# Supplementary material for: Multi-omic and multi-species meta-analyses of nicotine consumption
Source: PubMed Central journal article supplement (PMC7862377; doi:10.1038/s41398-021-01231-y), 2021-02-04
Supplement: 41398_2021_1231_MOESM5_ESM.pdf [file 41398_2021_1231_MOESM5_ESM.pdf]

H-MAGMA Gene Based Associations with Human Cigarettes per Day

| hgnc_symbol | GENE            | Zneuro    | Pneuro    | Zastro   | Pastro    | Zfetal    | Pfetal            |
|-------------|-----------------|-----------|-----------|----------|-----------|-----------|-------------------|
| Zadult      | Padult          | P_Minimum | of_Neuro  | Astro    | Fetal     | Adult     | Padj_of_P_Minimum |
| CSPG4P13    | ENSG00000260139 | 5.309     | 5.51E-08  | 10.061   | 4.12E-24  | -1.5359   | 0.93772           |
| 14.985      | 4.60E-51        | 4.60E-51  | 2.24E-46  |          |           |           |                   |
| NA          | ENSG00000279373 | 14.933    | 1.00E-50  | 14.933   | 1.00E-50  | 14.933    | 1.00E-50          |
| 14.933      | 1.00E-50        | 1.00E-50  | 2.24E-46  |          |           |           |                   |
| COMMD4P1    | ENSG00000214646 | 14.912    | 1.38E-50  | 7.5924   | 1.57E-14  | 11.811    |                   |
| 1.71E-32    | 4.4262          | 4.80E-06  | 1.38E-50  | 2.24E-46 |           |           |                   |
| NA          | ENSG00000261303 | 11.68     | 8.11E-32  | 14.002   | 7.56E-45  | 12.408    | 1.19E-35          |
| 8.4461      | 1.51E-17        | 7.56E-45  | 9.21E-41  |          |           |           |                   |
| IREB2       | ENSG00000136381 | 13.684    | 6.34E-43  | 13.684   | 6.34E-43  | 13.54     | 4.55E-42          |
| 11.049      | 1.10E-28        | 6.34E-43  | 6.18E-39  |          |           |           |                   |
| CHRNA5      | ENSG00000169684 | 13.244    | 2.44E-40  | 13.244   | 2.44E-40  | 13.244    |                   |
| 2.44E-40    | 13.244          | 2.44E-40  | 2.44E-40  | 1.98E-36 |           |           |                   |
| NA          | ENSG00000260776 | 10.936    | 3.87E-28  | 13.198   | 4.48E-40  | 5.5638    | 1.32E-08          |
| 9.8604      | 3.09E-23        | 4.48E-40  | 3.12E-36  |          |           |           |                   |
| NA          | ENSG00000261403 | 10.297    | 3.64E-25  | 7.4374   | 5.13E-14  | 13.166    | 6.88E-40          |
| 7.6944      | 7.11E-15        | 6.88E-40  | 4.19E-36  |          |           |           |                   |
| WDR61       | ENSG00000140395 | 9.9277    | 1.58E-23  | 10.275   | 4.58E-25  | 1.1702    | 0.12097           |
| 12.919      | 1.77E-38        | 1.77E-38  | 9.57E-35  |          |           |           |                   |
| CHRNA3      | ENSG00000080644 | 12.815    | 6.76E-38  | 10.724   | 3.92E-27  | 12.399    |                   |
| 1.33E-35    | 10.344          | 2.22E-25  | 6.76E-38  | 3.29E-34 |           |           |                   |
| ADAMTS7     | ENSG00000136378 | 12.613    | 8.93E-37  | 7.3376   | 1.09E-13  | 8.2261    |                   |
| 9.67E-17    | 6.8494          | 3.71E-12  | 8.93E-37  | 3.96E-33 |           |           |                   |
| DNAJA4      | ENSG00000140403 | 10.55     | 2.53E-26  | 1.0328   | 0.15086   | 1.0328    | 0.15086           |
| 0.78919     | 0.215           | 2.53E-26  | 1.03E-22  |          |           |           |                   |
| ADAMTS7P3   | ENSG00000261143 | 9.7169    | 1.28E-22  | 8.0727   | 3.44E-16  | 7.6339    |                   |
| 1.14E-14    | 10.462          | 6.44E-26  | 6.44E-26  | 2.42E-22 |           |           |                   |
| NA          | ENSG00000269843 | 10.062    | 4.08E-24  | 10.062   | 4.08E-24  | 10.062    | 4.08E-24          |
| 10.062      | 4.08E-24        | 4.08E-24  | 1.42E-20  |          |           |           |                   |
| NA          | ENSG00000279421 | 9.109     | 4.16E-20  | 7.6956   | 7.04E-15  | 7.6956    | 7.04E-15          |
| 7.6956      | 7.04E-15        | 4.16E-20  | 1.35E-16  |          |           |           |                   |
| PRR13P5     | ENSG00000187534 | 9.0402    | 7.82E-20  | 4.7344   | 1.10E-06  | 1.0665    |                   |
| 0.14309     | 1.0665          | 0.14309   | 7.82E-20  | 2.38E-16 |           |           |                   |
| TBC1D2B     | ENSG00000167202 | 8.8624    | 3.91E-19  | 5.5957   | 1.10E-08  | 4.3093    |                   |
| 8.19E-06    | 0.9392          | 0.17381   | 3.91E-19  | 1.12E-15 |           |           |                   |
| ACSBG1      | ENSG00000103740 | -0.038718 | 0.51544   | -0.15755 | 0.5626    | 0.56248   |                   |
| 0.2869      | 8.7694          | 8.98E-19  | 8.98E-19  | 2.43E-15 |           |           |                   |
| NA          | ENSG00000259474 | 8.7233    | 1.35E-18  | 8.7233   | 1.35E-18  | 8.7233    | 1.35E-18          |
| 8.7233      | 1.35E-18        | 1.35E-18  | 3.47E-15  |          |           |           |                   |
| NA          | ENSG00000273512 | 7.9603    | 8.58E-16  | 8.4885   | 1.05E-17  | 5.6171    | 9.71E-09          |
| 5.6171      | 9.71E-09        | 1.05E-17  | 2.55E-14  |          |           |           |                   |
| RN7SL214P   | ENSG00000242066 | -0.2212   | 0.58753   | -0.2212  | 0.58753   | 7.9522    |                   |
| 9.16E-16    | 8.2286          | 9.47E-17  | 9.47E-17  | 2.20E-13 |           |           |                   |
| HYKK        | ENSG00000188266 | 8.0272    | 4.98E-16  | 8.0272   | 4.98E-16  | 8.0272    | 4.98E-16          |
| 6.1149      | 4.83E-10        | 4.98E-16  | 1.10E-12  |          |           |           |                   |
| SPTBN4      | ENSG00000160460 | 7.6624    | 9.12E-15  | -1.0926  | 0.86271   | -0.017736 |                   |
| 0.50708     | 5.0477          | 2.24E-07  | 9.12E-15  | 1.93E-11 |           |           |                   |
| RPL18P11    | ENSG00000213307 | 7.634     | 1.14E-14  | 7.634    | 1.14E-14  | 7.634     | 1.14E-14          |
| 1.14E-14    | 1.14E-14        | 2.31E-11  |           |          |           |           |                   |
| NA          | ENSG00000279108 | 7.6109    | 1.36E-14  | 7.6109   | 1.36E-14  | 7.6109    | 1.36E-14          |
| 7.6109      | 1.36E-14        | 1.36E-14  | 2.65E-11  |          |           |           |                   |
| NA          | ENSG00000261762 | 7.4582    | 4.38E-14  | 7.4582   | 4.38E-14  | 7.4582    | 4.38E-14          |
| 7.4582      | 4.38E-14        | 4.38E-14  | 8.22E-11  |          |           |           |                   |
| CCDC97      | ENSG00000142039 | -0.77     | 0.77935   | -0.70444 | 0.75942   | 7.402     | 6.71E-14          |
| 1.6103      | 0.053669        | 6.71E-14  | 1.21E-10  |          |           |           |                   |
| CYP2T3P     | ENSG00000268529 | 0.6132    | 0.26987   | 7.1799   | 3.49E-13  | -0.86267  |                   |
| 0.80584     | -0.86267        | 0.80584   | 3.49E-13  | 6.07E-10 |           |           |                   |
| FCGBP       | ENSG00000275395 | 2.6727    | 0.0037617 | 2.9716   | 0.0014814 | 5.6273    | 9.15E-09          |
| 7.1155      | 5.57E-13        | 5.57E-13  | 9.37E-10  |          |           |           |                   |

|             |                 |          |            |            |           |           |            |
|-------------|-----------------|----------|------------|------------|-----------|-----------|------------|
| SNRPA       | ENSG00000077312 | 1.5016   | 0.066605   | 2.0973     | 0.017983  | 6.4898    | 4.30E-11   |
|             |                 | 7.0218   | 1.10E-12   | 1.10E-12   | 1.78E-09  |           |            |
| CYP2T1P     | ENSG00000233622 | 6.9893   | 1.38E-12   | 6.9893     | 1.38E-12  | 6.9893    |            |
|             |                 | 1.38E-12 | 6.9893     | 1.38E-12   | 1.38E-12  | 2.11E-09  |            |
| CIB2        | ENSG00000136425 | 6.9888   | 1.39E-12   | -0.34569   | 0.63521   | -0.20569  | 0.58148    |
|             |                 | -0.31071 | 0.62199    | 1.39E-12   | 2.11E-09  |           |            |
| PCAT19      | ENSG00000267107 | 6.9359   | 2.02E-12   | 2.3127     | 0.01037   | 1.556     | 0.059855   |
|             |                 | 6.4816   | 4.54E-11   | 2.02E-12   | 2.98E-09  |           |            |
| CYP2F2P     | ENSG00000237118 | 2.5132   | 0.0059817  | 6.8038     | 5.09E-12  | 2.0501    |            |
|             |                 | 0.020177 | 3.9051     | 4.71E-05   | 5.09E-12  | 7.30E-09  |            |
| NUMBL       | ENSG00000105245 | 0.80704  | 0.20982    | 4.5217     | 3.07E-06  | 1.8942    | 0.029098   |
|             |                 | 6.7521   | 7.29E-12   | 7.29E-12   | 1.01E-08  |           |            |
| HNRNPUL1    | ENSG00000105323 | 6.6706   | 1.27E-11   | -0.50821   | 0.69435   | -0.049069 |            |
|             |                 | 0.51957  | 0.31326    | 0.37704    | 1.27E-11  | 1.72E-08  |            |
| NA          | ENSG00000259420 | 0.27463  | 0.3918     | -0.31653   | 0.6242    | 0.3584    | 0.36002    |
|             |                 | 6.6208   | 1.79E-11   | 1.79E-11   | 2.35E-08  |           |            |
| ZNF780B     | ENSG00000128000 | 4.6011   | 2.10E-06   | 3.9273     | 4.29E-05  | -0.64034  |            |
|             |                 | 0.73903  | 6.5958     | 2.12E-11   | 2.12E-11  | 2.71E-08  |            |
| NA          | ENSG00000268034 | 0.63751  | 0.2619     | 6.4709     | 4.87E-11  | 0.63751   | 0.2619     |
|             |                 | 0.63751  | 0.2619     | 4.87E-11   | 6.09E-08  |           |            |
| CYP2G2P     | ENSG00000268101 | 2.1779   | 0.014708   | 0.99558    | 0.15973   | 6.4565    |            |
|             |                 | 5.36E-11 | 6.1083     | 5.04E-10   | 5.36E-11  | 6.53E-08  |            |
| CHRN3       | ENSG00000147432 | 5.1401   | 1.37E-07   | 6.355      | 1.04E-10  | 5.2836    | 6.33E-08   |
|             |                 | 5.2437   | 7.87E-08   | 1.04E-10   | 1.24E-07  |           |            |
| MAP3K10     | ENSG00000130758 | 6.3472   | 1.10E-10   | 0.36165    | 0.35881   | 0.36165   |            |
|             |                 | 0.35881  | -0.47195   | 0.68152    | 1.10E-10  | 1.27E-07  |            |
| CYP2G1P     | ENSG00000130612 | 3.6244   | 0.00014482 | 2.6877     | 0.0035968 | 6.2583    |            |
|             |                 | 1.95E-10 | 2.5327     | 0.005659   | 1.95E-10  | 2.21E-07  |            |
| CHRNA6      | ENSG00000147434 | 5.8057   | 3.21E-09   | 4.7559     | 9.88E-07  | 6.2445    |            |
|             |                 | 2.13E-10 | 3.1335     | 0.00086369 | 2.13E-10  | 2.35E-07  |            |
| MORF4L1     | ENSG00000185787 | 2.3904   | 0.0084161  | 1.7631     | 0.038943  | 6.1968    |            |
|             |                 | 2.88E-10 | 1.5599     | 0.059389   | 2.88E-10  | 3.12E-07  |            |
| SLC20A2     | ENSG00000168575 | 4.5647   | 2.50E-06   | 5.4287     | 2.84E-08  | 6.1534    |            |
|             |                 | 3.79E-10 | 1.4929     | 0.067728   | 3.79E-10  | 4.02E-07  |            |
| PSMA4       | ENSG00000041357 | 6.0495   | 7.27E-10   | 6.0495     | 7.27E-10  | 6.0495    | 7.27E-10   |
|             |                 | 6.0495   | 7.27E-10   | 7.27E-10   | 7.53E-07  |           |            |
| EGLN2       | ENSG00000269858 | 6.014    | 9.05E-10   | 6.014      | 9.05E-10  | 6.014     | 9.05E-10   |
|             |                 | 9.05E-10 | 9.19E-07   |            |           |           |            |
| PSMC4       | ENSG00000013275 | -1.3932  | 0.91821    | 5.9075     | 1.74E-09  | -1.3932   | 0.91821    |
|             |                 | -1.3932  | 0.91821    | 1.74E-09   | 1.73E-06  |           |            |
| NA          | ENSG00000238166 | 5.2601   | 7.20E-08   | 5.2601     | 7.20E-08  | 5.2388    | 8.08E-08   |
|             |                 | 5.8658   | 2.24E-09   | 2.24E-09   | 2.18E-06  |           |            |
| CYP2A7      | ENSG00000198077 | 4.1312   | 1.80E-05   | 5.8569     | 2.36E-09  | 5.0527    |            |
|             |                 | 2.18E-07 | 4.5811     | 2.31E-06   | 2.36E-09  | 2.25E-06  |            |
| CYP2A7P2    | ENSG00000198251 | 1.6282   | 0.051742   | 5.8045     | 3.23E-09  | 0.84332   |            |
|             |                 | 0.19953  | 5.8045     | 3.23E-09   | 3.23E-09  | 3.03E-06  |            |
| VDAC3       | ENSG00000078668 | 5.6835   | 6.60E-09   | 4.4644     | 4.01E-06  | 4.3338    | 7.33E-06   |
|             |                 | 4.0942   | 2.12E-05   | 6.60E-09   | 6.07E-06  |           |            |
| NA          | ENSG00000253408 | 0.1303   | 0.44817    | -0.23096   | 0.59133   | 0.070766  | 0.47179    |
|             |                 | 5.6351   | 8.75E-09   | 8.75E-09   | 7.90E-06  |           |            |
| RAB4B       | ENSG00000167578 | 5.5952   | 1.10E-08   | 5.5952     | 1.10E-08  | 4.7403    | 1.07E-06   |
|             |                 | 5.1681   | 1.18E-07   | 1.10E-08   | 9.76E-06  |           |            |
| POLB        | ENSG00000070501 | -0.41202 | 0.65984    | -0.41202   | 0.65984   | -0.15946  | 0.56335    |
|             |                 | 5.5532   | 1.40E-08   | 1.40E-08   | 1.22E-05  |           |            |
| ZNF546      | ENSG00000187187 | 5.463    | 2.34E-08   | -0.16989   | 0.56745   | -0.16989  | 0.56745    |
|             |                 | 2.6233   | 0.0043541  | 2.34E-08   | 2.00E-05  |           |            |
| RAB4B-EGLN2 | ENSG00000171570 | 5.427    | 2.87E-08   | 5.427      | 2.87E-08  | 4.8319    | 6.76E-07   |
|             |                 | 5.0619   | 2.08E-07   | 2.87E-08   | 2.41E-05  |           |            |
| NA          | ENSG00000255101 | 5.1764   | 1.13E-07   | 4.906      | 4.65E-07  | 3.3801    | 0.00036235 |
|             |                 | 3.1768   | 0.00074465 | 1.13E-07   | 9.28E-05  |           |            |
| NA          | ENSG00000255361 | 5.1744   | 1.14E-07   | 1.9971     | 0.022906  | 1.9971    | 0.022906   |
|             |                 | 1.9971   | 0.022906   | 1.14E-07   | 9.28E-05  |           |            |

|           |                 |            |            |             |             |          |            |          |
|-----------|-----------------|------------|------------|-------------|-------------|----------|------------|----------|
| CYP2A6    | ENSG00000255974 | 3.4651     | 0.00026504 | 2.6467      | 0.0040636   | 5.1389   |            |          |
|           | 1.38E-07        | 3.5048     | 0.00022845 | 1.38E-07    | 0.000110122 |          |            |          |
| NA        | ENSG00000268797 | 5.1363     | 1.40E-07   | 5.1363      | 1.40E-07    | 5.1363   | 1.40E-07   | 1.40E-07 |
|           | 5.1363          | 1.40E-07   | 1.40E-07   | 0.000110122 |             |          |            |          |
| CYP2B6    | ENSG00000197408 | 4.9603     | 3.52E-07   | 3.423       | 0.00030973  | 3.5131   | 0.00022146 |          |
|           | 2.6605          | 0.0039014  | 3.52E-07   | 0.000272169 |             |          |            |          |
| CEACAM3   | ENSG00000170956 | -2.0127    | 0.97793    | 4.8012      | 7.89E-07    | 1.3647   |            |          |
|           | 0.086181        | -1.2076    | 0.8864     | 7.89E-07    | 0.000600529 |          |            |          |
| MIA-RAB4B | ENSG00000268975 | 4.7959     | 8.10E-07   | 4.7959      | 8.10E-07    | 4.7959   |            |          |
|           | 8.10E-07        | 4.7959     | 8.10E-07   | 8.10E-07    | 0.000607033 |          |            |          |
| PEF1      | ENSG00000162517 | 2.1123     | 0.017332   | 2.1123      | 0.017332    | 4.7829   | 8.64E-07   |          |
|           | 2.1123          | 0.017332   | 8.64E-07   | 0.000635076 |             |          |            |          |
| GTF2I     | ENSG00000263001 | 3.6489     | 0.00013171 | 4.7808      | 8.73E-07    | 0.30351  | 0.38075    |          |
|           | 3.1799          | 0.00073651 | 8.73E-07   | 0.000635076 |             |          |            |          |
| C19orf54  | ENSG00000188493 | 4.7184     | 1.19E-06   | 4.7184      | 1.19E-06    | 4.7184   |            |          |
|           | 1.19E-06        | 4.7184     | 1.19E-06   | 1.19E-06    | 0.000851915 |          |            |          |
| TGFB1     | ENSG00000105329 | 4.6947     | 1.33E-06   | -0.41565    | 0.66117     | 2.4085   | 0.0080087  |          |
|           | -0.76939        | 0.77917    | 1.33E-06   | 0.000942678 |             |          |            |          |
| DPY19L1   | ENSG00000173852 | 4.2855     | 9.11E-06   | 4.6614      | 1.57E-06    | 2.6589   |            |          |
|           | 0.0039194       | 1.5507     | 0.060483   | 1.57E-06    | 0.001093292 |          |            |          |
| HCRTR1    | ENSG00000121764 | 2.1813     | 0.01458    | 4.6327      | 1.81E-06    | 1.2932   |            |          |
|           | 0.097972        | 1.8392     | 0.032945   | 1.81E-06    | 0.00123884  |          |            |          |
| VN1R96P   | ENSG00000230086 | 4.6107     | 2.01E-06   | -0.14516    | 0.55771     | 4.1592   |            |          |
|           | 1.60E-05        | 0.82267    | 0.20535    | 2.01E-06    | 0.001357807 |          |            |          |
| NA        | ENSG00000260416 | 0.074612   | 0.47026    | 1.1018      | 0.13527     | 4.596    | 2.15E-06   |          |
|           | 0.51253         | 0.30414    | 2.15E-06   | 0.001437802 |             |          |            |          |
| CXXC4     | ENSG00000168772 | 2.7535     | 0.0029484  | 4.354       | 6.68E-06    | 4.4716   | 3.88E-06   |          |
|           | 3.3596          | 0.00039034 | 3.88E-06   | 0.00255681  |             |          |            |          |
| RPL21P116 | ENSG00000243711 | 4.3477     | 6.88E-06   | 4.2387      | 1.12E-05    | 4.2387   |            |          |
|           | 1.12E-05        | 4.2387     | 1.12E-05   | 6.88E-06    | 0.004469905 |          |            |          |
| CHMP1A    | ENSG00000131165 | 3.008      | 0.0013149  | 3.2993      | 0.00048466  | 2.0886   | 0.01837    |          |
|           | 4.3172          | 7.90E-06   | 7.90E-06   | 0.005065548 |             |          |            |          |
| NA        | ENSG00000269353 | 4.3138     | 8.02E-06   | 4.3138      | 8.02E-06    | 4.3138   | 8.02E-06   |          |
|           | 4.3138          | 8.02E-06   | 8.02E-06   | 0.005077666 |             |          |            |          |
| GTF2IRD1  | ENSG00000006704 | 4.2604     | 1.02E-05   | 3.68        | 0.0001166   | 2.4747   | 0.0066678  |          |
|           | 3.6998          | 0.00010786 | 1.02E-05   | 0.006373634 |             |          |            |          |
| NA        | ENSG00000236212 | 4.2384     | 1.13E-05   | -0.89231    | 0.81389     | -0.31599 | 0.624      |          |
|           | 3.8143          | 6.83E-05   | 1.13E-05   | 0.006943717 |             |          |            |          |
| COQ8B     | ENSG00000123815 | 0.84376    | 0.1994     | 4.1731      | 1.50E-05    | 4.1731   | 1.50E-05   |          |
|           | 4.1731          | 1.50E-05   | 1.50E-05   | 0.009149667 |             |          |            |          |
| AXL       | ENSG00000167601 | 4.1663     | 1.55E-05   | -0.36559    | 0.64267     | 1.1268   | 0.12991    |          |
|           | 1.1268          | 0.12991    | 1.55E-05   | 0.00931104  |             |          |            |          |
| SHKBP1    | ENSG00000160410 | 2.5004     | 0.006203   | 2.5004      | 0.006203    | 2.5004   |            |          |
|           | 0.006203        | 4.1472     | 1.68E-05   | 1.68E-05    | 0.009999158 |          |            |          |
| DPY19L2P1 | ENSG00000189212 | 2.9243     | 0.0017263  | 3.8404      | 6.14E-05    | 3.585    | 0.00016855 |          |
|           | 4.1415          | 1.72E-05   | 1.72E-05   | 0.010127033 |             |          |            |          |
| NDUFS3    | ENSG00000213619 | 4.0927     | 2.13E-05   | 4.0927      | 2.13E-05    | 4.0927   |            |          |
|           | 2.13E-05        | 4.0927     | 2.13E-05   | 2.13E-05    | 0.012369298 |          |            |          |
| CEACAM6   | ENSG00000086548 | -0.1313    | 0.55223    | 4.0651      | 2.40E-05    | -0.1313  |            |          |
|           | 0.55223         | -0.1313    | 0.55223    | 2.40E-05    | 0.013759632 |          |            |          |
| GOLGA4    | ENSG00000144674 | 4.0561     | 2.50E-05   | 0.78895     | 0.21507     | 1.5289   |            |          |
|           | 0.063141        | -0.40461   | 0.65712    | 2.50E-05    | 0.014137366 |          |            |          |
| DMAC2     | ENSG00000105341 | 4.0172     | 2.94E-05   | -1.345      | 0.91068     | -1.345   | 0.91068    |          |
|           | -1.345          | 0.91068    | 2.94E-05   | 0.016392443 |             |          |            |          |
| APH1A     | ENSG00000117362 | 4.0133     | 2.99E-05   | 4.0133      | 2.99E-05    | 0.5575   | 0.28859    |          |
|           | 2.5218          | 0.0058373  | 2.99E-05   | 0.016392443 |             |          |            |          |
| C1orf54   | ENSG00000118292 | 4.0133     | 2.99E-05   | 4.0133      | 2.99E-05    | 1.5371   |            |          |
|           | 0.062139        | 4.0133     | 2.99E-05   | 2.99E-05    | 0.016392443 |          |            |          |
| MIA       | ENSG00000261857 | 3.9774     | 3.48E-05   | 3.9774      | 3.48E-05    | 3.9774   | 3.48E-05   |          |
|           | 3.9774          | 3.48E-05   | 3.48E-05   | 0.018865007 |             |          |            |          |
| NA        | ENSG00000227902 | 1.1508     | 0.12491    | 3.9498      | 3.91E-05    | -0.71488 | 0.76266    |          |
|           | 0.25087         | 0.40096    | 3.91E-05   | 0.020858029 |             |          |            |          |

|           |                 |            |             |             |             |             |            |
|-----------|-----------------|------------|-------------|-------------|-------------|-------------|------------|
| DIDO1     | ENSG00000101191 | 3.9481     | 3.94E-05    | 1.6408      | 0.050424    | 0.99447     | 0.16       |
|           |                 | 2.3018     | 0.010673    | 3.94E-05    | 0.020858029 |             |            |
| SMG6-IT1  | ENSG00000278941 | 3.9424     | 4.03E-05    | 3.9424      | 4.03E-05    | 3.9424      | 4.03E-05   |
|           |                 | 4.03E-05   | 3.9424      | 4.03E-05    | 4.03E-05    | 0.021131005 |            |
| CYBA      | ENSG00000051523 | 0.75348    | 0.22558     | 1.1179      | 0.13181     | 3.9269      | 4.30E-05   |
|           |                 | -0.12622   | 0.55022     | 4.30E-05    | 0.022307972 |             |            |
| THEM7P    | ENSG00000227160 | 2.9195     | 0.0017531   | 3.8986      | 4.84E-05    | 3.035       | 0.0012025  |
|           |                 | 2.2927     | 0.010934    | 4.84E-05    | 0.024812803 |             |            |
| AP3M2     | ENSG00000070718 | 0.0048395  | 0.49807     | -0.86103    | 0.80539     | 3.8839      | 5.14E-05   |
|           |                 | -1.3278    | 0.90787     | 5.14E-05    | 0.0260939   |             |            |
| NA        | ENSG00000230599 | 0.56318    | 0.28666     | 3.8774      | 5.28E-05    | 0.76552     | 0.22198    |
|           |                 | -1.056     | 0.85452     | 5.28E-05    | 0.026524694 |             |            |
| ITPKC     | ENSG00000086544 | 2.3566     | 0.0092209   | 3.874       | 5.35E-05    | 1.5693      | 0.058287   |
|           |                 | 5.35E-05   | 5.35E-05    | 0.026618017 |             |             | 3.874      |
| SPG7      | ENSG00000197912 | 3.8385     | 6.19E-05    | 0.69342     | 0.24402     | 0.56119     | 0.28733    |
|           |                 | 0.21576    | 0.41459     | 6.19E-05    | 0.030463633 |             |            |
| PSMC3     | ENSG00000165916 | 3.8229     | 6.60E-05    | 3.7568      | 8.60E-05    | 2.9283      | 0.0017042  |
|           |                 | 3.8229     | 6.60E-05    | 6.60E-05    | 0.032137435 |             |            |
| ZNF280D   | ENSG00000137871 | 3.8046     | 7.10E-05    | 2.5045      | 0.0061305   | 2.3681      |            |
|           |                 | 0.0089388  | 2.7563      | 0.0029226   | 7.10E-05    | 0.034021662 |            |
| SLC22A14  | ENSG00000144671 | 3.1543     | 0.0008045   | 3.8039      | 7.12E-05    | 3.1543      |            |
|           |                 | 0.0008045  | 3.3612      | 0.00038806  | 7.12E-05    | 0.034021662 |            |
| XRCC3     | ENSG00000126215 | 3.79       | 7.53E-05    | 3.79        | 7.53E-05    | 3.79        | 7.53E-05   |
|           |                 | 7.53E-05   | 0.035639608 |             |             |             |            |
| UBL5P3    | ENSG00000240359 | 3.0578     | 0.0011149   | 3.7856      | 7.67E-05    | 2.9679      |            |
|           |                 | 0.0014992  | -0.68311    | 0.75273     | 7.67E-05    | 0.035922913 |            |
| LINC02730 | ENSG00000255406 | -0.7954    | 0.78681     | 0.17888     | 0.42902     | 3.7831      |            |
|           |                 | 7.75E-05   | 1.3204      | 0.093359    | 7.75E-05    | 0.035944176 |            |
| NA        | ENSG00000255525 | 3.0575     | 0.0011159   | 3.4829      | 0.00024805  | 3.4469      | 0.00028353 |
|           |                 | 3.7708     | 8.14E-05    | 8.14E-05    | 0.037406251 |             |            |
| NAA20     | ENSG00000173418 | 1.6735     | 0.047116    | 3.7325      | 9.48E-05    | 0.95773     | 0.1691     |
|           |                 | 1.369      | 0.085496    | 9.48E-05    | 0.043163394 |             |            |
| RNU4-68P  | ENSG00000201184 | 3.722      | 9.88E-05    | 2.5802      | 0.0049366   | 1.0321      | 0.15102    |
|           |                 | 3.1152     | 0.00091908  | 9.88E-05    | 0.044584373 |             |            |
| NA        | ENSG00000269940 | 3.7197     | 9.97E-05    | 3.7197      | 9.97E-05    | 3.7197      | 9.97E-05   |
|           |                 | 3.7197     | 9.97E-05    | 9.97E-05    | 0.044584373 |             |            |
| CCNP      | ENSG00000105219 | -0.027289  | 0.51089     | 3.7124      | 0.00010267  | -0.027289   | 0.51089    |
|           |                 | 0.41804    | 0.33796     | 0.00010267  | 0.04548281  |             |            |
| NA        | ENSG00000203593 | 1.2103     | 0.11309     | 3.0665      | 0.0010829   | 3.7031      | 0.00010651 |
|           |                 | 0.58803    | 0.27826     | 0.00010651  | 0.046397921 |             |            |
| ZNF780A   | ENSG00000197782 | -0.67953   | 0.7516      | -0.67953    | 0.7516      | -0.67953    |            |
|           |                 | 0.7516     | 3.7028      | 0.00010664  | 0.00010664  | 0.046397921 |            |
| LINC00652 | ENSG00000179935 | 0.47222    | 0.31838     | 0.47222     | 0.31838     | 0.97528     |            |
|           |                 | 0.16471    | 3.7004      | 0.00010765  | 0.00010765  | 0.046422872 |            |
| RAPSN     | ENSG00000165917 | 1.8039     | 0.035627    | 3.5614      | 0.00018441  | 3.6967      | 0.0001092  |
|           |                 | 2.1579     | 0.015468    | 0.0001092   | 0.046678211 |             |            |
| SPDYE5    | ENSG00000170092 | 1.6602     | 0.048442    | 3.2247      | 0.00063062  | 2.866       | 0.0020781  |
|           |                 | 3.692      | 0.00011124  | 0.00011124  | 0.047136741 |             |            |
| GAS8-AS1  | ENSG00000221819 | 3.6883     | 0.00011287  | 3.6883      | 0.00011287  | 3.6883      |            |
|           |                 | 0.00011287 | 3.6883      | 0.00011287  | 0.00011287  | 0.04741513  |            |
| CLEC18A   | ENSG00000157322 | 2.4414     | 0.0073143   | 3.6771      | 0.00011796  | 3.0126      |            |
|           |                 | 0.0012951  | 2.8191      | 0.0024082   | 0.00011796  | 0.049129836 |            |
| ZFYVE28   | ENSG00000159733 | 2.497      | 0.0062624   | 2.4709      | 0.006738    | 2.6546      | 0.0039697  |
|           |                 | 3.6725     | 0.0001201   | 0.0001201   | 0.049426143 |             |            |
| NA        | ENSG00000224997 | 3.6712     | 0.0001207   | 3.6712      | 0.0001207   | 3.6712      | 0.0001207  |
|           |                 | 3.6712     | 0.0001207   | 0.0001207   | 0.049426143 |             |            |
| RAB42P1   | ENSG00000230997 | 1.2537     | 0.10497     | 2.8336      | 0.0023016   | 2.4318      |            |
|           |                 | 0.0075111  | 3.6634      | 0.00012445  | 0.00012445  | 0.050537071 |            |
| CDK10     | ENSG00000185324 | 2.4189     | 0.0077844   | 2.8724      | 0.0020368   | 2.3823      | 0.0086034  |
|           |                 | 3.6528     | 0.00012971  | 0.00012971  | 0.052237755 |             |            |
| TRIM35    | ENSG00000104228 | 2.5475     | 0.0054245   | 3.151       | 0.00081347  | 3.6504      | 0.00013094 |
|           |                 | 3.072      | 0.0010632   | 0.00013094  | 0.05230087  |             |            |

|            |                 |            |             |             |             |           |            |       |
|------------|-----------------|------------|-------------|-------------|-------------|-----------|------------|-------|
| LINC02503  | ENSG00000249614 | -0.60228   | 0.72651     | 0.63012     | 0.26431     | 0.10818   |            |       |
|            | 0.45693         | 3.6332     | 0.00013997  | 0.00013997  | 0.055453155 |           |            |       |
| GDPD1      | ENSG00000153982 | 3.6216     | 0.00014641  | 1.5778      | 0.057307    | 1.8082    | 0.035286   |       |
|            | 3.4498          | 0.00028053 | 0.00014641  | 0.057536769 |             |           |            |       |
| DYNLL1P6   | ENSG00000248820 | 3.6148     | 0.0001503   | -0.56359    | 0.71348     | 0.030476  |            |       |
|            | 0.48784         | 0.62681    | 0.26539     | 0.0001503   | 0.058226594 |           |            |       |
| PPIAP55    | ENSG00000228979 | 2.974      | 0.0014699   | 3.614       | 0.00015073  | 2.974     | 0.0014699  | 2.974 |
|            | 0.0014699       | 0.00015073 | 0.058226594 |             |             |           |            |       |
| NTNG2      | ENSG00000196358 | -0.45072   | 0.6739      | -0.90408    | 0.81702     | 3.6123    | 0.00015175 |       |
|            | -0.7212         | 0.76461    | 0.00015175  | 0.058226594 |             |           |            |       |
| JADRR      | ENSG00000280711 | 0.13625    | 0.44581     | 2.5143      | 0.0059637   | 3.6087    | 0.00015385 |       |
|            | 3.6087          | 0.00015385 | 0.00015385  | 0.058419337 |             |           |            |       |
| AFG1L      | ENSG00000135537 | 1.2261     | 0.11007     | 2.2587      | 0.01195     | 1.5892    | 0.056003   |       |
|            | 3.6074          | 0.00015465 | 0.00015465  | 0.058419337 |             |           |            |       |
| AKT2       | ENSG00000105221 | 0.49642    | 0.3098      | 3.6026      | 0.00015751  | 0.49642   | 0.3098     |       |
|            | 0.47014         | 0.31913    | 0.00015751  | 0.059042018 |             |           |            |       |
| POLN       | ENSG00000130997 | 0.90184    | 0.18357     | 1.6502      | 0.049452    | 3.594     | 0.00016279 |       |
|            | 2.2207          | 0.013187   | 0.00016279  | 0.060185242 |             |           |            |       |
| SORBS3     | ENSG00000120896 | 3.1186     | 0.00090854  | 2.7991      | 0.0025622   | 3.5937    |            |       |
|            | 0.00016303      | 1.8626     | 0.031262    | 0.00016303  | 0.060185242 |           |            |       |
| NPEPPSP1   | ENSG00000274487 | -0.19883   | 0.5788      | 0.993       | 0.16036     | 3.589     | 0.00016601 |       |
|            | 1.1006          | 0.13553    | 0.00016601  | 0.060824566 |             |           |            |       |
| SLC39A14   | ENSG00000104635 | 1.0929     | 0.13722     | 2.2975      | 0.010795    | 3.5817    |            |       |
|            | 0.00017069      | 2.6954     | 0.0035157   | 0.00017069  | 0.062072565 |           |            |       |
| NA         | ENSG00000260392 | 1.8776     | 0.030216    | 3.5739      | 0.00017583  | 0.75205   | 0.22601    |       |
|            | 3.5739          | 0.00017583 | 0.00017583  | 0.063468118 |             |           |            |       |
| NUP50      | ENSG00000093000 | 3.279      | 0.00052081  | 3.5696      | 0.00017875  | 2.9272    | 0.0017099  | 3.279 |
|            | 0.00052081      | 0.00017875 | 0.064047702 |             |             |           |            |       |
| CYP2B7P    | ENSG00000256612 | 1.9629     | 0.024827    | 3.5645      | 0.00018225  | 2.8004    |            |       |
|            | 0.0025517       | 3.0799     | 0.0010354   | 0.00018225  | 0.064825128 |           |            |       |
| NUP50-DT   | ENSG00000226328 | 2.7493     | 0.0029865   | 3.5607      | 0.0001849   | 3.5607    |            |       |
|            | 0.0001849       | 3.5607     | 0.0001849   | 0.0001849   | 0.065291138 |           |            |       |
| NA         | ENSG00000234340 | 0.02334    | 0.49069     | 3.5489      | 0.00019341  | 0.14544   | 0.44218    |       |
|            | 0.14544         | 0.44218    | 0.00019341  | 0.067804815 |             |           |            |       |
| GALNS      | ENSG00000141012 | 0.56713    | 0.28531     | 3.5378      | 0.00020172  | 0.23815   | 0.40588    |       |
|            | -0.65039        | 0.74228    | 0.00020172  | 0.070212969 |             |           |            |       |
| CDH15      | ENSG00000129910 | 0.31328    | 0.37703     | 3.534       | 0.00020466  | 0.94526   | 0.17226    |       |
|            | 1.4129          | 0.078842   | 0.00020466  | 0.070425145 |             |           |            |       |
| RNA5SP18   | ENSG00000212237 | 3.5333     | 0.00020522  | 3.5333      | 0.00020522  | 3.5333    |            |       |
|            | 0.00020522      | 3.5333     | 0.00020522  | 0.00020522  | 0.070425145 |           |            |       |
| TUBB8P6    | ENSG00000224625 | 3.5257     | 0.00021122  | 1.1686      | 0.12129     | -0.20165  |            |       |
|            | 0.57991         | 1.4205     | 0.077726    | 0.00021122  | 0.071770888 |           |            |       |
| MIR885     | ENSG00000216135 | 3.5229     | 0.00021343  | 3.5229      | 0.00021343  | 3.5229    |            |       |
|            | 0.00021343      | 3.5229     | 0.00021343  | 0.00021343  | 0.071770888 |           |            |       |
| CLDN3      | ENSG00000165215 | -0.60204   | 0.72643     | -0.23964    | 0.59469     | -0.67185  | 0.74916    |       |
|            | 3.5227          | 0.00021356 | 0.00021356  | 0.071770888 |             |           |            |       |
| ACAA1      | ENSG00000060971 | 3.5134     | 0.00022123  | 2.1599      | 0.01539     | 3.5134    | 0.00022123 |       |
|            | 3.2335          | 0.00061152 | 0.00022123  | 0.073839301 |             |           |            |       |
| NPSR1-AS1  | ENSG00000197085 | 3.1587     | 0.00079241  | 2.7591      | 0.0028983   | 2.3824    |            |       |
|            | 0.0086003       | 3.4889     | 0.00024247  | 0.00024247  | 0.08037798  |           |            |       |
| DPEP1      | ENSG00000015413 | 0.97512    | 0.16475     | 0.95293     | 0.17031     | 1.2316    | 0.10906    |       |
|            | 3.4797          | 0.00025096 | 0.00025096  | 0.082630276 |             |           |            |       |
| UFSP1      | ENSG00000176125 | 3.4727     | 0.00025767  | 3.4727      | 0.00025767  | 3.4727    | 0.00025767 |       |
|            | 3.4727          | 0.00025767 | 0.00025767  | 0.084270195 |             |           |            |       |
| RNU6-1274P | ENSG00000207287 | 3.4519     | 0.00027836  | 3.4519      | 0.00027836  | 3.4519    |            |       |
|            | 0.00027836      | 3.4519     | 0.00027836  | 0.00027836  | 0.090429885 |           |            |       |
| PHYHIP     | ENSG00000168490 | 3.4466     | 0.00028382  | 3.1464      | 0.00082653  | -0.078148 |            |       |
|            | 0.53114         | 1.7857     | 0.037073    | 0.00028382  | 0.091570723 |           |            |       |
| LINC01276  | ENSG00000226917 | 2.2565     | 0.012019    | 0.792       | 0.21418     | 3.4449    | 0.00028563 |       |
|            | 2.9637          | 0.0015198  | 0.00028563  | 0.091570723 |             |           |            |       |
| PLAT       | ENSG00000104368 | -0.29413   | 0.61567     | -0.22034    | 0.5872      | -0.29706  | 0.61679    |       |
|            | 3.4429          | 0.00028772 | 0.00028772  | 0.09163788  |             |           |            |       |

|           |                 |            |             |             |             |         |            |
|-----------|-----------------|------------|-------------|-------------|-------------|---------|------------|
| FUBP3     | ENSG00000107164 | 0.90076    | 0.18386     | 0.69314     | 0.24411     | 3.3922  | 0.00034667 |
|           | 3.4384          | 0.00029263 | 0.00029263  | 0.092596493 |             |         |            |
| GGTLC2    | ENSG00000100121 | 0.68248    | 0.24747     | -0.50836    | 0.6944      | 3.433   | 0.00029842 |
|           | 0.084342        | 0.46639    | 0.00029842  | 0.093819397 |             |         |            |
| NA        | ENSG00000279005 | 2.3367     | 0.009728    | 3.1833      | 0.00072801  | 3.4293  | 0.00030256 |
|           | 2.7657          | 0.0028402  | 0.00030256  | 0.094275479 |             |         |            |
| LCT       | ENSG00000115850 | 3.4283     | 0.00030374  | 2.0392      | 0.020716    | 1.4725  | 0.070446   |
|           | 1.3888          | 0.08244    | 0.00030374  | 0.094275479 |             |         |            |
| LINC02731 | ENSG00000204241 | 1.744      | 0.040575    | 1.213       | 0.11256     | 0.67993 | 0.24827    |
|           | 3.4224          | 0.0003103  | 0.0003103   | 0.095596614 |             |         |            |
| NA        | ENSG00000273691 | 3.421      | 0.00031192  | 3.421       | 0.00031192  | 3.421   | 0.00031192 |
|           | 0.12815         | 0.00031192 | 0.095596614 |             |             |         |            |
| LMOD1     | ENSG00000163431 | -1.316     | 0.90591     | -0.9968     | 0.84057     | 3.4181  | 0.0003153  |
|           | -1.4411         | 0.92522    | 0.0003153   | 0.095801364 |             |         |            |
| NR2F1-AS1 | ENSG00000237187 | 0.71434    | 0.23751     | 3.4171      | 0.00031652  | 1.598   | 0.055026   |
|           | 1.319           | 0.093587   | 0.00031652  | 0.095801364 |             |         |            |
| NA        | ENSG00000212569 | 2.6676     | 0.0038199   | 2.6676      | 0.0038199   | 3.4073  | 0.000328   |
|           | 2.6676          | 0.0038199  | 0.000328    | 0.097773053 |             |         |            |
| NA        | ENSG00000244470 | 1.065      | 0.14343     | 1.5048      | 0.066191    | 3.4072  | 0.00032812 |
|           | -0.79546        | 0.78683    | 0.00032812  | 0.097773053 |             |         |            |
| RNA5SP233 | ENSG00000238391 | 2.7291     | 0.0031756   | -0.28998    | 0.61408     | 0.51935 |            |
|           | 0.30176         | 3.4056     | 0.00033012  | 0.00033012  | 0.097773053 |         |            |
| ZNF678    | ENSG00000181450 | 1.4621     | 0.071856    | 1.9614      | 0.024916    | 3.4048  |            |
|           | 0.00033106      | 2.9612     | 0.0015323   | 0.00033106  | 0.097773053 |         |            |
| MAPK8IP1  | ENSG00000121653 | -1.1419    | 0.87325     | 0.95405     | 0.17003     | 3.3939  |            |
|           | 0.0003445       | 0.83193    | 0.20272     | 0.0003445   | 0.101129428 |         |            |
| RN7SKP16  | ENSG00000222112 | 3.2374     | 0.00060318  | 3.2374      | 0.00060318  | 3.3922  |            |
|           | 0.00034662      | 3.1166     | 0.00091481  | 0.00034662  | 0.101142471 |         |            |
| NA        | ENSG00000241026 | 2.2041     | 0.013759    | 1.0281      | 0.15195     | 3.3856  | 0.00035513 |
|           | 2.3609          | 0.0091151  | 0.00035513  | 0.102474288 |             |         |            |
| NA        | ENSG00000264078 | 3.3854     | 0.00035539  | 1.5852      | 0.056463    | 1.7296  | 0.041851   |
|           | 1.7296          | 0.041851   | 0.00035539  | 0.102474288 |             |         |            |
| DLK2      | ENSG00000171462 | 1.098      | 0.1361      | 3.2233      | 0.00063371  | 2.2423  | 0.012472   |
|           | 3.3803          | 0.00036208 | 0.00036208  | 0.103789167 |             |         |            |
| NA        | ENSG00000198211 | 2.8494     | 0.0021899   | 2.6859      | 0.0036172   | 3.3749  | 0.00036927 |
|           | 2.9945          | 0.0013745  | 0.00036927  | 0.104608945 |             |         |            |
| SPI1      | ENSG00000066336 | 0.55306    | 0.29011     | 3.3746      | 0.00036962  | 1.2997  | 0.09686    |
|           | 1.6859          | 0.045907   | 0.00036962  | 0.104608945 |             |         |            |
| NA        | ENSG00000253633 | 2.1035     | 0.017713    | 2.4058      | 0.0080689   | 3.3733  | 0.00037138 |
|           | 3.3733          | 0.00037138 | 0.00037138  | 0.104608945 |             |         |            |
| NA        | ENSG00000265711 | 3.3691     | 0.00037706  | 0.30834     | 0.37891     | 3.3691  | 0.00037706 |
|           | 1.229           | 0.10953    | 0.00037706  | 0.10559847  |             |         |            |
| NA        | ENSG00000268593 | 3.363      | 0.00038557  | 3.363       | 0.00038557  | 3.363   | 0.00038557 |
|           | 0.00038557      | 0.10627545 |             |             |             |         |            |
| SDC3      | ENSG00000162512 | 2.1802     | 0.014621    | 0.43878     | 0.33041     | 2.244   | 0.012415   |
|           | 3.3629          | 0.0003856  | 0.0003856   | 0.10627545  |             |         |            |
| CELF1     | ENSG00000149187 | 2.0293     | 0.021213    | 2.6049      | 0.0045948   | 3.3626  | 0.00038602 |
|           | 2.7225          | 0.0032392  | 0.00038602  | 0.10627545  |             |         |            |
| B3GALNT2  | ENSG00000162885 | 2.2156     | 0.01336     | 2.471       | 0.0067363   | 1.2609  | 0.10368    |
|           | 3.3493          | 0.00040504 | 0.00040504  | 0.110600766 |             |         |            |
| NA        | ENSG00000214970 | -0.15303   | 0.56081     | 1.4927      | 0.067756    | 3.3485  | 0.00040627 |
|           | 0.84481         | 0.19911    | 0.00040627  | 0.110600766 |             |         |            |
| KBTBD4    | ENSG00000123444 | 3.344      | 0.00041297  | 3.344       | 0.00041297  | 3.344   | 0.00041297 |
|           | 0.00041297      | 0.00041297 | 0.111800156 |             |             |         |            |
| NA        | ENSG00000250670 | 1.5219     | 0.064013    | 3.3377      | 0.00042239  | 1.8513  | 0.032061   |
|           | -0.84373        | 0.80059    | 0.00042239  | 0.112361948 |             |         |            |
| NA        | ENSG00000268153 | 1.8004     | 0.035901    | 0.69503     | 0.24352     | 1.8004  | 0.035901   |
|           | 3.337           | 0.00042344 | 0.00042344  | 0.112361948 |             |         |            |
| IL6RP1    | ENSG00000234910 | 1.6034     | 0.054419    | 0.70491     | 0.24043     | 3.3365  |            |
|           | 0.00042419      | 2.8025     | 0.0025355   | 0.00042419  | 0.112361948 |         |            |
| NA        | ENSG00000257239 | 1.2167     | 0.11186     | 3.336       | 0.00042502  | 3.336   | 0.00042502 |
|           | 0.00042502      | 0.00042502 | 0.112361948 |             |             |         |            |

|           |                 |            |            |            |             |             |            |
|-----------|-----------------|------------|------------|------------|-------------|-------------|------------|
| RNU7-193P | ENSG00000252532 | 3.3338     | 0.0004283  | 2.0648     | 0.01947     | 2.553       | 0.0053404  |
|           |                 | 3.3338     | 0.0004283  | 0.0004283  | 0.112361948 |             |            |
| NA        | ENSG00000160828 | 1.1138     | 0.13269    | 3.3335     | 0.00042888  | -0.055924   | 0.5223     |
|           |                 | 2.5148     | 0.0059546  | 0.00042888 | 0.112361948 |             |            |
| RPS17P13  | ENSG00000224706 | 3.3316     | 0.00043171 | 3.3316     | 0.00043171  | 3.3316      |            |
|           |                 | 0.00043171 | 3.3316     | 0.00043171 | 0.00043171  | 0.112498547 |            |
| NA        | ENSG00000273069 | 2.3452     | 0.0095085  | -0.45849   | 0.6767      | 3.3266      | 0.00043964 |
|           |                 | -0.45849   | 0.6767     | 0.00043964 | 0.113955623 |             |            |
| LINC01413 | ENSG00000260172 | 0.93692    | 0.1744     | 3.3231     | 0.00044505  | 0.93692     |            |
|           |                 | 0.1744     | 0.71439    | 0.23749    | 0.00044505  | 0.114747548 |            |
| SYPL1P1   | ENSG00000243154 | 2.1411     | 0.016132   | 3.3212     | 0.00044816  | -0.45265    |            |
|           |                 | 0.6746     | -0.45265   | 0.6746     | 0.00044816  | 0.114941246 |            |
| NA        | ENSG00000231136 | 3.3174     | 0.00045433 | -3.2204    | 0.99936     | 1.2152      | 0.11215    |
|           |                 | -3.2204    | 0.99936    | 0.00045433 | 0.115817505 |             |            |
| UCHL5     | ENSG00000116750 | 2.7347     | 0.0031215  | 3.3162     | 0.00045633  | 0.81233     | 0.2083     |
|           |                 | 2.7567     | 0.0029196  | 0.00045633 | 0.115817505 |             |            |
| RPL36AP45 | ENSG00000240366 | 0.38142    | 0.35145    | -0.052611  | 0.52098     | 0.56585     |            |
|           |                 | 0.28575    | 3.3126     | 0.00046225 | 0.00046225  | 0.116712137 |            |
| YPEL2     | ENSG00000175155 | 3.3102     | 0.00046611 | -0.23072   | 0.59124     | -0.35233    | 0.63771    |
|           |                 | -0.79626   | 0.78706    | 0.00046611 | 0.117080105 |             |            |
| ANKRD24   | ENSG00000089847 | 0.51307    | 0.30395    | 2.2316     | 0.01282     | 3.1253      |            |
|           |                 | 0.00088825 | 3.307      | 0.00047153 | 0.00047153  | 0.117834138 |            |
| CCDC171   | ENSG00000164989 | 3.3037     | 0.00047701 | 1.0372     | 0.14982     | 0.89537     |            |
|           |                 | 0.18529    | 0.39224    | 0.34744    | 0.00047701  | 0.118595394 |            |
| PIAS4     | ENSG00000105229 | 2.7802     | 0.0027159  | 3.1196     | 0.00090553  | 0.7674      | 0.22142    |
|           |                 | 3.2982     | 0.00048655 | 0.00048655 | 0.119096602 |             |            |
| SKINT1L   | ENSG00000242267 | 2.2876     | 0.011081   | 3.2955     | 0.00049118  | 2.9791      |            |
|           |                 | 0.0014457  | 2.9791     | 0.0014457  | 0.00049118  | 0.119096602 |            |
| DLEC1     | ENSG00000008226 | -0.005602  | 0.50223    | -0.046059  | 0.51837     | 0.73507     | 0.23115    |
|           |                 | 3.2952     | 0.00049175 | 0.00049175 | 0.119096602 |             |            |
| NA        | ENSG00000267133 | 3.2944     | 0.00049315 | 0.063094   | 0.47485     | 0.063094    | 0.47485    |
|           |                 | 0.063094   | 0.47485    | 0.00049315 | 0.119096602 |             |            |
| PPP3CC    | ENSG00000120910 | 2.1149     | 0.017221   | 2.9162     | 0.0017716   | 2.4766      |            |
|           |                 | 0.0066324  | 3.2942     | 0.00049353 | 0.00049353  | 0.119096602 |            |
| NA        | ENSG00000196696 | 3.2941     | 0.00049369 | 2.8024     | 0.0025363   | 3.0807      | 0.0010324  |
|           |                 | 2.1015     | 0.017797   | 0.00049369 | 0.119096602 |             |            |
| NA        | ENSG00000272744 | 3.2883     | 0.00050392 | 3.2883     | 0.00050392  | 3.2883      | 0.00050392 |
|           |                 | 3.2883     | 0.00050392 | 0.00050392 | 0.120793071 |             |            |
| HHLA1     | ENSG00000132297 | 3.2873     | 0.00050568 | 1.4077     | 0.079604    | 1.0651      | 0.14342    |
|           |                 | 0.79663    | 0.21283    | 0.00050568 | 0.120793071 |             |            |
| NA        | ENSG00000203900 | 3.2857     | 0.00050865 | 2.6707     | 0.0037846   | 3.2377      | 0.00060257 |
|           |                 | 3.2377     | 0.00060257 | 0.00050865 | 0.120909827 |             |            |
| NA        | ENSG00000206129 | -0.70633   | 0.76001    | 3.2778     | 0.00052309  | 0.37057     | 0.35548    |
|           |                 | 0.68965    | 0.24521    | 0.00052309 | 0.123738717 |             |            |
| NA        | ENSG00000282828 | -0.89708   | 0.81516    | 3.2719     | 0.00053411  | 0.62651     | 0.26549    |
|           |                 | -0.89708   | 0.81516    | 0.00053411 | 0.125735171 |             |            |
| NA        | ENSG00000185128 | 3.2662     | 0.00054503 | -1.5065    | 0.93403     | 0.46861     | 0.31968    |
|           |                 | 0.62025    | 0.26755    | 0.00054503 | 0.126818093 |             |            |
| YPEL5P2   | ENSG00000271557 | 3.2659     | 0.00054555 | 3.2659     | 0.00054555  | 3.2659      |            |
|           |                 | 0.00054555 | 3.2659     | 0.00054555 | 0.00054555  | 0.126818093 |            |
| UBXN4     | ENSG00000144224 | -0.25736   | 0.60155    | 3.2647     | 0.00054792  | 0.50225     | 0.30774    |
|           |                 | -0.68065   | 0.75196    | 0.00054792 | 0.126818093 |             |            |
| NA        | ENSG00000279382 | 3.2641     | 0.00054912 | 3.2641     | 0.00054912  | 3.2641      | 0.00054912 |
|           |                 | 3.2641     | 0.00054912 | 0.00054912 | 0.126818093 |             |            |
| FOXO3     | ENSG00000118689 | 3.2627     | 0.00055186 | 2.6886     | 0.0035873   | 1.8303      | 0.033603   |
|           |                 | 1.4559     | 0.072715   | 0.00055186 | 0.126849707 |             |            |
| NA        | ENSG00000200754 | -0.54907   | 0.70852    | 3.2488     | 0.00057946  | -0.54907    | 0.70852    |
|           |                 | -0.54907   | 0.70852    | 0.00057946 | 0.131985772 |             |            |
| YIPF1     | ENSG00000058799 | 1.7902     | 0.036711   | 1.4101     | 0.079252    | 3.2486      | 0.00057989 |
|           |                 | 2.389      | 0.0084469  | 0.00057989 | 0.131985772 |             |            |
| GNG12-AS1 | ENSG00000232284 | -0.081976  | 0.53267    | 3.2474     | 0.00058233  | 2.9057      |            |
|           |                 | 0.001832   | 2.7349     | 0.0031204  | 0.00058233  | 0.131985772 |            |

|             |                 |            |            |            |             |             |            |  |
|-------------|-----------------|------------|------------|------------|-------------|-------------|------------|--|
| RBBP8NL     | ENSG00000130701 | 0.79527    | 0.21323    | 0.064928   | 0.47412     | 0.79527     |            |  |
|             |                 | 0.21323    | 3.2446     | 0.00058814 | 0.00058814  | 0.132076265 |            |  |
| NA          | ENSG00000260285 | 1.966      | 0.024648   | 3.2446     | 0.00058815  | 3.2446      | 0.00058815 |  |
|             |                 | 3.2446     | 0.00058815 | 0.00058815 | 0.132076265 |             |            |  |
| WWP2        | ENSG00000198373 | 2.2058     | 0.0137     | 2.9078     | 0.00182     | 2.97        | 0.001489   |  |
|             |                 | 3.2399     | 0.00059785 | 0.00059785 | 0.133638672 |             |            |  |
| NA          | ENSG00000234427 | -0.33636   | 0.6317     | -0.33636   | 0.6317      | 3.2303      | 0.00061837 |  |
|             |                 | -0.33636   | 0.6317     | 0.00061837 | 0.135547368 |             |            |  |
| NA          | ENSG00000259674 | 0.39629    | 0.34595    | 0.39629    | 0.34595     | 0.39629     | 0.34595    |  |
|             |                 | 3.2302     | 0.00061857 | 0.00061857 | 0.135547368 |             |            |  |
| PPIAP14     | ENSG00000264775 | 3.23       | 0.00061885 | 0.41231    | 0.34006     | 0.17729     | 0.42964    |  |
|             |                 | 2.6105     | 0.00452    | 0.00061885 | 0.135547368 |             |            |  |
| NA          | ENSG00000261145 | 3.2282     | 0.00062281 | 1.3334     | 0.091202    | 1.564       | 0.058911   |  |
|             |                 | 0.73468    | 0.23127    | 0.00062281 | 0.135547368 |             |            |  |
| PTPMT1      | ENSG00000110536 | 0.99901    | 0.1589     | 3.228      | 0.0006232   | 0.51717     | 0.30252    |  |
|             |                 | -0.65532   | 0.74387    | 0.0006232  | 0.135547368 |             |            |  |
| DHX34       | ENSG00000134815 | 2.2713     | 0.011564   | 3.2272     | 0.00062502  | 1.4247      | 0.077128   |  |
|             |                 | 0.96086    | 0.16831    | 0.00062502 | 0.135547368 |             |            |  |
| LYST        | ENSG00000143669 | 3.1422     | 0.00083837 | 3.2268     | 0.00062586  | 2.5803      | 0.0049362  |  |
|             |                 | -0.24698   | 0.59754    | 0.00062586 | 0.135547368 |             |            |  |
| CYB5D1      | ENSG00000182224 | 1.4635     | 0.071667   | 3.2244     | 0.00063128  | 2.6272      |            |  |
|             |                 | 0.004305   | 2.9367     | 0.0016584  | 0.00063128  | 0.135853659 |            |  |
| LINC01300   | ENSG00000253595 | 3.2236     | 0.00063285 | -0.46689   | 0.67971     | -0.80986    |            |  |
|             |                 | 0.79099    | 0.016515   | 0.49341    | 0.00063285  | 0.135853659 |            |  |
| STRA6       | ENSG00000137868 | 3.2224     | 0.00063568 | 1.4103     | 0.079225    | 1.2889      | 0.098716   |  |
|             |                 | 1.3278     | 0.092116   | 0.00063568 | 0.13586266  |             |            |  |
| RN7SKP66    | ENSG00000252490 | 3.2207     | 0.00063936 | 3.2207     | 0.00063936  | 3.2207      |            |  |
|             |                 | 0.00063936 | 3.2207     | 0.00063936 | 0.00063936  | 0.136052458 |            |  |
| NA          | ENSG00000254627 | 2.6428     | 0.0041107  | 3.0135     | 0.0012911   | 3.2159      | 0.00065017 |  |
|             |                 | 0.92183    | 0.17831    | 0.00065017 | 0.137513529 |             |            |  |
| BCO2        | ENSG00000197580 | 3.2152     | 0.00065187 | 0.86051    | 0.19475     | 1.2124      | 0.11269    |  |
|             |                 | 1.2124     | 0.11269    | 0.00065187 | 0.137513529 |             |            |  |
| SCAF1       | ENSG00000126461 | 1.7449     | 0.040501   | 3.2102     | 0.00066316  | 2.0991      | 0.017905   |  |
|             |                 | 1.9764     | 0.024056   | 0.00066316 | 0.138959974 |             |            |  |
| ZFYVE21     | ENSG00000100711 | 3.1634     | 0.00077959 | 1.1501     | 0.12505     | 2.7974      |            |  |
|             |                 | 0.0025761  | 3.2097     | 0.00066443 | 0.00066443  | 0.138959974 |            |  |
| KLC1        | ENSG00000126214 | 3.0582     | 0.0011133  | 2.5455     | 0.0054558   | 3.2075      | 0.00066937 |  |
|             |                 | 2.9468     | 0.0016056  | 0.00066937 | 0.139394872 |             |            |  |
| NA          | ENSG00000255375 | 2.8071     | 0.0024998  | 3.2055     | 0.00067422  | -0.76512    | 0.7779     |  |
|             |                 | -0.30536   | 0.61995    | 0.00067422 | 0.139528857 |             |            |  |
| GULOP       | ENSG00000234770 | 3.2048     | 0.00067574 | 0.8164     | 0.20714     | 2.1342      | 0.016414   |  |
|             |                 | -0.018481  | 0.50737    | 0.00067574 | 0.139528857 |             |            |  |
| RNU6-649P   | ENSG00000207192 | 2.1378     | 0.016267   | 2.1181     | 0.017084    | 3.2028      |            |  |
|             |                 | 0.00068041 | 2.1181     | 0.017084   | 0.00068041  | 0.139556168 |            |  |
| HMGB1P51    | ENSG00000270986 | 3.2023     | 0.0006816  | 3.2023     | 0.0006816   | 3.2023      |            |  |
|             |                 | 0.0006816  | 0.65145    | 0.25738    | 0.0006816   | 0.139556168 |            |  |
| PDLIM2      | ENSG00000120913 | 2.3315     | 0.0098627  | 3.1973     | 0.00069358  | 3.0251      |            |  |
|             |                 | 0.0012428  | -1.0654    | 0.85664    | 0.00069358  | 0.14116878  |            |  |
| NA          | ENSG00000261627 | 2.7476     | 0.0030016  | 3.1966     | 0.00069527  | 2.7476      | 0.0030016  |  |
|             |                 | 2.5051     | 0.0061209  | 0.00069527 | 0.14116878  |             |            |  |
| NA          | ENSG00000261238 | -0.61811   | 0.73175    | 0.23788    | 0.40599     | 3.1923      | 0.00070579 |  |
|             |                 | 3.1923     | 0.00070579 | 0.00070579 | 0.142383951 |             |            |  |
| C4orf48     | ENSG00000243449 | 0.20358    | 0.41934    | 0.15383    | 0.43887     | 3.19        | 0.00071137 |  |
|             |                 | 0.90729    | 0.18213    | 0.00071137 | 0.142383951 |             |            |  |
| RNA5SP77    | ENSG00000202264 | 3.1891     | 0.00071353 | -1.4996    | 0.93314     | 0.9413      |            |  |
|             |                 | 0.17328    | 0.9413     | 0.17328    | 0.00071353  | 0.142383951 |            |  |
| TMEM254-AS1 | ENSG00000230091 | 2.1638     | 0.015241   | 2.1638     | 0.015241    | 2.1638      |            |  |
|             |                 | 0.015241   | 3.189      | 0.00071375 | 0.00071375  | 0.142383951 |            |  |
| NA          | ENSG00000238390 | 3.1874     | 0.00071778 | 3.1874     | 0.00071778  | 3.1874      | 0.00071778 |  |
|             |                 | 3.1874     | 0.00071778 | 0.00071778 | 0.142383951 |             |            |  |
| LINC02447   | ENSG00000245468 | -1.1644    | 0.87787    | 3.1861     | 0.00072109  | 0.16504     |            |  |
|             |                 | 0.43446    | -0.23603   | 0.5933     | 0.00072109  | 0.142383951 |            |  |



|           |                 |             |             |             |             |           |            |       |
|-----------|-----------------|-------------|-------------|-------------|-------------|-----------|------------|-------|
| LINC02337 | ENSG00000215881 | 3.1847      | 0.00072448  | 2.9055      | 0.0018331   | -1.472    |            |       |
|           | 0.92948         | -1.472      | 0.92948     | 0.00072448  | 0.142383951 |           |            |       |
| PGGT1BP2  | ENSG00000214584 | 3.1847      | 0.00072463  | -0.51581    | 0.69701     | -0.031477 |            |       |
|           | 0.51256         | -0.031477   | 0.51256     | 0.00072463  | 0.142383951 |           |            |       |
| LINC01854 | ENSG00000204460 | 3.1833      | 0.00072801  | 1.3207      | 0.0933      | -1.8838   |            |       |
|           | 0.97021         | -0.16747    | 0.5665      | 0.00072801  | 0.142473604 |           |            |       |
| CYP2F1    | ENSG00000197446 | 0.7472      | 0.22747     | 3.1799      | 0.0007367   | 0.84877   | 0.198      |       |
|           | 1.3499          | 0.088519    | 0.0007367   | 0.143597564 |             |           |            |       |
| RNU6-195P | ENSG00000223284 | 3.1765      | 0.00074527  | 3.1765      | 0.00074527  | 3.1765    |            |       |
|           | 0.00074527      | 3.1765      | 0.00074527  | 0.00074527  | 0.144382769 |           |            |       |
| PRMT8     | ENSG00000111218 | -0.20328    | 0.58054     | 3.1742      | 0.00075137  | -0.44503  | 0.67185    |       |
|           | 0.63591         | 0.26242     | 0.00075137  | 0.144382769 |             |           |            |       |
| GRK4      | ENSG00000125388 | 2.2931      | 0.010921    | 3.1738      | 0.00075238  | 2.079     | 0.01881    |       |
|           | 0.88456         | 0.1882      | 0.00075238  | 0.144382769 |             |           |            |       |
| DMRTB1    | ENSG00000143006 | 3.1737      | 0.00075258  | 1.6059      | 0.054147    | 0.63028   |            |       |
|           | 0.26425         | 0.63028     | 0.26425     | 0.00075258  | 0.144382769 |           |            |       |
| COA8      | ENSG00000256053 | 1.751       | 0.039975    | 3.1707      | 0.00076048  | 2.0099    | 0.02222    |       |
|           | 1.3301          | 0.091739    | 0.00076048  | 0.145326237 |             |           |            |       |
| CD24P2    | ENSG00000261333 | -0.25455    | 0.60046     | 3.165       | 0.00077532  | -0.25455  | 0.60046    |       |
|           | -0.25455        | 0.60046     | 0.00077532  | 0.147583373 |             |           |            |       |
| MYD88     | ENSG00000172936 | 3.1096      | 0.0009368   | 3.1096      | 0.0009368   | 3.1626    | 0.00078172 |       |
|           | 3.1096          | 0.0009368   | 0.00078172  | 0.148222629 |             |           |            |       |
| NA        | ENSG00000279609 | 3.1556      | 0.00080088  | 1.0473      | 0.14747     | 3.1556    | 0.00080088 |       |
|           | 3.1556          | 0.00080088  | 0.00080088  | 0.151266986 |             |           |            |       |
| FNDC5     | ENSG00000160097 | 2.8529      | 0.0021664   | 2.2734      | 0.011501    | 2.8529    | 0.0021664  |       |
|           | 3.1517          | 0.0008115   | 0.0008115   | 0.152601743 |             |           |            |       |
| NA        | ENSG00000228687 | 3.1508      | 0.00081421  | 3.1508      | 0.00081421  | 3.1508    | 0.00081421 |       |
|           | 3.1508          | 0.00081421  | 0.00081421  | 0.152601743 |             |           |            |       |
| NOP14-AS1 | ENSG00000249673 | 3.1482      | 0.00082143  | 2.7187      | 0.0032768   | 2.6812    |            |       |
|           | 0.0036678       | 2.6812      | 0.0036678   | 0.00082143  | 0.152811328 |           |            |       |
| NOP14     | ENSG00000087269 | 3.1481      | 0.0008216   | 1.2133      | 0.1125      | 2.3054    | 0.010572   |       |
|           | 1.3269          | 0.092276    | 0.0008216   | 0.152811328 |             |           |            |       |
| RN7SL674P | ENSG00000239899 | 3.146       | 0.00082757  | 3.146       | 0.00082757  | 3.146     | 0.00082757 | 3.146 |
|           | 0.00082757      | 0.00082757  | 0.153336449 |             |             |           |            |       |
| ADIPOR1P2 | ENSG00000258805 | 3.1434      | 0.00083496  | 0.2355      | 0.40691     | 1.7131    |            |       |
|           | 0.04335         | 1.7131      | 0.04335     | 0.00083496  | 0.153803153 |           |            |       |
| NA        | ENSG00000257941 | 1.887       | 0.029578    | 1.887       | 0.029578    | 3.142     | 0.00083888 | 3.142 |
|           | 0.00083888      | 0.153803153 |             |             |             |           |            |       |
| NA        | ENSG00000274093 | 3.1403      | 0.00084386  | 3.1403      | 0.00084386  | 3.1403    | 0.00084386 |       |
|           | 3.1403          | 0.00084386  | 0.00084386  | 0.153803153 |             |           |            |       |
| NA        | ENSG00000224149 | 3.1399      | 0.00084509  | 3.1399      | 0.00084509  | 3.1399    | 0.00084509 |       |
|           | 3.1399          | 0.00084509  | 0.00084509  | 0.153803153 |             |           |            |       |
| TMEM91    | ENSG00000142046 | 3.1396      | 0.00084587  | -0.44544    | 0.672       | -0.44544  | 0.672      |       |
|           | -0.44544        | 0.672       | 0.00084587  | 0.153803153 |             |           |            |       |
| NA        | ENSG00000254584 | 2.9915      | 0.001388    | 3.1385      | 0.00084921  | 3.0892    | 0.0010034  |       |
|           | 1.6165          | 0.052991    | 0.00084921  | 0.153836443 |             |           |            |       |
| CREB3L1   | ENSG00000157613 | 3.1346      | 0.00086046  | 2.6494      | 0.0040321   | 2.218     | 0.013277   |       |
|           | 2.4275          | 0.0076008   | 0.00086046  | 0.155297096 |             |           |            |       |
| NA        | ENSG00000203648 | 3.132       | 0.00086803  | 3.132       | 0.00086803  | 3.132     | 0.00086803 | 3.132 |
|           | 0.00086803      | 0.155907335 |             |             |             |           |            |       |
| PLCH1     | ENSG00000114805 | 3.1313      | 0.00087024  | 2.2054      | 0.013713    | 2.2404    | 0.012532   |       |
|           | 1.5164          | 0.064714    | 0.00087024  | 0.155907335 |             |           |            |       |
| RNU6-235P | ENSG00000199514 | 3.1294      | 0.00087581  | 3.1294      | 0.00087581  | 3.1294    |            |       |
|           | 0.00087581      | 3.1294      | 0.00087581  | 0.00087581  | 0.15628458  |           |            |       |
| GLYCAM1   | ENSG00000257780 | 3.1284      | 0.00087876  | 3.1284      | 0.00087876  | 1.4961    |            |       |
|           | 0.067313        | 3.1284      | 0.00087876  | 0.00087876  | 0.15628458  |           |            |       |
| NA        | ENSG00000269910 | 3.1224      | 0.00089679  | 3.1224      | 0.00089679  | 3.1224    | 0.00089679 |       |
|           | 3.1224          | 0.00089679  | 0.00089679  | 0.157651992 |             |           |            |       |
| NA        | ENSG00000211571 | 3.121       | 0.00090105  | 3.121       | 0.00090105  | 3.121     | 0.00090105 | 3.121 |
|           | 0.00090105      | 0.157651992 |             |             |             |           |            |       |
| PRPSAP1   | ENSG00000161542 | -0.64663    | 0.74106     | -0.77086    | 0.77961     | 0.23299   |            |       |
|           | 0.40788         | 3.1202      | 0.00090359  | 0.00090359  | 0.157651992 |           |            |       |

|            |                 |           |            |            |             |             |            |
|------------|-----------------|-----------|------------|------------|-------------|-------------|------------|
| NA         | ENSG00000229896 | 2.8467    | 0.002209   | 3.12       | 0.00090422  | 1.7177      | 0.042924   |
|            |                 | 1.9928    | 0.02314    | 0.00090422 | 0.157651992 |             |            |
| SNAP47-AS1 | ENSG00000230005 | -0.36843  | 0.64372    | 3.1196     | 0.00090542  | 0.5077      |            |
|            |                 | 0.30583   | 0.5077     | 0.30583    | 0.00090542  | 0.157651992 |            |
| RAB11A     | ENSG00000103769 | 3.1195    | 0.00090586 | 0.38677    | 0.34946     | -0.24091    |            |
|            |                 | 0.59519   | -0.61959   | 0.73224    | 0.00090586  | 0.157651992 |            |
| NA         | ENSG00000228133 | 1.1748    | 0.12004    | 3.1182     | 0.00090967  | 1.1748      | 0.12004    |
|            |                 | 1.1748    | 0.12004    | 0.00090967 | 0.157751669 |             |            |
| NA         | ENSG00000270859 | -0.36408  | 0.6421     | -0.29942   | 0.61769     | -0.61393    | 0.73037    |
|            |                 | 3.1164    | 0.00091535 | 0.00091535 | 0.15792136  |             |            |
| NA         | ENSG00000241853 | 3.1158    | 0.00091713 | 3.1158     | 0.00091713  | 3.1158      | 0.00091713 |
|            |                 | 3.1158    | 0.00091713 | 0.00091713 | 0.15792136  |             |            |
| COL16A1    | ENSG00000084636 | 3.1112    | 0.00093168 | 2.1811     | 0.014589    | 2.7523      |            |
|            |                 | 0.0029592 | 3.0021     | 0.0013408  | 0.00093168  | 0.15963777  |            |
| NA         | ENSG00000278875 | 3.1106    | 0.00093365 | 3.1106     | 0.00093365  | 3.1106      | 0.00093365 |
|            |                 | 3.1106    | 0.00093365 | 0.00093365 | 0.15963777  |             |            |
| NA         | ENSG00000251802 | 2.5777    | 0.0049726  | 3.1079     | 0.00094219  | 2.6452      | 0.0040824  |
|            |                 | 2.6452    | 0.0040824  | 0.00094219 | 0.160534681 |             |            |
| PITX2      | ENSG00000164093 | 0.43604   | 0.3314     | 1.9659     | 0.024653    | 1.3369      | 0.090625   |
|            |                 | 3.1045    | 0.00095291 | 0.00095291 | 0.161795485 |             |            |
| NA         | ENSG00000269958 | 3.1009    | 0.00096458 | 3.1009     | 0.00096458  | 3.1009      | 0.00096458 |
|            |                 | 3.1009    | 0.00096458 | 0.00096458 | 0.162938619 |             |            |
| USP45      | ENSG00000123552 | 1.7246    | 0.042298   | 2.4673     | 0.0068065   | 1.9946      | 0.023045   |
|            |                 | 3.1004    | 0.00096633 | 0.00096633 | 0.162938619 |             |            |
| LINC01011  | ENSG00000244041 | 1.3042    | 0.09609    | 3.099      | 0.00097096  | 1.9588      | 0.02507    |
|            |                 | 1.9588    | 0.02507    | 0.00097096 | 0.163154761 |             |            |
| NA         | ENSG00000278382 | 2.74      | 0.0030719  | 3.0937     | 0.00098848  | 0.50993     | 0.30505    |
|            |                 | 0.61842   | 0.26815    | 0.00098848 | 0.16552794  |             |            |
| NA         | ENSG00000251523 | -0.058531 | 0.52334    | -0.058531  | 0.52334     | -0.41831    | 0.66214    |
|            |                 | 3.092     | 0.00099413 | 0.00099413 | 0.165903955 |             |            |
| NA         | ENSG00000260198 | 0.91014   | 0.18138    | 3.0899     | 0.001001    | 0.039933    | 0.48407    |
|            |                 | 3.0899    | 0.001001   | 0.001001   | 0.16595184  |             |            |
| DOC2A      | ENSG00000149927 | 0.41034   | 0.34078    | 0.71574    | 0.23708     | 0.71574     | 0.23708    |
|            |                 | 3.0865    | 0.0010126  | 0.0010126  | 0.16595184  |             |            |
| LINC01353  | ENSG00000231507 | 3.0862    | 0.0010136  | 0.73835    | 0.23015     | 1.0277      |            |
|            |                 | 0.15204   | 0.71651    | 0.23684    | 0.0010136   | 0.16595184  |            |
| NA         | ENSG00000280182 | 3.0861    | 0.0010141  | 3.0861     | 0.0010141   | 3.0861      | 0.0010141  |
|            |                 | 3.0861    | 0.0010141  | 0.0010141  | 0.16595184  |             |            |
| NA         | ENSG00000233953 | 3.084     | 0.0010211  | 1.7396     | 0.040964    | 1.7396      | 0.040964   |
|            |                 | -0.55977  | 0.71218    | 0.0010211  | 0.16595184  |             |            |
| LINC00557  | ENSG00000260962 | 3.0834    | 0.0010233  | 0.50594    | 0.30645     | 0.38406     |            |
|            |                 | 0.35047   | 0.4916     | 0.3115     | 0.0010233   | 0.16595184  |            |
| NA         | ENSG00000219867 | 0.37012   | 0.35565    | -1.0246    | 0.84722     | 3.0831      | 0.0010242  |
|            |                 | 0.37012   | 0.35565    | 0.0010242  | 0.16595184  |             |            |
| NA         | ENSG00000268670 | 3.0815    | 0.0010299  | 3.0815     | 0.0010299   | 3.0815      | 0.0010299  |
|            |                 | 3.0815    | 0.0010299  | 0.0010299  | 0.16595184  |             |            |
| NA         | ENSG00000265041 | 3.0804    | 0.0010337  | 3.0804     | 0.0010337   | 3.0804      | 0.0010337  |
|            |                 | 3.0804    | 0.0010337  | 0.0010337  | 0.16595184  |             |            |
| B3GNTL1    | ENSG00000175711 | 2.1944    | 0.014102   | 2.0192     | 0.021735    | 0.93915     |            |
|            |                 | 0.17383   | 3.0803     | 0.001034   | 0.001034    | 0.16595184  |            |
| OR2L9P     | ENSG00000237492 | 2.4814    | 0.0065425  | 2.9925     | 0.0013835   | 3.0789      |            |
|            |                 | 0.0010388 | 2.8724     | 0.0020368  | 0.0010388   | 0.16595184  |            |
| NA         | ENSG00000251034 | 2.0831    | 0.01862    | 3.0779     | 0.0010424   | 2.0219      | 0.021595   |
|            |                 | 2.0219    | 0.021595   | 0.0010424  | 0.16595184  |             |            |
| SYNDIG1L   | ENSG00000183379 | 2.9722    | 0.0014783  | 2.2413     | 0.012504    | 3.0774      |            |
|            |                 | 0.0010441 | 2.6987     | 0.0034809  | 0.0010441   | 0.16595184  |            |
| ACOT11     | ENSG00000162390 | 1.1184    | 0.1317     | 1.2779     | 0.10064     | 3.0773      |            |
|            |                 | 0.0010446 | 0.26716    | 0.39467    | 0.0010446   | 0.16595184  |            |
| HSD3B7     | ENSG00000099377 | 3.077     | 0.0010455  | 2.964      | 0.0015183   | 2.8075      | 0.0024964  |
|            |                 | 2.6506    | 0.0040174  | 0.0010455  | 0.16595184  |             |            |
| NA         | ENSG00000241400 | 3.0748    | 0.0010532  | 3.0748     | 0.0010532   | 3.0748      | 0.0010532  |
|            |                 | 3.0748    | 0.0010532  | 0.0010532  | 0.166631286 |             |            |

|           |                 |           |             |             |             |          |           |
|-----------|-----------------|-----------|-------------|-------------|-------------|----------|-----------|
| NA        | ENSG00000268632 | 3.0715    | 0.001065    | 1.0787      | 0.14037     | 1.3613   | 0.086712  |
|           | 1.8076          | 0.035337  | 0.001065    | 0.167952913 |             |          |           |
| LINC02162 | ENSG00000249830 | 3.0667    | 0.0010821   | -0.013661   | 0.50545     | 1.0475   |           |
|           | 0.14743         | 1.1412    | 0.12689     | 0.0010821   | 0.169046331 |          |           |
| PRSS36    | ENSG00000178226 | 3.0641    | 0.0010916   | 1.2208      | 0.11108     | -0.35854 |           |
|           | 0.64003         | 1.2208    | 0.11108     | 0.0010916   | 0.169046331 |          |           |
| TMEM71    | ENSG00000165071 | 3.0638    | 0.0010927   | 2.2035      | 0.013779    | 2.2035   |           |
|           | 0.013779        | 2.2035    | 0.013779    | 0.0010927   | 0.169046331 |          |           |
| BAG5      | ENSG00000166170 | 2.7093    | 0.0033708   | 2.7093      | 0.0033708   | 2.8342   | 0.0022974 |
|           | 3.0636          | 0.0010933 | 0.0010933   | 0.169046331 |             |          |           |
| NA        | ENSG00000254780 | 0.23269   | 0.408       | 1.3811      | 0.083624    | 1.6305   | 0.051494  |
|           | 3.0629          | 0.001096  | 0.001096    | 0.169046331 |             |          |           |
| IQCF3     | ENSG00000229972 | 2.523     | 0.0058185   | 2.3984      | 0.0082325   | 2.4153   | 0.0078616 |
|           | 3.0617          | 0.0011004 | 0.0011004   | 0.169046331 |             |          |           |
| NA        | ENSG00000200090 | 3.0609    | 0.0011033   | 3.0609      | 0.0011033   | 3.0609   | 0.0011033 |
|           | 3.0609          | 0.0011033 | 0.0011033   | 0.169046331 |             |          |           |
| SNW1      | ENSG00000100603 | 0.70626   | 0.24001     | 2.1221      | 0.016916    | 3.0602   | 0.0011059 |
|           | 0.87227         | 0.19153   | 0.0011059   | 0.169046331 |             |          |           |
| LINC01551 | ENSG00000186960 | 0.70921   | 0.2391      | 1.1403      | 0.12708     | 3.0587   |           |
|           | 0.0011114       | 1.8218    | 0.034245    | 0.0011114   | 0.169046331 |          |           |
| NOP53-AS1 | ENSG00000269656 | -0.80578  | 0.78982     | -0.80578    | 0.78982     | -0.80578 |           |
|           | 0.78982         | 3.0586    | 0.0011117   | 0.0011117   | 0.169046331 |          |           |
| OXSR1     | ENSG00000172939 | 0.24751   | 0.40226     | 3.0584      | 0.0011124   | 1.0045   | 0.15757   |
|           | 1.0842          | 0.13914   | 0.0011124   | 0.169046331 |             |          |           |
| COX6CP11  | ENSG00000258668 | 3.057     | 0.0011177   | 0.6779      | 0.24892     | 2.3973   | 0.008258  |
|           | 1.618           | 0.052832  | 0.0011177   | 0.169046331 |             |          |           |
| CCNT2-AS1 | ENSG00000224043 | 3.057     | 0.001118    | 3.057       | 0.001118    | 3.057    | 0.001118  |
|           | 0.001118        | 0.001118  | 0.169046331 |             |             |          |           |
| NA        | ENSG00000268863 | 3.0563    | 0.0011205   | 3.0563      | 0.0011205   | 3.0563   | 0.0011205 |
|           | 3.0563          | 0.0011205 | 0.0011205   | 0.169046331 |             |          |           |
| NA        | ENSG00000254939 | 2.8457    | 0.0022156   | 2.0765      | 0.018925    | 3.0547   | 0.0011266 |
|           | 3.0547          | 0.0011266 | 0.0011266   | 0.169442031 |             |          |           |
| NA        | ENSG00000259828 | 3.053     | 0.0011329   | 2.763       | 0.0028638   | 2.1568   | 0.015509  |
|           | 0.042415        | 0.0011329 | 0.169865283 |             |             |          |           |
| TCF4      | ENSG00000196628 | 1.9852    | 0.023561    | 1.3049      | 0.095962    | 1.5815   | 0.056882  |
|           | 3.0484          | 0.0011503 | 0.0011503   | 0.17194515  |             |          |           |
| NA        | ENSG00000275263 | 3.0438    | 0.0011682   | 3.0438      | 0.0011682   | 3.0438   | 0.0011682 |
|           | 3.0438          | 0.0011682 | 0.0011682   | 0.174086807 |             |          |           |
| SACS      | ENSG00000151835 | 3.0408    | 0.0011797   | 1.4604      | 0.072089    | 2.7988   | 0.0025643 |
|           | 2.2051          | 0.013725  | 0.0011797   | 0.175264576 |             |          |           |
| NA        | ENSG00000250599 | 0.35895   | 0.35982     | 0.095075    | 0.46213     | 0.58943  | 0.27779   |
|           | 3.0392          | 0.0011859 | 0.0011859   | 0.175650173 |             |          |           |
| CRY2      | ENSG00000121671 | -0.42695  | 0.66529     | 2.1227      | 0.01689     | 2.3702   | 0.0088892 |
|           | 3.0368          | 0.0011956 | 0.0011956   | 0.176134659 |             |          |           |
| NA        | ENSG00000248772 | 3.0366    | 0.0011964   | 3.0366      | 0.0011964   | 3.0366   | 0.0011964 |
|           | 3.0366          | 0.0011964 | 0.0011964   | 0.176134659 |             |          |           |
| PPP4R2    | ENSG00000163605 | 1.8156    | 0.034713    | 2.065       | 0.01946     | 1.7075   | 0.04386   |
|           | 3.0324          | 0.0012132 | 0.0012132   | 0.177481312 |             |          |           |
| RNY3P15   | ENSG00000252106 | 3.0316    | 0.0012163   | 3.0316      | 0.0012163   | 3.0316   |           |
|           | 0.0012163       | 3.0316    | 0.0012163   | 0.0012163   | 0.177481312 |          |           |
| MIR4669   | ENSG00000263897 | 0.075391  | 0.46995     | 0.075391    | 0.46995     | 0.075391 |           |
|           | 0.46995         | 3.0311    | 0.0012183   | 0.0012183   | 0.177481312 |          |           |
| ETNK2     | ENSG00000143845 | 3.0305    | 0.0012206   | 2.0933      | 0.018159    | 2.1037   | 0.0177    |
|           | 0.039646        | 0.48419   | 0.0012206   | 0.177481312 |             |          |           |
| INTS2     | ENSG00000108506 | 0.41794   | 0.338       | -0.31316    | 0.62292     | 0.42809  | 0.33429   |
|           | 3.0289          | 0.0012271 | 0.0012271   | 0.177481312 |             |          |           |
| NA        | ENSG00000261527 | 0.11113   | 0.45576     | 3.0289      | 0.0012274   | 0.81012  | 0.20893   |
|           | 2.3064          | 0.010546  | 0.0012274   | 0.177481312 |             |          |           |
| LINC02218 | ENSG00000249662 | -0.31754  | 0.62458     | 3.0246      | 0.0012447   | -0.31754 |           |
|           | 0.62458         | 0.79118   | 0.21442     | 0.0012447   | 0.179450388 |          |           |
| CLIP2     | ENSG00000106665 | 0.49188   | 0.3114      | 2.1774      | 0.014726    | 3.0217   | 0.0012567 |
|           | 2.7224          | 0.0032404 | 0.0012567   | 0.180114679 |             |          |           |

|           |                 |           |           |             |             |           |           |  |
|-----------|-----------------|-----------|-----------|-------------|-------------|-----------|-----------|--|
| MARCHF4   | ENSG00000144583 | 2.5679    | 0.0051163 | 1.6842      | 0.046071    | 3.0217    |           |  |
|           | 0.0012567       | 0.59967   | 0.27436   | 0.0012567   | 0.180114679 |           |           |  |
| RN7SL480P | ENSG00000266187 | 2.8087    | 0.0024868 | 2.8087      | 0.0024868   | 3.02      | 0.0012638 |  |
|           | 2.8087          | 0.0024868 | 0.0012638 | 0.180601097 |             |           |           |  |
| RECQL5    | ENSG00000108469 | 1.8913    | 0.02929   | 3.0169      | 0.0012769   | 2.3052    |           |  |
|           | 0.010577        | 1.4894    | 0.068194  | 0.0012769   | 0.181939582 |           |           |  |
| AFF1      | ENSG00000172493 | 1.2666    | 0.10265   | 3.0144      | 0.0012874   | 2.1341    | 0.016419  |  |
|           | 1.394           | 0.081655  | 0.0012874 | 0.18290088  |             |           |           |  |
| NA        | ENSG00000265985 | 2.5241    | 0.0058004 | 0.091807    | 0.46343     | 3.0132    | 0.0012925 |  |
|           | 2.3828          | 0.0085913 | 0.0012925 | 0.183091642 |             |           |           |  |
| ZNF577    | ENSG00000161551 | 1.4855    | 0.0687    | 3.0101      | 0.0013057   | 2.8168    |           |  |
|           | 0.0024256       | 2.611     | 0.0045137 | 0.0013057   | 0.183681986 |           |           |  |
| NA        | ENSG00000236687 | 3.0083    | 0.0013135 | -0.37095    | 0.64466     | 0.78074   | 0.21748   |  |
|           | -0.11191        | 0.54455   | 0.0013135 | 0.183681986 |             |           |           |  |
| NA        | ENSG00000242073 | 3.0079    | 0.0013151 | 0.692       | 0.24447     | 0.2315    | 0.40846   |  |
|           | 0.11139         | 0.45565   | 0.0013151 | 0.183681986 |             |           |           |  |
| NA        | ENSG00000249982 | 3.0073    | 0.0013178 | 3.0073      | 0.0013178   | 3.0073    | 0.0013178 |  |
|           | 3.0073          | 0.0013178 | 0.0013178 | 0.183681986 |             |           |           |  |
| GLYCTK    | ENSG00000168237 | 0.73618   | 0.23081   | 0.31637     | 0.37586     | 3.0066    |           |  |
|           | 0.001321        | 0.3211    | 0.37407   | 0.001321    | 0.183681986 |           |           |  |
| TBX20     | ENSG00000164532 | 3.006     | 0.0013238 | 0.90029     | 0.18398     | 0.81015   | 0.20893   |  |
|           | -0.54928        | 0.70859   | 0.0013238 | 0.183681986 |             |           |           |  |
| SCGB1B2P  | ENSG00000268751 | -0.18758  | 0.5744    | 3.0045      | 0.0013301   | -0.18758  |           |  |
|           | 0.5744          | -0.18758  | 0.5744    | 0.0013301   | 0.183681986 |           |           |  |
| LINC01894 | ENSG00000264345 | 1.0419    | 0.14873   | 1.1944      | 0.11616     | 3.0033    |           |  |
|           | 0.0013352       | 1.9292    | 0.026855  | 0.0013352   | 0.183681986 |           |           |  |
| NSL1      | ENSG00000117697 | 1.3475    | 0.088913  | 0.99449     | 0.15999     | 3.0031    | 0.0013361 |  |
|           | 0.97999         | 0.16355   | 0.0013361 | 0.183681986 |             |           |           |  |
| YTHDF1    | ENSG00000149658 | 3.0031    | 0.0013363 | 0.090065    | 0.46412     | 1.5489    |           |  |
|           | 0.060707        | 0.92848   | 0.17658   | 0.0013363   | 0.183681986 |           |           |  |
| NA        | ENSG00000261499 | 2.6523    | 0.0039972 | 3.0021      | 0.0013408   | 1.5623    | 0.059113  |  |
|           | 2.8257          | 0.0023592 | 0.0013408 | 0.183681986 |             |           |           |  |
| S100BPB   | ENSG00000116497 | 2.72      | 0.0032646 | 3.0018      | 0.0013419   | 2.8656    | 0.0020809 |  |
|           | 2.9984          | 0.0013571 | 0.0013419 | 0.183681986 |             |           |           |  |
| IBSP      | ENSG00000029559 | 2.9996    | 0.0013518 | 0.26824     | 0.39426     | -0.56807  | 0.71501   |  |
|           | 0.11881         | 0.45271   | 0.0013518 | 0.184518807 |             |           |           |  |
| NLRP9     | ENSG00000185792 | 2.9982    | 0.0013577 | 2.9982      | 0.0013577   | -0.025958 | 0.51035   |  |
|           | 2.9982          | 0.0013577 | 0.0013577 | 0.184806483 |             |           |           |  |
| NA        | ENSG00000263443 | 1.4021    | 0.08044   | 2.9966      | 0.0013649   | -0.87921  | 0.81036   |  |
|           | 0.82588         | 0.20443   | 0.0013649 | 0.184903278 |             |           |           |  |
| GTF3C1    | ENSG00000077235 | 2.9964    | 0.001366  | 2.805       | 0.0025156   | 1.9098    | 0.02808   |  |
|           | 0.21308         | 0.41563   | 0.001366  | 0.184903278 |             |           |           |  |
| WNT5B     | ENSG00000111186 | 2.546     | 0.0054477 | 2.0449      | 0.020434    | 2.9889    | 0.0014001 |  |
|           | 1.2192          | 0.11139   | 0.0014001 | 0.188382394 |             |           |           |  |
| PACC1     | ENSG00000065600 | -0.67148  | 0.74904   | 2.9884      | 0.0014024   | 0.41942   | 0.33746   |  |
|           | 0.75592         | 0.22485   | 0.0014024 | 0.188382394 |             |           |           |  |
| SMG1P5    | ENSG00000183604 | 2.9882    | 0.0014033 | 2.256       | 0.012036    | 1.1395    | 0.12725   |  |
|           | 0.63792         | 0.26176   | 0.0014033 | 0.188382394 |             |           |           |  |
| CASKIN1   | ENSG00000167971 | 2.8289    | 0.0023356 | 2.5993      | 0.0046705   | 2.9862    |           |  |
|           | 0.0014125       | 2.8289    | 0.0023356 | 0.0014125   | 0.189096497 |           |           |  |
| TRMT61A   | ENSG00000166166 | 2.9776    | 0.0014528 | 2.7153      | 0.0033111   | 2.9776    |           |  |
|           | 0.0014528       | 0.84961   | 0.19777   | 0.0014528   | 0.193958751 |           |           |  |
| SEMA3G    | ENSG00000010319 | 0.95273   | 0.17036   | 2.9755      | 0.0014627   | 1.9313    |           |  |
|           | 0.026724        | 1.1326    | 0.12868   | 0.0014627   | 0.194734109 |           |           |  |
| TMEM141   | ENSG00000244187 | 2.3659    | 0.0089938 | 2.1118      | 0.017351    | 2.9747    |           |  |
|           | 0.0014666       | 2.193     | 0.014153  | 0.0014666   | 0.194734109 |           |           |  |
| TENT2     | ENSG00000164329 | 1.3296    | 0.091829  | 2.9734      | 0.0014726   | 1.3296    | 0.091829  |  |
|           | 1.487           | 0.068508  | 0.0014726 | 0.194999451 |             |           |           |  |
| AFG3L1P   | ENSG00000223959 | 2.8614    | 0.0021088 | 2.351       | 0.0093623   | 2.9694    | 0.0014917 |  |
|           | 1.9081          | 0.028192  | 0.0014917 | 0.19690335  |             |           |           |  |
| NA        | ENSG00000263427 | 2.9687    | 0.0014954 | -0.33483    | 0.63112     | -0.33483  | 0.63112   |  |
|           | -0.63076        | 0.7359    | 0.0014954 | 0.19690335  |             |           |           |  |

|            |                 |           |             |           |             |             |           |
|------------|-----------------|-----------|-------------|-----------|-------------|-------------|-----------|
| NA         | ENSG00000267284 | 0.48226   | 0.31481     | 2.9679    | 0.0014991   | 0.05537     | 0.47792   |
|            |                 | -0.56757  | 0.71484     | 0.0014991 | 0.19690335  |             |           |
| MIR124-2   | ENSG00000207816 | 0.037748  | 0.48494     | 0.037748  | 0.48494     | 2.9636      |           |
|            |                 | 0.0015205 | 0.037748    | 0.48494   | 0.0015205   | 0.1982425   |           |
| NA         | ENSG00000250855 | 2.9634    | 0.0015211   | 2.8813    | 0.0019799   | 2.9605      | 0.0015357 |
|            |                 | -0.23779  | 0.59398     | 0.0015211 | 0.1982425   |             |           |
| MRPL2P1    | ENSG00000257480 | 2.9634    | 0.0015215   | 2.9634    | 0.0015215   | 2.9634      |           |
|            |                 | 0.0015215 | 2.9634      | 0.0015215 | 0.1982425   |             |           |
| ABCC4      | ENSG00000125257 | 2.9599    | 0.0015389   | 1.6083    | 0.053888    | 1.7026      | 0.044321  |
|            |                 | 1.8881    | 0.029505    | 0.0015389 | 0.199961481 |             |           |
| C11orf49   | ENSG00000149179 | -0.11047  | 0.54398     | -0.42993  | 0.66638     | -0.30768    |           |
|            |                 | 0.62084   | 2.9591      | 0.0015429 | 0.0015429   | 0.199961481 |           |
| NA         | ENSG00000279196 | 2.9552    | 0.0015623   | 2.9552    | 0.0015623   | 2.9552      | 0.0015623 |
|            |                 | 2.9552    | 0.0015623   | 0.0015623 | 0.201938671 |             |           |
| REN        | ENSG00000143839 | 2.9531    | 0.0015732   | 2.2358    | 0.012682    | 2.3984      | 0.0082329 |
|            |                 | 1.9383    | 0.026295    | 0.0015732 | 0.202809619 |             |           |
| MTCYBP14   | ENSG00000238236 | 2.9504    | 0.0015866   | 2.2321    | 0.012804    | 1.6012      |           |
|            |                 | 0.054667  | 2.871       | 0.002046  | 0.0015866   | 0.203820168 |           |
| NA         | ENSG00000267599 | 2.9495    | 0.0015915   | 2.9495    | 0.0015915   | 1.3372      | 0.090574  |
|            |                 | 2.9495    | 0.0015915   | 0.0015915 | 0.203820168 |             |           |
| SCRN2      | ENSG00000141295 | 2.949     | 0.0015942   | 2.949     | 0.0015942   | 2.949       | 0.0015942 |
|            |                 | 0.0015942 | 0.203820168 |           |             |             |           |
| NA         | ENSG00000217455 | 2.9478    | 0.0016003   | 1.4357    | 0.07554     | 1.4562      | 0.072667  |
|            |                 | 1.0024    | 0.15809     | 0.0016003 | 0.203820168 |             |           |
| DTD1-AS1   | ENSG00000233993 | 2.9457    | 0.0016109   | 2.3452    | 0.0095077   | 1.0319      |           |
|            |                 | 0.15105   | 1.0319      | 0.15105   | 0.0016109   | 0.203820168 |           |
| NA         | ENSG00000242747 | 2.9456    | 0.0016117   | 2.9456    | 0.0016117   | 0.75663     | 0.22464   |
|            |                 | 1.2059    | 0.11393     | 0.0016117 | 0.203820168 |             |           |
| SP6        | ENSG00000189120 | 2.9453    | 0.0016131   | 0.68231   | 0.24752     | 2.9453      | 0.0016131 |
|            |                 | 2.9453    | 0.0016131   | 0.0016131 | 0.203820168 |             |           |
| NA         | ENSG00000279439 | 2.9451    | 0.0016145   | 2.9002    | 0.0018645   | 2.9002      | 0.0018645 |
|            |                 | 2.9002    | 0.0018645   | 0.0016145 | 0.203820168 |             |           |
| NELFA      | ENSG00000185049 | -1.1582   | 0.87661     | -0.065017 | 0.52592     | -0.64699    | 0.74118   |
|            |                 | 2.9395    | 0.0016436   | 0.0016436 | 0.206957695 |             |           |
| MYO18A     | ENSG00000196535 | 2.9381    | 0.0016512   | 2.8834    | 0.0019669   | 0.954       | 0.17004   |
|            |                 | 2.066     | 0.019413    | 0.0016512 | 0.207378804 |             |           |
| GPT2       | ENSG00000166123 | 2.9369    | 0.0016574   | 1.1481    | 0.12547     | 0.8815      | 0.18902   |
|            |                 | -0.30389  | 0.6194      | 0.0016574 | 0.20762237  |             |           |
| VAV3-AS1   | ENSG00000230489 | 2.1012    | 0.017811    | 0.63424   | 0.26296     | 2.1012      |           |
|            |                 | 0.017811  | 2.9345      | 0.0016704 | 0.0016704   | 0.208524822 |           |
| GALNT17    | ENSG00000185274 | 2.5246    | 0.0057912   | 2.2706    | 0.011586    | 2.9338      |           |
|            |                 | 0.0016744 | 2.8534      | 0.0021629 | 0.0016744   | 0.208524822 |           |
| SLC24A1    | ENSG00000074621 | 1.2116    | 0.11283     | -0.84585  | 0.80118     | 2.9322      |           |
|            |                 | 0.0016831 | 1.5374      | 0.062099  | 0.0016831   | 0.208524822 |           |
| LINC01478  | ENSG00000267337 | -0.74859  | 0.77295     | 2.9319    | 0.0016844   | 0.44763     |           |
|            |                 | 0.32721   | -0.16454    | 0.56535   | 0.0016844   | 0.208524822 |           |
| DEF8       | ENSG00000140995 | 2.5815    | 0.0049185   | 2.9316    | 0.001686    | 1.5111      | 0.065382  |
|            |                 | 0.98848   | 0.16146     | 0.001686  | 0.208524822 |             |           |
| ANAPC1     | ENSG00000153107 | 1.8216    | 0.034255    | 1.4459    | 0.074109    | 1.941       | 0.026127  |
|            |                 | 2.9285    | 0.001703    | 0.001703  | 0.208977201 |             |           |
| NA         | ENSG00000274756 | 1.4085    | 0.079491    | 2.9283    | 0.0017039   | 0.64992     | 0.25787   |
|            |                 | 0.99481   | 0.15991     | 0.0017039 | 0.208977201 |             |           |
| NA         | ENSG00000226026 | 2.2596    | 0.011924    | 2.9276    | 0.0017082   | 2.9276      | 0.0017082 |
|            |                 | 1.3817    | 0.083537    | 0.0017082 | 0.208977201 |             |           |
| SLC25A51P4 | ENSG00000189332 | 2.9275    | 0.0017083   | 1.7013    | 0.044447    | -1.5253     |           |
|            |                 | 0.9364    | 1.5792      | 0.057142  | 0.0017083   | 0.208977201 |           |
| LINC00690  | ENSG00000233570 | 2.927     | 0.0017111   | 1.7092    | 0.043704    | 0.34387     | 0.36547   |
|            |                 | 2.0225    | 0.021564    | 0.0017111 | 0.208977201 |             |           |
| POLR3D     | ENSG00000168495 | 2.4279    | 0.0075926   | -0.3347   | 0.63107     | -0.52585    |           |
|            |                 | 0.7005    | 2.9244      | 0.0017258 | 0.0017258   | 0.210219519 |           |
| NA         | ENSG00000254339 | 0.41042   | 0.34075     | 2.9236    | 0.0017299   | 1.6129      | 0.053384  |
|            |                 | 2.9236    | 0.0017299   | 0.0017299 | 0.210219519 |             |           |

|           |                 |           |           |             |             |          |           |  |
|-----------|-----------------|-----------|-----------|-------------|-------------|----------|-----------|--|
| MRPS21P3  | ENSG00000221879 | 2.8899    | 0.001927  | 2.8899      | 0.001927    | 2.9215   |           |  |
|           | 0.0017416       | 2.8899    | 0.001927  | 0.0017416   | 0.210297813 |          |           |  |
| NA        | ENSG00000248991 | 1.9578    | 0.02513   | 2.9207      | 0.0017461   | 2.9207   | 0.0017461 |  |
|           | 0.49767         | 0.30936   | 0.0017461 | 0.210297813 |             |          |           |  |
| NA        | ENSG00000263501 | 0.44097   | 0.32962   | 0.44097     | 0.32962     | 2.9196   | 0.0017525 |  |
|           | 0.44097         | 0.32962   | 0.0017525 | 0.210297813 |             |          |           |  |
| BMPER     | ENSG00000164619 | 2.9185    | 0.0017585 | 2.4499      | 0.0071438   | 1.2149   | 0.11221   |  |
|           | 0.75613         | 0.22479   | 0.0017585 | 0.210297813 |             |          |           |  |
| NA        | ENSG00000255314 | 2.9179    | 0.0017621 | 2.9179      | 0.0017621   | 2.9179   | 0.0017621 |  |
|           | 2.9179          | 0.0017621 | 0.0017621 | 0.210297813 |             |          |           |  |
| PHF12     | ENSG00000109118 | 2.7925    | 0.0026151 | 2.358       | 0.0091871   | 2.9178   | 0.0017625 |  |
|           | 2.2955          | 0.010851  | 0.0017625 | 0.210297813 |             |          |           |  |
| NA        | ENSG00000252742 | -0.67649  | 0.75064   | -0.47952    | 0.68421     | -0.79772 | 0.78748   |  |
|           | 2.9172          | 0.0017662 | 0.0017662 | 0.210297813 |             |          |           |  |
| SLC25A5P5 | ENSG00000226421 | -0.95335  | 0.82979   | 0.97806     | 0.16402     | -0.51801 |           |  |
|           | 0.69778         | 2.9169    | 0.0017677 | 0.0017677   | 0.210297813 |          |           |  |
| NA        | ENSG00000249258 | 2.9162    | 0.0017716 | 0.66536     | 0.25291     | 0.35067  | 0.36292   |  |
|           | 0.66536         | 0.25291   | 0.0017716 | 0.210297813 |             |          |           |  |
| MEIS2     | ENSG00000134138 | -0.096303 | 0.53836   | 2.9158      | 0.0017737   | -1.4983  | 0.93297   |  |
|           | 1.1901          | 0.11701   | 0.0017737 | 0.210297813 |             |          |           |  |
| NEK8      | ENSG00000160602 | 2.1846    | 0.014461  | 2.9022      | 0.0018525   | 2.7889   | 0.0026445 |  |
|           | 2.9151          | 0.0017781 | 0.0017781 | 0.210307799 |             |          |           |  |
| MYBPC3    | ENSG00000134571 | 2.9136    | 0.0017862 | 1.4582      | 0.072399    | 1.4582   |           |  |
|           | 0.072399        | 1.4582    | 0.072399  | 0.0017862   | 0.210497434 |          |           |  |
| RNA5SP87  | ENSG00000206882 | 1.6519    | 0.049278  | 2.9122      | 0.0017946   | 0.81835  |           |  |
|           | 0.20658         | 2.9122    | 0.0017946 | 0.0017946   | 0.210497434 |          |           |  |
| EDAR      | ENSG00000135960 | -1.3234   | 0.90715   | 2.9105      | 0.001804    | -0.20482 | 0.58114   |  |
|           | -0.61367        | 0.73028   | 0.001804  | 0.210497434 |             |          |           |  |
| LINC01289 | ENSG00000253734 | 2.9101    | 0.0018063 | 2.0115      | 0.022136    | 1.1086   |           |  |
|           | 0.13381         | 0.98372   | 0.16263   | 0.0018063   | 0.210497434 |          |           |  |
| NA        | ENSG00000264138 | -0.6509   | 0.74245   | 0.4603      | 0.32265     | -0.50837 | 0.6944    |  |
|           | 2.9099          | 0.0018076 | 0.0018076 | 0.210497434 |             |          |           |  |
| FAM110C   | ENSG00000184731 | 2.1856    | 0.014422  | 2.3411      | 0.0096147   | 2.6217   |           |  |
|           | 0.0043747       | 2.9092    | 0.0018116 | 0.0018116   | 0.210497434 |          |           |  |
| RN7SL666P | ENSG00000240639 | 2.909     | 0.0018132 | 2.0033      | 0.022574    | 2.909    | 0.0018132 |  |
|           | 1.0629          | 0.14392   | 0.0018132 | 0.210497434 |             |          |           |  |
| C16orf87  | ENSG00000155330 | -0.20914  | 0.58283   | 2.9086      | 0.0018155   | -0.19848 |           |  |
|           | 0.57867         | 0.4297    | 0.33371   | 0.0018155   | 0.210497434 |          |           |  |
| NA        | ENSG00000238201 | 1.4049    | 0.080019  | 1.6846      | 0.046037    | 1.4049   | 0.080019  |  |
|           | 2.9079          | 0.0018192 | 0.0018192 | 0.210497434 |             |          |           |  |
| SLC12A9   | ENSG00000146828 | -0.30106  | 0.61832   | 2.9073      | 0.0018229   | 2.6447   |           |  |
|           | 0.0040883       | 0.6404    | 0.26096   | 0.0018229   | 0.210497434 |          |           |  |
| NA        | ENSG00000237612 | 1.7066    | 0.043948  | 2.9058      | 0.0018315   | 2.9058   | 0.0018315 |  |
|           | 2.9058          | 0.0018315 | 0.0018315 | 0.210990532 |             |          |           |  |
| MIR4487   | ENSG00000264583 | 1.4337    | 0.07583   | 2.9043      | 0.0018407   | 2.9043   |           |  |
|           | 0.0018407       | 2.9043    | 0.0018407 | 0.0018407   | 0.21109836  |          |           |  |
| C1QTNF9B  | ENSG00000205863 | 1.6517    | 0.049293  | 1.4939      | 0.067598    | 2.9042   |           |  |
|           | 0.0018411       | 0.98368   | 0.16264   | 0.0018411   | 0.21109836  |          |           |  |
| NA        | ENSG00000248569 | 0.085741  | 0.46584   | -0.60481    | 0.72735     | 0.085741 | 0.46584   |  |
|           | 2.9032          | 0.0018469 | 0.0018469 | 0.211266284 |             |          |           |  |
| NA        | ENSG00000237654 | 2.279     | 0.011332  | -0.20754    | 0.58221     | 2.9019   | 0.0018546 |  |
|           | 0.36767         | 0.35656   | 0.0018546 | 0.211650253 |             |          |           |  |
| LINC01206 | ENSG00000242512 | 2.8984    | 0.0018754 | 2.819       | 0.0024084   | 2.4386   | 0.0073724 |  |
|           | 2.819           | 0.0024084 | 0.0018754 | 0.21352393  |             |          |           |  |
| NA        | ENSG00000223945 | 2.8959    | 0.0018906 | 2.4307      | 0.0075356   | 2.4519   | 0.0071044 |  |
|           | 2.0481          | 0.020277  | 0.0018906 | 0.214752769 |             |          |           |  |
| VPS4A     | ENSG00000132612 | 1.4233    | 0.077329  | 2.8938      | 0.0019031   | 0.69196  | 0.24448   |  |
|           | 1.7356          | 0.04132   | 0.0019031 | 0.215669914 |             |          |           |  |
| CRABP1    | ENSG00000166426 | 2.7218    | 0.0032464 | 2.7218      | 0.0032464   | 2.8896   |           |  |
|           | 0.0019286       | 1.9069    | 0.028264  | 0.0019286   | 0.217717067 |          |           |  |
| TIFAB     | ENSG00000255833 | 2.8894    | 0.0019301 | 2.8894      | 0.0019301   | 2.8894   | 0.0019301 |  |
|           | 2.8894          | 0.0019301 | 0.0019301 | 0.217717067 |             |          |           |  |

|           |                 |           |           |             |             |          |  |           |
|-----------|-----------------|-----------|-----------|-------------|-------------|----------|--|-----------|
| MIR3161   | ENSG00000263693 | -0.35122  | 0.63729   | 2.6492      | 0.004034    | 2.8873   |  |           |
|           | 0.0019429       | 1.8367    | 0.033128  | 0.0019429   | 0.218654774 |          |  |           |
| PNISR     | ENSG00000132424 | 2.8823    | 0.0019742 | 2.8823      | 0.0019742   | 2.8823   |  | 0.0019742 |
|           | 2.296           | 0.010837  | 0.0019742 | 0.220782665 |             |          |  |           |
| NQO2      | ENSG00000124588 | 2.8822    | 0.0019746 | 2.4754      | 0.0066545   | 2.3596   |  | 0.0091472 |
|           | 2.8482          | 0.0021985 | 0.0019746 | 0.220782665 |             |          |  |           |
| RBM22P13  | ENSG00000261284 | 1.8399    | 0.03289   | 0.70237     | 0.24122     | 0.70237  |  |           |
|           | 0.24122         | 2.8821    | 0.0019754 | 0.0019754   | 0.220782665 |          |  |           |
| RPL6P7    | ENSG00000239212 | 2.8808    | 0.0019833 | 1.9799      | 0.023858    | 1.5878   |  |           |
|           | 0.056161        | 1.5878    | 0.056161  | 0.0019833   | 0.221053966 |          |  |           |
| NA        | ENSG00000253355 | 0.026886  | 0.48928   | -0.69028    | 0.75499     | 0.66587  |  | 0.25275   |
|           | 2.8802          | 0.0019869 | 0.0019869 | 0.221053966 |             |          |  |           |
| GATA5     | ENSG00000130700 | 0.60706   | 0.2719    | 2.8769      | 0.0020083   | 0.96806  |  | 0.16651   |
|           | 1.2097          | 0.11321   | 0.0020083 | 0.222255    |             |          |  |           |
| SPATA33   | ENSG00000167523 | 2.3659    | 0.0089931 | 2.8766      | 0.0020101   | 2.3659   |  |           |
|           | 0.0089931       | 2.3659    | 0.0089931 | 0.0020101   | 0.222255    |          |  |           |
| FAM133FP  | ENSG00000225934 | 1.3854    | 0.082966  | 2.8763      | 0.0020119   | 0.93009  |  |           |
|           | 0.17616         | 0.55357   | 0.28994   | 0.0020119   | 0.222255    |          |  |           |
| RNU6-148P | ENSG00000252823 | 2.8753    | 0.0020181 | 2.8753      | 0.0020181   | 2.8753   |  |           |
|           | 0.0020181       | 2.8753    | 0.0020181 | 0.0020181   | 0.222255    |          |  |           |
| NA        | ENSG00000226771 | 1.2687    | 0.10227   | 2.8749      | 0.0020205   | 2.8749   |  | 0.0020205 |
|           | 2.8749          | 0.0020205 | 0.0020205 | 0.222255    |             |          |  |           |
| NA        | ENSG00000270739 | 2.8732    | 0.0020317 | 2.8732      | 0.0020317   | 2.8732   |  | 0.0020317 |
|           | 2.8732          | 0.0020317 | 0.0020317 | 0.222983651 |             |          |  |           |
| DPP9      | ENSG00000142002 | 2.031     | 0.02113   | 1.3041      | 0.096099    | 0.18654  |  | 0.42601   |
|           | 2.8697          | 0.0020543 | 0.0020543 | 0.224957391 |             |          |  |           |
| ABCD4     | ENSG00000119688 | 1.7512    | 0.039956  | 1.8017      | 0.0358      | 2.8688   |  | 0.0020603 |
|           | 1.8017          | 0.0358    | 0.0020603 | 0.225108563 |             |          |  |           |
| BCKDK     | ENSG00000103507 | 0.99474   | 0.15993   | 2.8677      | 0.0020672   | 2.5064   |  | 0.0060987 |
|           | 0.45695         | 0.32385   | 0.0020672 | 0.225357172 |             |          |  |           |
| NA        | ENSG00000234238 | -0.022306 | 0.5089    | 1.2452      | 0.10653     | 2.8623   |  | 0.0021031 |
|           | 1.0715          | 0.14196   | 0.0021031 | 0.228759069 |             |          |  |           |
| BMP4      | ENSG00000125378 | 2.8611    | 0.0021109 | 1.8921      | 0.029238    | 2.8611   |  | 0.0021109 |
|           | 2.8611          | 0.0021109 | 0.0021109 | 0.229031    |             |          |  |           |
| MREGP1    | ENSG00000270395 | 2.8592    | 0.0021236 | 2.8592      | 0.0021236   | 2.8592   |  |           |
|           | 0.0021236       | 2.8592    | 0.0021236 | 0.0021236   | 0.229031    |          |  |           |
| PRPF38A   | ENSG00000134748 | -1.0837   | 0.86076   | 2.8586      | 0.0021274   | -0.72312 |  |           |
|           | 0.7652          | -0.72312  | 0.7652    | 0.0021274   | 0.229031    |          |  |           |
| SETP14    | ENSG00000240489 | 2.8575    | 0.0021348 | 2.8575      | 0.0021348   | -0.11977 |  |           |
|           | 0.54767         | 1.8695    | 0.030778  | 0.0021348   | 0.229031    |          |  |           |
| RWDD3     | ENSG00000122481 | 2.8574    | 0.0021357 | 2.8574      | 0.0021357   | 2.8574   |  | 0.0021357 |
|           | 2.1953          | 0.014073  | 0.0021357 | 0.229031    |             |          |  |           |
| NMI       | ENSG00000123609 | 1.0361    | 0.15007   | 2.8572      | 0.0021372   | 1.0361   |  | 0.15007   |
|           | 1.0361          | 0.15007   | 0.0021372 | 0.229031    |             |          |  |           |
| NA        | ENSG00000253282 | 2.857     | 0.0021385 | 0.036959    | 0.48526     | -1.2383  |  | 0.8922    |
|           | -1.6174         | 0.9471    | 0.0021385 | 0.229031    |             |          |  |           |
| SNX22     | ENSG00000157734 | -0.98275  | 0.83714   | -1.4188     | 0.92203     | 2.7512   |  | 0.0029689 |
|           | 2.8536          | 0.0021617 | 0.0021617 | 0.230737083 |             |          |  |           |
| EFR3A     | ENSG00000132294 | 2.8532    | 0.0021639 | 2.1835      | 0.0145      | 2.1778   |  | 0.014712  |
|           | 1.8045          | 0.035577  | 0.0021639 | 0.230737083 |             |          |  |           |
| DCLRE1A   | ENSG00000198924 | -1.3671   | 0.91421   | -1.3671     | 0.91421     | 2.8516   |  |           |
|           | 0.0021749       | -1.3671   | 0.91421   | 0.0021749   | 0.231149696 |          |  |           |
| KISS1     | ENSG00000170498 | 1.9065    | 0.028292  | 1.9065      | 0.028292    | 1.9065   |  | 0.028292  |
|           | 2.8506          | 0.0021816 | 0.0021816 | 0.231149696 |             |          |  |           |
| RCN1      | ENSG00000049449 | 2.7216    | 0.0032483 | 2.3         | 0.010725    | 1.7645   |  | 0.03882   |
|           | 2.8506          | 0.002182  | 0.002182  | 0.231149696 |             |          |  |           |
| NA        | ENSG00000265840 | 2.8467    | 0.0022087 | 2.8467      | 0.0022087   | 2.8467   |  | 0.0022087 |
|           | 2.8467          | 0.0022087 | 0.0022087 | 0.23347061  |             |          |  |           |
| RPS4XP14  | ENSG00000243663 | 2.8458    | 0.0022152 | 2.8458      | 0.0022152   | 2.8458   |  |           |
|           | 0.0022152       | 2.8458    | 0.0022152 | 0.0022152   | 0.233536425 |          |  |           |
| NPM1P33   | ENSG00000213925 | 2.8451    | 0.0022201 | 2.8451      | 0.0022201   | 2.8451   |  |           |
|           | 0.0022201       | 2.8451    | 0.0022201 | 0.0022201   | 0.233536425 |          |  |           |

|            |                 |           |             |             |             |          |           |       |
|------------|-----------------|-----------|-------------|-------------|-------------|----------|-----------|-------|
| LINC01812  | ENSG00000237013 | -1.4499   | 0.92645     | -1.7324     | 0.9584      | 2.8445   |           |       |
|            | 0.0022237       | -1.4499   | 0.92645     | 0.0022237   | 0.233536425 |          |           |       |
| RNU6-336P  | ENSG00000201761 | 2.8437    | 0.0022298   | 2.8437      | 0.0022298   | 2.8437   |           |       |
|            | 0.0022298       | 2.8437    | 0.0022298   | 0.0022298   | 0.233673449 |          |           |       |
| H2BC18     | ENSG00000203814 | 2.8427    | 0.0022368   | 2.5596      | 0.005239    | 1.4995   |           |       |
|            | 0.066868        | 1.4995    | 0.066868    | 0.0022368   | 0.233904    |          |           |       |
| LINC02495  | ENSG00000249896 | 2.8417    | 0.0022439   | 0.46148     | 0.32223     | 0.58237  |           |       |
|            | 0.28016         | 0.99667   | 0.15946     | 0.0022439   | 0.234143998 |          |           |       |
| TXNDC12    | ENSG00000117862 | 1.2413    | 0.10724     | -0.54787    | 0.70811     | 2.8405   |           |       |
|            | 0.002252        | -0.41389  | 0.66052     | 0.002252    | 0.234487094 |          |           |       |
| NA         | ENSG00000259445 | 0.44074   | 0.3297      | 0.36153     | 0.35885     | -0.62233 | 0.73314   |       |
|            | 2.8384          | 0.0022668 | 0.0022668   | 0.235262219 |             |          |           |       |
| PNO1       | ENSG00000115946 | 2.8381    | 0.0022691   | 2.8381      | 0.0022691   | 2.8381   | 0.0022691 |       |
|            | 2.6834          | 0.0036442 | 0.0022691   | 0.235262219 |             |          |           |       |
| NA         | ENSG00000264246 | -0.18984  | 0.57528     | -0.2322     | 0.59181     | 2.8362   | 0.0022828 |       |
|            | 1.1739          | 0.12021   | 0.0022828   | 0.236180136 |             |          |           |       |
| EVA1A      | ENSG00000115363 | 1.5527    | 0.060252    | 2.8328      | 0.002307    | 1.054    | 0.14595   |       |
|            | 1.7228          | 0.042461  | 0.002307    | 0.237804447 |             |          |           |       |
| IGLV3-19   | ENSG00000211663 | 0.45353   | 0.32508     | 2.8322      | 0.0023112   | 2.8322   |           |       |
|            | 0.0023112       | 1.1494    | 0.1252      | 0.0023112   | 0.237804447 |          |           |       |
| FBXL19-AS1 | ENSG00000260852 | 2.8316    | 0.0023161   | 2.8316      | 0.0023161   | 2.8316   |           |       |
|            | 0.0023161       | 2.8316    | 0.0023161   | 0.0023161   | 0.237804447 |          |           |       |
| SEC16A     | ENSG00000148396 | 2.5981    | 0.0046875   | 1.6278      | 0.051778    | 2.8311   |           |       |
|            | 0.0023197       | 1.6269    | 0.051874    | 0.0023197   | 0.237804447 |          |           |       |
| LINC01301  | ENSG00000251396 | 2.8306    | 0.0023229   | 0.42051     | 0.33706     | 0.82099  |           |       |
|            | 0.20583         | -0.45057  | 0.67385     | 0.0023229   | 0.237804447 |          |           |       |
| NA         | ENSG00000262445 | 0.31325   | 0.37704     | 0.19417     | 0.42302     | 2.4905   | 0.0063785 |       |
|            | 2.8292          | 0.0023335 | 0.0023335   | 0.238388795 |             |          |           |       |
| NA         | ENSG00000221072 | 0.85299   | 0.19683     | 0.21537     | 0.41474     | 2.8282   | 0.0023404 |       |
|            | 2.298           | 0.01078   | 0.0023404   | 0.238593498 |             |          |           |       |
| GATA3      | ENSG00000107485 | 2.8259    | 0.0023575   | -0.21162    | 0.5838      | 1.5634   | 0.058983  |       |
|            | 0.29556         | 0.38378   | 0.0023575   | 0.239019137 |             |          |           |       |
| NA         | ENSG00000243517 | 0.71705   | 0.23667     | 2.8255      | 0.0023601   | 2.8255   | 0.0023601 |       |
|            | 2.8255          | 0.0023601 | 0.0023601   | 0.239019137 |             |          |           |       |
| NA         | ENSG00000264066 | 2.7697    | 0.0028054   | 2.6007      | 0.0046517   | 2.825    | 0.0023637 | 2.825 |
|            | 0.0023637       | 0.0023637 | 0.239019137 |             |             |          |           |       |
| NA         | ENSG00000204398 | 0.74086   | 0.22939     | 0.89424     | 0.1856      | 2.8248   | 0.0023651 |       |
|            | 1.9235          | 0.027212  | 0.0023651   | 0.239019137 |             |          |           |       |
| PLEKHO2    | ENSG00000241839 | 2.8243    | 0.0023691   | 1.5634      | 0.058978    | 1.7808   |           |       |
|            | 0.037473        | 1.3842    | 0.083145    | 0.0023691   | 0.239019137 |          |           |       |
| PIANP      | ENSG00000139200 | -0.50291  | 0.69249     | -0.50291    | 0.69249     | 2.823    | 0.0023788 |       |
|            | -0.34751        | 0.6359    | 0.0023788   | 0.239501909 |             |          |           |       |
| EXOC3L4    | ENSG00000205436 | 1.6618    | 0.048278    | 0.98608     | 0.16205     | 2.1224   |           |       |
|            | 0.0169          | 2.8212    | 0.0023921   | 0.0023921   | 0.240344398 |          |           |       |
| MARCHF10   | ENSG00000173838 | 0.4641    | 0.32129     | 2.8183      | 0.0024138   | 2.2746   |           |       |
|            | 0.011465        | 1.2393    | 0.10761     | 0.0024138   | 0.241724619 |          |           |       |
| RNLS       | ENSG00000184719 | 2.8167    | 0.0024258   | 0.68839     | 0.2456      | 1.2416   | 0.1072    |       |
|            | 1.1201          | 0.13133   | 0.0024258   | 0.241724619 |             |          |           |       |
| A3GALT2    | ENSG00000184389 | 2.2915    | 0.010969    | 2.2915      | 0.010969    | 2.8167   |           |       |
|            | 0.0024261       | 2.8167    | 0.0024261   | 0.0024261   | 0.241724619 |          |           |       |
| NA         | ENSG00000255872 | -0.3224   | 0.62643     | -0.3224     | 0.62643     | 2.8166   | 0.0024267 |       |
|            | -0.39772        | 0.65458   | 0.0024267   | 0.241724619 |             |          |           |       |
| ADIPOR2    | ENSG00000006831 | 2.1399    | 0.016182    | 2.2818      | 0.01125     | 1.9476   |           |       |
|            | 0.025729        | 2.8157    | 0.0024334   | 0.0024334   | 0.241724619 |          |           |       |
| MEGF11     | ENSG00000157890 | 2.8154    | 0.0024356   | 2.0021      | 0.022637    | 0.13604  |           |       |
|            | 0.4459          | 2.7478    | 0.0029996   | 0.0024356   | 0.241724619 |          |           |       |
| GAS8       | ENSG00000141013 | 2.8129    | 0.0024551   | 2.8129      | 0.0024551   | 2.0613   | 0.019637  |       |
|            | 2.8129          | 0.0024551 | 0.0024551   | 0.241908245 |             |          |           |       |
| NA         | ENSG00000282142 | 2.8122    | 0.0024604   | 2.8122      | 0.0024604   | 2.8122   | 0.0024604 |       |
|            | 2.8122          | 0.0024604 | 0.0024604   | 0.241908245 |             |          |           |       |
| NA         | ENSG00000233581 | 2.812     | 0.0024618   | 1.6774      | 0.046736    | 2.1038   | 0.017698  |       |
|            | 2.2894          | 0.011029  | 0.0024618   | 0.241908245 |             |          |           |       |



|           |                 |           |           |             |             |           |           |  |
|-----------|-----------------|-----------|-----------|-------------|-------------|-----------|-----------|--|
| MIR4778   | ENSG00000264525 | 1.8936    | 0.029138  | 2.8115      | 0.0024654   | -0.065506 |           |  |
|           | 0.52611         | -0.46185  | 0.67791   | 0.0024654   | 0.241908245 |           |           |  |
| RNU6-712P | ENSG00000222490 | 2.8112    | 0.002468  | 2.1255      | 0.016772    | -0.33379  |           |  |
|           | 0.63073         | 1.4916    | 0.067904  | 0.002468    | 0.241908245 |           |           |  |
| POLG      | ENSG00000140521 | 2.8106    | 0.0024722 | 0.70217     | 0.24129     | 2.8106    | 0.0024722 |  |
|           | 1.1846          | 0.11809   | 0.0024722 | 0.241908245 |             |           |           |  |
| NA        | ENSG00000261441 | 2.8106    | 0.0024722 | 2.8106      | 0.0024722   | 2.8106    | 0.0024722 |  |
|           | 2.8106          | 0.0024722 | 0.0024722 | 0.241908245 |             |           |           |  |
| NT5DC2    | ENSG00000168268 | 2.0379    | 0.020781  | 2.6356      | 0.0041996   | 2.8085    |           |  |
|           | 0.0024885       | 2.8085    | 0.0024885 | 0.0024885   | 0.242725978 |           |           |  |
| HSPA8P5   | ENSG00000256356 | 0.50303   | 0.30747   | 0.39896     | 0.34496     | 2.8081    |           |  |
|           | 0.0024921       | 0.88798   | 0.18728   | 0.0024921   | 0.242725978 |           |           |  |
| CAPSL     | ENSG00000152611 | 1.7616    | 0.03907   | 2.8076      | 0.0024955   | -0.14295  | 0.55683   |  |
|           | 0.431           | 0.33323   | 0.0024955 | 0.242725978 |             |           |           |  |
| C9orf85   | ENSG00000155621 | 2.8053    | 0.0025137 | -0.10098    | 0.54022     | -0.70875  |           |  |
|           | 0.76076         | -2.1039   | 0.98231   | 0.0025137   | 0.243766254 |           |           |  |
| DUSP14    | ENSG00000276023 | 2.805     | 0.0025162 | 1.5123      | 0.06523     | 2.805     | 0.0025162 |  |
|           | 2.5935          | 0.0047503 | 0.0025162 | 0.243766254 |             |           |           |  |
| NA        | ENSG00000236555 | 2.8032    | 0.0025297 | 2.1897      | 0.014272    | 2.1897    | 0.014272  |  |
|           | 2.1897          | 0.014272  | 0.0025297 | 0.244351635 |             |           |           |  |
| NPIP6     | ENSG00000198156 | 0.080102  | 0.46808   | 2.8023      | 0.0025368   | 1.767     | 0.038612  |  |
|           | 0.82184         | 0.20558   | 0.0025368 | 0.244351635 |             |           |           |  |
| RNA5SP124 | ENSG00000199609 | 2.1382    | 0.01625   | 1.7015      | 0.044422    | 2.8017    |           |  |
|           | 0.0025413       | 2.7963    | 0.0025846 | 0.0025413   | 0.244351635 |           |           |  |
| NA        | ENSG00000276110 | 0.61059   | 0.27074   | 2.8016      | 0.0025423   | 0.61059   | 0.27074   |  |
|           | 0.61059         | 0.27074   | 0.0025423 | 0.244351635 |             |           |           |  |
| NA        | ENSG00000279926 | 2.0538    | 0.019996  | 2.8004      | 0.0025517   | 2.8004    | 0.0025517 |  |
|           | 2.8004          | 0.0025517 | 0.0025517 | 0.244772325 |             |           |           |  |
| NA        | ENSG00000261318 | 0.38399   | 0.35049   | 2.7991      | 0.002562    | -0.18006  | 0.57145   |  |
|           | 0.011113        | 0.49557   | 0.002562  | 0.245277525 |             |           |           |  |
| NA        | ENSG00000282998 | 2.3294    | 0.0099177 | 0.72061     | 0.23558     | 1.1834    | 0.11832   |  |
|           | 2.7973          | 0.0025764 | 0.0025764 | 0.245767037 |             |           |           |  |
| NA        | ENSG00000279100 | 2.7972    | 0.0025772 | 2.7972      | 0.0025772   | 2.7972    | 0.0025772 |  |
|           | 2.7972          | 0.0025772 | 0.0025772 | 0.245767037 |             |           |           |  |
| LHX8      | ENSG00000162624 | 1.5564    | 0.059803  | 0.86512     | 0.19349     | 0.35372   | 0.36178   |  |
|           | 2.7948          | 0.002597  | 0.002597  | 0.247171504 |             |           |           |  |
| NA        | ENSG00000225313 | 2.7925    | 0.0026149 | 2.7925      | 0.0026149   | 2.7925    | 0.0026149 |  |
|           | 2.7925          | 0.0026149 | 0.0026149 | 0.247994937 |             |           |           |  |
| PLEKHH2   | ENSG00000152527 | 1.9709    | 0.024367  | 2.2625      | 0.011832    | 2.792     | 0.002619  |  |
|           | 0.39026         | 0.34817   | 0.002619  | 0.247994937 |             |           |           |  |
| NA        | ENSG00000235042 | -1.4834   | 0.93102   | 2.7914      | 0.0026237   | 2.186     | 0.014409  |  |
|           | -1.7877         | 0.96309   | 0.0026237 | 0.247994937 |             |           |           |  |
| RNU6-334P | ENSG00000252881 | 1.439     | 0.075073  | 2.0008      | 0.022708    | 2.7893    | 0.0026415 |  |
|           | 2.7893          | 0.0026415 | 0.0026415 | 0.247994937 |             |           |           |  |
| FBXL19    | ENSG00000099364 | 2.4216    | 0.0077252 | 2.7886      | 0.0026467   | 1.2341    |           |  |
|           | 0.10858         | -0.15952  | 0.56337   | 0.0026467   | 0.247994937 |           |           |  |
| LINC02744 | ENSG00000254863 | 1.3845    | 0.083096  | 1.8856      | 0.029672    | 2.7882    |           |  |
|           | 0.00265         | 0.90333   | 0.18318   | 0.00265     | 0.247994937 |           |           |  |
| NA        | ENSG00000200492 | 2.2051    | 0.013725  | 2.7878      | 0.002653    | 2.0364    | 0.020853  |  |
|           | 0.5228          | 0.30056   | 0.002653  | 0.247994937 |             |           |           |  |
| NA        | ENSG00000254186 | 1.1733    | 0.12033   | 0.43607     | 0.33139     | 2.7878    | 0.0026532 |  |
|           | 0.55546         | 0.28929   | 0.0026532 | 0.247994937 |             |           |           |  |
| MIR4266   | ENSG00000265965 | 2.5116    | 0.0060091 | 2.7866      | 0.0026633   | 2.4808    |           |  |
|           | 0.0065541       | 2.3467    | 0.0094695 | 0.0026633   | 0.247994937 |           |           |  |
| PGM1      | ENSG00000079739 | 2.165     | 0.015193  | 2.7149      | 0.0033146   | 2.7861    | 0.0026677 |  |
|           | 1.5176          | 0.064554  | 0.0026677 | 0.247994937 |             |           |           |  |
| DYNLT3P1  | ENSG00000232241 | 0.55048   | 0.29099   | 0.43164     | 0.333       | 0.30899   | 0.37866   |  |
|           | 2.7858          | 0.0026699 | 0.0026699 | 0.247994937 |             |           |           |  |
| SPARCL1   | ENSG00000152583 | 2.7857    | 0.0026709 | 2.1652      | 0.015185    | -0.28726  |           |  |
|           | 0.61304         | -1.1948   | 0.88391   | 0.0026709   | 0.247994937 |           |           |  |
| CDC23     | ENSG00000094880 | 0.95785   | 0.16907   | 2.651       | 0.004013    | 1.6544    | 0.049024  |  |
|           | 2.7853          | 0.002674  | 0.002674  | 0.247994937 |             |           |           |  |

|           |                 |            |           |             |             |             |           |
|-----------|-----------------|------------|-----------|-------------|-------------|-------------|-----------|
| NA        | ENSG00000246451 | 2.7849     | 0.0026769 | 2.3608      | 0.0091174   | 2.3608      | 0.0091174 |
|           |                 | 2.3608     | 0.0091174 | 0.0026769   | 0.247994937 |             |           |
| MIR4486   | ENSG00000265210 | 2.7827     | 0.0026956 | -0.54831    | 0.70826     | -0.81793    |           |
|           |                 | 0.7933     | -1.5908   | 0.94418     | 0.0026956   | 0.248955951 |           |
| RNU4-13P  | ENSG00000200889 | -0.96842   | 0.83358   | 2.7819      | 0.0027023   | 2.7819      |           |
|           |                 | 0.0027023  | 2.7819    | 0.0027023   | 0.0027023   | 0.248955951 |           |
| DBNDD1    | ENSG00000003249 | 2.5294     | 0.0057127 | 2.7818      | 0.0027026   | 2.7818      |           |
|           |                 | 0.0027026  | 2.2286    | 0.012921    | 0.0027026   | 0.248955951 |           |
| NPM1P22   | ENSG00000227969 | 0.637      | 0.26206   | 0.637       | 0.26206     | 0.637       | 0.26206   |
|           |                 | 0.0027121  | 0.0027121 | 0.249283261 |             |             | 2.7807    |
| LRP4      | ENSG00000134569 | 1.2409     | 0.10733   | 0.98474     | 0.16238     | 2.1324      | 0.016487  |
|           |                 | 2.7801     | 0.0027171 | 0.0027171   | 0.249283261 |             |           |
| BSDC1     | ENSG00000160058 | 1.4876     | 0.068432  | 0.011478    | 0.49542     | 2.7796      | 0.0027215 |
|           |                 | -0.89931   | 0.81576   | 0.0027215   | 0.249283261 |             |           |
| RNU6-909P | ENSG00000252867 | 1.3647     | 0.086176  | 2.7773      | 0.0027406   | 1.3647      |           |
|           |                 | 0.086176   | 1.3647    | 0.086176    | 0.0027406   | 0.250561797 |           |
| PABPN1L   | ENSG00000205022 | -0.71024   | 0.76122   | -0.47433    | 0.68237     | -0.83681    |           |
|           |                 | 0.79865    | 2.7737    | 0.0027714   | 0.0027714   | 0.252903225 |           |
| HOOK1     | ENSG00000134709 | 2.7713     | 0.0027918 | 1.3699      | 0.085352    | 2.7301      | 0.0031656 |
|           |                 | 2.0773     | 0.018887  | 0.0027918   | 0.254288624 |             |           |
| PPT1      | ENSG00000131238 | 2.3893     | 0.0084395 | 2.4932      | 0.0063293   | 2.7693      | 0.0028092 |
|           |                 | 1.6993     | 0.044629  | 0.0028092   | 0.254938663 |             |           |
| COQ3      | ENSG00000132423 | 1.7862     | 0.037037  | 1.7862      | 0.037037    | 1.7862      | 0.037037  |
|           |                 | 2.7692     | 0.0028094 | 0.0028094   | 0.254938663 |             |           |
| LINC01720 | ENSG00000231175 | -0.44275   | 0.67103   | 2.7679      | 0.002821    | -0.44275    |           |
|           |                 | 0.67103    | -0.37698  | 0.64691     | 0.002821    | 0.255515483 |           |
| NA        | ENSG00000252436 | 2.7669     | 0.0028294 | 2.4562      | 0.0070213   | 0.28161     | 0.38912   |
|           |                 | 0.9899     | 0.16111   | 0.0028294   | 0.255800857 |             |           |
| SETD1A    | ENSG00000099381 | 2.2451     | 0.01238   | 2.0148      | 0.021961    | 1.8984      |           |
|           |                 | 0.028819   | 2.7653    | 0.0028437   | 0.0028437   | 0.255984781 |           |
| HEBP2P1   | ENSG00000235548 | 2.765      | 0.0028466 | 2.765       | 0.0028466   | 2.765       | 0.0028466 |
|           |                 | 0.0028466  | 0.0028466 | 0.255984781 |             |             |           |
| NA        | ENSG00000199442 | 1.0481     | 0.1473    | 1.6641      | 0.048046    | 0.86049     | 0.19476   |
|           |                 | 2.7642     | 0.0028528 | 0.0028528   | 0.255984781 |             |           |
| SPOCD1    | ENSG00000134668 | 2.7642     | 0.0028535 | 1.6727      | 0.047198    | 1.3396      |           |
|           |                 | 0.090187   | 1.358     | 0.087236    | 0.0028535   | 0.255984781 |           |
| BDH2      | ENSG00000164039 | 0.30068    | 0.38183   | 2.7637      | 0.0028577   | 0.30068     | 0.38183   |
|           |                 | 1.618      | 0.052828  | 0.0028577   | 0.255984781 |             |           |
| NPM1      | ENSG00000181163 | 1.085      | 0.13895   | 2.7624      | 0.0028689   | 1.7976      | 0.036118  |
|           |                 | 1.3505     | 0.088424  | 0.0028689   | 0.256207346 |             |           |
| DNASE2B   | ENSG00000137976 | 1.8409     | 0.032817  | 2.6319      | 0.0042452   | 1.8409      |           |
|           |                 | 0.032817   | 2.7622    | 0.0028707   | 0.0028707   | 0.256207346 |           |
| NA        | ENSG00000237321 | -0.72204   | 0.76487   | 2.7615      | 0.0028767   | -0.42635    | 0.66507   |
|           |                 | 0.046565   | 0.48143   | 0.0028767   | 0.256273475 |             |           |
| MRAP      | ENSG00000170262 | 1.4387     | 0.075113  | 1.7492      | 0.040127    | 2.7594      | 0.0028957 |
|           |                 | 1.4732     | 0.070354  | 0.0028957   | 0.256958392 |             |           |
| TTLL7     | ENSG00000137941 | 2.7583     | 0.0029052 | 2.7134      | 0.0033299   | 1.959       | 0.025054  |
|           |                 | 0.010307   | 0.0029052 | 0.256958392 |             |             | 2.315     |
| NA        | ENSG00000224127 | 2.7581     | 0.0029068 | 2.7581      | 0.0029068   | 2.7581      | 0.0029068 |
|           |                 | 2.7581     | 0.0029068 | 0.0029068   | 0.256958392 |             |           |
| BICDL1    | ENSG00000135127 | 2.757      | 0.0029164 | 2.757       | 0.0029164   | 2.757       | 0.0029164 |
|           |                 | 0.0077647  | 0.0029164 | 0.256958392 |             |             | 2.4198    |
| NA        | ENSG00000234275 | 1.4019     | 0.080466  | -0.60407    | 0.7271      | 2.7568      | 0.0029188 |
|           |                 | 0.79943    | 0.21202   | 0.0029188   | 0.256958392 |             |           |
| OTUD7B    | ENSG00000264522 | 2.7568     | 0.0029189 | 2.3512      | 0.0093573   | 2.627       | 0.0043073 |
|           |                 | 2.5073     | 0.0060823 | 0.0029189   | 0.256958392 |             |           |
| PODXL     | ENSG00000128567 | -0.88187   | 0.81108   | -1.6078     | 0.94606     | -0.76122    | 0.77674   |
|           |                 | 2.7565     | 0.0029213 | 0.0029213   | 0.256958392 |             |           |
| KIR2DS4   | ENSG00000221957 | -0.0016981 | 0.50068   | -0.10829    | 0.54312     | 2.7544      |           |
|           |                 | 0.0029399  | -0.79481  | 0.78664     | 0.0029399   | 0.257587828 |           |
| NA        | ENSG00000248100 | 1.7429     | 0.040676  | 1.3753      | 0.084522    | 1.7429      | 0.040676  |
|           |                 | 2.7543     | 0.0029405 | 0.0029405   | 0.257587828 |             |           |

|             |                 |           |            |             |             |          |           |       |
|-------------|-----------------|-----------|------------|-------------|-------------|----------|-----------|-------|
| CCDC183     | ENSG00000213213 | 1.8898    | 0.029392   | 2.3161      | 0.010277    | 2.3639   |           |       |
|             | 0.0090431       | 2.7536    | 0.0029473  | 0.0029473   | 0.257587828 |          |           |       |
| RPL36AP29   | ENSG00000224683 | 0.16033   | 0.43631    | 0.16033     | 0.43631     | 0.16033  |           |       |
|             | 0.43631         | 2.7533    | 0.0029496  | 0.0029496   | 0.257587828 |          |           |       |
| RBM43       | ENSG00000184898 | 0.59728   | 0.27516    | 1.2563      | 0.1045      | 0.89321  | 0.18587   |       |
|             | 2.7526          | 0.0029566 | 0.0029566  | 0.257677279 |             |          |           |       |
| RN7SKP255   | ENSG00000200312 | 0.37929   | 0.35224    | 1.7779      | 0.037711    | 1.7686   |           |       |
|             | 0.038479        | 2.752     | 0.0029612  | 0.0029612   | 0.257677279 |          |           |       |
| NA          | ENSG00000261675 | 2.7515    | 0.0029665  | 2.7515      | 0.0029665   | 2.7515   | 0.0029665 |       |
|             | 2.7515          | 0.0029665 | 0.0029665  | 0.257678333 |             |          |           |       |
| PDGFA       | ENSG00000197461 | 0.10176   | 0.45947    | 0.33161     | 0.37009     | 2.7492   | 0.002987  |       |
|             | -0.65102        | 0.74248   | 0.002987   | 0.25816783  |             |          |           |       |
| LINC00637   | ENSG00000258735 | 2.7487    | 0.0029912  | 2.7487      | 0.0029912   | 2.7487   |           |       |
|             | 0.0029912       | 2.7487    | 0.0029912  | 0.0029912   | 0.25816783  |          |           |       |
| TCF12       | ENSG00000140262 | 1.2768    | 0.10084    | 2.7484      | 0.0029946   | 1.0912   | 0.1376    |       |
|             | 1.6149          | 0.053162  | 0.0029946  | 0.25816783  |             |          |           |       |
| TFIP11      | ENSG00000100109 | 0.8218    | 0.2056     | 2.2851      | 0.011154    | 2.7471   |           |       |
|             | 0.0030063       | 2.7471    | 0.0030063  | 0.0030063   | 0.25816783  |          |           |       |
| FAM8A1      | ENSG00000137414 | 0.77989   | 0.21773    | 2.7463      | 0.0030135   | 1.1457   |           |       |
|             | 0.12597         | 0.82386   | 0.20501    | 0.0030135   | 0.25816783  |          |           |       |
| MICU3       | ENSG00000155970 | 1.5414    | 0.061613   | 1.9048      | 0.028405    | 2.7456   | 0.0030196 |       |
|             | 0.74103         | 0.22934   | 0.0030196  | 0.25816783  |             |          |           |       |
| STX1B       | ENSG00000099365 | 2.7455    | 0.0030211  | 2.3961      | 0.0082844   | 2.6897   | 0.0035757 |       |
|             | 2.6312          | 0.0042537 | 0.0030211  | 0.25816783  |             |          |           |       |
| GLYCTK-AS1  | ENSG00000242797 | 1.542     | 0.06154    | 1.542       | 0.06154     | 0.18858  | 0.42521   |       |
|             | 2.7448          | 0.0030273 | 0.0030273  | 0.25816783  |             |          |           |       |
| NA          | ENSG00000232218 | 2.7444    | 0.0030309  | 2.7444      | 0.0030309   | 2.7444   | 0.0030309 |       |
|             | 2.7444          | 0.0030309 | 0.0030309  | 0.25816783  |             |          |           |       |
| NA          | ENSG00000234189 | 2.5233    | 0.0058134  | 2.7437      | 0.0030378   | 1.7021   | 0.044367  |       |
|             | 1.1347          | 0.12824   | 0.0030378  | 0.25816783  |             |          |           |       |
| TNFRSF10C   | ENSG00000173535 | 2.7433    | 0.0030408  | 1.3891      | 0.0824      | -0.19445 |           |       |
|             | 0.57709         | 1.8745    | 0.030433   | 0.0030408   | 0.25816783  |          |           |       |
| MIR320A     | ENSG00000208037 | -0.28949  | 0.6139     | 2.7428      | 0.0030463   | -0.82287 |           |       |
|             | 0.79471         | -0.82287  | 0.79471    | 0.0030463   | 0.25816783  |          |           |       |
| EPHA10      | ENSG00000183317 | 1.11      | 0.1335     | 2.7424      | 0.0030495   | 1.11     | 0.1335    |       |
|             | 1.0054          | 0.15735   | 0.0030495  | 0.25816783  |             |          |           |       |
| NA          | ENSG00000231092 | 2.7423    | 0.0030507  | 1.9368      | 0.026383    | 1.7046   | 0.044132  |       |
|             | 1.7046          | 0.044132  | 0.0030507  | 0.25816783  |             |          |           |       |
| LINC02607   | ENSG00000228971 | 2.7422    | 0.0030517  | 2.7422      | 0.0030517   | 2.7422   |           |       |
|             | 0.0030517       | 2.7422    | 0.0030517  | 0.0030517   | 0.25816783  |          |           |       |
| MEIS1       | ENSG00000143995 | -0.077892 | 0.53104    | 1.3629      | 0.08646     | 2.7415   | 0.0030575 |       |
|             | 0.88884         | 0.18704   | 0.0030575  | 0.25816783  |             |          |           |       |
| KCNQ3       | ENSG00000184156 | 1.621     | 0.052512   | 1.5989      | 0.054916    | 2.741    | 0.0030622 | 2.427 |
|             | 0.0076128       | 0.0030622 | 0.25816783 |             |             |          |           |       |
| NA          | ENSG00000271985 | 0.66204   | 0.25397    | 1.1254      | 0.13022     | 0.46799  | 0.31989   |       |
|             | 2.74            | 0.0030717 | 0.0030717  | 0.258521487 |             |          |           |       |
| PAUPAR      | ENSG00000281880 | 1.4707    | 0.070688   | 2.7393      | 0.0030782   | 1.4707   |           |       |
|             | 0.070688        | 1.4707    | 0.070688   | 0.0030782   | 0.258621872 |          |           |       |
| KCTD10      | ENSG00000110906 | 2.5571    | 0.0052769  | 2.5247      | 0.0057896   | 2.5247   |           |       |
|             | 0.0057896       | 2.7383    | 0.0030883  | 0.0030883   | 0.258871845 |          |           |       |
| ADGRA1      | ENSG00000197177 | 2.7379    | 0.0030918  | 1.3458      | 0.089188    | 1.3356   |           |       |
|             | 0.090841        | 1.017     | 0.15458    | 0.0030918   | 0.258871845 |          |           |       |
| XPO7        | ENSG00000130227 | 1.9083    | 0.028177   | 1.8293      | 0.033675    | 1.0864   | 0.13865   |       |
|             | 2.736           | 0.0031094 | 0.0031094  | 0.259586699 |             |          |           |       |
| NALCN       | ENSG00000102452 | -0.20191  | 0.58001    | -0.25071    | 0.59898     | 0.91768  | 0.17939   |       |
|             | 2.7353          | 0.0031159 | 0.0031159  | 0.259586699 |             |          |           |       |
| TLE3        | ENSG00000140332 | -0.45665  | 0.67604    | -0.20992    | 0.58313     | -0.76798 | 0.77875   |       |
|             | 2.7353          | 0.0031166 | 0.0031166  | 0.259586699 |             |          |           |       |
| PRKAR1B-AS1 | ENSG00000237181 | 2.4483    | 0.0071766  | 2.7345      | 0.0031241   | 2.7345   |           |       |
|             | 0.0031241       | 2.7345    | 0.0031241  | 0.0031241   | 0.259586699 |          |           |       |
| NA          | ENSG00000271964 | 2.2277    | 0.01295    | 2.6465      | 0.0040666   | 2.7338   | 0.00313   |       |
|             | 2.7338          | 0.00313   | 0.00313    | 0.259586699 |             |          |           |       |

|           |                 |           |           |             |             |          |           |
|-----------|-----------------|-----------|-----------|-------------|-------------|----------|-----------|
| LINC00299 | ENSG00000236790 | -0.59183  | 0.72302   | 2.7336      | 0.0031323   | -0.34955 |           |
|           | 0.63666         | 0.86599   | 0.19325   | 0.0031323   | 0.259586699 |          |           |
| RNA5SP19  | ENSG00000202056 | 1.5762    | 0.057487  | 0.67016     | 0.25138     | 2.7328   |           |
|           | 0.0031402       | 2.7328    | 0.0031402 | 0.0031402   | 0.259799569 |          |           |
| TMEM225B  | ENSG00000244219 | 0.77975   | 0.21777   | 2.7295      | 0.0031718   | 1.1812   |           |
|           | 0.11876         | 0.52618   | 0.29938   | 0.0031718   | 0.261969176 |          |           |
| ATP5MPL   | ENSG00000156411 | 2.6634    | 0.0038679 | 2.727       | 0.0031954   | 2.7143   | 0.0033213 |
|           | 2.209           | 0.013586  | 0.0031954 | 0.262128154 |             |          |           |
| RPL6P12   | ENSG00000214671 | 2.7266    | 0.0031995 | 2.7266      | 0.0031995   | 2.7266   |           |
|           | 0.0031995       | 2.7266    | 0.0031995 | 0.0031995   | 0.262128154 |          |           |
| MYMK      | ENSG00000187616 | 2.7265    | 0.003201  | 1.4983      | 0.067025    | 2.0728   | 0.019096  |
|           | 0.62588         | 0.2657    | 0.003201  | 0.262128154 |             |          |           |
| RAB34     | ENSG00000109113 | 1.6673    | 0.047731  | 1.6673      | 0.047731    | 2.6841   | 0.0036368 |
|           | 2.7264          | 0.0032014 | 0.0032014 | 0.262128154 |             |          |           |
| VRTN      | ENSG00000133980 | 2.7261    | 0.003204  | 2.4762      | 0.0066396   | 2.0865   | 0.018468  |
|           | 1.7807          | 0.037481  | 0.003204  | 0.262128154 |             |          |           |
| OBP2B     | ENSG00000171102 | -0.14931  | 0.55934   | 2.7259      | 0.003206    | -0.40414 | 0.65695   |
|           | 0.80638         | 0.21001   | 0.003206  | 0.262128154 |             |          |           |
| TP53AIP1  | ENSG00000120471 | 0.65231   | 0.2571    | 1.1345      | 0.1283      | 1.6683   |           |
|           | 0.047628        | 2.7236    | 0.003229  | 0.003229    | 0.263158216 |          |           |
| ZNF843    | ENSG00000176723 | -0.57256  | 0.71653   | 2.0755      | 0.01897     | 2.7235   |           |
|           | 0.0032294       | 0.12648   | 0.44967   | 0.0032294   | 0.263158216 |          |           |
| MEIS3     | ENSG00000105419 | 2.7229    | 0.0032353 | -1.155      | 0.87596     | 1.0991   | 0.13585   |
|           | 0.055836        | 0.47774   | 0.0032353 | 0.263158216 |             |          |           |
| SLC25A29  | ENSG00000197119 | 1.4652    | 0.071434  | 1.4652      | 0.071434    | 1.4652   |           |
|           | 0.071434        | 2.7223    | 0.0032418 | 0.0032418   | 0.263158216 |          |           |
| NA        | ENSG00000207049 | 2.7219    | 0.0032456 | 2.3088      | 0.010477    | 2.1492   | 0.015811  |
|           | 2.032           | 0.021077  | 0.0032456 | 0.263158216 |             |          |           |
| PCNPP5    | ENSG00000177197 | 0.16952   | 0.43269   | 2.7211      | 0.003253    | -0.85025 |           |
|           | 0.80241         | 0.46103   | 0.32239   | 0.003253    | 0.263320083 |          |           |
| NA        | ENSG00000241183 | 0.21807   | 0.41369   | -0.49119    | 0.68836     | 2.7194   | 0.0032697 |
|           | 0.84845         | 0.19809   | 0.0032697 | 0.26398106  |             |          |           |
| NA        | ENSG00000262075 | 2.7192    | 0.003272  | 2.3764      | 0.0087418   | 0.58723  | 0.27852   |
|           | 1.8637          | 0.031185  | 0.003272  | 0.26398106  |             |          |           |
| NA        | ENSG00000229282 | 2.7171    | 0.0032925 | 0.25286     | 0.40019     | 0.25286  | 0.40019   |
|           | 0.73937         | 0.22984   | 0.0032925 | 0.264734327 |             |          |           |
| DCP1B     | ENSG00000151065 | 2.7157    | 0.0033071 | 1.7278      | 0.042012    | 1.7201   | 0.042707  |
|           | 0.35491         | 0.36133   | 0.0033071 | 0.264734327 |             |          |           |
| SHISA3    | ENSG00000178343 | 2.6341    | 0.0042175 | 2.6341      | 0.0042175   | 2.7156   |           |
|           | 0.0033075       | 1.0634    | 0.1438    | 0.0033075   | 0.264734327 |          |           |
| NA        | ENSG00000261564 | 0.15869   | 0.43695   | 0.15869     | 0.43695     | 0.15869  | 0.43695   |
|           | 2.7156          | 0.0033079 | 0.0033079 | 0.264734327 |             |          |           |
| NA        | ENSG00000267689 | 2.7155    | 0.0033085 | 2.7155      | 0.0033085   | 2.7155   | 0.0033085 |
|           | 2.7155          | 0.0033085 | 0.0033085 | 0.264734327 |             |          |           |
| IFT80     | ENSG00000068885 | 2.7144    | 0.0033198 | -0.32519    | 0.62748     | 0.12876  | 0.44877   |
|           | -0.096473       | 0.53843   | 0.0033198 | 0.265203039 |             |          |           |
| MIR3649   | ENSG00000266043 | 2.2455    | 0.012368  | 1.3051      | 0.095935    | 1.8089   |           |
|           | 0.035231        | 2.7137    | 0.0033271 | 0.0033271   | 0.2653512   |          |           |
| FARSBP1   | ENSG00000231060 | 2.7126    | 0.0033377 | 2.7126      | 0.0033377   | 2.7126   |           |
|           | 0.0033377       | 2.7126    | 0.0033377 | 0.0033377   | 0.265761636 |          |           |
| KIAA0556  | ENSG00000047578 | 0.18235   | 0.42765   | 0.82232     | 0.20545     | 2.0375   |           |
|           | 0.020802        | 2.7119    | 0.0033447 | 0.0033447   | 0.265884553 |          |           |
| KCNJ16    | ENSG00000153822 | 1.9281    | 0.026922  | 2.4205      | 0.0077485   | 2.7102   |           |
|           | 0.0033619       | 1.6083    | 0.053885  | 0.0033619   | 0.266816591 |          |           |
| NA        | ENSG00000260710 | 0.59433   | 0.27615   | 0.072704    | 0.47102     | 2.7086   | 0.0033786 |
|           | 0.28733         | 0.38693   | 0.0033786 | 0.267250456 |             |          |           |
| MIR4294   | ENSG00000264800 | 2.7069    | 0.0033953 | 2.7069      | 0.0033953   | 2.7069   |           |
|           | 0.0033953       | 2.7069    | 0.0033953 | 0.0033953   | 0.267250456 |          |           |
| NAP1L1    | ENSG00000187109 | 2.706     | 0.0034048 | 0.029366    | 0.48829     | 1.4975   | 0.067133  |
|           | 1.0816          | 0.13971   | 0.0034048 | 0.267250456 |             |          |           |
| TAL2      | ENSG00000186051 | 2.7056    | 0.0034092 | 2.7056      | 0.0034092   | 2.7056   | 0.0034092 |
|           | 2.7056          | 0.0034092 | 0.0034092 | 0.267250456 |             |          |           |

|             |                 |           |             |             |             |          |           |       |
|-------------|-----------------|-----------|-------------|-------------|-------------|----------|-----------|-------|
| CEACAMP3    | ENSG00000239736 | -0.63741  | 0.73807     | -0.63741    | 0.73807     | 0.32602  |           |       |
|             | 0.3722          | 2.7054    | 0.0034107   | 0.0034107   | 0.267250456 |          |           |       |
| FAM222B     | ENSG00000173065 | 2.6443    | 0.0040932   | 2.6753      | 0.0037331   | 2.7051   |           |       |
|             | 0.0034144       | 2.2494    | 0.012244    | 0.0034144   | 0.267250456 |          |           |       |
| KCNJ4       | ENSG00000168135 | 2.7046    | 0.0034192   | 1.9638      | 0.024779    | 0.96349  | 0.16765   |       |
|             | 0.90016         | 0.18402   | 0.0034192   | 0.267250456 |             |          |           |       |
| LINC00454   | ENSG00000226921 | 2.7038    | 0.0034274   | 2.7038      | 0.0034274   | 2.7038   |           |       |
|             | 0.0034274       | 2.7038    | 0.0034274   | 0.0034274   | 0.267250456 |          |           |       |
| NA          | ENSG00000274766 | 2.7038    | 0.0034274   | 2.7038      | 0.0034274   | 2.7038   | 0.0034274 |       |
|             | 2.7038          | 0.0034274 | 0.0034274   | 0.267250456 |             |          |           |       |
| ZNF655      | ENSG00000197343 | 0.96203   | 0.16802     | 2.1436      | 0.016031    | 2.4422   |           |       |
|             | 0.0072993       | 2.7026    | 0.00344     | 0.00344     | 0.267250456 |          |           |       |
| MIR211      | ENSG00000207702 | 2.7026    | 0.00344     | 2.7026      | 0.00344     | 2.7026   |           |       |
|             | 0.00344         | 2.7026    | 0.00344     | 0.00344     | 0.267250456 |          |           |       |
| NA          | ENSG00000254265 | 2.7025    | 0.0034415   | 2.7025      | 0.0034415   | 0.44259  | 0.32903   |       |
|             | 0.78865         | 0.21516   | 0.0034415   | 0.267250456 |             |          |           |       |
| RNA5S17     | ENSG00000200370 | -0.45285  | 0.67467     | -0.21725    | 0.586       | 2.7021   | 0.0034449 |       |
|             | 2.7021          | 0.0034449 | 0.0034449   | 0.267250456 |             |          |           |       |
| FBXW4       | ENSG00000107829 | -1.9657   | 0.97533     | 2.7013      | 0.0034538   | -1.2083  | 0.88653   |       |
|             | -0.63184        | 0.73625   | 0.0034538   | 0.267250456 |             |          |           |       |
| NQO1        | ENSG00000181019 | 0.78099   | 0.2174      | 1.6115      | 0.053537    | 0.39514  | 0.34637   |       |
|             | 2.7012          | 0.003455  | 0.003455    | 0.267250456 |             |          |           |       |
| IGLVI-20    | ENSG00000254240 | 2.7007    | 0.0034601   | 2.7007      | 0.0034601   | 2.7007   |           |       |
|             | 0.0034601       | 2.7007    | 0.0034601   | 0.0034601   | 0.267250456 |          |           |       |
| CDCA2       | ENSG00000184661 | 0.098951  | 0.46059     | 2.7006      | 0.0034606   | 1.3552   | 0.08768   |       |
|             | -0.16545        | 0.5657    | 0.0034606   | 0.267250456 |             |          |           |       |
| EXOSC5      | ENSG00000077348 | -0.090669 | 0.53612     | -0.090669   | 0.53612     | 2.6995   |           |       |
|             | 0.0034723       | -0.090669 | 0.53612     | 0.0034723   | 0.267729714 |          |           |       |
| NA          | ENSG00000253776 | 0.78145   | 0.21727     | 2.6989      | 0.0034784   | 2.6989   | 0.0034784 |       |
|             | 2.6989          | 0.0034784 | 0.0034784   | 0.267776354 |             |          |           |       |
| FAM53C      | ENSG00000120709 | 2.6982    | 0.003486    | 2.6982      | 0.003486    | 2.1068   |           |       |
|             | 0.017567        | 2.5365    | 0.0055991   | 0.003486    | 0.267938139 |          |           |       |
| MBTD1       | ENSG00000011258 | 2.6967    | 0.0035012   | 2.508       | 0.0060702   | 2.508    | 0.0060702 | 2.508 |
|             | 0.0060702       | 0.0035012 | 0.268283239 |             |             |          |           |       |
| RNY1P10     | ENSG00000200138 | 2.6956    | 0.0035135   | 2.6956      | 0.0035135   | 2.6956   |           |       |
|             | 0.0035135       | 2.6956    | 0.0035135   | 0.0035135   | 0.268283239 |          |           |       |
| MIR491      | ENSG00000207609 | 2.6954    | 0.0035147   | 2.6954      | 0.0035147   | 2.6954   |           |       |
|             | 0.0035147       | 2.6954    | 0.0035147   | 0.0035147   | 0.268283239 |          |           |       |
| NA          | ENSG00000261188 | 2.6953    | 0.0035165   | 2.6953      | 0.0035165   | 2.6953   | 0.0035165 |       |
|             | 2.6953          | 0.0035165 | 0.0035165   | 0.268283239 |             |          |           |       |
| ADD1        | ENSG00000087274 | 1.4454    | 0.074168    | 2.6492      | 0.0040345   | 2.6931   | 0.003539  |       |
|             | 1.5273          | 0.063342  | 0.003539    | 0.268283239 |             |          |           |       |
| ADCK1       | ENSG00000063761 | 1.2635    | 0.1032      | 2.6922      | 0.003549    | 1.6866   | 0.045844  |       |
|             | 1.6262          | 0.051952  | 0.003549    | 0.268283239 |             |          |           |       |
| NOS2P1      | ENSG00000265788 | 2.6917    | 0.0035539   | 2.6917      | 0.0035539   | 2.6917   |           |       |
|             | 0.0035539       | 2.6917    | 0.0035539   | 0.0035539   | 0.268283239 |          |           |       |
| PPP1R26-AS1 | ENSG00000225361 | -0.49269  | 0.68889     | -0.67302    | 0.74953     | -0.31622 |           |       |
|             | 0.62408         | 2.6914    | 0.0035582   | 0.0035582   | 0.268283239 |          |           |       |
| NA          | ENSG00000243802 | 2.3321    | 0.0098479   | 2.6909      | 0.0035625   | 1.89     | 0.02938   |       |
|             | 1.1264          | 0.13      | 0.0035625   | 0.268283239 |             |          |           |       |
| NA          | ENSG00000250258 | 0.2608    | 0.39713     | -0.41531    | 0.66104     | 2.6908   | 0.003564  |       |
|             | 1.2523          | 0.10523   | 0.003564    | 0.268283239 |             |          |           |       |
| ARNTL       | ENSG00000133794 | 1.3663    | 0.08593     | 2.4632      | 0.0068857   | 2.6901   | 0.0035711 |       |
|             | 1.5572          | 0.05971   | 0.0035711   | 0.268283239 |             |          |           |       |
| EIF4H       | ENSG00000106682 | 0.96611   | 0.16699     | 1.2586      | 0.10409     | 1.9443   | 0.025928  |       |
|             | 2.6894          | 0.003579  | 0.003579    | 0.268283239 |             |          |           |       |
| DPYD-AS1    | ENSG00000232878 | 2.6887    | 0.0035861   | 1.301       | 0.096632    | 1.2448   | 0.10659   |       |
|             | 1.2448          | 0.10659   | 0.0035861   | 0.268283239 |             |          |           |       |
| RPL10AP1    | ENSG00000244691 | 2.6886    | 0.0035873   | 2.6886      | 0.0035873   | 2.6886   |           |       |
|             | 0.0035873       | 2.6886    | 0.0035873   | 0.0035873   | 0.268283239 |          |           |       |
| RNU7-80P    | ENSG00000238778 | 1.2226    | 0.11074     | 2.6882      | 0.0035914   | -0.10031 |           |       |
|             | 0.53995         | -0.2529   | 0.59983     | 0.0035914   | 0.268283239 |          |           |       |

|             |                 |           |           |             |             |          |           |        |
|-------------|-----------------|-----------|-----------|-------------|-------------|----------|-----------|--------|
| UNC45A      | ENSG00000140553 | -0.58225  | 0.7198    | 1.1268      | 0.12991     | 1.6055   |           |        |
|             | 0.054196        | 2.688     | 0.0035945 | 0.0035945   | 0.268283239 |          |           |        |
| AZIN2       | ENSG00000142920 | 2.6878    | 0.0035962 | 2.5838      | 0.0048863   | 1.6661   | 0.047846  |        |
|             | 1.3827          | 0.083377  | 0.0035962 | 0.268283239 |             |          |           |        |
| KCNN3       | ENSG00000143603 | 2.6877    | 0.0035975 | 2.3233      | 0.010082    | 1.5665   | 0.058613  |        |
|             | 1.6648          | 0.047977  | 0.0035975 | 0.268283239 |             |          |           |        |
| CALHM3      | ENSG00000183128 | 0.71954   | 0.2359    | 1.8079      | 0.03531     | 2.6877   |           |        |
|             | 0.0035975       | 2.2118    | 0.01349   | 0.0035975   | 0.268283239 |          |           |        |
| NA          | ENSG00000233082 | 1.9812    | 0.023783  | 2.6874      | 0.0036006   | 0.4064   | 0.34222   |        |
|             | 1.0744          | 0.14133   | 0.0036006 | 0.268283239 |             |          |           |        |
| MIR4299     | ENSG00000266645 | 2.6865    | 0.0036099 | 0.66027     | 0.25454     | -1.0192  |           |        |
|             | 0.84596         | 2.58      | 0.0049395 | 0.0036099   | 0.268565537 |          |           |        |
| ROR1        | ENSG00000185483 | 2.4686    | 0.0067817 | 2.1578      | 0.01547     | 2.6841   | 0.0036364 |        |
|             | 1.7532          | 0.039783  | 0.0036364 | 0.270124652 |             |          |           |        |
| ARSB        | ENSG00000113273 | 2.5041    | 0.0061376 | 2.6415      | 0.004127    | 2.6821   | 0.0036582 |        |
|             | 2.4541          | 0.0070622 | 0.0036582 | 0.270624746 |             |          |           |        |
| NA          | ENSG00000279693 | 2.6818    | 0.0036609 | 2.6095      | 0.0045334   | 2.6095   | 0.0045334 |        |
|             | 2.6095          | 0.0045334 | 0.0036609 | 0.270624746 |             |          |           |        |
| SLC12A9-AS1 | ENSG00000236305 | 2.6816    | 0.003663  | 2.6816      | 0.003663    | 2.6816   | 0.003663  | 2.6816 |
|             | 0.003663        | 0.59596   | 0.2756    | 0.003663    | 0.270624746 |          |           |        |
| NA          | ENSG00000200072 | 0.52569   | 0.29955   | 0.7633      | 0.22264     | -0.54456 | 0.70697   |        |
|             | 2.6811          | 0.0036696 | 0.0036696 | 0.270624746 |             |          |           |        |
| MTND1P21    | ENSG00000235940 | 2.6809    | 0.0036709 | 2.6809      | 0.0036709   | 2.6809   | 0.0036709 | 2.6809 |
|             | 0.0036709       | 2.6809    | 0.0036709 | 0.0036709   | 0.270624746 |          |           |        |
| LINC00368   | ENSG00000225870 | 1.5515    | 0.060392  | 0.92074     | 0.17859     | -0.21966 |           |        |
|             | 0.58693         | 2.6793    | 0.0036889 | 0.0036889   | 0.271540932 |          |           |        |
| ZNHIT1      | ENSG00000106400 | 2.6787    | 0.0036953 | 2.6787      | 0.0036953   | 2.6787   |           |        |
|             | 0.0036953       | 2.6787    | 0.0036953 | 0.0036953   | 0.271601763 |          |           |        |
| B9D2        | ENSG00000123810 | -0.50529  | 0.69332   | 2.6769      | 0.003715    | -0.50529 | 0.69332   |        |
|             | -0.50529        | 0.69332   | 0.003715  | 0.27231643  |             |          |           |        |
| NA          | ENSG00000233981 | 2.6768    | 0.0037162 | 2.6768      | 0.0037162   | 1.9618   | 0.024892  |        |
|             | 2.6768          | 0.0037162 | 0.0037162 | 0.27231643  |             |          |           |        |
| KCNH6       | ENSG00000173826 | 2.6749    | 0.0037381 | -0.83319    | 0.79763     | 0.44294  | 0.32891   |        |
|             | 1.1446          | 0.12618   | 0.0037381 | 0.273509929 |             |          |           |        |
| NA          | ENSG00000242687 | 2.4908    | 0.0063731 | 2.6737      | 0.003751    | 1.4127   | 0.078873  |        |
|             | 1.4127          | 0.078873  | 0.003751  | 0.273989531 |             |          |           |        |
| LINC00672   | ENSG00000263874 | 2.6733    | 0.0037559 | 2.6733      | 0.0037559   | 2.0729   |           |        |
|             | 0.019091        | 2.6733    | 0.0037559 | 0.0037559   | 0.273989531 |          |           |        |
| FNBP4       | ENSG00000109920 | 2.6727    | 0.0037618 | 0.47042     | 0.31903     | 1.949    | 0.025649  |        |
|             | 2.0212          | 0.021632  | 0.0037618 | 0.274009737 |             |          |           |        |
| PIDD1       | ENSG00000177595 | 2.6719    | 0.0037708 | 2.5489      | 0.0054034   | 2.1035   | 0.017709  |        |
|             | 0.91224         | 0.18082   | 0.0037708 | 0.274255349 |             |          |           |        |
| NA          | ENSG00000261268 | 1.5764    | 0.05747   | 2.6707      | 0.0037847   | 1.1536   | 0.12434   |        |
|             | 0.77158         | 0.22018   | 0.0037847 | 0.27440901  |             |          |           |        |
| NA          | ENSG00000237153 | 2.6706    | 0.0037858 | 1.7884      | 0.036854    | -0.73315 | 0.76827   |        |
|             | -0.32838        | 0.62869   | 0.0037858 | 0.27440901  |             |          |           |        |
| NA          | ENSG00000201668 | 2.6689    | 0.0038048 | 2.6689      | 0.0038048   | 2.6689   | 0.0038048 |        |
|             | 2.6689          | 0.0038048 | 0.0038048 | 0.27440901  |             |          |           |        |
| LINC02785   | ENSG00000226822 | 2.6689    | 0.0038051 | 2.6689      | 0.0038051   | 1.9875   |           |        |
|             | 0.023435        | 2.3307    | 0.0098844 | 0.0038051   | 0.27440901  |          |           |        |
| GGA3        | ENSG00000125447 | 1.2821    | 0.099912  | 1.4087      | 0.079456    | 2.6689   | 0.0038053 |        |
|             | 1.4087          | 0.079456  | 0.0038053 | 0.27440901  |             |          |           |        |
| MIR4474     | ENSG00000264941 | 2.6687    | 0.0038067 | 2.6687      | 0.0038067   | -1.268   |           |        |
|             | 0.8976          | 2.6687    | 0.0038067 | 0.0038067   | 0.27440901  |          |           |        |
| NCAPD2P1    | ENSG00000230356 | 2.6677    | 0.0038183 | 2.2167      | 0.013322    | 2.6677   |           |        |
|             | 0.0038183       | 1.7794    | 0.037586  | 0.0038183   | 0.27483864  |          |           |        |
| BTBD3       | ENSG00000132640 | 2.3423    | 0.0095839 | 2.6669      | 0.0038279   | 2.6669   | 0.0038279 |        |
|             | 2.412           | 0.0079322 | 0.0038279 | 0.275086185 |             |          |           |        |
| IFT27       | ENSG00000100360 | 0.55415   | 0.28974   | -0.89052    | 0.81341     | 2.6658   | 0.0038405 |        |
|             | 0.4381          | 0.33066   | 0.0038405 | 0.275086185 |             |          |           |        |
| SPIRE2      | ENSG00000204991 | 1.3315    | 0.091518  | 1.3315      | 0.091518    | 2.6657   |           |        |
|             | 0.0038414       | 1.6886    | 0.045647  | 0.0038414   | 0.275086185 |          |           |        |

|           |                 |           |           |             |             |          |           |  |
|-----------|-----------------|-----------|-----------|-------------|-------------|----------|-----------|--|
| SLC6A6    | ENSG00000131389 | 2.6641    | 0.0038599 | 1.8669      | 0.030959    | 1.6311   |           |  |
|           | 0.051439        | 0.81077   | 0.20875   | 0.0038599   | 0.275086185 |          |           |  |
| ZKSCAN5   | ENSG00000196652 | 1.6236    | 0.052234  | 2.2968      | 0.010816    | 2.6638   |           |  |
|           | 0.0038634       | 0.32856   | 0.37125   | 0.0038634   | 0.275086185 |          |           |  |
| NA        | ENSG00000232729 | 2.2632    | 0.011813  | 2.3639      | 0.009043    | 2.6638   | 0.0038635 |  |
|           | 2.4011          | 0.0081733 | 0.0038635 | 0.275086185 |             |          |           |  |
| LYG2      | ENSG00000185674 | 0.92854   | 0.17656   | 2.6635      | 0.0038665   | 0.63251  | 0.26353   |  |
|           | 0.84457         | 0.19918   | 0.0038665 | 0.275086185 |             |          |           |  |
| OR2L13    | ENSG00000196071 | 2.6635    | 0.0038669 | 0.45389     | 0.32496     | 0.93413  |           |  |
|           | 0.17512         | 0.45389   | 0.32496   | 0.0038669   | 0.275086185 |          |           |  |
| CH25H     | ENSG00000138135 | -0.1155   | 0.54598   | 2.1047      | 0.01766     | 0.83921  | 0.20068   |  |
|           | 2.6616          | 0.0038882 | 0.0038882 | 0.275810381 |             |          |           |  |
| NHLRC2    | ENSG00000196865 | -0.86076  | 0.80531   | -0.92834    | 0.82338     | -0.78236 | 0.783     |  |
|           | 2.6616          | 0.0038884 | 0.0038884 | 0.275810381 |             |          |           |  |
| OR7E66P   | ENSG00000243674 | 1.5971    | 0.055124  | 1.5971      | 0.055124    | 1.5971   |           |  |
|           | 0.055124        | 2.6606    | 0.0039002 | 0.0039002   | 0.27624527  |          |           |  |
| ERAL1     | ENSG00000132591 | 2.6593    | 0.0039155 | 2.6123      | 0.0044965   | 2.551    | 0.0053711 |  |
|           | 2.6593          | 0.0039155 | 0.0039155 | 0.276926437 |             |          |           |  |
| SV2A      | ENSG00000159164 | 2.3274    | 0.0099715 | 2.3274      | 0.0099715   | 2.6583   | 0.0039265 |  |
|           | 2.3136          | 0.010344  | 0.0039265 | 0.277013478 |             |          |           |  |
| NA        | ENSG00000256500 | 2.6582    | 0.0039281 | 2.6582      | 0.0039281   | 2.6582   | 0.0039281 |  |
|           | 2.6582          | 0.0039281 | 0.0039281 | 0.277013478 |             |          |           |  |
| SYNRG     | ENSG00000275066 | 2.6563    | 0.0039505 | 2.5195      | 0.0058764   | 2.1814   | 0.014576  |  |
|           | 2.0844          | 0.01856   | 0.0039505 | 0.278019311 |             |          |           |  |
| PTK2B     | ENSG00000120899 | 1.5504    | 0.060524  | 2.6559      | 0.0039546   | 1.5258   | 0.063525  |  |
|           | 2.3888          | 0.0084514 | 0.0039546 | 0.278019311 |             |          |           |  |
| PLPP7     | ENSG00000160539 | 0.82577   | 0.20447   | 2.6549      | 0.0039667   | -0.43536 | 0.66835   |  |
|           | 0.45205         | 0.32562   | 0.0039667 | 0.278019311 |             |          |           |  |
| NA        | ENSG00000265910 | 2.6543    | 0.0039737 | 2.6543      | 0.0039737   | 2.6543   | 0.0039737 |  |
|           | 2.6543          | 0.0039737 | 0.0039737 | 0.278019311 |             |          |           |  |
| DNAAF4    | ENSG00000256061 | -0.67303  | 0.74954   | -0.28897    | 0.6137      | 2.6537   |           |  |
|           | 0.0039806       | -1.3639   | 0.91369   | 0.0039806   | 0.278019311 |          |           |  |
| C16orf91  | ENSG00000174109 | 2.6536    | 0.003982  | -1.0344     | 0.84953     | 1.4573   |           |  |
|           | 0.072517        | -0.60559  | 0.72761   | 0.003982    | 0.278019311 |          |           |  |
| NA        | ENSG00000260772 | 2.6536    | 0.0039823 | 2.6536      | 0.0039823   | 2.6536   | 0.0039823 |  |
|           | 2.6536          | 0.0039823 | 0.0039823 | 0.278019311 |             |          |           |  |
| NA        | ENSG00000212511 | 2.6522    | 0.0039979 | 2.6522      | 0.0039979   | 2.6522   | 0.0039979 |  |
|           | 2.6522          | 0.0039979 | 0.0039979 | 0.278467031 |             |          |           |  |
| NPEPPS    | ENSG00000141279 | 2.652     | 0.0040013 | 2.3224      | 0.010105    | 0.6892   | 0.24535   |  |
|           | 2.0805          | 0.018742  | 0.0040013 | 0.278467031 |             |          |           |  |
| NA        | ENSG00000249359 | 1.6392    | 0.050586  | 0.63423     | 0.26297     | -0.36397 | 0.64206   |  |
|           | 2.6511          | 0.0040111 | 0.0040111 | 0.278467031 |             |          |           |  |
| AGBL4-AS1 | ENSG00000230114 | 2.6507    | 0.0040166 | 1.4996      | 0.06686     | 1.1893   |           |  |
|           | 0.11716         | 1.8838    | 0.029799  | 0.0040166   | 0.278467031 |          |           |  |
| TRIP6     | ENSG00000087077 | 0.84773   | 0.19829   | 2.2261      | 0.013002    | 2.6505   | 0.0040191 |  |
|           | 0.89067         | 0.18655   | 0.0040191 | 0.278467031 |             |          |           |  |
| SMARCAL1  | ENSG00000138375 | 2.2487    | 0.012267  | 2.6501      | 0.004023    | 0.68981  |           |  |
|           | 0.24516         | -2.5351   | 0.99438   | 0.004023    | 0.278467031 |          |           |  |
| LCN1P2    | ENSG00000204031 | -0.50727  | 0.69402   | 0.28539     | 0.38767     | -0.1367  |           |  |
|           | 0.55437         | 2.6477    | 0.004052  | 0.004052    | 0.279518588 |          |           |  |
| LRRC6     | ENSG00000129295 | 2.0649    | 0.019467  | -0.74551    | 0.77202     | 0.5034   | 0.30734   |  |
|           | 2.6477          | 0.0040524 | 0.0040524 | 0.279518588 |             |          |           |  |
| FGFR3P6   | ENSG00000226164 | 2.6474    | 0.0040554 | 2.6474      | 0.0040554   | 2.6474   |           |  |
|           | 0.0040554       | 2.6474    | 0.0040554 | 0.0040554   | 0.279518588 |          |           |  |
| UBE2U     | ENSG00000177414 | 2.1857    | 0.014418  | 2.6454      | 0.0040799   | 2.0534   | 0.020017  |  |
|           | 0.51205         | 0.30431   | 0.0040799 | 0.280810066 |             |          |           |  |
| PROS2P    | ENSG00000189002 | 1.7316    | 0.041672  | 1.9131      | 0.027865    | 1.0025   |           |  |
|           | 0.15806         | 2.644     | 0.0040971 | 0.0040971   | 0.280947983 |          |           |  |
| H1-4      | ENSG00000168298 | 0.94831   | 0.17149   | 1.1973      | 0.11559     | 2.6439   | 0.0040973 |  |
|           | 2.6439          | 0.0040973 | 0.0040973 | 0.280947983 |             |          |           |  |
| TPRKBP2   | ENSG00000260452 | 0.83109   | 0.20296   | 1.7867      | 0.036996    | 2.6438   |           |  |
|           | 0.0040992       | 2.6438    | 0.0040992 | 0.0040992   | 0.280947983 |          |           |  |

|           |                 |             |             |             |             |          |           |
|-----------|-----------------|-------------|-------------|-------------|-------------|----------|-----------|
| PARP15    | ENSG00000173200 | 2.1937      | 0.01413     | 2.6037      | 0.0046118   | 2.6428   |           |
|           | 0.0041116       | 2.2683      | 0.011655    | 0.0041116   | 0.281134615 |          |           |
| ZNF649    | ENSG00000198093 | 2.6418      | 0.0041229   | 2.6418      | 0.0041229   | 2.6418   |           |
|           | 0.0041229       | 2.6418      | 0.0041229   | 0.0041229   | 0.281134615 |          |           |
| RPS3      | ENSG00000149273 | -0.8146     | 0.79235     | -0.46909    | 0.6805      | 2.6418   | 0.0041239 |
|           | -1.9968         | 0.97708     | 0.0041239   | 0.281134615 |             |          |           |
| TSTD3     | ENSG00000279170 | 2.5341      | 0.0056376   | 2.5341      | 0.0056376   | 1.8012   | 0.035834  |
|           | 2.6417          | 0.004125    | 0.004125    | 0.281134615 |             |          |           |
| HS6ST1    | ENSG00000136720 | -0.62134    | 0.73281     | 1.4776      | 0.069761    | 2.6411   |           |
|           | 0.0041317       | 0.65166     | 0.25731     | 0.0041317   | 0.281197962 |          |           |
| CCNT2     | ENSG00000082258 | 1.641       | 0.050402    | 1.4425      | 0.074574    | 1.7375   | 0.041149  |
|           | 2.6404          | 0.004141    | 0.004141    | 0.281437838 |             |          |           |
| NA        | ENSG00000253855 | 1.2013      | 0.11482     | 1.2013      | 0.11482     | 1.2013   | 0.11482   |
|           | 2.6397          | 0.0041494   | 0.0041494   | 0.281615964 |             |          |           |
| GCN1      | ENSG00000089154 | 1.148       | 0.12548     | 1.1407      | 0.127       | 1.2139   | 0.1124    |
|           | 0.0041718       | 0.0041718   | 0.282742439 |             |             |          | 2.6378    |
| RN7SKP265 | ENSG00000252257 | 2.6367      | 0.0041862   | 2.6367      | 0.0041862   | 2.6367   |           |
|           | 0.0041862       | 2.6367      | 0.0041862   | 0.0041862   | 0.283254936 |          |           |
| RPL32P29  | ENSG00000244270 | 2.6359      | 0.0041962   | 2.6359      | 0.0041962   | 2.6359   |           |
|           | 0.0041962       | 2.6359      | 0.0041962   | 0.0041962   | 0.283254936 |          |           |
| LINC00955 | ENSG00000216560 | 0.27568     | 0.3914      | 0.68534     | 0.24656     | 2.6358   |           |
|           | 0.0041968       | 0.46956     | 0.31933     | 0.0041968   | 0.283254936 |          |           |
| NA        | ENSG00000240634 | 2.6342      | 0.0042172   | 0.75669     | 0.22462     | -0.56818 | 0.71504   |
|           | 0.50852         | 0.30554     | 0.0042172   | 0.284238113 |             |          |           |
| NA        | ENSG00000274667 | 2.6334      | 0.0042263   | 2.6334      | 0.0042263   | 2.6334   | 0.0042263 |
|           | 2.6334          | 0.0042263   | 0.0042263   | 0.28445801  |             |          |           |
| FAM114A2  | ENSG00000055147 | 2.6321      | 0.0042426   | 1.3237      | 0.092794    | 2.4421   |           |
|           | 0.0073014       | 1.0633      | 0.14382     | 0.0042426   | 0.284889273 |          |           |
| SIRT6     | ENSG00000077463 | 2.632       | 0.0042444   | 0.8771      | 0.19022     | 2.632    | 0.0042444 |
|           | 0.0042444       | 0.0042444   | 0.284889273 |             |             |          | 2.632     |
| KIR3DX1   | ENSG00000104970 | 2.6293      | 0.0042776   | 2.6293      | 0.0042776   | 0.39194  |           |
|           | 0.34755         | 2.6293      | 0.0042776   | 0.0042776   | 0.286722762 |          |           |
| ALDH18A1  | ENSG00000059573 | 2.3206      | 0.010155    | 2.6275      | 0.0043013   | 1.4208   |           |
|           | 0.077689        | 1.5055      | 0.066092    | 0.0043013   | 0.287767695 |          |           |
| PIPOX     | ENSG00000179761 | 1.5565      | 0.059793    | -1.2401     | 0.89254     | 2.6272   | 0.004305  |
|           | -0.32926        | 0.62902     | 0.004305    | 0.287767695 |             |          |           |
| TEKT2     | ENSG00000092850 | 2.5295      | 0.0057114   | 2.6243      | 0.004341    | 0.32013  | 0.37444   |
|           | 1.8421          | 0.032729    | 0.004341    | 0.289521351 |             |          |           |
| NA        | ENSG00000254433 | 0.40934     | 0.34115     | 2.6236      | 0.0043506   | 0.69245  | 0.24433   |
|           | 2.6236          | 0.0043506   | 0.0043506   | 0.289521351 |             |          |           |
| TMEM156   | ENSG00000121895 | -0.16831    | 0.56683     | -0.019186   | 0.50765     | 2.6234   |           |
|           | 0.0043525       | 1.0302      | 0.15145     | 0.0043525   | 0.289521351 |          |           |
| NA        | ENSG00000247416 | -0.53298    | 0.70298     | 2.6232      | 0.004355    | 2.6232   | 0.004355  |
|           | 2.6232          | 0.004355    | 0.004355    | 0.289521351 |             |          |           |
| UTP18     | ENSG00000011260 | 2.6216      | 0.0043761   | 2.4582      | 0.0069824   | 2.257    | 0.012005  |
|           | 2.4582          | 0.0069824   | 0.0043761   | 0.290527729 |             |          |           |
| ARSG      | ENSG00000141337 | 0.21676     | 0.4142      | 1.3256      | 0.092479    | 2.6194   | 0.0044043 |
|           | 1.7657          | 0.038726    | 0.0044043   | 0.29187157  |             |          |           |
| ACTR1AP1  | ENSG00000233370 | 2.4101      | 0.0079744   | 2.6186      | 0.0044142   | 1.6192   |           |
|           | 0.052702        | 1.6192      | 0.052702    | 0.0044142   | 0.29187157  |          |           |
| GREM1     | ENSG00000166923 | 2.6182      | 0.0044198   | 2.6182      | 0.0044198   | 2.6182   | 0.0044198 |
|           | 2.6182          | 0.0044198   | 0.0044198   | 0.29187157  |             |          |           |
| NHLRC1    | ENSG00000187566 | -0.29197    | 0.61484     | 2.6182      | 0.0044203   | -0.29197 |           |
|           | 0.61484         | -0.29197    | 0.61484     | 0.0044203   | 0.29187157  |          |           |
| NA        | ENSG00000254255 | 2.6166      | 0.0044409   | 2.6166      | 0.0044409   | 2.1871   | 0.014367  |
|           | 2.6166          | 0.0044409   | 0.0044409   | 0.292834989 |             |          |           |
| YBX1P7    | ENSG00000232349 | 2.6145      | 0.004468    | 0.45025     | 0.32627     | 2.4867   |           |
|           | 0.0064469       | 2.4867      | 0.0064469   | 0.004468    | 0.294223838 |          |           |
| NA        | ENSG00000273243 | 2.6132      | 0.0044853   | 2.6132      | 0.0044853   | 2.6132   | 0.0044853 |
|           | 2.6132          | 0.0044853   | 0.0044853   | 0.294757394 |             |          |           |
| NA        | ENSG00000273107 | 2.613       | 0.0044882   | 2.613       | 0.0044882   | 2.613    | 0.0044882 |
|           | 0.0044882       | 0.294757394 |             |             |             |          |           |



|            |                 |             |           |             |             |          |           |
|------------|-----------------|-------------|-----------|-------------|-------------|----------|-----------|
| IQCF5      | ENSG00000214681 | 1.33        | 0.091763  | 2.6123      | 0.0044968   | 2.6123   | 0.0044968 |
|            | 1.5918          | 0.05572     | 0.0044968 | 0.294800278 |             |          |           |
| NA         | ENSG00000265845 | 2.6119      | 0.0045016 | 2.6119      | 0.0045016   | 2.6119   | 0.0045016 |
|            | 2.6119          | 0.0045016   | 0.0045016 | 0.294800278 |             |          |           |
| PEG13      | ENSG00000282164 | 0.96806     | 0.16651   | 2.6108      | 0.0045168   | -1.7298  | 0.95817   |
|            | -1.1187         | 0.86836     | 0.0045168 | 0.294800278 |             |          |           |
| RPL7P3     | ENSG00000226094 | 0.014202    | 0.49433   | 2.6102      | 0.0045241   | 0.53047  |           |
|            | 0.29789         | 0.53047     | 0.29789   | 0.0045241   | 0.294800278 |          |           |
| LINC01960  | ENSG00000260868 | 2.61        | 0.0045268 | 2.3843      | 0.0085568   | 2.61     | 0.0045268 |
|            | 1.2023          | 0.11463     | 0.0045268 | 0.294800278 |             |          |           |
| NA         | ENSG00000212422 | 2.6097      | 0.0045315 | 2.6097      | 0.0045315   | 2.5407   | 0.0055316 |
|            | 2.0155          | 0.021924    | 0.0045315 | 0.294800278 |             |          |           |
| SARDH      | ENSG00000123453 | 0.35392     | 0.3617    | 1.3091      | 0.09525     | 1.2994   | 0.09691   |
|            | 2.6093          | 0.0045363   | 0.0045363 | 0.294800278 |             |          |           |
| CHD3       | ENSG00000170004 | 2.6091      | 0.004539  | 1.4611      | 0.071988    | 1.7491   | 0.040133  |
|            | 2.6091          | 0.004539    | 0.004539  | 0.294800278 |             |          |           |
| RABL6      | ENSG00000196642 | 1.5352      | 0.062364  | 2.6088      | 0.0045433   | 1.5352   | 0.062364  |
|            | 1.5036          | 0.066338    | 0.0045433 | 0.294800278 |             |          |           |
| GXYLT2     | ENSG00000172986 | -0.033133   | 0.51322   | 2.6078      | 0.0045562   | -0.16487 |           |
|            | 0.56548         | 1.6415      | 0.05035   | 0.0045562   | 0.294868066 |          |           |
| NA         | ENSG00000258452 | -0.094754   | 0.53774   | 0.038228    | 0.48475     | 2.6075   | 0.0045609 |
|            | -0.094754       | 0.53774     | 0.0045609 | 0.294868066 |             |          |           |
| NA         | ENSG00000278638 | 2.607       | 0.0045669 | 2.607       | 0.0045669   | 2.607    | 0.0045669 |
|            | 0.0045669       | 0.294868066 |           |             |             |          |           |
| MALL       | ENSG00000144063 | 2.0596      | 0.019717  | 2.6067      | 0.0045708   | 2.0596   | 0.019717  |
|            | 2.0596          | 0.019717    | 0.0045708 | 0.294868066 |             |          |           |
| LINC01570  | ENSG00000260338 | 1.2484      | 0.10594   | 1.2885      | 0.098794    | 2.6064   |           |
|            | 0.0045746       | 1.2484      | 0.10594   | 0.0045746   | 0.294868066 |          |           |
| CALCR      | ENSG00000004948 | 2.3576      | 0.0091963 | 2.6056      | 0.0045854   | 2.3576   | 0.0091963 |
|            | 1.8682          | 0.030865    | 0.0045854 | 0.295173768 |             |          |           |
| RNU6-1224P | ENSG00000252593 | 2.6031      | 0.0046196 | 2.6031      | 0.0046196   | 2.6031   |           |
|            | 0.0046196       | 2.5551      | 0.0053076 | 0.0046196   | 0.296439766 |          |           |
| RNA5SP131  | ENSG00000202322 | 2.0272      | 0.021319  | 2.2548      | 0.012072    | 2.6031   |           |
|            | 0.0046198       | 2.0717      | 0.019145  | 0.0046198   | 0.296439766 |          |           |
| SH2D6      | ENSG00000152292 | -0.42112    | 0.66317   | -0.0060713  | 0.50242     | 2.6025   | 0.004627  |
|            | -0.58999        | 0.7224      | 0.004627  | 0.296439766 |             |          |           |
| VPS45      | ENSG00000136631 | 2.1448      | 0.015986  | 2.0507      | 0.020146    | 2.1727   | 0.0149    |
|            | 2.6023          | 0.0046294   | 0.0046294 | 0.296439766 |             |          |           |
| NA         | ENSG00000273398 | 2.6018      | 0.0046362 | 2.421       | 0.0077382   | 2.6018   | 0.0046362 |
|            | 2.6018          | 0.0046362   | 0.0046362 | 0.296457666 |             |          |           |
| PYY2       | ENSG00000237575 | 0.93394     | 0.17517   | 0.93394     | 0.17517     | 2.6013   | 0.0046437 |
|            | 2.0662          | 0.019406    | 0.0046437 | 0.296457666 |             |          |           |
| NA         | ENSG00000236478 | 1.9039      | 0.028461  | 1.8944      | 0.029084    | 0.39715  | 0.34563   |
|            | 2.6004          | 0.0046554   | 0.0046554 | 0.296457666 |             |          |           |
| TRAC       | ENSG00000277734 | 2.4039      | 0.0081109 | 1.7346      | 0.041408    | 2.5997   | 0.004665  |
|            | 2.5997          | 0.004665    | 0.004665  | 0.296457666 |             |          |           |
| BAK1P1     | ENSG00000175730 | 2.4309      | 0.0075297 | 1.7357      | 0.04131     | 2.4309   |           |
|            | 0.0075297       | 2.5996      | 0.0046669 | 0.0046669   | 0.296457666 |          |           |
| RNU7-160P  | ENSG00000252469 | -0.15352    | 0.561     | 2.5993      | 0.0046701   | 0.39719  | 0.34562   |
|            | 1.4667          | 0.07123     | 0.0046701 | 0.296457666 |             |          |           |
| ZC3H8      | ENSG00000144161 | 2.599       | 0.0046748 | 2.3714      | 0.0088612   | 1.8285   | 0.033738  |
|            | 1.8285          | 0.033738    | 0.0046748 | 0.296457666 |             |          |           |
| PPM1K      | ENSG00000163644 | -0.67658    | 0.75067   | 2.4571      | 0.0070024   | -0.11507 | 0.54581   |
|            | 2.5976          | 0.0046933   | 0.0046933 | 0.296457666 |             |          |           |
| TPX2       | ENSG00000088325 | -0.14162    | 0.55631   | 0.1159      | 0.45387     | 0.57947  | 0.28113   |
|            | 2.5976          | 0.0046934   | 0.0046934 | 0.296457666 |             |          |           |
| CYTH1      | ENSG00000108669 | 2.5974      | 0.0046961 | 0.96606     | 0.16701     | 0.20297  | 0.41958   |
|            | 1.2111          | 0.11293     | 0.0046961 | 0.296457666 |             |          |           |
| RGS12      | ENSG00000159788 | -0.073253   | 0.5292    | 1.2404      | 0.10741     | 2.5974   | 0.0046966 |
|            | 1.465           | 0.071458    | 0.0046966 | 0.296457666 |             |          |           |
| AFTPH      | ENSG00000119844 | 1.382       | 0.083487  | 0.64297     | 0.26012     | 2.5958   | 0.004718  |
|            | 2.4736          | 0.0066883   | 0.004718  | 0.297152266 |             |          |           |

|           |                 |           |            |             |             |           |           |
|-----------|-----------------|-----------|------------|-------------|-------------|-----------|-----------|
| LINC01474 | ENSG00000236849 | 2.402     | 0.0081525  | 2.0435      | 0.020504    | 2.5957    | 0.0047198 |
|           | 1.4109          | 0.079141  | 0.0047198  | 0.297152266 |             |           |           |
| KRTAP10-8 | ENSG00000187766 | 2.5927    | 0.0047606  | 1.8696      | 0.030766    | 0.15727   |           |
|           | 0.43752         | -0.2358   | 0.59321    | 0.0047606   | 0.298932499 |           |           |
| NA        | ENSG00000237947 | 2.5922    | 0.0047686  | 2.049       | 0.020229    | 2.5922    | 0.0047686 |
|           | 2.5922          | 0.0047686 | 0.0047686  | 0.298932499 |             |           |           |
| NA        | ENSG00000270108 | 2.5912    | 0.0047814  | 2.5912      | 0.0047814   | 2.5912    | 0.0047814 |
|           | 2.5912          | 0.0047814 | 0.0047814  | 0.298932499 |             |           |           |
| NUDT18    | ENSG00000275074 | 2.5911    | 0.0047841  | 2.5911      | 0.0047841   | 2.5911    |           |
|           | 0.0047841       | 2.5911    | 0.0047841  | 0.0047841   | 0.298932499 |           |           |
| NA        | ENSG00000259336 | 2.5905    | 0.0047914  | 2.5905      | 0.0047914   | 2.5905    | 0.0047914 |
|           | 2.5905          | 0.0047914 | 0.0047914  | 0.298932499 |             |           |           |
| ANKRD34B  | ENSG00000189127 | 0.45427   | 0.32482    | 0.45427     | 0.32482     | 0.45427   |           |
|           | 0.32482         | 2.5898    | 0.0048014  | 0.0048014   | 0.298932499 |           |           |
| NA        | ENSG00000203620 | 0.043486  | 0.48266    | 0.043486    | 0.48266     | 0.043486  | 0.48266   |
|           | 2.5889          | 0.0048139 | 0.0048139  | 0.298932499 |             |           |           |
| NA        | ENSG00000258914 | 2.4397    | 0.0073491  | 2.5883      | 0.0048225   | 0.015171  | 0.49395   |
|           | 0.015171        | 0.49395   | 0.0048225  | 0.298932499 |             |           |           |
| NA        | ENSG00000226833 | 1.4575    | 0.072491   | 1.4959      | 0.067346    | 2.5881    | 0.0048258 |
|           | 2.1504          | 0.01576   | 0.0048258  | 0.298932499 |             |           |           |
| NA        | ENSG00000279694 | 2.5874    | 0.0048358  | 2.5874      | 0.0048358   | 2.5874    | 0.0048358 |
|           | 2.5874          | 0.0048358 | 0.0048358  | 0.298932499 |             |           |           |
| AUTS2     | ENSG00000158321 | 2.5864    | 0.0048493  | 2.488       | 0.006423    | 2.2812    | 0.011267  |
|           | 2.1403          | 0.016167  | 0.0048493  | 0.298932499 |             |           |           |
| NA        | ENSG00000275350 | 1.089     | 0.13808    | 2.5862      | 0.0048526   | 0.93433   | 0.17507   |
|           | 1.8729          | 0.030539  | 0.0048526  | 0.298932499 |             |           |           |
| NA        | ENSG00000252443 | 2.5857    | 0.0048589  | 2.5181      | 0.0058999   | 1.3457    | 0.089205  |
|           | 1.3457          | 0.089205  | 0.0048589  | 0.298932499 |             |           |           |
| SF3B4     | ENSG00000143368 | 2.2046    | 0.01374    | 2.5853      | 0.0048642   | 2.3039    | 0.010615  |
|           | 1.9668          | 0.024601  | 0.0048642  | 0.298932499 |             |           |           |
| TRAPPC3L  | ENSG00000173626 | 2.5852    | 0.0048658  | -0.021445   | 0.50855     | 1.2879    |           |
|           | 0.098888        | 1.6128    | 0.053397   | 0.0048658   | 0.298932499 |           |           |
| NA        | ENSG00000269967 | 0.0084722 | 0.49662    | 0.0084722   | 0.49662     | 0.0084722 | 0.49662   |
|           | 2.5851          | 0.0048678 | 0.0048678  | 0.298932499 |             |           |           |
| FAM151B   | ENSG00000152380 | 2.585     | 0.0048685  | 2.4619      | 0.0069109   | 1.5531    | 0.060204  |
|           | -0.46552        | 0.67922   | 0.0048685  | 0.298932499 |             |           |           |
| NPM1P40   | ENSG00000236523 | -0.94098  | 0.82664    | -0.94098    | 0.82664     | 2.585     | 0.0048696 |
|           | 0.85413         | 0.19652   | 0.0048696  | 0.298932499 |             |           |           |
| NA        | ENSG00000270460 | 1.9446    | 0.025914   | 1.9446      | 0.025914    | 0.34395   | 0.36544   |
|           | 2.5849          | 0.0048707 | 0.0048707  | 0.298932499 |             |           |           |
| NA        | ENSG00000267716 | 0.47286   | 0.31816    | 2.5846      | 0.004875    | 0.47286   | 0.31816   |
|           | 0.47286         | 0.31816   | 0.004875   | 0.298932499 |             |           |           |
| NA        | ENSG00000249072 | 2.5844    | 0.0048769  | -0.48656    | 0.68672     | 2.1924    | 0.014176  |
|           | 0.26339         | 0.39613   | 0.0048769  | 0.298932499 |             |           |           |
| RPL7P31   | ENSG00000235379 | 1.997     | 0.022915   | 2.5838      | 0.0048852   | 1.997     | 0.022915  |
|           | 0.022915        | 0.0048852 | 0.29906507 |             |             |           |           |
| NA        | ENSG00000269605 | 2.0364    | 0.020855   | 2.1695      | 0.015023    | 2.5819    | 0.0049127 |
|           | 1.7849          | 0.037141  | 0.0049127  | 0.300371231 |             |           |           |
| SMURF1    | ENSG00000198742 | 2.5815    | 0.0049191  | 0.4535      | 0.3251      | 1.0616    |           |
|           | 0.1442          | 0.31574   | 0.3761     | 0.0049191   | 0.300385643 |           |           |
| DDB2      | ENSG00000134574 | 0.74322   | 0.22867    | 1.6349      | 0.051035    | 2.5807    | 0.0049302 |
|           | -0.047341       | 0.51888   | 0.0049302  | 0.300628947 |             |           |           |
| RN7SL420P | ENSG00000239984 | -1.6871   | 0.95421    | 2.5803      | 0.004936    | 2.0802    |           |
|           | 0.018753        | -0.8429   | 0.80036    | 0.004936    | 0.300628947 |           |           |
| ABCG2     | ENSG00000118777 | 1.5277    | 0.063299   | 0.85429     | 0.19647     | 2.5799    | 0.0049416 |
|           | 1.6657          | 0.047891  | 0.0049416  | 0.300628947 |             |           |           |
| COX18     | ENSG00000163626 | 2.4885    | 0.006414   | 0.87922     | 0.18964     | 2.5794    | 0.0049482 |
|           | 2.5794          | 0.0049482 | 0.0049482  | 0.300628947 |             |           |           |
| ASNSP6    | ENSG00000267333 | 0.81334   | 0.20801    | -0.35811    | 0.63987     | 0.67099   |           |
|           | 0.25111         | 2.5789    | 0.0049564  | 0.0049564   | 0.300628947 |           |           |
| RPL18P1   | ENSG00000242417 | 2.5786    | 0.0049601  | 1.9849      | 0.023576    | 0.12507   |           |
|           | 0.45023         | 1.9243    | 0.027157   | 0.0049601   | 0.300628947 |           |           |

|            |                 |           |             |             |             |             |           |
|------------|-----------------|-----------|-------------|-------------|-------------|-------------|-----------|
| LRP5L      | ENSG00000100068 | 2.0164    | 0.021878    | 2.5778      | 0.0049716   | 0.30552     | 0.37998   |
|            |                 | 1.3341    | 0.091081    | 0.0049716   | 0.300951637 |             |           |
| SLC39A13   | ENSG00000165915 | 1.9718    | 0.024317    | 2.5764      | 0.0049918   | 2.1864      |           |
|            |                 | 0.014395  | 1.9718      | 0.024317    | 0.0049918   | 0.301799521 |           |
| NA         | ENSG00000234021 | -0.74061  | 0.77054     | 2.5755      | 0.0050052   | -2.1442     | 0.98399   |
|            |                 | -0.059593 | 0.52376     | 0.0050052   | 0.302234691 |             |           |
| RPL5P27    | ENSG00000228195 | 2.5721    | 0.0050545   | 2.5721      | 0.0050545   | 2.3605      |           |
|            |                 | 0.0091251 | 1.1859      | 0.11782     | 0.0050545   | 0.304655864 |           |
| NA         | ENSG00000224658 | 2.2321    | 0.012804    | 1.2472      | 0.10617     | 2.5719      | 0.0050578 |
|            |                 | 1.7716    | 0.038226    | 0.0050578   | 0.304655864 |             |           |
| H4C15      | ENSG00000270276 | 2.1094    | 0.017455    | 2.5705      | 0.0050771   | 1.387       | 0.082721  |
|            |                 | 2.1141    | 0.017252    | 0.0050771   | 0.305440843 |             |           |
| ZBTB7A     | ENSG00000178951 | 1.2128    | 0.1126      | 1.2128      | 0.1126      | 1.2128      |           |
|            |                 | 0.1126    | 2.5694      | 0.0050938   | 0.0050938   | 0.306067662 |           |
| NA         | ENSG00000250039 | 0.42069   | 0.33699     | -0.0031364  | 0.50125     | 0.0080463   | 0.49679   |
|            |                 | 2.5689    | 0.0051006   | 0.0051006   | 0.306098815 |             |           |
| NA         | ENSG00000229167 | 1.1398    | 0.12718     | 0.044589    | 0.48222     | 2.5673      | 0.005125  |
|            |                 | 0.044589  | 0.48222     | 0.005125    | 0.306846902 |             |           |
| RN7SL62P   | ENSG00000239640 | 2.5666    | 0.0051357   | 2.5666      | 0.0051357   | 2.4418      |           |
|            |                 | 0.0073062 | 2.5666      | 0.0051357   | 0.0051357   | 0.306846902 |           |
| NA         | ENSG00000261240 | 2.565     | 0.0051582   | 2.565       | 0.0051582   | 2.565       | 0.0051582 |
|            |                 | 0.0051582 | 0.306846902 |             |             |             |           |
| RPS27AP1   | ENSG00000242692 | 2.565     | 0.0051584   | 2.565       | 0.0051584   | 2.565       | 0.0051584 |
|            |                 | 0.0051584 | 0.0051584   | 0.306846902 |             |             |           |
| NA         | ENSG00000249818 | 2.5648    | 0.005162    | -0.039726   | 0.51584     | 1.9897      | 0.023311  |
|            |                 | 0.99318   | 0.16031     | 0.005162    | 0.306846902 |             |           |
| ADAMTS10   | ENSG00000142303 | -0.33281  | 0.63036     | 0.88618     | 0.18776     | 2.5647      |           |
|            |                 | 0.0051628 | 1.4557      | 0.072737    | 0.0051628   | 0.306846902 |           |
| IQCF2      | ENSG00000184345 | 2.4837    | 0.0065008   | 2.4893      | 0.0063996   | 2.5644      | 0.0051675 |
|            |                 | 1.5175    | 0.06457     | 0.0051675   | 0.306846902 |             |           |
| EDF1       | ENSG00000107223 | 2.5642    | 0.0051702   | 2.086       | 0.018488    | 1.3132      | 0.094559  |
|            |                 | 0.42631   | 0.33494     | 0.0051702   | 0.306846902 |             |           |
| NA         | ENSG00000106540 | 2.0914    | 0.018248    | 2.0914      | 0.018248    | 2.0914      | 0.018248  |
|            |                 | 2.5638    | 0.0051759   | 0.0051759   | 0.306846902 |             |           |
| MTCO1P3    | ENSG00000228930 | 2.5628    | 0.0051915   | -0.12458    | 0.54957     | -0.93565    |           |
|            |                 | 0.82527   | -0.93565    | 0.82527     | 0.0051915   | 0.306846902 |           |
| LAPTM5     | ENSG00000162511 | 1.2609    | 0.10368     | 2.5627      | 0.0051927   | 0.89487     |           |
|            |                 | 0.18543   | 0.095285    | 0.46204     | 0.0051927   | 0.306846902 |           |
| RNU6-1287P | ENSG00000199784 | -1.4095   | 0.92066     | 2.5626      | 0.0051943   | -0.16403    |           |
|            |                 | 0.56515   | 2.0587      | 0.019763    | 0.0051943   | 0.306846902 |           |
| SRR        | ENSG00000167720 | 0.15221   | 0.43951     | 2.5624      | 0.0051981   | 1.5898      | 0.055937  |
|            |                 | 2.5624    | 0.0051981   | 0.0051981   | 0.306846902 |             |           |
| ADAMTSL4   | ENSG00000143382 | 2.5618    | 0.0052068   | 1.6221      | 0.052386    | 1.7113      |           |
|            |                 | 0.043512  | 0.21482     | 0.41495     | 0.0052068   | 0.306846902 |           |
| LINC00609  | ENSG00000257585 | 0.91931   | 0.17897     | 0.91931     | 0.17897     | 2.5617      |           |
|            |                 | 0.0052088 | 0.91931     | 0.17897     | 0.0052088   | 0.306846902 |           |
| MARK3      | ENSG00000075413 | 2.5608    | 0.0052217   | 2.5428      | 0.0054978   | 2.4364      | 0.0074164 |
|            |                 | 2.4374    | 0.0073957   | 0.0052217   | 0.306846902 |             |           |
| TEN1       | ENSG00000257949 | 2.5603    | 0.0052286   | 2.3062      | 0.01055     | 2.5603      | 0.0052286 |
|            |                 | 2.5603    | 0.0052286   | 0.0052286   | 0.306846902 |             |           |
| CALY       | ENSG00000130643 | -0.55166  | 0.70941     | -0.42499    | 0.66458     | 2.5601      | 0.0052329 |
|            |                 | -0.35269  | 0.63784     | 0.0052329   | 0.306846902 |             |           |
| TPRG1-AS1  | ENSG00000234076 | 1.1625    | 0.12252     | 2.5599      | 0.0052355   | 0.87092     |           |
|            |                 | 0.1919    | -0.8923     | 0.81388     | 0.0052355   | 0.306846902 |           |
| TRPV4      | ENSG00000111199 | 2.5593    | 0.0052439   | 2.0446      | 0.020447    | 1.5982      | 0.055004  |
|            |                 | 0.0078261 | 0.49688     | 0.0052439   | 0.306846902 |             |           |
| NA         | ENSG00000251361 | 0.046271  | 0.48155     | 0.032926    | 0.48687     | 0.046271    | 0.48155   |
|            |                 | 2.5592    | 0.0052453   | 0.0052453   | 0.306846902 |             |           |
| LINC02710  | ENSG00000255269 | 1.8836    | 0.029811    | 2.5584      | 0.005258    | 0.60029     |           |
|            |                 | 0.27416   | 0.7457      | 0.22793     | 0.005258    | 0.307221031 |           |
| MIS18A-AS1 | ENSG00000227256 | 0.012278  | 0.4951      | 2.5552      | 0.0053064   | -1.0618     |           |
|            |                 | 0.85583   | -1.0618     | 0.85583     | 0.0053064   | 0.309677691 |           |

|             |                 |            |           |             |             |          |           |  |
|-------------|-----------------|------------|-----------|-------------|-------------|----------|-----------|--|
| OCSTAMP     | ENSG00000149635 | -1.7435    | 0.95938   | -1.7435     | 0.95938     | 0.67061  |           |  |
|             | 0.25123         | 2.5545     | 0.0053169 | 0.0053169   | 0.309919303 |          |           |  |
| ZNF788P     | ENSG00000214189 | 0.36296    | 0.35832   | 2.5535      | 0.005333    | 2.0102   |           |  |
|             | 0.022207        | 2.0102     | 0.022207  | 0.005333    | 0.310486368 |          |           |  |
| SPAG4       | ENSG00000061656 | -0.0049891 | 0.50199   | -0.0049891  | 0.50199     | 2.553    | 0.0053403 |  |
|             | -0.35023        | 0.63692    | 0.0053403 | 0.310540357 |             |          |           |  |
| NA          | ENSG00000261474 | 2.5518     | 0.0053585 | 2.3625      | 0.0090771   | -0.23817 | 0.59412   |  |
|             | -0.23817        | 0.59412    | 0.0053585 | 0.3112273   |             |          |           |  |
| NA          | ENSG00000283765 | 2.5511     | 0.0053693 | 2.5511      | 0.0053693   | 2.5511   | 0.0053693 |  |
|             | 2.5511          | 0.0053693  | 0.0053693 | 0.311265735 |             |          |           |  |
| LINC01839   | ENSG00000227509 | 1.7111     | 0.043527  | 0.10623     | 0.4577      | 2.5501   |           |  |
|             | 0.0053843       | 1.2915     | 0.09827   | 0.0053843   | 0.311265735 |          |           |  |
| RNF182      | ENSG00000180537 | -0.01272   | 0.50507   | 2.5497      | 0.0053904   | 1.6619   |           |  |
|             | 0.048268        | 1.0906     | 0.13772   | 0.0053904   | 0.311265735 |          |           |  |
| NA          | ENSG00000201749 | 2.5489     | 0.0054037 | 2.5489      | 0.0054037   | 2.5489   | 0.0054037 |  |
|             | 2.5489          | 0.0054037  | 0.0054037 | 0.311265735 |             |          |           |  |
| NA          | ENSG00000270090 | 2.5487     | 0.0054063 | 0.35732     | 0.36043     | 0.61189  | 0.2703    |  |
|             | -0.90585        | 0.81749    | 0.0054063 | 0.311265735 |             |          |           |  |
| KIF13A      | ENSG00000137177 | 1.0356     | 0.1502    | 1.47        | 0.070779    | 2.5479   | 0.0054185 |  |
|             | 2.1596          | 0.015402   | 0.0054185 | 0.311265735 |             |          |           |  |
| NA          | ENSG00000229857 | 2.0616     | 0.019621  | 2.5479      | 0.0054193   | 1.7629   | 0.038958  |  |
|             | 2.0183          | 0.021782   | 0.0054193 | 0.311265735 |             |          |           |  |
| AGBL4-IT1   | ENSG00000225623 | 1.9565     | 0.025205  | 2.5477      | 0.0054224   | 1.18     | 0.119     |  |
|             | 1.2316          | 0.10905    | 0.0054224 | 0.311265735 |             |          |           |  |
| NA          | ENSG00000259166 | 2.5476     | 0.0054233 | 1.4774      | 0.06979     | 0.86616  | 0.1932    |  |
|             | 1.69            | 0.045515   | 0.0054233 | 0.311265735 |             |          |           |  |
| PPP3R1      | ENSG00000221823 | 2.4103     | 0.0079699 | 2.3662      | 0.0089864   | 1.6591   |           |  |
|             | 0.048544        | 2.5471     | 0.0054315 | 0.0054315   | 0.311265735 |          |           |  |
| SYN2        | ENSG00000157152 | 2.0372     | 0.020817  | 0.56333     | 0.28661     | 0.52482  | 0.29985   |  |
|             | 2.5469          | 0.0054341  | 0.0054341 | 0.311265735 |             |          |           |  |
| KRTAP10-13P | ENSG00000236382 | -0.2182    | 0.58636   | -0.73042    | 0.76743     | -0.2182  |           |  |
|             | 0.58636         | 2.5464     | 0.0054421 | 0.0054421   | 0.311265735 |          |           |  |
| LINC02841   | ENSG00000267407 | 2.5464     | 0.0054422 | 2.4289      | 0.0075732   | -0.16684 |           |  |
|             | 0.56625         | 2.5464     | 0.0054422 | 0.0054422   | 0.311265735 |          |           |  |
| RAPH1       | ENSG00000173166 | 2.5457     | 0.0054529 | 2.2583      | 0.011962    | 1.5199   | 0.064272  |  |
|             | 1.2487          | 0.10589    | 0.0054529 | 0.311512095 |             |          |           |  |
| NA          | ENSG00000277301 | 2.545      | 0.0054635 | 2.2352      | 0.012703    | 1.6517   | 0.049301  |  |
|             | 1.6517          | 0.049301   | 0.0054635 | 0.311752172 |             |          |           |  |
| NA          | ENSG00000261458 | 2.5446     | 0.0054704 | 1.0844      | 0.13909     | 1.0844   | 0.13909   |  |
|             | 0.39204         | 0.34751    | 0.0054704 | 0.311758278 |             |          |           |  |
| NFKB1       | ENSG00000109320 | 1.5257     | 0.063542  | 1.9881      | 0.023402    | 2.5441   | 0.0054786 |  |
|             | 1.9679          | 0.02454    | 0.0054786 | 0.311758278 |             |          |           |  |
| NA          | ENSG00000261610 | 2.4097     | 0.0079831 | 1.6901      | 0.045504    | 2.5438   | 0.0054828 |  |
|             | 1.3856          | 0.082934   | 0.0054828 | 0.311758278 |             |          |           |  |
| NA          | ENSG00000259376 | 2.543      | 0.0054951 | 2.1797      | 0.014639    | 2.1797   | 0.014639  |  |
|             | 2.1797          | 0.014639   | 0.0054951 | 0.31179258  |             |          |           |  |
| NA          | ENSG00000260082 | 0.069958   | 0.47211   | 1.0784      | 0.14044     | 2.5429   | 0.0054962 |  |
|             | -0.42525        | 0.66467    | 0.0054962 | 0.31179258  |             |          |           |  |
| NA          | ENSG00000248766 | 2.5413     | 0.0055217 | 0.48781     | 0.31284     | 2.5413   | 0.0055217 |  |
|             | 2.5413          | 0.0055217  | 0.0055217 | 0.312516956 |             |          |           |  |
| NA          | ENSG00000259775 | -0.37166   | 0.64493   | -0.50971    | 0.69487     | -0.50971 | 0.69487   |  |
|             | 2.5411          | 0.0055253  | 0.0055253 | 0.312516956 |             |          |           |  |
| NA          | ENSG00000251249 | 0.63925    | 0.26133   | 2.202       | 0.013832    | 2.5404   | 0.0055355 |  |
|             | 2.2466          | 0.012332   | 0.0055355 | 0.312516956 |             |          |           |  |
| COMMD7      | ENSG00000149600 | 0.94714    | 0.17178   | 1.6243      | 0.052157    | 2.5402   |           |  |
|             | 0.0055394       | 1.6705     | 0.047406  | 0.0055394   | 0.312516956 |          |           |  |
| RPL23AP46   | ENSG00000213122 | 2.5398     | 0.0055463 | 2.5398      | 0.0055463   | 2.5398   |           |  |
|             | 0.0055463       | 2.5398     | 0.0055463 | 0.0055463   | 0.312516956 |          |           |  |
| GAPDHP35    | ENSG00000250982 | 1.7481     | 0.040224  | 1.4723      | 0.070467    | 1.5427   |           |  |
|             | 0.061457        | 2.5385     | 0.0055666 | 0.0055666   | 0.312516956 |          |           |  |
| NA          | ENSG00000282097 | -0.35491   | 0.63867   | 1.6934      | 0.045189    | -0.35491 | 0.63867   |  |
|             | 2.5382          | 0.0055708  | 0.0055708 | 0.312516956 |             |          |           |  |

|              |                 |           |           |             |             |             |           |
|--------------|-----------------|-----------|-----------|-------------|-------------|-------------|-----------|
| CEBPZ        | ENSG00000115816 | 2.4452    | 0.0072387 | 2.5381      | 0.0055734   | 2.5381      | 0.0055734 |
|              |                 | 2.5381    | 0.0055734 | 0.0055734   | 0.312516956 |             |           |
| ARHGAP26-IT1 | ENSG00000230789 | 2.5359    | 0.0056073 | 2.5359      | 0.0056073   | 1.6975      |           |
|              |                 | 0.044799  | 1.2135    | 0.11246     | 0.0056073   | 0.312516956 |           |
| NA           | ENSG00000229486 | 0.85028   | 0.19759   | 2.5239      | 0.0058031   | 2.5358      | 0.0056097 |
|              |                 | 0.94008   | 0.17359   | 0.0056097   | 0.312516956 |             |           |
| NA           | ENSG00000233292 | 2.5356    | 0.0056124 | 2.1574      | 0.015486    | 2.1574      | 0.015486  |
|              |                 | 2.1574    | 0.015486  | 0.0056124   | 0.312516956 |             |           |
| GNA12        | ENSG00000146535 | 2.2918    | 0.010958  | 2.5352      | 0.0056197   | 2.1982      | 0.013969  |
|              |                 | 0.88624   | 0.18775   | 0.0056197   | 0.312516956 |             |           |
| GFRA3        | ENSG00000146013 | 2.5352    | 0.0056199 | 1.1092      | 0.13367     | 1.3771      | 0.084248  |
|              |                 | 1.3089    | 0.095288  | 0.0056199   | 0.312516956 |             |           |
| HMGA1P2      | ENSG00000248641 | 2.5349    | 0.0056236 | 2.5349      | 0.0056236   | 2.5349      |           |
|              |                 | 0.0056236 | 2.5349    | 0.0056236   | 0.0056236   | 0.312516956 |           |
| RPL21P17     | ENSG00000214073 | -0.4532   | 0.6748    | 2.5343      | 0.005633    | 1.538       | 0.062019  |
|              |                 | 1.538     | 0.062019  | 0.005633    | 0.312516956 |             |           |
| YWHAG        | ENSG00000170027 | 1.6719    | 0.047268  | 1.011       | 0.156       | 2.5343      | 0.0056339 |
|              |                 | 0.015893  | 0.0056339 | 0.312516956 |             |             |           |
| LINC01694    | ENSG00000233922 | 2.5343    | 0.0056343 | 2.2783      | 0.011353    | 1.7948      |           |
|              |                 | 0.036346  | 1.7427    | 0.040697    | 0.0056343   | 0.312516956 |           |
| NA           | ENSG00000264193 | 0.78575   | 0.21601   | 2.5341      | 0.0056372   | 0.5479      | 0.29188   |
|              |                 | 0.59224   | 0.27684   | 0.0056372   | 0.312516956 |             |           |
| CHRNA4       | ENSG00000101204 | 1.4473    | 0.073909  | 1.8662      | 0.031005    | 1.6549      |           |
|              |                 | 0.048975  | 2.5333    | 0.0056503   | 0.0056503   | 0.312516956 |           |
| NA           | ENSG00000264434 | -0.23502  | 0.5929    | 2.3729      | 0.0088257   | 2.5332      | 0.005652  |
|              |                 | 2.3729    | 0.0088257 | 0.005652    | 0.312516956 |             |           |
| KIAA1522     | ENSG00000162522 | -0.16121  | 0.56404   | 1.0809      | 0.13988     | 0.11833     |           |
|              |                 | 0.4529    | 2.533     | 0.0056553   | 0.0056553   | 0.312516956 |           |
| RNF157-AS1   | ENSG00000267128 | 2.5328    | 0.005657  | 2.5328      | 0.005657    | 2.5328      |           |
|              |                 | 0.005657  | 2.5328    | 0.005657    | 0.005657    | 0.312516956 |           |
| RN7SL97P     | ENSG00000242216 | 0.291     | 0.38552   | 1.3986      | 0.080971    | 0.18337     | 0.42726   |
|              |                 | 2.5327    | 0.0056592 | 0.0056592   | 0.312516956 |             |           |
| DNPEP        | ENSG00000123992 | 2.5324    | 0.0056644 | 2.0601      | 0.019696    | 2.1553      | 0.015571  |
|              |                 | 1.7855    | 0.037092  | 0.0056644   | 0.312516956 |             |           |
| SOX1         | ENSG00000182968 | 2.5321    | 0.0056693 | 1.0011      | 0.15839     | 0.43213     | 0.33282   |
|              |                 | 1.0433    | 0.1484    | 0.0056693   | 0.312516956 |             |           |
| MLST8        | ENSG00000167965 | 2.5311    | 0.0056858 | 2.5311      | 0.0056858   | 2.5311      | 0.0056858 |
|              |                 | 2.5311    | 0.0056858 | 0.0056858   | 0.313072355 |             |           |
| LINC00882    | ENSG00000242759 | 0.66815   | 0.25202   | 2.2946      | 0.010878    | 2.5301      |           |
|              |                 | 0.0057021 | 1.0241    | 0.15289     | 0.0057021   | 0.3136155   |           |
| NA           | ENSG00000261797 | 0.21351   | 0.41547   | 2.5292      | 0.0057161   | 0.79279     | 0.21395   |
|              |                 | 0.7669    | 0.22157   | 0.0057161   | 0.314031063 |             |           |
| CA14         | ENSG00000118298 | 0.61059   | 0.27074   | 2.5283      | 0.0057312   | 1.8998      | 0.02873   |
|              |                 | 2.1463    | 0.015924  | 0.0057312   | 0.314506054 |             |           |
| NA           | ENSG00000233895 | 1.9836    | 0.023651  | 2.0512      | 0.020125    | 2.527       | 0.0057521 |
|              |                 | 1.7746    | 0.03798   | 0.0057521   | 0.315117025 |             |           |
| IFNAR1       | ENSG00000142166 | 0.0095632 | 0.49618   | 0.21447     | 0.41509     | 2.5266      |           |
|              |                 | 0.0057584 | 0.4343    | 0.33204     | 0.0057584   | 0.315117025 |           |
| RPS3AP36     | ENSG00000214362 | 2.5264    | 0.0057624 | 2.0177      | 0.021809    | 2.3768      |           |
|              |                 | 0.008732  | 1.886     | 0.029649    | 0.0057624   | 0.315117025 |           |
| LTBP4        | ENSG00000090006 | 0.53854   | 0.2951    | 1.487       | 0.068512    | 2.4219      | 0.007719  |
|              |                 | 0.0057682 | 0.0057682 | 0.315117025 |             |             | 2.526     |
| LINC00687    | ENSG00000228422 | 1.6687    | 0.047589  | 1.2468      | 0.10623     | 2.5238      |           |
|              |                 | 0.0058045 | 0.9202    | 0.17873     | 0.0058045   | 0.316347537 |           |
| TERF2        | ENSG00000132604 | 2.056     | 0.019891  | 2.5237      | 0.0058069   | 1.4652      | 0.071429  |
|              |                 | 1.7219    | 0.042546  | 0.0058069   | 0.316347537 |             |           |
| SNRPGP9      | ENSG00000228551 | 0.39423   | 0.34671   | 0.39423     | 0.34671     | 1.4235      |           |
|              |                 | 0.077299  | 2.5235    | 0.0058102   | 0.0058102   | 0.316347537 |           |
| DHX40        | ENSG00000108406 | 1.5806    | 0.056988  | 0.74673     | 0.22761     | 2.5223      | 0.00583   |
|              |                 | 0.23509   | 0.40707   | 0.00583     | 0.316750433 |             |           |
| CPSF4        | ENSG00000160917 | 2.4602    | 0.0069424 | 2.0411      | 0.02062     | 2.5222      | 0.0058306 |
|              |                 | 1.8299    | 0.033634  | 0.0058306   | 0.316750433 |             |           |

|           |                 |           |             |             |             |          |           |        |
|-----------|-----------------|-----------|-------------|-------------|-------------|----------|-----------|--------|
| MTMR11    | ENSG00000014914 | 2.047     | 0.020331    | 2.047       | 0.020331    | 2.047    | 0.020331  | 2.5214 |
|           | 0.0058452       | 0.0058452 | 0.316934716 |             |             |          |           |        |
| ZNF844    | ENSG00000223547 | 2.3909    | 0.0084036   | 2.3294      | 0.0099194   | 1.1704   |           |        |
|           | 0.12093         | 2.5212    | 0.005847    | 0.005847    | 0.316934716 |          |           |        |
| UNC5A     | ENSG00000113763 | -1.2897   | 0.90142     | 0.82931     | 0.20346     | 2.5198   | 0.0058708 |        |
|           | -0.868          | 0.8073    | 0.0058708   | 0.31771853  |             |          |           |        |
| TTL9      | ENSG00000131044 | 2.5187    | 0.0058889   | 1.2561      | 0.10453     | 2.1926   | 0.01417   |        |
|           | 2.4464          | 0.0072153 | 0.0058889   | 0.31771853  |             |          |           |        |
| PCGF3     | ENSG00000185619 | 2.5185    | 0.0058926   | 1.378       | 0.084103    | -0.36813 | 0.64361   |        |
|           | 0.10003         | 0.46016   | 0.0058926   | 0.31771853  |             |          |           |        |
| RPS3AP52  | ENSG00000230405 | 2.5182    | 0.0058985   | 2.5182      | 0.0058985   | 0.56802  |           |        |
|           | 0.28501         | 1.3581    | 0.087223    | 0.0058985   | 0.31771853  |          |           |        |
| NA        | ENSG00000259621 | -0.47379  | 0.68218     | 0.069637    | 0.47224     | 2.5176   | 0.0059075 |        |
|           | -0.12827        | 0.55103   | 0.0059075   | 0.31771853  |             |          |           |        |
| ZFH2      | ENSG00000136367 | 2.5174    | 0.0059106   | 0.40192     | 0.34387     | 0.40959  | 0.34105   |        |
|           | 0.8279          | 0.20386   | 0.0059106   | 0.31771853  |             |          |           |        |
| FGD5P1    | ENSG00000275340 | 0.51512   | 0.30323     | 2.5171      | 0.0059164   | 2.0849   |           |        |
|           | 0.01854         | 2.0849    | 0.01854     | 0.0059164   | 0.31771853  |          |           |        |
| PCDH9-AS4 | ENSG00000233840 | 0.75353   | 0.22557     | 0.75353     | 0.22557     | 0.75353  |           |        |
|           | 0.22557         | 2.5169    | 0.0059197   | 0.0059197   | 0.31771853  |          |           |        |
| C5AR1     | ENSG00000197405 | 1.0304    | 0.15141     | 2.0209      | 0.021645    | 2.1788   | 0.014674  |        |
|           | 2.5169          | 0.0059203 | 0.0059203   | 0.31771853  |             |          |           |        |
| NA        | ENSG00000227253 | 2.5164    | 0.0059285   | 0.043588    | 0.48262     | 2.5164   | 0.0059285 |        |
|           | 2.5164          | 0.0059285 | 0.0059285   | 0.31771853  |             |          |           |        |
| PCSK2     | ENSG00000125851 | 1.8836    | 0.029812    | 2.5161      | 0.0059338   | 2.2661   | 0.011722  |        |
|           | 1.6932          | 0.045211  | 0.0059338   | 0.31771853  |             |          |           |        |
| SPA17     | ENSG00000064199 | 2.1858    | 0.014416    | 2.1858      | 0.014416    | 2.5157   | 0.0059397 |        |
|           | 1.515           | 0.064889  | 0.0059397   | 0.31771853  |             |          |           |        |
| NA        | ENSG00000251285 | 0.80059   | 0.21168     | 2.5148      | 0.0059555   | 1.2179   | 0.11163   |        |
|           | 1.2179          | 0.11163   | 0.0059555   | 0.317914106 |             |          |           |        |
| NA        | ENSG00000231931 | -1.2147   | 0.88776     | 2.5134      | 0.005978    | -0.36925 | 0.64403   |        |
|           | -0.99112        | 0.83919   | 0.005978    | 0.317914106 |             |          |           |        |
| ALG1L6P   | ENSG00000238278 | -0.39221  | 0.65255     | 1.1671      | 0.12159     | 2.5129   |           |        |
|           | 0.0059873       | 1.8834    | 0.029822    | 0.0059873   | 0.317914106 |          |           |        |
| RNU7-170P | ENSG00000239082 | 2.5128    | 0.0059893   | 2.5128      | 0.0059893   | 2.5128   |           |        |
|           | 0.0059893       | 2.5128    | 0.0059893   | 0.0059893   | 0.317914106 |          |           |        |
| AMZ1      | ENSG00000174945 | 1.1064    | 0.13427     | 2.3431      | 0.0095619   | 2.2963   | 0.010831  |        |
|           | 2.5128          | 0.0059895 | 0.0059895   | 0.317914106 |             |          |           |        |
| ZNF830    | ENSG00000198783 | 2.5112    | 0.0060169   | -1.3173     | 0.90613     | -1.3173  |           |        |
|           | 0.90613         | -1.3173   | 0.90613     | 0.0060169   | 0.317914106 |          |           |        |
| NA        | ENSG00000250917 | -0.39665  | 0.65419     | -0.39665    | 0.65419     | 2.5112   | 0.0060169 |        |
|           | 0.60142         | 0.27378   | 0.0060169   | 0.317914106 |             |          |           |        |
| SLC9A8    | ENSG00000197818 | 2.3014    | 0.010683    | 2.5109      | 0.0060211   | 0.34768  |           |        |
|           | 0.36404         | 2.1421    | 0.016092    | 0.0060211   | 0.317914106 |          |           |        |
| RN7SL568P | ENSG00000239703 | 2.5103    | 0.0060318   | 2.5103      | 0.0060318   | 2.5103   |           |        |
|           | 0.0060318       | 2.5103    | 0.0060318   | 0.0060318   | 0.317914106 |          |           |        |
| LINC02055 | ENSG00000254101 | 1.4078    | 0.079597    | 0.9522      | 0.1705      | 2.5102   |           |        |
|           | 0.0060327       | 1.1457    | 0.12597     | 0.0060327   | 0.317914106 |          |           |        |
| NA        | ENSG00000258751 | 0.90243   | 0.18341     | 0.38335     | 0.35073     | 1.7762   | 0.037847  |        |
|           | 2.5101          | 0.0060342 | 0.0060342   | 0.317914106 |             |          |           |        |
| SERBP1    | ENSG00000142864 | 2.5094    | 0.0060468   | 2.5094      | 0.0060468   | 2.5094   |           |        |
|           | 0.0060468       | 2.5094    | 0.0060468   | 0.0060468   | 0.317914106 |          |           |        |
| CYB5B     | ENSG00000103018 | 2.3016    | 0.010679    | 1.5726      | 0.057911    | 2.5094   | 0.0060475 |        |
|           | 2.0571          | 0.01984   | 0.0060475   | 0.317914106 |             |          |           |        |
| NA        | ENSG00000259708 | 1.259     | 0.10402     | 2.5091      | 0.0060515   | 1.259    | 0.10402   | 1.259  |
|           | 0.10402         | 0.0060515 | 0.317914106 |             |             |          |           |        |
| SOCAR     | ENSG00000240350 | -0.060958 | 0.5243      | 2.2832      | 0.011209    | 2.5089   | 0.0060551 |        |
|           | -0.49998        | 0.69145   | 0.0060551   | 0.317914106 |             |          |           |        |
| EPN1      | ENSG00000063245 | 2.1405    | 0.016157    | 2.5085      | 0.0060616   | 2.5085   | 0.0060616 |        |
|           | 1.9662          | 0.024636  | 0.0060616   | 0.317914106 |             |          |           |        |
| TRAF4     | ENSG00000076604 | 2.5084    | 0.006064    | 2.069       | 0.019272    | 2.2387   | 0.012587  | 2.069  |
|           | 0.019272        | 0.006064  | 0.317914106 |             |             |          |           |        |

|             |                 |           |             |             |             |          |           |           |
|-------------|-----------------|-----------|-------------|-------------|-------------|----------|-----------|-----------|
| TMEM176B    | ENSG00000106565 | 0.58853   | 0.27809     | 0.58853     | 0.27809     | 0.58853  | 0.27809   | 0.58853   |
|             | 0.27809         | 2.5083    | 0.0060659   | 0.0060659   | 0.317914106 |          |           |           |
| NA          | ENSG00000260121 | 2.5073    | 0.0060831   | 2.5073      | 0.0060831   | 2.5073   | 0.0060831 | 0.0060831 |
|             | 2.5073          | 0.0060831 | 0.0060831   | 0.317914106 |             |          |           |           |
| PCDHGB5     | ENSG00000276547 | 2.5071    | 0.0060856   | 0.76044     | 0.2235      | 0.76044  |           |           |
|             | 0.2235          | 0.76044   | 0.2235      | 0.0060856   | 0.317914106 |          |           |           |
| BNC2-AS1    | ENSG00000234779 | 1.8751    | 0.030392    | 1.4002      | 0.080724    | 2.5066   |           |           |
|             | 0.0060951       | 2.5066    | 0.0060951   | 0.0060951   | 0.317914106 |          |           |           |
| LINC02310   | ENSG00000258808 | 2.5059    | 0.0061069   | 1.7253      | 0.042239    | 2.5059   |           |           |
|             | 0.0061069       | 1.1361    | 0.12796     | 0.0061069   | 0.317914106 |          |           |           |
| MIR548N     | ENSG00000221669 | 1.2817    | 0.099966    | 1.4692      | 0.070893    | 2.5056   |           |           |
|             | 0.006112        | 2.5056    | 0.006112    | 0.006112    | 0.317914106 |          |           |           |
| LINC01361   | ENSG00000236268 | 0.51464   | 0.3034      | 1.4545      | 0.072905    | 0.61043  |           |           |
|             | 0.27079         | 2.5052    | 0.0061197   | 0.0061197   | 0.317914106 |          |           |           |
| GALK1       | ENSG00000108479 | 2.3144    | 0.010323    | 1.9559      | 0.02524     | 2.1487   | 0.01583   |           |
|             | 2.5051          | 0.006121  | 0.006121    | 0.317914106 |             |          |           |           |
| FAM136BP    | ENSG00000232654 | 0.96589   | 0.16705     | 2.505       | 0.0061226   | 0.96589  | 0.16705   |           |
|             | 0.96589         | 0.16705   | 0.0061226   | 0.317914106 |             |          |           |           |
| NA          | ENSG00000200059 | 2.5044    | 0.006133    | -0.14447    | 0.55743     | 2.5044   | 0.006133  |           |
|             | 2.5044          | 0.006133  | 0.006133    | 0.317914106 |             |          |           |           |
| NA          | ENSG00000225625 | 2.5043    | 0.0061341   | 1.921       | 0.027368    | 2.5043   | 0.0061341 |           |
|             | 2.5043          | 0.0061341 | 0.0061341   | 0.317914106 |             |          |           |           |
| NA          | ENSG00000259353 | 2.5039    | 0.006142    | 2.5039      | 0.006142    | 2.5039   | 0.006142  |           |
|             | 2.5039          | 0.006142  | 0.006142    | 0.317914106 |             |          |           |           |
| CDC27       | ENSG00000004897 | 2.5038    | 0.0061436   | 2.315       | 0.010306    | 1.6357   | 0.050951  |           |
|             | 2.2673          | 0.011686  | 0.0061436   | 0.317914106 |             |          |           |           |
| MYH8        | ENSG00000133020 | 1.6661    | 0.047851    | 2.5037      | 0.0061456   | 1.6661   | 0.047851  |           |
|             | -0.29377        | 0.61553   | 0.0061456   | 0.317914106 |             |          |           |           |
| RNA5SP490   | ENSG00000252950 | 2.5026    | 0.0061637   | 1.0656      | 0.1433      | -0.82351 |           |           |
|             | 0.79489         | -0.88896  | 0.81299     | 0.0061637   | 0.318303947 |          |           |           |
| NA          | ENSG00000233293 | 1.04      | 0.14916     | 1.04        | 0.14916     | 1.95     | 0.025588  | 2.5025    |
|             | 0.0061662       | 0.0061662 | 0.318303947 |             |             |          |           |           |
| PLOD3       | ENSG00000106397 | 2.4999    | 0.0062106   | 2.3713      | 0.008864    | 1.9264   | 0.027025  |           |
|             | 2.4999          | 0.0062106 | 0.0062106   | 0.319724374 |             |          |           |           |
| LINC00399   | ENSG00000229792 | 2.4999    | 0.0062107   | 2.4999      | 0.0062107   | 2.4999   |           |           |
|             | 0.0062107       | 2.4999    | 0.0062107   | 0.0062107   | 0.319724374 |          |           |           |
| UBE2V1P5    | ENSG00000226582 | 2.4998    | 0.0062134   | 2.4998      | 0.0062134   | 0.18143  |           |           |
|             | 0.42801         | 0.0068746 | 0.49726     | 0.0062134   | 0.319724374 |          |           |           |
| CRYM-AS1    | ENSG00000189149 | 2.499     | 0.0062267   | 2.499       | 0.0062267   | 2.499    | 0.0062267 | 1.2001    |
|             | 0.11506         | 0.0062267 | 0.320070771 |             |             |          |           |           |
| NA          | ENSG00000229996 | 2.4982    | 0.0062405   | 0.58291     | 0.27998     | 2.4982   | 0.0062405 |           |
|             | 2.4982          | 0.0062405 | 0.0062405   | 0.32033698  |             |          |           |           |
| RTN4RL1     | ENSG00000185924 | 2.4977    | 0.006251    | 0.8328      | 0.20248     | 0.87977  |           |           |
|             | 0.18949         | 1.9268    | 0.027       | 0.006251    | 0.32033698  |          |           |           |
| CDC42BPB    | ENSG00000198752 | 1.293     | 0.098012    | -0.62003    | 0.73238     | 0.55249  | 0.29031   |           |
|             | 2.4976          | 0.0062516 | 0.0062516   | 0.32033698  |             |          |           |           |
| RPSAP24     | ENSG00000235414 | 2.4968    | 0.0062657   | 2.4968      | 0.0062657   | 2.4968   |           |           |
|             | 0.0062657       | 1.7048    | 0.044119    | 0.0062657   | 0.320363955 |          |           |           |
| NA          | ENSG00000255723 | 2.4959    | 0.0062811   | 2.4959      | 0.0062811   | 2.4959   | 0.0062811 |           |
|             | 2.4959          | 0.0062811 | 0.0062811   | 0.320363955 |             |          |           |           |
| REC114      | ENSG00000183324 | 2.1544    | 0.015603    | 2.4958      | 0.0062833   | 2.0034   |           |           |
|             | 0.022566        | 2.1544    | 0.015603    | 0.0062833   | 0.320363955 |          |           |           |
| CARD14      | ENSG00000141527 | 2.0239    | 0.021489    | 0.7855      | 0.21608     | 2.4956   |           |           |
|             | 0.0062876       | 0.75667   | 0.22462     | 0.0062876   | 0.320363955 |          |           |           |
| RNU6ATAC12P | ENSG00000252351 | 2.4955    | 0.0062886   | 2.4955      | 0.0062886   | 2.4955   |           |           |
|             | 0.0062886       | 2.4955    | 0.0062886   | 0.0062886   | 0.320363955 |          |           |           |
| SILC1       | ENSG00000232044 | 1.0761    | 0.14094     | 1.7453      | 0.040463    | -0.17616 | 0.56992   |           |
|             | 2.4947          | 0.0063038 | 0.0063038   | 0.320363955 |             |          |           |           |
| RGS2        | ENSG00000116741 | 2.453     | 0.0070841   | 2.453       | 0.0070841   | 2.453    | 0.0070841 | 2.4944    |
|             | 0.0063085       | 0.0063085 | 0.320363955 |             |             |          |           |           |
| STRN4       | ENSG00000090372 | 1.2008    | 0.11491     | 0.8555      | 0.19614     | 0.71692  | 0.23671   |           |
|             | 2.4941          | 0.0063132 | 0.0063132   | 0.320363955 |             |          |           |           |

|          |                 |           |             |             |             |           |           |         |
|----------|-----------------|-----------|-------------|-------------|-------------|-----------|-----------|---------|
| GRIN2A   | ENSG00000183454 | 0.22381   | 0.41145     | 2.4931      | 0.0063317   | 1.3304    |           |         |
|          | 0.0917          | 1.1999    | 0.11509     | 0.0063317   | 0.320363955 |           |           |         |
| LHX9     | ENSG00000143355 | 2.0097    | 0.022234    | 2.4923      | 0.0063461   | 2.3021    | 0.010665  |         |
|          | 1.8762          | 0.030311  | 0.0063461   | 0.320363955 |             |           |           |         |
| TPMT     | ENSG00000137364 | 1.5482    | 0.060792    | 0.81113     | 0.20865     | 2.3886    | 0.0084571 |         |
|          | 2.4918          | 0.0063543 | 0.0063543   | 0.320363955 |             |           |           |         |
| EDEM3    | ENSG00000116406 | 1.4538    | 0.072995    | 1.4144      | 0.078625    | 0.60361   | 0.27305   |         |
|          | 2.4917          | 0.0063573 | 0.0063573   | 0.320363955 |             |           |           |         |
| INTS14   | ENSG00000138614 | 1.5725    | 0.057919    | 0.13238     | 0.44734     | 2.4916    |           |         |
|          | 0.0063593       | 1.5112    | 0.065365    | 0.0063593   | 0.320363955 |           |           |         |
| TEKT1    | ENSG00000167858 | 2.4915    | 0.0063598   | -0.53203    | 0.70265     | -0.53203  | 0.70265   |         |
|          | -0.86885        | 0.80753   | 0.0063598   | 0.320363955 |             |           |           |         |
| EBLN2    | ENSG00000255423 | 2.4899    | 0.0063896   | 2.4899      | 0.0063896   | 2.4899    | 0.0063896 |         |
|          | 2.4899          | 0.0063896 | 0.0063896   | 0.320363955 |             |           |           |         |
| SLC26A6  | ENSG00000225697 | 2.1189    | 0.01705     | 2.4891      | 0.0064026   | 2.1456    |           |         |
|          | 0.015953        | 1.9195    | 0.027458    | 0.0064026   | 0.320363955 |           |           |         |
| NA       | ENSG00000233569 | 0.72863   | 0.23311     | 2.489       | 0.0064055   | 0.72863   | 0.23311   |         |
|          | 0.72863         | 0.23311   | 0.0064055   | 0.320363955 |             |           |           |         |
| NOXRED1  | ENSG00000165555 | 2.4888    | 0.0064082   | 2.4888      | 0.0064082   | 2.4888    |           |         |
|          | 0.0064082       | 0.77939   | 0.21787     | 0.0064082   | 0.320363955 |           |           |         |
| KAT8     | ENSG00000103510 | 1.256     | 0.10455     | 2.4885      | 0.006415    | 0.81875   | 0.20646   |         |
|          | 1.9459          | 0.025832  | 0.006415    | 0.320363955 |             |           |           |         |
| TMEM233  | ENSG00000224982 | 0.64065   | 0.26088     | 1.5376      | 0.062075    | 2.4884    |           |         |
|          | 0.0064166       | 1.092     | 0.13742     | 0.0064166   | 0.320363955 |           |           |         |
| PRTG     | ENSG00000166450 | -0.54741  | 0.70795     | 2.4883      | 0.0064184   | -0.50318  | 0.69258   |         |
|          | 0.22198         | 0.41217   | 0.0064184   | 0.320363955 |             |           |           |         |
| NA       | ENSG00000251054 | -0.44557  | 0.67205     | 2.4881      | 0.0064214   | 0.060915  | 0.47571   |         |
|          | -0.15292        | 0.56077   | 0.0064214   | 0.320363955 |             |           |           |         |
| KIAA0408 | ENSG00000189367 | 2.4881    | 0.0064216   | -1.2064     | 0.88617     | 2.4881    |           |         |
|          | 0.0064216       | -0.23915  | 0.59451     | 0.0064216   | 0.320363955 |           |           |         |
| NA       | ENSG00000270000 | 1.2001    | 0.11505     | 2.1557      | 0.015555    | 2.4881    | 0.0064222 |         |
|          | 2.4081          | 0.008018  | 0.0064222   | 0.320363955 |             |           |           |         |
| ROR1-AS1 | ENSG00000223949 | 2.4878    | 0.0064266   | 2.4404      | 0.0073363   | 0.72853   |           |         |
|          | 0.23315         | 2.2626    | 0.01183     | 0.0064266   | 0.320363955 |           |           |         |
| NA       | ENSG00000233577 | 2.4874    | 0.0064331   | 1.611       | 0.053589    | -0.25301  | 0.59987   |         |
|          | -0.52805        | 0.70127   | 0.0064331   | 0.320363955 |             |           |           |         |
| NA       | ENSG00000273271 | 2.4871    | 0.0064393   | 2.4871      | 0.0064393   | 2.4871    | 0.0064393 |         |
|          | 2.4871          | 0.0064393 | 0.0064393   | 0.320363955 |             |           |           |         |
| STK40    | ENSG00000196182 | 2.1588    | 0.015433    | 0.0046454   | 0.49815     | 2.4869    | 0.0064431 |         |
|          | -0.21965        | 0.58693   | 0.0064431   | 0.320363955 |             |           |           |         |
| PCDH1    | ENSG00000156453 | 2.4861    | 0.0064578   | 1.0267      | 0.15229     | -0.023313 | 0.5093    |         |
|          | -0.1727         | 0.56856   | 0.0064578   | 0.320363955 |             |           |           |         |
| NA       | ENSG00000264179 | 2.3227    | 0.010097    | 2.4861      | 0.0064578   | 2.2961    | 0.010835  |         |
|          | 2.4861          | 0.0064578 | 0.0064578   | 0.320363955 |             |           |           |         |
| NPTN-IT1 | ENSG00000281183 | 2.4856    | 0.0064662   | 2.4856      | 0.0064662   | 2.4856    |           |         |
|          | 0.0064662       | 2.4856    | 0.0064662   | 0.0064662   | 0.320363955 |           |           |         |
| NA       | ENSG00000228506 | 2.4853    | 0.0064727   | 2.4853      | 0.0064727   | 2.4853    | 0.0064727 |         |
|          | 2.4853          | 0.0064727 | 0.0064727   | 0.320363955 |             |           |           |         |
| EYA2     | ENSG00000064655 | 0.78557   | 0.21606     | 0.86885     | 0.19246     | 2.4849    | 0.0064787 |         |
|          | 1.0451          | 0.14799   | 0.0064787   | 0.320363955 |             |           |           |         |
| TRAJ7    | ENSG00000211882 | 2.4847    | 0.0064834   | 2.4847      | 0.0064834   | 2.4847    | 0.0064834 |         |
|          | 2.4847          | 0.0064834 | 0.0064834   | 0.320363955 |             |           |           |         |
| SLC22A7  | ENSG00000137204 | 0.16148   | 0.43586     | 2.4844      | 0.0064879   | 0.19265   |           |         |
|          | 0.42362         | 2.2436    | 0.012429    | 0.0064879   | 0.320363955 |           |           |         |
| NA       | ENSG00000254802 | 1.572     | 0.057975    | 1.572       | 0.057975    | 2.4844    | 0.0064888 | 0.40607 |
|          | 0.34234         | 0.0064888 | 0.320363955 |             |             |           |           |         |
| H1-6     | ENSG00000187475 | 0.53838   | 0.29516     | 0.53838     | 0.29516     | 0.28107   | 0.38933   |         |
|          | 2.4832          | 0.0065111 | 0.0065111   | 0.320998426 |             |           |           |         |
| CPSF4L   | ENSG00000187959 | 0.61065   | 0.27071     | 2.4824      | 0.0065241   | 0.31156   |           |         |
|          | 0.37769         | -0.052107 | 0.52078     | 0.0065241   | 0.320998426 |           |           |         |
| CKB      | ENSG00000166165 | 0.4449    | 0.3282      | -0.33982    | 0.633       | 2.4824    | 0.0065256 |         |
|          | 1.3334          | 0.091196  | 0.0065256   | 0.320998426 |             |           |           |         |



|            |                 |           |             |             |             |           |           |        |
|------------|-----------------|-----------|-------------|-------------|-------------|-----------|-----------|--------|
| PMS2P3     | ENSG00000127957 | 2.4822    | 0.006528    | 0.13364     | 0.44684     | 1.1369    |           |        |
|            | 0.12778         | 0.48575   | 0.31357     | 0.006528    | 0.320998426 |           |           |        |
| XPO4       | ENSG00000132953 | 0.56489   | 0.28607     | 1.5322      | 0.062736    | -0.62791  | 0.73497   |        |
|            | 2.4811          | 0.0065482 | 0.0065482   | 0.321020507 |             |           |           |        |
| RNU6-294P  | ENSG00000201869 | 1.3986    | 0.080969    | 1.8843      | 0.029762    | 2.4087    |           |        |
|            | 0.0080046       | 2.4811    | 0.0065483   | 0.0065483   | 0.321020507 |           |           |        |
| SLC4A1     | ENSG00000004939 | 2.0599    | 0.019704    | 1.9558      | 0.025247    | 2.4811    |           |        |
|            | 0.0065485       | 2.4811    | 0.0065485   | 0.0065485   | 0.321020507 |           |           |        |
| NA         | ENSG00000274549 | 2.4808    | 0.0065548   | 0.4009      | 0.34425     | -0.007518 | 0.503     |        |
|            | -0.007518       | 0.503     | 0.0065548   | 0.321020507 |             |           |           |        |
| NA         | ENSG00000229403 | -0.38977  | 0.65165     | -0.38977    | 0.65165     | 2.4803    | 0.0065637 |        |
|            | -0.38977        | 0.65165   | 0.0065637   | 0.321133636 |             |           |           |        |
| RPS6KB1    | ENSG00000108443 | 0.18967   | 0.42478     | 2.4793      | 0.0065823   | 0.83526   |           |        |
|            | 0.20179         | 1.1473    | 0.12564     | 0.0065823   | 0.321466634 |           |           |        |
| ADAR       | ENSG00000160710 | 0.89025   | 0.18666     | 1.2947      | 0.097708    | 2.4792    | 0.0065837 |        |
|            | 0.32293         | 0.37337   | 0.0065837   | 0.321466634 |             |           |           |        |
| NA         | ENSG00000226576 | 2.4781    | 0.0066046   | 2.4781      | 0.0066046   | 2.4781    | 0.0066046 |        |
|            | 2.4781          | 0.0066046 | 0.0066046   | 0.322045968 |             |           |           |        |
| RNU6-409P  | ENSG00000206841 | -0.51485  | 0.69667     | 2.4776      | 0.0066127   | 1.7574    |           |        |
|            | 0.039425        | 0.73132   | 0.23229     | 0.0066127   | 0.322045968 |           |           |        |
| LRRC37A12P | ENSG00000229259 | 2.4774    | 0.0066179   | 0.55314     | 0.29008     | 1.0706    |           |        |
|            | 0.14218         | -0.36006  | 0.6406      | 0.0066179   | 0.322045968 |           |           |        |
| LINC01031  | ENSG00000232077 | 2.3842    | 0.0085584   | -0.54029    | 0.7055      | 2.4771    |           |        |
|            | 0.006622        | 1.0735    | 0.14152     | 0.006622    | 0.322045968 |           |           |        |
| LMO1       | ENSG00000166407 | 2.3631    | 0.0090624   | 2.4766      | 0.0066324   | 2.1143    | 0.017247  |        |
|            | 2.2477          | 0.012298  | 0.0066324   | 0.322230162 |             |           |           |        |
| PPIF       | ENSG00000108179 | 2.4754    | 0.0066537   | 1.6825      | 0.046238    | 1.4082    | 0.079543  |        |
|            | 2.1439          | 0.016022  | 0.0066537   | 0.322899096 |             |           |           |        |
| RASA4DP    | ENSG00000233297 | 2.4751    | 0.0066604   | -0.44717    | 0.67262     | -0.67142  |           |        |
|            | 0.74902         | -0.67713  | 0.75084     | 0.0066604   | 0.322899096 |           |           |        |
| NA         | ENSG00000268861 | 2.4747    | 0.0066666   | 2.4747      | 0.0066666   | 2.4747    | 0.0066666 |        |
|            | 2.4747          | 0.0066666 | 0.0066666   | 0.322899096 |             |           |           |        |
| NDUFA8     | ENSG00000119421 | -1.6243   | 0.94785     | 2.4743      | 0.0066749   | -0.57299  |           |        |
|            | 0.71667         | 0.095213  | 0.46207     | 0.0066749   | 0.322899096 |           |           |        |
| COL5A1     | ENSG00000130635 | 2.4741    | 0.0066793   | 0.65578     | 0.25598     | 2.3898    |           |        |
|            | 0.0084284       | 1.1849    | 0.11803     | 0.0066793   | 0.322899096 |           |           |        |
| NA         | ENSG00000238516 | 2.4726    | 0.0067058   | 2.4726      | 0.0067058   | 2.4726    | 0.0067058 |        |
|            | 2.4726          | 0.0067058 | 0.0067058   | 0.323858904 |             |           |           |        |
| CFHR5      | ENSG00000134389 | 1.957     | 0.025175    | 2.4722      | 0.0067144   | 0.93639   | 0.17454   |        |
|            | 0.93639         | 0.17454   | 0.0067144   | 0.32395318  |             |           |           |        |
| NA         | ENSG00000206679 | 2.471     | 0.0067362   | 2.471       | 0.0067362   | 2.471     | 0.0067362 | 2.3347 |
|            | 0.0097798       | 0.0067362 | 0.324683507 |             |             |           |           |        |
| MIR4269    | ENSG00000265215 | 1.3492    | 0.088632    | 2.4701      | 0.0067536   | 0.045908  |           |        |
|            | 0.48169         | -1.4324   | 0.92399     | 0.0067536   | 0.325200522 |           |           |        |
| LINC02762  | ENSG00000250303 | 2.4692    | 0.0067711   | -0.86324    | 0.806       | 2.1435    | 0.016038  |        |
|            | 1.7731          | 0.038104  | 0.0067711   | 0.325721326 |             |           |           |        |
| NA         | ENSG00000239572 | 2.4677    | 0.0067991   | -0.45346    | 0.67489     | -1.4305   | 0.92372   |        |
|            | -1.1443         | 0.87376   | 0.0067991   | 0.326078927 |             |           |           |        |
| NA         | ENSG00000207386 | 2.4676    | 0.0068009   | 2.4676      | 0.0068009   | 2.4676    | 0.0068009 |        |
|            | 2.4676          | 0.0068009 | 0.0068009   | 0.326078927 |             |           |           |        |
| NA         | ENSG00000270279 | 2.4675    | 0.0068028   | 0.79454     | 0.21344     | 2.4675    | 0.0068028 |        |
|            | 2.4675          | 0.0068028 | 0.0068028   | 0.326078927 |             |           |           |        |
| NA         | ENSG00000244313 | 1.9729    | 0.024252    | 1.1936      | 0.11632     | 2.4674    | 0.0068053 |        |
|            | 2.4674          | 0.0068053 | 0.0068053   | 0.326078927 |             |           |           |        |
| JAGN1      | ENSG00000171135 | 2.4668    | 0.0068164   | 2.4668      | 0.0068164   | 0.97865   | 0.16388   |        |
|            | 2.4668          | 0.0068164 | 0.0068164   | 0.326289953 |             |           |           |        |
| YWHAH      | ENSG00000128245 | 2.4664    | 0.0068237   | 2.4664      | 0.0068237   | -0.29484  | 0.61594   |        |
|            | -0.19748        | 0.57828   | 0.0068237   | 0.326318843 |             |           |           |        |
| ENAM       | ENSG00000132464 | 2.4654    | 0.0068425   | 0.67002     | 0.25142     | 1.6947    | 0.045067  |        |
|            | 1.006           | 0.1572    | 0.0068425   | 0.326897083 |             |           |           |        |
| NA         | ENSG00000249857 | -0.80937  | 0.79085     | -0.58747    | 0.72156     | -1.0893   | 0.862     |        |
|            | 2.4649          | 0.0068521 | 0.0068521   | 0.326972578 |             |           |           |        |

|           |                 |           |             |             |             |          |           |        |
|-----------|-----------------|-----------|-------------|-------------|-------------|----------|-----------|--------|
| OSER1-DT  | ENSG00000223891 | 2.4646    | 0.0068575   | 0.53828     | 0.29519     | 0.1851   |           |        |
|           | 0.42658         | 0.026624  | 0.48938     | 0.0068575   | 0.326972578 |          |           |        |
| NA        | ENSG00000270702 | 2.2445    | 0.012401    | 1.7617      | 0.039062    | 2.4635   | 0.0068798 |        |
|           | 2.4635          | 0.0068798 | 0.0068798   | 0.327642627 |             |          |           |        |
| ALG14     | ENSG00000172339 | -0.46751  | 0.67993     | -0.54999    | 0.70884     | -0.40464 | 0.65713   |        |
|           | 2.4632          | 0.006885  | 0.006885    | 0.327642627 |             |          |           |        |
| MAMDC4    | ENSG00000177943 | 2.4628    | 0.0068929   | -0.25567    | 0.6009      | -0.25567 |           |        |
|           | 0.6009          | -0.25567  | 0.6009      | 0.0068929   | 0.327698553 |          |           |        |
| HAUS3     | ENSG00000214367 | 2.1747    | 0.014827    | 2.4609      | 0.0069295   | 1.1375   | 0.12767   |        |
|           | 2.1426          | 0.016074  | 0.0069295   | 0.329117481 |             |          |           |        |
| MIR548AI  | ENSG00000265226 | 2.4598    | 0.0069499   | 1.1955      | 0.11594     | 2.4598   |           |        |
|           | 0.0069499       | 2.4598    | 0.0069499   | 0.0069499   | 0.329337135 |          |           |        |
| HMHBI     | ENSG00000158497 | 2.4598    | 0.0069509   | 2.4414      | 0.0073161   | 1.3817   | 0.083524  |        |
|           | -0.58218        | 0.71978   | 0.0069509   | 0.329337135 |             |          |           |        |
| EXOSC6    | ENSG00000223496 | 2.4596    | 0.0069544   | 2.4596      | 0.0069544   | 2.4596   |           |        |
|           | 0.0069544       | 2.4596    | 0.0069544   | 0.0069544   | 0.329337135 |          |           |        |
| TMC3      | ENSG00000188869 | -0.66369  | 0.74656     | 1.2816      | 0.099985    | 2.4586   | 0.0069738 |        |
|           | 1.6155          | 0.053106  | 0.0069738   | 0.329338674 |             |          |           |        |
| TREML5P   | ENSG00000225690 | 1.6342    | 0.051107    | 2.4584      | 0.0069786   | 0.64395  |           |        |
|           | 0.2598          | -0.47016  | 0.68088     | 0.0069786   | 0.329338674 |          |           |        |
| NR1D2     | ENSG00000174738 | 0.010886  | 0.49566     | -0.93412    | 0.82488     | 2.458    | 0.0069859 |        |
|           | -0.95427        | 0.83003   | 0.0069859   | 0.329338674 |             |          |           |        |
| ZNF695    | ENSG00000197472 | -0.70814  | 0.76057     | -0.35774    | 0.63973     | 0.89175  |           |        |
|           | 0.18626         | 2.4576    | 0.0069933   | 0.0069933   | 0.329338674 |          |           |        |
| RNU7-121P | ENSG00000252413 | 2.4576    | 0.0069939   | 2.4576      | 0.0069939   | 2.4576   |           |        |
|           | 0.0069939       | 2.4303    | 0.0075442   | 0.0069939   | 0.329338674 |          |           |        |
| NA        | ENSG00000253577 | 1.5601    | 0.059365    | 1.5601      | 0.059365    | 2.4574   | 0.0069972 |        |
|           | 1.5601          | 0.059365  | 0.0069972   | 0.329338674 |             |          |           |        |
| IL9RP3    | ENSG00000226942 | 2.457     | 0.0070045   | -0.8017     | 0.78864     | -0.42333 | 0.66397   |        |
|           | 0.62327         | 0.26655   | 0.0070045   | 0.329338674 |             |          |           |        |
| NA        | ENSG00000248840 | 0.15594   | 0.43804     | 2.4568      | 0.0070085   | 0.83404  | 0.20213   |        |
|           | 0.83404         | 0.20213   | 0.0070085   | 0.329338674 |             |          |           |        |
| HTATSF1P2 | ENSG00000271361 | 2.4543    | 0.0070574   | 2.4543      | 0.0070574   | 2.4543   |           |        |
|           | 0.0070574       | 2.4543    | 0.0070574   | 0.0070574   | 0.330792052 |          |           |        |
| NA        | ENSG00000212598 | -0.073336 | 0.52923     | 2.4531      | 0.0070819   | 2.0568   | 0.019854  |        |
|           | -0.073336       | 0.52923   | 0.0070819   | 0.330792052 |             |          |           |        |
| NR1H3     | ENSG00000025434 | 2.2611    | 0.011876    | 2.4526      | 0.0070914   | 2.4526   | 0.0070914 |        |
|           | 2.1268          | 0.016717  | 0.0070914   | 0.330792052 |             |          |           |        |
| HOXA-AS3  | ENSG00000254369 | 1.4783    | 0.069658    | 2.169       | 0.015042    | 2.4525   | 0.0070943 |        |
|           | 2.4525          | 0.0070943 | 0.0070943   | 0.330792052 |             |          |           |        |
| SNX8      | ENSG00000106266 | 1.618     | 0.052827    | 1.1267      | 0.12993     | 1.618    | 0.052827  | 2.4523 |
|           | 0.0070966       | 0.0070966 | 0.330792052 |             |             |          |           |        |
| TM9SF4    | ENSG00000101337 | 0.82038   | 0.206       | 1.7157      | 0.04311     | 0.26049  | 0.39724   |        |
|           | 2.4523          | 0.0070977 | 0.0070977   | 0.330792052 |             |          |           |        |
| WWC1      | ENSG00000113645 | 0.82644   | 0.20428     | 2.4519      | 0.0071043   | 2.1625   | 0.01529   |        |
|           | 1.5754          | 0.057588  | 0.0071043   | 0.330792052 |             |          |           |        |
| ANKZF1    | ENSG00000163516 | 1.9776    | 0.023989    | 2.3409      | 0.0096198   | 1.9214   |           |        |
|           | 0.027341        | 2.4517    | 0.0071094   | 0.0071094   | 0.330792052 |          |           |        |
| TIMM17BP1 | ENSG00000256756 | 2.4081    | 0.008018    | 0.19502     | 0.42269     | 2.4516   |           |        |
|           | 0.0071117       | 1.3308    | 0.091632    | 0.0071117   | 0.330792052 |          |           |        |
| NA        | ENSG00000199964 | 0.71886   | 0.23611     | 0.30825     | 0.37895     | 0.023271 | 0.49072   |        |
|           | 2.4512          | 0.0071186 | 0.0071186   | 0.330792052 |             |          |           |        |
| LINC02071 | ENSG00000249383 | 0.2634    | 0.39612     | 1.1107      | 0.13335     | 0.82411  |           |        |
|           | 0.20494         | 2.451     | 0.0071239   | 0.0071239   | 0.330792052 |          |           |        |
| FLOT2     | ENSG00000132589 | 1.8484    | 0.032276    | 0.76494     | 0.22215     | 1.7295   | 0.041861  |        |
|           | 2.4509          | 0.0071255 | 0.0071255   | 0.330792052 |             |          |           |        |
| NA        | ENSG00000261777 | 2.0301    | 0.021173    | 2.0301      | 0.021173    | 2.4502   | 0.0071393 |        |
|           | 1.6655          | 0.047906  | 0.0071393   | 0.330792052 |             |          |           |        |
| PCGF6     | ENSG00000156374 | 0.33328   | 0.36946     | 2.4501      | 0.0071409   | 0.75305  | 0.22571   |        |
|           | -0.011678       | 0.50466   | 0.0071409   | 0.330792052 |             |          |           |        |
| DHRS13    | ENSG00000167536 | 2.4494    | 0.0071551   | 2.4494      | 0.0071551   | 2.4494   |           |        |
|           | 0.0071551       | 2.4494    | 0.0071551   | 0.0071551   | 0.330792052 |          |           |        |

|           |                 |             |           |             |             |           |           |
|-----------|-----------------|-------------|-----------|-------------|-------------|-----------|-----------|
| FAM3C     | ENSG00000196937 | 2.4494      | 0.0071553 | 1.3696      | 0.085406    | 2.2329    | 0.012776  |
|           | 1.266           | 0.10276     | 0.0071553 | 0.330792052 |             |           |           |
| NA        | ENSG00000264081 | -0.37031    | 0.64442   | 2.4491      | 0.0071608   | 0.0077167 | 0.49692   |
|           | -0.11573        | 0.54607     | 0.0071608 | 0.330792052 |             |           |           |
| NA        | ENSG00000227282 | 2.4482      | 0.0071782 | 0.5293      | 0.2983      | -0.6341   | 0.73699   |
|           | -0.30528        | 0.61992     | 0.0071782 | 0.330792052 |             |           |           |
| NA        | ENSG00000280242 | 2.4476      | 0.0071914 | 1.6525      | 0.049216    | 1.7507    | 0.039995  |
|           | 1.8673          | 0.030929    | 0.0071914 | 0.330792052 |             |           |           |
| PAQR3     | ENSG00000163291 | -0.29648    | 0.61657   | 2.4473      | 0.0071965   | 0.092224  | 0.46326   |
|           | 1.0342          | 0.15052     | 0.0071965 | 0.330792052 |             |           |           |
| ATP5PD    | ENSG00000167863 | -0.21045    | 0.58334   | -0.21045    | 0.58334     | -0.21045  |           |
|           | 0.58334         | 2.4472      | 0.007198  | 0.007198    | 0.330792052 |           |           |
| DVL3      | ENSG00000161202 | 2.4471      | 0.0071998 | 0.23735     | 0.40619     | -0.48242  | 0.68525   |
|           | -0.068102       | 0.52715     | 0.0071998 | 0.330792052 |             |           |           |
| RNU6-663P | ENSG00000212407 | 2.4463      | 0.0072157 | 2.4463      | 0.0072157   | 2.4463    |           |
|           | 0.0072157       | 2.4463      | 0.0072157 | 0.0072157   | 0.330792052 |           |           |
| REPIN1    | ENSG00000214022 | 2.1489      | 0.01582   | 2.4462      | 0.0072195   | 2.3951    |           |
|           | 0.0083072       | 2.3812      | 0.0086282 | 0.0072195   | 0.330792052 |           |           |
| ROBO2P1   | ENSG00000229478 | -0.20632    | 0.58173   | -0.56034    | 0.71238     | 2.4459    |           |
|           | 0.0072252       | 2.4459      | 0.0072252 | 0.0072252   | 0.330792052 |           |           |
| PRRX2-AS1 | ENSG00000236024 | -1.1391     | 0.87267   | 1.5496      | 0.060623    | 2.4458    |           |
|           | 0.0072275       | -0.069721   | 0.52779   | 0.0072275   | 0.330792052 |           |           |
| ZBTB42    | ENSG00000179627 | 2.4457      | 0.0072279 | 0.94611     | 0.17205     | 0.33175   |           |
|           | 0.37004         | -0.71278    | 0.76201   | 0.0072279   | 0.330792052 |           |           |
| ITGA9-AS1 | ENSG00000235257 | 2.4457      | 0.0072295 | 1.8188      | 0.034469    | 2.2652    |           |
|           | 0.01175         | 1.7593      | 0.039261  | 0.0072295   | 0.330792052 |           |           |
| NA        | ENSG00000233665 | 2.4449      | 0.0072453 | 2.4449      | 0.0072453   | 2.4449    | 0.0072453 |
|           | 1.2131          | 0.11255     | 0.0072453 | 0.330939268 |             |           |           |
| NA        | ENSG00000249960 | -0.81424    | 0.79224   | -0.81424    | 0.79224     | 2.4448    | 0.0072463 |
|           | -0.81424        | 0.79224     | 0.0072463 | 0.330939268 |             |           |           |
| TEN1-CDK3 | ENSG00000261408 | 2.4436      | 0.0072709 | 2.4436      | 0.0072709   | 2.4436    |           |
|           | 0.0072709       | 2.4436      | 0.0072709 | 0.0072709   | 0.331518988 |           |           |
| NA        | ENSG00000219314 | 1.4608      | 0.072038  | 1.4608      | 0.072038    | -0.66739  | 0.74774   |
|           | 2.4435          | 0.0072726   | 0.0072726 | 0.331518988 |             |           |           |
| NUB1      | ENSG00000013374 | -0.95503    | 0.83022   | 0.74034     | 0.22955     | 2.4431    | 0.007281  |
|           | 0.90163         | 0.18363     | 0.007281  | 0.331539969 |             |           |           |
| NA        | ENSG00000202508 | 2.4426      | 0.0072901 | 2.4426      | 0.0072901   | 0.57092   | 0.28403   |
|           | 1.4487          | 0.073705    | 0.0072901 | 0.331539969 |             |           |           |
| NME1-NME2 | ENSG00000011052 | 2.2166      | 0.013324  | 2.2835      | 0.011199    | 2.4419    |           |
|           | 0.0073048       | 2.4419      | 0.0073048 | 0.0073048   | 0.331539969 |           |           |
| SDHAF4    | ENSG00000154079 | 1.2259      | 0.11012   | 1.2259      | 0.11012     | 0.97255   |           |
|           | 0.16539         | 2.4416      | 0.0073108 | 0.0073108   | 0.331539969 |           |           |
| GAPDHP23  | ENSG00000235595 | 1.1449      | 0.12612   | 2.4411      | 0.007321    | 2.4411    |           |
|           | 0.007321        | 2.4411      | 0.007321  | 0.007321    | 0.331539969 |           |           |
| HMGB3P26  | ENSG00000259428 | 0.083117    | 0.46688   | 2.2205      | 0.013191    | 0.25603   |           |
|           | 0.39896         | 2.4407      | 0.0073289 | 0.0073289   | 0.331539969 |           |           |
| TTPAL     | ENSG00000124120 | 2.4402      | 0.0073391 | 2.4402      | 0.0073391   | 2.4402    | 0.0073391 |
|           | 1.7571          | 0.039451    | 0.0073391 | 0.331539969 |             |           |           |
| MRPL43    | ENSG00000055950 | 1.8935      | 0.029149  | 1.8935      | 0.029149    | 2.4401    |           |
|           | 0.0073409       | 1.1402      | 0.1271    | 0.0073409   | 0.331539969 |           |           |
| TRIM58    | ENSG00000162722 | 0.87532     | 0.1907    | 2.4401      | 0.007341    | -0.70384  |           |
|           | 0.75923         | -0.8553     | 0.80381   | 0.007341    | 0.331539969 |           |           |
| NA        | ENSG00000267898 | 2.44        | 0.0073426 | 2.44        | 0.0073426   | 2.44      | 0.0073426 |
|           | 0.0073426       | 0.331539969 |           |             |             |           |           |
| TPRX1     | ENSG00000178928 | 2.4398      | 0.0073479 | 2.4398      | 0.0073479   | 2.4398    | 0.0073479 |
|           | 1.9833          | 0.023665    | 0.0073479 | 0.331539969 |             |           |           |
| NA        | ENSG00000234360 | 2.4392      | 0.0073609 | 2.4392      | 0.0073609   | 2.4392    | 0.0073609 |
|           | 2.4392          | 0.0073609   | 0.0073609 | 0.331819294 |             |           |           |
| ITPKA     | ENSG00000137825 | 2.4383      | 0.0073773 | -0.51738    | 0.69755     | -0.51738  | 0.69755   |
|           | -0.03328        | 0.51327     | 0.0073773 | 0.332251228 |             |           |           |
| CHML      | ENSG00000203668 | 1.63        | 0.051549  | 2.4373      | 0.0073994   | 2.4373    | 0.0073994 |
|           | 1.6921          | 0.045314    | 0.0073994 | 0.332761404 |             |           |           |

|            |                 |           |           |             |             |          |           |
|------------|-----------------|-----------|-----------|-------------|-------------|----------|-----------|
| NA         | ENSG00000224410 | 0.99247   | 0.16048   | 2.4371      | 0.0074028   | 0.16489  | 0.43451   |
|            | 0.16489         | 0.43451   | 0.0074028 | 0.332761404 |             |          |           |
| NPC2       | ENSG00000119655 | 2.2829    | 0.011217  | 1.0749      | 0.14121     | 1.1985   | 0.11535   |
|            | 2.4367          | 0.0074108 | 0.0074108 | 0.332761404 |             |          |           |
| FGF12      | ENSG00000114279 | 1.4792    | 0.069549  | 2.4364      | 0.0074179   | -0.33773 | 0.63222   |
|            | -0.052005       | 0.52074   | 0.0074179 | 0.332761404 |             |          |           |
| LINC01939  | ENSG00000228799 | -0.78964  | 0.78513   | -0.85431    | 0.80353     | 2.436    | 0.0074248 |
|            | -0.94333        | 0.82724   | 0.0074248 | 0.332761404 |             |          |           |
| NA         | ENSG00000232675 | 2.4358    | 0.0074296 | 2.2547      | 0.012076    | 2.4358   | 0.0074296 |
|            | 2.4358          | 0.0074296 | 0.0074296 | 0.332761404 |             |          |           |
| HSPB11     | ENSG00000081870 | -0.738    | 0.76974   | 2.4349      | 0.0074485   | 1.1452   |           |
|            | 0.12606         | 1.1072    | 0.1341    | 0.0074485   | 0.333007688 |          |           |
| STUM       | ENSG00000203685 | -0.32241  | 0.62643   | 1.0871      | 0.1385      | 0.056711 | 0.47739   |
|            | 2.4348          | 0.0074497 | 0.0074497 | 0.333007688 |             |          |           |
| ABCG5      | ENSG00000138075 | -0.45564  | 0.67568   | 1.1         | 0.13568     | 2.4345   | 0.0074556 |
|            | 2.4345          | 0.0074556 | 0.0074556 | 0.333007688 |             |          |           |
| MIRLET7BHG | ENSG00000197182 | 0.32462   | 0.37273   | 0.49779     | 0.30932     | 2.434    | 0.0074667 |
|            | 1.144           | 0.1263    | 0.0074667 | 0.333198069 |             |          |           |
| OR4K12P    | ENSG00000218549 | 2.4326    | 0.0074958 | 1.1734      | 0.12033     | 1.4356   |           |
|            | 0.075559        | 0.06915   | 0.47244   | 0.0074958   | 0.334190608 |          |           |
| KCNJ2      | ENSG00000123700 | 2.4315    | 0.0075181 | 0.15384     | 0.43887     | -1.1342  | 0.87164   |
|            | -0.69792        | 0.75738   | 0.0075181 | 0.33487844  |             |          |           |
| RPS3AP30   | ENSG00000228744 | 0.51711   | 0.30254   | -0.064774   | 0.52582     | 2.4309   |           |
|            | 0.0075302       | 0.42778   | 0.33441   | 0.0075302   | 0.335005411 |          |           |
| NA         | ENSG00000270160 | 0.26268   | 0.3964    | 2.4307      | 0.0075347   | 0.89774  | 0.18466   |
|            | 0.89774         | 0.18466   | 0.0075347 | 0.335005411 |             |          |           |
| OR7E55P    | ENSG00000230655 | -1.2416   | 0.89281   | 2.4299      | 0.0075511   | 1.5283   |           |
|            | 0.063221        | 1.6211    | 0.052496  | 0.0075511   | 0.335428535 |          |           |
| STX4       | ENSG00000103496 | 2.4292    | 0.0075664 | 1.4452      | 0.074203    | 2.4219   | 0.0077193 |
|            | 1.8305          | 0.033588  | 0.0075664 | 0.335802069 |             |          |           |
| ZNF299P    | ENSG00000219368 | 2.4286    | 0.0075785 | 2.4286      | 0.0075785   | 2.4286   |           |
|            | 0.0075785       | 2.4286    | 0.0075785 | 0.0075785   | 0.336033035 |          |           |
| NA         | ENSG00000283913 | 2.4277    | 0.0075966 | 0.32541     | 0.37244     | 0.46244  | 0.32188   |
|            | 0.46244         | 0.32188   | 0.0075966 | 0.33652938  |             |          |           |
| EFCAB13    | ENSG00000178852 | 1.2474    | 0.10612   | 2.4263      | 0.0076264   | 1.857    | 0.031653  |
|            | 1.3331          | 0.091254  | 0.0076264 | 0.337445328 |             |          |           |
| NA         | ENSG00000253184 | 2.4256    | 0.0076421 | 0.81393     | 0.20784     | 0.023336 | 0.49069   |
|            | 0.11508         | 0.45419   | 0.0076421 | 0.337445328 |             |          |           |
| LINC02212  | ENSG00000249396 | 2.4254    | 0.0076454 | 2.2904      | 0.010999    | 2.4254   |           |
|            | 0.0076454       | 2.4254    | 0.0076454 | 0.0076454   | 0.337445328 |          |           |
| AARS1      | ENSG00000090861 | 1.9241    | 0.027171  | 1.9272      | 0.02698     | 0.72329  | 0.23475   |
|            | 2.4253          | 0.0076472 | 0.0076472 | 0.337445328 |             |          |           |
| SBSN       | ENSG00000189001 | 2.4251    | 0.0076519 | 1.3888      | 0.082452    | 2.4251   | 0.0076519 |
|            | 2.4251          | 0.0076519 | 0.0076519 | 0.337445328 |             |          |           |
| NA         | ENSG00000272647 | 2.4241    | 0.0076726 | 2.4241      | 0.0076726   | 2.4241   | 0.0076726 |
|            | 2.4241          | 0.0076726 | 0.0076726 | 0.337693198 |             |          |           |
| USP6       | ENSG00000129204 | 0.13161   | 0.44765   | -0.81578    | 0.79269     | 2.4241   | 0.0076735 |
|            | 1.1052          | 0.13453   | 0.0076735 | 0.337693198 |             |          |           |
| NA         | ENSG00000270624 | 2.4232    | 0.0076923 | 0.16922     | 0.43281     | 0.033438 | 0.48666   |
|            | -0.063663       | 0.52538   | 0.0076923 | 0.337693198 |             |          |           |
| NA         | ENSG00000212397 | -0.29626  | 0.61648   | -0.29626    | 0.61648     | 2.4231   | 0.0076944 |
|            | -0.29626        | 0.61648   | 0.0076944 | 0.337693198 |             |          |           |
| NA         | ENSG00000133808 | 0.29501   | 0.38399   | 2.4229      | 0.0076986   | 0.25639  | 0.39883   |
|            | -0.7466         | 0.77235   | 0.0076986 | 0.337693198 |             |          |           |
| TCF4-AS2   | ENSG00000267402 | 2.4229    | 0.0076991 | 2.4229      | 0.0076991   | 2.4229   |           |
|            | 0.0076991       | 2.3799    | 0.0086588 | 0.0076991   | 0.337693198 |          |           |
| HOXB-AS2   | ENSG00000239552 | 2.4217    | 0.007724  | 2.4217      | 0.007724    | 2.4217   |           |
|            | 0.007724        | 2.4217    | 0.007724  | 0.007724    | 0.338344714 |          |           |
| TRRAP      | ENSG00000196367 | 2.1178    | 0.017095  | 2.1325      | 0.016483    | 2.1122   | 0.017336  |
|            | 2.4212          | 0.007735  | 0.007735  | 0.338344714 |             |          |           |
| BRINP1     | ENSG00000078725 | 1.7015    | 0.044425  | 0.44077     | 0.32969     | 2.4211   |           |
|            | 0.0077367       | 2.2904    | 0.010998  | 0.0077367   | 0.338344714 |          |           |

|            |                 |           |             |             |             |          |           |
|------------|-----------------|-----------|-------------|-------------|-------------|----------|-----------|
| PHC2       | ENSG00000134686 | 2.049     | 0.02023     | 2.4204      | 0.0077509   | 1.7315   | 0.04168   |
|            | 1.8071          | 0.035376  | 0.0077509   | 0.338344714 |             |          |           |
| VEZF1P1    | ENSG00000236229 | 0.15868   | 0.43696     | 2.4201      | 0.0077572   | 1.7423   |           |
|            | 0.04073         | 1.7423    | 0.04073     | 0.0077572   | 0.338344714 |          |           |
| SH3RF3-AS1 | ENSG00000259863 | 1.0213    | 0.15355     | 2.4197      | 0.0077675   | 0.6453   |           |
|            | 0.25937         | 0.6453    | 0.25937     | 0.0077675   | 0.338344714 |          |           |
| NA         | ENSG00000237845 | 2.4196    | 0.0077688   | 2.4196      | 0.0077688   | 2.4196   | 0.0077688 |
|            | 2.4196          | 0.0077688 | 0.0077688   | 0.338344714 |             |          |           |
| KHDRBS1    | ENSG00000121774 | 2.4196    | 0.0077695   | 0.26521     | 0.39542     | 0.26521  |           |
|            | 0.39542         | -0.66144  | 0.74584     | 0.0077695   | 0.338344714 |          |           |
| CNRIP1     | ENSG00000119865 | -0.41221  | 0.65991     | 0.1792      | 0.42889     | 2.419    | 0.0077809 |
|            | 2.3754          | 0.0087646 | 0.0077809   | 0.338353995 |             |          |           |
| IQCF4P     | ENSG00000224792 | 2.4189    | 0.0077836   | 1.7507      | 0.039999    | 1.1007   |           |
|            | 0.13552         | 1.8672    | 0.030939    | 0.0077836   | 0.338353995 |          |           |
| NOD1       | ENSG00000106100 | 2.4185    | 0.0077913   | 2.3564      | 0.0092275   | 0.61119  | 0.27054   |
|            | 0.71023         | 0.23878   | 0.0077913   | 0.338386853 |             |          |           |
| FLI1       | ENSG00000151702 | 2.0448    | 0.020439    | -0.042113   | 0.5168      | 2.4175   | 0.0078129 |
|            | 0.95793         | 0.16905   | 0.0078129   | 0.338781885 |             |          |           |
| OVGP1      | ENSG00000085465 | 2.4175    | 0.0078143   | 1.4598      | 0.072166    | 1.1486   | 0.12536   |
|            | 1.1486          | 0.12536   | 0.0078143   | 0.338781885 |             |          |           |
| FILNC1     | ENSG00000231426 | 2.4163    | 0.0078404   | 2.3028      | 0.010646    | -0.03027 |           |
|            | 0.51207         | -0.03027  | 0.51207     | 0.0078404   | 0.339611282 |          |           |
| DENND4A    | ENSG00000174485 | 0.58349   | 0.27978     | 0.0080187   | 0.4968      | 0.33121  |           |
|            | 0.37024         | 2.4149    | 0.0078704   | 0.0078704   | 0.340409002 |          |           |
| CRYBB2P1   | ENSG00000100058 | 0.54798   | 0.29185     | 0.35865     | 0.35993     | 2.4137   |           |
|            | 0.0078957       | 0.23836   | 0.4058      | 0.0078957   | 0.340409002 |          |           |
| MFSD1      | ENSG00000118855 | 2.4129    | 0.0079132   | 1.3408      | 0.089995    | -0.55194 | 0.70951   |
|            | 1.3365          | 0.090689  | 0.0079132   | 0.340409002 |             |          |           |
| NA         | ENSG00000243969 | 0.15575   | 0.43811     | 0.48823     | 0.3127      | 0.81353  | 0.20796   |
|            | 2.4125          | 0.0079208 | 0.0079208   | 0.340409002 |             |          |           |
| NA         | ENSG00000223271 | 2.4125    | 0.0079212   | 2.4125      | 0.0079212   | 2.4125   | 0.0079212 |
|            | 2.4125          | 0.0079212 | 0.0079212   | 0.340409002 |             |          |           |
| SCARNA14   | ENSG00000252712 | 2.4125    | 0.0079212   | 2.4125      | 0.0079212   | 2.4125   |           |
|            | 0.0079212       | 2.4125    | 0.0079212   | 0.0079212   | 0.340409002 |          |           |
| GPD1       | ENSG00000167588 | 2.4121    | 0.0079297   | 0.45944     | 0.32296     | 2.4121   | 0.0079297 |
|            | -0.30562        | 0.62005   | 0.0079297   | 0.340409002 |             |          |           |
| RNU2-40P   | ENSG00000222765 | 2.4121    | 0.0079305   | 0.51454     | 0.30344     | -0.50631 |           |
|            | 0.69368         | 0.423     | 0.33615     | 0.0079305   | 0.340409002 |          |           |
| GPR68      | ENSG00000119714 | 0.073905  | 0.47054     | 0.073905    | 0.47054     | 2.4118   | 0.0079368 |
|            | 0.94774         | 0.17163   | 0.0079368   | 0.340409002 |             |          |           |
| NFIA-AS1   | ENSG00000237853 | 2.4117    | 0.0079398   | 2.4117      | 0.0079398   | 2.4117   |           |
|            | 0.0079398       | 2.4117    | 0.0079398   | 0.0079398   | 0.340409002 |          |           |
| NA         | ENSG00000278897 | 2.0711    | 0.019173    | 2.4111      | 0.0079513   | 2.0498   | 0.020194  |
|            | 2.0498          | 0.020194  | 0.0079513   | 0.340409002 |             |          |           |
| NKX2-1     | ENSG00000136352 | 2.4106    | 0.0079623   | 2.4106      | 0.0079623   | 1.1454   |           |
|            | 0.12601         | 2.4106    | 0.0079623   | 0.0079623   | 0.340409002 |          |           |
| PNPT1P2    | ENSG00000233272 | 2.4101    | 0.007974    | 2.4101      | 0.007974    | 1.0379   |           |
|            | 0.14966         | 2.4101    | 0.007974    | 0.007974    | 0.340409002 |          |           |
| ATP5MC1P7  | ENSG00000232734 | 0.24961   | 0.40145     | 2.4099      | 0.0079778   | 2.4099   |           |
|            | 0.0079778       | 1.219     | 0.11143     | 0.0079778   | 0.340409002 |          |           |
| IL17RA     | ENSG00000177663 | -1.1474   | 0.8744      | -0.78582    | 0.78401     | 2.4099   |           |
|            | 0.007979        | -0.2797   | 0.61015     | 0.007979    | 0.340409002 |          |           |
| BCL6       | ENSG00000113916 | 0.93862   | 0.17396     | 1.367       | 0.085816    | 2.4095   | 0.0079869 |
|            | -0.055432       | 0.5221    | 0.0079869   | 0.340409002 |             |          |           |
| LINC01312  | ENSG00000223586 | -0.51543  | 0.69687     | 1.9776      | 0.023985    | 2.4093   |           |
|            | 0.0079906       | 1.487     | 0.068514    | 0.0079906   | 0.340409002 |          |           |
| MADD       | ENSG00000110514 | 2.4091    | 0.0079968   | 2.1954      | 0.014066    | 1.8526   | 0.031973  |
|            | 2.3767          | 0.0087337 | 0.0079968   | 0.340409002 |             |          |           |
| SPEG       | ENSG00000072195 | 2.2028    | 0.013803    | 2.409       | 0.0079987   | 2.1639   | 0.015238  |
|            | 0.016543        | 0.0079987 | 0.340409002 |             |             |          | 2.131     |
| MRPL35P1   | ENSG00000220868 | 2.409     | 0.0079991   | 2.028       | 0.02128     | 2.409    | 0.0079991 |
|            | 0.60241         | 0.0079991 | 0.340409002 |             |             |          | -0.25959  |

|            |                 |            |             |             |             |          |           |        |
|------------|-----------------|------------|-------------|-------------|-------------|----------|-----------|--------|
| LINC00365  | ENSG00000224511 | 0.7595     | 0.22378     | 2.4086      | 0.0080076   | 1.4503   |           |        |
|            | 0.073486        | 1.2841     | 0.099561    | 0.0080076   | 0.340409002 |          |           |        |
| MEF2C      | ENSG00000081189 | 0.78605    | 0.21592     | 0.77336     | 0.21965     | 2.4083   | 0.0080125 |        |
|            | 0.75565         | 0.22493    | 0.0080125   | 0.340409002 |             |          |           |        |
| DIRAS3     | ENSG00000162595 | -1.5185    | 0.93555     | 2.4075      | 0.0080312   | -1.5185  |           |        |
|            | 0.93555         | -1.5185    | 0.93555     | 0.0080312   | 0.3408725   |          |           |        |
| MTCYBP21   | ENSG00000224747 | 2.4072     | 0.0080374   | 2.4072      | 0.0080374   | 2.4072   |           |        |
|            | 0.0080374       | 2.4072     | 0.0080374   | 0.0080374   | 0.3408725   |          |           |        |
| LINC01414  | ENSG00000253554 | 2.4067     | 0.0080478   | 1.6741      | 0.047056    | 2.0942   |           |        |
|            | 0.018122        | 2.2173     | 0.013301    | 0.0080478   | 0.341016777 |          |           |        |
| EEF1A1P8   | ENSG00000223529 | 0.46473    | 0.32106     | 0.83562     | 0.20169     | 2.4062   |           |        |
|            | 0.0080592       | 2.4062     | 0.0080592   | 0.0080592   | 0.341203142 |          |           |        |
| WFDC1      | ENSG00000103175 | -1.3096    | 0.90483     | -0.98798    | 0.83842     | -0.98798 | 0.83842   |        |
|            | 2.4051          | 0.0080831  | 0.0080831   | 0.341400862 |             |          |           |        |
| NA         | ENSG00000202275 | 1.1422     | 0.12669     | 2.4051      | 0.0080832   | 2.4051   | 0.0080832 |        |
|            | 2.4051          | 0.0080832  | 0.0080832   | 0.341400862 |             |          |           |        |
| C10orf71   | ENSG00000177354 | 1.2081     | 0.11351     | 2.4047      | 0.0080939   | 1.2081   |           |        |
|            | 0.11351         | 1.2081     | 0.11351     | 0.0080939   | 0.341400862 |          |           |        |
| RPS12P18   | ENSG00000232965 | 2.4045     | 0.0080971   | 0.55563     | 0.28923     | 1.1124   |           |        |
|            | 0.13299         | 0.56573    | 0.28579     | 0.0080971   | 0.341400862 |          |           |        |
| GATA2-AS1  | ENSG00000244300 | -0.0035817 | 0.50143     | 1.0269      | 0.15223     | 2.4044   |           |        |
|            | 0.0080989       | 2.4044     | 0.0080989   | 0.0080989   | 0.341400862 |          |           |        |
| LILRB1-AS1 | ENSG00000224730 | 2.4032     | 0.0081257   | 0.48063     | 0.31539     | 0.48063  |           |        |
|            | 0.31539         | 0.48063    | 0.31539     | 0.0081257   | 0.342023161 |          |           |        |
| NSF        | ENSG00000073969 | 1.2718     | 0.10172     | 0.51838     | 0.3021      | 2.4031   | 0.0081277 |        |
|            | 1.4421          | 0.074635   | 0.0081277   | 0.342023161 |             |          |           |        |
| RNA5SP169  | ENSG00000253077 | 2.4025     | 0.0081422   | 2.4025      | 0.0081422   | 2.4025   |           |        |
|            | 0.0081422       | 2.4025     | 0.0081422   | 0.0081422   | 0.34233771  |          |           |        |
| LDHAL6EP   | ENSG00000270098 | 1.0528     | 0.14621     | 1.044       | 0.14825     | 2.4019   | 0.0081552 |        |
|            | 2.4019          | 0.0081552  | 0.0081552   | 0.342588703 |             |          |           |        |
| USP39      | ENSG00000168883 | 1.6731     | 0.047154    | 1.2888      | 0.098734    | 0.5466   | 0.29233   |        |
|            | 2.4015          | 0.0081637  | 0.0081637   | 0.342650388 |             |          |           |        |
| GTF2H1     | ENSG00000110768 | 2.3995     | 0.0082079   | 2.3995      | 0.0082079   | 0.201    | 0.42035   |        |
|            | 2.364           | 0.0090405  | 0.0082079   | 0.344209094 |             |          |           |        |
| NA         | ENSG00000237271 | 2.3989     | 0.0082214   | 1.2009      | 0.11489     | 0.5754   | 0.28251   |        |
|            | 0.5754          | 0.28251    | 0.0082214   | 0.344241447 |             |          |           |        |
| HMGB1P40   | ENSG00000255291 | -0.30398   | 0.61943     | 1.2137      | 0.11243     | 2.3989   |           |        |
|            | 0.0082228       | 2.3989     | 0.0082228   | 0.0082228   | 0.344241447 |          |           |        |
| CST9L      | ENSG00000101435 | 0.64482    | 0.25952     | 2.1209      | 0.016964    | 1.0209   | 0.15364   |        |
|            | 2.3975          | 0.0082536  | 0.0082536   | 0.345118638 |             |          |           |        |
| EEF1A1P14  | ENSG00000233057 | 2.397      | 0.0082642   | -0.99744    | 0.84072     | -0.99744 | 0.84072   |        |
|            | -0.99744        | 0.84072    | 0.0082642   | 0.345118638 |             |          |           |        |
| LINC00710  | ENSG00000229240 | 2.397      | 0.008265    | -0.51053    | 0.69516     | 2.397    | 0.008265  |        |
|            | 0.34456         | 0.36521    | 0.008265    | 0.345118638 |             |          |           |        |
| OR6S1      | ENSG00000181803 | 2.3956     | 0.0082974   | 2.3956      | 0.0082974   | 2.3956   | 0.0082974 |        |
|            | 2.3956          | 0.0082974  | 0.0082974   | 0.346174916 |             |          |           |        |
| NA         | ENSG00000276054 | 2.395      | 0.0083106   | 2.395       | 0.0083106   | 0.65134  | 0.25741   | 1.2024 |
|            | 0.1146          | 0.0083106  | 0.346212073 |             |             |          |           |        |
| HSPA5P1    | ENSG00000215895 | -0.92462   | 0.82242     | -0.25001    | 0.59871     | 0.36186  |           |        |
|            | 0.35873         | 2.3949     | 0.0083125   | 0.0083125   | 0.346212073 |          |           |        |
| NA         | ENSG00000249831 | 0.34179    | 0.36626     | 2.3941      | 0.0083315   | 1.6412   | 0.050373  |        |
|            | 0.16291         | 0.43529    | 0.0083315   | 0.346447859 |             |          |           |        |
| OR2M1P     | ENSG00000177233 | -0.52023   | 0.69855     | 0.21876     | 0.41342     | 2.3932   |           |        |
|            | 0.008351        | -0.71159   | 0.76164     | 0.008351    | 0.346447859 |          |           |        |
| PROP1      | ENSG00000175325 | 1.5648     | 0.058814    | 1.7819      | 0.037383    | 2.3926   | 0.0083641 |        |
|            | -0.38152        | 0.64859    | 0.0083641   | 0.346447859 |             |          |           |        |
| NA         | ENSG00000270504 | -0.24833   | 0.59806     | -0.14912    | 0.55927     | 2.1741   | 0.014848  |        |
|            | 2.3923          | 0.0083716  | 0.0083716   | 0.346447859 |             |          |           |        |
| NPFFR1     | ENSG00000148734 | 2.3922     | 0.008373    | 0.93195     | 0.17568     | 1.0058   |           |        |
|            | 0.15726         | 1.4157     | 0.078432    | 0.008373    | 0.346447859 |          |           |        |
| NA         | ENSG00000275139 | 1.491      | 0.067981    | 2.3922      | 0.0083732   | 2.1404   | 0.016163  |        |
|            | 2.0175          | 0.021824   | 0.0083732   | 0.346447859 |             |          |           |        |

|             |                 |           |           |             |             |          |           |  |
|-------------|-----------------|-----------|-----------|-------------|-------------|----------|-----------|--|
| RNU6-326P   | ENSG00000202350 | 0.73799   | 0.23026   | -1.1612     | 0.87722     | 1.3036   |           |  |
|             | 0.09618         | 2.3921    | 0.0083761 | 0.0083761   | 0.346447859 |          |           |  |
| MCL1        | ENSG00000143384 | 0.091161  | 0.46368   | 1.0018      | 0.15821     | 2.3919   | 0.0083818 |  |
|             | -0.4537         | 0.67498   | 0.0083818 | 0.346447859 |             |          |           |  |
| RIN2        | ENSG00000132669 | -1.1542   | 0.87579   | 2.391       | 0.0084022   | 2.1998   | 0.013909  |  |
|             | 1.2519          | 0.10531   | 0.0084022 | 0.346447859 |             |          |           |  |
| PRTFDC1     | ENSG00000099256 | 2.3907    | 0.0084091 | 0.68705     | 0.24603     | 1.18     | 0.11899   |  |
|             | 0.8655          | 0.19338   | 0.0084091 | 0.346447859 |             |          |           |  |
| MGA         | ENSG00000174197 | 2.3902    | 0.0084204 | 1.5085      | 0.065719    | 1.9002   | 0.028703  |  |
|             | 0.96898         | 0.16628   | 0.0084204 | 0.346447859 |             |          |           |  |
| RN7SL441P   | ENSG00000241413 | 2.3893    | 0.0084393 | -0.40428    | 0.657       | -0.40428 | 0.657     |  |
|             | -0.40428        | 0.657     | 0.0084393 | 0.346447859 |             |          |           |  |
| LINC02166   | ENSG00000260259 | 2.3891    | 0.0084446 | 2.3891      | 0.0084446   | 2.3891   |           |  |
|             | 0.0084446       | 2.3891    | 0.0084446 | 0.0084446   | 0.346447859 |          |           |  |
| NDUFA12P1   | ENSG00000225999 | 2.3887    | 0.0084545 | 0.86353     | 0.19392     | 1.1486   |           |  |
|             | 0.12537         | 0.69435   | 0.24373   | 0.0084545   | 0.346447859 |          |           |  |
| NA          | ENSG00000251675 | 2.3886    | 0.0084569 | 2.3886      | 0.0084569   | 2.3886   | 0.0084569 |  |
|             | 0.91575         | 0.1799    | 0.0084569 | 0.346447859 |             |          |           |  |
| FSD1        | ENSG00000105255 | -0.18516  | 0.57345   | 1.1801      | 0.11897     | 2.3882   | 0.0084661 |  |
|             | 1.1801          | 0.11897   | 0.0084661 | 0.346447859 |             |          |           |  |
| SULT2A1     | ENSG00000105398 | 1.2335    | 0.1087    | 1.3691      | 0.085482    | 2.3879   |           |  |
|             | 0.0084723       | -0.34957  | 0.63667   | 0.0084723   | 0.346447859 |          |           |  |
| NA          | ENSG00000273064 | 2.3879    | 0.0084725 | 1.5742      | 0.057716    | 2.3879   | 0.0084725 |  |
|             | 2.3879          | 0.0084725 | 0.0084725 | 0.346447859 |             |          |           |  |
| ATP6V1G3    | ENSG00000151418 | 2.3081    | 0.010497  | 2.3878      | 0.0084758   | 0.97646  |           |  |
|             | 0.16442         | 1.1239    | 0.13053   | 0.0084758   | 0.346447859 |          |           |  |
| NA          | ENSG00000268401 | -0.47824  | 0.68376   | -1.1136     | 0.86727     | -0.47824 | 0.68376   |  |
|             | 2.3877          | 0.008476  | 0.008476  | 0.346447859 |             |          |           |  |
| CLCP2       | ENSG00000226158 | 2.3877    | 0.0084782 | 2.3877      | 0.0084782   | 2.3877   | 0.0084782 |  |
|             | 2.3877          | 0.0084782 | 0.0084782 | 0.346447859 |             |          |           |  |
| NA          | ENSG00000226739 | -0.23159  | 0.59157   | 2.3876      | 0.0084796   | 0.97115  | 0.16574   |  |
|             | 0.81151         | 0.20854   | 0.0084796 | 0.346447859 |             |          |           |  |
| FAM222A-AS1 | ENSG00000255650 | 2.241     | 0.012512  | 1.7273      | 0.042054    | 2.3229   |           |  |
|             | 0.010091        | 2.3871    | 0.0084909 | 0.0084909   | 0.346447859 |          |           |  |
| SH3RF3      | ENSG00000172985 | 2.3868    | 0.008497  | -0.86625    | 0.80682     | 1.8917   |           |  |
|             | 0.029266        | 0.43537   | 0.33165   | 0.008497    | 0.346447859 |          |           |  |
| APAF1       | ENSG00000120868 | -0.36138  | 0.64109   | 2.3867      | 0.0084992   | -0.46591 | 0.67936   |  |
|             | 1.6098          | 0.053724  | 0.0084992 | 0.346447859 |             |          |           |  |
| NA          | ENSG00000251171 | -1.3832   | 0.9167    | -1.3832     | 0.9167      | 2.3862   | 0.0085124 |  |
|             | 0.83992         | 0.20048   | 0.0085124 | 0.346447859 |             |          |           |  |
| NA          | ENSG00000235705 | -0.8669   | 0.807     | 0.45931     | 0.32301     | 2.3858   | 0.0085213 |  |
|             | 0.46695         | 0.32027   | 0.0085213 | 0.346447859 |             |          |           |  |
| LINC02323   | ENSG00000259230 | 1.8994    | 0.028754  | 0.63967     | 0.26119     | 0.55864  |           |  |
|             | 0.28821         | 2.3857    | 0.0085223 | 0.0085223   | 0.346447859 |          |           |  |
| BRWD1       | ENSG00000185658 | 1.4831    | 0.069029  | 1.1828      | 0.11844     | 1.6181   | 0.052825  |  |
|             | 2.3853          | 0.0085322 | 0.0085322 | 0.346447859 |             |          |           |  |
| PDCD11      | ENSG00000148843 | 1.7452    | 0.040475  | 2.385       | 0.0085388   | 0.68562  | 0.24648   |  |
|             | 1.3983          | 0.081015  | 0.0085388 | 0.346447859 |             |          |           |  |
| NA          | ENSG00000253923 | -0.2104   | 0.58332   | 2.3846      | 0.0085486   | -0.2104  | 0.58332   |  |
|             | -0.2104         | 0.58332   | 0.0085486 | 0.346447859 |             |          |           |  |
| SLIRP       | ENSG00000119705 | 2.3845    | 0.008552  | 1.2322      | 0.10894     | 1.2322   | 0.10894   |  |
|             | 1.2322          | 0.10894   | 0.008552  | 0.346447859 |             |          |           |  |
| ZDHHC22     | ENSG00000177108 | 0.77262   | 0.21987   | -0.73913    | 0.77009     | 0.81258  |           |  |
|             | 0.20823         | 2.3842    | 0.0085582 | 0.0085582   | 0.346447859 |          |           |  |
| NA          | ENSG00000261351 | 2.043     | 0.020525  | 1.9347      | 0.026513    | 2.3836   | 0.008571  |  |
|             | 2.3836          | 0.008571  | 0.008571  | 0.346447859 |             |          |           |  |
| NA          | ENSG00000270442 | 0.22591   | 0.41064   | 2.383       | 0.0085864   | 0.22591  | 0.41064   |  |
|             | 0.22591         | 0.41064   | 0.0085864 | 0.346447859 |             |          |           |  |
| NA          | ENSG00000236724 | -2.566    | 0.99486   | 2.3824      | 0.0086002   | -2.566   | 0.99486   |  |
|             | -2.566          | 0.99486   | 0.0086002 | 0.346447859 |             |          |           |  |
| NA          | ENSG00000253259 | 2.3823    | 0.0086025 | 0.83542     | 0.20174     | 0.55167  | 0.29059   |  |
|             | 0.18398         | 0.42701   | 0.0086025 | 0.346447859 |             |          |           |  |

|           |                 |           |           |             |             |          |           |
|-----------|-----------------|-----------|-----------|-------------|-------------|----------|-----------|
| AGAP1     | ENSG00000157985 | 2.1876    | 0.014348  | 2.3822      | 0.0086044   | 1.4869   | 0.06852   |
|           | 1.4446          | 0.074281  | 0.0086044 | 0.346447859 |             |          |           |
| CEP164P1  | ENSG00000226937 | 2.0293    | 0.021212  | 2.3821      | 0.0086072   | 1.8621   |           |
|           | 0.031291        | 0.62739   | 0.2652    | 0.0086072   | 0.346447859 |          |           |
| C12orf43  | ENSG00000157895 | 1.5413    | 0.061621  | 2.1539      | 0.015625    | 2.382    | 0.0086106 |
|           | 2.382           | 0.0086106 | 0.0086106 | 0.346447859 |             |          |           |
| TRAPPC3   | ENSG00000054116 | 2.3816    | 0.0086192 | 2.1269      | 0.016712    | 1.9489   |           |
|           | 0.025657        | 1.6353    | 0.050991  | 0.0086192   | 0.346447859 |          |           |
| NA        | ENSG00000240449 | 2.3812    | 0.0086273 | 2.3812      | 0.0086273   | 2.3812   | 0.0086273 |
|           | 2.3812          | 0.0086273 | 0.0086273 | 0.346447859 |             |          |           |
| STMN2     | ENSG00000104435 | 2.0728    | 0.019095  | 2.0124      | 0.022088    | 2.3811   | 0.0086308 |
|           | 0.4611          | 0.32236   | 0.0086308 | 0.346447859 |             |          |           |
| OPN3      | ENSG00000054277 | 0.12944   | 0.4485    | 2.3807      | 0.0086394   | 2.3807   | 0.0086394 |
|           | 2.3807          | 0.0086394 | 0.0086394 | 0.346447859 |             |          |           |
| NOTCH2    | ENSG00000134250 | 2.3805    | 0.0086452 | 1.8927      | 0.0292      | 0.46441  |           |
|           | 0.32118         | 0.3588    | 0.35987   | 0.0086452   | 0.346447859 |          |           |
| NA        | ENSG00000267081 | 2.3805    | 0.0086452 | -0.019242   | 0.50768     | 2.2952   | 0.010859  |
|           | 2.2952          | 0.010859  | 0.0086452 | 0.346447859 |             |          |           |
| C9orf153  | ENSG00000187753 | 1.1832    | 0.11836   | 1.1832      | 0.11836     | 2.3784   |           |
|           | 0.0086946       | 1.1832    | 0.11836   | 0.0086946   | 0.347310568 |          |           |
| NPIPBL10P | ENSG00000196796 | 0.76161   | 0.22315   | -0.013953   | 0.50557     | 0.66649  |           |
|           | 0.25255         | 2.3779    | 0.0087068 | 0.0087068   | 0.347310568 |          |           |
| RPSAP33   | ENSG00000226765 | 2.3771    | 0.0087248 | 2.3771      | 0.0087248   | 2.3771   |           |
|           | 0.0087248       | 2.3771    | 0.0087248 | 0.0087248   | 0.347310568 |          |           |
| DDAH1     | ENSG00000153904 | 2.377     | 0.0087264 | -0.87582    | 0.80944     | -1.602   | 0.94543   |
|           | -1.417          | 0.92176   | 0.0087264 | 0.347310568 |             |          |           |
| SLC9B2    | ENSG00000164038 | 1.1986    | 0.11534   | 1.1986      | 0.11534     | 1.6304   |           |
|           | 0.051511        | 2.3769    | 0.0087299 | 0.0087299   | 0.347310568 |          |           |
| CMYA5     | ENSG00000164309 | 0.81459   | 0.20765   | 0.61176     | 0.27035     | 0.15449  | 0.43861   |
|           | 2.3767          | 0.008734  | 0.008734  | 0.347310568 |             |          |           |
| RPRML     | ENSG00000179673 | 0.29611   | 0.38357   | 0.29611     | 0.38357     | 0.29611  | 0.38357   |
|           | 2.3765          | 0.0087388 | 0.0087388 | 0.347310568 |             |          |           |
| TLE6      | ENSG00000104953 | -0.14662  | 0.55828   | 2.376       | 0.0087513   | 0.95157  | 0.17066   |
|           | 0.57704         | 0.28196   | 0.0087513 | 0.347310568 |             |          |           |
| NA        | ENSG00000279479 | 2.3758    | 0.0087555 | 2.3758      | 0.0087555   | 2.3758   | 0.0087555 |
|           | 2.3758          | 0.0087555 | 0.0087555 | 0.347310568 |             |          |           |
| NRF1      | ENSG00000106459 | 1.6238    | 0.052205  | 0.78014     | 0.21765     | 2.3753   | 0.008767  |
|           | 0.33829         | 0.36757   | 0.008767  | 0.347310568 |             |          |           |
| RAB38     | ENSG00000123892 | 0.041091  | 0.48361   | 0.050281    | 0.47995     | 1.0464   | 0.14768   |
|           | 2.3753          | 0.0087673 | 0.0087673 | 0.347310568 |             |          |           |
| NA        | ENSG00000213132 | 1.9804    | 0.023831  | 1.9804      | 0.023831    | 0.96522  | 0.16722   |
|           | 2.3752          | 0.0087701 | 0.0087701 | 0.347310568 |             |          |           |
| SH3YL1    | ENSG00000035115 | 2.1561    | 0.015538  | 2.2471      | 0.012315    | 1.0713   |           |
|           | 0.14202         | 2.375     | 0.0087747 | 0.0087747   | 0.347310568 |          |           |
| CHD7      | ENSG00000171316 | 0.53766   | 0.29541   | -0.26113    | 0.603       | -0.29846 | 0.61732   |
|           | 2.3745          | 0.0087871 | 0.0087871 | 0.347310568 |             |          |           |
| NA        | ENSG00000254651 | 0.28059   | 0.38951   | -0.35156    | 0.63741     | -0.14826 | 0.55893   |
|           | 2.3744          | 0.0087887 | 0.0087887 | 0.347310568 |             |          |           |
| IMMP1LP2  | ENSG00000258159 | 2.3744    | 0.0087887 | 2.3744      | 0.0087887   | 2.3744   |           |
|           | 0.0087887       | 2.3744    | 0.0087887 | 0.0087887   | 0.347310568 |          |           |
| ENPP7P2   | ENSG00000239959 | 2.3743    | 0.00879   | -0.26841    | 0.60581     | -0.21809 |           |
|           | 0.58632         | 0.22388   | 0.41142   | 0.00879     | 0.347310568 |          |           |
| PGAP6     | ENSG00000129925 | 0.86953   | 0.19228   | 0.48292     | 0.31458     | 2.3739   | 0.0088015 |
|           | 1.0366          | 0.14996   | 0.0088015 | 0.347310568 |             |          |           |
| SHISA4    | ENSG00000198892 | 2.3738    | 0.0088029 | -1.7523     | 0.96014     | -1.7523  |           |
|           | 0.96014         | -1.7523   | 0.96014   | 0.0088029   | 0.347310568 |          |           |
| NA        | ENSG00000254197 | -1.0466   | 0.85236   | 2.3735      | 0.0088097   | -0.73396 | 0.76851   |
|           | -1.8441         | 0.96742   | 0.0088097 | 0.347310568 |             |          |           |
| CEP68     | ENSG00000011523 | 0.9984    | 0.15904   | 2.3365      | 0.0097331   | 1.8819   | 0.029928  |
|           | 2.3732          | 0.0088164 | 0.0088164 | 0.347310568 |             |          |           |
| NA        | ENSG00000237088 | 2.3723    | 0.0088395 | 2.3723      | 0.0088395   | 0.092122 | 0.4633    |
|           | 0.9876          | 0.16167   | 0.0088395 | 0.347679322 |             |          |           |



|            |                 |           |             |           |             |             |           |
|------------|-----------------|-----------|-------------|-----------|-------------|-------------|-----------|
| FRAS1      | ENSG00000138759 | 2.303     | 0.01064     | 2.0787    | 0.018821    | 1.9734      | 0.024226  |
|            |                 | 2.3719    | 0.0088495   | 0.0088495 | 0.347679322 |             |           |
| SLC26A1    | ENSG00000145217 | 2.3718    | 0.0088515   | 0.0088515 | 2.3718      | 0.0088515   | 1.4484    |
|            |                 | 0.073756  | 2.3718      | 0.0088515 | 0.0088515   | 0.347679322 |           |
| ZNF789     | ENSG00000198556 | 2.2506    | 0.012205    | 0.012205  | 1.7201      | 0.042711    | 2.3717    |
|            |                 | 0.0088543 | 1.1028      | 0.13505   | 0.0088543   | 0.347679322 |           |
| CSMD2      | ENSG00000121904 | 0.27341   | 0.39227     | 1.1674    | 0.12153     | 2.0138      | 0.022014  |
|            |                 | 2.3711    | 0.0088669   | 0.0088669 | 0.34789375  |             |           |
| HMG1P6     | ENSG00000224070 | 2.3708    | 0.0088741   | 0.0088741 | 2.3708      | 0.0088741   | 2.3708    |
|            |                 | 0.0088741 | 2.3708      | 0.0088741 | 0.0088741   | 0.347896133 |           |
| SMG1P7     | ENSG00000261556 | 1.6998    | 0.044581    | 0.044581  | 0.84526     | 0.19898     | 2.3698    |
|            |                 | 0.0088988 | 1.6243      | 0.052151  | 0.0088988   | 0.348182456 |           |
| RNU6-753P  | ENSG00000200796 | 2.3695    | 0.0089071   | 0.0089071 | 2.3695      | 0.0089071   | 1.8122    |
|            |                 | 0.034978  | 2.3695      | 0.0089071 | 0.0089071   | 0.348182456 |           |
| TAS2R1     | ENSG00000169777 | 2.3693    | 0.0089104   | 0.0089104 | 2.3693      | 0.0089104   | 2.3693    |
|            |                 | 0.0089104 | 2.3693      | 0.0089104 | 0.0089104   | 0.348182456 |           |
| OR4Q3      | ENSG00000182652 | -0.15781  | 0.5627      | 1.0966    | 0.13642     | 2.3689      | 0.0089205 |
|            |                 | 0.93205   | 0.17565     | 0.0089205 | 0.348182456 |             |           |
| NA         | ENSG00000249708 | 2.3688    | 0.0089236   | 1.8232    | 0.034138    | -0.14973    | 0.55951   |
|            |                 | 1.5292    | 0.063103    | 0.0089236 | 0.348182456 |             |           |
| NA         | ENSG00000259005 | 2.131     | 0.016543    | 2.3686    | 0.0089269   | 2.1641      | 0.015227  |
|            |                 | 2.1641    | 0.015227    | 0.0089269 | 0.348182456 |             |           |
| PPP1R8P1   | ENSG00000224986 | 2.3678    | 0.0089473   | 2.3678    | 0.0089473   | 2.3678      | 2.3678    |
|            |                 | 0.0089473 | 2.3678      | 0.0089473 | 0.0089473   | 0.348182456 |           |
| NA         | ENSG00000283421 | 2.3678    | 0.0089477   | 2.3678    | 0.0089477   | 2.3678      | 0.0089477 |
|            |                 | 2.3678    | 0.0089477   | 0.0089477 | 0.348182456 |             |           |
| ANXA9      | ENSG00000143412 | 2.3678    | 0.0089478   | 1.6041    | 0.054348    | -0.88168    | 0.81103   |
|            |                 | 0.74418   | 0.22838     | 0.0089478 | 0.348182456 |             |           |
| KCNMB2-AS1 | ENSG00000237978 | 2.3673    | 0.0089595   | 2.0823    | 0.01866     | 1.2322      |           |
|            |                 | 0.10893   | 1.5781      | 0.057273  | 0.0089595   | 0.348182456 |           |
| MNS1       | ENSG00000138587 | 2.3673    | 0.00896     | -0.084068 | 0.5335      | -1.2982     | 0.90289   |
|            |                 | -0.084068 | 0.5335      | 0.00896   | 0.348182456 |             |           |
| PRKACB     | ENSG00000142875 | 0.56642   | 0.28555     | 1.3897    | 0.082315    | 0.12478     |           |
|            |                 | 0.45035   | 2.3667      | 0.0089746 | 0.0089746   | 0.348471919 |           |
| GAPLINC    | ENSG00000266835 | 2.3657    | 0.0089973   | 2.3657    | 0.0089973   | 2.3657      | 2.3657    |
|            |                 | 0.0089973 | 0.82219     | 0.20548   | 0.0089973   | 0.348812984 |           |
| RN7SL677P  | ENSG00000242863 | 2.3657    | 0.0089977   | 2.3657    | 0.0089977   | 2.3657      | 2.3657    |
|            |                 | 0.0089977 | 2.3657      | 0.0089977 | 0.0089977   | 0.348812984 |           |
| NA         | ENSG00000265125 | 2.3649    | 0.0090179   | 1.6037    | 0.054388    | 2.3003      | 0.010715  |
|            |                 | 1.201     | 0.11487     | 0.0090179 | 0.349318177 |             |           |
| NA         | ENSG00000259345 | 1.7693    | 0.038422    | 1.8608    | 0.031387    | 0.28284     | 0.38865   |
|            |                 | 2.3639    | 0.0090421   | 0.0090421 | 0.34947307  |             |           |
| S100A2     | ENSG00000196754 | 2.3637    | 0.0090471   | 1.6534    | 0.049127    | 1.6354      |           |
|            |                 | 0.050981  | 1.3987      | 0.080957  | 0.0090471   | 0.34947307  |           |
| MYBPC1     | ENSG00000196091 | 0.60581   | 0.27232     | 2.3636    | 0.0090497   | 0.60581     |           |
|            |                 | 0.27232   | -0.27111    | 0.60685   | 0.0090497   | 0.34947307  |           |
| HR         | ENSG00000168453 | 1.3356    | 0.090836    | 2.3634    | 0.0090541   | 1.3356      | 0.090836  |
|            |                 | 1.3356    | 0.090836    | 0.0090541 | 0.34947307  |             |           |
| PRPF38AP1  | ENSG00000225053 | 2.363     | 0.0090631   | 0.38869   | 0.34875     | 0.38869     | 0.34875   |
|            |                 | 0.38869   | 0.34875     | 0.0090631 | 0.34947307  |             |           |
| CNOT4      | ENSG00000080802 | 2.3594    | 0.0091519   | 2.3629    | 0.0090667   | 1.9022      | 0.028575  |
|            |                 | 1.3136    | 0.094494    | 0.0090667 | 0.34947307  |             |           |
| RAD1       | ENSG00000113456 | -0.22119  | 0.58753     | -0.22119  | 0.58753     | 0.60282     | 0.27332   |
|            |                 | 2.3627    | 0.0090721   | 0.0090721 | 0.34947307  |             |           |
| NA         | ENSG00000271010 | 2.362     | 0.0090878   | 2.362     | 0.0090878   | 2.362       | 0.0090878 |
|            |                 | 0.0090878 | 0.349801338 |           |             |             |           |
| LINC01795  | ENSG00000225226 | 2.3607    | 0.00912     | 2.3607    | 0.00912     | 2.3607      | 2.3607    |
|            |                 | 0.00912   | 2.3607      | 0.00912   | 0.00912     | 0.350763694 |           |
| SCFD1      | ENSG00000092108 | 0.17705   | 0.42973     | 0.3144    | 0.37661     | 2.3603      | 0.0091305 |
|            |                 | -0.33638  | 0.63171     | 0.0091305 | 0.350890588 |             |           |
| THTPA      | ENSG00000259431 | 2.3584    | 0.0091765   | 2.3584    | 0.0091765   | 2.3584      | 0.0091765 |
|            |                 | 2.3584    | 0.0091765   | 0.0091765 | 0.351932504 |             |           |

|            |                 |             |           |             |             |           |           |       |
|------------|-----------------|-------------|-----------|-------------|-------------|-----------|-----------|-------|
| UBAP2L     | ENSG00000143569 | 0.66366     | 0.25345   | -1.2376     | 0.89207     | -1.2646   |           |       |
|            | 0.89699         | 2.3581      | 0.0091837 | 0.0091837   | 0.351932504 |           |           |       |
| RNU6-1169P | ENSG00000200407 | -0.96452    | 0.83261   | 2.3581      | 0.009185    | -0.96452  |           |       |
|            | 0.83261         | -0.96452    | 0.83261   | 0.009185    | 0.351932504 |           |           |       |
| NA         | ENSG00000222309 | 2.358       | 0.0091865 | 2.358       | 0.0091865   | 2.358     | 0.0091865 | 2.358 |
|            | 0.0091865       | 0.351932504 |           |             |             |           |           |       |
| SLC51A     | ENSG00000163959 | 2.2755      | 0.011438  | 1.4427      | 0.074558    | 2.3574    |           |       |
|            | 0.0092011       | 2.3574      | 0.0092011 | 0.0092011   | 0.352214928 |           |           |       |
| CDKN2AIP   | ENSG00000168564 | 0.89606     | 0.18511   | 0.89606     | 0.18511     | 1.9671    |           |       |
|            | 0.024588        | 2.3571      | 0.0092093 | 0.0092093   | 0.352252111 |           |           |       |
| DDX60      | ENSG00000137628 | 0.4355      | 0.3316    | 1.0107      | 0.15608     | 2.3568    | 0.0092178 |       |
|            | -0.9556         | 0.83036     | 0.0092178 | 0.352300701 |             |           |           |       |
| SERPINA4   | ENSG00000100665 | 2.0326      | 0.021047  | 1.0863      | 0.13866     | 2.3562    |           |       |
|            | 0.0092308       | 2.3562      | 0.0092308 | 0.0092308   | 0.352521069 |           |           |       |
| DLG2       | ENSG00000150672 | 1.945       | 0.025886  | 1.9654      | 0.024685    | 2.3553    | 0.0092542 |       |
|            | -0.17766        | 0.57051     | 0.0092542 | 0.353137953 |             |           |           |       |
| NA         | ENSG00000234913 | 2.3549      | 0.0092647 | 2.171       | 0.014964    | 1.2834    | 0.099671  |       |
|            | 1.9393          | 0.026229    | 0.0092647 | 0.353261996 |             |           |           |       |
| DRD1       | ENSG00000184845 | -0.23933    | 0.59457   | -0.25372    | 0.60014     | 2.3544    | 0.009276  |       |
|            | -1.2523         | 0.89477     | 0.009276  | 0.353383869 |             |           |           |       |
| MYL4       | ENSG00000198336 | 0.056684    | 0.4774    | 0.50962     | 0.30516     | -0.013532 | 0.5054    |       |
|            | 2.3542          | 0.0092824   | 0.0092824 | 0.353383869 |             |           |           |       |
| RPL7P40    | ENSG00000242991 | -0.28069    | 0.61053   | 0.7677      | 0.22133     | 0.7958    |           |       |
|            | 0.21307         | 2.3537      | 0.0092946 | 0.0092946   | 0.353470873 |           |           |       |
| NGLY1      | ENSG00000151092 | 1.0017      | 0.15825   | 2.3534      | 0.0093012   | -0.41362  | 0.66042   |       |
|            | -0.013743       | 0.50548     | 0.0093012 | 0.353470873 |             |           |           |       |
| NA         | ENSG00000260669 | 2.3531      | 0.0093085 | 2.3531      | 0.0093085   | 2.3531    | 0.0093085 |       |
|            | 2.3531          | 0.0093085   | 0.0093085 | 0.353470873 |             |           |           |       |
| NA         | ENSG00000248376 | 2.3529      | 0.0093137 | 0.88822     | 0.18721     | 0.74889   | 0.22696   |       |
|            | 0.44107         | 0.32958     | 0.0093137 | 0.353470873 |             |           |           |       |
| RNU6-1222P | ENSG00000207345 | 2.3523      | 0.0093283 | 0.39245     | 0.34736     | 0.39245   |           |       |
|            | 0.34736         | 0.39245     | 0.34736   | 0.0093283   | 0.353749462 |           |           |       |
| HERC5      | ENSG00000138646 | 1.1335      | 0.12851   | 2.3508      | 0.0093676   | 0.93367   | 0.17524   |       |
|            | 0.80533         | 0.21032     | 0.0093676 | 0.353937235 |             |           |           |       |
| MIR4666A   | ENSG00000266174 | 2.3506      | 0.0093704 | 2.3506      | 0.0093704   | 2.3506    |           |       |
|            | 0.0093704       | 2.3506      | 0.0093704 | 0.0093704   | 0.353937235 |           |           |       |
| NME1       | ENSG00000239672 | 2.3505      | 0.0093738 | 2.3505      | 0.0093738   | 2.3505    | 0.0093738 |       |
|            | 2.3505          | 0.0093738   | 0.0093738 | 0.353937235 |             |           |           |       |
| RFTN1      | ENSG00000131378 | 1.4089      | 0.079439  | 2.2809      | 0.011278    | 2.3501    | 0.0093844 |       |
|            | 1.9992          | 0.022794    | 0.0093844 | 0.353937235 |             |           |           |       |
| NA         | ENSG00000238804 | 2.35        | 0.009386  | 2.35        | 0.009386    | 2.35      | 0.009386  |       |
|            | 0.009386        | 0.353937235 |           |             |             |           |           |       |
| JAK1       | ENSG00000162434 | 0.86099     | 0.19462   | 1.1374      | 0.12768     | 0.80738   | 0.20972   |       |
|            | 2.3499          | 0.0093897   | 0.0093897 | 0.353937235 |             |           |           |       |
| MMEL1      | ENSG00000142606 | 2.3494      | 0.0094015 | 0.19051     | 0.42445     | 0.25674   | 0.39869   |       |
|            | -0.24105        | 0.59524     | 0.0094015 | 0.353937235 |             |           |           |       |
| HMGB3P7    | ENSG00000215399 | -1.7095     | 0.95632   | 0.65011     | 0.25781     | -0.067276 |           |       |
|            | 0.52682         | 2.3492      | 0.0094065 | 0.0094065   | 0.353937235 |           |           |       |
| EPB41L4A   | ENSG00000129595 | 2.3488      | 0.0094171 | 1.8965      | 0.028944    | 1.6915    |           |       |
|            | 0.045375        | 1.0564      | 0.14539   | 0.0094171   | 0.353937235 |           |           |       |
| RPL37AP1   | ENSG00000226243 | 2.3487      | 0.0094195 | 2.3487      | 0.0094195   | 2.3487    |           |       |
|            | 0.0094195       | 2.3487      | 0.0094195 | 0.0094195   | 0.353937235 |           |           |       |
| NA         | ENSG00000214331 | -0.46702    | 0.67976   | 0.26132     | 0.39692     | -0.12875  | 0.55122   |       |
|            | 2.3486          | 0.009422    | 0.009422  | 0.353937235 |             |           |           |       |
| RNU7-154P  | ENSG00000252003 | 2.3485      | 0.0094247 | 2.3485      | 0.0094247   | 2.3485    |           |       |
|            | 0.0094247       | 2.3485      | 0.0094247 | 0.0094247   | 0.353937235 |           |           |       |
| OR7E22P    | ENSG00000179799 | 1.4144      | 0.078622  | 1.1298      | 0.12929     | 2.3479    |           |       |
|            | 0.0094397       | -0.39877    | 0.65497   | 0.0094397   | 0.353937235 |           |           |       |
| NA         | ENSG00000261583 | 2.3479      | 0.00944   | 2.3479      | 0.00944     | 2.3479    | 0.00944   |       |
|            | 2.3479          | 0.00944     | 0.00944   | 0.353937235 |             |           |           |       |
| NA         | ENSG00000253894 | 2.3478      | 0.0094422 | -0.030295   | 0.51208     | 0.69963   | 0.24208   |       |
|            | 0.69963         | 0.24208     | 0.0094422 | 0.353937235 |             |           |           |       |

|             |                 |           |           |             |             |            |           |  |
|-------------|-----------------|-----------|-----------|-------------|-------------|------------|-----------|--|
| OTULINL     | ENSG00000145569 | 2.3473    | 0.0094542 | -0.26136    | 0.60309     | 0.70559    |           |  |
|             | 0.24022         | 0.0057813 | 0.49769   | 0.0094542   | 0.354114655 |            |           |  |
| KLHL6       | ENSG00000172578 | -0.28314  | 0.61146   | 0.30565     | 0.37994     | 1.8529     | 0.031949  |  |
|             | 2.3466          | 0.0094729 | 0.0094729 | 0.354194285 |             |            |           |  |
| MGP         | ENSG00000111341 | -0.51144  | 0.69548   | -0.0013626  | 0.50054     | -0.0013626 | 0.50054   |  |
|             | 2.3463          | 0.0094806 | 0.0094806 | 0.354194285 |             |            |           |  |
| NA          | ENSG00000249207 | 2.3462    | 0.0094821 | 1.341       | 0.08996     | -0.084441  | 0.53365   |  |
|             | -0.084441       | 0.53365   | 0.0094821 | 0.354194285 |             |            |           |  |
| RAB26       | ENSG00000167964 | 2.3461    | 0.0094854 | 2.3461      | 0.0094854   | 0.0059795  | 0.49761   |  |
|             | 2.3461          | 0.0094854 | 0.0094854 | 0.354194285 |             |            |           |  |
| SLC22A11    | ENSG00000168065 | 2.3455    | 0.0095005 | 1.4086      | 0.079471    | 0.88366    |           |  |
|             | 0.18844         | 1.6957    | 0.044968  | 0.0095005   | 0.354315942 |            |           |  |
| TP53INP2    | ENSG00000078804 | 2.233     | 0.012773  | 1.9702      | 0.024407    | 2.3454     | 0.0095032 |  |
|             | 1.5397          | 0.061818  | 0.0095032 | 0.354315942 |             |            |           |  |
| TVP23CP1    | ENSG00000223584 | 2.3285    | 0.0099428 | 0.78351     | 0.21666     | 1.4886     |           |  |
|             | 0.068302        | 2.3445    | 0.009526  | 0.009526    | 0.35489448  |            |           |  |
| FBLN7       | ENSG00000144152 | 2.3438    | 0.0095437 | 1.7387      | 0.041048    | 2.0507     | 0.020146  |  |
|             | -0.035664       | 0.51422   | 0.0095437 | 0.355282277 |             |            |           |  |
| LINC01267   | ENSG00000251576 | 2.1177    | 0.017099  | -1.4879     | 0.93161     | 2.3428     |           |  |
|             | 0.0095692       | -1.3949   | 0.91847   | 0.0095692   | 0.355699264 |            |           |  |
| NA          | ENSG00000279789 | 2.3428    | 0.0095695 | 2.3428      | 0.0095695   | 2.3428     | 0.0095695 |  |
|             | 2.3428          | 0.0095695 | 0.0095695 | 0.355699264 |             |            |           |  |
| NDUFAF2     | ENSG00000164182 | 1.8814    | 0.029959  | 0.34513     | 0.365       | 2.3412     | 0.0096102 |  |
|             | 1.3085          | 0.09536   | 0.0096102 | 0.356315087 |             |            |           |  |
| ADGRL3      | ENSG00000150471 | -0.25975  | 0.60247   | 0.62876     | 0.26475     | 2.0287     |           |  |
|             | 0.021245        | 2.3411    | 0.009613  | 0.009613    | 0.356315087 |            |           |  |
| NA          | ENSG00000270182 | 2.3411    | 0.009613  | 2.3411      | 0.009613    | 2.3411     | 0.009613  |  |
|             | 2.3411          | 0.009613  | 0.009613  | 0.356315087 |             |            |           |  |
| NA          | ENSG00000225798 | 2.3408    | 0.0096205 | 2.3408      | 0.0096205   | 2.3408     | 0.0096205 |  |
|             | 2.3408          | 0.0096205 | 0.0096205 | 0.356315087 |             |            |           |  |
| LINC01555   | ENSG00000180869 | 2.3401    | 0.0096398 | -0.58365    | 0.72027     | 1.6041     |           |  |
|             | 0.054351        | -0.58365  | 0.72027   | 0.0096398   | 0.356315087 |            |           |  |
| ANKRD66     | ENSG00000230062 | 0.83346   | 0.20229   | 0.15114     | 0.43993     | 2.34       | 0.0096426 |  |
|             | 0.15114         | 0.43993   | 0.0096426 | 0.356315087 |             |            |           |  |
| NA          | ENSG00000223881 | 2.3398    | 0.009647  | 2.3398      | 0.009647    | 2.3398     | 0.009647  |  |
|             | 2.3398          | 0.009647  | 0.009647  | 0.356315087 |             |            |           |  |
| RNU6-469P   | ENSG00000252062 | 2.3395    | 0.0096556 | 2.0828      | 0.018636    | 2.3395     |           |  |
|             | 0.0096556       | -0.79812  | 0.7876    | 0.0096556   | 0.356315087 |            |           |  |
| HMG1P19     | ENSG00000224519 | 2.3393    | 0.0096603 | 2.3393      | 0.0096603   | 2.3393     |           |  |
|             | 0.0096603       | 2.3393    | 0.0096603 | 0.0096603   | 0.356315087 |            |           |  |
| NA          | ENSG00000269686 | 2.3392    | 0.0096623 | 0.27259     | 0.39258     | 2.3392     | 0.0096623 |  |
|             | 2.3392          | 0.0096623 | 0.0096623 | 0.356315087 |             |            |           |  |
| SMIM15      | ENSG00000188725 | 0.44238   | 0.32911   | -0.1704     | 0.56765     | 2.339      | 0.0096665 |  |
|             | -1.0193         | 0.84598   | 0.0096665 | 0.356315087 |             |            |           |  |
| IQCJ-SCHIP1 | ENSG00000283154 | 1.9552    | 0.025279  | 1.2365      | 0.10814     | 2.3373     |           |  |
|             | 0.0097129       | 0.64667   | 0.25892   | 0.0097129   | 0.357386408 |            |           |  |
| EVPL        | ENSG00000167880 | 2.3371    | 0.0097175 | -0.95346    | 0.82982     | 0.74395    | 0.22845   |  |
|             | 0.74395         | 0.22845   | 0.0097175 | 0.357386408 |             |            |           |  |
| NA          | ENSG00000261317 | 2.3368    | 0.0097239 | 2.3368      | 0.0097239   | 2.3368     | 0.0097239 |  |
|             | 2.3368          | 0.0097239 | 0.0097239 | 0.357386408 |             |            |           |  |
| NA          | ENSG00000255197 | 2.0855    | 0.018511  | 2.3368      | 0.0097249   | 2.0855     | 0.018511  |  |
|             | 1.5387          | 0.061944  | 0.0097249 | 0.357386408 |             |            |           |  |
| NA          | ENSG00000271608 | 2.3075    | 0.010512  | 1.8346      | 0.033283    | 2.336      | 0.0097453 |  |
|             | 2.0864          | 0.018473  | 0.0097453 | 0.357614496 |             |            |           |  |
| ACTG1P9     | ENSG00000229349 | -0.32121  | 0.62597   | -0.64654    | 0.74103     | -1.0541    |           |  |
|             | 0.85408         | 2.3359    | 0.0097484 | 0.0097484   | 0.357614496 |            |           |  |
| ZNF507      | ENSG00000168813 | 0.50996   | 0.30504   | 0.66217     | 0.25393     | 2.3354     |           |  |
|             | 0.0097622       | 1.29      | 0.098529  | 0.0097622   | 0.357614496 |            |           |  |
| FGF12-AS1   | ENSG00000231383 | -0.45576  | 0.67572   | 0.26769     | 0.39447     | -0.56605   |           |  |
|             | 0.71432         | 2.3352    | 0.0097655 | 0.0097655   | 0.357614496 |            |           |  |
| NA          | ENSG00000245904 | 1.0904    | 0.13776   | 2.3351      | 0.0097678   | 1.8243     | 0.034052  |  |
|             | 1.0904          | 0.13776   | 0.0097678 | 0.357614496 |             |            |           |  |

|            |                 |           |           |             |             |          |           |
|------------|-----------------|-----------|-----------|-------------|-------------|----------|-----------|
| NA         | ENSG00000250310 | 1.3289    | 0.091947  | 0.5167      | 0.30268     | 1.4381   | 0.075205  |
|            | 2.3345          | 0.0097841 | 0.0097841 | 0.357915462 |             |          |           |
| NA         | ENSG00000255605 | 1.5669    | 0.058564  | 1.9942      | 0.023065    | 2.3339   | 0.0098014 |
|            | 1.5896          | 0.05596   | 0.0098014 | 0.357915462 |             |          |           |
| PSMC1P12   | ENSG00000226126 | 1.0958    | 0.13658   | -0.066613   | 0.52655     | 2.3338   |           |
|            | 0.0098043       | -0.74369  | 0.77147   | 0.0098043   | 0.357915462 |          |           |
| NA         | ENSG00000253762 | 1.0438    | 0.14828   | -0.13884    | 0.55521     | 0.25127  | 0.4008    |
|            | 2.3337          | 0.0098054 | 0.0098054 | 0.357915462 |             |          |           |
| ERICH1     | ENSG00000104714 | 0.36137   | 0.35891   | 2.3325      | 0.0098384   | -0.27381 |           |
|            | 0.60788         | -0.25435  | 0.60039   | 0.0098384   | 0.358790571 |          |           |
| LINC00877  | ENSG00000241163 | 0.66384   | 0.2534    | 2.3322      | 0.0098441   | -0.56555 |           |
|            | 0.71415         | 0.69076   | 0.24486   | 0.0098441   | 0.358790571 |          |           |
| LINC02220  | ENSG00000248457 | 1.1503    | 0.12501   | -1.5552     | 0.94005     | -1.5552  |           |
|            | 0.94005         | 2.3319    | 0.0098517 | 0.0098517   | 0.358799209 |          |           |
| PDGFRA     | ENSG00000134853 | -0.57909  | 0.71873   | 2.3314      | 0.0098668   | -1.2522  |           |
|            | 0.89475         | -0.93822  | 0.82593   | 0.0098668   | 0.35908078  |          |           |
| PHF21A     | ENSG00000135365 | 2.2606    | 0.011891  | 2.3305      | 0.0098886   | 1.2372   |           |
|            | 0.10801         | 1.8735    | 0.030501  | 0.0098886   | 0.359351118 |          |           |
| ADAM21P1   | ENSG00000235812 | 2.3304    | 0.0098937 | 1.1772      | 0.11956     | 2.3109   |           |
|            | 0.01042         | 2.3109    | 0.01042   | 0.0098937   | 0.359351118 |          |           |
| OR7E23P    | ENSG00000228433 | -2.465    | 0.99315   | -0.26002    | 0.60257     | 2.33     | 0.0099023 |
|            | 1.4596          | 0.072203  | 0.0099023 | 0.359351118 |             |          |           |
| WDR92      | ENSG00000243667 | -0.71853  | 0.76379   | 2.3297      | 0.0099111   | 0.72942  | 0.23287   |
|            | -0.47264        | 0.68176   | 0.0099111 | 0.359351118 |             |          |           |
| NA         | ENSG00000265246 | 1.1269    | 0.12989   | 1.3846      | 0.083089    | 2.3297   | 0.0099111 |
|            | -0.10509        | 0.54185   | 0.0099111 | 0.359351118 |             |          |           |
| PROCA1     | ENSG00000167525 | 1.0562    | 0.14543   | 0.72762     | 0.23342     | 2.3282   |           |
|            | 0.0099515       | 1.0016    | 0.15827   | 0.0099515   | 0.360547654 |          |           |
| RPEP1      | ENSG00000250732 | 2.3272    | 0.0099773 | 2.3272      | 0.0099773   | 2.3272   | 0.0099773 |
|            | 2.3272          | 0.0099773 | 0.0099773 | 0.36121384  |             |          |           |
| ZNF536     | ENSG00000198597 | 0.26495   | 0.39552   | -0.26645    | 0.60506     | 2.3264   |           |
|            | 0.0099979       | 1.3242    | 0.092721  | 0.0099979   | 0.361516137 |          |           |
| LINC01800  | ENSG00000234572 | 2.2757    | 0.011433  | 2.1961      | 0.014041    | 2.3261   |           |
|            | 0.010006        | 1.6395    | 0.050551  | 0.010006    | 0.361516137 |          |           |
| CSRP1      | ENSG00000159176 | 1.3468    | 0.089019  | 1.935       | 0.026495    | 0.49091  | 0.31175   |
|            | 2.3257          | 0.010017  | 0.010017  | 0.361516137 |             |          |           |
| NA         | ENSG00000231083 | 2.3257    | 0.010017  | 0.020132    | 0.49197     | 0.020132 | 0.49197   |
|            | 0.020132        | 0.49197   | 0.010017  | 0.361516137 |             |          |           |
| TRAF7      | ENSG00000131653 | 1.9786    | 0.023932  | 2.3253      | 0.010027    | 2.3253   | 0.010027  |
|            | 1.1513          | 0.12481   | 0.010027  | 0.361516137 |             |          |           |
| ETS1       | ENSG00000134954 | 2.325     | 0.010035  | -1.1548     | 0.87592     | 0.67709  | 0.24917   |
|            | 0.1186          | 0.45279   | 0.010035  | 0.361516137 |             |          |           |
| ST8SIA5    | ENSG00000101638 | 1.1099    | 0.13352   | 1.1486      | 0.12535     | 0.92602  |           |
|            | 0.17722         | 2.3247    | 0.010044  | 0.010044    | 0.361516137 |          |           |
| DCANP1     | ENSG00000251380 | 1.3841    | 0.083163  | 1.4693      | 0.070872    | 2.3247   |           |
|            | 0.010045        | 2.149     | 0.015817  | 0.010045    | 0.361516137 |          |           |
| FADS1      | ENSG00000149485 | 2.3238    | 0.010067  | 2.3238      | 0.010067    | 2.3238   | 0.010067  |
|            | 0.88523         | 0.18802   | 0.010067  | 0.361917279 |             |          |           |
| AKNA       | ENSG00000106948 | 2.3138    | 0.01034   | 2.3237      | 0.010071    | 0.56727  | 0.28527   |
|            | 1.3887          | 0.082457  | 0.010071  | 0.361917279 |             |          |           |
| ANKRD20A5P | ENSG00000186481 | 0.91966   | 0.17887   | 0.65549     | 0.25608     | 2.323    | 0.010089  |
|            | 1.882           | 0.029915  | 0.010089  | 0.362296957 |             |          |           |
| GDA        | ENSG00000119125 | -0.26446  | 0.60429   | 2.3223      | 0.010108    | 0.78393  | 0.21654   |
|            | 1.0001          | 0.15862   | 0.010108  | 0.362711959 |             |          |           |
| RHOF       | ENSG00000139725 | 1.9916    | 0.023208  | 1.9916      | 0.023208    | 1.4984   | 0.067015  |
|            | 2.322           | 0.010116  | 0.010116  | 0.362731921 |             |          |           |
| NA         | ENSG00000206734 | 2.3217    | 0.010124  | 1.4913      | 0.067939    | 1.8405   | 0.032844  |
|            | 1.6657          | 0.047891  | 0.010124  | 0.362751853 |             |          |           |
| PKIG       | ENSG00000168734 | 2.2502    | 0.012219  | 2.2656      | 0.011739    | 1.5032   | 0.066388  |
|            | 2.3212          | 0.010139  | 0.010139  | 0.362980109 |             |          |           |
| PRDM7      | ENSG00000126856 | 2.0236    | 0.021504  | 2.3198      | 0.010176    | 0.48288  | 0.31459   |
|            | 0.48288         | 0.31459   | 0.010176  | 0.362980109 |             |          |           |

|           |                 |             |             |             |             |            |          |
|-----------|-----------------|-------------|-------------|-------------|-------------|------------|----------|
| NUTF2P5   | ENSG00000215227 | 2.3196      | 0.010182    | 2.3196      | 0.010182    | -0.30969   |          |
|           | 0.6216          | 2.3196      | 0.010182    | 0.010182    | 0.362980109 |            |          |
| RN7SKP102 | ENSG00000223118 | 2.3194      | 0.010185    | 2.3194      | 0.010185    | -0.88725   |          |
|           | 0.81253         | 2.3194      | 0.010185    | 0.010185    | 0.362980109 |            |          |
| NA        | ENSG00000235881 | 2.319       | 0.010197    | 2.319       | 0.010197    | 0.12297    | 0.45106  |
|           | 0.67587         | 0.010197    | 0.362980109 |             |             |            | -0.45619 |
| OR13Z3P   | ENSG00000272480 | -0.84692    | 0.80148     | 2.319       | 0.010198    | 0.39907    | 0.34492  |
|           | 0.42457         | 0.33558     | 0.010198    | 0.362980109 |             |            |          |
| FXYD6     | ENSG00000137726 | 2.3189      | 0.010199    | -0.1762     | 0.56993     | -0.0061987 | 0.50247  |
|           | 1.1816          | 0.11867     | 0.010199    | 0.362980109 |             |            |          |
| NA        | ENSG00000202268 | 1.0084      | 0.15663     | 2.2255      | 0.013024    | 2.3189     | 0.010199 |
|           | 0.88159         | 0.189       | 0.010199    | 0.362980109 |             |            |          |
| ZNF485    | ENSG00000198298 | 1.463       | 0.071739    | 0.22143     | 0.41238     | 2.3185     | 0.01021  |
|           | 0.85655         | 0.19585     | 0.01021     | 0.362980109 |             |            |          |
| LINC01252 | ENSG00000247157 | 1.8319      | 0.033481    | 0.94371     | 0.17266     | 0.85539    |          |
|           | 0.19617         | 2.3184      | 0.010214    | 0.010214    | 0.362980109 |            |          |
| MIR5011   | ENSG00000263354 | 2.3184      | 0.010215    | 2.3184      | 0.010215    | 2.3184     |          |
|           | 0.010215        | 2.3184      | 0.010215    | 0.010215    | 0.362980109 |            |          |
| ZNF101P1  | ENSG00000237746 | 2.3177      | 0.010232    | 1.977       | 0.024018    | 1.0524     | 0.14631  |
|           | 1.683           | 0.046192    | 0.010232    | 0.362980109 |             |            |          |
| TMEM53    | ENSG00000126106 | 2.3175      | 0.010239    | -1.2407     | 0.89264     | -0.11561   |          |
|           | 0.54602         | -0.063654   | 0.52538     | 0.010239    | 0.362980109 |            |          |
| CAMTA2    | ENSG00000108509 | 1.583       | 0.056707    | 1.583       | 0.056707    | 1.583      | 0.056707 |
|           | 0.010246        | 0.010246    | 0.362980109 |             |             |            | 2.3172   |
| ZIC1      | ENSG00000152977 | 2.317       | 0.010252    | 2.317       | 0.010252    | 0.4316     | 0.33302  |
|           | 0.55007         | 0.010252    | 0.362980109 |             |             |            | -0.12584 |
| RPS2P24   | ENSG00000244019 | 1.9883      | 0.02339     | 1.7208      | 0.042641    | 0.93864    |          |
|           | 0.17396         | 2.3169      | 0.010255    | 0.010255    | 0.362980109 |            |          |
| LINC01634 | ENSG00000235295 | -0.15121    | 0.5601      | 2.3168      | 0.010257    | 2.2681     |          |
|           | 0.011661        | -0.15121    | 0.5601      | 0.010257    | 0.362980109 |            |          |
| NA        | ENSG00000230205 | 0.049546    | 0.48024     | 0.88992     | 0.18675     | -0.82735   | 0.79598  |
|           | 2.3153          | 0.010298    | 0.010298    | 0.364166575 |             |            |          |
| NA        | ENSG00000257879 | 0.75932     | 0.22383     | 0.68455     | 0.24681     | 0.75932    | 0.22383  |
|           | 2.3144          | 0.010323    | 0.010323    | 0.364785925 |             |            |          |
| TRAJ2     | ENSG00000211887 | 2.314       | 0.010335    | 2.314       | 0.010335    | 2.314      | 0.010335 |
|           | 0.010335        | 0.364945326 |             |             |             |            |          |
| LINC02277 | ENSG00000258487 | -0.26047    | 0.60275     | 2.3134      | 0.01035     | 0.40057    |          |
|           | 0.34437         | 0.93368     | 0.17524     | 0.01035     | 0.364981353 |            |          |
| NOS2      | ENSG00000007171 | 0.10095     | 0.4598      | 2.3134      | 0.010351    | -0.27937   | 0.61002  |
|           | 0.1804          | 0.42842     | 0.010351    | 0.364981353 |             |            |          |
| PPIAP30   | ENSG00000206448 | 2.313       | 0.010363    | 2.313       | 0.010363    | 2.313      | 0.010363 |
|           | 0.010363        | 0.010363    | 0.365140268 |             |             |            |          |
| TTBK1     | ENSG00000146216 | 2.3121      | 0.010386    | 0.45683     | 0.3239      | 0.28805    | 0.38666  |
|           | 1.0635          | 0.14377     | 0.010386    | 0.365141713 |             |            |          |
| NA        | ENSG00000235415 | 1.8429      | 0.032669    | 2.3118      | 0.010394    | 1.8429     | 0.032669 |
|           | 0.84439         | 0.19922     | 0.010394    | 0.365141713 |             |            |          |
| LINC00334 | ENSG00000182586 | 0.44507     | 0.32814     | 2.3116      | 0.010401    | 1.1096     |          |
|           | 0.1336          | 0.63552     | 0.26255     | 0.010401    | 0.365141713 |            |          |
| C12orf50  | ENSG00000165805 | -0.17192    | 0.56825     | 2.3115      | 0.010402    | -1.1671    |          |
|           | 0.87842         | -1.1671     | 0.87842     | 0.010402    | 0.365141713 |            |          |
| SNX33P1   | ENSG00000267609 | 2.3115      | 0.010403    | 2.3115      | 0.010403    | 2.3115     |          |
|           | 0.010403        | 2.3115      | 0.010403    | 0.010403    | 0.365141713 |            |          |
| VDAC2P1   | ENSG00000214976 | 1.6333      | 0.051204    | 2.3113      | 0.010408    | 1.3992     |          |
|           | 0.080872        | 2.3113      | 0.010408    | 0.010408    | 0.365141713 |            |          |
| LINC01054 | ENSG00000229723 | 2.311       | 0.010417    | 2.311       | 0.010417    | 2.311      | 0.010417 |
|           | 0.010417        | 0.010417    | 0.36519454  |             |             |            |          |
| SOX21     | ENSG00000125285 | 1.522       | 0.064008    | 0.97119     | 0.16573     | 0.2888     | 0.38637  |
|           | 2.3103          | 0.010436    | 0.010436    | 0.365597613 |             |            |          |
| NA        | ENSG00000244560 | 2.3095      | 0.010458    | 0.008024    | 0.4968      | 0.39419    | 0.34672  |
|           | 0.75235         | 0.22592     | 0.010458    | 0.365788712 |             |            |          |
| GLIS1     | ENSG00000174332 | 1.8685      | 0.030844    | 1.3872      | 0.082695    | 2.309      | 0.010471 |
|           | 1.9933          | 0.023117    | 0.010471    | 0.365788712 |             |            |          |

|            |                 |          |             |             |             |           |                |
|------------|-----------------|----------|-------------|-------------|-------------|-----------|----------------|
| ZNF646     | ENSG00000167395 | 2.3089   | 0.010474    | 1.85        | 0.032154    | 2.3089    | 0.010474       |
|            | 2.3089          | 0.010474 | 0.010474    | 0.365788712 |             |           |                |
| BGLAP      | ENSG00000242252 | 2.3088   | 0.010477    | 2.1845      | 0.014462    | 2.3088    | 0.010477       |
|            | 2.3088          | 0.010477 | 0.010477    | 0.365788712 |             |           |                |
| CICP5      | ENSG00000233771 | 2.0767   | 0.018915    | -1.4015     | 0.91947     | 0.11336   | 0.45487        |
|            | 2.3086          | 0.010482 | 0.010482    | 0.365788712 |             |           |                |
| C11orf45   | ENSG00000174370 | 0.2768   | 0.39097     | 2.3083      | 0.010491    | 2.3083    |                |
|            | 0.010491        | 2.3083   | 0.010491    | 0.010491    | 0.365788712 |           |                |
| MIR3180-5  | ENSG00000264397 | 2.3082   | 0.010494    | 2.3082      | 0.010494    | 2.3082    |                |
|            | 0.010494        | 2.3082   | 0.010494    | 0.010494    | 0.365788712 |           |                |
| NA         | ENSG00000237480 | 1.7184   | 0.042864    | 2.2322      | 0.012801    | 2.3078    | 0.010505       |
|            | 2.1866          | 0.014385 | 0.010505    | 0.3659104   |             |           |                |
| RCC2P6     | ENSG00000254454 | -0.47711 | 0.68336     | 2.3071      | 0.010525    | -0.59493  |                |
|            | 0.72405         | 0.77587  | 0.21891     | 0.010525    | 0.366345179 |           |                |
| MTND6P21   | ENSG00000223431 | 2.3061   | 0.010551    | 2.3061      | 0.010551    | 2.3061    |                |
|            | 0.010551        | -0.71753 | 0.76348     | 0.010551    | 0.366956888 |           |                |
| NA         | ENSG00000229616 | 2.3053   | 0.010576    | -0.24925    | 0.59842     | 1.167     | 0.1216 1.167   |
|            | 0.1216          | 0.010576 | 0.366956888 |             |             |           |                |
| CHCHD5     | ENSG00000125611 | 2.305    | 0.010585    | 2.305       | 0.010585    | 2.305     | 0.010585 2.305 |
|            | 0.010585        | 0.010585 | 0.366956888 |             |             |           |                |
| CUEDC1     | ENSG00000180891 | 2.3047   | 0.010592    | 1.9655      | 0.024679    | 0.82641   |                |
|            | 0.20429         | 1.6024   | 0.054534    | 0.010592    | 0.366956888 |           |                |
| MAN2B2     | ENSG00000013288 | 0.21341  | 0.4155      | 2.3045      | 0.010597    | 0.61994   |                |
|            | 0.26765         | -0.16424 | 0.56523     | 0.010597    | 0.366956888 |           |                |
| ABCC5      | ENSG00000114770 | 2.3045   | 0.010598    | 1.9599      | 0.025006    | 2.0077    | 0.022338       |
|            | 1.5165          | 0.064698 | 0.010598    | 0.366956888 |             |           |                |
| MDGA2      | ENSG00000139915 | 0.86831  | 0.19261     | 2.3043      | 0.010603    | -0.058584 | 0.52336        |
|            | -0.2252         | 0.58909  | 0.010603    | 0.366956888 |             |           |                |
| NA         | ENSG00000250889 | 2.304    | 0.010611    | 0.92009     | 0.17876     | 2.304     | 0.010611 2.304 |
|            | 0.010611        | 0.010611 | 0.366956888 |             |             |           |                |
| LINC01003  | ENSG00000261455 | -0.88147 | 0.81097     | -0.88147    | 0.81097     | 2.3039    |                |
|            | 0.010614        | -0.95721 | 0.83077     | 0.010614    | 0.366956888 |           |                |
| CD44-AS1   | ENSG00000255443 | 2.3036   | 0.010622    | 2.3036      | 0.010622    | 2.3036    |                |
|            | 0.010622        | 2.3036   | 0.010622    | 0.010622    | 0.366956888 |           |                |
| NA         | ENSG00000228681 | 2.2802   | 0.011299    | 2.3034      | 0.010628    | 2.1952    | 0.014073       |
|            | 1.5406          | 0.061704 | 0.010628    | 0.366956888 |             |           |                |
| MIR4512    | ENSG00000266589 | 2.303    | 0.010639    | 2.303       | 0.010639    | 2.303     | 0.010639 2.303 |
|            | 0.010639        | 0.010639 | 0.366956888 |             |             |           |                |
| SOGA3      | ENSG00000214338 | 2.3029   | 0.010642    | 2.3029      | 0.010642    | 0.20852   | 0.41741        |
|            | 0.011439        | 0.49544  | 0.010642    | 0.366956888 |             |           |                |
| MIR4506    | ENSG00000265768 | 2.3027   | 0.010648    | 2.3027      | 0.010648    | 2.3027    |                |
|            | 0.010648        | 2.3027   | 0.010648    | 0.010648    | 0.366956888 |           |                |
| SDHDP2     | ENSG00000227073 | 2.3014   | 0.010685    | 2.3014      | 0.010685    | 2.3014    |                |
|            | 0.010685        | 2.3014   | 0.010685    | 0.010685    | 0.367655659 |           |                |
| ALOX12-AS1 | ENSG00000215067 | 2.3013   | 0.010687    | 0.52981     | 0.29812     | 1.1188    |                |
|            | 0.13161         | 1.4559   | 0.072705    | 0.010687    | 0.367655659 |           |                |
| COL8A2     | ENSG00000171812 | -0.46    | 0.67724     | 2.3009      | 0.010699    | 0.31987   | 0.37453        |
|            | 2.0856          | 0.018509 | 0.010699    | 0.367655659 |             |           |                |
| SH3GL1     | ENSG00000141985 | 0.71231  | 0.23814     | 0.23809     | 0.4059      | 0.31064   |                |
|            | 0.37804         | 2.3008   | 0.010701    | 0.010701    | 0.367655659 |           |                |
| RFX3       | ENSG00000080298 | 0.71401  | 0.23761     | 2.3006      | 0.010706    | 0.93188   | 0.1757         |
|            | -0.49968        | 0.69135  | 0.010706    | 0.367655659 |             |           |                |
| RNU6-297P  | ENSG00000207366 | 2.2997   | 0.010731    | 0.89289     | 0.18596     | 0.89289   |                |
|            | 0.18596         | 0.89289  | 0.18596     | 0.010731    | 0.368182222 |           |                |
| GRAP2      | ENSG00000100351 | 1.3265   | 0.092332    | 2.2993      | 0.010743    | 0.12193   | 0.45148        |
|            | -0.30796        | 0.62095  | 0.010743    | 0.368182222 |             |           |                |
| OTOR       | ENSG00000125879 | 2.2993   | 0.010744    | 2.2993      | 0.010744    | 2.2993    | 0.010744       |
|            | 2.2993          | 0.010744 | 0.010744    | 0.368182222 |             |           |                |
| SLC19A1    | ENSG00000173638 | 0.1153   | 0.45411     | 0.70918     | 0.23911     | 1.9132    |                |
|            | 0.027861        | 2.2985   | 0.010766    | 0.010766    | 0.368330407 |           |                |
| CTAGE14P   | ENSG00000214211 | 2.2985   | 0.010766    | 2.2985      | 0.010766    | 2.2985    |                |
|            | 0.010766        | 2.2985   | 0.010766    | 0.010766    | 0.368330407 |           |                |

|              |                 |           |          |             |             |          |          |  |
|--------------|-----------------|-----------|----------|-------------|-------------|----------|----------|--|
| YWHAEP7      | ENSG00000276715 | 2.2408    | 0.012521 | 1.0485      | 0.1472      | 2.2984   |          |  |
|              | 0.010771        | -1.0334   | 0.84929  | 0.010771    | 0.368330407 |          |          |  |
| SLFNL1-AS1   | ENSG00000281207 | 1.0701    | 0.14228  | 2.2972      | 0.010803    | 1.0701   |          |  |
|              | 0.14228         | 1.0701    | 0.14228  | 0.010803    | 0.368785923 |          |          |  |
| NA           | ENSG00000279705 | -0.12793  | 0.5509   | -0.12793    | 0.5509      | -0.12793 | 0.5509   |  |
|              | 2.2971          | 0.010807  | 0.010807 | 0.368785923 |             |          |          |  |
| LINC02018    | ENSG00000272690 | 1.2572    | 0.10433  | 2.297       | 0.01081     | -0.40369 | 0.65678  |  |
|              | -0.40369        | 0.65678   | 0.01081  | 0.368785923 |             |          |          |  |
| FANCG        | ENSG00000221829 | 2.2965    | 0.010824 | -0.21015    | 0.58322     | -0.9143  | 0.81972  |  |
|              | -0.9143         | 0.81972   | 0.010824 | 0.368785923 |             |          |          |  |
| ARHGAP22-IT1 | ENSG00000248682 | 0.8905    | 0.1866   | -0.074446   | 0.52967     | 2.2963   |          |  |
|              | 0.010828        | 2.2377    | 0.01262  | 0.010828    | 0.368785923 |          |          |  |
| H2BC5        | ENSG00000158373 | 2.2958    | 0.010844 | 2.2958      | 0.010844    | 2.2958   | 0.010844 |  |
|              | 1.2004          | 0.115     | 0.010844 | 0.368785923 |             |          |          |  |
| RLF          | ENSG00000117000 | 1.6959    | 0.04495  | 2.2957      | 0.010848    | -0.20773 | 0.58228  |  |
|              | 1.8558          | 0.031745  | 0.010848 | 0.368785923 |             |          |          |  |
| SH3RF1       | ENSG00000154447 | 0.69186   | 0.24451  | 0.30942     | 0.3785      | 2.2955   |          |  |
|              | 0.010852        | 0.72655   | 0.23375  | 0.010852    | 0.368785923 |          |          |  |
| LINC01122    | ENSG00000233723 | -0.046132 | 0.5184   | 2.2953      | 0.010858    | 1.3669   |          |  |
|              | 0.085836        | 1.2072    | 0.11368  | 0.010858    | 0.368785923 |          |          |  |
| NDUFA10      | ENSG00000130414 | 2.2952    | 0.01086  | -0.91657    | 0.82032     | 0.42855  |          |  |
|              | 0.33413         | -1.5607   | 0.94071  | 0.01086     | 0.368785923 |          |          |  |
| WSB1         | ENSG00000109046 | -0.18765  | 0.57442  | -0.18765    | 0.57442     | -0.77673 | 0.78134  |  |
|              | 2.2948          | 0.010873  | 0.010873 | 0.368815226 |             |          |          |  |
| NA           | ENSG00000199285 | -0.48418  | 0.68587  | -0.87008    | 0.80787     | 2.2947   | 0.010876 |  |
|              | -0.87008        | 0.80787   | 0.010876 | 0.368815226 |             |          |          |  |
| LINC01596    | ENSG00000250666 | -0.96504  | 0.83274  | 1.9482      | 0.025697    | -0.96133 |          |  |
|              | 0.83181         | 2.2936    | 0.010907 | 0.010907    | 0.369609256 |          |          |  |
| NA           | ENSG00000265240 | 2.2933    | 0.010916 | 1.9014      | 0.028625    | 2.1017   | 0.017792 |  |
|              | 2.1017          | 0.017792  | 0.010916 | 0.369657179 |             |          |          |  |
| ACOT12       | ENSG00000172497 | -0.19349  | 0.57671  | 2.293       | 0.010925    | 0.077195 | 0.46923  |  |
|              | -0.21604        | 0.58552   | 0.010925 | 0.369705035 |             |          |          |  |
| CHAMP1       | ENSG00000198824 | 2.2918    | 0.010958 | 2.2918      | 0.010958    | 2.2918   |          |  |
|              | 0.010958        | 2.2918    | 0.010958 | 0.010958    | 0.370510208 |          |          |  |
| FMOD         | ENSG00000122176 | 0.83903   | 0.20073  | 2.2916      | 0.010964    | 0.18183  | 0.42786  |  |
|              | 0.025797        | 0.48971   | 0.010964 | 0.370510208 |             |          |          |  |
| CAMP         | ENSG00000164047 | 1.4251    | 0.077058 | 1.3294      | 0.091861    | 0.468    | 0.31989  |  |
|              | 2.2912          | 0.010975  | 0.010975 | 0.370624913 |             |          |          |  |
| ADGRF1       | ENSG00000153292 | 2.2908    | 0.010988 | -1.1733     | 0.87967     | -0.63971 |          |  |
|              | 0.73882         | -1.3595   | 0.91301  | 0.010988    | 0.370732178 |          |          |  |
| NA           | ENSG00000244535 | -0.82348  | 0.79488  | 0.35066     | 0.36292     | 2.2906   | 0.010995 |  |
|              | 0.46284         | 0.32174   | 0.010995 | 0.370732178 |             |          |          |  |
| INSC         | ENSG00000188487 | 1.9024    | 0.028557 | 2.1241      | 0.016831    | 2.2903   | 0.011001 |  |
|              | 1.9567          | 0.025194  | 0.011001 | 0.370732178 |             |          |          |  |
| TCP1P1       | ENSG00000229161 | 2.29      | 0.01101  | 0.58033     | 0.28085     | 0.89643  | 0.18501  |  |
|              | 0.26788         | 0.3944    | 0.01101  | 0.370744015 |             |          |          |  |
| LOXL2        | ENSG00000134013 | 1.9122    | 0.027924 | 0.79232     | 0.21409     | 2.2895   | 0.011024 |  |
|              | 1.796           | 0.036244  | 0.011024 | 0.370744015 |             |          |          |  |
| CHAF1A       | ENSG00000167670 | 1.5461    | 0.061044 | 2.2895      | 0.011026    | 1.485    | 0.068772 |  |
|              | 1.6891          | 0.045604  | 0.011026 | 0.370744015 |             |          |          |  |
| CMTR1        | ENSG00000137200 | 0.2864    | 0.38729  | 0.99772     | 0.15921     | 1.6166   | 0.052979 |  |
|              | 2.2891          | 0.011037  | 0.011037 | 0.370744015 |             |          |          |  |
| NA           | ENSG00000236935 | 1.5807    | 0.056977 | 1.3555      | 0.087622    | 2.2888   | 0.011044 |  |
|              | 2.2665          | 0.011711  | 0.011044 | 0.370744015 |             |          |          |  |
| NA           | ENSG00000224647 | 2.2887    | 0.011047 | 2.2887      | 0.011047    | 2.2887   | 0.011047 |  |
|              | 2.2887          | 0.011047  | 0.011047 | 0.370744015 |             |          |          |  |
| KIF18A       | ENSG00000121621 | -0.34152  | 0.63364  | 2.2874      | 0.011085    | 1.6699   |          |  |
|              | 0.04747         | -0.34152  | 0.63364  | 0.011085    | 0.371708686 |          |          |  |
| SIRT2        | ENSG00000068903 | 0.47233   | 0.31834  | 1.3624      | 0.08654     | 0.90859  | 0.18178  |  |
|              | 2.2872          | 0.011091  | 0.011091 | 0.371708686 |             |          |          |  |
| NA           | ENSG00000215450 | 2.1092    | 0.017463 | 2.0901      | 0.018304    | 2.2764   | 0.011411 |  |
|              | 2.2869          | 0.011102  | 0.011102 | 0.371711775 |             |          |          |  |

|           |                 |             |          |             |             |          |          |
|-----------|-----------------|-------------|----------|-------------|-------------|----------|----------|
| MATN1     | ENSG00000162510 | 0.52806     | 0.29873  | 0.51591     | 0.30296     | 0.49084  | 0.31177  |
|           | 2.2863          | 0.011119    | 0.011119 | 0.371711775 |             |          |          |
| MADD-AS1  | ENSG00000256746 | 2.2862      | 0.011121 | 2.2862      | 0.011121    | 2.2862   |          |
|           | 0.011121        | 2.2862      | 0.011121 | 0.011121    | 0.371711775 |          |          |
| DUSP22    | ENSG00000112679 | 2.2862      | 0.011123 | -0.95772    | 0.8309      | 0.63853  |          |
|           | 0.26156         | -0.060458   | 0.5241   | 0.011123    | 0.371711775 |          |          |
| ATRIP     | ENSG00000164053 | 2.2856      | 0.011139 | 1.6256      | 0.052019    | 1.2947   | 0.097703 |
|           | 0.52498         | 0.2998      | 0.011139 | 0.371711775 |             |          |          |
| OR6F1     | ENSG00000169214 | 2.2854      | 0.011146 | 2.2854      | 0.011146    | 0.28621  | 0.38736  |
|           | 0.92699         | 0.17697     | 0.011146 | 0.371711775 |             |          |          |
| NUS1      | ENSG00000153989 | -0.47919    | 0.6841   | 2.2852      | 0.011115    | 2.2852   | 0.011115 |
|           | -1.5747         | 0.94233     | 0.011115 | 0.371711775 |             |          |          |
| MIR3692   | ENSG00000266617 | 2.285       | 0.011155 | -0.65663    | 0.74429     | -0.65663 | 0.74429  |
|           | -0.65663        | 0.74429     | 0.011155 | 0.371711775 |             |          |          |
| HPCA      | ENSG00000121905 | 0.8479      | 0.19825  | 1.3618      | 0.086632    | 2.2848   | 0.011162 |
|           | 2.2848          | 0.011162    | 0.011162 | 0.371711775 |             |          |          |
| NA        | ENSG00000259874 | 2.2844      | 0.011173 | 0.043038    | 0.48284     | 0.043038 | 0.48284  |
|           | 0.043038        | 0.48284     | 0.011173 | 0.371711775 |             |          |          |
| TSR1      | ENSG00000167721 | 2.2844      | 0.011175 | 2.2844      | 0.011175    | 2.2844   | 0.011175 |
|           | 2.2844          | 0.011175    | 0.011175 | 0.371711775 |             |          |          |
| INPP5E    | ENSG00000148384 | 1.7426      | 0.040701 | 1.7426      | 0.040701    | 2.284    | 0.011187 |
|           | 1.7426          | 0.040701    | 0.011187 | 0.371857101 |             |          |          |
| LINC00494 | ENSG00000235621 | 2.1936      | 0.014133 | 1.3085      | 0.095352    | 2.2834   |          |
|           | 0.011204        | -0.035935   | 0.51433  | 0.011204    | 0.372168316 |          |          |
| NA        | ENSG00000277757 | 0.95671     | 0.16936  | 2.2825      | 0.011229    | 1.8524   | 0.031987 |
|           | 1.8524          | 0.031987    | 0.011229 | 0.372744666 |             |          |          |
| LINC02241 | ENSG00000251629 | 0.68088     | 0.24797  | 1.5063      | 0.065998    | 2.2817   |          |
|           | 0.011254        | 1.2676      | 0.10246  | 0.011254    | 0.373047905 |          |          |
| GPR79     | ENSG00000232374 | 2.1058      | 0.017611 | -0.089091   | 0.5355      | 2.2815   | 0.01126  |
|           | 1.6388          | 0.050625    | 0.01126  | 0.373047905 |             |          |          |
| NA        | ENSG00000233430 | 1.9784      | 0.023944 | 2.2807      | 0.011283    | 1.9124   | 0.027914 |
|           | 1.2899          | 0.098549    | 0.011283 | 0.373047905 |             |          |          |
| ZDHC20    | ENSG00000180776 | -0.38485    | 0.64983  | -0.37326    | 0.64552     | 2.2805   |          |
|           | 0.01129         | -0.56346    | 0.71344  | 0.01129     | 0.373047905 |          |          |
| NA        | ENSG00000280097 | 2.0402      | 0.020663 | 0.47848     | 0.31615     | 2.2804   | 0.011292 |
|           | 2.0402          | 0.020663    | 0.011292 | 0.373047905 |             |          |          |
| NA        | ENSG00000202177 | 2.28        | 0.011305 | 2.28        | 0.011305    | 2.28     | 0.011305 |
|           | 0.011305        | 0.373047905 |          |             |             |          |          |
| NA        | ENSG00000236892 | -0.1911     | 0.57578  | 0.21234     | 0.41592     | 0.25482  | 0.39943  |
|           | 2.2799          | 0.011308    | 0.011308 | 0.373047905 |             |          |          |
| H2AW      | ENSG00000181218 | 2.2797      | 0.011313 | 2.2797      | 0.011313    | 2.2797   | 0.011313 |
|           | 1.4349          | 0.075653    | 0.011313 | 0.373047905 |             |          |          |
| REXO1     | ENSG00000079313 | 0.58151     | 0.28045  | 2.2796      | 0.011316    | 0.017134 | 0.49316  |
|           | 0.23431         | 0.40737     | 0.011316 | 0.373047905 |             |          |          |
| PCDH18    | ENSG00000189184 | -0.11316    | 0.54505  | 0.20087     | 0.4204      | 2.2796   |          |
|           | 0.011317        | 1.971       | 0.024362 | 0.011317    | 0.373047905 |          |          |
| CDC25C    | ENSG00000158402 | 2.252       | 0.012161 | 2.2792      | 0.011329    | 2.213    | 0.013448 |
|           | 1.5471          | 0.060923    | 0.011329 | 0.373047905 |             |          |          |
| NA        | ENSG00000219755 | 2.2791      | 0.01133  | 2.2791      | 0.01133     | 1.7305   | 0.041769 |
|           | 2.2791          | 0.01133     | 0.01133  | 0.373047905 |             |          |          |
| DNAJB6P8  | ENSG00000264529 | -0.80933    | 0.79084  | -0.80933    | 0.79084     | 2.2788   |          |
|           | 0.01134         | 0.84199     | 0.1999   | 0.01134     | 0.373125051 |          |          |
| CXADRP3   | ENSG00000265766 | 0.51494     | 0.3033   | -0.75344    | 0.77441     | 1.3475   |          |
|           | 0.088913        | 2.2782      | 0.011357 | 0.011357    | 0.37327967  |          |          |
| MYO5B     | ENSG00000167306 | 0.78897     | 0.21506  | 0.98281     | 0.16285     | 2.2777   | 0.011371 |
|           | 1.6955          | 0.044987    | 0.011371 | 0.37327967  |             |          |          |
| RN7SL668P | ENSG00000239690 | 2.1712      | 0.014958 | 2.2777      | 0.011373    | 1.3036   |          |
|           | 0.096177        | 1.7257      | 0.042197 | 0.011373    | 0.37327967  |          |          |
| YBX1P5    | ENSG00000251108 | 2.2774      | 0.011383 | 0.81271     | 0.20819     | 1.1547   |          |
|           | 0.1241          | 2.2774      | 0.011383 | 0.011383    | 0.37327967  |          |          |
| NA        | ENSG00000222262 | 0.81942     | 0.20627  | 1.1423      | 0.12667     | 0.40371  | 0.34321  |
|           | 2.2774          | 0.011383    | 0.011383 | 0.37327967  |             |          |          |



|            |                 |          |             |             |             |          |          |
|------------|-----------------|----------|-------------|-------------|-------------|----------|----------|
| PPFIBP1    | ENSG00000110841 | 0.53979  | 0.29467     | 2.2769      | 0.011396    | 2.1637   |          |
|            | 0.015244        | 1.9494   | 0.025622    | 0.011396    | 0.37345466  |          |          |
| ALDH16A1   | ENSG00000161618 | 2.2756   | 0.011436    | 2.2756      | 0.011436    | 2.2756   |          |
|            | 0.011436        | 2.2756   | 0.011436    | 0.011436    | 0.374327562 |          |          |
| GGNBP2     | ENSG00000278311 | 1.2612   | 0.10362     | 0.74602     | 0.22783     | 0.10978  |          |
|            | 0.45629         | 2.2755   | 0.011438    | 0.011438    | 0.374327562 |          |          |
| HOXA6      | ENSG00000106006 | 2.2746   | 0.011464    | 2.2746      | 0.011464    | 2.2746   | 0.011464 |
|            | 2.2746          | 0.011464 | 0.011464    | 0.374926658 |             |          |          |
| LINC01476  | ENSG00000265313 | 2.1895   | 0.014279    | 2.274       | 0.011482    | 1.1666   | 0.12168  |
|            | 0.14084         | 0.444    | 0.011482    | 0.375077292 |             |          |          |
| RPL39P29   | ENSG00000236860 | 2.274    | 0.011484    | 2.274       | 0.011484    | 2.274    | 0.011484 |
|            | 0.011484        | 0.011484 | 0.375077292 |             |             |          |          |
| NA         | ENSG00000269985 | 0.35566  | 0.36105     | 0.28886     | 0.38634     | 2.2733   | 0.011505 |
|            | 0.43906         | 0.33031  | 0.011505    | 0.375511487 |             |          |          |
| NA         | ENSG00000244538 | -0.42935 | 0.66617     | 2.273       | 0.011514    | 0.092257 | 0.46325  |
|            | 0.092257        | 0.46325  | 0.011514    | 0.375553695 |             |          |          |
| LINC02311  | ENSG00000258718 | 2.2727   | 0.011523    | 2.2727      | 0.011523    | 2.2727   |          |
|            | 0.011523        | 2.2727   | 0.011523    | 0.011523    | 0.375595846 |          |          |
| MAP1LC3A   | ENSG00000101460 | 1.414    | 0.078684    | 1.8101      | 0.03514     | 1.2223   | 0.1108   |
|            | 2.2724          | 0.011532 | 0.011532    | 0.375637941 |             |          |          |
| LINC02254  | ENSG00000259664 | -0.30055 | 0.61812     | -0.51619    | 0.69714     | 2.2441   |          |
|            | 0.012414        | 2.2719   | 0.011547    | 0.011547    | 0.375875291 |          |          |
| RNU6-71P   | ENSG00000207203 | 2.2712   | 0.011567    | 1.9778      | 0.023973    | -0.29321 |          |
|            | 0.61532         | 0.26501  | 0.3955      | 0.011567    | 0.376186498 |          |          |
| PLEKHA6    | ENSG00000143850 | 0.97867  | 0.16387     | 1.5513      | 0.060415    | 1.1397   |          |
|            | 0.1272          | 2.271    | 0.011572    | 0.011572    | 0.376186498 |          |          |
| KDM3B      | ENSG00000120733 | 2.2707   | 0.011583    | 1.751       | 0.039972    | 1.9003   | 0.0287   |
|            | 1.3679          | 0.085672 | 0.011583    | 0.37629306  |             |          |          |
| NA         | ENSG00000202536 | 0.36567  | 0.35731     | 0.36567     | 0.35731     | 2.2703   | 0.011595 |
|            | 0.39475         | 0.34651  | 0.011595    | 0.376431945 |             |          |          |
| ALLC       | ENSG00000151360 | 1.8844   | 0.029753    | 2.2699      | 0.011606    | 1.8844   | 0.029753 |
|            | 1.6845          | 0.04604  | 0.011606    | 0.376538202 |             |          |          |
| NA         | ENSG00000255161 | -0.40905 | 0.65875     | -0.40905    | 0.65875     | -0.40905 | 0.65875  |
|            | 2.2683          | 0.011655 | 0.011655    | 0.377876347 |             |          |          |
| SEMA6C     | ENSG00000143434 | 2.0794   | 0.018792    | 1.7565      | 0.039504    | 1.6571   |          |
|            | 0.048754        | 2.2678   | 0.011672    | 0.011672    | 0.37805414  |          |          |
| NA         | ENSG00000206849 | 2.2676   | 0.011676    | 2.2676      | 0.011676    | 2.2676   | 0.011676 |
|            | 2.2676          | 0.011676 | 0.011676    | 0.37805414  |             |          |          |
| NA         | ENSG00000279985 | 1.4397   | 0.074973    | 2.267       | 0.011695    | 1.4397   | 0.074973 |
|            | 1.4397          | 0.074973 | 0.011695    | 0.378417895 |             |          |          |
| MIR5587    | ENSG00000266124 | 2.2665   | 0.011712    | 2.2665      | 0.011712    | 2.2665   |          |
|            | 0.011712        | 2.2665   | 0.011712    | 0.011712    | 0.378716496 |          |          |
| MIR4675    | ENSG00000265372 | 0.47801  | 0.31632     | 2.2656      | 0.011738    | 0.084516 |          |
|            | 0.46632         | 0.084516 | 0.46632     | 0.011738    | 0.379305531 |          |          |
| RNU6-1174P | ENSG00000253087 | 0.93835  | 0.17403     | 1.6401      | 0.050496    | 2.265    | 0.011755 |
|            | 2.1844          | 0.014468 | 0.011755    | 0.379416298 |             |          |          |
| NA         | ENSG00000272588 | 2.265    | 0.011757    | -0.01937    | 0.50773     | 1.7873   | 0.036947 |
|            | 1.7873          | 0.036947 | 0.011757    | 0.379416298 |             |          |          |
| NA         | ENSG00000238559 | 2.2645   | 0.011773    | 2.2645      | 0.011773    | 2.2645   | 0.011773 |
|            | 2.2645          | 0.011773 | 0.011773    | 0.379681198 |             |          |          |
| ISCA2      | ENSG00000165898 | 2.2641   | 0.011785    | 2.2641      | 0.011785    | 2.2641   | 0.011785 |
|            | 2.2641          | 0.011785 | 0.011785    | 0.379816832 |             |          |          |
| ARNTL2-AS1 | ENSG00000245311 | 1.4206   | 0.07772     | 0.80638     | 0.21001     | 2.2632   |          |
|            | 0.011811        | 2.1296   | 0.016601    | 0.011811    | 0.38028068  |          |          |
| RNU6-1125P | ENSG00000200471 | 1.6188   | 0.052748    | 2.2631      | 0.011815    | 2.2631   |          |
|            | 0.011815        | 2.2631   | 0.011815    | 0.011815    | 0.38028068  |          |          |
| TACR3      | ENSG00000169836 | 1.1063   | 0.13429     | 2.2626      | 0.011829    | 0.10535  | 0.45805  |
|            | 0.10535         | 0.45805  | 0.011829    | 0.380337971 |             |          |          |
| NA         | ENSG00000251170 | 1.5436   | 0.061338    | 1.1476      | 0.12556     | 2.2624   | 0.011836 |
|            | 1.9557          | 0.02525  | 0.011836    | 0.380337971 |             |          |          |
| LIN7A      | ENSG00000111052 | -0.88006 | 0.81059     | 2.2621      | 0.011844    | -0.76349 | 0.77741  |
|            | -0.76349        | 0.77741  | 0.011844    | 0.380337971 |             |          |          |

|           |                 |            |             |            |             |             |          |
|-----------|-----------------|------------|-------------|------------|-------------|-------------|----------|
| GATD1     | ENSG00000177225 | 0.051393   | 0.47951     | 1.2096     | 0.11322     | 2.262       | 0.011848 |
|           |                 | 0.91941    | 0.17894     | 0.011848   | 0.380337971 |             |          |
| NA        | ENSG00000284048 | 0.74372    | 0.22852     | 1.029      | 0.15174     | 0.74372     | 0.22852  |
|           |                 | 2.2614     | 0.011868    | 0.011868   | 0.380671066 |             |          |
| PGP       | ENSG00000184207 | 2.2612     | 0.011874    | 2.2612     | 0.011874    | 2.2612      | 0.011874 |
|           |                 | 2.2612     | 0.011874    | 0.011874   | 0.380671066 |             |          |
| MIR4719   | ENSG00000266426 | 1.6224     | 0.052355    | 2.2606     | 0.011893    | 1.0856      |          |
|           |                 | 0.13884    | 1.6224      | 0.052355   | 0.011893    | 0.380971268 |          |
| SRSF3P6   | ENSG00000233307 | 2.2604     | 0.011899    | -0.1679    | 0.56667     | 0.36534     |          |
|           |                 | 0.35743    | 1.1039      | 0.13482    | 0.011899    | 0.380971268 |          |
| NA        | ENSG00000116883 | 2.2597     | 0.011921    | -0.16802   | 0.56672     | 2.1839      | 0.014485 |
|           |                 | 1.9438     | 0.025959    | 0.011921   | 0.381206732 |             |          |
| NA        | ENSG00000233714 | 0.29932    | 0.38235     | 0.16833    | 0.43316     | 2.2596      | 0.011922 |
|           |                 | 0.16833    | 0.43316     | 0.011922   | 0.381206732 |             |          |
| BHLHB9P1  | ENSG00000258915 | 1.4196     | 0.077869    | 1.4196     | 0.077869    | 2.2593      |          |
|           |                 | 0.011931   | 1.4196      | 0.077869   | 0.011931    | 0.381244348 |          |
| RNU6-673P | ENSG00000201954 | 1.9983     | 0.022842    | 2.2585     | 0.011958    | 1.9983      |          |
|           |                 | 0.022842   | 1.9983      | 0.022842   | 0.011958    | 0.381516355 |          |
| KIF11     | ENSG00000138160 | -0.1247    | 0.54962     | -0.1247    | 0.54962     | -0.1247     | 0.54962  |
|           |                 | 2.2583     | 0.011963    | 0.011963   | 0.381516355 |             |          |
| RNA5SP46  | ENSG00000199240 | -0.62584   | 0.73429     | -0.51503   | 0.69673     | -0.51503    |          |
|           |                 | 0.69673    | 2.2583      | 0.011963   | 0.011963    | 0.381516355 |          |
| TBL2      | ENSG00000106638 | 2.258      | 0.011974    | 2.258      | 0.011974    | 2.258       | 0.011974 |
|           |                 | 0.63121    | 0.011974    | 0.38161741 |             |             |          |
| TACR1     | ENSG00000115353 | 1.1867     | 0.11767     | 2.2575     | 0.011987    | 2.2575      | 0.011987 |
|           |                 | 0.79964    | 0.21196     | 0.011987   | 0.381782033 |             |          |
| LCN1      | ENSG00000160349 | 0.32539    | 0.37244     | 2.257      | 0.012004    | -1.2957     | 0.90245  |
|           |                 | 0.018944   | 0.49244     | 0.012004   | 0.382073756 |             |          |
| NA        | ENSG00000212144 | 1.5971     | 0.055119    | 0.9913     | 0.16077     | 2.2568      | 0.012012 |
|           |                 | 0.31495    | 0.3764      | 0.012012   | 0.382078825 |             |          |
| NA        | ENSG00000231357 | 2.1137     | 0.017271    | 2.2565     | 0.012021    | 2.0441      | 0.020474 |
|           |                 | 1.7623     | 0.039005    | 0.012021   | 0.382115675 |             |          |
| NA        | ENSG00000206028 | -0.0099212 | 0.50396     | 2.2562     | 0.012029    | 0.36232     | 0.35855  |
|           |                 | 0.83135    | 0.20289     | 0.012029   | 0.382120711 |             |          |
| NA        | ENSG00000238195 | 2.2554     | 0.012055    | 2.2554     | 0.012055    | 2.2554      | 0.012055 |
|           |                 | 2.2554     | 0.012055    | 0.012055   | 0.382674756 |             |          |
| ACSS2     | ENSG00000131069 | 0.78516    | 0.21618     | 2.2549     | 0.012068    | 2.2549      | 0.012068 |
|           |                 | -0.47312   | 0.68194     | 0.012068   | 0.382674756 |             |          |
| NA        | ENSG00000249341 | 0.6777     | 0.24898     | 0.77668    | 0.21867     | -0.49316    | 0.68905  |
|           |                 | 2.2549     | 0.01207     | 0.01207    | 0.382674756 |             |          |
| ACOX1     | ENSG00000161533 | 2.2539     | 0.012103    | 2.2539     | 0.012103    | 1.0891      | 0.13805  |
|           |                 | -0.20086   | 0.57959     | 0.012103   | 0.383471515 |             |          |
| LINC00391 | ENSG00000238230 | 1.3426     | 0.089693    | 1.3426     | 0.089693    | 2.2533      |          |
|           |                 | 0.012121   | 1.3426      | 0.089693   | 0.012121    | 0.383792287 |          |
| LINC02263 | ENSG00000228358 | 2.2523     | 0.012151    | 2.2523     | 0.012151    | 2.0383      |          |
|           |                 | 0.020758   | 2.2523      | 0.012151   | 0.012151    | 0.384467691 |          |
| SPATA31C1 | ENSG00000230246 | 2.2519     | 0.012163    | -1.7443    | 0.95944     | 1.2705      |          |
|           |                 | 0.10195    | 0.62974     | 0.26443    | 0.012163    | 0.384467691 |          |
| B4GALT5   | ENSG00000158470 | -0.43627   | 0.66868     | -0.41866   | 0.66227     | 2.2519      |          |
|           |                 | 0.012166   | -0.83401    | 0.79786    | 0.012166    | 0.384467691 |          |
| NA        | ENSG00000280046 | 2.251      | 0.012192    | 2.251      | 0.012192    | 2.251       | 0.012192 |
|           |                 | 0.012192   | 0.385039637 |            |             |             |          |
| NA        | ENSG00000263618 | 1.911      | 0.028003    | 2.2506     | 0.012205    | 1.6928      | 0.045251 |
|           |                 | 0.82155    | 0.20567     | 0.012205   | 0.385200551 |             |          |
| NA        | ENSG00000222001 | -0.76069   | 0.77658     | -0.39203   | 0.65248     | 2.2503      | 0.012215 |
|           |                 | -0.76069   | 0.77658     | 0.012215   | 0.385266634 |             |          |
| DGAT2     | ENSG00000062282 | 2.25       | 0.012224    | 1.2599     | 0.10386     | -0.89359    | 0.81423  |
|           |                 | -0.28413   | 0.61185     | 0.012224   | 0.385301113 |             |          |
| RPL5P4    | ENSG00000229994 | 0.1387     | 0.44485     | 0.1387     | 0.44485     | 0.1387      |          |
|           |                 | 0.44485    | 2.2494      | 0.012242   | 0.012242    | 0.385619043 |          |
| VAT1L     | ENSG00000171724 | 1.6611     | 0.048343    | 1.8097     | 0.035169    | 2.2484      | 0.012276 |
|           |                 | 2.1095     | 0.01745     | 0.012276   | 0.386440233 |             |          |

|             |                 |          |          |          |             |             |          |
|-------------|-----------------|----------|----------|----------|-------------|-------------|----------|
| ECE2        | ENSG00000145194 | 1.8957   | 0.028999 | 0.34401  | 0.36542     | 2.2479      | 0.012291 |
|             |                 | -1.7603  | 0.96082  | 0.012291 | 0.38666264  |             |          |
| BCL11A      | ENSG00000119866 | -0.77243 | 0.78007  | 0.68909  | 0.24538     | 2.2474      |          |
|             |                 | 0.012308 | -0.289   | 0.61371  | 0.012308    | 0.386698156 |          |
| CCDC190     | ENSG00000185860 | 2.2474   | 0.012308 | 1.7678   | 0.038551    | 0.51273     |          |
|             |                 | 0.30407  | 1.0144   | 0.15519  | 0.012308    | 0.386698156 |          |
| NME2        | ENSG00000243678 | 2.2468   | 0.012325 | 2.2468   | 0.012325    | 2.2468      | 0.012325 |
|             |                 | 2.2468   | 0.012325 | 0.012325 | 0.386982764 |             |          |
| SMARCD1     | ENSG00000066117 | 2.2463   | 0.012342 | 1.5839   | 0.05661     | 1.3628      |          |
|             |                 | 0.086473 | 1.8799   | 0.030058 | 0.012342    | 0.386993549 |          |
| KCNC2       | ENSG00000166006 | 1.741    | 0.040845 | 2.2461   | 0.012349    | 2.2461      | 0.012349 |
|             |                 | 2.1332   | 0.016455 | 0.012349 | 0.386993549 |             |          |
| ALDH1A2     | ENSG00000128918 | 2.2459   | 0.012356 | 1.227    | 0.10991     | 0.35137     | 0.36265  |
|             |                 | 2.1661   | 0.015154 | 0.012356 | 0.386993549 |             |          |
| DECR2       | ENSG00000242612 | 0.15619  | 0.43794  | 1.1348   | 0.12824     | 2.2447      | 0.012393 |
|             |                 | 0.53695  | 0.29565  | 0.012393 | 0.386993549 |             |          |
| NA          | ENSG00000251310 | 1.3982   | 0.081023 | 2.1433   | 0.016044    | 2.2245      | 0.013057 |
|             |                 | 2.2445   | 0.012399 | 0.012399 | 0.386993549 |             |          |
| NA          | ENSG00000277397 | 0.80489  | 0.21044  | 2.2443   | 0.012406    | 0.59475     | 0.27601  |
|             |                 | 1.0833   | 0.13935  | 0.012406 | 0.386993549 |             |          |
| HTR3C       | ENSG00000178084 | 2.244    | 0.012415 | -0.27686 | 0.60906     | -0.59695    | 0.72473  |
|             |                 | -0.7284  | 0.76682  | 0.012415 | 0.386993549 |             |          |
| MFAP3       | ENSG00000037749 | 1.2053   | 0.11405  | 1.1668   | 0.12165     | 1.2213      | 0.11098  |
|             |                 | 2.244    | 0.012417 | 0.012417 | 0.386993549 |             |          |
| FFAR4       | ENSG00000186188 | 2.2439   | 0.01242  | 0.70502  | 0.2404      | 0.70502     | 0.2404   |
|             |                 | 0.70502  | 0.2404   | 0.01242  | 0.386993549 |             |          |
| APOE        | ENSG00000130203 | 0.71622  | 0.23693  | -0.21399 | 0.58472     | -0.32259    | 0.6265   |
|             |                 | 2.2436   | 0.012428 | 0.012428 | 0.386993549 |             |          |
| MRM1        | ENSG00000278619 | 2.2427   | 0.012459 | 1.6328   | 0.051255    | -0.1703     | 0.56761  |
|             |                 | 0.17372  | 0.43104  | 0.012459 | 0.386993549 |             |          |
| RNA5SP454   | ENSG00000253040 | 2.2423   | 0.012471 | 1.5242   | 0.06373     | 1.1668      |          |
|             |                 | 0.12164  | 2.1309   | 0.01655  | 0.012471    | 0.386993549 |          |
| DCLK1       | ENSG00000133083 | -1.0218  | 0.84657  | 0.52109  | 0.30115     | 2.2418      | 0.012488 |
|             |                 | 1.3622   | 0.086571 | 0.012488 | 0.386993549 |             |          |
| FKBP4P1     | ENSG00000251463 | 2.2418   | 0.012489 | -0.32383 | 0.62697     | -1.2113     |          |
|             |                 | 0.8871   | -0.32383 | 0.62697  | 0.012489    | 0.386993549 |          |
| PCBP3       | ENSG00000183570 | 1.0555   | 0.1456   | 2.0808   | 0.018728    | 2.2417      | 0.012491 |
|             |                 | 0.59093  | 0.27728  | 0.012491 | 0.386993549 |             |          |
| ARFGAP2     | ENSG00000149182 | 1.1816   | 0.11868  | 1.1816   | 0.11868     | 1.1816      |          |
|             |                 | 0.11868  | 2.2416   | 0.012493 | 0.012493    | 0.386993549 |          |
| SEZ6L-AS1   | ENSG00000224192 | 2.1398   | 0.016186 | 2.2416   | 0.012494    | 2.2416      |          |
|             |                 | 0.012494 | 1.482    | 0.069176 | 0.012494    | 0.386993549 |          |
| DHFR        | ENSG00000228716 | 2.2415   | 0.012497 | 0.87593  | 0.19053     | 0.084248    | 0.46643  |
|             |                 | 1.0072   | 0.15692  | 0.012497 | 0.386993549 |             |          |
| NA          | ENSG00000230339 | 2.2415   | 0.012498 | 0.17976  | 0.42867     | 0.77354     | 0.2196   |
|             |                 | 1.092    | 0.13742  | 0.012498 | 0.386993549 |             |          |
| STMND1      | ENSG00000230873 | -0.62776 | 0.73492  | -0.29239 | 0.61501     | 0.50045     |          |
|             |                 | 0.30838  | 2.2412   | 0.012505 | 0.012505    | 0.386993549 |          |
| NA          | ENSG00000233947 | 2.2412   | 0.012505 | -0.73909 | 0.77007     | -0.40383    | 0.65683  |
|             |                 | -0.40383 | 0.65683  | 0.012505 | 0.386993549 |             |          |
| CCDC51      | ENSG00000164051 | 0.95368  | 0.17012  | 0.77957  | 0.21782     | 2.2412      |          |
|             |                 | 0.012507 | 1.5811   | 0.05693  | 0.012507    | 0.386993549 |          |
| CACNA1C-AS2 | ENSG00000256271 | 2.2411   | 0.012508 | 0.23842  | 0.40578     | 2.2411      |          |
|             |                 | 0.012508 | 2.2411   | 0.012508 | 0.012508    | 0.386993549 |          |
| DCAF13P2    | ENSG00000250816 | 0.71099  | 0.23854  | 0.15042  | 0.44022     | 0.17254     |          |
|             |                 | 0.43151  | 2.2406   | 0.012525 | 0.012525    | 0.38702806  |          |
| NA          | ENSG00000258750 | 0.91718  | 0.17952  | 0.91718  | 0.17952     | 2.2406      | 0.012525 |
|             |                 | -1.0532  | 0.85387  | 0.012525 | 0.38702806  |             |          |
| RPL31P58    | ENSG00000243053 | 2.2401   | 0.012544 | 2.2401   | 0.012544    | 2.2401      |          |
|             |                 | 0.012544 | 2.2401   | 0.012544 | 0.012544    | 0.387102014 |          |
| NA          | ENSG00000279089 | 2.2399   | 0.012549 | 2.2399   | 0.012549    | 2.2399      | 0.012549 |
|             |                 | 2.2399   | 0.012549 | 0.012549 | 0.387102014 |             |          |

|            |                 |             |             |             |             |          |          |
|------------|-----------------|-------------|-------------|-------------|-------------|----------|----------|
| NA         | ENSG00000197320 | 2.2397      | 0.012555    | 0.69355     | 0.24398     | -0.22306 | 0.58826  |
|            | -0.47275        | 0.6818      | 0.012555    | 0.387102014 |             |          |          |
| MAPK10     | ENSG00000109339 | 2.2391      | 0.012576    | 0.075436    | 0.46993     | -0.17452 |          |
|            | 0.56927         | -1.1806     | 0.88113     | 0.012576    | 0.387102014 |          |          |
| RPS7P9     | ENSG00000233353 | 2.239       | 0.012577    | 2.239       | 0.012577    | 2.239    | 0.012577 |
|            | 0.012577        | 0.012577    | 0.387102014 |             |             |          |          |
| TRPV6      | ENSG00000165125 | 2.2389      | 0.012583    | 1.9759      | 0.024081    | 0.17467  | 0.43067  |
|            | 1.5782          | 0.057257    | 0.012583    | 0.387102014 |             |          |          |
| LINC02262  | ENSG00000224932 | 2.2388      | 0.012583    | 1.8424      | 0.032709    | 2.2388   |          |
|            | 0.012583        | 2.2388      | 0.012583    | 0.012583    | 0.387102014 |          |          |
| PNPLA6     | ENSG00000032444 | -2.5704     | 0.99492     | -1.1754     | 0.88008     | 0.065164 |          |
|            | 0.47402         | 2.2381      | 0.012606    | 0.012606    | 0.38753707  |          |          |
| NA         | ENSG00000231443 | 1.0472      | 0.1475      | -0.89762    | 0.81531     | 2.2378   | 0.012616 |
|            | 0.13422         | 0.44661     | 0.012616    | 0.38753707  |             |          |          |
| NA         | ENSG00000240979 | 2.2377      | 0.012621    | 2.2377      | 0.012621    | 2.2377   | 0.012621 |
|            | 2.2377          | 0.012621    | 0.012621    | 0.38753707  |             |          |          |
| NA         | ENSG00000252874 | 2.2371      | 0.012639    | 2.2371      | 0.012639    | 2.2371   | 0.012639 |
|            | 2.2371          | 0.012639    | 0.012639    | 0.387754638 |             |          |          |
| MC1R       | ENSG00000258839 | 2.237       | 0.012644    | 2.237       | 0.012644    | 2.237    | 0.012644 |
|            | 0.012644        | 0.387754638 |             |             |             |          |          |
| NA         | ENSG00000253342 | 1.8685      | 0.030844    | 1.8685      | 0.030844    | 1.1418   | 0.12677  |
|            | 2.236           | 0.012675    | 0.012675    | 0.388460849 |             |          |          |
| NA         | ENSG00000258422 | 2.2357      | 0.012684    | 2.2357      | 0.012684    | 2.2357   | 0.012684 |
|            | 0.15388         | 0.43885     | 0.012684    | 0.388462582 |             |          |          |
| ACP6       | ENSG00000162836 | 2.2355      | 0.012691    | 0.3647      | 0.35767     | 2.0048   | 0.022491 |
|            | -0.35675        | 0.63936     | 0.012691    | 0.388462582 |             |          |          |
| CYP2A13    | ENSG00000197838 | 0.69553     | 0.24336     | 0.73835     | 0.23015     | -0.63794 |          |
|            | 0.73824         | 2.235       | 0.012707    | 0.012707    | 0.388708167 |          |          |
| CYCSP1     | ENSG00000271423 | -1.166      | 0.87819     | -0.97938    | 0.8363      | 0.12973  |          |
|            | 0.44839         | 2.2343      | 0.012732    | 0.012732    | 0.388711708 |          |          |
| ZNF444P1   | ENSG00000259738 | 2.2343      | 0.012733    | 2.2343      | 0.012733    | 2.2343   |          |
|            | 0.012733        | 2.2343      | 0.012733    | 0.012733    | 0.388711708 |          |          |
| ATG9A      | ENSG00000198925 | 1.9229      | 0.027249    | 2.2342      | 0.012737    | 2.1544   | 0.015603 |
|            | 2.1544          | 0.015603    | 0.012737    | 0.388711708 |             |          |          |
| RN7SL246P  | ENSG00000265093 | 2.234       | 0.012742    | 2.234       | 0.012742    | 2.234    | 0.012742 |
|            | 0.012742        | 0.012742    | 0.388711708 |             |             |          |          |
| HK3        | ENSG00000160883 | -1.0466     | 0.85236     | 2.2338      | 0.012747    | 1.4487   | 0.073709 |
|            | 1.3507          | 0.088396    | 0.012747    | 0.388711708 |             |          |          |
| SCOC-AS1   | ENSG00000196951 | 0.51511     | 0.30324     | -0.076426   | 0.53046     | 2.2335   |          |
|            | 0.012758        | 0.0030033   | 0.4988      | 0.012758    | 0.38880384  |          |          |
| NA         | ENSG00000249658 | 2.233       | 0.012775    | 2.233       | 0.012775    | 2.233    | 0.012775 |
|            | 0.012775        | 0.388926883 |             |             |             |          |          |
| XRCC4      | ENSG00000152422 | 0.23247     | 0.40809     | -0.62659    | 0.73454     | 2.2329   | 0.012778 |
|            | -1.3064         | 0.90429     | 0.012778    | 0.388926883 |             |          |          |
| MTCO2P34   | ENSG00000232198 | 2.2323      | 0.012798    | 2.2323      | 0.012798    | 2.2323   |          |
|            | 0.012798        | 2.2323      | 0.012798    | 0.012798    | 0.389141253 |          |          |
| MYMX       | ENSG00000262179 | 2.2321      | 0.012804    | 2.2312      | 0.012832    | 1.8253   | 0.033978 |
|            | 1.8253          | 0.033978    | 0.012804    | 0.389141253 |             |          |          |
| VPS9D1-AS1 | ENSG00000261373 | 2.2319      | 0.012809    | 2.2319      | 0.012809    | 2.2319   |          |
|            | 0.012809        | 2.2319      | 0.012809    | 0.012809    | 0.389141253 |          |          |
| GRIK4      | ENSG00000149403 | 0.07296     | 0.47092     | 1.6046      | 0.05429     | 2.2308   | 0.012847 |
|            | 0.98333         | 0.16272     | 0.012847    | 0.389567257 |             |          |          |
| NA         | ENSG00000278531 | 2.2308      | 0.012848    | 1.2815      | 0.10001     | 1.5911   | 0.055795 |
|            | 1.5152          | 0.064865    | 0.012848    | 0.389567257 |             |          |          |
| ZC3H6      | ENSG00000188177 | 0.21161     | 0.41621     | 0.66282     | 0.25372     | 1.3833   | 0.08329  |
|            | 2.2306          | 0.012852    | 0.012852    | 0.389567257 |             |          |          |
| NA         | ENSG00000236108 | 2.2306      | 0.012855    | 2.2306      | 0.012855    | 2.2306   | 0.012855 |
|            | 1.6654          | 0.047917    | 0.012855    | 0.389567257 |             |          |          |
| WFIKN1     | ENSG00000127578 | 2.2296      | 0.012886    | 2.0497      | 0.020197    | 2.0497   |          |
|            | 0.020197        | 2.0497      | 0.020197    | 0.012886    | 0.390264002 |          |          |
| FAM200A    | ENSG00000221909 | 2.2292      | 0.012901    | 1.989       | 0.023351    | 2.2292   | 0.012901 |
|            | 2.2292          | 0.012901    | 0.012901    | 0.390384132 |             |          |          |

|           |                 |          |             |             |             |            |          |       |
|-----------|-----------------|----------|-------------|-------------|-------------|------------|----------|-------|
| LINC01549 | ENSG00000232560 | 0.26524  | 0.39541     | 0.26524     | 0.39541     | 0.19517    |          |       |
|           | 0.42263         | 2.229    | 0.012908    | 0.012908    | 0.390384132 |            |          |       |
| PCDH9-AS2 | ENSG00000228842 | 2.2288   | 0.012914    | 2.2288      | 0.012914    | 1.6684     |          |       |
|           | 0.047616        | 1.8533   | 0.031922    | 0.012914    | 0.390384132 |            |          |       |
| MIR4799   | ENSG00000264274 | 2.2278   | 0.012947    | 2.2278      | 0.012947    | 2.2278     |          |       |
|           | 0.012947        | 1.0747   | 0.14126     | 0.012947    | 0.391139064 |            |          |       |
| NA        | ENSG00000226197 | 2.2272   | 0.012967    | -0.95546    | 0.83033     | 1.9385     | 0.026279 |       |
|           | 0.22332         | 0.41164  | 0.012967    | 0.391500564 |             |            |          |       |
| EIF2B5    | ENSG00000145191 | 1.8879   | 0.029523    | -1.8109     | 0.96492     | -1.3638    |          |       |
|           | 0.91369         | 2.2262   | 0.013001    | 0.013001    | 0.392284043 |            |          |       |
| ARNTL2    | ENSG00000029153 | 2.2255   | 0.013024    | 1.2465      | 0.10629     | 0.9501     |          |       |
|           | 0.17103         | 1.2926   | 0.098067    | 0.013024    | 0.392639191 |            |          |       |
| TUBGCP3   | ENSG00000126216 | 1.5234   | 0.063833    | 0.57202     | 0.28365     | 2.225      | 0.01304  |       |
|           | 1.7655          | 0.038742 | 0.01304     | 0.392639191 |             |            |          |       |
| NA        | ENSG00000207351 | -0.69026 | 0.75499     | -0.69026    | 0.75499     | 2.2249     | 0.013043 |       |
|           | -0.73812        | 0.76978  | 0.013043    | 0.392639191 |             |            |          |       |
| NA        | ENSG00000274678 | 2.2249   | 0.013045    | 2.2249      | 0.013045    | 2.2249     | 0.013045 |       |
|           | 2.2249          | 0.013045 | 0.013045    | 0.392639191 |             |            |          |       |
| MRPL45P2  | ENSG00000228782 | 1.7191   | 0.042801    | 1.919       | 0.027491    | 2.2243     | 0.013064 |       |
|           | 0.41141         | 0.34038  | 0.013064    | 0.392968346 |             |            |          |       |
| ADAMTSL2  | ENSG00000197859 | 1.0958   | 0.13659     | 1.2202      | 0.11119     | 2.2238     |          |       |
|           | 0.013082        | 1.7792   | 0.037604    | 0.013082    | 0.393267033 |            |          |       |
| BTF3L4P3  | ENSG00000213108 | 2.2232   | 0.013101    | 2.2232      | 0.013101    | 2.2232     |          |       |
|           | 0.013101        | 2.2232   | 0.013101    | 0.013101    | 0.393320714 |            |          |       |
| NCR1      | ENSG00000189430 | 2.197    | 0.014011    | 2.1993      | 0.013929    | 0.051842   | 0.47933  | 2.223 |
|           | 0.013108        | 0.013108 | 0.393320714 |             |             |            |          |       |
| PPIAP28   | ENSG00000226633 | -0.26862 | 0.60589     | 0.32463     | 0.37273     | 0.52485    |          |       |
|           | 0.29985         | 2.223    | 0.013108    | 0.013108    | 0.393320714 |            |          |       |
| NA        | ENSG00000273816 | 2.2223   | 0.013132    | 2.2223      | 0.013132    | 2.2223     | 0.013132 |       |
|           | 2.2223          | 0.013132 | 0.013132    | 0.393798375 |             |            |          |       |
| PPP1CB    | ENSG00000213639 | 2.2217   | 0.013153    | 0.54273     | 0.29366     | 1.2038     |          |       |
|           | 0.11434         | 0.73748  | 0.23042     | 0.013153    | 0.393940743 |            |          |       |
| GPR162    | ENSG00000250510 | -0.53145 | 0.70245     | 2.2216      | 0.013154    | -0.53145   |          |       |
|           | 0.70245         | -0.53145 | 0.70245     | 0.013154    | 0.393940743 |            |          |       |
| NA        | ENSG00000266846 | -0.75769 | 0.77568     | -0.0076349  | 0.50305     | -0.0076349 | 0.50305  |       |
|           | 2.2214          | 0.013161 | 0.013161    | 0.393940743 |             |            |          |       |
| AHCY      | ENSG00000101444 | 2.2211   | 0.013171    | 1.2892      | 0.098665    | 1.1857     | 0.11786  |       |
|           | 1.0899          | 0.13787  | 0.013171    | 0.393998054 |             |            |          |       |
| NA        | ENSG00000267662 | -0.68663 | 0.75384     | -0.72732    | 0.76649     | 1.3739     | 0.084735 |       |
|           | 2.2198          | 0.013216 | 0.013216    | 0.395101644 |             |            |          |       |
| RAB1A     | ENSG00000138069 | 1.9056   | 0.02835     | 2.1504      | 0.01576     | 1.9056     | 0.02835  |       |
|           | 2.219           | 0.013244 | 0.013244    | 0.395657648 |             |            |          |       |
| IL17RC    | ENSG00000163702 | -0.17417 | 0.56913     | 2.2187      | 0.013254    | 0.83705    |          |       |
|           | 0.20128         | 0.87855  | 0.18982     | 0.013254    | 0.395657648 |            |          |       |
| NA        | ENSG00000219404 | 1.2022   | 0.11463     | 2.2183      | 0.013268    | 2.2183     | 0.013268 |       |
|           | 2.2183          | 0.013268 | 0.013268    | 0.395657648 |             |            |          |       |
| NA        | ENSG00000225118 | -0.45588 | 0.67576     | 0.62756     | 0.26515     | 2.0503     | 0.020167 |       |
|           | 2.2177          | 0.013288 | 0.013288    | 0.395657648 |             |            |          |       |
| HELLS     | ENSG00000119969 | 2.2176   | 0.013292    | 0.1419      | 0.44358     | -0.18309   | 0.57264  |       |
|           | -0.26737        | 0.60541  | 0.013292    | 0.395657648 |             |            |          |       |
| SLA       | ENSG00000155926 | -0.75314 | 0.77432     | -0.75314    | 0.77432     | -1.0433    | 0.8516   |       |
|           | 2.2172          | 0.013304 | 0.013304    | 0.395657648 |             |            |          |       |
| SNAP47    | ENSG00000143740 | 0.18525  | 0.42652     | 2.2168      | 0.013319    | -0.00254   |          |       |
|           | 0.50101         | 1.2345   | 0.1085      | 0.013319    | 0.395657648 |            |          |       |
| NDUFB4P6  | ENSG00000235258 | 0.52631  | 0.29934     | 2.2165      | 0.013327    | 1.3848     |          |       |
|           | 0.083052        | 1.5988   | 0.054931    | 0.013327    | 0.395657648 |            |          |       |
| NA        | ENSG00000177788 | -0.75133 | 0.77377     | 0.40787     | 0.34168     | 2.2162     | 0.013337 |       |
|           | -0.47362        | 0.68212  | 0.013337    | 0.395657648 |             |            |          |       |
| KLHL5     | ENSG00000109790 | 0.034628 | 0.48619     | 2.2162      | 0.01334     | -0.31869   | 0.62502  |       |
|           | 0.42316         | 0.33609  | 0.01334     | 0.395657648 |             |            |          |       |
| LRRC10B   | ENSG00000204950 | 2.2161   | 0.013342    | 2.2161      | 0.013342    | 2.2161     |          |       |
|           | 0.013342        | 0.57557  | 0.28245     | 0.013342    | 0.395657648 |            |          |       |

|             |                 |             |             |             |             |          |          |         |
|-------------|-----------------|-------------|-------------|-------------|-------------|----------|----------|---------|
| MIR4488     | ENSG00000266006 | 0.36554     | 0.35736     | 2.2161      | 0.013342    | 2.2161   |          |         |
|             | 0.013342        | 2.2161      | 0.013342    | 0.013342    | 0.395657648 |          |          |         |
| ATG13       | ENSG00000175224 | -0.0019327  | 0.50077     | 1.3882      | 0.082541    | 1.7713   | 0.038252 |         |
|             | 2.216           | 0.013346    | 0.395657648 |             |             |          |          |         |
| WNT8A       | ENSG00000061492 | 0.36718     | 0.35674     | 0.33719     | 0.36799     | 0.97156  | 0.16564  |         |
|             | 2.2157          | 0.013355    | 0.013355    | 0.395657648 |             |          |          |         |
| NA          | ENSG00000229172 | 2.2149      | 0.013383    | 2.2149      | 0.013383    | 2.2149   | 0.013383 |         |
|             | 2.2149          | 0.013383    | 0.013383    | 0.395657648 |             |          |          |         |
| NA          | ENSG00000280305 | 1.6283      | 0.051725    | 2.2149      | 0.013383    | 2.2149   | 0.013383 |         |
|             | 2.2149          | 0.013383    | 0.013383    | 0.395657648 |             |          |          |         |
| NATD1       | ENSG00000274180 | 0.16161     | 0.43581     | 2.1921      | 0.014187    | 2.2147   | 0.013389 |         |
|             | 1.8108          | 0.035088    | 0.013389    | 0.395657648 |             |          |          |         |
| LINC02586   | ENSG00000224965 | 2.214       | 0.013414    | -0.36251    | 0.64152     | 0.5039   | 0.30717  |         |
|             | 0.5039          | 0.30717     | 0.013414    | 0.395657648 |             |          |          |         |
| RPL13       | ENSG00000167526 | 2.2138      | 0.013422    | -0.24394    | 0.59636     | 1.0707   | 0.14215  |         |
|             | 1.0106          | 0.1561      | 0.013422    | 0.395657648 |             |          |          |         |
| MIR140      | ENSG00000208017 | 2.2137      | 0.013424    | 2.2137      | 0.013424    | 2.2137   |          |         |
|             | 0.013424        | 2.2137      | 0.013424    | 0.013424    | 0.395657648 |          |          |         |
| NA          | ENSG00000223119 | 0.74785     | 0.22728     | 2.2137      | 0.013425    | 1.5136   | 0.065061 |         |
|             | -0.26446        | 0.60429     | 0.013425    | 0.395657648 |             |          |          |         |
| SPSB3       | ENSG00000162032 | 0.12215     | 0.45139     | 2.2136      | 0.013426    | 0.12215  | 0.45139  |         |
|             | 0.12215         | 0.45139     | 0.013426    | 0.395657648 |             |          |          |         |
| RNF214      | ENSG00000167257 | 0.36286     | 0.35835     | -0.62477    | 0.73394     | -0.62477 |          |         |
|             | 0.73394         | 2.2135      | 0.013432    | 0.013432    | 0.395657648 |          |          |         |
| CST13P      | ENSG00000204663 | 0.28878     | 0.38638     | 0.98743     | 0.16172     | -0.42975 |          |         |
|             | 0.66631         | 2.2125      | 0.013465    | 0.013465    | 0.395657648 |          |          |         |
| ARPC1B      | ENSG00000130429 | 2.2122      | 0.013476    | 1.5545      | 0.060038    | 1.0597   |          |         |
|             | 0.14465         | 1.3889      | 0.082437    | 0.013476    | 0.395657648 |          |          |         |
| NA          | ENSG00000255575 | 2.2122      | 0.013476    | 2.2122      | 0.013476    | 2.2122   | 0.013476 |         |
|             | 2.2122          | 0.013476    | 0.013476    | 0.395657648 |             |          |          |         |
| LINC01916   | ENSG00000264232 | 1.1867      | 0.11767     | 2.2121      | 0.01348     | -0.24944 |          |         |
|             | 0.59849         | -0.57833    | 0.71848     | 0.01348     | 0.395657648 |          |          |         |
| NA          | ENSG00000232172 | 0.77032     | 0.22056     | 2.2119      | 0.013487    | 2.2119   | 0.013487 |         |
|             | 0.36554         | 0.35735     | 0.013487    | 0.395657648 |             |          |          |         |
| PRIMA1      | ENSG00000175785 | 0.87676     | 0.19031     | 2.2116      | 0.013498    | 0.75614  |          |         |
|             | 0.22478         | 0.61039     | 0.2708      | 0.013498    | 0.395657648 |          |          |         |
| ABCC5-AS1   | ENSG00000223882 | 1.0733      | 0.14157     | 1.8757      | 0.030349    | 2.211    | 0.013519 |         |
|             | 2.0666          | 0.019384    | 0.013519    | 0.395657648 |             |          |          |         |
| DNAJC24     | ENSG00000170946 | 2.2105      | 0.013536    | 2.0781      | 0.01885     | 0.42275  |          |         |
|             | 0.33624         | 2.2105      | 0.013536    | 0.013536    | 0.395657648 |          |          |         |
| NA          | ENSG00000264312 | 1.9884      | 0.023386    | 0.67668     | 0.2493      | 2.2103   | 0.013543 |         |
|             | 2.2103          | 0.013543    | 0.013543    | 0.395657648 |             |          |          |         |
| RNU2-9P     | ENSG00000222126 | 1.5629      | 0.059039    | 1.5629      | 0.059039    | 1.5629   |          |         |
|             | 0.059039        | 2.2099      | 0.013557    | 0.013557    | 0.395657648 |          |          |         |
| RNU6ATAC3P  | ENSG00000210709 | 0.57145     | 0.28385     | 2.2099      | 0.013558    | 0.04059  |          |         |
|             | 0.48381         | 0.04059     | 0.48381     | 0.013558    | 0.395657648 |          |          |         |
| LMO3        | ENSG00000048540 | -0.5234     | 0.69965     | -0.7165     | 0.76316     | 0.040472 | 0.48386  |         |
|             | 2.2096          | 0.013565    | 0.013565    | 0.395657648 |             |          |          |         |
| PRKAR2A-AS1 | ENSG00000224424 | 2.2095      | 0.01357     | 2.2095      | 0.01357     | 2.2095   |          |         |
|             | 0.01357         | 2.2095      | 0.01357     | 0.01357     | 0.395657648 |          |          |         |
| PGLYRP2     | ENSG00000161031 | 2.2093      | 0.013576    | 2.1         | 0.017866    | 1.129    | 0.12945  |         |
|             | 2.2093          | 0.013576    | 0.013576    | 0.395657648 |             |          |          |         |
| LINC00861   | ENSG00000245164 | 2.2093      | 0.013577    | 2.2093      | 0.013577    | 0.78042  |          |         |
|             | 0.21757         | 1.9394      | 0.026225    | 0.013577    | 0.395657648 |          |          |         |
| ZMAT5       | ENSG00000100319 | 2.209       | 0.013587    | 2.209       | 0.013587    | 2.209    | 0.013587 | 0.371   |
|             | 0.013587        | 0.395657648 |             |             |             |          |          | 0.35532 |
| NA          | ENSG00000253343 | 1.389       | 0.082416    | 1.9882      | 0.023393    | 2.209    | 0.013587 | 2.209   |
|             | 0.013587        | 0.013587    | 0.395657648 |             |             |          |          |         |
| RPL7P23     | ENSG00000244363 | 1.5791      | 0.057157    | 1.9641      | 0.024762    | 2.209    | 0.013589 |         |
|             | 1.1962          | 0.11581     | 0.013589    | 0.395657648 |             |          |          |         |
| NA          | ENSG00000263781 | 2.2089      | 0.01359     | 2.2089      | 0.01359     | 2.2089   | 0.01359  |         |
|             | 2.2089          | 0.01359     | 0.01359     | 0.395657648 |             |          |          |         |

|           |                 |             |             |             |             |          |          |       |
|-----------|-----------------|-------------|-------------|-------------|-------------|----------|----------|-------|
| RN7SKP222 | ENSG00000222583 | -0.18744    | 0.57434     | -0.20664    | 0.58186     | 2.2088   |          |       |
|           | 0.013593        | 0.28484     | 0.38788     | 0.013593    | 0.395657648 |          |          |       |
| TRBV7-5   | ENSG00000227550 | 2.2087      | 0.013599    | 1.2357      | 0.10828     | 2.2087   |          |       |
|           | 0.013599        | 2.2087      | 0.013599    | 0.013599    | 0.395657648 |          |          |       |
| NA        | ENSG00000283338 | 2.2085      | 0.013605    | 2.2085      | 0.013605    | 2.2085   | 0.013605 |       |
|           | 2.2085          | 0.013605    | 0.013605    | 0.395657648 |             |          |          |       |
| NA        | ENSG00000231756 | 2.2084      | 0.013609    | 2.2084      | 0.013609    | -0.23974 | 0.59473  |       |
|           | 2.2084          | 0.013609    | 0.013609    | 0.395657648 |             |          |          |       |
| NA        | ENSG00000278291 | 2.2076      | 0.013635    | 1.7266      | 0.042119    | 1.7266   | 0.042119 |       |
|           | 1.7266          | 0.042119    | 0.013635    | 0.395657648 |             |          |          |       |
| OR7E38P   | ENSG00000183444 | 0.68454     | 0.24682     | 0.68454     | 0.24682     | 0.68454  |          |       |
|           | 0.24682         | 2.2076      | 0.013637    | 0.013637    | 0.395657648 |          |          |       |
| NA        | ENSG00000237070 | 2.2072      | 0.013649    | 2.2072      | 0.013649    | 2.2072   | 0.013649 |       |
|           | 0.7948          | 0.21336     | 0.013649    | 0.395657648 |             |          |          |       |
| TAF4B     | ENSG00000141384 | 0.23127     | 0.40855     | 1.3828      | 0.083366    | 1.2116   | 0.11283  |       |
|           | 2.2071          | 0.013654    | 0.013654    | 0.395657648 |             |          |          |       |
| NA        | ENSG00000258695 | -0.66239    | 0.74614     | 2.2068      | 0.013664    | -0.52753 | 0.70109  |       |
|           | -0.52753        | 0.70109     | 0.013664    | 0.395657648 |             |          |          |       |
| NA        | ENSG00000278475 | 2.2066      | 0.01367     | 2.2066      | 0.01367     | 2.2066   | 0.01367  |       |
|           | 2.2066          | 0.01367     | 0.01367     | 0.395657648 |             |          |          |       |
| CHMP4A    | ENSG00000254505 | 2.206       | 0.013693    | 2.206       | 0.013693    | 2.206    | 0.013693 | 2.206 |
|           | 0.013693        | 0.013693    | 0.395657648 |             |             |          |          |       |
| NA        | ENSG00000254692 | 2.206       | 0.013693    | 2.206       | 0.013693    | 2.206    | 0.013693 | 2.206 |
|           | 0.013693        | 0.395657648 |             |             |             |          |          |       |
| SLC33A1   | ENSG00000169359 | 2.0601      | 0.019693    | 2.1686      | 0.015057    | 2.206    | 0.013694 |       |
|           | 1.3298          | 0.091799    | 0.013694    | 0.395657648 |             |          |          |       |
| LINC01587 | ENSG00000082929 | 2.2056      | 0.013707    | 0.64795     | 0.25851     | 2.0199   |          |       |
|           | 0.021695        | 1.8996      | 0.028745    | 0.013707    | 0.395657648 |          |          |       |
| NA        | ENSG00000264869 | 0.41872     | 0.33771     | 0.89652     | 0.18499     | 2.2054   | 0.013713 |       |
|           | -0.87525        | 0.80928     | 0.013713    | 0.395657648 |             |          |          |       |
| MIR26B    | ENSG00000199121 | 2.2052      | 0.013721    | 2.2052      | 0.013721    | 2.2052   |          |       |
|           | 0.013721        | 2.2052      | 0.013721    | 0.013721    | 0.395657648 |          |          |       |
| C1orf167  | ENSG00000215910 | 2.205       | 0.013726    | 1.3949      | 0.08152     | 1.3949   | 0.08152  |       |
|           | 1.3949          | 0.08152     | 0.013726    | 0.395657648 |             |          |          |       |
| NA        | ENSG00000229498 | 2.205       | 0.013728    | -0.94337    | 0.82726     | -0.95887 | 0.83119  |       |
|           | -0.6767         | 0.7507      | 0.013728    | 0.395657648 |             |          |          |       |
| MIS18A    | ENSG00000159055 | 0.59765     | 0.27504     | -1.7998     | 0.96405     | 2.2049   |          |       |
|           | 0.013731        | 0.6713      | 0.25101     | 0.013731    | 0.395657648 |          |          |       |
| NA        | ENSG00000279676 | 2.2047      | 0.013738    | 2.2047      | 0.013738    | 2.2047   | 0.013738 |       |
|           | 2.2047          | 0.013738    | 0.013738    | 0.395657648 |             |          |          |       |
| NA        | ENSG00000261227 | 2.2042      | 0.013756    | -0.7317     | 0.76782     | -1.552   | 0.93967  |       |
|           | -0.7317         | 0.76782     | 0.013756    | 0.395765844 |             |          |          |       |
| LNX1      | ENSG00000072201 | 0.92498     | 0.17749     | 1.7547      | 0.039658    | 2.2041   | 0.013758 |       |
|           | -1.2877         | 0.90108     | 0.013758    | 0.395765844 |             |          |          |       |
| TPD52L2   | ENSG00000101150 | 2.2031      | 0.013795    | 1.9127      | 0.027891    | 0.81509  |          |       |
|           | 0.20751         | 1.417       | 0.07824     | 0.013795    | 0.396390497 |          |          |       |
| MIR320B2  | ENSG00000221406 | 2.2028      | 0.013806    | 2.2028      | 0.013806    | 2.2028   |          |       |
|           | 0.013806        | 1.8926      | 0.029204    | 0.013806    | 0.396390497 |          |          |       |
| COX20P2   | ENSG00000235013 | 2.2022      | 0.013825    | -1.0418     | 0.85124     | -1.0418  |          |       |
|           | 0.85124         | -1.0418     | 0.85124     | 0.013825    | 0.396390497 |          |          |       |
| PHLDA3    | ENSG00000174307 | 1.2761      | 0.10097     | 1.288       | 0.098876    | -0.6665  | 0.74745  |       |
|           | 2.2017          | 0.013842    | 0.013842    | 0.396390497 |             |          |          |       |
| NA        | ENSG00000283403 | 1.4123      | 0.078935    | 0.88502     | 0.18807     | 1.2961   | 0.097475 |       |
|           | 2.2015          | 0.013849    | 0.013849    | 0.396390497 |             |          |          |       |
| RN7SL432P | ENSG00000242769 | 1.122       | 0.13093     | 2.2014      | 0.013853    | 2.2014   | 0.013853 |       |
|           | 2.2014          | 0.013853    | 0.013853    | 0.396390497 |             |          |          |       |
| NA        | ENSG00000261602 | 2.2014      | 0.013854    | 2.2014      | 0.013854    | 2.2014   | 0.013854 |       |
|           | 2.2014          | 0.013854    | 0.013854    | 0.396390497 |             |          |          |       |
| NA        | ENSG00000254775 | 0.92401     | 0.17774     | 2.1885      | 0.014317    | 2.2011   | 0.013865 |       |
|           | 0.57858         | 0.28144     | 0.013865    | 0.396390497 |             |          |          |       |
| RN7SL117P | ENSG00000264192 | 2.2011      | 0.013865    | 2.2011      | 0.013865    | 2.2011   |          |       |
|           | 0.013865        | 2.2011      | 0.013865    | 0.013865    | 0.396390497 |          |          |       |

|           |                 |            |             |             |             |             |          |
|-----------|-----------------|------------|-------------|-------------|-------------|-------------|----------|
| GMPR2     | ENSG00000100938 | 2.2006     | 0.013883    | 2.2006      | 0.013883    | 1.7773      | 0.037759 |
|           |                 | 2.2006     | 0.013883    | 0.013883    | 0.396390497 |             |          |
| GSTZ1     | ENSG00000100577 | 1.4024     | 0.080397    | 1.4024      | 0.080397    | 1.4024      | 0.080397 |
|           |                 | 2.2003     | 0.013892    | 0.013892    | 0.396390497 |             |          |
| NA        | ENSG00000230730 | 1.4347     | 0.075687    | 2.2002      | 0.013895    | 1.4347      | 0.075687 |
|           |                 | 1.4347     | 0.075687    | 0.013895    | 0.396390497 |             |          |
| RNA5SP307 | ENSG00000199733 | 2.2002     | 0.013898    | 2.2002      | 0.013898    | 2.2002      |          |
|           |                 | 0.013898   | 2.2002      | 0.013898    | 0.013898    | 0.396390497 |          |
| PKD1L3    | ENSG00000277481 | 2.1999     | 0.013906    | 2.1999      | 0.013906    | 2.1999      |          |
|           |                 | 0.013906   | 1.5789      | 0.057185    | 0.013906    | 0.396390497 |          |
| REEP6     | ENSG00000115255 | 2.1996     | 0.013916    | 2.133       | 0.016462    | 2.1996      | 0.013916 |
|           |                 | 2.1996     | 0.013916    | 0.013916    | 0.396390497 |             |          |
| NA        | ENSG00000249787 | 2.1996     | 0.013917    | 2.0196      | 0.021712    | 2.1711      | 0.014963 |
|           |                 | 0.32447    | 0.37279     | 0.013917    | 0.396390497 |             |          |
| NA        | ENSG00000225860 | 2.1996     | 0.013918    | 2.1996      | 0.013918    | 2.1996      | 0.013918 |
|           |                 | 2.1996     | 0.013918    | 0.013918    | 0.396390497 |             |          |
| NA        | ENSG00000269529 | 0.84394    | 0.19935     | 2.1992      | 0.013932    | 0.74785     | 0.22727  |
|           |                 | -0.19319   | 0.5766      | 0.013932    | 0.396411296 |             |          |
| RN7SKP172 | ENSG00000223273 | -0.57669   | 0.71793     | 2.1991      | 0.013935    | 0.14481     |          |
|           |                 | 0.44243    | -0.65214    | 0.74284     | 0.013935    | 0.396411296 |          |
| FGF3      | ENSG00000186895 | 2.1985     | 0.013957    | 1.7494      | 0.040109    | 0.96258     | 0.16788  |
|           |                 | 0.7556     | 0.22495     | 0.013957    | 0.39680549  |             |          |
| NA        | ENSG00000255102 | -0.19115   | 0.5758      | 0.82513     | 0.20465     | 2.1977      | 0.013985 |
|           |                 | -0.0088794 | 0.50354     | 0.013985    | 0.397138141 |             |          |
| NA        | ENSG00000255241 | 2.1977     | 0.013985    | 2.1977      | 0.013985    | 2.1977      | 0.013985 |
|           |                 | 2.1977     | 0.013985    | 0.013985    | 0.397138141 |             |          |
| NA        | ENSG00000249050 | 2.197      | 0.014011    | 0.51916     | 0.30183     | 2.197       | 0.014011 |
|           |                 | 0.014011   | 0.014011    | 0.397437231 |             |             |          |
| BBS10     | ENSG00000179941 | 2.1969     | 0.014013    | 2.068       | 0.019319    | -1.0202     | 0.84619  |
|           |                 | 0.11833    | 0.4529      | 0.014013    | 0.397437231 |             |          |
| MTND6P14  | ENSG00000235638 | 2.1967     | 0.01402     | 1.489       | 0.068246    | 2.1967      | 0.01402  |
|           |                 | 2.1967     | 0.01402     | 0.01402     | 0.397437231 |             |          |
| KCNJ1     | ENSG00000151704 | 1.8187     | 0.034482    | 2.1954      | 0.014068    | 1.2842      | 0.099541 |
|           |                 | 1.8123     | 0.034973    | 0.014068    | 0.398220318 |             |          |
| NA        | ENSG00000212590 | 2.195      | 0.014083    | 2.195       | 0.014083    | 2.195       | 0.014083 |
|           |                 | 0.014083   | 0.398220318 |             |             |             |          |
| PPP1R9B   | ENSG00000108819 | 2.1949     | 0.014085    | 2.1949      | 0.014085    | 2.1779      |          |
|           |                 | 0.014705   | 0.7126      | 0.23805     | 0.014085    | 0.398220318 |          |
| YAE1      | ENSG00000241127 | 1.2216     | 0.11093     | 2.1949      | 0.014086    | 1.7955      | 0.036284 |
|           |                 | 1.2577     | 0.10425     | 0.014086    | 0.398220318 |             |          |
| NA        | ENSG00000232604 | 2.1944     | 0.014103    | 2.1944      | 0.014103    | 2.1944      | 0.014103 |
|           |                 | 2.1944     | 0.014103    | 0.014103    | 0.398220318 |             |          |
| FEV       | ENSG00000163497 | -0.18968   | 0.57522     | 0.32944     | 0.37091     | 2.1943      | 0.014106 |
|           |                 | 0.353      | 0.36204     | 0.014106    | 0.398220318 |             |          |
| SNN       | ENSG00000184602 | 1.9207     | 0.027386    | 2.166       | 0.015156    | 2.166       | 0.015156 |
|           |                 | 0.014112   | 0.014112    | 0.398220318 |             |             |          |
| COX6CP8   | ENSG00000253231 | 1.6353     | 0.050997    | -0.85122    | 0.80268     | -0.69776    |          |
|           |                 | 0.75734    | 2.1941      | 0.014113    | 0.014113    | 0.398220318 |          |
| BNIP3L    | ENSG00000104765 | 1.02       | 0.15387     | 0.86972     | 0.19223     | 2.193       | 0.014152 |
|           |                 | 0.68583    | 0.24641     | 0.014152    | 0.398797306 |             |          |
| NA        | ENSG00000272896 | 2.193      | 0.014153    | 2.193       | 0.014153    | 2.193       | 0.014153 |
|           |                 | 0.014153   | 0.398797306 |             |             |             |          |
| NA        | ENSG00000249213 | 0.41697    | 0.33835     | 2.1929      | 0.014158    | 2.1929      | 0.014158 |
|           |                 | 2.1929     | 0.014158    | 0.014158    | 0.398797306 |             |          |
| GYPA      | ENSG00000170180 | 2.1922     | 0.014181    | 0.14347     | 0.44296     | 1.6102      | 0.053675 |
|           |                 | 1.6292     | 0.051632    | 0.014181    | 0.398866157 |             |          |
| AMER3     | ENSG00000178171 | 0.54415    | 0.29317     | -1.0537     | 0.854       | 0.89317     | 0.18588  |
|           |                 | 2.1922     | 0.014184    | 0.014184    | 0.398866157 |             |          |
| NA        | ENSG00000267787 | 2.1921     | 0.014185    | 1.0315      | 0.15115     | 0.53901     | 0.29494  |
|           |                 | 1.0023     | 0.15809     | 0.014185    | 0.398866157 |             |          |
| RNA5SP150 | ENSG00000199839 | -0.7882    | 0.78471     | -0.7882     | 0.78471     | -0.7882     |          |
|           |                 | 0.78471    | 2.1916      | 0.014205    | 0.014205    | 0.399198183 |          |



|            |                 |           |          |           |             |             |          |
|------------|-----------------|-----------|----------|-----------|-------------|-------------|----------|
| NA         | ENSG00000222326 | 2.1905    | 0.014245 | 2.1905    | 0.014245    | 2.1905      | 0.014245 |
|            |                 | 2.1905    | 0.014245 | 0.014245  | 0.399759735 |             |          |
| PXYLP1     | ENSG00000155893 | 0.33073   | 0.37042  | 1.1557    | 0.12391     | 2.1904      |          |
|            |                 | 0.014248  | 1.4797   | 0.069473  | 0.014248    | 0.399759735 |          |
| NA         | ENSG00000225982 | 0.93725   | 0.17431  | 0.67829   | 0.24879     | 2.1902      | 0.014256 |
|            |                 | 1.0273    | 0.15214  | 0.014256  | 0.399759735 |             |          |
| NA         | ENSG00000257520 | 2.1901    | 0.01426  | 2.1901    | 0.01426     | 2.1901      | 0.01426  |
|            |                 | 2.1901    | 0.01426  | 0.01426   | 0.399759735 |             |          |
| NREP-AS1   | ENSG00000250095 | 2.1899    | 0.014266 | 2.1899    | 0.014266    | 2.1899      |          |
|            |                 | 0.014266  | 0.49691  | 0.30963   | 0.014266    | 0.399759735 |          |
| RN7SL587P  | ENSG00000240233 | 0.58585   | 0.27899  | 2.1887    | 0.014308    | 0.58585     |          |
|            |                 | 0.27899   | 0.58585  | 0.27899   | 0.014308    | 0.400469966 |          |
| B3GALT2    | ENSG00000162630 | -0.28822  | 0.61341  | -0.28822  | 0.61341     | 2.1887      |          |
|            |                 | 0.014311  | -0.28822 | 0.61341   | 0.014311    | 0.400469966 |          |
| MIAT       | ENSG00000225783 | 2.1885    | 0.014316 | -0.090834 | 0.53619     | 0.35706     | 0.36052  |
|            |                 | 1.8864    | 0.029622 | 0.014316  | 0.400469966 |             |          |
| SMIM5      | ENSG00000204323 | 2.0681    | 0.019314 | 2.1875    | 0.014353    | 2.1875      | 0.014353 |
|            |                 | 1.3526    | 0.08809  | 0.014353  | 0.400647281 |             |          |
| CLCN2      | ENSG00000114859 | 1.8651    | 0.031082 | 2.1873    | 0.014361    | 1.9439      | 0.025955 |
|            |                 | 1.662     | 0.048254 | 0.014361  | 0.400647281 |             |          |
| ORC1       | ENSG00000085840 | 1.9386    | 0.026275 | 2.1873    | 0.014362    | 0.28807     | 0.38665  |
|            |                 | -0.33627  | 0.63166  | 0.014362  | 0.400647281 |             |          |
| RNU6-750P  | ENSG00000212248 | 2.1872    | 0.014365 | 2.1872    | 0.014365    | 2.1872      |          |
|            |                 | 0.014365  | 2.1872   | 0.014365  | 0.014365    | 0.400647281 |          |
| VEZF1      | ENSG00000136451 | -0.19763  | 0.57833  | 0.54966   | 0.29128     | 1.7082      | 0.043798 |
|            |                 | 2.1871    | 0.014368 | 0.014368  | 0.400647281 |             |          |
| TUT1       | ENSG00000149016 | 2.1863    | 0.014396 | 2.1863    | 0.014396    | 0.80799     | 0.20955  |
|            |                 | 0.46373   | 0.32142  | 0.014396  | 0.400647281 |             |          |
| GNAT3      | ENSG00000214415 | 1.5171    | 0.064618 | 0.053769  | 0.47856     | 1.4452      | 0.074199 |
|            |                 | 2.186     | 0.014407 | 0.014407  | 0.400647281 |             |          |
| NA         | ENSG00000272710 | 0.46999   | 0.31918  | 1.9145    | 0.027777    | 0.84378     | 0.19939  |
|            |                 | 2.186     | 0.014407 | 0.014407  | 0.400647281 |             |          |
| CCDC9      | ENSG00000105321 | 1.9531    | 0.025401 | 1.953     | 0.025411    | 2.1561      | 0.015537 |
|            |                 | 2.1859    | 0.01441  | 0.01441   | 0.400647281 |             |          |
| HMGNA4     | ENSG00000182952 | 1.6477    | 0.049702 | 0.94065   | 0.17344     | 1.02        | 0.15386  |
|            |                 | 2.1859    | 0.014411 | 0.014411  | 0.400647281 |             |          |
| GOLM1      | ENSG00000135052 | 1.6832    | 0.04617  | 0.88775   | 0.18734     | 0.5314      | 0.29757  |
|            |                 | 2.1858    | 0.014414 | 0.014414  | 0.400647281 |             |          |
| NA         | ENSG00000204003 | 0.31827   | 0.37514  | 2.1856    | 0.014421    | -0.50465    | 0.6931   |
|            |                 | -0.50465  | 0.6931   | 0.014421  | 0.400647281 |             |          |
| GOSR2      | ENSG00000108433 | 1.3407    | 0.090016 | 0.66526   | 0.25294     | 2.1853      | 0.014433 |
|            |                 | -0.042986 | 0.51714  | 0.014433  | 0.400752188 |             |          |
| GUCY2GP    | ENSG00000243316 | 0.015155  | 0.49395  | 2.1848    | 0.014451    | -1.1471     |          |
|            |                 | 0.87433   | -1.8563  | 0.96829   | 0.014451    | 0.40093391  |          |
| NA         | ENSG00000234902 | 1.5246    | 0.063682 | 2.1847    | 0.014456    | 2.1847      | 0.014456 |
|            |                 | 2.1847    | 0.014456 | 0.014456  | 0.40093391  |             |          |
| PTCD1      | ENSG00000106246 | 2.0894    | 0.018338 | 2.1844    | 0.014467    | 1.4723      | 0.070467 |
|            |                 | 0.98198   | 0.16305  | 0.014467  | 0.400970375 |             |          |
| NMB        | ENSG00000197696 | 1.7183    | 0.042867 | 1.7183    | 0.042867    | 1.7183      | 0.042867 |
|            |                 | 2.184     | 0.01448  | 0.01448   | 0.400970375 |             |          |
| STXBP5-AS1 | ENSG00000233452 | 1.9242    | 0.027164 | 2.184     | 0.014482    | 2.1003      | 0.017851 |
|            |                 | 2.1049    | 0.01765  | 0.014482  | 0.400970375 |             |          |
| NA         | ENSG00000256557 | 1.7875    | 0.036931 | 2.1837    | 0.014493    | 1.7875      | 0.036931 |
|            |                 | 0.18813   | 0.42539  | 0.014493  | 0.40104707  |             |          |
| RNU1-94P   | ENSG00000199497 | 2.1833    | 0.014507 | 2.1833    | 0.014507    | 2.1833      |          |
|            |                 | 0.014507  | 2.1833   | 0.014507  | 0.014507    | 0.401112947 |          |
| ARPC1A     | ENSG00000241685 | 2.0012    | 0.022685 | 1.5268    | 0.063411    | 2.1831      |          |
|            |                 | 0.014515  | 1.3961   | 0.081337  | 0.014515    | 0.401112947 |          |
| RIC3-DT    | ENSG00000246820 | 2.1828    | 0.014525 | 1.6878    | 0.045727    | 2.0752      |          |
|            |                 | 0.018983  | 0.085582 | 0.4659    | 0.014525    | 0.401112947 |          |
| EGLN3      | ENSG00000129521 | 2.1824    | 0.01454  | 1.2692    | 0.10219     | 2.1824      | 0.01454  |
|            |                 | -1.2196   | 0.88869  | 0.01454   | 0.401112947 |             |          |

|             |                 |           |          |             |             |             |          |
|-------------|-----------------|-----------|----------|-------------|-------------|-------------|----------|
| NA          | ENSG00000230958 | 2.1823    | 0.014545 | 2.1823      | 0.014545    | 2.1823      | 0.014545 |
|             |                 | 2.1823    | 0.014545 | 0.401112947 |             |             |          |
| ATP6V1G1P6  | ENSG00000249372 | 2.1821    | 0.014552 | 2.1821      | 0.014552    | 2.1821      |          |
|             |                 | 0.014552  | 2.1821   | 0.014552    | 0.401112947 |             |          |
| NA          | ENSG00000229200 | -1.2491   | 0.89418  | 2.1821      | 0.014553    | -0.042194   | 0.51683  |
|             |                 | -0.042194 | 0.51683  | 0.014553    | 0.401112947 |             |          |
| LINC02679   | ENSG00000226676 | -0.64831  | 0.74161  | 2.1808      | 0.014601    | -0.78075    |          |
|             |                 | 0.78252   | 0.040639 | 0.48379     | 0.014601    | 0.40220844  |          |
| NA          | ENSG00000233969 | -0.24317  | 0.59606  | 2.1802      | 0.014623    | 1.8187      | 0.03448  |
|             |                 | -0.24317  | 0.59606  | 0.014623    | 0.402248992 |             |          |
| RN7SKP36    | ENSG00000200867 | 1.6609    | 0.048363 | 2.1801      | 0.014624    | 0.58537     |          |
|             |                 | 0.27915   | 0.33471  | 0.36892     | 0.014624    | 0.402248992 |          |
| SAMD12      | ENSG00000177570 | 2.1799    | 0.014631 | 1.4909      | 0.067988    | 2.1569      |          |
|             |                 | 0.015507  | -0.21329 | 0.58445     | 0.014631    | 0.402248992 |          |
| NA          | ENSG00000278962 | 2.1798    | 0.014636 | 2.1798      | 0.014636    | 2.1798      | 0.014636 |
|             |                 | 2.1798    | 0.014636 | 0.014636    | 0.402248992 |             |          |
| NA          | ENSG00000231951 | 1.0709    | 0.1421   | 2.118       | 0.017085    | 2.1795      | 0.014648 |
|             |                 | 2.1795    | 0.014648 | 0.014648    | 0.402248992 |             |          |
| THRAP3      | ENSG00000054118 | 2.1794    | 0.014652 | 0.80894     | 0.20927     | 1.6607      |          |
|             |                 | 0.04839   | -0.60989 | 0.72903     | 0.014652    | 0.402248992 |          |
| DEFB125     | ENSG00000178591 | 1.1693    | 0.12115  | 2.0637      | 0.019522    | 2.0053      |          |
|             |                 | 0.022465  | 2.1789   | 0.01467     | 0.01467     | 0.402516385 |          |
| EFCAB11     | ENSG00000140025 | 2.1785    | 0.014686 | 1.5745      | 0.057681    | 1.478       | 0.0697   |
|             |                 | 0.26689   | 0.39478  | 0.014686    | 0.402529533 |             |          |
| SLC45A4     | ENSG00000022567 | 0.1753    | 0.43042  | 0.75426     | 0.22535     | 1.2355      |          |
|             |                 | 0.10832   | 2.1784   | 0.014687    | 0.014687    | 0.402529533 |          |
| DUSP7       | ENSG00000164086 | 2.07      | 0.019226 | 2.1775      | 0.014723    | 1.0351      | 0.15031  |
|             |                 | 0.021591  | 0.014723 | 0.40328937  |             |             | 2.022    |
| PYGO1       | ENSG00000171016 | 1.2584    | 0.10412  | 1.9067      | 0.028282    | 1.9175      | 0.027588 |
|             |                 | 2.1767    | 0.014751 | 0.014751    | 0.403556391 |             |          |
| NA          | ENSG00000261269 | 2.1763    | 0.014768 | 0.87528     | 0.19071     | 2.1763      | 0.014768 |
|             |                 | 2.1763    | 0.014768 | 0.014768    | 0.403556391 |             |          |
| DUXAP7      | ENSG00000232136 | 0.75561   | 0.22494  | -0.038217   | 0.51524     | 2.1762      |          |
|             |                 | 0.014769  | 0.75561  | 0.22494     | 0.014769    | 0.403556391 |          |
| MAP3K20-AS1 | ENSG00000238133 | 1.0815    | 0.13975  | 0.54726     | 0.2921      | 2.1761      |          |
|             |                 | 0.014775  | 2.1761   | 0.014775    | 0.014775    | 0.403556391 |          |
| LINC00942   | ENSG00000249628 | 2.1759    | 0.014782 | 1.1521      | 0.12463     | 2.0504      |          |
|             |                 | 0.020164  | 1.6591   | 0.048551    | 0.014782    | 0.403556391 |          |
| HOXA7       | ENSG00000122592 | 2.1757    | 0.014788 | 2.1757      | 0.014788    | 2.1757      | 0.014788 |
|             |                 | 1.3767    | 0.084308 | 0.014788    | 0.403556391 |             |          |
| TLR12P      | ENSG00000234512 | 2.1756    | 0.014793 | 1.4539      | 0.072985    | 0.51158     |          |
|             |                 | 0.30447   | -0.63369 | 0.73686     | 0.014793    | 0.403556391 |          |
| IDH2        | ENSG00000182054 | 0.1374    | 0.44536  | 2.1754      | 0.014799    | 2.1754      | 0.014799 |
|             |                 | 0.81643   | 0.20713  | 0.014799    | 0.403556391 |             |          |
| NA          | ENSG00000223942 | 0.59738   | 0.27513  | 2.1749      | 0.014819    | 2.1749      | 0.014819 |
|             |                 | 2.1749    | 0.014819 | 0.014819    | 0.403875766 |             |          |
| RNF217      | ENSG00000146373 | 0.51762   | 0.30236  | 2.1745      | 0.014834    | 0.51639     |          |
|             |                 | 0.30279   | 2.0306   | 0.021147    | 0.014834    | 0.404050648 |          |
| RN7SL228P   | ENSG00000244033 | 2.1743    | 0.014842 | 1.3225      | 0.093007    | 2.1743      |          |
|             |                 | 0.014842  | 2.1743   | 0.014842    | 0.014842    | 0.404050648 |          |
| RNU6-544P   | ENSG00000200146 | 0.14141   | 0.44377  | 2.1737      | 0.014863    | 0.14141     |          |
|             |                 | 0.44377   | 0.14141  | 0.44377     | 0.014863    | 0.404396421 |          |
| NA          | ENSG00000175604 | 1.3188    | 0.093615 | 2.1727      | 0.014902    | 2.1084      | 0.0175   |
|             |                 | 1.3188    | 0.093615 | 0.014902    | 0.405231283 |             |          |
| NA          | ENSG00000271243 | 2.1719    | 0.014932 | 0.33318     | 0.3695      | 0.33318     | 0.3695   |
|             |                 | 0.33318   | 0.3695   | 0.014932    | 0.405393257 |             |          |
| CELF2-AS2   | ENSG00000237986 | 2.1713    | 0.014956 | 2.1713      | 0.014956    | 2.1713      |          |
|             |                 | 0.014956  | 2.1713   | 0.014956    | 0.014956    | 0.405393257 |          |
| SCOC        | ENSG00000153130 | 2.1712    | 0.014959 | 1.6876      | 0.045746    | -0.98423    | 0.8375   |
|             |                 | 1.066     | 0.14321  | 0.014959    | 0.405393257 |             |          |
| PCDHGB6     | ENSG00000253305 | 0.73851   | 0.2301   | 2.1702      | 0.014997    | 0.73851     |          |
|             |                 | 0.2301    | 0.73851  | 0.2301      | 0.014997    | 0.405393257 |          |

|           |                 |          |          |             |             |          |          |
|-----------|-----------------|----------|----------|-------------|-------------|----------|----------|
| PMS2P5    | ENSG00000123965 | 1.301    | 0.096632 | -0.22966    | 0.59082     | 2.1697   | 0.015014 |
|           | -0.26865        | 0.6059   | 0.015014 | 0.405393257 |             |          |          |
| SCN2A     | ENSG00000136531 | 1.4878   | 0.0684   | 1.6365      | 0.050867    | 2.1695   | 0.015024 |
|           | 1.3271          | 0.092239 | 0.015024 | 0.405393257 |             |          |          |
| HSPA9P1   | ENSG00000226666 | 0.72279  | 0.2349   | 1.146       | 0.12589     | 2.1693   | 0.015029 |
|           | 0.52513         | 0.29975  | 0.015029 | 0.405393257 |             |          |          |
| IL18      | ENSG00000150782 | -0.30041 | 0.61807  | 2.1693      | 0.015031    | -0.30041 | 0.61807  |
|           | -0.30041        | 0.61807  | 0.015031 | 0.405393257 |             |          |          |
| PDPR      | ENSG00000090857 | 1.5472   | 0.060907 | 2.1025      | 0.017756    | 2.169    | 0.015041 |
|           | 1.7097          | 0.043657 | 0.015041 | 0.405393257 |             |          |          |
| IPO9      | ENSG00000198700 | 0.83269  | 0.20251  | 1.0601      | 0.14455     | 2.1688   | 0.015047 |
|           | -1.1686         | 0.87871  | 0.015047 | 0.405393257 |             |          |          |
| NA        | ENSG00000272362 | 0.77591  | 0.2189   | 2.1688      | 0.015047    | 0.77591  | 0.2189   |
|           | 0.77591         | 0.2189   | 0.015047 | 0.405393257 |             |          |          |
| RNU1-62P  | ENSG00000199469 | 2.1686   | 0.015057 | 2.1686      | 0.015057    | 2.1686   |          |
|           | 0.015057        | 0.20478  | 0.41887  | 0.015057    | 0.405393257 |          |          |
| NA        | ENSG00000259035 | 2.1682   | 0.015071 | 1.5835      | 0.056656    | 2.1682   | 0.015071 |
|           | 1.4361          | 0.075481 | 0.015071 | 0.405393257 |             |          |          |
| NA        | ENSG00000278128 | 2.1681   | 0.015076 | 2.1681      | 0.015076    | 2.1681   | 0.015076 |
|           | 2.1681          | 0.015076 | 0.015076 | 0.405393257 |             |          |          |
| SMOC2     | ENSG00000112562 | 1.1055   | 0.13448  | 2.1678      | 0.015087    | 1.5289   | 0.063144 |
|           | 0.85527         | 0.1962   | 0.015087 | 0.405393257 |             |          |          |
| RNU6-442P | ENSG00000206695 | 0.063646 | 0.47463  | 0.063646    | 0.47463     | 2.1678   |          |
|           | 0.015087        | -0.8914  | 0.81364  | 0.015087    | 0.405393257 |          |          |
| ANTXR1    | ENSG00000274209 | 2.1676   | 0.015093 | 0.94196     | 0.17311     | 0.34768  |          |
|           | 0.36404         | 0.33222  | 0.36986  | 0.015093    | 0.405393257 |          |          |
| GPSM1     | ENSG00000160360 | 2.1675   | 0.015099 | 0.83041     | 0.20315     | 1.675    | 0.046967 |
|           | 1.9955          | 0.022993 | 0.015099 | 0.405393257 |             |          |          |
| ASS1P10   | ENSG00000215325 | 0.49154  | 0.31152  | 0.49154     | 0.31152     | 0.24807  |          |
|           | 0.40204         | 2.1672   | 0.015109 | 0.015109    | 0.405393257 |          |          |
| ADPRHL1   | ENSG00000153531 | 1.0382   | 0.14959  | 1.4982      | 0.067045    | -0.03022 |          |
|           | 0.51205         | 2.1669   | 0.015122 | 0.015122    | 0.405393257 |          |          |
| NA        | ENSG00000205682 | -0.58656 | 0.72125  | -0.58656    | 0.72125     | -0.58656 | 0.72125  |
|           | 2.1669          | 0.015122 | 0.015122 | 0.405393257 |             |          |          |
| SNAPC5    | ENSG00000174446 | 0.42343  | 0.33599  | 1.6943      | 0.045107    | 2.1668   |          |
|           | 0.015126        | 2.1668   | 0.015126 | 0.015126    | 0.405393257 |          |          |
| MSX2      | ENSG00000120149 | -0.24635 | 0.59729  | 2.1665      | 0.015136    | 0.63868  | 0.26152  |
|           | -0.10252        | 0.54083  | 0.015136 | 0.405393257 |             |          |          |
| NA        | ENSG00000270591 | 2.1663   | 0.015145 | 1.749       | 0.040141    | 2.1663   | 0.015145 |
|           | 2.1663          | 0.015145 | 0.015145 | 0.405393257 |             |          |          |
| BTN2A1    | ENSG00000112763 | 2.1658   | 0.015163 | 0.3114      | 0.37775     | 1.0776   |          |
|           | 0.14061         | 0.9435   | 0.17271  | 0.015163    | 0.405393257 |          |          |
| RN7SL132P | ENSG00000242653 | 2.1657   | 0.015169 | 2.1657      | 0.015169    | 2.1657   |          |
|           | 0.015169        | 2.1657   | 0.015169 | 0.015169    | 0.405393257 |          |          |
| LINC02316 | ENSG00000258912 | 0.22735  | 0.41007  | 0.86357     | 0.19391     | 0.86357  |          |
|           | 0.19391         | 2.1655   | 0.015173 | 0.015173    | 0.405393257 |          |          |
| FAM180B   | ENSG00000196666 | 2.1652   | 0.015185 | 2.1652      | 0.015185    | 2.1652   |          |
|           | 0.015185        | 2.1652   | 0.015185 | 0.015185    | 0.405393257 |          |          |
| THUMPD3P1 | ENSG00000248711 | 2.1651   | 0.015189 | 0.42952     | 0.33377     | 0.42952  |          |
|           | 0.33377         | -0.70031 | 0.75813  | 0.015189    | 0.405393257 |          |          |
| NA        | ENSG00000284292 | 2.1651   | 0.015189 | 2.1651      | 0.015189    | 2.1651   | 0.015189 |
|           | 2.1651          | 0.015189 | 0.015189 | 0.405393257 |             |          |          |
| PTCSC3    | ENSG00000259104 | -0.37878 | 0.64758  | 2.1649      | 0.015199    | 0.33447  |          |
|           | 0.36901         | -0.50347 | 0.69268  | 0.015199    | 0.405393257 |          |          |
| PIGC      | ENSG00000135845 | -0.36264 | 0.64156  | 1.0305      | 0.15139     | 2.1645   | 0.015211 |
|           | -0.80356        | 0.78918  | 0.015211 | 0.405393257 |             |          |          |
| GAPDHS    | ENSG00000105679 | 2.1644   | 0.015216 | 1.8824      | 0.029893    | 2.1644   |          |
|           | 0.015216        | 2.1644   | 0.015216 | 0.015216    | 0.405393257 |          |          |
| OLFM1     | ENSG00000130558 | 0.40924  | 0.34118  | 2.1644      | 0.015217    | 0.33075  | 0.37042  |
|           | 0.8037          | 0.21079  | 0.015217 | 0.405393257 |             |          |          |
| BPIFC     | ENSG00000184459 | -1.1353  | 0.87188  | 0.17311     | 0.43128     | -1.0957  | 0.86339  |
|           | 2.1643          | 0.01522  | 0.01522  | 0.405393257 |             |          |          |

|              |                 |          |          |             |             |           |          |
|--------------|-----------------|----------|----------|-------------|-------------|-----------|----------|
| TBCA         | ENSG00000171530 | -0.29793 | 0.61712  | 2.1642      | 0.015226    | 0.83149   | 0.20285  |
|              | 1.5483          | 0.060776 | 0.015226 | 0.405393257 |             |           |          |
| VN1R20P      | ENSG00000233121 | 0.4213   | 0.33677  | 0.77729     | 0.21849     | -0.16525  |          |
|              | 0.56563         | 2.1639   | 0.015235 | 0.015235    | 0.405393257 |           |          |
| MIR100HG     | ENSG00000255248 | 1.2065   | 0.11381  | 1.6976      | 0.044791    | 1.5079    |          |
|              | 0.065795        | 2.1635   | 0.01525  | 0.01525     | 0.405393257 |           |          |
| RNU4-83P     | ENSG00000222795 | 2.1635   | 0.015252 | 0.78195     | 0.21712     | -0.069466 |          |
|              | 0.52769         | -0.13384 | 0.55324  | 0.015252    | 0.405393257 |           |          |
| COBLL1       | ENSG00000082438 | 2.1633   | 0.015259 | 0.74892     | 0.22695     | 0.5319    |          |
|              | 0.2974          | 1.6377   | 0.050746 | 0.015259    | 0.405393257 |           |          |
| NA           | ENSG00000228162 | 0.37602  | 0.35345  | 0.94416     | 0.17254     | 2.1632    | 0.015261 |
|              | 0.23759         | 0.4061   | 0.015261 | 0.405393257 |             |           |          |
| LINC02647    | ENSG00000223993 | 2.1631   | 0.015266 | 1.6511      | 0.049361    | 1.6511    |          |
|              | 0.049361        | 0.90317  | 0.18322  | 0.015266    | 0.405393257 |           |          |
| RNU6-321P    | ENSG00000222844 | 2.1631   | 0.015267 | 0.16165     | 0.43579     | 2.1631    |          |
|              | 0.015267        | 2.1631   | 0.015267 | 0.015267    | 0.405393257 |           |          |
| PTS          | ENSG00000150787 | 2.1629   | 0.015274 | -0.89326    | 0.81414     | 2.0955    | 0.018061 |
|              | -0.19232        | 0.57626  | 0.015274 | 0.405393257 |             |           |          |
| RGS10        | ENSG00000148908 | 1.3599   | 0.086932 | 0.49044     | 0.31191     | 2.162     | 0.01531  |
|              | 1.2382          | 0.10782  | 0.01531  | 0.406127545 |             |           |          |
| CARM1P1      | ENSG00000227835 | 2.161    | 0.015346 | 0.60357     | 0.27307     | -1.1071   | 0.86587  |
|              | 0.23249         | 0.40808  | 0.015346 | 0.406861034 |             |           |          |
| RESP18       | ENSG00000182698 | 1.4487   | 0.073716 | 0.89023     | 0.18667     | 2.1608    |          |
|              | 0.015357        | 0.89023  | 0.18667  | 0.015357    | 0.406912705 |           |          |
| PAX6         | ENSG00000007372 | 0.71382  | 0.23767  | 1.7095      | 0.043682    | 2.1604    | 0.015371 |
|              | 0.2158          | 0.41457  | 0.015371 | 0.406912705 |             |           |          |
| APOB         | ENSG00000084674 | 0.98256  | 0.16291  | 2.1603      | 0.015373    | 1.8938    | 0.029126 |
|              | 0.55035         | 0.29104  | 0.015373 | 0.406912705 |             |           |          |
| NA           | ENSG00000274949 | 2.1601   | 0.015382 | 2.1601      | 0.015382    | 2.1146    | 0.017231 |
|              | 0.57667         | 0.28208  | 0.015382 | 0.406929891 |             |           |          |
| ABCF3        | ENSG00000161204 | -0.39589 | 0.65391  | 2.1598      | 0.015393    | 1.1382    | 0.12751  |
|              | 0.26081         | 0.39712  | 0.015393 | 0.406990634 |             |           |          |
| SLC16A12     | ENSG00000152779 | 0.27772  | 0.39061  | 1.2856      | 0.099291    | 0.27772   |          |
|              | 0.39061         | 2.1596   | 0.015401 | 0.015401    | 0.406990634 |           |          |
| NA           | ENSG00000255860 | 0.33659  | 0.36821  | -0.94198    | 0.8269      | 0.20166   | 0.42009  |
|              | 2.1592          | 0.015419 | 0.015419 | 0.407077644 |             |           |          |
| CKAP5        | ENSG00000175216 | 0.33039  | 0.37055  | 1.9085      | 0.028165    | 2.1591    | 0.015421 |
|              | 0.95478         | 0.16985  | 0.015421 | 0.407077644 |             |           |          |
| NA           | ENSG00000280057 | -1.1855  | 0.88208  | -0.40031    | 0.65553     | 1.8443    | 0.032572 |
|              | 2.1587          | 0.015436 | 0.015436 | 0.407198416 |             |           |          |
| RNU6-1286P   | ENSG00000206598 | 2.1583   | 0.015452 | -0.39083    | 0.65204     | 2.1583    |          |
|              | 0.015452        | 2.1583   | 0.015452 | 0.015452    | 0.407198416 |           |          |
| NBPF5P       | ENSG00000243967 | -0.46566 | 0.67927  | 0.8197      | 0.20619     | 2.1583    |          |
|              | 0.015453        | 2.1014   | 0.017801 | 0.015453    | 0.407198416 |           |          |
| GPN1         | ENSG00000198522 | -1.3235  | 0.90717  | -0.47903    | 0.68404     | -0.49889  | 0.69107  |
|              | 2.1581          | 0.015459 | 0.015459 | 0.407198416 |             |           |          |
| ABHD14A-ACY1 | ENSG00000114786 | 1.3993   | 0.080855 | 2.1577      | 0.015475    | 1.1271    |          |
|              | 0.12985         | 0.83791  | 0.20104  | 0.015475    | 0.407232295 |           |          |
| TUBBP9       | ENSG00000220586 | 2.1577   | 0.015477 | -1.0567     | 0.85468     | 1.9887    |          |
|              | 0.023367        | 0.094316 | 0.46243  | 0.015477    | 0.407232295 |           |          |
| NA           | ENSG00000236015 | 2.1571   | 0.0155   | 2.1571      | 0.0155      | 2.1571    | 0.0155   |
|              | 2.1571          | 0.0155   | 0.0155   | 0.407333493 |             |           |          |
| RPL39P3      | ENSG00000235174 | 0.95607  | 0.16952  | -0.12014    | 0.54781     | -0.12014  |          |
|              | 0.54781         | 2.157    | 0.015504 | 0.015504    | 0.407333493 |           |          |
| GATA2        | ENSG00000179348 | 1.6644   | 0.048013 | 0.80242     | 0.21115     | 1.1866    | 0.11769  |
|              | 2.1566          | 0.015517 | 0.015517 | 0.407333493 |             |           |          |
| AGAP7P       | ENSG00000264204 | 1.4521   | 0.073238 | -1.0363     | 0.84996     | 1.4646    |          |
|              | 0.071515        | 2.1565   | 0.015524 | 0.015524    | 0.407333493 |           |          |
| OR7E93P      | ENSG00000228963 | 2.0562   | 0.019882 | 2.1563      | 0.015531    | 0.70921   |          |
|              | 0.2391          | 1.3171   | 0.093909 | 0.015531    | 0.407333493 |           |          |
| NA           | ENSG00000239072 | 2.1563   | 0.015531 | 1.6756      | 0.046912    | 2.1563    | 0.015531 |
|              | 2.1563          | 0.015531 | 0.015531 | 0.407333493 |             |           |          |

|             |                 |           |          |             |             |            |          |  |
|-------------|-----------------|-----------|----------|-------------|-------------|------------|----------|--|
| LINC02102   | ENSG00000248677 | 2.1558    | 0.015551 | -0.088155   | 0.53512     | 2.1558     |          |  |
|             | 0.015551        | 0.036071  | 0.48561  | 0.015551    | 0.407567099 |            |          |  |
| NA          | ENSG00000257178 | 2.1555    | 0.015562 | 2.1555      | 0.015562    | 2.1555     | 0.015562 |  |
|             | 2.1555          | 0.015562  | 0.015562 | 0.407567099 |             |            |          |  |
| DCP1A       | ENSG00000272886 | 1.44      | 0.074938 | 0.59711     | 0.27522     | 2.1551     | 0.015576 |  |
|             | 1.6332          | 0.051212  | 0.015576 | 0.407567099 |             |            |          |  |
| BECN2       | ENSG00000196289 | 2.1345    | 0.016402 | 0.70618     | 0.24004     | 2.1551     | 0.015578 |  |
|             | 0.99518         | 0.15983   | 0.015578 | 0.407567099 |             |            |          |  |
| NA          | ENSG00000266801 | -1.5225   | 0.93606  | -1.5225     | 0.93606     | 2.1547     | 0.015592 |  |
|             | 1.9881          | 0.023398  | 0.015592 | 0.407567099 |             |            |          |  |
| NA          | ENSG00000256897 | 2.0141    | 0.022002 | 2.0141      | 0.022002    | 2.0141     | 0.022002 |  |
|             | 2.1543          | 0.015608  | 0.015608 | 0.407567099 |             |            |          |  |
| NEDD9       | ENSG00000111859 | 2.1542    | 0.01561  | 0.43611     | 0.33138     | 1.0361     | 0.15008  |  |
|             | 1.4089          | 0.079434  | 0.01561  | 0.407567099 |             |            |          |  |
| PAX5        | ENSG00000196092 | 0.073263  | 0.4708   | 2.1541      | 0.015614    | -1.0477    | 0.85262  |  |
|             | -0.19617        | 0.57776   | 0.015614 | 0.407567099 |             |            |          |  |
| NA          | ENSG00000223779 | 2.0297    | 0.021195 | 2.1538      | 0.015627    | 1.2461     | 0.10637  |  |
|             | 1.4631          | 0.071723  | 0.015627 | 0.407567099 |             |            |          |  |
| POT1-AS1    | ENSG00000224897 | 2.1535    | 0.01564  | 1.2344      | 0.10852     | 0.87467    |          |  |
|             | 0.19088         | -0.60732  | 0.72818  | 0.01564     | 0.407567099 |            |          |  |
| NA          | ENSG00000226500 | 2.1534    | 0.015643 | 1.7827      | 0.03732     | 1.8127     | 0.034937 |  |
|             | 2.1448          | 0.015984  | 0.015643 | 0.407567099 |             |            |          |  |
| GPR132      | ENSG00000183484 | 0.79773   | 0.21251  | 1.1811      | 0.11878     | 1.1962     |          |  |
|             | 0.11581         | 2.1532    | 0.01565  | 0.01565     | 0.407567099 |            |          |  |
| NDUFA5P6    | ENSG00000256310 | 2.1532    | 0.015652 | 2.1532      | 0.015652    | 2.1532     |          |  |
|             | 0.015652        | 0.19891   | 0.42117  | 0.015652    | 0.407567099 |            |          |  |
| LYPLAL1     | ENSG00000143353 | 1.0268    | 0.15225  | 2.1531      | 0.015657    | 0.07138    |          |  |
|             | 0.47155         | 0.93726   | 0.17431  | 0.015657    | 0.407567099 |            |          |  |
| MTCO1P5     | ENSG00000233026 | 2.1518    | 0.015707 | 2.1518      | 0.015707    | 2.1518     |          |  |
|             | 0.015707        | 2.1518    | 0.015707 | 0.015707    | 0.408650352 |            |          |  |
| NA          | ENSG00000231539 | 0.3378    | 0.36776  | 1.6068      | 0.054045    | 0.72737    | 0.2335   |  |
|             | 2.1514          | 0.015723  | 0.015723 | 0.40884834  |             |            |          |  |
| FAM209B     | ENSG00000213714 | 2.1508    | 0.015747 | 1.0651      | 0.14342     | 0.4586     |          |  |
|             | 0.32326         | 0.44498   | 0.32817  | 0.015747    | 0.409083034 |            |          |  |
| SLC29A1     | ENSG00000112759 | -0.038727 | 0.51545  | 1.9423      | 0.026053    | 2.1502     |          |  |
|             | 0.015769        | 1.4494    | 0.073608 | 0.015769    | 0.409083034 |            |          |  |
| NA          | ENSG00000237031 | 2.1502    | 0.015771 | 1.1324      | 0.12874     | 2.1502     | 0.015771 |  |
|             | 2.1502          | 0.015771  | 0.015771 | 0.409083034 |             |            |          |  |
| IQCF5-AS1   | ENSG00000235455 | 2.1501    | 0.015772 | 2.1501      | 0.015772    | 2.1501     |          |  |
|             | 0.015772        | 2.1501    | 0.015772 | 0.015772    | 0.409083034 |            |          |  |
| RNU6-100P   | ENSG00000252414 | 2.1501    | 0.015774 | 2.1501      | 0.015774    | 2.1501     |          |  |
|             | 0.015774        | 2.1501    | 0.015774 | 0.015774    | 0.409083034 |            |          |  |
| NA          | ENSG00000257826 | 0.90788   | 0.18197  | 2.1496      | 0.015792    | 0.90788    | 0.18197  |  |
|             | 0.90788         | 0.18197   | 0.015792 | 0.40912147  |             |            |          |  |
| NA          | ENSG00000225416 | 2.1494    | 0.0158   | 2.1494      | 0.0158      | 2.1494     | 0.0158   |  |
|             | 2.1494          | 0.0158    | 0.0158   | 0.40912147  |             |            |          |  |
| NA          | ENSG00000274855 | 0.9923    | 0.16053  | 2.1491      | 0.015814    | 0.9923     | 0.16053  |  |
|             | 2.0922          | 0.018212  | 0.015814 | 0.40912147  |             |            |          |  |
| SLTM        | ENSG00000137776 | 2.1487    | 0.015829 | -0.42641    | 0.66509     | -0.0026548 | 0.50106  |  |
|             | 0.94037         | 0.17351   | 0.015829 | 0.40912147  |             |            |          |  |
| POLR2J4     | ENSG00000272655 | 1.372     | 0.085026 | -1.2795     | 0.89964     | 2.1487     | 0.01583  |  |
|             | 2.1487          | 0.01583   | 0.01583  | 0.40912147  |             |            |          |  |
| NA          | ENSG00000215428 | 2.1486    | 0.015832 | 2.1486      | 0.015832    | 2.1486     | 0.015832 |  |
|             | 2.1486          | 0.015832  | 0.015832 | 0.40912147  |             |            |          |  |
| NA          | ENSG00000253130 | 2.1481    | 0.015854 | 2.1436      | 0.016032    | 2.1436     | 0.016032 |  |
|             | 1.092           | 0.13742   | 0.015854 | 0.40912147  |             |            |          |  |
| NEURL4      | ENSG00000215041 | 2.1478    | 0.015864 | 0.46055     | 0.32256     | 2.1478     |          |  |
|             | 0.015864        | 1.9435    | 0.02598  | 0.015864    | 0.40912147  |            |          |  |
| YWHAQP9     | ENSG00000230019 | 2.1478    | 0.015866 | 2.1478      | 0.015866    | 2.1478     |          |  |
|             | 0.015866        | 2.1478    | 0.015866 | 0.015866    | 0.40912147  |            |          |  |
| TMEM147-AS1 | ENSG00000236144 | 2.1474    | 0.015881 | 2.1474      | 0.015881    | 2.1474     |          |  |
|             | 0.015881        | 2.1474    | 0.015881 | 0.015881    | 0.40912147  |            |          |  |

|            |                 |              |             |             |             |            |          |
|------------|-----------------|--------------|-------------|-------------|-------------|------------|----------|
| MT1P1      | ENSG00000213761 | 0.48275      | 0.31464     | 2.1469      | 0.015901    | 1.6751     | 0.04696  |
|            | 1.7957          | 0.036272     | 0.015901    | 0.40912147  |             |            |          |
| MANBAL     | ENSG00000101363 | 2.1469       | 0.015902    | 0.4403      | 0.32986     | 0.77574    |          |
|            | 0.21895         | 1.3505       | 0.088422    | 0.015902    | 0.40912147  |            |          |
| RNA5SP352  | ENSG00000200278 | 2.1468       | 0.015905    | 2.1468      | 0.015905    | 2.1468     |          |
|            | 0.015905        | 2.1468       | 0.015905    | 0.015905    | 0.40912147  |            |          |
| NA         | ENSG00000267523 | 2.1465       | 0.015917    | 2.1465      | 0.015917    | 2.1465     | 0.015917 |
|            | 2.1465          | 0.015917     | 0.015917    | 0.40912147  |             |            |          |
| OR1N2      | ENSG00000171501 | 1.7113       | 0.043514    | 2.1464      | 0.015922    | 2.1464     | 0.015922 |
|            | 2.1464          | 0.015922     | 0.015922    | 0.40912147  |             |            |          |
| RAB40C     | ENSG00000197562 | 1.9781       | 0.023959    | 2.1462      | 0.01593     | 1.5384     |          |
|            | 0.061974        | 1.161012283  | 0.01593     | 0.40912147  |             |            |          |
| AKR1C5P    | ENSG00000225418 | 2.1462       | 0.01593     | 2.01        | 0.022214    | 2.0284     | 0.021262 |
|            | 2.01            | 0.022214     | 0.01593     | 0.40912147  |             |            |          |
| BRD7P5     | ENSG00000235768 | 0.91262      | 0.18072     | 2.1461      | 0.015931    | 2.1461     |          |
|            | 0.015931        | 2.1461       | 0.015931    | 0.015931    | 0.40912147  |            |          |
| VWA2       | ENSG00000165816 | 2.146015935  | 2.146015935 | 2.0526      | 0.020055    | 1.4844     |          |
|            | 0.068847        | 0.015935     | 0.40912147  |             |             |            |          |
| SETBP1-DT  | ENSG00000267414 | 2.1451       | 0.015972    | 1.5301      | 0.062998    | 0.74374    |          |
|            | 0.22852         | 1.2177       | 0.11166     | 0.015972    | 0.40969581  |            |          |
| NWD1       | ENSG00000188039 | 1.1675       | 0.12149     | 2.1448      | 0.015986    | 0.4709     | 0.31886  |
|            | -0.33562        | 0.63142      | 0.015986    | 0.40969581  |             |            |          |
| MAP7D1     | ENSG00000116871 | 1.9317       | 0.026698    | -1.1094     | 0.86637     | 2.1446     |          |
|            | 0.015991        | 1.3140094418 | 0.015991    | 0.40969581  |             |            |          |
| NA         | ENSG00000273091 | 2.1446       | 0.015991    | 2.1446      | 0.015991    | 2.1446     | 0.015991 |
|            | 2.1446          | 0.015991     | 0.015991    | 0.40969581  |             |            |          |
| RNU6-832P  | ENSG00000200189 | 1.9719       | 0.02431     | 1.9719      | 0.02431     | 1.2762     |          |
|            | 0.10094         | 2.1437       | 0.016027    | 0.016027    | 0.410224958 |            |          |
| MIR4465    | ENSG00000264390 | 0.69171      | 0.24456     | 2.1436      | 0.016033    | 2.0424     |          |
|            | 0.020557        | 2.0424       | 0.020557    | 0.016033    | 0.410224958 |            |          |
| NA         | ENSG00000275484 | 2.1429       | 0.016061    | 2.1429      | 0.016061    | 2.1429     | 0.016061 |
|            | 2.1429          | 0.016061     | 0.016061    | 0.410224958 |             |            |          |
| ADGRL3-AS1 | ENSG00000248692 | 1.1798       | 0.11903     | 2.1427      | 0.016068    | 2.1427     |          |
|            | 0.016068        | 2.1427       | 0.016068    | 0.016068    | 0.410224958 |            |          |
| LINC01909  | ENSG00000266258 | 2.1426       | 0.016071    | 1.9338      | 0.026569    | 0.98503    |          |
|            | 0.16231         | 0.98503      | 0.16231     | 0.016071    | 0.410224958 |            |          |
| BPIFB5P    | ENSG00000233146 | 2.1426       | 0.016072    | -1.9391     | 0.97376     | 2.0942     |          |
|            | 0.01812         | -1.826       | 0.96608     | 0.016072    | 0.410224958 |            |          |
| PPM1AP1    | ENSG00000250483 | -0.036135    | 0.51441     | 2.1426      | 0.016074    | -0.036135  |          |
|            | 0.51441         | -0.036135    | 0.51441     | 0.016074    | 0.410224958 |            |          |
| NA         | ENSG00000278925 | 1.0306       | 0.15137     | 1.1635      | 0.12231     | 1.8266     | 0.033879 |
|            | 2.1424          | 0.016079     | 0.016079    | 0.410224958 |             |            |          |
| PEBP1P3    | ENSG00000236278 | 2.1421       | 0.016092    | 1.2397      | 0.10754     | 0.37731    |          |
|            | 0.35297         | 0.37731      | 0.35297     | 0.016092    | 0.41034179  |            |          |
| NA         | ENSG00000232789 | 2.1417       | 0.016108    | 0.90914     | 0.18164     | 0.90914    | 0.18164  |
|            | 0.90914         | 0.18164      | 0.016108    | 0.410534958 |             |            |          |
| RNU6-141P  | ENSG00000222431 | 2.141016136  | 2.141016136 | 2.141016136 | 2.141016136 | 2.141      |          |
|            | 0.016136        | 0.016136     | 0.41082905  |             |             |            |          |
| LINC02496  | ENSG00000249066 | 2.141016139  | 0.4733      | 0.31804733  | 0.31804733  | 0.31804733 |          |
|            | 0.318016139     | 0.41082905   |             |             |             |            |          |
| CST9LP2    | ENSG00000204658 | 0.43443      | 0.33199     | 0.46837     | 0.31976     | 2.1407     |          |
|            | 0.01615         | 2.1407       | 0.01615     | 0.01615     | 0.41082905  |            |          |
| NLE1       | ENSG00000073536 | -0.045321    | 0.51807     | 2.1404      | 0.01616     | 0.48933    | 0.3123   |
|            | 0.48933         | 0.3123       | 0.01616     | 0.41082905  |             |            |          |
| CFL1P7     | ENSG00000213877 | 2.1402       | 0.016168    | 2.1402      | 0.016168    | 2.1402     |          |
|            | 0.016168        | 2.1402       | 0.016168    | 0.016168    | 0.41082905  |            |          |
| NA         | ENSG00000235271 | 2            | 0.02275     | 1.0703      | 0.14224     | 0.25054    | 0.40108  |
|            | 2.1399          | 0.016181     | 0.016181    | 0.41082905  |             |            |          |
| SPTBN1     | ENSG00000115306 | 2.0502       | 0.020172    | 2.1396      | 0.016195    | 1.7394     |          |
|            | 0.040978        | 1.2257       | 0.11016     | 0.016195    | 0.41082905  |            |          |
| CCDC110    | ENSG00000168491 | 1.1023       | 0.13517     | 1.8896      | 0.029404    | 1.5245     |          |
|            | 0.063697        | 2.1392       | 0.016211    | 0.016211    | 0.41082905  |            |          |

|           |                 |          |          |             |             |           |          |
|-----------|-----------------|----------|----------|-------------|-------------|-----------|----------|
| NA        | ENSG00000233407 | 1.7839   | 0.037222 | 1.9972      | 0.022904    | 2.1386    | 0.016232 |
|           | 1.7839          | 0.037222 | 0.016232 | 0.41082905  |             |           |          |
| NA        | ENSG00000230932 | 2.0303   | 0.021164 | 2.0303      | 0.021164    | 2.1385    | 0.016237 |
|           | 2.0303          | 0.021164 | 0.016237 | 0.41082905  |             |           |          |
| NA        | ENSG00000254281 | 2.1385   | 0.016238 | -0.88057    | 0.81072     | 2.1385    | 0.016238 |
|           | 0.72144         | 0.23532  | 0.016238 | 0.41082905  |             |           |          |
| LINC02298 | ENSG00000257556 | 0.43048  | 0.33342  | 0.092535    | 0.46314     | -0.13476  |          |
|           | 0.5536          | 2.1384   | 0.016242 | 0.016242    | 0.41082905  |           |          |
| NA        | ENSG00000199580 | 1.0381   | 0.14961  | 2.1384      | 0.016243    | 0.56606   | 0.28567  |
|           | 1.0381          | 0.14961  | 0.016243 | 0.41082905  |             |           |          |
| TMEM220   | ENSG00000187824 | 2.1383   | 0.016245 | 0.59625     | 0.2755      | 0.25871   |          |
|           | 0.39793         | 0.81201  | 0.20839  | 0.016245    | 0.41082905  |           |          |
| RN7SL630P | ENSG00000264978 | 2.1383   | 0.016246 | 2.1383      | 0.016246    | 2.1383    |          |
|           | 0.016246        | 2.1383   | 0.016246 | 0.016246    | 0.41082905  |           |          |
| ISCA1     | ENSG00000135070 | 1.8836   | 0.02981  | 1.3408      | 0.089987    | 2.0857    | 0.018501 |
|           | 2.1378          | 0.016265 | 0.016265 | 0.410976511 |             |           |          |
| LINC01444 | ENSG00000264301 | 2.1377   | 0.01627  | 2.1377      | 0.01627     | 2.1377    |          |
|           | 0.01627         | 2.1377   | 0.01627  | 0.01627     | 0.410976511 |           |          |
| SAMD15    | ENSG00000100583 | 2.1373   | 0.016285 | 2.1373      | 0.016285    | -0.51541  |          |
|           | 0.69687         | 1.003    | 0.15794  | 0.016285    | 0.410976511 |           |          |
| RPL29P3   | ENSG00000243730 | 0.97419  | 0.16498  | 0.41905     | 0.33759     | 2.1371    |          |
|           | 0.016293        | 2.1371   | 0.016293 | 0.016293    | 0.410976511 |           |          |
| NA        | ENSG00000252459 | -0.92867 | 0.82347  | 2.1371      | 0.016294    | 1.0292    | 0.15169  |
|           | -0.92867        | 0.82347  | 0.016294 | 0.410976511 |             |           |          |
| NA        | ENSG00000255541 | -0.25267 | 0.59974  | 2.1368      | 0.016308    | 2.1368    | 0.016308 |
|           | 2.1368          | 0.016308 | 0.016308 | 0.410983182 |             |           |          |
| NA        | ENSG00000268149 | 2.1366   | 0.016316 | 2.1366      | 0.016316    | 2.1366    | 0.016316 |
|           | 2.1366          | 0.016316 | 0.016316 | 0.410983182 |             |           |          |
| NA        | ENSG00000276687 | 2.1364   | 0.016323 | -0.82736    | 0.79598     | 0.58974   | 0.27768  |
|           | -1.0036         | 0.8422   | 0.016323 | 0.410983182 |             |           |          |
| LINC00570 | ENSG00000224177 | -0.37095 | 0.64466  | 2.1363      | 0.016328    | 0.11637   |          |
|           | 0.45368         | 0.76372  | 0.22252  | 0.016328    | 0.410983182 |           |          |
| LINC00524 | ENSG00000259023 | 0.043466 | 0.48267  | 0.53177     | 0.29744     | 2.1355    |          |
|           | 0.016359        | -0.4936  | 0.68921  | 0.016359    | 0.411439107 |           |          |
| NA        | ENSG00000212589 | 1.7264   | 0.04214  | -0.69353    | 0.75601     | -0.69353  | 0.75601  |
|           | 2.1354          | 0.016363 | 0.016363 | 0.411439107 |             |           |          |
| JAKMIP1   | ENSG00000152969 | 1.1684   | 0.12132  | 1.4505      | 0.073462    | 2.1348    |          |
|           | 0.01639         | 0.32178  | 0.37381  | 0.01639     | 0.411905467 |           |          |
| ARL4C     | ENSG00000188042 | 0.89799  | 0.1846   | 0.7905      | 0.21462     | 1.6034    | 0.054425 |
|           | 2.1342          | 0.016413 | 0.016413 | 0.412158892 |             |           |          |
| NA        | ENSG00000236874 | 1.3779   | 0.084111 | 1.8534      | 0.031912    | 2.1341    | 0.016417 |
|           | 1.263           | 0.10329  | 0.016417 | 0.412158892 |             |           |          |
| NA        | ENSG00000249413 | 0.41168  | 0.34029  | -0.31753    | 0.62458     | 2.1339    | 0.016426 |
|           | 1.1266          | 0.12996  | 0.016426 | 0.412172492 |             |           |          |
| NA        | ENSG00000234382 | -0.60234 | 0.72653  | -0.7081     | 0.76056     | 2.1332    | 0.016456 |
|           | 0.7148          | 0.23737  | 0.016456 | 0.412712753 |             |           |          |
| RPL31P15  | ENSG00000232430 | 2.1322   | 0.016495 | 2.1322      | 0.016495    | 2.1322    |          |
|           | 0.016495        | 2.1322   | 0.016495 | 0.016495    | 0.413478061 |           |          |
| NA        | ENSG00000255465 | 0.47026  | 0.31908  | 1.1692      | 0.12116     | -0.088837 | 0.53539  |
|           | 2.1318          | 0.01651  | 0.01651  | 0.413629054 |             |           |          |
| NA        | ENSG00000238565 | 2.1316   | 0.016518 | 1.3883      | 0.082527    | 1.2389    | 0.1077   |
|           | 1.1683          | 0.12134  | 0.016518 | 0.413629054 |             |           |          |
| RNU7-19P  | ENSG00000238959 | 2.1312   | 0.016535 | 2.1312      | 0.016535    | 2.1312    |          |
|           | 0.016535        | 2.1312   | 0.016535 | 0.016535    | 0.41384209  |           |          |
| RPL13P6   | ENSG00000213176 | -1.4106  | 0.92081  | -1.4303     | 0.92369     | 0.50843   |          |
|           | 0.30558         | 2.1309   | 0.016551 | 0.016551    | 0.414029892 |           |          |
| ADPRS     | ENSG00000116863 | 2.1303   | 0.016574 | 2.1303      | 0.016574    | 2.1303    | 0.016574 |
|           | 2.1303          | 0.016574 | 0.016574 | 0.414392519 |             |           |          |
| RSL24D1P9 | ENSG00000265402 | 2.0573   | 0.019831 | 0.40648     | 0.3422      | 2.1294    |          |
|           | 0.016612        | 1.9311   | 0.026735 | 0.016612    | 0.415129621 |           |          |
| PTK6      | ENSG00000101213 | 2.1278   | 0.016678 | 0.99417     | 0.16007     | 0.62194   | 0.26699  |
|           | 1.328           | 0.092087 | 0.016678 | 0.41656532  |             |           |          |

|          |                 |          |          |             |          |          |          |
|----------|-----------------|----------|----------|-------------|----------|----------|----------|
| NA       | ENSG00000234084 | 2.1269   | 0.016714 | 2.1269      | 0.016714 | 2.1269   | 0.016714 |
|          |                 | 2.1269   | 0.016714 | 0.417097876 |          |          |          |
| NA       | ENSG00000236838 | 2.1268   | 0.01672  | 2.1268      | 0.01672  | 2.1268   | 0.01672  |
|          |                 | 2.1268   | 0.01672  | 0.417097876 |          |          |          |
| DISC1    | ENSG00000162946 | 2.1266   | 0.016725 | 2.0556      | 0.01991  | 1.8771   | 0.030251 |
|          |                 | 1.8963   | 0.028962 | 0.417097876 |          |          |          |
| GABRD    | ENSG00000187730 | 2.1261   | 0.016746 | -0.74408    | 0.77159  | -0.51731 | 0.69753  |
|          |                 | 1.8408   | 0.032825 | 0.417219484 |          |          |          |
| ZNF415P1 | ENSG00000266127 | 2.1261   | 0.016747 | 0.66896     | 0.25176  | 2.1261   |          |
|          |                 | 0.016747 | 0.46788  | 0.417219484 |          |          |          |
| NA       | ENSG00000264270 | 2.1255   | 0.01677  | 2.1255      | 0.01677  | 2.1255   | 0.01677  |
|          |                 | 2.1255   | 0.01677  | 0.417578998 |          |          |          |
| FKBP9    | ENSG00000122642 | -0.37909 | 0.64769  | 1.3945      | 0.081585 | 0.085587 | 0.4659   |
|          |                 | 2.1241   | 0.016829 | 0.418378691 |          |          |          |
| NA       | ENSG00000230365 | 2.1238   | 0.016844 | -0.9424     | 0.82701  | 2.1238   | 0.016844 |
|          |                 | 1.0648   | 0.14348  | 0.418378691 |          |          |          |
| NA       | ENSG00000258807 | 2.0587   | 0.01976  | 1.3947      | 0.081546 | 2.1237   | 0.016849 |
|          |                 | 2.0587   | 0.01976  | 0.418378691 |          |          |          |
| PYY      | ENSG00000131096 | 2.123    | 0.016877 | -0.90929    | 0.8184   | -1.1325  | 0.8713   |
|          |                 | -1.4642  | 0.92844  | 0.418378691 |          |          |          |
| COPS7B   | ENSG00000144524 | 2.123    | 0.016877 | -0.11291    | 0.54495  | 1.9386   | 0.026276 |
|          |                 | 1.2469   | 0.10622  | 0.418378691 |          |          |          |
| NA       | ENSG00000272849 | 2.1229   | 0.016881 | 2.1229      | 0.016881 | 2.1229   | 0.016881 |
|          |                 | 2.1229   | 0.016881 | 0.418378691 |          |          |          |
| UBE2V2P4 | ENSG00000231849 | 0.31683  | 0.37568  | 2.1228      | 0.016886 | 2.1228   |          |
|          |                 | 0.016886 | 2.1228   | 0.418378691 |          |          |          |
| ZNF239   | ENSG00000196793 | -0.67247 | 0.74936  | 2.1228      | 0.016887 | 0.90849  |          |
|          |                 | 0.18181  | 0.90849  | 0.418378691 |          |          |          |
| NA       | ENSG00000273702 | 2.1228   | 0.016887 | 2.1228      | 0.016887 | 2.1228   | 0.016887 |
|          |                 | 2.1228   | 0.016887 | 0.418378691 |          |          |          |
| NR1H5P   | ENSG00000227970 | 2.1226   | 0.016895 | 1.2561      | 0.10454  | 2.1226   |          |
|          |                 | 0.016895 | 2.1226   | 0.418378691 |          |          |          |
| NA       | ENSG00000253927 | 2.1224   | 0.016902 | 1.4655      | 0.071391 | 0.10051  | 0.45997  |
|          |                 | 1.7241   | 0.042344 | 0.418378691 |          |          |          |
| LPCAT3   | ENSG00000111684 | 2.1223   | 0.016906 | 1.298       | 0.097149 | 1.8004   | 0.035901 |
|          |                 | 1.1184   | 0.13169  | 0.418378691 |          |          |          |
| FCAR     | ENSG00000186431 | 1.0823   | 0.13956  | 1.7589      | 0.039293 | 1.7589   | 0.039293 |
|          |                 | 2.1218   | 0.016928 | 0.418378691 |          |          |          |
| NA       | ENSG00000222044 | 2.1216   | 0.016937 | 2.1216      | 0.016937 | 2.1216   | 0.016937 |
|          |                 | 2.1216   | 0.016937 | 0.418378691 |          |          |          |
| MARK2P16 | ENSG00000270670 | 2.1215   | 0.016939 | 2.1215      | 0.016939 | 2.1215   |          |
|          |                 | 0.016939 | 2.1215   | 0.418378691 |          |          |          |
| DMAC1    | ENSG00000137038 | 0.74605  | 0.22782  | 0.24854     | 0.40186  | 0.085919 | 0.46577  |
|          |                 | 2.1213   | 0.016949 | 0.418378691 |          |          |          |
| NA       | ENSG00000272885 | 2.1209   | 0.016964 | 0.77944     | 0.21786  | 0.77944  | 0.21786  |
|          |                 | 0.77944  | 0.21786  | 0.418378691 |          |          |          |
| NA       | ENSG00000253543 | 2.1208   | 0.016969 | 0.29555     | 0.38379  | 1.4362   | 0.075469 |
|          |                 | 2.1208   | 0.016969 | 0.418378691 |          |          |          |
| TAF7     | ENSG00000178913 | -0.69742 | 0.75723  | -0.69742    | 0.75723  | 2.1207   | 0.016972 |
|          |                 | -0.69742 | 0.75723  | 0.418378691 |          |          |          |
| BLID     | ENSG00000259571 | 1.0858   | 0.13879  | 0.49726     | 0.3095   | 2.1205   | 0.016981 |
|          |                 | 2.1205   | 0.016981 | 0.418378691 |          |          |          |
| NA       | ENSG00000261400 | 2.048    | 0.020278 | 1.8092      | 0.035212 | 2.1204   | 0.016985 |
|          |                 | 0.020278 | 0.016985 | 0.418378691 |          |          | 2.048    |
| DNMT3A   | ENSG00000119772 | -0.4019  | 0.65612  | 0.34598     | 0.36468  | 0.2057   |          |
|          |                 | 0.41851  | 2.1203   | 0.418378691 |          |          |          |
| RPL17P19 | ENSG00000241261 | -0.01596 | 0.50637  | -0.01596    | 0.50637  | 2.1194   |          |
|          |                 | 0.017027 | 0.19469  | 0.419053389 |          |          |          |
| ETNK1    | ENSG00000139163 | 0.99437  | 0.16002  | 0.99437     | 0.16002  | 0.99437  | 0.16002  |
|          |                 | 2.1187   | 0.017058 | 0.419495335 |          |          |          |
| SMPD3    | ENSG00000103056 | 2.1186   | 0.017064 | 1.8963      | 0.028958 | 1.4252   | 0.077044 |
|          |                 | 1.084    | 0.13918  | 0.419495335 |          |          |          |



|            |                 |           |          |             |             |          |
|------------|-----------------|-----------|----------|-------------|-------------|----------|
| SLC1A4     | ENSG00000115902 | 2.1182    | 0.01708  | 0.10255     | 0.45916     | 0.028807 |
|            | 0.48851         | -0.63571  | 0.73752  | 0.01708     | 0.419495335 |          |
| RNU6-919P  | ENSG00000252540 | -0.12571  | 0.55002  | 2.1181      | 0.017085    | 1.7627   |
|            | 0.038972        | -0.055858 | 0.52227  | 0.017085    | 0.419495335 |          |
| MCCC1      | ENSG00000078070 | 2.118     | 0.017088 | 0.66435     | 0.25323     | 0.14531  |
|            | 1.3407          | 0.090003  | 0.017088 | 0.419495335 |             | 0.44223  |
| CFL1P4     | ENSG00000213026 | 2.1176    | 0.017104 | 0.0036185   | 0.49856     | 0.76602  |
|            | 0.22183         | 0.76602   | 0.22183  | 0.017104    | 0.419676697 |          |
| MTND5P19   | ENSG00000231199 | 2.1172    | 0.017122 | 2.1172      | 0.017122    | 2.1172   |
|            | 0.017122        | 2.1172    | 0.017122 | 0.017122    | 0.419818265 |          |
| ZFAS1      | ENSG00000177410 | 2.1171    | 0.017127 | 1.3191      | 0.093566    | 2.0261   |
|            | 1.0628          | 0.14393   | 0.017127 | 0.419818265 |             | 0.021375 |
| R3HCC1     | ENSG00000104679 | 0.94608   | 0.17205  | 1.5889      | 0.056042    | 2.1167   |
|            | 0.017142        | -0.11131  | 0.54431  | 0.017142    | 0.419929307 |          |
| RPL23AP44  | ENSG00000244088 | 2.1164    | 0.017157 | 2.1164      | 0.017157    | 2.1164   |
|            | 0.017157        | 2.1164    | 0.017157 | 0.017157    | 0.419929307 |          |
| CERS5      | ENSG00000139624 | 1.5692    | 0.058298 | 2.0899      | 0.018315    | 1.9656   |
|            | 2.1162          | 0.017162  | 0.017162 | 0.419929307 |             | 0.024674 |
| HHLA3      | ENSG00000197568 | 2.1162    | 0.017166 | -1.2767     | 0.89914     | -1.2767  |
|            | -1.2767         | 0.89914   | 0.017166 | 0.419929307 |             | 0.89914  |
| ALDH7A1P1  | ENSG00000251400 | 1.8367    | 0.033124 | 1.8367      | 0.033124    | 2.1081   |
|            | 0.01751         | 2.1159    | 0.017176 | 0.017176    | 0.419963111 |          |
| RANBP9     | ENSG00000010017 | 1.3165    | 0.094001 | 2.0904      | 0.018293    | 1.6536   |
|            | 0.049105        | 2.1154    | 0.017198 | 0.017198    | 0.420238585 |          |
| OR4M1      | ENSG00000176299 | 0.76481   | 0.22219  | 1.3153      | 0.094209    | -0.42492 |
|            | 2.1151          | 0.017209  | 0.017209 | 0.420238585 |             | 0.66455  |
| MIR3167    | ENSG00000266215 | 0.31394   | 0.37678  | 1.5894      | 0.055983    | 2.1149   |
|            | 0.017218        | 0.21491   | 0.41492  | 0.017218    | 0.420238585 |          |
| RPL23AP66  | ENSG00000243141 | 2.1146    | 0.017232 | 2.1146      | 0.017232    | 2.1146   |
|            | 0.017232        | 2.1146    | 0.017232 | 0.017232    | 0.420238585 |          |
| TAF4A4     | ENSG00000163377 | 2.1145    | 0.017235 | 1.0757      | 0.14103     | 1.9192   |
|            | 1.5408          | 0.061678  | 0.017235 | 0.420238585 |             | 0.027476 |
| NA         | ENSG00000224750 | 2.1144    | 0.017242 | -0.27635    | 0.60886     | -0.27635 |
|            | -0.27635        | 0.60886   | 0.017242 | 0.420238585 |             | 0.60886  |
| KCNH2      | ENSG00000055118 | 1.0377    | 0.14971  | 2.1134      | 0.017283    | 1.2857   |
|            | 0.35685         | 0.3606    | 0.017283 | 0.420238585 |             | 0.099278 |
| IGLC3      | ENSG00000211679 | 2.1134    | 0.017285 | 2.1134      | 0.017285    | 2.1134   |
|            | 2.1134          | 0.017285  | 0.017285 | 0.420238585 |             | 0.017285 |
| RPL4       | ENSG00000174444 | 2.1133    | 0.017286 | 2.1133      | 0.017286    | 2.1133   |
|            | 2.1133          | 0.017286  | 0.017286 | 0.420238585 |             | 0.017286 |
| NA         | ENSG00000231896 | 0.81485   | 0.20758  | 0.81485     | 0.20758     | 2.1131   |
|            | 0.81485         | 0.20758   | 0.017294 | 0.420238585 |             | 0.017294 |
| NA         | ENSG00000279429 | 2.1131    | 0.017298 | 2.1131      | 0.017298    | 2.1131   |
|            | 2.1131          | 0.017298  | 0.017298 | 0.420238585 |             | 0.017298 |
| RBMXL1     | ENSG00000213516 | 0.46722   | 0.32017  | 1.3661      | 0.085948    | 0.17716  |
|            | 0.42969         | 2.113     | 0.017301 | 0.017301    | 0.420238585 |          |
| RN7SL434P  | ENSG00000241868 | 2.1129    | 0.017307 | 2.1129      | 0.017307    | 2.1129   |
|            | 0.017307        | 2.1129    | 0.017307 | 0.017307    | 0.420238585 |          |
| LRRC30     | ENSG00000206422 | 0.57388   | 0.28302  | 0.62495     | 0.266       | 0.49893  |
|            | 2.1128          | 0.017308  | 0.017308 | 0.420238585 |             | 0.30892  |
| SPATA31D5P | ENSG00000240632 | 0.23316   | 0.40782  | 0.78353     | 0.21666     | 2.1124   |
|            | 0.017326        | -0.39671  | 0.65421  | 0.017326    | 0.420241701 |          |
| NA         | ENSG00000269430 | 2.1123    | 0.01733  | 2.1123      | 0.01733     | 2.1123   |
|            | 2.1123          | 0.01733   | 0.01733  | 0.420241701 |             | 0.01733  |
| SETP22     | ENSG00000213701 | 2.1122    | 0.017334 | 0.95185     | 0.17059     | 2.1122   |
|            | 0.017334        | 1.5147    | 0.064927 | 0.017334    | 0.420241701 |          |
| EN2        | ENSG00000164778 | 0.93438   | 0.17505  | 0.7714      | 0.22023     | 0.05096  |
|            | 2.1115          | 0.017365  | 0.017365 | 0.420783913 |             | 0.47968  |
| STPG2      | ENSG00000163116 | 1.3887    | 0.082459 | 1.4464      | 0.074031    | 2.1111   |
|            | 0.41874         | 0.3377    | 0.017381 | 0.420909301 |             | 0.017381 |
| NA         | ENSG00000231138 | 2.1109    | 0.017389 | 2.1109      | 0.017389    | 2.1109   |
|            | 2.1109          | 0.017389  | 0.017389 | 0.420909301 |             | 0.017389 |

|            |                 |          |             |             |             |           |          |
|------------|-----------------|----------|-------------|-------------|-------------|-----------|----------|
| LINC02608  | ENSG00000226251 | 2.1105   | 0.017406    | 2.1105      | 0.017406    | 1.483     | 0.069036 |
|            | 1.7323          | 0.04161  | 0.017406    | 0.420909301 |             |           |          |
| PNMA2      | ENSG00000240694 | 0.46225  | 0.32195     | -0.18519    | 0.57346     | 2.1103    | 0.017417 |
|            | -0.033828       | 0.51349  | 0.017417    | 0.420909301 |             |           |          |
| RNU6-1053P | ENSG00000251739 | 2.1103   | 0.017417    | 2.1103      | 0.017417    | 2.1103    |          |
|            | 0.017417        | 2.1103   | 0.017417    | 0.420909301 |             |           |          |
| NA         | ENSG00000270361 | 2.1102   | 0.017422    | 1.6912      | 0.045396    | -0.16005  | 0.56358  |
|            | -0.16005        | 0.56358  | 0.017422    | 0.420909301 |             |           |          |
| ALOX12P2   | ENSG00000262943 | 2.1096   | 0.017446    | 2.1096      | 0.017446    | 2.1096    |          |
|            | 0.017446        | 2.1096   | 0.017446    | 0.421280268 |             |           |          |
| GYG1P1     | ENSG00000251633 | 2.1092   | 0.017463    | 2.1092      | 0.017463    | 2.1092    |          |
|            | 0.017463        | 2.1092   | 0.017463    | 0.421281774 |             |           |          |
| WLS        | ENSG00000116729 | 2.1086   | 0.017489    | 1.8751      | 0.030388    | 0.15641   | 0.43786  |
|            | 1.0497          | 0.14694  | 0.017489    | 0.421281774 |             |           |          |
| NA         | ENSG00000250642 | 1.9781   | 0.02396     | 2.1086      | 0.01749     | 1.0636    | 0.14376  |
|            | -1.1587         | 0.87672  | 0.01749     | 0.421281774 |             |           |          |
| ARMC7      | ENSG00000125449 | -0.60419 | 0.72714     | -0.42578    | 0.66487     | -1.142    | 0.87328  |
|            | 2.1084          | 0.017496 | 0.017496    | 0.421281774 |             |           |          |
| NA         | ENSG00000263895 | 2.1083   | 0.017501    | 0.59728     | 0.27516     | -0.11046  | 0.54398  |
|            | -0.11046        | 0.54398  | 0.017501    | 0.421281774 |             |           |          |
| NA         | ENSG00000238802 | 2.1074   | 0.017541    | 1.7305      | 0.041773    | 0.3742    | 0.35413  |
|            | 2.1074          | 0.017541 | 0.017541    | 0.421281774 |             |           |          |
| ASPA       | ENSG00000108381 | 0.97036  | 0.16593     | 1.3997      | 0.080795    | 2.1074    | 0.017542 |
|            | -0.040594       | 0.51619  | 0.017542    | 0.421281774 |             |           |          |
| NA         | ENSG00000253617 | 2.0305   | 0.021152    | 1.769       | 0.03845     | 2.1073    | 0.017545 |
|            | 2.1073          | 0.017545 | 0.017545    | 0.421281774 |             |           |          |
| NA         | ENSG00000225129 | 2.1071   | 0.017553    | 1.7723      | 0.038176    | 1.7723    | 0.038176 |
|            | 1.7723          | 0.038176 | 0.017553    | 0.421281774 |             |           |          |
| SPATA2L    | ENSG00000158792 | 2.1069   | 0.017562    | 2.1069      | 0.017562    | 1.653     | 0.049162 |
|            | 1.6518          | 0.04929  | 0.017562    | 0.421281774 |             |           |          |
| NA         | ENSG00000260668 | 2.1069   | 0.017563    | 0.62868     | 0.26478     | 0.51864   | 0.30201  |
|            | 0.51864         | 0.30201  | 0.017563    | 0.421281774 |             |           |          |
| NAA38      | ENSG00000183011 | 2.1068   | 0.017566    | 2.1068      | 0.017566    | 2.1068    | 0.017566 |
|            | 2.1068          | 0.017566 | 0.017566    | 0.421281774 |             |           |          |
| LINC01135  | ENSG00000234807 | 0.7493   | 0.22684     | 2.1061      | 0.017599    | 0.28255   |          |
|            | 0.38876         | -0.4796  | 0.68425     | 0.017599    | 0.421281774 |           |          |
| ACSS3      | ENSG00000111058 | 0.5782   | 0.28156     | 0.097159    | 0.4613      | -0.089082 | 0.53549  |
|            | 2.1061          | 0.0176   | 0.0176      | 0.421281774 |             |           |          |
| SPAG9      | ENSG00000008294 | 2.1057   | 0.017615    | 2.094       | 0.01813     | 1.2633    | 0.10325  |
|            | 0.95337         | 0.1702   | 0.017615    | 0.421281774 |             |           |          |
| TRHDE-AS1  | ENSG00000236333 | -0.59436 | 0.72387     | 2.1057      | 0.017615    | -0.59436  |          |
|            | 0.72387         | -0.59436 | 0.72387     | 0.017615    | 0.421281774 |           |          |
| NA         | ENSG00000272904 | 2.1046   | 0.017664    | 2.1046      | 0.017664    | 2.1046    | 0.017664 |
|            | 2.1046          | 0.017664 | 0.017664    | 0.421281774 |             |           |          |
| SCT        | ENSG00000070031 | 0.028038 | 0.48882     | 0.028038    | 0.48882     | 2.1044    | 0.017672 |
|            | 0.45144         | 0.32583  | 0.017672    | 0.421281774 |             |           |          |
| RPLP0P2    | ENSG00000243742 | 1.5457   | 0.061089    | 1.0403      | 0.1491      | 2.1043    |          |
|            | 0.017678        | -0.10679 | 0.54252     | 0.017678    | 0.421281774 |           |          |
| NA         | ENSG00000280113 | 2.1042   | 0.01768     | 2.1042      | 0.01768     | 2.1042    | 0.01768  |
|            | 2.1042          | 0.01768  | 0.01768     | 0.421281774 |             |           |          |
| NA         | ENSG00000249166 | 2.1042   | 0.017681    | 2.1042      | 0.017681    | 2.1042    | 0.017681 |
|            | 2.1042          | 0.017681 | 0.017681    | 0.421281774 |             |           |          |
| RNU6-276P  | ENSG00000251923 | 2.104    | 0.017691    | 2.104       | 0.017691    | 2.104     | 0.017691 |
|            | 0.017691        | 0.017691 | 0.421281774 |             |             |           |          |
| NA         | ENSG00000199398 | 1.5501   | 0.060562    | 2.1039      | 0.017693    | -0.17042  | 0.56766  |
|            | -0.17042        | 0.56766  | 0.017693    | 0.421281774 |             |           |          |
| FAM222A    | ENSG00000139438 | 2.1039   | 0.017694    | 1.8572      | 0.03164     | 2.0247    |          |
|            | 0.021449        | 1.7873   | 0.036943    | 0.017694    | 0.421281774 |           |          |
| NA         | ENSG00000279352 | -0.14961 | 0.55946     | 2.1035      | 0.017712    | 0.64788   | 0.25853  |
|            | -0.87571        | 0.80941  | 0.017712    | 0.421281774 |             |           |          |
| AKR1C4     | ENSG00000198610 | 0.58282  | 0.28001     | 0.88656     | 0.18766     | 2.1034    |          |
|            | 0.017714        | 1.1098   | 0.13354     | 0.017714    | 0.421281774 |           |          |

|           |                 |             |             |             |             |          |          |
|-----------|-----------------|-------------|-------------|-------------|-------------|----------|----------|
| NA        | ENSG00000237471 | 1.2804      | 0.1002      | -1.1173     | 0.86807     | 1.0571   | 0.14524  |
|           | 2.1034          | 0.017714    | 0.017714    | 0.421281774 |             |          |          |
| LINC02618 | ENSG00000242104 | -1.4705     | 0.92929     | -0.5973     | 0.72485     | 2.1034   |          |
|           | 0.017715        | -1.9161     | 0.97232     | 0.017715    | 0.421281774 |          |          |
| NA        | ENSG00000258987 | 2.1032      | 0.017725    | 2.1032      | 0.017725    | 2.1032   | 0.017725 |
|           | 2.1032          | 0.017725    | 0.017725    | 0.421281774 |             |          |          |
| NA        | ENSG00000253583 | 0.56619     | 0.28563     | 2.1031      | 0.017727    | 1.3482   | 0.088799 |
|           | 0.43155         | 0.33303     | 0.017727    | 0.421281774 |             |          |          |
| NA        | ENSG00000266441 | 2.103       | 0.017732    | 2.103       | 0.017732    | 2.103    | 0.017732 |
|           | 0.017732        | 0.421281774 |             |             |             |          |          |
| NA        | ENSG00000252846 | 0.8363      | 0.20149     | 0.8363      | 0.20149     | 0.8363   | 0.20149  |
|           | 2.103           | 0.017734    | 0.017734    | 0.421281774 |             |          |          |
| CKS1BP2   | ENSG00000225976 | 1.596       | 0.055239    | 2.1029      | 0.017735    | 2.1029   | 0.017735 |
|           | 2.1029          | 0.017735    | 0.017735    | 0.421281774 |             |          |          |
| PIGW      | ENSG00000277161 | 0.53659     | 0.29578     | -0.37151    | 0.64487     | -0.37151 | 0.64487  |
|           | 2.1028          | 0.01774     | 0.01774     | 0.421281774 |             |          |          |
| GLB1L     | ENSG00000163521 | 2.1021      | 0.01777     | 2.1021      | 0.01777     | 2.1021   | 0.01777  |
|           | 2.1021          | 0.01777     | 0.01777     | 0.421749372 |             |          |          |
| ADAM15    | ENSG00000143537 | -0.22031    | 0.58718     | -0.051419   | 0.5205      | -0.22031 |          |
|           | 0.58718         | 2.102       | 0.017777    | 0.017777    | 0.421749372 |          |          |
| COLGALT1  | ENSG00000130309 | -0.24938    | 0.59847     | -0.24938    | 0.59847     | 2.1017   |          |
|           | 0.017792        | -0.14797    | 0.55882     | 0.017792    | 0.421844973 |          |          |
| ACKR1     | ENSG00000213088 | 2.1013      | 0.017806    | 2.1013      | 0.017806    | 2.1013   | 0.017806 |
|           | 2.1013          | 0.017806    | 0.017806    | 0.421844973 |             |          |          |
| NA        | ENSG00000225240 | 2.1013      | 0.017807    | 2.1013      | 0.017807    | 2.1013   | 0.017807 |
|           | 0.39431         | 0.34668     | 0.017807    | 0.421844973 |             |          |          |
| NA        | ENSG00000255965 | 2.101       | 0.017821    | 2.101       | 0.017821    | 2.101    | 0.017821 |
|           | 0.017821        | 0.421971492 |             |             |             |          |          |
| SNORD16   | ENSG00000199673 | 2.1005      | 0.017842    | 2.1005      | 0.017842    | 2.1005   |          |
|           | 0.017842        | 2.1005      | 0.017842    | 0.017842    | 0.421972009 |          |          |
| C1DP3     | ENSG00000224760 | 0.93739     | 0.17428     | 0.93739     | 0.17428     | 0.24985  | 0.40135  |
|           | 2.1005          | 0.017843    | 0.017843    | 0.421972009 |             |          |          |
| NA        | ENSG00000260487 | 2.1004      | 0.017847    | 2.1004      | 0.017847    | 2.1004   | 0.017847 |
|           | 2.1004          | 0.017847    | 0.017847    | 0.421972009 |             |          |          |
| NA        | ENSG00000151303 | 2.0999      | 0.017871    | 0.37865     | 0.35247     | 0.53737  | 0.29551  |
|           | 0.10563         | 0.45794     | 0.017871    | 0.422295172 |             |          |          |
| LCA5L     | ENSG00000157578 | 2.0997      | 0.017878    | 1.5991      | 0.054899    | 1.5991   | 0.054899 |
|           | 1.638           | 0.050706    | 0.017878    | 0.422295172 |             |          |          |
| MROH3P    | ENSG00000233217 | 1.8995      | 0.02875     | 2.0993      | 0.017896    | 2.0993   |          |
|           | 0.017896        | 0.67881     | 0.24863     | 0.017896    | 0.422303295 |          |          |
| MIR2276   | ENSG00000252695 | 2.0992      | 0.0179      | 2.0992      | 0.0179      | 2.0992   |          |
|           | 0.0179          | 2.0992      | 0.0179      | 0.0179      | 0.422303295 |          |          |
| SHD       | ENSG00000105251 | 0.6863      | 0.24626     | 1.1799      | 0.11903     | 2.099    | 0.017907 |
|           | 1.0416          | 0.1488      | 0.017907    | 0.422303295 |             |          |          |
| SLC35G3   | ENSG00000164729 | -0.03165    | 0.51262     | -1.2209     | 0.88894     | 2.0987   |          |
|           | 0.017923        | 1.0236      | 0.15302     | 0.017923    | 0.422303295 |          |          |
| NA        | ENSG00000259372 | 2.0986      | 0.017926    | 1.0196      | 0.15396     | 1.1268   | 0.12992  |
|           | 0.079854        | 0.46818     | 0.017926    | 0.422303295 |             |          |          |
| POLR2H    | ENSG00000163882 | 2.0985      | 0.017932    | 2.005       | 0.022481    | 1.32     | 0.093423 |
|           | 0.093423        | 0.017932    | 0.422303295 |             |             |          |          |
| PTCRA     | ENSG00000171611 | 1.3078      | 0.095462    | 1.4376      | 0.075271    | 2.0977   | 0.017967 |
|           | 1.0753          | 0.14113     | 0.017967    | 0.422303295 |             |          |          |
| PARP1P1   | ENSG00000227105 | 1.1559      | 0.12385     | 1.0639      | 0.14369     | 1.1559   |          |
|           | 0.12385         | 2.0976      | 0.01797     | 0.01797     | 0.422303295 |          |          |
| TMED6     | ENSG00000157315 | 1.8525      | 0.031976    | 2.0975      | 0.017973    | -2.148   | 0.98414  |
|           | -2.148          | 0.98414     | 0.017973    | 0.422303295 |             |          |          |
| NA        | ENSG00000268055 | 2.0971      | 0.017991    | 2.0971      | 0.017991    | 2.0971   | 0.017991 |
|           | 2.0971          | 0.017991    | 0.017991    | 0.422303295 |             |          |          |
| RASSF7    | ENSG00000099849 | 0.10437     | 0.45844     | 0.10437     | 0.45844     | 0.545    | 0.29288  |
|           | 2.0971          | 0.017994    | 0.017994    | 0.422303295 |             |          |          |
| DNAH1     | ENSG00000114841 | 2.097       | 0.017995    | 0.48589     | 0.31352     | 1.2773   | 0.10076  |
|           | 0.119           | 0.017995    | 0.422303295 |             |             |          | 1.18     |

|           |                 |           |           |          |             |             |           |
|-----------|-----------------|-----------|-----------|----------|-------------|-------------|-----------|
| GNAS      | ENSG00000087460 | 1.8524    | 0.031981  | 2.097    | 0.017997    | 1.1554      | 0.12397   |
|           |                 | 0.38159   | 0.35138   | 0.017997 | 0.422303295 |             |           |
| SCO1      | ENSG00000133028 | 2.0968    | 0.018005  | 0.51187  | 0.30437     | 0.51187     | 0.30437   |
|           |                 | 0.78426   | 0.21644   | 0.018005 | 0.422303295 |             |           |
| OR2AT4    | ENSG00000171561 | 0.91566   | 0.17992   | 0.91566  | 0.17992     | 0.91566     | 0.91566   |
|           |                 | 0.17992   | 2.0965    | 0.01802  | 0.01802     | 0.422303295 |           |
| NME4      | ENSG00000103202 | 1.3468    | 0.089024  | 1.5203   | 0.064213    | 0.66821     | 0.252     |
|           |                 | 2.0963    | 0.018026  | 0.018026 | 0.422303295 |             |           |
| TSEN15P2  | ENSG00000230604 | 2.0963    | 0.018028  | 2.0963   | 0.018028    | 2.0963      | 2.0963    |
|           |                 | 0.018028  | 2.0963    | 0.018028 | 0.018028    | 0.422303295 |           |
| DGKZ      | ENSG00000149091 | 1.5582    | 0.059596  | 2.0961   | 0.018038    | 1.5793      | 0.057137  |
|           |                 | 1.9259    | 0.027056  | 0.018038 | 0.422303295 |             |           |
| CLRN2     | ENSG00000249581 | 0.9782    | 0.16399   | 2.0959   | 0.018045    | 2.0959      | 0.018045  |
|           |                 | 1.3883    | 0.082524  | 0.018045 | 0.422303295 |             |           |
| ITIH3     | ENSG00000162267 | 2.0956    | 0.018058  | 0.47144  | 0.31866     | 1.5214      | 0.064078  |
|           |                 | 1.5214    | 0.064078  | 0.018058 | 0.422303295 |             |           |
| GBP3      | ENSG00000117226 | 2.0955    | 0.018065  | 1.734    | 0.041461    | 1.4006      | 0.080663  |
|           |                 | 0.38361   | 0.35063   | 0.018065 | 0.422303295 |             |           |
| EEF1GP8   | ENSG00000234125 | 2.0954    | 0.018069  | 2.0954   | 0.018069    | 2.0954      | 2.0954    |
|           |                 | 0.018069  | 2.0954    | 0.018069 | 0.018069    | 0.422303295 |           |
| PRKAR1B   | ENSG00000188191 | 1.1655    | 0.12191   | 0.54003  | 0.29459     | 2.0949      | 2.0949    |
|           |                 | 0.018089  | 0.69651   | 0.24305  | 0.018089    | 0.422311115 |           |
| NA        | ENSG00000260672 | 2.0947    | 0.018099  | 0.95013  | 0.17102     | 1.3964      | 0.081293  |
|           |                 | 0.34471   | 0.36516   | 0.018099 | 0.422311115 |             |           |
| MAPK9     | ENSG00000050748 | -1.4487   | 0.92629   | 0.84417  | 0.19929     | 0.78981     | 0.21482   |
|           |                 | 2.0946    | 0.018104  | 0.018104 | 0.422311115 |             |           |
| NA        | ENSG00000271671 | 2.0946    | 0.018104  | 2.0946   | 0.018104    | 2.0946      | 0.018104  |
|           |                 | 2.0946    | 0.018104  | 0.018104 | 0.422311115 |             |           |
| HPS5      | ENSG00000110756 | 0.95949   | 0.16866   | 2.0938   | 0.01814     | 1.2414      | 0.10723   |
|           |                 | 1.1       | 0.13566   | 0.01814  | 0.422419221 |             |           |
| VIPAS39   | ENSG00000151445 | -0.030068 | 0.51199   | 0.12343  | 0.45088     | 2.0936      | 2.0936    |
|           |                 | 0.018148  | 0.75476   | 0.2252   | 0.018148    | 0.422419221 |           |
| TUBB8P7   | ENSG00000261812 | 2.0936    | 0.018149  | 1.5913   | 0.055768    | -0.074376   | -0.074376 |
|           |                 | 0.52964   | -0.074376 | 0.52964  | 0.018149    | 0.422419221 |           |
| TRAJ6     | ENSG00000211883 | 2.0932    | 0.018164  | 2.0932   | 0.018164    | 2.0932      | 0.018164  |
|           |                 | 2.0932    | 0.018164  | 0.018164 | 0.422419221 |             |           |
| NA        | ENSG00000279328 | 2.0931    | 0.01817   | 1.2596   | 0.10391     | 2.0931      | 0.01817   |
|           |                 | 2.0931    | 0.01817   | 0.01817  | 0.422419221 |             |           |
| MRPS21    | ENSG00000266472 | 0.44359   | 0.32867   | 1.5035   | 0.066352    | 0.71504     | 0.71504   |
|           |                 | 0.23729   | 2.093     | 0.018173 | 0.018173    | 0.422419221 |           |
| HMCN2     | ENSG00000148357 | 0.43094   | 0.33326   | 1.3474   | 0.088918    | -0.14926    | 0.55933   |
|           |                 | 2.0929    | 0.01818   | 0.01818  | 0.422419221 |             |           |
| RN7SL624P | ENSG00000265777 | 0.38187   | 0.35128   | 2.0921   | 0.018216    | 2.0581      | 2.0581    |
|           |                 | 0.019792  | 1.4464    | 0.074037 | 0.018216    | 0.422419221 |           |
| SNORA77   | ENSG00000221643 | 2.0917    | 0.018232  | 2.0917   | 0.018232    | 2.0917      | 2.0917    |
|           |                 | 0.018232  | 2.0917    | 0.018232 | 0.018232    | 0.422419221 |           |
| C12orf57  | ENSG00000111678 | 2.0916    | 0.018236  | 2.0916   | 0.018236    | 2.0916      | 2.0916    |
|           |                 | 0.018236  | 2.0916    | 0.018236 | 0.018236    | 0.422419221 |           |
| RNU7-1    | ENSG00000238923 | 2.0916    | 0.018236  | 2.0916   | 0.018236    | 2.0916      | 2.0916    |
|           |                 | 0.018236  | 2.0916    | 0.018236 | 0.018236    | 0.422419221 |           |
| NA        | ENSG00000272173 | 2.0916    | 0.018236  | 2.0916   | 0.018236    | 2.0916      | 0.018236  |
|           |                 | 2.0916    | 0.018236  | 0.018236 | 0.422419221 |             |           |
| CRACR2A   | ENSG00000130038 | 0.79926   | 0.21207   | 2.0915   | 0.018244    | 0.83509     | 0.83509   |
|           |                 | 0.20183   | -0.50421  | 0.69294  | 0.018244    | 0.422419221 |           |
| RPRM      | ENSG00000177519 | 1.802     | 0.035773  | -0.24953 | 0.59852     | 0.94081     | 0.1734    |
|           |                 | 2.0913    | 0.018251  | 0.018251 | 0.422419221 |             |           |
| TRAJ20    | ENSG00000211869 | 2.0912    | 0.018256  | 2.0912   | 0.018256    | 2.0912      | 2.0912    |
|           |                 | 0.018256  | 2.0912    | 0.018256 | 0.018256    | 0.422419221 |           |
| TRAJ19    | ENSG00000211870 | 2.0912    | 0.018256  | 2.0912   | 0.018256    | 2.0912      | 2.0912    |
|           |                 | 0.018256  | 2.0912    | 0.018256 | 0.018256    | 0.422419221 |           |
| TRAJ18    | ENSG00000211871 | 2.0912    | 0.018256  | 2.0912   | 0.018256    | 2.0912      | 2.0912    |
|           |                 | 0.018256  | 2.0912    | 0.018256 | 0.018256    | 0.422419221 |           |

|           |                 |              |              |              |              |           |          |
|-----------|-----------------|--------------|--------------|--------------|--------------|-----------|----------|
| MGAT3     | ENSG00000128268 | 0.95423      | 0.16998      | 1.5769       | 0.057408     | 1.5769    | 0.057408 |
|           | 2.0908          | 0.018271     | 0.018271     | 0.422565653  |              |           |          |
| C1QA      | ENSG00000173372 | 2.0904       | 0.01829      | -0.091125    | 0.5363       | 1.3815    | 0.083558 |
|           | 1.0494          | 0.147001829  | 0.422804412  |              |              |           |          |
| KDM6B     | ENSG00000132510 | 2.0899       | 0.018314     | 2.0899       | 0.018314     | 2.0899    | 0.018314 |
|           | 1.7084          | 0.043782     | 0.018314     | 0.422919152  |              |           |          |
| PEX16     | ENSG00000121680 | -1.0056      | 0.84271      | 2.0898       | 0.018316     | 0.32269   | 0.37346  |
|           | -0.41745        | 0.66183      | 0.018316     | 0.422919152  |              |           |          |
| PCDHB4    | ENSG00000081818 | 0.42058      | 0.33703      | 0.42058      | 0.33703      | 0.42058   |          |
|           | 0.33703         | 2.0897       | 0.018321     | 0.018321     | 0.422919152  |           |          |
| NA        | ENSG00000238851 | 2.0892       | 0.018347     | 2.0892       | 0.018347     | 2.0892    | 0.018347 |
|           | 2.0892          | 0.018347     | 0.018347     | 0.423216712  |              |           |          |
| RPRD2     | ENSG00000163125 | 2.0887       | 0.018367     | 1.8866       | 0.029607     | 1.7205    | 0.042675 |
|           | 1.6919          | 0.045337     | 0.018367     | 0.423216712  |              |           |          |
| NA        | ENSG00000268734 | 2.0887       | 0.018368     | 2.0887       | 0.018368     | 2.0887    | 0.018368 |
|           | 2.0887          | 0.018368     | 0.018368     | 0.423216712  |              |           |          |
| MYBL2     | ENSG00000101057 | 2.0887       | 0.018369     | 1.6830046186 | 1.4194       | 0.077894  |          |
|           | 1.0102          | 0.15619      | 0.018369     | 0.423216712  |              |           |          |
| IGBP1P1   | ENSG00000226677 | 2.0884       | 0.01838      | 2.0884       | 0.01838      | 2.0884    |          |
|           | 0.01838         | 2.0884       | 0.01838      | 0.01838      | 0.423216712  |           |          |
| IQGAP2    | ENSG00000145703 | 2.0883       | 0.018386     | 0.33524      | 0.36872      | 0.011016  |          |
|           | 0.49561         | 0.24185      | 0.40445      | 0.018386     | 0.423216712  |           |          |
| RNA5SP461 | ENSG00000252260 | 2.0879       | 0.018401     | 0.12676      | 0.44956      | -0.019615 |          |
|           | 0.50782         | 1.9329       | 0.026622     | 0.018401     | 0.423362007  |           |          |
| ASCC3     | ENSG00000112249 | 2.0873       | 0.018428     | 0.23852      | 0.40574      | 1.4067    | 0.07976  |
|           | 1.3886          | 0.082474     | 0.018428     | 0.423526762  |              |           |          |
| NA        | ENSG00000250681 | 2.0871       | 0.018438     | 1.9920023184 | 2.0871       | 0.018438  |          |
|           | 2.0586          | 0.019767     | 0.018438     | 0.423526762  |              |           |          |
| NA        | ENSG00000188897 | 1.4846       | 0.068827     | 1.2783       | 0.10058      | 1.7704    | 0.038327 |
|           | 2.0871          | 0.01844      | 0.01844      | 0.423526762  |              |           |          |
| LINC01339 | ENSG00000248555 | 2.0869       | 0.018448     | 1.6291       | 0.05165      | 0.60871   |          |
|           | 0.27136         | -0.011446    | 0.50457      | 0.018448     | 0.423526762  |           |          |
| LINC01924 | ENSG00000267134 | 2.0866       | 0.018464     | 0.26018      | 0.39736      | -1.7586   |          |
|           | 0.96068         | -0.89353     | 0.81421      | 0.018464     | 0.423526762  |           |          |
| NA        | ENSG00000231533 | 2.0865       | 0.018467     | 2.0865       | 0.018467     | 2.0865    | 0.018467 |
|           | 2.0865          | 0.018467     | 0.018467     | 0.423526762  |              |           |          |
| NA        | ENSG00000276662 | -0.6303      | 0.73575      | 1.9571       | 0.025166     | 0.35095   | 0.36281  |
|           | 2.0864          | 0.018469     | 0.018469     | 0.423526762  |              |           |          |
| NPTN      | ENSG00000156642 | 1.2378       | 0.10789      | 2.0859       | 0.018494     | 0.0039999 | 0.4984   |
|           | 0.62729         | 0.26524      | 0.018494     | 0.423900574  |              |           |          |
| OSBPL8    | ENSG00000091039 | -0.57983     | 0.71898      | 2.0613       | 0.019637     | 0.27065   |          |
|           | 0.39333         | 2.0856       | 0.01851      | 0.01851      | 0.423914361  |           |          |
| ZNF383    | ENSG00000188283 | 0.38597      | 0.34976      | 2.0855       | 0.018512     | 1.6014    |          |
|           | 0.054641        | 2.0855       | 0.018512     | 0.018512     | 0.423914361  |           |          |
| ACKR2     | ENSG00000144648 | 1.6658       | 0.047872     | 2.0853       | 0.018523     | -1.5596   | 0.94057  |
|           | -1.0107         | 0.84392      | 0.018523     | 0.423967022  |              |           |          |
| PHB2P1    | ENSG00000232728 | 2.0848       | 0.018542     | 2.0848       | 0.018542     | 2.0848    |          |
|           | 0.018542        | 2.0848       | 0.018542     | 0.018542     | 0.424140798  |           |          |
| RAB3A     | ENSG00000105649 | 2.0847       | 0.018548     | 2.0847       | 0.018548     | 2.0847    | 0.018548 |
|           | 1.5550059968    | 0.018548     | 0.424140798  |              |              |           |          |
| NUP58     | ENSG00000139496 | -1.0186      | 0.84581      | -0.26705     | 0.60528      | -0.24734  | 0.59768  |
|           | 2.0839          | 0.018585     | 0.018585     | 0.424400606  |              |           |          |
| NA        | ENSG00000253682 | 0.12279      | 0.45114      | 0.81416      | 0.20778      | 2.0838    | 0.018587 |
|           | 0.71506         | 0.23729      | 0.018587     | 0.424400606  |              |           |          |
| SERPINA5  | ENSG00000188488 | 2.0834       | 0.018607     | 1.7827       | 0.037318     | 2.0834    |          |
|           | 0.018607        | 2.0834       | 0.018607     | 0.018607     | 0.424400606  |           |          |
| OASL      | ENSG00000135114 | -0.039501    | 0.51575      | -0.039501    | 0.51575      | 2.0832    | 0.018617 |
|           | 1.0271          | 0.15218      | 0.018617     | 0.424400606  |              |           |          |
| RNU7-87P  | ENSG00000238500 | 2.0830018628 | 2.0830018628 | 2.0830018628 | 2.0830018628 | 2.083     |          |
|           | 0.018628        | 0.018628     | 0.424400606  |              |              |           |          |
| NA        | ENSG00000228434 | 2.0828       | 0.018636     | 2.0828       | 0.018636     | 2.0828    | 0.018636 |
|           | 2.0828          | 0.018636     | 0.018636     | 0.424400606  |              |           |          |

|           |                 |           |             |             |             |          |          |
|-----------|-----------------|-----------|-------------|-------------|-------------|----------|----------|
| POLM      | ENSG00000122678 | 2.0827    | 0.018641    | 1.3756      | 0.084472    | 1.1723   | 0.12054  |
|           | 0.75195         | 0.22604   | 0.018641    | 0.424400606 |             |          |          |
| PCBP3-AS1 | ENSG00000205424 | 1.0671    | 0.14297     | -0.36201    | 0.64133     | 2.0824   |          |
|           | 0.018652        | 1.2339    | 0.10861     | 0.018652    | 0.424400606 |          |          |
| NA        | ENSG00000253263 | -0.77815  | 0.78176     | 2.0824      | 0.018652    | -0.77815 | 0.78176  |
|           | -1.5432         | 0.93861   | 0.018652    | 0.424400606 |             |          |          |
| NA        | ENSG00000279635 | 0.8327    | 0.20251     | 0.8327      | 0.20251     | 0.8327   | 0.20251  |
|           | 2.0823          | 0.018658  | 0.018658    | 0.424400606 |             |          |          |
| NA        | ENSG00000236031 | 2.0822    | 0.018664    | 2.0822      | 0.018664    | 2.0822   | 0.018664 |
|           | 2.0822          | 0.018664  | 0.018664    | 0.424400606 |             |          |          |
| LINC00184 | ENSG00000224939 | -0.50093  | 0.69179     | -0.67731    | 0.75089     | 2.0819   |          |
|           | 0.018677        | 0.52322   | 0.30041     | 0.018677    | 0.424400606 |          |          |
| NA        | ENSG00000277738 | -0.99991  | 0.84132     | -0.065657   | 0.52617     | 2.0817   | 0.018684 |
|           | -0.47996        | 0.68437   | 0.018684    | 0.424400606 |             |          |          |
| NA        | ENSG00000278428 | 0.1112    | 0.45573     | -0.72119    | 0.7646      | -0.46305 | 0.67834  |
|           | 2.0816          | 0.018688  | 0.018688    | 0.424400606 |             |          |          |
| NEDD4     | ENSG00000069869 | 1.3558    | 0.087582    | 0.27501     | 0.39165     | 2.0816   | 0.01869  |
|           | 0.33892         | 0.36734   | 0.01869     | 0.424400606 |             |          |          |
| SMAD1     | ENSG00000170365 | 1.2597    | 0.10388     | 1.4526      | 0.073162    | 0.68299  | 0.24731  |
|           | 2.0812          | 0.018706  | 0.018706    | 0.424443062 |             |          |          |
| TRBV6-6   | ENSG00000211724 | 1.5827    | 0.05675     | 1.7612      | 0.039102    | 2.0811   |          |
|           | 0.018714        | 2.0811    | 0.018714    | 0.018714    | 0.424443062 |          |          |
| NA        | ENSG00000227722 | 2.081     | 0.018718    | 0.25482     | 0.39943     | 0.13565  | 0.44605  |
|           | 1.0504          | 0.14676   | 0.018718    | 0.424443062 |             |          |          |
| NA        | ENSG00000269469 | 2.0802    | 0.018752    | 2.0802      | 0.018752    | 2.0802   | 0.018752 |
|           | 2.0802          | 0.018752  | 0.018752    | 0.424978793 |             |          |          |
| GPAM      | ENSG00000119927 | 1.8573    | 0.031632    | 2.0517      | 0.0201      | -0.13175 | 0.55241  |
|           | 2.0798          | 0.018774  | 0.018774    | 0.424978793 |             |          |          |
| NA        | ENSG00000226814 | 1.6032    | 0.054447    | 0.52471     | 0.29989     | 2.0797   | 0.018775 |
|           | 0.99082         | 0.16089   | 0.018775    | 0.424978793 |             |          |          |
| NA        | ENSG00000232036 | 0.22896   | 0.40945     | 2.0793      | 0.018794    | 1.7969   | 0.036177 |
|           | 0.22896         | 0.40945   | 0.018794    | 0.424978793 |             |          |          |
| NA        | ENSG00000258506 | 2.079     | 0.018808    | 1.1235      | 0.13061     | 1.1235   | 0.13061  |
|           | 1.1235          | 0.13061   | 0.018808    | 0.424978793 |             |          |          |
| RSF1      | ENSG00000048649 | 1.116     | 0.13221     | 2.079       | 0.018809    | 0.85107  | 0.19737  |
|           | 0.1704          | 0.018809  | 0.424978793 |             |             |          | 0.9526   |
| NA        | ENSG00000260911 | 2.0789    | 0.018812    | 1.6839      | 0.046101    | 2.0789   | 0.018812 |
|           | 2.0789          | 0.018812  | 0.018812    | 0.424978793 |             |          |          |
| RIF1      | ENSG00000080345 | 1.8477    | 0.032326    | 2.0789      | 0.018813    | 2.0102   | 0.022206 |
|           | 2.0525          | 0.020059  | 0.018813    | 0.424978793 |             |          |          |
| LYPLA1P1  | ENSG00000223595 | 2.0785    | 0.018832    | 2.0785      | 0.018832    | 2.0785   |          |
|           | 0.018832        | 2.0785    | 0.018832    | 0.018832    | 0.424978793 |          |          |
| SPOCK2    | ENSG00000107742 | 2.0783    | 0.018839    | 1.4643      | 0.071553    | 0.50917  |          |
|           | 0.30532         | 0.0022132 | 0.49912     | 0.018839    | 0.424978793 |          |          |
| TRAV25    | ENSG00000211806 | 2.0782    | 0.018846    | 2.0782      | 0.018846    | 2.0782   |          |
|           | 0.018846        | 2.0782    | 0.018846    | 0.018846    | 0.424978793 |          |          |
| TMEM267   | ENSG00000151881 | 2.0781    | 0.018851    | 2.0781      | 0.018851    | 2.0781   |          |
|           | 0.018851        | 0.80158   | 0.2114      | 0.018851    | 0.424978793 |          |          |
| MIR298    | ENSG00000216031 | 0.57208   | 0.28364     | 0.57208     | 0.28364     | 0.57208  |          |
|           | 0.28364         | 2.078     | 0.018855    | 0.018855    | 0.424978793 |          |          |
| NA        | ENSG00000254653 | 1.8891    | 0.029438    | 1.8891      | 0.029438    | 2.0778   | 0.018864 |
|           | 1.8891          | 0.029438  | 0.018864    | 0.424985076 |             |          |          |
| RAB11FIP5 | ENSG00000135631 | 1.7469    | 0.040327    | -0.080402   | 0.53204     | 2.0542   |          |
|           | 0.01998         | 2.077     | 0.018899    | 0.018899    | 0.425407555 |          |          |
| ADGRB2    | ENSG00000121753 | 2.0603    | 0.019684    | 1.6265      | 0.05192     | 2.0766   |          |
|           | 0.018918        | 1.2924    | 0.098102    | 0.018918    | 0.425407555 |          |          |
| NA        | ENSG00000230096 | 0.53278   | 0.29709     | 0.57446     | 0.28283     | 2.0766   | 0.01892  |
|           | 1.177           | 0.11959   | 0.01892     | 0.425407555 |             |          |          |
| RNU6-823P | ENSG00000212344 | 2.0764    | 0.018929    | 0.62223     | 0.2669      | 1.7254   |          |
|           | 0.042225        | 1.1334    | 0.12852     | 0.018929    | 0.425407555 |          |          |
| NA        | ENSG00000260834 | -0.16899  | 0.5671      | -0.1869     | 0.57413     | 2.076    | 0.018945 |
|           | 0.19622         | 0.42222   | 0.018945    | 0.425407555 |             |          |          |

|           |                 |           |             |           |             |             |          |          |          |
|-----------|-----------------|-----------|-------------|-----------|-------------|-------------|----------|----------|----------|
| NA        | ENSG00000259408 | 2.076     | 0.018948    | 2.076     | 0.018948    | 2.076       | 0.018948 | 2.076    | 0.018948 |
|           |                 | 0.018948  | 0.425407555 |           |             |             |          |          |          |
| NA        | ENSG00000264677 | 2.0759    | 0.018952    | 2.0759    | 0.018952    | 2.0759      | 0.018952 | 2.0759   | 0.018952 |
|           |                 | 2.0759    | 0.018952    | 0.018952  | 0.425407555 |             |          |          |          |
| RPL3P7    | ENSG00000225093 | 2.0752    | 0.018986    | 2.0752    | 0.018986    | 2.0752      | 0.018986 | -0.14696 |          |
|           |                 | 0.55842   | -0.69935    | 0.75783   | 0.018986    | 0.425407555 |          |          |          |
| ESAM      | ENSG00000149564 | 1.8669    | 0.030956    | 2.0749    | 0.018997    | 2.0749      | 0.018997 | -0.6044  | 0.72721  |
|           |                 | -0.6044   | 0.72721     | 0.018997  | 0.425407555 |             |          |          |          |
| SPATA31D1 | ENSG00000214929 | -0.83007  | 0.79675     | 1.0979    | 0.13612     | -0.83007    |          |          |          |
|           |                 | 0.79675   | 2.0749      | 0.018999  | 0.018999    | 0.425407555 |          |          |          |
| LINC01730 | ENSG00000275491 | 2.0748    | 0.019001    | 1.7685    | 0.038491    | 2.0748      |          |          |          |
|           |                 | 0.019001  | 2.0748      | 0.019001  | 0.019001    | 0.425407555 |          |          |          |
| MAP6D1    | ENSG00000180834 | 1.9308    | 0.026753    | 1.8869    | 0.029589    | 2.0746      |          |          |          |
|           |                 | 0.019014  | 2.0746      | 0.019014  | 0.019014    | 0.425407555 |          |          |          |
| EPG5      | ENSG00000152223 | 2.0745    | 0.019018    | 1.9869    | 0.023466    | -0.20845    | 0.58256  |          |          |
|           |                 | 1.9068    | 0.028271    | 0.019018  | 0.425407555 |             |          |          |          |
| SNORD18A  | ENSG00000200623 | 2.0741    | 0.019036    | 2.0741    | 0.019036    | 2.0741      |          |          |          |
|           |                 | 0.019036  | 2.0741      | 0.019036  | 0.019036    | 0.425407555 |          |          |          |
| RPUSD3    | ENSG00000156990 | 2.074     | 0.019038    | 1.4159    | 0.078406    | 1.6099      | 0.053713 |          |          |
|           |                 | 1.6886    | 0.045647    | 0.019038  | 0.425407555 |             |          |          |          |
| CCDC178   | ENSG00000166960 | 1.2201    | 0.11122     | 2.0736    | 0.01906     | 1.4035      |          |          |          |
|           |                 | 0.080229  | 1.2547      | 0.10479   | 0.01906     | 0.425407555 |          |          |          |
| RAB17     | ENSG00000124839 | 0.77551   | 0.21902     | 0.44344   | 0.32872     | 2.0735      | 0.019063 |          |          |
|           |                 | 0.3187    | 0.37498     | 0.019063  | 0.425407555 |             |          |          |          |
| PPP1R13B  | ENSG00000088808 | 1.7308    | 0.041742    | 1.0098    | 0.1563      | 2.0734      |          |          |          |
|           |                 | 0.019066  | 1.8637      | 0.031181  | 0.019066    | 0.425407555 |          |          |          |
| RNU6-637P | ENSG00000206777 | 1.1104    | 0.13341     | -0.036956 | 0.51474     | 0.044633    |          |          |          |
|           |                 | 0.4822    | 2.0733      | 0.019071  | 0.019071    | 0.425407555 |          |          |          |
| NMBR-AS1  | ENSG00000236822 | 2.0733    | 0.019073    | 0.59134   | 0.27715     | 0.59134     |          |          |          |
|           |                 | 0.27715   | 0.59134     | 0.27715   | 0.019073    | 0.425407555 |          |          |          |
| NA        | ENSG00000268650 | 2.0729    | 0.019088    | 2.0729    | 0.019088    | 2.0729      | 0.019088 |          |          |
|           |                 | 2.0729    | 0.019088    | 0.019088  | 0.425407555 |             |          |          |          |
| CD96      | ENSG00000153283 | 2.0729    | 0.019092    | 1.9971    | 0.022907    | 1.9971      | 0.022907 |          |          |
|           |                 | 1.9971    | 0.022907    | 0.019092  | 0.425407555 |             |          |          |          |
| NA        | ENSG00000274267 | 1.4243    | 0.077178    | 1.2902    | 0.098484    | 2.0729      | 0.019092 |          |          |
|           |                 | 0.38378   | 0.35057     | 0.019092  | 0.425407555 |             |          |          |          |
| RNA5SP44  | ENSG00000222378 | 2.0727    | 0.019101    | 1.757     | 0.039455    | 1.0062      | 0.15716  |          |          |
|           |                 | 2.0727    | 0.019101    | 0.019101  | 0.425407555 |             |          |          |          |
| NA        | ENSG00000267849 | 2.0727    | 0.019101    | 1.3034    | 0.096222    | 2.0727      | 0.019101 |          |          |
|           |                 | 2.0727    | 0.019101    | 0.019101  | 0.425407555 |             |          |          |          |
| SOX5-AS1  | ENSG00000256120 | 2.0721    | 0.01913     | 2.0721    | 0.01913     | 0.40538     |          |          |          |
|           |                 | 0.3426    | 1.6768      | 0.046794  | 0.01913     | 0.425775594 |          |          |          |
| NA        | ENSG00000276593 | 0.32867   | 0.3712      | 1.7669    | 0.03862     | 2.072       | 0.019135 |          |          |
|           |                 | 1.7725    | 0.038157    | 0.019135  | 0.425775594 |             |          |          |          |
| NA        | ENSG00000185495 | -0.21723  | 0.58599     | 2.0715    | 0.019155    | 0.057721    | 0.47699  |          |          |
|           |                 | -0.79816  | 0.78761     | 0.019155  | 0.425982342 |             |          |          |          |
| GCOM1     | ENSG00000137878 | 0.39627   | 0.34595     | 2.0711    | 0.019175    | -0.42458    | 0.66443  |          |          |
|           |                 | -0.062551 | 0.52494     | 0.019175  | 0.425982342 |             |          |          |          |
| TAF9BP2   | ENSG00000215760 | -0.72198  | 0.76485     | 0.099884  | 0.46022     | 2.071       | 0.019179 |          |          |
|           |                 | -0.29356  | 0.61545     | 0.019179  | 0.425982342 |             |          |          |          |
| NA        | ENSG00000220745 | 2.0708    | 0.019187    | 0.35965   | 0.35955     | 1.6096      | 0.053737 |          |          |
|           |                 | 1.6096    | 0.053737    | 0.019187  | 0.425982342 |             |          |          |          |
| E2F3-IT1  | ENSG00000224707 | 2.0708    | 0.019188    | 2.0708    | 0.019188    | 2.0708      |          |          |          |
|           |                 | 0.019188  | 2.0708      | 0.019188  | 0.019188    | 0.425982342 |          |          |          |
| NA        | ENSG00000266336 | 2.0705    | 0.019201    | 0.97672   | 0.16435     | 0.97672     | 0.16435  |          |          |
|           |                 | 0.97672   | 0.16435     | 0.019201  | 0.425983079 |             |          |          |          |
| NA        | ENSG00000264310 | 2.0703    | 0.019214    | 2.0703    | 0.019214    | 2.0703      | 0.019214 |          |          |
|           |                 | 2.0703    | 0.019214    | 0.019214  | 0.425983079 |             |          |          |          |
| VKORC1    | ENSG00000167397 | 2.0702    | 0.019216    | 2.0702    | 0.019216    | 2.0702      |          |          |          |
|           |                 | 0.019216  | 2.0702      | 0.019216  | 0.019216    | 0.425983079 |          |          |          |
| GRB14     | ENSG00000115290 | 1.5034    | 0.066373    | 2.0701    | 0.019223    | -0.77616    | 0.78117  |          |          |
|           |                 | -1.064    | 0.85635     | 0.019223  | 0.425983079 |             |          |          |          |

|           |                 |          |             |          |             |             |          |
|-----------|-----------------|----------|-------------|----------|-------------|-------------|----------|
| NA        | ENSG00000259994 | 2.0695   | 0.01925     | 2.0695   | 0.01925     | 2.0695      | 0.01925  |
|           |                 | 2.0695   | 0.01925     | 0.01925  | 0.4263875   |             |          |
| BTC       | ENSG00000174808 | 0.15898  | 0.43684     | 1.2878   | 0.09891     | 2.069       | 0.019271 |
|           |                 | 1.3239   | 0.092768    | 0.019271 | 0.426641994 |             |          |
| EIF5      | ENSG00000100664 | 1.4488   | 0.073698    | 2.0689   | 0.019279    | 0.18665     | 0.42597  |
|           |                 | 1.7682   | 0.038516    | 0.019279 | 0.426641994 |             |          |
| AURKAIP1  | ENSG00000175756 | 2.0677   | 0.019335    | 2.0677   | 0.019335    | 2.0677      |          |
|           |                 | 0.019335 | 1.9246      | 0.027139 | 0.019335    | 0.426815149 |          |
| NA        | ENSG00000261007 | 2.0677   | 0.019336    | 0.94022  | 0.17355     | 2.0677      | 0.019336 |
|           |                 | 2.0677   | 0.019336    | 0.019336 | 0.426815149 |             |          |
| NEDD8P1   | ENSG00000226970 | 2.0673   | 0.019354    | 2.0673   | 0.019354    | 2.0673      |          |
|           |                 | 0.019354 | 2.0673      | 0.019354 | 0.426815149 |             |          |
| TADA2A    | ENSG00000276234 | 2.0669   | 0.019373    | 1.6939   | 0.045138    | 2.064       | 0.019509 |
|           |                 | 1.8413   | 0.032791    | 0.019373 | 0.426815149 |             |          |
| CHMP1B    | ENSG00000255112 | 2.0666   | 0.019384    | 0.21205  | 0.41603     | -0.026875   |          |
|           |                 | 0.51072  | 2.0666      | 0.019384 | 0.019384    | 0.426815149 |          |
| RPS23P5   | ENSG00000242608 | 0.10091  | 0.45981     | 2.0664   | 0.019396    | -0.91669    |          |
|           |                 | 0.82035  | -0.91669    | 0.82035  | 0.019396    | 0.426815149 |          |
| NA        | ENSG00000261124 | 2.0662   | 0.019404    | 2.0662   | 0.019404    | 2.0662      | 0.019404 |
|           |                 | 2.0662   | 0.019404    | 0.019404 | 0.426815149 |             |          |
| CCDC166   | ENSG00000255181 | 2.0659   | 0.019417    | 2.0659   | 0.019417    | 2.0659      |          |
|           |                 | 0.019417 | 2.0659      | 0.019417 | 0.019417    | 0.426815149 |          |
| AK2       | ENSG00000004455 | 1.4117   | 0.079018    | 1.668    | 0.04766     | -0.25846    | 0.60198  |
|           |                 | 2.0658   | 0.019425    | 0.019425 | 0.426815149 |             |          |
| LCN15     | ENSG00000177984 | 1.9014   | 0.028623    | 1.9014   | 0.028623    | 1.9014      | 0.028623 |
|           |                 | 2.0658   | 0.019425    | 0.019425 | 0.426815149 |             |          |
| CD28      | ENSG00000178562 | 2.0657   | 0.019428    | 1.6988   | 0.044676    | 1.5413      | 0.061623 |
|           |                 | 1.5413   | 0.061623    | 0.019428 | 0.426815149 |             |          |
| NA        | ENSG00000241776 | 2.0657   | 0.019429    | 2.0657   | 0.019429    | 2.0657      | 0.019429 |
|           |                 | 2.0657   | 0.019429    | 0.019429 | 0.426815149 |             |          |
| NA        | ENSG00000265474 | 2.0656   | 0.019431    | 2.0656   | 0.019431    | 2.0656      | 0.019431 |
|           |                 | 2.0656   | 0.019431    | 0.019431 | 0.426815149 |             |          |
| IQCA1     | ENSG00000132321 | 2.0654   | 0.01944     | 1.6259   | 0.051988    | 0.78631     | 0.21584  |
|           |                 | 0.94194  | 0.17311     | 0.01944  | 0.426815149 |             |          |
| SHC1      | ENSG00000160691 | 2.0653   | 0.019449    | 0.66845  | 0.25192     | 2.0279      | 0.021287 |
|           |                 | 0.66845  | 0.25192     | 0.019449 | 0.426815149 |             |          |
| LINC01661 | ENSG00000237460 | 2.0651   | 0.019455    | 0.27972  | 0.38985     | -0.41123    |          |
|           |                 | 0.65955  | -0.83982    | 0.79949  | 0.019455    | 0.426815149 |          |
| NA        | ENSG00000249042 | 2.0651   | 0.019458    | -0.524   | 0.69986     | 2.0651      | 0.019458 |
|           |                 | 2.0651   | 0.019458    | 0.019458 | 0.426815149 |             |          |
| SNX3      | ENSG00000112335 | 0.34569  | 0.36479     | 0.90299  | 0.18326     | 0.34569     | 0.36479  |
|           |                 | 2.065    | 0.019462    | 0.019462 | 0.426815149 |             |          |
| RIC3      | ENSG00000166405 | 2.0256   | 0.021402    | 2.0256   | 0.021402    | 2.065       | 0.019462 |
|           |                 | 1.2747   | 0.10121     | 0.019462 | 0.426815149 |             |          |
| NA        | ENSG00000249492 | 2.065    | 0.019462    | 2.065    | 0.019462    | 2.065       | 0.019462 |
|           |                 | 0.019462 | 0.426815149 |          |             |             |          |
| TNRC6B    | ENSG00000100354 | -0.86222 | 0.80572     | -0.94379 | 0.82736     | -0.45484    |          |
|           |                 | 0.67539  | 2.0648      | 0.019473 | 0.019473    | 0.426864278 |          |
| RN7SL808P | ENSG00000240637 | 2.0645   | 0.019486    | 0.90888  | 0.18171     | 2.0645      |          |
|           |                 | 0.019486 | 2.0645      | 0.019486 | 0.019486    | 0.426957185 |          |
| STMN4     | ENSG00000015592 | 1.2805   | 0.10019     | 0.71462  | 0.23742     | -0.49632    | 0.69016  |
|           |                 | 2.064    | 0.019509    | 0.019509 | 0.42726902  |             |          |
| NA        | ENSG00000265342 | 1.9619   | 0.024885    | 2.0631   | 0.01955     | 1.3418      | 0.089836 |
|           |                 | 1.8896   | 0.029404    | 0.01955  | 0.427343097 |             |          |
| FOXQ1     | ENSG00000164379 | 0.10055  | 0.45996     | 1.4109   | 0.07913     | 2.0631      | 0.019554 |
|           |                 | -0.65995 | 0.74536     | 0.019554 | 0.427343097 |             |          |
| MARK3P1   | ENSG00000271642 | 1.6902   | 0.045495    | 2.0629   | 0.01956     | 0.95209     |          |
|           |                 | 0.17053  | 0.27332     | 0.3923   | 0.01956     | 0.427343097 |          |
| TPSB2     | ENSG00000197253 | 0.67278  | 0.25054     | 2.0629   | 0.019563    | 0.50294     | 0.3075   |
|           |                 | 0.23001  | 0.40904     | 0.019563 | 0.427343097 |             |          |
| NA        | ENSG00000255931 | 1.8315   | 0.033513    | 1.882    | 0.029921    | 1.4112      | 0.079096 |
|           |                 | 2.0628   | 0.019564    | 0.019564 | 0.427343097 |             |          |



|            |                 |          |             |             |             |           |          |          |
|------------|-----------------|----------|-------------|-------------|-------------|-----------|----------|----------|
| TCP1P3     | ENSG00000256849 | 2.0628   | 0.019565    | 0.033868    | 0.48649     | 2.0628    |          |          |
|            | 0.019565        | 2.0628   | 0.019565    | 0.019565    | 0.427343097 |           |          |          |
| FOXJ1      | ENSG00000129654 | 2.0625   | 0.019582    | 1.6246      | 0.052126    | 2.0625    | 0.019582 |          |
|            | 1.6998          | 0.044584 | 0.019582    | 0.427522787 |             |           |          |          |
| YTHDC1     | ENSG00000083896 | 1.4985   | 0.067004    | 1.9876      | 0.023427    | -0.68379  |          |          |
|            | 0.75294         | 2.0622   | 0.019595    | 0.019595    | 0.427615025 |           |          |          |
| NUP160     | ENSG00000030066 | -0.18435 | 0.57313     | -0.57358    | 0.71688     | 1.005     | 0.15745  |          |
|            | 2.0616          | 0.019621 | 0.019621    | 0.427787099 |             |           |          |          |
| NA         | ENSG00000264194 | 2.0614   | 0.019631    | 2.0614      | 0.019631    | 0.15535   | 0.43827  |          |
|            | 0.15535         | 0.43827  | 0.019631    | 0.427787099 |             |           |          |          |
| NA         | ENSG00000207356 | 0.28415  | 0.38815     | 2.0613      | 0.019637    | -0.66964  | 0.74845  |          |
|            | -0.69099        | 0.75521  | 0.019637    | 0.427787099 |             |           |          |          |
| LMAN2      | ENSG00000169223 | 2.0613   | 0.019638    | -0.29524    | 0.61609     | -1.349    | 0.91134  |          |
|            | 1.6195          | 0.05267  | 0.019638    | 0.427787099 |             |           |          |          |
| NA         | ENSG00000268597 | -0.16718 | 0.56638     | 2.0609      | 0.019655    | -0.27616  | 0.60879  |          |
|            | -1.5183         | 0.93553  | 0.019655    | 0.427966108 |             |           |          |          |
| ACTR3C     | ENSG00000106526 | -0.23131 | 0.59146     | 2.0606      | 0.01967     | -0.023542 |          |          |
|            | 0.50939         | -0.43467 | 0.6681      | 0.01967     | 0.428101429 |           |          |          |
| LCN8       | ENSG00000204001 | 0.58181  | 0.28035     | 1.6003      | 0.054769    | 0.99231   | 0.16052  |          |
|            | 2.0596          | 0.01972  | 0.01972     | 0.428109853 |             |           |          |          |
| NA         | ENSG00000251062 | 0.49818  | 0.30918     | 0.1891      | 0.42501     | -1.1459   | 0.87409  |          |
|            | 2.0594          | 0.019728 | 0.019728    | 0.428109853 |             |           |          |          |
| SUPT6H     | ENSG00000109111 | 1.023    | 0.15315     | 0.86459     | 0.19363     | 0.927     | 0.17696  |          |
|            | 2.0591          | 0.019744 | 0.019744    | 0.428109853 |             |           |          |          |
| NA         | ENSG00000254534 | -0.12864 | 0.55118     | 2.059       | 0.019749    | 2.059     | 0.019749 | 2.059    |
|            | 0.019749        | 0.019749 | 0.428109853 |             |             |           |          |          |
| NA         | ENSG00000249568 | 1.751    | 0.039975    | 1.751       | 0.039975    | 2.0585    | 0.019769 | 0.082886 |
|            | 0.46697         | 0.019769 | 0.428109853 |             |             |           |          |          |
| NA         | ENSG00000258973 | 2.0583   | 0.01978     | 2.0583      | 0.01978     | 2.0583    | 0.01978  |          |
|            | 2.0583          | 0.01978  | 0.01978     | 0.428109853 |             |           |          |          |
| NA         | ENSG00000244662 | 2.0583   | 0.019781    | -0.26402    | 0.60412     | -0.26402  | 0.60412  |          |
|            | -0.26402        | 0.60412  | 0.019781    | 0.428109853 |             |           |          |          |
| NRGN       | ENSG00000154146 | -1.5661  | 0.94134     | -1.5661     | 0.94134     | -1.5661   | 0.94134  |          |
|            | 2.0582          | 0.019784 | 0.019784    | 0.428109853 |             |           |          |          |
| LINC02424  | ENSG00000258220 | 0.2756   | 0.39143     | 2.058       | 0.019793    | 0.26057   | 0.39721  |          |
|            | 0.26057         | 0.39721  | 0.019793    | 0.428109853 |             |           |          |          |
| IFNWP4     | ENSG00000225027 | 1.3019   | 0.096479    | 0.42477     | 0.3355      | 2.057     | 0.019842 |          |
|            | 2.057           | 0.019842 | 0.019842    | 0.428109853 |             |           |          |          |
| SLC23A3    | ENSG00000213901 | 1.6891   | 0.045599    | 2.0569      | 0.019848    | -0.24594  |          |          |
|            | 0.59714         | -0.24594 | 0.59714     | 0.019848    | 0.428109853 |           |          |          |
| RAB44      | ENSG00000255587 | 0.29776  | 0.38294     | 2.0568      | 0.019852    | 1.9574    | 0.025151 |          |
|            | 0.37913         | 0.3523   | 0.019852    | 0.428109853 |             |           |          |          |
| FAM83F     | ENSG00000133477 | 2.0566   | 0.019861    | 0.64081     | 0.26082     | 0.99961   |          |          |
|            | 0.15875         | 1.674    | 0.047062    | 0.019861    | 0.428109853 |           |          |          |
| NA         | ENSG00000272461 | -0.51734 | 0.69754     | 0.43402     | 0.33214     | -0.29394  | 0.6156   |          |
|            | 2.056           | 0.019892 | 0.019892    | 0.428109853 |             |           |          |          |
| RNU6-1310P | ENSG00000206880 | 2.0559   | 0.019895    | 0.18999     | 0.42466     | 0.18999   |          |          |
|            | 0.42466         | 0.18999  | 0.42466     | 0.019895    | 0.428109853 |           |          |          |
| C10orf143  | ENSG00000237489 | 2.0559   | 0.019896    | 2.0559      | 0.019896    | 2.0559    |          |          |
|            | 0.019896        | 0.13664  | 0.44566     | 0.019896    | 0.428109853 |           |          |          |
| CAPRIN1    | ENSG00000135387 | 2.0558   | 0.019901    | 1.6944      | 0.045095    | 1.2792    |          |          |
|            | 0.10042         | 2.0335   | 0.021003    | 0.019901    | 0.428109853 |           |          |          |
| DNAAF5     | ENSG00000164818 | -0.10018 | 0.5399      | -0.47874    | 0.68394     | -0.25749  |          |          |
|            | 0.6016          | 2.0558   | 0.019901    | 0.019901    | 0.428109853 |           |          |          |
| EEF1A1P32  | ENSG00000213046 | 2.0557   | 0.019908    | 2.0557      | 0.019908    | 2.0557    |          |          |
|            | 0.019908        | 2.0557   | 0.019908    | 0.019908    | 0.428109853 |           |          |          |
| AMD1P4     | ENSG00000215124 | 2.0553   | 0.019923    | -0.3797     | 0.64791     | -0.3797   |          |          |
|            | 0.64791         | -0.3797  | 0.64791     | 0.019923    | 0.428109853 |           |          |          |
| MTOR-AS1   | ENSG00000225602 | 0.015961 | 0.49363     | 2.0549      | 0.019944    | 0.015961  |          |          |
|            | 0.49363         | 0.015961 | 0.49363     | 0.019944    | 0.428109853 |           |          |          |
| DYRK3      | ENSG00000143479 | 2.0547   | 0.019955    | 0.049703    | 0.48018     | 1.5253    | 0.063593 |          |
|            | -0.38523        | 0.64997  | 0.019955    | 0.428109853 |             |           |          |          |

|           |                 |           |           |           |             |             |          |
|-----------|-----------------|-----------|-----------|-----------|-------------|-------------|----------|
| NA        | ENSG00000247763 | -1.1722   | 0.87944   | 2.0546    | 0.019959    | -1.1722     | 0.87944  |
|           |                 | -1.1722   | 0.87944   | 0.019959  | 0.428109853 |             |          |
| ZNF859P   | ENSG00000215887 | 1.8943    | 0.029094  | 2.0544    | 0.019966    | 0.77554     |          |
|           |                 | 0.21901   | 1.067     | 0.14299   | 0.019966    | 0.428109853 |          |
| NA        | ENSG00000201820 | 0.077105  | 0.46927   | 0.3744    | 0.35405     | 2.0542      | 0.019979 |
|           |                 | 2.0542    | 0.019979  | 0.019979  | 0.428109853 |             |          |
| RPS4XP12  | ENSG00000244400 | 0.68425   | 0.24691   | 0.68425   | 0.24691     | -0.32609    |          |
|           |                 | 0.62782   | 2.0539    | 0.019991  | 0.019991    | 0.428109853 |          |
| NA        | ENSG00000236403 | 2.0538    | 0.019997  | 0.1943    | 0.42297     | -0.46093    | 0.67758  |
|           |                 | 0.0879    | 0.46498   | 0.019997  | 0.428109853 |             |          |
| H2BC20P   | ENSG00000261716 | 2.0537    | 0.020002  | 2.0461    | 0.020375    | 0.76243     |          |
|           |                 | 0.2229    | 0.76243   | 0.2229    | 0.020002    | 0.428109853 |          |
| USF1P1    | ENSG00000226501 | 2.0534    | 0.020018  | 2.0534    | 0.020018    | 2.0534      |          |
|           |                 | 0.020018  | 2.0534    | 0.020018  | 0.020018    | 0.428109853 |          |
| NA        | ENSG00000263766 | 2.0527    | 0.02005   | 2.0527    | 0.02005     | 2.0527      | 0.02005  |
|           |                 | 2.0527    | 0.02005   | 0.02005   | 0.428109853 |             |          |
| CA8       | ENSG00000178538 | 0.98744   | 0.16171   | 2.0525    | 0.020059    | 2.0525      | 0.020059 |
|           |                 | 2.0525    | 0.020059  | 0.020059  | 0.428109853 |             |          |
| FAM238C   | ENSG00000283709 | 2.0525    | 0.020059  | 1.7781    | 0.037697    | 1.8652      |          |
|           |                 | 0.031074  | 1.0143    | 0.15522   | 0.020059    | 0.428109853 |          |
| NA        | ENSG00000219758 | -0.20792  | 0.58235   | 2.0519    | 0.020088    | 0.69716     | 0.24285  |
|           |                 | 1.2395    | 0.10758   | 0.020088  | 0.428109853 |             |          |
| NA        | ENSG00000230699 | 2.0271    | 0.021326  | 1.9613    | 0.02492     | 1.9163      | 0.027661 |
|           |                 | 2.0517    | 0.020097  | 0.020097  | 0.428109853 |             |          |
| MFSD4A    | ENSG00000174514 | 1.1475    | 0.12559   | 1.3001    | 0.096778    | 2.0513      |          |
|           |                 | 0.020119  | 0.024464  | 0.49024   | 0.020119    | 0.428109853 |          |
| EIF4EP4   | ENSG00000232968 | 1.3482    | 0.088793  | 2.0512    | 0.020124    | 0.76955     |          |
|           |                 | 0.22078   | -0.20056  | 0.57948   | 0.020124    | 0.428109853 |          |
| NA        | ENSG00000251964 | 2.0512    | 0.020125  | 2.0512    | 0.020125    | 2.0512      | 0.020125 |
|           |                 | 2.0512    | 0.020125  | 0.020125  | 0.428109853 |             |          |
| PPP1R2B   | ENSG00000231989 | 1.0842    | 0.13913   | 2.0297    | 0.021195    | 2.0297      |          |
|           |                 | 0.021195  | 2.0509    | 0.020137  | 0.020137    | 0.428109853 |          |
| SDK2      | ENSG00000069188 | 1.2645    | 0.10302   | 0.32397   | 0.37298     | -0.050551   | 0.52016  |
|           |                 | 2.0509    | 0.020138  | 0.020138  | 0.428109853 |             |          |
| NA        | ENSG00000249265 | 2.0457    | 0.020395  | 2.0509    | 0.020138    | 2.0509      | 0.020138 |
|           |                 | 2.0509    | 0.020138  | 0.020138  | 0.428109853 |             |          |
| WDR86-AS1 | ENSG00000243836 | -0.40812  | 0.65841   | 2.0507    | 0.020146    | 0.54285     |          |
|           |                 | 0.29362   | -1.7562   | 0.96047   | 0.020146    | 0.428109853 |          |
| NA        | ENSG00000240097 | 2.0507    | 0.02015   | 0.86543   | 0.1934      | 1.051       | 0.14662  |
|           |                 | 2.0507    | 0.02015   | 0.02015   | 0.428109853 |             |          |
| NA        | ENSG00000252123 | 2.0506    | 0.020153  | -1.1822   | 0.88143     | -1.1822     | 0.88143  |
|           |                 | -1.1822   | 0.88143   | 0.020153  | 0.428109853 |             |          |
| CFHR4     | ENSG00000134365 | 1.3109    | 0.094947  | 0.68313   | 0.24726     | 2.0506      | 0.020155 |
|           |                 | 0.60586   | 0.27231   | 0.020155  | 0.428109853 |             |          |
| LINC01710 | ENSG00000225561 | 2.0503    | 0.020167  | -0.56868  | 0.71521     | -0.83811    |          |
|           |                 | 0.79902   | -0.83811  | 0.79902   | 0.020167    | 0.428109853 |          |
| RN7SKP260 | ENSG00000252716 | 2.0502    | 0.020172  | 2.0502    | 0.020172    | 2.0502      |          |
|           |                 | 0.020172  | 2.0502    | 0.020172  | 0.020172    | 0.428109853 |          |
| LINC01533 | ENSG00000267779 | 0.49973   | 0.30863   | 0.16908   | 0.43287     | 2.05        | 0.020181 |
|           |                 | -0.074332 | 0.52963   | 0.020181  | 0.428109853 |             |          |
| RN7SL549P | ENSG00000239825 | 0.80962   | 0.20908   | 1.9347    | 0.026514    | 1.9347      |          |
|           |                 | 0.026514  | 2.05      | 0.020184  | 0.020184    | 0.428109853 |          |
| SOX2-OT   | ENSG00000242808 | 2.0496    | 0.020202  | 1.8091    | 0.035216    | 1.0014      |          |
|           |                 | 0.15832   | 0.61542   | 0.26914   | 0.020202    | 0.428109853 |          |
| LINC00939 | ENSG00000249267 | -1.2863   | 0.90083   | -0.19901  | 0.57887     | -0.66241    |          |
|           |                 | 0.74614   | 2.0495    | 0.020208  | 0.020208    | 0.428109853 |          |
| NA        | ENSG00000267465 | 2.0495    | 0.020209  | 2.0495    | 0.020209    | 2.0495      | 0.020209 |
|           |                 | 2.0495    | 0.020209  | 0.020209  | 0.428109853 |             |          |
| NA        | ENSG00000271118 | 2.0492    | 0.020219  | 1.7539    | 0.039723    | 1.7539      | 0.039723 |
|           |                 | 1.7539    | 0.039723  | 0.020219  | 0.428109853 |             |          |
| RNA5SP204 | ENSG00000201415 | -0.030217 | 0.51205   | -0.030217 | 0.51205     | 2.0491      |          |
|           |                 | 0.020226  | -0.059411 | 0.52369   | 0.020226    | 0.428109853 |          |

|           |                 |          |             |             |             |          |           |
|-----------|-----------------|----------|-------------|-------------|-------------|----------|-----------|
| PRPF3     | ENSG00000117360 | -0.33504 | 0.6312      | 1.5765      | 0.057457    | 2.0491   | 0.020227  |
|           | 1.627           | 0.051868 | 0.020227    | 0.428109853 |             |          |           |
| RSU1P2    | ENSG00000232554 | 1.1519   | 0.12468     | 2.049       | 0.020233    | 1.6097   | 0.053733  |
|           | 1.472           | 0.070507 | 0.020233    | 0.428109853 |             |          |           |
| CCDC102A  | ENSG00000135736 | 2.0489   | 0.020235    | 0.99764     | 0.15923     | 1.3355   |           |
|           | 0.090854        | 0.395    | 0.34642     | 0.020235    | 0.428109853 |          |           |
| NA        | ENSG00000243979 | 2.0489   | 0.020235    | 2.0489      | 0.020235    | 2.0489   | 0.020235  |
|           | 2.0489          | 0.020235 | 0.020235    | 0.428109853 |             |          |           |
| SERPINE3  | ENSG00000253309 | 1.3921   | 0.081947    | 1.1644      | 0.12213     | 1.8966   |           |
|           | 0.028937        | 2.0489   | 0.020238    | 0.020238    | 0.428109853 |          |           |
| MYEOV     | ENSG00000172927 | 1.3704   | 0.085286    | 1.4002      | 0.080726    | 2.0488   | 0.020239  |
|           | 1.7588          | 0.039303 | 0.020239    | 0.428109853 |             |          |           |
| LINC01103 | ENSG00000234781 | 2.0488   | 0.020243    | 1.7351      | 0.041363    | -0.51385 |           |
|           | 0.69632         | 1.6043   | 0.054321    | 0.020243    | 0.428109853 |          |           |
| NA        | ENSG00000244699 | 1.0917   | 0.13748     | 1.4452      | 0.074204    | 1.0201   | 0.15385   |
|           | 2.0488          | 0.020243 | 0.020243    | 0.428109853 |             |          |           |
| NA        | ENSG00000242553 | 2.0487   | 0.020245    | 0.26584     | 0.39518     | 2.0487   | 0.020245  |
|           | 2.0487          | 0.020245 | 0.020245    | 0.428109853 |             |          |           |
| HMG1P26   | ENSG00000259557 | 2.0485   | 0.020255    | 1.1607      | 0.12287     | 2.0485   |           |
|           | 0.020255        | 2.0485   | 0.020255    | 0.020255    | 0.428109853 |          |           |
| RPS3AP42  | ENSG00000244244 | 2.0484   | 0.020262    | -0.12711    | 0.55057     | 2.0484   |           |
|           | 0.020262        | 1.3708   | 0.085216    | 0.020262    | 0.428109853 |          |           |
| NA        | ENSG00000229505 | 1.9714   | 0.024338    | 2.0483      | 0.020267    | 2.0483   | 0.020267  |
|           | 2.0483          | 0.020267 | 0.020267    | 0.428109853 |             |          |           |
| NA        | ENSG00000228151 | -0.48857 | 0.68743     | 2.048       | 0.020279    | 2.048    | 0.020279  |
|           | 0.5133          | 0.020279 | 0.428109853 |             |             |          | -0.033342 |
| ARHGAP30  | ENSG00000186517 | -0.53755 | 0.70455     | -0.32533    | 0.62753     | -0.53755 |           |
|           | 0.70455         | 2.0479   | 0.020287    | 0.020287    | 0.428109853 |          |           |
| SLC17A7   | ENSG00000104888 | 2.0476   | 0.020299    | 2.0476      | 0.020299    | 2.0476   |           |
|           | 0.020299        | 2.0476   | 0.020299    | 0.020299    | 0.428109853 |          |           |
| RNA5SP38  | ENSG00000222682 | 1.5322   | 0.062742    | 2.0476      | 0.020302    | 1.5322   |           |
|           | 0.062742        | 1.5322   | 0.062742    | 0.020302    | 0.428109853 |          |           |
| NA        | ENSG00000273987 | 2.0474   | 0.02031     | 2.0474      | 0.02031     | 2.0474   | 0.02031   |
|           | 2.0474          | 0.02031  | 0.02031     | 0.428109853 |             |          |           |
| TRAJ21    | ENSG00000211868 | 2.0472   | 0.02032     | 2.0472      | 0.02032     | 2.0472   |           |
|           | 0.02032         | 2.0472   | 0.02032     | 0.02032     | 0.428109853 |          |           |
| SNORA63E  | ENSG00000199363 | 0.42963  | 0.33373     | 0.42963     | 0.33373     | 2.0272   |           |
|           | 0.021319        | 2.0471   | 0.020322    | 0.020322    | 0.428109853 |          |           |
| CNTN1     | ENSG00000018236 | 0.17064  | 0.43225     | 1.061       | 0.14435     | 0.62282  | 0.2667    |
|           | 2.0471          | 0.020326 | 0.020326    | 0.428109853 |             |          |           |
| NA        | ENSG00000264853 | 1.7477   | 0.04026     | 1.9422      | 0.026055    | 2.047    | 0.020331  |
|           | 1.2922          | 0.098136 | 0.020331    | 0.428109853 |             |          |           |
| ZP3       | ENSG00000188372 | 2.0464   | 0.020359    | 0.74472     | 0.22822     | 1.4927   | 0.067758  |
|           | 0.82545         | 0.20456  | 0.020359    | 0.428109853 |             |          |           |
| NA        | ENSG00000182109 | -1.1083  | 0.86614     | 1.2879      | 0.098887    | 2.0463   | 0.020364  |
|           | 1.4458          | 0.074119 | 0.020364    | 0.428109853 |             |          |           |
| UTP4      | ENSG00000141076 | 0.51108  | 0.30465     | 0.49813     | 0.3092      | 1.1471   | 0.12567   |
|           | 2.0462          | 0.020368 | 0.020368    | 0.428109853 |             |          |           |
| C3orf33   | ENSG00000174928 | 1.6166   | 0.052982    | 1.6166      | 0.052982    | 1.6166   |           |
|           | 0.052982        | 2.0461   | 0.020373    | 0.020373    | 0.428109853 |          |           |
| KRT18P3   | ENSG00000215553 | 2.046    | 0.02038     | 2.046       | 0.02038     | 2.046    | 0.02038   |
|           | 0.52456         | 0.02038  | 0.428109853 |             |             |          | -0.061609 |
| NPHP1     | ENSG00000144061 | 2.0459   | 0.020381    | 1.6642      | 0.04804     | 1.0186   | 0.15421   |
|           | 1.7699          | 0.038376 | 0.020381    | 0.428109853 |             |          |           |
| LINC02290 | ENSG00000258502 | 2.0459   | 0.020382    | 2.0459      | 0.020382    | 2.0459   |           |
|           | 0.020382        | 2.0459   | 0.020382    | 0.020382    | 0.428109853 |          |           |
| NA        | ENSG00000242197 | 2.0454   | 0.020407    | 2.0454      | 0.020407    | 1.9248   | 0.027127  |
|           | 2.0454          | 0.020407 | 0.020407    | 0.428333134 |             |          |           |
| DPT       | ENSG00000143196 | 1.5405   | 0.061718    | 2.0075      | 0.022348    | 1.5405   | 0.061718  |
|           | 2.0453          | 0.020414 | 0.020414    | 0.428333134 |             |          |           |
| NA        | ENSG00000226426 | 2.0452   | 0.020419    | 2.0452      | 0.020419    | 2.0452   | 0.020419  |
|           | 2.0452          | 0.020419 | 0.020419    | 0.428333134 |             |          |           |

|           |                 |          |          |             |             |             |          |
|-----------|-----------------|----------|----------|-------------|-------------|-------------|----------|
| NA        | ENSG00000240201 | 2.0448   | 0.020438 | 2.0448      | 0.020438    | 2.0448      | 0.020438 |
|           |                 | 2.0448   | 0.020438 | 0.42854722  |             |             |          |
| BACH1-IT1 | ENSG00000248476 | 2.0445   | 0.02045  | 0.054552    | 0.47825     | 0.91274     |          |
|           |                 | 0.18069  | 0.067686 | 0.47302     | 0.02045     | 0.428614409 |          |
| NA        | ENSG00000255356 | 2.0442   | 0.020466 | 2.0442      | 0.020466    | 2.0442      | 0.020466 |
|           |                 | 2.0442   | 0.020466 | 0.42876534  |             |             |          |
| NA        | ENSG00000228156 | 2.0428   | 0.020536 | 2.0428      | 0.020536    | 2.0428      | 0.020536 |
|           |                 | 0.82179  | 0.2056   | 0.020536    | 0.429535903 |             |          |
| LCEP1     | ENSG00000233819 | 2.0427   | 0.02054  | 2.0427      | 0.02054     | 2.0427      | 0.02054  |
|           |                 | 2.0427   | 0.02054  | 0.429535903 |             |             |          |
| NA        | ENSG00000253646 | 2.0427   | 0.020542 | 0.79063     | 0.21458     | 0.82307     | 0.20523  |
|           |                 | 0.82307  | 0.20523  | 0.020542    | 0.429535903 |             |          |
| MLN       | ENSG00000096395 | -0.49182 | 0.68858  | 2.0426      | 0.020548    | 0.73516     | 0.23112  |
|           |                 | -0.23886 | 0.59439  | 0.020548    | 0.429535903 |             |          |
| HSP90AB4P | ENSG00000282100 | 0.97728  | 0.16422  | 1.5839      | 0.056612    | 2.0423      |          |
|           |                 | 0.02056  | 0.93127  | 0.17586     | 0.02056     | 0.429535903 |          |
| NA        | ENSG00000227297 | 1.8784   | 0.030165 | 0.31661     | 0.37577     | 2.042       | 0.020575 |
|           |                 | 0.020575 | 0.020575 | 0.429535903 |             |             | 2.042    |
| ECT2L     | ENSG00000203734 | 2.0419   | 0.020582 | 1.0479      | 0.14735     | 1.3551      | 0.08769  |
|           |                 | 0.93665  | 0.17447  | 0.020582    | 0.429535903 |             |          |
| ABCB6     | ENSG00000115657 | 0.43774  | 0.33079  | 1.7138      | 0.04328     | 0.58217     | 0.28023  |
|           |                 | 2.0418   | 0.020588 | 0.020588    | 0.429535903 |             |          |
| NA        | ENSG00000251556 | 2.0416   | 0.020596 | 2.0416      | 0.020596    | 2.0416      | 0.020596 |
|           |                 | 2.0416   | 0.020596 | 0.020596    | 0.429535903 |             |          |
| SLC24A3   | ENSG00000185052 | 0.70564  | 0.2402   | 2.0415      | 0.020602    | 1.3114      |          |
|           |                 | 0.094867 | 1.8301   | 0.03362     | 0.020602    | 0.429535903 |          |
| NA        | ENSG00000254933 | 2.0412   | 0.020617 | 2.0412      | 0.020617    | 2.0412      | 0.020617 |
|           |                 | 2.0412   | 0.020617 | 0.020617    | 0.429535903 |             |          |
| CYCSP25   | ENSG00000255370 | 2.041    | 0.020626 | 2.041       | 0.020626    | 2.041       | 0.020626 |
|           |                 | 0.10937  | 0.020626 | 0.429535903 |             |             | 1.2299   |
| MYO3B     | ENSG00000071909 | 1.2714   | 0.10179  | 1.0521      | 0.14637     | 2.0409      | 0.020629 |
|           |                 | -0.37518 | 0.64624  | 0.020629    | 0.429535903 |             |          |
| NA        | ENSG00000266771 | 2.0408   | 0.020634 | 2.0408      | 0.020634    | 2.0408      | 0.020634 |
|           |                 | 2.0408   | 0.020634 | 0.020634    | 0.429535903 |             |          |
| OTX2P1    | ENSG00000234644 | 2.0408   | 0.020635 | 2.0408      | 0.020635    | 0.70865     |          |
|           |                 | 0.23927  | 2.0408   | 0.020635    | 0.020635    | 0.429535903 |          |
| PAIP1     | ENSG00000172239 | 2.0228   | 0.021548 | 2.0228      | 0.021548    | 2.0228      | 0.021548 |
|           |                 | 2.0406   | 0.020646 | 0.020646    | 0.429581375 |             |          |
| NA        | ENSG00000266456 | 2.0398   | 0.020687 | 2.0398      | 0.020687    | 2.0398      | 0.020687 |
|           |                 | 2.0398   | 0.020687 | 0.020687    | 0.429738074 |             |          |
| TNR       | ENSG00000116147 | 1.872    | 0.030606 | 0.63573     | 0.26248     | 0.57923     | 0.28122  |
|           |                 | 2.0397   | 0.020689 | 0.020689    | 0.429738074 |             |          |
| MCOLN2    | ENSG00000153898 | -0.10685 | 0.54254  | 1.6372      | 0.050796    | 2.0396      |          |
|           |                 | 0.020695 | 0.28957  | 0.38607     | 0.020695    | 0.429738074 |          |
| TBX19     | ENSG00000143178 | -0.65437 | 0.74356  | 1.9032      | 0.028506    | 0.17694     | 0.42978  |
|           |                 | 2.0395   | 0.020701 | 0.020701    | 0.429738074 |             |          |
| ALDH6A1   | ENSG00000119711 | 2.0394   | 0.020703 | 1.4446      | 0.07429     | 1.4314      |          |
|           |                 | 0.076153 | 1.6411   | 0.050391    | 0.020703    | 0.429738074 |          |
| NA        | ENSG00000257452 | 2.0389   | 0.02073  | 2.0389      | 0.02073     | 2.0389      | 0.02073  |
|           |                 | 0.63129  | 0.26392  | 0.02073     | 0.429738074 |             |          |
| RPL34P20  | ENSG00000231508 | 2.0386   | 0.020747 | 2.0386      | 0.020747    | 2.0386      |          |
|           |                 | 0.020747 | 2.0386   | 0.020747    | 0.020747    | 0.429738074 |          |
| NA        | ENSG00000239317 | 2.0385   | 0.020748 | 2.0385      | 0.020748    | 2.0385      | 0.020748 |
|           |                 | 2.0385   | 0.020748 | 0.020748    | 0.429738074 |             |          |
| ZNF467    | ENSG00000181444 | -1.5363  | 0.93777  | -1.885      | 0.97029     | 2.0383      |          |
|           |                 | 0.020761 | 0.04903  | 0.48045     | 0.020761    | 0.429738074 |          |
| NA        | ENSG00000259173 | 2.0381   | 0.020771 | 2.0381      | 0.020771    | 2.0381      | 0.020771 |
|           |                 | 2.0381   | 0.020771 | 0.020771    | 0.429738074 |             |          |
| RPL23AP37 | ENSG00000236148 | -0.42015 | 0.66281  | 1.6969      | 0.044857    | 2.0381      |          |
|           |                 | 0.020772 | -0.42015 | 0.66281     | 0.020772    | 0.429738074 |          |
| RPL3P1    | ENSG00000228149 | 2.038    | 0.020774 | 1.012       | 0.15577     | 1.012       | 0.15577  |
|           |                 | 0.1217   | 0.020774 | 0.429738074 |             |             | 1.1666   |

|            |                 |             |             |             |             |          |          |
|------------|-----------------|-------------|-------------|-------------|-------------|----------|----------|
| LINC00554  | ENSG00000260738 | 0.24817     | 0.402       | -0.21272    | 0.58423     | 2.038    | 0.020777 |
|            | 0.73773         | 0.23034     | 0.020777    | 0.429738074 |             |          |          |
| MIR557     | ENSG00000207974 | 0.92081     | 0.17857     | 2.0371      | 0.020818    | 0.92081  |          |
|            | 0.17857         | 2.0371      | 0.020818    | 0.020818    | 0.429738074 |          |          |
| NA         | ENSG00000262810 | 1.3828      | 0.083359    | 2.0371      | 0.020822    | 0.20102  | 0.42034  |
|            | 1.3828          | 0.083359    | 0.020822    | 0.429738074 |             |          |          |
| UQCRBP2    | ENSG00000227941 | 2.037       | 0.020825    | 2.037       | 0.020825    | 2.037    | 0.020825 |
|            | 0.020825        | 0.020825    | 0.429738074 |             |             |          |          |
| FBXO9      | ENSG00000112146 | 1.0144      | 0.15519     | 2.0369      | 0.020829    | 1.8856   | 0.029671 |
|            | 0.60371         | 0.27302     | 0.020829    | 0.429738074 |             |          |          |
| NA         | ENSG00000250378 | 1.2611      | 0.10363     | 2.0368      | 0.020833    | -1.1285  | 0.87044  |
|            | 0.18271         | 0.42751     | 0.020833    | 0.429738074 |             |          |          |
| NANO6P6    | ENSG00000227351 | 2.0367      | 0.02084     | 2.0367      | 0.02084     | 2.0367   |          |
|            | 0.02084         | 2.0367      | 0.02084     | 0.02084     | 0.429738074 |          |          |
| ANKRD13D   | ENSG00000172932 | 2.0366      | 0.020843    | 2.0366      | 0.020843    | 1.5486   |          |
|            | 0.060735        | 1.7426      | 0.040703    | 0.020843    | 0.429738074 |          |          |
| NA         | ENSG00000263220 | 2.0366      | 0.020843    | 2.0366      | 0.020843    | 2.0366   | 0.020843 |
|            | 2.0366          | 0.020843    | 0.020843    | 0.429738074 |             |          |          |
| NAGLU      | ENSG00000108784 | -1.4057     | 0.92009     | -0.45274    | 0.67463     | 2.0364   | 0.020855 |
|            | -0.68702        | 0.75396     | 0.020855    | 0.429738074 |             |          |          |
| ARL13B     | ENSG00000169379 | 1.1495      | 0.12517     | 0.5588      | 0.28815     | 1.1495   |          |
|            | 0.12517         | 2.0364      | 0.020857    | 0.020857    | 0.429738074 |          |          |
| NA         | ENSG00000264286 | 2.0361      | 0.020869    | 2.0361      | 0.020869    | 2.0361   | 0.020869 |
|            | 2.0361          | 0.020869    | 0.020869    | 0.429738074 |             |          |          |
| NA         | ENSG00000258407 | 2.036       | 0.020874    | 2.036       | 0.020874    | 2.036    | 0.020874 |
|            | 0.020874        | 0.429738074 |             |             |             |          |          |
| YEATS2-AS1 | ENSG00000233885 | 2.0356      | 0.020897    | 2.0356      | 0.020897    | 2.0356   |          |
|            | 0.020897        | 2.0356      | 0.020897    | 0.020897    | 0.429911869 |          |          |
| NA         | ENSG00000271659 | 2.0354      | 0.020903    | 2.0354      | 0.020903    | 2.0354   | 0.020903 |
|            | 2.0354          | 0.020903    | 0.020903    | 0.429911869 |             |          |          |
| NA         | ENSG00000261293 | 2.0344      | 0.020956    | 2.0344      | 0.020956    | 2.0344   | 0.020956 |
|            | 1.7662          | 0.038678    | 0.020956    | 0.429911869 |             |          |          |
| IMPDH1P7   | ENSG00000226553 | 2.0341      | 0.020969    | 2.0341      | 0.020969    | 2.0341   |          |
|            | 0.020969        | 1.2282      | 0.10968     | 0.020969    | 0.429911869 |          |          |
| CT66       | ENSG00000234215 | 1.8402      | 0.032873    | 2.0338      | 0.020987    | 2.0338   | 0.020987 |
|            | 2.0338          | 0.020987    | 0.020987    | 0.429911869 |             |          |          |
| LINC02501  | ENSG00000249882 | 2.0337      | 0.020989    | -0.44145    | 0.67056     | -0.44145 |          |
|            | 0.67056         | -0.44145    | 0.67056     | 0.020989    | 0.429911869 |          |          |
| NA         | ENSG00000270934 | 2.0335      | 0.020999    | 2.0335      | 0.020999    | 2.0335   | 0.020999 |
|            | 2.0335          | 0.020999    | 0.020999    | 0.429911869 |             |          |          |
| NA         | ENSG00000261529 | 2.0335      | 0.021004    | 2.0335      | 0.021004    | 2.0335   | 0.021004 |
|            | 2.0335          | 0.021004    | 0.021004    | 0.429911869 |             |          |          |
| CD19       | ENSG00000177455 | 1.6205      | 0.052566    | 0.79807     | 0.21241     | 1.2779   | 0.10065  |
|            | 2.0332          | 0.021018    | 0.021018    | 0.429911869 |             |          |          |
| MICALL2    | ENSG00000164877 | 0.23514     | 0.40705     | 0.14747     | 0.44138     | 2.0331   |          |
|            | 0.02102         | 0.58519     | 0.27921     | 0.02102     | 0.429911869 |          |          |
| NA         | ENSG00000239602 | 2.0327      | 0.021043    | 2.0327      | 0.021043    | 2.0327   | 0.021043 |
|            | 2.0327          | 0.021043    | 0.021043    | 0.429911869 |             |          |          |
| MED9       | ENSG00000141026 | 2.0326      | 0.021044    | 2.0326      | 0.021044    | 2.0326   | 0.021044 |
|            | 2.0326          | 0.021044    | 0.021044    | 0.429911869 |             |          |          |
| CCDC88B    | ENSG00000168071 | 0.79412     | 0.21356     | 2.0326      | 0.021044    | 0.31762  |          |
|            | 0.37539         | 1.7613      | 0.039092    | 0.021044    | 0.429911869 |          |          |
| RNU6-91P   | ENSG00000272439 | 0.82329     | 0.20517     | 0.82329     | 0.20517     | 0.82329  |          |
|            | 0.20517         | 2.0325      | 0.02105     | 0.02105     | 0.429911869 |          |          |
| NA         | ENSG00000280991 | 2.0324      | 0.021055    | 0.65089     | 0.25756     | 0.23901  | 0.40555  |
|            | 0.23901         | 0.40555     | 0.021055    | 0.429911869 |             |          |          |
| COL22A1    | ENSG00000169436 | 2.0324      | 0.021059    | -0.69477    | 0.7564      | -1.0124  |          |
|            | 0.84432         | 0.24401     | 0.40361     | 0.021059    | 0.429911869 |          |          |
| MMS19      | ENSG00000155229 | 0.33949     | 0.36712     | 0.64241     | 0.2603      | 2.032    | 0.021074 |
|            | -0.026902       | 0.51073     | 0.021074    | 0.429911869 |             |          |          |
| GPR1-AS    | ENSG00000279220 | 2.0321      | 0.021074    | 1.4496      | 0.073582    | 2.0321   |          |
|            | 0.021074        | 1.3902      | 0.082233    | 0.021074    | 0.429911869 |          |          |

|             |                 |           |             |            |             |             |          |
|-------------|-----------------|-----------|-------------|------------|-------------|-------------|----------|
| NA          | ENSG00000280251 | 2.0321    | 0.021074    | -0.84683   | 0.80146     | -0.84683    | 0.80146  |
|             |                 | -0.84683  | 0.80146     | 0.021074   | 0.42991869  |             |          |
| GK3P        | ENSG00000229894 | -0.47169  | 0.68143     | 0.17978    | 0.42866     | 1.3506      | 0.088407 |
|             |                 | 2.032     | 0.021075    | 0.42991869 |             |             |          |
| AGPAT5      | ENSG00000155189 | 2.0319    | 0.02108     | 1.08       | 0.14008     | -0.23696    | 0.59365  |
|             |                 | 0.14623   | 0.44187     | 0.02108    | 0.42991869  |             |          |
| PIGO        | ENSG00000165282 | 0.11897   | 0.45265     | 2.0319     | 0.021083    | 1.8099      | 0.035156 |
|             |                 | 0.4869    | 0.31316     | 0.021083   | 0.42991869  |             |          |
| NA          | ENSG00000264895 | 2.0317    | 0.021092    | 2.0317     | 0.021092    | 2.0317      | 0.021092 |
|             |                 | 2.0317    | 0.021092    | 0.021092   | 0.42991869  |             |          |
| CLTC        | ENSG00000141367 | 1.96      | 0.024996    | 1.7348     | 0.041389    | 2.0315      | 0.021103 |
|             |                 | 1.9415    | 0.026096    | 0.021103   | 0.42991869  |             |          |
| YY1P1       | ENSG00000230661 | 1.1064    | 0.13427     | -0.003024  | 0.50121     | -0.11511    | 0.54582  |
|             |                 | 2.0315    | 0.021103    | 0.021103   | 0.42991869  |             |          |
| NA          | ENSG00000239775 | 2.031     | 0.02113     | 2.031      | 0.02113     | 2.031       | 0.02113  |
|             |                 | 0.02113   | 0.429946661 |            |             |             |          |
| NA          | ENSG00000271769 | 2.0309    | 0.021132    | 2.0309     | 0.021132    | 2.0309      | 0.021132 |
|             |                 | 2.0309    | 0.021132    | 0.021132   | 0.429946661 |             |          |
| SLC6A11     | ENSG00000132164 | 2.0308    | 0.021137    | -0.46063   | 0.67747     | 0.66256     |          |
|             |                 | 0.25381   | -0.33591    | 0.63153    | 0.021137    | 0.429946661 |          |
| IL17RE      | ENSG00000163701 | 1.4053    | 0.079964    | 2.0308     | 0.02114     | 0.54578     |          |
|             |                 | 0.29261   | 1.8052      | 0.035522   | 0.02114     | 0.429946661 |          |
| NA          | ENSG00000248416 | 0.4476    | 0.32722     | -0.087221  | 0.53475     | -0.66031    | 0.74547  |
|             |                 | 2.0302    | 0.02117     | 0.02117    | 0.430238349 |             |          |
| PARP3       | ENSG00000041880 | 2.0301    | 0.021172    | 0.44224    | 0.32916     | 1.0354      | 0.15023  |
|             |                 | 0.33524   | 0.36872     | 0.021172   | 0.430238349 |             |          |
| NA          | ENSG00000231704 | -0.91864  | 0.82086     | 1.5004     | 0.066757    | -0.53221    | 0.70271  |
|             |                 | 2.0295    | 0.021205    | 0.021205   | 0.43071556  |             |          |
| NA          | ENSG00000279311 | 0.36403   | 0.35792     | 2.0292     | 0.021218    | -0.04896    | 0.51952  |
|             |                 | -0.04896  | 0.51952     | 0.021218   | 0.43071556  |             |          |
| NA          | ENSG00000272144 | 0.13105   | 0.44787     | 0.017222   | 0.49313     | 0.74549     | 0.22799  |
|             |                 | 2.0291    | 0.021222    | 0.021222   | 0.43071556  |             |          |
| H4C8        | ENSG00000158406 | 2.0288    | 0.021238    | 1.4203     | 0.077758    | 1.345       | 0.089312 |
|             |                 | 1.9937    | 0.023093    | 0.021238   | 0.430765903 |             |          |
| NA          | ENSG00000165121 | 1.7424    | 0.040721    | 1.2215     | 0.11094     | 2.0287      | 0.021245 |
|             |                 | 0.82351   | 0.20511     | 0.021245   | 0.430765903 |             |          |
| MSH5-SAPCD1 | ENSG00000255152 | 2.0286    | 0.021251    | 1.8872     | 0.029564    | 1.8872      |          |
|             |                 | 0.029564  | 1.8872      | 0.029564   | 0.021251    | 0.430765903 |          |
| BRICD5      | ENSG00000182685 | 2.0283    | 0.021267    | 2.0283     | 0.021267    | 2.0283      |          |
|             |                 | 0.021267  | 1.231       | 0.10917    | 0.021267    | 0.430910981 |          |
| DAW1        | ENSG00000123977 | 2.0276    | 0.021299    | 0.94183    | 0.17314     | 0.98327     | 0.16274  |
|             |                 | 1.1656    | 0.12189     | 0.021299   | 0.431241267 |             |          |
| TNFRSF25    | ENSG00000215788 | 2.0276    | 0.021301    | 2.0276     | 0.021301    | 2.0276      |          |
|             |                 | 0.021301  | 2.0276      | 0.021301   | 0.021301    | 0.431241267 |          |
| PKN2        | ENSG00000065243 | 0.4212    | 0.3368      | 1.5136     | 0.065064    | 0.4212      | 0.3368   |
|             |                 | 2.0274    | 0.02131     | 0.02131    | 0.431244311 |             |          |
| SUPT16HP1   | ENSG00000256238 | 1.8369    | 0.033112    | 2.0269     | 0.021337    | 0.91545     |          |
|             |                 | 0.17998   | 0.95066     | 0.17089    | 0.021337    | 0.431326079 |          |
| NA          | ENSG00000228231 | 2.0267    | 0.021349    | 0.27642    | 0.39111     | -0.37399    | 0.64579  |
|             |                 | -0.083417 | 0.53324     | 0.021349   | 0.431326079 |             |          |
| PRSS53      | ENSG00000151006 | 0.83057   | 0.20311     | 0.91472    | 0.18017     | 0.26897     |          |
|             |                 | 0.39397   | 2.0265      | 0.021356   | 0.021356    | 0.431326079 |          |
| CCDC183-AS1 | ENSG00000228544 | 2.0263    | 0.021367    | 1.0496     | 0.14695     | 1.0496      |          |
|             |                 | 0.14695   | 1.0496      | 0.14695    | 0.021367    | 0.431326079 |          |
| NA          | ENSG00000253774 | 2.0263    | 0.021369    | 2.0263     | 0.021369    | 2.0263      | 0.021369 |
|             |                 | 2.0263    | 0.021369    | 0.021369   | 0.431326079 |             |          |
| NUP153      | ENSG00000124789 | 0.18227   | 0.42769     | 0.81925    | 0.20632     | 1.3917      |          |
|             |                 | 0.082012  | 2.0262      | 0.021374   | 0.021374    | 0.431326079 |          |
| PCDH17      | ENSG00000118946 | 2.0261    | 0.021376    | -1.0642    | 0.85638     | -0.12286    |          |
|             |                 | 0.54889   | -0.036139   | 0.51441    | 0.021376    | 0.431326079 |          |
| NA          | ENSG00000251009 | 1.7958    | 0.036261    | 2.0258     | 0.02139     | 1.7958      | 0.036261 |
|             |                 | 1.7958    | 0.036261    | 0.02139    | 0.431347015 |             |          |

|             |                 |          |             |             |             |           |          |          |
|-------------|-----------------|----------|-------------|-------------|-------------|-----------|----------|----------|
| BPIFB2      | ENSG00000078898 | 2.0257   | 0.021395    | 1.4119      | 0.078991    | 0.33336   |          |          |
|             | 0.36943         | 1.7401   | 0.040917    | 0.021395    | 0.431347015 |           |          |          |
| NA          | ENSG00000265579 | 2.0254   | 0.021411    | 2.0254      | 0.021411    | 2.0254    | 0.021411 | 0.021411 |
|             | 2.0254          | 0.021411 | 0.021411    | 0.431347015 |             |           |          |          |
| FRY         | ENSG00000073910 | 2.0254   | 0.021414    | 1.4522      | 0.073228    | 1.1677    | 0.12147  |          |
|             | -0.10086        | 0.54017  | 0.021414    | 0.431347015 |             |           |          |          |
| LHB         | ENSG00000104826 | 1.1247   | 0.13037     | 1.8619      | 0.03131     | 2.0251    | 0.021429 |          |
|             | -0.34499        | 0.63495  | 0.021429    | 0.431347015 |             |           |          |          |
| CHMP7       | ENSG00000147457 | 1.6474   | 0.049742    | 0.35654     | 0.36072     | 0.54522   | 0.2928   |          |
|             | 2.025           | 0.021434 | 0.021434    | 0.431347015 |             |           |          |          |
| LINC02179   | ENSG00000261623 | 2.0249   | 0.021439    | 1.1177      | 0.13185     | 1.7098    |          |          |
|             | 0.043654        | 1.7098   | 0.043654    | 0.021439    | 0.431347015 |           |          |          |
| SLC9B1      | ENSG00000164037 | 2.0245   | 0.021457    | 0.80975     | 0.20904     | 0.58827   |          |          |
|             | 0.27818         | 0.7843   | 0.21643     | 0.021457    | 0.431530999 |           |          |          |
| RAD54L2     | ENSG00000164080 | -0.15138 | 0.56016     | -0.554      | 0.71021     | -0.0826   |          |          |
|             | 0.53292         | 2.0242   | 0.021475    | 0.021475    | 0.431714831 |           |          |          |
| SSBP4       | ENSG00000130511 | 1.8039   | 0.035621    | 1.9391      | 0.026248    | 2.024     | 0.021487 |          |
|             | 0.58001         | 0.28095  | 0.021487    | 0.431763461 |             |           |          |          |
| NECTIN2     | ENSG00000130202 | 2.0238   | 0.021497    | -0.12644    | 0.55031     | -0.4846   |          |          |
|             | 0.68602         | -1.7807  | 0.96252     | 0.021497    | 0.431763461 |           |          |          |
| CEP19P1     | ENSG00000231032 | 0.41519  | 0.339       | 2.0236      | 0.021504    | 1.449     | 0.07367  |          |
|             | -2.0665         | 0.98061  | 0.021504    | 0.431763461 |             |           |          |          |
| BCDIN3D-AS1 | ENSG00000258057 | 2.0233   | 0.02152     | 2.0233      | 0.02152     | 2.0233    |          |          |
|             | 0.02152         | 2.0233   | 0.02152     | 0.02152     | 0.431839668 |           |          |          |
| ESRRA       | ENSG00000173153 | 1.2649   | 0.10296     | 0.41911     | 0.33757     | 2.023     | 0.021538 |          |
|             | -0.49392        | 0.68932  | 0.021538    | 0.431839668 |             |           |          |          |
| RNU6-1213P  | ENSG00000252884 | 2.0227   | 0.021553    | 2.0227      | 0.021553    | 2.0227    |          |          |
|             | 0.021553        | 0.42445  | 0.33562     | 0.021553    | 0.431839668 |           |          |          |
| NA          | ENSG00000279512 | 2.0222   | 0.021576    | 2.0222      | 0.021576    | 2.0222    | 0.021576 |          |
|             | 2.0222          | 0.021576 | 0.021576    | 0.431839668 |             |           |          |          |
| LINC00994   | ENSG00000189196 | 2.0221   | 0.021581    | 2.0221      | 0.021581    | 0.19765   |          |          |
|             | 0.42166         | 2.0221   | 0.021581    | 0.021581    | 0.431839668 |           |          |          |
| RPL36AP51   | ENSG00000242291 | 0.036284 | 0.48553     | -0.13635    | 0.55423     | -0.035797 |          |          |
|             | 0.51428         | 2.0221   | 0.021586    | 0.021586    | 0.431839668 |           |          |          |
| CTPS1       | ENSG00000171793 | 1.2324   | 0.1089      | 2.0219      | 0.021594    | 2.0219    | 0.021594 |          |
|             | 0.44479         | 0.32824  | 0.021594    | 0.431839668 |             |           |          |          |
| IFNL3       | ENSG00000197110 | -0.12496 | 0.54972     | 2.0219      | 0.021594    | 0.7512    | 0.22627  |          |
|             | 0.7512          | 0.22627  | 0.021594    | 0.431839668 |             |           |          |          |
| PKD2        | ENSG00000118762 | 2.0217   | 0.021602    | 1.2135      | 0.11247     | 2.0217    | 0.021602 |          |
|             | 1.9655          | 0.02468  | 0.021602    | 0.431839668 |             |           |          |          |
| CDC42EP4    | ENSG00000179604 | 2.0217   | 0.021606    | 2.0217      | 0.021606    | 1.5716    |          |          |
|             | 0.058022        | 1.2376   | 0.10794     | 0.021606    | 0.431839668 |           |          |          |
| NA          | ENSG00000254352 | 2.0214   | 0.021617    | 2.0214      | 0.021617    | 2.0214    | 0.021617 |          |
|             | 2.0214          | 0.021617 | 0.021617    | 0.431839668 |             |           |          |          |
| RPS3AP53    | ENSG00000227578 | -2.0422  | 0.97944     | 2.0213      | 0.021623    | 1.4161    |          |          |
|             | 0.078369        | 0.49586  | 0.31        | 0.021623    | 0.431839668 |           |          |          |
| MIR4681     | ENSG00000265719 | 2.0213   | 0.021623    | 0.064102    | 0.47444     | 0.064102  |          |          |
|             | 0.47444         | 1.8478   | 0.032317    | 0.021623    | 0.431839668 |           |          |          |
| DMC1        | ENSG00000100206 | 1.946    | 0.025828    | 1.5542      | 0.060065    | 2.021     | 0.021639 | 0.39747  |
|             | 0.34551         | 0.021639 | 0.431982167 |             |             |           |          |          |
| PSMD2       | ENSG00000175166 | -0.99884 | 0.84106     | -1.1315     | 0.87108     | 2.0204    | 0.021673 |          |
|             | -0.99884        | 0.84106  | 0.021673    | 0.432483739 |             |           |          |          |
| NA          | ENSG00000250192 | -0.38048 | 0.64821     | -1.2702     | 0.89799     | -0.38048  | 0.64821  |          |
|             | 2.0201          | 0.021685 | 0.021685    | 0.43254607  |             |           |          |          |
| GOT1L1      | ENSG00000169154 | 2.0198   | 0.021701    | 2.0198      | 0.021701    | 2.0198    |          |          |
|             | 0.021701        | 2.0198   | 0.021701    | 0.021701    | 0.432688106 |           |          |          |
| NA          | ENSG00000245768 | 1.2716   | 0.10175     | 1.2716      | 0.10175     | 2.0195    | 0.021717 |          |
|             | 1.1645          | 0.12211  | 0.021717    | 0.432830025 |             |           |          |          |
| HBA2        | ENSG00000188536 | 0.54915  | 0.29145     | -0.877      | 0.80976     | 2.0192    | 0.021736 |          |
|             | 0.0051259       | 0.49796  | 0.021736    | 0.433031594 |             |           |          |          |
| KCTD12      | ENSG00000178695 | 0.20469  | 0.41891     | 2.0188      | 0.021754    | 0.81925   |          |          |
|             | 0.20632         | 1.7896   | 0.036761    | 0.021754    | 0.433213085 |           |          |          |

|             |                 |          |             |             |             |          |          |
|-------------|-----------------|----------|-------------|-------------|-------------|----------|----------|
| NA          | ENSG00000273600 | 1.9276   | 0.026952    | 1.6316      | 0.051377    | 1.7449   | 0.040498 |
|             | 2.0184          | 0.021775 | 0.021775    | 0.433279314 |             |          |          |
| NIFKP1      | ENSG00000214434 | 2.0184   | 0.021777    | 2.0184      | 0.021777    | 0.83481  |          |
|             | 0.20191         | 1.1975   | 0.11555     | 0.021777    | 0.433279314 |          |          |
| UBOX5-AS1   | ENSG00000235958 | 1.3235   | 0.092832    | 0.91571     | 0.17991     | 2.0182   |          |
|             | 0.021784        | 2.0182   | 0.021784    | 0.021784    | 0.433279314 |          |          |
| ZFYVE16     | ENSG00000039319 | 2.0175   | 0.021819    | 0.7649      | 0.22217     | 1.4697   |          |
|             | 0.070816        | 1.8762   | 0.030316    | 0.021819    | 0.43359391  |          |          |
| NA          | ENSG00000239804 | 0.24971  | 0.40141     | 1.3484      | 0.088765    | 2.0172   | 0.021836 |
|             | 2.0172          | 0.021836 | 0.021836    | 0.43359391  |             |          |          |
| ZSCAN10     | ENSG00000130182 | 2.0170   | 0.021847    | 1.4953      | 0.067424    | 2.0170   | 0.021847 |
|             | 1.1699          | 0.12102  | 0.021847    | 0.43359391  |             |          |          |
| NA          | ENSG00000278953 | 0.88839  | 0.18717     | 0.88839     | 0.18717     | 2.0168   | 0.021859 |
|             | 0.88839         | 0.18717  | 0.021859    | 0.43359391  |             |          |          |
| ESRRAP2     | ENSG00000235438 | 2.0167   | 0.021865    | 1.1964      | 0.11577     | -0.98237 |          |
|             | 0.83704         | -1.6336  | 0.94883     | 0.021865    | 0.43359391  |          |          |
| MIR4435-2HG | ENSG00000172965 | -0.67595 | 0.75046     | -0.68996    | 0.75489     | 1.765    |          |
|             | 0.038782        | 2.0167   | 0.021866    | 0.021866    | 0.43359391  |          |          |
| C5orf66-AS2 | ENSG00000249647 | 1.8014   | 0.035823    | 2.0166      | 0.021869    | 2.0166   |          |
|             | 0.021869        | 0.12881  | 0.44876     | 0.021869    | 0.43359391  |          |          |
| TLCD4-RWDD3 | ENSG00000271092 | 2.0166   | 0.021871    | 2.0166      | 0.021871    | 2.0166   |          |
|             | 0.021871        | 2.0166   | 0.021871    | 0.021871    | 0.43359391  |          |          |
| FMO4        | ENSG00000076258 | -0.18881 | 0.57488     | 2.0160      | 0.021898    | -0.85104 | 0.80263  |
|             | -0.57168        | 0.71623  | 0.021898    | 0.433776236 |             |          |          |
| VTI1B       | ENSG00000100568 | 0.13675  | 0.44562     | 2.0160      | 0.021898    | 0.13675  | 0.44562  |
|             | 0.13675         | 0.44562  | 0.021898    | 0.433776236 |             |          |          |
| NKAIN4      | ENSG00000101198 | 0.33271  | 0.36968     | 1.1931      | 0.11641     | 2.0156   |          |
|             | 0.021922        | 1.5174   | 0.064584    | 0.021922    | 0.433884803 |          |          |
| NA          | ENSG00000276436 | 2.0154   | 0.02193     | 2.0154      | 0.02193     | 2.0154   | 0.02193  |
|             | 2.0154          | 0.02193  | 0.02193     | 0.433884803 |             |          |          |
| TRAJ22      | ENSG00000211867 | 2.0154   | 0.021931    | 2.0154      | 0.021931    | 2.0154   |          |
|             | 0.021931        | 2.0154   | 0.021931    | 0.021931    | 0.433884803 |          |          |
| GYPB        | ENSG00000250361 | -1.1156  | 0.8677      | 2.0152      | 0.021943    | 0.054422 | 0.4783   |
|             | -0.38393        | 0.64949  | 0.021943    | 0.433884803 |             |          |          |
| NDUFB4P8    | ENSG00000223663 | 2.0151   | 0.021948    | 2.0151      | 0.021948    | 2.0151   |          |
|             | 0.021948        | 2.0151   | 0.021948    | 0.021948    | 0.433884803 |          |          |
| LINC02719   | ENSG00000254580 | 0.37931  | 0.35223     | 1.8050      | 0.035536    | 0.77501  | 0.21917  |
|             | 2.0143          | 0.02199  | 0.02199     | 0.43438242  |             |          |          |
| NA          | ENSG00000271904 | 2.0143   | 0.021991    | 0.95449     | 0.16992     | 0.21168  | 0.41618  |
|             | 2.0143          | 0.021991 | 0.021991    | 0.43438242  |             |          |          |
| EEF1A1P19   | ENSG00000249855 | 2.0141   | 0.0220      | 2.0141      | 0.0220      | 2.0141   | 0.0220   |
|             | 0.0220          | 0.0220   | 0.434384117 |             |             |          |          |
| C1orf105    | ENSG00000180999 | 0.41661  | 0.33848     | -0.13861    | 0.55512     | 2.0136   |          |
|             | 0.022027        | 1.1847   | 0.11807     | 0.022027    | 0.434528879 |          |          |
| SERINC3     | ENSG00000132824 | 1.4748   | 0.070138    | 1.6575      | 0.048712    | 2.0136   |          |
|             | 0.022028        | 1.3998   | 0.080782    | 0.022028    | 0.434528879 |          |          |
| FAM205A     | ENSG00000205108 | 0.94942  | 0.1712      | 0.91264     | 0.18071     | 2.0133   |          |
|             | 0.022039        | 0.77413  | 0.21943     | 0.022039    | 0.434528879 |          |          |
| DUXAP4      | ENSG00000270258 | 1.2227   | 0.11072     | 1.2227      | 0.11072     | 2.0133   |          |
|             | 0.022043        | 0.22493  | 0.41102     | 0.022043    | 0.434528879 |          |          |
| NR2F2       | ENSG00000185551 | 2.0130   | 0.022057    | 0.054586    | 0.47823     | 1.8965   | 0.02895  |
|             | 0.054586        | 0.47823  | 0.022057    | 0.434591237 |             |          |          |
| NA          | ENSG00000272368 | 1.6005   | 0.054748    | 1.7011      | 0.04446     | 1.9255   | 0.027085 |
|             | 2.0129          | 0.022064 | 0.022064    | 0.434591237 |             |          |          |
| NDUFS5P3    | ENSG00000233664 | 2.0124   | 0.022089    | -0.24308    | 0.59603     | 0.32876  |          |
|             | 0.37117         | 1.8520   | 0.032012    | 0.022089    | 0.434835147 |          |          |
| STC2        | ENSG00000113739 | 0.64402  | 0.25978     | -0.54634    | 0.70758     | -0.99373 | 0.83982  |
|             | 2.0121          | 0.022105 | 0.022105    | 0.434835147 |             |          |          |
| NA          | ENSG00000229765 | 0.44256  | 0.32904     | 2.0120      | 0.022109    | 1.2146   | 0.11226  |
|             | 0.022109        | 0.022109 | 0.434835147 |             |             |          |          |
| RDH11       | ENSG00000072042 | 2.0118   | 0.022121    | 0.12455     | 0.45044     | 0.12455  | 0.45044  |
|             | 1.6584          | 0.048619 | 0.022121    | 0.434835147 |             |          |          |



|            |                 |          |             |             |             |          |          |
|------------|-----------------|----------|-------------|-------------|-------------|----------|----------|
| BCL9       | ENSG00000116128 | 1.0382   | 0.1496      | 2.0118      | 0.022121    | 0.46961  | 0.31932  |
|            | 2.0008          | 0.022705 | 0.022121    | 0.434835147 |             |          |          |
| KRT16P6    | ENSG00000226145 | 2.0114   | 0.022141    | -0.71021    | 0.76121     | 0.27623  |          |
|            | 0.39118         | -1.0909  | 0.86234     | 0.022141    | 0.435052794 |          |          |
| IFNWP9     | ENSG00000226597 | -1.9739  | 0.9758      | 2.0111      | 0.022158    | 1.7029   |          |
|            | 0.044297        | 1.0121   | 0.15574     | 0.022158    | 0.435211342 |          |          |
| IFITM8P    | ENSG00000215096 | 0.94788  | 0.1716      | 2.0105      | 0.02219     | 1.2409   |          |
|            | 0.10732         | 1.0921   | 0.13739     | 0.02219     | 0.435437497 |          |          |
| NA         | ENSG00000213828 | 2.0102   | 0.022203    | 1.8494      | 0.0322      | 0.068801 | 0.47257  |
|            | 0.068801        | 0.47257  | 0.022203    | 0.435437497 |             |          |          |
| DNAJC6     | ENSG00000116675 | 1.4442   | 0.074338    | 1.7606      | 0.039156    | 1.0517   |          |
|            | 0.14648         | 2.0101   | 0.022213    | 0.022213    | 0.435437497 |          |          |
| NA         | ENSG00000206705 | 0.39555  | 0.34622     | 1.5215      | 0.064062    | 2.0097   | 0.022229 |
|            | 1.2068          | 0.11376  | 0.022229    | 0.435437497 |             |          |          |
| DIPK1B     | ENSG00000165716 | 0.44173  | 0.32934     | -0.30087    | 0.61824     | 2.0097   |          |
|            | 0.02223         | 0.42772  | 0.33443     | 0.02223     | 0.435437497 |          |          |
| SNAPC4     | ENSG00000165684 | 2.0097   | 0.022232    | -0.83906    | 0.79928     | 0.92622  |          |
|            | 0.17717         | 0.72404  | 0.23452     | 0.022232    | 0.435437497 |          |          |
| RNU1-141P  | ENSG00000201493 | 1.0122   | 0.15573     | 2.0095      | 0.02224     | 2.0095   |          |
|            | 0.02224         | 2.0095   | 0.02224     | 0.02224     | 0.435437497 |          |          |
| ILDR2      | ENSG00000143195 | 1.5682   | 0.058421    | 2.0095      | 0.022241    | 0.96618  | 0.16698  |
|            | 1.1736          | 0.12028  | 0.022241    | 0.435437497 |             |          |          |
| PHF7       | ENSG00000010318 | 2.0091   | 0.022262    | -0.07801    | 0.53109     | 1.652    | 0.049263 |
|            | 0.46335         | 0.32156  | 0.022262    | 0.435673598 |             |          |          |
| RPL35AP28  | ENSG00000242041 | 0.01716  | 0.49315     | 0.01716     | 0.49315     | -0.70903 |          |
|            | 0.76085         | 2.0088   | 0.022281    | 0.022281    | 0.435794364 |          |          |
| RNU6-256P  | ENSG00000252556 | -1.3382  | 0.90958     | -1.3382     | 0.90958     | 2.0086   |          |
|            | 0.022292        | -0.40691 | 0.65796     | 0.022292    | 0.435794364 |          |          |
| NA         | ENSG00000267295 | 0.63744  | 0.26192     | 0.14836     | 0.44103     | 0.65632  | 0.25581  |
|            | 2.0085          | 0.022295 | 0.022295    | 0.435794364 |             |          |          |
| NA         | ENSG00000251412 | 2.0082   | 0.022309    | 0.49919     | 0.30882     | 0.35007  | 0.36314  |
|            | 1.0726          | 0.14173  | 0.022309    | 0.435837841 |             |          |          |
| MYOG       | ENSG00000122180 | 2.008    | 0.022322    | 0.20096     | 0.42036     | 0.66597  | 0.25271  |
|            | 0.022322        | 0.022322 | 0.435837841 |             |             |          | 2.008    |
| ELAVL4-AS1 | ENSG00000237337 | 1.8382   | 0.033014    | 2.0079      | 0.022329    | 1.2561   |          |
|            | 0.10454         | 1.2561   | 0.10454     | 0.022329    | 0.435837841 |          |          |
| RALA       | ENSG00000006451 | 0.86712  | 0.19294     | 2.0078      | 0.022333    | 1.7938   | 0.036426 |
|            | 1.7458          | 0.040425 | 0.022333    | 0.435837841 |             |          |          |
| NA         | ENSG00000261643 | 2.0073   | 0.022357    | -0.30762    | 0.62081     | 0.3922   | 0.34745  |
|            | 0.3922          | 0.34745  | 0.022357    | 0.436016548 |             |          |          |
| AMD1P1     | ENSG00000228339 | 2.0072   | 0.022362    | 2.0072      | 0.022362    | 2.0072   |          |
|            | 0.022362        | 2.0072   | 0.022362    | 0.022362    | 0.436016548 |          |          |
| TRAJ17     | ENSG00000211872 | 2.0071   | 0.022369    | 2.0071      | 0.022369    | 2.0071   |          |
|            | 0.022369        | 2.0071   | 0.022369    | 0.022369    | 0.436016548 |          |          |
| NA         | ENSG00000271860 | 0.31003  | 0.37827     | 2.0069      | 0.022379    | 1.5993   | 0.054882 |
|            | -0.13048        | 0.55191  | 0.022379    | 0.436037053 |             |          |          |
| COG2       | ENSG00000135775 | 2.0062   | 0.022418    | 1.3859      | 0.082892    | 0.91693  | 0.17959  |
|            | 0.97065         | 0.16586  | 0.022418    | 0.436340903 |             |          |          |
| PEX2       | ENSG00000164751 | 0.18108  | 0.42815     | 2.0061      | 0.022423    | 2.0061   | 0.022423 |
|            | 0.69475         | 0.24361  | 0.022423    | 0.436340903 |             |          |          |
| NA         | ENSG00000221746 | 1.609    | 0.053812    | 1.1068      | 0.1342      | 1.4941   | 0.067572 |
|            | 0.02243         | 0.02243  | 0.436340903 |             |             |          | 2.006    |
| PIGK       | ENSG00000142892 | -0.74939 | 0.77319     | 1.3831      | 0.083324    | 0.59569  | 0.27569  |
|            | 2.0056          | 0.022447 | 0.022447    | 0.436340903 |             |          |          |
| FAM135B    | ENSG00000147724 | -1.2298  | 0.89062     | -0.82571    | 0.79551     | 2.0055   |          |
|            | 0.022454        | 1.153    | 0.12446     | 0.022454    | 0.436340903 |          |          |
| NA         | ENSG00000223829 | 0.3745   | 0.35402     | 2.0054      | 0.022459    | 1.3058   | 0.095814 |
|            | 0.49926         | 0.3088   | 0.022459    | 0.436340903 |             |          |          |
| NA         | ENSG00000248576 | 2.0051   | 0.022477    | 1.3187      | 0.093629    | 2.0051   | 0.022477 |
|            | 1.8842          | 0.029771 | 0.022477    | 0.436340903 |             |          |          |
| SOX11      | ENSG00000176887 | -0.31508 | 0.62365     | 0.20649     | 0.4182      | 2.005    | 0.022479 |
|            | 0.20649         | 0.4182   | 0.022479    | 0.436340903 |             |          |          |

|                |                 |          |          |          |             |             |          |
|----------------|-----------------|----------|----------|----------|-------------|-------------|----------|
| NA             | ENSG00000279189 | 0.81527  | 0.20746  | 2.0049   | 0.022487    | -0.64678    | 0.74111  |
|                |                 | -0.1965  | 0.57789  | 0.022487 | 0.436340903 |             |          |
| RTEL1-TNFRSF6B | ENSG00000026036 | 0.99862  | 0.15899  | 2.0046   | 0.022501    | 0.38493     |          |
|                |                 | 0.35014  | 1.1306   | 0.12912  | 0.022501    | 0.436340903 |          |
| H3C13          | ENSG00000183598 | 1.5472   | 0.060905 | 1.5472   | 0.060905    | 1.7345      | 0.041411 |
|                |                 | 2.0045   | 0.022509 | 0.022509 | 0.436340903 |             |          |
| ZNF408         | ENSG00000175213 | 1.1924   | 0.11655  | 1.1924   | 0.11655     | 2.0045      |          |
|                |                 | 0.02251  | 1.1924   | 0.11655  | 0.02251     | 0.436340903 |          |
| NA             | ENSG00000256514 | 2.0045   | 0.022511 | 2.0045   | 0.022511    | 2.0045      | 0.022511 |
|                |                 | 2.0045   | 0.022511 | 0.022511 | 0.436340903 |             |          |
| MOCS1          | ENSG00000124615 | 2.004    | 0.022533 | 1.7497   | 0.040089    | 0.78973     | 0.21484  |
|                |                 | 1.4817   | 0.069214 | 0.022533 | 0.436536355 |             |          |
| RNU6-1223P     | ENSG00000252933 | 2.0039   | 0.022539 | 2.0039   | 0.022539    | 2.0039      |          |
|                |                 | 0.022539 | 2.0039   | 0.022539 | 0.436536355 |             |          |
| SLC39A8        | ENSG00000138821 | 0.64304  | 0.2601   | 1.026    | 0.15244     | 2.0034      | 0.022567 |
|                |                 | 0.44557  | 0.32795  | 0.022567 | 0.436732227 |             |          |
| RNU6-518P      | ENSG00000251865 | 0.14573  | 0.44207  | 0.14573  | 0.44207     | 0.14573     |          |
|                |                 | 0.44207  | 2.0033   | 0.022572 | 0.022572    | 0.436732227 |          |
| NA             | ENSG00000225610 | 2.0032   | 0.022576 | 2.0032   | 0.022576    | 2.0032      | 0.022576 |
|                |                 | 2.0032   | 0.022576 | 0.022576 | 0.436732227 |             |          |
| MTURN          | ENSG00000180354 | 0.54224  | 0.29383  | 1.5462   | 0.061025    | 2.0027      | 0.022605 |
|                |                 | 1.8411   | 0.0328   | 0.022605 | 0.437119702 |             |          |
| ZBTB7B         | ENSG00000160685 | 1.8454   | 0.03249  | 2.0022   | 0.02263     | -0.86001    |          |
|                |                 | 0.80511  | 0.39957  | 0.34474  | 0.02263     | 0.437256106 |          |
| SNORD18B       | ENSG00000202529 | 2.0022   | 0.02263  | 2.0022   | 0.02263     | 2.0022      |          |
|                |                 | 0.02263  | 2.0022   | 0.02263  | 0.437256106 |             |          |
| NOC2LP1        | ENSG00000213225 | 2.0019   | 0.022648 | -1.293   | 0.902       | 0.96303     | 0.16777  |
|                |                 | 0.045328 | 0.48192  | 0.022648 | 0.437430456 |             |          |
| LINC00235      | ENSG00000277142 | 2.0016   | 0.022665 | 2.0016   | 0.022665    | 2.0016      |          |
|                |                 | 0.022665 | 2.0016   | 0.022665 | 0.437431358 |             |          |
| NA             | ENSG00000239116 | 1.6302   | 0.051533 | 1.855    | 0.031801    | 2.0016      | 0.022666 |
|                |                 | 1.8778   | 0.030202 | 0.022666 | 0.437431358 |             |          |
| NA             | ENSG00000266947 | 2.0012   | 0.022686 | 2.0012   | 0.022686    | 2.0012      | 0.022686 |
|                |                 | 2.0012   | 0.022686 | 0.022686 | 0.437644014 |             |          |
| NEPNP          | ENSG00000218233 | -2.0144  | 0.97801  | 2.0007   | 0.022713    | -0.97366    | 0.83489  |
|                |                 | 0.12866  | 0.44881  | 0.022713 | 0.437917452 |             |          |
| AMN            | ENSG00000166126 | 0.013737 | 0.49452  | 1.096    | 0.13654     | 0.28612     | 0.38739  |
|                |                 | 2.0002   | 0.022739 | 0.022739 | 0.437917452 |             |          |
| RNU6-681P      | ENSG00000200882 | 1.9998   | 0.02276  | 1.9998   | 0.02276     | 1.9998      |          |
|                |                 | 0.02276  | 1.9998   | 0.02276  | 0.437917452 |             |          |
| NA             | ENSG00000257281 | 1.9998   | 0.022762 | 1.9998   | 0.022762    | 1.9998      | 0.022762 |
|                |                 | 1.9998   | 0.022762 | 0.022762 | 0.437917452 |             |          |
| BOLA1          | ENSG00000178096 | 1.9997   | 0.022766 | 1.4689   | 0.070935    | 1.9774      | 0.023995 |
|                |                 | 1.4689   | 0.070935 | 0.022766 | 0.437917452 |             |          |
| ENTR1P2        | ENSG00000181101 | 1.9996   | 0.022773 | 1.6351   | 0.051016    | 1.6351      |          |
|                |                 | 0.051016 | 1.3186   | 0.093652 | 0.022773    | 0.437917452 |          |
| LINC01013      | ENSG00000228495 | 0.76908  | 0.22092  | 1.0856   | 0.13882     | 1.9993      |          |
|                |                 | 0.022786 | 0.84711  | 0.19847  | 0.022786    | 0.437917452 |          |
| CCNK           | ENSG00000090061 | 1.9991   | 0.022801 | -0.473   | 0.68189     | 0.41087     | 0.34058  |
|                |                 | 1.1555   | 0.12395  | 0.022801 | 0.437917452 |             |          |
| ARHGAP28       | ENSG00000088756 | 1.1191   | 0.13154  | 1.1464   | 0.12581     | 1.1322      |          |
|                |                 | 0.12877  | 1.999    | 0.022803 | 0.022803    | 0.437917452 |          |
| RNU6-201P      | ENSG00000252909 | 1.9989   | 0.022808 | 1.9989   | 0.022808    | 1.9989      |          |
|                |                 | 0.022808 | 1.9989   | 0.022808 | 0.437917452 |             |          |
| AXIN1          | ENSG00000103126 | 0.035936 | 0.48567  | 0.16897  | 0.43291     | 0.33005     | 0.37068  |
|                |                 | 1.9988   | 0.022816 | 0.022816 | 0.437917452 |             |          |
| NA             | ENSG00000214773 | 1.6743   | 0.047038 | 1.6422   | 0.05027     | 1.9988      | 0.022817 |
|                |                 | 1.9988   | 0.022817 | 0.022817 | 0.437917452 |             |          |
| NA             | ENSG00000264596 | 0.73635  | 0.23076  | 1.9988   | 0.022817    | 0.73635     | 0.23076  |
|                |                 | 0.83777  | 0.20108  | 0.022817 | 0.437917452 |             |          |
| LINC01134      | ENSG00000236423 | 1.9985   | 0.022834 | -0.16443 | 0.5653      | -0.3916     |          |
|                |                 | 0.65232  | 0.45301  | 0.32527  | 0.022834    | 0.437956562 |          |

|            |                 |           |             |             |             |             |          |
|------------|-----------------|-----------|-------------|-------------|-------------|-------------|----------|
| NA         | ENSG00000236580 | 1.9983    | 0.022844    | 1.9983      | 0.022844    | 1.9983      | 0.022844 |
|            |                 | 1.9983    | 0.022844    | 0.437956562 |             |             |          |
| RFPL4AP5   | ENSG00000248720 | 1.9982    | 0.022846    | 1.855       | 0.031802    | 1.855       | 0.031802 |
|            |                 | 0.031802  | 0.022846    | 0.437956562 |             |             |          |
| NA         | ENSG00000279086 | 0.97771   | 0.16411     | 1.9978      | 0.02287     | 0.97771     | 0.16411  |
|            |                 | 1.3425    | 0.089715    | 0.02287     | 0.438244239 |             |          |
| MYH16      | ENSG00000002079 | 0.52632   | 0.29933     | 1.3748      | 0.08459     | 1.9972      | 0.0229   |
|            |                 | 0.1623    | 0.43553     | 0.0229      | 0.438646619 |             |          |
| NOSIP      | ENSG00000142546 | 1.997     | 0.022911    | 1.997       | 0.022911    | 1.997       | 0.022911 |
|            |                 | 0.022911  | 0.438684884 |             |             |             |          |
| NA         | ENSG00000267755 | 1.9967    | 0.022927    | 1.9967      | 0.022927    | 1.9967      | 0.022927 |
|            |                 | 1.9967    | 0.022927    | 0.438703874 |             |             |          |
| NA         | ENSG00000258549 | 1.9967    | 0.022931    | 1.9967      | 0.022931    | 1.9967      | 0.022931 |
|            |                 | 1.9967    | 0.022931    | 0.438703874 |             |             |          |
| PTDSS2     | ENSG00000174915 | 1.9965    | 0.022939    | 0.56118     | 0.28734     | -0.18807    |          |
|            |                 | 0.57459   | 0.80266     | 0.21109     | 0.022939    | 0.438703874 |          |
| NA         | ENSG00000235575 | 0.20319   | 0.41949     | 0.21126     | 0.41634     | -0.39525    | 0.65367  |
|            |                 | 1.9963    | 0.022949    | 0.022949    | 0.438722938 |             |          |
| LINC02475  | ENSG00000251350 | 1.9957    | 0.022983    | -0.87474    | 0.80914     | -1.2076     |          |
|            |                 | 0.88641   | -0.76048    | 0.77651     | 0.022983    | 0.439085157 |          |
| ANKRD17    | ENSG00000132466 | 1.6085    | 0.053866    | 1.7268      | 0.0421      | 1.9955      |          |
|            |                 | 0.022995  | 0.74251     | 0.22889     | 0.022995    | 0.439085157 |          |
| EPHB6      | ENSG00000106123 | 1.6771    | 0.046757    | 1.9954      | 0.022999    | 1.6771      | 0.046757 |
|            |                 | 0.020855  | 0.49168     | 0.022999    | 0.439085157 |             |          |
| LARP7P3    | ENSG00000265698 | 1.0255    | 0.15256     | 1.4429      | 0.074519    | 1.0946      |          |
|            |                 | 0.13684   | 1.9952      | 0.023011    | 0.023011    | 0.439085157 |          |
| NA         | ENSG00000270091 | 1.9952    | 0.023013    | 1.468       | 0.071056    | 1.9952      | 0.023013 |
|            |                 | 0.1387    | 0.44484     | 0.023013    | 0.439085157 |             |          |
| NA         | ENSG00000279711 | 0.1258    | 0.44994     | 1.6282      | 0.051739    | 1.9947      | 0.023035 |
|            |                 | 1.1238    | 0.13055     | 0.023035    | 0.439332896 |             |          |
| RN7SKP135  | ENSG00000252358 | 0.73949   | 0.22981     | 1.0324      | 0.15094     | 1.9941      |          |
|            |                 | 0.023071  | 1.0229      | 0.15318     | 0.023071    | 0.439713002 |          |
| MIR4701    | ENSG00000264201 | 1.994     | 0.023077    | 1.994       | 0.023077    | 1.994       | 0.023077 |
|            |                 | 0.023077  | 0.023077    | 0.439713002 |             |             |          |
| SHOC2      | ENSG00000108061 | 1.9939    | 0.023082    | -0.77161    | 0.77983     | -0.77161    | 0.77983  |
|            |                 | -1.3148   | 0.9057      | 0.023082    | 0.439713002 |             |          |
| NA         | ENSG00000270790 | 1.9932    | 0.023122    | 1.9932      | 0.023122    | 1.9932      | 0.023122 |
|            |                 | 1.9932    | 0.023122    | 0.440302876 |             |             |          |
| RNF103     | ENSG00000239305 | 0.60804   | 0.27158     | 1.9929      | 0.023134    | -0.20945    |          |
|            |                 | 0.58295   | 0.48151     | 0.31508     | 0.023134    | 0.440323149 |          |
| LINC01235  | ENSG00000270547 | -0.22956  | 0.59078     | 1.9923      | 0.023167    | 1.7772      |          |
|            |                 | 0.037766  | -0.42918    | 0.6661      | 0.023167    | 0.440323149 |          |
| NA         | ENSG00000248242 | 1.1107    | 0.13335     | 1.9922      | 0.023173    | 1.241       | 0.1073   |
|            |                 | 0.1073    | 0.023173    | 0.440323149 |             |             | 1.241    |
| NA         | ENSG00000223651 | 1.1428    | 0.12657     | 1.1428      | 0.12657     | 1.9917      | 0.023201 |
|            |                 | 1.1428    | 0.12657     | 0.023201    | 0.440323149 |             |          |
| NA         | ENSG00000264380 | 0.0013209 | 0.49947     | 0.071698    | 0.47142     | 1.9915      | 0.023212 |
|            |                 | 0.2213    | 0.41243     | 0.023212    | 0.440323149 |             |          |
| GPC6-AS1   | ENSG00000236520 | 1.9915    | 0.023215    | 0.64996     | 0.25786     | 1.9915      |          |
|            |                 | 0.023215  | 0.32004     | 0.37447     | 0.023215    | 0.440323149 |          |
| TATDN2P3   | ENSG00000235205 | 1.9912    | 0.023228    | 1.7805      | 0.0375      | 1.7805      |          |
|            |                 | 0.0375    | 1.7805      | 0.0375      | 0.023228    | 0.440323149 |          |
| RNU6-1106P | ENSG00000212147 | 1.6033    | 0.054432    | 1.6033      | 0.054432    | 1.9912      |          |
|            |                 | 0.023229  | 1.6205      | 0.052559    | 0.023229    | 0.440323149 |          |
| CD160      | ENSG00000117281 | 1.9912    | 0.02323     | 1.9912      | 0.02323     | 1.9912      | 0.02323  |
|            |                 | -0.45187  | 0.67432     | 0.02323     | 0.440323149 |             |          |
| NA         | ENSG00000231743 | 1.9911    | 0.023233    | 0.099528    | 0.46036     | -0.20422    | 0.58091  |
|            |                 | -0.20422  | 0.58091     | 0.023233    | 0.440323149 |             |          |
| NA         | ENSG00000232271 | 1.0233    | 0.15309     | 1.6275      | 0.051819    | 1.991       | 0.023242 |
|            |                 | 0.060448  | 0.023242    | 0.440323149 |             |             | 1.551    |
| NA         | ENSG00000272330 | 1.9909    | 0.023248    | 1.9909      | 0.023248    | 1.9909      | 0.023248 |
|            |                 | 1.9909    | 0.023248    | 0.023248    | 0.440323149 |             |          |

|           |                 |             |             |             |             |           |          |          |
|-----------|-----------------|-------------|-------------|-------------|-------------|-----------|----------|----------|
| C2orf42   | ENSG00000115998 | -0.82669    | 0.79579     | -0.21804    | 0.5863      | 1.9906    |          |          |
|           | 0.023263        | 0.76142     | 0.2232      | 0.023263    | 0.440323149 |           |          |          |
| NA        | ENSG00000231970 | 1.9906      | 0.023264    | 1.9906      | 0.023264    | 1.211     | 0.11295  | 1.263    |
|           | 0.10329         | 0.023264    | 0.440323149 |             |             |           |          |          |
| SELP      | ENSG00000174175 | 0.65509     | 0.2562      | 1.9904      | 0.023271    | 1.9904    |          | 0.023271 |
|           | -0.13072        | 0.552       | 0.023271    | 0.440323149 |             |           |          |          |
| PRELID1P6 | ENSG00000228305 | -0.48011    | 0.68443     | -0.9665     | 0.8331      | 1.9904    |          |          |
|           | 0.023273        | -0.9665     | 0.8331      | 0.023273    | 0.440323149 |           |          |          |
| WDR89     | ENSG00000140006 | 0.06789     | 0.47294     | 0.083211    | 0.46684     | 0.06789   |          | 0.47294  |
|           | 1.9902          | 0.023286    | 0.023286    | 0.440323149 |             |           |          |          |
| LHX3      | ENSG00000107187 | 1.3527      | 0.088077    | 1.4069      | 0.079734    | 1.9896    |          | 0.02332  |
|           | 1.9052          | 0.028378    | 0.02332     | 0.440323149 |             |           |          |          |
| LINC01799 | ENSG00000230525 | 0.405       | 0.34274     | 1.9896      | 0.02332     | 0.018468  |          | 0.49263  |
|           | 1.5225          | 0.063937    | 0.02332     | 0.440323149 |             |           |          |          |
| CSRNP2    | ENSG00000110925 | -0.24303    | 0.59601     | 1.9894      | 0.023328    | -0.24303  |          |          |
|           | 0.59601         | -0.12046    | 0.54794     | 0.023328    | 0.440323149 |           |          |          |
| EPHA6     | ENSG00000080224 | -1.0599     | 0.8554      | -1.5741     | 0.94227     | -0.73839  |          | 0.76986  |
|           | 1.9893          | 0.023334    | 0.023334    | 0.440323149 |             |           |          |          |
| MT1HL1    | ENSG00000244020 | 1.9893      | 0.023335    | 1.9893      | 0.023335    | 1.9893    |          |          |
|           | 0.023335        | 0.85773     | 0.19552     | 0.023335    | 0.440323149 |           |          |          |
| CABLES1   | ENSG00000134508 | 1.9891      | 0.023344    | 1.3685      | 0.085582    | 0.35645   |          |          |
|           | 0.36075         | 1.6195      | 0.052665    | 0.023344    | 0.440323149 |           |          |          |
| PCDHGA5   | ENSG00000253485 | 0.8148      | 0.20759     | 0.8148      | 0.20759     | 0.8148    |          |          |
|           | 0.20759         | 1.989       | 0.023351    | 0.023351    | 0.440323149 |           |          |          |
| NA        | ENSG00000284430 | -1.4688     | 0.92905     | 1.989       | 0.023352    | -1.0173   |          | 0.8455   |
|           | -1.0173         | 0.8455      | 0.023352    | 0.440323149 |             |           |          |          |
| POFUT1    | ENSG00000101346 | 1.1503      | 0.12501     | 0.18876     | 0.42514     | 0.94448   |          |          |
|           | 0.17246         | 1.9889      | 0.023358    | 0.023358    | 0.440323149 |           |          |          |
| NA        | ENSG00000233656 | 1.6501      | 0.049459    | 1.9884      | 0.023383    | 1.8684    |          | 0.030851 |
|           | 1.9658          | 0.02466     | 0.023383    | 0.440381732 |             |           |          |          |
| NA        | ENSG00000244036 | 1.7804      | 0.037505    | 1.9883      | 0.023391    | 1.4934    |          | 0.067661 |
|           | 0.47877         | 0.31605     | 0.023391    | 0.440381732 |             |           |          |          |
| TREML2    | ENSG00000112195 | 0.82452     | 0.20482     | 0.82452     | 0.20482     | 0.97385   |          |          |
|           | 0.16507         | 1.9879      | 0.023409    | 0.023409    | 0.440381732 |           |          |          |
| ARHGAP8   | ENSG00000241484 | 1.9878      | 0.023417    | -0.71793    | 0.7636      | -0.82056  |          |          |
|           | 0.79405         | -0.94353    | 0.82729     | 0.023417    | 0.440381732 |           |          |          |
| FAM193A   | ENSG00000125386 | 0.73913     | 0.22991     | 1.9877      | 0.023422    | -0.020301 |          |          |
|           | 0.5081          | 0.43429     | 0.33204     | 0.023422    | 0.440381732 |           |          |          |
| NA        | ENSG00000230637 | 1.8757      | 0.030345    | 1.9876      | 0.023427    | 1.421     | 0.077655 |          |
|           | 1.4836          | 0.068963    | 0.023427    | 0.440381732 |             |           |          |          |
| NKX2-6    | ENSG00000180053 | 0.68314     | 0.24726     | 1.9872      | 0.023449    | -0.049581 |          |          |
|           | 0.51977         | 0.39329     | 0.34705     | 0.023449    | 0.440381732 |           |          |          |
| RN7SL865P | ENSG00000240205 | 1.9872      | 0.023452    | 1.7093      | 0.043697    | 1.4644    |          |          |
|           | 0.071539        | 1.9872      | 0.023452    | 0.023452    | 0.440381732 |           |          |          |
| NA        | ENSG00000261047 | 1.987       | 0.023462    | 1.987       | 0.023462    | 1.987     | 0.023462 | 1.987    |
|           | 0.023462        | 0.440381732 |             |             |             |           |          |          |
| RNA5SP141 | ENSG00000201413 | -0.14906    | 0.55925     | 0.039403    | 0.48428     | 1.9868    |          |          |
|           | 0.023475        | 1.7591      | 0.039282    | 0.023475    | 0.440381732 |           |          |          |
| GPM6A     | ENSG00000150625 | 0.88253     | 0.18874     | -0.76723    | 0.77853     | 1.2663    |          | 0.1027   |
|           | 1.9867          | 0.023476    | 0.023476    | 0.440381732 |             |           |          |          |
| MRGPRX8P  | ENSG00000276789 | 1.9864      | 0.023495    | 1.9864      | 0.023495    | 1.6788    |          |          |
|           | 0.046598        | 1.9864      | 0.023495    | 0.023495    | 0.440381732 |           |          |          |
| NA        | ENSG00000261146 | 1.9863      | 0.023498    | 0.065942    | 0.47371     | 1.0939    |          | 0.137    |
|           | -0.041945       | 0.51673     | 0.023498    | 0.440381732 |             |           |          |          |
| TBC1D1    | ENSG00000065882 | 1.2824      | 0.099858    | 0.92978     | 0.17624     | 0.78424   |          |          |
|           | 0.21645         | 1.9861      | 0.023513    | 0.023513    | 0.440381732 |           |          |          |
| NA        | ENSG00000232862 | 1.9859      | 0.02352     | 1.762       | 0.039039    | 1.9859    |          | 0.02352  |
|           | 1.9859          | 0.02352     | 0.02352     | 0.440381732 |             |           |          |          |
| NA        | ENSG00000236414 | 1.8737      | 0.030487    | 0.25238     | 0.40037     | 1.8737    |          | 0.030487 |
|           | 1.9859          | 0.023525    | 0.023525    | 0.440381732 |             |           |          |          |
| NA        | ENSG00000267193 | 1.9143      | 0.027792    | 1.9222      | 0.02729     | 0.85582   |          | 0.19605  |
|           | 1.9858          | 0.023526    | 0.023526    | 0.440381732 |             |           |          |          |

|           |                 |          |           |             |             |             |          |
|-----------|-----------------|----------|-----------|-------------|-------------|-------------|----------|
| PARD3     | ENSG00000148498 | 1.9855   | 0.023545  | 0.18695     | 0.42585     | 0.77599     | 0.21888  |
|           |                 | 0.6151   | 0.26924   | 0.023545    | 0.440381732 |             |          |
| ZFAND2B   | ENSG00000158552 | 1.9854   | 0.023548  | 1.4872      | 0.068482    | 1.9854      |          |
|           |                 | 0.023548 | 1.9854    | 0.023548    | 0.023548    | 0.440381732 |          |
| DACH1     | ENSG00000276644 | 0.96796  | 0.16653   | 1.4787      | 0.06961     | 1.9854      | 0.02355  |
|           |                 | -0.53447 | 0.70349   | 0.02355     | 0.440381732 |             |          |
| RNU6-399P | ENSG00000202034 | 1.9852   | 0.023561  | 1.9852      | 0.023561    | 1.9852      |          |
|           |                 | 0.023561 | 1.9852    | 0.023561    | 0.440381732 |             |          |
| NOB1      | ENSG00000141101 | 1.0882   | 0.13825   | 1.9852      | 0.023563    | 0.86583     | 0.19329  |
|           |                 | 1.5652   | 0.058766  | 0.023563    | 0.440381732 |             |          |
| XKR5      | ENSG00000275591 | -0.74859 | 0.77295   | 1.9849      | 0.023576    | 1.8238      | 0.034092 |
|           |                 | 0.49098  | 0.31172   | 0.023576    | 0.440381732 |             |          |
| NA        | ENSG00000237002 | 0.88457  | 0.18819   | 1.3163      | 0.094036    | 1.9849      | 0.023578 |
|           |                 | 1.3163   | 0.094036  | 0.023578    | 0.440381732 |             |          |
| LINC02623 | ENSG00000234944 | 1.8546   | 0.031824  | 0.11741     | 0.45327     | 0.15205     |          |
|           |                 | 0.43958  | 1.9847    | 0.023592    | 0.023592    | 0.440474391 |          |
| NA        | ENSG00000238840 | 1.9844   | 0.023606  | -0.64685    | 0.74114     | 0.7213      | 0.23536  |
|           |                 | 0.7213   | 0.23536   | 0.023606    | 0.440507278 |             |          |
| VDAC3P1   | ENSG00000271198 | 1.4233   | 0.077325  | 1.9842      | 0.023618    | -0.28975    | 0.614    |
|           |                 | -0.23144 | 0.59151   | 0.023618    | 0.440507278 |             |          |
| NA        | ENSG00000125385 | 1.9841   | 0.023623  | -0.33932    | 0.63282     | -0.33932    | 0.63282  |
|           |                 | -0.33932 | 0.63282   | 0.023623    | 0.440507278 |             |          |
| MPPED2    | ENSG00000066382 | 0.57001  | 0.28434   | 0.082017    | 0.46732     | 1.9839      |          |
|           |                 | 0.023634 | 0.73364   | 0.23158     | 0.023634    | 0.440507278 |          |
| NA        | ENSG00000254551 | 1.9836   | 0.023648  | 1.9836      | 0.023648    | 1.9836      | 0.023648 |
|           |                 | 1.9836   | 0.023648  | 0.023648    | 0.440507278 |             |          |
| LINC01176 | ENSG00000281404 | 1.1463   | 0.12583   | 1.1463      | 0.12583     | 1.9836      |          |
|           |                 | 0.023648 | -1.2411   | 0.89272     | 0.023648    | 0.440507278 |          |
| NA        | ENSG00000200652 | 1.9833   | 0.023664  | 1.9833      | 0.023664    | 1.9833      | 0.023664 |
|           |                 | 1.9833   | 0.023664  | 0.023664    | 0.440616697 |             |          |
| NA        | ENSG00000254639 | -0.39069 | 0.65199   | 0.88086     | 0.1892      | -0.16418    | 0.56521  |
|           |                 | 1.9831   | 0.023676  | 0.023676    | 0.440616697 |             |          |
| SLC39A11  | ENSG00000133195 | -0.51675 | 0.69733   | 0.43111     | 0.33319     | 1.983       | 0.023681 |
|           |                 | 0.60105  | 0.2739    | 0.023681    | 0.440616697 |             |          |
| RNF2      | ENSG00000121481 | 0.84519  | 0.199     | -0.42706    | 0.66533     | -0.36725    | 0.64328  |
|           |                 | 1.9827   | 0.023699  | 0.023699    | 0.44065232  |             |          |
| ADAMTSL5  | ENSG00000185761 | 1.9827   | 0.023701  | 1.9827      | 0.023701    | 1.4178      |          |
|           |                 | 0.078132 | -0.058339 | 0.52326     | 0.023701    | 0.44065232  |          |
| LINC01392 | ENSG00000233607 | -1.1106  | 0.86663   | -1.1106     | 0.86663     | 1.9821      |          |
|           |                 | 0.023733 | -1.1106   | 0.86663     | 0.023733    | 0.440714416 |          |
| RPS6KA4   | ENSG00000162302 | 1.9821   | 0.023735  | 1.1488      | 0.12533     | 0.93861     |          |
|           |                 | 0.17396  | -0.30074  | 0.61819     | 0.023735    | 0.440714416 |          |
| NA        | ENSG00000223583 | 1.982    | 0.023742  | 1.982       | 0.023742    | 1.4492      | 0.073642 |
|           |                 | 0.073642 | 0.023742  | 0.440714416 |             |             |          |
| GNG12     | ENSG00000172380 | 0.50669  | 0.30619   | -0.47956    | 0.68423     | 1.8539      | 0.03188  |
|           |                 | 1.9816   | 0.023761  | 0.023761    | 0.440714416 |             |          |
| NA        | ENSG00000222031 | 1.9814   | 0.023774  | 0.42136     | 0.33674     | 1.9814      | 0.023774 |
|           |                 | 1.9814   | 0.023774  | 0.023774    | 0.440714416 |             |          |
| AMBRA1    | ENSG00000110497 | 1.9813   | 0.02378   | 1.4698      | 0.070812    | 1.484       | 0.068907 |
|           |                 | 1.4703   | 0.070742  | 0.02378     | 0.440714416 |             |          |
| CRYZ      | ENSG00000116791 | 1.9812   | 0.023784  | 1.9812      | 0.023784    | 1.9812      | 0.023784 |
|           |                 | 1.9812   | 0.023784  | 0.023784    | 0.440714416 |             |          |
| VWA5A     | ENSG00000110002 | 1.2803   | 0.10022   | 1.981       | 0.023796    | 1.981       | 0.023796 |
|           |                 | 0.023796 | 0.023796  | 0.440714416 |             |             |          |
| SLC25A22  | ENSG00000177542 | 0.11602  | 0.45382   | 0.11602     | 0.45382     | 1.9809      |          |
|           |                 | 0.023804 | 1.1179    | 0.13181     | 0.023804    | 0.440714416 |          |
| PTPRM     | ENSG00000173482 | 0.85224  | 0.19704   | 0.68686     | 0.24609     | 1.9808      | 0.023805 |
|           |                 | -0.27526 | 0.60844   | 0.023805    | 0.440714416 |             |          |
| NA        | ENSG00000227193 | -1.2145  | 0.88772   | 0.44509     | 0.32813     | 1.9805      | 0.023825 |
|           |                 | 0.054936 | 0.47809   | 0.023825    | 0.440714416 |             |          |
| NA        | ENSG00000254844 | -0.82789 | 0.79613   | 1.9805      | 0.023826    | -0.2721     | 0.60723  |
|           |                 | -0.30027 | 0.61801   | 0.023826    | 0.440714416 |             |          |

|            |                 |           |             |             |             |             |          |
|------------|-----------------|-----------|-------------|-------------|-------------|-------------|----------|
| NA         | ENSG00000279891 | 1.9804    | 0.023831    | 1.9804      | 0.023831    | 1.9804      | 0.023831 |
|            |                 | 1.9804    | 0.023831    | 0.440714416 |             |             |          |
| TLCD2      | ENSG00000185561 | 1.9804    | 0.023832    | 1.6481      | 0.049671    | 1.9804      | 0.023832 |
|            |                 | 1.9804    | 0.023832    | 0.440714416 |             |             |          |
| GPANK1     | ENSG00000204438 | 1.9802    | 0.02384     | 0.0042187   | 0.49832     | 0.57628     |          |
|            |                 | 0.28221   | 0.0042187   | 0.49832     | 0.02384     | 0.440714416 |          |
| BPIFA2     | ENSG00000131050 | 1.9791    | 0.023901    | 1.9438      | 0.02596     | 1.5608      |          |
|            |                 | 0.059289  | 0.73132     | 0.23229     | 0.023901    | 0.441487522 |          |
| DOK4       | ENSG00000125170 | 0.12904   | 0.44866     | 1.9791      | 0.023902    | 0.12904     | 0.44866  |
|            |                 | 0.92975   | 0.17625     | 0.023902    | 0.441487522 |             |          |
| NA         | ENSG00000276573 | 1.979     | 0.023909    | 1.979       | 0.023909    | 1.979       | 0.023909 |
|            |                 | 0.023909  | 0.441487522 |             |             |             |          |
| TMEM163    | ENSG00000152128 | 1.5996    | 0.054843    | 1.9787      | 0.023923    | 0.42428     |          |
|            |                 | 0.33568   | 1.6504      | 0.049426    | 0.023923    | 0.441578708 |          |
| BANK1      | ENSG00000153064 | 1.484     | 0.068902    | 0.19814     | 0.42147     | -0.90735    | 0.81789  |
|            |                 | 1.9778    | 0.023975    | 0.023975    | 0.442329803 |             |          |
| NA         | ENSG00000277319 | 0.52906   | 0.29838     | 1.9776      | 0.023989    | 1.2251      | 0.11027  |
|            |                 | 1.2251    | 0.11027     | 0.023989    | 0.442329803 |             |          |
| SLC14A1    | ENSG00000141469 | 1.4273    | 0.076751    | 1.556       | 0.059848    | 0.5683      | 0.28491  |
|            |                 | 1.9774    | 0.023996    | 0.023996    | 0.442329803 |             |          |
| ELAVL4     | ENSG00000162374 | 1.9774    | 0.024       | 1.9197      | 0.02745     | 1.9197      | 0.02745  |
|            |                 | 1.908     | 0.028195    | 0.024       | 0.442329803 |             |          |
| NA         | ENSG00000259269 | 1.977     | 0.024018    | -0.021124   | 0.50843     | -0.3204     | 0.62567  |
|            |                 | -0.075212 | 0.52998     | 0.024018    | 0.442382211 |             |          |
| TXK        | ENSG00000074966 | 1.0836    | 0.13926     | 1.977       | 0.024021    | 0.98484     | 0.16235  |
|            |                 | 1.3031    | 0.096276    | 0.024021    | 0.442382211 |             |          |
| LINC01089  | ENSG00000212694 | 1.9764    | 0.024052    | 1.9764      | 0.024052    | 1.9764      |          |
|            |                 | 0.024052  | 1.9764      | 0.024052    | 0.44278578  |             |          |
| MMP24      | ENSG00000125966 | 1.5902    | 0.055895    | 0.30073     | 0.38181     | 1.9763      | 0.024062 |
|            |                 | 0.10635   | 0.45765     | 0.024062    | 0.442802591 |             |          |
| NA         | ENSG00000282887 | 1.976     | 0.024075    | 0.50765     | 0.30585     | 1.976       | 0.024075 |
|            |                 | 0.22993   | 0.024075    | 0.442874575 |             |             |          |
| NA         | ENSG00000201442 | 1.9755    | 0.024108    | 1.9755      | 0.024108    | 0.90504     | 0.18272  |
|            |                 | 1.9755    | 0.024108    | 0.024108    | 0.443059977 |             |          |
| RCN2       | ENSG00000117906 | -0.32606  | 0.62781     | 0.31203     | 0.37751     | 1.9753      | 0.024114 |
|            |                 | 1.0414    | 0.14884     | 0.024114    | 0.443059977 |             |          |
| NA         | ENSG00000238158 | -1.0312   | 0.84879     | 1.9752      | 0.02412     | 1.9752      | 0.02412  |
|            |                 | -0.50079  | 0.69174     | 0.02412     | 0.443059977 |             |          |
| MIR5481i   | ENSG00000221737 | 1.9751    | 0.02413     | 1.9751      | 0.02413     | 1.0881      |          |
|            |                 | 0.13827   | 1.2078      | 0.11355     | 0.02413     | 0.443059977 |          |
| NA         | ENSG00000260058 | 1.6428    | 0.050216    | 1.975       | 0.024134    | 1.6428      | 0.050216 |
|            |                 | -0.68432  | 0.75311     | 0.024134    | 0.443059977 |             |          |
| MZT1P1     | ENSG00000271264 | 1.9747    | 0.024152    | 1.9747      | 0.024152    | 1.7893      |          |
|            |                 | 0.036781  | 1.9747      | 0.024152    | 0.443059977 |             |          |
| AHCYP3     | ENSG00000233955 | 0.92344   | 0.17789     | 1.619       | 0.05272     | 1.125       | 0.13029  |
|            |                 | 1.9747    | 0.024153    | 0.024153    | 0.443059977 |             |          |
| EXOC7      | ENSG00000182473 | 1.8342    | 0.033314    | 1.9744      | 0.024166    | 1.4372      | 0.075326 |
|            |                 | 0.93434   | 0.17506     | 0.024166    | 0.443059977 |             |          |
| HSD3BP4    | ENSG00000203855 | 0.041062  | 0.48362     | -1.3799     | 0.91619     | 1.9743      |          |
|            |                 | 0.024174  | 0.83386     | 0.20218     | 0.024174    | 0.443059977 |          |
| POM121L3P  | ENSG00000167390 | -2.4881   | 0.99358     | 0.34103     | 0.36654     | 1.9743      |          |
|            |                 | 0.024176  | 0.87055     | 0.192       | 0.024176    | 0.443059977 |          |
| NKX2-1-AS1 | ENSG00000253563 | 1.974     | 0.02419     | 1.974       | 0.02419     | 1.974       | 0.02419  |
|            |                 | 0.02419   | 0.02419     | 0.443129853 |             |             |          |
| NA         | ENSG00000205147 | 1.9739    | 0.024198    | 1.9739      | 0.024198    | 1.9739      | 0.024198 |
|            |                 | 1.9739    | 0.024198    | 0.024198    | 0.443129853 |             |          |
| GREB1      | ENSG00000196208 | 1.1177    | 0.13185     | 1.2761      | 0.10096     | 1.525       | 0.063633 |
|            |                 | 1.9735    | 0.024221    | 0.024221    | 0.443157858 |             |          |
| NA         | ENSG00000222883 | 1.9734    | 0.024223    | 1.8528      | 0.031953    | 1.9734      | 0.024223 |
|            |                 | 1.9734    | 0.024223    | 0.024223    | 0.443157858 |             |          |
| UQCC2      | ENSG00000137288 | 0.56215   | 0.28701     | 1.9733      | 0.024228    | 0.36653     | 0.35699  |
|            |                 | 0.15498   | 0.43842     | 0.024228    | 0.443157858 |             |          |

|           |                 |           |             |             |             |          |          |
|-----------|-----------------|-----------|-------------|-------------|-------------|----------|----------|
| S100A5    | ENSG00000196420 | 1.9732    | 0.024237    | 1.9732      | 0.024237    | 1.9526   |          |
|           | 0.025432        | 0.37909   | 0.35231     | 0.024237    | 0.443157858 |          |          |
| RPS28P1   | ENSG00000270912 | 0.72767   | 0.23341     | 0.59372     | 0.27635     | 1.2786   |          |
|           | 0.10052         | 1.973     | 0.024245    | 0.024245    | 0.443157858 |          |          |
| ZNF519    | ENSG00000175322 | 1.6461    | 0.04987     | 1.3043      | 0.096066    | 1.9722   |          |
|           | 0.024291        | 0.86815   | 0.19266     | 0.024291    | 0.443682177 |          |          |
| FTH1P9    | ENSG00000251395 | 1.658     | 0.048658    | 1.9686      | 0.024497    | 1.9722   | 0.024292 |
|           | 1.7011          | 0.044463  | 0.024292    | 0.443682177 |             |          |          |
| CXXC4-AS1 | ENSG00000245384 | 0.19059   | 0.42442     | 0.85062     | 0.19749     | 0.47259  |          |
|           | 0.31825         | 1.9721    | 0.024301    | 0.024301    | 0.443682177 |          |          |
| MIR548H1  | ENSG00000221537 | 1.9711    | 0.024356    | 1.9711      | 0.024356    | 1.9711   |          |
|           | 0.024356        | 1.9711    | 0.024356    | 0.024356    | 0.444519805 |          |          |
| NA        | ENSG00000228007 | 1.9562    | 0.025219    | 1.8         | 0.035932    | 1.9703   | 0.024401 |
|           | 1.9703          | 0.024401  | 0.024401    | 0.444834245 |             |          |          |
| NA        | ENSG00000276633 | 1.5813    | 0.056909    | 1.8173      | 0.034587    | 1.4488   | 0.073697 |
|           | 1.9703          | 0.024405  | 0.024405    | 0.444834245 |             |          |          |
| TRAJ9     | ENSG00000211880 | 1.9701    | 0.024413    | 1.9701      | 0.024413    | 1.9701   | 0.024413 |
|           | 1.9701          | 0.024413  | 0.024413    | 0.444834245 |             |          |          |
| TRAJ8     | ENSG00000211881 | 1.9701    | 0.024413    | 1.9701      | 0.024413    | 1.9701   | 0.024413 |
|           | 1.9701          | 0.024413  | 0.024413    | 0.444834245 |             |          |          |
| NA        | ENSG00000229742 | 1.9699    | 0.024426    | 1.9699      | 0.024426    | 1.9699   | 0.024426 |
|           | 1.9699          | 0.024426  | 0.024426    | 0.444834245 |             |          |          |
| AIDAP3    | ENSG00000264189 | -0.36236  | 0.64146     | 1.9699      | 0.024428    | -0.7678  |          |
|           | 0.7787          | -0.7678   | 0.7787      | 0.024428    | 0.444834245 |          |          |
| DEFB124   | ENSG00000180383 | 1.3583    | 0.087189    | 1.1591      | 0.1232      | 1.9696   |          |
|           | 0.024442        | 0.83786   | 0.20105     | 0.024442    | 0.444922921 |          |          |
| NA        | ENSG00000224550 | -0.2247   | 0.58889     | -0.2247     | 0.58889     | -0.2247  | 0.58889  |
|           | 1.9693          | 0.024461  | 0.024461    | 0.445102513 |             |          |          |
| CEP78     | ENSG00000148019 | -0.10824  | 0.5431      | -0.71452    | 0.76255     | 1.969    | 0.024478 |
|           | 0.048822        | 0.48053   | 0.024478    | 0.445245592 |             |          |          |
| LINC01254 | ENSG00000260913 | 0.61175   | 0.27035     | 1.9688      | 0.02449     | 1.0999   |          |
|           | 0.13568         | 1.2745    | 0.10124     | 0.02449     | 0.445262687 |          |          |
| NA        | ENSG00000255045 | 0.56296   | 0.28673     | 1.9683      | 0.024517    | 0.56296  | 0.28673  |
|           | 0.56296         | 0.28673   | 0.024517    | 0.445262687 |             |          |          |
| CDS2      | ENSG00000101290 | -0.59474  | 0.72399     | 1.3777      | 0.084146    | 0.21941  | 0.41317  |
|           | 1.968           | 0.024532  | 0.024532    | 0.445262687 |             |          |          |
| NCAPGP2   | ENSG00000259749 | -0.036951 | 0.51474     | 1.9679      | 0.024538    | 1.9679   |          |
|           | 0.024538        | 1.9679    | 0.024538    | 0.024538    | 0.445262687 |          |          |
| SIM1      | ENSG00000112246 | 0.9989    | 0.15892     | 1.2986      | 0.097045    | 1.7677   | 0.038558 |
|           | 1.9678          | 0.024548  | 0.024548    | 0.445262687 |             |          |          |
| USP2      | ENSG00000036672 | 1.9677    | 0.024551    | 1.9677      | 0.024551    | 0.030423 | 0.48786  |
|           | 0.59749         | 0.27509   | 0.024551    | 0.445262687 |             |          |          |
| NA        | ENSG00000276406 | 1.9677    | 0.024551    | 1.9677      | 0.024551    | 1.9677   | 0.024551 |
|           | 1.9677          | 0.024551  | 0.024551    | 0.445262687 |             |          |          |
| MIR3160-1 | ENSG00000265014 | 1.537     | 0.062151    | 1.9673      | 0.024572    | 1.537    | 0.062151 |
|           | 0.062151        | 0.024572  | 0.445262687 |             |             |          |          |
| RPS6KC1   | ENSG00000136643 | 0.60969   | 0.27103     | 1.1422      | 0.12668     | 1.2284   |          |
|           | 0.10965         | 1.9673    | 0.024574    | 0.024574    | 0.445262687 |          |          |
| SOX2      | ENSG00000181449 | -0.083976 | 0.53346     | 1.621       | 0.052513    | 1.9669   | 0.024599 |
|           | 0.76272         | 0.22282   | 0.024599    | 0.445262687 |             |          |          |
| NA        | ENSG00000230736 | 1.9669    | 0.0246      | 1.9669      | 0.0246      | 1.9669   | 0.0246   |
|           | 1.9669          | 0.0246    | 0.0246      | 0.445262687 |             |          |          |
| CTAGE12P  | ENSG00000215441 | 0.47972   | 0.31571     | 1.9668      | 0.024604    | 1.9668   |          |
|           | 0.024604        | 1.9668    | 0.024604    | 0.024604    | 0.445262687 |          |          |
| HSD17B13  | ENSG00000170509 | 0.48789   | 0.31282     | 0.48789     | 0.31282     | 1.9666   |          |
|           | 0.024614        | 0.029557  | 0.48821     | 0.024614    | 0.445262687 |          |          |
| GMPPA     | ENSG00000144591 | 1.6648    | 0.047979    | 1.9666      | 0.024616    | 1.9666   | 0.024616 |
|           | 1.9666          | 0.024616  | 0.024616    | 0.445262687 |             |          |          |
| NA        | ENSG00000268603 | 1.9666    | 0.024616    | 1.9666      | 0.024616    | 1.9666   | 0.024616 |
|           | 1.9666          | 0.024616  | 0.024616    | 0.445262687 |             |          |          |
| NA        | ENSG00000267852 | 1.9662    | 0.024639    | 1.9662      | 0.024639    | 1.9662   | 0.024639 |
|           | 1.9662          | 0.024639  | 0.024639    | 0.445508198 |             |          |          |

|           |                 |          |          |             |             |           |          |
|-----------|-----------------|----------|----------|-------------|-------------|-----------|----------|
| LINC02747 | ENSG00000255774 | 0.13135  | 0.44775  | 1.9659      | 0.024654    | -0.44229  |          |
|           | 0.67086         | 0.6479   | 0.25852  | 0.024654    | 0.445508198 |           |          |
| TMEM145   | ENSG00000167619 | 1.9659   | 0.024657 | 0.49715     | 0.30954     | 0.94024   |          |
|           | 0.17355         | 0.96491  | 0.1673   | 0.024657    | 0.445508198 |           |          |
| ARL17A    | ENSG00000185829 | 0.56813  | 0.28497  | 1.5989      | 0.05492     | 1.9655    |          |
|           | 0.024676        | 0.13453  | 0.44649  | 0.024676    | 0.445567498 |           |          |
| ERG       | ENSG00000157554 | 1.9653   | 0.024688 | 0.5601      | 0.2877      | 1.8954    | 0.029021 |
|           | 0.94309         | 0.17282  | 0.024688 | 0.445567498 |             |           |          |
| RNA5SP467 | ENSG00000212576 | 1.9651   | 0.0247   | 1.9651      | 0.0247      | 1.9651    |          |
|           | 0.0247          | 1.9651   | 0.0247   | 0.0247      | 0.445567498 |           |          |
| QRSL1P1   | ENSG00000215833 | 0.22157  | 0.41232  | 1.9651      | 0.024704    | 1.1317    |          |
|           | 0.12888         | -0.16862 | 0.56695  | 0.024704    | 0.445567498 |           |          |
| LINC02641 | ENSG00000230131 | 0.38722  | 0.3493   | -0.21755    | 0.58611     | 1.965     | 0.024706 |
|           | 1.2974          | 0.097248 | 0.024706 | 0.445567498 |             |           |          |
| ZNF620    | ENSG00000177842 | -0.83711 | 0.79873  | 1.9647      | 0.024723    | 1.7546    |          |
|           | 0.039662        | -0.26333 | 0.60385  | 0.024723    | 0.445616387 |           |          |
| LINC00466 | ENSG00000224209 | 0.28555  | 0.38761  | 0.50347     | 0.30732     | 0.3501    |          |
|           | 0.36313         | 1.9647   | 0.024727 | 0.024727    | 0.445616387 |           |          |
| RNU6-308P | ENSG00000212259 | 1.9641   | 0.024761 | 1.9641      | 0.024761    | 1.9641    |          |
|           | 0.024761        | 1.9641   | 0.024761 | 0.024761    | 0.446014362 |           |          |
| CLIC1     | ENSG00000213719 | 1.637    | 0.05082  | 1.9638      | 0.024775    | 1.9638    | 0.024775 |
|           | 1.9638          | 0.024775 | 0.024775 | 0.446014362 |             |           |          |
| NA        | ENSG00000219992 | 1.9637   | 0.024785 | 1.9637      | 0.024785    | 1.9637    | 0.024785 |
|           | 1.9637          | 0.024785 | 0.024785 | 0.446014362 |             |           |          |
| NA        | ENSG00000276702 | 1.9635   | 0.024794 | 1.9635      | 0.024794    | 1.9635    | 0.024794 |
|           | 1.9635          | 0.024794 | 0.024794 | 0.446014362 |             |           |          |
| SATB1-AS1 | ENSG00000228956 | 0.63771  | 0.26183  | 0.27479     | 0.39174     | 1.1657    |          |
|           | 0.12187         | 1.9634   | 0.024799 | 0.024799    | 0.446014362 |           |          |
| SPATA45   | ENSG00000185523 | 0.56614  | 0.28565  | 0.56614     | 0.28565     | 1.9633    |          |
|           | 0.024804        | 1.3199   | 0.09343  | 0.024804    | 0.446014362 |           |          |
| FARP1     | ENSG00000152767 | 1.2757   | 0.10104  | 1.2052      | 0.11407     | 1.9631    | 0.02482  |
|           | 1.2948          | 0.097697 | 0.02482  | 0.446108343 |             |           |          |
| PGAM2     | ENSG00000164708 | 1.9627   | 0.024838 | 1.9627      | 0.024838    | 1.9627    | 0.024838 |
|           | 1.9627          | 0.024838 | 0.024838 | 0.446108343 |             |           |          |
| MIR3681HG | ENSG00000224184 | 1.613    | 0.053377 | -0.012178   | 0.50486     | 0.0091753 | 0.49634  |
|           | 1.9626          | 0.024845 | 0.024845 | 0.446108343 |             |           |          |
| PCDHB2    | ENSG00000112852 | 0.99163  | 0.16069  | 1.2483      | 0.10597     | -0.13697  |          |
|           | 0.55447         | 1.9626   | 0.024847 | 0.024847    | 0.446108343 |           |          |
| NA        | ENSG00000274629 | 0.51102  | 0.30467  | 0.51102     | 0.30467     | 0.51102   | 0.30467  |
|           | 1.9625          | 0.024855 | 0.024855 | 0.446108343 |             |           |          |
| NA        | ENSG00000242411 | 1.9621   | 0.024876 | 1.9621      | 0.024876    | 1.9621    | 0.024876 |
|           | 1.9621          | 0.024876 | 0.024876 | 0.446131245 |             |           |          |
| MIR124-3  | ENSG00000207598 | 1.962    | 0.024881 | 1.1732      | 0.12035     | 0.1452    | 0.44228  |
|           | 0.78431         | 0.21643  | 0.024881 | 0.446131245 |             |           |          |
| NA        | ENSG00000249094 | 1.9619   | 0.024889 | -0.4625     | 0.67814     | -0.4625   | 0.67814  |
|           | -0.2913         | 0.61459  | 0.024889 | 0.446131245 |             |           |          |
| HOXB2     | ENSG00000173917 | 1.9613   | 0.024922 | 1.9613      | 0.024922    | 1.9613    | 0.024922 |
|           | 1.9613          | 0.024922 | 0.024922 | 0.446131245 |             |           |          |
| MED23     | ENSG00000112282 | 0.15829  | 0.43711  | 1.9612      | 0.024926    | 0.58461   | 0.27941  |
|           | 0.20923         | 0.41713  | 0.024926 | 0.446131245 |             |           |          |
| RTCB      | ENSG00000100220 | 0.073166 | 0.47084  | 1.9611      | 0.024936    | 1.9611    | 0.024936 |
|           | 1.6571          | 0.048752 | 0.024936 | 0.446131245 |             |           |          |
| COX4I1    | ENSG00000131143 | 1.7438   | 0.040599 | 1.2188      | 0.11147     | 1.961     | 0.024942 |
|           | -0.90947        | 0.81845  | 0.024942 | 0.446131245 |             |           |          |
| GK2       | ENSG00000196475 | 1.7384   | 0.041074 | 1.9609      | 0.024943    | 1.0149    | 0.15508  |
|           | 0.4783          | 0.31622  | 0.024943 | 0.446131245 |             |           |          |
| VPS33B    | ENSG00000184056 | 1.2747   | 0.10121  | 1.9609      | 0.024946    | 1.679     | 0.046574 |
|           | 1.8374          | 0.033072 | 0.024946 | 0.446131245 |             |           |          |
| CASP7     | ENSG00000165806 | 1.9291   | 0.026862 | 1.9608      | 0.024952    | 1.6676    | 0.047701 |
|           | 1.3518          | 0.088218 | 0.024952 | 0.446131245 |             |           |          |
| SMAP1     | ENSG00000112305 | 1.9605   | 0.02497  | 0.45232     | 0.32552     | 0.26636   | 0.39498  |
|           | 1.3414          | 0.089903 | 0.02497  | 0.446131245 |             |           |          |



|           |                 |          |             |             |             |             |          |        |
|-----------|-----------------|----------|-------------|-------------|-------------|-------------|----------|--------|
| MIR182    | ENSG00000207990 | -1.0145  | 0.84484     | 1.9602      | 0.024989    | -1.0145     |          |        |
|           |                 | 0.84484  | -1.0145     | 0.84484     | 0.024989    | 0.446131245 |          |        |
| TSEN2     | ENSG00000154743 | 1.914    | 0.027813    | 1.96        | 0.024997    | 0.21208     | 0.41602  | 1.4912 |
|           |                 | 0.067953 | 0.024997    | 0.446131245 |             |             |          |        |
| NA        | ENSG00000280434 | 1.9598   | 0.025008    | 1.9598      | 0.025008    | 1.9598      | 0.025008 |        |
|           |                 | 1.9598   | 0.025008    | 0.025008    | 0.446131245 |             |          |        |
| PDAP1     | ENSG00000106244 | 1.709    | 0.043726    | 1.9598      | 0.02501     | 1.9329      | 0.026625 |        |
|           |                 | 1.7381   | 0.041093    | 0.02501     | 0.446131245 |             |          |        |
| PFN1P11   | ENSG00000213061 | 0.071523 | 0.47149     | 1.9596      | 0.025024    | 0.070007    |          |        |
|           |                 | 0.47209  | 0.058575    | 0.47665     | 0.025024    | 0.446131245 |          |        |
| CLSTN3    | ENSG00000139182 | 1.9595   | 0.025026    | -0.66697    | 0.7476      | 0.59034     |          |        |
|           |                 | 0.27748  | 0.33522     | 0.36873     | 0.025026    | 0.446131245 |          |        |
| NA        | ENSG00000226193 | 1.9593   | 0.025036    | 1.9593      | 0.025036    | 1.9593      | 0.025036 |        |
|           |                 | 1.9593   | 0.025036    | 0.025036    | 0.446131245 |             |          |        |
| RNY1P13   | ENSG00000201900 | 1.4775   | 0.069777    | 1.9592      | 0.025043    | 1.9592      |          |        |
|           |                 | 0.025043 | 1.9592      | 0.025043    | 0.025043    | 0.446131245 |          |        |
| CAP1      | ENSG00000131236 | 1.9097   | 0.028085    | 1.9592      | 0.025046    | 0.12105     | 0.45183  |        |
|           |                 | -0.8094  | 0.79086     | 0.025046    | 0.446131245 |             |          |        |
| NA        | ENSG00000224946 | 1.959    | 0.025054    | 1.959       | 0.025054    | 1.959       | 0.025054 |        |
|           |                 | 0.025054 | 0.446131245 |             |             |             |          |        |
| NA        | ENSG00000253652 | 1.9588   | 0.025067    | 0.78657     | 0.21577     | -1.0341     | 0.84946  |        |
|           |                 | -1.5805  | 0.94301     | 0.025067    | 0.446131245 |             |          |        |
| DCAF1     | ENSG00000145041 | -0.43464 | 0.66809     | 0.32982     | 0.37077     | 1.9587      | 0.025073 |        |
|           |                 | 1.8493   | 0.032209    | 0.025073    | 0.446131245 |             |          |        |
| PPM1A     | ENSG00000100614 | 0.54119  | 0.29419     | 1.8085      | 0.035267    | 1.9587      | 0.025076 |        |
|           |                 | 1.429    | 0.076504    | 0.025076    | 0.446131245 |             |          |        |
| NA        | ENSG00000205485 | 0.81517  | 0.20749     | 1.9579      | 0.025121    | 1.4573      | 0.072515 |        |
|           |                 | 0.46613  | 0.32056     | 0.025121    | 0.446143145 |             |          |        |
| RNF157    | ENSG00000141576 | 1.9577   | 0.025132    | 0.51637     | 0.3028      | 1.2721      |          |        |
|           |                 | 0.10166  | 0.56899     | 0.28468     | 0.025132    | 0.446143145 |          |        |
| VINAC1P   | ENSG00000283698 | 1.4386   | 0.075134    | 1.9577      | 0.025132    | 0.4054      |          |        |
|           |                 | 0.34259  | 0.48064     | 0.31539     | 0.025132    | 0.446143145 |          |        |
| NAT14     | ENSG00000090971 | 1.9577   | 0.025134    | 1.9577      | 0.025134    | 1.9577      | 0.025134 |        |
|           |                 | 1.9577   | 0.025134    | 0.025134    | 0.446143145 |             |          |        |
| MLLT3     | ENSG00000171843 | 1.3574   | 0.087327    | -0.50632    | 0.69368     | 1.9574      | 0.025149 |        |
|           |                 | 0.38704  | 0.34936     | 0.025149    | 0.446143145 |             |          |        |
| RGR       | ENSG00000148604 | 1.9574   | 0.025152    | 1.9574      | 0.025152    | -0.32519    | 0.62748  |        |
|           |                 | 0.71431  | 0.23752     | 0.025152    | 0.446143145 |             |          |        |
| ADAM5     | ENSG00000196115 | 0.17111  | 0.43207     | 1.4006      | 0.080666    | 0.99839     | 0.15905  |        |
|           |                 | 1.9571   | 0.025165    | 0.025165    | 0.446143145 |             |          |        |
| RNU6-983P | ENSG00000251813 | 1.5922   | 0.055675    | 0.47928     | 0.31587     | 1.9571      |          |        |
|           |                 | 0.025168 | -1.5657     | 0.94129     | 0.025168    | 0.446143145 |          |        |
| RGS7BP    | ENSG00000186479 | 0.62636  | 0.26554     | 0.48033     | 0.3155      | 0.73134     |          |        |
|           |                 | 0.23229  | 1.9569      | 0.025178    | 0.025178    | 0.446143145 |          |        |
| NA        | ENSG00000253978 | 1.9569   | 0.025178    | 1.9569      | 0.025178    | 1.9569      | 0.025178 |        |
|           |                 | 1.9569   | 0.025178    | 0.025178    | 0.446143145 |             |          |        |
| OR4K7P    | ENSG00000265340 | 1.1406   | 0.12701     | 0.50182     | 0.3079      | 0.50182     |          |        |
|           |                 | 0.3079   | 1.9568      | 0.025188    | 0.025188    | 0.446143145 |          |        |
| PDIA5     | ENSG00000065485 | 1.9566   | 0.025196    | 0.038633    | 0.48459     | 1.0643      | 0.1436   |        |
|           |                 | 0.077607 | 0.46907     | 0.025196    | 0.446143145 |             |          |        |
| ADIG      | ENSG00000182035 | 1.9564   | 0.025206    | 1.0836      | 0.13926     | 1.0836      | 0.13926  |        |
|           |                 | 1.0836   | 0.13926     | 0.025206    | 0.446143145 |             |          |        |
| MGAT5     | ENSG00000152127 | 1.5194   | 0.064335    | 0.95047     | 0.17094     | 1.9563      | 0.025214 |        |
|           |                 | 0.62705  | 0.26531     | 0.025214    | 0.446143145 |             |          |        |
| NA        | ENSG00000266363 | 1.3853   | 0.082985    | 1.2603      | 0.10378     | 1.841       | 0.032812 |        |
|           |                 | 1.9563   | 0.025214    | 0.025214    | 0.446143145 |             |          |        |
| NA        | ENSG00000247970 | 1.9557   | 0.02525     | 1.9557      | 0.02525     | 1.252       | 0.10529  |        |
|           |                 | 0.50574  | 0.30652     | 0.02525     | 0.446455914 |             |          |        |
| NA        | ENSG00000227603 | 1.9557   | 0.02525     | 1.9557      | 0.02525     | 1.4884      | 0.068322 |        |
|           |                 | 0.24854  | 0.40186     | 0.02525     | 0.446455914 |             |          |        |
| PCSK4     | ENSG00000115257 | 1.0304   | 0.15141     | 1.8551      | 0.031789    | 1.9434      | 0.025983 |        |
|           |                 | 1.9552   | 0.02528     | 0.02528     | 0.44669461  |             |          |        |

|           |                 |             |             |             |             |           |          |       |
|-----------|-----------------|-------------|-------------|-------------|-------------|-----------|----------|-------|
| RNU2-62P  | ENSG00000222800 | -0.70269    | 0.75888     | 1.9552      | 0.025282    | -1.3067   |          |       |
|           | 0.90435         | -0.70269    | 0.75888     | 0.025282    | 0.44669461  |           |          |       |
| ELP4      | ENSG00000109911 | 0.22093     | 0.41257     | 1.1123      | 0.13301     | 1.955     | 0.025291 |       |
|           | 0.55625         | 0.28902     | 0.025291    | 0.44669461  |             |           |          |       |
| RNU6-835P | ENSG00000252783 | 1.9547      | 0.02531     | 1.9547      | 0.02531     | 1.9547    |          |       |
|           | 0.02531         | 1.9547      | 0.02531     | 0.02531     | 0.446868225 |           |          |       |
| RNU6-908P | ENSG00000222092 | 1.9538      | 0.025362    | 0.30581     | 0.37987     | 1.9538    |          |       |
|           | 0.025362        | 1.9538      | 0.025362    | 0.025362    | 0.447624143 |           |          |       |
| INTS7     | ENSG00000143493 | 0.9139      | 0.18038     | 0.68174     | 0.2477      | 1.9532    | 0.025397 |       |
|           | 1.3327          | 0.091322    | 0.025397    | 0.448079584 |             |           |          |       |
| LINC01674 | ENSG00000228159 | 1.104       | 0.13479     | 0.15477     | 0.4385      | 0.263     | 0.39627  |       |
|           | 1.9524          | 0.025445    | 0.025445    | 0.44876397  |             |           |          |       |
| PIGCP2    | ENSG00000229626 | 1.952       | 0.025467    | 1.4013      | 0.080556    | 1.4013    | 0.080556 |       |
|           | 1.952           | 0.025467    | 0.025467    | 0.448989475 |             |           |          |       |
| TDRD9     | ENSG00000156414 | 0.91703     | 0.17956     | 1.9518      | 0.025484    | 0.65516   | 0.25618  |       |
|           | -0.1865         | 0.57397     | 0.025484    | 0.449048623 |             |           |          |       |
| KCNA7     | ENSG00000104848 | 1.7725      | 0.038153    | 1.7725      | 0.038153    | 1.9516    | 0.025493 |       |
|           | 0.16109         | 0.43601     | 0.025493    | 0.449048623 |             |           |          |       |
| NA        | ENSG00000231724 | -0.078759   | 0.53139     | 1.148       | 0.12549     | -1.3598   | 0.91305  |       |
|           | 1.9515          | 0.025498    | 0.025498    | 0.449048623 |             |           |          |       |
| NA        | ENSG00000235111 | -2.0858     | 0.9815      | 0.35504     | 0.36128     | 1.9514    | 0.025508 |       |
|           | -0.43254        | 0.66733     | 0.025508    | 0.449062442 |             |           |          |       |
| TTL7-IT1  | ENSG00000233061 | 0.47685     | 0.31674     | 1.9509      | 0.025534    | 0.26683   |          |       |
|           | 0.3948          | 0.52264     | 0.30061     | 0.025534    | 0.449170357 |           |          |       |
| NA        | ENSG00000231923 | 0.81791     | 0.2067      | -1.5374     | 0.9379      | 1.9508    | 0.025541 |       |
|           | -0.61736        | 0.7315      | 0.025541    | 0.449170357 |             |           |          |       |
| RPS2P2    | ENSG00000177776 | -1.3538     | 0.91209     | 0.016207    | 0.49353     | -0.38525  |          |       |
|           | 0.64997         | 1.9506      | 0.025551    | 0.025551    | 0.449170357 |           |          |       |
| NA        | ENSG00000220702 | 1.9506      | 0.025551    | 1.9506      | 0.025551    | 1.7364    | 0.041247 |       |
|           | 1.9506          | 0.025551    | 0.025551    | 0.449170357 |             |           |          |       |
| NA        | ENSG00000253198 | 0.37007     | 0.35566     | -0.40232    | 0.65628     | 0.3921    | 0.34749  |       |
|           | 1.9503          | 0.025568    | 0.025568    | 0.449268115 |             |           |          |       |
| NA        | ENSG00000225643 | -0.70965    | 0.76104     | -0.70965    | 0.76104     | 1.9502    | 0.025575 |       |
|           | 0.17637         | 0.43        | 0.025575    | 0.449268115 |             |           |          |       |
| MIS12     | ENSG00000167842 | 0.95331     | 0.17022     | 1.3737      | 0.084761    | 1.9497    | 0.025605 |       |
|           | 1.3737          | 0.084761    | 0.025605    | 0.449433934 |             |           |          |       |
| FAT3      | ENSG00000165323 | 1.9497      | 0.025608    | 1.3388      | 0.090315    | 1.7773    | 0.037763 |       |
|           | 0.57163         | 0.28379     | 0.025608    | 0.449433934 |             |           |          |       |
| TBX3      | ENSG00000135111 | 1.9493      | 0.025631    | 0.15697     | 0.43763     | 0.73092   | 0.23242  |       |
|           | 0.44639         | 0.32766     | 0.025631    | 0.449433934 |             |           |          |       |
| NA        | ENSG00000241020 | 1.949       | 0.025647    | 1.949       | 0.025647    | 1.949     | 0.025647 |       |
|           | 0.025647        | 0.449433934 |             |             |             |           |          |       |
| NA        | ENSG00000259402 | 1.949       | 0.025647    | 1.949       | 0.025647    | 1.949     | 0.025647 |       |
|           | 0.025647        | 0.449433934 |             |             |             |           |          |       |
| SMIM4     | ENSG00000168273 | 1.6319      | 0.051353    | 1.5371      | 0.062134    | 1.949     | 0.025648 | 1.949 |
|           | 0.025648        | 0.025648    | 0.449433934 |             |             |           |          |       |
| BTN1A1    | ENSG00000124557 | 1.8022      | 0.035759    | 1.804       | 0.035616    | 1.949     | 0.025649 |       |
|           | 1.0626          | 0.14398     | 0.025649    | 0.449433934 |             |           |          |       |
| SLC38A4   | ENSG00000139209 | 1.9483      | 0.025691    | 0.5836      | 0.27974     | -0.26539  |          |       |
|           | 0.60464         | 0.95824     | 0.16897     | 0.025691    | 0.449881383 |           |          |       |
| NA        | ENSG00000235426 | 1.6465      | 0.049827    | 1.9482      | 0.025693    | 1.3525    | 0.088107 |       |
|           | 1.1824          | 0.11853     | 0.025693    | 0.449881383 |             |           |          |       |
| NA        | ENSG00000238031 | 1.0944      | 0.13689     | -0.061889   | 0.52467     | -0.54827  | 0.70825  |       |
|           | 1.9476          | 0.025729    | 0.025729    | 0.450205709 |             |           |          |       |
| SNORA70E  | ENSG00000207221 | 1.1763      | 0.11975     | 1.1763      | 0.11975     | 1.1763    |          |       |
|           | 0.11975         | 1.9476      | 0.02573     | 0.02573     | 0.450205709 |           |          |       |
| AKAP6     | ENSG00000151320 | -0.20789    | 0.58234     | 1.9474      | 0.025745    | 1.0587    | 0.14486  |       |
|           | 0.64538         | 0.25934     | 0.025745    | 0.450302268 |             |           |          |       |
| NA        | ENSG00000261012 | 1.9472      | 0.025754    | 1.3567      | 0.087439    | 1.9472    | 0.025754 |       |
|           | 1.9472          | 0.025754    | 0.025754    | 0.450302268 |             |           |          |       |
| ITGB4     | ENSG00000132470 | 1.1633      | 0.12235     | 1.947       | 0.025768    | -0.038568 | 0.51538  |       |
|           | 1.5829          | 0.056727    | 0.025768    | 0.450385452 |             |           |          |       |

|            |                 |           |          |           |             |             |          |        |
|------------|-----------------|-----------|----------|-----------|-------------|-------------|----------|--------|
| SLC25A14P1 | ENSG00000213608 | 1.9466    | 0.025789 | 1.9466    | 0.025789    | 1.9466      | 0.025789 | 1.9466 |
|            |                 | 0.025789  | 1.9466   | 0.025789  | 0.025789    | 0.450534176 |          |        |
| ANKDD1A    | ENSG00000166839 | 1.1478    | 0.12552  | 1.9465    | 0.025795    | 0.56162     |          |        |
|            |                 | 0.28719   | 1.2946   | 0.097728  | 0.025795    | 0.450534176 |          |        |
| IFITM9P    | ENSG00000213275 | 1.7375    | 0.04115  | 0.31388   | 0.37681     | 1.9463      |          |        |
|            |                 | 0.025809  | 0.91635  | 0.17974   | 0.025809    | 0.450617187 |          |        |
| NA         | ENSG00000214942 | 1.9458    | 0.025837 | 1.9458    | 0.025837    | 1.9458      | 0.025837 |        |
|            |                 | 1.9458    | 0.025837 | 0.025837  | 0.450656575 |             |          |        |
| NA         | ENSG00000258125 | 1.1789    | 0.11922  | 1.1789    | 0.11922     | 1.9458      | 0.025838 |        |
|            |                 | 0.87135   | 0.19178  | 0.025838  | 0.450656575 |             |          |        |
| FAM90A1    | ENSG00000171847 | 1.079     | 0.14029  | 1.5406    | 0.061708    | 0.21145     | 0.41627  |        |
|            |                 | 1.9458    | 0.025839 | 0.025839  | 0.450656575 |             |          |        |
| EEF1A1P28  | ENSG00000237709 | 1.9455    | 0.025857 | -0.17235  | 0.56842     | -0.23364    |          |        |
|            |                 | 0.59237   | -0.23364 | 0.59237   | 0.025857    | 0.450809163 |          |        |
| MYH7       | ENSG00000092054 | 0.95435   | 0.16995  | 1.5764    | 0.057468    | 1.4424      | 0.074588 |        |
|            |                 | 1.9453    | 0.02587  | 0.02587   | 0.450874499 |             |          |        |
| RPL13AP5   | ENSG00000236552 | 1.9447    | 0.025904 | 1.7685    | 0.03849     | 1.9447      |          |        |
|            |                 | 0.025904  | 1.9447   | 0.025904  | 0.025904    | 0.451282174 |          |        |
| NA         | ENSG00000232748 | 1.9443    | 0.025929 | 1.7745    | 0.037994    | 1.9443      | 0.025929 |        |
|            |                 | 1.117     | 0.13201  | 0.025929  | 0.451282174 |             |          |        |
| NA         | ENSG00000278745 | 1.9441    | 0.025941 | 1.9441    | 0.025941    | 1.9441      | 0.025941 |        |
|            |                 | 1.9441    | 0.025941 | 0.025941  | 0.451282174 |             |          |        |
| NA         | ENSG00000258386 | 1.0098    | 0.15629  | -0.60767  | 0.7283      | 1.9441      | 0.025943 |        |
|            |                 | 1.9441    | 0.025943 | 0.025943  | 0.451282174 |             |          |        |
| NA         | ENSG00000254645 | 1.9439    | 0.025952 | 1.1345    | 0.1283      | 1.4042      | 0.080132 |        |
|            |                 | 1.2104    | 0.11306  | 0.025952  | 0.451282174 |             |          |        |
| RPS29P29   | ENSG00000233717 | 0.95949   | 0.16866  | 1.9439    | 0.025955    | 1.9439      |          |        |
|            |                 | 0.025955  | 1.9439   | 0.025955  | 0.025955    | 0.451282174 |          |        |
| NA         | ENSG00000230728 | 1.0178    | 0.1544   | 0.045471  | 0.48187     | 1.9437      | 0.025968 |        |
|            |                 | 1.9437    | 0.025968 | 0.025968  | 0.451282174 |             |          |        |
| SEPTIN7P7  | ENSG00000229897 | 1.9436    | 0.025971 | 1.9436    | 0.025971    | 1.9436      |          |        |
|            |                 | 0.025971  | 1.8204   | 0.034347  | 0.025971    | 0.451282174 |          |        |
| KIAA0895   | ENSG00000164542 | -1.3499   | 0.91148  | 1.9435    | 0.025978    | -1.3338     |          |        |
|            |                 | 0.90886   | -0.69196 | 0.75552   | 0.025978    | 0.451282174 |          |        |
| NA         | ENSG00000278514 | 1.9434    | 0.025986 | 1.9434    | 0.025986    | 1.9434      | 0.025986 |        |
|            |                 | 1.9434    | 0.025986 | 0.025986  | 0.451282174 |             |          |        |
| TEX101     | ENSG00000131126 | -0.079334 | 0.53162  | 1.4328    | 0.075954    | 0.82225     |          |        |
|            |                 | 0.20547   | 1.943    | 0.02601   | 0.02601     | 0.451538048 |          |        |
| PPFIBP2    | ENSG00000166387 | 1.9425    | 0.026038 | 0.081862  | 0.46738     | 0.88198     |          |        |
|            |                 | 0.18889   | 0.43756  | 0.33085   | 0.026038    | 0.451863155 |          |        |
| NA         | ENSG00000253215 | 1.9423    | 0.026048 | -1.3696   | 0.9146      | -1.3696     | 0.9146   |        |
|            |                 | -1.3696   | 0.9146   | 0.026048  | 0.451875771 |             |          |        |
| RPS3AP28   | ENSG00000234995 | -0.085876 | 0.53422  | -0.085876 | 0.53422     | -1.5538     |          |        |
|            |                 | 0.93988   | 1.942    | 0.026066  | 0.026066    | 0.451924226 |          |        |
| BBS4       | ENSG00000140463 | 0.37878   | 0.35243  | 1.0676    | 0.14285     | 1.0394      | 0.1493   |        |
|            |                 | 1.9419    | 0.026075 | 0.026075  | 0.451924226 |             |          |        |
| CHDH       | ENSG00000016391 | 1.9416    | 0.026092 | 0.87894   | 0.18972     | 1.4514      | 0.073328 |        |
|            |                 | 0.28342   | 0.38843  | 0.026092  | 0.451924226 |             |          |        |
| NA         | ENSG00000266368 | 0.23383   | 0.40756  | -1.4177   | 0.92187     | 1.9414      | 0.026106 |        |
|            |                 | -1.4177   | 0.92187  | 0.026106  | 0.451924226 |             |          |        |
| RPL22P13   | ENSG00000242670 | 1.9413    | 0.02611  | -0.71744  | 0.76345     | 1.3095      |          |        |
|            |                 | 0.095182  | 0.8016   | 0.21139   | 0.02611     | 0.451924226 |          |        |
| RCC1L      | ENSG00000274523 | 1.9412    | 0.026119 | 0.83497   | 0.20187     | 0.8767      | 0.19033  |        |
|            |                 | 0.3904    | 0.34812  | 0.026119  | 0.451924226 |             |          |        |
| NA         | ENSG00000254115 | 1.9411    | 0.026126 | 0.24062   | 0.40492     | 0.17531     | 0.43042  |        |
|            |                 | -0.91126  | 0.81892  | 0.026126  | 0.451924226 |             |          |        |
| NA         | ENSG00000270705 | 1.0672    | 0.14293  | 1.2888    | 0.098727    | 1.0672      | 0.14293  |        |
|            |                 | 1.941     | 0.026129 | 0.026129  | 0.451924226 |             |          |        |
| LRRC25     | ENSG00000175489 | -0.10329  | 0.54113  | 1.9408    | 0.02614     | 0.10596     |          |        |
|            |                 | 0.45781   | 1.1785   | 0.1193    | 0.02614     | 0.451924226 |          |        |
| NA         | ENSG00000265815 | 1.9405    | 0.026162 | 1.9405    | 0.026162    | 1.9405      | 0.026162 |        |
|            |                 | 1.9405    | 0.026162 | 0.026162  | 0.451924226 |             |          |        |

|             |                 |           |             |             |             |           |          |
|-------------|-----------------|-----------|-------------|-------------|-------------|-----------|----------|
| NA          | ENSG00000234509 | 1.9403    | 0.02617     | 1.5979      | 0.055034    | 1.9403    | 0.02617  |
|             | 1.5053          | 0.066124  | 0.02617     | 0.451924226 |             |           |          |
| LINC02383   | ENSG00000248143 | 1.4709    | 0.070663    | 1.9403      | 0.026172    | 0.0095872 |          |
|             | 0.49618         | 0.32896   | 0.37109     | 0.026172    | 0.451924226 |           |          |
| NA          | ENSG00000238221 | 1.9403    | 0.026173    | 0.1069      | 0.45743     | 0.1069    | 0.45743  |
|             | -1.1081         | 0.86608   | 0.026173    | 0.451924226 |             |           |          |
| ADAMTS7P1   | ENSG00000274376 | 0.52904   | 0.29839     | -0.44146    | 0.67056     | 0.61831   |          |
|             | 0.26819         | 1.9401    | 0.026185    | 0.026185    | 0.451924226 |           |          |
| CHSY1       | ENSG00000131873 | 1.9398    | 0.026201    | 0.72044     | 0.23563     | -0.47553  | 0.68279  |
|             | -0.1694         | 0.56726   | 0.026201    | 0.451924226 |             |           |          |
| LINC01423   | ENSG00000231231 | -0.016471 | 0.50657     | -0.48097    | 0.68473     | -0.621    |          |
|             | 0.7327          | 1.9396    | 0.026217    | 0.026217    | 0.451924226 |           |          |
| NDUFAF6     | ENSG00000156170 | 1.9395    | 0.026219    | 1.5099      | 0.06553     | 1.7574    |          |
|             | 0.039427        | 1.3978    | 0.081087    | 0.026219    | 0.451924226 |           |          |
| NA          | ENSG00000254810 | 1.9395    | 0.026219    | 1.9395      | 0.026219    | 1.9395    | 0.026219 |
|             | 1.9395          | 0.026219  | 0.026219    | 0.451924226 |             |           |          |
| NA          | ENSG00000274292 | 1.5496    | 0.060622    | 1.9394      | 0.026227    | 1.8922    | 0.029234 |
|             | 1.8922          | 0.029234  | 0.026227    | 0.451924226 |             |           |          |
| NA          | ENSG00000265552 | 1.33      | 0.09176     | 1.33        | 0.09176     | 1.9389    | 0.026254 |
|             | 0.09176         | 0.026254  | 0.452229558 |             |             |           |          |
| NA          | ENSG00000257817 | 0.8805    | 0.18929     | 1.294       | 0.097826    | 1.9387    | 0.026271 |
|             | 0.096294        | 0.026271  | 0.452362484 |             |             |           | 1.303    |
| NA          | ENSG00000260725 | -0.036629 | 0.51461     | -0.65295    | 0.74311     | 1.3022    | 0.096429 |
|             | 1.9384          | 0.026286  | 0.026286    | 0.452387677 |             |           |          |
| RN7SL491P   | ENSG00000264400 | 1.9377    | 0.026332    | 1.9377      | 0.026332    | 1.9377    |          |
|             | 0.026332        | 1.9377    | 0.026332    | 0.026332    | 0.452387677 |           |          |
| RNU6-1096P  | ENSG00000252898 | 1.9376    | 0.026337    | -0.31953    | 0.62534     | 1.2613    |          |
|             | 0.1036          | -0.31953  | 0.62534     | 0.026337    | 0.452387677 |           |          |
| EHD2        | ENSG00000024422 | 1.9375    | 0.026342    | -1.2585     | 0.8959      | -1.4024   | 0.91961  |
|             | -0.32958        | 0.62914   | 0.026342    | 0.452387677 |             |           |          |
| FADS6       | ENSG00000172782 | 0.23709   | 0.40629     | 0.23709     | 0.40629     | 0.23709   | 0.40629  |
|             | 1.9371          | 0.026364  | 0.026364    | 0.452387677 |             |           |          |
| ARF4        | ENSG00000168374 | 1.9371    | 0.026369    | -0.41153    | 0.65966     | -0.55788  | 0.71154  |
|             | -0.73154        | 0.76777   | 0.026369    | 0.452387677 |             |           |          |
| NA          | ENSG00000266411 | 1.937     | 0.026375    | 1.0351      | 0.15031     | 0.0303    | 0.48791  |
|             | 1.8394          | 0.032928  | 0.026375    | 0.452387677 |             |           |          |
| TFF1        | ENSG00000160182 | -0.041885 | 0.5167      | 0.39823     | 0.34523     | 1.9369    | 0.026377 |
|             | -0.012165       | 0.50485   | 0.026377    | 0.452387677 |             |           |          |
| RBBP5       | ENSG00000117222 | 1.858     | 0.031582    | 1.9368      | 0.026386    | 1.9368    | 0.026386 |
|             | 1.6406          | 0.050441  | 0.026386    | 0.452387677 |             |           |          |
| SOD1        | ENSG00000142168 | 0.90907   | 0.18166     | 1.9368      | 0.026387    | 0.056677  | 0.4774   |
|             | -1.2792         | 0.89959   | 0.026387    | 0.452387677 |             |           |          |
| SLC22A12    | ENSG00000197891 | 1.4419    | 0.074671    | 1.8131      | 0.034911    | 1.8763    |          |
|             | 0.030304        | 1.9368    | 0.026387    | 0.026387    | 0.452387677 |           |          |
| PTPN7       | ENSG00000143851 | 0.29396   | 0.3844      | 0.51054     | 0.30484     | -0.45825  | 0.67661  |
|             | 1.9365          | 0.026404  | 0.026404    | 0.452387677 |             |           |          |
| COLEC12     | ENSG00000158270 | 1.9364    | 0.026411    | 1.2792      | 0.10041     | 0.64643   | 0.259    |
|             | 0.82936         | 0.20345   | 0.026411    | 0.452387677 |             |           |          |
| SHE         | ENSG00000169291 | 1.7538    | 0.039734    | 1.4431      | 0.074502    | 1.9364    | 0.026412 |
|             | 1.5836          | 0.056644  | 0.026412    | 0.452387677 |             |           |          |
| NA          | ENSG00000228361 | 1.9364    | 0.026412    | 0.25317     | 0.40007     | -0.91681  | 0.82038  |
|             | -0.91681        | 0.82038   | 0.026412    | 0.452387677 |             |           |          |
| HNF4A-AS1   | ENSG00000229005 | -1.1128   | 0.86711     | 1.9362      | 0.026421    | 1.0889    |          |
|             | 0.13809         | 0.42192   | 0.33654     | 0.026421    | 0.452387677 |           |          |
| COX14       | ENSG00000178449 | 1.6806    | 0.046417    | 1.0689      | 0.14257     | 1.0689    | 0.14257  |
|             | 1.9358          | 0.026446  | 0.026446    | 0.452473385 |             |           |          |
| CTSE        | ENSG00000196188 | -0.97181  | 0.83443     | -0.44568    | 0.67209     | -0.51964  | 0.69834  |
|             | 1.9356          | 0.02646   | 0.02646     | 0.452473385 |             |           |          |
| C5orf34-AS1 | ENSG00000248554 | 1.9352    | 0.026482    | 1.9352      | 0.026482    | 1.9352    |          |
|             | 0.026482        | 1.9352    | 0.026482    | 0.026482    | 0.452473385 |           |          |
| CWF19L1     | ENSG00000095485 | 1.1459    | 0.12592     | 1.3337      | 0.091152    | 1.3337    |          |
|             | 0.091152        | 1.9352    | 0.026485    | 0.026485    | 0.452473385 |           |          |

|          |                 |          |          |            |             |             |          |
|----------|-----------------|----------|----------|------------|-------------|-------------|----------|
| NA       | ENSG00000225243 | 1.8621   | 0.031298 | -1.0945    | 0.86313     | 1.935       | 0.026493 |
|          |                 | -0.51276 | 0.69594  | 0.026493   | 0.452473385 |             |          |
| DEK      | ENSG00000124795 | 1.7185   | 0.042856 | 0.75379    | 0.22549     | 0.61124     | 0.27052  |
|          |                 | 1.9349   | 0.026501 | 0.026501   | 0.452473385 |             |          |
| ASB3     | ENSG00000115239 | 0.61874  | 0.26804  | 1.9346     | 0.026517    | -0.16257    | 0.56457  |
|          |                 | -0.41584 | 0.66124  | 0.026517   | 0.452473385 |             |          |
| TCF25    | ENSG00000141002 | 1.2615   | 0.10357  | 1.4027     | 0.08036     | 1.9344      | 0.026531 |
|          |                 | 1.5946   | 0.055401 | 0.026531   | 0.452473385 |             |          |
| NFAT5    | ENSG00000102908 | 1.4993   | 0.066904 | 0.83731    | 0.20121     | 1.5652      | 0.058772 |
|          |                 | 1.9343   | 0.026536 | 0.026536   | 0.452473385 |             |          |
| RPL36    | ENSG00000130255 | -0.48038 | 0.68452  | 1.9342     | 0.026542    | -0.51455    | 0.69657  |
|          |                 | -0.39075 | 0.65201  | 0.026542   | 0.452473385 |             |          |
| NA       | ENSG00000264281 | 1.9342   | 0.026543 | 1.9342     | 0.026543    | 1.9342      | 0.026543 |
|          |                 | 1.9342   | 0.026543 | 0.026543   | 0.452473385 |             |          |
| NFU1P2   | ENSG00000233557 | 1.9341   | 0.026552 | 1.9341     | 0.026552    | 1.9341      |          |
|          |                 | 0.026552 | 0.9583   | 0.16896    | 0.026552    | 0.452473385 |          |
| NA       | ENSG00000270387 | 0.014401 | 0.49426  | 0.014401   | 0.49426     | 1.7591      | 0.039279 |
|          |                 | 1.934    | 0.026555 | 0.026555   | 0.452473385 |             |          |
| NA       | ENSG00000241317 | 1.934    | 0.026556 | 1.2058     | 0.11394     | -1.0813     | 0.86023  |
|          |                 | -1.0813  | 0.86023  | 0.026556   | 0.452473385 |             |          |
| C18orf25 | ENSG00000152242 | 1.6927   | 0.045253 | -0.33033   | 0.62943     | 1.9335      |          |
|          |                 | 0.02659  | 1.6078   | 0.053935   | 0.02659     | 0.45267427  |          |
| NISCH    | ENSG00000010322 | 1.9334   | 0.026591 | 1.8072     | 0.035363    | 1.6824      | 0.046245 |
|          |                 | 1.4093   | 0.079366 | 0.026591   | 0.45267427  |             |          |
| BEND5    | ENSG00000162373 | 1.193    | 0.11643  | 1.933      | 0.026617    | 1.1053      | 0.13452  |
|          |                 | 0.13452  | 0.026617 | 0.45267427 |             |             |          |
| NA       | ENSG00000254362 | 0.84327  | 0.19954  | 0.92647    | 0.1771      | 1.9327      | 0.026637 |
|          |                 | 1.4215   | 0.077589 | 0.026637   | 0.45267427  |             |          |
| NA       | ENSG00000268803 | 1.9327   | 0.026637 | 1.9327     | 0.026637    | 1.9327      | 0.026637 |
|          |                 | 1.9327   | 0.026637 | 0.026637   | 0.45267427  |             |          |
| GPX4     | ENSG00000167468 | 1.9327   | 0.026638 | 1.9327     | 0.026638    | 1.9327      | 0.026638 |
|          |                 | 1.9327   | 0.026638 | 0.026638   | 0.45267427  |             |          |
| VPS50    | ENSG00000004766 | 1.9325   | 0.026647 | 1.7996     | 0.03596     | 0.34869     | 0.36366  |
|          |                 | 0.34869  | 0.36366  | 0.026647   | 0.45267427  |             |          |
| NA       | ENSG00000202248 | 1.9324   | 0.026655 | 1.9324     | 0.026655    | 1.9324      | 0.026655 |
|          |                 | 1.9324   | 0.026655 | 0.026655   | 0.45267427  |             |          |
| ABO      | ENSG00000175164 | 1.9322   | 0.026664 | 0.71492    | 0.23733     | 1.0111      | 0.15598  |
|          |                 | 1.7354   | 0.041336 | 0.026664   | 0.45267427  |             |          |
| NA       | ENSG00000280371 | -1.4179  | 0.92189  | 0.87107    | 0.19186     | 1.9321      | 0.026676 |
|          |                 | 0.34973  | 0.36327  | 0.026676   | 0.45267427  |             |          |
| CNTN3    | ENSG00000113805 | 1.9089   | 0.02814  | 1.9319     | 0.026684    | -0.52219    | 0.69923  |
|          |                 | -1.0936  | 0.86293  | 0.026684   | 0.45267427  |             |          |
| TSHR     | ENSG00000165409 | 1.9317   | 0.026697 | 1.52       | 0.064261    | 0.70909     | 0.23913  |
|          |                 | 0.90211  | 0.1835   | 0.026697   | 0.45267427  |             |          |
| NA       | ENSG00000254131 | 1.0706   | 0.14218  | 1.0706     | 0.14218     | 1.0706      | 0.14218  |
|          |                 | 1.9316   | 0.026706 | 0.026706   | 0.45267427  |             |          |
| NDUFB4P3 | ENSG00000231096 | 1.9314   | 0.026716 | 1.9314     | 0.026716    | 1.9314      |          |
|          |                 | 0.026716 | 1.9314   | 0.026716   | 0.026716    | 0.45267427  |          |
| OR7A10   | ENSG00000127515 | 0.372    | 0.35495  | 1.9313     | 0.026726    | -0.0029501  | 0.50118  |
|          |                 | 0.372    | 0.35495  | 0.026726   | 0.45267427  |             |          |
| ATG10    | ENSG00000152348 | 0.80216  | 0.21123  | 1.0809     | 0.13986     | 0.99657     | 0.15949  |
|          |                 | 1.9312   | 0.02673  | 0.02673    | 0.45267427  |             |          |
| UBE2D3   | ENSG00000109332 | 1.6175   | 0.052888 | 1.2137     | 0.11243     | 1.9311      |          |
|          |                 | 0.026734 | 1.4974   | 0.067139   | 0.026734    | 0.45267427  |          |
| NA       | ENSG00000246089 | 1.3246   | 0.092647 | 1.2795     | 0.10036     | 1.9311      | 0.026735 |
|          |                 | 1.9311   | 0.026735 | 0.026735   | 0.45267427  |             |          |
| SERPINB6 | ENSG00000124570 | -0.42011 | 0.6628   | 0.29607    | 0.38359     | 0.62767     |          |
|          |                 | 0.26511  | 1.9309   | 0.026749   | 0.026749    | 0.452754001 |          |
| NA       | ENSG00000279251 | 1.9303   | 0.026782 | 1.9303     | 0.026782    | 1.9303      | 0.026782 |
|          |                 | 1.9303   | 0.026782 | 0.026782   | 0.453043588 |             |          |
| NA       | ENSG00000244740 | 1.4612   | 0.071978 | 1.4612     | 0.071978    | 1.4612      | 0.071978 |
|          |                 | 1.9301   | 0.026794 | 0.026794   | 0.453043588 |             |          |

|           |                 |           |          |             |             |             |          |        |
|-----------|-----------------|-----------|----------|-------------|-------------|-------------|----------|--------|
| RNA5SP460 | ENSG00000252598 | 1.9301    | 0.026794 | 1.9301      | 0.026794    | 1.9301      | 0.026794 | 1.9301 |
|           |                 | 0.026794  | 1.9301   | 0.026794    | 0.026794    | 0.453043588 |          |        |
| BRCA2     | ENSG00000139618 | 1.9296    | 0.026826 | 0.98387     | 0.16259     | 1.8752      | 0.030382 |        |
|           |                 | 1.7369    | 0.041202 | 0.026826    | 0.453248118 |             |          |        |
| RPL12P26  | ENSG00000236171 | 0.54225   | 0.29382  | 1.9296      | 0.026829    | 0.14038     |          |        |
|           |                 | 0.44418   | 0.14038  | 0.44418     | 0.026829    | 0.453248118 |          |        |
| NA        | ENSG00000230160 | 1.9295    | 0.026834 | 0.43751     | 0.33087     | 1.1499      | 0.1251   |        |
|           |                 | 1.9295    | 0.026834 | 0.026834    | 0.453248118 |             |          |        |
| SRP68     | ENSG00000167881 | 0.25141   | 0.40075  | 1.9292      | 0.026855    | 1.9292      | 0.026855 |        |
|           |                 | -0.29577  | 0.6163   | 0.026855    | 0.453445651 |             |          |        |
| RET       | ENSG00000165731 | -0.9515   | 0.82933  | 0.1052      | 0.45811     | 1.65        | 0.049476 |        |
|           |                 | 1.9285    | 0.026895 | 0.026895    | 0.453627401 |             |          |        |
| NRXN2     | ENSG00000110076 | 1.4374    | 0.075299 | 0.93978     | 0.17366     | 0.80894     | 0.20928  |        |
|           |                 | 1.9285    | 0.026898 | 0.026898    | 0.453627401 |             |          |        |
| ZNF124    | ENSG00000196418 | 0.78987   | 0.2148   | 0.54768     | 0.29196     | 1.9284      |          |        |
|           |                 | 0.026903  | 1.7033   | 0.044255    | 0.026903    | 0.453627401 |          |        |
| LINC01923 | ENSG00000236653 | 0.37499   | 0.35384  | 1.2025      | 0.11459     | 1.9284      |          |        |
|           |                 | 0.026903  | 1.2078   | 0.11357     | 0.026903    | 0.453627401 |          |        |
| TRH       | ENSG00000170893 | 1.9281    | 0.026922 | 1.9281      | 0.026922    | 1.9281      | 0.026922 |        |
|           |                 | 1.9281    | 0.026922 | 0.026922    | 0.453790751 |             |          |        |
| RPL35AP30 | ENSG00000226729 | 1.9273    | 0.026973 | 1.9273      | 0.026973    | 1.9273      |          |        |
|           |                 | 0.026973  | 1.9273   | 0.026973    | 0.026973    | 0.45401154  |          |        |
| NA        | ENSG00000225879 | 0.96556   | 0.16713  | 0.72252     | 0.23499     | 0.53141     | 0.29757  |        |
|           |                 | 1.9272    | 0.026977 | 0.026977    | 0.45401154  |             |          |        |
| LIPG      | ENSG00000101670 | 0.25151   | 0.40071  | 1.7255      | 0.042222    | 1.9272      | 0.02698  |        |
|           |                 | 0.084944  | 0.46615  | 0.02698     | 0.45401154  |             |          |        |
| HELZ2     | ENSG00000130589 | 0.95151   | 0.17067  | 0.88289     | 0.18865     | 1.9271      | 0.026981 |        |
|           |                 | 0.45175   | 0.32572  | 0.026981    | 0.45401154  |             |          |        |
| PBX4      | ENSG00000105717 | 1.9271    | 0.026985 | 0.4183      | 0.33786     | 1.9271      | 0.026985 |        |
|           |                 | -0.082992 | 0.53307  | 0.026985    | 0.45401154  |             |          |        |
| RNU6-465P | ENSG00000207149 | 0.70852   | 0.23931  | 0.00623     | 0.49751     | 1.927       | 0.026991 |        |
|           |                 | 1.0353    | 0.15027  | 0.026991    | 0.45401154  |             |          |        |
| NA        | ENSG00000252115 | 1.9264    | 0.027028 | 1.9264      | 0.027028    | 1.9264      | 0.027028 |        |
|           |                 | 1.9264    | 0.027028 | 0.027028    | 0.454136761 |             |          |        |
| NA        | ENSG00000257078 | 1.9263    | 0.027032 | 1.7561      | 0.039534    | 0.18437     | 0.42686  |        |
|           |                 | 1.4705    | 0.070719 | 0.027032    | 0.454136761 |             |          |        |
| SSMEM1    | ENSG00000165120 | 1.9262    | 0.027041 | 1.9262      | 0.027041    | 1.9262      |          |        |
|           |                 | 0.027041  | 1.9262   | 0.027041    | 0.027041    | 0.454136761 |          |        |
| TUBA1A    | ENSG00000167552 | 1.6083    | 0.053884 | 1.6083      | 0.053884    | 1.1673      |          |        |
|           |                 | 0.12155   | 1.9261   | 0.027044    | 0.027044    | 0.454136761 |          |        |
| PHC2-AS1  | ENSG00000233246 | 1.926     | 0.027051 | 1.926       | 0.027051    | 1.926       | 0.027051 | 1.926  |
|           |                 | 0.027051  | 0.027051 | 0.454136761 |             |             |          |        |
| ZXDC      | ENSG00000070476 | 1.9259    | 0.027056 | -0.14862    | 0.55907     | 0.044838    | 0.48212  |        |
|           |                 | 0.28525   | 0.38772  | 0.027056    | 0.454136761 |             |          |        |
| ARMC2     | ENSG00000118690 | 0.10922   | 0.45651  | 1.5656      | 0.058725    | 1.9258      | 0.027065 |        |
|           |                 | 0.79255   | 0.21402  | 0.027065    | 0.454136761 |             |          |        |
| NA        | ENSG00000225208 | 1.9257    | 0.027073 | 1.8498      | 0.03217     | 1.9119      | 0.027943 |        |
|           |                 | 1.0567    | 0.14532  | 0.027073    | 0.454136761 |             |          |        |
| TMEM239   | ENSG00000198326 | 1.8041    | 0.035608 | 1.9254      | 0.027092    | -0.1347     |          |        |
|           |                 | 0.55358   | 1.8041   | 0.035608    | 0.027092    | 0.454299092 |          |        |
| CIBAR1P2  | ENSG00000230219 | 1.9249    | 0.027119 | -0.47871    | 0.68393     | 0.36146     |          |        |
|           |                 | 0.35888   | 0.81773  | 0.20676     | 0.027119    | 0.454534142 |          |        |
| NPIPP1    | ENSG00000188599 | 0.7234    | 0.23472  | -1.7284     | 0.95804     | 1.9247      |          |        |
|           |                 | 0.027132  | 0.33579  | 0.36852     | 0.027132    | 0.454534142 |          |        |
| MAGEL2    | ENSG00000254585 | -0.26471  | 0.60439  | -0.23678    | 0.59359     | -1.0526     |          |        |
|           |                 | 0.85373   | 1.9247   | 0.027134    | 0.027134    | 0.454534142 |          |        |
| NA        | ENSG00000270302 | 0.27118   | 0.39313  | 0.2825      | 0.38878     | 0.56642     | 0.28555  |        |
|           |                 | 1.9243    | 0.027158 | 0.027158    | 0.454657094 |             |          |        |
| NA        | ENSG00000229960 | 0.67034   | 0.25132  | 1.9243      | 0.02716     | 0.67034     | 0.25132  |        |
|           |                 | 0.67034   | 0.25132  | 0.02716     | 0.454657094 |             |          |        |
| GJB5      | ENSG00000189280 | 1.9237    | 0.027193 | 1.6804      | 0.046442    | -0.11866    | 0.54723  |        |
|           |                 | 1.1995    | 0.11517  | 0.027193    | 0.454980446 |             |          |        |

|          |                 |             |          |             |             |          |          |  |
|----------|-----------------|-------------|----------|-------------|-------------|----------|----------|--|
| ADGRF5   | ENSG00000069122 | -1.1032     | 0.86503  | 1.9236      | 0.027204    | 0.21981  |          |  |
|          | 0.41301         | -0.99319    | 0.83969  | 0.027204    | 0.454980446 |          |          |  |
| NA       | ENSG00000225676 | 1.9234      | 0.027216 | 1.9234      | 0.027216    | 0.78457  | 0.21635  |  |
|          | 1.9234          | 0.027216    | 0.027216 | 0.454980446 |             |          |          |  |
| CILK1    | ENSG00000112144 | 0.29387     | 0.38443  | 0.47511     | 0.31735     | 1.9233   | 0.027219 |  |
|          | 1.8116          | 0.035025    | 0.027219 | 0.454980446 |             |          |          |  |
| FAM181A  | ENSG00000140067 | 1.8516      | 0.032044 | 1.8516      | 0.032044    | 1.8516   |          |  |
|          | 0.032044        | 1.9232      | 0.027226 | 0.027226    | 0.454980446 |          |          |  |
| NMBR     | ENSG00000135577 | 1.9229      | 0.027243 | -0.68808    | 0.7543      | -0.68808 | 0.7543   |  |
|          | 0.59659         | 0.27539     | 0.027243 | 0.455108464 |             |          |          |  |
| NA       | ENSG00000239930 | 1.9226      | 0.027263 | 1.9226      | 0.027263    | 1.9226   | 0.027263 |  |
|          | 1.9226          | 0.027263    | 0.027263 | 0.455130521 |             |          |          |  |
| NA       | ENSG00000255094 | 1.9226      | 0.027263 | 0.53587     | 0.29602     | 0.53587  | 0.29602  |  |
|          | 0.53587         | 0.29602     | 0.027263 | 0.455130521 |             |          |          |  |
| RTKN     | ENSG00000114993 | 0.69971     | 0.24205  | 0.69971     | 0.24205     | 1.9224   | 0.027278 |  |
|          | 0.69971         | 0.24205     | 0.027278 | 0.455224979 |             |          |          |  |
| C2CD4B   | ENSG00000205502 | 1.9222      | 0.027293 | 1.9222      | 0.027293    | 1.9222   |          |  |
|          | 0.027293        | 1.9222      | 0.027293 | 0.027293    | 0.455319374 |          |          |  |
| ANKRD30B | ENSG00000180777 | 1.0426      | 0.14857  | 1.9219      | 0.027311    | 0.67945  |          |  |
|          | 0.24843         | 1.7681      | 0.038523 | 0.027311    | 0.45540794  |          |          |  |
| ADAMTS3  | ENSG00000156140 | 1.7681      | 0.038524 | 0.95818     | 0.16899     | 1.9218   |          |  |
|          | 0.027317        | 0.82285     | 0.2053   | 0.027317    | 0.45540794  |          |          |  |
| DPP8     | ENSG00000074603 | -0.93226    | 0.8244   | -0.86105    | 0.80539     | 0.76124  | 0.22326  |  |
|          | 1.9212          | 0.027353    | 0.027353 | 0.455710204 |             |          |          |  |
| NA       | ENSG00000272154 | 1.9211      | 0.027362 | -0.45798    | 0.67652     | 0.6956   | 0.24334  |  |
|          | 0.6956          | 0.24334     | 0.027362 | 0.455710204 |             |          |          |  |
| QRFPR    | ENSG00000186867 | 1.6673      | 0.047732 | 1.0338      | 0.1506      | 1.0338   | 0.1506   |  |
|          | 1.921           | 0.027365    | 0.027365 | 0.455710204 |             |          |          |  |
| PLET1    | ENSG00000188771 | 1.9207      | 0.027382 | -0.4848     | 0.68609     | 1.2056   | 0.11399  |  |
|          | 0.19247         | 0.42369     | 0.027382 | 0.455710204 |             |          |          |  |
| PIGF     | ENSG00000151665 | 1.1877      | 0.11748  | 0.51273     | 0.30407     | 1.9205   | 0.027399 |  |
|          | 0.65697         | 0.2556      | 0.027399 | 0.455710204 |             |          |          |  |
| OR5K1    | ENSG00000232382 | 1.2973      | 0.097261 | -0.0076505  | 0.50305     | 1.9204   | 0.027401 |  |
|          | -0.0076505      | 0.50305     | 0.027401 | 0.455710204 |             |          |          |  |
| MRPL28   | ENSG00000086504 | 1.8253      | 0.033981 | 1.9203      | 0.02741     | 1.7328   |          |  |
|          | 0.041562        | 1.749       | 0.040148 | 0.02741     | 0.455710204 |          |          |  |
| ITIH4    | ENSG00000055955 | 1.1127      | 0.13291  | 0.66523     | 0.25295     | 1.9201   | 0.02742  |  |
|          | 1.6537          | 0.049096    | 0.02742  | 0.455710204 |             |          |          |  |
| NA       | ENSG00000260202 | -0.056822   | 0.52266  | 0.11584     | 0.45389     | 1.9201   | 0.027422 |  |
|          | 1.9201          | 0.027422    | 0.027422 | 0.455710204 |             |          |          |  |
| NA       | ENSG00000227637 | 1.92        | 0.027431 | 1.92        | 0.027431    | 1.92     | 0.027431 |  |
|          | 0.027431        | 0.455710204 |          |             |             |          |          |  |
| RAMACL   | ENSG00000235272 | 0.89084     | 0.18651  | 1.9198      | 0.027438    | -0.20228 |          |  |
|          | 0.58015         | -2.2209     | 0.98682  | 0.027438    | 0.455710204 |          |          |  |
| OPCML    | ENSG00000183715 | 0.53635     | 0.29586  | 1.7905      | 0.036686    | 1.9193   | 0.027471 |  |
|          | -0.61302        | 0.73007     | 0.027471 | 0.456047074 |             |          |          |  |
| POM121C  | ENSG00000272391 | 0.035003    | 0.48604  | 0.75935     | 0.22382     | 1.1878   |          |  |
|          | 0.11745         | 1.9192      | 0.027477 | 0.027477    | 0.456047074 |          |          |  |
| SFXN5    | ENSG00000144040 | 1.4819      | 0.069187 | 1.7832      | 0.037274    | 1.7918   | 0.036582 |  |
|          | 1.9191          | 0.027487    | 0.027487 | 0.456057715 |             |          |          |  |
| NA       | ENSG00000278923 | 1.9187      | 0.027513 | 1.8181      | 0.034522    | 1.9187   | 0.027513 |  |
|          | 1.8704          | 0.030717    | 0.027513 | 0.456166484 |             |          |          |  |
| NA       | ENSG00000272638 | 1.9186      | 0.027519 | 1.9186      | 0.027519    | 1.9186   | 0.027519 |  |
|          | 1.9186          | 0.027519    | 0.027519 | 0.456166484 |             |          |          |  |
| DDX39B   | ENSG00000198563 | 0.035317    | 0.48591  | 0.29619     | 0.38354     | 1.5581   |          |  |
|          | 0.059603        | 1.9185      | 0.027524 | 0.027524    | 0.456166484 |          |          |  |
| ZFP91    | ENSG00000186660 | 1.5977      | 0.055057 | 1.1445      | 0.1262      | 1.9184   | 0.027531 |  |
|          | 1.4021          | 0.080447    | 0.027531 | 0.456166484 |             |          |          |  |
| NA       | ENSG00000250751 | 1.9181      | 0.027548 | 1.9181      | 0.027548    | 1.9181   | 0.027548 |  |
|          | 1.9181          | 0.027548    | 0.027548 | 0.456293012 |             |          |          |  |
| NA       | ENSG00000227172 | 0.12776     | 0.44917  | 1.2156      | 0.11208     | 1.9178   | 0.02757  |  |
|          | 1.3906          | 0.082176    | 0.02757  | 0.456324598 |             |          |          |  |

|            |                 |              |           |             |             |          |          |
|------------|-----------------|--------------|-----------|-------------|-------------|----------|----------|
| TRDV1      | ENSG00000211804 | 1.9176       | 0.027578  | 0.52892     | 0.29843     | 1.9176   | 0.027578 |
|            |                 | 1.9176       | 0.027578  | 0.456324598 |             |          |          |
| OR13A1     | ENSG00000256574 | 1.9123       | 0.027918  | 1.2851      | 0.099375    | 1.9177   |          |
|            |                 | 0.027578     | 1.9177    | 0.027578    | 0.456324598 |          |          |
| PON2       | ENSG00000105854 | 0.21896      | 0.41334   | 0.088189    | 0.46486     | 1.9172   | 0.027605 |
|            |                 | 1.2210.11105 | 0.027605  | 0.45661631  |             |          |          |
| NA         | ENSG00000233754 | 1.9165       | 0.027652  | 1.9165      | 0.027652    | 1.3753   | 0.084515 |
|            |                 | 1.9165       | 0.027652  | 0.456693272 |             |          |          |
| PSME3IP1   | ENSG00000172775 | 1.1155       | 0.13232   | 1.3098      | 0.09513     | 1.4626   |          |
|            |                 | 0.071791     | 1.9163    | 0.027662    | 0.456693272 |          |          |
| RAD51C     | ENSG00000108384 | -0.24366     | 0.59625   | -0.13135    | 0.55225     | 0.06857  |          |
|            |                 | 0.47267      | 1.9163    | 0.027663    | 0.456693272 |          |          |
| PLAC8L1    | ENSG00000173261 | 1.9162       | 0.027673  | 1.9162      | 0.027673    | 1.9162   |          |
|            |                 | 0.027673     | 1.3964    | 0.081297    | 0.456693272 |          |          |
| RPL31P61   | ENSG00000243297 | 1.9162       | 0.027673  | 1.9162      | 0.027673    | 1.9162   |          |
|            |                 | 0.027673     | 1.9162    | 0.027673    | 0.456693272 |          |          |
| NA         | ENSG00000232035 | 1.9161       | 0.027676  | 0.33352     | 0.36937     | 0.48872  | 0.31252  |
|            |                 | 0.33352      | 0.36937   | 0.456693272 |             |          |          |
| RNU6-1172P | ENSG00000202095 | -0.34082     | 0.63338   | -0.73453    | 0.76869     | -0.14948 |          |
|            |                 | 0.55941      | 1.9161    | 0.027679    | 0.456693272 |          |          |
| OR5B12     | ENSG00000172362 | -0.15459     | 0.56143   | 1.9159      | 0.02769     | -0.57354 |          |
|            |                 | 0.71686      | -0.2459   | 0.59712     | 0.456693272 |          |          |
| NA         | ENSG00000276945 | 1.9158       | 0.027694  | 0.20019     | 0.42066     | 1.9158   | 0.027694 |
|            |                 | 1.9158       | 0.027694  | 0.456693272 |             |          |          |
| ANK1       | ENSG00000029534 | -0.037846    | 0.51509   | -0.64826    | 0.74159     | -0.67553 | 0.75033  |
|            |                 | 1.9156       | 0.027707  | 0.456753082 |             |          |          |
| ASIC1      | ENSG00000110881 | 1.3831       | 0.083321  | 1.9152      | 0.027733    | 0.30817  | 0.37898  |
|            |                 | 0.9626       | 0.16788   | 0.456954949 |             |          |          |
| FBXL21P    | ENSG00000164616 | 1.4895       | 0.068179  | 0.77662     | 0.21869     | 1.6114   |          |
|            |                 | 0.053545     | 1.9151    | 0.027738    | 0.456954949 |          |          |
| RN7SL507P  | ENSG00000239702 | 1.7164       | 0.043048  | 0.26608     | 0.39509     | 1.6252   |          |
|            |                 | 0.052056     | 1.9149    | 0.027754    | 0.457064015 |          |          |
| ZSWIM4     | ENSG00000132003 | 1.9147       | 0.027765  | 0.41374     | 0.33953     | -0.62025 |          |
|            |                 | 0.73245      | -0.070202 | 0.457090693 |             |          |          |
| NA         | ENSG00000243116 | -0.015066    | 0.50601   | -1.3263     | 0.90763     | -0.49722 | 0.69048  |
|            |                 | 1.9144       | 0.027783  | 0.457170618 |             |          |          |
| MIR3121    | ENSG00000265435 | 1.9142       | 0.027797  | 1.9142      | 0.027797    | 1.9142   |          |
|            |                 | 0.027797     | 1.9142    | 0.457170618 |             |          |          |
| ANKRD10    | ENSG00000088448 | 0.3441       | 0.36538   | 1.9142      | 0.027798    | 1.3024   |          |
|            |                 | 0.096393     | 1.4889    | 0.457170618 |             |          |          |
| TPM3P1     | ENSG00000213050 | 0.22022      | 0.41285   | 1.9139      | 0.027817    | 0.22022  |          |
|            |                 | 0.41285      | 0.22022   | 0.457328748 |             |          |          |
| GSTA4      | ENSG00000170899 | 1.9134       | 0.02785   | 1.9134      | 0.02785     | 1.9134   | 0.02785  |
|            |                 | 1.1166       | 0.13208   | 0.457716863 |             |          |          |
| TUBB4A     | ENSG00000104833 | -0.90414     | 0.81704   | -0.91141    | 0.81896     | 1.0451   |          |
|            |                 | 0.14799      | 1.9126    | 0.458367589 |             |          |          |
| RN7SL105P  | ENSG00000243704 | 1.9124       | 0.027913  | 1.9124      | 0.027913    | 1.9124   |          |
|            |                 | 0.027913     | 1.9124    | 0.458443037 |             |          |          |
| ACOXL      | ENSG00000153093 | 1.9121       | 0.02793   | 1.6057      | 0.054173    | 1.7003   | 0.044539 |
|            |                 | 1.8656       | 0.031051  | 0.458567689 |             |          |          |
| NA         | ENSG00000226041 | 1.9115       | 0.027968  | 1.9115      | 0.027968    | 1.9115   | 0.027968 |
|            |                 | 1.9115       | 0.027968  | 0.459030037 |             |          |          |
| UBE2CP1    | ENSG00000258648 | 1.9114       | 0.027977  | 0.47484     | 0.31745     | 0.32421  |          |
|            |                 | 0.37289      | 0.53053   | 0.459030037 |             |          |          |
| FGFR3P1    | ENSG00000230994 | 1.9107       | 0.028025  | 1.9107      | 0.028025    | 1.9107   |          |
|            |                 | 0.028025     | 1.9107    | 0.459559373 |             |          |          |
| KCNQ1-AS1  | ENSG00000229414 | 1.5623       | 0.059107  | 1.9104      | 0.02804     | 0.30126  |          |
|            |                 | 0.38161      | 1.2029    | 0.459559373 |             |          |          |
| NA         | ENSG00000269786 | 1.9104       | 0.028041  | 1.9104      | 0.028041    | 0.25823  | 0.39811  |
|            |                 | 1.9104       | 0.028041  | 0.459559373 |             |          |          |
| RNF2P1     | ENSG00000231381 | -0.18425     | 0.57309   | 1.8623      | 0.031283    | 0.31075  |          |
|            |                 | 0.37799      | 1.9102    | 0.459559373 |             |          |          |



|           |                 |           |          |          |             |             |          |
|-----------|-----------------|-----------|----------|----------|-------------|-------------|----------|
| LCE1A     | ENSG00000186844 | 0.81307   | 0.20809  | 0.42731  | 0.33458     | 1.9097      | 0.028086 |
|           |                 | -1.0254   | 0.84742  | 0.028086 | 0.459559373 |             |          |
| HDAC4-AS1 | ENSG00000222020 | 1.9096    | 0.028093 | 1.9096   | 0.028093    | 1.9096      |          |
|           |                 | 0.028093  | 1.9096   | 0.028093 | 0.028093    | 0.459559373 |          |
| NA        | ENSG00000228953 | -1.4009   | 0.91938  | 1.9096   | 0.028095    | -1.4009     | 0.91938  |
|           |                 | -1.4009   | 0.91938  | 0.028095 | 0.459559373 |             |          |
| LINC02379 | ENSG00000251649 | 1.9095    | 0.0281   | 1.3715   | 0.085116    | 0.62925     |          |
|           |                 | 0.26459   | 1.3715   | 0.085116 | 0.0281      | 0.459559373 |          |
| XCL2      | ENSG00000143185 | 1.147     | 0.1257   | 0.8963   | 0.18505     | 1.9094      | 0.028107 |
|           |                 | 1.5051    | 0.066154 | 0.028107 | 0.459559373 |             |          |
| NA        | ENSG00000241917 | 1.6463    | 0.049849 | 1.9094   | 0.028107    | 1.556       | 0.059859 |
|           |                 | 1.6676    | 0.047698 | 0.028107 | 0.459559373 |             |          |
| CCNG1     | ENSG00000113328 | 1.9093    | 0.028113 | 1.9093   | 0.028113    | 1.9093      | 0.028113 |
|           |                 | 1.9093    | 0.028113 | 0.028113 | 0.459559373 |             |          |
| GAPDHP66  | ENSG00000250933 | -0.26461  | 0.60434  | 1.909    | 0.028128    | -0.62637    | 0.73447  |
|           |                 | 0.26452   | 0.39569  | 0.028128 | 0.459650382 |             |          |
| NA        | ENSG00000283269 | 1.4864    | 0.068581 | 1.9085   | 0.028165    | 0.6332      | 0.2633   |
|           |                 | 1.2695    | 0.10213  | 0.028165 | 0.460100721 |             |          |
| TRIB3     | ENSG00000101255 | 0.42413   | 0.33573  | 0.73453  | 0.23131     | 1.8093      | 0.035202 |
|           |                 | 1.9078    | 0.028211 | 0.028211 | 0.460439789 |             |          |
| SLC7A6OS  | ENSG00000103061 | 1.9077    | 0.028217 | 1.9077   | 0.028217    | 1.9077      |          |
|           |                 | 0.028217  | 0.56671  | 0.28545  | 0.028217    | 0.460439789 |          |
| OSER1     | ENSG00000132823 | -0.75812  | 0.77581  | 0.36298  | 0.35831     | -0.99051    | 0.83904  |
|           |                 | 1.9076    | 0.02822  | 0.02822  | 0.460439789 |             |          |
| GLUL      | ENSG00000135821 | -0.28196  | 0.61101  | 0.38641  | 0.3496      | -0.22412    | 0.58867  |
|           |                 | 1.9075    | 0.028226 | 0.028226 | 0.460439789 |             |          |
| SLC35F3   | ENSG00000183780 | 1.9074    | 0.028233 | 0.94842  | 0.17146     | 1.1705      |          |
|           |                 | 0.12091   | -0.17093 | 0.56786  | 0.028233    | 0.460439789 |          |
| NA        | ENSG00000216017 | 1.1141    | 0.13261  | 0.33364  | 0.36933     | 1.9069      | 0.028266 |
|           |                 | 1.9069    | 0.028266 | 0.028266 | 0.460790364 |             |          |
| NA        | ENSG00000253347 | 1.9065    | 0.028295 | 1.9065   | 0.028295    | 1.9065      | 0.028295 |
|           |                 | 1.9065    | 0.028295 | 0.028295 | 0.460790364 |             |          |
| DNAJA2    | ENSG00000069345 | 1.0931    | 0.13718  | 1.9062   | 0.028309    | 1.7369      |          |
|           |                 | 0.041205  | 0.27566  | 0.3914   | 0.028309    | 0.460790364 |          |
| NA        | ENSG00000231754 | 1.9062    | 0.028309 | -0.97062 | 0.83413     | 0.10282     | 0.45905  |
|           |                 | 1.9062    | 0.028309 | 0.028309 | 0.460790364 |             |          |
| PFKL      | ENSG00000141959 | 1.5342    | 0.062492 | -0.57009 | 0.71569     | 1.1817      | 0.11867  |
|           |                 | 1.9059    | 0.028331 | 0.028331 | 0.460790364 |             |          |
| NA        | ENSG00000270359 | -0.089454 | 0.53564  | -0.16792 | 0.56668     | 1.9058      | 0.028338 |
|           |                 | 1.9058    | 0.028338 | 0.028338 | 0.460790364 |             |          |
| ZYXP1     | ENSG00000274572 | -0.95795  | 0.83096  | 1.9058   | 0.02834     | -0.3365     | 0.63175  |
|           |                 | -0.3365   | 0.63175  | 0.02834  | 0.460790364 |             |          |
| TMEM183A  | ENSG00000163444 | -1.152    | 0.87533  | 1.9056   | 0.028353    | -0.92165    |          |
|           |                 | 0.82164   | -0.97088 | 0.8342   | 0.028353    | 0.460790364 |          |
| DEPDC1    | ENSG00000024526 | 0.86012   | 0.19486  | 1.4205   | 0.07773     | 1.9051      |          |
|           |                 | 0.028386  | 1.9051   | 0.028386 | 0.028386    | 0.460790364 |          |
| NA        | ENSG00000259622 | 0.96112   | 0.16824  | 1.905    | 0.028393    | 1.9041      | 0.028452 |
|           |                 | 1.2695    | 0.10212  | 0.028393 | 0.460790364 |             |          |
| PISRT1    | ENSG00000281473 | -0.5736   | 0.71688  | 1.9048   | 0.028402    | -0.5736     |          |
|           |                 | 0.71688   | -0.5736  | 0.71688  | 0.028402    | 0.460790364 |          |
| PACS1     | ENSG00000175115 | 1.0238    | 0.15295  | 0.47039  | 0.31904     | 1.2723      | 0.10164  |
|           |                 | 1.9046    | 0.028416 | 0.028416 | 0.460790364 |             |          |
| UGT8      | ENSG00000174607 | 1.9045    | 0.028422 | 1.315    | 0.09425     | 1.6483      | 0.049651 |
|           |                 | 0.24425   | 0.40352  | 0.028422 | 0.460790364 |             |          |
| PCBP1-AS1 | ENSG00000179818 | 1.8865    | 0.029611 | 1.9045   | 0.028422    | 1.6798      |          |
|           |                 | 0.0465    | 1.6093   | 0.053771 | 0.028422    | 0.460790364 |          |
| ZRANB1    | ENSG00000019995 | -1.2921   | 0.90183  | -1.2373  | 0.89202     | -1.4495     |          |
|           |                 | 0.92641   | 1.9045   | 0.028423 | 0.028423    | 0.460790364 |          |
| DNAJC4    | ENSG00000110011 | 0.3391    | 0.36727  | 0.3391   | 0.36727     | 1.9043      |          |
|           |                 | 0.028436  | -0.32813 | 0.62859  | 0.028436    | 0.460790364 |          |
| RN7SL26P  | ENSG00000242014 | 1.9043    | 0.028438 | 1.9043   | 0.028438    | 1.9043      |          |
|           |                 | 0.028438  | 1.9043   | 0.028438 | 0.028438    | 0.460790364 |          |

|           |                 |           |          |             |             |             |          |
|-----------|-----------------|-----------|----------|-------------|-------------|-------------|----------|
| NA        | ENSG00000240934 | 1.6843    | 0.046066 | 1.4481      | 0.073791    | 1.9042      | 0.02844  |
|           |                 | 0.89082   | 0.18651  | 0.02844     | 0.460790364 |             |          |
| THSD4-AS1 | ENSG00000259964 | 1.9039    | 0.028462 | -0.051227   | 0.52043     | -1.6233     |          |
|           |                 | 0.94773   | 0.71193  | 0.23826     | 0.028462    | 0.460790364 |          |
| NA        | ENSG00000262633 | 0.19738   | 0.42176  | -0.3746     | 0.64602     | 1.4532      | 0.073084 |
|           |                 | 1.9038    | 0.028468 | 0.028468    | 0.460790364 |             |          |
| NA        | ENSG00000272438 | 1.4762    | 0.069951 | 1.1         | 0.13567     | 1.9036      | 0.028482 |
|           |                 | 1.9036    | 0.028482 | 0.028482    | 0.460790364 |             |          |
| NOS3      | ENSG00000164867 | -0.15917  | 0.56323  | 1.9032      | 0.028507    | 1.9032      | 0.028507 |
|           |                 | 1.9032    | 0.028507 | 0.028507    | 0.460790364 |             |          |
| NA        | ENSG00000251088 | -0.49109  | 0.68832  | 1.9032      | 0.02851     | -0.66099    | 0.74569  |
|           |                 | -0.66099  | 0.74569  | 0.02851     | 0.460790364 |             |          |
| NA        | ENSG00000242012 | 1.9031    | 0.028514 | 1.9031      | 0.028514    | 0.78084     | 0.21745  |
|           |                 | 1.9031    | 0.028514 | 0.028514    | 0.460790364 |             |          |
| NA        | ENSG00000231200 | 0.95732   | 0.1692   | 0.95732     | 0.1692      | 1.9031      | 0.028517 |
|           |                 | 0.95732   | 0.1692   | 0.028517    | 0.460790364 |             |          |
| ASPRV1    | ENSG00000244617 | 1.903     | 0.028519 | 1.903       | 0.028519    | 1.903       | 0.028519 |
|           |                 | 0.028519  | 0.028519 | 0.460790364 |             |             |          |
| NA        | ENSG00000243780 | -0.85312  | 0.8032   | -0.85312    | 0.8032      | -0.85312    | 0.8032   |
|           |                 | 1.903     | 0.028522 | 0.028522    | 0.460790364 |             |          |
| NA        | ENSG00000255462 | 1.9028    | 0.028534 | 1.9028      | 0.028534    | 1.9028      | 0.028534 |
|           |                 | 1.9028    | 0.028534 | 0.028534    | 0.460790364 |             |          |
| SMIM13    | ENSG00000224531 | 0.72266   | 0.23494  | 1.9027      | 0.028542    | -0.91703    |          |
|           |                 | 0.82044   | -0.95853 | 0.8311      | 0.028542    | 0.460790364 |          |
| SPDYE16   | ENSG00000185040 | 1.9026    | 0.028546 | 0.51028     | 0.30493     | 0.063028    |          |
|           |                 | 0.47487   | 0.63409  | 0.26301     | 0.028546    | 0.460790364 |          |
| RUSC1-AS1 | ENSG00000225855 | -0.68552  | 0.75349  | 1.9025      | 0.028551    | -1.8302     |          |
|           |                 | 0.96639   | -1.8302  | 0.96639     | 0.028551    | 0.460790364 |          |
| HMGB1P26  | ENSG00000225984 | -0.12565  | 0.55     | -0.12565    | 0.55        | 1.9022      | 0.028571 |
|           |                 | -0.26612  | 0.60493  | 0.028571    | 0.460790364 |             |          |
| ING4      | ENSG00000111653 | -0.067979 | 0.5271   | -0.067979   | 0.5271      | -0.2408     | 0.59514  |
|           |                 | 1.9022    | 0.028574 | 0.028574    | 0.460790364 |             |          |
| MASP1     | ENSG00000127241 | 1.4675    | 0.071126 | 1.9022      | 0.028576    | 0.2138      | 0.41535  |
|           |                 | 1.691     | 0.045422 | 0.028576    | 0.460790364 |             |          |
| RNU7-61P  | ENSG00000251706 | 1.9017    | 0.028605 | 1.9017      | 0.028605    | 1.9017      |          |
|           |                 | 0.028605  | 1.9017   | 0.028605    | 0.028605    | 0.460938133 |          |
| RNU6-58P  | ENSG00000252952 | 1.6319    | 0.051353 | 1.9015      | 0.028622    | 0.67285     |          |
|           |                 | 0.25052   | 1.9015   | 0.028622    | 0.028622    | 0.460938133 |          |
| RNF112    | ENSG00000128482 | 1.9014    | 0.028623 | 1.9014      | 0.028623    | 1.9014      |          |
|           |                 | 0.028623  | 1.9014   | 0.028623    | 0.028623    | 0.460938133 |          |
| NA        | ENSG00000238018 | 1.3671    | 0.085793 | 1.9014      | 0.028623    | 1.3398      | 0.09015  |
|           |                 | 1.7225    | 0.042487 | 0.028623    | 0.460938133 |             |          |
| NA        | ENSG00000238991 | 0.15329   | 0.43908  | 1.9012      | 0.02864     | 0.15329     | 0.43908  |
|           |                 | 0.15329   | 0.43908  | 0.02864     | 0.461059531 |             |          |
| NA        | ENSG00000249198 | 1.2999    | 0.096812 | 0.61575     | 0.26903     | 1.4478      | 0.073843 |
|           |                 | 1.901     | 0.028651 | 0.028651    | 0.46108429  |             |          |
| RNU1-134P | ENSG00000199805 | 1.9007    | 0.028674 | 1.9007      | 0.028674    | 1.2011      |          |
|           |                 | 0.11486   | 1.9007   | 0.028674    | 0.028674    | 0.461302086 |          |
| NA        | ENSG00000248128 | 1.9002    | 0.028705 | 0.6135      | 0.26977     | 0.28793     | 0.3867   |
|           |                 | -0.19737  | 0.57823  | 0.028705    | 0.461601032 |             |          |
| NPM1P38   | ENSG00000219257 | 0.60075   | 0.274    | 0.27635     | 0.39114     | 0.27635     | 0.39114  |
|           |                 | 1.9       | 0.028717 | 0.028717    | 0.461601032 |             |          |
| FAM183DP  | ENSG00000205716 | -1.0805   | 0.86004  | 1.8999      | 0.028721    | -0.98866    |          |
|           |                 | 0.83858   | -0.98866 | 0.83858     | 0.028721    | 0.461601032 |          |
| AMPD1     | ENSG00000116748 | 1.8998    | 0.028732 | 1.8998      | 0.028732    | 1.8998      | 0.028732 |
|           |                 | 0.097956  | 0.46098  | 0.028732    | 0.461625572 |             |          |
| NOL8P1    | ENSG00000248327 | -0.02005  | 0.508    | 1.8993      | 0.02876     | 0.015672    | 0.49375  |
|           |                 | 0.39203   | 0.34752  | 0.02876     | 0.461923138 |             |          |
| HSPD1P6   | ENSG00000230067 | 1.8991    | 0.028774 | 1.8991      | 0.028774    | 1.8991      |          |
|           |                 | 0.028774  | 1.8991   | 0.028774    | 0.028774    | 0.461923804 |          |
| CLIC6     | ENSG00000159212 | 1.8991    | 0.028779 | 0.62884     | 0.26473     | 0.49997     | 0.30855  |
|           |                 | 1.1374    | 0.12768  | 0.028779    | 0.461923804 |             |          |

|            |                 |             |             |             |             |          |          |        |
|------------|-----------------|-------------|-------------|-------------|-------------|----------|----------|--------|
| RHDF1      | ENSG00000007384 | 0.27843     | 0.39034     | -0.85474    | 0.80365     | 1.8986   |          |        |
|            | 0.028805        | 0.61723     | 0.26854     | 0.028805    | 0.462188887 |          |          |        |
| LINC02228  | ENSG00000251273 | 1.8983      | 0.028831    | -0.33641    | 0.63172     | -1.987   |          |        |
|            | 0.97654         | -1.8564     | 0.9683      | 0.028831    | 0.46224618  |          |          |        |
| FSTL3      | ENSG00000070404 | 1.8982      | 0.028833    | 1.0211      | 0.15359     | 1.0604   | 0.14447  |        |
|            | 1.6881          | 0.045698    | 0.028833    | 0.46224618  |             |          |          |        |
| LINC01942  | ENSG00000253428 | -0.45208    | 0.6744      | 1.898       | 0.028846    | 0.25492  | 0.39939  |        |
|            | -1.6215         | 0.94754     | 0.028846    | 0.46224618  |             |          |          |        |
| HID1       | ENSG00000167861 | 0.59608     | 0.27556     | 0.59608     | 0.27556     | -0.61109 | 0.72943  |        |
|            | 1.8979          | 0.028854    | 0.028854    | 0.46224618  |             |          |          |        |
| ATP5MF     | ENSG00000241468 | 1.7812      | 0.037444    | 1.8979      | 0.028856    | 1.8287   |          |        |
|            | 0.033724        | 0.96846     | 0.16641     | 0.028856    | 0.46224618  |          |          |        |
| SYT4       | ENSG00000132872 | 1.8976      | 0.028877    | 1.3104      | 0.095023    | 0.93541  | 0.17479  |        |
|            | 0.89694         | 0.18488     | 0.028877    | 0.462294658 |             |          |          |        |
| SYT8       | ENSG00000149043 | 0.60747     | 0.27177     | 1.355       | 0.087708    | -0.33518 | 0.63126  |        |
|            | 1.8975          | 0.028878    | 0.028878    | 0.462294658 |             |          |          |        |
| NOL4L      | ENSG00000197183 | 1.0626      | 0.14398     | 1.1842      | 0.11816     | 1.897    | 0.028917 |        |
|            | 1.0929          | 0.13721     | 0.028917    | 0.462567769 |             |          |          |        |
| AURKAP2    | ENSG00000230165 | 1.8967      | 0.028934    | 1.8967      | 0.028934    | 1.8967   |          |        |
|            | 0.028934        | 1.8967      | 0.028934    | 0.028934    | 0.462567769 |          |          |        |
| SRMS       | ENSG00000125508 | 1.258       | 0.1042      | 1.8966      | 0.028941    | -0.21306 | 0.58436  |        |
|            | 0.90828         | 0.18187     | 0.028941    | 0.462567769 |             |          |          |        |
| TSPAN5     | ENSG00000168785 | -0.87199    | 0.80839     | 0.93916     | 0.17382     | 1.8964   |          |        |
|            | 0.028951        | 0.63803     | 0.26173     | 0.028951    | 0.462567769 |          |          |        |
| MTCH2      | ENSG00000109919 | 1.8964      | 0.028957    | -0.01106    | 0.50441     | 1.6864   | 0.045863 |        |
|            | -0.013128       | 0.50524     | 0.028957    | 0.462567769 |             |          |          |        |
| ST6GALNAC4 | ENSG00000136840 | -0.42978    | 0.66632     | 1.8963      | 0.028957    | 1.8963   |          |        |
|            | 0.028957        | 1.8963      | 0.028957    | 0.028957    | 0.462567769 |          |          |        |
| KLHL12     | ENSG00000117153 | 1.8962      | 0.028966    | 0.36232     | 0.35856     | 0.61661  |          |        |
|            | 0.26875         | 0.61661     | 0.26875     | 0.028966    | 0.462567769 |          |          |        |
| MKX        | ENSG00000150051 | 0.32185     | 0.37378     | 1.6198      | 0.052641    | 0.64384  | 0.25984  |        |
|            | 1.8961          | 0.028971    | 0.028971    | 0.462567769 |             |          |          |        |
| RPL29      | ENSG00000162244 | 1.8958      | 0.028993    | 1.8958      | 0.028993    | 1.8958   | 0.028993 |        |
|            | 1.8958          | 0.028993    | 0.028993    | 0.462615878 |             |          |          |        |
| TAS2R62P   | ENSG00000234066 | 1.8958      | 0.028993    | 1.8958      | 0.028993    | 1.8958   |          |        |
|            | 0.028993        | 1.8958      | 0.028993    | 0.028993    | 0.462615878 |          |          |        |
| PRKD2      | ENSG00000105287 | 1.8953      | 0.029023    | 1.8953      | 0.029023    | 1.0418   | 0.14874  |        |
|            | 1.838           | 0.03303     | 0.029023    | 0.462831387 |             |          |          |        |
| LFNG       | ENSG00000106003 | 0.57508     | 0.28262     | 0.67739     | 0.24908     | 1.8952   | 0.029031 |        |
|            | 0.78661         | 0.21575     | 0.029031    | 0.462831387 |             |          |          |        |
| NA         | ENSG00000267109 | 0.17278     | 0.43141     | 0.17278     | 0.43141     | 1.8952   | 0.029035 |        |
|            | 0.17278         | 0.43141     | 0.029035    | 0.462831387 |             |          |          |        |
| FAXC       | ENSG00000146267 | 1.7894      | 0.036773    | 1.7894      | 0.036773    | 1.7894   | 0.036773 |        |
|            | 1.8946          | 0.029075    | 0.029075    | 0.463078324 |             |          |          |        |
| DUBR       | ENSG00000243701 | 1.8946      | 0.029076    | -0.04302    | 0.51716     | 0.24412  | 0.40357  |        |
|            | 1.114           | 0.13264     | 0.029076    | 0.463078324 |             |          |          |        |
| TRBV7-6    | ENSG00000211727 | -0.11912    | 0.54741     | -0.11912    | 0.54741     | 1.8945   |          |        |
|            | 0.029079        | -0.11912    | 0.54741     | 0.029079    | 0.463078324 |          |          |        |
| FOXP1      | ENSG00000114861 | 0.65049     | 0.25769     | 0.39339     | 0.34701     | 1.8943   | 0.029094 |        |
|            | 1.8894          | 0.02942     | 0.029094    | 0.463165835 |             |          |          |        |
| NA         | ENSG00000272308 | 1.894       | 0.029113    | 1.894       | 0.029113    | 1.894    | 0.029113 |        |
|            | 0.029113        | 0.463316946 |             |             |             |          |          |        |
| NA         | ENSG00000254718 | 1.7036      | 0.044229    | 0.86141     | 0.19451     | 1.893    | 0.029178 | 1.893  |
|            | 0.029178        | 0.029178    | 0.464102804 |             |             |          |          |        |
| NA         | ENSG00000229832 | 1.8929      | 0.029186    | 1.8929      | 0.029186    | 1.8929   | 0.029186 |        |
|            | 1.8929          | 0.029186    | 0.029186    | 0.464102804 |             |          |          |        |
| RNA5SP126  | ENSG00000201962 | 1.8928      | 0.029194    | 0.96118     | 0.16823     | 0.27705  |          |        |
|            | 0.39087         | 0.13489     | 0.44635     | 0.029194    | 0.464102804 |          |          |        |
| DEGS2      | ENSG00000168350 | 1.407       | 0.07971     | 1.407       | 0.07971     | 1.407    | 0.07971  | 1.8926 |
|            | 0.029203        | 0.029203    | 0.464102804 |             |             |          |          |        |
| C9orf106   | ENSG00000179082 | -1.8894     | 0.97058     | 1.8925      | 0.02921     | -1.0654  |          |        |
|            | 0.85665         | -1.7342     | 0.95856     | 0.02921     | 0.464102804 |          |          |        |

|             |                 |           |             |          |             |             |          |
|-------------|-----------------|-----------|-------------|----------|-------------|-------------|----------|
| FAT4        | ENSG00000196159 | 1.8924    | 0.029222    | 1.6716   | 0.047298    | 1.8065      | 0.035423 |
|             |                 | 0.93631   | 0.17456     | 0.029222 | 0.464142132 |             |          |
| MYOM1       | ENSG00000101605 | 0.60257   | 0.2734      | 0.81718  | 0.20691     | 1.8921      | 0.029242 |
|             |                 | 0.49074   | 0.31181     | 0.029242 | 0.464308459 |             |          |
| NA          | ENSG00000271314 | -1.1513   | 0.8752      | 0.21339  | 0.41551     | 1.1713      | 0.12074  |
|             |                 | 1.8918    | 0.029256    | 0.029256 | 0.46437944  |             |          |
| BCL2L14     | ENSG00000121380 | 1.8915    | 0.029281    | -0.34769 | 0.63596     | 0.98873     |          |
|             |                 | 0.1614    | 1.231010917 | 0.029281 | 0.46462492  |             |          |
| KCNK18      | ENSG00000186795 | -1.3546   | 0.91223     | 1.8913   | 0.029292    | 0.4455      |          |
|             |                 | 0.32798   | -0.54736    | 0.70793  | 0.029292    | 0.464648164 |          |
| EMCN        | ENSG00000164035 | -0.081438 | 0.53245     | 1.6477   | 0.049712    | -0.35004    | 0.63685  |
|             |                 | 1.8908    | 0.029325    | 0.029325 | 0.464939665 |             |          |
| LINC00467   | ENSG00000153363 | -0.63072  | 0.73589     | 0.015709 | 0.49373     | 1.8907      |          |
|             |                 | 0.029334  | 0.71578     | 0.23706  | 0.029334    | 0.464939665 |          |
| GSG1        | ENSG00000111305 | 0.64232   | 0.26033     | 0.059237 | 0.47638     | -0.097688   | 0.53891  |
|             |                 | 1.8906    | 0.029339    | 0.029339 | 0.464939665 |             |          |
| GBP1P1      | ENSG00000225492 | 0.15018   | 0.44031     | 0.92532  | 0.1774      | 1.8902      |          |
|             |                 | 0.029363  | 1.2945      | 0.09775  | 0.029363    | 0.465115525 |          |
| SLITRK6     | ENSG00000184564 | 1.6177    | 0.052864    | 1.89     | 0.029381    | 1.4995      | 0.066871 |
|             |                 | -0.13017  | 0.55178     | 0.029381 | 0.465115525 |             |          |
| TTC37       | ENSG00000198677 | 1.4022    | 0.080423    | 1.4398   | 0.074955    | 1.8898      | 0.02939  |
|             |                 | 1.4119    | 0.078992    | 0.02939  | 0.465115525 |             |          |
| NA          | ENSG00000249328 | 1.8898    | 0.029393    | 1.095    | 0.13677     | 1.8898      | 0.029393 |
|             |                 | 1.8898    | 0.029393    | 0.029393 | 0.465115525 |             |          |
| BNIP3P28    | ENSG00000271095 | -1.1443   | 0.87375     | -1.3715  | 0.9149      | 1.8896      |          |
|             |                 | 0.029403  | -0.22279    | 0.58815  | 0.029403    | 0.465115525 |          |
| NA          | ENSG00000268628 | 1.0277    | 0.15204     | 1.8895   | 0.029412    | 1.0277      | 0.15204  |
|             |                 | 1.0277    | 0.15204     | 0.029412 | 0.465115525 |             |          |
| NA          | ENSG00000273211 | 1.8894    | 0.029419    | 1.8894   | 0.029419    | 1.8894      | 0.029419 |
|             |                 | 1.8894    | 0.029419    | 0.029419 | 0.465115525 |             |          |
| KDM3A       | ENSG00000115548 | 0.11336   | 0.45487     | 1.1308   | 0.12907     | 1.8893      | 0.029427 |
|             |                 | 0.44673   | 0.32753     | 0.029427 | 0.465115525 |             |          |
| NA          | ENSG00000250166 | 1.3688    | 0.08553     | 1.8891   | 0.029436    | 1.3688      | 0.08553  |
|             |                 | 1.3688    | 0.08553     | 0.029436 | 0.465115525 |             |          |
| RNU6ATAC7P  | ENSG00000221038 | 1.8886    | 0.02947     | 1.8886   | 0.02947     | 1.8886      |          |
|             |                 | 0.02947   | 0.08421     | 0.46644  | 0.02947     | 0.465261861 |          |
| CACNA1C-IT2 | ENSG00000256257 | 1.8886    | 0.029473    | -0.22205 | 0.58786     | 0.21862     |          |
|             |                 | 0.41347   | 1.655       | 0.048958 | 0.029473    | 0.465261861 |          |
| SDK1-AS1    | ENSG00000236708 | 0.32765   | 0.37159     | -0.90033 | 0.81603     | -1.7188     |          |
|             |                 | 0.95717   | 1.8886      | 0.029475 | 0.029475    | 0.465261861 |          |
| NA          | ENSG00000269296 | 1.8884    | 0.029489    | -0.73734 | 0.76954     | -0.73734    | 0.76954  |
|             |                 | -0.73734  | 0.76954     | 0.029489 | 0.465261861 |             |          |
| RN7SL300P   | ENSG00000265813 | -0.81881  | 0.79355     | -0.54074 | 0.70565     | 1.8883      |          |
|             |                 | 0.029493  | -0.54074    | 0.70565  | 0.029493    | 0.465261861 |          |
| BAIAP2L2    | ENSG00000128298 | 1.8881    | 0.02951     | 1.2206   | 0.11112     | 1.495       | 0.067455 |
|             |                 | 0.39403   | 0.34678     | 0.02951  | 0.465379385 |             |          |
| CHCHD4P2    | ENSG00000237360 | 1.1011    | 0.13544     | 1.8869   | 0.029587    | 1.1011      |          |
|             |                 | 0.13544   | -0.23026    | 0.59106  | 0.029587    | 0.46644274  |          |
| LINC01994   | ENSG00000241098 | -1.5485   | 0.93925     | 0.61212  | 0.27023     | 1.8867      |          |
|             |                 | 0.0296    | -1.5485     | 0.93925  | 0.0296      | 0.466496766 |          |
| CFHR3       | ENSG00000116785 | 1.8863    | 0.02963     | 0.96697  | 0.16678     | -0.27372    | 0.60785  |
|             |                 | 0.25354   | 0.39993     | 0.02963  | 0.466602342 |             |          |
| NA          | ENSG00000230199 | 0.84204   | 0.19988     | 1.8861   | 0.029637    | 0.032111    | 0.48719  |
|             |                 | 0.19919   | 0.42106     | 0.029637 | 0.466602342 |             |          |
| NA          | ENSG00000231867 | 1.8861    | 0.029641    | 1.8861   | 0.029641    | 1.8861      | 0.029641 |
|             |                 | 1.8861    | 0.029641    | 0.029641 | 0.466602342 |             |          |
| SEC11A      | ENSG00000140612 | 1.886     | 0.029645    | 1.7405   | 0.040885    | 1.7405      | 0.040885 |
|             |                 | 1.7405    | 0.040885    | 0.029645 | 0.466602342 |             |          |
| NA          | ENSG00000234949 | 1.5718    | 0.058002    | 1.7015   | 0.044422    | 1.8858      | 0.029658 |
|             |                 | 1.1807    | 0.11886     | 0.029658 | 0.466606654 |             |          |
| RN7SL470P   | ENSG00000263669 | 1.8857    | 0.02967     | 1.8857   | 0.02967     | 1.8857      |          |
|             |                 | 0.02967   | 1.8857      | 0.02967  | 0.02967     | 0.466606654 |          |

|             |                 |           |             |             |             |          |          |
|-------------|-----------------|-----------|-------------|-------------|-------------|----------|----------|
| NA          | ENSG00000261744 | 1.6409    | 0.050405    | 0.21761     | 0.41387     | 1.4918   | 0.067878 |
|             | 1.8856          | 0.029674  | 0.029674    | 0.466606654 |             |          |          |
| SYTL1       | ENSG00000142765 | 1.8855    | 0.029684    | 1.6736      | 0.047104    | 1.348    | 0.088831 |
|             | 1.1924          | 0.11655   | 0.029684    | 0.466613329 |             |          |          |
| PIGN        | ENSG00000197563 | 0.13804   | 0.4451      | -0.19034    | 0.57548     | -0.1788  | 0.57095  |
|             | 1.8852          | 0.029704  | 0.029704    | 0.466630947 |             |          |          |
| NA          | ENSG00000267756 | 1.0041    | 0.15766     | 0.042603    | 0.48301     | 1.8851   | 0.029707 |
|             | -0.057566       | 0.52295   | 0.029707    | 0.466630947 |             |          |          |
| PHLDB2      | ENSG00000144824 | 1.8849    | 0.029723    | 1.2715      | 0.10178     | 1.7568   |          |
|             | 0.039475        | 1.1976    | 0.11553     | 0.029723    | 0.466630947 |          |          |
| NA          | ENSG00000264515 | -1.0411   | 0.85109     | -0.24875    | 0.59822     | 0.8803   | 0.18935  |
|             | 1.8848          | 0.029727  | 0.029727    | 0.466630947 |             |          |          |
| RNU6-708P   | ENSG00000206944 | 1.8847    | 0.029733    | 1.8847      | 0.029733    | 1.8847   |          |
|             | 0.029733        | 1.8847    | 0.029733    | 0.029733    | 0.466630947 |          |          |
| RNU6-217P   | ENSG00000206891 | 0.45014   | 0.3263      | -0.42502    | 0.66459     | 0.82788  |          |
|             | 0.20387         | 1.8845    | 0.029749    | 0.029749    | 0.466731735 |          |          |
| TAF5L       | ENSG00000135801 | 1.884     | 0.029781    | -0.22824    | 0.59027     | 0.10509  | 0.45815  |
|             | 0.17691         | 0.42979   | 0.029781    | 0.466926829 |             |          |          |
| NA          | ENSG00000253273 | 1.8837    | 0.029802    | 1.8837      | 0.029802    | 1.8837   | 0.029802 |
|             | 1.8837          | 0.029802  | 0.029802    | 0.466926829 |             |          |          |
| VN1R13P     | ENSG00000216762 | 1.8836    | 0.02981     | 0.507       | 0.30608     | -0.50513 | 0.69327  |
|             | -1.5315         | 0.93718   | 0.02981     | 0.466926829 |             |          |          |
| ABRAXAS1    | ENSG00000163322 | 0.60116   | 0.27387     | 1.8835      | 0.029814    | 1.8835   |          |
|             | 0.029814        | 1.7935    | 0.036446    | 0.029814    | 0.466926829 |          |          |
| MCHR2       | ENSG00000152034 | 0.32744   | 0.37167     | 0.38537     | 0.34998     | 0.59502  | 0.27592  |
|             | 1.8835          | 0.029816  | 0.029816    | 0.466926829 |             |          |          |
| NA          | ENSG00000249748 | 0.85281   | 0.19688     | -0.41234    | 0.65996     | 1.8834   | 0.02982  |
|             | -1.2405         | 0.89261   | 0.02982     | 0.466926829 |             |          |          |
| ZNF863P     | ENSG00000236538 | 1.8833    | 0.029832    | 1.8833      | 0.029832    | 1.8833   |          |
|             | 0.029832        | 1.8833    | 0.029832    | 0.029832    | 0.466926829 |          |          |
| COTL1       | ENSG00000103187 | 1.8832    | 0.029839    | -0.90453    | 0.81714     | -0.0416  | 0.51659  |
|             | -2.0143         | 0.97801   | 0.029839    | 0.466926829 |             |          |          |
| TRAPPC2B    | ENSG00000256060 | 1.8829    | 0.029857    | 1.8829      | 0.029857    | 1.8829   |          |
|             | 0.029857        | 1.8829    | 0.029857    | 0.029857    | 0.466926829 |          |          |
| MAN2A2      | ENSG00000196547 | 1.8828    | 0.029867    | 1.8828      | 0.029867    | 1.7924   |          |
|             | 0.036536        | 1.2276    | 0.1098      | 0.029867    | 0.466926829 |          |          |
| NA          | ENSG00000249763 | -1.3789   | 0.91603     | -0.48451    | 0.68599     | -0.95282 | 0.82966  |
|             | 1.8828          | 0.029867  | 0.029867    | 0.466926829 |             |          |          |
| PHBP7       | ENSG00000213711 | -0.87548  | 0.80934     | -0.87548    | 0.80934     | -0.87548 | 0.80934  |
|             | 1.8826          | 0.029877  | 0.029877    | 0.466926829 |             |          |          |
| ZGPAT       | ENSG00000197114 | 0.71708   | 0.23666     | 0.71708     | 0.23666     | 1.6541   | 0.04905  |
|             | 1.8825          | 0.029886  | 0.029886    | 0.466926829 |             |          |          |
| DYNC2LI1    | ENSG00000138036 | 1.882     | 0.029916    | 1.882       | 0.029916    | 1.882    | 0.029916 |
|             | 0.029916        | 0.029916  | 0.467245731 |             |             |          |          |
| RNA5SP466   | ENSG00000252546 | 1.8817    | 0.029937    | 1.8817      | 0.029937    | 1.8817   |          |
|             | 0.029937        | 1.8817    | 0.029937    | 0.029937    | 0.467423906 |          |          |
| LINC02722   | ENSG00000255169 | 0.61759   | 0.26842     | 0.61759     | 0.26842     | 1.8815   |          |
|             | 0.029954        | 0.61759   | 0.26842     | 0.029954    | 0.467539532 |          |          |
| GRPEL1      | ENSG00000109519 | 0.15138   | 0.43984     | 1.8746      | 0.030425    | 1.8811   |          |
|             | 0.029977        | 0.92959   | 0.17629     | 0.029977    | 0.467590732 |          |          |
| NA          | ENSG00000225044 | 1.8806    | 0.030013    | 0.045168    | 0.48199     | -0.78299 | 0.78318  |
|             | -0.78299        | 0.78318   | 0.030013    | 0.467590732 |             |          |          |
| CELSR3      | ENSG00000008300 | 1.8805    | 0.030023    | 1.6321      | 0.051326    | 1.4072   |          |
|             | 0.079689        | 1.3382    | 0.090416    | 0.030023    | 0.467590732 |          |          |
| SUCLA2P3    | ENSG00000229593 | 1.205     | 0.11411     | 1.5296      | 0.063061    | 1.5296   | 0.063061 |
|             | 1.8805          | 0.030023  | 0.030023    | 0.467590732 |             |          |          |
| CAPNS1P1    | ENSG00000215874 | 1.8804    | 0.030027    | 1.8804      | 0.030027    | 0.77068  |          |
|             | 0.22045         | 1.2247    | 0.11034     | 0.030027    | 0.467590732 |          |          |
| CACNA1C-AS3 | ENSG00000256769 | 1.8803    | 0.030032    | 1.8803      | 0.030032    | 1.8803   |          |
|             | 0.030032        | 1.8803    | 0.030032    | 0.030032    | 0.467590732 |          |          |
| NA          | ENSG00000235815 | -0.020384 | 0.50813     | -0.23375    | 0.59241     | 1.1971   | 0.11563  |
|             | 1.8801          | 0.030047  | 0.030047    | 0.467590732 |             |          |          |

|              |                 |            |            |             |             |             |          |           |
|--------------|-----------------|------------|------------|-------------|-------------|-------------|----------|-----------|
| NA           | ENSG00000266573 | -1.3063    | 0.90428    | -0.37427    | 0.6459      | 1.88        | 0.030051 |           |
|              |                 | -0.79565   | 0.78688    | 0.030051    | 0.467590732 |             |          |           |
| SNORD18C     | ENSG00000199574 | 1.8797     | 0.030071   | 0.030071    | 1.8797      | 0.030071    | 1.8797   |           |
|              |                 | 0.030071   | 1.8797     | 0.030071    | 0.030071    | 0.467590732 |          |           |
| RN7SL738P    | ENSG00000243339 | 1.8797     | 0.030077   | 0.030077    | 1.8797      | 0.030077    | 1.8797   |           |
|              |                 | 0.030077   | 1.8797     | 0.030077    | 0.030077    | 0.467590732 |          |           |
| NA           | ENSG00000259033 | 0.78761    | 0.21546    | 1.8796      | 0.030079    | 0.78761     | 0.21546  |           |
|              |                 | 0.78761    | 0.21546    | 0.030079    | 0.467590732 |             |          |           |
| RNU6-1008P   | ENSG00000206887 | 1.8796     | 0.030084   | 1.8796      | 0.030084    | 1.8796      |          |           |
|              |                 | 0.030084   | 1.8796     | 0.030084    | 0.030084    | 0.467590732 |          |           |
| PLXDC1       | ENSG00000161381 | 1.6921     | 0.045309   | 1.8792      | 0.030109    | 1.2135      |          |           |
|              |                 | 0.11246    | 0.042105   | 0.48321     | 0.030109    | 0.467590732 |          |           |
| BNC2         | ENSG00000173068 | 1.1795     | 0.11909    | 0.82449     | 0.20483     | 1.8792      | 0.03011  |           |
|              |                 | 0.94001    | 0.17361    | 0.03011     | 0.467590732 |             |          |           |
| MIR4746      | ENSG00000266437 | 1.8792     | 0.030112   | 1.8792      | 0.030112    | 1.8792      |          |           |
|              |                 | 0.030112   | 1.8792     | 0.030112    | 0.030112    | 0.467590732 |          |           |
| THAP12P7     | ENSG00000253919 | 1.2557     | 0.10461    | 1.8791      | 0.030113    | 0.58792     |          |           |
|              |                 | 0.27829    | 0.13425    | 0.4466      | 0.030113    | 0.467590732 |          |           |
| KLC4         | ENSG00000137171 | 1.425      | 0.077074   | 1.879       | 0.030121    | 0.732       | 0.23208  | -0.051054 |
|              |                 | 0.52036    | 0.030121   | 0.467590732 |             |             |          |           |
| TENM2        | ENSG00000145934 | 1.8789     | 0.03013    | 1.2798      | 0.10031     | 0.42023     | 0.33716  |           |
|              |                 | 0.84171    | 0.19997    | 0.03013     | 0.467590732 |             |          |           |
| NA           | ENSG00000273965 | 0.96682    | 0.16682    | 1.8781      | 0.030181    | 1.8781      | 0.030181 |           |
|              |                 | 1.1829     | 0.11843    | 0.030181    | 0.468099574 |             |          |           |
| BASP1-AS1    | ENSG00000215196 | 1.8781     | 0.030182   | 0.6224      | 0.26684     | 0.48289     |          |           |
|              |                 | 0.31459    | 0.08255    | 0.4671      | 0.030182    | 0.468099574 |          |           |
| ADSS1        | ENSG00000185100 | 1.0718     | 0.14191    | 1.8777      | 0.030214    | 1.5298      | 0.063033 |           |
|              |                 | -0.65122   | 0.74255    | 0.030214    | 0.468446777 |             |          |           |
| RNU4-23P     | ENSG00000199709 | 1.8775     | 0.030225   | 1.8775      | 0.030225    | 1.8775      |          |           |
|              |                 | 0.030225   | 1.8775     | 0.030225    | 0.030225    | 0.468468273 |          |           |
| INTS11       | ENSG00000127054 | 1.8772     | 0.030246   | 1.778       | 0.037705    | 1.7635      | 0.038908 |           |
|              |                 | 1.7754     | 0.037918   | 0.030246    | 0.468563648 |             |          |           |
| VCP          | ENSG00000165280 | 0.23686    | 0.40638    | -0.68314    | 0.75274     | -0.45603    | 0.67581  |           |
|              |                 | 1.8771     | 0.030253   | 0.030253    | 0.468563648 |             |          |           |
| NA           | ENSG00000228108 | -0.42527   | 0.66468    | 1.877       | 0.03026     | 0.49239     | 0.31122  | 1.586     |
|              |                 | 0.056368   | 0.03026    | 0.468563648 |             |             |          |           |
| NICN1        | ENSG00000145029 | 1.8763     | 0.030306   | 1.8763      | 0.030306    | 1.8763      | 0.030306 |           |
|              |                 | 1.8763     | 0.030306   | 0.030306    | 0.468933725 |             |          |           |
| FAR1P1       | ENSG00000235879 | -0.5372    | 0.70444    | 1.8758      | 0.030339    | -0.5372     |          |           |
|              |                 | 0.70444    | -0.5372    | 0.70444     | 0.030339    | 0.468933725 |          |           |
| ATP1A4       | ENSG00000132681 | 1.8758     | 0.030344   | 1.6255      | 0.052023    | 1.1436      |          |           |
|              |                 | 0.12639    | 1.5978     | 0.05504     | 0.030344    | 0.468933725 |          |           |
| NA           | ENSG00000235038 | -0.0045653 | 0.50182    | 1.8755      | 0.030363    | -0.35865    | 0.64007  |           |
|              |                 | -0.0045653 | 0.50182    | 0.030363    | 0.468933725 |             |          |           |
| ARHGAP15-AS1 | ENSG00000231758 | 1.2437     | 0.1068     | 1.854       | 0.03187     | 1.8754      |          |           |
|              |                 | 0.030372   | -0.0017194 | 0.50069     | 0.030372    | 0.468933725 |          |           |
| NA           | ENSG00000199332 | -0.026661  | 0.51063    | 1.8753      | 0.030374    | 1.0871      | 0.1385   |           |
|              |                 | 0.70023    | 0.24189    | 0.030374    | 0.468933725 |             |          |           |
| CADPS2       | ENSG00000081803 | 1.8753     | 0.030377   | 0.37024     | 0.3556      | 0.91367     |          |           |
|              |                 | 0.18044    | 0.13404    | 0.44668     | 0.030377    | 0.468933725 |          |           |
| PAX8-AS1     | ENSG00000189223 | 1.8661     | 0.03101    | 1.8752      | 0.030381    | 1.8661      |          |           |
|              |                 | 0.03101    | 1.8661     | 0.03101     | 0.030381    | 0.468933725 |          |           |
| APOC3        | ENSG00000110245 | 1.5504     | 0.060525   | 1.5504      | 0.060525    | 1.0093      | 0.15642  |           |
|              |                 | 1.8751     | 0.030391   | 0.030391    | 0.468933725 |             |          |           |
| NA           | ENSG00000233021 | 1.7337     | 0.041482   | 1.875       | 0.030397    | 1.875       | 0.030397 | 1.875     |
|              |                 | 0.030397   | 0.030397   | 0.468933725 |             |             |          |           |
| CAMTA1-IT1   | ENSG00000237402 | 0.49964    | 0.30867    | 0.49119     | 0.31165     | 1.8749      |          |           |
|              |                 | 0.030401   | 0.072466   | 0.47112     | 0.030401    | 0.468933725 |          |           |
| BEND7        | ENSG00000165626 | 1.8748     | 0.030408   | 1.8748      | 0.030408    | 1.7491      | 0.04014  |           |
|              |                 | 1.6007     | 0.054717   | 0.030408    | 0.468933725 |             |          |           |
| BUD31        | ENSG00000106245 | 1.8748     | 0.030409   | 1.8748      | 0.030409    | 0.94932     | 0.17123  |           |
|              |                 | 1.8392     | 0.03294    | 0.030409    | 0.468933725 |             |          |           |

|              |                 |           |          |             |             |          |          |
|--------------|-----------------|-----------|----------|-------------|-------------|----------|----------|
| MIR648       | ENSG00000207780 | 1.3668    | 0.085837 | 1.3668      | 0.085837    | 1.8744   |          |
|              | 0.030439        | 1.3668    | 0.085837 | 0.030439    | 0.469205122 |          |          |
| CYP2AB1P     | ENSG00000233441 | 0.29034   | 0.38578  | 1.6973      | 0.044823    | 1.874    | 0.030463 |
|              | 0.24727         | 0.40235   | 0.030463 | 0.469205122 |             |          |          |
| LRR3         | ENSG00000160233 | 1.874     | 0.030468 | 0.87758     | 0.19009     | 1.5793   | 0.057137 |
|              | -0.23174        | 0.59163   | 0.030468 | 0.469205122 |             |          |          |
| CYP3A54P     | ENSG00000261809 | -1.3466   | 0.91095  | 1.2771      | 0.10078     | 1.8739   |          |
|              | 0.030475        | 0.21403   | 0.41526  | 0.030475    | 0.469205122 |          |          |
| NA           | ENSG00000259390 | 1.1034    | 0.13493  | 1.43        | 0.076352    | 1.8737   | 0.030489 |
|              | 0.21257         | 0.41583   | 0.030489 | 0.469205122 |             |          |          |
| ATP5MF-PTCD1 | ENSG00000248919 | 1.8736    | 0.030494 | 1.8736      | 0.030494    | 1.8736   |          |
|              | 0.030494        | 1.8736    | 0.030494 | 0.030494    | 0.469205122 |          |          |
| NA           | ENSG00000278900 | -0.64734  | 0.7413   | 1.8736      | 0.030494    | 1.842    | 0.032735 |
|              | 1.0043          | 0.15761   | 0.030494 | 0.469205122 |             |          |          |
| MRGPRX9P     | ENSG00000255424 | 1.8733    | 0.030511 | 1.8733      | 0.030511    | 1.8733   |          |
|              | 0.030511        | 1.8733    | 0.030511 | 0.030511    | 0.469231401 |          |          |
| ST3GAL2      | ENSG00000157350 | 1.8731    | 0.030527 | 1.7514      | 0.039935    | 1.8255   |          |
|              | 0.03396         | 0.58856   | 0.27808  | 0.030527    | 0.469231401 |          |          |
| SPAG5-AS1    | ENSG00000227543 | 1.8729    | 0.030543 | 1.8729      | 0.030543    | 1.8729   |          |
|              | 0.030543        | 1.8729    | 0.030543 | 0.030543    | 0.469231401 |          |          |
| NA           | ENSG00000263635 | 1.2139    | 0.11239  | 1.8728      | 0.030549    | 1.8728   | 0.030549 |
|              | 1.8465          | 0.032412  | 0.030549 | 0.469231401 |             |          |          |
| CENPT        | ENSG00000102901 | -0.70319  | 0.75903  | -0.70319    | 0.75903     | -0.54291 | 0.70641  |
|              | 1.8726          | 0.030563  | 0.030563 | 0.469231401 |             |          |          |
| NA           | ENSG00000203286 | 0.34573   | 0.36477  | 0.97704     | 0.16428     | 0.782    | 0.21711  |
|              | 1.8725          | 0.030569  | 0.030569 | 0.469231401 |             |          |          |
| KNOP1P2      | ENSG00000270429 | 1.8724    | 0.030575 | 1.8724      | 0.030575    | 1.8724   |          |
|              | 0.030575        | 1.8724    | 0.030575 | 0.030575    | 0.469231401 |          |          |
| PIK3AP1      | ENSG00000155629 | -1.3114   | 0.90514  | -1.3114     | 0.90514     | -1.3114  |          |
|              | 0.90514         | 1.8724    | 0.030579 | 0.030579    | 0.469231401 |          |          |
| NA           | ENSG00000218499 | 1.8601    | 0.031436 | -0.79004    | 0.78525     | 1.8722   | 0.03059  |
|              | 0.3818          | 0.3513    | 0.03059  | 0.469231401 |             |          |          |
| LYAR         | ENSG00000145220 | 1.8722    | 0.030592 | 0.9342      | 0.1751      | 0.65223  | 0.25713  |
|              | 1.8722          | 0.030592  | 0.030592 | 0.469231401 |             |          |          |
| NA           | ENSG00000237090 | 1.8718    | 0.030619 | 1.8718      | 0.030619    | 1.8718   | 0.030619 |
|              | 1.8718          | 0.030619  | 0.030619 | 0.469376674 |             |          |          |
| AKR1B15      | ENSG00000227471 | 0.0020438 | 0.49918  | 1.8716      | 0.030633    | 0.37851  |          |
|              | 0.35252         | -0.84274  | 0.80031  | 0.030633    | 0.469376674 |          |          |
| NBPF6        | ENSG00000186086 | 0.55205   | 0.29046  | 1.8715      | 0.030639    | 0.54122  | 0.29418  |
|              | 0.24112         | 0.40473   | 0.030639 | 0.469376674 |             |          |          |
| B3GALT1      | ENSG00000172318 | 1.8715    | 0.03064  | -0.26392    | 0.60408     | 0.010578 |          |
|              | 0.49578         | -1.0923   | 0.86265  | 0.03064     | 0.469376674 |          |          |
| CRPPA-AS1    | ENSG00000229688 | -1.3027   | 0.90365  | 1.8712      | 0.030662    | -1.3027  |          |
|              | 0.90365         | -1.3027   | 0.90365  | 0.030662    | 0.469479793 |          |          |
| SAP30BP      | ENSG00000161526 | 1.8711    | 0.030666 | 1.8711      | 0.030666    | 1.8711   |          |
|              | 0.030666        | 1.7394    | 0.040984 | 0.030666    | 0.469479793 |          |          |
| NA           | ENSG00000227748 | 1.8709    | 0.030681 | 1.616       | 0.05305     | 1.5463   | 0.061014 |
|              | 1.3553          | 0.087667  | 0.030681 | 0.469561913 |             |          |          |
| NA           | ENSG00000234630 | 1.8707    | 0.030696 | 1.8707      | 0.030696    | 0.61377  | 0.26968  |
|              | -0.15292        | 0.56077   | 0.030696 | 0.469643981 |             |          |          |
| SFTPA2       | ENSG00000185303 | 0.67902   | 0.24856  | 1.8705      | 0.03071     | 0.97131  |          |
|              | 0.1657          | 0.83994   | 0.20047  | 0.03071     | 0.469710703 |          |          |
| RN7SL601P    | ENSG00000243346 | 0.096153  | 0.4617   | 0.56091     | 0.28743     | -0.42145 |          |
|              | 0.66329         | 1.8702    | 0.030726 | 0.030726    | 0.469721738 |          |          |
| NPIP8        | ENSG00000255524 | 0.74877   | 0.227    | -0.63613    | 0.73765     | 1.8702   | 0.03073  |
|              | 0.18668         | 0.42596   | 0.03073  | 0.469721738 |             |          |          |
| NEDD8-MDP1   | ENSG00000255526 | 1.8694    | 0.030782 | 1.8694      | 0.030782    | 1.8694   |          |
|              | 0.030782        | 1.8694    | 0.030782 | 0.030782    | 0.470369037 |          |          |
| ALG14-AS1    | ENSG00000230427 | 0.74132   | 0.22925  | 0.84154     | 0.20002     | 0.33175  |          |
|              | 0.37004         | 1.8692    | 0.030794 | 0.030794    | 0.470392121 |          |          |
| TRAPPC11     | ENSG00000168538 | 1.2377    | 0.10792  | 1.8689      | 0.030817    | 0.50403  |          |
|              | 0.30712         | 0.54706   | 0.29217  | 0.030817    | 0.470392121 |          |          |

|            |                 |          |          |             |             |          |          |
|------------|-----------------|----------|----------|-------------|-------------|----------|----------|
| TNPO1P3    | ENSG00000229586 | 1.8688   | 0.030828 | 1.1904      | 0.11695     | 1.4078   |          |
|            | 0.079589        | -0.70669 | 0.76012  | 0.030828    | 0.470392121 |          |          |
| SLC6A16    | ENSG00000063127 | 1.8687   | 0.030834 | 0.030834    | 0.89784     | 0.18464  | 1.8687   |
|            | 0.030834        | 1.8687   | 0.030834 | 0.030834    | 0.470392121 |          |          |
| NA         | ENSG00000244345 | -0.65224 | 0.74288  | -1.4451     | 0.92578     | -0.9388  | 0.82608  |
|            | 1.8686          | 0.030841 | 0.030841 | 0.470392121 |             |          |          |
| NA         | ENSG00000231054 | 1.8682   | 0.030867 | 1.8682      | 0.030867    | 1.8682   | 0.030867 |
|            | 1.8682          | 0.030867 | 0.030867 | 0.470392121 |             |          |          |
| DSCAM      | ENSG00000171587 | 0.66859  | 0.25188  | 1.8682      | 0.03087     | 1.4701   | 0.070772 |
|            | 0.58379         | 0.27968  | 0.03087  | 0.470392121 |             |          |          |
| HHIP       | ENSG00000164161 | 1.8679   | 0.030886 | -0.15503    | 0.5616      | -0.64574 | 0.74077  |
|            | 1.4304          | 0.076298 | 0.030886 | 0.470392121 |             |          |          |
| PLEKHO1    | ENSG00000023902 | 1.5314   | 0.062831 | 1.4682      | 0.071026    | 1.4682   |          |
|            | 0.071026        | 1.8679   | 0.030887 | 0.030887    | 0.470392121 |          |          |
| TXNIP      | ENSG00000265972 | 1.8351   | 0.033247 | 1.7098      | 0.043649    | 1.8677   | 0.0309   |
|            | 1.3832          | 0.0833   | 0.0309   | 0.470392121 |             |          |          |
| SNORD115-1 | ENSG00000201831 | 1.8677   | 0.030901 | 1.8677      | 0.030901    | 1.8677   |          |
|            | 0.030901        | 1.8677   | 0.030901 | 0.030901    | 0.470392121 |          |          |
| DMAC1P1    | ENSG00000270814 | 1.8677   | 0.030901 | 1.8677      | 0.030901    | 1.8677   |          |
|            | 0.030901        | 1.8677   | 0.030901 | 0.030901    | 0.470392121 |          |          |
| TENM4      | ENSG00000149256 | 0.71927  | 0.23599  | 0.067266    | 0.47319     | 0.65256  | 0.25702  |
|            | 1.8676          | 0.030909 | 0.030909 | 0.470392121 |             |          |          |
| DDX19B     | ENSG00000157349 | 0.53492  | 0.29635  | 1.8666      | 0.030981    | 1.0955   |          |
|            | 0.13666         | 1.0955   | 0.13666  | 0.030981    | 0.4705357   |          |          |
| ZNF548     | ENSG00000188785 | 0.64949  | 0.25801  | 1.2987      | 0.097019    | 1.8665   |          |
|            | 0.030985        | 1.8665   | 0.030985 | 0.030985    | 0.4705357   |          |          |
| TRBV7-7    | ENSG00000253291 | 1.8665   | 0.030989 | -0.55866    | 0.7118      | 1.4337   |          |
|            | 0.075833        | 1.4337   | 0.075833 | 0.030989    | 0.4705357   |          |          |
| SNAI3-AS1  | ENSG00000260630 | 1.8664   | 0.030992 | -0.36526    | 0.64254     | 0.91725  |          |
|            | 0.17951         | 0.96495  | 0.16728  | 0.030992    | 0.4705357   |          |          |
| LINC02837  | ENSG00000264464 | 0.55307  | 0.29011  | 0.55307     | 0.29011     | 1.1769   |          |
|            | 0.11961         | 1.8662   | 0.031008 | 0.031008    | 0.4705357   |          |          |
| NA         | ENSG00000225144 | 1.7992   | 0.035995 | 0.186       | 0.42622     | 1.7992   | 0.035995 |
|            | 1.8661          | 0.031015 | 0.031015 | 0.4705357   |             |          |          |
| RPL7P1     | ENSG00000214485 | -0.23593 | 0.59326  | 1.866       | 0.031018    | -0.23593 | 0.59326  |
|            | -0.23593        | 0.59326  | 0.031018 | 0.4705357   |             |          |          |
| MIR4324    | ENSG00000265407 | 1.8658   | 0.031032 | 1.8658      | 0.031032    | 1.8658   |          |
|            | 0.031032        | 1.8658   | 0.031032 | 0.031032    | 0.4705357   |          |          |
| RNU6-928P  | ENSG00000252685 | 1.8655   | 0.031059 | 1.8655      | 0.031059    | 1.8655   |          |
|            | 0.031059        | 1.8655   | 0.031059 | 0.031059    | 0.4705357   |          |          |
| NA         | ENSG00000266932 | 1.8655   | 0.031059 | 0.46152     | 0.32221     | -0.252   | 0.59948  |
|            | -0.252          | 0.59948  | 0.031059 | 0.4705357   |             |          |          |
| DPYSL2     | ENSG00000092964 | 0.86185  | 0.19439  | 0.96863     | 0.16636     | 1.3869   |          |
|            | 0.082735        | 1.8652   | 0.031077 | 0.031077    | 0.4705357   |          |          |
| ZNF543     | ENSG00000178229 | 0.55618  | 0.28904  | 1.3635      | 0.086355    | 1.3635   |          |
|            | 0.086355        | 1.8651   | 0.031085 | 0.031085    | 0.4705357   |          |          |
| LINC02492  | ENSG00000250590 | 1.865    | 0.031089 | -0.76928    | 0.77914     | 0.11067  | 0.45594  |
|            | -0.40976        | 0.65901  | 0.031089 | 0.4705357   |             |          |          |
| NA         | ENSG00000234735 | 1.8648   | 0.031106 | 1.8648      | 0.031106    | 1.8648   | 0.031106 |
|            | 1.8648          | 0.031106 | 0.031106 | 0.4705357   |             |          |          |
| RPS19      | ENSG00000105372 | 1.8647   | 0.031109 | 1.8647      | 0.031109    | 1.2103   | 0.11307  |
|            | 1.8647          | 0.031109 | 0.031109 | 0.4705357   |             |          |          |
| RER1       | ENSG00000157916 | 0.42888  | 0.33401  | 1.8647      | 0.031115    | 0.24961  | 0.40144  |
|            | 0.24961         | 0.40144  | 0.031115 | 0.4705357   |             |          |          |
| NA         | ENSG00000228120 | 0.93422  | 0.17509  | 1.1889      | 0.11724     | 0.39179  | 0.34761  |
|            | 1.8644          | 0.031134 | 0.031134 | 0.4705357   |             |          |          |
| PIP5K1A    | ENSG00000143398 | 1.6703   | 0.047433 | 1.8643      | 0.031141    | 1.4004   |          |
|            | 0.080692        | 0.90814  | 0.1819   | 0.031141    | 0.4705357   |          |          |
| LINC01104  | ENSG00000232084 | 1.5554   | 0.059922 | 1.8558      | 0.031744    | 1.8642   |          |
|            | 0.031148        | 0.97623  | 0.16448  | 0.031148    | 0.4705357   |          |          |
| FAM187B    | ENSG00000177558 | 1.8641   | 0.031153 | 1.8641      | 0.031153    | 1.8641   |          |
|            | 0.031153        | 1.8641   | 0.031153 | 0.031153    | 0.4705357   |          |          |



|           |                 |          |          |           |           |           |          |
|-----------|-----------------|----------|----------|-----------|-----------|-----------|----------|
| NA        | ENSG00000260051 | 1.8637   | 0.031179 | 1.8637    | 0.031179  | 1.8637    | 0.031179 |
|           |                 | 1.8637   | 0.031179 | 0.4705357 |           |           |          |
| RPL15P3   | ENSG00000212802 | -0.74321 | 0.77132  | -0.9445   | 0.82754   | 1.0859    |          |
|           |                 | 0.13877  | 1.8635   | 0.031193  | 0.031193  | 0.4705357 |          |
| NA        | ENSG00000271272 | 1.8635   | 0.031197 | 1.0699    | 0.14233   | 1.8635    | 0.031197 |
|           |                 | 1.448    | 0.073814 | 0.031197  | 0.4705357 |           |          |
| NA        | ENSG00000259187 | 1.0482   | 0.14726  | 1.0482    | 0.14726   | -1.0344   | 0.84953  |
|           |                 | 1.8634   | 0.031202 | 0.031202  | 0.4705357 |           |          |
| RNA5SP472 | ENSG00000200738 | 0.26539  | 0.39536  | 1.8634    | 0.031204  | -0.90564  |          |
|           |                 | 0.81744  | -0.90564 | 0.81744   | 0.031204  | 0.4705357 |          |
| GPR55     | ENSG00000135898 | 1.8633   | 0.031209 | 0.47019   | 0.31911   | -1.1854   | 0.88207  |
|           |                 | -1.0808  | 0.86012  | 0.031209  | 0.4705357 |           |          |
| RNU6-406P | ENSG00000252279 | 0.79899  | 0.21215  | -0.076623 | 0.53054   | -0.14493  |          |
|           |                 | 0.55762  | 1.863    | 0.031232  | 0.031232  | 0.4705357 |          |
| DCST1     | ENSG00000163357 | 0.48806  | 0.31275  | 0.48806   | 0.31275   | 0.48806   | 0.31275  |
|           |                 | 1.8628   | 0.031244 | 0.031244  | 0.4705357 |           |          |
| NA        | ENSG00000264422 | 1.8627   | 0.031251 | 0.19871   | 0.42124   | -1.8083   | 0.96472  |
|           |                 | 1.1394   | 0.12727  | 0.031251  | 0.4705357 |           |          |
| LRRC3-DT  | ENSG00000229356 | 1.8625   | 0.031269 | 1.3429    | 0.089659  | 1.8625    |          |
|           |                 | 0.031269 | 1.8625   | 0.031269  | 0.031269  | 0.4705357 |          |
| RNA5SP305 | ENSG00000199535 | 1.8622   | 0.031288 | 1.3279    | 0.092098  | 1.8622    |          |
|           |                 | 0.031288 | 1.8622   | 0.031288  | 0.031288  | 0.4705357 |          |
| CBARP     | ENSG00000099625 | -0.18565 | 0.57364  | -1.562    | 0.94085   | -0.20128  | 0.57976  |
|           |                 | 1.8621   | 0.031295 | 0.031295  | 0.4705357 |           |          |
| NA        | ENSG00000231702 | -0.47523 | 0.68269  | 1.8621    | 0.031297  | -0.47523  | 0.68269  |
|           |                 | -0.47523 | 0.68269  | 0.031297  | 0.4705357 |           |          |
| RNU1-77P  | ENSG00000212170 | 1.862    | 0.0313   | 0.83501   | 0.20186   | 1.1475    | 0.12559  |
|           |                 | 0.83501  | 0.20186  | 0.0313    | 0.4705357 |           |          |
| EFHB      | ENSG00000163576 | 1.744    | 0.040577 | 1.0658    | 0.14325   | 1.8617    | 0.031323 |
|           |                 | -0.28872 | 0.6136   | 0.031323  | 0.4705357 |           |          |
| RPS3AP14  | ENSG00000242229 | 0.57089  | 0.28404  | 0.067572  | 0.47306   | 1.8612    |          |
|           |                 | 0.031358 | 0.89308  | 0.18591   | 0.031358  | 0.4705357 |          |
| NA        | ENSG00000227912 | 0.25493  | 0.39939  | 0.25493   | 0.39939   | 0.25493   | 0.39939  |
|           |                 | 1.8609   | 0.031377 | 0.031377  | 0.4705357 |           |          |
| RPS4XP2   | ENSG00000226948 | -0.62489 | 0.73398  | 1.8608    | 0.031387  | -0.62489  |          |
|           |                 | 0.73398  | 0.36821  | 0.35636   | 0.031387  | 0.4705357 |          |
| RNU11-3P  | ENSG00000212413 | 0.38076  | 0.35169  | 1.8607    | 0.031394  | 1.8607    |          |
|           |                 | 0.031394 | 1.8607   | 0.031394  | 0.031394  | 0.4705357 |          |
| GUCA2A    | ENSG00000197273 | 1.8605   | 0.031407 | 0.69407   | 0.24382   | 0.8226    |          |
|           |                 | 0.20537  | 1.3131   | 0.094571  | 0.031407  | 0.4705357 |          |
| NA        | ENSG00000202224 | 1.8603   | 0.031418 | 1.8603    | 0.031418  | 1.3085    | 0.09535  |
|           |                 | -0.28298 | 0.6114   | 0.031418  | 0.4705357 |           |          |
| RN7SKP247 | ENSG00000223026 | 0.87919  | 0.18965  | 1.3879    | 0.082588  | 1.6856    |          |
|           |                 | 0.045933 | 1.8603   | 0.03142   | 0.03142   | 0.4705357 |          |
| RPL17P45  | ENSG00000267664 | 1.8602   | 0.031428 | 1.8602    | 0.031428  | 1.8602    |          |
|           |                 | 0.031428 | 1.8602   | 0.031428  | 0.031428  | 0.4705357 |          |
| LINC01433 | ENSG00000230176 | 1.86     | 0.031443 | 1.86      | 0.031443  | 1.86      | 0.031443 |
|           |                 | 0.031443 | 0.031443 | 0.4705357 |           |           |          |
| ZDBF2     | ENSG00000204186 | 0.68217  | 0.24756  | 1.8599    | 0.031453  | 1.8599    | 0.031453 |
|           |                 | 1.8599   | 0.031453 | 0.031453  | 0.4705357 |           |          |
| RPS15AP3  | ENSG00000214903 | 1.8595   | 0.031481 | 1.1179    | 0.1318    | 1.8595    |          |
|           |                 | 0.031481 | 1.8595   | 0.031481  | 0.031481  | 0.4705357 |          |
| LINC01956 | ENSG00000258910 | 0.46875  | 0.31962  | -0.61647  | 0.73121   | 1.8594    |          |
|           |                 | 0.031483 | 1.8594   | 0.031483  | 0.031483  | 0.4705357 |          |
| BBOF1     | ENSG00000119636 | 0.77099  | 0.22036  | 1.0867    | 0.13858   | 1.6833    | 0.046156 |
|           |                 | 1.8592   | 0.031498 | 0.031498  | 0.4705357 |           |          |
| ARHGAP22  | ENSG00000128805 | -0.62503 | 0.73402  | -0.53844  | 0.70486   | -0.77233  |          |
|           |                 | 0.78004  | 1.8587   | 0.031532  | 0.031532  | 0.4705357 |          |
| LEMD1-DT  | ENSG00000224717 | 1.8585   | 0.03155  | 1.8585    | 0.03155   | 1.8585    |          |
|           |                 | 0.03155  | 1.8585   | 0.03155   | 0.03155   | 0.4705357 |          |
| NA        | ENSG00000237844 | 0.69982  | 0.24202  | 0.34563   | 0.36481   | 1.8584    | 0.031554 |
|           |                 | -0.1506  | 0.55985  | 0.031554  | 0.4705357 |           |          |

|           |                 |          |          |           |          |           |          |           |          |           |           |
|-----------|-----------------|----------|----------|-----------|----------|-----------|----------|-----------|----------|-----------|-----------|
| RPS3AP23  | ENSG00000218351 | 0.81529  | 0.20745  | 1.8584    | 0.031555 | 0.81529   | 0.20745  | 0.81529   | 0.20745  | 0.031555  | 0.4705357 |
| TWF2      | ENSG00000247596 | 1.3157   | 0.094132 | 1.8583    | 0.031564 | 1.8583    | 0.031564 | 1.8583    | 0.031564 | 1.8583    | 0.4705357 |
| NA        | ENSG00000225936 | 1.8581   | 0.031579 | 1.8581    | 0.031579 | 1.8581    | 0.031579 | 1.8581    | 0.031579 | 1.8581    | 0.4705357 |
| ZNF791    | ENSG00000173875 | 1.8578   | 0.031599 | 0.2159    | 0.41453  | 0.2159    | 0.41453  | 0.2159    | 0.41453  | 0.2159    | 0.4705357 |
| SLC25A20  | ENSG00000178537 | 1.5082   | 0.065758 | 1.8578    | 0.031599 | 0.55942   | 0.031599 | 0.55942   | 0.031599 | 0.55942   | 0.4705357 |
| SDAD1P1   | ENSG00000228451 | 1.8577   | 0.031603 | 1.1752    | 0.11996  | 1.1752    | 0.031603 | 1.1752    | 0.031603 | 1.1752    | 0.4705357 |
| NA        | ENSG00000258989 | 1.8577   | 0.031605 | 1.8577    | 0.031605 | 1.8577    | 0.031605 | 1.8577    | 0.031605 | 1.8577    | 0.4705357 |
| NA        | ENSG00000236957 | 1.8576   | 0.03161  | -0.026625 | 0.51062  | -0.80263  | 0.03161  | -0.026625 | 0.51062  | -0.80263  | 0.4705357 |
| NA        | ENSG00000252399 | 0.98373  | 0.16262  | 0.9346    | 0.175    | 1.8575    | 0.03162  | 0.16262   | 0.9346   | 0.175     | 1.8575    |
| MYF5      | ENSG00000111049 | 1.8574   | 0.031629 | 0.39883   | 0.34501  | 0.39883   | 0.031629 | 0.39883   | 0.34501  | 0.39883   | 0.4705357 |
| CENPBD1   | ENSG00000177946 | 1.8573   | 0.031636 | 1.8573    | 0.031636 | 1.8573    | 0.031636 | 1.8573    | 0.031636 | 1.8573    | 0.4705357 |
| HHIPL2    | ENSG00000143512 | 1.8571   | 0.03165  | -0.070266 | 0.52801  | 1.2178    | 0.03165  | -0.070266 | 0.52801  | 1.2178    | 0.4705357 |
| MBD3L2B   | ENSG00000196589 | -1.2015  | 0.88522  | -1.2779   | 0.89936  | 0.32959   | 0.88522  | -1.2779   | 0.89936  | 0.32959   | 0.4705357 |
| RBM26-AS1 | ENSG00000227354 | 1.8567   | 0.031675 | 1.4703    | 0.070736 | 1.6181    | 0.031675 | 1.4703    | 0.070736 | 1.6181    | 0.4705357 |
| RAC1P6    | ENSG00000226962 | 1.8565   | 0.031688 | -0.092373 | 0.5368   | -0.092373 | 0.031688 | -0.092373 | 0.5368   | -0.092373 | 0.4705357 |
| MRPS7     | ENSG00000125445 | 1.3265   | 0.092333 | 1.3265    | 0.092333 | 1.8564    | 0.092333 | 1.3265    | 0.092333 | 1.8564    | 0.4705357 |
| H2AC6     | ENSG00000180573 | 1.8564   | 0.031702 | 1.0243    | 0.15285  | 1.0243    | 0.031702 | 1.0243    | 0.15285  | 1.0243    | 0.4705357 |
| VPS33B-DT | ENSG00000214432 | 0.44211  | 0.32921  | 0.5278    | 0.29882  | 1.6738    | 0.32921  | 0.5278    | 0.29882  | 1.6738    | 0.4705357 |
| SOD1P3    | ENSG00000253651 | 1.856    | 0.031728 | 1.856     | 0.031728 | 1.856     | 0.031728 | 1.856     | 0.031728 | 1.856     | 0.4705357 |
| MYO18B    | ENSG00000133454 | -1.3896  | 0.91767  | 0.77557   | 0.219    | 1.8559    | 0.91767  | 0.77557   | 0.219    | 1.8559    | 0.4705357 |
| MTUS2     | ENSG00000132938 | -0.79786 | 0.78752  | 1.8559    | 0.031735 | -0.55427  | 0.78752  | 1.8559    | 0.031735 | -0.55427  | 0.4705357 |
| SLC16A14  | ENSG00000163053 | 1.6192   | 0.052704 | 1.8558    | 0.031743 | 0.39575   | 0.052704 | 1.8558    | 0.031743 | 0.39575   | 0.4705357 |
| NA        | ENSG00000275494 | 1.8557   | 0.031747 | 1.8557    | 0.031747 | 1.8557    | 0.031747 | 1.8557    | 0.031747 | 1.8557    | 0.4705357 |
| NFATC2IP  | ENSG00000176953 | 1.0274   | 0.15212  | 1.0996    | 0.13575  | 1.8557    | 0.15212  | 1.0996    | 0.13575  | 1.8557    | 0.4705357 |
| NA        | ENSG00000276259 | 1.8554   | 0.031768 | 1.8554    | 0.031768 | 1.8554    | 0.031768 | 1.8554    | 0.031768 | 1.8554    | 0.4705357 |
| RPS16P9   | ENSG00000242675 | 0.28483  | 0.38789  | -0.029443 | 0.51174  | 1.8553    | 0.38789  | -0.029443 | 0.51174  | 1.8553    | 0.4705357 |
| SLC14A2   | ENSG00000132874 | 1.1254   | 0.13021  | 1.6761    | 0.046855 | 1.6597    | 0.13021  | 1.6761    | 0.046855 | 1.6597    | 0.4705357 |
| LINC00160 | ENSG00000230978 | -0.55591 | 0.71086  | 1.8551    | 0.031794 | 1.2403    | 0.71086  | 1.8551    | 0.031794 | 1.2403    | 0.4705357 |
| NA        | ENSG00000226208 | 1.855    | 0.031795 | 1.855     | 0.031795 | 1.855     | 0.031795 | 1.855     | 0.031795 | 1.855     | 0.4705357 |
| NA        | ENSG00000224326 | 1.8549   | 0.031804 | 1.8549    | 0.031804 | 1.4685    | 0.031804 | 1.8549    | 0.031804 | 1.4685    | 0.4705357 |
| CHRNA2    | ENSG00000160716 | 0.084852 | 0.46619  | 1.8549    | 0.031806 | 1.8349    | 0.46619  | 1.8549    | 0.031806 | 1.8349    | 0.4705357 |

|           |                 |          |           |             |             |           |          |       |
|-----------|-----------------|----------|-----------|-------------|-------------|-----------|----------|-------|
| RNU6-392P | ENSG00000201796 | 1.8549   | 0.031806  | 0.81965     | 0.20621     | 0.81978   |          |       |
|           | 0.20617         | 1.4853   | 0.068726  | 0.031806    | 0.4705357   |           |          |       |
| DNM1      | ENSG00000106976 | -0.24081 | 0.59515   | 1.8544      | 0.03184     | 1.0613    | 0.14427  |       |
|           | 1.3856          | 0.082932 | 0.03184   | 0.4705357   |             |           |          |       |
| NA        | ENSG00000272970 | 0.12291  | 0.45109   | 0.60999     | 0.27093     | 1.8543    | 0.031847 |       |
|           | -1.4578         | 0.92755  | 0.031847  | 0.4705357   |             |           |          |       |
| S100A4    | ENSG00000196154 | 1.8543   | 0.03185   | 1.8543      | 0.03185     | 1.8543    |          |       |
|           | 0.03185         | 1.8543   | 0.03185   | 0.03185     | 0.4705357   |           |          |       |
| LINC02005 | ENSG00000242741 | 0.15098  | 0.43999   | -1.2082     | 0.88651     | 1.8542    |          |       |
|           | 0.031852        | 1.6536   | 0.049104  | 0.031852    | 0.4705357   |           |          |       |
| BCL2L11   | ENSG00000153094 | 1.8389   | 0.032967  | 1.5204      | 0.064203    | -0.066632 |          |       |
|           | 0.52656         | 1.8542   | 0.031854  | 0.031854    | 0.4705357   |           |          |       |
| NA        | ENSG00000236304 | 1.8542   | 0.031856  | 1.8542      | 0.031856    | 1.8542    | 0.031856 |       |
|           | 1.8542          | 0.031856 | 0.031856  | 0.4705357   |             |           |          |       |
| ERICD     | ENSG00000280303 | 1.8541   | 0.03186   | 1.8541      | 0.03186     | 1.8541    | 0.03186  |       |
|           | 1.8541          | 0.03186  | 0.03186   | 0.4705357   |             |           |          |       |
| WDR75     | ENSG00000115368 | 0.92445  | 0.17763   | 1.0173      | 0.15451     | 1.4719    | 0.070526 |       |
|           | 1.854           | 0.031866 | 0.031866  | 0.4705357   |             |           |          |       |
| NA        | ENSG00000241961 | -0.48612 | 0.68656   | -0.48612    | 0.68656     | -0.19895  | 0.57885  |       |
|           | 1.8539          | 0.031876 | 0.031876  | 0.4705357   |             |           |          |       |
| PYDC1     | ENSG00000169900 | 1.8538   | 0.031881  | 1.8538      | 0.031881    | 1.2515    | 0.10538  |       |
|           | 0.46862         | 0.31967  | 0.031881  | 0.4705357   |             |           |          |       |
| TRIM72    | ENSG00000177238 | 1.8538   | 0.031881  | 0.32502     | 0.37258     | -0.094066 |          |       |
|           | 0.53747         | 1.2519   | 0.1053    | 0.031881    | 0.4705357   |           |          |       |
| NA        | ENSG00000283285 | 1.0975   | 0.13621   | 1.0543      | 0.14587     | 1.8538    | 0.031885 |       |
|           | 1.8538          | 0.031885 | 0.031885  | 0.4705357   |             |           |          |       |
| HOXB-AS1  | ENSG00000230148 | 1.8538   | 0.031886  | 1.8538      | 0.031886    | 1.8538    |          |       |
|           | 0.031886        | 1.8538   | 0.031886  | 0.031886    | 0.4705357   |           |          |       |
| NA        | ENSG00000270781 | 1.8537   | 0.031888  | 1.8537      | 0.031888    | 1.8537    | 0.031888 |       |
|           | 1.8537          | 0.031888 | 0.031888  | 0.4705357   |             |           |          |       |
| LINC02361 | ENSG00000256576 | -0.75732 | 0.77557   | 0.20128     | 0.42024     | 1.8537    |          |       |
|           | 0.031892        | 1.8537   | 0.031892  | 0.031892    | 0.4705357   |           |          |       |
| WDR41     | ENSG00000164253 | 1.8535   | 0.031905  | 1.5385      | 0.061966    | 0.79689   | 0.21276  |       |
|           | 0.44217         | 0.32918  | 0.031905  | 0.4705357   |             |           |          |       |
| SYBU      | ENSG00000147642 | 1.0579   | 0.14505   | 1.8535      | 0.031907    | 1.507     | 0.065901 | 1.526 |
|           | 0.063505        | 0.031907 | 0.4705357 |             |             |           |          |       |
| NA        | ENSG00000253528 | 1.8535   | 0.031908  | 1.8535      | 0.031908    | 1.8535    | 0.031908 |       |
|           | 1.8535          | 0.031908 | 0.031908  | 0.4705357   |             |           |          |       |
| BTN2A2    | ENSG00000124508 | 1.7943   | 0.036387  | 0.4186      | 0.33775     | 0.44691   |          |       |
|           | 0.32747         | 1.8534   | 0.03191   | 0.03191     | 0.4705357   |           |          |       |
| BTN2A3P   | ENSG00000124549 | 1.3842   | 0.083154  | 1.8534      | 0.031913    | 1.5561    |          |       |
|           | 0.05984         | 1.442    | 0.074647  | 0.031913    | 0.4705357   |           |          |       |
| NA        | ENSG00000266872 | 1.8531   | 0.031933  | 1.8531      | 0.031933    | 1.8531    | 0.031933 |       |
|           | 1.8531          | 0.031933 | 0.031933  | 0.470546302 |             |           |          |       |
| TET2      | ENSG00000168769 | 0.9949   | 0.15989   | 0.56888     | 0.28472     | 0.87574   | 0.19059  |       |
|           | 1.853           | 0.031943 | 0.031943  | 0.470546302 |             |           |          |       |
| TXN2P1    | ENSG00000213540 | 1.8527   | 0.031961  | 1.8527      | 0.031961    | 1.8527    |          |       |
|           | 0.031961        | 0.92287  | 0.17804   | 0.031961    | 0.470546302 |           |          |       |
| NA        | ENSG00000269889 | 1.8527   | 0.031961  | 1.8527      | 0.031961    | 1.8527    | 0.031961 |       |
|           | 1.8527          | 0.031961 | 0.031961  | 0.470546302 |             |           |          |       |
| NA        | ENSG00000267620 | 1.8527   | 0.031962  | 1.8527      | 0.031962    | 1.8527    | 0.031962 |       |
|           | 1.8527          | 0.031962 | 0.031962  | 0.470546302 |             |           |          |       |
| BUB1      | ENSG00000169679 | 1.8523   | 0.031992  | 0.62044     | 0.26748     | 0.43416   | 0.33208  |       |
|           | 0.11473         | 0.45433  | 0.031992  | 0.470587121 |             |           |          |       |
| NA        | ENSG00000271858 | 1.8523   | 0.031994  | 1.8523      | 0.031994    | 1.8523    | 0.031994 |       |
|           | 1.8523          | 0.031994 | 0.031994  | 0.470587121 |             |           |          |       |
| RPS29P30  | ENSG00000268243 | 1.8519   | 0.032022  | 1.8519      | 0.032022    | 1.8519    |          |       |
|           | 0.032022        | 1.8519   | 0.032022  | 0.032022    | 0.470587121 |           |          |       |
| JARID2    | ENSG00000008083 | 1.6367   | 0.050851  | 1.2019      | 0.1147      | 0.29545   |          |       |
|           | 0.38383         | 1.8517   | 0.032037  | 0.032037    | 0.470587121 |           |          |       |
| NA        | ENSG00000239142 | 0.46727  | 0.32015   | 1.8516      | 0.032042    | 1.5064    | 0.065988 |       |
|           | 1.5064          | 0.065988 | 0.032042  | 0.470587121 |             |           |          |       |

|           |                 |           |          |             |             |             |          |
|-----------|-----------------|-----------|----------|-------------|-------------|-------------|----------|
| NA        | ENSG00000227519 | 1.8516    | 0.032043 | 1.8516      | 0.032043    | 1.8516      | 0.032043 |
|           |                 | 1.8516    | 0.032043 | 0.470587121 |             |             |          |
| CHRM1     | ENSG00000168539 | -0.50697  | 0.69391  | -0.034821   | 0.51389     | 1.8515      | 0.032047 |
|           |                 | -0.10361  | 0.54126  | 0.032047    | 0.470587121 |             |          |
| WDR59     | ENSG00000103091 | 0.29513   | 0.38395  | 0.29513     | 0.38395     | 1.8513      | 0.032061 |
|           |                 | 0.98046   | 0.16343  | 0.032061    | 0.470587121 |             |          |
| SALL1     | ENSG00000103449 | 1.6546    | 0.049006 | 1.4542      | 0.072943    | 0.36666     | 0.35694  |
|           |                 | 1.8513    | 0.032064 | 0.032064    | 0.470587121 |             |          |
| NA        | ENSG00000206728 | 1.8512    | 0.032068 | 1.8512      | 0.032068    | 1.8512      | 0.032068 |
|           |                 | 1.8512    | 0.032068 | 0.470587121 |             |             |          |
| NA        | ENSG00000237297 | 1.3317    | 0.091475 | 1.8512      | 0.032071    | -0.40881    | 0.65866  |
|           |                 | 0.5095    | 0.3052   | 0.032071    | 0.470587121 |             |          |
| NA        | ENSG00000267782 | 1.8506    | 0.032111 | 1.8506      | 0.032111    | 1.8506      | 0.032111 |
|           |                 | 1.8506    | 0.032111 | 0.470919798 |             |             |          |
| NA        | ENSG00000270577 | 1.8506    | 0.032113 | 1.8506      | 0.032113    | 1.8506      | 0.032113 |
|           |                 | 1.8506    | 0.032113 | 0.470919798 |             |             |          |
| ZC3H12C   | ENSG00000149289 | 1.5513    | 0.060419 | 1.8504      | 0.032131    | 1.5513      |          |
|           |                 | 0.060419  | 1.5857   | 0.056404    | 0.032131    | 0.470929651 |          |
| ARMC4     | ENSG00000169126 | 0.089412  | 0.46438  | -0.44573    | 0.6721      | 1.8503      | 0.032133 |
|           |                 | -0.96517  | 0.83277  | 0.032133    | 0.470929651 |             |          |
| TRAJ29    | ENSG00000211860 | 1.8497    | 0.032176 | 1.8497      | 0.032176    | 1.8497      |          |
|           |                 | 0.032176  | 1.8497   | 0.032176    | 0.470988397 |             |          |
| TRAJ28    | ENSG00000211861 | 1.8497    | 0.032176 | 1.8497      | 0.032176    | 1.8497      |          |
|           |                 | 0.032176  | 1.8497   | 0.032176    | 0.470988397 |             |          |
| NA        | ENSG00000266450 | -0.70171  | 0.75857  | -1.3765     | 0.91567     | 1.8496      | 0.032188 |
|           |                 | -1.3765   | 0.91567  | 0.032188    | 0.470988397 |             |          |
| OR9I2P    | ENSG00000186508 | 1.8495    | 0.032192 | -0.056217   | 0.52242     | 1.1718      |          |
|           |                 | 0.12064   | 1.1718   | 0.12064     | 0.032192    | 0.470988397 |          |
| NA        | ENSG00000255317 | 1.8495    | 0.032194 | -0.58962    | 0.72228     | 0.84789     | 0.19825  |
|           |                 | 0.86959   | 0.19226  | 0.032194    | 0.470988397 |             |          |
| SEPTIN2   | ENSG00000168385 | 1.8495    | 0.032195 | 1.2379      | 0.10787     | 1.3563      |          |
|           |                 | 0.087498  | 1.3747   | 0.084618    | 0.032195    | 0.470988397 |          |
| SNORA12   | ENSG00000212464 | 1.8485    | 0.032266 | 1.8485      | 0.032266    | 1.8485      |          |
|           |                 | 0.032266  | 1.8485   | 0.032266    | 0.471885408 |             |          |
| NA        | ENSG00000267226 | -0.41071  | 0.65936  | 1.8482      | 0.032284    | -0.41071    | 0.65936  |
|           |                 | -0.41071  | 0.65936  | 0.032284    | 0.472006997 |             |          |
| STN1      | ENSG00000107960 | 1.523     | 0.063873 | 1.8481      | 0.032297    | -0.10271    | 0.5409   |
|           |                 | 1.1694    | 0.12112  | 0.032297    | 0.472055432 |             |          |
| LINC02619 | ENSG00000249382 | -0.58437  | 0.72051  | -0.58437    | 0.72051     | -0.58437    |          |
|           |                 | 0.72051   | 1.8478   | 0.032316    | 0.032316    | 0.472144737 |          |
| LINC00114 | ENSG00000223806 | 0.87121   | 0.19182  | 1.8477      | 0.032323    | 1.2647      |          |
|           |                 | 0.10299   | 1.6613   | 0.048326    | 0.032323    | 0.472144737 |          |
| RNU6-75P  | ENSG00000251753 | 1.8475    | 0.032338 | 1.8475      | 0.032338    | 1.8475      |          |
|           |                 | 0.032338  | 1.8475   | 0.032338    | 0.472144737 |             |          |
| NUP133    | ENSG00000069248 | -1.3539   | 0.91211  | -0.36716    | 0.64325     | -0.8038     |          |
|           |                 | 0.78924   | 1.8473   | 0.032354    | 0.032354    | 0.472144737 |          |
| UBE3B     | ENSG00000151148 | 0.59025   | 0.27751  | 1.1153      | 0.13235     | 0.64069     | 0.26086  |
|           |                 | 1.8472    | 0.032361 | 0.032361    | 0.472144737 |             |          |
| TNC       | ENSG00000041982 | 1.847     | 0.03237  | -0.43058    | 0.66661     | 0.50165     | 0.30796  |
|           |                 | -0.088382 | 0.53521  | 0.03237     | 0.472144737 |             |          |
| NA        | ENSG00000267360 | 1.8469    | 0.032383 | 1.8469      | 0.032383    | 1.8469      | 0.032383 |
|           |                 | 1.8469    | 0.032383 | 0.032383    | 0.472144737 |             |          |
| TFRC      | ENSG00000072274 | 0.46104   | 0.32238  | 1.8467      | 0.032395    | -0.74659    | 0.77234  |
|           |                 | 0.060493  | 0.47588  | 0.032395    | 0.472144737 |             |          |
| NA        | ENSG00000249317 | 1.8466    | 0.032399 | 1.8466      | 0.032399    | 0.47844     | 0.31617  |
|           |                 | 1.8466    | 0.032399 | 0.032399    | 0.472144737 |             |          |
| CLSTN1    | ENSG00000171603 | 1.8466    | 0.0324   | 1.7407      | 0.040865    | 1.7253      |          |
|           |                 | 0.042237  | 0.57382  | 0.28304     | 0.0324      | 0.472144737 |          |
| IPO5      | ENSG00000065150 | 1.0636    | 0.14375  | 0.80401     | 0.2107      | 0.60557     | 0.2724   |
|           |                 | 1.8462    | 0.032432 | 0.032432    | 0.472191953 |             |          |
| NA        | ENSG00000233099 | 1.8462    | 0.032434 | 1.8462      | 0.032434    | 1.8462      | 0.032434 |
|           |                 | 1.8462    | 0.032434 | 0.032434    | 0.472191953 |             |          |

|            |                 |           |          |             |             |             |          |
|------------|-----------------|-----------|----------|-------------|-------------|-------------|----------|
| NA         | ENSG00000236194 | 1.8461    | 0.032441 | 1.8461      | 0.032441    | 1.8461      | 0.032441 |
|            |                 | 1.8461    | 0.032441 | 0.472191953 |             |             |          |
| NA         | ENSG00000232034 | -0.81064  | 0.79121  | 1.8461      | 0.032442    | 0.29201     | 0.38514  |
|            |                 | -0.73988  | 0.77031  | 0.032442    | 0.472191953 |             |          |
| CCNE2      | ENSG00000175305 | 1.8458    | 0.03246  | 1.8458      | 0.03246     | 1.2439      | 0.10677  |
|            |                 | 1.2439    | 0.10677  | 0.03246     | 0.472297208 |             |          |
| RPL21P37   | ENSG00000229503 | 1.8456    | 0.032473 | 1.8456      | 0.032473    | 1.8456      |          |
|            |                 | 0.032473  | 1.8456   | 0.032473    | 0.472297208 |             |          |
| TMEM159    | ENSG00000011638 | 0.3441    | 0.36539  | 1.8454      | 0.032487    | -1.1882     |          |
|            |                 | 0.88263   | -0.95355 | 0.82985     | 0.032487    | 0.472297208 |          |
| RPL21P47   | ENSG00000241344 | 1.8454    | 0.032488 | 1.8454      | 0.032488    | 1.8454      |          |
|            |                 | 0.032488  | 1.8454   | 0.032488    | 0.472297208 |             |          |
| DOCK10     | ENSG00000135905 | 0.69601   | 0.24321  | 1.4072      | 0.079685    | -0.64618    |          |
|            |                 | 0.74092   | 1.8451   | 0.03251     | 0.03251     | 0.472476081 |          |
| NA         | ENSG00000260385 | 1.1819    | 0.11863  | -0.28392    | 0.61176     | 1.1055      | 0.13447  |
|            |                 | 1.8448    | 0.032531 | 0.032531    | 0.472640319 |             |          |
| LYRM4      | ENSG00000214113 | 1.5339    | 0.062529 | 0.27958     | 0.3899      | 1.8445      | 0.032555 |
|            |                 | 0.042253  | 0.48315  | 0.032555    | 0.472837819 |             |          |
| TMEM254    | ENSG00000133678 | 1.1012    | 0.1354   | 0.92636     | 0.17713     | 1.8444      |          |
|            |                 | 0.032564  | 0.20053  | 0.42053     | 0.032564    | 0.472837819 |          |
| METTL21AP1 | ENSG00000229623 | 1.8442    | 0.032578 | 1.8442      | 0.032578    | 1.8442      |          |
|            |                 | 0.032578  | 1.8442   | 0.032578    | 0.472900191 |             |          |
| TUBGCP2    | ENSG00000130640 | 1.3634    | 0.086383 | -1.3689     | 0.91448     | -0.33395    |          |
|            |                 | 0.63079   | 1.844    | 0.03259     | 0.03259     | 0.472933502 |          |
| SULT1A1    | ENSG00000196502 | 1.8437    | 0.032611 | 1.1063      | 0.1343      | 0.35782     |          |
|            |                 | 0.36024   | 0.31226  | 0.37742     | 0.032611    | 0.472956557 |          |
| TUBB3      | ENSG00000258947 | 1.0352    | 0.15028  | 1.8437      | 0.032611    | -0.075077   | 0.52992  |
|            |                 | -0.075077 | 0.52992  | 0.032611    | 0.472956557 |             |          |
| NA         | ENSG00000273374 | 1.8435    | 0.032626 | -0.9032     | 0.81679     | -0.43933    | 0.66979  |
|            |                 | -0.87041  | 0.80796  | 0.032626    | 0.473033317 |             |          |
| IRF2       | ENSG00000168310 | 1.8432    | 0.032652 | 1.7069      | 0.043923    | 1.0898      | 0.13789  |
|            |                 | -0.1756   | 0.56969  | 0.032652    | 0.473068987 |             |          |
| DERA       | ENSG00000023697 | 0.1287    | 0.4488   | 0.1287      | 0.4488      | 1.8431      | 0.032656 |
|            |                 | -0.30408  | 0.61947  | 0.032656    | 0.473068987 |             |          |
| C1orf127   | ENSG00000175262 | 1.1135    | 0.13275  | 0.54348     | 0.2934      | -0.75657    |          |
|            |                 | 0.77535   | 1.8429   | 0.032669    | 0.032669    | 0.473068987 |          |
| LINC01052  | ENSG00000234767 | 1.8429    | 0.032671 | 1.8429      | 0.032671    | 1.8429      |          |
|            |                 | 0.032671  | 1.8429   | 0.032671    | 0.473068987 |             |          |
| NA         | ENSG00000258600 | 1.8428    | 0.032677 | -0.82623    | 0.79566     | -0.82623    | 0.79566  |
|            |                 | -0.82623  | 0.79566  | 0.032677    | 0.473068987 |             |          |
| NA         | ENSG00000207303 | -1.3332   | 0.90876  | -1.3332     | 0.90876     | -1.3332     | 0.90876  |
|            |                 | 1.8423    | 0.032713 | 0.032713    | 0.47311114  |             |          |
| HSPA12A    | ENSG00000165868 | -0.39401  | 0.65321  | 0.86579     | 0.1933      | 1.8423      |          |
|            |                 | 0.032717  | 0.4706   | 0.31896     | 0.032717    | 0.47311114  |          |
| PCDHGA2    | ENSG00000081853 | 0.3376    | 0.36783  | 1.8418      | 0.032749    | 0.08021     |          |
|            |                 | 0.46804   | 0.08021  | 0.46804     | 0.032749    | 0.47311114  |          |
| LIN52      | ENSG00000205659 | 1.8418    | 0.032752 | 1.7335      | 0.041505    | 1.6857      | 0.045931 |
|            |                 | 0.58862   | 0.27806  | 0.032752    | 0.47311114  |             |          |
| NA         | ENSG00000267030 | 1.8417    | 0.032761 | 1.8417      | 0.032761    | 1.8417      | 0.032761 |
|            |                 | 1.8417    | 0.032761 | 0.032761    | 0.47311114  |             |          |
| NA         | ENSG00000280104 | -0.37614  | 0.64659  | 1.8416      | 0.032766    | 0.53051     | 0.29788  |
|            |                 | 0.57546   | 0.28249  | 0.032766    | 0.47311114  |             |          |
| LINC01740  | ENSG00000228067 | 0.99189   | 0.16063  | 0.99189     | 0.16063     | 0.99189     |          |
|            |                 | 0.16063   | 1.8416   | 0.032767    | 0.032767    | 0.47311114  |          |
| H2AZ1-DT   | ENSG00000245322 | 1.8415    | 0.032775 | 1.7671      | 0.038607    | 1.3627      |          |
|            |                 | 0.086488  | 0.46708  | 0.32022     | 0.032775    | 0.47311114  |          |
| GLRX3      | ENSG00000108010 | -1.3972   | 0.91883  | 1.8415      | 0.032776    | -0.67016    | 0.74862  |
|            |                 | -0.50353  | 0.6927   | 0.032776    | 0.47311114  |             |          |
| NA         | ENSG00000264040 | -1.0682   | 0.85728  | 1.8415      | 0.032777    | -0.96601    | 0.83298  |
|            |                 | -0.77879  | 0.78195  | 0.032777    | 0.47311114  |             |          |
| LRMDA      | ENSG00000148655 | 0.46384   | 0.32138  | 1.841       | 0.032811    | 1.2317      | 0.10904  |
|            |                 | 1.4947    | 0.067501 | 0.032811    | 0.473364804 |             |          |

|              |                 |           |             |             |             |          |          |
|--------------|-----------------|-----------|-------------|-------------|-------------|----------|----------|
| NKAIN2       | ENSG00000188580 | 1.8407    | 0.03283     | 0.97296     | 0.16529     | -0.12568 |          |
|              | 0.55001         | 0.38377   | 0.35057     | 0.03283     | 0.473364804 |          |          |
| LINC02753    | ENSG00000248844 | 0.98965   | 0.16117     | 1.8407      | 0.032831    | 1.2634   |          |
|              | 0.10323         | 0.004109  | 0.49836     | 0.032831    | 0.473364804 |          |          |
| SDHAP3       | ENSG00000185986 | -0.75898  | 0.77607     | -0.72942    | 0.76713     | 1.8403   |          |
|              | 0.032862        | 1.1221    | 0.13092     | 0.032862    | 0.473364804 |          |          |
| OR2F1        | ENSG00000213215 | 1.8403    | 0.032863    | 1.8403      | 0.032863    | 1.8403   | 0.032863 |
|              | 1.8403          | 0.032863  | 0.032863    | 0.473364804 |             |          |          |
| ZBTB49       | ENSG00000168826 | 1.8401    | 0.032876    | 0.63094     | 0.26404     | 0.31012  |          |
|              | 0.37824         | 0.63819   | 0.26167     | 0.032876    | 0.473364804 |          |          |
| HMGB1P5      | ENSG00000132967 | 0.60313   | 0.27321     | 0.60313     | 0.27321     | 0.31968  |          |
|              | 0.37461         | 1.8401    | 0.03288     | 0.03288     | 0.473364804 |          |          |
| NA           | ENSG00000279593 | 1.2183    | 0.11155     | 1.8103      | 0.035127    | 1.8401   | 0.03288  |
|              | 0.69            | 0.2451    | 0.03288     | 0.473364804 |             |          |          |
| PSKH1        | ENSG00000159792 | 1.84      | 0.032882    | 0.64214     | 0.26039     | 1.84     | 0.032882 |
|              | 0.032882        | 0.032882  | 0.473364804 |             |             |          |          |
| KY           | ENSG00000174611 | -0.062979 | 0.52511     | 0.91726     | 0.1795      | 1.8399   | 0.032893 |
|              | -0.57401        | 0.71702   | 0.032893    | 0.473383311 |             |          |          |
| SHANK2-AS3   | ENSG00000171671 | 0.53348   | 0.29685     | 0.84119     | 0.20012     | 0.83748  |          |
|              | 0.20116         | 1.8396    | 0.032916    | 0.032916    | 0.473434675 |          |          |
| LBX1-AS1     | ENSG00000227128 | 1.7966    | 0.036197    | 1.8396      | 0.032916    | 1.5859   |          |
|              | 0.056381        | 1.3782    | 0.084072    | 0.032916    | 0.473434675 |          |          |
| TATDN3       | ENSG00000203705 | 1.1864    | 0.11773     | 1.8394      | 0.03293     | 1.1702   |          |
|              | 0.12095         | 1.4998    | 0.066828    | 0.03293     | 0.473442855 |          |          |
| SNX19P1      | ENSG00000228184 | 1.8393    | 0.032936    | 1.8025      | 0.035732    | 0.22196  |          |
|              | 0.41217         | 0.050086  | 0.48003     | 0.032936    | 0.473442855 |          |          |
| SLC25A12     | ENSG00000115840 | 0.86937   | 0.19232     | 1.8387      | 0.032979    | 0.40968  |          |
|              | 0.34102         | 0.43821   | 0.33062     | 0.032979    | 0.473692919 |          |          |
| NA           | ENSG00000232188 | 0.69008   | 0.24507     | 1.8386      | 0.032984    | 1.8386   | 0.032984 |
|              | 1.8386          | 0.032984  | 0.032984    | 0.473692919 |             |          |          |
| NA           | ENSG00000233691 | 1.8386    | 0.032984    | 1.8386      | 0.032984    | 1.8386   | 0.032984 |
|              | 1.8386          | 0.032984  | 0.032984    | 0.473692919 |             |          |          |
| SLC35D2      | ENSG00000130958 | -0.50197  | 0.69216     | -1.1896     | 0.88289     | -1.1527  |          |
|              | 0.87549         | 1.8385    | 0.032993    | 0.032993    | 0.473692919 |          |          |
| NA           | ENSG00000283064 | 1.8384    | 0.033002    | 1.331       | 0.091594    | 1.8384   | 0.033002 |
|              | 1.8384          | 0.033002  | 0.033002    | 0.473692919 |             |          |          |
| CAVIN2       | ENSG00000168497 | -1.5741   | 0.94226     | 1.8373      | 0.033084    | -1.5741  |          |
|              | 0.94226         | -1.5741   | 0.94226     | 0.033084    | 0.474368414 |          |          |
| CCDC195      | ENSG00000283428 | 1.8373    | 0.033084    | 1.3398      | 0.090147    | 0.56981  |          |
|              | 0.2844          | 0.58647   | 0.27878     | 0.033084    | 0.474368414 |          |          |
| ILF2P2       | ENSG00000257720 | 1.8373    | 0.033085    | 1.8373      | 0.033085    | 1.8373   |          |
|              | 0.033085        | 1.8373    | 0.033085    | 0.033085    | 0.474368414 |          |          |
| MGAM2        | ENSG00000257743 | -1.4745   | 0.92983     | -1.677      | 0.95323     | -1.6964  | 0.9551   |
|              | 1.8372          | 0.033088  | 0.033088    | 0.474368414 |             |          |          |
| NA           | ENSG00000271973 | 1.8367    | 0.033128    | 0.97719     | 0.16424     | 0.97719  | 0.16424  |
|              | 0.97719         | 0.16424   | 0.033128    | 0.474728659 |             |          |          |
| PRC1         | ENSG00000198901 | 1.6345    | 0.051075    | 1.6345      | 0.051075    | 1.8366   | 0.033137 |
|              | 1.4819          | 0.069186  | 0.033137    | 0.474728659 |             |          |          |
| NA           | ENSG00000260223 | 1.2544    | 0.10485     | 0.75835     | 0.22412     | 1.8365   | 0.033143 |
|              | 1.2544          | 0.10485   | 0.033143    | 0.474728659 |             |          |          |
| NA           | ENSG00000263120 | 1.8363    | 0.033153    | 1.8363      | 0.033153    | 1.8363   | 0.033153 |
|              | 1.8363          | 0.033153  | 0.033153    | 0.474728659 |             |          |          |
| KIAA1671-AS1 | ENSG00000203280 | 1.8359    | 0.033186    | 1.8359      | 0.033186    | 1.8359   |          |
|              | 0.033186        | 1.8359    | 0.033186    | 0.033186    | 0.474728659 |          |          |
| DIP2A-IT1    | ENSG00000223692 | 1.2253    | 0.11023     | 1.8358      | 0.033195    | 1.8358   |          |
|              | 0.033195        | 1.8358    | 0.033195    | 0.033195    | 0.474728659 |          |          |
| SIGLEC15     | ENSG00000197046 | -0.74306  | 0.77128     | -0.087759   | 0.53497     | 1.8357   |          |
|              | 0.033198        | 0.40041   | 0.34443     | 0.033198    | 0.474728659 |          |          |
| RNU6-83P     | ENSG00000207298 | 1.751     | 0.039969    | 0.6331      | 0.26333     | 1.8357   | 0.033205 |
|              | 0.68565         | 0.24647   | 0.033205    | 0.474728659 |             |          |          |
| ETF1P2       | ENSG00000240132 | -0.5854   | 0.72086     | 1.7637      | 0.038889    | 1.8356   |          |
|              | 0.03321         | 0.28803   | 0.38666     | 0.03321     | 0.474728659 |          |          |

|           |                 |          |          |             |             |          |          |
|-----------|-----------------|----------|----------|-------------|-------------|----------|----------|
| ZNF773    | ENSG00000152439 | 1.822    | 0.034229 | 1.8203      | 0.034356    | 1.8354   | 0.033225 |
|           | 1.8182          | 0.034518 | 0.033225 | 0.474728659 |             |          |          |
| NR3C2     | ENSG00000151623 | 0.88264  | 0.18872  | -0.53221    | 0.70271     | 1.8353   | 0.033231 |
|           | 1.4567          | 0.072599 | 0.033231 | 0.474728659 |             |          |          |
| RNU6-949P | ENSG00000206767 | 0.076906 | 0.46935  | 0.076906    | 0.46935     | 0.092355 |          |
|           | 0.46321         | 1.8351   | 0.033245 | 0.033245    | 0.474728659 |          |          |
| NA        | ENSG00000250939 | 1.835    | 0.03325  | -1.2664     | 0.89732     | 0.19461  | 0.42285  |
|           | 0.19461         | 0.42285  | 0.03325  | 0.474728659 |             |          |          |
| NA        | ENSG00000256056 | 0.60302  | 0.27325  | 0.60302     | 0.27325     | 0.60302  | 0.27325  |
|           | 1.8348          | 0.033264 | 0.033264 | 0.474728659 |             |          |          |
| NA        | ENSG00000239350 | 1.8348   | 0.033269 | 1.8348      | 0.033269    | 1.5773   | 0.057362 |
|           | 1.8348          | 0.033269 | 0.033269 | 0.474728659 |             |          |          |
| NA        | ENSG00000276471 | 0.61734  | 0.26851  | 0.74234     | 0.22894     | 1.8348   | 0.033269 |
|           | 1.8348          | 0.033269 | 0.033269 | 0.474728659 |             |          |          |
| CTDSPL    | ENSG00000144677 | 1.834    | 0.033323 | 1.6307      | 0.05148     | 1.4888   | 0.068275 |
|           | 1.6428          | 0.050211 | 0.033323 | 0.475360009 |             |          |          |
| F13B      | ENSG00000143278 | 0.96796  | 0.16653  | 0.96796     | 0.16653     | 1.8334   | 0.033373 |
|           | 0.96796         | 0.16653  | 0.033373 | 0.475725918 |             |          |          |
| RPS20P25  | ENSG00000228375 | 1.8332   | 0.033383 | 1.8332      | 0.033383    | 1.3515   |          |
|           | 0.088273        | 1.0981   | 0.13607  | 0.033383    | 0.475725918 |          |          |
| UGT1A8    | ENSG00000242366 | -0.3507  | 0.63709  | 1.8332      | 0.033384    | 0.37552  |          |
|           | 0.35364         | -0.92379 | 0.8222   | 0.033384    | 0.475725918 |          |          |
| C1orf53   | ENSG00000203724 | -0.34006 | 0.6331   | 1.7709      | 0.038286    | -0.34006 |          |
|           | 0.6331          | 1.8329   | 0.033407 | 0.033407    | 0.475725918 |          |          |
| LINC02301 | ENSG00000258743 | 1.8327   | 0.033422 | 0.47281     | 0.31817     | 0.61076  |          |
|           | 0.27068         | 0.11511  | 0.45418  | 0.033422    | 0.475725918 |          |          |
| NA        | ENSG00000274584 | 1.8326   | 0.033433 | 0.58106     | 0.2806      | -1.3058  | 0.90419  |
|           | -1.3058         | 0.90419  | 0.033433 | 0.475725918 |             |          |          |
| TC2N      | ENSG00000165929 | 1.2361   | 0.10821  | 1.8325      | 0.03344     | 1.516    | 0.064762 |
|           | 0.21546         | 0.4147   | 0.03344  | 0.475725918 |             |          |          |
| RNA5SP445 | ENSG00000251698 | 1.8324   | 0.033445 | 1.8324      | 0.033445    | 1.8324   |          |
|           | 0.033445        | 1.8324   | 0.033445 | 0.033445    | 0.475725918 |          |          |
| NA        | ENSG00000227683 | 1.8323   | 0.033456 | 1.8323      | 0.033456    | 0.9744   | 0.16493  |
|           | 1.8323          | 0.033456 | 0.033456 | 0.475725918 |             |          |          |
| NA        | ENSG00000261038 | -0.41386 | 0.66051  | -1.0972     | 0.86372     | 1.832    | 0.033473 |
|           | -0.41386        | 0.66051  | 0.033473 | 0.475725918 |             |          |          |
| NA        | ENSG00000272991 | 1.8319   | 0.033487 | 1.8319      | 0.033487    | 1.8319   | 0.033487 |
|           | 1.8319          | 0.033487 | 0.033487 | 0.475725918 |             |          |          |
| MTCO1P57  | ENSG00000232975 | 0.72776  | 0.23338  | -0.80863    | 0.79064     | 1.8318   |          |
|           | 0.033494        | 0.72776  | 0.23338  | 0.033494    | 0.475725918 |          |          |
| MRGPRX11P | ENSG00000254738 | 1.6298   | 0.051576 | 1.0572      | 0.1452      | 1.8316   |          |
|           | 0.033505        | 1.8316   | 0.033505 | 0.033505    | 0.475725918 |          |          |
| NA        | ENSG00000250803 | 0.11419  | 0.45454  | 1.8315      | 0.033513    | 1.8315   | 0.033513 |
|           | 1.8315          | 0.033513 | 0.033513 | 0.475725918 |             |          |          |
| ZFP69B    | ENSG00000187801 | 1.4166   | 0.078293 | -0.10375    | 0.54132     | 0.62693  |          |
|           | 0.26535         | 1.8313   | 0.033526 | 0.033526    | 0.475725918 |          |          |
| MUC4      | ENSG00000145113 | 0.30077  | 0.38179  | -0.18516    | 0.57345     | 1.8313   | 0.033532 |
|           | 1.7399          | 0.040935 | 0.033532 | 0.475725918 |             |          |          |
| NA        | ENSG00000265781 | 1.7975   | 0.036125 | -0.68389    | 0.75298     | 1.4963   | 0.067285 |
|           | 1.8312          | 0.033532 | 0.033532 | 0.475725918 |             |          |          |
| EPHA8     | ENSG00000070886 | 1.2543   | 0.10487  | 0.83329     | 0.20234     | 1.8012   | 0.035838 |
|           | 1.8308          | 0.033562 | 0.033562 | 0.475725918 |             |          |          |
| RPL34P18  | ENSG00000240509 | 1.8306   | 0.033577 | 0.91202     | 0.18088     | -0.22995 |          |
|           | 0.59093         | -0.45314 | 0.67477  | 0.033577    | 0.475725918 |          |          |
| NA        | ENSG00000200294 | 0.8708   | 0.19193  | -1.0236     | 0.84698     | 1.8305   | 0.033587 |
|           | -1.3239         | 0.90724  | 0.033587 | 0.475725918 |             |          |          |
| SEMA3C    | ENSG00000075223 | 1.0842   | 0.13913  | 1.8304      | 0.033593    | 1.5332   |          |
|           | 0.062609        | 1.7335   | 0.041505 | 0.033593    | 0.475725918 |          |          |
| NA        | ENSG00000280048 | 1.8304   | 0.033597 | 1.8304      | 0.033597    | 1.8304   | 0.033597 |
|           | 1.8304          | 0.033597 | 0.033597 | 0.475725918 |             |          |          |
| SETD1B    | ENSG00000139718 | 1.8149   | 0.034768 | 1.8302      | 0.033607    | 0.2435   |          |
|           | 0.40381         | 1.1766   | 0.11968  | 0.033607    | 0.475725918 |          |          |

|           |                 |          |          |            |             |             |          |
|-----------|-----------------|----------|----------|------------|-------------|-------------|----------|
| HOXA-AS2  | ENSG00000253552 | 1.8302   | 0.03361  | 0.8691     | 0.1924      | 0.8691      |          |
|           |                 | 0.1924   | 0.8691   | 0.1924     | 0.03361     | 0.475725918 |          |
| MRPS14    | ENSG00000120333 | 0.94541  | 0.17222  | 0.94541    | 0.17222     | 0.94541     |          |
|           |                 | 0.17222  | 1.8302   | 0.033611   | 0.033611    | 0.475725918 |          |
| ISYNA1    | ENSG00000105655 | 1.8302   | 0.033613 | 1.1868     | 0.11766     | 1.6943      |          |
|           |                 | 0.045101 | 1.6943   | 0.045101   | 0.033613    | 0.475725918 |          |
| RPSAP51   | ENSG00000244131 | 1.8301   | 0.033618 | -0.44273   | 0.67102     | -0.22942    |          |
|           |                 | 0.59073  | 1.2092   | 0.11329    | 0.033618    | 0.475725918 |          |
| LINC00370 | ENSG00000223617 | 0.6696   | 0.25156  | 1.4853     | 0.068737    | 1.83        | 0.033622 |
|           |                 | 0.93997  | 0.17362  | 0.033622   | 0.475725918 |             |          |
| VTA1P2    | ENSG00000253401 | 1.1903   | 0.11696  | 0.76186    | 0.22307     | 1.8298      |          |
|           |                 | 0.033641 | 0.28881  | 0.38636    | 0.033641    | 0.475856583 |          |
| IL2RA     | ENSG00000134460 | 1.0711   | 0.14206  | 1.0472     | 0.14749     | 0.098867    | 0.46062  |
|           |                 | 1.8295   | 0.033662 | 0.033662   | 0.475933908 |             |          |
| NDUFAB1P1 | ENSG00000217767 | 1.8294   | 0.033666 | 1.8294     | 0.033666    | 1.8294      |          |
|           |                 | 0.033666 | 1.8294   | 0.033666   | 0.033666    | 0.475933908 |          |
| RIC8B     | ENSG00000111785 | 1.8163   | 0.034663 | 1.758      | 0.039377    | 1.829       | 0.033703 |
|           |                 | 0.04008  | 0.033703 | 0.47594477 |             |             | 1.7498   |
| INO80D    | ENSG00000114933 | 1.8289   | 0.033708 | 1.8289     | 0.033708    | 1.8289      |          |
|           |                 | 0.033708 | 1.8289   | 0.033708   | 0.033708    | 0.47594477  |          |
| NA        | ENSG00000271682 | -1.1005  | 0.86443  | 1.4098     | 0.079292    | 1.8286      | 0.03373  |
|           |                 | 0.44261  | 0.32902  | 0.03373    | 0.47594477  |             |          |
| SMG6      | ENSG00000070366 | 1.4223   | 0.077473 | 1.5062     | 0.066003    | 1.3219      | 0.093093 |
|           |                 | 1.8284   | 0.033746 | 0.033746   | 0.47594477  |             |          |
| UTF1      | ENSG00000171794 | 1.8284   | 0.033748 | -0.11152   | 0.5444      | -0.50276    | 0.69243  |
|           |                 | -0.57345 | 0.71683  | 0.033748   | 0.47594477  |             |          |
| WDFY3-AS2 | ENSG00000180769 | 1.8283   | 0.03375  | 1.4809     | 0.069316    | 1.4478      |          |
|           |                 | 0.073839 | 1.6988   | 0.044675   | 0.03375     | 0.47594477  |          |
| GCNT1P4   | ENSG00000219653 | -1.1365  | 0.87212  | 1.8281     | 0.033771    | -0.24237    |          |
|           |                 | 0.59575  | -0.24237 | 0.59575    | 0.033771    | 0.47594477  |          |
| RNU1-131P | ENSG00000238833 | -0.36698 | 0.64318  | -0.36698   | 0.64318     | 1.8276      |          |
|           |                 | 0.033801 | -1.0406  | 0.85098    | 0.033801    | 0.47594477  |          |
| RNA5SP66  | ENSG00000252987 | -1.7797  | 0.96243  | -1.7797    | 0.96243     | 1.8277      |          |
|           |                 | 0.033801 | 0.091225 | 0.46366    | 0.033801    | 0.47594477  |          |
| DEPDC4    | ENSG00000166153 | 1.8276   | 0.033805 | 1.8276     | 0.033805    | 1.4193      |          |
|           |                 | 0.077912 | 1.4193   | 0.077912   | 0.033805    | 0.47594477  |          |
| PPP6R1    | ENSG00000105063 | 1.0243   | 0.15285  | 1.0243     | 0.15285     | 1.0243      |          |
|           |                 | 0.15285  | 1.8274   | 0.033816   | 0.033816    | 0.47594477  |          |
| NA        | ENSG00000235817 | -0.67891 | 0.7514   | 1.3883     | 0.08253     | 1.8274      | 0.033817 |
|           |                 | 1.8274   | 0.033817 | 0.033817   | 0.47594477  |             |          |
| NA        | ENSG00000214641 | 0.76463  | 0.22225  | 0.81001    | 0.20897     | 1.8273      | 0.033824 |
|           |                 | 1.0961   | 0.13652  | 0.033824   | 0.47594477  |             |          |
| XRCC1     | ENSG00000073050 | 1.7539   | 0.039722 | 1.8273     | 0.03383     | 0.71526     | 0.23722  |
|           |                 | 0.57862  | 0.28142  | 0.03383    | 0.47594477  |             |          |
| NRON      | ENSG00000253079 | -0.47474 | 0.68252  | 0.63385    | 0.26309     | 1.8272      | 0.033838 |
|           |                 | 0.11862  | 0.45279  | 0.033838   | 0.47594477  |             |          |
| NA        | ENSG00000231476 | 1.8271   | 0.033839 | 0.20463    | 0.41893     | 0.77763     | 0.21839  |
|           |                 | 1.7673   | 0.038591 | 0.033839   | 0.47594477  |             |          |
| GALNT10   | ENSG00000164574 | 1.1744   | 0.12012  | 1.2176     | 0.11168     | 1.2609      |          |
|           |                 | 0.10367  | 1.8271   | 0.033842   | 0.033842    | 0.47594477  |          |
| CUBNP3    | ENSG00000235690 | 1.8266   | 0.033878 | 1.8266     | 0.033878    | 1.8266      |          |
|           |                 | 0.033878 | 1.8266   | 0.033878   | 0.033878    | 0.47594477  |          |
| XPR1      | ENSG00000143324 | 1.8262   | 0.033908 | 1.3457     | 0.089194    | 1.4801      | 0.069423 |
|           |                 | 1.4725   | 0.070442 | 0.033908   | 0.47594477  |             |          |
| MOGAT2    | ENSG00000166391 | 1.0133   | 0.15547  | 1.8261     | 0.033916    | 1.0196      |          |
|           |                 | 0.15396  | 1.5791   | 0.057152   | 0.033916    | 0.47594477  |          |
| SH3BP2    | ENSG00000087266 | 1.826    | 0.033922 | 1.1638     | 0.12226     | 0.62935     | 0.26456  |
|           |                 | -0.35626 | 0.63918  | 0.033922   | 0.47594477  |             |          |
| NPSR1     | ENSG00000187258 | 0.36081  | 0.35912  | 1.826      | 0.033923    | 0.53345     | 0.29686  |
|           |                 | 0.71675  | 0.23676  | 0.033923   | 0.47594477  |             |          |
| PRB4      | ENSG00000230657 | 1.2059   | 0.11394  | 1.8257     | 0.03395     | -0.54939    | 0.70863  |
|           |                 | -0.55957 | 0.71211  | 0.03395    | 0.47594477  |             |          |



|             |                 |           |          |            |            |          |          |
|-------------|-----------------|-----------|----------|------------|------------|----------|----------|
| GTF3AP1     | ENSG00000237274 | -0.11938  | 0.54751  | 1.8256     | 0.033959   | 1.8256   |          |
|             | 0.033959        | 1.8256    | 0.033959 | 0.033959   | 0.47594477 |          |          |
| GABPB2      | ENSG00000143458 | 1.3584    | 0.087166 | 1.6898     | 0.045535   | 1.8251   |          |
|             | 0.033994        | 1.1907    | 0.1169   | 0.033994   | 0.47594477 |          |          |
| ROBO3       | ENSG00000154134 | 0.29049   | 0.38572  | 1.1503     | 0.12501    | 0.64007  | 0.26106  |
|             | 1.825           | 0.034     | 0.034    | 0.47594477 |            |          |          |
| DBH-AS1     | ENSG00000225756 | 1.8249    | 0.034007 | 0.38506    | 0.3501     | 1.8249   |          |
|             | 0.034007        | 1.8249    | 0.034007 | 0.034007   | 0.47594477 |          |          |
| GAPDHP38    | ENSG00000249210 | 0.40542   | 0.34259  | 0.40542    | 0.34259    | 1.8248   |          |
|             | 0.034014        | 0.40542   | 0.34259  | 0.034014   | 0.47594477 |          |          |
| RBAK-RBAKDN | ENSG00000272968 | 1.8246    | 0.034028 | 1.8246     | 0.034028   | 1.8246   |          |
|             | 0.034028        | 1.2124    | 0.11267  | 0.034028   | 0.47594477 |          |          |
| PCBP2       | ENSG00000197111 | 1.0001    | 0.15863  | 0.33316    | 0.36951    | 1.8241   | 0.034072 |
|             | 1.313           | 0.094596  | 0.034072 | 0.47594477 |            |          |          |
| NECAB3      | ENSG00000125967 | 0.15479   | 0.4385   | -0.6135    | 0.73023    | 1.8239   |          |
|             | 0.034082        | 0.3738    | 0.35428  | 0.034082   | 0.47594477 |          |          |
| ZNF784      | ENSG00000179922 | 1.8238    | 0.034093 | 1.8238     | 0.034093   | 1.8238   |          |
|             | 0.034093        | 1.8238    | 0.034093 | 0.034093   | 0.47594477 |          |          |
| NA          | ENSG00000207503 | 1.8237    | 0.034099 | 0.40536    | 0.34261    | 1.8237   | 0.034099 |
|             | 1.8237          | 0.034099  | 0.034099 | 0.47594477 |            |          |          |
| LINC01569   | ENSG00000262468 | 0.28828   | 0.38657  | 1.8234     | 0.034119   | 1.4733   |          |
|             | 0.070332        | 1.4733    | 0.070332 | 0.034119   | 0.47594477 |          |          |
| TINAG       | ENSG00000137251 | 1.3644    | 0.086216 | 1.8233     | 0.034127   | 0.65713  | 0.25555  |
|             | 1.0602          | 0.14453   | 0.034127 | 0.47594477 |            |          |          |
| NA          | ENSG00000253295 | 1.8233    | 0.034132 | 0.23536    | 0.40696    | 1.1312   | 0.12898  |
|             | 1.1312          | 0.12898   | 0.034132 | 0.47594477 |            |          |          |
| FKBP1BP1    | ENSG00000258536 | 1.8232    | 0.034136 | 1.8232     | 0.034136   | 1.8232   |          |
|             | 0.034136        | 1.8232    | 0.034136 | 0.034136   | 0.47594477 |          |          |
| RAVER2      | ENSG00000162437 | 1.8232    | 0.034138 | 0.18412    | 0.42696    | 1.3673   |          |
|             | 0.085764        | -0.11995  | 0.54774  | 0.034138   | 0.47594477 |          |          |
| ARHGFEF33   | ENSG00000214694 | 1.8232    | 0.034138 | 1.3853     | 0.082981   | 0.8309   |          |
|             | 0.20302         | 0.85054   | 0.19751  | 0.034138   | 0.47594477 |          |          |
| NA          | ENSG00000223070 | 1.8232    | 0.03414  | 1.1559     | 0.12386    | -0.97701 | 0.83572  |
|             | -0.55787        | 0.71153   | 0.03414  | 0.47594477 |            |          |          |
| NA          | ENSG00000264834 | 1.8231    | 0.034142 | 1.8231     | 0.034142   | 1.8231   | 0.034142 |
|             | 1.8231          | 0.034142  | 0.034142 | 0.47594477 |            |          |          |
| C5orf64-AS1 | ENSG00000251575 | -0.082937 | 0.53305  | -0.082937  | 0.53305    | 1.8229   |          |
|             | 0.034158        | -0.082937 | 0.53305  | 0.034158   | 0.47594477 |          |          |
| TOMM20      | ENSG00000173726 | -0.24143  | 0.59539  | 1.094      | 0.13698    | 1.8229   | 0.03416  |
|             | -0.25284        | 0.59981   | 0.03416  | 0.47594477 |            |          |          |
| NA          | ENSG00000249228 | 1.8225    | 0.034191 | 1.8225     | 0.034191   | 0.29794  | 0.38287  |
|             | 0.0080201       | 0.4968    | 0.034191 | 0.47594477 |            |          |          |
| IFNA22P     | ENSG00000224416 | 1.8223    | 0.034203 | -0.032789  | 0.51308    | 0.98799  |          |
|             | 0.16158         | 1.1546    | 0.12413  | 0.034203   | 0.47594477 |          |          |
| TRIM11      | ENSG00000154370 | 1.7894    | 0.036779 | 1.6128     | 0.053389   | 1.8221   |          |
|             | 0.03422         | 1.0618    | 0.14417  | 0.03422    | 0.47594477 |          |          |
| C5AR2       | ENSG00000134830 | -0.31984  | 0.62545  | 1.822      | 0.034226   | -0.10916 | 0.54346  |
|             | -0.96465        | 0.83264   | 0.034226 | 0.47594477 |            |          |          |
| NPM1P43     | ENSG00000259440 | 1.8218    | 0.034246 | -0.3422    | 0.6339     | -0.3422  |          |
|             | 0.6339          | -1.141    | 0.87307  | 0.034246   | 0.47594477 |          |          |
| NA          | ENSG00000271840 | 1.1511    | 0.12485  | 1.1511     | 0.12485    | 1.1511   | 0.12485  |
|             | 1.8217          | 0.034252  | 0.034252 | 0.47594477 |            |          |          |
| BMP8B       | ENSG00000116985 | -0.99432  | 0.83997  | -0.84449   | 0.8008     | 0.51794  | 0.30225  |
|             | 1.8217          | 0.034254  | 0.034254 | 0.47594477 |            |          |          |
| RNU6-1263P  | ENSG00000207331 | 1.8214    | 0.03427  | 1.8214     | 0.03427    | 1.8214   |          |
|             | 0.03427         | 1.8214    | 0.03427  | 0.03427    | 0.47594477 |          |          |
| RN7SL76P    | ENSG00000241959 | 1.3506    | 0.088413 | 1.8214     | 0.034271   | 1.3506   |          |
|             | 0.088413        | 1.3506    | 0.088413 | 0.034271   | 0.47594477 |          |          |
| NA          | ENSG00000253205 | 0.16555   | 0.43425  | 0.4524     | 0.32549    | 0.19998  | 0.42075  |
|             | 1.8213          | 0.03428   | 0.03428  | 0.47594477 |            |          |          |
| STIMATE     | ENSG00000213533 | 1.2681    | 0.10239  | 1.8213     | 0.034282   | 0.32418  |          |
|             | 0.3729          | 0.71143   | 0.23841  | 0.034282   | 0.47594477 |          |          |

|           |                 |            |            |            |            |          |          |
|-----------|-----------------|------------|------------|------------|------------|----------|----------|
| TARS2P1   | ENSG00000248104 | -0.77556   | 0.781      | 1.8212     | 0.034285   | 1.8212   | 0.034285 |
|           | 1.8212          | 0.034285   | 0.034285   | 0.47594477 |            |          |          |
| NA        | ENSG00000260447 | 0.62434    | 0.2662     | 0.74676    | 0.22761    | -1.1811  | 0.88123  |
|           | 1.8212          | 0.034291   | 0.034291   | 0.47594477 |            |          |          |
| ZBTB1     | ENSG00000126804 | 1.8211     | 0.034292   | 1.8211     | 0.034292   | 1.8211   | 0.034292 |
|           | 1.8211          | 0.034292   | 0.034292   | 0.47594477 |            |          |          |
| METAP2P1  | ENSG00000234119 | 1.8209     | 0.034308   | 1.8209     | 0.034308   | 1.8209   |          |
|           | 0.034308        | 1.8209     | 0.034308   | 0.034308   | 0.47594477 |          |          |
| ACTRT3    | ENSG00000184378 | 1.8209     | 0.034309   | 1.8209     | 0.034309   | 1.8209   |          |
|           | 0.034309        | 1.8209     | 0.034309   | 0.034309   | 0.47594477 |          |          |
| NA        | ENSG00000272247 | 0.89337    | 0.18583    | 0.72334    | 0.23474    | 1.8209   | 0.034313 |
|           | 1.8209          | 0.034313   | 0.034313   | 0.47594477 |            |          |          |
| NA        | ENSG00000272944 | 1.8207     | 0.034322   | 1.8207     | 0.034322   | 1.8207   | 0.034322 |
|           | 1.8207          | 0.034322   | 0.034322   | 0.47594477 |            |          |          |
| RCCD1     | ENSG00000166965 | 1.8207     | 0.034327   | 1.8207     | 0.034327   | 0.45698  | 0.32384  |
|           | 1.8207          | 0.034327   | 0.034327   | 0.47594477 |            |          |          |
| FCSK      | ENSG00000157353 | 1.4559     | 0.072714   | 1.8206     | 0.034336   | 0.5982   | 0.27485  |
|           | 1.1065          | 0.13425    | 0.034336   | 0.47594477 |            |          |          |
| LINC01397 | ENSG00000258673 | -1.3025    | 0.90362    | -1.1281    | 0.87037    | -1.3025  |          |
|           | 0.90362         | 1.8205     | 0.034338   | 0.034338   | 0.47594477 |          |          |
| SH3RF2    | ENSG00000156463 | 0.2207     | 0.41266    | 1.0794     | 0.14021    | 1.8205   |          |
|           | 0.034342        | -0.0033103 | 0.50132    | 0.034342   | 0.47594477 |          |          |
| MIR4265   | ENSG00000264934 | 1.8204     | 0.034349   | 0.6286     | 0.26481    | 0.6286   |          |
|           | 0.26481         | 0.6286     | 0.26481    | 0.034349   | 0.47594477 |          |          |
| RAP2A     | ENSG00000125249 | 1.7195     | 0.042761   | 1.8204     | 0.034351   | 1.8204   | 0.034351 |
|           | 1.3483          | 0.088775   | 0.034351   | 0.47594477 |            |          |          |
| NA        | ENSG00000242660 | -1.3326    | 0.90866    | -1.3326    | 0.90866    | -1.3326  | 0.90866  |
|           | 1.8201          | 0.034369   | 0.034369   | 0.47594477 |            |          |          |
| NA        | ENSG00000248795 | 1.3927     | 0.081856   | 1.3927     | 0.081856   | 1.8199   | 0.034391 |
|           | -0.88083        | 0.8108     | 0.034391   | 0.47594477 |            |          |          |
| SPINK8    | ENSG00000229453 | 0.70264    | 0.24114    | 0.1504     | 0.44022    | 1.8198   |          |
|           | 0.034395        | 1.1919     | 0.11666    | 0.034395   | 0.47594477 |          |          |
| NA        | ENSG00000264697 | -0.63449   | 0.73712    | -0.63449   | 0.73712    | -0.63449 | 0.73712  |
|           | 1.8197          | 0.034405   | 0.034405   | 0.47594477 |            |          |          |
| DLEU2     | ENSG00000231607 | 1.8196     | 0.034413   | -0.05045   | 0.52012    | 0.26296  | 0.39629  |
|           | 0.38681         | 0.34945    | 0.034413   | 0.47594477 |            |          |          |
| MIR1471   | ENSG00000222246 | 0.74561    | 0.22795    | 1.8195     | 0.03442    | 1.0133   |          |
|           | 0.15546         | -0.19671   | 0.57797    | 0.03442    | 0.47594477 |          |          |
| NA        | ENSG00000236985 | 1.8193     | 0.034431   | -0.33483   | 0.63112    | 0.19481  | 0.42277  |
|           | 1.1773          | 0.11955    | 0.034431   | 0.47594477 |            |          |          |
| MX2       | ENSG00000183486 | -1.1821    | 0.88142    | -1.1821    | 0.88142    | 1.6217   | 0.052431 |
|           | 1.8192          | 0.034439   | 0.034439   | 0.47594477 |            |          |          |
| DHX37     | ENSG00000150990 | 0.60881    | 0.27133    | 0.60881    | 0.27133    | 0.4768   | 0.31675  |
|           | 1.8191          | 0.034448   | 0.034448   | 0.47594477 |            |          |          |
| ZAR1L     | ENSG00000189167 | 1.8191     | 0.03445    | 1.1802     | 0.11897    | 1.1662   | 0.12177  |
|           | 1.1662          | 0.12177    | 0.03445    | 0.47594477 |            |          |          |
| PRPF4B    | ENSG00000112739 | -0.47378   | 0.68217    | 1.819      | 0.034452   | 0.95199  | 0.17055  |
|           | -0.090477       | 0.53605    | 0.034452   | 0.47594477 |            |          |          |
| FTLP19    | ENSG00000237913 | 1.819      | 0.034454   | 1.819      | 0.034454   | 1.819    | 0.034454 |
|           | 0.034454        | 0.034454   | 0.47594477 |            |            |          |          |
| MIR4671   | ENSG00000264377 | -0.35569   | 0.63896    | 1.8189     | 0.034467   | 0.97185  |          |
|           | 0.16556         | 0.97185    | 0.16556    | 0.034467   | 0.47594477 |          |          |
| NA        | ENSG00000276851 | 1.8187     | 0.034475   | 1.8187     | 0.034475   | 1.8187   | 0.034475 |
|           | 1.8187          | 0.034475   | 0.034475   | 0.47594477 |            |          |          |
| NA        | ENSG00000233936 | -1.6071    | 0.94599    | 1.8185     | 0.03449    | 1.4621   | 0.071851 |
|           | 0.8432          | 0.19956    | 0.03449    | 0.47594477 |            |          |          |
| PINX1     | ENSG00000258724 | 1.8185     | 0.034494   | 1.8185     | 0.034494   | 1.8185   | 0.034494 |
|           | 1.8185          | 0.034494   | 0.034494   | 0.47594477 |            |          |          |
| NA        | ENSG00000207383 | 1.8182     | 0.034514   | 1.8182     | 0.034514   | 1.8182   | 0.034514 |
|           | 1.8182          | 0.034514   | 0.034514   | 0.47594477 |            |          |          |
| PPIAP64   | ENSG00000236259 | 1.3338     | 0.091141   | -0.25858   | 0.60202    | -0.93111 |          |
|           | 0.8241          | 1.8181     | 0.034525   | 0.034525   | 0.47594477 |          |          |

|           |                 |          |          |             |             |             |          |         |
|-----------|-----------------|----------|----------|-------------|-------------|-------------|----------|---------|
| KRR1      | ENSG00000111615 | 1.4083   | 0.079516 | 0.83057     | 0.20311     | 1.818       | 0.034528 |         |
|           |                 | 1.2251   | 0.11027  | 0.034528    | 0.47594477  |             |          |         |
| NA        | ENSG00000250256 | 0.42161  | 0.33666  | 1.818       | 0.034529    | 1.818       | 0.034529 | 1.818   |
|           |                 | 0.034529 | 0.034529 | 0.47594477  |             |             |          |         |
| RNU6-512P | ENSG00000201308 | 1.8178   | 0.034549 | 1.0179      | 0.15437     | 1.0179      |          |         |
|           |                 | 0.15437  | 1.0179   | 0.15437     | 0.034549    | 0.47594477  |          |         |
| NA        | ENSG00000253573 | 1.8177   | 0.034553 | 1.2303      | 0.10929     | -0.18418    | 0.57306  |         |
|           |                 | 0.77644  | 0.21875  | 0.034553    | 0.47594477  |             |          |         |
| RN7SL116P | ENSG00000240474 | 0.04309  | 0.48281  | 0.04309     | 0.48281     | 0.04309     |          |         |
|           |                 | 0.48281  | 1.8177   | 0.034555    | 0.034555    | 0.47594477  |          |         |
| MIR5693   | ENSG00000266072 | 1.8175   | 0.034567 | 1.8175      | 0.034567    | 1.8175      |          |         |
|           |                 | 0.034567 | 1.8175   | 0.034567    | 0.034567    | 0.47594477  |          |         |
| NA        | ENSG00000263877 | 1.8175   | 0.034568 | -1.3718     | 0.91494     | -1.3718     | 0.91494  |         |
|           |                 | -1.3718  | 0.91494  | 0.034568    | 0.47594477  |             |          |         |
| NA        | ENSG00000236457 | 0.90255  | 0.18338  | 1.8173      | 0.034586    | 1.3861      | 0.082851 |         |
|           |                 | 1.5839   | 0.056606 | 0.034586    | 0.47594477  |             |          |         |
| PKD1P6    | ENSG00000250251 | 1.817    | 0.034609 | -0.32715    | 0.62822     | -0.6483     | 0.7416   |         |
|           |                 | -0.6483  | 0.7416   | 0.034609    | 0.47594477  |             |          |         |
| OR1L8     | ENSG00000171496 | 1.817    | 0.034611 | 1.817       | 0.034611    | 0.39628     | 0.34595  | 0.39628 |
|           |                 | 0.34595  | 0.034611 | 0.47594477  |             |             |          |         |
| LRP2      | ENSG00000081479 | 0.21906  | 0.4133   | 1.1737      | 0.12026     | 1.8166      | 0.034641 |         |
|           |                 | -0.4361  | 0.66862  | 0.034641    | 0.47594477  |             |          |         |
| LINC01485 | ENSG00000254211 | 1.1979   | 0.11549  | 1.8165      | 0.034647    | 1.5147      |          |         |
|           |                 | 0.06492  | 1.2841   | 0.099552    | 0.034647    | 0.47594477  |          |         |
| SPATA7    | ENSG00000042317 | 0.73066  | 0.23249  | 1.8165      | 0.034649    | 1.3761      |          |         |
|           |                 | 0.084402 | 1.0534   | 0.14607     | 0.034649    | 0.47594477  |          |         |
| RARRES2P8 | ENSG00000259996 | 1.8165   | 0.03465  | 1.4596      | 0.072194    | 1.8165      |          |         |
|           |                 | 0.03465  | 0.51839  | 0.30209     | 0.03465     | 0.47594477  |          |         |
| PPY       | ENSG00000108849 | 1.8164   | 0.034657 | -0.026      | 0.51037     | 0.51222     | 0.30425  |         |
|           |                 | 1.8164   | 0.034657 | 0.034657    | 0.47594477  |             |          |         |
| NA        | ENSG00000236021 | 1.8163   | 0.034659 | 0.76174     | 0.22311     | 1.8163      | 0.034659 |         |
|           |                 | 1.8163   | 0.034659 | 0.034659    | 0.47594477  |             |          |         |
| NA        | ENSG00000235047 | 1.8163   | 0.034663 | 1.8163      | 0.034663    | 1.8163      | 0.034663 |         |
|           |                 | 1.8163   | 0.034663 | 0.034663    | 0.47594477  |             |          |         |
| SMIM23    | ENSG00000185662 | 1.8156   | 0.034712 | -0.71361    | 0.76227     | -0.71361    |          |         |
|           |                 | 0.76227  | 0.27955  | 0.38991     | 0.034712    | 0.476483313 |          |         |
| PCCB      | ENSG00000114054 | 0.98589  | 0.16209  | 1.8148      | 0.034777    | -0.4124     | 0.65998  |         |
|           |                 | 0.10479  | 0.45827  | 0.034777    | 0.477241118 |             |          |         |
| NA        | ENSG00000270293 | 1.8145   | 0.0348   | 1.8145      | 0.0348      | 1.8145      | 0.0348   |         |
|           |                 | 1.8145   | 0.0348   | 0.0348      | 0.477422297 |             |          |         |
| SRRD      | ENSG00000100104 | 1.5605   | 0.059322 | 1.5213      | 0.064095    | 1.8143      | 0.034815 |         |
|           |                 | 1.5754   | 0.057577 | 0.034815    | 0.477474519 |             |          |         |
| NA        | ENSG00000179038 | 1.8141   | 0.034834 | 1.3433      | 0.089582    | -0.16267    | 0.56461  |         |
|           |                 | -0.16267 | 0.56461  | 0.034834    | 0.477474519 |             |          |         |
| NA        | ENSG00000234647 | 0.063828 | 0.47455  | 1.814       | 0.034838    | 0.39885     | 0.345    | 0.39885 |
|           |                 | 0.345    | 0.034838 | 0.477474519 |             |             |          |         |
| KCNA1     | ENSG00000111262 | 1.8139   | 0.034843 | 0.22147     | 0.41236     | 0.41504     | 0.33906  |         |
|           |                 | 0.22147  | 0.41236  | 0.034843    | 0.477474519 |             |          |         |
| VGLL3     | ENSG00000206538 | 1.8134   | 0.034889 | 1.5977      | 0.055059    | 1.4479      | 0.07382  |         |
|           |                 | 1.4461   | 0.074071 | 0.034889    | 0.477573019 |             |          |         |
| MRS2      | ENSG00000124532 | -0.44419 | 0.67155  | 1.8131      | 0.034905    | -0.45826    | 0.67662  |         |
|           |                 | -0.35033 | 0.63695  | 0.034905    | 0.477573019 |             |          |         |
| LINC00921 | ENSG00000281005 | 1.8131   | 0.034906 | 0.70522     | 0.24034     | 1.8131      |          |         |
|           |                 | 0.034906 | 1.8131   | 0.034906    | 0.034906    | 0.477573019 |          |         |
| TARS3     | ENSG00000185418 | 1.8131   | 0.034907 | 1.8131      | 0.034907    | 1.8131      | 0.034907 |         |
|           |                 | 1.8131   | 0.034907 | 0.034907    | 0.477573019 |             |          |         |
| TRAJ31    | ENSG00000211858 | 0.083629 | 0.46668  | 1.813       | 0.034914    | 1.813       | 0.034914 | 1.813   |
|           |                 | 0.034914 | 0.034914 | 0.477573019 |             |             |          |         |
| TRAJ30    | ENSG00000211859 | 1.813    | 0.034914 | 1.813       | 0.034914    | 1.813       | 0.034914 | 1.813   |
|           |                 | 0.034914 | 0.034914 | 0.477573019 |             |             |          |         |
| NA        | ENSG00000271200 | 1.8128   | 0.034932 | -0.87582    | 0.80944     | 0.43606     | 0.3314   |         |
|           |                 | -0.71308 | 0.7621   | 0.034932    | 0.477573019 |             |          |         |

|            |                 |          |             |             |             |           |          |        |
|------------|-----------------|----------|-------------|-------------|-------------|-----------|----------|--------|
| LINC02417  | ENSG00000257048 | 0.26551  | 0.39531     | 1.8126      | 0.034943    | 0.86399   |          |        |
|            | 0.1938          | 0.86399  | 0.1938      | 0.034943    | 0.477573019 |           |          |        |
| IGF2-AS    | ENSG00000099869 | 1.8122   | 0.034977    | 1.8122      | 0.034977    | 1.6074    |          |        |
|            | 0.053986        | 1.8122   | 0.034977    | 0.034977    | 0.477573019 |           |          |        |
| EMX1       | ENSG00000135638 | 1.5223   | 0.06397     | -0.41971    | 0.66265     | 1.8119    | 0.034999 |        |
|            | -0.3775         | 0.6471   | 0.034999    | 0.477573019 |             |           |          |        |
| SDF4       | ENSG00000078808 | -0.13766 | 0.55474     | 1.8119      | 0.035002    | -0.13766  | 0.55474  |        |
|            | -0.076018       | 0.5303   | 0.035002    | 0.477573019 |             |           |          |        |
| PIEZO1     | ENSG00000103335 | 1.8119   | 0.035004    | 1.2894      | 0.098636    | 1.6028    |          |        |
|            | 0.054486        | 1.0497   | 0.14693     | 0.035004    | 0.477573019 |           |          |        |
| FBXL4      | ENSG00000112234 | 1.2114   | 0.11287     | 1.8118      | 0.035009    | 0.29366   | 0.38451  |        |
|            | 0.29366         | 0.38451  | 0.035009    | 0.477573019 |             |           |          |        |
| TWINK      | ENSG00000107815 | 1.5235   | 0.063813    | 1.8117      | 0.035018    | 0.91567   | 0.17992  |        |
|            | 0.45866         | 0.32324  | 0.035018    | 0.477573019 |             |           |          |        |
| LINC00901  | ENSG00000242385 | 0.79702  | 0.21272     | -0.28934    | 0.61384     | 0.44665   |          |        |
|            | 0.32756         | 1.8117   | 0.03502     | 0.03502     | 0.477573019 |           |          |        |
| KRT18P42   | ENSG00000214794 | 0.27419  | 0.39197     | 0.78631     | 0.21584     | -0.21556  |          |        |
|            | 0.58534         | 1.8115   | 0.035033    | 0.035033    | 0.477573019 |           |          |        |
| DLX2       | ENSG00000115844 | 1.8114   | 0.03504     | 0.8179      | 0.20671     | 1.4644    | 0.071548 |        |
|            | 1.5399          | 0.061787 | 0.03504     | 0.477573019 |             |           |          |        |
| NUDT9      | ENSG00000170502 | -0.26018 | 0.60264     | 1.3856      | 0.082927    | 0.96827   | 0.16645  |        |
|            | 1.8113          | 0.035048 | 0.035048    | 0.477573019 |             |           |          |        |
| CACNA2D2   | ENSG00000007402 | 1.811    | 0.03507     | 1.482       | 0.069175    | 1.674     | 0.047065 | 0.5333 |
|            | 0.29691         | 0.03507  | 0.477573019 |             |             |           |          |        |
| NA         | ENSG00000253515 | 1.8109   | 0.035075    | -0.95486    | 0.83017     | 0.63581   | 0.26245  |        |
|            | -0.47434        | 0.68237  | 0.035075    | 0.477573019 |             |           |          |        |
| LINC02430  | ENSG00000250252 | 0.081717 | 0.46744     | 1.8109      | 0.035082    | 0.081717  |          |        |
|            | 0.46744         | 0.081717 | 0.46744     | 0.035082    | 0.477573019 |           |          |        |
| RNU6-1275P | ENSG00000212389 | 1.1994   | 0.11518     | 1.1344      | 0.12832     | 1.8108    |          |        |
|            | 0.035086        | 1.7323   | 0.041614    | 0.035086    | 0.477573019 |           |          |        |
| NA         | ENSG00000255342 | 1.1592   | 0.12318     | 0.57834     | 0.28152     | -0.10633  | 0.54234  |        |
|            | 1.8108          | 0.035087 | 0.035087    | 0.477573019 |             |           |          |        |
| AATK       | ENSG00000181409 | -0.40955 | 0.65893     | 0.032739    | 0.48694     | 0.081854  | 0.46738  |        |
|            | 1.8108          | 0.035089 | 0.035089    | 0.477573019 |             |           |          |        |
| SNPH       | ENSG00000101298 | -0.53959 | 0.70526     | -1.2896     | 0.90141     | 1.8103    | 0.035128 |        |
|            | -1.503          | 0.93358  | 0.035128    | 0.477573019 |             |           |          |        |
| RNA5SP188  | ENSG00000199786 | 1.8102   | 0.035131    | 1.8102      | 0.035131    | 1.8102    |          |        |
|            | 0.035131        | 1.8102   | 0.035131    | 0.035131    | 0.477573019 |           |          |        |
| NA         | ENSG00000261467 | 1.8102   | 0.035131    | 0.70912     | 0.23913     | -1.1475   | 0.87442  |        |
|            | 0.87853         | 0.18983  | 0.035131    | 0.477573019 |             |           |          |        |
| PKMP5      | ENSG00000215057 | 0.074772 | 0.4702      | 1.8102      | 0.035133    | -0.97636  | 0.83556  |        |
|            | 0.18965         | 0.42479  | 0.035133    | 0.477573019 |             |           |          |        |
| NA         | ENSG00000271399 | 1.8101   | 0.035143    | 1.8101      | 0.035143    | 1.8101    | 0.035143 |        |
|            | 1.8101          | 0.035143 | 0.035143    | 0.477573019 |             |           |          |        |
| LINC02520  | ENSG00000204110 | 1.81     | 0.035145    | -0.1572     | 0.56245     | -1.1507   | 0.87507  |        |
|            | -0.1572         | 0.56245  | 0.035145    | 0.477573019 |             |           |          |        |
| LOXL1-AS1  | ENSG00000261801 | -0.63122 | 0.73605     | 1.8099      | 0.035154    | -0.52708  |          |        |
|            | 0.70093         | 0.1772   | 0.42968     | 0.035154    | 0.477573019 |           |          |        |
| CCDC154    | ENSG00000197599 | 1.8098   | 0.035164    | 1.8098      | 0.035164    | 1.8098    |          |        |
|            | 0.035164        | 1.4324   | 0.076015    | 0.035164    | 0.47757573  |           |          |        |
| NA         | ENSG00000258437 | -0.17629 | 0.56997     | 1.8093      | 0.035205    | 1.8093    | 0.035205 |        |
|            | 1.8093          | 0.035205 | 0.035205    | 0.477999345 |             |           |          |        |
| FGF5       | ENSG00000138675 | 0.086284 | 0.46562     | 1.809       | 0.035225    | 0.28433   | 0.38808  |        |
|            | 0.28433         | 0.38808  | 0.035225    | 0.478101315 |             |           |          |        |
| NA         | ENSG00000237520 | 1.8088   | 0.035241    | 1.2094      | 0.11325     | 1.8088    | 0.035241 |        |
|            | 1.8088          | 0.035241 | 0.035241    | 0.478101315 |             |           |          |        |
| LINC01868  | ENSG00000234169 | 0.64213  | 0.26039     | 0.26747     | 0.39455     | 1.8088    |          |        |
|            | 0.035245        | 0.84382  | 0.19938     | 0.035245    | 0.478101315 |           |          |        |
| SELENBP1   | ENSG00000143416 | 1.8084   | 0.035271    | 1.7745      | 0.037987    | -0.081412 |          |        |
|            | 0.53244         | 1.7745   | 0.037987    | 0.035271    | 0.478101315 |           |          |        |
| CSRNP3     | ENSG00000178662 | 0.97437  | 0.16494     | 1.8084      | 0.035273    | 0.67612   |          |        |
|            | 0.24948         | 0.86496  | 0.19353     | 0.035273    | 0.478101315 |           |          |        |

|             |                 |          |             |             |             |          |          |
|-------------|-----------------|----------|-------------|-------------|-------------|----------|----------|
| HACD3       | ENSG00000074696 | 1.7792   | 0.0376      | -0.87886    | 0.81026     | 1.8082   | 0.035287 |
|             | 0.077068        | 0.46928  | 0.035287    | 0.478101315 |             |          |          |
| NA          | ENSG00000230628 | 1.6631   | 0.048146    | 1.775       | 0.037948    | 1.6631   | 0.048146 |
|             | 1.8082          | 0.035288 | 0.035288    | 0.478101315 |             |          |          |
| RPL23AP12   | ENSG00000228861 | 0.95466  | 0.16988     | 1.3893      | 0.082377    | 0.52598  |          |
|             | 0.29945         | 1.8082   | 0.035291    | 0.035291    | 0.478101315 |          |          |
| MIR153-1    | ENSG00000207647 | 1.8079   | 0.035311    | 1.8079      | 0.035311    | 1.8079   |          |
|             | 0.035311        | 1.8079   | 0.035311    | 0.035311    | 0.478239308 |          |          |
| CAPN5       | ENSG00000149260 | 1.1979   | 0.11548     | 1.5205      | 0.06419     | 1.8076   | 0.035332 |
|             | 1.3364          | 0.090703 | 0.035332    | 0.478390764 |             |          |          |
| TRAJ16      | ENSG00000211873 | 1.8075   | 0.035343    | 1.8075      | 0.035343    | 1.8075   |          |
|             | 0.035343        | 1.8075   | 0.035343    | 0.035343    | 0.478394545 |          |          |
| NA          | ENSG00000258729 | 0.16443  | 0.4347      | 0.19682     | 0.42198     | 1.8069   | 0.035386 |
|             | 1.8069          | 0.035386 | 0.035386    | 0.478394545 |             |          |          |
| NA          | ENSG00000245008 | 1.8069   | 0.035387    | 1.0123      | 0.1557      | 1.3505   | 0.088425 |
|             | 0.18384         | 0.42707  | 0.035387    | 0.478394545 |             |          |          |
| MMD2        | ENSG00000136297 | -0.44383 | 0.67142     | 1.8069      | 0.035389    | -0.39095 | 0.65208  |
|             | 1.3995          | 0.080839 | 0.035389    | 0.478394545 |             |          |          |
| RNA5SP70    | ENSG00000252977 | 1.8069   | 0.035392    | 1.8069      | 0.035392    | 1.8069   |          |
|             | 0.035392        | 1.8069   | 0.035392    | 0.035392    | 0.478394545 |          |          |
| NA          | ENSG00000257180 | 1.2868   | 0.099073    | 1.2868      | 0.099073    | 1.3921   | 0.081945 |
|             | 1.8068          | 0.0354   | 0.0354      | 0.478394545 |             |          |          |
| NA          | ENSG00000235358 | 1.0469   | 0.14756     | 1.8068      | 0.035401    | 0.8147   | 0.20762  |
|             | -0.28775        | 0.61323  | 0.035401    | 0.478394545 |             |          |          |
| RCVRN       | ENSG00000109047 | 1.684    | 0.046091    | 1.8065      | 0.035424    | 1.684    | 0.046091 |
|             | 0.046091        | 0.035424 | 0.478494024 |             |             |          |          |
| NUP210P1    | ENSG00000198284 | 0.27496  | 0.39167     | 1.8064      | 0.035428    | 0.60986  |          |
|             | 0.27098         | 0.64103  | 0.26075     | 0.035428    | 0.478494024 |          |          |
| NA          | ENSG00000199890 | 1.8062   | 0.035441    | 1.8062      | 0.035441    | 1.8062   | 0.035441 |
|             | 1.8062          | 0.035441 | 0.035441    | 0.478536971 |             |          |          |
| LINC02453   | ENSG00000245017 | 1.8055   | 0.0355      | 1.8055      | 0.0355      | 1.8055   |          |
|             | 0.0355          | 1.8055   | 0.0355      | 0.0355      | 0.478863888 |          |          |
| NA          | ENSG00000278239 | 1.8054   | 0.035503    | 1.8054      | 0.035503    | 1.8054   | 0.035503 |
|             | 1.8054          | 0.035503 | 0.035503    | 0.478863888 |             |          |          |
| TXNDC12-AS1 | ENSG00000228369 | 0.012096 | 0.49517     | 0.012096    | 0.49517     | 1.8052   |          |
|             | 0.03552         | 0.012096 | 0.49517     | 0.03552     | 0.478863888 |          |          |
| NA          | ENSG00000271409 | 1.8052   | 0.035522    | 1.7226      | 0.042478    | 1.6948   | 0.045061 |
|             | 1.6741          | 0.047052 | 0.035522    | 0.478863888 |             |          |          |
| LINC01441   | ENSG00000224008 | 1.0214   | 0.15352     | 1.4969      | 0.067213    | 1.8052   |          |
|             | 0.035523        | 1.4969   | 0.067213    | 0.035523    | 0.478863888 |          |          |
| SCNN1D      | ENSG00000162572 | 1.8052   | 0.035525    | 1.1847      | 0.11808     | 1.1847   |          |
|             | 0.11808         | 1.1847   | 0.11808     | 0.035525    | 0.478863888 |          |          |
| CIDEB       | ENSG00000136305 | 1.448    | 0.073806    | 1.448       | 0.073806    | 1.805    | 0.035534 |
|             | 0.23471         | 0.035534 | 0.478863888 |             |             |          |          |
| NA          | ENSG00000242578 | 0.51142  | 0.30453     | 1.8048      | 0.035556    | 0.94349  | 0.17271  |
|             | 0.20167         | 0.42009  | 0.035556    | 0.478994362 |             |          |          |
| NA          | ENSG00000261402 | 1.8045   | 0.035573    | 0.55117     | 0.29076     | 1.5094   | 0.065601 |
|             | -1.4813         | 0.93074  | 0.035573    | 0.478994362 |             |          |          |
| CCDC140     | ENSG00000163081 | 1.8045   | 0.035575    | 1.8045      | 0.035575    | 1.8045   |          |
|             | 0.035575        | 1.8045   | 0.035575    | 0.035575    | 0.478994362 |          |          |
| SNORA63D    | ENSG00000201229 | 0.23453  | 0.40729     | 0.23453     | 0.40729     | 1.0425   |          |
|             | 0.1486          | 1.8044   | 0.035583    | 0.035583    | 0.478994362 |          |          |
| FAM131A     | ENSG00000175182 | 1.804    | 0.035617    | 0.32871     | 0.37119     | -0.35107 | 0.63723  |
|             | -0.35107        | 0.63723  | 0.035617    | 0.479213857 |             |          |          |
| GTF2A2      | ENSG00000140307 | 0.14187  | 0.44359     | 1.8039      | 0.035623    | 0.14187  |          |
|             | 0.44359         | 0.14187  | 0.44359     | 0.035623    | 0.479213857 |          |          |
| NA          | ENSG00000226040 | 0.42454  | 0.33559     | 1.8037      | 0.035642    | 0.42454  | 0.33559  |
|             | 0.401           | 0.34421  | 0.035642    | 0.479213857 |             |          |          |
| RN7SL813P   | ENSG00000241074 | -1.615   | 0.94685     | -1.615      | 0.94685     | -1.615   |          |
|             | 0.94685         | 1.8035   | 0.035658    | 0.035658    | 0.479213857 |          |          |
| PRKRA       | ENSG00000180228 | 1.8032   | 0.035675    | 1.8032      | 0.035675    | -0.22917 | 0.59063  |
|             | 0.16295         | 0.43528  | 0.035675    | 0.479213857 |             |          |          |

|            |                 |          |             |             |             |          |          |
|------------|-----------------|----------|-------------|-------------|-------------|----------|----------|
| GBP1       | ENSG00000117228 | 0.28631  | 0.38732     | 0.38672     | 0.34948     | 0.25124  | 0.40082  |
|            | 1.8027          | 0.035714 | 0.035714    | 0.479213857 |             |          |          |
| FAM161B    | ENSG00000156050 | 1.5523   | 0.060297    | 0.060297    | 1.8027      | 0.035717 | 1.3139   |
|            | 0.094437        | 1.5523   | 0.060297    | 0.035717    | 0.479213857 |          |          |
| BTD        | ENSG00000169814 | 1.8026   | 0.035726    | -1.4649     | 0.92853     | -1.4735  | 0.92969  |
|            | -0.97042        | 0.83408  | 0.035726    | 0.479213857 |             |          |          |
| NA         | ENSG00000271580 | 1.6653   | 0.047929    | 1.8025      | 0.035735    | 1.8025   | 0.035735 |
|            | 1.8025          | 0.035735 | 0.035735    | 0.479213857 |             |          |          |
| NA         | ENSG00000258576 | -0.74249 | 0.7711      | 0.15125     | 0.43989     | -0.31749 | 0.62456  |
|            | 1.8024          | 0.035741 | 0.035741    | 0.479213857 |             |          |          |
| DIO2       | ENSG00000211448 | -0.24718 | 0.59762     | -0.016248   | 0.50648     | 1.8023   | 0.035747 |
|            | 0.5978          | 0.27499  | 0.035747    | 0.479213857 |             |          |          |
| SPATA3-AS1 | ENSG00000238062 | -1.1922  | 0.88341     | 1.8023      | 0.035749    | -0.45064 |          |
|            | 0.67388         | -1.4639  | 0.92839     | 0.035749    | 0.479213857 |          |          |
| NA         | ENSG00000255309 | -1.4684  | 0.92901     | -1.149      | 0.87472     | -1.1914  | 0.88326  |
|            | 1.8023          | 0.03575  | 0.03575     | 0.479213857 |             |          |          |
| SKA2P1     | ENSG00000232387 | 1.802    | 0.03577     | -0.47575    | 0.68287     | -1.3285  | 0.90799  |
|            | -1.015          | 0.84495  | 0.03577     | 0.479213857 |             |          |          |
| NA         | ENSG00000234446 | 1.8019   | 0.035778    | 1.4767      | 0.069872    | 1.4767   | 0.069872 |
|            | 1.4767          | 0.069872 | 0.035778    | 0.479213857 |             |          |          |
| DMTN       | ENSG00000158856 | 1.8019   | 0.035782    | 1.3663      | 0.085918    | -0.42508 | 0.66461  |
|            | 0.033314        | 0.48671  | 0.035782    | 0.479213857 |             |          |          |
| CDC25A     | ENSG00000164045 | 1.0669   | 0.143       | 1.0669      | 0.143       | 1.8017   | 0.035793 |
|            | 1.6457          | 0.049913 | 0.035793    | 0.479213857 |             |          |          |
| NA         | ENSG00000225050 | 1.8017   | 0.035795    | 0.78396     | 0.21653     | -0.04013 | 0.51601  |
|            | 0.91601         | 0.17983  | 0.035795    | 0.479213857 |             |          |          |
| RPS29P8    | ENSG00000232238 | 0.95566  | 0.16962     | 0.95566     | 0.16962     | 0.95566  |          |
|            | 0.16962         | 1.8014   | 0.035818    | 0.035818    | 0.479213857 |          |          |
| DCDC1      | ENSG00000170959 | 1.8014   | 0.035819    | 1.4442      | 0.074338    | 1.6701   | 0.047455 |
|            | 0.48482         | 0.3139   | 0.035819    | 0.479213857 |             |          |          |
| APOH       | ENSG00000091583 | 0.44782  | 0.32714     | 0.21306     | 0.41564     | 0.5129   | 0.30401  |
|            | 1.801           | 0.035854 | 0.035854    | 0.479213857 |             |          |          |
| ZBTB20-AS1 | ENSG00000241560 | 1.1945   | 0.11615     | 1.8009      | 0.035863    | 0.71151  |          |
|            | 0.23838         | 1.1194   | 0.13148     | 0.035863    | 0.479213857 |          |          |
| IGLV3-31   | ENSG00000253920 | 0.93598  | 0.17464     | 1.8008      | 0.035865    | 1.8008   |          |
|            | 0.035865        | 1.8008   | 0.035865    | 0.035865    | 0.479213857 |          |          |
| LINC02756  | ENSG00000255332 | 0.41987  | 0.33729     | 1.8008      | 0.035871    | 1.8008   |          |
|            | 0.035871        | 1.8008   | 0.035871    | 0.035871    | 0.479213857 |          |          |
| NA         | ENSG00000249579 | 1.0029   | 0.15796     | 0.92753     | 0.17683     | 1.8007   | 0.035877 |
|            | 1.0029          | 0.15796  | 0.035877    | 0.479213857 |             |          |          |
| NA         | ENSG00000236887 | -0.60735 | 0.72819     | 1.8005      | 0.035892    | 0.026376 | 0.48948  |
|            | 0.026376        | 0.48948  | 0.035892    | 0.479213857 |             |          |          |
| NA         | ENSG00000260793 | 0.58834  | 0.27815     | 0.58834     | 0.27815     | 1.8003   | 0.035903 |
|            | 0.010451        | 0.49583  | 0.035903    | 0.479213857 |             |          |          |
| NA         | ENSG00000250319 | -0.3973  | 0.65443     | 1.8003      | 0.035906    | 1.8003   | 0.035906 |
|            | 1.8003          | 0.035906 | 0.035906    | 0.479213857 |             |          |          |
| LINC00456  | ENSG00000233124 | 1.8002   | 0.035915    | 1.7504      | 0.040027    | 1.8002   |          |
|            | 0.035915        | 1.8002   | 0.035915    | 0.035915    | 0.479213857 |          |          |
| NA         | ENSG00000270911 | 1.8002   | 0.035915    | 1.2359      | 0.10825     | 1.8002   | 0.035915 |
|            | 1.8002          | 0.035915 | 0.035915    | 0.479213857 |             |          |          |
| RNU6-1282P | ENSG00000252544 | -0.22256 | 0.58806     | -1.1439     | 0.87367     | -1.0669  |          |
|            | 0.85699         | 1.8      | 0.035928    | 0.035928    | 0.479213857 |          |          |
| IQCM       | ENSG00000234828 | 1.7999   | 0.035937    | 1.4227      | 0.077406    | 0.34868  | 0.36366  |
|            | 1.1526          | 0.12453  | 0.035937    | 0.479213857 |             |          |          |
| NA         | ENSG00000236169 | -0.34785 | 0.63602     | 1.0807      | 0.13991     | 1.7999   | 0.035939 |
|            | 1.7999          | 0.035939 | 0.035939    | 0.479213857 |             |          |          |
| NA         | ENSG00000265010 | 1.7997   | 0.035955    | 1.7997      | 0.035955    | 1.7997   | 0.035955 |
|            | 1.7997          | 0.035955 | 0.035955    | 0.479213857 |             |          |          |
| WDFY3      | ENSG00000163625 | 1.526    | 0.063501    | 1.7996      | 0.035961    | 1.7502   | 0.040044 |
|            | 0.045137        | 0.035961 | 0.479213857 |             |             |          | 1.694    |
| BCL2L12    | ENSG00000126453 | 1.7995   | 0.035969    | 1.7995      | 0.035969    | 1.7995   |          |
|            | 0.035969        | 1.7995   | 0.035969    | 0.035969    | 0.479213857 |          |          |

|           |                 |               |          |                |             |             |                   |
|-----------|-----------------|---------------|----------|----------------|-------------|-------------|-------------------|
| IRF3      | ENSG00000126456 | 1.7995        | 0.035969 | 1.7995         | 0.035969    | 1.7995      | 0.035969          |
|           |                 | 1.7995        | 0.035969 | 0.035969       | 0.479213857 |             |                   |
| NA        | ENSG00000237087 | 1.7995        | 0.035973 | 1.7995         | 0.035973    | 1.7995      | 0.035973          |
|           |                 | 1.7995        | 0.035973 | 0.035973       | 0.479213857 |             |                   |
| ZNF862    | ENSG00000106479 | -0.45861      | 0.036009 | 0.67674        | 1.799       | 0.036009    | 0.0075941 0.49697 |
|           |                 | -1.7122       | 0.95657  | 0.036009       | 0.479291411 |             |                   |
| HSD3BP1   | ENSG00000187481 | 0.54222       | 0.036013 | 0.29383        | -0.301      | 0.61829     | 1.7989            |
|           |                 | 0.036013      | 1.7989   | 0.036013       | 0.036013    | 0.479291411 |                   |
| NA        | ENSG00000234424 | 0.99542       | 0.036015 | 0.15976        | 1.5736      | 0.057795    | 1.7989 0.036015   |
|           |                 | 1.0835        | 0.1393   | 0.036015       | 0.479291411 |             |                   |
| TLCD4     | ENSG00000152078 | 0.40517       | 0.036024 | 0.34268        | 0.40517     | 0.34268     | 0.40517 0.34268   |
|           |                 | 1.7988        | 0.036024 | 0.036024       | 0.479291411 |             |                   |
| NA        | ENSG00000264449 | -0.31002      | 0.036028 | 0.62173        | 0.18577     | 0.42631     | 1.2987 0.097031   |
|           |                 | 1.7988        | 0.036028 | 0.036028       | 0.479291411 |             |                   |
| NA        | ENSG00000273153 | 1.7986        | 0.036042 | 1.7986         | 0.036042    | 1.7986      | 0.036042          |
|           |                 | 1.7986        | 0.036042 | 0.036042       | 0.479346796 |             |                   |
| NA        | ENSG00000229118 | 0.0098878     | 0.036059 | 0.49606        | 1.7984      | 0.036059    | 0.267 0.39473     |
|           |                 | 0.88864       | 0.1871   | 0.036059       | 0.47937772  |             |                   |
| LINC02866 | ENSG00000253665 | 0.75532       | 0.036064 | 0.22503        | 0.75532     | 0.22503     | 1.7983            |
|           |                 | 0.036064      | 0.045143 | 0.482 0.036064 | 0.47937772  |             |                   |
| NA        | ENSG00000234091 | 1.2757        | 0.036095 | 0.10102        | 1.7979      | 0.036095    | 0.71842 0.23625   |
|           |                 | 1.4633        | 0.071689 | 0.036095       | 0.479636547 |             |                   |
| LINC01167 | ENSG00000224758 | -0.40978      | 0.03611  | 0.65902        | 1.7977      | 0.03611     | -0.36932          |
|           |                 | 0.64405       | -0.36932 | 0.64405        | 0.03611     | 0.479636547 |                   |
| NA        | ENSG00000284513 | 0.091077      | 0.036113 | 0.46372        | 0.14884     | 0.44084     | 1.7977 0.036113   |
|           |                 | 0.091077      | 0.46372  | 0.036113       | 0.479636547 |             |                   |
| PRKCH     | ENSG00000027075 | 1.1242        | 0.036155 | 0.13047        | 1.4106      | 0.07918     | 1.7972 0.036155   |
|           |                 | 1.3605        | 0.086829 | 0.036155       | 0.4800322   |             |                   |
| GGCTP2    | ENSG00000232943 | 1.7967        | 0.03619  | 1.7967         | 0.03619     | 1.3945      |                   |
|           |                 | 0.081582      | 0.81993  | 0.20613        | 0.03619     | 0.4800322   |                   |
| NA        | ENSG00000279011 | -0.21324      | 0.036193 | 0.58443        | -0.21324    | 0.58443     | -0.21324 0.58443  |
|           |                 | 1.7967        | 0.036193 | 0.036193       | 0.4800322   |             |                   |
| PSMG1     | ENSG00000183527 | 1.7966        | 0.036199 | 1.7966         | 0.036199    | 1.7966      | 0.036199          |
|           |                 | 1.5063        | 0.065991 | 0.036199       | 0.4800322   |             |                   |
| RPS26P15  | ENSG00000223416 | -0.57781      | 0.03621  | 0.7183         | 1.7965      | 0.03621     | -0.98865          |
|           |                 | 0.83858       | -0.98865 | 0.83858        | 0.03621     | 0.4800322   |                   |
| SESN1     | ENSG00000080546 | 1.6467        | 0.036219 | 0.049813       | 1.6467      | 0.049813    | 1.6467 0.049813   |
|           |                 | 1.7964        | 0.036219 | 0.036219       | 0.4800322   |             |                   |
| SRF       | ENSG00000112658 | 1.7962        | 0.036233 | 1.5559         | 0.059872    | 1.5559      | 0.059872          |
|           |                 | 0.13433       | 0.44657  | 0.036233       | 0.4800322   |             |                   |
| PNMA1     | ENSG00000176903 | 0.99385       | 0.036242 | 0.16015        | 1.7961      | 0.036242    | -0.024792 0.50989 |
|           |                 | -0.024792     | 0.50989  | 0.036242       | 0.4800322   |             |                   |
| NA        | ENSG00000264932 | 1.7959        | 0.036253 | 1.7959         | 0.036253    | 1.7959      | 0.036253          |
|           |                 | 1.7959        | 0.036253 | 0.036253       | 0.4800322   |             |                   |
| OR52M2P   | ENSG00000226616 | 1.2016        | 0.036254 | 0.11476        | 0.58107     | 0.2806      | 1.7874            |
|           |                 | 0.036936      | 1.7959   | 0.036254       | 0.036254    | 0.4800322   |                   |
| PCLO      | ENSG00000186472 | 1.0238        | 0.036256 | 0.15296        | 0.13685     | 0.44558     | -0.14076 0.55597  |
|           |                 | 1.7959        | 0.036256 | 0.036256       | 0.4800322   |             |                   |
| MRPL54    | ENSG00000183617 | 1.7958        | 0.036261 | 1.7958         | 0.036261    | 1.7958      |                   |
|           |                 | 0.036261      | 1.7958   | 0.036261       | 0.036261    | 0.4800322   |                   |
| LINC02653 | ENSG00000236373 | 0.69328       | 0.036298 | 0.24407        | 1.7954      | 0.036298    | 0.54057           |
|           |                 | 0.2944        | -0.49151 | 0.68847        | 0.036298    | 0.48039151  |                   |
| NA        | ENSG00000236768 | 1.6009        | 0.03632  | 0.054695       | 1.7951      | 0.03632     | 1.4898 0.068143   |
|           |                 | 0.83276       | 0.20249  | 0.03632        | 0.480552159 |             |                   |
| NCAPG     | ENSG00000109805 | 0.65661       | 0.036335 | 0.25572        | 1.7949      | 0.036335    | 0.80993 0.20899   |
|           |                 | 0.32933       | 0.37095  | 0.036335       | 0.480620128 |             |                   |
| NA        | ENSG00000223930 | -0.42728      | 0.036346 | 0.66541        | 0.0024215   | 0.49903     | 0.067234 0.4732   |
|           |                 | 1.7948        | 0.036346 | 0.036346       | 0.480635164 |             |                   |
| CCDC85C   | ENSG00000205476 | 1.7946        | 0.036356 | 1.7877         | 0.036913    | 1.3301      |                   |
|           |                 | 0.091743      | 1.3594   | 0.087004       | 0.036356    | 0.480636972 |                   |
| RNU4-60P  | ENSG00000253048 | -1.08 0.85992 | 0.036379 | 1.2652         | 0.10289     | 0.48655     | 0.31329           |
|           |                 | 1.7943        | 0.036379 | 0.036379       | 0.480800905 |             |                   |

|            |                 |          |             |             |             |          |
|------------|-----------------|----------|-------------|-------------|-------------|----------|
| MCF2L2     | ENSG00000053524 | 0.61274  | 0.27002     | -0.093678   | 0.53732     | 0.65229  |
|            | 0.25711         | 1.7942   | 0.036391    | 0.036391    | 0.480800905 |          |
| TMEM201    | ENSG00000188807 | -0.19118 | 0.57581     | 1.0374      | 0.14977     | 0.60379  |
|            | 0.27299         | 1.7941   | 0.036398    | 0.036398    | 0.480800905 |          |
| L3MBTL1    | ENSG00000185513 | 1.7939   | 0.036417    | 1.2971      | 0.097294    | 1.6102   |
|            | 0.053679        | 0.61345  | 0.26979     | 0.036417    | 0.480870439 |          |
| GPATCH3    | ENSG00000198746 | 0.40823  | 0.34155     | 0.40823     | 0.34155     | 0.40823  |
|            | 0.34155         | 1.7938   | 0.036423    | 0.036423    | 0.480870439 |          |
| ZRANB2     | ENSG00000132485 | 1.7936   | 0.036439    | 0.48856     | 0.31258     | 1.7936   |
|            | 0.036439        | 0.146    | 0.44196     | 0.036439    | 0.480941619 |          |
| TMEM231P1  | ENSG00000262583 | 1.7935   | 0.036449    | 1.7935      | 0.036449    | 1.7935   |
|            | 0.036449        | 0.6015   | 0.27375     | 0.036449    | 0.480941619 |          |
| BCL7A      | ENSG00000110987 | -0.18401 | 0.573       | 0.4577      | 0.32358     | 0.43462  |
|            | 1.7934          | 0.036458 | 0.036458    | 0.480941619 |             | 0.33192  |
| RPS11P1    | ENSG00000235544 | 1.793    | 0.036485    | 1.793       | 0.036485    | 1.793    |
|            | 0.036485        | 0.036485 | 0.481050536 |             |             |          |
| NA         | ENSG00000258534 | 0.04068  | 0.48378     | 0.59268     | 0.2767      | 1.793    |
|            | 1.6323          | 0.051311 | 0.036486    | 0.481050536 |             | 0.036486 |
| SLC7A7     | ENSG00000155465 | 1.6093   | 0.053776    | 1.7926      | 0.036515    | 1.7926   |
|            | 0.036515        | 1.6506   | 0.049412    | 0.036515    | 0.481057619 |          |
| RNU2-13P   | ENSG00000251718 | 1.7926   | 0.03652     | -0.20605    | 0.58162     | 1.7926   |
|            | 0.03652         | 1.7926   | 0.03652     | 0.03652     | 0.481057619 |          |
| UOX        | ENSG00000240520 | 1.7924   | 0.036531    | 1.5258      | 0.063527    | 1.7924   |
|            | 1.7924          | 0.036531 | 0.036531    | 0.481057619 |             | 0.036531 |
| HNRNPCL4   | ENSG00000179412 | -0.76232 | 0.77706     | -0.76232    | 0.77706     | -0.76232 |
|            | 0.77706         | 1.7923   | 0.036542    | 0.036542    | 0.481057619 |          |
| CEND1P1    | ENSG00000213159 | 1.7922   | 0.03655     | 0.20244     | 0.41979     | -0.92395 |
|            | 0.82224         | 0.097035 | 0.46135     | 0.03655     | 0.481057619 |          |
| NA         | ENSG00000267288 | 1.7918   | 0.036584    | 1.7918      | 0.036584    | 1.7918   |
|            | 1.7918          | 0.036584 | 0.036584    | 0.481057619 |             | 0.036584 |
| NA         | ENSG00000267238 | 0.4642   | 0.32125     | 1.7664      | 0.038662    | 1.7918   |
|            | 1.7918          | 0.036585 | 0.036585    | 0.481057619 |             | 0.036585 |
| NR2E1      | ENSG00000112333 | 0.90914  | 0.18164     | 0.90914     | 0.18164     | 1.7917   |
|            | -0.16661        | 0.56616  | 0.036587    | 0.481057619 |             | 0.036587 |
| TMEM182    | ENSG00000170417 | 0.61097  | 0.27061     | 0.61097     | 0.27061     | 0.33644  |
|            | 0.36827         | 1.7916   | 0.036595    | 0.036595    | 0.481057619 |          |
| NA         | ENSG00000254914 | 1.7916   | 0.036602    | 1.5705      | 0.058145    | 1.7313   |
|            | 1.7313          | 0.041698 | 0.036602    | 0.481057619 |             | 0.041698 |
| RNA5SP323  | ENSG00000212396 | 1.7915   | 0.036605    | 1.2812      | 0.10005     | 1.7915   |
|            | 0.036605        | 1.7915   | 0.036605    | 0.036605    | 0.481057619 |          |
| ERCC8-AS1  | ENSG00000233847 | 1.7915   | 0.036605    | 1.7915      | 0.036605    | 1.7915   |
|            | 0.036605        | 1.7915   | 0.036605    | 0.036605    | 0.481057619 |          |
| SOCS7      | ENSG00000274211 | 1.7911   | 0.03664     | 1.7214      | 0.042589    | 1.7911   |
|            | 1.7911          | 0.03664  | 0.03664     | 0.481154584 |             | 0.03664  |
| KXD1       | ENSG00000105700 | 1.5697   | 0.058237    | 0.47823     | 0.31624     | 1.7911   |
|            | 1.4653          | 0.071422 | 0.036641    | 0.481154584 |             | 0.036641 |
| JARID2-AS1 | ENSG00000235488 | 1.7911   | 0.036642    | 1.7911      | 0.036642    | 1.7911   |
|            | 0.036642        | 1.7911   | 0.036642    | 0.036642    | 0.481154584 |          |
| CYCSP12    | ENSG00000224263 | 1.7908   | 0.036663    | -0.0086328  | 0.50344     | 1.3605   |
|            | 0.086835        | 1.0054   | 0.15735     | 0.036663    | 0.481300644 |          |
| NA         | ENSG00000248842 | 1.7468   | 0.040338    | 1.7905      | 0.036688    | 0.57867  |
|            | 0.57867         | 0.28141  | 0.036688    | 0.48140884  |             | 0.28141  |
| NA         | ENSG00000224970 | 1.7905   | 0.036691    | 1.7905      | 0.036691    | 1.7905   |
|            | 1.6798          | 0.046499 | 0.036691    | 0.48140884  |             | 0.036691 |
| SARM1      | ENSG00000004139 | -0.13535 | 0.55383     | -0.52617    | 0.70061     | -0.52617 |
|            | 1.7899          | 0.036735 | 0.036735    | 0.481665717 |             | 0.70061  |
| CST1       | ENSG00000170373 | 1.7898   | 0.036745    | 0.19485     | 0.42275     | -0.59966 |
|            | 1.111           | 0.13328  | 0.036745    | 0.481665717 |             | 0.72563  |
| NA         | ENSG00000274330 | 1.7897   | 0.036752    | 1.7897      | 0.036752    | 1.7897   |
|            | 1.7897          | 0.036752 | 0.036752    | 0.481665717 |             | 0.036752 |
| KIAA1614   | ENSG00000135835 | 0.23579  | 0.4068      | 1.7896      | 0.036759    | 0.23579  |
|            | 0.4068          | -0.36338 | 0.64184     | 0.036759    | 0.481665717 |          |



|             |                 |          |             |             |             |           |          |
|-------------|-----------------|----------|-------------|-------------|-------------|-----------|----------|
| NA          | ENSG00000253690 | -0.50688 | 0.69388     | -0.4311     | 0.6668      | -1.2697   | 0.89791  |
|             | 1.7896          | 0.03676  | 0.03676     | 0.481665717 |             |           |          |
| SIMC1       | ENSG00000170085 | 1.789    | 0.036807    | 1.2436      | 0.10682     | 0.56658   | 0.2855   |
|             | 0.7745          | 0.21932  | 0.036807    | 0.482022335 |             |           |          |
| NA          | ENSG00000254424 | 0.70154  | 0.24148     | -1.2701     | 0.89798     | 0.80393   | 0.21072  |
|             | 1.789           | 0.036807 | 0.482022335 |             |             |           |          |
| NA          | ENSG00000279554 | 1.7886   | 0.036842    | 1.7886      | 0.036842    | 1.7886    | 0.036842 |
|             | 1.7886          | 0.036842 | 0.036842    | 0.482351064 |             |           |          |
| NA          | ENSG00000225489 | 1.19     | 0.11701     | 1.7883      | 0.036867    | 1.19      | 0.11701  |
|             | 0.11701         | 0.036867 | 0.482430895 |             |             |           |          |
| TMPRSS11BNL | ENSG00000250026 | 1.7882   | 0.036876    | -0.90804    | 0.81807     | 0.65069   |          |
|             | 0.25762         | -0.94102 | 0.82665     | 0.036876    | 0.482430895 |           |          |
| RNU105C     | ENSG00000199212 | 1.7881   | 0.036881    | 1.7881      | 0.036881    | 1.7881    |          |
|             | 0.036881        | 1.7881   | 0.036881    | 0.036881    | 0.482430895 |           |          |
| IMPDH1      | ENSG00000106348 | 0.53791  | 0.29532     | 1.6296      | 0.05159     | 1.7879    |          |
|             | 0.036897        | 1.5275   | 0.063322    | 0.036897    | 0.482430895 |           |          |
| RARB        | ENSG00000077092 | 1.6614   | 0.048314    | 1.4386      | 0.075132    | 1.7878    | 0.036908 |
|             | 1.2629          | 0.10331  | 0.036908    | 0.482430895 |             |           |          |
| LINC01354   | ENSG00000231768 | 1.0691   | 0.14251     | 1.7044      | 0.044151    | 1.7876    |          |
|             | 0.036923        | 1.6756   | 0.046908    | 0.036923    | 0.482430895 |           |          |
| NA          | ENSG00000213386 | 0.9741   | 0.165       | 1.4311      | 0.076205    | 1.4983    | 0.067032 |
|             | 1.7876          | 0.036924 | 0.036924    | 0.482430895 |             |           |          |
| NA          | ENSG00000276923 | -0.39315 | 0.6529      | 1.7875      | 0.036932    | -0.39315  | 0.6529   |
|             | -0.39315        | 0.6529   | 0.036932    | 0.482430895 |             |           |          |
| HAO1        | ENSG00000101323 | 0.57634  | 0.28219     | 0.45535     | 0.32443     | -2.0485   | 0.97975  |
|             | 1.7874          | 0.036938 | 0.036938    | 0.482430895 |             |           |          |
| NA          | ENSG00000257803 | 0.12099  | 0.45185     | -0.59851    | 0.72525     | -0.59851  | 0.72525  |
|             | 1.7873          | 0.036948 | 0.036948    | 0.482430895 |             |           |          |
| IGHV1-3     | ENSG00000211935 | -0.58833 | 0.72184     | 1.787       | 0.036965    | 1.787     | 0.036965 |
|             | 0.75508         | 0.2251   | 0.036965    | 0.482430895 |             |           |          |
| RNU7-141P   | ENSG00000238777 | 1.7868   | 0.036986    | 1.7868      | 0.036986    | 1.7868    |          |
|             | 0.036986        | 1.7868   | 0.036986    | 0.036986    | 0.482430895 |           |          |
| KIAA0100    | ENSG00000007202 | 0.52787  | 0.2988      | -0.5115     | 0.6955      | -0.5115   |          |
|             | 0.6955          | 1.7866   | 0.037005    | 0.037005    | 0.482430895 |           |          |
| NA          | ENSG00000201218 | 1.7865   | 0.037011    | -0.57327    | 0.71677     | 0.40761   | 0.34178  |
|             | 0.31126         | 0.3778   | 0.037011    | 0.482430895 |             |           |          |
| C3          | ENSG00000125730 | 1.3767   | 0.084298    | 1.4015      | 0.080538    | 0.53232   | 0.29725  |
|             | 1.786           | 0.037047 | 0.037047    | 0.482430895 |             |           |          |
| NA          | ENSG00000257307 | 1.1615   | 0.12271     | 0.4387      | 0.33044     | 1.4828    | 0.069061 |
|             | 1.786           | 0.037054 | 0.037054    | 0.482430895 |             |           |          |
| CTAGE15     | ENSG00000271079 | -0.87759 | 0.80992     | 1.7859      | 0.037054    | -0.066276 |          |
|             | 0.52642         | -1.0724  | 0.85822     | 0.037054    | 0.482430895 |           |          |
| NA          | ENSG00000249761 | -0.90555 | 0.81741     | -0.1721     | 0.56832     | -0.82324  | 0.79482  |
|             | 1.7859          | 0.037057 | 0.037057    | 0.482430895 |             |           |          |
| LBX1        | ENSG00000138136 | 1.4753   | 0.070063    | 1.5741      | 0.057738    | 1.7859    | 0.037061 |
|             | -0.63727        | 0.73803  | 0.037061    | 0.482430895 |             |           |          |
| SRC         | ENSG00000197122 | 0.81194  | 0.20841     | 1.1046      | 0.13466     | 0.70592   | 0.24012  |
|             | 1.7857          | 0.037075 | 0.037075    | 0.482430895 |             |           |          |
| NA          | ENSG00000282048 | 1.7856   | 0.037079    | -0.1247     | 0.54962     | -0.1247   | 0.54962  |
|             | -0.1247         | 0.54962  | 0.037079    | 0.482430895 |             |           |          |
| FAM32CP     | ENSG00000213525 | 1.7856   | 0.037085    | 1.7856      | 0.037085    | 1.7856    |          |
|             | 0.037085        | 1.2688   | 0.10226     | 0.037085    | 0.482430895 |           |          |
| NA          | ENSG00000270832 | 1.0542   | 0.14591     | 0.29321     | 0.38468     | -0.45541  | 0.67559  |
|             | 1.7854          | 0.037095 | 0.037095    | 0.482430895 |             |           |          |
| STRIP2      | ENSG00000128578 | 1.7853   | 0.037108    | 0.36804     | 0.35642     | 1.2879    |          |
|             | 0.098893        | 1.2446   | 0.10664     | 0.037108    | 0.482430895 |           |          |
| NA          | ENSG00000270897 | 1.7851   | 0.037126    | 1.7851      | 0.037126    | 1.7851    | 0.037126 |
|             | 1.7851          | 0.037126 | 0.037126    | 0.482430895 |             |           |          |
| RNU6-925P   | ENSG00000207359 | 1.7838   | 0.037228    | 1.7849      | 0.037139    | 1.7838    |          |
|             | 0.037228        | 1.7838   | 0.037228    | 0.037139    | 0.482430895 |           |          |
| NA          | ENSG00000273329 | 1.7849   | 0.037141    | 1.7849      | 0.037141    | 1.7849    | 0.037141 |
|             | 1.4439          | 0.074379 | 0.037141    | 0.482430895 |             |           |          |

|            |                 |            |             |             |             |          |          |
|------------|-----------------|------------|-------------|-------------|-------------|----------|----------|
| ATP6V1G1P3 | ENSG00000224662 | 1.7848     | 0.037144    | 1.4469      | 0.073968    | 1.4469   |          |
|            | 0.073968        | -0.046907  | 0.51871     | 0.037144    | 0.482430895 |          |          |
| EIF4BP8    | ENSG00000243918 | 1.2799     | 0.10029     | 0.65655     | 0.25573     | 1.7847   |          |
|            | 0.037151        | 0.66627    | 0.25262     | 0.037151    | 0.482430895 |          |          |
| NA         | ENSG00000270838 | 1.4447     | 0.074271    | 0.63562     | 0.26251     | 1.7847   | 0.037154 |
|            | 1.5982          | 0.055      | 0.037154    | 0.482430895 |             |          |          |
| NCKIPSD    | ENSG00000213672 | 1.4846     | 0.068821    | 1.7847      | 0.037155    | 0.74093  |          |
|            | 0.22937         | 1.7847     | 0.037155    | 0.037155    | 0.482430895 |          |          |
| NA         | ENSG00000255972 | 1.7844     | 0.037183    | 1.7844      | 0.037183    | 1.7844   | 0.037183 |
|            | 1.7844          | 0.037183   | 0.037183    | 0.482665847 |             |          |          |
| CYP7A1     | ENSG00000167910 | 1.7839     | 0.037218    | 1.7839      | 0.037218    | 1.7839   |          |
|            | 0.037218        | 1.7839     | 0.037218    | 0.037218    | 0.482991515 |          |          |
| HEBP2      | ENSG00000051620 | 0.35835    | 0.36004     | 1.7837      | 0.03724     | 1.235    | 0.10841  |
|            | 0.72111         | 0.23542    | 0.03724     | 0.483148349 |             |          |          |
| ST7-OT4    | ENSG00000214188 | -0.039745  | 0.51585     | -0.039745   | 0.51585     | 1.7833   |          |
|            | 0.037267        | -0.039745  | 0.51585     | 0.037267    | 0.483361175 |          |          |
| NPAP1P7    | ENSG00000277357 | 1.7831     | 0.037281    | -0.60286    | 0.7267      | -0.60286 |          |
|            | 0.7267          | -0.60286   | 0.7267      | 0.037281    | 0.483361175 |          |          |
| LONRF2P5   | ENSG00000273692 | 1.0617     | 0.14418     | 0.63975     | 0.26117     | 1.7831   |          |
|            | 0.037289        | 0.70741    | 0.23966     | 0.037289    | 0.483361175 |          |          |
| EPN2       | ENSG00000072134 | 1.4985     | 0.067004    | 0.80084     | 0.21161     | 1.7829   | 0.037304 |
|            | 0.11217         | 0.45534    | 0.037304    | 0.483361175 |             |          |          |
| ZDHHC21    | ENSG00000175893 | 0.72081    | 0.23551     | 0.76963     | 0.22076     | 0.17684  |          |
|            | 0.42982         | 1.7828     | 0.037306    | 0.037306    | 0.483361175 |          |          |
| PIK3R2     | ENSG00000105647 | 0.33876    | 0.36739     | -0.57332    | 0.71678     | 0.68554  |          |
|            | 0.2465          | 1.7825     | 0.037335    | 0.037335    | 0.483391246 |          |          |
| ZNF71      | ENSG00000197951 | -0.0052311 | 0.50209     | 1.0433      | 0.14841     | 1.7825   | 0.037336 |
|            | 1.0433          | 0.14841    | 0.037336    | 0.483391246 |             |          |          |
| CST4       | ENSG00000101441 | 0.89068    | 0.18655     | 0.54403     | 0.29321     | 1.7824   | 0.037344 |
|            | 0.844           | 0.19933    | 0.037344    | 0.483391246 |             |          |          |
| NA         | ENSG00000232259 | 0.091354   | 0.46361     | 0.091354    | 0.46361     | 1.7823   | 0.037348 |
|            | 1.3966          | 0.081264   | 0.037348    | 0.483391246 |             |          |          |
| MIR626     | ENSG00000207766 | 1.782      | 0.037372    | 1.782       | 0.037372    | 1.782    | 0.037372 |
|            | 0.037372        | 0.037372   | 0.483573436 |             |             |          |          |
| NA         | ENSG00000276704 | 1.7819     | 0.037385    | 1.7819      | 0.037385    | -0.51904 | 0.69813  |
|            | -1.084          | 0.86081    | 0.037385    | 0.483592283 |             |          |          |
| RPL34P17   | ENSG00000240534 | 1.7816     | 0.037404    | 1.7816      | 0.037404    | 1.7816   |          |
|            | 0.037404        | 1.7816     | 0.037404    | 0.037404    | 0.483592283 |          |          |
| TEMN3-AS1  | ENSG00000251336 | 1.3578     | 0.087267    | 1.3578      | 0.087267    | 1.7816   |          |
|            | 0.037406        | 0.33912    | 0.36726     | 0.037406    | 0.483592283 |          |          |
| TM4SF19    | ENSG00000145107 | 1.5238     | 0.063784    | 0.66875     | 0.25183     | 1.7813   |          |
|            | 0.037429        | 1.6973     | 0.044824    | 0.037429    | 0.483592283 |          |          |
| RNU6-511P  | ENSG00000200366 | 1.7813     | 0.037432    | 1.7813      | 0.037432    | 1.7813   |          |
|            | 0.037432        | 1.7813     | 0.037432    | 0.037432    | 0.483592283 |          |          |
| CNPPD1     | ENSG00000115649 | 0.26704    | 0.39472     | 1.6077      | 0.053948    | 1.7813   |          |
|            | 0.037433        | 1.6077     | 0.053948    | 0.037433    | 0.483592283 |          |          |
| PTPN23     | ENSG00000076201 | -1.4043    | 0.91988     | 0.60438     | 0.27279     | 1.7809   |          |
|            | 0.037465        | 1.2314     | 0.10908     | 0.037465    | 0.483839576 |          |          |
| NA         | ENSG00000257226 | 1.7808     | 0.037472    | 1.7808      | 0.037472    | 1.7808   | 0.037472 |
|            | 1.7808          | 0.037472   | 0.037472    | 0.483839576 |             |          |          |
| NA         | ENSG00000232208 | 0.61195    | 0.27029     | 0.54657     | 0.29234     | 1.1121   | 0.13306  |
|            | 1.7805          | 0.037496   | 0.037496    | 0.484021213 |             |          |          |
| FAM111B    | ENSG00000189057 | -0.73208   | 0.76794     | 0.80509     | 0.21038     | 1.6274   |          |
|            | 0.051829        | 1.7801     | 0.037527    | 0.037527    | 0.484293091 |          |          |
| NA         | ENSG00000253183 | 1.78       | 0.037541    | -0.024476   | 0.50976     | 1.0749   | 0.14121  |
|            | 0.065693        | 0.47381    | 0.037541    | 0.484345494 |             |          |          |
| ZNF484     | ENSG00000127081 | 1.7797     | 0.037561    | 0.11251     | 0.45521     | 0.30527  |          |
|            | 0.38008         | 1.1656     | 0.12189     | 0.037561    | 0.484446384 |          |          |
| NA         | ENSG00000249112 | 1.7795     | 0.037575    | 0.54479     | 0.29295     | 0.54479  | 0.29295  |
|            | 0.54479         | 0.29295    | 0.037575    | 0.484446384 |             |          |          |
| LINC01613  | ENSG00000261432 | 1.7795     | 0.037583    | 1.7795      | 0.037583    | 1.7795   |          |
|            | 0.037583        | 1.7795     | 0.037583    | 0.037583    | 0.484446384 |          |          |

|               |                 |             |          |             |             |          |          |
|---------------|-----------------|-------------|----------|-------------|-------------|----------|----------|
| LINC00958     | ENSG00000251381 | 1.7548      | 0.039643 | 0.94277     | 0.1729      | 1.5195   |          |
|               | 0.064324        | 1.7793      | 0.037597 | 0.037597    | 0.484446384 |          |          |
| NA            | ENSG00000237250 | -0.8722     | 0.80845  | -0.38067    | 0.64828     | 1.7791   | 0.037609 |
|               | 0.18912         | 0.425       | 0.037609 | 0.484446384 |             |          |          |
| EIF1P5        | ENSG00000266563 | 1.7789      | 0.037631 | 1.7789      | 0.037631    | 1.7789   |          |
|               | 0.037631        | 1.7789      | 0.037631 | 0.037631    | 0.484446384 |          |          |
| NA            | ENSG00000236025 | 1.7788      | 0.037638 | 0.082525    | 0.46711     | 0.082525 | 0.46711  |
|               | 0.082525        | 0.46711     | 0.037638 | 0.484446384 |             |          |          |
| KCNA10        | ENSG00000143105 | -1.2985     | 0.90294  | 1.7788      | 0.03764     | -0.77324 |          |
|               | 0.78031         | -1.1333     | 0.87145  | 0.03764     | 0.484446384 |          |          |
| NA            | ENSG00000266586 | -1.1461     | 0.87412  | -0.12277    | 0.54885     | 1.7787   | 0.037643 |
|               | 0.42129         | 0.33677     | 0.037643 | 0.484446384 |             |          |          |
| RNF103-CHMP3  | ENSG00000249884 | 1.7784      | 0.037668 | -0.13419    | 0.55337     | 0.084836 |          |
|               | 0.4662          | 0.20493     | 0.41882  | 0.037668    | 0.484446384 |          |          |
| NA            | ENSG00000261434 | 1.7784      | 0.037669 | 1.7784      | 0.037669    | 1.7784   | 0.037669 |
|               | 1.7784          | 0.037669    | 0.037669 | 0.484446384 |             |          |          |
| NA            | ENSG00000258202 | -0.16212    | 0.56439  | -0.64687    | 0.74114     | 1.0154   | 0.15496  |
|               | 1.7783          | 0.037675    | 0.037675 | 0.484446384 |             |          |          |
| RPL11         | ENSG00000142676 | 0.047272    | 0.48115  | 1.7782      | 0.037688    | 1.7782   | 0.037688 |
|               | 0.089134        | 0.46449     | 0.037688 | 0.484446384 |             |          |          |
| H2BU1         | ENSG00000196890 | 1.7782      | 0.037688 | 1.7782      | 0.037688    | 1.7782   | 0.037688 |
|               | 1.7782          | 0.037688    | 0.037688 | 0.484446384 |             |          |          |
| RNU4ATAC2P    | ENSG00000221601 | 1.7779      | 0.037712 | 1.7779      | 0.037712    | 1.7779   |          |
|               | 0.037712        | 1.7779      | 0.037712 | 0.037712    | 0.484467457 |          |          |
| C1QTNF3-AMACR | ENSG00000273294 | -0.15762    | 0.56262  | -0.15762    | 0.56262     | 1.7778   |          |
|               | 0.037715        | 0.96961     | 0.16612  | 0.037715    | 0.484467457 |          |          |
| NA            | ENSG00000225236 | 0.24833     | 0.40194  | 1.4681      | 0.071036    | 1.1539   | 0.12428  |
|               | 1.7777          | 0.037723    | 0.037723 | 0.484467457 |             |          |          |
| RPS29P5       | ENSG00000230777 | 1.7774      | 0.03775  | 0.52117     | 0.30112     | 1.6971   |          |
|               | 0.044841        | 0.52117     | 0.30112  | 0.03775     | 0.484467457 |          |          |
| LINC01600     | ENSG00000164385 | 1.7773      | 0.037762 | 1.7773      | 0.037762    | -0.4608  |          |
|               | 0.67753         | 1.4483      | 0.07376  | 0.037762    | 0.484467457 |          |          |
| RNU6-699P     | ENSG00000252890 | 0.38459     | 0.35027  | 1.7773      | 0.037763    | 1.7773   |          |
|               | 0.037763        | 1.7773      | 0.037763 | 0.037763    | 0.484467457 |          |          |
| NA            | ENSG00000232310 | 1.7771      | 0.037777 | 1.7771      | 0.037777    | 1.4974   | 0.067146 |
|               | 0.93311         | 0.17538     | 0.037777 | 0.484467457 |             |          |          |
| RN7SL516P     | ENSG00000242699 | 1.7769      | 0.037792 | 1.7769      | 0.037792    | 1.7769   |          |
|               | 0.037792        | 1.7769      | 0.037792 | 0.037792    | 0.484467457 |          |          |
| NA            | ENSG00000248714 | 0.65888     | 0.25499  | 0.65888     | 0.25499     | 0.65888  | 0.25499  |
|               | 1.7769          | 0.037796    | 0.037796 | 0.484467457 |             |          |          |
| RPS10P3       | ENSG00000217716 | -0.32762    | 0.6284   | 0.048914    | 0.48049     | 0.42759  |          |
|               | 0.33447         | 1.7768      | 0.037798 | 0.037798    | 0.484467457 |          |          |
| NA            | ENSG00000255447 | -0.67956    | 0.75161  | -0.67956    | 0.75161     | -0.67956 | 0.75161  |
|               | 1.7768          | 0.037799    | 0.037799 | 0.484467457 |             |          |          |
| NA            | ENSG00000279874 | 1.7764      | 0.037836 | 1.7764      | 0.037836    | 1.7764   | 0.037836 |
|               | 1.7764          | 0.037836    | 0.037836 | 0.484574467 |             |          |          |
| NA            | ENSG00000275178 | 0.42082     | 0.33694  | 0.86595     | 0.19326     | 0.42082  | 0.33694  |
|               | 1.7763          | 0.037841    | 0.037841 | 0.484574467 |             |          |          |
| DMGDH         | ENSG00000132837 | 1.7761      | 0.037856 | -1.6666     | 0.95221     | -1.3775  | 0.91581  |
|               | -1.8933         | 0.97084     | 0.037856 | 0.484574467 |             |          |          |
| ZNF668        | ENSG00000167394 | 1.4893      | 0.068206 | 1.4893      | 0.068206    | 0.25113  |          |
|               | 0.40086         | 1.7758      | 0.037882 | 0.037882    | 0.484574467 |          |          |
| NA            | ENSG00000258942 | 1.7757      | 0.037889 | 1.7757      | 0.037889    | 1.7757   | 0.037889 |
|               | 1.7757          | 0.037889    | 0.037889 | 0.484574467 |             |          |          |
| PCBP1         | ENSG00000169564 | 1.7756      | 0.037901 | 1.7756      | 0.037901    | 1.4626   | 0.071792 |
|               | 1.7756          | 0.037901    | 0.037901 | 0.484574467 |             |          |          |
| RNU6-723P     | ENSG00000206700 | 1.7754      | 0.037912 | 0.55374     | 0.28988     | 0.55374  |          |
|               | 0.28988         | 0.55374     | 0.28988  | 0.037912    | 0.484574467 |          |          |
| NA            | ENSG00000252852 | 1.7751      | 0.037938 | 1.7751      | 0.037938    | 1.7751   | 0.037938 |
|               | 1.7751          | 0.037938    | 0.037938 | 0.484574467 |             |          |          |
| TRGVB         | ENSG00000231202 | 1.775       | 0.037945 | 1.775       | 0.037945    | 1.775    | 0.037945 |
|               | 0.037945        | 0.484574467 |          |             |             |          |          |

|           |                 |             |          |             |             |           |          |        |          |
|-----------|-----------------|-------------|----------|-------------|-------------|-----------|----------|--------|----------|
| TIAF1     | ENSG00000221995 | 1.775       | 0.037952 | 1.775       | 0.037952    | 1.775     | 0.037952 | 1.775  | 0.037952 |
|           | 0.037952        | 0.484574467 |          |             |             |           |          |        |          |
| PRC1-AS1  | ENSG00000258725 | 1.7749      | 0.037957 | 1.7749      | 0.037957    | 1.7749    | 0.037957 | 1.7749 |          |
|           | 0.037957        | 1.7749      | 0.037957 | 0.037957    | 0.484574467 |           |          |        |          |
| LINC01760 | ENSG00000228504 | 0.38474     | 0.35021  | 1.7748      | 0.037965    | -0.46066  |          |        |          |
|           | 0.67748         | 1.7748      | 0.037965 | 0.037965    | 0.484574467 |           |          |        |          |
| RPL12P36  | ENSG00000242423 | 1.7748      | 0.037965 | 1.7748      | 0.037965    | 1.7748    |          |        |          |
|           | 0.037965        | 1.7748      | 0.037965 | 0.037965    | 0.484574467 |           |          |        |          |
| RNF168    | ENSG00000163961 | -0.38392    | 0.64948  | 1.7748      | 0.037969    | 0.37956   |          |        |          |
|           | 0.35214         | -1.3431     | 0.91038  | 0.037969    | 0.484574467 |           |          |        |          |
| LINC01082 | ENSG00000269186 | 1.7748      | 0.037969 | 1.7748      | 0.037969    | 1.7748    |          |        |          |
|           | 0.037969        | 1.7748      | 0.037969 | 0.037969    | 0.484574467 |           |          |        |          |
| TBC1D3P1  | ENSG00000238283 | 0.67113     | 0.25107  | 1.7746      | 0.037982    | 0.99741   |          |        |          |
|           | 0.15928         | 0.1961      | 0.42227  | 0.037982    | 0.484574467 |           |          |        |          |
| NA        | ENSG00000259229 | 1.7746      | 0.037985 | 0.32797     | 0.37147     | -0.23539  | 0.59305  |        |          |
|           | 0.32797         | 0.37147     | 0.037985 | 0.484574467 |             |           |          |        |          |
| PTPRG-AS1 | ENSG00000241472 | 1.7745      | 0.03799  | 1.7745      | 0.03799     | 1.7745    |          |        |          |
|           | 0.03799         | 0.698       | 0.24259  | 0.03799     | 0.484574467 |           |          |        |          |
| NA        | ENSG00000260361 | 0.31883     | 0.37493  | 0.31883     | 0.37493     | 1.7743    | 0.038007 |        |          |
|           | 0.31883         | 0.37493     | 0.038007 | 0.484574467 |             |           |          |        |          |
| VN1R21P   | ENSG00000224752 | 1.7741      | 0.038026 | 1.7741      | 0.038026    | -0.17895  |          |        |          |
|           | 0.57101         | 1.1172      | 0.13195  | 0.038026    | 0.484574467 |           |          |        |          |
| NA        | ENSG00000241475 | 1.774       | 0.038032 | 1.774       | 0.038032    | 1.774     | 0.038032 |        |          |
|           | 0.038032        | 0.484574467 |          |             |             |           |          |        |          |
| RN7SKP104 | ENSG00000199475 | 1.2118      | 0.11279  | 1.7739      | 0.038037    | -0.21743  |          |        |          |
|           | 0.58606         | 1.2118      | 0.11279  | 0.038037    | 0.484574467 |           |          |        |          |
| SLC28A1   | ENSG00000156222 | 1.5921      | 0.055681 | 1.7739      | 0.038042    | 0.76885   |          |        |          |
|           | 0.22099         | 1.5323      | 0.062728 | 0.038042    | 0.484574467 |           |          |        |          |
| CUL9      | ENSG00000112659 | 0.85885     | 0.19521  | 0.68128     | 0.24785     | 1.7738    | 0.038049 |        |          |
|           | 1.5398          | 0.061804    | 0.038049 | 0.484574467 |             |           |          |        |          |
| NA        | ENSG00000257253 | 1.7736      | 0.038063 | -0.55454    | 0.7104      | 0.01716   | 0.49315  |        |          |
|           | 0.01716         | 0.49315     | 0.038063 | 0.484574467 |             |           |          |        |          |
| NA        | ENSG00000228044 | 1.3153      | 0.094206 | 1.2222      | 0.11082     | 1.7735    | 0.038074 |        |          |
|           | 1.6256          | 0.052022    | 0.038074 | 0.484574467 |             |           |          |        |          |
| NA        | ENSG00000271259 | 1.7734      | 0.038083 | 1.7734      | 0.038083    | 1.7734    | 0.038083 |        |          |
|           | 1.7734          | 0.038083    | 0.038083 | 0.484574467 |             |           |          |        |          |
| LINC01958 | ENSG00000283436 | 1.7733      | 0.038093 | 1.2066      | 0.11379     | 1.2066    |          |        |          |
|           | 0.11379         | 1.2808      | 0.10013  | 0.038093    | 0.484574467 |           |          |        |          |
| RPSAP31   | ENSG00000234371 | 1.7728      | 0.038135 | 1.7728      | 0.038135    | 1.7728    |          |        |          |
|           | 0.038135        | 1.7728      | 0.038135 | 0.038135    | 0.484574467 |           |          |        |          |
| OR5K4     | ENSG00000196098 | 1.2728      | 0.10155  | 1.7726      | 0.038146    | -0.40628  | 0.65773  |        |          |
|           | -0.2783         | 0.60961     | 0.038146 | 0.484574467 |             |           |          |        |          |
| WNT3A     | ENSG00000154342 | -0.7736     | 0.78042  | 1.7726      | 0.03815     | -0.48382  | 0.68574  |        |          |
|           | -0.58079        | 0.71931     | 0.03815  | 0.484574467 |             |           |          |        |          |
| NA        | ENSG00000234646 | 1.7725      | 0.038157 | 1.7725      | 0.038157    | 1.7725    | 0.038157 |        |          |
|           | 1.7725          | 0.038157    | 0.038157 | 0.484574467 |             |           |          |        |          |
| NA        | ENSG00000274256 | 1.7724      | 0.038163 | 1.7724      | 0.038163    | 1.7724    | 0.038163 |        |          |
|           | 1.7724          | 0.038163    | 0.038163 | 0.484574467 |             |           |          |        |          |
| NA        | ENSG00000229330 | -0.5439     | 0.70674  | -0.77188    | 0.77991     | 1.7723    | 0.038175 |        |          |
|           | -0.5243         | 0.69997     | 0.038175 | 0.484574467 |             |           |          |        |          |
| SHISA9    | ENSG00000237515 | 0.41688     | 0.33838  | 1.1387      | 0.12741     | 1.1097    |          |        |          |
|           | 0.13356         | 1.7723      | 0.038176 | 0.038176    | 0.484574467 |           |          |        |          |
| PRDM12    | ENSG00000130711 | 1.7722      | 0.038184 | 1.3226      | 0.092983    | 1.2712    |          |        |          |
|           | 0.10184         | -0.28626    | 0.61266  | 0.038184    | 0.484574467 |           |          |        |          |
| NA        | ENSG00000219529 | 1.3797      | 0.083833 | 1.772       | 0.038198    | 1.3457    | 0.089195 |        |          |
|           | 1.3457          | 0.089195    | 0.038198 | 0.484574467 |             |           |          |        |          |
| DCDC2C    | ENSG00000214866 | -2.2944     | 0.98912  | -1.4266     | 0.92315     | -0.059574 |          |        |          |
|           | 0.52375         | 1.772       | 0.0382   | 0.0382      | 0.484574467 |           |          |        |          |
| CELA2A    | ENSG00000142615 | 1.7719      | 0.038204 | 1.7387      | 0.041044    | 1.5336    |          |        |          |
|           | 0.062562        | -0.15746    | 0.56256  | 0.038204    | 0.484574467 |           |          |        |          |
| LNCPRESS1 | ENSG00000232301 | 1.7719      | 0.038208 | 0.97265     | 0.16536     | 1.5316    |          |        |          |
|           | 0.062809        | 1.04        | 0.14916  | 0.038208    | 0.484574467 |           |          |        |          |

|           |                 |          |             |             |             |          |          |       |
|-----------|-----------------|----------|-------------|-------------|-------------|----------|----------|-------|
| NA        | ENSG00000237363 | 0.9008   | 0.18385     | 1.7718      | 0.038216    | -0.43    | 0.6664   |       |
|           | 0.48846         | 0.31261  | 0.038216    | 0.484574467 |             |          |          |       |
| NA        | ENSG00000248783 | 1.3969   | 0.081218    | 0.77088     | 0.22039     | 1.7717   | 0.038225 |       |
|           | 0.77088         | 0.22039  | 0.038225    | 0.484574467 |             |          |          |       |
| LINC00326 | ENSG00000231023 | 1.7715   | 0.038239    | 1.7715      | 0.038239    | 1.7715   |          |       |
|           | 0.038239        | 1.6486   | 0.049613    | 0.038239    | 0.484601225 |          |          |       |
| NA        | ENSG00000223795 | 0.58053  | 0.28078     | -1.6425     | 0.94976     | -0.95423 | 0.83002  |       |
|           | 1.7714          | 0.038247 | 0.038247    | 0.484601225 |             |          |          |       |
| MYH13     | ENSG00000006788 | -0.1672  | 0.56639     | 0.10184     | 0.45944     | -0.54144 | 0.7059   |       |
|           | 1.771           | 0.038281 | 0.038281    | 0.484805247 |             |          |          |       |
| NA        | ENSG00000242888 | 0.26184  | 0.39672     | 0.71225     | 0.23816     | 1.771    | 0.038283 |       |
|           | 0.51652         | 0.30275  | 0.038283    | 0.484805247 |             |          |          |       |
| ANGPTL6   | ENSG00000130812 | 1.7707   | 0.038305    | 1.7707      | 0.038305    | 1.7707   |          |       |
|           | 0.038305        | 1.7707   | 0.038305    | 0.038305    | 0.484884368 |          |          |       |
| ZBTB25    | ENSG00000089775 | 1.7324   | 0.041599    | 1.7228      | 0.042466    | 1.7705   |          |       |
|           | 0.03832         | 1.5981   | 0.055008    | 0.03832     | 0.484884368 |          |          |       |
| NA        | ENSG00000258823 | 0.36853  | 0.35624     | 0.36853     | 0.35624     | 0.36853  | 0.35624  |       |
|           | 1.7704          | 0.038333 | 0.038333    | 0.484884368 |             |          |          |       |
| PRRT4     | ENSG00000224940 | 1.7703   | 0.038337    | 1.0207      | 0.1537      | 0.60701  | 0.27192  |       |
|           | -0.16232        | 0.56447  | 0.038337    | 0.484884368 |             |          |          |       |
| LINC01867 | ENSG00000225444 | 1.7703   | 0.038339    | 1.7703      | 0.038339    | 1.7703   |          |       |
|           | 0.038339        | 1.7703   | 0.038339    | 0.038339    | 0.484884368 |          |          |       |
| SLC1A5    | ENSG00000105281 | 1.7701   | 0.038359    | 1.1722      | 0.12056     | 1.1722   |          |       |
|           | 0.12056         | 0.68868  | 0.24551     | 0.038359    | 0.484948825 |          |          |       |
| CCNJL     | ENSG00000135083 | 1.6203   | 0.052581    | 1.77        | 0.038364    | 0.75615  | 0.22478  |       |
|           | 1.4785          | 0.069642 | 0.038364    | 0.484948825 |             |          |          |       |
| NA        | ENSG00000260488 | 1.7697   | 0.038391    | 1.7697      | 0.038391    | 1.7697   | 0.038391 |       |
|           | 1.7697          | 0.038391 | 0.038391    | 0.485039069 |             |          |          |       |
| ITCH      | ENSG00000078747 | 1.7696   | 0.038399    | 1.3249      | 0.092602    | 1.0125   | 0.15565  |       |
|           | 1.1195          | 0.13146  | 0.038399    | 0.485039069 |             |          |          |       |
| CLIC4P2   | ENSG00000269546 | 1.7695   | 0.038401    | 1.7695      | 0.038401    | 1.7695   |          |       |
|           | 0.038401        | 1.7695   | 0.038401    | 0.038401    | 0.485039069 |          |          |       |
| NA        | ENSG00000259594 | 0.8156   | 0.20736     | -0.81911    | 0.79364     | 1.3752   | 0.084533 |       |
|           | 1.7694          | 0.038411 | 0.038411    | 0.485039655 |             |          |          |       |
| NA        | ENSG00000254347 | 1.7692   | 0.038431    | 1.7692      | 0.038431    | 1.7692   | 0.038431 |       |
|           | 1.7692          | 0.038431 | 0.038431    | 0.485041411 |             |          |          |       |
| NA        | ENSG00000265803 | 1.7691   | 0.038436    | 1.7691      | 0.038436    | 0.63797  | 0.26175  |       |
|           | 0.2692          | 0.39389  | 0.038436    | 0.485041411 |             |          |          |       |
| C15orf41  | ENSG00000186073 | 1.2657   | 0.10281     | 0.81323     | 0.20804     | 1.4627   |          |       |
|           | 0.071777        | 1.7691   | 0.038441    | 0.038441    | 0.485041411 |          |          |       |
| NA        | ENSG00000254730 | -0.60382 | 0.72702     | 1.7688      | 0.038467    | -0.83113 | 0.79705  |       |
|           | 0.70137         | 0.24154  | 0.038467    | 0.485243829 |             |          |          |       |
| NA        | ENSG00000231747 | 1.7683   | 0.038504    | 1.0774      | 0.14066     | 1.7683   | 0.038504 |       |
|           | -0.7462         | 0.77223  | 0.038504    | 0.485572701 |             |          |          |       |
| MIR590    | ENSG00000207741 | 1.7682   | 0.038513    | 1.7682      | 0.038513    | 1.7682   |          |       |
|           | 0.038513        | 1.7682   | 0.038513    | 0.038513    | 0.485572701 |          |          |       |
| NA        | ENSG00000266268 | 0.4525   | 0.32546     | 0.69563     | 0.24333     | 1.7678   | 0.03855  |       |
|           | -0.57113        | 0.71604  | 0.03855     | 0.485788211 |             |          |          |       |
| CDYLP1    | ENSG00000224039 | 1.7677   | 0.038552    | 1.7677      | 0.038552    | 1.7677   |          |       |
|           | 0.038552        | 1.7677   | 0.038552    | 0.038552    | 0.485788211 |          |          |       |
| NA        | ENSG00000263489 | -0.46181 | 0.67789     | -0.46181    | 0.67789     | 1.7676   | 0.03856  |       |
|           | 0.034527        | 0.48623  | 0.03856     | 0.485788211 |             |          |          |       |
| OSGIN1    | ENSG00000140961 | 1.4075   | 0.079637    | 1.2108      | 0.11298     | 1.7671   |          |       |
|           | 0.038606        | 1.3908   | 0.082143    | 0.038606    | 0.486204519 |          |          |       |
| RSPH1     | ENSG00000160188 | 1.767    | 0.038613    | -0.6151     | 0.73076     | 0.30486  | 0.38024  | 1.238 |
|           | 0.10786         | 0.038613 | 0.486204519 |             |             |          |          |       |
| NA        | ENSG00000199473 | 1.7667   | 0.038637    | 1.7667      | 0.038637    | 1.7667   | 0.038637 |       |
|           | 1.7667          | 0.038637 | 0.038637    | 0.486381041 |             |          |          |       |
| NA        | ENSG00000230492 | 0.62928  | 0.26458     | 1.0816      | 0.13971     | 1.7666   | 0.038649 |       |
|           | 1.7666          | 0.038649 | 0.038649    | 0.486406449 |             |          |          |       |
| ZNF394    | ENSG00000160908 | 1.4848   | 0.068795    | 1.7194      | 0.042772    | 1.7663   |          |       |
|           | 0.038669        | 1.6895   | 0.045562    | 0.038669    | 0.486532499 |          |          |       |

|           |                 |          |             |             |             |           |          |       |
|-----------|-----------------|----------|-------------|-------------|-------------|-----------|----------|-------|
| FAM189A1  | ENSG00000104059 | -0.56644 | 0.71445     | -0.56644    | 0.71445     | 1.7662    |          |       |
|           | 0.038685        | -0.95406 | 0.82997     | 0.038685    | 0.48660817  |           |          |       |
| DUXAP5    | ENSG00000255377 | 1.7659   | 0.038707    | 0.36947     | 0.35589     | -0.62225  |          |       |
|           | 0.73311         | -0.10991 | 0.54376     | 0.038707    | 0.486621274 |           |          |       |
| KBTBD3    | ENSG00000182359 | 1.7658   | 0.038714    | 1.3638      | 0.086314    | 1.7658    |          |       |
|           | 0.038714        | 1.7658   | 0.038714    | 0.038714    | 0.486621274 |           |          |       |
| PLD1      | ENSG00000075651 | 0.01282  | 0.49489     | -0.32359    | 0.62687     | 0.15654   | 0.4378   |       |
|           | 1.7658          | 0.038716 | 0.038716    | 0.486621274 |             |           |          |       |
| RFC4      | ENSG00000163918 | 1.7654   | 0.038745    | -0.60982    | 0.72901     | -0.60982  | 0.72901  |       |
|           | 0.97666         | 0.16437  | 0.038745    | 0.486860199 |             |           |          |       |
| RMRPP5    | ENSG00000223088 | 1.7652   | 0.038765    | 0.76048     | 0.22348     | 1.4984    |          |       |
|           | 0.067016        | 1.4984   | 0.067016    | 0.038765    | 0.486985937 |           |          |       |
| SLC5A8    | ENSG00000256870 | 0.73283  | 0.23183     | 0.31822     | 0.37516     | 0.95899   |          |       |
|           | 0.16878         | 1.7648   | 0.038799    | 0.038799    | 0.487274888 |           |          |       |
| NA        | ENSG00000230631 | 1.4338   | 0.075813    | 1.7647      | 0.038808    | 1.0438    | 0.14828  |       |
|           | 1.5557          | 0.059887 | 0.038808    | 0.487274888 |             |           |          |       |
| NA        | ENSG00000223929 | 1.7644   | 0.038829    | 1.7644      | 0.038829    | 1.7644    | 0.038829 |       |
|           | 1.7644          | 0.038829 | 0.038829    | 0.487412975 |             |           |          |       |
| VDAC1P4   | ENSG00000235060 | 1.764    | 0.038867    | 1.764       | 0.038867    | 1.1913    | 0.11676  | 1.764 |
|           | 0.038867        | 0.038867 | 0.48773867  |             |             |           |          |       |
| UBQLN4    | ENSG00000160803 | 1.7638   | 0.038879    | 1.7638      | 0.038879    | 0.79182   |          |       |
|           | 0.21423         | 0.49551  | 0.31012     | 0.038879    | 0.48773867  |           |          |       |
| NA        | ENSG00000266443 | 1.4303   | 0.076319    | 1.4355      | 0.075575    | 1.2787    | 0.10051  |       |
|           | 1.7637          | 0.038891 | 0.038891    | 0.48773867  |             |           |          |       |
| RABGGTB   | ENSG00000137955 | 1.7635   | 0.03891     | 1.7635      | 0.03891     | 1.7635    |          |       |
|           | 0.03891         | 1.7635   | 0.03891     | 0.03891     | 0.48773867  |           |          |       |
| ACE       | ENSG00000159640 | 1.7634   | 0.038914    | 1.4854      | 0.06872     | 1.7634    | 0.038914 |       |
|           | 1.7586          | 0.039322 | 0.038914    | 0.48773867  |             |           |          |       |
| NA        | ENSG00000280035 | 1.7634   | 0.038915    | 1.7634      | 0.038915    | 1.7634    | 0.038915 |       |
|           | 1.7634          | 0.038915 | 0.038915    | 0.48773867  |             |           |          |       |
| TBC1D19   | ENSG00000109680 | -1.6659  | 0.95214     | 1.7628      | 0.038963    | -0.34127  |          |       |
|           | 0.63355         | -0.78734 | 0.78446     | 0.038963    | 0.488088998 |           |          |       |
| MIR3976HG | ENSG00000261738 | 1.7628   | 0.038969    | -0.089087   | 0.53549     | 0.31566   |          |       |
|           | 0.37613         | 0.76663  | 0.22165     | 0.038969    | 0.488088998 |           |          |       |
| NA        | ENSG00000259523 | 1.7627   | 0.038973    | 1.7627      | 0.038973    | 1.7627    | 0.038973 |       |
|           | 1.7627          | 0.038973 | 0.038973    | 0.488088998 |             |           |          |       |
| SSH3      | ENSG00000172830 | 0.36607  | 0.35716     | 1.4244      | 0.077158    | 1.7625    | 0.038989 |       |
|           | 1.3819          | 0.0835   | 0.038989    | 0.488163918 |             |           |          |       |
| FBXO28    | ENSG00000143756 | 1.7624   | 0.039004    | 1.5797      | 0.057093    | 1.4471    |          |       |
|           | 0.073932        | -0.55025 | 0.70893     | 0.039004    | 0.488226283 |           |          |       |
| VNN1      | ENSG00000112299 | 1.7619   | 0.039044    | 0.42529     | 0.33531     | 0.66174   | 0.25407  |       |
|           | 0.88381         | 0.1884   | 0.039044    | 0.488484886 |             |           |          |       |
| DNAJB9    | ENSG00000128590 | 1.7618   | 0.039049    | 1.7618      | 0.039049    | 1.7618    |          |       |
|           | 0.039049        | 1.7618   | 0.039049    | 0.039049    | 0.488484886 |           |          |       |
| IP6K2     | ENSG00000068745 | 1.6762   | 0.046851    | 1.7617      | 0.039056    | 1.5741    | 0.057728 |       |
|           | 1.6138          | 0.053284 | 0.039056    | 0.488484886 |             |           |          |       |
| LINC02226 | ENSG00000245729 | 1.7616   | 0.03907     | -0.12854    | 0.55114     | -0.12854  |          |       |
|           | 0.55114         | -0.11608 | 0.5462      | 0.03907     | 0.488484886 |           |          |       |
| SLA2      | ENSG00000101082 | 1.7613   | 0.039096    | 1.7613      | 0.039096    | 0.6762    | 0.24946  |       |
|           | 0.31537         | 0.37624  | 0.039096    | 0.488484886 |             |           |          |       |
| TRNP1     | ENSG00000253368 | 1.237    | 0.10804     | 1.7612      | 0.0391      | -0.20326  | 0.58053  | 1.237 |
|           | 0.10804         | 0.0391   | 0.488484886 |             |             |           |          |       |
| KIF12     | ENSG00000136883 | 1.1261   | 0.13007     | 0.14892     | 0.44081     | 1.7609    | 0.039129 |       |
|           | 1.5346          | 0.062439 | 0.039129    | 0.488484886 |             |           |          |       |
| NA        | ENSG00000254031 | 1.7607   | 0.039145    | 1.4177      | 0.078136    | -1.4305   | 0.92371  |       |
|           | -0.17129        | 0.568    | 0.039145    | 0.488484886 |             |           |          |       |
| ERC1      | ENSG00000082805 | -0.19868 | 0.57874     | 0.364       | 0.35793     | 0.53454   | 0.29649  |       |
|           | 1.7607          | 0.039146 | 0.039146    | 0.488484886 |             |           |          |       |
| OR7E115P  | ENSG00000182531 | -0.63576 | 0.73753     | 1.7606      | 0.039151    | 0.66913   |          |       |
|           | 0.25171         | 0.20638  | 0.41825     | 0.039151    | 0.488484886 |           |          |       |
| NA        | ENSG00000228391 | 1.7606   | 0.039152    | 0.14454     | 0.44254     | -0.033185 | 0.51324  |       |
|           | 1.0182          | 0.1543   | 0.039152    | 0.488484886 |             |           |          |       |

|           |                 |           |          |             |             |             |          |
|-----------|-----------------|-----------|----------|-------------|-------------|-------------|----------|
| NA        | ENSG00000279393 | 1.7606    | 0.039157 | 1.7606      | 0.039157    | 1.7606      | 0.039157 |
|           |                 | 1.7606    | 0.039157 | 0.488484886 |             |             |          |
| WHRN      | ENSG00000095397 | 0.52414   | 0.30009  | 0.8038      | 0.21076     | -1.1352     | 0.87185  |
|           |                 | 1.7605    | 0.039161 | 0.488484886 |             |             |          |
| BRD8      | ENSG00000112983 | 1.7605    | 0.039165 | -1.2691     | 0.8978      | 1.2716      | 0.10176  |
|           |                 | 1.1509    | 0.12488  | 0.488484886 |             |             |          |
| PLXNB2    | ENSG00000196576 | 1.7596    | 0.039238 | -0.39466    | 0.65345     | -0.89683    |          |
|           |                 | 0.81509   | -0.28227 | 0.61113     | 0.039238    | 0.48909466  |          |
| RPL30P12  | ENSG00000240631 | 1.0575    | 0.14515  | 1.7595      | 0.039244    | 1.7595      |          |
|           |                 | 0.039244  | 1.5651   | 0.058778    | 0.039244    | 0.48909466  |          |
| NA        | ENSG00000280239 | 1.7595    | 0.039244 | 1.7595      | 0.039244    | 1.7595      | 0.039244 |
|           |                 | 1.7595    | 0.039244 | 0.48909466  |             |             |          |
| PYDC2     | ENSG00000253548 | 0.82276   | 0.20532  | 1.7592      | 0.039274    | 1.3402      | 0.090095 |
|           |                 | 1.6061    | 0.054125 | 0.039274    | 0.489330417 |             |          |
| RAB11FIP3 | ENSG00000090565 | 0.25091   | 0.40094  | 1.7591      | 0.039283    | 1.1416      |          |
|           |                 | 0.1268    | 1.7388   | 0.041037    | 0.039283    | 0.489330417 |          |
| NA        | ENSG00000258084 | 0.34362   | 0.36557  | -0.1499     | 0.55958     | 1.7588      | 0.039308 |
|           |                 | 0.052608  | 0.47902  | 0.039308    | 0.489352182 |             |          |
| TSPYL5    | ENSG00000180543 | 1.7585    | 0.039328 | 1.7585      | 0.039328    | 1.7585      |          |
|           |                 | 0.039328  | 0.34655  | 0.36446     | 0.039328    | 0.489352182 |          |
| TCHHL1    | ENSG00000182898 | 1.7585    | 0.039334 | 0.27843     | 0.39034     | -0.83269    |          |
|           |                 | 0.79749   | 0.58436  | 0.27949     | 0.039334    | 0.489352182 |          |
| RPL7AP69  | ENSG00000268483 | 1.1832    | 0.11837  | 1.7584      | 0.039336    | 0.063191    |          |
|           |                 | 0.47481   | 1.7584   | 0.039336    | 0.039336    | 0.489352182 |          |
| NA        | ENSG00000259106 | 1.7584    | 0.039342 | 0.8294      | 0.20344     | 0.8294      | 0.20344  |
|           |                 | 0.8294    | 0.20344  | 0.039342    | 0.489352182 |             |          |
| NA        | ENSG00000225761 | 0.43568   | 0.33153  | 1.7583      | 0.039345    | -0.63245    | 0.73645  |
|           |                 | 1.7583    | 0.039345 | 0.039345    | 0.489352182 |             |          |
| ALDH1B1   | ENSG00000137124 | 0.64125   | 0.26068  | -0.24641    | 0.59732     | 0.54187     |          |
|           |                 | 0.29395   | 1.7579   | 0.039379    | 0.039379    | 0.489650082 |          |
| AGBL4     | ENSG00000186094 | 1.5761    | 0.057502 | 1.3695      | 0.085419    | 1.7575      | 0.039415 |
|           |                 | 1.2952    | 0.09762  | 0.039415    | 0.489921745 |             |          |
| RUNX1T1   | ENSG00000079102 | 1.569     | 0.058324 | 1.7572      | 0.039445    | 1.1189      | 0.13158  |
|           |                 | 0.58841   | 0.27813  | 0.039445    | 0.489921745 |             |          |
| NA        | ENSG00000241168 | 1.7568    | 0.039474 | 0.76842     | 0.22112     | 0.76842     | 0.22112  |
|           |                 | 0.30074   | 0.38181  | 0.039474    | 0.489921745 |             |          |
| NA        | ENSG00000260114 | 1.6748    | 0.046988 | 1.7568      | 0.039478    | 1.6748      | 0.046988 |
|           |                 | 1.6748    | 0.046988 | 0.039478    | 0.489921745 |             |          |
| NA        | ENSG00000271654 | 1.7565    | 0.039504 | 1.7565      | 0.039504    | 1.7565      | 0.039504 |
|           |                 | 1.7565    | 0.039504 | 0.039504    | 0.489921745 |             |          |
| DPEP2     | ENSG00000167261 | -0.01029  | 0.5041   | 0.12218     | 0.45138     | -0.74609    | 0.77219  |
|           |                 | 1.7564    | 0.039506 | 0.039506    | 0.489921745 |             |          |
| NA        | ENSG00000262879 | 1.7564    | 0.039508 | 1.5581      | 0.059599    | 1.3927      | 0.081856 |
|           |                 | 0.73148   | 0.23224  | 0.039508    | 0.489921745 |             |          |
| TBL1XR1   | ENSG00000177565 | 1.6628    | 0.048172 | 0.79108     | 0.21445     | 1.7562      |          |
|           |                 | 0.039525  | 0.42917  | 0.3339      | 0.039525    | 0.489921745 |          |
| HSPE1P21  | ENSG00000238059 | -0.010549 | 0.50421  | 1.756       | 0.039542    | -1.7745     | 0.96201  |
|           |                 | -1.7745   | 0.96201  | 0.039542    | 0.489921745 |             |          |
| SEPTIN7   | ENSG00000122545 | -0.94911  | 0.82872  | -0.89481    | 0.81456     | 0.25969     |          |
|           |                 | 0.39755   | 1.756    | 0.039547    | 0.039547    | 0.489921745 |          |
| LINC02355 | ENSG00000248210 | 0.38932   | 0.34852  | 0.76651     | 0.22169     | 1.7556      |          |
|           |                 | 0.039579  | 0.60377  | 0.273       | 0.039579    | 0.489921745 |          |
| LINC01910 | ENSG00000266278 | -0.60594  | 0.72772  | 1.7554      | 0.039598    | -0.60594    |          |
|           |                 | 0.72772   | -0.60594 | 0.72772     | 0.039598    | 0.489921745 |          |
| NA        | ENSG00000269391 | 1.6003    | 0.054761 | 1.7553      | 0.039608    | -0.90898    | 0.81832  |
|           |                 | -0.90898  | 0.81832  | 0.039608    | 0.489921745 |             |          |
| NPAS1     | ENSG00000130751 | 1.2773    | 0.10075  | 1.7552      | 0.039609    | 1.2517      | 0.10535  |
|           |                 | 0.095899  | 0.4618   | 0.039609    | 0.489921745 |             |          |
| NA        | ENSG00000260152 | 0.85014   | 0.19762  | 1.7552      | 0.039611    | 0.5001      | 0.3085   |
|           |                 | -0.42958  | 0.66625  | 0.039611    | 0.489921745 |             |          |
| NA        | ENSG00000188646 | 1.7548    | 0.039645 | 1.7548      | 0.039645    | 1.7548      | 0.039645 |
|           |                 | 1.7548    | 0.039645 | 0.039645    | 0.489921745 |             |          |

|            |                 |           |          |             |             |             |          |
|------------|-----------------|-----------|----------|-------------|-------------|-------------|----------|
| NA         | ENSG00000275265 | 1.7548    | 0.039646 | 1.7548      | 0.039646    | 1.7548      | 0.039646 |
|            |                 | 1.7548    | 0.039646 | 0.489921745 |             |             |          |
| ZNF418     | ENSG00000196724 | -1.8233   | 0.96587  | 1.7547      | 0.039654    | 1.4368      |          |
|            |                 | 0.075388  | -1.8233  | 0.96587     | 0.039654    | 0.489921745 |          |
| RBM26      | ENSG00000139746 | 0.3481    | 0.36388  | 1.6969      | 0.044862    | 1.7547      | 0.039656 |
|            |                 | 1.3395    | 0.090207 | 0.039656    | 0.489921745 |             |          |
| NA         | ENSG00000274718 | 0.1795    | 0.42877  | 1.3651      | 0.086107    | 1.7547      | 0.039657 |
|            |                 | 1.6246    | 0.052127 | 0.039657    | 0.489921745 |             |          |
| DES        | ENSG00000175084 | 0.085862  | 0.46579  | 1.7545      | 0.039675    | 1.4455      | 0.074152 |
|            |                 | 1.2802    | 0.10025  | 0.039675    | 0.489921745 |             |          |
| THBS1      | ENSG00000137801 | 1.6165    | 0.052989 | 0.70863     | 0.23928     | 0.78579     | 0.216    |
|            |                 | 1.7544    | 0.039677 | 0.039677    | 0.489921745 |             |          |
| OR2X1P     | ENSG00000224830 | -1.0815   | 0.86027  | -1.0815     | 0.86027     | -1.651      |          |
|            |                 | 0.95063   | 1.7544   | 0.039683    | 0.039683    | 0.489921745 |          |
| PTPRQ      | ENSG00000139304 | 0.64892   | 0.2582   | 1.5853      | 0.056444    | 1.7543      | 0.03969  |
|            |                 | 1.6607    | 0.048389 | 0.03969     | 0.489921745 |             |          |
| DPH6       | ENSG00000134146 | 1.3325    | 0.091355 | -0.62635    | 0.73446     | 1.754       | 0.039711 |
|            |                 | -0.021312 | 0.5085   | 0.039711    | 0.489921745 |             |          |
| HIC1       | ENSG00000177374 | 1.2472    | 0.10616  | 1.5956      | 0.055284    | 0.90672     | 0.18228  |
|            |                 | 1.7539    | 0.03972  | 0.03972     | 0.489921745 |             |          |
| PDXDC2P    | ENSG00000255185 | 0.65467   | 0.25634  | 0.81676     | 0.20703     | 1.7538      |          |
|            |                 | 0.03973   | 1.7538   | 0.03973     | 0.03973     | 0.489921745 |          |
| NA         | ENSG00000260271 | 1.7538    | 0.039733 | 0.5368      | 0.2957      | 1.741       | 0.040842 |
|            |                 | 1.7538    | 0.039733 | 0.039733    | 0.489921745 |             |          |
| FALEC      | ENSG00000228126 | -0.057097 | 0.52277  | 1.7537      | 0.039737    | 0.049309    | 0.48034  |
|            |                 | 0.049309  | 0.48034  | 0.039737    | 0.489921745 |             |          |
| CYP3A137P  | ENSG00000261511 | 1.7537    | 0.03974  | 0.51072     | 0.30477     | 0.51072     |          |
|            |                 | 0.30477   | 0.51072  | 0.30477     | 0.03974     | 0.489921745 |          |
| RAB18      | ENSG00000099246 | 1.3277    | 0.092135 | 0.42313     | 0.3361      | 0.98681     | 0.16187  |
|            |                 | 1.7536    | 0.039749 | 0.039749    | 0.489921745 |             |          |
| NA         | ENSG00000278181 | -0.16893  | 0.56707  | 1.7536      | 0.039753    | 0.83494     | 0.20188  |
|            |                 | 0.83494   | 0.20188  | 0.039753    | 0.489921745 |             |          |
| NA         | ENSG00000243491 | 1.7536    | 0.039754 | 0.92361     | 0.17785     | 1.1411      | 0.12691  |
|            |                 | 0.24451   | 0.40342  | 0.039754    | 0.489921745 |             |          |
| ARGFX      | ENSG00000186103 | 0.046562  | 0.48143  | 0.94442     | 0.17248     | 0.76188     | 0.22307  |
|            |                 | 1.7534    | 0.039768 | 0.039768    | 0.489921745 |             |          |
| TEX53      | ENSG00000230054 | 0.57762   | 0.28176  | -0.055892   | 0.52229     | -1.3261     | 0.9076   |
|            |                 | 1.7532    | 0.039782 | 0.039782    | 0.489921745 |             |          |
| RNU6-1159P | ENSG00000199803 | 0.18142   | 0.42802  | 1.7531      | 0.039796    | 1.7531      |          |
|            |                 | 0.039796  | 1.7531   | 0.039796    | 0.039796    | 0.489921745 |          |
| RNU6-115P  | ENSG00000201180 | 1.7531    | 0.039796 | 1.7531      | 0.039796    | 1.7531      |          |
|            |                 | 0.039796  | 1.7531   | 0.039796    | 0.039796    | 0.489921745 |          |
| DNAJC10    | ENSG00000077232 | 0.43201   | 0.33287  | 0.79411     | 0.21357     | 1.753       | 0.039802 |
|            |                 | 0.98067   | 0.16338  | 0.039802    | 0.489921745 |             |          |
| MAP4       | ENSG00000047849 | 0.87045   | 0.19203  | 1.1882      | 0.11737     | 1.3688      | 0.085534 |
|            |                 | 1.753     | 0.039803 | 0.039803    | 0.489921745 |             |          |
| LINC02814  | ENSG00000236975 | 1.753     | 0.039803 | -0.087895   | 0.53502     | -0.38776    | 0.6509   |
|            |                 | -0.38776  | 0.6509   | 0.039803    | 0.489921745 |             |          |
| CIDEC      | ENSG00000187288 | 0.15344   | 0.43903  | 1.7475      | 0.040273    | 1.7527      | 0.03983  |
|            |                 | 0.83964   | 0.20056  | 0.03983     | 0.490066654 |             |          |
| NMRAL2P    | ENSG00000171658 | 0.41305   | 0.33978  | 0.11643     | 0.45366     | 1.7524      |          |
|            |                 | 0.039853  | 1.4148   | 0.078567    | 0.039853    | 0.490066654 |          |
| SYT16      | ENSG00000139973 | 0.8716    | 0.19171  | 1.7524      | 0.039855    | 0.75167     | 0.22612  |
|            |                 | 0.92147   | 0.1784   | 0.039855    | 0.490066654 |             |          |
| RN7SL465P  | ENSG00000244297 | 1.7524    | 0.039855 | 1.7524      | 0.039855    | 1.7524      |          |
|            |                 | 0.039855  | 1.7524   | 0.039855    | 0.039855    | 0.490066654 |          |
| SUMO2P16   | ENSG00000253579 | 1.7519    | 0.039893 | 1.7519      | 0.039893    | 1.7519      |          |
|            |                 | 0.039893  | 1.7519   | 0.039893    | 0.039893    | 0.490222818 |          |
| NA         | ENSG00000224901 | 1.487     | 0.068509 | 1.7519      | 0.039898    | -0.5324     | 0.70278  |
|            |                 | 1.7519    | 0.039898 | 0.039898    | 0.490222818 |             |          |
| NA         | ENSG00000248547 | 0.17893   | 0.429    | 1.7519      | 0.039898    | 0.17893     | 0.429    |
|            |                 | 0.13536   | 0.039898 | 0.490222818 |             |             |          |



|           |                 |          |          |             |             |             |          |          |
|-----------|-----------------|----------|----------|-------------|-------------|-------------|----------|----------|
| NA        | ENSG00000271901 | 1.7518   | 0.039908 | 0.039908    | -0.78623    | 0.78413     | 1.7518   | 0.039908 |
|           |                 | 1.7518   | 0.039908 | 0.039908    | 0.490222818 |             |          |          |
| LSMEM1    | ENSG00000181016 | -0.32287 | 0.6266   | 1.7516      | 0.039918    | -0.54556    |          |          |
|           |                 | 0.70732  | -0.54556 | 0.70732     | 0.039918    | 0.490222818 |          |          |
| NA        | ENSG00000223923 | 1.5535   | 0.060149 | 1.2829      | 0.099756    | 1.7512      | 0.039958 |          |
|           |                 | 1.4124   | 0.078922 | 0.039958    | 0.490575657 |             |          |          |
| PRRG2     | ENSG00000126460 | 1.7511   | 0.039967 | 1.7511      | 0.039967    | 1.7511      | 0.039967 |          |
|           |                 | 1.7269   | 0.042092 | 0.039967    | 0.490575657 |             |          |          |
| HIVEP1    | ENSG00000095951 | -0.21465 | 0.58498  | -1.064      | 0.85634     | 1.7509      |          |          |
|           |                 | 0.039983 | 0.3773   | 0.35297     | 0.039983    | 0.490575657 |          |          |
| NAMPTP1   | ENSG00000229644 | 1.7508   | 0.039987 | 0.0071559   | 0.49715     | -1.6755     |          |          |
|           |                 | 0.95308  | 1.7508   | 0.039987    | 0.039987    | 0.490575657 |          |          |
| MIR4714   | ENSG00000264480 | -0.51403 | 0.69638  | -0.51403    | 0.69638     | 0.5263      |          |          |
|           |                 | 0.29934  | 1.7506   | 0.04001     | 0.04001     | 0.49073169  |          |          |
| GRK6      | ENSG00000198055 | 1.3143   | 0.094366 | 1.7503      | 0.040033    | 0.49219     | 0.31129  |          |
|           |                 | 0.79634  | 0.21292  | 0.040033    | 0.49073169  |             |          |          |
| RN7SL632P | ENSG00000241524 | 1.7503   | 0.040037 | 1.7503      | 0.040037    | 1.7503      |          |          |
|           |                 | 0.040037 | -0.12488 | 0.54969     | 0.040037    | 0.49073169  |          |          |
| KRT6A     | ENSG00000205420 | 0.69881  | 0.24234  | 0.60702     | 0.27192     | 1.7502      | 0.04004  |          |
|           |                 | 0.70775  | 0.23955  | 0.04004     | 0.49073169  |             |          |          |
| NA        | ENSG00000253160 | 1.75     | 0.040058 | 1.75        | 0.040058    | 1.75        | 0.040058 | 0.11566  |
|           |                 | 0.45396  | 0.040058 | 0.490828851 |             |             |          |          |
| NA        | ENSG00000270076 | 0.84522  | 0.19899  | 0.78678     | 0.2157      | 1.7495      | 0.040101 |          |
|           |                 | 1.6739   | 0.047072 | 0.040101    | 0.49104     |             |          |          |
| TPRX2P    | ENSG00000259009 | 1.7493   | 0.040116 | 1.7493      | 0.040116    | 1.7493      |          |          |
|           |                 | 0.040116 | 1.1921   | 0.11661     | 0.040116    | 0.49104     |          |          |
| TNRC18P1  | ENSG00000249661 | 1.7493   | 0.040123 | 1.7493      | 0.040123    | 1.7493      |          |          |
|           |                 | 0.040123 | 1.7493   | 0.040123    | 0.040123    | 0.49104     |          |          |
| PPP1R2P2  | ENSG00000234008 | 0.2883   | 0.38656  | 1.7492      | 0.040131    | 0.66876     |          |          |
|           |                 | 0.25182  | -0.89683 | 0.8151      | 0.040131    | 0.49104     |          |          |
| NA        | ENSG00000259747 | 1.749    | 0.040143 | 1.6402      | 0.050485    | 1.4472      | 0.073916 |          |
|           |                 | 0.53293  | 0.29704  | 0.040143    | 0.49104     |             |          |          |
| UBE2Z     | ENSG00000159202 | 1.739    | 0.041015 | 1.749       | 0.040144    | 1.6931      | 0.045217 | 1.4795   |
|           |                 | 0.069503 | 0.040144 | 0.49104     |             |             |          |          |
| NA        | ENSG00000241782 | 1.7489   | 0.040153 | 1.7489      | 0.040153    | 1.7489      | 0.040153 |          |
|           |                 | 0.097804 | 0.46104  | 0.040153    | 0.49104     |             |          |          |
| MRPL44    | ENSG00000135900 | -0.13784 | 0.55482  | -0.79903    | 0.78786     | 1.7489      |          |          |
|           |                 | 0.040156 | -1.2482  | 0.89402     | 0.040156    | 0.49104     |          |          |
| NA        | ENSG00000268742 | 1.7488   | 0.040167 | -0.9742     | 0.83502     | -2.0522     | 0.97992  |          |
|           |                 | 1.5081   | 0.065758 | 0.040167    | 0.49104     |             |          |          |
| HYAL1     | ENSG00000114378 | 1.7487   | 0.040176 | 1.7181      | 0.042888    | 1.6789      | 0.046582 |          |
|           |                 | 1.6789   | 0.046582 | 0.040176    | 0.49104     |             |          |          |
| NA        | ENSG00000229525 | 1.7483   | 0.040203 | 1.7483      | 0.040203    | 1.7483      | 0.040203 |          |
|           |                 | 1.7483   | 0.040203 | 0.040203    | 0.491232596 |             |          |          |
| PGBD5     | ENSG00000177614 | -0.1978  | 0.5784   | 1.7482      | 0.040212    | 1.2476      | 0.1061   |          |
|           |                 | 0.53325  | 0.29693  | 0.040212    | 0.491232596 |             |          |          |
| SCAF11    | ENSG00000139218 | 1.281    | 0.1001   | 1.7481      | 0.040222    | 0.88442     | 0.18824  |          |
|           |                 | 0.15474  | 0.43851  | 0.040222    | 0.491232596 |             |          |          |
| NPW       | ENSG00000183971 | 0.10145  | 0.4596   | -0.51134    | 0.69544     | 0.11834     | 0.4529   |          |
|           |                 | 1.7478   | 0.040251 | 0.040251    | 0.491463601 |             |          |          |
| NA        | ENSG00000238512 | 1.7475   | 0.040274 | -0.4675     | 0.67993     | -0.17604    | 0.56987  |          |
|           |                 | 0.49327  | 0.31091  | 0.040274    | 0.491478598 |             |          |          |
| NA        | ENSG00000257634 | -0.98834 | 0.83851  | -0.82724    | 0.79595     | -0.36576    | 0.64273  |          |
|           |                 | 1.7473   | 0.040291 | 0.040291    | 0.491478598 |             |          |          |
| NA        | ENSG00000271977 | -0.58997 | 0.72239  | 0.73673     | 0.23064     | 1.7472      | 0.040299 |          |
|           |                 | 1.7472   | 0.040299 | 0.040299    | 0.491478598 |             |          |          |
| NA        | ENSG00000267758 | 1.7472   | 0.040302 | 1.2634      | 0.10322     | 1.7472      | 0.040302 |          |
|           |                 | 1.7472   | 0.040302 | 0.040302    | 0.491478598 |             |          |          |
| SNORC     | ENSG00000182600 | -0.92582 | 0.82273  | 1.7471      | 0.040308    | -0.30691    | 0.62054  |          |
|           |                 | -0.35438 | 0.63847  | 0.040308    | 0.491478598 |             |          |          |
| NME5      | ENSG00000112981 | 1.747    | 0.04032  | 1.2428      | 0.10697     | 0.88901     | 0.187    | 0.81867  |
|           |                 | 0.20649  | 0.04032  | 0.491478598 |             |             |          |          |

|           |                 |           |          |             |             |           |          |          |
|-----------|-----------------|-----------|----------|-------------|-------------|-----------|----------|----------|
| MIRLET7I  | ENSG00000199179 | 1.7467    | 0.040343 | 1.7467      | 0.040343    | 1.7467    | 0.040343 | 1.7467   |
|           | 0.040343        | 1.7467    | 0.040343 | 0.040343    | 0.491478598 |           |          |          |
| LINC01465 | ENSG00000221949 | 1.7467    | 0.040343 | 1.7467      | 0.040343    | 1.7467    | 0.040343 | 1.7467   |
|           | 0.040343        | 1.7467    | 0.040343 | 0.040343    | 0.491478598 |           |          |          |
| NA        | ENSG00000275180 | 1.7467    | 0.040343 | 1.7467      | 0.040343    | 1.7467    | 0.040343 | 1.7467   |
|           | 1.7467          | 0.040343  | 0.040343 | 0.491478598 |             |           |          | 0.040343 |
| C2CD4C    | ENSG00000183186 | 0.28217   | 0.38891  | -0.022535   | 0.50899     | 0.59762   |          |          |
|           | 0.27505         | 1.7466    | 0.040354 | 0.040354    | 0.491488686 |           |          |          |
| CISD2     | ENSG00000145354 | 1.7465    | 0.040364 | 0.94614     | 0.17204     | 1.1106    | 0.13336  |          |
|           | -0.46147        | 0.67777   | 0.040364 | 0.491488686 |             |           |          |          |
| LINC02052 | ENSG00000224406 | 1.7462    | 0.040388 | 0.8511      | 0.19736     | 1.13      | 0.12923  |          |
|           | -0.26363        | 0.60397   | 0.040388 | 0.491658066 |             |           |          |          |
| S100A3    | ENSG00000188015 | 1.5008    | 0.0667   | 1.7458      | 0.040422    | 1.7458    |          |          |
|           | 0.040422        | 0.66238   | 0.25386  | 0.040422    | 0.491949066 |           |          |          |
| NA        | ENSG00000268423 | 1.7455    | 0.040447 | 1.7455      | 0.040447    | 1.7455    | 0.040447 |          |
|           | 1.0422          | 0.14865   | 0.040447 | 0.491976234 |             |           |          |          |
| LINC02062 | ENSG00000248489 | 1.7454    | 0.040455 | 1.7454      | 0.040455    | 0.069088  |          |          |
|           | 0.47246         | 1.7454    | 0.040455 | 0.040455    | 0.491976234 |           |          |          |
| NA        | ENSG00000239173 | 0.41785   | 0.33803  | 0.20386     | 0.41923     | 1.7452    | 0.040478 |          |
|           | 1.0541          | 0.14592   | 0.040478 | 0.491976234 |             |           |          |          |
| CCL20     | ENSG00000115009 | -0.39026  | 0.65183  | 1.7451      | 0.040483    | 0.60202   | 0.27358  |          |
|           | 0.89984         | 0.1841    | 0.040483 | 0.491976234 |             |           |          |          |
| NA        | ENSG00000226723 | 1.7449    | 0.040502 | -1.1159     | 0.86777     | 1.1501    | 0.12505  |          |
|           | 0.94581         | 0.17212   | 0.040502 | 0.491976234 |             |           |          |          |
| NA        | ENSG00000250523 | 1.7449    | 0.040503 | 1.7449      | 0.040503    | 1.7449    | 0.040503 |          |
|           | 1.7449          | 0.040503  | 0.040503 | 0.491976234 |             |           |          |          |
| SOCS5P5   | ENSG00000216904 | -0.52152  | 0.699    | 1.7449      | 0.040504    | -0.47282  | 0.68183  |          |
|           | -0.4845         | 0.68598   | 0.040504 | 0.491976234 |             |           |          |          |
| NA        | ENSG00000242169 | 0.33231   | 0.36983  | 1.7449      | 0.040505    | 1.3846    | 0.083091 |          |
|           | 1.3846          | 0.083091  | 0.040505 | 0.491976234 |             |           |          |          |
| NA        | ENSG00000257235 | 1.7444    | 0.040545 | 1.7444      | 0.040545    | 1.7444    | 0.040545 |          |
|           | 1.7444          | 0.040545  | 0.040545 | 0.492029469 |             |           |          |          |
| LINC01873 | ENSG00000232164 | -0.095686 | 0.53811  | -1.1394     | 0.87274     | 1.7443    |          |          |
|           | 0.040551        | 0.0050739 | 0.49798  | 0.040551    | 0.492029469 |           |          |          |
| SRP14-AS1 | ENSG00000248508 | 0.0096522 | 0.49615  | 1.7443      | 0.040552    | 0.0096522 |          |          |
|           | 0.49615         | -0.22848  | 0.59036  | 0.040552    | 0.492029469 |           |          |          |
| LINC02639 | ENSG00000230573 | 1.7441    | 0.040572 | -0.7254     | 0.7659      | 0.61993   |          |          |
|           | 0.26765         | 0.32574   | 0.37231  | 0.040572    | 0.492029469 |           |          |          |
| NA        | ENSG00000272563 | -0.2799   | 0.61022  | 1.744       | 0.040582    | 1.2607    | 0.10372  |          |
|           | 1.2607          | 0.10372   | 0.040582 | 0.492029469 |             |           |          |          |
| NA        | ENSG00000187904 | 1.7436    | 0.040618 | 0.69386     | 0.24388     | 0.69386   | 0.24388  |          |
|           | 0.69386         | 0.24388   | 0.040618 | 0.492029469 |             |           |          |          |
| NA        | ENSG00000228028 | 1.7434    | 0.040629 | 1.7434      | 0.040629    | 1.7434    | 0.040629 |          |
|           | 1.7434          | 0.040629  | 0.040629 | 0.492029469 |             |           |          |          |
| EEF1A1P25 | ENSG00000241429 | 0.92147   | 0.1784   | 0.92147     | 0.1784      | 1.7434    |          |          |
|           | 0.040634        | 0.40541   | 0.34259  | 0.040634    | 0.492029469 |           |          |          |
| AKR1D1    | ENSG00000122787 | 1.7433    | 0.040636 | 0.42229     | 0.33641     | 0.38484   |          |          |
|           | 0.35018         | 0.015491  | 0.49382  | 0.040636    | 0.492029469 |           |          |          |
| SNORA70F  | ENSG00000206869 | 1.7431    | 0.040659 | 1.7431      | 0.040659    | 1.7431    |          |          |
|           | 0.040659        | 1.7431    | 0.040659 | 0.040659    | 0.492029469 |           |          |          |
| RPS16P3   | ENSG00000233329 | 1.743     | 0.040666 | -0.58541    | 0.72086     | -0.58541  | 0.72086  |          |
|           | -0.58541        | 0.72086   | 0.040666 | 0.492029469 |             |           |          |          |
| TMEM87B   | ENSG00000153214 | 1.3351    | 0.090921 | 1.743       | 0.040667    | 1.5375    | 0.062091 |          |
|           | 1.6722          | 0.047239  | 0.040667 | 0.492029469 |             |           |          |          |
| COA7      | ENSG00000162377 | 0.82566   | 0.2045   | 1.7429      | 0.040679    | 0.94156   | 0.17321  |          |
|           | 1.0452          | 0.14796   | 0.040679 | 0.492029469 |             |           |          |          |
| RN7SL254P | ENSG00000240014 | 1.7427    | 0.040695 | 1.7427      | 0.040695    | 1.7427    |          |          |
|           | 0.040695        | 1.7427    | 0.040695 | 0.040695    | 0.492029469 |           |          |          |
| RAPGEF3   | ENSG00000079337 | 1.7424    | 0.040718 | -0.40254    | 0.65636     | 0.83658   |          |          |
|           | 0.20141         | 0.9029    | 0.18329  | 0.040718    | 0.492029469 |           |          |          |
| DPH3      | ENSG00000154813 | 0.59162   | 0.27705  | 1.7424      | 0.040719    | 0.25544   | 0.39919  |          |
|           | 0.48633         | 0.31337   | 0.040719 | 0.492029469 |             |           |          |          |

|           |                 |          |             |             |             |             |          |
|-----------|-----------------|----------|-------------|-------------|-------------|-------------|----------|
| WNT4      | ENSG00000162552 | 1.7423   | 0.040732    | 0.51399     | 0.30363     | 0.22561     | 0.41075  |
|           |                 | 0.18228  | 0.42768     | 0.040732    | 0.492029469 |             |          |
| SLC5A9    | ENSG00000117834 | 0.44991  | 0.32639     | 1.7422      | 0.040737    | 0.56606     |          |
|           |                 | 0.28568  | 0.040737    | 0.492029469 |             |             |          |
| CDC42-IT1 | ENSG00000230068 | 1.0046   | 0.15755     | 0.57567     | 0.28242     | 1.742       | 0.040751 |
|           |                 | 0.98612  | 0.040751    | 0.492029469 |             |             |          |
| NA        | ENSG00000228852 | 0.49606  | 0.30993     | 1.742       | 0.040754    | 1.742       | 0.040754 |
|           |                 | 0.040754 | 0.492029469 |             |             |             |          |
| NA        | ENSG00000273971 | 1.7418   | 0.040771    | 1.7418      | 0.040771    | 1.7418      | 0.040771 |
|           |                 | 1.7418   | 0.040771    | 0.492029469 |             |             |          |
| NDUFB4P4  | ENSG00000217718 | 1.596    | 0.055239    | 1.7417      | 0.040779    | -0.24756    | 0.59776  |
|           |                 | 0.055156 | 0.47801     | 0.040779    | 0.492029469 |             |          |
| PIP4K2A   | ENSG00000150867 | 1.7416   | 0.040789    | -0.17741    | 0.57041     | 1.7416      |          |
|           |                 | 0.040789 | -1.032      | 0.84896     | 0.040789    | 0.492029469 |          |
| RETREG2   | ENSG00000144567 | 1.7416   | 0.040792    | -0.18904    | 0.57497     | -0.18904    |          |
|           |                 | 0.57497  | -0.18904    | 0.57497     | 0.040792    | 0.492029469 |          |
| STK32B    | ENSG00000152953 | 0.55887  | 0.28812     | 0.37355     | 0.35437     | 0.97532     |          |
|           |                 | 0.1647   | 1.7413      | 0.040819    | 0.040819    | 0.492029469 |          |
| OR7E94P   | ENSG00000249646 | 1.7412   | 0.040824    | 1.6855      | 0.045945    | 1.285       | 0.099402 |
|           |                 | -0.39    | 0.65173     | 0.040824    | 0.492029469 |             |          |
| RPS2P28   | ENSG00000179157 | 0.79414  | 0.21356     | 1.7409      | 0.040852    | -0.91404    |          |
|           |                 | 0.81965  | -0.91404    | 0.81965     | 0.040852    | 0.492029469 |          |
| BPIFB3    | ENSG00000186190 | 1.0365   | 0.14998     | 1.7409      | 0.040852    | 0.83824     |          |
|           |                 | 0.20095  | 0.67581     | 0.24958     | 0.040852    | 0.492029469 |          |
| CDCA7     | ENSG00000144354 | 0.78716  | 0.21559     | 1.3592      | 0.087036    | 0.16794     | 0.43332  |
|           |                 | 1.7408   | 0.040856    | 0.040856    | 0.492029469 |             |          |
| TRAJ10    | ENSG00000211879 | 1.7408   | 0.040862    | 1.7408      | 0.040862    | 1.7408      |          |
|           |                 | 0.040862 | 1.7408      | 0.040862    | 0.040862    | 0.492029469 |          |
| TYRO3     | ENSG00000092445 | 0.85914  | 0.19513     | -1.8962     | 0.97103     | 1.4707      | 0.070682 |
|           |                 | 1.7406   | 0.04088     | 0.04088     | 0.492029469 |             |          |
| PNPT1P1   | ENSG00000229241 | 0.89375  | 0.18573     | 0.5024      | 0.30769     | 1.7404      |          |
|           |                 | 0.040899 | 0.8832      | 0.18857     | 0.040899    | 0.492029469 |          |
| IRX6      | ENSG00000159387 | 1.7403   | 0.040907    | 1.7403      | 0.040907    | 1.7403      | 0.040907 |
|           |                 | 1.7403   | 0.040907    | 0.040907    | 0.492029469 |             |          |
| RAB3C     | ENSG00000152932 | 0.44097  | 0.32962     | 0.98868     | 0.16141     | 1.74        | 0.040927 |
|           |                 | 0.14779  | 0.44125     | 0.040927    | 0.492029469 |             |          |
| NA        | ENSG00000233920 | 0.56729  | 0.28526     | 0.46238     | 0.3219      | 1.74        | 0.040932 |
|           |                 | 0.91869  | 0.17913     | 0.040932    | 0.492029469 |             |          |
| SALL3     | ENSG00000256463 | 1.5855   | 0.056429    | -0.95762    | 0.83087     | 0.42199     | 0.33652  |
|           |                 | 1.7396   | 0.040964    | 0.040964    | 0.492029469 |             |          |
| LAMB3     | ENSG00000196878 | 1.7283   | 0.041971    | 1.7395      | 0.040973    | 1.3551      | 0.087693 |
|           |                 | 0.86785  | 0.19274     | 0.040973    | 0.492029469 |             |          |
| SLC2A2    | ENSG00000163581 | -0.28594 | 0.61254     | -0.10699    | 0.5426      | 1.7393      |          |
|           |                 | 0.04099  | 0.24077     | 0.40487     | 0.04099     | 0.492029469 |          |
| NA        | ENSG00000275716 | 1.3712   | 0.08516     | 1.2953      | 0.097606    | 1.7393      | 0.040991 |
|           |                 | 1.4777   | 0.06974     | 0.040991    | 0.492029469 |             |          |
| NA        | ENSG00000279348 | 1.7391   | 0.041004    | 1.7391      | 0.041004    | 1.7391      | 0.041004 |
|           |                 | 1.7391   | 0.041004    | 0.041004    | 0.492029469 |             |          |
| OSGIN2    | ENSG00000164823 | 0.8898   | 0.18679     | 1.6094      | 0.053766    | 1.6094      |          |
|           |                 | 0.053766 | 1.739       | 0.041022    | 0.041022    | 0.492029469 |          |
| NA        | ENSG00000254095 | 1.2811   | 0.10008     | 1.7389      | 0.041023    | 0.38154     | 0.3514   |
|           |                 | 0.58509  | 0.27924     | 0.041023    | 0.492029469 |             |          |
| NRDC      | ENSG00000078618 | -0.37096 | 0.64467     | 0.51085     | 0.30473     | 1.7387      | 0.04104  |
|           |                 | -1.1261  | 0.86993     | 0.04104     | 0.492029469 |             |          |
| SPATA6L   | ENSG00000106686 | 0.12658  | 0.44963     | 0.41902     | 0.3376      | -0.10725    |          |
|           |                 | 0.54271  | 1.7387      | 0.041043    | 0.041043    | 0.492029469 |          |
| OR8F1P    | ENSG00000239426 | 1.7386   | 0.04105     | 1.7386      | 0.04105     | 1.7386      |          |
|           |                 | 0.04105  | 1.6631      | 0.04815     | 0.04105     | 0.492029469 |          |
| NA        | ENSG00000273110 | 1.7386   | 0.041057    | 1.7386      | 0.041057    | 1.7386      | 0.041057 |
|           |                 | 1.7386   | 0.041057    | 0.041057    | 0.492029469 |             |          |
| QKI       | ENSG00000112531 | 1.7385   | 0.041061    | 0.77511     | 0.21914     | 0.15689     | 0.43767  |
|           |                 | 0.84907  | 0.19792     | 0.041061    | 0.492029469 |             |          |

|           |                 |           |          |            |             |             |          |          |
|-----------|-----------------|-----------|----------|------------|-------------|-------------|----------|----------|
| HOXC-AS1  | ENSG00000250451 | 1.7385    | 0.041064 | 1.7385     | 0.041064    | 1.7385      | 0.041064 | 1.7385   |
|           |                 | 0.041064  | 1.7385   | 0.041064   | 0.041064    | 0.492029469 |          |          |
| SLC7A9    | ENSG00000021488 | -0.46252  | 0.67815  | -0.46252   | 0.67815     | 0.67815     | -0.40192 |          |
|           |                 | 0.65613   | 1.7384   | 0.041068   | 0.041068    | 0.492029469 |          |          |
| NA        | ENSG00000266642 | 1.7382    | 0.041087 | 1.7382     | 0.041087    | 1.7382      | 0.041087 | 0.041087 |
|           |                 | 1.7382    | 0.041087 | 0.041087   | 0.492029469 |             |          |          |
| NA        | ENSG00000261273 | -0.55369  | 0.71011  | -0.0090524 | 0.50361     | 0.018151    | 0.49276  |          |
|           |                 | 1.7381    | 0.041098 | 0.041098   | 0.492029469 |             |          |          |
| RNF40     | ENSG00000103549 | -1.0836   | 0.86072  | 1.7378     | 0.041123    | -0.94964    | 0.82885  |          |
|           |                 | -0.94964  | 0.82885  | 0.041123   | 0.492029469 |             |          |          |
| NA        | ENSG00000259493 | 1.7378    | 0.041124 | -0.16053   | 0.56377     | -0.16053    | 0.56377  |          |
|           |                 | -0.16053  | 0.56377  | 0.041124   | 0.492029469 |             |          |          |
| TBCEL     | ENSG00000154114 | 1.3283    | 0.092033 | 1.7376     | 0.041144    | 0.40412     | 0.34306  |          |
|           |                 | 1.7376    | 0.041144 | 0.041144   | 0.492029469 |             |          |          |
| NCKAP1    | ENSG00000061676 | 1.5761    | 0.057496 | 1.6899     | 0.045524    | 1.7374      |          |          |
|           |                 | 0.04116   | 1.6727   | 0.047189   | 0.04116     | 0.492029469 |          |          |
| NA        | ENSG00000271870 | 1.7373    | 0.041167 | 1.7373     | 0.041167    | 1.7373      | 0.041167 | 0.041167 |
|           |                 | 1.7373    | 0.041167 | 0.041167   | 0.492029469 |             |          |          |
| RNU1-42P  | ENSG00000200903 | 1.7373    | 0.041169 | 1.7373     | 0.041169    | 1.7373      |          |          |
|           |                 | 0.041169  | 1.7373   | 0.041169   | 0.041169    | 0.492029469 |          |          |
| NA        | ENSG00000277011 | 1.7372    | 0.041175 | 1.7372     | 0.041175    | 1.7372      | 0.041175 | 0.041175 |
|           |                 | 1.7372    | 0.041175 | 0.041175   | 0.492029469 |             |          |          |
| NA        | ENSG00000278872 | 1.7372    | 0.041175 | 1.7372     | 0.041175    | 1.7372      | 0.041175 | 0.041175 |
|           |                 | 1.7372    | 0.041175 | 0.041175   | 0.492029469 |             |          |          |
| LINC02098 | ENSG00000272575 | 1.6433    | 0.050163 | 1.6231     | 0.052287    | 1.4868      |          |          |
|           |                 | 0.068532  | 1.7372   | 0.041177   | 0.041177    | 0.492029469 |          |          |
| MIR346    | ENSG00000199104 | 1.7371    | 0.041185 | 1.5466     | 0.060977    | 1.5466      |          |          |
|           |                 | 0.060977  | -0.44599 | 0.6722     | 0.041185    | 0.492029469 |          |          |
| CYP4B1    | ENSG00000142973 | 0.39561   | 0.3462   | 1.7369     | 0.041204    | 0.82684     |          |          |
|           |                 | 0.20416   | 0.69509  | 0.2435     | 0.041204    | 0.492029469 |          |          |
| PPP1R3D   | ENSG00000132825 | 1.7369    | 0.041205 | 1.7369     | 0.041205    | 1.7369      |          |          |
|           |                 | 0.041205  | 1.7369   | 0.041205   | 0.041205    | 0.492029469 |          |          |
| TMED11P   | ENSG00000215367 | 0.39966   | 0.34471  | 1.7368     | 0.041215    | 1.7368      |          |          |
|           |                 | 0.041215  | 1.4758   | 0.069997   | 0.041215    | 0.492029469 |          |          |
| NA        | ENSG00000245261 | 1.7367    | 0.041224 | 1.7367     | 0.041224    | 1.7367      | 0.041224 | 0.041224 |
|           |                 | 1.7367    | 0.041224 | 0.041224   | 0.492029469 |             |          |          |
| NA        | ENSG00000212224 | 1.7366    | 0.041226 | 1.7366     | 0.041226    | 1.7366      | 0.041226 | 0.041226 |
|           |                 | 1.7366    | 0.041226 | 0.041226   | 0.492029469 |             |          |          |
| ASS1P9    | ENSG00000217791 | 1.7366    | 0.041232 | 1.0789     | 0.14031     | -0.7181     |          |          |
|           |                 | 0.76365   | 1.0789   | 0.14031    | 0.041232    | 0.492029469 |          |          |
| TPSP2     | ENSG00000260284 | -0.1148   | 0.5457   | -0.1148    | 0.5457      | 1.7362      | 0.041261 |          |
|           |                 | 0.82863   | 0.20366  | 0.041261   | 0.492029469 |             |          |          |
| NA        | ENSG00000226669 | 0.38241   | 0.35108  | 0.38241    | 0.35108     | 1.7362      | 0.041268 |          |
|           |                 | 0.38241   | 0.35108  | 0.041268   | 0.492029469 |             |          |          |
| PPM1B     | ENSG00000138032 | -0.33926  | 0.63279  | 1.7361     | 0.041276    | 0.4984      | 0.3091   |          |
|           |                 | 0.43296   | 0.33252  | 0.041276   | 0.492029469 |             |          |          |
| SMIM32    | ENSG00000271824 | 1.6088    | 0.053835 | 1.4777     | 0.069745    | 1.171       | 0.1208   |          |
|           |                 | 1.736     | 0.04128  | 0.04128    | 0.492029469 |             |          |          |
| PBRM1     | ENSG00000163939 | 1.2292    | 0.1095   | 1.2865     | 0.099143    | 1.2365      | 0.10814  |          |
|           |                 | 1.736     | 0.041286 | 0.041286   | 0.492029469 |             |          |          |
| MACROH2A1 | ENSG00000113648 | 0.0051849 | 0.49793  | -0.64901   | 0.74183     | -1.5358     |          |          |
|           |                 | 0.9377    | 1.7358   | 0.0413     | 0.0413      | 0.492029469 |          |          |
| RNU6-278P | ENSG00000212247 | 1.7355    | 0.041327 | 1.7355     | 0.041327    | 1.7355      |          |          |
|           |                 | 0.041327  | 1.7355   | 0.041327   | 0.041327    | 0.492029469 |          |          |
| NA        | ENSG00000254920 | 1.7355    | 0.041328 | -2.1039    | 0.98231     | -1.074      | 0.8586   |          |
|           |                 | -1.074    | 0.8586   | 0.041328   | 0.492029469 |             |          |          |
| NA        | ENSG00000269185 | 1.7354    | 0.041337 | 1.7354     | 0.041337    | 1.7354      | 0.041337 | 0.041337 |
|           |                 | 1.7354    | 0.041337 | 0.041337   | 0.492029469 |             |          |          |
| GPR107    | ENSG00000148358 | 0.37377   | 0.35429  | -0.43756   | 0.66915     | -0.18677    |          |          |
|           |                 | 0.57408   | 1.7349   | 0.041379   | 0.041379    | 0.492029469 |          |          |
| GFY       | ENSG00000261949 | 1.7348    | 0.04139  | 1.7348     | 0.04139     | 1.7348      | 0.04139  | 0.04139  |
|           |                 | 1.7348    | 0.04139  | 0.04139    | 0.492029469 |             |          |          |

|             |                 |           |             |             |             |           |          |          |
|-------------|-----------------|-----------|-------------|-------------|-------------|-----------|----------|----------|
| CNOT6L      | ENSG00000138767 | 0.012291  | 0.4951      | 1.4121      | 0.078966    | 0.40679   |          |          |
|             | 0.34208         | 1.7348    | 0.041391    | 0.041391    | 0.492029469 |           |          |          |
| SNORD116-26 | ENSG00000251815 | 1.7347    | 0.041394    | 1.7347      | 0.041394    | 1.7347    |          |          |
|             | 0.041394        | 1.7347    | 0.041394    | 0.041394    | 0.492029469 |           |          |          |
| NA          | ENSG00000256813 | 1.7346    | 0.041408    | 1.7346      | 0.041408    | 1.7346    |          | 0.041408 |
|             | 1.7346          | 0.041408  | 0.041408    | 0.492029469 |             |           |          |          |
| STAT5B      | ENSG00000173757 | 0.66953   | 0.25158     | 1.7346      | 0.041409    | 1.6603    |          |          |
|             | 0.04843         | -0.15884  | 0.5631      | 0.041409    | 0.492029469 |           |          |          |
| NRSN2       | ENSG00000125841 | -0.81041  | 0.79115     | -0.77946    | 0.78215     | -0.076026 | 0.5303   |          |
|             | 1.7345          | 0.04141   | 0.04141     | 0.492029469 |             |           |          |          |
| NA          | ENSG00000279250 | 1.7345    | 0.041411    | -0.28357    | 0.61163     | -0.28357  | 0.61163  |          |
|             | -0.28357        | 0.61163   | 0.041411    | 0.492029469 |             |           |          |          |
| NDUFAF7     | ENSG00000003509 | 1.7344    | 0.041421    | 1.7344      | 0.041421    | 1.7344    |          |          |
|             | 0.041421        | 0.63674   | 0.26215     | 0.041421    | 0.492029469 |           |          |          |
| DTWD1       | ENSG00000104047 | 1.7344    | 0.041426    | 1.4544      | 0.072916    | 1.4544    | 0.072916 |          |
|             | 1.4544          | 0.072916  | 0.041426    | 0.492029469 |             |           |          |          |
| GAL3ST4     | ENSG00000197093 | 1.7343    | 0.041431    | 0.56101     | 0.2874      | 0.69124   |          |          |
|             | 0.24471         | 1.7343    | 0.041431    | 0.041431    | 0.492029469 |           |          |          |
| RAB35       | ENSG00000111737 | 0.16489   | 0.43451     | 0.16489     | 0.43451     | 0.16489   | 0.43451  |          |
|             | 1.7342          | 0.041445  | 0.041445    | 0.492029469 |             |           |          |          |
| NDUFB4P9    | ENSG00000249754 | 1.138     | 0.12756     | 1.138       | 0.12756     | 1.7341    | 0.04145  | 1.138    |
|             | 0.12756         | 0.04145   | 0.492029469 |             |             |           |          |          |
| NA          | ENSG00000264705 | -0.048512 | 0.51935     | 0.38572     | 0.34985     | -0.29583  | 0.61632  |          |
|             | 1.7341          | 0.041453  | 0.041453    | 0.492029469 |             |           |          |          |
| MPP7        | ENSG00000150054 | 1.4337    | 0.075832    | 1.7339      | 0.041471    | 0.9646    | 0.16737  |          |
|             | 1.509           | 0.06565   | 0.041471    | 0.492029469 |             |           |          |          |
| PAPSS1      | ENSG00000138801 | 0.84281   | 0.19967     | 1.7337      | 0.041484    | 0.34693   |          |          |
|             | 0.36432         | -0.47119  | 0.68125     | 0.041484    | 0.492029469 |           |          |          |
| PIF1        | ENSG00000140451 | 0.56967   | 0.28445     | 1.6367      | 0.050842    | 1.7337    | 0.041485 |          |
|             | 1.3481          | 0.088819  | 0.041485    | 0.492029469 |             |           |          |          |
| ZNF621      | ENSG00000172888 | 0.36992   | 0.35572     | 1.7337      | 0.041486    | 1.5938    |          |          |
|             | 0.055492        | 1.7337    | 0.041486    | 0.041486    | 0.492029469 |           |          |          |
| RPL35AP4    | ENSG00000225644 | 1.7336    | 0.041497    | 1.7336      | 0.041497    | 0.97727   |          |          |
|             | 0.16422         | 0.54444   | 0.29307     | 0.041497    | 0.492029469 |           |          |          |
| KIFC1       | ENSG00000237649 | 0.60886   | 0.27131     | 0.53253     | 0.29718     | 1.7336    | 0.041497 |          |
|             | 1.7336          | 0.041497  | 0.041497    | 0.492029469 |             |           |          |          |
| RNU6-1120P  | ENSG00000199858 | 1.7334    | 0.041517    | 1.7334      | 0.041517    | 1.7334    |          |          |
|             | 0.041517        | 1.7334    | 0.041517    | 0.041517    | 0.492029469 |           |          |          |
| SLAMF6      | ENSG00000162739 | 0.91291   | 0.18065     | 0.47214     | 0.31841     | 1.7331    |          |          |
|             | 0.041536        | 1.7331    | 0.041536    | 0.041536    | 0.492029469 |           |          |          |
| RASD1       | ENSG00000108551 | 1.733     | 0.041551    | 1.733       | 0.041551    | -0.12749  | 0.55072  | 0.57246  |
|             | 0.2835          | 0.041551  | 0.492029469 |             |             |           |          |          |
| NA          | ENSG00000232184 | 0.084256  | 0.46643     | 0.084256    | 0.46643     | 1.7329    | 0.041553 |          |
|             | 0.26375         | 0.39599   | 0.041553    | 0.492029469 |             |           |          |          |
| NA          | ENSG00000242973 | 1.7329    | 0.041556    | 1.7329      | 0.041556    | 1.7329    | 0.041556 |          |
|             | 1.7329          | 0.041556  | 0.041556    | 0.492029469 |             |           |          |          |
| TOPORSLP    | ENSG00000242111 | 1.3528    | 0.088067    | 1.7327      | 0.041573    | 1.7327    |          |          |
|             | 0.041573        | 1.4634    | 0.071679    | 0.041573    | 0.492029469 |           |          |          |
| NA          | ENSG00000262888 | 0.22429   | 0.41126     | 1.0393      | 0.14934     | 1.0393    | 0.14934  |          |
|             | 1.7327          | 0.041578  | 0.041578    | 0.492029469 |             |           |          |          |
| ZEB2P1      | ENSG00000249506 | 0.33644   | 0.36827     | 0.66682     | 0.25244     | 0.12887   |          |          |
|             | 0.44873         | 1.7326    | 0.041582    | 0.041582    | 0.492029469 |           |          |          |
| PDZD7       | ENSG00000186862 | 1.3197    | 0.093463    | 0.98265     | 0.16289     | 1.3906    | 0.082169 |          |
|             | 1.7325          | 0.041593  | 0.041593    | 0.492029469 |             |           |          |          |
| CENPU       | ENSG00000151725 | 1.7322    | 0.041615    | 0.53046     | 0.2979      | 0.74022   | 0.22958  |          |
|             | 0.24865         | 0.40182   | 0.041615    | 0.492029469 |             |           |          |          |
| LINC00562   | ENSG00000260388 | 1.7321    | 0.041626    | 1.7321      | 0.041626    | 1.6026    |          |          |
|             | 0.054514        | 1.7321    | 0.041626    | 0.041626    | 0.492029469 |           |          |          |
| KDM1B       | ENSG00000165097 | 0.8486    | 0.19805     | 1.403       | 0.080304    | 0.67647   | 0.24937  | 1.732    |
|             | 0.04164         | 0.04164   | 0.492029469 |             |             |           |          |          |
| RAP1AP      | ENSG00000258769 | 1.7317    | 0.041666    | -0.21814    | 0.58634     | 1.7317    |          |          |
|             | 0.041666        | 1.7317    | 0.041666    | 0.041666    | 0.492029469 |           |          |          |

|           |                 |           |          |             |             |             |          |         |
|-----------|-----------------|-----------|----------|-------------|-------------|-------------|----------|---------|
| RN7SL664P | ENSG00000265078 | 1.7317    | 0.041666 | 1.7317      | 0.041666    | 1.7317      | 0.041666 | 1.7317  |
|           |                 | 0.041666  | 1.7317   | 0.041666    | 0.041666    | 0.492029469 |          |         |
| LZTS2     | ENSG00000107816 | 1.1388    | 0.12739  | 0.94137     | 0.17326     | 0.94137     | 0.17326  |         |
|           |                 | 1.7316    | 0.041675 | 0.041675    | 0.492029469 |             |          |         |
| RNA5SP105 | ENSG00000212425 | 1.7315    | 0.041683 | 0.55043     | 0.29101     | -0.03547    |          |         |
|           |                 | 0.51415   | 1.1467   | 0.12576     | 0.041683    | 0.492029469 |          |         |
| AHSA1     | ENSG00000100591 | 1.7314    | 0.041692 | 1.7314      | 0.041692    | 1.7314      | 0.041692 |         |
|           |                 | -0.33522  | 0.63127  | 0.041692    | 0.492029469 |             |          |         |
| LARS1     | ENSG00000133706 | 1.7312    | 0.041707 | 1.7312      | 0.041707    | 1.398       | 0.081051 |         |
|           |                 | 0.75047   | 0.22649  | 0.041707    | 0.492029469 |             |          |         |
| LINC00905 | ENSG00000167459 | 1.731     | 0.041724 | 0.02112     | 0.49157     | 1.731       | 0.041724 | 1.731   |
|           |                 | 0.041724  | 0.041724 | 0.492029469 |             |             |          |         |
| RN7SKP132 | ENSG00000251810 | 1.731     | 0.041728 | 1.731       | 0.041728    | -0.20226    | 0.58015  |         |
|           |                 | 1.5574    | 0.059692 | 0.041728    | 0.492029469 |             |          |         |
| PLBD1-AS1 | ENSG00000256751 | -0.051356 | 0.52048  | 0.9468      | 0.17187     | 0.9468      |          |         |
|           |                 | 0.17187   | 1.7309   | 0.041736    | 0.041736    | 0.492029469 |          |         |
| ALOX5     | ENSG00000012779 | 1.1683    | 0.12134  | 1.0538      | 0.14599     | 0.2818      | 0.38905  |         |
|           |                 | 1.7308    | 0.04174  | 0.04174     | 0.492029469 |             |          |         |
| C1QL4     | ENSG00000186897 | 0.94547   | 0.17221  | -0.10788    | 0.54295     | 1.7307      | 0.041753 |         |
|           |                 | 1.667     | 0.047762 | 0.041753    | 0.492029469 |             |          |         |
| PSEN1     | ENSG00000080815 | 1.0124    | 0.15568  | 1.0928      | 0.13724     | 1.3293      | 0.091878 |         |
|           |                 | 1.7305    | 0.041771 | 0.041771    | 0.492029469 |             |          |         |
| ACVR2B    | ENSG00000114739 | 1.3851    | 0.083006 | 1.7303      | 0.041784    | 1.1214      |          |         |
|           |                 | 0.13107   | 0.34454  | 0.36522     | 0.041784    | 0.492029469 |          |         |
| ATP2B1    | ENSG00000070961 | 1.7303    | 0.041789 | 0.62409     | 0.26628     | 0.24053     |          |         |
|           |                 | 0.40496   | 0.24053  | 0.40496     | 0.041789    | 0.492029469 |          |         |
| NDUFS5    | ENSG00000168653 | 1.7303    | 0.04179  | 1.7303      | 0.04179     | 1.5778      |          |         |
|           |                 | 0.057306  | 0.22399  | 0.41138     | 0.04179     | 0.492029469 |          |         |
| ATG10-IT1 | ENSG00000236447 | 1.7303    | 0.041791 | 1.7303      | 0.041791    | 1.7303      |          |         |
|           |                 | 0.041791  | 1.7303   | 0.041791    | 0.041791    | 0.492029469 |          |         |
| RNU6-725P | ENSG00000252371 | 1.4848    | 0.068803 | 1.4848      | 0.068803    | 1.7302      |          |         |
|           |                 | 0.041793  | 1.4848   | 0.068803    | 0.041793    | 0.492029469 |          |         |
| COX6CP4   | ENSG00000270500 | 0.54047   | 0.29444  | 0.54047     | 0.29444     | -0.61049    |          |         |
|           |                 | 0.72923   | 1.7302   | 0.041799    | 0.041799    | 0.492029469 |          |         |
| MEGF8     | ENSG00000105429 | 0.21962   | 0.41309  | 0.0051962   | 0.49793     | 1.73        | 0.041813 |         |
|           |                 | -0.36501  | 0.64245  | 0.041813    | 0.492029469 |             |          |         |
| LINC01706 | ENSG00000224711 | 0.39009   | 0.34824  | 1.73        | 0.041818    | 1.73        | 0.041818 | 1.73    |
|           |                 | 0.041818  | 0.041818 | 0.492029469 |             |             |          |         |
| CLDN9     | ENSG00000213937 | 1.7299    | 0.041822 | -0.20592    | 0.58157     | 1.7299      | 0.041822 |         |
|           |                 | 1.7299    | 0.041822 | 0.041822    | 0.492029469 |             |          |         |
| NA        | ENSG00000255376 | 1.7299    | 0.041822 | 1.7299      | 0.041822    | 1.7299      | 0.041822 |         |
|           |                 | 1.7299    | 0.041822 | 0.041822    | 0.492029469 |             |          |         |
| KPNA3     | ENSG00000102753 | 1.7231    | 0.042438 | 0.10946     | 0.45642     | 0.048528    | 0.48065  |         |
|           |                 | 1.7297    | 0.041843 | 0.041843    | 0.492157709 |             |          |         |
| CDH11     | ENSG00000140937 | -0.64698  | 0.74118  | -0.47765    | 0.68355     | 1.7291      | 0.041899 |         |
|           |                 | -0.039653 | 0.51582  | 0.041899    | 0.492339819 |             |          |         |
| CLEC4A    | ENSG00000111729 | 0.46658   | 0.3204   | 0.63719     | 0.262       | 1.729       | 0.041902 |         |
|           |                 | -1.2539   | 0.89506  | 0.041902    | 0.492339819 |             |          |         |
| NA        | ENSG00000275198 | 0.43339   | 0.33237  | 1.729       | 0.041905    | -0.34678    | 0.63562  |         |
|           |                 | 0.64705   | 0.2588   | 0.041905    | 0.492339819 |             |          |         |
| C8orf17   | ENSG00000250733 | 1.4061    | 0.079847 | 1.729       | 0.041906    | 1.4151      | 0.078524 |         |
|           |                 | 1.2473    | 0.10615  | 0.041906    | 0.492339819 |             |          |         |
| ARHGDI1   | ENSG00000111348 | 1.729     | 0.041909 | 1.729       | 0.041909    | 1.729       | 0.041909 | 0.87757 |
|           |                 | 0.19009   | 0.041909 | 0.492339819 |             |             |          |         |
| LRP12     | ENSG00000147650 | -1.0229   | 0.84683  | 1.7287      | 0.041931    | 0.98135     | 0.16321  |         |
|           |                 | -0.10931  | 0.54352  | 0.041931    | 0.492479544 |             |          |         |
| NA        | ENSG00000245498 | 0.41152   | 0.34034  | 1.7285      | 0.041949    | 0.41152     | 0.34034  |         |
|           |                 | 0.41152   | 0.34034  | 0.041949    | 0.492572234 |             |          |         |
| RN7SL596P | ENSG00000264519 | 0.11977   | 0.45233  | -0.60596    | 0.72773     | -1.3151     |          |         |
|           |                 | 0.90576   | 1.7282   | 0.041977    | 0.041977    | 0.492685762 |          |         |
| EXT1      | ENSG00000182197 | -0.96376  | 0.83242  | -1.3303     | 0.90828     | -0.044338   | 0.51768  |         |
|           |                 | 1.7281    | 0.041984 | 0.041984    | 0.492685762 |             |          |         |

|            |                 |           |          |             |             |           |          |          |
|------------|-----------------|-----------|----------|-------------|-------------|-----------|----------|----------|
| GLTPD2     | ENSG00000182327 | 1.7281    | 0.041989 | 1.7281      | 0.041989    | 1.7281    | 0.041989 | 1.7281   |
|            | 0.041989        | 1.7281    | 0.041989 | 0.041989    | 0.492685762 |           |          |          |
| RNU6-331P  | ENSG00000207455 | 1.2837    | 0.099628 | 1.567       | 0.058557    | 1.7278    |          | 0.042016 |
|            | 1.2837          | 0.099628  | 0.042016 | 0.49288389  |             |           |          |          |
| MANBA      | ENSG00000109323 | 1.727     | 0.042083 | 1.6153      | 0.053126    | 1.5477    |          | 0.060846 |
|            | 1.0155          | 0.15493   | 0.042083 | 0.493383924 |             |           |          |          |
| SPEF2      | ENSG00000152582 | 1.227     | 0.10991  | 1.7269      | 0.042089    | 0.86522   |          | 0.19346  |
|            | -0.036495       | 0.51456   | 0.042089 | 0.493383924 |             |           |          |          |
| NA         | ENSG00000230303 | 1.1529    | 0.12448  | -0.39969    | 0.65531     | 1.7269    |          | 0.042089 |
|            | 1.1572          | 0.12359   | 0.042089 | 0.493383924 |             |           |          |          |
| LRRC34     | ENSG00000171757 | 1.4596    | 0.072205 | 1.4596      | 0.072205    | 1.4596    |          |          |
|            | 0.072205        | 1.7267    | 0.042112 | 0.042112    | 0.493498165 |           |          |          |
| NA         | ENSG00000233933 | 1.7266    | 0.042119 | 0.89154     | 0.18632     | 1.1099    |          | 0.13352  |
|            | 0.031306        | 0.48751   | 0.042119 | 0.493498165 |             |           |          |          |
| NA         | ENSG00000279106 | -0.083767 | 0.53338  | 1.7263      | 0.042144    | 0.48473   |          | 0.31393  |
|            | -0.60754        | 0.72825   | 0.042144 | 0.49362097  |             |           |          |          |
| DNM1P33    | ENSG00000260096 | -0.21859  | 0.58651  | -0.44088    | 0.67035     | 1.6717    |          |          |
|            | 0.047294        | 1.7262    | 0.042156 | 0.042156    | 0.49362097  |           |          |          |
| NA         | ENSG00000278513 | 0.20383   | 0.41924  | 1.7261      | 0.042165    | 1.7261    |          | 0.042165 |
|            | 0.69661         | 0.24302   | 0.042165 | 0.49362097  |             |           |          |          |
| NA         | ENSG00000224134 | 0.073228  | 0.47081  | 1.4662      | 0.071297    | 1.6097    |          | 0.053732 |
|            | 1.726           | 0.04217   | 0.04217  | 0.49362097  |             |           |          |          |
| SIRPA      | ENSG00000198053 | 1.7252    | 0.042245 | 0.75331     | 0.22563     | -0.62241  |          | 0.73316  |
|            | 0.70781         | 0.23953   | 0.042245 | 0.494102797 |             |           |          |          |
| NA         | ENSG00000254040 | -0.043237 | 0.51724  | -0.30007    | 0.61794     | -0.051785 |          | 0.52065  |
|            | 1.7251          | 0.042255  | 0.042255 | 0.494102797 |             |           |          |          |
| MIR550A1   | ENSG00000207771 | -0.20091  | 0.57961  | 1.2138      | 0.11241     | 0.047616  |          |          |
|            | 0.48101         | 1.725     | 0.042259 | 0.042259    | 0.494102797 |           |          |          |
| NA         | ENSG00000280920 | 0.28199   | 0.38898  | 1.7249      | 0.04227     | 0.28199   |          | 0.38898  |
|            | 0.28199         | 0.38898   | 0.04227  | 0.494102797 |             |           |          |          |
| NA         | ENSG00000267274 | 0.12772   | 0.44919  | 0.45963     | 0.32289     | 1.7249    |          | 0.042271 |
|            | -0.24403        | 0.5964    | 0.042271 | 0.494102797 |             |           |          |          |
| PELI1      | ENSG00000197329 | 0.3294    | 0.37093  | 0.53578     | 0.29606     | 0.9381    |          | 0.1741   |
|            | 1.7249          | 0.042272  | 0.042272 | 0.494102797 |             |           |          |          |
| NA         | ENSG00000250781 | 0.76236   | 0.22292  | 1.7247      | 0.042292    | 1.4842    |          | 0.068873 |
|            | 1.0454          | 0.14792   | 0.042292 | 0.494111218 |             |           |          |          |
| STARD7-AS1 | ENSG00000204685 | 1.2974    | 0.09725  | 0.73695     | 0.23058     | 1.7247    |          |          |
|            | 0.042293        | 1.2974    | 0.09725  | 0.042293    | 0.494111218 |           |          |          |
| TRAV2      | ENSG00000211776 | 1.7244    | 0.042314 | -0.31629    | 0.62411     | -0.31629  |          | 0.62411  |
|            | -0.31629        | 0.62411   | 0.042314 | 0.494238068 |             |           |          |          |
| IL12A      | ENSG00000168811 | 1.7243    | 0.04233  | 0.43265     | 0.33263     | 1.0474    |          | 0.14746  |
|            | -0.20271        | 0.58032   | 0.04233  | 0.494248172 |             |           |          |          |
| NA         | ENSG00000266670 | 0.2147    | 0.415    | 1.7242      | 0.042338    | 1.2553    |          | 0.10468  |
|            | 0.63029         | 0.26425   | 0.042338 | 0.494248172 |             |           |          |          |
| NA         | ENSG00000124835 | 1.724     | 0.042351 | -0.10828    | 0.54312     | 0.5589    |          | 0.28812  |
|            | -0.84219        | 0.80016   | 0.042351 | 0.494248172 |             |           |          |          |
| SRP72P1    | ENSG00000265182 | 1.7237    | 0.042378 | 1.6388      | 0.050631    | 0.86788   |          |          |
|            | 0.19273         | 0.86788   | 0.19273  | 0.042378    | 0.494248172 |           |          |          |
| NA         | ENSG00000256041 | 0.73378   | 0.23154  | 0.48951     | 0.31224     | -1.067    |          | 0.85701  |
|            | 1.7237          | 0.042383  | 0.042383 | 0.494248172 |             |           |          |          |
| RNU6-1025P | ENSG00000222561 | 0.083398  | 0.46677  | -0.12657    | 0.55036     | -0.65498  |          |          |
|            | 0.74376         | 1.7234    | 0.042408 | 0.042408    | 0.494248172 |           |          |          |
| RNU7-125P  | ENSG00000238964 | 1.7233    | 0.042421 | 1.7229      | 0.042453    | 1.7233    |          |          |
|            | 0.042421        | 1.7233    | 0.042421 | 0.042421    | 0.494248172 |           |          |          |
| RNU7-186P  | ENSG00000238419 | 0.95144   | 0.17069  | 1.7231      | 0.042438    | 0.95144   |          |          |
|            | 0.17069         | 0.95144   | 0.17069  | 0.042438    | 0.494248172 |           |          |          |
| NA         | ENSG00000272108 | 0.052429  | 0.47909  | 1.7229      | 0.042456    | 0.87667   |          | 0.19033  |
|            | 0.87667         | 0.19033   | 0.042456 | 0.494248172 |             |           |          |          |
| METRNL     | ENSG00000176845 | 1.7229    | 0.042457 | -0.42269    | 0.66374     | 1.6281    |          |          |
|            | 0.051754        | 1.7229    | 0.042457 | 0.042457    | 0.494248172 |           |          |          |
| NA         | ENSG00000217801 | 1.1313    | 0.12897  | 1.7227      | 0.042469    | 1.1313    |          | 0.12897  |
|            | 0.2846          | 0.38798   | 0.042469 | 0.494248172 |             |           |          |          |

|           |                 |          |             |             |             |             |          |          |
|-----------|-----------------|----------|-------------|-------------|-------------|-------------|----------|----------|
| MIR4319   | ENSG00000265957 | 1.7227   | 0.042475    | 1.0088      | 0.15654     | 1.7227      |          |          |
|           |                 | 0.042475 | 1.7227      | 0.042475    | 0.042475    | 0.494248172 |          |          |
| NA        | ENSG00000236132 | 1.7226   | 0.04248     | 1.7226      | 0.04248     | 1.7226      | 0.04248  |          |
|           |                 | 1.7226   | 0.04248     | 0.04248     | 0.494248172 |             |          |          |
| NA        | ENSG00000233574 | 1.5808   | 0.056962    | 1.5808      | 0.056962    | 1.7226      | 0.042483 |          |
|           |                 | 0.99492  | 0.15989     | 0.042483    | 0.494248172 |             |          |          |
| NA        | ENSG00000238012 | 0.69485  | 0.24357     | 1.6303      | 0.051521    | 1.4847      | 0.068813 |          |
|           |                 | 1.7224   | 0.042497    | 0.042497    | 0.494248172 |             |          |          |
| COPA      | ENSG00000122218 | 1.2519   | 0.10531     | 0.91443     | 0.18025     | 1.2519      | 0.10531  |          |
|           |                 | 1.7223   | 0.042505    | 0.042505    | 0.494248172 |             |          |          |
| HEYL      | ENSG00000163909 | 1.7222   | 0.042518    | 1.3922      | 0.081938    | 1.0571      | 0.14522  |          |
|           |                 | -0.8606  | 0.80527     | 0.042518    | 0.494248172 |             |          |          |
| INTS10    | ENSG00000104613 | -1.1767  | 0.88034     | -0.79724    | 0.78734     | -1.1091     |          |          |
|           |                 | 0.86631  | 1.7221      | 0.042525    | 0.042525    | 0.494248172 |          |          |
| FRMD6     | ENSG00000139926 | 1.3576   | 0.087297    | 1.2063      | 0.11384     | 1.6802      | 0.046459 |          |
|           |                 | 1.7221   | 0.042527    | 0.042527    | 0.494248172 |             |          |          |
| RNU6-410P | ENSG00000252815 | -0.17298 | 0.56867     | 1.7221      | 0.042529    | -0.45888    |          |          |
|           |                 | 0.67684  | -0.636      | 0.73761     | 0.042529    | 0.494248172 |          |          |
| NA        | ENSG00000177452 | 1.722    | 0.042532    | 1.722       | 0.042532    | 1.722       | 0.042532 |          |
|           |                 | 0.042532 | 0.494248172 |             |             |             |          |          |
| NA        | ENSG00000253712 | 1.7218   | 0.042556    | 0.93946     | 0.17375     | 1.7218      | 0.042556 |          |
|           |                 | 1.7218   | 0.042556    | 0.042556    | 0.494248172 |             |          |          |
| GJB2      | ENSG00000165474 | 0.84856  | 0.19806     | 1.7216      | 0.042573    | -0.27773    | 0.60939  |          |
|           |                 | -0.67843 | 0.75125     | 0.042573    | 0.494248172 |             |          |          |
| CHIC2     | ENSG00000109220 | 1.2329   | 0.10881     | -1.8885     | 0.97052     | -1.2109     | 0.88703  |          |
|           |                 | 1.7215   | 0.042582    | 0.042582    | 0.494248172 |             |          |          |
| NA        | ENSG00000280167 | 1.7215   | 0.042584    | 1.7215      | 0.042584    | 1.7215      | 0.042584 |          |
|           |                 | 1.7215   | 0.042584    | 0.042584    | 0.494248172 |             |          |          |
| ZCCHC8    | ENSG00000033030 | 0.80248  | 0.21114     | 0.67984     | 0.2483      | 0.10487     |          |          |
|           |                 | 0.45824  | 1.7214      | 0.042589    | 0.042589    | 0.494248172 |          |          |
| CASP8AP2  | ENSG00000118412 | -1.0474  | 0.85253     | 1.7213      | 0.042601    | -0.20073    |          |          |
|           |                 | 0.57955  | -0.44382    | 0.67141     | 0.042601    | 0.494248172 |          |          |
| LINC00251 | ENSG00000280725 | 1.094    | 0.13698     | 1.094       | 0.13698     | 1.7212      | 0.042607 | 1.094    |
|           |                 | 0.13698  | 0.042607    | 0.494248172 |             |             |          |          |
| NA        | ENSG00000282940 | 1.4811   | 0.069294    | 1.7212      | 0.042609    | 0.97575     | 0.16459  |          |
|           |                 | 1.4811   | 0.069294    | 0.042609    | 0.494248172 |             |          |          |
| NA        | ENSG00000259933 | 1.7207   | 0.042649    | 1.7207      | 0.042649    | 1.7207      | 0.042649 |          |
|           |                 | 1.7207   | 0.042649    | 0.042649    | 0.494297841 |             |          |          |
| ARNILA    | ENSG00000235072 | 0.20254  | 0.41975     | -0.003163   | 0.50126     | 1.7207      |          |          |
|           |                 | 0.042651 | -0.79121    | 0.78559     | 0.042651    | 0.494297841 |          |          |
| GGCTP1    | ENSG00000251000 | 1.7207   | 0.042652    | 1.5912      | 0.055784    | 0.70125     |          |          |
|           |                 | 0.24157  | 1.7207      | 0.042652    | 0.042652    | 0.494297841 |          |          |
| STK32C    | ENSG00000165752 | 0.2464   | 0.40269     | 0.41154     | 0.34034     | 0.58382     |          |          |
|           |                 | 0.27967  | 1.7206      | 0.042658    | 0.042658    | 0.494297841 |          |          |
| SAE1      | ENSG00000142230 | 0.16339  | 0.43511     | 1.6105      | 0.053643    | 1.7206      | 0.042664 |          |
|           |                 | -0.92024 | 0.82128     | 0.042664    | 0.494297841 |             |          |          |
| LTB4R2    | ENSG00000213906 | 1.6217   | 0.052437    | 1.7203      | 0.04269     | 1.6217      |          |          |
|           |                 | 0.052437 | 1.6217      | 0.052437    | 0.04269     | 0.494350741 |          |          |
| LINC01562 | ENSG00000203356 | 0.40031  | 0.34446     | 0.40031     | 0.34446     | 0.40031     |          |          |
|           |                 | 0.34446  | 1.7202      | 0.042698    | 0.042698    | 0.494350741 |          |          |
| SBNO2     | ENSG00000064932 | 1.7202   | 0.042699    | 0.94043     | 0.1735      | -0.23946    | 0.59463  |          |
|           |                 | 0.10592  | 0.45782     | 0.042699    | 0.494350741 |             |          |          |
| NA        | ENSG00000251024 | 1.082    | 0.13962     | 1.082       | 0.13962     | 1.7201      | 0.042711 | 0.067298 |
|           |                 | 0.47317  | 0.042711    | 0.494356438 |             |             |          |          |
| HIF1A     | ENSG00000100644 | 1.0519   | 0.14642     | 1.7199      | 0.042725    | 0.87315     | 0.19129  |          |
|           |                 | 0.79667  | 0.21282     | 0.042725    | 0.494356438 |             |          |          |
| GAK       | ENSG00000178950 | 1.7196   | 0.042753    | 0.43857     | 0.33048     | -0.093736   | 0.53734  |          |
|           |                 | -0.27284 | 0.60751     | 0.042753    | 0.494356438 |             |          |          |
| NA        | ENSG00000253917 | 1.7192   | 0.042789    | 1.7192      | 0.042789    | 0.41931     | 0.33749  |          |
|           |                 | 0.37224  | 0.35486     | 0.042789    | 0.494356438 |             |          |          |
| NA        | ENSG00000260362 | 0.68941  | 0.24528     | 1.7192      | 0.042791    | -0.072822   | 0.52903  |          |
|           |                 | 0.10018  | 0.4601      | 0.042791    | 0.494356438 |             |          |          |



|           |                 |             |             |             |             |          |          |         |
|-----------|-----------------|-------------|-------------|-------------|-------------|----------|----------|---------|
| PHF5CP    | ENSG00000267178 | 1.719       | 0.042804    | 1.719       | 0.042804    | 1.719    | 0.042804 | 1.719   |
|           | 0.042804        | 0.494356438 |             |             |             |          |          |         |
| SLC25A48  | ENSG00000145832 | 0.099011    | 0.46056     | 1.6815      | 0.046335    | 1.7188   |          |         |
|           | 0.042826        | 1.3206      | 0.093321    | 0.042826    | 0.494356438 |          |          |         |
| PPIAP81   | ENSG00000213548 | 1.2138      | 0.11241     | 1.7187      | 0.042833    | 1.306    | 0.095771 |         |
|           | 0.92347         | 0.17788     | 0.042833    | 0.494356438 |             |          |          |         |
| HERC3     | ENSG00000138641 | 0.93755     | 0.17424     | -0.16826    | 0.56681     | -0.13643 | 0.55426  |         |
|           | 1.7187          | 0.042838    | 0.042838    | 0.494356438 |             |          |          |         |
| SNX18P13  | ENSG00000230965 | -0.43231    | 0.66724     | -0.36614    | 0.64287     | -1.0575  |          |         |
|           | 0.85486         | 1.7185      | 0.042852    | 0.042852    | 0.494356438 |          |          |         |
| MIR3166   | ENSG00000266581 | 1.7184      | 0.042859    | 1.7184      | 0.042859    | 1.7184   |          |         |
|           | 0.042859        | 1.5397      | 0.061815    | 0.042859    | 0.494356438 |          |          |         |
| ZACN      | ENSG00000186919 | 1.7182      | 0.042878    | 1.7182      | 0.042878    | 1.7182   | 0.042878 |         |
|           | 1.7182          | 0.042878    | 0.042878    | 0.494356438 |             |          |          |         |
| DEFA3     | ENSG00000239839 | -0.49426    | 0.68944     | 1.7179      | 0.042909    | -0.46598 | 0.67938  |         |
|           | 0.68949         | 0.24526     | 0.042909    | 0.494356438 |             |          |          |         |
| NA        | ENSG00000277935 | 1.7179      | 0.042909    | 1.7179      | 0.042909    | 1.7179   | 0.042909 |         |
|           | 1.7179          | 0.042909    | 0.042909    | 0.494356438 |             |          |          |         |
| RNA5SP138 | ENSG00000201968 | -0.062127   | 0.52477     | -0.094268   | 0.53755     | -0.25792 |          |         |
|           | 0.60176         | 1.7177      | 0.042928    | 0.042928    | 0.494356438 |          |          |         |
| NA        | ENSG00000232411 | 1.7148      | 0.043192    | 1.1454      | 0.12603     | 1.7177   | 0.042928 |         |
|           | 1.7177          | 0.042928    | 0.042928    | 0.494356438 |             |          |          |         |
| CTXND1    | ENSG00000259417 | -0.60914    | 0.72878     | -0.60914    | 0.72878     | 0.79195  |          |         |
|           | 0.21419         | 1.7175      | 0.042945    | 0.042945    | 0.494356438 |          |          |         |
| NA        | ENSG00000258811 | 0.37949     | 0.35216     | 0.37949     | 0.35216     | 1.717    | 0.042987 |         |
|           | 0.37949         | 0.35216     | 0.042987    | 0.494356438 |             |          |          |         |
| FMO5      | ENSG00000131781 | 1.7167      | 0.043016    | 1.3144      | 0.094355    | 0.48833  | 0.31266  |         |
|           | 1.4614          | 0.071947    | 0.043016    | 0.494356438 |             |          |          |         |
| NA        | ENSG00000264761 | 1.7162      | 0.043067    | -0.019787   | 0.50789     | 0.068121 | 0.47284  |         |
|           | 1.7162          | 0.043067    | 0.043067    | 0.494356438 |             |          |          |         |
| RPGRIP1   | ENSG00000092200 | 1.4187      | 0.07799     | 1.6895      | 0.045559    | 1.7161   |          |         |
|           | 0.043068        | 1.6342      | 0.051106    | 0.043068    | 0.494356438 |          |          |         |
| MIR1289-2 | ENSG00000221287 | 1.2318      | 0.10901     | 1.2318      | 0.10901     | 1.7161   |          |         |
|           | 0.04307         | 1.2318      | 0.10901     | 0.04307     | 0.494356438 |          |          |         |
| RPL34P23  | ENSG00000243669 | -0.72451    | 0.76562     | 0.1411      | 0.4439      | 1.7161   |          |         |
|           | 0.043076        | 0.48623     | 0.3134      | 0.043076    | 0.494356438 |          |          |         |
| MTCO2P25  | ENSG00000230654 | 1.7158      | 0.043102    | 1.7158      | 0.043102    | 1.7158   |          |         |
|           | 0.043102        | 1.7158      | 0.043102    | 0.043102    | 0.494356438 |          |          |         |
| IGF2BP1   | ENSG00000159217 | 1.6623      | 0.048222    | 1.7157      | 0.043107    | -0.12963 |          |         |
|           | 0.55157         | -0.12963    | 0.55157     | 0.043107    | 0.494356438 |          |          |         |
| DSEL      | ENSG00000171451 | 1.7157      | 0.043113    | 0.82627     | 0.20432     | 0.6159   | 0.26898  |         |
|           | 0.25715         | 0.39853     | 0.043113    | 0.494356438 |             |          |          |         |
| RNU6-338P | ENSG00000206615 | 1.2513      | 0.10541     | 0.2817      | 0.38909     | 1.7155   |          |         |
|           | 0.043124        | 0.66227     | 0.2539      | 0.043124    | 0.494356438 |          |          |         |
| MTHFD2P1  | ENSG00000244681 | -0.68039    | 0.75187     | 1.3777      | 0.084151    | 0.29811  |          |         |
|           | 0.38281         | 1.7154      | 0.043138    | 0.043138    | 0.494356438 |          |          |         |
| TMEM17    | ENSG00000186889 | 1.7152      | 0.043154    | 1.5711      | 0.058077    | 1.0778   |          |         |
|           | 0.14057         | 0.46971     | 0.31928     | 0.043154    | 0.494356438 |          |          |         |
| NA        | ENSG00000219240 | -0.79583    | 0.78693     | -0.37487    | 0.64612     | 0.032385 | 0.48708  |         |
|           | 1.7152          | 0.043154    | 0.043154    | 0.494356438 |             |          |          |         |
| NA        | ENSG00000279016 | 1.7152      | 0.043155    | 1.7152      | 0.043155    | 1.7152   | 0.043155 |         |
|           | 1.7152          | 0.043155    | 0.043155    | 0.494356438 |             |          |          |         |
| RPL12P1   | ENSG00000204194 | 1.7151      | 0.043164    | 1.7151      | 0.043164    | 0.52541  |          |         |
|           | 0.29965         | 1.7151      | 0.043164    | 0.043164    | 0.494356438 |          |          |         |
| LINC01920 | ENSG00000236049 | -0.94579    | 0.82787     | 1.7151      | 0.043168    | 0.30683  |          |         |
|           | 0.37949         | -0.75083    | 0.77362     | 0.043168    | 0.494356438 |          |          |         |
| RD3L      | ENSG00000227729 | 1.715       | 0.043169    | 0.17662     | 0.4299      | 1.4199   | 0.07782  |         |
|           | 0.17662         | 0.4299      | 0.043169    | 0.494356438 |             |          |          |         |
| CNTN4     | ENSG00000144619 | 1.715       | 0.043172    | 1.166       | 0.1218      | -0.7213  | 0.76464  | -0.3163 |
|           | 0.62411         | 0.043172    | 0.494356438 |             |             |          |          |         |
| MRPL30P1  | ENSG00000276576 | 1.7149      | 0.043177    | 1.7149      | 0.043177    | 1.7149   |          |         |
|           | 0.043177        | 1.7149      | 0.043177    | 0.043177    | 0.494356438 |          |          |         |

|           |                 |          |             |             |             |           |          |
|-----------|-----------------|----------|-------------|-------------|-------------|-----------|----------|
| CHD5      | ENSG00000116254 | 0.51491  | 0.30331     | 1.7148      | 0.043188    | 0.77984   | 0.21774  |
|           | -0.2093         | 0.58289  | 0.043188    | 0.494356438 |             |           |          |
| PDE3B     | ENSG00000152270 | -0.58923 | 0.72215     | -0.5832     | 0.72012     | 1.7147    | 0.043202 |
|           | -0.41258        | 0.66004  | 0.043202    | 0.494356438 |             |           |          |
| LINC01396 | ENSG00000273396 | -0.64338 | 0.74001     | 1.113       | 0.13286     | 1.7145    | 0.043221 |
|           | -0.98754        | 0.83831  | 0.043221    | 0.494356438 |             |           |          |
| RDH8      | ENSG00000080511 | 1.4867   | 0.068549    | 0.72258     | 0.23497     | 0.0035756 | 0.49857  |
|           | 1.7144          | 0.043223 | 0.043223    | 0.494356438 |             |           |          |
| RUVBL1    | ENSG00000175792 | 1.0658   | 0.14327     | 1.7144      | 0.043228    | 0.64101   |          |
|           | 0.26076         | 0.81336  | 0.20801     | 0.043228    | 0.494356438 |           |          |
| UBE2Q2P8  | ENSG00000259633 | 1.7143   | 0.043235    | 0.31639     | 0.37585     | -0.47122  |          |
|           | 0.68126         | 0.55383  | 0.28985     | 0.043235    | 0.494356438 |           |          |
| NA        | ENSG00000230638 | 1.7143   | 0.043238    | 1.7143      | 0.043238    | -1.1464   | 0.87419  |
|           | -0.013208       | 0.50527  | 0.043238    | 0.494356438 |             |           |          |
| RBM44     | ENSG00000177483 | -0.37876 | 0.64757     | 0.84008     | 0.20043     | 1.7142    | 0.043246 |
|           | 0.56076         | 0.28748  | 0.043246    | 0.494356438 |             |           |          |
| CLIP1-AS1 | ENSG00000257097 | 1.3197   | 0.093465    | 1.7142      | 0.043247    | 0.70637   |          |
|           | 0.23998         | 0.5703   | 0.28424     | 0.043247    | 0.494356438 |           |          |
| NA        | ENSG00000284523 | 1.3555   | 0.087633    | 1.714       | 0.043261    | 1.3565    | 0.087469 |
|           | 1.6396          | 0.050544 | 0.043261    | 0.494356438 |             |           |          |
| NA        | ENSG00000263393 | 0.7231   | 0.23481     | 1.7136      | 0.043297    | 0.7231    | 0.23481  |
|           | 0.7231          | 0.23481  | 0.043297    | 0.494356438 |             |           |          |
| NA        | ENSG00000231015 | 1.7135   | 0.043308    | 1.7135      | 0.043308    | 1.7135    | 0.043308 |
|           | 1.7135          | 0.043308 | 0.043308    | 0.494356438 |             |           |          |
| POLR2K    | ENSG00000147669 | -0.70659 | 0.76009     | 1.7135      | 0.04331     | -1.2701   |          |
|           | 0.89797         | -0.69754 | 0.75727     | 0.04331     | 0.494356438 |           |          |
| GP6       | ENSG00000088053 | 0.94604  | 0.17206     | -0.18785    | 0.5745      | 1.7135    | 0.043313 |
|           | -0.086562       | 0.53449  | 0.043313    | 0.494356438 |             |           |          |
| BRD9      | ENSG00000028310 | 0.64681  | 0.25888     | 1.7134      | 0.043321    | 1.2221    | 0.11083  |
|           | 0.46714         | 0.3202   | 0.043321    | 0.494356438 |             |           |          |
| LINC01411 | ENSG00000249306 | -0.70722 | 0.76029     | 0.49111     | 0.31167     | 0.22202   |          |
|           | 0.41215         | 1.7134   | 0.043322    | 0.043322    | 0.494356438 |           |          |
| HNRNPF    | ENSG00000169813 | 1.7133   | 0.043327    | 1.7133      | 0.043327    | 0.50576   |          |
|           | 0.30651         | 1.145    | 0.12611     | 0.043327    | 0.494356438 |           |          |
| NAIP      | ENSG00000249437 | 0.47578  | 0.31712     | 1.7133      | 0.043331    | -0.41043  | 0.65925  |
|           | 0.65359         | 0.25669  | 0.043331    | 0.494356438 |             |           |          |
| VHLL      | ENSG00000189030 | 1.7133   | 0.043333    | 1.7133      | 0.043333    | 1.7133    | 0.043333 |
|           | 1.7133          | 0.043333 | 0.043333    | 0.494356438 |             |           |          |
| RNU4-41P  | ENSG00000201296 | 0.096706 | 0.46148     | 1.6144      | 0.053218    | 1.6144    |          |
|           | 0.053218        | 1.7132   | 0.043335    | 0.043335    | 0.494356438 |           |          |
| NA        | ENSG00000258569 | 1.6808   | 0.046398    | 1.7131      | 0.04335     | 0.36053   | 0.35922  |
|           | 0.79634         | 0.21292  | 0.04335     | 0.494356438 |             |           |          |
| RNU6-123P | ENSG00000251972 | 1.713    | 0.043357    | 1.713       | 0.043357    | 1.713     | 0.043357 |
|           | 0.043357        | 0.043357 | 0.494356438 |             |             |           |          |
| NA        | ENSG00000224638 | 1.3808   | 0.083669    | 0.83169     | 0.20279     | -0.35315  | 0.63801  |
|           | 1.713           | 0.043357 | 0.043357    | 0.494356438 |             |           |          |
| NA        | ENSG00000260441 | -0.90716 | 0.81784     | 1.7129      | 0.043364    | -0.90716  | 0.81784  |
|           | -0.90716        | 0.81784  | 0.043364    | 0.494356438 |             |           |          |
| NA        | ENSG00000269519 | 1.7129   | 0.043368    | 1.7129      | 0.043368    | 1.7129    | 0.043368 |
|           | 1.7129          | 0.043368 | 0.043368    | 0.494356438 |             |           |          |
| NA        | ENSG00000259140 | 1.2415   | 0.1072      | 1.0171      | 0.15456     | 1.7126    | 0.043397 |
|           | 0.77369         | 0.21956  | 0.043397    | 0.494356438 |             |           |          |
| NA        | ENSG00000228569 | 1.4555   | 0.072759    | 1.7125      | 0.043405    | 1.3561    | 0.087532 |
|           | 1.7125          | 0.043405 | 0.043405    | 0.494356438 |             |           |          |
| NA        | ENSG00000227133 | 1.7122   | 0.043431    | 0.68911     | 0.24538     | 0.68911   | 0.24538  |
|           | -0.066314       | 0.52644  | 0.043431    | 0.494356438 |             |           |          |
| KRT17P4   | ENSG00000205312 | -0.82272 | 0.79467     | 1.7121      | 0.043441    | 0.24553   |          |
|           | 0.40302         | 1.011    | 0.15602     | 0.043441    | 0.494356438 |           |          |
| NA        | ENSG00000258982 | 1.3345   | 0.091014    | 0.40294     | 0.34349     | 1.3345    | 0.091014 |
|           | 1.7118          | 0.043463 | 0.043463    | 0.494356438 |             |           |          |
| CHORDC2P  | ENSG00000259050 | 1.5984   | 0.054981    | 1.7118      | 0.04347     | 1.5984    |          |
|           | 0.054981        | 1.7118   | 0.04347     | 0.04347     | 0.494356438 |           |          |

|              |                 |           |             |             |             |           |          |      |
|--------------|-----------------|-----------|-------------|-------------|-------------|-----------|----------|------|
| C10orf71-AS1 | ENSG00000236208 | -0.29441  | 0.61578     | 1.7117      | 0.043474    | 1.7117    |          |      |
|              | 0.043474        | 1.7117    | 0.043474    | 0.043474    | 0.494356438 |           |          |      |
| RNU6-506P    | ENSG00000252362 | 0.66441   | 0.25322     | 1.4487      | 0.073712    | 0.68722   |          |      |
|              | 0.24597         | 1.7115    | 0.04349     | 0.04349     | 0.494356438 |           |          |      |
| ZNF197-AS1   | ENSG00000233509 | -1.6083   | 0.94612     | -1.0791     | 0.85973     | -1.0791   |          |      |
|              | 0.85973         | 1.7115    | 0.043498    | 0.043498    | 0.494356438 |           |          |      |
| NMU          | ENSG00000109255 | -0.57342  | 0.71682     | 1.7112      | 0.043522    | -0.77504  | 0.78084  |      |
|              | -1.5215         | 0.93593   | 0.043522    | 0.494356438 |             |           |          |      |
| NA           | ENSG00000254222 | 1.7111    | 0.043527    | 1.1626      | 0.12249     | -0.69495  | 0.75646  |      |
|              | -0.63552        | 0.73746   | 0.043527    | 0.494356438 |             |           |          |      |
| KRTAP24-1    | ENSG00000188694 | 1.7109    | 0.043546    | 1.7109      | 0.043546    | 1.7109    |          |      |
|              | 0.043546        | 1.7109    | 0.043546    | 0.043546    | 0.494356438 |           |          |      |
| NA           | ENSG00000261707 | 1.7109    | 0.043546    | 1.7109      | 0.043546    | 1.7109    | 0.043546 |      |
|              | 1.7109          | 0.043546  | 0.043546    | 0.494356438 |             |           |          |      |
| LINC01139    | ENSG00000215808 | 1.7109    | 0.043548    | 1.1362      | 0.12794     | 1.4452    |          |      |
|              | 0.074198        | 1.4452    | 0.074198    | 0.043548    | 0.494356438 |           |          |      |
| NA           | ENSG00000275674 | 1.7109    | 0.043551    | -0.24907    | 0.59835     | 1.2073    | 0.11367  |      |
|              | -0.43486        | 0.66817   | 0.043551    | 0.494356438 |             |           |          |      |
| RNA5SP493    | ENSG00000200985 | 1.7107    | 0.043567    | 1.7107      | 0.043567    | 1.7107    |          |      |
|              | 0.043567        | 1.7107    | 0.043567    | 0.043567    | 0.494356438 |           |          |      |
| NA           | ENSG00000279254 | 1.1341    | 0.12838     | 1.7107      | 0.043567    | 1.7107    | 0.043567 |      |
|              | 0.24118         | 0.40471   | 0.043567    | 0.494356438 |             |           |          |      |
| C3AR1        | ENSG00000171860 | 1.7106    | 0.043574    | -0.49798    | 0.69075     | 1.7106    | 0.043574 |      |
|              | 1.7106          | 0.043574  | 0.043574    | 0.494356438 |             |           |          |      |
| VASH2        | ENSG00000143494 | 1.6099    | 0.053713    | 1.4793      | 0.069536    | 1.4529    | 0.07313  |      |
|              | 1.7105          | 0.043591  | 0.043591    | 0.494356438 |             |           |          |      |
| GRK2         | ENSG00000173020 | 0.95832   | 0.16895     | 0.82752     | 0.20397     | 0.58005   | 0.28094  |      |
|              | 1.7102          | 0.043614  | 0.043614    | 0.494356438 |             |           |          |      |
| UNC79        | ENSG00000133958 | 0.50648   | 0.30626     | 1.7101      | 0.043625    | 1.0534    | 0.14607  |      |
|              | -0.13009        | 0.55175   | 0.043625    | 0.494356438 |             |           |          |      |
| C18orf32     | ENSG00000177576 | -0.091544 | 0.53647     | 1.4432      | 0.074475    | 0.061704  |          |      |
|              | 0.4754          | 1.71      | 0.043632    | 0.043632    | 0.494356438 |           |          |      |
| LITAF        | ENSG00000189067 | 1.71      | 0.043632    | -0.65216    | 0.74285     | -0.057529 | 0.52294  |      |
|              | -0.079963       | 0.53187   | 0.043632    | 0.494356438 |             |           |          |      |
| TRGJP        | ENSG00000211691 | 0.26142   | 0.39689     | 1.71        | 0.043634    | 1.71      | 0.043634 | 1.71 |
|              | 0.043634        | 0.043634  | 0.494356438 |             |             |           |          |      |
| CLCA1        | ENSG00000016490 | -0.36207  | 0.64135     | 1.71        | 0.043636    | -0.33912  | 0.63274  |      |
|              | -0.77802        | 0.78172   | 0.043636    | 0.494356438 |             |           |          |      |
| NA           | ENSG00000224260 | -0.37456  | 0.64601     | 1.6251      | 0.052075    | -0.37729  | 0.64702  |      |
|              | 1.7099          | 0.043647  | 0.043647    | 0.494356438 |             |           |          |      |
| NRBF2P6      | ENSG00000251485 | 1.7098    | 0.043652    | 1.7098      | 0.043652    | 1.7098    |          |      |
|              | 0.043652        | 1.7098    | 0.043652    | 0.043652    | 0.494356438 |           |          |      |
| NA           | ENSG00000229846 | 1.4725    | 0.07044     | 1.3181      | 0.093727    | 1.3181    | 0.093727 |      |
|              | 1.7097          | 0.043665  | 0.043665    | 0.494356438 |             |           |          |      |
| ARHGEF7-AS2  | ENSG00000235875 | -0.30939  | 0.62149     | 1.7096      | 0.043673    | 1.7096    |          |      |
|              | 0.043673        | 1.7096    | 0.043673    | 0.043673    | 0.494356438 |           |          |      |
| NA           | ENSG00000242444 | 1.7094    | 0.043686    | 1.2203      | 0.11118     | -0.2741   | 0.60799  |      |
|              | 1.7094          | 0.043686  | 0.043686    | 0.494356438 |             |           |          |      |
| CYP17A1      | ENSG00000148795 | 0.21101   | 0.41644     | 0.67612     | 0.24948     | 1.7094    |          |      |
|              | 0.043687        | 1.2808    | 0.10013     | 0.043687    | 0.494356438 |           |          |      |
| ENTPD5       | ENSG00000187097 | 1.683     | 0.046186    | 1.7092      | 0.043703    | 1.5898    | 0.055937 |      |
|              | 1.1542          | 0.12422   | 0.043703    | 0.494356438 |             |           |          |      |
| OR5AC2       | ENSG00000196578 | 1.7092    | 0.043705    | 0.71858     | 0.2362      | 0.25812   |          |      |
|              | 0.39816         | 1.7092    | 0.043705    | 0.043705    | 0.494356438 |           |          |      |
| SLC4A4       | ENSG00000080493 | 1.4206    | 0.077718    | 1.7091      | 0.043715    | 1.0643    |          |      |
|              | 0.14361         | 1.259     | 0.10401     | 0.043715    | 0.494356438 |           |          |      |
| RNU6ATAC33P  | ENSG00000221574 | -1.3815   | 0.91644     | 0.96416     | 0.16748     | -0.28986  |          |      |
|              | 0.61404         | 1.7089    | 0.043731    | 0.043731    | 0.494356438 |           |          |      |
| DCAF4        | ENSG00000119599 | 1.5518    | 0.060357    | 0.076146    | 0.46965     | 1.7088    | 0.043746 |      |
|              | 1.059           | 0.1448    | 0.043746    | 0.494356438 |             |           |          |      |
| GRB2         | ENSG00000177885 | 1.7088    | 0.043748    | 1.6773      | 0.046743    | 1.6525    | 0.049219 |      |
|              | 1.6931          | 0.045218  | 0.043748    | 0.494356438 |             |           |          |      |

|           |                 |           |             |             |             |           |          |          |
|-----------|-----------------|-----------|-------------|-------------|-------------|-----------|----------|----------|
| CCDC85A   | ENSG00000055813 | -2.0038   | 0.97745     | -1.7524     | 0.96015     | -1.7027   |          |          |
|           | 0.95569         | 1.7087    | 0.043753    | 0.043753    | 0.494356438 |           |          |          |
| OR11H5P   | ENSG00000258625 | 1.7087    | 0.043755    | 0.043755    | 0.98305     | 0.16279   | 1.7087   |          |
|           | 0.043755        | 1.7087    | 0.043755    | 0.043755    | 0.494356438 |           |          |          |
| NA        | ENSG00000202198 | 1.7084    | 0.043782    | 1.7084      | 0.043782    | 1.7084    | 0.043782 |          |
|           | 1.7084          | 0.043782  | 0.043782    | 0.494356438 |             |           |          |          |
| NA        | ENSG00000277746 | -0.063141 | 0.52517     | 1.7084      | 0.043782    | 0.073693  | 0.47063  |          |
|           | 0.2987          | 0.38259   | 0.043782    | 0.494356438 |             |           |          |          |
| RN7SK     | ENSG00000283293 | 1.7084    | 0.043782    | 1.7084      | 0.043782    | 1.7084    | 0.043782 |          |
|           | 1.7084          | 0.043782  | 0.043782    | 0.494356438 |             |           |          |          |
| TNFRSF17  | ENSG0000048462  | 1.664     | 0.048053    | 1.708       | 0.043814    | 0.8525    | 0.19697  |          |
|           | 1.0558          | 0.14553   | 0.043814    | 0.494356438 |             |           |          |          |
| NA        | ENSG00000248529 | 1.708     | 0.043816    | 1.0471      | 0.14752     | 0.8161    | 0.20722  |          |
|           | 0.8161          | 0.20722   | 0.043816    | 0.494356438 |             |           |          |          |
| PLEKHG1   | ENSG00000120278 | 1.708     | 0.043817    | 0.53826     | 0.2952      | 1.3029    | 0.096307 |          |
|           | 1.0645          | 0.14354   | 0.043817    | 0.494356438 |             |           |          |          |
| NA        | ENSG00000260071 | 0.22355   | 0.41155     | -0.23708    | 0.5937      | -0.037483 | 0.51495  |          |
|           | 1.708           | 0.043818  | 0.043818    | 0.494356438 |             |           |          |          |
| RNA5SP89  | ENSG00000222232 | 1.708     | 0.04382     | 1.708       | 0.04382     | 1.708     | 0.04382  | 1.708    |
|           | 0.04382         | 0.04382   | 0.494356438 |             |             |           |          |          |
| NA        | ENSG00000236885 | -0.1712   | 0.56797     | 1.708       | 0.043821    | -0.1712   | 0.56797  |          |
|           | -0.1712         | 0.56797   | 0.043821    | 0.494356438 |             |           |          |          |
| EEF1B2P4  | ENSG00000257119 | 1.6174    | 0.052891    | 1.5655      | 0.058738    | 1.1804    |          |          |
|           | 0.11892         | 1.7078    | 0.043833    | 0.043833    | 0.494356438 |           |          |          |
| NA        | ENSG00000274116 | 1.7077    | 0.043845    | -2.3303     | 0.9901      | -2.3303   | 0.9901   |          |
|           | -2.3303         | 0.9901    | 0.043845    | 0.494356438 |             |           |          |          |
| PTRH2     | ENSG00000141378 | 1.7077    | 0.043847    | 1.7077      | 0.043847    | 1.7077    | 0.043847 |          |
|           | 1.7077          | 0.043847  | 0.043847    | 0.494356438 |             |           |          |          |
| RNU6-573P | ENSG00000206665 | 1.7077    | 0.043849    | 1.7077      | 0.043849    | 1.7077    |          |          |
|           | 0.043849        | 1.7077    | 0.043849    | 0.043849    | 0.494356438 |           |          |          |
| NA        | ENSG00000237920 | 0.91373   | 0.18043     | 0.73935     | 0.22985     | 0.994     | 0.16011  |          |
|           | 1.7076          | 0.043856  | 0.043856    | 0.494356438 |             |           |          |          |
| NA        | ENSG00000271366 | 1.7071    | 0.043904    | 1.7071      | 0.043904    | 1.7071    | 0.043904 |          |
|           | 1.7071          | 0.043904  | 0.043904    | 0.494783053 |             |           |          |          |
| TMEM268   | ENSG00000157693 | 0.53336   | 0.29689     | 1.6937      | 0.045161    | -0.083073 |          |          |
|           | 0.5331          | 1.7068    | 0.043931    | 0.043931    | 0.494972862 |           |          |          |
| STAM      | ENSG00000136738 | -0.8686   | 0.80747     | -0.5352     | 0.70374     | -0.70562  | 0.75979  |          |
|           | 1.7065          | 0.043957  | 0.043957    | 0.495039536 |             |           |          |          |
| KIF3AP1   | ENSG00000235836 | 1.7065    | 0.043958    | 1.7065      | 0.043958    | 1.7065    |          |          |
|           | 0.043958        | -0.7219   | 0.76482     | 0.043958    | 0.495039536 |           |          |          |
| NA        | ENSG00000236356 | 0.28704   | 0.38704     | 0.28704     | 0.38704     | 1.7064    | 0.043968 |          |
|           | 0.28704         | 0.38704   | 0.043968    | 0.495039536 |             |           |          |          |
| NA        | ENSG00000255063 | 1.706     | 0.044       | -0.67645    | 0.75062     | -0.67645  | 0.75062  | -0.67645 |
|           | 0.75062         | 0.044     | 0.495039536 |             |             |           |          |          |
| IGLVIV-53 | ENSG00000253935 | 1.706     | 0.044004    | 1.706       | 0.044004    | 1.706     | 0.044004 | 1.706    |
|           | 0.044004        | 0.044004  | 0.495039536 |             |             |           |          |          |
| LTV1      | ENSG00000135521 | 1.7059    | 0.044011    | -0.49174    | 0.68855     | 1.7059    | 0.044011 |          |
|           | 0.23556         | 0.40689   | 0.044011    | 0.495039536 |             |           |          |          |
| NA        | ENSG00000197462 | 0.27326   | 0.39233     | -0.38058    | 0.64824     | 1.7051    | 0.044086 |          |
|           | 0.58753         | 0.27842   | 0.044086    | 0.495039536 |             |           |          |          |
| MIR1225   | ENSG00000221656 | 1.7051    | 0.044087    | 1.7051      | 0.044087    | 1.7051    |          |          |
|           | 0.044087        | 1.7051    | 0.044087    | 0.044087    | 0.495039536 |           |          |          |
| NA        | ENSG00000186354 | 0.47098   | 0.31883     | 0.86137     | 0.19452     | 0.58923   | 0.27785  |          |
|           | 1.7051          | 0.044091  | 0.044091    | 0.495039536 |             |           |          |          |
| NA        | ENSG00000197991 | 1.2055    | 0.11401     | 1.705       | 0.044102    | 0.52573   | 0.29954  |          |
|           | 0.49605         | 0.30993   | 0.044102    | 0.495039536 |             |           |          |          |
| NDUFS7    | ENSG00000115286 | 1.7021    | 0.044372    | 1.7048      | 0.044113    | 1.7048    |          |          |
|           | 0.044113        | 1.1418    | 0.12677     | 0.044113    | 0.495039536 |           |          |          |
| NA        | ENSG00000264748 | 1.7048    | 0.044113    | 1.7048      | 0.044113    | 1.7048    | 0.044113 |          |
|           | 1.7048          | 0.044113  | 0.044113    | 0.495039536 |             |           |          |          |
| RNU1-84P  | ENSG00000202317 | -0.70362  | 0.75916     | -0.4122     | 0.6599      | 1.4938    |          |          |
|           | 0.067611        | 1.7048    | 0.044115    | 0.044115    | 0.495039536 |           |          |          |

|           |                 |          |          |             |             |          |          |
|-----------|-----------------|----------|----------|-------------|-------------|----------|----------|
| NA        | ENSG00000199715 | 1.7048   | 0.044118 | 0.17239     | 0.43157     | 1.7048   | 0.044118 |
|           | 1.7048          | 0.044118 | 0.044118 | 0.495039536 |             |          |          |
| NA        | ENSG00000252473 | 1.7047   | 0.044125 | 1.7047      | 0.044125    | 1.7047   | 0.044125 |
|           | 1.7047          | 0.044125 | 0.044125 | 0.495039536 |             |          |          |
| KCNQ2-AS1 | ENSG00000226390 | 0.34486  | 0.3651   | 0.61814     | 0.26824     | 1.7046   |          |
|           | 0.044131        | -0.4795  | 0.68421  | 0.044131    | 0.495039536 |          |          |
| NA        | ENSG00000224307 | -0.8098  | 0.79097  | -0.69764    | 0.7573      | 1.7045   | 0.044142 |
|           | -1.7261         | 0.95784  | 0.044142 | 0.495039536 |             |          |          |
| TNN       | ENSG00000120332 | 1.7045   | 0.044145 | 1.4201      | 0.077784    | 1.6715   | 0.047316 |
|           | 1.5624          | 0.059092 | 0.044145 | 0.495039536 |             |          |          |
| SOD1P2    | ENSG00000261282 | 1.7044   | 0.044154 | 1.7044      | 0.044154    | 1.7044   |          |
|           | 0.044154        | 1.605    | 0.054248 | 0.044154    | 0.495039536 |          |          |
| LGALS16   | ENSG00000249861 | 0.70418  | 0.24066  | 0.79882     | 0.2122      | 1.7043   |          |
|           | 0.044167        | 1.7043   | 0.044167 | 0.044167    | 0.495039536 |          |          |
| HOGA1     | ENSG00000241935 | 1.7041   | 0.044177 | 1.6736      | 0.0471      | -0.18306 | 0.57263  |
|           | -1.0081         | 0.8433   | 0.044177 | 0.495039536 |             |          |          |
| ABHD16A   | ENSG00000204427 | 0.69436  | 0.24373  | 1.704       | 0.044187    | -0.30147 | 0.61847  |
|           | -0.30147        | 0.61847  | 0.044187 | 0.495039536 |             |          |          |
| BPI       | ENSG00000101425 | 1.7038   | 0.044213 | -0.53203    | 0.70265     | 0.55207  | 0.29045  |
|           | 0.23979         | 0.40525  | 0.044213 | 0.495039536 |             |          |          |
| NA        | ENSG00000215945 | 0.06509  | 0.47405  | 0.74018     | 0.22959     | 1.7037   | 0.044218 |
|           | 0.10269         | 0.4591   | 0.044218 | 0.495039536 |             |          |          |
| NA        | ENSG00000249774 | 1.7036   | 0.044224 | 0.049375    | 0.48031     | 1.7036   | 0.044224 |
|           | 1.7036          | 0.044224 | 0.044224 | 0.495039536 |             |          |          |
| ENPP2     | ENSG00000136960 | 0.43368  | 0.33226  | -0.64021    | 0.73898     | 1.7036   | 0.044228 |
|           | -0.7493         | 0.77316  | 0.044228 | 0.495039536 |             |          |          |
| LINC02253 | ENSG00000259485 | -0.12567 | 0.55     | 1.3317      | 0.091475    | 1.7035   | 0.044236 |
|           | 1.1835          | 0.11831  | 0.044236 | 0.495039536 |             |          |          |
| EXOC6     | ENSG00000138190 | 1.5924   | 0.05565  | 1.7035      | 0.044237    | 1.0272   | 0.15217  |
|           | 0.21019         | 0.41676  | 0.044237 | 0.495039536 |             |          |          |
| NA        | ENSG00000267976 | 0.64415  | 0.25974  | -0.50145    | 0.69197     | 1.7035   | 0.044238 |
|           | 0.14791         | 0.44121  | 0.044238 | 0.495039536 |             |          |          |
| NA        | ENSG00000253181 | -0.86456 | 0.80636  | 0.34693     | 0.36432     | 1.7034   | 0.044246 |
|           | -0.035277       | 0.51407  | 0.044246 | 0.495039536 |             |          |          |
| GIP       | ENSG00000159224 | 1.7032   | 0.044261 | 0.99474     | 0.15993     | 0.98054  | 0.16341  |
|           | 0.87645         | 0.19039  | 0.044261 | 0.495039536 |             |          |          |
| NA        | ENSG00000263714 | 1.7032   | 0.044262 | 1.7032      | 0.044262    | 1.7032   | 0.044262 |
|           | 1.7032          | 0.044262 | 0.044262 | 0.495039536 |             |          |          |
| COQ6      | ENSG00000119723 | 1.6967   | 0.044872 | 1.4909      | 0.067999    | 1.7029   | 0.044293 |
|           | 1.6967          | 0.044872 | 0.044293 | 0.495145697 |             |          |          |
| LINC01952 | ENSG00000234183 | 1.7027   | 0.044311 | 1.7027      | 0.044311    | 1.7027   |          |
|           | 0.044311        | 1.7027   | 0.044311 | 0.044311    | 0.495145697 |          |          |
| TRIB1     | ENSG00000173334 | -0.6553  | 0.74386  | -0.64479    | 0.74047     | 1.7024   | 0.044336 |
|           | -1.8223         | 0.96579  | 0.044336 | 0.495145697 |             |          |          |
| NA        | ENSG00000213579 | -0.17202 | 0.56829  | -0.17202    | 0.56829     | -0.91938 | 0.82105  |
|           | 1.7024          | 0.044336 | 0.044336 | 0.495145697 |             |          |          |
| OR7E33P   | ENSG00000226537 | 1.7023   | 0.044352 | 1.5744      | 0.057695    | -0.99856 | 0.841    |
|           | 1.6032          | 0.054448 | 0.044352 | 0.495145697 |             |          |          |
| NA        | ENSG00000248245 | 1.6519   | 0.049274 | 1.1557      | 0.12391     | 1.7022   | 0.044358 |
|           | 1.7022          | 0.044358 | 0.044358 | 0.495145697 |             |          |          |
| NA        | ENSG00000249436 | 1.7019   | 0.044384 | 1.7019      | 0.044384    | 1.7019   | 0.044384 |
|           | 1.7019          | 0.044384 | 0.044384 | 0.495145697 |             |          |          |
| MBLAC2    | ENSG00000176055 | 1.7018   | 0.044396 | 0.14153     | 0.44373     | 1.0302   |          |
|           | 0.15145         | 0.13037  | 0.44814  | 0.044396    | 0.495145697 |          |          |
| C4orf36   | ENSG00000163633 | 0.96758  | 0.16663  | 1.7017      | 0.044402    | 0.77832  |          |
|           | 0.21819         | 1.6635   | 0.048108 | 0.044402    | 0.495145697 |          |          |
| NSFP1     | ENSG00000260075 | 0.45094  | 0.32602  | -0.63216    | 0.73636     | 1.7016   | 0.044417 |
|           | 0.18551         | 0.42641  | 0.044417 | 0.495145697 |             |          |          |
| RNU7-172P | ENSG00000252934 | 1.7015   | 0.044423 | 1.7015      | 0.044423    | 0.73199  |          |
|           | 0.23209         | 1.7015   | 0.044423 | 0.044423    | 0.495145697 |          |          |
| MSH5      | ENSG00000204410 | 1.6836   | 0.046129 | 1.7014      | 0.044435    | 0.43736  | 0.33093  |
|           | -0.36148        | 0.64113  | 0.044435 | 0.495145697 |             |          |          |

|           |                 |           |             |             |             |             |          |
|-----------|-----------------|-----------|-------------|-------------|-------------|-------------|----------|
| NA        | ENSG00000277795 | 1.7013    | 0.044446    | -0.92941    | 0.82366     | 0.2495      | 0.40149  |
|           |                 | 0.2495    | 0.40149     | 0.044446    | 0.495145697 |             |          |
| NA        | ENSG00000200298 | 1.7012    | 0.044456    | 1.7012      | 0.044456    | 0.037316    | 0.48512  |
|           |                 | 1.5392    | 0.061873    | 0.044456    | 0.495145697 |             |          |
| NA        | ENSG00000228711 | 1.3324    | 0.091366    | 0.79078     | 0.21454     | 1.7012      | 0.044456 |
|           |                 | 1.7012    | 0.044456    | 0.044456    | 0.495145697 |             |          |
| AP5M1     | ENSG00000053770 | 1.5206    | 0.06418     | 1.7011      | 0.044459    | 1.4084      | 0.079509 |
|           |                 | -0.41484  | 0.66087     | 0.044459    | 0.495145697 |             |          |
| NA        | ENSG00000221323 | 1.701     | 0.044471    | 1.701       | 0.044471    | 1.701       | 0.044471 |
|           |                 | 0.044471  | 0.495145697 |             |             |             |          |
| NA        | ENSG00000283535 | 1.2421    | 0.1071      | 1.7009      | 0.044481    | 1.2421      | 0.1071   |
|           |                 | 1.2421    | 0.1071      | 0.044481    | 0.495145697 |             |          |
| MED15P8   | ENSG00000248796 | 1.535     | 0.062386    | -1.3125     | 0.90533     | 1.7008      | 0.044488 |
|           |                 | 0.0094201 | 0.49624     | 0.044488    | 0.495145697 |             |          |
| NENF      | ENSG00000117691 | 1.4564    | 0.072639    | 1.7008      | 0.044489    | 1.7008      | 0.044489 |
|           |                 | 1.1612    | 0.12278     | 0.044489    | 0.495145697 |             |          |
| NA        | ENSG00000232353 | 1.7007    | 0.044498    | 0.50912     | 0.30533     | 0.50912     | 0.30533  |
|           |                 | -0.019966 | 0.50796     | 0.044498    | 0.495145697 |             |          |
| COL14A1   | ENSG00000187955 | -0.083532 | 0.53329     | 1.7007      | 0.044501    | 0.42127     |          |
|           |                 | 0.33678   | -0.17307    | 0.5687      | 0.044501    | 0.495145697 |          |
| STOML3    | ENSG00000133115 | 0.27965   | 0.38987     | 1.7006      | 0.044513    | 1.7006      |          |
|           |                 | 0.044513  | 1.3025      | 0.096375    | 0.044513    | 0.495145697 |          |
| MIR1303   | ENSG00000221552 | -0.034262 | 0.51367     | -0.18097    | 0.57181     | 1.7004      |          |
|           |                 | 0.044532  | -0.48831    | 0.68733     | 0.044532    | 0.495145697 |          |
| NA        | ENSG00000231741 | 1.7002    | 0.044548    | -0.90216    | 0.81651     | -0.90216    | 0.81651  |
|           |                 | -0.90216  | 0.81651     | 0.044548    | 0.495145697 |             |          |
| PIN1      | ENSG00000127445 | -0.11894  | 0.54734     | -0.11894    | 0.54734     | -0.11894    | 0.54734  |
|           |                 | 1.7002    | 0.044549    | 0.044549    | 0.495145697 |             |          |
| LINC02861 | ENSG00000262185 | 1.7001    | 0.044554    | 1.7001      | 0.044554    | 1.2724      |          |
|           |                 | 0.10161   | 1.7001      | 0.044554    | 0.044554    | 0.495145697 |          |
| NA        | ENSG00000249639 | 1.7001    | 0.044556    | 0.31147     | 0.37772     | 0.59789     | 0.27496  |
|           |                 | 0.30929   | 0.37855     | 0.044556    | 0.495145697 |             |          |
| NA        | ENSG00000265189 | 1.6999    | 0.044571    | -0.0077117  | 0.50308     | 1.6999      | 0.044571 |
|           |                 | 1.6999    | 0.044571    | 0.044571    | 0.49519946  |             |          |
| ATP5MGP7  | ENSG00000267189 | 1.6997    | 0.044594    | 1.6997      | 0.044594    | 0.96353     |          |
|           |                 | 0.16764   | 1.6997      | 0.044594    | 0.044594    | 0.495209058 |          |
| LINC02339 | ENSG00000279797 | 1.6997    | 0.044596    | 1.6997      | 0.044596    | 1.6997      |          |
|           |                 | 0.044596  | 1.6997      | 0.044596    | 0.044596    | 0.495209058 |          |
| LCP2      | ENSG00000043462 | -0.51873  | 0.69803     | 0.12938     | 0.44853     | 1.6995      | 0.044613 |
|           |                 | 0.043952  | 0.48247     | 0.044613    | 0.495209058 |             |          |
| NA        | ENSG00000258540 | 1.652     | 0.049268    | 1.6994      | 0.044618    | 1.5485      | 0.060751 |
|           |                 | 0.049268  | 0.044618    | 0.495209058 |             |             |          |
| NA        | ENSG00000223570 | 1.6992    | 0.044639    | 1.6992      | 0.044639    | 1.6992      | 0.044639 |
|           |                 | 1.6992    | 0.044639    | 0.044639    | 0.495209058 |             |          |
| DDX49     | ENSG00000105671 | 1.6992    | 0.04464     | 1.6992      | 0.04464     | 1.6992      | 0.04464  |
|           |                 | 1.6992    | 0.04464     | 0.04464     | 0.495209058 |             |          |
| AQP11     | ENSG00000178301 | 0.38006   | 0.35195     | 1.0081      | 0.1567      | 1.6992      | 0.044643 |
|           |                 | 0.95993   | 0.16855     | 0.044643    | 0.495209058 |             |          |
| PCCA-AS1  | ENSG00000234650 | 0.5351    | 0.29629     | 1.6988      | 0.044677    | 0.8372      |          |
|           |                 | 0.20124   | 0.08228     | 0.46721     | 0.044677    | 0.495473421 |          |
| CEACAM21  | ENSG00000007129 | 1.6112    | 0.053564    | 1.6986      | 0.044697    | 1.6986      |          |
|           |                 | 0.044697  | 1.552       | 0.060326    | 0.044697    | 0.495569065 |          |
| FRMD6-AS1 | ENSG00000273888 | 1.5443    | 0.061254    | 1.6982      | 0.044731    | 0.035509    |          |
|           |                 | 0.48584   | 0.035509    | 0.48584     | 0.044731    | 0.495569065 |          |
| ASB14     | ENSG00000239388 | 0.96323   | 0.16772     | 0.96323     | 0.16772     | 0.96323     | 0.16772  |
|           |                 | 1.6982    | 0.044734    | 0.044734    | 0.495569065 |             |          |
| NA        | ENSG00000273176 | 1.6982    | 0.044735    | 1.6982      | 0.044735    | 1.6982      | 0.044735 |
|           |                 | 1.6982    | 0.044735    | 0.044735    | 0.495569065 |             |          |
| LINC01448 | ENSG00000238284 | 0.25721   | 0.39851     | 1.6981      | 0.044741    | 0.9017      |          |
|           |                 | 0.18361   | -0.36171    | 0.64121     | 0.044741    | 0.495569065 |          |
| ROBO4     | ENSG00000154133 | 1.6979    | 0.044761    | 1.6979      | 0.044761    | 1.6979      | 0.044761 |
|           |                 | 1.6979    | 0.044761    | 0.044761    | 0.495569065 |             |          |

|            |                 |          |             |          |             |             |          |         |
|------------|-----------------|----------|-------------|----------|-------------|-------------|----------|---------|
| NA         | ENSG00000223009 | 1.6979   | 0.044764    | 0.044764 | 1.6979      | 0.044764    | 0.39992  | 0.34461 |
|            |                 | 1.6979   | 0.044764    | 0.044764 | 0.495569065 |             |          |         |
| ATP5POP1   | ENSG00000159186 | 1.6976   | 0.044789    | 0.044789 | 1.6976      | 0.044789    | 1.6976   |         |
|            |                 | 0.044789 | 1.6976      | 0.044789 | 0.044789    | 0.495569065 |          |         |
| NA         | ENSG00000222586 | -1.5605  | 0.94068     | -1.5605  | 0.94068     | -1.5605     | 0.94068  |         |
|            |                 | 1.6976   | 0.044793    | 0.044793 | 0.495569065 |             |          |         |
| RN7SL377P  | ENSG00000266569 | 1.6806   | 0.046421    | 1.06     | 0.14457     | 0.88452     | 0.18821  |         |
|            |                 | 1.6975   | 0.044797    | 0.044797 | 0.495569065 |             |          |         |
| NA         | ENSG00000259661 | 1.6974   | 0.04481     | 1.6974   | 0.04481     | 1.6974      | 0.04481  |         |
|            |                 | 1.6974   | 0.04481     | 0.04481  | 0.495569065 |             |          |         |
| NA         | ENSG00000263958 | 1.6974   | 0.044813    | -0.19942 | 0.57903     | -0.19942    | 0.57903  |         |
|            |                 | -0.19942 | 0.57903     | 0.044813 | 0.495569065 |             |          |         |
| LINC01088  | ENSG00000249307 | 0.87159  | 0.19172     | 1.6972   | 0.044827    | 1.5805      | 0.057    |         |
|            |                 | 0.19273  | 0.42359     | 0.044827 | 0.495569065 |             |          |         |
| EEF1DP4    | ENSG00000213640 | 0.42197  | 0.33653     | 0.42197  | 0.33653     | 1.6972      |          |         |
|            |                 | 0.044828 | 0.4907      | 0.31182  | 0.044828    | 0.495569065 |          |         |
| SYNJ2      | ENSG00000078269 | 1.5007   | 0.066714    | -0.50412 | 0.69291     | 1.697       | 0.044847 |         |
|            |                 | -0.22648 | 0.58959     | 0.044847 | 0.495666661 |             |          |         |
| NA         | ENSG00000278979 | 1.6969   | 0.044858    | 1.6969   | 0.044858    | 1.6969      | 0.044858 |         |
|            |                 | 1.6969   | 0.044858    | 0.044858 | 0.495675814 |             |          |         |
| SHISAL2A   | ENSG00000182183 | -0.22568 | 0.58927     | -0.82438 | 0.79514     | 0.53211     |          |         |
|            |                 | 0.29732  | 1.6968      | 0.044872 | 0.044872    | 0.495718105 |          |         |
| RNU6-1062P | ENSG00000206635 | 1.2376   | 0.10793     | 1.6146   | 0.053198    | 1.485       | 0.068777 |         |
|            |                 | 1.6965   | 0.044897    | 0.044897 | 0.495836803 |             |          |         |
| JPT1       | ENSG00000189159 | -0.37427 | 0.6459      | -0.37427 | 0.6459      | 0.90186     | 0.18357  |         |
|            |                 | 1.6959   | 0.044951    | 0.044951 | 0.495836803 |             |          |         |
| YBX1P10    | ENSG00000213866 | 1.6958   | 0.044964    | 1.1338   | 0.12843     | 0.21716     |          |         |
|            |                 | 0.41404  | 1.3534      | 0.087957 | 0.044964    | 0.495836803 |          |         |
| NA         | ENSG00000241954 | 1.6956   | 0.044977    | 1.6956   | 0.044977    | 1.6956      | 0.044977 |         |
|            |                 | 1.6956   | 0.044977    | 0.044977 | 0.495836803 |             |          |         |
| PKLR       | ENSG00000143627 | 0.59238  | 0.2768      | 1.1285   | 0.12955     | 0.59505     | 0.2759   |         |
|            |                 | 1.6956   | 0.044983    | 0.044983 | 0.495836803 |             |          |         |
| CARMIL1    | ENSG00000079691 | 1.3341   | 0.09109     | 1.1124   | 0.13298     | 1.6956      |          |         |
|            |                 | 0.044985 | 0.87573     | 0.19059  | 0.044985    | 0.495836803 |          |         |
| OR7D1P     | ENSG00000188314 | 0.58396  | 0.27962     | 1.6955   | 0.044986    | 0.58396     |          |         |
|            |                 | 0.27962  | 0.58396     | 0.27962  | 0.044986    | 0.495836803 |          |         |
| NA         | ENSG00000264990 | 1.6955   | 0.044986    | 1.6955   | 0.044986    | 1.6955      | 0.044986 |         |
|            |                 | 1.6955   | 0.044986    | 0.044986 | 0.495836803 |             |          |         |
| FAM111A-DT | ENSG00000245571 | 1.6955   | 0.044989    | 1.6955   | 0.044989    | 1.6955      |          |         |
|            |                 | 0.044989 | 1.6955      | 0.044989 | 0.044989    | 0.495836803 |          |         |
| ADRA1B     | ENSG00000170214 | 1.426    | 0.076938    | 0.2198   | 0.41301     | 1.6955      | 0.044992 |         |
|            |                 | 1.3398   | 0.090153    | 0.044992 | 0.495836803 |             |          |         |
| LNPEP      | ENSG00000113441 | 0.95434  | 0.16995     | 1.6954   | 0.044999    | 0.95434     | 0.16995  |         |
|            |                 | 0.95434  | 0.16995     | 0.044999 | 0.495836803 |             |          |         |
| NA         | ENSG00000258559 | 1.695    | 0.045037    | 1.695    | 0.045037    | 1.695       | 0.045037 |         |
|            |                 | 0.045037 | 0.495836803 |          |             |             |          |         |
| RRP12      | ENSG00000052749 | 0.86147  | 0.19449     | 1.6949   | 0.045045    | 1.692       | 0.045326 |         |
|            |                 | 1.6056   | 0.054185    | 0.045045 | 0.495836803 |             |          |         |
| C4orf47    | ENSG00000205129 | 0.20037  | 0.4206      | 1.6946   | 0.045074    | 1.0655      |          |         |
|            |                 | 0.14333  | 1.6612      | 0.048338 | 0.045074    | 0.495836803 |          |         |
| RNA5SP94   | ENSG00000252726 | 1.6946   | 0.045076    | 0.98282  | 0.16285     | 0.98282     |          |         |
|            |                 | 0.16285  | -0.70539    | 0.75972  | 0.045076    | 0.495836803 |          |         |
| FGF7       | ENSG00000140285 | 1.4506   | 0.073451    | 1.1195   | 0.13146     | 1.2236      | 0.11055  |         |
|            |                 | 1.6946   | 0.045077    | 0.045077 | 0.495836803 |             |          |         |
| NA         | ENSG00000280121 | 1.6945   | 0.045085    | 1.6945   | 0.045085    | 1.6945      | 0.045085 |         |
|            |                 | 1.6945   | 0.045085    | 0.045085 | 0.495836803 |             |          |         |
| NA         | ENSG00000258885 | -0.11064 | 0.54405     | 0.66406  | 0.25333     | 1.6943      | 0.0451   |         |
|            |                 | 1.6943   | 0.0451      | 0.0451   | 0.495836803 |             |          |         |
| RNVU1-34   | ENSG00000200997 | 0.32281  | 0.37342     | 1.6942   | 0.04511     | 0.32281     |          |         |
|            |                 | 0.37342  | 0.32281     | 0.37342  | 0.04511     | 0.495836803 |          |         |
| ACTBP9     | ENSG00000266920 | 1.6942   | 0.045114    | 0.35349  | 0.36186     | 0.35349     |          |         |
|            |                 | 0.36186  | 1.198       | 0.11545  | 0.045114    | 0.495836803 |          |         |

|           |                 |          |          |             |             |          |          |
|-----------|-----------------|----------|----------|-------------|-------------|----------|----------|
| NA        | ENSG00000258847 | 0.64716  | 0.25876  | 1.694       | 0.045129    | 0.94694  | 0.17183  |
|           | 0.91881         | 0.1791   | 0.045129 | 0.495836803 |             |          |          |
| RNU7-144P | ENSG00000238452 | 0.19131  | 0.42414  | -1.3893     | 0.91763     | -0.36383 |          |
|           | 0.64201         | 1.694    | 0.04513  | 0.04513     | 0.495836803 |          |          |
| OAS2      | ENSG00000111335 | 1.6939   | 0.04514  | 1.6939      | 0.04514     | 1.1938   | 0.11629  |
|           | 0.15636         | 0.43788  | 0.04514  | 0.495836803 |             |          |          |
| CALM1     | ENSG00000198668 | 1.6939   | 0.045145 | 1.2904      | 0.09846     | -1.0421  | 0.85132  |
|           | 0.77755         | 0.21842  | 0.045145 | 0.495836803 |             |          |          |
| PMPCA     | ENSG00000165688 | -1.1086  | 0.86619  | -1.1017     | 0.86471     | -1.3795  | 0.91613  |
|           | 1.6937          | 0.045156 | 0.045156 | 0.495836803 |             |          |          |
| LINC00924 | ENSG00000259134 | 1.6936   | 0.045171 | 0.92555     | 0.17734     | -0.73587 |          |
|           | 0.7691          | 0.17671  | 0.42987  | 0.045171    | 0.495836803 |          |          |
| MICAL3    | ENSG00000243156 | 0.97472  | 0.16485  | 1.5104      | 0.065475    | 1.419    | 0.077946 |
|           | 1.6935          | 0.045179 | 0.045179 | 0.495836803 |             |          |          |
| GALNT5    | ENSG00000136542 | 0.11956  | 0.45241  | 1.367       | 0.085809    | 0.75527  | 0.22504  |
|           | 1.6935          | 0.045183 | 0.045183 | 0.495836803 |             |          |          |
| RN7SKP270 | ENSG00000223229 | 1.6935   | 0.045184 | 0.90663     | 0.1823      | 1.6935   |          |
|           | 0.045184        | 1.6935   | 0.045184 | 0.045184    | 0.495836803 |          |          |
| NA        | ENSG00000280092 | 1.6934   | 0.045188 | 1.4565      | 0.07263     | 1.4565   | 0.07263  |
|           | 1.4565          | 0.07263  | 0.045188 | 0.495836803 |             |          |          |
| NA        | ENSG00000202216 | 1.2603   | 0.10379  | 1.6933      | 0.045199    | 0.54864  | 0.29163  |
|           | 1.6126          | 0.053421 | 0.045199 | 0.495845851 |             |          |          |
| NA        | ENSG00000256312 | 1.6931   | 0.045219 | 1.6931      | 0.045219    | 0.059033 | 0.47646  |
|           | 0.475           | 0.31739  | 0.045219 | 0.495885866 |             |          |          |
| NA        | ENSG00000201034 | 1.6931   | 0.045223 | 0.81516     | 0.20749     | 0.81516  | 0.20749  |
|           | 0.81516         | 0.20749  | 0.045223 | 0.495885866 |             |          |          |
| ZNF22     | ENSG00000165512 | 1.6927   | 0.045259 | 0.60876     | 0.27134     | -0.2912  | 0.61455  |
|           | 0.60876         | 0.27134  | 0.045259 | 0.496040512 |             |          |          |
| TUT7      | ENSG00000083223 | 1.0386   | 0.1495   | 1.6926      | 0.04527     | 1.5741   | 0.057736 |
|           | 1.3743          | 0.084672 | 0.04527  | 0.496040512 |             |          |          |
| ADCY5     | ENSG00000173175 | 0.20049  | 0.42055  | 0.67179     | 0.25086     | 1.6925   | 0.045277 |
|           | 1.5821          | 0.056811 | 0.045277 | 0.496040512 |             |          |          |
| C7orf66   | ENSG00000205174 | -0.43499 | 0.66822  | -0.43499    | 0.66822     | -0.43499 |          |
|           | 0.66822         | 1.6924   | 0.045287 | 0.045287    | 0.496040512 |          |          |
| HMGB1P45  | ENSG00000229316 | 1.6924   | 0.045288 | 0.50701     | 0.30608     | 1.6924   |          |
|           | 0.045288        | 1.6924   | 0.045288 | 0.045288    | 0.496040512 |          |          |
| NA        | ENSG00000275175 | 1.6922   | 0.045302 | 1.1228      | 0.13076     | 1.1228   | 0.13076  |
|           | 1.1228          | 0.13076  | 0.045302 | 0.496082351 |             |          |          |
| NA        | ENSG00000277803 | -0.49172 | 0.68854  | 0.21563     | 0.41464     | 0.5025   | 0.30766  |
|           | 1.6919          | 0.045332 | 0.045332 | 0.496185866 |             |          |          |
| NA        | ENSG00000217557 | 0.8268   | 0.20418  | 0.8268      | 0.20418     | 0.8268   | 0.20418  |
|           | 1.6919          | 0.045336 | 0.045336 | 0.496185866 |             |          |          |
| NA        | ENSG00000183791 | 1.6918   | 0.045342 | 1.6918      | 0.045342    | -0.31993 | 0.62549  |
|           | 0.57043         | 0.28419  | 0.045342 | 0.496185866 |             |          |          |
| CPXM2     | ENSG00000121898 | -0.67985 | 0.7517   | 0.20591     | 0.41843     | -0.95793 | 0.83095  |
|           | 1.6916          | 0.045357 | 0.045357 | 0.496238574 |             |          |          |
| EFNB2     | ENSG00000125266 | 0.95311  | 0.17027  | 0.72261     | 0.23496     | 0.24596  | 0.40286  |
|           | 1.6912          | 0.0454   | 0.0454   | 0.496597531 |             |          |          |
| NA        | ENSG00000249881 | 1.1003   | 0.13561  | 1.6911      | 0.045412    | 1.1003   | 0.13561  |
|           | -0.36168        | 0.6412   | 0.045412 | 0.496617316 |             |          |          |
| NA        | ENSG00000252235 | -0.99369 | 0.83981  | -0.68521    | 0.75339     | -0.29693 | 0.61674  |
|           | 1.6908          | 0.045439 | 0.045439 | 0.496705185 |             |          |          |
| NA        | ENSG00000273654 | 0.2483   | 0.40195  | 0.2483      | 0.40195     | 0.2483   | 0.40195  |
|           | 1.6907          | 0.045443 | 0.045443 | 0.496705185 |             |          |          |
| UNC45B    | ENSG00000141161 | -0.62726 | 0.73476  | 1.4828      | 0.069063    | 1.6906   |          |
|           | 0.045453        | -0.95624 | 0.83052  | 0.045453    | 0.496705185 |          |          |
| MRPS18C   | ENSG00000163319 | 1.6905   | 0.045466 | 1.6905      | 0.045466    | 1.6905   |          |
|           | 0.045466        | 1.6905   | 0.045466 | 0.045466    | 0.496705185 |          |          |
| LAMA1     | ENSG00000101680 | 0.48106  | 0.31524  | 0.37815     | 0.35266     | 1.6905   | 0.045471 |
|           | 0.55106         | 0.2908   | 0.045471 | 0.496705185 |             |          |          |
| FBF1      | ENSG00000188878 | 0.18631  | 0.4261   | 1.6902      | 0.045493    | 0.75224  | 0.22595  |
|           | 1.2265          | 0.11     | 0.045493 | 0.496755564 |             |          |          |



|            |                 |           |          |             |          |          |          |
|------------|-----------------|-----------|----------|-------------|----------|----------|----------|
| LYPD4      | ENSG00000273111 | 1.6902    | 0.045496 | 1.6902      | 0.045496 | 1.6902   | 0.045496 |
|            |                 | 1.6902    | 0.045496 | 0.496755564 |          |          |          |
| NRXN2-AS1  | ENSG00000237410 | 1.6899    | 0.045527 | 1.6899      | 0.045527 | 1.6899   |          |
|            |                 | 0.045527  | 1.6899   | 0.496847414 |          |          |          |
| NA         | ENSG00000279191 | -0.26789  | 0.60561  | 0.15343     | 0.43903  | 1.5749   | 0.057638 |
|            |                 | 1.6898    | 0.045533 | 0.496847414 |          |          |          |
| NA         | ENSG00000251828 | 0.88841   | 0.18716  | 1.6898      | 0.045535 | 1.0937   | 0.13704  |
|            |                 | 0.13012   | 0.44824  | 0.496847414 |          |          |          |
| NA         | ENSG00000228064 | 1.6894    | 0.045569 | 1.6894      | 0.045569 | 1.6894   | 0.045569 |
|            |                 | 1.6894    | 0.045569 | 0.496857031 |          |          |          |
| TRAM1      | ENSG00000067167 | 0.68359   | 0.24712  | 0.69564     | 0.24333  | 1.6894   | 0.045573 |
|            |                 | 0.23404   | 0.40748  | 0.496857031 |          |          |          |
| BNIPL      | ENSG00000163141 | 1.6893    | 0.045577 | 1.6212      | 0.052486 | 0.47625  | 0.31695  |
|            |                 | 0.47625   | 0.31695  | 0.496857031 |          |          |          |
| NA         | ENSG00000251461 | -1.2342   | 0.89144  | -1.2342     | 0.89144  | 1.6892   | 0.045592 |
|            |                 | -1.2342   | 0.89144  | 0.496857031 |          |          |          |
| LHFPL3-AS2 | ENSG00000225329 | 1.689     | 0.045608 | 0.24425     | 0.40352  | 1.5276   | 0.063309 |
|            |                 | -0.050959 | 0.52032  | 0.496857031 |          |          |          |
| ELF3-AS1   | ENSG00000234678 | 1.19      | 0.11701  | 1.6391      | 0.050601 | 1.6889   | 0.045618 |
|            |                 | 1.6889    | 0.045618 | 0.496857031 |          |          |          |
| ZNF518B    | ENSG00000178163 | 1.6889    | 0.045622 | 0.055422    | 0.4779   | 1.6889   |          |
|            |                 | 0.045622  | 1.6889   | 0.496857031 |          |          |          |
| CARD11     | ENSG00000198286 | -1.3327   | 0.90868  | 1.6888      | 0.04563  | 0.63752  |          |
|            |                 | 0.26189   | -0.32719 | 0.496857031 |          |          |          |
| SCARNA3    | ENSG00000252906 | 1.6883    | 0.045676 | 1.6883      | 0.045676 | 1.6883   |          |
|            |                 | 0.045676  | 1.6883   | 0.496857031 |          |          |          |
| VMO1       | ENSG00000182853 | 1.6883    | 0.045681 | 1.6883      | 0.045681 | 1.6883   | 0.045681 |
|            |                 | 1.6883    | 0.045681 | 0.496857031 |          |          |          |
| NA         | ENSG00000280254 | 1.6883    | 0.045681 | 1.6883      | 0.045681 | 1.6883   | 0.045681 |
|            |                 | 1.6883    | 0.045681 | 0.496857031 |          |          |          |
| RPUSD4     | ENSG00000165526 | 1.6882    | 0.045685 | 0.16681     | 0.43376  | 0.07148  |          |
|            |                 | 0.47151   | 0.091106 | 0.496857031 |          |          |          |
| SECISBP2   | ENSG00000187742 | 1.6882    | 0.045685 | 1.317       | 0.093926 | 1.4122   | 0.078951 |
|            |                 | 1.1673    | 0.12154  | 0.496857031 |          |          |          |
| NA         | ENSG00000273291 | 1.6881    | 0.045693 | 1.6881      | 0.045693 | 1.6881   | 0.045693 |
|            |                 | 1.6881    | 0.045693 | 0.496857031 |          |          |          |
| SPDEF      | ENSG00000124664 | -0.81231  | 0.79169  | 1.6881      | 0.045699 | -1.3881  | 0.91745  |
|            |                 | -0.38489  | 0.64984  | 0.496857031 |          |          |          |
| PRKAR2A    | ENSG00000114302 | 1.6881    | 0.045701 | 1.617       | 0.052934 | 1.2802   | 0.10024  |
|            |                 | 0.82382   | 0.20502  | 0.496857031 |          |          |          |
| ELOA       | ENSG00000011007 | 1.6878    | 0.045725 | 1.0958      | 0.13658  | 1.0958   | 0.13658  |
|            |                 | 1.0958    | 0.13658  | 0.496857031 |          |          |          |
| TRIP13     | ENSG00000071539 | 1.6877    | 0.045732 | 1.217       | 0.11179  | 1.217    | 0.11179  |
|            |                 | 0.71262   | 0.23804  | 0.496857031 |          |          |          |
| LINC01202  | ENSG00000280776 | -1.173    | 0.87961  | 1.6877      | 0.045736 | -0.5659  |          |
|            |                 | 0.71427   | 0.10612  | 0.496857031 |          |          |          |
| HOXC9      | ENSG00000180806 | 1.6876    | 0.045742 | 1.6876      | 0.045742 | 1.1414   | 0.12686  |
|            |                 | 1.4178    | 0.078131 | 0.496857031 |          |          |          |
| FAM217B    | ENSG00000196227 | 1.6875    | 0.04575  | 0.39557     | 0.34621  | 1.4982   |          |
|            |                 | 0.067044  | 1.4982   | 0.496857031 |          |          |          |
| SLC22A13   | ENSG00000172940 | 1.6872    | 0.045783 | 1.6872      | 0.045783 | 1.6872   |          |
|            |                 | 0.045783  | 1.6872   | 0.496928892 |          |          |          |
| SERPINB1   | ENSG00000021355 | 0.10663   | 0.45754  | 0.36582     | 0.35725  | 1.6869   |          |
|            |                 | 0.045807  | 0.83046  | 0.496928892 |          |          |          |
| BAHCC1     | ENSG00000266074 | 0.60755   | 0.27174  | 1.3833      | 0.083283 | 0.86867  |          |
|            |                 | 0.19251   | 1.6869   | 0.496928892 |          |          |          |
| KCNJ11     | ENSG00000187486 | 1.6868    | 0.045818 | 0.189       | 0.42504  | 1.378    | 0.084102 |
|            |                 | 0.67873   | 0.24866  | 0.496928892 |          |          |          |
| NA         | ENSG00000240777 | 1.6868    | 0.045821 | 1.6868      | 0.045821 | 1.6868   | 0.045821 |
|            |                 | 1.6868    | 0.045821 | 0.496928892 |          |          |          |
| NA         | ENSG00000251281 | -0.59404  | 0.72376  | -0.42766    | 0.66555  | -0.21534 | 0.58525  |
|            |                 | 1.6868    | 0.045825 | 0.496928892 |          |          |          |

|            |                 |            |             |             |             |           |          |
|------------|-----------------|------------|-------------|-------------|-------------|-----------|----------|
| FADS2      | ENSG00000134824 | 0.92382    | 0.17779     | 1.6867      | 0.045828    | 1.3711    | 0.085173 |
|            | 0.788           | 0.21535    | 0.045828    | 0.496928892 |             |           |          |
| FITM2      | ENSG00000197296 | 1.6863     | 0.045865    | 1.5733      | 0.057823    | 1.1183    | 0.13172  |
|            | 1.2638          | 0.10316    | 0.045865    | 0.497113154 |             |           |          |
| SBF1       | ENSG00000100241 | -0.81605   | 0.79276     | -2.4918     | 0.99364     | -0.42475  | 0.66449  |
|            | 1.6862          | 0.045881   | 0.045881    | 0.497113154 |             |           |          |
| GRHL2      | ENSG00000083307 | 0.40285    | 0.34353     | -0.38167    | 0.64865     | -0.36242  | 0.64148  |
|            | 1.6861          | 0.045885   | 0.045885    | 0.497113154 |             |           |          |
| NA         | ENSG00000250674 | 1.0627     | 0.14396     | 0.92289     | 0.17803     | 1.6861    | 0.045889 |
|            | 0.63311         | 0.26333    | 0.045889    | 0.497113154 |             |           |          |
| DELE1      | ENSG00000081791 | -0.92234   | 0.82182     | 1.686       | 0.045896    | -0.010241 | 0.50409  |
|            | -0.35573        | 0.63898    | 0.045896    | 0.497113154 |             |           |          |
| PRSS55     | ENSG00000184647 | 1.6858     | 0.045914    | 0.0013001   | 0.49948     | 0.97571   |          |
|            | 0.1646          | 0.1167     | 0.45355     | 0.045914    | 0.497197604 |           |          |
| RNU6-232P  | ENSG00000252953 | 0.48769    | 0.31288     | 0.31009     | 0.37824     | 1.6857    |          |
|            | 0.04593         | -1.616     | 0.94696     | 0.04593     | 0.497236804 |           |          |
| CPNE2      | ENSG00000140848 | 0.74446    | 0.2283      | 0.69489     | 0.24356     | 1.6853    | 0.045967 |
|            | 0.2855          | 0.38763    | 0.045967    | 0.497236804 |             |           |          |
| ARHGAP11A  | ENSG00000198826 | -0.79045   | 0.78537     | 0.39107     | 0.34787     | 1.6851    |          |
|            | 0.045987        | -1.1477    | 0.87445     | 0.045987    | 0.497236804 |           |          |
| NA         | ENSG00000212249 | 0.00049479 | 0.4998      | 0.51732     | 0.30247     | -0.5733   | 0.71678  |
|            | 1.6848          | 0.046009   | 0.046009    | 0.497236804 |             |           |          |
| ZBTB47     | ENSG00000114853 | 1.0798     | 0.14012     | 1.6845      | 0.046044    | 0.77648   |          |
|            | 0.21873         | 1.2853     | 0.099345    | 0.046044    | 0.497236804 |           |          |
| H3P15      | ENSG00000251005 | 1.6845     | 0.046046    | 1.1563      | 0.12378     | 1.6845    | 0.046046 |
|            | 1.4241          | 0.077209   | 0.046046    | 0.497236804 |             |           |          |
| RNU6-1163P | ENSG00000201386 | 0.99405    | 0.1601      | 1.6842      | 0.046068    | 0.99405   |          |
|            | 0.1601          | 0.99405    | 0.1601      | 0.046068    | 0.497236804 |           |          |
| CCNL2      | ENSG00000221978 | 1.6842     | 0.046072    | 1.6842      | 0.046072    | 1.6807    | 0.046414 |
|            | 0.86868         | 0.19251    | 0.046072    | 0.497236804 |             |           |          |
| SMARCC1    | ENSG00000173473 | 1.5273     | 0.063342    | 1.539       | 0.061904    | 1.0015    | 0.15829  |
|            | 1.6841          | 0.046077   | 0.046077    | 0.497236804 |             |           |          |
| TFAP2A-AS1 | ENSG00000229950 | 1.684      | 0.046086    | 1.684       | 0.046086    | 1.684     | 0.046086 |
|            | 0.046086        | 0.046086   | 0.497236804 |             |             |           |          |
| MCHR2-AS1  | ENSG00000229315 | 0.79979    | 0.21192     | 0.51388     | 0.30367     | 0.24718   |          |
|            | 0.40239         | 1.6837     | 0.046116    | 0.046116    | 0.497236804 |           |          |
| WDR81      | ENSG00000167716 | 1.6837     | 0.046119    | 1.3596      | 0.086974    | 0.85779   | 0.1955   |
|            | 1.1788          | 0.11925    | 0.046119    | 0.497236804 |             |           |          |
| NA         | ENSG00000227072 | 1.6837     | 0.046119    | 1.6837      | 0.046119    | 1.6837    | 0.046119 |
|            | 1.6837          | 0.046119   | 0.046119    | 0.497236804 |             |           |          |
| STAT4      | ENSG00000138378 | 0.7686     | 0.22107     | 0.87679     | 0.1903      | 0.83292   | 0.20245  |
|            | 1.6837          | 0.046121   | 0.046121    | 0.497236804 |             |           |          |
| REEP2      | ENSG00000132563 | 1.6834     | 0.046153    | 1.343       | 0.089635    | 1.0697    | 0.14238  |
|            | 0.074226        | 0.046153   | 0.497236804 |             |             |           | 1.445    |
| RAET1K     | ENSG00000218358 | 1.6834     | 0.046153    | 0.014903    | 0.49405     | 1.0038    |          |
|            | 0.15773         | 0.99105    | 0.16083     | 0.046153    | 0.497236804 |           |          |
| LPP        | ENSG00000145012 | 1.3118     | 0.094793    | 0.59552     | 0.27575     | 0.68611   | 0.24632  |
|            | 1.6832          | 0.046167   | 0.046167    | 0.497236804 |             |           |          |
| RNU7-151P  | ENSG00000252739 | 1.6706     | 0.047399    | 1.6831      | 0.046177    | 1.6831    |          |
|            | 0.046177        | 1.6706     | 0.047399    | 0.046177    | 0.497236804 |           |          |
| MIR3663HG  | ENSG00000234474 | 1.683      | 0.046183    | -0.39637    | 0.65408     | 0.71595   | 0.23701  |
|            | 1.2686          | 0.10229    | 0.046183    | 0.497236804 |             |           |          |
| KMT2D      | ENSG00000167548 | 1.3017     | 0.096513    | 1.683       | 0.046191    | 1.1853    | 0.11795  |
|            | 1.2063          | 0.11386    | 0.046191    | 0.497236804 |             |           |          |
| TPRXL      | ENSG00000180438 | 0.53248    | 0.2972      | 1.6828      | 0.046209    | 1.0232    | 0.15311  |
|            | -0.11534        | 0.54591    | 0.046209    | 0.497236804 |             |           |          |
| GOPC       | ENSG00000047932 | -1.2536    | 0.89501     | -0.40779    | 0.65829     | 1.6827    | 0.046221 |
|            | 1.6827          | 0.046221   | 0.046221    | 0.497236804 |             |           |          |
| RNU6-1010P | ENSG00000199627 | 0.43389    | 0.33219     | 0.80798     | 0.20955     | 1.6825    |          |
|            | 0.046239        | 0.45575    | 0.32429     | 0.046239    | 0.497236804 |           |          |
| NA         | ENSG00000228076 | 1.4175     | 0.078174    | 1.6824      | 0.046245    | 1.4175    | 0.078174 |
|            | 1.4175          | 0.078174   | 0.046245    | 0.497236804 |             |           |          |

|            |                 |                |                |                |                |                |          |  |
|------------|-----------------|----------------|----------------|----------------|----------------|----------------|----------|--|
| ZNF592     | ENSG00000166716 | 1.5918         | 0.055718       | 1.5918         | 0.055718       | 1.6823         |          |  |
|            | 0.046252        | 1.454 0.07298  | 0.046252       | 0.497236804    |                |                |          |  |
| BTBD7P1    | ENSG00000203414 | 1.3593         | 0.087029       | -0.37653       | 0.64674        | 0.55036        |          |  |
|            | 0.29104         | 1.6823         | 0.046253       | 0.046253       | 0.497236804    |                |          |  |
| PSMC1P8    | ENSG00000256896 | 1.6822         | 0.046264       | 1.6822         | 0.046264       | 1.6822         |          |  |
|            | 0.046264        | 0.079142       | 0.46846        | 0.046264       | 0.497236804    |                |          |  |
| KRBOX1-AS1 | ENSG00000206552 | 1.6821         | 0.046274       | 1.6821         | 0.046274       | -1.3026        |          |  |
|            | 0.90365         | 1.6821         | 0.046274       | 0.046274       | 0.497236804    |                |          |  |
| NA         | ENSG00000249605 | 1.4994         | 0.066887       | 0.57035        | 0.28422        | 1.4994         | 0.066887 |  |
|            | 1.682 0.046281  | 0.046281       | 0.497236804    |                |                |                |          |  |
| TMEM200C   | ENSG00000206432 | -1.7576        | 0.96059        | -1.0971        | 0.8637         | 1.682 0.046282 |          |  |
|            | -1.0185         | 0.84578        | 0.046282       | 0.497236804    |                |                |          |  |
| RPL23A     | ENSG00000198242 | 1.682 0.046288 | 1.682 0.046288 | 1.682 0.046288 | 1.682 0.046288 | 1.682          |          |  |
|            | 0.046288        | 0.046288       | 0.497236804    |                |                |                |          |  |
| RARS1P1    | ENSG00000257037 | -0.70195       | 0.75864        | 1.6819         | 0.046289       | -0.70195       |          |  |
|            | 0.75864         | -0.70195       | 0.75864        | 0.046289       | 0.497236804    |                |          |  |
| RNU6-46P   | ENSG00000206587 | 1.6819         | 0.046297       | 1.6819         | 0.046297       | -0.3461        |          |  |
|            | 0.63537         | 0.66599        | 0.25271        | 0.046297       | 0.497236804    |                |          |  |
| TPPP       | ENSG00000171368 | 0.46173        | 0.32214        | -0.0052952     | 0.50211        | 1.6818         | 0.046309 |  |
|            | -0.45433        | 0.6752         | 0.046309       | 0.497236804    |                |                |          |  |
| CLDN15     | ENSG00000106404 | 1.4755         | 0.070043       | 1.6817         | 0.046312       | 1.6817         |          |  |
|            | 0.046312        | 1.3948         | 0.081537       | 0.046312       | 0.497236804    |                |          |  |
| FLT4       | ENSG00000037280 | -0.066752      | 0.52661        | 1.6817         | 0.046314       | -0.088542      | 0.53528  |  |
|            | -0.11836        | 0.54711        | 0.046314       | 0.497236804    |                |                |          |  |
| NA         | ENSG00000255285 | 1.6816         | 0.046321       | 1.6816         | 0.046321       | 1.6816         | 0.046321 |  |
|            | 1.6816          | 0.046321       | 0.046321       | 0.497236804    |                |                |          |  |
| RNA5SP450  | ENSG00000223138 | 0.8543         | 0.19647        | 0.59884        | 0.27464        | 1.6449         |          |  |
|            | 0.049997        | 1.6816         | 0.046326       | 0.046326       | 0.497236804    |                |          |  |
| CEND1      | ENSG00000184524 | 1.6815         | 0.046336       | -0.13756       | 0.55471        | -0.33395       | 0.63079  |  |
|            | -0.33395        | 0.63079        | 0.046336       | 0.497236804    |                |                |          |  |
| RDX        | ENSG00000137710 | 1.2429         | 0.10695        | 0.31628        | 0.3759         | 1.3897         | 0.08231  |  |
|            | 1.6814          | 0.046339       | 0.046339       | 0.497236804    |                |                |          |  |
| NA         | ENSG00000260568 | 1.6812         | 0.046362       | 0.86644        | 0.19313        | 0.081878       | 0.46737  |  |
|            | 0.081878        | 0.46737        | 0.046362       | 0.497236804    |                |                |          |  |
| IL1RL2     | ENSG00000115598 | 0.02498        | 0.49004        | 1.6812         | 0.046365       | 0.78498        |          |  |
|            | 0.21623         | 1.3912         | 0.08208        | 0.046365       | 0.497236804    |                |          |  |
| NA         | ENSG00000278694 | 1.0512         | 0.14658        | 1.2193         | 0.11137        | 0.67755        | 0.24903  |  |
|            | 1.6811          | 0.046368       | 0.046368       | 0.497236804    |                |                |          |  |
| STAP2      | ENSG00000178078 | 1.0183         | 0.15427        | 1.681 0.04638  | 1.0183         | 0.15427        | 1.681    |  |
|            | 0.04638         | 0.04638        | 0.497236804    |                |                |                |          |  |
| NA         | ENSG00000226252 | 1.6809         | 0.046387       | 1.6809         | 0.046387       | 1.6809         | 0.046387 |  |
|            | 1.6809          | 0.046387       | 0.046387       | 0.497236804    |                |                |          |  |
| NA         | ENSG00000254641 | 1.6809         | 0.046387       | 1.6809         | 0.046387       | 1.6809         | 0.046387 |  |
|            | 1.6809          | 0.046387       | 0.046387       | 0.497236804    |                |                |          |  |
| RNU6-250P  | ENSG00000252767 | 0.5425         | 0.29374        | -0.77487       | 0.78079        | 1.6802         |          |  |
|            | 0.046464        | 0.58786        | 0.27831        | 0.046464       | 0.497428071    |                |          |  |
| HSPA8P8    | ENSG00000229091 | 1.5417         | 0.061575       | 1.5417         | 0.061575       | 0.054657       |          |  |
|            | 0.47821         | 1.6801         | 0.046471       | 0.046471       | 0.497428071    |                |          |  |
| RN7SKP195  | ENSG00000252396 | 1.68 0.046479  | 1.68 0.046479  | 1.68 0.046479  | 1.68 0.046479  | 1.68           |          |  |
|            | 0.046479        | 0.046479       | 0.497428071    |                |                |                |          |  |
| CGB5       | ENSG00000189052 | 1.2076         | 0.1136         | 1.6799         | 0.046484       | 0.34653        | 0.36447  |  |
|            | 1.673 0.047161  | 0.046484       | 0.497428071    |                |                |                |          |  |
| LINC02393  | ENSG00000256597 | 0.20668        | 0.41813        | 1.5619         | 0.059158       | 1.5619         |          |  |
|            | 0.059158        | 1.6799         | 0.04649        | 0.04649        | 0.497428071    |                |          |  |
| NUDT4B     | ENSG00000177144 | -1.3823        | 0.91656        | 1.6798         | 0.046502       | 1.04 0.14916   |          |  |
|            | -1.2749         | 0.89883        | 0.046502       | 0.497428071    |                |                |          |  |
| NA         | ENSG00000242282 | 1.6797         | 0.046506       | 0.83042        | 0.20315        | 0.87783        | 0.19002  |  |
|            | 0.42923         | 0.33388        | 0.046506       | 0.497428071    |                |                |          |  |
| CDK1       | ENSG00000170312 | 1.5764         | 0.057466       | 1.6796         | 0.04652        | 0.52542        | 0.29964  |  |
|            | 0.52542         | 0.29964        | 0.04652        | 0.497428071    |                |                |          |  |
| YKT6       | ENSG00000106636 | 0.33152        | 0.37013        | 1.6794         | 0.046538       | -1.5342        | 0.9375   |  |
|            | -1.5342         | 0.9375         | 0.046538       | 0.497428071    |                |                |          |  |

|           |                 |           |             |             |             |          |          |
|-----------|-----------------|-----------|-------------|-------------|-------------|----------|----------|
| COG1      | ENSG00000166685 | 1.3014    | 0.096559    | 1.6793      | 0.046543    | 1.6309   | 0.051457 |
|           | 1.603 0.054462  | 0.046543  | 0.497428071 |             |             |          |          |
| NA        | ENSG00000256004 | -0.24795  | 0.59791     | -0.2154     | 0.58527     | 0.18577  | 0.42631  |
|           | 1.6793          | 0.046548  | 0.046548    | 0.497428071 |             |          |          |
| ATP2B2    | ENSG00000157087 | 0.67364   | 0.25027     | 0.83278     | 0.20248     | 1.6429   |          |
|           | 0.050197        | 1.6792    | 0.046552    | 0.046552    | 0.497428071 |          |          |
| ADIPOQ    | ENSG00000181092 | -1.7009   | 0.95552     | -0.55248    | 0.70969     | 1.6792   |          |
|           | 0.046557        | 0.2566    | 0.39874     | 0.046557    | 0.497428071 |          |          |
| NA        | ENSG00000229957 | 1.3363    | 0.090731    | 1.6789      | 0.046586    | 1.1366   | 0.12785  |
|           | 1.6789          | 0.046586  | 0.046586    | 0.497428071 |             |          |          |
| NA        | ENSG00000225744 | -0.16511  | 0.56557     | -0.16511    | 0.56557     | -0.16511 | 0.56557  |
|           | 1.6789          | 0.046588  | 0.046588    | 0.497428071 |             |          |          |
| NA        | ENSG00000235475 | 0.70189   | 0.24137     | 0.70189     | 0.24137     | 0.70189  | 0.24137  |
|           | 1.6789          | 0.046589  | 0.046589    | 0.497428071 |             |          |          |
| NA        | ENSG00000225122 | 0.96343   | 0.16767     | 0.96343     | 0.16767     | 1.6789   | 0.04659  |
|           | 0.96343         | 0.16767   | 0.04659     | 0.497428071 |             |          |          |
| NA        | ENSG00000253256 | 1.09      | 0.13787     | 1.09        | 0.13787     | 1.6788   |          |
|           | 0.046599        | 0.046599  | 0.497428071 |             |             |          |          |
| C2        | ENSG00000166278 | 0.68529   | 0.24658     | 1.6787      | 0.046608    | 1.2916   | 0.098255 |
|           | 0.47706         | 0.31666   | 0.046608    | 0.497428071 |             |          |          |
| LINC02405 | ENSG00000249345 | 1.5283    | 0.063225    | 0.23334     | 0.40775     | 1.6787   |          |
|           | 0.046609        | 0.080104  | 0.46808     | 0.046609    | 0.497428071 |          |          |
| LCMT1     | ENSG00000205629 | 1.6785    | 0.046629    | 1.6785      | 0.046629    | 1.6785   | 0.046629 |
|           | 1.2654          | 0.10287   | 0.046629    | 0.497444972 |             |          |          |
| C7orf69   | ENSG00000136275 | 1.6784    | 0.046631    | 1.6784      | 0.046631    | 0.86906  |          |
|           | 0.19241         | -0.75652  | 0.77533     | 0.046631    | 0.497444972 |          |          |
| ALB       | ENSG00000163631 | 0.0019183 | 0.49923     | 1.6783      | 0.046645    | 1.6783   | 0.046645 |
|           | 1.6783          | 0.046645  | 0.046645    | 0.497485413 |             |          |          |
| NA        | ENSG00000261394 | 1.6779    | 0.046687    | 1.6779      | 0.046687    | 1.6779   | 0.046687 |
|           | 1.6779          | 0.046687  | 0.046687    | 0.49776909  |             |          |          |
| NA        | ENSG00000267642 | 1.6777    | 0.046706    | 1.6777      | 0.046706    | 1.5842   | 0.056572 |
|           | 1.6318          | 0.051358  | 0.046706    | 0.49776909  |             |          |          |
| NA        | ENSG00000224516 | 1.6774    | 0.046736    | 1.6774      | 0.046736    | 1.6774   | 0.046736 |
|           | 1.6774          | 0.046736  | 0.046736    | 0.49776909  |             |          |          |
| NA        | ENSG00000213383 | 1.6773    | 0.046743    | 1.6773      | 0.046743    | 1.6773   | 0.046743 |
|           | 1.6773          | 0.046743  | 0.046743    | 0.49776909  |             |          |          |
| NA        | ENSG00000236234 | 1.6771    | 0.046766    | 1.6771      | 0.046766    | 1.6771   | 0.046766 |
|           | 1.6771          | 0.046766  | 0.046766    | 0.49776909  |             |          |          |
| NA        | ENSG00000226681 | 1.6767    | 0.046798    | 1.6767      | 0.046798    | 1.6767   | 0.046798 |
|           | 1.6767          | 0.046798  | 0.046798    | 0.49776909  |             |          |          |
| RPS3AP51  | ENSG00000225971 | 1.4769    | 0.069846    | 1.6765      | 0.04682     | 1.4769   |          |
|           | 0.069846        | 1.4769    | 0.069846    | 0.04682     | 0.49776909  |          |          |
| ZNF814    | ENSG00000204514 | 1.6764    | 0.04683     | 0.79508     | 0.21328     | 0.38763  |          |
|           | 0.34915         | 0.19939   | 0.42098     | 0.04683     | 0.49776909  |          |          |
| AK7       | ENSG00000140057 | -0.13427  | 0.55341     | 1.6763      | 0.046836    | 1.2264   | 0.11003  |
|           | -0.49965        | 0.69134   | 0.046836    | 0.49776909  |             |          |          |
| NA        | ENSG00000261757 | 1.6762    | 0.046845    | 1.6762      | 0.046845    | -0.14436 | 0.55739  |
|           | 1.0156          | 0.15491   | 0.046845    | 0.49776909  |             |          |          |
| C4B       | ENSG00000224389 | 1.6762    | 0.046848    | 0.54475     | 0.29296     | -0.76803 | 0.77876  |
|           | 0.061789        | 0.47537   | 0.046848    | 0.49776909  |             |          |          |
| ZNF345    | ENSG00000251247 | 1.6762    | 0.046851    | 1.6762      | 0.046851    | 1.6762   |          |
|           | 0.046851        | 1.6762    | 0.046851    | 0.046851    | 0.49776909  |          |          |
| NA        | ENSG00000268199 | 1.6762    | 0.046851    | 1.6762      | 0.046851    | 1.6762   | 0.046851 |
|           | 1.6762          | 0.046851  | 0.046851    | 0.49776909  |             |          |          |
| VMP1      | ENSG00000062716 | 1.6761    | 0.046855    | 0.4017      | 0.34395     | 0.47711  | 0.31664  |
|           | 1.4095          | 0.07934   | 0.046855    | 0.49776909  |             |          |          |
| NA        | ENSG00000176043 | 1.6761    | 0.046864    | 1.6761      | 0.046864    | 1.6761   | 0.046864 |
|           | 1.6761          | 0.046864  | 0.046864    | 0.49776909  |             |          |          |
| ZNF839    | ENSG00000022976 | -0.99047  | 0.83903     | -1.034      | 0.84943     | 1.2491   |          |
|           | 0.10581         | 1.676     | 0.046867    | 0.046867    | 0.49776909  |          |          |
| SLC6A2    | ENSG00000103546 | 1.676     | 0.046873    | 1.1239      | 0.13053     | 1.1438   | 0.12635  |
|           | 1.1119          | 0.13309   | 0.046873    | 0.49776909  |             |          |          |

|           |                 |          |          |            |            |            |          |
|-----------|-----------------|----------|----------|------------|------------|------------|----------|
| CDH19     | ENSG00000071991 | -0.17584 | 0.56979  | -0.23278   | 0.59203    | -0.1113    | 0.54431  |
|           |                 | 1.6759   | 0.046874 | 0.046874   | 0.49776909 |            |          |
| RNVU1-32  | ENSG00000207110 | 1.6759   | 0.046882 | 0.046882   | 1.6759     | 0.046882   | 1.6759   |
|           |                 | 0.046882 | 1.6759   | 0.046882   | 0.046882   | 0.49776909 |          |
| COMMD4P2  | ENSG00000214702 | 1.6758   | 0.046892 | 0.046892   | 1.559      | 0.059499   | 0.50223  |
|           |                 | 1.3452   | 0.089288 | 0.046892   | 0.49776909 |            | 0.30775  |
| NA        | ENSG00000271420 | 1.6757   | 0.046897 | 0.046897   | 1.6757     | 0.046897   | 1.6757   |
|           |                 | 1.6757   | 0.046897 | 0.046897   | 0.49776909 |            | 0.046897 |
| KRTAP5-5  | ENSG00000185940 | 1.6753   | 0.046938 | 0.046938   | 1.6183     | 0.052797   | 1.6183   |
|           |                 | 0.052797 | 1.6753   | 0.046938   | 0.046938   | 0.49776909 |          |
| NA        | ENSG00000212054 | 0.27596  | 0.39129  | 1.6625     | 0.048204   | 1.6752     | 0.04695  |
|           |                 | 1.6293   | 0.051622 | 0.04695    | 0.49776909 |            |          |
| ING2      | ENSG00000168556 | 1.6751   | 0.046953 | 0.49243    | 0.31121    | -0.23808   | 0.59409  |
|           |                 | 1.2573   | 0.10431  | 0.046953   | 0.49776909 |            |          |
| LTB4R     | ENSG00000213903 | 1.6751   | 0.046958 | 1.6751     | 0.046958   | 1.6751     | 0.046958 |
|           |                 | 1.6751   | 0.046958 | 0.046958   | 0.49776909 |            |          |
| CPA6      | ENSG00000165078 | 0.48854  | 0.31259  | 0.59587    | 0.27563    | 1.6751     | 0.046959 |
|           |                 | 0.16035  | 0.4363   | 0.046959   | 0.49776909 |            |          |
| ERCC1     | ENSG00000012061 | 0.25173  | 0.40062  | 0.43919    | 0.33026    | 1.6751     | 0.04696  |
|           |                 | -0.80478 | 0.78953  | 0.04696    | 0.49776909 |            |          |
| LINC02844 | ENSG00000253679 | 1.494    | 0.067587 | 1.6748     | 0.046986   | 1.494      | 0.067587 |
|           |                 | 0.067587 | 0.046986 | 0.49776909 |            |            | 1.494    |
| TRAV14DV4 | ENSG00000211792 | 1.5294   | 0.063087 | 1.6747     | 0.047001   | 1.6747     |          |
|           |                 | 0.047001 | 1.6747   | 0.047001   | 0.047001   | 0.49776909 |          |
| TMPO      | ENSG00000120802 | 1.6746   | 0.047006 | 1.6746     | 0.047006   | 1.6746     | 0.047006 |
|           |                 | 1.2216   | 0.11093  | 0.047006   | 0.49776909 |            |          |
| NA        | ENSG00000272574 | 1.6742   | 0.047045 | 1.6742     | 0.047045   | 1.6742     | 0.047045 |
|           |                 | 1.6742   | 0.047045 | 0.047045   | 0.49776909 |            |          |
| ASIC4     | ENSG00000072182 | 1.6742   | 0.047046 | 0.4372     | 0.33098    | -1.3737    | 0.91523  |
|           |                 | 0.80784  | 0.20959  | 0.047046   | 0.49776909 |            |          |
| NA        | ENSG00000225457 | 1.6739   | 0.047079 | 0.36971    | 0.3558     | 0.36971    | 0.3558   |
|           |                 | 0.36971  | 0.3558   | 0.047079   | 0.49776909 |            |          |
| MED4-AS1  | ENSG00000229111 | 1.6737   | 0.047091 | 1.6737     | 0.047091   | 1.6737     |          |
|           |                 | 0.047091 | 1.6737   | 0.047091   | 0.047091   | 0.49776909 |          |
| LTBR      | ENSG00000111321 | 1.6736   | 0.047101 | -0.64414   | 0.74026    | 0.91977    | 0.17885  |
|           |                 | 0.17844  | 0.42919  | 0.047101   | 0.49776909 |            |          |
| UGT2B24P  | ENSG00000249956 | 0.62976  | 0.26443  | 0.74072    | 0.22943    | 0.42319    |          |
|           |                 | 0.33608  | 1.6736   | 0.047105   | 0.047105   | 0.49776909 |          |
| CCDC144NL | ENSG00000205212 | 0.034488 | 0.48624  | -0.13423   | 0.55339    | 1.6735     |          |
|           |                 | 0.047111 | -0.74889 | 0.77304    | 0.047111   | 0.49776909 |          |
| NA        | ENSG00000280449 | 1.6735   | 0.047118 | 1.6735     | 0.047118   | 1.6735     | 0.047118 |
|           |                 | 0.27998  | 0.38975  | 0.047118   | 0.49776909 |            |          |
| NA        | ENSG00000252722 | 1.0903   | 0.13779  | 1.6734     | 0.047125   | 1.0903     | 0.13779  |
|           |                 | 1.6734   | 0.047125 | 0.047125   | 0.49776909 |            |          |
| RNU5E-8P  | ENSG00000200372 | 1.6733   | 0.047138 | 1.6733     | 0.047138   | 1.6733     |          |
|           |                 | 0.047138 | 1.6733   | 0.047138   | 0.047138   | 0.49776909 |          |
| OAS3      | ENSG00000111331 | 0.77633  | 0.21878  | -0.42791   | 0.66564    | -0.19045   | 0.57552  |
|           |                 | 1.6731   | 0.047151 | 0.047151   | 0.49776909 |            |          |
| NA        | ENSG00000253500 | 0.011552 | 0.49539  | 1.4965     | 0.067263   | -0.23588   | 0.59324  |
|           |                 | 1.6731   | 0.047152 | 0.047152   | 0.49776909 |            |          |
| COX15     | ENSG00000014919 | 1.673    | 0.047168 | -0.3042    | 0.61951    | 0.23727    | 0.40622  |
|           |                 | 1.0749   | 0.14122  | 0.047168   | 0.49776909 |            |          |
| RNU4-61P  | ENSG00000223175 | 1.6729   | 0.047171 | 1.6729     | 0.047171   | 1.6729     |          |
|           |                 | 0.047171 | 1.6729   | 0.047171   | 0.047171   | 0.49776909 |          |
| NA        | ENSG00000222007 | 0.76655  | 0.22167  | 1.2317     | 0.10903    | 1.2648     | 0.10298  |
|           |                 | 1.6726   | 0.047201 | 0.047201   | 0.49776909 |            |          |
| NA        | ENSG00000257746 | 1.6726   | 0.047207 | -0.065947  | 0.52629    | 0.54487    | 0.29292  |
|           |                 | 1.3337   | 0.091156 | 0.047207   | 0.49776909 |            |          |
| ACP3      | ENSG00000014257 | 1.6724   | 0.047222 | 1.1628     | 0.12246    | 0.11501    | 0.45422  |
|           |                 | 0.051966 | 0.47928  | 0.047222   | 0.49776909 |            |          |
| DNAJB2    | ENSG00000135924 | 1.6724   | 0.047223 | 1.6616     | 0.048297   | 1.6616     |          |
|           |                 | 0.048297 | 1.6616   | 0.048297   | 0.047223   | 0.49776909 |          |

|           |                 |           |            |            |            |          |          |
|-----------|-----------------|-----------|------------|------------|------------|----------|----------|
| NA        | ENSG00000249825 | 1.0315    | 0.15114    | -0.53334   | 0.7031     | 1.1493   | 0.12521  |
|           | 1.6724          | 0.047226  | 0.047226   | 0.49776909 |            |          |          |
| SYNE3     | ENSG00000176438 | 1.6723    | 0.047228   | -0.45292   | 0.6747     | 0.35775  | 0.36026  |
|           | 0.868           | 0.1927    | 0.047228   | 0.49776909 |            |          |          |
| NA        | ENSG00000240219 | 1.6721    | 0.047252   | 1.6721     | 0.047252   | 1.6721   | 0.047252 |
|           | 1.6721          | 0.047252  | 0.047252   | 0.49776909 |            |          |          |
| RNU4-30P  | ENSG00000222177 | 1.672     | 0.047262   | 1.672      | 0.047262   | 1.672    | 0.047262 |
|           | 0.047262        | 0.047262  | 0.49776909 |            |            |          |          |
| LINC01744 | ENSG00000236497 | 1.672     | 0.047263   | 1.4943     | 0.067554   | 1.4943   | 0.067554 |
|           | 0.40453         | 0.34291   | 0.047263   | 0.49776909 |            |          |          |
| SP1       | ENSG00000185591 | 1.608     | 0.053917   | 1.54       | 0.061785   | 1.291    | 0.098344 |
|           | 0.047268        | 0.047268  | 0.49776909 |            |            |          |          |
| FAM83G    | ENSG00000188522 | 1.6717    | 0.04729    | 1.6717     | 0.04729    | 1.6717   |          |
|           | 0.04729         | 1.6717    | 0.04729    | 0.04729    | 0.49776909 |          |          |
| NA        | ENSG00000232396 | 1.6717    | 0.047294   | 1.6717     | 0.047294   | 1.6717   | 0.047294 |
|           | 1.6717          | 0.047294  | 0.047294   | 0.49776909 |            |          |          |
| NA        | ENSG00000239446 | 1.6717    | 0.047294   | 1.6717     | 0.047294   | 1.6717   | 0.047294 |
|           | 1.6717          | 0.047294  | 0.047294   | 0.49776909 |            |          |          |
| HDLBP     | ENSG00000115677 | 1.418     | 0.078102   | 1.6716     | 0.047299   | 0.30439  | 0.38041  |
|           | 1.1965          | 0.11575   | 0.047299   | 0.49776909 |            |          |          |
| NA        | ENSG00000275002 | 1.6716    | 0.047303   | 1.6716     | 0.047303   | 1.6716   | 0.047303 |
|           | 1.6716          | 0.047303  | 0.047303   | 0.49776909 |            |          |          |
| ARL5AP2   | ENSG00000236818 | 0.32116   | 0.37404    | 1.6716     | 0.047305   | 1.6716   |          |
|           | 0.047305        | 1.6716    | 0.047305   | 0.047305   | 0.49776909 |          |          |
| HMGB3P12  | ENSG00000237603 | 1.6715    | 0.047307   | 1.6715     | 0.047307   | 1.6715   |          |
|           | 0.047307        | 0.98865   | 0.16142    | 0.047307   | 0.49776909 |          |          |
| RFESDP1   | ENSG00000231650 | 0.37059   | 0.35547    | 1.6714     | 0.047318   | -0.27785 |          |
|           | 0.60944         | 1.6714    | 0.047318   | 0.047318   | 0.49776909 |          |          |
| HSPA8P3   | ENSG00000234788 | 1.6714    | 0.047318   | 1.6714     | 0.047318   | 1.6714   |          |
|           | 0.047318        | 1.6714    | 0.047318   | 0.047318   | 0.49776909 |          |          |
| HMGXB4    | ENSG00000100281 | 1.6712    | 0.047337   | 0.60842    | 0.27145    | 0.98717  |          |
|           | 0.16178         | 0.81687   | 0.207      | 0.047337   | 0.49776909 |          |          |
| MRPS2     | ENSG00000122140 | -0.56617  | 0.71436    | -0.56617   | 0.71436    | -0.56617 | 0.71436  |
|           | 1.6711          | 0.047349  | 0.047349   | 0.49776909 |            |          |          |
| LINC02504 | ENSG00000248339 | -0.55505  | 0.71057    | 1.6711     | 0.047351   | -0.4515  |          |
|           | 0.67418         | -0.82038  | 0.794      | 0.047351   | 0.49776909 |          |          |
| KIRREL1   | ENSG00000183853 | 1.5133    | 0.065099   | 1.4902     | 0.06808    | 1.671    | 0.047356 |
|           | 1.2283          | 0.10967   | 0.047356   | 0.49776909 |            |          |          |
| HOXA4     | ENSG00000197576 | 1.2865    | 0.099129   | 1.6707     | 0.047386   | 1.2865   | 0.099129 |
|           | 1.2865          | 0.099129  | 0.047386   | 0.49776909 |            |          |          |
| NA        | ENSG00000256011 | 1.6707    | 0.047392   | -0.33048   | 0.62948    | -0.33048 | 0.62948  |
|           | -0.33048        | 0.62948   | 0.047392   | 0.49776909 |            |          |          |
| NA        | ENSG00000254286 | 1.6706    | 0.047399   | 0.95112    | 0.17077    | 1.2996   | 0.096875 |
|           | -0.11475        | 0.54568   | 0.047399   | 0.49776909 |            |          |          |
| LRRC31    | ENSG00000114248 | -0.16797  | 0.5667     | -0.16797   | 0.5667     | -0.58464 |          |
|           | 0.72061         | 1.6705    | 0.047413   | 0.047413   | 0.49776909 |          |          |
| RPL38     | ENSG00000172809 | 1.6704    | 0.047425   | -0.67567   | 0.75037    | -0.13991 | 0.55563  |
|           | 0.3521          | 0.36238   | 0.047425   | 0.49776909 |            |          |          |
| NA        | ENSG00000274080 | 1.6702    | 0.047437   | 1.6702     | 0.047437   | 1.6702   | 0.047437 |
|           | 1.6702          | 0.047437  | 0.047437   | 0.49776909 |            |          |          |
| NA        | ENSG00000178193 | -0.019358 | 0.50772    | -0.019358  | 0.50772    | 1.6702   | 0.047439 |
|           | -0.48657        | 0.68672   | 0.047439   | 0.49776909 |            |          |          |
| ZNF557    | ENSG00000130544 | 1.0409    | 0.14895    | -0.13982   | 0.5556     | 1.4689   |          |
|           | 0.070924        | 1.6701    | 0.047447   | 0.047447   | 0.49776909 |          |          |
| SLC34A1   | ENSG00000131183 | -1.4003   | 0.91929    | 1.6701     | 0.047453   | -0.83013 |          |
|           | 0.79677         | -1.125    | 0.8697     | 0.047453   | 0.49776909 |          |          |
| POLR3G    | ENSG00000113356 | 1.6699    | 0.047471   | 0.42162    | 0.33665    | 1.6699   |          |
|           | 0.047471        | 1.6181    | 0.052821   | 0.047471   | 0.49776909 |          |          |
| FNDC7     | ENSG00000143107 | -0.12385  | 0.54928    | 0.37207    | 0.35492    | -0.12385 | 0.54928  |
|           | 1.6697          | 0.047489  | 0.047489   | 0.49776909 |            |          |          |
| GPC2      | ENSG00000213420 | 1.3594    | 0.087011   | 1.6697     | 0.047492   | 1.6697   | 0.047492 |
|           | 1.6697          | 0.047492  | 0.047492   | 0.49776909 |            |          |          |

|            |                 |             |          |             |          |           |          |
|------------|-----------------|-------------|----------|-------------|----------|-----------|----------|
| NA         | ENSG00000227482 | 1.6697      | 0.047493 | 0.64941     | 0.25804  | -0.032299 | 0.51288  |
|            | 0.11175         | 0.45551     | 0.047493 | 0.49776909  |          |           |          |
| CHRM4      | ENSG00000180720 | 1.6696      | 0.047499 | 1.6696      | 0.047499 | 1.6696    | 0.047499 |
|            | 1.6696          | 0.047499    | 0.047499 | 0.49776909  |          |           |          |
| TLK2       | ENSG00000146872 | -0.081183   | 0.53235  | 1.6693      | 0.047524 | 0.21515   | 0.41483  |
|            | 1.2454          | 0.1065      | 0.047524 | 0.497837915 |          |           |          |
| NA         | ENSG00000237760 | 0.27386     | 0.3921   | 0.43311     | 0.33247  | 1.1618    | 0.12266  |
|            | 1.6693          | 0.047526    | 0.047526 | 0.497837915 |          |           |          |
| NA         | ENSG00000237356 | 0.95284     | 0.17034  | 1.6692      | 0.047538 | 0.77222   | 0.21999  |
|            | 1.1839          | 0.11822     | 0.047538 | 0.497856596 |          |           |          |
| MRPL45     | ENSG00000278845 | 0.91948     | 0.17892  | 1.1425      | 0.12663  | -1.2097   |          |
|            | 0.8868          | 1.6689      | 0.047564 | 0.497925492 |          |           |          |
| MROH7      | ENSG00000184313 | 0.39048     | 0.34809  | 0.55674     | 0.28885  | 1.3785    | 0.084019 |
|            | 1.6682          | 0.047639    | 0.047639 | 0.497925492 |          |           |          |
| RNU6-640P  | ENSG00000200563 | 0.91123     | 0.18109  | 0.9121      | 0.18086  | 1.0584    |          |
|            | 0.14493         | 1.6681      | 0.047643 | 0.497925492 |          |           |          |
| LINC01299  | ENSG00000254081 | 1.6679      | 0.047666 | 1.1749      | 0.12002  | 1.493     | 0.067715 |
|            | 1.1894          | 0.11713     | 0.047666 | 0.497925492 |          |           |          |
| NA         | ENSG00000248867 | 1.1599      | 0.12304  | 0.89362     | 0.18576  | 1.6678    | 0.047675 |
|            | 0.067723        | 0.473       | 0.047675 | 0.497925492 |          |           |          |
| OR7A19P    | ENSG00000272963 | 1.1934      | 0.11635  | -0.065492   | 0.52611  | 1.6678    |          |
|            | 0.047675        | 1.1934      | 0.11635  | 0.497925492 |          |           |          |
| RNU6-1212P | ENSG00000252832 | 1.0805      | 0.13996  | 0.90769     | 0.18202  | 0.067454  |          |
|            | 0.47311         | 1.6678      | 0.047679 | 0.497925492 |          |           |          |
| PTPN21     | ENSG00000070778 | 1.6675      | 0.047705 | 0.10697     | 0.45741  | 1.6675    |          |
|            | 0.047705        | 0.10697     | 0.45741  | 0.497925492 |          |           |          |
| LINC02565  | ENSG00000267726 | -0.13403    | 0.55331  | 1.6675      | 0.047707 | 0.55188   |          |
|            | 0.29052         | 1.6675      | 0.047707 | 0.497925492 |          |           |          |
| SERPINA13P | ENSG00000187483 | -0.29346    | 0.61542  | 0.22309     | 0.41173  | 1.6669    |          |
|            | 0.047762        | -0.26368    | 0.60399  | 0.497925492 |          |           |          |
| SSC4D      | ENSG00000146700 | 1.6669      | 0.047765 | 1.4867      | 0.068552 | 1.4269    | 0.076804 |
|            | 1.6301          | 0.051543    | 0.047765 | 0.497925492 |          |           |          |
| NA         | ENSG00000260090 | 1.6669      | 0.047767 | 1.6641      | 0.048044 | 0.30575   | 0.3799   |
|            | 0.30575         | 0.3799      | 0.047767 | 0.497925492 |          |           |          |
| NA         | ENSG00000251112 | -0.18013    | 0.57147  | 1.6669      | 0.04777  | -0.18013  | 0.57147  |
|            | -0.18013        | 0.57147     | 0.04777  | 0.497925492 |          |           |          |
| NA         | ENSG00000266544 | 1.6668      | 0.04778  | 1.6668      | 0.04778  | 1.6668    | 0.04778  |
|            | 1.1889          | 0.11725     | 0.04778  | 0.497925492 |          |           |          |
| SERP2      | ENSG00000151778 | -1.9231     | 0.97276  | 1.6667      | 0.047787 | -1.4654   | 0.92859  |
|            | -0.52508        | 0.70024     | 0.047787 | 0.497925492 |          |           |          |
| NA         | ENSG00000260661 | -1.2226     | 0.88925  | 1.6665      | 0.04781  | -1.2226   | 0.88925  |
|            | -0.90655        | 0.81768     | 0.04781  | 0.497925492 |          |           |          |
| MIR1229    | ENSG00000221394 | 1.6665      | 0.047811 | 1.6665      | 0.047811 | 1.6665    |          |
|            | 0.047811        | 1.6665      | 0.047811 | 0.497925492 |          |           |          |
| NA         | ENSG00000280129 | 1.6663      | 0.047822 | 1.6663      | 0.047822 | 1.6663    | 0.047822 |
|            | 1.6663          | 0.047822    | 0.047822 | 0.497925492 |          |           |          |
| RPL39P31   | ENSG00000242176 | 1.6663      | 0.047826 | 1.6663      | 0.047826 | 1.6663    |          |
|            | 0.047826        | 1.6663      | 0.047826 | 0.497925492 |          |           |          |
| MIR7515HG  | ENSG00000236172 | 0.94529     | 0.17226  | 1.3802      | 0.083755 | 1.1995    |          |
|            | 0.11517         | 1.6662      | 0.047839 | 0.497925492 |          |           |          |
| NA         | ENSG00000253369 | 1.666       | 0.047852 | 1.666       | 0.047852 | 1.666     | 0.047852 |
|            | 0.047852        | 0.497925492 |          |             |          |           |          |
| UPF2       | ENSG00000151461 | 1.5492      | 0.060666 | 1.5082      | 0.065751 | 1.6659    | 0.047865 |
|            | 1.284           | 0.099576    | 0.047865 | 0.497925492 |          |           |          |
| GOLGA6L4   | ENSG00000184206 | -0.0043567  | 0.50174  | 1.6659      | 0.047868 | 0.011925  |          |
|            | 0.49524         | 0.15369     | 0.43893  | 0.497925492 |          |           |          |
| NA         | ENSG00000213527 | 1.5516      | 0.060375 | 1.6658      | 0.047879 | 1.306     | 0.095772 |
|            | 1.5516          | 0.060375    | 0.047879 | 0.497925492 |          |           |          |
| RPS12P16   | ENSG00000215184 | 1.1706      | 0.12087  | 0.84759     | 0.19833  | 1.6656    |          |
|            | 0.047901        | 1.1706      | 0.12087  | 0.497925492 |          |           |          |
| RN7SL350P  | ENSG00000243254 | 1.6656      | 0.047901 | 1.6656      | 0.047901 | 1.6656    |          |
|            | 0.047901        | 0.87149     | 0.19174  | 0.497925492 |          |           |          |

|            |                 |           |          |             |             |           |          |  |
|------------|-----------------|-----------|----------|-------------|-------------|-----------|----------|--|
| FBXW12     | ENSG00000164049 | 1.1289    | 0.12946  | 1.0959      | 0.13657     | 1.5083    |          |  |
|            | 0.065742        | 1.6655    | 0.047911 | 0.047911    | 0.497925492 |           |          |  |
| NA         | ENSG00000279668 | 0.66995   | 0.25144  | 1.6654      | 0.047917    | -0.070272 | 0.52801  |  |
|            | -0.48853        | 0.68741   | 0.047917 | 0.497925492 |             |           |          |  |
| PRDX3P2    | ENSG00000231468 | 1.5523    | 0.060295 | 1.6652      | 0.047932    | 1.5523    |          |  |
|            | 0.060295        | 1.5523    | 0.060295 | 0.047932    | 0.497925492 |           |          |  |
| NA         | ENSG00000215958 | -0.99192  | 0.83938  | -0.99192    | 0.83938     | 1.6652    | 0.047941 |  |
|            | -0.963          | 0.83223   | 0.047941 | 0.497925492 |             |           |          |  |
| NA         | ENSG00000240404 | 1.6651    | 0.047943 | 1.6651      | 0.047943    | 1.6651    | 0.047943 |  |
|            | 1.6651          | 0.047943  | 0.047943 | 0.497925492 |             |           |          |  |
| SETP6      | ENSG00000241319 | 1.6651    | 0.047943 | 1.5109      | 0.065405    | 1.6651    | 0.047943 |  |
|            | 1.6651          | 0.047943  | 0.047943 | 0.497925492 |             |           |          |  |
| RPS27AP9   | ENSG00000242706 | -0.25708  | 0.60144  | 0.15491     | 0.43845     | 1.6651    |          |  |
|            | 0.047943        | 1.6651    | 0.047943 | 0.047943    | 0.497925492 |           |          |  |
| BSN        | ENSG00000164061 | 0.81083   | 0.20873  | 0.44585     | 0.32785     | -0.21622  | 0.58559  |  |
|            | 1.6646          | 0.047998  | 0.047998 | 0.497925492 |             |           |          |  |
| ZNF85      | ENSG00000105750 | 1.6646    | 0.048001 | 0.3807      | 0.35171     | 1.0355    | 0.15023  |  |
|            | -0.5536         | 0.71007   | 0.048001 | 0.497925492 |             |           |          |  |
| RASSF5     | ENSG00000266094 | 0.65195   | 0.25722  | 1.6645      | 0.048006    | 0.70299   |          |  |
|            | 0.24103         | 1.3006    | 0.096695 | 0.048006    | 0.497925492 |           |          |  |
| TBC1D8     | ENSG00000204634 | 1.6644    | 0.04802  | -0.081831   | 0.53261     | 0.33527   |          |  |
|            | 0.36871         | 1.0159    | 0.15485  | 0.04802     | 0.497925492 |           |          |  |
| MORC3      | ENSG00000159256 | 0.0071129 | 0.49716  | 1.6643      | 0.048025    | 0.48934   | 0.3123   |  |
|            | 0.18757         | 0.42561   | 0.048025 | 0.497925492 |             |           |          |  |
| ATP8B4     | ENSG00000104043 | 1.6128    | 0.053396 | 1.6642      | 0.048041    | 1.4039    |          |  |
|            | 0.080176        | 0.82596   | 0.20441  | 0.048041    | 0.497925492 |           |          |  |
| IFITM2     | ENSG00000185201 | 0.32144   | 0.37394  | 0.32144     | 0.37394     | 1.6642    |          |  |
|            | 0.048041        | -0.11414  | 0.54544  | 0.048041    | 0.497925492 |           |          |  |
| SNORA36B   | ENSG00000222370 | 0.17219   | 0.43164  | 1.3188      | 0.093614    | 1.664     | 0.04806  |  |
|            | 1.664           | 0.04806   | 0.04806  | 0.497925492 |             |           |          |  |
| CCDC167    | ENSG00000198937 | -0.35016  | 0.63689  | 1.6639      | 0.048063    | -0.59769  |          |  |
|            | 0.72498         | 0.18943   | 0.42488  | 0.048063    | 0.497925492 |           |          |  |
| LINC02132  | ENSG00000268804 | 0.55705   | 0.28875  | 1.6639      | 0.048067    | 1.6639    |          |  |
|            | 0.048067        | 1.4613    | 0.071972 | 0.048067    | 0.497925492 |           |          |  |
| ZFP64P1    | ENSG00000258491 | 1.6638    | 0.04808  | 1.0996      | 0.13576     | 1.6638    |          |  |
|            | 0.04808         | 1.6638    | 0.04808  | 0.04808     | 0.497925492 |           |          |  |
| NA         | ENSG00000235105 | 1.6637    | 0.048085 | 1.1884      | 0.11733     | 0.6754    | 0.24971  |  |
|            | 0.65319         | 0.25682   | 0.048085 | 0.497925492 |             |           |          |  |
| TDRD10     | ENSG00000163239 | 1.3402    | 0.090085 | 0.69028     | 0.24501     | 1.6637    |          |  |
|            | 0.048087        | 1.0268    | 0.15227  | 0.048087    | 0.497925492 |           |          |  |
| NA         | ENSG00000257932 | 0.41951   | 0.33742  | 0.17642     | 0.42998     | 1.6635    | 0.048111 |  |
|            | -0.85517        | 0.80377   | 0.048111 | 0.497925492 |             |           |          |  |
| NA         | ENSG00000236426 | 1.6634    | 0.048121 | 1.404       | 0.080153    | 1.6634    | 0.048121 |  |
|            | 1.6634          | 0.048121  | 0.048121 | 0.497925492 |             |           |          |  |
| NA         | ENSG00000236543 | 0.73675   | 0.23064  | -0.83731    | 0.79879     | -1.3407   | 0.90999  |  |
|            | 1.6633          | 0.048127  | 0.048127 | 0.497925492 |             |           |          |  |
| PRELID3BP2 | ENSG00000271242 | 1.6631    | 0.048142 | 1.2089      | 0.11336     | 1.2481    |          |  |
|            | 0.10599         | 0.56865   | 0.2848   | 0.048142    | 0.497925492 |           |          |  |
| ARL6IP5    | ENSG00000144746 | 1.5553    | 0.059932 | 1.5663      | 0.058635    | 1.0485    |          |  |
|            | 0.1472          | 1.663     | 0.048156 | 0.048156    | 0.497925492 |           |          |  |
| NA         | ENSG00000276107 | 1.6629    | 0.048163 | 1.6629      | 0.048163    | 1.6629    | 0.048163 |  |
|            | 1.6629          | 0.048163  | 0.048163 | 0.497925492 |             |           |          |  |
| BMP1       | ENSG00000168487 | -0.83879  | 0.79921  | 1.6627      | 0.048187    | 0.7683    | 0.22115  |  |
|            | -0.11868        | 0.54723   | 0.048187 | 0.497925492 |             |           |          |  |
| PPDPF      | ENSG00000125534 | 0.44572   | 0.3279   | 1.3359      | 0.090791    | 1.6626    | 0.048193 |  |
|            | 1.6626          | 0.048193  | 0.048193 | 0.497925492 |             |           |          |  |
| MTPAP      | ENSG00000107951 | 1.6624    | 0.048212 | 1.6624      | 0.048212    | 0.14284   | 0.44321  |  |
|            | 1.5371          | 0.062135  | 0.048212 | 0.497925492 |             |           |          |  |
| SAMD13     | ENSG00000203943 | 1.5231    | 0.063863 | 1.5231      | 0.063863    | 1.5231    |          |  |
|            | 0.063863        | 1.6622    | 0.048236 | 0.048236    | 0.497925492 |           |          |  |
| TUBA4B     | ENSG00000243910 | 1.6622    | 0.048239 | 1.4093      | 0.079378    | 1.6622    |          |  |
|            | 0.048239        | 1.6622    | 0.048239 | 0.048239    | 0.497925492 |           |          |  |



|            |                 |            |          |             |             |          |          |  |
|------------|-----------------|------------|----------|-------------|-------------|----------|----------|--|
| DLGAP1-AS5 | ENSG00000261520 | 1.6621     | 0.048244 | 0.4456      | 0.32794     | -0.35918 |          |  |
|            | 0.64027         | -0.50028   | 0.69156  | 0.048244    | 0.497925492 |          |          |  |
| STXBP3     | ENSG00000116266 | 1.6621     | 0.048245 | 1.2777      | 0.10068     | 1.6621   |          |  |
|            | 0.048245        | 1.5097     | 0.065558 | 0.048245    | 0.497925492 |          |          |  |
| RNU6-815P  | ENSG00000206807 | -0.4091    | 0.65877  | 1.6621      | 0.04825     | 0.32451  |          |  |
|            | 0.37278         | -0.4091    | 0.65877  | 0.04825     | 0.497925492 |          |          |  |
| LINC01817  | ENSG00000231420 | -0.21576   | 0.58541  | 1.662       | 0.048256    | 1.1547   | 0.1241   |  |
|            | -0.13225        | 0.55261    | 0.048256 | 0.497925492 |             |          |          |  |
| CPHL1P     | ENSG00000240216 | 1.0885     | 0.13819  | 1.2351      | 0.1084      | 1.662    | 0.048257 |  |
|            | 0.98543         | 0.16221    | 0.048257 | 0.497925492 |             |          |          |  |
| LINC01565  | ENSG00000198685 | 1.4451     | 0.074221 | 1.6619      | 0.048261    | 1.022    | 0.15339  |  |
|            | 0.22349         | 0.41158    | 0.048261 | 0.497925492 |             |          |          |  |
| RNA5SP182  | ENSG00000251873 | 1.6619     | 0.048267 | 1.5768      | 0.057424    | 1.2649   |          |  |
|            | 0.10295         | 1.6619     | 0.048267 | 0.048267    | 0.497925492 |          |          |  |
| RN7SL685P  | ENSG00000242315 | 0.20921    | 0.41714  | 0.72443     | 0.2344      | 1.3962   |          |  |
|            | 0.081329        | 1.6619     | 0.048269 | 0.048269    | 0.497925492 |          |          |  |
| RNU7-59P   | ENSG00000238880 | 1.6618     | 0.048273 | -0.24658    | 0.59738     | 0.67251  |          |  |
|            | 0.25063         | 1.4116     | 0.079029 | 0.048273    | 0.497925492 |          |          |  |
| PTP4A2P2   | ENSG00000254481 | 1.336      | 0.090767 | 1.3672      | 0.085775    | 1.6143   | 0.053232 |  |
|            | 1.6616          | 0.048298   | 0.048298 | 0.497925492 |             |          |          |  |
| NA         | ENSG00000204365 | 1.6615     | 0.048303 | 0.84524     | 0.19899     | 0.84524  | 0.19899  |  |
|            | 0.84524         | 0.19899    | 0.048303 | 0.497925492 |             |          |          |  |
| PCDHA9     | ENSG00000204961 | 1.6615     | 0.048305 | -0.3186     | 0.62499     | -0.58458 |          |  |
|            | 0.72058         | -0.097398  | 0.53879  | 0.048305    | 0.497925492 |          |          |  |
| RBP3       | ENSG00000265203 | -0.0091515 | 0.50365  | 1.6613      | 0.048323    | 1.2658   | 0.10279  |  |
|            | 1.5854          | 0.056438   | 0.048323 | 0.497925492 |             |          |          |  |
| PIGQ       | ENSG00000007541 | 1.6613     | 0.04833  | 0.18193     | 0.42782     | 1.4677   | 0.071092 |  |
|            | 1.5551          | 0.059964   | 0.04833  | 0.497925492 |             |          |          |  |
| NA         | ENSG00000278126 | 1.6613     | 0.04833  | 1.6613      | 0.04833     | 1.6613   | 0.04833  |  |
|            | 1.6613          | 0.04833    | 0.04833  | 0.497925492 |             |          |          |  |
| RPL27AP    | ENSG00000215467 | 1.6612     | 0.048336 | -0.37792    | 0.64726     | -0.37792 |          |  |
|            | 0.64726         | -0.37792   | 0.64726  | 0.048336    | 0.497925492 |          |          |  |
| LINC02863  | ENSG00000238160 | 1.6612     | 0.048336 | 1.1358      | 0.12803     | 1.6087   |          |  |
|            | 0.05384         | 0.7759     | 0.2189   | 0.048336    | 0.497925492 |          |          |  |
| MRPL50P2   | ENSG00000238285 | 1.6611     | 0.048343 | 1.6611      | 0.048343    | 1.6611   |          |  |
|            | 0.048343        | 1.5381     | 0.062014 | 0.048343    | 0.497925492 |          |          |  |
| GTF2IP4    | ENSG00000233369 | 1.661      | 0.048357 | 0.46792     | 0.31992     | 0.54845  | 0.29169  |  |
|            | 0.73389         | 0.23151    | 0.048357 | 0.497925492 |             |          |          |  |
| NA         | ENSG00000271893 | 1.1903     | 0.11696  | 1.6609      | 0.048364    | 1.6061   | 0.054122 |  |
|            | 0.84938         | 0.19783    | 0.048364 | 0.497925492 |             |          |          |  |
| NA         | ENSG00000249261 | 1.6609     | 0.048368 | 1.6609      | 0.048368    | 1.6609   | 0.048368 |  |
|            | 1.6609          | 0.048368   | 0.048368 | 0.497925492 |             |          |          |  |
| LSMEM2     | ENSG00000179564 | 1.4598     | 0.072175 | 1.6606      | 0.048395    | 1.5966   |          |  |
|            | 0.055182        | 1.2249     | 0.1103   | 0.048395    | 0.497925492 |          |          |  |
| NA         | ENSG00000260042 | -0.094545  | 0.53766  | 1.6606      | 0.048398    | -0.24469 | 0.59665  |  |
|            | -0.06321        | 0.5252     | 0.048398 | 0.497925492 |             |          |          |  |
| TIMD4      | ENSG00000145850 | 0.095414   | 0.46199  | 1.6605      | 0.048403    | 0.095414 | 0.46199  |  |
|            | -0.035981       | 0.51435    | 0.048403 | 0.497925492 |             |          |          |  |
| NA         | ENSG00000273058 | 1.3695     | 0.085426 | 1.3781      | 0.084087    | 1.2364   | 0.10816  |  |
|            | 1.6604          | 0.048412   | 0.048412 | 0.497925492 |             |          |          |  |
| RALGAPB    | ENSG00000170471 | 1.6603     | 0.048426 | 1.6603      | 0.048426    | 1.6603   |          |  |
|            | 0.048426        | 1.6603     | 0.048426 | 0.048426    | 0.497925492 |          |          |  |
| NA         | ENSG00000231691 | 1.6603     | 0.048431 | 1.6603      | 0.048431    | 1.6603   | 0.048431 |  |
|            | 1.6603          | 0.048431   | 0.048431 | 0.497925492 |             |          |          |  |
| NA         | ENSG00000233818 | 1.5259     | 0.063513 | 1.6603      | 0.048431    | 1.4573   | 0.072514 |  |
|            | 1.1306          | 0.12911    | 0.048431 | 0.497925492 |             |          |          |  |
| NA         | ENSG00000221048 | 0.56149    | 0.28723  | 0.75504     | 0.22511     | -0.33893 | 0.63267  |  |
|            | 1.6602          | 0.048433   | 0.048433 | 0.497925492 |             |          |          |  |
| CCIN       | ENSG00000185972 | 1.6599     | 0.048464 | 1.5401      | 0.061768    | 0.56516  | 0.28598  |  |
|            | 0.79482         | 0.21336    | 0.048464 | 0.497925492 |             |          |          |  |
| SMAD1-AS2  | ENSG00000250582 | 1.3806     | 0.083695 | 1.4777      | 0.069746    | 1.6599   |          |  |
|            | 0.048466        | 1.4964     | 0.067271 | 0.048466    | 0.497925492 |          |          |  |

|            |                 |           |             |             |             |          |          |          |
|------------|-----------------|-----------|-------------|-------------|-------------|----------|----------|----------|
| TPST2P1    | ENSG00000260582 | 1.6599    | 0.048466    | 1.6599      | 0.048466    | 1.6599   | 0.048466 | 1.6599   |
|            | 0.048466        | 1.6599    | 0.048466    | 0.048466    | 0.497925492 |          |          |          |
| VPS25      | ENSG00000131475 | 1.6596    | 0.048495    | 1.6596      | 0.048495    | 1.6596   | 0.048495 | 0.048495 |
|            | 1.6596          | 0.048495  | 0.048495    | 0.497925492 |             |          |          |          |
| TRAJ26     | ENSG00000211863 | 1.6596    | 0.048502    | 1.6596      | 0.048502    | 1.6596   | 0.048502 | 1.6596   |
|            | 0.048502        | 1.6596    | 0.048502    | 0.048502    | 0.497925492 |          |          |          |
| TRAJ25     | ENSG00000211864 | 1.6596    | 0.048502    | 1.6596      | 0.048502    | 1.6596   | 0.048502 | 1.6596   |
|            | 0.048502        | 1.6596    | 0.048502    | 0.048502    | 0.497925492 |          |          |          |
| NA         | ENSG00000237217 | 1.6595    | 0.048509    | 0.39075     | 0.34799     | 1.6595   | 0.048509 | 0.048509 |
|            | 1.6595          | 0.048509  | 0.048509    | 0.497925492 |             |          |          |          |
| NA         | ENSG00000267587 | 1.6594    | 0.048515    | 1.6594      | 0.048515    | 1.6594   | 0.048515 | 0.048515 |
|            | 1.6594          | 0.048515  | 0.048515    | 0.497925492 |             |          |          |          |
| ARL5A      | ENSG00000162980 | 1.6593    | 0.048531    | 0.52912     | 0.29836     | 0.23682  | 0.4064   | 0.4064   |
|            | 0.29773         | 0.38296   | 0.048531    | 0.497925492 |             |          |          |          |
| RPS19BP1   | ENSG00000187051 | -0.29309  | 0.61527     | 0.12195     | 0.45147     | -0.50202 |          |          |
|            | 0.69217         | 1.6591    | 0.048545    | 0.048545    | 0.497925492 |          |          |          |
| TPM1       | ENSG00000140416 | 1.6589    | 0.048563    | 1.3199      | 0.093433    | 0.4048   | 0.34281  | 0.34281  |
|            | 1.0892          | 0.13802   | 0.048563    | 0.497925492 |             |          |          |          |
| C9orf57    | ENSG00000204669 | 0.86961   | 0.19226     | 0.83988     | 0.20049     | 1.6588   |          |          |
|            | 0.048577        | 1.1271    | 0.12985     | 0.048577    | 0.497925492 |          |          |          |
| GBX1       | ENSG00000164900 | 1.6039    | 0.054373    | 0.27676     | 0.39098     | 1.6588   | 0.048582 | 0.048582 |
|            | 1.6039          | 0.054373  | 0.048582    | 0.497925492 |             |          |          |          |
| MND1       | ENSG00000121211 | -0.42242  | 0.66364     | -0.85825    | 0.80462     | 1.6585   | 0.048608 | 0.048608 |
|            | 0.85504         | 0.19626   | 0.048608    | 0.497925492 |             |          |          |          |
| GGNBP1     | ENSG00000204188 | 1.6584    | 0.048621    | 0.27247     | 0.39263     | 1.4089   |          |          |
|            | 0.079429        | 0.81497   | 0.20754     | 0.048621    | 0.497925492 |          |          |          |
| NA         | ENSG00000224049 | 1.3076    | 0.095499    | -0.17525    | 0.56956     | 1.6584   | 0.048623 | 0.048623 |
|            | 1.6584          | 0.048623  | 0.048623    | 0.497925492 |             |          |          |          |
| CLIC5      | ENSG00000112782 | -0.40259  | 0.65638     | -0.58351    | 0.72022     | 0.87506  | 0.19077  | 0.19077  |
|            | 1.6582          | 0.048636  | 0.048636    | 0.497925492 |             |          |          |          |
| SLC7A1     | ENSG00000139514 | 0.60322   | 0.27318     | 0.04193     | 0.48328     | 1.1885   |          |          |
|            | 0.11731         | 1.6582    | 0.048639    | 0.048639    | 0.497925492 |          |          |          |
| LINC02694  | ENSG00000175779 | -0.27096  | 0.60679     | 1.6121      | 0.053475    | 1.6581   |          |          |
|            | 0.048645        | 0.38775   | 0.3491      | 0.048645    | 0.497925492 |          |          |          |
| LIF        | ENSG00000128342 | 1.4188    | 0.077983    | 1.6581      | 0.048649    | 1.2083   | 0.11347  | 0.11347  |
|            | 1.2083          | 0.11347   | 0.048649    | 0.497925492 |             |          |          |          |
| RNU4-10P   | ENSG00000201253 | 1.6579    | 0.048669    | 1.6579      | 0.048669    | 1.6579   | 0.048669 | 1.6579   |
|            | 0.048669        | 1.6579    | 0.048669    | 0.048669    | 0.497925492 |          |          |          |
| NA         | ENSG00000205740 | -0.23438  | 0.59265     | 1.6579      | 0.04867     | -0.23438 | 0.59265  | 0.59265  |
|            | -0.23438        | 0.59265   | 0.04867     | 0.497925492 |             |          |          |          |
| PRMT7      | ENSG00000132600 | 0.66612   | 0.25267     | 0.20425     | 0.41908     | 1.6578   | 0.048675 | 0.048675 |
|            | 1.6578          | 0.048675  | 0.048675    | 0.497925492 |             |          |          |          |
| RHBG       | ENSG00000132677 | 0.89875   | 0.18439     | 1.6578      | 0.048675    | 0.82067  | 0.20592  | 0.20592  |
|            | 0.38212         | 0.35119   | 0.048675    | 0.497925492 |             |          |          |          |
| RGPD8      | ENSG00000169629 | 1.0165    | 0.15469     | 1.6577      | 0.048684    | 1.098    | 0.1361   | 0.1361   |
|            | -0.54557        | 0.70732   | 0.048684    | 0.497925492 |             |          |          |          |
| PRKD3      | ENSG00000115825 | 1.6577    | 0.048689    | 0.92061     | 0.17863     | 1.4233   | 0.077321 | 0.077321 |
|            | 1.3088          | 0.095302  | 0.048689    | 0.497925492 |             |          |          |          |
| RNU6-1234P | ENSG00000252686 | 1.6576    | 0.048703    | 1.6576      | 0.048703    | 1.6576   | 0.048703 | 1.6576   |
|            | 0.048703        | 1.6576    | 0.048703    | 0.048703    | 0.497964161 |          |          |          |
| PMVK       | ENSG00000163344 | 1.6467    | 0.04981     | 1.3376      | 0.090515    | 1.6569   | 0.048773 | 0.048773 |
|            | -1.1731         | 0.87962   | 0.048773    | 0.498491139 |             |          |          |          |
| MOCOS      | ENSG00000075643 | 1.6569    | 0.048775    | 1.1834      | 0.11832     | -0.1078  | 0.54292  | 0.54292  |
|            | -0.15349        | 0.56099   | 0.048775    | 0.498491139 |             |          |          |          |
| IVD        | ENSG00000128928 | -0.010821 | 0.50432     | 0.63726     | 0.26198     | 1.6567   | 0.048793 | 0.048793 |
|            | 0.77975         | 0.21777   | 0.048793    | 0.498560238 |             |          |          |          |
| MIR4688    | ENSG00000264102 | 1.6563    | 0.048828    | 1.6563      | 0.048828    | 1.6563   | 0.048828 | 1.6563   |
|            | 0.048828        | 1.6563    | 0.048828    | 0.048828    | 0.498560238 |          |          |          |
| LINC02712  | ENSG00000273409 | 0.50311   | 0.30745     | 1.656       | 0.04886     | 0.92916  | 0.1764   | 0.1764   |
|            | 0.92916         | 0.1764    | 0.04886     | 0.498560238 |             |          |          |          |
| RNY3P7     | ENSG00000206800 | 1.656     | 0.048866    | 1.656       | 0.048866    | 1.656    | 0.048866 | 1.656    |
|            | 0.048866        | 0.048866  | 0.498560238 |             |             |          |          |          |

|            |                 |          |             |             |             |              |          |
|------------|-----------------|----------|-------------|-------------|-------------|--------------|----------|
| NA         | ENSG00000267144 | 1.6559   | 0.048872    | 1.6559      | 0.048872    | 1.6559       | 0.048872 |
|            |                 | 1.6559   | 0.048872    | 0.498560238 |             |              |          |
| LINC01912  | ENSG00000264699 | 0.14468  | 0.44248     | 0.77146     | 0.22022     | 1.6559       |          |
|            |                 | 0.048876 | 0.7973      | 0.21264     | 0.048876    | 0.498560238  |          |
| LINC01950  | ENSG00000251027 | 1.5132   | 0.065116    | 0.94507     | 0.17231     | 1.5132       |          |
|            |                 | 0.065116 | 1.6558      | 0.048878    | 0.048878    | 0.498560238  |          |
| NA         | ENSG00000238999 | 1.6555   | 0.048916    | 1.6555      | 0.048916    | 1.6555       | 0.048916 |
|            |                 | 1.6555   | 0.048916    | 0.498560238 |             |              |          |
| SNORA50A   | ENSG00000206952 | 1.6554   | 0.04892     | 1.6554      | 0.04892     | 1.6554       |          |
|            |                 | 0.04892  | 1.6554      | 0.04892     | 0.498560238 |              |          |
| SCNN1A     | ENSG00000111319 | 1.6554   | 0.048921    | 0.22434     | 0.41125     | -1.8856      |          |
|            |                 | 0.97033  | 1.066014321 | 0.048921    | 0.498560238 |              |          |
| MLX        | ENSG00000108788 | 1.0242   | 0.15288     | 1.6554      | 0.048924    | 1.0999       | 0.1357   |
|            |                 | 0.33098  | 0.37033     | 0.048924    | 0.498560238 |              |          |
| TSG101     | ENSG00000074319 | 0.98777  | 0.16163     | -1.5664     | 0.94137     | 1.6552       |          |
|            |                 | 0.04894  | -0.10766    | 0.54287     | 0.04894     | 0.498560238  |          |
| NA         | ENSG00000262172 | -0.14557 | 0.55787     | 1.2419      | 0.10714     | 1.6551       | 0.048956 |
|            |                 | -0.32581 | 0.62772     | 0.048956    | 0.498560238 |              |          |
| SLC28A2    | ENSG00000137860 | 1.4259   | 0.076947    | 1.4259      | 0.076947    | 1.6549       |          |
|            |                 | 0.048973 | 1.44007493  | 0.048973    | 0.498560238 |              |          |
| ZNF222     | ENSG00000159885 | 1.6549   | 0.048976    | 1.6549      | 0.048976    | 1.6549       |          |
|            |                 | 0.048976 | 1.6549      | 0.048976    | 0.498560238 |              |          |
| ERI3-IT1   | ENSG00000233602 | 0.39509  | 0.34639     | 1.6548      | 0.048981    | 0.39509      |          |
|            |                 | 0.34639  | -0.45927    | 0.67698     | 0.048981    | 0.498560238  |          |
| MUC12      | ENSG00000205277 | 1.6547   | 0.048992    | 0.63763     | 0.26186     | 1.6547       | 0.048992 |
|            |                 | 1.6547   | 0.048992    | 0.498560238 |             |              |          |
| SPACA7     | ENSG00000153498 | -0.34696 | 0.63569     | 0.79145     | 0.21434     | 1.3273       |          |
|            |                 | 0.092199 | 1.6547      | 0.048995    | 0.048995    | 0.498560238  |          |
| WARS2P1    | ENSG00000227209 | 1.6545   | 0.049013    | 0.59921     | 0.27452     | 1.6545       |          |
|            |                 | 0.049013 | -1.7696     | 0.9616      | 0.049013    | 0.498560238  |          |
| NA         | ENSG00000266891 | 1.212    | 0.11276     | 1.6544      | 0.049023    | 0.91359      | 0.18047  |
|            |                 | 1.6544   | 0.049023    | 0.498560238 |             |              |          |
| NA         | ENSG00000249721 | 1.6544   | 0.049025    | 1.6544      | 0.049025    | 1.6544       | 0.049025 |
|            |                 | 1.6544   | 0.049025    | 0.498560238 |             |              |          |
| PIM1       | ENSG00000137193 | 0.65937  | 0.25483     | 0.35348     | 0.36186     | 1.6543       | 0.04903  |
|            |                 | 1.1594   | 0.12315     | 0.04903     | 0.498560238 |              |          |
| NA         | ENSG00000230490 | 1.2804   | 0.10021     | 1.6543      | 0.049033    | 1.2596       | 0.10391  |
|            |                 | 0.74461  | 0.22825     | 0.049033    | 0.498560238 |              |          |
| RNA5SP275  | ENSG00000200806 | 1.3514   | 0.088281    | 1.3268      | 0.092295    | 0.53587      |          |
|            |                 | 0.29602  | 1.6542      | 0.04904     | 0.04904     | 0.498560238  |          |
| POC1A      | ENSG00000164087 | 0.90337  | 0.18316     | 1.0592      | 0.14475     | 1.6542       | 0.049048 |
|            |                 | 1.3004   | 0.09673     | 0.049048    | 0.498560238 |              |          |
| TPD52L1    | ENSG00000111907 | 0.99292  | 0.16038     | 0.34594     | 0.3647      | 1.6541       |          |
|            |                 | 0.049058 | 1.6541      | 0.049058    | 0.049058    | 0.498560238  |          |
| CCNYL3     | ENSG00000216671 | 0.072652 | 0.47104     | 0.23222     | 0.40819     | 0.21025      |          |
|            |                 | 0.41674  | 1.6541      | 0.049058    | 0.049058    | 0.498560238  |          |
| LONRF2     | ENSG00000170500 | 1.6538   | 0.049086    | 1.0373      | 0.14979     | 1.0627       |          |
|            |                 | 0.14396  | 1.1288      | 0.12949     | 0.049086    | 0.49874078   |          |
| SH3BP4     | ENSG00000130147 | -2.1189  | 0.98295     | -1.0065     | 0.8429      | 0.98312      |          |
|            |                 | 0.16277  | 1.6535      | 0.049119    | 0.049119    | 0.498759315  |          |
| RNU6-1289P | ENSG00000207160 | 1.6534   | 0.049122    | 1.6534      | 0.049122    | 1.6534       |          |
|            |                 | 0.049122 | 1.6534      | 0.049122    | 0.498759315 |              |          |
| RNU6-1226P | ENSG00000207044 | 1.6534   | 0.049125    | 1.6534      | 0.049125    | 1.6534       |          |
|            |                 | 0.049125 | 1.6534      | 0.049125    | 0.498759315 |              |          |
| RPL17P33   | ENSG00000243844 | 1.6534   | 0.04913     | 0.087068    | 0.46531     | 1.6534       |          |
|            |                 | 0.04913  | 1.6534      | 0.04913     | 0.498759315 |              |          |
| NA         | ENSG00000272508 | 1.6533   | 0.049139    | 1.6533      | 0.049139    | 1.6533       | 0.049139 |
|            |                 | 1.6533   | 0.049139    | 0.498759315 |             |              |          |
| NA         | ENSG00000254746 | 1.6531   | 0.049151    | 1.6531      | 0.049151    | 1.6531       | 0.049151 |
|            |                 | 0.35409  | 0.36164     | 0.049151    | 0.498777224 |              |          |
| AGO4       | ENSG00000134698 | 1.5334   | 0.062591    | 1.3115      | 0.094838    | 1.6530049169 |          |
|            |                 | 0.25068  | 0.40103     | 0.049169    | 0.498856    |              |          |

|           |                 |           |             |             |             |             |          |
|-----------|-----------------|-----------|-------------|-------------|-------------|-------------|----------|
| MYLIP     | ENSG00000007944 | 1.6526    | 0.049209    | 1.4393      | 0.075035    | 1.1086      | 0.13379  |
|           |                 | 1.1472    | 0.12564     | 0.049209    | 0.499157904 |             |          |
| NA        | ENSG00000260132 | 1.6524    | 0.049226    | 1.6524      | 0.049226    | 1.6524      | 0.049226 |
|           |                 | 1.6524    | 0.049226    | 0.049226    | 0.499163374 |             |          |
| MTND4P18  | ENSG00000228694 | 0.66142   | 0.25417     | 0.66142     | 0.25417     | 1.6522      |          |
|           |                 | 0.049245  | 0.66142     | 0.25417     | 0.049245    | 0.499163374 |          |
| NPIPB7    | ENSG00000233232 | 0.27544   | 0.39149     | 0.85057     | 0.19751     | 0.74445     |          |
|           |                 | 0.2283    | 1.6521      | 0.049259    | 0.049259    | 0.499163374 |          |
| CFAP99    | ENSG00000206113 | 0.72491   | 0.23425     | 1.522       | 0.064005    | 0.69196     | 0.24448  |
|           |                 | 1.6521    | 0.049261    | 0.049261    | 0.499163374 |             |          |
| NA        | ENSG00000236920 | 0.67595   | 0.24954     | 0.817       | 0.20696     | 1.652       | 0.049263 |
|           |                 | 0.068702  | 0.049263    | 0.499163374 |             |             | 1.4855   |
| NA        | ENSG00000188424 | 1.652     | 0.049271    | -0.88589    | 0.81216     | -1.2053     | 0.88596  |
|           |                 | -0.39477  | 0.65349     | 0.049271    | 0.499163374 |             |          |
| ELOA2     | ENSG00000206181 | 1.4149    | 0.078545    | 1.6518      | 0.049283    | 1.5431      | 0.061398 |
|           |                 | 1.6518    | 0.049283    | 0.049283    | 0.499181166 |             |          |
| RN7SL756P | ENSG00000244610 | 1.6516    | 0.049311    | 1.6516      | 0.049311    | 1.6516      |          |
|           |                 | 0.049311  | 1.6516      | 0.049311    | 0.049311    | 0.499277476 |          |
| RPS29P32  | ENSG00000276703 | -0.37259  | 0.64528     | 0.91983     | 0.17883     | 0.52944     |          |
|           |                 | 0.29825   | 1.6515      | 0.049313    | 0.049313    | 0.499277476 |          |
| NA        | ENSG00000264989 | 1.6265    | 0.051922    | 1.6513      | 0.049344    | 0.52299     | 0.30049  |
|           |                 | 1.4024    | 0.080402    | 0.049344    | 0.499487561 |             |          |
| NANOS2    | ENSG00000188425 | 1.2354    | 0.10834     | 1.6507      | 0.049405    | 1.2947      |          |
|           |                 | 0.097705  | 0.35391     | 0.3617      | 0.049405    | 0.499713305 |          |
| NA        | ENSG00000212458 | 1.6505    | 0.049425    | 1.6505      | 0.049425    | 0.93922     | 0.17381  |
|           |                 | 1.1842    | 0.11817     | 0.049425    | 0.499713305 |             |          |
| NA        | ENSG00000224532 | 0.7304    | 0.23257     | 1.4929      | 0.067735    | 1.4929      | 0.067735 |
|           |                 | 1.6504    | 0.049432    | 0.049432    | 0.499713305 |             |          |
| NA        | ENSG00000234594 | 0.23807   | 0.40591     | -0.50299    | 0.69251     | 1.0346      | 0.15044  |
|           |                 | 1.6502    | 0.049446    | 0.049446    | 0.499713305 |             |          |
| CDC73     | ENSG00000134371 | 0.31691   | 0.37566     | 1.65        | 0.049472    | 0.31691     | 0.37566  |
|           |                 | 0.093856  | 0.46261     | 0.049472    | 0.499713305 |             |          |
| H3-5      | ENSG00000188375 | 0.70811   | 0.23944     | 1.6499      | 0.049481    | 1.6499      | 0.049481 |
|           |                 | 1.6499    | 0.049481    | 0.049481    | 0.499713305 |             |          |
| RNY3P13   | ENSG00000202412 | 1.5827    | 0.056747    | 1.6498      | 0.049494    | 1.3163      |          |
|           |                 | 0.094033  | 1.5055      | 0.066099    | 0.049494    | 0.499713305 |          |
| DCUN1D2   | ENSG00000150401 | 1.0443    | 0.14816     | 0.65453     | 0.25639     | 1.6496      |          |
|           |                 | 0.049507  | 0.91146     | 0.18103     | 0.049507    | 0.499713305 |          |
| MRPL15    | ENSG00000137547 | 1.3076    | 0.095502    | 0.45498     | 0.32456     | 1.6496      |          |
|           |                 | 0.049511  | 1.5049      | 0.066169    | 0.049511    | 0.499713305 |          |
| NA        | ENSG00000233517 | 0.14914   | 0.44072     | 0.088523    | 0.46473     | 1.6496      | 0.049517 |
|           |                 | 0.14914   | 0.44072     | 0.049517    | 0.499713305 |             |          |
| FAM86LP   | ENSG00000242731 | 1.6494    | 0.049535    | 1.1645      | 0.12211     | -1.0217     |          |
|           |                 | 0.84653   | -0.27271    | 0.60746     | 0.049535    | 0.499713305 |          |
| PCNPP2    | ENSG00000225856 | 1.6494    | 0.049537    | 1.6494      | 0.049537    | 1.6494      |          |
|           |                 | 0.049537  | 0.11411     | 0.45458     | 0.049537    | 0.499713305 |          |
| NOL4L-DT  | ENSG00000204393 | 1.264     | 0.10311     | 1.6493      | 0.049547    | 1.2259      | 0.11012  |
|           |                 | 1.6076    | 0.053966    | 0.049547    | 0.499713305 |             |          |
| NA        | ENSG00000283341 | 1.649     | 0.049577    | 1.649       | 0.049577    | 1.649       | 0.049577 |
|           |                 | 0.049577  | 0.499713305 |             |             |             |          |
| NA        | ENSG00000249403 | 0.0053246 | 0.49788     | 0.97335     | 0.16519     | 1.6489      | 0.049583 |
|           |                 | 0.0053246 | 0.49788     | 0.049583    | 0.499713305 |             |          |
| COL21A1   | ENSG00000124749 | 1.6488    | 0.049599    | 0.34932     | 0.36342     | -0.50927    |          |
|           |                 | 0.69472   | -0.36964    | 0.64417     | 0.049599    | 0.499713305 |          |
| TECPR2    | ENSG00000196663 | 1.63      | 0.051547    | 1.6487      | 0.049604    | 1.3111      | 0.094919 |
|           |                 | 1.0621    | 0.1441      | 0.049604    | 0.499713305 |             |          |
| GPS2P1    | ENSG00000236496 | 1.6487    | 0.049606    | 0.19248     | 0.42368     | -0.69084    |          |
|           |                 | 0.75517   | 0.19248     | 0.42368     | 0.049606    | 0.499713305 |          |
| SSTR2     | ENSG00000180616 | 1.6487    | 0.049608    | 1.0661      | 0.14319     | 0.081603    | 0.46748  |
|           |                 | -1.1393   | 0.87271     | 0.049608    | 0.499713305 |             |          |
| UCP2      | ENSG00000175567 | -0.59061  | 0.72261     | -0.33296    | 0.63042     | 1.6486      | 0.049613 |
|           |                 | -0.62218  | 0.73309     | 0.049613    | 0.499713305 |             |          |

|            |                 |             |          |             |             |          |          |
|------------|-----------------|-------------|----------|-------------|-------------|----------|----------|
| SMAD5      | ENSG00000113658 | 0.035915    | 0.48568  | 1.4624      | 0.071819    | 1.6484   | 0.049631 |
|            | 0.82942         | 0.20343     | 0.049631 | 0.499713305 |             |          |          |
| RNU6-633P  | ENSG00000199482 | 0.32414     | 0.37292  | 0.3633      | 0.35819     | 0.53567  |          |
|            | 0.29609         | 1.6484      | 0.049637 | 0.049637    | 0.499713305 |          |          |
| LINC00701  | ENSG00000234556 | 0.28411     | 0.38816  | 0.71615     | 0.23695     | 1.6483   |          |
|            | 0.049641        | 1.6483      | 0.049641 | 0.049641    | 0.499713305 |          |          |
| RPL30P1    | ENSG00000225713 | 1.6483      | 0.049645 | 1.6483      | 0.049645    | 1.6483   |          |
|            | 0.049645        | 0.83482     | 0.20191  | 0.049645    | 0.499713305 |          |          |
| RNU6-584P  | ENSG00000222282 | 1.3118      | 0.094796 | -0.12017    | 0.54782     | 1.6482   |          |
|            | 0.049652        | 1.6482      | 0.049652 | 0.049652    | 0.499713305 |          |          |
| NA         | ENSG00000266944 | 1.6482      | 0.049652 | 1.6482      | 0.049652    | 1.6482   | 0.049652 |
|            | 1.6482          | 0.049652    | 0.049652 | 0.499713305 |             |          |          |
| NA         | ENSG00000284328 | 1.6482      | 0.049658 | 1.6482      | 0.049658    | 1.6482   | 0.049658 |
|            | 1.6482          | 0.049658    | 0.049658 | 0.499713305 |             |          |          |
| BRAT1      | ENSG00000106009 | 1.4703      | 0.070736 | 1.6482      | 0.04966     | 0.85353  | 0.19668  |
|            | 1.107           | 0.13415     | 0.04966  | 0.499713305 |             |          |          |
| PAX2       | ENSG00000075891 | 1.6478      | 0.049692 | 0.12041     | 0.45208     | 0.35513  | 0.36124  |
|            | 0.14615         | 0.4419      | 0.049692 | 0.499713305 |             |          |          |
| DEPDC5     | ENSG00000100150 | 0.05406     | 0.47844  | 1.6477      | 0.049703    | 0.93604  |          |
|            | 0.17463         | 1.43        | 0.076357 | 0.049703    | 0.499713305 |          |          |
| RNU6-346P  | ENSG00000252097 | 0.21856     | 0.4135   | 1.6477      | 0.049711    | 1.3099   |          |
|            | 0.095118        | 1.6477      | 0.049711 | 0.049711    | 0.499713305 |          |          |
| NA         | ENSG00000213041 | 1.6436      | 0.050129 | 1.6476      | 0.049717    | 1.1626   | 0.12249  |
|            | 1.1626          | 0.12249     | 0.049717 | 0.499713305 |             |          |          |
| NA         | ENSG00000234977 | 0.80776     | 0.20961  | -0.18675    | 0.57407     | 1.6476   | 0.049719 |
|            | 1.6476          | 0.049719    | 0.049719 | 0.499713305 |             |          |          |
| MAP3K6     | ENSG00000142733 | 0.28019     | 0.38967  | 0.28019     | 0.38967     | 1.6474   |          |
|            | 0.049735        | -0.69465    | 0.75636  | 0.049735    | 0.499713305 |          |          |
| NA         | ENSG00000263984 | 1.6472      | 0.049763 | -0.39753    | 0.65451     | -0.39753 | 0.65451  |
|            | -0.39753        | 0.65451     | 0.049763 | 0.499713305 |             |          |          |
| LAT        | ENSG00000213658 | 1.0009      | 0.15845  | 1.0009      | 0.15845     | 1.6471   | 0.049767 |
|            | 1.0009          | 0.15845     | 0.049767 | 0.499713305 |             |          |          |
| APOL2      | ENSG00000128335 | 1.37        | 0.085341 | 1.2308      | 0.1092      | 1.2308   | 0.1092   |
|            | 1.6471          | 0.049769    | 0.049769 | 0.499713305 |             |          |          |
| RNF145     | ENSG00000145860 | -0.45619    | 0.67587  | 1.6471      | 0.04977     | 0.49562  |          |
|            | 0.31008         | 1.5249      | 0.063636 | 0.04977     | 0.499713305 |          |          |
| NA         | ENSG00000267232 | 1.647       | 0.049776 | 1.647       | 0.049776    | 1.647    | 0.049776 |
|            | 0.049776        | 0.499713305 |          |             |             |          |          |
| PPP2R2C    | ENSG00000074211 | 1.0368      | 0.14993  | 1.647       | 0.049781    | 1.2821   | 0.099898 |
|            | 1.3647          | 0.086173    | 0.049781 | 0.499713305 |             |          |          |
| HSP90AA2P  | ENSG00000224411 | -1.0388     | 0.85056  | 1.6469      | 0.049789    | -1.8883  |          |
|            | 0.97051         | -1.0388     | 0.85056  | 0.049789    | 0.499713305 |          |          |
| MXD1       | ENSG00000059728 | 1.4821      | 0.069162 | 0.68481     | 0.24673     | 1.6468   | 0.049797 |
|            | 0.67796         | 0.2489      | 0.049797 | 0.499713305 |             |          |          |
| ILDR1      | ENSG00000145103 | 0.88216     | 0.18884  | 0.88216     | 0.18884     | 1.5004   | 0.066749 |
|            | 1.6467          | 0.04981     | 0.04981  | 0.499738287 |             |          |          |
| RN7SL344P  | ENSG00000241395 | 1.6466      | 0.04982  | 1.6466      | 0.04982     | 1.6466   |          |
|            | 0.04982         | 1.6466      | 0.04982  | 0.04982     | 0.499738287 |          |          |
| AFF3       | ENSG00000144218 | 0.010356    | 0.49587  | -0.1416     | 0.5563      | 1.6463   | 0.049848 |
|            | 0.5862          | 0.27887     | 0.049848 | 0.499772322 |             |          |          |
| DEPDC1-AS1 | ENSG00000234264 | 1.0927      | 0.13726  | 1.0668      | 0.14302     | 1.1534   |          |
|            | 0.12438         | 1.6463      | 0.049856 | 0.049856    | 0.499772322 |          |          |
| NA         | ENSG00000238290 | 1.6462      | 0.049857 | 1.5074      | 0.065852    | 0.428    | 0.33432  |
|            | -0.65662        | 0.74429     | 0.049857 | 0.499772322 |             |          |          |
| CAMK1      | ENSG00000134072 | -1.3488     | 0.9113   | -0.54126    | 0.70583     | -0.26664 | 0.60513  |
|            | 1.6461          | 0.049877    | 0.049877 | 0.499772322 |             |          |          |
| NA         | ENSG00000240790 | -0.13534    | 0.55383  | 1.646       | 0.049877    | 0.31457  | 0.37654  |
|            | 0.40938         | 0.34113     | 0.049877 | 0.499772322 |             |          |          |
| NA         | ENSG00000263011 | 1.6459      | 0.049891 | 1.6459      | 0.049891    | 1.6459   | 0.049891 |
|            | 0.20066         | 0.42048     | 0.049891 | 0.499772322 |             |          |          |
| NME7       | ENSG00000143156 | -0.73204    | 0.76793  | 1.6456      | 0.049923    | 0.10343  | 0.45881  |
|            | -0.17007        | 0.56752     | 0.049923 | 0.499772322 |             |          |          |

|           |                 |           |          |           |             |             |          |          |
|-----------|-----------------|-----------|----------|-----------|-------------|-------------|----------|----------|
| RNU2-59P  | ENSG00000222414 | 1.6455    | 0.04993  | 1.4251    | 0.077069    | 1.4251      | 0.077069 | 1.4251   |
|           |                 | 0.077069  | 1.4251   | 0.077069  | 0.04993     | 0.499772322 |          |          |
| IPMKP1    | ENSG00000226507 | 0.7972    | 0.21267  | 1.3642    | 0.086245    | 1.6455      |          |          |
|           |                 | 0.049931  | 1.3642   | 0.086245  | 0.049931    | 0.499772322 |          |          |
| NA        | ENSG00000228618 | 0.69866   | 0.24238  | 1.4199    | 0.077821    | 1.6454      | 0.049943 | 0.049943 |
|           |                 | 1.6454    | 0.049943 | 0.049943  | 0.499772322 |             |          |          |
| NA        | ENSG00000200252 | 0.39629   | 0.34595  | 0.39629   | 0.34595     | 1.6454      | 0.049946 | 0.049946 |
|           |                 | 0.39629   | 0.34595  | 0.049946  | 0.499772322 |             |          |          |
| C8orf37   | ENSG00000156172 | 0.14884   | 0.44084  | 0.89996   | 0.18407     | 1.6451      |          |          |
|           |                 | 0.04997   | 0.23204  | 0.40825   | 0.04997     | 0.499772322 |          |          |
| NACAP5    | ENSG00000249488 | 1.645     | 0.049988 | 0.36852   | 0.35624     | 0.89507     | 0.18537  |          |
|           |                 | -0.49805  | 0.69078  | 0.049988  | 0.499772322 |             |          |          |
| GJA10     | ENSG00000135355 | -0.087007 | 0.53467  | -0.066906 | 0.52667     | 1.6449      | 0.049991 | 0.049991 |
|           |                 | -0.36453  | 0.64227  | 0.049991  | 0.499772322 |             |          |          |
| MIR629    | ENSG00000207965 | 1.1891    | 0.1172   | 1.6449    | 0.049998    | 0.54856     |          |          |
|           |                 | 0.29165   | 0.65863  | 0.25507   | 0.049998    | 0.499772322 |          |          |
| NA        | ENSG00000224865 | -1.0159   | 0.84517  | 1.6449    | 0.05        | -0.44826    | 0.67302  |          |
|           |                 | 0.47558   | 0.31719  | 0.05      | 0.499772322 |             |          |          |
| AP2S1     | ENSG00000042753 | 0.63161   | 0.26382  | 1.6448    | 0.050004    | -0.82242    | 0.79458  |          |
|           |                 | -1.4914   | 0.93208  | 0.050004  | 0.499772322 |             |          |          |
| RASGEF1C  | ENSG00000146090 | -0.29111  | 0.61452  | 1.6448    | 0.050008    | -0.23722    |          |          |
|           |                 | 0.59376   | -0.53497 | 0.70366   | 0.050008    | 0.499772322 |          |          |
| MIR3136   | ENSG00000265355 | 1.6443    | 0.050061 | 1.6443    | 0.050061    | 1.6443      |          |          |
|           |                 | 0.050061  | 1.6443   | 0.050061  | 0.050061    | 0.500146818 |          |          |
| NA        | ENSG00000254392 | 1.6442    | 0.050066 | 0.51261   | 0.30411     | 1.6442      | 0.050066 |          |
|           |                 | 0.80197   | 0.21129  | 0.050066  | 0.500146818 |             |          |          |
| DMRTC2    | ENSG00000142025 | 0.93337   | 0.17532  | -0.4988   | 0.69104     | 0.20259     |          |          |
|           |                 | 0.41973   | 1.644    | 0.050088  | 0.050088    | 0.500150991 |          |          |
| GMNC      | ENSG00000205835 | -2.0435   | 0.9795   | 1.6439    | 0.050093    | -2.0435     | 0.9795   |          |
|           |                 | -2.0435   | 0.9795   | 0.050093  | 0.500150991 |             |          |          |
| GJA9      | ENSG00000131233 | 1.6438    | 0.050113 | 1.6438    | 0.050113    | 1.6438      | 0.050113 |          |
|           |                 | 1.6438    | 0.050113 | 0.050113  | 0.500150991 |             |          |          |
| LINC02846 | ENSG00000260193 | 0.087675  | 0.46507  | -1.5646   | 0.94116     | 1.6437      |          |          |
|           |                 | 0.050114  | -0.38868 | 0.65124   | 0.050114    | 0.500150991 |          |          |
| MIR5590   | ENSG00000263783 | 1.6437    | 0.050118 | 1.6437    | 0.050118    | 1.6437      |          |          |
|           |                 | 0.050118  | 1.6437   | 0.050118  | 0.050118    | 0.500150991 |          |          |
| LINC01229 | ENSG00000260876 | 1.6436    | 0.050128 | 1.2244    | 0.1104      | 1.6436      |          |          |
|           |                 | 0.050128  | 1.6436   | 0.050128  | 0.050128    | 0.500150991 |          |          |
| NA        | ENSG00000243939 | 0.31614   | 0.37595  | 0.89913   | 0.18429     | 1.6435      | 0.050141 |          |
|           |                 | 0.93898   | 0.17387  | 0.050141  | 0.500178287 |             |          |          |
| ARHGAP1   | ENSG00000175220 | 1.4099    | 0.07929  | 1.2048    | 0.11413     | 1.4099      |          |          |
|           |                 | 0.07929   | 1.6432   | 0.050167  | 0.050167    | 0.500246863 |          |          |
| FAM204CP  | ENSG00000230902 | -0.85457  | 0.8036   | 1.6431    | 0.050185    | 0.93927     |          |          |
|           |                 | 0.17379   | -0.30715 | 0.62063   | 0.050185    | 0.500246863 |          |          |
| NSUN3     | ENSG00000178694 | -0.54901  | 0.7085   | -0.54901  | 0.7085      | -0.54901    | 0.7085   |          |
|           |                 | 1.643     | 0.050192 | 0.050192  | 0.500246863 |             |          |          |
| NA        | ENSG00000145965 | 1.6428    | 0.050212 | 1.6428    | 0.050212    | -1.1394     | 0.87272  |          |
|           |                 | 1.6428    | 0.050212 | 0.050212  | 0.500246863 |             |          |          |
| SUGCT     | ENSG00000175600 | -0.31942  | 0.6253   | 1.6427    | 0.05022     | -0.54781    | 0.70809  |          |
|           |                 | 0.53747   | 0.29547  | 0.05022   | 0.500246863 |             |          |          |
| GRM2      | ENSG00000164082 | 1.6427    | 0.050221 | -1.0919   | 0.86256     | 1.5909      | 0.05582  |          |
|           |                 | -0.069606 | 0.52775  | 0.050221  | 0.500246863 |             |          |          |
| NA        | ENSG00000261736 | 0.72307   | 0.23482  | 1.6427    | 0.050222    | -0.37968    | 0.64791  |          |
|           |                 | -0.37968  | 0.64791  | 0.050222  | 0.500246863 |             |          |          |
| NA        | ENSG00000260101 | 1.6426    | 0.05023  | 1.6426    | 0.05023     | 1.6426      | 0.05023  |          |
|           |                 | -0.23444  | 0.59268  | 0.05023   | 0.500246863 |             |          |          |
| NA        | ENSG00000266248 | 1.6425    | 0.050248 | 1.6425    | 0.050248    | 0.60442     | 0.27278  |          |
|           |                 | 1.6425    | 0.050248 | 0.050248  | 0.500323874 |             |          |          |
| ENPP7P14  | ENSG00000273963 | 1.6423    | 0.050263 | 0.42265   | 0.33628     | -0.04531    |          |          |
|           |                 | 0.51807   | 0.78115  | 0.21736   | 0.050263    | 0.500329093 |          |          |
| NA        | ENSG00000272255 | -1.0356   | 0.8498   | 1.6422    | 0.050277    | -0.72526    | 0.76585  |          |
|           |                 | -0.72526  | 0.76585  | 0.050277  | 0.500329093 |             |          |          |

|           |                 |            |             |             |             |             |          |
|-----------|-----------------|------------|-------------|-------------|-------------|-------------|----------|
| NA        | ENSG00000277315 | 1.6421     | 0.050287    | 0.024505    | 0.50978     | -0.024505   | 0.50978  |
|           |                 | -0.38321   | 0.64922     | 0.050287    | 0.500329093 |             |          |
| NA        | ENSG00000283097 | 0.87651    | 0.19038     | 1.642       | 0.050299    | -0.2287     | 0.59045  |
|           |                 | -0.2287    | 0.59045     | 0.050299    | 0.500329093 |             |          |
| NA        | ENSG00000258999 | 1.6419     | 0.050306    | 0.52161     | 0.30097     | 1.1112      | 0.13325  |
|           |                 | 0.69884    | 0.24233     | 0.050306    | 0.500329093 |             |          |
| NA        | ENSG00000265413 | 0.6927     | 0.24425     | 1.6418      | 0.05032     | 0.79464     | 0.21341  |
|           |                 | 0.79464    | 0.21341     | 0.05032     | 0.500329093 |             |          |
| DBNL      | ENSG00000136279 | 1.6415     | 0.050344    | 1.5849      | 0.056489    | 1.5872      | 0.056229 |
|           |                 | -0.30316   | 0.61911     | 0.050344    | 0.500329093 |             |          |
| NCMAP     | ENSG00000184454 | 0.34852    | 0.36372     | 1.6414      | 0.050355    | 0.018759    | 0.49252  |
|           |                 | -1.0364    | 0.84999     | 0.050355    | 0.500329093 |             |          |
| LINC02273 | ENSG00000245954 | -1.2996    | 0.90313     | -0.74275    | 0.77118     | 1.6414      |          |
|           |                 | 0.050359   | 1.3013      | 0.096585    | 0.050359    | 0.500329093 |          |
| GRIK3     | ENSG00000163873 | -0.4376    | 0.66916     | 0.29621     | 0.38353     | -0.38505    | 0.6499   |
|           |                 | 1.6412     | 0.050376    | 0.050376    | 0.500329093 |             |          |
| NA        | ENSG00000225923 | 1.6412     | 0.050376    | 1.6412      | 0.050376    | 1.6412      | 0.050376 |
|           |                 | 1.6412     | 0.050376    | 0.050376    | 0.500329093 |             |          |
| NA        | ENSG00000258216 | 0.96872    | 0.16634     | 1.6412      | 0.050377    | 1.6412      | 0.050377 |
|           |                 | 1.6412     | 0.050377    | 0.050377    | 0.500329093 |             |          |
| HRH4      | ENSG00000134489 | 1.09       | 0.13786     | 1.09        | 0.13786     | 1.6412      | 0.050382 |
|           |                 | 0.19116    | 0.050382    | 0.500329093 |             |             |          |
| CNTF      | ENSG00000242689 | 0.51752    | 0.3024      | 0.15875     | 0.43693     | 0.15875     | 0.43693  |
|           |                 | 1.641      | 0.050395    | 0.050395    | 0.500356225 |             |          |
| NA        | ENSG00000225486 | -0.61411   | 0.73043     | 0.44992     | 0.32638     | 1.6408      | 0.050423 |
|           |                 | -0.61411   | 0.73043     | 0.050423    | 0.500509701 |             |          |
| NA        | ENSG00000260249 | 0.73112    | 0.23235     | 1.3625      | 0.086522    | 1.3625      | 0.086522 |
|           |                 | 1.6407     | 0.050431    | 0.050431    | 0.500509701 |             |          |
| MBL1P     | ENSG00000242600 | -0.059785  | 0.52384     | 1.6404      | 0.050457    | 0.63774     | 0.26182  |
|           |                 | 0.63774    | 0.26182     | 0.050457    | 0.500611514 |             |          |
| DAPP1     | ENSG00000070190 | -0.0093806 | 0.50374     | 0.40261     | 0.34362     | 1.2186      | 0.11149  |
|           |                 | 1.6402     | 0.050482    | 0.050482    | 0.500611514 |             |          |
| NA        | ENSG00000247735 | 1.6402     | 0.050484    | 1.6402      | 0.050484    | 1.6402      | 0.050484 |
|           |                 | 1.6402     | 0.050484    | 0.050484    | 0.500611514 |             |          |
| LPIN2     | ENSG00000101577 | -0.97903   | 0.83622     | 1.64        | 0.050505    | -0.42857    | 0.66588  |
|           |                 | 1.1944     | 0.11617     | 0.050505    | 0.500611514 |             |          |
| NA        | ENSG00000265987 | 1.6399     | 0.050508    | 1.6399      | 0.050508    | 1.6399      | 0.050508 |
|           |                 | 1.5101     | 0.065507    | 0.050508    | 0.500611514 |             |          |
| TLR3      | ENSG00000164342 | 1.6399     | 0.05051     | -0.00065845 | 0.50026     | -0.00065845 |          |
|           |                 | 0.50026    | -0.00065845 | 0.50026     | 0.05051     | 0.500611514 |          |
| COL7A1    | ENSG00000114270 | 1.6397     | 0.050536    | 1.0862      | 0.1387      | 1.4807      |          |
|           |                 | 0.069348   | 0.9094      | 0.18157     | 0.050536    | 0.500611514 |          |
| LINC01391 | ENSG00000244578 | 1.2226     | 0.11074     | 1.6395      | 0.050551    | 0.28385     |          |
|           |                 | 0.38826    | -0.13054    | 0.55193     | 0.050551    | 0.500611514 |          |
| NA        | ENSG00000260983 | 0.48564    | 0.31361     | 0.88202     | 0.18888     | 1.6395      | 0.050551 |
|           |                 | 1.6395     | 0.050551    | 0.050551    | 0.500611514 |             |          |
| TM2D1     | ENSG00000162604 | 0.39062    | 0.34804     | -0.89745    | 0.81526     | 0.20177     | 0.42005  |
|           |                 | 1.6394     | 0.050569    | 0.050569    | 0.500611514 |             |          |
| RASGRF1   | ENSG00000058335 | 1.597      | 0.055133    | 1.2081      | 0.1135      | -1.6549     | 0.95103  |
|           |                 | 1.6393     | 0.050576    | 0.050576    | 0.500611514 |             |          |
| ASCC1     | ENSG00000138303 | 0.75581    | 0.22488     | 0.455       | 0.32455     | -0.49634    | 0.69017  |
|           |                 | 1.6393     | 0.050578    | 0.050578    | 0.500611514 |             |          |
| KRTAP19-8 | ENSG00000206102 | 1.5264     | 0.063454    | 0.52557     | 0.29959     | -0.37434    |          |
|           |                 | 0.64593    | 1.6392      | 0.050584    | 0.050584    | 0.500611514 |          |
| LINC02564 | ENSG00000262352 | 1.6392     | 0.050586    | 1.2832      | 0.099706    | -0.80383    |          |
|           |                 | 0.78925    | -0.80383    | 0.78925     | 0.050586    | 0.500611514 |          |
| RNU6-157P | ENSG00000206684 | 1.639      | 0.050603    | 0.54492     | 0.2929      | 0.13024     | 0.44819  |
|           |                 | 0.13024    | 0.44819     | 0.050603    | 0.500611514 |             |          |
| IFIT1B    | ENSG00000204010 | 0.90933    | 0.18159     | 0.69688     | 0.24294     | 0.4033      |          |
|           |                 | 0.34336    | 1.639       | 0.050606    | 0.050606    | 0.500611514 |          |
| MEA1      | ENSG00000124733 | 1.6388     | 0.050624    | 1.6388      | 0.050624    | 1.6388      | 0.050624 |
|           |                 | 1.6388     | 0.050624    | 0.050624    | 0.500611514 |             |          |

|           |                 |           |          |             |             |          |          |
|-----------|-----------------|-----------|----------|-------------|-------------|----------|----------|
| NA        | ENSG00000249423 | -0.065547 | 0.52613  | 0.51366     | 0.30374     | 1.6385   | 0.050657 |
|           | 0.30276         | 0.38104   | 0.050657 | 0.500611514 |             |          |          |
| MGAT5B    | ENSG00000167889 | 1.6385    | 0.05066  | 1.4227      | 0.077411    | 1.5217   |          |
|           | 0.064048        | 0.40735   | 0.34188  | 0.05066     | 0.500611514 |          |          |
| NA        | ENSG00000265645 | 1.6385    | 0.050663 | 1.6385      | 0.050663    | 1.6385   | 0.050663 |
|           | 0.49702         | 0.30959   | 0.050663 | 0.500611514 |             |          |          |
| MAP6      | ENSG00000171533 | -0.8787   | 0.81022  | 1.6383      | 0.050684    | -0.87075 | 0.80805  |
|           | -1.1474         | 0.87438   | 0.050684 | 0.500611514 |             |          |          |
| USP6NL    | ENSG00000148429 | 1.4545    | 0.072904 | 1.6382      | 0.050689    | 1.6207   |          |
|           | 0.052543        | 1.5547    | 0.060006 | 0.050689    | 0.500611514 |          |          |
| PRRC2A    | ENSG00000204469 | 0.23208   | 0.40824  | 1.6382      | 0.050689    | -0.22228 |          |
|           | 0.58795         | 0.53614   | 0.29593  | 0.050689    | 0.500611514 |          |          |
| RN7SL364P | ENSG00000243560 | 1.6382    | 0.050693 | 1.6382      | 0.050693    | 1.6382   |          |
|           | 0.050693        | 1.6382    | 0.050693 | 0.050693    | 0.500611514 |          |          |
| THSD7B    | ENSG00000144229 | -1.3347   | 0.90902  | -1.3252     | 0.90744     | 0.43977  |          |
|           | 0.33005         | 1.6377    | 0.050737 | 0.050737    | 0.500611514 |          |          |
| NA        | ENSG00000214919 | 1.6377    | 0.050737 | 1.6377      | 0.050737    | 1.6377   | 0.050737 |
|           | 1.6377          | 0.050737  | 0.050737 | 0.500611514 |             |          |          |
| NA        | ENSG00000253932 | 1.6377    | 0.050747 | 1.6377      | 0.050747    | 1.0052   | 0.1574   |
|           | 1.6377          | 0.050747  | 0.050747 | 0.500611514 |             |          |          |
| SETD7     | ENSG00000145391 | 1.6375    | 0.050766 | 1.0892      | 0.13802     | 1.2297   | 0.10941  |
|           | 1.0597          | 0.14465   | 0.050766 | 0.500611514 |             |          |          |
| RBAK      | ENSG00000146587 | 1.3949    | 0.081527 | 0.52584     | 0.2995      | 1.6375   | 0.050767 |
|           | 1.1949          | 0.11606   | 0.050767 | 0.500611514 |             |          |          |
| PDCD5     | ENSG00000105185 | 1.5459    | 0.061059 | 1.6374      | 0.050769    | 1.5459   | 0.061059 |
|           | 0.29285         | 0.38482   | 0.050769 | 0.500611514 |             |          |          |
| SNORA75B  | ENSG00000206780 | 0.88993   | 0.18675  | 1.6374      | 0.05077     | -0.43062 |          |
|           | 0.66663         | 0.024161  | 0.49036  | 0.05077     | 0.500611514 |          |          |
| MIR3935   | ENSG00000265281 | 1.6374    | 0.05077  | 1.6374      | 0.05077     | 1.6374   |          |
|           | 0.05077         | 1.6374    | 0.05077  | 0.05077     | 0.500611514 |          |          |
| NA        | ENSG00000266261 | 1.6373    | 0.050784 | 1.6373      | 0.050784    | 1.6373   | 0.050784 |
|           | 1.6373          | 0.050784  | 0.050784 | 0.500642855 |             |          |          |
| FTH1P26   | ENSG00000218213 | 1.6371    | 0.050802 | 1.6371      | 0.050802    | 1.6371   |          |
|           | 0.050802        | 1.6371    | 0.050802 | 0.050802    | 0.500642855 |          |          |
| NA        | ENSG00000267404 | 1.6371    | 0.050804 | 1.6371      | 0.050804    | 1.6371   | 0.050804 |
|           | 1.6371          | 0.050804  | 0.050804 | 0.500642855 |             |          |          |
| TRAF2     | ENSG00000127191 | 1.0088    | 0.15654  | 0.97789     | 0.16407     | 1.6367   | 0.050848 |
|           | 1.0088          | 0.15654   | 0.050848 | 0.500721398 |             |          |          |
| NA        | ENSG00000271656 | 0.73482   | 0.23122  | 0.73482     | 0.23122     | 0.63515  | 0.26266  |
|           | 1.6366          | 0.05086   | 0.05086  | 0.500721398 |             |          |          |
| CCDC197   | ENSG00000175699 | 0.36946   | 0.35589  | 1.6365      | 0.050866    | 0.82203  |          |
|           | 0.20553         | 1.524     | 0.063753 | 0.050866    | 0.500721398 |          |          |
| CELA3B    | ENSG00000219073 | 1.6363    | 0.050891 | -0.48554    | 0.68635     | 0.45806  |          |
|           | 0.32346         | 0.43823   | 0.33061  | 0.050891    | 0.500721398 |          |          |
| NA        | ENSG00000267551 | 1.6362    | 0.050894 | 1.6362      | 0.050894    | 1.6362   | 0.050894 |
|           | 1.6362          | 0.050894  | 0.050894 | 0.500721398 |             |          |          |
| TMEM176A  | ENSG00000002933 | 0.88136   | 0.18906  | 1.6362      | 0.050902    | 0.88136  |          |
|           | 0.18906         | 1.4561    | 0.072685 | 0.050902    | 0.500721398 |          |          |
| RABEP2    | ENSG00000177548 | 0.94531   | 0.17225  | 0.80426     | 0.21062     | 1.6362   |          |
|           | 0.050902        | 0.067289  | 0.47318  | 0.050902    | 0.500721398 |          |          |
| SPRY4-AS1 | ENSG00000231185 | 0.50534   | 0.30666  | 1.636       | 0.050915    | 1.2977   | 0.097198 |
|           | 0.95113         | 0.17077   | 0.050915 | 0.500721398 |             |          |          |
| FAM71A    | ENSG00000162771 | 0.38722   | 0.3493   | 0.38722     | 0.3493      | 0.38722  |          |
|           | 0.3493          | 1.636     | 0.050916 | 0.050916    | 0.500721398 |          |          |
| NA        | ENSG00000253891 | -0.11595  | 0.54615  | 1.636       | 0.050924    | -0.5156  | 0.69693  |
|           | -1.0857         | 0.8612    | 0.050924 | 0.500721398 |             |          |          |
| NA        | ENSG00000283583 | -0.82918  | 0.7965   | 1.1605      | 0.12292     | 1.636    | 0.050925 |
|           | -1.3238         | 0.90722   | 0.050925 | 0.500721398 |             |          |          |
| LINC01482 | ENSG00000267659 | -0.13904  | 0.55529  | 1.6355      | 0.050971    | 0.080436 |          |
|           | 0.46795         | 0.49744   | 0.30944  | 0.050971    | 0.501059984 |          |          |
| AGXT2     | ENSG00000113492 | -0.19826  | 0.57858  | -0.14052    | 0.55588     | 1.6354   | 0.05098  |
|           | -0.33294        | 0.63041   | 0.05098  | 0.501059984 |             |          |          |



|           |                 |           |          |           |             |             |          |  |
|-----------|-----------------|-----------|----------|-----------|-------------|-------------|----------|--|
| BTF3P2    | ENSG00000258282 | -0.41812  | 0.66207  | -0.41812  | 0.66207     | -0.41812    |          |  |
|           |                 | 0.66207   | 1.6351   | 0.051013  | 0.051013    | 0.50128322  |          |  |
| HPS4      | ENSG00000100099 | 1.6348    | 0.051046 | 0.95662   | 0.16938     | 0.95662     | 0.16938  |  |
|           |                 | 1.3966    | 0.081265 | 0.051046  | 0.501478669 |             |          |  |
| RFX4      | ENSG00000111783 | 1.1095    | 0.13361  | 1.4061    | 0.079851    | 1.3169      | 0.093943 |  |
|           |                 | 1.6347    | 0.051061 | 0.051061  | 0.501478669 |             |          |  |
| TRAV23DV6 | ENSG00000211803 | 1.6346    | 0.051069 | 1.6346    | 0.051069    | 1.6346      |          |  |
|           |                 | 0.051069  | 0.10598  | 0.4578    | 0.051069    | 0.501478669 |          |  |
| NA        | ENSG00000248763 | 1.6345    | 0.05108  | 0.28452   | 0.38801     | 0.27425     | 0.39195  |  |
|           |                 | 0.32164   | 0.37386  | 0.05108   | 0.501478669 |             |          |  |
| RN7SL504P | ENSG00000241789 | 1.2443    | 0.10669  | 1.6343    | 0.051096    | 1.6343      |          |  |
|           |                 | 0.051096  | 1.6343   | 0.051096  | 0.051096    | 0.501478669 |          |  |
| NA        | ENSG00000226571 | 1.6342    | 0.051108 | 1.6342    | 0.051108    | 1.6342      | 0.051108 |  |
|           |                 | 1.6342    | 0.051108 | 0.051108  | 0.501478669 |             |          |  |
| TAC1      | ENSG00000006128 | 0.39383   | 0.34685  | -1.0598   | 0.85537     | 1.6341      | 0.051121 |  |
|           |                 | -0.82229  | 0.79454  | 0.051121  | 0.501478669 |             |          |  |
| ATG9B     | ENSG00000181652 | -0.64462  | 0.74041  | -0.871    | 0.80812     | -0.64462    | 0.74041  |  |
|           |                 | 1.634     | 0.051129 | 0.051129  | 0.501478669 |             |          |  |
| NA        | ENSG00000238596 | 0.60649   | 0.2721   | 0.60649   | 0.2721      | 0.60649     | 0.2721   |  |
|           |                 | 1.634     | 0.05113  | 0.05113   | 0.501478669 |             |          |  |
| HBQ1      | ENSG00000086506 | -0.90624  | 0.8176   | 1.6339    | 0.051142    | -1.0365     | 0.85001  |  |
|           |                 | -1.0365   | 0.85001  | 0.051142  | 0.501478669 |             |          |  |
| NTRK2     | ENSG00000148053 | 0.76022   | 0.22356  | 1.6337    | 0.051164    | -0.082893   | 0.53303  |  |
|           |                 | 0.50618   | 0.30636  | 0.051164  | 0.501478669 |             |          |  |
| PIP5K1C   | ENSG00000186111 | 1.6337    | 0.051164 | 0.34274   | 0.3659      | 1.228       | 0.10973  |  |
|           |                 | 0.88837   | 0.18717  | 0.051164  | 0.501478669 |             |          |  |
| NA        | ENSG00000235300 | 1.6335    | 0.051181 | 0.17437   | 0.43079     | 0.17437     | 0.43079  |  |
|           |                 | 0.17437   | 0.43079  | 0.051181  | 0.501478669 |             |          |  |
| TRAJ1     | ENSG00000211888 | 1.6335    | 0.051185 | 1.6335    | 0.051185    | 1.6335      | 0.051185 |  |
|           |                 | 1.6335    | 0.051185 | 0.051185  | 0.501478669 |             |          |  |
| STARD13   | ENSG00000133121 | 1.4044    | 0.080101 | 1.2011    | 0.11486     | 1.6334      |          |  |
|           |                 | 0.051197  | -0.33831 | 0.63244   | 0.051197    | 0.501478669 |          |  |
| HLX       | ENSG00000136630 | 0.60627   | 0.27217  | 1.4238    | 0.077247    | 1.1705      | 0.1209   |  |
|           |                 | 1.6333    | 0.051206 | 0.051206  | 0.501478669 |             |          |  |
| MIR644A   | ENSG00000207997 | 1.6332    | 0.051219 | 1.6332    | 0.051219    | 1.6332      |          |  |
|           |                 | 0.051219  | 1.6332   | 0.051219  | 0.051219    | 0.501478669 |          |  |
| DSTYK     | ENSG00000133059 | 1.6331    | 0.051228 | 1.4918    | 0.067871    | 0.96418     | 0.16748  |  |
|           |                 | 1.1839    | 0.11823  | 0.051228  | 0.501478669 |             |          |  |
| PPARG     | ENSG00000132170 | 0.61955   | 0.26778  | -0.029759 | 0.51187     | 1.633       | 0.051231 |  |
|           |                 | -0.032855 | 0.5131   | 0.051231  | 0.501478669 |             |          |  |
| NA        | ENSG00000237400 | 1.6329    | 0.051247 | -1.4288   | 0.92347     | -1.0799     | 0.85992  |  |
|           |                 | -1.6924   | 0.95472  | 0.051247  | 0.501478669 |             |          |  |
| BEGAIN    | ENSG00000183092 | 0.02279   | 0.49091  | 0.38813   | 0.34896     | 0.92985     |          |  |
|           |                 | 0.17623   | 1.6329   | 0.051249  | 0.051249    | 0.501478669 |          |  |
| NA        | ENSG00000270135 | 1.6324    | 0.051293 | 1.6324    | 0.051293    | 1.6324      | 0.051293 |  |
|           |                 | 1.6324    | 0.051293 | 0.051293  | 0.501546709 |             |          |  |
| NA        | ENSG00000233878 | 1.5914    | 0.055764 | -0.026593 | 0.51061     | 1.6323      | 0.05131  |  |
|           |                 | 1.3208    | 0.093277 | 0.05131   | 0.501546709 |             |          |  |
| NA        | ENSG00000253809 | 0.61463   | 0.2694   | 0.18396   | 0.42702     | 1.6322      | 0.051319 |  |
|           |                 | 1.6322    | 0.051319 | 0.051319  | 0.501546709 |             |          |  |
| TCIM      | ENSG00000176907 | 1.6322    | 0.051322 | 0.25039   | 0.40114     | 0.27433     | 0.39192  |  |
|           |                 | 1.6322    | 0.051322 | 0.051322  | 0.501546709 |             |          |  |
| SNORD60   | ENSG00000206630 | 1.6321    | 0.051325 | 1.6321    | 0.051325    | 1.6321      |          |  |
|           |                 | 0.051325  | 1.6321   | 0.051325  | 0.051325    | 0.501546709 |          |  |
| SNHG19    | ENSG00000260260 | 1.6321    | 0.051325 | 1.6321    | 0.051325    | 1.6321      |          |  |
|           |                 | 0.051325  | 1.6321   | 0.051325  | 0.051325    | 0.501546709 |          |  |
| NA        | ENSG00000228098 | 1.6321    | 0.051328 | 1.6321    | 0.051328    | 1.6321      | 0.051328 |  |
|           |                 | 1.6321    | 0.051328 | 0.051328  | 0.501546709 |             |          |  |
| NA        | ENSG00000217585 | 1.5008    | 0.06671  | 1.6319    | 0.05135     | 0.9879      | 0.1616   |  |
|           |                 | 1.0325    | 0.15091  | 0.05135   | 0.501589836 |             |          |  |
| RNU7-54P  | ENSG00000238590 | 0.98238   | 0.16296  | 0.31097   | 0.37791     | 1.6319      |          |  |
|           |                 | 0.051353  | 0.56984  | 0.28439   | 0.051353    | 0.501589836 |          |  |

|           |                 |          |          |             |             |             |         |          |
|-----------|-----------------|----------|----------|-------------|-------------|-------------|---------|----------|
| NA        | ENSG00000271214 | 1.257    | 0.10438  | 1.6316      | 0.051379    | 1.257       | 0.10438 | 1.1767   |
|           |                 | 0.11965  | 0.051379 | 0.501659341 |             |             |         |          |
| NA        | ENSG00000248459 | 1.122    | 0.13093  | -0.61248    | 0.72989     | 1.122       | 0.13093 | 1.6316   |
|           |                 | 0.051384 | 0.051384 | 0.501659341 |             |             |         |          |
| NA        | ENSG00000278496 | 1.3965   | 0.081289 | 1.6315      | 0.051391    | 1.4309      |         | 0.076226 |
|           |                 | 0.74136  | 0.22924  | 0.051391    | 0.501659341 |             |         |          |
| DHX30     | ENSG00000132153 | 1.2457   | 0.10644  | 1.1888      | 0.11727     | 1.1408      |         | 0.12698  |
|           |                 | 1.6314   | 0.051404 | 0.051404    | 0.501685744 |             |         |          |
| ABLIM3    | ENSG00000173210 | 1.631    | 0.051445 | -0.079846   | 0.53182     | 0.17097     |         | 0.43213  |
|           |                 | -0.53393 | 0.70331  | 0.051445    | 0.501755463 |             |         |          |
| COPB2     | ENSG00000184432 | -0.52296 | 0.6995   | -0.52296    | 0.6995      | -0.52296    |         | 0.6995   |
|           |                 | 1.6309   | 0.051458 | 0.051458    | 0.501755463 |             |         |          |
| NA        | ENSG00000257958 | -1.366   | 0.91403  | 0.40399     | 0.34311     | -1.1846     |         | 0.8819   |
|           |                 | 1.6306   | 0.051485 | 0.051485    | 0.501755463 |             |         |          |
| FCN1      | ENSG00000085265 | 0.13338  | 0.44695  | 1.6306      | 0.051486    | 0.13338     |         | 0.44695  |
|           |                 | 0.57661  | 0.2821   | 0.051486    | 0.501755463 |             |         |          |
| SMAD5-AS1 | ENSG00000164621 | 0.95599  | 0.16954  | 1.6306      | 0.051491    | 1.6306      |         |          |
|           |                 | 0.051491 | 1.6306   | 0.051491    | 0.051491    | 0.501755463 |         |          |
| MIR5190   | ENSG00000266146 | 0.79139  | 0.21436  | 0.18247     | 0.42761     | 0.50414     |         |          |
|           |                 | 0.30708  | 1.6306   | 0.051492    | 0.051492    | 0.501755463 |         |          |
| COIL      | ENSG00000121058 | 1.6305   | 0.051497 | -1.0562     | 0.85457     | 0.21994     |         | 0.41296  |
|           |                 | 0.56608  | 0.28567  | 0.051497    | 0.501755463 |             |         |          |
| NA        | ENSG00000269971 | 0.73619  | 0.23081  | 0.80384     | 0.21075     | 1.6304      |         | 0.051505 |
|           |                 | 0.73619  | 0.23081  | 0.051505    | 0.501755463 |             |         |          |
| NA        | ENSG00000258107 | 0.70162  | 0.24146  | -0.80631    | 0.78997     | 1.6303      |         | 0.051524 |
|           |                 | -0.89705 | 0.81515  | 0.051524    | 0.501755463 |             |         |          |
| NA        | ENSG00000283166 | 1.6302   | 0.051528 | 1.6302      | 0.051528    | 1.6302      |         | 0.051528 |
|           |                 | 1.6302   | 0.051528 | 0.051528    | 0.501755463 |             |         |          |
| LINC01514 | ENSG00000237579 | 1.3738   | 0.084759 | 1.3335      | 0.091186    | 1.5944      |         |          |
|           |                 | 0.055424 | 1.6302   | 0.051535    | 0.051535    | 0.501755463 |         |          |
| IRF4      | ENSG00000137265 | -0.29479 | 0.61592  | -0.39978    | 0.65534     | 0.86343     |         | 0.19395  |
|           |                 | 1.6301   | 0.051541 | 0.051541    | 0.501755463 |             |         |          |
| NA        | ENSG00000265437 | -1.0003  | 0.84142  | -0.89387    | 0.8143      | -0.89387    |         | 0.8143   |
|           |                 | 1.6301   | 0.051545 | 0.051545    | 0.501755463 |             |         |          |
| ANKRD46   | ENSG00000186106 | 0.29476  | 0.38409  | 1.5705      | 0.058151    | 1.6298      |         |          |
|           |                 | 0.051575 | 0.12017  | 0.45217     | 0.051575    | 0.501881089 |         |          |
| LINC02399 | ENSG00000257725 | -0.31131 | 0.62222  | 1.6297      | 0.051583    | 1.6297      |         |          |
|           |                 | 0.051583 | 1.6297   | 0.051583    | 0.051583    | 0.501881089 |         |          |
| NA        | ENSG00000258699 | 1.4889   | 0.068254 | 1.4889      | 0.068254    | 1.6296      |         | 0.05159  |
|           |                 | 1.4889   | 0.068254 | 0.05159     | 0.501881089 |             |         |          |
| ITGB2     | ENSG00000160255 | 1.4656   | 0.071382 | 1.6293      | 0.05162     | -1.1874     |         | 0.88246  |
|           |                 | -1.3176  | 0.90619  | 0.05162     | 0.501881089 |             |         |          |
| RNU6-253P | ENSG00000207461 | -0.55214 | 0.70957  | -0.55214    | 0.70957     | -0.73457    |         |          |
|           |                 | 0.7687   | 1.6293   | 0.051622    | 0.051622    | 0.501881089 |         |          |
| HTT       | ENSG00000197386 | 1.5626   | 0.059068 | 0.76591     | 0.22186     | 1.1983      |         | 0.1154   |
|           |                 | 1.6293   | 0.051628 | 0.051628    | 0.501881089 |             |         |          |
| CDK6-AS1  | ENSG00000237819 | 1.6293   | 0.05163  | 1.6293      | 0.05163     | 1.6293      |         |          |
|           |                 | 0.05163  | 0.9772   | 0.16423     | 0.05163     | 0.501881089 |         |          |
| NA        | ENSG00000212620 | 1.6291   | 0.051645 | 0.41341     | 0.33965     | 0.99097     |         | 0.16085  |
|           |                 | 0.99097  | 0.16085  | 0.051645    | 0.501926775 |             |         |          |
| MVK       | ENSG00000110921 | 1.6288   | 0.051673 | 1.1837      | 0.11828     | 1.1797      |         | 0.11907  |
|           |                 | 1.1438   | 0.12635  | 0.051673    | 0.502070492 |             |         |          |
| PRRT1     | ENSG00000204314 | 1.6286   | 0.051696 | -0.5626     | 0.71315     | 0.78299     |         | 0.21682  |
|           |                 | 0.066554 | 0.47347  | 0.051696    | 0.502070492 |             |         |          |
| PPT2      | ENSG00000221988 | 1.6286   | 0.051696 | -0.20787    | 0.58234     | 1.6286      |         | 0.051696 |
|           |                 | 1.6286   | 0.051696 | 0.051696    | 0.502070492 |             |         |          |
| NA        | ENSG00000274863 | -0.1327  | 0.55279  | -0.31649    | 0.62418     | 1.6286      |         | 0.051701 |
|           |                 | 0.63225  | 0.26361  | 0.051701    | 0.502070492 |             |         |          |
| NA        | ENSG00000240354 | 1.6283   | 0.051736 | 1.6283      | 0.051736    | 1.6283      |         | 0.051736 |
|           |                 | 1.6283   | 0.051736 | 0.051736    | 0.502152803 |             |         |          |
| TIMM9P3   | ENSG00000232786 | 1.6281   | 0.051752 | 1.6281      | 0.051752    | 1.6281      |         |          |
|           |                 | 0.051752 | 1.6281   | 0.051752    | 0.051752    | 0.502152803 |         |          |

|            |                 |          |          |             |             |          |          |
|------------|-----------------|----------|----------|-------------|-------------|----------|----------|
| TMEM161A   | ENSG00000064545 | 0.26616  | 0.39506  | 1.6281      | 0.051753    | 1.5828   |          |
|            | 0.056731        | 1.0029   | 0.15796  | 0.051753    | 0.502152803 |          |          |
| PICK1      | ENSG00000100151 | 0.5752   | 0.28258  | 1.628       | 0.051758    | 0.46943  | 0.31938  |
|            | -0.27381        | 0.60788  | 0.051758 | 0.502152803 |             |          |          |
| NA         | ENSG00000218672 | 1.628    | 0.051761 | 0.66917     | 0.25169     | 0.69022  | 0.24503  |
|            | 0.74281         | 0.2288   | 0.051761 | 0.502152803 |             |          |          |
| LINC02233  | ENSG00000250488 | -0.69798 | 0.75741  | 1.6278      | 0.051783    | -0.69798 |          |
|            | 0.75741         | -0.69798 | 0.75741  | 0.051783    | 0.50226624  |          |          |
| MIR3201    | ENSG00000266508 | -0.25667 | 0.60128  | 1.053       | 0.14617     | 1.6274   | 0.051823 |
|            | -0.97766        | 0.83588  | 0.051823 | 0.50251237  |             |          |          |
| NA         | ENSG00000255369 | -0.3342  | 0.63089  | 0.37466     | 0.35395     | -0.1332  | 0.55298  |
|            | 1.6274          | 0.051829 | 0.051829 | 0.50251237  |             |          |          |
| HELQ       | ENSG00000163312 | 1.6271   | 0.051862 | 0.38179     | 0.35131     | 1.6271   | 0.051862 |
|            | 1.6271          | 0.051862 | 0.051862 | 0.502671078 |             |          |          |
| RN7SL862P  | ENSG00000242651 | -0.70027 | 0.75812  | -0.99293    | 0.83963     | -0.70027 |          |
|            | 0.75812         | 1.627    | 0.051866 | 0.051866    | 0.502671078 |          |          |
| KRT8P5     | ENSG00000267573 | 0.33672  | 0.36817  | 1.6269      | 0.051884    | 0.33672  |          |
|            | 0.36817         | 0.33672  | 0.36817  | 0.051884    | 0.50274554  |          |          |
| NA         | ENSG00000247193 | 1.6264   | 0.051929 | 1.6264      | 0.051929    | 1.6264   | 0.051929 |
|            | 0.44519         | 0.32809  | 0.051929 | 0.502767696 |             |          |          |
| MRPL42P4   | ENSG00000242552 | 0.46848  | 0.31972  | 1.6263      | 0.051946    | 1.6263   |          |
|            | 0.051946        | 1.6263   | 0.051946 | 0.051946    | 0.502767696 |          |          |
| MIR181B1   | ENSG00000207975 | 1.6262   | 0.051948 | 1.6202      | 0.052592    | -1.173   |          |
|            | 0.8796          | -1.173   | 0.8796   | 0.051948    | 0.502767696 |          |          |
| DHX40P1    | ENSG00000266992 | 1.626    | 0.051973 | 1.11        | 0.13349     | 0.31991  | 0.37452  |
|            | 1.2574          | 0.10431  | 0.051973 | 0.502767696 |             |          |          |
| DEPDC1B    | ENSG00000035499 | -1.1473  | 0.87437  | -1.0129     | 0.84445     | -0.91287 |          |
|            | 0.81934         | 1.626    | 0.051977 | 0.051977    | 0.502767696 |          |          |
| ALPP       | ENSG00000163283 | 1.2129   | 0.11258  | 1.626       | 0.051979    | 0.68407  | 0.24696  |
|            | 0.48486         | 0.31389  | 0.051979 | 0.502767696 |             |          |          |
| FBLN2      | ENSG00000163520 | 1.474    | 0.070242 | 0.29904     | 0.38246     | 1.1905   | 0.11693  |
|            | 1.6258          | 0.051999 | 0.051999 | 0.502767696 |             |          |          |
| MUC3A      | ENSG00000169894 | 1.2286   | 0.10962  | 0.59393     | 0.27628     | 1.6257   | 0.052007 |
|            | 0.93327         | 0.17534  | 0.052007 | 0.502767696 |             |          |          |
| C20orf203  | ENSG00000198547 | 1.6256   | 0.052013 | 0.6794      | 0.24844     | 0.99442  |          |
|            | 0.16001         | 1.2421   | 0.10711  | 0.052013    | 0.502767696 |          |          |
| PPIAP63    | ENSG00000231570 | 1.6254   | 0.052035 | -0.62742    | 0.73481     | 1.321    | 0.093252 |
|            | 0.53186         | 0.29741  | 0.052035 | 0.502767696 |             |          |          |
| AZGP1P2    | ENSG00000214252 | 1.6253   | 0.052052 | 0.74088     | 0.22938     | 0.086117 |          |
|            | 0.46569         | 1.2102   | 0.1131   | 0.052052    | 0.502767696 |          |          |
| ATL3       | ENSG00000184743 | 0.83358  | 0.20226  | 0.83358     | 0.20226     | 1.6253   | 0.052053 |
|            | 1.4274          | 0.076727 | 0.052053 | 0.502767696 |             |          |          |
| SSX2IP     | ENSG00000117155 | 1.1596   | 0.12311  | 0.89738     | 0.18476     | 1.6253   |          |
|            | 0.052054        | 0.64913  | 0.25813  | 0.052054    | 0.502767696 |          |          |
| TTC1       | ENSG00000113312 | 0.071695 | 0.47142  | 0.99762     | 0.15923     | 1.6252   | 0.05206  |
|            | 0.9548          | 0.16984  | 0.05206  | 0.502767696 |             |          |          |
| ZNF511     | ENSG00000198546 | 1.6252   | 0.052061 | -0.89897    | 0.81567     | -1.2981  |          |
|            | 0.90287         | -1.2981  | 0.90287  | 0.052061    | 0.502767696 |          |          |
| RASSF1-AS1 | ENSG00000281358 | 1.6252   | 0.052064 | 1.6252      | 0.052064    | 1.6252   |          |
|            | 0.052064        | 1.6252   | 0.052064 | 0.052064    | 0.502767696 |          |          |
| IPO7P2     | ENSG00000225674 | -0.10495 | 0.54179  | -0.10495    | 0.54179     | 1.6251   |          |
|            | 0.052067        | 1.495    | 0.067451 | 0.052067    | 0.502767696 |          |          |
| TANGO2     | ENSG00000183597 | -0.59167 | 0.72296  | 1.6251      | 0.052072    | 0.26564  |          |
|            | 0.39526         | 0.20515  | 0.41873  | 0.052072    | 0.502767696 |          |          |
| CUBNP1     | ENSG00000231009 | 1.625    | 0.052083 | -0.42439    | 0.66436     | 1.0055   | 0.15733  |
|            | 0.67584         | 0.24957  | 0.052083 | 0.502774285 |             |          |          |
| NA         | ENSG00000207193 | 1.6248   | 0.052105 | 1.6248      | 0.052105    | 1.6248   | 0.052105 |
|            | 1.6248          | 0.052105 | 0.052105 | 0.502797548 |             |          |          |
| NA         | ENSG00000237735 | -0.14656 | 0.55826  | 1.6247      | 0.052117    | 1.6247   | 0.052117 |
|            | 1.6247          | 0.052117 | 0.052117 | 0.502797548 |             |          |          |
| NIPA2P1    | ENSG00000225843 | 1.6246   | 0.052124 | 1.6246      | 0.052124    | 1.6246   |          |
|            | 0.052124        | 1.6246   | 0.052124 | 0.052124    | 0.502797548 |          |          |

|            |                 |           |             |             |             |           |          |
|------------|-----------------|-----------|-------------|-------------|-------------|-----------|----------|
| ZNF410     | ENSG00000119725 | 1.5683    | 0.058409    | 1.6245      | 0.052137    | 1.5394    |          |
|            | 0.061851        | 1.3409    | 0.089975    | 0.052137    | 0.502797548 |           |          |
| LINC02172  | ENSG00000251632 | 1.6245    | 0.052137    | -0.22205    | 0.58786     | 1.6245    |          |
|            | 0.052137        | 1.6245    | 0.052137    | 0.052137    | 0.502797548 |           |          |
| PSAT1P2    | ENSG00000232144 | 1.6243    | 0.052159    | 0.7377      | 0.23035     | 1.3291    |          |
|            | 0.091902        | 1.3291    | 0.091902    | 0.052159    | 0.502820336 |           |          |
| RHBDF1P1   | ENSG00000234123 | 1.6243    | 0.05216     | 1.6243      | 0.05216     | 1.6243    |          |
|            | 0.05216         | 1.6243    | 0.05216     | 0.05216     | 0.502820336 |           |          |
| CLNS1AP1   | ENSG00000213335 | 1.6238    | 0.052213    | -0.39171    | 0.65236     | -0.057985 |          |
|            | 0.52312         | -1.3112   | 0.9051      | 0.052213    | 0.503154829 |           |          |
| AOX1       | ENSG00000138356 | 0.54286   | 0.29361     | 1.6236      | 0.052226    | 0.41878   | 0.33769  |
|            | -0.046705       | 0.51863   | 0.052226    | 0.503154829 |             |           |          |
| ZNF417     | ENSG00000173480 | -0.15281  | 0.56073     | 1.6236      | 0.052229    | 0.34862   |          |
|            | 0.36369         | -1.7726   | 0.96185     | 0.052229    | 0.503154829 |           |          |
| NA         | ENSG00000283529 | 0.65874   | 0.25503     | 1.4015      | 0.080538    | 0.95157   | 0.17066  |
|            | 1.6235          | 0.052236  | 0.052236    | 0.503154829 |             |           |          |
| NA         | ENSG00000239739 | 0.96648   | 0.1669      | 0.96648     | 0.1669      | 1.6232    | 0.05227  |
|            | 0.20143         | 0.42018   | 0.05227     | 0.503350763 |             |           |          |
| ERICH2     | ENSG00000204334 | 1.6232    | 0.052277    | -0.28555    | 0.61239     | 0.56683   |          |
|            | 0.28541         | 0.20612   | 0.41835     | 0.052277    | 0.503350763 |           |          |
| POTEC      | ENSG00000183206 | -0.17983  | 0.57136     | -0.17983    | 0.57136     | 0.67919   | 0.24851  |
|            | 1.623           | 0.05229   | 0.05229     | 0.503376472 |             |           |          |
| C1orf229   | ENSG00000221953 | 1.6229    | 0.052302    | 1.6229      | 0.052302    | 0.62621   |          |
|            | 0.26559         | 1.1134    | 0.13278     | 0.052302    | 0.503392546 |           |          |
| MYO7A      | ENSG00000137474 | 1.1148    | 0.13247     | 1.3322      | 0.091402    | 1.346     | 0.089148 |
|            | 1.6227          | 0.052331  | 0.052331    | 0.503572202 |             |           |          |
| RNU6ATAC8P | ENSG00000221387 | 0.95564   | 0.16963     | 0.95564     | 0.16963     | 0.95564   |          |
|            | 0.16963         | 1.6224    | 0.052362    | 0.052362    | 0.503674045 |           |          |
| SPARC      | ENSG00000113140 | -1.1693   | 0.87885     | -1.1942     | 0.8838      | -0.85085  | 0.80257  |
|            | 1.6221          | 0.052387  | 0.052387    | 0.503674045 |             |           |          |
| NA         | ENSG00000231866 | 1.6221    | 0.052396    | 1.6221      | 0.052396    | 1.6221    | 0.052396 |
|            | 1.6221          | 0.052396  | 0.052396    | 0.503674045 |             |           |          |
| MIR4491    | ENSG00000264032 | 1.6219    | 0.052416    | 1.6219      | 0.052416    | 0.21302   |          |
|            | 0.41566         | 1.6219    | 0.052416    | 0.052416    | 0.503674045 |           |          |
| MTPN       | ENSG00000105887 | -0.39073  | 0.652       | 1.6218      | 0.052422    | -0.045727 | 0.51824  |
|            | -0.39073        | 0.652     | 0.052422    | 0.503674045 |             |           |          |
| NA         | ENSG00000228679 | -0.21442  | 0.58489     | 1.6217      | 0.052434    | 1.6217    | 0.052434 |
|            | 1.6217          | 0.052434  | 0.052434    | 0.503674045 |             |           |          |
| DNAJC18    | ENSG00000170464 | 1.6217    | 0.052435    | -0.077606   | 0.53093     | -0.92828  |          |
|            | 0.82337         | -0.28807  | 0.61335     | 0.052435    | 0.503674045 |           |          |
| NA         | ENSG00000238582 | 1.6215    | 0.05245     | 1.6215      | 0.05245     | 1.6215    | 0.05245  |
|            | 1.6215          | 0.05245   | 0.05245     | 0.503674045 |             |           |          |
| PRKCD      | ENSG00000163932 | 1.6214    | 0.052462    | 0.57736     | 0.28185     | 0.76816   | 0.2212   |
|            | -0.47902        | 0.68404   | 0.052462    | 0.503674045 |             |           |          |
| POLE4      | ENSG00000115350 | 1.6212    | 0.052491    | 1.6212      | 0.052491    | 1.6212    | 0.052491 |
|            | -0.14328        | 0.55697   | 0.052491    | 0.503674045 |             |           |          |
| NA         | ENSG00000270927 | -1.2635   | 0.89679     | 1.6211      | 0.052495    | -0.81389  | 0.79215  |
|            | 1.0302          | 0.15146   | 0.052495    | 0.503674045 |             |           |          |
| NA         | ENSG00000237838 | 1.6211    | 0.052499    | 0.12793     | 0.4491      | 1.3193    | 0.093534 |
|            | 0.11883         | 0.45271   | 0.052499    | 0.503674045 |             |           |          |
| TMEM147    | ENSG00000105677 | 1.621     | 0.052511    | 1.621       | 0.052511    | 1.621     | 0.052511 |
|            | 0.052511        | 0.052511  | 0.503674045 |             |             |           |          |
| NA         | ENSG00000249149 | 0.0075485 | 0.49699     | 1.6208      | 0.052528    | -0.17439  | 0.56922  |
|            | -0.63167        | 0.7362    | 0.052528    | 0.503674045 |             |           |          |
| RPL21P44   | ENSG00000229585 | 1.1868    | 0.11764     | 0.63399     | 0.26304     | 1.599     | 0.054915 |
|            | 1.6207          | 0.052537  | 0.052537    | 0.503674045 |             |           |          |
| THRSP      | ENSG00000151365 | 1.0897    | 0.13792     | 1.6207      | 0.052538    | 1.0897    | 0.13792  |
|            | 1.0897          | 0.13792   | 0.052538    | 0.503674045 |             |           |          |
| LINC00574  | ENSG00000231690 | 1.6207    | 0.052546    | 0.11409     | 0.45458     | 0.9764    |          |
|            | 0.16443         | -1.6946   | 0.95492     | 0.052546    | 0.503674045 |           |          |
| NA         | ENSG00000248636 | -0.39274  | 0.65274     | -1.9513     | 0.97449     | 1.6205    | 0.052565 |
|            | -1.2931         | 0.90201   | 0.052565    | 0.503674045 |             |           |          |

|           |                 |           |          |             |             |           |          |  |
|-----------|-----------------|-----------|----------|-------------|-------------|-----------|----------|--|
| RPL12P7   | ENSG00000242941 | -1.5146   | 0.93506  | -0.37362    | 0.64566     | 1.6204    |          |  |
|           | 0.052574        | -0.5265   | 0.70073  | 0.052574    | 0.503674045 |           |          |  |
| CLSPN     | ENSG00000092853 | -0.058556 | 0.52335  | 1.6204      | 0.052577    | -0.45805  | 0.67654  |  |
|           | 1.0647          | 0.14351   | 0.052577 | 0.503674045 |             |           |          |  |
| CHAC1     | ENSG00000128965 | -0.098067 | 0.53906  | -0.098067   | 0.53906     | 1.6204    | 0.052577 |  |
|           | 0.26329         | 0.39617   | 0.052577 | 0.503674045 |             |           |          |  |
| LINC-PINT | ENSG00000231721 | 1.5493    | 0.060649 | 1.6203      | 0.052587    | 0.41911   |          |  |
|           | 0.33757         | 0.10385   | 0.45864  | 0.052587    | 0.503674045 |           |          |  |
| NA        | ENSG00000213331 | -0.34416  | 0.63464  | 1.6201      | 0.052603    | -0.23078  | 0.59126  |  |
|           | -1.3628         | 0.91353   | 0.052603 | 0.503674045 |             |           |          |  |
| GBX2      | ENSG00000168505 | 1.6201    | 0.052605 | -0.31238    | 0.62262     | 1.0315    | 0.15116  |  |
|           | -0.31238        | 0.62262   | 0.052605 | 0.503674045 |             |           |          |  |
| CEACAM18  | ENSG00000213822 | 1.6198    | 0.052634 | 1.6198      | 0.052634    | 1.6198    |          |  |
|           | 0.052634        | 1.6198    | 0.052634 | 0.503674045 |             |           |          |  |
| MYCBP     | ENSG00000214114 | 0.052862  | 0.47892  | 1.6198      | 0.052642    | 1.2068    | 0.11376  |  |
|           | 1.2068          | 0.11376   | 0.052642 | 0.503674045 |             |           |          |  |
| SCG5-AS1  | ENSG00000241818 | -0.0809   | 0.53224  | 0.55126     | 0.29073     | -0.7789   |          |  |
|           | 0.78198         | 1.6197    | 0.052651 | 0.052651    | 0.503674045 |           |          |  |
| NA        | ENSG00000262803 | -0.68462  | 0.75321  | -0.11866    | 0.54723     | -0.68462  | 0.75321  |  |
|           | 1.6197          | 0.052651  | 0.052651 | 0.503674045 |             |           |          |  |
| NA        | ENSG00000233358 | 0.65193   | 0.25722  | 0.65193     | 0.25722     | 0.10054   | 0.45996  |  |
|           | 1.6196          | 0.052655  | 0.052655 | 0.503674045 |             |           |          |  |
| CNTNAP4   | ENSG00000152910 | 1.6196    | 0.052656 | 1.4389      | 0.075086    | 0.25351   |          |  |
|           | 0.39994         | 0.26711   | 0.39469  | 0.052656    | 0.503674045 |           |          |  |
| SDC2      | ENSG00000169439 | 0.56381   | 0.28644  | 0.28765     | 0.38681     | 0.61659   | 0.26875  |  |
|           | 1.6196          | 0.052662  | 0.052662 | 0.503674045 |             |           |          |  |
| GAB1      | ENSG00000109458 | 0.19824   | 0.42143  | 1.3589      | 0.087093    | 0.78815   | 0.2153   |  |
|           | 1.6193          | 0.05269   | 0.05269  | 0.503763096 |             |           |          |  |
| LLPHP3    | ENSG00000233868 | 1.4915    | 0.067917 | 1.4915      | 0.067917    | 1.6192    |          |  |
|           | 0.052705        | 1.4915    | 0.067917 | 0.052705    | 0.503763096 |           |          |  |
| NA        | ENSG00000271576 | 1.6191    | 0.052715 | 1.6191      | 0.052715    | 1.6191    | 0.052715 |  |
|           | 1.6191          | 0.052715  | 0.052715 | 0.503763096 |             |           |          |  |
| NA        | ENSG00000260278 | -0.34392  | 0.63455  | 1.6191      | 0.052717    | -0.34392  | 0.63455  |  |
|           | -0.34392        | 0.63455   | 0.052717 | 0.503763096 |             |           |          |  |
| RNU1-31P  | ENSG00000200745 | 1.3782    | 0.084067 | 1.5715      | 0.058033    | 1.2488    |          |  |
|           | 0.10586         | 1.619     | 0.052723 | 0.052723    | 0.503763096 |           |          |  |
| CAP1P2    | ENSG00000232004 | -0.21568  | 0.58538  | 1.6188      | 0.052741    | 1.6188    |          |  |
|           | 0.052741        | 1.6188    | 0.052741 | 0.052741    | 0.50378487  |           |          |  |
| ROGDI     | ENSG00000067836 | 1.6186    | 0.052769 | 1.6186      | 0.052769    | -0.18679  | 0.57409  |  |
|           | -0.10865        | 0.54326   | 0.052769 | 0.50378487  |             |           |          |  |
| NA        | ENSG00000234311 | -0.49058  | 0.68814  | 1.0347      | 0.15039     | 1.6185    | 0.052772 |  |
|           | -0.054272       | 0.52164   | 0.052772 | 0.50378487  |             |           |          |  |
| MARCHF5   | ENSG00000198060 | 1.3259    | 0.092436 | 1.3259      | 0.092436    | 0.12619   |          |  |
|           | 0.44979         | 1.6185    | 0.052778 | 0.052778    | 0.50378487  |           |          |  |
| CYCSP7    | ENSG00000269383 | 1.0861    | 0.13871  | 1.6184      | 0.052791    | 1.0861    |          |  |
|           | 0.13871         | 1.0861    | 0.13871  | 0.052791    | 0.50378487  |           |          |  |
| RDH13     | ENSG00000160439 | 1.6181    | 0.052817 | 0.49284     | 0.31106     | 0.95417   | 0.17     |  |
|           | 0.95417         | 0.17      | 0.052817 | 0.50378487  |             |           |          |  |
| NA        | ENSG00000282080 | -0.080352 | 0.53202  | 1.6181      | 0.052823    | -0.080352 | 0.53202  |  |
|           | -0.080352       | 0.53202   | 0.052823 | 0.50378487  |             |           |          |  |
| LINC01618 | ENSG00000250302 | 0.47629   | 0.31693  | 1.618       | 0.052827    | 0.27295   | 0.39245  |  |
|           | 0.47472         | 0.31749   | 0.052827 | 0.50378487  |             |           |          |  |
| ZNF578    | ENSG00000258405 | 1.6179    | 0.052838 | -1.251      | 0.89454     | -0.13162  |          |  |
|           | 0.55236         | -0.79928  | 0.78794  | 0.052838    | 0.50378487  |           |          |  |
| RNF19B    | ENSG00000116514 | 1.6179    | 0.052839 | 0.85295     | 0.19684     | 1.342     | 0.089803 |  |
|           | 0.64933         | 0.25806   | 0.052839 | 0.50378487  |             |           |          |  |
| LINC00112 | ENSG00000232401 | 1.6179    | 0.052839 | 1.6179      | 0.052839    | 1.409     | 0.079425 |  |
|           | 1.6179          | 0.052839  | 0.052839 | 0.50378487  |             |           |          |  |
| NA        | ENSG00000221720 | 1.4654    | 0.071401 | -0.14519    | 0.55772     | 1.1318    | 0.12887  |  |
|           | 1.6178          | 0.052854  | 0.052854 | 0.503816544 |             |           |          |  |
| TNNC1     | ENSG00000114854 | 0.49023   | 0.31199  | 1.6177      | 0.052863    | 0.49023   | 0.31199  |  |
|           | 0.49023         | 0.31199   | 0.052863 | 0.503816544 |             |           |          |  |

|            |                 |               |               |               |               |               |          |
|------------|-----------------|---------------|---------------|---------------|---------------|---------------|----------|
| GPAT3      | ENSG00000138678 | 0.51959       | 0.30168       | 0.72653       | 0.23376       | 0.58179       | 0.28035  |
|            | 1.6174          | 0.052899      | 0.052899      | 0.504029204   |               |               |          |
| TRAV12-2   | ENSG00000211789 | 1.6173        | 0.052906      | 1.6173        | 0.052906      | 1.6173        |          |
|            | 0.052906        | 1.6173        | 0.052906      | 0.052906      | 0.504029204   |               |          |
| MTCO1P51   | ENSG00000232981 | 1.6170.052943 | 0.62146       | 0.26715       | 1.6170.052943 | 1.617         |          |
|            | 0.052943        | 0.052943      | 0.50428311    |               |               |               |          |
| RNU2-43P   | ENSG00000222238 | 0.82777       | 0.2039        | 1.3772        | 0.084225      | 1.5484        |          |
|            | 0.060758        | 1.6168        | 0.052963      | 0.052963      | 0.504375022   |               |          |
| MMS22L     | ENSG00000146263 | 1.4773        | 0.069801      | 1.6166        | 0.052985      | 1.2877        |          |
|            | 0.098933        | 1.4101        | 0.079258      | 0.052985      | 0.504485942   |               |          |
| LINC01963  | ENSG00000260804 | 1.0519        | 0.14642       | 1.0519        | 0.14642       | 1.6163        |          |
|            | 0.053012        | 1.6163        | 0.053012      | 0.053012      | 0.504602957   |               |          |
| NOCT       | ENSG00000151014 | 1.2307        | 0.10922       | 1.6163        | 0.053018      | 1.3779        | 0.084123 |
|            | 1.1184          | 0.13169       | 0.053018      | 0.504602957   |               |               |          |
| NA         | ENSG00000221690 | 1.6161        | 0.053034      | 1.6161        | 0.053034      | 1.6161        | 0.053034 |
|            | 1.6161          | 0.053034      | 0.053034      | 0.504624742   |               |               |          |
| GPATCH1    | ENSG00000076650 | -1.0186       | 0.84581       | 0.20038       | 0.42059       | -1.1321       |          |
|            | 0.87121         | 1.6161        | 0.053041      | 0.053041      | 0.504624742   |               |          |
| NA         | ENSG00000251244 | 1.6158        | 0.053065      | 1.6158        | 0.053065      | 0.70336       | 0.24092  |
|            | 1.6158          | 0.053065      | 0.053065      | 0.504662142   |               |               |          |
| RPL21P54   | ENSG00000241829 | 1.6158        | 0.053066      | 1.6158        | 0.053066      | 1.6158        |          |
|            | 0.053066        | 1.6158        | 0.053066      | 0.053066      | 0.504662142   |               |          |
| NA         | ENSG00000274219 | -0.12958      | 0.55155       | -0.12958      | 0.55155       | 1.6157        | 0.053076 |
|            | -0.12958        | 0.55155       | 0.053076      | 0.504662142   |               |               |          |
| RGS17      | ENSG00000091844 | 0.012917      | 0.49485       | -0.36016      | 0.64064       | 1.6154        | 0.053112 |
|            | -1.039          | 0.85061       | 0.053112      | 0.504704928   |               |               |          |
| NA         | ENSG00000264880 | -0.038193     | 0.51523       | -0.038193     | 0.51523       | -0.038193     | 0.51523  |
|            | 1.6154          | 0.053116      | 0.053116      | 0.504704928   |               |               |          |
| LRRC38     | ENSG00000162494 | -0.28912      | 0.61375       | 1.6153        | 0.053126      | 0.55897       |          |
|            | 0.28809         | 0.43927       | 0.33023       | 0.053126      | 0.504704928   |               |          |
| RNU6-1146P | ENSG00000252091 | 1.6152        | 0.053129      | 1.6152        | 0.053129      | 0.65899       |          |
|            | 0.25495         | -0.072688     | 0.52897       | 0.053129      | 0.504704928   |               |          |
| NA         | ENSG00000234758 | 1.6151        | 0.053143      | 1.6151        | 0.053143      | 1.6151        | 0.053143 |
|            | 1.6151          | 0.053143      | 0.053143      | 0.504704928   |               |               |          |
| NFE2L3     | ENSG00000050344 | -0.49073      | 0.68819       | 1.6150.053152 | 0.16588       | 0.43413       |          |
|            | -1.2025         | 0.88542       | 0.053152      | 0.504704928   |               |               |          |
| NA         | ENSG00000258115 | 1.6150.053153 | 1.6150.053153 | 1.6150.053153 | 1.6150.053153 | 1.6150.053153 |          |
|            | 0.053153        | 0.504704928   |               |               |               |               |          |
| MRPS6P4    | ENSG00000257820 | 1.6149        | 0.053169      | 1.6149        | 0.053169      | 1.6149        |          |
|            | 0.053169        | 1.6149        | 0.053169      | 0.053169      | 0.504755097   |               |          |
| CKS1B      | ENSG00000173207 | 1.6148        | 0.053179      | 0.38712       | 0.34933       | 0.74391       | 0.22847  |
|            | 0.74391         | 0.22847       | 0.053179      | 0.504755097   |               |               |          |
| NA         | ENSG00000238861 | 0.86044       | 0.19477       | 1.3390.090289 | 1.6147        | 0.05319       |          |
|            | 0.64305         | 0.2601        | 0.05319       | 0.504761188   |               |               |          |
| PLXDC2     | ENSG00000120594 | 1.4528        | 0.073139      | 1.6144        | 0.053224      | 1.0030.15792  |          |
|            | -0.0063092      | 0.50252       | 0.053224      | 0.50480716    |               |               |          |
| NA         | ENSG00000255299 | 0.37262       | 0.35471       | 0.28489       | 0.38787       | 1.0372        | 0.14981  |
|            | 1.6143          | 0.053234      | 0.053234      | 0.50480716    |               |               |          |
| NA         | ENSG00000283377 | 1.6142        | 0.053237      | 1.6142        | 0.053237      | 1.6142        | 0.053237 |
|            | 1.6142          | 0.053237      | 0.053237      | 0.50480716    |               |               |          |
| LGALS8     | ENSG00000116977 | 1.1159        | 0.13224       | 1.0686        | 0.14263       | 1.6142        |          |
|            | 0.053239        | 1.1763        | 0.11974       | 0.053239      | 0.50480716    |               |          |
| TOMM40     | ENSG00000130204 | 1.6141        | 0.05325       | 1.6141        | 0.05325       | 1.6141        |          |
|            | 0.05325         | 1.6141        | 0.05325       | 0.05325       | 0.50480716    |               |          |
| RNU6-1051P | ENSG00000202341 | -0.18128      | 0.57192       | -0.2949       | 0.61596       | 0.83953       |          |
|            | 0.20059         | 1.6141        | 0.053257      | 0.053257      | 0.50480716    |               |          |
| FGF20      | ENSG00000078579 | 0.43033       | 0.33348       | -0.1255       | 0.54993       | -0.1255       | 0.54993  |
|            | 1.6137          | 0.053295      | 0.053295      | 0.504981299   |               |               |          |
| PATL1      | ENSG00000166889 | 0.26722       | 0.39465       | 1.1168        | 0.13204       | 1.6136        | 0.053302 |
|            | -0.2846         | 0.61203       | 0.053302      | 0.504981299   |               |               |          |
| EMC10      | ENSG00000161671 | 0.30174       | 0.38143       | -0.25285      | 0.59981       | 0.30174       | 0.38143  |
|            | 1.6135          | 0.053317      | 0.053317      | 0.504981299   |               |               |          |

|           |                 |           |          |             |             |           |          |  |
|-----------|-----------------|-----------|----------|-------------|-------------|-----------|----------|--|
| GASK1A    | ENSG00000144649 | 1.6135    | 0.053321 | 0.60999     | 0.27094     | -0.7593   |          |  |
|           | 0.77616         | 0.65819   | 0.25521  | 0.053321    | 0.504981299 |           |          |  |
| NA        | ENSG00000277688 | 1.6134    | 0.053328 | 1.6134      | 0.053328    | 1.6134    | 0.053328 |  |
|           | 1.6134          | 0.053328  | 0.053328 | 0.504981299 |             |           |          |  |
| NA        | ENSG00000234626 | 0.82643   | 0.20428  | 0.63951     | 0.26125     | 1.6132    | 0.05335  |  |
|           | -1.0352         | 0.84971   | 0.05335  | 0.504981299 |             |           |          |  |
| RCCD1-AS1 | ENSG00000258384 | 1.6132    | 0.053353 | 1.6132      | 0.053353    | 1.6132    |          |  |
|           | 0.053353        | 1.6132    | 0.053353 | 0.504981299 |             |           |          |  |
| EZH2      | ENSG00000106462 | -0.8869   | 0.81243  | 1.6131      | 0.053365    | -0.77422  | 0.7806   |  |
|           | -0.77422        | 0.7806    | 0.053365 | 0.504981299 |             |           |          |  |
| FAM104A   | ENSG00000133193 | 1.4861    | 0.068624 | 1.613       | 0.053376    | 1.5453    | 0.061139 |  |
|           | 1.613           | 0.053376  | 0.053376 | 0.504981299 |             |           |          |  |
| NA        | ENSG00000266024 | -1.6702   | 0.95256  | 0.82705     | 0.20411     | 1.6129    | 0.053379 |  |
|           | -0.41841        | 0.66217   | 0.053379 | 0.504981299 |             |           |          |  |
| BUB3P1    | ENSG00000227968 | 1.6128    | 0.053398 | 0.60121     | 0.27385     | 0.60121   |          |  |
|           | 0.27385         | 0.60121   | 0.27385  | 0.053398    | 0.505021719 |           |          |  |
| H2AC4     | ENSG00000278463 | 1.6127    | 0.053404 | 1.6127      | 0.053404    | 1.6127    | 0.053404 |  |
|           | 1.6127          | 0.053404  | 0.053404 | 0.505021719 |             |           |          |  |
| SP9       | ENSG00000217236 | 1.3242    | 0.092721 | 1.3242      | 0.092721    | 0.10983   | 0.45627  |  |
|           | 1.6126          | 0.053415  | 0.053415 | 0.505027736 |             |           |          |  |
| RPL23AP56 | ENSG00000244413 | 1.6124    | 0.053442 | 1.6124      | 0.053442    | 1.6124    |          |  |
|           | 0.053442        | 1.6124    | 0.053442 | 0.053442    | 0.505184997 |           |          |  |
| SRSF11    | ENSG00000116754 | 1.6122    | 0.053463 | 1.4225      | 0.077436    | -1.5858   |          |  |
|           | 0.9436          | -1.4104   | 0.92078  | 0.053463    | 0.505285491 |           |          |  |
| RAB4A     | ENSG00000168118 | -0.67662  | 0.75068  | 1.612       | 0.05348     | 0.46847   | 0.31973  |  |
|           | 0.68667         | 0.24615   | 0.05348  | 0.505287964 |             |           |          |  |
| WDR93     | ENSG00000140527 | 0.98094   | 0.16331  | 1.0014      | 0.15831     | 1.1878    | 0.11745  |  |
|           | 1.612           | 0.053484  | 0.053484 | 0.505287964 |             |           |          |  |
| NA        | ENSG00000252192 | 1.6116    | 0.053519 | 1.6116      | 0.053519    | 1.6116    | 0.053519 |  |
|           | 1.6116          | 0.053519  | 0.053519 | 0.505488756 |             |           |          |  |
| RN7SKP115 | ENSG00000200047 | 0.42217   | 0.33645  | 0.19201     | 0.42387     | 1.6116    |          |  |
|           | 0.053526        | 0.62153   | 0.26712  | 0.053526    | 0.505488756 |           |          |  |
| LINC01149 | ENSG00000230174 | 1.6114    | 0.053549 | 1.2184      | 0.11154     | 1.1893    |          |  |
|           | 0.11716         | 1.4996    | 0.066855 | 0.053549    | 0.505563132 |           |          |  |
| LINC02013 | ENSG00000228730 | 0.23136   | 0.40852  | -1.3288     | 0.90805     | 1.6113    |          |  |
|           | 0.053559        | -0.023244 | 0.50927  | 0.053559    | 0.505563132 |           |          |  |
| WIPF3     | ENSG00000122574 | 0.24018   | 0.4051   | 1.1198      | 0.1314      | 0.39405   | 0.34677  |  |
|           | 1.6112          | 0.053565  | 0.053565 | 0.505563132 |             |           |          |  |
| NA        | ENSG00000237586 | 0.9391    | 0.17384  | 1.6109      | 0.053603    | 0.9391    | 0.17384  |  |
|           | 0.9391          | 0.17384   | 0.053603 | 0.505589069 |             |           |          |  |
| RPS3P2    | ENSG00000231307 | 1.6108    | 0.053607 | 1.6108      | 0.053607    | 1.6108    |          |  |
|           | 0.053607        | 1.6108    | 0.053607 | 0.053607    | 0.505589069 |           |          |  |
| DENND1B   | ENSG00000213047 | 0.69772   | 0.24267  | 1.1741      | 0.12017     | 1.6108    |          |  |
|           | 0.053609        | 0.91784   | 0.17935  | 0.053609    | 0.505589069 |           |          |  |
| VSTM5     | ENSG00000214376 | -0.60825  | 0.72849  | 1.6107      | 0.053622    | -0.60825  | 0.72849  |  |
|           | -0.32696        | 0.62815   | 0.053622 | 0.505589069 |             |           |          |  |
| NA        | ENSG00000243583 | 1.6107    | 0.053625 | 1.2341      | 0.10858     | 1.6107    | 0.053625 |  |
|           | 1.6107          | 0.053625  | 0.053625 | 0.505589069 |             |           |          |  |
| NA        | ENSG00000250333 | -0.22428  | 0.58873  | -0.087417   | 0.53483     | -0.087417 | 0.53483  |  |
|           | 1.6106          | 0.05363   | 0.05363  | 0.505589069 |             |           |          |  |
| HMGB3P6   | ENSG00000213070 | 1.6105    | 0.053645 | 1.6105      | 0.053645    | 1.6105    |          |  |
|           | 0.053645        | 1.6105    | 0.053645 | 0.053645    | 0.50563266  |           |          |  |
| KLHL6-AS1 | ENSG00000242522 | 1.6104    | 0.053659 | 0.39256     | 0.34732     | 1.0771    |          |  |
|           | 0.14072         | 1.0771    | 0.14072  | 0.053659    | 0.505666809 |           |          |  |
| ZNF587B   | ENSG00000269343 | 1.61      | 0.053697 | 1.0344      | 0.15047     | 1.0393    | 0.14934  |  |
|           | 0.99788         | 0.15917   | 0.053697 | 0.505844525 |             |           |          |  |
| CENPNP1   | ENSG00000233671 | 1.61      | 0.053702 | 0.97572     | 0.1646      | 0.91391   | 0.18038  |  |
|           | -1.6345         | 0.94892   | 0.053702 | 0.505844525 |             |           |          |  |
| NA        | ENSG00000250032 | 0.67282   | 0.25053  | 0.67282     | 0.25053     | 0.67282   | 0.25053  |  |
|           | 1.6099          | 0.053709  | 0.053709 | 0.505844525 |             |           |          |  |
| MTF1      | ENSG00000188786 | 1.4175    | 0.078167 | 0.2566      | 0.39874     | 1.6097    | 0.053733 |  |
|           | 1.2282          | 0.10969   | 0.053733 | 0.505972771 |             |           |          |  |

|           |                 |            |             |             |             |          |          |
|-----------|-----------------|------------|-------------|-------------|-------------|----------|----------|
| NA        | ENSG00000212529 | -0.0041782 | 0.50167     | -0.0041782  | 0.50167     | 0.096271 | 0.46165  |
|           | 1.6093          | 0.05377    | 0.05377     | 0.50621029  |             |          |          |
| NA        | ENSG00000273474 | 1.6093     | 0.053779    | 1.6093      | 0.053779    | 1.6093   | 0.053779 |
|           | 1.6093          | 0.053779   | 0.053779    | 0.50621029  |             |          |          |
| RNA5SP371 | ENSG00000222302 | 1.6091     | 0.053799    | 0.28861     | 0.38644     | 0.40065  |          |
|           | 0.34434         | 0.40065    | 0.34434     | 0.053799    | 0.506220255 |          |          |
| SMIM17    | ENSG00000268182 | 1.609      | 0.053811    | 1.609       | 0.053811    | 1.609    | 0.053811 |
|           | 0.053811        | 0.053811   | 0.506220255 |             |             |          |          |
| NA        | ENSG00000273637 | 1.6089     | 0.053817    | -0.2642     | 0.60419     | 1.2068   | 0.11376  |
|           | 1.2068          | 0.11376    | 0.053817    | 0.506220255 |             |          |          |
| TRANK1    | ENSG00000168016 | 0.95699    | 0.16929     | 1.0075      | 0.15685     | 1.6089   |          |
|           | 0.053824        | 0.43646    | 0.33125     | 0.053824    | 0.506220255 |          |          |
| NA        | ENSG00000232089 | 0.65399    | 0.25656     | 1.6088      | 0.053832    | 1.2396   | 0.10756  |
|           | 0.65399         | 0.25656    | 0.053832    | 0.506220255 |             |          |          |
| NA        | ENSG00000263279 | 1.6077     | 0.053945    | 1.6077      | 0.053945    | 1.6077   | 0.053945 |
|           | 1.6077          | 0.053945   | 0.053945    | 0.507130012 |             |          |          |
| NA        | ENSG00000229309 | -0.69023   | 0.75497     | -0.69023    | 0.75497     | 0.70004  | 0.24195  |
|           | 1.6077          | 0.053955   | 0.053955    | 0.507130012 |             |          |          |
| TDRD6     | ENSG00000180113 | 1.4285     | 0.076571    | 1.4285      | 0.076571    | 1.6074   | 0.053987 |
|           | 0.91474         | 0.18017    | 0.053987    | 0.507130012 |             |          |          |
| EEF1A1P36 | ENSG00000223912 | 1.6073     | 0.05399     | 0.96816     | 0.16648     | 1.1327   |          |
|           | 0.12868         | 0.96816    | 0.16648     | 0.05399     | 0.507130012 |          |          |
| RN7SL726P | ENSG00000272232 | -0.58433   | 0.7205      | 0.23223     | 0.40818     | 0.75084  |          |
|           | 0.22637         | 1.6073     | 0.05399     | 0.05399     | 0.507130012 |          |          |
| NA        | ENSG00000262420 | 1.6072     | 0.054001    | 1.6072      | 0.054001    | 1.6072   | 0.054001 |
|           | 1.6072          | 0.054001   | 0.054001    | 0.507130012 |             |          |          |
| NA        | ENSG00000232006 | -0.2015    | 0.57985     | -1.0787     | 0.85964     | -1.1206  | 0.86877  |
|           | 1.6072          | 0.054002   | 0.054002    | 0.507130012 |             |          |          |
| MIR4448   | ENSG00000263932 | 1.6071     | 0.054012    | 1.6071      | 0.054012    | 1.6071   |          |
|           | 0.054012        | 1.6071     | 0.054012    | 0.054012    | 0.507130012 |          |          |
| KRTAP10-1 | ENSG00000215455 | 1.607      | 0.054025    | 0.20601     | 0.41839     | -0.98132 | 0.83678  |
|           | 0.20601         | 0.41839    | 0.054025    | 0.507154354 |             |          |          |
| FUS       | ENSG00000089280 | 1.6064     | 0.054095    | 0.4559      | 0.32423     | 1.6064   | 0.054095 |
|           | 1.6064          | 0.054095   | 0.054095    | 0.507615896 |             |          |          |
| TUBA1B    | ENSG00000123416 | 0.97157    | 0.16563     | 0.28743     | 0.38689     | 1.6064   |          |
|           | 0.054095        | 1.5476     | 0.060854    | 0.054095    | 0.507615896 |          |          |
| NA        | ENSG00000279498 | 1.6059     | 0.054144    | 1.6059      | 0.054144    | 1.6059   | 0.054144 |
|           | 1.6059          | 0.054144   | 0.054144    | 0.507917621 |             |          |          |
| NA        | ENSG00000218806 | 0.14196    | 0.44356     | 0.96834     | 0.16644     | 0.73939  | 0.22984  |
|           | 1.6059          | 0.054148   | 0.054148    | 0.507917621 |             |          |          |
| RNU6-843P | ENSG00000207183 | 1.6058     | 0.054163    | 1.6058      | 0.054163    | 1.6058   |          |
|           | 0.054163        | 1.3751     | 0.084544    | 0.054163    | 0.507956569 |          |          |
| STMN3     | ENSG00000197457 | 1.4992     | 0.066916    | 1.6057      | 0.054173    | 1.5714   | 0.058041 |
|           | 1.288           | 0.098877   | 0.054173    | 0.507956569 |             |          |          |
| ARHGEF37  | ENSG00000183111 | 1.6055     | 0.054188    | 1.334       | 0.091097    | 1.371    | 0.085191 |
|           | 0.10366         | 0.45872    | 0.054188    | 0.507999469 |             |          |          |
| ZC3H4     | ENSG00000130749 | 1.5308     | 0.062908    | 0.75712     | 0.22449     | 0.99249  | 0.16048  |
|           | 1.6053          | 0.054214   | 0.054214    | 0.508099962 |             |          |          |
| VILL      | ENSG00000136059 | 1.6052     | 0.054221    | 1.4771      | 0.06982     | 0.42875  | 0.33405  |
|           | 1.2164          | 0.11192    | 0.054221    | 0.508099962 |             |          |          |
| NA        | ENSG00000270094 | 1.6052     | 0.05423     | 1.6052      | 0.05423     | 1.6052   | 0.05423  |
|           | 1.6052          | 0.05423    | 0.05423     | 0.508099962 |             |          |          |
| CYP4V2    | ENSG00000145476 | 1.2697     | 0.10209     | 1.2697      | 0.10209     | 1.2697   |          |
|           | 0.10209         | 1.6049     | 0.054262    | 0.054262    | 0.508302049 |          |          |
| ADGRE4P   | ENSG00000268758 | 0.51645    | 0.30277     | 0.60126     | 0.27383     | -0.92065 |          |
|           | 0.82138         | 1.6048     | 0.054274    | 0.054274    | 0.508316744 |          |          |
| NA        | ENSG00000259731 | 1.6045     | 0.054305    | 1.2757      | 0.10103     | 1.5066   | 0.065963 |
|           | 1.5113          | 0.065359   | 0.054305    | 0.508421014 |             |          |          |
| NA        | ENSG00000237456 | 0.69298    | 0.24416     | -0.022985   | 0.50917     | 1.6045   | 0.054306 |
|           | 0.12097         | 0.45186    | 0.054306    | 0.508421014 |             |          |          |
| NA        | ENSG00000233558 | 1.4283     | 0.076599    | 1.4938      | 0.067613    | 0.11044  | 0.45603  |
|           | 1.6041          | 0.054349   | 0.054349    | 0.508656224 |             |          |          |



|             |                 |          |          |             |             |          |          |
|-------------|-----------------|----------|----------|-------------|-------------|----------|----------|
| NA          | ENSG00000236106 | 0.38881  | 0.34871  | 0.24149     | 0.40459     | 1.6041   | 0.054352 |
|             | 0.28031         | 0.38962  | 0.054352 | 0.508656224 |             |          |          |
| NA          | ENSG00000263272 | 1.6038   | 0.054384 | 1.6038      | 0.054384    | 1.6038   | 0.054384 |
|             | 1.6038          | 0.054384 | 0.054384 | 0.508752048 |             |          |          |
| DTHD1       | ENSG00000197057 | 1.6037   | 0.054389 | 1.5395      | 0.061835    | 1.6037   | 0.054389 |
|             | 0.47021         | 0.3191   | 0.054389 | 0.508752048 |             |          |          |
| NA          | ENSG00000279324 | 1.6036   | 0.054398 | 1.1647      | 0.12208     | 0.74025  | 0.22957  |
|             | 0.74025         | 0.22957  | 0.054398 | 0.508752048 |             |          |          |
| TP53RK      | ENSG00000172315 | 1.6036   | 0.054404 | 1.6036      | 0.054404    | 1.6036   |          |
|             | 0.054404        | 1.0594   | 0.1447   | 0.054404    | 0.508752048 |          |          |
| MIR3659     | ENSG00000265596 | -1.0859  | 0.86123  | -1.2392     | 0.89237     | -1.0859  |          |
|             | 0.86123         | 1.603    | 0.054467 | 0.509164468 |             |          |          |
| IGLJ4       | ENSG00000211680 | 0.028888 | 0.48848  | 1.603       | 0.054469    | 0.028888 | 0.48848  |
|             | 0.028888        | 0.48848  | 0.054469 | 0.509164468 |             |          |          |
| NA          | ENSG00000252204 | 0.60047  | 0.2741   | 0.60047     | 0.2741      | -0.9873  | 0.83825  |
|             | 1.6027          | 0.054499 | 0.054499 | 0.509347194 |             |          |          |
| FNDC11      | ENSG00000125531 | -0.41296 | 0.66018  | 1.1471      | 0.12568     | -0.34254 |          |
|             | 0.63403         | 1.6025   | 0.054524 | 0.054524    | 0.509483129 |          |          |
| CTH         | ENSG00000116761 | 1.6021   | 0.054565 | -0.82781    | 0.79611     | 1.6021   | 0.054565 |
|             | -0.39746        | 0.65449  | 0.054565 | 0.509680119 |             |          |          |
| SECISBP2L   | ENSG00000138593 | 1.5769   | 0.057411 | 1.6021      | 0.054566    | 1.6021   |          |
|             | 0.054566        | 0.71554  | 0.23714  | 0.054566    | 0.509680119 |          |          |
| HOXA3       | ENSG00000105997 | 1.2777   | 0.10067  | 1.6017      | 0.054608    | 1.6017   | 0.054608 |
|             | 1.6017          | 0.054608 | 0.054608 | 0.509707057 |             |          |          |
| PARP14      | ENSG00000173193 | 1.3379   | 0.090459 | 0.63506     | 0.26269     | 1.6013   |          |
|             | 0.054659        | 0.85676  | 0.19579  | 0.054659    | 0.509707057 |          |          |
| LINC01893   | ENSG00000264260 | 1.6013   | 0.054661 | 1.6013      | 0.054661    | 1.6013   |          |
|             | 0.054661        | 1.6013   | 0.054661 | 0.054661    | 0.509707057 |          |          |
| ATP6V1G1    | ENSG00000136888 | 1.6012   | 0.054664 | 1.6012      | 0.054664    | 1.6012   |          |
|             | 0.054664        | 0.048448 | 0.48068  | 0.054664    | 0.509707057 |          |          |
| RNU6ATAC29P | ENSG00000221015 | 1.6012   | 0.054665 | 0.66044     | 0.25449     | -1.1666  |          |
|             | 0.87831         | 0.33877  | 0.36739  | 0.054665    | 0.509707057 |          |          |
| RNU6-668P   | ENSG00000201050 | 1.5805   | 0.056992 | 1.5509      | 0.060461    | 1.6012   |          |
|             | 0.05467         | 1.5805   | 0.056992 | 0.05467     | 0.509707057 |          |          |
| NA          | ENSG00000269994 | 1.601    | 0.05469  | 0.41705     | 0.33832     | -1.1795  | 0.88091  |
|             | -2.4425         | 0.99271  | 0.05469  | 0.509707057 |             |          |          |
| COL4A4      | ENSG00000081052 | 1.601    | 0.054694 | 1.0739      | 0.14144     | 1.2784   | 0.10056  |
|             | 0.50576         | 0.30651  | 0.054694 | 0.509707057 |             |          |          |
| OR7E21P     | ENSG00000251178 | 1.2965   | 0.0974   | 1.2965      | 0.0974      | -0.45187 |          |
|             | 0.67432         | 1.6009   | 0.054695 | 0.054695    | 0.509707057 |          |          |
| NA          | ENSG00000237320 | 1.6009   | 0.054703 | -0.40752    | 0.65819     | 0.18717  | 0.42576  |
|             | -0.024274       | 0.50968  | 0.054703 | 0.509707057 |             |          |          |
| CREB5       | ENSG00000146592 | 0.4886   | 0.31256  | 0.60964     | 0.27105     | 1.6009   | 0.054705 |
|             | -0.13899        | 0.55527  | 0.054705 | 0.509707057 |             |          |          |
| ARMC10P1    | ENSG00000178660 | -0.84609 | 0.80125  | 1.6008      | 0.054707    | -0.84609 |          |
|             | 0.80125         | -0.84609 | 0.80125  | 0.054707    | 0.509707057 |          |          |
| NA          | ENSG00000282692 | -0.36638 | 0.64296  | -0.34223    | 0.63391     | 0.38112  | 0.35156  |
|             | 1.6008          | 0.054716 | 0.054716 | 0.509707057 |             |          |          |
| NT5C1A      | ENSG00000116981 | -0.23561 | 0.59313  | -1.1106     | 0.86663     | -0.23561 |          |
|             | 0.59313         | 1.6006   | 0.054734 | 0.054734    | 0.509707057 |          |          |
| TTC39DP     | ENSG00000227238 | 0.13784  | 0.44518  | 0.13784     | 0.44518     | 0.13784  |          |
|             | 0.44518         | 1.6006   | 0.054734 | 0.054734    | 0.509707057 |          |          |
| TAAR3P      | ENSG00000179073 | 1.6003   | 0.054767 | 0.056229    | 0.47758     | 0.6392   |          |
|             | 0.26135         | 0.53026  | 0.29797  | 0.054767    | 0.509707057 |          |          |
| NMNAT1P2    | ENSG00000225719 | 0.55762  | 0.28855  | 1.6003      | 0.054767    | 1.318    | 0.093749 |
|             | 1.318           | 0.093749 | 0.054767 | 0.509707057 |             |          |          |
| PQLC1P1     | ENSG00000231763 | 1.6003   | 0.05477  | 1.6003      | 0.05477     | 1.6003   |          |
|             | 0.05477         | 1.6003   | 0.05477  | 0.05477     | 0.509707057 |          |          |
| RCC2P4      | ENSG00000249558 | 0.68219  | 0.24756  | 1.6002      | 0.054774    | 0.92269  |          |
|             | 0.17808         | 1.0159   | 0.15484  | 0.054774    | 0.509707057 |          |          |
| MIR5580     | ENSG00000266431 | 0.24037  | 0.40502  | 1.6001      | 0.054783    | 1.6001   |          |
|             | 0.054783        | 1.6001   | 0.054783 | 0.054783    | 0.509707057 |          |          |

|             |                 |             |             |             |             |           |          |
|-------------|-----------------|-------------|-------------|-------------|-------------|-----------|----------|
| NA          | ENSG00000207119 | -0.42254    | 0.66369     | 0.9279      | 0.17673     | -0.055751 | 0.52223  |
|             | 1.6             | 0.054798    | 0.054798    | 0.509707057 |             |           |          |
| NA          | ENSG00000205971 | 1.6         | 0.054799    | 1.6         | 0.054799    | 0.48226   | 0.31481  |
|             | 0.054799        | 0.054799    | 0.509707057 |             |             |           | 1.6      |
| NA          | ENSG00000244061 | -0.74497    | 0.77185     | 1.5998      | 0.054821    | -0.56995  | 0.71564  |
|             | -1.0258         | 0.8475      | 0.054821    | 0.509758658 |             |           |          |
| TAF12       | ENSG00000120656 | 1.1491      | 0.12527     | 1.5995      | 0.05485     | 0.0056723 | 0.49774  |
|             | 0.32185         | 0.37378     | 0.05485     | 0.509758658 |             |           |          |
| NA          | ENSG00000219298 | 1.5383      | 0.06199     | 1.5994      | 0.054865    | 1.48      | 0.069439 |
|             | 1.5383          | 0.06199     | 0.054865    | 0.509758658 |             |           |          |
| RNU6-1178P  | ENSG00000252483 | 1.5993      | 0.054875    | 1.5993      | 0.054875    | 1.5993    |          |
|             | 0.054875        | 1.5993      | 0.054875    | 0.509758658 |             |           |          |
| NA          | ENSG00000254890 | 1.5992      | 0.054893    | 1.5992      | 0.054893    | 1.5992    | 0.054893 |
|             | 1.5992          | 0.054893    | 0.054893    | 0.509758658 |             |           |          |
| NA          | ENSG00000267528 | 0.036056    | 0.48562     | 1.453       | 0.073106    | 1.5991    | 0.054899 |
|             | 1.3218          | 0.09311     | 0.054899    | 0.509758658 |             |           |          |
| NA          | ENSG00000270632 | -0.023857   | 0.50952     | 1.599       | 0.054912    | -0.023857 | 0.50952  |
|             | -0.38801        | 0.651       | 0.054912    | 0.509758658 |             |           |          |
| MFSD9       | ENSG00000135953 | 1.599       | 0.054913    | 1.599       | 0.054913    | 1.599     | 0.054913 |
|             | 0.054913        | 0.509758658 |             |             |             |           |          |
| NDUFAF4P4   | ENSG00000231378 | 1.5989      | 0.054917    | 0.58613     | 0.27889     | 0.58613   |          |
|             | 0.27889         | 0.38749     | 0.3492      | 0.054917    | 0.509758658 |           |          |
| NA          | ENSG00000242590 | 1.5989      | 0.054926    | 1.5989      | 0.054926    | 1.5989    | 0.054926 |
|             | 1.5989          | 0.054926    | 0.054926    | 0.509758658 |             |           |          |
| NCLP1       | ENSG00000213212 | 1.5988      | 0.054935    | 1.5988      | 0.054935    | 1.5988    | 0.054935 |
|             | 1.5988          | 0.054935    | 0.054935    | 0.509758658 |             |           |          |
| APBA3       | ENSG00000011132 | 1.5987      | 0.054942    | 0.16754     | 0.43347     | 1.5987    | 0.054942 |
|             | 1.5987          | 0.054942    | 0.054942    | 0.509758658 |             |           |          |
| LINC02823   | ENSG00000258100 | 0.82887     | 0.20359     | 1.3921      | 0.081952    | 1.1238    |          |
|             | 0.13055         | 1.5987      | 0.054949    | 0.054949    | 0.509758658 |           |          |
| NA          | ENSG00000261404 | 0.50894     | 0.3054      | 0.64604     | 0.25913     | 1.5986    | 0.054951 |
|             | 1.0304          | 0.15141     | 0.054951    | 0.509758658 |             |           |          |
| NA          | ENSG00000248733 | 0.80759     | 0.20966     | 1.5983      | 0.05499     | -1.3995   | 0.91917  |
|             | -1.3995         | 0.91917     | 0.05499     | 0.509851274 |             |           |          |
| NA          | ENSG00000230967 | 1.4798      | 0.069468    | 1.5982      | 0.054995    | 0.41316   | 0.33975  |
|             | -0.29195        | 0.61484     | 0.054995    | 0.509851274 |             |           |          |
| RNU1-17P    | ENSG00000199892 | 1.5979      | 0.05503     | -0.878      | 0.81003     | -0.37054  |          |
|             | 0.64451         | -1.436      | 0.9245      | 0.05503     | 0.509851274 |           |          |
| FAM171B     | ENSG00000144369 | 0.82054     | 0.20595     | -0.018974   | 0.50757     | 1.5978    |          |
|             | 0.055039        | 1.5978      | 0.055039    | 0.055039    | 0.509851274 |           |          |
| NA          | ENSG00000213690 | 1.4001      | 0.080746    | 1.5978      | 0.05504     | 1.5978    | 0.05504  |
|             | 1.5978          | 0.05504     | 0.05504     | 0.509851274 |             |           |          |
| AOC2        | ENSG00000131480 | 1.5977      | 0.055051    | 1.5977      | 0.055051    | 1.5977    | 0.055051 |
|             | 1.5977          | 0.055051    | 0.055051    | 0.509851274 |             |           |          |
| CCDC28A-AS1 | ENSG00000279968 | -1.8158     | 0.9653      | 1.5977      | 0.055055    | 0.45508   |          |
|             | 0.32453         | -0.88324    | 0.81145     | 0.055055    | 0.509851274 |           |          |
| SAXO2       | ENSG00000188659 | -1.2653     | 0.89712     | 1.5976      | 0.055064    | -0.34825  | 0.63618  |
|             | 0.89752         | 0.18472     | 0.055064    | 0.509851274 |             |           |          |
| NA          | ENSG00000201965 | 1.5976      | 0.055071    | 1.5976      | 0.055071    | 1.5976    | 0.055071 |
|             | 1.5976          | 0.055071    | 0.055071    | 0.509851274 |             |           |          |
| LINC01695   | ENSG00000236532 | 1.3022      | 0.096423    | 1.5975      | 0.055082    | 1.4928    |          |
|             | 0.067742        | 1.0354      | 0.15025     | 0.055082    | 0.509851274 |           |          |
| NA          | ENSG00000271734 | 1.5974      | 0.055092    | 1.5974      | 0.055092    | 1.5974    | 0.055092 |
|             | 1.5974          | 0.055092    | 0.055092    | 0.509851274 |             |           |          |
| NA          | ENSG00000240419 | -0.69644    | 0.75692     | 1.5974      | 0.055093    | 0.80577   | 0.21019  |
|             | 1.5974          | 0.055093    | 0.055093    | 0.509851274 |             |           |          |
| SOS1        | ENSG00000115904 | 1.5233      | 0.063844    | 1.3971      | 0.081191    | 1.5973    | 0.055097 |
|             | 1.5154          | 0.064832    | 0.055097    | 0.509851274 |             |           |          |
| MITF        | ENSG00000187098 | 0.32049     | 0.3743      | 0.60277     | 0.27333     | 0.099266  | 0.46046  |
|             | 1.5968          | 0.055151    | 0.055151    | 0.510024648 |             |           |          |
| LINC02135   | ENSG00000268532 | -0.4775     | 0.6835      | -1.3168     | 0.90605     | -0.4775   |          |
|             | 0.6835          | 1.5968      | 0.05516     | 0.05516     | 0.510024648 |           |          |

|             |                 |          |             |             |             |            |          |
|-------------|-----------------|----------|-------------|-------------|-------------|------------|----------|
| TP53BP2     | ENSG00000143514 | 1.5967   | 0.055162    | 0.2293      | 0.40932     | 0.2293     |          |
|             | 0.40932         | 1.1542   | 0.12422     | 0.055162    | 0.510024648 |            |          |
| NANOGP1     | ENSG00000176654 | 0.60176  | 0.27367     | 1.5967      | 0.055162    | 1.5967     |          |
|             | 0.055162        | 0.60459  | 0.27273     | 0.055162    | 0.510024648 |            |          |
| PPP2R2B-IT1 | ENSG00000249553 | -0.74282 | 0.7712      | 1.5966      | 0.055178    | 0.77153    |          |
|             | 0.2202          | -0.26915 | 0.60609     | 0.055178    | 0.510024648 |            |          |
| EIF4B       | ENSG00000063046 | 0.45836  | 0.32335     | -0.18467    | 0.57326     | -0.22855   | 0.59039  |
|             | 1.5966          | 0.05518  | 0.05518     | 0.510024648 |             |            |          |
| TMEM72-AS1  | ENSG00000224812 | -2.0574  | 0.98018     | 1.5965      | 0.055189    | -1.5494    |          |
|             | 0.93936         | -0.64439 | 0.74034     | 0.055189    | 0.510024648 |            |          |
| NA          | ENSG00000253105 | 1.1109   | 0.13331     | 0.49535     | 0.31018     | 0.73875    | 0.23003  |
|             | 1.5963          | 0.055212 | 0.055212    | 0.510140455 |             |            |          |
| IGLCOR22-2  | ENSG00000271093 | 1.596    | 0.055241    | 1.596       | 0.055241    | 1.596      | 0.055241 |
|             | 0.055241        | 0.055241 | 0.510236103 |             |             |            |          |
| HIF1A-AS1   | ENSG00000258777 | 1.596    | 0.055246    | 1.5775      | 0.057336    | 0.30142    | 0.38155  |
|             | 0.30142         | 0.38155  | 0.055246    | 0.510236103 |             |            |          |
| FAM181A-AS1 | ENSG00000258584 | 1.3474   | 0.088923    | 0.13264     | 0.44724     | 0.50999    |          |
|             | 0.30503         | 1.5958   | 0.055263    | 0.055263    | 0.510236103 |            |          |
| C7orf65     | ENSG00000221845 | -1.1711  | 0.87922     | 1.5956      | 0.055287    | -1.1711    |          |
|             | 0.87922         | -1.1711  | 0.87922     | 0.055287    | 0.510236103 |            |          |
| MRPS18AP1   | ENSG00000229759 | 0.94526  | 0.17226     | 0.86806     | 0.19268     | 1.5955     |          |
|             | 0.0553          | 1.2201   | 0.11121     | 0.0553      | 0.510236103 |            |          |
| NA          | ENSG00000275936 | 1.5954   | 0.055311    | 1.5954      | 0.055311    | 1.5954     | 0.055311 |
|             | 1.5954          | 0.055311 | 0.055311    | 0.510236103 |             |            |          |
| LINC02476   | ENSG00000225546 | -0.85983 | 0.80506     | -0.85983    | 0.80506     | 1.5953     |          |
|             | 0.055324        | -0.85983 | 0.80506     | 0.055324    | 0.510236103 |            |          |
| SPDYE1      | ENSG00000136206 | -0.5959  | 0.72438     | 1.5952      | 0.055329    | -1.4987    |          |
|             | 0.93302         | 0.26047  | 0.39725     | 0.055329    | 0.510236103 |            |          |
| NUTM2B-AS1  | ENSG00000225484 | 0.64524  | 0.25939     | 1.5952      | 0.055331    | 0.016532   |          |
|             | 0.4934          | 1.1302   | 0.1292      | 0.055331    | 0.510236103 |            |          |
| LGALS9DP    | ENSG00000266786 | 0.7481   | 0.2272      | 0.95945     | 0.16867     | -0.41657   |          |
|             | 0.6615          | 1.5952   | 0.055333    | 0.055333    | 0.510236103 |            |          |
| LNCNEF      | ENSG00000237396 | 1.5951   | 0.055341    | -1.0489     | 0.85288     | -0.0032605 |          |
|             | 0.5013          | -1.08    | 0.85992     | 0.055341    | 0.510236103 |            |          |
| LINC01234   | ENSG00000249550 | -0.36338 | 0.64184     | -0.18042    | 0.57159     | 1.5951     |          |
|             | 0.055348        | -0.30124 | 0.61838     | 0.055348    | 0.510236103 |            |          |
| LINC00582   | ENSG00000229228 | 1.4527   | 0.07315     | 1.4423      | 0.074604    | 1.2916     |          |
|             | 0.098254        | 1.5949   | 0.055371    | 0.055371    | 0.510316248 |            |          |
| NA          | ENSG00000236961 | 0.38644  | 0.34959     | 1.5947      | 0.055387    | 0.47714    | 0.31663  |
|             | 1.2607          | 0.1037   | 0.055387    | 0.510316248 |             |            |          |
| RNU6-1207P  | ENSG00000207071 | 1.5945   | 0.055411    | 1.5945      | 0.055411    | 1.5945     |          |
|             | 0.055411        | 1.5945   | 0.055411    | 0.055411    | 0.510316248 |            |          |
| TUBA4A      | ENSG00000127824 | 1.5944   | 0.055424    | 1.5944      | 0.055424    | 1.5944     |          |
|             | 0.055424        | 1.5944   | 0.055424    | 0.055424    | 0.510316248 |            |          |
| PPA1        | ENSG00000180817 | 0.78289  | 0.21685     | 1.5944      | 0.055424    | 0.71721    | 0.23662  |
|             | 0.60436         | 0.2728   | 0.055424    | 0.510316248 |             |            |          |
| UBALD2      | ENSG00000185262 | 0.53983  | 0.29466     | 1.5944      | 0.055427    | 0.53983    |          |
|             | 0.29466         | 1.0647   | 0.1435      | 0.055427    | 0.510316248 |            |          |
| SERPINB8P1  | ENSG00000217707 | 1.1634   | 0.12234     | 1.1634      | 0.12234     | 1.5943     |          |
|             | 0.05543         | 1.1634   | 0.12234     | 0.05543     | 0.510316248 |            |          |
| NA          | ENSG00000261526 | 1.5941   | 0.055452    | 1.5941      | 0.055452    | 1.5941     | 0.055452 |
|             | 1.5941          | 0.055452 | 0.055452    | 0.510336167 |             |            |          |
| NA          | ENSG00000255853 | 1.0749   | 0.1412      | 1.594       | 0.05547     | 1.0749     | 0.1412   |
|             | 1.0749          | 0.1412   | 0.05547     | 0.510336167 |             |            |          |
| MTCH1       | ENSG00000137409 | 1.248    | 0.10602     | -0.011248   | 0.50449     | 1.5017     | 0.066582 |
|             | 0.055471        | 0.055471 | 0.510336167 |             |             |            | 1.594    |
| SNRPD2P1    | ENSG00000228938 | 1.5939   | 0.055476    | 0.65009     | 0.25782     | 1.5939     |          |
|             | 0.055476        | 0.19319  | 0.42341     | 0.055476    | 0.510336167 |            |          |
| NA          | ENSG00000227946 | 1.5938   | 0.055494    | 1.5938      | 0.055494    | 1.5938     | 0.055494 |
|             | 1.5938          | 0.055494 | 0.055494    | 0.510336167 |             |            |          |
| FANCD2P2    | ENSG00000230342 | 0.82692  | 0.20414     | -0.26729    | 0.60538     | 1.5938     |          |
|             | 0.055495        | -0.4933  | 0.6891      | 0.055495    | 0.510336167 |            |          |

|           |                 |           |          |             |             |          |          |
|-----------|-----------------|-----------|----------|-------------|-------------|----------|----------|
| KCTD9     | ENSG00000104756 | -0.16819  | 0.56678  | 0.57314     | 0.28327     | -0.25905 | 0.6022   |
|           | 1.5935          | 0.055521  | 0.055521 | 0.51047893  |             |          |          |
| NA        | ENSG00000251352 | -0.16328  | 0.56485  | 0.21778     | 0.4138      | -0.69659 | 0.75697  |
|           | 1.5934          | 0.055537  | 0.055537 | 0.510529713 |             |          |          |
| NA        | ENSG00000230649 | -0.14402  | 0.55726  | -1.833      | 0.9666      | 1.5929   | 0.055586 |
|           | 1.1164          | 0.13212   | 0.055586 | 0.510783009 |             |          |          |
| SERPINB3  | ENSG00000057149 | -1.9221   | 0.97271  | 0.82715     | 0.20408     | 1.5929   |          |
|           | 0.055595        | -2.0909   | 0.98173  | 0.055595    | 0.510783009 |          |          |
| NA        | ENSG00000267789 | 1.5929    | 0.055596 | 0.54428     | 0.29313     | 1.2992   | 0.096945 |
|           | 1.2992          | 0.096945  | 0.055596 | 0.510783009 |             |          |          |
| NA        | ENSG00000200874 | 1.5926    | 0.05562  | 1.5926      | 0.05562     | 1.5926   | 0.05562  |
|           | 1.5926          | 0.05562   | 0.05562  | 0.510907182 |             |          |          |
| ATIC      | ENSG00000138363 | 0.9202    | 0.17873  | 0.3391      | 0.36727     | 0.38947  | 0.34847  |
|           | 1.5923          | 0.055657  | 0.055657 | 0.511129254 |             |          |          |
| NAXD      | ENSG00000213995 | -0.15241  | 0.56057  | 0.6122      | 0.2702      | -0.6912  | 0.75528  |
|           | 1.5922          | 0.05567   | 0.05567  | 0.511129254 |             |          |          |
| B4GALNT4  | ENSG00000182272 | 0.41384   | 0.33949  | -1.8214     | 0.96573     | 1.5921   |          |
|           | 0.055683        | -0.33267  | 0.63031  | 0.055683    | 0.511129254 |          |          |
| MTHFD2P4  | ENSG00000251253 | 1.5919    | 0.055699 | 1.5919      | 0.055699    | 1.5919   |          |
|           | 0.055699        | 1.5919    | 0.055699 | 0.055699    | 0.511129254 |          |          |
| TMEM263   | ENSG00000151135 | 1.3614    | 0.086689 | 1.5919      | 0.055701    | 1.3614   |          |
|           | 0.086689        | 1.378     | 0.084097 | 0.055701    | 0.511129254 |          |          |
| NA        | ENSG00000255757 | 0.27878   | 0.39021  | 1.5918      | 0.055717    | 0.27878  | 0.39021  |
|           | 0.27878         | 0.39021   | 0.055717 | 0.511129254 |             |          |          |
| LMBR1L    | ENSG00000139636 | 0.39359   | 0.34694  | 1.5916      | 0.055735    | 0.76686  |          |
|           | 0.22158         | 1.3193    | 0.093542 | 0.055735    | 0.511129254 |          |          |
| SLC25A2   | ENSG00000120329 | 0.28329   | 0.38848  | 0.75219     | 0.22597     | 0.28329  |          |
|           | 0.38848         | 1.5916    | 0.055741 | 0.055741    | 0.511129254 |          |          |
| RPL22P12  | ENSG00000216867 | 1.5914    | 0.05576  | 0.53945     | 0.29479     | 0.95358  |          |
|           | 0.17015         | 0.95358   | 0.17015  | 0.05576     | 0.511129254 |          |          |
| LINC02864 | ENSG00000263711 | 0.64848   | 0.25834  | 1.5912      | 0.055777    | -0.76008 |          |
|           | 0.7764          | -0.56851  | 0.71516  | 0.055777    | 0.511129254 |          |          |
| FOCAD     | ENSG00000188352 | 1.5152    | 0.064861 | 1.5912      | 0.055783    | 0.80826  | 0.20947  |
|           | 0.97345         | 0.16516   | 0.055783 | 0.511129254 |             |          |          |
| HSD11B1   | ENSG00000117594 | 0.79787   | 0.21247  | -0.13489    | 0.55365     | 1.5911   |          |
|           | 0.055789        | -1.1311   | 0.87099  | 0.055789    | 0.511129254 |          |          |
| RFPL3     | ENSG00000128276 | 1.3252    | 0.092557 | 1.5911      | 0.055797    | 1.5661   | 0.058663 |
|           | 1.5661          | 0.058663  | 0.055797 | 0.511129254 |             |          |          |
| AHCYL2    | ENSG00000158467 | 1.401     | 0.080607 | 0.85915     | 0.19513     | 0.43954  | 0.33013  |
|           | 1.5911          | 0.055797  | 0.055797 | 0.511129254 |             |          |          |
| NA        | ENSG00000254153 | 1.0538    | 0.14599  | 0.7556      | 0.22495     | 1.591    | 0.055807 |
|           | 0.9839          | 0.16258   | 0.055807 | 0.511129254 |             |          |          |
| RNY3P3    | ENSG00000200686 | 0.58218   | 0.28022  | 0.58218     | 0.28022     | 1.5909   |          |
|           | 0.055812        | 0.58218   | 0.28022  | 0.055812    | 0.511129254 |          |          |
| NA        | ENSG00000258355 | 0.61004   | 0.27092  | 1.5908      | 0.055831    | -1.3059  | 0.9042   |
|           | -1.3059         | 0.9042    | 0.055831 | 0.511207183 |             |          |          |
| UNK       | ENSG00000132478 | 1.4296    | 0.076415 | 0.76607     | 0.22182     | 1.5906   | 0.055852 |
|           | -0.56115        | 0.71265   | 0.055852 | 0.511266924 |             |          |          |
| PTCSC2    | ENSG00000236130 | -0.081204 | 0.53236  | -0.025565   | 0.5102      | 1.5905   |          |
|           | 0.055863        | 1.5905    | 0.055863 | 0.055863    | 0.511266924 |          |          |
| HS3ST6    | ENSG00000162040 | 1.5904    | 0.055869 | 0.71741     | 0.23656     | -0.33412 |          |
|           | 0.63086         | -0.90798  | 0.81806  | 0.055869    | 0.511266924 |          |          |
| NA        | ENSG00000263604 | -0.067813 | 0.52703  | 0.61985     | 0.26768     | 1.5901   | 0.055904 |
|           | 0.49257         | 0.31116   | 0.055904 | 0.51149116  |             |          |          |
| NA        | ENSG00000221711 | 1.5899    | 0.055928 | 1.5899      | 0.055928    | 1.5899   | 0.055928 |
|           | 1.5899          | 0.055928  | 0.055928 | 0.511614687 |             |          |          |
| GNL2      | ENSG00000134697 | 1.2768    | 0.10084  | 1.5896      | 0.055964    | 1.2768   | 0.10084  |
|           | 1.2             | 0.11507   | 0.055964 | 0.511825025 |             |          |          |
| DHH       | ENSG00000139549 | 1.5895    | 0.055972 | -0.2575     | 0.6016      | 1.3482   | 0.088791 |
|           | 0.62527         | 0.2659    | 0.055972 | 0.511825025 |             |          |          |
| RPS3AP29  | ENSG00000237818 | 1.5894    | 0.055991 | -0.78724    | 0.78443     | 1.2871   |          |
|           | 0.099026        | 0.16894   | 0.43292  | 0.055991    | 0.511861308 |          |          |

|            |                 |           |             |             |             |          |          |        |
|------------|-----------------|-----------|-------------|-------------|-------------|----------|----------|--------|
| KCTD13     | ENSG00000174943 | 1.589     | 0.056026    | 1.589       | 0.056026    | 1.589    | 0.056026 | 1.3579 |
|            | 0.087253        | 0.056026  | 0.511861308 |             |             |          |          |        |
| NA         | ENSG00000200610 | 1.589     | 0.056026    | -0.49141    | 0.68843     | 1.589    | 0.056026 | 1.589  |
|            | 0.056026        | 0.056026  | 0.511861308 |             |             |          |          |        |
| HAUS1      | ENSG00000152240 | 1.0872    | 0.13847     | 1.589       | 0.056034    | 0.93261  | 0.17551  |        |
|            | 0.44302         | 0.32888   | 0.056034    | 0.511861308 |             |          |          |        |
| NA         | ENSG00000225063 | 1.4052    | 0.079981    | 0.92789     | 0.17673     | 1.172    | 0.12059  |        |
|            | 1.5889          | 0.05604   | 0.05604     | 0.511861308 |             |          |          |        |
| NA         | ENSG00000226206 | 0.56298   | 0.28672     | -0.78649    | 0.78421     | -0.31667 | 0.62425  |        |
|            | 1.5888          | 0.056048  | 0.056048    | 0.511861308 |             |          |          |        |
| MRPL20-AS1 | ENSG00000224870 | 1.5887    | 0.05606     | 1.5887      | 0.05606     | 1.5887   |          |        |
|            | 0.05606         | 1.5887    | 0.05606     | 0.05606     | 0.511861308 |          |          |        |
| NA         | ENSG00000252915 | 1.5887    | 0.05606     | 1.5887      | 0.05606     | 1.5887   | 0.05606  |        |
|            | 1.5887          | 0.05606   | 0.05606     | 0.511861308 |             |          |          |        |
| CYP4A43P   | ENSG00000261196 | 1.5399    | 0.061791    | 1.5402      | 0.061752    | 0.04618  |          |        |
|            | 0.48158         | 1.5886    | 0.056078    | 0.056078    | 0.511929738 |          |          |        |
| HDAC2      | ENSG00000196591 | 1.5883    | 0.056111    | 1.5883      | 0.056111    | 1.5883   | 0.056111 |        |
|            | 1.5883          | 0.056111  | 0.056111    | 0.51213505  |             |          |          |        |
| SLC1A2     | ENSG00000110436 | -0.068393 | 0.52726     | -0.22105    | 0.58747     | -0.25928 |          |        |
|            | 0.60229         | 1.5879    | 0.056159    | 0.056159    | 0.512426834 |          |          |        |
| ALDH4A1    | ENSG00000159423 | 1.4361    | 0.075489    | 1.5878      | 0.056164    | 1.1609   |          |        |
|            | 0.12283         | 1.051     | 0.14663     | 0.056164    | 0.512426834 |          |          |        |
| REG1A      | ENSG00000115386 | 1.2027    | 0.11455     | 1.5877      | 0.056179    | 1.2027   | 0.11455  |        |
|            | 1.2027          | 0.11455   | 0.056179    | 0.512467741 |             |          |          |        |
| MIR548AP   | ENSG00000264406 | 1.5875    | 0.056198    | 1.5875      | 0.056198    | 1.5875   |          |        |
|            | 0.056198        | 1.5875    | 0.056198    | 0.056198    | 0.512485677 |          |          |        |
| CCDC58P3   | ENSG00000267076 | 1.5875    | 0.056202    | 1.248       | 0.10601     | 1.138    | 0.12755  |        |
|            | -0.33226        | 0.63015   | 0.056202    | 0.512485677 |             |          |          |        |
| HLCS       | ENSG00000159267 | 0.047539  | 0.48104     | 1.5873      | 0.056219    | 0.037089 | 0.48521  |        |
|            | 0.11343         | 0.45485   | 0.056219    | 0.51248762  |             |          |          |        |
| PEMT       | ENSG00000133027 | -2.1183   | 0.98292     | -1.6338     | 0.94885     | 1.5871   | 0.056242 |        |
|            | -0.55631        | 0.711     | 0.056242    | 0.51248762  |             |          |          |        |
| NA         | ENSG00000258017 | 1.4887    | 0.06829     | 1.587       | 0.056252    | 1.4893   | 0.068208 |        |
|            | 1.3105          | 0.095005  | 0.056252    | 0.51248762  |             |          |          |        |
| TRBV5-7    | ENSG00000211731 | -0.72409  | 0.76549     | -0.60027    | 0.72584     | 1.587    | 0.056257 |        |
|            | 1.3988          | 0.080929  | 0.056257    | 0.51248762  |             |          |          |        |
| MIR1294    | ENSG00000221430 | -0.10697  | 0.54259     | -0.10697    | 0.54259     | 1.5868   |          |        |
|            | 0.056279        | -0.10697  | 0.54259     | 0.056279    | 0.51248762  |          |          |        |
| NA         | ENSG00000259242 | 1.5868    | 0.05628     | 1.5868      | 0.05628     | 1.5868   | 0.05628  |        |
|            | 1.5868          | 0.05628   | 0.05628     | 0.51248762  |             |          |          |        |
| ETV3       | ENSG00000117036 | -0.086863 | 0.53461     | 0.05304     | 0.47885     | 0.05304  | 0.47885  |        |
|            | 1.5866          | 0.056298  | 0.056298    | 0.51248762  |             |          |          |        |
| NA         | ENSG00000260517 | 0.95657   | 0.16939     | 0.52603     | 0.29943     | 0.81242  | 0.20828  |        |
|            | 1.5866          | 0.056307  | 0.056307    | 0.51248762  |             |          |          |        |
| TMPO-AS1   | ENSG00000257167 | 1.5864    | 0.056322    | 1.5864      | 0.056322    | 1.5864   |          |        |
|            | 0.056322        | 1.5864    | 0.056322    | 0.056322    | 0.51248762  |          |          |        |
| NA         | ENSG00000279858 | 1.5864    | 0.056322    | 1.5864      | 0.056322    | 1.5864   | 0.056322 |        |
|            | 1.5864          | 0.056322  | 0.056322    | 0.51248762  |             |          |          |        |
| PTPRK      | ENSG00000152894 | -0.79951  | 0.788       | -1.1279     | 0.87032     | 0.88488  | 0.18811  |        |
|            | 1.5864          | 0.056329  | 0.056329    | 0.51248762  |             |          |          |        |
| NA         | ENSG00000180211 | 1.5861    | 0.056353    | -1.6226     | 0.94767     | 0.68515  | 0.24662  |        |
|            | 0.9332          | 0.17536   | 0.056353    | 0.51248762  |             |          |          |        |
| MAGI3      | ENSG00000081026 | 1.2883    | 0.098813    | 1.5861      | 0.056354    | 0.91984  | 0.17883  |        |
|            | 1.2111          | 0.11292   | 0.056354    | 0.51248762  |             |          |          |        |
| ZNF385C    | ENSG00000187595 | 1.1927    | 0.11649     | 1.3075      | 0.095527    | 1.586    | 0.05637  |        |
|            | 1.555           | 0.059973  | 0.05637     | 0.51248762  |             |          |          |        |
| NQO2-AS1   | ENSG00000224846 | 1.586     | 0.056373    | 1.586       | 0.056373    | 1.0435   | 0.14836  | 1.586  |
|            | 0.056373        | 0.056373  | 0.51248762  |             |             |          |          |        |
| GPR65      | ENSG00000140030 | 1.2077    | 0.11359     | 1.3376      | 0.090506    | 1.3102   | 0.095066 |        |
|            | 1.586           | 0.056374  | 0.056374    | 0.51248762  |             |          |          |        |
| FAM133CP   | ENSG00000183055 | 1.5859    | 0.056381    | 0.81241     | 0.20828     | 0.81241  |          |        |
|            | 0.20828         | 0.81241   | 0.20828     | 0.056381    | 0.51248762  |          |          |        |

|            |                 |           |             |             |             |             |          |       |
|------------|-----------------|-----------|-------------|-------------|-------------|-------------|----------|-------|
| NA         | ENSG00000223719 | 1.5857    | 0.056403    | 1.2643      | 0.10307     | 1.293       | 0.098006 | 1.293 |
|            |                 | 0.098006  | 0.056403    | 0.512591979 |             |             |          |       |
| FEM1A      | ENSG00000141965 | -0.80489  | 0.78956     | 1.3118      | 0.094788    | 1.5855      | 0.05643  |       |
|            |                 | 1.3504    | 0.088447    | 0.05643     | 0.51274173  |             |          |       |
| NA         | ENSG00000268686 | 1.2327    | 0.10884     | 1.2327      | 0.10884     | 1.5853      | 0.056444 |       |
|            |                 | 1.2327    | 0.10884     | 0.056444    | 0.512773326 |             |          |       |
| LINC02119  | ENSG00000248461 | 0.87912   | 0.18967     | 0.90828     | 0.18186     | 1.585       | 0.056488 |       |
|            |                 | 0.87912   | 0.18967     | 0.056488    | 0.513077398 |             |          |       |
| NA         | ENSG00000259762 | 1.5845    | 0.056541    | 1.5845      | 0.056541    | 1.5845      | 0.056541 |       |
|            |                 | 1.5845    | 0.056541    | 0.056541    | 0.513335328 |             |          |       |
| TSC22D2    | ENSG00000196428 | -0.29592  | 0.61635     | 1.5844      | 0.056547    | -0.18097    |          |       |
|            |                 | 0.57181   | 0.90213     | 0.18349     | 0.056547    | 0.513335328 |          |       |
| CHORDC1P5  | ENSG00000233020 | -1.4367   | 0.92459     | 1.5844      | 0.056548    | 1.1256      |          |       |
|            |                 | 0.13017   | 1.199       | 0.11526     | 0.056548    | 0.513335328 |          |       |
| UFSP2      | ENSG00000109775 | 1.5842    | 0.056569    | 0.3402      | 0.36685     | 0.92767     | 0.17679  |       |
|            |                 | 0.90217   | 0.18348     | 0.056569    | 0.513430317 |             |          |       |
| RPS14P4    | ENSG00000226928 | 0.91003   | 0.1814      | 0.91003     | 0.1814      | 1.5838      |          |       |
|            |                 | 0.056619  | 0.4895      | 0.31224     | 0.056619    | 0.513473004 |          |       |
| MAP2K1     | ENSG00000169032 | 0.059418  | 0.47631     | 1.2384      | 0.10779     | 1.5838      |          |       |
|            |                 | 0.056621  | 1.0779      | 0.14054     | 0.056621    | 0.513473004 |          |       |
| AHDC1      | ENSG00000126705 | 1.5838    | 0.056622    | -0.79546    | 0.78683     | -1.5664     | 0.94138  |       |
|            |                 | -0.95938  | 0.83132     | 0.056622    | 0.513473004 |             |          |       |
| RNU6-1305P | ENSG00000201223 | 1.5838    | 0.056622    | 1.5838      | 0.056622    | 1.5838      |          |       |
|            |                 | 0.056622  | 1.5838      | 0.056622    | 0.056622    | 0.513473004 |          |       |
| NA         | ENSG00000280044 | 1.2324    | 0.1089      | 1.5835      | 0.056652    | 1.2324      | 0.1089   |       |
|            |                 | 1.2324    | 0.1089      | 0.056652    | 0.513473004 |             |          |       |
| REM1       | ENSG00000088320 | 1.5835    | 0.056658    | 1.5835      | 0.056658    | 1.3528      | 0.088063 |       |
|            |                 | 1.2175    | 0.1117      | 0.056658    | 0.513473004 |             |          |       |
| PDE4C      | ENSG00000105650 | 0.16779   | 0.43337     | 0.74892     | 0.22695     | 0.81386     | 0.20786  |       |
|            |                 | 1.5835    | 0.056658    | 0.056658    | 0.513473004 |             |          |       |
| SUB1P2     | ENSG00000258737 | 1.5835    | 0.056658    | 1.5835      | 0.056658    | 1.5086      |          |       |
|            |                 | 0.065695  | 1.536       | 0.062264    | 0.056658    | 0.513473004 |          |       |
| MRPS36P1   | ENSG00000236152 | 1.5833    | 0.05668     | 1.5833      | 0.05668     | 1.5833      |          |       |
|            |                 | 0.05668   | 1.5833      | 0.05668     | 0.05668     | 0.513512068 |          |       |
| LINC02732  | ENSG00000254416 | 0.14907   | 0.44075     | 1.5832      | 0.056688    | 0.66578     |          |       |
|            |                 | 0.25278   | 0.50121     | 0.30811     | 0.056688    | 0.513512068 |          |       |
| NA         | ENSG00000216895 | 0.72829   | 0.23322     | 1.583       | 0.056709    | 1.2221      | 0.11084  |       |
|            |                 | 1.2209    | 0.11105     | 0.056709    | 0.513512068 |             |          |       |
| NA         | ENSG00000272677 | 1.583     | 0.056711    | 1.583       | 0.056711    | 1.583       | 0.056711 |       |
|            |                 | 0.056711  | 0.513512068 |             |             |             |          |       |
| NA         | ENSG00000197149 | 1.583     | 0.056715    | 0.12592     | 0.4499      | 1.583       | 0.056715 | 1.583 |
|            |                 | 0.056715  | 0.056715    | 0.513512068 |             |             |          |       |
| SNORD19    | ENSG00000212493 | 1.5827    | 0.056745    | 1.5827      | 0.056745    | 1.5827      |          |       |
|            |                 | 0.056745  | 1.5827      | 0.056745    | 0.056745    | 0.51359284  |          |       |
| NA         | ENSG00000252787 | 1.5827    | 0.056745    | 1.5827      | 0.056745    | 1.5827      | 0.056745 |       |
|            |                 | 1.5827    | 0.056745    | 0.056745    | 0.51359284  |             |          |       |
| STAC2      | ENSG00000141750 | 1.5822    | 0.056797    | 1.5822      | 0.056797    | 1.5822      | 0.056797 |       |
|            |                 | 1.5822    | 0.056797    | 0.056797    | 0.513627886 |             |          |       |
| NA         | ENSG00000252234 | 0.5798    | 0.28103     | 1.5822      | 0.056798    | -0.81058    | 0.7912   |       |
|            |                 | -0.81219  | 0.79166     | 0.056798    | 0.513627886 |             |          |       |
| ARL2BP     | ENSG00000102931 | 1.5822    | 0.056799    | 1.5822      | 0.056799    | 1.5822      |          |       |
|            |                 | 0.056799  | 0.1197      | 0.45236     | 0.056799    | 0.513627886 |          |       |
| CCNT1      | ENSG00000129315 | -0.017351 | 0.50692     | 1.582       | 0.056824    | 0.83161     | 0.20281  |       |
|            |                 | -0.41525  | 0.66102     | 0.056824    | 0.513627886 |             |          |       |
| BTN3A3     | ENSG00000111801 | 1.3293    | 0.09187     | 1.5819      | 0.05684     | 1.1585      |          |       |
|            |                 | 0.12333   | 0.44792     | 0.3271      | 0.05684     | 0.513627886 |          |       |
| DNHD1      | ENSG00000179532 | 0.87164   | 0.1917      | 0.29431     | 0.38426     | 0.75183     | 0.22608  |       |
|            |                 | 1.5819    | 0.056841    | 0.056841    | 0.513627886 |             |          |       |
| NA         | ENSG00000228317 | -0.71395  | 0.76237     | 1.5818      | 0.056843    | 1.5818      | 0.056843 |       |
|            |                 | 1.5818    | 0.056843    | 0.056843    | 0.513627886 |             |          |       |
| NA         | ENSG00000269048 | 1.5818    | 0.056852    | 1.5818      | 0.056852    | 1.5818      | 0.056852 |       |
|            |                 | 1.5818    | 0.056852    | 0.056852    | 0.513627886 |             |          |       |

|              |                 |           |          |             |             |          |
|--------------|-----------------|-----------|----------|-------------|-------------|----------|
| RPS3AP34     | ENSG00000242607 | 0.65887   | 0.25499  | 0.8026      | 0.2111      | 0.59903  |
|              | 0.27458         | 1.5817    | 0.056859 | 0.056859    | 0.513627886 |          |
| RNA5SP353    | ENSG00000201476 | 1.5817    | 0.056864 | -0.36586    | 0.64277     | -0.36586 |
|              | 0.64277         | -0.36586  | 0.64277  | 0.056864    | 0.513627886 |          |
| MYADML       | ENSG00000239649 | 1.3677    | 0.085697 | 1.2415      | 0.10721     | 1.5816   |
|              | 0.056871        | 0.50428   | 0.30703  | 0.056871    | 0.513627886 |          |
| NA           | ENSG00000255830 | 1.5813    | 0.056908 | 1.5813      | 0.056908    | 0.11156  |
|              | 1.2777          | 0.10067   | 0.056908 | 0.513627886 |             | 0.45559  |
| EIF5A        | ENSG00000132507 | 1.5322    | 0.062731 | 1.5322      | 0.062731    | 1.5322   |
|              | 1.5812          | 0.056918  | 0.056918 | 0.513627886 |             | 0.062731 |
| NA           | ENSG00000225718 | -0.45352  | 0.67491  | -0.45352    | 0.67491     | 0.88786  |
|              | 1.5812          | 0.056919  | 0.056919 | 0.513627886 |             | 0.18731  |
| IGLVIVOR22-2 | ENSG00000243519 | 1.5811    | 0.056924 | 1.5811      | 0.056924    | 1.5811   |
|              | 0.056924        | 1.5811    | 0.056924 | 0.056924    | 0.513627886 |          |
| REPS1        | ENSG00000135597 | 1.1105    | 0.13339  | 1.581       | 0.056934    | 0.052416 |
|              | -0.0098595      | 0.50393   | 0.056934 | 0.513627886 |             | 0.4791   |
| H4C9         | ENSG00000276180 | 1.5809    | 0.056947 | 1.5809      | 0.056947    | 1.5809   |
|              | 1.5809          | 0.056947  | 0.056947 | 0.513627886 |             | 0.056947 |
| PRDM1        | ENSG00000057657 | 1.4446    | 0.074285 | -0.064914   | 0.52588     | 1.5808   |
|              | 0.95395         | 0.17005   | 0.056967 | 0.513627886 |             | 0.056967 |
| MNAT1        | ENSG00000020426 | -0.63684  | 0.73789  | 1.5807      | 0.056978    | 0.1991   |
|              | 0.072636        | 0.47105   | 0.056978 | 0.513627886 |             | 0.42109  |
| NA           | ENSG00000248126 | 1.5805    | 0.056992 | 1.5805      | 0.056992    | 1.5805   |
|              | 1.5805          | 0.056992  | 0.056992 | 0.513627886 |             | 0.056992 |
| MIR551A      | ENSG00000207776 | 0.43899   | 0.33033  | 0.69951     | 0.24212     | 0.19636  |
|              | 0.42216         | 1.5805    | 0.056997 | 0.056997    | 0.513627886 |          |
| NA           | ENSG00000262147 | 1.5805    | 0.056999 | 1.5805      | 0.056999    | 1.5805   |
|              | 1.5805          | 0.056999  | 0.056999 | 0.513627886 |             | 0.056999 |
| STARD7       | ENSG00000084090 | 1.2765    | 0.10089  | 1.5804      | 0.057007    | 0.76629  |
|              | 0.22175         | 1.1666    | 0.12169  | 0.057007    | 0.513627886 |          |
| TRIM36       | ENSG00000152503 | 1.2716    | 0.10175  | 1.5804      | 0.057012    | 0.68178  |
|              | 0.24769         | 0.68178   | 0.24769  | 0.057012    | 0.513627886 |          |
| NA           | ENSG00000257568 | 1.5803    | 0.057023 | 1.5803      | 0.057023    | 1.5803   |
|              | 1.5803          | 0.057023  | 0.057023 | 0.513627886 |             | 0.057023 |
| HMGB3P5      | ENSG00000237642 | -1.3186   | 0.90634  | -1.3186     | 0.90634     | 1.5801   |
|              | 0.057038        | 0.65954   | 0.25478  | 0.057038    | 0.513627886 |          |
| ANKMY2       | ENSG00000106524 | 1.5801    | 0.057044 | 1.5801      | 0.057044    | 1.5801   |
|              | 0.057044        | -0.34175  | 0.63373  | 0.057044    | 0.513627886 |          |
| KDM3AP1      | ENSG00000233996 | 1.5801    | 0.057044 | 0.96539     | 0.16717     | 0.96539  |
|              | 0.16717         | 0.96539   | 0.16717  | 0.057044    | 0.513627886 |          |
| NA           | ENSG00000270522 | 0.558     | 0.28842  | 0.79718     | 0.21267     | 1.5798   |
|              | 0.96498         | 0.16728   | 0.057076 | 0.513821075 |             | 0.057076 |
| SP100        | ENSG00000067066 | 1.5796    | 0.0571   | 0.52966     | 0.29817     | 0.55216  |
|              | 0.2774          | 0.39073   | 0.0571   | 0.513942187 |             | 0.29042  |
| NA           | ENSG00000279394 | -0.017147 | 0.50684  | 1.5795      | 0.057112    | 0.45965  |
|              | 1.4014          | 0.080554  | 0.057112 | 0.513950343 |             | 0.32288  |
| NA           | ENSG00000253687 | 1.5794    | 0.057122 | 1.5794      | 0.057122    | 1.5794   |
|              | 1.5794          | 0.057122  | 0.057122 | 0.513950343 |             | 0.057122 |
| AGAP10P      | ENSG00000230869 | -1.3631   | 0.91357  | 1.2253      | 0.11023     | 1.5792   |
|              | 0.057147        | 0.74549   | 0.22799  | 0.057147    | 0.513971559 |          |
| FAM78B-AS1   | ENSG00000203307 | 1.5792    | 0.057148 | 1.3576      | 0.087299    | 0.42152  |
|              | 0.33669         | 0.42152   | 0.33669  | 0.057148    | 0.513971559 |          |
| RN7SL416P    | ENSG00000242101 | -1.7088   | 0.95626  | -1.6217     | 0.94757     | 1.4123   |
|              | 0.078926        | 1.5791    | 0.057156 | 0.057156    | 0.513971559 |          |
| IGLV1-50     | ENSG00000211645 | 0.98365   | 0.16264  | 1.1114      | 0.1332      | 1.5789   |
|              | 0.057179        | 1.5789    | 0.057179 | 0.057179    | 0.514052142 |          |
| MTND6P15     | ENSG00000225723 | -0.11212  | 0.54464  | -0.11212    | 0.54464     | -0.11212 |
|              | 0.54464         | 1.5787    | 0.057207 | 0.057207    | 0.514052142 |          |
| F11R         | ENSG00000158769 | 1.0642    | 0.14361  | 1.4273      | 0.07674     | 1.427    |
|              | 1.5786          | 0.057211  | 0.057211 | 0.514052142 |             | 0.076787 |
| PGAM3P       | ENSG00000237256 | 1.2182    | 0.11157  | 1.3126      | 0.094659    | 1.3125   |
|              | 0.094679        | 1.5784    | 0.057231 | 0.057231    | 0.514052142 |          |

|           |                 |           |          |             |             |                   |
|-----------|-----------------|-----------|----------|-------------|-------------|-------------------|
| USP12-AS2 | ENSG00000230641 | 1.5784    | 0.057241 | 1.5784      | 0.057241    | -0.49812          |
|           | 0.6908          | -0.47282  | 0.68183  | 0.057241    | 0.514052142 |                   |
| RN7SL279P | ENSG00000265648 | 1.5782    | 0.057261 | 1.5782      | 0.057261    | 1.5782            |
|           | 0.057261        | 1.5782    | 0.057261 | 0.057261    | 0.514052142 |                   |
| FECHP1    | ENSG00000235534 | -0.58029  | 0.71914  | -1.5373     | 0.93789     | 1.5782            |
|           | 0.057265        | -0.58029  | 0.71914  | 0.057265    | 0.514052142 |                   |
| ZNF589    | ENSG00000164048 | 1.3454    | 0.089254 | 1.1855      | 0.11791     | 1.2228            |
|           | 0.1107          | 1.5781    | 0.057274 | 0.057274    | 0.514052142 |                   |
| HOXB4     | ENSG00000182742 | 1.5781    | 0.057276 | 1.5781      | 0.057276    | 1.5781            |
|           | 1.5781          | 0.057276  | 0.057276 | 0.514052142 |             | 0.057276          |
| OR7E159P  | ENSG00000258849 | 1.1714    | 0.12071  | 1.1714      | 0.12071     | 1.1714            |
|           | 0.12071         | 1.5781    | 0.057276 | 0.057276    | 0.514052142 |                   |
| PBXIP1    | ENSG00000163346 | 0.069099  | 0.47246  | 0.99727     | 0.15932     | 1.578 0.057281    |
|           | 0.062728        | 0.47499   | 0.057281 | 0.514052142 |             |                   |
| LINC00529 | ENSG00000236827 | 1.5779    | 0.057299 | -0.25717    | 0.60148     | 1.1099            |
|           | 0.13351         | -0.99875  | 0.84104  | 0.057299    | 0.514114059 |                   |
| BOLA3P3   | ENSG00000213630 | 0.87518   | 0.19074  | 1.5778      | 0.057309    | 0.41557           |
|           | 0.33886         | 0.8458    | 0.19883  | 0.057309    | 0.514114059 |                   |
| TGIF1     | ENSG00000177426 | 1.5777    | 0.05732  | -0.53534    | 0.70379     | -0.081267 0.53239 |
|           | -0.26701        | 0.60527   | 0.05732  | 0.514118093 |             |                   |
| OSTM1     | ENSG00000081087 | 1.0125    | 0.15565  | 1.0029      | 0.15796     | 0.97827 0.16397   |
|           | 1.5773          | 0.057358  | 0.057358 | 0.514364251 |             |                   |
| RNU6-522P | ENSG00000201367 | 1.3752    | 0.084537 | 1.3752      | 0.084537    | 1.3752            |
|           | 0.084537        | 1.5771    | 0.057387 | 0.057387    | 0.514529625 |                   |
| LINC01146 | ENSG00000258867 | 1.5769    | 0.057411 | 1.2715      | 0.10178     | 1.3406            |
|           | 0.09003         | 1.3406    | 0.09003  | 0.057411    | 0.514650116 |                   |
| CDCP1     | ENSG00000163814 | 0.98659   | 0.16192  | 1.2979      | 0.097156    | 1.5768 0.057426   |
|           | -0.081693       | 0.53255   | 0.057426 | 0.514689899 |             |                   |
| NA        | ENSG00000269825 | 1.5762    | 0.057493 | 1.5762      | 0.057493    | 1.5762 0.057493   |
|           | 1.5762          | 0.057493  | 0.057493 | 0.515130384 |             |                   |
| PDE6B     | ENSG00000133256 | 0.70619   | 0.24003  | 0.057758    | 0.47697     | 0.088632 0.46469  |
|           | 1.5759          | 0.057523  | 0.057523 | 0.515130384 |             |                   |
| PDIA4     | ENSG00000155660 | 1.5759    | 0.057525 | -0.25327    | 0.59997     | -0.90839 0.81816  |
|           | -1.454          | 0.92702   | 0.057525 | 0.515130384 |             |                   |
| NA        | ENSG00000241114 | 1.5759    | 0.057528 | 1.5759      | 0.057528    | 1.5759 0.057528   |
|           | 0.76198         | 0.22303   | 0.057528 | 0.515130384 |             |                   |
| ZSCAN2    | ENSG00000176371 | 0.93497   | 0.1749   | -1.2746     | 0.89878     | 0.017516          |
|           | 0.49301         | 1.5759    | 0.057529 | 0.057529    | 0.515130384 |                   |
| SSR2      | ENSG00000163479 | 1.4348    | 0.075673 | 1.5758      | 0.057539    | 0.93425 0.17509   |
|           | -0.31944        | 0.6253    | 0.057539 | 0.515130384 |             |                   |
| SCN1A     | ENSG00000144285 | 0.4155    | 0.33889  | 0.63032     | 0.26424     | 0.70179 0.2414    |
|           | 1.5755          | 0.057576  | 0.057576 | 0.515130384 |             |                   |
| C1QC      | ENSG00000159189 | 0.75596   | 0.22484  | 1.5753      | 0.05759     | 0.1292 0.4486     |
|           | 0.1292          | 0.4486    | 0.05759  | 0.515130384 |             |                   |
| HMG1P2    | ENSG00000229046 | 1.5753    | 0.057594 | 1.5753      | 0.057594    | 1.5753            |
|           | 0.057594        | 1.5753    | 0.057594 | 0.057594    | 0.515130384 |                   |
| MIR138-1  | ENSG00000207954 | -1.1567   | 0.8763   | 1.5753      | 0.057595    | -1.1567           |
|           | 0.8763          | -2.8645   | 0.99791  | 0.057595    | 0.515130384 |                   |
| PDP1      | ENSG00000164951 | -0.23395  | 0.59249  | 1.5752      | 0.057601    | 0.31928 0.37476   |
|           | -0.23395        | 0.59249   | 0.057601 | 0.515130384 |             |                   |
| ZNF439    | ENSG00000171291 | 0.47498   | 0.3174   | 0.40779     | 0.34171     | 1.5752            |
|           | 0.057602        | 1.5716    | 0.058017 | 0.057602    | 0.515130384 |                   |
| NA        | ENSG00000275997 | 1.5749    | 0.057645 | 1.5749      | 0.057645    | 1.556 0.059857    |
|           | 0.54596         | 0.29255   | 0.057645 | 0.5151837   |             |                   |
| LINC02583 | ENSG00000187600 | -0.032433 | 0.51294  | 0.30006     | 0.38207     | 1.5748            |
|           | 0.05765         | 1.1943    | 0.11617  | 0.05765     | 0.5151837   |                   |
| NA        | ENSG00000200309 | 1.5748    | 0.057657 | 1.5748      | 0.057657    | 1.5748 0.057657   |
|           | 1.5748          | 0.057657  | 0.057657 | 0.5151837   |             |                   |
| ZNF547    | ENSG00000152433 | 1.5747    | 0.057664 | 0.67406     | 0.25014     | 0.68801           |
|           | 0.24572         | 1.5747    | 0.057664 | 0.057664    | 0.5151837   |                   |
| NA        | ENSG00000251312 | 1.5747    | 0.057668 | 1.2799      | 0.1003      | 1.4825 0.06911    |
|           | 0.96267         | 0.16786   | 0.057668 | 0.5151837   |             |                   |



|            |                 |           |          |          |           |           |          |  |
|------------|-----------------|-----------|----------|----------|-----------|-----------|----------|--|
| SLC25A3P1  | ENSG00000236253 | 1.5745    | 0.057684 | -0.12323 | 0.54904   | 0.77389   |          |  |
|            |                 | 0.2195    | 1.1521   | 0.12464  | 0.057684  | 0.5151837 |          |  |
| NA         | ENSG00000228800 | 0.81677   | 0.20703  | 1.5744   | 0.057695  | 1.4489    | 0.07368  |  |
|            |                 | 0.63886   | 0.26146  | 0.057695 | 0.5151837 |           |          |  |
| SLC9A9-AS2 | ENSG00000244493 | 1.5743    | 0.057704 | 1.5743   | 0.057704  | 1.5743    |          |  |
|            |                 | 0.057704  | 1.5743   | 0.057704 | 0.057704  | 0.5151837 |          |  |
| NA         | ENSG00000279673 | 0.65303   | 0.25687  | 1.5741   | 0.057732  | 0.35259   | 0.3622   |  |
|            |                 | 0.35259   | 0.3622   | 0.057732 | 0.5151837 |           |          |  |
| H1-12P     | ENSG00000216331 | -0.61571  | 0.73096  | 1.5741   | 0.057734  | -0.62133  |          |  |
|            |                 | 0.73281   | -0.62133 | 0.73281  | 0.057734  | 0.5151837 |          |  |
| ASB9P1     | ENSG00000258527 | 0.016147  | 0.49356  | 1.5317   | 0.062796  | 0.029161  |          |  |
|            |                 | 0.48837   | 1.574    | 0.057742 | 0.057742  | 0.5151837 |          |  |
| NA         | ENSG00000228413 | 1.5733    | 0.05782  | -1.2541  | 0.8951    | -1.2541   | 0.8951   |  |
|            |                 | -1.2541   | 0.8951   | 0.05782  | 0.5151837 |           |          |  |
| UBE2D3-AS1 | ENSG00000246560 | 1.5732    | 0.057833 | 1.5732   | 0.057833  | 1.5732    |          |  |
|            |                 | 0.057833  | 1.4406   | 0.074851 | 0.057833  | 0.5151837 |          |  |
| SPRED2     | ENSG00000198369 | 0.74407   | 0.22842  | 1.5732   | 0.057836  | 0.78716   |          |  |
|            |                 | 0.21559   | 1.0948   | 0.13679  | 0.057836  | 0.5151837 |          |  |
| NA         | ENSG00000201827 | -0.33004  | 0.62931  | 0.31465  | 0.37651   | 1.1298    | 0.12929  |  |
|            |                 | 1.5732    | 0.057838 | 0.057838 | 0.5151837 |           |          |  |
| NA         | ENSG00000278990 | 1.5732    | 0.057838 | 1.5732   | 0.057838  | 1.5732    | 0.057838 |  |
|            |                 | 1.5732    | 0.057838 | 0.057838 | 0.5151837 |           |          |  |
| AQP2       | ENSG00000167580 | 0.80553   | 0.21026  | 1.5731   | 0.057846  | -0.1719   | 0.56824  |  |
|            |                 | -0.26612  | 0.60493  | 0.057846 | 0.5151837 |           |          |  |
| OPA3       | ENSG00000125741 | 0.8937    | 0.18574  | 1.573    | 0.057864  | 1.1343    | 0.12834  |  |
|            |                 | 1.4045    | 0.08009  | 0.057864 | 0.5151837 |           |          |  |
| TMPRSS11B  | ENSG00000185873 | 1.4118    | 0.079002 | 1.2089   | 0.11335   | -0.91837  |          |  |
|            |                 | 0.82079   | 1.573    | 0.057864 | 0.057864  | 0.5151837 |          |  |
| LTC4S      | ENSG00000213316 | 0.75242   | 0.2259   | 1.5729   | 0.057866  | 0.75242   | 0.2259   |  |
|            |                 | 0.75242   | 0.2259   | 0.057866 | 0.5151837 |           |          |  |
| NA         | ENSG00000250614 | 1.5729    | 0.057866 | 1.5729   | 0.057866  | 1.5729    | 0.057866 |  |
|            |                 | 1.5729    | 0.057866 | 0.057866 | 0.5151837 |           |          |  |
| CDK17      | ENSG00000059758 | 1.5729    | 0.057875 | 1.2756   | 0.10105   | 1.3529    | 0.088041 |  |
|            |                 | 0.93426   | 0.17509  | 0.057875 | 0.5151837 |           |          |  |
| NA         | ENSG00000275613 | 1.5728    | 0.057883 | 1.4677   | 0.071087  | 0.9845    | 0.16244  |  |
|            |                 | 1.4677    | 0.071087 | 0.057883 | 0.5151837 |           |          |  |
| ADCY6-DT   | ENSG00000257660 | 1.5727    | 0.05789  | 1.5727   | 0.05789   | 1.5727    |          |  |
|            |                 | 0.05789   | 1.5727   | 0.05789  | 0.05789   | 0.5151837 |          |  |
| NA         | ENSG00000250749 | 1.5727    | 0.057892 | 1.5727   | 0.057892  | 0.26623   | 0.39503  |  |
|            |                 | -0.19427  | 0.57702  | 0.057892 | 0.5151837 |           |          |  |
| NA         | ENSG00000259155 | 1.5726    | 0.057911 | 1.5726   | 0.057911  | 1.5726    | 0.057911 |  |
|            |                 | 1.5726    | 0.057911 | 0.057911 | 0.5151837 |           |          |  |
| NA         | ENSG00000232682 | 1.5725    | 0.05792  | 1.5725   | 0.05792   | 1.5725    | 0.05792  |  |
|            |                 | 1.5725    | 0.05792  | 0.05792  | 0.5151837 |           |          |  |
| NA         | ENSG00000280294 | 1.5724    | 0.057932 | 0.83817  | 0.20097   | 0.83817   | 0.20097  |  |
|            |                 | 0.83817   | 0.20097  | 0.057932 | 0.5151837 |           |          |  |
| JAKMIP3    | ENSG00000188385 | 0.2569    | 0.39863  | -0.43122 | 0.66685   | 0.2329    |          |  |
|            |                 | 0.40792   | 1.5723   | 0.057941 | 0.057941  | 0.5151837 |          |  |
| NA         | ENSG00000250820 | 1.5719    | 0.057986 | 0.72336  | 0.23473   | 0.42702   | 0.33468  |  |
|            |                 | 1.4266    | 0.076845 | 0.057986 | 0.5151837 |           |          |  |
| RNA5SP306  | ENSG00000223019 | -0.061284 | 0.52443  | -1.0639  | 0.85632   | -0.061284 |          |  |
|            |                 | 0.52443   | 1.5719   | 0.057987 | 0.057987  | 0.5151837 |          |  |
| PKD1       | ENSG00000008710 | 1.3579    | 0.087246 | 1.5028   | 0.06644   | 1.5718    | 0.057997 |  |
|            |                 | 1.2271    | 0.1099   | 0.057997 | 0.5151837 |           |          |  |
| OR7E149P   | ENSG00000177586 | -1.4525   | 0.92682  | 1.5718   | 0.058003  | -1.4283   |          |  |
|            |                 | 0.92339   | -1.1679  | 0.87858  | 0.058003  | 0.5151837 |          |  |
| MRAS       | ENSG00000158186 | 0.66655   | 0.25253  | 1.1511   | 0.12484   | 1.1511    | 0.12484  |  |
|            |                 | 1.5717    | 0.058009 | 0.058009 | 0.5151837 |           |          |  |
| CES5A      | ENSG00000159398 | -0.40913  | 0.65878  | -0.26385 | 0.60405   | 1.379     | 0.08395  |  |
|            |                 | 1.5716    | 0.058025 | 0.058025 | 0.5151837 |           |          |  |
| PCAT6      | ENSG00000228288 | -0.91334  | 0.81947  | 1.5715   | 0.058029  | -0.91334  | 0.81947  |  |
|            |                 | -0.91334  | 0.81947  | 0.058029 | 0.5151837 |           |          |  |

|              |                 |           |          |             |             |          |          |  |
|--------------|-----------------|-----------|----------|-------------|-------------|----------|----------|--|
| C1QTNF7-AS1  | ENSG00000249252 | -0.32438  | 0.62717  | 0.62782     | 0.26506     | 1.5715   |          |  |
|              | 0.058037        | 1.4272    | 0.076758 | 0.058037    | 0.5151837   |          |          |  |
| MAP11        | ENSG00000146826 | 1.5712    | 0.058066 | 1.5712      | 0.058066    | -0.63654 | 0.73779  |  |
|              | -0.70125        | 0.75843   | 0.058066 | 0.5151837   |             |          |          |  |
| NA           | ENSG00000250547 | 1.5711    | 0.058074 | 1.5711      | 0.058074    | 1.5711   | 0.058074 |  |
|              | 1.5711          | 0.058074  | 0.058074 | 0.5151837   |             |          |          |  |
| NA           | ENSG00000281772 | 1.5711    | 0.058083 | 1.5711      | 0.058083    | 1.5711   | 0.058083 |  |
|              | 1.5711          | 0.058083  | 0.058083 | 0.5151837   |             |          |          |  |
| NA           | ENSG00000230732 | 1.5710    | 0.058092 | 1.5710      | 0.058092    | 1.5710   | 0.058092 |  |
|              | 0.058092        | 0.5151837 |          |             |             |          |          |  |
| NA           | ENSG00000251670 | 1.5710    | 0.058092 | 0.038535    | 0.48463     | -0.21596 | 0.58549  |  |
|              | -0.52334        | 0.69963   | 0.058092 | 0.5151837   |             |          |          |  |
| FKRP         | ENSG00000181027 | 1.5422    | 0.061515 | 1.4740      | 0.070242    | 1.5422   | 0.061515 |  |
|              | 1.5709          | 0.0581    | 0.0581   | 0.5151837   |             |          |          |  |
| PDZRN3       | ENSG00000121440 | 1.5709    | 0.058106 | 0.48607     | 0.31346     | 1.4775   |          |  |
|              | 0.069776        | 0.44397   | 0.32853  | 0.058106    | 0.5151837   |          |          |  |
| NA           | ENSG00000260796 | 1.5709    | 0.058107 | 1.3272      | 0.092227    | 0.87743  | 0.19013  |  |
|              | 0.87743         | 0.19013   | 0.058107 | 0.5151837   |             |          |          |  |
| CCL11        | ENSG00000172156 | 1.5707    | 0.058125 | 0.51295     | 0.30399     | 0.51295  | 0.30399  |  |
|              | 0.51295         | 0.30399   | 0.058125 | 0.5151837   |             |          |          |  |
| RN7SKP144    | ENSG00000223040 | -0.77731  | 0.78151  | 1.5707      | 0.058125    | -0.2826  |          |  |
|              | 0.61126         | 0.33208   | 0.36991  | 0.058125    | 0.5151837   |          |          |  |
| GUF1         | ENSG00000151806 | 1.5707    | 0.058126 | 1.5707      | 0.058126    | 1.5707   | 0.058126 |  |
|              | 1.5707          | 0.058126  | 0.058126 | 0.5151837   |             |          |          |  |
| NA           | ENSG00000265702 | 1.5707    | 0.058126 | 1.5707      | 0.058126    | 1.5707   | 0.058126 |  |
|              | 1.5707          | 0.058126  | 0.058126 | 0.5151837   |             |          |          |  |
| NA           | ENSG00000254177 | -0.59841  | 0.72522  | 1.5703      | 0.058177    | -0.59841 | 0.72522  |  |
|              | -0.59841        | 0.72522   | 0.058177 | 0.515436617 |             |          |          |  |
| NA           | ENSG00000278576 | -0.7428   | 0.7712   | -0.7428     | 0.7712      | -0.7428  | 0.7712   |  |
|              | 1.5702          | 0.058182  | 0.058182 | 0.515436617 |             |          |          |  |
| PCDHB5       | ENSG00000113209 | 0.3475    | 0.36411  | 0.63279     | 0.26344     | 1.5702   |          |  |
|              | 0.058188        | 0.3475    | 0.36411  | 0.058188    | 0.515436617 |          |          |  |
| SPATA20      | ENSG00000006282 | 0.14595   | 0.44198  | -0.075567   | 0.53012     | 1.5702   | 0.058206 |  |
|              | -0.20102        | 0.57966   | 0.058206 | 0.515436617 |             |          |          |  |
| ELP1         | ENSG00000070061 | 0.7925    | 0.21404  | 0.47941     | 0.31582     | 1.5702   | 0.058213 |  |
|              | 0.54695         | 0.29221   | 0.058213 | 0.515436617 |             |          |          |  |
| LSM3P5       | ENSG00000260014 | 1.5699    | 0.058218 | 1.5699      | 0.058218    | 1.5699   |          |  |
|              | 0.058218        | 1.5699    | 0.058218 | 0.058218    | 0.515436617 |          |          |  |
| GLIPR1L2     | ENSG00000180481 | 1.5697    | 0.058248 | 0.40012     | 0.34453     | -0.12892 |          |  |
|              | 0.55129         | 1.4642    | 0.071564 | 0.058248    | 0.515474382 |          |          |  |
| RNU6-311P    | ENSG00000252033 | 0.70781   | 0.23953  | 0.70781     | 0.23953     | 0.70781  |          |  |
|              | 0.23953         | 1.5696    | 0.058251 | 0.058251    | 0.515474382 |          |          |  |
| LINC02195    | ENSG00000236481 | 0.22994   | 0.40907  | 1.5696      | 0.058254    | -1.251   |          |  |
|              | 0.89453         | 0.18923   | 0.42496  | 0.058254    | 0.515474382 |          |          |  |
| NA           | ENSG00000248511 | 0.28406   | 0.38818  | 1.5691      | 0.058315    | 1.5691   | 0.058315 |  |
|              | 1.5691          | 0.058315  | 0.058315 | 0.51592047  |             |          |          |  |
| NA           | ENSG00000279043 | 1.5688    | 0.058352 | 1.5688      | 0.058352    | 1.5688   | 0.058352 |  |
|              | 1.5688          | 0.058352  | 0.058352 | 0.515984973 |             |          |          |  |
| NA           | ENSG00000205041 | 1.5687    | 0.058353 | 1.5687      | 0.058353    | 1.5687   | 0.058353 |  |
|              | 1.5687          | 0.058353  | 0.058353 | 0.515984973 |             |          |          |  |
| IRAIN        | ENSG00000259424 | -0.549    | 0.7085   | -0.62332    | 0.73346     | 1.5686   | 0.058366 |  |
|              | 1.5686          | 0.058366  | 0.058366 | 0.515984973 |             |          |          |  |
| NA           | ENSG00000265128 | 0.60895   | 0.27128  | 1.5686      | 0.058375    | 1.5686   | 0.058375 |  |
|              | 1.5686          | 0.058375  | 0.058375 | 0.515984973 |             |          |          |  |
| NA           | ENSG00000228235 | 1.5685    | 0.058385 | 0.24605     | 0.40282     | 1.1469   | 0.12571  |  |
|              | 1.1469          | 0.12571   | 0.058385 | 0.515984973 |             |          |          |  |
| BORCS8-MEF2B | ENSG00000064489 | 1.5683    | 0.058403 | 0.15376     | 0.4389      | 1.5683   |          |  |
|              | 0.058403        | -0.45674  | 0.67607  | 0.058403    | 0.515984973 |          |          |  |
| NA           | ENSG00000275179 | -0.17445  | 0.56924  | 1.5683      | 0.058404    | 1.4006   | 0.080672 |  |
|              | 1.4006          | 0.080672  | 0.058404 | 0.515984973 |             |          |          |  |
| C2CD5        | ENSG00000111731 | 0.060622  | 0.47583  | 1.3154      | 0.094185    | 1.5683   | 0.058407 |  |
|              | 0.9113          | 0.18107   | 0.058407 | 0.515984973 |             |          |          |  |

|           |                 |          |           |             |             |                      |
|-----------|-----------------|----------|-----------|-------------|-------------|----------------------|
| KCNMB1    | ENSG00000145936 | 1.5681   | 0.058428  | 1.5681      | 0.058428    | 1.4781               |
|           | 0.069685        | 0.65949  | 0.25479   | 0.058428    | 0.5159943   |                      |
| NA        | ENSG00000255353 | 1.568    | 0.058435  | 0.68587     | 0.2464      | 1.568 0.058435 1.568 |
|           | 0.058435        | 0.058435 | 0.5159943 |             |             |                      |
| NA        | ENSG00000187229 | 0.3848   | 0.35019   | -1.7365     | 0.95876     | 1.568 0.05844        |
|           | -2.1861         | 0.9856   | 0.05844   | 0.5159943   |             |                      |
| RNU6-396P | ENSG00000202239 | 1.5679   | 0.058457  | 1.5679      | 0.058457    | 1.5679               |
|           | 0.058457        | 1.5679   | 0.058457  | 0.058457    | 0.5159943   |                      |
| SERPINB7  | ENSG00000166396 | 0.69931  | 0.24218   | -0.42967    | 0.66628     | 0.61536              |
|           | 0.26916         | 1.5678   | 0.058461  | 0.058461    | 0.5159943   |                      |
| RPSAP7    | ENSG00000237032 | -0.87408 | 0.80896   | -0.87408    | 0.80896     | 1.5676               |
|           | 0.058489        | -0.87408 | 0.80896   | 0.058489    | 0.516147948 |                      |
| LRCH1     | ENSG00000136141 | 1.5674   | 0.058509  | -0.075962   | 0.53028     | 0.3597 0.35954       |
|           | 0.71919         | 0.23601  | 0.058509  | 0.516230956 |             |                      |
| CLK3      | ENSG00000179335 | 1.5672   | 0.058537  | 0.26356     | 0.39606     | 0.09856 0.46074      |
|           | 0.86754         | 0.19282  | 0.058537  | 0.51625869  |             |                      |
| NA        | ENSG00000270990 | -0.32078 | 0.62581   | -0.32078    | 0.62581     | 1.567 0.058556       |
|           | -1.1217         | 0.86901  | 0.058556  | 0.51625869  |             |                      |
| RAB22A    | ENSG00000124209 | 0.61905  | 0.26794   | 1.567       | 0.058559    | 1.567 0.058559       |
|           | 0.89411         | 0.18563  | 0.058559  | 0.51625869  |             |                      |
| RNF19A    | ENSG00000034677 | -0.57412 | 0.71706   | 0.47114     | 0.31877     | 0.42452              |
|           | 0.33559         | 1.567    | 0.058563  | 0.058563    | 0.51625869  |                      |
| NKX6-2    | ENSG00000148826 | 0.78359  | 0.21664   | 1.5668      | 0.058583    | 0.78359              |
|           | 0.21664         | 0.78359  | 0.21664   | 0.058583    | 0.51625869  |                      |
| TSPO2     | ENSG00000112212 | 0.97761  | 0.16413   | 0.97761     | 0.16413     | 0.97761 0.16413      |
|           | 1.5667          | 0.058593 | 0.058593  | 0.51625869  |             |                      |
| RNU6-626P | ENSG00000200224 | 1.5665   | 0.058615  | 1.1233      | 0.13066     | 0.70493              |
|           | 0.24043         | 0.70493  | 0.24043   | 0.058615    | 0.51625869  |                      |
| POLR3C    | ENSG00000186141 | 1.5665   | 0.058621  | 0.15584     | 0.43808     | -0.17107             |
|           | 0.56792         | 1.2898   | 0.098565  | 0.058621    | 0.51625869  |                      |
| NA        | ENSG00000255387 | 0.15676  | 0.43772   | -1.4594     | 0.92777     | -0.93559 0.82526     |
|           | 1.5663          | 0.058638 | 0.058638  | 0.51625869  |             |                      |
| IDE       | ENSG00000119912 | -0.85872 | 0.80475   | -1.0894     | 0.86201     | 1.5663 0.058644      |
|           | -0.08087        | 0.53223  | 0.058644  | 0.51625869  |             |                      |
| LINC00624 | ENSG00000278811 | 0.13395  | 0.44672   | -1.2276     | 0.8902      | 1.5662               |
|           | 0.058653        | -1.2276  | 0.8902    | 0.058653    | 0.51625869  |                      |
| NA        | ENSG00000271989 | -0.97635 | 0.83555   | 1.5662      | 0.058654    | 0.76753 0.22138      |
|           | 0.76753         | 0.22138  | 0.058654  | 0.51625869  |             |                      |
| RNU6-209P | ENSG00000206845 | 1.5661   | 0.058658  | 1.5661      | 0.058658    | 1.5661               |
|           | 0.058658        | 1.5661   | 0.058658  | 0.058658    | 0.51625869  |                      |
| NA        | ENSG00000251588 | 1.5661   | 0.058666  | 0.94142     | 0.17324     | 1.0975 0.13621       |
|           | 0.58794         | 0.27828  | 0.058666  | 0.51625869  |             |                      |
| ANXA5     | ENSG00000164111 | 0.92853  | 0.17657   | 1.5659      | 0.058688    | 0.10226 0.45928      |
|           | 0.35852         | 0.35998  | 0.058688  | 0.51625869  |             |                      |
| MYLK2     | ENSG00000101306 | 0.28789  | 0.38672   | 0.16739     | 0.43353     | -0.13156 0.55233     |
|           | 1.5658          | 0.058699 | 0.058699  | 0.51625869  |             |                      |
| BOD1L1    | ENSG00000038219 | -1.1899  | 0.88296   | -0.020072   | 0.50801     | -1.0498              |
|           | 0.8531          | 1.5656   | 0.058718  | 0.058718    | 0.51625869  |                      |
| ZNF276    | ENSG00000158805 | 0.78519  | 0.21617   | 0.60126     | 0.27383     | 1.5655               |
|           | 0.058727        | 0.81134  | 0.20859   | 0.058727    | 0.51625869  |                      |
| RPS3AP35  | ENSG00000244289 | -0.57664 | 0.71791   | 1.5655      | 0.058738    | 0.41005              |
|           | 0.34088         | 0.2058   | 0.41847   | 0.058738    | 0.51625869  |                      |
| NA        | ENSG00000253901 | -0.72923 | 0.76707   | 1.5654      | 0.058741    | 0.54257 0.29371      |
|           | -0.31747        | 0.62456  | 0.058741  | 0.51625869  |             |                      |
| ABTB2     | ENSG00000166016 | 0.88855  | 0.18712   | 1.5654      | 0.058748    | 0.37262 0.35471      |
|           | -0.12385        | 0.54928  | 0.058748  | 0.51625869  |             |                      |
| NA        | ENSG00000269938 | 1.5653   | 0.05876   | 1.5653      | 0.05876     | 1.5653 0.05876       |
|           | 1.5653          | 0.05876  | 0.05876   | 0.51625869  |             |                      |
| RNA5SP413 | ENSG00000252182 | 1.5653   | 0.058761  | 1.5653      | 0.058761    | 1.5653               |
|           | 0.058761        | 1.5653   | 0.058761  | 0.058761    | 0.51625869  |                      |
| TRIM47    | ENSG00000132481 | 1.5652   | 0.05877   | 1.5652      | 0.05877     | 1.0808               |
|           | 0.13989         | 1.4825   | 0.069106  | 0.05877     | 0.51625869  |                      |

|            |                 |           |           |          |             |             |          |
|------------|-----------------|-----------|-----------|----------|-------------|-------------|----------|
| NA         | ENSG00000237601 | 1.5651    | 0.058777  | -1.0149  | 0.84493     | -1.0149     | 0.84493  |
|            |                 | -1.0149   | 0.84493   | 0.058777 | 0.51625869  |             |          |
| RBPJ       | ENSG00000168214 | 1.565     | 0.058792  | 0.38264  | 0.35099     | -0.72625    | 0.76616  |
|            |                 | -0.050764 | 0.52024   | 0.058792 | 0.516260596 |             |          |
| SEPTIN9-DT | ENSG00000263718 | -0.77294  | 0.78022   | -0.77294 | 0.78022     |             | 0.76497  |
|            |                 | 0.22214   | 1.5649    | 0.058808 | 0.516260596 |             |          |
| LINC01815  | ENSG00000235519 | -0.64854  | 0.74168   | 0.74168  | 1.5649      | 0.058809    | -0.64854 |
|            |                 | 0.74168   | 0.051724  | 0.47937  | 0.058809    | 0.516260596 |          |
| NA         | ENSG00000266416 | 1.5647    | 0.058823  | 1.5647   | 0.058823    | 1.5647      | 0.058823 |
|            |                 | 1.5647    | 0.058823  | 0.058823 | 0.516290488 |             |          |
| FAM120AOS  | ENSG00000188938 | 1.1334    | 0.12852   | 1.5645   | 0.05885     | 1.5645      |          |
|            |                 | 0.05885   | 1.4365    | 0.075424 | 0.05885     | 0.516341466 |          |
| NA         | ENSG00000267560 | 1.5645    | 0.05885   | 1.5645   | 0.05885     | 1.5645      | 0.05885  |
|            |                 | 1.5645    | 0.05885   | 0.05885  | 0.516341466 |             |          |
| NA         | ENSG00000275332 | 1.5643    | 0.058873  | 1.5643   | 0.058873    | 1.5643      | 0.058873 |
|            |                 | 1.5643    | 0.058873  | 0.058873 | 0.516409948 |             |          |
| MIR1972-2  | ENSG00000239118 | 1.5522    | 0.060301  | 0.12611  | 0.44982     | 1.5643      |          |
|            |                 | 0.058879  | 1.5643    | 0.058879 | 0.058879    | 0.516409948 |          |
| ELOBP1     | ENSG00000234152 | -0.51642  | 0.69722   | -0.33784 | 0.63226     | 1.5638      |          |
|            |                 | 0.058929  | 0.75863   | 0.22404  | 0.058929    | 0.516671147 |          |
| TRAV8-5    | ENSG00000256379 | 1.5638    | 0.05893   | 1.5638   | 0.05893     | 1.0482      |          |
|            |                 | 0.14727   | 1.5638    | 0.05893  | 0.05893     | 0.516671147 |          |
| PCSK7      | ENSG00000160613 | 0.39236   | 0.3474    | 0.39236  | 0.3474      | 1.5636      | 0.058956 |
|            |                 | 0.12613   | 0.44982   | 0.058956 | 0.516671147 |             |          |
| RNU6-231P  | ENSG00000252931 | 1.5635    | 0.058962  | 1.5635   | 0.058962    | 1.1844      |          |
|            |                 | 0.11812   | 1.5635    | 0.058962 | 0.058962    | 0.516671147 |          |
| SAMD4A     | ENSG0000020577  | -0.37752  | 0.64711   | 0.76056  | 0.22346     | 0.24048     |          |
|            |                 | 0.40498   | 1.5634    | 0.058974 | 0.058974    | 0.516671147 |          |
| NA         | ENSG00000228634 | -1.2754   | 0.89892   | -1.2754  | 0.89892     | 1.5634      | 0.058982 |
|            |                 | 0.7241    | 0.2345    | 0.058982 | 0.516671147 |             |          |
| IL10RA     | ENSG00000110324 | 1.5634    | 0.058983  | 1.5634   | 0.058983    | 0.26403     |          |
|            |                 | 0.39588   | 0.86073   | 0.19469  | 0.058983    | 0.516671147 |          |
| PARP1P2    | ENSG00000258995 | 1.5632    | 0.058998  | 1.1005   | 0.13557     | 0.89903     |          |
|            |                 | 0.18432   | -0.089066 | 0.53549  | 0.058998    | 0.516709659 |          |
| TNFAIP8L2  | ENSG00000163154 | 1.2474    | 0.10613   | 1.1066   | 0.13422     | 1.5625      |          |
|            |                 | 0.059082  | 0.46843   | 0.31974  | 0.059082    | 0.517199517 |          |
| FKTN       | ENSG00000106692 | 1.3898    | 0.082292  | 1.5624   | 0.059099    | 1.5624      | 0.059099 |
|            |                 | 1.1045    | 0.13468   | 0.059099 | 0.517199517 |             |          |
| LINC02092  | ENSG00000234721 | 1.5623    | 0.059104  | -1.539   | 0.9381      | 1.5623      |          |
|            |                 | 0.059104  | 1.5623    | 0.059104 | 0.059104    | 0.517199517 |          |
| NA         | ENSG00000243486 | -0.41514  | 0.66098   | -0.14209 | 0.5565      | -0.04708    | 0.51878  |
|            |                 | 1.5623    | 0.059106  | 0.059106 | 0.517199517 |             |          |
| EPHX1      | ENSG00000143819 | -0.63036  | 0.73577   | -0.3795  | 0.64784     | -0.042276   | 0.51686  |
|            |                 | 1.5623    | 0.059107  | 0.059107 | 0.517199517 |             |          |
| NA         | ENSG00000263630 | 0.043928  | 0.48248   | 1.5619   | 0.059151    | -0.48595    | 0.6865   |
|            |                 | -0.78775  | 0.78458   | 0.059151 | 0.517491603 |             |          |
| NA         | ENSG00000226619 | 1.5617    | 0.059178  | 1.5617   | 0.059178    | 1.5617      | 0.059178 |
|            |                 | 1.5617    | 0.059178  | 0.059178 | 0.517634884 |             |          |
| FUCA1P1    | ENSG00000237053 | 1.5616    | 0.059196  | -1.2586  | 0.89591     | 0.11123     |          |
|            |                 | 0.45572   | 0.11123   | 0.45572  | 0.059196    | 0.517693949 |          |
| NA         | ENSG00000268439 | 1.5615    | 0.059206  | 1.5615   | 0.059206    | 1.5615      | 0.059206 |
|            |                 | 1.5615    | 0.059206  | 0.059206 | 0.517693949 |             |          |
| MSANTD2    | ENSG00000120458 | 0.21109   | 0.41641   | 0.21109  | 0.41641     | 1.5613      |          |
|            |                 | 0.059231  | 0.21109   | 0.41641  | 0.059231    | 0.517819632 |          |
| TRERF1     | ENSG00000124496 | 1.161     | 0.12282   | 1.0237   | 0.153       | 1.2619      | 0.10349  |
|            |                 | 1.5611    | 0.059251  | 0.059251 | 0.517901566 |             |          |
| SEMA7A     | ENSG00000138623 | 1.5608    | 0.059285  | 0.86271  | 0.19415     | 1.1147      |          |
|            |                 | 0.13248   | 0.82547   | 0.20455  | 0.059285    | 0.517999638 |          |
| NA         | ENSG00000261662 | 1.5454    | 0.061127  | 1.5607   | 0.059296    | 1.5454      | 0.061127 |
|            |                 | 1.5454    | 0.061127  | 0.059296 | 0.517999638 |             |          |
| TEC        | ENSG00000135605 | 0.55667   | 0.28888   | 1.5607   | 0.059301    | -0.35396    | 0.63832  |
|            |                 | 0.024526  | 0.49022   | 0.059301 | 0.517999638 |             |          |

|           |                 |             |             |             |             |           |          |
|-----------|-----------------|-------------|-------------|-------------|-------------|-----------|----------|
| LINC01727 | ENSG00000279082 | 0.7456      | 0.22796     | 1.5605      | 0.059318    | 0.26906   |          |
|           | 0.39394         | -0.51688    | 0.69738     | 0.059318    | 0.517999638 |           |          |
| SPATA41   | ENSG00000189419 | -1.5621     | 0.94087     | 1.1147      | 0.13249     | 0.30136   |          |
|           | 0.38157         | 1.5605      | 0.059324    | 0.059324    | 0.517999638 |           |          |
| PPP4R1L   | ENSG00000124224 | 1.5605      | 0.059326    | 1.1775      | 0.1195      | 1.403     | 0.080308 |
|           | 1.159           | 0.12323     | 0.059326    | 0.517999638 |             |           |          |
| S100A16   | ENSG00000188643 | -0.031745   | 0.51266     | 1.5602      | 0.059362    | -0.031745 |          |
|           | 0.51266         | -0.031745   | 0.51266     | 0.059362    | 0.518221114 |           |          |
| WDR6      | ENSG00000178252 | 1.5599      | 0.059397    | 1.4993      | 0.066899    | 1.5599    | 0.059397 |
|           | 1.5599          | 0.059397    | 0.059397    | 0.518433783 |             |           |          |
| ATG2B     | ENSG00000066739 | 1.5597      | 0.059411    | 1.2749      | 0.10118     | 0.28616   | 0.38738  |
|           | 0.255           | 0.39936     | 0.059411    | 0.518463114 |             |           |          |
| NA        | ENSG00000276535 | 0.64434     | 0.25968     | 0.64434     | 0.25968     | 1.5594    | 0.059451 |
|           | 0.64434         | 0.25968     | 0.059451    | 0.518658819 |             |           |          |
| DEPP1     | ENSG00000165507 | 1.5594      | 0.059455    | 1.1836      | 0.11828     | 1.1836    | 0.11828  |
|           | 1.1836          | 0.11828     | 0.059455    | 0.518658819 |             |           |          |
| RPS27P18  | ENSG00000233135 | 1.5592      | 0.05947     | 1.5592      | 0.05947     | 1.5592    |          |
|           | 0.05947         | 1.3451      | 0.089296    | 0.05947     | 0.518658819 |           |          |
| NCKAP5L   | ENSG00000167566 | 1.396       | 0.081362    | -0.14155    | 0.55628     | 1.5592    | 0.059476 |
|           | -0.55377        | 0.71013     | 0.059476    | 0.518658819 |             |           |          |
| RNF34     | ENSG00000170633 | 0.68067     | 0.24804     | 0.7085      | 0.23932     | 1.5591    | 0.059488 |
|           | 1.0479          | 0.14735     | 0.059488    | 0.518665034 |             |           |          |
| TFCP2     | ENSG00000135457 | 0.42436     | 0.33565     | -0.17537    | 0.5696      | 1.559     | 0.059498 |
|           | 1.1805          | 0.1189      | 0.059498    | 0.518665034 |             |           |          |
| NEO1      | ENSG00000067141 | 1.2054      | 0.11402     | 1.0109      | 0.15603     | 1.5588    | 0.059523 |
|           | 0.54688         | 0.29223     | 0.059523    | 0.518790161 |             |           |          |
| MIR5197   | ENSG00000266478 | -0.2931     | 0.61528     | -0.2931     | 0.61528     | 1.5586    |          |
|           | 0.059543        | -0.2931     | 0.61528     | 0.059543    | 0.518871672 |           |          |
| NA        | ENSG00000246575 | 1.5583      | 0.05958     | 1.5583      | 0.05958     | 1.5583    | 0.05958  |
|           | 1.5583          | 0.05958     | 0.05958     | 0.518901353 |             |           |          |
| NOP9      | ENSG00000196943 | 1.5583      | 0.059586    | 1.5583      | 0.059586    | 1.5583    | 0.059586 |
|           | 1.5583          | 0.059586    | 0.059586    | 0.518901353 |             |           |          |
| EEF1DP3   | ENSG00000229715 | -0.36957    | 0.64415     | 1.5582      | 0.059589    | 0.10884   |          |
|           | 0.45666         | 0.48746     | 0.31297     | 0.059589    | 0.518901353 |           |          |
| NA        | ENSG00000279970 | 1.4563      | 0.072656    | 1.4126      | 0.078885    | 1.5582    | 0.059589 |
|           | 1.5582          | 0.059589    | 0.059589    | 0.518901353 |             |           |          |
| RN7SKP207 | ENSG00000223136 | 1.558       | 0.059615    | 1.558       | 0.059615    | 1.558     | 0.059615 |
|           | 0.059615        | 0.059615    | 0.518942292 |             |             |           |          |
| NA        | ENSG00000262048 | 1.558       | 0.059615    | 1.558       | 0.059615    | 1.558     | 0.059615 |
|           | 0.059615        | 0.518942292 |             |             |             |           |          |
| NA        | ENSG00000231172 | 1.4343      | 0.075743    | 1.2688      | 0.10226     | 1.5576    | 0.059666 |
|           | 1.4343          | 0.075743    | 0.059666    | 0.519209448 |             |           |          |
| FAM111A   | ENSG00000166801 | 1.5576      | 0.059667    | 1.5576      | 0.059667    | 0.61569   |          |
|           | 0.26905         | 1.5576      | 0.059667    | 0.059667    | 0.519209448 |           |          |
| TMEM179   | ENSG00000258986 | 1.5574      | 0.059689    | 0.4474      | 0.32729     | 0.31493   |          |
|           | 0.37641         | 1.1288      | 0.1295      | 0.059689    | 0.519308154 |           |          |
| VRK1      | ENSG00000100749 | 1.1934      | 0.11636     | 1.1934      | 0.11636     | 1.5572    | 0.059709 |
|           | 1.1934          | 0.11636     | 0.059709    | 0.519348911 |             |           |          |
| NA        | ENSG00000231170 | 1.5572      | 0.059715    | 1.5572      | 0.059715    | 1.5572    | 0.059715 |
|           | 1.5572          | 0.059715    | 0.059715    | 0.519348911 |             |           |          |
| RN7SKP78  | ENSG00000201581 | 1.557       | 0.059729    | 1.0083      | 0.15666     | 0.41717   | 0.33828  |
|           | -0.47186        | 0.68149     | 0.059729    | 0.519377975 |             |           |          |
| RNU6-502P | ENSG00000199289 | 1.5569      | 0.059742    | 1.5569      | 0.059742    | 1.5569    |          |
|           | 0.059742        | 1.5569      | 0.059742    | 0.059742    | 0.519392608 |           |          |
| NA        | ENSG00000252075 | 1.2677      | 0.10246     | 1.4706      | 0.070697    | 0.7643    | 0.22234  |
|           | 1.5569          | 0.059752    | 0.059752    | 0.519392608 |             |           |          |
| SLC10A7   | ENSG00000120519 | 1.1462      | 0.12585     | 1.027       | 0.15222     | 0.63861   | 0.26154  |
|           | 1.5566          | 0.059785    | 0.059785    | 0.519586775 |             |           |          |
| HARBI1    | ENSG00000180423 | 1.5515      | 0.060393    | 1.5515      | 0.060393    | 1.5515    |          |
|           | 0.060393        | 1.5564      | 0.059802    | 0.059802    | 0.519636078 |           |          |
| NA        | ENSG00000251031 | 1.1092      | 0.13368     | 1.5564      | 0.059812    | 0.32794   | 0.37148  |
|           | 0.32794         | 0.37148     | 0.059812    | 0.519636078 |             |           |          |

|           |                 |            |             |           |             |             |          |       |          |
|-----------|-----------------|------------|-------------|-----------|-------------|-------------|----------|-------|----------|
| NA        | ENSG00000265833 | 1.556      | 0.059851    | 1.556     | 0.059851    | 1.556       | 0.059851 | 1.556 | 0.059851 |
|           |                 | 0.059851   | 0.519882216 |           |             |             |          |       |          |
| MIR3925   | ENSG00000263894 | 0.44113    | 0.32956     | -0.055972 | 0.52232     | -0.50167    |          |       |          |
|           |                 | 0.69205    | 1.5559      | 0.059864  | 0.059864    | 0.519902463 |          |       |          |
| NA        | ENSG00000243171 | 0.95816    | 0.16899     | 1.5557    | 0.059896    | 1.5557      | 0.059896 |       |          |
|           |                 | 1.5557     | 0.059896    | 0.059896  | 0.520087684 |             |          |       |          |
| NA        | ENSG00000250698 | 0.67816    | 0.24883     | 1.5554    | 0.05992     | 0.57877     | 0.28137  |       |          |
|           |                 | 1.334      | 0.091101    | 0.05992   | 0.520203385 |             |          |       |          |
| NA        | ENSG00000228620 | 1.5553     | 0.059941    | 1.5553    | 0.059941    | 1.5553      | 0.059941 |       |          |
|           |                 | -0.24269   | 0.59588     | 0.059941  | 0.520226145 |             |          |       |          |
| SERINC2   | ENSG00000168528 | -0.0010188 | 0.50041     | 1.3992    | 0.080876    | 1.287       | 0.099039 |       |          |
|           |                 | 1.5552     | 0.059952    | 0.059952  | 0.520226145 |             |          |       |          |
| MIR4438   | ENSG00000265734 | 0.064925   | 0.47412     | 1.5551    | 0.059956    | 0.064925    |          |       |          |
|           |                 | 0.47412    | 0.064925    | 0.47412   | 0.059956    | 0.520226145 |          |       |          |
| CDK6      | ENSG00000105810 | 0.44744    | 0.32728     | 0.091967  | 0.46336     | 0.64664     | 0.25893  |       |          |
|           |                 | 1.555      | 0.059972    | 0.059972  | 0.520226145 |             |          |       |          |
| NA        | ENSG00000267713 | 1.555      | 0.059976    | 1.555     | 0.059976    | 1.555       | 0.059976 |       |          |
|           |                 | 0.059976   | 0.520226145 |           |             |             |          |       |          |
| MMADHC-DT | ENSG00000231969 | 1.5549     | 0.05999     | -1.555    | 0.94003     | 0.99176     |          |       |          |
|           |                 | 0.16066    | 0.99176     | 0.16066   | 0.05999     | 0.520234579 |          |       |          |
| NA        | ENSG00000239828 | 0.94156    | 0.17321     | 1.3049    | 0.095965    | 0.8385      | 0.20087  |       |          |
|           |                 | 1.5547     | 0.060005    | 0.060005  | 0.520234579 |             |          |       |          |
| NA        | ENSG00000248659 | 1.5546     | 0.060019    | 1.5547    | 0.060009    | 1.128       | 0.12965  |       |          |
|           |                 | 0.87682    | 0.19029     | 0.060009  | 0.520234579 |             |          |       |          |
| SPATS1    | ENSG00000249481 | 1.5546     | 0.06002     | 0.49465   | 0.31042     | 0.87187     |          |       |          |
|           |                 | 0.19164    | 0.088136    | 0.46488   | 0.06002     | 0.520237389 |          |       |          |
| TCF4-AS1  | ENSG00000267028 | 1.2279     | 0.10974     | 0.40645   | 0.3422      | 1.5544      |          |       |          |
|           |                 | 0.060043   | 0.73916     | 0.2299    | 0.060043    | 0.520271801 |          |       |          |
| METAP1D   | ENSG00000172878 | 1.5544     | 0.060048    | 1.3849    | 0.083048    | 0.83959     |          |       |          |
|           |                 | 0.20057    | 0.53722     | 0.29556   | 0.060048    | 0.520271801 |          |       |          |
| KIAA2026  | ENSG00000183354 | 0.085389   | 0.46598     | 0.085389  | 0.46598     | 1.5543      |          |       |          |
|           |                 | 0.060056   | -0.44129    | 0.6705    | 0.060056    | 0.520271801 |          |       |          |
| RASSF1    | ENSG00000068028 | 1.554      | 0.060087    | 1.4961    | 0.06732     | 1.4961      | 0.06732  |       |          |
|           |                 | 1.4961     | 0.06732     | 0.060087  | 0.520447833 |             |          |       |          |
| ANO4      | ENSG00000151572 | 0.35243    | 0.36226     | 0.51477   | 0.30336     | 0.3912      | 0.34782  |       |          |
|           |                 | 1.5538     | 0.060117    | 0.060117  | 0.520476215 |             |          |       |          |
| SNRPE     | ENSG00000182004 | 0.11212    | 0.45536     | 1.5538    | 0.06012     | 1.1884      | 0.11735  |       |          |
|           |                 | -0.34873   | 0.63636     | 0.06012   | 0.520476215 |             |          |       |          |
| DENND2D   | ENSG00000162777 | 1.5537     | 0.060133    | 0.86191   | 0.19437     | 0.86191     |          |       |          |
|           |                 | 0.19437    | 0.86191     | 0.19437   | 0.060133    | 0.520476215 |          |       |          |
| NA        | ENSG00000269588 | 1.5537     | 0.060133    | 0.87643   | 0.1904      | 0.45735     | 0.32371  |       |          |
|           |                 | 0.45735    | 0.32371     | 0.060133  | 0.520476215 |             |          |       |          |
| EEF1AKMT3 | ENSG00000123427 | 1.5535     | 0.060152    | 1.5535    | 0.060152    | 1.5535      |          |       |          |
|           |                 | 0.060152   | 1.5535      | 0.060152  | 0.060152    | 0.520548208 |          |       |          |
| TEX49     | ENSG00000257987 | 1.5533     | 0.060179    | 1.2699    | 0.10206     | 1.1101      | 0.13348  |       |          |
|           |                 | 1.2699     | 0.10206     | 0.060179  | 0.520689395 |             |          |       |          |
| RNY3P12   | ENSG00000202297 | 1.0049     | 0.15748     | 1.0049    | 0.15748     | 1.0049      |          |       |          |
|           |                 | 0.15748    | 1.5529      | 0.06022   | 0.06022     | 0.520801335 |          |       |          |
| NA        | ENSG00000259531 | 0.4894     | 0.31228     | 1.0672    | 0.14295     | 1.5529      | 0.060221 |       |          |
|           |                 | 1.5529     | 0.060221    | 0.060221  | 0.520801335 |             |          |       |          |
| NA        | ENSG00000230435 | 1.0904     | 0.13777     | 1.1597    | 0.12308     | 1.5529      | 0.060224 |       |          |
|           |                 | 1.5529     | 0.060224    | 0.060224  | 0.520801335 |             |          |       |          |
| RHEBL1    | ENSG00000167550 | 1.0708     | 0.14214     | 1.5527    | 0.060249    | 0.98404     |          |       |          |
|           |                 | 0.16255    | 1.2818      | 0.099959  | 0.060249    | 0.520852653 |          |       |          |
| GAPDHP42  | ENSG00000219881 | 1.5527     | 0.060253    | 1.5527    | 0.060253    | 1.5527      |          |       |          |
|           |                 | 0.060253   | 1.5527      | 0.060253  | 0.060253    | 0.520852653 |          |       |          |
| KREMEN1   | ENSG00000183762 | 1.5526     | 0.060262    | 0.49369   | 0.31076     | 0.49369     |          |       |          |
|           |                 | 0.31076    | 0.49369     | 0.31076   | 0.060262    | 0.520852653 |          |       |          |
| NA        | ENSG00000254536 | 1.5521     | 0.060316    | 1.5521    | 0.060316    | 1.5521      | 0.060316 |       |          |
|           |                 | 1.5521     | 0.060316    | 0.060316  | 0.521226934 |             |          |       |          |
| NA        | ENSG00000234116 | 0.17046    | 0.43232     | -0.65531  | 0.74387     | 1.552       | 0.060333 |       |          |
|           |                 | 1.0074     | 0.15687     | 0.060333  | 0.521281399 |             |          |       |          |

|           |                 |          |             |             |             |             |          |        |
|-----------|-----------------|----------|-------------|-------------|-------------|-------------|----------|--------|
| PCDHGC5   | ENSG00000240764 | 1.5518   | 0.060349    | 1.5518      | 0.060349    | 1.5518      | 0.060349 | 1.5518 |
|           |                 | 0.060349 | 1.5518      | 0.060349    | 0.060349    | 0.521327206 |          |        |
| SYCP1     | ENSG00000198765 | 1.5515   | 0.060387    | 0.063804    | 0.47456     | 0.23237     | 0.40812  |        |
|           |                 | -0.25487 | 0.60059     | 0.060387    | 0.521463639 |             |          |        |
| NA        | ENSG00000248294 | 1.5515   | 0.060396    | 0.65084     | 0.25758     | 1.5515      | 0.060396 |        |
|           |                 | 0.61256  | 0.27008     | 0.060396    | 0.521463639 |             |          |        |
| RNU7-187P | ENSG00000238998 | 1.1964   | 0.11577     | 1.5513      | 0.060416    | 1.5513      |          |        |
|           |                 | 0.060416 | 1.5513      | 0.060416    | 0.060416    | 0.521463639 |          |        |
| CARMN     | ENSG00000249669 | 0.64798  | 0.2585      | -0.31382    | 0.62317     | 1.5513      | 0.060421 |        |
|           |                 | 1.4207   | 0.077698    | 0.060421    | 0.521463639 |             |          |        |
| NTN5      | ENSG00000142233 | 1.3516   | 0.088251    | 1.5512      | 0.060426    | 1.0072      | 0.15693  |        |
|           |                 | 1.3516   | 0.088251    | 0.060426    | 0.521463639 |             |          |        |
| NA        | ENSG00000251411 | 0.43948  | 0.33016     | 1.5512      | 0.060429    | 1.3361      | 0.09076  |        |
|           |                 | 1.013    | 0.15554     | 0.060429    | 0.521463639 |             |          |        |
| NA        | ENSG00000199912 | 1.551    | 0.060447    | 1.551       | 0.060447    | 1.551       | 0.060447 |        |
|           |                 | 0.060447 | 0.521526613 |             |             |             |          |        |
| FMC1      | ENSG00000164898 | 1.5508   | 0.060474    | 1.5508      | 0.060474    | 0.62857     | 0.26481  |        |
|           |                 | 1.1034   | 0.13493     | 0.060474    | 0.521587652 |             |          |        |
| NA        | ENSG00000258513 | 0.25421  | 0.39967     | 1.2446      | 0.10663     | 1.5508      | 0.06048  |        |
|           |                 | 0.42367  | 0.3359      | 0.06048     | 0.521587652 |             |          |        |
| KIFBP     | ENSG00000198954 | 1.5507   | 0.060488    | 0.044008    | 0.48245     | 0.99162     | 0.16069  |        |
|           |                 | 0.2537   | 0.39986     | 0.060488    | 0.521587652 |             |          |        |
| NA        | ENSG00000254626 | 0.93829  | 0.17405     | 0.93829     | 0.17405     | 0.93829     | 0.17405  |        |
|           |                 | 1.5506   | 0.060504    | 0.060504    | 0.521587652 |             |          |        |
| NA        | ENSG00000228737 | -1.045   | 0.852       | 1.5504      | 0.060522    | -1.045      | 0.852    | -1.045 |
|           |                 | 0.852    | 0.060522    | 0.521587652 |             |             |          |        |
| FOXP2     | ENSG00000128573 | 0.11057  | 0.45598     | 1.4327      | 0.075968    | 1.5504      | 0.060525 |        |
|           |                 | 0.87804  | 0.18996     | 0.060525    | 0.521587652 |             |          |        |
| DAB2IP    | ENSG00000136848 | 0.39308  | 0.34713     | -0.28888    | 0.61366     | 1.5503      |          |        |
|           |                 | 0.060529 | 1.0877      | 0.13836     | 0.060529    | 0.521587652 |          |        |
| NA        | ENSG00000275312 | 1.5499   | 0.060583    | 1.5499      | 0.060583    | 1.5499      | 0.060583 |        |
|           |                 | 1.5499   | 0.060583    | 0.060583    | 0.521930064 |             |          |        |
| AGO3      | ENSG00000126070 | 1.4467   | 0.073991    | 1.5497      | 0.060604    | 1.5357      | 0.062302 |        |
|           |                 | 1.5497   | 0.060604    | 0.060604    | 0.521930064 |             |          |        |
| DERL2     | ENSG00000072849 | 1.4034   | 0.080249    | 1.4034      | 0.080249    | 1.5496      | 0.060624 |        |
|           |                 | 1.4079   | 0.079574    | 0.060624    | 0.521930064 |             |          |        |
| TIPIN     | ENSG00000075131 | 1.5495   | 0.060628    | 1.2755      | 0.10106     | -0.90649    | 0.81766  |        |
|           |                 | -0.75671 | 0.77539     | 0.060628    | 0.521930064 |             |          |        |
| SLC45A3   | ENSG00000158715 | -0.15205 | 0.56043     | 1.5495      | 0.060629    | 1.4181      |          |        |
|           |                 | 0.07808  | -0.42461    | 0.66444     | 0.060629    | 0.521930064 |          |        |
| ATP23     | ENSG00000166896 | 1.5495   | 0.060633    | 0.031461    | 0.48745     | -0.16404    | 0.56515  |        |
|           |                 | -0.28306 | 0.61144     | 0.060633    | 0.521930064 |             |          |        |
| NA        | ENSG00000276524 | 1.5493   | 0.060658    | 1.5189      | 0.064389    | 1.5189      | 0.064389 |        |
|           |                 | 1.2849   | 0.09942     | 0.060658    | 0.522053045 |             |          |        |
| ZMIZ1     | ENSG00000108175 | 1.1238   | 0.13055     | 0.26642     | 0.39496     | 0.87528     | 0.19071  |        |
|           |                 | 1.5488   | 0.06071     | 0.06071     | 0.522337556 |             |          |        |
| LINC02881 | ENSG00000277288 | -0.14242 | 0.55663     | 1.5487      | 0.060728    | -1.2376     |          |        |
|           |                 | 0.89207  | 0.7162      | 0.23693     | 0.060728    | 0.522337556 |          |        |
| NA        | ENSG00000252432 | -0.41581 | 0.66123     | -1.0303     | 0.84857     | 0.11314     | 0.45496  |        |
|           |                 | 1.5487   | 0.060732    | 0.060732    | 0.522337556 |             |          |        |
| IL12B     | ENSG00000113302 | -1.0235  | 0.84696     | 1.328       | 0.09209     | 1.0365      | 0.14999  |        |
|           |                 | 1.5486   | 0.060736    | 0.060736    | 0.522337556 |             |          |        |
| SNRPCP20  | ENSG00000267182 | -0.529   | 0.7016      | 0.77231     | 0.21996     | 1.5485      |          |        |
|           |                 | 0.060756 | -1.1294     | 0.87064     | 0.060756    | 0.522337556 |          |        |
| KAZN-AS1  | ENSG00000234593 | 1.5484   | 0.060768    | -0.26504    | 0.60451     | -0.89311    |          |        |
|           |                 | 0.8141   | -1.2195     | 0.88867     | 0.060768    | 0.522337556 |          |        |
| ZIC2      | ENSG00000043355 | 0.31324  | 0.37705     | -0.10326    | 0.54112     | 0.29852     | 0.38265  |        |
|           |                 | 1.5482   | 0.060789    | 0.060789    | 0.522337556 |             |          |        |
| FRG2LP    | ENSG00000267704 | 1.5479   | 0.060822    | 1.5479      | 0.060822    | 1.5479      |          |        |
|           |                 | 0.060822 | 1.5479      | 0.060822    | 0.060822    | 0.522337556 |          |        |
| NA        | ENSG00000268069 | 1.5478   | 0.060834    | 1.5478      | 0.060834    | 1.5478      | 0.060834 |        |
|           |                 | 1.5478   | 0.060834    | 0.060834    | 0.522337556 |             |          |        |

|             |                 |           |             |             |             |           |          |
|-------------|-----------------|-----------|-------------|-------------|-------------|-----------|----------|
| RNU4-77P    | ENSG00000252501 | 1.3706    | 0.085251    | 1.3706      | 0.085251    | 0.029695  |          |
|             | 0.48816         | 1.5478    | 0.06084     | 0.06084     | 0.522337556 |           |          |
| NA          | ENSG00000258204 | 0.75083   | 0.22638     | 1.5477      | 0.060843    | 0.75083   | 0.22638  |
|             | 0.75083         | 0.22638   | 0.060843    | 0.522337556 |             |           |          |
| BTF3P10     | ENSG00000231120 | 1.5477    | 0.060851    | 1.5477      | 0.060851    | 1.5477    |          |
|             | 0.060851        | 1.5477    | 0.060851    | 0.060851    | 0.522337556 |           |          |
| GBP7        | ENSG00000213512 | 0.7512    | 0.22627     | 0.42546     | 0.33525     | 1.5476    | 0.060854 |
|             | 1.4967          | 0.067241  | 0.060854    | 0.522337556 |             |           |          |
| RNA5SP42    | ENSG00000201148 | 1.0204    | 0.15377     | 1.5476      | 0.06086     | 1.0204    |          |
|             | 0.15377         | 0.85101   | 0.19738     | 0.06086     | 0.522337556 |           |          |
| NA          | ENSG00000250080 | 0.13692   | 0.44555     | 0.13692     | 0.44555     | 1.5476    | 0.06086  |
|             | -0.12768        | 0.5508    | 0.06086     | 0.522337556 |             |           |          |
| LINC02427   | ENSG00000271538 | -1.4285   | 0.92343     | 0.30699     | 0.37943     | 1.5476    |          |
|             | 0.060863        | 0.62046   | 0.26748     | 0.060863    | 0.522337556 |           |          |
| WNT9B       | ENSG00000158955 | 1.5474    | 0.060879    | -0.18208    | 0.57224     | 1.3798    | 0.083824 |
|             | 1.0951          | 0.13674   | 0.060879    | 0.522337556 |             |           |          |
| NA          | ENSG00000216781 | 1.5474    | 0.060884    | 0.02687     | 0.48928     | 0.02687   | 0.48928  |
|             | 0.02687         | 0.48928   | 0.060884    | 0.522337556 |             |           |          |
| AMTN        | ENSG00000187689 | -0.61004  | 0.72908     | 1.5472      | 0.060913    | -0.61004  | 0.72908  |
|             | -0.61004        | 0.72908   | 0.060913    | 0.522396233 |             |           |          |
| DDIT4L      | ENSG00000145358 | 1.0754    | 0.14109     | 1.5471      | 0.060917    | 1.5471    |          |
|             | 0.060917        | 1.5471    | 0.060917    | 0.060917    | 0.522396233 |           |          |
| RNU6-237P   | ENSG00000251794 | 1.5471    | 0.060923    | 1.5471      | 0.060923    | 1.5471    |          |
|             | 0.060923        | 1.5471    | 0.060923    | 0.060923    | 0.522396233 |           |          |
| UNC5CL      | ENSG00000124602 | 1.2065    | 0.11382     | 1.5466      | 0.060978    | -1.0899   |          |
|             | 0.86213         | 0.97546   | 0.16467     | 0.060978    | 0.522709609 |           |          |
| NA          | ENSG00000235582 | 1.5466    | 0.060981    | 1.5466      | 0.060981    | 1.5466    | 0.060981 |
|             | 1.5466          | 0.060981  | 0.060981    | 0.522709609 |             |           |          |
| NA          | ENSG00000232693 | 1.5465    | 0.060997    | 1.244       | 0.10674     | 1.5465    | 0.060997 |
|             | 1.5465          | 0.060997  | 0.060997    | 0.522722863 |             |           |          |
| AMHR2       | ENSG00000135409 | 1.2341    | 0.10858     | 1.2341      | 0.10858     | 1.5464    | 0.061004 |
|             | 1.2341          | 0.10858   | 0.061004    | 0.522722863 |             |           |          |
| LINC00362   | ENSG00000229483 | 1.5461    | 0.061044    | 0.81248     | 0.20826     | 0.80305   |          |
|             | 0.21097         | -0.46931  | 0.68058     | 0.061044    | 0.52297365  |           |          |
| NA          | ENSG00000279869 | -0.19432  | 0.57704     | 0.30687     | 0.37947     | 1.5456    | 0.061098 |
|             | 0.46469         | 0.32108   | 0.061098    | 0.523003506 |             |           |          |
| NA          | ENSG00000253535 | -0.81061  | 0.7912      | 0.29217     | 0.38508     | -0.30299  | 0.61905  |
|             | 1.5456          | 0.0611    | 0.0611      | 0.523003506 |             |           |          |
| NA          | ENSG00000243518 | 1.2642    | 0.10308     | 1.5453      | 0.061139    | -0.14787  | 0.55878  |
|             | 1.1178          | 0.13182   | 0.061139    | 0.523003506 |             |           |          |
| CASQ2       | ENSG00000118729 | -0.4626   | 0.67818     | 0.76009     | 0.2236      | 0.58489   | 0.27931  |
|             | 1.5453          | 0.061143  | 0.061143    | 0.523003506 |             |           |          |
| MBNL2       | ENSG00000139793 | -0.044731 | 0.51784     | 1.1383      | 0.1275      | -0.42885  | 0.66598  |
|             | 1.5452          | 0.061144  | 0.061144    | 0.523003506 |             |           |          |
| CARD9       | ENSG00000187796 | -0.66762  | 0.74781     | 1.5451      | 0.061157    | -0.18294  | 0.57258  |
|             | -1.2577         | 0.89575   | 0.061157    | 0.523003506 |             |           |          |
| DST-AS1     | ENSG00000231441 | -1.328    | 0.90791     | -1.328      | 0.90791     | 1.5451    |          |
|             | 0.061162        | -1.328    | 0.90791     | 0.061162    | 0.523003506 |           |          |
| RNU6-198P   | ENSG00000206985 | -0.38725  | 0.65072     | 1.545       | 0.061174    | -0.38725  | 0.65072  |
|             | -0.38725        | 0.65072   | 0.061174    | 0.523003506 |             |           |          |
| RNU6-391P   | ENSG00000202050 | 1.545     | 0.061178    | 1.545       | 0.061178    | 1.545     | 0.061178 |
|             | 0.061178        | 0.061178  | 0.523003506 |             |             |           |          |
| ATP2B4      | ENSG00000058668 | -0.38309  | 0.64917     | -0.19209    | 0.57616     | 1.4007    |          |
|             | 0.080656        | 1.5449    | 0.061183    | 0.061183    | 0.523003506 |           |          |
| EXOSC10-AS1 | ENSG00000230337 | 1.5449    | 0.061184    | 0.10924     | 0.45651     | 0.0015003 |          |
|             | 0.4994          | 0.0015003 | 0.4994      | 0.061184    | 0.523003506 |           |          |
| NA          | ENSG00000254141 | -0.44712  | 0.67261     | -0.18731    | 0.57429     | 1.5448    | 0.061198 |
|             | 1.0196          | 0.15396   | 0.061198    | 0.523003506 |             |           |          |
| TRAJ4       | ENSG00000211885 | -0.73583  | 0.76908     | -1.5904     | 0.94413     | 1.5448    | 0.061203 |
|             | -0.73583        | 0.76908   | 0.061203    | 0.523003506 |             |           |          |
| VPS37D      | ENSG00000176428 | -0.23243  | 0.5919      | 1.5002      | 0.066787    | 1.5447    |          |
|             | 0.061207        | 0.51293   | 0.304       | 0.061207    | 0.523003506 |           |          |



|            |                 |          |          |             |             |          |          |
|------------|-----------------|----------|----------|-------------|-------------|----------|----------|
| NA         | ENSG00000244669 | -0.2746  | 0.60819  | -0.2746     | 0.60819     | -0.26345 | 0.6039   |
|            | 1.5447          | 0.06121  | 0.06121  | 0.523003506 |             |          |          |
| NA         | ENSG00000221101 | 1.5443   | 0.061262 | 0.91884     | 0.17909     | -0.29605 | 0.6164   |
|            | 1.5443          | 0.061262 | 0.061262 | 0.523003506 |             |          |          |
| RGS19      | ENSG00000171700 | 1.5442   | 0.061271 | 0.63379     | 0.26311     | 0.63379  | 0.26311  |
|            | 0.63379         | 0.26311  | 0.061271 | 0.523003506 |             |          |          |
| MANEAL     | ENSG00000185090 | 1.3737   | 0.08477  | 1.197       | 0.11566     | 1.5441   | 0.061281 |
|            | -0.26396        | 0.6041   | 0.061281 | 0.523003506 |             |          |          |
| PPP5D1     | ENSG00000230510 | 0.85517  | 0.19623  | 1.5441      | 0.061284    | 1.2926   |          |
|            | 0.098074        | 0.85517  | 0.19623  | 0.061284    | 0.523003506 |          |          |
| NA         | ENSG00000227935 | 1.5441   | 0.061287 | 1.1258      | 0.13013     | 1.5441   | 0.061287 |
|            | 1.5441          | 0.061287 | 0.061287 | 0.523003506 |             |          |          |
| NA         | ENSG00000249792 | 1.5441   | 0.061288 | 0.54031     | 0.29449     | 0.54031  | 0.29449  |
|            | 0.54031         | 0.29449  | 0.061288 | 0.523003506 |             |          |          |
| DDX19A     | ENSG00000168872 | 1.5041   | 0.066284 | 0.064417    | 0.47432     | 0.29916  |          |
|            | 0.38241         | 1.5439   | 0.061312 | 0.061312    | 0.523003506 |          |          |
| PLA2G12B   | ENSG00000138308 | 1.5437   | 0.061325 | 0.043896    | 0.48249     | 1.5437   |          |
|            | 0.061325        | 1.4914   | 0.067928 | 0.061325    | 0.523003506 |          |          |
| NA         | ENSG00000275015 | 1.5437   | 0.061325 | 0.91114     | 0.18111     | 1.5437   | 0.061325 |
|            | 1.5437          | 0.061325 | 0.061325 | 0.523003506 |             |          |          |
| CD84       | ENSG00000066294 | 1.5437   | 0.06133  | 1.5437      | 0.06133     | 1.5437   | 0.06133  |
|            | 1.5437          | 0.06133  | 0.06133  | 0.523003506 |             |          |          |
| NA         | ENSG00000272249 | 1.5437   | 0.061336 | -0.52999    | 0.70194     | 1.5437   | 0.061336 |
|            | 1.5437          | 0.061336 | 0.061336 | 0.523003506 |             |          |          |
| NA         | ENSG00000199840 | 1.5436   | 0.061343 | 1.5436      | 0.061343    | 1.2994   | 0.096909 |
|            | 1.5436          | 0.061343 | 0.061343 | 0.523003506 |             |          |          |
| CSP2       | ENSG00000241218 | 0.015018 | 0.49401  | 1.5436      | 0.061348    | 0.015018 | 0.49401  |
|            | 0.20488         | 0.41883  | 0.061348 | 0.523003506 |             |          |          |
| RPSAP17    | ENSG00000226855 | 0.98503  | 0.1623   | 0.98503     | 0.1623      | 0.21002  |          |
|            | 0.41683         | 1.5433   | 0.061379 | 0.061379    | 0.52315294  |          |          |
| PSORS1C3   | ENSG00000204528 | -1.9393  | 0.97377  | -1.6743     | 0.95296     | 1.5432   |          |
|            | 0.061387        | -3.2991  | 0.99952  | 0.061387    | 0.52315294  |          |          |
| LINC01119  | ENSG00000239332 | 1.0197   | 0.15393  | 1.0197      | 0.15393     | 1.0197   |          |
|            | 0.15393         | 1.5429   | 0.061431 | 0.061431    | 0.52331305  |          |          |
| RN7SL657P  | ENSG00000264293 | 1.5428   | 0.061442 | 1.5428      | 0.061442    | 1.5428   |          |
|            | 0.061442        | 1.5428   | 0.061442 | 0.061442    | 0.52331305  |          |          |
| CCL21      | ENSG00000137077 | 1.5427   | 0.061447 | 1.2783      | 0.10057     | 1.1412   | 0.1269   |
|            | 0.53158         | 0.29751  | 0.061447 | 0.52331305  |             |          |          |
| NA         | ENSG00000264000 | 1.5427   | 0.061455 | 1.2035      | 0.11438     | 0.57609  | 0.28228  |
|            | 1.5427          | 0.061455 | 0.061455 | 0.52331305  |             |          |          |
| MAPK10-AS1 | ENSG00000250062 | -0.43445 | 0.66802  | 0.20068     | 0.42047     | 0.31613  |          |
|            | 0.37595         | 1.5426   | 0.061463 | 0.061463    | 0.52331305  |          |          |
| GOLGA6L5P  | ENSG00000230373 | 1.5425   | 0.061478 | 1.13        | 0.12924     | 0.01279  | 0.4949   |
|            | 0.68079         | 0.248    | 0.061478 | 0.52331305  |             |          |          |
| NA         | ENSG00000217514 | 0.38173  | 0.35133  | 0.38173     | 0.35133     | 0.38173  | 0.35133  |
|            | 1.5425          | 0.061482 | 0.061482 | 0.52331305  |             |          |          |
| RPL28      | ENSG00000108107 | 1.4417   | 0.07469  | 0.96693     | 0.16679     | 0.96693  | 0.16679  |
|            | 1.5421          | 0.06152  | 0.06152  | 0.52331305  |             |          |          |
| PPIAP1     | ENSG00000215351 | -1.8668  | 0.96903  | 1.5421      | 0.061525    | -1.8668  |          |
|            | 0.96903         | -1.8668  | 0.96903  | 0.061525    | 0.52331305  |          |          |
| OR4C9P     | ENSG00000254925 | 1.5419   | 0.061546 | 0.037134    | 0.48519     | -0.73256 |          |
|            | 0.76809         | -0.45086 | 0.67395  | 0.061546    | 0.52331305  |          |          |
| NA         | ENSG00000260926 | 0.5374   | 0.2955   | 0.5374      | 0.2955      | 0.5374   | 0.2955   |
|            | 1.5417          | 0.061574 | 0.061574 | 0.52331305  |             |          |          |
| NA         | ENSG00000279227 | 1.5416   | 0.061587 | 1.5416      | 0.061587    | 1.5416   | 0.061587 |
|            | 1.5416          | 0.061587 | 0.061587 | 0.52331305  |             |          |          |
| NA         | ENSG00000261011 | 1.5415   | 0.061601 | 1.5415      | 0.061601    | 1.5415   | 0.061601 |
|            | 1.5415          | 0.061601 | 0.061601 | 0.52331305  |             |          |          |
| NA         | ENSG00000267345 | 1.5414   | 0.061605 | 1.5414      | 0.061605    | 1.5414   | 0.061605 |
|            | 1.5414          | 0.061605 | 0.061605 | 0.52331305  |             |          |          |
| BEND6      | ENSG00000151917 | 0.98308  | 0.16278  | 0.75309     | 0.2257      | 0.81755  | 0.20681  |
|            | 1.5414          | 0.061611 | 0.061611 | 0.52331305  |             |          |          |

|           |                 |          |          |            |            |          |          |  |
|-----------|-----------------|----------|----------|------------|------------|----------|----------|--|
| SUMO2P17  | ENSG00000248278 | 1.5414   | 0.061613 | 0.70761    | 0.23959    | 1.3275   |          |  |
|           | 0.092177        | 1.3275   | 0.092177 | 0.061613   | 0.52331305 |          |          |  |
| NA        | ENSG00000266061 | 1.5414   | 0.061615 | 0.98832    | 0.1615     | 1.5414   | 0.061615 |  |
|           | 1.5414          | 0.061615 | 0.061615 | 0.52331305 |            |          |          |  |
| RNU5B-2P  | ENSG00000199906 | 1.5413   | 0.061625 | 1.5413     | 0.061625   | 1.5413   |          |  |
|           | 0.061625        | 1.5413   | 0.061625 | 0.061625   | 0.52331305 |          |          |  |
| NA        | ENSG00000251838 | 0.32771  | 0.37157  | 0.32771    | 0.37157    | 0.32771  | 0.37157  |  |
|           | 1.5412          | 0.061635 | 0.061635 | 0.52331305 |            |          |          |  |
| PHBP2     | ENSG00000254512 | 0.6609   | 0.25434  | 0.6609     | 0.25434    | 0.6609   | 0.25434  |  |
|           | 1.5412          | 0.061635 | 0.061635 | 0.52331305 |            |          |          |  |
| MTHFD2P5  | ENSG00000213530 | 1.1871   | 0.11759  | 0.61505    | 0.26926    | 1.541    | 0.061655 |  |
|           | 1.0898          | 0.1379   | 0.061655 | 0.52331305 |            |          |          |  |
| NA        | ENSG00000269533 | 1.5409   | 0.061668 | 1.5409     | 0.061668   | 1.5409   | 0.061668 |  |
|           | 1.5409          | 0.061668 | 0.061668 | 0.52331305 |            |          |          |  |
| LINC01765 | ENSG00000233730 | 0.18635  | 0.42608  | 0.66026    | 0.25454    | 0.66026  |          |  |
|           | 0.25454         | 1.5408   | 0.061686 | 0.061686   | 0.52331305 |          |          |  |
| NA        | ENSG00000229010 | 0.40613  | 0.34232  | 0.91425    | 0.18029    | 1.5407   | 0.0617   |  |
|           | 0.74746         | 0.22739  | 0.0617   | 0.52331305 |            |          |          |  |
| SNX11     | ENSG00000002919 | 1.5406   | 0.061706 | -0.32242   | 0.62643    | -0.29729 | 0.61688  |  |
|           | 1.4683          | 0.071009 | 0.061706 | 0.52331305 |            |          |          |  |
| NA        | ENSG00000273123 | 0.45046  | 0.32619  | 1.5405     | 0.06172    | -0.62789 | 0.73496  |  |
|           | 0.090349        | 0.46401  | 0.06172  | 0.52331305 |            |          |          |  |
| NA        | ENSG00000231143 | -0.36346 | 0.64187  | 0.51772    | 0.30233    | -0.31147 | 0.62228  |  |
|           | 1.5405          | 0.061723 | 0.061723 | 0.52331305 |            |          |          |  |
| NA        | ENSG00000249878 | 1.5405   | 0.061724 | 1.394      | 0.081663   | -0.89707 | 0.81516  |  |
|           | -0.89707        | 0.81516  | 0.061724 | 0.52331305 |            |          |          |  |
| YARS1     | ENSG00000134684 | 1.5402   | 0.061754 | 1.5402     | 0.061754   | -0.47142 | 0.68133  |  |
|           | 0.14152         | 0.44373  | 0.061754 | 0.52331305 |            |          |          |  |
| NA        | ENSG00000272993 | 1.5402   | 0.061759 | 1.5402     | 0.061759   | 1.5402   | 0.061759 |  |
|           | 1.5402          | 0.061759 | 0.061759 | 0.52331305 |            |          |          |  |
| CCDC33    | ENSG00000140481 | 1.2643   | 0.10306  | 0.026032   | 0.48962    | 0.98676  |          |  |
|           | 0.16188         | 1.54     | 0.061777 | 0.061777   | 0.52331305 |          |          |  |
| CLEC2L    | ENSG00000236279 | -0.92886 | 0.82352  | 1.54       | 0.061784   | -0.32597 | 0.62778  |  |
|           | 0.3398          | 0.36701  | 0.061784 | 0.52331305 |            |          |          |  |
| RPL12P33  | ENSG00000244585 | 1.5399   | 0.061789 | 1.5399     | 0.061789   | 1.5399   |          |  |
|           | 0.061789        | 1.5399   | 0.061789 | 0.061789   | 0.52331305 |          |          |  |
| KRT18P36  | ENSG00000226246 | 0.48229  | 0.3148   | 1.5399     | 0.061793   | 1.5399   |          |  |
|           | 0.061793        | -0.49668 | 0.69029  | 0.061793   | 0.52331305 |          |          |  |
| NA        | ENSG00000218416 | -0.83788 | 0.79895  | 1.5399     | 0.061798   | -0.15925 | 0.56327  |  |
|           | -0.75277        | 0.77421  | 0.061798 | 0.52331305 |            |          |          |  |
| NA        | ENSG00000223211 | 1.5398   | 0.061804 | -1.579     | 0.94283    | -1.579   | 0.94283  |  |
|           | -1.579          | 0.94283  | 0.061804 | 0.52331305 |            |          |          |  |
| LIMK1     | ENSG00000106683 | 0.27154  | 0.39299  | 0.79475    | 0.21338    | 1.5397   | 0.061821 |  |
|           | 1.1054          | 0.13449  | 0.061821 | 0.52331305 |            |          |          |  |
| SERPINA1  | ENSG00000197249 | 0.55055  | 0.29097  | 1.5397     | 0.061821   | 0.55055  |          |  |
|           | 0.29097         | 0.77198  | 0.22006  | 0.061821   | 0.52331305 |          |          |  |
| PARP9     | ENSG00000138496 | -0.49168 | 0.68853  | 1.2991     | 0.096955   | 0.66412  | 0.25331  |  |
|           | 1.5394          | 0.061851 | 0.061851 | 0.52331305 |            |          |          |  |
| NA        | ENSG00000259020 | 1.5394   | 0.061853 | 1.5394     | 0.061853   | 1.5394   | 0.061853 |  |
|           | 1.5394          | 0.061853 | 0.061853 | 0.52331305 |            |          |          |  |
| RAP2B     | ENSG00000181467 | 0.26059  | 0.3972   | 0.48361    | 0.31433    | 1.5393   | 0.061861 |  |
|           | 0.013954        | 0.49443  | 0.061861 | 0.52331305 |            |          |          |  |
| ATXN2L    | ENSG00000168488 | 0.76279  | 0.22279  | 1.5393     | 0.06187    | 0.62462  |          |  |
|           | 0.26611         | 1.4421   | 0.074639 | 0.06187    | 0.52331305 |          |          |  |
| MKKS      | ENSG00000125863 | 0.49798  | 0.30925  | 1.3499     | 0.088527   | 1.5392   | 0.061873 |  |
|           | 0.46185         | 0.3221   | 0.061873 | 0.52331305 |            |          |          |  |
| RPL32P23  | ENSG00000214015 | 0.96477  | 0.16733  | 1.5391     | 0.061889   | 0.23004  |          |  |
|           | 0.40903         | 0.74557  | 0.22796  | 0.061889   | 0.52331305 |          |          |  |
| NA        | ENSG00000225605 | -1.1468  | 0.87427  | 1.5389     | 0.061911   | -0.32401 | 0.62703  |  |
|           | 0.78026         | 0.21762  | 0.061911 | 0.52331305 |            |          |          |  |
| LINC01736 | ENSG00000228058 | 1.5389   | 0.061915 | 1.5389     | 0.061915   | 0.60055  |          |  |
|           | 0.27407         | 1.4789   | 0.069579 | 0.061915   | 0.52331305 |          |          |  |

|           |                 |             |          |             |             |          |
|-----------|-----------------|-------------|----------|-------------|-------------|----------|
| TRAV8-4   | ENSG00000211790 | 1.0597      | 0.14464  | 1.5388      | 0.061922    | 0.79995  |
|           | 0.21187         | 1.3726      | 0.084938 | 0.061922    | 0.52331305  |          |
| LINC00550 | ENSG00000281778 | -0.45266    | 0.6746   | -1.5406     | 0.93829     | 1.5388   |
|           | 0.061922        | -1.5406     | 0.93829  | 0.061922    | 0.52331305  |          |
| FAM133B   | ENSG00000234545 | 1.1136      | 0.13272  | 1.5388      | 0.061932    | 1.1361   |
|           | 0.12796         | 1.1361      | 0.12796  | 0.061932    | 0.52331305  |          |
| NCAPGP1   | ENSG00000250290 | 1.2577      | 0.10424  | 0.3827      | 0.35097     | 1.5381   |
|           | 0.062013        | 1.5381      | 0.062013 | 0.062013    | 0.523906638 |          |
| NA        | ENSG00000230647 | 1.5379      | 0.062033 | 0.09042     | 0.46398     | 0.17615  |
|           | 0.17615         | 0.43009     | 0.062033 | 0.523984762 |             | 0.43009  |
| CLDN1     | ENSG00000163347 | 1.1779      | 0.11941  | 1.1779      | 0.11941     | 1.3038   |
|           | 1.5378          | 0.062047    | 0.062047 | 0.524011844 |             | 0.096151 |
| TNPO3     | ENSG00000064419 | -0.16353    | 0.56495  | -0.16353    | 0.56495     | -0.16353 |
|           | 1.5376          | 0.062072    | 0.062072 | 0.524011844 |             | 0.56495  |
| SNRPEP4   | ENSG00000233270 | 1.5375      | 0.062084 | -0.11086    | 0.54414     | -0.11086 |
|           | 0.54414         | -0.11086    | 0.54414  | 0.062084    | 0.524011844 |          |
| CETP      | ENSG00000087237 | -1.6234     | 0.94775  | -1.6234     | 0.94775     | -2.0029  |
|           | 1.5375          | 0.062091    | 0.062091 | 0.524011844 |             | 0.97741  |
| LSM6P2    | ENSG00000257730 | 0.076607    | 0.46947  | 1.1956      | 0.11594     | 1.5373   |
|           | 0.062107        | 1.1862      | 0.11778  | 0.062107    | 0.524011844 |          |
| NA        | ENSG00000277728 | 1.5373      | 0.062114 | 1.5373      | 0.062114    | 1.5373   |
|           | 1.5373          | 0.062114    | 0.062114 | 0.524011844 |             | 0.062114 |
| NA        | ENSG00000269599 | 0.79786     | 0.21247  | 0.33183     | 0.37001     | 1.5372   |
|           | 1.4905          | 0.068045    | 0.062116 | 0.524011844 |             | 0.062116 |
| HTR3C2P   | ENSG00000233576 | 1.5372      | 0.062126 | -0.2988     | 0.61745     | 1.4247   |
|           | 0.077125        | -0.84727    | 0.80158  | 0.062126    | 0.524011844 |          |
| NA        | ENSG00000262171 | 1.537       | 0.06215  | 1.537       | 0.06215     | 1.537    |
|           | 0.06215         | 0.524011844 |          |             |             | 0.06215  |
| RN7SL66P  | ENSG00000264030 | 0.43058     | 0.33339  | 0.046903    | 0.4813      | 1.5369   |
|           | 0.062157        | 0.1018      | 0.45946  | 0.062157    | 0.524011844 |          |
| GP1ER1    | ENSG00000164850 | 1.5368      | 0.062165 | 1.5368      | 0.062165    | 0.82559  |
|           | 1.3589          | 0.08709     | 0.062165 | 0.524011844 |             | 0.20452  |
| LINC02315 | ENSG00000251363 | 1.0027      | 0.15799  | 0.27226     | 0.39271     | 1.5368   |
|           | 0.062169        | 0.51021     | 0.30495  | 0.062169    | 0.524011844 |          |
| TAS1R3    | ENSG00000169962 | 1.5368      | 0.062176 | 1.5124      | 0.065217    | 1.5368   |
|           | 0.062176        | 1.5368      | 0.062176 | 0.062176    | 0.524011844 |          |
| ABCC3     | ENSG00000108846 | 0.027831    | 0.4889   | 1.3764      | 0.084355    | -0.43383 |
|           | 1.5364          | 0.062219    | 0.062219 | 0.524235048 |             | 0.66779  |
| ZNF648    | ENSG00000179930 | 1.5364      | 0.062224 | -0.54617    | 0.70753     | 0.63956  |
|           | 0.26123         | 0.53378     | 0.29675  | 0.062224    | 0.524235048 |          |
| LINC01861 | ENSG00000251183 | -2.9168     | 0.99823  | 1.536       | 0.062267    | -2.9168  |
|           | -2.9168         | 0.99823     | 0.062267 | 0.524356331 |             | 0.99823  |
| NA        | ENSG00000267291 | 1.536       | 0.062271 | 1.536       | 0.062271    | 1.536    |
|           | 0.062271        | 0.524356331 |          |             |             | 0.062271 |
| MED4      | ENSG00000136146 | 1.5358      | 0.062292 | 1.5358      | 0.062292    | 1.5358   |
|           | 0.46436         | 0.32119     | 0.062292 | 0.524356331 |             | 0.062292 |
| LINC01680 | ENSG00000233882 | 1.5357      | 0.062307 | 1.5357      | 0.062307    | 1.5357   |
|           | 0.062307        | 1.5357      | 0.062307 | 0.062307    | 0.524356331 |          |
| DNAJA3    | ENSG00000103423 | 1.0177      | 0.15442  | 1.5355      | 0.062326    | 1.5355   |
|           | 0.062326        | -0.15508    | 0.56162  | 0.062326    | 0.524356331 |          |
| NA        | ENSG00000248015 | 1.5355      | 0.06233  | 1.5355      | 0.06233     | 1.5355   |
|           | 1.5355          | 0.06233     | 0.06233  | 0.524356331 |             | 0.06233  |
| H3Y2      | ENSG00000268799 | 0.38857     | 0.3488   | -0.30099    | 0.61829     | 1.5354   |
|           | 1.5354          | 0.062339    | 0.062339 | 0.524356331 |             | 0.062339 |
| NA        | ENSG00000267724 | -0.1028     | 0.54094  | 1.5354      | 0.06234     | -0.1028  |
|           | -0.1028         | 0.54094     | 0.06234  | 0.524356331 |             | 0.54094  |
| NA        | ENSG00000234658 | 1.5354      | 0.062344 | -1.0347     | 0.84959     | -0.84207 |
|           | -0.84207        | 0.80013     | 0.062344 | 0.524356331 |             | 0.80013  |
| RNF4      | ENSG00000063978 | 1.5354      | 0.062346 | 1.0559      | 0.14551     | 0.90717  |
|           | 1.0614          | 0.14425     | 0.062346 | 0.524356331 |             | 0.18216  |
| LRRC7     | ENSG00000033122 | 0.23853     | 0.40573  | 1.5351      | 0.062381    | 0.74945  |
|           | -0.5214         | 0.69896     | 0.062381 | 0.52456016  |             | 0.22679  |

|           |                 |           |             |             |             |             |          |
|-----------|-----------------|-----------|-------------|-------------|-------------|-------------|----------|
| NA        | ENSG00000249642 | -0.1268   | 0.55045     | 1.5347      | 0.062423    | 0.32915     | 0.37102  |
|           |                 | -0.045347 | 0.51808     | 0.062423    | 0.524612057 |             |          |
| RNU6-755P | ENSG00000201270 | 0.10358   | 0.45875     | 1.5347      | 0.062424    | 0.10358     |          |
|           |                 | 0.45875   | 0.10358     | 0.45875     | 0.062424    | 0.524612057 |          |
| CBX3P6    | ENSG00000228837 | 1.3445    | 0.0894      | 1.5347      | 0.062429    | 1.5347      |          |
|           |                 | 0.062429  | 1.5347      | 0.062429    | 0.062429    | 0.524612057 |          |
| THAP9     | ENSG00000168152 | -0.065168 | 0.52598     | -0.10639    | 0.54236     | 1.5346      | 0.062441 |
|           |                 | -0.4003   | 0.65553     | 0.062441    | 0.524612057 |             |          |
| NA        | ENSG00000267121 | 1.5346    | 0.062441    | 0.25779     | 0.39828     | -0.31363    | 0.6231   |
|           |                 | 1.2746    | 0.10122     | 0.062441    | 0.524612057 |             |          |
| PPP1R14B  | ENSG00000173457 | 1.5345    | 0.062457    | 1.5345      | 0.062457    | 1.5345      |          |
|           |                 | 0.062457  | 1.5345      | 0.062457    | 0.062457    | 0.524656027 |          |
| NA        | ENSG00000248758 | 1.172     | 0.1206      | 1.172       | 0.1206      | 1.5341      |          |
|           |                 | 0.062499  | 0.062499    | 0.524747809 |             |             |          |
| PLCH2     | ENSG00000149527 | 0.047321  | 0.48113     | -0.35366    | 0.6382      | 1.5341      | 0.0625   |
|           |                 | -0.91448  | 0.81977     | 0.0625      | 0.524747809 |             |          |
| SPHK1     | ENSG00000176170 | 0.89407   | 0.18564     | -0.22919    | 0.59064     | -0.22919    | 0.59064  |
|           |                 | 1.5341    | 0.062505    | 0.062505    | 0.524747809 |             |          |
| NAT2      | ENSG00000156006 | 1.534     | 0.062511    | 1.534       | 0.062511    | 1.534       | 0.062511 |
|           |                 | 0.062511  | 0.524747809 |             |             |             |          |
| NA        | ENSG00000263041 | 0.95609   | 0.16951     | 1.4476      | 0.073864    | 1.5339      | 0.062529 |
|           |                 | 0.2552    | 0.39929     | 0.062529    | 0.524808503 |             |          |
| NA        | ENSG00000267324 | 0.24785   | 0.40212     | 1.5337      | 0.062548    | 0.35781     | 0.36024  |
|           |                 | -0.70549  | 0.75975     | 0.062548    | 0.524877568 |             |          |
| AGR3      | ENSG00000173467 | -1.2296   | 0.89058     | -0.80132    | 0.78853     | -1.0413     | 0.85114  |
|           |                 | 1.5333    | 0.062602    | 0.062602    | 0.525240265 |             |          |
| RN7SKP37  | ENSG00000201364 | 0.89991   | 0.18408     | 1.5331      | 0.06262     | 0.89991     |          |
|           |                 | 0.18408   | 0.89991     | 0.18408     | 0.06262     | 0.525300844 |          |
| LINC02051 | ENSG00000226859 | 1.185     | 0.11801     | 1.3066      | 0.095679    | 1.5329      | 0.062654 |
|           |                 | 1.5329    | 0.062654    | 0.062654    | 0.525348304 |             |          |
| NR2F6     | ENSG00000160113 | 1.5329    | 0.062656    | 1.5329      | 0.062656    | 1.5329      | 0.062656 |
|           |                 | 1.5329    | 0.062656    | 0.062656    | 0.525348304 |             |          |
| HMGB3P27  | ENSG00000267132 | 1.382     | 0.083492    | 1.1835      | 0.1183      | 1.1835      | 0.1183   |
|           |                 | 1.5328    | 0.062658    | 0.062658    | 0.525348304 |             |          |
| GNMT      | ENSG00000124713 | 0.33571   | 0.36855     | 0.3229      | 0.37339     | 1.5326      | 0.06269  |
|           |                 | 1.252     | 0.10529     | 0.06269     | 0.525398304 |             |          |
| NA        | ENSG00000236283 | 1.5324    | 0.062708    | 0.70876     | 0.23924     | 1.0984      | 0.13601  |
|           |                 | 1.2024    | 0.11461     | 0.062708    | 0.525398304 |             |          |
| GAPDHP40  | ENSG00000248626 | 1.5323    | 0.062723    | 0.54876     | 0.29159     | 0.97575     |          |
|           |                 | 0.16459   | 0.97575     | 0.16459     | 0.062723    | 0.525398304 |          |
| EBAG9     | ENSG00000147654 | 0.75124   | 0.22625     | 1.3948      | 0.081539    | 1.4472      | 0.073922 |
|           |                 | 1.5321    | 0.062744    | 0.062744    | 0.525398304 |             |          |
| AKR1B1P6  | ENSG00000225212 | 1.5321    | 0.06275     | 1.5321      | 0.06275     | 1.5321      |          |
|           |                 | 0.06275   | 1.5321      | 0.06275     | 0.06275     | 0.525398304 |          |
| NA        | ENSG00000240827 | -0.68118  | 0.75212     | -0.68118    | 0.75212     | 1.5321      | 0.06275  |
|           |                 | -0.68118  | 0.75212     | 0.06275     | 0.525398304 |             |          |
| NA        | ENSG00000235911 | 1.5147    | 0.064925    | 1.5321      | 0.062754    | 1.5321      | 0.062754 |
|           |                 | 0.45524   | 0.32447     | 0.062754    | 0.525398304 |             |          |
| NA        | ENSG00000227227 | -0.98182  | 0.83691     | 0.75045     | 0.22649     | 0.75045     | 0.22649  |
|           |                 | 1.532     | 0.062757    | 0.062757    | 0.525398304 |             |          |
| NA        | ENSG00000235209 | 1.532     | 0.062761    | -1.3648     | 0.91384     | -1.3648     | 0.91384  |
|           |                 | -2.1414   | 0.98388     | 0.062761    | 0.525398304 |             |          |
| FPR2      | ENSG00000171049 | -1.489    | 0.93176     | -1.489      | 0.93176     | 0.84593     | 0.1988   |
|           |                 | 1.5319    | 0.062776    | 0.062776    | 0.525427062 |             |          |
| NA        | ENSG00000250961 | 1.4742    | 0.070214    | 0.88464     | 0.18818     | 1.5318      | 0.062786 |
|           |                 | 1.3214    | 0.09318     | 0.062786    | 0.525427062 |             |          |
| NA        | ENSG00000221730 | -0.26316  | 0.60378     | 1.5313      | 0.062842    | -0.39291    | 0.65281  |
|           |                 | -1.7397   | 0.95904     | 0.062842    | 0.525733634 |             |          |
| AKR1C6P   | ENSG00000151631 | -0.53222  | 0.70271     | 0.93924     | 0.1738      | 1.5313      |          |
|           |                 | 0.062847  | 0.33838     | 0.36754     | 0.062847    | 0.525733634 |          |
| GDF1      | ENSG00000130283 | 1.1282    | 0.12962     | 1.5312      | 0.062855    | 1.0977      | 0.13617  |
|           |                 | 0.85658   | 0.19584     | 0.062855    | 0.525733634 |             |          |

|              |                 |           |           |             |             |             |          |
|--------------|-----------------|-----------|-----------|-------------|-------------|-------------|----------|
| NA           | ENSG00000278017 | 1.5308    | 0.062913  | 1.5308      | 0.062913    | 1.5308      | 0.062913 |
|              |                 | 1.5308    | 0.062913  | 0.525956572 |             |             |          |
| LTA          | ENSG00000226979 | 0.14972   | 0.44049   | 1.5308      | 0.062915    | 1.5308      | 0.062915 |
|              |                 | 1.0138    | 0.15533   | 0.062915    | 0.525956572 |             |          |
| PLUT         | ENSG00000247381 | 0.14072   | 0.44405   | 0.66386     | 0.25339     | 1.5307      | 0.062923 |
|              |                 | 0.14072   | 0.44405   | 0.062923    | 0.525956572 |             |          |
| RPL35AP31    | ENSG00000233460 | -0.86237  | 0.80576   | -0.34348    | 0.63438     | 1.5306      |          |
|              |                 | 0.062932  | -0.26366  | 0.60398     | 0.062932    | 0.525956572 |          |
| HCN4         | ENSG00000138622 | -0.25737  | 0.60155   | -0.36064    | 0.64082     | 0.44578     | 0.32788  |
|              |                 | 1.5306    | 0.062936  | 0.062936    | 0.525956572 |             |          |
| TRHDE        | ENSG00000072657 | 0.96148   | 0.16815   | 1.5304      | 0.062958    | 1.0391      | 0.14938  |
|              |                 | -0.23814  | 0.59411   | 0.062958    | 0.525956572 |             |          |
| NA           | ENSG00000260060 | 1.5304    | 0.062963  | 1.5304      | 0.062963    | 1.5304      | 0.062963 |
|              |                 | 1.5304    | 0.062963  | 0.062963    | 0.525956572 |             |          |
| NA           | ENSG00000271468 | 1.5303    | 0.062968  | 0.060361    | 0.47593     | 0.060361    | 0.47593  |
|              |                 | 0.060361  | 0.47593   | 0.062968    | 0.525956572 |             |          |
| ANKRD34C-AS1 | ENSG00000259234 | 1.3407    | 0.090014  | 0.68597     | 0.24637     | 1.5302      |          |
|              |                 | 0.06298   | 1.239     | 0.10767     | 0.06298     | 0.52596665  |          |
| RN7SKP264    | ENSG00000223012 | 0.83742   | 0.20118   | 1.5298      | 0.063037    | 0.35877     |          |
|              |                 | 0.35988   | 0.35877   | 0.35988     | 0.063037    | 0.526352469 |          |
| HEATR4       | ENSG00000187105 | 1.5297    | 0.063048  | 0.69797     | 0.2426      | -0.72514    |          |
|              |                 | 0.76582   | 1.2789    | 0.10046     | 0.063048    | 0.526354127 |          |
| PTF1A        | ENSG00000168267 | 1.5296    | 0.063061  | 1.1512      | 0.12482     | 0.10925     | 0.4565   |
|              |                 | -0.61162  | 0.7296    | 0.063061    | 0.526372479 |             |          |
| SEH1L        | ENSG00000085415 | 1.386     | 0.082867  | 1.5295      | 0.063073    | 1.3033      | 0.096237 |
|              |                 | 0.6721    | 0.25076   | 0.063073    | 0.526382478 |             |          |
| NA           | ENSG00000251048 | 0.49031   | 0.31196   | 1.5292      | 0.063106    | 1.5018      | 0.066568 |
|              |                 | 0.93067   | 0.17601   | 0.063106    | 0.526407409 |             |          |
| RNU6-1298P   | ENSG00000199326 | 1.5292    | 0.063109  | 1.5292      | 0.063109    | 1.0248      |          |
|              |                 | 0.15272   | 1.5078    | 0.065799    | 0.063109    | 0.526407409 |          |
| KIF26B-AS1   | ENSG00000232192 | 0.48983   | 0.31213   | -1.0483     | 0.85274     | 1.5292      |          |
|              |                 | 0.063112  | -0.089697 | 0.53574     | 0.063112    | 0.526407409 |          |
| BOLA3        | ENSG00000163170 | -0.90544  | 0.81739   | 1.5291      | 0.063123    | -1.3957     | 0.91859  |
|              |                 | -1.4656   | 0.92862   | 0.063123    | 0.526407409 |             |          |
| UBL5P4       | ENSG00000260224 | 1.529     | 0.06313   | 1.529       | 0.06313     | 1.529       | 0.06313  |
|              |                 | 0.06313   | 0.06313   | 0.526407409 |             |             |          |
| MIR577       | ENSG00000207931 | -0.087724 | 0.53495   | 1.5286      | 0.063176    | -0.087724   |          |
|              |                 | 0.53495   | -0.32806  | 0.62857     | 0.063176    | 0.52654091  |          |
| NBEAL1       | ENSG00000144426 | 1.5284    | 0.063209  | -0.036423   | 0.51453     | 0.81069     |          |
|              |                 | 0.20877   | -0.14498  | 0.55764     | 0.063209    | 0.52654091  |          |
| HS1BP3       | ENSG00000118960 | 1.0221    | 0.15338   | 1.5284      | 0.063212    | 0.35506     |          |
|              |                 | 0.36127   | 1.128     | 0.12967     | 0.063212    | 0.52654091  |          |
| FSD1L        | ENSG00000106701 | 1.3348    | 0.090963  | 0.10621     | 0.45771     | 1.5283      | 0.063218 |
|              |                 | 0.94788   | 0.17159   | 0.063218    | 0.52654091  |             |          |
| EPB41L1      | ENSG00000088367 | 0.41021   | 0.34083   | 1.5283      | 0.063223    | 1.0466      |          |
|              |                 | 0.14764   | -0.072226 | 0.52879     | 0.063223    | 0.52654091  |          |
| CSPG5        | ENSG00000114646 | 1.5282    | 0.063229  | 1.4298      | 0.076389    | 1.4724      | 0.070462 |
|              |                 | 0.5757    | 0.28241   | 0.063229    | 0.52654091  |             |          |
| RRN3P2       | ENSG00000103472 | 0.49508   | 0.31027   | 1.528       | 0.063259    | 1.0002      | 0.1586   |
|              |                 | -0.070463 | 0.52809   | 0.063259    | 0.52654091  |             |          |
| HMG3         | ENSG00000118418 | 1.5278    | 0.063281  | 1.2502      | 0.10561     | 1.2502      | 0.10561  |
|              |                 | 0.56535   | 0.28592   | 0.063281    | 0.52654091  |             |          |
| LINC02681    | ENSG00000229649 | 1.3051    | 0.095924  | 1.4906      | 0.068037    | 1.5278      |          |
|              |                 | 0.063281  | -0.99483  | 0.84009     | 0.063281    | 0.52654091  |          |
| NA           | ENSG00000224247 | 0.3756    | 0.35361   | 1.5278      | 0.063285    | -1.3042     | 0.90391  |
|              |                 | 1.0619    | 0.14414   | 0.063285    | 0.52654091  |             |          |
| NA           | ENSG00000272418 | 1.5278    | 0.063287  | 1.5278      | 0.063287    | 1.5278      | 0.063287 |
|              |                 | 1.5278    | 0.063287  | 0.063287    | 0.52654091  |             |          |
| LINC00242    | ENSG00000229214 | 1.5275    | 0.06332   | -0.82906    | 0.79646     | -0.91676    |          |
|              |                 | 0.82037   | -0.50584  | 0.69352     | 0.06332     | 0.52654091  |          |
| NA           | ENSG00000219133 | 1.3347    | 0.090988  | 1.3347      | 0.090983    | 1.0558      | 0.14553  |
|              |                 | 1.5273    | 0.063342  | 0.063342    | 0.52654091  |             |          |

|           |                 |          |            |             |             |           |          |
|-----------|-----------------|----------|------------|-------------|-------------|-----------|----------|
| ABR       | ENSG00000159842 | 1.5095   | 0.065587   | 1.5273      | 0.063345    | 0.065791  | 0.47377  |
|           | 0.097826        | 0.46104  | 0.063345   | 0.52654091  |             |           |          |
| NA        | ENSG00000234455 | 1.1092   | 0.13368    | -0.93527    | 0.82518     | 1.5272    | 0.063362 |
|           | 1.1489          | 0.1253   | 0.063362   | 0.52654091  |             |           |          |
| CDC42     | ENSG00000070831 | 0.28652  | 0.38724    | 1.5271      | 0.063369    | 1.304     | 0.096119 |
|           | 0.28652         | 0.38724  | 0.063369   | 0.52654091  |             |           |          |
| LINC02043 | ENSG00000232233 | 1.5271   | 0.06337    | -0.18894    | 0.57493     | -0.18894  |          |
|           | 0.57493         | -0.18894 | 0.57493    | 0.06337     | 0.52654091  |           |          |
| NA        | ENSG00000213480 | 0.2863   | 0.38733    | -0.4259     | 0.66491     | 1.5267    | 0.063412 |
|           | 0.66622         | 0.25264  | 0.063412   | 0.52654091  |             |           |          |
| CPTP      | ENSG00000224051 | 1.5267   | 0.063423   | 1.5267      | 0.063423    | 1.5267    | 0.063423 |
|           | 1.5267          | 0.063423 | 0.063423   | 0.52654091  |             |           |          |
| TMEM81    | ENSG00000174529 | 1.5266   | 0.063427   | 1.4462      | 0.074066    | 1.5266    |          |
|           | 0.063427        | 1.5266   | 0.063427   | 0.063427    | 0.52654091  |           |          |
| NA        | ENSG00000221617 | 1.5266   | 0.063432   | 1.5266      | 0.063432    | 0.041339  | 0.48351  |
|           | 1.5266          | 0.063432 | 0.063432   | 0.52654091  |             |           |          |
| LCMT1-AS1 | ENSG00000260448 | 1.5265   | 0.06344    | 1.5265      | 0.06344     | 1.5265    |          |
|           | 0.06344         | 0.65774  | 0.25535    | 0.06344     | 0.52654091  |           |          |
| RNU6-214P | ENSG00000206857 | 1.5265   | 0.063441   | 0.6096      | 0.27106     | -1.1628   |          |
|           | 0.87754         | 0.40423  | 0.34302    | 0.063441    | 0.52654091  |           |          |
| PTPN11    | ENSG00000179295 | 1.4833   | 0.068996   | 1.1399      | 0.12716     | 1.5264    |          |
|           | 0.063457        | 0.85317  | 0.19678    | 0.063457    | 0.52654091  |           |          |
| TMEM242   | ENSG00000215712 | 0.80531  | 0.21032    | -0.2547     | 0.60052     | -0.23712  |          |
|           | 0.59372         | 1.5263   | 0.063464   | 0.063464    | 0.52654091  |           |          |
| NA        | ENSG00000271911 | 0.24747  | 0.40227    | -0.03026    | 0.51207     | -0.64695  | 0.74117  |
|           | 1.5263          | 0.063469 | 0.063469   | 0.52654091  |             |           |          |
| BMP2K     | ENSG00000138756 | 0.70904  | 0.23915    | 0.6403      | 0.26099     | 1.5263    | 0.06347  |
|           | -1.1862         | 0.88224  | 0.06347    | 0.52654091  |             |           |          |
| PRSS1     | ENSG00000204983 | 1.5261   | 0.063496   | 0.27701     | 0.39089     | -0.52927  | 0.70169  |
|           | 0.35059         | 0.36295  | 0.063496   | 0.52654091  |             |           |          |
| NA        | ENSG00000230226 | 1.5261   | 0.063496   | 1.5261      | 0.063496    | 1.5261    | 0.063496 |
|           | 1.5261          | 0.063496 | 0.063496   | 0.52654091  |             |           |          |
| VPS25P1   | ENSG00000226755 | 1.526    | 0.0635     | 1.526       | 0.0635      | 1.526     | 0.0635   |
|           | 0.0635          | 0.0635   | 0.52654091 |             |             |           |          |
| SS18      | ENSG00000141380 | 1.5259   | 0.063515   | 0.72267     | 0.23494     | 0.72267   | 0.23494  |
|           | 0.88159         | 0.189    | 0.063515   | 0.52654091  |             |           |          |
| NPBWR2    | ENSG00000125522 | 1.5259   | 0.063517   | 1.5259      | 0.063517    | 1.5259    |          |
|           | 0.063517        | 1.3726   | 0.084931   | 0.063517    | 0.52654091  |           |          |
| ZYG11A    | ENSG00000203995 | -0.08581 | 0.53419    | 1.5259      | 0.063517    | 1.0978    |          |
|           | 0.13615         | 1.2993   | 0.096927   | 0.063517    | 0.52654091  |           |          |
| NA        | ENSG00000250167 | 1.1846   | 0.11809    | 1.5259      | 0.063519    | 0.23305   | 0.40786  |
|           | 0.3641          | 0.35789  | 0.063519   | 0.52654091  |             |           |          |
| RNU6-743P | ENSG00000201021 | 1.1812   | 0.11875    | 1.2834      | 0.09968     | 1.5258    |          |
|           | 0.063534        | 0.88535  | 0.18799    | 0.063534    | 0.52654091  |           |          |
| NA        | ENSG00000281021 | 1.5258   | 0.063535   | 1.5258      | 0.063535    | 1.5258    | 0.063535 |
|           | 1.5258          | 0.063535 | 0.063535   | 0.52654091  |             |           |          |
| NA        | ENSG00000254051 | 1.5255   | 0.063568   | 0.0079586   | 0.49683     | 0.0079586 | 0.49683  |
|           | 0.0079586       | 0.49683  | 0.063568   | 0.526724816 |             |           |          |
| NA        | ENSG00000212205 | 1.5252   | 0.063603   | 1.5252      | 0.063603    | 1.5252    | 0.063603 |
|           | 1.1708          | 0.12085  | 0.063603   | 0.526731638 |             |           |          |
| NGEF      | ENSG00000066248 | 1.1039   | 0.13482    | 0.53068     | 0.29782     | 0.83669   | 0.20138  |
|           | 1.5252          | 0.063608 | 0.063608   | 0.526731638 |             |           |          |
| NA        | ENSG00000225182 | 1.5251   | 0.063617   | 1.5251      | 0.063617    | 1.5251    | 0.063617 |
|           | 1.5251          | 0.063617 | 0.063617   | 0.526731638 |             |           |          |
| YRDCP3    | ENSG00000230859 | 1.525    | 0.063633   | -0.94243    | 0.82701     | -0.94243  | 0.82701  |
|           | -0.94243        | 0.82701  | 0.063633   | 0.526731638 |             |           |          |
| PRKAG1    | ENSG00000181929 | 1.5248   | 0.063652   | 1.5248      | 0.063652    | 1.5248    |          |
|           | 0.063652        | 0.38376  | 0.35058    | 0.063652    | 0.526731638 |           |          |
| DDN-AS1   | ENSG00000257913 | 1.241    | 0.1073     | 1.241       | 0.1073      | 1.5248    | 0.063652 |
|           | 1.5248          | 0.063652 | 0.063652   | 0.526731638 |             |           |          |
| RPL31P49  | ENSG00000241680 | 1.5247   | 0.063666   | 1.5247      | 0.063666    | 1.5247    |          |
|           | 0.063666        | 1.5247   | 0.063666   | 0.063666    | 0.526731638 |           |          |

|             |                 |           |          |             |             |             |          |
|-------------|-----------------|-----------|----------|-------------|-------------|-------------|----------|
| NA          | ENSG00000282742 | 1.5245    | 0.063695 | 0.4756      | 0.31718     | -0.78291    | 0.78316  |
|             |                 | -0.78291  | 0.78316  | 0.063695    | 0.526731638 |             |          |
| OAS1        | ENSG00000089127 | 1.045     | 0.14801  | 0.88678     | 0.1876      | 1.5244      | 0.063702 |
|             |                 | -0.085684 | 0.53414  | 0.063702    | 0.526731638 |             |          |
| CSF2RB      | ENSG00000100368 | 0.03608   | 0.48561  | 1.5244      | 0.063705    | 0.03608     |          |
|             |                 | 0.48561   | 0.03608  | 0.48561     | 0.063705    | 0.526731638 |          |
| AZGP1       | ENSG00000160862 | -0.083786 | 0.53339  | 1.5243      | 0.063719    | -1.3276     | 0.90785  |
|             |                 | 0.17867   | 0.4291   | 0.063719    | 0.526731638 |             |          |
| CDK5R2      | ENSG00000171450 | 1.5242    | 0.063729 | 1.4782      | 0.069673    | 0.95824     |          |
|             |                 | 0.16897   | 0.91795  | 0.17932     | 0.063729    | 0.526731638 |          |
| LINC02771   | ENSG00000224535 | 1.3327    | 0.091322 | 0.070012    | 0.47209     | 0.88193     |          |
|             |                 | 0.18891   | 1.5242   | 0.06373     | 0.06373     | 0.526731638 |          |
| NA          | ENSG00000250260 | 1.5241    | 0.063743 | 1.5241      | 0.063743    | 1.5241      | 0.063743 |
|             |                 | 1.5241    | 0.063743 | 0.063743    | 0.526731638 |             |          |
| NA          | ENSG00000250024 | -0.91543  | 0.82002  | -0.12185    | 0.54849     | 1.5241      | 0.063745 |
|             |                 | 1.5241    | 0.063745 | 0.063745    | 0.526731638 |             |          |
| CDKN2A      | ENSG00000147889 | 0.0037733 | 0.49849  | 1.1409      | 0.12695     | 0.0037733   |          |
|             |                 | 0.49849   | 1.524    | 0.063758    | 0.063758    | 0.526731638 |          |
| FMC1-LUC7L2 | ENSG00000269955 | 1.5239    | 0.063766 | 1.5239      | 0.063766    | 1.5239      | 0.063766 |
|             |                 | 0.063766  | 1.5239   | 0.063766    | 0.063766    | 0.526731638 |          |
| NA          | ENSG00000274840 | -0.63757  | 0.73812  | 1.5238      | 0.063778    | 1.5238      | 0.063778 |
|             |                 | 1.5238    | 0.063778 | 0.063778    | 0.526731638 |             |          |
| KRTAP27-1   | ENSG00000206107 | 1.5238    | 0.063783 | -0.73392    | 0.7685      | -0.13627    |          |
|             |                 | 0.5542    | -1.2481  | 0.89401     | 0.063783    | 0.526731638 |          |
| RNU6ATAC11P | ENSG00000221468 | -0.22568  | 0.58927  | -0.22568    | 0.58927     | -0.40885    |          |
|             |                 | 0.65868   | 1.5237   | 0.063794    | 0.063794    | 0.526731638 |          |
| TEX14       | ENSG00000121101 | 1.1307    | 0.12909  | -0.52356    | 0.69971     | 1.5236      | 0.063801 |
|             |                 | -0.9354   | 0.82521  | 0.063801    | 0.526731638 |             |          |
| NA          | ENSG00000251286 | 0.88771   | 0.18735  | 1.5236      | 0.06381     | 1.5236      | 0.06381  |
|             |                 | 0.33798   | 0.36769  | 0.06381     | 0.526731638 |             |          |
| NA          | ENSG00000271709 | 1.2987    | 0.097025 | 1.5235      | 0.063822    | 1.5215      | 0.064064 |
|             |                 | -0.22222  | 0.58793  | 0.063822    | 0.526731638 |             |          |
| IGLV3-32    | ENSG00000211657 | 1.5234    | 0.063835 | 1.5234      | 0.063835    | 1.5234      |          |
|             |                 | 0.063835  | 1.5234   | 0.063835    | 0.063835    | 0.526731638 |          |
| AFP         | ENSG00000081051 | 0.28137   | 0.38921  | 0.8472      | 0.19844     | 1.5233      | 0.063846 |
|             |                 | 0.38033   | 0.35185  | 0.063846    | 0.526731638 |             |          |
| SIRPD       | ENSG00000125900 | 0.52902   | 0.29839  | 0.30539     | 0.38004     | 1.5232      | 0.063851 |
|             |                 | 0.073282  | 0.47079  | 0.063851    | 0.526731638 |             |          |
| NA          | ENSG00000260184 | 1.5231    | 0.063866 | 1.5231      | 0.063866    | 1.5231      | 0.063866 |
|             |                 | 1.5231    | 0.063866 | 0.063866    | 0.526731638 |             |          |
| NCF4        | ENSG00000100365 | 1.523     | 0.063882 | -0.28353    | 0.61162     | 0.13603     | 0.4459   |
|             |                 | -0.33454  | 0.63102  | 0.063882    | 0.526731638 |             |          |
| NA          | ENSG00000234141 | 1.5228    | 0.063908 | 1.5228      | 0.063908    | 1.5228      | 0.063908 |
|             |                 | 1.5228    | 0.063908 | 0.063908    | 0.526731638 |             |          |
| NA          | ENSG00000271784 | 1.5227    | 0.063911 | 1.5227      | 0.063911    | 1.5227      | 0.063911 |
|             |                 | 1.5227    | 0.063911 | 0.063911    | 0.526731638 |             |          |
| OVCH2       | ENSG00000183378 | -0.74527  | 0.77194  | 0.61348     | 0.26978     | -0.64254    | 0.73974  |
|             |                 | 1.5227    | 0.063914 | 0.063914    | 0.526731638 |             |          |
| NA          | ENSG00000219487 | -0.80156  | 0.7886   | -0.80156    | 0.7886      | -0.80156    | 0.7886   |
|             |                 | 1.5227    | 0.063917 | 0.063917    | 0.526731638 |             |          |
| RGS4        | ENSG00000117152 | 1.27      | 0.10204  | 1.276       | 0.10098     | 1.5226      | 0.063932 |
|             |                 | 0.14687   | 0.063932 | 0.526731638 |             |             |          |
| HARS2       | ENSG00000112855 | -0.75732  | 0.77557  | -0.75732    | 0.77557     | -0.75732    | 0.77557  |
|             |                 | 1.5224    | 0.063952 | 0.063952    | 0.526731638 |             |          |
| ARIH2OS     | ENSG00000221883 | 1.5223    | 0.063965 | 1.5223      | 0.063965    | 1.5223      |          |
|             |                 | 0.063965  | 1.5223   | 0.063965    | 0.063965    | 0.526731638 |          |
| CTSH        | ENSG00000103811 | 0.31408   | 0.37673  | 0.089786    | 0.46423     | 0.49852     | 0.30906  |
|             |                 | 1.5222    | 0.063974 | 0.063974    | 0.526731638 |             |          |
| NA          | ENSG00000223539 | 1.5221    | 0.063991 | 0.87418     | 0.19101     | 0.87418     | 0.19101  |
|             |                 | 0.6962    | 0.24315  | 0.063991    | 0.526731638 |             |          |
| OBI1-AS1    | ENSG00000234377 | 1.5221    | 0.063996 | 0.081656    | 0.46746     | -0.92022    |          |
|             |                 | 0.82127   | 1.2581   | 0.10417     | 0.063996    | 0.526731638 |          |

|           |                 |          |          |             |             |          |          |
|-----------|-----------------|----------|----------|-------------|-------------|----------|----------|
| NA        | ENSG00000228363 | 0.7273   | 0.23352  | 0.7273      | 0.23352     | 0.99003  | 0.16108  |
|           | 1.522           | 0.064008 | 0.064008 | 0.526731638 |             |          |          |
| AK4P2     | ENSG00000249410 | 1.522    | 0.064008 | 0.27129     | 0.39308     | 1.1565   | 0.12375  |
|           | -0.15479        | 0.56151  | 0.064008 | 0.526731638 |             |          |          |
| RNA5SP34  | ENSG00000252696 | 0.19407  | 0.42306  | 1.5219      | 0.064012    | 0.19407  |          |
|           | 0.42306         | -0.75018 | 0.77343  | 0.064012    | 0.526731638 |          |          |
| KLF9      | ENSG00000119138 | 1.2225   | 0.11075  | 1.2225      | 0.11075     | 1.2225   | 0.11075  |
|           | 1.5218          | 0.064023 | 0.064023 | 0.526733208 |             |          |          |
| HSPB1     | ENSG00000106211 | 0.91732  | 0.17949  | 0.61141     | 0.27047     | 1.1783   | 0.11935  |
|           | 1.5216          | 0.064049 | 0.064049 | 0.526826815 |             |          |          |
| NA        | ENSG00000250962 | 1.1499   | 0.12509  | -0.40427    | 0.65699     | 1.5216   | 0.064056 |
|           | 1.5216          | 0.064056 | 0.064056 | 0.526826815 |             |          |          |
| NA        | ENSG00000241180 | 1.5214   | 0.064076 | 1.5214      | 0.064076    | 1.5214   | 0.064076 |
|           | 1.5214          | 0.064076 | 0.064076 | 0.526846364 |             |          |          |
| MON1A     | ENSG00000164077 | -2.14    | 0.98382  | -1.9671     | 0.97541     | 1.5214   | 0.06408  |
|           | 0.090785        | 0.46383  | 0.06408  | 0.526846364 |             |          |          |
| NA        | ENSG00000259093 | 1.0378   | 0.14968  | 1.5212      | 0.064101    | 1.5212   | 0.064101 |
|           | 1.5212          | 0.064101 | 0.064101 | 0.526890046 |             |          |          |
| RNA5SP208 | ENSG00000251965 | -0.80929 | 0.79083  | 1.5211      | 0.064121    | 1.5211   |          |
|           | 0.064121        | 1.5211   | 0.064121 | 0.064121    | 0.526890046 |          |          |
| RN7SL870P | ENSG00000244732 | 1.339    | 0.090287 | 1.1687      | 0.12126     | 1.5209   | 0.064141 |
|           | 1.5209          | 0.064141 | 0.064141 | 0.526890046 |             |          |          |
| PPIAP10   | ENSG00000224530 | -1.8495  | 0.96781  | 1.5208      | 0.064149    | -1.8495  |          |
|           | 0.96781         | -0.69059 | 0.75509  | 0.064149    | 0.526890046 |          |          |
| SLC6A15   | ENSG00000072041 | 0.81772  | 0.20676  | 1.5208      | 0.06415     | 1.4118   |          |
|           | 0.079008        | 1.4118   | 0.079008 | 0.06415     | 0.526890046 |          |          |
| MIR3616   | ENSG00000264901 | 1.5208   | 0.06416  | 1.5208      | 0.06416     | 1.5208   |          |
|           | 0.06416         | 1.5208   | 0.06416  | 0.06416     | 0.526890046 |          |          |
| PRLR      | ENSG00000113494 | 1.0481   | 0.1473   | 1.5208      | 0.064161    | 0.48109  | 0.31523  |
|           | 1.0478          | 0.14737  | 0.064161 | 0.526890046 |             |          |          |
| NA        | ENSG00000276627 | 1.5203   | 0.064216 | -0.085352   | 0.53401     | -0.31261 | 0.62271  |
|           | -0.31261        | 0.62271  | 0.064216 | 0.527114075 |             |          |          |
| NA        | ENSG00000206741 | 0.60362  | 0.27305  | 0.60362     | 0.27305     | 1.5203   | 0.064218 |
|           | 1.2039          | 0.11432  | 0.064218 | 0.527114075 |             |          |          |
| TBCB      | ENSG00000105254 | -0.20255 | 0.58026  | 0.62516     | 0.26593     | -0.20255 | 0.58026  |
|           | 1.5203          | 0.064223 | 0.064223 | 0.527114075 |             |          |          |
| NA        | ENSG00000248802 | 0.44996  | 0.32637  | 0.44996     | 0.32637     | 0.44996  | 0.32637  |
|           | 1.5201          | 0.064243 | 0.064243 | 0.527114075 |             |          |          |
| NA        | ENSG00000254434 | 1.5201   | 0.064245 | -1.7415     | 0.9592      | -1.01    | 0.84375  |
|           | -0.62287        | 0.73332  | 0.064245 | 0.527114075 |             |          |          |
| PAIP2B    | ENSG00000124374 | 0.039921 | 0.48408  | 1.52        | 0.064259    | 1.0381   | 0.14961  |
|           | 1.093           | 0.13721  | 0.064259 | 0.527114075 |             |          |          |
| NA        | ENSG00000254851 | 1.3236   | 0.092817 | 1.5199      | 0.064264    | 0.50258  | 0.30763  |
|           | 1.1104          | 0.13341  | 0.064264 | 0.527114075 |             |          |          |
| NA        | ENSG00000267096 | 1.5197   | 0.06429  | 1.5197      | 0.06429     | 1.5197   | 0.06429  |
|           | 1.5197          | 0.06429  | 0.06429  | 0.527231869 |             |          |          |
| CAPZA2    | ENSG00000198898 | 0.76103  | 0.22332  | 0.49294     | 0.31103     | 0.49294  |          |
|           | 0.31103         | 1.5196   | 0.0643   | 0.0643      | 0.527231869 |          |          |
| ELOCP21   | ENSG00000226186 | 0.14251  | 0.44334  | 1.5192      | 0.064352    | 1.5192   |          |
|           | 0.064352        | 1.5192   | 0.064352 | 0.064352    | 0.527569475 |          |          |
| FBXL5     | ENSG00000118564 | 1.5189   | 0.064395 | 0.8833      | 0.18854     | 0.6413   | 0.26067  |
|           | 0.53052         | 0.29788  | 0.064395 | 0.527760816 |             |          |          |
| NA        | ENSG00000230941 | 1.5189   | 0.064397 | 1.5189      | 0.064397    | 1.5189   | 0.064397 |
|           | 1.5189          | 0.064397 | 0.064397 | 0.527760816 |             |          |          |
| CABP5     | ENSG00000105507 | 1.5184   | 0.064463 | 1.5184      | 0.064463    | 1.5184   | 0.064463 |
|           | 0.50767         | 0.30584  | 0.064463 | 0.528212879 |             |          |          |
| B3GNT5    | ENSG00000176597 | 0.25299  | 0.40014  | 1.5181      | 0.064488    | -1.4594  |          |
|           | 0.92777         | 1.5146   | 0.064936 | 0.064488    | 0.528237129 |          |          |
| RPL41P5   | ENSG00000256393 | 1.5181   | 0.064498 | 1.5181      | 0.064498    | 1.5181   |          |
|           | 0.064498        | 1.5181   | 0.064498 | 0.064498    | 0.528237129 |          |          |
| PLXNB1    | ENSG00000164050 | 1.1952   | 0.11601  | 1.5179      | 0.064518    | 1.0899   |          |
|           | 0.13788         | 1.2859   | 0.099235 | 0.064518    | 0.528237129 |          |          |



|            |                 |               |               |               |               |               |          |  |
|------------|-----------------|---------------|---------------|---------------|---------------|---------------|----------|--|
| EFCAB7     | ENSG00000203965 | 0.53332       | 0.29691       | 0.94986       | 0.17109       | 0.82763       |          |  |
|            | 0.20394         | 1.5178        | 0.064528      | 0.064528      | 0.528237129   |               |          |  |
| GRTP1-AS1  | ENSG00000225083 | 1.5178        | 0.064529      | -0.55124      | 0.70927       | 1.5178        |          |  |
|            | 0.064529        | 1.5178        | 0.064529      | 0.064529      | 0.528237129   |               |          |  |
| MIR641     | ENSG00000207631 | 1.5178        | 0.064531      | 1.5178        | 0.064531      | 1.5178        |          |  |
|            | 0.064531        | 1.5178        | 0.064531      | 0.064531      | 0.528237129   |               |          |  |
| CSNK1A1P3  | ENSG00000250162 | 1.5177        | 0.064542      | -0.79382      | 0.78635       | -0.65219      |          |  |
|            | 0.74286         | 1.3486        | 0.088726      | 0.064542      | 0.528238438   |               |          |  |
| AMIGO1     | ENSG00000181754 | 1.5176        | 0.064554      | 1.5176        | 0.064554      | 1.5176        |          |  |
|            | 0.064554        | -0.28973      | 0.61399       | 0.064554      | 0.528247929   |               |          |  |
| NA         | ENSG00000227045 | 1.5170.064631 | 1.5170.064631 | 1.5170.064631 | 1.5170.064631 | 1.5170.064631 |          |  |
|            | 0.064631        | 0.528661946   |               |               |               |               |          |  |
| NA         | ENSG00000274154 | 0.43112       | 0.33319       | 0.43112       | 0.33319       | 0.43112       | 0.33319  |  |
|            | 1.5170.064632   | 0.064632      | 0.528661946   |               |               |               |          |  |
| USH1C      | ENSG00000006611 | 1.5166        | 0.064688      | 1.4111        | 0.079107      | 1.5166        | 0.064688 |  |
|            | 0.97744         | 0.16418       | 0.064688      | 0.528661946   |               |               |          |  |
| GSTM2      | ENSG00000213366 | -0.50367      | 0.69275       | 1.5166        | 0.064689      | 0.47115       | 0.31877  |  |
|            | -1.0573         | 0.8548        | 0.064689      | 0.528661946   |               |               |          |  |
| NA         | ENSG00000253214 | 1.5165        | 0.064691      | 1.5165        | 0.064691      | 1.5165        | 0.064691 |  |
|            | -1.3128         | 0.90537       | 0.064691      | 0.528661946   |               |               |          |  |
| NA         | ENSG00000213287 | 1.1313        | 0.12896       | 1.5165        | 0.064699      | 0.93281       | 0.17546  |  |
|            | 1.5165          | 0.064699      | 0.064699      | 0.528661946   |               |               |          |  |
| ST7        | ENSG00000004866 | 0.55059       | 0.29096       | 1.5165        | 0.0647        | 1.0265        | 0.15233  |  |
|            | 0.63323         | 0.26329       | 0.0647        | 0.528661946   |               |               |          |  |
| RNU6-61P   | ENSG00000202398 | -0.6902       | 0.75497       | -1.0507       | 0.85331       | -0.78763      |          |  |
|            | 0.78454         | 1.5164        | 0.064711      | 0.064711      | 0.528661946   |               |          |  |
| ADAMTS1    | ENSG00000154734 | 1.3730.084879 | 1.3454        | 0.089255      | 0.75967       | 0.22373       |          |  |
|            | 1.5163          | 0.064716      | 0.064716      | 0.528661946   |               |               |          |  |
| REV1       | ENSG00000135945 | 1.4186        | 0.078001      | 1.2330.10879  | 0.98955       | 0.1612        |          |  |
|            | 1.5159          | 0.064772      | 0.064772      | 0.528661946   |               |               |          |  |
| RPS18P13   | ENSG00000243455 | 1.5158        | 0.064786      | 0.56835       | 0.2849        | 1.3391        |          |  |
|            | 0.090265        | 1.3735        | 0.084806      | 0.064786      | 0.528661946   |               |          |  |
| LINC02362  | ENSG00000249096 | 1.3723        | 0.084992      | 0.99074       | 0.16091       | 0.38343       |          |  |
|            | 0.3507          | 1.5157        | 0.064796      | 0.064796      | 0.528661946   |               |          |  |
| KAZALD1    | ENSG00000107821 | -0.72436      | 0.76558       | -0.72436      | 0.76558       | -0.72436      |          |  |
|            | 0.76558         | 1.5156        | 0.064812      | 0.064812      | 0.528661946   |               |          |  |
| CALHM6-AS1 | ENSG00000244158 | 1.5156        | 0.064812      | 0.36799       | 0.35644       | 1.5156        |          |  |
|            | 0.064812        | 1.5156        | 0.064812      | 0.064812      | 0.528661946   |               |          |  |
| INSR       | ENSG00000171105 | 1.5154        | 0.064831      | 1.0440.14825  | 0.72492       | 0.23425       |          |  |
|            | -1.2378         | 0.8921        | 0.064831      | 0.528661946   |               |               |          |  |
| STXBP2     | ENSG00000076944 | 1.5154        | 0.064834      | 1.5154        | 0.064834      | 1.5154        |          |  |
|            | 0.064834        | 1.2237        | 0.11053       | 0.064834      | 0.528661946   |               |          |  |
| NA         | ENSG00000227734 | 1.5154        | 0.064837      | 1.5154        | 0.064837      | 1.5154        | 0.064837 |  |
|            | 1.5154          | 0.064837      | 0.064837      | 0.528661946   |               |               |          |  |
| NA         | ENSG00000234425 | 1.1009        | 0.13547       | 1.0209        | 0.15365       | 1.1009        | 0.13547  |  |
|            | 1.5153          | 0.064845      | 0.064845      | 0.528661946   |               |               |          |  |
| SLC15A4    | ENSG00000139370 | 1.5150.064881 | 1.4338        | 0.075817      | 1.1330.12862  |               |          |  |
|            | 0.3774          | 0.35294       | 0.064881      | 0.528661946   |               |               |          |  |
| LINC00113  | ENSG00000225298 | 1.5150.064884 | -0.9518       | 0.8294        | -0.57181      | 0.71627       |          |  |
|            | 0.29662         | 0.38338       | 0.064884      | 0.528661946   |               |               |          |  |
| NA         | ENSG00000257277 | 0.3581        | 0.36013       | 1.5150.064889 | 1.3452        | 0.089283      | 1.515    |  |
|            | 0.064889        | 0.064889      | 0.528661946   |               |               |               |          |  |
| KRT18P65   | ENSG00000215807 | 0.38325       | 0.35077       | 0.38325       | 0.35077       | 0.38325       |          |  |
|            | 0.35077         | 1.5150.064893 | 0.064893      | 0.528661946   |               |               |          |  |
| STK33      | ENSG00000130413 | 0.52471       | 0.29989       | 0.79253       | 0.21403       | 1.5149        | 0.064894 |  |
|            | 0.38448         | 0.35031       | 0.064894      | 0.528661946   |               |               |          |  |
| NA         | ENSG00000229195 | 1.5149        | 0.064904      | 1.5149        | 0.064904      | 1.0673        | 0.14291  |  |
|            | 1.3773          | 0.084203      | 0.064904      | 0.528661946   |               |               |          |  |
| NA         | ENSG00000226851 | 1.2838        | 0.099599      | 0.64096       | 0.26077       | 1.5148        | 0.064905 |  |
|            | 0.87027         | 0.19208       | 0.064905      | 0.528661946   |               |               |          |  |
| KIF20A     | ENSG00000112984 | 1.5147        | 0.064929      | -1.7886       | 0.96316       | -1.7886       |          |  |
|            | 0.96316         | -1.7886       | 0.96316       | 0.064929      | 0.528661946   |               |          |  |

|           |                 |             |             |             |             |           |          |        |
|-----------|-----------------|-------------|-------------|-------------|-------------|-----------|----------|--------|
| RNU6-452P | ENSG00000207135 | 0.8089      | 0.20929     | 0.8089      | 0.20929     | 1.5146    |          |        |
|           | 0.064937        | 1.1045      | 0.13469     | 0.064937    | 0.528661946 |           |          |        |
| FAM91A1   | ENSG00000176853 | 0.38143     | 0.35144     | 0.011216    | 0.49553     | 1.4171    |          |        |
|           | 0.078228        | 1.5146      | 0.064941    | 0.064941    | 0.528661946 |           |          |        |
| TST       | ENSG00000128311 | 0.50953     | 0.30519     | 0.50953     | 0.30519     | 0.50953   | 0.30519  |        |
|           | 1.5145          | 0.06495     | 0.06495     | 0.528661946 |             |           |          |        |
| NA        | ENSG00000271888 | 0.29725     | 0.38314     | 1.0344      | 0.15048     | 1.5145    | 0.064954 |        |
|           | 1.5145          | 0.064954    | 0.064954    | 0.528661946 |             |           |          |        |
| RN7SL311P | ENSG00000265892 | 1.1976      | 0.11553     | 0.47889     | 0.31601     | 1.1976    |          |        |
|           | 0.11553         | 1.5144      | 0.064961    | 0.064961    | 0.528661946 |           |          |        |
| BAD       | ENSG00000002330 | 1.5144      | 0.064962    | -0.7085     | 0.76068     | 1.482     | 0.069173 |        |
|           | -1.7894         | 0.96323     | 0.064962    | 0.528661946 |             |           |          |        |
| NA        | ENSG00000264825 | 0.73466     | 0.23127     | 0.73466     | 0.23127     | -0.014104 | 0.50563  |        |
|           | 1.5143          | 0.064974    | 0.064974    | 0.528661946 |             |           |          |        |
| HERC6     | ENSG00000138642 | 0.3069      | 0.37946     | 1.5143      | 0.064981    | 0.70841   | 0.23934  |        |
|           | 1.0591          | 0.14478     | 0.064981    | 0.528661946 |             |           |          |        |
| NA        | ENSG00000257390 | 1.5142      | 0.064985    | 1.5142      | 0.064985    | 1.5142    | 0.064985 |        |
|           | 1.5142          | 0.064985    | 0.064985    | 0.528661946 |             |           |          |        |
| NA        | ENSG00000265472 | 1.1767      | 0.11967     | 1.5141      | 0.065005    | 1.1767    | 0.11967  |        |
|           | 1.1767          | 0.11967     | 0.065005    | 0.528661946 |             |           |          |        |
| PI4K2B    | ENSG00000038210 | 0.43647     | 0.33125     | -0.091224   | 0.53634     | 0.10815   |          |        |
|           | 0.45694         | 1.5141      | 0.065006    | 0.065006    | 0.528661946 |           |          |        |
| MIR9-3HG  | ENSG00000255571 | 0.25447     | 0.39957     | 1.5138      | 0.065041    | 0.93929   |          |        |
|           | 0.17379         | -0.083701   | 0.53335     | 0.065041    | 0.528684788 |           |          |        |
| RPSAP71   | ENSG00000254256 | 0.59324     | 0.27651     | 1.5138      | 0.065045    | 1.3122    |          |        |
|           | 0.094719        | 1.3122      | 0.094719    | 0.065045    | 0.528684788 |           |          |        |
| RCOR1     | ENSG00000089902 | 1.5137      | 0.065046    | 0.93412     | 0.17512     | 0.48487   | 0.31388  |        |
|           | 0.96912         | 0.16624     | 0.065046    | 0.528684788 |             |           |          |        |
| DTNB      | ENSG00000138101 | -0.89521    | 0.81466     | 1.5136      | 0.065062    | -0.87778  | 0.80997  |        |
|           | -0.31763        | 0.62462     | 0.065062    | 0.528684788 |             |           |          |        |
| DMRTA1    | ENSG00000176399 | 1.1809      | 0.11882     | 1.5135      | 0.065075    | 0.22306   |          |        |
|           | 0.41175         | 1.5135      | 0.065075    | 0.065075    | 0.528684788 |           |          |        |
| NA        | ENSG00000274191 | 1.5135      | 0.065075    | 1.5135      | 0.065075    | 1.5135    | 0.065075 |        |
|           | 1.5135          | 0.065075    | 0.065075    | 0.528684788 |             |           |          |        |
| TUBG2     | ENSG00000037042 | 1.0392      | 0.14937     | 1.3205      | 0.093329    | 1.0392    | 0.14937  |        |
|           | 1.5133          | 0.065101    | 0.065101    | 0.528684788 |             |           |          |        |
| NA        | ENSG00000228488 | 0.19694     | 0.42194     | -1.3719     | 0.91495     | 1.5132    | 0.065116 |        |
|           | -0.72063        | 0.76443     | 0.065116    | 0.528684788 |             |           |          |        |
| EPHA2     | ENSG00000142627 | 1.0969      | 0.13633     | 0.24895     | 0.4017      | 0.50253   | 0.30765  |        |
|           | 1.5131          | 0.065123    | 0.065123    | 0.528684788 |             |           |          |        |
| GNA14     | ENSG00000156049 | 0.46074     | 0.32249     | 1.1943      | 0.11619     | 0.64569   | 0.25924  |        |
|           | 1.5131          | 0.065132    | 0.065132    | 0.528684788 |             |           |          |        |
| NA        | ENSG00000279010 | 1.513       | 0.065138    | 1.4872      | 0.06848     | 1.4872    | 0.06848  |        |
|           | 1.5117          | 0.065302    | 0.065138    | 0.528684788 |             |           |          |        |
| PCOTH     | ENSG00000205861 | 1.513       | 0.065139    | 1.513       | 0.065139    | 1.513     | 0.065139 |        |
|           | 0.065139        | 0.528684788 |             |             |             |           |          |        |
| HMG2P4    | ENSG00000249014 | 1.2099      | 0.11316     | -0.4808     | 0.68467     | 1.5128    |          |        |
|           | 0.065165        | -0.4808     | 0.68467     | 0.065165    | 0.528807735 |           |          |        |
| KLHL29    | ENSG00000119771 | -0.18185    | 0.57215     | 0.74147     | 0.2292      | 1.5126    |          |        |
|           | 0.065194        | 0.14919     | 0.4407      | 0.065194    | 0.528833552 |           |          |        |
| TRIAP1P1  | ENSG00000237956 | 0.53633     | 0.29586     | 0.04884     | 0.48052     | 1.5125    |          |        |
|           | 0.065207        | 1.2413      | 0.10725     | 0.065207    | 0.528833552 |           |          |        |
| NA        | ENSG00000233393 | 1.5124      | 0.06521     | 1.5124      | 0.06521     | 0.24997   | 0.40131  |        |
|           | 0.27551         | 0.39146     | 0.06521     | 0.528833552 |             |           |          |        |
| NA        | ENSG00000248346 | 0.92919     | 0.17639     | 1.5123      | 0.065234    | 1.5123    | 0.065234 |        |
|           | 1.5123          | 0.065234    | 0.065234    | 0.528833552 |             |           |          |        |
| NA        | ENSG00000278586 | 1.5122      | 0.065237    | 1.5122      | 0.065237    | 1.5122    | 0.065237 |        |
|           | 1.5122          | 0.065237    | 0.065237    | 0.528833552 |             |           |          |        |
| MXRA8     | ENSG00000162576 | 1.485       | 0.068772    | 1.5122      | 0.065238    | 1.485     | 0.068772 | 1.2405 |
|           | 0.1074          | 0.065238    | 0.528833552 |             |             |           |          |        |
| NKTR      | ENSG00000114857 | 1.5121      | 0.065252    | 1.4966      | 0.067255    | 1.4737    | 0.07028  |        |
|           | 0.96044         | 0.16842     | 0.065252    | 0.528833552 |             |           |          |        |

|           |                 |            |          |             |             |             |          |
|-----------|-----------------|------------|----------|-------------|-------------|-------------|----------|
| TDRD5     | ENSG00000162782 | -0.96429   | 0.83255  | 1.5121      | 0.065255    | 0.55818     | 0.28836  |
|           |                 | -0.6025    | 0.72658  | 0.065255    | 0.528833552 |             |          |
| CLCF1     | ENSG00000175505 | 1.1571     | 0.12362  | 1.5119      | 0.065274    | 1.2564      | 0.10448  |
|           |                 | 1.3616     | 0.086662 | 0.065274    | 0.528883796 |             |          |
| LINC02645 | ENSG00000234170 | 1.5119     | 0.065286 | 0.065286    | 0.37691     | 0.35312     | 0.1993   |
|           |                 | 0.42101    | 1.5119   | 0.065286    | 0.065286    | 0.528883796 |          |
| MIR2392   | ENSG00000266461 | -0.63972   | 0.73882  | 0.73882     | 0.28058     | 0.38952     | 1.5118   |
|           |                 | 0.065298   | -0.41567 | 0.66117     | 0.065298    | 0.528883796 |          |
| SNORD19C  | ENSG00000222345 | 1.5117     | 0.065308 | 1.5117      | 0.065308    | 1.5117      |          |
|           |                 | 0.065308   | 1.5117   | 0.065308    | 0.065308    | 0.528883796 |          |
| C22orf42  | ENSG00000205856 | 0.99385    | 0.16015  | 1.5115      | 0.065328    | 0.29003     |          |
|           |                 | 0.38589    | -1.3424  | 0.91027     | 0.065328    | 0.528883796 |          |
| MRPL36P1  | ENSG00000225392 | 1.5114     | 0.065338 | 1.5114      | 0.065338    | 1.5114      |          |
|           |                 | 0.065338   | 1.5114   | 0.065338    | 0.065338    | 0.528883796 |          |
| SERPINE2  | ENSG00000135919 | 0.75681    | 0.22458  | 0.61561     | 0.26908     | 0.63843     |          |
|           |                 | 0.2616     | 1.5114   | 0.065341    | 0.065341    | 0.528883796 |          |
| VN1R67P   | ENSG00000260722 | 1.5112     | 0.065373 | -0.45438    | 0.67522     | -0.45438    |          |
|           |                 | 0.67522    | -0.45438 | 0.67522     | 0.065373    | 0.528883796 |          |
| NA        | ENSG00000260466 | 1.5111     | 0.06538  | 1.5111      | 0.06538     | 1.5111      | 0.06538  |
|           |                 | 1.5111     | 0.06538  | 0.06538     | 0.528883796 |             |          |
| GYS2      | ENSG00000111713 | 1.5111     | 0.065382 | 0.63002     | 0.26434     | 0.16045     | 0.43626  |
|           |                 | 0.90651    | 0.18233  | 0.065382    | 0.528883796 |             |          |
| PPIAP86   | ENSG00000213873 | 0.83329    | 0.20234  | -0.21659    | 0.58574     | -1.6009     |          |
|           |                 | 0.94531    | 1.511    | 0.0654      | 0.0654      | 0.528883796 |          |
| LINC00343 | ENSG00000226620 | 1.4267     | 0.076826 | 1.2841      | 0.099546    | 1.5109      |          |
|           |                 | 0.065413   | 1.4127   | 0.078871    | 0.065413    | 0.528883796 |          |
| VN2R3P    | ENSG00000234680 | -0.34875   | 0.63636  | 1.5108      | 0.065414    | -0.77027    |          |
|           |                 | 0.77943    | 1.4668   | 0.071218    | 0.065414    | 0.528883796 |          |
| IZUMO1    | ENSG00000182264 | 1.5108     | 0.065417 | 1.5108      | 0.065417    | 1.5108      |          |
|           |                 | 0.065417   | 1.5108   | 0.065417    | 0.065417    | 0.528883796 |          |
| NA        | ENSG00000228834 | 1.5108     | 0.065424 | 1.5108      | 0.065424    | 1.5108      | 0.065424 |
|           |                 | 1.5108     | 0.065424 | 0.065424    | 0.528883796 |             |          |
| VPS72     | ENSG00000163159 | -0.57078   | 0.71593  | 1.5103      | 0.065483    | -0.57078    | 0.71593  |
|           |                 | -0.05216   | 0.5208   | 0.065483    | 0.528929089 |             |          |
| QARS1     | ENSG00000172053 | 1.5103     | 0.065485 | 0.79296     | 0.2139      | 1.1681      | 0.12139  |
|           |                 | -0.71668   | 0.76321  | 0.065485    | 0.528929089 |             |          |
| NAT10     | ENSG00000135372 | 0.75956    | 0.22376  | 1.053       | 0.14617     | 0.97665     | 0.16437  |
|           |                 | 1.5103     | 0.06549  | 0.06549     | 0.528929089 |             |          |
| NA        | ENSG00000231492 | 1.5102     | 0.065493 | 1.2156      | 0.11207     | 0.82588     | 0.20443  |
|           |                 | -0.0066749 | 0.50266  | 0.065493    | 0.528929089 |             |          |
| RNY4P7    | ENSG00000201470 | 1.5101     | 0.065512 | 1.5101      | 0.065512    | 1.5101      |          |
|           |                 | 0.065512   | 1.5101   | 0.065512    | 0.065512    | 0.528929089 |          |
| ZNF362    | ENSG00000160094 | -0.47661   | 0.68318  | 0.96943     | 0.16617     | 1.51        | 0.065516 |
|           |                 | 0.26164    | 0.3968   | 0.065516    | 0.528929089 |             |          |
| TRBV5-5   | ENSG00000211725 | 1.51       | 0.065522 | 1.51        | 0.065522    | 1.51        | 0.065522 |
|           |                 | 0.065522   | 0.065522 | 0.528929089 |             |             |          |
| NA        | ENSG00000280349 | 1.51       | 0.065526 | -0.26564    | 0.60474     | 1.51        | 0.065526 |
|           |                 | 0.065526   | 0.065526 | 0.528929089 |             |             |          |
| NDUFA8P1  | ENSG00000271710 | 1.5099     | 0.065535 | 1.5099      | 0.065535    | 1.5099      |          |
|           |                 | 0.065535   | 1.5099   | 0.065535    | 0.065535    | 0.528929089 |          |
| ZFYVE27   | ENSG00000155256 | 1.5098     | 0.065543 | -0.66401    | 0.74666     | -0.26892    | 0.606    |
|           |                 | -0.68696   | 0.75395  | 0.065543    | 0.528929089 |             |          |
| LCT-AS1   | ENSG00000226806 | 1.5098     | 0.065549 | 1.5098      | 0.065549    | 1.5098      |          |
|           |                 | 0.065549   | 1.5098   | 0.065549    | 0.065549    | 0.528929089 |          |
| MIR3691   | ENSG00000265083 | 1.5095     | 0.065583 | -0.17611    | 0.56989     | -0.80609    |          |
|           |                 | 0.7899     | -0.2871  | 0.61298     | 0.065583    | 0.529013395 |          |
| NA        | ENSG00000243199 | 1.5093     | 0.065606 | 0.28158     | 0.38913     | 1.3822      | 0.08346  |
|           |                 | -1.5579    | 0.94038  | 0.065606    | 0.529013395 |             |          |
| PCDHB8    | ENSG00000120322 | 1.5091     | 0.065637 | 1.5091      | 0.065637    | 1.5091      |          |
|           |                 | 0.065637   | 1.5091   | 0.065637    | 0.065637    | 0.529013395 |          |
| NA        | ENSG00000251367 | 1.509      | 0.065646 | -0.20001    | 0.57926     | 1.509       | 0.065646 |
|           |                 | 0.065646   | 0.065646 | 0.529013395 |             |             |          |

|              |                 |           |          |             |             |           |          |
|--------------|-----------------|-----------|----------|-------------|-------------|-----------|----------|
| NECTIN4      | ENSG00000143217 | -1.7012   | 0.95555  | -1.6663     | 0.95217     | -1.7012   |          |
|              | 0.95555         | 1.509     | 0.065649 | 0.065649    | 0.529013395 |           |          |
| ELOVL7       | ENSG00000164181 | 0.8841    | 0.18832  | 0.8841      | 0.18832     | 1.5089    |          |
|              | 0.065659        | 1.4662    | 0.071293 | 0.065659    | 0.529013395 |           |          |
| PRSS51       | ENSG00000253649 | 0.086626  | 0.46548  | 1.3228      | 0.092956    | 1.5089    |          |
|              | 0.065661        | 1.1239    | 0.13053  | 0.065661    | 0.529013395 |           |          |
| ZNF236       | ENSG00000130856 | 1.0616    | 0.14422  | 1.5088      | 0.065677    | 1.0745    |          |
|              | 0.14131         | 0.013195  | 0.49474  | 0.065677    | 0.529013395 |           |          |
| NA           | ENSG00000259368 | 1.5086    | 0.065698 | 1.5086      | 0.065698    | 1.5086    | 0.065698 |
|              | 1.5086          | 0.065698  | 0.065698 | 0.529013395 |             |           |          |
| NA           | ENSG00000200502 | 0.15757   | 0.4374   | 0.15757     | 0.4374      | 0.15757   | 0.4374   |
|              | 1.5086          | 0.065705  | 0.065705 | 0.529013395 |             |           |          |
| NA           | ENSG00000234589 | -0.92309  | 0.82202  | 1.5085      | 0.065708    | -0.60429  | 0.72718  |
|              | -0.60429        | 0.72718   | 0.065708 | 0.529013395 |             |           |          |
| NA           | ENSG00000222545 | 1.3076    | 0.095498 | 0.18359     | 0.42717     | 1.5085    | 0.065708 |
|              | 1.3924          | 0.081904  | 0.065708 | 0.529013395 |             |           |          |
| NA           | ENSG00000206806 | 0.87355   | 0.19118  | 0.87355     | 0.19118     | -1.0757   | 0.85898  |
|              | 1.5085          | 0.065711  | 0.065711 | 0.529013395 |             |           |          |
| KCNK4        | ENSG00000182450 | 1.5085    | 0.065718 | 0.47579     | 0.31711     | 0.54698   | 0.2922   |
|              | 0.47579         | 0.31711   | 0.065718 | 0.529013395 |             |           |          |
| MIR1-1HG-AS1 | ENSG00000174403 | -1.586    | 0.94363  | -1.2836     | 0.90035     | 0.84515   |          |
|              | 0.19901         | 1.5084    | 0.065725 | 0.065725    | 0.529013395 |           |          |
| EFHD1        | ENSG00000115468 | 0.1551    | 0.43837  | 0.51927     | 0.30179     | 1.5083    | 0.065737 |
|              | 0.5132          | 0.3039    | 0.065737 | 0.529013395 |             |           |          |
| RNU6-1215P   | ENSG00000207170 | 1.5083    | 0.065744 | 1.5083      | 0.065744    | 1.5083    |          |
|              | 0.065744        | 1.5083    | 0.065744 | 0.065744    | 0.529013395 |           |          |
| NA           | ENSG00000232891 | 1.1097    | 0.13356  | 1.5079      | 0.065788    | -0.54047  | 0.70556  |
|              | -0.75251        | 0.77413   | 0.065788 | 0.529037713 |             |           |          |
| MIR4801      | ENSG00000264319 | -0.10958  | 0.54363  | 0.35674     | 0.36064     | 1.5079    |          |
|              | 0.065789        | 1.5079    | 0.065789 | 0.065789    | 0.529037713 |           |          |
| AKR1B1P3     | ENSG00000213785 | 1.5079    | 0.065793 | 0.19551     | 0.4225      | 0.59659   |          |
|              | 0.27539         | 0.59659   | 0.27539  | 0.065793    | 0.529037713 |           |          |
| NXPB1        | ENSG00000122584 | 0.97512   | 0.16475  | 1.5078      | 0.065804    | 0.97512   | 0.16475  |
|              | 0.97512         | 0.16475   | 0.065804 | 0.529037713 |             |           |          |
| FMN1         | ENSG00000248905 | 1.0733    | 0.14157  | 1.2371      | 0.10803     | 1.5077    | 0.06582  |
|              | 1.4924          | 0.067795  | 0.06582  | 0.529037713 |             |           |          |
| PRELID3BP11  | ENSG00000231108 | 1.5077    | 0.065821 | 1.2222      | 0.11082     | 0.76066   |          |
|              | 0.22343         | -1.6747   | 0.953    | 0.065821    | 0.529037713 |           |          |
| SNF8         | ENSG00000159210 | 1.1512    | 0.12482  | -0.00058459 | 0.50023     | 1.5075    |          |
|              | 0.065837        | 0.63199   | 0.2637   | 0.065837    | 0.529037713 |           |          |
| C17orf80     | ENSG00000141219 | 1.1688    | 0.12124  | 1.4187      | 0.077996    | 1.4667    |          |
|              | 0.071228        | 1.5074    | 0.06585  | 0.06585     | 0.529037713 |           |          |
| NA           | ENSG00000260750 | 1.5074    | 0.065859 | -1.6228     | 0.94768     | -0.42946  | 0.66621  |
|              | 0.1769          | 0.42979   | 0.065859 | 0.529037713 |             |           |          |
| LINC01987    | ENSG00000267790 | 1.5071    | 0.065898 | 1.5071      | 0.065898    | 1.5071    |          |
|              | 0.065898        | 1.5071    | 0.065898 | 0.065898    | 0.529037713 |           |          |
| DAAM1        | ENSG00000100592 | 1.507     | 0.065901 | -0.53194    | 0.70262     | -1.1522   | 0.87539  |
|              | -1.0321         | 0.84899   | 0.065901 | 0.529037713 |             |           |          |
| AGAP3        | ENSG00000133612 | -1.589    | 0.94397  | 1.5069      | 0.065913    | -0.055327 | 0.52206  |
|              | 1.0653          | 0.14337   | 0.065913 | 0.529037713 |             |           |          |
| RARRES2P6    | ENSG00000261010 | 1.4849    | 0.06878  | 1.4242      | 0.0772      | 1.5069    |          |
|              | 0.06592         | 1.5069    | 0.06592  | 0.06592     | 0.529037713 |           |          |
| NA           | ENSG00000282393 | 1.5067    | 0.065944 | 0.43584     | 0.33148     | -0.7067   | 0.76012  |
|              | 0.1702          | 0.43243   | 0.065944 | 0.529037713 |             |           |          |
| H3C6         | ENSG00000274750 | -0.036093 | 0.5144   | 0.78144     | 0.21727     | 1.5066    | 0.06596  |
|              | 0.36587         | 0.35723   | 0.06596  | 0.529037713 |             |           |          |
| RN7SL804P    | ENSG00000266185 | 1.5066    | 0.065962 | 1.5066      | 0.065962    | 1.5066    |          |
|              | 0.065962        | 1.5066    | 0.065962 | 0.065962    | 0.529037713 |           |          |
| LINC02548    | ENSG00000255411 | 0.04667   | 0.48139  | 1.5065      | 0.065969    | 0.11846   |          |
|              | 0.45285         | -0.5137   | 0.69627  | 0.065969    | 0.529037713 |           |          |
| FAM124B      | ENSG00000124019 | 1.5065    | 0.065973 | 0.504       | 0.30713     | 1.4066    | 0.079772 |
|              | 0.504           | 0.30713   | 0.065973 | 0.529037713 |             |           |          |

|           |                 |             |          |             |             |          |          |          |
|-----------|-----------------|-------------|----------|-------------|-------------|----------|----------|----------|
| RPL37P12  | ENSG00000237916 | 1.0695      | 0.14241  | 1.2059      | 0.11394     | 1.5062   |          |          |
|           | 0.066008        | 1.5062      | 0.066008 | 0.066008    | 0.529037713 |          |          |          |
| HMGB1P29  | ENSG00000250862 | 1.1388      | 0.12738  | 1.5062      | 0.066009    | 1.5062   |          |          |
|           | 0.066009        | 1.0847      | 0.13902  | 0.066009    | 0.529037713 |          |          |          |
| GAPDHP60  | ENSG00000248180 | 1.5061      | 0.066015 | 1.5061      | 0.066015    | 1.5061   |          |          |
|           | 0.066015        | 1.5061      | 0.066015 | 0.066015    | 0.529037713 |          |          |          |
| LINC01926 | ENSG00000267593 | -1.2078     | 0.88643  | 1.1956      | 0.11592     | 0.73442  |          |          |
|           | 0.23135         | 1.5060      | 0.066032 | 0.066032    | 0.529037713 |          |          |          |
| NA        | ENSG00000279207 | 1.5060      | 0.066039 | 1.5060      | 0.066039    | 1.5060   | 0.066039 | 1.5060   |
|           | 0.066039        | 0.529037713 |          |             |             |          |          |          |
| NA        | ENSG00000235204 | 1.5059      | 0.066051 | 1.5059      | 0.066051    | 1.5059   | 0.066051 | 0.066051 |
|           | 1.5059          | 0.066051    | 0.066051 | 0.529037713 |             |          |          |          |
| ABI1P1    | ENSG00000271484 | 1.5058      | 0.066054 | 1.5058      | 0.066054    | 1.5058   |          |          |
|           | 0.066054        | 1.5058      | 0.066054 | 0.066054    | 0.529037713 |          |          |          |
| RWDD4     | ENSG00000182552 | 1.4239      | 0.077242 | 1.3363      | 0.090718    | 1.322    | 0.093081 |          |
|           | 1.5058          | 0.06606     | 0.06606  | 0.529037713 |             |          |          |          |
| GLT6D1    | ENSG00000204007 | 0.093813    | 0.46263  | 0.41856     | 0.33777     | 1.5058   |          |          |
|           | 0.06606         | -1.518      | 0.9355   | 0.06606     | 0.529037713 |          |          |          |
| EPHA5     | ENSG00000145242 | -1.5497     | 0.93939  | 1.5057      | 0.066066    | -0.42336 | 0.66398  |          |
|           | 0.8479          | 0.19825     | 0.066066 | 0.529037713 |             |          |          |          |
| SEZ6      | ENSG00000063015 | 0.67551     | 0.24968  | 1.5057      | 0.066074    | 1.3193   | 0.093527 |          |
|           | 1.0929          | 0.13721     | 0.066074 | 0.529037713 |             |          |          |          |
| NA        | ENSG00000255608 | 1.341       | 0.08996  | -1.6846     | 0.95396     | 1.5057   | 0.066078 |          |
|           | -0.39392        | 0.65318     | 0.066078 | 0.529037713 |             |          |          |          |
| NA        | ENSG00000228697 | 1.5055      | 0.066096 | -0.62442    | 0.73382     | 0.69437  | 0.24372  |          |
|           | 0.63458         | 0.26285     | 0.066096 | 0.529037713 |             |          |          |          |
| ICA1L     | ENSG00000163596 | 0.47648     | 0.31687  | 1.0751      | 0.14118     | 0.55687  | 0.28881  |          |
|           | 1.5055          | 0.066103    | 0.066103 | 0.529037713 |             |          |          |          |
| KRTAP23-1 | ENSG00000186980 | 1.5054      | 0.066111 | 1.5054      | 0.066111    | 1.5054   |          |          |
|           | 0.066111        | 0.78266     | 0.21691  | 0.066111    | 0.529037713 |          |          |          |
| NA        | ENSG00000262227 | 1.5053      | 0.066122 | 1.5053      | 0.066122    | 1.5053   | 0.066122 |          |
|           | 1.5053          | 0.066122    | 0.066122 | 0.529037713 |             |          |          |          |
| NA        | ENSG00000242963 | 1.5053      | 0.066127 | 1.5053      | 0.066127    | 1.5053   | 0.066127 |          |
|           | -0.58442        | 0.72053     | 0.066127 | 0.529037713 |             |          |          |          |
| MEIS1-AS3 | ENSG00000226819 | 1.5051      | 0.066154 | 0.18941     | 0.42489     | 1.1317   |          |          |
|           | 0.12887         | 1.0841      | 0.13915  | 0.066154    | 0.529079997 |          |          |          |
| GRM7-AS2  | ENSG00000237665 | -0.46085    | 0.67755  | 0.63616     | 0.26234     | 1.5051   |          |          |
|           | 0.066154        | 1.5051      | 0.066154 | 0.066154    | 0.529079997 |          |          |          |
| ICAM5     | ENSG00000105376 | 1.5049      | 0.066173 | 1.5049      | 0.066173    | 0.50925  | 0.30529  |          |
|           | 0.50925         | 0.30529     | 0.066173 | 0.529086834 |             |          |          |          |
| POFUT2    | ENSG00000186866 | 0.0089672   | 0.49642  | 0.44581     | 0.32787     | 1.5048   |          |          |
|           | 0.066183        | -0.44131    | 0.67051  | 0.066183    | 0.529086834 |          |          |          |
| NA        | ENSG00000269921 | 1.5047      | 0.066206 | 1.5047      | 0.066206    | 1.5047   | 0.066206 |          |
|           | 1.5047          | 0.066206    | 0.066206 | 0.529086834 |             |          |          |          |
| NA        | ENSG00000232537 | -0.18591    | 0.57374  | -0.997      | 0.84062     | 1.5046   | 0.066208 |          |
|           | -0.4011         | 0.65583     | 0.066208 | 0.529086834 |             |          |          |          |
| CWC25     | ENSG00000273559 | 1.5046      | 0.066211 | 1.5046      | 0.066211    | 1.4464   | 0.074037 |          |
|           | 1.1808          | 0.11884     | 0.066211 | 0.529086834 |             |          |          |          |
| NA        | ENSG00000275461 | -1.0514     | 0.85346  | -1.0514     | 0.85346     | 1.5046   | 0.06622  |          |
|           | -1.1163         | 0.86786     | 0.06622  | 0.529086834 |             |          |          |          |
| HSCB      | ENSG00000100209 | 1.5043      | 0.066251 | 1.5043      | 0.066251    | 1.5043   | 0.066251 |          |
|           | 0.17292         | 0.43136     | 0.066251 | 0.529114205 |             |          |          |          |
| SKIL      | ENSG00000136603 | 1.2153      | 0.11213  | -0.96097    | 0.83172     | -1.3546  | 0.91223  |          |
|           | 1.5043          | 0.066254    | 0.066254 | 0.529114205 |             |          |          |          |
| SOCS6     | ENSG00000170677 | 0.82833     | 0.20374  | 1.5043      | 0.066256    | 0.82833  | 0.20374  |          |
|           | 0.43322         | 0.33243     | 0.066256 | 0.529114205 |             |          |          |          |
| TRPM8     | ENSG00000144481 | 0.48062     | 0.31539  | 1.5041      | 0.066273    | -1.7333  | 0.95848  |          |
|           | -1.0238         | 0.84703     | 0.066273 | 0.529163246 |             |          |          |          |
| NA        | ENSG00000242391 | 1.5038      | 0.066316 | 1.5038      | 0.066316    | 1.5038   | 0.066316 |          |
|           | 1.5038          | 0.066316    | 0.066316 | 0.529233804 |             |          |          |          |
| CSTF2T    | ENSG00000177613 | 1.144       | 0.12632  | 1.5038      | 0.066317    | 1.3479   | 0.088851 |          |
|           | 1.2506          | 0.10554     | 0.066317 | 0.529233804 |             |          |          |          |

|           |                 |          |          |          |          |            |          |
|-----------|-----------------|----------|----------|----------|----------|------------|----------|
| NA        | ENSG00000236723 | 1.5038   | 0.066322 | -1.2902  | 0.90152  | -1.2902    | 0.90152  |
|           |                 |          |          |          |          |            |          |
| CFH       | ENSG00000000971 | 1.5036   | 0.066341 | 0.84878  | 0.198    | 0.91063    | 0.18125  |
|           |                 |          |          |          |          |            |          |
| TFPI2     | ENSG00000105825 | 1.5036   | 0.066344 | -0.98267 | 0.83711  | -0.6773    | 0.75089  |
|           |                 |          |          |          |          |            |          |
| MS4A6A    | ENSG00000110077 | -0.26934 | 0.066347 | 0.60617  | -0.1962  | 0.57777    | 1.0921   |
|           |                 |          |          |          |          |            |          |
| MRPL20    | ENSG00000242485 | 1.5032   | 0.066392 | 1.5032   | 0.066392 | 0.066392   | 1.5032   |
|           |                 |          |          |          |          |            |          |
| NA        | ENSG00000233423 | 1.5032   | 0.066395 | 0.28029  | 0.38963  | 0.28029    | 0.38963  |
|           |                 |          |          |          |          |            |          |
| NA        | ENSG00000226490 | 1.5031   | 0.066405 | 0.039552 | 0.48423  | 0.85841    | 0.19533  |
|           |                 |          |          |          |          |            |          |
| NA        | ENSG00000235586 | -0.73504 | 0.066407 | 1.5031   | 0.066407 | -0.73504   | 0.76884  |
|           |                 |          |          |          |          |            |          |
| GCX       | ENSG00000115486 | 0.52022  | 0.066431 | -0.72241 | 0.76498  | 0.042749   | 0.48295  |
|           |                 |          |          |          |          |            |          |
| NA        | ENSG00000229044 | -0.97095 | 0.066432 | -0.23869 | 0.59433  | 1.5029     | 0.066432 |
|           |                 |          |          |          |          |            |          |
| NA        | ENSG00000250348 | 1.5027   | 0.066458 | 1.5027   | 0.066458 | 1.5027     | 0.066458 |
|           |                 |          |          |          |          |            |          |
| NFYBP1    | ENSG00000214380 | 1.1903   | 0.066476 | 1.5026   | 0.066476 | 1.3762     |          |
|           |                 |          |          |          |          |            |          |
| NA        | ENSG00000267656 | 1.1734   | 0.066485 | 0.9603   | 0.16845  | 1.5025     | 0.066485 |
|           |                 |          |          |          |          |            |          |
| ALAS1     | ENSG00000023330 | 0.21637  | 0.066501 | 1.1241   | 0.13049  | 1.0066     | 0.15706  |
|           |                 |          |          |          |          |            |          |
| CEBPG     | ENSG00000153879 | 0.76548  | 0.066502 | 0.76548  | 0.22199  | 0.76548    | 0.22199  |
|           |                 |          |          |          |          |            |          |
| MTCO1P25  | ENSG00000229031 | 1.5023   | 0.066507 | 1.5023   | 0.066507 | 1.339      | 0.090285 |
|           |                 |          |          |          |          |            |          |
| RNA5SP475 | ENSG00000222500 | 1.502    | 0.066553 | 1.502    | 0.066553 | 1.502      | 0.066553 |
|           |                 |          |          |          |          |            |          |
| SIPA1L1   | ENSG00000197555 | 1.4867   | 0.066559 | 1.5019   | 0.066559 | 1.2891     |          |
|           |                 |          |          |          |          |            |          |
| BZW1P2    | ENSG00000198406 | 1.5017   | 0.066586 | 1.0622   | 0.14407  | -0.0073506 |          |
|           |                 |          |          |          |          |            |          |
| NA        | ENSG00000259656 | 1.5017   | 0.066592 | 1.5017   | 0.066592 | 1.5017     | 0.066592 |
|           |                 |          |          |          |          |            |          |
| NA        | ENSG00000229892 | 1.369    | 0.066644 | 1.5013   | 0.066644 | 1.3115     | 0.094845 |
|           |                 |          |          |          |          |            |          |
| CYP4A26P  | ENSG00000259832 | 1.501    | 0.066672 | 1.501    | 0.066672 | 0.342      | 0.36618  |
|           |                 |          |          |          |          |            |          |
| NA        | ENSG00000279444 | 1.501    | 0.066673 | 1.501    | 0.066673 | 1.501      | 0.066673 |
|           |                 |          |          |          |          |            |          |
| RPS26P35  | ENSG00000242206 | 0.47614  | 0.066676 | -1.4589  | 0.92771  | 1.501      | 0.066676 |
|           |                 |          |          |          |          |            |          |
| NA        | ENSG00000251393 | 1.5008   | 0.0667   | 0.607    | 0.27193  | 0.61515    | 0.26923  |
|           |                 |          |          |          |          |            |          |
| NA        | ENSG00000249959 | 1.5008   | 0.066708 | 1.5008   | 0.066708 | 1.5008     | 0.066708 |
|           |                 |          |          |          |          |            |          |
| NA        | ENSG00000201309 | 1.5006   | 0.066734 | 1.5006   | 0.066734 | 1.5006     | 0.066734 |
|           |                 |          |          |          |          |            |          |
| OR7A2P    | ENSG00000172148 | 1.1997   | 0.066752 | 1.5004   | 0.066752 | 1.5004     |          |
|           |                 |          |          |          |          |            |          |
| NA        | ENSG00000278891 | 1.5003   | 0.066773 | 0.89491  | 0.18542  | 0.89491    | 0.18542  |
|           |                 |          |          |          |          |            |          |
| KLHL25    | ENSG00000183655 | 1.5003   | 0.066774 | 1.5003   | 0.066774 | 1.1337     |          |
|           |                 |          |          |          |          |            |          |
| RN7SL708P | ENSG00000265675 | 1.5002   | 0.066783 | 1.5002   | 0.066783 | 1.5002     |          |
|           |                 |          |          |          |          |            |          |

|           |                 |          |           |             |             |             |          |
|-----------|-----------------|----------|-----------|-------------|-------------|-------------|----------|
| NA        | ENSG00000273448 | -0.14126 | 0.55617   | 1.5001      | 0.066789    | -0.0029994  | 0.5012   |
|           |                 | -0.22884 | 0.5905    | 0.066789    | 0.530190651 |             |          |
| BRF1      | ENSG00000185024 | 1.5001   | 0.066792  | -0.19456    | 0.57713     | -0.37077    | 0.64459  |
|           |                 | 0.26955  | 0.39375   | 0.066792    | 0.530190651 |             |          |
| LINC00963 | ENSG00000204054 | 0.92851  | 0.17657   | -1.0961     | 0.86349     | -1.0961     |          |
|           |                 | 0.86349  | 1.4999    | 0.066823    | 0.066823    | 0.530190651 |          |
| TRMT10A   | ENSG00000145331 | 0.62363  | 0.26644   | 0.66453     | 0.25317     | 0.40396     |          |
|           |                 | 0.34312  | 1.4999    | 0.066825    | 0.066825    | 0.530190651 |          |
| NA        | ENSG00000233799 | 1.4999   | 0.066826  | 1.4999      | 0.066826    | 1.4999      | 0.066826 |
|           |                 | 1.4999   | 0.066826  | 0.066826    | 0.530190651 |             |          |
| PLCH1-AS1 | ENSG00000239508 | 1.4999   | 0.066826  | 1.4999      | 0.066826    | 1.4999      |          |
|           |                 | 0.066826 | 1.4999    | 0.066826    | 0.066826    | 0.530190651 |          |
| PHIP      | ENSG00000146247 | 1.4988   | 0.066963  | 0.6913      | 0.24469     | 0.64124     | 0.26068  |
|           |                 | 1.1817   | 0.11865   | 0.066963    | 0.531036522 |             |          |
| RNA5SP128 | ENSG00000202175 | 1.1807   | 0.11887   | 1.4987      | 0.06697     | 1.4987      |          |
|           |                 | 0.06697  | 1.4987    | 0.06697     | 0.06697     | 0.531036522 |          |
| ULK2      | ENSG00000083290 | 0.35558  | 0.36108   | 0.222       | 0.41216     | 1.4987      | 0.066973 |
|           |                 | 0.42904  | 0.33395   | 0.066973    | 0.531036522 |             |          |
| CLTA      | ENSG00000122705 | -0.94978 | 0.82889   | 1.4987      | 0.066977    | 0.087013    | 0.46533  |
|           |                 | 0.087013 | 0.46533   | 0.066977    | 0.531036522 |             |          |
| RNU6-844P | ENSG00000252984 | 0.86227  | 0.19427   | 0.42997     | 0.33361     | 1.4986      |          |
|           |                 | 0.066994 | 0.42997   | 0.33361     | 0.066994    | 0.531036522 |          |
| NA        | ENSG00000248195 | 0.35069  | 0.36291   | 0.64543     | 0.25932     | 1.4985      | 0.066998 |
|           |                 | 1.4985   | 0.066998  | 0.066998    | 0.531036522 |             |          |
| NA        | ENSG00000228829 | 0.76996  | 0.22066   | 1.4979      | 0.067086    | 1.397       | 0.081201 |
|           |                 | -0.66976 | 0.74849   | 0.067086    | 0.531121488 |             |          |
| MSH4      | ENSG00000057468 | 0.38778  | 0.34909   | 0.026968    | 0.48924     | 1.4977      | 0.067107 |
|           |                 | -0.41205 | 0.65985   | 0.067107    | 0.531121488 |             |          |
| NA        | ENSG00000257086 | 1.4977   | 0.067108  | 1.4977      | 0.067108    | 1.4977      | 0.067108 |
|           |                 | 1.4977   | 0.067108  | 0.067108    | 0.531121488 |             |          |
| CHIAP3    | ENSG00000234020 | -0.96536 | 0.83282   | 1.4976      | 0.067122    | -0.96536    |          |
|           |                 | 0.83282  | -0.13526  | 0.5538      | 0.067122    | 0.531121488 |          |
| NIP7P2    | ENSG00000213264 | 1.4975   | 0.067133  | 1.4311      | 0.076204    | -2.0226     |          |
|           |                 | 0.97844  | 1.4311    | 0.076204    | 0.067133    | 0.531121488 |          |
| ARF6      | ENSG00000165527 | 1.4975   | 0.067136  | -0.47674    | 0.68323     | -0.53785    | 0.70466  |
|           |                 | -0.85948 | 0.80496   | 0.067136    | 0.531121488 |             |          |
| NA        | ENSG00000273145 | 1.4817   | 0.069214  | 1.4974      | 0.067148    | 0.3181      | 0.37521  |
|           |                 | 1.2622   | 0.10344   | 0.067148    | 0.531121488 |             |          |
| NA        | ENSG00000274212 | 0.22758  | 0.40999   | -0.60189    | 0.72638     | 1.4974      | 0.06715  |
|           |                 | 0.22758  | 0.40999   | 0.06715     | 0.531121488 |             |          |
| HRCT1     | ENSG00000196196 | 1.4971   | 0.067178  | -0.18514    | 0.57344     | -1.0263     | 0.84763  |
|           |                 | 1.3636   | 0.086347  | 0.067178    | 0.531121488 |             |          |
| MRGPRX5P  | ENSG00000255536 | -1.4533  | 0.92693   | -1.4533     | 0.92693     | -1.4533     |          |
|           |                 | 0.92693  | 1.4971    | 0.067186    | 0.067186    | 0.531121488 |          |
| DENR      | ENSG00000139726 | 1.497    | 0.067192  | 0.04038     | 0.48389     | 1.3049      | 0.09596  |
|           |                 | 0.9471   | 0.17179   | 0.067192    | 0.531121488 |             |          |
| NA        | ENSG00000260981 | 1.497    | 0.067195  | 0.79343     | 0.21376     | 0.79343     | 0.21376  |
|           |                 | 0.79343  | 0.21376   | 0.067195    | 0.531121488 |             |          |
| DDX18P1   | ENSG00000259165 | 1.4969   | 0.067215  | -1.23       | 0.89065     | -1.23       | 0.89065  |
|           |                 | 0.89065  | 0.067215  | 0.531121488 |             |             | -1.23    |
| NA        | ENSG00000199901 | 1.4968   | 0.067218  | 1.149       | 0.12527     | 0.76723     | 0.22147  |
|           |                 | 1.0456   | 0.14788   | 0.067218    | 0.531121488 |             |          |
| NA        | ENSG00000253110 | 1.4968   | 0.067218  | -0.44084    | 0.67034     | -0.36746    | 0.64336  |
|           |                 | -0.69016 | 0.75495   | 0.067218    | 0.531121488 |             |          |
| NA        | ENSG00000265737 | -0.68163 | 0.75226   | -0.68163    | 0.75226     | -0.68163    | 0.75226  |
|           |                 | 1.4968   | 0.067229  | 0.067229    | 0.531121488 |             |          |
| MCAT      | ENSG00000100294 | -1.0591  | 0.85522   | 1.4966      | 0.067242    | -1.0591     | 0.85522  |
|           |                 | -1.3036  | 0.90381   | 0.067242    | 0.531121488 |             |          |
| ZDHC16    | ENSG00000171307 | 1.4966   | 0.067247  | 0.71677     | 0.23676     | -0.33465    |          |
|           |                 | 0.63106  | -0.058522 | 0.52333     | 0.067247    | 0.531121488 |          |
| EXOSC1    | ENSG00000171311 | 1.4966   | 0.067247  | 1.4966      | 0.067247    | 1.4966      |          |
|           |                 | 0.067247 | 1.3031    | 0.096273    | 0.067247    | 0.531121488 |          |

|           |                 |          |             |             |             |           |          |
|-----------|-----------------|----------|-------------|-------------|-------------|-----------|----------|
| PIP4K2B   | ENSG00000276293 | 0.22207  | 0.41213     | 1.4966      | 0.067247    | 0.22207   |          |
|           | 0.41213         | 0.87919  | 0.18965     | 0.067247    | 0.531121488 |           |          |
| HDHD3     | ENSG00000119431 | 1.4966   | 0.067253    | 1.4966      | 0.067253    | 1.4966    | 0.067253 |
|           | 1.4966          | 0.067253 | 0.067253    | 0.531121488 |             |           |          |
| NA        | ENSG00000253921 | 1.4964   | 0.067269    | -1.3473     | 0.91105     | -1.3473   | 0.91105  |
|           | -1.3473         | 0.91105  | 0.067269    | 0.531121488 |             |           |          |
| TMEM178A  | ENSG00000152154 | 0.82698  | 0.20413     | -0.33546    | 0.63136     | 0.14253   |          |
|           | 0.44333         | 1.4963   | 0.067292    | 0.067292    | 0.531121488 |           |          |
| SNORD45C  | ENSG00000206620 | 1.4963   | 0.067292    | 1.4963      | 0.067292    | 1.4963    |          |
|           | 0.067292        | 1.4963   | 0.067292    | 0.067292    | 0.531121488 |           |          |
| RNF38     | ENSG00000137075 | -1.2551  | 0.89529     | -0.33875    | 0.6326      | -0.014907 | 0.50595  |
|           | 1.4963          | 0.067293 | 0.067293    | 0.531121488 |             |           |          |
| BCAT1     | ENSG00000060982 | 1.4962   | 0.067297    | -0.0089386  | 0.50357     | 0.70567   | 0.2402   |
|           | 0.47583         | 0.3171   | 0.067297    | 0.531121488 |             |           |          |
| F13A1     | ENSG00000124491 | 0.6059   | 0.27229     | -1.076      | 0.85905     | -0.87766  | 0.80994  |
|           | 1.4962          | 0.067303 | 0.067303    | 0.531121488 |             |           |          |
| NA        | ENSG00000277050 | -0.12108 | 0.54819     | 1.3055      | 0.095868    | 1.4961    | 0.067319 |
|           | 0.89945         | 0.18421  | 0.067319    | 0.531161734 |             |           |          |
| NA        | ENSG00000213987 | 0.066625 | 0.47344     | 0.066625    | 0.47344     | 1.4958    | 0.067349 |
|           | 0.066625        | 0.47344  | 0.067349    | 0.531259341 |             |           |          |
| H2AC20    | ENSG00000184260 | 1.4957   | 0.067366    | 1.4957      | 0.067366    | 1.4957    |          |
|           | 0.067366        | 1.4957   | 0.067366    | 0.067366    | 0.531259341 |           |          |
| RN7SL147P | ENSG00000263988 | -1.0327  | 0.84912     | -1.0327     | 0.84912     | -1.0327   |          |
|           | 0.84912         | 1.4956   | 0.067375    | 0.067375    | 0.531259341 |           |          |
| NA        | ENSG00000267005 | 0.57902  | 0.28129     | 1.4954      | 0.067411    | 0.57902   | 0.28129  |
|           | -0.4387         | 0.66956  | 0.067411    | 0.531259341 |             |           |          |
| USP12-AS1 | ENSG00000232162 | 1.4953   | 0.067415    | 1.1951      | 0.11601     | 1.3356    |          |
|           | 0.090845        | 0.85219  | 0.19706     | 0.067415    | 0.531259341 |           |          |
| SNORD45B  | ENSG00000201487 | 1.4953   | 0.067418    | 1.4953      | 0.067418    | 1.4953    |          |
|           | 0.067418        | 1.4953   | 0.067418    | 0.067418    | 0.531259341 |           |          |
| RNF175    | ENSG00000145428 | 1.4952   | 0.067437    | 1.4952      | 0.067437    | 0.60731   |          |
|           | 0.27182         | 0.91567  | 0.17992     | 0.067437    | 0.531259341 |           |          |
| RPS4XP15  | ENSG00000240721 | 1.4951   | 0.06744     | -0.022063   | 0.5088      | -0.064046 |          |
|           | 0.52553         | 1.1091   | 0.13369     | 0.06744     | 0.531259341 |           |          |
| RNA5SP103 | ENSG00000238379 | 1.4951   | 0.067444    | -0.078804   | 0.53141     | 0.55185   |          |
|           | 0.29053         | 0.40268  | 0.34359     | 0.067444    | 0.531259341 |           |          |
| LINC00460 | ENSG00000233532 | 1.495    | 0.067457    | 1.495       | 0.067457    | 1.495     | 0.067457 |
|           | 0.17156         | 0.067457 | 0.531259341 |             |             |           |          |
| MAFK      | ENSG00000198517 | 0.83485  | 0.2019      | 0.96515     | 0.16723     | 1.4949    | 0.067465 |
|           | 1.2115          | 0.11285  | 0.067465    | 0.531259341 |             |           |          |
| C22orf23  | ENSG00000128346 | 1.4949   | 0.067476    | 1.4949      | 0.067476    | 1.4949    |          |
|           | 0.067476        | 1.4949   | 0.067476    | 0.067476    | 0.531259341 |           |          |
| EFCAB14P1 | ENSG00000228348 | 1.4948   | 0.067483    | 1.4948      | 0.067483    | 1.4948    |          |
|           | 0.067483        | 1.4948   | 0.067483    | 0.067483    | 0.531259341 |           |          |
| RNA5SP27  | ENSG00000200709 | 1.4948   | 0.067484    | 1.4948      | 0.067484    | 1.4948    |          |
|           | 0.067484        | 1.4948   | 0.067484    | 0.067484    | 0.531259341 |           |          |
| NKX2-2    | ENSG00000125820 | 0.90171  | 0.1836      | -0.4351     | 0.66826     | 1.4946    |          |
|           | 0.067511        | 1.4946   | 0.067511    | 0.067511    | 0.5313      |           |          |
| NA        | ENSG00000273432 | 1.4944   | 0.067535    | 1.4944      | 0.067535    | 1.4944    | 0.067535 |
|           | 1.4944          | 0.067535 | 0.067535    | 0.5313      |             |           |          |
| NA        | ENSG00000215094 | 1.4944   | 0.067536    | 1.4944      | 0.067536    | 1.4944    | 0.067536 |
|           | 1.4944          | 0.067536 | 0.067536    | 0.5313      |             |           |          |
| PIK3CD    | ENSG00000171608 | 0.40117  | 0.34415     | 1.1166      | 0.13207     | 1.4944    |          |
|           | 0.06754         | 0.18102  | 0.42818     | 0.06754     | 0.5313      |           |          |
| DDIT4-AS1 | ENSG00000269926 | 1.4942   | 0.067565    | 1.4942      | 0.067565    | 1.4942    |          |
|           | 0.067565        | 1.4942   | 0.067565    | 0.067565    | 0.5313      |           |          |
| NA        | ENSG00000277466 | -1.2385  | 0.89224     | 1.494       | 0.067586    | 0.53542   | 0.29618  |
|           | -0.06259        | 0.52495  | 0.067586    | 0.5313      |             |           |          |
| PDE6D     | ENSG00000156973 | -1.0158  | 0.84513     | -1.0443     | 0.85184     | -1.4817   | 0.93079  |
|           | 1.4939          | 0.067595 | 0.067595    | 0.5313      |             |           |          |
| RNASEH1P1 | ENSG00000265790 | 1.4939   | 0.067598    | 1.4939      | 0.067598    | 1.4939    |          |
|           | 0.067598        | 1.4939   | 0.067598    | 0.067598    | 0.5313      |           |          |



|           |                 |            |             |             |             |           |          |
|-----------|-----------------|------------|-------------|-------------|-------------|-----------|----------|
| NA        | ENSG00000235066 | 0.93489    | 0.17492     | 1.31        | 0.095103    | 0.98103   | 0.16329  |
|           | 1.4939          | 0.067603   | 0.067603    | 0.5313      |             |           |          |
| ATF4P3    | ENSG00000228218 | 1.4938     | 0.06761     | 1.2885      | 0.098787    | 1.2885    |          |
|           | 0.098787        | 1.2885     | 0.098787    | 0.06761     | 0.5313      |           |          |
| NA        | ENSG00000277170 | 1.4938     | 0.067614    | 1.4938      | 0.067614    | 1.4938    | 0.067614 |
|           | 1.4938          | 0.067614   | 0.067614    | 0.5313      |             |           |          |
| NA        | ENSG00000267780 | 1.4938     | 0.06762     | 1.2966      | 0.097377    | -0.18566  | 0.57364  |
|           | 1.2966          | 0.097377   | 0.06762     | 0.5313      |             |           |          |
| TSNAX     | ENSG00000116918 | -0.0077157 | 0.50308     | 1.3889      | 0.082434    | 1.4935    | 0.067654 |
|           | 1.413           | 0.078825   | 0.067654    | 0.531372967 |             |           |          |
| USP25     | ENSG00000155313 | 1.4934     | 0.067661    | 0.81304     | 0.2081      | -1.0051   | 0.84257  |
|           | -0.84593        | 0.80121    | 0.067661    | 0.531372967 |             |           |          |
| DTX2      | ENSG00000091073 | 1.4934     | 0.067662    | 1.0794      | 0.14021     | -0.096315 | 0.53836  |
|           | 0.099612        | 0.46033    | 0.067662    | 0.531372967 |             |           |          |
| CEP57L1   | ENSG00000183137 | 1.4933     | 0.067685    | 1.4933      | 0.067685    | 1.4933    |          |
|           | 0.067685        | 0.143      | 0.44315     | 0.067685    | 0.531410265 |           |          |
| FKBP1AP3  | ENSG00000230243 | 0.32168    | 0.37385     | 0.80348     | 0.21085     | -0.074541 |          |
|           | 0.52971         | 1.4932     | 0.067699    | 0.067699    | 0.531410265 |           |          |
| NA        | ENSG00000250360 | 1.0132     | 0.15549     | -0.078599   | 0.53132     | 1.4931    | 0.067704 |
|           | 1.4931          | 0.067704   | 0.067704    | 0.531410265 |             |           |          |
| DBF4B     | ENSG00000161692 | 1.493      | 0.067713    | 1.493       | 0.067713    | 0.11249   | 0.45522  |
|           | 0.11804         | 0.067713   | 0.531410265 |             |             |           |          |
| SLC19A3   | ENSG00000135917 | 1.2224     | 0.11078     | 1.4929      | 0.067733    | 1.4929    |          |
|           | 0.067733        | -0.40536   | 0.65739     | 0.067733    | 0.531410265 |           |          |
| FOXC1     | ENSG00000054598 | -0.97      | 0.83398     | -0.79901    | 0.78786     | 1.4929    | 0.067734 |
|           | -0.54667        | 0.7077     | 0.067734    | 0.531410265 |             |           |          |
| ALPK3     | ENSG00000136383 | 1.296      | 0.097488    | 1.4927      | 0.067761    | 1.0369    | 0.14988  |
|           | 1.0369          | 0.14988    | 0.067761    | 0.531410265 |             |           |          |
| NA        | ENSG00000233839 | 1.4926     | 0.067768    | 0.78554     | 0.21607     | 0.91691   | 0.1796   |
|           | 1.0451          | 0.14798    | 0.067768    | 0.531410265 |             |           |          |
| NA        | ENSG00000253750 | 1.4925     | 0.067778    | 1.0625      | 0.14401     | 0.93823   | 0.17406  |
|           | 0.39719         | 0.34561    | 0.067778    | 0.531410265 |             |           |          |
| MC2R      | ENSG00000185231 | -0.0062673 | 0.5025      | 1.4925      | 0.067782    | -0.13467  | 0.55356  |
|           | 0.9365          | 0.17451    | 0.067782    | 0.531410265 |             |           |          |
| BAG6      | ENSG00000204463 | 1.4924     | 0.067791    | 1.3775      | 0.084175    | 1.2324    | 0.1089   |
|           | 1.1908          | 0.11686    | 0.067791    | 0.531410265 |             |           |          |
| LINC02746 | ENSG00000282916 | 1.4924     | 0.0678      | 1.4924      | 0.0678      | 1.4924    |          |
|           | 0.0678          | 1.4924     | 0.0678      | 0.0678      | 0.531410265 |           |          |
| NA        | ENSG00000225867 | 1.4923     | 0.067812    | 1.4923      | 0.067812    | 1.4923    | 0.067812 |
|           | 1.1011          | 0.13542    | 0.067812    | 0.531410265 |             |           |          |
| NA        | ENSG00000261018 | 1.1636     | 0.12229     | -0.51689    | 0.69738     | 1.4922    | 0.067821 |
|           | -0.68123        | 0.75214    | 0.067821    | 0.531410265 |             |           |          |
| TAPBP     | ENSG00000231925 | 1.4915     | 0.06792     | 0.3459      | 0.36471     | -0.43378  | 0.66778  |
|           | 1.2606          | 0.10373    | 0.06792     | 0.531410265 |             |           |          |
| RNY4P34   | ENSG00000201649 | -0.4558    | 0.67573     | 0.78964     | 0.21487     | 1.4914    |          |
|           | 0.067922        | 1.4914     | 0.067922    | 0.067922    | 0.531410265 |           |          |
| NA        | ENSG00000253507 | 0.54273    | 0.29366     | 1.4914      | 0.067927    | 1.0383    | 0.14957  |
|           | -0.69435        | 0.75627    | 0.067927    | 0.531410265 |             |           |          |
| TNFSF15   | ENSG00000181634 | 1.4914     | 0.067928    | 0.64683     | 0.25887     | 1.4914    |          |
|           | 0.067928        | 1.4914     | 0.067928    | 0.067928    | 0.531410265 |           |          |
| DTNBP1    | ENSG00000047579 | 1.1511     | 0.12484     | 0.41034     | 0.34078     | 1.4912    |          |
|           | 0.067948        | 1.2874     | 0.098985    | 0.067948    | 0.531410265 |           |          |
| HDC2      | ENSG00000111906 | 0.91457    | 0.18021     | 1.4913      | 0.067948    | 0.69354   | 0.24398  |
|           | 0.68278         | 0.24737    | 0.067948    | 0.531410265 |             |           |          |
| NA        | ENSG00000280180 | 1.3432     | 0.089599    | -0.31662    | 0.62423     | 1.4912    | 0.06795  |
|           | 0.53999         | 0.2946     | 0.06795     | 0.531410265 |             |           |          |
| IL6R      | ENSG00000160712 | 1.4912     | 0.067956    | -0.17565    | 0.56972     | 0.21916   | 0.41326  |
|           | -0.13935        | 0.55541    | 0.067956    | 0.531410265 |             |           |          |
| MTND5P20  | ENSG00000238256 | 0.35481    | 0.36137     | -0.14401    | 0.55725     | 1.4912    |          |
|           | 0.067956        | 1.4008     | 0.08063     | 0.067956    | 0.531410265 |           |          |
| NA        | ENSG00000251652 | 0.61046    | 0.27078     | 1.1044      | 0.13471     | 1.1044    | 0.13471  |
|           | 1.4912          | 0.067957   | 0.067957    | 0.531410265 |             |           |          |

|             |                 |           |             |             |             |          |          |      |
|-------------|-----------------|-----------|-------------|-------------|-------------|----------|----------|------|
| MKX-AS1     | ENSG00000230500 | 1.2617    | 0.10352     | 1.2617      | 0.10352     | 0.22431  |          |      |
|             | 0.41126         | 1.4911    | 0.067971    | 0.067971    | 0.531410265 |          |          |      |
| TXNDC11     | ENSG00000153066 | 0.90138   | 0.18369     | 1.2925      | 0.098089    | 1.491    | 0.067978 |      |
|             | 0.35236         | 0.36228   | 0.067978    | 0.531410265 |             |          |          |      |
| NA          | ENSG00000233052 | -0.53948  | 0.70522     | 1.491       | 0.067978    | -0.58102 | 0.71939  |      |
|             | -0.58102        | 0.71939   | 0.067978    | 0.531410265 |             |          |          |      |
| RSPRY1      | ENSG00000159579 | 0.76124   | 0.22326     | 1.4205      | 0.077732    | 1.491    | 0.067979 |      |
|             | 1.4205          | 0.077732  | 0.067979    | 0.531410265 |             |          |          |      |
| HGF         | ENSG00000019991 | 1.491     | 0.067983    | 0.23945     | 0.40538     | 0.85506  | 0.19626  |      |
|             | 0.85506         | 0.19626   | 0.067983    | 0.531410265 |             |          |          |      |
| NA          | ENSG00000255836 | 0.11757   | 0.4532      | 0.088149    | 0.46488     | 1.4909   | 0.067999 |      |
|             | 1.4909          | 0.067999  | 0.067999    | 0.531450083 |             |          |          |      |
| HOXB1       | ENSG00000120094 | 1.1675    | 0.1215      | 1.1317      | 0.12888     | 1.4906   | 0.068029 |      |
|             | 1.4906          | 0.068029  | 0.068029    | 0.531553122 |             |          |          |      |
| ABCA6       | ENSG00000154262 | 0.57331   | 0.28322     | 1.4906      | 0.068034    | 1.4906   | 0.068034 |      |
|             | 0.8443          | 0.19925   | 0.068034    | 0.531553122 |             |          |          |      |
| PIH1D1      | ENSG00000104872 | 1.4668    | 0.071211    | 1.4668      | 0.071211    | 0.78195  |          |      |
|             | 0.21712         | 1.4904    | 0.068054    | 0.068054    | 0.531612771 |          |          |      |
| RN7SL353P   | ENSG00000263608 | 1.4902    | 0.068089    | 1.4902      | 0.068089    | 1.4902   |          |      |
|             | 0.068089        | 1.4902    | 0.068089    | 0.068089    | 0.531612771 |          |          |      |
| LINC00159   | ENSG00000230323 | 1.394     | 0.081651    | 1.0198      | 0.1539      | 0.70393  | 0.24074  |      |
|             | 1.4901          | 0.068102  | 0.068102    | 0.531612771 |             |          |          |      |
| NA          | ENSG00000236948 | -0.91058  | 0.81874     | 1.4901      | 0.068105    | -0.92538 | 0.82262  |      |
|             | -0.54678        | 0.70774   | 0.068105    | 0.531612771 |             |          |          |      |
| NA          | ENSG00000259137 | -0.56229  | 0.71304     | -0.17122    | 0.56797     | 1.4901   | 0.068105 |      |
|             | -0.17122        | 0.56797   | 0.068105    | 0.531612771 |             |          |          |      |
| LINC01242   | ENSG00000280683 | 0.10709   | 0.45736     | 1.3444      | 0.089414    | 1.1048   |          |      |
|             | 0.13462         | 1.49      | 0.068113    | 0.068113    | 0.531612771 |          |          |      |
| AGO1        | ENSG00000092847 | 1.2314    | 0.10909     | 1.2508      | 0.1055      | 1.306    | 0.095769 | 1.49 |
|             | 0.068118        | 0.068118  | 0.531612771 |             |             |          |          |      |
| SEC62       | ENSG00000008952 | 1.4897    | 0.068146    | -0.78391    | 0.78345     | -0.96509 | 0.83275  |      |
|             | -0.55336        | 0.70999   | 0.068146    | 0.53174613  |             |          |          |      |
| NA          | ENSG00000279633 | 1.4896    | 0.068158    | -0.34471    | 0.63484     | 1.4896   | 0.068158 |      |
|             | 1.4896          | 0.068158  | 0.068158    | 0.531754617 |             |          |          |      |
| NA          | ENSG00000273258 | 1.1624    | 0.12254     | 1.4894      | 0.068189    | 1.1624   | 0.12254  |      |
|             | 1.1624          | 0.12254   | 0.068189    | 0.531911313 |             |          |          |      |
| NA          | ENSG00000262213 | 1.4888    | 0.068267    | -0.11937    | 0.54751     | 1.4888   | 0.068267 |      |
|             | 0.97218         | 0.16548   | 0.068267    | 0.53218269  |             |          |          |      |
| FAM216A     | ENSG00000204856 | 1.4887    | 0.06828     | -0.059584   | 0.52376     | 0.88646  |          |      |
|             | 0.18768         | 0.54523   | 0.2928      | 0.06828     | 0.53218269  |          |          |      |
| HORMAD2-AS1 | ENSG00000227117 | 0.24113   | 0.40473     | 0.67863     | 0.24869     | 1.0704   |          |      |
|             | 0.14221         | 1.4887    | 0.068287    | 0.068287    | 0.53218269  |          |          |      |
| CDV3P1      | ENSG00000176243 | 1.4886    | 0.068303    | -0.42725    | 0.6654      | -1.2327  |          |      |
|             | 0.89115         | -0.64863  | 0.74171     | 0.068303    | 0.53218269  |          |          |      |
| NA          | ENSG00000275740 | 1.3247    | 0.092636    | 1.4885      | 0.06831     | 1.3247   | 0.092636 |      |
|             | 1.3247          | 0.092636  | 0.06831     | 0.53218269  |             |          |          |      |
| FNBP1P1     | ENSG00000257800 | 0.28542   | 0.38766     | 1.4885      | 0.068314    | 0.83003  |          |      |
|             | 0.20326         | 0.17497   | 0.43055     | 0.068314    | 0.53218269  |          |          |      |
| GMPR        | ENSG00000137198 | -0.86351  | 0.80607     | -0.62265    | 0.73324     | 0.75636  | 0.22472  |      |
|             | 1.4885          | 0.068316  | 0.068316    | 0.53218269  |             |          |          |      |
| NA          | ENSG00000274695 | 1.0909    | 0.13765     | 1.4884      | 0.068323    | 1.2027   | 0.11455  |      |
|             | 0.81155         | 0.20852   | 0.068323    | 0.53218269  |             |          |          |      |
| TADA2B      | ENSG00000173011 | -0.27327  | 0.60768     | 1.4883      | 0.06833     | -0.7034  |          |      |
|             | 0.7591          | -0.097348 | 0.53877     | 0.06833     | 0.53218269  |          |          |      |
| PIGH        | ENSG00000100564 | 1.4883    | 0.068333    | 1.4883      | 0.068333    | 1.4883   | 0.068333 |      |
|             | 0.68034         | 0.24815   | 0.068333    | 0.53218269  |             |          |          |      |
| ZNF154      | ENSG00000179909 | 0.57187   | 0.28371     | 0.57187     | 0.28371     | 1.488    | 0.06838  |      |
|             | 0.0094767       | 0.49622   | 0.06838     | 0.532463631 |             |          |          |      |
| NA          | ENSG00000232518 | 1.4878    | 0.068404    | 1.4878      | 0.068404    | 1.4878   | 0.068404 |      |
|             | 1.4878          | 0.068404  | 0.068404    | 0.532565413 |             |          |          |      |
| RNU1-22P    | ENSG00000200204 | 1.4873    | 0.068464    | 1.4873      | 0.068464    | 1.4873   |          |      |
|             | 0.068464        | 1.4873    | 0.068464    | 0.068464    | 0.532947399 |          |          |      |

|            |                 |          |          |             |             |             |          |
|------------|-----------------|----------|----------|-------------|-------------|-------------|----------|
| SSPOP      | ENSG00000197558 | 0.37838  | 0.35257  | -1.3736     | 0.91522     | 1.0879      | 0.13832  |
|            |                 | 1.4872   | 0.068475 | 0.068475    | 0.532947892 |             |          |
| LINC02134  | ENSG00000260450 | 0.65693  | 0.25561  | 0.44812     | 0.32703     | 1.4871      |          |
|            |                 | 0.0685   | 0.73491  | 0.2312      | 0.0685      | 0.532973194 |          |
| EEF1DP6    | ENSG00000229280 | 1.1413   | 0.12688  | 1.4869      | 0.068515    | -1.4224     |          |
|            |                 | 0.92254  | -1.4224  | 0.92254     | 0.068515    | 0.532973194 |          |
| NA         | ENSG00000240809 | 1.1273   | 0.12981  | 1.4869      | 0.06852     | 1.4869      | 0.06852  |
|            |                 | 1.4869   | 0.06852  | 0.06852     | 0.532973194 |             |          |
| RIPK2      | ENSG00000104312 | 1.4869   | 0.068522 | 1.0756      | 0.14106     | 1.4869      | 0.068522 |
|            |                 | 0.43147  | 0.33306  | 0.068522    | 0.532973194 |             |          |
| NA         | ENSG00000232648 | 1.0582   | 0.14497  | 1.4868      | 0.068539    | -0.017798   | 0.5071   |
|            |                 | 0.43902  | 0.33032  | 0.068539    | 0.533020343 |             |          |
| IGSF11-AS1 | ENSG00000239877 | 1.4859   | 0.068657 | 1.4859      | 0.068657    | 1.4859      |          |
|            |                 | 0.068657 | -0.21811 | 0.58633     | 0.068657    | 0.533261598 |          |
| XKR8       | ENSG00000158156 | 0.80021  | 0.21179  | 1.4858      | 0.06866     | 0.069709    | 0.47221  |
|            |                 | 0.019339 | 0.49229  | 0.06866     | 0.533261598 |             |          |
| IGDCC3     | ENSG00000174498 | 0.56592  | 0.28572  | 0.25848     | 0.39802     | 0.34897     |          |
|            |                 | 0.36355  | 1.4858   | 0.068668    | 0.068668    | 0.533261598 |          |
| NA         | ENSG00000232615 | 1.3742   | 0.084683 | 1.3742      | 0.084683    | 0.42044     | 0.33708  |
|            |                 | 1.4857   | 0.068678 | 0.068678    | 0.533261598 |             |          |
| NA         | ENSG00000279262 | 1.4857   | 0.068684 | 1.4857      | 0.068684    | 1.4857      | 0.068684 |
|            |                 | 1.4857   | 0.068684 | 0.068684    | 0.533261598 |             |          |
| RPL4P5     | ENSG00000230207 | 1.4193   | 0.077913 | 1.4856      | 0.068695    | 1.4193      |          |
|            |                 | 0.077913 | 1.4193   | 0.077913    | 0.068695    | 0.533261598 |          |
| SCGN       | ENSG00000079689 | 0.45241  | 0.32549  | 1.4856      | 0.068698    | 0.7981      | 0.21241  |
|            |                 | 0.7981   | 0.21241  | 0.068698    | 0.533261598 |             |          |
| NA         | ENSG00000226927 | 1.4856   | 0.068699 | 1.4856      | 0.068699    | 1.4856      | 0.068699 |
|            |                 | 1.4856   | 0.068699 | 0.068699    | 0.533261598 |             |          |
| NA         | ENSG00000280061 | 1.4854   | 0.068714 | 1.4854      | 0.068714    | 1.4854      | 0.068714 |
|            |                 | 1.4854   | 0.068714 | 0.068714    | 0.533261598 |             |          |
| NA         | ENSG00000273325 | 1.4854   | 0.068718 | 1.1124      | 0.13299     | -0.79837    | 0.78767  |
|            |                 | -0.79837 | 0.78767  | 0.068718    | 0.533261598 |             |          |
| CXCL1      | ENSG00000163739 | -1.4751  | 0.92991  | -0.082995   | 0.53307     | 1.4853      | 0.068729 |
|            |                 | 0.44816  | 0.32702  | 0.068729    | 0.533261598 |             |          |
| ZWILCH     | ENSG00000174442 | -0.2332  | 0.5922   | 1.4853      | 0.068731    | 0.6939      |          |
|            |                 | 0.24387  | -0.27901 | 0.60988     | 0.068731    | 0.533261598 |          |
| NA         | ENSG00000236173 | 0.040736 | 0.48375  | 1.4852      | 0.068744    | -1.9234     | 0.97278  |
|            |                 | -0.27342 | 0.60773  | 0.068744    | 0.533261598 |             |          |
| LAT2       | ENSG00000086730 | -0.12489 | 0.5497   | 0.36936     | 0.35593     | 1.4851      | 0.068753 |
|            |                 | -0.11729 | 0.54668  | 0.068753    | 0.533261598 |             |          |
| HAR1B      | ENSG00000231133 | 1.4851   | 0.06876  | 0.10208     | 0.45935     | -0.58263    | 0.71993  |
|            |                 | -0.17132 | 0.56801  | 0.06876     | 0.533261598 |             |          |
| NA         | ENSG00000270112 | 0.83422  | 0.20208  | 0.83422     | 0.20208     | 0.83422     | 0.20208  |
|            |                 | 1.485    | 0.068776 | 0.068776    | 0.533261598 |             |          |
| NA         | ENSG00000258891 | 0.93839  | 0.17402  | 1.4848      | 0.068794    | 1.2613      | 0.10359  |
|            |                 | 1.2613   | 0.10359  | 0.068794    | 0.533261598 |             |          |
| LINC00615  | ENSG00000196243 | 1.4846   | 0.068829 | 1.4343      | 0.075742    | 0.27472     |          |
|            |                 | 0.39177  | -0.50625 | 0.69366     | 0.068829    | 0.533261598 |          |
| NA         | ENSG00000213959 | -0.23925 | 0.59454  | 1.4845      | 0.068834    | -0.21298    | 0.58433  |
|            |                 | -0.21298 | 0.58433  | 0.068834    | 0.533261598 |             |          |
| KASH5      | ENSG00000161609 | 1.4844   | 0.06885  | 1.0802      | 0.14002     | 1.0802      | 0.14002  |
|            |                 | 1.0802   | 0.14002  | 0.06885     | 0.533261598 |             |          |
| SFMBT1     | ENSG00000163935 | 0.80919  | 0.2092   | 0.020761    | 0.49172     | 1.4843      |          |
|            |                 | 0.068863 | 0.76068  | 0.22342     | 0.068863    | 0.533261598 |          |
| MIR1269A   | ENSG00000221563 | 1.4843   | 0.068868 | 1.4843      | 0.068868    | 0.954       | 0.17004  |
|            |                 | 1.4843   | 0.068868 | 0.068868    | 0.533261598 |             |          |
| NA         | ENSG00000248050 | 1.4842   | 0.068877 | 0.69556     | 0.24335     | 1.4842      | 0.068877 |
|            |                 | 1.4842   | 0.068877 | 0.068877    | 0.533261598 |             |          |
| NA         | ENSG00000223720 | 1.4841   | 0.068886 | 0.057108    | 0.47723     | 0.59093     | 0.27728  |
|            |                 | 1.399    | 0.080912 | 0.068886    | 0.533261598 |             |          |
| FKBP1AP1   | ENSG00000269304 | 1.484    | 0.068902 | 1.484       | 0.068902    | 1.484       | 0.068902 |
|            |                 | 0.068902 | 0.068902 | 0.533261598 |             |             |          |

|           |                 |           |             |             |             |           |          |
|-----------|-----------------|-----------|-------------|-------------|-------------|-----------|----------|
| VWC2L     | ENSG00000174453 | 1.484     | 0.068905    | 0.80449     | 0.21056     | 0.49964   | 0.30866  |
|           | 0.50843         | 0.30558   | 0.068905    | 0.533261598 |             |           |          |
| NHLH2     | ENSG00000177551 | -0.070458 | 0.52809     | 1.484       | 0.06891     | -0.070458 | 0.52809  |
|           | -0.64025        | 0.739     | 0.06891     | 0.533261598 |             |           |          |
| NA        | ENSG00000223492 | 0.29859   | 0.38263     | 1.4838      |             | 0.068933  | 0.57877  |
|           | -1.4062         | 0.92017   | 0.068933    | 0.533261598 |             |           | 0.28137  |
| MSR1      | ENSG00000038945 | -0.15022  | 0.55971     | 1.4838      |             | 0.068935  | -1.2896  |
|           | 0.006522        | 0.4974    | 0.068935    | 0.533261598 |             |           | 0.9014   |
| DDIAS     | ENSG00000165490 | 1.2203    | 0.11117     | -0.18085    | 0.57176     | 1.4837    | 0.06895  |
|           | 0.51061         | 0.30481   | 0.06895     | 0.533261598 |             |           |          |
| CBY1P1    | ENSG00000236832 | 1.4836    | 0.068956    | 1.1119      | 0.13308     | 1.1237    |          |
|           | 0.13058         | 1.1139    | 0.13266     | 0.068956    | 0.533261598 |           |          |
| TCP11L1   | ENSG00000176148 | 1.2983    | 0.09709     | 0.65622     | 0.25584     | 1.4835    |          |
|           | 0.068973        | 0.65622   | 0.25584     | 0.068973    | 0.533261598 |           |          |
| BPGM      | ENSG00000172331 | 0.10424   | 0.45849     | 0.61218     | 0.27021     | 0.53313   | 0.29697  |
|           | 1.4834          | 0.068979  | 0.068979    | 0.533261598 |             |           |          |
| HCG11     | ENSG00000228223 | 0.90432   | 0.18291     | 1.2038      | 0.11434     | 1.4832    | 0.069006 |
|           | 1.2655          | 0.10285   | 0.069006    | 0.533261598 |             |           |          |
| TRAPPC12  | ENSG00000171853 | 1.4832    | 0.069011    | 0.96062     | 0.16837     | 0.71133   |          |
|           | 0.23844         | 1.3987    | 0.08095     | 0.069011    | 0.533261598 |           |          |
| H2AC21    | ENSG00000184270 | 1.4831    | 0.069025    | 1.4831      | 0.069025    | 1.4831    |          |
|           | 0.069025        | 1.4831    | 0.069025    | 0.069025    | 0.533261598 |           |          |
| NA        | ENSG00000257261 | 0.20716   | 0.41794     | 0.7132      | 0.23786     | 0.32769   | 0.37157  |
|           | 1.483           | 0.069038  | 0.069038    | 0.533261598 |             |           |          |
| EIF2A     | ENSG00000144895 | 0.58275   | 0.28003     | 0.99366     | 0.16019     | 0.99366   | 0.16019  |
|           | 1.483           | 0.069039  | 0.069039    | 0.533261598 |             |           |          |
| MIR128-1  | ENSG00000207654 | -0.86778  | 0.80724     | 1.483       | 0.069041    | 0.66687   | 0.25243  |
|           | -0.90554        | 0.81741   | 0.069041    | 0.533261598 |             |           |          |
| CHCHD2P7  | ENSG00000249973 | 1.4829    | 0.069047    | 0.48641     | 0.31334     | 0.92175   |          |
|           | 0.17833         | 0.41609   | 0.33867     | 0.069047    | 0.533261598 |           |          |
| NA        | ENSG00000258465 | 1.4826    | 0.06909     | 1.4826      | 0.06909     | 1.4826    | 0.06909  |
|           | 1.4826          | 0.06909   | 0.06909     | 0.533261598 |             |           |          |
| NA        | ENSG00000275839 | 1.4826    | 0.069096    | 1.4826      | 0.069096    | 1.4826    | 0.069096 |
|           | 1.4826          | 0.069096  | 0.069096    | 0.533261598 |             |           |          |
| NA        | ENSG00000219622 | -0.11047  | 0.54398     | 1.4822      | 0.069149    | 0.888     | 0.18727  |
|           | 0.27629         | 0.39116   | 0.069149    | 0.533261598 |             |           |          |
| NA        | ENSG00000245651 | 1.1643    | 0.12215     | 1.4742      | 0.070212    | 1.3738    | 0.084755 |
|           | 1.4821          | 0.069154  | 0.069154    | 0.533261598 |             |           |          |
| NA        | ENSG00000220291 | 0.70228   | 0.24125     | 1.482       | 0.069172    | 1.482     | 0.069172 |
|           | 0.069172        | 0.069172  | 0.533261598 |             |             |           |          |
| ECSCR     | ENSG00000249751 | 0.8174    | 0.20685     | 0.20764     | 0.41776     | 0.86663   | 0.19307  |
|           | 1.4818          | 0.069194  | 0.069194    | 0.533261598 |             |           |          |
| SEL1L2    | ENSG00000101251 | 1.4816    | 0.069224    | 0.59097     | 0.27727     | 1.4816    |          |
|           | 0.069224        | 1.0445    | 0.14812     | 0.069224    | 0.533261598 |           |          |
| LINC01340 | ENSG00000250331 | 1.4815    | 0.069231    | -0.5188     | 0.69805     | -0.041525 |          |
|           | 0.51656         | -0.025119 | 0.51002     | 0.069231    | 0.533261598 |           |          |
| ULBP1     | ENSG00000111981 | 0.76875   | 0.22102     | 0.88178     | 0.18895     | 1.4814    | 0.069251 |
|           | 0.35826         | 0.36008   | 0.069251    | 0.533261598 |             |           |          |
| NA        | ENSG00000250609 | -0.072183 | 0.52877     | 1.4813      | 0.069268    | -0.072183 | 0.52877  |
|           | -0.072183       | 0.52877   | 0.069268    | 0.533261598 |             |           |          |
| WBP1P1    | ENSG00000231351 | 0.60443   | 0.27278     | 1.4812      | 0.069271    | 0.13853   |          |
|           | 0.44491         | -0.19038  | 0.5755      | 0.069271    | 0.533261598 |           |          |
| LINC00271 | ENSG00000231028 | -0.056262 | 0.52243     | 1.481       | 0.069302    | -0.12677  | 0.55044  |
|           | 0.82748         | 0.20398   | 0.069302    | 0.533261598 |             |           |          |
| SIGLEC11  | ENSG00000161640 | 0.63394   | 0.26306     | 0.78039     | 0.21758     | 1.481     | 0.069303 |
|           | 1.481           | 0.069303  | 0.069303    | 0.533261598 |             |           |          |
| NA        | ENSG00000283217 | 1.4809    | 0.06932     | 1.4809      | 0.06932     | 1.4809    | 0.06932  |
|           | 1.3877          | 0.082616  | 0.06932     | 0.533261598 |             |           |          |
| NFKBIE    | ENSG00000146232 | 0.90033   | 0.18397     | 1.1845      | 0.11811     | 1.4383    |          |
|           | 0.075173        | 1.4809    | 0.069321    | 0.069321    | 0.533261598 |           |          |
| ZNF17     | ENSG00000186272 | 0.74542   | 0.22801     | 1.3899      | 0.082282    | 1.4808    | 0.069333 |
|           | 1.4808          | 0.069333  | 0.069333    | 0.533261598 |             |           |          |

|             |                 |           |          |             |             |             |          |          |
|-------------|-----------------|-----------|----------|-------------|-------------|-------------|----------|----------|
| NA          | ENSG00000264689 | 1.4807    | 0.069345 | 0.069345    | 1.4807      | 0.069345    | 1.4807   | 0.069345 |
|             |                 | 1.4807    | 0.069345 | 0.069345    | 0.533261598 |             |          |          |
| TOMM5       | ENSG00000175768 | 1.4807    | 0.069346 | 0.069346    | 1.2432      | 0.1069      | -0.68158 | 0.75225  |
|             |                 | -0.64822  | 0.74158  | 0.069346    | 0.533261598 |             |          |          |
| NA          | ENSG00000256966 | 1.4807    | 0.069346 | 0.069346    | 1.4807      | 0.069346    | 1.4807   | 0.069346 |
|             |                 | 1.4807    | 0.069346 | 0.069346    | 0.533261598 |             |          |          |
| NA          | ENSG00000267636 | 1.4807    | 0.069349 | 0.069349    | -0.14157    | 0.55629     | 1.4807   | 0.069349 |
|             |                 | 1.4807    | 0.069349 | 0.069349    | 0.533261598 |             |          |          |
| BAG2        | ENSG00000112208 | 0.16872   | 0.43301  | 0.43301     | 1.4806      | 0.069353    | 0.16872  | 0.43301  |
|             |                 | 0.78675   | 0.21571  | 0.069353    | 0.533261598 |             |          |          |
| OR7E129P    | ENSG00000180770 | -0.26048  | 0.60275  | 0.60275     | 0.7371      | 0.23053     | 1.4806   |          |
|             |                 | 0.069361  | 1.199    | 0.11526     | 0.069361    | 0.533261598 |          |          |
| FAM155A-IT1 | ENSG00000227248 | 1.4805    | 0.069364 | 0.069364    | 1.1114      | 0.13321     | 0.45671  |          |
|             |                 | 0.32394   | 1.009    | 0.15649     | 0.069364    | 0.533261598 |          |          |
| SFI1        | ENSG00000198089 | 0.26821   | 0.39427  | 0.39427     | 0.66994     | 0.25145     | 0.42378  | 0.33586  |
|             |                 | 1.4805    | 0.069365 | 0.069365    | 0.533261598 |             |          |          |
| RHOD        | ENSG00000173156 | 1.4805    | 0.069367 | 0.069367    | -0.82193    | 0.79444     | -0.29295 | 0.61522  |
|             |                 | 0.36455   | 0.35772  | 0.069367    | 0.533261598 |             |          |          |
| PAC3IN3     | ENSG00000165912 | 1.4805    | 0.06937  | 0.06937     | -0.071119   | 0.52835     | 0.8205   |          |
|             |                 | 0.20596   | 1.4805   | 0.06937     | 0.06937     | 0.533261598 |          |          |
| GAPDHP37    | ENSG00000231907 | 1.4804    | 0.069378 | 0.069378    | 1.4804      | 0.069378    | 1.356    | 0.087552 |
|             |                 | -0.8321   | 0.79732  | 0.069378    | 0.533261598 |             |          |          |
| TMSB4XP3    | ENSG00000223437 | 0.90954   | 0.18153  | 0.18153     | 1.1888      | 0.11726     | 1.1888   |          |
|             |                 | 0.11726   | 1.4804   | 0.069382    | 0.069382    | 0.533261598 |          |          |
| ATP6V0A4    | ENSG00000105929 | 0.85032   | 0.19757  | 0.19757     | 0.8333      | 0.20234     | 1.4797   |          |
|             |                 | 0.069476  | 1.3535   | 0.087952    | 0.069476    | 0.533261598 |          |          |
| RPL23AP26   | ENSG00000228884 | 1.4797    | 0.069483 | 0.069483    | -0.34717    | 0.63577     | -0.35031 |          |
|             |                 | 0.63695   | -0.35031 | 0.63695     | 0.069483    | 0.533261598 |          |          |
| NA          | ENSG00000221741 | 1.4796    | 0.069496 | 0.069496    | 1.4796      | 0.069496    | 1.4796   | 0.069496 |
|             |                 | 1.4796    | 0.069496 | 0.069496    | 0.533261598 |             |          |          |
| PCDHGA7     | ENSG00000253537 | 1.4795    | 0.069499 | 0.069499    | 1.4795      | 0.069499    | 1.4795   |          |
|             |                 | 0.069499  | 1.4795   | 0.069499    | 0.069499    | 0.533261598 |          |          |
| ST13P4      | ENSG00000232150 | -1.7526   | 0.96017  | 0.96017     | 1.4794      | 0.069515    | 0.52025  |          |
|             |                 | 0.30144   | -0.76057 | 0.77654     | 0.069515    | 0.533261598 |          |          |
| KCN3G3      | ENSG00000171126 | 1.4794    | 0.069519 | 0.069519    | 0.094749    | 0.46226     | 0.95186  | 0.17059  |
|             |                 | -0.15901  | 0.56317  | 0.069519    | 0.533261598 |             |          |          |
| ALOX12      | ENSG00000108839 | 1.4793    | 0.069524 | 0.069524    | -0.13019    | 0.55179     | 1.0121   |          |
|             |                 | 0.15576   | 0.74878  | 0.22699     | 0.069524    | 0.533261598 |          |          |
| ADH5        | ENSG00000197894 | -0.26438  | 0.60426  | 0.60426     | 1.4793      | 0.069526    | 1.4793   | 0.069526 |
|             |                 | -0.62599  | 0.73434  | 0.069526    | 0.533261598 |             |          |          |
| KIAA0040    | ENSG00000235750 | 0.52645   | 0.29929  | 0.29929     | 1.4793      | 0.069528    | -1.0286  |          |
|             |                 | 0.84817   | -0.12028 | 0.54787     | 0.069528    | 0.533261598 |          |          |
| NA          | ENSG00000272489 | 1.4793    | 0.069532 | 0.069532    | 1.4793      | 0.069532    | 1.4793   | 0.069532 |
|             |                 | 1.4793    | 0.069532 | 0.069532    | 0.533261598 |             |          |          |
| NPTXR       | ENSG00000221890 | 1.3704    | 0.085282 | 0.085282    | 1.4793      | 0.069534    | 1.3704   | 0.085282 |
|             |                 | 0.74526   | 0.22806  | 0.069534    | 0.533261598 |             |          |          |
| SMAD1-AS1   | ENSG00000250902 | 1.187     | 0.11761  | 0.11761     | 0.11773     | 0.45314     | 1.187    | 0.11761  |
|             |                 | 1.4792    | 0.069541 | 0.069541    | 0.533261598 |             |          |          |
| NA          | ENSG00000240731 | 1.4792    | 0.069542 | 0.069542    | 1.4792      | 0.069542    | 1.4792   | 0.069542 |
|             |                 | 1.4792    | 0.069542 | 0.069542    | 0.533261598 |             |          |          |
| B3GNT6      | ENSG00000198488 | 1.4792    | 0.069546 | 0.069546    | 0.6907      | 0.24488     | 1.0396   |          |
|             |                 | 0.14925   | 1.4428   | 0.074534    | 0.069546    | 0.533261598 |          |          |
| OR1L6       | ENSG00000171459 | 1.4792    | 0.06955  | 0.06955     | -0.43097    | 0.66675     | 1.1817   | 0.11866  |
|             |                 | -1.5652   | 0.94124  | 0.06955     | 0.533261598 |             |          |          |
| PPP1R26     | ENSG00000196422 | 1.4791    | 0.06956  | 0.06956     | -0.6943     | 0.75625     | -0.84087 |          |
|             |                 | 0.79979   | -0.95257 | 0.8296      | 0.06956     | 0.533261598 |          |          |
| NA          | ENSG00000255704 | 0.0080439 | 0.49679  | 0.49679     | 0.0080439   | 0.49679     | 1.479    | 0.069571 |
|             |                 | -0.40772  | 0.65826  | 0.069571    | 0.533261598 |             |          |          |
| RNU6-1271P  | ENSG00000252858 | 1.479     | 0.069574 | 0.069574    | 1.479       | 0.069574    | 1.479    | 0.069574 |
|             |                 | 0.069574  | 0.069574 | 0.533261598 |             |             |          |          |
| NA          | ENSG00000214797 | -0.66436  | 0.74677  | 0.74677     | 1.4789      | 0.069585    | 1.4415   | 0.074718 |
|             |                 | -0.66436  | 0.74677  | 0.069585    | 0.533261598 |             |          |          |

|           |                 |               |             |              |             |             |          |
|-----------|-----------------|---------------|-------------|--------------|-------------|-------------|----------|
| LHX4      | ENSG00000121454 | 1.4788        | 0.069592    | -0.69775     | 0.75733     | 1.1248      | 0.13035  |
|           |                 | 0.18693       | 0.42586     | 0.069592     | 0.533261598 |             |          |
| NA        | ENSG00000270852 | 0.29487       | 0.38405     | 0.0941       | 0.46251     | 0.021618    | 0.49138  |
|           |                 | 1.4788        | 0.069593    | 0.069593     | 0.533261598 |             |          |
| C2orf50   | ENSG00000150873 | 1.2718        | 0.10173     | 1.4451       | 0.074213    | 1.4787      |          |
|           |                 | 0.069609      | 1.4787      | 0.069609     | 0.069609    | 0.533261598 |          |
| CFAP300   | ENSG00000137691 | -1.5709       | 0.9419      | -1.5709      | 0.9419      | 1.4787      |          |
|           |                 | 0.06961       | 0.452032564 | 0.06961      | 0.533261598 |             |          |
| AKR7A3    | ENSG00000162482 | 1.4787        | 0.069613    | 0.48435      | 0.31407     | -0.046273   |          |
|           |                 | 0.51845       | 0.42213     | 0.33646      | 0.069613    | 0.533261598 |          |
| NA        | ENSG00000226471 | 1.3113        | 0.094885    | 1.4786       | 0.069622    | 0.58634     | 0.27882  |
|           |                 | 0.68286       | 0.24735     | 0.069622     | 0.533261598 |             |          |
| ZNF451    | ENSG00000112200 | 1.36900855    | 1.1919      | 0.11665      | 0.65497     | 0.25624     |          |
|           |                 | 1.4786        | 0.069624    | 0.069624     | 0.533261598 |             |          |
| ARMC1     | ENSG00000104442 | 1.128012967   | 0.48696     | 0.31314      | 0.23133     | 0.40853     |          |
|           |                 | 1.4785        | 0.069638    | 0.069638     | 0.533261598 |             |          |
| C19orf57  | ENSG00000132016 | 1.4785        | 0.069643    | 1.4580072418 | -0.47884    | 0.68397     |          |
|           |                 | 0.72542       | 0.2341      | 0.069643     | 0.533261598 |             |          |
| RNF180    | ENSG00000164197 | 1.4784        | 0.069645    | 0.17156      | 0.43189     | 0.81623     |          |
|           |                 | 0.20718       | -0.39874    | 0.65496      | 0.069645    | 0.533261598 |          |
| PROS1     | ENSG00000184500 | 0.2714        | 0.39304     | 1.3229       | 0.092936    | -0.12358    | 0.54918  |
|           |                 | 1.4782        | 0.069671    | 0.069671     | 0.533261598 |             |          |
| LINC00476 | ENSG00000175611 | 1.4782        | 0.069682    | 0.057954     | 0.47689     | -0.23901    |          |
|           |                 | 0.59445       | -0.50923    | 0.6947       | 0.069682    | 0.533261598 |          |
| NA        | ENSG00000224886 | 1.4782        | 0.069683    | 1.4782       | 0.069683    | 0.1133      | 0.4549   |
|           |                 | 1.2019        | 0.11469     | 0.069683     | 0.533261598 |             |          |
| SPCS1     | ENSG00000114902 | 1.1585        | 0.12333     | 1.4781       | 0.069694    | 0.83305     | 0.20241  |
|           |                 | 0.75596       | 0.22484     | 0.069694     | 0.533261598 |             |          |
| HMG2P5    | ENSG00000234664 | 1.4779        | 0.069714    | 1.4779       | 0.069714    | 1.4779      |          |
|           |                 | 0.069714      | 1.4779      | 0.069714     | 0.069714    | 0.533261598 |          |
| NA        | ENSG00000278893 | 0.78118       | 0.21735     | 1.4779       | 0.069718    | 0.78118     | 0.21735  |
|           |                 | 0.78118       | 0.21735     | 0.069718     | 0.533261598 |             |          |
| RNU6-236P | ENSG00000200756 | 1.4778        | 0.069727    | 1.4778       | 0.069727    | 1.4778      |          |
|           |                 | 0.069727      | 1.4778      | 0.069727     | 0.069727    | 0.533261598 |          |
| NDUFB8P2  | ENSG00000270264 | 1.4778        | 0.069729    | 1.4778       | 0.069729    | 1.4778      |          |
|           |                 | 0.069729      | 1.4778      | 0.069729     | 0.069729    | 0.533261598 |          |
| RN7SKP197 | ENSG00000252886 | 1.4778        | 0.06973     | 1.4778       | 0.06973     | 1.4778      |          |
|           |                 | 0.06973       | 1.4778      | 0.06973      | 0.06973     | 0.533261598 |          |
| GRHPR     | ENSG00000137106 | 1.4775        | 0.069766    | 0.17662      | 0.4299      | -0.63833    | 0.73837  |
|           |                 | 0.21849       | 0.41352     | 0.069766     | 0.53345319  |             |          |
| NA        | ENSG00000278215 | 1.4772        | 0.069809    | 1.4772       | 0.069809    | 1.4772      | 0.069809 |
|           |                 | 1.4772        | 0.069809    | 0.069809     | 0.533482126 |             |          |
| TFEC      | ENSG00000105967 | -0.4484       | 0.67307     | 0.087553     | 0.46512     | -0.41275    | 0.66011  |
|           |                 | 1.4772        | 0.069815    | 0.069815     | 0.533482126 |             |          |
| NA        | ENSG00000270071 | 0.79596       | 0.21303     | 0.26378      | 0.39597     | 0.76636     | 0.22173  |
|           |                 | 1.4770.069831 | 0.069831    | 0.533482126  |             |             |          |
| SAFB2     | ENSG00000130254 | -0.49245      | 0.6888      | -1.7666      | 0.96135     | 1.4769      | 0.069849 |
|           |                 | -0.31356      | 0.62307     | 0.069849     | 0.533482126 |             |          |
| MIR4476   | ENSG00000265368 | 1.4383        | 0.075174    | 1.4768       | 0.069859    | 1.4383      |          |
|           |                 | 0.075174      | 1.4383      | 0.075174     | 0.069859    | 0.533482126 |          |
| NA        | ENSG00000280355 | -0.060418     | 0.52409     | 1.0087       | 0.15656     | 1.4768      | 0.06986  |
|           |                 | 1.4768        | 0.06986     | 0.06986      | 0.533482126 |             |          |
| LCA5      | ENSG00000135338 | 0.30949       | 0.37848     | -0.081344    | 0.53242     | 1.4768      | 0.069866 |
|           |                 | 0.3890.34864  | 0.069866    | 0.533482126  |             |             |          |
| AARS1P1   | ENSG00000249038 | 1.4767        | 0.069878    | 1.4767       | 0.069878    | 1.4767      |          |
|           |                 | 0.069878      | 1.1628      | 0.12245      | 0.069878    | 0.533482126 |          |
| NA        | ENSG00000271857 | 0.40895       | 0.34129     | -0.46805     | 0.68013     | 1.4766      | 0.069889 |
|           |                 | 1.1257        | 0.13015     | 0.069889     | 0.533482126 |             |          |
| NA        | ENSG00000259742 | -1.718        | 0.9571      | -1.3603      | 0.91313     | -0.81141    | 0.79144  |
|           |                 | 1.4765        | 0.069902    | 0.069902     | 0.533482126 |             |          |
| CDK7P1    | ENSG00000213194 | 0.92991       | 0.17621     | 0.53599      | 0.29598     | 1.4765      |          |
|           |                 | 0.069905      | 1.4765      | 0.069905     | 0.069905    | 0.533482126 |          |

|           |                 |          |          |             |             |           |          |
|-----------|-----------------|----------|----------|-------------|-------------|-----------|----------|
| NA        | ENSG00000267194 | -0.24358 | 0.59622  | -0.18909    | 0.57499     | 0.20144   | 0.42018  |
|           | 1.4765          | 0.069905 | 0.069905 | 0.533482126 |             |           |          |
| PLAAT4    | ENSG00000133321 | 1.4764   | 0.069917 | -0.76949    | 0.7792      | -0.76949  |          |
|           | 0.7792          | -0.76949 | 0.7792   | 0.069917    | 0.533482126 |           |          |
| FUT4      | ENSG00000196371 | 1.4763   | 0.069926 | 1.4763      | 0.069926    | 1.4763    | 0.069926 |
|           | 1.4763          | 0.069926 | 0.069926 | 0.533482126 |             |           |          |
| STX17-AS1 | ENSG00000255145 | 0.98399  | 0.16256  | 0.98399     | 0.16256     | 1.4763    |          |
|           | 0.069934        | 0.98399  | 0.16256  | 0.069934    | 0.533482126 |           |          |
| NA        | ENSG00000280159 | 1.4757   | 0.07001  | 1.4757      | 0.07001     | 1.4757    | 0.07001  |
|           | 0.90745         | 0.18209  | 0.07001  | 0.533978291 |             |           |          |
| RGS7      | ENSG00000182901 | -0.09591 | 0.5382   | 0.19681     | 0.42199     | 1.4756    | 0.070029 |
|           | 0.33662         | 0.3682   | 0.070029 | 0.53403962  |             |           |          |
| NA        | ENSG00000233290 | -1.1231  | 0.8693   | 1.4754      | 0.070058    | -0.96267  | 0.83214  |
|           | -0.60099        | 0.72608  | 0.070058 | 0.534101835 |             |           |          |
| PIGU      | ENSG00000101464 | 0.31808  | 0.37521  | 1.3367      | 0.090666    | 0.029041  | 0.48842  |
|           | 1.4753          | 0.070067 | 0.070067 | 0.534101835 |             |           |          |
| NA        | ENSG00000257904 | 1.4752   | 0.070075 | -0.46632    | 0.67951     | -0.88144  | 0.81096  |
|           | -1.1966         | 0.88428  | 0.070075 | 0.534101835 |             |           |          |
| NA        | ENSG00000237729 | 1.4752   | 0.070081 | -0.52619    | 0.70062     | 1.4752    | 0.070081 |
|           | 1.4752          | 0.070081 | 0.070081 | 0.534101835 |             |           |          |
| ZNF136    | ENSG00000196646 | 1.47     | 0.070787 | 0.40123     | 0.34413     | 1.475     | 0.070101 |
|           | 0.24674         | 0.40256  | 0.070101 | 0.534170716 |             |           |          |
| GSC2      | ENSG00000063515 | 1.4749   | 0.070125 | 1.4749      | 0.070125    | 1.4749    | 0.070125 |
|           | 1.4749          | 0.070125 | 0.070125 | 0.534232239 |             |           |          |
| RPL12P2   | ENSG00000216412 | 0.40743  | 0.34184  | 1.4748      | 0.070131    | 1.4135    |          |
|           | 0.078761        | 0.68592  | 0.24638  | 0.070131    | 0.534232239 |           |          |
| NA        | ENSG00000259703 | 1.1678   | 0.12145  | 1.4746      | 0.070158    | 1.4746    | 0.070158 |
|           | 1.4746          | 0.070158 | 0.070158 | 0.534354383 |             |           |          |
| NA        | ENSG00000265550 | 1.4745   | 0.070173 | 1.4745      | 0.070173    | 1.4745    | 0.070173 |
|           | 1.4745          | 0.070173 | 0.070173 | 0.534385105 |             |           |          |
| UCA1      | ENSG00000214049 | 1.3966   | 0.081269 | 1.0175      | 0.15445     | 1.4743    | 0.070204 |
|           | 1.4743          | 0.070204 | 0.070204 | 0.534537644 |             |           |          |
| UGT1A3    | ENSG00000243135 | 1.4739   | 0.070249 | 1.4739      | 0.070249    | 1.4739    |          |
|           | 0.070249        | 1.4739   | 0.070249 | 0.070249    | 0.534796715 |           |          |
| PZP       | ENSG00000126838 | 1.1002   | 0.13563  | 1.4738      | 0.070271    | 1.4738    | 0.070271 |
|           | -0.27525        | 0.60844  | 0.070271 | 0.534804902 |             |           |          |
| DOCK7     | ENSG00000116641 | -0.21817 | 0.58635  | 1.053       | 0.14617     | 1.4737    | 0.070282 |
|           | -0.65801        | 0.74474  | 0.070282 | 0.534804902 |             |           |          |
| NA        | ENSG00000248533 | 1.4737   | 0.070283 | 1.4737      | 0.070283    | 1.4737    | 0.070283 |
|           | 1.4737          | 0.070283 | 0.070283 | 0.534804902 |             |           |          |
| LINC00839 | ENSG00000185904 | -0.14046 | 0.55585  | 1.4733      | 0.070333    | -0.2997   |          |
|           | 0.6178          | 1.2435   | 0.10685  | 0.070333    | 0.534965362 |           |          |
| NA        | ENSG00000279803 | 1.4733   | 0.070342 | 1.4733      | 0.070342    | 1.4733    | 0.070342 |
|           | 1.4733          | 0.070342 | 0.070342 | 0.534965362 |             |           |          |
| XRCC6P3   | ENSG00000230318 | 1.4732   | 0.070348 | 1.4732      | 0.070348    | 0.95056   |          |
|           | 0.17091         | 1.4732   | 0.070348 | 0.070348    | 0.534965362 |           |          |
| RPL34P21  | ENSG00000244451 | 1.1478   | 0.12554  | 1.1478      | 0.12554     | 1.4732    |          |
|           | 0.070348        | 1.1478   | 0.12554  | 0.070348    | 0.534965362 |           |          |
| SSU72P5   | ENSG00000284018 | 1.4729   | 0.070386 | -1.0364     | 0.84998     | -0.018234 |          |
|           | 0.50727         | 0.045299 | 0.48193  | 0.070386    | 0.535118449 |           |          |
| SNORD58C  | ENSG00000202093 | 1.4728   | 0.070405 | 1.4728      | 0.070405    | 1.4728    |          |
|           | 0.070405        | 1.4728   | 0.070405 | 0.070405    | 0.535118449 |           |          |
| NUTM2A    | ENSG00000184923 | 0.84981  | 0.19772  | 1.4727      | 0.07041     | 0.43052   |          |
|           | 0.33341         | 0.2191   | 0.41328  | 0.07041     | 0.535118449 |           |          |
| OR1D2     | ENSG00000184166 | -0.95729 | 0.83079  | -0.94118    | 0.82669     | 1.4726    | 0.070427 |
|           | -1.0064         | 0.84289  | 0.070427 | 0.535118449 |             |           |          |
| NA        | ENSG00000273367 | 1.4726   | 0.070429 | 1.4726      | 0.070429    | 1.4726    | 0.070429 |
|           | 1.4726          | 0.070429 | 0.070429 | 0.535118449 |             |           |          |
| RNU6-900P | ENSG00000207227 | 1.4725   | 0.070444 | 1.4725      | 0.070444    | 1.4725    |          |
|           | 0.070444        | 1.4725   | 0.070444 | 0.070444    | 0.535118449 |           |          |
| NA        | ENSG00000267769 | 1.4725   | 0.070445 | 1.4725      | 0.070445    | 1.4725    | 0.070445 |
|           | 1.4725          | 0.070445 | 0.070445 | 0.535118449 |             |           |          |

|           |                 |          |             |             |             |             |          |
|-----------|-----------------|----------|-------------|-------------|-------------|-------------|----------|
| NA        | ENSG00000278254 | -0.58909 | 0.7221      | 1.4723      | 0.070475    | -0.58909    | 0.7221   |
|           |                 | -0.79392 | 0.78638     | 0.070475    | 0.535164431 |             |          |
| MAP1LC3C  | ENSG00000197769 | 0.76469  | 0.22223     | 1.4722      | 0.07048     | 0.80949     |          |
|           |                 | 0.20912  | -1.0174     | 0.84553     | 0.07048     | 0.535164431 |          |
| NA        | ENSG00000249200 | 1.4722   | 0.070484    | 1.4722      | 0.070484    | 1.4722      | 0.070484 |
|           |                 | 1.4722   | 0.070484    | 0.070484    | 0.535164431 |             |          |
| PTPRR     | ENSG00000153233 | -0.31861 | 0.62499     | 0.88447     | 0.18822     | -0.59383    | 0.72369  |
|           |                 | 1.472    | 0.070508    | 0.535249289 |             |             |          |
| DAZAP1    | ENSG00000071626 | 0.32965  | 0.37083     | 0.67617     | 0.24947     | 0.32965     |          |
|           |                 | 0.37083  | 1.4718      | 0.070536    | 0.070536    | 0.535249289 |          |
| ZMYND8    | ENSG00000101040 | 1.4717   | 0.070548    | 1.2131      | 0.11256     | -0.35283    |          |
|           |                 | 0.63789  | 1.0667      | 0.14305     | 0.070548    | 0.535249289 |          |
| SETDB1    | ENSG00000143379 | 1.385    | 0.083034    | 1.3296      | 0.091823    | 1.4716      | 0.070566 |
|           |                 | 0.12969  | 0.44841     | 0.070566    | 0.535249289 |             |          |
| HNRNPKP3  | ENSG00000251557 | 0.77116  | 0.22031     | 0.68529     | 0.24658     | 1.4716      |          |
|           |                 | 0.070566 | 0.77116     | 0.22031     | 0.070566    | 0.535249289 |          |
| FAM174B   | ENSG00000185442 | -0.16717 | 0.56638     | 1.4715      | 0.070571    | -0.16717    |          |
|           |                 | 0.56638  | 0.37856     | 0.35251     | 0.070571    | 0.535249289 |          |
| METTL15   | ENSG00000169519 | 0.83164  | 0.20281     | 0.0088082   | 0.49649     | 1.4713      |          |
|           |                 | 0.070602 | -0.18213    | 0.57226     | 0.070602    | 0.535249289 |          |
| NA        | ENSG00000241411 | 1.4713   | 0.070606    | -1.2212     | 0.88899     | -1.2212     | 0.88899  |
|           |                 | -1.2212  | 0.88899     | 0.070606    | 0.535249289 |             |          |
| NA        | ENSG00000207384 | 1.4712   | 0.070613    | 1.4712      | 0.070613    | 0.53195     | 0.29738  |
|           |                 | 0.23938  | 0.40541     | 0.070613    | 0.535249289 |             |          |
| ZNF420    | ENSG00000197050 | 0.56762  | 0.28515     | 1.4712      | 0.070616    | -0.14381    |          |
|           |                 | 0.55718  | 0.87981     | 0.18948     | 0.070616    | 0.535249289 |          |
| TRMT112P3 | ENSG00000265262 | -0.16599 | 0.56592     | 1.4712      | 0.070616    | -0.16599    |          |
|           |                 | 0.56592  | -0.16599    | 0.56592     | 0.070616    | 0.535249289 |          |
| GNRH1     | ENSG00000147437 | 1.4708   | 0.070671    | -0.71912    | 0.76397     | -0.71912    | 0.76397  |
|           |                 | -0.15224 | 0.5605      | 0.070671    | 0.535545124 |             |          |
| TRIM40    | ENSG00000204614 | 1.4707   | 0.07068     | 1.4707      | 0.07068     | 1.4707      |          |
|           |                 | 0.07068  | 0.39702     | 0.34568     | 0.07068     | 0.535545124 |          |
| CCDC169   | ENSG00000242715 | 1.4707   | 0.070688    | 0.74423     | 0.22837     | -0.3985     |          |
|           |                 | 0.65487  | -0.53152    | 0.70247     | 0.070688    | 0.535545124 |          |
| RN7SKP12  | ENSG00000252084 | 0.096163 | 0.4617      | 1.4706      | 0.070701    | 0.46206     |          |
|           |                 | 0.32202  | 0.86984     | 0.19219     | 0.070701    | 0.53556035  |          |
| ARHGEF7   | ENSG00000102606 | 1.4705   | 0.070717    | -0.58577    | 0.72098     | -0.76773    |          |
|           |                 | 0.77868  | -0.63304    | 0.73665     | 0.070717    | 0.535598292 |          |
| NA        | ENSG00000270713 | 1.4702   | 0.070753    | -1.0277     | 0.84796     | 0.65376     | 0.25663  |
|           |                 | -0.8223  | 0.79455     | 0.070753    | 0.535787675 |             |          |
| SFMBT2    | ENSG00000198879 | 1.3173   | 0.09387     | 1.47        | 0.070781    | 1.0795      | 0.14019  |
|           |                 | 1.2292   | 0.1095      | 0.070781    | 0.535916428 |             |          |
| NA        | ENSG00000204717 | 0.74203  | 0.22903     | 0.40496     | 0.34275     | 1.2635      | 0.10321  |
|           |                 | 1.4699   | 0.070798    | 0.070798    | 0.535961867 |             |          |
| LINC01995 | ENSG00000244247 | 1.3768   | 0.084291    | 1.4697      | 0.070823    | 0.6325      |          |
|           |                 | 0.26353  | -0.33938    | 0.63284     | 0.070823    | 0.536067846 |          |
| RPL7AP4   | ENSG00000213641 | 0.78156  | 0.21724     | 0.78156     | 0.21724     | 1.4696      |          |
|           |                 | 0.070839 | 1.4696      | 0.070839    | 0.070839    | 0.536105679 |          |
| MIR4257   | ENSG00000264553 | 1.4694   | 0.070858    | 1.4694      | 0.070858    | 1.4694      |          |
|           |                 | 0.070858 | 1.4694      | 0.070858    | 0.070858    | 0.536166202 |          |
| SPRR2F    | ENSG00000244094 | 1.4693   | 0.070872    | -1.3981     | 0.91896     | -0.31316    |          |
|           |                 | 0.62292  | -0.31316    | 0.62292     | 0.070872    | 0.536188878 |          |
| NA        | ENSG00000266814 | 1.4692   | 0.070892    | -0.40454    | 0.65709     | 1.0705      | 0.14219  |
|           |                 | -0.49949 | 0.69128     | 0.070892    | 0.536248791 |             |          |
| CALM1P2   | ENSG00000230564 | 1.4687   | 0.070959    | 1.4687      | 0.070959    | -0.32709    |          |
|           |                 | 0.6282   | 0.1787      | 0.42909     | 0.070959    | 0.536248791 |          |
| ID3       | ENSG00000117318 | 1.4686   | 0.070974    | -0.25442    | 0.60041     | 1.4686      | 0.070974 |
|           |                 | 1.4686   | 0.070974    | 0.070974    | 0.536248791 |             |          |
| SEC22C    | ENSG00000093183 | -0.5521  | 0.70956     | 1.4685      | 0.070982    | 1.4685      |          |
|           |                 | 0.070982 | 1.2516      | 0.10536     | 0.070982    | 0.536248791 |          |
| NA        | ENSG00000271027 | 1.4684   | 0.071       | 1.4684      | 0.071       | 1.4684      | 0.071    |
|           |                 | 0.071    | 0.536248791 |             |             |             |          |



|            |                 |           |          |             |             |          |          |        |
|------------|-----------------|-----------|----------|-------------|-------------|----------|----------|--------|
| MIR302D    | ENSG00000199145 | 1.4683    | 0.071007 | 1.4683      | 0.071007    | 1.4683   | 0.071007 | 1.4683 |
|            | 0.071007        | 1.4683    | 0.071007 | 0.071007    | 0.536248791 |          |          |        |
| MIR367     | ENSG00000199169 | 1.4683    | 0.071007 | 1.4683      | 0.071007    | 1.4683   | 0.071007 | 1.4683 |
|            | 0.071007        | 1.4683    | 0.071007 | 0.071007    | 0.536248791 |          |          |        |
| RNU6-1144P | ENSG00000206974 | 1.4683    | 0.071013 | 1.4683      | 0.071013    | 1.4683   | 0.071013 | 1.4683 |
|            | 0.071013        | 1.4683    | 0.071013 | 0.071013    | 0.536248791 |          |          |        |
| RNU1-130P  | ENSG00000200800 | -0.50516  | 0.69328  | 1.4392      | 0.075049    | 0.72496  |          |        |
|            | 0.23424         | 1.4683    | 0.071016 | 0.071016    | 0.536248791 |          |          |        |
| KLF4P1     | ENSG00000233186 | 0.55828   | 0.28833  | 1.4683      | 0.071018    | 0.39006  |          |        |
|            | 0.34825         | 1.4683    | 0.071018 | 0.071018    | 0.536248791 |          |          |        |
| LINC02385  | ENSG00000257193 | -0.75483  | 0.77482  | -0.24296    | 0.59598     | -0.4583  |          |        |
|            | 0.67663         | 1.4681    | 0.071045 | 0.071045    | 0.536248791 |          |          |        |
| PRODH      | ENSG00000100033 | 1.468     | 0.071057 | 0.58897     | 0.27794     | 1.0352   | 0.15029  |        |
|            | 0.56588         | 0.28574   | 0.071057 | 0.536248791 |             |          |          |        |
| NA         | ENSG00000280878 | 0.84365   | 0.19943  | 1.468       | 0.071057    | 0.65159  | 0.25733  |        |
|            | 0.65159         | 0.25733   | 0.071057 | 0.536248791 |             |          |          |        |
| MRPS5P3    | ENSG00000214743 | 0.014998  | 0.49402  | 0.014998    | 0.49402     | 1.4679   |          |        |
|            | 0.071063        | -0.081559 | 0.5325   | 0.071063    | 0.536248791 |          |          |        |
| NA         | ENSG00000254614 | 1.4679    | 0.071063 | 1.4679      | 0.071063    | 1.4679   | 0.071063 |        |
|            | 1.4679          | 0.071063  | 0.071063 | 0.536248791 |             |          |          |        |
| TCP11L2    | ENSG00000166046 | 1.4679    | 0.071071 | 1.2599      | 0.10385     | 1.4092   |          |        |
|            | 0.079381        | 1.4132    | 0.078799 | 0.071071    | 0.536248791 |          |          |        |
| DPYD-AS2   | ENSG00000235777 | -0.59661  | 0.72462  | 1.4678      | 0.071075    | -0.16274 |          |        |
|            | 0.56464         | -0.59661  | 0.72462  | 0.071075    | 0.536248791 |          |          |        |
| PPP1R8     | ENSG00000117751 | 1.1869    | 0.11763  | 1.3909      | 0.082125    | 0.73144  |          |        |
|            | 0.23225         | 1.4678    | 0.071078 | 0.071078    | 0.536248791 |          |          |        |
| NA         | ENSG00000221455 | 1.4677    | 0.071094 | 1.2581      | 0.10418     | 1.394    | 0.081658 |        |
|            | 1.4677          | 0.071094  | 0.071094 | 0.536263554 |             |          |          |        |
| ASS1       | ENSG00000130707 | 0.8407    | 0.20026  | 1.4676      | 0.071104    | 0.92623  | 0.17716  |        |
|            | 0.78568         | 0.21603   | 0.071104 | 0.536263554 |             |          |          |        |
| NA         | ENSG00000234837 | 0.63837   | 0.26162  | 0.90038     | 0.18396     | 1.4674   | 0.071127 |        |
|            | 1.4468          | 0.073976  | 0.071127 | 0.536263554 |             |          |          |        |
| ASPG       | ENSG00000166183 | 0.61055   | 0.27075  | 1.4673      | 0.071149    | 0.62521  | 0.26592  |        |
|            | 1.1673          | 0.12155   | 0.071149 | 0.536263554 |             |          |          |        |
| LINC00350  | ENSG00000225316 | 1.4673    | 0.071153 | -2.2872     | 0.98891     | -2.2872  |          |        |
|            | 0.98891         | -0.83607  | 0.79844  | 0.071153    | 0.536263554 |          |          |        |
| MYHAS      | ENSG00000272975 | 1.4672    | 0.071163 | 0.40969     | 0.34102     | -0.11891 | 0.54733  |        |
|            | 0.86623         | 0.19318   | 0.071163 | 0.536263554 |             |          |          |        |
| NA         | ENSG00000239219 | -1.132    | 0.87119  | 1.4672      | 0.071167    | -1.132   | 0.87119  |        |
|            | -1.132          | 0.87119   | 0.071167 | 0.536263554 |             |          |          |        |
| NA         | ENSG00000272506 | 1.4671    | 0.071178 | 1.4671      | 0.071178    | 1.4671   | 0.071178 |        |
|            | 1.4671          | 0.071178  | 0.071178 | 0.536263554 |             |          |          |        |
| UGT2B11    | ENSG00000213759 | -0.68111  | 0.7521   | 0.50318     | 0.30742     | -0.51394 |          |        |
|            | 0.69635         | 1.4671    | 0.071179 | 0.071179    | 0.536263554 |          |          |        |
| MYH2       | ENSG00000125414 | 0.70393   | 0.24074  | 1.1205      | 0.13126     | 1.4669   | 0.071201 |        |
|            | 1.1205          | 0.13126   | 0.071201 | 0.53631616  |             |          |          |        |
| RN7SKP237  | ENSG00000201533 | 0.81432   | 0.20773  | -0.4489     | 0.67325     | 1.4668   |          |        |
|            | 0.071217        | 0.89106   | 0.18645  | 0.071217    | 0.53631616  |          |          |        |
| ECEL1P1    | ENSG00000204121 | -0.36552  | 0.64264  | 0.55901     | 0.28808     | 0.55582  |          |        |
|            | 0.28917         | 1.4668    | 0.071219 | 0.071219    | 0.53631616  |          |          |        |
| NA         | ENSG00000253908 | 1.4658    | 0.071348 | 0.22296     | 0.41178     | 0.22296  | 0.41178  |        |
|            | 0.22296         | 0.41178   | 0.071348 | 0.537106033 |             |          |          |        |
| SHQ1       | ENSG00000144736 | 1.4658    | 0.07135  | 0.49909     | 0.30886     | 1.1961   | 0.11582  |        |
|            | 0.19699         | 0.42192   | 0.07135  | 0.537106033 |             |          |          |        |
| CENPS      | ENSG00000175279 | 1.4657    | 0.071367 | 0.048084    | 0.48082     | 1.206    | 0.11391  |        |
|            | 0.24679         | 0.40254   | 0.071367 | 0.537106033 |             |          |          |        |
| RNA5SP447  | ENSG00000200619 | 0.26866   | 0.39409  | 0.26866     | 0.39409     | 1.4656   |          |        |
|            | 0.071375        | 0.26866   | 0.39409  | 0.071375    | 0.537106033 |          |          |        |
| CIAO3      | ENSG00000103245 | -1.1318   | 0.87114  | 1.4656      | 0.071379    | -1.4362  | 0.92453  |        |
|            | -0.25633        | 0.60115   | 0.071379 | 0.537106033 |             |          |          |        |
| DEFA9P     | ENSG00000233238 | 1.4655    | 0.071397 | 0.50003     | 0.30853     | 0.81091  |          |        |
|            | 0.20871         | 0.81091   | 0.20871  | 0.071397    | 0.537158532 |          |          |        |

|            |                 |             |             |             |             |          |          |
|------------|-----------------|-------------|-------------|-------------|-------------|----------|----------|
| NA         | ENSG00000283525 | -1.4313     | 0.92383     | 0.59043     | 0.27745     | -0.87933 | 0.81039  |
|            | 1.4653          | 0.071421    | 0.071421    | 0.537180569 |             |          |          |
| NA         | ENSG00000241073 | 1.4653      | 0.071426    | 1.4653      | 0.071426    | 1.4653   | 0.071426 |
|            | 1.4653          | 0.071426    | 0.071426    | 0.537180569 |             |          |          |
| PPP1R2P1   | ENSG00000234515 | -0.18426    | 0.5731      | -0.62841    | 0.73513     | 0.47964  |          |
|            | 0.31574         | 1.4652      | 0.071433    | 0.071433    | 0.537180569 |          |          |
| GMPS       | ENSG00000163655 | 1.2392      | 0.10763     | 1.3874      | 0.082659    | 1.3874   | 0.082659 |
|            | 1.4651          | 0.071448    | 0.071448    | 0.537210468 |             |          |          |
| RNA5SP31   | ENSG00000223076 | 1.465       | 0.071464    | 0.36812     | 0.35639     | 1.465    | 0.071464 |
|            | 0.071464        | 0.071464    | 0.537247874 |             |             |          | 1.465    |
| NA         | ENSG00000237606 | 0.0081993   | 0.49673     | 1.4648      | 0.071484    | -0.12157 | 0.54838  |
|            | 0.0081993       | 0.49673     | 0.071484    | 0.537277175 |             |          |          |
| NA         | ENSG00000254777 | -0.63758    | 0.73813     | -0.63758    | 0.73813     | -0.63758 | 0.73813  |
|            | 1.4647          | 0.0715      | 0.0715      | 0.537277175 |             |          |          |
| EIF4BP2    | ENSG00000228753 | 0.72675     | 0.23369     | 1.4646      | 0.07151     | 1.4646   |          |
|            | 0.07151         | 1.4646      | 0.07151     | 0.07151     | 0.537277175 |          |          |
| FAM83A-AS1 | ENSG00000204949 | 1.2202      | 0.1112      | 1.4646      | 0.071512    | 1.2202   |          |
|            | 0.1112          | 1.2202      | 0.1112      | 0.071512    | 0.537277175 |          |          |
| NA         | ENSG00000248747 | 0.19279     | 0.42356     | 0.62685     | 0.26538     | 1.4643   | 0.071551 |
|            | 0.62685         | 0.26538     | 0.071551    | 0.537419496 |             |          |          |
| H3P2       | ENSG00000237279 | 1.4643      | 0.071553    | 1.4643      | 0.071553    | 1.4643   | 0.071553 |
|            | 1.4643          | 0.071553    | 0.071553    | 0.537419496 |             |          |          |
| NAPG       | ENSG00000134265 | 1.386       | 0.082878    | 0.78866     | 0.21515     | 1.0984   | 0.13602  |
|            | 1.4642          | 0.07157     | 0.07157     | 0.537437689 |             |          |          |
| CARD19     | ENSG00000165233 | 0.037496    | 0.48504     | -1.7073     | 0.95612     | 1.4641   |          |
|            | 0.071583        | -0.21733    | 0.58602     | 0.071583    | 0.537437689 |          |          |
| NA         | ENSG00000215899 | 0.66214     | 0.25394     | 0.66214     | 0.25394     | 1.4639   | 0.071604 |
|            | 0.66214         | 0.25394     | 0.071604    | 0.537437689 |             |          |          |
| TLR5       | ENSG00000187554 | 1.4637      | 0.071632    | 1.304       | 0.096111    | 0.51242  | 0.30418  |
|            | 0.94323         | 0.17278     | 0.071632    | 0.537437689 |             |          |          |
| NA         | ENSG00000266135 | -0.44875    | 0.67319     | 0.71149     | 0.23839     | 1.2373   | 0.10799  |
|            | 1.4637          | 0.071636    | 0.071636    | 0.537437689 |             |          |          |
| DEFB1      | ENSG00000164825 | 1.4469      | 0.073964    | 0.28238     | 0.38882     | 1.4636   | 0.071646 |
|            | 1.4116          | 0.079029    | 0.071646    | 0.537437689 |             |          |          |
| OR7E25P    | ENSG00000187847 | -0.11612    | 0.54622     | 0.44484     | 0.32822     | 0.39039  |          |
|            | 0.34812         | 1.4635      | 0.071669    | 0.071669    | 0.537437689 |          |          |
| NA         | ENSG00000248288 | 1.4635      | 0.071672    | 1.4635      | 0.071672    | 1.4635   | 0.071672 |
|            | 1.4635          | 0.071672    | 0.071672    | 0.537437689 |             |          |          |
| NA         | ENSG00000280936 | 1.4633      | 0.07169     | 1.4633      | 0.07169     | 1.4633   | 0.07169  |
|            | 1.4633          | 0.07169     | 0.07169     | 0.537437689 |             |          |          |
| KIF3A      | ENSG00000131437 | 0.91475     | 0.18016     | 1.3463      | 0.089099    | 1.4633   | 0.071693 |
|            | -1.0553         | 0.85436     | 0.071693    | 0.537437689 |             |          |          |
| NA         | ENSG00000235119 | -0.20972    | 0.58306     | 1.0978      | 0.13615     | 1.4632   | 0.071707 |
|            | 1.4632          | 0.071707    | 0.071707    | 0.537437689 |             |          |          |
| LRRC77P    | ENSG00000244227 | 1.4632      | 0.071713    | -0.49276    | 0.68891     | -1.6164  | 0.947    |
|            | -1.1188         | 0.86838     | 0.071713    | 0.537437689 |             |          |          |
| NA         | ENSG00000272918 | 1.463       | 0.071736    | 1.463       | 0.071736    | 1.463    | 0.071736 |
|            | 0.071736        | 0.537437689 |             |             |             |          |          |
| POSTN      | ENSG00000133110 | 0.8189      | 0.20642     | 1.4629      | 0.071741    | 0.33324  | 0.36948  |
|            | 1.2501          | 0.10563     | 0.071741    | 0.537437689 |             |          |          |
| NA         | ENSG00000225563 | 0.9192      | 0.17899     | 1.4629      | 0.071746    | 1.4629   | 0.071746 |
|            | 1.4629          | 0.071746    | 0.071746    | 0.537437689 |             |          |          |
| RN7SL577P  | ENSG00000265942 | 1.4628      | 0.071757    | 1.4628      | 0.071757    | 1.4628   |          |
|            | 0.071757        | 1.4628      | 0.071757    | 0.071757    | 0.537437689 |          |          |
| MYL2       | ENSG00000111245 | 1.4628      | 0.071764    | -1.7151     | 0.95684     | 0.12794  | 0.4491   |
|            | -0.65934        | 0.74516     | 0.071764    | 0.537437689 |             |          |          |
| NA         | ENSG00000264634 | 1.4627      | 0.071773    | 1.0218      | 0.15345     | 1.0218   | 0.15345  |
|            | 1.0218          | 0.15345     | 0.071773    | 0.537437689 |             |          |          |
| NA         | ENSG00000254467 | 1.4627      | 0.071775    | 0.73566     | 0.23097     | 0.58273  | 0.28004  |
|            | 0.19957         | 0.42091     | 0.071775    | 0.537437689 |             |          |          |
| ZNF890P    | ENSG00000159904 | -0.71938    | 0.76405     | -1.0644     | 0.85642     | 0.59997  |          |
|            | 0.27426         | 1.4627      | 0.071776    | 0.071776    | 0.537437689 |          |          |

|           |                 |           |          |             |             |          |          |
|-----------|-----------------|-----------|----------|-------------|-------------|----------|----------|
| CLEC16A   | ENSG00000038532 | 1.4623    | 0.07183  | -0.51424    | 0.69646     | -0.47272 |          |
|           | 0.68179         | -1.0474   | 0.85254  | 0.07183     | 0.537638621 |          |          |
| NA        | ENSG00000270610 | 1.4622    | 0.071848 | 0.25531     | 0.39924     | 0.73231  | 0.23199  |
|           | 0.61863         | 0.26808   | 0.071848 | 0.537638621 |             |          |          |
| SLC49A3   | ENSG00000169026 | 1.4621    | 0.071852 | 0.91753     | 0.17943     | 1.0712   |          |
|           | 0.14204         | -1.5226   | 0.93607  | 0.071852    | 0.537638621 |          |          |
| MIR5089   | ENSG00000264999 | 1.4621    | 0.071857 | 1.4621      | 0.071857    | 1.4621   |          |
|           | 0.071857        | 1.4621    | 0.071857 | 0.071857    | 0.537638621 |          |          |
| NA        | ENSG00000270178 | -0.11356  | 0.54521  | 1.4621      | 0.071858    | 1.4621   | 0.071858 |
|           | 1.4621          | 0.071858  | 0.071858 | 0.537638621 |             |          |          |
| MTFMT     | ENSG00000103707 | 1.4619    | 0.071889 | 1.1401      | 0.12712     | 1.4619   | 0.071889 |
|           | -0.093109       | 0.53709   | 0.071889 | 0.53778799  |             |          |          |
| EHBP1     | ENSG00000115504 | 0.46724   | 0.32016  | 1.1782      | 0.11936     | 0.9752   | 0.16473  |
|           | 1.4617          | 0.071916  | 0.071916 | 0.537889582 |             |          |          |
| RPL22P19  | ENSG00000241129 | 1.4615    | 0.071939 | 1.4615      | 0.071939    | 1.4615   |          |
|           | 0.071939        | -0.93966  | 0.8263   | 0.071939    | 0.537889582 |          |          |
| RHOC      | ENSG00000155366 | 1.4613    | 0.071971 | 0.19217     | 0.4238      | -0.59952 | 0.72559  |
|           | 1.2636          | 0.10319   | 0.071971 | 0.537889582 |             |          |          |
| RNU7-23P  | ENSG00000239099 | 1.4612    | 0.071976 | -0.41948    | 0.66257     | 0.15927  |          |
|           | 0.43673         | 0.13023   | 0.44819  | 0.071976    | 0.537889582 |          |          |
| EDNRA     | ENSG00000151617 | -0.29843  | 0.61731  | 1.4612      | 0.071981    | 0.040748 | 0.48375  |
|           | 0.3588          | 0.35987   | 0.071981 | 0.537889582 |             |          |          |
| NA        | ENSG00000229462 | 1.4611    | 0.071993 | 1.3952      | 0.081482    | 0.53163  | 0.29749  |
|           | -1.2123         | 0.8873    | 0.071993 | 0.537889582 |             |          |          |
| ZNF775    | ENSG00000196456 | 1.4611    | 0.071997 | 1.4611      | 0.071997    | 1.4611   |          |
|           | 0.071997        | 1.4577    | 0.072465 | 0.071997    | 0.537889582 |          |          |
| ELK2BP    | ENSG00000234402 | 0.27292   | 0.39246  | 1.4609      | 0.072019    | 1.4609   |          |
|           | 0.072019        | 0.5384    | 0.29515  | 0.072019    | 0.537889582 |          |          |
| KIF9-AS1  | ENSG00000227398 | -1.3857   | 0.91707  | -1.1149     | 0.86756     | -1.105   |          |
|           | 0.86542         | 1.4609    | 0.072021 | 0.072021    | 0.537889582 |          |          |
| NA        | ENSG00000239891 | 1.4609    | 0.072023 | 1.4609      | 0.072023    | 1.4609   | 0.072023 |
|           | 0.35678         | 0.36063   | 0.072023 | 0.537889582 |             |          |          |
| OBI1      | ENSG00000152193 | 1.4609    | 0.072024 | -0.90264    | 0.81664     | 0.25847  | 0.39802  |
|           | -0.093161       | 0.53711   | 0.072024 | 0.537889582 |             |          |          |
| GALNT8    | ENSG00000130035 | 1.196     | 0.11585  | 0.47546     | 0.31723     | -0.92387 | 0.82222  |
|           | 1.4608          | 0.072041  | 0.072041 | 0.537934099 |             |          |          |
| LINC02395 | ENSG00000257771 | 0.10768   | 0.45712  | 0.47974     | 0.31571     | 1.4606   |          |
|           | 0.072062        | -0.57507  | 0.71738  | 0.072062    | 0.537946977 |          |          |
| NFKBIB    | ENSG00000104825 | 1.4605    | 0.072077 | 1.4605      | 0.072077    | 1.4605   |          |
|           | 0.072077        | 1.4605    | 0.072077 | 0.072077    | 0.537946977 |          |          |
| NA        | ENSG00000264388 | -0.009195 | 0.50367  | 1.4605      | 0.072083    | 1.4605   | 0.072083 |
|           | 1.3071          | 0.095585  | 0.072083 | 0.537946977 |             |          |          |
| IMMP2L    | ENSG00000184903 | 0.60944   | 0.27112  | 1.4603      | 0.07211     | -0.34489 |          |
|           | 0.63491         | -0.33014  | 0.62935  | 0.07211     | 0.537946977 |          |          |
| NA        | ENSG00000238813 | 1.4602    | 0.072115 | 1.2645      | 0.10303     | 1.4602   | 0.072115 |
|           | 1.4602          | 0.072115  | 0.072115 | 0.537946977 |             |          |          |
| KDM4C     | ENSG00000107077 | 1.063     | 0.14389  | 0.86882     | 0.19247     | 0.35714  | 0.36049  |
|           | 1.4602          | 0.072118  | 0.072118 | 0.537946977 |             |          |          |
| FCF1      | ENSG00000119616 | -1.5434   | 0.93863  | -0.57146    | 0.71615     | 1.4602   | 0.07212  |
|           | 0.24351         | 0.4038    | 0.07212  | 0.537946977 |             |          |          |
| LINC00163 | ENSG00000234880 | -2.1432   | 0.98395  | -0.99095    | 0.83915     | -1.4001  |          |
|           | 0.91926         | 1.46      | 0.07215  | 0.07215     | 0.538013198 |          |          |
| CNTN5     | ENSG00000149972 | -0.63621  | 0.73768  | 1.4599      | 0.072155    | 1.0521   | 0.14637  |
|           | 0.63614         | 0.26234   | 0.072155 | 0.538013198 |             |          |          |
| SNAP91    | ENSG00000065609 | 0.34616   | 0.36461  | -0.76239    | 0.77709     | 0.46386  |          |
|           | 0.32138         | 1.4599    | 0.072162 | 0.072162    | 0.538013198 |          |          |
| TMEM68    | ENSG00000167904 | 0.1036    | 0.45874  | 1.4598      | 0.072174    | 0.98706  |          |
|           | 0.16181         | 0.98706   | 0.16181  | 0.072174    | 0.538020349 |          |          |
| LINC02622 | ENSG00000259267 | -1.9243   | 0.97284  | -1.5835     | 0.94334     | 1.4597   |          |
|           | 0.072189        | -0.082905 | 0.53304  | 0.072189    | 0.538049858 |          |          |
| LSP1P1    | ENSG00000269099 | 0.89644   | 0.18501  | 1.2796      | 0.10035     | 0.8912   |          |
|           | 0.18641         | 1.4594    | 0.072226 | 0.072226    | 0.538100764 |          |          |

|           |                 |          |          |             |             |          |          |
|-----------|-----------------|----------|----------|-------------|-------------|----------|----------|
| TBX21     | ENSG00000073861 | 0.14172  | 0.44365  | 0.3349      | 0.36885     | 0.14172  | 0.44365  |
|           | 1.4594          | 0.072234 | 0.072234 | 0.538100764 |             |          |          |
| NA        | ENSG00000247867 | 0.91811  | 0.17928  | -0.83584    | 0.79838     | 0.078824 | 0.46859  |
|           | 1.4593          | 0.072237 | 0.072237 | 0.538100764 |             |          |          |
| LDHBP3    | ENSG00000248950 | 1.4593   | 0.07224  | 0.88893     | 0.18702     | 1.4593   |          |
|           | 0.07224         | 1.4593   | 0.07224  | 0.07224     | 0.538100764 |          |          |
| NA        | ENSG00000271730 | 1.4592   | 0.072254 | 1.3582      | 0.087202    | 1.4592   | 0.072254 |
|           | 1.4592          | 0.072254 | 0.072254 | 0.538122791 |             |          |          |
| HSPA13    | ENSG00000155304 | 0.23358  | 0.40766  | 0.40766     | 1.459       | 0.072278 | 0.29272  |
|           | 0.23358         | 0.40766  | 0.072278 | 0.538178104 |             |          | 0.38487  |
| ZNF662    | ENSG00000182983 | 1.4589   | 0.0723   | 1.2287      | 0.1096      | 1.2287   |          |
|           | 0.1096          | -0.23256 | 0.59195  | 0.0723      | 0.538178104 |          |          |
| PERCC1    | ENSG00000284395 | 0.66659  | 0.25252  | 0.37701     | 0.35308     | 1.4589   |          |
|           | 0.0723          | 1.4589   | 0.0723   | 0.0723      | 0.538178104 |          |          |
| NA        | ENSG00000271427 | 1.4588   | 0.072309 | 1.4588      | 0.072309    | 1.4588   | 0.072309 |
|           | 1.4588          | 0.072309 | 0.072309 | 0.538178104 |             |          |          |
| SLC13A1   | ENSG00000081800 | 1.4587   | 0.07233  | 0.029281    | 0.48832     | 0.5291   |          |
|           | 0.29837         | 0.032883 | 0.48688  | 0.07233     | 0.538178104 |          |          |
| AQP6      | ENSG00000086159 | -0.58514 | 0.72077  | -0.52898    | 0.70159     | 1.4585   | 0.072355 |
|           | 0.15474         | 0.43851  | 0.072355 | 0.538178104 |             |          |          |
| NA        | ENSG00000270890 | 1.4584   | 0.072366 | 1.4584      | 0.072366    | 1.4584   | 0.072366 |
|           | 1.4584          | 0.072366 | 0.072366 | 0.538178104 |             |          |          |
| NA        | ENSG00000232663 | -0.39113 | 0.65215  | 1.4583      | 0.072381    | -0.29197 | 0.61485  |
|           | 0.54657         | 0.29234  | 0.072381 | 0.538178104 |             |          |          |
| NA        | ENSG00000233825 | 1.4583   | 0.072383 | 1.4583      | 0.072383    | 1.4583   | 0.072383 |
|           | 1.4583          | 0.072383 | 0.072383 | 0.538178104 |             |          |          |
| RNU6-182P | ENSG00000252779 | 1.4583   | 0.072383 | 1.4583      | 0.072383    | 1.4583   |          |
|           | 0.072383        | 1.4583   | 0.072383 | 0.072383    | 0.538178104 |          |          |
| NA        | ENSG00000279121 | 1.0812   | 0.13981  | 1.4582      | 0.072397    | 0.52578  | 0.29952  |
|           | 1.4582          | 0.072397 | 0.072397 | 0.538178104 |             |          |          |
| MIR571    | ENSG00000207642 | 1.4582   | 0.0724   | 0.65095     | 0.25754     | 0.65095  |          |
|           | 0.25754         | 0.9802   | 0.16349  | 0.0724      | 0.538178104 |          |          |
| ULBP2     | ENSG00000131015 | 0.42458  | 0.33557  | -0.6972     | 0.75716     | 0.98616  | 0.16203  |
|           | 1.4581          | 0.072405 | 0.072405 | 0.538178104 |             |          |          |
| NA        | ENSG00000161583 | 1.4578   | 0.072447 | -1.6386     | 0.94935     | -1.8156  | 0.96528  |
|           | -0.12537        | 0.54989  | 0.072447 | 0.538254437 |             |          |          |
| ARL4AP4   | ENSG00000231395 | 0.90028  | 0.18399  | 1.4576      | 0.072481    | 0.84257  |          |
|           | 0.19974         | 0.84257  | 0.19974  | 0.072481    | 0.538254437 |          |          |
| DDX20     | ENSG00000064703 | 0.58585  | 0.27899  | 1.1506      | 0.12494     | 1.4575   | 0.072487 |
|           | 0.19606         | 0.42228  | 0.072487 | 0.538254437 |             |          |          |
| MEGF6     | ENSG00000162591 | 0.52286  | 0.30054  | -0.057085   | 0.52276     | -0.63866 | 0.73848  |
|           | 1.4575          | 0.072494 | 0.072494 | 0.538254437 |             |          |          |
| LINC00487 | ENSG00000205837 | 0.50471  | 0.30688  | 1.4574      | 0.072501    | 0.16972  |          |
|           | 0.43262         | 0.99689  | 0.15941  | 0.072501    | 0.538254437 |          |          |
| CEACAMP6  | ENSG00000238092 | -0.61205 | 0.72975  | 1.4573      | 0.072518    | -0.60409 |          |
|           | 0.72711         | 0.26988  | 0.39363  | 0.072518    | 0.538254437 |          |          |
| CLEC4GP1  | ENSG00000268297 | 1.4572   | 0.072526 | -0.10977    | 0.5437      | 1.4572   |          |
|           | 0.072526        | -0.82489 | 0.79528  | 0.072526    | 0.538254437 |          |          |
| WASHC2C   | ENSG00000172661 | 0.49509  | 0.31027  | 0.53409     | 0.29664     | 1.4572   |          |
|           | 0.072537        | 0.55677  | 0.28884  | 0.072537    | 0.538254437 |          |          |
| TLE2      | ENSG00000065717 | 1.4571   | 0.072547 | 1.2647      | 0.10298     | 0.19882  | 0.4212   |
|           | -0.97891        | 0.83619  | 0.072547 | 0.538254437 |             |          |          |
| NA        | ENSG00000267320 | 0.48699  | 0.31313  | -0.92841    | 0.8234      | 1.457    | 0.072552 |
|           | -0.66769        | 0.74783  | 0.072552 | 0.538254437 |             |          |          |
| IFNAR2    | ENSG00000159110 | -0.39252 | 0.65266  | -0.39252    | 0.65266     | -0.85041 |          |
|           | 0.80245         | 1.457    | 0.072554 | 0.072554    | 0.538254437 |          |          |
| POGZ      | ENSG00000143442 | 1.4569   | 0.072571 | 0.53558     | 0.29613     | 0.47794  | 0.31635  |
|           | -0.041117       | 0.5164   | 0.072571 | 0.538254437 |             |          |          |
| NA        | ENSG00000261532 | 1.4569   | 0.072574 | 1.4569      | 0.072574    | 1.4569   | 0.072574 |
|           | 1.4569          | 0.072574 | 0.072574 | 0.538254437 |             |          |          |
| DAPK3     | ENSG00000167657 | 0.73313  | 0.23174  | -0.40659    | 0.65784     | 0.38429  | 0.35038  |
|           | 1.4568          | 0.072583 | 0.072583 | 0.538254437 |             |          |          |

|           |                 |          |             |             |             |            |          |
|-----------|-----------------|----------|-------------|-------------|-------------|------------|----------|
| NA        | ENSG00000227958 | 1.4568   | 0.072584    | 0.49657     | 0.30975     | -0.12066   | 0.54802  |
|           | -1.6679         | 0.95233  | 0.072584    | 0.538254437 |             |            |          |
| NA        | ENSG00000267009 | 1.4568   | 0.072592    | -1.1256     | 0.86982     | -0.83649   | 0.79856  |
|           | -0.48276        | 0.68537  | 0.072592    | 0.538254437 |             |            |          |
| ABCC6     | ENSG00000091262 | 1.4566   | 0.072613    | -0.73605    | 0.76915     | 0.77212    | 0.22002  |
|           | -1.324          | 0.90724  | 0.072613    | 0.538328235 |             |            |          |
| SP7       | ENSG00000170374 | 1.4565   | 0.072632    | 1.2308      | 0.10919     | 0.35418    | 0.3616   |
|           | 0.76513         | 0.2221   | 0.072632    | 0.538364593 |             |            |          |
| NA        | ENSG00000242262 | 1.4564   | 0.07264     | 0.61853     | 0.26811     | 1.4564     | 0.07264  |
|           | 1.4564          | 0.07264  | 0.07264     | 0.538364593 |             |            |          |
| FXVD6P1   | ENSG00000270762 | 1.4563   | 0.072653    | -1.2318     | 0.89099     | -0.0047107 |          |
|           | 0.50188         | 0.88269  | 0.1887      | 0.072653    | 0.538379059 |            |          |
| NA        | ENSG00000218631 | 0.85688  | 0.19575     | 1.456       | 0.07269     | 0.85688    | 0.19575  |
|           | 0.68703         | 0.24603  | 0.07269     | 0.53857134  |             |            |          |
| NA        | ENSG00000240573 | 0.40691  | 0.34204     | 0.40691     | 0.34204     | 1.456      | 0.072702 |
|           | -0.01698        | 0.50677  | 0.072702    | 0.538578361 |             |            |          |
| CTSS      | ENSG00000163131 | -0.19806 | 0.5785      | -0.21466    | 0.58498     | 1.4559     | 0.072716 |
|           | 1.2885          | 0.098778 | 0.072716    | 0.538584992 |             |            |          |
| NA        | ENSG00000279342 | -0.11655 | 0.54639     | 1.4558      | 0.072725    | -0.64664   | 0.74107  |
|           | -0.64664        | 0.74107  | 0.072725    | 0.538584992 |             |            |          |
| NA        | ENSG00000248240 | 1.4557   | 0.072738    | 1.4557      | 0.072738    | 1.4557     | 0.072738 |
|           | 1.4557          | 0.072738 | 0.072738    | 0.538599413 |             |            |          |
| NA        | ENSG00000273472 | 1.4554   | 0.072775    | 1.4554      | 0.072775    | 1.4554     | 0.072775 |
|           | 1.4554          | 0.072775 | 0.072775    | 0.538664454 |             |            |          |
| CCDC192   | ENSG00000230561 | 0.77267  | 0.21986     | 1.1739      | 0.12021     | -0.024791  |          |
|           | 0.50989         | 1.4554   | 0.072781    | 0.072781    | 0.538664454 |            |          |
| NA        | ENSG00000279737 | 1.4553   | 0.07279     | 0.59932     | 0.27448     | 0.59932    | 0.27448  |
|           | 0.59932         | 0.27448  | 0.07279     | 0.538664454 |             |            |          |
| FAM187B2P | ENSG00000262497 | 0.88224  | 0.18882     | 1.4553      | 0.072791    | 0.88224    |          |
|           | 0.18882         | 0.88224  | 0.18882     | 0.072791    | 0.538664454 |            |          |
| LINC00430 | ENSG00000233528 | -0.78204 | 0.78291     | 0.067362    | 0.47315     | 0.067362   |          |
|           | 0.47315         | 1.4548   | 0.072857    | 0.072857    | 0.538688799 |            |          |
| GATA3-AS1 | ENSG00000197308 | -0.64397 | 0.7402      | 0.97909     | 0.16377     | 1.4546     |          |
|           | 0.072886        | 1.4546   | 0.072886    | 0.072886    | 0.538688799 |            |          |
| NA        | ENSG00000227741 | 1.4545   | 0.072905    | 1.4545      | 0.072905    | 1.4545     | 0.072905 |
|           | 1.4545          | 0.072905 | 0.072905    | 0.538688799 |             |            |          |
| NA        | ENSG00000238481 | 1.4545   | 0.072909    | 1.4545      | 0.072909    | 1.4545     | 0.072909 |
|           | 1.4545          | 0.072909 | 0.072909    | 0.538688799 |             |            |          |
| LINC02820 | ENSG00000258815 | 1.4544   | 0.072912    | 1.4544      | 0.072912    | 1.4544     |          |
|           | 0.072912        | 1.0212   | 0.15357     | 0.072912    | 0.538688799 |            |          |
| DEFB109F  | ENSG00000244050 | 1.4543   | 0.072933    | 1.3893      | 0.082367    | 0.25031    |          |
|           | 0.40118         | 0.25031  | 0.40118     | 0.072933    | 0.538688799 |            |          |
| DDIT4     | ENSG00000168209 | 1.4543   | 0.072938    | 0.036335    | 0.48551     | -0.23935   | 0.59458  |
|           | 1.4543          | 0.072938 | 0.072938    | 0.538688799 |             |            |          |
| NA        | ENSG00000201003 | 1.4542   | 0.07294     | 1.4542      | 0.07294     | 1.4542     | 0.07294  |
|           | 1.4542          | 0.07294  | 0.07294     | 0.538688799 |             |            |          |
| MMAB      | ENSG00000139428 | 1.1868   | 0.11765     | 1.4542      | 0.072946    | 1.4542     | 0.072946 |
|           | 1.4542          | 0.072946 | 0.072946    | 0.538688799 |             |            |          |
| ELMO1-AS1 | ENSG00000224101 | -1.2101  | 0.88688     | 0.067994    | 0.4729      | 1.4541     |          |
|           | 0.072958        | -0.11068 | 0.54406     | 0.072958    | 0.538688799 |            |          |
| NA        | ENSG00000239216 | 1.4541   | 0.07296     | 1.4541      | 0.07296     | 1.4541     | 0.07296  |
|           | 1.4541          | 0.07296  | 0.07296     | 0.538688799 |             |            |          |
| RN7SKP76  | ENSG00000201289 | 1.454    | 0.07297     | 1.454       | 0.07297     | 1.454      | 0.07297  |
|           | 0.07297         | 0.07297  | 0.538688799 |             |             |            |          |
| SEC61A1   | ENSG00000058262 | 0.32492  | 0.37262     | 1.3914      | 0.082047    | 1.4538     | 0.073    |
|           | -0.74099        | 0.77065  | 0.073       | 0.538688799 |             |            |          |
| RNU6-850P | ENSG00000252743 | 1.4535   | 0.073038    | 1.4535      | 0.073038    | 1.4535     |          |
|           | 0.073038        | 1.4535   | 0.073038    | 0.073038    | 0.538688799 |            |          |
| LINC01544 | ENSG00000260440 | 1.4534   | 0.07305     | 1.4534      | 0.07305     | 1.4534     |          |
|           | 0.07305         | 1.4534   | 0.07305     | 0.07305     | 0.538688799 |            |          |
| NA        | ENSG00000229459 | 0.80032  | 0.21176     | -0.35491    | 0.63867     | 0.57209    | 0.28363  |
|           | 1.4534          | 0.073061 | 0.073061    | 0.538688799 |             |            |          |

|             |                 |           |             |             |             |             |          |
|-------------|-----------------|-----------|-------------|-------------|-------------|-------------|----------|
| NA          | ENSG00000280029 | 1.4534    | 0.073061    | 1.4534      | 0.073061    | 1.4534      | 0.073061 |
|             |                 | 1.4534    | 0.073061    | 0.538688799 |             |             |          |
| KLF2        | ENSG00000127528 | 1.4531    | 0.073103    | 1.4531      | 0.073103    | 0.049027    | 0.48045  |
|             |                 | 1.4531    | 0.073103    | 0.538688799 |             |             |          |
| H2BC21      | ENSG00000184678 | 1.4531    | 0.073103    | 1.3841      | 0.083168    | 1.4531      |          |
|             |                 | 0.073103  | 1.4531      | 0.073103    | 0.073103    | 0.538688799 |          |
| NA          | ENSG00000240441 | 1.2688    | 0.10226     | 1.453       | 0.073109    | 0.86174     | 0.19441  |
|             |                 | -0.092318 | 0.53678     | 0.073109    | 0.538688799 |             |          |
| NA          | ENSG00000237617 | 0.34913   | 0.3635      | 0.68695     | 0.24606     | 1.3111      | 0.09491  |
|             |                 | 1.453     | 0.073114    | 0.073114    | 0.538688799 |             |          |
| SNORD116-27 | ENSG00000251896 | 1.453     | 0.073115    | 1.453       | 0.073115    | 1.453       | 0.073115 |
|             |                 | 0.073115  | 0.073115    | 0.538688799 |             |             |          |
| ABHD17A     | ENSG00000129968 | 0.45917   | 0.32306     | 1.4527      | 0.07315     | 0.14357     |          |
|             |                 | 0.44292   | 0.24555     | 0.40302     | 0.07315     | 0.538688799 |          |
| NA          | ENSG00000260620 | -0.38864  | 0.65123     | 0.20428     | 0.41907     | -0.11407    | 0.54541  |
|             |                 | 1.4526    | 0.07316     | 0.07316     | 0.538688799 |             |          |
| OR10Y1P     | ENSG00000254403 | 1.4526    | 0.073163    | 1.4526      | 0.073163    | 1.3346      |          |
|             |                 | 0.091001  | 0.87273     | 0.19141     | 0.073163    | 0.538688799 |          |
| LINC01679   | ENSG00000237989 | 0.024639  | 0.49017     | 0.024639    | 0.49017     | 0.81678     |          |
|             |                 | 0.20703   | 1.4525      | 0.073183    | 0.073183    | 0.538688799 |          |
| EPHB2       | ENSG00000133216 | 1.3408    | 0.089986    | 1.4524      | 0.073198    | -0.1299     | 0.55168  |
|             |                 | 0.40124   | 0.34412     | 0.073198    | 0.538688799 |             |          |
| RNU6-1204P  | ENSG00000200818 | 1.4523    | 0.073209    | 1.4523      | 0.073209    | 0.46552     |          |
|             |                 | 0.32078   | 1.4523      | 0.073209    | 0.073209    | 0.538688799 |          |
| RN7SL461P   | ENSG00000243801 | 1.4523    | 0.073209    | 1.4523      | 0.073209    | 1.4523      |          |
|             |                 | 0.073209  | 1.4523      | 0.073209    | 0.073209    | 0.538688799 |          |
| NME9        | ENSG00000181322 | 0.74938   | 0.22681     | -0.03826    | 0.51526     | 0.74938     | 0.22681  |
|             |                 | 1.4523    | 0.073214    | 0.073214    | 0.538688799 |             |          |
| NA          | ENSG00000232949 | 1.4521    | 0.073232    | -0.25282    | 0.5998      | 0.0086053   | 0.49657  |
|             |                 | -1.1324   | 0.87126     | 0.073232    | 0.538688799 |             |          |
| NA          | ENSG00000223679 | 1.4521    | 0.073234    | 0.17225     | 0.43162     | 1.4521      | 0.073234 |
|             |                 | 1.4521    | 0.073234    | 0.073234    | 0.538688799 |             |          |
| PCDH20      | ENSG00000280165 | -1.5402   | 0.93824     | 0.94993     | 0.17107     | 1.4521      |          |
|             |                 | 0.073241  | 1.4521      | 0.073241    | 0.073241    | 0.538688799 |          |
| NA          | ENSG00000265637 | 1.4518    | 0.07328     | 1.4518      | 0.07328     | 1.4518      | 0.07328  |
|             |                 | 1.4518    | 0.07328     | 0.07328     | 0.538688799 |             |          |
| LINC01195   | ENSG00000261075 | 0.19033   | 0.42453     | -0.78152    | 0.78275     | 1.4518      |          |
|             |                 | 0.073284  | -0.94404    | 0.82743     | 0.073284    | 0.538688799 |          |
| RNU6-865P   | ENSG00000201642 | 1.4516    | 0.073309    | 0.7264      | 0.2338      | 1.4516      |          |
|             |                 | 0.073309  | 1.4516      | 0.073309    | 0.073309    | 0.538688799 |          |
| COL9A3      | ENSG00000092758 | 0.14216   | 0.44348     | 0.31262     | 0.37729     | 0.50597     |          |
|             |                 | 0.30644   | 1.4516      | 0.073311    | 0.073311    | 0.538688799 |          |
| ATP11B      | ENSG00000058063 | 0.10475   | 0.45829     | 1.4516      | 0.073312    | 0.2554      |          |
|             |                 | 0.39921   | 1.3518      | 0.08822     | 0.073312    | 0.538688799 |          |
| NA          | ENSG00000251665 | 1.4515    | 0.073322    | 1.4515      | 0.073322    | 1.4515      | 0.073322 |
|             |                 | 1.4515    | 0.073322    | 0.073322    | 0.538688799 |             |          |
| ERGIC1      | ENSG00000113719 | 1.4193    | 0.077907    | 1.4515      | 0.073324    | 1.4513      |          |
|             |                 | 0.073353  | 0.020684    | 0.49175     | 0.073324    | 0.538688799 |          |
| NA          | ENSG00000251314 | -0.2074   | 0.58215     | 0.66752     | 0.25222     | 1.4515      | 0.073327 |
|             |                 | 0.634     | 0.26304     | 0.073327    | 0.538688799 |             |          |
| NA          | ENSG00000200630 | 1.4514    | 0.073334    | 1.4514      | 0.073334    | 1.4514      | 0.073334 |
|             |                 | 1.4514    | 0.073334    | 0.073334    | 0.538688799 |             |          |
| PPP3CA      | ENSG00000138814 | 1.4512    | 0.073364    | 0.28997     | 0.38592     | 0.30048     |          |
|             |                 | 0.3819    | -0.60662    | 0.72795     | 0.073364    | 0.538688799 |          |
| CHRM3-AS1   | ENSG00000234601 | 1.4511    | 0.073373    | 0.71056     | 0.23868     | 0.16821     |          |
|             |                 | 0.43321   | 0.71056     | 0.23868     | 0.073373    | 0.538688799 |          |
| LINC02803   | ENSG00000227740 | 1.4511    | 0.073375    | 1.4511      | 0.073375    | 1.4511      |          |
|             |                 | 0.073375  | 1.4511      | 0.073375    | 0.073375    | 0.538688799 |          |
| NA          | ENSG00000272675 | 1.451     | 0.073384    | 1.451       | 0.073384    | 1.451       | 0.073384 |
|             |                 | 0.073384  | 0.538688799 |             |             |             |          |
| CEP20       | ENSG00000133393 | 1.3361    | 0.090755    | 1.4509      | 0.073397    | 1.4158      | 0.07842  |
|             |                 | 1.3887    | 0.082456    | 0.073397    | 0.538688799 |             |          |

|           |                 |             |             |             |             |           |          |        |
|-----------|-----------------|-------------|-------------|-------------|-------------|-----------|----------|--------|
| TSPYL1    | ENSG00000189241 | 0.38044     | 0.35181     | 1.1399      | 0.12717     | 1.4509    |          |        |
|           | 0.073407        | 0.68649     | 0.2462      | 0.073407    | 0.538688799 |           |          |        |
| NA        | ENSG00000225106 | 0.10238     | 0.45923     | 0.36578     | 0.35727     | 0.36578   | 0.35727  |        |
|           | 1.4508          | 0.073424    | 0.073424    | 0.538688799 |             |           |          |        |
| RN7SL18P  | ENSG00000241625 | 1.4362      | 0.075479    | 1.4507      | 0.073425    | 1.0886    |          |        |
|           | 0.13817         | 1.4507      | 0.073425    | 0.073425    | 0.538688799 |           |          |        |
| SHANK1    | ENSG00000161681 | 1.4507      | 0.073429    | 0.071628    | 0.47145     | 1.4507    |          |        |
|           | 0.073429        | 1.421077652 | 0.073429    | 0.538688799 |             |           |          |        |
| COL4A1    | ENSG00000187498 | 0.20535     | 0.41865     | -1.2656     | 0.89717     | 1.4507    |          |        |
|           | 0.07343         | -0.18367    | 0.57286     | 0.07343     | 0.538688799 |           |          |        |
| RNA5SP492 | ENSG00000223262 | 1.4507      | 0.073432    | 1.4507      | 0.073432    | 1.4507    |          |        |
|           | 0.073432        | 1.4507      | 0.073432    | 0.073432    | 0.538688799 |           |          |        |
| RN7SL530P | ENSG00000239910 | 1.1354      | 0.12809     | 1.4505      | 0.073453    | 1.1469    |          |        |
|           | 0.12572         | 0.97411     | 0.165073453 | 0.538688799 |             |           |          |        |
| FAM83H    | ENSG00000180921 | 1.4505      | 0.073461    | 1.4119      | 0.07899     | 0.13928   |          |        |
|           | 0.44461         | 0.4959      | 0.30998     | 0.073461    | 0.538688799 |           |          |        |
| LYPLA2P3  | ENSG00000236604 | 1.4504      | 0.073475    | 1.2347      | 0.10848     | 1.4504    |          |        |
|           | 0.073475        | 1.4504      | 0.073475    | 0.073475    | 0.538688799 |           |          |        |
| CENPN     | ENSG00000166451 | 1.0111      | 0.15599     | 1.4504      | 0.073477    | 1.2614    | 0.10358  |        |
|           | 1.4504          | 0.073477    | 0.073477    | 0.538688799 |             |           |          |        |
| ADD2      | ENSG00000075340 | 1.1545      | 0.12415     | 0.45304     | 0.32526     | 1.4504    | 0.073478 |        |
|           | 1.1158          | 0.13225     | 0.073478    | 0.538688799 |             |           |          |        |
| BROX      | ENSG00000162819 | 0.39249     | 0.34735     | 1.1006      | 0.13553     | 1.4503    | 0.073489 |        |
|           | 0.39249         | 0.34735     | 0.073489    | 0.538688799 |             |           |          |        |
| TNS3      | ENSG00000136205 | 1.4502      | 0.073498    | 0.17081     | 0.43219     | 0.46763   | 0.32002  |        |
|           | 0.49378         | 0.31073     | 0.073498    | 0.538688799 |             |           |          |        |
| RPS18P9   | ENSG00000220848 | 1.4502      | 0.073505    | 1.4502      | 0.073505    | 1.4502    |          |        |
|           | 0.073505        | 1.4502      | 0.073505    | 0.073505    | 0.538688799 |           |          |        |
| RAPGEF4   | ENSG00000091428 | 1.4501      | 0.073509    | 0.94583     | 0.17212     | 0.86859   |          |        |
|           | 0.19254         | 0.88905     | 0.18699     | 0.073509    | 0.538688799 |           |          |        |
| NA        | ENSG00000226622 | 1.0217      | 0.15345     | 1.4501      | 0.073518    | 0.50274   | 0.30757  |        |
|           | 0.66012         | 0.25459     | 0.073518    | 0.538688799 |             |           |          |        |
| DECR1     | ENSG00000104325 | 1.0743      | 0.14134     | 0.834020214 | 1.2549      | 0.10476   | 1.45     |        |
|           | 0.073524        | 0.073524    | 0.538688799 |             |             |           |          |        |
| NA        | ENSG00000207480 | 1.45        | 0.073531    | 1.45        | 0.073531    | 1.45      | 0.073531 | 1.1894 |
|           | 0.11713         | 0.073531    | 0.538688799 |             |             |           |          |        |
| RNU6-789P | ENSG00000252914 | 1.45        | 0.073531    | 0.94478     | 0.17239     | 1.0033    | 0.15785  |        |
|           | 0.88364         | 0.18844     | 0.073531    | 0.538688799 |             |           |          |        |
| RN7SL65P  | ENSG00000243770 | 1.4499      | 0.073536    | 1.4499      | 0.073536    | -0.029278 |          |        |
|           | 0.51168         | 0.69174     | 0.24455     | 0.073536    | 0.538688799 |           |          |        |
| HSD17B1P1 | ENSG00000108785 | 1.0348      | 0.15039     | 1.4499      | 0.073546    | 0.20049   |          |        |
|           | 0.42055         | 1.2992      | 0.09694     | 0.073546    | 0.538688799 |           |          |        |
| NA        | ENSG00000270049 | 1.4497      | 0.073578    | -0.80488    | 0.78955     | 0.30988   | 0.37832  |        |
|           | -0.48832        | 0.68734     | 0.073578    | 0.538790512 |             |           |          |        |
| NA        | ENSG00000255348 | 1.4496      | 0.073582    | 1.4496      | 0.073582    | 1.4496    | 0.073582 |        |
|           | 1.4496          | 0.073582    | 0.073582    | 0.538790512 |             |           |          |        |
| MIRLET7C  | ENSG00000199030 | 0.66807     | 0.25205     | 0.66807     | 0.25205     | 0.66807   |          |        |
|           | 0.25205         | 1.4493      | 0.073628    | 0.073628    | 0.538859059 |           |          |        |
| KCTD1     | ENSG00000134504 | 0.79137     | 0.21436     | 0.85037     | 0.19756     | 1.4493    | 0.073631 |        |
|           | 0.94424         | 0.17252     | 0.073631    | 0.538859059 |             |           |          |        |
| NA        | ENSG00000238297 | 1.449       | 0.073664    | 1.449       | 0.073664    | 1.449     | 0.073664 | 1.449  |
|           | 0.073664        | 0.538859059 |             |             |             |           |          |        |
| ZNF204P   | ENSG00000204789 | -0.46421    | 0.67875     | -0.66597    | 0.74729     | 1.4489    |          |        |
|           | 0.07369         | 1.4489      | 0.07369     | 0.07369     | 0.538859059 |           |          |        |
| RN7SKP257 | ENSG00000201395 | 1.1248      | 0.13034     | 1.4488      | 0.073693    | 1.4488    |          |        |
|           | 0.073693        | 0.34828     | 0.36381     | 0.073693    | 0.538859059 |           |          |        |
| CELF5     | ENSG00000161082 | 0.43462     | 0.33192     | 1.4488      | 0.073694    | -0.64512  | 0.74057  |        |
|           | -0.55016        | 0.7089      | 0.073694    | 0.538859059 |             |           |          |        |
| SFTPB     | ENSG00000168878 | 1.4488      | 0.073697    | -0.77248    | 0.78008     | -1.048    | 0.85269  |        |
|           | 0.13566         | 0.44604     | 0.073697    | 0.538859059 |             |           |          |        |
| TTYH1     | ENSG00000167614 | -0.45323    | 0.67481     | 1.4488      | 0.073699    | -0.45323  | 0.67481  |        |
|           | -0.45323        | 0.67481     | 0.073699    | 0.538859059 |             |           |          |        |

|           |                 |           |          |           |             |             |          |
|-----------|-----------------|-----------|----------|-----------|-------------|-------------|----------|
| CBLN3     | ENSG00000139899 | 1.0615    | 0.14423  | 1.4487    | 0.073707    | 1.0615      | 0.14423  |
|           |                 | 1.0615    | 0.14423  | 0.073707  | 0.538859059 |             |          |
| SGSH      | ENSG00000181523 | 1.4487    | 0.073707 | 1.4487    | 0.073707    | 1.4487      | 0.073707 |
|           |                 | 1.4487    | 0.073707 | 0.073707  | 0.538859059 |             |          |
| TNFSF4    | ENSG00000117586 | 1.4487    | 0.073713 | 1.1806    | 0.11888     | 1.2145      |          |
|           |                 | 0.11229   | 0.94943  | 0.1712    | 0.073713    | 0.538859059 |          |
| CCDC172   | ENSG00000182645 | 0.68944   | 0.24527  | 1.4484    | 0.073748    | 0.48583     |          |
|           |                 | 0.31354   | -0.2417  | 0.59549   | 0.073748    | 0.538982448 |          |
| HIGD1AP18 | ENSG00000253952 | 0.32585   | 0.37227  | 1.4484    | 0.073752    | 1.4484      |          |
|           |                 | 0.073752  | 1.4484   | 0.073752  | 0.073752    | 0.538982448 |          |
| ETV6      | ENSG00000139083 | 1.4482    | 0.073779 | -0.42052  | 0.66295     | -0.81202    | 0.79161  |
|           |                 | 1.2091    | 0.11332  | 0.073779  | 0.539098916 |             |          |
| NA        | ENSG00000202035 | 1.1121    | 0.13305  | 0.28837   | 0.38653     | 1.448       | 0.073804 |
|           |                 | -0.59505  | 0.72409  | 0.073804  | 0.539178348 |             |          |
| NA        | ENSG00000215567 | 0.3702    | 0.35562  | 0.5308    | 0.29778     | 1.448       | 0.073812 |
|           |                 | 0.75985   | 0.22367  | 0.073812  | 0.539178348 |             |          |
| KLF17     | ENSG00000171872 | -0.49593  | 0.69003  | -0.49593  | 0.69003     | 1.4478      | 0.073832 |
|           |                 | -0.93635  | 0.82545  | 0.073832  | 0.539243609 |             |          |
| TFAMP1    | ENSG00000230444 | 1.4477    | 0.073847 | 0.23049   | 0.40885     | 0.92722     |          |
|           |                 | 0.17691   | 0.40912  | 0.34123   | 0.073847    | 0.539272338 |          |
| ZIC4      | ENSG00000174963 | 1.4475    | 0.073883 | -0.040925 | 0.51632     | 0.72341     | 0.23471  |
|           |                 | 0.57812   | 0.28159  | 0.073883  | 0.53934457  |             |          |
| NA        | ENSG00000234773 | 1.4474    | 0.073892 | 0.67246   | 0.25065     | 0.7417      | 0.22913  |
|           |                 | 1.4474    | 0.073892 | 0.073892  | 0.53934457  |             |          |
| CCDC173   | ENSG00000154479 | 1.4473    | 0.0739   | 1.4473    | 0.0739      | 1.4473      |          |
|           |                 | 0.0739    | 1.4473   | 0.0739    | 0.0739      | 0.53934457  |          |
| NA        | ENSG00000279708 | -0.19824  | 0.57857  | 0.29733   | 0.38311     | 1.4471      | 0.073933 |
|           |                 | 1.4471    | 0.073933 | 0.073933  | 0.53934457  |             |          |
| DNAH2     | ENSG00000183914 | 0.70117   | 0.2416   | 0.13028   | 0.44817     | 1.4471      | 0.073937 |
|           |                 | -1.1659   | 0.87818  | 0.073937  | 0.53934457  |             |          |
| MYH4      | ENSG00000264424 | 0.21036   | 0.41669  | 1.3556    | 0.087618    | 1.4471      | 0.073938 |
|           |                 | 1.2584    | 0.10413  | 0.073938  | 0.53934457  |             |          |
| NA        | ENSG00000259362 | 1.447     | 0.073944 | 0.68575   | 0.24644     | 1.2938      | 0.097866 |
|           |                 | 1.4141    | 0.078669 | 0.073944  | 0.53934457  |             |          |
| NAGK      | ENSG00000124357 | 0.37883   | 0.35241  | 1.4467    | 0.073985    | 0.37883     | 0.35241  |
|           |                 | 1.4102    | 0.079236 | 0.073985  | 0.53934457  |             |          |
| NA        | ENSG00000254951 | 0.52604   | 0.29943  | 1.4467    | 0.073986    | -0.041784   | 0.51666  |
|           |                 | -0.041784 | 0.51666  | 0.073986  | 0.53934457  |             |          |
| NUS1P2    | ENSG00000234685 | 1.4467    | 0.073989 | -0.47955  | 0.68423     | -0.13901    |          |
|           |                 | 0.55528   | 0.93294  | 0.17543   | 0.073989    | 0.53934457  |          |
| NA        | ENSG00000253526 | 0.66687   | 0.25243  | 0.66687   | 0.25243     | 0.58426     | 0.27952  |
|           |                 | 1.4466    | 0.07401  | 0.07401   | 0.53934457  |             |          |
| NA        | ENSG00000249335 | 0.34393   | 0.36545  | -0.92126  | 0.82154     | 0.57138     | 0.28387  |
|           |                 | 1.4465    | 0.074025 | 0.074025  | 0.53934457  |             |          |
| SPG21     | ENSG00000090487 | 0.55909   | 0.28805  | 1.4463    | 0.074046    | 1.4463      | 0.074046 |
|           |                 | 1.4463    | 0.074046 | 0.074046  | 0.53934457  |             |          |
| CXADR     | ENSG00000154639 | -0.35704  | 0.63947  | 1.4463    | 0.074048    | 0.19032     | 0.42453  |
|           |                 | -0.21909  | 0.58671  | 0.074048  | 0.53934457  |             |          |
| LGALS12   | ENSG00000133317 | 1.4463    | 0.074051 | 0.7889    | 0.21509     | 0.7889      |          |
|           |                 | 0.21509   | -1.1682  | 0.87863   | 0.074051    | 0.53934457  |          |
| PIAS2     | ENSG00000078043 | 1.385     | 0.083028 | 1.2451    | 0.10654     | 1.4154      | 0.078477 |
|           |                 | 1.4462    | 0.074066 | 0.074066  | 0.53934457  |             |          |
| NAIPP4    | ENSG00000251634 | 0.10351   | 0.45878  | 1.446     | 0.074091    | 0.045496    | 0.48186  |
|           |                 | 0.23242   | 0.40811  | 0.074091  | 0.53934457  |             |          |
| CNN2P11   | ENSG00000237383 | 1.446     | 0.074093 | -0.20275  | 0.58033     | 0.95805     | 0.16902  |
|           |                 | 0.93892   | 0.17389  | 0.074093  | 0.53934457  |             |          |
| NA        | ENSG00000279176 | 1.4458    | 0.07412  | 1.4458    | 0.07412     | 1.4458      | 0.07412  |
|           |                 | 1.4458    | 0.07412  | 0.07412   | 0.53934457  |             |          |
| NA        | ENSG00000239383 | 1.4457    | 0.074128 | 0.44085   | 0.32966     | 0.099584    | 0.46034  |
|           |                 | 0.16361   | 0.43502  | 0.074128  | 0.53934457  |             |          |
| NA        | ENSG00000276925 | -1.4185   | 0.92198  | 1.4456    | 0.07414     | -1.4185     | 0.92198  |
|           |                 | -1.4185   | 0.92198  | 0.07414   | 0.53934457  |             |          |



|           |                 |           |          |             |             |          |          |          |
|-----------|-----------------|-----------|----------|-------------|-------------|----------|----------|----------|
| RPL27P8   | ENSG00000237041 | 1.4456    | 0.074145 | 1.4456      | 0.074145    | 1.4456   | 0.074145 | 1.4456   |
|           | 0.074145        | 1.4456    | 0.074145 | 0.074145    | 0.53934457  |          |          |          |
| NA        | ENSG00000224525 | 1.4455    | 0.074153 | 1.3806      | 0.083706    | 1.3806   | 0.083706 | 0.083706 |
|           | 0.83727         | 0.20122   | 0.074153 | 0.53934457  |             |          |          |          |
| NA        | ENSG00000248858 | 1.1679    | 0.12142  | 0.51168     | 0.30444     | 0.43035  | 0.33347  | 0.33347  |
|           | 1.4455          | 0.074159  | 0.074159 | 0.53934457  |             |          |          |          |
| ZSCAN21   | ENSG00000166529 | 1.1421    | 0.1267   | 0.8585      | 0.19531     | -0.02689 |          |          |
|           | 0.51073         | 1.4455    | 0.074161 | 0.074161    | 0.53934457  |          |          |          |
| LINC00513 | ENSG00000233559 | -0.63292  | 0.73661  | -1.4957     | 0.93264     | -0.63292 |          |          |
|           | 0.73661         | 1.4455    | 0.074164 | 0.074164    | 0.53934457  |          |          |          |
| NA        | ENSG00000223565 | 1.4454    | 0.074172 | 1.4454      | 0.074172    | 1.4454   | 0.074172 | 0.074172 |
|           | 1.4454          | 0.074172  | 0.074172 | 0.53934457  |             |          |          |          |
| NA        | ENSG00000280274 | 1.4453    | 0.074189 | 0.52962     | 0.29819     | 1.4453   | 0.074189 | 0.074189 |
|           | 1.4453          | 0.074189  | 0.074189 | 0.53934457  |             |          |          |          |
| NA        | ENSG00000259946 | 1.4453    | 0.074191 | 1.4453      | 0.074191    | 1.4453   | 0.074191 | 0.074191 |
|           | 1.4453          | 0.074191  | 0.074191 | 0.53934457  |             |          |          |          |
| LINC00410 | ENSG00000231674 | 1.4452    | 0.074194 | 1.4452      | 0.074194    | 1.4452   |          |          |
|           | 0.074194        | 1.4452    | 0.074194 | 0.074194    | 0.53934457  |          |          |          |
| NA        | ENSG00000221104 | -0.92046  | 0.82133  | -0.92046    | 0.82133     | -0.92046 | 0.82133  | 0.82133  |
|           | 1.4452          | 0.0742    | 0.0742   | 0.53934457  |             |          |          |          |
| ZNF286B   | ENSG00000249459 | 1.4451    | 0.07422  | 0.60444     | 0.27277     | 1.4451   |          |          |
|           | 0.07422         | 0.7826    | 0.21693  | 0.07422     | 0.539409485 |          |          |          |
| NA        | ENSG00000262587 | 1.4445    | 0.074299 | 1.4445      | 0.074299    | 1.4445   | 0.074299 | 0.074299 |
|           | -0.28719        | 0.61302   | 0.074299 | 0.539564104 |             |          |          |          |
| NA        | ENSG00000267507 | 1.1836    | 0.11829  | 0.62012     | 0.26759     | 1.4444   | 0.074307 | 0.074307 |
|           | -0.36529        | 0.64255   | 0.074307 | 0.539564104 |             |          |          |          |
| NA        | ENSG00000275734 | 1.4444    | 0.074308 | 1.4444      | 0.074308    | 1.4444   | 0.074308 | 0.074308 |
|           | 1.4444          | 0.074308  | 0.074308 | 0.539564104 |             |          |          |          |
| DIO1      | ENSG00000211452 | 1.3734    | 0.084817 | 0.2993      | 0.38235     | 1.1436   | 0.12639  | 0.12639  |
|           | 1.4443          | 0.074322  | 0.074322 | 0.539564104 |             |          |          |          |
| CCNI      | ENSG00000118816 | 0.73346   | 0.23164  | 0.27091     | 0.39323     | 1.4443   | 0.07433  | 0.07433  |
|           | -0.43065        | 0.66664   | 0.07433  | 0.539564104 |             |          |          |          |
| NA        | ENSG00000283259 | 0.48516   | 0.31378  | -0.069214   | 0.52759     | -0.20563 | 0.58146  | 0.58146  |
|           | 1.4443          | 0.074333  | 0.074333 | 0.539564104 |             |          |          |          |
| NA        | ENSG00000274225 | 1.4442    | 0.074334 | 1.4442      | 0.074334    | 1.4442   | 0.074334 | 0.074334 |
|           | 1.4442          | 0.074334  | 0.074334 | 0.539564104 |             |          |          |          |
| NA        | ENSG00000270780 | 1.4442    | 0.074348 | 0.41934     | 0.33749     | 0.41934  | 0.33749  | 0.33749  |
|           | 0.41934         | 0.33749   | 0.074348 | 0.539564104 |             |          |          |          |
| FKBP1C    | ENSG00000198225 | 0.80775   | 0.20962  | 1.4441      | 0.074351    | 1.4441   |          |          |
|           | 0.074351        | 1.4441    | 0.074351 | 0.074351    | 0.539564104 |          |          |          |
| RNU6-659P | ENSG00000252263 | 1.4441    | 0.074352 | 0.91627     | 0.17976     | 0.37566  |          |          |
|           | 0.35358         | 0.6875    | 0.24588  | 0.074352    | 0.539564104 |          |          |          |
| FCF1P6    | ENSG00000225671 | 1.4439    | 0.074378 | 1.4439      | 0.074378    | 1.0403   |          |          |
|           | 0.1491          | 1.4439    | 0.074378 | 0.074378    | 0.539672415 |          |          |          |
| PSMD10P1  | ENSG00000228663 | 1.0716    | 0.14196  | 1.1839      | 0.11823     | 0.11343  |          |          |
|           | 0.45485         | 1.4437    | 0.074406 | 0.074406    | 0.539753815 |          |          |          |
| RCOR3     | ENSG00000117625 | 0.51543   | 0.30313  | 1.0764      | 0.14087     | 1.4436   | 0.074421 | 0.074421 |
|           | 0.75587         | 0.22486   | 0.074421 | 0.539753815 |             |          |          |          |
| THAP6     | ENSG00000174796 | 1.3735    | 0.0848   | 1.4435      | 0.074436    | 1.3735   | 0.0848   | 0.0848   |
|           | 0.65079         | 0.25759   | 0.074436 | 0.539753815 |             |          |          |          |
| OR7E163P  | ENSG00000251166 | -0.49863  | 0.69098  | -1.5639     | 0.94107     | -0.65051 |          |          |
|           | 0.74232         | 1.4433    | 0.074464 | 0.074464    | 0.539753815 |          |          |          |
| PCDH9-AS3 | ENSG00000225263 | 1.4429    | 0.074529 | 1.4429      | 0.074529    | 1.4429   |          |          |
|           | 0.074529        | 1.4429    | 0.074529 | 0.074529    | 0.539753815 |          |          |          |
| MBP       | ENSG00000197971 | 0.86658   | 0.19309  | 1.4426      | 0.074566    | 0.14969  | 0.44051  | 0.44051  |
|           | 0.51368         | 0.30374   | 0.074566 | 0.539753815 |             |          |          |          |
| NA        | ENSG00000248172 | 1.4425    | 0.074577 | 1.4425      | 0.074577    | 1.4425   | 0.074577 | 0.074577 |
|           | 1.4425          | 0.074577  | 0.074577 | 0.539753815 |             |          |          |          |
| RNA5SP213 | ENSG00000212333 | -0.045239 | 0.51804  | 1.4424      | 0.074591    | 1.4424   |          |          |
|           | 0.074591        | 1.4424    | 0.074591 | 0.074591    | 0.539753815 |          |          |          |
| ATP2A1    | ENSG00000196296 | -0.085642 | 0.53412  | 0.51197     | 0.30434     | 0.61635  |          |          |
|           | 0.26883         | 1.4424    | 0.074597 | 0.074597    | 0.539753815 |          |          |          |

|           |                 |           |          |             |             |             |          |      |
|-----------|-----------------|-----------|----------|-------------|-------------|-------------|----------|------|
| BRWD1-AS1 | ENSG00000238141 | 0.86075   | 0.19469  | 1.0474      | 0.14745     | 0.86075     |          |      |
|           |                 | 0.19469   | 1.4423   | 0.074602    | 0.074602    | 0.539753815 |          |      |
| RNU1-73P  | ENSG00000206698 | 1.4423    | 0.074609 | 0.074609    | 0.21949     | 0.41313     | 1.4423   |      |
|           |                 | 0.074609  | 1.4423   | 0.074609    | 0.074609    | 0.539753815 |          |      |
| SYT12     | ENSG00000173227 | 1.4422    | 0.074627 | 0.40609     | 0.34234     | 0.86477     | 0.19358  |      |
|           |                 | -1.2524   | 0.89479  | 0.074627    | 0.539753815 |             |          |      |
| SAMHD1    | ENSG00000101347 | -0.077027 | 0.5307   | 0.42779     | 0.3344      | 0.079635    |          |      |
|           |                 | 0.46826   | 1.4421   | 0.07463     | 0.07463     | 0.539753815 |          |      |
| GDF11     | ENSG00000135414 | 0.32986   | 0.37075  | 1.1059      | 0.13438     | 1.4421      | 0.074632 |      |
|           |                 | 0.90891   | 0.1817   | 0.074632    | 0.539753815 |             |          |      |
| NA        | ENSG00000251239 | 1.4421    | 0.074639 | 1.4421      | 0.074639    | 1.4421      | 0.074639 |      |
|           |                 | 1.4421    | 0.074639 | 0.074639    | 0.539753815 |             |          |      |
| COX7B2    | ENSG00000170516 | 0.69053   | 0.24493  | 1.3325      | 0.091356    | 0.638       | 0.26174  |      |
|           |                 | 1.4419    | 0.074663 | 0.074663    | 0.539753815 |             |          |      |
| RPL10AP5  | ENSG00000235467 | 1.4419    | 0.074665 | -0.27937    | 0.61002     | 0.27684     |          |      |
|           |                 | 0.39095   | 0.010418 | 0.49584     | 0.074665    | 0.539753815 |          |      |
| LINS1     | ENSG00000140471 | -0.96129  | 0.8318   | 1.4419      | 0.074669    | -0.84855    | 0.80193  |      |
|           |                 | 0.5261    | 0.29941  | 0.074669    | 0.539753815 |             |          |      |
| NDUFAF4P1 | ENSG00000259467 | 1.4418    | 0.074686 | 1.4418      | 0.074686    | 1.4418      |          |      |
|           |                 | 0.074686  | 1.4418   | 0.074686    | 0.074686    | 0.539753815 |          |      |
| MIR1226   | ENSG00000221585 | 1.4417    | 0.074688 | 1.4417      | 0.074688    | 1.4417      |          |      |
|           |                 | 0.074688  | 1.4417   | 0.074688    | 0.074688    | 0.539753815 |          |      |
| RPSAP3    | ENSG00000242952 | 0.37106   | 0.3553   | 0.37106     | 0.3553      | 1.4416      |          |      |
|           |                 | 0.074703  | 0.37106  | 0.3553      | 0.074703    | 0.539753815 |          |      |
| EFL1      | ENSG00000140598 | 1.2184    | 0.11154  | 1.4022      | 0.080424    | 1.4416      | 0.074706 |      |
|           |                 | 0.11883   | 0.4527   | 0.074706    | 0.539753815 |             |          |      |
| RNU6-592P | ENSG00000223265 | 0.64569   | 0.25924  | -0.55751    | 0.71141     | -0.43588    |          |      |
|           |                 | 0.66854   | 1.4416   | 0.074706    | 0.074706    | 0.539753815 |          |      |
| NA        | ENSG00000258703 | 1.3888    | 0.082447 | 0.56286     | 0.28676     | 0.22657     | 0.41038  |      |
|           |                 | 1.4416    | 0.074709 | 0.074709    | 0.539753815 |             |          |      |
| LINC01571 | ENSG00000260057 | 1.0006    | 0.1585   | 1.4413      | 0.074743    | 1.1321      |          |      |
|           |                 | 0.12881   | 0.45289  | 0.32531     | 0.074743    | 0.539753815 |          |      |
| NA        | ENSG00000237500 | -0.62224  | 0.73311  | 1.4413      | 0.074745    | -1.1485     | 0.87462  |      |
|           |                 | -1.1485   | 0.87462  | 0.074745    | 0.539753815 |             |          |      |
| NA        | ENSG00000256044 | 0.28139   | 0.3892   | 1.4412      | 0.07476     | -0.21878    | 0.58659  |      |
|           |                 | -0.21878  | 0.58659  | 0.07476     | 0.539753815 |             |          |      |
| NA        | ENSG00000229283 | 0.85915   | 0.19513  | 1.4409      | 0.074803    | 1.4409      | 0.074803 |      |
|           |                 | 1.4409    | 0.074803 | 0.074803    | 0.539753815 |             |          |      |
| NA        | ENSG00000266954 | 1.4409    | 0.074806 | 1.4409      | 0.074806    | 1.4409      | 0.074806 |      |
|           |                 | 1.4409    | 0.074806 | 0.074806    | 0.539753815 |             |          |      |
| JAM3      | ENSG00000166086 | 1.2283    | 0.10967  | 0.514       | 0.30363     | 1.3484      | 0.088763 |      |
|           |                 | 1.4407    | 0.074834 | 0.074834    | 0.539753815 |             |          |      |
| EOGT      | ENSG00000163378 | 1.4406    | 0.074855 | 0.022677    | 0.49095     | 0.033812    | 0.48651  |      |
|           |                 | 0.033812  | 0.48651  | 0.074855    | 0.539753815 |             |          |      |
| NA        | ENSG00000224331 | 1.4405    | 0.074863 | 1.4405      | 0.074863    | 1.4405      | 0.074863 |      |
|           |                 | 1.4405    | 0.074863 | 0.074863    | 0.539753815 |             |          |      |
| VWA3A     | ENSG00000175267 | 1.4405    | 0.074864 | 1.203       | 0.1145      | 0.28732     | 0.38693  |      |
|           |                 | 0.27699   | 0.39089  | 0.074864    | 0.539753815 |             |          |      |
| RN7SKP159 | ENSG00000222589 | 0.51498   | 0.30328  | -0.22644    | 0.58957     | -0.22363    |          |      |
|           |                 | 0.58848   | 1.4405   | 0.074868    | 0.074868    | 0.539753815 |          |      |
| POLD3     | ENSG00000077514 | 1.4403    | 0.074888 | 0.24258     | 0.40417     | 0.6159      | 0.26898  |      |
|           |                 | 1.0009    | 0.15843  | 0.074888    | 0.539753815 |             |          |      |
| NA        | ENSG00000260177 | 0.43825   | 0.3306   | 0.60411     | 0.27289     | 1.4402      | 0.074904 |      |
|           |                 | -0.39409  | 0.65324  | 0.074904    | 0.539753815 |             |          |      |
| FIGN      | ENSG00000182263 | 1.4401    | 0.074917 | 0.59598     | 0.27559     | 1.258       | 0.10419  |      |
|           |                 | -0.090035 | 0.53587  | 0.074917    | 0.539753815 |             |          |      |
| HTATIP2   | ENSG00000109854 | 1.44      | 0.074939 | 0.92693     | 0.17698     | 0.895       | 0.18539  | 1.44 |
|           |                 | 0.074939  | 0.074939 | 0.539753815 |             |             |          |      |
| NA        | ENSG00000260835 | 1.4399    | 0.074948 | -0.67662    | 0.75068     | -0.053665   | 0.5214   |      |
|           |                 | 0.90004   | 0.18405  | 0.074948    | 0.539753815 |             |          |      |
| MUC5B     | ENSG00000117983 | 1.4399    | 0.074949 | 0.84754     | 0.19835     | 0.96227     | 0.16796  |      |
|           |                 | -0.20322  | 0.58052  | 0.074949    | 0.539753815 |             |          |      |

|           |                 |            |             |             |             |             |          |
|-----------|-----------------|------------|-------------|-------------|-------------|-------------|----------|
| NA        | ENSG00000270891 | 0.66975    | 0.25151     | -0.049704   | 0.51982     | 1.4399      | 0.07495  |
|           |                 | 0.94483    | 0.17237     | 0.07495     | 0.539753815 |             |          |
| STYXL1    | ENSG00000127952 | -0.53544   | 0.70383     | -1.2226     | 0.88925     | -0.80207    |          |
|           |                 | 0.78874    | 1.4397      | 0.07497     | 0.07497     | 0.539753815 |          |
| NA        | ENSG00000267215 | 1.4397     | 0.074978    | -0.28666    | 0.61281     | 0.95182     | 0.1706   |
|           |                 | 1.4397     | 0.074978    | 0.074978    | 0.539753815 |             |          |
| NA        | ENSG00000237072 | 0.72772    | 0.23339     | 0.72772     | 0.23339     | 0.72772     | 0.23339  |
|           |                 | 1.4396     | 0.07499     | 0.07499     | 0.539753815 |             |          |
| NA        | ENSG00000248134 | 1.4396     | 0.07499     | -0.45657    | 0.67601     | 0.07538     | 0.46996  |
|           |                 | 0.07538    | 0.46996     | 0.07499     | 0.539753815 |             |          |
| NA        | ENSG00000267304 | 1.4396     | 0.074992    | 1.4396      | 0.074992    | 0.90765     | 0.18203  |
|           |                 | 0.04424    | 0.48236     | 0.074992    | 0.539753815 |             |          |
| NA        | ENSG00000207502 | 1.4394     | 0.075013    | 0.70248     | 0.24119     | 0.43784     | 0.33075  |
|           |                 | 0.43784    | 0.33075     | 0.075013    | 0.539753815 |             |          |
| NA        | ENSG00000256789 | 1.4394     | 0.075013    | 1.4394      | 0.075013    | 1.4394      | 0.075013 |
|           |                 | 1.4394     | 0.075013    | 0.075013    | 0.539753815 |             |          |
| LINC01356 | ENSG00000215866 | -1.0709    | 0.85789     | -0.87327    | 0.80874     | -1.0665     |          |
|           |                 | 0.85691    | 1.4394      | 0.075014    | 0.075014    | 0.539753815 |          |
| BAK1      | ENSG00000030110 | 0.47218    | 0.3184      | 0.52301     | 0.30048     | 1.4394      | 0.075023 |
|           |                 | -0.6433    | 0.73999     | 0.075023    | 0.539753815 |             |          |
| NA        | ENSG00000280425 | 1.4392     | 0.075042    | 1.4392      | 0.075042    | 1.4392      | 0.075042 |
|           |                 | 1.4392     | 0.075042    | 0.075042    | 0.539753815 |             |          |
| NA        | ENSG00000250390 | 1.439      | 0.075069    | 1.439       | 0.075069    | 1.439       | 0.075069 |
|           |                 | 0.075069   | 0.539753815 |             |             |             |          |
| MIR1-1HG  | ENSG00000174407 | 0.2474     | 0.4023      | 1.439       | 0.075071    | 0.2474      | 0.4023   |
|           |                 | -0.058007  | 0.52313     | 0.075071    | 0.539753815 |             |          |
| RNA5SP354 | ENSG00000212549 | 1.439      | 0.075072    | 1.439       | 0.075072    | 1.439       | 0.075072 |
|           |                 | 0.075072   | 0.075072    | 0.539753815 |             |             |          |
| NA        | ENSG00000233778 | -0.003854  | 0.50154     | 0.44937     | 0.32658     | 1.2293      | 0.10949  |
|           |                 | 1.4389     | 0.075087    | 0.075087    | 0.539753815 |             |          |
| NA        | ENSG00000230074 | 1.1695     | 0.12111     | 0.5521      | 0.29044     | 0.5521      | 0.29044  |
|           |                 | 1.4389     | 0.07509     | 0.07509     | 0.539753815 |             |          |
| MTND5P33  | ENSG00000261904 | -0.0067693 | 0.5027      | -0.0067693  | 0.5027      | 1.1551      |          |
|           |                 | 0.12402    | 1.4388      | 0.0751      | 0.0751      | 0.539753815 |          |
| NA        | ENSG00000223811 | -1.3109    | 0.90506     | -1.3109     | 0.90506     | -0.5881     | 0.72177  |
|           |                 | 1.4388     | 0.075104    | 0.075104    | 0.539753815 |             |          |
| LDB3      | ENSG00000122367 | -0.27483   | 0.60828     | 0.21278     | 0.41575     | 0.7617      | 0.22312  |
|           |                 | 1.4384     | 0.075163    | 0.075163    | 0.539753815 |             |          |
| PXDC1     | ENSG00000168994 | 0.32828    | 0.37135     | 1.4382      | 0.075183    | 1.2278      | 0.10977  |
|           |                 | 0.26479    | 0.39558     | 0.075183    | 0.539753815 |             |          |
| NA        | ENSG00000231916 | 1.4382     | 0.075183    | 1.4382      | 0.075183    | 1.4382      | 0.075183 |
|           |                 | 1.4382     | 0.075183    | 0.075183    | 0.539753815 |             |          |
| LINC00307 | ENSG00000227342 | 0.32748    | 0.37165     | 1.4381      | 0.075198    | 1.4381      |          |
|           |                 | 0.075198   | 1.4381      | 0.075198    | 0.075198    | 0.539753815 |          |
| MMP20     | ENSG00000137674 | 1.4381     | 0.075199    | 1.4381      | 0.075199    | 1.4381      | 0.075199 |
|           |                 | 1.4381     | 0.075199    | 0.075199    | 0.539753815 |             |          |
| NA        | ENSG00000229863 | 1.438      | 0.075212    | 1.438       | 0.075212    | 1.438       | 0.075212 |
|           |                 | 0.075212   | 0.539753815 |             |             |             |          |
| ERVFRD-1  | ENSG00000244476 | 1.438      | 0.075215    | 1.2409      | 0.10732     | 0.47157     | 0.31862  |
|           |                 | 0.53989    | 0.29464     | 0.075215    | 0.539753815 |             |          |
| PDE4DIP   | ENSG00000178104 | 1.438      | 0.07522     | 0.95        | 0.17106     | 0.86701     | 0.19297  |
|           |                 | 1.3771     | 0.084238    | 0.07522     | 0.539753815 |             |          |
| LINC01450 | ENSG00000232458 | 1.438      | 0.075222    | -0.25073    | 0.59899     | -0.30597    | 0.62018  |
|           |                 | 0.92464    | 0.17758     | 0.075222    | 0.539753815 |             |          |
| AKAP3     | ENSG00000111254 | -1.649     | 0.95043     | -1.649      | 0.95043     | -1.649      | 0.95043  |
|           |                 | 1.4379     | 0.075237    | 0.075237    | 0.539753815 |             |          |
| NA        | ENSG00000255320 | 1.4378     | 0.075241    | 1.4378      | 0.075241    | 1.4378      | 0.075241 |
|           |                 | 1.4378     | 0.075241    | 0.075241    | 0.539753815 |             |          |
| CCDC71    | ENSG00000177352 | 1.2741     | 0.10132     | 1.1733      | 0.12033     | 1.4378      |          |
|           |                 | 0.07525    | 0.27437     | 0.3919      | 0.07525     | 0.539753815 |          |
| NA        | ENSG00000256008 | 0.63921    | 0.26134     | 1.4377      | 0.075255    | 1.0672      | 0.14294  |
|           |                 | 0.76343    | 0.2226      | 0.075255    | 0.539753815 |             |          |

|              |                 |           |            |          |             |             |          |
|--------------|-----------------|-----------|------------|----------|-------------|-------------|----------|
| ELP6         | ENSG00000163832 | 1.4377    | 0.075259   | 1.1501   | 0.12505     | 1.404       | 0.080165 |
|              |                 | 1.1557    | 0.1239     | 0.075259 | 0.539753815 |             |          |
| WFDC12       | ENSG00000168703 | 0.95932   | 0.1687     | 1.4377   | 0.075265    | -0.55966    |          |
|              |                 | 0.71214   | 1.4377     | 0.075265 | 0.075265    | 0.539753815 |          |
| OR10J8P      | ENSG00000251686 | 1.4376    | 0.075267   | 1.4376   | 0.075267    | 1.4376      |          |
|              |                 | 0.075267  | 1.4376     | 0.075267 | 0.075267    | 0.539753815 |          |
| DHFR2        | ENSG00000178700 | -0.54901  | 0.7085     | 1.4375   | 0.075289    | -0.54901    | 0.7085   |
|              |                 | -0.54901  | 0.7085     | 0.075289 | 0.539753815 |             |          |
| RPS3AP16     | ENSG00000243894 | 1.4374    | 0.075307   | 0.6599   | 0.25466     | 0.6599      |          |
|              |                 | 0.25466   | -1.462     | 0.92813  | 0.075307    | 0.539753815 |          |
| NA           | ENSG00000279822 | 1.4373    | 0.07532    | 1.3345   | 0.091015    | 1.2755      | 0.10106  |
|              |                 | 1.2755    | 0.10106    | 0.07532  | 0.539753815 |             |          |
| FGF18        | ENSG00000156427 | 0.24209   | 0.40435    | 1.1253   | 0.13023     | 1.437       | 0.075354 |
|              |                 | 1.1807    | 0.11886    | 0.075354 | 0.539753815 |             |          |
| NA           | ENSG00000224733 | 0.92145   | 0.17841    | 0.54222  | 0.29383     | 1.437       | 0.075359 |
|              |                 | 0.82485   | 0.20473    | 0.075359 | 0.539753815 |             |          |
| RNA5SP125    | ENSG00000201713 | -0.42619  | 0.66502    | -0.42619 | 0.66502     | -0.42619    |          |
|              |                 | 0.66502   | 1.4369     | 0.07537  | 0.07537     | 0.539753815 |          |
| CIT          | ENSG00000122966 | 1.4368    | 0.075382   | -0.3826  | 0.64899     | -0.55318    | 0.70993  |
|              |                 | -0.19425  | 0.57701    | 0.075382 | 0.539753815 |             |          |
| TMEM8B       | ENSG00000137103 | 0.14338   | 0.44299    | 1.4368   | 0.075386    | 1.0313      |          |
|              |                 | 0.15121   | -0.35757   | 0.63967  | 0.075386    | 0.539753815 |          |
| BTBD11       | ENSG00000151136 | 0.35392   | 0.3617     | 0.9915   | 0.16072     | 0.62553     |          |
|              |                 | 0.26581   | 1.4367     | 0.075396 | 0.075396    | 0.539753815 |          |
| PPP1R14B-AS1 | ENSG00000256940 | 1.4367    | 0.075403   | 1.4367   | 0.075403    | 1.4367      |          |
|              |                 | 0.075403  | 1.4367     | 0.075403 | 0.075403    | 0.539753815 |          |
| PDIA6        | ENSG00000143870 | 1.4366    | 0.075419   | -0.1537  | 0.56107     | 0.018452    | 0.49264  |
|              |                 | 0.50102   | 0.30818    | 0.075419 | 0.539753815 |             |          |
| NA           | ENSG00000257379 | 1.4365    | 0.075424   | 1.4069   | 0.07973     | 1.4365      | 0.075424 |
|              |                 | 1.4365    | 0.075424   | 0.075424 | 0.539753815 |             |          |
| NA           | ENSG00000234573 | 1.4365    | 0.075436   | 1.4365   | 0.075436    | 1.4365      | 0.075436 |
|              |                 | 1.4365    | 0.075436   | 0.075436 | 0.539753815 |             |          |
| NA           | ENSG00000232638 | 1.4363    | 0.075456   | 1.4363   | 0.075456    | 1.4363      | 0.075456 |
|              |                 | 1.4363    | 0.075456   | 0.075456 | 0.539753815 |             |          |
| CCL19        | ENSG00000172724 | 1.4361    | 0.075484   | -0.23248 | 0.59192     | -0.56546    | 0.71412  |
|              |                 | -0.29133  | 0.6146     | 0.075484 | 0.539753815 |             |          |
| NA           | ENSG00000227726 | -0.056099 | 0.52237    | 0.77259  | 0.21988     | -2.3503     | 0.99062  |
|              |                 | 1.4361    | 0.075487   | 0.075487 | 0.539753815 |             |          |
| FARP2        | ENSG00000006607 | 1.2458    | 0.10641    | 1.4361   | 0.075489    | 1.0966      | 0.13641  |
|              |                 | 1.1599    | 0.12304    | 0.075489 | 0.539753815 |             |          |
| SNORD116-25  | ENSG00000252326 | 1.4358    | 0.075523   | 1.4358   | 0.075523    | 1.4358      |          |
|              |                 | 0.075523  | 1.4358     | 0.075523 | 0.075523    | 0.539753815 |          |
| LINC01087    | ENSG00000224559 | -0.15779  | 0.56269    | 1.4357   | 0.075544    | -0.61729    |          |
|              |                 | 0.73148   | -0.61729   | 0.73148  | 0.075544    | 0.539753815 |          |
| NA           | ENSG00000263508 | 0.43817   | 0.33063    | 1.4356   | 0.075554    | 0.54374     | 0.29331  |
|              |                 | 1.4218    | 0.077539   | 0.075554 | 0.539753815 |             |          |
| IL20RB       | ENSG00000174564 | 0.52101   | 0.30118    | 1.4356   | 0.075556    | 0.8704      |          |
|              |                 | 0.19204   | -1.036     | 0.84989  | 0.075556    | 0.539753815 |          |
| RNA5SP244    | ENSG00000212238 | 1.4356    | 0.075558   | 1.4356   | 0.075558    | 1.4356      |          |
|              |                 | 0.075558  | 1.4356     | 0.075558 | 0.075558    | 0.539753815 |          |
| RNU6-1197P   | ENSG00000212485 | -1.3131   | 0.90543    | -1.0622  | 0.85594     | 1.4356      |          |
|              |                 | 0.075565  | -0.0079687 | 0.50318  | 0.075565    | 0.539753815 |          |
| AIP          | ENSG00000110711 | -0.87965  | 0.81048    | 1.4354   | 0.075586    | -0.87965    | 0.81048  |
|              |                 | -0.87965  | 0.81048    | 0.075586 | 0.539753815 |             |          |
| NA           | ENSG00000251010 | -1.2086   | 0.88659    | 0.85378  | 0.19661     | 1.4353      | 0.075596 |
|              |                 | 0.69719   | 0.24284    | 0.075596 | 0.539753815 |             |          |
| UGT2B7       | ENSG00000171234 | 1.4353    | 0.075606   | 1.3679   | 0.085672    | 1.4353      |          |
|              |                 | 0.075606  | 1.4353     | 0.075606 | 0.075606    | 0.539753815 |          |
| HOXB8        | ENSG00000120068 | 0.013292  | 0.4947     | 1.4352   | 0.075609    | 0.62927     | 0.26459  |
|              |                 | 0.4637    | 0.32143    | 0.075609 | 0.539753815 |             |          |
| L3MBTL4      | ENSG00000154655 | 1.4352    | 0.075616   | 0.85125  | 0.19731     | 0.96129     |          |
|              |                 | 0.1682    | 1.0062     | 0.15715  | 0.075616    | 0.539753815 |          |

|                        |                 |             |             |             |             |             |             |
|------------------------|-----------------|-------------|-------------|-------------|-------------|-------------|-------------|
| RNU6-474P              | ENSG00000206970 | 0.47722     | 0.3166      | 0.064929    | 0.47412     | 1.4351      |             |
|                        | 0.075632        | 0.66376     | 0.25342     | 0.075632    | 0.539753815 |             |             |
| ZNF670-ZNF695          | ENSG00000135747 | 1.4351      | 0.075635    | -0.26074    | 0.60285     | 0.30414     |             |
|                        | 0.38051         | -0.21623    | 0.5856      | 0.075635    | 0.539753815 |             |             |
| NTM-AS1                | ENSG00000224795 | -0.024501   | 0.50977     | 1.4351      | 0.075636    | -0.24326    |             |
|                        | 0.5961          | -0.39859    | 0.6549      | 0.075636    | 0.539753815 |             |             |
| FAM71F1                | ENSG00000135248 | 1.3741      | 0.084703    | 1.435       | 0.075643    | 0.99873     | 0.15896     |
|                        | 1.435           | 0.075643    | 0.075643    | 0.539753815 |             |             |             |
| FLRT3                  | ENSG00000125848 | 1.4349      | 0.075659    | -0.50732    | 0.69404     | -0.2503     | 0.59882     |
|                        | -0.48293        | 0.68543     | 0.075659    | 0.539753815 |             |             |             |
| NA                     | ENSG00000254092 | 0.98641     | 0.16197     | -0.17034    | 0.56763     | 1.4348      | 0.075668    |
|                        | 1.4348          | 0.075668    | 0.075668    | 0.539753815 |             |             |             |
| DTX2P1-UPK3BP1-PMS2P11 | ENSG00000265479 | 1.1327      | 0.12868     | 1.4348      | 0.075672    | 0.075672    | 0.539753815 |
|                        | 0.81005         | 0.20895     | 1.4348      | 0.075672    | 0.075672    | 0.539753815 |             |
| NUP205                 | ENSG00000155561 | 1.0955      | 0.13665     | -0.024314   | 0.5097      | 0.92274     |             |
|                        | 0.17807         | 1.4347      | 0.07568     | 0.07568     | 0.539753815 |             |             |
| SAMD14                 | ENSG00000167100 | 1.4347      | 0.075685    | 1.4347      | 0.075685    | 1.4347      |             |
|                        | 0.075685        | 1.4347      | 0.075685    | 0.075685    | 0.539753815 |             |             |
| RPL21P120              | ENSG00000244582 | 0.084314    | 0.4664      | 0.32204     | 0.37371     | -0.2906     |             |
|                        | 0.61432         | 1.4346      | 0.075697    | 0.075697    | 0.539753815 |             |             |
| LINC01707              | ENSG00000223883 | 1.4345      | 0.075708    | -0.95185    | 0.82941     | -0.62697    |             |
|                        | 0.73466         | -0.95185    | 0.82941     | 0.075708    | 0.539753815 |             |             |
| MEP1B                  | ENSG00000141434 | 0.80058     | 0.21169     | -0.38233    | 0.64889     | 1.4345      | 0.075722    |
|                        | 0.62952         | 0.2645      | 0.075722    | 0.539753815 |             |             |             |
| LINC02612              | ENSG00000224048 | 1.4344      | 0.075727    | 0.15342     | 0.43903     | -0.60789    |             |
|                        | 0.72837         | -0.10665    | 0.54246     | 0.075727    | 0.539753815 |             |             |
| PGAM1P8                | ENSG00000255200 | 1.4344      | 0.075727    | 1.4344      | 0.075727    | 1.4344      |             |
|                        | 0.075727        | 1.4344      | 0.075727    | 0.075727    | 0.539753815 |             |             |
| SNRPCP10               | ENSG00000243794 | 1.4343      | 0.075744    | 1.3446      | 0.089373    | 0.38165     |             |
|                        | 0.35136         | -0.015997   | 0.50638     | 0.075744    | 0.539753815 |             |             |
| NA                     | ENSG00000259079 | 1.4343      | 0.075746    | -1.0793     | 0.85977     | -1.422      | 0.92248     |
|                        | -1.3929         | 0.91817     | 0.075746    | 0.539753815 |             |             |             |
| NUP85                  | ENSG00000125450 | 1.4343      | 0.075748    | 1.3217      | 0.093137    | 0.56324     | 0.28664     |
|                        | 0.48155         | 0.31506     | 0.075748    | 0.539753815 |             |             |             |
| LINC02144              | ENSG00000248708 | -0.029425   | 0.51174     | 1.4342      | 0.07576     | -0.76127    |             |
|                        | 0.77675         | -0.76127    | 0.77675     | 0.07576     | 0.539753815 |             |             |
| TUBB3P1                | ENSG00000220418 | 1.4341      | 0.075772    | 1.4341      | 0.075772    | 1.4341      |             |
|                        | 0.075772        | -0.14504    | 0.55766     | 0.075772    | 0.539753815 |             |             |
| NA                     | ENSG00000232124 | 0.49703     | 0.30959     | 1.4341      | 0.075772    | -0.2873     | 0.61306     |
|                        | -0.20099        | 0.57965     | 0.075772    | 0.539753815 |             |             |             |
| VPREB1                 | ENSG00000169575 | 0.25581     | 0.39905     | 0.25581     | 0.39905     | 0.25581     |             |
|                        | 0.39905         | 1.434       | 0.07579     | 0.07579     | 0.539753815 |             |             |
| PLA2G4B                | ENSG00000243708 | 1.434       | 0.075792    | 1.0111      | 0.15599     | 1.434       | 0.075792    |
|                        | 0.075792        | 0.075792    | 0.539753815 |             |             |             |             |
| NA                     | ENSG00000258551 | 1.434       | 0.075792    | 1.434       | 0.075792    | 1.434       | 0.075792    |
|                        | 0.075792        | 0.539753815 |             |             |             |             |             |
| NA                     | ENSG00000253798 | 0.74667     | 0.22763     | 0.74803     | 0.22722     | 1.4339      | 0.075795    |
|                        | 0.52313         | 0.30044     | 0.075795    | 0.539753815 |             |             |             |
| NSRP1P1                | ENSG00000235613 | 1.4339      | 0.075796    | 1.4339      | 0.075796    | 1.4339      |             |
|                        | 0.075796        | 1.4339      | 0.075796    | 0.075796    | 0.539753815 |             |             |
| RTEL1                  | ENSG00000258366 | 1.4339      | 0.075807    | 0.57311     | 0.28328     | -0.21122    | 0.58364     |
|                        | -0.21122        | 0.58364     | 0.075807    | 0.539753815 |             |             |             |
| NA                     | ENSG00000233708 | 1.4337      | 0.075831    | 1.4337      | 0.075831    | 1.4337      | 0.075831    |
|                        | -0.61119        | 0.72946     | 0.075831    | 0.539771349 |             |             |             |
| LPCAT2                 | ENSG00000087253 | -1.2126     | 0.88736     | 1.3969      | 0.081226    | 1.4336      |             |
|                        | 0.075843        | 0.16579     | 0.43416     | 0.075843    | 0.539771349 |             |             |
| ZBTB20                 | ENSG00000181722 | 0.61768     | 0.26839     | 0.40776     | 0.34172     | 1.201       | 0.11488     |
|                        | 1.4336          | 0.075844    | 0.075844    | 0.539771349 |             |             |             |
| NR2F2-AS1              | ENSG00000247809 | 1.4335      | 0.075864    | 0.77997     | 0.2177      | 0.93088     |             |
|                        | 0.17596         | 0.083794    | 0.46661     | 0.075864    | 0.539771349 |             |             |
| ITGA7                  | ENSG00000135424 | -0.62315    | 0.73341     | -0.62315    | 0.73341     | 1.4334      | 0.075873    |
|                        | -0.66753        | 0.74778     | 0.075873    | 0.539771349 |             |             |             |

|             |                 |            |          |             |             |          |          |
|-------------|-----------------|------------|----------|-------------|-------------|----------|----------|
| OR7D4       | ENSG00000174667 | 1.4333     | 0.075887 | 1.4333      | 0.075887    | 1.4333   | 0.075887 |
|             |                 | 1.4333     | 0.075887 | 0.539771349 |             |          |          |
| NA          | ENSG00000248155 | 0.11767    | 0.45316  | 0.37774     | 0.35281     | 1.4333   | 0.075887 |
|             |                 | 0.49722    | 0.30952  | 0.539771349 |             |          |          |
| NDUFB5      | ENSG00000136521 | 0.54535    | 0.29276  | 1.226       | 0.1101      | 1.4331   | 0.07592  |
|             |                 | 0.36319    | 0.35823  | 0.539840808 |             |          |          |
| C11orf91    | ENSG00000205177 | 1.433      | 0.075926 | 1.433       | 0.075926    | 1.433    | 0.075926 |
|             |                 | 0.075926   | 0.075926 | 0.539840808 |             |          |          |
| TRPM4       | ENSG00000130529 | -0.63365   | 0.73685  | -0.50108    | 0.69184     | 0.71914  | 0.23603  |
|             |                 | 1.433      | 0.07593  | 0.539840808 |             |          |          |
| NA          | ENSG00000250696 | 1.2296     | 0.10942  | 1.4328      | 0.07596     | 1.4328   | 0.07596  |
|             |                 | 1.4328     | 0.07596  | 0.539917314 |             |          |          |
| NIPA2P2     | ENSG00000241022 | -1.3014    | 0.90343  | 1.4328      | 0.075963    | -1.7437  |          |
|             |                 | 0.9594     | 0.74897  | 0.539917314 |             |          |          |
| NA          | ENSG00000225806 | -0.049146  | 0.5196   | 0.26758     | 0.39451     | 1.4327   | 0.075974 |
|             |                 | 0.39138    | 0.34776  | 0.539917314 |             |          |          |
| RNU6-1176P  | ENSG00000212257 | 0.28793    | 0.3867   | 1.43        | 0.07636     | 0.33546  | 0.36864  |
|             |                 | 1.4326     | 0.075986 | 0.539923852 |             |          |          |
| TLCD3B      | ENSG00000149926 | 0.8593     | 0.19509  | 0.8593      | 0.19509     | 1.1757   |          |
|             |                 | 0.11987    | 1.4322   | 0.076048    | 0.540113321 |          |          |
| AMZ2        | ENSG00000196704 | 0.79801    | 0.21243  | 1.4321      | 0.076056    | 1.4044   | 0.080098 |
|             |                 | -0.66193   | 0.74599  | 0.540113321 |             |          |          |
| GNAS-AS1    | ENSG00000235590 | 0.35652    | 0.36073  | 1.1171      | 0.13197     | 1.3117   |          |
|             |                 | 0.09481    | 1.4321   | 0.076056    | 0.540113321 |          |          |
| NA          | ENSG00000275956 | 1.4321     | 0.076057 | 0.89471     | 0.18547     | 1.2515   | 0.10537  |
|             |                 | 1.2515     | 0.10537  | 0.540113321 |             |          |          |
| WSCD1       | ENSG00000179314 | 0.52828    | 0.29865  | 0.73136     | 0.23228     | 1.432    | 0.076075 |
|             |                 | 0.42943    | 0.3338   | 0.540162429 |             |          |          |
| RN7SL700P   | ENSG00000244521 | -0.045532  | 0.51816  | -0.75887    | 0.77604     | 1.1012   |          |
|             |                 | 0.13539    | 1.4317   | 0.076111    | 0.540296093 |          |          |
| MIR16-1     | ENSG00000208006 | 1.4317     | 0.076116 | -0.14032    | 0.5558      | -0.36229 |          |
|             |                 | 0.64143    | 0.38793  | 0.540296093 |             |          |          |
| SNX27       | ENSG00000143376 | -0.11933   | 0.54749  | 1.317       | 0.093924    | 1.4315   | 0.076144 |
|             |                 | 0.31064    | 0.37804  | 0.540386468 |             |          |          |
| PEX7        | ENSG00000112357 | -0.0052322 | 0.50209  | -0.66435    | 0.74677     | 1.4314   | 0.076162 |
|             |                 | -1.2416    | 0.89281  | 0.540386468 |             |          |          |
| RPL7P20     | ENSG00000254252 | 0.7523     | 0.22593  | 1.4314      | 0.076162    | 0.7523   |          |
|             |                 | 0.22593    | 0.7523   | 0.540386468 |             |          |          |
| GRIA4       | ENSG00000152578 | -1.5606    | 0.94069  | -0.44615    | 0.67226     | 0.77434  | 0.21936  |
|             |                 | 1.4313     | 0.076178 | 0.540420026 |             |          |          |
| LINC00636   | ENSG00000240423 | 1.4311     | 0.076199 | 0.55867     | 0.28819     | 0.83837  |          |
|             |                 | 0.20091    | 0.26982  | 0.540420026 |             |          |          |
| NA          | ENSG00000244137 | 1.4311     | 0.0762   | -0.35905    | 0.64022     | 1.4311   | 0.0762   |
|             |                 | 1.4311     | 0.0762   | 0.540420026 |             |          |          |
| RPL26P28    | ENSG00000223987 | -0.4071    | 0.65803  | 0.058799    | 0.47656     | 0.5781   |          |
|             |                 | 0.2816     | 1.4306   | 0.540586718 |             |          |          |
| ADNP        | ENSG00000101126 | 1.1523     | 0.12459  | 0.41994     | 0.33726     | 1.4305   | 0.076286 |
|             |                 | 1.2385     | 0.10776  | 0.540586718 |             |          |          |
| NA          | ENSG00000243554 | 1.4305     | 0.076289 | 1.1121      | 0.13305     | -0.14352 | 0.55706  |
|             |                 | -0.54877   | 0.70842  | 0.540586718 |             |          |          |
| RNU6ATAC30P | ENSG00000221114 | 1.4305     | 0.07629  | 1.4305      | 0.07629     | 1.4305   |          |
|             |                 | 0.07629    | 1.4305   | 0.540586718 |             |          |          |
| NA          | ENSG00000245330 | 1.4304     | 0.076295 | 1.3361      | 0.090757    | 0.63471  | 0.26281  |
|             |                 | 0.63471    | 0.26281  | 0.540586718 |             |          |          |
| KRT14       | ENSG00000186847 | -1.4955    | 0.9326   | -0.40334    | 0.65665     | -0.3606  | 0.6408   |
|             |                 | 1.4303     | 0.076316 | 0.540586718 |             |          |          |
| DMBT1       | ENSG00000187908 | 0.18385    | 0.42707  | -0.42482    | 0.66452     | 0.32493  | 0.37262  |
|             |                 | 1.4303     | 0.076321 | 0.540586718 |             |          |          |
| NA          | ENSG00000251680 | -0.7915    | 0.78567  | 0.11001     | 0.4562      | -0.56636 | 0.71442  |
|             |                 | 1.4302     | 0.076323 | 0.540586718 |             |          |          |
| NA          | ENSG00000276093 | 1.4302     | 0.076325 | 0.30868     | 0.37878     | 1.4302   | 0.076325 |
|             |                 | -0.027915  | 0.51114  | 0.540586718 |             |          |          |

|            |                 |          |             |          |             |             |          |      |          |
|------------|-----------------|----------|-------------|----------|-------------|-------------|----------|------|----------|
| NA         | ENSG00000257925 | 1.43     | 0.076363    | 1.43     | 0.076363    | 1.43        | 0.076363 | 1.43 | 0.076363 |
|            |                 | 0.076363 | 0.540586718 |          |             |             |          |      |          |
| RNU6-731P  | ENSG00000253022 | 1.0445   | 0.14814     | 1.4299   | 0.076366    | 1.0425      |          |      |          |
|            |                 | 0.14859  | 1.0425      | 0.14859  | 0.076366    | 0.540586718 |          |      |          |
| TNIK       | ENSG00000154310 | 0.43525  | 0.33169     | 0.87271  | 0.19141     | 0.16913     | 0.43285  |      |          |
|            |                 | 1.4298   | 0.076384    | 0.076384 | 0.540586718 |             |          |      |          |
| ATP5F1AP4  | ENSG00000258877 | 1.4298   | 0.076386    | 1.4298   | 0.076386    | 1.4298      |          |      |          |
|            |                 | 0.076386 | 1.4298      | 0.076386 | 0.076386    | 0.540586718 |          |      |          |
| SKAP1      | ENSG00000141293 | 1.4298   | 0.076387    | 1.3609   | 0.08677     | 0.87196     | 0.19161  |      |          |
|            |                 | 0.06417  | 0.47442     | 0.076387 | 0.540586718 |             |          |      |          |
| NA         | ENSG00000265545 | 1.4297   | 0.076397    | -0.30309 | 0.61909     | -2.1459     | 0.98406  |      |          |
|            |                 | -0.87897 | 0.81029     | 0.076397 | 0.540586718 |             |          |      |          |
| NA         | ENSG00000266708 | 1.4297   | 0.076401    | 1.4297   | 0.076401    | 1.4297      | 0.076401 |      |          |
|            |                 | 1.4297   | 0.076401    | 0.076401 | 0.540586718 |             |          |      |          |
| ZNRF3-AS1  | ENSG00000177993 | 1.4295   | 0.076425    | 1.4295   | 0.076425    | 1.4295      |          |      |          |
|            |                 | 0.076425 | 1.4295      | 0.076425 | 0.076425    | 0.540654118 |          |      |          |
| NA         | ENSG00000235713 | 0.78721  | 0.21558     | 0.11645  | 0.45365     | 1.4294      | 0.076441 |      |          |
|            |                 | 0.30566  | 0.37993     | 0.076441 | 0.540654118 |             |          |      |          |
| NA         | ENSG00000243224 | 1.4293   | 0.076455    | 1.4293   | 0.076455    | 1.4293      | 0.076455 |      |          |
|            |                 | 1.4293   | 0.076455    | 0.076455 | 0.540654118 |             |          |      |          |
| NEK7       | ENSG00000151414 | 1.4293   | 0.076456    | 1.294    | 0.09784     | -0.61677    | 0.73131  |      |          |
|            |                 | -0.61677 | 0.73131     | 0.076456 | 0.540654118 |             |          |      |          |
| PHBP9      | ENSG00000230224 | 1.4292   | 0.076466    | 1.4292   | 0.076466    | 1.4292      | 0.076466 |      |          |
|            |                 | 1.4292   | 0.076466    | 0.076466 | 0.540654118 |             |          |      |          |
| SUN2       | ENSG00000100242 | -1.2895  | 0.90138     | -0.89984 | 0.8159      | 0.072772    | 0.47099  |      |          |
|            |                 | 1.429    | 0.076504    | 0.076504 | 0.540729166 |             |          |      |          |
| NA         | ENSG00000278621 | 1.4289   | 0.07651     | 1.4289   | 0.07651     | 1.4289      | 0.07651  |      |          |
|            |                 | 1.4289   | 0.07651     | 0.07651  | 0.540729166 |             |          |      |          |
| NA         | ENSG00000198106 | 1.4289   | 0.076517    | 0.35874  | 0.3599      | 1.0772      | 0.14069  |      |          |
|            |                 | 1.3262   | 0.092385    | 0.076517 | 0.540729166 |             |          |      |          |
| NA         | ENSG00000212168 | 1.4289   | 0.076521    | 1.4289   | 0.076521    | -0.637      | 0.73794  |      |          |
|            |                 | 1.4289   | 0.076521    | 0.076521 | 0.540729166 |             |          |      |          |
| C20orf96   | ENSG00000196476 | 1.4287   | 0.076547    | 0.95184  | 0.17059     | 1.2937      |          |      |          |
|            |                 | 0.09789  | -0.54457    | 0.70697  | 0.076547    | 0.540834466 |          |      |          |
| REG1CP     | ENSG00000204787 | -0.4663  | 0.6795      | -0.4663  | 0.6795      | -0.4663     |          |      |          |
|            |                 | 0.6795   | 1.4286      | 0.076559 | 0.076559    | 0.540840834 |          |      |          |
| USP36      | ENSG00000055483 | -0.62366 | 0.73357     | 0.39604  | 0.34604     | 1.4281      | 0.076625 |      |          |
|            |                 | 0.59214  | 0.27688     | 0.076625 | 0.540893836 |             |          |      |          |
| H2AZ2      | ENSG00000105968 | 1.4281   | 0.076638    | 0.38841  | 0.34886     | -0.18139    | 0.57197  |      |          |
|            |                 | 1.1709   | 0.12081     | 0.076638 | 0.540893836 |             |          |      |          |
| NA         | ENSG00000201633 | 1.2176   | 0.11169     | 1.3835   | 0.083254    | 1.2377      | 0.10791  |      |          |
|            |                 | 1.428    | 0.076648    | 0.076648 | 0.540893836 |             |          |      |          |
| KNOP1P5    | ENSG00000250563 | 1.4279   | 0.07666     | 1.4279   | 0.07666     | 1.4279      |          |      |          |
|            |                 | 0.07666  | 1.4279      | 0.07666  | 0.07666     | 0.540893836 |          |      |          |
| M6PR       | ENSG00000003056 | 1.4279   | 0.076665    | 1.4279   | 0.076665    | 1.4279      | 0.076665 |      |          |
|            |                 | 1.4279   | 0.076665    | 0.076665 | 0.540893836 |             |          |      |          |
| MIR548V    | ENSG00000265520 | 1.4278   | 0.076677    | 1.4278   | 0.076677    | 1.4278      |          |      |          |
|            |                 | 0.076677 | 1.4278      | 0.076677 | 0.076677    | 0.540893836 |          |      |          |
| ARHGAP42P1 | ENSG00000227817 | 0.28882  | 0.38636     | 0.28882  | 0.38636     | 1.4278      |          |      |          |
|            |                 | 0.076678 | -0.97813    | 0.836    | 0.076678    | 0.540893836 |          |      |          |
| CCNQ1P1    | ENSG00000233827 | 1.4278   | 0.07668     | 1.4278   | 0.07668     | 1.4278      |          |      |          |
|            |                 | 0.07668  | 0.15657     | 0.43779  | 0.07668     | 0.540893836 |          |      |          |
| RNU6-219P  | ENSG00000201598 | 1.4277   | 0.076696    | 1.4277   | 0.076696    | 0.83378     |          |      |          |
|            |                 | 0.2022   | 0.77624     | 0.2188   | 0.076696    | 0.540893836 |          |      |          |
| NA         | ENSG00000266390 | -1.6858  | 0.95408     | 0.73808  | 0.23023     | 1.4277      | 0.076696 |      |          |
|            |                 | -0.70748 | 0.76037     | 0.076696 | 0.540893836 |             |          |      |          |
| NA         | ENSG00000283053 | 1.4276   | 0.076699    | 0.67243  | 0.25066     | -0.72553    | 0.76594  |      |          |
|            |                 | 0.68387  | 0.24703     | 0.076699 | 0.540893836 |             |          |      |          |
| NA         | ENSG00000273353 | 1.4275   | 0.076713    | 1.4275   | 0.076713    | 1.4275      | 0.076713 |      |          |
|            |                 | 1.4275   | 0.076713    | 0.076713 | 0.540893836 |             |          |      |          |
| SLC48A1    | ENSG00000211584 | 0.56402  | 0.28637     | 1.4275   | 0.07672     | 1.2079      |          |      |          |
|            |                 | 0.11355  | 1.2079      | 0.11355  | 0.07672     | 0.540893836 |          |      |          |

|           |                 |             |          |             |             |           |
|-----------|-----------------|-------------|----------|-------------|-------------|-----------|
| SBDSP1    | ENSG00000225648 | 1.4275      | 0.076722 | 0.86909     | 0.1924      | 0.65425   |
|           | 0.25647         | 0.89804     | 0.18458  | 0.076722    | 0.540893836 |           |
| FAM135A   | ENSG00000082269 | 0.69612     | 0.24318  | 1.2082      | 0.11348     | 0.87388   |
|           | 0.19109         | 1.4274      | 0.076733 | 0.076733    | 0.540893836 |           |
| NA        | ENSG00000254695 | 1.0362      | 0.15004  | 0.87684     | 0.19029     | 1.4271    |
|           | 0.96773         | 0.16659     | 0.07678  | 0.540931876 |             | 0.07678   |
| ALPG      | ENSG00000163286 | 1.2022      | 0.11464  | 0.90551     | 0.1826      | 1.4271    |
|           | 0.27053         | 0.39338     | 0.076782 | 0.540931876 |             | 0.076782  |
| PTGR2     | ENSG00000140043 | 1.2103      | 0.11309  | 1.1325      | 0.12871     | 1.1325    |
|           | 1.427           | 0.076792    | 0.076792 | 0.540931876 |             | 0.12871   |
| NA        | ENSG00000258922 | 1.2237      | 0.11053  | 1.1542      | 0.1242      | 1.427     |
|           | 1.1416          | 0.12682     | 0.076793 | 0.540931876 |             | 0.076793  |
| NA        | ENSG00000280117 | 1.427       | 0.076796 | 1.427       | 0.076796    | 1.427     |
|           | 0.076796        | 0.540931876 |          |             |             | 0.076796  |
| CCNI2     | ENSG00000205089 | 1.4269      | 0.076805 | 1.4269      | 0.076805    | 1.4269    |
|           | 1.4269          | 0.076805    | 0.076805 | 0.540931876 |             | 0.076805  |
| RN7SKP129 | ENSG00000222220 | 1.4267      | 0.076835 | -0.38665    | 0.65049     | -0.037573 |
|           | 0.51499         | -0.67964    | 0.75164  | 0.076835    | 0.541036073 |           |
| IGF2BP2   | ENSG00000073792 | 1.0009      | 0.15845  | 1.1912      | 0.11678     | 1.4266    |
|           | 0.076842        | 1.2383      | 0.1078   | 0.076842    | 0.541036073 |           |
| PELO      | ENSG00000152684 | 1.4264      | 0.076874 | 1.3346      | 0.091       | 1.4264    |
|           | 0.71036         | 0.23874     | 0.076874 | 0.541180837 |             | 0.076874  |
| NA        | ENSG00000268743 | 1.4263      | 0.076886 | 1.4263      | 0.076886    | 1.4263    |
|           | 1.4263          | 0.076886    | 0.076886 | 0.541180837 |             | 0.076886  |
| NA        | ENSG00000270335 | 1.2262      | 0.11006  | 1.4262      | 0.0769      | 0.97558   |
|           | 0.94101         | 0.17335     | 0.0769   | 0.541180837 |             | 0.16464   |
| TRBV19    | ENSG00000211746 | -0.53996    | 0.70539  | 1.4262      | 0.076909    | -0.97301  |
|           | 0.83473         | 1.0327      | 0.15088  | 0.076909    | 0.541180837 |           |
| GNL3      | ENSG00000163938 | 1.426       | 0.076936 | 1.426       | 0.076936    | 1.426     |
|           | 0.076936        | 0.541180837 |          |             |             | 0.076936  |
| FGF14-IT1 | ENSG00000243319 | -0.20289    | 0.58039  | 1.4259      | 0.076953    | 1.4259    |
|           | 0.076953        | 0.73097     | 0.2324   | 0.076953    | 0.541180837 |           |
| GPR19     | ENSG00000183150 | 0.67614     | 0.24948  | 1.4258      | 0.076969    | 0.2915    |
|           | 0.44917         | 0.32666     | 0.076969 | 0.541180837 |             | 0.38534   |
| NA        | ENSG00000232883 | 1.4256      | 0.076987 | 1.4256      | 0.076987    | 1.4256    |
|           | 1.2732          | 0.10146     | 0.076987 | 0.541180837 |             | 0.076987  |
| MIR567    | ENSG00000207940 | 1.4256      | 0.076989 | -0.24387    | 0.59633     | 1.4256    |
|           | 0.076989        | 1.4256      | 0.076989 | 0.076989    | 0.541180837 |           |
| DHFRP6    | ENSG00000219095 | -1.0927     | 0.86275  | -1.0795     | 0.85983     | 1.4255    |
|           | 0.077001        | -1.2947     | 0.90228  | 0.077001    | 0.541180837 |           |
| LINC00926 | ENSG00000247982 | 0.26919     | 0.39389  | -0.31171    | 0.62237     | 0.26919   |
|           | 0.39389         | 1.4255      | 0.07701  | 0.07701     | 0.541180837 |           |
| HSD17B12  | ENSG00000149084 | 1.4254      | 0.077024 | 1.0119      | 0.1558      | 0.83762   |
|           | 0.20112         | 0.88255     | 0.18874  | 0.077024    | 0.541180837 |           |
| ACTRT2    | ENSG00000169717 | -1.5285     | 0.93681  | 1.425       | 0.077083    | 0.57184   |
|           | 0.33897         | 0.36732     | 0.077083 | 0.541180837 |             | 0.28372   |
| LINC01148 | ENSG00000258804 | 1.4248      | 0.077101 | 1.0484      | 0.14723     | -0.18708  |
|           | 0.5742          | -0.18708    | 0.5742   | 0.077101    | 0.541180837 |           |
| LINC02031 | ENSG00000238837 | 1.4248      | 0.077112 | 0.69833     | 0.24249     | -0.17558  |
|           | 0.56969         | 0.15545     | 0.43823  | 0.077112    | 0.541180837 |           |
| NA        | ENSG00000235572 | -1.3825     | 0.9166   | 1.4247      | 0.077117    | -1.1925   |
|           | -2.2519         | 0.98784     | 0.077117 | 0.541180837 |             | 0.88348   |
| PCAT7     | ENSG00000231806 | 1.4247      | 0.077118 | 0.77125     | 0.22028     | -0.47367  |
|           | -0.47367        | 0.68213     | 0.077118 | 0.541180837 |             | 0.68213   |
| FCN2      | ENSG00000160339 | -1.4996     | 0.93313  | -0.63559    | 0.73748     | -1.2586   |
|           | 1.4247          | 0.077121    | 0.077121 | 0.541180837 |             | 0.89591   |
| NA        | ENSG00000221007 | 1.4246      | 0.077131 | -0.14006    | 0.55569     | -0.14006  |
|           | -0.14006        | 0.55569     | 0.077131 | 0.541180837 |             | 0.55569   |
| BOLA2P2   | ENSG00000271161 | 1.4246      | 0.077141 | -0.32405    | 0.62705     | -1.1579   |
|           | 0.87654         | -1.1579     | 0.87654  | 0.077141    | 0.541180837 |           |
| PDCL3P3   | ENSG00000214286 | 1.4245      | 0.077155 | 1.4245      | 0.077155    | 1.4245    |
|           | 0.077155        | 1.4245      | 0.077155 | 0.077155    | 0.541180837 |           |



|            |                 |          |          |             |             |             |          |
|------------|-----------------|----------|----------|-------------|-------------|-------------|----------|
| NA         | ENSG00000206816 | 1.4244   | 0.077161 | 1.4244      | 0.077161    | 1.4244      | 0.077161 |
|            |                 | 0.077161 | 0.077161 | 0.541180837 |             |             |          |
| NA         | ENSG00000271239 | -1.4699  | 0.92921  | 1.4244      | 0.077161    | -1.4699     | 0.92921  |
|            |                 | 0.92921  | 0.077161 | 0.541180837 |             |             |          |
| CCBE1      | ENSG00000183287 | 0.63324  | 0.26329  | 1.4244      | 0.077163    | 0.12201     | 0.45144  |
|            |                 | 0.84123  | 0.077163 | 0.541180837 |             |             |          |
| FBXW10     | ENSG00000171931 | 1.4244   | 0.077168 | -1.435      | 0.92435     | 0.17147     |          |
|            |                 | 0.43193  | -0.70614 | 0.75995     | 0.077168    | 0.541180837 |          |
| RASSF10-DT | ENSG00000254670 | 1.4244   | 0.07717  | 1.4244      | 0.07717     | 1.4244      |          |
|            |                 | 0.07717  | 1.4244   | 0.07717     | 0.07717     | 0.541180837 |          |
| ENGASE     | ENSG00000167280 | 1.4242   | 0.077193 | -0.28382    | 0.61173     | -0.45294    |          |
|            |                 | 0.67471  | -0.60465 | 0.7273      | 0.077193    | 0.541180837 |          |
| NA         | ENSG00000273306 | 1.4242   | 0.077201 | 1.4242      | 0.077201    | 1.4242      | 0.077201 |
|            |                 | 1.4242   | 0.077201 | 0.077201    | 0.541180837 |             |          |
| NA         | ENSG00000278595 | -0.23114 | 0.5914   | -0.23344    | 0.59229     | 1.4241      | 0.077202 |
|            |                 | -0.25789 | 0.60175  | 0.077202    | 0.541180837 |             |          |
| NA         | ENSG00000251811 | -1.5128  | 0.93484  | -0.46117    | 0.67766     | 0.067828    | 0.47296  |
|            |                 | 1.4241   | 0.077212 | 0.077212    | 0.541180837 |             |          |
| EGLN1      | ENSG00000135766 | 0.31612  | 0.37596  | 1.424       | 0.07722     | 0.48734     | 0.31301  |
|            |                 | -0.90077 | 0.81614  | 0.07722     | 0.541180837 |             |          |
| PGM2       | ENSG00000169299 | 0.63822  | 0.26167  | 0.63822     | 0.26167     | 1.424       | 0.077223 |
|            |                 | 1.2555   | 0.10465  | 0.077223    | 0.541180837 |             |          |
| RAC1P7     | ENSG00000236101 | 0.60161  | 0.27372  | -0.2005     | 0.57946     | 1.4238      |          |
|            |                 | 0.077249 | -0.57042 | 0.71581     | 0.077249    | 0.541180837 |          |
| DEFA5      | ENSG00000164816 | 1.4237   | 0.077264 | 1.4237      | 0.077264    | 1.4237      | 0.077264 |
|            |                 | 1.4237   | 0.077264 | 0.077264    | 0.541180837 |             |          |
| NOTCH1     | ENSG00000148400 | -0.70288 | 0.75893  | 1.4237      | 0.077267    | 0.72591     |          |
|            |                 | 0.23395  | -0.39607 | 0.65397     | 0.077267    | 0.541180837 |          |
| OR5P2      | ENSG00000183303 | -2.0186  | 0.97824  | -0.5797     | 0.71894     | 1.3892      | 0.082383 |
|            |                 | 1.4236   | 0.077279 | 0.077279    | 0.541180837 |             |          |
| NF2        | ENSG00000186575 | 1.1197   | 0.13141  | 1.4236      | 0.07728     | 1.1239      | 0.13053  |
|            |                 | 0.44844  | 0.32692  | 0.07728     | 0.541180837 |             |          |
| NA         | ENSG00000201451 | 1.4235   | 0.077301 | 1.4235      | 0.077301    | 1.4235      | 0.077301 |
|            |                 | 1.4235   | 0.077301 | 0.077301    | 0.541180837 |             |          |
| NA         | ENSG00000230064 | 1.4235   | 0.077301 | 1.4235      | 0.077301    | 1.4235      | 0.077301 |
|            |                 | 1.4235   | 0.077301 | 0.077301    | 0.541180837 |             |          |
| NA         | ENSG00000223060 | 1.4234   | 0.077307 | 1.4234      | 0.077307    | 1.4234      | 0.077307 |
|            |                 | 1.4234   | 0.077307 | 0.077307    | 0.541180837 |             |          |
| RNA5SP384  | ENSG00000252424 | 1.4233   | 0.077325 | 1.4233      | 0.077325    | 1.4233      |          |
|            |                 | 0.077325 | 1.1945   | 0.11613     | 0.077325    | 0.541180837 |          |
| TRAF3IP1   | ENSG00000204104 | 1.4233   | 0.077329 | -0.1268     | 0.55045     | 1.0759      | 0.141    |
|            |                 | -0.21156 | 0.58377  | 0.077329    | 0.541180837 |             |          |
| LINC01989  | ENSG00000261156 | 1.4231   | 0.077346 | 0.048152    | 0.4808      | -0.61562    |          |
|            |                 | 0.73093  | -0.34518 | 0.63502     | 0.077346    | 0.541222082 |          |
| RPL31P57   | ENSG00000256358 | 1.423    | 0.077364 | 1.423       | 0.077364    | 1.423       | 0.077364 |
|            |                 | 0.077364 | 0.077364 | 0.541270312 |             |             |          |
| NA         | ENSG00000280310 | 1.4227   | 0.077407 | 0.079848    | 0.46818     | -2.1496     | 0.98421  |
|            |                 | 0.30493  | 0.38021  | 0.077407    | 0.541356676 |             |          |
| OR10G1P    | ENSG00000273586 | 1.4225   | 0.077434 | -0.48485    | 0.68611     | -0.56954    |          |
|            |                 | 0.7155   | -0.35341 | 0.63811     | 0.077434    | 0.541356676 |          |
| NA         | ENSG00000254067 | 1.3926   | 0.081878 | 1.4225      | 0.077435    | 0.84371     | 0.19942  |
|            |                 | 0.84414  | 0.1993   | 0.077435    | 0.541356676 |             |          |
| PADI1      | ENSG00000142623 | -0.34887 | 0.63641  | -1.0801     | 0.85995     | 1.4225      | 0.077439 |
|            |                 | -1.3416  | 0.91014  | 0.077439    | 0.541356676 |             |          |
| LRIT1      | ENSG00000148602 | 1.4225   | 0.077441 | -0.28748    | 0.61313     | 1.4225      | 0.077441 |
|            |                 | -0.54239 | 0.70622  | 0.077441    | 0.541356676 |             |          |
| RPL12P30   | ENSG00000242353 | 1.23     | 0.10936  | 1.2758      | 0.10101     | 1.0057      | 0.15729  |
|            |                 | 1.4225   | 0.077443 | 0.077443    | 0.541356676 |             |          |
| DLGAP2     | ENSG00000198010 | 0.29757  | 0.38302  | 0.24308     | 0.40397     | 0.84985     |          |
|            |                 | 0.1977   | 1.4222   | 0.077479    | 0.077479    | 0.541486363 |          |
| KIAA1217   | ENSG00000120549 | 0.56741  | 0.28522  | 1.2358      | 0.10826     | 1.4222      |          |
|            |                 | 0.077487 | -0.34532 | 0.63507     | 0.077487    | 0.541486363 |          |

|            |                 |           |          |             |             |          |          |
|------------|-----------------|-----------|----------|-------------|-------------|----------|----------|
| TRMT112P2  | ENSG00000249778 | -1.1772   | 0.88043  | 1.4221      | 0.077499    | 1.4221   |          |
|            | 0.077499        | 1.4221    | 0.077499 | 0.077499    | 0.541486363 |          |          |
| POLR2F     | ENSG00000100142 | 0.62336   | 0.26652  | 0.46326     | 0.32159     | 0.38761  |          |
|            | 0.34915         | 1.4221    | 0.077506 | 0.077506    | 0.541486363 |          |          |
| RNU6-549P  | ENSG00000207162 | 1.4218    | 0.077546 | 1.4218      | 0.077546    | 1.4218   |          |
|            | 0.077546        | 1.4218    | 0.077546 | 0.077546    | 0.541555291 |          |          |
| ANKRD62    | ENSG00000181626 | -0.56744  | 0.71479  | 1.4214      | 0.077603    | 0.83444  |          |
|            | 0.20202         | 0.29259   | 0.38492  | 0.077603    | 0.541555291 |          |          |
| LAIR1      | ENSG00000167613 | -0.1154   | 0.54593  | 1.4213      | 0.077616    | 1.4175   | 0.078165 |
|            | 0.16362         | 0.43502   | 0.077616 | 0.541555291 |             |          |          |
| KRT8P42    | ENSG00000220378 | 1.4213    | 0.077618 | 1.4213      | 0.077618    | 1.4213   |          |
|            | 0.077618        | 1.2445    | 0.10666  | 0.077618    | 0.541555291 |          |          |
| STC1       | ENSG00000159167 | -1.4616   | 0.92807  | -1.4616     | 0.92807     | -0.45457 | 0.67529  |
|            | 1.4213          | 0.077619  | 0.077619 | 0.541555291 |             |          |          |
| NA         | ENSG00000229855 | 0.7128    | 0.23798  | 1.4213      | 0.077619    | 1.4213   | 0.077619 |
|            | 1.4213          | 0.077619  | 0.077619 | 0.541555291 |             |          |          |
| ZNF544     | ENSG00000198131 | -1.3098   | 0.90486  | -1.113      | 0.86714     | -0.81109 |          |
|            | 0.79134         | 1.4212    | 0.077623 | 0.077623    | 0.541555291 |          |          |
| LIX1L-AS1  | ENSG00000234222 | -0.19441  | 0.57707  | 0.81796     | 0.20669     | 1.4212   |          |
|            | 0.077623        | 0.58433   | 0.2795   | 0.077623    | 0.541555291 |          |          |
| WDR19      | ENSG00000157796 | 1.4212    | 0.077624 | 0.5201      | 0.3015      | 0.55024  | 0.29108  |
|            | -0.022636       | 0.50903   | 0.077624 | 0.541555291 |             |          |          |
| IL22RA1    | ENSG00000142677 | -0.67672  | 0.75071  | 0.42048     | 0.33707     | 1.4212   |          |
|            | 0.077627        | 0.3764    | 0.35331  | 0.077627    | 0.541555291 |          |          |
| SBF1P1     | ENSG00000248522 | 1.3564    | 0.087478 | 0.93448     | 0.17503     | 1.1152   |          |
|            | 0.13238         | 1.421     | 0.077665 | 0.077665    | 0.541735044 |          |          |
| B4GALT2    | ENSG00000117411 | 1.4209    | 0.077675 | 1.4209      | 0.077675    | 0.087089 |          |
|            | 0.4653          | 1.4209    | 0.077675 | 0.077675    | 0.541735044 |          |          |
| NA         | ENSG00000262791 | 1.4207    | 0.077702 | 1.4207      | 0.077702    | 1.4207   | 0.077702 |
|            | 1.4207          | 0.077702  | 0.077702 | 0.541845801 |             |          |          |
| NA         | ENSG00000271771 | 0.27733   | 0.39076  | 1.4205      | 0.077736    | 0.11979  | 0.45232  |
|            | 0.73404         | 0.23146   | 0.077736 | 0.541883682 |             |          |          |
| PRDM14     | ENSG00000147596 | -1.8816   | 0.97006  | -1.8816     | 0.97006     | 0.48257  |          |
|            | 0.3147          | 1.4204    | 0.077749 | 0.077749    | 0.541883682 |          |          |
| RN7SKP3    | ENSG00000223341 | 0.4209    | 0.33692  | -0.16604    | 0.56594     | 1.4204   |          |
|            | 0.07775         | -0.75503  | 0.77488  | 0.07775     | 0.541883682 |          |          |
| RPL5       | ENSG00000122406 | 1.4202    | 0.077772 | 1.4202      | 0.077772    | 1.0204   | 0.15378  |
|            | 0.076467        | 0.46952   | 0.077772 | 0.541883682 |             |          |          |
| LINC02219  | ENSG00000253787 | -0.077506 | 0.53089  | -1.1424     | 0.87335     | -0.61926 |          |
|            | 0.73213         | 1.4197    | 0.077844 | 0.077844    | 0.541883682 |          |          |
| RNU6-1127P | ENSG00000207310 | 1.4196    | 0.077866 | 1.4196      | 0.077866    | 1.4196   |          |
|            | 0.077866        | -0.039725 | 0.51584  | 0.077866    | 0.541883682 |          |          |
| DCST2      | ENSG00000163354 | 0.31225   | 0.37743  | 1.4194      | 0.077889    | 0.71178  | 0.2383   |
|            | 0.81138         | 0.20857   | 0.077889 | 0.541883682 |             |          |          |
| OR11H6     | ENSG00000176219 | 1.4193    | 0.0779   | 1.4193      | 0.0779      | 1.4193   |          |
|            | 0.0779          | 1.0914    | 0.13755  | 0.0779      | 0.541883682 |          |          |
| FA2H       | ENSG00000103089 | 0.37879   | 0.35242  | 1.1444      | 0.12624     | 0.020771 | 0.49171  |
|            | 1.4191          | 0.077935  | 0.077935 | 0.541883682 |             |          |          |
| NA         | ENSG00000264216 | -0.033895 | 0.51352  | -0.0063856  | 0.50255     | 1.419    | 0.077952 |
|            | 0.39453         | 0.34659   | 0.077952 | 0.541883682 |             |          |          |
| LRRN2      | ENSG00000170382 | 0.67921   | 0.2485   | 1.419       | 0.077956    | 0.037285 | 0.48513  |
|            | 0.30784         | 0.3791    | 0.077956 | 0.541883682 |             |          |          |
| RN7SL215P  | ENSG00000242201 | 0.12197   | 0.45146  | 0.49984     | 0.30859     | 0.10679  |          |
|            | 0.45748         | 1.4188    | 0.077972 | 0.077972    | 0.541883682 |          |          |
| NA         | ENSG00000274481 | 1.4188    | 0.077978 | 1.4188      | 0.077978    | 1.4188   | 0.077978 |
|            | 1.4188          | 0.077978  | 0.077978 | 0.541883682 |             |          |          |
| NA         | ENSG00000229533 | 1.4187    | 0.077993 | -0.77026    | 0.77943     | 1.4187   | 0.077993 |
|            | 1.4187          | 0.077993  | 0.077993 | 0.541883682 |             |          |          |
| TMCC1      | ENSG00000172765 | 0.73677   | 0.23063  | 1.0862      | 0.13869     | 1.1784   | 0.11932  |
|            | 1.4187          | 0.077996  | 0.077996 | 0.541883682 |             |          |          |
| SLC9C2     | ENSG00000162753 | 1.4187    | 0.077997 | 0.15365     | 0.43894     | -0.8332  |          |
|            | 0.79764         | 0.97818   | 0.16399  | 0.077997    | 0.541883682 |          |          |

|          |                 |            |          |             |             |             |          |          |
|----------|-----------------|------------|----------|-------------|-------------|-------------|----------|----------|
| SYCP2    | ENSG00000196074 | 1.4187     | 0.077999 | 0.077999    | 1.4187      | 0.077999    | 1.4187   | 0.077999 |
|          |                 | 1.4187     | 0.077999 | 0.077999    | 0.541883682 |             |          |          |
| KRT223P  | ENSG00000229028 | -0.19155   | 0.57595  | -0.84661    | 0.80139     | -1.0837     |          |          |
|          |                 | 0.86075    | 1.4186   | 0.078004    | 0.078004    | 0.541883682 |          |          |
| NFRKB    | ENSG00000170322 | 1.4186     | 0.078006 | 1.4186      | 0.078006    | 0.36348     | 0.35812  |          |
|          |                 | 0.6705     | 0.25127  | 0.078006    | 0.541883682 |             |          |          |
| NRG1     | ENSG00000157168 | 1.4186     | 0.078013 | -0.43946    | 0.66984     | 0.82644     | 0.20428  |          |
|          |                 | 0.28106    | 0.38933  | 0.078013    | 0.541883682 |             |          |          |
| ATP8B2   | ENSG00000143515 | 0.64117    | 0.26071  | 1.4185      | 0.078029    | 1.2776      |          |          |
|          |                 | 0.1007     | 1.3865   | 0.082799    | 0.078029    | 0.541883682 |          |          |
| AMZ2P1   | ENSG00000214174 | -0.20839   | 0.58254  | 1.4184      | 0.07803     | 0.18952     |          |          |
|          |                 | 0.42484    | 1.1462   | 0.12585     | 0.07803     | 0.541883682 |          |          |
| NA       | ENSG00000271368 | 1.1131     | 0.13282  | 1.1131      | 0.13282     | 1.4183      | 0.078055 |          |
|          |                 | 1.1131     | 0.13282  | 0.078055    | 0.541883682 |             |          |          |
| BTF3P9   | ENSG00000224834 | 1.4183     | 0.078057 | 0.31893     | 0.37489     | 0.23558     |          |          |
|          |                 | 0.40688    | 0.1865   | 0.42603     | 0.078057    | 0.541883682 |          |          |
| CCDC90B  | ENSG00000137500 | -0.13664   | 0.55434  | 1.4181      | 0.078081    | -0.73446    |          |          |
|          |                 | 0.76867    | 0.41167  | 0.34029     | 0.078081    | 0.541883682 |          |          |
| KRTAP4-4 | ENSG00000171396 | 1.4181     | 0.078088 | 1.4181      | 0.078088    | 1.4181      |          |          |
|          |                 | 0.078088   | 1.4181   | 0.078088    | 0.078088    | 0.541883682 |          |          |
| NA       | ENSG00000235185 | 0.032294   | 0.48712  | -0.4012     | 0.65586     | 1.4181      | 0.078088 |          |
|          |                 | -0.32061   | 0.62575  | 0.078088    | 0.541883682 |             |          |          |
| NA       | ENSG00000267070 | 0.1961     | 0.42227  | 1.418       | 0.07809     | -1.3175     | 0.90617  |          |
|          |                 | -0.0027035 | 0.50108  | 0.07809     | 0.541883682 |             |          |          |
| UBE2D4   | ENSG00000078967 | 0.54283    | 0.29362  | 1.418       | 0.078092    | 0.63333     | 0.26326  |          |
|          |                 | 0.61312    | 0.2699   | 0.078092    | 0.541883682 |             |          |          |
| NA       | ENSG00000271621 | 1.267      | 0.10259  | 1.418       | 0.078097    | 1.0638      | 0.1437   | 0.25344  |
|          |                 | 0.39996    | 0.078097 | 0.541883682 |             |             |          |          |
| NCAM1    | ENSG00000149294 | -0.47506   | 0.68263  | -0.093465   | 0.53723     | 0.87346     | 0.19121  |          |
|          |                 | 1.4179     | 0.078114 | 0.078114    | 0.541883682 |             |          |          |
| FGFRL1   | ENSG00000127418 | -0.39204   | 0.65248  | -0.45495    | 0.67543     | 1.0387      |          |          |
|          |                 | 0.14948    | 1.4178   | 0.078119    | 0.078119    | 0.541883682 |          |          |
| ZSCAN5A  | ENSG00000131848 | 0.3427     | 0.36591  | 0.53125     | 0.29762     | 0.3427      |          |          |
|          |                 | 0.36591    | 1.4178   | 0.078124    | 0.078124    | 0.541883682 |          |          |
| SNORA66  | ENSG00000207523 | 1.4178     | 0.078129 | 1.4178      | 0.078129    | 1.4178      |          |          |
|          |                 | 0.078129   | 1.4178   | 0.078129    | 0.078129    | 0.541883682 |          |          |
| NA       | ENSG00000233461 | 1.4177     | 0.078134 | 0.35295     | 0.36206     | 0.76756     | 0.22138  |          |
|          |                 | 0.65521    | 0.25617  | 0.078134    | 0.541883682 |             |          |          |
| KRT8P13  | ENSG00000241416 | 1.4177     | 0.07814  | 1.4177      | 0.07814     | 1.4177      |          |          |
|          |                 | 0.07814    | 1.4177   | 0.07814     | 0.07814     | 0.541883682 |          |          |
| NA       | ENSG00000226886 | -0.97918   | 0.83626  | 0.63746     | 0.26191     | 1.4176      | 0.07815  |          |
|          |                 | -1.2128    | 0.88739  | 0.07815     | 0.541883682 |             |          |          |
| DNMT3B   | ENSG00000088305 | 0.58987    | 0.27764  | 1.4176      | 0.078151    | 0.93065     |          |          |
|          |                 | 0.17602    | 1.3793   | 0.083897    | 0.078151    | 0.541883682 |          |          |
| PARP16   | ENSG00000138617 | 1.4139     | 0.078696 | -1.0454     | 0.85208     | 1.4176      |          |          |
|          |                 | 0.078155   | -0.29718 | 0.61684     | 0.078155    | 0.541883682 |          |          |
| HMGB3P18 | ENSG00000220184 | -2.0374    | 0.9792   | 1.4175      | 0.078164    | -2.0374     |          |          |
|          |                 | 0.9792     | 1.1414   | 0.12685     | 0.078164    | 0.541883682 |          |          |
| CIBAR1   | ENSG00000188343 | 1.4175     | 0.078174 | 0.12499     | 0.45027     | 0.33826     |          |          |
|          |                 | 0.36758    | -0.49478 | 0.68962     | 0.078174    | 0.541883682 |          |          |
| DNM3     | ENSG00000197959 | 1.2461     | 0.10636  | 1.4172      | 0.078219    | 0.17718     | 0.42968  |          |
|          |                 | 1.0417     | 0.14877  | 0.078219    | 0.541883682 |             |          |          |
| RTBDN    | ENSG00000132026 | -0.74127   | 0.77074  | -0.74127    | 0.77074     | -0.74127    | 0.77074  |          |
|          |                 | 1.4171     | 0.078225 | 0.078225    | 0.541883682 |             |          |          |
| NA       | ENSG00000236839 | 1.0281     | 0.15196  | 1.4171      | 0.078225    | 1.4171      | 0.078225 |          |
|          |                 | 1.4171     | 0.078225 | 0.078225    | 0.541883682 |             |          |          |
| HMGA1P6  | ENSG00000233440 | -0.45818   | 0.67659  | -1.0541     | 0.85408     | 1.4171      |          |          |
|          |                 | 0.078229   | -1.235   | 0.89159     | 0.078229    | 0.541883682 |          |          |
| MEX3A    | ENSG00000254726 | 1.4171     | 0.078233 | 0.436       | 0.33142     | 1.4157      | 0.078433 |          |
|          |                 | 1.4157     | 0.078433 | 0.078233    | 0.541883682 |             |          |          |
| NA       | ENSG00000239054 | 1.4171     | 0.078233 | 1.4171      | 0.078233    | 1.4171      | 0.078233 |          |
|          |                 | 0.86826    | 0.19263  | 0.078233    | 0.541883682 |             |          |          |

|            |                 |           |          |          |             |             |          |        |
|------------|-----------------|-----------|----------|----------|-------------|-------------|----------|--------|
| RNU7-57P   | ENSG00000238365 | 1.4167    | 0.078287 | 1.4167   | 0.078287    | 1.4167      | 0.078287 | 1.4167 |
|            |                 | 0.078287  | 1.4167   | 0.078287 | 0.078287    | 0.541883682 |          |        |
| SUCLG2-AS1 | ENSG00000241316 | -0.664    | 0.74666  | -1.18    | 0.881       | 0.012611    | 0.49497  |        |
|            |                 | 1.4166    | 0.078293 | 0.078293 | 0.541883682 |             |          |        |
| LINC02437  | ENSG00000248517 | 0.95959   | 0.16863  | 0.35963  | 0.35956     | 1.4166      |          |        |
|            |                 | 0.078305  | 0.81772  | 0.20676  | 0.078305    | 0.541883682 |          |        |
| FTH1P16    | ENSG00000227376 | 1.4165    | 0.078309 | 1.4165   | 0.078309    | 1.4165      |          |        |
|            |                 | 0.078309  | 1.4165   | 0.078309 | 0.078309    | 0.541883682 |          |        |
| CLDN8      | ENSG00000156284 | -0.014137 | 0.50564  | 0.14621  | 0.44188     | 1.4165      | 0.078311 |        |
|            |                 | 1.4165    | 0.078311 | 0.078311 | 0.541883682 |             |          |        |
| LRFN5      | ENSG00000165379 | 1.1221    | 0.13092  | 1.4165   | 0.078319    | 0.99527     | 0.1598   |        |
|            |                 | -0.42359  | 0.66407  | 0.078319 | 0.541883682 |             |          |        |
| NA         | ENSG00000268240 | 0.25213   | 0.40047  | 1.4163   | 0.078341    | 0.90496     | 0.18274  |        |
|            |                 | 1.4163    | 0.078341 | 0.078341 | 0.541883682 |             |          |        |
| SDAD1P4    | ENSG00000236803 | 0.15649   | 0.43782  | 0.15649  | 0.43782     | -0.68256    |          |        |
|            |                 | 0.75256   | 1.4162   | 0.078359 | 0.078359    | 0.541883682 |          |        |
| OSBPL2     | ENSG00000130703 | -0.32746  | 0.62834  | -0.1287  | 0.5512      | 1.4161      |          |        |
|            |                 | 0.078367  | 0.08638  | 0.46558  | 0.078367    | 0.541883682 |          |        |
| CACNA1S    | ENSG00000081248 | 1.4161    | 0.078372 | 0.29351  | 0.38457     | 1.3877      |          |        |
|            |                 | 0.082616  | 0.5847   | 0.27937  | 0.078372    | 0.541883682 |          |        |
| LYPD1      | ENSG00000150551 | 1.4161    | 0.078374 | -0.67493 | 0.75014     | -0.63753    | 0.73811  |        |
|            |                 | -1.0645   | 0.85644  | 0.078374 | 0.541883682 |             |          |        |
| NSA2P6     | ENSG00000250980 | 1.2994    | 0.096909 | 1.416    | 0.078385    | 0.019497    | 0.49222  |        |
|            |                 | 1.416     | 0.078385 | 0.078385 | 0.541883682 |             |          |        |
| IGKV1OR2-3 | ENSG00000204670 | 0.55548   | 0.28928  | 1.416    | 0.078388    | 0.81924     | 0.20633  |        |
|            |                 | 0.23272   | 0.40799  | 0.078388 | 0.541883682 |             |          |        |
| SLC26A11   | ENSG00000181045 | -0.044463 | 0.51773  | 1.416    | 0.078392    | 0.96938     | 0.16618  |        |
|            |                 | -0.89708  | 0.81516  | 0.078392 | 0.541883682 |             |          |        |
| CPPED1     | ENSG00000103381 | 1.4159    | 0.078405 | 1.4159   | 0.078405    | 1.3516      |          |        |
|            |                 | 0.088251  | 1.0337   | 0.15063  | 0.078405    | 0.541883682 |          |        |
| CLIC1P1    | ENSG00000231313 | 1.238     | 0.10785  | 0.35952  | 0.3596      | 1.4159      | 0.078408 |        |
|            |                 | 0.063414  | 0.47472  | 0.078408 | 0.541883682 |             |          |        |
| NA         | ENSG00000240890 | 1.4154    | 0.078474 | 1.3239   | 0.092762    | 1.3239      | 0.092762 |        |
|            |                 | 1.3239    | 0.092762 | 0.078474 | 0.542198967 |             |          |        |
| CLEC11A    | ENSG00000105472 | 1.4153    | 0.078487 | 0.41716  | 0.33828     | 1.4153      |          |        |
|            |                 | 0.078487  | 1.4153   | 0.078487 | 0.078487    | 0.542198967 |          |        |
| NA         | ENSG00000256763 | 1.4153    | 0.078487 | 1.4153   | 0.078487    | -0.20707    | 0.58202  |        |
|            |                 | -0.95724  | 0.83078  | 0.078487 | 0.542198967 |             |          |        |
| NA         | ENSG00000250892 | 1.4152    | 0.078508 | -0.55048 | 0.709       | 0.69567     | 0.24332  |        |
|            |                 | 0.97079   | 0.16583  | 0.078508 | 0.542267164 |             |          |        |
| NA         | ENSG00000227388 | 1.4148    | 0.078568 | -0.11589 | 0.54613     | 0.59297     | 0.2766   |        |
|            |                 | 1.222     | 0.11085  | 0.078568 | 0.542434593 |             |          |        |
| HOXC10     | ENSG00000180818 | -0.87858  | 0.81019  | 1.4147   | 0.078575    | -0.87858    |          |        |
|            |                 | 0.81019   | -0.87858 | 0.81019  | 0.078575    | 0.542434593 |          |        |
| NA         | ENSG00000249184 | 1.4146    | 0.078594 | -0.35124 | 0.63729     | 0.42751     | 0.3345   |        |
|            |                 | 0.42751   | 0.3345   | 0.078594 | 0.542434593 |             |          |        |
| GON7       | ENSG00000170270 | 0.26073   | 0.39715  | 1.4146   | 0.078598    | 0.48659     | 0.31328  |        |
|            |                 | 0.17434   | 0.4308   | 0.078598 | 0.542434593 |             |          |        |
| RPL11P5    | ENSG00000242137 | 0.43086   | 0.33328  | -1.2002  | 0.88497     | 1.4144      |          |        |
|            |                 | 0.078629  | -0.79976 | 0.78807  | 0.078629    | 0.542434593 |          |        |
| LRRC37A15P | ENSG00000230069 | 1.4142    | 0.078645 | 1.4142   | 0.078645    | 1.4142      |          |        |
|            |                 | 0.078645  | 1.4142   | 0.078645 | 0.078645    | 0.542434593 |          |        |
| KRT8P46    | ENSG00000248971 | 1.4142    | 0.078645 | 1.4142   | 0.078645    | 1.4142      |          |        |
|            |                 | 0.078645  | 1.4142   | 0.078645 | 0.078645    | 0.542434593 |          |        |
| NA         | ENSG00000265997 | -0.16281  | 0.56467  | 0.44669  | 0.32755     | 1.2265      | 0.11001  |        |
|            |                 | 1.4141    | 0.078673 | 0.078673 | 0.542434593 |             |          |        |
| PPIL4      | ENSG00000131013 | -1.1717   | 0.87934  | 1.414    | 0.078675    | -1.1717     | 0.87934  |        |
|            |                 | 0.51392   | 0.30365  | 0.078675 | 0.542434593 |             |          |        |
| KATNA1     | ENSG00000186625 | 1.3917    | 0.082011 | 1.4139   | 0.078692    | 1.3958      |          |        |
|            |                 | 0.081392  | 1.3027   | 0.096344 | 0.078692    | 0.542434593 |          |        |
| NA         | ENSG00000235886 | 1.2908    | 0.098379 | 1.4139   | 0.078701    | 1.2908      | 0.098379 |        |
|            |                 | 1.2908    | 0.098379 | 0.078701 | 0.542434593 |             |          |        |

|            |                 |           |             |             |             |          |          |       |
|------------|-----------------|-----------|-------------|-------------|-------------|----------|----------|-------|
| FN3KRP     | ENSG00000141560 | -1.1701   | 0.87903     | -0.90558    | 0.81742     | 1.4138   |          |       |
|            | 0.078715        | 0.0017119 | 0.49932     | 0.078715    | 0.542434593 |          |          |       |
| NA         | ENSG00000261095 | 1.0543    | 0.14586     | 1.0427      | 0.14855     | 1.4137   | 0.078722 |       |
|            | -0.32585        | 0.62773   | 0.078722    | 0.542434593 |             |          |          |       |
| POU2AF1    | ENSG00000110777 | 0.25979   | 0.39751     | 1.4137      | 0.078728    | 1.4137   |          |       |
|            | 0.078728        | 1.4137    | 0.078728    | 0.078728    | 0.542434593 |          |          |       |
| NA         | ENSG00000235594 | -0.6806   | 0.75194     | 1.4136      | 0.078735    | -1.0132  | 0.84452  |       |
|            | -1.0132         | 0.84452   | 0.078735    | 0.542434593 |             |          |          |       |
| SLC18B1    | ENSG00000146409 | 1.1746    | 0.12007     | 0.73748     | 0.23041     | 0.58356  |          |       |
|            | 0.27976         | 1.4136    | 0.078738    | 0.078738    | 0.542434593 |          |          |       |
| NA         | ENSG00000255515 | 1.1514    | 0.12477     | 0.92254     | 0.17812     | 1.4136   | 0.078743 |       |
|            | 0.72513         | 0.23419   | 0.078743    | 0.542434593 |             |          |          |       |
| PABPC1P7   | ENSG00000250651 | 1.4135    | 0.078747    | 1.4135      | 0.078747    | 1.4135   |          |       |
|            | 0.078747        | 1.4135    | 0.078747    | 0.078747    | 0.542434593 |          |          |       |
| NA         | ENSG00000270993 | 1.4135    | 0.078753    | 1.4135      | 0.078753    | 1.4135   | 0.078753 |       |
|            | 1.4135          | 0.078753  | 0.078753    | 0.542434593 |             |          |          |       |
| HNRNPC     | ENSG00000092199 | 1.4135    | 0.078761    | 0.43712     | 0.33101     | 0.011982 |          |       |
|            | 0.49522         | 0.70499   | 0.24041     | 0.078761    | 0.542434593 |          |          |       |
| NA         | ENSG00000284300 | 1.4134    | 0.078766    | 1.4134      | 0.078766    | 1.4134   | 0.078766 |       |
|            | 1.4134          | 0.078766  | 0.078766    | 0.542434593 |             |          |          |       |
| NA         | ENSG00000261298 | 0.3816    | 0.35138     | 0.94369     | 0.17267     | 0.11864  | 0.45278  |       |
|            | 1.4132          | 0.078804  | 0.078804    | 0.542619602 |             |          |          |       |
| MIR215     | ENSG00000207590 | 1.3135    | 0.094509    | 1.413       | 0.078826    | 1.413    | 0.078826 | 1.413 |
|            | 0.078826        | 0.078826  | 0.542677815 |             |             |          |          |       |
| NA         | ENSG00000279237 | 1.4129    | 0.07884     | 0.75894     | 0.22394     | 0.69504  | 0.24352  |       |
|            | 0.55406         | 0.28977   | 0.07884     | 0.542677815 |             |          |          |       |
| TMEM82     | ENSG00000162460 | 0.91453   | 0.18022     | -1.5472     | 0.93909     | -0.61503 |          |       |
|            | 0.73073         | 1.4129    | 0.078846    | 0.078846    | 0.542677815 |          |          |       |
| NA         | ENSG00000254710 | 0.8242    | 0.20491     | 0.86888     | 0.19246     | 1.4128   | 0.078857 |       |
|            | 0.8242          | 0.20491   | 0.078857    | 0.542677815 |             |          |          |       |
| SAP30L-AS1 | ENSG00000245275 | 1.1046    | 0.13467     | 0.22844     | 0.40965     | 1.3723   |          |       |
|            | 0.084992        | 1.4127    | 0.07887     | 0.07887     | 0.542690638 |          |          |       |
| NA         | ENSG00000246465 | 1.4123    | 0.078925    | 0.20237     | 0.41981     | 1.1761   | 0.11978  |       |
|            | 1.4123          | 0.078925  | 0.078925    | 0.542992411 |             |          |          |       |
| OVAAL      | ENSG00000236719 | 1.1669    | 0.12162     | 1.4122      | 0.078946    | 1.074    | 0.1414   |       |
|            | 1.4122          | 0.078946  | 0.078946    | 0.543060217 |             |          |          |       |
| LMNB1-DT   | ENSG00000251072 | 0.53593   | 0.296       | 1.412       | 0.07897     | -0.12975 | 0.55162  |       |
|            | -0.031806       | 0.51269   | 0.07897     | 0.543092618 |             |          |          |       |
| NA         | ENSG00000231760 | 1.412     | 0.078973    | 0.54698     | 0.2922      | 1.412    | 0.078973 | 1.412 |
|            | 0.078973        | 0.078973  | 0.543092618 |             |             |          |          |       |
| NA         | ENSG00000230805 | 1.4119    | 0.078989    | -0.55383    | 0.71015     | 1.4119   | 0.078989 |       |
|            | 1.4119          | 0.078989  | 0.078989    | 0.543126001 |             |          |          |       |
| PTPRT      | ENSG00000196090 | 0.82991   | 0.20329     | 0.40789     | 0.34168     | 0.47665  | 0.31681  |       |
|            | 1.4118          | 0.079012  | 0.079012    | 0.5432075   |             |          |          |       |
| DST        | ENSG00000151914 | 1.4116    | 0.079034    | 0.99656     | 0.15949     | 0.90843  | 0.18183  |       |
|            | 0.87757         | 0.19009   | 0.079034    | 0.543212348 |             |          |          |       |
| NA         | ENSG00000241499 | 1.4116    | 0.079035    | -0.25026    | 0.59881     | -0.25026 | 0.59881  |       |
|            | -0.25026        | 0.59881   | 0.079035    | 0.543212348 |             |          |          |       |
| NA         | ENSG00000255434 | 1.4113    | 0.079082    | 1.4113      | 0.079082    | 1.4113   | 0.079082 |       |
|            | 1.4113          | 0.079082  | 0.079082    | 0.543443941 |             |          |          |       |
| LINC01326  | ENSG00000244321 | 0.079153  | 0.46846     | 0.079153    | 0.46846     | 1.4112   |          |       |
|            | 0.079091        | 0.079153  | 0.46846     | 0.079091    | 0.543443941 |          |          |       |
| DBF4P3     | ENSG00000271097 | -0.066951 | 0.52669     | 1.411       | 0.079127    | 0.29854  | 0.38265  |       |
|            | 1.411           | 0.079127  | 0.079127    | 0.54361465  |             |          |          |       |
| ZBTB20-AS4 | ENSG00000242767 | -0.59352  | 0.72358     | 1.4108      | 0.079148    | -1.9578  |          |       |
|            | 0.97487         | 0.68561   | 0.24648     | 0.079148    | 0.543672171 |          |          |       |
| LINC02422  | ENSG00000255760 | 1.4107    | 0.079163    | 0.60231     | 0.27348     | 1.4107   |          |       |
|            | 0.079163        | 0.68326   | 0.24722     | 0.079163    | 0.543672171 |          |          |       |
| RNU6-607P  | ENSG00000223215 | -1.0153   | 0.84502     | 1.4107      | 0.079171    | 0.86225  |          |       |
|            | 0.19427         | -0.38504  | 0.64989     | 0.079171    | 0.543672171 |          |          |       |
| OR1E3      | ENSG00000142163 | -1.3532   | 0.91201     | 1.4106      | 0.07918     | -1.1582  | 0.8766   |       |
|            | -1.8917         | 0.97073   | 0.07918     | 0.543672171 |             |          |          |       |

|           |                 |           |             |             |             |            |          |
|-----------|-----------------|-----------|-------------|-------------|-------------|------------|----------|
| SELL      | ENSG00000188404 | -1.5026   | 0.93353     | -1.7117     | 0.95652     | -1.7117    | 0.95652  |
|           | 1.4104          | 0.079209  | 0.079209    | 0.54379467  |             |            |          |
| NA        | ENSG00000234273 | 1.4101    | 0.079262    | 1.2651      | 0.10292     | 0.057683   | 0.477    |
|           | 1.2077          | 0.11357   | 0.079262    | 0.544081879 |             |            |          |
| MAP2K7    | ENSG00000076984 | 1.4098    | 0.079298    | 0.11007     | 0.45618     | 1.4098     |          |
|           | 0.079298        | 1.4098    | 0.079298    | 0.079298    | 0.54418941  |            |          |
| COL17A1   | ENSG00000065618 | 1.4098    | 0.0793      | 1.301       | 0.096624    | 1.4098     | 0.0793   |
|           | 1.4098          | 0.0793    | 0.0793      | 0.54418941  |             |            |          |
| NA        | ENSG00000227200 | 1.4097    | 0.079312    | 1.4097      | 0.079312    | 1.4097     | 0.079312 |
|           | 1.4097          | 0.079312  | 0.079312    | 0.544195123 |             |            |          |
| MIDEAS    | ENSG00000156030 | 1.4096    | 0.079327    | -0.20348    | 0.58062     | 0.55581    |          |
|           | 0.28917         | 0.49615   | 0.30989     | 0.079327    | 0.544221415 |            |          |
| MIR31     | ENSG00000199177 | 1.4095    | 0.079339    | 1.4095      | 0.079339    | 1.4095     | 0.079339 |
|           | 1.4095          | 0.079339  | 0.079339    | 0.544227121 |             |            |          |
| STAT6     | ENSG00000166888 | 0.48187   | 0.31495     | 0.011209    | 0.49553     | -0.25283   | 0.5998   |
|           | 1.4093          | 0.079377  | 0.079377    | 0.544390371 |             |            |          |
| RPL21P126 | ENSG00000242320 | 1.409     | 0.079415    | 1.409       | 0.079415    | 1.409      | 0.079415 |
|           | 0.079415        | 0.079415  | 0.544390371 |             |             |            |          |
| LINC01619 | ENSG00000257242 | 1.4089    | 0.079426    | -0.11637    | 0.54632     | -0.0049353 |          |
|           | 0.50197         | 0.51854   | 0.30204     | 0.079426    | 0.544390371 |            |          |
| TAF11L2   | ENSG00000284373 | 1.4089    | 0.079434    | 1.4089      | 0.079434    | 1.4089     |          |
|           | 0.079434        | 1.4089    | 0.079434    | 0.079434    | 0.544390371 |            |          |
| NA        | ENSG00000231986 | 1.4089    | 0.079435    | 1.4089      | 0.079435    | 1.4089     | 0.079435 |
|           | 1.4089          | 0.079435  | 0.079435    | 0.544390371 |             |            |          |
| GRINA     | ENSG00000178719 | 1.4089    | 0.079438    | 1.4089      | 0.079438    | 1.4089     | 0.079438 |
|           | 1.4089          | 0.079438  | 0.079438    | 0.544390371 |             |            |          |
| PRRC2C    | ENSG00000117523 | 0.77934   | 0.21789     | 0.40107     | 0.34418     | 1.4088     |          |
|           | 0.079441        | 0.47948   | 0.3158      | 0.079441    | 0.544390371 |            |          |
| NA        | ENSG00000259388 | 1.2121    | 0.11273     | 1.4087      | 0.079458    | 1.4087     | 0.079458 |
|           | 1.4087          | 0.079458  | 0.079458    | 0.544430307 |             |            |          |
| NA        | ENSG00000251468 | 1.4085    | 0.079488    | 0.58768     | 0.27837     | 1.4085     | 0.079488 |
|           | 1.4085          | 0.079488  | 0.079488    | 0.544559291 |             |            |          |
| ZNF705A   | ENSG00000196946 | -0.065577 | 0.52614     | 1.4083      | 0.079514    | 0.34226    |          |
|           | 0.36608         | 0.77736   | 0.21847     | 0.079514    | 0.544660841 |            |          |
| SYNGAP1   | ENSG00000197283 | -0.25466  | 0.60051     | 0.17111     | 0.43207     | 0.65055    |          |
|           | 0.25767         | 1.4081    | 0.079544    | 0.079544    | 0.544789757 |            |          |
| NA        | ENSG00000252993 | -0.037728 | 0.51505     | -0.037728   | 0.51505     | -0.037728  | 0.51505  |
|           | 1.4078          | 0.079597  | 0.079597    | 0.544998292 |             |            |          |
| RN7SKP42  | ENSG00000222845 | 1.4078    | 0.0796      | 1.4078      | 0.0796      | 1.4078     |          |
|           | 0.0796          | 1.4078    | 0.0796      | 0.0796      | 0.544998292 |            |          |
| NA        | ENSG00000276993 | -1.7163   | 0.95695     | 1.4077      | 0.079608    | -1.7163    | 0.95695  |
|           | -0.759          | 0.77607   | 0.079608    | 0.544998292 |             |            |          |
| NA        | ENSG00000252448 | 1.4076    | 0.079628    | 1.4076      | 0.079628    | 1.4076     | 0.079628 |
|           | 1.4076          | 0.079628  | 0.079628    | 0.545058637 |             |            |          |
| RHBDL3    | ENSG00000141314 | 0.63175   | 0.26378     | 1.4075      | 0.079644    | 1.1067     |          |
|           | 0.13421         | -0.12782  | 0.55085     | 0.079644    | 0.54509159  |            |          |
| NA        | ENSG00000226438 | 1.4072    | 0.079687    | 1.0346      | 0.15042     | 0.090553   | 0.46392  |
|           | 0.090553        | 0.46392   | 0.079687    | 0.545204706 |             |            |          |
| OLA1      | ENSG00000138430 | 0.55974   | 0.28783     | -0.24194    | 0.59559     | 1.407      | 0.079707 |
|           | 0.50018         | 0.30847   | 0.079707    | 0.545204706 |             |            |          |
| RNU6-943P | ENSG00000252769 | 1.4069    | 0.079728    | 1.2156      | 0.11206     | 1.4069     |          |
|           | 0.079728        | 0.69437   | 0.24373     | 0.079728    | 0.545204706 |            |          |
| ECEL1P2   | ENSG00000244280 | 1.4068    | 0.079737    | 0.68283     | 0.24736     | 1.4068     |          |
|           | 0.079737        | 1.4068    | 0.079737    | 0.079737    | 0.545204706 |            |          |
| VASH1-AS1 | ENSG00000258301 | -0.052559 | 0.52096     | 1.4067      | 0.079753    | -0.052559  |          |
|           | 0.52096         | -0.052559 | 0.52096     | 0.079753    | 0.545204706 |            |          |
| SLC47A1   | ENSG00000142494 | -0.74332  | 0.77136     | 1.4067      | 0.07976     | -0.1595    |          |
|           | 0.56336         | -0.80796  | 0.79044     | 0.07976     | 0.545204706 |            |          |
| UBXN6     | ENSG00000167671 | 1.2893    | 0.098646    | 1.1405      | 0.12704     | 1.4066     | 0.079767 |
|           | 0.83161         | 0.20281   | 0.079767    | 0.545204706 |             |            |          |
| NA        | ENSG00000229389 | 0.30629   | 0.37969     | 1.4066      | 0.079767    | -1.4768    | 0.93014  |
|           | 0.37182         | 0.35501   | 0.079767    | 0.545204706 |             |            |          |

|           |                 |          |          |          |             |             |          |        |
|-----------|-----------------|----------|----------|----------|-------------|-------------|----------|--------|
| ZNF175    | ENSG00000105497 | 1.4065   | 0.079789 | 1.4065   | 0.079789    | 1.4065      | 0.079789 | 1.4065 |
|           |                 | 0.079789 | 1.4065   | 0.079789 | 0.079789    | 0.545204706 |          |        |
| ZNF83     | ENSG00000167766 | 0.38058  | 0.35176  | -1.0835  | 0.8607      | -0.04454    | 0.51776  |        |
|           |                 | 1.4064   | 0.079802 | 0.079802 | 0.545204706 |             |          |        |
| NA        | ENSG00000226573 | 1.4064   | 0.079802 | 1.4064   | 0.079802    | 1.4064      | 0.079802 |        |
|           |                 | 1.4064   | 0.079802 | 0.079802 | 0.545204706 |             |          |        |
| NA        | ENSG00000275850 | 1.4063   | 0.079815 | -1.8904  | 0.97065     | -0.16046    | 0.56374  |        |
|           |                 | -0.16046 | 0.56374  | 0.079815 | 0.545204706 |             |          |        |
| DOP1B     | ENSG00000142197 | 0.27712  | 0.39085  | 0.10164  | 0.45952     | 0.95475     | 0.16985  |        |
|           |                 | 1.4062   | 0.079826 | 0.079826 | 0.545204706 |             |          |        |
| NA        | ENSG00000276478 | -0.50748 | 0.69409  | 1.4061   | 0.07984     | -0.50748    | 0.69409  |        |
|           |                 | -0.2199  | 0.58702  | 0.07984  | 0.545204706 |             |          |        |
| ANKRD2    | ENSG00000165887 | 1.4061   | 0.079842 | 1.3186   | 0.093644    | 1.4061      |          |        |
|           |                 | 0.079842 | 1.4061   | 0.079842 | 0.079842    | 0.545204706 |          |        |
| NA        | ENSG00000241962 | 0.58689  | 0.27864  | 0.58689  | 0.27864     | 1.3335      | 0.091186 |        |
|           |                 | 1.4061   | 0.079848 | 0.079848 | 0.545204706 |             |          |        |
| GCNT7     | ENSG00000124091 | 1.1623   | 0.12256  | 0.13815  | 0.44506     | 1.406       | 0.079857 |        |
|           |                 | 0.7243   | 0.23444  | 0.079857 | 0.545204706 |             |          |        |
| RNU6-687P | ENSG00000252252 | 1.0413   | 0.14888  | 1.4059   | 0.079874    | -0.6439     |          |        |
|           |                 | 0.74018  | -0.86221 | 0.80571  | 0.079874    | 0.545204706 |          |        |
| NA        | ENSG00000250990 | 1.4057   | 0.0799   | 1.4057   | 0.0799      | 1.4057      | 0.0799   |        |
|           |                 | 1.4057   | 0.0799   | 0.0799   | 0.545204706 |             |          |        |
| MIR4639   | ENSG00000263712 | 1.4057   | 0.079911 | 0.065351 | 0.47395     | -1.5337     |          |        |
|           |                 | 0.93744  | -1.5337  | 0.93744  | 0.079911    | 0.545204706 |          |        |
| ABCB1     | ENSG00000085563 | 0.16947  | 0.43271  | -0.33061 | 0.62953     | -0.44045    | 0.67019  |        |
|           |                 | 1.4056   | 0.079915 | 0.079915 | 0.545204706 |             |          |        |
| SSU72     | ENSG00000160075 | -0.6964  | 0.75691  | -1.0707  | 0.85785     | -0.48552    | 0.68635  |        |
|           |                 | 1.4056   | 0.079923 | 0.079923 | 0.545204706 |             |          |        |
| RPL17P3   | ENSG00000271705 | 0.20653  | 0.41819  | 1.4055   | 0.079934    | 0.20653     |          |        |
|           |                 | 0.41819  | 0.20653  | 0.41819  | 0.079934    | 0.545204706 |          |        |
| KLF7      | ENSG00000118263 | 0.46235  | 0.32192  | 0.91479  | 0.18015     | 1.4053      | 0.079962 |        |
|           |                 | 0.22772  | 0.40993  | 0.079962 | 0.545204706 |             |          |        |
| LINC02061 | ENSG00000250885 | 1.2195   | 0.11133  | 1.4053   | 0.079963    | 1.1934      |          |        |
|           |                 | 0.11636  | 0.29619  | 0.38354  | 0.079963    | 0.545204706 |          |        |
| LBH       | ENSG00000213626 | -0.43884 | 0.66961  | 1.4052   | 0.079974    | 0.0075808   | 0.49698  |        |
|           |                 | -0.30897 | 0.62133  | 0.079974 | 0.545204706 |             |          |        |
| LLGL2     | ENSG00000073350 | 0.6401   | 0.26105  | 0.6401   | 0.26105     | 0.062992    | 0.47489  |        |
|           |                 | 1.4051   | 0.079992 | 0.079992 | 0.545204706 |             |          |        |
| NA        | ENSG00000280225 | 0.87583  | 0.19056  | 0.9542   | 0.16999     | 1.4051      | 0.079997 |        |
|           |                 | 1.4051   | 0.079997 | 0.079997 | 0.545204706 |             |          |        |
| NA        | ENSG00000229817 | 1.0575   | 0.14515  | 1.0575   | 0.14515     | 1.405       | 0.080008 |        |
|           |                 | 1.0575   | 0.14515  | 0.080008 | 0.545204706 |             |          |        |
| RPL3P3    | ENSG00000243388 | -0.39878 | 0.65497  | 1.4049   | 0.080025    | -0.39878    |          |        |
|           |                 | 0.65497  | -0.39878 | 0.65497  | 0.080025    | 0.545204706 |          |        |
| ESM1      | ENSG00000164283 | 0.45607  | 0.32417  | 1.4049   | 0.080027    | 0.45607     | 0.32417  |        |
|           |                 | 0.45607  | 0.32417  | 0.080027 | 0.545204706 |             |          |        |
| NA        | ENSG00000258809 | 1.3381   | 0.090438 | 1.4047   | 0.080049    | 1.3381      | 0.090438 |        |
|           |                 | 1.3381   | 0.090438 | 0.080049 | 0.545204706 |             |          |        |
| NA        | ENSG00000231585 | 1.4045   | 0.080086 | 1.4045   | 0.080086    | 1.4045      | 0.080086 |        |
|           |                 | 1.4045   | 0.080086 | 0.080086 | 0.545204706 |             |          |        |
| NA        | ENSG00000197376 | -0.81801 | 0.79332  | -0.36986 | 0.64426     | -0.36986    | 0.64426  |        |
|           |                 | 1.4044   | 0.080093 | 0.080093 | 0.545204706 |             |          |        |
| RPAP2P1   | ENSG00000270874 | 0.81413  | 0.20779  | 1.4044   | 0.080093    | 0.80327     |          |        |
|           |                 | 0.21091  | 0.45029  | 0.32625  | 0.080093    | 0.545204706 |          |        |
| NA        | ENSG00000201549 | 0.3284   | 0.3713   | 1.4044   | 0.080104    | 0.3284      | 0.3713   |        |
|           |                 | 0.1625   | 0.43546  | 0.080104 | 0.545204706 |             |          |        |
| NA        | ENSG00000279319 | 1.3867   | 0.082762 | 1.4044   | 0.080105    | 1.4044      | 0.080105 |        |
|           |                 | 1.4044   | 0.080105 | 0.080105 | 0.545204706 |             |          |        |
| NA        | ENSG00000279378 | -0.27107 | 0.60683  | 1.4043   | 0.080109    | 1.4043      | 0.080109 |        |
|           |                 | 1.4043   | 0.080109 | 0.080109 | 0.545204706 |             |          |        |
| NA        | ENSG00000264687 | -0.17384 | 0.569    | -0.99439 | 0.83998     | 0.63454     | 0.26286  |        |
|           |                 | 1.4042   | 0.080129 | 0.080129 | 0.545204706 |             |          |        |

|            |                 |             |             |             |             |           |          |
|------------|-----------------|-------------|-------------|-------------|-------------|-----------|----------|
| BZW1-AS1   | ENSG00000230408 | 0.77848     | 0.21814     | 1.4042      | 0.080136    | 0.77848   |          |
|            | 0.21814         | 1.0148      | 0.15511     | 0.080136    | 0.545204706 |           |          |
| NA         | ENSG00000253220 | 1.4041      | 0.08014     | 0.34504     | 0.36503     | 1.4041    | 0.08014  |
|            | 1.4041          | 0.08014     | 0.08014     | 0.545204706 |             |           |          |
| NA         | ENSG00000231873 | 1.4041      | 0.080145    | -0.64121    | 0.73931     | -1.4984   | 0.93299  |
|            | 0.47734         | 0.31656     | 0.080145    | 0.545204706 |             |           |          |
| SMG1P2     | ENSG00000205534 | 0.72935     | 0.23289     | 1.1777      | 0.11947     | 1.4041    |          |
|            | 0.08015         | 0.71306     | 0.2379      | 0.08015     | 0.545204706 |           |          |
| SNORD91B   | ENSG00000275084 | 1.404       | 0.080158    | 1.404       | 0.080158    | 1.404     | 0.080158 |
|            | 0.080158        | 0.080158    | 0.545204706 |             |             |           |          |
| NA         | ENSG00000283579 | -0.55006    | 0.70886     | 0.87701     | 0.19024     | -0.79564  | 0.78688  |
|            | 1.404           | 0.080164    | 0.080164    | 0.545204706 |             |           |          |
| ALG1L      | ENSG00000189366 | -0.71669    | 0.76322     | -0.008203   | 0.50327     | 1.4036    | 0.080213 |
|            | -1.261          | 0.89634     | 0.080213    | 0.545328736 |             |           |          |
| HSPE1P24   | ENSG00000225158 | -0.13932    | 0.5554      | -0.13932    | 0.5554      | 1.2607    |          |
|            | 0.10371         | 1.4036      | 0.080217    | 0.080217    | 0.545328736 |           |          |
| ENO1P1     | ENSG00000244457 | 1.4036      | 0.080226    | 1.4036      | 0.080226    | 1.4036    |          |
|            | 0.080226        | 1.4036      | 0.080226    | 0.080226    | 0.545328736 |           |          |
| TAS1R1     | ENSG00000173662 | 1.1062      | 0.13431     | 1.1062      | 0.13431     | 1.4035    |          |
|            | 0.080227        | 1.3434      | 0.089565    | 0.080227    | 0.545328736 |           |          |
| NA         | ENSG00000258082 | 0.63256     | 0.26351     | 0.47744     | 0.31653     | 1.3368    | 0.090638 |
|            | 1.4034          | 0.080255    | 0.080255    | 0.545442978 |             |           |          |
| NA         | ENSG00000271573 | 1.4032      | 0.080278    | 1.4032      | 0.080278    | 1.4032    | 0.080278 |
|            | 1.4032          | 0.080278    | 0.080278    | 0.54552321  |             |           |          |
| NA         | ENSG00000266535 | -0.61162    | 0.7296      | 1.403       | 0.080309    | 0.33307   | 0.36954  |
|            | 0.33307         | 0.36954     | 0.080309    | 0.545553203 |             |           |          |
| WNT9A      | ENSG00000143816 | 0.40665     | 0.34213     | 1.403       | 0.080311    | 0.47854   | 0.31613  |
|            | -0.33706        | 0.63196     | 0.080311    | 0.545553203 |             |           |          |
| NA         | ENSG00000273461 | 1.403       | 0.080316    | 1.403       | 0.080316    | 1.403     | 0.080316 |
|            | 0.080316        | 0.545553203 |             |             |             |           |          |
| NA         | ENSG00000271629 | 0.80642     | 0.21        | 0.80642     | 0.21        | 0.80642   | 0.21     |
|            | 0.080363        | 0.080363    | 0.545572393 |             |             |           |          |
| SLC44A1    | ENSG00000070214 | 0.89532     | 0.18531     | 1.4026      | 0.080366    | 1.1021    |          |
|            | 0.13521         | 0.67762     | 0.24901     | 0.080366    | 0.545572393 |           |          |
| RNA5SP212  | ENSG00000212525 | 0.72711     | 0.23358     | 0.72711     | 0.23358     | 0.72711   |          |
|            | 0.23358         | 1.4026      | 0.080373    | 0.080373    | 0.545572393 |           |          |
| LINC02787  | ENSG00000229201 | -1.8439     | 0.9674      | -0.9735     | 0.83485     | 1.4025    |          |
|            | 0.080378        | 1.4025      | 0.080378    | 0.080378    | 0.545572393 |           |          |
| NA         | ENSG00000212363 | 1.4025      | 0.080379    | 1.0284      | 0.15189     | 1.4025    | 0.080379 |
|            | -0.66532        | 0.74708     | 0.080379    | 0.545572393 |             |           |          |
| LIMD1      | ENSG00000144791 | 0.66513     | 0.25298     | 1.4025      | 0.080386    | -0.50507  | 0.69325  |
|            | 0.25198         | 0.40053     | 0.080386    | 0.545572393 |             |           |          |
| RGPD1      | ENSG00000187627 | 1.4023      | 0.080406    | -0.11143    | 0.54436     | -0.048164 | 0.51921  |
|            | 0.91598         | 0.17984     | 0.080406    | 0.545632138 |             |           |          |
| CUL7       | ENSG00000044090 | 1.4018      | 0.080484    | 1.3944      | 0.081605    | 1.2877    | 0.09893  |
|            | 1.3528          | 0.088059    | 0.080484    | 0.546085397 |             |           |          |
| LINC00407  | ENSG00000237585 | 1.1963      | 0.1158      | 1.4016      | 0.080513    | -0.90664  |          |
|            | 0.8177          | -0.064715   | 0.5258      | 0.080513    | 0.546200447 |           |          |
| C3orf35    | ENSG00000198590 | -0.37495    | 0.64615     | -0.19641    | 0.57785     | 0.87041   |          |
|            | 0.19204         | 1.4014      | 0.080541    | 0.080541    | 0.546200447 |           |          |
| HYI-AS1    | ENSG00000229348 | 1.4014      | 0.080545    | 1.4014      | 0.080545    | 1.4014    |          |
|            | 0.080545        | 1.4014      | 0.080545    | 0.080545    | 0.546200447 |           |          |
| RPL21P1    | ENSG00000214760 | 1.4014      | 0.080551    | 0.77038     | 0.22054     | 1.0161    |          |
|            | 0.1548          | 1.0161      | 0.1548      | 0.080551    | 0.546200447 |           |          |
| RNA5SP336  | ENSG00000201059 | 1.3577      | 0.087279    | 1.4013      | 0.080557    | 1.4013    |          |
|            | 0.080557        | 1.4013      | 0.080557    | 0.080557    | 0.546200447 |           |          |
| BMS1P4     | ENSG00000242338 | 1.4011      | 0.080588    | 0.54873     | 0.2916      | 1.4011    |          |
|            | 0.080588        | 1.4011      | 0.080588    | 0.080588    | 0.546334619 |           |          |
| PPP1R14BP5 | ENSG00000213133 | 1.401       | 0.080603    | 1.401       | 0.080603    | 0.14974   | 0.44049  |
|            | 0.80765         | 0.20965     | 0.080603    | 0.546360299 |             |           |          |
| KATNBL1P3  | ENSG00000235422 | 1.4009      | 0.080624    | 1.4009      | 0.080624    | 1.4009    |          |
|            | 0.080624        | 1.4009      | 0.080624    | 0.080624    | 0.546425733 |           |          |



|           |                 |           |          |             |             |           |          |
|-----------|-----------------|-----------|----------|-------------|-------------|-----------|----------|
| GRIN2D    | ENSG00000105464 | 0.34702   | 0.36429  | 0.34702     | 0.36429     | 1.4008    |          |
|           | 0.080642        | 0.34702   | 0.36429  | 0.080642    | 0.546425733 |           |          |
| NA        | ENSG00000264813 | 1.4007    | 0.080651 | 1.4007      | 0.080651    | 1.4007    | 0.080651 |
|           | 1.4007          | 0.080651  | 0.080651 | 0.546425733 |             |           |          |
| RPL12P20  | ENSG00000239627 | 0.40108   | 0.34418  | 0.40085     | 0.34426     | 1.4005    |          |
|           | 0.080677        | 1.4005    | 0.080677 | 0.080677    | 0.546425733 |           |          |
| NA        | ENSG00000246323 | 0.99072   | 0.16091  | 0.63564     | 0.26251     | 1.4005    | 0.080685 |
|           | 1.243           | 0.10694   | 0.080685 | 0.546425733 |             |           |          |
| CENPNP2   | ENSG00000228615 | 0.15381   | 0.43888  | 1.4004      | 0.080692    | 0.15381   |          |
|           | 0.43888         | 1.3226    | 0.092977 | 0.080692    | 0.546425733 |           |          |
| NA        | ENSG00000260817 | 0.13214   | 0.44744  | 1.4004      | 0.080696    | 0.3301    | 0.37066  |
|           | 0.3301          | 0.37066   | 0.080696 | 0.546425733 |             |           |          |
| LINC01716 | ENSG00000225657 | 0.61326   | 0.26985  | -0.38475    | 0.64979     | 0.22185   |          |
|           | 0.41222         | 1.4004    | 0.080704 | 0.080704    | 0.546425733 |           |          |
| TRIM16L   | ENSG00000108448 | -0.44004  | 0.67004  | 1.4002      | 0.08073     | 0.72348   |          |
|           | 0.23469         | 1.2644    | 0.10305  | 0.08073     | 0.546425733 |           |          |
| PDCL3     | ENSG00000115539 | -1.5435   | 0.93864  | -0.8345     | 0.798       | -2.3646   | 0.99097  |
|           | 1.4002          | 0.080734  | 0.080734 | 0.546425733 |             |           |          |
| NA        | ENSG00000176984 | 1.4001    | 0.080736 | 0.93906     | 0.17385     | 0.063218  | 0.4748   |
|           | -0.34667        | 0.63558   | 0.080736 | 0.546425733 |             |           |          |
| LINC01711 | ENSG00000268941 | 1.3999    | 0.080767 | -0.56369    | 0.71352     | 0.86847   |          |
|           | 0.19257         | 1.1405    | 0.12704  | 0.080767    | 0.546517058 |           |          |
| NA        | ENSG00000216663 | 1.3998    | 0.08079  | 1.3998      | 0.08079     | 1.3998    | 0.08079  |
|           | 1.2201          | 0.11122   | 0.08079  | 0.546517058 |             |           |          |
| NA        | ENSG00000257995 | 1.3997    | 0.080806 | 0.23847     | 0.40576     | 0.23847   | 0.40576  |
|           | 0.23847         | 0.40576   | 0.080806 | 0.546517058 |             |           |          |
| CLCA3P    | ENSG00000153923 | 1.3996    | 0.080813 | -0.58267    | 0.71994     | -0.74077  |          |
|           | 0.77058         | -0.6434   | 0.74002  | 0.080813    | 0.546517058 |           |          |
| H2AZP2    | ENSG00000253173 | 1.3996    | 0.080823 | 0.18867     | 0.42518     | 1.2388    |          |
|           | 0.10771         | 0.12572   | 0.44998  | 0.080823    | 0.546517058 |           |          |
| NA        | ENSG00000250132 | 1.3156    | 0.094147 | 1.3995      | 0.080825    | 0.69187   | 0.24451  |
|           | 1.3523          | 0.088142  | 0.080825 | 0.546517058 |             |           |          |
| THAP5     | ENSG00000177683 | 1.3995    | 0.080828 | 1.3995      | 0.080828    | 1.3995    | 0.080828 |
|           | 0.87268         | 0.19142   | 0.080828 | 0.546517058 |             |           |          |
| FAM209A   | ENSG00000124103 | -0.018113 | 0.50723  | 0.014307    | 0.49429     | 1.3994    |          |
|           | 0.080843        | 1.3994    | 0.080843 | 0.080843    | 0.546542646 |           |          |
| RASGRP2   | ENSG00000068831 | -0.27789  | 0.60945  | 1.3992      | 0.080882    | 0.095863  |          |
|           | 0.46181         | -0.27789  | 0.60945  | 0.080882    | 0.546571317 |           |          |
| NA        | ENSG00000262801 | 0.73444   | 0.23134  | -0.40769    | 0.65825     | 1.3991    | 0.080892 |
|           | 1.3991          | 0.080892  | 0.080892 | 0.546571317 |             |           |          |
| IFIT2     | ENSG00000119922 | -1.3037   | 0.90383  | 1.3991      | 0.080897    | -0.22594  | 0.58938  |
|           | 0.40113         | 0.34416   | 0.080897 | 0.546571317 |             |           |          |
| NA        | ENSG00000204187 | -1.1516   | 0.87526  | -0.71076    | 0.76138     | 1.3988    | 0.08093  |
|           | -0.17047        | 0.56768   | 0.08093  | 0.546571317 |             |           |          |
| NA        | ENSG00000260853 | 1.3988    | 0.080936 | 1.3988      | 0.080936    | 1.3988    | 0.080936 |
|           | 1.3988          | 0.080936  | 0.080936 | 0.546571317 |             |           |          |
| ALDH1L1   | ENSG00000144908 | 1.3988    | 0.080937 | -0.097801   | 0.53896     | 0.10919   |          |
|           | 0.45652         | 0.49027   | 0.31197  | 0.080937    | 0.546571317 |           |          |
| TECTA     | ENSG00000109927 | -0.32314  | 0.62671  | 1.3986      | 0.080963    | -0.032276 | 0.51287  |
|           | -0.18262        | 0.57245   | 0.080963 | 0.546571317 |             |           |          |
| LINC02615 | ENSG00000251432 | -1.5492   | 0.93933  | -0.39217    | 0.65254     | 1.3984    |          |
|           | 0.080991        | -0.96752  | 0.83336  | 0.080991    | 0.546571317 |           |          |
| LINC01443 | ENSG00000266554 | 0.87799   | 0.18998  | 1.3984      | 0.081001    | 1.3984    |          |
|           | 0.081001        | 1.3213    | 0.093195 | 0.081001    | 0.546571317 |           |          |
| NA        | ENSG00000236531 | 1.3983    | 0.081013 | -0.16879    | 0.56702     | 1.3983    | 0.081013 |
|           | 1.3983          | 0.081013  | 0.081013 | 0.546571317 |             |           |          |
| BMP7-AS1  | ENSG00000235032 | -1.103    | 0.86499  | 1.3982      | 0.081019    | -1.103    |          |
|           | 0.86499         | -1.103    | 0.86499  | 0.081019    | 0.546571317 |           |          |
| ZNF777    | ENSG00000196453 | 1.3981    | 0.081036 | -0.79116    | 0.78558     | 0.28451   |          |
|           | 0.38801         | 0.69135   | 0.24467  | 0.081036    | 0.546571317 |           |          |
| NA        | ENSG00000231992 | 1.3981    | 0.081036 | 1.3981      | 0.081036    | 1.3981    | 0.081036 |
|           | 1.3981          | 0.081036  | 0.081036 | 0.546571317 |             |           |          |

|           |                 |          |          |             |             |             |          |
|-----------|-----------------|----------|----------|-------------|-------------|-------------|----------|
| NA        | ENSG00000238005 | 1.1159   | 0.13224  | 1.3761      | 0.084396    | 1.1159      | 0.13224  |
|           |                 | 1.3981   | 0.081036 | 0.546571317 |             |             |          |
| NINJ2     | ENSG00000171840 | -1.1678  | 0.87855  | 1.3981      | 0.08104     | -0.40349    | 0.65671  |
|           |                 | -0.22733 | 0.58992  | 0.08104     | 0.546571317 |             |          |
| POLE3     | ENSG00000148229 | 1.1938   | 0.11628  | 1.3981      | 0.081044    | 1.3631      | 0.086419 |
|           |                 | 0.37286  | 0.35462  | 0.081044    | 0.546571317 |             |          |
| MAB21L2   | ENSG00000181541 | 1.3981   | 0.081047 | 1.3981      | 0.081047    | 1.3981      |          |
|           |                 | 0.081047 | 1.3981   | 0.081047    | 0.546571317 |             |          |
| EWSAT1    | ENSG00000212766 | -0.27507 | 0.60837  | 1.3085      | 0.095346    | 1.3979      |          |
|           |                 | 0.081072 | 0.31784  | 0.3753      | 0.081072    | 0.546571317 |          |
| ATP5MC1P3 | ENSG00000242244 | 1.3979   | 0.081072 | 1.3856      | 0.08294     | 0.74387     |          |
|           |                 | 0.22848  | -0.39297 | 0.65283     | 0.081072    | 0.546571317 |          |
| PTCHD3    | ENSG00000182077 | 0.97535  | 0.16469  | -0.15223    | 0.5605      | 1.3978      |          |
|           |                 | 0.081084 | -0.87162 | 0.80829     | 0.081084    | 0.546571317 |          |
| NA        | ENSG00000270631 | 1.2619   | 0.1035   | 0.53222     | 0.29729     | 1.3978      | 0.081089 |
|           |                 | -0.17458 | 0.56929  | 0.081089    | 0.546571317 |             |          |
| ZNF75A    | ENSG00000162086 | -0.26254 | 0.60355  | -0.26254    | 0.60355     | 1.3978      |          |
|           |                 | 0.081094 | -0.50009 | 0.69149     | 0.081094    | 0.546571317 |          |
| RNU2-47P  | ENSG00000222581 | 1.3975   | 0.081129 | 0.72693     | 0.23363     | 1.0233      |          |
|           |                 | 0.15308  | 1.0233   | 0.15308     | 0.081129    | 0.546626652 |          |
| LINC01208 | ENSG00000223715 | 1.3973   | 0.081156 | 1.3973      | 0.081156    | 1.3973      |          |
|           |                 | 0.081156 | 0.91691  | 0.1796      | 0.081156    | 0.546626652 |          |
| KLC2      | ENSG00000174996 | 0.21089  | 0.41648  | 1.3973      | 0.081159    | 0.21089     | 0.41648  |
|           |                 | 0.36732  | 0.35669  | 0.081159    | 0.546626652 |             |          |
| HIGD2AP2  | ENSG00000235695 | 1.3972   | 0.081174 | 1.3972      | 0.081174    | 1.3972      |          |
|           |                 | 0.081174 | 1.3972   | 0.081174    | 0.081174    | 0.546626652 |          |
| H2BP6     | ENSG00000226908 | -1.6677  | 0.95231  | 0.59501     | 0.27592     | -1.2197     | 0.88871  |
|           |                 | 1.3972   | 0.081179 | 0.081179    | 0.546626652 |             |          |
| NA        | ENSG00000259481 | 1.3971   | 0.081197 | -1.3246     | 0.90735     | 1.3971      | 0.081197 |
|           |                 | 1.3971   | 0.081197 | 0.081197    | 0.546626652 |             |          |
| NA        | ENSG00000228194 | 0.3382   | 0.36761  | 1.3969      | 0.08122     | 1.3969      | 0.08122  |
|           |                 | 0.66226  | 0.2539   | 0.08122     | 0.546626652 |             |          |
| NA        | ENSG00000232227 | 1.3969   | 0.081222 | 1.3969      | 0.081222    | 1.3969      | 0.081222 |
|           |                 | 1.3969   | 0.081222 | 0.081222    | 0.546626652 |             |          |
| LAMP1     | ENSG00000185896 | -0.2411  | 0.59526  | -0.17629    | 0.56997     | 1.3967      | 0.081251 |
|           |                 | -0.24981 | 0.59863  | 0.081251    | 0.546626652 |             |          |
| NA        | ENSG00000272017 | 1.3967   | 0.081253 | 1.3967      | 0.081253    | 1.3967      | 0.081253 |
|           |                 | 1.3967   | 0.081253 | 0.081253    | 0.546626652 |             |          |
| NA        | ENSG00000273249 | 0.66848  | 0.25192  | 0.54821     | 0.29178     | 1.3967      | 0.081255 |
|           |                 | -0.88146 | 0.81097  | 0.081255    | 0.546626652 |             |          |
| NA        | ENSG00000271155 | 1.3966   | 0.081263 | -0.084904   | 0.53383     | 1.3966      | 0.081263 |
|           |                 | 1.3966   | 0.081263 | 0.081263    | 0.546626652 |             |          |
| ZC3H11B   | ENSG00000215817 | 0.25323  | 0.40004  | 0.15241     | 0.43943     | 0.74075     |          |
|           |                 | 0.22942  | 1.3966   | 0.081271    | 0.081271    | 0.546626652 |          |
| HRH2      | ENSG00000113749 | 0.28776  | 0.38677  | -1.0523     | 0.85368     | 1.3966      | 0.081272 |
|           |                 | 1.1644   | 0.12212  | 0.081272    | 0.546626652 |             |          |
| CAPS2-AS1 | ENSG00000254451 | 0.42775  | 0.33442  | 1.3964      | 0.081292    | 0.22525     |          |
|           |                 | 0.41089  | 0.22525  | 0.41089     | 0.081292    | 0.546626652 |          |
| PADI4     | ENSG00000159339 | -0.84271 | 0.80031  | 1.3963      | 0.081308    | -1.3835     | 0.91675  |
|           |                 | 0.50965  | 0.30515  | 0.081308    | 0.546626652 |             |          |
| NA        | ENSG00000250669 | 1.3963   | 0.081318 | 1.3963      | 0.081318    | 1.3963      | 0.081318 |
|           |                 | 1.3963   | 0.081318 | 0.081318    | 0.546626652 |             |          |
| PCDHGC3   | ENSG00000240184 | 1.3962   | 0.081321 | 1.3962      | 0.081321    | 1.3645      |          |
|           |                 | 0.086199 | 1.3962   | 0.081321    | 0.081321    | 0.546626652 |          |
| MISP      | ENSG00000099812 | 1.3959   | 0.081372 | 0.033706    | 0.48656     | -0.13867    | 0.55514  |
|           |                 | -0.20734 | 0.58213  | 0.081372    | 0.546626652 |             |          |
| NA        | ENSG00000236018 | 1.3958   | 0.081385 | 1.3958      | 0.081385    | 1.3958      | 0.081385 |
|           |                 | 1.3958   | 0.081385 | 0.081385    | 0.546626652 |             |          |
| SETD6     | ENSG00000103037 | 1.0808   | 0.13989  | 1.1503      | 0.12501     | 1.3956      | 0.081419 |
|           |                 | 0.96836  | 0.16643  | 0.081419    | 0.546626652 |             |          |
| SLC25A19  | ENSG00000125454 | 0.62938  | 0.26455  | 1.3956      | 0.081419    | 1.1016      |          |
|           |                 | 0.13531  | 1.2883   | 0.09882     | 0.081419    | 0.546626652 |          |

|           |                 |            |            |              |             |             |          |
|-----------|-----------------|------------|------------|--------------|-------------|-------------|----------|
| GINM1     | ENSG00000055211 | 1.2561     | 0.10454    | 1.2572       | 0.10433     | 1.3255      | 0.092499 |
|           |                 | 1.3955     | 0.08143    | 0.08143      | 0.546626652 |             |          |
| PCDHB15   | ENSG00000113248 | 1.3954     | 0.081447   | 1.3954       | 0.081447    | 1.3954      |          |
|           |                 | 0.081447   | 1.3954     | 0.081447     | 0.081447    | 0.546626652 |          |
| MYH14     | ENSG00000105357 | -0.0066869 | 0.50267    | 1.3953       | 0.081467    | 0.10914     | 0.45655  |
|           |                 | 0.36295    | 0.35832    | 0.081467     | 0.546626652 |             |          |
| LINC01256 | ENSG00000251398 | 0.21008    | 0.4168     | -0.74315     | 0.7713      | 1.3952      |          |
|           |                 | 0.081478   | 1.3952     | 0.081478     | 0.081478    | 0.546626652 |          |
| NA        | ENSG00000279885 | 0.30284    | 0.38110778 | 0.14057      | 0.88067     | 0.18925     | 1.395    |
|           |                 | 0.081503   | 0.081503   | 0.546626652  |             |             |          |
| NA        | ENSG00000235840 | -0.12716   | 0.55059    | 1.3950081515 | 0.12221     | 0.45137     |          |
|           |                 | 0.25922    | 0.39773    | 0.081515     | 0.546626652 |             |          |
| NA        | ENSG00000253572 | -0.95144   | 0.82931    | 0.5573       | 0.28866     | -0.59799    | 0.72508  |
|           |                 | 1.3948     | 0.081543   | 0.081543     | 0.546626652 |             |          |
| LINC02843 | ENSG00000228189 | 0.47979    | 0.31569    | 0.58717      | 0.27855     | 0.47979     |          |
|           |                 | 0.31569    | 1.3945     | 0.081585     | 0.081585    | 0.546626652 |          |
| RFX3-AS1  | ENSG00000232104 | 1.3945     | 0.081586   | -0.86282     | 0.80588     | 0.28221     |          |
|           |                 | 0.38889    | -0.35043   | 0.63699      | 0.081586    | 0.546626652 |          |
| PANX1     | ENSG00000110218 | 0.52127    | 0.30109    | -0.072886    | 0.52905     | -0.072886   | 0.52905  |
|           |                 | 1.3945     | 0.08159    | 0.08159      | 0.546626652 |             |          |
| RUNX2     | ENSG00000124813 | -0.48503   | 0.68617    | 1.3944       | 0.081599    | -0.14406    | 0.55727  |
|           |                 | -0.14222   | 0.55655    | 0.081599     | 0.546626652 |             |          |
| NA        | ENSG00000275406 | 0.66889    | 0.25178    | 0.66889      | 0.25178     | 0.66889     | 0.25178  |
|           |                 | 1.3944     | 0.081602   | 0.081602     | 0.546626652 |             |          |
| NPPC      | ENSG00000163273 | 1.3943     | 0.081615   | 0.48435      | 0.31407     | 0.95599     | 0.16954  |
|           |                 | 0.60277    | 0.27333    | 0.081615     | 0.546626652 |             |          |
| GADD45B   | ENSG00000099860 | 1.3942     | 0.081629   | 0.058445     | 0.4767      | 1.3942      |          |
|           |                 | 0.081629   | 1.3942     | 0.081629     | 0.081629    | 0.546626652 |          |
| LRPAP1    | ENSG00000163956 | 0.19869    | 0.42125    | 0.38982      | 0.34833     | 0.75103     |          |
|           |                 | 0.22632    | 1.3941     | 0.081639     | 0.081639    | 0.546626652 |          |
| PRRT1B    | ENSG00000283526 | -0.54774   | 0.70806    | 0.55949      | 0.28791     | 1.3941      |          |
|           |                 | 0.081643   | 0.68311    | 0.24727      | 0.081643    | 0.546626652 |          |
| NA        | ENSG00000235293 | 0.89604    | 0.18512    | -0.15919     | 0.56324     | 1.3941      | 0.081648 |
|           |                 | 1.3941     | 0.081648   | 0.081648     | 0.546626652 |             |          |
| NA        | ENSG00000261251 | 0.20208    | 0.41993    | 1.3940081661 | -0.40566    | 0.6575      |          |
|           |                 | -0.40566   | 0.6575     | 0.081661     | 0.546626652 |             |          |
| NA        | ENSG00000223948 | 0.15548    | 0.43822    | 1.3939       | 0.081679    | 1.3939      | 0.081679 |
|           |                 | 1.3939     | 0.081679   | 0.081679     | 0.546626652 |             |          |
| PAFAH1B1  | ENSG00000007168 | 1.3937     | 0.08171    | -1.9309      | 0.97325     | 0.94462     |          |
|           |                 | 0.17243    | 0.5055     | 0.3066       | 0.08171     | 0.546626652 |          |
| CUL2      | ENSG00000108094 | 1.3936     | 0.081725   | 1.3146       | 0.094316    | 1.1759      | 0.11981  |
|           |                 | 0.59961    | 0.27438    | 0.081725     | 0.546626652 |             |          |
| NA        | ENSG00000230343 | 1.3935     | 0.081731   | -0.32421     | 0.62711     | 0.56472     | 0.28613  |
|           |                 | 0.2512     | 0.40083    | 0.081731     | 0.546626652 |             |          |
| RNA5SP55  | ENSG00000252510 | 1.3935     | 0.081734   | 1.3935       | 0.081734    | 1.3935      |          |
|           |                 | 0.081734   | 1.3935     | 0.081734     | 0.081734    | 0.546626652 |          |
| CXXC5     | ENSG00000171604 | -0.046167  | 0.51841    | -0.1509      | 0.55997     | 1.3935      | 0.081739 |
|           |                 | -0.46631   | 0.6795     | 0.081739     | 0.546626652 |             |          |
| RPL7AP57  | ENSG00000242248 | 1.2785     | 0.10053    | 1.3934       | 0.081743    | 1.0484      |          |
|           |                 | 0.14723    | 1.0484     | 0.14723      | 0.081743    | 0.546626652 |          |
| MS4A8     | ENSG00000166959 | -1.053     | 0.85382    | -1.053       | 0.85382     | 1.3934      | 0.081746 |
|           |                 | -0.88713   | 0.8125     | 0.081746     | 0.546626652 |             |          |
| NA        | ENSG00000271559 | 1.0908     | 0.13769    | -0.76368     | 0.77747     | 1.3933      | 0.081764 |
|           |                 | 1.3933     | 0.081764   | 0.081764     | 0.546626652 |             |          |
| NA        | ENSG00000271360 | 1.3933     | 0.081767   | 1.3933       | 0.081767    | 1.3933      | 0.081767 |
|           |                 | 1.3933     | 0.081767   | 0.081767     | 0.546626652 |             |          |
| NA        | ENSG00000229022 | -0.15325   | 0.5609     | 1.3933       | 0.081769    | -0.38363    | 0.64937  |
|           |                 | 1.0124     | 0.15568    | 0.081769     | 0.546626652 |             |          |
| NA        | ENSG00000263551 | 1.3931     | 0.081792   | -0.13947     | 0.55546     | -0.93545    | 0.82522  |
|           |                 | -0.57214   | 0.71639    | 0.081792     | 0.546626652 |             |          |
| LAMA4     | ENSG00000112769 | -0.95701   | 0.83072    | 0.31168      | 0.37764     | -0.51843    | 0.69792  |
|           |                 | 1.3931     | 0.081796   | 0.081796     | 0.546626652 |             |          |

|            |                 |          |          |             |             |           |          |
|------------|-----------------|----------|----------|-------------|-------------|-----------|----------|
| RN7SKP75   | ENSG00000199940 | 0.42358  | 0.33594  | 1.393       | 0.081808    | -0.15016  | 0.55968  |
|            | 1.3924          | 0.0819   | 0.081808 | 0.546626652 |             |           |          |
| MUC6       | ENSG00000184956 | 1.3456   | 0.089222 | 0.5738      | 0.28305     | 0.66543   | 0.25289  |
|            | 1.3928          | 0.08184  | 0.08184  | 0.546626652 |             |           |          |
| NA         | ENSG00000241978 | -1.0406  | 0.85096  | 0.072799    | 0.47098     | -0.14501  | 0.55765  |
|            | 1.3928          | 0.08184  | 0.08184  | 0.546626652 |             |           |          |
| LSM3       | ENSG00000170860 | -0.50343 | 0.69267  | -0.29277    | 0.61515     | 1.3927    | 0.081857 |
|            | -0.22923        | 0.59065  | 0.081857 | 0.546626652 |             |           |          |
| C9orf64    | ENSG00000165118 | 0.25565  | 0.39911  | 0.71166     | 0.23834     | 1.3926    |          |
|            | 0.081872        | 1.0403   | 0.1491   | 0.081872    | 0.546626652 |           |          |
| OSBP       | ENSG00000110048 | 1.3926   | 0.081875 | 1.2352      | 0.10837     | 1.3039    | 0.096126 |
|            | 1.0261          | 0.15242  | 0.081875 | 0.546626652 |             |           |          |
| NA         | ENSG00000234535 | 1.0973   | 0.13625  | 1.0973      | 0.13625     | 1.0973    | 0.13625  |
|            | 1.3925          | 0.081879 | 0.081879 | 0.546626652 |             |           |          |
| RNU6-931P  | ENSG00000200720 | -1.2335  | 0.8913   | 1.3925      | 0.081882    | -0.32577  |          |
|            | 0.6277          | -0.32577 | 0.6277   | 0.081882    | 0.546626652 |           |          |
| RPS4XP9    | ENSG00000217404 | 0.61176  | 0.27035  | 0.61176     | 0.27035     | 1.3924    |          |
|            | 0.081899        | 0.61176  | 0.27035  | 0.081899    | 0.546626652 |           |          |
| PRELP      | ENSG00000188783 | -0.2391  | 0.59449  | -0.70404    | 0.7593      | -0.051303 | 0.52046  |
|            | 1.3924          | 0.081902 | 0.081902 | 0.546626652 |             |           |          |
| NA         | ENSG00000268536 | 1.3923   | 0.081915 | 1.3923      | 0.081915    | 1.1711    | 0.12079  |
|            | 1.3923          | 0.081915 | 0.081915 | 0.546626652 |             |           |          |
| PYCR2      | ENSG00000143811 | 0.17452  | 0.43073  | 1.3922      | 0.081936    | 0.17452   | 0.43073  |
|            | -0.49703        | 0.69042  | 0.081936 | 0.546626652 |             |           |          |
| NA         | ENSG00000278994 | -0.41812 | 0.66207  | 1.3922      | 0.081938    | -0.012066 | 0.50481  |
|            | 0.68259         | 0.24743  | 0.081938 | 0.546626652 |             |           |          |
| NA         | ENSG00000261641 | 1.3921   | 0.081949 | 1.3921      | 0.081949    | 1.3921    | 0.081949 |
|            | 1.3921          | 0.081949 | 0.081949 | 0.546626652 |             |           |          |
| SNHG8      | ENSG00000269893 | 0.54111  | 0.29422  | 1.392       | 0.081963    | -0.044607 | 0.51779  |
|            | 0.48895         | 0.31244  | 0.081963 | 0.546626652 |             |           |          |
| CLCC1      | ENSG00000121940 | 0.5905   | 0.27743  | -0.23429    | 0.59262     | 1.392     | 0.081966 |
|            | -0.29889        | 0.61749  | 0.081966 | 0.546626652 |             |           |          |
| VAPA       | ENSG00000101558 | 1.3919   | 0.081983 | 0.65293     | 0.2569      | 1.209     | 0.11332  |
|            | 1.3133          | 0.09454  | 0.081983 | 0.546626652 |             |           |          |
| SNORD58B   | ENSG00000271982 | 1.3918   | 0.08199  | 1.3918      | 0.08199     | 1.3918    |          |
|            | 0.08199         | 1.3918   | 0.08199  | 0.08199     | 0.546626652 |           |          |
| TMEM14B    | ENSG00000137210 | 1.2031   | 0.11446  | 1.3917      | 0.082004    | 1.2031    |          |
|            | 0.11446         | -0.65947 | 0.7452   | 0.082004    | 0.546626652 |           |          |
| NA         | ENSG00000257872 | 1.3917   | 0.082007 | 1.3917      | 0.082007    | 1.3917    | 0.082007 |
|            | 1.3917          | 0.082007 | 0.082007 | 0.546626652 |             |           |          |
| NEDD8      | ENSG00000129559 | 1.3916   | 0.082021 | 1.3916      | 0.082021    | 1.3916    | 0.082021 |
|            | 1.3916          | 0.082021 | 0.082021 | 0.546626652 |             |           |          |
| RN7SKP235  | ENSG00000222594 | 1.3916   | 0.082024 | 0.52046     | 0.30137     | 0.18702   |          |
|            | 0.42582         | 0.33237  | 0.36981  | 0.082024    | 0.546626652 |           |          |
| NA         | ENSG00000261745 | 0.22796  | 0.40984  | 0.93935     | 0.17378     | 1.3916    | 0.082027 |
|            | 1.3916          | 0.082027 | 0.082027 | 0.546626652 |             |           |          |
| NA         | ENSG00000224797 | -0.32051 | 0.62571  | 0.9065      | 0.18234     | 0.89087   | 0.1865   |
|            | 1.3915          | 0.082038 | 0.082038 | 0.546626652 |             |           |          |
| RPS24P14   | ENSG00000223688 | -0.58065 | 0.71926  | 1.3914      | 0.082045    | -0.58941  |          |
|            | 0.72221         | -0.70342 | 0.7591   | 0.082045    | 0.546626652 |           |          |
| NA         | ENSG00000268204 | 1.3914   | 0.082047 | 1.3914      | 0.082047    | 1.3914    | 0.082047 |
|            | 1.3914          | 0.082047 | 0.082047 | 0.546626652 |             |           |          |
| NA         | ENSG00000231615 | 1.3343   | 0.091053 | 1.3914      | 0.082052    | 1.3914    | 0.082052 |
|            | 1.3914          | 0.082052 | 0.082052 | 0.546626652 |             |           |          |
| LPGAT1-AS1 | ENSG00000229258 | 1.3913   | 0.082069 | 1.3913      | 0.082069    | 1.3913    |          |
|            | 0.082069        | 1.3913   | 0.082069 | 0.082069    | 0.546626652 |           |          |
| NA         | ENSG00000223703 | 1.091    | 0.13764  | 0.98737     | 0.16173     | 0.79433   | 0.2135   |
|            | 1.3913          | 0.082073 | 0.082073 | 0.546626652 |             |           |          |
| RSU1       | ENSG00000148484 | -0.47885 | 0.68398  | -0.3301     | 0.62934     | 1.1457    | 0.12596  |
|            | 1.3912          | 0.08208  | 0.08208  | 0.546626652 |             |           |          |
| NA         | ENSG00000259579 | -0.47592 | 0.68293  | 1.3912      | 0.082084    | 0.18992   | 0.42469  |
|            | -0.73109        | 0.76764  | 0.082084 | 0.546626652 |             |           |          |

|           |                 |             |             |             |             |         |          |       |
|-----------|-----------------|-------------|-------------|-------------|-------------|---------|----------|-------|
| POU5F1P4  | ENSG00000237872 | 1.3911      | 0.082101    | 1.0243      | 0.15284     | 1.2193  |          |       |
|           | 0.11136         | 1.2193      | 0.11136     | 0.082101    | 0.546626652 |         |          |       |
| OR13Z1P   | ENSG00000226653 | 0.54441     | 0.29308     | 1.391       | 0.082106    | 1.111   | 0.13329  | 1.111 |
|           | 0.13329         | 0.082106    | 0.546626652 |             |             |         |          |       |
| NA        | ENSG00000264739 | 1.391       | 0.082107    | 1.391       | 0.082107    | 1.391   | 0.082107 | 1.391 |
|           | 0.082107        | 0.546626652 |             |             |             |         |          |       |
| H3-3B     | ENSG00000132475 | 1.391       | 0.082116    | 1.3855      | 0.082943    | 1.0513  | 0.14657  |       |
|           | 1.0513          | 0.14657     | 0.082116    | 0.546626652 |             |         |          |       |
| MTCO3P24  | ENSG00000262158 | 0.2542      | 0.39967     | 1.3909      | 0.082125    | 0.59468 |          |       |
|           | 0.27603         | 0.60202     | 0.27358     | 0.082125    | 0.546626652 |         |          |       |
| NA        | ENSG00000251456 | 1.1077      | 0.13399     | -0.18591    | 0.57374     | 1.3909  | 0.082128 |       |
|           | 0.35199         | 0.36242     | 0.082128    | 0.546626652 |             |         |          |       |
| SLC15A5   | ENSG00000188991 | 1.3908      | 0.08214     | -0.17955    | 0.57125     | 0.79207 |          |       |
|           | 0.21416         | -1.553      | 0.93979     | 0.08214     | 0.546626652 |         |          |       |
| PRR12     | ENSG00000126464 | 0.061847    | 0.47534     | 1.3908      | 0.082146    | 1.3908  | 0.082146 |       |
|           | -0.040078       | 0.51598     | 0.082146    | 0.546626652 |             |         |          |       |
| PDE1B     | ENSG00000123360 | 1.3907      | 0.082163    | 0.5108      | 0.30475     | 0.21891 | 0.41336  |       |
|           | 1.3907          | 0.082163    | 0.082163    | 0.546626652 |             |         |          |       |
| U2AF2     | ENSG00000063244 | 1.3635      | 0.086367    | 1.3906      | 0.082172    | 1.3906  | 0.082172 |       |
|           | 1.3906          | 0.082172    | 0.082172    | 0.546626652 |             |         |          |       |
| NA        | ENSG00000232465 | -1.2082     | 0.88652     | 0.77658     | 0.2187      | -0.6577 | 0.74464  |       |
|           | 1.3906          | 0.082177    | 0.082177    | 0.546626652 |             |         |          |       |
| COPS8P2   | ENSG00000214552 | 1.3905      | 0.082195    | 0.35695     | 0.36057     | 1.0138  |          |       |
|           | 0.15535         | 1.3905      | 0.082195    | 0.082195    | 0.546626652 |         |          |       |
| LLPHP1    | ENSG00000270793 | 0.57041     | 0.2842      | 0.57041     | 0.2842      | 1.3904  |          |       |
|           | 0.082205        | 0.25772     | 0.39831     | 0.082205    | 0.546626652 |         |          |       |
| DUSP8P5   | ENSG00000235316 | 1.3904      | 0.082208    | 1.3904      | 0.082208    | 1.3904  |          |       |
|           | 0.082208        | 1.2509      | 0.10549     | 0.082208    | 0.546626652 |         |          |       |
| NA        | ENSG00000213488 | 1.0989      | 0.1359      | 0.3208      | 0.37418     | 0.94811 | 0.17154  |       |
|           | 1.3903          | 0.082223    | 0.082223    | 0.546626652 |             |         |          |       |
| NA        | ENSG00000234996 | 1.3902      | 0.082232    | 1.3902      | 0.082232    | 1.3902  | 0.082232 |       |
|           | 1.3902          | 0.082232    | 0.082232    | 0.546626652 |             |         |          |       |
| NA        | ENSG00000271071 | 0.084259    | 0.46643     | 0.13967     | 0.44446     | 0.58864 | 0.27805  |       |
|           | 1.3901          | 0.082242    | 0.082242    | 0.546626652 |             |         |          |       |
| HPD       | ENSG00000158104 | 0.7769      | 0.21861     | 1.3899      | 0.082281    | 1.3317  | 0.091472 |       |
|           | 0.50669         | 0.30619     | 0.082281    | 0.546626652 |             |         |          |       |
| NA        | ENSG00000279088 | 1.3898      | 0.082288    | 1.3898      | 0.082288    | 1.3898  | 0.082288 |       |
|           | 1.3898          | 0.082288    | 0.082288    | 0.546626652 |             |         |          |       |
| C5orf34   | ENSG00000172244 | 0.35579     | 0.361       | -0.71507    | 0.76272     | 1.3897  | 0.082309 |       |
|           | -0.1803         | 0.57154     | 0.082309    | 0.546626652 |             |         |          |       |
| SNORD58A  | ENSG00000206602 | 1.3897      | 0.082315    | 1.3897      | 0.082315    | 1.3897  |          |       |
|           | 0.082315        | 1.3897      | 0.082315    | 0.082315    | 0.546626652 |         |          |       |
| NA        | ENSG00000260401 | 1.3896      | 0.082324    | -0.56622    | 0.71438     | 1.3896  | 0.082324 |       |
|           | 1.3896          | 0.082324    | 0.082324    | 0.546626652 |             |         |          |       |
| NA        | ENSG00000251545 | 0.90841     | 0.18183     | 0.90841     | 0.18183     | 1.3894  | 0.082354 |       |
|           | 0.36844         | 0.35627     | 0.082354    | 0.546626652 |             |         |          |       |
| RN7SL396P | ENSG00000244642 | 1.2302      | 0.10932     | 1.1784      | 0.11931     | 1.3788  |          |       |
|           | 0.083979        | 1.3894      | 0.08236     | 0.08236     | 0.546626652 |         |          |       |
| LINC02557 | ENSG00000225413 | -0.44249    | 0.67093     | 1.3894      | 0.082361    | 1.3894  |          |       |
|           | 0.082361        | 1.3894      | 0.082361    | 0.082361    | 0.546626652 |         |          |       |
| LARP4P    | ENSG00000261315 | 1.3893      | 0.082364    | 1.3893      | 0.082364    | 1.3893  |          |       |
|           | 0.082364        | 1.3893      | 0.082364    | 0.082364    | 0.546626652 |         |          |       |
| TMEM271   | ENSG00000273238 | 1.1259      | 0.13011     | -1.1443     | 0.87375     | 1.3893  |          |       |
|           | 0.082373        | -1.1443     | 0.87375     | 0.082373    | 0.546626652 |         |          |       |
| LMO2      | ENSG00000135363 | 0.56084     | 0.28745     | 0.46305     | 0.32166     | -1.2435 | 0.89316  |       |
|           | 1.3892          | 0.082379    | 0.082379    | 0.546626652 |             |         |          |       |
| VNN3      | ENSG00000093134 | 0.96439     | 0.16742     | 1.3892      | 0.08238     | 0.96439 | 0.16742  |       |
|           | 0.56075         | 0.28748     | 0.08238     | 0.546626652 |             |         |          |       |
| HMG1P10   | ENSG00000244101 | 1.3892      | 0.082381    | 1.3892      | 0.082381    | 1.3892  |          |       |
|           | 0.082381        | 1.3892      | 0.082381    | 0.082381    | 0.546626652 |         |          |       |
| SAP30L    | ENSG00000164576 | 0.36358     | 0.35809     | 0.36358     | 0.35809     | 0.49158 |          |       |
|           | 0.31151         | 1.3889      | 0.082431    | 0.082431    | 0.54679038  |         |          |       |

|           |                 |             |            |             |             |            |          |          |
|-----------|-----------------|-------------|------------|-------------|-------------|------------|----------|----------|
| SEMA6A    | ENSG00000092421 | -0.055008   | 0.52193    | -0.060066   | 0.52395     | 1.3888     |          |          |
|           | 0.082448        | -0.21317    | 0.5844     | 0.082448    | 0.54679038  |            |          |          |
| NA        | ENSG00000282246 | 1.3888      | 0.082449   | 1.3888      | 0.082449    | 1.3888     | 0.082449 | 0.082449 |
|           | 1.3888          | 0.082449    | 0.082449   | 0.54679038  |             |            |          |          |
| SPHKAP    | ENSG00000153820 | 0.31055     | 0.37807    | 1.3887      | 0.082461    | 0.98331    |          |          |
|           | 0.16273         | 0.21769     | 0.41383    | 0.082461    | 0.54679038  |            |          |          |
| NA        | ENSG00000256372 | 1.3887      | 0.082463   | 1.3887      | 0.082463    | 1.3887     | 0.082463 | 0.082463 |
|           | 1.3887          | 0.082463    | 0.082463   | 0.54679038  |             |            |          |          |
| CFAP251   | ENSG00000158023 | 1.3152      | 0.094224   | 1.3886      | 0.082473    | 1.2577     |          |          |
|           | 0.10425         | 0.91786     | 0.17935    | 0.082473    | 0.54679038  |            |          |          |
| LARP4B    | ENSG00000107929 | 1.3112      | 0.094899   | 0.89198     | 0.1862      | 1.388      | 0.082564 |          |
|           | -0.48725        | 0.68696     | 0.082564   | 0.54717548  |             |            |          |          |
| MGST1     | ENSG0000008394  | 1.388       | 0.08257    | -1.1075     | 0.86596     | -0.0032246 | 0.50129  | 1.082    |
|           | 0.13963         | 0.08257     | 0.54717548 |             |             |            |          |          |
| TMEM207   | ENSG00000198398 | -0.078976   | 0.53147    | 1.388       | 0.082576    | 0.91953    | 0.17891  |          |
|           | 0.71677         | 0.23676     | 0.082576   | 0.54717548  |             |            |          |          |
| MTND2P9   | ENSG00000225901 | 1.3879      | 0.082576   | 1.3879      | 0.082576    | 1.3879     |          |          |
|           | 0.082576        | 1.3879      | 0.082576   | 0.082576    | 0.54717548  |            |          |          |
| NA        | ENSG00000236461 | 1.3878      | 0.082599   | 1.3878      | 0.082599    | 1.3878     | 0.082599 | 0.082599 |
|           | 1.3878          | 0.082599    | 0.082599   | 0.547192323 |             |            |          |          |
| NA        | ENSG00000202343 | 1.3878      | 0.082601   | 1.3878      | 0.082601    | 1.3878     | 0.082601 | 0.082601 |
|           | 1.3878          | 0.082601    | 0.082601   | 0.547192323 |             |            |          |          |
| LINC01934 | ENSG00000234663 | 0.31812     | 0.3752     | -2.354      | 0.99071     | 1.3877     |          |          |
|           | 0.082613        | -0.93165    | 0.82424    | 0.082613    | 0.54719743  |            |          |          |
| MIR550A2  | ENSG00000207573 | -0.60639    | 0.72787    | -0.45351    | 0.67491     | -1.5739    |          |          |
|           | 0.94224         | 1.3873      | 0.082682   | 0.082682    | 0.547330861 |            |          |          |
| NA        | ENSG00000203498 | 1.3872      | 0.082689   | 1.3872      | 0.082689    | 1.3872     | 0.082689 | 0.082689 |
|           | 1.2153          | 0.11213     | 0.082689   | 0.547330861 |             |            |          |          |
| RPL23P5   | ENSG00000230406 | 1.3871      | 0.082699   | -0.016935   | 0.50676     | 1.1952     |          |          |
|           | 0.11601         | -0.21871    | 0.58656    | 0.082699    | 0.547330861 |            |          |          |
| OR10J5    | ENSG00000184155 | 1.3871      | 0.082701   | -0.66491    | 0.74694     | -0.34311   |          |          |
|           | 0.63424         | -0.34311    | 0.63424    | 0.082701    | 0.547330861 |            |          |          |
| NA        | ENSG00000271851 | 1.3871      | 0.082704   | 1.3871      | 0.082704    | 1.3871     | 0.082704 | 0.082704 |
|           | 1.3871          | 0.082704    | 0.082704   | 0.547330861 |             |            |          |          |
| NA        | ENSG00000233258 | 1.3871      | 0.082709   | 1.3871      | 0.082709    | 1.3871     | 0.082709 | 0.082709 |
|           | 1.3871          | 0.082709    | 0.082709   | 0.547330861 |             |            |          |          |
| LINC01426 | ENSG00000234380 | 1.387       | 0.082722   | 0.66384     | 0.2534      | 0.61934    | 0.26785  |          |
|           | 0.094696        | 0.46228     | 0.082722   | 0.547330861 |             |            |          |          |
| NA        | ENSG00000257921 | 1.387       | 0.082723   | 1.387       | 0.082723    | 1.387      | 0.082723 | 1.387    |
|           | 0.082723        | 0.547330861 |            |             |             |            |          |          |
| NA        | ENSG00000257579 | 0.52937     | 0.29827    | 0.63427     | 0.26295     | 1.3866     | 0.082774 | 0.082774 |
|           | 1.3866          | 0.082774    | 0.082774   | 0.547593948 |             |            |          |          |
| NA        | ENSG00000273736 | 1.0633      | 0.14383    | 1.3864      | 0.082815    | 1.0633     | 0.14383  | 0.14383  |
|           | 1.0822          | 0.13959     | 0.082815   | 0.547790817 |             |            |          |          |
| CHD1      | ENSG00000153922 | -0.52604    | 0.70057    | 1.386       | 0.08288     | -0.20797   | 0.58237  |          |
|           | 0.32207         | 0.3737      | 0.08288    | 0.548091816 |             |            |          |          |
| RNU6-125P | ENSG00000207234 | 1.3859      | 0.082883   | 1.1008      | 0.13548     | 1.1008     |          |          |
|           | 0.13548         | 1.1008      | 0.13548    | 0.082883    | 0.548091816 |            |          |          |
| PPIAP43   | ENSG00000255059 | 1.3857      | 0.082914   | 1.3857      | 0.082914    | 1.3857     |          |          |
|           | 0.082914        | 1.3857      | 0.082914   | 0.082914    | 0.548167875 |            |          |          |
| RPS3AP19  | ENSG00000244004 | 0.098926    | 0.4606     | -0.76171    | 0.77688     | -0.85531   |          |          |
|           | 0.80381         | 1.3857      | 0.082917   | 0.082917    | 0.548167875 |            |          |          |
| ACADM     | ENSG00000117054 | 0.5354      | 0.29619    | 1.3856      | 0.082939    | 0.8297     | 0.20335  |          |
|           | -0.080999       | 0.53228     | 0.082939   | 0.548177801 |             |            |          |          |
| NA        | ENSG00000227950 | 0.48219     | 0.31484    | 0.48219     | 0.31484     | 1.3856     | 0.082941 | 0.082941 |
|           | 0.48219         | 0.31484     | 0.082941   | 0.548177801 |             |            |          |          |
| ACOT2     | ENSG00000119673 | -1.0488     | 0.85288    | 1.3855      | 0.082957    | -0.74013   | 0.77039  |          |
|           | -0.74013        | 0.77039     | 0.082957   | 0.548209196 |             |            |          |          |
| GLRX3P2   | ENSG00000216657 | 0.46469     | 0.32108    | 0.038618    | 0.4846      | 1.3853     |          |          |
|           | 0.082978        | -1.2066     | 0.88621    | 0.082978    | 0.548258746 |            |          |          |
| SKOR2     | ENSG00000215474 | 1.3853      | 0.082987   | -0.50387    | 0.69282     | 0.44824    | 0.32699  |          |
|           | 1.0978          | 0.13615     | 0.082987   | 0.548258746 |             |            |          |          |

|             |                 |           |             |             |             |           |          |
|-------------|-----------------|-----------|-------------|-------------|-------------|-----------|----------|
| NA          | ENSG00000229774 | 1.385     | 0.083024    | 0.71727     | 0.2366      | 0.32971   | 0.37081  |
|             | 0.61426         | 0.26952   | 0.083024    | 0.548302936 |             |           |          |
| RNU6ATAC31P | ENSG00000221440 | 1.385     | 0.083029    | 1.385       | 0.083029    | 1.385     | 0.083029 |
|             | 0.083029        | 0.083029  | 0.548302936 |             |             |           | 1.385    |
| RNA5SP231   | ENSG00000222428 | 0.8448    | 0.19911     | 0.8448      | 0.19911     | 0.8448    | 0.8448   |
|             | 0.19911         | 1.3849    | 0.083039    | 0.083039    | 0.548302936 |           |          |
| ADCY9       | ENSG00000162104 | 1.3848    | 0.083063    | -0.71531    | 0.76279     | -0.014637 | 0.50584  |
|             | 0.33241         | 0.36979   | 0.083063    | 0.548302936 |             |           |          |
| CD4         | ENSG00000010610 | 1.3846    | 0.08309     | -0.39609    | 0.65398     | -0.051702 | 0.52062  |
|             | -0.083207       | 0.53316   | 0.08309     | 0.548302936 |             |           |          |
| SMARCE1     | ENSG00000073584 | 1.134     | 0.1284      | 1.3845      | 0.083103    | -0.035998 | 0.51436  |
|             | -0.035998       | 0.51436   | 0.083103    | 0.548302936 |             |           |          |
| CATSPERD    | ENSG00000174898 | 0.070128  | 0.47205     | -0.40298    | 0.65652     | -0.56826  |          |
|             | 0.71507         | 1.3844    | 0.083111    | 0.083111    | 0.548302936 |           |          |
| TRGJP1      | ENSG00000211692 | 1.3843    | 0.083136    | 1.3843      | 0.083136    | 1.3843    |          |
|             | 0.083136        | 1.3843    | 0.083136    | 0.083136    | 0.548302936 |           |          |
| DNAH5       | ENSG00000039139 | 0.23748   | 0.40614     | 1.3842      | 0.083155    | -0.59958  | 0.72561  |
|             | -0.23591        | 0.59325   | 0.083155    | 0.548302936 |             |           |          |
| NA          | ENSG00000221060 | 0.97048   | 0.1659      | 1.3841      | 0.083168    | 0.5191    | 0.30185  |
|             | 0.73591         | 0.23089   | 0.083168    | 0.548302936 |             |           |          |
| DAD1        | ENSG00000129562 | -1.0531   | 0.85386     | 1.384       | 0.083175    | -0.46791  | 0.68007  |
|             | 1.1121          | 0.13305   | 0.083175    | 0.548302936 |             |           |          |
| RN7SL216P   | ENSG00000244404 | -1.5875   | 0.9438      | 1.384       | 0.083177    | -1.5875   | 0.9438   |
|             | -1.5875         | 0.9438    | 0.083177    | 0.548302936 |             |           |          |
| RNU6-1094P  | ENSG00000199286 | 0.98029   | 0.16347     | -0.69346    | 0.75599     | 1.3838    |          |
|             | 0.083208        | -0.65364  | 0.74333     | 0.083208    | 0.548302936 |           |          |
| LINC01985   | ENSG00000227260 | 1.3838    | 0.083212    | 1.3838      | 0.083212    | 1.3838    |          |
|             | 0.083212        | 1.3838    | 0.083212    | 0.083212    | 0.548302936 |           |          |
| NA          | ENSG00000230739 | 1.3838    | 0.083214    | 1.1075      | 0.13403     | 1.1956    | 0.11593  |
|             | -0.041712       | 0.51664   | 0.083214    | 0.548302936 |             |           |          |
| NA          | ENSG00000266538 | -1.9633   | 0.97519     | -1.5121     | 0.93475     | -1.1421   | 0.8733   |
|             | 1.3837          | 0.083218  | 0.083218    | 0.548302936 |             |           |          |
| F2          | ENSG00000180210 | -0.54336  | 0.70656     | 0.95643     | 0.16943     | 1.3836    | 0.083247 |
|             | 0.84454         | 0.19918   | 0.083247    | 0.548302936 |             |           |          |
| RPL7P6      | ENSG00000227525 | 1.1328    | 0.12865     | 1.3835      | 0.083257    | -0.25869  |          |
|             | 0.60206         | -0.065248 | 0.52601     | 0.083257    | 0.548302936 |           |          |
| INPP5B      | ENSG00000204084 | 1.3834    | 0.083276    | 0.78529     | 0.21614     | 1.073     | 0.14163  |
|             | 0.74728         | 0.22745   | 0.083276    | 0.548302936 |             |           |          |
| SOX6        | ENSG00000110693 | 0.41422   | 0.33936     | 1.366       | 0.085966    | 0.45288   | 0.32532  |
|             | 1.3833          | 0.083279  | 0.083279    | 0.548302936 |             |           |          |
| PDE11A-AS1  | ENSG00000229941 | 0.71635   | 0.23689     | 0.43995     | 0.32999     | 1.3833    |          |
|             | 0.083283        | 0.94056   | 0.17346     | 0.083283    | 0.548302936 |           |          |
| ZNF555      | ENSG00000186300 | -0.28032  | 0.61039     | 1.3832      | 0.083295    | 1.2101    |          |
|             | 0.11311         | 1.2101    | 0.11311     | 0.083295    | 0.548302936 |           |          |
| NA          | ENSG00000249522 | 0.0035221 | 0.49859     | 0.69988     | 0.242       | 0.69988   | 0.242    |
|             | 0.083297        | 0.083297  | 0.548302936 |             |             |           | 1.3832   |
| PLA2G4C     | ENSG00000105499 | 1.3832    | 0.083298    | 0.056829    | 0.47734     | 0.23189   |          |
|             | 0.40831         | -0.30434  | 0.61957     | 0.083298    | 0.548302936 |           |          |
| TEX29       | ENSG00000153495 | -0.67576  | 0.7504      | 1.3832      | 0.083298    | -0.33236  | 0.63019  |
|             | -0.84126        | 0.7999    | 0.083298    | 0.548302936 |             |           |          |
| NUBP1       | ENSG00000103274 | 0.41436   | 0.33931     | 1.3832      | 0.083301    | 0.41436   | 0.33931  |
|             | -0.18372        | 0.57289   | 0.083301    | 0.548302936 |             |           |          |
| NA          | ENSG00000224235 | 1.3831    | 0.083323    | 0.57141     | 0.28386     | 1.3831    | 0.083323 |
|             | 1.3831          | 0.083323  | 0.083323    | 0.548302936 |             |           |          |
| VSX2        | ENSG00000119614 | 1.3831    | 0.083324    | 1.36        | 0.086918    | 1.2423    | 0.10706  |
|             | 1.1305          | 0.12914   | 0.083324    | 0.548302936 |             |           |          |
| NA          | ENSG00000263320 | 1.3829    | 0.083351    | 1.3829      | 0.083351    | 1.3829    | 0.083351 |
|             | 1.3829          | 0.083351  | 0.083351    | 0.548302936 |             |           |          |
| NA          | ENSG00000267313 | 1.0678    | 0.14281     | 1.3829      | 0.083352    | 1.3829    | 0.083352 |
|             | 1.3829          | 0.083352  | 0.083352    | 0.548302936 |             |           |          |
| NTN4        | ENSG00000074527 | 0.2275    | 0.41002     | 1.3828      | 0.083356    | 0.78243   | 0.21698  |
|             | -0.51212        | 0.69572   | 0.083356    | 0.548302936 |             |           |          |

|             |                 |          |             |             |             |           |          |
|-------------|-----------------|----------|-------------|-------------|-------------|-----------|----------|
| CBX8        | ENSG00000141570 | 0.015989 | 0.49362     | 1.0081      | 0.15671     | 0.84946   | 0.19781  |
|             | 1.3828          | 0.08336  | 0.08336     | 0.548302936 |             |           |          |
| CCT6P4      | ENSG00000232610 | -0.43749 | 0.66912     | 1.3828      | 0.083365    | -0.43749  |          |
|             | 0.66912         | -0.43749 | 0.66912     | 0.083365    | 0.548302936 |           |          |
| SNORD69     | ENSG00000212452 | 1.3827   | 0.083385    | 1.3827      | 0.083385    | 1.3827    |          |
|             | 0.083385        | 1.3827   | 0.083385    | 0.083385    | 0.548317635 |           |          |
| NA          | ENSG00000261245 | 1.3826   | 0.08339     | 1.3826      | 0.08339     | 1.3826    | 0.08339  |
|             | 1.3826          | 0.08339  | 0.08339     | 0.548317635 |             |           |          |
| DEFB131B    | ENSG00000225805 | -0.56682 | 0.71458     | 0.10896     | 0.45662     | 1.3825    |          |
|             | 0.083403        | -1.2497  | 0.89429     | 0.083403    | 0.548317635 |           |          |
| OSBPL11     | ENSG00000144909 | -0.64995 | 0.74214     | 1.3825      | 0.083415    | -0.022869 |          |
|             | 0.50912         | -0.60626 | 0.72783     | 0.083415    | 0.548317635 |           |          |
| KDM2A       | ENSG00000173120 | 1.0965   | 0.13644     | 0.98391     | 0.16258     | 1.2597    | 0.10388  |
|             | 1.3824          | 0.083426 | 0.083426    | 0.548317635 |             |           |          |
| MIR4425     | ENSG00000264371 | 0.59724  | 0.27518     | 1.3823      | 0.083441    | 0.59724   |          |
|             | 0.27518         | 1.1479   | 0.1255      | 0.083441    | 0.548317635 |           |          |
| NA          | ENSG00000266769 | -0.1935  | 0.57672     | -0.57095    | 0.71598     | 0.59192   | 0.27695  |
|             | 1.3823          | 0.083446 | 0.083446    | 0.548317635 |             |           |          |
| TBC1D31     | ENSG00000156787 | 1.3818   | 0.083518    | 0.27281     | 0.3925      | 1.1805    |          |
|             | 0.11891         | 0.92913  | 0.17641     | 0.083518    | 0.54871504  |           |          |
| SERPINA3    | ENSG00000196136 | -1.3245  | 0.90734     | -1.3245     | 0.90734     | 1.3817    |          |
|             | 0.083529        | 1.3699   | 0.085354    | 0.083529    | 0.54871504  |           |          |
| NA          | ENSG00000267801 | 1.3814   | 0.083574    | 1.3814      | 0.083574    | 1.3814    | 0.083574 |
|             | 1.3814          | 0.083574 | 0.083574    | 0.548808526 |             |           |          |
| NA          | ENSG00000224174 | 1.3813   | 0.083588    | 1.3813      | 0.083588    | 1.3813    | 0.083588 |
|             | 1.3813          | 0.083588 | 0.083588    | 0.548808526 |             |           |          |
| RNU6ATAC10P | ENSG00000221562 | 0.031429 | 0.48746     | 0.092241    | 0.46325     | 1.3812    |          |
|             | 0.083603        | -0.25244 | 0.59965     | 0.083603    | 0.548808526 |           |          |
| NA          | ENSG00000267607 | 1.3811   | 0.08362     | 1.3811      | 0.08362     | 1.3811    | 0.08362  |
|             | 1.3811          | 0.08362  | 0.08362     | 0.548808526 |             |           |          |
| DEFB128     | ENSG00000185982 | 1.381    | 0.083645    | 0.38115     | 0.35155     | 0.21984   | 0.413    |
|             | 0.88254         | 0.18874  | 0.083645    | 0.548808526 |             |           |          |
| NPM1P30     | ENSG00000228219 | -0.34917 | 0.63652     | 1.2828      | 0.099773    | 1.3809    |          |
|             | 0.083648        | 1.3809   | 0.083648    | 0.083648    | 0.548808526 |           |          |
| NA          | ENSG00000256694 | 1.3809   | 0.08365     | 1.3809      | 0.08365     | 1.3809    | 0.08365  |
|             | 1.3809          | 0.08365  | 0.08365     | 0.548808526 |             |           |          |
| OR1N1       | ENSG00000171505 | 1.3807   | 0.083679    | 1.209       | 0.11332     | 0.56486   | 0.28609  |
|             | 0.11332         | 0.083679 | 0.548808526 |             |             |           | 1.209    |
| SLC6A7      | ENSG00000011083 | -0.54625 | 0.70755     | -0.16797    | 0.5667      | -0.41271  |          |
|             | 0.66009         | 1.3807   | 0.083686    | 0.083686    | 0.548808526 |           |          |
| BTBD10P2    | ENSG00000219433 | 1.3806   | 0.0837      | 1.3806      | 0.0837      | 1.3806    |          |
|             | 0.0837          | 1.3806   | 0.0837      | 0.0837      | 0.548808526 |           |          |
| NA          | ENSG00000254638 | 1.3806   | 0.083702    | 1.3806      | 0.083702    | 1.3806    | 0.083702 |
|             | 1.3806          | 0.083702 | 0.083702    | 0.548808526 |             |           |          |
| MED7        | ENSG00000155868 | -0.7861  | 0.7841      | 1.3805      | 0.083714    | -0.7861   | 0.7841   |
|             | -0.54512        | 0.70716  | 0.083714    | 0.548808526 |             |           |          |
| CUX2P1      | ENSG00000272436 | 1.3805   | 0.083718    | 1.3592      | 0.087037    | 1.3592    |          |
|             | 0.087037        | 0.67599  | 0.24952     | 0.083718    | 0.548808526 |           |          |
| NA          | ENSG00000265533 | 0.75024  | 0.22656     | 0.10627     | 0.45769     | 1.3805    | 0.08372  |
|             | 0.75024         | 0.22656  | 0.08372     | 0.548808526 |             |           |          |
| PRDM16-DT   | ENSG00000177133 | 1.0101   | 0.15623     | -0.6524     | 0.74293     | 1.3804    |          |
|             | 0.08373         | -0.36655 | 0.64302     | 0.08373     | 0.548808526 |           |          |
| NA          | ENSG00000271369 | 1.3803   | 0.083753    | 1.3803      | 0.083753    | 1.3803    | 0.083753 |
|             | 1.3803          | 0.083753 | 0.083753    | 0.548808526 |             |           |          |
| CKAP4       | ENSG00000136026 | 1.0982   | 0.13606     | 0.47562     | 0.31717     | 1.3802    | 0.083755 |
|             | 1.3693          | 0.08546  | 0.083755    | 0.548808526 |             |           |          |
| LINC01788   | ENSG00000229051 | 1.3802   | 0.083764    | 0.64263     | 0.26023     | 1.3802    |          |
|             | 0.083764        | 1.3802   | 0.083764    | 0.083764    | 0.548808526 |           |          |
| SUN5        | ENSG00000167098 | 0.89583  | 0.18517     | 0.89583     | 0.18517     | 1.3802    | 0.083766 |
|             | 1.3802          | 0.083766 | 0.083766    | 0.548808526 |             |           |          |
| NA          | ENSG00000277767 | 1.2428   | 0.10698     | 1.3801      | 0.083775    | 1.3801    | 0.083775 |
|             | 1.0295          | 0.15161  | 0.083775    | 0.548808526 |             |           |          |



|            |                 |             |          |             |             |          |          |        |
|------------|-----------------|-------------|----------|-------------|-------------|----------|----------|--------|
| FABP7P2    | ENSG00000235129 | -0.95684    | 0.83067  | 1.3801      | 0.08378     | -1.3825  |          |        |
|            | 0.91659         | -0.48942    | 0.68773  | 0.08378     | 0.548808526 |          |          |        |
| NA         | ENSG00000261281 | 1.38        | 0.083791 | 1.38        | 0.083791    | 1.38     | 0.083791 | 1.38   |
|            | 0.083791        | 0.548808526 |          |             |             |          |          |        |
| ZNF318     | ENSG00000171467 | 0.080772    | 0.46781  | 1.3797      | 0.083839    | -0.19634 |          |        |
|            | 0.57783         | -1.1492     | 0.87476  | 0.083839    | 0.549014626 |          |          |        |
| METTL1     | ENSG00000037897 | 1.3797      | 0.083845 | 1.3797      | 0.083845    | 0.91847  |          |        |
|            | 0.17919         | 0.91847     | 0.17919  | 0.083845    | 0.549014626 |          |          |        |
| LACTB2-AS1 | ENSG00000246366 | 1.3796      | 0.083861 | 0.51962     | 0.30166     | 1.3796   |          |        |
|            | 0.083861        | 1.3796      | 0.083861 | 0.083861    | 0.549045617 |          |          |        |
| CRY1       | ENSG00000008405 | 1.2315      | 0.10906  | 0.95876     | 0.16884     | 1.3794   | 0.08388  |        |
|            | 0.20802         | 0.41761     | 0.08388  | 0.549096239 |             |          |          |        |
| LINC00536  | ENSG00000249917 | 1.1918      | 0.11668  | 1.3793      | 0.083906    | 0.013766 |          |        |
|            | 0.49451         | -0.35779    | 0.63975  | 0.083906    | 0.549133261 |          |          |        |
| NA         | ENSG00000206998 | -0.9084     | 0.81817  | 0.0093667   | 0.49626     | 1.3792   | 0.083918 |        |
|            | 0.38007         | 0.35195     | 0.083918 | 0.549133261 |             |          |          |        |
| MUC17      | ENSG00000169876 | 1.3791      | 0.083938 | 0.99683     | 0.15942     | 0.89492  | 0.18542  |        |
|            | 0.26164         | 0.3968      | 0.083938 | 0.549133261 |             |          |          |        |
| EIF5A2     | ENSG00000163577 | 0.45454     | 0.32472  | 1.379       | 0.083942    | -0.98716 | 0.83822  |        |
|            | -0.98716        | 0.83822     | 0.083942 | 0.549133261 |             |          |          |        |
| NA         | ENSG00000254452 | 1.379       | 0.083942 | 1.379       | 0.083942    | 1.379    | 0.083942 | 1.379  |
|            | 0.083942        | 0.549133261 |          |             |             |          |          |        |
| NA         | ENSG00000233974 | 0.50686     | 0.30613  | 0.71249     | 0.23808     | 1.3788   | 0.083974 |        |
|            | -0.79555        | 0.78685     | 0.083974 | 0.549268862 |             |          |          |        |
| TOX4P1     | ENSG00000248697 | 0.18036     | 0.42844  | 1.3786      | 0.084014    | 0.91134  |          |        |
|            | 0.18106         | 1.0471      | 0.14752  | 0.084014    | 0.549456747 |          |          |        |
| NOC2L      | ENSG00000188976 | 1.3784      | 0.084036 | -0.25468    | 0.60051     | 0.22325  | 0.41167  |        |
|            | -0.72973        | 0.76722     | 0.084036 | 0.549526876 |             |          |          |        |
| RPL7P59    | ENSG00000225918 | -0.0066013  | 0.50263  | -0.63303    | 0.73664     | 1.3782   |          |        |
|            | 0.084072        | 1.3782      | 0.084072 | 0.084072    | 0.549688523 |          |          |        |
| ZNF778     | ENSG00000170100 | -0.44631    | 0.67231  | 1.1927      | 0.1165      | 1.3778   |          |        |
|            | 0.08413         | 0.05472     | 0.47818  | 0.08413     | 0.549918311 |          |          |        |
| LINC01677  | ENSG00000233047 | 1.2213      | 0.111    | 1.3778      | 0.084137    | 0.62782  | 0.26506  |        |
|            | 1.3778          | 0.084137    | 0.084137 | 0.549918311 |             |          |          |        |
| NA         | ENSG00000242753 | 0.9098      | 0.18146  | 0.98766     | 0.16166     | 0.88303  | 0.18861  |        |
|            | 1.3777          | 0.084141    | 0.084141 | 0.549918311 |             |          |          |        |
| RGS18      | ENSG00000150681 | 0.9687      | 0.16635  | 0.9687      | 0.16635     | 1.3777   | 0.084153 |        |
|            | 0.9687          | 0.16635     | 0.084153 | 0.549922984 |             |          |          |        |
| NA         | ENSG00000236817 | -1.4718     | 0.92947  | 1.3776      | 0.084169    | -0.10155 | 0.54044  |        |
|            | -0.19788        | 0.57843     | 0.084169 | 0.549953791 |             |          |          |        |
| NA         | ENSG00000262777 | 1.3774      | 0.084191 | 1.3774      | 0.084191    | 1.3774   | 0.084191 | 1.3774 |
|            | 1.3774          | 0.084191    | 0.084191 | 0.550015379 |             |          |          |        |
| SNRNP70    | ENSG00000104852 | 1.3774      | 0.084201 | -1.0604     | 0.85552     | 1.3774   |          |        |
|            | 0.084201        | 0.1222      | 0.45137  | 0.084201    | 0.550015379 |          |          |        |
| EFCAB9     | ENSG00000214360 | -0.14457    | 0.55748  | 1.3772      | 0.084227    | 1.3772   |          |        |
|            | 0.084227        | 0.0016834   | 0.49933  | 0.084227    | 0.550063874 |          |          |        |
| NA         | ENSG00000200318 | 0.48718     | 0.31306  | 1.3772      | 0.084231    | 0.6298   | 0.26441  |        |
|            | 0.6298          | 0.26441     | 0.084231 | 0.550063874 |             |          |          |        |
| SMC3P1     | ENSG00000231822 | -0.44005    | 0.67005  | 1.3767      | 0.084309    | -0.44005 |          |        |
|            | 0.67005         | -0.44005    | 0.67005  | 0.084309    | 0.550351238 |          |          |        |
| NA         | ENSG00000214259 | 1.3765      | 0.084326 | 0.65677     | 0.25566     | -0.40283 | 0.65646  |        |
|            | 0.22124         | 0.41245     | 0.084326 | 0.550351238 |             |          |          |        |
| NA         | ENSG00000236308 | 1.3765      | 0.084331 | 1.3765      | 0.084331    | 1.3765   | 0.084331 | 1.3765 |
|            | 1.3765          | 0.084331    | 0.084331 | 0.550351238 |             |          |          |        |
| PPP1R2P5   | ENSG00000229360 | -0.90247    | 0.8166   | 0.6616      | 0.25411     | 1.3765   |          |        |
|            | 0.084337        | 1.3133      | 0.094535 | 0.084337    | 0.550351238 |          |          |        |
| NA         | ENSG00000260390 | 1.3763      | 0.084364 | 1.0152      | 0.15501     | 1.0152   | 0.15501  |        |
|            | 1.0152          | 0.15501     | 0.084364 | 0.550351238 |             |          |          |        |
| NA         | ENSG00000261049 | -1.5785     | 0.94277  | -0.64605    | 0.74088     | 1.3763   | 0.084369 |        |
|            | -0.87062        | 0.80802     | 0.084369 | 0.550351238 |             |          |          |        |
| NA         | ENSG00000276188 | 1.3762      | 0.084379 | 1.3762      | 0.084379    | 1.3762   | 0.084379 | 1.3762 |
|            | 1.3762          | 0.084379    | 0.084379 | 0.550351238 |             |          |          |        |

|           |                 |          |             |             |             |           |          |         |
|-----------|-----------------|----------|-------------|-------------|-------------|-----------|----------|---------|
| PRUNE1    | ENSG00000143363 | -0.50311 | 0.69256     | 1.0759      | 0.14098     | 1.3762    |          |         |
|           | 0.084383        | 1.2586   | 0.10409     | 0.084383    | 0.550351238 |           |          |         |
| EVI5L     | ENSG00000142459 | 1.0412   | 0.1489      | 1.0412      | 0.1489      | 1.0412    | 0.1489   |         |
|           | 1.3762          | 0.084387 | 0.084387    | 0.550351238 |             |           |          |         |
| ASPH      | ENSG00000198363 | 0.90343  | 0.18315     | -1.1396     | 0.87277     | 0.021742  | 0.49133  |         |
|           | 1.3761          | 0.084388 | 0.084388    | 0.550351238 |             |           |          |         |
| OR2L1P    | ENSG00000224227 | 1.3759   | 0.084427    | 1.3759      | 0.084427    | 1.3759    |          |         |
|           | 0.084427        | -1.1804  | 0.88109     | 0.084427    | 0.550351238 |           |          |         |
| NA        | ENSG00000260651 | 1.3652   | 0.086094    | 1.3758      | 0.084436    | 1.3652    | 0.086094 |         |
|           | 1.3652          | 0.086094 | 0.084436    | 0.550351238 |             |           |          |         |
| ADAMTS7P4 | ENSG00000218052 | 0.66038  | 0.2545      | 0.94602     | 0.17207     | 0.054503  |          |         |
|           | 0.47827         | 1.3758   | 0.084446    | 0.084446    | 0.550351238 |           |          |         |
| IMPDH1P11 | ENSG00000261647 | -0.74829 | 0.77286     | 1.3757      | 0.084456    | -0.74829  |          |         |
|           | 0.77286         | -0.46758 | 0.67996     | 0.084456    | 0.550351238 |           |          |         |
| NA        | ENSG00000231791 | 1.3757   | 0.08446     | 1.3757      | 0.08446     | 1.3757    | 0.08446  |         |
|           | 1.3757          | 0.08446  | 0.08446     | 0.550351238 |             |           |          |         |
| CASC6     | ENSG00000224944 | 1.3757   | 0.084462    | 0.83017     | 0.20322     | 0.83017   | 0.20322  |         |
|           | 0.83017         | 0.20322  | 0.084462    | 0.550351238 |             |           |          |         |
| OR11H7    | ENSG00000258806 | 1.3756   | 0.084467    | 1.3756      | 0.084467    | 1.3756    |          |         |
|           | 0.084467        | 1.3756   | 0.084467    | 0.084467    | 0.550351238 |           |          |         |
| PADI2     | ENSG00000117115 | 1.0786   | 0.14038     | 1.3755      | 0.084495    | 0.83343   | 0.2023   |         |
|           | 1.1081          | 0.13391  | 0.084495    | 0.55037882  |             |           |          |         |
| NA        | ENSG00000265414 | 0.1523   | 0.43948     | 1.3754      | 0.084505    | 0.087835  | 0.465    |         |
|           | 1.1137          | 0.1327   | 0.084505    | 0.55037882  |             |           |          |         |
| CC2D1B    | ENSG00000154222 | 0.14149  | 0.44374     | -1.6206     | 0.94745     | -0.79781  |          |         |
|           | 0.78751         | 1.3754   | 0.08451     | 0.08451     | 0.55037882  |           |          |         |
| MCUR1     | ENSG00000050393 | 0.38384  | 0.35055     | 1.1273      | 0.12981     | 1.3752    | 0.084528 |         |
|           | 0.3481          | 0.36388  | 0.084528    | 0.55037882  |             |           |          |         |
| DEPTOR    | ENSG00000155792 | 1.1934   | 0.11635     | 0.68036     | 0.24814     | 1.0916    |          |         |
|           | 0.13752         | 1.3752   | 0.084536    | 0.084536    | 0.55037882  |           |          |         |
| SPTB      | ENSG00000070182 | 0.62043  | 0.26749     | 1.3752      | 0.084539    | -0.083172 | 0.53314  |         |
|           | -0.26159        | 0.60318  | 0.084539    | 0.55037882  |             |           |          |         |
| PAF1      | ENSG00000006712 | 1.375    | 0.084561    | -0.48341    | 0.6856      | -0.48341  | 0.6856   |         |
|           | -0.48341        | 0.6856   | 0.084561    | 0.550397184 |             |           |          |         |
| MN1       | ENSG00000169184 | -0.55326 | 0.70996     | 1.375       | 0.084568    | 0.51342   | 0.30383  |         |
|           | -0.50242        | 0.69231  | 0.084568    | 0.550397184 |             |           |          |         |
| NA        | ENSG00000259444 | 0.57055  | 0.28415     | 1.3749      | 0.084576    | -0.24083  | 0.59516  |         |
|           | -0.24083        | 0.59516  | 0.084576    | 0.550397184 |             |           |          |         |
| NA        | ENSG00000236451 | 1.3749   | 0.084587    | 0.53988     | 0.29464     | -1.0103   | 0.84382  |         |
|           | -0.76818        | 0.77881  | 0.084587    | 0.550397184 |             |           |          |         |
| GRIN2C    | ENSG00000161509 | 1.2573   | 0.10432     | 0.71805     | 0.23636     | 0.74296   |          |         |
|           | 0.22875         | 1.3746   | 0.084623    | 0.084623    | 0.550557916 |           |          |         |
| RNU6-39P  | ENSG00000207072 | 0.15505  | 0.43839     | 1.3254      | 0.09252     | 0.80749   |          |         |
|           | 0.20969         | 1.3745   | 0.08464     | 0.08464     | 0.550595007 |           |          |         |
| NA        | ENSG00000176515 | 1.3742   | 0.084695    | 1.0224      | 0.15329     | 1.1937    | 0.11629  |         |
|           | 0.14384         | 0.44281  | 0.084695    | 0.550776043 |             |           |          |         |
| BCL2L10   | ENSG00000137875 | 1.3741   | 0.0847      | 0.7493      | 0.22684     | 0.7493    |          |         |
|           | 0.22684         | 0.7493   | 0.22684     | 0.0847      | 0.550776043 |           |          |         |
| MBD3      | ENSG00000071655 | -0.27173 | 0.60708     | 1.374       | 0.084717    | 1.374     | 0.084717 | 0.60335 |
|           | 0.27314         | 0.084717 | 0.550776043 |             |             |           |          |         |
| MBL3P     | ENSG00000219430 | 0.74491  | 0.22816     | 1.2582      | 0.10416     | 1.3738    | 0.084744 |         |
|           | 1.3665          | 0.085889 | 0.084744    | 0.550776043 |             |           |          |         |
| SSTR4     | ENSG00000132671 | 1.3738   | 0.084746    | 1.3738      | 0.084746    | 1.3738    | 0.084746 |         |
|           | 1.3738          | 0.084746 | 0.084746    | 0.550776043 |             |           |          |         |
| RILP      | ENSG00000167705 | -0.55666 | 0.71112     | -0.55666    | 0.71112     | 1.3737    | 0.084771 |         |
|           | -0.55666        | 0.71112  | 0.084771    | 0.550776043 |             |           |          |         |
| SNORD94   | ENSG00000208772 | 1.3734   | 0.084817    | 1.3734      | 0.084817    | 1.3734    |          |         |
|           | 0.084817        | 1.3734   | 0.084817    | 0.084817    | 0.550776043 |           |          |         |
| MVP       | ENSG00000013364 | 0.65886  | 0.25499     | 1.2532      | 0.10507     | 0.9085    | 0.18181  |         |
|           | 1.3734          | 0.08482  | 0.08482     | 0.550776043 |             |           |          |         |
| NA        | ENSG00000261066 | -0.34387 | 0.63453     | 1.3734      | 0.08482     | -0.34387  | 0.63453  |         |
|           | -0.34387        | 0.63453  | 0.08482     | 0.550776043 |             |           |          |         |

|           |                 |             |          |             |             |          |          |  |
|-----------|-----------------|-------------|----------|-------------|-------------|----------|----------|--|
| KLHL14    | ENSG00000197705 | 1.2081      | 0.11351  | 1.3733      | 0.084833    | 0.21811  |          |  |
|           | 0.41367         | 0.64981     | 0.25791  | 0.084833    | 0.550776043 |          |          |  |
| HIPK1     | ENSG00000163349 | -0.025134   | 0.51003  | 1.3732      | 0.084841    | 0.89909  | 0.1843   |  |
|           | 1.3386          | 0.090355    | 0.084841 | 0.550776043 |             |          |          |  |
| C5orf60   | ENSG00000204661 | 1.3732      | 0.084841 | 0.43106     | 0.33321     | 0.23675  |          |  |
|           | 0.40642         | 0.92915     | 0.17641  | 0.084841    | 0.550776043 |          |          |  |
| M1AP      | ENSG00000159374 | 0.66588     | 0.25274  | 1.272       | 0.10168     | -0.32993 | 0.62927  |  |
|           | 1.3732          | 0.084844    | 0.084844 | 0.550776043 |             |          |          |  |
| NA        | ENSG00000233683 | 0.60902     | 0.27126  | 1.0764      | 0.14087     | 1.1609   | 0.12285  |  |
|           | 1.3732          | 0.084849    | 0.084849 | 0.550776043 |             |          |          |  |
| CPNE7     | ENSG00000178773 | 1.373       | 0.084869 | 1.0969      | 0.13634     | 0.44367  | 0.32864  |  |
|           | 0.33644         | 0.36827     | 0.084869 | 0.550776043 |             |          |          |  |
| NA        | ENSG00000271816 | 1.373       | 0.084881 | 1.373       | 0.084881    | 1.373    | 0.084881 |  |
|           | 0.084881        | 0.550776043 |          |             |             |          |          |  |
| NA        | ENSG00000267022 | 1.3729      | 0.084895 | 1.3729      | 0.084895    | 1.3729   | 0.084895 |  |
|           | 1.3729          | 0.084895    | 0.084895 | 0.550776043 |             |          |          |  |
| NA        | ENSG00000270306 | -0.10613    | 0.54226  | 1.3729      | 0.084896    | -0.14227 | 0.55657  |  |
|           | -0.14227        | 0.55657     | 0.084896 | 0.550776043 |             |          |          |  |
| RPL36P19  | ENSG00000232540 | -0.37104    | 0.64469  | 1.3729      | 0.084897    | 1.3729   |          |  |
|           | 0.084897        | 1.3729      | 0.084897 | 0.084897    | 0.550776043 |          |          |  |
| GFRA1     | ENSG00000151892 | 1.0694      | 0.14245  | 0.70921     | 0.2391      | 1.0182   | 0.1543   |  |
|           | 1.3728          | 0.084915    | 0.084915 | 0.550776043 |             |          |          |  |
| PTGS1     | ENSG00000095303 | -1.0727     | 0.8583   | -0.17476    | 0.56936     | -0.27529 | 0.60845  |  |
|           | 1.3727          | 0.084924    | 0.084924 | 0.550776043 |             |          |          |  |
| NA        | ENSG00000270342 | 1.3726      | 0.084937 | 1.3726      | 0.084937    | 1.3726   | 0.084937 |  |
|           | 1.3726          | 0.084937    | 0.084937 | 0.550776043 |             |          |          |  |
| NA        | ENSG00000203886 | 1.3725      | 0.084953 | 1.3725      | 0.084953    | 1.3725   | 0.084953 |  |
|           | 1.3725          | 0.084953    | 0.084953 | 0.550776043 |             |          |          |  |
| NA        | ENSG00000254372 | 1.3724      | 0.084964 | -1.5069     | 0.93408     | 1.3724   | 0.084964 |  |
|           | 1.3724          | 0.084964    | 0.084964 | 0.550776043 |             |          |          |  |
| YJU2      | ENSG00000105248 | 1.3724      | 0.084968 | 0.58357     | 0.27975     | -2.4034  | 0.99188  |  |
|           | 0.17293         | 0.43135     | 0.084968 | 0.550776043 |             |          |          |  |
| NA        | ENSG00000235683 | 0.47548     | 0.31722  | 1.3724      | 0.084968    | -0.96045 | 0.83158  |  |
|           | -0.0073135      | 0.50292     | 0.084968 | 0.550776043 |             |          |          |  |
| EPC1      | ENSG00000120616 | 0.95645     | 0.16942  | 1.3724      | 0.084973    | -0.86762 | 0.8072   |  |
|           | 1.2103          | 0.11309     | 0.084973 | 0.550776043 |             |          |          |  |
| NA        | ENSG00000254328 | 1.3723      | 0.08499  | 1.3723      | 0.08499     | 1.3723   | 0.08499  |  |
|           | 1.3723          | 0.08499     | 0.08499  | 0.550812967 |             |          |          |  |
| RPL26P3   | ENSG00000240179 | 1.3721      | 0.085013 | 1.3721      | 0.085013    | 1.3721   |          |  |
|           | 0.085013        | 1.3721      | 0.085013 | 0.085013    | 0.550888762 |          |          |  |
| ATP11A    | ENSG00000068650 | 1.3633      | 0.086398 | 1.2471      | 0.10618     | 0.8545   |          |  |
|           | 0.19641         | 1.3719      | 0.08504  | 0.08504     | 0.55094814  |          |          |  |
| ADIRF     | ENSG00000148671 | 1.3717      | 0.085076 | 1.3717      | 0.085076    | 1.3156   | 0.094153 |  |
|           | 1.1536          | 0.12433     | 0.085076 | 0.55094814  |             |          |          |  |
| NA        | ENSG00000277589 | 1.3717      | 0.08508  | 1.3717      | 0.08508     | 1.3717   | 0.08508  |  |
|           | 1.3717          | 0.08508     | 0.08508  | 0.55094814  |             |          |          |  |
| EGF       | ENSG00000138798 | 1.3717      | 0.085081 | 0.12826     | 0.44897     | 0.052538 | 0.47905  |  |
|           | -0.15655        | 0.5622      | 0.085081 | 0.55094814  |             |          |          |  |
| DPY19L4P2 | ENSG00000231839 | 0.80268     | 0.21108  | 0.28104     | 0.38934     | 1.3717   |          |  |
|           | 0.085081        | 0.90907     | 0.18166  | 0.085081    | 0.55094814  |          |          |  |
| FAM205C   | ENSG00000187791 | 0.24833     | 0.40194  | 1.3716      | 0.08509     | 0.24289  |          |  |
|           | 0.40405         | -0.25159    | 0.59932  | 0.08509     | 0.55094814  |          |          |  |
| NA        | ENSG00000280219 | 1.3713      | 0.085134 | 0.21793     | 0.41374     | 1.3713   | 0.085134 |  |
|           | 1.2163          | 0.11193     | 0.085134 | 0.551118952 |             |          |          |  |
| AHNAK     | ENSG00000124942 | -0.55549    | 0.71072  | 1.1797      | 0.11905     | 1.3713   | 0.085139 |  |
|           | 1.228           | 0.10971     | 0.085139 | 0.551118952 |             |          |          |  |
| NA        | ENSG00000253803 | 0.24103     | 0.40477  | -1.0885     | 0.8618      | 0.4218   | 0.33658  |  |
|           | 1.3711          | 0.085169    | 0.085169 | 0.551239922 |             |          |          |  |
| NA        | ENSG00000234464 | -0.59646    | 0.72457  | -0.27146    | 0.60698     | 1.1678   | 0.12144  |  |
|           | 1.371           | 0.085192    | 0.085192 | 0.551244867 |             |          |          |  |
| GABRR1    | ENSG00000146276 | 1.3709      | 0.085198 | 1.056       | 0.14549     | 1.1385   | 0.12745  |  |
|           | 0.58604         | 0.27892     | 0.085198 | 0.551244867 |             |          |          |  |

|           |                 |          |             |             |             |           |          |
|-----------|-----------------|----------|-------------|-------------|-------------|-----------|----------|
| NA        | ENSG00000267338 | 0.67384  | 0.25021     | 1.3708      | 0.085226    | 0.25633   | 0.39885  |
|           | -1.0059         | 0.84276  | 0.085226    | 0.551244867 |             |           |          |
| NA        | ENSG00000254477 | 1.3704   | 0.085279    | 1.1026      | 0.13509     | 1.3704    | 0.085279 |
|           | 1.3704          | 0.085279 | 0.085279    | 0.551244867 |             |           |          |
| SYPL2     | ENSG00000143028 | 0.99973  | 0.15872     | 0.99973     | 0.15872     | 0.99973   | 0.15872  |
|           | 1.3703          | 0.085289 | 0.085289    | 0.551244867 |             |           |          |
| NA        | ENSG00000207027 | 1.3703   | 0.085294    | 1.3703      | 0.085294    | 1.3703    | 0.085294 |
|           | 1.3703          | 0.085294 | 0.085294    | 0.551244867 |             |           |          |
| NA        | ENSG00000207419 | 0.3507   | 0.36291     | 1.3702      | 0.085305    | 1.1204    | 0.13126  |
|           | 0.54513         | 0.29283  | 0.085305    | 0.551244867 |             |           |          |
| ADTRP     | ENSG00000111863 | 0.44841  | 0.32693     | -0.036879   | 0.51471     | 0.39186   | 0.34758  |
|           | 1.3702          | 0.085313 | 0.085313    | 0.551244867 |             |           |          |
| SMOC1     | ENSG00000198732 | -0.756   | 0.77518     | 1.3702      | 0.085317    | -0.57567  | 0.71758  |
|           | -0.0093527      | 0.50373  | 0.085317    | 0.551244867 |             |           |          |
| MCRIP2P2  | ENSG00000270920 | 1.3701   | 0.08532     | 1.3701      | 0.08532     | 1.3701    |          |
|           | 0.08532         | 1.3701   | 0.08532     | 0.08532     | 0.551244867 |           |          |
| MIR548G   | ENSG00000221369 | 1.3701   | 0.085328    | 1.3701      | 0.085328    | 1.3701    |          |
|           | 0.085328        | 1.3701   | 0.085328    | 0.085328    | 0.551244867 |           |          |
| NA        | ENSG00000278477 | -0.40794 | 0.65834     | 1.37        | 0.08535     | -0.15863  | 0.56302  |
|           | 0.08535         | 0.08535  | 0.551244867 |             |             |           | 1.37     |
| NA        | ENSG00000264166 | 1.3698   | 0.085375    | 1.3698      | 0.085375    | 1.3698    | 0.085375 |
|           | 1.3698          | 0.085375 | 0.085375    | 0.551244867 |             |           |          |
| NA        | ENSG00000280016 | -0.47471 | 0.6825      | 1.3697      | 0.085397    | 1.3697    | 0.085397 |
|           | 1.3697          | 0.085397 | 0.085397    | 0.551244867 |             |           |          |
| SLC9A3R2  | ENSG00000065054 | -0.65519 | 0.74383     | -0.65519    | 0.74383     | -0.95898  |          |
|           | 0.83122         | 1.3696   | 0.085414    | 0.085414    | 0.551244867 |           |          |
| TRAPPC8   | ENSG00000153339 | 1.3695   | 0.085415    | -0.52788    | 0.70121     | 1.272     | 0.10168  |
|           | -0.76349        | 0.77741  | 0.085415    | 0.551244867 |             |           |          |
| FUT8-AS1  | ENSG00000276116 | 1.3695   | 0.085426    | 1.3695      | 0.085426    | 1.3695    |          |
|           | 0.085426        | 1.3695   | 0.085426    | 0.085426    | 0.551244867 |           |          |
| HS3ST5    | ENSG00000249853 | 0.063623 | 0.47464     | 0.063623    | 0.47464     | 0.063623  |          |
|           | 0.47464         | 1.3693   | 0.085456    | 0.085456    | 0.551244867 |           |          |
| GLUD1P3   | ENSG00000250959 | 1.3693   | 0.085457    | 1.3693      | 0.085457    | 1.3693    |          |
|           | 0.085457        | 1.3693   | 0.085457    | 0.085457    | 0.551244867 |           |          |
| LINC02663 | ENSG00000228636 | 1.3693   | 0.08546     | 1.3693      | 0.08546     | 1.3693    |          |
|           | 0.08546         | 1.3693   | 0.08546     | 0.08546     | 0.551244867 |           |          |
| NA        | ENSG00000238085 | 0.20355  | 0.41935     | 1.3693      | 0.08546     | 0.20355   | 0.41935  |
|           | -1.1537         | 0.87569  | 0.08546     | 0.551244867 |             |           |          |
| GAS1      | ENSG00000180447 | -1.0401  | 0.85086     | 1.3692      | 0.085468    | -0.62638  | 0.73447  |
|           | -1.5341         | 0.9375   | 0.085468    | 0.551244867 |             |           |          |
| RGPD4-AS1 | ENSG00000230651 | 1.369    | 0.085495    | -0.48907    | 0.6876      | 1.0165    | 0.1547   |
|           | -0.087193       | 0.53474  | 0.085495    | 0.551244867 |             |           |          |
| UNC93B3   | ENSG00000172971 | 0.82291  | 0.20528     | 1.369       | 0.085499    | 0.87422   | 0.191    |
|           | 0.089294        | 0.46442  | 0.085499    | 0.551244867 |             |           |          |
| RPS26P13  | ENSG00000227887 | 0.70841  | 0.23935     | 1.369       | 0.085499    | -0.82762  | 0.79606  |
|           | 0.42202         | 0.3365   | 0.085499    | 0.551244867 |             |           |          |
| MRPS24    | ENSG00000062582 | 1.3689   | 0.085521    | 1.3689      | 0.085521    | 1.3689    |          |
|           | 0.085521        | -0.45644 | 0.67596     | 0.085521    | 0.551244867 |           |          |
| ICOS      | ENSG00000163600 | 1.3689   | 0.085521    | 0.33213     | 0.3699      | 0.12068   | 0.45197  |
|           | 0.12068         | 0.45197  | 0.085521    | 0.551244867 |             |           |          |
| TRBV24-1  | ENSG00000211750 | 1.3689   | 0.085522    | -0.45498    | 0.67544     | -0.24637  |          |
|           | 0.5973          | -1.1284  | 0.87043     | 0.085522    | 0.551244867 |           |          |
| SNORD45A  | ENSG00000207241 | 1.3687   | 0.085544    | 1.3687      | 0.085544    | 1.3687    |          |
|           | 0.085544        | 1.3687   | 0.085544    | 0.085544    | 0.551244867 |           |          |
| RPL36AP6  | ENSG00000231293 | 0.075436 | 0.46993     | 0.075436    | 0.46993     | 0.075436  |          |
|           | 0.46993         | 1.3687   | 0.085549    | 0.085549    | 0.551244867 |           |          |
| OR4A42P   | ENSG00000254674 | 1.3686   | 0.08556     | 0.016835    | 0.49328     | -0.71372  |          |
|           | 0.7623          | -1.1697  | 0.87894     | 0.08556     | 0.551244867 |           |          |
| PCNA      | ENSG00000132646 | 1.3686   | 0.085565    | 1.3686      | 0.085565    | 0.75229   | 0.22594  |
|           | 0.75229         | 0.22594  | 0.085565    | 0.551244867 |             |           |          |
| LINC02446 | ENSG00000256039 | 0.47716  | 0.31663     | 1.3686      | 0.08557     | -0.065904 |          |
|           | 0.52627         | 0.29389  | 0.38442     | 0.08557     | 0.551244867 |           |          |

|           |                 |          |             |          |             |             |            |          |
|-----------|-----------------|----------|-------------|----------|-------------|-------------|------------|----------|
| NA        | ENSG00000244652 | 1.3685   | 0.085582    | 0.085582 | -0.86496    | 0.80647     | 1.3685     | 0.085582 |
|           |                 | 1.3685   | 0.085582    | 0.085582 | 0.551244867 |             |            |          |
| MPG       | ENSG00000103152 | 0.17415  | 0.43088     | 0.43088  | 1.0057      | 0.15728     | 1.3685     | 0.085584 |
|           |                 | 1.3685   | 0.085584    | 0.085584 | 0.551244867 |             |            |          |
| TMEM72    | ENSG00000187783 | -0.12024 | 0.54786     | 0.54786  | 0.1366      | 0.44568     | 1.3684     |          |
|           |                 | 0.085599 | 1.3141      | 0.094407 | 0.085599    | 0.551244867 |            |          |
| CFL2      | ENSG00000165410 | 1.3683   | 0.085602    | 0.085602 | 0.68266     | 0.24741     | 0.94434    | 0.1725   |
|           |                 | 0.31665  | 0.37575     | 0.085602 | 0.551244867 |             |            |          |
| DPY19L2P5 | ENSG00000225100 | 1.3683   | 0.085609    | 0.085609 | 1.3683      | 0.085609    | 1.3683     |          |
|           |                 | 0.085609 | 1.3683      | 0.085609 | 0.085609    | 0.551244867 |            |          |
| PAPPA-AS2 | ENSG00000226604 | 1.3682   | 0.085618    | 0.085618 | 1.3682      | 0.085618    | 1.3682     |          |
|           |                 | 0.085618 | 1.3682      | 0.085618 | 0.085618    | 0.551244867 |            |          |
| LUADT1    | ENSG00000196634 | 0.15097  | 0.44        | 0.15097  | 0.44        | 1.3682      | 0.085631   |          |
|           |                 | 0.15097  | 0.44        | 0.085631 | 0.551244867 |             |            |          |
| HCG27     | ENSG00000206344 | -0.41362 | 0.66042     | 0.66042  | 0.55351     | 0.28996     | 0.5447     | 0.29298  |
|           |                 | 1.3678   | 0.08569     | 0.08569  | 0.551244867 |             |            |          |
| NA        | ENSG00000226181 | 0.62187  | 0.26701     | 0.26701  | 1.3677      | 0.085709    | -0.64328   | 0.73998  |
|           |                 | -0.64328 | 0.73998     | 0.085709 | 0.551244867 |             |            |          |
| LINC02324 | ENSG00000255002 | 1.2013   | 0.11481     | 0.11481  | -0.21252    | 0.58415     | 0.31009    |          |
|           |                 | 0.37825  | 1.3677      | 0.08571  | 0.08571     | 0.551244867 |            |          |
| TRIM50    | ENSG00000146755 | 1.1808   | 0.11885     | 0.11885  | 1.3676      | 0.085723    | 0.10084    |          |
|           |                 | 0.45984  | 1.1808      | 0.11885  | 0.085723    | 0.551244867 |            |          |
| LINC00987 | ENSG00000237248 | 1.3676   | 0.085725    | 0.085725 | 1.3676      | 0.085725    | 1.3676     |          |
|           |                 | 0.085725 | 1.3676      | 0.085725 | 0.085725    | 0.551244867 |            |          |
| NA        | ENSG00000258426 | 1.3676   | 0.085726    | 0.085726 | 1.3676      | 0.085726    | 1.3676     | 0.085726 |
|           |                 | 1.3676   | 0.085726    | 0.085726 | 0.551244867 |             |            |          |
| SH3BGR    | ENSG00000185437 | 1.3675   | 0.085733    | 0.085733 | 0.58824     | 0.27818     | 0.39251    |          |
|           |                 | 0.34734  | 0.4024      | 0.34369  | 0.085733    | 0.551244867 |            |          |
| SLC25A1P1 | ENSG00000254479 | 1.3674   | 0.085743    | 0.085743 | 0.041486    | 0.48345     | 0.34698    |          |
|           |                 | 0.3643   | 0.43739     | 0.33091  | 0.085743    | 0.551244867 |            |          |
| RNU6-478P | ENSG00000200774 | 0.86837  | 0.1926      | 0.1926   | 0.86837     | 0.1926      | 1.3674     |          |
|           |                 | 0.085744 | 0.41896     | 0.33762  | 0.085744    | 0.551244867 |            |          |
| NA        | ENSG00000254165 | 0.34359  | 0.36558     | 0.36558  | 1.3674      | 0.085751    | 0.34359    | 0.36558  |
|           |                 | 0.34359  | 0.36558     | 0.085751 | 0.551244867 |             |            |          |
| NA        | ENSG00000272149 | 1.3674   | 0.085755    | 0.085755 | 1.3674      | 0.085755    | 1.3674     | 0.085755 |
|           |                 | 1.3674   | 0.085755    | 0.085755 | 0.551244867 |             |            |          |
| FBN1      | ENSG00000166147 | 1.3289   | 0.091934    | 0.091934 | 1.1328      | 0.12864     | 1.3673     | 0.085758 |
|           |                 | 1.2505   | 0.10556     | 0.085758 | 0.551244867 |             |            |          |
| RN7SL665P | ENSG00000264169 | 1.3671   | 0.085795    | 0.085795 | 1.3671      | 0.085795    | 1.3671     |          |
|           |                 | 0.085795 | 1.3671      | 0.085795 | 0.085795    | 0.55134808  |            |          |
| DHDDS     | ENSG00000117682 | 1.1389   | 0.12738     | 0.12738  | 0.62587     | 0.2657      | 1.367      | 0.085806 |
|           |                 | 0.68326  | 0.24722     | 0.085806 | 0.55134808  |             |            |          |
| EPHA4     | ENSG00000116106 | 0.90781  | 0.18199     | 0.18199  | 1.0693      | 0.14246     | 1.367      | 0.085808 |
|           |                 | -0.24564 | 0.59702     | 0.085808 | 0.55134808  |             |            |          |
| NA        | ENSG00000233906 | 1.3669   | 0.085835    | 0.085835 | 1.3669      | 0.085835    | 1.3669     | 0.085835 |
|           |                 | 1.3669   | 0.085835    | 0.085835 | 0.551401855 |             |            |          |
| NA        | ENSG00000223398 | -0.11745 | 0.54675     | 0.54675  | -0.11745    | 0.54675     | 1.3668     | 0.085839 |
|           |                 | -0.11745 | 0.54675     | 0.085839 | 0.551401855 |             |            |          |
| MIR101-1  | ENSG00000199135 | 0.28309  | 0.38855     | 0.38855  | 0.28309     | 0.38855     | 0.28309    |          |
|           |                 | 0.38855  | 1.3666      | 0.085876 | 0.085876    | 0.551566822 |            |          |
| TVP23B    | ENSG00000171928 | 1.3664   | 0.085908    | 0.085908 | -0.49857    | 0.69096     | -0.0093883 |          |
|           |                 | 0.50375  | -1.0123     | 0.84431  | 0.085908    | 0.551613087 |            |          |
| PSMB3P2   | ENSG00000235444 | 1.3664   | 0.085911    | 0.085911 | 1.3664      | 0.085911    | 1.3664     |          |
|           |                 | 0.085911 | 1.3664      | 0.085911 | 0.085911    | 0.551613087 |            |          |
| SKAP2     | ENSG00000005020 | -0.2104  | 0.58332     | 0.58332  | 0.51967     | 0.30165     | 1.3661     | 0.08596  |
|           |                 | 0.021578 | 0.49139     | 0.08596  | 0.551613087 |             |            |          |
| SERPINA9  | ENSG00000170054 | -0.16258 | 0.56458     | 0.56458  | 1.366       | 0.08597     | 0.66207    | 0.25396  |
|           |                 | 0.61579  | 0.26902     | 0.08597  | 0.551613087 |             |            |          |
| NA        | ENSG00000272239 | 1.366    | 0.085976    | 0.085976 | 1.366       | 0.085976    | 1.366      | 0.085976 |
|           |                 | 0.085976 | 0.551613087 |          |             |             |            |          |
| MIR5581   | ENSG00000263675 | 1.3659   | 0.08598     | 0.08598  | 1.3659      | 0.08598     | 1.3659     |          |
|           |                 | 0.08598  | 1.3659      | 0.08598  | 0.08598     | 0.551613087 |            |          |

|             |                 |            |          |             |             |           |  |          |
|-------------|-----------------|------------|----------|-------------|-------------|-----------|--|----------|
| PCBP2P1     | ENSG00000235701 | 0.8589     | 0.1952   | 0.076785    | 0.4694      | 1.3658    |  |          |
|             | 0.085997        | 1.3658     | 0.085997 | 0.085997    | 0.551613087 |           |  |          |
| MEAF6P1     | ENSG00000240286 | 0.0011025  | 0.49956  | 0.36036     | 0.35929     | 1.3658    |  |          |
|             | 0.085998        | 1.3658     | 0.085998 | 0.085998    | 0.551613087 |           |  |          |
| LINC02225   | ENSG00000249584 | 0.53811    | 0.29525  | -0.80275    | 0.78894     | 1.3658    |  |          |
|             | 0.086007        | -0.18621   | 0.57386  | 0.086007    | 0.551613087 |           |  |          |
| NA          | ENSG00000265496 | 1.3658     | 0.086008 | 1.3658      | 0.086008    | 1.3658    |  | 0.086008 |
|             | 1.3658          | 0.086008   | 0.086008 | 0.551613087 |             |           |  |          |
| TAF6        | ENSG00000106290 | 0.033785   | 0.48652  | 1.238       | 0.10787     | 1.3657    |  | 0.086023 |
|             | 1.3431          | 0.089626   | 0.086023 | 0.551613087 |             |           |  |          |
| NA          | ENSG00000232995 | 1.1377     | 0.12761  | 1.3655      | 0.086042    | 1.1978    |  | 0.11549  |
|             | 0.24433         | 0.40349    | 0.086042 | 0.551613087 |             |           |  |          |
| RN7SL332P   | ENSG00000242989 | -0.88498   | 0.81192  | 1.3655      | 0.086052    | 0.85487   |  |          |
|             | 0.19631         | -0.13878   | 0.55519  | 0.086052    | 0.551613087 |           |  |          |
| GPR12       | ENSG00000132975 | 1.3655     | 0.086053 | 1.3655      | 0.086053    | 0.26839   |  | 0.3942   |
|             | 1.277           | 0.1008     | 0.086053 | 0.551613087 |             |           |  |          |
| NA          | ENSG00000264472 | 1.3655     | 0.086053 | 1.3655      | 0.086053    | 1.3655    |  | 0.086053 |
|             | 1.3655          | 0.086053   | 0.086053 | 0.551613087 |             |           |  |          |
| KRTAP13-1   | ENSG00000198390 | 1.3651     | 0.086106 | 1.3651      | 0.086106    | 1.3651    |  |          |
|             | 0.086106        | 1.3651     | 0.086106 | 0.086106    | 0.55186757  |           |  |          |
| NA          | ENSG00000279642 | 1.365      | 0.086125 | 1.365       | 0.086125    | 1.365     |  | 0.086125 |
|             | 0.086125        | 0.55186757 |          |             |             |           |  |          |
| PRICKLE2-DT | ENSG00000244564 | 0.10927    | 0.45649  | 0.91492     | 0.18012     | -0.72311  |  |          |
|             | 0.76519         | 1.3649     | 0.086137 | 0.086137    | 0.55186757  |           |  |          |
| NAMPT       | ENSG00000105835 | 0.65187    | 0.25724  | 1.3649      | 0.086138    | 0.19565   |  | 0.42244  |
|             | 0.94625         | 0.17201    | 0.086138 | 0.55186757  |             |           |  |          |
| NA          | ENSG00000177369 | 1.3644     | 0.086218 | 1.3644      | 0.086218    | 1.3097    |  | 0.095146 |
|             | 1.3644          | 0.086218   | 0.086218 | 0.552149566 |             |           |  |          |
| HOXD1       | ENSG00000128645 | 1.3643     | 0.086232 | 1.3643      | 0.086232    | 1.3643    |  | 0.086232 |
|             | 0.36294         | 0.35832    | 0.086232 | 0.552149566 |             |           |  |          |
| NA          | ENSG00000267687 | 0.98216    | 0.16301  | 1.3643      | 0.086232    | 0.9043    |  | 0.18292  |
|             | 0.48213         | 0.31486    | 0.086232 | 0.552149566 |             |           |  |          |
| NA          | ENSG00000200325 | 0.65862    | 0.25507  | 1.3643      | 0.086235    | -0.39566  |  | 0.65382  |
|             | 1.109           | 0.13371    | 0.086235 | 0.552149566 |             |           |  |          |
| SLC8A3      | ENSG00000100678 | 1.3643     | 0.08624  | 0.61952     | 0.26779     | 0.18119   |  |          |
|             | 0.42811         | 1.3435     | 0.089548 | 0.08624     | 0.552149566 |           |  |          |
| TLR6        | ENSG00000174130 | 1.3642     | 0.08625  | 0.69026     | 0.24502     | 1.2398    |  | 0.10752  |
|             | 0.0027508       | 0.4989     | 0.08625  | 0.552149566 |             |           |  |          |
| NA          | ENSG00000259610 | -2.3074    | 0.98948  | 1.3641      | 0.086263    | -1.3521   |  | 0.91182  |
|             | -1.3521         | 0.91182    | 0.086263 | 0.552160251 |             |           |  |          |
| NA          | ENSG00000271074 | 1.3638     | 0.086314 | 0.85382     | 0.1966      | -0.16049  |  | 0.56375  |
|             | 1.1522          | 0.12461    | 0.086314 | 0.552192383 |             |           |  |          |
| PDE6C       | ENSG00000095464 | 1.3638     | 0.086319 | 1.0826      | 0.13948     | 1.3638    |  | 0.086319 |
|             | -0.30885        | 0.62128    | 0.086319 | 0.552192383 |             |           |  |          |
| DUTP7       | ENSG00000250473 | 1.0488     | 0.14714  | 0.42172     | 0.33661     | 0.58673   |  | 0.27869  |
|             | 1.3636          | 0.086344   | 0.086344 | 0.552192383 |             |           |  |          |
| MIPEP       | ENSG00000027001 | 1.3636     | 0.086348 | 0.91754     | 0.17943     | 1.2937    |  | 0.097886 |
|             | 1.2435          | 0.10684    | 0.086348 | 0.552192383 |             |           |  |          |
| APCDD1L     | ENSG00000198768 | -1.327     | 0.90775  | 1.3635      | 0.086361    | -1.1617   |  |          |
|             | 0.87732         | -1.327     | 0.90775  | 0.086361    | 0.552192383 |           |  |          |
| CTAGE13P    | ENSG00000230711 | -0.96404   | 0.83249  | 1.3635      | 0.086365    | -0.029193 |  |          |
|             | 0.51164         | -0.029193  | 0.51164  | 0.086365    | 0.552192383 |           |  |          |
| CSNK1A1L    | ENSG00000180138 | 0.17247    | 0.43153  | 1.3634      | 0.086371    | 0.29235   |  |          |
|             | 0.38501         | 0.086517   | 0.46553  | 0.086371    | 0.552192383 |           |  |          |
| CYP26A1     | ENSG00000095596 | -0.71901   | 0.76393  | -0.71901    | 0.76393     | 1.3634    |  |          |
|             | 0.086379        | 0.39518    | 0.34635  | 0.086379    | 0.552192383 |           |  |          |
| ZNF521      | ENSG00000198795 | -0.39815   | 0.65474  | 0.0063103   | 0.49748     | 1.3633    |  |          |
|             | 0.08639         | 0.37206    | 0.35492  | 0.08639     | 0.552192383 |           |  |          |
| NA          | ENSG00000279271 | 1.3633     | 0.086398 | 1.3633      | 0.086398    | 1.3633    |  | 0.086398 |
|             | 1.3633          | 0.086398   | 0.086398 | 0.552192383 |             |           |  |          |
| AP1M2       | ENSG00000129354 | 0.47597    | 0.31705  | 1.3633      | 0.0864      | 0.85004   |  | 0.19765  |
|             | -0.97074        | 0.83416    | 0.0864   | 0.552192383 |             |           |  |          |

|            |                 |             |          |             |             |          |          |
|------------|-----------------|-------------|----------|-------------|-------------|----------|----------|
| NA         | ENSG00000233919 | -0.97636    | 0.83556  | -0.35539    | 0.63885     | -0.9875  | 0.8383   |
|            | 1.3632          | 0.086404    | 0.086404 | 0.552192383 |             |          |          |
| MRPL3      | ENSG00000114686 | -0.43167    | 0.66701  | 1.3631      | 0.086431    | -0.16916 | 0.56716  |
|            | -0.59016        | 0.72246     | 0.086431 | 0.552252045 |             |          |          |
| NA         | ENSG00000270797 | 1.363       | 0.086444 | 1.363       | 0.086444    | 1.363    | 0.086444 |
|            | 0.086444        | 0.552252045 |          |             |             |          |          |
| TMPRSS11E  | ENSG00000087128 | 1.363       | 0.086449 | 1.2971      | 0.097291    | 1.0474   | 0.14746  |
|            | 1.3088          | 0.095303    | 0.086449 | 0.552252045 |             |          |          |
| NA         | ENSG00000263916 | 1.3628      | 0.086467 | 1.3628      | 0.086467    | 1.3628   | 0.086467 |
|            | 1.3628          | 0.086467    | 0.086467 | 0.552252045 |             |          |          |
| NA         | ENSG00000227236 | 1.3628      | 0.08647  | 1.3628      | 0.08647     | 1.3628   | 0.08647  |
|            | 1.3628          | 0.08647     | 0.08647  | 0.552252045 |             |          |          |
| NA         | ENSG00000266973 | -1.4324     | 0.92399  | 0.35982     | 0.35949     | -1.4324  | 0.92399  |
|            | 1.3626          | 0.086502    | 0.086502 | 0.552324413 |             |          |          |
| FNTB       | ENSG00000257365 | 1.3626      | 0.086504 | 1.3626      | 0.086504    | 1.3626   | 0.086504 |
|            | 0.66071         | 0.2544      | 0.086504 | 0.552324413 |             |          |          |
| LINC00373  | ENSG00000231019 | 1.3625      | 0.08652  | 1.3625      | 0.08652     | 1.3625   |          |
|            | 0.08652         | 1.3625      | 0.08652  | 0.08652     | 0.552354199 |          |          |
| MTND2P32   | ENSG00000254090 | -1.3363     | 0.90927  | -1.3363     | 0.90927     | 1.3622   |          |
|            | 0.08657         | -1.4503     | 0.92651  | 0.08657     | 0.552562482 |          |          |
| SLC29A2    | ENSG00000174669 | 0.067742    | 0.473    | 0.74311     | 0.22871     | 0.69236  | 0.24436  |
|            | 1.3621          | 0.086578    | 0.086578 | 0.552562482 |             |          |          |
| NA         | ENSG00000250908 | 1.3621      | 0.086589 | 1.3621      | 0.086589    | 1.3621   | 0.086589 |
|            | 0.13795         | 0.44514     | 0.086589 | 0.552562482 |             |          |          |
| NEU2       | ENSG00000115488 | 0.41824     | 0.33789  | -0.4458     | 0.67213     | 1.3619   | 0.086618 |
|            | -1.2068         | 0.88624     | 0.086618 | 0.552562482 |             |          |          |
| PRB3       | ENSG00000197870 | -1.2119     | 0.88723  | -2.3421     | 0.99041     | 1.3619   | 0.086619 |
|            | -0.62935        | 0.73544     | 0.086619 | 0.552562482 |             |          |          |
| NA         | ENSG00000251572 | 1.3425      | 0.089713 | 1.3424      | 0.08973     | 1.3618   | 0.086631 |
|            | 1.2367          | 0.10809     | 0.086631 | 0.552562482 |             |          |          |
| NA         | ENSG00000226636 | 1.3618      | 0.086632 | 1.3618      | 0.086632    | 1.3618   | 0.086632 |
|            | 1.3618          | 0.086632    | 0.086632 | 0.552562482 |             |          |          |
| LINC02740  | ENSG00000255109 | 1.3617      | 0.086647 | -0.99005    | 0.83892     | 1.3617   |          |
|            | 0.086647        | 1.3617      | 0.086647 | 0.086647    | 0.552581495 |          |          |
| CCNE1      | ENSG00000105173 | 1.3616      | 0.086667 | 1.3616      | 0.086667    | 1.3616   | 0.086667 |
|            | 1.3616          | 0.086667    | 0.086667 | 0.552581495 |             |          |          |
| MIR1290    | ENSG00000221662 | 1.3616      | 0.086669 | 1.1457      | 0.12597     | 1.2662   |          |
|            | 0.10272         | 1.2662      | 0.10272  | 0.086669    | 0.552581495 |          |          |
| NA         | ENSG00000228353 | -0.55368    | 0.7101   | 1.3614      | 0.086689    | 0.86294  | 0.19409  |
|            | 0.86294         | 0.19409     | 0.086689 | 0.552587625 |             |          |          |
| ENPP7P4    | ENSG00000241278 | -0.043297   | 0.51727  | 1.3613      | 0.086711    | 0.80095  |          |
|            | 0.21158         | 0.26159     | 0.39682  | 0.086711    | 0.552587625 |          |          |
| NA         | ENSG00000258114 | 0.27871     | 0.39023  | 0.57193     | 0.28369     | 1.3612   | 0.086723 |
|            | -0.72085        | 0.7645      | 0.086723 | 0.552587625 |             |          |          |
| BIN3       | ENSG00000147439 | 0.76822     | 0.22118  | 0.20924     | 0.41713     | 1.3612   | 0.086725 |
|            | 0.13515         | 0.44625     | 0.086725 | 0.552587625 |             |          |          |
| BOC        | ENSG00000144857 | 0.43556     | 0.33158  | 0.80496     | 0.21042     | -0.23396 | 0.59249  |
|            | 1.3612          | 0.086733    | 0.086733 | 0.552587625 |             |          |          |
| CDC42SE1   | ENSG00000197622 | 0.86379     | 0.19385  | 0.86379     | 0.19385     | 1.3611   |          |
|            | 0.086738        | 0.65193     | 0.25722  | 0.086738    | 0.552587625 |          |          |
| SLC16A6    | ENSG00000108932 | 1.1224      | 0.13084  | -0.2901     | 0.61413     | 0.7777   |          |
|            | 0.21837         | 1.3609      | 0.08677  | 0.08677     | 0.552649012 |          |          |
| LINGO3     | ENSG00000220008 | 1.3608      | 0.086785 | 1.3608      | 0.086785    | 1.0467   |          |
|            | 0.14762         | 0.87054     | 0.192    | 0.086785    | 0.552649012 |          |          |
| NA         | ENSG00000267108 | 1.3608      | 0.08679  | 1.3608      | 0.08679     | 1.3608   | 0.08679  |
|            | 1.3608          | 0.08679     | 0.08679  | 0.552649012 |             |          |          |
| LPCAT4     | ENSG00000176454 | 1.3608      | 0.086793 | -0.1714     | 0.56805     | 0.18958  |          |
|            | 0.42482         | 0.47924     | 0.31589  | 0.086793    | 0.552649012 |          |          |
| TTC21B-AS1 | ENSG00000224490 | 1.3606      | 0.086824 | 1.3606      | 0.086824    | 1.3606   |          |
|            | 0.086824        | 1.3606      | 0.086824 | 0.086824    | 0.552665633 |          |          |
| PSMG3      | ENSG00000157778 | 1.0374      | 0.14978  | 0.73102     | 0.23238     | 1.3604   | 0.086844 |
|            | 0.16354         | 0.43505     | 0.086844 | 0.552665633 |             |          |          |

|            |                 |           |           |           |             |             |          |
|------------|-----------------|-----------|-----------|-----------|-------------|-------------|----------|
| NBN        | ENSG00000104320 | 0.56009   | 0.28771   | 1.3604    | 0.086853    | 0.50038     | 0.3084   |
|            |                 | 0.96082   | 0.16832   | 0.086853  | 0.552665633 |             |          |
| MNX1       | ENSG00000130675 | 0.25334   | 0.4       | 1.3604    | 0.086856    | 0.57612     | 0.28227  |
|            |                 | 1.1433    | 0.12647   | 0.086856  | 0.552665633 |             |          |
| TMEM161B   | ENSG00000164180 | -1.3842   | 0.91686   | 1.3604    | 0.086858    | -1.5033     |          |
|            |                 | 0.93362   | -1.361    | 0.91324   | 0.086858    | 0.552665633 |          |
| NA         | ENSG00000272065 | 1.3603    | 0.086871  | 1.3603    | 0.086871    | 1.3603      | 0.086871 |
|            |                 | 1.3603    | 0.086871  | 0.086871  | 0.552665633 |             |          |
| NA         | ENSG00000280125 | -0.73267  | 0.76812   | 1.3603    | 0.086875    | -0.73267    | 0.76812  |
|            |                 | -0.73267  | 0.76812   | 0.086875  | 0.552665633 |             |          |
| LINC01717  | ENSG00000232812 | 1.3599    | 0.086936  | 1.3599    | 0.086936    | 0.37208     |          |
|            |                 | 0.35492   | 1.3599    | 0.086936  | 0.086936    | 0.552964359 |          |
| CHL1       | ENSG00000134121 | -0.56738  | 0.71477   | 1.3598    | 0.086947    | -0.5784     | 0.7185   |
|            |                 | -0.017567 | 0.50701   | 0.086947  | 0.552964359 |             |          |
| HOXA2      | ENSG00000105996 | -0.35922  | 0.64028   | -0.18625  | 0.57387     | 1.3597      | 0.086956 |
|            |                 | -0.18625  | 0.57387   | 0.086956  | 0.552964359 |             |          |
| TMEM127    | ENSG00000135956 | 1.2367    | 0.10809   | 1.087     | 0.13852     | 1.3594      | 0.087005 |
|            |                 | 0.23514   | 0.40705   | 0.087005  | 0.553124901 |             |          |
| CACYBP     | ENSG00000116161 | 1.3594    | 0.087018  | 0.28753   | 0.38685     | 0.28753     |          |
|            |                 | 0.38685   | 0.28753   | 0.38685   | 0.087018    | 0.553124901 |          |
| HSPE1P10   | ENSG00000249768 | 1.3593    | 0.087033  | 1.1303    | 0.12918     | 0.17529     |          |
|            |                 | 0.43042   | 1.3593    | 0.087033  | 0.087033    | 0.553124901 |          |
| LINC02774  | ENSG00000226828 | 0.64728   | 0.25872   | 1.3592    | 0.087037    | 0.10174     |          |
|            |                 | 0.45948   | 1.0007    | 0.15848   | 0.087037    | 0.553124901 |          |
| PRR13      | ENSG00000205352 | 1.3592    | 0.087038  | 0.31493   | 0.37641     | 0.60677     | 0.272    |
|            |                 | 0.53336   | 0.29689   | 0.087038  | 0.553124901 |             |          |
| ABCE1      | ENSG00000164163 | 0.15208   | 0.43956   | 1.3588    | 0.087111    | -0.80611    | 0.78991  |
|            |                 | -0.36479  | 0.64237   | 0.087111  | 0.553424502 |             |          |
| NA         | ENSG00000271579 | 1.3587    | 0.087119  | 0.96069   | 0.16835     | 1.3587      | 0.087119 |
|            |                 | 1.3587    | 0.087119  | 0.087119  | 0.553424502 |             |          |
| NA         | ENSG00000258636 | 1.3586    | 0.087135  | 1.3586    | 0.087135    | 0.7336      | 0.2316   |
|            |                 | 1.3586    | 0.087135  | 0.087135  | 0.553424502 |             |          |
| NA         | ENSG00000223455 | 1.3586    | 0.087138  | 1.3586    | 0.087138    | 0.34131     | 0.36644  |
|            |                 | 1.3586    | 0.087138  | 0.087138  | 0.553424502 |             |          |
| CRB3P1     | ENSG00000232563 | -1.2474   | 0.89387   | -0.30304  | 0.61907     | 1.3584      |          |
|            |                 | 0.087166  | -0.071306 | 0.52842   | 0.087166    | 0.553424502 |          |
| CD46       | ENSG00000117335 | 1.3584    | 0.087174  | -0.091499 | 0.53645     | -0.091499   | 0.53645  |
|            |                 | -0.091499 | 0.53645   | 0.087174  | 0.553424502 |             |          |
| MATN2      | ENSG00000132561 | -0.6572   | 0.74447   | 0.96003   | 0.16852     | -0.39626    | 0.65404  |
|            |                 | 1.3583    | 0.087176  | 0.087176  | 0.553424502 |             |          |
| LINC01603  | ENSG00000253479 | -0.22076  | 0.58736   | 1.3584    | 0.087176    | -0.49869    | 0.691    |
|            |                 | 0.1534    | 0.43904   | 0.087176  | 0.553424502 |             |          |
| NA         | ENSG00000229337 | 0.17464   | 0.43068   | 0.46383   | 0.32138     | -0.1245     | 0.54954  |
|            |                 | 1.3581    | 0.087224  | 0.087224  | 0.553528673 |             |          |
| RNU6-450P  | ENSG00000201524 | 0.71397   | 0.23762   | 1.358     | 0.087228    | 0.71397     | 0.23762  |
|            |                 | 1.358     | 0.087228  | 0.087228  | 0.553528673 |             |          |
| MLLT11     | ENSG00000213190 | 1.358     | 0.08723   | 1.1506    | 0.12494     | -0.49191    | 0.68861  |
|            |                 | -0.49191  | 0.68861   | 0.08723   | 0.553528673 |             |          |
| HNRNPA1P72 | ENSG00000254713 | 1.3578    | 0.087259  | 1.21      | 0.11314     | 1.1711      | 0.12078  |
|            |                 | 1.3578    | 0.087259  | 0.087259  | 0.553528673 |             |          |
| RN7SL847P  | ENSG00000265319 | 1.1216    | 0.13101   | 1.3577    | 0.087275    | 1.1216      |          |
|            |                 | 0.13101   | 1.1216    | 0.13101   | 0.087275    | 0.553528673 |          |
| NA         | ENSG00000199565 | 0.77554   | 0.21901   | 0.77554   | 0.21901     | 0.77554     | 0.21901  |
|            |                 | 1.3577    | 0.087281  | 0.087281  | 0.553528673 |             |          |
| TRAV31     | ENSG00000249048 | 1.0715    | 0.14196   | 1.3576    | 0.087289    | 1.3576      |          |
|            |                 | 0.087289  | 1.3576    | 0.087289  | 0.087289    | 0.553528673 |          |
| NA         | ENSG00000276744 | 1.3576    | 0.087289  | 1.3576    | 0.087289    | 1.3576      | 0.087289 |
|            |                 | 1.3576    | 0.087289  | 0.087289  | 0.553528673 |             |          |
| PLCXD2     | ENSG00000240891 | 1.3576    | 0.087297  | 1.1137    | 0.13271     | 0.4644      |          |
|            |                 | 0.32118   | 0.84067   | 0.20027   | 0.087297    | 0.553528673 |          |
| BMS1P3     | ENSG00000240089 | 1.3575    | 0.087306  | 1.3575    | 0.087306    | 1.3575      |          |
|            |                 | 0.087306  | 1.3575    | 0.087306  | 0.087306    | 0.553528673 |          |



|              |                 |           |          |             |             |             |          |
|--------------|-----------------|-----------|----------|-------------|-------------|-------------|----------|
| NA           | ENSG00000205622 | 1.3455    | 0.089239 | 1.3573      | 0.087344    | 0.15393     | 0.43883  |
|              |                 | 0.79286   | 0.21393  | 0.087344    | 0.553560953 |             |          |
| KHDRBS3      | ENSG00000131773 | 0.61968   | 0.26773  | 1.3573      | 0.08735     | -0.054178   |          |
|              |                 | 0.5216    | -0.31916 | 0.6252      | 0.08735     | 0.553560953 |          |
| NA           | ENSG00000250515 | -0.72641  | 0.76621  | 0.12941     | 0.44852     | 1.3572      | 0.087364 |
|              |                 | 0.75089   | 0.22636  | 0.087364    | 0.553560953 |             |          |
| NA           | ENSG00000274776 | 1.3571    | 0.087373 | 1.2534      | 0.10503     | 1.2534      | 0.10503  |
|              |                 | 1.1701    | 0.12097  | 0.087373    | 0.553560953 |             |          |
| POM121       | ENSG00000196313 | 0.98891   | 0.16135  | 1.0802      | 0.14003     | 1.128       | 0.12966  |
|              |                 | 1.3569    | 0.087414 | 0.087414    | 0.553560953 |             |          |
| HP           | ENSG00000257017 | 1.3567    | 0.087432 | 1.261       | 0.10365     | 1.261       | 0.10365  |
|              |                 | 0.10365   | 0.087432 | 0.553560953 |             |             |          |
| NA           | ENSG00000244076 | 1.3567    | 0.087442 | 0.72467     | 0.23433     | 0.72467     | 0.23433  |
|              |                 | 0.72467   | 0.23433  | 0.087442    | 0.553560953 |             |          |
| NA           | ENSG00000248525 | 1.3567    | 0.087445 | 0.53943     | 0.29479     | 1.3567      | 0.087445 |
|              |                 | 1.3567    | 0.087445 | 0.087445    | 0.553560953 |             |          |
| LINC02810    | ENSG00000236648 | -1.3647   | 0.91382  | 1.3565      | 0.087463    | -0.16378    |          |
|              |                 | 0.56505   | -1.1894  | 0.88287     | 0.087463    | 0.553560953 |          |
| NA           | ENSG00000280338 | 0.61424   | 0.26953  | 1.3565      | 0.087465    | -0.17498    | 0.56945  |
|              |                 | 0.4558    | 0.32427  | 0.087465    | 0.553560953 |             |          |
| BPIFB1       | ENSG00000125999 | 0.63179   | 0.26376  | 1.3565      | 0.087476    | 0.5324      |          |
|              |                 | 0.29723   | -0.76613 | 0.7782      | 0.087476    | 0.553560953 |          |
| ZNF148       | ENSG00000163848 | -0.31078  | 0.62201  | -0.73155    | 0.76778     | -0.0092953  |          |
|              |                 | 0.50371   | 1.3563   | 0.087502    | 0.087502    | 0.553560953 |          |
| RN7SL382P    | ENSG00000240723 | 0.76533   | 0.22204  | 0.30694     | 0.37945     | 0.46559     |          |
|              |                 | 0.32076   | 1.3562   | 0.087523    | 0.087523    | 0.553560953 |          |
| C1orf167-AS1 | ENSG00000177553 | 1.3561    | 0.087527 | 1.3561      | 0.087527    | 1.3561      |          |
|              |                 | 0.087527  | 1.3561   | 0.087527    | 0.087527    | 0.553560953 |          |
| NA           | ENSG00000260723 | 1.3561    | 0.087531 | 1.3561      | 0.087531    | 1.3561      | 0.087531 |
|              |                 | 1.3561    | 0.087531 | 0.087531    | 0.553560953 |             |          |
| NA           | ENSG00000213875 | 0.17998   | 0.42858  | 1.356       | 0.087553    | 1.356       | 0.087553 |
|              |                 | 0.087553  | 0.087553 | 0.553560953 |             |             |          |
| PCDH9        | ENSG00000184226 | -0.057239 | 0.52282  | 1.356       | 0.087554    | 1.1655      | 0.12191  |
|              |                 | 1.0929    | 0.13722  | 0.087554    | 0.553560953 |             |          |
| EFHD2        | ENSG00000142634 | 1.356     | 0.087556 | 1.356       | 0.087556    | 0.90923     | 0.18161  |
|              |                 | 0.89566   | 0.087556 | 0.553560953 |             |             | -1.2572  |
| NA           | ENSG00000253725 | 1.3558    | 0.087574 | -1.7601     | 0.96081     | -0.58676    | 0.72132  |
|              |                 | -1.2698   | 0.89793  | 0.087574    | 0.553560953 |             |          |
| CACFD1       | ENSG00000160325 | 0.15983   | 0.43651  | 1.3558      | 0.087588    | 0.069009    |          |
|              |                 | 0.47249   | 0.15959  | 0.4366      | 0.087588    | 0.553560953 |          |
| MYH15        | ENSG00000144821 | 1.1405    | 0.12705  | 1.3557      | 0.087594    | 1.1877      | 0.11748  |
|              |                 | 0.85371   | 0.19663  | 0.087594    | 0.553560953 |             |          |
| KCND2        | ENSG00000184408 | -1.0601   | 0.85545  | 1.3556      | 0.087619    | -0.36752    | 0.64339  |
|              |                 | -1.4054   | 0.92005  | 0.087619    | 0.553560953 |             |          |
| IGSF9B       | ENSG00000080854 | 1.3555    | 0.087632 | 0.27002     | 0.39357     | 1.2554      |          |
|              |                 | 0.10466   | 0.14743  | 0.4414      | 0.087632    | 0.553560953 |          |
| NA           | ENSG00000221252 | -0.27058  | 0.60664  | 1.2518      | 0.10533     | 0.93113     | 0.17589  |
|              |                 | 1.3554    | 0.087652 | 0.087652    | 0.553560953 |             |          |
| RPL8P2       | ENSG00000225267 | 0.075719  | 0.46982  | 0.20251     | 0.41976     | 1.3553      |          |
|              |                 | 0.087654  | 1.3553   | 0.087654    | 0.087654    | 0.553560953 |          |
| MGAT4B       | ENSG00000161013 | 0.98068   | 0.16338  | 0.30078     | 0.38179     | 0.7337      |          |
|              |                 | 0.23157   | 1.3553   | 0.087666    | 0.087666    | 0.553560953 |          |
| EXD1         | ENSG00000178997 | -0.69957  | 0.7579   | -0.46946    | 0.68063     | -0.94595    | 0.82791  |
|              |                 | 1.3551    | 0.087692 | 0.087692    | 0.553560953 |             |          |
| ADAM20P1     | ENSG00000259158 | 0.13477   | 0.4464   | 0.08351     | 0.46672     | 1.3551      |          |
|              |                 | 0.087692  | 1.3202   | 0.093386    | 0.087692    | 0.553560953 |          |
| SDHAP2       | ENSG00000215837 | 0.426     | 0.33505  | 0.9243      | 0.17767     | 1.3551      | 0.087694 |
|              |                 | 0.19185   | 0.42393  | 0.087694    | 0.553560953 |             |          |
| RPS27AP12    | ENSG00000225224 | 1.355     | 0.087713 | 1.355       | 0.087713    | 1.355       | 0.087713 |
|              |                 | 0.087713  | 0.087713 | 0.553560953 |             |             |          |
| DDX21        | ENSG00000165732 | 0.34723   | 0.36421  | 1.355       | 0.087714    | 1.0782      | 0.14047  |
|              |                 | 0.0068678 | 0.49726  | 0.087714    | 0.553560953 |             |          |

|             |                 |           |          |             |             |           |          |
|-------------|-----------------|-----------|----------|-------------|-------------|-----------|----------|
| PITPNC1     | ENSG00000154217 | 0.76308   | 0.22271  | 1.3549      | 0.087719    | -0.57634  |          |
|             | 0.71781         | 0.30036   | 0.38195  | 0.087719    | 0.553560953 |           |          |
| RNU4ATAC15P | ENSG00000252224 | -0.24143  | 0.59539  | 1.3549      | 0.08772     | 1.3549    |          |
|             | 0.08772         | 1.3549    | 0.08772  | 0.08772     | 0.553560953 |           |          |
| RNF14P3     | ENSG00000238109 | 1.3549    | 0.087721 | 1.3549      | 0.087721    | 1.3549    |          |
|             | 0.087721        | 1.3549    | 0.087721 | 0.087721    | 0.553560953 |           |          |
| OVOL3       | ENSG00000105261 | 1.3548    | 0.087737 | 1.3548      | 0.087737    | 1.3548    | 0.087737 |
|             | 1.3548          | 0.087737  | 0.087737 | 0.553560953 |             |           |          |
| GTSE1       | ENSG00000075218 | -0.13151  | 0.55231  | 0.87877     | 0.18976     | 0.0073333 | 0.49707  |
|             | 1.3548          | 0.087739  | 0.087739 | 0.553560953 |             |           |          |
| NA          | ENSG00000254616 | 0.66337   | 0.25355  | 1.3548      | 0.087747    | 1.3548    | 0.087747 |
|             | 1.3548          | 0.087747  | 0.087747 | 0.553560953 |             |           |          |
| GPX1P2      | ENSG00000215326 | -0.29758  | 0.61699  | -0.52387    | 0.69982     | 1.3546    |          |
|             | 0.087766        | 0.51849   | 0.30206  | 0.087766    | 0.553560953 |           |          |
| NA          | ENSG00000272509 | 1.3546    | 0.087769 | 1.3546      | 0.087769    | 1.3546    | 0.087769 |
|             | 1.3546          | 0.087769  | 0.087769 | 0.553560953 |             |           |          |
| RPL29P29    | ENSG00000225289 | 0.99278   | 0.16041  | 0.99278     | 0.16041     | 1.3546    |          |
|             | 0.087772        | 0.85517   | 0.19623  | 0.087772    | 0.553560953 |           |          |
| NA          | ENSG00000232759 | -0.48522  | 0.68624  | 0.98626     | 0.162       | 1.3545    | 0.087783 |
|             | -0.68081        | 0.75201   | 0.087783 | 0.553560953 |             |           |          |
| ACTBL2      | ENSG00000169067 | 1.3544    | 0.0878   | 0.9239      | 0.17777     | 0.074784  |          |
|             | 0.47019         | 0.074784  | 0.47019  | 0.0878      | 0.553560953 |           |          |
| NA          | ENSG00000279268 | 0.6834    | 0.24718  | 1.3543      | 0.087814    | 0.15775   | 0.43733  |
|             | 0.68099         | 0.24794   | 0.087814 | 0.553560953 |             |           |          |
| SART3       | ENSG00000075856 | 1.3543    | 0.087819 | 0.82216     | 0.20549     | 0.47915   | 0.31592  |
|             | -0.03669        | 0.51463   | 0.087819 | 0.553560953 |             |           |          |
| NUMB        | ENSG00000133961 | 1.2087    | 0.11339  | 1.1104      | 0.13342     | 1.3399    | 0.090135 |
|             | 1.3542          | 0.087831  | 0.087831 | 0.553560953 |             |           |          |
| NA          | ENSG00000269130 | 1.3542    | 0.087835 | 1.3542      | 0.087835    | 1.3542    | 0.087835 |
|             | 1.3542          | 0.087835  | 0.087835 | 0.553560953 |             |           |          |
| NA          | ENSG00000257268 | 1.3541    | 0.087845 | 1.3541      | 0.087845    | 0.35765   | 0.3603   |
|             | 0.19548         | 0.42251   | 0.087845 | 0.553560953 |             |           |          |
| RPL5P16     | ENSG00000240411 | 1.3539    | 0.087882 | 0.52878     | 0.29848     | 0.52878   |          |
|             | 0.29848         | 0.52878   | 0.29848  | 0.087882    | 0.553722506 |           |          |
| NA          | ENSG00000258419 | 1.3537    | 0.087916 | 0.80617     | 0.21007     | 0.46462   | 0.3211   |
|             | 1.3537          | 0.087916  | 0.087916 | 0.55375     |             |           |          |
| BCAS2       | ENSG00000116752 | -0.34913  | 0.63651  | -1.0589     | 0.85517     | -0.34913  | 0.63651  |
|             | 1.3537          | 0.087922  | 0.087922 | 0.55375     |             |           |          |
| PEX5        | ENSG00000139197 | 1.0921    | 0.1374   | 1.3189      | 0.093597    | 1.3536    | 0.087925 |
|             | 0.84594         | 0.19879   | 0.087925 | 0.55375     |             |           |          |
| NA          | ENSG00000188002 | 0.0026266 | 0.49895  | 1.3534      | 0.087961    | 1.2592    | 0.10398  |
|             | 1.2626          | 0.10336   | 0.087961 | 0.55375     |             |           |          |
| GZMK        | ENSG00000113088 | 1.3534    | 0.087965 | 1.3534      | 0.087965    | 1.3534    | 0.087965 |
|             | 1.3534          | 0.087965  | 0.087965 | 0.55375     |             |           |          |
| LINC02441   | ENSG00000256643 | 1.0033    | 0.15786  | 1.3534      | 0.087971    | 0.16801   |          |
|             | 0.43329         | 0.16801   | 0.43329  | 0.087971    | 0.55375     |           |          |
| NA          | ENSG00000259143 | 1.3533    | 0.087983 | 1.3533      | 0.087983    | 1.3533    | 0.087983 |
|             | 1.3533          | 0.087983  | 0.087983 | 0.55375     |             |           |          |
| LINC01449   | ENSG00000224017 | -0.066661 | 0.52657  | -0.17195    | 0.56826     | 1.3533    |          |
|             | 0.087984        | 1.0468    | 0.14759  | 0.087984    | 0.55375     |           |          |
| NA          | ENSG00000221181 | 1.3532    | 0.087996 | -1.4339     | 0.9242      | -0.76271  | 0.77718  |
|             | -0.76271        | 0.77718   | 0.087996 | 0.55375     |             |           |          |
| NA          | ENSG00000253505 | 1.0824    | 0.13955  | 0.24722     | 0.40237     | 0.74199   | 0.22905  |
|             | 1.3532          | 0.088     | 0.088    | 0.55375     |             |           |          |
| NA          | ENSG00000225333 | -0.46903  | 0.68047  | 1.353       | 0.088033    | -0.9071   | 0.81782  |
|             | 0.079012        | 0.46851   | 0.088033 | 0.553886132 |             |           |          |
| NA          | ENSG00000237643 | 1.2317    | 0.10904  | -0.84233    | 0.8002      | 1.2317    | 0.10904  |
|             | 1.3527          | 0.088069  | 0.088069 | 0.554025517 |             |           |          |
| RN7SL583P   | ENSG00000239504 | 1.3526    | 0.088093 | 0.0026385   | 0.49895     | 1.3526    |          |
|             | 0.088093        | 1.3526    | 0.088093 | 0.088093    | 0.554025517 |           |          |
| NA          | ENSG00000223969 | 1.3525    | 0.088102 | 1.3525      | 0.088102    | 1.3525    | 0.088102 |
|             | 1.3525          | 0.088102  | 0.088102 | 0.554025517 |             |           |          |

|            |                 |           |          |             |             |             |          |
|------------|-----------------|-----------|----------|-------------|-------------|-------------|----------|
| STK24-AS1  | ENSG00000224418 | 0.4738    | 0.31782  | 0.4738      | 0.31782     | 0.4738      | 0.4738   |
|            |                 | 0.31782   | 1.3525   | 0.088105    | 0.088105    | 0.554025517 |          |
| ZNF581     | ENSG00000171425 | 1.3197    | 0.093474 | 1.3525      | 0.088112    | 0.54505     |          |
|            |                 | 0.29286   | 1.3525   | 0.088112    | 0.088112    | 0.554025517 |          |
| NA         | ENSG00000227920 | 1.3524    | 0.088128 | 1.3524      | 0.088128    | -0.80001    | 0.78815  |
|            |                 | 1         | 0.15865  | 0.088128    | 0.55405463  |             |          |
| NA         | ENSG00000255021 | 1.2262    | 0.11007  | 1.3519      | 0.0882      | 0.64389     | 0.25982  |
|            |                 | 1.1836    | 0.11829  | 0.0882      | 0.554179759 |             |          |
| RN7SL760P  | ENSG00000272469 | 1.3518    | 0.088213 | 1.3518      | 0.088213    | 1.3518      |          |
|            |                 | 0.088213  | 1.3518   | 0.088213    | 0.088213    | 0.554179759 |          |
| NA         | ENSG00000279810 | 1.3518    | 0.088221 | 0.84277     | 0.19968     | 0.84277     | 0.19968  |
|            |                 | 0.84277   | 0.19968  | 0.088221    | 0.554179759 |             |          |
| NA         | ENSG00000279946 | 1.3518    | 0.088227 | 1.3518      | 0.088227    | 1.3518      | 0.088227 |
|            |                 | 1.3518    | 0.088227 | 0.088227    | 0.554179759 |             |          |
| VEGFB      | ENSG00000173511 | 1.3517    | 0.088232 | 1.3517      | 0.088232    | 1.3517      | 0.088232 |
|            |                 | 1.3517    | 0.088232 | 0.088232    | 0.554179759 |             |          |
| LINC02327  | ENSG00000258038 | -0.050493 | 0.52014  | 0.2656      | 0.39527     | -0.26518    |          |
|            |                 | 0.60457   | 1.3517   | 0.088233    | 0.088233    | 0.554179759 |          |
| NA         | ENSG00000276984 | 1.3516    | 0.088251 | 1.1663      | 0.12175     | -0.18074    | 0.57171  |
|            |                 | -0.18074  | 0.57171  | 0.088251    | 0.554179759 |             |          |
| NA         | ENSG00000223841 | 1.3516    | 0.088255 | 1.3516      | 0.088255    | 1.3516      | 0.088255 |
|            |                 | 1.3516    | 0.088255 | 0.088255    | 0.554179759 |             |          |
| MOGAT3     | ENSG00000106384 | 1.3515    | 0.088264 | 0.03304     | 0.48682     | 0.82718     |          |
|            |                 | 0.20407   | 0.32436  | 0.37283     | 0.088264    | 0.554179759 |          |
| MCTP1      | ENSG00000175471 | 0.60445   | 0.27277  | -0.044827   | 0.51788     | 1.3515      | 0.088269 |
|            |                 | -1.6556   | 0.9511   | 0.088269    | 0.554179759 |             |          |
| NA         | ENSG00000255202 | 1.3515    | 0.088273 | 0.72353     | 0.23468     | 0.94336     | 0.17275  |
|            |                 | 0.94336   | 0.17275  | 0.088273    | 0.554179759 |             |          |
| NA         | ENSG00000271500 | 1.3513    | 0.088298 | 1.3513      | 0.088298    | 1.3513      | 0.088298 |
|            |                 | 1.3513    | 0.088298 | 0.088298    | 0.554237848 |             |          |
| STX18-AS1  | ENSG00000247708 | -0.056245 | 0.52243  | 1.3513      | 0.088305    | 1.2265      | 0.11     |
|            |                 | 0.23515   | 0.40705  | 0.088305    | 0.554237848 |             |          |
| NA         | ENSG00000253153 | 1.3511    | 0.088329 | 1.3511      | 0.088329    | 1.3511      | 0.088329 |
|            |                 | 1.3511    | 0.088329 | 0.088329    | 0.554317086 |             |          |
| NA         | ENSG00000243655 | 1.3509    | 0.088356 | 1.3509      | 0.088356    | 1.3509      | 0.088356 |
|            |                 | 1.3509    | 0.088356 | 0.088356    | 0.554372755 |             |          |
| MIR378D2HG | ENSG00000264448 | -0.22256  | 0.58806  | 1.3509      | 0.088362    | -0.22256    |          |
|            |                 | 0.58806   | -0.22256 | 0.58806     | 0.088362    | 0.554372755 |          |
| RAB5CP1    | ENSG00000213731 | 1.3509    | 0.088372 | 1.0384      | 0.14953     | 0.38046     |          |
|            |                 | 0.3518    | 1.1067   | 0.13422     | 0.088372    | 0.554372755 |          |
| NPM1P17    | ENSG00000242070 | -1.2937   | 0.90211  | 1.3506      | 0.088415    | -1.4121     |          |
|            |                 | 0.92104   | 1.3506   | 0.088415    | 0.088415    | 0.554396208 |          |
| UTP11      | ENSG00000183520 | 0.52773   | 0.29884  | 1.3505      | 0.088422    | -0.77009    | 0.77938  |
|            |                 | 1.251     | 0.10548  | 0.088422    | 0.554396208 |             |          |
| USP12      | ENSG00000152484 | 1.2157    | 0.11206  | 1.3505      | 0.088433    | 0.85149     | 0.19725  |
|            |                 | 1.2783    | 0.10057  | 0.088433    | 0.554396208 |             |          |
| NA         | ENSG00000258747 | 1.3505    | 0.088434 | 1.3505      | 0.088434    | 0.64125     | 0.26068  |
|            |                 | 1.3505    | 0.088434 | 0.088434    | 0.554396208 |             |          |
| NA         | ENSG00000237409 | 0.88335   | 0.18852  | 1.3505      | 0.088435    | 0.95374     | 0.17011  |
|            |                 | 0.66724   | 0.25231  | 0.088435    | 0.554396208 |             |          |
| NA         | ENSG00000254163 | 1.3504    | 0.088444 | -0.31911    | 0.62518     | 0.14115     | 0.44388  |
|            |                 | 0.64943   | 0.25803  | 0.088444    | 0.554396208 |             |          |
| MIR26A1    | ENSG00000199075 | 1.35      | 0.088502 | 1.35        | 0.088502    | 1.35        | 0.088502 |
|            |                 | 0.088502  | 0.088502 | 0.554600369 |             |             |          |
| NA         | ENSG00000272720 | 1.3499    | 0.088521 | 1.3499      | 0.088521    | 1.3499      | 0.088521 |
|            |                 | 1.3499    | 0.088521 | 0.088521    | 0.554600369 |             |          |
| CDC5L      | ENSG00000096401 | 0.26772   | 0.39446  | 0.63439     | 0.26291     | 1.3499      | 0.088522 |
|            |                 | 0.32816   | 0.3714   | 0.088522    | 0.554600369 |             |          |
| RNU6-514P  | ENSG00000206935 | 1.3498    | 0.088532 | 0.77829     | 0.2182      | 0.36138     |          |
|            |                 | 0.35891   | 1.3135   | 0.094501    | 0.088532    | 0.554600369 |          |
| NA         | ENSG00000281469 | 0.51215   | 0.30427  | 1.3498      | 0.08854     | 0.33566     | 0.36856  |
|            |                 | 0.91789   | 0.17934  | 0.08854     | 0.554600369 |             |          |

|            |                 |           |             |             |             |          |          |
|------------|-----------------|-----------|-------------|-------------|-------------|----------|----------|
| ATP6V0A1   | ENSG00000033627 | 1.3244    | 0.092689    | 1.0988      | 0.13592     | 1.3497   |          |
|            | 0.088559        | 0.91717   | 0.17953     | 0.088559    | 0.554600369 |          |          |
| NA         | ENSG00000200344 | 0.51562   | 0.30306     | 1.3496      | 0.088571    | 0.19422  | 0.423    |
|            | 0.19422         | 0.423     | 0.088571    | 0.554600369 |             |          |          |
| RPS2P18    | ENSG00000231735 | 0.90869   | 0.18176     | 1.3496      | 0.088572    | 1.3496   |          |
|            | 0.088572        | 0.86065   | 0.19472     | 0.088572    | 0.554600369 |          |          |
| PPP1CC     | ENSG00000186298 | 1.1293    | 0.12938     | 1.3496      | 0.088579    | 0.92549  |          |
|            | 0.17736         | 1.1354    | 0.12811     | 0.088579    | 0.554600369 |          |          |
| MYDGF      | ENSG00000074842 | -0.98001  | 0.83646     | -0.98001    | 0.83646     | -0.98001 | 0.83646  |
|            | 1.3495          | 0.088594  | 0.088594    | 0.554623024 |             |          |          |
| SUM01P4    | ENSG00000235555 | 1.3494    | 0.088607    | 1.3494      | 0.088607    | 1.3494   |          |
|            | 0.088607        | 1.3494    | 0.088607    | 0.088607    | 0.554632246 |          |          |
| RN7SL411P  | ENSG00000265327 | 1.3009    | 0.096654    | 1.3493      | 0.088627    | 1.3493   |          |
|            | 0.088627        | 1.3493    | 0.088627    | 0.088627    | 0.554632246 |          |          |
| LAMA4-AS1  | ENSG00000226440 | 0.038377  | 0.48469     | 1.3492      | 0.088638    | 0.24878  |          |
|            | 0.40176         | 1.0085    | 0.15661     | 0.088638    | 0.554632246 |          |          |
| GLT8D1     | ENSG00000016864 | 1.3492    | 0.088641    | 1.3492      | 0.088641    | 0.8088   |          |
|            | 0.20932         | 1.0546    | 0.1458      | 0.088641    | 0.554632246 |          |          |
| RPS20P32   | ENSG00000218198 | 1.3489    | 0.08869     | 0.56021     | 0.28767     | 0.56021  |          |
|            | 0.28767         | -0.072236 | 0.52879     | 0.08869     | 0.554836754 |          |          |
| TIPARP-AS1 | ENSG00000243926 | 0.11776   | 0.45313     | 1.3488      | 0.088705    | -0.1487  |          |
|            | 0.55911         | -0.11421  | 0.54547     | 0.088705    | 0.554836754 |          |          |
| NA         | ENSG00000272779 | 0.18606   | 0.4262      | 1.0026      | 0.15802     | -0.92138 | 0.82157  |
|            | 1.3487          | 0.088714  | 0.088714    | 0.554836754 |             |          |          |
| OXSM       | ENSG00000151093 | 1.3486    | 0.088725    | 1.3486      | 0.088725    | 1.3486   | 0.088725 |
|            | 1.3486          | 0.088725  | 0.088725    | 0.554836754 |             |          |          |
| CACHD1     | ENSG00000158966 | 0.51837   | 0.3021      | 1.0842      | 0.13914     | 1.3486   |          |
|            | 0.088732        | 0.33091   | 0.37036     | 0.088732    | 0.554836754 |          |          |
| RAD17P2    | ENSG00000223724 | 0.17197   | 0.43173     | 0.49308     | 0.31098     | 1.3485   |          |
|            | 0.088742        | 0.65521   | 0.25616     | 0.088742    | 0.554836754 |          |          |
| GBP6       | ENSG00000183347 | 0.55949   | 0.28791     | 0.6603      | 0.25453     | 0.54881  | 0.29157  |
|            | 1.3484          | 0.08876   | 0.08876     | 0.554878101 |             |          |          |
| RN7SL23P   | ENSG00000240823 | -1.244    | 0.89325     | 1.3483      | 0.088787    | 0.60137  |          |
|            | 0.2738          | 0.60137   | 0.2738      | 0.088787    | 0.554975694 |          |          |
| NA         | ENSG00000253553 | 0.64173   | 0.26052     | -0.83694    | 0.79869     | 1.348    | 0.088824 |
|            | 0.7974          | 0.21261   | 0.088824    | 0.555054769 |             |          |          |
| NA         | ENSG00000255449 | 1.348     | 0.088825    | 1.2199      | 0.11125     | 1.348    | 0.088825 |
|            | 0.088825        | 0.088825  | 0.555054769 |             |             |          |          |
| NA         | ENSG00000257124 | 1.3478    | 0.088867    | -0.32835    | 0.62868     | -0.32835 | 0.62868  |
|            | -0.32835        | 0.62868   | 0.088867    | 0.555054769 |             |          |          |
| OPTN       | ENSG00000123240 | 0.84574   | 0.19885     | 1.3477      | 0.088878    | -1.1136  | 0.86728  |
|            | -0.1129         | 0.54495   | 0.088878    | 0.555054769 |             |          |          |
| FDPS       | ENSG00000160752 | 0.96441   | 0.16742     | 0.34516     | 0.36499     | 0.37092  | 0.35535  |
|            | 1.3476          | 0.088889  | 0.088889    | 0.555054769 |             |          |          |
| KCNMB2     | ENSG00000197584 | 1.3476    | 0.088891    | 1.1032      | 0.13497     | 0.57722  |          |
|            | 0.2819          | 0.4309    | 0.33327     | 0.088891    | 0.555054769 |          |          |
| NA         | ENSG00000229642 | 1.3476    | 0.088897    | 0.5529      | 0.29017     | 1.3476   | 0.088897 |
|            | 1.3476          | 0.088897  | 0.088897    | 0.555054769 |             |          |          |
| RFPL2      | ENSG00000128253 | 0.2842    | 0.38813     | 1.3475      | 0.088911    | -1.1149  | 0.86755  |
|            | -0.18746        | 0.57435   | 0.088911    | 0.555054769 |             |          |          |
| CD276      | ENSG00000103855 | 1.1198    | 0.13139     | 0.80955     | 0.2091      | 1.3471   | 0.088969 |
|            | -0.76467        | 0.77777   | 0.088969    | 0.555054769 |             |          |          |
| SLC5A11    | ENSG00000158865 | 1.2169    | 0.11181     | 1.2169      | 0.11181     | 0.31915  |          |
|            | 0.37481         | 1.3471    | 0.088972    | 0.088972    | 0.555054769 |          |          |
| NA         | ENSG00000270066 | 1.3471    | 0.088982    | 1.3471      | 0.088982    | 1.3471   | 0.088982 |
|            | 1.3471          | 0.088982  | 0.088982    | 0.555054769 |             |          |          |
| LINC01504  | ENSG00000225434 | 0.21782   | 0.41378     | 0.46172     | 0.32214     | 1.3468   |          |
|            | 0.089016        | 0.17255   | 0.4315      | 0.089016    | 0.555054769 |          |          |
| NA         | ENSG00000232363 | 1.3468    | 0.089016    | -0.096804   | 0.53856     | 1.3468   | 0.089016 |
|            | -0.91037        | 0.81869   | 0.089016    | 0.555054769 |             |          |          |
| MTCO2P5    | ENSG00000231766 | 1.3468    | 0.089018    | 1.3468      | 0.089018    | 1.3468   |          |
|            | 0.089018        | 1.3468    | 0.089018    | 0.089018    | 0.555054769 |          |          |

|             |                 |          |          |             |             |             |          |
|-------------|-----------------|----------|----------|-------------|-------------|-------------|----------|
| NA          | ENSG00000266050 | 0.95703  | 0.16928  | 1.3468      | 0.089029    | -0.44125    | 0.67048  |
|             |                 | 0.41195  | 0.34019  | 0.089029    | 0.555054769 |             |          |
| TMEM151A    | ENSG00000179292 | -0.24463 | 0.59663  | -0.19199    | 0.57612     | 0.60377     | 0.273    |
|             |                 | 1.3464   | 0.08909  | 0.08909     | 0.555054769 |             |          |
| IGHV1OR15-9 | ENSG00000188403 | 1.0688   | 0.14258  | 1.0764      | 0.14088     | 0.80142     |          |
|             |                 | 0.21145  | 1.3463   | 0.089096    | 0.089096    | 0.555054769 |          |
| PDX1        | ENSG00000139515 | -0.31652 | 0.62419  | -0.62132    | 0.73281     | -0.31652    | 0.62419  |
|             |                 | 1.3463   | 0.089097 | 0.089097    | 0.555054769 |             |          |
| NA          | ENSG00000224618 | 1.3463   | 0.089104 | -0.54449    | 0.70695     | 1.3463      | 0.089104 |
|             |                 | 1.3463   | 0.089104 | 0.089104    | 0.555054769 |             |          |
| GPR150      | ENSG00000178015 | -0.14095 | 0.55604  | 1.3463      | 0.089106    | -0.14095    |          |
|             |                 | 0.55604  | -0.14095 | 0.55604     | 0.089106    | 0.555054769 |          |
| ARHGEF7-AS1 | ENSG00000227352 | -0.25828 | 0.60191  | -0.25828    | 0.60191     | 1.0927      |          |
|             |                 | 0.13727  | 1.3462   | 0.08912     | 0.08912     | 0.555054769 |          |
| NA          | ENSG00000258878 | 0.90201  | 0.18353  | 1.3462      | 0.089126    | 0.90201     | 0.18353  |
|             |                 | 0.90201  | 0.18353  | 0.089126    | 0.555054769 |             |          |
| ATP1A3      | ENSG00000105409 | 1.2678   | 0.10243  | 0.13306     | 0.44707     | -0.48309    |          |
|             |                 | 0.68548  | 1.3461   | 0.08913     | 0.08913     | 0.555054769 |          |
| SIPA1L2     | ENSG00000116991 | 1.3461   | 0.089135 | -0.74797    | 0.77276     | -0.75776    |          |
|             |                 | 0.7757   | 0.030317 | 0.48791     | 0.089135    | 0.555054769 |          |
| ORAI2       | ENSG00000160991 | 1.3461   | 0.089139 | 0.88951     | 0.18687     | 1.3461      | 0.089139 |
|             |                 | 0.26176  | 0.39675  | 0.089139    | 0.555054769 |             |          |
| NA          | ENSG00000261129 | 0.70902  | 0.23916  | 1.3459      | 0.089169    | 1.3459      | 0.089169 |
|             |                 | 1.3459   | 0.089169 | 0.089169    | 0.555054769 |             |          |
| TEX45       | ENSG00000198723 | 0.76167  | 0.22313  | 0.76167     | 0.22313     | 0.76167     | 0.22313  |
|             |                 | 1.3459   | 0.089172 | 0.089172    | 0.555054769 |             |          |
| COPG2       | ENSG00000158623 | -1.8064  | 0.96458  | -1.0157     | 0.84511     | 0.099989    | 0.46018  |
|             |                 | 1.3457   | 0.089204 | 0.089204    | 0.555054769 |             |          |
| ROPN1B      | ENSG00000114547 | 1.3456   | 0.08921  | -0.013993   | 0.50558     | 0.5633      |          |
|             |                 | 0.28661  | -0.10411 | 0.54146     | 0.08921     | 0.555054769 |          |
| HNRNPA1P63  | ENSG00000227453 | 1.3456   | 0.089219 | 1.3456      | 0.089219    | 1.3456      |          |
|             |                 | 0.089219 | 1.3456   | 0.089219    | 0.089219    | 0.555054769 |          |
| MTCO1P28    | ENSG00000262118 | 1.3455   | 0.089225 | 1.3455      | 0.089225    | 1.3455      |          |
|             |                 | 0.089225 | 1.3455   | 0.089225    | 0.089225    | 0.555054769 |          |
| NA          | ENSG00000244281 | 1.3455   | 0.089228 | 1.3455      | 0.089228    | 1.3455      | 0.089228 |
|             |                 | 1.3455   | 0.089228 | 0.089228    | 0.555054769 |             |          |
| UACA        | ENSG00000137831 | -0.75911 | 0.77611  | -1.4255     | 0.92299     | -1.351      | 0.91165  |
|             |                 | 1.3455   | 0.089236 | 0.089236    | 0.555054769 |             |          |
| ZDHHC11B    | ENSG00000206077 | 0.77665  | 0.21868  | -0.012655   | 0.50505     | -0.20827    |          |
|             |                 | 0.58249  | 1.3454   | 0.08924     | 0.08924     | 0.555054769 |          |
| MAPRE1P3    | ENSG00000233204 | 1.0666   | 0.14308  | 1.2455      | 0.10647     | 1.3454      |          |
|             |                 | 0.089241 | 1.241    | 0.10729     | 0.089241    | 0.555054769 |          |
| NA          | ENSG00000249593 | 0.8677   | 0.19278  | 1.3453      | 0.089257    | 1.2708      | 0.1019   |
|             |                 | 1.2708   | 0.1019   | 0.089257    | 0.555054769 |             |          |
| FGFR1OP2P1  | ENSG00000230256 | -0.17386 | 0.56901  | -1.877      | 0.96974     | 1.3452      |          |
|             |                 | 0.089279 | 1.3362   | 0.090738    | 0.089279    | 0.555054769 |          |
| GRM7-AS3    | ENSG00000226258 | 1.3451   | 0.089295 | 1.0186      | 0.1542      | 0.19375     |          |
|             |                 | 0.42318  | -0.35482 | 0.63864     | 0.089295    | 0.555054769 |          |
| ANKRD9      | ENSG00000156381 | 0.61811  | 0.26825  | 0.97392     | 0.16505     | 1.3451      |          |
|             |                 | 0.089298 | 1.2352   | 0.10837     | 0.089298    | 0.555054769 |          |
| SEPSECS     | ENSG00000109618 | 0.89796  | 0.1846   | 1.3451      | 0.089303    | 0.56776     |          |
|             |                 | 0.2851   | -0.50811 | 0.69431     | 0.089303    | 0.555054769 |          |
| OR10J1      | ENSG00000196184 | 0.27228  | 0.39271  | 0.27228     | 0.39271     | 0.27228     |          |
|             |                 | 0.39271  | 1.3451   | 0.089303    | 0.089303    | 0.555054769 |          |
| CSDE1       | ENSG00000009307 | -0.24156 | 0.59544  | 1.0911      | 0.13761     | 1.345       | 0.089305 |
|             |                 | 0.089305 | 0.089305 | 0.555054769 |             |             | 1.345    |
| CDH4        | ENSG00000179242 | 1.345    | 0.089307 | 0.71847     | 0.23623     | 0.61833     | 0.26818  |
|             |                 | 1.0736   | 0.14149  | 0.089307    | 0.555054769 |             |          |
| PUF60       | ENSG00000179950 | -0.45037 | 0.67378  | 1.345       | 0.08931     | -0.30472    | 0.61971  |
|             |                 | -0.51894 | 0.6981   | 0.08931     | 0.555054769 |             |          |
| RPL21P75    | ENSG00000213860 | 1.345    | 0.089319 | 1.345       | 0.089319    | 1.345       | 0.089319 |
|             |                 | 0.089319 | 0.089319 | 0.555054769 |             |             |          |

|              |                 |          |          |             |             |             |          |
|--------------|-----------------|----------|----------|-------------|-------------|-------------|----------|
| NA           | ENSG00000269950 | 1.3449   | 0.089328 | 1.3449      | 0.089328    | 0.87302     | 0.19133  |
|              |                 | 1.3449   | 0.089328 | 0.089328    | 0.555054769 |             |          |
| NA           | ENSG00000253736 | 1.0044   | 0.15758  | 1.3449      | 0.089335    | 0.98834     | 0.16149  |
|              |                 | 0.98834  | 0.16149  | 0.089335    | 0.555054769 |             |          |
| CIC          | ENSG00000079432 | 0.8079   | 0.20957  | 1.2993      | 0.096924    | 1.0904      | 0.13776  |
|              |                 | 1.3447   | 0.089359 | 0.089359    | 0.555124458 |             |          |
| NA           | ENSG00000256001 | 0.92256  | 0.17812  | 0.91789     | 0.17934     | 0.89676     | 0.18492  |
|              |                 | 1.3447   | 0.089369 | 0.089369    | 0.555124458 |             |          |
| CBLN4        | ENSG00000054803 | -0.29011 | 0.61413  | -0.10509    | 0.54185     | 1.344       | 0.089471 |
|              |                 | -0.30923 | 0.62143  | 0.089471    | 0.555415269 |             |          |
| RNU1-75P     | ENSG00000194297 | 1.344    | 0.089475 | 1.344       | 0.089475    | 1.344       | 0.089475 |
|              |                 | 0.089475 | 0.089475 | 0.555415269 |             |             |          |
| TMEM132D-AS2 | ENSG00000256699 | 1.3439   | 0.089491 | 1.3439      | 0.089491    | 1.3439      | 0.089491 |
|              |                 | 0.089491 | 1.3439   | 0.089491    | 0.089491    | 0.555415269 |          |
| TM9SF2       | ENSG00000125304 | 0.41011  | 0.34086  | 1.3439      | 0.089493    | 0.41011     |          |
|              |                 | 0.34086  | 0.8302   | 0.20321     | 0.089493    | 0.555415269 |          |
| NA           | ENSG00000279846 | 1.3439   | 0.089497 | 1.3439      | 0.089497    | 1.3439      | 0.089497 |
|              |                 | 1.3439   | 0.089497 | 0.089497    | 0.555415269 |             |          |
| NA           | ENSG00000254877 | 1.0091   | 0.15646  | 0.075294    | 0.46999     | 1.3438      | 0.089504 |
|              |                 | 1.3438   | 0.089504 | 0.089504    | 0.555415269 |             |          |
| NHEJ1        | ENSG00000187736 | 0.012538 | 0.495    | 0.27029     | 0.39347     | 0.31788     | 0.37529  |
|              |                 | 1.3438   | 0.089507 | 0.089507    | 0.555415269 |             |          |
| LINC00920    | ENSG00000246898 | 1.3438   | 0.089507 | -0.57079    | 0.71593     | 1.3438      |          |
|              |                 | 0.089507 | 1.3438   | 0.089507    | 0.089507    | 0.555415269 |          |
| TSGA13       | ENSG00000213265 | -1.0214  | 0.84646  | -0.35554    | 0.63891     | 1.3437      |          |
|              |                 | 0.089529 | -0.73778 | 0.76967     | 0.089529    | 0.55548105  |          |
| MIR1255A     | ENSG00000221265 | 0.13507  | 0.44628  | -0.7059     | 0.75987     | -0.1618     |          |
|              |                 | 0.56427  | 1.3435   | 0.089561    | 0.089561    | 0.555608852 |          |
| NA           | ENSG00000237686 | 0.57828  | 0.28154  | 1.3433      | 0.089586    | 0.011374    | 0.49546  |
|              |                 | 0.011374 | 0.49546  | 0.089586    | 0.5556932   |             |          |
| ZNF771       | ENSG00000179965 | 0.61958  | 0.26777  | 1.1704      | 0.12091     | 1.3431      |          |
|              |                 | 0.089614 | -0.39301 | 0.65285     | 0.089614    | 0.555796133 |          |
| NA           | ENSG00000278902 | 0.91635  | 0.17974  | 1.3428      | 0.089668    | 1.3428      | 0.089668 |
|              |                 | -1.061   | 0.85565  | 0.089668    | 0.556060275 |             |          |
| NPIPBP1      | ENSG00000257513 | -1.4109  | 0.92087  | 0.63617     | 0.26233     | 1.3427      |          |
|              |                 | 0.089692 | 0.415    | 0.33907     | 0.089692    | 0.556138333 |          |
| NA           | ENSG00000280335 | -0.33699 | 0.63194  | -0.093488   | 0.53724     | -0.33699    | 0.63194  |
|              |                 | 1.3421   | 0.089785 | 0.089785    | 0.556210549 |             |          |
| PRR35        | ENSG00000161992 | -0.72405 | 0.76548  | 1.3421      | 0.089787    | -0.56467    | 0.71385  |
|              |                 | -0.56467 | 0.71385  | 0.089787    | 0.556210549 |             |          |
| P4HA2        | ENSG00000072682 | 1.3421   | 0.089788 | -1.2289     | 0.89045     | -0.2315     | 0.59154  |
|              |                 | -1.9511  | 0.97448  | 0.089788    | 0.556210549 |             |          |
| NA           | ENSG00000263293 | 1.3421   | 0.089789 | 1.2019      | 0.1147      | 1.3421      | 0.089789 |
|              |                 | 1.332    | 0.091433 | 0.089789    | 0.556210549 |             |          |
| SOCS2        | ENSG00000120833 | 0.21657  | 0.41427  | 0.21657     | 0.41427     | -0.026991   | 0.51077  |
|              |                 | 1.342    | 0.089797 | 0.089797    | 0.556210549 |             |          |
| NA           | ENSG00000224077 | 1.0999   | 0.13569  | 1.1003      | 0.1356      | 1.2235      | 0.11057  |
|              |                 | 1.3419   | 0.089819 | 0.089819    | 0.556210549 |             |          |
| GPR180       | ENSG00000152749 | 0.41871  | 0.33771  | 0.36646     | 0.35701     | -0.22903    |          |
|              |                 | 0.59058  | 1.3418   | 0.089828    | 0.089828    | 0.556210549 |          |
| C9orf43      | ENSG00000157653 | 0.98443  | 0.16245  | 1.1835      | 0.1183      | 1.3418      |          |
|              |                 | 0.089831 | 1.3418   | 0.089831    | 0.089831    | 0.556210549 |          |
| LINC01657    | ENSG00000224718 | 1.3417   | 0.089843 | 1.3417      | 0.089843    | 1.3417      |          |
|              |                 | 0.089843 | 1.3417   | 0.089843    | 0.089843    | 0.556210549 |          |
| SLC22A8      | ENSG00000149452 | 1.3417   | 0.089853 | -0.34794    | 0.63606     | -0.2936     |          |
|              |                 | 0.61547  | 0.00764  | 0.49695     | 0.089853    | 0.556210549 |          |
| NA           | ENSG00000254990 | -0.57803 | 0.71838  | 0.021716    | 0.49134     | 1.3416      | 0.08987  |
|              |                 | 0.62141  | 0.26716  | 0.08987     | 0.556210549 |             |          |
| NA           | ENSG00000237742 | -0.62135 | 0.73282  | -1.3576     | 0.9127      | 0.30888     | 0.37871  |
|              |                 | 1.3415   | 0.089873 | 0.089873    | 0.556210549 |             |          |
| PHACTR3      | ENSG00000087495 | 1.039    | 0.1494   | 1.2784      | 0.10056     | 1.3414      | 0.089887 |
|              |                 | 1.0239   | 0.15294  | 0.089887    | 0.556210549 |             |          |

|           |                 |           |           |             |             |             |          |
|-----------|-----------------|-----------|-----------|-------------|-------------|-------------|----------|
| NA        | ENSG00000234080 | 0.79495   | 0.21332   | 1.3414      | 0.089892    | 0.36429     | 0.35782  |
|           |                 | 0.36429   | 0.35782   | 0.089892    | 0.556210549 |             |          |
| NA        | ENSG00000265380 | 1.3413    | 0.089907  | 1.3413      | 0.089907    | 1.3413      | 0.089907 |
|           |                 | -0.066496 | 0.52651   | 0.089907    | 0.556210549 |             |          |
| BCAS4     | ENSG00000124243 | 0.65729   | 0.2555    | 0.29371     | 0.38449     | 1.25        | 0.10566  |
|           |                 | 1.3412    | 0.089928  | 0.089928    | 0.556210549 |             |          |
| MIR378A   | ENSG00000199047 | 0.92467   | 0.17757   | 0.92467     | 0.17757     | 0.92467     |          |
|           |                 | 0.17757   | 1.3412    | 0.08993     | 0.08993     | 0.556210549 |          |
| CFAP61    | ENSG00000089101 | 1.0521    | 0.14637   | 1.3411      | 0.089938    | 0.58106     |          |
|           |                 | 0.2806    | 0.5595    | 0.28791     | 0.089938    | 0.556210549 |          |
| LINC00265 | ENSG00000188185 | 1.0651    | 0.14342   | 1.3411      | 0.089939    | 0.52965     |          |
|           |                 | 0.29818   | -0.091148 | 0.53631     | 0.089939    | 0.556210549 |          |
| PLA2G3    | ENSG00000100078 | 1.341     | 0.089953  | -0.10291    | 0.54098     | -0.41938    | 0.66253  |
|           |                 | 0.4034    | 0.34333   | 0.089953    | 0.556210549 |             |          |
| SS18L2    | ENSG00000008324 | 1.341     | 0.089954  | 1.341       | 0.089954    | 0.92361     | 0.17784  |
|           |                 | 0.63966   | 0.2612    | 0.089954    | 0.556210549 |             |          |
| RPL35AP32 | ENSG00000243404 | 1.3409    | 0.089982  | 1.3409      | 0.089982    | 1.3409      |          |
|           |                 | 0.089982  | 1.3409    | 0.089982    | 0.089982    | 0.556210549 |          |
| GALR1     | ENSG00000166573 | 1.3409    | 0.089983  | 1.0449      | 0.14803     | 1.3409      | 0.089983 |
|           |                 | 1.3409    | 0.089983  | 0.089983    | 0.556210549 |             |          |
| NA        | ENSG00000265614 | -0.75704  | 0.77549   | 1.3408      | 0.089985    | -0.75704    | 0.77549  |
|           |                 | -1.1927   | 0.88351   | 0.089985    | 0.556210549 |             |          |
| NA        | ENSG00000224649 | 1.3408    | 0.089989  | 1.3408      | 0.089989    | 1.3408      | 0.089989 |
|           |                 | 1.3408    | 0.089989  | 0.089989    | 0.556210549 |             |          |
| NA        | ENSG00000214248 | 1.3407    | 0.090012  | 1.3407      | 0.090012    | 1.3407      | 0.090012 |
|           |                 | 1.3407    | 0.090012  | 0.090012    | 0.556282151 |             |          |
| NKAIN1    | ENSG00000084628 | 0.33491   | 0.36885   | 0.73201     | 0.23208     | 0.72969     |          |
|           |                 | 0.23279   | 1.3403    | 0.090079    | 0.090079    | 0.556506345 |          |
| QRICH1    | ENSG00000198218 | 0.89661   | 0.18496   | 1.3403      | 0.090082    | 0.33439     |          |
|           |                 | 0.36904   | -0.061686 | 0.52459     | 0.090082    | 0.556506345 |          |
| ABCB11    | ENSG00000073734 | 0.1763    | 0.43003   | 0.63465     | 0.26283     | 1.3401      |          |
|           |                 | 0.090101  | 1.3401    | 0.090101    | 0.090101    | 0.556506345 |          |
| ZC3H11A   | ENSG00000058673 | 0.80557   | 0.21025   | 0.31868     | 0.37498     | 1.3401      |          |
|           |                 | 0.090102  | 0.39285   | 0.34721     | 0.090102    | 0.556506345 |          |
| RPS12P31  | ENSG00000242325 | 1.34      | 0.090118  | 1.34        | 0.090118    | 1.34        | 0.090118 |
|           |                 | 0.090118  | 0.090118  | 0.556506345 |             |             |          |
| SNORA59B  | ENSG00000266079 | 1.34      | 0.090118  | 1.34        | 0.090118    | 1.34        | 0.090118 |
|           |                 | 0.090118  | 0.090118  | 0.556506345 |             |             |          |
| C1orf122  | ENSG00000197982 | 1.3399    | 0.09014   | 1.3399      | 0.09014     | 1.3399      |          |
|           |                 | 0.09014   | 1.3399    | 0.09014     | 0.09014     | 0.556506345 |          |
| NA        | ENSG00000250771 | 1.0161    | 0.15478   | 0.89443     | 0.18555     | 1.3397      | 0.090165 |
|           |                 | 0.89443   | 0.18555   | 0.090165    | 0.556506345 |             |          |
| SURF1     | ENSG00000148290 | 0.25549   | 0.39917   | -0.06926    | 0.52761     | 1.3397      | 0.090169 |
|           |                 | 0.11615   | 0.45377   | 0.090169    | 0.556506345 |             |          |
| LPXN      | ENSG00000110031 | 1.0788    | 0.14034   | 0.19671     | 0.42203     | 1.3397      | 0.090176 |
|           |                 | 0.80901   | 0.20925   | 0.090176    | 0.556506345 |             |          |
| NA        | ENSG00000225297 | 1.3397    | 0.090179  | 1.3397      | 0.090179    | 1.3397      | 0.090179 |
|           |                 | 1.3397    | 0.090179  | 0.090179    | 0.556506345 |             |          |
| MTRNR2L12 | ENSG00000269028 | 0.33948   | 0.36713   | 1.3396      | 0.090192    | -0.14627    |          |
|           |                 | 0.55814   | -0.14627  | 0.55814     | 0.090192    | 0.556506345 |          |
| LINC01797 | ENSG00000237179 | -0.99226  | 0.83947   | 1.3395      | 0.090203    | -0.99226    |          |
|           |                 | 0.83947   | -0.99226  | 0.83947     | 0.090203    | 0.556506345 |          |
| NA        | ENSG00000225146 | 1.0817    | 0.13969   | 1.3394      | 0.090226    | 1.0195      | 0.15399  |
|           |                 | 1.3394    | 0.090226  | 0.090226    | 0.556506345 |             |          |
| MIR8485   | ENSG00000216191 | -0.57986  | 0.719     | 0.89542     | 0.18528     | 1.3394      | 0.090228 |
|           |                 | 0.89542   | 0.18528   | 0.090228    | 0.556506345 |             |          |
| MIR4644   | ENSG00000266245 | 1.3393    | 0.090231  | 1.3393      | 0.090231    | 1.3393      |          |
|           |                 | 0.090231  | 1.3393    | 0.090231    | 0.090231    | 0.556506345 |          |
| NA        | ENSG00000251574 | -0.41696  | 0.66165   | 0.81578     | 0.20731     | 0.09407     | 0.46253  |
|           |                 | 1.3392    | 0.090245  | 0.090245    | 0.556522254 |             |          |
| SPP1      | ENSG00000118785 | 1.339     | 0.090287  | 0.3021      | 0.38129     | -0.17417    | 0.56914  |
|           |                 | 0.28093   | 0.38938   | 0.090287    | 0.556700534 |             |          |

|           |                 |           |             |             |             |           |          |         |
|-----------|-----------------|-----------|-------------|-------------|-------------|-----------|----------|---------|
| MIR4744   | ENSG00000263849 | 1.3389    | 0.090307    | 1.3389      | 0.090307    | 1.3389    | 0.090307 | 1.3389  |
|           | 0.090307        | 1.3389    | 0.090307    | 0.090307    | 0.556700534 |           |          |         |
| Clorf52   | ENSG00000162642 | -0.27067  | 0.60668     | 0.87774     | 0.19004     | -0.068923 |          |         |
|           | 0.52747         | 1.3388    | 0.090315    | 0.090315    | 0.556700534 |           |          |         |
| LINC00865 | ENSG00000232229 | 0.40484   | 0.3428      | 1.1868      | 0.11765     | 0.61593   |          |         |
|           | 0.26897         | 1.3388    | 0.090324    | 0.090324    | 0.556700534 |           |          |         |
| HOXB3     | ENSG00000120093 | 0.77841   | 0.21816     | 0.99457     | 0.15997     | 1.3387    | 0.090334 |         |
|           | 1.3387          | 0.090334  | 0.090334    | 0.556700534 |             |           |          |         |
| LMNA      | ENSG00000160789 | 0.33285   | 0.36962     | 1.068       | 0.14277     | 1.3385    | 0.090374 |         |
|           | 0.90002         | 0.18406   | 0.090374    | 0.556700534 |             |           |          |         |
| GALC      | ENSG00000054983 | 1.14      | 0.12714     | 1.3383      | 0.090399    | 0.97885   | 0.16383  |         |
|           | 1.1327          | 0.12866   | 0.090399    | 0.556700534 |             |           |          |         |
| NA        | ENSG00000265425 | -0.3587   | 0.64009     | 0.45422     | 0.32484     | 0.87396   | 0.19107  |         |
|           | 1.3383          | 0.090401  | 0.090401    | 0.556700534 |             |           |          |         |
| NA        | ENSG00000258108 | -1.113    | 0.86714     | -0.31369    | 0.62312     | 1.3383    | 0.090403 |         |
|           | 0.59917         | 0.27453   | 0.090403    | 0.556700534 |             |           |          |         |
| EFNA5     | ENSG00000184349 | 1.3383    | 0.090406    | 0.94762     | 0.17166     | 1.3383    | 0.090406 |         |
|           | 1.3383          | 0.090406  | 0.090406    | 0.556700534 |             |           |          |         |
| RNA5SP476 | ENSG00000252422 | 1.3382    | 0.090408    | 1.3382      | 0.090408    | 1.3382    |          |         |
|           | 0.090408        | 1.3382    | 0.090408    | 0.090408    | 0.556700534 |           |          |         |
| NA        | ENSG00000235208 | 1.3382    | 0.090411    | 1.3382      | 0.090411    | 1.3382    | 0.090411 |         |
|           | 1.3382          | 0.090411  | 0.090411    | 0.556700534 |             |           |          |         |
| PSMC3IP   | ENSG00000131470 | 1.3381    | 0.090437    | 1.3381      | 0.090437    | 1.3381    |          |         |
|           | 0.090437        | 1.3381    | 0.090437    | 0.090437    | 0.556769183 |           |          |         |
| FAM230F   | ENSG00000276095 | 1.338     | 0.090445    | -0.87986    | 0.81053     | -0.074974 | 0.52988  |         |
|           | 0.15988         | 0.43649   | 0.090445    | 0.556769183 |             |           |          |         |
| NUP43     | ENSG00000120253 | 1.3378    | 0.090487    | 1.0598      | 0.14462     | 0.27431   | 0.39192  |         |
|           | 0.911           | 0.18115   | 0.090487    | 0.556927472 |             |           |          |         |
| RPL5P32   | ENSG00000228992 | -0.054819 | 0.52186     | -1.2138     | 0.88758     | 1.3377    |          |         |
|           | 0.090502        | -0.054819 | 0.52186     | 0.090502    | 0.556927472 |           |          |         |
| NA        | ENSG00000229582 | 1.3376    | 0.090505    | -0.37574    | 0.64645     | -0.12282  | 0.54888  |         |
|           | -0.12282        | 0.54888   | 0.090505    | 0.556927472 |             |           |          |         |
| FKBP1A    | ENSG00000088832 | 1.3374    | 0.090553    | -0.83378    | 0.7978      | -0.94991  |          |         |
|           | 0.82892         | -0.65504  | 0.74378     | 0.090553    | 0.557152486 |           |          |         |
| COX6A1    | ENSG00000111775 | 0.50764   | 0.30585     | 1.3372      | 0.090573    | 0.09103   |          |         |
|           | 0.46373         | -0.26732  | 0.60539     | 0.090573    | 0.557184061 |           |          |         |
| NA        | ENSG00000248161 | 1.1867    | 0.11768     | 1.2411      | 0.10729     | 1.1024    | 0.13514  |         |
|           | 1.3372          | 0.090581  | 0.090581    | 0.557184061 |             |           |          |         |
| WBP2P1    | ENSG00000229248 | 1.3371    | 0.090601    | 0.9619      | 0.16805     | 1.3371    |          |         |
|           | 0.090601        | 1.3371    | 0.090601    | 0.090601    | 0.55720332  |           |          |         |
| PCMT1     | ENSG00000120265 | 1.337     | 0.090607    | 1.2769      | 0.10082     | 1.337     | 0.090607 | 0.31958 |
|           | 0.37464         | 0.090607  | 0.55720332  |             |             |           |          |         |
| NA        | ENSG00000279199 | 1.3366    | 0.09067     | 1.3366      | 0.09067     | 1.3366    | 0.09067  |         |
|           | 1.3366          | 0.09067   | 0.09067     | 0.557520391 |             |           |          |         |
| ALDH7A1   | ENSG00000164904 | 1.3364    | 0.090709    | -0.47006    | 0.68084     | 0.50781   |          |         |
|           | 0.30579         | 0.09784   | 0.46103     | 0.090709    | 0.557536296 |           |          |         |
| NA        | ENSG00000251187 | 1.2023    | 0.11462     | 1.3364      | 0.090711    | 0.88348   | 0.18849  |         |
|           | 0.043946        | 0.48247   | 0.090711    | 0.557536296 |             |           |          |         |
| DRG1      | ENSG00000185721 | 1.3363    | 0.090723    | 1.0426      | 0.14856     | 1.042     | 0.1487   |         |
|           | 1.3013          | 0.096573  | 0.090723    | 0.557536296 |             |           |          |         |
| LINC01805 | ENSG00000223863 | 0.79437   | 0.21349     | 1.3363      | 0.090732    | 0.90916   |          |         |
|           | 0.18163         | 1.135     | 0.12819     | 0.090732    | 0.557536296 |           |          |         |
| IRX2      | ENSG00000170561 | 0.10948   | 0.45641     | 1.3361      | 0.090751    | 0.28284   | 0.38865  |         |
|           | -0.19312        | 0.57657   | 0.090751    | 0.557536296 |             |           |          |         |
| CAPS2     | ENSG00000180881 | 0.88196   | 0.1889      | 1.0712      | 0.14204     | 0.88206   | 0.18887  |         |
|           | 1.3361          | 0.090755  | 0.090755    | 0.557536296 |             |           |          |         |
| RBM48P1   | ENSG00000223620 | 1.299     | 0.096974    | 1.3361      | 0.090758    | -1.0779   | 0.85945  |         |
|           | -0.72461        | 0.76565   | 0.090758    | 0.557536296 |             |           |          |         |
| NA        | ENSG00000212229 | 0.47721   | 0.3166      | 1.336       | 0.090779    | 1.336     | 0.090779 | 1.336   |
|           | 0.090779        | 0.090779  | 0.557536296 |             |             |           |          |         |
| RLIMP2    | ENSG00000237278 | 1.336     | 0.09078     | 1.336       | 0.09078     | 1.336     | 0.09078  | 1.336   |
|           | 0.09078         | 0.09078   | 0.557536296 |             |             |           |          |         |



|            |                 |          |            |             |             |          |          |
|------------|-----------------|----------|------------|-------------|-------------|----------|----------|
| SUPT20H    | ENSG00000102710 | 0.27224  | 0.39272    | 1.2666      | 0.10264     | 1.3359   |          |
|            | 0.090787        | 1.3359   | 0.090787   | 0.090787    | 0.557536296 |          |          |
| SPOCK3     | ENSG00000196104 | 0.47719  | 0.31661    | -0.41584    | 0.66124     | 1.3355   |          |
|            | 0.090861        | -1.0372  | 0.85019    | 0.090861    | 0.55789053  |          |          |
| NA         | ENSG00000251438 | 0.15033  | 0.44025    | 0.61145     | 0.27045     | 1.3354   | 0.090869 |
|            | 0.079181        | 0.46844  | 0.090869   | 0.55789053  |             |          |          |
| RNU6-1113P | ENSG00000207076 | -0.30198 | 0.61867    | 1.3352      | 0.090912    | -0.30198 |          |
|            | 0.61867         | -0.30198 | 0.61867    | 0.090912    | 0.55789053  |          |          |
| NA         | ENSG00000257548 | -0.36519 | 0.64252    | 0.84569     | 0.19886     | 0.46859  | 0.31968  |
|            | 1.3349          | 0.090961 | 0.090961   | 0.55789053  |             |          |          |
| UNC13B     | ENSG00000198722 | 0.43519  | 0.33171    | 0.38638     | 0.34961     | 0.96597  |          |
|            | 0.16703         | 1.3348   | 0.090967   | 0.090967    | 0.55789053  |          |          |
| ALDH7A1P3  | ENSG00000243853 | -0.96179 | 0.83192    | -0.85929    | 0.80491     | -1.1061  |          |
|            | 0.86565         | 1.3348   | 0.090968   | 0.090968    | 0.55789053  |          |          |
| NA         | ENSG00000250957 | -0.63171 | 0.73621    | 1.3348      | 0.090975    | -0.78457 | 0.78365  |
|            | 1.3348          | 0.090975 | 0.090975   | 0.55789053  |             |          |          |
| NA         | ENSG00000228862 | 0.6398   | 0.26115    | -0.048264   | 0.51925     | 1.3347   | 0.090993 |
|            | 0.35027         | 0.36307  | 0.090993   | 0.55789053  |             |          |          |
| RPS3AP38   | ENSG00000226318 | 1.3346   | 0.091008   | 0.72215     | 0.2351      | 1.3346   |          |
|            | 0.091008        | 1.3346   | 0.091008   | 0.091008    | 0.55789053  |          |          |
| C6orf62    | ENSG00000112308 | 0.65499  | 0.25624    | 1.0209      | 0.15366     | 0.080793 |          |
|            | 0.4678          | 1.3345   | 0.091012   | 0.091012    | 0.55789053  |          |          |
| HNRNPALP55 | ENSG00000249920 | 1.3345   | 0.091018   | 1.3345      | 0.091018    | 1.3345   |          |
|            | 0.091018        | 1.3345   | 0.091018   | 0.091018    | 0.55789053  |          |          |
| NA         | ENSG00000258696 | 1.3345   | 0.091023   | 1.3345      | 0.091023    | -0.85811 | 0.80458  |
|            | 1.3345          | 0.091023 | 0.091023   | 0.55789053  |             |          |          |
| NA         | ENSG00000238058 | -0.17015 | 0.56755    | -0.17015    | 0.56755     | 1.3344   | 0.091034 |
|            | 0.52771         | 0.29885  | 0.091034   | 0.55789053  |             |          |          |
| SIGLEC21P  | ENSG00000269253 | 1.3344   | 0.091038   | 1.3344      | 0.091038    | 1.3344   |          |
|            | 0.091038        | 1.3344   | 0.091038   | 0.091038    | 0.55789053  |          |          |
| NA         | ENSG00000253381 | 0.7257   | 0.23401    | 0.88788     | 0.1873      | 1.3343   | 0.091047 |
|            | 1.3343          | 0.091047 | 0.091047   | 0.55789053  |             |          |          |
| NPAP1P2    | ENSG00000214695 | -0.72753 | 0.76655    | 0.47104     | 0.31881     | -0.72342 |          |
|            | 0.76529         | 1.3343   | 0.091051   | 0.091051    | 0.55789053  |          |          |
| SP3        | ENSG00000172845 | 0.90404  | 0.18299    | 0.62149     | 0.26714     | 1.3154   | 0.094188 |
|            | 1.3343          | 0.091057 | 0.091057   | 0.55789053  |             |          |          |
| SMIM6      | ENSG00000259120 | 1.3343   | 0.091057   | 1.3343      | 0.091057    | 1.3343   | 0.091057 |
|            | 1.3343          | 0.091057 | 0.091057   | 0.55789053  |             |          |          |
| NA         | ENSG00000231057 | 1.3342   | 0.091075   | 1.1129      | 0.13287     | 1.326    | 0.092419 |
|            | 1.0901          | 0.13783  | 0.091075   | 0.55789053  |             |          |          |
| ANAPC4     | ENSG00000053900 | -1.2242  | 0.88957    | -0.84875    | 0.80199     | -0.63817 |          |
|            | 0.73832         | 1.3341   | 0.091079   | 0.091079    | 0.55789053  |          |          |
| PRR14      | ENSG00000156858 | -1.1097  | 0.86644    | -1.1097     | 0.86644     | 1.2248   | 0.11032  |
|            | 1.334           | 0.091101 | 0.091101   | 0.55789053  |             |          |          |
| PCDHB17P   | ENSG00000255622 | 1.334    | 0.091107   | 1.334       | 0.091107    | 1.334    | 0.091107 |
|            | 0.091107        | 0.091107 | 0.55789053 |             |             |          |          |
| CAMTA1-AS1 | ENSG00000225126 | 0.34002  | 0.36692    | -0.8983     | 0.81549     | 1.334    | 0.091108 |
|            | 0.92469         | 0.17756  | 0.091108   | 0.55789053  |             |          |          |
| PPP2R2A    | ENSG00000221914 | 1.093    | 0.13719    | 1.0847      | 0.13903     | 1.1933   | 0.11637  |
|            | 1.3338          | 0.091136 | 0.091136   | 0.55791627  |             |          |          |
| COPS4      | ENSG00000138663 | 0.21255  | 0.41584    | 0.19191     | 0.42391     | 1.3338   | 0.091138 |
|            | -1.0772         | 0.8593   | 0.091138   | 0.55791627  |             |          |          |
| COL18A1    | ENSG00000182871 | 0.7315   | 0.23224    | 0.9111      | 0.18112     | 1.3337   |          |
|            | 0.091155        | 0.35356  | 0.36184    | 0.091155    | 0.55791627  |          |          |
| LINC01480  | ENSG00000270164 | 1.3337   | 0.091158   | 1.3337      | 0.091158    | 1.3337   |          |
|            | 0.091158        | 1.3337   | 0.091158   | 0.091158    | 0.55791627  |          |          |
| PAX3       | ENSG00000135903 | 0.74707  | 0.22751    | 0.56234     | 0.28694     | -1.2971  | 0.9027   |
|            | 1.3335          | 0.091186 | 0.091186   | 0.557943004 |             |          |          |
| GUSBP1     | ENSG00000183666 | 0.071231 | 0.47161    | 1.077       | 0.14073     | 1.3334   | 0.091202 |
|            | 0.93747         | 0.17426  | 0.091202   | 0.557943004 |             |          |          |
| NA         | ENSG00000260814 | 1.3332   | 0.091234   | 1.3332      | 0.091234    | 1.3332   | 0.091234 |
|            | 1.3332          | 0.091234 | 0.091234   | 0.557943004 |             |          |          |

|          |                 |          |             |             |             |           |          |        |
|----------|-----------------|----------|-------------|-------------|-------------|-----------|----------|--------|
| ZNF384   | ENSG00000126746 | 1.3327   | 0.091322    | -0.51595    | 0.69705     | -0.076424 |          |        |
|          | 0.53046         | -0.23708 | 0.5937      | 0.091322    | 0.557943004 |           |          |        |
| NA       | ENSG00000236572 | -0.79049 | 0.78538     | -0.64678    | 0.74111     | 1.3326    | 0.091331 |        |
|          | -0.028056       | 0.51119  | 0.091331    | 0.557943004 |             |           |          |        |
| CICP26   | ENSG00000233003 | 1.3326   | 0.091332    | -0.30883    | 0.62127     | 1.0438    |          |        |
|          | 0.14829         | 1.0497   | 0.14692     | 0.091332    | 0.557943004 |           |          |        |
| PSMD9    | ENSG00000110801 | 1.2811   | 0.10007     | 0.60766     | 0.27171     | 0.089177  | 0.46447  |        |
|          | 1.3322          | 0.091397 | 0.091397    | 0.557943004 |             |           |          |        |
| CRIP1    | ENSG00000119878 | 1.3322   | 0.0914      | 0.62509     | 0.26596     | 1.3322    | 0.0914   |        |
|          | 0.34112         | 0.36651  | 0.0914      | 0.557943004 |             |           |          |        |
| NA       | ENSG00000207022 | 0.52612  | 0.2994      | 0.52612     | 0.2994      | 1.3322    | 0.091401 |        |
|          | 1.3322          | 0.091401 | 0.091401    | 0.557943004 |             |           |          |        |
| NA       | ENSG00000230690 | -0.2653  | 0.60461     | 0.044312    | 0.48233     | 1.3322    | 0.091403 |        |
|          | 1.02            | 0.15387  | 0.091403    | 0.557943004 |             |           |          |        |
| NA       | ENSG00000237027 | 1.3321   | 0.09141     | 0.55889     | 0.28812     | 1.1311    | 0.129    |        |
|          | 1.1311          | 0.129    | 0.09141     | 0.557943004 |             |           |          |        |
| RTN3     | ENSG00000133318 | 0.95624  | 0.16948     | 1.3321      | 0.091417    | 0.53216   | 0.29731  |        |
|          | 1.0993          | 0.13583  | 0.091417    | 0.557943004 |             |           |          |        |
| RGS11    | ENSG00000076344 | -1.4938  | 0.93239     | 1.332       | 0.091422    | -1.3187   | 0.90637  |        |
|          | 0.20327         | 0.41946  | 0.091422    | 0.557943004 |             |           |          |        |
| NEGR1    | ENSG00000172260 | 1.1159   | 0.13224     | 0.30544     | 0.38002     | 1.2572    | 0.10435  |        |
|          | 1.332           | 0.091424 | 0.091424    | 0.557943004 |             |           |          |        |
| TOP3B    | ENSG00000100038 | -0.40687 | 0.65795     | 1.332       | 0.091425    | -1.4242   | 0.92281  |        |
|          | -0.88911        | 0.81303  | 0.091425    | 0.557943004 |             |           |          |        |
| DNAL1    | ENSG00000119661 | 0.88736  | 0.18744     | 0.93734     | 0.17429     | 0.97404   | 0.16502  |        |
|          | 1.332           | 0.09143  | 0.09143     | 0.557943004 |             |           |          |        |
| NA       | ENSG00000261392 | 1.3319   | 0.09144     | 1.3319      | 0.09144     | 1.3319    | 0.09144  |        |
|          | 0.69163         | 0.24459  | 0.09144     | 0.557943004 |             |           |          |        |
| IFFO2    | ENSG00000169991 | 1.3318   | 0.091466    | 0.415       | 0.33907     | 1.047     | 0.14754  | 1.2846 |
|          | 0.099468        | 0.091466 | 0.557943004 |             |             |           |          |        |
| GPSM2    | ENSG00000121957 | 0.019424 | 0.49225     | 0.019424    | 0.49225     | 1.3317    | 0.091475 |        |
|          | 0.94789         | 0.17159  | 0.091475    | 0.557943004 |             |           |          |        |
| STRADB   | ENSG00000082146 | 0.93077  | 0.17599     | 0.83585     | 0.20162     | 1.3317    |          |        |
|          | 0.091478        | 0.25479  | 0.39944     | 0.091478    | 0.557943004 |           |          |        |
| CFAP74   | ENSG00000142609 | -0.5809  | 0.71935     | -0.29285    | 0.61518     | 1.3317    |          |        |
|          | 0.091485        | 0.69734  | 0.24279     | 0.091485    | 0.557943004 |           |          |        |
| TRAJ11   | ENSG00000211878 | 1.3316   | 0.09149     | 1.3316      | 0.09149     | 1.3316    |          |        |
|          | 0.09149         | 1.3316   | 0.09149     | 0.557943004 |             |           |          |        |
| INTS1    | ENSG00000164880 | 0.043171 | 0.48278     | 0.41457     | 0.33923     | 0.66136   | 0.25419  |        |
|          | 1.3316          | 0.091503 | 0.091503    | 0.557943004 |             |           |          |        |
| NA       | ENSG00000239557 | 1.3315   | 0.091506    | 1.3315      | 0.091506    | 1.3315    | 0.091506 |        |
|          | 1.3315          | 0.091506 | 0.091506    | 0.557943004 |             |           |          |        |
| NA       | ENSG00000224251 | 1.3314   | 0.091534    | 1.3314      | 0.091534    | 1.3314    | 0.091534 |        |
|          | 1.3314          | 0.091534 | 0.091534    | 0.557943004 |             |           |          |        |
| DHRS11   | ENSG00000278535 | -0.25239 | 0.59963     | 1.3313      | 0.09155     | 0.86814   |          |        |
|          | 0.19266         | 0.45961  | 0.3229      | 0.09155     | 0.557943004 |           |          |        |
| NA       | ENSG00000263164 | 1.3312   | 0.091569    | 1.3312      | 0.091569    | 1.3312    | 0.091569 |        |
|          | 0.72042         | 0.23563  | 0.091569    | 0.557943004 |             |           |          |        |
| NA       | ENSG00000254587 | 1.3311   | 0.091574    | 0.43853     | 0.3305      | 1.3311    | 0.091574 |        |
|          | 0.28432         | 0.38808  | 0.091574    | 0.557943004 |             |           |          |        |
| NA       | ENSG00000265053 | 1.3311   | 0.091574    | 1.3311      | 0.091574    | 1.3311    | 0.091574 |        |
|          | 1.3311          | 0.091574 | 0.091574    | 0.557943004 |             |           |          |        |
| STAM2    | ENSG00000115145 | 0.70641  | 0.23997     | 1.0673      | 0.14292     | 1.331     | 0.091592 |        |
|          | 1.0404          | 0.14907  | 0.091592    | 0.557943004 |             |           |          |        |
| CIR1     | ENSG00000138433 | 0.21233  | 0.41592     | 1.331       | 0.091596    | 1.1575    | 0.12353  |        |
|          | 1.1575          | 0.12353  | 0.091596    | 0.557943004 |             |           |          |        |
| NA       | ENSG00000274501 | 0.76764  | 0.22135     | 1.331       | 0.0916      | 1.331     | 0.0916   | 1.331  |
|          | 0.0916          | 0.0916   | 0.557943004 |             |             |           |          |        |
| PKN2-AS1 | ENSG00000237505 | 0.27833  | 0.39038     | 0.19292     | 0.42351     | 1.331     | 0.091601 |        |
|          | 0.27833         | 0.39038  | 0.091601    | 0.557943004 |             |           |          |        |
| NA       | ENSG00000277579 | 1.1177   | 0.13184     | 1.0128      | 0.15559     | 1.3309    | 0.091608 |        |
|          | 1.3309          | 0.091608 | 0.091608    | 0.557943004 |             |           |          |        |

|           |                 |           |             |             |             |           |          |          |
|-----------|-----------------|-----------|-------------|-------------|-------------|-----------|----------|----------|
| SLAMF7    | ENSG00000026751 | 1.3308    | 0.091625    | 0.16664     | 0.43383     | -0.65794  |          |          |
|           | 0.74471         | -0.16077  | 0.56386     | 0.091625    | 0.557943004 |           |          |          |
| NA        | ENSG00000239300 | 1.3308    | 0.091627    | 1.3308      | 0.091627    | 1.3308    | 0.091627 | 0.091627 |
|           | 1.3308          | 0.091627  | 0.091627    | 0.557943004 |             |           |          |          |
| SLC16A5   | ENSG00000170190 | 0.38764   | 0.34914     | -0.26169    | 0.60322     | 1.3307    |          |          |
|           | 0.091636        | 0.73861   | 0.23007     | 0.091636    | 0.557943004 |           |          |          |
| NA        | ENSG00000224067 | 1.3307    | 0.091639    | 1.3307      | 0.091639    | 1.3307    | 0.091639 | 0.091639 |
|           | 1.3307          | 0.091639  | 0.091639    | 0.557943004 |             |           |          |          |
| NA        | ENSG00000247134 | 1.1312    | 0.12899     | 1.2844      | 0.099501    | 1.3307    | 0.091646 | 0.091646 |
|           | 1.3307          | 0.091646  | 0.091646    | 0.557943004 |             |           |          |          |
| NA        | ENSG00000269064 | 1.3307    | 0.091646    | 1.3307      | 0.091646    | 1.3307    | 0.091646 | 0.091646 |
|           | 1.3307          | 0.091646  | 0.091646    | 0.557943004 |             |           |          |          |
| NA        | ENSG00000235281 | 1.3306    | 0.091653    | -0.35427    | 0.63843     | 0.066583  | 0.47346  | 0.47346  |
|           | -0.26661        | 0.60512   | 0.091653    | 0.557943004 |             |           |          |          |
| GNAI2     | ENSG00000114353 | -0.477    | 0.68332     | -0.477      | 0.68332     | 0.87015   | 0.19211  | 0.19211  |
|           | 1.3306          | 0.091656  | 0.091656    | 0.557943004 |             |           |          |          |
| CAPNS1    | ENSG00000126247 | -1.5408   | 0.93832     | 1.3305      | 0.091674    | -1.5408   |          |          |
|           | 0.93832         | -1.5408   | 0.93832     | 0.091674    | 0.557943004 |           |          |          |
| RNU4-88P  | ENSG00000223152 | 1.3305    | 0.091684    | 1.3305      | 0.091684    | 0.031963  |          |          |
|           | 0.48725         | 1.3305    | 0.091684    | 0.091684    | 0.557943004 |           |          |          |
| N4BP3     | ENSG00000145911 | 1.0623    | 0.14405     | 0.0055637   | 0.49778     | 1.0623    | 0.14405  | 0.14405  |
|           | 1.3303          | 0.091705  | 0.091705    | 0.557943004 |             |           |          |          |
| NA        | ENSG00000250842 | 0.88974   | 0.1868      | 1.3302      | 0.091724    | 1.2527    | 0.10517  | 0.10517  |
|           | 0.41216         | 0.34011   | 0.091724    | 0.557943004 |             |           |          |          |
| NA        | ENSG00000224484 | 0.62871   | 0.26477     | 0.62871     | 0.26477     | 0.29909   | 0.38244  | 0.38244  |
|           | 1.3302          | 0.091733  | 0.091733    | 0.557943004 |             |           |          |          |
| SGCG      | ENSG00000102683 | 1.2726    | 0.10157     | 0.35404     | 0.36166     | -0.366    | 0.64282  | 0.64282  |
|           | 1.3301          | 0.091743  | 0.091743    | 0.557943004 |             |           |          |          |
| TGOLN2    | ENSG00000152291 | 1.33      | 0.091753    | 1.2968      | 0.097355    | 1.1165    | 0.1321   | 0.1321   |
|           | 1.33            | 0.091753  | 0.091753    | 0.557943004 |             |           |          |          |
| TMEM125   | ENSG00000179178 | -0.031142 | 0.51242     | 0.086168    | 0.46567     | 1.3298    |          |          |
|           | 0.091789        | 1.3298    | 0.091789    | 0.091789    | 0.557943004 |           |          |          |
| MACROD2   | ENSG00000172264 | 0.066679  | 0.47342     | 1.3298      | 0.091792    | 0.53292   |          |          |
|           | 0.29705         | 0.5403    | 0.2945      | 0.091792    | 0.557943004 |           |          |          |
| ZIM3      | ENSG00000141946 | 1.3298    | 0.091795    | 1.3298      | 0.091795    | 1.3298    | 0.091795 | 0.091795 |
|           | 1.3298          | 0.091795  | 0.091795    | 0.557943004 |             |           |          |          |
| S100A6    | ENSG00000197956 | 1.3298    | 0.091797    | 1.3298      | 0.091797    | 1.3298    |          |          |
|           | 0.091797        | 1.3298    | 0.091797    | 0.091797    | 0.557943004 |           |          |          |
| NA        | ENSG00000236439 | 0.079128  | 0.46847     | 0.18324     | 0.4273      | 1.2198    | 0.11127  | 0.11127  |
|           | 1.3298          | 0.091798  | 0.091798    | 0.557943004 |             |           |          |          |
| NA        | ENSG00000250100 | 1.3298    | 0.091799    | 1.3298      | 0.091799    | 1.3298    | 0.091799 | 0.091799 |
|           | 1.0462          | 0.14773   | 0.091799    | 0.557943004 |             |           |          |          |
| SLMAP     | ENSG00000163681 | -0.10025  | 0.53993     | 1.3297      | 0.091814    | -0.011666 | 0.50465  | 0.50465  |
|           | -0.15963        | 0.56341   | 0.091814    | 0.557943004 |             |           |          |          |
| NA        | ENSG00000223646 | 0.40586   | 0.34242     | 1.3297      | 0.091815    | -0.1498   | 0.55954  | 0.55954  |
|           | -0.96011        | 0.8315    | 0.091815    | 0.557943004 |             |           |          |          |
| NA        | ENSG00000227842 | 1.3295    | 0.091841    | -1.0737     | 0.85851     | 0.6812    | 0.24787  | 0.24787  |
|           | -1.2697         | 0.8979    | 0.091841    | 0.558031413 |             |           |          |          |
| NA        | ENSG00000263884 | 0.3057    | 0.37992     | -0.86156    | 0.80553     | -0.86405  | 0.80622  | 0.80622  |
|           | 1.3291          | 0.091902  | 0.091902    | 0.558178346 |             |           |          |          |
| PLCL2-AS1 | ENSG00000226441 | 1.1232    | 0.13068     | 1.329       | 0.091922    | 1.329     | 0.091922 | 1.329    |
|           | 0.091922        | 0.091922  | 0.558178346 |             |             |           |          |          |
| TOMM22P6  | ENSG00000241874 | -0.73589  | 0.7691      | 1.329       | 0.091924    | 0.48784   | 0.31283  | 0.31283  |
|           | 0.41452         | 0.33925   | 0.091924    | 0.558178346 |             |           |          |          |
| ZNF597    | ENSG00000167981 | 0.3885    | 0.34882     | 0.094874    | 0.46221     | 0.3885    |          |          |
|           | 0.34882         | 1.329     | 0.091928    | 0.091928    | 0.558178346 |           |          |          |
| ANO6      | ENSG00000177119 | 1.2628    | 0.10333     | 0.64996     | 0.25786     | 1.3289    | 0.091935 | 0.091935 |
|           | 0.83737         | 0.20119   | 0.091935    | 0.558178346 |             |           |          |          |
| NA        | ENSG00000248686 | 1.1606    | 0.12291     | 0.24369     | 0.40373     | 0.11509   | 0.45419  | 0.45419  |
|           | 1.3289          | 0.09194   | 0.09194     | 0.558178346 |             |           |          |          |
| MUC20     | ENSG00000176945 | 1.1291    | 0.12943     | 0.44799     | 0.32708     | 1.3288    | 0.091961 | 0.091961 |
|           | 0.44437         | 0.32839   | 0.091961    | 0.558178346 |             |           |          |          |

|           |                 |           |             |             |             |          |                   |
|-----------|-----------------|-----------|-------------|-------------|-------------|----------|-------------------|
| CLEC2D    | ENSG00000069493 | -0.26659  | 0.60511     | -0.12753    | 0.55074     | 1.3288   |                   |
|           | 0.091964        | 0.69779   | 0.24265     | 0.091964    | 0.558178346 |          |                   |
| GABRB3    | ENSG00000166206 | 1.3285    | 0.092007    | 0.83504     | 0.20185     | 0.45905  |                   |
|           | 0.3231          | 0.53212   | 0.29732     | 0.092007    | 0.558178346 |          |                   |
| OR52W1    | ENSG00000175485 | 1.3285    | 0.09201     | 1.3285      | 0.09201     | 1.3285   |                   |
|           | 0.09201         | 1.3285    | 0.09201     | 0.09201     | 0.558178346 |          |                   |
| NA        | ENSG00000284500 | -0.63988  | 0.73888     | -0.94482    | 0.82763     | 0.82926  | 0.20348           |
|           | 1.3285          | 0.092013  | 0.092013    | 0.558178346 |             |          |                   |
| NA        | ENSG00000270039 | 1.3284    | 0.092023    | 1.3284      | 0.092023    | 1.3284   | 0.092023          |
|           | 1.3284          | 0.092023  | 0.092023    | 0.558178346 |             |          |                   |
| CENPUP1   | ENSG00000255075 | 1.3283    | 0.092033    | -0.85173    | 0.80282     | -0.79033 |                   |
|           | 0.78533         | -0.20898  | 0.58277     | 0.092033    | 0.558178346 |          |                   |
| LINC00606 | ENSG00000226567 | -0.080095 | 0.53192     | 1.0202      | 0.15382     | 0.11011  |                   |
|           | 0.45616         | 1.3283    | 0.092036    | 0.092036    | 0.558178346 |          |                   |
| NDUFS4    | ENSG00000164258 | 1.2191    | 0.11141     | 1.3283      | 0.092037    | 0.22265  |                   |
|           | 0.41191         | 0.079498  | 0.46832     | 0.092037    | 0.558178346 |          |                   |
| NA        | ENSG00000228873 | 1.3282    | 0.092062    | 1.3282      | 0.092062    | 1.3282   | 0.092062          |
|           | 1.3282          | 0.092062  | 0.092062    | 0.558227403 |             |          |                   |
| TPTEP2    | ENSG00000244627 | 0.83578   | 0.20164     | 1.3281      | 0.092068    | 0.38971  |                   |
|           | 0.34838         | 0.60093   | 0.27394     | 0.092068    | 0.558227403 |          |                   |
| C1QL3     | ENSG00000165985 | 0.26488   | 0.39555     | -0.53262    | 0.70285     | 1.3278   | 0.092128          |
|           | -0.53262        | 0.70285   | 0.092128    | 0.558361052 |             |          |                   |
| SARS2     | ENSG00000104835 | 0.91161   | 0.18099     | 1.3277      | 0.092131    | -0.20886 | 0.58272           |
|           | 1.0849          | 0.13898   | 0.092131    | 0.558361052 |             |          |                   |
| NA        | ENSG00000266578 | 0.84791   | 0.19824     | -0.1035     | 0.54122     | 1.0748   | 0.14124           |
|           | 1.3276          | 0.092158  | 0.092158    | 0.558361052 |             |          |                   |
| FCF1P3    | ENSG00000239997 | 1.3276    | 0.092161    | 1.3276      | 0.092161    | 1.3276   |                   |
|           | 0.092161        | 1.3276    | 0.092161    | 0.092161    | 0.558361052 |          |                   |
| NA        | ENSG00000274627 | 0.79527   | 0.21323     | 0.79527     | 0.21323     | 0.79527  | 0.21323           |
|           | 1.3276          | 0.092163  | 0.092163    | 0.558361052 |             |          |                   |
| NA        | ENSG00000259421 | 0.78727   | 0.21556     | 0.21959     | 0.41309     | -0.44316 | 0.67117           |
|           | 1.3274          | 0.092196  | 0.092196    | 0.558361052 |             |          |                   |
| NA        | ENSG00000279187 | 1.3273    | 0.092198    | 1.3273      | 0.092198    | 1.3273   | 0.092198          |
|           | 1.3273          | 0.092198  | 0.092198    | 0.558361052 |             |          |                   |
| VWFP1     | ENSG00000241717 | -0.048213 | 0.51923     | 1.089       | 0.13808     | -0.44062 | 0.67026           |
|           | 1.3273          | 0.092209  | 0.092209    | 0.558361052 |             |          |                   |
| PMFBP1    | ENSG00000118557 | 1.3272    | 0.092215    | -0.94316    | 0.8272      | -0.21929 |                   |
|           | 0.58679         | -0.11564  | 0.54603     | 0.092215    | 0.558361052 |          |                   |
| NAT8B     | ENSG00000204872 | 0.092411  | 0.46319     | 1.3272      | 0.092218    | 1.222    | 0.11085 1.222     |
|           | 0.11085         | 0.092218  | 0.558361052 |             |             |          |                   |
| GABRA4    | ENSG00000109158 | 1.3272    | 0.092229    | 0.64305     | 0.26009     | 0.078261 |                   |
|           | 0.46881         | -0.030116 | 0.51201     | 0.092229    | 0.558361052 |          |                   |
| CRTAP     | ENSG00000170275 | 1.0524    | 0.14632     | 1.3271      | 0.092233    | 1.1463   | 0.12584           |
|           | 1.3254          | 0.092519  | 0.092233    | 0.558361052 |             |          |                   |
| NA        | ENSG00000237502 | 1.3271    | 0.092239    | 1.3271      | 0.092239    | 1.3271   | 0.092239          |
|           | 1.3271          | 0.092239  | 0.092239    | 0.558361052 |             |          |                   |
| NA        | ENSG00000257654 | -0.39749  | 0.6545      | 1.327       | 0.092258    | 1.327    | 0.092258 -0.34229 |
|           | 0.63393         | 0.092258  | 0.558361557 |             |             |          |                   |
| TCFL5     | ENSG00000101190 | 1.327     | 0.092262    | 0.83602     | 0.20157     | 0.94268  | 0.17292           |
|           | 0.58223         | 0.28021   | 0.092262    | 0.558361557 |             |          |                   |
| NPFF      | ENSG00000139574 | 1.3266    | 0.092323    | 1.3266      | 0.092323    | 1.3266   | 0.092323          |
|           | 1.3266          | 0.092323  | 0.092323    | 0.558604079 |             |          |                   |
| MTCYBP4   | ENSG00000220113 | 0.13498   | 0.44631     | 0.49499     | 0.3103      | 1.3266   |                   |
|           | 0.092325        | 1.0011    | 0.1584      | 0.092325    | 0.558604079 |          |                   |
| P2RX5     | ENSG00000083454 | -0.23261  | 0.59197     | 1.3264      | 0.092346    | 0.95458  | 0.16989           |
|           | 0.23501         | 0.4071    | 0.092346    | 0.558641252 |             |          |                   |
| MILR1     | ENSG00000271605 | 1.3263    | 0.092372    | 1.0759      | 0.14098     | 1.0507   | 0.14669           |
|           | 0.082403        | 0.46716   | 0.092372    | 0.558641252 |             |          |                   |
| LINC01816 | ENSG00000231327 | -0.56524  | 0.71404     | 1.3263      | 0.092375    | -0.56524 |                   |
|           | 0.71404         | 0.99837   | 0.15905     | 0.092375    | 0.558641252 |          |                   |
| ACTBP2    | ENSG00000213763 | 1.3263    | 0.092377    | 1.3263      | 0.092377    | 1.3263   |                   |
|           | 0.092377        | 1.3263    | 0.092377    | 0.092377    | 0.558641252 |          |                   |

|              |                 |           |          |             |             |           |          |
|--------------|-----------------|-----------|----------|-------------|-------------|-----------|----------|
| NLRP7        | ENSG00000167634 | -0.022281 | 0.50889  | 1.3261      | 0.092401    | -0.13576  | 0.554    |
|              | 0.022524        | 0.49102   | 0.092401 | 0.558653779 |             |           |          |
| TMEM161B-AS1 | ENSG00000247828 | -1.4835   | 0.93103  | -1.6508     | 0.95061     | 1.3261    |          |
|              | 0.092402        | -1.7845   | 0.96283  | 0.092402    | 0.558653779 |           |          |
| SUDS3P1      | ENSG00000249129 | 1.3256    | 0.092479 | 1.3256      | 0.092479    | 1.3256    |          |
|              | 0.092479        | -0.54025  | 0.70549  | 0.092479    | 0.558956788 |           |          |
| CYTH4        | ENSG00000100055 | -0.1619   | 0.56431  | 1.3256      | 0.092491    | -0.022185 | 0.50885  |
|              | -0.25167        | 0.59935   | 0.092491 | 0.558956788 |             |           |          |
| NA           | ENSG00000251488 | 1.3256    | 0.092492 | 1.3256      | 0.092492    | 0.51866   | 0.302    |
|              | 0.55242         | 0.29033   | 0.092492 | 0.558956788 |             |           |          |
| THOC3        | ENSG00000051596 | 0.88639   | 0.1877   | 0.62648     | 0.2655      | 0.41675   | 0.33843  |
|              | 1.3255          | 0.092498  | 0.092498 | 0.558956788 |             |           |          |
| YBX1P3       | ENSG00000240002 | -0.47908  | 0.68406  | 1.3254      | 0.09252     | 1.3254    |          |
|              | 0.09252         | 1.3254    | 0.09252  | 0.09252     | 0.559020409 |           |          |
| MUPP         | ENSG00000237906 | 0.67468   | 0.24994  | 0.67468     | 0.24994     | 1.3252    | 0.09256  |
|              | 1.3252          | 0.09256   | 0.09256  | 0.559133859 |             |           |          |
| NA           | ENSG00000253028 | 0.30347   | 0.38077  | 1.3251      | 0.092571    | 0.88576   | 0.18787  |
|              | 0.88576         | 0.18787   | 0.092571 | 0.559133859 |             |           |          |
| GLI2         | ENSG00000074047 | 1.2176    | 0.11169  | 1.2284      | 0.10964     | 1.325     | 0.092584 |
|              | -1.2153         | 0.88787   | 0.092584 | 0.559133859 |             |           |          |
| CERS4        | ENSG00000090661 | -0.15931  | 0.56329  | 0.46153     | 0.32221     | 0.11436   | 0.45447  |
|              | 1.3249          | 0.09261   | 0.09261  | 0.559133859 |             |           |          |
| NA           | ENSG00000263826 | 0.80766   | 0.20964  | 1.3248      | 0.092616    | 0.80766   | 0.20964  |
|              | 0.80766         | 0.20964   | 0.092616 | 0.559133859 |             |           |          |
| GLIPR1L1     | ENSG00000173401 | 1.3248    | 0.092627 | 1.3248      | 0.092627    | 0.85102   |          |
|              | 0.19738         | 0.83312   | 0.20239  | 0.092627    | 0.559133859 |           |          |
| RBM27        | ENSG00000091009 | -0.39006  | 0.65175  | 0.2808      | 0.38943     | 0.2808    | 0.38943  |
|              | 1.3246          | 0.092644  | 0.092644 | 0.559133859 |             |           |          |
| NA           | ENSG00000224361 | 1.3246    | 0.092651 | 1.3246      | 0.092651    | 1.3232    | 0.092877 |
|              | 0.45356         | 0.32507   | 0.092651 | 0.559133859 |             |           |          |
| RNASEL       | ENSG00000135828 | 1.1175    | 0.13189  | 0.62362     | 0.26644     | 0.42186   |          |
|              | 0.33657         | 1.3246    | 0.092659 | 0.092659    | 0.559133859 |           |          |
| IFITM3P6     | ENSG00000258352 | 1.3243    | 0.092699 | 1.3243      | 0.092699    | 1.3243    |          |
|              | 0.092699        | 1.3243    | 0.092699 | 0.092699    | 0.559133859 |           |          |
| NA           | ENSG00000275343 | 0.046771  | 0.48135  | 0.27122     | 0.39311     | 1.3242    | 0.092711 |
|              | 0.046771        | 0.48135   | 0.092711 | 0.559133859 |             |           |          |
| BASP1        | ENSG00000176788 | 0.42004   | 0.33723  | 1.2601      | 0.10382     | 1.3242    | 0.092716 |
|              | 0.36182         | 0.35874   | 0.092716 | 0.559133859 |             |           |          |
| CDK13        | ENSG00000065883 | 0.09824   | 0.46087  | 0.74984     | 0.22668     | 0.66264   | 0.25378  |
|              | 1.324           | 0.092747  | 0.092747 | 0.559133859 |             |           |          |
| MDK          | ENSG00000110492 | 0.56602   | 0.28569  | 0.56602     | 0.28569     | 1.2428    | 0.10697  |
|              | 1.3239          | 0.092765  | 0.092765 | 0.559133859 |             |           |          |
| NA           | ENSG00000279774 | 1.3239    | 0.092765 | 1.3239      | 0.092765    | 1.3239    | 0.092765 |
|              | 1.3239          | 0.092765  | 0.092765 | 0.559133859 |             |           |          |
| NA           | ENSG00000268146 | 1.3239    | 0.092765 | 1.3239      | 0.092765    | 1.3239    | 0.092765 |
|              | 1.3239          | 0.092765  | 0.092765 | 0.559133859 |             |           |          |
| EXO1         | ENSG00000174371 | 0.066814  | 0.47336  | -0.066827   | 0.52664     | 1.3239    | 0.092772 |
|              | 0.025531        | 0.48982   | 0.092772 | 0.559133859 |             |           |          |
| DLX2-DT      | ENSG00000236651 | 0.60192   | 0.27361  | -0.24979    | 0.59863     | 0.72225   |          |
|              | 0.23507         | 1.3238    | 0.092782 | 0.092782    | 0.559133859 |           |          |
| CEACAM7      | ENSG00000007306 | 0.12848   | 0.44889  | 1.135       | 0.12818     | 1.3238    | 0.092786 |
|              | 1.3238          | 0.092786  | 0.092786 | 0.559133859 |             |           |          |
| NA           | ENSG00000237788 | -0.15297  | 0.56079  | -0.15297    | 0.56079     | -0.15297  | 0.56079  |
|              | 1.3238          | 0.092786  | 0.092786 | 0.559133859 |             |           |          |
| GPRC5C       | ENSG00000170412 | 0.10618   | 0.45772  | 1.3237      | 0.092807    | -0.51632  |          |
|              | 0.69719         | 0.47356   | 0.31791  | 0.092807    | 0.559133859 |           |          |
| NA           | ENSG00000267101 | 0.75989   | 0.22366  | 0.56736     | 0.28523     | 1.3237    | 0.092808 |
|              | 1.2377          | 0.10791   | 0.092808 | 0.559133859 |             |           |          |
| CTSL3P       | ENSG00000188029 | 0.66713   | 0.25234  | 1.0742      | 0.14137     | 0.66713   |          |
|              | 0.25234         | 1.3236    | 0.09281  | 0.09281     | 0.559133859 |           |          |
| RPS12        | ENSG00000112306 | 0.84645   | 0.19865  | 1.3235      | 0.092835    | 0.1022    | 0.4593   |
|              | 1.1112          | 0.13323   | 0.092835 | 0.559133859 |             |           |          |

|            |                 |           |           |             |             |             |           |          |
|------------|-----------------|-----------|-----------|-------------|-------------|-------------|-----------|----------|
| NA         | ENSG00000270040 | 1.3235    | 0.092842  | 0.092842    | 1.3235      | 0.092842    | 1.3235    | 0.092842 |
|            |                 | 1.3235    | 0.092842  | 0.092842    | 0.559133859 |             |           |          |
| CTRL       | ENSG00000141086 | 1.3234    | 0.092851  | 0.092851    | 1.3234      | 0.092851    | 1.3234    | 0.092851 |
|            |                 | 0.62204   | 0.26696   | 0.092851    | 0.559133859 |             |           |          |
| NA         | ENSG00000237773 | 1.3233    | 0.092863  | 0.092863    | -0.42205    | 0.66351     | 1.3233    | 0.092863 |
|            |                 | 0.73508   | 0.23115   | 0.092863    | 0.559133859 |             |           |          |
| LINC01687  | ENSG00000233215 | 1.3233    | 0.092864  | 0.092864    | 0.47345     | 0.31795     | -0.94152  |          |
|            |                 | 0.82678   | -0.94152  | 0.82678     | 0.092864    | 0.559133859 |           |          |
| NA         | ENSG00000279175 | 0.66521   | 0.25296   | 0.25296     | 1.3232      | 0.092878    | -0.13749  | 0.55468  |
|            |                 | 0.48191   | 0.31493   | 0.092878    | 0.559133859 |             |           |          |
| NA         | ENSG00000255996 | 0.38394   | 0.35051   | 0.35051     | 1.3232      | 0.092883    | -0.17365  | 0.56893  |
|            |                 | -0.80914  | 0.79078   | 0.092883    | 0.559133859 |             |           |          |
| NA         | ENSG00000279461 | 1.3227    | 0.092961  | 0.092961    | 1.3227      | 0.092961    | 1.3227    | 0.092961 |
|            |                 | 1.3227    | 0.092961  | 0.092961    | 0.55953428  |             |           |          |
| RFPL1      | ENSG00000128250 | -0.14523  | 0.55774   | 0.55774     | 1.3226      | 0.092983    | 0.47134   | 0.3187   |
|            |                 | 0.47134   | 0.3187    | 0.092983    | 0.559543624 |             |           |          |
| NA         | ENSG00000233178 | -1.196    | 0.88416   | 0.88416     | -2.0031     | 0.97741     | -0.62185  | 0.73298  |
|            |                 | 1.3225    | 0.092997  | 0.092997    | 0.559543624 |             |           |          |
| NA         | ENSG00000283392 | 0.65135   | 0.25741   | 0.25741     | 0.28392     | 0.38824     | -0.79537  | 0.7868   |
|            |                 | 1.3225    | 0.092997  | 0.092997    | 0.559543624 |             |           |          |
| MIR4698    | ENSG00000263838 | -0.88862  | 0.8129    | 0.8129      | 1.3224      | 0.093012    | -0.88862  |          |
|            |                 | 0.8129    | 0.36822   | 0.36822     | 0.093012    | 0.559564785 |           |          |
| RPS2P7     | ENSG00000235508 | -0.19218  | 0.5762    | 0.5762      | 0.52099     | 0.30119     | 0.52099   |          |
|            |                 | 0.30119   | 1.3222    | 0.093044    | 0.093044    | 0.55963115  |           |          |
| LINC00973  | ENSG00000240476 | 0.8477    | 0.1983    | 0.1983      | 0.61106     | 0.27058     | 1.2141    |          |
|            |                 | 0.11236   | 1.3222    | 0.093046    | 0.093046    | 0.55963115  |           |          |
| NA         | ENSG00000201683 | 1.3221    | 0.093064  | 0.093064    | 1.3221      | 0.093064    | 0.019029  | 0.49241  |
|            |                 | 0.50244   | 0.30768   | 0.093064    | 0.559667417 |             |           |          |
| NA         | ENSG00000249007 | 1.3221    | 0.093075  | 0.093075    | 1.3221      | 0.093075    | 1.3221    | 0.093075 |
|            |                 | 1.3221    | 0.093075  | 0.093075    | 0.559667417 |             |           |          |
| LINC01290  | ENSG00000260468 | 1.2408    | 0.10734   | 0.10734     | 1.2408      | 0.10734     | 1.2408    |          |
|            |                 | 0.10734   | 1.3219    | 0.093101    | 0.093101    | 0.559754686 |           |          |
| HNRNPCP9   | ENSG00000232048 | 1.3217    | 0.093136  | 0.093136    | 1.3217      | 0.093136    | 1.3217    |          |
|            |                 | 0.093136  | 1.3217    | 0.093136    | 0.093136    | 0.559863039 |           |          |
| STX16      | ENSG00000124222 | 1.3217    | 0.093142  | 0.093142    | -0.761      | 0.77667     | -1.0715   | 0.85803  |
|            |                 | -0.79312  | 0.78615   | 0.093142    | 0.559863039 |             |           |          |
| NA         | ENSG00000236292 | 1.3215    | 0.09316   | 0.09316     | 1.3215      | 0.09316     | 1.3215    | 0.09316  |
|            |                 | 1.3215    | 0.09316   | 0.09316     | 0.559875189 |             |           |          |
| RGMB       | ENSG00000174136 | 0.95084   | 0.17084   | 0.17084     | -0.69654    | 0.75695     | 1.3215    | 0.093167 |
|            |                 | -0.081498 | 0.53248   | 0.093167    | 0.559875189 |             |           |          |
| MIR4500HG  | ENSG00000228824 | -0.56463  | 0.71384   | 0.71384     | 1.3213      | 0.093195    | -0.56463  |          |
|            |                 | 0.71384   | -0.56463  | 0.71384     | 0.093195    | 0.559875574 |           |          |
| NA         | ENSG00000224273 | -0.23109  | 0.59138   | 0.59138     | 1.3213      | 0.093199    | 0.13494   | 0.44633  |
|            |                 | 1.1846    | 0.11808   | 0.093199    | 0.559875574 |             |           |          |
| RN7SKP120  | ENSG00000222693 | 0.82194   | 0.20555   | 0.20555     | 0.82194     | 0.20555     | 0.82194   |          |
|            |                 | 0.20555   | 1.3212    | 0.093211    | 0.093211    | 0.559875574 |           |          |
| NA         | ENSG00000258383 | 1.3212    | 0.093216  | 0.093216    | 1.3212      | 0.093216    | 1.3212    | 0.093216 |
|            |                 | 1.3212    | 0.093216  | 0.093216    | 0.559875574 |             |           |          |
| KIAA1958   | ENSG00000165185 | 0.84968   | 0.19775   | 0.19775     | 0.64909     | 0.25814     | 1.3211    |          |
|            |                 | 0.09323   | 0.78548   | 0.21609     | 0.09323     | 0.559875574 |           |          |
| NA         | ENSG00000252266 | 0.16609   | 0.43404   | 0.43404     | 0.5037      | 0.30724     | 1.3211    | 0.093236 |
|            |                 | 0.038741  | 0.48455   | 0.093236    | 0.559875574 |             |           |          |
| NFASC      | ENSG00000163531 | -0.059139 | 0.52358   | 0.52358     | 0.8368      | 0.20135     | 1.3209    | 0.093266 |
|            |                 | -0.12179  | 0.54847   | 0.093266    | 0.559941963 |             |           |          |
| NA         | ENSG00000235869 | 1.3208    | 0.09328   | 0.09328     | 0.8513      | 0.1973      | 1.3208    | 0.09328  |
|            |                 | 0.89534   | 0.1853    | 0.09328     | 0.559941963 |             |           |          |
| LRRC6P1    | ENSG00000254784 | 1.3208    | 0.093292  | 0.093292    | -0.096795   | 0.53856     | -0.096795 |          |
|            |                 | 0.53856   | -0.096795 | 0.53856     | 0.093292    | 0.559941963 |           |          |
| ZNF451-AS1 | ENSG00000226803 | 1.226     | 0.11009   | 0.11009     | 1.3207      | 0.093299    | 1.226     | 0.11009  |
|            |                 | 0.11009   | 0.093299  | 0.559941963 |             |             |           | 1.226    |
| ASB18      | ENSG00000182177 | 0.84332   | 0.19952   | 0.19952     | 0.67432     | 0.25005     | 0.68499   | 0.24667  |
|            |                 | 1.3207    | 0.093309  | 0.093309    | 0.559941963 |             |           |          |

|           |                 |           |             |             |             |           |               |
|-----------|-----------------|-----------|-------------|-------------|-------------|-----------|---------------|
| NRBF2P4   | ENSG00000253228 | 0.50573   | 0.30652     | 1.3206      | 0.093316    | 1.143     | 0.12651       |
|           | 1.2145          | 0.11229   | 0.093316    | 0.559941963 |             |           |               |
| LINC00482 | ENSG00000185168 | 1.3205    | 0.093339    | 1.3205      | 0.093339    | 1.3205    |               |
|           | 0.093339        | 0.16967   | 0.43264     | 0.093339    | 0.559981119 |           |               |
| AGPAT2    | ENSG00000169692 | -0.18189  | 0.57217     | -0.18189    | 0.57217     | 1.3204    |               |
|           | 0.093352        | -0.18189  | 0.57217     | 0.093352    | 0.559981119 |           |               |
| VLDLR-AS1 | ENSG00000236404 | -1.3961   | 0.91866     | -0.40405    | 0.65691     | 1.3204    |               |
|           | 0.093357        | 0.82032   | 0.20602     | 0.093357    | 0.559981119 |           |               |
| NA        | ENSG00000224621 | 1.3201    | 0.093399    | 1.3201      | 0.093399    | 1.3201    | 0.093399      |
|           | 1.3201          | 0.093399  | 0.093399    | 0.560077404 |             |           |               |
| TSC2      | ENSG00000103197 | -1.6687   | 0.95241     | 1.32        | 0.09342     | 0.75565   | 0.22493 0.297 |
|           | 0.38323         | 0.09342   | 0.560077404 |             |             |           |               |
| TUBD1     | ENSG00000108423 | -0.55734  | 0.71135     | 1.32        | 0.093423    | 0.14268   | 0.44327       |
|           | 0.51299         | 0.30398   | 0.093423    | 0.560077404 |             |           |               |
| LINC00934 | ENSG00000281196 | 1.3199    | 0.093433    | -0.1943     | 0.57703     | -1.4505   |               |
|           | 0.92654         | 0.27759   | 0.39066     | 0.093433    | 0.560077404 |           |               |
| NA        | ENSG00000227755 | -0.47472  | 0.68251     | -0.5351     | 0.70371     | 1.3198    | 0.093456      |
|           | -0.8859         | 0.81217   | 0.093456    | 0.560077404 |             |           |               |
| NA        | ENSG00000175911 | 0.95039   | 0.17096     | 0.054787    | 0.47815     | 1.3197    | 0.09346       |
|           | -0.63591        | 0.73758   | 0.09346     | 0.560077404 |             |           |               |
| RN7SL334P | ENSG00000244618 | 1.3197    | 0.093463    | 0.27593     | 0.3913      | 0.55481   |               |
|           | 0.28951         | 0.27593   | 0.3913      | 0.093463    | 0.560077404 |           |               |
| NA        | ENSG00000227681 | 0.53076   | 0.29779     | 0.64727     | 0.25873     | 0.64727   | 0.25873       |
|           | 1.3197          | 0.093465  | 0.093465    | 0.560077404 |             |           |               |
| NA        | ENSG00000222373 | 0.80468   | 0.2105      | -0.53905    | 0.70507     | 0.51457   | 0.30343       |
|           | 1.3196          | 0.093485  | 0.093485    | 0.560125409 |             |           |               |
| NA        | ENSG00000229272 | 1.2673    | 0.10252     | 1.3195      | 0.093496    | 1.3195    | 0.093496      |
|           | 1.3195          | 0.093496  | 0.093496    | 0.560125409 |             |           |               |
| NA        | ENSG00000272810 | 1.3194    | 0.093513    | 1.3194      | 0.093513    | 1.3194    | 0.093513      |
|           | 1.3194          | 0.093513  | 0.093513    | 0.560158388 |             |           |               |
| NA        | ENSG00000231683 | 0.66438   | 0.25323     | 1.3193      | 0.093527    | 1.3193    | 0.093527      |
|           | 1.2167          | 0.11186   | 0.093527    | 0.560165057 |             |           |               |
| CD74      | ENSG00000019582 | -0.61344  | 0.73021     | 0.6103      | 0.27083     | 1.3191    | 0.093562      |
|           | -0.61344        | 0.73021   | 0.093562    | 0.560165057 |             |           |               |
| NA        | ENSG00000273366 | 1.3191    | 0.093564    | 1.3191      | 0.093564    | 1.3191    | 0.093564      |
|           | 1.3191          | 0.093564  | 0.093564    | 0.560165057 |             |           |               |
| LINC01676 | ENSG00000230768 | 0.78716   | 0.21559     | 1.3191      | 0.093574    | -0.38787  |               |
|           | 0.65094         | -1.2921   | 0.90184     | 0.093574    | 0.560165057 |           |               |
| HMG3-AS1  | ENSG00000270362 | 1.3189    | 0.093594    | 1.3189      | 0.093594    | 1.3189    |               |
|           | 0.093594        | 1.3189    | 0.093594    | 0.093594    | 0.560165057 |           |               |
| NA        | ENSG00000255875 | 1.3188    | 0.093616    | 1.3188      | 0.093616    | 1.3188    | 0.093616      |
|           | 1.3188          | 0.093616  | 0.093616    | 0.560165057 |             |           |               |
| NA        | ENSG00000274446 | 0.028193  | 0.48875     | -1.4725     | 0.92955     | 1.3188    | 0.093626      |
|           | -0.56213        | 0.71298   | 0.093626    | 0.560165057 |             |           |               |
| NA        | ENSG00000255005 | 1.3187    | 0.093641    | 1.3187      | 0.093641    | 1.3187    | 0.093641      |
|           | 1.3187          | 0.093641  | 0.093641    | 0.560165057 |             |           |               |
| OR6C7P    | ENSG00000257757 | -0.34841  | 0.63623     | 0.30841     | 0.37889     | 1.3186    |               |
|           | 0.093644        | -0.28328  | 0.61152     | 0.093644    | 0.560165057 |           |               |
| MRGPRX3   | ENSG00000179826 | 1.3185    | 0.093671    | -1.5923     | 0.94434     | -0.43716  | 0.669         |
|           | 0.13226         | 0.44739   | 0.093671    | 0.560165057 |             |           |               |
| NA        | ENSG00000257254 | 1.3185    | 0.093672    | 1.3185      | 0.093672    | 1.3185    | 0.093672      |
|           | 1.3185          | 0.093672  | 0.093672    | 0.560165057 |             |           |               |
| SNIP1     | ENSG00000163877 | 0.50124   | 0.3081      | 0.50124     | 0.3081      | 0.50124   | 0.3081        |
|           | 1.3184          | 0.093683  | 0.093683    | 0.560165057 |             |           |               |
| TSPAN33   | ENSG00000158457 | 1.0377    | 0.14971     | -0.55957    | 0.71212     | -0.18602  |               |
|           | 0.57379         | 1.3183    | 0.093701    | 0.093701    | 0.560165057 |           |               |
| CKMT2-AS1 | ENSG00000247572 | -0.54989  | 0.7088      | 1.3183      | 0.093706    | -0.15901  |               |
|           | 0.56317         | -0.15901  | 0.56317     | 0.093706    | 0.560165057 |           |               |
| NA        | ENSG00000257407 | 0.87404   | 0.19105     | 1.3182      | 0.093721    | 1.1557    | 0.12391       |
|           | 1.1052          | 0.13454   | 0.093721    | 0.560165057 |             |           |               |
| GHDC      | ENSG00000167925 | -0.030709 | 0.51225     | -0.030709   | 0.51225     | -0.030709 | 0.51225       |
|           | 1.3181          | 0.093727  | 0.093727    | 0.560165057 |             |           |               |

|            |                 |           |             |             |             |             |          |
|------------|-----------------|-----------|-------------|-------------|-------------|-------------|----------|
| NA         | ENSG00000273132 | 1.3181    | 0.093732    | 1.3181      | 0.093732    | 1.3181      | 0.093732 |
|            |                 | 1.3181    | 0.093732    | 0.560165057 |             |             |          |
| CALML6     | ENSG00000169885 | 1.3181    | 0.093737    | 1.2786      | 0.10052     | 0.30074     |          |
|            |                 | 0.38181   | 1.3181      | 0.093737    | 0.093737    | 0.560165057 |          |
| DLGAP1-AS4 | ENSG00000263878 | 1.318     | 0.093744    | 0.20985     | 0.41689     | -0.14934    | 0.55936  |
|            |                 | -0.031605 | 0.51261     | 0.093744    | 0.560165057 |             |          |
| NA         | ENSG00000207292 | 1.3179    | 0.093763    | 1.1754      | 0.11993     | 1.1754      | 0.11993  |
|            |                 | 1.1754    | 0.11993     | 0.093763    | 0.560165057 |             |          |
| IGLJ6      | ENSG00000211682 | 0.55475   | 0.28953     | 1.3179      | 0.093772    | 1.3179      | 0.093772 |
|            |                 | 0.59348   | 0.27643     | 0.093772    | 0.560165057 |             |          |
| NYNRIN     | ENSG00000205978 | 1.1999    | 0.11509     | 0.73433     | 0.23137     | 1.3178      |          |
|            |                 | 0.093788  | 1.2084      | 0.11344     | 0.093788    | 0.560165057 |          |
| RFPL3S     | ENSG00000205853 | 1.3178    | 0.09379     | 1.3178      | 0.09379     | 1.3178      |          |
|            |                 | 0.09379   | 1.3178      | 0.09379     | 0.09379     | 0.560165057 |          |
| LINC00989  | ENSG00000250334 | 1.2806    | 0.10017     | 0.048829    | 0.48053     | 0.11098     |          |
|            |                 | 0.45582   | 1.3178      | 0.09379     | 0.09379     | 0.560165057 |          |
| LINC00957  | ENSG00000235314 | 1.3176    | 0.093811    | 1.3176      | 0.093811    | 1.3176      |          |
|            |                 | 0.093811  | 1.3176      | 0.093811    | 0.093811    | 0.56021001  |          |
| NA         | ENSG00000284263 | 1.3175    | 0.093832    | 1.3175      | 0.093832    | 1.3175      | 0.093832 |
|            |                 | 1.3175    | 0.093832    | 0.093832    | 0.56021001  |             |          |
| ZNF619P1   | ENSG00000224547 | 1.3175    | 0.093842    | 0.16021     | 0.43636     | 1.3175      |          |
|            |                 | 0.093842  | 1.3175      | 0.093842    | 0.093842    | 0.56021001  |          |
| ATG12P2    | ENSG00000224121 | 1.3173    | 0.093862    | 1.3173      | 0.093862    | 1.3173      |          |
|            |                 | 0.093862  | 1.3173      | 0.093862    | 0.093862    | 0.56021001  |          |
| LINC02561  | ENSG00000224034 | 1.3173    | 0.093875    | 1.0144      | 0.15518     | 0.3055      |          |
|            |                 | 0.37999   | 0.40139     | 0.34407     | 0.093875    | 0.56021001  |          |
| MTCYBP33   | ENSG00000263241 | 1.3173    | 0.093875    | 0.051599    | 0.47942     | -0.062848   |          |
|            |                 | 0.52506   | -0.062848   | 0.52506     | 0.093875    | 0.56021001  |          |
| LEXM       | ENSG00000162398 | 1.3172    | 0.093878    | -0.65293    | 0.7431      | -0.28773    | 0.61322  |
|            |                 | -0.61478  | 0.73065     | 0.093878    | 0.56021001  |             |          |
| MIF4GD     | ENSG00000125457 | 1.3171    | 0.093902    | 1.3171      | 0.093902    | 1.3171      |          |
|            |                 | 0.093902  | 1.3171      | 0.093902    | 0.093902    | 0.560227953 |          |
| CCNC       | ENSG00000112237 | 1.3171    | 0.093904    | 1.3171      | 0.093904    | 1.3171      | 0.093904 |
|            |                 | 1.3171    | 0.093904    | 0.093904    | 0.560227953 |             |          |
| RN7SKP285  | ENSG00000222069 | 0.19581   | 0.42238     | 1.3169      | 0.093935    | -0.27012    |          |
|            |                 | 0.60646   | -0.27012    | 0.60646     | 0.093935    | 0.560344296 |          |
| SLC39A10   | ENSG00000196950 | -0.12402  | 0.54935     | 1.2092      | 0.11329     | 1.3168      |          |
|            |                 | 0.093957  | 0.19357     | 0.42326     | 0.093957    | 0.560362255 |          |
| QSOX1      | ENSG00000116260 | 0.96019   | 0.16848     | 0.94851     | 0.17143     | 1.3167      | 0.093966 |
|            |                 | 0.23413   | 0.40744     | 0.093966    | 0.560362255 |             |          |
| NA         | ENSG00000236741 | 1.1477    | 0.12554     | 1.1477      | 0.12554     | 1.1477      | 0.12554  |
|            |                 | 1.3167    | 0.093975    | 0.093975    | 0.560362255 |             |          |
| HPR        | ENSG00000261701 | 1.3164    | 0.094022    | 1.3164      | 0.094022    | 1.3164      | 0.094022 |
|            |                 | 1.3164    | 0.094022    | 0.094022    | 0.560362255 |             |          |
| STMN1P2    | ENSG00000251440 | 0.5394    | 0.2948      | 0.5394      | 0.2948      | 0.5394      |          |
|            |                 | 0.2948    | 1.3164      | 0.094023    | 0.094023    | 0.560362255 |          |
| TRGC1      | ENSG00000211689 | 1.2956    | 0.097554    | 0.15464     | 0.43855     | 1.3164      | 0.094025 |
|            |                 | 1.3164    | 0.094025    | 0.094025    | 0.560362255 |             |          |
| SPRY4      | ENSG00000187678 | 0.39149   | 0.34772     | -1.1143     | 0.86742     | -1.063      | 0.85612  |
|            |                 | 1.3162    | 0.094048    | 0.094048    | 0.560362255 |             |          |
| UBE2J1     | ENSG00000198833 | 1.1466    | 0.12577     | 0.8736      | 0.19117     | 0.8736      |          |
|            |                 | 0.19117   | 1.3161      | 0.094074    | 0.094074    | 0.560362255 |          |
| NA         | ENSG00000262678 | 1.316     | 0.094082    | 1.316       | 0.094082    | 1.316       | 0.094082 |
|            |                 | 0.094082  | 0.560362255 |             |             |             |          |
| NA         | ENSG00000218027 | 1.316     | 0.094084    | -0.19654    | 0.57791     | 1.316       | 0.094084 |
|            |                 | 0.2763    | 0.094084    | 0.560362255 |             |             |          |
| NA         | ENSG00000259055 | 1.0228    | 0.1532      | 0.96578     | 0.16708     | -0.3408     | 0.63337  |
|            |                 | 1.316     | 0.094088    | 0.094088    | 0.560362255 |             |          |
| FBN2       | ENSG00000138829 | 0.96878   | 0.16633     | 0.60872     | 0.27135     | 1.3159      | 0.094109 |
|            |                 | -0.16078  | 0.56387     | 0.094109    | 0.560362255 |             |          |
| IGSF6      | ENSG00000140749 | 1.3159    | 0.094111    | -0.36171    | 0.64122     | -0.36171    | 0.64122  |
|            |                 | -0.36171  | 0.64122     | 0.094111    | 0.560362255 |             |          |



|             |                 |           |          |             |             |           |          |
|-------------|-----------------|-----------|----------|-------------|-------------|-----------|----------|
| RNU6-48P    | ENSG00000206888 | 0.64456   | 0.25961  | 1.0401      | 0.14915     | 1.3158    |          |
|             | 0.09412         | 1.3158    | 0.09412  | 0.09412     | 0.560362255 |           |          |
| ACTG1P20    | ENSG00000241547 | 1.3158    | 0.09412  | 0.09412     | 1.3158      | 0.09412   | 1.3158   |
|             | 0.09412         | 1.3158    | 0.09412  | 0.09412     | 0.560362255 |           |          |
| EPHA7       | ENSG00000135333 | -0.10651  | 0.54241  | 1.3158      | 0.094122    | 0.29675   | 0.38333  |
|             | -1.072          | 0.85813   | 0.094122 | 0.560362255 |             |           |          |
| GIGYF1      | ENSG00000146830 | 0.54216   | 0.29385  | -1.0817     | 0.86031     | -1.1084   |          |
|             | 0.86616         | 1.3156    | 0.094148 | 0.094148    | 0.560448576 |           |          |
| NA          | ENSG00000253223 | 1.3155    | 0.094163 | 1.3155      | 0.094163    | 1.3155    | 0.094163 |
|             | 1.3155          | 0.094163  | 0.094163 | 0.560469401 |             |           |          |
| RNU7-55P    | ENSG00000239078 | 1.3152    | 0.094213 | -0.89272    | 0.814       | -0.90792  | 0.81804  |
|             | -1.0552         | 0.85433   | 0.094213 | 0.560698521 |             |           |          |
| SPATA5L1    | ENSG00000171763 | 0.48212   | 0.31486  | 1.3149      | 0.094268    | 0.49549   |          |
|             | 0.31013         | -1.4544   | 0.92709  | 0.094268    | 0.560888845 |           |          |
| RPS26P55    | ENSG00000239210 | 1.3149    | 0.094268 | 1.3149      | 0.094268    | 1.3149    |          |
|             | 0.094268        | 1.3149    | 0.094268 | 0.094268    | 0.560888845 |           |          |
| LINC02584   | ENSG00000254417 | -0.039562 | 0.51578  | 1.3147      | 0.094298    | 0.80711   |          |
|             | 0.2098          | 0.80711   | 0.2098   | 0.094298    | 0.560915302 |           |          |
| NA          | ENSG00000268957 | 1.3147    | 0.094307 | 0.1435      | 0.44295     | 1.3147    | 0.094307 |
|             | 0.57186         | 0.28371   | 0.094307 | 0.560915302 |             |           |          |
| RNU7-119P   | ENSG00000239119 | 0.18328   | 0.42729  | 0.18328     | 0.42729     | 0.18328   |          |
|             | 0.42729         | 1.3146    | 0.094322 | 0.094322    | 0.560915302 |           |          |
| FTH1P15     | ENSG00000218980 | -0.18678  | 0.57408  | -0.18678    | 0.57408     | 0.48344   |          |
|             | 0.31439         | 1.3146    | 0.09433  | 0.09433     | 0.560915302 |           |          |
| SLC9A7P1    | ENSG00000227825 | 1.3146    | 0.09433  | 1.3146      | 0.09433     | 1.0968    |          |
|             | 0.13637         | 0.5273    | 0.29899  | 0.09433     | 0.560915302 |           |          |
| NA          | ENSG00000227210 | 1.3142    | 0.094386 | 0.017161    | 0.49315     | 0.017161  | 0.49315  |
|             | 0.017161        | 0.49315   | 0.094386 | 0.560938027 |             |           |          |
| ABCA10      | ENSG00000154263 | 0.39599   | 0.34606  | 1.1256      | 0.13016     | -0.2904   |          |
|             | 0.61425         | 1.314     | 0.09443  | 0.09443     | 0.560938027 |           |          |
| NA          | ENSG00000221670 | -0.48362  | 0.68567  | 0.75765     | 0.22433     | 1.3139    | 0.094437 |
|             | 0.75765         | 0.22433   | 0.094437 | 0.560938027 |             |           |          |
| POLR3KP2    | ENSG00000265469 | 1.3138    | 0.094451 | 1.0949      | 0.13678     | 1.0291    |          |
|             | 0.15171         | 0.202     | 0.41996  | 0.094451    | 0.560938027 |           |          |
| ADAMTS9-AS2 | ENSG00000241684 | 1.3138    | 0.094462 | 0.033456    | 0.48666     | -1.6095   |          |
|             | 0.94624         | -0.063535 | 0.52533  | 0.094462    | 0.560938027 |           |          |
| NA          | ENSG00000260519 | 1.3137    | 0.094468 | 1.3137      | 0.094468    | 1.3137    | 0.094468 |
|             | 1.3137          | 0.094468  | 0.094468 | 0.560938027 |             |           |          |
| CACNG4      | ENSG00000075461 | -1.631    | 0.94855  | -1.631      | 0.94855     | -1.631    |          |
|             | 0.94855         | 1.3137    | 0.094474 | 0.094474    | 0.560938027 |           |          |
| LINC01322   | ENSG00000244128 | 0.28454   | 0.388    | 0.62132     | 0.26719     | 1.3136    | 0.094483 |
|             | -0.040739       | 0.51625   | 0.094483 | 0.560938027 |             |           |          |
| NA          | ENSG00000275812 | 1.3136    | 0.094497 | 1.3136      | 0.094497    | 1.3136    | 0.094497 |
|             | 1.3136          | 0.094497  | 0.094497 | 0.560938027 |             |           |          |
| DEFB126     | ENSG00000125788 | 0.58956   | 0.27774  | 1.3135      | 0.0945      | 0.44804   |          |
|             | 0.32706         | 0.57883   | 0.28135  | 0.0945      | 0.560938027 |           |          |
| RUVBL2      | ENSG00000183207 | 1.3135    | 0.094507 | 1.3135      | 0.094507    | 1.3135    |          |
|             | 0.094507        | 1.3135    | 0.094507 | 0.094507    | 0.560938027 |           |          |
| LINC01358   | ENSG00000237352 | -0.27131  | 0.60692  | 1.041       | 0.14894     | 1.3135    | 0.09451  |
|             | -0.73626        | 0.76921   | 0.09451  | 0.560938027 |             |           |          |
| NA          | ENSG00000255158 | -0.064024 | 0.52552  | 1.3135      | 0.094511    | -0.064024 | 0.52552  |
|             | -0.064024       | 0.52552   | 0.094511 | 0.560938027 |             |           |          |
| NA          | ENSG00000234147 | 1.3135    | 0.094512 | 1.3135      | 0.094512    | 1.0542    | 0.1459   |
|             | 1.3135          | 0.094512  | 0.094512 | 0.560938027 |             |           |          |
| RPL7AP7     | ENSG00000213880 | 1.3135    | 0.094515 | 1.3135      | 0.094515    | 1.3135    |          |
|             | 0.094515        | 0.83419   | 0.20209  | 0.094515    | 0.560938027 |           |          |
| GPAT2P2     | ENSG00000188383 | 0.25103   | 0.40089  | -0.74165    | 0.77085     | 1.3134    |          |
|             | 0.094518        | 1.3134    | 0.094518 | 0.094518    | 0.560938027 |           |          |
| RNU6-948P   | ENSG00000252183 | 0.91775   | 0.17938  | 0.36344     | 0.35814     | 1.3132    |          |
|             | 0.094556        | -0.31314  | 0.62291  | 0.094556    | 0.561095212 |           |          |
| SLC66A2     | ENSG00000122490 | -1.1108   | 0.86668  | 1.313       | 0.094595    | -1.0264   | 0.84765  |
|             | 0.53693         | 0.29566   | 0.094595 | 0.561258292 |             |           |          |

|            |                 |           |           |          |             |             |          |
|------------|-----------------|-----------|-----------|----------|-------------|-------------|----------|
| UBOX5      | ENSG00000185019 | 1.3129    | 0.094609  | 1.3129   | 0.094609    | -1.3075     | 0.90447  |
|            |                 | 0.26158   | 0.39682   | 0.094609 | 0.561273018 |             |          |
| RNU6-1155P | ENSG00000200424 | 1.3127    | 0.094634  | 1.3127   | 0.094634    | 1.3127      |          |
|            |                 | 0.094634  | 0.39219   | 0.34746  | 0.094634    | 0.561352991 |          |
| RPL21P129  | ENSG00000242636 | 1.3126    | 0.094659  | 1.3126   | 0.094659    | 1.3126      |          |
|            |                 | 0.094659  | 1.3126    | 0.094659 | 0.094659    | 0.561432944 |          |
| DISC1-IT1  | ENSG00000226758 | 0.68006   | 0.24823   | 0.24823  | 0.29766     | 0.38298     | 1.3124   |
|            |                 | 0.094696  | 0.28843   | 0.38651  | 0.094696    | 0.561584043 |          |
| NA         | ENSG00000238033 | 1.3122    | 0.094723  | 1.3122   | 0.094723    | 1.3122      | 0.094723 |
|            |                 | 1.0231    | 0.15313   | 0.094723 | 0.561586573 |             |          |
| CD63       | ENSG00000135404 | 0.1742    | 0.43085   | 0.1742   | 0.43085     | -0.43052    | 0.66659  |
|            |                 | 1.3122    | 0.094724  | 0.094724 | 0.561586573 |             |          |
| RNU7-147P  | ENSG00000238698 | 1.3122    | 0.094731  | 1.3122   | 0.094731    | -0.17117    |          |
|            |                 | 0.56796   | -0.29078  | 0.61439  | 0.094731    | 0.561586573 |          |
| NA         | ENSG00000271196 | 0.4482    | 0.327     | 0.96489  | 0.1673      | 1.3119      | 0.09478  |
|            |                 | 0.78714   | 0.2156    | 0.09478  | 0.561746306 |             |          |
| TRIM65     | ENSG00000141569 | 1.3119    | 0.094781  | 1.3119   | 0.094781    | 0.96497     |          |
|            |                 | 0.16728   | 1.0593    | 0.14473  | 0.094781    | 0.561746306 |          |
| RPL36AP26  | ENSG00000235828 | -0.20873  | 0.58267   | 1.3116   | 0.094826    | -0.20873    |          |
|            |                 | 0.58267   | -0.20873  | 0.58267  | 0.094826    | 0.561926514 |          |
| SPRY1      | ENSG00000164056 | 0.40668   | 0.34212   | 1.3115   | 0.094843    | 0.53449     | 0.2965   |
|            |                 | 0.73783   | 0.23031   | 0.094843 | 0.561926514 |             |          |
| PRRT3-AS1  | ENSG00000230082 | 0.52354   | 0.3003    | 1.3115   | 0.094846    | -1.1994     |          |
|            |                 | 0.88482   | -1.1994   | 0.88482  | 0.094846    | 0.561926514 |          |
| FABP5P10   | ENSG00000213201 | 0.38948   | 0.34846   | 0.38948  | 0.34846     | 0.38948     |          |
|            |                 | 0.34846   | 1.3112    | 0.094891 | 0.094891    | 0.562097914 |          |
| SNORA2C    | ENSG00000221491 | 1.3112    | 0.094898  | 1.3112   | 0.094898    | 1.3112      |          |
|            |                 | 0.094898  | 1.3112    | 0.094898 | 0.094898    | 0.562097914 |          |
| LINC00919  | ENSG00000260268 | -0.96774  | 0.83341   | -0.96774 | 0.83341     | -0.54435    |          |
|            |                 | 0.7069    | 1.311     | 0.094924 | 0.094924    | 0.562138952 |          |
| NA         | ENSG00000251740 | 1.311     | 0.094928  | 0.53462  | 0.29646     | -0.16736    | 0.56646  |
|            |                 | -0.16736  | 0.56646   | 0.094928 | 0.562138952 |             |          |
| ZNF691     | ENSG00000164011 | 1.3107    | 0.094983  | 1.3107   | 0.094983    | 1.3107      |          |
|            |                 | 0.094983  | 1.3107    | 0.094983 | 0.094983    | 0.562322442 |          |
| EEF1A1P37  | ENSG00000254124 | 1.3105    | 0.095006  | 1.3105   | 0.095006    | 1.3105      |          |
|            |                 | 0.095006  | 1.3105    | 0.095006 | 0.095006    | 0.562322442 |          |
| NA         | ENSG00000258592 | 0.72954   | 0.23283   | 1.0921   | 0.13741     | 1.3105      | 0.095006 |
|            |                 | -0.80328  | 0.78909   | 0.095006 | 0.562322442 |             |          |
| RNU7-196P  | ENSG00000238913 | -0.39533  | 0.6537    | 1.3105   | 0.095015    | -1.2566     |          |
|            |                 | 0.89556   | -1.2566   | 0.89556  | 0.095015    | 0.562322442 |          |
| NA         | ENSG00000260367 | 0.28978   | 0.38599   | 0.86572  | 0.19332     | 1.3104      | 0.095029 |
|            |                 | 1.3104    | 0.095029  | 0.095029 | 0.562322442 |             |          |
| NA         | ENSG00000279597 | 0.53202   | 0.29736   | -0.20325 | 0.58053     | 1.3103      | 0.095049 |
|            |                 | 0.53202   | 0.29736   | 0.095049 | 0.562322442 |             |          |
| NA         | ENSG00000272369 | -0.33317  | 0.6305    | 0.71198  | 0.23824     | 1.3102      | 0.095057 |
|            |                 | -0.060091 | 0.52396   | 0.095057 | 0.562322442 |             |          |
| CDH2       | ENSG00000170558 | 0.17785   | 0.42942   | 0.81125  | 0.20861     | 1.1577      | 0.1235   |
|            |                 | 1.3101    | 0.095074  | 0.095074 | 0.562322442 |             |          |
| NA         | ENSG00000276248 | 0.86261   | 0.19417   | 1.3101   | 0.095079    | 1.2002      | 0.11504  |
|            |                 | 1.2002    | 0.11504   | 0.095079 | 0.562322442 |             |          |
| NA         | ENSG00000200829 | 0.16047   | 0.43626   | 0.6311   | 0.26399     | 0.6311      | 0.26399  |
|            |                 | 1.3101    | 0.095084  | 0.095084 | 0.562322442 |             |          |
| PLXNA4     | ENSG00000221866 | -0.54703  | 0.70782   | -0.59358 | 0.7236      | 0.05058     |          |
|            |                 | 0.47983   | 1.3101    | 0.095089 | 0.095089    | 0.562322442 |          |
| RPS15P4    | ENSG00000233762 | 1.3099    | 0.095107  | 1.3099   | 0.095107    | 1.3099      |          |
|            |                 | 0.095107  | 1.3099    | 0.095107 | 0.095107    | 0.562322442 |          |
| FAM76B     | ENSG00000077458 | 1.3099    | 0.095109  | -0.45934 | 0.677       | 0.78527     | 0.21615  |
|            |                 | 1.285     | 0.099388  | 0.095109 | 0.562322442 |             |          |
| KLHL20     | ENSG00000076321 | 1.3096    | 0.095164  | -0.23558 | 0.59312     | 0.5765      |          |
|            |                 | 0.28214   | -0.052021 | 0.52074  | 0.095164    | 0.562490183 |          |
| YBX1P1     | ENSG00000224861 | 1.3096    | 0.095171  | 0.62823  | 0.26493     | 1.3096      |          |
|            |                 | 0.095171  | 1.3096    | 0.095171 | 0.095171    | 0.562490183 |          |

|            |                 |          |             |             |             |             |          |
|------------|-----------------|----------|-------------|-------------|-------------|-------------|----------|
| NA         | ENSG00000282964 | 0.71038  | 0.23873     | 1.3096      | 0.095172    | 0.65883     | 0.255    |
|            |                 | -0.10941 | 0.54356     | 0.095172    | 0.562490183 |             |          |
| NANOGP11   | ENSG00000233464 | 1.3095   | 0.095189    | 1.3095      | 0.095189    | 1.3095      |          |
|            |                 | 0.095189 | 1.3095      | 0.095189    | 0.095189    | 0.562522431 |          |
| OR52Y1P    | ENSG00000231070 | 1.3093   | 0.09521     | 1.3093      | 0.09521     | -0.74811    |          |
|            |                 | 0.7728   | -0.24348    | 0.59618     | 0.09521     | 0.56257456  |          |
| RFC2       | ENSG00000049541 | 0.51945  | 0.30172     | 1.0141      | 0.15526     | 1.3092      | 0.095233 |
|            |                 | 0.91444  | 0.18024     | 0.095233    | 0.56257456  |             |          |
| C2orf66    | ENSG00000187944 | -1.3344  | 0.90897     | 0.81965     | 0.20621     | 1.3092      |          |
|            |                 | 0.095234 | 0.71483     | 0.23736     | 0.095234    | 0.56257456  |          |
| PPATP1     | ENSG00000241293 | 1.2108   | 0.11298     | -0.62893    | 0.7353      | 1.3091      |          |
|            |                 | 0.095244 | -0.62893    | 0.7353      | 0.095244    | 0.56257456  |          |
| BTF3L4     | ENSG00000134717 | -1.9461  | 0.97418     | 0.85171     | 0.19719     | 1.309       | 0.095274 |
|            |                 | 0.59703  | 0.27524     | 0.095274    | 0.56261483  |             |          |
| NBPF4      | ENSG00000196427 | -0.18398 | 0.57299     | -1.2196     | 0.88868     | 1.3089      | 0.095276 |
|            |                 | 0.315    | 0.37638     | 0.095276    | 0.56261483  |             |          |
| NA         | ENSG00000267568 | 1.01     | 0.15624     | 1.3089      | 0.095286    | 1.01        | 0.15624  |
|            |                 | 0.12641  | 0.095286    | 0.56261483  |             |             |          |
| PADI6      | ENSG00000276747 | 1.3088   | 0.095297    | 0.7189      | 0.2361      | 0.15436     | 0.43866  |
|            |                 | 0.61071  | 0.2707      | 0.095297    | 0.56261483  |             |          |
| NA         | ENSG00000254664 | 1.3087   | 0.095316    | 1.3087      | 0.095316    | 1.3087      | 0.095316 |
|            |                 | 1.3087   | 0.095316    | 0.095316    | 0.562658835 |             |          |
| ASS1P1     | ENSG00000220517 | 0.55953  | 0.2879      | 0.40791     | 0.34167     | 1.3085      |          |
|            |                 | 0.095353 | 1.3085      | 0.095353    | 0.095353    | 0.562809071 |          |
| PTPRD      | ENSG00000153707 | -0.42297 | 0.66384     | -1.5052     | 0.93387     | 1.3083      | 0.095392 |
|            |                 | 0.92011  | 0.17876     | 0.095392    | 0.562896014 |             |          |
| NA         | ENSG00000270015 | 1.3082   | 0.095408    | -0.12816    | 0.55099     | -0.12816    | 0.55099  |
|            |                 | -0.12816 | 0.55099     | 0.095408    | 0.562896014 |             |          |
| PWP1       | ENSG00000136045 | 1.308    | 0.095434    | 0.98888     | 0.16136     | 0.98628     | 0.162    |
|            |                 | 0.19201  | 0.095434    | 0.562896014 |             |             | 0.87053  |
| WDR25      | ENSG00000176473 | 1.3078   | 0.095476    | 0.64865     | 0.25828     | -0.7229     | 0.76513  |
|            |                 | 0.79844  | 0.21231     | 0.095476    | 0.562896014 |             |          |
| NA         | ENSG00000235077 | 1.3077   | 0.095484    | 1.3077      | 0.095484    | 1.3077      | 0.095484 |
|            |                 | 1.3077   | 0.095484    | 0.095484    | 0.562896014 |             |          |
| OR2L6P     | ENSG00000232215 | 1.3077   | 0.095489    | 1.3077      | 0.095489    | 1.3077      |          |
|            |                 | 0.095489 | 1.3077      | 0.095489    | 0.095489    | 0.562896014 |          |
| SMIM7P1    | ENSG00000196085 | 1.3077   | 0.095491    | -0.88901    | 0.813       | -0.92384    | 0.82222  |
|            |                 | -0.88901 | 0.813       | 0.095491    | 0.562896014 |             |          |
| NDST1      | ENSG00000070614 | 0.32893  | 0.3711      | 1.3077      | 0.095492    | 0.046841    | 0.48132  |
|            |                 | 1.2222   | 0.11081     | 0.095492    | 0.562896014 |             |          |
| LRRC71     | ENSG00000160838 | 0.21384  | 0.41534     | 1.3076      | 0.095503    | 1.3076      |          |
|            |                 | 0.095503 | -0.30822    | 0.62104     | 0.095503    | 0.562896014 |          |
| SAMD11P1   | ENSG00000262480 | 1.3076   | 0.095507    | 1.3076      | 0.095507    | 1.3076      |          |
|            |                 | 0.095507 | 1.3076      | 0.095507    | 0.095507    | 0.562896014 |          |
| NA         | ENSG00000258883 | 1.0436   | 0.14834     | 1.3075      | 0.095514    | 0.059135    | 0.47642  |
|            |                 | 1.0572   | 0.14521     | 0.095514    | 0.562896014 |             |          |
| NA         | ENSG00000262339 | 1.2511   | 0.10544     | 1.3075      | 0.095521    | 1.3075      | 0.095521 |
|            |                 | 1.3075   | 0.095521    | 0.095521    | 0.562896014 |             |          |
| TMEM63A    | ENSG00000196187 | 1.0664   | 0.14312     | 0.86707     | 0.19295     | 0.90608     |          |
|            |                 | 0.18245  | 1.3075      | 0.095525    | 0.095525    | 0.562896014 |          |
| TRIM36-IT1 | ENSG00000250472 | 1.3074   | 0.095537    | 1.3074      | 0.095537    | 1.3074      |          |
|            |                 | 0.095537 | 1.3074      | 0.095537    | 0.095537    | 0.562896014 |          |
| SAMMSON    | ENSG00000240405 | 1.3074   | 0.095541    | 1.3074      | 0.095541    | 1.3074      |          |
|            |                 | 0.095541 | 1.3074      | 0.095541    | 0.095541    | 0.562896014 |          |
| MIR548D2   | ENSG00000263690 | 0.93088  | 0.17596     | 0.021353    | 0.49148     | 1.3071      |          |
|            |                 | 0.09559  | 1.3071      | 0.09559     | 0.09559     | 0.563057761 |          |
| HPYR1      | ENSG00000253521 | 1.307    | 0.095603    | 1.307       | 0.095603    | 1.307       | 0.095603 |
|            |                 | 0.095603 | 0.563057761 |             |             |             |          |
| NA         | ENSG00000262766 | 1.3069   | 0.095627    | 1.3069      | 0.095627    | 1.3069      | 0.095627 |
|            |                 | 1.3069   | 0.095627    | 0.095627    | 0.563057761 |             |          |
| ANKRD26P2  | ENSG00000235550 | -0.55441 | 0.71035     | 1.3068      | 0.095642    | -0.55441    |          |
|            |                 | 0.71035  | 0.98568     | 0.16215     | 0.095642    | 0.563057761 |          |

|            |                 |            |             |          |             |             |            |          |
|------------|-----------------|------------|-------------|----------|-------------|-------------|------------|----------|
| NA         | ENSG00000261253 | 1.3068     | 0.095643    | 0.095643 | 1.2686      | 0.10229     | 1.3068     | 0.095643 |
|            |                 | 1.3068     | 0.095643    | 0.095643 | 0.563057761 |             |            |          |
| NA         | ENSG00000233339 | -0.67483   | 0.75011     | 0.75011  | 1.3068      | 0.095647    | -0.0015151 | 0.5006   |
|            |                 | -0.0015151 | 0.5006      | 0.095647 | 0.563057761 |             |            |          |
| USP48      | ENSG0000090686  | 0.78363    | 0.21663     | 0.21663  | 1.3067      | 0.095662    | 0.40657    | 0.34216  |
|            |                 | 0.086134   | 0.46568     | 0.095662 | 0.563057761 |             |            |          |
| SNX18P3    | ENSG00000225345 | 1.3066     | 0.095666    | 0.095666 | 0.81242     | 0.20828     | -0.78669   |          |
|            |                 | 0.78427    | -0.5451     | 0.70716  | 0.095666    | 0.563057761 |            |          |
| LINC01659  | ENSG00000234928 | 1.3065     | 0.095683    | 0.095683 | 0.042821    | 0.48292     | -0.0069021 |          |
|            |                 | 0.50275    | 0.43541     | 0.33163  | 0.095683    | 0.563057761 |            |          |
| BAIAP3     | ENSG00000007516 | 1.3065     | 0.095684    | 0.095684 | -0.10492    | 0.54178     | -0.2271    |          |
|            |                 | 0.58983    | -0.2271     | 0.58983  | 0.095684    | 0.563057761 |            |          |
| NA         | ENSG00000260262 | 1.3065     | 0.095696    | 0.43098  | 0.33324     | 0.031704    | 0.48735    |          |
|            |                 | 0.39581    | 0.34612     | 0.095696 | 0.563060382 |             |            |          |
| MESP1      | ENSG00000166823 | 0.86303    | 0.19406     | 0.19406  | 1.3062      | 0.09574     | 1.1781     | 0.11939  |
|            |                 | 0.86303    | 0.19406     | 0.09574  | 0.563200916 |             |            |          |
| NA         | ENSG00000266541 | 0.42984    | 0.33366     | 0.74495  | 0.22815     | 1.3062      | 0.095743   |          |
|            |                 | 1.3062     | 0.095743    | 0.095743 | 0.563200916 |             |            |          |
| NA         | ENSG00000279315 | 1.3061     | 0.095767    | 1.3061   | 0.095767    | 1.3061      | 0.095767   |          |
|            |                 | 1.3061     | 0.095767    | 0.095767 | 0.563202841 |             |            |          |
| DCK        | ENSG00000156136 | -0.75769   | 0.77568     | -0.6768  | 0.75073     | 0.99271     | 0.16043    |          |
|            |                 | 1.306      | 0.095778    | 0.095778 | 0.563202841 |             |            |          |
| NA         | ENSG00000260940 | 1.306      | 0.095778    | 1.306    | 0.095778    | 1.306       | 0.095778   | 1.306    |
|            |                 | 0.095778   | 0.563202841 |          |             |             |            |          |
| ASS1P8     | ENSG00000251418 | 1.3058     | 0.095811    | -0.11949 | 0.54756     | 0.33667     |            |          |
|            |                 | 0.36818    | 0.55181     | 0.29054  | 0.095811    | 0.563219672 |            |          |
| NA         | ENSG00000240919 | 1.3058     | 0.095812    | 1.3058   | 0.095812    | 1.3058      | 0.095812   |          |
|            |                 | 1.3058     | 0.095812    | 0.095812 | 0.563219672 |             |            |          |
| NA         | ENSG00000272703 | 1.3056     | 0.095837    | 1.3056   | 0.095837    | 1.3056      | 0.095837   |          |
|            |                 | 1.3056     | 0.095837    | 0.095837 | 0.563219672 |             |            |          |
| NA         | ENSG00000221681 | 0.45046    | 0.32619     | 1.3054   | 0.095874    | 0.88202     | 0.18888    |          |
|            |                 | -1.5203    | 0.93578     | 0.095874 | 0.563219672 |             |            |          |
| SLC2A4RG   | ENSG00000125520 | 1.3054     | 0.095875    | 1.3054   | 0.095875    | 1.3054      |            |          |
|            |                 | 0.095875   | 1.3054      | 0.095875 | 0.095875    | 0.563219672 |            |          |
| TRIM23     | ENSG00000113595 | 0.17634    | 0.43001     | 0.16687  | 0.43374     | -0.65763    |            |          |
|            |                 | 0.74461    | 1.3054      | 0.09588  | 0.09588     | 0.563219672 |            |          |
| PRKAG2     | ENSG00000106617 | 0.53286    | 0.29707     | 1.3054   | 0.095884    | 0.63857     |            |          |
|            |                 | 0.26155    | 0.24807     | 0.40204  | 0.095884    | 0.563219672 |            |          |
| TTC21B     | ENSG00000123607 | 1.1634     | 0.12234     | 1.3053   | 0.095894    | 1.2904      |            |          |
|            |                 | 0.098453   | -0.20443    | 0.58099  | 0.095894    | 0.563219672 |            |          |
| CXCR5      | ENSG00000160683 | 1.3053     | 0.095901    | 0.76894  | 0.22096     | 1.2203      | 0.11118    |          |
|            |                 | 0.84798    | 0.19822     | 0.095901 | 0.563219672 |             |            |          |
| NA         | ENSG00000252004 | 0.64697    | 0.25883     | 1.3052   | 0.095905    | 1.3052      | 0.095905   |          |
|            |                 | 1.3052     | 0.095905    | 0.095905 | 0.563219672 |             |            |          |
| MMP23B     | ENSG00000189409 | 0.97569    | 0.16461     | 1.3052   | 0.095908    | -0.80607    |            |          |
|            |                 | 0.7899     | -1.4094     | 0.92064  | 0.095908    | 0.563219672 |            |          |
| NA         | ENSG00000234282 | 1.2127     | 0.11262     | -0.30757 | 0.62079     | 1.3051      | 0.095935   |          |
|            |                 | 1.1152     | 0.13238     | 0.095935 | 0.563239198 |             |            |          |
| NA         | ENSG00000276740 | -0.81446   | 0.79231     | 0.036324 | 0.48551     | 0.036324    | 0.48551    |          |
|            |                 | 1.305      | 0.095943    | 0.095943 | 0.563239198 |             |            |          |
| TERC       | ENSG00000270141 | 1.305      | 0.095946    | 1.305    | 0.095946    | 1.305       | 0.095946   | 1.305    |
|            |                 | 0.095946   | 0.563239198 |          |             |             |            |          |
| BOD1       | ENSG00000145919 | 0.55645    | 0.28895     | -0.44944 | 0.67344     | 1.3048      | 0.095983   |          |
|            |                 | 0.49644    | 0.30979     | 0.095983 | 0.563361761 |             |            |          |
| NA         | ENSG00000260470 | -0.25094   | 0.59907     | 1.3047   | 0.09599     | 0.96186     | 0.16806    |          |
|            |                 | 0.96186    | 0.16806     | 0.09599  | 0.563361761 |             |            |          |
| NA         | ENSG00000223728 | 0.43427    | 0.33205     | 1.3046   | 0.096016    | -0.28058    | 0.61048    |          |
|            |                 | 0.84613    | 0.19874     | 0.096016 | 0.563384517 |             |            |          |
| TMEM9B-AS1 | ENSG00000254860 | 0.50082    | 0.30825     | 0.86725  | 0.1929      | 0.19552     |            |          |
|            |                 | 0.42249    | 1.3046      | 0.096017 | 0.096017    | 0.563384517 |            |          |
| NA         | ENSG00000200206 | 1.3045     | 0.096037    | 1.3045   | 0.096037    | 1.3045      | 0.096037   |          |
|            |                 | 1.3045     | 0.096037    | 0.096037 | 0.563434025 |             |            |          |

|            |                 |          |             |             |             |           |          |          |
|------------|-----------------|----------|-------------|-------------|-------------|-----------|----------|----------|
| RNASE3     | ENSG00000169397 | 1.1196   | 0.13143     | -0.48126    | 0.68483     | -0.25595  |          |          |
|            | 0.60101         | 1.3044   | 0.096056    | 0.096056    | 0.563477655 |           |          |          |
| NA         | ENSG00000271150 | 1.3041   | 0.096091    | 1.3041      | 0.096091    | 1.3041    | 0.096091 | 0.096091 |
|            | 1.3041          | 0.096091 | 0.096091    | 0.563615122 |             |           |          |          |
| NUAK2      | ENSG00000163545 | 0.69312  | 0.24412     | 1.3038      | 0.096157    | 0.65331   | 0.25678  |          |
|            | -0.065851       | 0.52625  | 0.096157    | 0.563934362 |             |           |          |          |
| NA         | ENSG00000260744 | 1.3037   | 0.09617     | 0.12338     | 0.4509      | -0.42125  | 0.66321  |          |
|            | 0.22376         | 0.41147  | 0.09617     | 0.563942732 |             |           |          |          |
| NA         | ENSG00000249418 | 1.3036   | 0.096193    | 1.3036      | 0.096193    | 1.3036    | 0.096193 | 0.096193 |
|            | 1.3036          | 0.096193 | 0.096193    | 0.564009733 |             |           |          |          |
| NA         | ENSG00000219445 | 1.3035   | 0.09621     | -0.14876    | 0.55913     | -0.56116  | 0.71265  |          |
|            | -0.65991        | 0.74534  | 0.09621     | 0.564041542 |             |           |          |          |
| POLR3K     | ENSG00000161980 | 0.69164  | 0.24458     | 1.2978      | 0.09718     | 1.3033    |          |          |
|            | 0.096228        | -0.64885 | 0.74178     | 0.096228    | 0.564079206 |           |          |          |
| INTS8      | ENSG00000164941 | 1.3032   | 0.096251    | 1.3032      | 0.096251    | 0.23514   | 0.40705  |          |
|            | 1.2089          | 0.11335  | 0.096251    | 0.564127685 |             |           |          |          |
| NA         | ENSG00000201788 | 1.3031   | 0.096265    | 1.3031      | 0.096265    | 1.3031    | 0.096265 | 0.096265 |
|            | 1.3031          | 0.096265 | 0.096265    | 0.564127685 |             |           |          |          |
| NA         | ENSG00000253410 | 1.3031   | 0.096271    | 1.3031      | 0.096271    | 1.3031    | 0.096271 | 0.096271 |
|            | 1.3031          | 0.096271 | 0.096271    | 0.564127685 |             |           |          |          |
| NA         | ENSG00000259907 | 1.303    | 0.096285    | 0.48656     | 0.31329     | 0.86727   | 0.1929   |          |
|            | 0.34021         | 0.36685  | 0.096285    | 0.564141884 |             |           |          |          |
| NA         | ENSG00000225963 | -0.24542 | 0.59693     | 0.53452     | 0.29649     | -0.5985   | 0.72525  |          |
|            | 1.3029          | 0.096303 | 0.096303    | 0.564179513 |             |           |          |          |
| AHCTF1     | ENSG00000153207 | 0.2693   | 0.39385     | 0.72732     | 0.23352     | -0.068477 |          |          |
|            | 0.5273          | 1.3027   | 0.096338    | 0.096338    | 0.564208245 |           |          |          |
| GRM4       | ENSG00000124493 | 1.3027   | 0.096345    | 0.76603     | 0.22183     | -0.49794  | 0.69074  |          |
|            | 0.40836         | 0.3415   | 0.096345    | 0.564208245 |             |           |          |          |
| BANF2      | ENSG00000125888 | 1.3025   | 0.096367    | 0.82876     | 0.20362     | 0.27187   | 0.39286  |          |
|            | 0.96514         | 0.16724  | 0.096367    | 0.564208245 |             |           |          |          |
| NA         | ENSG00000239706 | 0.1898   | 0.42473     | 1.3025      | 0.096377    | 0.1898    | 0.42473  |          |
|            | 0.1898          | 0.42473  | 0.096377    | 0.564208245 |             |           |          |          |
| Clorf61    | ENSG00000125462 | 1.3024   | 0.096393    | 0.47861     | 0.31611     | 0.51838   |          |          |
|            | 0.3021          | 0.25332  | 0.40001     | 0.096393    | 0.564208245 |           |          |          |
| ARIH1      | ENSG00000166233 | 1.057    | 0.14526     | 1.3024      | 0.096397    | 1.0949    | 0.13679  |          |
|            | 0.31684         | 0.37568  | 0.096397    | 0.564208245 |             |           |          |          |
| SRP54-AS1  | ENSG00000258704 | 1.3022   | 0.096426    | -0.62154    | 0.73288     | -0.35337  |          |          |
|            | 0.63809         | 0.1407   | 0.44405     | 0.096426    | 0.564208245 |           |          |          |
| LGALS9C    | ENSG00000171916 | 1.3021   | 0.096439    | 0.021684    | 0.49135     | -0.98903  |          |          |
|            | 0.83868         | -2.6343  | 0.99578     | 0.096439    | 0.564208245 |           |          |          |
| TECRL      | ENSG00000205678 | -0.34048 | 0.63325     | 1.1016      | 0.13532     | 1.3021    | 0.096445 |          |
|            | -1.1204         | 0.86873  | 0.096445    | 0.564208245 |             |           |          |          |
| LRRTM4-AS1 | ENSG00000234653 | 1.302    | 0.096451    | 1.302       | 0.096451    | 0.47014   | 0.31913  | 1.302    |
|            | 0.096451        | 0.096451 | 0.564208245 |             |             |           |          |          |
| SPAAR      | ENSG00000235387 | 0.4573   | 0.32373     | 1.302       | 0.096465    | 0.39201   | 0.34753  |          |
|            | 0.47864         | 0.3161   | 0.096465    | 0.564208245 |             |           |          |          |
| NA         | ENSG00000280450 | -0.36939 | 0.64408     | -0.57572    | 0.7176      | 0.81251   | 0.20825  |          |
|            | 1.3019          | 0.096468 | 0.096468    | 0.564208245 |             |           |          |          |
| PDGFRL     | ENSG00000104213 | 0.070341 | 0.47196     | 1.058       | 0.14503     | -1.3666   | 0.91413  |          |
|            | 1.3019          | 0.09647  | 0.09647     | 0.564208245 |             |           |          |          |
| NA         | ENSG00000264019 | 1.3019   | 0.09647     | 1.3019      | 0.09647     | 1.3019    | 0.09647  | 0.09647  |
|            | 1.3019          | 0.09647  | 0.09647     | 0.564208245 |             |           |          |          |
| NA         | ENSG00000231979 | -0.80717 | 0.79021     | 1.3018      | 0.096492    | -0.80717  | 0.79021  |          |
|            | -0.80717        | 0.79021  | 0.096492    | 0.56425379  |             |           |          |          |
| NA         | ENSG00000265428 | 1.2437   | 0.1068      | 1.2437      | 0.1068      | 1.3017    | 0.096511 |          |
|            | 1.2437          | 0.1068   | 0.096511    | 0.56425379  |             |           |          |          |
| PPP1R14BP3 | ENSG00000179967 | 1.3015   | 0.096548    | 1.2264      | 0.11002     | 1.2264    |          |          |
|            | 0.11002         | 1.3015   | 0.096548    | 0.096548    | 0.56425379  |           |          |          |
| DNAL4      | ENSG00000100246 | -0.17876 | 0.57094     | 1.3014      | 0.096557    | -0.17876  | 0.57094  |          |
|            | -0.17876        | 0.57094  | 0.096557    | 0.56425379  |             |           |          |          |
| NA         | ENSG00000260329 | 0.72804  | 0.23329     | 1.2909      | 0.098364    | 1.3014    | 0.096562 |          |
|            | 1.3014          | 0.096562 | 0.096562    | 0.56425379  |             |           |          |          |

|             |                 |           |          |          |             |             |          |        |
|-------------|-----------------|-----------|----------|----------|-------------|-------------|----------|--------|
| AGGF1P8     | ENSG00000261752 | 1.3014    | 0.096568 | 1.3014   | 0.096568    | 1.3014      | 0.096568 | 1.3014 |
|             |                 | 0.096568  | 1.3014   | 0.096568 | 0.096568    | 0.56425379  |          |        |
| CCDC153     | ENSG00000248712 | 1.3013    | 0.096574 | 1.3013   | 0.096574    | 1.3013      | 0.096574 | 1.3013 |
|             |                 | 0.096574  | 1.3013   | 0.096574 | 0.096574    | 0.56425379  |          |        |
| PRDM9       | ENSG00000164256 | 1.3013    | 0.096582 | -1.2727  | 0.89844     | 0.11382     | 0.45469  |        |
|             |                 | 0.52861   | 0.29854  | 0.096582 | 0.56425379  |             |          |        |
| NA          | ENSG00000207173 | -0.29801  | 0.61715  | -0.29801 | 0.61715     | -1.0066     | 0.84295  |        |
|             |                 | 1.3013    | 0.096582 | 0.096582 | 0.56425379  |             |          |        |
| LINC02743   | ENSG00000255258 | 1.2803    | 0.10022  | 0.57878  | 0.28137     | 0.54143     |          |        |
|             |                 | 0.29411   | 1.3008   | 0.096666 | 0.096666    | 0.564676838 |          |        |
| TMEM220-AS1 | ENSG00000263400 | 0.5264    | 0.2993   | 1.3007   | 0.096679    | 0.5264      |          |        |
|             |                 | 0.2993    | 0.5264   | 0.2993   | 0.096679    | 0.564685086 |          |        |
| SDHAF2      | ENSG00000167985 | -0.1009   | 0.54019  | -0.45702 | 0.67617     | -0.89889    |          |        |
|             |                 | 0.81564   | 1.3006   | 0.096695 | 0.096695    | 0.564710852 |          |        |
| VEGFA       | ENSG00000112715 | 1.0097    | 0.15632  | 1.3005   | 0.096719    | -0.0040235  | 0.50161  |        |
|             |                 | 1.0658    | 0.14326  | 0.096719 | 0.564783328 |             |          |        |
| RSL24D1P4   | ENSG00000215800 | -0.76523  | 0.77793  | -0.78032 | 0.7824      | -0.78032    |          |        |
|             |                 | 0.7824    | 1.3003   | 0.096757 | 0.096757    | 0.564901416 |          |        |
| LECT2       | ENSG00000145826 | -0.39726  | 0.65441  | -0.40895 | 0.65871     | 0.13638     | 0.44576  |        |
|             |                 | 1.3002    | 0.096763 | 0.096763 | 0.564901416 |             |          |        |
| NA          | ENSG00000276071 | 1.3002    | 0.096774 | 0.83174  | 0.20278     | 1.3002      | 0.096774 |        |
|             |                 | 1.1623    | 0.12255  | 0.096774 | 0.564901416 |             |          |        |
| NA          | ENSG00000284452 | 1.2999    | 0.096813 | 1.2999   | 0.096813    | 1.2999      | 0.096813 |        |
|             |                 | 1.2999    | 0.096813 | 0.096813 | 0.565006801 |             |          |        |
| RBM25       | ENSG00000119707 | 1.2998    | 0.096836 | 1.2491   | 0.10581     | 0.66996     | 0.25144  |        |
|             |                 | 0.66841   | 0.25194  | 0.096836 | 0.565006801 |             |          |        |
| RPL34P27    | ENSG00000232858 | -2.3169   | 0.98974  | -2.3169  | 0.98974     | -2.3169     |          |        |
|             |                 | 0.98974   | 1.2997   | 0.096851 | 0.096851    | 0.565006801 |          |        |
| NA          | ENSG00000234190 | -0.16699  | 0.56631  | 1.2996   | 0.096868    | 0.24713     | 0.4024   |        |
|             |                 | -0.011504 | 0.50459  | 0.096868 | 0.565006801 |             |          |        |
| TTK         | ENSG00000112742 | 0.80801   | 0.20954  | 1.2996   | 0.096877    | 1.2996      | 0.096877 |        |
|             |                 | 1.2996    | 0.096877 | 0.096877 | 0.565006801 |             |          |        |
| NPIP14P     | ENSG00000226232 | 1.2995    | 0.09688  | 1.2995   | 0.09688     | 1.2995      |          |        |
|             |                 | 0.09688   | 1.2995   | 0.09688  | 0.09688     | 0.565006801 |          |        |
| HIGD1AP6    | ENSG00000253229 | 1.2995    | 0.09688  | -0.40982 | 0.65903     | 1.2995      |          |        |
|             |                 | 0.09688   | -0.40982 | 0.65903  | 0.09688     | 0.565006801 |          |        |
| NA          | ENSG00000255422 | 1.2994    | 0.096897 | 1.2994   | 0.096897    | 1.2994      | 0.096897 |        |
|             |                 | 1.2994    | 0.096897 | 0.096897 | 0.565006801 |             |          |        |
| GAD1        | ENSG00000128683 | -0.58887  | 0.72203  | -0.27786 | 0.60944     | 1.2155      | 0.11209  |        |
|             |                 | 1.2994    | 0.096905 | 0.096905 | 0.565006801 |             |          |        |
| NA          | ENSG00000204038 | -0.94733  | 0.82827  | -0.94733 | 0.82827     | 1.2994      | 0.096908 |        |
|             |                 | -1.1229   | 0.86927  | 0.096908 | 0.565006801 |             |          |        |
| LINC02855   | ENSG00000254209 | 1.2993    | 0.096922 | 1.1776   | 0.11947     | 1.2342      |          |        |
|             |                 | 0.10857   | 1.2993   | 0.096922 | 0.096922    | 0.565020823 |          |        |
| ZNF30-AS1   | ENSG00000270876 | 1.2992    | 0.09694  | 1.2992   | 0.09694     | 1.2992      |          |        |
|             |                 | 0.09694   | 1.2992   | 0.09694  | 0.09694     | 0.565058158 |          |        |
| NA          | ENSG00000269604 | 1.2991    | 0.096955 | 1.2991   | 0.096955    | 1.2991      | 0.096955 |        |
|             |                 | 1.2991    | 0.096955 | 0.096955 | 0.565062993 |             |          |        |
| DYNC1I2     | ENSG00000077380 | 1.2989    | 0.096997 | 0.66439  | 0.25322     | 0.91037     |          |        |
|             |                 | 0.18131   | 0.90319  | 0.18321  | 0.096997    | 0.565062993 |          |        |
| SNORA70J    | ENSG00000206909 | 1.2988    | 0.097004 | 1.2988   | 0.097004    | 1.2988      |          |        |
|             |                 | 0.097004  | 0.26241  | 0.3965   | 0.097004    | 0.565062993 |          |        |
| RPL10P8     | ENSG00000254012 | 1.2988    | 0.097004 | 1.2988   | 0.097004    | 1.2988      |          |        |
|             |                 | 0.097004  | 1.2988   | 0.097004 | 0.097004    | 0.565062993 |          |        |
| ZNF554      | ENSG00000172006 | 1.2987    | 0.097016 | 1.0735   | 0.14152     | 1.0735      |          |        |
|             |                 | 0.14152   | 0.83809  | 0.20099  | 0.097016    | 0.565062993 |          |        |
| NA          | ENSG00000235337 | 0.26288   | 0.39632  | 0.26288  | 0.39632     | 1.2987      | 0.097021 |        |
|             |                 | 0.26288   | 0.39632  | 0.097021 | 0.565062993 |             |          |        |
| NA          | ENSG00000279160 | 1.2987    | 0.097022 | 1.2987   | 0.097022    | 1.2987      | 0.097022 |        |
|             |                 | 1.2987    | 0.097022 | 0.097022 | 0.565062993 |             |          |        |
| NA          | ENSG00000229327 | 0.49954   | 0.3087   | 1.2985   | 0.097066    | 1.2985      | 0.097066 |        |
|             |                 | 1.2985    | 0.097066 | 0.097066 | 0.565155107 |             |          |        |

|          |                 |           |             |             |             |           |          |         |
|----------|-----------------|-----------|-------------|-------------|-------------|-----------|----------|---------|
| ELAPOR1  | ENSG00000116299 | 1.0492    | 0.14705     | -0.53449    | 0.7035      | 1.0516    |          |         |
|          | 0.14649         | 1.2984    | 0.097073    | 0.097073    | 0.565155107 |           |          |         |
| IFRD2    | ENSG00000214706 | 1.2983    | 0.097085    | 0.50168     | 0.30795     | 1.2983    | 0.097085 |         |
|          | 1.2983          | 0.097085  | 0.097085    | 0.565155107 |             |           |          |         |
| CAPN15   | ENSG00000103326 | 1.2983    | 0.097098    | -0.53783    | 0.70465     | 1.2983    |          |         |
|          | 0.097098        | -0.40625  | 0.65772     | 0.097098    | 0.565155107 |           |          |         |
| NUP35P1  | ENSG00000223928 | -0.30774  | 0.62086     | 0.45438     | 0.32478     | 1.2982    |          |         |
|          | 0.09711         | 0.53549   | 0.29615     | 0.09711     | 0.565155107 |           |          |         |
| PATZ1    | ENSG00000100105 | -0.63914  | 0.73863     | 1.2982      | 0.097115    | -0.63914  | 0.73863  |         |
|          | 0.57171         | 0.28376   | 0.097115    | 0.565155107 |             |           |          |         |
| NA       | ENSG00000201860 | 1.2981    | 0.097119    | 1.2981      | 0.097119    | 1.2981    | 0.097119 |         |
|          | 1.2981          | 0.097119  | 0.097119    | 0.565155107 |             |           |          |         |
| NA       | ENSG00000275989 | -0.57529  | 0.71745     | -0.38018    | 0.64809     | 1.298     | 0.097141 |         |
|          | -1.7831         | 0.96272   | 0.097141    | 0.565169144 |             |           |          |         |
| BHMT2    | ENSG00000132840 | 1.298     | 0.097148    | -0.62712    | 0.73471     | -1.2533   | 0.89495  |         |
|          | -0.62712        | 0.73471   | 0.097148    | 0.565169144 |             |           |          |         |
| OR10V2P  | ENSG00000255538 | 1.2979    | 0.097166    | 1.2979      | 0.097166    | 1.2979    |          |         |
|          | 0.097166        | 1.2979    | 0.097166    | 0.097166    | 0.565169144 |           |          |         |
| MIR3177  | ENSG00000265820 | 1.2978    | 0.097172    | 0.30208     | 0.38129     | 0.30208   |          |         |
|          | 0.38129         | 0.30208   | 0.38129     | 0.097172    | 0.565169144 |           |          |         |
| NA       | ENSG00000254242 | 1.2977    | 0.097189    | -0.64274    | 0.7398      | 0.14919   | 0.4407   |         |
|          | 1.2977          | 0.097189  | 0.097189    | 0.565169144 |             |           |          |         |
| LIVAR    | ENSG00000266304 | 1.2977    | 0.097191    | 1.2977      | 0.097191    | 1.2977    | 0.097191 |         |
|          | 1.2977          | 0.097191  | 0.097191    | 0.565169144 |             |           |          |         |
| ODF1     | ENSG00000155087 | 1.2976    | 0.09722     | 1.2976      | 0.09722     | 1.2976    | 0.09722  |         |
|          | 1.2976          | 0.09722   | 0.09722     | 0.565266839 |             |           |          |         |
| WNT7B    | ENSG00000188064 | 0.73403   | 0.23147     | 0.89139     | 0.18636     | 0.97676   | 0.16434  |         |
|          | 1.2974          | 0.097255  | 0.097255    | 0.565266839 |             |           |          |         |
| RNU2-11P | ENSG00000239122 | 1.2973    | 0.097257    | 0.47332     | 0.31799     | 1.2973    |          |         |
|          | 0.097257        | 1.2973    | 0.097257    | 0.097257    | 0.565266839 |           |          |         |
| DGKG     | ENSG00000058866 | 0.63065   | 0.26414     | 1.0302      | 0.15145     | 1.2973    | 0.097263 |         |
|          | -0.49564        | 0.68993   | 0.097263    | 0.565266839 |             |           |          |         |
| ZFPL1    | ENSG00000162300 | 1.2973    | 0.09727     | 1.2973      | 0.09727     | 1.2973    | 0.09727  |         |
|          | 1.2973          | 0.09727   | 0.09727     | 0.565266839 |             |           |          |         |
| OR10A6   | ENSG00000279000 | -0.012568 | 0.50501     | 1.2971      | 0.097302    | 1.2971    |          |         |
|          | 0.097302        | 1.2971    | 0.097302    | 0.097302    | 0.565266839 |           |          |         |
| NA       | ENSG00000235263 | 0.60861   | 0.27139     | -0.16519    | 0.5656      | -0.019315 | 0.50771  |         |
|          | 1.2971          | 0.097304  | 0.097304    | 0.565266839 |             |           |          |         |
| BARX1    | ENSG00000131668 | -0.71252  | 0.76193     | 1.0634      | 0.1438      | 1.297     | 0.097318 |         |
|          | -0.98112        | 0.83673   | 0.097318    | 0.565266839 |             |           |          |         |
| FAF1-AS1 | ENSG00000225767 | 1.297     | 0.097322    | 1.297       | 0.097322    | 1.297     | 0.097322 | 0.41833 |
|          | 0.33785         | 0.097322  | 0.565266839 |             |             |           |          |         |
| TRIM66   | ENSG00000166436 | 1.2969    | 0.09733     | 1.2969      | 0.09733     | 1.1002    |          |         |
|          | 0.13562         | 1.0605    | 0.14446     | 0.09733     | 0.565266839 |           |          |         |
| NA       | ENSG00000236392 | -0.96565  | 0.83289     | 1.2969      | 0.097341    | -1.0659   | 0.85676  |         |
|          | -1.0659         | 0.85676   | 0.097341    | 0.565266839 |             |           |          |         |
| MIR4525  | ENSG00000266107 | 1.2968    | 0.097347    | 1.2968      | 0.097347    | 1.2968    |          |         |
|          | 0.097347        | 1.2968    | 0.097347    | 0.097347    | 0.565266839 |           |          |         |
| NA       | ENSG00000270441 | 1.0909    | 0.13765     | 1.174       | 0.1202      | 1.2965    | 0.097398 |         |
|          | -0.24339        | 0.59615   | 0.097398    | 0.565440937 |             |           |          |         |
| NA       | ENSG00000232762 | -1.7833   | 0.96273     | -1.4628     | 0.92824     | 1.2964    | 0.097411 |         |
|          | -0.69648        | 0.75694   | 0.097411    | 0.565440937 |             |           |          |         |
| NA       | ENSG00000201245 | 1.2911    | 0.098341    | 0.6145      | 0.26944     | 0.21316   | 0.4156   |         |
|          | 1.2964          | 0.097424  | 0.097424    | 0.565440937 |             |           |          |         |
| NA       | ENSG00000250978 | -1.4505   | 0.92655     | -1.1312     | 0.87102     | -1.1312   | 0.87102  |         |
|          | 1.2963          | 0.097428  | 0.097428    | 0.565440937 |             |           |          |         |
| IRF2BP2  | ENSG00000168264 | -0.016505 | 0.50658     | 1.2963      | 0.097435    | 0.89756   |          |         |
|          | 0.18471         | 0.12303   | 0.45104     | 0.097435    | 0.565440937 |           |          |         |
| GANAB    | ENSG00000089597 | 1.296     | 0.097491    | 0.39356     | 0.34695     | 1.296     | 0.097491 | 1.296   |
|          | 0.097491        | 0.097491  | 0.565637808 |             |             |           |          |         |
| FSHR     | ENSG00000170820 | 1.2959    | 0.097505    | 0.63808     | 0.26171     | 1.2959    | 0.097505 |         |
|          | 0.73415         | 0.23143   | 0.097505    | 0.565637808 |             |           |          |         |

|              |                 |           |            |            |             |            |          |          |
|--------------|-----------------|-----------|------------|------------|-------------|------------|----------|----------|
| NA           | ENSG00000267646 | 1.2958    | 0.097515   | 0.097515   | 1.2958      | 0.097515   | 1.2958   | 0.097515 |
|              |                 | 1.2958    | 0.097515   | 0.097515   | 0.565637808 |            |          |          |
| NA           | ENSG00000272279 | 0.089609  | 0.4643     | 0.18013    | 0.42852     | 1.2958     | 0.097521 | 0.097521 |
|              |                 | -0.50064  | 0.69169    | 0.097521   | 0.565637808 |            |          |          |
| RNA5SP453    | ENSG00000199373 | 0.47329   | 0.318      | 1.2958     | 0.09753     | -0.22984   | 0.59089  | 0.59089  |
|              |                 | -0.28789  | 0.61328    | 0.09753    | 0.565637808 |            |          |          |
| RNU6-531P    | ENSG00000252503 | 0.24878   | 0.40177    | 1.2956     | 0.097553    | 1.2956     |          |          |
|              |                 | 0.097553  | 1.2956     | 0.097553   | 0.565637808 |            |          |          |
| LMTK2        | ENSG00000164715 | 0.24917   | 0.40162    | 0.015313   | 0.49389     | 1.2956     | 0.097565 | 0.097565 |
|              |                 | 0.1808    | 0.42826    | 0.097565   | 0.565637808 |            |          |          |
| NA           | ENSG00000146677 | -0.76336  | 0.77738    | 1.2955     | 0.097573    | 0.50445    | 0.30697  | 0.30697  |
|              |                 | -0.92152  | 0.82161    | 0.097573   | 0.565637808 |            |          |          |
| NA           | ENSG00000263843 | 1.2955    | 0.097575   | 1.2955     | 0.097575    | 1.2955     | 0.097575 | 0.097575 |
|              |                 | 1.2955    | 0.097575   | 0.097575   | 0.565637808 |            |          |          |
| XPO6         | ENSG00000169180 | 1.0623    | 0.14405    | 1.0241     | 0.15289     | 0.21947    | 0.41314  | 0.41314  |
|              |                 | 1.2954    | 0.097585   | 0.097585   | 0.565637808 |            |          |          |
| SULT1D1P     | ENSG00000236959 | -0.79566  | 0.78688    | 1.2952     | 0.097626    | 1.2952     |          |          |
|              |                 | 0.097626  | 1.2952     | 0.097626   | 0.097626    | 0.56569374 |          |          |
| NA           | ENSG00000249326 | 0.0062838 | 0.49749    | 1.295      | 0.097652    | -0.054696  | 0.52181  | 0.52181  |
|              |                 | -0.34009  | 0.6331     | 0.097652   | 0.56569374  |            |          |          |
| EBF2         | ENSG00000221818 | 1.295     | 0.097655   | 0.74808    | 0.22721     | 0.88715    | 0.1875   | 0.1875   |
|              |                 | -0.094216 | 0.53753    | 0.097655   | 0.56569374  |            |          |          |
| LINC02401    | ENSG00000257762 | 1.2486    | 0.1059     | 0.92686    | 0.177       | 1.2949     | 0.09767  | 0.09767  |
|              |                 | 0.78525   | 0.21615    | 0.09767    | 0.56569374  |            |          |          |
| MTCO3P13     | ENSG00000264316 | 0.74624   | 0.22776    | 1.2949     | 0.09767     | 1.2949     |          |          |
|              |                 | 0.09767   | 1.2949     | 0.09767    | 0.09767     | 0.56569374 |          |          |
| BCL7B        | ENSG00000106635 | -0.11504  | 0.54579    | 1.2949     | 0.097673    | 0.51573    | 0.30302  | 0.30302  |
|              |                 | 0.29394   | 0.3844     | 0.097673   | 0.56569374  |            |          |          |
| CIRBP        | ENSG00000099622 | 1.2949    | 0.097683   | 1.2038     | 0.11433     | 0.83914    | 0.2007   | 0.2007   |
|              |                 | 0.74217   | 0.22899    | 0.097683   | 0.56569374  |            |          |          |
| RN7SL34P     | ENSG00000239868 | 1.2946    | 0.097735   | 1.2946     | 0.097735    | 1.2946     |          |          |
|              |                 | 0.097735  | 1.2946     | 0.097735   | 0.097735    | 0.56569374 |          |          |
| IGHV3OR16-13 | ENSG00000271178 | 0.52476   | 0.29987    | 0.52033    | 0.30142     | -0.60132   |          |          |
|              |                 | 0.72619   | 1.2944     | 0.097757   | 0.097757    | 0.56569374 |          |          |
| NA           | ENSG00000272679 | 1.2943    | 0.097773   | 1.2943     | 0.097773    | 1.2943     | 0.097773 | 0.097773 |
|              |                 | 1.2943    | 0.097773   | 0.097773   | 0.56569374  |            |          |          |
| LINC02832    | ENSG00000227308 | -0.1554   | 0.56175    | 1.2943     | 0.097784    | 0.84119    |          |          |
|              |                 | 0.20012   | 0.51107    | 0.30465    | 0.097784    | 0.56569374 |          |          |
| HSPE1P23     | ENSG00000250356 | 1.2942    | 0.097794   | -1.1011    | 0.86458     | -0.18546   |          |          |
|              |                 | 0.57356   | -0.42094   | 0.6631     | 0.097794    | 0.56569374 |          |          |
| MRPS11P1     | ENSG00000225803 | 1.2941    | 0.097815   | 0.85524    | 0.19621     | 1.1084     |          |          |
|              |                 | 0.13384   | 0.80601    | 0.21012    | 0.097815    | 0.56569374 |          |          |
| MIR495       | ENSG00000207743 | 0.44111   | 0.32957    | 1.294      | 0.097831    | 0.44111    | 0.32957  | 0.32957  |
|              |                 | 0.44111   | 0.32957    | 0.097831   | 0.56569374  |            |          |          |
| NA           | ENSG00000268505 | 1.294     | 0.097835   | 0.70723    | 0.23971     | 1.294      | 0.097835 | 1.294    |
|              |                 | 0.097835  | 0.097835   | 0.56569374 |             |            |          |          |
| NA           | ENSG00000235776 | 1.294     | 0.097838   | 1.294      | 0.097838    | 1.294      | 0.097838 | 1.294    |
|              |                 | 0.097838  | 0.56569374 |            |             |            |          |          |
| ZNF235       | ENSG00000159917 | 1.2939    | 0.097845   | 1.2939     | 0.097845    | 1.2939     |          |          |
|              |                 | 0.097845  | 1.2939     | 0.097845   | 0.097845    | 0.56569374 |          |          |
| NA           | ENSG00000244738 | 1.2939    | 0.097847   | 1.2939     | 0.097847    | 1.2939     | 0.097847 | 0.097847 |
|              |                 | 1.2939    | 0.097847   | 0.097847   | 0.56569374  |            |          |          |
| NA           | ENSG00000278084 | 0.83241   | 0.20259    | 0.57051    | 0.28417     | 1.2939     | 0.097847 | 0.097847 |
|              |                 | 0.54473   | 0.29297    | 0.097847   | 0.56569374  |            |          |          |
| TMCO5A       | ENSG00000166069 | 6.89E-05  | 0.49997    | 0.087703   | 0.46506     | -0.15296   |          |          |
|              |                 | 0.56079   | 1.2938     | 0.097859   | 0.097859    | 0.56569374 |          |          |
| KCNIP1       | ENSG00000182132 | 0.69457   | 0.24366    | 0.32336    | 0.37321     | 1.2935     |          |          |
|              |                 | 0.097914  | 0.92362    | 0.17784    | 0.097914    | 0.56569374 |          |          |
| SELENOO      | ENSG00000073169 | -0.38046  | 0.6482     | 1.2935     | 0.097921    | -0.30707   |          |          |
|              |                 | 0.62061   | 0.7862     | 0.21588    | 0.097921    | 0.56569374 |          |          |
| LINC01715    | ENSG00000229388 | 1.1613    | 0.12276    | 1.1613     | 0.12276     | 1.2935     |          |          |
|              |                 | 0.097921  | 0.40929    | 0.34116    | 0.097921    | 0.56569374 |          |          |



|           |                 |          |          |            |            |            |          |
|-----------|-----------------|----------|----------|------------|------------|------------|----------|
| DSTNP5    | ENSG00000236681 | -0.51434 | 0.69649  | 0.85115    | 0.19734    | 1.2935     |          |
|           | 0.097921        | 1.0759   | 0.14098  | 0.097921   | 0.56569374 |            |          |
| KRTAP5-7  | ENSG00000244411 | -0.4095  | 0.65891  | -0.7306    | 0.76749    | 1.2935     |          |
|           | 0.097925        | 0.54775  | 0.29193  | 0.097925   | 0.56569374 |            |          |
| DEFB127   | ENSG0000088782  | 0.91315  | 0.18058  | 0.88637    | 0.18771    | 1.0989     |          |
|           | 0.1359          | 1.2934   | 0.097935 | 0.097935   | 0.56569374 |            |          |
| DSC1      | ENSG00000134765 | 0.82109  | 0.2058   | -0.37396   | 0.64578    | 1.2934     | 0.097939 |
|           | -1.0353         | 0.84974  | 0.097939 | 0.56569374 |            |            |          |
| NDUFS5P5  | ENSG00000230671 | 0.28618  | 0.38737  | 0.25755    | 0.39838    | 1.2933     |          |
|           | 0.097947        | -0.86222 | 0.80572  | 0.097947   | 0.56569374 |            |          |
| NA        | ENSG00000238084 | -0.53037 | 0.70207  | -0.83158   | 0.79718    | 1.2929     | 0.098026 |
|           | 1.2929          | 0.098026 | 0.098026 | 0.56569374 |            |            |          |
| RN7SL363P | ENSG00000241869 | -0.58078 | 0.71931  | 0.36015    | 0.35937    | 1.2929     |          |
|           | 0.098031        | 1.2929   | 0.098031 | 0.098031   | 0.56569374 |            |          |
| RPL21P38  | ENSG00000233934 | 1.2195   | 0.11133  | 1.2928     | 0.098038   | 1.0498     |          |
|           | 0.1469          | 1.0827   | 0.13948  | 0.098038   | 0.56569374 |            |          |
| SFTPA1    | ENSG00000122852 | 1.2928   | 0.098045 | 0.508      | 0.30573    | 1.2262     | 0.11007  |
|           | 1.2262          | 0.11007  | 0.098045 | 0.56569374 |            |            |          |
| ZYG11B    | ENSG00000162378 | 1.2927   | 0.098052 | -0.72302   | 0.76517    | 1.1515     |          |
|           | 0.12477         | 0.68422  | 0.24692  | 0.098052   | 0.56569374 |            |          |
| NA        | ENSG00000255410 | 1.2927   | 0.098052 | 1.2927     | 0.098052   | 1.2927     | 0.098052 |
|           | 1.2927          | 0.098052 | 0.098052 | 0.56569374 |            |            |          |
| C1QB      | ENSG00000173369 | 1.0316   | 0.15112  | 0.1721     | 0.43168    | 0.79965    | 0.21196  |
|           | 1.2927          | 0.098053 | 0.098053 | 0.56569374 |            |            |          |
| EMC3      | ENSG00000125037 | 1.2927   | 0.098057 | 0.39133    | 0.34778    | 0.00090097 | 0.49964  |
|           | -0.2565         | 0.60122  | 0.098057 | 0.56569374 |            |            |          |
| NA        | ENSG00000236378 | 1.2927   | 0.098064 | 1.2927     | 0.098064   | 1.2927     | 0.098064 |
|           | 1.2927          | 0.098064 | 0.098064 | 0.56569374 |            |            |          |
| RAC1P3    | ENSG00000231404 | 1.1621   | 0.1226   | 1.1621     | 0.1226     | 0.43586    |          |
|           | 0.33147         | 1.2926   | 0.09808  | 0.09808    | 0.56569374 |            |          |
| NA        | ENSG00000267048 | 1.2926   | 0.098081 | 1.2926     | 0.098081   | 1.2926     | 0.098081 |
|           | 1.2926          | 0.098081 | 0.098081 | 0.56569374 |            |            |          |
| TRGJ2     | ENSG00000211687 | -0.79923 | 0.78792  | 1.2925     | 0.098097   | 1.0695     | 0.14243  |
|           | 0.65815         | 0.25522  | 0.098097 | 0.56569374 |            |            |          |
| MIR186    | ENSG00000207721 | 1.2924   | 0.098103 | 1.2924     | 0.098103   | 1.2924     |          |
|           | 0.098103        | 1.2924   | 0.098103 | 0.098103   | 0.56569374 |            |          |
| LINC01233 | ENSG00000269364 | 1.2924   | 0.098109 | 1.2924     | 0.098109   | 1.2924     |          |
|           | 0.098109        | 1.2924   | 0.098109 | 0.098109   | 0.56569374 |            |          |
| ALDOA     | ENSG00000149925 | 1.2923   | 0.098118 | 0.30861    | 0.37881    | 1.2923     | 0.098118 |
|           | 1.2923          | 0.098118 | 0.098118 | 0.56569374 |            |            |          |
| PDPK2P    | ENSG00000205918 | -0.55103 | 0.70919  | 1.2923     | 0.098129   | -0.32033   |          |
|           | 0.62564         | -0.63442 | 0.7371   | 0.098129   | 0.56569374 |            |          |
| NA        | ENSG00000283423 | 1.2922   | 0.098144 | 1.2922     | 0.098144   | 1.2922     | 0.098144 |
|           | 1.2922          | 0.098144 | 0.098144 | 0.56569374 |            |            |          |
| NA        | ENSG00000259275 | 1.0888   | 0.13812  | 1.2921     | 0.098155   | -1.4166    | 0.9217   |
|           | -1.4166         | 0.9217   | 0.098155 | 0.56569374 |            |            |          |
| CAND2     | ENSG00000144712 | -1.0019  | 0.8418   | -0.92226   | 0.8218     | 1.2921     | 0.098159 |
|           | 0.25489         | 0.3994   | 0.098159 | 0.56569374 |            |            |          |
| RN7SKP244 | ENSG00000252322 | -1.0443  | 0.85182  | -1.0443    | 0.85182    | -1.0443    |          |
|           | 0.85182         | 1.292    | 0.098177 | 0.098177   | 0.56569374 |            |          |
| NA        | ENSG00000277227 | -0.33334 | 0.63056  | 1.2919     | 0.09819    | 0.89504    | 0.18538  |
|           | 0.89504         | 0.18538  | 0.09819  | 0.56569374 |            |            |          |
| ARMC4P1   | ENSG00000238021 | 1.2486   | 0.10591  | 1.2919     | 0.098196   | 1.1858     |          |
|           | 0.11784         | -0.31736 | 0.62452  | 0.098196   | 0.56569374 |            |          |
| NID1      | ENSG00000116962 | 1.2917   | 0.098222 | -1.898     | 0.97116    | -1.898     | 0.97116  |
|           | -0.5239         | 0.69983  | 0.098222 | 0.56569374 |            |            |          |
| SPDYE4    | ENSG00000183318 | 0.9148   | 0.18015  | 0.54716    | 0.29213    | 1.2917     |          |
|           | 0.098234        | -0.98986 | 0.83888  | 0.098234   | 0.56569374 |            |          |
| GCNT1P2   | ENSG00000249206 | 1.2916   | 0.098253 | -1.1193    | 0.8685     | -0.33764   |          |
|           | 0.63218         | -1.1193  | 0.8685   | 0.098253   | 0.56569374 |            |          |
| NA        | ENSG00000221412 | 1.2915   | 0.098268 | -0.43874   | 0.66958    | 0.98868    | 0.16141  |
|           | 0.40306         | 0.34345  | 0.098268 | 0.56569374 |            |            |          |

|              |                 |           |          |             |             |           |          |
|--------------|-----------------|-----------|----------|-------------|-------------|-----------|----------|
| HTR7         | ENSG00000148680 | 0.45993   | 0.32278  | 0.42725     | 0.3346      | 1.2914    | 0.098283 |
|              | 0.057835        | 0.47694   | 0.098283 | 0.56569374  |             |           |          |
| NA           | ENSG00000251188 | 0.31123   | 0.37781  | 1.2913      | 0.098293    | 0.31123   | 0.37781  |
|              | 0.31123         | 0.37781   | 0.098293 | 0.56569374  |             |           |          |
| TESC         | ENSG00000088992 | -0.042101 | 0.51679  | -0.13859    | 0.55511     | 1.2913    | 0.098295 |
|              | 1.111           | 0.13328   | 0.098295 | 0.56569374  |             |           |          |
| STX7         | ENSG00000079950 | -0.15485  | 0.56153  | 1.2371      | 0.10803     | 1.2913    | 0.098302 |
|              | 0.40011         | 0.34454   | 0.098302 | 0.56569374  |             |           |          |
| NA           | ENSG00000201867 | 0.30882   | 0.37873  | 1.2198      | 0.11128     | 0.86411   | 0.19376  |
|              | 1.2913          | 0.098306  | 0.098306 | 0.56569374  |             |           |          |
| NA           | ENSG00000279403 | 0.52444   | 0.29999  | 1.2913      | 0.098307    | 1.2913    | 0.098307 |
|              | 1.2913          | 0.098307  | 0.098307 | 0.56569374  |             |           |          |
| NA           | ENSG00000224959 | 0.71176   | 0.23831  | -1.5278     | 0.93671     | -0.25073  | 0.59899  |
|              | 1.2912          | 0.098309  | 0.098309 | 0.56569374  |             |           |          |
| NF1P8        | ENSG00000236956 | 1.2912    | 0.098323 | -0.81359    | 0.79206     | -0.67876  | 0.75135  |
|              | 0.11983         | 0.45231   | 0.098323 | 0.56569374  |             |           |          |
| MST1L        | ENSG00000186715 | 0.49074   | 0.3118   | -0.7654     | 0.77798     | 1.2911    | 0.098326 |
|              | -0.16443        | 0.56531   | 0.098326 | 0.56569374  |             |           |          |
| NA           | ENSG00000270555 | 1.2909    | 0.098372 | 1.1576      | 0.1235      | 1.0457    | 0.14785  |
|              | 0.71425         | 0.23754   | 0.098372 | 0.565821266 |             |           |          |
| ACP5         | ENSG00000102575 | 1.2909    | 0.098373 | 0.19667     | 0.42204     | 1.2909    | 0.098373 |
|              | 1.2909          | 0.098373  | 0.098373 | 0.565821266 |             |           |          |
| RPS14P8      | ENSG00000239528 | 1.2908    | 0.098383 | 1.2908      | 0.098383    | -0.7514   |          |
|              | 0.77379         | 1.2908    | 0.098383 | 0.098383    | 0.565821266 |           |          |
| TMEM132D-AS1 | ENSG00000249196 | -0.32088  | 0.62585  | 1.2906      | 0.098425    | 1.2906    |          |
|              | 0.098425        | 1.2906    | 0.098425 | 0.098425    | 0.565996017 |           |          |
| RPL7L1P8     | ENSG00000228766 | -1.1869   | 0.88236  | 1.2902      | 0.098488    | -1.1869   |          |
|              | 0.88236         | -1.1869   | 0.88236  | 0.098488    | 0.566053005 |           |          |
| ANO2         | ENSG00000047617 | -0.37537  | 0.64631  | 0.38767     | 0.34913     | -0.017323 | 0.50691  |
|              | 1.2901          | 0.098508  | 0.098508 | 0.566053005 |             |           |          |
| NA           | ENSG00000273066 | 1.2901    | 0.098511 | 1.2901      | 0.098511    | 1.2901    | 0.098511 |
|              | 1.2901          | 0.098511  | 0.098511 | 0.566053005 |             |           |          |
| GLYATL1P4    | ENSG00000254399 | 0.20339   | 0.41941  | 0.4601      | 0.32272     | -0.53013  |          |
|              | 0.70199         | 1.2899    | 0.098546 | 0.098546    | 0.566053005 |           |          |
| NA           | ENSG00000283175 | 1.2898    | 0.098553 | 0.95808     | 0.16901     | 1.2898    | 0.098553 |
|              | 1.0148          | 0.15511   | 0.098553 | 0.566053005 |             |           |          |
| RNU1-89P     | ENSG00000207322 | -0.56168  | 0.71283  | -0.56168    | 0.71283     | 1.2898    |          |
|              | 0.098561        | -0.56168  | 0.71283  | 0.098561    | 0.566053005 |           |          |
| EEF1A1P38    | ENSG00000261557 | 0.18277   | 0.42749  | 1.2897      | 0.09857     | 1.2897    |          |
|              | 0.09857         | 1.2897    | 0.09857  | 0.09857     | 0.566053005 |           |          |
| ZNF436       | ENSG00000125945 | 1.2897    | 0.098577 | 1.2276      | 0.10979     | 0.4015    |          |
|              | 0.34402         | 0.052775  | 0.47896  | 0.098577    | 0.566053005 |           |          |
| NA           | ENSG00000280393 | 1.2897    | 0.098582 | 1.2897      | 0.098582    | 1.2897    | 0.098582 |
|              | 1.2897          | 0.098582  | 0.098582 | 0.566053005 |             |           |          |
| NA           | ENSG00000199711 | 1.2896    | 0.098591 | -0.5796     | 0.71891     | 0.93547   | 0.17477  |
|              | -0.5796         | 0.71891   | 0.098591 | 0.566053005 |             |           |          |
| RFX7         | ENSG00000181827 | 0.30227   | 0.38122  | 0.10226     | 0.45928     | 0.30227   | 0.38122  |
|              | 1.2896          | 0.098593  | 0.098593 | 0.566053005 |             |           |          |
| NA           | ENSG00000225785 | -0.97521  | 0.83527  | -0.45944    | 0.67704     | 1.2895    | 0.098617 |
|              | 1.2895          | 0.098617  | 0.098617 | 0.566053005 |             |           |          |
| TEX41        | ENSG00000226674 | -0.06359  | 0.52535  | -0.40355    | 0.65673     | -0.06359  | 0.52535  |
|              | 1.2895          | 0.098618  | 0.098618 | 0.566053005 |             |           |          |
| NA           | ENSG00000269919 | 1.2895    | 0.098618 | 1.2895      | 0.098618    | 1.2895    | 0.098618 |
|              | 1.2895          | 0.098618  | 0.098618 | 0.566053005 |             |           |          |
| RPL21P18     | ENSG00000213343 | -0.51651  | 0.69725  | 1.2894      | 0.098621    | 0.90858   |          |
|              | 0.18179         | -0.63508  | 0.73731  | 0.098621    | 0.566053005 |           |          |
| NA           | ENSG00000240695 | 0.90971   | 0.18149  | -0.36755    | 0.6434      | 0.2383    | 0.40582  |
|              | 1.2894          | 0.098625  | 0.098625 | 0.566053005 |             |           |          |
| ELFN1-AS1    | ENSG00000236081 | 1.2894    | 0.098634 | 1.003       | 0.15793     | 0.19661   | 0.42207  |
|              | 0.62754         | 0.26515   | 0.098634 | 0.566053005 |             |           |          |
| AP2A2        | ENSG00000183020 | 0.38432   | 0.35037  | 1.2893      | 0.098644    | 0.32196   | 0.37374  |
|              | 0.96798         | 0.16653   | 0.098644 | 0.566053005 |             |           |          |

|           |                 |                |          |                |             |             |          |
|-----------|-----------------|----------------|----------|----------------|-------------|-------------|----------|
| NA        | ENSG00000253571 | 0.091702       | 0.46347  | 1.2892         | 0.098668    | -0.37115    | 0.64474  |
|           |                 | -0.37115       | 0.64474  | 0.098668       | 0.566068112 |             |          |
| NA        | ENSG00000269916 | 1.2891         | 0.098679 | 1.2891         | 0.098679    | 1.2891      | 0.098679 |
|           |                 | 1.2891         | 0.098679 | 0.098679       | 0.566068112 |             |          |
| HPSE      | ENSG00000173083 | 0.50242        | 0.30768  | 0.11031        | 0.45608     | 0.83068     | 0.20308  |
|           |                 | 1.289 0.098703 | 0.098703 | 0.566068112    |             |             |          |
| ANKRD11   | ENSG00000167522 | 1.289 0.098707 | 0.61824  | 0.26821        | 0.35876     | 0.35989     |          |
|           |                 | 0.13889        | 0.44477  | 0.098707       | 0.566068112 |             |          |
| FRG2JP    | ENSG00000259897 | 0.86562        | 0.19335  | 1.2888         | 0.098729    | 0.76422     |          |
|           |                 | 0.22237        | 0.70434  | 0.24061        | 0.098729    | 0.566068112 |          |
| ATP5PB    | ENSG00000116459 | 1.2887         | 0.098752 | 0.66595        | 0.25272     | 0.48258     |          |
|           |                 | 0.3147         | 0.12916  | 0.44862        | 0.098752    | 0.566068112 |          |
| STK24     | ENSG00000102572 | 0.61257        | 0.27008  | 1.2887         | 0.09876     | 0.80212     | 0.21124  |
|           |                 | 1.1998         | 0.1151   | 0.09876        | 0.566068112 |             |          |
| ITFG2     | ENSG00000111203 | -0.060765      | 0.52423  | 0.59778        | 0.27499     | 0.59778     | 0.27499  |
|           |                 | 1.2885         | 0.098787 | 0.098787       | 0.566068112 |             |          |
| IL17RD    | ENSG00000144730 | 0.96641        | 0.16692  | 1.2884         | 0.098797    | 0.41511     |          |
|           |                 | 0.33903        | 1.2177   | 0.11166        | 0.098797    | 0.566068112 |          |
| NA        | ENSG00000266602 | 0.76189        | 0.22306  | 1.2884         | 0.098808    | -0.082414   | 0.53284  |
|           |                 | -0.50481       | 0.69315  | 0.098808       | 0.566068112 |             |          |
| BRMS1L    | ENSG00000100916 | 0.67366        | 0.25026  | -1.2844        | 0.9005      | 1.2883      |          |
|           |                 | 0.098823       | 0.32171  | 0.37384        | 0.098823    | 0.566068112 |          |
| GAPDHP44  | ENSG00000213352 | 0.9606         | 0.16838  | 1.2881         | 0.098848    | -0.45812    |          |
|           |                 | 0.67657        | -0.35908 | 0.64023        | 0.098848    | 0.566068112 |          |
| CPEB3     | ENSG00000107864 | 1.2881         | 0.098852 | 1.196 0.11584  | 0.34729     | 0.36419     |          |
|           |                 | 0.21282        | 0.41573  | 0.098852       | 0.566068112 |             |          |
| LINC00462 | ENSG00000233610 | -0.94103       | 0.82666  | 1.2881         | 0.098852    | 0.65783     |          |
|           |                 | 0.25533        | 0.3458   | 0.36475        | 0.098852    | 0.566068112 |          |
| NA        | ENSG00000279613 | 1.2881         | 0.098856 | 1.2881         | 0.098856    | 1.2881      | 0.098856 |
|           |                 | 1.2881         | 0.098856 | 0.098856       | 0.566068112 |             |          |
| CLTB      | ENSG00000175416 | 0.080144       | 0.46806  | -0.53015       | 0.70199     | 1.2881      | 0.098861 |
|           |                 | 0.094773       | 0.46225  | 0.098861       | 0.566068112 |             |          |
| PTMAP4    | ENSG00000231503 | 1.2881         | 0.098862 | 1.2881         | 0.098862    | 1.2881      |          |
|           |                 | 0.098862       | 1.2881   | 0.098862       | 0.098862    | 0.566068112 |          |
| PRMT5-AS1 | ENSG00000237054 | 1.288 0.098873 | 0.25922  | 0.39773        | 0.48516     | 0.31378     |          |
|           |                 | 0.48516        | 0.31378  | 0.098873       | 0.566068112 |             |          |
| TOB1      | ENSG00000141232 | 1.2679         | 0.10242  | 1.288 0.098879 | 1.2705      | 0.10196     |          |
|           |                 | 0.34381        | 0.36549  | 0.098879       | 0.566068112 |             |          |
| FOCAD-AS1 | ENSG00000227071 | 1.239 0.10767  | 1.1266   | 0.12995        | -0.074972   | 0.52988     |          |
|           |                 | 1.2877         | 0.098918 | 0.098918       | 0.566068112 |             |          |
| PRSS42P   | ENSG00000178055 | -0.001362      | 0.50054  | 1.2877         | 0.09892     | -1.2475     |          |
|           |                 | 0.8939         | -1.2475  | 0.8939         | 0.09892     | 0.566068112 |          |
| NA        | ENSG00000243831 | 1.1536         | 0.12433  | 1.2877         | 0.09892     | -0.48308    | 0.68548  |
|           |                 | 1.2863         | 0.099171 | 0.09892        | 0.566068112 |             |          |
| NA        | ENSG00000229603 | 0.76753        | 0.22138  | 0.21844        | 0.41354     | 0.63358     | 0.26318  |
|           |                 | 1.2876         | 0.098937 | 0.098937       | 0.566068112 |             |          |
| NA        | ENSG00000270131 | 1.2876         | 0.098941 | -1.2652        | 0.89711     | -1.1228     | 0.86924  |
|           |                 | -1.1228        | 0.86924  | 0.098941       | 0.566068112 |             |          |
| PSMD12    | ENSG00000197170 | 0.49263        | 0.31114  | 0.92831        | 0.17662     | 0.47257     |          |
|           |                 | 0.31826        | 1.2874   | 0.098979       | 0.098979    | 0.566068112 |          |
| DCAF5     | ENSG00000139990 | -0.26711       | 0.60531  | 1.2872         | 0.099005    | -0.26711    | 0.60531  |
|           |                 | 1.1172         | 0.13195  | 0.099005       | 0.566068112 |             |          |
| NA        | ENSG00000261257 | 1.2872         | 0.099014 | 1.2872         | 0.099014    | 0.62175     | 0.26705  |
|           |                 | 1.2872         | 0.099014 | 0.099014       | 0.566068112 |             |          |
| NA        | ENSG00000250330 | -0.5856        | 0.72093  | -0.5856        | 0.72093     | -0.5856     | 0.72093  |
|           |                 | 1.2872         | 0.099015 | 0.099015       | 0.566068112 |             |          |
| INPP5A    | ENSG00000068383 | 0.72858        | 0.23313  | 1.287 0.09904  | 1.1208      | 0.13118     |          |
|           |                 | 0.018581       | 0.49259  | 0.09904        | 0.566068112 |             |          |
| NA        | ENSG00000205653 | -0.78145       | 0.78273  | 1.287 0.09905  | -0.14035    | 0.55581     |          |
|           |                 | 0.99961        | 0.15875  | 0.09905        | 0.566068112 |             |          |
| MIR4462   | ENSG00000263926 | 1.2035         | 0.11438  | 1.2869         | 0.099059    | 0.15059     |          |
|           |                 | 0.44015        | 0.15768  | 0.43735        | 0.099059    | 0.566068112 |          |

|           |                 |          |          |             |             |             |          |
|-----------|-----------------|----------|----------|-------------|-------------|-------------|----------|
| NA        | ENSG00000235871 | 1.2868   | 0.099084 | 1.2868      | 0.099084    | 1.2868      | 0.099084 |
|           |                 | 1.2868   | 0.099084 | 0.566068112 |             |             |          |
| HOXB7     | ENSG00000260027 | 1.2867   | 0.099103 | 1.2867      | 0.099103    | 1.2867      | 0.099103 |
|           |                 | 1.2867   | 0.099103 | 0.566068112 |             |             |          |
| RNU6-457P | ENSG00000200869 | -1.0148  | 0.8449   | -1.0148     | 0.8449      | -1.0148     |          |
|           |                 | 0.8449   | 1.2866   | 0.099122    | 0.099122    | 0.566068112 |          |
| RP9       | ENSG00000164610 | 1.2865   | 0.099126 | 1.2865      | 0.099126    | 1.2865      | 0.099126 |
|           |                 | 1.2865   | 0.099126 | 0.566068112 |             |             |          |
| NA        | ENSG00000276620 | 1.2865   | 0.099127 | 1.2865      | 0.099127    | 1.2865      | 0.099127 |
|           |                 | 1.2865   | 0.099127 | 0.566068112 |             |             |          |
| CALB2     | ENSG00000172137 | 0.67137  | 0.25099  | 0.082911    | 0.46696     | 1.2865      | 0.099134 |
|           |                 | 1.2865   | 0.099134 | 0.566068112 |             |             |          |
| KCND3-IT1 | ENSG00000232558 | 1.2863   | 0.099172 | -0.0715     | 0.5285      | 1.2863      |          |
|           |                 | 0.099172 | 0.66721  | 0.25232     | 0.099172    | 0.566068112 |          |
| C9orf62   | ENSG00000178243 | 0.94498  | 0.17234  | 1.2862      | 0.099182    | 0.32107     |          |
|           |                 | 0.37408  | 0.93159  | 0.17577     | 0.099182    | 0.566068112 |          |
| NA        | ENSG00000199224 | -0.88283 | 0.81134  | 0.85813     | 0.19541     | -0.88283    | 0.81134  |
|           |                 | 1.286    | 0.09923  | 0.09923     | 0.566068112 |             |          |
| RPL30P5   | ENSG00000239525 | 1.2859   | 0.099241 | 0.21882     | 0.4134      | 1.2736      |          |
|           |                 | 0.10141  | 1.2275   | 0.10982     | 0.099241    | 0.566068112 |          |
| NA        | ENSG00000232499 | 0.10852  | 0.45679  | -0.83609    | 0.79845     | 1.2859      | 0.099245 |
|           |                 | -0.83609 | 0.79845  | 0.099245    | 0.566068112 |             |          |
| TUBA3C    | ENSG00000198033 | 0.74163  | 0.22916  | 0.99        | 0.16109     | 1.2285      | 0.10963  |
|           |                 | 1.2857   | 0.099275 | 0.099275    | 0.566068112 |             |          |
| SPATA22   | ENSG00000141255 | 0.77325  | 0.21969  | -1.5902     | 0.9441      | 1.2856      |          |
|           |                 | 0.099288 | 1.0491   | 0.14706     | 0.099288    | 0.566068112 |          |
| PEX5L-AS1 | ENSG00000243799 | 1.2856   | 0.099288 | 1.2856      | 0.099288    | 1.2856      |          |
|           |                 | 0.099288 | 1.2856   | 0.099288    | 0.099288    | 0.566068112 |          |
| TROAP     | ENSG00000135451 | 0.48459  | 0.31398  | 0.39555     | 0.34622     | 0.25224     | 0.40043  |
|           |                 | 1.2856   | 0.09929  | 0.09929     | 0.566068112 |             |          |
| ATN1      | ENSG00000111676 | 1.2856   | 0.099291 | 0.81732     | 0.20687     | 0.60781     | 0.27166  |
|           |                 | 0.65536  | 0.25612  | 0.099291    | 0.566068112 |             |          |
| MIR194-1  | ENSG00000207624 | 1.2855   | 0.099305 | 1.2855      | 0.099305    | 1.2855      |          |
|           |                 | 0.099305 | 1.2855   | 0.099305    | 0.099305    | 0.566068112 |          |
| TRIOBP    | ENSG00000100106 | 1.2854   | 0.099321 | 0.22045     | 0.41276     | 0.15825     |          |
|           |                 | 0.43713  | 0.83893  | 0.20075     | 0.099321    | 0.566068112 |          |
| LINC01269 | ENSG00000258689 | 1.2853   | 0.099337 | 0.85086     | 0.19742     | 1.2853      |          |
|           |                 | 0.099337 | 1.2853   | 0.099337    | 0.099337    | 0.566068112 |          |
| LINC02057 | ENSG00000249279 | 0.42138  | 0.33674  | 1.2851      | 0.099373    | -0.65714    |          |
|           |                 | 0.74445  | 0.54096  | 0.29427     | 0.099373    | 0.566068112 |          |
| NA        | ENSG00000281392 | 1.0972   | 0.13627  | 1.1557      | 0.12391     | 1.2851      | 0.099377 |
|           |                 | 0.53641  | 0.29584  | 0.099377    | 0.566068112 |             |          |
| LRP11     | ENSG00000120256 | 0.48712  | 0.31309  | 1.285       | 0.099398    | 1.2717      | 0.10174  |
|           |                 | 0.7301   | 0.23266  | 0.099398    | 0.566068112 |             |          |
| NA        | ENSG00000259111 | 0.36174  | 0.35877  | -0.6519     | 0.74277     | 1.285       | 0.099402 |
|           |                 | 0.72969  | 0.23279  | 0.099402    | 0.566068112 |             |          |
| NA        | ENSG00000237152 | 0.11013  | 0.45615  | -0.25687    | 0.60136     | 1.2849      | 0.099412 |
|           |                 | 0.038975 | 0.48446  | 0.099412    | 0.566068112 |             |          |
| NA        | ENSG00000260035 | 1.2847   | 0.09944  | 1.2847      | 0.09944     | 1.2847      | 0.09944  |
|           |                 | 1.2847   | 0.09944  | 0.09944     | 0.566068112 |             |          |
| EYA3      | ENSG00000158161 | 1.0556   | 0.14558  | 1.2847      | 0.099456    | 0.93326     | 0.17534  |
|           |                 | 0.28447  | 0.38803  | 0.099456    | 0.566068112 |             |          |
| LINC02165 | ENSG00000261014 | -1.3174  | 0.90614  | 1.2845      | 0.099478    | -1.7759     |          |
|           |                 | 0.96213  | -1.7759  | 0.96213     | 0.099478    | 0.566068112 |          |
| FAM13B    | ENSG00000031003 | 0.65524  | 0.25616  | 0.78014     | 0.21765     | 1.2752      |          |
|           |                 | 0.10113  | 1.2845   | 0.099479    | 0.099479    | 0.566068112 |          |
| PLCB2     | ENSG00000137841 | 0.81545  | 0.20741  | 1.2845      | 0.09948     | 0.79387     | 0.21363  |
|           |                 | 0.1405   | 0.44413  | 0.09948     | 0.566068112 |             |          |
| RPS20P2   | ENSG00000219274 | 1.2845   | 0.099481 | 1.2845      | 0.099481    | 1.2845      |          |
|           |                 | 0.099481 | 1.2845   | 0.099481    | 0.099481    | 0.566068112 |          |
| NA        | ENSG00000225365 | -0.57124 | 0.71608  | 0.97176     | 0.16558     | 1.2844      | 0.099495 |
|           |                 | 0.97176  | 0.16558  | 0.099495    | 0.566068112 |             |          |

|             |                 |           |          |             |             |           |          |
|-------------|-----------------|-----------|----------|-------------|-------------|-----------|----------|
| KIFC3       | ENSG00000140859 | 0.16796   | 0.43331  | -0.16123    | 0.56404     | -0.16123  | 0.56404  |
|             | 1.2844          | 0.099501  | 0.099501 | 0.566068112 |             |           |          |
| FAM227B     | ENSG00000166262 | 1.1888    | 0.11727  | 0.6076      | 0.27173     | 1.2844    |          |
|             | 0.099502        | 0.1718    | 0.4318   | 0.099502    | 0.566068112 |           |          |
| POM121L6P   | ENSG00000243307 | 0.33688   | 0.3681   | -0.54396    | 0.70677     | -0.46412  |          |
|             | 0.67872         | 1.2844    | 0.099508 | 0.099508    | 0.566068112 |           |          |
| NA          | ENSG00000225594 | -1.7807   | 0.96252  | -1.5551     | 0.94004     | 1.2843    | 0.099514 |
|             | 0.15395         | 0.43883   | 0.099514 | 0.566068112 |             |           |          |
| NA          | ENSG00000229983 | -0.139    | 0.55527  | 1.2843      | 0.099521    | -0.139    | 0.55527  |
|             | -0.139          | 0.55527   | 0.099521 | 0.566068112 |             |           |          |
| NA          | ENSG00000267564 | 1.1344    | 0.12832  | 1.2842      | 0.099529    | 0.67342   | 0.25034  |
|             | 1.1071          | 0.13413   | 0.099529 | 0.566068112 |             |           |          |
| NA          | ENSG00000230603 | 1.2842    | 0.099535 | 1.1767      | 0.11965     | 1.1767    | 0.11965  |
|             | 1.1767          | 0.11965   | 0.099535 | 0.566068112 |             |           |          |
| NA          | ENSG00000211534 | -2.1629   | 0.98473  | 1.2841      | 0.099554    | -0.7415   | 0.7708   |
|             | -1.2685         | 0.89769   | 0.099554 | 0.566068112 |             |           |          |
| NA          | ENSG00000223344 | 1.2839    | 0.09958  | 0.73933     | 0.22985     | 1.1076    | 0.13402  |
|             | 1.1076          | 0.13402   | 0.09958  | 0.566068112 |             |           |          |
| GMEB1       | ENSG00000162419 | -0.65312  | 0.74316  | 0.69928     | 0.24219     | 0.75803   | 0.22422  |
|             | 1.2839          | 0.099591  | 0.099591 | 0.566068112 |             |           |          |
| CLCN7       | ENSG00000103249 | 1.2838    | 0.099607 | 0.57528     | 0.28255     | -0.060985 | 0.52431  |
|             | 0.099822        | 0.46024   | 0.099607 | 0.566068112 |             |           |          |
| PLCB3       | ENSG00000149782 | -0.64769  | 0.74141  | 0.43154     | 0.33304     | 1.1207    | 0.13122  |
|             | 1.2837          | 0.099623  | 0.099623 | 0.566068112 |             |           |          |
| GABRG3-AS1  | ENSG00000228740 | 1.2516    | 0.10536  | 1.2837      | 0.099623    | -0.306    |          |
|             | 0.6202          | 1.2837    | 0.099623 | 0.099623    | 0.566068112 |           |          |
| NA          | ENSG00000254000 | 1.2837    | 0.099632 | 0.32762     | 0.3716      | 0.42018   | 0.33718  |
|             | 1.184           | 0.1182    | 0.099632 | 0.566068112 |             |           |          |
| IL4         | ENSG00000113520 | -1.1458   | 0.87407  | 1.2836      | 0.099642    | 0.99229   | 0.16053  |
|             | -0.67621        | 0.75055   | 0.099642 | 0.566068112 |             |           |          |
| NA          | ENSG00000253275 | 0.6534    | 0.25675  | 1.2833      | 0.099689    | 1.2833    | 0.099689 |
|             | 1.2833          | 0.099689  | 0.099689 | 0.566068112 |             |           |          |
| NA          | ENSG00000255256 | 1.2833    | 0.0997   | 1.2833      | 0.0997      | 1.2833    | 0.0997   |
|             | 1.2833          | 0.0997    | 0.0997   | 0.566068112 |             |           |          |
| LINC02794   | ENSG00000226133 | 0.22005   | 0.41291  | -0.039375   | 0.5157      | -0.16043  |          |
|             | 0.56373         | 1.2832    | 0.099718 | 0.099718    | 0.566068112 |           |          |
| ERHP1       | ENSG00000254270 | -0.39365  | 0.65308  | 0.13956     | 0.4445      | 0.96018   | 0.16848  |
|             | 1.2832          | 0.099719  | 0.099719 | 0.566068112 |             |           |          |
| MTRNR2L4    | ENSG00000232196 | 1.2831    | 0.099731 | 1.2831      | 0.099731    | 1.2124    |          |
|             | 0.11269         | 0.99872   | 0.15896  | 0.099731    | 0.566068112 |           |          |
| SLC22A18AS  | ENSG00000254827 | 0.53333   | 0.2969   | 1.2819      | 0.099941    | 1.2831    |          |
|             | 0.099734        | 0.70731   | 0.23969  | 0.099734    | 0.566068112 |           |          |
| NA          | ENSG00000256480 | 1.283     | 0.09974  | 0.8553      | 0.19619     | -0.36832  | 0.64368  |
|             | -0.51043        | 0.69512   | 0.09974  | 0.566068112 |             |           |          |
| OR1A2       | ENSG00000172150 | -0.75993  | 0.77635  | 1.283       | 0.099746    | -0.91496  | 0.81989  |
|             | 0.50498         | 0.30679   | 0.099746 | 0.566068112 |             |           |          |
| RNA5SP285   | ENSG00000252428 | 1.0592    | 0.14477  | 1.283       | 0.099752    | 0.31776   | 0.37533  |
|             | 0.78012         | 0.21766   | 0.099752 | 0.566068112 |             |           |          |
| NA          | ENSG00000227809 | 1.283     | 0.099754 | 1.1816      | 0.11868     | 1.0304    | 0.15141  |
|             | 1.0304          | 0.15141   | 0.099754 | 0.566068112 |             |           |          |
| DCHS1       | ENSG00000166341 | 1.0642    | 0.14362  | 1.0642      | 0.14362     | 1.2828    | 0.099776 |
|             | 1.0642          | 0.14362   | 0.099776 | 0.566068112 |             |           |          |
| ARHGEF3-AS1 | ENSG00000240198 | 1.2828    | 0.099787 | -1.9725     | 0.97573     | 0.74146   |          |
|             | 0.22921         | -1.9011   | 0.97135  | 0.099787    | 0.566068112 |           |          |
| NA          | ENSG00000235653 | 1.2827    | 0.099806 | 1.2827      | 0.099806    | 1.2827    | 0.099806 |
|             | 1.2827          | 0.099806  | 0.099806 | 0.566068112 |             |           |          |
| CYP4F35P    | ENSG00000265787 | -0.075405 | 0.53005  | 1.2826      | 0.099808    | 0.13966   |          |
|             | 0.44446         | -0.9733   | 0.8348   | 0.099808    | 0.566068112 |           |          |
| HDDC3       | ENSG00000184508 | 0.83958   | 0.20057  | 1.2826      | 0.099811    | 1.2826    | 0.099811 |
|             | 1.2826          | 0.099811  | 0.099811 | 0.566068112 |             |           |          |
| ATF7IP2     | ENSG00000166669 | 0.62515   | 0.26594  | 0.12866     | 0.44881     | 0.6191    |          |
|             | 0.26792         | 1.2826    | 0.099813 | 0.099813    | 0.566068112 |           |          |

|           |                 |             |             |             |             |           |          |
|-----------|-----------------|-------------|-------------|-------------|-------------|-----------|----------|
| SF3A3     | ENSG00000183431 | 0.83401     | 0.20214     | 1.0184      | 0.15425     | -0.86009  | 0.80513  |
|           | 1.2826          | 0.099818    | 0.099818    | 0.566068112 |             |           |          |
| NA        | ENSG00000263555 | 1.2826      | 0.099819    | 1.2826      | 0.099819    | 1.2826    | 0.099819 |
|           | 1.2826          | 0.099819    | 0.099819    | 0.566068112 |             |           |          |
| NA        | ENSG00000267487 | 1.2826      | 0.099824    | 1.2826      | 0.099824    | 1.2826    | 0.099824 |
|           | 1.2826          | 0.099824    | 0.099824    | 0.566068112 |             |           |          |
| NA        | ENSG00000199471 | 1.2825      | 0.099828    | 1.2825      | 0.099828    | 1.2825    | 0.099828 |
|           | 1.2825          | 0.099828    | 0.099828    | 0.566068112 |             |           |          |
| RNU6-557P | ENSG00000252651 | 0.80199     | 0.21128     | 0.72139     | 0.23533     | 1.0938    |          |
|           | 0.13702         | 1.2825      | 0.09984     | 0.09984     | 0.566068112 |           |          |
| LINC02086 | ENSG00000244649 | 0.79072     | 0.21455     | 1.2822      | 0.099888    | 0.79072   |          |
|           | 0.21455         | 1.1196      | 0.13145     | 0.099888    | 0.566068112 |           |          |
| MFN2      | ENSG00000116688 | 0.46666     | 0.32037     | 1.2821      | 0.099911    | -0.031431 | 0.51254  |
|           | -0.70499        | 0.75959     | 0.099911    | 0.566068112 |             |           |          |
| NA        | ENSG00000259548 | 1.282       | 0.099915    | -0.4754     | 0.68275     | 0.57697   | 0.28198  |
|           | 0.63924         | 0.26133     | 0.099915    | 0.566068112 |             |           |          |
| NA        | ENSG00000254575 | -0.38365    | 0.64938     | 1.2819      | 0.099936    | 1.2819    | 0.099936 |
|           | 1.2819          | 0.099936    | 0.099936    | 0.566068112 |             |           |          |
| LPCAT1    | ENSG00000153395 | 0.80444     | 0.21057     | 1.2819      | 0.099938    | 1.115     | 0.13243  |
|           | -1.3223         | 0.90697     | 0.099938    | 0.566068112 |             |           |          |
| SNRPEP10  | ENSG00000227002 | 0.97885     | 0.16383     | 0.53958     | 0.29474     | 0.53958   |          |
|           | 0.29474         | 1.2819      | 0.099944    | 0.099944    | 0.566068112 |           |          |
| NCK2      | ENSG00000071051 | 0.69015     | 0.24505     | 0.13839     | 0.44497     | 1.2818    | 0.099955 |
|           | 0.093465        | 0.46277     | 0.099955    | 0.566068112 |             |           |          |
| NA        | ENSG00000253924 | 0.12436     | 0.45051     | 0.50928     | 0.30528     | 1.2817    | 0.099966 |
|           | 1.2817          | 0.099966    | 0.099966    | 0.566068112 |             |           |          |
| RETREG3   | ENSG00000141699 | 1.2817      | 0.099979    | 1.0344      | 0.15048     | -0.36711  |          |
|           | 0.64323         | 0.70223     | 0.24127     | 0.099979    | 0.566068112 |           |          |
| NA        | ENSG00000268108 | 1.2816      | 0.099983    | 1.2816      | 0.099983    | 1.2816    | 0.099983 |
|           | 1.2816          | 0.099983    | 0.099983    | 0.566068112 |             |           |          |
| EEF1B2P8  | ENSG00000230497 | 1.2815      | 0.1         | 0.9853      | 0.16224     | 0.9853    | 0.16224  |
|           | 0.93774         | 0.17419     | 0.1         | 0.566068112 |             |           |          |
| NA        | ENSG00000265378 | 1.2815      | 0.1         | 0.36317     | 0.35824     | 1.2815    | 0.1      |
|           | 0.26925         | 0.1         | 0.566068112 |             |             |           |          |
| UBASH3B   | ENSG00000154127 | 1.2815      | 0.10001     | 0.82747     | 0.20399     | 0.98592   |          |
|           | 0.16209         | 0.62035     | 0.26752     | 0.10001     | 0.566068112 |           |          |
| PSMD4     | ENSG00000159352 | 1.0844      | 0.13909     | 1.2815      | 0.10001     | 1.2815    | 0.10001  |
|           | 1.2815          | 0.10001     | 0.10001     | 0.566068112 |             |           |          |
| MRPS16P1  | ENSG00000229182 | 1.2815      | 0.10001     | 0.37122     | 0.35524     | 1.2815    |          |
|           | 0.10001         | 1.2815      | 0.10001     | 0.10001     | 0.566068112 |           |          |
| NA        | ENSG00000212266 | 1.2814      | 0.10002     | 1.2814      | 0.10002     | 1.2814    | 0.10002  |
|           | 0.28133         | 0.38923     | 0.10002     | 0.566068112 |             |           |          |
| NA        | ENSG00000261543 | 1.2814      | 0.10002     | 0.36762     | 0.35658     | 0.79359   | 0.21372  |
|           | 0.97901         | 0.16379     | 0.10002     | 0.566068112 |             |           |          |
| C16orf78  | ENSG00000166152 | 0.61857     | 0.2681      | 1.2813      | 0.10004     | 0.55107   |          |
|           | 0.29079         | 1.0344      | 0.15047     | 0.10004     | 0.566068112 |           |          |
| NA        | ENSG00000281028 | 1.2813      | 0.10005     | 1.2813      | 0.10005     | 1.2813    | 0.10005  |
|           | 1.2813          | 0.10005     | 0.10005     | 0.566068112 |             |           |          |
| MIR584    | ENSG00000207714 | 1.2812      | 0.10007     | 0.18608     | 0.42619     | 0.18608   |          |
|           | 0.42619         | 0.18608     | 0.42619     | 0.10007     | 0.566068112 |           |          |
| NA        | ENSG00000267224 | 1.2812      | 0.10007     | 1.2812      | 0.10007     | 1.2812    | 0.10007  |
|           | 1.2812          | 0.10007     | 0.10007     | 0.566068112 |             |           |          |
| EHF       | ENSG00000135373 | 1.2811      | 0.10008     | 1.2811      | 0.10008     | 1.2811    | 0.10008  |
|           | 0.082559        | 0.4671      | 0.10008     | 0.566068112 |             |           |          |
| NA        | ENSG00000250866 | 0.066471    | 0.4735      | 1.2811      | 0.10008     | 0.066471  | 0.4735   |
|           | 0.066471        | 0.4735      | 0.10008     | 0.566068112 |             |           |          |
| UGT2B29P  | ENSG00000250566 | 0.5308      | 0.29778     | 0.023068    | 0.4908      | 1.281     | 0.1001   |
|           | 0.36736         | 0.35667     | 0.1001      | 0.566068112 |             |           |          |
| NA        | ENSG00000255856 | 1.281       | 0.1001      | 1.281       | 0.1001      | 1.281     | 0.1001   |
|           | 0.1001          | 0.566068112 |             |             |             |           |          |
| OR7G3     | ENSG00000170920 | 1.2809      | 0.10011     | -0.26349    | 0.60391     | 0.24127   | 0.40467  |
|           | 0.70539         | 0.24028     | 0.10011     | 0.566068112 |             |           |          |

|            |                 |           |          |           |             |             |         |
|------------|-----------------|-----------|----------|-----------|-------------|-------------|---------|
| LATS1      | ENSG00000131023 | 1.2541    | 0.1049   | 1.2748    | 0.10119     | 1.2809      | 0.10012 |
|            |                 | 1.2346    | 0.10848  | 0.10012   | 0.566068112 |             |         |
| NA         | ENSG00000270611 | 1.2808    | 0.10013  | -1.288    | 0.90112     | -1.288      | 0.90112 |
|            |                 | -1.288    | 0.90112  | 0.10013   | 0.566068112 |             |         |
| NXNL2      | ENSG00000130045 | -0.61204  | 0.72974  | -0.23917  | 0.59451     | -1.031      | 0.84873 |
|            |                 | 1.2808    | 0.10014  | 0.10014   | 0.566068112 |             |         |
| SOCS4      | ENSG00000180008 | 1.2808    | 0.10014  | 1.2808    | 0.10014     | 1.2808      | 0.10014 |
|            |                 | 1.2808    | 0.10014  | 0.10014   | 0.566068112 |             |         |
| PPFIA2-AS1 | ENSG00000257467 | -0.89726  | 0.81521  | 1.2807    | 0.10015     | 0.08007     |         |
|            |                 | 0.46809   | 0.08007  | 0.46809   | 0.10015     | 0.566068112 |         |
| NA         | ENSG00000186076 | 0.20185   | 0.42002  | 0.39364   | 0.34692     | -0.76929    | 0.77914 |
|            |                 | 1.2807    | 0.10016  | 0.10016   | 0.566068112 |             |         |
| MCPH1-AS1  | ENSG00000249898 | 0.44806   | 0.32706  | -0.24643  | 0.59733     | 0.83102     |         |
|            |                 | 0.20298   | 1.2806   | 0.10017   | 0.10017     | 0.566068112 |         |
| ERVFRD-3   | ENSG00000264801 | 1.2805    | 0.10018  | 0.19545   | 0.42252     | 0.19545     |         |
|            |                 | 0.42252   | 0.19545  | 0.42252   | 0.10018     | 0.566068112 |         |
| MRPL42P2   | ENSG00000216364 | 1.1942    | 0.1162   | 1.2804    | 0.1002      | -0.36097    |         |
|            |                 | 0.64094   | -1.4639  | 0.92838   | 0.1002      | 0.566106341 |         |
| RN7SL510P  | ENSG00000266308 | 1.2804    | 0.10021  | 1.2804    | 0.10021     | 1.2804      |         |
|            |                 | 0.10021   | 1.2804   | 0.10021   | 0.10021     | 0.566106341 |         |
| NA         | ENSG00000233891 | -0.44882  | 0.67322  | 0.82981   | 0.20332     | 0.71759     | 0.23651 |
|            |                 | 1.2802    | 0.10023  | 0.10023   | 0.566153692 |             |         |
| NACAP8     | ENSG00000257210 | 1.2799    | 0.10029  | 1.2799    | 0.10029     | 1.2799      |         |
|            |                 | 0.10029   | 1.2799   | 0.10029   | 0.10029     | 0.56640861  |         |
| NA         | ENSG00000230092 | -1.8304   | 0.9664   | -1.8304   | 0.9664      | -0.88929    | 0.81308 |
|            |                 | 1.2799    | 0.1003   | 0.1003    | 0.56640861  |             |         |
| OR2S2      | ENSG00000278889 | -0.24344  | 0.59617  | 0.41822   | 0.33789     | 1.2798      | 0.10031 |
|            |                 | 0.93239   | 0.17557  | 0.10031   | 0.56640861  |             |         |
| SLC25A36   | ENSG00000114120 | 1.2796    | 0.10035  | -0.39691  | 0.65428     | -0.1411     |         |
|            |                 | 0.5561    | -0.39691 | 0.65428   | 0.10035     | 0.566568822 |         |
| TTL        | ENSG00000114999 | 1.1351    | 0.12817  | 1.2793    | 0.10039     | 0.94007     | 0.17359 |
|            |                 | 0.97063   | 0.16587  | 0.10039   | 0.566570175 |             |         |
| MTCO1P40   | ENSG00000262902 | 1.2793    | 0.10039  | 1.2793    | 0.10039     | 1.2793      |         |
|            |                 | 0.10039   | 1.2793   | 0.10039   | 0.10039     | 0.566570175 |         |
| CNPY3      | ENSG00000137161 | 1.2793    | 0.1004   | -0.68786  | 0.75423     | 1.2462      | 0.10635 |
|            |                 | 0.49867   | 0.30901  | 0.1004    | 0.566570175 |             |         |
| AASDH      | ENSG00000157426 | 0.26613   | 0.39507  | 1.2792    | 0.10042     | 0.65121     | 0.25745 |
|            |                 | 0.19232   | 0.42374  | 0.10042   | 0.566570175 |             |         |
| LINC01049  | ENSG00000234384 | 0.6172    | 0.26855  | 0.13596   | 0.44593     | 0.6172      |         |
|            |                 | 0.26855   | 1.2792   | 0.10042   | 0.10042     | 0.566570175 |         |
| NA         | ENSG00000249695 | 0.69175   | 0.24455  | 1.1694    | 0.12113     | 1.2792      | 0.10042 |
|            |                 | 1.2792    | 0.10042  | 0.10042   | 0.566570175 |             |         |
| RAB3B      | ENSG00000169213 | 0.58692   | 0.27863  | 0.58286   | 0.27999     | 1.0862      | 0.1387  |
|            |                 | 1.279     | 0.10045  | 0.10045   | 0.566673825 |             |         |
| TMCC2      | ENSG00000133069 | 1.2788    | 0.10048  | -0.006762 | 0.5027      | 1.1364      | 0.12789 |
|            |                 | -0.10852  | 0.54321  | 0.10048   | 0.566702662 |             |         |
| SP140      | ENSG00000079263 | -0.039534 | 0.51577  | 1.1862    | 0.11776     | 1.2787      | 0.10049 |
|            |                 | -0.6725   | 0.74937  | 0.10049   | 0.566702662 |             |         |
| NA         | ENSG00000262136 | 1.2788    | 0.10049  | 1.2788    | 0.10049     | 1.2788      | 0.10049 |
|            |                 | 1.2788    | 0.10049  | 0.10049   | 0.566702662 |             |         |
| LINC02164  | ENSG00000261811 | 0.21058   | 0.41661  | -0.46189  | 0.67792     | 0.21058     |         |
|            |                 | 0.41661   | 1.2787   | 0.10051   | 0.10051     | 0.566741901 |         |
| NA         | ENSG00000230696 | 1.2785    | 0.10054  | 1.2785    | 0.10054     | 1.2785      | 0.10054 |
|            |                 | 1.2785    | 0.10054  | 0.10054   | 0.566741901 |             |         |
| NA         | ENSG00000279535 | -0.46952  | 0.68065  | 1.2785    | 0.10054     | 1.2785      | 0.10054 |
|            |                 | 1.2785    | 0.10054  | 0.10054   | 0.566741901 |             |         |
| NA         | ENSG00000282738 | -1.4654   | 0.92859  | 0.64317   | 0.26006     | -1.0345     | 0.84956 |
|            |                 | 1.2784    | 0.10056  | 0.10056   | 0.566741901 |             |         |
| KLF6       | ENSG00000067082 | -0.38197  | 0.64876  | 1.2783    | 0.10057     | 0.17159     | 0.43188 |
|            |                 | 0.053398  | 0.47871  | 0.10057   | 0.566741901 |             |         |
| RPL7AP22   | ENSG00000227331 | 1.2782    | 0.10058  | 0.57192   | 0.28369     | 1.2782      |         |
|            |                 | 0.10058   | 0.50553  | 0.30659   | 0.10058     | 0.566741901 |         |

|             |                 |          |             |             |             |           |         |       |
|-------------|-----------------|----------|-------------|-------------|-------------|-----------|---------|-------|
| LRR3B       | ENSG00000179796 | 0.81301  | 0.20811     | 0.011157    | 0.49555     | 0.81143   |         |       |
|             | 0.20856         | 1.2782   | 0.10059     | 0.10059     | 0.566741901 |           |         |       |
| NA          | ENSG00000238438 | 0.25281  | 0.40021     | -0.18992    | 0.57531     | -0.18992  | 0.57531 |       |
|             | 1.2782          | 0.10059  | 0.10059     | 0.566741901 |             |           |         |       |
| MIR4755     | ENSG00000264616 | -0.32679 | 0.62809     | -0.32679    | 0.62809     | 1.2781    |         |       |
|             | 0.10061         | -0.32679 | 0.62809     | 0.10061     | 0.566789052 |           |         |       |
| NME8        | ENSG00000086288 | 1.278    | 0.10063     | 0.57888     | 0.28134     | -0.1183   | 0.54708 |       |
|             | 1.0471          | 0.14753  | 0.10063     | 0.566836192 |             |           |         |       |
| NA          | ENSG00000231597 | -0.79664 | 0.78717     | -0.88257    | 0.81127     | 1.2779    | 0.10065 |       |
|             | -1.991          | 0.97676  | 0.10065     | 0.566883322 |             |           |         |       |
| MYNN        | ENSG00000085274 | -0.17635 | 0.56999     | 1.2777      | 0.10068     | 1.2777    | 0.10068 |       |
|             | -0.14055        | 0.55589  | 0.10068     | 0.566921239 |             |           |         |       |
| OR8G7P      | ENSG00000276316 | 1.2777   | 0.10068     | 1.2777      | 0.10068     | 1.2777    |         |       |
|             | 0.10068         | 1.2777   | 0.10068     | 0.10068     | 0.566921239 |           |         |       |
| NA          | ENSG00000233383 | 1.2775   | 0.10072     | -0.51262    | 0.69589     | 0.017371  | 0.49307 |       |
|             | -0.94244        | 0.82702  | 0.10072     | 0.566940737 |             |           |         |       |
| SMCO2       | ENSG00000165935 | 0.40417  | 0.34304     | 0.39359     | 0.34694     | 0.40417   | 0.34304 |       |
|             | 1.2774          | 0.10073  | 0.10073     | 0.566940737 |             |           |         |       |
| RNA5SP302   | ENSG00000201766 | 1.2774   | 0.10073     | 1.2774      | 0.10073     | 1.2774    |         |       |
|             | 0.10073         | 1.2774   | 0.10073     | 0.10073     | 0.566940737 |           |         |       |
| NA          | ENSG00000268421 | 1.2774   | 0.10073     | 0.63303     | 0.26336     | 1.2774    | 0.10073 |       |
|             | 1.2774          | 0.10073  | 0.10073     | 0.566940737 |             |           |         |       |
| LSAMP       | ENSG00000185565 | 1.2771   | 0.10078     | -0.42006    | 0.66278     | 0.66803   | 0.25206 |       |
|             | 0.79555         | 0.21315  | 0.10078     | 0.566980743 |             |           |         |       |
| LGALS9B     | ENSG00000170298 | 1.2769   | 0.10081     | 0.25765     | 0.39834     | -0.59583  |         |       |
|             | 0.72436         | 0.89052  | 0.18659     | 0.10081     | 0.566980743 |           |         |       |
| NA          | ENSG00000267433 | 1.2769   | 0.10081     | 1.2769      | 0.10081     | 1.1741    | 0.12017 |       |
|             | 1.2769          | 0.10081  | 0.10081     | 0.566980743 |             |           |         |       |
| RITA1       | ENSG00000139405 | 0.95652  | 0.1694      | 0.87776     | 0.19004     | 0.0050743 | 0.49798 |       |
|             | 1.2769          | 0.10083  | 0.10083     | 0.566980743 |             |           |         |       |
| NA          | ENSG00000254364 | 0.70969  | 0.23895     | 1.2768      | 0.10084     | -0.5421   | 0.70613 |       |
|             | -0.11472        | 0.54567  | 0.10084     | 0.566980743 |             |           |         |       |
| HTR5BP      | ENSG00000125631 | 0.36331  | 0.35819     | 0.57746     | 0.28181     | 1.2766    |         |       |
|             | 0.10086         | 1.2729   | 0.10152     | 0.10086     | 0.566980743 |           |         |       |
| ATP5MC1     | ENSG00000159199 | 1.2767   | 0.10086     | 1.2767      | 0.10086     | 1.2767    |         |       |
|             | 0.10086         | 1.2767   | 0.10086     | 0.10086     | 0.566980743 |           |         |       |
| BAZ1B       | ENSG00000009954 | 1.2766   | 0.10088     | 1.0154      | 0.15495     | 0.12064   | 0.45199 |       |
|             | 0.72409         | 0.23451  | 0.10088     | 0.566980743 |             |           |         |       |
| PDCL        | ENSG00000136940 | 0.69437  | 0.24372     | 0.39391     | 0.34682     | 1.2766    | 0.10088 |       |
|             | 1.081           | 0.13984  | 0.10088     | 0.566980743 |             |           |         |       |
| MRPL20-DT   | ENSG00000272455 | 1.2766   | 0.10088     | 1.2766      | 0.10088     | 1.2766    |         |       |
|             | 0.10088         | 1.2766   | 0.10088     | 0.10088     | 0.566980743 |           |         |       |
| Clorf21     | ENSG00000116667 | 0.2642   | 0.39581     | 1.0097      | 0.15633     | 1.2765    |         |       |
|             | 0.10089         | 0.59145  | 0.27711     | 0.10089     | 0.566980743 |           |         |       |
| COPZ2       | ENSG00000005243 | 1.2765   | 0.1009      | -0.038827   | 0.51549     | 0.30249   | 0.38114 |       |
|             | -0.54694        | 0.70779  | 0.1009      | 0.566980743 |             |           |         |       |
| MTARC1      | ENSG00000186205 | 1.2654   | 0.10286     | 1.2396      | 0.10756     | 1.2764    |         |       |
|             | 0.1009          | 1.0009   | 0.15844     | 0.1009      | 0.566980743 |           |         |       |
| NA          | ENSG00000232063 | -1.2114  | 0.88714     | 1.2764      | 0.1009      | 1.1763    | 0.11974 |       |
|             | 0.67588         | 0.24956  | 0.1009      | 0.566980743 |             |           |         |       |
| RNA5SP62    | ENSG00000200327 | 1.2547   | 0.10479     | -0.87291    | 0.80864     | 1.2762    |         |       |
|             | 0.10094         | 1.2762   | 0.10094     | 0.10094     | 0.56700936  |           |         |       |
| RNU6ATAC15P | ENSG00000221206 | 1.0281   | 0.15196     | 1.0281      | 0.15196     | 1.0281    |         |       |
|             | 0.15196         | 1.2762   | 0.10094     | 0.10094     | 0.56700936  |           |         |       |
| GAPDHP22    | ENSG00000234005 | 1.2762   | 0.10094     | 1.2762      | 0.10094     | 1.2762    |         |       |
|             | 0.10094         | 1.2762   | 0.10094     | 0.10094     | 0.56700936  |           |         |       |
| RRAS2P1     | ENSG00000236360 | 1.276    | 0.10098     | 1.276       | 0.10098     | 1.276     | 0.10098 | 1.276 |
|             | 0.10098         | 0.10098  | 0.567168672 |             |             |           |         |       |
| PCDHGB2     | ENSG00000253910 | 0.78722  | 0.21558     | 0.5716      | 0.2838      | 0.78722   |         |       |
|             | 0.21558         | 1.2758   | 0.10101     | 0.10101     | 0.567262572 |           |         |       |
| NA          | ENSG00000248486 | 0.71003  | 0.23884     | -0.34764    | 0.63594     | 1.2758    | 0.10102 |       |
|             | 0.97439         | 0.16493  | 0.10102     | 0.567262572 |             |           |         |       |



|           |                 |           |             |             |             |           |         |
|-----------|-----------------|-----------|-------------|-------------|-------------|-----------|---------|
| EXOSC8    | ENSG00000120699 | 1.2756    | 0.10105     | 1.2054      | 0.11402     | 1.2201    |         |
|           | 0.11121         | 1.2201    | 0.11121     | 0.10105     | 0.567356429 |           |         |
| NA        | ENSG00000267624 | 1.2756    | 0.10106     | 1.2756      | 0.10106     | 1.2756    | 0.10106 |
|           | 1.2756          | 0.10106   | 0.10106     | 0.567356429 |             |           |         |
| RNU2-19P  | ENSG00000253097 | 1.2753    | 0.1011      | 0.37118     | 0.35525     | 0.37118   |         |
|           | 0.35525         | 0.37118   | 0.35525     | 0.1011      | 0.567375668 |           |         |
| RACGAP1P  | ENSG00000257331 | 1.2753    | 0.1011      | 1.2753      | 0.1011      | 1.2753    |         |
|           | 0.1011          | 1.2753    | 0.1011      | 0.1011      | 0.567375668 |           |         |
| RNY3P11   | ENSG00000201023 | 1.2753    | 0.10111     | 1.2753      | 0.10111     | 1.2753    |         |
|           | 0.10111         | 1.2753    | 0.10111     | 0.10111     | 0.567375668 |           |         |
| NA        | ENSG00000254754 | 0.66158   | 0.25412     | 1.2753      | 0.10111     | -0.022609 | 0.50902 |
|           | -0.022609       | 0.50902   | 0.10111     | 0.567375668 |             |           |         |
| TTYH3     | ENSG00000136295 | 0.55353   | 0.28995     | 1.275       | 0.10115     | 0.036506  | 0.48544 |
|           | 0.26747         | 0.39455   | 0.10115     | 0.567397209 |             |           |         |
| AURKA     | ENSG00000087586 | -1.0194   | 0.84599     | 1.122       | 0.13094     | -1.0194   | 0.84599 |
|           | 1.2749          | 0.10116   | 0.10116     | 0.567397209 |             |           |         |
| NA        | ENSG00000280010 | 1.2749    | 0.10117     | 1.2749      | 0.10117     | 1.2749    | 0.10117 |
|           | 1.2749          | 0.10117   | 0.10117     | 0.567397209 |             |           |         |
| RPS20P14  | ENSG00000223803 | 1.2477    | 0.10607     | 1.0259      | 0.15247     | 1.0259    |         |
|           | 0.15247         | 1.2748    | 0.10118     | 0.10118     | 0.567397209 |           |         |
| LINC02347 | ENSG00000214043 | 0.33019   | 0.37063     | 0.33019     | 0.37063     | 1.2745    |         |
|           | 0.10124         | 0.33072   | 0.37043     | 0.10124     | 0.567397209 |           |         |
| LRRC52    | ENSG00000162763 | 0.16713   | 0.43363     | 1.2745      | 0.10125     | 0.18426   |         |
|           | 0.42691         | -0.27507  | 0.60837     | 0.10125     | 0.567397209 |           |         |
| FABP5P2   | ENSG00000236044 | -0.43797  | 0.6693      | 1.2745      | 0.10125     | 1.2745    |         |
|           | 0.10125         | 1.2745    | 0.10125     | 0.10125     | 0.567397209 |           |         |
| CAP2P1    | ENSG00000259151 | 0.52391   | 0.30017     | 1.2744      | 0.10125     | 0.52391   |         |
|           | 0.30017         | 0.52391   | 0.30017     | 0.10125     | 0.567397209 |           |         |
| LINC02284 | ENSG00000259719 | 0.022877  | 0.49087     | 1.2745      | 0.10125     | 0.58945   |         |
|           | 0.27778         | 0.84741   | 0.19838     | 0.10125     | 0.567397209 |           |         |
| NA        | ENSG00000259322 | 1.2744    | 0.10126     | 1.2744      | 0.10126     | 1.2744    | 0.10126 |
|           | 1.2744          | 0.10126   | 0.10126     | 0.567397209 |             |           |         |
| RN7SL775P | ENSG00000243370 | 1.2744    | 0.10127     | 1.2744      | 0.10127     | 1.2744    |         |
|           | 0.10127         | 1.2744    | 0.10127     | 0.10127     | 0.567397209 |           |         |
| NA        | ENSG00000240895 | 1.2742    | 0.10129     | 0.74388     | 0.22847     | 1.2742    | 0.10129 |
|           | -0.41617        | 0.66136   | 0.10129     | 0.567397209 |             |           |         |
| LINC01724 | ENSG00000227421 | 1.2742    | 0.1013      | 1.1796      | 0.11907     | 1.0444    |         |
|           | 0.14816         | 0.2135    | 0.41547     | 0.1013      | 0.567397209 |           |         |
| CSNK1A1P1 | ENSG00000223518 | 1.2741    | 0.10131     | 1.2741      | 0.10131     | 1.2741    |         |
|           | 0.10131         | 1.2741    | 0.10131     | 0.10131     | 0.567397209 |           |         |
| ERCC6L2   | ENSG00000182150 | 1.266     | 0.10276     | 1.2741      | 0.10132     | 0.19919   | 0.42106 |
|           | -0.074196       | 0.52957   | 0.10132     | 0.567397209 |             |           |         |
| RN7SL783P | ENSG00000265885 | 0.87673   | 0.19032     | -0.24255    | 0.59582     | 1.274     | 0.10132 |
|           | 1.274           | 0.10132   | 0.10132     | 0.567397209 |             |           |         |
| LINC00240 | ENSG00000224843 | -0.12037  | 0.5479      | 0.096226    | 0.46167     | -1.1377   |         |
|           | 0.87239         | 1.274     | 0.10133     | 0.10133     | 0.567397209 |           |         |
| IIFT140   | ENSG00000187535 | -0.047366 | 0.51889     | 0.1134      | 0.45486     | 1.2739    |         |
|           | 0.10134         | 0.054526  | 0.47826     | 0.10134     | 0.567397209 |           |         |
| NA        | ENSG00000233835 | 1.018     | 0.15435     | 1.2739      | 0.10134     | 1.018     | 0.15435 |
|           | 0.28895         | 0.10134   | 0.567397209 |             |             |           |         |
| WIPI1     | ENSG00000070540 | 1.2305    | 0.10925     | 0.66717     | 0.25233     | 0.89167   | 0.18628 |
|           | 1.2738          | 0.10137   | 0.10137     | 0.567397209 |             |           |         |
| CHD6      | ENSG00000124177 | 1.2738    | 0.10137     | 0.70631     | 0.24        | 1.2738    | 0.10137 |
|           | 1.2738          | 0.10137   | 0.10137     | 0.567397209 |             |           |         |
| IGHV3-7   | ENSG00000211938 | 1.2738    | 0.10137     | 1.2738      | 0.10137     | 1.2738    |         |
|           | 0.10137         | -0.34588  | 0.63528     | 0.10137     | 0.567397209 |           |         |
| TPRKB     | ENSG00000144034 | 1.2737    | 0.10139     | 0.33683     | 0.36812     | 1.2737    | 0.10139 |
|           | 0.72598         | 0.23393   | 0.10139     | 0.567443976 |             |           |         |
| SNORA22B  | ENSG00000206603 | 1.2736    | 0.10141     | 1.2736      | 0.10141     | 1.2736    |         |
|           | 0.10141         | 1.2736    | 0.10141     | 0.10141     | 0.567481525 |           |         |
| NA        | ENSG00000276863 | 1.2735    | 0.10142     | 1.2735      | 0.10142     | 1.2735    | 0.10142 |
|           | 1.2735          | 0.10142   | 0.10142     | 0.567481525 |             |           |         |

|           |                 |           |             |             |             |          |         |          |
|-----------|-----------------|-----------|-------------|-------------|-------------|----------|---------|----------|
| PPP1R1AP1 | ENSG00000255255 | 0.73677   | 0.23063     | 1.2733      | 0.10146     | -0.80319 |         |          |
|           | 0.78907         | -0.80319  | 0.78907     | 0.10146     | 0.567612499 |          |         |          |
| NA        | ENSG00000269906 | 0.84046   | 0.20032     | 0.84046     | 0.20032     | 0.84046  | 0.20032 |          |
|           | 1.2732          | 0.10148   | 0.10148     | 0.567612499 |             |          |         |          |
| NPAS3     | ENSG00000151322 | 1.0586    | 0.14489     | -0.050809   | 0.52026     | 0.36727  | 0.35671 |          |
|           | 1.2731          | 0.10149   | 0.10149     | 0.567612499 |             |          |         |          |
| NA        | ENSG00000266905 | -0.26486  | 0.60444     | 0.65349     | 0.25672     | 1.2731   | 0.10149 |          |
|           | 1.1748          | 0.12003   | 0.10149     | 0.567612499 |             |          |         |          |
| CHRNA2    | ENSG00000120903 | -0.26533  | 0.60462     | 0.33926     | 0.36721     | 1.2729   |         |          |
|           | 0.10152         | 1.2594    | 0.10395     | 0.10152     | 0.567649983 |          |         |          |
| NA        | ENSG00000254586 | 1.273     | 0.10152     | 1.273       | 0.10152     | -0.85807 | 0.80457 | -0.53456 |
|           | 0.70352         | 0.10152   | 0.567649983 |             |             |          |         |          |
| XCL1      | ENSG00000143184 | 1.2572    | 0.10434     | 1.006       | 0.1572      | 0.98091  | 0.16332 |          |
|           | 1.2726          | 0.10157   | 0.10157     | 0.567679957 |             |          |         |          |
| NA        | ENSG00000233611 | 0.83193   | 0.20272     | -0.083936   | 0.53345     | 1.2727   | 0.10157 |          |
|           | 0.80333         | 0.21089   | 0.10157     | 0.567679957 |             |          |         |          |
| MAN1C1    | ENSG00000117643 | 1.2726    | 0.10159     | -0.83271    | 0.79749     | 1.0242   |         |          |
|           | 0.15287         | 0.04691   | 0.48129     | 0.10159     | 0.567679957 |          |         |          |
| EEF1B2P2  | ENSG00000213864 | 0.99675   | 0.15944     | 0.99675     | 0.15944     | 0.99675  |         |          |
|           | 0.15944         | 1.2726    | 0.10159     | 0.10159     | 0.567679957 |          |         |          |
| SCEL      | ENSG00000136155 | 1.2724    | 0.10162     | -0.45411    | 0.67513     | -0.72527 | 0.76586 |          |
|           | -0.82127        | 0.79425   | 0.10162     | 0.567679957 |             |          |         |          |
| MIR4498   | ENSG00000266704 | 1.2722    | 0.10165     | 1.2722      | 0.10165     | 1.2722   |         |          |
|           | 0.10165         | 1.2722    | 0.10165     | 0.10165     | 0.567679957 |          |         |          |
| NA        | ENSG00000271355 | -0.73353  | 0.76838     | 1.2722      | 0.10165     | -0.73353 | 0.76838 |          |
|           | -0.73353        | 0.76838   | 0.10165     | 0.567679957 |             |          |         |          |
| PFDN4     | ENSG00000101132 | 0.95951   | 0.16865     | 1.2721      | 0.10166     | 0.92023  | 0.17873 |          |
|           | 1.237           | 0.10804   | 0.10166     | 0.567679957 |             |          |         |          |
| CDCA8     | ENSG00000134690 | 0.26319   | 0.3962      | 0.94813     | 0.17153     | 0.94813  | 0.17153 |          |
|           | 1.2722          | 0.10166   | 0.10166     | 0.567679957 |             |          |         |          |
| NA        | ENSG00000253147 | -0.63017  | 0.73571     | 1.2721      | 0.10166     | -0.48861 | 0.68744 |          |
|           | -0.46576        | 0.67931   | 0.10166     | 0.567679957 |             |          |         |          |
| RIPK3     | ENSG00000129465 | 1.2721    | 0.10167     | 1.2721      | 0.10167     | 1.2721   | 0.10167 |          |
|           | 1.2168          | 0.11184   | 0.10167     | 0.567679957 |             |          |         |          |
| NA        | ENSG00000228943 | 1.2719    | 0.1017      | 0.57078     | 0.28407     | 0.93163  | 0.17576 |          |
|           | 1.0491          | 0.14708   | 0.1017      | 0.567679957 |             |          |         |          |
| NA        | ENSG00000253842 | 0.064103  | 0.47444     | 0.064103    | 0.47444     | 1.2719   | 0.10171 |          |
|           | 0.064103        | 0.47444   | 0.10171     | 0.567679957 |             |          |         |          |
| LMBRD2    | ENSG00000164187 | 0.18402   | 0.427       | -0.095784   | 0.53815     | 1.2718   | 0.10172 |          |
|           | 0.18599         | 0.42623   | 0.10172     | 0.567679957 |             |          |         |          |
| ANO3      | ENSG00000134343 | 1.2717    | 0.10173     | -0.20209    | 0.58008     | -0.64447 | 0.74036 |          |
|           | -0.57119        | 0.71607   | 0.10173     | 0.567679957 |             |          |         |          |
| TRAV26-2  | ENSG00000211812 | 1.0486    | 0.14718     | 1.2717      | 0.10174     | 1.0486   |         |          |
|           | 0.14718         | 0.6002    | 0.27419     | 0.10174     | 0.567679957 |          |         |          |
| NA        | ENSG00000200664 | 1.2716    | 0.10175     | 1.2716      | 0.10175     | 1.2716   | 0.10175 |          |
|           | 1.2716          | 0.10175   | 0.10175     | 0.567679957 |             |          |         |          |
| NA        | ENSG00000260977 | 0.055519  | 0.47786     | 1.2716      | 0.10175     | -0.22816 | 0.59024 |          |
|           | -0.22816        | 0.59024   | 0.10175     | 0.567679957 |             |          |         |          |
| FUT1      | ENSG00000174951 | 1.2716    | 0.10176     | 1.2716      | 0.10176     | 1.2716   | 0.10176 |          |
|           | 1.2716          | 0.10176   | 0.10176     | 0.567679957 |             |          |         |          |
| ACP1      | ENSG00000143727 | -1.0344   | 0.84952     | 0.66227     | 0.2539      | 0.66227  | 0.2539  |          |
|           | 1.2715          | 0.10177   | 0.10177     | 0.567679957 |             |          |         |          |
| FAIM      | ENSG00000158234 | 0.085954  | 0.46575     | 1.2715      | 0.10177     | 0.34752  | 0.3641  |          |
|           | -0.35495        | 0.63869   | 0.10177     | 0.567679957 |             |          |         |          |
| SFTPA3P   | ENSG00000225827 | 1.0926    | 0.13729     | 1.1826      | 0.11849     | 1.0926   |         |          |
|           | 0.13729         | 1.2714    | 0.10179     | 0.10179     | 0.567726531 |          |         |          |
| LHX1-DT   | ENSG00000277268 | 0.89067   | 0.18655     | 0.95099     | 0.17081     | 1.2712   |         |          |
|           | 0.10182         | 1.231     | 0.10917     | 0.10182     | 0.567746004 |          |         |          |
| EI24      | ENSG00000149547 | -0.087448 | 0.53484     | 1.2711      | 0.10184     | 0.48948  | 0.31225 |          |
|           | 0.54855         | 0.29166   | 0.10184     | 0.567746004 |             |          |         |          |
| TMEM14EP  | ENSG00000221962 | 1.271     | 0.10186     | 0.97536     | 0.16469     | 1.271    | 0.10186 | 1.271    |
|           | 0.10186         | 0.10186   | 0.567746004 |             |             |          |         |          |

|            |                 |           |          |          |             |             |         |
|------------|-----------------|-----------|----------|----------|-------------|-------------|---------|
| CRLF1      | ENSG00000006016 | -0.31893  | 0.62511  | 1.2709   | 0.10188     | -0.31893    | 0.62511 |
|            |                 | -0.12585  | 0.55007  | 0.10188  | 0.567746004 |             |         |
| ZNF28      | ENSG00000198538 | 1.0689    | 0.14256  | 0.31769  | 0.37536     | 1.2709      | 0.10188 |
|            |                 | 1.2709    | 0.10188  | 0.10188  | 0.567746004 |             |         |
| RNU6-580P  | ENSG00000202029 | 1.2708    | 0.10189  | 1.2708   | 0.10189     | 1.2708      |         |
|            |                 | 0.10189   | 1.2708   | 0.10189  | 0.10189     | 0.567746004 |         |
| NA         | ENSG00000256951 | 1.2708    | 0.1019   | 1.2708   | 0.1019      | 1.2708      | 0.1019  |
|            |                 | 1.2708    | 0.1019   | 0.1019   | 0.567746004 |             |         |
| ARHGAP23   | ENSG00000275832 | 0.8967    | 0.18494  | 0.81979  | 0.20617     | 1.2708      |         |
|            |                 | 0.1019    | 0.96124  | 0.16822  | 0.1019      | 0.567746004 |         |
| NA         | ENSG00000279972 | 1.2708    | 0.1019   | -0.8171  | 0.79306     | -0.58553    | 0.72091 |
|            |                 | 1.2708    | 0.1019   | 0.1019   | 0.567746004 |             |         |
| ELF2       | ENSG00000109381 | 0.32473   | 0.37269  | 1.2707   | 0.10191     | 0.63787     | 0.26178 |
|            |                 | 0.77604   | 0.21886  | 0.10191  | 0.567746004 |             |         |
| NA         | ENSG00000237897 | 1.2707    | 0.10193  | 1.2707   | 0.10193     | 1.2707      | 0.10193 |
|            |                 | 1.2707    | 0.10193  | 0.10193  | 0.567774114 |             |         |
| LINC02593  | ENSG00000223764 | 1.1782    | 0.11937  | 1.1782   | 0.11937     | 1.1782      |         |
|            |                 | 0.11937   | 1.2705   | 0.10195  | 0.10195     | 0.567774114 |         |
| SCAMP1-AS1 | ENSG00000245556 | 1.2705    | 0.10195  | 1.2705   | 0.10195     | 0.95011     |         |
|            |                 | 0.17103   | -0.30357 | 0.61927  | 0.10195     | 0.567774114 |         |
| RPS7P15    | ENSG00000237170 | 0.47965   | 0.31574  | 1.2703   | 0.10198     | -1.0556     |         |
|            |                 | 0.85442   | 0.19462  | 0.42284  | 0.10198     | 0.567839475 |         |
| NA         | ENSG00000254571 | 1.0346    | 0.15042  | 1.2702   | 0.1020      | 0.12017     | 0.45217 |
|            |                 | 0.12017   | 0.45217  | 0.1020   | 0.567839475 |             |         |
| GLUD1      | ENSG00000148672 | 1.2702    | 0.10201  | 0.49441  | 0.31051     | 0.49441     | 0.31051 |
|            |                 | 0.8891    | 0.18698  | 0.10201  | 0.567839475 |             |         |
| NA         | ENSG00000257653 | 1.2702    | 0.10201  | 1.2702   | 0.10201     | 1.2702      | 0.10201 |
|            |                 | 1.2702    | 0.10201  | 0.10201  | 0.567839475 |             |         |
| NA         | ENSG00000253420 | 0.18163   | 0.42794  | 1.2701   | 0.10202     | -1.3929     | 0.91818 |
|            |                 | -0.50375  | 0.69278  | 0.10202  | 0.567839475 |             |         |
| ITGAM      | ENSG00000169896 | -0.076785 | 0.5306   | 1.2136   | 0.11245     | 0.96698     | 0.16678 |
|            |                 | 1.27      | 0.10204  | 0.10204  | 0.56788593  |             |         |
| NPEPL1     | ENSG00000215440 | 0.72106   | 0.23544  | 1.2699   | 0.10206     | 0.62215     |         |
|            |                 | 0.26692   | 0.78429  | 0.21643  | 0.10206     | 0.567923167 |         |
| NA         | ENSG00000238272 | -0.67587  | 0.75044  | -0.77581 | 0.78107     | 1.2698      | 0.10207 |
|            |                 | 1.2435    | 0.10683  | 0.10207  | 0.567923167 |             |         |
| ERLIN1     | ENSG00000107566 | 0.69912   | 0.24224  | 0.85647  | 0.19587     | 0.85647     |         |
|            |                 | 0.19587   | 1.2697   | 0.1021   | 0.1021      | 0.567933174 |         |
| MEI4       | ENSG00000269964 | -0.61963  | 0.73225  | 0.91751  | 0.17944     | 1.2697      | 0.1021  |
|            |                 | -0.81514  | 0.7925   | 0.1021   | 0.567933174 |             |         |
| MCUR1P1    | ENSG00000262402 | 1.2696    | 0.10211  | -1.2239  | 0.8895      | -1.2239     |         |
|            |                 | 0.8895    | -1.2239  | 0.8895   | 0.10211     | 0.567933174 |         |
| NA         | ENSG00000279674 | 0.032004  | 0.48723  | 0.032004 | 0.48723     | 1.2695      | 0.10212 |
|            |                 | 0.032004  | 0.48723  | 0.10212  | 0.567933174 |             |         |
| SNORD12C   | ENSG00000209042 | 1.2693    | 0.10217  | 1.2693   | 0.10217     | 1.2693      |         |
|            |                 | 0.10217   | 1.2693   | 0.10217  | 0.10217     | 0.567933174 |         |
| NA         | ENSG00000243531 | 0.24332   | 0.40388  | -0.54316 | 0.70649     | 0.041407    | 0.48349 |
|            |                 | 1.2693    | 0.10218  | 0.10218  | 0.567933174 |             |         |
| NA         | ENSG00000270241 | 1.2692    | 0.10218  | 0.35831  | 0.36006     | 0.35831     | 0.36006 |
|            |                 | 0.35831   | 0.36006  | 0.10218  | 0.567933174 |             |         |
| NA         | ENSG00000238988 | 0.72517   | 0.23417  | -0.03382 | 0.51349     | 0.19381     | 0.42316 |
|            |                 | 1.2692    | 0.10218  | 0.10218  | 0.567933174 |             |         |
| DAXX       | ENSG00000204209 | 0.95158   | 0.17066  | 0.9376   | 0.17423     | 1.2692      | 0.10219 |
|            |                 | 0.47526   | 0.3173   | 0.10219  | 0.567933174 |             |         |
| APC        | ENSG00000134982 | 1.2691    | 0.1022   | 0.25713  | 0.39854     | 0.89648     | 0.185   |
|            |                 | 0.99666   | 0.15947  | 0.1022   | 0.567933174 |             |         |
| RPS7P7     | ENSG00000240167 | 1.2691    | 0.1022   | 1.2691   | 0.1022      | 1.2691      |         |
|            |                 | 0.1022    | 0.60131  | 0.27382  | 0.1022      | 0.567933174 |         |
| NA         | ENSG00000235168 | -0.46652  | 0.67958  | 1.269    | 0.10222     | -0.46652    | 0.67958 |
|            |                 | -0.46652  | 0.67958  | 0.10222  | 0.567979544 |             |         |
| HSPA8P17   | ENSG00000228557 | 1.1752    | 0.11996  | 1.1065   | 0.13426     | 1.2688      |         |
|            |                 | 0.10225   | 1.2688   | 0.10225  | 0.10225     | 0.56799901  |         |

|           |                 |            |         |             |             |          |         |
|-----------|-----------------|------------|---------|-------------|-------------|----------|---------|
| AP1B1P1   | ENSG00000234479 | 1.2687     | 0.10228 | 0.62078     | 0.26737     | 0.49667  |         |
|           | 0.30971         | -0.30838   | 0.6211  | 0.10228     | 0.56799901  |          |         |
| EMC2      | ENSG00000104412 | 1.2686     | 0.10229 | -0.16605    | 0.56594     | -0.16605 | 0.56594 |
|           | 0.8838          | 0.1884     | 0.10229 | 0.56799901  |             |          |         |
| HSPA8P11  | ENSG00000248159 | 1.2685     | 0.1023  | 0.63487     | 0.26276     | 0.084216 |         |
|           | 0.46644         | -0.42782   | 0.66561 | 0.1023      | 0.56799901  |          |         |
| LRRC1     | ENSG00000137269 | 1.2685     | 0.10231 | -0.14001    | 0.55567     | -0.83923 | 0.79933 |
|           | -1.6128         | 0.94661    | 0.10231 | 0.56799901  |             |          |         |
| NA        | ENSG00000244757 | 1.2685     | 0.10231 | 0.61914     | 0.26791     | 0.61914  | 0.26791 |
|           | 0.61914         | 0.26791    | 0.10231 | 0.56799901  |             |          |         |
| STAB1     | ENSG00000010327 | 1.107      | 0.13414 | 1.2685      | 0.10232     | 1.1635   | 0.12231 |
|           | 1.1768          | 0.11964    | 0.10232 | 0.56799901  |             |          |         |
| PTPRJ     | ENSG00000149177 | -0.16802   | 0.56671 | -0.3556     | 0.63893     | 1.2684   | 0.10233 |
|           | 0.36381         | 0.358      | 0.10233 | 0.56799901  |             |          |         |
| MYPOP     | ENSG00000176182 | 1.2683     | 0.10235 | 1.2683      | 0.10235     | 1.2683   | 0.10235 |
|           | 0.23641         | 0.40656    | 0.10235 | 0.56799901  |             |          |         |
| NCSTNP1   | ENSG00000219592 | -0.21258   | 0.58417 | 1.2683      | 0.10235     | -1.0368  |         |
|           | 0.85008         | -1.0368    | 0.85008 | 0.10235     | 0.56799901  |          |         |
| GNG8      | ENSG00000167414 | 1.2681     | 0.10237 | 1.2681      | 0.10237     | 1.2681   | 0.10237 |
|           | 1.2681          | 0.10237    | 0.10237 | 0.56799901  |             |          |         |
| LINC02635 | ENSG00000283000 | 1.2681     | 0.10238 | 1.2435      | 0.10684     | 0.82962  |         |
|           | 0.20338         | 1.2681     | 0.10238 | 0.10238     | 0.56799901  |          |         |
| ADAT3     | ENSG00000213638 | -0.8862    | 0.81224 | -0.34306    | 0.63422     | 1.268    | 0.10239 |
|           | -0.34306        | 0.63422    | 0.10239 | 0.56799901  |             |          |         |
| MMP19     | ENSG00000123342 | 1.268      | 0.1024  | 1.268       | 0.1024      | 1.268    | 0.1024  |
|           | 0.1024          | 0.56799901 |         |             |             |          |         |
| NA        | ENSG00000233330 | 1.2679     | 0.10241 | 1.2679      | 0.10241     | 1.2679   | 0.10241 |
|           | 1.2679          | 0.10241    | 0.10241 | 0.56799901  |             |          |         |
| TMC3-AS1  | ENSG00000259343 | 1.2679     | 0.10241 | 1.2679      | 0.10241     | 1.2679   |         |
|           | 0.10241         | 1.2679     | 0.10241 | 0.10241     | 0.56799901  |          |         |
| MRPL38    | ENSG00000204316 | 1.2674     | 0.1025  | 1.2674      | 0.1025      | 1.2674   |         |
|           | 0.1025          | 1.2674     | 0.1025  | 0.1025      | 0.56830413  |          |         |
| MIR606    | ENSG00000207583 | 1.2675     | 0.1025  | 1.2675      | 0.1025      | 0.23438  |         |
|           | 0.40735         | -0.47887   | 0.68399 | 0.1025      | 0.56830413  |          |         |
| LINC00635 | ENSG00000241469 | 0.8253     | 0.2046  | 0.6558      | 0.25598     | 1.2674   |         |
|           | 0.1025          | 1.2674     | 0.1025  | 0.1025      | 0.56830413  |          |         |
| MIR1237   | ENSG00000221273 | 1.2672     | 0.10254 | 1.2672      | 0.10254     | 1.2672   |         |
|           | 0.10254         | 1.2672     | 0.10254 | 0.10254     | 0.568461229 |          |         |
| RNU6-856P | ENSG00000252768 | 1.2669     | 0.10259 | 1.2669      | 0.10259     | 1.2669   |         |
|           | 0.10259         | 1.2669     | 0.10259 | 0.10259     | 0.568664468 |          |         |
| NA        | ENSG00000257359 | -0.2503    | 0.59882 | 1.2669      | 0.1026      | -0.2503  | 0.59882 |
|           | -0.2503         | 0.59882    | 0.1026  | 0.568664468 |             |          |         |
| NA        | ENSG00000178836 | 1.2667     | 0.10263 | 1.2667      | 0.10263     | 1.2667   | 0.10263 |
|           | 0.57501         | 0.28264    | 0.10263 | 0.568766053 |             |          |         |
| RNU6-686P | ENSG00000201709 | 0.40165    | 0.34397 | 0.40165     | 0.34397     | 0.40165  |         |
|           | 0.34397         | 1.2666     | 0.10266 | 0.10266     | 0.568793668 |          |         |
| PKP4P1    | ENSG00000229670 | 1.2666     | 0.10266 | 1.2666      | 0.10266     | 1.2093   |         |
|           | 0.11328         | 1.155      | 0.12404 | 0.10266     | 0.568793668 |          |         |
| CLNS1A    | ENSG00000074201 | 0.937      | 0.17438 | 1.2665      | 0.10267     | 0.55588  | 0.28915 |
|           | 0.8359          | 0.2016     | 0.10267 | 0.568793668 |             |          |         |
| FAM169A   | ENSG00000198780 | -1.1545    | 0.87585 | 1.2664      | 0.10269     | 0.13425  |         |
|           | 0.4466          | 0.60099    | 0.27392 | 0.10269     | 0.568820849 |          |         |
| LEKR1     | ENSG00000197980 | 1.0728     | 0.14168 | -0.12248    | 0.54874     | 1.2663   | 0.10271 |
|           | 0.69598         | 0.24322    | 0.10271 | 0.568820849 |             |          |         |
| RFPL4AP6  | ENSG00000278292 | 0.80642    | 0.21    | 0.8268      | 0.20417     | 0.07439  | 0.47035 |
|           | 1.2662          | 0.10272    | 0.10272 | 0.568820849 |             |          |         |
| DEFB107B  | ENSG00000198129 | 0.015965   | 0.49363 | -0.6679     | 0.7479      | 0.62632  |         |
|           | 0.26555         | 1.266      | 0.10275 | 0.10275     | 0.568820849 |          |         |
| DSCC1     | ENSG00000136982 | 0.56789    | 0.28505 | -0.58329    | 0.72015     | -0.38958 | 0.65158 |
|           | 1.2659          | 0.10277    | 0.10277 | 0.568820849 |             |          |         |
| GPR139    | ENSG00000180269 | 0.75661    | 0.22464 | 1.2659      | 0.10277     | -0.88703 |         |
|           | 0.81247         | 0.75661    | 0.22464 | 0.10277     | 0.568820849 |          |         |

|           |                 |           |          |             |             |             |         |
|-----------|-----------------|-----------|----------|-------------|-------------|-------------|---------|
| NA        | ENSG00000214908 | -0.415    | 0.66093  | -1.0363     | 0.84997     | 1.2658      | 0.10279 |
|           |                 | -0.17101  | 0.56789  | 0.10279     | 0.568820849 |             |         |
| NA        | ENSG00000273893 | 1.2658    | 0.1028   | 0.55242     | 0.29033     | 1.2658      | 0.1028  |
|           |                 | 1.2658    | 0.1028   | 0.568820849 |             |             |         |
| NA        | ENSG00000253805 | -0.022246 | 0.50887  | 1.2657      | 0.10281     | 0.913       | 0.18062 |
|           |                 | -0.10913  | 0.54345  | 0.10281     | 0.568820849 |             |         |
| TIAM1     | ENSG00000156299 | 1.0149    | 0.15508  | 1.2656      | 0.10282     | 0.48755     | 0.31293 |
|           |                 | 0.74835   | 0.22713  | 0.10282     | 0.568820849 |             |         |
| NA        | ENSG00000248515 | 0.41087   | 0.34058  | -1.3692     | 0.91453     | -1.3552     | 0.91233 |
|           |                 | 1.2656    | 0.10282  | 0.10282     | 0.568820849 |             |         |
| NA        | ENSG00000270218 | 1.2657    | 0.10282  | 1.2657      | 0.10282     | 1.2657      | 0.10282 |
|           |                 | 1.2657    | 0.10282  | 0.10282     | 0.568820849 |             |         |
| RNU6-771P | ENSG00000202250 | 0.23406   | 0.40747  | 1.2656      | 0.10284     | -0.40402    |         |
|           |                 | 0.6569    | -0.62027 | 0.73246     | 0.10284     | 0.568820849 |         |
| NA        | ENSG00000250760 | 0.14808   | 0.44114  | 1.2655      | 0.10284     | 0.14808     | 0.44114 |
|           |                 | 0.14808   | 0.44114  | 0.10284     | 0.568820849 |             |         |
| NA        | ENSG00000228554 | 1.2655    | 0.10285  | 1.2655      | 0.10285     | 1.2655      | 0.10285 |
|           |                 | 1.2655    | 0.10285  | 0.10285     | 0.568820849 |             |         |
| WNT16     | ENSG00000002745 | 0.48843   | 0.31262  | 0.089804    | 0.46422     | 1.2653      | 0.10287 |
|           |                 | -0.58999  | 0.7224   | 0.10287     | 0.568829889 |             |         |
| NA        | ENSG00000277672 | 1.2653    | 0.10288  | 1.2653      | 0.10288     | 1.2653      | 0.10288 |
|           |                 | 1.2653    | 0.10288  | 0.10288     | 0.568829889 |             |         |
| SLC43A3   | ENSG00000134802 | 1.2652    | 0.1029   | 1.2652      | 0.1029      | 0.03103     |         |
|           |                 | 0.48762   | 1.2652   | 0.1029      | 0.1029      | 0.568829889 |         |
| MRPL30    | ENSG00000185414 | 0.87557   | 0.19063  | -1.0389     | 0.85058     | 0.58121     |         |
|           |                 | 0.28055   | 1.2652   | 0.10291     | 0.10291     | 0.568829889 |         |
| LINC01583 | ENSG00000259518 | -1.0453   | 0.85206  | -1.2798     | 0.89969     | 1.2652      |         |
|           |                 | 0.10291   | -0.9884  | 0.83852     | 0.10291     | 0.568829889 |         |
| NA        | ENSG00000228950 | -1.6891   | 0.9544   | -0.35343    | 0.63812     | 0.22602     | 0.41059 |
|           |                 | 1.2649    | 0.10295  | 0.10295     | 0.568986447 |             |         |
| FOXS1     | ENSG00000179772 | -0.8783   | 0.81011  | 0.95898     | 0.16879     | 1.2648      | 0.10297 |
|           |                 | 1.2648    | 0.10297  | 0.10297     | 0.569032445 |             |         |
| NA        | ENSG00000233783 | 1.0109    | 0.15603  | 1.0149      | 0.15508     | 1.2647      | 0.10299 |
|           |                 | -0.98684  | 0.83814  | 0.10299     | 0.569059891 |             |         |
| TRAV9-2   | ENSG00000211793 | 0.73153   | 0.23223  | 1.2646      | 0.10301     | 0.77947     |         |
|           |                 | 0.21785   | 1.2646   | 0.10301     | 0.10301     | 0.569059891 |         |
| NA        | ENSG00000252433 | 1.2646    | 0.10301  | 1.2646      | 0.10301     | 1.2646      | 0.10301 |
|           |                 | 1.2646    | 0.10301  | 0.10301     | 0.569059891 |             |         |
| NA        | ENSG00000278899 | 1.1079    | 0.13394  | 1.2644      | 0.10304     | 1.1079      | 0.13394 |
|           |                 | 1.1079    | 0.13394  | 0.10304     | 0.56911351  |             |         |
| LINC00708 | ENSG00000232170 | -0.31538  | 0.62377  | 1.2643      | 0.10305     | 1.2643      |         |
|           |                 | 0.10305   | 1.2643   | 0.10305     | 0.10305     | 0.56911351  |         |
| ATP5MFP3  | ENSG00000232851 | -0.90688  | 0.81776  | -0.90688    | 0.81776     | -0.90688    |         |
|           |                 | 0.81776   | 1.2643   | 0.10306     | 0.10306     | 0.56911351  |         |
| NA        | ENSG00000251317 | 1.2641    | 0.10309  | 1.2641      | 0.10309     | 1.2641      | 0.10309 |
|           |                 | 1.2641    | 0.10309  | 0.10309     | 0.56911351  |             |         |
| NA        | ENSG00000251894 | 1.2639    | 0.10313  | 0.23603     | 0.4067      | 0.65416     | 0.2565  |
|           |                 | -0.46521  | 0.67911  | 0.10313     | 0.56911351  |             |         |
| NA        | ENSG00000228604 | 1.2639    | 0.10314  | 1.1328      | 0.12865     | 0.57836     | 0.28151 |
|           |                 | 1.1328    | 0.12865  | 0.10314     | 0.56911351  |             |         |
| SMAD9     | ENSG00000120693 | -0.018425 | 0.50735  | 1.2638      | 0.10315     | 0.062217    | 0.4752  |
|           |                 | -0.010871 | 0.50434  | 0.10315     | 0.56911351  |             |         |
| USP31     | ENSG00000103404 | 0.50776   | 0.30581  | 0.45406     | 0.32489     | 1.2637      | 0.10316 |
|           |                 | 0.98672   | 0.16189  | 0.10316     | 0.56911351  |             |         |
| NA        | ENSG00000263154 | 1.2636    | 0.10318  | 1.2636      | 0.10318     | 1.2636      | 0.10318 |
|           |                 | -1.1144   | 0.86745  | 0.10318     | 0.56911351  |             |         |
| ACTG1P12  | ENSG00000226642 | 0.060219  | 0.47599  | 1.2636      | 0.10319     | 1.2636      |         |
|           |                 | 0.10319   | 0.65918  | 0.25489     | 0.10319     | 0.56911351  |         |
| LGALSL    | ENSG00000119862 | -0.027576 | 0.511    | -0.027576   | 0.511       | 1.2635      | 0.1032  |
|           |                 | 1.2522    | 0.10526  | 0.1032      | 0.56911351  |             |         |
| NMT2      | ENSG00000152465 | 0.38915   | 0.34858  | 1.2635      | 0.1032      | 0.72714     | 0.23357 |
|           |                 | 1.2635    | 0.1032   | 0.1032      | 0.56911351  |             |         |

|            |                 |            |            |            |             |             |         |
|------------|-----------------|------------|------------|------------|-------------|-------------|---------|
| SV2C       | ENSG00000122012 | -0.34136   | 0.63358    | 0.42361    | 0.33593     | 1.2634      | 0.10322 |
|            |                 | 0.29949    | 0.38228    | 0.10322    | 0.56911351  |             |         |
| MACC1      | ENSG00000183742 | -0.0058545 | 0.50234    | 0.22132    | 0.41242     | 0.056441    | 0.4775  |
|            |                 | 1.2634     | 0.10322    | 0.10322    | 0.56911351  |             |         |
| LINC01085  | ENSG00000248698 | 1.2634     | 0.10322    | 0.61965    | 0.26774     | 1.2634      |         |
|            |                 | 0.10322    | 0.42548    | 0.33524    | 0.10322     | 0.56911351  |         |
| NA         | ENSG00000215953 | 1.2634     | 0.10323    | -0.80558   | 0.78976     | 1.2634      | 0.10323 |
|            |                 | 1.2634     | 0.10323    | 0.10323    | 0.56911351  |             |         |
| ACHE       | ENSG00000087085 | -0.19801   | 0.57848    | 1.2633     | 0.10325     | 0.014912    | 0.49405 |
|            |                 | 0.37998    | 0.35198    | 0.10325    | 0.56911351  |             |         |
| OR7E41P    | ENSG00000250640 | -0.98552   | 0.83782    | 1.2632     | 0.10325     | -1.7031     |         |
|            |                 | 0.95572    | -1.1983    | 0.8846     | 0.10325     | 0.56911351  |         |
| NA         | ENSG00000272114 | 1.2632     | 0.10326    | 1.2632     | 0.10326     | 1.2632      | 0.10326 |
|            |                 | 1.2632     | 0.10326    | 0.10326    | 0.56911351  |             |         |
| ITPKB      | ENSG00000143772 | 0.73224    | 0.23201    | 1.0167     | 0.15464     | 1.2631      | 0.10328 |
|            |                 | 0.53138    | 0.29758    | 0.10328    | 0.56911351  |             |         |
| CREG1      | ENSG00000143162 | -2.0146    | 0.97803    | 1.263      | 0.10329     | -1.1485     | 0.87462 |
|            |                 | -0.15993   | 0.56353    | 0.10329    | 0.56911351  |             |         |
| PCDHB11    | ENSG00000197479 | 1.263      | 0.10329    | 0.64484    | 0.25951     | 1.263       | 0.10329 |
|            |                 | 0.10329    | 0.10329    | 0.56911351 |             |             | 1.263   |
| RNU1-46P   | ENSG00000207154 | 1.263      | 0.10329    | 1.263      | 0.10329     | 1.263       | 0.10329 |
|            |                 | 0.4345     | 0.10329    | 0.56911351 |             |             | 0.16493 |
| NA         | ENSG00000252458 | 1.263      | 0.1033     | 1.263      | 0.1033      | 1.263       | 0.1033  |
|            |                 | 0.1033     | 0.56911351 |            |             |             |         |
| RPL31      | ENSG00000071082 | -0.3132    | 0.62293    | 1.2628     | 0.10332     | -0.61838    | 0.73184 |
|            |                 | -1.0161    | 0.84521    | 0.10332    | 0.569150096 |             |         |
| LINC02505  | ENSG00000248215 | 1.2628     | 0.10333    | 1.0826     | 0.1395      | 0.55858     |         |
|            |                 | 0.28822    | 0.95003    | 0.17105    | 0.10333     | 0.569150096 |         |
| OPRD1      | ENSG00000116329 | 0.33522    | 0.36873    | 0.87439    | 0.19095     | 0.60722     | 0.27185 |
|            |                 | 1.2627     | 0.10335    | 0.10335    | 0.569168162 |             |         |
| TCEA1      | ENSG00000187735 | 1.2626     | 0.10336    | 0.96356    | 0.16763     | 1.2626      | 0.10336 |
|            |                 | -0.60325   | 0.72683    | 0.10336    | 0.569168162 |             |         |
| SLFN5      | ENSG00000166750 | 0.28961    | 0.38606    | 0.041684   | 0.48338     | 1.2625      | 0.10338 |
|            |                 | 1.2625     | 0.10338    | 0.10338    | 0.569168162 |             |         |
| SMARCE1P3  | ENSG00000259102 | 1.2625     | 0.10338    | 0.36976    | 0.35578     | 0.36976     |         |
|            |                 | 0.35578    | 0.36976    | 0.35578    | 0.10338     | 0.569168162 |         |
| SHC4       | ENSG00000185634 | 0.27215    | 0.39275    | 0.35216    | 0.36236     | 1.2623      | 0.10342 |
|            |                 | 1.223      | 0.11067    | 0.10342    | 0.569271621 |             |         |
| NA         | ENSG00000227760 | 0.24452    | 0.40341    | 0.21517    | 0.41482     | 0.059558    | 0.47625 |
|            |                 | 1.2622     | 0.10343    | 0.10343    | 0.569271621 |             |         |
| NA         | ENSG00000232848 | -0.49967   | 0.69135    | 0.36376    | 0.35802     | 1.2621      | 0.10345 |
|            |                 | 0.2616     | 0.39682    | 0.10345    | 0.569271621 |             |         |
| ACTG1P13   | ENSG00000241305 | 0.27089    | 0.39324    | 0.27089    | 0.39324     | 0.27089     |         |
|            |                 | 0.39324    | 1.2621     | 0.10346    | 0.10346     | 0.569271621 |         |
| NA         | ENSG00000273047 | 1.2621     | 0.10346    | 1.2621     | 0.10346     | 1.2621      | 0.10346 |
|            |                 | 1.2621     | 0.10346    | 0.10346    | 0.569271621 |             |         |
| DISP1      | ENSG00000154309 | 1.2619     | 0.10349    | 1.2619     | 0.10349     | 0.8135      | 0.20797 |
|            |                 | 1.2619     | 0.10349    | 0.10349    | 0.569271621 |             |         |
| H4C3       | ENSG00000197061 | 1.2619     | 0.10349    | 1.2619     | 0.10349     | 1.2619      | 0.10349 |
|            |                 | 1.2619     | 0.10349    | 0.10349    | 0.569271621 |             |         |
| NA         | ENSG00000237754 | 1.2616     | 0.10355    | 1.2616     | 0.10355     | 1.2616      | 0.10355 |
|            |                 | 1.2616     | 0.10355    | 0.10355    | 0.569271621 |             |         |
| NA         | ENSG00000272137 | 0.13212    | 0.44744    | 0.13212    | 0.44744     | 1.2616      | 0.10355 |
|            |                 | -0.86969   | 0.80777    | 0.10355    | 0.569271621 |             |         |
| RPL29P2    | ENSG00000240480 | -0.032377  | 0.51291    | 1.2615     | 0.10356     | 0.14986     |         |
|            |                 | 0.44044    | 0.80296    | 0.211      | 0.10356     | 0.569271621 |         |
| EIF4E2P2   | ENSG00000244157 | -0.4011    | 0.65583    | -0.4011    | 0.65583     | 1.2615      |         |
|            |                 | 0.10356    | 0.81784    | 0.20672    | 0.10356     | 0.569271621 |         |
| MIR4443    | ENSG00000265483 | 0.59507    | 0.2759     | 1.042      | 0.14871     | 1.2615      | 0.10356 |
|            |                 | 1.2493     | 0.10577    | 0.10356    | 0.569271621 |             |         |
| RNU6-1211P | ENSG00000238382 | 1.2615     | 0.10357    | 0.84452    | 0.19919     | 1.2615      |         |
|            |                 | 0.10357    | 1.2615     | 0.10357    | 0.10357     | 0.569271621 |         |

|           |                 |           |             |             |             |             |          |
|-----------|-----------------|-----------|-------------|-------------|-------------|-------------|----------|
| GRM8      | ENSG00000179603 | 0.88206   | 0.18887     | 0.29976     | 0.38218     | 0.78396     | 0.21653  |
|           |                 | 1.2613    | 0.1036      | 0.1036      | 0.569271621 |             |          |
| OR2S1P    | ENSG00000228307 | -1.9593   | 0.97496     | 1.2613      | 0.10361     | -1.9593     |          |
|           |                 | 0.97496   | -1.9593     | 0.97496     | 0.10361     | 0.569271621 |          |
| CNDP2     | ENSG00000133313 | 0.52542   | 0.29964     | 0.102       | 0.45938     | 0.52542     | 0.29964  |
|           |                 | 1.2611    | 0.10363     | 0.10363     | 0.569271621 |             |          |
| ECI2-DT   | ENSG00000234817 | 1.2611    | 0.10364     | -0.46806    | 0.68013     | 0.059646    |          |
|           |                 | 0.47622   | 0.059646    | 0.47622     | 0.10364     | 0.569271621 |          |
| RNU6-869P | ENSG00000207138 | 1.261     | 0.10365     | 1.261       | 0.10365     | 1.261       | 0.10365  |
|           |                 | 0.10365   | 0.10365     | 0.569271621 |             |             |          |
| NA        | ENSG00000253140 | 1.261     | 0.10366     | 0.28416     | 0.38814     | 1.261       | 0.10366  |
|           |                 | 0.59915   | 0.10366     | 0.569271621 |             |             | -0.25115 |
| GUCY2D    | ENSG00000132518 | 1.2608    | 0.10369     | 0.014561    | 0.49419     | 1.0423      |          |
|           |                 | 0.14864   | 0.25406     | 0.39972     | 0.10369     | 0.569271621 |          |
| PRNT      | ENSG00000180259 | 1.2608    | 0.10369     | 0.047027    | 0.48125     | 0.49885     | 0.30894  |
|           |                 | 0.6065    | 0.27209     | 0.10369     | 0.569271621 |             |          |
| TXNL1     | ENSG00000091164 | 1.2607    | 0.1037      | 1.0889      | 0.1381      | 1.1413      | 0.12687  |
|           |                 | 0.94047   | 0.17349     | 0.1037      | 0.569271621 |             |          |
| NA        | ENSG00000242072 | 0.24872   | 0.40179     | 1.2605      | 0.10374     | 0.24872     | 0.40179  |
|           |                 | 0.24872   | 0.40179     | 0.10374     | 0.569271621 |             |          |
| HGFAC     | ENSG00000109758 | 1.2604    | 0.10376     | 1.2604      | 0.10376     | 1.2604      | 0.10376  |
|           |                 | 0.25887   | 0.39787     | 0.10376     | 0.569271621 |             |          |
| MIR4642   | ENSG00000266619 | 1.2604    | 0.10377     | 1.2604      | 0.10377     | 1.2604      |          |
|           |                 | 0.10377   | 1.2604      | 0.10377     | 0.10377     | 0.569271621 |          |
| NA        | ENSG00000252210 | 1.2601    | 0.10382     | 1.2601      | 0.10382     | 1.2601      | 0.10382  |
|           |                 | 1.2601    | 0.10382     | 0.10382     | 0.569271621 |             |          |
| NA        | ENSG00000255027 | -0.60956  | 0.72892     | -0.2125     | 0.58414     | 1.2601      | 0.10382  |
|           |                 | -0.60956  | 0.72892     | 0.10382     | 0.569271621 |             |          |
| NA        | ENSG00000243012 | 1.26      | 0.10383     | 1.26        | 0.10383     | 1.26        | 0.10383  |
|           |                 | 0.26385   | 0.10383     | 0.569271621 |             |             | 0.63152  |
| FAM207BP  | ENSG00000228797 | 0.90225   | 0.18346     | 1.26        | 0.10384     | -0.40632    | 0.65775  |
|           |                 | -0.14937  | 0.55937     | 0.10384     | 0.569271621 |             |          |
| NA        | ENSG00000248918 | 1.26      | 0.10384     | 1.26        | 0.10384     | -0.57561    | 0.71756  |
|           |                 | 0.38685   | 0.10384     | 0.569271621 |             |             |          |
| NA        | ENSG00000260600 | 1.26      | 0.10384     | 1.26        | 0.10384     | 1.26        | 0.10384  |
|           |                 | 0.10384   | 0.569271621 |             |             |             |          |
| MRPS15P1  | ENSG00000259186 | 1.2599    | 0.10385     | 1.2599      | 0.10385     | 1.2599      |          |
|           |                 | 0.10385   | 1.2599      | 0.10385     | 0.10385     | 0.569271621 |          |
| PHOX2B    | ENSG00000109132 | -0.080779 | 0.53219     | 1.2599      | 0.10386     | 0.71925     |          |
|           |                 | 0.23599   | -0.4536     | 0.67494     | 0.10386     | 0.569271621 |          |
| NTF4      | ENSG00000225950 | 1.2599    | 0.10386     | 1.2599      | 0.10386     | 1.2599      | 0.10386  |
|           |                 | 1.2599    | 0.10386     | 0.10386     | 0.569271621 |             |          |
| NA        | ENSG00000268287 | 1.2599    | 0.10386     | 1.2599      | 0.10386     | 1.2599      | 0.10386  |
|           |                 | 1.2599    | 0.10386     | 0.10386     | 0.569271621 |             |          |
| SGPP1     | ENSG00000126821 | 0.95175   | 0.17061     | 0.95175     | 0.17061     | 0.95175     | 0.17061  |
|           |                 | 1.2597    | 0.10389     | 0.10389     | 0.569271621 |             |          |
| NA        | ENSG00000255310 | 1.2596    | 0.1039      | 1.2596      | 0.1039      | 0.88804     | 0.18726  |
|           |                 | 1.2596    | 0.1039      | 0.1039      | 0.569271621 |             |          |
| ACP7      | ENSG00000183760 | -0.81387  | 0.79214     | 1.2596      | 0.10391     | 1.2169      | 0.11183  |
|           |                 | 0.47167   | 0.31858     | 0.10391     | 0.569271621 |             |          |
| NA        | ENSG00000249541 | 0.55222   | 0.2904      | 1.0474      | 0.14746     | 0.75225     | 0.22595  |
|           |                 | 1.2596    | 0.10391     | 0.10391     | 0.569271621 |             |          |
| RN7SL454P | ENSG00000243426 | 1.2594    | 0.10394     | 1.2594      | 0.10394     | 1.2594      |          |
|           |                 | 0.10394   | 1.2594      | 0.10394     | 0.10394     | 0.569271621 |          |
| PPDPFL    | ENSG00000168333 | 0.49672   | 0.30969     | 1.2593      | 0.10395     | 1.2593      |          |
|           |                 | 0.10395   | 1.2593      | 0.10395     | 0.10395     | 0.569271621 |          |
| NA        | ENSG00000264608 | 1.2593    | 0.10395     | 1.2593      | 0.10395     | 1.2593      | 0.10395  |
|           |                 | 1.2593    | 0.10395     | 0.10395     | 0.569271621 |             |          |
| LXN       | ENSG00000079257 | 1.2593    | 0.10396     | 1.2593      | 0.10396     | 1.2593      | 0.10396  |
|           |                 | 1.2593    | 0.10396     | 0.10396     | 0.569271621 |             |          |
| XRCC6P1   | ENSG00000237417 | 0.18172   | 0.4279      | 1.2593      | 0.10396     | -0.33161    |          |
|           |                 | 0.62991   | -0.38906    | 0.65138     | 0.10396     | 0.569271621 |          |

|            |                 |           |             |             |             |           |         |          |
|------------|-----------------|-----------|-------------|-------------|-------------|-----------|---------|----------|
| LINC02125  | ENSG00000250514 | 0.95398   | 0.17005     | 0.35665     | 0.36068     | 0.83005   |         |          |
|            | 0.20326         | 1.2592    | 0.10398     | 0.10398     | 0.569271621 |           |         |          |
| LINC00933  | ENSG00000259728 | 0.99233   | 0.16052     | 0.025075    | 0.49        | -0.13731  | 0.55461 |          |
|            | 1.2592          | 0.10398   | 0.10398     | 0.569271621 |             |           |         |          |
| RPL7AP73   | ENSG00000237952 | 1.259     | 0.10401     | 1.259       | 0.10401     | -0.32391  | 0.627   | 0.036143 |
|            | 0.48558         | 0.10401   | 0.569271621 |             |             |           |         |          |
| RNU7-183P  | ENSG00000252407 | 1.259     | 0.10401     | 0.87728     | 0.19017     | 1.1485    | 0.12537 |          |
|            | 1.1485          | 0.12537   | 0.10401     | 0.569271621 |             |           |         |          |
| NA         | ENSG00000253094 | 1.2563    | 0.10451     | 0.77684     | 0.21863     | 1.259     | 0.10401 | 1.259    |
|            | 0.10401         | 0.10401   | 0.569271621 |             |             |           |         |          |
| NA         | ENSG00000279134 | -0.28122  | 0.61073     | 1.259       | 0.10401     | 1.259     | 0.10401 | 1.259    |
|            | 0.10401         | 0.10401   | 0.569271621 |             |             |           |         |          |
| NA         | ENSG00000206249 | -0.06561  | 0.52616     | 1.259       | 0.10402     | -0.06561  | 0.52616 |          |
|            | -0.06561        | 0.52616   | 0.10402     | 0.569271621 |             |           |         |          |
| SFTPD      | ENSG00000133661 | 1.2364    | 0.10815     | 1.2364      | 0.10815     | 1.2589    | 0.10403 |          |
|            | 1.1447          | 0.12618   | 0.10403     | 0.569271621 |             |           |         |          |
| CANX       | ENSG00000127022 | 1.2588    | 0.10405     | 1.0921      | 0.1374      | -0.061197 | 0.5244  |          |
|            | 0.14639         | 0.44181   | 0.10405     | 0.569271621 |             |           |         |          |
| NA         | ENSG00000254992 | 1.006     | 0.1572      | -0.91011    | 0.81862     | 1.006     | 0.1572  | 1.2588   |
|            | 0.10405         | 0.10405   | 0.569271621 |             |             |           |         |          |
| MIR4431    | ENSG00000264975 | 0.44319   | 0.32881     | 0.31513     | 0.37633     | 0.11614   |         |          |
|            | 0.45377         | 1.2588    | 0.10405     | 0.10405     | 0.569271621 |           |         |          |
| CIPC       | ENSG00000198894 | -0.69997  | 0.75803     | -0.69997    | 0.75803     | 1.2587    | 0.10407 |          |
|            | -0.6869         | 0.75393   | 0.10407     | 0.569271621 |             |           |         |          |
| AAAS       | ENSG00000094914 | -1.1855   | 0.88209     | 1.1758      | 0.11984     | 0.90155   | 0.18365 |          |
|            | 1.2586          | 0.10408   | 0.10408     | 0.569271621 |             |           |         |          |
| NA         | ENSG00000240519 | 1.2585    | 0.1041      | 1.2585      | 0.1041      | 1.2585    | 0.1041  |          |
|            | 1.2585          | 0.1041    | 0.1041      | 0.569271621 |             |           |         |          |
| TMEM51-AS1 | ENSG00000175147 | 1.2585    | 0.10411     | 0.93339     | 0.17531     | 1.0658    |         |          |
|            | 0.14326         | 0.41844   | 0.33781     | 0.10411     | 0.569271621 |           |         |          |
| NA         | ENSG00000270008 | 1.2585    | 0.10411     | 1.2585      | 0.10411     | 1.2585    | 0.10411 |          |
|            | 1.2585          | 0.10411   | 0.10411     | 0.569271621 |             |           |         |          |
| RNU4-82P   | ENSG00000199313 | 1.2583    | 0.10414     | 1.2583      | 0.10414     | 1.2583    |         |          |
|            | 0.10414         | 1.2583    | 0.10414     | 0.10414     | 0.569271621 |           |         |          |
| NORAD      | ENSG00000260032 | 0.9438    | 0.17264     | 0.87168     | 0.19169     | 0.88787   | 0.1873  |          |
|            | 1.2583          | 0.10415   | 0.10415     | 0.569271621 |             |           |         |          |
| THRAP3P3   | ENSG00000235920 | 1.0971    | 0.13629     | 1.2581      | 0.10417     | 0.20533   |         |          |
|            | 0.41866         | -0.025922 | 0.51034     | 0.10417     | 0.569271621 |           |         |          |
| NA         | ENSG00000253189 | -1.0134   | 0.84456     | -0.74056    | 0.77052     | -0.25075  | 0.59899 |          |
|            | 1.2581          | 0.10417   | 0.10417     | 0.569271621 |             |           |         |          |
| LINC02439  | ENSG00000255814 | -0.055396 | 0.52209     | 1.2581      | 0.10418     | -0.81664  |         |          |
|            | 0.79293         | -0.84342  | 0.8005      | 0.10418     | 0.569271621 |           |         |          |
| PROCR      | ENSG00000101000 | -0.21935  | 0.58681     | 0.66115     | 0.25426     | 1.258     | 0.1042  |          |
|            | 0.53923         | 0.29486   | 0.1042      | 0.569271621 |             |           |         |          |
| TRDMT1     | ENSG00000107614 | 1.2579    | 0.10421     | -0.21624    | 0.5856      | 0.13509   |         |          |
|            | 0.44627         | 0.47343   | 0.31795     | 0.10421     | 0.569271621 |           |         |          |
| PROK2      | ENSG00000163421 | 0.75798   | 0.22423     | 0.75798     | 0.22423     | 1.2577    | 0.10425 |          |
|            | 1.2041          | 0.11427   | 0.10425     | 0.569271621 |             |           |         |          |
| NA         | ENSG00000201898 | 1.2576    | 0.10426     | 1.2576      | 0.10426     | 1.2576    | 0.10426 |          |
|            | 1.2576          | 0.10426   | 0.10426     | 0.569271621 |             |           |         |          |
| FREM1      | ENSG00000164946 | 0.40327   | 0.34337     | 0.54511     | 0.29284     | 0.33975   | 0.36702 |          |
|            | 1.2575          | 0.10428   | 0.10428     | 0.569271621 |             |           |         |          |
| LINC01945  | ENSG00000236485 | -0.58963  | 0.72228     | -0.25975    | 0.60247     | 1.2575    |         |          |
|            | 0.10428         | 0.70909   | 0.23913     | 0.10428     | 0.569271621 |           |         |          |
| IGLC5      | ENSG00000254030 | 1.2575    | 0.10428     | 1.2575      | 0.10428     | 1.2575    | 0.10428 |          |
|            | 1.2575          | 0.10428   | 0.10428     | 0.569271621 |             |           |         |          |
| IGHMBP2    | ENSG00000132740 | -0.045314 | 0.51807     | -1.1614     | 0.87727     | 1.2575    |         |          |
|            | 0.10429         | 0.52127   | 0.30109     | 0.10429     | 0.569271621 |           |         |          |
| TGM6       | ENSG00000166948 | -0.31133  | 0.62223     | -0.71017    | 0.7612      | -0.74897  | 0.77306 |          |
|            | 1.2575          | 0.10429   | 0.10429     | 0.569271621 |             |           |         |          |
| NA         | ENSG00000237596 | -0.56581  | 0.71424     | 0.28003     | 0.38973     | 1.2575    | 0.10429 |          |
|            | 0.36664         | 0.35694   | 0.10429     | 0.569271621 |             |           |         |          |



|           |                 |           |         |             |             |           |         |
|-----------|-----------------|-----------|---------|-------------|-------------|-----------|---------|
| RNF123    | ENSG00000164068 | 0.14834   | 0.44104 | -0.088019   | 0.53507     | -0.53284  |         |
|           | 0.70293         | 1.2574    | 0.1043  | 0.1043      | 0.569271621 |           |         |
| UBE2V1P2  | ENSG00000214192 | 1.2574    | 0.1043  | 0.64712     | 0.25878     | 0.060979  |         |
|           | 0.47569         | 0.060979  | 0.47569 | 0.1043      | 0.569271621 |           |         |
| OR51M1    | ENSG00000184698 | 1.254     | 0.10492 | 1.2574      | 0.10431     | 1.2574    | 0.10431 |
|           | 1.2574          | 0.10431   | 0.10431 | 0.569271621 |             |           |         |
| EHBP1L1   | ENSG00000173442 | -0.015167 | 0.50605 | 0.1374      | 0.44536     | -0.38583  |         |
|           | 0.65019         | 1.257     | 0.10438 | 0.10438     | 0.569314865 |           |         |
| NA        | ENSG00000253880 | -0.93134  | 0.82416 | 1.257       | 0.10438     | 0.019662  | 0.49216 |
|           | -1.0819         | 0.86036   | 0.10438 | 0.569314865 |             |           |         |
| NA        | ENSG00000279625 | 0.65954   | 0.25477 | 0.31612     | 0.37596     | 1.2569    | 0.10439 |
|           | 0.31612         | 0.37596   | 0.10439 | 0.569314865 |             |           |         |
| C10orf62  | ENSG00000203942 | -0.67242  | 0.74934 | 1.2569      | 0.1044      | -0.67242  |         |
|           | 0.74934         | -0.67242  | 0.74934 | 0.1044      | 0.569314865 |           |         |
| MACO1     | ENSG00000204178 | 1.2542    | 0.10489 | 1.2542      | 0.10489     | 1.2566    | 0.10445 |
|           | 0.70581         | 0.24015   | 0.10445 | 0.569314865 |             |           |         |
| FAM120A   | ENSG00000048828 | 0.025899  | 0.48967 | -0.044434   | 0.51772     | 0.61315   |         |
|           | 0.26989         | 1.2565    | 0.10447 | 0.10447     | 0.569314865 |           |         |
| CBFA2T3   | ENSG00000129993 | -0.85515  | 0.80377 | 0.48245     | 0.31474     | 1.2565    |         |
|           | 0.10447         | 0.62481   | 0.26605 | 0.10447     | 0.569314865 |           |         |
| SOX10     | ENSG00000100146 | 1.2564    | 0.10448 | 1.2564      | 0.10448     | 0.21664   | 0.41424 |
|           | 1.2564          | 0.10448   | 0.10448 | 0.569314865 |             |           |         |
| NA        | ENSG00000226757 | 1.2564    | 0.10448 | 1.2564      | 0.10448     | 1.2564    | 0.10448 |
|           | 1.2564          | 0.10448   | 0.10448 | 0.569314865 |             |           |         |
| RPL7P10   | ENSG00000229752 | 1.2564    | 0.10449 | 1.2564      | 0.10449     | 1.2564    |         |
|           | 0.10449         | 1.2564    | 0.10449 | 0.10449     | 0.569314865 |           |         |
| NA        | ENSG00000256916 | 1.2564    | 0.10449 | 1.2564      | 0.10449     | 1.2564    | 0.10449 |
|           | 1.2564          | 0.10449   | 0.10449 | 0.569314865 |             |           |         |
| RABGGTA   | ENSG00000100949 | 1.2563    | 0.10451 | 1.2563      | 0.10451     | 1.2563    |         |
|           | 0.10451         | 1.2563    | 0.10451 | 0.10451     | 0.569314865 |           |         |
| NA        | ENSG00000235091 | -0.65384  | 0.74339 | 1.2563      | 0.10451     | -0.25782  | 0.60173 |
|           | -0.18397        | 0.57298   | 0.10451 | 0.569314865 |             |           |         |
| NA        | ENSG00000252778 | 0.23548   | 0.40692 | 1.2562      | 0.10451     | 0.001139  | 0.49955 |
|           | 0.31595         | 0.37602   | 0.10451 | 0.569314865 |             |           |         |
| HIPK2     | ENSG00000064393 | 1.2561    | 0.10454 | 0.62923     | 0.2646      | -0.30613  | 0.62025 |
|           | 1.0869          | 0.13854   | 0.10454 | 0.569314865 |             |           |         |
| NA        | ENSG00000278913 | 0.88058   | 0.18927 | 0.74729     | 0.22744     | 0.88058   | 0.18927 |
|           | 1.2561          | 0.10454   | 0.10454 | 0.569314865 |             |           |         |
| MIR548H4  | ENSG00000221616 | -0.18765  | 0.57442 | -0.18765    | 0.57442     | 1.256     | 0.10456 |
|           | -0.18644        | 0.57395   | 0.10456 | 0.569314865 |             |           |         |
| CCDC58P2  | ENSG00000236944 | 1.2559    | 0.10457 | 1.2559      | 0.10457     | 1.2559    |         |
|           | 0.10457         | 1.2559    | 0.10457 | 0.10457     | 0.569314865 |           |         |
| NA        | ENSG00000261368 | 1.2559    | 0.10457 | 1.2559      | 0.10457     | 1.2559    | 0.10457 |
|           | 1.2559          | 0.10457   | 0.10457 | 0.569314865 |             |           |         |
| WDR77     | ENSG00000116455 | 1.2559    | 0.10458 | 0.62116     | 0.26725     | 1.2559    | 0.10458 |
|           | 0.68287         | 0.24734   | 0.10458 | 0.569314865 |             |           |         |
| CLEC12B   | ENSG00000256660 | 1.2558    | 0.10459 | 1.2558      | 0.10459     | 1.2558    |         |
|           | 0.10459         | 1.2558    | 0.10459 | 0.10459     | 0.569314865 |           |         |
| NA        | ENSG00000231412 | 0.41691   | 0.33837 | 1.2558      | 0.1046      | 1.2055    | 0.114   |
|           | 1.2558          | 0.1046    | 0.1046  | 0.569314865 |             |           |         |
| NA        | ENSG00000250149 | 0.61517   | 0.26922 | 0.93889     | 0.17389     | -0.23421  | 0.59259 |
|           | 1.2558          | 0.1046    | 0.1046  | 0.569314865 |             |           |         |
| LINC01044 | ENSG00000223626 | -0.28324  | 0.6115  | 0.57229     | 0.28356     | -0.92667  |         |
|           | 0.82295         | 1.2557    | 0.10461 | 0.10461     | 0.569314865 |           |         |
| NA        | ENSG00000257657 | 1.2557    | 0.10461 | -1.0429     | 0.85151     | -0.98899  | 0.83867 |
|           | -0.98899        | 0.83867   | 0.10461 | 0.569314865 |             |           |         |
| NA        | ENSG00000253107 | 1.2556    | 0.10464 | 1.2556      | 0.10464     | 1.2556    | 0.10464 |
|           | 1.2556          | 0.10464   | 0.10464 | 0.569332095 |             |           |         |
| ATXN1     | ENSG00000124788 | 0.86595   | 0.19326 | 0.72821     | 0.23324     | 1.2555    | 0.10466 |
|           | -0.23669        | 0.59355   | 0.10466 | 0.569332095 |             |           |         |
| NA        | ENSG00000280096 | -0.032567 | 0.51299 | 0.99757     | 0.15924     | -0.032567 | 0.51299 |
|           | 1.2553          | 0.10469   | 0.10469 | 0.569332095 |             |           |         |

|              |                 |           |           |           |             |             |         |
|--------------|-----------------|-----------|-----------|-----------|-------------|-------------|---------|
| DZIP1        | ENSG00000134874 | 0.78513   | 0.21619   | 0.70849   | 0.23932     | 1.2552      | 0.1047  |
|              |                 | 0.4694    | 0.31939   | 0.1047    | 0.569332095 |             |         |
| SPDYE18      | ENSG00000205482 | 0.52688   | 0.29914   | 1.2552    | 0.1047      | 0.85851     |         |
|              |                 | 0.1953    | 0.45693   | 0.32386   | 0.1047      | 0.569332095 |         |
| LINC01102    | ENSG00000235597 | 0.09868   | 0.4607    | -0.029349 | 0.51171     | 0.17765     |         |
|              |                 | 0.4295    | 1.2552    | 0.10471   | 0.10471     | 0.569332095 |         |
| NA           | ENSG00000283273 | 1.2552    | 0.10471   | -1.0041   | 0.84234     | -0.59344    | 0.72356 |
|              |                 | -0.59344  | 0.72356   | 0.10471   | 0.569332095 |             |         |
| AZGP1P1      | ENSG00000214313 | 0.9309    | 0.17595   | -0.12417  | 0.54941     | 0.022809    |         |
|              |                 | 0.4909    | 1.2551    | 0.10472   | 0.10472     | 0.569332095 |         |
| SPATA9       | ENSG00000145757 | 0.23852   | 0.40574   | 0.11123   | 0.45572     | 0.23852     |         |
|              |                 | 0.40574   | 1.2551    | 0.10473   | 0.10473     | 0.569332095 |         |
| ARHGAP19     | ENSG00000213390 | 0.62636   | 0.26554   | 0.39009   | 0.34824     | 1.2551      |         |
|              |                 | 0.10473   | 0.9562    | 0.16948   | 0.10473     | 0.569332095 |         |
| NA           | ENSG00000225335 | 1.255     | 0.10475   | -0.32468  | 0.62729     | 0.93893     | 0.17388 |
|              |                 | 1.1538    | 0.1243    | 0.10475   | 0.569358994 |             |         |
| MAML1        | ENSG00000161021 | 1.0109    | 0.15604   | 1.2549    | 0.10476     | 0.46389     | 0.32136 |
|              |                 | 0.29055   | 0.3857    | 0.10476   | 0.569358994 |             |         |
| LINC00504    | ENSG00000248360 | -0.26516  | 0.60456   | -0.80143  | 0.78856     | -0.29212    |         |
|              |                 | 0.6149    | 1.2548    | 0.10477   | 0.10477     | 0.569358994 |         |
| CACNA2D1-AS1 | ENSG00000223770 | 1.1021    | 0.13521   | 0.44369   | 0.32863     | 0.2452      |         |
|              |                 | 0.40315   | 1.2547    | 0.1048    | 0.1048      | 0.569458519 |         |
| GALNT1       | ENSG00000141429 | 0.17068   | 0.43224   | 1.2545    | 0.10482     | -0.35599    |         |
|              |                 | 0.63908   | 0.021867  | 0.49128   | 0.10482     | 0.56950369  |         |
| RNU6-987P    | ENSG00000207490 | 1.1303    | 0.12918   | 0.10863   | 0.45675     | 0.45114     |         |
|              |                 | 0.32595   | 1.2544    | 0.10486   | 0.10486     | 0.569648322 |         |
| APPL1        | ENSG00000157500 | -0.063085 | 0.52515   | -0.188    | 0.57456     | 1.2543      | 0.10487 |
|              |                 | -0.18978  | 0.57526   | 0.10487   | 0.569648322 |             |         |
| AP1S1        | ENSG00000106367 | 1.2542    | 0.10489   | 1.2542    | 0.10489     | 0.65208     | 0.25717 |
|              |                 | -0.17742  | 0.57041   | 0.10489   | 0.569664382 |             |         |
| NA           | ENSG00000238165 | 1.2541    | 0.10491   | 1.2541    | 0.10491     | 1.2541      | 0.10491 |
|              |                 | 1.2541    | 0.10491   | 0.10491   | 0.569664382 |             |         |
| RN7SL123P    | ENSG00000266863 | 1.2539    | 0.10493   | -1.0924   | 0.86267     | -0.81183    |         |
|              |                 | 0.79155   | -0.81183  | 0.79155   | 0.10493     | 0.569664382 |         |
| SOS2         | ENSG00000100485 | 1.2539    | 0.10494   | 1.1903    | 0.11697     | 1.0479      | 0.14734 |
|              |                 | 1.2539    | 0.10494   | 0.10494   | 0.569664382 |             |         |
| KRT128P      | ENSG00000258120 | 1.2538    | 0.10495   | 1.2538    | 0.10495     | 1.2538      |         |
|              |                 | 0.10495   | 1.2538    | 0.10495   | 0.10495     | 0.569664382 |         |
| NA           | ENSG00000230532 | 1.2538    | 0.10496   | 1.2538    | 0.10496     | 1.2538      | 0.10496 |
|              |                 | 1.2538    | 0.10496   | 0.10496   | 0.569664382 |             |         |
| ALKAL2       | ENSG00000189292 | 0.42432   | 0.33567   | 0.91679   | 0.17963     | 0.70452     |         |
|              |                 | 0.24055   | 1.2537    | 0.10497   | 0.10497     | 0.569664382 |         |
| NA           | ENSG00000266065 | 1.2537    | 0.10498   | -0.25673  | 0.60131     | -0.25673    | 0.60131 |
|              |                 | -0.25673  | 0.60131   | 0.10498   | 0.569664382 |             |         |
| MIR1288      | ENSG00000221355 | 0.61952   | 0.26779   | 1.2536    | 0.10499     | 1.2536      |         |
|              |                 | 0.10499   | 1.2536    | 0.10499   | 0.10499     | 0.569664382 |         |
| WDCP         | ENSG00000163026 | 1.2535    | 0.10501   | 0.16459   | 0.43463     | 0.13588     | 0.44596 |
|              |                 | -0.12112  | 0.5482    | 0.10501   | 0.569664382 |             |         |
| APOBEC3D     | ENSG00000243811 | 1.2534    | 0.10503   | -0.49369  | 0.68924     | 1.2534      |         |
|              |                 | 0.10503   | -1.1742   | 0.87984   | 0.10503     | 0.569664382 |         |
| NA           | ENSG00000284554 | 1.2534    | 0.10503   | 1.2534    | 0.10503     | 1.2534      | 0.10503 |
|              |                 | 1.2534    | 0.10503   | 0.10503   | 0.569664382 |             |         |
| LINC00404    | ENSG00000229520 | -0.15576  | 0.56189   | 1.2533    | 0.10504     | -0.034531   |         |
|              |                 | 0.51377   | -0.034531 | 0.51377   | 0.10504     | 0.569664382 |         |
| NA           | ENSG00000255899 | 1.2533    | 0.10505   | 1.2533    | 0.10505     | 1.2533      | 0.10505 |
|              |                 | 1.2533    | 0.10505   | 0.10505   | 0.569664382 |             |         |
| TBC1D16      | ENSG00000167291 | 0.9327    | 0.17549   | 1.2532    | 0.10506     | 0.41292     |         |
|              |                 | 0.33983   | 0.50232   | 0.30772   | 0.10506     | 0.569664382 |         |
| MIR4433B     | ENSG00000264297 | 1.2532    | 0.10506   | 1.2532    | 0.10506     | 1.2532      |         |
|              |                 | 0.10506   | 1.2532    | 0.10506   | 0.10506     | 0.569664382 |         |
| HIF1A-AS3    | ENSG00000258667 | 0.44771   | 0.32718   | 0.54256   | 0.29372     | 1.2531      |         |
|              |                 | 0.10508   | 1.2531    | 0.10508   | 0.10508     | 0.569709435 |         |

|           |                 |          |          |            |             |             |          |         |
|-----------|-----------------|----------|----------|------------|-------------|-------------|----------|---------|
| LINC02461 | ENSG00000258331 | -0.35897 | 0.64019  | 1.2529     | 0.10511     | -0.35897    |          |         |
|           |                 | 0.64019  | -0.35897 | 0.64019    | 0.10511     | 0.569808688 |          |         |
| HMG1P24   | ENSG00000226977 | 1.2528   | 0.10514  | 0.10514    | 0.022877    | 0.49087     | 0.022877 |         |
|           |                 | 0.49087  | 1.2528   | 0.10514    | 0.10514     | 0.569862001 |          |         |
| NA        | ENSG00000267537 | 1.2527   | 0.10515  | -0.14803   | 0.55884     | -1.1416     | 0.87318  |         |
|           |                 | -1.1416  | 0.87318  | 0.10515    | 0.569862001 |             |          |         |
| NA        | ENSG00000254183 | 0.83259  | 0.20254  | -0.039119  | 0.5156      | 1.2527      | 0.10517  |         |
|           |                 | 0.13198  | 0.4475   | 0.10517    | 0.569862001 |             |          |         |
| TSEN15    | ENSG00000198860 | 1.2526   | 0.10518  | 0.39503    | 0.34641     | 0.63794     |          |         |
|           |                 | 0.26176  | 0.83547  | 0.20173    | 0.10518     | 0.569862001 |          |         |
| NA        | ENSG00000240426 | -0.60348 | 0.7269   | 1.2525     | 0.10519     | -0.60348    | 0.7269   |         |
|           |                 | -0.60348 | 0.7269   | 0.10519    | 0.569862001 |             |          |         |
| EDIL3-DT  | ENSG00000250320 | 1.2525   | 0.10519  | 0.28684    | 0.38712     | 1.2525      |          |         |
|           |                 | 0.10519  | 1.1939   | 0.11626    | 0.10519     | 0.569862001 |          |         |
| CYSLTR2   | ENSG00000152207 | 1.2522   | 0.10524  | 1.0344     | 0.15047     | 0.73576     |          |         |
|           |                 | 0.23094  | 1.0424   | 0.14862    | 0.10524     | 0.569906065 |          |         |
| NA        | ENSG00000250654 | 0.36156  | 0.35884  | 1.0254     | 0.1526      | 1.2523      | 0.10524  |         |
|           |                 | 1.2523   | 0.10524  | 0.10524    | 0.569906065 |             |          |         |
| KCNQ1DN   | ENSG00000237941 | 1.2522   | 0.10525  | 0.93514    | 0.17486     | 0.17408     |          |         |
|           |                 | 0.4309   | 0.16339  | 0.43511    | 0.10525     | 0.569906065 |          |         |
| CLUL1     | ENSG00000079101 | -0.75784 | 0.77573  | 1.2521     | 0.10526     | -0.50238    | 0.6923   |         |
|           |                 | -1.3612  | 0.91328  | 0.10526    | 0.569906065 |             |          |         |
| ITGAV     | ENSG00000138448 | 0.7429   | 0.22877  | 0.23582    | 0.40678     | 1.2521      | 0.10527  |         |
|           |                 | 0.9626   | 0.16787  | 0.10527    | 0.569906065 |             |          |         |
| LINC00838 | ENSG00000261683 | -0.8417  | 0.80002  | -0.14657   | 0.55826     | 1.2521      |          |         |
|           |                 | 0.10527  | -0.14657 | 0.55826    | 0.10527     | 0.569906065 |          |         |
| IQCD      | ENSG00000166578 | 1.0781   | 0.1405   | 1.0781     | 0.1405      | 1.2521      | 0.10528  |         |
|           |                 | 0.58409  | 0.27958  | 0.10528    | 0.569906065 |             |          |         |
| NA        | ENSG00000258665 | 1.2518   | 0.10532  | 1.2518     | 0.10532     | 1.2518      | 0.10532  |         |
|           |                 | 1.2518   | 0.10532  | 0.10532    | 0.569995957 |             |          |         |
| NA        | ENSG00000275929 | 1.2518   | 0.10532  | 1.2518     | 0.10532     | 1.2518      | 0.10532  |         |
|           |                 | 1.2518   | 0.10532  | 0.10532    | 0.569995957 |             |          |         |
| LINC01584 | ENSG00000260477 | 0.33883  | 0.36737  | 0.097095   | 0.46133     | 1.2517      |          |         |
|           |                 | 0.10534  | 0.097095 | 0.46133    | 0.10534     | 0.570030692 |          |         |
| ADI1      | ENSG00000182551 | -0.11361 | 0.54523  | 1.2516     | 0.10535     | 0.88264     | 0.18872  |         |
|           |                 | 0.95486  | 0.16983  | 0.10535    | 0.570030692 |             |          |         |
| MTMR6     | ENSG00000139505 | 1.2515   | 0.10537  | 0.48039    | 0.31548     | -0.49867    | 0.69099  |         |
|           |                 | 0.48039  | 0.31548  | 0.10537    | 0.570030692 |             |          |         |
| ITGB5     | ENSG00000082781 | 1.0712   | 0.14204  | 1.2515     | 0.10538     | 0.10358     | 0.45875  |         |
|           |                 | 0.21346  | 0.41549  | 0.10538    | 0.570030692 |             |          |         |
| GYS1      | ENSG00000104812 | 1.2423   | 0.10705  | 1.2514     | 0.1054      | 1.2423      | 0.10705  |         |
|           |                 | 1.2423   | 0.10705  | 0.1054     | 0.570030692 |             |          |         |
| RNA5SP334 | ENSG00000201695 | 1.2514   | 0.1054   | 1.2514     | 0.1054      | 1.2514      |          |         |
|           |                 | 0.1054   | 1.2514   | 0.1054     | 0.1054      | 0.570030692 |          |         |
| NA        | ENSG00000261385 | 1.2513   | 0.10541  | 1.2513     | 0.10541     | 1.2513      | 0.10541  |         |
|           |                 | 1.2513   | 0.10541  | 0.10541    | 0.570030692 |             |          |         |
| SLC1A3    | ENSG00000079215 | 0.24918  | 0.40161  | 1.139      | 0.12735     | 0.74792     | 0.22725  |         |
|           |                 | 1.2513   | 0.10542  | 0.10542    | 0.570030692 |             |          |         |
| RASAL3    | ENSG00000105122 | 1.2511   | 0.10544  | 1.2511     | 0.10544     | 1.2511      |          |         |
|           |                 | 0.10544  | 1.2511   | 0.10544    | 0.10544     | 0.57007558  |          |         |
| NA        | ENSG00000241057 | -0.98672 | 0.83811  | -0.24146   | 0.5954      | 1.251       | 0.10546  | 1.251   |
|           |                 | 0.10546  | 0.10546  | 0.57011127 |             |             |          |         |
| NA        | ENSG00000277640 | 1.251    | 0.10547  | 1.251      | 0.10547     | 1.251       | 0.10547  | 0.17476 |
|           |                 | 0.43064  | 0.10547  | 0.57011127 |             |             |          |         |
| NA        | ENSG00000234686 | 1.2509   | 0.10549  | 1.2509     | 0.10549     | 1.2509      | 0.10549  |         |
|           |                 | 1.2509   | 0.10549  | 0.10549    | 0.570146945 |             |          |         |
| LINC01375 | ENSG00000226159 | -0.88456 | 0.8118   | 0.17521    | 0.43046     | 0.13733     |          |         |
|           |                 | 0.44539  | 1.2508   | 0.1055     | 0.1055      | 0.570146945 |          |         |
| NA        | ENSG00000254630 | 1.2507   | 0.10553  | 1.2507     | 0.10553     | 1.2507      | 0.10553  |         |
|           |                 | 1.2507   | 0.10553  | 0.10553    | 0.570172313 |             |          |         |
| IL11RA    | ENSG00000137070 | 0.19878  | 0.42122  | 0.19878    | 0.42122     | 0.19878     |          |         |
|           |                 | 0.42122  | 1.2504   | 0.10557    | 0.10557     | 0.570172313 |          |         |

|            |                 |           |           |             |             |             |         |
|------------|-----------------|-----------|-----------|-------------|-------------|-------------|---------|
| NA         | ENSG00000228658 | 0.50308   | 0.30745   | 1.2504      | 0.10557     | -0.54543    | 0.70727 |
|            |                 | 0.50308   | 0.30745   | 0.10557     | 0.570172313 |             |         |
| USH2A      | ENSG00000042781 | -0.67164  | 0.74909   | -0.61703    | 0.73139     | -0.07221    | 0.52878 |
|            |                 | 1.2504    | 0.10558   | 0.10558     | 0.570172313 |             |         |
| RNU6-567P  | ENSG00000252555 | 1.2503    | 0.10559   | 1.2503      | 0.10559     | 1.2503      |         |
|            |                 | 0.10559   | 1.2503    | 0.10559     | 0.570172313 |             |         |
| MIR4262    | ENSG00000265172 | 0.4986    | 0.30903   | 0.32678     | 0.37192     | 1.2503      |         |
|            |                 | 0.10559   | -0.83367  | 0.79777     | 0.10559     | 0.570172313 |         |
| NA         | ENSG00000263729 | 1.2503    | 0.1056    | 1.2503      | 0.1056      | 1.2503      | 0.1056  |
|            |                 | 1.2503    | 0.1056    | 0.1056      | 0.570172313 |             |         |
| GRM7-AS1   | ENSG00000236202 | 1.2335    | 0.10869   | 0.31012     | 0.37824     | 0.72033     |         |
|            |                 | 0.23566   | 1.2502    | 0.10561     | 0.10561     | 0.570172313 |         |
| NA         | ENSG00000266014 | 0.58026   | 0.28087   | 0.32782     | 0.37153     | 1.2502      | 0.10561 |
|            |                 | 1.2502    | 0.10561   | 0.10561     | 0.570172313 |             |         |
| COL28A1    | ENSG00000215018 | -0.013286 | 0.5053    | 0.69594     | 0.24323     | -0.30874    |         |
|            |                 | 0.62124   | 1.25      | 0.10565     | 0.10565     | 0.570234348 |         |
| TUBBP10    | ENSG00000226147 | 1.25      | 0.10566   | 1.25        | 0.10566     | 1.25        | 0.10566 |
|            |                 | 0.10566   | 0.10566   | 0.570234348 |             |             |         |
| LINC02020  | ENSG00000234548 | 0.55993   | 0.28776   | 0.55993     | 0.28776     | 1.2499      |         |
|            |                 | 0.10566   | 0.55993   | 0.28776     | 0.10566     | 0.570234348 |         |
| PRSS12     | ENSG00000164099 | 1.2499    | 0.10567   | 1.147       | 0.1257      | 0.87098     | 0.19188 |
|            |                 | 0.72639   | 0.2338    | 0.10567     | 0.570234348 |             |         |
| NA         | ENSG00000226829 | 1.2498    | 0.10568   | -0.11952    | 0.54757     | -0.2925     | 0.61505 |
|            |                 | -0.91015  | 0.81863   | 0.10568     | 0.570234348 |             |         |
| TRAJ24     | ENSG00000211865 | 1.2497    | 0.10571   | 1.2497      | 0.10571     | 1.2497      |         |
|            |                 | 0.10571   | 1.2497    | 0.10571     | 0.10571     | 0.570269932 |         |
| TRAJ23     | ENSG00000211866 | 1.2497    | 0.10571   | 1.2497      | 0.10571     | 1.2497      |         |
|            |                 | 0.10571   | 1.2497    | 0.10571     | 0.10571     | 0.570269932 |         |
| NA         | ENSG00000238490 | 0.92      | 0.17879   | 1.2494      | 0.10576     | 1.2494      | 0.10576 |
|            |                 | 1.2494    | 0.10576   | 0.10576     | 0.57041337  |             |         |
| NA         | ENSG00000250602 | 1.2494    | 0.10576   | 0.20126     | 0.42025     | 1.2494      | 0.10576 |
|            |                 | 1.2494    | 0.10576   | 0.10576     | 0.57041337  |             |         |
| RPL12P24   | ENSG00000243601 | 1.2493    | 0.10578   | -0.99497    | 0.84012     | 1.0791      |         |
|            |                 | 0.14026   | 0.23248   | 0.40808     | 0.10578     | 0.570456813 |         |
| POU3F2     | ENSG00000184486 | 0.30176   | 0.38142   | 0.30176     | 0.38142     | 1.2491      |         |
|            |                 | 0.10581   | -0.025179 | 0.51004     | 0.10581     | 0.570456813 |         |
| SCGB1D4    | ENSG00000197745 | 0.10405   | 0.45856   | 1.2491      | 0.10582     | -1.0483     |         |
|            |                 | 0.85274   | -0.31013  | 0.62177     | 0.10582     | 0.570456813 |         |
| IGFBP4     | ENSG00000141753 | 1.249     | 0.10583   | 0.68263     | 0.24742     | 1.249       | 0.10583 |
|            |                 | 0.10583   | 0.10583   | 0.570456813 |             |             | 1.249   |
| NA         | ENSG00000248387 | 0.70945   | 0.23902   | 0.844       | 0.19934     | 1.249       | 0.10583 |
|            |                 | 0.21679   | 0.10583   | 0.570456813 |             |             | 0.7831  |
| LPAR3      | ENSG00000171517 | 1.2489    | 0.10584   | 0.41        | 0.3409      | -0.4666     | 0.67961 |
|            |                 | 0.37727   | 0.35299   | 0.10584     | 0.570456813 |             |         |
| ADGRA1-AS1 | ENSG00000256925 | 1.2489    | 0.10585   | 1.0186      | 0.1542      | -1.3485     |         |
|            |                 | 0.91125   | -1.3485   | 0.91125     | 0.10585     | 0.570456813 |         |
| KRBOX1     | ENSG00000240747 | 0.90621   | 0.18241   | 1.2487      | 0.10588     | -0.032559   |         |
|            |                 | 0.51299   | 0.77595   | 0.21889     | 0.10588     | 0.570555391 |         |
| RNU6-1006P | ENSG00000252807 | 0.15876   | 0.43693   | 1.2487      | 0.1059      | 1.2487      |         |
|            |                 | 0.1059    | 1.2487    | 0.1059      | 0.1059      | 0.570600066 |         |
| HOXC11     | ENSG00000123388 | 1.2047    | 0.11415   | 1.2485      | 0.10593     | 0.75569     |         |
|            |                 | 0.22492   | 0.7742    | 0.21941     | 0.10593     | 0.570635518 |         |
| NA         | ENSG00000250493 | 1.2485    | 0.10593   | 0.9572      | 0.16923     | 0.9572      | 0.16923 |
|            |                 | 0.9572    | 0.16923   | 0.10593     | 0.570635518 |             |         |
| NUP88      | ENSG00000108559 | 0.94969   | 0.17114   | 0.94969     | 0.17114     | 0.94969     | 0.17114 |
|            |                 | 1.2483    | 0.10596   | 0.10596     | 0.570670955 |             |         |
| MIR137HG   | ENSG00000225206 | 1.2483    | 0.10596   | 0.38279     | 0.35094     | 1.0653      |         |
|            |                 | 0.14337   | 0.47097   | 0.31883     | 0.10596     | 0.570670955 |         |
| WBP1L      | ENSG00000166272 | 0.61953   | 0.26778   | -0.065267   | 0.52602     | 1.2482      | 0.10598 |
|            |                 | 0.60703   | 0.27192   | 0.10598     | 0.570715593 |             |         |
| RNA5SP230  | ENSG00000252848 | 1.2478    | 0.10605   | 1.2478      | 0.10605     | 1.2478      |         |
|            |                 | 0.10605   | 1.2478    | 0.10605     | 0.10605     | 0.571029448 |         |

|            |                 |           |          |           |             |             |         |
|------------|-----------------|-----------|----------|-----------|-------------|-------------|---------|
| RAB36      | ENSG00000100228 | 1.2477    | 0.10607  | 0.58558   | 0.27908     | 0.32908     | 0.37105 |
|            |                 | 0.58558   | 0.27908  | 0.10607   | 0.571064781 |             |         |
| NA         | ENSG00000259407 | 1.2477    | 0.10608  | 1.2477    | 0.10608     | 1.2477      | 0.10608 |
|            |                 | 1.2477    | 0.10608  | 0.10608   | 0.571064781 |             |         |
| LINC02358  | ENSG00000251256 | 1.2475    | 0.1061   | 0.27602   | 0.39127     | -0.08935    |         |
|            |                 | 0.5356    | -0.08935 | 0.5356    | 0.1061      | 0.571109356 |         |
| FAM32BP    | ENSG00000203416 | 1.2473    | 0.10614  | 1.2473    | 0.10614     | 1.2473      |         |
|            |                 | 0.10614   | 1.2473   | 0.10614   | 0.10614     | 0.571243021 |         |
| NA         | ENSG00000257183 | 1.2472    | 0.10615  | -0.032857 | 0.51311     | -0.032857   | 0.51311 |
|            |                 | -0.032857 | 0.51311  | 0.10615   | 0.571243021 |             |         |
| SNX29      | ENSG0000048471  | 0.83503   | 0.20185  | 1.2472    | 0.10616     | 0.28476     | 0.38792 |
|            |                 | 0.49455   | 0.31046  | 0.10616   | 0.571243021 |             |         |
| NA         | ENSG00000237107 | 0.96173   | 0.16809  | 1.2468    | 0.10623     | 1.1664      | 0.12173 |
|            |                 | 1.0555    | 0.1456   | 0.10623   | 0.571463648 |             |         |
| GPR37L1    | ENSG00000170075 | 1.2467    | 0.10626  | 0.93857   | 0.17398     | 0.93476     |         |
|            |                 | 0.17496   | 0.93707  | 0.17436   | 0.10626     | 0.571463648 |         |
| KCNQ1      | ENSG0000053918  | 1.2466    | 0.10627  | 0.66131   | 0.25421     | -0.36149    | 0.64113 |
|            |                 | -0.274    | 0.60796  | 0.10627   | 0.571463648 |             |         |
| LINC02357  | ENSG00000283314 | -0.43694  | 0.66892  | -1.5506   | 0.9395      | 0.7485      |         |
|            |                 | 0.22708   | 1.2466   | 0.10627   | 0.10627     | 0.571463648 |         |
| SRSF3P4    | ENSG00000224061 | 0.32422   | 0.37288  | 0.32422   | 0.37288     | 0.32422     |         |
|            |                 | 0.37288   | 1.2466   | 0.10628   | 0.10628     | 0.571463648 |         |
| SPATA18    | ENSG00000163071 | -0.80784  | 0.79041  | 0.28951   | 0.3861      | 0.081169    |         |
|            |                 | 0.46765   | 1.2465   | 0.10629   | 0.10629     | 0.571463648 |         |
| COL4A2-AS1 | ENSG00000232814 | 1.2465    | 0.10629  | 1.2465    | 0.10629     | 1.2465      |         |
|            |                 | 0.10629   | 1.2465   | 0.10629   | 0.10629     | 0.571463648 |         |
| NA         | ENSG00000273812 | -1.1543   | 0.87582  | -1.1543   | 0.87582     | 0.32464     | 0.37272 |
|            |                 | 1.2463    | 0.10632  | 0.10632   | 0.571463648 |             |         |
| NA         | ENSG00000277611 | 1.2463    | 0.10632  | 1.2463    | 0.10632     | 1.2463      | 0.10632 |
|            |                 | 1.2463    | 0.10632  | 0.10632   | 0.571463648 |             |         |
| MIR662     | ENSG00000207579 | 1.2463    | 0.10633  | 1.2463    | 0.10633     | 1.2463      |         |
|            |                 | 0.10633   | 1.2463   | 0.10633   | 0.10633     | 0.571463648 |         |
| NA         | ENSG00000279136 | 1.2463    | 0.10633  | 1.2463    | 0.10633     | 1.2463      | 0.10633 |
|            |                 | 1.2463    | 0.10633  | 0.10633   | 0.571463648 |             |         |
| UBXN7      | ENSG00000163960 | 1.2461    | 0.10636  | 1.0991    | 0.13586     | 0.54816     | 0.29179 |
|            |                 | 0.77682   | 0.21863  | 0.10636   | 0.571470977 |             |         |
| LGALS9     | ENSG00000168961 | 1.2461    | 0.10636  | -0.59279  | 0.72334     | 1.0405      |         |
|            |                 | 0.14906   | -0.25453 | 0.60046   | 0.10636     | 0.571470977 |         |
| CHMP3      | ENSG00000115561 | 1.0454    | 0.14792  | 1.0033    | 0.15785     | 1.2461      | 0.10637 |
|            |                 | 0.93374   | 0.17522  | 0.10637   | 0.571470977 |             |         |
| LINC00501  | ENSG00000203645 | -1.0886   | 0.86184  | 1.0463    | 0.14772     | 1.246       | 0.10638 |
|            |                 | 1.1731    | 0.12038  | 0.10638   | 0.571470977 |             |         |
| NA         | ENSG00000225913 | 1.2459    | 0.10639  | 0.44044   | 0.32981     | 0.97341     | 0.16517 |
|            |                 | 0.44044   | 0.32981  | 0.10639   | 0.571470977 |             |         |
| NA         | ENSG00000245857 | 1.2458    | 0.10642  | 0.8404    | 0.20034     | -0.41993    | 0.66273 |
|            |                 | 1.1674    | 0.12153  | 0.10642   | 0.5715671   |             |         |
| TMEM260    | ENSG00000070269 | 1.0593    | 0.14474  | 0.38945   | 0.34847     | 1.2457      |         |
|            |                 | 0.10644   | 1.1737   | 0.12026   | 0.10644     | 0.5715671   |         |
| AK3        | ENSG00000147853 | 1.0794    | 0.1402   | 1.0321    | 0.15102     | 1.2456      | 0.10646 |
|            |                 | -0.623    | 0.73336  | 0.10646   | 0.5715671   |             |         |
| NA         | ENSG00000237530 | 1.2456    | 0.10646  | 1.0032    | 0.15789     | 0.25322     | 0.40005 |
|            |                 | 0.19931   | 0.42101  | 0.10646   | 0.5715671   |             |         |
| RN7SL50P   | ENSG00000242985 | 1.1833    | 0.11835  | 1.0531    | 0.14614     | 1.2455      |         |
|            |                 | 0.10647   | 0.65208  | 0.25717   | 0.10647     | 0.5715671   |         |
| OLFM2      | ENSG00000105088 | -0.70334  | 0.75908  | -0.8988   | 0.81562     | -0.7398     | 0.77029 |
|            |                 | 1.2454    | 0.10648  | 0.10648   | 0.5715671   |             |         |
| NA         | ENSG00000225541 | 1.2338    | 0.10865  | 1.2454    | 0.10649     | -0.66074    | 0.74561 |
|            |                 | 1.0672    | 0.14294  | 0.10649   | 0.5715671   |             |         |
| NA         | ENSG00000259013 | 1.2453    | 0.10651  | 1.2453    | 0.10651     | 1.2453      | 0.10651 |
|            |                 | 1.2453    | 0.10651  | 0.10651   | 0.57159292  |             |         |
| PRDM4      | ENSG00000110851 | 1.0063    | 0.15714  | 0.97226   | 0.16546     | 1.0977      | 0.13618 |
|            |                 | 1.2453    | 0.10652  | 0.10652   | 0.57159292  |             |         |

|            |                 |           |         |             |             |           |
|------------|-----------------|-----------|---------|-------------|-------------|-----------|
| PIEZO1P2   | ENSG00000237121 | 1.2452    | 0.10653 | 0.41242     | 0.34002     | 0.90914   |
|            | 0.18164         | 0.41242   | 0.34002 | 0.10653     | 0.57159292  |           |
| BMF-AS1    | ENSG00000259409 | 1.2451    | 0.10656 | 1.2451      | 0.10656     | 1.2451    |
|            | 0.10656         | 1.2451    | 0.10656 | 0.10656     | 0.571647589 |           |
| RPS6P3     | ENSG00000237549 | 0.19835   | 0.42139 | -0.77537    | 0.78094     | 1.2447    |
|            | 0.10661         | -0.51137  | 0.69545 | 0.10661     | 0.571647589 |           |
| NA         | ENSG00000238371 | -1.3664   | 0.9141  | -1.4478     | 0.92616     | 0.28053   |
|            | 1.2447          | 0.10661   | 0.10661 | 0.571647589 |             | 0.38953   |
| RHOQ       | ENSG00000119729 | 0.0019719 | 0.49921 | 0.59456     | 0.27607     | -0.24315  |
|            | 1.2447          | 0.10662   | 0.10662 | 0.571647589 |             | 0.59606   |
| LINC01745  | ENSG00000225919 | 1.2446    | 0.10663 | 1.2446      | 0.10663     | 1.2446    |
|            | 0.10663         | 1.2446    | 0.10663 | 0.10663     | 0.571647589 |           |
| ZNF205     | ENSG00000122386 | 1.2446    | 0.10664 | 1.2446      | 0.10664     | 1.2446    |
|            | 0.10664         | -0.6199   | 0.73234 | 0.10664     | 0.571647589 |           |
| ANKRD20A8P | ENSG00000229089 | 0.333     | 0.36957 | 1.2446      | 0.10664     | -0.082019 |
|            | 0.96554         | 0.16714   | 0.10664 | 0.571647589 |             | 0.53268   |
| DDX11      | ENSG00000013573 | 0.14624   | 0.44187 | 1.2446      | 0.10665     | 0.83043   |
|            | 0.99614         | 0.15959   | 0.10665 | 0.571647589 |             | 0.20315   |
| ATP6V0E1P4 | ENSG00000227883 | 1.2444    | 0.10667 | 1.2444      | 0.10667     | 1.2444    |
|            | 0.10667         | 1.2444    | 0.10667 | 0.10667     | 0.571647589 |           |
| NA         | ENSG00000256695 | 1.2444    | 0.10668 | 0.10737     | 0.45725     | 1.1144    |
|            | 0.85853         | 0.1953    | 0.10668 | 0.571647589 |             | 0.13256   |
| TXLNB      | ENSG00000164440 | 0.68318   | 0.24725 | 0.68318     | 0.24725     | 0.68318   |
|            | 1.2443          | 0.1067    | 0.1067  | 0.571647589 |             | 0.24725   |
| ZNF202     | ENSG00000166261 | 1.2441    | 0.10672 | -0.96574    | 0.83291     | -0.96574  |
|            | 0.83291         | -0.96574  | 0.83291 | 0.10672     | 0.571647589 |           |
| NA         | ENSG00000254061 | 1.2442    | 0.10672 | 0.31194     | 0.37754     | 0.94099   |
|            | 0.31194         | 0.37754   | 0.10672 | 0.571647589 |             | 0.17336   |
| NA         | ENSG00000265217 | 0.2261    | 0.41056 | 0.45376     | 0.325       | 1.2441    |
|            | 0.45376         | 0.325     | 0.10674 | 0.571647589 |             | 0.10674   |
| EEF2KMT    | ENSG00000118894 | -1.0039   | 0.84227 | 0.097135    | 0.46131     | 1.244     |
|            | -0.65914        | 0.7451    | 0.10675 | 0.571647589 |             | 0.10675   |
| IFT22      | ENSG00000128581 | 0.56417   | 0.28632 | 0.44898     | 0.32672     | 1.244     |
|            | 0.23072         | 0.40877   | 0.10675 | 0.571647589 |             | 0.10675   |
| NA         | ENSG00000250740 | 1.2439    | 0.10676 | 1.2439      | 0.10676     | 1.2439    |
|            | 1.2439          | 0.10676   | 0.10676 | 0.571647589 |             | 0.10676   |
| AATF       | ENSG00000275700 | 1.0839    | 0.13922 | 0.075962    | 0.46972     | 1.2439    |
|            | -0.25529        | 0.60075   | 0.10677 | 0.571647589 |             | 0.10677   |
| FANCI      | ENSG00000140525 | 0.71697   | 0.2367  | 1.2437      | 0.1068      | 1.2044    |
|            | 0.66035         | 0.25451   | 0.1068  | 0.571647589 |             | 0.11421   |
| UTP23      | ENSG00000147679 | 0.016337  | 0.49348 | 1.2437      | 0.1068      | -0.91056  |
|            | 0.29498         | 0.384     | 0.1068  | 0.571647589 |             | 0.81874   |
| NA         | ENSG00000251638 | 1.2437    | 0.1068  | 1.2437      | 0.1068      | 1.2437    |
|            | 1.2437          | 0.1068    | 0.1068  | 0.571647589 |             | 0.1068    |
| SLC22A15   | ENSG00000163393 | 1.2437    | 0.10681 | -0.37165    | 0.64493     | -0.31938  |
|            | 0.62528         | -0.9135   | 0.81951 | 0.10681     | 0.571647589 |           |
| SDHD       | ENSG00000204370 | 1.2436    | 0.10681 | -0.69752    | 0.75726     | -0.69752  |
|            | -0.69752        | 0.75726   | 0.10681 | 0.571647589 |             | 0.75726   |
| IFITM3     | ENSG00000142089 | -1.4275   | 0.92328 | 1.2434      | 0.10686     | 0.70427   |
|            | 0.24063         | -1.4275   | 0.92328 | 0.10686     | 0.571680489 |           |
| NA         | ENSG00000237324 | 1.2434    | 0.10686 | 1.2434      | 0.10686     | 1.2434    |
|            | 1.2434          | 0.10686   | 0.10686 | 0.571680489 |             | 0.10686   |
| FAM207A    | ENSG00000160256 | 0.18634   | 0.42609 | -0.021715   | 0.50866     | -1.5011   |
|            | 0.93333         | 1.2433    | 0.10687 | 0.10687     | 0.571680489 |           |
| PAPSS2     | ENSG00000198682 | 0.29593   | 0.38364 | -0.40478    | 0.65718     | 1.2433    |
|            | 0.10688         | 0.29593   | 0.38364 | 0.10688     | 0.571680489 |           |
| HMG2P13    | ENSG00000241810 | 1.2431    | 0.10691 | 0.67289     | 0.25051     | 0.084101  |
|            | 0.46649         | 0.478     | 0.31633 | 0.10691     | 0.571680489 |           |
| NA         | ENSG00000250321 | 1.2431    | 0.10691 | 1.2431      | 0.10691     | 1.2431    |
|            | 1.2431          | 0.10691   | 0.10691 | 0.571680489 |             | 0.10691   |
| NA         | ENSG00000253163 | 0.75205   | 0.22601 | 0.75205     | 0.22601     | 0.75205   |
|            | 1.2431          | 0.10691   | 0.10691 | 0.571680489 |             | 0.22601   |

|            |                 |             |             |             |             |          |         |
|------------|-----------------|-------------|-------------|-------------|-------------|----------|---------|
| NA         | ENSG00000269471 | 0.6146      | 0.26941     | -0.44294    | 0.6711      | -0.74061 | 0.77054 |
|            | 1.2431          | 0.10691     | 0.10691     | 0.571680489 |             |          |         |
| NA         | ENSG00000228925 | 1.2428      | 0.10697     | -0.12238    | 0.5487      | -0.85841 | 0.80467 |
|            | -0.85841        | 0.80467     | 0.10697     | 0.571899956 |             |          |         |
| NA         | ENSG00000249877 | 1.2427      | 0.10698     | -0.62271    | 0.73326     | 0.58802  | 0.27826 |
|            | 0.61982         | 0.26769     | 0.10698     | 0.571899956 |             |          |         |
| IFNE       | ENSG00000184995 | 1.2427      | 0.10699     | -0.060698   | 0.5242      | 0.46095  | 0.32242 |
|            | 0.46095         | 0.32242     | 0.10699     | 0.571899956 |             |          |         |
| DNAJB8     | ENSG00000179407 | 0.78364     | 0.21663     | -0.037088   | 0.51479     | 1.2426   | 0.107   |
|            | 1.2426          | 0.107       | 0.107       | 0.571899956 |             |          |         |
| RNA5SP335  | ENSG00000200687 | 1.2425      | 0.10702     | 1.2425      | 0.10702     | 1.2425   |         |
|            | 0.10702         | 1.2425      | 0.10702     | 0.10702     | 0.571899956 |          |         |
| TPT1P10    | ENSG00000180221 | 1.2424      | 0.10704     | 1.2424      | 0.10704     | 1.2424   |         |
|            | 0.10704         | 1.2424      | 0.10704     | 0.10704     | 0.571899956 |          |         |
| NA         | ENSG00000226541 | 1.2424      | 0.10705     | 1.1186      | 0.13166     | 1.1186   | 0.13166 |
|            | 1.1784          | 0.11931     | 0.10705     | 0.571899956 |             |          |         |
| NA         | ENSG00000258026 | 0.50178     | 0.30791     | 1.2423      | 0.10707     | 0.50178  | 0.30791 |
|            | 0.50178         | 0.30791     | 0.10707     | 0.571899956 |             |          |         |
| LINC02217  | ENSG00000248455 | 1.2422      | 0.10708     | 1.2422      | 0.10708     | 1.1019   |         |
|            | 0.13526         | 1.2422      | 0.10708     | 0.10708     | 0.571899956 |          |         |
| RNU6-72P   | ENSG00000207012 | 1.2421      | 0.10709     | 1.2421      | 0.10709     | 1.2421   |         |
|            | 0.10709         | 0.80169     | 0.21137     | 0.10709     | 0.571899956 |          |         |
| NA         | ENSG00000254425 | 1.242       | 0.10712     | 1.242       | 0.10712     | -0.77385 | 0.78049 |
|            | 0.10712         | 0.10712     | 0.571899956 |             |             |          |         |
| SEPTIN7P2  | ENSG00000214765 | 0.92672     | 0.17704     | 1.2419      | 0.10713     | -0.39122 |         |
|            | 0.65218         | 0.34742     | 0.36414     | 0.10713     | 0.571899956 |          |         |
| ZFR2       | ENSG00000105278 | -0.10971    | 0.54368     | 1.2419      | 0.10714     | -0.9433  | 0.82724 |
|            | -0.16478        | 0.56544     | 0.10714     | 0.571899956 |             |          |         |
| NA         | ENSG00000250636 | 1.1303      | 0.12919     | -0.013725   | 0.50548     | 1.1303   | 0.12919 |
|            | 1.2418          | 0.10715     | 0.10715     | 0.571899956 |             |          |         |
| NA         | ENSG00000239715 | -1.4323     | 0.92397     | -0.31457    | 0.62346     | -0.14836 | 0.55897 |
|            | 1.2418          | 0.10716     | 0.10716     | 0.571899956 |             |          |         |
| RNU6-168P  | ENSG00000251998 | 0.26471     | 0.39562     | 1.2417      | 0.10718     | 0.26471  |         |
|            | 0.39562         | 0.26471     | 0.39562     | 0.10718     | 0.571899956 |          |         |
| LINC02204  | ENSG00000280639 | 1.2416      | 0.10718     | 0.14196     | 0.44356     | 0.077095 |         |
|            | 0.46927         | -0.85425    | 0.80352     | 0.10718     | 0.571899956 |          |         |
| NA         | ENSG00000199241 | 0.88289     | 0.18865     | 1.1898      | 0.11705     | 0.73277  | 0.23185 |
|            | 1.2415          | 0.10721     | 0.10721     | 0.571899956 |             |          |         |
| RNA5SP205  | ENSG00000201523 | 1.2415      | 0.10721     | 1.2415      | 0.10721     | 1.2415   |         |
|            | 0.10721         | 1.2415      | 0.10721     | 0.10721     | 0.571899956 |          |         |
| F2RL3      | ENSG00000127533 | 1.2414      | 0.10722     | 1.2414      | 0.10722     | 1.0713   | 0.14203 |
|            | 1.2414          | 0.10722     | 0.10722     | 0.571899956 |             |          |         |
| RNU6-927P  | ENSG00000252008 | 1.2414      | 0.10723     | 1.2414      | 0.10723     | 0.82418  |         |
|            | 0.20492         | 0.72139     | 0.23533     | 0.10723     | 0.571899956 |          |         |
| HSPBP1     | ENSG00000133265 | 1.0081      | 0.15669     | 1.2413      | 0.10726     | 1.2413   |         |
|            | 0.10726         | 1.2413      | 0.10726     | 0.10726     | 0.571899956 |          |         |
| MIR1275    | ENSG00000221697 | 0.61064     | 0.27072     | -0.96741    | 0.83333     | 1.2412   |         |
|            | 0.10726         | -0.50812    | 0.69432     | 0.10726     | 0.571899956 |          |         |
| HIVEP2     | ENSG00000010818 | 0.16672     | 0.43379     | -0.15901    | 0.56317     | 0.80391  |         |
|            | 0.21072         | 1.2411      | 0.10728     | 0.10728     | 0.571899956 |          |         |
| H3P9       | ENSG00000227430 | 0.58767     | 0.27838     | 0.063482    | 0.47469     | 1.2411   | 0.10728 |
|            | 0.025123        | 0.48998     | 0.10728     | 0.571899956 |             |          |         |
| LYPLAL1-DT | ENSG00000228063 | -1.0228     | 0.8468      | 0.58976     | 0.27768     | 1.241    | 0.1073  |
|            | 0.5207          | 0.30129     | 0.1073      | 0.571899956 |             |          |         |
| NA         | ENSG00000237494 | 1.241       | 0.1073      | 1.241       | 0.1073      | 1.241    | 0.1073  |
|            | 0.1073          | 0.571899956 |             |             |             |          |         |
| RPL23AP33  | ENSG00000237824 | 1.241       | 0.10731     | 0.81567     | 0.20734     | 1.241    | 0.10731 |
|            | 0.10731         | 0.10731     | 0.571899956 |             |             |          |         |
| NA         | ENSG00000229751 | -0.30703    | 0.62059     | 0.064647    | 0.47423     | -1.4085  | 0.92051 |
|            | 1.2409          | 0.10733     | 0.10733     | 0.571899956 |             |          |         |
| LINC02751  | ENSG00000254946 | 1.2408      | 0.10735     | 1.2408      | 0.10735     | 0.14329  |         |
|            | 0.44303         | 0.14329     | 0.44303     | 0.10735     | 0.571899956 |          |         |

|            |                 |           |             |           |             |             |          |         |
|------------|-----------------|-----------|-------------|-----------|-------------|-------------|----------|---------|
| NA         | ENSG00000276968 | 1.2408    | 0.10735     | 0.10735   | 1.2408      | 0.10735     | 1.2408   | 0.10735 |
|            |                 | 1.2408    | 0.10735     | 0.10735   | 0.571899956 |             |          |         |
| ZNF512B    | ENSG00000196700 | 1.2407    | 0.10736     | 0.10736   | 1.119       | 0.13156     | -1.3246  | 0.90735 |
|            |                 | -1.3246   | 0.90735     | 0.10736   | 0.571899956 |             |          |         |
| MIR342     | ENSG00000199082 | 1.2407    | 0.10736     | 0.10736   | 1.2407      | 0.10736     | 1.2407   |         |
|            |                 | 0.10736   | 1.2407      | 0.10736   | 0.10736     | 0.571899956 |          |         |
| MRPS18CP6  | ENSG00000228807 | 1.2407    | 0.10736     | 0.10736   | 1.2407      | 0.10736     | 1.2407   |         |
|            |                 | 0.10736   | 1.2407      | 0.10736   | 0.10736     | 0.571899956 |          |         |
| LINC01467  | ENSG00000258977 | 1.2406    | 0.10737     | 0.10737   | 1.2406      | 0.10737     | 1.2406   |         |
|            |                 | 0.10737   | 1.2406      | 0.10737   | 0.10737     | 0.571899956 |          |         |
| AMMECR1L   | ENSG00000144233 | 0.5289    | 0.29844     | 0.29844   | 1.2405      | 0.10739     | 0.3112   |         |
|            |                 | 0.37782   | 0.78809     | 0.21532   | 0.10739     | 0.571899956 |          |         |
| NA         | ENSG00000273860 | 1.2404    | 0.10741     | 0.10741   | 1.2404      | 0.10741     | 1.2404   | 0.10741 |
|            |                 | 1.2404    | 0.10741     | 0.10741   | 0.571899956 |             |          |         |
| NA         | ENSG00000179253 | -0.042189 | 0.51683     | -0.042189 | 0.51683     | 1.2404      | 0.10742  |         |
|            |                 | -0.67027  | 0.74866     | 0.10742   | 0.571899956 |             |          |         |
| IGKV2OR2-1 | ENSG00000270748 | 1.2403    | 0.10743     | 0.10743   | 0.75549     | 0.22498     | 0.13197  |         |
|            |                 | 0.4475    | 1.2403      | 0.10743   | 0.10743     | 0.571899956 |          |         |
| NA         | ENSG00000235024 | 1.2403    | 0.10744     | 0.10744   | 1.1548      | 0.12408     | 1.2403   | 0.10744 |
|            |                 | 1.2403    | 0.10744     | 0.10744   | 0.571899956 |             |          |         |
| MICB       | ENSG00000204516 | 1.2402    | 0.10745     | 0.10745   | 1.034       | 0.15057     | 0.88081  | 0.18921 |
|            |                 | 0.81922   | 0.20633     | 0.10745   | 0.571899956 |             |          |         |
| EIF5B      | ENSG00000158417 | 1.2401    | 0.10747     | 0.10747   | 0.77082     | 0.22041     | 1.055    | 0.14571 |
|            |                 | 0.80431   | 0.21061     | 0.10747   | 0.571899956 |             |          |         |
| ADAM19     | ENSG00000135074 | 1.24      | 0.10748     | 0.10748   | 1.2372      | 0.10801     | 0.87264  | 0.19143 |
|            |                 | 1.0647    | 0.14351     | 0.10748   | 0.571899956 |             |          |         |
| RNU6-818P  | ENSG00000201707 | 0.78947   | 0.21492     | 0.21492   | 0.90132     | 0.18371     | 0.78947  |         |
|            |                 | 0.21492   | 1.24        | 0.10749   | 0.10749     | 0.571899956 |          |         |
| PIGG       | ENSG00000174227 | 0.77061   | 0.22047     | 0.22047   | 1.24        | 0.1075      | 0.71208  | 0.23821 |
|            |                 | 0.1571    | 0.43758     | 0.1075    | 0.571899956 |             |          |         |
| PJVK       | ENSG00000204311 | 1.24      | 0.1075      | 0.1075    | 1.24        | 0.1075      | 1.24     | 0.1075  |
|            |                 | 0.1075    | 0.571899956 |           |             |             |          |         |
| NA         | ENSG00000199938 | -1.3901   | 0.91775     | 0.91775   | 1.2399      | 0.10751     | -1.4704  | 0.92927 |
|            |                 | -1.4704   | 0.92927     | 0.10751   | 0.571899956 |             |          |         |
| PAFAH1B3   | ENSG00000079462 | 0.76582   | 0.22189     | 0.22189   | -0.18241    | 0.57237     | 1.2398   |         |
|            |                 | 0.10753   | 0.99961     | 0.15875   | 0.10753     | 0.571899956 |          |         |
| ASAH2B     | ENSG00000204147 | -1.3271   | 0.90777     | 0.90777   | 1.2398      | 0.10753     | -0.74627 |         |
|            |                 | 0.77225   | 0.68415     | 0.24694   | 0.10753     | 0.571899956 |          |         |
| NXPH4      | ENSG00000182379 | -0.33525  | 0.63128     | 0.63128   | 0.15782     | 0.4373      | -0.20163 | 0.5799  |
|            |                 | 1.2397    | 0.10754     | 0.10754   | 0.571899956 |             |          |         |
| IFNA5      | ENSG00000147873 | -0.46372  | 0.67858     | 0.67858   | -0.2101     | 0.58321     | 1.004    | 0.15769 |
|            |                 | 1.2397    | 0.10755     | 0.10755   | 0.571899956 |             |          |         |
| UBLCP1     | ENSG00000164332 | 0.50546   | 0.30662     | 0.30662   | 0.54272     | 0.29366     | 0.81335  |         |
|            |                 | 0.20801   | 1.2395      | 0.10759   | 0.10759     | 0.571899956 |          |         |
| NA         | ENSG00000274944 | 1.2395    | 0.10759     | 0.10759   | 1.2395      | 0.10759     | 1.2395   | 0.10759 |
|            |                 | 1.2395    | 0.10759     | 0.10759   | 0.571899956 |             |          |         |
| TRIM13     | ENSG00000204977 | 0.61278   | 0.27001     | 0.27001   | 1.2394      | 0.1076      | -0.13847 |         |
|            |                 | 0.55507   | 0.42454     | 0.33559   | 0.1076      | 0.571899956 |          |         |
| CTF2P      | ENSG00000230447 | 1.2394    | 0.1076      | 0.1076    | 0.48278     | 0.31463     | 1.2394   | 0.1076  |
|            |                 | 1.2394    | 0.1076      | 0.1076    | 0.571899956 |             |          |         |
| LINC00336  | ENSG00000197251 | -0.36049  | 0.64076     | 0.64076   | 1.2393      | 0.10761     | -0.18699 |         |
|            |                 | 0.57417   | 0.6264      | 0.26553   | 0.10761     | 0.571899956 |          |         |
| NA         | ENSG00000230234 | -0.54457  | 0.70697     | 0.70697   | 0.3959      | 0.34609     | 1.2393   | 0.10762 |
|            |                 | 1.2393    | 0.10762     | 0.10762   | 0.571899956 |             |          |         |
| MRGPRX4    | ENSG00000179817 | -0.83355  | 0.79773     | 0.79773   | 1.239       | 0.10767     | -0.75409 | 0.7746  |
|            |                 | -0.75409  | 0.7746      | 0.10767   | 0.571976272 |             |          |         |
| NA         | ENSG00000261758 | 1.1021    | 0.13522     | 0.13522   | 1.239       | 0.10768     | 1.2133   | 0.11251 |
|            |                 | 1.2133    | 0.11251     | 0.10768   | 0.571976272 |             |          |         |
| MTLN       | ENSG00000175701 | 1.2389    | 0.1077      | 0.1077    | 0.24278     | 0.40409     | 0.11196  | 0.45543 |
|            |                 | 0.45644   | 0.32404     | 0.1077    | 0.571976272 |             |          |         |
| HCG22      | ENSG00000228789 | -2.2224   | 0.98687     | 0.98687   | -2.7959     | 0.99741     | 1.2388   | 0.1077  |
|            |                 | 0.71101   | 0.23854     | 0.1077    | 0.571976272 |             |          |         |



|           |                 |              |              |              |             |              |         |
|-----------|-----------------|--------------|--------------|--------------|-------------|--------------|---------|
| NA        | ENSG00000260966 | 0.88011      | 0.1894       | 0.8936       | 0.18577     | 1.2389       | 0.1077  |
|           |                 | 0.8936       | 0.18577      | 0.1077       | 0.571976272 |              |         |
| BTN3A2    | ENSG00000186470 | 0.86193      | 0.19436      | 1.1934       | 0.11636     | 1.2387       |         |
|           |                 | 0.10772      | 1.1552       | 0.1240.10772 | 0.571976272 |              |         |
| CCL2      | ENSG00000108691 | 1.2387       | 0.10773      | -0.80014     | 0.78819     | -0.80014     | 0.78819 |
|           |                 | -0.80014     | 0.78819      | 0.10773      | 0.571976272 |              |         |
| LINC01620 | ENSG00000168746 | 1.2319       | 0.1091.2387  | 0.10773      | 1.2319      | 0.109        | 0.109   |
|           |                 | -0.80556     | 0.78975      | 0.10773      | 0.571976272 |              |         |
| NA        | ENSG00000260395 | 1.2386       | 0.10774      | -0.85087     | 0.80258     | 1.2386       | 0.10774 |
|           |                 | 1.2386       | 0.10774      | 0.10774      | 0.571976272 |              |         |
| NA        | ENSG00000233508 | 1.2385       | 0.10777      | -0.029177    | 0.51164     | -0.12693     | 0.5505  |
|           |                 | 0.55558      | 0.28925      | 0.10777      | 0.572001677 |              |         |
| NME6      | ENSG00000172113 | 1.1749       | 0.12001      | 1.0977       | 0.13616     | 1.2384       | 0.10778 |
|           |                 | 1.1749       | 0.12001      | 0.10778      | 0.572001677 |              |         |
| NA        | ENSG00000275963 | 1.2384       | 0.10778      | 0.6938       | 0.2439      | 0.91368      | 0.18044 |
|           |                 | 0.84368      | 0.19942      | 0.10778      | 0.572001677 |              |         |
| PAMR1     | ENSG00000149090 | -1.3079      | 0.90454      | 0.16998      | 0.43251     | -0.7255      | 0.76593 |
|           |                 | 1.2383       | 0.1078       | 0.1078       | 0.572045519 |              |         |
| FGR       | ENSG00000000938 | -0.1143      | 0.5455       | 0.62265      | 0.26676     | -0.1248      | 0.54966 |
|           |                 | 1.2382       | 0.10782      | 0.10782      | 0.572066254 |              |         |
| EEF1A2    | ENSG00000101210 | -0.47851     | 0.68386      | -0.4365      | 0.66876     | 0.37201      |         |
|           |                 | 0.35494      | 1.2380.10786 | 0.10786      | 0.572066254 |              |         |
| IQCE      | ENSG00000106012 | 0.77303      | 0.21975      | -0.11182     | 0.54452     | 0.36543      | 0.35739 |
|           |                 | 1.2380.10786 | 0.10786      | 0.572066254  |             |              |         |
| SLC7A5P1  | ENSG00000260727 | 0.017928     | 0.49285      | 0.017928     | 0.49285     | 1.2380.10786 |         |
|           |                 | 0.55913      | 0.28804      | 0.10786      | 0.572066254 |              |         |
| NA        | ENSG00000259081 | 1.2379       | 0.10787      | -0.37114     | 0.64473     | 0.37005      | 0.35567 |
|           |                 | 0.37005      | 0.35567      | 0.10787      | 0.572066254 |              |         |
| TMCO2     | ENSG00000188800 | 0.1668       | 0.43376      | 0.1668       | 0.43376     | 0.1668       | 0.43376 |
|           |                 | 1.2378       | 0.10789      | 0.10789      | 0.572066254 |              |         |
| NA        | ENSG00000252550 | 1.2378       | 0.1079       | -0.71731     | 0.76341     | 1.2378       | 0.1079  |
|           |                 | -0.29257     | 0.61507      | 0.1079       | 0.572066254 |              |         |
| NA        | ENSG00000227197 | 1.2377       | 0.10791      | 1.2377       | 0.10791     | 1.2377       | 0.10791 |
|           |                 | 1.2377       | 0.10791      | 0.10791      | 0.572066254 |              |         |
| OR8S21P   | ENSG00000273434 | 1.2376       | 0.10793      | 1.2376       | 0.10793     | -0.006529    |         |
|           |                 | 0.5026       | -0.79737     | 0.78738      | 0.10793     | 0.572066254  |         |
| SEC24C    | ENSG00000176986 | 1.2375       | 0.10795      | 1.1544       | 0.12417     | 1.11         | 0.1335  |
|           |                 | 1.1544       | 0.12417      | 0.10795      | 0.572066254 |              |         |
| NA        | ENSG00000261654 | 0.33776      | 0.36777      | 0.48789      | 0.31281     | 1.2375       | 0.10795 |
|           |                 | 0.14502      | 0.44235      | 0.10795      | 0.572066254 |              |         |
| FAM204DP  | ENSG00000258552 | -0.62939     | 0.73545      | 0.64579      | 0.25921     | 1.2375       |         |
|           |                 | 0.10796      | 0.64579      | 0.25921      | 0.10796     | 0.572066254  |         |
| SNTG2-AS1 | ENSG00000235688 | 0.53569      | 0.29609      | 0.16666      | 0.43382     | 1.2374       |         |
|           |                 | 0.10797      | 1.2374       | 0.10797      | 0.10797     | 0.572066254  |         |
| NA        | ENSG00000234203 | 1.2374       | 0.10798      | 1.2374       | 0.10798     | 1.2374       | 0.10798 |
|           |                 | 1.2374       | 0.10798      | 0.10798      | 0.572066254 |              |         |
| RNU6-139P | ENSG00000252449 | 0.40657      | 0.34216      | 1.2374       | 0.10798     | 1.2374       |         |
|           |                 | 0.10798      | 1.2374       | 0.10798      | 0.10798     | 0.572066254  |         |
| SMPD4P1   | ENSG00000223553 | 0.66753      | 0.25222      | 0.39348      | 0.34698     | 0.39348      |         |
|           |                 | 0.34698      | 1.2372       | 0.10801      | 0.10801     | 0.572162985  |         |
| HMG1      | ENSG00000205581 | -0.30514     | 0.61987      | 1.1353       | 0.12813     | 1.2368       | 0.10807 |
|           |                 | 0.58497      | 0.27929      | 0.10807      | 0.572294186 |              |         |
| RPL36AP33 | ENSG00000235619 | 0.15627      | 0.43791      | 1.2368       | 0.10807     | 1.2368       |         |
|           |                 | 0.10807      | 0.3056       | 0.37995      | 0.10807     | 0.572294186  |         |
| NA        | ENSG00000259723 | 0.67212      | 0.25075      | 0.44272      | 0.32898     | 1.2369       | 0.10807 |
|           |                 | -0.78132     | 0.78269      | 0.10807      | 0.572294186 |              |         |
| RNU6-694P | ENSG00000200941 | 1.2367       | 0.1081       | 0.55861      | 0.28821     | 0.67532      |         |
|           |                 | 0.24974      | 0.84674      | 0.19857      | 0.1081      | 0.572328661  |         |
| ABCD1P3   | ENSG00000261233 | 0.95704      | 0.16927      | -0.073322    | 0.52923     | 1.2367       |         |
|           |                 | 0.1081       | 1.2367       | 0.1081       | 0.1081      | 0.572328661  |         |
| NA        | ENSG00000217805 | -0.5239      | 0.69983      | 1.2366       | 0.10812     | -0.97436     | 0.83506 |
|           |                 | 1.2366       | 0.10812      | 0.10812      | 0.572372363 |              |         |

|            |                 |           |             |             |             |           |         |
|------------|-----------------|-----------|-------------|-------------|-------------|-----------|---------|
| RNU6-1114P | ENSG00000251831 | 1.2364    | 0.10815     | -0.067012   | 0.52671     | 0.070242  | 0.472   |
|            | 0.52707         | 0.29907   | 0.10815     | 0.572459737 |             |           |         |
| OR10H3     | ENSG00000171936 | -0.056201 | 0.52241     | 1.2363      | 0.10816     | -0.056201 |         |
|            | 0.52241         | -0.056201 | 0.52241     | 0.10816     | 0.572459737 |           |         |
| MIR4470    | ENSG00000264408 | 1.2362    | 0.10818     | 1.2362      | 0.10818     | 1.2362    |         |
|            | 0.10818         | 1.2362    | 0.10818     | 0.10818     | 0.572484908 |           |         |
| MOB4       | ENSG00000115540 | 0.23512   | 0.40706     | 0.47077     | 0.3189      | -0.59636  | 0.72453 |
|            | 1.2362          | 0.10819   | 0.10819     | 0.572484908 |             |           |         |
| FAM192BP   | ENSG00000231841 | 1.1368    | 0.1278      | 1.2361      | 0.1082      | 0.025263  |         |
|            | 0.48992         | 0.94144   | 0.17324     | 0.1082      | 0.572484908 |           |         |
| NA         | ENSG00000251416 | 1.2361    | 0.10822     | 0.96973     | 0.16609     | 1.2361    | 0.10822 |
|            | -1.1176         | 0.86814   | 0.10822     | 0.572519312 |             |           |         |
| TRAV8-2    | ENSG00000211786 | 0.062956  | 0.4749      | -0.23951    | 0.59465     | -0.23951  |         |
|            | 0.59465         | 1.236     | 0.10823     | 0.10823     | 0.572519312 |           |         |
| NA         | ENSG00000232952 | 1.2358    | 0.10827     | 1.2358      | 0.10827     | 1.2358    | 0.10827 |
|            | 1.2358          | 0.10827   | 0.10827     | 0.572659475 |             |           |         |
| RNF220     | ENSG00000187147 | 1.2357    | 0.10828     | 0.4676      | 0.32004     | 0.32552   |         |
|            | 0.37239         | -0.11177  | 0.5445      | 0.10828     | 0.572659475 |           |         |
| ANK2       | ENSG00000145362 | 1.2355    | 0.10832     | 0.75264     | 0.22583     | 1.0669    | 0.14301 |
|            | 0.69553         | 0.24336   | 0.10832     | 0.572738456 |             |           |         |
| PRDX2P4    | ENSG00000213177 | 1.2354    | 0.10835     | 0.37123     | 0.35523     | 1.2354    |         |
|            | 0.10835         | 1.2354    | 0.10835     | 0.10835     | 0.572738456 |           |         |
| NA         | ENSG00000279392 | 1.2353    | 0.10835     | 0.54403     | 0.29321     | 1.2353    | 0.10835 |
|            | 1.2353          | 0.10835   | 0.10835     | 0.572738456 |             |           |         |
| LINC01147  | ENSG00000258826 | 1.2353    | 0.10836     | 1.2353      | 0.10836     | 0.76219   |         |
|            | 0.22297         | 0.49787   | 0.30929     | 0.10836     | 0.572738456 |           |         |
| UPF1       | ENSG00000005007 | 1.2351    | 0.10839     | 1.174       | 0.12019     | 1.2236    | 0.11055 |
|            | -0.22759        | 0.59002   | 0.10839     | 0.572738456 |             |           |         |
| MATN4      | ENSG00000124159 | 0.97106   | 0.16576     | -0.03077    | 0.51227     | 1.2351    | 0.1084  |
|            | 0.092725        | 0.46306   | 0.1084      | 0.572738456 |             |           |         |
| NA         | ENSG00000227930 | 1.2351    | 0.1084      | -0.6532     | 0.74318     | -0.6532   | 0.74318 |
|            | -0.6532         | 0.74318   | 0.1084      | 0.572738456 |             |           |         |
| ANKRD40CL  | ENSG00000167117 | 1.235     | 0.10841     | 1.235       | 0.10841     | 1.235     | 0.10841 |
|            | 0.10841         | 0.10841   | 0.572738456 |             |             |           |         |
| LINC01440  | ENSG00000235166 | -0.47789  | 0.68364     | 1.0622      | 0.14408     | 1.2349    |         |
|            | 0.10843         | 0.7724    | 0.21994     | 0.10843     | 0.572738456 |           |         |
| RBMX2P3    | ENSG00000223575 | 1.0804    | 0.13999     | 1.2349      | 0.10844     | 0.047265  |         |
|            | 0.48115         | -0.016756 | 0.50668     | 0.10844     | 0.572738456 |           |         |
| LINC02328  | ENSG00000258733 | 0.18187   | 0.42784     | 0.88772     | 0.18735     | 1.2348    |         |
|            | 0.10846         | -0.70642  | 0.76004     | 0.10846     | 0.572738456 |           |         |
| PRPF8      | ENSG00000174231 | 0.36357   | 0.35809     | 0.046315    | 0.48153     | 1.2347    | 0.10847 |
|            | -0.72276        | 0.76508   | 0.10847     | 0.572738456 |             |           |         |
| ATP8B5P    | ENSG00000179766 | 1.0427    | 0.14854     | 0.44238     | 0.32911     | 0.56573   |         |
|            | 0.28579         | 1.2347    | 0.10847     | 0.10847     | 0.572738456 |           |         |
| DARS2      | ENSG00000117593 | -0.64661  | 0.74106     | -0.63301    | 0.73664     | 1.2347    | 0.10848 |
|            | -0.27254        | 0.6074    | 0.10848     | 0.572738456 |             |           |         |
| GOT1       | ENSG00000120053 | 1.2345    | 0.1085      | -0.8193     | 0.79369     | 0.14222   | 0.44345 |
|            | -0.98684        | 0.83814   | 0.1085      | 0.572738456 |             |           |         |
| RNU6-578P  | ENSG00000212282 | -1.3973   | 0.91884     | -1.1102     | 0.86655     | -1.7926   |         |
|            | 0.96348         | 1.2345    | 0.1085      | 0.1085      | 0.572738456 |           |         |
| NA         | ENSG00000259178 | -1.7723   | 0.96182     | 1.2345      | 0.1085      | -1.7723   | 0.96182 |
|            | -1.7723         | 0.96182   | 0.1085      | 0.572738456 |             |           |         |
| MYO9B      | ENSG00000099331 | -0.67998  | 0.75174     | 0.2283      | 0.40971     | 1.2344    | 0.10853 |
|            | -0.048232       | 0.51923   | 0.10853     | 0.572738456 |             |           |         |
| RNU6-1059P | ENSG00000200622 | 1.2344    | 0.10853     | 0.55668     | 0.28887     | 0.40827   |         |
|            | 0.34154         | -0.37873  | 0.64756     | 0.10853     | 0.572738456 |           |         |
| MTND2P13   | ENSG00000263914 | 1.2344    | 0.10853     | 1.2344      | 0.10853     | 1.2344    |         |
|            | 0.10853         | 1.2344    | 0.10853     | 0.10853     | 0.572738456 |           |         |
| MRPS9-AS2  | ENSG00000224509 | 0.59339   | 0.27646     | 0.53632     | 0.29587     | 0.28854   |         |
|            | 0.38647         | 1.2341    | 0.10857     | 0.10857     | 0.572744962 |           |         |
| LINC00871  | ENSG00000258700 | 1.2342    | 0.10857     | -1.0591     | 0.85523     | -0.50218  |         |
|            | 0.69223         | -1.3066   | 0.90432     | 0.10857     | 0.572744962 |           |         |

|             |                 |           |           |             |             |             |         |
|-------------|-----------------|-----------|-----------|-------------|-------------|-------------|---------|
| NA          | ENSG00000215409 | 1.2341    | 0.10858   | 0.5355      | 0.29615     | 0.89698     | 0.18486 |
|             |                 | 0.89698   | 0.18486   | 0.10858     | 0.572744962 |             |         |
| TJP1        | ENSG00000104067 | -0.68007  | 0.75177   | -0.2975     | 0.61696     | 0.36244     | 0.35851 |
|             |                 | 1.234     | 0.10859   | 0.572744962 |             |             |         |
| PTEN        | ENSG00000171862 | 1.2341    | 0.10859   | 0.93365     | 0.17524     | 0.64535     | 0.25935 |
|             |                 | 1.004     | 0.15769   | 0.572744962 |             |             |         |
| NA          | ENSG00000254854 | 0.37069   | 0.35544   | 0.37069     | 0.35544     | 1.234       | 0.10861 |
|             |                 | 0.052919  | 0.4789    | 0.10861     | 0.572788452 |             |         |
| BCAT2       | ENSG00000105552 | 1.2338    | 0.10864   | -0.94092    | 0.82663     | 1.2338      | 0.10864 |
|             |                 | -0.94092  | 0.82663   | 0.10864     | 0.572794927 |             |         |
| NA          | ENSG00000250326 | 0.13834   | 0.44498   | -0.42099    | 0.66312     | 0.34437     | 0.36529 |
|             |                 | 1.2338    | 0.10864   | 0.10864     | 0.572794927 |             |         |
| NA          | ENSG00000279120 | 0.48625   | 0.31339   | 1.2337      | 0.10865     | -0.55196    | 0.70951 |
|             |                 | 0.48625   | 0.31339   | 0.10865     | 0.572794927 |             |         |
| PARL        | ENSG00000175193 | 1.2337    | 0.10866   | 0.32909     | 0.37104     | -0.07167    | 0.52857 |
|             |                 | 0.8659    | 0.19327   | 0.10866     | 0.572794927 |             |         |
| EIF4E2P1    | ENSG00000213384 | 0.54184   | 0.29396   | 0.97895     | 0.1638      | 1.2337      |         |
|             |                 | 0.10867   | -0.030877 | 0.51232     | 0.10867     | 0.572794927 |         |
| NA          | ENSG00000270096 | 1.2335    | 0.1087    | 1.2335      | 0.1087      | 1.2335      | 0.1087  |
|             |                 | 1.2335    | 0.1087    | 0.1087      | 0.572801395 |             |         |
| NA          | ENSG00000201370 | 0.069439  | 0.47232   | 0.069439    | 0.47232     | 0.65237     | 0.25708 |
|             |                 | 1.2334    | 0.10871   | 0.10871     | 0.572801395 |             |         |
| RSPH4A      | ENSG00000111834 | 1.2333    | 0.10872   | 1.2333      | 0.10872     | 1.2333      |         |
|             |                 | 0.10872   | 1.2333    | 0.10872     | 0.10872     | 0.572801395 |         |
| NA          | ENSG00000249807 | -0.060453 | 0.5241    | 1.2333      | 0.10873     | 1.2333      | 0.10873 |
|             |                 | -0.16619  | 0.56599   | 0.10873     | 0.572801395 |             |         |
| NA          | ENSG00000272084 | 1.2333    | 0.10873   | 0.50141     | 0.30804     | 1.1516      | 0.12475 |
|             |                 | -0.45635  | 0.67593   | 0.10873     | 0.572801395 |             |         |
| CPOX        | ENSG00000080819 | 1.2331    | 0.10876   | 1.2331      | 0.10876     | -0.29977    | 0.61783 |
|             |                 | 0.58865   | 0.27805   | 0.10876     | 0.572897503 |             |         |
| NA          | ENSG00000270226 | 1.233     | 0.10879   | -0.90046    | 0.81606     | 0.74848     | 0.22709 |
|             |                 | 0.74848   | 0.22709   | 0.10879     | 0.572944435 |             |         |
| NA          | ENSG00000253800 | 0.50661   | 0.30621   | 1.1432      | 0.12648     | 0.93138     | 0.17583 |
|             |                 | 1.2329    | 0.1088    | 0.1088      | 0.572944435 |             |         |
| GEMIN8P2    | ENSG00000260451 | 1.2329    | 0.10881   | 1.2329      | 0.10881     | 1.2329      |         |
|             |                 | 0.10881   | 0.80585   | 0.21017     | 0.10881     | 0.572944435 |         |
| MHENCN      | ENSG00000232442 | 1.1112    | 0.13324   | 1.1112      | 0.13324     | 1.2328      |         |
|             |                 | 0.10882   | 1.2236    | 0.11055     | 0.10882     | 0.572944435 |         |
| RNU6-989P   | ENSG00000199626 | 1.2327    | 0.10885   | 1.2327      | 0.10885     | 1.2327      |         |
|             |                 | 0.10885   | 1.1028    | 0.13506     | 0.10885     | 0.572944435 |         |
| TEKT4       | ENSG00000163060 | 0.15676   | 0.43772   | 0.3078      | 0.37912     | 1.2326      | 0.10886 |
|             |                 | 0.61896   | 0.26797   | 0.10886     | 0.572944435 |             |         |
| ZMYND10-AS1 | ENSG00000235058 | 1.2326    | 0.10887   | 1.2326      | 0.10887     | 1.2326      |         |
|             |                 | 0.10887   | 1.2326    | 0.10887     | 0.10887     | 0.572944435 |         |
| NA          | ENSG00000271702 | -0.84202  | 0.80011   | -0.018985   | 0.50757     | -0.48373    | 0.68571 |
|             |                 | 1.2326    | 0.10887   | 0.10887     | 0.572944435 |             |         |
| NA          | ENSG00000173366 | 1.0279    | 0.152     | 1.0279      | 0.152       | 0.95656     | 0.16939 |
|             |                 | 0.10888   | 0.10888   | 0.572944435 |             |             |         |
| NANOGP2     | ENSG00000228670 | 1.2324    | 0.10891   | 0.086337    | 0.4656      | 1.2324      |         |
|             |                 | 0.10891   | 1.2324    | 0.10891     | 0.10891     | 0.572944435 |         |
| LINC01675   | ENSG00000234142 | -0.24302  | 0.596     | -0.37711    | 0.64695     | -0.19039    | 0.5755  |
|             |                 | 1.2324    | 0.10891   | 0.10891     | 0.572944435 |             |         |
| NA          | ENSG00000279903 | 1.2323    | 0.10891   | 1.2323      | 0.10891     | 1.2323      | 0.10891 |
|             |                 | 1.2323    | 0.10891   | 0.10891     | 0.572944435 |             |         |
| NA          | ENSG00000251176 | 1.2323    | 0.10893   | 1.2323      | 0.10893     | -0.42222    | 0.66357 |
|             |                 | 1.2323    | 0.10893   | 0.10893     | 0.572975655 |             |         |
| SWT1        | ENSG00000116668 | 1.0844    | 0.13909   | 0.39384     | 0.34685     | 1.2322      | 0.10895 |
|             |                 | -0.033768 | 0.51347   | 0.10895     | 0.572975655 |             |         |
| LY86-AS1    | ENSG00000216863 | 0.5603    | 0.28764   | 1.2321      | 0.10896     | 1.1054      |         |
|             |                 | 0.13449   | -1.9584   | 0.97491     | 0.10896     | 0.572975655 |         |
| SCAMP3      | ENSG00000116521 | 0.75534   | 0.22502   | 1.232       | 0.10898     | 0.35012     | 0.36312 |
|             |                 | 0.081467  | 0.46754   | 0.10898     | 0.572975655 |             |         |

|           |                 |             |             |             |             |             |             |
|-----------|-----------------|-------------|-------------|-------------|-------------|-------------|-------------|
| PLEKHD1   | ENSG00000175985 | -0.85835    | 0.80465     | 1.2319      | 0.10899     | -1.0951     |             |
|           | 0.86327         | 0.72674     | 0.23369     | 0.10899     | 0.572975655 |             |             |
| PIK3R4    | ENSG00000196455 | 1.2319      | 0.10899     | 1.2319      | 0.10899     | 1.2319      |             |
|           | 0.10899         | 0.34943     | 0.36338     | 0.10899     | 0.572975655 |             |             |
| ZNF419    | ENSG00000105136 | 0.62764     | 0.26512     | 1.2319      | 0.109093716 | 0.17434     |             |
|           | 1.1123          | 0.1330109   | 0.572975655 |             |             |             |             |
| MTND5P5   | ENSG00000251149 | -1.0116     | 0.84413     | 1.2318      | 0.10901     | -1.0116     |             |
|           | 0.84413         | 0.9494      | 0.17121     | 0.10901     | 0.572975655 |             |             |
| NA        | ENSG00000272428 | 0.3344      | 0.36904     | 1.2317      | 0.10904     | -0.072378   | 0.52885     |
|           | 0.42613         | 0.335010904 | 0.573062278 |             |             |             |             |
| GNPDA2    | ENSG00000163281 | 1.2316      | 0.10905     | 0.60975     | 0.27101     | 1.2316      |             |
|           | 0.10905         | 0.91267     | 0.18071     | 0.10905     | 0.573062278 |             |             |
| HSD17B4   | ENSG00000133835 | 0.98411     | 0.16253     | 1.0238      | 0.15297     | 0.54732     |             |
|           | 0.29208         | 1.2315      | 0.10908     | 0.10908     | 0.573087074 |             |             |
| NA        | ENSG00000236434 | 1.2314      | 0.10908     | -1.6077     | 0.94605     | -1.6077     | 0.94605     |
|           | -1.6077         | 0.94605     | 0.10908     | 0.573087074 |             |             |             |
| PREX2     | ENSG00000046889 | 0.86885     | 0.19247     | 1.0946      | 0.13685     | 1.2314      | 0.10909     |
|           | 0.041537        | 0.48343     | 0.10909     | 0.573087074 |             |             |             |
| EI24P1    | ENSG00000236357 | -0.88618    | 0.81224     | 1.2313      | 0.10911     | 0.81977     |             |
|           | 0.20617         | -0.63704    | 0.73795     | 0.10911     | 0.573130355 |             |             |
| FAM230I   | ENSG00000178248 | -1.0192     | 0.84593     | -0.90844    | 0.81818     | 0.47271     |             |
|           | 0.31821         | 1.2312      | 0.10913     | 0.10913     | 0.573164371 |             |             |
| NA        | ENSG00000236495 | 0.98969     | 0.16116     | 1.2311      | 0.10914     | -0.58935    | 0.72219     |
|           | 1.1674          | 0.12153     | 0.10914     | 0.573164371 |             |             |             |
| NA        | ENSG00000260963 | 1.231010916 | 1.231010916 | 1.231010916 | 1.231010916 | 1.231010916 | 1.231010916 |
|           | 0.10916         | 0.573189119 |             |             |             |             |             |
| C9orf152  | ENSG00000188959 | 1.2309      | 0.10918     | -0.056762   | 0.52263     | -0.056762   |             |
|           | 0.52263         | -1.0256     | 0.84745     | 0.10918     | 0.573189119 |             |             |
| NA        | ENSG00000270521 | -0.091734   | 0.53655     | -0.1215     | 0.54835     | -0.61361    | 0.73026     |
|           | 1.2309          | 0.10918     | 0.10918     | 0.573189119 |             |             |             |
| LINC01293 | ENSG00000230836 | 1.2307      | 0.10922     | 1.2307      | 0.10922     | 1.2307      |             |
|           | 0.10922         | 1.2307      | 0.10922     | 0.10922     | 0.573248733 |             |             |
| ANKLE1    | ENSG00000160117 | 1.2306      | 0.10924     | 1.2306      | 0.10924     | 1.2306      |             |
|           | 0.10924         | 1.2306      | 0.10924     | 0.10924     | 0.573248733 |             |             |
| MYB-AS1   | ENSG00000236703 | 1.2305      | 0.10925     | 1.2305      | 0.10925     | 1.2305      |             |
|           | 0.10925         | 1.2305      | 0.10925     | 0.10925     | 0.573248733 |             |             |
| FOXP1-AS1 | ENSG00000244203 | 0.67825     | 0.24881     | 1.2305      | 0.10926     | 0.67825     |             |
|           | 0.24881         | 0.67825     | 0.24881     | 0.10926     | 0.573248733 |             |             |
| CCDC9B    | ENSG00000188549 | 1.2304      | 0.10927     | 1.2304      | 0.10927     | 1.0196      |             |
|           | 0.15396         | 1.0664      | 0.14311     | 0.10927     | 0.573248733 |             |             |
| ZNF404    | ENSG00000176222 | 1.2304      | 0.10928     | -0.80233    | 0.78882     | -0.53556    |             |
|           | 0.70387         | -0.80233    | 0.78882     | 0.10928     | 0.573248733 |             |             |
| AQP9      | ENSG00000103569 | -0.2083     | 0.5825      | -0.23599    | 0.59328     | -0.20831    | 0.58251     |
|           | 1.2303          | 0.10929     | 0.10929     | 0.573248733 |             |             |             |
| RICTOR    | ENSG00000164327 | 0.74443     | 0.22831     | 1.2302      | 0.10931     | 0.44957     |             |
|           | 0.32651         | 1.1701      | 0.12097     | 0.10931     | 0.573248733 |             |             |
| NA        | ENSG00000203565 | 1.23010935  | 1.23010935  | 1.23010935  | 1.23010935  | 0.57197     |             |
|           | 0.28367         | 0.10935     | 0.573248733 |             |             |             |             |
| NA        | ENSG00000268649 | 1.23010935  | 1.0458      | 0.14782     | 1.0458      | 0.14782     |             |
|           | 1.0458          | 0.14782     | 0.10935     | 0.573248733 |             |             |             |
| BMPR1A    | ENSG00000107779 | 0.94981     | 0.1711      | 0.71158     | 0.23836     | 1.1678      |             |
|           | 0.12144         | 1.2299      | 0.10936     | 0.10936     | 0.573248733 |             |             |
| CACNA1I   | ENSG00000100346 | 0.10907     | 0.45657     | 0.34871     | 0.36365     | 0.96585     |             |
|           | 0.16706         | 1.2298      | 0.10938     | 0.10938     | 0.573248733 |             |             |
| NA        | ENSG00000226276 | 1.2298      | 0.10938     | 0.24577     | 0.40293     | 1.2298      | 0.10938     |
|           | 1.2298          | 0.10938     | 0.10938     | 0.573248733 |             |             |             |
| CTSLP4    | ENSG00000230011 | -0.83327    | 0.79765     | -1.0615     | 0.85577     | -0.99197    |             |
|           | 0.83939         | 1.2298      | 0.10938     | 0.10938     | 0.573248733 |             |             |
| NA        | ENSG00000234513 | 0.14722     | 0.44148     | 1.0918      | 0.13746     | 1.2299      | 0.10938     |
|           | 1.0918          | 0.13746     | 0.10938     | 0.573248733 |             |             |             |
| CLGN      | ENSG00000153132 | -0.84013    | 0.79958     | -2.1618     | 0.98468     | 1.2297      | 0.10941     |
|           | -0.60879        | 0.72867     | 0.10941     | 0.573248733 |             |             |             |

|            |                 |           |           |             |             |             |         |
|------------|-----------------|-----------|-----------|-------------|-------------|-------------|---------|
| RREB1      | ENSG00000124782 | 1.0944    | 0.13689   | 1.2296      | 0.10942     | 0.90812     | 0.18191 |
|            |                 | 0.88403   | 0.18834   | 0.10942     | 0.573248733 |             |         |
| ACTG2      | ENSG00000163017 | 1.2296    | 0.10943   | -0.012411   | 0.50495     | 0.38459     | 0.35027 |
|            |                 | -0.30175  | 0.61858   | 0.10943     | 0.573248733 |             |         |
| LRTM2      | ENSG00000166159 | 0.7446    | 0.22826   | -0.28525    | 0.61227     | 0.73306     | 0.23176 |
|            |                 | 1.2295    | 0.10944   | 0.10944     | 0.573248733 |             |         |
| MRPS21P1   | ENSG00000234496 | -0.79347  | 0.78625   | 0.47067     | 0.31894     | 1.2295      |         |
|            |                 | 0.10944   | 0.15639   | 0.43786     | 0.10944     | 0.573248733 |         |
| RNU6-1161P | ENSG00000251985 | -1.8234   | 0.96588   | -1.8234     | 0.96588     | 1.2294      |         |
|            |                 | 0.10947   | -1.8234   | 0.96588     | 0.10947     | 0.573248733 |         |
| NA         | ENSG00000237336 | 1.2293    | 0.10949   | 0.17948     | 0.42878     | 1.2089      | 0.11335 |
|            |                 | 0.0071313 | 0.49716   | 0.10949     | 0.573248733 |             |         |
| NA         | ENSG00000271344 | -0.14151  | 0.55626   | -0.14151    | 0.55626     | -0.14151    | 0.55626 |
|            |                 | 1.2292    | 0.1095    | 0.1095      | 0.573248733 |             |         |
| NA         | ENSG00000223986 | 1.2108    | 0.11298   | -2.0285     | 0.97875     | 1.2291      | 0.10951 |
|            |                 | 0.11718   | 0.45336   | 0.10951     | 0.573248733 |             |         |
| LINC01932  | ENSG00000253315 | 1.2291    | 0.10952   | 1.2291      | 0.10952     | 1.2291      |         |
|            |                 | 0.10952   | 1.2291    | 0.10952     | 0.10952     | 0.573248733 |         |
| IGLV1-51   | ENSG00000211644 | 1.229     | 0.10953   | 1.229       | 0.10953     | 1.229       | 0.10953 |
|            |                 | 0.10953   | 0.10953   | 0.573248733 |             |             |         |
| UHMK1      | ENSG00000152332 | 0.53919   | 0.29488   | 0.69014     | 0.24505     | 1.229       | 0.10954 |
|            |                 | 0.10954   | 0.10954   | 0.573248733 |             |             | 1.229   |
| LINC02862  | ENSG00000237571 | 1.229     | 0.10954   | 0.37406     | 0.35418     | 0.11072     | 0.45592 |
|            |                 | 0.978     | 0.16404   | 0.10954     | 0.573248733 |             |         |
| MC3R       | ENSG00000124089 | 1.2289    | 0.10956   | 1.2289      | 0.10956     | 1.2289      | 0.10956 |
|            |                 | 0.42909   | 0.33393   | 0.10956     | 0.573248733 |             |         |
| UBBP1      | ENSG00000230037 | 1.2288    | 0.10957   | 1.2288      | 0.10957     | 1.2288      | 0.10957 |
|            |                 | 1.2288    | 0.10957   | 0.10957     | 0.573248733 |             |         |
| NA         | ENSG00000198491 | -0.18795  | 0.57454   | 1.2287      | 0.10959     | 0.86105     | 0.19461 |
|            |                 | 0.41918   | 0.33754   | 0.10959     | 0.573248733 |             |         |
| RNU1-18P   | ENSG00000199932 | 1.0893    | 0.13801   | 1.2287      | 0.10959     | 0.0040099   |         |
|            |                 | 0.4984    | -0.38769  | 0.65088     | 0.10959     | 0.573248733 |         |
| ZNRF2P2    | ENSG00000225264 | 1.2285    | 0.10962   | 1.2285      | 0.10962     | 1.2285      |         |
|            |                 | 0.10962   | 1.2285    | 0.10962     | 0.10962     | 0.573248733 |         |
| NA         | ENSG00000267545 | 1.2285    | 0.10963   | 1.2285      | 0.10963     | 1.2285      | 0.10963 |
|            |                 | 1.2285    | 0.10963   | 0.10963     | 0.573248733 |             |         |
| SPRYD3     | ENSG00000167778 | -0.16085  | 0.56389   | -0.41706    | 0.66168     | 1.2284      |         |
|            |                 | 0.10964   | -0.41919  | 0.66246     | 0.10964     | 0.573248733 |         |
| NPM1P26    | ENSG00000235677 | 1.2283    | 0.10968   | -0.13832    | 0.555       | -0.13832    | 0.555   |
|            |                 | -0.13832  | 0.555     | 0.10968     | 0.573248733 |             |         |
| ELOCP20    | ENSG00000229101 | 0.44311   | 0.32884   | -1.9655     | 0.97532     | 1.2282      |         |
|            |                 | 0.10969   | -0.23535  | 0.59303     | 0.10969     | 0.573248733 |         |
| NANOGBP1   | ENSG00000226034 | 1.2281    | 0.1097    | -1.0262     | 0.84761     | 1.2281      |         |
|            |                 | 0.1097    | 1.2281    | 0.1097      | 0.1097      | 0.573248733 |         |
| NA         | ENSG00000279379 | 1.228     | 0.10972   | -0.36411    | 0.64211     | -0.10496    | 0.54179 |
|            |                 | 0.35122   | 0.36271   | 0.10972     | 0.573248733 |             |         |
| GRAMD2B    | ENSG00000155324 | 1.2279    | 0.10974   | -0.49321    | 0.68907     | 0.53084     |         |
|            |                 | 0.29776   | -1.035    | 0.84968     | 0.10974     | 0.573248733 |         |
| S100A12    | ENSG00000163221 | 0.38174   | 0.35133   | 1.0293      | 0.15166     | 1.2278      |         |
|            |                 | 0.10976   | -0.084731 | 0.53376     | 0.10976     | 0.573248733 |         |
| C8orf34    | ENSG00000165084 | -0.14903  | 0.55924   | 1.0469      | 0.14757     | 0.98143     |         |
|            |                 | 0.16319   | 1.2277    | 0.10977     | 0.10977     | 0.573248733 |         |
| NA         | ENSG00000263709 | 1.2274    | 0.10983   | 1.2274      | 0.10983     | 1.2274      | 0.10983 |
|            |                 | -0.33884  | 0.63263   | 0.10983     | 0.573248733 |             |         |
| ABHD12     | ENSG00000100997 | 0.11417   | 0.45455   | 1.2274      | 0.10984     | -0.29085    |         |
|            |                 | 0.61442   | 0.15962   | 0.43659     | 0.10984     | 0.573248733 |         |
| RAET1G     | ENSG00000203722 | 0.31771   | 0.37535   | 1.2273      | 0.10985     | 0.50597     |         |
|            |                 | 0.30644   | 0.11741   | 0.45327     | 0.10985     | 0.573248733 |         |
| NSA2P4     | ENSG00000259750 | 0.23575   | 0.40681   | 1.2273      | 0.10985     | 0.23575     |         |
|            |                 | 0.40681   | 0.23575   | 0.40681     | 0.10985     | 0.573248733 |         |
| NA         | ENSG00000262837 | 1.2273    | 0.10985   | 1.2273      | 0.10985     | 1.2273      | 0.10985 |
|            |                 | 1.2273    | 0.10985   | 0.10985     | 0.573248733 |             |         |

|            |                 |           |         |             |             |           |         |  |
|------------|-----------------|-----------|---------|-------------|-------------|-----------|---------|--|
| TMEM230    | ENSG00000089063 | 0.75792   | 0.22425 | 1.2272      | 0.10988     | -1.224    |         |  |
|            | 0.88952         | 0.33363   | 0.36933 | 0.10988     | 0.573248733 |           |         |  |
| QPRT       | ENSG00000103485 | 1.2272    | 0.10988 | 0.11346     | 0.45483     | 0.11346   | 0.45483 |  |
|            | 0.91575         | 0.1799    | 0.10988 | 0.573248733 |             |           |         |  |
| NA         | ENSG00000265261 | 1.227     | 0.10991 | -0.73581    | 0.76908     | -0.73581  | 0.76908 |  |
|            | -0.73581        | 0.76908   | 0.10991 | 0.573248733 |             |           |         |  |
| CHCHD2P8   | ENSG00000235115 | -0.089104 | 0.5355  | -0.65489    | 0.74373     | 1.2269    |         |  |
|            | 0.10993         | 0.89168   | 0.18628 | 0.10993     | 0.573248733 |           |         |  |
| NA         | ENSG00000268643 | 1.2269    | 0.10993 | 1.2269      | 0.10993     | 1.2269    | 0.10993 |  |
|            | 1.2269          | 0.10993   | 0.10993 | 0.573248733 |             |           |         |  |
| SFRP2      | ENSG00000145423 | 0.48432   | 0.31408 | 0.1522      | 0.43951     | 0.26867   | 0.39409 |  |
|            | 1.2268          | 0.10994   | 0.10994 | 0.573248733 |             |           |         |  |
| SRGAP3-AS2 | ENSG00000228723 | 0.68119   | 0.24788 | 1.2269      | 0.10994     | 0.4702    |         |  |
|            | 0.3191          | 1.2269    | 0.10994 | 0.10994     | 0.573248733 |           |         |  |
| LSM11      | ENSG00000155858 | 0.41995   | 0.33726 | -0.068854   | 0.52745     | 0.70505   | 0.24039 |  |
|            | 1.2268          | 0.10995   | 0.10995 | 0.573248733 |             |           |         |  |
| DEFA8P     | ENSG00000223629 | 0.30701   | 0.37942 | 0.22431     | 0.41126     | 1.2268    |         |  |
|            | 0.10995         | 0.14743   | 0.4414  | 0.10995     | 0.573248733 |           |         |  |
| NA         | ENSG00000260188 | 0.52103   | 0.30117 | 1.2267      | 0.10997     | -0.50949  | 0.6948  |  |
|            | -0.62598        | 0.73434   | 0.10997 | 0.573248733 |             |           |         |  |
| RRN3P1     | ENSG00000248124 | 1.2267    | 0.10998 | 1.2077      | 0.11357     | 0.31817   |         |  |
|            | 0.37518         | -0.93764  | 0.82578 | 0.10998     | 0.573248733 |           |         |  |
| NA         | ENSG00000262052 | 0.84193   | 0.19991 | 0.14125     | 0.44384     | 1.2267    | 0.10998 |  |
|            | 0.43579         | 0.33149   | 0.10998 | 0.573248733 |             |           |         |  |
| NA         | ENSG00000267579 | 1.2266    | 0.10998 | 0.34038     | 0.36678     | 0.78475   | 0.2163  |  |
|            | -0.41538        | 0.66107   | 0.10998 | 0.573248733 |             |           |         |  |
| LINC02037  | ENSG00000238097 | -1.2033   | 0.88557 | -1.0395     | 0.85071     | -1.2033   |         |  |
|            | 0.88557         | 1.2265    | 0.11    | 0.11        | 0.573248733 |           |         |  |
| AKR7L      | ENSG00000211454 | 0.76467   | 0.22223 | 0.77778     | 0.21835     | 1.2265    | 0.11001 |  |
|            | 1.2265          | 0.11001   | 0.11001 | 0.573248733 |             |           |         |  |
| HMGXB3     | ENSG00000113716 | 0.80428   | 0.21062 | -1.0569     | 0.85471     | 1.2264    |         |  |
|            | 0.11003         | 0.26337   | 0.39613 | 0.11003     | 0.573248733 |           |         |  |
| NA         | ENSG00000233219 | -0.8682   | 0.80736 | -1.1416     | 0.87318     | 1.2264    | 0.11003 |  |
|            | 1.2189          | 0.11145   | 0.11003 | 0.573248733 |             |           |         |  |
| NA         | ENSG00000249685 | -0.24666  | 0.59742 | -0.24666    | 0.59742     | 1.2263    | 0.11003 |  |
|            | -0.01081        | 0.50431   | 0.11003 | 0.573248733 |             |           |         |  |
| NA         | ENSG00000217060 | -0.066838 | 0.52664 | -0.30345    | 0.61923     | 1.2262    | 0.11006 |  |
|            | -1.1256         | 0.86984   | 0.11006 | 0.573248733 |             |           |         |  |
| NA         | ENSG00000233017 | -1.0569   | 0.85473 | 1.2261      | 0.11009     | -1.2311   | 0.89086 |  |
|            | -1.0499         | 0.85311   | 0.11009 | 0.573248733 |             |           |         |  |
| COPS2      | ENSG00000166200 | 0.59544   | 0.27577 | 1.2259      | 0.11011     | -0.56698  | 0.71463 |  |
|            | 0.16635         | 0.43394   | 0.11011 | 0.573248733 |             |           |         |  |
| RRM1       | ENSG00000167325 | -0.28382  | 0.61173 | -0.018032   | 0.50719     | 0.40006   | 0.34456 |  |
|            | 1.2259          | 0.11012   | 0.11012 | 0.573248733 |             |           |         |  |
| DGKA       | ENSG00000065357 | 0.69168   | 0.24457 | 1.2258      | 0.11013     | 0.6877    | 0.24582 |  |
|            | -0.34581        | 0.63526   | 0.11013 | 0.573248733 |             |           |         |  |
| PGK2       | ENSG00000170950 | 0.15887   | 0.43689 | 1.2259      | 0.11013     | 1.2259    | 0.11013 |  |
|            | -0.2776         | 0.60934   | 0.11013 | 0.573248733 |             |           |         |  |
| SAA1       | ENSG00000173432 | 1.2258    | 0.11013 | 1.2258      | 0.11013     | 1.2258    | 0.11013 |  |
|            | 1.2258          | 0.11013   | 0.11013 | 0.573248733 |             |           |         |  |
| OR7A3P     | ENSG00000269787 | 0.45997   | 0.32277 | 0.45997     | 0.32277     | 1.2258    |         |  |
|            | 0.11013         | 1.2258    | 0.11013 | 0.11013     | 0.573248733 |           |         |  |
| NA         | ENSG00000278367 | 1.2259    | 0.11013 | 1.2259      | 0.11013     | 1.2259    | 0.11013 |  |
|            | 1.2259          | 0.11013   | 0.11013 | 0.573248733 |             |           |         |  |
| RPL12P13   | ENSG00000172746 | 1.2258    | 0.11014 | 1.2258      | 0.11014     | -0.074452 |         |  |
|            | 0.52967         | -0.40747  | 0.65817 | 0.11014     | 0.573248733 |           |         |  |
| SRGAP3-AS4 | ENSG00000235830 | 1.2258    | 0.11014 | 1.2258      | 0.11014     | 1.2258    |         |  |
|            | 0.11014         | 1.2258    | 0.11014 | 0.11014     | 0.573248733 |           |         |  |
| PCDHB6     | ENSG00000113211 | 0.47441   | 0.31761 | 1.2257      | 0.11016     | 1.1011    |         |  |
|            | 0.13543         | 1.1011    | 0.13543 | 0.11016     | 0.573248733 |           |         |  |
| NA         | ENSG00000251136 | 0.9494    | 0.17121 | 1.0798      | 0.14011     | 1.2256    | 0.11018 |  |
|            | 0.26349         | 0.39609   | 0.11018 | 0.573248733 |             |           |         |  |

|             |                 |          |             |           |             |             |         |
|-------------|-----------------|----------|-------------|-----------|-------------|-------------|---------|
| NA          | ENSG00000253949 | 0.36907  | 0.35604     | 1.2256    | 0.11018     | -0.063836   | 0.52545 |
|             |                 | -0.66094 | 0.74568     | 0.11018   | 0.573248733 |             |         |
| MIR5707     | ENSG00000265598 | 1.2255   | 0.11018     | 1.2255    | 0.11018     | 1.2255      |         |
|             |                 | 0.11018  | 1.2255      | 0.11018   | 0.573248733 |             |         |
| NA          | ENSG00000279930 | 1.2256   | 0.11018     | 1.2256    | 0.11018     | 1.2256      | 0.11018 |
|             |                 | 1.2256   | 0.11018     | 0.11018   | 0.573248733 |             |         |
| ATP5IF1     | ENSG00000130770 | 1.2255   | 0.11019     | 0.59468   | 0.27603     | 0.92774     |         |
|             |                 | 0.17677  | 0.93873     | 0.11019   | 0.573248733 |             |         |
| S100A7P1    | ENSG00000203781 | 1.2255   | 0.11019     | 0.91737   | 0.17947     | 0.91737     |         |
|             |                 | 0.17947  | 0.91737     | 0.11019   | 0.573248733 |             |         |
| FKBP15      | ENSG00000119321 | 0.17736  | 0.42961     | 1.2255    | 0.1102      | 1.2255      |         |
|             |                 | 0.1102   | 0.94554     | 0.17219   | 0.1102      | 0.573248733 |         |
| FAM217A     | ENSG00000145975 | -1.4866  | 0.93144     | 1.2255    | 0.1102      | 0.39406     |         |
|             |                 | 0.34677  | 0.53039     | 0.29792   | 0.1102      | 0.573248733 |         |
| PPARGC1A    | ENSG00000109819 | 0.26272  | 0.39638     | 0.97172   | 0.16559     | 1.2253      |         |
|             |                 | 0.11022  | 1.1789      | 0.11921   | 0.11022     | 0.573248733 |         |
| NA          | ENSG00000278829 | 1.2253   | 0.11024     | 1.2253    | 0.11024     | 1.2253      | 0.11024 |
|             |                 | 1.2253   | 0.11024     | 0.11024   | 0.573248733 |             |         |
| ARHGAP5-AS1 | ENSG00000258655 | -1.0344  | 0.84953     | -0.78127  | 0.78268     | 1.2252      |         |
|             |                 | 0.11025  | 1.2252      | 0.11025   | 0.11025     | 0.573248733 |         |
| OR9S24P     | ENSG00000231278 | -1.0365  | 0.85003     | -0.007244 | 0.50289     | -1.0848     |         |
|             |                 | 0.86101  | 1.2252      | 0.11026   | 0.11026     | 0.573248733 |         |
| LLCFC1      | ENSG00000165131 | 1.2251   | 0.11027     | 1.2251    | 0.11027     | 1.2251      |         |
|             |                 | 0.11027  | 1.2251      | 0.11027   | 0.11027     | 0.573248733 |         |
| MIR4303     | ENSG00000263890 | 0.25262  | 0.40028     | 0.25262   | 0.40028     | 0.10133     |         |
|             |                 | 0.45964  | 1.2249      | 0.1103    | 0.1103      | 0.573248733 |         |
| RNU6ATAC35P | ENSG00000221571 | 1.2249   | 0.11031     | 1.2249    | 0.11031     | 1.2249      |         |
|             |                 | 0.11031  | 1.2249      | 0.11031   | 0.11031     | 0.573248733 |         |
| PAQR5       | ENSG00000137819 | -0.19011 | 0.57539     | -0.65244  | 0.74294     | 0.48413     | 0.31415 |
|             |                 | 1.2247   | 0.11034     | 0.11034   | 0.573248733 |             |         |
| LRGUK       | ENSG00000155530 | 1.0534   | 0.14608     | 1.2247    | 0.11035     | -0.15417    | 0.56126 |
|             |                 | 0.58953  | 0.27775     | 0.11035   | 0.573248733 |             |         |
| UNC5C       | ENSG00000182168 | 0.42389  | 0.33582     | 0.41896   | 0.33762     | 0.61039     | 0.2708  |
|             |                 | 1.2247   | 0.11035     | 0.11035   | 0.573248733 |             |         |
| CYB561      | ENSG00000008283 | 0.097799 | 0.46105     | 0.0032185 | 0.49872     | 1.2246      |         |
|             |                 | 0.11036  | 0.18213     | 0.42774   | 0.11036     | 0.573248733 |         |
| NA          | ENSG00000266763 | 1.2246   | 0.11036     | 1.2246    | 0.11036     | 1.2246      | 0.11036 |
|             |                 | 1.2246   | 0.11036     | 0.11036   | 0.573248733 |             |         |
| LINC02110   | ENSG00000251518 | 1.2246   | 0.11037     | 1.2246    | 0.11037     | 1.2246      |         |
|             |                 | 0.11037  | 1.2246      | 0.11037   | 0.11037     | 0.573248733 |         |
| NA          | ENSG00000255345 | 0.60679  | 0.27199     | -0.45478  | 0.67537     | 0.60679     | 0.27199 |
|             |                 | 1.2244   | 0.11039     | 0.11039   | 0.573248733 |             |         |
| KDM4D       | ENSG00000186280 | -0.24667 | 0.59742     | 0.65519   | 0.25617     | 1.2244      | 0.1104  |
|             |                 | 1.2244   | 0.1104      | 0.1104    | 0.573248733 |             |         |
| ZC3H14      | ENSG00000100722 | 1.2243   | 0.11043     | 0.33809   | 0.36765     | 0.084978    |         |
|             |                 | 0.46614  | 0.084978    | 0.46614   | 0.11043     | 0.573248733 |         |
| LCE1D       | ENSG00000172155 | 1.2077   | 0.11357     | 1.2077    | 0.11357     | 0.99663     | 0.15947 |
|             |                 | 1.2242   | 0.11043     | 0.11043   | 0.573248733 |             |         |
| NA          | ENSG00000269121 | 1.2243   | 0.11043     | 1.2243    | 0.11043     | 1.2243      | 0.11043 |
|             |                 | 1.2243   | 0.11043     | 0.11043   | 0.573248733 |             |         |
| ZNF846      | ENSG00000196605 | 0.094891 | 0.4622      | 1.2241    | 0.11045     | -0.32716    |         |
|             |                 | 0.62823  | -0.11454    | 0.54559   | 0.11045     | 0.573248733 |         |
| LINC00903   | ENSG00000241397 | 1.2241   | 0.11047     | 0.97273   | 0.16534     | 0.97273     |         |
|             |                 | 0.16534  | 1.1886      | 0.1173    | 0.11047     | 0.573248733 |         |
| NA          | ENSG00000200485 | 1.224    | 0.11048     | 1.224     | 0.11048     | 1.224       | 0.11048 |
|             |                 | 0.11048  | 0.573248733 |           |             |             |         |
| CCDC93      | ENSG00000125633 | 1.2238   | 0.11051     | 1.1289    | 0.12947     | 0.71753     |         |
|             |                 | 0.23652  | 0.085181    | 0.46606   | 0.11051     | 0.573248733 |         |
| NA          | ENSG00000251213 | -0.68587 | 0.7536      | 0.87877   | 0.18976     | 1.2236      | 0.11054 |
|             |                 | 0.33977  | 0.36701     | 0.11054   | 0.573248733 |             |         |
| RNFT1       | ENSG00000189050 | 0.62851  | 0.26484     | 1.118     | 0.13179     | 1.2235      | 0.11056 |
|             |                 | 0.12822  | 0.44899     | 0.11056   | 0.573248733 |             |         |

|            |                 |           |         |             |             |           |         |  |
|------------|-----------------|-----------|---------|-------------|-------------|-----------|---------|--|
| RNA5SP225  | ENSG00000222806 | 0.96547   | 0.16715 | 0.58707     | 0.27858     | 1.2235    |         |  |
|            | 0.11056         | -0.06666  | 0.52657 | 0.11056     | 0.573248733 |           |         |  |
| NA         | ENSG00000225620 | 1.2235    | 0.11057 | 0.27897     | 0.39013     | 0.83691   | 0.20132 |  |
|            | 0.83691         | 0.20132   | 0.11057 | 0.573248733 |             |           |         |  |
| RPS3AP10   | ENSG00000226292 | 0.3803    | 0.35186 | 1.2235      | 0.11057     | 0.48685   |         |  |
|            | 0.31318         | 0.3803    | 0.35186 | 0.11057     | 0.573248733 |           |         |  |
| NA         | ENSG00000202533 | 1.2235    | 0.11058 | 1.2235      | 0.11058     | 1.2235    | 0.11058 |  |
|            | 1.2235          | 0.11058   | 0.11058 | 0.573248733 |             |           |         |  |
| LIME1      | ENSG00000203896 | 1.1477    | 0.12554 | 1.2233      | 0.11062     | 1.2233    | 0.11062 |  |
|            | 1.2233          | 0.11062   | 0.11062 | 0.573248733 |             |           |         |  |
| RNA5SP156  | ENSG00000222182 | 1.2233    | 0.11062 | -0.24393    | 0.59636     | 0.27067   |         |  |
|            | 0.39332         | 0.16184   | 0.43572 | 0.11062     | 0.573248733 |           |         |  |
| NA         | ENSG00000231291 | 1.2232    | 0.11062 | 1.2232      | 0.11062     | 1.0197    | 0.15393 |  |
|            | 0.88776         | 0.18734   | 0.11062 | 0.573248733 |             |           |         |  |
| NA         | ENSG00000236829 | 1.2232    | 0.11062 | 0.48216     | 0.31485     | 0.3367    | 0.36817 |  |
|            | 0.3367          | 0.36817   | 0.11062 | 0.573248733 |             |           |         |  |
| ZNF402P    | ENSG00000220248 | -0.52265  | 0.69939 | 1.2232      | 0.11064     | 1.2232    |         |  |
|            | 0.11064         | 0.19654   | 0.4221  | 0.11064     | 0.573248733 |           |         |  |
| LIX1       | ENSG00000145721 | 0.19033   | 0.42453 | 1.2231      | 0.11065     | -0.076697 | 0.53057 |  |
|            | 0.41376         | 0.33953   | 0.11065 | 0.573248733 |             |           |         |  |
| ANTXR2     | ENSG00000163297 | 0.43887   | 0.33038 | 0.55992     | 0.28777     | 1.2229    |         |  |
|            | 0.11068         | -0.51861  | 0.69798 | 0.11068     | 0.573248733 |           |         |  |
| NEK4       | ENSG00000114904 | 0.82452   | 0.20482 | 1.2229      | 0.11069     | 0.14701   | 0.44156 |  |
|            | 0.83616         | 0.20153   | 0.11069 | 0.573248733 |             |           |         |  |
| TSHZ1      | ENSG00000179981 | -0.94741  | 0.82829 | -0.14759    | 0.55867     | 0.60002   | 0.27424 |  |
|            | 1.2228          | 0.1107    | 0.1107  | 0.573248733 |             |           |         |  |
| NA         | ENSG00000255663 | -0.22203  | 0.58785 | -0.22203    | 0.58785     | -0.22203  | 0.58785 |  |
|            | 1.2228          | 0.11071   | 0.11071 | 0.573248733 |             |           |         |  |
| LINC02346  | ENSG00000206187 | 1.2227    | 0.11073 | -0.49795    | 0.69074     | -0.30106  |         |  |
|            | 0.61832         | 1.2227    | 0.11073 | 0.11073     | 0.573248733 |           |         |  |
| NA         | ENSG00000279135 | 1.2226    | 0.11073 | -0.51411    | 0.69641     | 1.2226    | 0.11073 |  |
|            | 0.13101         | 0.44788   | 0.11073 | 0.573248733 |             |           |         |  |
| PNPLA3     | ENSG00000100344 | -0.1362   | 0.55417 | -0.92549    | 0.82264     | 1.2226    |         |  |
|            | 0.11074         | 0.25565   | 0.39911 | 0.11074     | 0.573248733 |           |         |  |
| RNU6-1231P | ENSG00000252994 | 1.0772    | 0.1407  | 1.2225      | 0.11075     | 1.0263    |         |  |
|            | 0.15237         | 1.0263    | 0.15237 | 0.11075     | 0.573248733 |           |         |  |
| COL25A1    | ENSG00000188517 | 1.0898    | 0.1379  | 0.49744     | 0.30944     | 1.2225    |         |  |
|            | 0.11076         | -0.06158  | 0.52455 | 0.11076     | 0.573248733 |           |         |  |
| NA         | ENSG00000233359 | 1.2225    | 0.11076 | 0.62086     | 0.26735     | 0.017678  | 0.49295 |  |
|            | -0.22207        | 0.58787   | 0.11076 | 0.573248733 |             |           |         |  |
| RPL5P33    | ENSG00000243521 | -0.86963  | 0.80775 | -0.78426    | 0.78356     | 1.1921    |         |  |
|            | 0.11661         | 1.2225    | 0.11076 | 0.11076     | 0.573248733 |           |         |  |
| NA         | ENSG00000261350 | 1.2225    | 0.11076 | 1.2225      | 0.11076     | 1.2225    | 0.11076 |  |
|            | 1.2225          | 0.11076   | 0.11076 | 0.573248733 |             |           |         |  |
| NA         | ENSG00000273998 | 1.2225    | 0.11077 | 1.2225      | 0.11077     | 1.2225    | 0.11077 |  |
|            | 1.2225          | 0.11077   | 0.11077 | 0.573248733 |             |           |         |  |
| LIN28AP1   | ENSG00000213120 | 0.60916   | 0.27121 | 0.45293     | 0.3253      | 0.44884   |         |  |
|            | 0.32677         | 1.2223    | 0.11079 | 0.11079     | 0.573248733 |           |         |  |
| NA         | ENSG00000235629 | 0.76118   | 0.22327 | 0.29922     | 0.38239     | 1.2223    | 0.1108  |  |
|            | 0.34044         | 0.36676   | 0.1108  | 0.573248733 |             |           |         |  |
| NA         | ENSG00000275830 | -0.38975  | 0.65164 | 0.16497     | 0.43448     | 1.2222    | 0.11081 |  |
|            | 0.16497         | 0.43448   | 0.11081 | 0.573248733 |             |           |         |  |
| FTLP13     | ENSG00000263725 | 1.158     | 0.12344 | 1.0507      | 0.14669     | 0.64549   | 0.2593  |  |
|            | 1.2222          | 0.11082   | 0.11082 | 0.573248733 |             |           |         |  |
| NA         | ENSG00000199472 | 1.2222    | 0.11083 | 1.2222      | 0.11083     | 1.2222    | 0.11083 |  |
|            | 1.2222          | 0.11083   | 0.11083 | 0.573248733 |             |           |         |  |
| NDFIP2     | ENSG00000102471 | -0.096352 | 0.53838 | 0.97364     | 0.16512     | -0.12647  |         |  |
|            | 0.55032         | 1.2221    | 0.11084 | 0.11084     | 0.573248733 |           |         |  |
| SNAI1P1    | ENSG00000237194 | 1.2221    | 0.11084 | 1.2221      | 0.11084     | 1.2221    |         |  |
|            | 0.11084         | 1.2221    | 0.11084 | 0.11084     | 0.573248733 |           |         |  |
| RNA5SP114  | ENSG00000200650 | -0.40256  | 0.65637 | -0.40256    | 0.65637     | 1.222     | 0.11086 |  |
|            | -0.40256        | 0.65637   | 0.11086 | 0.573248733 |             |           |         |  |



|           |                 |          |             |             |             |           |         |
|-----------|-----------------|----------|-------------|-------------|-------------|-----------|---------|
| NA        | ENSG00000233682 | 0.30242  | 0.38117     | 0.54489     | 0.29291     | 0.55827   | 0.28833 |
|           | 1.222           | 0.11086  | 0.11086     | 0.573248733 |             |           |         |
| GUCY1A2   | ENSG00000152402 | 0.58531  | 0.27917     | 1.2217      | 0.1109      | 1.2058    |         |
|           | 0.11396         | 0.59263  | 0.27671     | 0.1109      | 0.573248733 |           |         |
| NA        | ENSG00000222614 | 1.2218   | 0.1109      | 1.2218      | 0.1109      | 1.2218    | 0.1109  |
|           | 1.2218          | 0.1109   | 0.1109      | 0.573248733 |             |           |         |
| KRT18P22  | ENSG00000218153 | 1.2217   | 0.11091     | 1.2217      | 0.11091     | 1.2217    |         |
|           | 0.11091         | 1.2217   | 0.11091     | 0.11091     | 0.573248733 |           |         |
| RPSAP9    | ENSG00000234618 | -0.26813 | 0.6057      | 1.0417      | 0.14878     | 0.48193   |         |
|           | 0.31493         | 1.2217   | 0.11091     | 0.11091     | 0.573248733 |           |         |
| NA        | ENSG00000265287 | 1.2217   | 0.11092     | 1.2217      | 0.11092     | 1.2217    | 0.11092 |
|           | 1.2217          | 0.11092  | 0.11092     | 0.573248733 |             |           |         |
| RNU4-24P  | ENSG00000201435 | 1.2216   | 0.11093     | 1.2216      | 0.11093     | 1.2216    |         |
|           | 0.11093         | 1.2216   | 0.11093     | 0.11093     | 0.573248733 |           |         |
| PXN       | ENSG00000089159 | 0.37452  | 0.35401     | 1.2215      | 0.11095     | 0.87256   | 0.19145 |
|           | 1.0786          | 0.14039  | 0.11095     | 0.573248733 |             |           |         |
| UBE2V2P2  | ENSG00000267463 | 1.2215   | 0.11095     | 1.2215      | 0.11095     | 1.2215    |         |
|           | 0.11095         | 1.2215   | 0.11095     | 0.11095     | 0.573248733 |           |         |
| LINC01874 | ENSG00000223985 | 0.385    | 0.35012     | 1.2213      | 0.11098     | -0.048637 | 0.5194  |
|           | 1.1816          | 0.11868  | 0.11098     | 0.573248733 |             |           |         |
| NA        | ENSG00000256706 | 1.0339   | 0.15059     | 1.2213      | 0.11098     | 1.0339    | 0.15059 |
|           | 1.0339          | 0.15059  | 0.11098     | 0.573248733 |             |           |         |
| NA        | ENSG00000279387 | 0.42369  | 0.3359      | 0.18728     | 0.42572     | -0.60246  | 0.72657 |
|           | 1.2213          | 0.11098  | 0.11098     | 0.573248733 |             |           |         |
| ZNF514    | ENSG00000144026 | -0.11581 | 0.5461      | 0.17596     | 0.43016     | 1.2211    |         |
|           | 0.11103         | 1.2211   | 0.11103     | 0.11103     | 0.573248733 |           |         |
| FOXK2     | ENSG00000141568 | 0.3383   | 0.36757     | -0.56808    | 0.71501     | -0.28162  | 0.61088 |
|           | 1.221           | 0.11104  | 0.11104     | 0.573248733 |             |           |         |
| NA        | ENSG00000223300 | 1.221    | 0.11104     | 0.71359     | 0.23774     | 1.221     | 0.11104 |
|           | 0.11104         | 0.11104  | 0.573248733 |             |             |           |         |
| FICD      | ENSG00000198855 | 1.2208   | 0.11108     | 0.11655     | 0.45361     | -0.3067   | 0.62047 |
|           | -0.41807        | 0.66205  | 0.11108     | 0.573248733 |             |           |         |
| NA        | ENSG00000233706 | 1.2208   | 0.11108     | 1.2208      | 0.11108     | 1.2208    | 0.11108 |
|           | 1.2208          | 0.11108  | 0.11108     | 0.573248733 |             |           |         |
| NA        | ENSG00000199366 | 1.0584   | 0.14493     | 1.2207      | 0.11109     | 1.0584    | 0.14493 |
|           | 1.0584          | 0.14493  | 0.11109     | 0.573248733 |             |           |         |
| NA        | ENSG00000234943 | 0.34109  | 0.36652     | 0.34109     | 0.36652     | 0.34109   | 0.36652 |
|           | 1.2208          | 0.11109  | 0.11109     | 0.573248733 |             |           |         |
| NA        | ENSG00000258077 | 0.16496  | 0.43449     | 1.1736      | 0.12027     | 1.2207    | 0.1111  |
|           | -0.037484       | 0.51495  | 0.1111      | 0.573248733 |             |           |         |
| NEURL3    | ENSG00000163121 | 0.73725  | 0.23048     | 0.91419     | 0.18031     | 1.2206    |         |
|           | 0.11111         | 1.2162   | 0.11195     | 0.11111     | 0.573248733 |           |         |
| NA        | ENSG00000231460 | 0.030072 | 0.48801     | 1.2206      | 0.11111     | -1.1001   | 0.86436 |
|           | 0.030072        | 0.48801  | 0.11111     | 0.573248733 |             |           |         |
| TMEM144   | ENSG00000164124 | 1.1522   | 0.12461     | 1.2206      | 0.11112     | 0.96388   |         |
|           | 0.16755         | 0.82713  | 0.20408     | 0.11112     | 0.573248733 |           |         |
| NARS2     | ENSG00000137513 | 0.97127  | 0.16571     | 0.25737     | 0.39845     | 1.2205    | 0.11114 |
|           | 0.2872          | 0.38698  | 0.11114     | 0.573248733 |             |           |         |
| MICA      | ENSG00000204520 | 0.8504   | 0.19755     | 1.2204      | 0.11116     | 0.24755   | 0.40224 |
|           | 0.91711         | 0.17954  | 0.11116     | 0.573248733 |             |           |         |
| NA        | ENSG00000250540 | -0.61717 | 0.73144     | 1.2203      | 0.11117     | 0.31445   | 0.37659 |
|           | 0.91673         | 0.17964  | 0.11117     | 0.573248733 |             |           |         |
| NA        | ENSG00000260674 | 1.2202   | 0.11119     | 0.33963     | 0.36707     | 1.2202    | 0.11119 |
|           | 1.2202          | 0.11119  | 0.11119     | 0.573248733 |             |           |         |
| RNU6-604P | ENSG00000212219 | -0.72653 | 0.76624     | -0.64621    | 0.74093     | 1.2201    |         |
|           | 0.11121         | -0.24627 | 0.59726     | 0.11121     | 0.573248733 |           |         |
| PLAGL2    | ENSG00000126003 | 1.125    | 0.1303      | 0.83026     | 0.20319     | 0.83026   | 0.20319 |
|           | 1.22            | 0.11123  | 0.11123     | 0.573248733 |             |           |         |
| NA        | ENSG00000236673 | 1.22     | 0.11124     | 0.53245     | 0.29721     | 0.2866    | 0.38721 |
|           | 0.71334         | 0.23782  | 0.11124     | 0.573248733 |             |           |         |
| PCDHGB3   | ENSG00000262209 | 1.0897   | 0.13791     | 1.22        | 0.11124     | 1.0897    | 0.13791 |
|           | 1.0897          | 0.13791  | 0.11124     | 0.573248733 |             |           |         |

|             |                 |           |         |             |             |          |         |
|-------------|-----------------|-----------|---------|-------------|-------------|----------|---------|
| HTR1DP1     | ENSG00000275811 | 0.11503   | 0.45421 | 1.2199      | 0.11125     | -0.8737  |         |
|             | 0.80886         | 1.2199    | 0.11125 | 0.11125     | 0.573248733 |          |         |
| OR7E14P     | ENSG00000184669 | 1.2199    | 0.11126 | -0.079037   | 0.5315      | 0.24786  |         |
|             | 0.40212         | 0.78903   | 0.21505 | 0.11126     | 0.573248733 |          |         |
| UPF3AP2     | ENSG00000214832 | 0.45905   | 0.3231  | -1.0175     | 0.84555     | 1.2199   |         |
|             | 0.11126         | -0.38303  | 0.64915 | 0.11126     | 0.573248733 |          |         |
| NA          | ENSG00000237835 | 1.2198    | 0.11127 | 1.2198      | 0.11127     | 1.2198   | 0.11127 |
|             | 1.2198          | 0.11127   | 0.11127 | 0.573248733 |             |          |         |
| NA          | ENSG00000263991 | 1.2198    | 0.11127 | 1.2198      | 0.11127     | 1.2198   | 0.11127 |
|             | 1.2198          | 0.11127   | 0.11127 | 0.573248733 |             |          |         |
| OR51F5P     | ENSG00000272634 | 0.45595   | 0.32421 | 1.2198      | 0.11128     | 0.45595  |         |
|             | 0.32421         | 0.45595   | 0.32421 | 0.11128     | 0.573248733 |          |         |
| NA          | ENSG00000249977 | 0.6437    | 0.25988 | 0.53287     | 0.29706     | 0.6437   | 0.25988 |
|             | 1.2196          | 0.11131   | 0.11131 | 0.573248733 |             |          |         |
| NA          | ENSG00000224745 | 0.058947  | 0.4765  | 1.2195      | 0.11132     | -0.19569 | 0.57757 |
|             | -0.19569        | 0.57757   | 0.11132 | 0.573248733 |             |          |         |
| RNU1-35P    | ENSG00000199652 | 0.87417   | 0.19101 | 1.2195      | 0.11134     | 1.2195   |         |
|             | 0.11134         | 0.044716  | 0.48217 | 0.11134     | 0.573248733 |          |         |
| ATP5MFP6    | ENSG00000261102 | 1.2193    | 0.11136 | 1.2193      | 0.11136     | 1.2193   |         |
|             | 0.11136         | 1.2193    | 0.11136 | 0.11136     | 0.573248733 |          |         |
| RNU6-528P   | ENSG00000252735 | 0.77359   | 0.21959 | 0.18561     | 0.42638     | 1.2192   |         |
|             | 0.11138         | 0.77374   | 0.21954 | 0.11138     | 0.573248733 |          |         |
| NEB         | ENSG00000183091 | 0.80013   | 0.21182 | -0.3928     | 0.65277     | 1.219    | 0.11141 |
|             | 0.31306         | 0.37712   | 0.11141 | 0.573248733 |             |          |         |
| RNU6-105P   | ENSG00000200779 | 1.2191    | 0.11141 | 1.2191      | 0.11141     | 1.2191   |         |
|             | 0.11141         | 1.2191    | 0.11141 | 0.11141     | 0.573248733 |          |         |
| CEACAM1     | ENSG00000079385 | 1.219     | 0.11142 | 0.49382     | 0.31072     | 0.25434  | 0.39962 |
|             | -0.30003        | 0.61792   | 0.11142 | 0.573248733 |             |          |         |
| ANKRD54     | ENSG00000100124 | 0.89925   | 0.18426 | 1.1344      | 0.12831     | 0.95287  |         |
|             | 0.17033         | 1.219     | 0.11142 | 0.11142     | 0.573248733 |          |         |
| ARIH2       | ENSG00000177479 | 0.91206   | 0.18087 | 1.219       | 0.11142     | 0.9893   | 0.16126 |
|             | -0.35826        | 0.63993   | 0.11142 | 0.573248733 |             |          |         |
| ARHGEF19    | ENSG00000142632 | 1.2189    | 0.11143 | -0.95715    | 0.83075     | -1.2198  |         |
|             | 0.88874         | -1.2198   | 0.88874 | 0.11143     | 0.573248733 |          |         |
| NA          | ENSG00000260331 | 0.88337   | 0.18852 | 0.42423     | 0.3357      | 0.2304   | 0.40889 |
|             | 1.2189          | 0.11143   | 0.11143 | 0.573248733 |             |          |         |
| GSTM3P2     | ENSG00000226878 | 1.2189    | 0.11144 | 1.2189      | 0.11144     | 1.2189   |         |
|             | 0.11144         | 1.2189    | 0.11144 | 0.11144     | 0.573248733 |          |         |
| GOLGA8J     | ENSG00000179938 | 0.96744   | 0.16666 | -0.10366    | 0.54128     | 1.2189   |         |
|             | 0.11145         | -0.044398 | 0.51771 | 0.11145     | 0.573248733 |          |         |
| NA          | ENSG00000232855 | -0.11042  | 0.54396 | 1.2189      | 0.11145     | 0.43485  | 0.33183 |
|             | 0.53848         | 0.29512   | 0.11145 | 0.573248733 |             |          |         |
| CAMTA1-DT   | ENSG00000237436 | 1.2186    | 0.11149 | -0.18782    | 0.57449     | 0.2143   |         |
|             | 0.41516         | 0.2143    | 0.41516 | 0.11149     | 0.573263874 |          |         |
| RNU6-488P   | ENSG00000251727 | 0.50541   | 0.30664 | -0.35919    | 0.64027     | -0.52571 |         |
|             | 0.70046         | 1.2187    | 0.11149 | 0.11149     | 0.573263874 |          |         |
| OR2T32P     | ENSG00000197067 | -0.15371  | 0.56108 | -0.83527    | 0.79822     | 1.2186   |         |
|             | 0.1115          | -1.5825   | 0.94324 | 0.1115      | 0.573263874 |          |         |
| RNU6ATAC32P | ENSG00000251835 | 1.2186    | 0.1115  | 1.2186      | 0.1115      | 1.2186   |         |
|             | 0.1115          | 1.2186    | 0.1115  | 0.1115      | 0.573263874 |          |         |
| NA          | ENSG00000253361 | 0.078038  | 0.4689  | -0.80132    | 0.78853     | -0.42543 | 0.66474 |
|             | 1.2185          | 0.11152   | 0.11152 | 0.573306214 |             |          |         |
| CNTN2       | ENSG00000184144 | 0.72206   | 0.23513 | 0.58873     | 0.27802     | 1.2184   | 0.11154 |
|             | 0.91668         | 0.17965   | 0.11154 | 0.573348544 |             |          |         |
| NA          | ENSG00000275383 | 1.2183    | 0.11156 | 1.2183      | 0.11156     | 1.2183   | 0.11156 |
|             | 1.2183          | 0.11156   | 0.11156 | 0.573381787 |             |          |         |
| APOBR       | ENSG00000184730 | 0.26671   | 0.39484 | 0.83539     | 0.20175     | 1.2182   | 0.11157 |
|             | 0.8215          | 0.20568   | 0.11157 | 0.573381787 |             |          |         |
| SERPINA6    | ENSG00000170099 | -0.035147 | 0.51402 | 1.2181      | 0.1116      | 0.51899  |         |
|             | 0.30189         | 1.2181    | 0.1116  | 0.1116      | 0.573466396 |          |         |
| COMMD1      | ENSG00000173163 | -0.75671  | 0.77539 | -0.53526    | 0.70376     | 1.218    | 0.11161 |
|             | -0.18014        | 0.57148   | 0.11161 | 0.573466396 |             |          |         |

|            |                 |          |          |             |             |             |         |         |
|------------|-----------------|----------|----------|-------------|-------------|-------------|---------|---------|
| FTCD-AS1   | ENSG00000237338 | 1.2178   | 0.11165  | 1.2178      | 0.11165     | 1.2178      | 0.11165 | 1.2178  |
|            |                 | 0.11165  | 1.2178   | 0.11165     | 0.11165     | 0.573608218 |         |         |
| UBA7       | ENSG00000182179 | 1.2177   | 0.11167  | -0.53093    | 0.70227     | -0.53093    | 0.70227 | 0.70227 |
|            |                 | -0.53093 | 0.70227  | 0.11167     | 0.573608218 |             |         |         |
| SDCBP      | ENSG00000137575 | 1.2176   | 0.11168  | 1.2176      | 0.11168     | 1.2176      | 0.11168 | 0.11168 |
|            |                 | 1.1607   | 0.12288  | 0.11168     | 0.573608218 |             |         |         |
| CALHM6     | ENSG00000188820 | 1.2175   | 0.1117   | 1.2175      | 0.1117      | 1.2175      | 0.1117  | 1.2175  |
|            |                 | 0.1117   | -0.36676 | 0.6431      | 0.1117      | 0.573608218 |         |         |
| RPP25      | ENSG00000178718 | 1.2175   | 0.11171  | 1.2175      | 0.11171     | 1.2175      | 0.11171 | 0.11171 |
|            |                 | 1.2175   | 0.11171  | 0.11171     | 0.573608218 |             |         |         |
| GOLGA2P8   | ENSG00000214433 | 0.15861  | 0.43699  | -0.11033    | 0.54393     | 1.2175      |         |         |
|            |                 | 0.11171  | 0.89013  | 0.1867      | 0.11171     | 0.573608218 |         |         |
| LINC01543  | ENSG00000263862 | 0.87516  | 0.19074  | 1.2174      | 0.11172     | 0.87516     |         |         |
|            |                 | 0.19074  | -0.13764 | 0.55474     | 0.11172     | 0.573608218 |         |         |
| STIP1      | ENSG00000168439 | 0.1355   | 0.44611  | 1.2172      | 0.11177     | 0.1355      | 0.44611 | 0.44611 |
|            |                 | -1.5318  | 0.93721  | 0.11177     | 0.573744032 |             |         |         |
| NA         | ENSG00000271100 | 1.2172   | 0.11177  | 1.0381      | 0.14961     | 1.0998      | 0.13572 | 0.13572 |
|            |                 | 1.0381   | 0.14961  | 0.11177     | 0.573744032 |             |         |         |
| SRRT       | ENSG00000087087 | 1.191    | 0.11683  | -0.17517    | 0.56953     | 1.217       | 0.11179 | 1.217   |
|            |                 | 0.11179  | 0.11179  | 0.573777146 |             |             |         |         |
| LTN1       | ENSG00000198862 | 0.028312 | 0.48871  | 0.028312    | 0.48871     | 0.028312    | 0.48871 | 0.48871 |
|            |                 | 1.217    | 0.1118   | 0.1118      | 0.573777146 |             |         |         |
| NA         | ENSG00000204684 | 0.62529  | 0.26589  | 1.2169      | 0.11182     | -0.32232    | 0.62639 | 0.62639 |
|            |                 | 0.15323  | 0.43911  | 0.11182     | 0.573819356 |             |         |         |
| NA         | ENSG00000241537 | -1.3824  | 0.91657  | 0.19884     | 0.42119     | 1.2167      | 0.11186 | 0.11186 |
|            |                 | 0.48136  | 0.31513  | 0.11186     | 0.57395162  |             |         |         |
| ATP6V1E2   | ENSG00000250565 | 0.26692  | 0.39477  | 1.2165      | 0.1119      | -0.42216    |         |         |
|            |                 | 0.66355  | -0.42216 | 0.66355     | 0.1119      | 0.57395162  |         |         |
| LINC01787  | ENSG00000231987 | 1.2165   | 0.11191  | 0.78014     | 0.21765     | 0.66134     |         |         |
|            |                 | 0.2542   | 1.1476   | 0.12556     | 0.11191     | 0.57395162  |         |         |
| SCGB1A1    | ENSG00000149021 | 1.2164   | 0.11192  | 0.12006     | 0.45222     | -0.82755    |         |         |
|            |                 | 0.79604  | 0.16947  | 0.43271     | 0.11192     | 0.57395162  |         |         |
| KLHL8      | ENSG00000145332 | -0.56743 | 0.71479  | 0.87927     | 0.18963     | 0.87927     | 0.18963 | 0.18963 |
|            |                 | 1.2163   | 0.11193  | 0.11193     | 0.57395162  |             |         |         |
| ATF3       | ENSG00000162772 | -0.24371 | 0.59627  | 0.95702     | 0.16928     | -0.24371    | 0.59627 | 0.59627 |
|            |                 | 1.2163   | 0.11193  | 0.11193     | 0.57395162  |             |         |         |
| NA         | ENSG00000265046 | 0.3926   | 0.34731  | 0.90667     | 0.18229     | 0.35838     | 0.36003 | 0.36003 |
|            |                 | 1.2164   | 0.11193  | 0.11193     | 0.57395162  |             |         |         |
| LINC01507  | ENSG00000230945 | 1.2163   | 0.11194  | -0.14066    | 0.55593     | -0.14066    |         |         |
|            |                 | 0.55593  | -0.14066 | 0.55593     | 0.11194     | 0.57395162  |         |         |
| NA         | ENSG00000215302 | 0.93007  | 0.17617  | 1.2161      | 0.11197     | -0.42204    | 0.6635  | 0.6635  |
|            |                 | 0.45457  | 0.32471  | 0.11197     | 0.574045039 |             |         |         |
| NA         | ENSG00000272840 | 1.216    | 0.11199  | -0.91832    | 0.82077     | -0.23743    | 0.59384 | 0.59384 |
|            |                 | 1.2147   | 0.11224  | 0.11199     | 0.574087177 |             |         |         |
| NA         | ENSG00000223623 | 1.2158   | 0.11202  | 0.20314     | 0.41951     | -0.74084    | 0.77061 | 0.77061 |
|            |                 | -0.4732  | 0.68196  | 0.11202     | 0.574180562 |             |         |         |
| NA         | ENSG00000232598 | -0.17965 | 0.57129  | 0.18272     | 0.42751     | 0.018506    | 0.49262 | 0.49262 |
|            |                 | 1.2157   | 0.11205  | 0.11205     | 0.574264781 |             |         |         |
| IPCEF1     | ENSG00000074706 | 1.0486   | 0.14719  | 1.2156      | 0.11206     | 0.87542     |         |         |
|            |                 | 0.19067  | 0.31657  | 0.37579     | 0.11206     | 0.574264781 |         |         |
| TTC28      | ENSG00000100154 | 1.1284   | 0.12958  | 0.95641     | 0.16943     | 0.58933     | 0.27782 | 0.27782 |
|            |                 | 1.2155   | 0.11208  | 0.11208     | 0.574297729 |             |         |         |
| GNG4       | ENSG00000168243 | -0.82978 | 0.79667  | -0.82978    | 0.79667     | 0.66892     | 0.25177 | 0.25177 |
|            |                 | 1.2155   | 0.11209  | 0.11209     | 0.574297729 |             |         |         |
| RAB2A      | ENSG00000104388 | 0.50957  | 0.30518  | -0.028845   | 0.51151     | 1.179       | 0.1192  | 0.1192  |
|            |                 | 1.2154   | 0.11211  | 0.11211     | 0.574339813 |             |         |         |
| WDR45B     | ENSG00000141580 | 1.2153   | 0.11213  | 1.1862      | 0.11777     | -0.034971   |         |         |
|            |                 | 0.51395  | -0.42733 | 0.66543     | 0.11213     | 0.574381888 |         |         |
| ZNF529-AS1 | ENSG00000233527 | 1.2151   | 0.11217  | 1.2151      | 0.11217     | 1.2151      | 0.11217 | 1.2151  |
|            |                 | 0.11217  | 1.2151   | 0.11217     | 0.11217     | 0.574445637 |         |         |
| NA         | ENSG00000259961 | 1.2151   | 0.11217  | 1.2151      | 0.11217     | 1.2151      | 0.11217 | 0.11217 |
|            |                 | 1.2151   | 0.11217  | 0.11217     | 0.574445637 |             |         |         |

|            |                 |           |          |             |             |             |         |
|------------|-----------------|-----------|----------|-------------|-------------|-------------|---------|
| DNAI2      | ENSG00000171595 | -1.4005   | 0.91932  | 1.215       | 0.11219     | 0.54235     | 0.29379 |
|            |                 | 0.44954   | 0.32652  | 0.11219     | 0.574445637 |             |         |
| SLC9A3-AS1 | ENSG00000225138 | 1.1799    | 0.11903  | 1.0735      | 0.14153     | 1.2148      |         |
|            |                 | 0.11222   | 1.2148   | 0.11222     | 0.11222     | 0.574445637 |         |
| NA         | ENSG00000268723 | 1.2146    | 0.11225  | 1.2146      | 0.11225     | 1.2146      | 0.11225 |
|            |                 | 1.2146    | 0.11225  | 0.11225     | 0.574445637 |             |         |
| XAB2       | ENSG00000076924 | 0.96511   | 0.16724  | 0.96511     | 0.16724     | 0.96511     | 0.16724 |
|            |                 | 1.2145    | 0.11228  | 0.11228     | 0.574445637 |             |         |
| NA         | ENSG00000278975 | 1.2145    | 0.11228  | 1.2145      | 0.11228     | 1.2145      | 0.11228 |
|            |                 | 0.65243   | 0.25706  | 0.11228     | 0.574445637 |             |         |
| C17orf67   | ENSG00000214226 | 0.37855   | 0.35251  | -0.76997    | 0.77934     | 1.2144      |         |
|            |                 | 0.11231   | 0.61156  | 0.27042     | 0.11231     | 0.574445637 |         |
| SPC25      | ENSG00000152253 | 1.2143    | 0.11232  | 1.2143      | 0.11232     | 1.2143      | 0.11232 |
|            |                 | 1.2143    | 0.11232  | 0.11232     | 0.574445637 |             |         |
| SCN9A      | ENSG00000169432 | 0.39456   | 0.34658  | -0.7744     | 0.78065     | -0.24181    | 0.59554 |
|            |                 | 1.2143    | 0.11232  | 0.11232     | 0.574445637 |             |         |
| NA         | ENSG00000257897 | 1.2143    | 0.11232  | -1.4913     | 0.93206     | -0.19081    | 0.57566 |
|            |                 | -0.19081  | 0.57566  | 0.11232     | 0.574445637 |             |         |
| RAB24      | ENSG00000169228 | 1.2142    | 0.11233  | -0.0074711  | 0.50298     | -0.8188     | 0.79355 |
|            |                 | -0.15242  | 0.56057  | 0.11233     | 0.574445637 |             |         |
| EPHB1      | ENSG00000154928 | 0.69453   | 0.24367  | 0.14828     | 0.44106     | 0.20972     | 0.41694 |
|            |                 | 1.2142    | 0.11234  | 0.11234     | 0.574445637 |             |         |
| NA         | ENSG00000224981 | 1.2142    | 0.11234  | 0.20503     | 0.41877     | -0.37534    | 0.6463  |
|            |                 | -0.37534  | 0.6463   | 0.11234     | 0.574445637 |             |         |
| RNU6-679P  | ENSG00000212305 | -0.29353  | 0.61544  | 1.214       | 0.11237     | 1.214       | 0.11237 |
|            |                 | 0.11237   | 0.11237  | 0.574445637 |             |             | 1.214   |
| LURAP1     | ENSG00000171357 | 1.214     | 0.11238  | 0.031988    | 0.48724     | 0.031988    | 0.48724 |
|            |                 | 0.031988  | 0.48724  | 0.11238     | 0.574445637 |             |         |
| NA         | ENSG00000185296 | 1.214     | 0.11238  | 0.82766     | 0.20393     | 0.82766     | 0.20393 |
|            |                 | 0.60859   | 0.2714   | 0.11238     | 0.574445637 |             |         |
| UBA52P7    | ENSG00000241656 | 1.214     | 0.11238  | 0.6748      | 0.2499      | -1.0441     | 0.85178 |
|            |                 | 0.29259   | 0.38492  | 0.11238     | 0.574445637 |             |         |
| NA         | ENSG00000263840 | 0.6143    | 0.26951  | 1.214       | 0.11238     | 1.1835      | 0.1183  |
|            |                 | 1.0188    | 0.15414  | 0.11238     | 0.574445637 |             |         |
| PCDHA2     | ENSG00000204969 | 0.74602   | 0.22783  | 0.71618     | 0.23694     | 1.2139      |         |
|            |                 | 0.11239   | 0.060525 | 0.47587     | 0.11239     | 0.574445637 |         |
| ZNF503-AS1 | ENSG00000226051 | 0.64101   | 0.26076  | 0.35882     | 0.35986     | 1.2139      |         |
|            |                 | 0.11239   | 1.1451   | 0.12609     | 0.11239     | 0.574445637 |         |
| CCDC63     | ENSG00000173093 | 0.67282   | 0.25053  | 1.2137      | 0.11243     | 0.88671     |         |
|            |                 | 0.18762   | 0.2443   | 0.4035      | 0.11243     | 0.574589816 |         |
| NA         | ENSG00000227803 | -0.41277  | 0.66011  | 0.41745     | 0.33817     | -0.013472   | 0.50537 |
|            |                 | 1.2135    | 0.11247  | 0.11247     | 0.574637072 |             |         |
| NA         | ENSG00000235371 | 1.1054    | 0.13449  | 1.2135      | 0.11247     | 1.0359      | 0.15012 |
|            |                 | 0.69257   | 0.24429  | 0.11247     | 0.574637072 |             |         |
| NDUFAF3    | ENSG00000178057 | 1.2133    | 0.1125   | 0.084434    | 0.46636     | 0.83022     |         |
|            |                 | 0.20321   | 0.63238  | 0.26357     | 0.1125      | 0.574637072 |         |
| NA         | ENSG00000267617 | -0.042651 | 0.51701  | -0.050854   | 0.52028     | 1.2133      | 0.1125  |
|            |                 | 0.7246    | 0.23435  | 0.1125      | 0.574637072 |             |         |
| ZNF300P1   | ENSG00000197083 | 0.64087   | 0.2608   | 0.82568     | 0.20449     | 0.085167    |         |
|            |                 | 0.46606   | 1.2133   | 0.11251     | 0.11251     | 0.574637072 |         |
| NA         | ENSG00000271390 | 1.1909    | 0.11684  | 1.2133      | 0.11251     | 0.48022     | 0.31554 |
|            |                 | 1.1909    | 0.11684  | 0.11251     | 0.574637072 |             |         |
| TMEM97P2   | ENSG00000253866 | 1.0063    | 0.15713  | 0.082369    | 0.46718     | 0.92064     |         |
|            |                 | 0.17862   | 1.2132   | 0.11253     | 0.11253     | 0.574669831 |         |
| NA         | ENSG00000274800 | 1.2131    | 0.11254  | 0.65596     | 0.25593     | 0.87134     | 0.19178 |
|            |                 | 1.0741    | 0.14139  | 0.11254     | 0.574669831 |             |         |
| NA         | ENSG00000269933 | 0.020753  | 0.49172  | -0.61666    | 0.73127     | 1.2129      | 0.11258 |
|            |                 | 1.2129    | 0.11258  | 0.11258     | 0.574804683 |             |         |
| OR2A1-AS1  | ENSG00000244479 | -0.012946 | 0.50516  | -1.2442     | 0.89328     | -0.983      |         |
|            |                 | 0.8372    | 1.2129   | 0.11259     | 0.11259     | 0.574804683 |         |
| NA         | ENSG00000256733 | 1.2128    | 0.11261  | 1.2128      | 0.11261     | 1.2128      | 0.11261 |
|            |                 | -0.28718  | 0.61301  | 0.11261     | 0.574846564 |             |         |

|           |                 |          |             |             |             |             |         |
|-----------|-----------------|----------|-------------|-------------|-------------|-------------|---------|
| NA        | ENSG00000228436 | 1.2126   | 0.11263     | 1.2126      | 0.11263     | 1.2126      | 0.11263 |
|           |                 | 1.2126   | 0.11263     | 0.574888436 |             |             |         |
| IQGAP3    | ENSG00000183856 | 0.14217  | 0.44347     | 0.60629     | 0.27216     | 1.2124      |         |
|           |                 | 0.11268  | 0.065139    | 0.47403     | 0.11268     | 0.574962974 |         |
| MIR422A   | ENSG00000199156 | 0.19617  | 0.42224     | 0.19617     | 0.42224     | 1.2124      |         |
|           |                 | 0.11268  | 1.2124      | 0.11268     | 0.11268     | 0.574962974 |         |
| NA        | ENSG00000278022 | 1.2124   | 0.11268     | 1.2124      | 0.11268     | -1.2506     | 0.89447 |
|           |                 | -0.31373 | 0.62314     | 0.11268     | 0.574962974 |             |         |
| RNU6-625P | ENSG00000238658 | 1.2123   | 0.1127      | 1.2123      | 0.1127      | 1.2123      |         |
|           |                 | 0.1127   | 1.2123      | 0.1127      | 0.574991567 |             |         |
| NA        | ENSG00000234041 | 1.2123   | 0.11271     | 1.2123      | 0.11271     | 1.2123      | 0.11271 |
|           |                 | 1.2123   | 0.11271     | 0.574991567 |             |             |         |
| GCSHP2    | ENSG00000259525 | 1.2121   | 0.11273     | 0.081752    | 0.46742     | 0.26911     |         |
|           |                 | 0.39392  | 0.26911     | 0.39392     | 0.11273     | 0.574991567 |         |
| EIF4A1P11 | ENSG00000231564 | 1.212    | 0.11275     | 1.212       | 0.11275     | 1.212       | 0.11275 |
|           |                 | 0.11275  | 0.11275     | 0.574991567 |             |             |         |
| NA        | ENSG00000236847 | 1.212    | 0.11275     | 1.212       | 0.11275     | 1.212       | 0.11275 |
|           |                 | 0.11275  | 0.574991567 |             |             |             |         |
| NA        | ENSG00000272576 | 1.212    | 0.11276     | 1.212       | 0.11276     | 1.212       | 0.11276 |
|           |                 | 0.11276  | 0.574991567 |             |             |             |         |
| NA        | ENSG00000261555 | 1.2119   | 0.11278     | 1.2119      | 0.11278     | 1.2119      | 0.11278 |
|           |                 | 1.2119   | 0.11278     | 0.11278     | 0.574991567 |             |         |
| NA        | ENSG00000221347 | 0.35375  | 0.36176     | -1.5175     | 0.93543     | 0.35375     | 0.36176 |
|           |                 | 1.2119   | 0.11278     | 0.11278     | 0.574991567 |             |         |
| HOXB5     | ENSG00000120075 | 0.78626  | 0.21586     | 0.8135      | 0.20796     | 0.61989     | 0.26766 |
|           |                 | 1.2118   | 0.1128      | 0.1128      | 0.575005846 |             |         |
| SERPINA2  | ENSG00000258597 | 1.2117   | 0.11282     | 1.2117      | 0.11282     | 1.2117      |         |
|           |                 | 0.11282  | 1.2117      | 0.11282     | 0.11282     | 0.575005846 |         |
| UNCX      | ENSG00000164853 | 0.34989  | 0.36321     | 0.23258     | 0.40804     | 1.2116      | 0.11283 |
|           |                 | 0.17711  | 0.42971     | 0.11283     | 0.575005846 |             |         |
| NSUN7     | ENSG00000179299 | -0.96307 | 0.83224     | -0.75013    | 0.77341     | -1.6239     | 0.9478  |
|           |                 | 1.2116   | 0.11283     | 0.11283     | 0.575005846 |             |         |
| ADAMTS17  | ENSG00000140470 | 1.0532   | 0.14612     | -1.3083     | 0.90461     | -0.5861     |         |
|           |                 | 0.7211   | 1.2114      | 0.11286     | 0.11286     | 0.575029284 |         |
| ITGB5-AS1 | ENSG00000244286 | 0.80701  | 0.20983     | 0.80701     | 0.20983     | 1.1148      |         |
|           |                 | 0.13247  | 1.2115      | 0.11286     | 0.11286     | 0.575029284 |         |
| NA        | ENSG00000240995 | -1.4126  | 0.92111     | -1.4126     | 0.92111     | -1.1561     | 0.87618 |
|           |                 | 1.2114   | 0.11287     | 0.11287     | 0.575029284 |             |         |
| NA        | ENSG00000214955 | 1.2112   | 0.11291     | 0.86158     | 0.19446     | 0.86341     | 0.19396 |
|           |                 | -1.0325  | 0.84907     | 0.11291     | 0.575112815 |             |         |
| NA        | ENSG00000229943 | 1.2112   | 0.11291     | 0.93494     | 0.17491     | 0.93494     | 0.17491 |
|           |                 | 0.93494  | 0.17491     | 0.11291     | 0.575112815 |             |         |
| RGL3      | ENSG00000205517 | -0.82313 | 0.79478     | 0.24379     | 0.4037      | 1.2111      | 0.11293 |
|           |                 | 0.3846   | 0.35027     | 0.11293     | 0.575122888 |             |         |
| ASXL3     | ENSG00000141431 | 0.91278  | 0.18068     | 1.2108      | 0.11298     | 0.87936     | 0.1896  |
|           |                 | 1.0474   | 0.14746     | 0.11298     | 0.575122888 |             |         |
| NA        | ENSG00000200024 | 1.0914   | 0.13755     | 0.9449      | 0.17235     | 1.0914      | 0.13755 |
|           |                 | 1.2108   | 0.11299     | 0.11299     | 0.575122888 |             |         |
| NA        | ENSG00000257354 | 0.63501  | 0.26271     | -0.14053    | 0.55588     | 1.2108      | 0.11299 |
|           |                 | 0.96583  | 0.16706     | 0.11299     | 0.575122888 |             |         |
| NA        | ENSG00000212072 | -0.13764 | 0.55474     | 1.2108      | 0.11299     | -0.030998   | 0.51236 |
|           |                 | -0.36235 | 0.64145     | 0.11299     | 0.575122888 |             |         |
| CLDN7     | ENSG00000181885 | 1.2107   | 0.113       | 1.2107      | 0.113       | 1.2107      | 0.113   |
|           |                 | 0.113    | 0.575122888 |             |             |             |         |
| PPP2R5D   | ENSG00000112640 | 1.2107   | 0.11301     | 0.75339     | 0.22561     | 1.0007      |         |
|           |                 | 0.15848  | 0.73538     | 0.23105     | 0.11301     | 0.575122888 |         |
| LINC01811 | ENSG00000226320 | 0.41519  | 0.339       | 0.91192     | 0.1809      | 1.2107      | 0.11301 |
|           |                 | -1.8149  | 0.96523     | 0.11301     | 0.575122888 |             |         |
| C14orf178 | ENSG00000197734 | 1.2106   | 0.11302     | 1.2106      | 0.11302     | 1.2106      |         |
|           |                 | 0.11302  | 1.2106      | 0.11302     | 0.11302     | 0.575122888 |         |
| NA        | ENSG00000251168 | 0.21978  | 0.41302     | 0.56753     | 0.28518     | 1.2106      | 0.11303 |
|           |                 | 0.21232  | 0.41593     | 0.11303     | 0.575122888 |             |         |

|            |                 |           |           |             |             |             |           |          |
|------------|-----------------|-----------|-----------|-------------|-------------|-------------|-----------|----------|
| NA         | ENSG00000274614 | 1.2104    | 0.11306   | 0.11306     | -0.66348    | 0.74649     | -0.66348  | 0.74649  |
|            |                 | -0.66348  | 0.74649   | 0.11306     | 0.575196971 |             |           |          |
| CRIP1P3    | ENSG00000227109 | 1.2102    | 0.11309   | 0.11309     | 0.23413     | 0.40744     | 0.19491   |          |
|            |                 | 0.42273   | 0.94523   | 0.17227     | 0.11309     | 0.575196971 |           |          |
| NDUFB8P1   | ENSG00000258972 | -0.050957 | 0.52032   | 0.52032     | 1.2101      | 0.11311     | -0.050957 |          |
|            |                 | 0.52032   | -0.050957 | 0.52032     | 0.11311     | 0.575196971 |           |          |
| RNA5SP496  | ENSG00000212542 | 1.21      | 0.11314   | 1.21        | 0.11314     | 1.21        | 0.11314   | -0.13797 |
|            |                 | 0.55487   | 0.11314   | 0.575196971 |             |             |           |          |
| NA         | ENSG00000253666 | 1.21      | 0.11315   | 1.1386      | 0.12744     | 0.38209     | 0.3512    |          |
|            |                 | 1.1494    | 0.1252    | 0.11315     | 0.575196971 |             |           |          |
| SUCO       | ENSG00000094975 | -0.13112  | 0.55216   | 1.2098      | 0.11317     | 0.20822     | 0.41753   |          |
|            |                 | 0.67296   | 0.25049   | 0.11317     | 0.575196971 |             |           |          |
| ITGB3      | ENSG00000259207 | 0.77172   | 0.22014   | 0.71471     | 0.23739     | 1.2098      | 0.11317   |          |
|            |                 | 0.9068    | 0.18226   | 0.11317     | 0.575196971 |             |           |          |
| PPP1R14C   | ENSG00000198729 | -0.47682  | 0.68326   | 1.2097      | 0.1132      | -0.45394    |           |          |
|            |                 | 0.67507   | 0.073456  | 0.47072     | 0.1132      | 0.575196971 |           |          |
| RNU6-1069P | ENSG00000252421 | 1.2095    | 0.11324   | 1.2095      | 0.11324     | 1.2095      |           |          |
|            |                 | 0.11324   | -0.6941   | 0.75619     | 0.11324     | 0.575196971 |           |          |
| NA         | ENSG00000227304 | 1.2093    | 0.11327   | 1.2093      | 0.11327     | 1.2093      | 0.11327   |          |
|            |                 | 1.2093    | 0.11327   | 0.11327     | 0.575196971 |             |           |          |
| PGLS       | ENSG00000130313 | 1.2092    | 0.1133    | 1.2092      | 0.1133      | -0.07192    | 0.52867   |          |
|            |                 | -0.27834  | 0.60962   | 0.1133      | 0.575196971 |             |           |          |
| SLC25A30   | ENSG00000174032 | 1.2092    | 0.1133    | 1.2092      | 0.1133      | -0.16862    |           |          |
|            |                 | 0.56695   | -0.1744   | 0.56922     | 0.1133      | 0.575196971 |           |          |
| ARL14EP    | ENSG00000152219 | 1.1142    | 0.13259   | 1.2051      | 0.11409     | 1.2089      |           |          |
|            |                 | 0.11334   | 0.26507   | 0.39548     | 0.11334     | 0.575196971 |           |          |
| LINC02406  | ENSG00000258144 | 1.209     | 0.11334   | 1.209       | 0.11334     | -0.61152    | 0.72957   |          |
|            |                 | -0.81577  | 0.79268   | 0.11334     | 0.575196971 |             |           |          |
| ABHD13     | ENSG00000139826 | 0.19652   | 0.4221    | 1.0965      | 0.13644     | -0.46946    |           |          |
|            |                 | 0.68063   | 1.2089    | 0.11335     | 0.11335     | 0.575196971 |           |          |
| RNU6-1260P | ENSG00000199814 | 1.2089    | 0.11335   | 0.2159      | 0.41453     | 1.2089      |           |          |
|            |                 | 0.11335   | 1.2089    | 0.11335     | 0.11335     | 0.575196971 |           |          |
| ACMSD      | ENSG00000153086 | 0.079107  | 0.46847   | 0.78218     | 0.21706     | 1.2088      | 0.11336   |          |
|            |                 | 0.38017   | 0.35191   | 0.11336     | 0.575196971 |             |           |          |
| MTCYBP42   | ENSG00000228803 | 0.16404   | 0.43485   | 0.17456     | 0.43071     | 1.2088      |           |          |
|            |                 | 0.11337   | -0.60261  | 0.72662     | 0.11337     | 0.575196971 |           |          |
| SPATC1L    | ENSG00000160284 | 1.0046    | 0.15753   | 1.2087      | 0.11339     | 1.1169      |           |          |
|            |                 | 0.13201   | 0.57589   | 0.28235     | 0.11339     | 0.575196971 |           |          |
| RPL21P10   | ENSG00000239272 | 1.2087    | 0.11339   | -0.14       | 0.55567     | -0.14       | 0.55567   | -0.14    |
|            |                 | 0.55567   | 0.11339   | 0.575196971 |             |             |           |          |
| BMP5       | ENSG00000112175 | 0.11729   | 0.45331   | 1.2087      | 0.1134      | 1.1277      | 0.12973   |          |
|            |                 | -1.1879   | 0.88257   | 0.1134      | 0.575196971 |             |           |          |
| NA         | ENSG00000227107 | -0.55257  | 0.70972   | -1.0585     | 0.85509     | -1.0337     | 0.84937   |          |
|            |                 | 1.2086    | 0.1134    | 0.1134      | 0.575196971 |             |           |          |
| FAM126A    | ENSG00000122591 | 1.1542    | 0.12422   | 1.2085      | 0.11343     | 0.61942     |           |          |
|            |                 | 0.26782   | 0.43045   | 0.33343     | 0.11343     | 0.575196971 |           |          |
| MIR151B    | ENSG00000265154 | 1.2085    | 0.11343   | 1.2085      | 0.11343     | 1.2085      |           |          |
|            |                 | 0.11343   | 1.2085    | 0.11343     | 0.11343     | 0.575196971 |           |          |
| NA         | ENSG00000268618 | 1.2085    | 0.11343   | 1.2085      | 0.11343     | 1.2085      | 0.11343   |          |
|            |                 | 1.2085    | 0.11343   | 0.11343     | 0.575196971 |             |           |          |
| DNAJC14    | ENSG00000135392 | 1.0809    | 0.13987   | 1.2084      | 0.11344     | 1.0809      |           |          |
|            |                 | 0.13987   | -0.59057  | 0.7226      | 0.11344     | 0.575196971 |           |          |
| NA         | ENSG00000234811 | -0.016732 | 0.50667   | -0.016732   | 0.50667     | -1.3173     | 0.90613   |          |
|            |                 | 1.2084    | 0.11344   | 0.11344     | 0.575196971 |             |           |          |
| SPCS3-AS1  | ENSG00000248980 | -1.011    | 0.84399   | -0.068256   | 0.52721     | 0.32356     |           |          |
|            |                 | 0.37313   | 1.2084    | 0.11344     | 0.11344     | 0.575196971 |           |          |
| MIR124-2HG | ENSG00000254377 | 1.2084    | 0.11344   | 1.0186      | 0.15419     | 0.16432     |           |          |
|            |                 | 0.43474   | 0.16432   | 0.43474     | 0.11344     | 0.575196971 |           |          |
| NA         | ENSG00000256473 | 0.39448   | 0.34661   | -0.020053   | 0.508       | 1.2084      | 0.11344   |          |
|            |                 | 1.2084    | 0.11344   | 0.11344     | 0.575196971 |             |           |          |
| NA         | ENSG00000232311 | 1.2085    | 0.11344   | 1.2085      | 0.11344     | 1.2085      | 0.11344   |          |
|            |                 | 1.2085    | 0.11344   | 0.11344     | 0.575196971 |             |           |          |

|              |                 |          |             |             |             |             |         |
|--------------|-----------------|----------|-------------|-------------|-------------|-------------|---------|
| NA           | ENSG00000264856 | 1.2085   | 0.11344     | 1.2085      | 0.11344     | 1.2085      | 0.11344 |
|              |                 | 1.2085   | 0.11344     | 0.575196971 |             |             |         |
| CALCOCO1     | ENSG00000012822 | -0.94706 | 0.8282      | 1.2083      | 0.11347     | 0.40469     |         |
|              |                 | 0.34285  | 0.63578     | 0.26246     | 0.11347     | 0.575196971 |         |
| BNIP3P11     | ENSG00000271550 | 1.2083   | 0.11347     | 0.144       | 0.44275     | 1.2083      | 0.11347 |
|              |                 | 1.2083   | 0.11347     | 0.575196971 |             |             |         |
| ST8SIA1      | ENSG00000111728 | 1.1133   | 0.1328      | 1.0902      | 0.13781     | 1.1598      |         |
|              |                 | 0.12307  | 1.2082      | 0.11348     | 0.575196971 |             |         |
| RPL6P21      | ENSG00000223445 | -1.5963  | 0.94479     | 1.2082      | 0.11348     | -1.5963     |         |
|              |                 | 0.94479  | -1.5963     | 0.94479     | 0.11348     | 0.575196971 |         |
| NA           | ENSG00000215156 | 0.91991  | 0.17881     | -0.60174    | 0.72633     | 0.021161    | 0.49156 |
|              |                 | 1.2081   | 0.1135      | 0.575196971 |             |             |         |
| NA           | ENSG00000273369 | 1.2081   | 0.11351     | 1.2081      | 0.11351     | 1.2081      | 0.11351 |
|              |                 | 1.2081   | 0.11351     | 0.575196971 |             |             |         |
| ZDHHC19      | ENSG00000163958 | 0.82113  | 0.20579     | 0.89688     | 0.18489     | -0.4142     |         |
|              |                 | 0.66064  | 1.208       | 0.11352     | 0.11352     | 0.575196971 |         |
| PEX11A       | ENSG00000166821 | 1.208    | 0.11353     | 1.208       | 0.11353     | 1.208       | 0.11353 |
|              |                 | 0.11353  | 0.11353     | 0.575196971 |             |             |         |
| CASTOR3      | ENSG00000239521 | 0.75393  | 0.22544     | 1.2078      | 0.11356     | -0.59139    |         |
|              |                 | 0.72287  | -0.10746    | 0.54279     | 0.11356     | 0.575196971 |         |
| NA           | ENSG00000201208 | 1.2077   | 0.11357     | 1.2077      | 0.11357     | 1.2077      | 0.11357 |
|              |                 | 1.2077   | 0.11357     | 0.575196971 |             |             |         |
| NA           | ENSG00000279672 | 0.85178  | 0.19717     | 1.2078      | 0.11357     | 0.99654     | 0.15949 |
|              |                 | 0.99654  | 0.15949     | 0.11357     | 0.575196971 |             |         |
| SPTLC1P3     | ENSG00000219940 | -0.30554 | 0.62002     | 1.2077      | 0.11358     | 1.2077      |         |
|              |                 | 0.11358  | 1.2077      | 0.11358     | 0.11358     | 0.575196971 |         |
| POLHP1       | ENSG00000232970 | 0.80093  | 0.21159     | 1.2077      | 0.11358     | 1.2077      |         |
|              |                 | 0.11358  | 1.2077      | 0.11358     | 0.11358     | 0.575196971 |         |
| NA           | ENSG00000256973 | 1.2076   | 0.1136      | 1.2076      | 0.1136      | 1.2076      | 0.1136  |
|              |                 | 1.2076   | 0.1136      | 0.575196971 |             |             |         |
| CDKN2AIPNLP3 | ENSG00000224351 | 0.81542  | 0.20742     | -1.4241     | 0.9228      | -0.30847    |         |
|              |                 | 0.62114  | 1.2075      | 0.11363     | 0.11363     | 0.575196971 |         |
| TPMTP1       | ENSG00000267156 | 1.2074   | 0.11364     | 1.2074      | 0.11364     | 1.2074      |         |
|              |                 | 0.11364  | 1.2074      | 0.11364     | 0.11364     | 0.575196971 |         |
| COASY        | ENSG00000068120 | 1.2073   | 0.11366     | 1.2073      | 0.11366     | -0.78713    | 0.7844  |
|              |                 | -0.20186 | 0.57999     | 0.11366     | 0.575196971 |             |         |
| SOHLH1       | ENSG00000165643 | -0.70228 | 0.75875     | -0.097421   | 0.5388      | 1.2073      |         |
|              |                 | 0.11366  | -0.32145    | 0.62606     | 0.11366     | 0.575196971 |         |
| NA           | ENSG00000200884 | 1.207    | 0.11371     | 1.207       | 0.11371     | 1.207       | 0.11371 |
|              |                 | 0.11371  | 0.575196971 |             |             |             |         |
| MYO19        | ENSG00000278259 | -0.26418 | 0.60418     | -0.34335    | 0.63433     | 1.207       | 0.11372 |
|              |                 | 0.71542  | 0.23718     | 0.11372     | 0.575196971 |             |         |
| NA           | ENSG00000253281 | 1.0301   | 0.15148     | 1.2069      | 0.11373     | 1.2069      | 0.11373 |
|              |                 | 1.2069   | 0.11373     | 0.11373     | 0.575196971 |             |         |
| NA           | ENSG00000254973 | 1.2069   | 0.11373     | 1.2069      | 0.11373     | 1.2069      | 0.11373 |
|              |                 | 0.54802  | 0.29184     | 0.11373     | 0.575196971 |             |         |
| NDUFA4P2     | ENSG00000236691 | 0.17196  | 0.43173     | -0.045166   | 0.51801     | 1.2068      |         |
|              |                 | 0.11376  | 1.2068      | 0.11376     | 0.11376     | 0.575196971 |         |
| NA           | ENSG00000255037 | 0.15085  | 0.44005     | 1.2067      | 0.11377     | 0.49159     | 0.3115  |
|              |                 | 1.1634   | 0.12234     | 0.11377     | 0.575196971 |             |         |
| POMZP3       | ENSG00000146707 | 0.76113  | 0.22329     | -0.52037    | 0.6986      | -0.044504   |         |
|              |                 | 0.51775  | 1.2067      | 0.11378     | 0.11378     | 0.575196971 |         |
| PDLIM1       | ENSG00000107438 | -1.6944  | 0.9549      | 1.2066      | 0.11379     | 0.18171     |         |
|              |                 | 0.4279   | -0.64827    | 0.7416      | 0.11379     | 0.575196971 |         |
| SLC25A11     | ENSG00000108528 | 1.2066   | 0.11379     | 1.2066      | 0.11379     | 1.2066      |         |
|              |                 | 0.11379  | 1.2066      | 0.11379     | 0.11379     | 0.575196971 |         |
| OR6J1        | ENSG00000255804 | 1.1303   | 0.12917     | 1.2066      | 0.11379     | 1.0577      | 0.1451  |
|              |                 | 1.1373   | 0.1277      | 0.11379     | 0.575196971 |             |         |
| NA           | ENSG00000260290 | 1.0033   | 0.15787     | 0.72774     | 0.23339     | 1.2066      | 0.11379 |
|              |                 | 1.2066   | 0.11379     | 0.11379     | 0.575196971 |             |         |
| FKBP14       | ENSG00000106080 | -1.0776  | 0.85939     | -1.0776     | 0.85939     | 1.2066      |         |
|              |                 | 0.1138   | -0.65035    | 0.74227     | 0.1138      | 0.575196971 |         |

|           |                 |             |             |             |             |          |         |
|-----------|-----------------|-------------|-------------|-------------|-------------|----------|---------|
| NA        | ENSG00000223360 | 0.50239     | 0.3077      | 1.2059      | 0.11393     | 0.25232  | 0.4004  |
|           | 1.2066          | 0.1138      | 0.1138      | 0.575196971 |             |          |         |
| NA        | ENSG00000271955 | 0.19007     | 0.42463     | -0.24624    | 0.59725     | 1.2066   | 0.1138  |
|           | 1.2066          | 0.1138      | 0.1138      | 0.575196971 |             |          |         |
| LINC02749 | ENSG00000254480 | 0.3037      | 0.38068     | 0.70071     | 0.24174     | 0.69203  |         |
|           | 0.24446         | 1.2064      | 0.11383     | 0.11383     | 0.575288934 |          |         |
| NA        | ENSG00000230325 | 1.2062      | 0.11386     | 1.2062      | 0.11386     | 1.2062   | 0.11386 |
|           | 1.2062          | 0.11386     | 0.11386     | 0.575371744 |             |          |         |
| NA        | ENSG00000282432 | 1.2062      | 0.11387     | 1.2062      | 0.11387     | 1.2062   | 0.11387 |
|           | 1.2062          | 0.11387     | 0.11387     | 0.575371744 |             |          |         |
| LGALS3BP  | ENSG00000108679 | -0.84656    | 0.80138     | -0.86727    | 0.8071      | -0.84656 |         |
|           | 0.80138         | 1.2060      | 0.11391     | 0.11391     | 0.57545452  |          |         |
| ANKRD18A  | ENSG00000180071 | 0.5017      | 0.30794     | 1.1122      | 0.13304     | 0.12264  |         |
|           | 0.45119         | 1.2060      | 0.11391     | 0.11391     | 0.57545452  |          |         |
| IL16      | ENSG00000172349 | 1.2057      | 0.11397     | 1.1335      | 0.12849     | 1.1860   | 0.1178  |
|           | 0.89276         | 0.18599     | 0.11397     | 0.575688785 |             |          |         |
| MTFR2P1   | ENSG00000233716 | 1.2056      | 0.11398     | 1.2056      | 0.11398     | 1.2056   |         |
|           | 0.11398         | 1.2056      | 0.11398     | 0.11398     | 0.575688785 |          |         |
| NA        | ENSG00000245156 | 1.2055      | 0.1141      | 1.2055      | 0.1141      | 1.2055   | 0.1141  |
|           | 0.1141          | 0.575726239 |             |             |             |          |         |
| SNORD12B  | ENSG00000222365 | 1.2054      | 0.11403     | 1.2054      | 0.11403     | 1.2054   |         |
|           | 0.11403         | 1.2054      | 0.11403     | 0.11403     | 0.575726239 |          |         |
| NA        | ENSG00000279650 | 1.2053      | 0.11404     | 0.48106     | 0.31524     | 1.2053   | 0.11404 |
|           | -0.23881        | 0.59437     | 0.11404     | 0.575726239 |             |          |         |
| PRDM8     | ENSG00000152784 | -0.56729    | 0.71474     | -0.71441    | 0.76251     | 1.2052   | 0.11406 |
|           | 0.74366         | 0.22854     | 0.11406     | 0.575726239 |             |          |         |
| SLC7A6    | ENSG00000103064 | 1.2051      | 0.11408     | 0.92108     | 0.1785      | 0.19259  |         |
|           | 0.42364         | -0.021576   | 0.50861     | 0.11408     | 0.575726239 |          |         |
| RNU6-783P | ENSG00000252519 | 0.62915     | 0.26462     | 0.9738      | 0.16508     | 1.2050   | 0.11409 |
|           | 1.2050          | 0.11409     | 0.11409     | 0.575726239 |             |          |         |
| MIR204    | ENSG00000207935 | 1.2050      | 0.1141      | 1.2050      | 0.1141      | 1.2050   | 0.1141  |
|           | 0.1141          | 0.1141      | 0.575726239 |             |             |          |         |
| TRIM3     | ENSG00000110171 | 1.1193      | 0.13151     | -0.077447   | 0.53087     | 1.1193   | 0.13151 |
|           | 1.2050          | 0.11411     | 0.11411     | 0.575726239 |             |          |         |
| ZNF354A   | ENSG00000169131 | -0.21785    | 0.58623     | 1.2049      | 0.11412     | -0.21652 |         |
|           | 0.58571         | -0.82347    | 0.79488     | 0.11412     | 0.575726239 |          |         |
| EIF3F     | ENSG00000175390 | 0.93027     | 0.17612     | 1.0711      | 0.14206     | 1.2049   | 0.11413 |
|           | 1.1735          | 0.12031     | 0.11413     | 0.575726239 |             |          |         |
| NA        | ENSG00000270470 | 1.2048      | 0.11414     | 1.2048      | 0.11414     | 1.2048   | 0.11414 |
|           | 0.61004         | 0.27092     | 0.11414     | 0.575726239 |             |          |         |
| NUP210P2  | ENSG00000225275 | -0.3823     | 0.64888     | 0.25666     | 0.39872     | -0.92474 |         |
|           | 0.82245         | 1.2046      | 0.11417     | 0.11417     | 0.575726239 |          |         |
| NA        | ENSG00000260763 | 0.7940      | 0.2136      | 1.2047      | 0.11417     | 1.0182   | 0.15428 |
|           | -0.82683        | 0.79583     | 0.11417     | 0.575726239 |             |          |         |
| RNU6-669P | ENSG00000202445 | -0.31223    | 0.62257     | 1.0456      | 0.14788     | 1.0456   |         |
|           | 0.14788         | 1.2045      | 0.11419     | 0.11419     | 0.575726239 |          |         |
| KLHL10    | ENSG00000161594 | -0.95551    | 0.83034     | -0.95551    | 0.83034     | -0.95551 |         |
|           | 0.83034         | 1.2045      | 0.11421     | 0.11421     | 0.575726239 |          |         |
| CHRNA7    | ENSG00000175344 | -0.58493    | 0.7207      | 0.53023     | 0.29797     | 0.14529  |         |
|           | 0.44224         | 1.2044      | 0.11421     | 0.11421     | 0.575726239 |          |         |
| TOMM22P4  | ENSG00000248396 | -0.0079974  | 0.50319     | 0.15577     | 0.43811     | -0.10546 |         |
|           | 0.54199         | 1.2045      | 0.11421     | 0.11421     | 0.575726239 |          |         |
| RNA5SP430 | ENSG00000199299 | 1.2043      | 0.11424     | 1.2043      | 0.11424     | 1.2043   |         |
|           | 0.11424         | 1.2043      | 0.11424     | 0.11424     | 0.575726239 |          |         |
| NA        | ENSG00000261313 | 0.44573     | 0.32789     | 0.69003     | 0.24509     | 1.1524   | 0.12458 |
|           | 1.2043          | 0.11424     | 0.11424     | 0.575726239 |             |          |         |
| INO80E    | ENSG00000169592 | 1.2042      | 0.11425     | 1.2042      | 0.11425     | 1.2042   |         |
|           | 0.11425         | 1.2042      | 0.11425     | 0.11425     | 0.575726239 |          |         |
| OR7E110P  | ENSG00000235623 | 0.39241     | 0.34738     | 0.9384      | 0.17402     | 1.1157   |         |
|           | 0.13228         | 1.2042      | 0.11425     | 0.11425     | 0.575726239 |          |         |
| NPR3      | ENSG00000113389 | 1.0648      | 0.14348     | 1.2041      | 0.11428     | 0.48162  | 0.31504 |
|           | 0.72678         | 0.23368     | 0.11428     | 0.575726239 |             |          |         |



|              |                 |           |          |             |             |             |         |         |
|--------------|-----------------|-----------|----------|-------------|-------------|-------------|---------|---------|
| NA           | ENSG00000279019 | 1.2041    | 0.11428  | 0.11428     | 1.2041      | 0.11428     | 1.2041  | 0.11428 |
|              |                 | 1.2041    | 0.11428  | 0.11428     | 0.575726239 |             |         |         |
| LINC01487    | ENSG00000241336 | 1.204     | 0.1143   | 1.204       | 0.1143      | 1.204       | 0.1143  | 1.1574  |
|              |                 | 0.12355   | 0.1143   | 0.575726239 |             |             |         |         |
| TRAPPC12-AS1 | ENSG00000225234 | 1.2039    | 0.11432  | 0.11432     | 1.2039      | 0.11432     | 1.2039  | 0.11432 |
|              |                 | 0.11432   | 1.2039   | 0.11432     | 0.575726239 |             |         |         |
| NA           | ENSG00000261187 | 0.86546   | 0.19339  | 1.2036      | 0.11437     | 1.2036      | 0.11437 | 0.11437 |
|              |                 | 1.2036    | 0.11437  | 0.11437     | 0.575726239 |             |         |         |
| NA           | ENSG00000243687 | 0.72075   | 0.23553  | 0.38868     | 0.34876     | 1.2035      | 0.11439 | 0.11439 |
|              |                 | 0.59132   | 0.27715  | 0.11439     | 0.575726239 |             |         |         |
| LINC01499    | ENSG00000255171 | 1.2035    | 0.11439  | -0.66156    | 0.74587     | -1.3625     |         |         |
|              |                 | 0.91348   | -0.70015 | 0.75808     | 0.11439     | 0.575726239 |         |         |
| NA           | ENSG00000277595 | 0.49756   | 0.3094   | 1.2035      | 0.11439     | 0.70687     | 0.23982 | 0.23982 |
|              |                 | 0.70687   | 0.23982  | 0.11439     | 0.575726239 |             |         |         |
| TANGO6       | ENSG00000103047 | 0.39835   | 0.34519  | -1.1888     | 0.88274     | -0.24624    |         |         |
|              |                 | 0.59725   | 1.2035   | 0.1144      | 0.1144      | 0.575726239 |         |         |
| GLRA1        | ENSG00000145888 | 0.18445   | 0.42683  | 0.97997     | 0.16355     | 1.2035      | 0.1144  | 0.1144  |
|              |                 | 1.1266    | 0.12995  | 0.1144      | 0.575726239 |             |         |         |
| NA           | ENSG00000256802 | 0.81313   | 0.20807  | 0.48483     | 0.3139      | 0.81313     | 0.20807 | 0.20807 |
|              |                 | 1.2034    | 0.1144   | 0.1144      | 0.575726239 |             |         |         |
| NA           | ENSG00000280283 | 1.2035    | 0.1144   | 1.2035      | 0.1144      | 1.2035      | 0.1144  | 0.1144  |
|              |                 | 1.0239    | 0.15295  | 0.1144      | 0.575726239 |             |         |         |
| FAM71BP1     | ENSG00000270683 | 0.34461   | 0.3652   | 1.2033      | 0.11442     | -1.0006     |         |         |
|              |                 | 0.8415    | -1.0006  | 0.8415      | 0.11442     | 0.575726239 |         |         |
| GJD2         | ENSG00000159248 | 1.2033    | 0.11443  | 1.2033      | 0.11443     | 1.2033      | 0.11443 | 0.11443 |
|              |                 | 1.2033    | 0.11443  | 0.11443     | 0.575726239 |             |         |         |
| NA           | ENSG00000249976 | -0.61486  | 0.73068  | -0.57186    | 0.71629     | -1.336      | 0.90922 | 0.90922 |
|              |                 | 1.2033    | 0.11443  | 0.11443     | 0.575726239 |             |         |         |
| A2M-AS1      | ENSG00000245105 | 0.10992   | 0.45624  | 1.2032      | 0.11444     | 1.2032      |         |         |
|              |                 | 0.11444   | 1.2032   | 0.11444     | 0.11444     | 0.575726239 |         |         |
| NA           | ENSG00000256987 | 1.2033    | 0.11444  | 1.2033      | 0.11444     | 1.2033      | 0.11444 | 0.11444 |
|              |                 | 1.2033    | 0.11444  | 0.11444     | 0.575726239 |             |         |         |
| NA           | ENSG00000272097 | 1.2031    | 0.11446  | 1.2031      | 0.11446     | 1.2031      | 0.11446 | 0.11446 |
|              |                 | 1.2031    | 0.11446  | 0.11446     | 0.575726239 |             |         |         |
| NA           | ENSG00000272162 | 1.2031    | 0.11446  | 1.2031      | 0.11446     | 1.2031      | 0.11446 | 0.11446 |
|              |                 | 1.2031    | 0.11446  | 0.11446     | 0.575726239 |             |         |         |
| DCUN1D2-AS   | ENSG00000233613 | 0.27984   | 0.3898   | -0.24677    | 0.59746     | 1.2029      |         |         |
|              |                 | 0.11451   | 1.2029   | 0.11451     | 0.11451     | 0.575918289 |         |         |
| NA           | ENSG00000266549 | 1.2027    | 0.11455  | 1.2027      | 0.11455     | 1.2027      | 0.11455 | 0.11455 |
|              |                 | 1.2027    | 0.11455  | 0.11455     | 0.576032539 |             |         |         |
| LASP1        | ENSG00000002834 | -0.92181  | 0.82169  | -0.93153    | 0.82421     | 1.0065      | 0.15709 | 0.15709 |
|              |                 | 1.2026    | 0.11456  | 0.11456     | 0.576032539 |             |         |         |
| NA           | ENSG00000241597 | 1.2026    | 0.11457  | 1.2026      | 0.11457     | 0.85198     | 0.19711 | 0.19711 |
|              |                 | 1.2026    | 0.11457  | 0.11457     | 0.576032539 |             |         |         |
| BLOC1S3      | ENSG00000189114 | 1.2025    | 0.11458  | 1.2025      | 0.11458     | 1.2025      |         |         |
|              |                 | 0.11458   | 1.2025   | 0.11458     | 0.11458     | 0.576032539 |         |         |
| NA           | ENSG00000258294 | -0.31637  | 0.62414  | 1.2024      | 0.1146      | 0.26436     | 0.39575 | 0.39575 |
|              |                 | -0.31195  | 0.62246  | 0.1146      | 0.576073654 |             |         |         |
| NA           | ENSG00000230972 | 1.2023    | 0.11463  | 0.52869     | 0.29851     | 0.52869     | 0.29851 | 0.29851 |
|              |                 | 0.52869   | 0.29851  | 0.11463     | 0.576087286 |             |         |         |
| NA           | ENSG00000228005 | 1.2022    | 0.11464  | 1.2022      | 0.11464     | 1.2022      | 0.11464 | 0.11464 |
|              |                 | 1.2022    | 0.11464  | 0.11464     | 0.576087286 |             |         |         |
| NA           | ENSG00000276564 | 1.0804    | 0.13999  | 1.2022      | 0.11464     | 1.2022      | 0.11464 | 0.11464 |
|              |                 | 0.5643    | 0.28628  | 0.11464     | 0.576087286 |             |         |         |
| LINC00698    | ENSG00000244342 | 0.48112   | 0.31522  | -1.1085     | 0.86618     | 1.2022      |         |         |
|              |                 | 0.11465   | -0.62381 | 0.73362     | 0.11465     | 0.576087286 |         |         |
| NA           | ENSG00000201009 | 1.2021    | 0.11467  | 1.2021      | 0.11467     | 1.2021      | 0.11467 | 0.11467 |
|              |                 | 1.2021    | 0.11467  | 0.11467     | 0.576128374 |             |         |         |
| GET1         | ENSG00000182093 | -0.019746 | 0.50788  | -0.019746   | 0.50788     | -0.044509   | 0.51775 | 0.51775 |
|              |                 | 1.2018    | 0.11473  | 0.11473     | 0.576310989 |             |         |         |
| NA           | ENSG00000271234 | 1.2018    | 0.11473  | 1.2018      | 0.11473     | 1.2018      | 0.11473 | 0.11473 |
|              |                 | 1.2018    | 0.11473  | 0.11473     | 0.576310989 |             |         |         |

|           |                 |             |             |             |             |          |         |
|-----------|-----------------|-------------|-------------|-------------|-------------|----------|---------|
| NA        | ENSG00000234710 | 1.2016      | 0.11476     | -0.46856    | 0.68031     | 1.2016   | 0.11476 |
|           | 1.2016          | 0.11476     | 0.11476     | 0.576342863 |             |          |         |
| NA        | ENSG00000280486 | 1.2016      | 0.11476     | 1.2016      | 0.11476     | 1.2016   | 0.11476 |
|           | 1.2016          | 0.11476     | 0.11476     | 0.576342863 |             |          |         |
| WNT8B     | ENSG00000075290 | -0.068189   | 0.52718     | 0.25404     | 0.39973     | 1.2015   | 0.11479 |
|           | 0.65587         | 0.25595     | 0.11479     | 0.576374724 |             |          |         |
| CEP57L1P1 | ENSG00000224725 | 1.2014      | 0.11479     | 1.2014      | 0.11479     | -0.26126 |         |
|           | 0.60306         | 0.48503     | 0.31383     | 0.11479     | 0.576374724 |          |         |
| SLC6A21P  | ENSG00000269009 | 1.2013      | 0.11482     | 1.2013      | 0.11482     | 1.2013   |         |
|           | 0.11482         | 1.2013      | 0.11482     | 0.11482     | 0.576379042 |          |         |
| RBAKDN    | ENSG00000273313 | 1.2012      | 0.11483     | 1.2012      | 0.11483     | 1.2012   |         |
|           | 0.11483         | 1.2012      | 0.11483     | 0.11483     | 0.576379042 |          |         |
| DBIP2     | ENSG00000251366 | -0.94158    | 0.8268      | 1.2012      | 0.11484     | -0.94158 | 0.8268  |
|           | -0.94158        | 0.8268      | 0.11484     | 0.576379042 |             |          |         |
| NA        | ENSG00000261696 | 1.2012      | 0.11484     | 1.2012      | 0.11484     | 1.2012   | 0.11484 |
|           | 1.2012          | 0.11484     | 0.11484     | 0.576379042 |             |          |         |
| NA        | ENSG00000213851 | -0.9265     | 0.82291     | 1.2011      | 0.11485     | 0.53087  | 0.29776 |
|           | -2.4209         | 0.99226     | 0.11485     | 0.576379042 |             |          |         |
| PLOD1     | ENSG00000083444 | 0.43016     | 0.33354     | -0.066779   | 0.52662     | 1.2008   | 0.11491 |
|           | 0.21941         | 0.41317     | 0.11491     | 0.576415169 |             |          |         |
| MTND5P15  | ENSG00000231888 | -2.1165     | 0.98285     | 1.2007      | 0.11493     | -2.1165  |         |
|           | 0.98285         | -2.1165     | 0.98285     | 0.11493     | 0.576415169 |          |         |
| NA        | ENSG00000261035 | 0.62362     | 0.26644     | 1.2007      | 0.11493     | 0.048492 | 0.48066 |
|           | 0.048492        | 0.48066     | 0.11493     | 0.576415169 |             |          |         |
| NA        | ENSG00000269547 | 1.2007      | 0.11493     | 1.2007      | 0.11493     | 1.2007   | 0.11493 |
|           | 1.2007          | 0.11493     | 0.11493     | 0.576415169 |             |          |         |
| CLASP2    | ENSG00000163539 | 1.1739      | 0.12023     | 0.59159     | 0.27706     | 1.2007   |         |
|           | 0.11494         | 0.94745     | 0.17171     | 0.11494     | 0.576415169 |          |         |
| GAST      | ENSG00000184502 | 1.2007      | 0.11494     | 1.2007      | 0.11494     | 1.1143   | 0.13258 |
|           | 1.2007          | 0.11494     | 0.11494     | 0.576415169 |             |          |         |
| SACM1L    | ENSG00000211456 | -0.30675    | 0.62048     | 1.2007      | 0.11494     | 1.0976   |         |
|           | 0.13618         | -0.47499    | 0.6826      | 0.11494     | 0.576415169 |          |         |
| RPL39P5   | ENSG00000214289 | 0.38886     | 0.34869     | 1.2006      | 0.11496     | 0.38886  |         |
|           | 0.34869         | 0.38886     | 0.34869     | 0.11496     | 0.576419461 |          |         |
| NA        | ENSG00000261751 | 0.4218      | 0.33658     | 0.11548     | 0.45403     | 0.3717   | 0.35506 |
|           | 1.2005          | 0.11497     | 0.11497     | 0.576419461 |             |          |         |
| FAM171A1  | ENSG00000148468 | 1.2004      | 0.11499     | 0.26232     | 0.39654     | -0.54846 |         |
|           | 0.70831         | -0.099471   | 0.53962     | 0.11499     | 0.576419461 |          |         |
| C11orf95  | ENSG00000188070 | 1.2004      | 0.11499     | 1.2004      | 0.11499     | 0.85851  |         |
|           | 0.19531         | -0.24219    | 0.59568     | 0.11499     | 0.576419461 |          |         |
| TIGD4     | ENSG00000169989 | 1.2003      | 0.115       | 1.2003      | 0.115       | 1.2003   | 0.115   |
|           | 0.115           | 0.576419461 |             |             |             |          |         |
| MIR7-3    | ENSG00000207630 | 1.2002      | 0.11503     | 1.2002      | 0.11503     | 1.2002   |         |
|           | 0.11503         | 1.2002      | 0.11503     | 0.11503     | 0.576500678 |          |         |
| LIM2      | ENSG00000105370 | 1.2         | 0.11506     | 1.2         | 0.11506     | 1.2      | 0.11506 |
|           | 0.42182         | 0.11506     | 0.576500678 |             |             |          |         |
| VPS9D1    | ENSG00000075399 | 0.85293     | 0.19685     | 0.98457     | 0.16242     | 1.2      | 0.11507 |
|           | 1.1132          | 0.13281     | 0.11507     | 0.576500678 |             |          |         |
| NA        | ENSG00000273443 | 1.2         | 0.11507     | 1.2         | 0.11507     | 1.2      | 0.11507 |
|           | 0.11507         | 0.576500678 |             |             |             |          |         |
| EXOSC9    | ENSG00000123737 | 1.0508      | 0.14668     | 1.1093      | 0.13366     | 0.35721  |         |
|           | 0.36047         | 1.1999      | 0.11509     | 0.11509     | 0.576500678 |          |         |
| UPK3BP1   | ENSG00000242435 | 1.1998      | 0.1151      | 1.1998      | 0.1151      | 1.1998   |         |
|           | 0.1151          | 1.1998      | 0.1151      | 0.1151      | 0.576500678 |          |         |
| TOP1MT    | ENSG00000184428 | 0.5832      | 0.27988     | -0.61439    | 0.73052     | 1.1998   |         |
|           | 0.11511         | 0.40642     | 0.34222     | 0.11511     | 0.576500678 |          |         |
| LRRIQ1    | ENSG00000133640 | -0.69354    | 0.75601     | -0.48233    | 0.68521     | 1.1997   |         |
|           | 0.11512         | 0.61826     | 0.2682      | 0.11512     | 0.576500678 |          |         |
| LINC00400 | ENSG00000229928 | -0.72282    | 0.7651      | 1.1997      | 0.11513     | 1.1997   |         |
|           | 0.11513         | -0.1663     | 0.56604     | 0.11513     | 0.576500678 |          |         |
| C16orf95  | ENSG00000260456 | 0.17583     | 0.43021     | -0.61685    | 0.73133     | -1.7121  |         |
|           | 0.95656         | 1.1997      | 0.11514     | 0.11514     | 0.576500678 |          |         |

|           |                 |            |            |             |             |           |         |
|-----------|-----------------|------------|------------|-------------|-------------|-----------|---------|
| GDI2P2    | ENSG00000233994 | 1.1538     | 0.12429    | 1.1996      | 0.11515     | 1.1996    |         |
|           | 0.11515         | 1.1996     | 0.11515    | 0.11515     | 0.576500678 |           |         |
| OLAH      | ENSG00000152463 | 1.1995     | 0.11516    | -0.26169    | 0.60322     | 0.014045  | 0.4944  |
|           | -0.13848        | 0.55507    | 0.11516    | 0.576500678 |             |           |         |
| RNF185    | ENSG00000138942 | 1.1995     | 0.11517    | 1.1995      | 0.11517     | -0.74486  |         |
|           | 0.77182         | 0.075113   | 0.47006    | 0.11517     | 0.576500678 |           |         |
| BCO1      | ENSG00000135697 | -1.4888    | 0.93173    | 1.1994      | 0.1152      | 1.1994    | 0.1152  |
|           | -0.146          | 0.55804    | 0.1152     | 0.576554949 |             |           |         |
| NA        | ENSG00000254171 | -0.19948   | 0.57905    | 1.1993      | 0.11521     | 0.59613   | 0.27554 |
|           | -0.83693        | 0.79868    | 0.11521    | 0.576554949 |             |           |         |
| MLLT10    | ENSG00000078403 | 0.96196    | 0.16804    | 1.1991      | 0.11524     | 0.026054  |         |
|           | 0.48961         | 0.79058    | 0.21459    | 0.11524     | 0.576554949 |           |         |
| AKAP8P1   | ENSG00000234146 | -0.81683   | 0.79299    | -1.2198     | 0.88873     | 0.76675   |         |
|           | 0.22161         | 1.1991     | 0.11524    | 0.11524     | 0.576554949 |           |         |
| JAZF1-AS1 | ENSG00000234336 | -0.50458   | 0.69307    | -0.54917    | 0.70856     | 1.1072    |         |
|           | 0.1341          | 1.1991     | 0.11524    | 0.11524     | 0.576554949 |           |         |
| NA        | ENSG00000267988 | 1.1371     | 0.12774    | 1.1989      | 0.11529     | 1.1371    | 0.12774 |
|           | 1.1371          | 0.12774    | 0.11529    | 0.576677512 |             |           |         |
| C17orf58  | ENSG00000186665 | 1.1988     | 0.1153     | 0.32308     | 0.37332     | 0.32308   |         |
|           | 0.37332         | 0.32308    | 0.37332    | 0.1153      | 0.576677512 |           |         |
| NA        | ENSG00000260393 | 1.1988     | 0.1153     | 1.1988      | 0.1153      | 1.1988    | 0.1153  |
|           | 1.1988          | 0.1153     | 0.1153     | 0.576677512 |             |           |         |
| NA        | ENSG00000266473 | 1.1986     | 0.11533    | 1.1986      | 0.11533     | 1.1986    | 0.11533 |
|           | 1.1986          | 0.11533    | 0.11533    | 0.57676836  |             |           |         |
| VPS33A    | ENSG00000139719 | -0.31059   | 0.62194    | 0.50117     | 0.30813     | 1.1985    |         |
|           | 0.11536         | 0.38607    | 0.34972    | 0.11536     | 0.576859189 |           |         |
| SFTPC     | ENSG00000168484 | 0.83487    | 0.2019     | 1.1983      | 0.1154      | 1.1983    | 0.1154  |
|           | 1.1983          | 0.1154     | 0.1154     | 0.577       |             |           |         |
| RNU7-143P | ENSG00000252590 | 1.1982     | 0.11542    | 1.1982      | 0.11542     | 0.8383    |         |
|           | 0.20093         | -0.9785    | 0.83609    | 0.11542     | 0.57701715  |           |         |
| RPS4XP19  | ENSG00000242058 | 1.1981     | 0.11543    | -0.064338   | 0.52565     | 0.44065   |         |
|           | 0.32973         | 0.15982    | 0.43651    | 0.11543     | 0.57701715  |           |         |
| NA        | ENSG00000279806 | 1.198      | 0.11545    | 0.51356     | 0.30378     | 1.198     | 0.11545 |
|           | 0.11545         | 0.11545    | 0.57701715 |             |             |           |         |
| PDE8A     | ENSG00000073417 | -0.8471    | 0.80153    | 1.1979      | 0.11548     | -0.18464  | 0.57324 |
|           | -0.89386        | 0.8143     | 0.11548    | 0.57701715  |             |           |         |
| LEPR      | ENSG00000116678 | 0.84965    | 0.19776    | -0.46507    | 0.67906     | 0.8296    | 0.20338 |
|           | 1.1979          | 0.11548    | 0.11548    | 0.57701715  |             |           |         |
| CRNKL1    | ENSG00000101343 | 1.0164     | 0.15473    | 1.1978      | 0.11549     | 1.0736    |         |
|           | 0.14151         | 0.99951    | 0.15877    | 0.11549     | 0.57701715  |           |         |
| NA        | ENSG00000259989 | -1.5093    | 0.93439    | 0.45217     | 0.32557     | -0.059956 | 0.5239  |
|           | 1.1978          | 0.1155     | 0.1155     | 0.57701715  |             |           |         |
| NA        | ENSG00000230331 | 1.1977     | 0.11551    | -0.14172    | 0.55635     | -0.14172  | 0.55635 |
|           | 0.054323        | 0.47834    | 0.11551    | 0.57701715  |             |           |         |
| NA        | ENSG00000259356 | 1.1977     | 0.11551    | 1.1977      | 0.11551     | 1.1977    | 0.11551 |
|           | 0.4315          | 0.33305    | 0.11551    | 0.57701715  |             |           |         |
| IKZF1     | ENSG00000185811 | 1.1975     | 0.11555    | 0.36297     | 0.35832     | 1.1975    | 0.11555 |
|           | 0.65441         | 0.25642    | 0.11555    | 0.577148591 |             |           |         |
| NA        | ENSG00000269761 | -1.4803    | 0.9306     | 1.1975      | 0.11556     | 0.83589   | 0.20161 |
|           | 0.83589         | 0.20161    | 0.11556    | 0.577148591 |             |           |         |
| NA        | ENSG00000201026 | -1.087     | 0.86149    | 1.1816      | 0.11868     | -0.47296  | 0.68188 |
|           | 1.1974          | 0.11558    | 0.11558    | 0.577189322 |             |           |         |
| MCM7      | ENSG00000166508 | 0.66028    | 0.25454    | 0.9442      | 0.17253     | 0.66028   | 0.25454 |
|           | 1.1973          | 0.1156     | 0.1156     | 0.577211618 |             |           |         |
| NEUROG3   | ENSG00000122859 | 1.1972     | 0.11561    | -0.29916    | 0.61759     | 1.1972    |         |
|           | 0.11561         | 1.1972     | 0.11561    | 0.11561     | 0.577211618 |           |         |
| TCEA1P4   | ENSG00000236184 | 1.1972     | 0.11562    | 0.79684     | 0.21277     | 1.1972    |         |
|           | 0.11562         | 1.1972     | 0.11562    | 0.11562     | 0.577211618 |           |         |
| NA        | ENSG00000254568 | 1.197      | 0.11566    | 1.197       | 0.11566     | 1.197     | 0.11566 |
|           | 0.11566         | 0.57730829 |            |             |             |           |         |
| SERGEF    | ENSG00000129158 | 0.76216    | 0.22298    | 1.1969      | 0.11568     | 0.17486   |         |
|           | 0.43059         | -1.5187    | 0.93559    | 0.11568     | 0.57730829  |           |         |

|           |                 |           |          |             |         |           |         |
|-----------|-----------------|-----------|----------|-------------|---------|-----------|---------|
| NA        | ENSG00000272986 | 1.1968    | 0.11569  | 1.0814      | 0.13975 | 1.1968    | 0.11569 |
|           |                 | 1.1968    | 0.11569  | 0.57730829  |         |           |         |
| NA        | ENSG00000248373 | 0.23784   | 0.406    | -0.7719     | 0.77991 | 0.74323   | 0.22867 |
|           |                 | 1.1967    | 0.11571  | 0.57730829  |         |           |         |
| NA        | ENSG00000259889 | -0.054532 | 0.52174  | -1.9888     | 0.97664 | -0.62304  | 0.73337 |
|           |                 | 1.1966    | 0.11573  | 0.57730829  |         |           |         |
| NA        | ENSG00000230033 | 1.1965    | 0.11576  | 0.98818     | 0.16153 | 1.131     | 0.12904 |
|           |                 | -0.097205 | 0.53872  | 0.57730829  |         |           |         |
| IL4R      | ENSG00000077238 | -1.2792   | 0.89959  | 0.70929     | 0.23907 | -1.2792   | 0.89959 |
|           |                 | 1.1963    | 0.11578  | 0.57730829  |         |           |         |
| NA        | ENSG00000200976 | 1.1964    | 0.11578  | 1.1964      | 0.11578 | 1.1964    | 0.11578 |
|           |                 | 0.87592   | 0.19054  | 0.57730829  |         |           |         |
| MIR299    | ENSG00000207749 | 0.54689   | 0.29223  | 1.1964      | 0.11578 | 1.1964    |         |
|           |                 | 0.11578   | 1.1964   | 0.57730829  |         |           |         |
| RNU6-768P | ENSG00000207414 | 1.1962    | 0.1158   | 1.1962      | 0.1158  | 1.1962    |         |
|           |                 | 0.1158    | 1.1962   | 0.57730829  |         |           |         |
| IGLJ2     | ENSG00000211676 | -0.1477   | 0.55871  | 0.83062     | 0.20309 | 1.1962    | 0.11581 |
|           |                 | 1.1962    | 0.11581  | 0.57730829  |         |           |         |
| MNX1-AS2  | ENSG00000235029 | 1.1962    | 0.11581  | 1.1962      | 0.11581 | 1.1962    |         |
|           |                 | 0.11581   | 1.1962   | 0.57730829  |         |           |         |
| GCM1      | ENSG00000137270 | 0.7427    | 0.22883  | 0.7427      | 0.22883 | 0.069217  | 0.47241 |
|           |                 | 1.1961    | 0.11582  | 0.57730829  |         |           |         |
| NA        | ENSG00000259545 | 1.1962    | 0.11582  | -0.57518    | 0.71742 | 1.1962    | 0.11582 |
|           |                 | -0.39265  | 0.65271  | 0.57730829  |         |           |         |
| LINC02047 | ENSG00000239454 | 1.1961    | 0.11583  | -0.36297    | 0.64169 | -0.96392  |         |
|           |                 | 0.83246   | -1.3053  | 0.57730829  |         |           |         |
| NA        | ENSG00000234398 | 1.196     | 0.11584  | -0.61805    | 0.73173 | 1.196     | 0.11584 |
|           |                 | 0.11584   | 0.11584  | 0.57730829  |         |           |         |
| PRAMEF35P | ENSG00000236179 | 1.196     | 0.11586  | 1.0931      | 0.13718 | 0.51318   | 0.30391 |
|           |                 | -1.093    | 0.8628   | 0.57730829  |         |           |         |
| ATP5F1EP1 | ENSG00000250922 | 1.1959    | 0.11586  | 1.1959      | 0.11586 | 1.1959    |         |
|           |                 | 0.11586   | -0.24749 | 0.57730829  |         |           |         |
| KLHDC3    | ENSG00000124702 | 1.1959    | 0.11587  | 1.1959      | 0.11587 | 1.1959    |         |
|           |                 | 0.11587   | 1.1959   | 0.57730829  |         |           |         |
| CYCSP17   | ENSG00000219627 | 1.1958    | 0.11589  | 1.1958      | 0.11589 | 0.0041322 |         |
|           |                 | 0.49835   | 0.18001  | 0.57730829  |         |           |         |
| ZNF230    | ENSG00000159882 | 1.1957    | 0.1159   | 1.1957      | 0.1159  | 1.1957    |         |
|           |                 | 0.1159    | 1.1957   | 0.57730829  |         |           |         |
| CLEC3B    | ENSG00000163815 | 0.65288   | 0.25692  | 0.90603     | 0.18246 | 0.78226   |         |
|           |                 | 0.21703   | 1.1958   | 0.57730829  |         |           |         |
| FAM83D    | ENSG00000101447 | -0.59186  | 0.72303  | -0.59186    | 0.72303 | -0.29066  |         |
|           |                 | 0.61434   | 1.1956   | 0.577332677 |         |           |         |
| NA        | ENSG00000260677 | -0.65177  | 0.74273  | -0.65177    | 0.74273 | -0.36163  | 0.64119 |
|           |                 | 1.1955    | 0.11594  | 0.577332677 |         |           |         |
| LINC02765 | ENSG00000234476 | -0.56394  | 0.7136   | -0.65764    | 0.74461 | 1.1955    |         |
|           |                 | 0.11595   | 0.33655  | 0.577332677 |         |           |         |
| NA        | ENSG00000257894 | 1.1954    | 0.11596  | -0.79811    | 0.7876  | 1.1954    | 0.11596 |
|           |                 | 1.1954    | 0.11596  | 0.577332677 |         |           |         |
| C1QTNF7   | ENSG00000163145 | 1.1954    | 0.11597  | 0.98605     | 0.16205 | 1.1412    |         |
|           |                 | 0.1269    | 0.34741  | 0.577332677 |         |           |         |
| NA        | ENSG00000256915 | 1.1952    | 0.116    | 1.0269      | 0.15222 | 1.0269    | 0.15222 |
|           |                 | 1.0269    | 0.15222  | 0.577332677 |         |           |         |
| ELOBP4    | ENSG00000234167 | -0.039549 | 0.51577  | 1.1952      | 0.11601 | 1.1952    |         |
|           |                 | 0.11601   | 1.1952   | 0.577332677 |         |           |         |
| OTX2-AS1  | ENSG00000248550 | 1.1952    | 0.11601  | -0.64714    | 0.74123 | 1.0872    |         |
|           |                 | 0.13847   | -1.6933  | 0.577332677 |         |           |         |
| TCERG1    | ENSG00000113649 | 0.57246   | 0.28351  | 1.1211      | 0.13113 | 0.20536   |         |
|           |                 | 0.41865   | 1.1951   | 0.577332677 |         |           |         |
| QSER1     | ENSG00000060749 | -1.7872   | 0.96305  | 1.195       | 0.11604 | -2.5332   | 0.99435 |
|           |                 | -0.25456  | 0.60047  | 0.577332677 |         |           |         |
| PTMAP12   | ENSG00000282886 | -1.8198   | 0.96561  | 1.195       | 0.11604 | -0.45219  | 0.67443 |
|           |                 | -0.7449   | 0.77184  | 0.577332677 |         |           |         |

|           |                 |            |             |             |             |          |         |
|-----------|-----------------|------------|-------------|-------------|-------------|----------|---------|
| CSNK1G2   | ENSG00000133275 | 1.1949     | 0.11606     | -1.1835     | 0.8817      | -0.11246 |         |
|           | 0.54477         | -0.9759    | 0.83544     | 0.11606     | 0.577332677 |          |         |
| VXN       | ENSG00000169085 | 0.64306    | 0.26009     | 1.1948      | 0.11608     | 0.64306  | 0.26009 |
|           | 0.64306         | 0.26009    | 0.11608     | 0.577332677 |             |          |         |
| NA        | ENSG00000280160 | 1.1948     | 0.11608     | 1.1948      | 0.11608     | 1.1948   | 0.11608 |
|           | 1.1948          | 0.11608    | 0.11608     | 0.577332677 |             |          |         |
| SYNGR2    | ENSG00000108639 | 0.45957    | 0.32291     | 1.1947      | 0.11609     | 0.20608  |         |
|           | 0.41836         | 0.20608    | 0.41836     | 0.11609     | 0.577332677 |          |         |
| CT62      | ENSG00000225362 | 0.29157    | 0.38531     | 0.29157     | 0.38531     | 1.1947   | 0.11611 |
|           | 0.12822         | 0.44899    | 0.11611     | 0.577332677 |             |          |         |
| NA        | ENSG00000274569 | 1.1946     | 0.11612     | 1.1946      | 0.11612     | 1.1946   | 0.11612 |
|           | 1.1946          | 0.11612    | 0.11612     | 0.577332677 |             |          |         |
| NA        | ENSG00000276272 | 1.0357     | 0.15017     | 0.88434     | 0.18826     | 1.1946   | 0.11612 |
|           | 1.1946          | 0.11612    | 0.11612     | 0.577332677 |             |          |         |
| OR4T1P    | ENSG00000258641 | 1.1946     | 0.11613     | 0.99453     | 0.15998     | 1.1946   |         |
|           | 0.11613         | 1.1946     | 0.11613     | 0.11613     | 0.577332677 |          |         |
| CENPX     | ENSG00000169689 | 1.0563     | 0.14541     | 1.1943      | 0.11618     | 1.0563   | 0.14541 |
|           | 0.91401         | 0.18036    | 0.11618     | 0.577463423 |             |          |         |
| RNA5SP396 | ENSG00000201704 | 1.1943     | 0.11618     | 1.1943      | 0.11618     | 1.1943   |         |
|           | 0.11618         | 1.1943     | 0.11618     | 0.11618     | 0.577463423 |          |         |
| CSNK1G2P1 | ENSG00000234534 | 0.72924    | 0.23293     | 0.86531     | 0.19343     | 0.86531  |         |
|           | 0.19343         | 1.1941     | 0.11622     | 0.11622     | 0.577516821 |          |         |
| TM9SF3    | ENSG00000077147 | -0.46536   | 0.67916     | -0.46536    | 0.67916     | 1.194    | 0.11624 |
|           | 1.0416          | 0.14879    | 0.11624     | 0.577516821 |             |          |         |
| ZNF233    | ENSG00000159915 | 1.194      | 0.11624     | 1.194       | 0.11624     | 1.194    | 0.11624 |
|           | 0.11624         | 0.11624    | 0.577516821 |             |             |          |         |
| NA        | ENSG00000270437 | 0.17504    | 0.43052     | 0.16385     | 0.43493     | 0.26622  | 0.39504 |
|           | 1.194           | 0.11624    | 0.11624     | 0.577516821 |             |          |         |
| FKBP6     | ENSG00000077800 | 1.1939     | 0.11625     | 1.1939      | 0.11625     | 1.1939   | 0.11625 |
|           | 0.61572         | 0.26904    | 0.11625     | 0.577516821 |             |          |         |
| NA        | ENSG00000239180 | 1.1938     | 0.11628     | 1.1938      | 0.11628     | 1.1938   | 0.11628 |
|           | 1.1938          | 0.11628    | 0.11628     | 0.577524198 |             |          |         |
| TEX43     | ENSG00000196900 | -0.83557   | 0.7983      | -0.34699    | 0.6357      | 1.1937   | 0.11629 |
|           | 0.13094         | 0.44791    | 0.11629     | 0.577524198 |             |          |         |
| NA        | ENSG00000258752 | 1.1938     | 0.11629     | -0.47002    | 0.68083     | 0.35778  | 0.36026 |
|           | -0.022048       | 0.5088     | 0.11629     | 0.577524198 |             |          |         |
| MIR2113   | ENSG00000238367 | 0.25055    | 0.40108     | 1.1937      | 0.1163      | 0.68585  |         |
|           | 0.2464          | 0.92693    | 0.17698     | 0.1163      | 0.577524198 |          |         |
| NA        | ENSG00000270558 | 1.1936     | 0.11632     | 1.1936      | 0.11632     | 1.1936   | 0.11632 |
|           | 1.1936          | 0.11632    | 0.11632     | 0.577524198 |             |          |         |
| CCDC80    | ENSG00000091986 | -0.65079   | 0.74241     | -1.3497     | 0.91144     | 1.1715   |         |
|           | 0.12069         | 1.1934     | 0.11635     | 0.11635     | 0.577524198 |          |         |
| HERC2P9   | ENSG00000206149 | -0.34941   | 0.63661     | 1.1935      | 0.11635     | -0.47982 |         |
|           | 0.68432         | 0.52656    | 0.29925     | 0.11635     | 0.577524198 |          |         |
| PLAAT1    | ENSG00000127252 | -0.86618   | 0.8068      | 1.1934      | 0.11636     | -1.3657  |         |
|           | 0.91398         | -2.3475    | 0.99055     | 0.11636     | 0.577524198 |          |         |
| MIR3910-1 | ENSG00000266855 | -0.37878   | 0.64757     | -0.11939    | 0.54752     | 0.85555  |         |
|           | 0.19612         | 1.1934     | 0.11636     | 0.11636     | 0.577524198 |          |         |
| NA        | ENSG00000278376 | 1.1934     | 0.11637     | 1.1934      | 0.11637     | 1.1934   | 0.11637 |
|           | 1.1934          | 0.11637    | 0.11637     | 0.577524198 |             |          |         |
| NA        | ENSG00000163009 | -0.2244    | 0.58878     | -0.39598    | 0.65394     | -0.49269 | 0.68888 |
|           | 1.1932          | 0.1164     | 0.1164      | 0.577614257 |             |          |         |
| PDCD6IPP2 | ENSG00000261377 | 0.68652    | 0.24619     | -0.29473    | 0.6159      | 1.1929   |         |
|           | 0.11646         | 0.10741    | 0.45723     | 0.11646     | 0.577843932 |          |         |
| HOXC-AS2  | ENSG00000250133 | 0.5743     | 0.28288     | 1.1928      | 0.11647     | 0.21137  |         |
|           | 0.4163          | 0.21137    | 0.4163      | 0.11647     | 0.577843932 |          |         |
| NA        | ENSG00000227101 | 1.1927     | 0.1165      | 0.61106     | 0.27058     | -0.49083 | 0.68823 |
|           | 0.48142         | 0.31511    | 0.1165      | 0.577875102 |             |          |         |
| NA        | ENSG00000264123 | 0.00070439 | 0.49972     | 0.9912      | 0.16079     | 0.60056  | 0.27407 |
|           | 1.1927          | 0.1165     | 0.1165      | 0.577875102 |             |          |         |
| ARHGEF2   | ENSG00000116584 | 0.40396    | 0.34312     | 0.59635     | 0.27547     | 0.83082  |         |
|           | 0.20304         | 1.1925     | 0.11654     | 0.11654     | 0.577928182 |          |         |

|              |                 |            |           |             |             |             |         |
|--------------|-----------------|------------|-----------|-------------|-------------|-------------|---------|
| OTUD4        | ENSG00000164164 | 0.62241    | 0.26683   | 0.030679    | 0.48776     | 0.10899     | 0.4566  |
|              |                 | 1.1924     | 0.11655   | 0.11655     | 0.577928182 |             |         |
| SNHG10       | ENSG00000247092 | -0.65071   | 0.74238   | 1.1924      | 0.11655     | -0.54534    |         |
|              |                 | 0.70724    | -0.024632 | 0.50983     | 0.11655     | 0.577928182 |         |
| DCTN3        | ENSG00000137100 | -0.51199   | 0.69567   | -0.51199    | 0.69567     | -0.51199    | 0.69567 |
|              |                 | 1.1923     | 0.11657   | 0.11657     | 0.577928182 |             |         |
| NA           | ENSG00000279221 | -2.1245    | 0.98319   | 1.1923      | 0.11657     | 0.088168    | 0.46487 |
|              |                 | -2.1245    | 0.98319   | 0.11657     | 0.577928182 |             |         |
| RSU1P3       | ENSG00000213659 | 1.1922     | 0.11659   | 1.1922      | 0.11659     | 1.1922      |         |
|              |                 | 0.11659    | 0.24856   | 0.40185     | 0.11659     | 0.577968535 |         |
| FRMPD1       | ENSG00000070601 | 0.279      | 0.39012   | 1.192       | 0.11662     | 0.76301     | 0.22273 |
|              |                 | -0.20059   | 0.57949   | 0.11662     | 0.578058448 |             |         |
| DBX2         | ENSG00000185610 | 1.1919     | 0.11665   | 0.94331     | 0.17276     | 1.1919      | 0.11665 |
|              |                 | 1.1919     | 0.11665   | 0.11665     | 0.578111397 |             |         |
| NCR3         | ENSG00000204475 | 1.1918     | 0.11666   | 0.74227     | 0.22896     | 1.1101      | 0.13347 |
|              |                 | 0.85494    | 0.19629   | 0.11666     | 0.578111397 |             |         |
| VN1R8P       | ENSG00000219280 | 0.59056    | 0.27741   | -0.45169    | 0.67425     | 1.1918      |         |
|              |                 | 0.11668    | -0.11886  | 0.54731     | 0.11668     | 0.578111397 |         |
| TNFRSF14-AS1 | ENSG00000238164 | 1.1917     | 0.11668   | -0.64479    | 0.74047     | -0.050714   |         |
|              |                 | 0.52022    | -0.050714 | 0.52022     | 0.11668     | 0.578111397 |         |
| KBTBD11-OT1  | ENSG00000253696 | 1.1917     | 0.11669   | 0.82978     | 0.20333     | 0.23321     |         |
|              |                 | 0.4078     | 0.23321   | 0.4078      | 0.11669     | 0.578111397 |         |
| MTHFS        | ENSG00000136371 | 0.441      | 0.32961   | 0.441       | 0.32961     | 1.1916      | 0.11671 |
|              |                 | 0.1872     | 0.11671   | 0.578151703 |             |             | 0.88828 |
| NA           | ENSG00000200506 | 0.5508     | 0.29089   | 0.6952      | 0.24347     | 0.50733     | 0.30596 |
|              |                 | 1.1914     | 0.11674   | 0.11674     | 0.578241533 |             |         |
| RN7SL741P    | ENSG00000242381 | 1.1631     | 0.12239   | -0.97173    | 0.83441     | 0.046866    |         |
|              |                 | 0.48131    | 1.1912    | 0.11678     | 0.11678     | 0.578371616 |         |
| PARBP        | ENSG00000185480 | -0.45752   | 0.67635   | 1.0585      | 0.14493     | -0.45752    |         |
|              |                 | 0.67635    | 1.1912    | 0.11679     | 0.11679     | 0.578371616 |         |
| FAM131C      | ENSG00000185519 | -0.0030763 | 0.50123   | -0.183      | 0.5726      | -0.5407     |         |
|              |                 | 0.70564    | 1.1909    | 0.11685     | 0.11685     | 0.578609948 |         |
| NA           | ENSG00000272967 | 1.1907     | 0.11688   | 1.1907      | 0.11688     | 1.1907      | 0.11688 |
|              |                 | 1.1907     | 0.11688   | 0.11688     | 0.578699695 |             |         |
| LIMK2        | ENSG00000182541 | 0.97483    | 0.16482   | 0.97483     | 0.16482     | 0.97483     | 0.16482 |
|              |                 | 1.1906     | 0.11691   | 0.11691     | 0.578721341 |             |         |
| OR1P1        | ENSG00000262085 | 0.75764    | 0.22433   | -0.74055    | 0.77052     | -0.80114    | 0.78847 |
|              |                 | 1.1906     | 0.11691   | 0.11691     | 0.578721341 |             |         |
| CPED1        | ENSG00000106034 | 0.055051   | 0.47805   | 1.1905      | 0.11692     | 0.7733      | 0.21967 |
|              |                 | 1.0815     | 0.13973   | 0.11692     | 0.578721341 |             |         |
| CD93         | ENSG00000125810 | 0.22766    | 0.40996   | 0.25327     | 0.40003     | 1.1904      | 0.11694 |
|              |                 | -0.1315    | 0.55231   | 0.11694     | 0.578761548 |             |         |
| FGD3         | ENSG00000127084 | -0.10624   | 0.5423    | -0.11922    | 0.54745     | 1.1903      | 0.11696 |
|              |                 | 0.63019    | 0.26429   | 0.11696     | 0.578792455 |             |         |
| ZNF664       | ENSG00000179195 | 0.74935    | 0.22682   | -0.65725    | 0.74449     | 0.3755      |         |
|              |                 | 0.35364    | 1.1903    | 0.11697     | 0.11697     | 0.578792455 |         |
| NA           | ENSG00000281365 | 0.39515    | 0.34637   | 0.26583     | 0.39518     | -0.21194    | 0.58392 |
|              |                 | 1.1901     | 0.117     | 0.117       | 0.578804771 |             |         |
| WNT10A       | ENSG00000135925 | 0.91158    | 0.18099   | 1.1901      | 0.11701     | 0.16581     |         |
|              |                 | 0.43415    | 1.1901    | 0.11701     | 0.11701     | 0.578804771 |         |
| MME          | ENSG00000196549 | -0.24792   | 0.5979    | 1.1901      | 0.11701     | 0.52704     | 0.29908 |
|              |                 | -0.10241   | 0.54078   | 0.11701     | 0.578804771 |             |         |
| MIR941-2     | ENSG00000216141 | 1.19       | 0.11702   | 1.19        | 0.11702     | 1.19        | 0.11702 |
|              |                 | 0.11702    | 0.11702   | 0.578804771 |             |             | 1.19    |
| NA           | ENSG00000240497 | 0.4782     | 0.31625   | 0.4782      | 0.31625     | 0.4782      | 0.31625 |
|              |                 | 1.1899     | 0.11704   | 0.11704     | 0.578844941 |             |         |
| S100A15A     | ENSG00000224784 | 0.84505    | 0.19904   | 1.1897      | 0.11709     | 0.84505     |         |
|              |                 | 0.19904    | 0.84505   | 0.19904     | 0.11709     | 0.579005539 |         |
| SUMO1P3      | ENSG00000235082 | 1.1896     | 0.11711   | 1.1896      | 0.11711     | 1.1896      |         |
|              |                 | 0.11711    | 1.1896    | 0.11711     | 0.11711     | 0.579005539 |         |
| SINHCAFP2    | ENSG00000267742 | 1.1895     | 0.11711   | 1.1895      | 0.11711     | 1.1895      |         |
|              |                 | 0.11711    | 1.1895    | 0.11711     | 0.11711     | 0.579005539 |         |

|           |                 |           |             |             |             |             |         |
|-----------|-----------------|-----------|-------------|-------------|-------------|-------------|---------|
| NA        | ENSG00000271558 | -0.51133  | 0.69544     | 1.1895      | 0.11712     | 1.1895      | 0.11712 |
|           |                 | -0.17555  | 0.56968     | 0.11712     | 0.579005539 |             |         |
| NA        | ENSG00000250375 | -0.095758 | 0.53814     | 0.76836     | 0.22114     | 1.1893      | 0.11716 |
|           |                 | 1.1279    | 0.12969     | 0.11716     | 0.579017757 |             |         |
| NA        | ENSG00000200120 | 1.1893    | 0.11717     | -0.074115   | 0.52954     | -0.27231    | 0.60731 |
|           |                 | -0.27231  | 0.60731     | 0.11717     | 0.579017757 |             |         |
| ACTR3P3   | ENSG00000242573 | -1.4085   | 0.92051     | 1.1893      | 0.11717     | -1.4085     |         |
|           |                 | 0.92051   | -1.4085     | 0.92051     | 0.11717     | 0.579017757 |         |
| NA        | ENSG00000280354 | 1.1892    | 0.11717     | 1.1892      | 0.11717     | 1.1892      | 0.11717 |
|           |                 | 1.1892    | 0.11717     | 0.11717     | 0.579017757 |             |         |
| DUXAP1    | ENSG00000259056 | 1.1891    | 0.11719     | 1.1891      | 0.11719     | 1.1891      |         |
|           |                 | 0.11719   | 1.1891      | 0.11719     | 0.11719     | 0.579057869 |         |
| HEMGN     | ENSG00000136929 | 1.1891    | 0.11721     | 1.1891      | 0.11721     | -0.4837     | 0.6857  |
|           |                 | 0.33577   | 0.36852     | 0.11721     | 0.579079361 |             |         |
| RNU6-938P | ENSG00000223217 | 1.189     | 0.11722     | 1.189       | 0.11722     | 1.189       | 0.11722 |
|           |                 | 0.11722   | 0.11722     | 0.579079361 |             |             |         |
| RN7SL184P | ENSG00000239279 | 1.1054    | 0.13449     | 1.1889      | 0.11723     | 0.60852     |         |
|           |                 | 0.27142   | -1.8889     | 0.97055     | 0.11723     | 0.579079361 |         |
| SFRP5     | ENSG00000120057 | 0.62999   | 0.26435     | 0.62999     | 0.26435     | 0.90013     | 0.18403 |
|           |                 | 1.1888    | 0.11726     | 0.11726     | 0.579140916 |             |         |
| DOCK9     | ENSG00000088387 | 1.1574    | 0.12356     | 0.73474     | 0.23125     | 0.52815     | 0.2987  |
|           |                 | 1.1887    | 0.11727     | 0.11727     | 0.579140916 |             |         |
| PPM1H     | ENSG00000111110 | 0.80708   | 0.20981     | 1.1887      | 0.11728     | 1.1553      | 0.12399 |
|           |                 | -0.29501  | 0.61601     | 0.11728     | 0.579140916 |             |         |
| NA        | ENSG00000268652 | 1.1886    | 0.11729     | 1.1886      | 0.11729     | 1.1886      | 0.11729 |
|           |                 | 1.1886    | 0.11729     | 0.11729     | 0.579140916 |             |         |
| RNU6-525P | ENSG00000200555 | -0.86654  | 0.8069      | -0.86654    | 0.8069      | 1.1885      |         |
|           |                 | 0.11732   | 0.10551     | 0.45799     | 0.11732     | 0.579165202 |         |
| TFEB      | ENSG00000112561 | 1.1884    | 0.11734     | 0.074725    | 0.47022     | 1.0058      | 0.15727 |
|           |                 | -0.88747  | 0.81259     | 0.11734     | 0.579165202 |             |         |
| MIR4650-2 | ENSG00000264494 | 0.26099   | 0.39705     | -0.43737    | 0.66908     | 1.1884      |         |
|           |                 | 0.11735   | -0.81828    | 0.7934      | 0.11735     | 0.579165202 |         |
| GOLGA5P1  | ENSG00000251215 | 1.1883    | 0.11736     | -0.574      | 0.71702     | 1.1883      |         |
|           |                 | 0.11736   | 1.1883      | 0.11736     | 0.11736     | 0.579165202 |         |
| NA        | ENSG00000273181 | 1.1883    | 0.11736     | -1.2071     | 0.8863      | -1.2071     | 0.8863  |
|           |                 | -1.2071   | 0.8863      | 0.11736     | 0.579165202 |             |         |
| RPL5P11   | ENSG00000242882 | 0.46475   | 0.32106     | 1.1883      | 0.11737     | -1.1901     | 0.883   |
|           |                 | -1.1901   | 0.883       | 0.11737     | 0.579165202 |             |         |
| NA        | ENSG00000260496 | 1.0461    | 0.14776     | 1.1882      | 0.11738     | -0.54352    | 0.70661 |
|           |                 | -0.20267  | 0.5803      | 0.11738     | 0.579165202 |             |         |
| NA        | ENSG00000237227 | 1.1881    | 0.11739     | 1.1881      | 0.11739     | 1.1881      | 0.11739 |
|           |                 | 1.1881    | 0.11739     | 0.11739     | 0.579165202 |             |         |
| NA        | ENSG00000235389 | 1.188     | 0.11742     | 1.188       | 0.11742     | 1.188       | 0.11742 |
|           |                 | 0.11742   | 0.579216458 |             |             |             |         |
| NA        | ENSG00000271778 | 1.1879    | 0.11743     | 1.1668      | 0.12164     | -0.64555    | 0.74071 |
|           |                 | -0.64555  | 0.74071     | 0.11743     | 0.579216458 |             |         |
| NA        | ENSG00000271034 | 1.1878    | 0.11746     | 1.1878      | 0.11746     | 1.1878      | 0.11746 |
|           |                 | 1.1878    | 0.11746     | 0.11746     | 0.579216458 |             |         |
| NA        | ENSG00000228683 | 1.1876    | 0.1175      | -0.41874    | 0.6623      | 1.1876      | 0.1175  |
|           |                 | -0.26879  | 0.60595     | 0.1175      | 0.579216458 |             |         |
| TGS1      | ENSG00000137574 | 1.1875    | 0.11751     | 0.31576     | 0.37609     | 0.48552     | 0.31365 |
|           |                 | 0.86085   | 0.19466     | 0.11751     | 0.579216458 |             |         |
| MRPS31P2  | ENSG00000232894 | -2.1363   | 0.98367     | 1.1875      | 0.11751     | -1.8589     |         |
|           |                 | 0.96848   | -1.3914     | 0.91795     | 0.11751     | 0.579216458 |         |
| C3orf22   | ENSG00000180697 | -2.2254   | 0.98697     | 1.1874      | 0.11753     | -1.1117     |         |
|           |                 | 0.86687   | -1.08       | 0.85992     | 0.11753     | 0.579216458 |         |
| HSP90AB7P | ENSG00000235838 | 1.1874    | 0.11753     | -0.94143    | 0.82676     | 1.1874      |         |
|           |                 | 0.11753   | 1.1874      | 0.11753     | 0.11753     | 0.579216458 |         |
| HOXA11    | ENSG00000005073 | 1.1874    | 0.11754     | 0.97355     | 0.16514     | 1.1843      |         |
|           |                 | 0.11816   | -0.72507    | 0.7658      | 0.11754     | 0.579216458 |         |
| NA        | ENSG00000248114 | 0.29885   | 0.38253     | 0.50021     | 0.30846     | 1.1874      | 0.11754 |
|           |                 | 1.1874    | 0.11754     | 0.11754     | 0.579216458 |             |         |

|               |                 |           |         |          |             |             |         |
|---------------|-----------------|-----------|---------|----------|-------------|-------------|---------|
| NA            | ENSG00000253512 | 1.1874    | 0.11754 | 1.1874   | 0.11754     | 1.1874      | 0.11754 |
|               |                 | 1.0806    | 0.13993 | 0.11754  | 0.579216458 |             |         |
| BACH1-IT3     | ENSG00000234293 | 0.37423   | 0.35412 | 1.1873   | 0.11756     | 0.024855    |         |
|               |                 | 0.49009   | 0.24447 | 0.40343  | 0.11756     | 0.579216458 |         |
| NA            | ENSG00000236075 | 1.1029    | 0.13504 | 0.73375  | 0.23155     | 0.3211      | 0.37407 |
|               |                 | 1.1872    | 0.11758 | 0.11758  | 0.579216458 |             |         |
| ZNF829        | ENSG00000185869 | 1.1871    | 0.11759 | 0.22327  | 0.41166     | 1.1871      |         |
|               |                 | 0.11759   | 1.1871  | 0.11759  | 0.11759     | 0.579216458 |         |
| LINC01770     | ENSG00000225285 | 1.1871    | 0.1176  | 1.1871   | 0.1176      | 1.1871      |         |
|               |                 | 0.1176    | 1.1871  | 0.1176   | 0.1176      | 0.579216458 |         |
| STX1A         | ENSG00000106089 | -0.83536  | 0.79824 | 1.1870   | 0.11761     | -0.99949    | 0.84122 |
|               |                 | -0.16088  | 0.56391 | 0.11761  | 0.579216458 |             |         |
| CIR1P1        | ENSG00000253146 | 1.1599    | 0.12304 | 1.1869   | 0.11763     | 1.1599      |         |
|               |                 | 0.12304   | 1.1599  | 0.12304  | 0.11763     | 0.579216458 |         |
| NA            | ENSG00000284209 | 1.1869    | 0.11763 | 0.87532  | 0.1907      | -0.16975    | 0.5674  |
|               |                 | -0.16975  | 0.5674  | 0.11763  | 0.579216458 |             |         |
| PRF1          | ENSG00000180644 | -0.19821  | 0.57856 | 1.1869   | 0.11764     | -0.93221    | 0.82439 |
|               |                 | -1.3139   | 0.90557 | 0.11764  | 0.579216458 |             |         |
| TLX1          | ENSG00000107807 | 1.1868    | 0.11765 | -1.2736  | 0.8986      | -0.13624    | 0.55419 |
|               |                 | -0.8797   | 0.81049 | 0.11765  | 0.579216458 |             |         |
| NA            | ENSG00000275457 | 1.1868    | 0.11765 | 1.1868   | 0.11765     | 1.1868      | 0.11765 |
|               |                 | 1.1868    | 0.11765 | 0.11765  | 0.579216458 |             |         |
| NA            | ENSG00000279076 | 0.3612    | 0.35897 | 1.1865   | 0.11771     | 1.1865      | 0.11771 |
|               |                 | 1.063     | 0.14388 | 0.11771  | 0.579387805 |             |         |
| DUS1L         | ENSG00000169718 | 0.19203   | 0.42386 | 1.1864   | 0.11774     | 0.99255     | 0.16046 |
|               |                 | -1.044    | 0.85175 | 0.11774  | 0.579387805 |             |         |
| NA            | ENSG00000100101 | 0.44116   | 0.32955 | -0.56927 | 0.71541     | 1.1863      | 0.11776 |
|               |                 | -0.59645  | 0.72456 | 0.11776  | 0.579387805 |             |         |
| PCDHGA1       | ENSG00000204956 | 1.1863    | 0.11776 | 0.74412  | 0.2284      | 1.1863      |         |
|               |                 | 0.11776   | 1.1863  | 0.11776  | 0.11776     | 0.579387805 |         |
| RN7SL518P     | ENSG00000265486 | 1.1862    | 0.11776 | 1.1862   | 0.11776     | 1.1862      |         |
|               |                 | 0.11776   | 1.1862  | 0.11776  | 0.11776     | 0.579387805 |         |
| CCDC144NL-AS1 | ENSG00000233098 | -0.044488 | 0.51774 | 1.1861   | 0.11779     | 0.30983     |         |
|               |                 | 0.37835   | 1.1594  | 0.12314  | 0.11779     | 0.579387805 |         |
| GSPT1         | ENSG00000103342 | 0.18908   | 0.42502 | 0.71891  | 0.2361      | 0.24908     | 0.40165 |
|               |                 | 1.1859    | 0.11782 | 0.11782  | 0.579387805 |             |         |
| EAPP          | ENSG00000129518 | 1.1859    | 0.11782 | 0.64326  | 0.26003     | 1.1859      | 0.11782 |
|               |                 | -0.29198  | 0.61485 | 0.11782  | 0.579387805 |             |         |
| NA            | ENSG00000222274 | 0.86882   | 0.19247 | 1.1860   | 0.11782     | 0.75594     | 0.22484 |
|               |                 | 0.62091   | 0.26733 | 0.11782  | 0.579387805 |             |         |
| ERF           | ENSG00000105722 | 1.1859    | 0.11783 | 0.81683  | 0.20701     | 0.92369     | 0.17782 |
|               |                 | 0.99227   | 0.16053 | 0.11783  | 0.579387805 |             |         |
| SHISA5        | ENSG00000164054 | 0.78251   | 0.21696 | 1.1859   | 0.11783     | 0.44664     |         |
|               |                 | 0.32757   | 0.96608 | 0.167    | 0.11783     | 0.579387805 |         |
| CRTC1         | ENSG00000105662 | 0.25501   | 0.39936 | -0.0136  | 0.50543     | -0.22835    | 0.59031 |
|               |                 | 1.1856    | 0.11788 | 0.11788  | 0.579387805 |             |         |
| ZNF30         | ENSG00000168661 | 1.1856    | 0.1179  | 1.1856   | 0.1179      | 1.1856      | 0.1179  |
|               |                 | 0.53722   | 0.29556 | 0.1179   | 0.579387805 |             |         |
| LINC01595     | ENSG00000259108 | 1.1855    | 0.1179  | 1.1855   | 0.1179      | 1.1855      |         |
|               |                 | 0.1179    | 1.1855  | 0.1179   | 0.1179      | 0.579387805 |         |
| NA            | ENSG00000279345 | 0.24097   | 0.40479 | 1.1855   | 0.1179      | 0.24097     | 0.40479 |
|               |                 | 0.24097   | 0.40479 | 0.1179   | 0.579387805 |             |         |
| MIR339        | ENSG00000199023 | 1.1855    | 0.11791 | 1.1855   | 0.11791     | 0.55688     |         |
|               |                 | 0.28881   | 1.1855  | 0.11791  | 0.11791     | 0.579387805 |         |
| NPVF          | ENSG00000105954 | -1.1754   | 0.88007 | -1.0219  | 0.84659     | 1.1855      | 0.11792 |
|               |                 | -1.0219   | 0.84659 | 0.11792  | 0.579387805 |             |         |
| MTRF1L        | ENSG00000112031 | 0.036061  | 0.48562 | 1.1854   | 0.11793     | 0.51457     |         |
|               |                 | 0.30343   | 1.1854  | 0.11793  | 0.11793     | 0.579387805 |         |
| NA            | ENSG00000252228 | -0.38723  | 0.65071 | -0.10582 | 0.54214     | 1.1854      | 0.11794 |
|               |                 | 1.1854    | 0.11794 | 0.11794  | 0.579387805 |             |         |
| NA            | ENSG00000202269 | 1.1853    | 0.11795 | 1.1853   | 0.11795     | -1.3026     | 0.90364 |
|               |                 | -0.69858  | 0.75759 | 0.11795  | 0.579387805 |             |         |



|            |                 |            |             |             |             |          |         |             |
|------------|-----------------|------------|-------------|-------------|-------------|----------|---------|-------------|
| CTNNA1     | ENSG00000044115 | -0.73079   | 0.76755     | -0.65736    | 0.74453     | 0.15369  |         |             |
|            | 0.43893         | 1.1852     | 0.11797     | 0.11797     | 0.579387805 |          |         |             |
| NA         | ENSG00000267714 | 1.1851     | 0.11799     | 1.1851      | 0.11799     | 1.1851   | 0.11799 |             |
|            | 1.1851          | 0.11799    | 0.11799     | 0.579387805 |             |          |         |             |
| NA         | ENSG00000271825 | 1.185      | 0.118       | 1.185       | 0.118       | 1.185    | 0.118   | 0.579387805 |
| RAET1L     | ENSG00000155918 | 0.81918    | 0.20634     | 1.185       | 0.11801     | 0.27606  | 0.39125 |             |
|            | -0.3812         | 0.64847    | 0.11801     | 0.579387805 |             |          |         |             |
| RNU6-1039P | ENSG00000206658 | 1.1849     | 0.11803     | -0.29998    | 0.6179      | -0.29998 |         |             |
|            | 0.6179          | -0.29998   | 0.6179      | 0.11803     | 0.579387805 |          |         |             |
| NA         | ENSG00000253824 | -0.0095135 | 0.5038      | -0.61689    | 0.73135     | 1.1712   | 0.12076 |             |
|            | 1.1849          | 0.11803    | 0.11803     | 0.579387805 |             |          |         |             |
| NA         | ENSG00000233028 | 1.1848     | 0.11804     | -0.8983     | 0.81549     | -1.0583  | 0.85505 |             |
|            | 0.027444        | 0.48905    | 0.11804     | 0.579387805 |             |          |         |             |
| RN7SKP33   | ENSG00000222874 | 0.7904     | 0.21465     | 1.1848      | 0.11805     | 0.64952  | 0.258   |             |
|            | 0.75347         | 0.22558    | 0.11805     | 0.579387805 |             |          |         |             |
| TEX19      | ENSG00000182459 | 0.33708    | 0.36803     | -1.0387     | 0.85052     | -0.83409 | 0.79788 |             |
|            | 1.1847          | 0.11806    | 0.11806     | 0.579387805 |             |          |         |             |
| KCNMA1-AS2 | ENSG00000225497 | 1.1847     | 0.11806     | -0.29642    | 0.61654     | -1.9776  |         |             |
|            | 0.97602         | -1.0095    | 0.84363     | 0.11806     | 0.579387805 |          |         |             |
| NBEA       | ENSG00000172915 | -0.36583   | 0.64276     | 0.72459     | 0.23435     | 1.1846   | 0.11809 |             |
|            | -0.37775        | 0.64719    | 0.11809     | 0.579387805 |             |          |         |             |
| GPRC5D-AS1 | ENSG00000247498 | -0.69218   | 0.75559     | 1.1845      | 0.11811     | -0.41402 |         |             |
|            | 0.66057         | -0.41402   | 0.66057     | 0.11811     | 0.579387805 |          |         |             |
| UBBP4      | ENSG00000263563 | 1.1845     | 0.11811     | 0.32551     | 0.3724      | -0.3011  | 0.61833 |             |
|            | 0.20481         | 0.41886    | 0.11811     | 0.579387805 |             |          |         |             |
| RNU4-31P   | ENSG00000206938 | -0.43247   | 0.6673      | 0.32466     | 0.37272     | 0.32466  |         |             |
|            | 0.37272         | 1.1843     | 0.11815     | 0.11815     | 0.579387805 |          |         |             |
| ZNF790     | ENSG00000197863 | 0.015282   | 0.4939      | 1.1843      | 0.11816     | 1.1843   |         |             |
|            | 0.11816         | 1.1843     | 0.11816     | 0.11816     | 0.579387805 |          |         |             |
| CNOT6      | ENSG00000113300 | 1.1287     | 0.12952     | 1.1842      | 0.11817     | 1.0429   | 0.14849 |             |
|            | 1.0489          | 0.1471     | 0.11817     | 0.579387805 |             |          |         |             |
| TCTEX1D2   | ENSG00000213123 | 0.60507    | 0.27257     | 1.1842      | 0.11818     | 0.024776 |         |             |
|            | 0.49012         | 0.080334   | 0.46799     | 0.11818     | 0.579387805 |          |         |             |
| LCAT       | ENSG00000213398 | 1.1841     | 0.11819     | 1.1841      | 0.11819     | 1.1841   | 0.11819 |             |
|            | 1.1841          | 0.11819    | 0.11819     | 0.579387805 |             |          |         |             |
| HDAC1      | ENSG00000116478 | 0.44161    | 0.32938     | 1.1514      | 0.12479     | 0.43824  | 0.33061 |             |
|            | 1.1839          | 0.11823    | 0.11823     | 0.579387805 |             |          |         |             |
| HPS3       | ENSG00000163755 | 1.1839     | 0.11823     | -0.32937    | 0.62906     | 0.44915  | 0.32666 |             |
|            | 1.113           | 0.13286    | 0.11823     | 0.579387805 |             |          |         |             |
| MIR2053    | ENSG00000238399 | 1.1838     | 0.11825     | 1.1838      | 0.11825     | 1.1838   |         |             |
|            | 0.11825         | 1.1838     | 0.11825     | 0.11825     | 0.579387805 |          |         |             |
| ZSCAN5C    | ENSG00000204532 | 1.1837     | 0.11826     | 0.2364      | 0.40656     | 0.63723  |         |             |
|            | 0.26199         | 0.57002    | 0.28433     | 0.11826     | 0.579387805 |          |         |             |
| SERINC5    | ENSG00000164300 | -0.31025   | 0.62182     | 0.043105    | 0.48281     | -0.69621 |         |             |
|            | 0.75685         | 1.1836     | 0.11829     | 0.11829     | 0.579387805 |          |         |             |
| NA         | ENSG00000234259 | -0.67469   | 0.75006     | -0.67469    | 0.75006     | 0.25962  | 0.39758 |             |
|            | 1.1836          | 0.11829    | 0.11829     | 0.579387805 |             |          |         |             |
| IQCA1L     | ENSG00000278685 | -0.59311   | 0.72345     | -0.59311    | 0.72345     | -0.59311 |         |             |
|            | 0.72345         | 1.1836     | 0.11829     | 0.11829     | 0.579387805 |          |         |             |
| RNA5SP93   | ENSG00000199395 | -0.23316   | 0.59218     | 1.1835      | 0.1183      | 1.1835   |         |             |
|            | 0.1183          | 1.1835     | 0.1183      | 0.1183      | 0.579387805 |          |         |             |
| RPS6P20    | ENSG00000226356 | -1.3849    | 0.91697     | 0.030834    | 0.4877      | 1.1834   |         |             |
|            | 0.11832         | -0.26795   | 0.60563     | 0.11832     | 0.579387805 |          |         |             |
| SNORA2A    | ENSG00000206612 | -1.3648    | 0.91384     | 1.1832      | 0.11837     | 1.1832   |         |             |
|            | 0.11837         | 1.1832     | 0.11837     | 0.11837     | 0.579387805 |          |         |             |
| NA         | ENSG00000251017 | -0.11743   | 0.54674     | 0.45637     | 0.32406     | 0.13557  | 0.44608 |             |
|            | 1.1832          | 0.11837    | 0.11837     | 0.579387805 |             |          |         |             |
| PHBP11     | ENSG00000227621 | 1.183      | 0.1184      | 1.183       | 0.1184      | 1.183    | 0.1184  | -0.49029    |
|            | 0.68803         | 0.1184     | 0.579387805 |             |             |          |         |             |
| NA         | ENSG00000279278 | 0.084863   | 0.46619     | 1.1829      | 0.11842     | 0.77985  | 0.21774 |             |
|            | 0.022336        | 0.49109    | 0.11842     | 0.579387805 |             |          |         |             |
| CWH43      | ENSG00000109182 | -0.69359   | 0.75603     | 1.1829      | 0.11843     | -0.14488 | 0.5576  |             |

|           |                 |           |             |             |             |          |         |       |
|-----------|-----------------|-----------|-------------|-------------|-------------|----------|---------|-------|
|           | -0.4149         | 0.66089   | 0.11843     | 0.579387805 |             |          |         |       |
| APEH      | ENSG00000164062 | -0.75967  | 0.77627     | -1.3559     | 0.91243     | -1.4908  | 0.932   |       |
|           | 1.1828          | 0.11845   | 0.11845     | 0.579387805 |             |          |         |       |
| CENPCP1   | ENSG00000226982 | 1.1827    | 0.11846     | 1.1827      | 0.11846     | 1.1827   |         |       |
|           | 0.11846         | 1.1827    | 0.11846     | 0.11846     | 0.579387805 |          |         |       |
| BNIP3P41  | ENSG00000248302 | 0.26685   | 0.39479     | 0.50811     | 0.30569     | 1.1826   |         |       |
|           | 0.11847         | 1.0389    | 0.14943     | 0.11847     | 0.579387805 |          |         |       |
| NA        | ENSG00000254574 | 1.1826    | 0.11848     | 1.1826      | 0.11848     | 1.1826   | 0.11848 |       |
|           | 1.1826          | 0.11848   | 0.11848     | 0.579387805 |             |          |         |       |
| NA        | ENSG00000279943 | 1.1825    | 0.1185      | 1.1825      | 0.1185      | 1.1825   | 0.1185  |       |
|           | 1.1825          | 0.1185    | 0.1185      | 0.579387805 |             |          |         |       |
| CRYGS     | ENSG00000213139 | 0.16342   | 0.43509     | 0.18176     | 0.42788     | 1.1824   | 0.11852 |       |
|           | 1.1824          | 0.11852   | 0.11852     | 0.579387805 |             |          |         |       |
| RN7SL328P | ENSG00000240853 | -0.012589 | 0.50502     | -0.28809    | 0.61336     | 1.1824   |         |       |
|           | 0.11853         | -0.30342  | 0.61921     | 0.11853     | 0.579387805 |          |         |       |
| NA        | ENSG00000250848 | -0.72934  | 0.7671      | 1.1824      | 0.11853     | 0.48004  | 0.3156  |       |
|           | 0.41806         | 0.33795   | 0.11853     | 0.579387805 |             |          |         |       |
| RRP36     | ENSG00000124541 | 1.1823    | 0.11854     | 1.1823      | 0.11854     | 1.094    | 0.13698 | 1.094 |
|           | 0.13698         | 0.11854   | 0.579387805 |             |             |          |         |       |
| THUMPD2   | ENSG00000138050 | 1.1823    | 0.11854     | 0.71135     | 0.23844     | 0.78655  |         |       |
|           | 0.21577         | 0.78655   | 0.21577     | 0.11854     | 0.579387805 |          |         |       |
| PDE8B     | ENSG00000113231 | -0.558    | 0.71158     | 1.1823      | 0.11855     | -1.4634  | 0.92833 |       |
|           | -1.3298         | 0.90821   | 0.11855     | 0.579387805 |             |          |         |       |
| RNU6-422P | ENSG00000207362 | 1.1822    | 0.11856     | 1.1822      | 0.11856     | 1.1822   |         |       |
|           | 0.11856         | 1.1822    | 0.11856     | 0.11856     | 0.579387805 |          |         |       |
| KCNK3     | ENSG00000171303 | 1.1822    | 0.11857     | -0.28434    | 0.61192     | -0.1783  | 0.57076 |       |
|           | 0.30849         | 0.37885   | 0.11857     | 0.579387805 |             |          |         |       |
| NA        | ENSG00000253768 | -0.1154   | 0.54594     | 1.1822      | 0.11857     | 0.60688  | 0.27197 |       |
|           | -0.34928        | 0.63656   | 0.11857     | 0.579387805 |             |          |         |       |
| LINC02109 | ENSG00000259786 | 0.17096   | 0.43213     | 0.67597     | 0.24953     | 1.1822   |         |       |
|           | 0.11857         | 0.67597   | 0.24953     | 0.11857     | 0.579387805 |          |         |       |
| NA        | ENSG00000271302 | 0.97443   | 0.16492     | 1.1821      | 0.11859     | 1.1821   | 0.11859 |       |
|           | 0.40909         | 0.34124   | 0.11859     | 0.579387805 |             |          |         |       |
| SEL1L     | ENSG00000071537 | -0.44654  | 0.6724      | -0.34331    | 0.63432     | 1.1137   | 0.1327  |       |
|           | 1.182           | 0.11861   | 0.11861     | 0.579387805 |             |          |         |       |
| DIRC3-AS1 | ENSG00000233143 | 1.182     | 0.11861     | 1.0867      | 0.13858     | 0.46758  | 0.32004 |       |
|           | -0.14072        | 0.55596   | 0.11861     | 0.579387805 |             |          |         |       |
| ILF3      | ENSG00000129351 | 0.8388    | 0.20079     | 0.82211     | 0.20551     | 1.1819   | 0.11862 |       |
|           | 0.77269         | 0.21985   | 0.11862     | 0.579387805 |             |          |         |       |
| MIOX      | ENSG00000100253 | 1.1818    | 0.11864     | 1.1818      | 0.11864     | 1.1818   | 0.11864 |       |
|           | 1.1818          | 0.11864   | 0.11864     | 0.579387805 |             |          |         |       |
| RNASEH2C  | ENSG00000172922 | -0.50447  | 0.69303     | -0.50447    | 0.69303     | -0.55845 |         |       |
|           | 0.71173         | 1.1818    | 0.11864     | 0.11864     | 0.579387805 |          |         |       |
| PLAC9P1   | ENSG00000214100 | 1.1538    | 0.12428     | 1.1818      | 0.11864     | 0.37739  |         |       |
|           | 0.35294         | 0.11137   | 0.45566     | 0.11864     | 0.579387805 |          |         |       |
| PCDHGA12  | ENSG00000253159 | 0.59993   | 0.27428     | -0.08305    | 0.53309     | 0.59993  |         |       |
|           | 0.27428         | 1.1818    | 0.11864     | 0.11864     | 0.579387805 |          |         |       |
| NA        | ENSG00000248478 | 0.83499   | 0.20186     | -1.1798     | 0.88097     | 0.57196  | 0.28368 |       |
|           | 1.1818          | 0.11864   | 0.11864     | 0.579387805 |             |          |         |       |
| NA        | ENSG00000225304 | -0.28297  | 0.6114      | 1.1816      | 0.11869     | -0.28297 | 0.6114  |       |
|           | -0.28297        | 0.6114    | 0.11869     | 0.579387805 |             |          |         |       |
| MEIOC     | ENSG00000180336 | 0.97813   | 0.16401     | 0.018185    | 0.49275     | 1.1815   | 0.1187  |       |
|           | 0.94144         | 0.17324   | 0.1187      | 0.579387805 |             |          |         |       |
| LINC01470 | ENSG00000249484 | 0.22835   | 0.40969     | 1.1815      | 0.1187      | -0.16695 |         |       |
|           | 0.56629         | 0.65681   | 0.25565     | 0.1187      | 0.579387805 |          |         |       |
| NA        | ENSG00000271192 | -1.1185   | 0.86831     | 0.46218     | 0.32198     | 0.81615  | 0.20721 |       |
|           | 1.1815          | 0.1187    | 0.1187      | 0.579387805 |             |          |         |       |
| NA        | ENSG00000262370 | -0.8778   | 0.80997     | 0.29769     | 0.38297     | 0.97899  | 0.16379 |       |
|           | 1.1815          | 0.11871   | 0.11871     | 0.579387805 |             |          |         |       |
| PLCXD3    | ENSG00000182836 | 1.1814    | 0.11873     | -0.84241    | 0.80022     | 0.33846  |         |       |
|           | 0.36751         | 1.1814    | 0.11873     | 0.11873     | 0.579387805 |          |         |       |
| VAV2      | ENSG00000160293 | 0.84585   | 0.19882     | 1.1813      | 0.11874     | 0.47177  | 0.31855 |       |

|              |                 |            |             |             |             |          |         |       |
|--------------|-----------------|------------|-------------|-------------|-------------|----------|---------|-------|
|              | 1.077           | 0.14074    | 0.11874     | 0.579387805 |             |          |         |       |
| TMEM151B     | ENSG00000178233 | 1.1813     | 0.11875     | 0.21328     | 0.41555     | 1.0262   |         |       |
|              | 0.15239         | 1.0262     | 0.15239     | 0.11875     | 0.579387805 |          |         |       |
| COX6CP13     | ENSG00000234144 | 1.1813     | 0.11875     | 1.1813      | 0.11875     | 1.1813   |         |       |
|              | 0.11875         | 1.1813     | 0.11875     | 0.11875     | 0.579387805 |          |         |       |
| NA           | ENSG00000258719 | 1.1812     | 0.11875     | 1.1812      | 0.11875     | -0.22625 | 0.5895  |       |
|              | 1.1812          | 0.11875    | 0.11875     | 0.579387805 |             |          |         |       |
| NA           | ENSG00000224888 | 1.1811     | 0.11878     | 1.1811      | 0.11878     | 1.1811   | 0.11878 |       |
|              | 1.1811          | 0.11878    | 0.11878     | 0.579387805 |             |          |         |       |
| ZNF57        | ENSG00000171970 | 1.181      | 0.1188      | 1.1665      | 0.12171     | 1.181    | 0.1188  | 1.181 |
|              | 0.1188          | 0.1188     | 0.579387805 |             |             |          |         |       |
| FANCA        | ENSG00000187741 | 0.84018    | 0.2004      | 0.66831     | 0.25197     | 0.79162  | 0.21429 |       |
|              | 1.181           | 0.1188     | 0.1188      | 0.579387805 |             |          |         |       |
| OR7E16P      | ENSG00000267775 | 0.17522    | 0.43045     | 1.181       | 0.1188      | 0.65429  | 0.25646 |       |
|              | 0.14585         | 0.44202    | 0.1188      | 0.579387805 |             |          |         |       |
| PHF13        | ENSG00000116273 | 1.1809     | 0.11881     | 1.1173      | 0.13192     | 1.1809   | 0.11881 |       |
|              | 1.1809          | 0.11881    | 0.11881     | 0.579387805 |             |          |         |       |
| ARHGFE19-AS1 | ENSG00000234166 | -1.1678    | 0.87856     | 1.181       | 0.11881     | -1.1678  |         |       |
|              | 0.87856         | -1.1678    | 0.87856     | 0.11881     | 0.579387805 |          |         |       |
| SERPINB9     | ENSG00000170542 | 0.53851    | 0.29511     | 1.1809      | 0.11882     | 0.39547  |         |       |
|              | 0.34625         | 0.074881   | 0.47015     | 0.11882     | 0.579387805 |          |         |       |
| NA           | ENSG00000268655 | 1.1809     | 0.11882     | 1.1809      | 0.11882     | 1.1809   | 0.11882 |       |
|              | 1.1809          | 0.11882    | 0.11882     | 0.579387805 |             |          |         |       |
| NA           | ENSG00000224844 | 0.41193    | 0.3402      | -2.1932     | 0.98585     | -0.84081 | 0.79977 |       |
|              | 1.1808          | 0.11883    | 0.11883     | 0.579387805 |             |          |         |       |
| OFD1P17      | ENSG00000228212 | 1.1808     | 0.11883     | 1.1116      | 0.13315     | 1.1116   |         |       |
|              | 0.13315         | 1.1116     | 0.13315     | 0.11883     | 0.579387805 |          |         |       |
| NA           | ENSG00000265689 | -0.3536    | 0.63818     | -2.362      | 0.99091     | -1.068   | 0.85725 |       |
|              | 1.1808          | 0.11884    | 0.11884     | 0.579387805 |             |          |         |       |
| MIR4316      | ENSG00000264060 | 1.1807     | 0.11885     | 1.1807      | 0.11885     | 1.1807   |         |       |
|              | 0.11885         | 1.1807     | 0.11885     | 0.11885     | 0.579387805 |          |         |       |
| NA           | ENSG00000275894 | 1.1807     | 0.11887     | 1.1807      | 0.11887     | 1.1807   | 0.11887 |       |
|              | 1.1807          | 0.11887    | 0.11887     | 0.579411585 |             |          |         |       |
| NA           | ENSG00000229052 | 1.1805     | 0.11889     | 1.0666      | 0.14308     | 1.1805   | 0.11889 |       |
|              | 0.79272         | 0.21397    | 0.11889     | 0.579411585 |             |          |         |       |
| RN7SL244P    | ENSG00000242865 | 1.1805     | 0.1189      | 0.96556     | 0.16713     | 0.96556  |         |       |
|              | 0.16713         | 0.96556    | 0.16713     | 0.1189      | 0.579411585 |          |         |       |
| ANAPC10      | ENSG00000164162 | 0.98357    | 0.16266     | 0.62481     | 0.26605     | 1.1804   |         |       |
|              | 0.11892         | 0.66335    | 0.25355     | 0.11892     | 0.579411585 |          |         |       |
| KRTAP5-AS1   | ENSG00000233930 | 1.1804     | 0.11892     | -0.73061    | 0.76749     | -0.81075 |         |       |
|              | 0.79124         | -0.81075   | 0.79124     | 0.11892     | 0.579411585 |          |         |       |
| NA           | ENSG00000273550 | -0.06149   | 0.52452     | 1.1803      | 0.11894     | 0.087245 | 0.46524 |       |
|              | 0.68079         | 0.248      | 0.11894     | 0.579411585 |             |          |         |       |
| NA           | ENSG00000259084 | 1.1802     | 0.11895     | 1.1802      | 0.11895     | 1.1802   | 0.11895 |       |
|              | 1.1802          | 0.11895    | 0.11895     | 0.579411585 |             |          |         |       |
| EIF4A3P1     | ENSG00000266181 | 0.42499    | 0.33542     | 0.42499     | 0.33542     | 0.60987  |         |       |
|              | 0.27097         | 1.1803     | 0.11895     | 0.11895     | 0.579411585 |          |         |       |
| NA           | ENSG00000199461 | 0.90578    | 0.18253     | 1.1801      | 0.11897     | 1.1801   | 0.11897 |       |
|              | 1.1801          | 0.11897    | 0.11897     | 0.579451084 |             |          |         |       |
| ARHGAP35     | ENSG00000160007 | 1.1798     | 0.11903     | 0.77211     | 0.22002     | 0.49251  |         |       |
|              | 0.31118         | 0.099488   | 0.46038     | 0.11903     | 0.579685379 |          |         |       |
| OR4K16P      | ENSG00000258822 | 1.1797     | 0.11906     | -0.32409    | 0.62706     | -0.76709 |         |       |
|              | 0.77849         | -0.76709   | 0.77849     | 0.11906     | 0.579727357 |          |         |       |
| SMPDL3A      | ENSG00000172594 | 1.1797     | 0.11907     | 1.1797      | 0.11907     | 1.1797   |         |       |
|              | 0.11907         | 1.1797     | 0.11907     | 0.11907     | 0.579727357 |          |         |       |
| ZNF141       | ENSG00000131127 | 1.1796     | 0.11908     | 1.1796      | 0.11908     | 1.1796   |         |       |
|              | 0.11908         | -0.0010862 | 0.50043     | 0.11908     | 0.579727357 |          |         |       |
| NA           | ENSG00000271971 | 1.1796     | 0.11909     | 1.1796      | 0.11909     | 1.1796   | 0.11909 |       |
|              | 1.1796          | 0.11909    | 0.11909     | 0.579727357 |             |          |         |       |
| OTX2         | ENSG00000165588 | 0.18857    | 0.42521     | 0.18857     | 0.42521     | 1.1795   | 0.11911 |       |
|              | 0.18857         | 0.42521    | 0.11911     | 0.579727357 |             |          |         |       |
| LAMC1-AS1    | ENSG00000224468 | 1.1794     | 0.11911     | 1.1794      | 0.11911     | 1.1794   |         |       |

|            |                 |           |         |             |             |           |         |  |
|------------|-----------------|-----------|---------|-------------|-------------|-----------|---------|--|
|            | 0.11911         | 1.1794    | 0.11911 | 0.11911     | 0.579727357 |           |         |  |
| GNLY       | ENSG00000115523 | 0.28156   | 0.38914 | 0.5635      | 0.28655     | 1.1794    | 0.11913 |  |
|            | 0.22529         | 0.41088   | 0.11913 | 0.579766793 |             |           |         |  |
| ALDH8A1    | ENSG00000118514 | 1.1793    | 0.11915 | 0.79475     | 0.21338     | -0.65814  |         |  |
|            | 0.74477         | 0.0815    | 0.46752 | 0.11915     | 0.579806221 |           |         |  |
| VPS13A-AS1 | ENSG00000232998 | 1.179     | 0.1192  | 0.0037036   | 0.49852     | 0.0037036 | 0.49852 |  |
|            | 0.0037036       | 0.49852   | 0.1192  | 0.579915213 |             |           |         |  |
| GRIFIN     | ENSG00000275572 | 1.1789    | 0.11921 | 0.33024     | 0.37061     | 0.1143    |         |  |
|            | 0.4545          | 0.66427   | 0.25326 | 0.11921     | 0.579915213 |           |         |  |
| LINC00272  | ENSG00000203729 | 0.79648   | 0.21288 | -1.3696     | 0.91459     | 1.1789    |         |  |
|            | 0.11922         | -0.62903  | 0.73533 | 0.11922     | 0.579915213 |           |         |  |
| NA         | ENSG00000235182 | 1.1789    | 0.11922 | 1.1789      | 0.11922     | 1.1789    | 0.11922 |  |
|            | 1.1789          | 0.11922   | 0.11922 | 0.579915213 |             |           |         |  |
| PTCD3      | ENSG00000132300 | -0.071672 | 0.52857 | -0.13099    | 0.55211     | 1.1788    | 0.11924 |  |
|            | 0.95055         | 0.17092   | 0.11924 | 0.579915639 |             |           |         |  |
| LINC02434  | ENSG00000248370 | 0.44416   | 0.32846 | 0.31669     | 0.37574     | 1.1786    |         |  |
|            | 0.11928         | 0.29974   | 0.38219 | 0.11928     | 0.579915639 |           |         |  |
| C10orf55   | ENSG00000222047 | 0.74752   | 0.22737 | 0.59307     | 0.27657     | 1.1784    |         |  |
|            | 0.11931         | 0.68235   | 0.24751 | 0.11931     | 0.579915639 |           |         |  |
| NA         | ENSG00000264871 | -0.091218 | 0.53634 | 0.24344     | 0.40383     | 1.1784    | 0.11932 |  |
|            | 0.81317         | 0.20806   | 0.11932 | 0.579915639 |             |           |         |  |
| NA         | ENSG00000253390 | 1.1784    | 0.11933 | 1.1784      | 0.11933     | 1.1784    | 0.11933 |  |
|            | 0.63105         | 0.26401   | 0.11933 | 0.579915639 |             |           |         |  |
| LINC01494  | ENSG00000228135 | 0.85939   | 0.19506 | 1.0358      | 0.15015     | 1.1783    |         |  |
|            | 0.11934         | 1.0358    | 0.15015 | 0.11934     | 0.579915639 |           |         |  |
| NA         | ENSG00000268362 | 1.1782    | 0.11936 | 0.83513     | 0.20182     | 0.83513   | 0.20182 |  |
|            | 0.88101         | 0.18916   | 0.11936 | 0.579915639 |             |           |         |  |
| PPA2       | ENSG00000138777 | -0.15592  | 0.56195 | -0.070496   | 0.5281      | 0.57166   | 0.28378 |  |
|            | 1.1781          | 0.11937   | 0.11937 | 0.579915639 |             |           |         |  |
| MCCC2      | ENSG00000131844 | 0.15818   | 0.43716 | 0.04954     | 0.48024     | 1.1781    | 0.11938 |  |
|            | 1.0953          | 0.13669   | 0.11938 | 0.579915639 |             |           |         |  |
| RNA5SP157  | ENSG00000251816 | -0.36292  | 0.64167 | 1.1781      | 0.11938     | 1.1781    |         |  |
|            | 0.11938         | 1.1781    | 0.11938 | 0.11938     | 0.579915639 |           |         |  |
| NA         | ENSG00000266088 | -0.68808  | 0.7543  | 0.33542     | 0.36866     | -0.56924  | 0.7154  |  |
|            | 1.178           | 0.11939   | 0.11939 | 0.579915639 |             |           |         |  |
| GTF2B      | ENSG00000137947 | 1.178     | 0.1194  | 0.11428     | 0.45451     | 0.11428   | 0.45451 |  |
|            | 0.98753         | 0.16169   | 0.1194  | 0.579915639 |             |           |         |  |
| TRBV30     | ENSG00000237254 | 1.1779    | 0.11942 | 1.1779      | 0.11942     | 1.1779    |         |  |
|            | 0.11942         | 1.1779    | 0.11942 | 0.11942     | 0.579915639 |           |         |  |
| TRA2B      | ENSG00000136527 | 1.1779    | 0.11943 | 0.13574     | 0.44602     | -0.17972  | 0.57132 |  |
|            | -0.65374        | 0.74336   | 0.11943 | 0.579915639 |             |           |         |  |
| AKR1C3     | ENSG00000196139 | 0.62256   | 0.26679 | 0.74737     | 0.22742     | 0.86507   |         |  |
|            | 0.1935          | 1.1778    | 0.11943 | 0.11943     | 0.579915639 |           |         |  |
| RNU2-31P   | ENSG00000252763 | 0.82892   | 0.20357 | -1.3847     | 0.91693     | 1.1778    |         |  |
|            | 0.11943         | -0.57724  | 0.71811 | 0.11943     | 0.579915639 |           |         |  |
| ESRRB      | ENSG00000119715 | 1.1778    | 0.11944 | -0.49776    | 0.69067     | 0.76986   | 0.22069 |  |
|            | 1.1394          | 0.12727   | 0.11944 | 0.579915639 |             |           |         |  |
| BBOX1      | ENSG00000129151 | -0.14284  | 0.55679 | -0.79325    | 0.78618     | 1.1778    | 0.11944 |  |
|            | -0.10645        | 0.54239   | 0.11944 | 0.579915639 |             |           |         |  |
| RN7SKP101  | ENSG00000223308 | 1.1777    | 0.11945 | 1.1777      | 0.11945     | 1.1777    |         |  |
|            | 0.11945         | 1.0165    | 0.15471 | 0.11945     | 0.579915639 |           |         |  |
| RPS15AP1   | ENSG00000214535 | 1.1777    | 0.11946 | 1.1777      | 0.11946     | 1.1777    |         |  |
|            | 0.11946         | 1.1777    | 0.11946 | 0.11946     | 0.579915639 |           |         |  |
| CNFN       | ENSG00000105427 | 0.76742   | 0.22142 | 1.1282      | 0.12962     | 1.1776    | 0.11947 |  |
|            | 1.1776          | 0.11947   | 0.11947 | 0.579915639 |             |           |         |  |
| STK11      | ENSG00000118046 | -0.66435  | 0.74677 | -0.68358    | 0.75288     | 0.28265   | 0.38872 |  |
|            | 1.1775          | 0.1195    | 0.1195  | 0.579976093 |             |           |         |  |
| TSC22D4    | ENSG00000166925 | -0.85039  | 0.80245 | 1.1774      | 0.11952     | -1.2623   |         |  |
|            | 0.89658         | -1.2623   | 0.89658 | 0.11952     | 0.579976093 |           |         |  |
| GAPDHP25   | ENSG00000213594 | 1.1774    | 0.11952 | -0.56788    | 0.71494     | 0.15627   |         |  |
|            | 0.43791         | 0.15627   | 0.43791 | 0.11952     | 0.579976093 |           |         |  |
| CFAP43     | ENSG00000197748 | -0.24875  | 0.59822 | 1.1773      | 0.11954     | -0.18531  |         |  |

|            |                 |          |         |             |             |          |         |  |
|------------|-----------------|----------|---------|-------------|-------------|----------|---------|--|
|            | 0.57351         | 0.11318  | 0.45494 | 0.11954     | 0.579976093 |          |         |  |
| KCNB1      | ENSG00000158445 | 0.11891  | 0.45268 | 0.10269     | 0.45911     | 0.032061 | 0.48721 |  |
|            | 1.1772          | 0.11956  | 0.11956 | 0.579976093 |             |          |         |  |
| NA         | ENSG00000252202 | 1.1771   | 0.11957 | 1.1771      | 0.11957     | 1.1771   | 0.11957 |  |
|            | 1.1771          | 0.11957  | 0.11957 | 0.579976093 |             |          |         |  |
| RNU7-27P   | ENSG00000238750 | 1.1771   | 0.11958 | 1.1771      | 0.11958     | 1.1771   |         |  |
|            | 0.11958         | 1.1771   | 0.11958 | 0.11958     | 0.579976093 |          |         |  |
| NA         | ENSG00000272921 | 1.1771   | 0.11958 | -0.93721    | 0.82567     | -0.93721 | 0.82567 |  |
|            | -0.93721        | 0.82567  | 0.11958 | 0.579976093 |             |          |         |  |
| RN7SKP95   | ENSG00000199730 | 0.10167  | 0.45951 | 1.177       | 0.11959     | -0.56103 | 0.71261 |  |
|            | 1.177           | 0.11959  | 0.11959 | 0.579976093 |             |          |         |  |
| SFRP4      | ENSG00000106483 | 0.022984 | 0.49083 | 0.022984    | 0.49083     | 0.022984 | 0.49083 |  |
|            | 1.1768          | 0.11964  | 0.11964 | 0.579976093 |             |          |         |  |
| NA         | ENSG00000251373 | 0.073753 | 0.4706  | 1.1767      | 0.11965     | 1.1767   | 0.11965 |  |
|            | 1.1767          | 0.11965  | 0.11965 | 0.579976093 |             |          |         |  |
| MSANTD1    | ENSG00000188981 | 0.4329   | 0.33254 | 0.13289     | 0.44714     | -0.43771 |         |  |
|            | 0.6692          | 1.1767   | 0.11966 | 0.11966     | 0.579976093 |          |         |  |
| HCAR2      | ENSG00000182782 | 0.055271 | 0.47796 | 0.055271    | 0.47796     | -0.7035  | 0.75913 |  |
|            | 1.1766          | 0.11967  | 0.11967 | 0.579976093 |             |          |         |  |
| NA         | ENSG00000239661 | 1.1767   | 0.11967 | 1.1767      | 0.11967     | 1.1767   | 0.11967 |  |
|            | 0.030839        | 0.4877   | 0.11967 | 0.579976093 |             |          |         |  |
| NAA35      | ENSG00000135040 | -1.4837  | 0.93105 | -1.4837     | 0.93105     | 1.1624   | 0.12254 |  |
|            | 1.1765          | 0.11969  | 0.11969 | 0.579976093 |             |          |         |  |
| RNU6-1171P | ENSG00000252515 | 1.1765   | 0.11969 | 1.1765      | 0.11969     | 1.1765   |         |  |
|            | 0.11969         | 1.1765   | 0.11969 | 0.11969     | 0.579976093 |          |         |  |
| NA         | ENSG00000199862 | 0.44734  | 0.32731 | 1.1765      | 0.1197      | 0.44734  | 0.32731 |  |
|            | 0.62361         | 0.26644  | 0.1197  | 0.579976093 |             |          |         |  |
| TAAR5      | ENSG00000135569 | 1.1148   | 0.13247 | 1.1763      | 0.11973     | 1.1763   | 0.11973 |  |
|            | 1.1763          | 0.11973  | 0.11973 | 0.579976093 |             |          |         |  |
| NA         | ENSG00000254522 | 1.1763   | 0.11975 | 1.1763      | 0.11975     | 1.1763   | 0.11975 |  |
|            | 1.1763          | 0.11975  | 0.11975 | 0.579976093 |             |          |         |  |
| NA         | ENSG00000266378 | 0.18716  | 0.42577 | -1.2169     | 0.88818     | 1.1762   | 0.11975 |  |
|            | 0.21299         | 0.41567  | 0.11975 | 0.579976093 |             |          |         |  |
| SSU72P3    | ENSG00000284546 | 1.1762   | 0.11975 | -0.13649    | 0.55428     | -1.1327  |         |  |
|            | 0.87133         | 0.60838  | 0.27147 | 0.11975     | 0.579976093 |          |         |  |
| LILRB1     | ENSG00000104972 | 0.58425  | 0.27952 | 0.40891     | 0.3413      | 1.1761   |         |  |
|            | 0.11977         | 0.58425  | 0.27952 | 0.11977     | 0.579976093 |          |         |  |
| DCLRE1CP1  | ENSG00000237470 | -1.7491  | 0.95986 | 1.1761      | 0.11977     | -1.2048  |         |  |
|            | 0.88586         | -1.2048  | 0.88586 | 0.11977     | 0.579976093 |          |         |  |
| ATP6V1F    | ENSG00000128524 | 1.1761   | 0.11978 | 1.1761      | 0.11978     | 1.1761   |         |  |
|            | 0.11978         | 1.1761   | 0.11978 | 0.11978     | 0.579976093 |          |         |  |
| EFCAB6     | ENSG00000186976 | 0.035207 | 0.48596 | 1.1761      | 0.11978     | 0.10041  |         |  |
|            | 0.46001         | 0.22849  | 0.40963 | 0.11978     | 0.579976093 |          |         |  |
| NA         | ENSG00000253339 | -1.9033  | 0.9715  | 1.176       | 0.1198      | -1.9033  | 0.9715  |  |
|            | -0.9013         | 0.81628  | 0.1198  | 0.579996881 |             |          |         |  |
| PARD3B     | ENSG00000116117 | 0.32617  | 0.37215 | 0.45431     | 0.3248      | 1.1759   |         |  |
|            | 0.11982         | 0.66975  | 0.25151 | 0.11982     | 0.579996881 |          |         |  |
| MIR4298    | ENSG00000264493 | 1.1759   | 0.11982 | 0.41709     | 0.33831     | 0.41709  |         |  |
|            | 0.33831         | 0.41709  | 0.33831 | 0.11982     | 0.579996881 |          |         |  |
| FCF1P2     | ENSG00000228638 | 1.1756   | 0.11988 | 1.1756      | 0.11988     | 1.1756   |         |  |
|            | 0.11988         | 1.1756   | 0.11988 | 0.11988     | 0.580229678 |          |         |  |
| PTPRD-AS2  | ENSG00000226717 | 1.1753   | 0.11994 | 0.97738     | 0.16419     | 0.88749  |         |  |
|            | 0.18741         | 0.97738  | 0.16419 | 0.11994     | 0.580304631 |          |         |  |
| ZEB1-AS1   | ENSG00000237036 | -1.2131  | 0.88745 | -1.255      | 0.89525     | 0.10054  |         |  |
|            | 0.45996         | 1.1753   | 0.11995 | 0.11995     | 0.580304631 |          |         |  |
| NA         | ENSG00000257604 | 1.0639   | 0.14369 | 1.1752      | 0.11995     | 0.6485   | 0.25833 |  |
|            | 0.27635         | 0.39114  | 0.11995 | 0.580304631 |             |          |         |  |
| IFT81      | ENSG00000122970 | 1.0817   | 0.13968 | 1.0782      | 0.14047     | 1.0815   | 0.13975 |  |
|            | 1.1751          | 0.11997  | 0.11997 | 0.580304631 |             |          |         |  |
| NBPF1      | ENSG00000219481 | 1.175    | 0.11999 | 0.77242     | 0.21993     | -0.40549 | 0.65744 |  |
|            | 1.1505          | 0.12496  | 0.11999 | 0.580304631 |             |          |         |  |
| NSD2       | ENSG00000109685 | 1.175    | 0.12001 | 0.85007     | 0.19764     | 0.084457 | 0.46635 |  |

|           |                 |           |             |             |             |          |         |       |
|-----------|-----------------|-----------|-------------|-------------|-------------|----------|---------|-------|
|           | 0.01029         | 0.49589   | 0.12001     | 0.580304631 |             |          |         |       |
| NA        | ENSG00000260052 | 1.1749    | 0.12002     | 0.20897     | 0.41723     | -0.32426 | 0.62713 |       |
|           | 1.1085          | 0.13383   | 0.12002     | 0.580304631 |             |          |         |       |
| NA        | ENSG00000278873 | 0.18736   | 0.42569     | -0.34516    | 0.63501     | 1.1749   | 0.12002 |       |
|           | 1.1749          | 0.12002   | 0.12002     | 0.580304631 |             |          |         |       |
| RPS13P2   | ENSG00000228929 | 1.1745    | 0.12009     | 1.1745      | 0.12009     | 1.1745   |         |       |
|           | 0.12009         | 1.1745    | 0.12009     | 0.12009     | 0.580304631 |          |         |       |
| LIMA1     | ENSG00000050405 | 1.1744    | 0.12012     | 0.96475     | 0.16733     | 0.95762  | 0.16913 |       |
|           | 0.17212         | 0.43167   | 0.12012     | 0.580304631 |             |          |         |       |
| GNG13     | ENSG00000127588 | -0.052223 | 0.52082     | -0.49217    | 0.6887      | 1.1744   | 0.12012 |       |
|           | -1.4699         | 0.92921   | 0.12012     | 0.580304631 |             |          |         |       |
| NA        | ENSG00000225005 | 1.1743    | 0.12013     | 1.1743      | 0.12013     | 1.1743   | 0.12013 |       |
|           | 1.1743          | 0.12013   | 0.12013     | 0.580304631 |             |          |         |       |
| DPPA2P4   | ENSG00000261429 | 1.1743    | 0.12013     | 1.1743      | 0.12013     | 1.1743   |         |       |
|           | 0.12013         | 1.1743    | 0.12013     | 0.12013     | 0.580304631 |          |         |       |
| NA        | ENSG00000206669 | 1.1743    | 0.12014     | 1.1743      | 0.12014     | 1.1743   | 0.12014 |       |
|           | 1.1743          | 0.12014   | 0.12014     | 0.580304631 |             |          |         |       |
| PPP6R2P1  | ENSG00000233442 | 0.67638   | 0.2494      | 1.1743      | 0.12015     | -0.66357 |         |       |
|           | 0.74652         | -1.4394   | 0.92498     | 0.12015     | 0.580304631 |          |         |       |
| NA        | ENSG00000238110 | 1.1743    | 0.12015     | 0.33062     | 0.37047     | -0.33467 | 0.63106 |       |
|           | -0.36837        | 0.6437    | 0.12015     | 0.580304631 |             |          |         |       |
| MED28P2   | ENSG00000240511 | 1.1741    | 0.12018     | 1.1741      | 0.12018     | 1.1741   |         |       |
|           | 0.12018         | 1.1741    | 0.12018     | 0.12018     | 0.580304631 |          |         |       |
| DNAAF2    | ENSG00000165506 | 0.20188   | 0.42001     | 0.3308      | 0.3704      | 0.20188  |         |       |
|           | 0.42001         | 1.174     | 0.12019     | 0.12019     | 0.580304631 |          |         |       |
| RN7SL263P | ENSG00000240160 | 1.174     | 0.1202      | 1.174       | 0.1202      | 1.174    | 0.1202  | 1.174 |
|           | 0.1202          | 0.1202    | 0.580304631 |             |             |          |         |       |
| PCBP2P3   | ENSG00000248826 | 0.5804    | 0.28082     | 0.5804      | 0.28082     | 0.34007  |         |       |
|           | 0.3669          | 1.174     | 0.1202      | 0.1202      | 0.580304631 |          |         |       |
| NA        | ENSG00000266962 | 1.1739    | 0.12022     | 1.1739      | 0.12022     | 1.1739   | 0.12022 |       |
|           | 1.1739          | 0.12022   | 0.12022     | 0.580304631 |             |          |         |       |
| MOB1A     | ENSG00000114978 | -0.82251  | 0.79461     | -1.7667     | 0.96136     | 1.1737   | 0.12025 |       |
|           | -0.27419        | 0.60803   | 0.12025     | 0.580304631 |             |          |         |       |
| NA        | ENSG00000269425 | 1.1737    | 0.12025     | 1.1737      | 0.12025     | 1.1737   | 0.12025 |       |
|           | 1.1737          | 0.12025   | 0.12025     | 0.580304631 |             |          |         |       |
| NA        | ENSG00000270669 | -1.7548   | 0.96036     | -1.6101     | 0.94631     | -1.6101  | 0.94631 |       |
|           | 1.1737          | 0.12026   | 0.12026     | 0.580304631 |             |          |         |       |
| H2AZ1     | ENSG00000164032 | 1.1736    | 0.12027     | 1.1736      | 0.12027     | 1.1736   | 0.12027 |       |
|           | 1.1736          | 0.12027   | 0.12027     | 0.580304631 |             |          |         |       |
| RNU1-32P  | ENSG00000200807 | 1.1736    | 0.12027     | 1.1736      | 0.12027     | 1.1736   |         |       |
|           | 0.12027         | 1.1736    | 0.12027     | 0.12027     | 0.580304631 |          |         |       |
| TIPARP    | ENSG00000163659 | 0.059029  | 0.47646     | 0.83394     | 0.20216     | 1.1735   |         |       |
|           | 0.12029         | 0.99023   | 0.16103     | 0.12029     | 0.580304631 |          |         |       |
| LINC01685 | ENSG00000238063 | -0.5361   | 0.70405     | 1.0636      | 0.14376     | -0.40833 |         |       |
|           | 0.65849         | 1.1735    | 0.12029     | 0.12029     | 0.580304631 |          |         |       |
| NA        | ENSG00000251535 | 0.58107   | 0.2806      | 0.65301     | 0.25687     | 1.1735   | 0.12029 |       |
|           | 1.1735          | 0.12029   | 0.12029     | 0.580304631 |             |          |         |       |
| OR8G5     | ENSG00000255298 | 1.1735    | 0.12031     | 1.1735      | 0.12031     | 1.1735   | 0.12031 |       |
|           | 1.1735          | 0.12031   | 0.12031     | 0.580304631 |             |          |         |       |
| ADH5P3    | ENSG00000223694 | 1.1734    | 0.12032     | 1.1734      | 0.12032     | 1.1734   |         |       |
|           | 0.12032         | 1.1226    | 0.13079     | 0.12032     | 0.580304631 |          |         |       |
| RNU6-99P  | ENSG00000201591 | 1.1733    | 0.12033     | 0.71437     | 0.2375      | 0.71437  |         |       |
|           | 0.2375          | 0.71437   | 0.2375      | 0.12033     | 0.580304631 |          |         |       |
| NA        | ENSG00000273920 | 1.1733    | 0.12033     | 1.1733      | 0.12033     | 1.1733   | 0.12033 |       |
|           | 1.1733          | 0.12033   | 0.12033     | 0.580304631 |             |          |         |       |
| NA        | ENSG00000200351 | 0.88258   | 0.18873     | 0.43771     | 0.3308      | 0.88258  | 0.18873 |       |
|           | 1.1733          | 0.12034   | 0.12034     | 0.580304631 |             |          |         |       |
| NA        | ENSG00000266938 | 1.1733    | 0.12034     | 1.03        | 0.15151     | 1.1733   | 0.12034 |       |
|           | 1.1733          | 0.12034   | 0.12034     | 0.580304631 |             |          |         |       |
| NA        | ENSG00000271343 | 0.32544   | 0.37242     | 0.32544     | 0.37242     | 0.32544  | 0.37242 |       |
|           | 1.1733          | 0.12035   | 0.12035     | 0.580304631 |             |          |         |       |
| COL6A4P1  | ENSG00000230524 | 0.56645   | 0.28554     | -0.34753    | 0.6359      | 1.1732   |         |       |

|           |                 |          |             |             |             |           |         |       |
|-----------|-----------------|----------|-------------|-------------|-------------|-----------|---------|-------|
|           | 0.12036         | 1.0687   | 0.14261     | 0.12036     | 0.580304631 |           |         |       |
| FBLN5     | ENSG00000140092 | -1.1962  | 0.88419     | 1.1731      | 0.12038     | 0.76444   | 0.2223  |       |
|           | 0.43609         | 0.33139  | 0.12038     | 0.580304631 |             |           |         |       |
| NA        | ENSG00000248393 | 1.1731   | 0.12038     | -0.59566    | 0.7243      | 1.1731    | 0.12038 |       |
|           | 1.1731          | 0.12038  | 0.12038     | 0.580304631 |             |           |         |       |
| MIR941-4  | ENSG00000216195 | 1.173    | 0.1204      | 1.173       | 0.1204      | 1.173     | 0.1204  | 1.173 |
|           | 0.1204          | 0.1204   | 0.580304631 |             |             |           |         |       |
| RPS26P24  | ENSG00000243920 | 1.1729   | 0.12041     | 1.1729      | 0.12041     | 1.1729    |         |       |
|           | 0.12041         | 1.1729   | 0.12041     | 0.12041     | 0.580304631 |           |         |       |
| NA        | ENSG00000260675 | 1.1729   | 0.12043     | 1.1729      | 0.12043     | 1.1729    | 0.12043 |       |
|           | 1.1729          | 0.12043  | 0.12043     | 0.580304631 |             |           |         |       |
| RGS21     | ENSG00000253148 | 1.1728   | 0.12044     | -1.2568     | 0.89558     | -1.2568   | 0.89558 |       |
|           | -1.2568         | 0.89558  | 0.12044     | 0.580304631 |             |           |         |       |
| NA        | ENSG00000231978 | 0.68503  | 0.24666     | 1.1728      | 0.12045     | 0.39063   | 0.34803 |       |
|           | 0.17982         | 0.42865  | 0.12045     | 0.580304631 |             |           |         |       |
| NA        | ENSG00000255016 | -2.959   | 0.99846     | 1.1727      | 0.12045     | -1.4642   | 0.92844 |       |
|           | -0.2508         | 0.59901  | 0.12045     | 0.580304631 |             |           |         |       |
| NA        | ENSG00000215198 | 0.67547  | 0.24969     | 0.97342     | 0.16517     | 1.0639    | 0.14368 |       |
|           | 1.1727          | 0.12046  | 0.12046     | 0.580304631 |             |           |         |       |
| MIR3659HG | ENSG00000224592 | -0.78482 | 0.78372     | -0.14934    | 0.55936     | -1.3094   |         |       |
|           | 0.9048          | 1.1726   | 0.12047     | 0.12047     | 0.580304631 |           |         |       |
| NA        | ENSG00000232028 | 1.1726   | 0.12047     | 1.1726      | 0.12047     | 1.1726    | 0.12047 |       |
|           | 1.1726          | 0.12047  | 0.12047     | 0.580304631 |             |           |         |       |
| NA        | ENSG00000217512 | 1.1726   | 0.12048     | 1.1726      | 0.12048     | 1.1726    | 0.12048 |       |
|           | 1.1726          | 0.12048  | 0.12048     | 0.580304631 |             |           |         |       |
| NA        | ENSG00000239117 | 1.1725   | 0.1205      | 0.21248     | 0.41587     | 1.1499    | 0.12508 |       |
|           | 0.21248         | 0.41587  | 0.1205      | 0.580304631 |             |           |         |       |
| CHPF2     | ENSG00000033100 | 1.1175   | 0.13188     | 1.1175      | 0.13188     | 1.0627    | 0.14395 |       |
|           | 1.1722          | 0.12056  | 0.12056     | 0.580304631 |             |           |         |       |
| SGK2      | ENSG00000101049 | 1.1721   | 0.12057     | 0.96052     | 0.1684      | 0.96052   | 0.1684  |       |
|           | 0.82278         | 0.20532  | 0.12057     | 0.580304631 |             |           |         |       |
| LINC00189 | ENSG00000215533 | 0.99515  | 0.15983     | 1.1721      | 0.12057     | -0.14974  |         |       |
|           | 0.55951         | 0.88664  | 0.18764     | 0.12057     | 0.580304631 |           |         |       |
| NA        | ENSG00000259966 | 1.1722   | 0.12057     | 1.1471      | 0.12568     | 0.838     | 0.20102 | 0.838 |
|           | 0.20102         | 0.12057  | 0.580304631 |             |             |           |         |       |
| COL6A6    | ENSG00000206384 | 1.0851   | 0.13894     | 1.172       | 0.1206      | 0.83971   | 0.20053 |       |
|           | -0.78317        | 0.78324  | 0.1206      | 0.580304631 |             |           |         |       |
| LINC00354 | ENSG00000226903 | 1.0527   | 0.14623     | 1.172       | 0.1206      | -1.0505   | 0.85325 |       |
|           | -0.76019        | 0.77643  | 0.1206      | 0.580304631 |             |           |         |       |
| LINC01513 | ENSG00000246016 | -1.1186  | 0.86835     | 1.172       | 0.1206      | 1.1569    | 0.12366 |       |
|           | -1.1186         | 0.86835  | 0.1206      | 0.580304631 |             |           |         |       |
| PLA2G12A  | ENSG00000123739 | 1.1719   | 0.12061     | 1.1719      | 0.12061     | -0.10616  |         |       |
|           | 0.54227         | 0.21107  | 0.41642     | 0.12061     | 0.580304631 |           |         |       |
| NA        | ENSG00000251399 | 0.84632  | 0.19869     | -0.25748    | 0.6016      | 1.0105    | 0.15612 |       |
|           | 1.1719          | 0.12061  | 0.12061     | 0.580304631 |             |           |         |       |
| LINC01668 | ENSG00000283051 | 1.1719   | 0.12061     | 1.1719      | 0.12061     | 1.1719    |         |       |
|           | 0.12061         | 1.1719   | 0.12061     | 0.12061     | 0.580304631 |           |         |       |
| NA        | ENSG00000272777 | 1.1718   | 0.12064     | 1.1718      | 0.12064     | 1.1718    | 0.12064 |       |
|           | 1.1718          | 0.12064  | 0.12064     | 0.580391667 |             |           |         |       |
| CELF2-DT  | ENSG00000270111 | 0.81571  | 0.20733     | 1.1717      | 0.12066     | -0.013663 |         |       |
|           | 0.50545         | 0.10756  | 0.45717     | 0.12066     | 0.580430582 |           |         |       |
| GUCY2EP   | ENSG00000204529 | 1.1716   | 0.12068     | -0.60978    | 0.72899     | -0.6789   |         |       |
|           | 0.7514          | 0.37923  | 0.35226     | 0.12068     | 0.58046949  |           |         |       |
| GPR137B   | ENSG00000077585 | 1.1715   | 0.1207      | 0.68631     | 0.24626     | -0.59317  |         |       |
|           | 0.72347         | -2.0502  | 0.97983     | 0.1207      | 0.580508389 |           |         |       |
| OR2AP1    | ENSG00000179615 | -0.24087 | 0.59517     | 1.1714      | 0.12072     | -0.32188  |         |       |
|           | 0.62623         | -0.36894 | 0.64391     | 0.12072     | 0.580547281 |           |         |       |
| IGKV6D-21 | ENSG00000225523 | 1.1713   | 0.12074     | 1.1713      | 0.12074     | 1.1713    |         |       |
|           | 0.12074         | 1.1713   | 0.12074     | 0.12074     | 0.580576961 |           |         |       |
| RNU7-155P | ENSG00000238759 | 1.1713   | 0.12075     | 1.1713      | 0.12075     | 1.1713    |         |       |
|           | 0.12075         | 1.1713   | 0.12075     | 0.12075     | 0.580576961 |           |         |       |
| NEK2      | ENSG00000117650 | 0.083156 | 0.46686     | 0.30733     | 0.3793      | 0.083156  | 0.46686 |       |

|           |                 |            |         |             |             |           |         |       |
|-----------|-----------------|------------|---------|-------------|-------------|-----------|---------|-------|
|           | 1.1711          | 0.12077    | 0.12077 | 0.580615835 |             |           |         |       |
| RPL32P3   | ENSG00000251474 | 1.1711     | 0.12079 | 0.12079     | 1.1711      | 0.12079   | 1.1711  |       |
|           | 0.12079         | 1.1711     | 0.12079 | 0.12079     | 0.580651571 |           |         |       |
| CXCL14    | ENSG00000145824 | -0.40119   | 0.65586 | 1.0568      | 0.14529     | 1.171     | 0.12081 |       |
|           | 0.92979         | 0.17624    | 0.12081 | 0.580651571 |             |           |         |       |
| NA        | ENSG00000283189 | 1.1708     | 0.12083 | 1.1708      | 0.12083     | 1.1708    | 0.12083 |       |
|           | 1.1708          | 0.12083    | 0.12083 | 0.580651571 |             |           |         |       |
| LINC02563 | ENSG00000263520 | 1.1707     | 0.12085 | -0.05688    | 0.52268     | 1.1707    |         |       |
|           | 0.12085         | 1.1707     | 0.12085 | 0.12085     | 0.580651571 |           |         |       |
| SPTLC2    | ENSG00000100596 | 1.1707     | 0.12086 | -1.0997     | 0.86428     | -0.19968  |         |       |
|           | 0.57914         | 0.32061    | 0.37425 | 0.12086     | 0.580651571 |           |         |       |
| CRYZP2    | ENSG00000250293 | -0.0040481 | 0.50161 | 1.1707      | 0.12086     | -0.026595 |         |       |
|           | 0.51061         | -0.026595  | 0.51061 | 0.12086     | 0.580651571 |           |         |       |
| NA        | ENSG00000270507 | 1.1186     | 0.13166 | 1.1706      | 0.12088     | 0.40891   | 0.3413  |       |
|           | 0.86597         | 0.19325    | 0.12088 | 0.580651571 |             |           |         |       |
| XYLT2     | ENSG00000015532 | -0.11511   | 0.54582 | -0.11511    | 0.54582     | -0.52703  | 0.70091 |       |
|           | 1.1705          | 0.1209     | 0.1209  | 0.580651571 |             |           |         |       |
| RNY1P4    | ENSG00000207325 | 1.1705     | 0.1209  | 1.1705      | 0.1209      | 1.1705    |         |       |
|           | 0.1209          | 1.1705     | 0.1209  | 0.1209      | 0.580651571 |           |         |       |
| ICMT      | ENSG00000116237 | 1.1705     | 0.12091 | 0.1453      | 0.44224     | 0.098843  | 0.46063 |       |
|           | 0.99273         | 0.16042    | 0.12091 | 0.580651571 |             |           |         |       |
| AVPR1B    | ENSG00000198049 | -1.1074    | 0.86595 | 1.1705      | 0.12091     | -0.60354  |         |       |
|           | 0.72693         | 0.60866    | 0.27138 | 0.12091     | 0.580651571 |           |         |       |
| PEX19     | ENSG00000162735 | 1.1703     | 0.12094 | 1.1703      | 0.12094     | 1.1703    | 0.12094 |       |
|           | 1.1703          | 0.12094    | 0.12094 | 0.580651571 |             |           |         |       |
| TPT1P8    | ENSG00000219491 | 0.68465    | 0.24678 | 1.1703      | 0.12094     | 1.1703    |         |       |
|           | 0.12094         | 0.024983   | 0.49003 | 0.12094     | 0.580651571 |           |         |       |
| KRT18P23  | ENSG00000215333 | 1.1703     | 0.12095 | 1.1703      | 0.12095     | 1.1703    |         |       |
|           | 0.12095         | 1.1703     | 0.12095 | 0.12095     | 0.580651571 |           |         |       |
| NA        | ENSG00000279153 | -0.10697   | 0.54259 | 1.1702      | 0.12096     | 0.095985  | 0.46177 |       |
|           | 0.095985        | 0.46177    | 0.12096 | 0.580651571 |             |           |         |       |
| RNU6-89P  | ENSG00000272262 | -1.2037    | 0.88565 | 0.66769     | 0.25217     | 1.1702    |         |       |
|           | 0.12097         | -0.22001   | 0.58707 | 0.12097     | 0.580651571 |           |         |       |
| NA        | ENSG00000224676 | 0.14573    | 0.44207 | 0.82227     | 0.20546     | 1.1701    | 0.12098 |       |
|           | -1.408          | 0.92043    | 0.12098 | 0.580651571 |             |           |         |       |
| MIR1913   | ENSG00000222958 | 1.17       | 0.121   | 1.17        | 0.121       | 1.17      | 0.121   | 0.121 |
|           | 0.580681172     |            |         |             |             |           |         |       |
| MIR3200   | ENSG00000264661 | -0.54029   | 0.7055  | -0.91546    | 0.82003     | -0.54029  |         |       |
|           | 0.7055          | 1.1699     | 0.12101 | 0.12101     | 0.580681172 |           |         |       |
| RN7SKP253 | ENSG00000252233 | -0.34345   | 0.63437 | -0.34345    | 0.63437     | 1.1352    |         |       |
|           | 0.12815         | 1.1698     | 0.12103 | 0.12103     | 0.580719959 |           |         |       |
| NIPAL3    | ENSG00000001461 | 0.95391    | 0.17006 | 0.36989     | 0.35573     | 0.70982   |         |       |
|           | 0.23891         | 1.1698     | 0.12105 | 0.12105     | 0.580758738 |           |         |       |
| ARL3      | ENSG00000138175 | -0.3297    | 0.62919 | -1.0904     | 0.86224     | 0.41183   | 0.34023 |       |
|           | 1.1697          | 0.12107    | 0.12107 | 0.580797509 |             |           |         |       |
| MANCR     | ENSG00000231298 | 1.1695     | 0.12109 | 0.086157    | 0.46567     | -0.94074  | 0.82658 |       |
|           | -0.86964        | 0.80775    | 0.12109 | 0.580836273 |             |           |         |       |
| B9D1      | ENSG00000108641 | -0.66285   | 0.74629 | -0.66285    | 0.74629     | 1.1694    | 0.12112 |       |
|           | 0.39733         | 0.34556    | 0.12112 | 0.580922992 |             |           |         |       |
| ZNF200    | ENSG00000010539 | 0.51157    | 0.30447 | 0.19251     | 0.42367     | 0.043976  |         |       |
|           | 0.48246         | 1.1693     | 0.12114 | 0.12114     | 0.580961736 |           |         |       |
| SPATA19   | ENSG00000166118 | 1.1692     | 0.12116 | -0.15352    | 0.561       | 1.0973    | 0.13626 |       |
|           | 0.22347         | 0.41158    | 0.12116 | 0.580982035 |             |           |         |       |
| NA        | ENSG00000258542 | 1.1692     | 0.12117 | 1.1692      | 0.12117     | 1.1692    | 0.12117 |       |
|           | 1.1692          | 0.12117    | 0.12117 | 0.580982035 |             |           |         |       |
| LINC02429 | ENSG00000251266 | 1.1691     | 0.12118 | 0.035165    | 0.48597     | -0.29433  |         |       |
|           | 0.61575         | 0.069981   | 0.4721  | 0.12118     | 0.580982035 |           |         |       |
| CHRFAM7A  | ENSG00000166664 | 1.1689     | 0.12122 | 0.63647     | 0.26224     | -0.35838  |         |       |
|           | 0.63997         | 0.31885    | 0.37492 | 0.12122     | 0.581015222 |           |         |       |
| NDUFAF5   | ENSG00000101247 | 1.0961     | 0.13651 | 1.1688      | 0.12123     | 1.0466    |         |       |
|           | 0.14764         | -0.96119   | 0.83177 | 0.12123     | 0.581015222 |           |         |       |
| SEPHS2    | ENSG00000179918 | 0.57075    | 0.28409 | 0.75464     | 0.22523     | 1.1688    |         |       |



|            |                 |          |         |             |             |          |         |  |
|------------|-----------------|----------|---------|-------------|-------------|----------|---------|--|
|            | 0.12125         | 0.91539  | 0.17999 | 0.12125     | 0.581015222 |          |         |  |
| NA         | ENSG00000257454 | -0.28726 | 0.61304 | -1.1159     | 0.86777     | 1.1687   | 0.12126 |  |
|            | 1.1687          | 0.12126  | 0.12126 | 0.581015222 |             |          |         |  |
| NA         | ENSG00000267549 | 1.1687   | 0.12126 | 1.1687      | 0.12126     | 1.1687   | 0.12126 |  |
|            | 1.1687          | 0.12126  | 0.12126 | 0.581015222 |             |          |         |  |
| CENPUP2    | ENSG00000258546 | 1.1687   | 0.12127 | 1.1687      | 0.12127     | 1.1687   |         |  |
|            | 0.12127         | 1.1687   | 0.12127 | 0.581015222 |             |          |         |  |
| OSTN       | ENSG00000188729 | -0.42047 | 0.66293 | 0.24977     | 0.40138     | 1.1686   | 0.12129 |  |
|            | 1.1686          | 0.12129  | 0.12129 | 0.581015222 |             |          |         |  |
| RN7SL854P  | ENSG00000239319 | 0.57224  | 0.28358 | 0.85827     | 0.19537     | 1.1684   |         |  |
|            | 0.12131         | -0.60021 | 0.72582 | 0.12131     | 0.581015222 |          |         |  |
| OR1F1      | ENSG00000168124 | 1.1684   | 0.12132 | 1.1684      | 0.12132     | -0.33094 | 0.62966 |  |
|            | 1.1684          | 0.12132  | 0.12132 | 0.581015222 |             |          |         |  |
| NA         | ENSG00000260633 | 0.69801  | 0.24258 | 0.69801     | 0.24258     | 0.69801  | 0.24258 |  |
|            | 1.1684          | 0.12132  | 0.12132 | 0.581015222 |             |          |         |  |
| TRMT1L     | ENSG00000121486 | 1.1684   | 0.12133 | 0.28529     | 0.38771     | 0.28529  |         |  |
|            | 0.38771         | 0.28529  | 0.38771 | 0.12133     | 0.581015222 |          |         |  |
| NA         | ENSG00000272905 | -0.18479 | 0.5733  | 1.1684      | 0.12133     | -0.22256 | 0.58806 |  |
|            | -0.74936        | 0.77318  | 0.12133 | 0.581015222 |             |          |         |  |
| ERI3       | ENSG00000117419 | 1.1682   | 0.12136 | 0.039448    | 0.48427     | 0.88805  | 0.18726 |  |
|            | 0.56311         | 0.28668  | 0.12136 | 0.581101779 |             |          |         |  |
| FBXL15     | ENSG00000107872 | -0.399   | 0.65505 | 1.1681      | 0.12138     | 1.1681   |         |  |
|            | 0.12138         | 1.1681   | 0.12138 | 0.12138     | 0.581131221 |          |         |  |
| MRPL57P8   | ENSG00000282625 | -0.12142 | 0.54832 | -0.12142    | 0.54832     | 1.1681   |         |  |
|            | 0.12139         | 1.0052   | 0.1574  | 0.12139     | 0.581131221 |          |         |  |
| ACAP1      | ENSG00000072818 | 1.1677   | 0.12146 | 0.18337     | 0.42726     | 0.53385  | 0.29672 |  |
|            | 0.5285          | 0.29858  | 0.12146 | 0.581226418 |             |          |         |  |
| NA         | ENSG00000264039 | 0.3671   | 0.35677 | -1.5137     | 0.93495     | 0.73508  | 0.23115 |  |
|            | 1.1677          | 0.12146  | 0.12146 | 0.581226418 |             |          |         |  |
| LINC01091  | ENSG00000249464 | 0.67421  | 0.25009 | 1.1676      | 0.12148     | 0.80291  |         |  |
|            | 0.21101         | 0.66647  | 0.25255 | 0.12148     | 0.581226418 |          |         |  |
| OR5H5P     | ENSG00000249321 | -0.27488 | 0.6083  | -0.85342    | 0.80329     | 1.1675   |         |  |
|            | 0.1215          | -0.12792 | 0.55089 | 0.1215      | 0.581226418 |          |         |  |
| ADAM2      | ENSG00000104755 | -1.4595  | 0.92778 | 0.7109      | 0.23857     | 1.1675   | 0.12151 |  |
|            | 1.0055          | 0.15733  | 0.12151 | 0.581226418 |             |          |         |  |
| TMEM150C   | ENSG00000249242 | -0.935   | 0.82511 | -0.935      | 0.82511     | 0.12581  |         |  |
|            | 0.44994         | 1.1674   | 0.12152 | 0.12152     | 0.581226418 |          |         |  |
| RNU6-1111P | ENSG00000212420 | 1.1672   | 0.12156 | 1.1672      | 0.12156     | 1.1672   |         |  |
|            | 0.12156         | 1.1672   | 0.12156 | 0.12156     | 0.581226418 |          |         |  |
| RAET1E     | ENSG00000164520 | 0.35099  | 0.3628  | 0.35099     | 0.3628      | 0.35099  |         |  |
|            | 0.3628          | 1.1672   | 0.12157 | 0.12157     | 0.581226418 |          |         |  |
| NA         | ENSG00000214135 | -0.14674 | 0.55833 | 0.47979     | 0.31569     | 0.46361  | 0.32146 |  |
|            | 1.1672          | 0.12157  | 0.12157 | 0.581226418 |             |          |         |  |
| PHF24      | ENSG00000122733 | -0.2812  | 0.61072 | 1.1671      | 0.12159     | -0.26318 | 0.60379 |  |
|            | 0.57417         | 0.28293  | 0.12159 | 0.581226418 |             |          |         |  |
| FAM21FP    | ENSG00000237840 | 1.167    | 0.1216  | 0.40384     | 0.34317     | 0.60006  | 0.27423 |  |
|            | 0.76603         | 0.22183  | 0.1216  | 0.581226418 |             |          |         |  |
| MIR4696    | ENSG00000265902 | 0.27251  | 0.39261 | 0.17438     | 0.43078     | 1.1669   |         |  |
|            | 0.12163         | 0.17438  | 0.43078 | 0.12163     | 0.581226418 |          |         |  |
| APC2       | ENSG00000115266 | -0.23948 | 0.59463 | -1.7641     | 0.96115     | 1.1668   | 0.12164 |  |
|            | -1.3605         | 0.91317  | 0.12164 | 0.581226418 |             |          |         |  |
| NA         | ENSG00000249588 | 0.79562  | 0.21313 | 1.1668      | 0.12164     | 0.79562  | 0.21313 |  |
|            | -0.64777        | 0.74143  | 0.12164 | 0.581226418 |             |          |         |  |
| UBE2MP1    | ENSG00000261461 | 1.1668   | 0.12164 | -0.805      | 0.78959     | 0.61065  |         |  |
|            | 0.27071         | 0.15377  | 0.4389  | 0.12164     | 0.581226418 |          |         |  |
| LINC02819  | ENSG00000224943 | 1.1668   | 0.12165 | 1.1668      | 0.12165     | 1.1668   |         |  |
|            | 0.12165         | 1.1668   | 0.12165 | 0.12165     | 0.581226418 |          |         |  |
| HMGN2P16   | ENSG00000231376 | 0.29945  | 0.3823  | -0.40007    | 0.65545     | -0.78124 |         |  |
|            | 0.78267         | 1.1668   | 0.12165 | 0.12165     | 0.581226418 |          |         |  |
| DUXAP3     | ENSG00000270552 | 1.1668   | 0.12165 | -0.0069314  | 0.50277     | 1.1668   |         |  |
|            | 0.12165         | 1.1668   | 0.12165 | 0.12165     | 0.581226418 |          |         |  |
| OR7E91P    | ENSG00000205847 | 0.73624  | 0.23079 | 0.87675     | 0.19031     | 1.1667   |         |  |

|             |                 |             |             |             |             |           |         |        |
|-------------|-----------------|-------------|-------------|-------------|-------------|-----------|---------|--------|
|             | 0.12166         | -0.17353    | 0.56888     | 0.12166     | 0.581226418 |           |         |        |
| IFT122      | ENSG00000163913 | 1.1666      | 0.12168     | 0.51608     | 0.3029      | 0.9949    |         |        |
|             | 0.15989         | 0.73719     | 0.2305      | 0.12168     | 0.581226418 |           |         |        |
| HIGD2B      | ENSG00000175202 | -0.20391    | 0.58079     | 1.1666      | 0.12168     | -0.20391  |         |        |
|             | 0.58079         | -0.20391    | 0.58079     | 0.12168     | 0.581226418 |           |         |        |
| NA          | ENSG00000278193 | 0.08905     | 0.46452     | 0.08905     | 0.46452     | 0.08905   | 0.46452 |        |
|             | 1.1666          | 0.12168     | 0.12168     | 0.581226418 |             |           |         |        |
| METTL2A     | ENSG00000087995 | 0.7496      | 0.22675     | -0.50856    | 0.69447     | 1.1666    |         |        |
|             | 0.12169         | 0.72512     | 0.23419     | 0.12169     | 0.581226418 |           |         |        |
| RN7SKP1     | ENSG00000202395 | 0.43639     | 0.33128     | 0.10892     | 0.45663     | 1.1665    |         |        |
|             | 0.12171         | 0.89543     | 0.18528     | 0.12171     | 0.581226418 |           |         |        |
| SULT1E1     | ENSG00000109193 | 0.35562     | 0.36106     | 1.1664      | 0.12172     | -0.72827  |         |        |
|             | 0.76678         | 0.041797    | 0.48333     | 0.12172     | 0.581226418 |           |         |        |
| NA          | ENSG00000260368 | -0.67545    | 0.75031     | 1.1664      | 0.12172     | 1.1664    | 0.12172 |        |
|             | 1.1664          | 0.12172     | 0.12172     | 0.581226418 |             |           |         |        |
| NA          | ENSG00000255160 | 1.1661      | 0.12178     | -1.7848     | 0.96286     | 0.044542  | 0.48224 |        |
|             | -0.33625        | 0.63166     | 0.12178     | 0.581313014 |             |           |         |        |
| NA          | ENSG00000259072 | -0.46641    | 0.67954     | 0.59736     | 0.27513     | -0.36978  | 0.64423 |        |
|             | 1.1661          | 0.12178     | 0.12178     | 0.581313014 |             |           |         |        |
| GDI2        | ENSG00000057608 | 0.57759     | 0.28177     | 0.78189     | 0.21714     | -0.043119 | 0.5172  |        |
|             | 1.1661          | 0.12179     | 0.12179     | 0.581313014 |             |           |         |        |
| ADCY8       | ENSG00000155897 | 0.90345     | 0.18314     | 0.38986     | 0.34832     | 1.166     | 0.1218  |        |
|             | 0.46593         | 0.32063     | 0.1218      | 0.581313014 |             |           |         |        |
| CTBP2       | ENSG00000175029 | -1.2035     | 0.8856      | 1.1658      | 0.12184     | 0.2912    | 0.38545 |        |
|             | -1.4787         | 0.93039     | 0.12184     | 0.581313014 |             |           |         |        |
| FAM160B2    | ENSG00000158863 | 1.105       | 0.13457     | -0.035548   | 0.51418     | -0.20475  | 0.58112 |        |
|             | 1.1658          | 0.12185     | 0.12185     | 0.581313014 |             |           |         |        |
| ELK4        | ENSG00000158711 | 0.61942     | 0.26782     | 0.89765     | 0.18469     | 1.1657    | 0.12186 |        |
|             | 1.1204          | 0.13128     | 0.12186     | 0.581313014 |             |           |         |        |
| NA          | ENSG00000279509 | 0.91388     | 0.18039     | 1.1658      | 0.12186     | -0.28243  | 0.61119 |        |
|             | 8.45E-05        | 0.49997     | 0.12186     | 0.581313014 |             |           |         |        |
| SNORD116-23 | ENSG00000207375 | 1.1656      | 0.12188     | 1.1656      | 0.12188     | 0.12188   | 1.1656  |        |
|             | 0.12188         | 1.1656      | 0.12188     | 0.12188     | 0.581313014 |           |         |        |
| NA          | ENSG00000257319 | 1.1656      | 0.12189     | 1.1656      | 0.12189     | 1.1656    | 0.12189 |        |
|             | 1.1656          | 0.12189     | 0.12189     | 0.581313014 |             |           |         |        |
| SPTLC1P1    | ENSG00000230397 | 1.1655      | 0.12191     | -0.12047    | 0.54794     | 1.1655    |         |        |
|             | 0.12191         | 1.1655      | 0.12191     | 0.12191     | 0.581313014 |           |         |        |
| NA          | ENSG00000240305 | 0.76157     | 0.22316     | 1.1655      | 0.12191     | 0.76157   | 0.22316 |        |
|             | 0.76157         | 0.22316     | 0.12191     | 0.581313014 |             |           |         |        |
| EVA1B       | ENSG00000142694 | 1.1651      | 0.12199     | 1.1651      | 0.12199     | 1.1651    | 0.12199 |        |
|             | 1.1651          | 0.12199     | 0.12199     | 0.581313014 |             |           |         |        |
| ARF1P2      | ENSG00000213137 | 0.4742      | 0.31768     | 1.0027      | 0.158       | 1.1651    | 0.12199 |        |
|             | 1.0508          | 0.14668     | 0.12199     | 0.581313014 |             |           |         |        |
| PDK2        | ENSG00000005882 | 1.165       | 0.122       | -0.34995    | 0.63681     | 1.165     | 0.122   | 1.0261 |
|             | 0.122           | 0.581313014 |             |             |             |           |         |        |
| ECE1-AS1    | ENSG00000231105 | 0.33732     | 0.36794     | 0.50719     | 0.30601     | 0.33732   |         |        |
|             | 0.36794         | 1.165       | 0.122       | 0.122       | 0.581313014 |           |         |        |
| NSMAF       | ENSG00000035681 | 0.27531     | 0.39154     | 0.79868     | 0.21224     | 0.79868   | 0.21224 |        |
|             | 1.165           | 0.12201     | 0.12201     | 0.581313014 |             |           |         |        |
| OR51F4P     | ENSG00000273051 | 1.165       | 0.12201     | 1.165       | 0.12201     | 1.165     | 0.12201 | 1.165  |
|             | 0.12201         | 0.12201     | 0.581313014 |             |             |           |         |        |
| NA          | ENSG00000263311 | 1.165       | 0.12202     | 1.165       | 0.12202     | 1.165     | 0.12202 | 1.165  |
|             | 0.12202         | 0.581313014 |             |             |             |           |         |        |
| NA          | ENSG00000260443 | 1.1647      | 0.12207     | 1.1647      | 0.12207     | 1.1647    | 0.12207 |        |
|             | 1.1647          | 0.12207     | 0.12207     | 0.581313014 |             |           |         |        |
| STPG1       | ENSG00000001460 | 0.27169     | 0.39293     | 1.1647      | 0.12208     | -1.0905   | 0.86225 |        |
|             | 0.35373         | 0.36177     | 0.12208     | 0.581313014 |             |           |         |        |
| KRT74       | ENSG00000170484 | 0.82372     | 0.20505     | 0.79547     | 0.21317     | 0.53441   | 0.29653 |        |
|             | 1.1647          | 0.12208     | 0.12208     | 0.581313014 |             |           |         |        |
| POLD2       | ENSG00000106628 | 0.76995     | 0.22066     | 1.1646      | 0.12209     | 1.1646    | 0.12209 |        |
|             | 1.1646          | 0.12209     | 0.12209     | 0.581313014 |             |           |         |        |
| MTCYBP19    | ENSG00000253504 | 1.1646      | 0.12209     | 1.1646      | 0.12209     | 1.1646    |         |        |

|           |                 |           |         |             |             |           |         |  |
|-----------|-----------------|-----------|---------|-------------|-------------|-----------|---------|--|
|           | 0.12209         | 1.1646    | 0.12209 | 0.12209     | 0.581313014 |           |         |  |
| MTND5P41  | ENSG00000253685 | 1.1646    | 0.12209 | 0.12209     | 1.1646      | 0.12209   | 1.1646  |  |
|           | 0.12209         | 1.1646    | 0.12209 | 0.12209     | 0.581313014 |           |         |  |
| NA        | ENSG00000236325 | 1.1645    | 0.1221  | 1.1645      | 0.1221      | 1.1645    | 0.1221  |  |
|           | 1.1645          | 0.1221    | 0.1221  | 0.581313014 |             |           |         |  |
| NA        | ENSG00000179755 | 0.47526   | 0.3173  | 0.58363     | 0.27973     | 0.96706   | 0.16676 |  |
|           | 1.1645          | 0.12211   | 0.12211 | 0.581313014 |             |           |         |  |
| DNAH12    | ENSG00000174844 | 0.80186   | 0.21132 | -1.1234     | 0.86937     | 1.1644    |         |  |
|           | 0.12212         | 0.098655  | 0.46071 | 0.12212     | 0.581313014 |           |         |  |
| IMMP1LP1  | ENSG00000270269 | 1.1644    | 0.12212 | 1.1644      | 0.12212     | 1.1644    |         |  |
|           | 0.12212         | 1.1644    | 0.12212 | 0.12212     | 0.581313014 |           |         |  |
| TNFRSF9   | ENSG00000049249 | 0.28438   | 0.38806 | 0.46427     | 0.32123     | 1.1644    |         |  |
|           | 0.12213         | 0.46427   | 0.32123 | 0.12213     | 0.581313014 |           |         |  |
| RNA5SP442 | ENSG00000201920 | 1.1644    | 0.12214 | 1.1644      | 0.12214     | 1.1644    |         |  |
|           | 0.12214         | 1.1644    | 0.12214 | 0.12214     | 0.581313014 |           |         |  |
| RPL12P39  | ENSG00000237314 | 0.0022503 | 0.4991  | 1.1644      | 0.12214     | 1.1644    |         |  |
|           | 0.12214         | 0.74949   | 0.22678 | 0.12214     | 0.581313014 |           |         |  |
| GTF2F2P2  | ENSG00000233910 | -0.7318   | 0.76786 | 0.14706     | 0.44154     | -0.091399 |         |  |
|           | 0.53641         | 1.1643    | 0.12215 | 0.12215     | 0.581313014 |           |         |  |
| NA        | ENSG00000259317 | 1.1643    | 0.12216 | 1.1643      | 0.12216     | 1.1643    | 0.12216 |  |
|           | 1.1643          | 0.12216   | 0.12216 | 0.581313014 |             |           |         |  |
| TOR3A     | ENSG00000186283 | 0.22867   | 0.40956 | 0.34925     | 0.36345     | 0.58758   | 0.27841 |  |
|           | 1.1641          | 0.12219   | 0.12219 | 0.581313014 |             |           |         |  |
| ADCY7     | ENSG00000121281 | 0.86191   | 0.19437 | -0.0095208  | 0.5038      | 1.1641    | 0.1222  |  |
|           | 1.0496          | 0.14694   | 0.1222  | 0.581313014 |             |           |         |  |
| TRIM73    | ENSG00000178809 | 1.164     | 0.12221 | -0.13731    | 0.55461     | -0.60592  | 0.72771 |  |
|           | 0.29043         | 0.38574   | 0.12221 | 0.581313014 |             |           |         |  |
| DOCK11P1  | ENSG00000259000 | 0.96631   | 0.16695 | 1.1639      | 0.12223     | 0.81055   |         |  |
|           | 0.20881         | 0.81055   | 0.20881 | 0.12223     | 0.581313014 |           |         |  |
| PPP1R16B  | ENSG00000101445 | 0.025887  | 0.48967 | 0.025887    | 0.48967     | -0.3864   |         |  |
|           | 0.6504          | 1.1638    | 0.12225 | 0.12225     | 0.581313014 |           |         |  |
| MIR1267   | ENSG00000221650 | 1.1638    | 0.12226 | 0.37657     | 0.35325     | 0.37657   |         |  |
|           | 0.35325         | 0.92624   | 0.17716 | 0.12226     | 0.581313014 |           |         |  |
| NA        | ENSG00000271931 | 0.33585   | 0.36849 | 1.1638      | 0.12226     | 0.33585   | 0.36849 |  |
|           | 1.1285          | 0.12955   | 0.12226 | 0.581313014 |             |           |         |  |
| KLRF1     | ENSG00000150045 | 1.1637    | 0.12227 | 1.1637      | 0.12227     | 1.1637    | 0.12227 |  |
|           | 1.1637          | 0.12227   | 0.12227 | 0.581313014 |             |           |         |  |
| NA        | ENSG00000230747 | 0.9174    | 0.17947 | -0.28996    | 0.61408     | 1.0115    | 0.15589 |  |
|           | 1.1637          | 0.12227   | 0.12227 | 0.581313014 |             |           |         |  |
| ACSL1     | ENSG00000151726 | 0.13107   | 0.44786 | 1.1636      | 0.12229     | -0.33639  | 0.63171 |  |
|           | -0.71425        | 0.76246   | 0.12229 | 0.581313014 |             |           |         |  |
| NA        | ENSG00000283234 | 1.1636    | 0.1223  | 1.0324      | 0.15095     | 1.1636    | 0.1223  |  |
|           | 1.1636          | 0.1223    | 0.1223  | 0.581313014 |             |           |         |  |
| NA        | ENSG00000211553 | 1.1636    | 0.1223  | -0.19444    | 0.57709     | 0.07825   | 0.46881 |  |
|           | -0.13325        | 0.553     | 0.1223  | 0.581313014 |             |           |         |  |
| RPLP0P11  | ENSG00000239780 | 0.88881   | 0.18705 | 0.88881     | 0.18705     | 0.88881   |         |  |
|           | 0.18705         | 1.1634    | 0.12233 | 0.12233     | 0.581313014 |           |         |  |
| NA        | ENSG00000278041 | -0.26964  | 0.60628 | 0.14859     | 0.44094     | 1.1634    | 0.12233 |  |
|           | -0.20139        | 0.5798    | 0.12233 | 0.581313014 |             |           |         |  |
| MIR2115   | ENSG00000252466 | 1.1634    | 0.12234 | 1.1634      | 0.12234     | 1.1634    |         |  |
|           | 0.12234         | 1.1634    | 0.12234 | 0.12234     | 0.581313014 |           |         |  |
| LINC02840 | ENSG00000224893 | 1.1633    | 0.12235 | 1.1633      | 0.12235     | 1.1633    |         |  |
|           | 0.12235         | 1.1633    | 0.12235 | 0.12235     | 0.581313014 |           |         |  |
| HOXC4     | ENSG00000198353 | 1.1633    | 0.12236 | -0.9381     | 0.8259      | -1.4312   | 0.92381 |  |
|           | 1.1633          | 0.12236   | 0.12236 | 0.581313014 |             |           |         |  |
| ST18      | ENSG00000147488 | 1.1632    | 0.12237 | -0.35506    | 0.63873     | 0.79015   | 0.21472 |  |
|           | 0.16004         | 0.43642   | 0.12237 | 0.581313014 |             |           |         |  |
| NA        | ENSG00000235128 | 1.1631    | 0.1224  | 0.29863     | 0.38261     | 1.1631    | 0.1224  |  |
|           | 1.1631          | 0.1224    | 0.1224  | 0.581313014 |             |           |         |  |
| ARID5B    | ENSG00000150347 | -1.012    | 0.84422 | -0.33222    | 0.63014     | -0.37214  |         |  |
|           | 0.64511         | 1.163     | 0.12241 | 0.12241     | 0.581313014 |           |         |  |
| ACAD8     | ENSG00000151498 | 1.1628    | 0.12245 | 0.32081     | 0.37418     | 0.32081   | 0.37418 |  |

|             |                 |             |             |             |             |          |         |       |
|-------------|-----------------|-------------|-------------|-------------|-------------|----------|---------|-------|
|             | 0.57161         | 0.28379     | 0.12245     | 0.581313014 |             |          |         |       |
| OPALIN      | ENSG00000197430 | 0.6564      | 0.25578     | 0.79615     | 0.21297     | 1.1628   |         |       |
|             | 0.12245         | 0.039489    | 0.48425     | 0.12245     | 0.581313014 |          |         |       |
| MACROD2-AS1 | ENSG00000235914 | 1.1211      | 0.13113     | 1.1628      | 0.12245     | 1.1628   |         |       |
|             | 0.12245         | 1.1628      | 0.12245     | 0.12245     | 0.581313014 |          |         |       |
| RN7SL251P   | ENSG00000244399 | 1.1627      | 0.12247     | -0.59039    | 0.72253     | 1.1627   |         |       |
|             | 0.12247         | 1.1627      | 0.12247     | 0.12247     | 0.581313014 |          |         |       |
| NA          | ENSG00000214770 | 0.23975     | 0.40526     | 1.1627      | 0.12248     | 0.42858  | 0.33411 |       |
|             | -0.30361        | 0.61929     | 0.12248     | 0.581313014 |             |          |         |       |
| HTATSF1P1   | ENSG00000223457 | 1.1627      | 0.12248     | 0.77346     | 0.21963     | -0.1304  |         |       |
|             | 0.55188         | 0.30975     | 0.37838     | 0.12248     | 0.581313014 |          |         |       |
| RAMP3       | ENSG00000122679 | 0.57931     | 0.28119     | 0.39416     | 0.34673     | 1.1626   | 0.12249 |       |
|             | 0.23045         | 0.40887     | 0.12249     | 0.581313014 |             |          |         |       |
| NA          | ENSG00000253608 | 1.1626      | 0.12249     | -0.26062    | 0.60281     | -0.38682 | 0.65056 |       |
|             | -0.065641       | 0.52617     | 0.12249     | 0.581313014 |             |          |         |       |
| NA          | ENSG00000252940 | 1.1623      | 0.12255     | 0.34414     | 0.36537     | 0.23134  | 0.40852 |       |
|             | 0.14293         | 0.44317     | 0.12255     | 0.581313014 |             |          |         |       |
| PPP1R12A    | ENSG00000058272 | 1.1623      | 0.12256     | -0.19472    | 0.5772      | -0.42089 |         |       |
|             | 0.66308         | 0.27358     | 0.3922      | 0.12256     | 0.581313014 |          |         |       |
| SLC5A3      | ENSG00000198743 | 0.079905    | 0.46816     | 0.079905    | 0.46816     | 0.079905 |         |       |
|             | 0.46816         | 1.1621      | 0.12259     | 0.12259     | 0.581313014 |          |         |       |
| TSMF        | ENSG00000123297 | 0.5358      | 0.29605     | 0.5358      | 0.29605     | 1.1621   | 0.1226  |       |
|             | 1.1621          | 0.1226      | 0.1226      | 0.581313014 |             |          |         |       |
| PTGIS       | ENSG00000124212 | 1.162       | 0.12262     | -0.25016    | 0.59877     | 0.61785  | 0.26834 |       |
|             | 0.52651         | 0.29927     | 0.12262     | 0.581313014 |             |          |         |       |
| OSTCP6      | ENSG00000219790 | 0.99747     | 0.15927     | 1.162       | 0.12262     | 1.162    | 0.12262 | 1.162 |
|             | 0.12262         | 0.12262     | 0.581313014 |             |             |          |         |       |
| BID         | ENSG00000015475 | 0.26275     | 0.39637     | 0.59782     | 0.27498     | 0.65865  | 0.25506 |       |
|             | 1.1619          | 0.12263     | 0.12263     | 0.581313014 |             |          |         |       |
| NDRG2       | ENSG00000165795 | 0.81382     | 0.20787     | 0.43199     | 0.33287     | -0.46143 | 0.67776 |       |
|             | 1.1619          | 0.12263     | 0.12263     | 0.581313014 |             |          |         |       |
| CLK2        | ENSG00000176444 | 1.1618      | 0.12265     | 0.80729     | 0.20975     | 1.1618   | 0.12265 |       |
|             | 1.1618          | 0.12265     | 0.12265     | 0.581313014 |             |          |         |       |
| TSTD1       | ENSG00000215845 | 1.1617      | 0.12268     | 1.1617      | 0.12268     | 1.1617   | 0.12268 |       |
|             | 1.1617          | 0.12268     | 0.12268     | 0.581313014 |             |          |         |       |
| NA          | ENSG00000254343 | 1.1617      | 0.12268     | 1.1617      | 0.12268     | 1.1617   | 0.12268 |       |
|             | 1.1617          | 0.12268     | 0.12268     | 0.581313014 |             |          |         |       |
| ADAMTS12    | ENSG00000151388 | 0.57153     | 0.28382     | 0.50117     | 0.30812     | 1.1615   |         |       |
|             | 0.12272         | -0.63653    | 0.73779     | 0.12272     | 0.581313014 |          |         |       |
| PDXP-DT     | ENSG00000233360 | 1.1615      | 0.12272     | 1.1615      | 0.12272     | 1.1615   |         |       |
|             | 0.12272         | 1.1615      | 0.12272     | 0.12272     | 0.581313014 |          |         |       |
| GAS6-DT     | ENSG00000272695 | 1.1615      | 0.12272     | 1.1615      | 0.12272     | 1.1615   |         |       |
|             | 0.12272         | 1.1615      | 0.12272     | 0.12272     | 0.581313014 |          |         |       |
| NA          | ENSG00000276958 | 1.1614      | 0.12275     | 1.1614      | 0.12275     | 1.1614   | 0.12275 |       |
|             | 1.1614          | 0.12275     | 0.12275     | 0.581313014 |             |          |         |       |
| HNRNPA1P73  | ENSG00000236569 | 1.1613      | 0.12276     | 0.31991     | 0.37452     | 0.31991  |         |       |
|             | 0.37452         | 0.31991     | 0.37452     | 0.12276     | 0.581313014 |          |         |       |
| NA          | ENSG00000279443 | 1.0291      | 0.15171     | 1.1333      | 0.12854     | 1.1613   | 0.12277 |       |
|             | 1.1613          | 0.12277     | 0.12277     | 0.581313014 |             |          |         |       |
| ZMYM1       | ENSG00000197056 | 0.34767     | 0.36404     | -0.42516    | 0.66464     | 1.1611   | 0.12279 |       |
|             | 0.62939         | 0.26455     | 0.12279     | 0.581313014 |             |          |         |       |
| ELK3        | ENSG00000111145 | 1.1611      | 0.1228      | -0.023052   | 0.5092      | -0.38116 | 0.64846 |       |
|             | -0.97843        | 0.83607     | 0.1228      | 0.581313014 |             |          |         |       |
| LINC02777   | ENSG00000232453 | -0.40533    | 0.65738     | -0.40533    | 0.65738     | 1.161    | 0.12281 |       |
|             | -0.34587        | 0.63528     | 0.12281     | 0.581313014 |             |          |         |       |
| NA          | ENSG00000254006 | 0.98193     | 0.16307     | 1.161       | 0.12282     | 1.161    | 0.12282 | 1.161 |
|             | 0.12282         | 0.12282     | 0.581313014 |             |             |          |         |       |
| NA          | ENSG00000259588 | 1.161       | 0.12282     | 1.161       | 0.12282     | 1.161    | 0.12282 | 1.161 |
|             | 0.12282         | 0.581313014 |             |             |             |          |         |       |
| SGPL1       | ENSG00000166224 | -0.26803    | 0.60566     | -0.36999    | 0.6443      | 1.0108   | 0.15606 |       |
|             | 1.1609          | 0.12283     | 0.12283     | 0.581313014 |             |          |         |       |
| EMG1        | ENSG00000126749 | 1.1609      | 0.12284     | 1.1609      | 0.12284     | 1.1609   | 0.12284 |       |

|            |                 |             |         |             |             |           |         |      |         |
|------------|-----------------|-------------|---------|-------------|-------------|-----------|---------|------|---------|
|            | 1.1609          | 0.12284     | 0.12284 | 0.581313014 |             |           |         |      |         |
| INCENP     | ENSG00000149503 | 0.30924     | 0.37857 | -0.11791    | 0.54693     | -0.029112 |         |      |         |
|            | 0.51161         | 1.1609      | 0.12284 | 0.12284     | 0.581313014 |           |         |      |         |
| MIR3129    | ENSG00000264725 | 0.42077     | 0.33696 | 1.1609      | 0.12284     | 0.42077   |         |      |         |
|            | 0.33696         | 0.42077     | 0.33696 | 0.12284     | 0.581313014 |           |         |      |         |
| RARS1      | ENSG00000113643 | 1.1608      | 0.12286 | -0.074552   | 0.52971     | -0.61404  | 0.73041 |      |         |
|            | -0.08585        | 0.53421     | 0.12286 | 0.581313014 |             |           |         |      |         |
| C4orf17    | ENSG00000138813 | 1.1608      | 0.12287 | 0.52984     | 0.29811     | -0.24152  |         |      |         |
|            | 0.59542         | -0.24152    | 0.59542 | 0.12287     | 0.581313014 |           |         |      |         |
| RNU6-380P  | ENSG00000222139 | 1.1608      | 0.12287 | 1.1608      | 0.12287     | -0.062741 |         |      |         |
|            | 0.52501         | 0.037958    | 0.48486 | 0.12287     | 0.581313014 |           |         |      |         |
| MIR411     | ENSG00000199109 | 1.1606      | 0.12289 | 1.1606      | 0.12289     | 1.1606    |         |      |         |
|            | 0.12289         | 1.1606      | 0.12289 | 0.12289     | 0.581313014 |           |         |      |         |
| NA         | ENSG00000223831 | -0.87749    | 0.80989 | -0.87749    | 0.80989     | 1.1606    | 0.12289 |      |         |
|            | -0.33554        | 0.63139     | 0.12289 | 0.581313014 |             |           |         |      |         |
| SAMD11     | ENSG00000187634 | 0.8203      | 0.20602 | 1.1606      | 0.1229      | -0.057319 |         |      |         |
|            | 0.52285         | 0.82632     | 0.20431 | 0.1229      | 0.581313014 |           |         |      |         |
| EPGN       | ENSG00000182585 | -1.0018     | 0.84179 | 1.1606      | 0.12291     | -0.135    | 0.55369 |      |         |
|            | -0.36705        | 0.64321     | 0.12291 | 0.581313014 |             |           |         |      |         |
| OR7E136P   | ENSG00000205897 | -0.42284    | 0.6638  | -0.048284   | 0.51926     | 1.0234    |         |      |         |
|            | 0.15307         | 1.1605      | 0.12291 | 0.12291     | 0.581313014 |           |         |      |         |
| HOXA5      | ENSG00000106004 | 0.69026     | 0.24501 | 0.69026     | 0.24501     | 0.22605   | 0.41058 |      |         |
|            | 1.1604          | 0.12293     | 0.12293 | 0.581313014 |             |           |         |      |         |
| ADAMTSL1   | ENSG00000178031 | 1.1604      | 0.12294 | 0.27098     | 0.3932      | 0.052699  |         |      |         |
|            | 0.47899         | 1.0348      | 0.15038 | 0.12294     | 0.581313014 |           |         |      |         |
| NA         | ENSG00000257994 | 1.1604      | 0.12294 | 1.1604      | 0.12294     | 0.99827   | 0.15907 |      |         |
|            | 1.1604          | 0.12294     | 0.12294 | 0.581313014 |             |           |         |      |         |
| VAC14-AS1  | ENSG00000214353 | 1.1604      | 0.12295 | -0.19039    | 0.5755      | -0.19039  |         |      |         |
|            | 0.5755          | -0.19039    | 0.5755  | 0.12295     | 0.581313014 |           |         |      |         |
| NA         | ENSG00000257681 | 1.1603      | 0.12295 | 1.1603      | 0.12295     | 1.1603    | 0.12295 |      |         |
|            | 1.1603          | 0.12295     | 0.12295 | 0.581313014 |             |           |         |      |         |
| DNAJC5     | ENSG00000101152 | 0.65377     | 0.25663 | 0.65377     | 0.25663     | 1.0637    |         |      |         |
|            | 0.14372         | 1.1602      | 0.12299 | 0.12299     | 0.581313014 |           |         |      |         |
| ANKRD13A   | ENSG00000076513 | 0.40274     | 0.34357 | 0.15513     | 0.43836     | 0.66899   |         |      |         |
|            | 0.25175         | 1.1601      | 0.12301 | 0.12301     | 0.581313014 |           |         |      |         |
| CALB1      | ENSG00000104327 | 1.1601      | 0.12301 | 0.10664     | 0.45754     | 0.10664   | 0.45754 |      |         |
|            | 0.10664         | 0.45754     | 0.12301 | 0.581313014 |             |           |         |      |         |
| NA         | ENSG00000224441 | 1.16        | 0.12303 | 1.16        | 0.12303     | 1.16      | 0.12303 | 1.16 | 0.12303 |
|            | 0.12303         | 0.581313014 |         |             |             |           |         |      |         |
| NA         | ENSG00000249392 | 0.49421     | 0.31058 | 0.07606     | 0.46969     | 1.1599    | 0.12304 |      |         |
|            | 0.68373         | 0.24707     | 0.12304 | 0.581313014 |             |           |         |      |         |
| OR1I1      | ENSG00000094661 | 0.28509     | 0.38779 | -0.62182    | 0.73297     | 1.1599    | 0.12305 |      |         |
|            | 0.016889        | 0.49326     | 0.12305 | 0.581313014 |             |           |         |      |         |
| ZRANB2-AS1 | ENSG00000235079 | -0.507      | 0.69392 | -0.33452    | 0.63101     | 1.1599    |         |      |         |
|            | 0.12305         | 1.1599      | 0.12305 | 0.12305     | 0.581313014 |           |         |      |         |
| RPL31P60   | ENSG00000239988 | 1.1598      | 0.12306 | 1.1598      | 0.12306     | 1.1598    |         |      |         |
|            | 0.12306         | 1.1598      | 0.12306 | 0.12306     | 0.581313014 |           |         |      |         |
| METTL21C   | ENSG00000139780 | -0.53466    | 0.70356 | 0.45384     | 0.32497     | 1.1597    |         |      |         |
|            | 0.12308         | 1.1597      | 0.12308 | 0.12308     | 0.581313014 |           |         |      |         |
| NA         | ENSG00000279775 | 1.1597      | 0.12309 | 1.1597      | 0.12309     | -0.19925  | 0.57897 |      |         |
|            | -0.19925        | 0.57897     | 0.12309 | 0.581313014 |             |           |         |      |         |
| ATP5PBP2   | ENSG00000214342 | 1.1596      | 0.1231  | 1.1596      | 0.1231      | 1.1596    |         |      |         |
|            | 0.1231          | 1.1596      | 0.1231  | 0.1231      | 0.581313014 |           |         |      |         |
| TRAV9-1    | ENSG00000211783 | -0.22647    | 0.58958 | -1.0857     | 0.8612      | 1.1596    |         |      |         |
|            | 0.12311         | -1.0857     | 0.8612  | 0.12311     | 0.581313014 |           |         |      |         |
| TRAV24     | ENSG00000211805 | 1.1596      | 0.12311 | 1.1596      | 0.12311     | 0.18157   |         |      |         |
|            | 0.42796         | 1.1596      | 0.12311 | 0.12311     | 0.581313014 |           |         |      |         |
| FABP5P7    | ENSG00000234964 | 1.1596      | 0.12311 | 1.1596      | 0.12311     | 1.1596    |         |      |         |
|            | 0.12311         | 1.1596      | 0.12311 | 0.12311     | 0.581313014 |           |         |      |         |
| TIMELESS   | ENSG00000111602 | 0.4629      | 0.32172 | 0.79337     | 0.21378     | 1.1591    |         |      |         |
|            | 0.1232          | -0.88616    | 0.81223 | 0.1232      | 0.581625266 |           |         |      |         |
| PHB2       | ENSG00000215021 | 1.1591      | 0.1232  | 1.1591      | 0.1232      | 1.1591    | 0.1232  |      |         |

|           |                 |             |         |             |             |          |         |  |
|-----------|-----------------|-------------|---------|-------------|-------------|----------|---------|--|
|           | 1.1591          | 0.1232      | 0.1232  | 0.581625266 |             |          |         |  |
| GIT2      | ENSG00000139436 | 0.3516      | 0.36257 | 0.053472    | 0.47868     | 0.12428  | 0.45055 |  |
|           | 1.1589          | 0.12326     | 0.12326 | 0.581852155 |             |          |         |  |
| FCRLA     | ENSG00000132185 | 1.1587      | 0.12328 | 1.0509      | 0.14665     | 1.1587   | 0.12328 |  |
|           | 1.1587          | 0.12328     | 0.12328 | 0.581881036 |             |          |         |  |
| FHL3      | ENSG00000183386 | -0.94203    | 0.82691 | -0.19667    | 0.57796     | 1.1587   | 0.12329 |  |
|           | 0.88993         | 0.18675     | 0.12329 | 0.581881036 |             |          |         |  |
| CDCA5     | ENSG00000146670 | 1.1586      | 0.12331 | 1.1586      | 0.12331     | 1.1586   | 0.12331 |  |
|           | -0.11012        | 0.54384     | 0.12331 | 0.581919068 |             |          |         |  |
| NA        | ENSG00000265717 | 1.1585      | 0.12334 | 1.1585      | 0.12334     | 1.1585   | 0.12334 |  |
|           | 1.1585          | 0.12334     | 0.12334 | 0.58200428  |             |          |         |  |
| VIPR1-AS1 | ENSG00000232354 | 0.85372     | 0.19663 | 1.1582      | 0.12339     | 1.1582   |         |  |
|           | 0.12339         | 1.1582      | 0.12339 | 0.12339     | 0.58218384  |          |         |  |
| NA        | ENSG00000229191 | 1.158       | 0.12342 | 1.158       | 0.12342     | 1.158    | 0.12342 |  |
|           | 0.12342         | 0.582241434 |         |             |             |          |         |  |
| RN7SL165P | ENSG00000241188 | -0.68019    | 0.75181 | 1.158       | 0.12343     | -0.64882 | 0.74177 |  |
|           | -0.68019        | 0.75181     | 0.12343 | 0.582241434 |             |          |         |  |
| SDC4      | ENSG00000124145 | 1.1272      | 0.12982 | 1.158       | 0.12344     | 0.41694  | 0.33836 |  |
|           | 0.086355        | 0.46559     | 0.12344 | 0.582241434 |             |          |         |  |
| IGSF21    | ENSG00000117154 | 0.72184     | 0.2352  | 1.1579      | 0.12345     | -0.65903 |         |  |
|           | 0.74506         | -0.50123    | 0.69189 | 0.12345     | 0.582241434 |          |         |  |
| IPO8      | ENSG00000133704 | 1.1577      | 0.12348 | 0.42221     | 0.33644     | -0.16692 | 0.56628 |  |
|           | -0.29106        | 0.6145      | 0.12348 | 0.582301363 |             |          |         |  |
| NA        | ENSG00000270061 | 1.1577      | 0.1235  | 1.1577      | 0.1235      | 1.1577   | 0.1235  |  |
|           | 1.1577          | 0.1235      | 0.1235  | 0.582301363 |             |          |         |  |
| NA        | ENSG00000231678 | 1.1576      | 0.12352 | 1.1576      | 0.12352     | 1.1576   | 0.12352 |  |
|           | 1.1576          | 0.12352     | 0.12352 | 0.582301363 |             |          |         |  |
| NA        | ENSG00000268858 | 0.95467     | 0.16987 | 1.1576      | 0.12352     | 1.1576   | 0.12352 |  |
|           | 1.1576          | 0.12352     | 0.12352 | 0.582301363 |             |          |         |  |
| PRDX5     | ENSG00000126432 | 1.1574      | 0.12356 | 1.1574      | 0.12356     | 0.61542  | 0.26914 |  |
|           | 0.62128         | 0.26721     | 0.12356 | 0.582301363 |             |          |         |  |
| CHRM2     | ENSG00000181072 | -0.17803    | 0.57065 | 1.1573      | 0.12357     | -0.44596 | 0.67219 |  |
|           | 0.28351         | 0.38839     | 0.12357 | 0.582301363 |             |          |         |  |
| CUL1P1    | ENSG00000251032 | 1.1572      | 0.12359 | -0.65437    | 0.74356     | -0.35393 |         |  |
|           | 0.63831         | -0.51729    | 0.69752 | 0.12359     | 0.582301363 |          |         |  |
| LINC01572 | ENSG00000261008 | -0.92667    | 0.82295 | -0.21785    | 0.58623     | -0.92667 |         |  |
|           | 0.82295         | 1.1572      | 0.12359 | 0.12359     | 0.582301363 |          |         |  |
| CHODL     | ENSG00000154645 | 0.91495     | 0.18011 | 0.64146     | 0.26061     | 1.1572   | 0.1236  |  |
|           | -0.71568        | 0.76291     | 0.1236  | 0.582301363 |             |          |         |  |
| FRMD4A    | ENSG00000151474 | -0.61398    | 0.73039 | 0.19983     | 0.42081     | 1.1571   |         |  |
|           | 0.12361         | 0.86655     | 0.19309 | 0.12361     | 0.582301363 |          |         |  |
| NA        | ENSG00000237390 | 0.44722     | 0.32736 | 0.53462     | 0.29646     | 1.1571   | 0.12362 |  |
|           | 1.1571          | 0.12362     | 0.12362 | 0.582301363 |             |          |         |  |
| NA        | ENSG00000258631 | 1.1571      | 0.12362 | -0.67624    | 0.75056     | 1.1571   | 0.12362 |  |
|           | 1.1571          | 0.12362     | 0.12362 | 0.582301363 |             |          |         |  |
| SNRPGP6   | ENSG00000205433 | 1.157       | 0.12363 | -1.9451     | 0.97412     | 0.086629 | 0.46548 |  |
|           | -1.9451         | 0.97412     | 0.12363 | 0.582301363 |             |          |         |  |
| NA        | ENSG00000224063 | 0.36335     | 0.35817 | 1.157       | 0.12363     | 0.48878  | 0.3125  |  |
|           | 1.0667          | 0.14305     | 0.12363 | 0.582301363 |             |          |         |  |
| NA        | ENSG00000199856 | 0.71368     | 0.23771 | 1.1569      | 0.12365     | 0.71368  | 0.23771 |  |
|           | 0.71368         | 0.23771     | 0.12365 | 0.58232091  |             |          |         |  |
| A2M       | ENSG00000175899 | 0.50603     | 0.30642 | 0.29688     | 0.38328     | 1.1569   | 0.12366 |  |
|           | -0.6727         | 0.74943     | 0.12366 | 0.58232091  |             |          |         |  |
| ARSI      | ENSG00000183876 | 1.1568      | 0.12367 | 0.9676      | 0.16662     | 0.98969  | 0.16116 |  |
|           | 0.8339          | 0.20217     | 0.12367 | 0.58232091  |             |          |         |  |
| LINC02603 | ENSG00000230262 | 0.22616     | 0.41054 | -1.1798     | 0.88096     | 1.1568   |         |  |
|           | 0.12369         | 0.60138     | 0.27379 | 0.12369     | 0.582331266 |          |         |  |
| LCEP2     | ENSG00000229713 | -0.76629    | 0.77825 | -0.422      | 0.66349     | -0.90937 | 0.81842 |  |
|           | 1.1566          | 0.12371     | 0.12371 | 0.582331266 |             |          |         |  |
| NA        | ENSG00000239674 | 1.1566      | 0.12371 | 1.1566      | 0.12371     | 1.1566   | 0.12371 |  |
|           | 1.1566          | 0.12371     | 0.12371 | 0.582331266 |             |          |         |  |
| ASB16     | ENSG00000161664 | -0.6083     | 0.72851 | -0.6083     | 0.72851     | -0.45093 | 0.67398 |  |

|            |                 |             |             |             |             |          |         |         |
|------------|-----------------|-------------|-------------|-------------|-------------|----------|---------|---------|
|            | 1.1566          | 0.12372     | 0.12372     | 0.582331266 |             |          |         |         |
| MMP2-AS1   | ENSG00000260135 | 0.78254     | 0.21695     | 0.88067     | 0.18925     | 1.1564   |         |         |
|            | 0.12376         | 0.72805     | 0.23329     | 0.12376     | 0.582417347 |          |         |         |
| NA         | ENSG00000270557 | 1.1564      | 0.12377     | 1.1564      | 0.12377     | 1.1564   | 0.12377 |         |
|            | 1.1564          | 0.12377     | 0.12377     | 0.582417347 |             |          |         |         |
| LAPTM4BP1  | ENSG00000237008 | 1.1055      | 0.13447     | 1.1563      | 0.12378     | 1.1563   |         |         |
|            | 0.12378         | 0.34273     | 0.3659      | 0.12378     | 0.582417347 |          |         |         |
| NA         | ENSG00000256357 | 0.42607     | 0.33503     | 0.42607     | 0.33503     | 0.42607  | 0.33503 |         |
|            | 1.1562          | 0.12379     | 0.12379     | 0.582417347 |             |          |         |         |
| NA         | ENSG00000273552 | -0.64417    | 0.74027     | -0.64417    | 0.74027     | -0.4384  | 0.66945 |         |
|            | 1.1562          | 0.1238      | 0.1238      | 0.582417347 |             |          |         |         |
| SLC18A2    | ENSG00000165646 | 1.1561      | 0.12381     | 1.1561      | 0.12381     | 1.1561   |         |         |
|            | 0.12381         | 0.19342     | 0.42331     | 0.12381     | 0.582417347 |          |         |         |
| NA         | ENSG00000280268 | 1.156       | 0.12383     | 1.156       | 0.12383     | 1.156    | 0.12383 |         |
|            | 0.12383         | 0.582455203 |             |             |             |          |         |         |
| NA         | ENSG00000282440 | 0.83835     | 0.20092     | -1.1026     | 0.86489     | 1.156    | 0.12385 |         |
|            | -0.28222        | 0.61111     | 0.12385     | 0.582493051 |             |          |         |         |
| RPL22P8    | ENSG00000237745 | -0.35027    | 0.63693     | 1.1558      | 0.12387     | 0.29785  |         |         |
|            | 0.38291         | 0.29785     | 0.38291     | 0.12387     | 0.582530892 |          |         |         |
| NPIPB2     | ENSG00000234719 | 0.55136     | 0.29069     | -0.65762    | 0.74461     | 1.1557   |         |         |
|            | 0.1239          | 0.15242     | 0.43943     | 0.1239      | 0.582542224 |          |         |         |
| NA         | ENSG00000225142 | 1.1557      | 0.12391     | 1.1557      | 0.12391     | 1.1557   | 0.12391 |         |
|            | 1.0202          | 0.15383     | 0.12391     | 0.582542224 |             |          |         |         |
| NA         | ENSG00000272130 | 0.33645     | 0.36827     | 1.1555      | 0.12394     | -0.60979 | 0.729   |         |
|            | -0.81701        | 0.79304     | 0.12394     | 0.582542224 |             |          |         |         |
| TTC29      | ENSG00000137473 | 0.29227     | 0.38504     | 1.1555      | 0.12395     | 0.56732  | 0.28525 |         |
|            | 0.92397         | 0.17775     | 0.12395     | 0.582542224 |             |          |         |         |
| HNRNPA1P39 | ENSG00000237804 | 1.1555      | 0.12395     | 1.1555      | 0.12395     | -0.26346 |         |         |
|            | 0.6039          | 0.17301     | 0.43132     | 0.12395     | 0.582542224 |          |         |         |
| NA         | ENSG00000234484 | 1.1554      | 0.12396     | 1.1554      | 0.12396     | 1.1554   | 0.12396 |         |
|            | 1.1554          | 0.12396     | 0.12396     | 0.582542224 |             |          |         |         |
| COX6B1P4   | ENSG00000253813 | 1.1554      | 0.12397     | -1.6224     | 0.94764     | -1.6224  |         |         |
|            | 0.94764         | -1.6224     | 0.94764     | 0.12397     | 0.582542224 |          |         |         |
| NA         | ENSG00000258792 | 0.216       | 0.41449     | 0.216       | 0.41449     | 1.1554   | 0.12397 | -1.2878 |
|            | 0.90109         | 0.12397     | 0.582542224 |             |             |          |         |         |
| COX19      | ENSG00000240230 | 1.1553      | 0.12398     | -0.59779    | 0.72501     | 0.31563  | 0.37614 |         |
|            | 1.0902          | 0.13782     | 0.12398     | 0.582542224 |             |          |         |         |
| HAUS6      | ENSG00000147874 | 1.1551      | 0.12402     | 1.0986      | 0.13598     | 0.86211  | 0.19431 |         |
|            | 0.2159          | 0.41453     | 0.12402     | 0.582571892 |             |          |         |         |
| NA         | ENSG00000235319 | 1.1551      | 0.12402     | 1.1551      | 0.12402     | 1.1551   | 0.12402 |         |
|            | 1.1551          | 0.12402     | 0.12402     | 0.582571892 |             |          |         |         |
| NA         | ENSG00000256640 | 1.1551      | 0.12403     | 1.1551      | 0.12403     | 1.1551   | 0.12403 |         |
|            | 1.1551          | 0.12403     | 0.12403     | 0.582571892 |             |          |         |         |
| PLEKHG5    | ENSG00000171680 | 1.155       | 0.12404     | 0.75217     | 0.22597     | 1.0826   | 0.13949 |         |
|            | 0.9259          | 0.17725     | 0.12404     | 0.582571892 |             |          |         |         |
| RNU6-690P  | ENSG00000202112 | 1.1549      | 0.12407     | -0.2593     | 0.6023      | 0.16759  |         |         |
|            | 0.43345         | -0.65264    | 0.74301     | 0.12407     | 0.582571892 |          |         |         |
| NA         | ENSG00000237372 | 0.77652     | 0.21872     | 1.1549      | 0.12407     | 1.0336   | 0.15067 |         |
|            | 0.93582         | 0.17468     | 0.12407     | 0.582571892 |             |          |         |         |
| TRMT9B     | ENSG00000250305 | 1.1549      | 0.12407     | -0.15092    | 0.55998     | 0.88691  |         |         |
|            | 0.18756         | 0.21933     | 0.4132      | 0.12407     | 0.582571892 |          |         |         |
| MRPS5P4    | ENSG00000266915 | 0.51794     | 0.30225     | 1.0949      | 0.13679     | 1.1548   |         |         |
|            | 0.12409         | 0.14267     | 0.44328     | 0.12409     | 0.582609664 |          |         |         |
| NA         | ENSG00000235288 | 1.1545      | 0.12414     | 0.24012     | 0.40512     | 0.6507   | 0.25762 |         |
|            | 1.1545          | 0.12414     | 0.12414     | 0.582639264 |             |          |         |         |
| CABYRP1    | ENSG00000242983 | 1.1545      | 0.12414     | 0.20943     | 0.41706     | 0.20943  |         |         |
|            | 0.41706         | 0.20943     | 0.41706     | 0.12414     | 0.582639264 |          |         |         |
| HINT1      | ENSG00000169567 | 0.97797     | 0.16405     | 1.1545      | 0.12415     | 0.82213  | 0.2055  |         |
|            | 0.77858         | 0.21811     | 0.12415     | 0.582639264 |             |          |         |         |
| MAN1A2     | ENSG00000198162 | 0.32776     | 0.37155     | 0.90086     | 0.18383     | 0.86599  |         |         |
|            | 0.19325         | 1.1545      | 0.12415     | 0.12415     | 0.582639264 |          |         |         |
| NA         | ENSG00000260126 | 0.62362     | 0.26644     | 0.78853     | 0.21519     | 1.1544   | 0.12417 |         |

|           |                 |           |         |             |             |          |         |  |
|-----------|-----------------|-----------|---------|-------------|-------------|----------|---------|--|
|           | -2.5998         | 0.99534   | 0.12417 | 0.582639264 |             |          |         |  |
| RNU6-135P | ENSG00000252578 | 1.1543    | 0.12418 | -0.196      | 0.57769     | -0.196   |         |  |
|           | 0.57769         | -0.196    | 0.57769 | 0.12418     | 0.582639264 |          |         |  |
| NA        | ENSG00000254983 | 0.54727   | 0.2921  | 1.1543      | 0.12418     | -0.33472 | 0.63108 |  |
|           | 0.9458          | 0.17212   | 0.12418 | 0.582639264 |             |          |         |  |
| NA        | ENSG00000226115 | 1.1541    | 0.12422 | 1.1541      | 0.12422     | -0.46597 | 0.67938 |  |
|           | 0.38269         | 0.35097   | 0.12422 | 0.582714729 |             |          |         |  |
| NA        | ENSG00000275427 | 1.1542    | 0.12422 | 0.35689     | 0.36059     | 0.25495  | 0.39938 |  |
|           | 0.081744        | 0.46743   | 0.12422 | 0.582714729 |             |          |         |  |
| CD70      | ENSG00000125726 | 1.1541    | 0.12424 | -0.26135    | 0.60309     | -1.0071  | 0.84306 |  |
|           | 0.18739         | 0.42568   | 0.12424 | 0.582724894 |             |          |         |  |
| DNM1P51   | ENSG00000235370 | 1.1539    | 0.12426 | 1.1539      | 0.12426     | 1.1539   |         |  |
|           | 0.12426         | -0.31551  | 0.62381 | 0.12426     | 0.582724894 |          |         |  |
| RPL23AP72 | ENSG00000239840 | 1.1539    | 0.12426 | -0.056124   | 0.52238     | -0.1297  |         |  |
|           | 0.5516          | -0.1297   | 0.5516  | 0.12426     | 0.582724894 |          |         |  |
| HMGB1P38  | ENSG00000243877 | 1.1539    | 0.12427 | 1.1539      | 0.12427     | 1.1539   |         |  |
|           | 0.12427         | 1.1539    | 0.12427 | 0.12427     | 0.582724894 |          |         |  |
| LINC00544 | ENSG00000122043 | 1.1538    | 0.12429 | 0.78948     | 0.21492     | 1.1538   |         |  |
|           | 0.12429         | 1.1538    | 0.12429 | 0.12429     | 0.582726851 |          |         |  |
| TRAPPC6A  | ENSG00000007255 | 1.1537    | 0.12431 | 1.1537      | 0.12431     | 1.1537   |         |  |
|           | 0.12431         | 0.7742    | 0.21941 | 0.12431     | 0.582726851 |          |         |  |
| NA        | ENSG00000265393 | 1.1536    | 0.12433 | 1.1536      | 0.12433     | 1.1536   | 0.12433 |  |
|           | 1.1536          | 0.12433   | 0.12433 | 0.582726851 |             |          |         |  |
| AOAH      | ENSG00000136250 | -0.84079  | 0.79977 | 0.84925     | 0.19787     | 1.1535   | 0.12435 |  |
|           | -2.26           | 0.98809   | 0.12435 | 0.582726851 |             |          |         |  |
| IGLVV-58  | ENSG00000253637 | 1.1535    | 0.12435 | 1.1535      | 0.12435     | 1.1535   |         |  |
|           | 0.12435         | 1.1535    | 0.12435 | 0.12435     | 0.582726851 |          |         |  |
| SOX14     | ENSG00000168875 | 1.1534    | 0.12438 | -1.0596     | 0.85534     | -0.08935 | 0.5356  |  |
|           | -1.0596         | 0.85534   | 0.12438 | 0.582726851 |             |          |         |  |
| NA        | ENSG00000221316 | 1.1534    | 0.12438 | 1.1534      | 0.12438     | 0.58906  | 0.27791 |  |
|           | 1.1534          | 0.12438   | 0.12438 | 0.582726851 |             |          |         |  |
| CDH8      | ENSG00000150394 | 0.73231   | 0.23199 | 0.70617     | 0.24004     | -0.11956 | 0.54759 |  |
|           | 1.1533          | 0.12439   | 0.12439 | 0.582726851 |             |          |         |  |
| RPL27AP3  | ENSG00000236667 | 0.76462   | 0.22225 | 1.1533      | 0.12439     | 0.173    | 0.43133 |  |
|           | 1.1533          | 0.12439   | 0.12439 | 0.582726851 |             |          |         |  |
| NA        | ENSG00000276278 | 1.1533    | 0.12439 | 1.1533      | 0.12439     | 1.1533   | 0.12439 |  |
|           | 1.1533          | 0.12439   | 0.12439 | 0.582726851 |             |          |         |  |
| NA        | ENSG00000198671 | 1.1532    | 0.12441 | 1.1532      | 0.12441     | 1.1532   | 0.12441 |  |
|           | 1.1532          | 0.12441   | 0.12441 | 0.58276452  |             |          |         |  |
| NA        | ENSG00000273433 | 1.1529    | 0.12447 | 1.1529      | 0.12447     | 1.1529   | 0.12447 |  |
|           | 1.1529          | 0.12447   | 0.12447 | 0.582952757 |             |          |         |  |
| MIR1293   | ENSG00000221604 | 1.1528    | 0.12449 | 1.1528      | 0.12449     | 1.1528   |         |  |
|           | 0.12449         | 1.1528    | 0.12449 | 0.12449     | 0.582952757 |          |         |  |
| NA        | ENSG00000260033 | -0.55282  | 0.70981 | 1.1528      | 0.12449     | -0.17987 | 0.57137 |  |
|           | 1.1528          | 0.12449   | 0.12449 | 0.582952757 |             |          |         |  |
| NA        | ENSG00000255655 | 1.1527    | 0.12451 | 1.1527      | 0.12451     | 1.1527   | 0.12451 |  |
|           | 1.1527          | 0.12451   | 0.12451 | 0.582952757 |             |          |         |  |
| NA        | ENSG00000272442 | 1.1527    | 0.12451 | 1.1527      | 0.12451     | 1.1527   | 0.12451 |  |
|           | 1.1527          | 0.12451   | 0.12451 | 0.582952757 |             |          |         |  |
| NA        | ENSG00000240521 | -0.001933 | 0.50077 | 1.1525      | 0.12455     | -0.8172  | 0.79309 |  |
|           | 0.3234          | 0.3732    | 0.12455 | 0.583018807 |             |          |         |  |
| PLEKHA8P1 | ENSG00000134297 | 1.1525    | 0.12456 | 0.75613     | 0.22478     | 0.69676  |         |  |
|           | 0.24298         | 0.36995   | 0.35571 | 0.12456     | 0.583018807 |          |         |  |
| FSCN2     | ENSG00000186765 | 1.1525    | 0.12456 | 0.36009     | 0.35939     | 0.38364  | 0.35062 |  |
|           | 1.1525          | 0.12456   | 0.12456 | 0.583018807 |             |          |         |  |
| MTND1P15  | ENSG00000264168 | 1.1523    | 0.1246  | 1.1523      | 0.1246      | 1.1523   |         |  |
|           | 0.1246          | 1.1523    | 0.1246  | 0.1246      | 0.583131611 |          |         |  |
| HMGB3P19  | ENSG00000217085 | 0.14726   | 0.44146 | 0.84802     | 0.19821     | 0.66493  |         |  |
|           | 0.25305         | 1.1522    | 0.12462 | 0.12462     | 0.583131611 |          |         |  |
| NA        | ENSG00000275542 | 0.87207   | 0.19159 | 0.87207     | 0.19159     | 1.1522   | 0.12462 |  |
|           | -0.98198        | 0.83695   | 0.12462 | 0.583131611 |             |          |         |  |
| C11orf88  | ENSG00000183644 | 1.1521    | 0.12464 | 0.82013     | 0.20607     | 0.82013  |         |  |



|            |                 |            |             |             |             |           |         |       |
|------------|-----------------|------------|-------------|-------------|-------------|-----------|---------|-------|
|            | 0.20607         | 0.82013    | 0.20607     | 0.12464     | 0.583150792 |           |         |       |
| SASS6      | ENSG00000156876 | 1.152      | 0.12466     | -0.7247     | 0.76568     | 1.152     | 0.12466 | 1.152 |
|            | 0.12466         | 0.12466    | 0.583150792 |             |             |           |         |       |
| LINC02255  | ENSG00000277718 | 0.97253    | 0.16539     | 0.81627     | 0.20717     | 1.152     | 0.12466 |       |
|            | 0.61558         | 0.26909    | 0.12466     | 0.583150792 |             |           |         |       |
| COL4A2     | ENSG00000134871 | 0.79236    | 0.21408     | -0.84239    | 0.80021     | -0.015305 |         |       |
|            | 0.50611         | 1.1518     | 0.12471     | 0.12471     | 0.583216727 |           |         |       |
| NUDT16P1   | ENSG00000246082 | 1.1517     | 0.12471     | 1.1517      | 0.12471     | 0.8575    |         |       |
|            | 0.19559         | 1.0186     | 0.1542      | 0.12471     | 0.583216727 |           |         |       |
| NA         | ENSG00000272733 | 1.1518     | 0.12471     | 1.1518      | 0.12471     | 1.1518    | 0.12471 |       |
|            | 1.1518          | 0.12471    | 0.12471     | 0.583216727 |             |           |         |       |
| RIOX1      | ENSG00000170468 | -0.0094606 | 0.50377     | -0.20197    | 0.58003     | 1.1516    | 0.12473 |       |
|            | 0.88436         | 0.18825    | 0.12473     | 0.583254285 |             |           |         |       |
| RN7SL372P  | ENSG00000242565 | 1.1515     | 0.12477     | 0.82519     | 0.20463     | 0.76845   |         |       |
|            | 0.22111         | 0.82519    | 0.20463     | 0.12477     | 0.583385348 |           |         |       |
| MAPK15     | ENSG00000181085 | 1.0424     | 0.14861     | 0.8489      | 0.19797     | 0.082375  |         |       |
|            | 0.46717         | 1.1511     | 0.12484     | 0.12484     | 0.583508957 |           |         |       |
| EEF1G1     | ENSG00000186676 | -0.37682   | 0.64685     | 0.50919     | 0.30531     | 1.151     | 0.12486 |       |
|            | -0.48497        | 0.68615    | 0.12486     | 0.583508957 |             |           |         |       |
| FNIP1      | ENSG00000217128 | 0.65775    | 0.25535     | 1.1509      | 0.12488     | 0.33714   | 0.368   |       |
|            | 0.69029         | 0.24501    | 0.12488     | 0.583508957 |             |           |         |       |
| NA         | ENSG00000234675 | 0.10637    | 0.45765     | -0.28972    | 0.61398     | 0.10637   | 0.45765 |       |
|            | 1.151           | 0.12488    | 0.12488     | 0.583508957 |             |           |         |       |
| MIR4510    | ENSG00000265098 | -0.11701   | 0.54657     | 1.1509      | 0.12489     | -0.11701  |         |       |
|            | 0.54657         | -0.11701   | 0.54657     | 0.12489     | 0.583508957 |           |         |       |
| NA         | ENSG00000253496 | 0.59497    | 0.27593     | 0.22289     | 0.41181     | 0.70532   | 0.24031 |       |
|            | 1.1509          | 0.1249     | 0.1249      | 0.583508957 |             |           |         |       |
| NA         | ENSG00000271714 | 1.1507     | 0.12492     | 1.1507      | 0.12492     | 1.1507    | 0.12492 |       |
|            | 1.1507          | 0.12492    | 0.12492     | 0.583508957 |             |           |         |       |
| RNU6-1082P | ENSG00000201444 | 1.1507     | 0.12494     | -0.82714    | 0.79592     | 1.1507    |         |       |
|            | 0.12494         | 1.1507     | 0.12494     | 0.12494     | 0.583508957 |           |         |       |
| RPL29P28   | ENSG00000232378 | 1.1506     | 0.12494     | 1.1506      | 0.12494     | 1.1506    |         |       |
|            | 0.12494         | -0.3052    | 0.61989     | 0.12494     | 0.583508957 |           |         |       |
| PCYT1A     | ENSG00000161217 | -0.018708  | 0.50746     | 0.68801     | 0.24572     | 0.85145   |         |       |
|            | 0.19726         | 1.1506     | 0.12495     | 0.12495     | 0.583508957 |           |         |       |
| MIR617     | ENSG00000207763 | 1.1506     | 0.12495     | 1.1506      | 0.12495     | 1.1506    |         |       |
|            | 0.12495         | 1.1506     | 0.12495     | 0.12495     | 0.583508957 |           |         |       |
| RPL12P35   | ENSG00000243007 | 0.27272    | 0.39253     | 0.27272     | 0.39253     | 0.27272   |         |       |
|            | 0.39253         | 1.1506     | 0.12496     | 0.12496     | 0.583508957 |           |         |       |
| NA         | ENSG00000274441 | 0.89814    | 0.18456     | -0.79829    | 0.78765     | 1.1505    | 0.12497 |       |
|            | 1.145           | 0.12611    | 0.12497     | 0.583508957 |             |           |         |       |
| AGPS       | ENSG00000018510 | 0.9764     | 0.16443     | 1.1504      | 0.12499     | 1.0778    | 0.14055 |       |
|            | -0.41834        | 0.66215    | 0.12499     | 0.583508957 |             |           |         |       |
| H3P36      | ENSG00000236534 | 1.1504     | 0.12499     | 0.29434     | 0.38425     | 0.29434   | 0.38425 |       |
|            | 0.5579          | 0.28846    | 0.12499     | 0.583508957 |             |           |         |       |
| NA         | ENSG00000257680 | 1.1504     | 0.12499     | 1.1504      | 0.12499     | 1.1504    | 0.12499 |       |
|            | 1.1504          | 0.12499    | 0.12499     | 0.583508957 |             |           |         |       |
| LSP1       | ENSG00000130592 | -0.25796   | 0.60178     | 1.1504      | 0.125       | 0.21097   | 0.41646 |       |
|            | 0.028422        | 0.48866    | 0.125       | 0.583508957 |             |           |         |       |
| ZNF585B    | ENSG00000245680 | 0.54898    | 0.29151     | 0.34322     | 0.36571     | -0.20701  | 0.582   |       |
|            | 1.1502          | 0.12503    | 0.12503     | 0.583583871 |             |           |         |       |
| RHBDD1     | ENSG00000144468 | -0.47897   | 0.68402     | -1.0255     | 0.84744     | 0.72984   |         |       |
|            | 0.23275         | 1.1502     | 0.12504     | 0.12504     | 0.583583871 |           |         |       |
| BOD1L2     | ENSG00000228075 | 1.1499     | 0.12509     | 1.1499      | 0.12509     | 1.1499    |         |       |
|            | 0.12509         | 1.1499     | 0.12509     | 0.12509     | 0.583724383 |           |         |       |
| NA         | ENSG00000258803 | 1.1328     | 0.12865     | 1.1014      | 0.13535     | 0.91433   | 0.18027 |       |
|            | 1.1498          | 0.1251     | 0.1251      | 0.583724383 |             |           |         |       |
| DNAJC27    | ENSG00000115137 | 1.0255     | 0.15257     | 0.69331     | 0.24406     | 1.1498    |         |       |
|            | 0.12511         | 0.43261    | 0.33265     | 0.12511     | 0.583724383 |           |         |       |
| H2BU2P     | ENSG00000181201 | 1.1497     | 0.12513     | 1.1497      | 0.12513     | 1.1497    |         |       |
|            | 0.12513         | 1.1497     | 0.12513     | 0.12513     | 0.583724383 |           |         |       |
| NA         | ENSG00000232821 | -0.19591   | 0.57766     | 1.1497      | 0.12513     | 0.068054  | 0.47287 |       |

|            |                 |             |         |             |             |          |         |  |
|------------|-----------------|-------------|---------|-------------|-------------|----------|---------|--|
|            | 0.068054        | 0.47287     | 0.12513 | 0.583724383 |             |          |         |  |
| RALGAPA1P1 | ENSG00000229419 | 1.1496      | 0.12515 | 1.1496      | 0.12515     | -1.0468  |         |  |
|            | 0.85241         | -0.72392    | 0.76544 | 0.12515     | 0.583743334 |          |         |  |
| ACRBP      | ENSG00000111644 | 0.986       | 0.16207 | 0.8019      | 0.2113      | 1.1496   | 0.12516 |  |
|            | 0.89724         | 0.18479     | 0.12516 | 0.583743334 |             |          |         |  |
| HYAL2      | ENSG00000068001 | 1.1495      | 0.12517 | -1.9366     | 0.9736      | 1.141    | 0.12693 |  |
|            | -1.9366         | 0.9736      | 0.12517 | 0.583743334 |             |          |         |  |
| RPF2P1     | ENSG00000225357 | 0.99445     | 0.16    | 0.99445     | 0.16        | 1.0731   | 0.1416  |  |
|            | 1.1494          | 0.12519     | 0.12519 | 0.583780737 |             |          |         |  |
| MLIP       | ENSG00000146147 | 0.7285      | 0.23315 | 1.1493      | 0.12522     | 0.25803  | 0.39819 |  |
|            | 0.09332         | 0.46282     | 0.12522 | 0.583790434 |             |          |         |  |
| RN7SL714P  | ENSG00000241757 | -1.3229     | 0.90707 | 1.1493      | 0.12522     | -1.3229  |         |  |
|            | 0.90707         | -1.3229     | 0.90707 | 0.12522     | 0.583790434 |          |         |  |
| MIR3125    | ENSG00000264370 | 1.1492      | 0.12523 | 0.99768     | 0.15922     | -0.32852 |         |  |
|            | 0.62874         | -1.054      | 0.85407 | 0.12523     | 0.583790434 |          |         |  |
| NA         | ENSG00000270265 | -0.19676    | 0.57799 | 0.7845      | 0.21637     | 1.1492   | 0.12524 |  |
|            | -1.0836         | 0.86073     | 0.12524 | 0.583790434 |             |          |         |  |
| NA         | ENSG00000254273 | 1.149       | 0.12527 | 1.149       | 0.12527     | 1.149    | 0.12527 |  |
|            | 0.12527         | 0.583874424 |         |             |             |          |         |  |
| DNM1P34    | ENSG00000260357 | 0.12902     | 0.44867 | -0.044565   | 0.51777     | 1.1489   |         |  |
|            | 0.1253          | -0.48056    | 0.68459 | 0.1253      | 0.583902963 |          |         |  |
| IFNA16     | ENSG00000147885 | 1.1488      | 0.12532 | 0.59656     | 0.2754      | 0.25517  |         |  |
|            | 0.39929         | 0.74444     | 0.2283  | 0.12532     | 0.583902963 |          |         |  |
| RNU6-546P  | ENSG00000206718 | -0.1787     | 0.57091 | 0.091118    | 0.4637      | 1.1487   |         |  |
|            | 0.12533         | -0.90866    | 0.81824 | 0.12533     | 0.583902963 |          |         |  |
| LSM1P1     | ENSG00000233551 | 1.1488      | 0.12533 | 1.1488      | 0.12533     | 1.1488   |         |  |
|            | 0.12533         | 1.1488      | 0.12533 | 0.12533     | 0.583902963 |          |         |  |
| RNU6-348P  | ENSG00000207114 | 0.90122     | 0.18374 | 0.9701      | 0.166       | 0.90122  | 0.18374 |  |
|            | 1.1487          | 0.12534     | 0.12534 | 0.583902963 |             |          |         |  |
| NA         | ENSG00000237870 | 1.1487      | 0.12535 | 0.25418     | 0.39968     | 1.1487   | 0.12535 |  |
|            | 0.7229          | 0.23487     | 0.12535 | 0.583902963 |             |          |         |  |
| Clorf68    | ENSG00000198854 | 1.1486      | 0.12536 | 1.1486      | 0.12536     | 1.1486   |         |  |
|            | 0.12536         | 1.1486      | 0.12536 | 0.12536     | 0.583902963 |          |         |  |
| TLE4       | ENSG00000106829 | 1.1485      | 0.12538 | -0.10814    | 0.54306     | 1.1485   | 0.12538 |  |
|            | -0.11213        | 0.54464     | 0.12538 | 0.583940304 |             |          |         |  |
| KLK2       | ENSG00000167751 | 1.1482      | 0.12544 | 0.12586     | 0.44992     | 1.1482   | 0.12544 |  |
|            | 1.1482          | 0.12544     | 0.12544 | 0.583972164 |             |          |         |  |
| HOXD-AS2   | ENSG00000237380 | -1.3254     | 0.90747 | -0.96289    | 0.8322      | -1.219   |         |  |
|            | 0.88858         | 1.1482      | 0.12544 | 0.12544     | 0.583972164 |          |         |  |
| HMGB1P7    | ENSG00000231148 | 1.1481      | 0.12546 | 0.70749     | 0.23963     | 1.1481   |         |  |
|            | 0.12546         | -0.69797    | 0.7574  | 0.12546     | 0.583972164 |          |         |  |
| GJA4       | ENSG00000187513 | -1.2579     | 0.89578 | -1.2579     | 0.89578     | 0.71364  | 0.23772 |  |
|            | 1.1481          | 0.12547     | 0.12547 | 0.583972164 |             |          |         |  |
| NA         | ENSG00000261060 | 1.1478      | 0.12552 | 1.1478      | 0.12552     | 1.1478   | 0.12552 |  |
|            | 1.1478          | 0.12552     | 0.12552 | 0.583972164 |             |          |         |  |
| PDE7A      | ENSG00000205268 | -0.27783    | 0.60943 | 1.1478      | 0.12553     | -0.27783 | 0.60943 |  |
|            | -0.92407        | 0.82227     | 0.12553 | 0.583972164 |             |          |         |  |
| STBD1      | ENSG00000118804 | 0.38788     | 0.34905 | 1.1477      | 0.12555     | 0.51855  | 0.30204 |  |
|            | 0.8897          | 0.18681     | 0.12555 | 0.583972164 |             |          |         |  |
| NA         | ENSG00000234997 | 1.1476      | 0.12556 | 1.1476      | 0.12556     | -0.59697 | 0.72474 |  |
|            | -0.41236        | 0.65996     | 0.12556 | 0.583972164 |             |          |         |  |
| SLC2A7     | ENSG00000197241 | 0.59569     | 0.27569 | 0.061969    | 0.47529     | 1.1476   |         |  |
|            | 0.12557         | -0.48659    | 0.68673 | 0.12557     | 0.583972164 |          |         |  |
| NDUFB6     | ENSG00000165264 | -0.088554   | 0.53528 | 1.1475      | 0.12558     | 0.65486  |         |  |
|            | 0.25628         | 0.78547     | 0.21609 | 0.12558     | 0.583972164 |          |         |  |
| NA         | ENSG00000226072 | 1.1475      | 0.12559 | 1.1475      | 0.12559     | 1.1475   | 0.12559 |  |
|            | 1.1475          | 0.12559     | 0.12559 | 0.583972164 |             |          |         |  |
| MAPK8      | ENSG00000107643 | 0.47254     | 0.31827 | 1.1474      | 0.1256      | 1.1474   | 0.1256  |  |
|            | 1.1474          | 0.1256      | 0.1256  | 0.583972164 |             |          |         |  |
| NDUFS5P6   | ENSG00000255531 | 0.56982     | 0.2844  | 1.1474      | 0.12561     | 0.62093  |         |  |
|            | 0.26732         | 0.19893     | 0.42116 | 0.12561     | 0.583972164 |          |         |  |
| ARG1       | ENSG00000118520 | -0.41366    | 0.66044 | 0.50721     | 0.306       | 1.1474   | 0.12562 |  |

|           |                 |             |             |             |             |           |         |       |
|-----------|-----------------|-------------|-------------|-------------|-------------|-----------|---------|-------|
|           | 1.1474          | 0.12562     | 0.12562     | 0.583972164 |             |           |         |       |
| SLC13A5   | ENSG00000141485 | 0.87338     | 0.19123     | 1.1473      | 0.12562     | -0.46985  |         |       |
|           | 0.68077         | -0.41464    | 0.6608      | 0.12562     | 0.583972164 |           |         |       |
| ZNF33B    | ENSG00000196693 | 1.1473      | 0.12562     | -0.34447    | 0.63475     | 0.017973  |         |       |
|           | 0.49283         | -0.23842    | 0.59422     | 0.12562     | 0.583972164 |           |         |       |
| C1QTNF2   | ENSG00000145861 | 0.86589     | 0.19328     | 0.32313     | 0.3733      | 1.1473    |         |       |
|           | 0.12563         | 1.0677      | 0.14282     | 0.12563     | 0.583972164 |           |         |       |
| SLC2A9    | ENSG00000109667 | -0.80276    | 0.78894     | -1.2208     | 0.88893     | 1.1472    |         |       |
|           | 0.12564         | 0.61437     | 0.26949     | 0.12564     | 0.583972164 |           |         |       |
| LINC01241 | ENSG00000236306 | 0.67776     | 0.24896     | 1.1472      | 0.12565     | -1.1737   |         |       |
|           | 0.87975         | -2.0897     | 0.98168     | 0.12565     | 0.583972164 |           |         |       |
| HMGB1P13  | ENSG00000220557 | 0.9902      | 0.16104     | 0.65788     | 0.25531     | 0.92391   |         |       |
|           | 0.17777         | 1.1472      | 0.12566     | 0.12566     | 0.583972164 |           |         |       |
| SEMA4A    | ENSG00000196189 | 1.1101      | 0.13348     | 1.1471      | 0.12568     | 0.7832    |         |       |
|           | 0.21675         | 0.8588      | 0.19523     | 0.12568     | 0.583972164 |           |         |       |
| NA        | ENSG00000248337 | 1.1471      | 0.12568     | -0.07744    | 0.53086     | -0.07744  | 0.53086 |       |
|           | -0.07744        | 0.53086     | 0.12568     | 0.583972164 |             |           |         |       |
| NA        | ENSG00000279334 | 1.147       | 0.12568     | 1.147       | 0.12568     | 1.147     | 0.12568 |       |
|           | 0.12568         | 0.583972164 |             |             |             |           |         |       |
| NA        | ENSG00000226238 | 1.147       | 0.12569     | 0.34068     | 0.36667     | 1.147     | 0.12569 | 1.147 |
|           | 0.12569         | 0.12569     | 0.583972164 |             |             |           |         |       |
| TOLLIP    | ENSG00000078902 | 0.57458     | 0.28279     | -2.0007     | 0.97729     | 0.28538   |         |       |
|           | 0.38768         | 1.1469      | 0.12571     | 0.12571     | 0.583972164 |           |         |       |
| SUSD4     | ENSG00000143502 | -0.12605    | 0.55015     | 1.1469      | 0.12571     | 0.92859   | 0.17655 |       |
|           | 0.13985         | 0.44439     | 0.12571     | 0.583972164 |             |           |         |       |
| PPM1E     | ENSG00000175175 | -0.1822     | 0.57229     | 1.1468      | 0.12573     | -0.015923 | 0.50635 |       |
|           | -0.01463        | 0.50584     | 0.12573     | 0.583972164 |             |           |         |       |
| NA        | ENSG00000259544 | 1.1468      | 0.12574     | 1.1468      | 0.12574     | -0.017002 | 0.50678 |       |
|           | -0.017002       | 0.50678     | 0.12574     | 0.583972164 |             |           |         |       |
| HTR3D     | ENSG00000186090 | 1.1467      | 0.12575     | 1.1467      | 0.12575     | -0.093533 | 0.53726 |       |
|           | 1.1467          | 0.12575     | 0.12575     | 0.583972164 |             |           |         |       |
| PCDHGB9P  | ENSG00000276545 | 1.1467      | 0.12575     | 0.92788     | 0.17674     | 1.1467    |         |       |
|           | 0.12575         | 1.1467      | 0.12575     | 0.12575     | 0.583972164 |           |         |       |
| RASL10A   | ENSG00000100276 | -0.28129    | 0.61076     | 1.084       | 0.13919     | -0.28129  | 0.61076 |       |
|           | 1.1465          | 0.1258      | 0.1258      | 0.583972164 |             |           |         |       |
| NKPD1     | ENSG00000179846 | 1.1464      | 0.12582     | 1.1464      | 0.12582     | 1.1464    | 0.12582 |       |
|           | 1.1464          | 0.12582     | 0.12582     | 0.583972164 |             |           |         |       |
| PBX1      | ENSG00000185630 | 1.1463      | 0.12584     | 0.49967     | 0.30865     | -0.6487   | 0.74174 |       |
|           | -0.30042        | 0.61807     | 0.12584     | 0.583972164 |             |           |         |       |
| NA        | ENSG00000228779 | 0.37588     | 0.3535      | 0.69663     | 0.24302     | -0.12842  | 0.55109 |       |
|           | 1.1463          | 0.12584     | 0.12584     | 0.583972164 |             |           |         |       |
| NA        | ENSG00000277206 | 1.1463      | 0.12584     | 1.1463      | 0.12584     | 1.1463    | 0.12584 |       |
|           | 0.93583         | 0.17468     | 0.12584     | 0.583972164 |             |           |         |       |
| RN7SL178P | ENSG00000263616 | 0.8037      | 0.21078     | 0.0016094   | 0.49936     | 1.1462    |         |       |
|           | 0.12585         | -0.6087     | 0.72864     | 0.12585     | 0.583972164 |           |         |       |
| CLUAP1    | ENSG00000103351 | 0.59739     | 0.27512     | 0.30393     | 0.38059     | 1.1462    |         |       |
|           | 0.12586         | 0.86911     | 0.19239     | 0.12586     | 0.583972164 |           |         |       |
| BSPH1     | ENSG00000188334 | 0.025103    | 0.48999     | -0.0049276  | 0.50197     | 1.1462    | 0.12586 |       |
|           | -1.0503         | 0.85322     | 0.12586     | 0.583972164 |             |           |         |       |
| NA        | ENSG00000233805 | 1.1461      | 0.12588     | 1.1461      | 0.12588     | 0.87668   | 0.19033 |       |
|           | 1.1461          | 0.12588     | 0.12588     | 0.583972164 |             |           |         |       |
| NA        | ENSG00000277711 | 1.1426      | 0.1266      | 1.146       | 0.12589     | 1.146     | 0.12589 | 1.146 |
|           | 0.12589         | 0.12589     | 0.583972164 |             |             |           |         |       |
| RNU6-281P | ENSG00000206939 | 1.146       | 0.1259      | 1.146       | 0.1259      | 1.146     | 0.1259  | 1.146 |
|           | 0.1259          | 0.1259      | 0.583972164 |             |             |           |         |       |
| NA        | ENSG00000257869 | 0.11985     | 0.4523      | -1.2214     | 0.88904     | 0.5292    | 0.29833 |       |
|           | 1.146           | 0.12591     | 0.12591     | 0.583972164 |             |           |         |       |
| KCNH5     | ENSG00000140015 | 0.98675     | 0.16188     | 0.57714     | 0.28192     | 0.60167   | 0.2737  |       |
|           | 1.1459          | 0.12593     | 0.12593     | 0.583972164 |             |           |         |       |
| RNA5SP433 | ENSG00000201361 | 1.1458      | 0.12594     | 1.1458      | 0.12594     | -0.22628  |         |       |
|           | 0.58951         | -1.4092     | 0.92062     | 0.12594     | 0.583972164 |           |         |       |
| NA        | ENSG00000260858 | 1.1458      | 0.12594     | 1.1458      | 0.12594     | 1.1458    | 0.12594 |       |

|           |                 |             |         |             |             |           |         |        |
|-----------|-----------------|-------------|---------|-------------|-------------|-----------|---------|--------|
|           | 1.1458          | 0.12594     | 0.12594 | 0.583972164 |             |           |         |        |
| NSUN2     | ENSG00000037474 | -0.19262    | 0.57637 | 0.57572     | 0.2824      | 1.1457    | 0.12595 |        |
|           | 0.23267         | 0.40801     | 0.12595 | 0.583972164 |             |           |         |        |
| MORN4     | ENSG00000171160 | -0.27976    | 0.61017 | -0.27976    | 0.61017     | 1.1457    | 0.12597 |        |
|           | 0.17311         | 0.43128     | 0.12597 | 0.583972164 |             |           |         |        |
| TICAM1    | ENSG00000127666 | 0.44964     | 0.32649 | 1.1455      | 0.126       | -0.27509  | 0.60838 |        |
|           | -0.52322        | 0.69959     | 0.126   | 0.583972164 |             |           |         |        |
| NCF4-AS1  | ENSG00000183822 | 1.1455      | 0.126   | 1.1241      | 0.13048     | 1.1455    | 0.126   |        |
|           | 1.1455          | 0.126       | 0.126   | 0.583972164 |             |           |         |        |
| NA        | ENSG00000229294 | 1.1455      | 0.126   | 1.1455      | 0.126       | 1.1455    | 0.126   | 1.1455 |
|           | 0.126           | 0.583972164 |         |             |             |           |         | 0.126  |
| CBX3P4    | ENSG00000256030 | 1.1455      | 0.12601 | 1.1455      | 0.12601     | 1.1455    |         |        |
|           | 0.12601         | 1.1455      | 0.12601 | 0.12601     | 0.583972164 |           |         |        |
| EEF1A1P2  | ENSG00000258841 | 1.1455      | 0.12601 | 1.1455      | 0.12601     | 1.1455    |         |        |
|           | 0.12601         | 1.1455      | 0.12601 | 0.12601     | 0.583972164 |           |         |        |
| NA        | ENSG00000242588 | -0.41658    | 0.66151 | 0.18344     | 0.42723     | -1.539    | 0.9381  |        |
|           | 1.1451          | 0.12608     | 0.12608 | 0.584222571 |             |           |         |        |
| PTPRN     | ENSG00000054356 | 0.59116     | 0.27721 | 0.35351     | 0.36185     | 1.145     | 0.1261  |        |
|           | 0.7713          | 0.22027     | 0.1261  | 0.584222571 |             |           |         |        |
| MEOX2     | ENSG00000106511 | 1.145       | 0.1261  | 1.145       | 0.1261      | 1.145     | 0.1261  |        |
|           | 0.1261          | 0.584222571 |         |             |             |           |         |        |
| NALCN-AS1 | ENSG00000233009 | 1.1449      | 0.12612 | 0.089269    | 0.46443     | -0.6821   |         |        |
|           | 0.75241         | -0.68739    | 0.75408 | 0.12612     | 0.584241251 |           |         |        |
| RNU6-794P | ENSG00000253070 | -0.0058881  | 0.50235 | -0.0058881  | 0.50235     | 1.1448    |         |        |
|           | 0.12614         | -0.0058881  | 0.50235 | 0.12614     | 0.584241251 |           |         |        |
| NA        | ENSG00000263472 | -0.58273    | 0.71996 | -0.067289   | 0.52682     | 1.1448    | 0.12614 |        |
|           | -0.43113        | 0.66681     | 0.12614 | 0.584241251 |             |           |         |        |
| SNORD92   | ENSG00000264994 | 1.1446      | 0.12618 | 1.1446      | 0.12618     | 1.1446    |         |        |
|           | 0.12618         | 1.1446      | 0.12618 | 0.12618     | 0.584370975 |           |         |        |
| NA        | ENSG00000255606 | -1.7019     | 0.95561 | 1.1445      | 0.1262      | 0.52466   | 0.29991 |        |
|           | -1.0091         | 0.84354     | 0.1262  | 0.584398831 |             |           |         |        |
| NA        | ENSG00000279407 | 1.1445      | 0.12621 | 1.1445      | 0.12621     | 1.1445    | 0.12621 |        |
|           | 1.1445          | 0.12621     | 0.12621 | 0.584398831 |             |           |         |        |
| RRP1B     | ENSG00000160208 | 0.079336    | 0.46838 | -0.53175    | 0.70255     | -0.58197  | 0.71971 |        |
|           | 1.1444          | 0.12623     | 0.12623 | 0.584435905 |             |           |         |        |
| RAB5CP2   | ENSG00000251356 | 1.1442      | 0.12628 | 1.1442      | 0.12628     | 1.1442    |         |        |
|           | 0.12628         | 1.1442      | 0.12628 | 0.12628     | 0.584574891 |           |         |        |
| NA        | ENSG00000223503 | 1.0548      | 0.14577 | 0.069413    | 0.47233     | 1.144     | 0.12631 |        |
|           | -0.038416       | 0.51532     | 0.12631 | 0.584574891 |             |           |         |        |
| ZC3H7A    | ENSG00000122299 | -0.051166   | 0.5204  | -0.051166   | 0.5204      | -0.051166 |         |        |
|           | 0.5204          | 1.144       | 0.12632 | 0.12632     | 0.584574891 |           |         |        |
| KRT19P1   | ENSG00000218014 | 1.1439      | 0.12632 | 1.1439      | 0.12632     | 1.1439    |         |        |
|           | 0.12632         | 1.1439      | 0.12632 | 0.12632     | 0.584574891 |           |         |        |
| TCF24     | ENSG00000261787 | 1.144       | 0.12632 | 0.81165     | 0.2085      | 0.34786   | 0.36397 |        |
|           | -0.24909        | 0.59836     | 0.12632 | 0.584574891 |             |           |         |        |
| NA        | ENSG00000231856 | 1.1437      | 0.12637 | 0.35479     | 0.36137     | -0.4861   | 0.68655 |        |
|           | -0.1825         | 0.5724      | 0.12637 | 0.584603208 |             |           |         |        |
| LINC01231 | ENSG00000236511 | 1.1436      | 0.12639 | 1.1436      | 0.12639     | -0.079167 |         |        |
|           | 0.53155         | 1.1436      | 0.12639 | 0.12639     | 0.584603208 |           |         |        |
| GPR89P    | ENSG00000216915 | -0.70301    | 0.75898 | 1.1435      | 0.12642     | -0.36176  |         |        |
|           | 0.64123         | -0.48212    | 0.68514 | 0.12642     | 0.584603208 |           |         |        |
| NAV1      | ENSG00000134369 | 1.1434      | 0.12643 | -0.84471    | 0.80086     | 1.0585    | 0.14491 |        |
|           | 0.29397         | 0.38439     | 0.12643 | 0.584603208 |             |           |         |        |
| SLK       | ENSG00000065613 | 0.11754     | 0.45322 | 0.52868     | 0.29851     | 1.1434    | 0.12644 |        |
|           | 0.061199        | 0.4756      | 0.12644 | 0.584603208 |             |           |         |        |
| NA        | ENSG00000277646 | 1.1433      | 0.12646 | 1.1433      | 0.12646     | 1.1433    | 0.12646 |        |
|           | 1.1433          | 0.12646     | 0.12646 | 0.584603208 |             |           |         |        |
| NA        | ENSG00000230090 | 1.1432      | 0.12647 | 0.59073     | 0.27735     | 0.0086508 | 0.49655 |        |
|           | -1.1629         | 0.87756     | 0.12647 | 0.584603208 |             |           |         |        |
| CCDC18    | ENSG00000122483 | -0.15947    | 0.56335 | 0.27667     | 0.39102     | 1.1432    |         |        |
|           | 0.12649         | 0.75266     | 0.22583 | 0.12649     | 0.584603208 |           |         |        |
| LINC02296 | ENSG00000258859 | -0.3363     | 0.63168 | 1.1432      | 0.12649     | 0.72018   |         |        |

|           |                 |          |             |             |             |          |         |        |
|-----------|-----------------|----------|-------------|-------------|-------------|----------|---------|--------|
|           | 0.23571         | -0.33272 | 0.63033     | 0.12649     | 0.584603208 |          |         |        |
| CNOT1     | ENSG00000125107 | 0.8788   | 0.18976     | 0.90597     | 0.18248     | 1.143    | 0.12653 |        |
|           | 0.45216         | 0.32558  | 0.12653     | 0.584603208 |             |          |         |        |
| LINC00491 | ENSG00000250682 | 0.96738  | 0.16668     | 0.96738     | 0.16668     | 1.1429   |         |        |
|           | 0.12653         | 0.96738  | 0.16668     | 0.12653     | 0.584603208 |          |         |        |
| MRGPRD    | ENSG00000172938 | -1.0898  | 0.8621      | -1.0898     | 0.8621      | 1.135    | 0.12819 |        |
|           | 1.1428          | 0.12655  | 0.12655     | 0.584603208 |             |          |         |        |
| ZNF70     | ENSG00000187792 | 1.1426   | 0.12661     | 1.1426      | 0.12661     | 1.1426   | 0.12661 |        |
|           | 1.1426          | 0.12661  | 0.12661     | 0.584603208 |             |          |         |        |
| ADCY6     | ENSG00000174233 | 0.31747  | 0.37544     | 0.84858     | 0.19806     | 0.83011  | 0.20324 |        |
|           | 1.1425          | 0.12662  | 0.12662     | 0.584603208 |             |          |         |        |
| POU5F1P5  | ENSG00000236375 | 1.1425   | 0.12663     | 0.69754     | 0.24273     | 1.1425   |         |        |
|           | 0.12663         | -1.4765  | 0.93009     | 0.12663     | 0.584603208 |          |         |        |
| H6PD      | ENSG00000049239 | 1.1424   | 0.12664     | -1.3423     | 0.91024     | -0.32554 | 0.62762 |        |
|           | -1.0318         | 0.84892  | 0.12664     | 0.584603208 |             |          |         |        |
| METTL9    | ENSG00000197006 | -0.88885 | 0.81296     | 0.50874     | 0.30547     | -0.88885 |         |        |
|           | 0.81296         | 1.1424   | 0.12664     | 0.12664     | 0.584603208 |          |         |        |
| LRFN3     | ENSG00000126243 | 1.1424   | 0.12665     | 1.1424      | 0.12665     | 1.1424   | 0.12665 |        |
|           | 1.1424          | 0.12665  | 0.12665     | 0.584603208 |             |          |         |        |
| NA        | ENSG00000259735 | -0.30141 | 0.61845     | -1.1309     | 0.87095     | 0.17778  | 0.42945 |        |
|           | 1.1424          | 0.12665  | 0.12665     | 0.584603208 |             |          |         |        |
| NCSTN     | ENSG00000162736 | 1.1423   | 0.12666     | 0.78317     | 0.21676     | 1.1423   | 0.12666 |        |
|           | 1.1423          | 0.12666  | 0.12666     | 0.584603208 |             |          |         |        |
| ARHGAP29  | ENSG00000137962 | -0.50236 | 0.69229     | -1.4952     | 0.93257     | -1.8455  |         |        |
|           | 0.96752         | 1.1422   | 0.12668     | 0.12668     | 0.584603208 |          |         |        |
| PHKBP2    | ENSG00000258467 | 1.1422   | 0.12668     | 0.018579    | 0.49259     | 1.1422   |         |        |
|           | 0.12668         | 1.1422   | 0.12668     | 0.12668     | 0.584603208 |          |         |        |
| AKR1C1    | ENSG00000187134 | 1.1421   | 0.1267      | 0.70809     | 0.23944     | 0.056588 |         |        |
|           | 0.47744         | 0.57862  | 0.28142     | 0.1267      | 0.584603208 |          |         |        |
| NA        | ENSG00000238570 | -1.3797  | 0.91616     | 0.699       | 0.24228     | 0.699    | 0.24228 | 1.1421 |
|           | 0.1267          | 0.1267   | 0.584603208 |             |             |          |         |        |
| SLC35B4   | ENSG00000205060 | 0.9619   | 0.16805     | 1.1421      | 0.12671     | 1.1421   |         |        |
|           | 0.12671         | 1.1049   | 0.1346      | 0.12671     | 0.584603208 |          |         |        |
| RNA5SP236 | ENSG00000251978 | 1.1421   | 0.12671     | 1.1421      | 0.12671     | 1.1421   |         |        |
|           | 0.12671         | 1.1421   | 0.12671     | 0.12671     | 0.584603208 |          |         |        |
| RFT1      | ENSG00000163933 | 1.142    | 0.12672     | 1.0562      | 0.14543     | 0.90626  | 0.1824  |        |
|           | 1.0501          | 0.14683  | 0.12672     | 0.584603208 |             |          |         |        |
| RPL31P44  | ENSG00000213657 | 0.82052  | 0.20596     | 1.142       | 0.12673     | 1.142    | 0.12673 | 1.142  |
|           | 0.12673         | 0.12673  | 0.584603208 |             |             |          |         |        |
| NDUFB9P2  | ENSG00000236281 | 1.142    | 0.12673     | 0.15679     | 0.4377      | 1.142    | 0.12673 |        |
|           | 0.0090713       | 0.49638  | 0.12673     | 0.584603208 |             |          |         |        |
| RCC2P7    | ENSG00000220666 | 0.23751  | 0.40613     | -0.59643    | 0.72456     | 1.1419   |         |        |
|           | 0.12674         | 1.1373   | 0.1277      | 0.12674     | 0.584603208 |          |         |        |
| RNU6-887P | ENSG00000222592 | 1.1419   | 0.12675     | 1.1419      | 0.12675     | 0.78596  |         |        |
|           | 0.21595         | 1.1332   | 0.12857     | 0.12675     | 0.584603208 |          |         |        |
| CYP1D1P   | ENSG00000228024 | -0.53146 | 0.70245     | 1.1419      | 0.12675     | -0.53146 |         |        |
|           | 0.70245         | -0.53146 | 0.70245     | 0.12675     | 0.584603208 |          |         |        |
| NA        | ENSG00000257243 | 1.1419   | 0.12675     | 1.1419      | 0.12675     | 1.1419   | 0.12675 |        |
|           | 1.1419          | 0.12675  | 0.12675     | 0.584603208 |             |          |         |        |
| USP19     | ENSG00000172046 | 1.1418   | 0.12677     | 1.1241      | 0.13049     | 1.0565   | 0.14537 |        |
|           | 0.68033         | 0.24815  | 0.12677     | 0.584603208 |             |          |         |        |
| RNU11-5P  | ENSG00000212518 | -0.55781 | 0.71151     | 0.39172     | 0.34763     | 1.1418   |         |        |
|           | 0.12677         | 1.1418   | 0.12677     | 0.12677     | 0.584603208 |          |         |        |
| PPIAP27   | ENSG00000234363 | 0.40833  | 0.34152     | 0.55776     | 0.2885      | 1.1418   |         |        |
|           | 0.12677         | 1.1418   | 0.12677     | 0.12677     | 0.584603208 |          |         |        |
| NA        | ENSG00000274353 | -1.3611  | 0.91326     | 0.60078     | 0.27399     | 1.1418   | 0.12677 |        |
|           | -1.1885         | 0.88268  | 0.12677     | 0.584603208 |             |          |         |        |
| MSTO2P    | ENSG00000203761 | 1.1416   | 0.12681     | -0.44378    | 0.6714      | -0.44378 |         |        |
|           | 0.6714          | -0.44378 | 0.6714      | 0.12681     | 0.584667796 |          |         |        |
| ADAM3A    | ENSG00000197475 | 1.1416   | 0.12682     | 0.75277     | 0.22579     | -1.1299  |         |        |
|           | 0.87074         | 0.23951  | 0.40536     | 0.12682     | 0.584667796 |          |         |        |
| NA        | ENSG00000269086 | 0.93942  | 0.17376     | 1.1416      | 0.12682     | 0.93942  | 0.17376 |        |

|            |                 |          |         |             |             |          |         |  |
|------------|-----------------|----------|---------|-------------|-------------|----------|---------|--|
|            | 0.93942         | 0.17376  | 0.12682 | 0.584667796 |             |          |         |  |
| NA         | ENSG00000197846 | 1.1374   | 0.12769 | 0.67963     | 0.24837     | -0.14402 | 0.55726 |  |
|            | 1.1415          | 0.12684  | 0.12684 | 0.584695469 |             |          |         |  |
| LINC01070  | ENSG00000260102 | 0.22021  | 0.41285 | -0.49896    | 0.69109     | -1.2997  |         |  |
|            | 0.90316         | 1.1414   | 0.12685 | 0.12685     | 0.584695469 |          |         |  |
| RNU6-1290P | ENSG00000199827 | 1.1413   | 0.12687 | -0.53205    | 0.70265     | -0.34424 |         |  |
|            | 0.63467         | -0.34424 | 0.63467 | 0.12687     | 0.58469652  |          |         |  |
| RN7SKP293  | ENSG00000223321 | 0.21676  | 0.4142  | 0.21676     | 0.4142      | 1.1413   |         |  |
|            | 0.12688         | 0.21676  | 0.4142  | 0.12688     | 0.58469652  |          |         |  |
| MEPCE      | ENSG00000146834 | -0.15684 | 0.56232 | -0.88312    | 0.81141     | 0.17308  | 0.4313  |  |
|            | 1.1412          | 0.12689  | 0.12689 | 0.58469652  |             |          |         |  |
| RNU1-1     | ENSG00000206652 | -1.0752  | 0.85885 | -1.7866     | 0.963       | 1.1412   | 0.1269  |  |
|            | -0.60335        | 0.72686  | 0.1269  | 0.58469652  |             |          |         |  |
| PRKCA      | ENSG00000154229 | 0.66304  | 0.25365 | 1.1409      | 0.12695     | 0.20446  | 0.419   |  |
|            | 0.61365         | 0.26972  | 0.12695 | 0.58469652  |             |          |         |  |
| NA         | ENSG00000254492 | -0.762   | 0.77697 | 0.13627     | 0.44581     | 1.1409   | 0.12695 |  |
|            | -0.32858        | 0.62877  | 0.12695 | 0.58469652  |             |          |         |  |
| MIR5092    | ENSG00000264986 | 0.64464  | 0.25958 | 0.49693     | 0.30962     | 0.2235   |         |  |
|            | 0.41157         | 1.1409   | 0.12696 | 0.12696     | 0.58469652  |          |         |  |
| NA         | ENSG00000261729 | 1.121    | 0.13115 | 0.44177     | 0.32933     | 0.77261  | 0.21988 |  |
|            | 1.1408          | 0.12697  | 0.12697 | 0.58469652  |             |          |         |  |
| STIM2      | ENSG00000109689 | 1.1405   | 0.12703 | -1.2358     | 0.89173     | -1.3733  | 0.91516 |  |
|            | -1.2054         | 0.88597  | 0.12703 | 0.58469652  |             |          |         |  |
| NA         | ENSG00000277829 | -0.71184 | 0.76172 | 1.1405      | 0.12704     | 1.1405   | 0.12704 |  |
|            | 1.1405          | 0.12704  | 0.12704 | 0.58469652  |             |          |         |  |
| FAM99B     | ENSG00000205865 | -0.69554 | 0.75664 | -0.45779    | 0.67645     | 1.1404   |         |  |
|            | 0.12705         | 0.20512  | 0.41874 | 0.12705     | 0.58469652  |          |         |  |
| NA         | ENSG00000231563 | 1.1404   | 0.12706 | 1.1404      | 0.12706     | 1.1404   | 0.12706 |  |
|            | 1.1404          | 0.12706  | 0.12706 | 0.58469652  |             |          |         |  |
| NA         | ENSG00000260234 | 1.1404   | 0.12707 | 1.1404      | 0.12707     | 1.1404   | 0.12707 |  |
|            | 1.1404          | 0.12707  | 0.12707 | 0.58469652  |             |          |         |  |
| NA         | ENSG00000201228 | 1.1403   | 0.12708 | 1.1403      | 0.12708     | 1.1403   | 0.12708 |  |
|            | 1.1403          | 0.12708  | 0.12708 | 0.58469652  |             |          |         |  |
| RNU6-1156P | ENSG00000222297 | 1.1403   | 0.12708 | 1.1403      | 0.12708     | 1.1403   |         |  |
|            | 0.12708         | 1.1403   | 0.12708 | 0.12708     | 0.58469652  |          |         |  |
| RNU5F-6P   | ENSG00000199849 | -0.28695 | 0.61292 | 0.77503     | 0.21916     | 1.1402   |         |  |
|            | 0.12711         | -0.38184 | 0.64871 | 0.12711     | 0.58469652  |          |         |  |
| RN7SL519P  | ENSG00000243075 | 0.015223 | 0.49393 | 1.1401      | 0.12711     | 0.45153  |         |  |
|            | 0.3258          | 0.45153  | 0.3258  | 0.12711     | 0.58469652  |          |         |  |
| NA         | ENSG00000256922 | 1.1401   | 0.12712 | 0.83559     | 0.20169     | -0.40509 | 0.65729 |  |
|            | -0.40509        | 0.65729  | 0.12712 | 0.58469652  |             |          |         |  |
| TBC1D9     | ENSG00000109436 | 1.14     | 0.12714 | 0.92591     | 0.17725     | 1.14     | 0.12714 |  |
|            | -0.081709       | 0.53256  | 0.12714 | 0.58469652  |             |          |         |  |
| NA         | ENSG00000231236 | -0.49784 | 0.6907  | 1.1399      | 0.12715     | 0.901    | 0.18379 |  |
|            | 1.0462          | 0.14773  | 0.12715 | 0.58469652  |             |          |         |  |
| NA         | ENSG00000207209 | 1.1399   | 0.12716 | 1.1399      | 0.12716     | 1.1399   | 0.12716 |  |
|            | 0.37871         | 0.35245  | 0.12716 | 0.58469652  |             |          |         |  |
| ORAI3      | ENSG00000175938 | 1.1397   | 0.1272  | 1.1397      | 0.1272      | 1.1397   | 0.1272  |  |
|            | 1.1397          | 0.1272   | 0.1272  | 0.58469652  |             |          |         |  |
| NA         | ENSG00000261487 | 1.1397   | 0.1272  | 1.1397      | 0.1272      | 1.1397   | 0.1272  |  |
|            | 1.1397          | 0.1272   | 0.1272  | 0.58469652  |             |          |         |  |
| COPS5      | ENSG00000121022 | 1.1397   | 0.12721 | 0.34319     | 0.36573     | 1.1397   | 0.12721 |  |
|            | 0.41605         | 0.33869  | 0.12721 | 0.58469652  |             |          |         |  |
| RRP1       | ENSG00000160214 | 0.9197   | 0.17887 | 1.1396      | 0.12722     | 0.74987  | 0.22667 |  |
|            | 0.14751         | 0.44136  | 0.12722 | 0.58469652  |             |          |         |  |
| NA         | ENSG00000218565 | 1.1396   | 0.12722 | -0.70459    | 0.75947     | 1.1396   | 0.12722 |  |
|            | 1.1396          | 0.12722  | 0.12722 | 0.58469652  |             |          |         |  |
| CARHSP1    | ENSG00000153048 | 0.74012  | 0.22961 | 0.70518     | 0.24035     | 0.74012  |         |  |
|            | 0.22961         | 1.1395   | 0.12724 | 0.12724     | 0.58469652  |          |         |  |
| PCA3       | ENSG00000225937 | 0.40441  | 0.34295 | 0.95989     | 0.16855     | 0.99222  | 0.16055 |  |
|            | 1.1395          | 0.12725  | 0.12725 | 0.58469652  |             |          |         |  |
| NA         | ENSG00000275880 | 1.1395   | 0.12725 | 1.1395      | 0.12725     | 1.1395   | 0.12725 |  |

|           |                 |           |         |            |            |           |         |  |
|-----------|-----------------|-----------|---------|------------|------------|-----------|---------|--|
|           | 1.1395          | 0.12725   | 0.12725 | 0.58469652 |            |           |         |  |
| KL        | ENSG00000133116 | -0.014374 | 0.50573 | 0.56529    | 0.28594    | -0.014374 | 0.50573 |  |
|           | 1.1394          | 0.12726   | 0.12726 | 0.58469652 |            |           |         |  |
| FBXL7     | ENSG00000183580 | 1.1257    | 0.13015 | 0.83121    | 0.20293    | -0.94381  | 0.82737 |  |
|           | 1.1394          | 0.12726   | 0.12726 | 0.58469652 |            |           |         |  |
| NA        | ENSG00000206711 | 1.1394    | 0.12726 | -0.53262   | 0.70285    | -0.53262  | 0.70285 |  |
|           | -0.53262        | 0.70285   | 0.12726 | 0.58469652 |            |           |         |  |
| LINC01416 | ENSG00000260930 | 1.1393    | 0.1273  | -0.49289   | 0.68895    | 0.92999   |         |  |
|           | 0.17619         | -0.15985  | 0.5635  | 0.1273     | 0.58469652 |           |         |  |
| RNF113B   | ENSG00000139797 | 1.019     | 0.1541  | 1.1392     | 0.12731    | 1.0875    | 0.13841 |  |
|           | -0.085788       | 0.53418   | 0.12731 | 0.58469652 |            |           |         |  |
| RNA5SP88  | ENSG00000202430 | 1.1392    | 0.12731 | 1.1392     | 0.12731    | 1.1392    |         |  |
|           | 0.12731         | 1.1392    | 0.12731 | 0.12731    | 0.58469652 |           |         |  |
| NA        | ENSG00000236395 | 1.1391    | 0.12733 | 1.0268     | 0.15225    | 0.6128    | 0.27    |  |
|           | 1.0268          | 0.15225   | 0.12733 | 0.58469652 |            |           |         |  |
| NA        | ENSG00000212479 | 1.032     | 0.15104 | 0.94803    | 0.17156    | 1.1389    | 0.12737 |  |
|           | 1.1389          | 0.12737   | 0.12737 | 0.58469652 |            |           |         |  |
| NA        | ENSG00000234089 | 0.40209   | 0.34381 | 0.40209    | 0.34381    | 1.1389    | 0.12737 |  |
|           | -0.062227       | 0.52481   | 0.12737 | 0.58469652 |            |           |         |  |
| NA        | ENSG00000280014 | 1.1388    | 0.1274  | 1.1388     | 0.1274     | 1.1388    | 0.1274  |  |
|           | 1.1388          | 0.1274    | 0.1274  | 0.58469652 |            |           |         |  |
| SUMO2     | ENSG00000188612 | -0.36368  | 0.64195 | 1.1386     | 0.12743    | -0.95808  | 0.83099 |  |
|           | 0.27679         | 0.39097   | 0.12743 | 0.58469652 |            |           |         |  |
| RPL9P25   | ENSG00000240821 | -0.68064  | 0.75195 | 0.8238     | 0.20503    | 1.1386    |         |  |
|           | 0.12743         | 1.1386    | 0.12743 | 0.12743    | 0.58469652 |           |         |  |
| ABCB5     | ENSG00000004846 | 1.1385    | 0.12745 | -0.64284   | 0.73984    | -0.60795  | 0.72839 |  |
|           | -0.26174        | 0.60324   | 0.12745 | 0.58469652 |            |           |         |  |
| NA        | ENSG00000261072 | 1.1384    | 0.12747 | 1.1384     | 0.12747    | 1.1384    | 0.12747 |  |
|           | 1.1384          | 0.12747   | 0.12747 | 0.58469652 |            |           |         |  |
| LINC02582 | ENSG00000261780 | -1.0483   | 0.85275 | -0.66901   | 0.74826    | 1.1383    |         |  |
|           | 0.12751         | -1.021    | 0.84636 | 0.12751    | 0.58469652 |           |         |  |
| MIR2681   | ENSG00000265164 | 0.26773   | 0.39446 | -0.13308   | 0.55293    | 0.35613   |         |  |
|           | 0.36087         | 1.1381    | 0.12753 | 0.12753    | 0.58469652 |           |         |  |
| NA        | ENSG00000226750 | 1.1381    | 0.12755 | -3.0729    | 0.99894    | -0.66654  | 0.74747 |  |
|           | -0.65426        | 0.74353   | 0.12755 | 0.58469652 |            |           |         |  |
| NA        | ENSG00000240057 | 0.65614   | 0.25587 | 0.62857    | 0.26482    | 1.1381    | 0.12755 |  |
|           | 0.067288        | 0.47318   | 0.12755 | 0.58469652 |            |           |         |  |
| NA        | ENSG00000223691 | 1.1379    | 0.12758 | 1.1201     | 0.13134    | 1.1201    | 0.13134 |  |
|           | 0.2908          | 0.3856    | 0.12758 | 0.58469652 |            |           |         |  |
| NA        | ENSG00000173862 | -0.55412  | 0.71025 | 1.1379     | 0.12759    | -0.55412  | 0.71025 |  |
|           | -0.55412        | 0.71025   | 0.12759 | 0.58469652 |            |           |         |  |
| SCRN3     | ENSG00000144306 | 1.1378    | 0.1276  | 1.0487     | 0.14717    | 1.0487    | 0.14717 |  |
|           | 0.055591        | 0.47783   | 0.1276  | 0.58469652 |            |           |         |  |
| GAPDHP29  | ENSG00000178596 | -0.21029  | 0.58328 | 1.1378     | 0.1276     | 1.1378    |         |  |
|           | 0.1276          | 1.1378    | 0.1276  | 0.1276     | 0.58469652 |           |         |  |
| NA        | ENSG00000255139 | 1.1312    | 0.12898 | 1.1378     | 0.12761    | 1.1312    | 0.12898 |  |
|           | 1.1312          | 0.12898   | 0.12761 | 0.58469652 |            |           |         |  |
| SLC15A1   | ENSG00000088386 | -0.18444  | 0.57317 | -0.01107   | 0.50442    | 0.25791   |         |  |
|           | 0.39824         | 1.1377    | 0.12762 | 0.12762    | 0.58469652 |           |         |  |
| FAM99A    | ENSG00000205866 | 0.48118   | 0.3152  | 0.48118    | 0.3152     | -1.1191   |         |  |
|           | 0.86845         | 1.1377    | 0.12762 | 0.12762    | 0.58469652 |           |         |  |
| NA        | ENSG00000264694 | 1.1377    | 0.12762 | 0.785      | 0.21623    | 0.50128   | 0.30809 |  |
|           | 0.14667         | 0.4417    | 0.12762 | 0.58469652 |            |           |         |  |
| LINC00445 | ENSG00000236036 | 1.1376    | 0.12763 | 1.1376     | 0.12763    | 1.1376    |         |  |
|           | 0.12763         | 1.1376    | 0.12763 | 0.12763    | 0.58469652 |           |         |  |
| TERT      | ENSG00000164362 | -0.93236  | 0.82442 | -0.59465   | 0.72396    | -0.27521  | 0.60842 |  |
|           | 1.1376          | 0.12764   | 0.12764 | 0.58469652 |            |           |         |  |
| NA        | ENSG00000272582 | 1.1373    | 0.1277  | 1.1373     | 0.1277     | 1.1373    | 0.1277  |  |
|           | 1.1373          | 0.1277    | 0.1277  | 0.58469652 |            |           |         |  |
| ZNF321P   | ENSG00000213801 | -0.85031  | 0.80242 | 0.79907    | 0.21212    | -1.2328   |         |  |
|           | 0.89118         | 1.1373    | 0.12771 | 0.12771    | 0.58469652 |           |         |  |
| TMEM202   | ENSG00000187806 | -0.1342   | 0.55338 | 0.49474    | 0.31039    | 1.1372    |         |  |

|            |                 |            |            |            |            |           |         |       |
|------------|-----------------|------------|------------|------------|------------|-----------|---------|-------|
|            | 0.12773         | 0.28087    | 0.38941    | 0.12773    | 0.58469652 |           |         |       |
| TOMM40P4   | ENSG00000213222 | 1.1372     | 0.12773    | 0.12773    | 1.1372     | 0.12773   | 1.1372  |       |
|            | 0.12773         | 1.1372     | 0.12773    | 0.12773    | 0.58469652 |           |         |       |
| KIAA1143P1 | ENSG00000259086 | 1.1370     | 0.12777    | 0.58818    | 0.27821    | -0.073152 | 0.52916 |       |
|            | -1.7321         | 0.95837    | 0.12777    | 0.58469652 |            |           |         |       |
| LINC00888  | ENSG00000240024 | 0.20703    | 0.41799    | 1.1370     | 0.12778    | -0.12339  | 0.5491  |       |
|            | -0.12339        | 0.5491     | 0.12778    | 0.58469652 |            |           |         |       |
| LINC02160  | ENSG00000251443 | 1.1369     | 0.12778    | -0.37995   | 0.64801    | -0.58084  |         |       |
|            | 0.71933         | 0.75886    | 0.22397    | 0.12778    | 0.58469652 |           |         |       |
| NA         | ENSG00000249411 | 0.15142    | 0.43982    | 1.1368     | 0.12781    | -0.84954  | 0.80221 |       |
|            | -0.43228        | 0.66723    | 0.12781    | 0.58469652 |            |           |         |       |
| NA         | ENSG00000266409 | 1.1368     | 0.12782    | 1.1368     | 0.12782    | 1.1368    | 0.12782 |       |
|            | 1.1368          | 0.12782    | 0.12782    | 0.58469652 |            |           |         |       |
| NA         | ENSG00000268473 | 1.0258     | 0.1525     | -1.0868    | 0.86144    | 1.1367    | 0.12783 |       |
|            | -0.14575        | 0.55794    | 0.12783    | 0.58469652 |            |           |         |       |
| USP4       | ENSG00000114316 | 0.72788    | 0.23334    | 1.1366     | 0.12785    | -0.27813  | 0.60954 |       |
|            | -0.093951       | 0.53743    | 0.12785    | 0.58469652 |            |           |         |       |
| RNU4-32P   | ENSG00000200274 | 1.1364     | 0.1279     | 1.1364     | 0.1279     | 1.1364    |         |       |
|            | 0.1279          | 1.1364     | 0.1279     | 0.1279     | 0.58469652 |           |         |       |
| MRFAP1L1   | ENSG00000178988 | 0.55676    | 0.28885    | 1.1363     | 0.12791    | 0.4439    |         |       |
|            | 0.32856         | 0.92667    | 0.17705    | 0.12791    | 0.58469652 |           |         |       |
| GDPD3      | ENSG00000102886 | 1.1362     | 0.12795    | 1.1362     | 0.12795    | 1.1362    | 0.12795 |       |
|            | 0.89132         | 0.18638    | 0.12795    | 0.58469652 |            |           |         |       |
| NA         | ENSG00000239344 | 1.1361     | 0.12795    | 0.10068    | 0.4599     | -1.8024   | 0.96426 |       |
|            | -0.18877        | 0.57486    | 0.12795    | 0.58469652 |            |           |         |       |
| CLIP4      | ENSG00000115295 | 0.60483    | 0.27265    | 1.1361     | 0.12796    | 0.88366   | 0.18844 |       |
|            | 0.97225         | 0.16546    | 0.12796    | 0.58469652 |            |           |         |       |
| NA         | ENSG00000233852 | 1.1360     | 0.12797    | 0.83768    | 0.20111    | 1.1360    | 0.12797 | 1.136 |
|            | 0.12797         | 0.12797    | 0.58469652 |            |            |           |         |       |
| SUCLA2     | ENSG00000136143 | 1.1360     | 0.12798    | 0.91464    | 0.18019    | 0.92258   | 0.17811 |       |
|            | 0.76075         | 0.2234     | 0.12798    | 0.58469652 |            |           |         |       |
| NA         | ENSG00000200011 | 0.80917    | 0.20921    | 0.80917    | 0.20921    | 1.1360    | 0.12799 | 1.136 |
|            | 0.12799         | 0.12799    | 0.58469652 |            |            |           |         |       |
| NA         | ENSG00000259015 | 1.1359     | 0.1281     | 1.1359     | 0.1281     | 1.1359    | 0.1281  | 0.128 |
|            | 0.1280          | 0.58469652 |            |            |            |           |         |       |
| TMED9      | ENSG00000184840 | 0.77774    | 0.21836    | 1.1359     | 0.12801    | 0.49978   | 0.30861 |       |
|            | -0.17873        | 0.57093    | 0.12801    | 0.58469652 |            |           |         |       |
| LINC02143  | ENSG00000253236 | 1.1358     | 0.12802    | -0.17868   | 0.57091    | -0.73634  |         |       |
|            | 0.76924         | -0.3462    | 0.6354     | 0.12802    | 0.58469652 |           |         |       |
| NA         | ENSG00000272161 | 1.1356     | 0.12805    | 1.1356     | 0.12805    | 1.1356    | 0.12805 |       |
|            | 1.1356          | 0.12805    | 0.12805    | 0.58469652 |            |           |         |       |
| MIR4508    | ENSG00000265673 | -0.38525   | 0.64998    | -1.0544    | 0.85416    | -0.78866  |         |       |
|            | 0.78484         | 1.1356     | 0.12806    | 0.12806    | 0.58469652 |           |         |       |
| ISCU       | ENSG00000136003 | 1.1356     | 0.12807    | -0.09692   | 0.5386     | 0.33905   | 0.36728 |       |
|            | -0.43774        | 0.66921    | 0.12807    | 0.58469652 |            |           |         |       |
| CYB5R4     | ENSG00000065615 | 0.8246     | 0.2048     | 1.1355     | 0.12809    | 0.060152  |         |       |
|            | 0.47602         | 0.19168    | 0.4240     | 0.12809    | 0.58469652 |           |         |       |
| NA         | ENSG00000260764 | 1.1354     | 0.1281     | 1.1354     | 0.1281     | 1.1354    | 0.1281  |       |
|            | 1.1354          | 0.1281     | 0.1281     | 0.58469652 |            |           |         |       |
| LINC00628  | ENSG00000280924 | 1.1354     | 0.1281     | -0.49861   | 0.69097    | -0.94673  |         |       |
|            | 0.82811         | 1.1354     | 0.1281     | 0.1281     | 0.58469652 |           |         |       |
| RNA5SP224  | ENSG00000201939 | 1.1353     | 0.12812    | 1.1353     | 0.12812    | 1.1353    |         |       |
|            | 0.12812         | 1.1353     | 0.12812    | 0.12812    | 0.58469652 |           |         |       |
| MIR1207    | ENSG00000221176 | 1.0687     | 0.14261    | 1.1353     | 0.12812    | 1.1353    |         |       |
|            | 0.12812         | 1.0687     | 0.14261    | 0.12812    | 0.58469652 |           |         |       |
| IMMP1LP3   | ENSG00000271098 | 1.1353     | 0.12812    | 1.1353     | 0.12812    | 1.1353    |         |       |
|            | 0.12812         | 1.1353     | 0.12812    | 0.12812    | 0.58469652 |           |         |       |
| HMG2P31    | ENSG00000214195 | 0.4674     | 0.32011    | -0.47761   | 0.68354    | 1.1353    |         |       |
|            | 0.12813         | -0.47761   | 0.68354    | 0.12813    | 0.58469652 |           |         |       |
| LINC02338  | ENSG00000277448 | 1.1353     | 0.12813    | 1.1353     | 0.12813    | 1.1353    |         |       |
|            | 0.12813         | 1.1353     | 0.12813    | 0.12813    | 0.58469652 |           |         |       |
| NDUFB4P2   | ENSG00000251306 | 1.1352     | 0.12814    | 1.1352     | 0.12814    | 1.1352    |         |       |



|            |                 |           |            |            |            |          |         |       |
|------------|-----------------|-----------|------------|------------|------------|----------|---------|-------|
|            | 0.12814         | 1.1352    | 0.12814    | 0.12814    | 0.58469652 |          |         |       |
| RPL36AP43  | ENSG00000241362 | 1.1352    | 0.12815    | 0.12815    | 1.1352     | 0.12815  | 1.1352  |       |
|            | 0.12815         | 1.1352    | 0.12815    | 0.12815    | 0.58469652 |          |         |       |
| NA         | ENSG00000250461 | -0.3536   | 0.63818    | -0.3536    | 0.63818    | -0.3536  | 0.63818 |       |
|            | 1.1352          | 0.12815   | 0.12815    | 0.58469652 |            |          |         |       |
| PDGFRB     | ENSG00000113721 | 1.1351    | 0.12816    | 0.12816    | 0.28925    | 0.3862   | 0.85853 |       |
|            | 0.1953          | -0.37705  | 0.64693    | 0.12816    | 0.58469652 |          |         |       |
| KRT8P43    | ENSG00000218186 | 1.1351    | 0.12817    | 0.12817    | 1.1351     | 0.12817  | 1.1351  |       |
|            | 0.12817         | 1.1351    | 0.12817    | 0.12817    | 0.58469652 |          |         |       |
| STARD13-AS | ENSG00000236581 | 1.1351    | 0.12818    | 0.12818    | 0.41179    | 0.34025  | 0.60867 |       |
|            | 0.27137         | 0.09385   | 0.46261    | 0.12818    | 0.58469652 |          |         |       |
| NA         | ENSG00000254897 | 0.56986   | 0.28438    | 0.70861    | 0.23928    | 1.135    | 0.12818 | 1.135 |
|            | 0.12818         | 0.12818   | 0.58469652 |            |            |          |         |       |
| NA         | ENSG00000260078 | 0.7605    | 0.22348    | 1.1351     | 0.12818    | 1.1351   | 0.12818 |       |
|            | 1.1351          | 0.12818   | 0.12818    | 0.58469652 |            |          |         |       |
| SLC2A10    | ENSG00000197496 | 0.18056   | 0.42836    | -0.1764    | 0.57001    | 1.135    | 0.12819 |       |
|            | -0.62617        | 0.7344    | 0.12819    | 0.58469652 |            |          |         |       |
| ZRANB2-AS2 | ENSG00000229956 | 0.92373   | 0.17781    | 1.092      | 0.13741    | 1.1349   | 0.12821 |       |
|            | 0.98319         | 0.16276   | 0.12821    | 0.58469652 |            |          |         |       |
| NA         | ENSG00000235530 | 0.57356   | 0.28313    | 1.1348     | 0.12822    | 1.1348   | 0.12822 |       |
|            | 0.94398         | 0.17259   | 0.12822    | 0.58469652 |            |          |         |       |
| PPFIA1     | ENSG00000131626 | -0.59859  | 0.72528    | 1.1348     | 0.12823    | -0.48821 |         |       |
|            | 0.6873          | -0.11586  | 0.54612    | 0.12823    | 0.58469652 |          |         |       |
| MTFR2P2    | ENSG00000235647 | 1.1346    | 0.12827    | 1.1346     | 0.12827    | 1.1346   |         |       |
|            | 0.12827         | 1.1346    | 0.12827    | 0.12827    | 0.58469652 |          |         |       |
| CFAP100    | ENSG00000163885 | 1.1345    | 0.12828    | 0.5552     | 0.28938    | -0.19284 |         |       |
|            | 0.57646         | 1.1345    | 0.12828    | 0.12828    | 0.58469652 |          |         |       |
| NA         | ENSG00000253854 | 1.1345    | 0.1283     | 1.1345     | 0.1283     | 1.1345   | 0.1283  |       |
|            | 1.1345          | 0.1283    | 0.1283     | 0.58469652 |            |          |         |       |
| MIR4289    | ENSG00000265873 | 1.1345    | 0.1283     | 1.1345     | 0.1283     | 1.1345   |         |       |
|            | 0.1283          | 1.1345    | 0.1283     | 0.1283     | 0.58469652 |          |         |       |
| FDX1       | ENSG00000137714 | 0.96692   | 0.16679    | 1.1344     | 0.12832    | 0.73208  | 0.23206 |       |
|            | 0.094915        | 0.46219   | 0.12832    | 0.58469652 |            |          |         |       |
| ING5       | ENSG00000168395 | -0.014954 | 0.50597    | 1.1344     | 0.12832    | 0.45367  | 0.32503 |       |
|            | -0.19661        | 0.57793   | 0.12832    | 0.58469652 |            |          |         |       |
| NA         | ENSG00000235480 | 0.46728   | 0.32015    | 0.50935    | 0.30525    | 0.46728  | 0.32015 |       |
|            | 1.1344          | 0.12832   | 0.12832    | 0.58469652 |            |          |         |       |
| NA         | ENSG00000280007 | 1.1343    | 0.12834    | 1.1343     | 0.12834    | 1.1343   | 0.12834 |       |
|            | 1.1343          | 0.12834   | 0.12834    | 0.58469652 |            |          |         |       |
| N4BP2L1    | ENSG00000139597 | -0.27416  | 0.60802    | -0.27416   | 0.60802    | -0.27416 |         |       |
|            | 0.60802         | 1.1342    | 0.12835    | 0.12835    | 0.58469652 |          |         |       |
| NA         | ENSG00000263788 | -0.19016  | 0.57541    | 0.12921    | 0.44859    | 1.1342   | 0.12836 |       |
|            | -0.23758        | 0.5939    | 0.12836    | 0.58469652 |            |          |         |       |
| LINC01931  | ENSG00000162947 | 1.1342    | 0.12837    | 1.0621     | 0.14409    | -0.328   |         |       |
|            | 0.62855         | -0.75176  | 0.7739     | 0.12837    | 0.58469652 |          |         |       |
| RN7SL618P  | ENSG00000241613 | 1.1341    | 0.12837    | 1.1341     | 0.12837    | 1.1341   |         |       |
|            | 0.12837         | 1.1341    | 0.12837    | 0.12837    | 0.58469652 |          |         |       |
| ZNF75BP    | ENSG00000258212 | 0.72693   | 0.23363    | 1.1341     | 0.12838    | 0.34836  |         |       |
|            | 0.36379         | 0.40511   | 0.3427     | 0.12838    | 0.58469652 |          |         |       |
| NA         | ENSG00000283214 | 1.1341    | 0.12838    | 1.1341     | 0.12838    | 1.1341   | 0.12838 |       |
|            | 1.1341          | 0.12838   | 0.12838    | 0.58469652 |            |          |         |       |
| NA         | ENSG00000278356 | 1.1341    | 0.12839    | 1.1341     | 0.12839    | 1.1341   | 0.12839 |       |
|            | 1.1341          | 0.12839   | 0.12839    | 0.58469652 |            |          |         |       |
| ZSWIM6     | ENSG00000130449 | 0.67941   | 0.24844    | 0.94929    | 0.17124    | -0.38735 |         |       |
|            | 0.65075         | 1.134     | 0.1284     | 0.1284     | 0.58469652 |          |         |       |
| RNU6-455P  | ENSG00000207412 | 1.1339    | 0.12841    | 1.1175     | 0.13189    | -0.52108 |         |       |
|            | 0.69884         | -0.52863  | 0.70147    | 0.12841    | 0.58469652 |          |         |       |
| JSRP1      | ENSG00000167476 | 1.1339    | 0.12842    | 1.1339     | 0.12842    | 1.1339   | 0.12842 |       |
|            | 1.1339          | 0.12842   | 0.12842    | 0.58469652 |            |          |         |       |
| RNU1-23P   | ENSG00000200231 | 0.33392   | 0.36922    | 1.1338     | 0.12844    | 0.33392  |         |       |
|            | 0.36922         | 0.33392   | 0.36922    | 0.12844    | 0.58469652 |          |         |       |
| RN7SKP13   | ENSG00000251742 | 1.1337    | 0.12846    | 1.1337     | 0.12846    | 1.1337   |         |       |

|           |                 |            |         |            |            |          |         |  |
|-----------|-----------------|------------|---------|------------|------------|----------|---------|--|
|           | 0.12846         | 1.1337     | 0.12846 | 0.12846    | 0.58469652 |          |         |  |
| NA        | ENSG00000273259 | 1.1337     | 0.12846 | 0.84381    | 0.19939    | 0.43939  | 0.33019 |  |
|           | 0.43939         | 0.33019    | 0.12846 | 0.58469652 |            |          |         |  |
| TNFSF13   | ENSG00000161955 | 0.081293   | 0.4676  | 1.1337     | 0.12847    | 0.081293 |         |  |
|           | 0.4676          | -1.0108    | 0.84394 | 0.12847    | 0.58469652 |          |         |  |
| TLX3      | ENSG00000164438 | -1.4234    | 0.92269 | -1.4234    | 0.92269    | 0.107    | 0.45739 |  |
|           | 1.1337          | 0.12847    | 0.12847 | 0.58469652 |            |          |         |  |
| RNU6-169P | ENSG00000202206 | 1.1336     | 0.12847 | 1.1336     | 0.12847    | 1.1336   |         |  |
|           | 0.12847         | 1.1336     | 0.12847 | 0.12847    | 0.58469652 |          |         |  |
| RBM17     | ENSG00000134453 | 1.1335     | 0.1285  | 0.25479    | 0.39944    | 1.051    | 0.14662 |  |
|           | 0.56321         | 0.28665    | 0.1285  | 0.58469652 |            |          |         |  |
| FBXL14    | ENSG00000171823 | 0.50274    | 0.30757 | 1.1335     | 0.1285     | 0.92425  |         |  |
|           | 0.17768         | 0.27157    | 0.39297 | 0.1285     | 0.58469652 |          |         |  |
| ADCYAP1   | ENSG00000141433 | 1.1335     | 0.12851 | 0.018276   | 0.49271    | -0.53018 |         |  |
|           | 0.70201         | -1.5509    | 0.93953 | 0.12851    | 0.58469652 |          |         |  |
| LINC00559 | ENSG00000261446 | 0.92349    | 0.17788 | 1.1334     | 0.12851    | 0.81185  |         |  |
|           | 0.20844         | 0.64597    | 0.25915 | 0.12851    | 0.58469652 |          |         |  |
| SLC8B1    | ENSG00000089060 | 1.1333     | 0.12854 | 0.49246    | 0.3112     | 0.60872  |         |  |
|           | 0.27136         | 0.074044   | 0.47049 | 0.12854    | 0.58469652 |          |         |  |
| KDSR      | ENSG00000119537 | -0.36563   | 0.64268 | 0.96732    | 0.16669    | 1.1332   | 0.12856 |  |
|           | -0.51315        | 0.69608    | 0.12856 | 0.58469652 |            |          |         |  |
| RRN3P3    | ENSG00000257122 | 0.28944    | 0.38612 | -0.1327    | 0.55278    | 0.3027   |         |  |
|           | 0.38106         | 1.1332     | 0.12856 | 0.12856    | 0.58469652 |          |         |  |
| CFAP53    | ENSG00000172361 | 1.0554     | 0.14562 | -0.2546    | 0.60048    | -0.2546  |         |  |
|           | 0.60048         | 1.1332     | 0.12857 | 0.12857    | 0.58469652 |          |         |  |
| NA        | ENSG00000235934 | 1.1331     | 0.1286  | 0.17132    | 0.43199    | -0.20957 | 0.583   |  |
|           | -0.20957        | 0.583      | 0.1286  | 0.58469652 |            |          |         |  |
| NA        | ENSG00000250407 | 1.133      | 0.1286  | -0.90452   | 0.81714    | 0.5732   | 0.28325 |  |
|           | -0.14838        | 0.55898    | 0.1286  | 0.58469652 |            |          |         |  |
| NA        | ENSG00000273824 | 1.133      | 0.1286  | 1.133      | 0.1286     | 1.133    | 0.1286  |  |
|           | 0.1286          | 0.58469652 |         |            |            |          |         |  |
| NA        | ENSG00000269676 | 1.1329     | 0.12862 | -1.4796    | 0.93051    | -1.4796  | 0.93051 |  |
|           | -0.22633        | 0.58953    | 0.12862 | 0.58469652 |            |          |         |  |
| DISP2     | ENSG00000140323 | 0.90885    | 0.18171 | 0.90885    | 0.18171    | 0.556    | 0.2891  |  |
|           | 1.1329          | 0.12863    | 0.12863 | 0.58469652 |            |          |         |  |
| LINC00608 | ENSG00000236445 | 1.1329     | 0.12863 | -0.04207   | 0.51678    | 1.1329   |         |  |
|           | 0.12863         | 1.1329     | 0.12863 | 0.12863    | 0.58469652 |          |         |  |
| NA        | ENSG00000233721 | 0.5279     | 0.29878 | 0.41445    | 0.33927    | -0.88409 | 0.81168 |  |
|           | 1.1328          | 0.12864    | 0.12864 | 0.58469652 |            |          |         |  |
| NA        | ENSG00000255182 | -0.44109   | 0.67043 | 0.024823   | 0.4901     | 1.1328   | 0.12865 |  |
|           | 1.1328          | 0.12865    | 0.12865 | 0.58469652 |            |          |         |  |
| MTND4P7   | ENSG00000253257 | 1.1327     | 0.12867 | 0.5366     | 0.29577    | 1.1327   |         |  |
|           | 0.12867         | 0.24169    | 0.40451 | 0.12867    | 0.58469652 |          |         |  |
| NA        | ENSG00000202077 | -0.86367   | 0.80611 | -0.86367   | 0.80611    | 1.1327   | 0.12867 |  |
|           | -0.062247       | 0.52482    | 0.12867 | 0.58469652 |            |          |         |  |
| CTCF1     | ENSG00000124092 | 0.26085    | 0.3971  | 1.1327     | 0.12868    | -0.73049 | 0.76746 |  |
|           | 0.52495         | 0.29981    | 0.12868 | 0.58469652 |            |          |         |  |
| SMIM21    | ENSG00000206026 | -0.21844   | 0.58646 | -1.0168    | 0.84537    | 1.1326   |         |  |
|           | 0.12868         | 0.58972    | 0.27769 | 0.12868    | 0.58469652 |          |         |  |
| NA        | ENSG00000226566 | 1.1327     | 0.12868 | -0.75366   | 0.77447    | 0.77776  | 0.21836 |  |
|           | 0.77963         | 0.2178     | 0.12868 | 0.58469652 |            |          |         |  |
| NA        | ENSG00000232261 | 1.1326     | 0.12868 | 1.1326     | 0.12868    | 1.1326   | 0.12868 |  |
|           | 0.63588         | 0.26243    | 0.12868 | 0.58469652 |            |          |         |  |
| NA        | ENSG00000256824 | -2.3156    | 0.98971 | 0.3112     | 0.37783    | -1.1319  | 0.87115 |  |
|           | 1.1325          | 0.12871    | 0.12871 | 0.58469652 |            |          |         |  |
| SWSAP1    | ENSG00000173928 | 1.1324     | 0.12873 | 1.1324     | 0.12873    | 1.1324   |         |  |
|           | 0.12873         | 1.1324     | 0.12873 | 0.12873    | 0.58469652 |          |         |  |
| NA        | ENSG00000234639 | 1.1324     | 0.12873 | 1.1324     | 0.12873    | 0.87979  | 0.18949 |  |
|           | 1.1324          | 0.12873    | 0.12873 | 0.58469652 |            |          |         |  |
| BMS1P19   | ENSG00000231099 | 1.1323     | 0.12876 | 1.1323     | 0.12876    | 1.1323   |         |  |
|           | 0.12876         | 1.1323     | 0.12876 | 0.12876    | 0.58469652 |          |         |  |
| NA        | ENSG00000248268 | 1.1323     | 0.12876 | 0.95017    | 0.17101    | -0.38928 | 0.65147 |  |

|            |                 |            |         |             |             |           |         |         |
|------------|-----------------|------------|---------|-------------|-------------|-----------|---------|---------|
|            | -0.38928        | 0.65147    | 0.12876 | 0.58469652  |             |           |         |         |
| DNASE1L2   | ENSG00000167968 | 1.1322     | 0.12878 | 1.1322      | 0.12878     | 1.1322    | 0.12878 | 1.1322  |
|            | 0.12878         | 1.1322     | 0.12878 | 0.12878     | 0.58469652  |           |         |         |
| NA         | ENSG00000259780 | 1.1322     | 0.12878 | 1.1322      | 0.12878     | 1.1322    | 0.12878 | 0.12878 |
|            | 1.1322          | 0.12878    | 0.12878 | 0.58469652  |             |           |         |         |
| SLC37A3    | ENSG00000157800 | -0.15651   | 0.56218 | -0.71225    | 0.76185     | 1.1321    |         |         |
|            | 0.12879         | -0.040983  | 0.51635 | 0.12879     | 0.58469652  |           |         |         |
| NA         | ENSG00000260413 | 0.36195    | 0.3587  | 0.40167     | 0.34396     | 0.55505   | 0.28943 |         |
|            | 1.132           | 0.12881    | 0.12881 | 0.58469652  |             |           |         |         |
| NA         | ENSG00000233962 | 1.132      | 0.12882 | 1.132       | 0.12882     | 1.132     | 0.12882 | 1.132   |
|            | 0.12882         | 0.58469652 |         |             |             |           |         |         |
| NA         | ENSG00000234085 | 1.132      | 0.12882 | 1.132       | 0.12882     | 1.132     | 0.12882 | 1.132   |
|            | 0.12882         | 0.58469652 |         |             |             |           |         |         |
| NEURL1B    | ENSG00000214357 | 0.22762    | 0.40997 | 0.52055     | 0.30134     | 0.24428   |         |         |
|            | 0.40351         | 1.1319     | 0.12883 | 0.12883     | 0.58469652  |           |         |         |
| SCARNA12   | ENSG00000238795 | 1.1319     | 0.12883 | 1.1319      | 0.12883     | 1.1319    |         |         |
|            | 0.12883         | 1.1319     | 0.12883 | 0.12883     | 0.58469652  |           |         |         |
| RN7SL369P  | ENSG00000241542 | 0.19149    | 0.42407 | 0.037435    | 0.48507     | 0.19149   |         |         |
|            | 0.42407         | 1.1319     | 0.12883 | 0.12883     | 0.58469652  |           |         |         |
| LRRC8E     | ENSG00000171017 | 1.1319     | 0.12884 | 1.1319      | 0.12884     | 1.1319    |         |         |
|            | 0.12884         | 1.1319     | 0.12884 | 0.12884     | 0.58469652  |           |         |         |
| NA         | ENSG00000276649 | -0.366     | 0.64282 | -0.366      | 0.64282     | 1.1319    | 0.12884 |         |
|            | 0.22871         | 0.40955    | 0.12884 | 0.58469652  |             |           |         |         |
| OR5C1      | ENSG00000148215 | -0.14171   | 0.55635 | 1.1317      | 0.12887     | 0.59487   | 0.27596 |         |
|            | 0.57403         | 0.28297    | 0.12887 | 0.58469652  |             |           |         |         |
| SIPA1L3    | ENSG00000105738 | -0.81165   | 0.7915  | -0.060728   | 0.52421     | 0.60212   |         |         |
|            | 0.27355         | 1.1317     | 0.12888 | 0.12888     | 0.58469652  |           |         |         |
| COMTD1     | ENSG00000165644 | 1.1317     | 0.12888 | 1.1317      | 0.12888     | 1.1317    |         |         |
|            | 0.12888         | 1.1317     | 0.12888 | 0.12888     | 0.58469652  |           |         |         |
| NA         | ENSG00000278830 | 1.1317     | 0.12888 | 0.79948     | 0.21201     | -0.49819  | 0.69083 |         |
|            | -0.49819        | 0.69083    | 0.12888 | 0.58469652  |             |           |         |         |
| ZFPM1      | ENSG00000179588 | 0.67239    | 0.25067 | -0.72655    | 0.76625     | 1.1317    | 0.12889 |         |
|            | 0.40249         | 0.34366    | 0.12889 | 0.58469652  |             |           |         |         |
| C8orf48    | ENSG00000164743 | 0.93829    | 0.17405 | 0.93829     | 0.17405     | 1.1316    |         |         |
|            | 0.1289          | 0.32929    | 0.37097 | 0.1289      | 0.58469652  |           |         |         |
| EIF2AK1    | ENSG00000086232 | 0.55729    | 0.28866 | 1.1315      | 0.12892     | -0.73123  |         |         |
|            | 0.76768         | -0.24726   | 0.59765 | 0.12892     | 0.58469652  |           |         |         |
| POMGNT2    | ENSG00000144647 | 0.1736     | 0.43109 | 1.1314      | 0.12895     | 0.081956  |         |         |
|            | 0.46734         | 0.2552     | 0.39928 | 0.12895     | 0.58469652  |           |         |         |
| MCPH1      | ENSG00000147316 | 0.1063     | 0.45767 | 0.57704     | 0.28195     | 1.1314    | 0.12895 |         |
|            | 0.49514         | 0.31025    | 0.12895 | 0.58469652  |             |           |         |         |
| RNY4P16    | ENSG00000201638 | 1.0572     | 0.14522 | 1.0572      | 0.14522     | 1.1314    |         |         |
|            | 0.12895         | 1.0572     | 0.14522 | 0.12895     | 0.58469652  |           |         |         |
| LINC01837  | ENSG00000267489 | 0.49632    | 0.30983 | 1.1314      | 0.12895     | -0.17415  |         |         |
|            | 0.56913         | -0.25286   | 0.59981 | 0.12895     | 0.58469652  |           |         |         |
| NA         | ENSG00000251431 | 1.1313     | 0.12897 | 0.33525     | 0.36872     | -0.70229  | 0.75875 |         |
|            | -0.70229        | 0.75875    | 0.12897 | 0.584732797 |             |           |         |         |
| PRKD1      | ENSG00000184304 | 0.88601    | 0.18781 | 0.1258      | 0.44995     | 1.1311    | 0.12901 |         |
|            | 0.85428         | 0.19648    | 0.12901 | 0.584859736 |             |           |         |         |
| SLC12A7    | ENSG00000113504 | 1.0564     | 0.1454  | -0.29305    | 0.61526     | 1.131     | 0.12903 |         |
|            | 0.50092         | 0.30821    | 0.12903 | 0.584886913 |             |           |         |         |
| NA         | ENSG00000261428 | 0.85659    | 0.19584 | 1.131       | 0.12904     | 0.81345   | 0.20798 |         |
|            | 0.81345         | 0.20798    | 0.12904 | 0.584886913 |             |           |         |         |
| THORLNC    | ENSG00000226856 | 1.1307     | 0.12908 | 0.52436     | 0.30001     | -0.091918 |         |         |
|            | 0.53662         | 0.59728    | 0.27516 | 0.12908     | 0.584959397 |           |         |         |
| CYP1B1-AS1 | ENSG00000232973 | 1.1307     | 0.12908 | -1.545      | 0.93883     | -1.0757   |         |         |
|            | 0.85897         | -1.3965    | 0.91872 | 0.12908     | 0.584959397 |           |         |         |
| TRAPPC9    | ENSG00000167632 | -0.3036    | 0.61928 | -0.27013    | 0.60647     | 1.1306    |         |         |
|            | 0.12911         | 0.63817    | 0.26168 | 0.12911     | 0.584977464 |           |         |         |
| NA         | ENSG00000223374 | 1.1306     | 0.12911 | 0.20506     | 0.41876     | 1.1306    | 0.12911 |         |
|            | 1.1306          | 0.12911    | 0.12911 | 0.584977464 |             |           |         |         |
| FKBP4      | ENSG00000004478 | 1.1306     | 0.12912 | 0.47339     | 0.31797     | 0.46714   | 0.3202  |         |

|           |                 |            |             |             |             |           |         |      |
|-----------|-----------------|------------|-------------|-------------|-------------|-----------|---------|------|
|           | 0.65558         | 0.25605    | 0.12912     | 0.584977464 |             |           |         |      |
| ACTR5     | ENSG00000101442 | 1.1304     | 0.12916     | -0.8119     | 0.79158     | -0.58904  | 0.72208 |      |
|           | -0.092377       | 0.5368     | 0.12916     | 0.585095039 |             |           |         |      |
| CSTB      | ENSG00000160213 | -0.10902   | 0.54341     | 0.057846    | 0.47694     | 1.1301    | 0.12921 |      |
|           | -0.94323        | 0.82722    | 0.12921     | 0.585095039 |             |           |         |      |
| RPS25P9   | ENSG00000232142 | 0.51598    | 0.30293     | 0.51598     | 0.30293     | 1.1301    |         |      |
|           | 0.12921         | 0.51598    | 0.30293     | 0.12921     | 0.585095039 |           |         |      |
| NA        | ENSG00000206582 | 1.1301     | 0.12922     | 1.1301      | 0.12922     | 1.1301    | 0.12922 |      |
|           | 1.1301          | 0.12922    | 0.12922     | 0.585095039 |             |           |         |      |
| CT69      | ENSG00000231971 | -0.33069   | 0.62956     | -0.34875    | 0.63636     | -0.66319  | 0.7464  |      |
|           | 1.1301          | 0.12922    | 0.12922     | 0.585095039 |             |           |         |      |
| NA        | ENSG00000228655 | 1.1301     | 0.12923     | -1.0165     | 0.8453      | -1.3778   | 0.91587 |      |
|           | -1.0165         | 0.8453     | 0.12923     | 0.585095039 |             |           |         |      |
| MIR4304   | ENSG00000265526 | 1.13       | 0.12923     | 1.13        | 0.12923     | 1.13      | 0.12923 | 1.13 |
|           | 0.12923         | 0.12923    | 0.585095039 |             |             |           |         |      |
| SPDYE7P   | ENSG00000179994 | 0.89194    | 0.18621     | -0.065688   | 0.52619     | 1.1295    |         |      |
|           | 0.12934         | -0.18923   | 0.57504     | 0.12934     | 0.585401362 |           |         |      |
| NA        | ENSG00000265115 | -0.0084902 | 0.50339     | 1.1294      | 0.12937     | 1.1294    | 0.12937 |      |
|           | 1.1294          | 0.12937    | 0.12937     | 0.585401362 |             |           |         |      |
| NA        | ENSG00000225058 | -0.85049   | 0.80247     | 1.1293      | 0.12938     | 0.57665   | 0.28209 |      |
|           | 0.80894         | 0.20927    | 0.12938     | 0.585401362 |             |           |         |      |
| CNTROB    | ENSG00000170037 | 0.21012    | 0.41679     | 0.21012     | 0.41679     | 1.1293    |         |      |
|           | 0.12939         | 0.1587     | 0.43695     | 0.12939     | 0.585401362 |           |         |      |
| NA        | ENSG00000263386 | 0.74355    | 0.22857     | -0.5082     | 0.69434     | 1.1293    | 0.12939 |      |
|           | 0.39018         | 0.3482     | 0.12939     | 0.585401362 |             |           |         |      |
| SPEBP1    | ENSG00000258484 | 1.1292     | 0.1294      | -1.1466     | 0.87423     | -0.58357  |         |      |
|           | 0.72025         | -0.58357   | 0.72025     | 0.1294      | 0.585401362 |           |         |      |
| NA        | ENSG00000261501 | 1.1292     | 0.1294      | 1.1292      | 0.1294      | 1.1292    | 0.1294  |      |
|           | 1.1292          | 0.1294     | 0.1294      | 0.585401362 |             |           |         |      |
| NA        | ENSG00000273711 | 1.1292     | 0.12942     | 1.1292      | 0.12942     | 1.1292    | 0.12942 |      |
|           | 1.1292          | 0.12942    | 0.12942     | 0.585401362 |             |           |         |      |
| ASIP      | ENSG00000101440 | -0.17698   | 0.57024     | 0.78626     | 0.21586     | 1.1291    | 0.12943 |      |
|           | -1.1389         | 0.87263    | 0.12943     | 0.585401362 |             |           |         |      |
| CAMK2D    | ENSG00000145349 | -0.44225   | 0.67084     | 1.1288      | 0.12949     | 0.59524   |         |      |
|           | 0.27584         | 0.48369    | 0.3143      | 0.12949     | 0.585401362 |           |         |      |
| FDX1P1    | ENSG00000181741 | 1.1288     | 0.12949     | 1.0018      | 0.15821     | 1.1288    |         |      |
|           | 0.12949         | 1.1288     | 0.12949     | 0.12949     | 0.585401362 |           |         |      |
| PGBP      | ENSG00000227179 | 0.37385    | 0.35426     | 1.1288      | 0.12949     | -0.026383 | 0.51052 |      |
|           | -0.59195        | 0.72306    | 0.12949     | 0.585401362 |             |           |         |      |
| RNU6-529P | ENSG00000200253 | 1.1288     | 0.1295      | 1.1288      | 0.1295      | 0.24729   |         |      |
|           | 0.40234         | 0.95236    | 0.17046     | 0.1295      | 0.585401362 |           |         |      |
| OR3A2     | ENSG00000221882 | 1.1286     | 0.12954     | 0.85094     | 0.1974      | -1.0314   | 0.84883 |      |
|           | 0.70479         | 0.24047    | 0.12954     | 0.585401362 |             |           |         |      |
| PDCD5P2   | ENSG00000251107 | 1.1286     | 0.12954     | 1.1286      | 0.12954     | 1.1286    |         |      |
|           | 0.12954         | 1.1286     | 0.12954     | 0.12954     | 0.585401362 |           |         |      |
| NA        | ENSG00000252170 | 0.50602    | 0.30642     | 0.020857    | 0.49168     | 1.1286    | 0.12954 |      |
|           | 1.1286          | 0.12954    | 0.12954     | 0.585401362 |             |           |         |      |
| ADGRL2    | ENSG00000117114 | 1.1285     | 0.12955     | 0.78109     | 0.21737     | -0.44542  |         |      |
|           | 0.67199         | 0.53878    | 0.29502     | 0.12955     | 0.585401362 |           |         |      |
| TGFBI     | ENSG00000120708 | -0.20453   | 0.58103     | 0.13842     | 0.44495     | -0.14789  | 0.55879 |      |
|           | 1.1285          | 0.12955    | 0.12955     | 0.585401362 |             |           |         |      |
| NA        | ENSG00000274023 | 1.1285     | 0.12955     | 0.79268     | 0.21398     | 0.63674   | 0.26215 |      |
|           | 0.81238         | 0.20829    | 0.12955     | 0.585401362 |             |           |         |      |
| TTC39A    | ENSG00000085831 | 0.32133    | 0.37398     | 1.1285      | 0.12956     | -0.92529  |         |      |
|           | 0.82259         | -0.92529   | 0.82259     | 0.12956     | 0.585401362 |           |         |      |
| NA        | ENSG00000236054 | 1.1285     | 0.12956     | 1.1285      | 0.12956     | 1.1285    | 0.12956 |      |
|           | 1.1285          | 0.12956    | 0.12956     | 0.585401362 |             |           |         |      |
| NA        | ENSG00000241932 | 0.10386    | 0.45864     | 0.79833     | 0.21234     | 1.1284    | 0.12958 |      |
|           | 0.79833         | 0.21234    | 0.12958     | 0.585401362 |             |           |         |      |
| NA        | ENSG00000244593 | 1.1284     | 0.12958     | 1.1284      | 0.12958     | 1.1284    | 0.12958 |      |
|           | 1.1284          | 0.12958    | 0.12958     | 0.585401362 |             |           |         |      |
| DOCK5     | ENSG00000147459 | 0.42895    | 0.33398     | 0.97899     | 0.16379     | 0.16312   | 0.43521 |      |

|              |                 |             |             |             |             |           |         |         |
|--------------|-----------------|-------------|-------------|-------------|-------------|-----------|---------|---------|
|              | 1.1283          | 0.1296      | 0.1296      | 0.585401362 |             |           |         |         |
| ZBBX         | ENSG00000169064 | -0.77484    | 0.78078     | 0.65924     | 0.25487     | 1.1282    | 0.12961 |         |
|              | -1.2733         | 0.89854     | 0.12961     | 0.585401362 |             |           |         |         |
| NA           | ENSG00000253695 | -0.22448    | 0.58881     | -0.73185    | 0.76787     | -0.12167  | 0.54842 |         |
|              | 1.1282          | 0.12961     | 0.12961     | 0.585401362 |             |           |         |         |
| STMN1        | ENSG00000117632 | 0.35153     | 0.36259     | 1.128       | 0.12966     | 0.808     | 0.20954 | 0.59669 |
|              | 0.27536         | 0.12966     | 0.585446211 |             |             |           |         |         |
| NA           | ENSG00000235432 | -0.058514   | 0.52333     | 1.1279      | 0.12967     | 1.1279    | 0.12967 |         |
|              | 1.1279          | 0.12967     | 0.12967     | 0.585446211 |             |           |         |         |
| NA           | ENSG00000268027 | 1.128       | 0.12967     | 1.128       | 0.12967     | 1.128     | 0.12967 |         |
|              | 0.12967         | 0.585446211 |             |             |             |           |         |         |
| GID8         | ENSG00000101193 | 1.1279      | 0.12968     | 1.1279      | 0.12968     | 1.1279    | 0.12968 |         |
|              | 1.1279          | 0.12968     | 0.12968     | 0.585446211 |             |           |         |         |
| MIR4655      | ENSG00000265089 | -0.82433    | 0.79512     | 1.1279      | 0.12968     | -0.046187 |         |         |
|              | 0.51842         | -0.046187   | 0.51842     | 0.12968     | 0.585446211 |           |         |         |
| TMEM222      | ENSG00000186501 | 1.1277      | 0.12971     | 0.95575     | 0.1696      | -0.13881  |         |         |
|              | 0.5552          | 0.5874      | 0.27847     | 0.12971     | 0.585518303 |           |         |         |
| HSPE1P14     | ENSG00000271612 | 0.94038     | 0.17351     | 0.93071     | 0.176       | 1.1277    | 0.12972 |         |
|              | 1.1277          | 0.12972     | 0.12972     | 0.585518303 |             |           |         |         |
| SEMA3F-AS1   | ENSG00000235016 | 0.74723     | 0.22746     | 0.80941     | 0.20914     | 1.1276    |         |         |
|              | 0.12975         | 0.51189     | 0.30436     | 0.12975     | 0.585527046 |           |         |         |
| ZADH2        | ENSG00000180011 | 1.1275      | 0.12976     | -1.1253     | 0.86976     | -0.38904  | 0.65137 |         |
|              | -0.78719        | 0.78441     | 0.12976     | 0.585527046 |             |           |         |         |
| ALOX15B      | ENSG00000179593 | 1.1275      | 0.12977     | 0.013907    | 0.49445     | 0.013907  |         |         |
|              | 0.49445         | 1.0191      | 0.15408     | 0.12977     | 0.585527046 |           |         |         |
| NA           | ENSG00000203364 | -0.41466    | 0.6608      | 1.1275      | 0.12977     | -1.1416   | 0.87319 |         |
|              | 0.19672         | 0.42202     | 0.12977     | 0.585527046 |             |           |         |         |
| NA           | ENSG00000276362 | 1.1271      | 0.12984     | 0.084373    | 0.46638     | 0.20173   | 0.42006 |         |
|              | 0.16594         | 0.4341      | 0.12984     | 0.585770416 |             |           |         |         |
| ASIC4-AS1    | ENSG00000227432 | 1.127       | 0.12986     | 1.127       | 0.12986     | 1.127     | 0.12986 | 1.127   |
|              | 0.12986         | 0.12986     | 0.585770416 |             |             |           |         |         |
| PRB1         | ENSG00000251655 | 0.14796     | 0.44119     | 0.60477     | 0.27266     | 1.127     | 0.12986 |         |
|              | 0.26365         | 0.39602     | 0.12986     | 0.585770416 |             |           |         |         |
| ASAP3        | ENSG00000088280 | 0.76456     | 0.22227     | 1.127       | 0.12988     | 0.67982   | 0.24831 |         |
|              | 0.35178         | 0.3625      | 0.12988     | 0.585806405 |             |           |         |         |
| LINC01217    | ENSG00000251219 | 0.95947     | 0.16866     | -0.27455    | 0.60817     | 1.1267    |         |         |
|              | 0.12994         | 0.67145     | 0.25097     | 0.12994     | 0.585958316 |           |         |         |
| SERAC1       | ENSG00000122335 | 0.46683     | 0.32031     | 1.1265      | 0.12998     | 0.79069   |         |         |
|              | 0.21456         | 0.79069     | 0.21456     | 0.12998     | 0.585958316 |           |         |         |
| NA           | ENSG00000260328 | -1.1247     | 0.86965     | -0.7815     | 0.78275     | 0.48884   | 0.31248 |         |
|              | 1.1265          | 0.12998     | 0.12998     | 0.585958316 |             |           |         |         |
| GUSBP2       | ENSG00000241549 | 1.1264      | 0.12999     | 0.90422     | 0.18294     | 0.5259    |         |         |
|              | 0.29948         | -0.20258    | 0.58027     | 0.12999     | 0.585958316 |           |         |         |
| ZNF721       | ENSG00000182903 | 1.1264      | 0.13        | 0.82125     | 0.20575     | 1.0189    | 0.15413 |         |
|              | 0.33247         | 0.36977     | 0.13        | 0.585958316 |             |           |         |         |
| RASGRF2-AS1  | ENSG00000251450 | 1.1264      | 0.13        | 1.1264      | 0.13        | 1.1264    | 0.13    |         |
|              | 1.1264          | 0.13        | 0.13        | 0.585958316 |             |           |         |         |
| NA           | ENSG00000254471 | -0.044989   | 0.51794     | -0.21234    | 0.58408     | -0.061405 | 0.52448 |         |
|              | 1.1263          | 0.13001     | 0.13001     | 0.585958316 |             |           |         |         |
| CREB3L3      | ENSG00000060566 | -0.20351    | 0.58063     | -0.20351    | 0.58063     | 1.1262    |         |         |
|              | 0.13004         | -0.77516    | 0.78088     | 0.13004     | 0.585958316 |           |         |         |
| SYNGR3       | ENSG00000127561 | 1.1262      | 0.13004     | -2.1484     | 0.98416     | 0.66758   |         |         |
|              | 0.2522          | -1.7669     | 0.96137     | 0.13004     | 0.585958316 |           |         |         |
| ARL5C        | ENSG00000141748 | 0.94325     | 0.17278     | 1.1262      | 0.13005     | 1.1262    | 0.13005 |         |
|              | 1.1262          | 0.13005     | 0.13005     | 0.585958316 |             |           |         |         |
| TRAV8-3      | ENSG00000211787 | 1.1261      | 0.13005     | 1.1261      | 0.13005     | 1.1261    |         |         |
|              | 0.13005         | 1.1261      | 0.13005     | 0.13005     | 0.585958316 |           |         |         |
| NMTRS-TGA3-1 | ENSG00000241225 | 1.1261      | 0.13007     | 1.1261      | 0.13007     | 1.1261    |         |         |
|              | 0.13007         | 1.1261      | 0.13007     | 0.13007     | 0.585958316 |           |         |         |
| MTATP6P3     | ENSG00000263483 | 1.1261      | 0.13007     | 1.1261      | 0.13007     | 1.1261    |         |         |
|              | 0.13007         | 1.1261      | 0.13007     | 0.13007     | 0.585958316 |           |         |         |
| NA           | ENSG00000206913 | -0.30877    | 0.62125     | -0.30877    | 0.62125     | -0.30877  | 0.62125 |         |

|            |                 |          |         |             |             |          |         |  |
|------------|-----------------|----------|---------|-------------|-------------|----------|---------|--|
|            | 1.1258          | 0.13012  | 0.13012 | 0.586047819 |             |          |         |  |
| RPL7P35    | ENSG00000233518 | 0.14508  | 0.44233 | 1.1258      | 0.13012     | -0.31307 |         |  |
|            | 0.62289         | -0.35883 | 0.64014 | 0.13012     | 0.586047819 |          |         |  |
| NA         | ENSG00000275805 | 1.1258   | 0.13013 | 0.3752      | 0.35375     | 1.1258   | 0.13013 |  |
|            | 0.14776         | 0.44127  | 0.13013 | 0.586047819 |             |          |         |  |
| SYPL1      | ENSG00000008282 | 1.1257   | 0.13015 | 1.1257      | 0.13015     | 1.1257   | 0.13015 |  |
|            | -0.35067        | 0.63708  | 0.13015 | 0.586047819 |             |          |         |  |
| ATP5F1A    | ENSG00000152234 | 0.56819  | 0.28495 | 0.61215     | 0.27022     | 1.1257   |         |  |
|            | 0.13015         | 0.33624  | 0.36835 | 0.13015     | 0.586047819 |          |         |  |
| BLOC1S2    | ENSG00000196072 | 1.113    | 0.13285 | 1.1255      | 0.13019     | -0.14657 | 0.55827 |  |
|            | 0.95292         | 0.17031  | 0.13019 | 0.58614573  |             |          |         |  |
| QSOX2      | ENSG00000165661 | 0.88206  | 0.18887 | 0.29648     | 0.38343     | 1.1254   | 0.13021 |  |
|            | 0.88206         | 0.18887  | 0.13021 | 0.58614573  |             |          |         |  |
| NA         | ENSG00000217181 | 1.1252   | 0.13024 | 1.1252      | 0.13024     | 1.1252   | 0.13024 |  |
|            | 1.1252          | 0.13024  | 0.13024 | 0.58614573  |             |          |         |  |
| NA         | ENSG00000268555 | 1.1253   | 0.13024 | 1.1253      | 0.13024     | 1.1253   | 0.13024 |  |
|            | 1.1253          | 0.13024  | 0.13024 | 0.58614573  |             |          |         |  |
| C4BPB      | ENSG00000123843 | -0.36215 | 0.64138 | 0.36448     | 0.35775     | -0.51349 | 0.69619 |  |
|            | 1.1251          | 0.13027  | 0.13027 | 0.58614573  |             |          |         |  |
| NA         | ENSG00000269506 | 1.1251   | 0.13027 | 1.1251      | 0.13027     | 1.1251   | 0.13027 |  |
|            | 1.1251          | 0.13027  | 0.13027 | 0.58614573  |             |          |         |  |
| TMEM205    | ENSG00000105518 | 1.1251   | 0.13028 | 1.1251      | 0.13028     | 1.1251   |         |  |
|            | 0.13028         | 1.1251   | 0.13028 | 0.13028     | 0.58614573  |          |         |  |
| TUBA1C     | ENSG00000167553 | 1.1251   | 0.13028 | 0.3763      | 0.35335     | 0.43852  |         |  |
|            | 0.33051         | 0.89426  | 0.18559 | 0.13028     | 0.58614573  |          |         |  |
| ZBTB48     | ENSG00000204859 | 0.77478  | 0.21924 | 1.1205      | 0.13125     | 1.1251   |         |  |
|            | 0.13028         | 1.1205   | 0.13125 | 0.13028     | 0.58614573  |          |         |  |
| MT1G       | ENSG00000125144 | 1.1248   | 0.13033 | 1.1248      | 0.13033     | 1.1248   | 0.13033 |  |
|            | 1.1248          | 0.13033  | 0.13033 | 0.586188742 |             |          |         |  |
| NA         | ENSG00000248185 | 1.1247   | 0.13035 | 0.10864     | 0.45675     | 0.10864  | 0.45675 |  |
|            | 0.10864         | 0.45675  | 0.13035 | 0.586188742 |             |          |         |  |
| NA         | ENSG00000201031 | 1.1246   | 0.13038 | 0.93754     | 0.17424     | 0.93754  | 0.17424 |  |
|            | -0.024156       | 0.50964  | 0.13038 | 0.586188742 |             |          |         |  |
| NA         | ENSG00000229519 | 1.1245   | 0.13039 | 1.1245      | 0.13039     | 1.1245   | 0.13039 |  |
|            | 1.1245          | 0.13039  | 0.13039 | 0.586188742 |             |          |         |  |
| CSTA       | ENSG00000121552 | 0.54853  | 0.29166 | 1.1245      | 0.1304      | -0.89292 | 0.81405 |  |
|            | -0.58439        | 0.72052  | 0.1304  | 0.586188742 |             |          |         |  |
| HNRNPA1P17 | ENSG00000243188 | 1.1245   | 0.1304  | 1.1245      | 0.1304      | 1.1245   |         |  |
|            | 0.1304          | 1.1245   | 0.1304  | 0.1304      | 0.586188742 |          |         |  |
| MTCO1P30   | ENSG00000248729 | -0.32676 | 0.62807 | 0.65877     | 0.25502     | 1.1244   |         |  |
|            | 0.13042         | -0.37576 | 0.64645 | 0.13042     | 0.586188742 |          |         |  |
| PIGR       | ENSG00000162896 | -1.3225  | 0.907   | 1.1244      | 0.13043     | -1.0641  | 0.85635 |  |
|            | -1.2194         | 0.88866  | 0.13043 | 0.586188742 |             |          |         |  |
| RNU6-344P  | ENSG00000252444 | 0.70386  | 0.24076 | 1.1244      | 0.13043     | 0.70386  |         |  |
|            | 0.24076         | 0.70386  | 0.24076 | 0.13043     | 0.586188742 |          |         |  |
| NUP93      | ENSG00000102900 | 0.79781  | 0.21249 | 0.77431     | 0.21937     | 1.1243   | 0.13044 |  |
|            | 0.84825         | 0.19815  | 0.13044 | 0.586188742 |             |          |         |  |
| NA         | ENSG00000271527 | 0.22624  | 0.41051 | -2.196      | 0.98596     | 1.1243   | 0.13045 |  |
|            | 0.87269         | 0.19142  | 0.13045 | 0.586188742 |             |          |         |  |
| MCM6       | ENSG00000076003 | 0.23825  | 0.40584 | 0.31667     | 0.37575     | 0.81206  | 0.20838 |  |
|            | 1.1242          | 0.13046  | 0.13046 | 0.586188742 |             |          |         |  |
| FGF23      | ENSG00000118972 | -0.35518 | 0.63877 | 1.1242      | 0.13047     | -0.10843 | 0.54317 |  |
|            | 0.10727         | 0.45729  | 0.13047 | 0.586188742 |             |          |         |  |
| GPR31      | ENSG00000120436 | 1.0244   | 0.15281 | 1.1242      | 0.13047     | 0.34967  | 0.36329 |  |
|            | 0.64158         | 0.26057  | 0.13047 | 0.586188742 |             |          |         |  |
| LIPJ       | ENSG00000204022 | 0.85614  | 0.19596 | 0.85614     | 0.19596     | 1.1242   | 0.13047 |  |
|            | -0.18579        | 0.5737   | 0.13047 | 0.586188742 |             |          |         |  |
| ECHDC3     | ENSG00000134463 | 1.1241   | 0.13049 | 1.0502      | 0.14681     | 0.9777   |         |  |
|            | 0.16411         | 1.0655   | 0.14334 | 0.13049     | 0.586224551 |          |         |  |
| NA         | ENSG00000240265 | 1.1237   | 0.13056 | 1.1237      | 0.13056     | -0.2031  | 0.58047 |  |
|            | 1.1237          | 0.13056  | 0.13056 | 0.586427055 |             |          |         |  |
| SPPL3      | ENSG00000157837 | 0.58702  | 0.2786  | 0.72624     | 0.23385     | 0.54951  | 0.29133 |  |

|            |                 |           |             |             |             |          |         |        |
|------------|-----------------|-----------|-------------|-------------|-------------|----------|---------|--------|
|            | 1.1235          | 0.1306    | 0.1306      | 0.586427055 |             |          |         |        |
| NA         | ENSG00000276688 | 0.79719   | 0.21267     | 0.79719     | 0.21267     | 1.1235   | 0.13061 |        |
|            | 0.79719         | 0.21267   | 0.13061     | 0.586427055 |             |          |         |        |
| NA         | ENSG00000275725 | 1.1235    | 0.13062     | -0.61761    | 0.73158     | -0.70061 | 0.75823 |        |
|            | -0.64652        | 0.74103   | 0.13062     | 0.586427055 |             |          |         |        |
| MEFV       | ENSG00000103313 | 0.21343   | 0.4155      | 1.1234      | 0.13063     | 0.7453   | 0.22805 |        |
|            | 1.0955          | 0.13664   | 0.13063     | 0.586427055 |             |          |         |        |
| WDFY4      | ENSG00000128815 | 0.19191   | 0.42391     | 0.7709      | 0.22038     | 1.1234   | 0.13063 |        |
|            | 0.465           | 0.32097   | 0.13063     | 0.586427055 |             |          |         |        |
| NA         | ENSG00000259403 | -1.3695   | 0.91458     | -1.3695     | 0.91458     | 1.1234   | 0.13064 |        |
|            | -1.3695         | 0.91458   | 0.13064     | 0.586427055 |             |          |         |        |
| MROH6      | ENSG00000204839 | 1.1233    | 0.13065     | -1.432      | 0.92392     | -0.61176 | 0.72965 |        |
|            | -0.61176        | 0.72965   | 0.13065     | 0.586427055 |             |          |         |        |
| IGKV2OR2-2 | ENSG00000271402 | 1.1233    | 0.13065     | 1.1233      | 0.13065     | 1.1233   |         |        |
|            | 0.13065         | 1.1233    | 0.13065     | 0.13065     | 0.586427055 |          |         |        |
| ADAM20     | ENSG00000134007 | 1.1232    | 0.13068     | 0.26558     | 0.39528     | 0.62313  |         |        |
|            | 0.2666          | 0.62313   | 0.2666      | 0.13068     | 0.586427055 |          |         |        |
| SPTLC1     | ENSG00000090054 | 0.12305   | 0.45103     | 1.1231      | 0.13071     | 0.52034  |         |        |
|            | 0.30141         | -0.11186  | 0.54453     | 0.13071     | 0.586427055 |          |         |        |
| PNP        | ENSG00000198805 | 1.123     | 0.13071     | 0.68719     | 0.24598     | 0.68719  | 0.24598 |        |
|            | -0.089133       | 0.53551   | 0.13071     | 0.586427055 |             |          |         |        |
| NA         | ENSG00000259212 | 1.1229    | 0.13074     | 1.1229      | 0.13074     | 1.1229   | 0.13074 |        |
|            | 1.1229          | 0.13074   | 0.13074     | 0.586427055 |             |          |         |        |
| SLC23A2    | ENSG00000089057 | -1.1003   | 0.86439     | -1.5609     | 0.94073     | -1.0742  |         |        |
|            | 0.85863         | 1.1229    | 0.13075     | 0.13075     | 0.586427055 |          |         |        |
| TREM2      | ENSG00000095970 | 0.175     | 0.43054     | 0.175       | 0.43054     | 0.175    | 0.43054 | 1.1229 |
|            | 0.13075         | 0.13075   | 0.586427055 |             |             |          |         |        |
| NA         | ENSG00000279249 | 0.38319   | 0.35079     | 1.1228      | 0.13075     | -0.20536 | 0.58135 |        |
|            | -0.20536        | 0.58135   | 0.13075     | 0.586427055 |             |          |         |        |
| WDR95P     | ENSG00000231894 | -1.1398   | 0.87281     | -1.155      | 0.87595     | 0.34375  |         |        |
|            | 0.36552         | 1.1227    | 0.13078     | 0.13078     | 0.586427055 |          |         |        |
| CHMP4BP1   | ENSG00000258469 | 1.1226    | 0.1308      | 1.1226      | 0.1308      | 1.1226   |         |        |
|            | 0.1308          | 1.1226    | 0.1308      | 0.1308      | 0.586427055 |          |         |        |
| NA         | ENSG00000250877 | 1.1226    | 0.13081     | -0.043315   | 0.51727     | -0.13157 | 0.55234 |        |
|            | -0.51302        | 0.69603   | 0.13081     | 0.586427055 |             |          |         |        |
| WDFY3-AS1  | ENSG00000251260 | 1.1226    | 0.13081     | 1.1226      | 0.13081     | 1.1226   |         |        |
|            | 0.13081         | 1.1226    | 0.13081     | 0.13081     | 0.586427055 |          |         |        |
| CSPG4P5    | ENSG00000272887 | 1.1225    | 0.13082     | 1.1225      | 0.13082     | 1.1225   |         |        |
|            | 0.13082         | 1.1225    | 0.13082     | 0.13082     | 0.586427055 |          |         |        |
| PPIE       | ENSG00000084072 | 1.1225    | 0.13083     | 1.1225      | 0.13083     | 0.38953  | 0.34844 |        |
|            | 0.30073         | 0.38181   | 0.13083     | 0.586427055 |             |          |         |        |
| BBS7       | ENSG00000138686 | 0.0083359 | 0.49667     | 1.1225      | 0.13083     | 0.079211 | 0.46843 |        |
|            | 0.010832        | 0.49568   | 0.13083     | 0.586427055 |             |          |         |        |
| TMSB10P1   | ENSG00000228499 | 1.1224    | 0.13084     | 1.1224      | 0.13084     | 1.1224   |         |        |
|            | 0.13084         | 1.1224    | 0.13084     | 0.13084     | 0.586427055 |          |         |        |
| NA         | ENSG00000199900 | 1.1224    | 0.13084     | 1.1224      | 0.13084     | 1.1224   | 0.13084 |        |
|            | 1.1224          | 0.13084   | 0.13084     | 0.586427055 |             |          |         |        |
| NUCKS1     | ENSG00000069275 | -0.18107  | 0.57184     | -0.17907    | 0.57106     | -0.15155 |         |        |
|            | 0.56023         | 1.1224    | 0.13085     | 0.13085     | 0.586427055 |          |         |        |
| GRAMD4P8   | ENSG00000270930 | 1.1223    | 0.13086     | 0.15121     | 0.43991     | -1.2831  |         |        |
|            | 0.90027         | -1.2831   | 0.90027     | 0.13086     | 0.586427055 |          |         |        |
| MIR3196    | ENSG00000266463 | 1.122     | 0.13093     | 1.1159      | 0.13222     | 1.122    | 0.13093 | 1.122  |
|            | 0.13093         | 0.13093   | 0.586677657 |             |             |          |         |        |
| NA         | ENSG00000257094 | -0.077719 | 0.53097     | 0.15993     | 0.43647     | -0.68861 | 0.75447 |        |
|            | 1.122           | 0.13094   | 0.13094     | 0.586677657 |             |          |         |        |
| RNA5SP115  | ENSG00000223092 | 1.1218    | 0.13098     | 1.1218      | 0.13098     | 1.1218   |         |        |
|            | 0.13098         | 1.1218    | 0.13098     | 0.13098     | 0.586739838 |          |         |        |
| EEF1B2P5   | ENSG00000225121 | -0.57658  | 0.71789     | 1.1218      | 0.13098     | 1.1218   |         |        |
|            | 0.13098         | 1.1218    | 0.13098     | 0.13098     | 0.586739838 |          |         |        |
| NPY1R      | ENSG00000164128 | -0.33738  | 0.63208     | 1.1217      | 0.13099     | -0.48009 | 0.68442 |        |
|            | 0.055806        | 0.47775   | 0.13099     | 0.586739838 |             |          |         |        |
| NA         | ENSG00000259113 | 1.1216    | 0.13101     | 0.19632     | 0.42218     | 1.1216   | 0.13101 |        |

|            |                 |           |         |             |             |          |         |  |
|------------|-----------------|-----------|---------|-------------|-------------|----------|---------|--|
|            | 1.1216          | 0.13101   | 0.13101 | 0.586775487 |             |          |         |  |
| NA         | ENSG00000242618 | 1.1214    | 0.13106 | 0.80703     | 0.20982     | 1.1214   | 0.13106 |  |
|            | -0.090648       | 0.53611   | 0.13106 | 0.586891546 |             |          |         |  |
| LINC02882  | ENSG00000251138 | 0.50438   | 0.307   | -0.32529    | 0.62752     | 0.41289  | 0.33984 |  |
|            | 1.1214          | 0.13106   | 0.13106 | 0.586891546 |             |          |         |  |
| DNAJB3     | ENSG00000227802 | 1.1213    | 0.13109 | 1.1213      | 0.13109     | 1.1213   |         |  |
|            | 0.13109         | -0.15627  | 0.56209 | 0.13109     | 0.586935327 |          |         |  |
| RPL12P28   | ENSG00000240180 | 1.1212    | 0.13111 | 1.1212      | 0.13111     | 1.1212   |         |  |
|            | 0.13111         | 1.1212    | 0.13111 | 0.13111     | 0.586935327 |          |         |  |
| ZSWIM8-AS1 | ENSG00000272589 | 1.1211    | 0.13113 | 1.1211      | 0.13113     | 1.1211   |         |  |
|            | 0.13113         | 1.1211    | 0.13113 | 0.13113     | 0.586935327 |          |         |  |
| NA         | ENSG00000277558 | 1.1211    | 0.13113 | 1.1211      | 0.13113     | 1.1211   | 0.13113 |  |
|            | 1.1211          | 0.13113   | 0.13113 | 0.586935327 |             |          |         |  |
| NA         | ENSG00000278937 | 1.121     | 0.13113 | -0.80962    | 0.79092     | -0.40587 | 0.65758 |  |
|            | 0.85288         | 0.19686   | 0.13113 | 0.586935327 |             |          |         |  |
| AQP12A     | ENSG00000184945 | 1.1209    | 0.13116 | -0.99003    | 0.83892     | 0.72886  |         |  |
|            | 0.23304         | 0.70631   | 0.24    | 0.13116     | 0.586943476 |          |         |  |
| KRT3       | ENSG00000186442 | 1.0947    | 0.13682 | 1.1209      | 0.13117     | 1.1209   | 0.13117 |  |
|            | 1.1209          | 0.13117   | 0.13117 | 0.586943476 |             |          |         |  |
| ATP6V0CP2  | ENSG00000244142 | 0.1055    | 0.45799 | 0.1055      | 0.45799     | 0.1055   |         |  |
|            | 0.45799         | 1.1208    | 0.13118 | 0.13118     | 0.586943476 |          |         |  |
| NA         | ENSG00000257787 | 1.1209    | 0.13118 | 1.0398      | 0.14921     | 1.0398   | 0.14921 |  |
|            | 1.0398          | 0.14921   | 0.13118 | 0.586943476 |             |          |         |  |
| RABEPK     | ENSG00000136933 | 0.3544    | 0.36152 | 1.1207      | 0.1312      | 0.34943  |         |  |
|            | 0.36338         | -0.031595 | 0.5126  | 0.1312      | 0.586968903 |          |         |  |
| OPCML-IT2  | ENSG00000255371 | -0.17531  | 0.56958 | 1.1205      | 0.13125     | 0.4186   |         |  |
|            | 0.33775         | 1.0948    | 0.13681 | 0.13125     | 0.586968903 |          |         |  |
| DOK6       | ENSG00000206052 | 0.247     | 0.40245 | 0.63261     | 0.26349     | 0.49576  | 0.31003 |  |
|            | 1.1205          | 0.13126   | 0.13126 | 0.586968903 |             |          |         |  |
| PET100     | ENSG00000229833 | 1.1205    | 0.13126 | 1.1205      | 0.13126     | 1.1205   |         |  |
|            | 0.13126         | 1.1205    | 0.13126 | 0.13126     | 0.586968903 |          |         |  |
| C2orf69P4  | ENSG00000260480 | 1.1205    | 0.13126 | 1.1205      | 0.13126     | 1.1205   |         |  |
|            | 0.13126         | 1.1205    | 0.13126 | 0.13126     | 0.586968903 |          |         |  |
| NA         | ENSG00000268400 | 1.1205    | 0.13126 | 1.1205      | 0.13126     | 1.1205   | 0.13126 |  |
|            | 1.1205          | 0.13126   | 0.13126 | 0.586968903 |             |          |         |  |
| NA         | ENSG00000258681 | 1.1204    | 0.13127 | 0.98462     | 0.16241     | 1.1204   | 0.13127 |  |
|            | 1.1204          | 0.13127   | 0.13127 | 0.586968903 |             |          |         |  |
| NA         | ENSG00000238337 | -0.43319  | 0.66756 | -0.43319    | 0.66756     | -0.43319 | 0.66756 |  |
|            | 1.1203          | 0.13129   | 0.13129 | 0.587004468 |             |          |         |  |
| PANX3      | ENSG00000154143 | 0.99842   | 0.15904 | 1.1201      | 0.13133     | 0.61563  | 0.26907 |  |
|            | 1.1201          | 0.13133   | 0.13133 | 0.58712944  |             |          |         |  |
| NA         | ENSG00000219784 | -0.48005  | 0.6844  | -0.16363    | 0.56499     | 1.12     | 0.13136 |  |
|            | -0.16363        | 0.56499   | 0.13136 | 0.587209687 |             |          |         |  |
| LHPP       | ENSG00000107902 | 1.1198    | 0.13139 | -0.30601    | 0.6202      | 0.22988  | 0.40909 |  |
|            | -0.19487        | 0.57725   | 0.13139 | 0.587253246 |             |          |         |  |
| RNU6-112P  | ENSG00000200469 | 1.1198    | 0.1314  | 1.1198      | 0.1314      | 1.1198   |         |  |
|            | 0.1314          | 1.1198    | 0.1314  | 0.1314      | 0.587253246 |          |         |  |
| NA         | ENSG00000242140 | 0.93948   | 0.17374 | 1.1198      | 0.13141     | 1.1198   | 0.13141 |  |
|            | 0.074352        | 0.47037   | 0.13141 | 0.587253246 |             |          |         |  |
| NA         | ENSG00000229143 | -1.2537   | 0.89503 | 0.49473     | 0.31039     | -1.2537  | 0.89503 |  |
|            | 1.1197          | 0.13143   | 0.13143 | 0.587253246 |             |          |         |  |
| RN7SL743P  | ENSG00000243954 | 1.1197    | 0.13143 | 1.1197      | 0.13143     | 1.1197   |         |  |
|            | 0.13143         | -0.033122 | 0.51321 | 0.13143     | 0.587253246 |          |         |  |
| NA         | ENSG00000253931 | 0.06949   | 0.4723  | -0.21704    | 0.58591     | 1.1195   | 0.13146 |  |
|            | -0.22662        | 0.58964   | 0.13146 | 0.587279593 |             |          |         |  |
| MAFA-AS1   | ENSG00000254338 | 0.069312  | 0.47237 | 1.0231      | 0.15313     | 0.21639  |         |  |
|            | 0.41434         | 1.1195    | 0.13146 | 0.13146     | 0.587279593 |          |         |  |
| CHGB       | ENSG00000089199 | 0.1804    | 0.42842 | 1.089       | 0.13809     | 1.1191   | 0.13154 |  |
|            | -1.2103         | 0.88692   | 0.13154 | 0.587583115 |             |          |         |  |
| POLR1B     | ENSG00000125630 | 0.99816   | 0.1591  | 0.86739     | 0.19287     | 1.119    | 0.13157 |  |
|            | 1.003           | 0.15793   | 0.13157 | 0.587600202 |             |          |         |  |
| NA         | ENSG00000271401 | 1.119     | 0.13157 | 1.119       | 0.13157     | 1.119    | 0.13157 |  |



|            |                 |             |         |             |             |          |         |       |
|------------|-----------------|-------------|---------|-------------|-------------|----------|---------|-------|
|            | 0.13157         | 0.587600202 |         |             |             |          |         |       |
| SGCB       | ENSG00000163069 | 1.119       | 0.13158 | 0.85006     | 0.19765     | 0.60895  | 0.27128 |       |
|            | 0.66725         | 0.25231     | 0.13158 | 0.587600202 |             |          |         |       |
| ME1        | ENSG00000065833 | 0.44731     | 0.32732 | -0.15484    | 0.56153     | 0.49329  | 0.3109  |       |
|            | 1.1188          | 0.13161     | 0.13161 | 0.587615971 |             |          |         |       |
| HSPA8      | ENSG00000109971 | 1.0504      | 0.14678 | 1.0504      | 0.14678     | 0.19996  | 0.42075 |       |
|            | 1.1188          | 0.13162     | 0.13162 | 0.587615971 |             |          |         |       |
| VPREB3     | ENSG00000128218 | 1.1186      | 0.13165 | 1.1186      | 0.13165     | 1.1186   |         |       |
|            | 0.13165         | 1.1186      | 0.13165 | 0.13165     | 0.587615971 |          |         |       |
| NA         | ENSG00000265728 | -0.87101    | 0.80813 | 0.22063     | 0.41269     | 1.1186   | 0.13165 |       |
|            | 0.37859         | 0.35249     | 0.13165 | 0.587615971 |             |          |         |       |
| NA         | ENSG00000284540 | -0.17002    | 0.5675  | -0.52925    | 0.70168     | -0.47025 | 0.68091 |       |
|            | 1.1186          | 0.13165     | 0.13165 | 0.587615971 |             |          |         |       |
| NA         | ENSG00000249735 | 0.050832    | 0.47973 | 1.1186      | 0.13166     | 0.52841  | 0.29861 |       |
|            | 0.97394         | 0.16504     | 0.13166 | 0.587615971 |             |          |         |       |
| NA         | ENSG00000224967 | 1.1185      | 0.13167 | 1.1185      | 0.13167     | 1.1185   | 0.13167 |       |
|            | 1.1185          | 0.13167     | 0.13167 | 0.587615971 |             |          |         |       |
| NA         | ENSG00000280108 | 0.13048     | 0.44809 | -0.63095    | 0.73596     | 1.1185   | 0.13168 |       |
|            | 0.057287        | 0.47716     | 0.13168 | 0.587615971 |             |          |         |       |
| NA         | ENSG00000242421 | 1.1184      | 0.1317  | 1.1184      | 0.1317      | 1.1184   | 0.1317  |       |
|            | 1.1184          | 0.1317      | 0.1317  | 0.587651406 |             |          |         |       |
| CEACAM4    | ENSG00000105352 | 0.41182     | 0.34023 | 1.1182      | 0.13173     | 0.41182  |         |       |
|            | 0.34023         | 0.41182     | 0.34023 | 0.13173     | 0.587659268 |          |         |       |
| NA         | ENSG00000260866 | 1.1182      | 0.13174 | 0.22219     | 0.41208     | 1.1082   | 0.13389 |       |
|            | 0.24196         | 0.40441     | 0.13174 | 0.587659268 |             |          |         |       |
| LINC02470  | ENSG00000225231 | 0.29318     | 0.38469 | 0.29318     | 0.38469     | 0.29318  |         |       |
|            | 0.38469         | 1.1182      | 0.13175 | 0.13175     | 0.587659268 |          |         |       |
| NA         | ENSG00000260269 | 0.64589     | 0.25918 | 1.1182      | 0.13175     | 1.1074   | 0.13406 |       |
|            | 0.023197        | 0.49075     | 0.13175 | 0.587659268 |             |          |         |       |
| H2BC4      | ENSG00000180596 | -0.086549   | 0.53449 | 0.35732     | 0.36043     | 0.85113  | 0.19735 |       |
|            | 1.118           | 0.13179     | 0.13179 | 0.587774687 |             |          |         |       |
| NA         | ENSG00000254204 | 1.1179      | 0.1318  | 1.1179      | 0.1318      | 1.1179   | 0.1318  |       |
|            | 1.1179          | 0.1318      | 0.1318  | 0.587774687 |             |          |         |       |
| RNU7-173P  | ENSG00000238950 | -0.89817    | 0.81545 | 0.63316     | 0.26331     | 1.1178   |         |       |
|            | 0.13182         | 0.43386     | 0.33219 | 0.13182     | 0.587800888 |          |         |       |
| LINC01638  | ENSG00000233521 | 1.1178      | 0.13183 | 1.1178      | 0.13183     | 1.1178   |         |       |
|            | 0.13183         | 1.1178      | 0.13183 | 0.13183     | 0.587800888 |          |         |       |
| NA         | ENSG00000228577 | 1.1177      | 0.13185 | 1.1177      | 0.13185     | 1.1177   | 0.13185 |       |
|            | 1.1177          | 0.13185     | 0.13185 | 0.587805903 |             |          |         |       |
| NA         | ENSG00000201498 | 1.1174      | 0.13191 | 1.1174      | 0.13191     | 0.78575  | 0.21601 |       |
|            | 0.91947         | 0.17893     | 0.13191 | 0.587805903 |             |          |         |       |
| EMC1-AS1   | ENSG00000230424 | 1.1173      | 0.13194 | 1.1173      | 0.13194     | 1.1173   |         |       |
|            | 0.13194         | 1.1173      | 0.13194 | 0.13194     | 0.587805903 |          |         |       |
| LINC00896  | ENSG00000236499 | -0.82844    | 0.79629 | 1.1172      | 0.13195     | 0.27982  |         |       |
|            | 0.38981         | 0.47413     | 0.3177  | 0.13195     | 0.587805903 |          |         |       |
| ZBTB20-AS3 | ENSG00000239946 | 0.88566     | 0.1879  | 0.93935     | 0.17378     | 0.88566  |         |       |
|            | 0.1879          | 1.1172      | 0.13195 | 0.13195     | 0.587805903 |          |         |       |
| LINC02699  | ENSG00000254456 | -0.20169    | 0.57992 | 1.1172      | 0.13195     | 0.33002  |         |       |
|            | 0.37069         | -0.25034    | 0.59884 | 0.13195     | 0.587805903 |          |         |       |
| MYOSLID    | ENSG00000229647 | 1.1172      | 0.13196 | 1.1172      | 0.13196     | 1.1172   |         |       |
|            | 0.13196         | 1.1172      | 0.13196 | 0.13196     | 0.587805903 |          |         |       |
| NA         | ENSG00000250413 | 1.1172      | 0.13196 | -0.0040648  | 0.50162     | 1.1172   | 0.13196 |       |
|            | 1.1172          | 0.13196     | 0.13196 | 0.587805903 |             |          |         |       |
| NA         | ENSG00000260563 | 1.0561      | 0.14546 | 1.1172      | 0.13196     | 1.1172   | 0.13196 |       |
|            | 1.0425          | 0.14859     | 0.13196 | 0.587805903 |             |          |         |       |
| OR4H12P    | ENSG00000176312 | 1.1171      | 0.13198 | -0.2463     | 0.59727     | -1.7958  |         |       |
|            | 0.96374         | -0.64759    | 0.74137 | 0.13198     | 0.587805903 |          |         |       |
| NA         | ENSG00000273338 | 1.1171      | 0.13198 | 1.1171      | 0.13198     | 1.1171   | 0.13198 |       |
|            | 1.1171          | 0.13198     | 0.13198 | 0.587805903 |             |          |         |       |
| CDH22      | ENSG00000149654 | 0.2561      | 0.39894 | -0.54734    | 0.70793     | 1.117    | 0.13199 |       |
|            | 0.24727         | 0.40235     | 0.13199 | 0.587805903 |             |          |         |       |
| NA         | ENSG00000233737 | 1.117       | 0.13199 | 1.117       | 0.13199     | -0.19028 | 0.57546 | 1.117 |

|            |                 |          |             |             |             |          |         |       |       |
|------------|-----------------|----------|-------------|-------------|-------------|----------|---------|-------|-------|
|            | 0.13199         | 0.13199  | 0.587805903 |             |             |          |         |       |       |
| RNU6-54P   | ENSG00000202433 | -0.16115 | 0.56401     | 1.117       | 0.132       | 1.117    | 0.132   | 1.117 | 0.132 |
|            | 0.587805903     |          |             |             |             |          |         |       |       |
| NA         | ENSG00000228484 | -0.10079 | 0.54014     | 1.1167      | 0.13206     | 0.06928  | 0.47238 |       |       |
|            | -0.084656       | 0.53373  | 0.13206     | 0.587938526 |             |          |         |       |       |
| RNA5SP392  | ENSG00000252714 | 1.1167   | 0.13206     | 1.1167      | 0.13206     | 1.1167   |         |       |       |
|            | 0.13206         | 1.1167   | 0.13206     | 0.13206     | 0.587938526 |          |         |       |       |
| PRPSAP2    | ENSG00000141127 | -1.1599  | 0.87696     | 0.11244     | 0.45524     | 1.1166   |         |       |       |
|            | 0.13209         | -0.67085 | 0.74884     | 0.13209     | 0.587938526 |          |         |       |       |
| ITGA6      | ENSG00000091409 | 1.1164   | 0.13212     | 0.31918     | 0.37479     | 0.098492 | 0.46077 |       |       |
|            | -0.32367        | 0.62691  | 0.13212     | 0.587938526 |             |          |         |       |       |
| NA         | ENSG00000136315 | 1.1164   | 0.13213     | 1.1164      | 0.13213     | -0.10428 | 0.54153 |       |       |
|            | -1.0013         | 0.84166  | 0.13213     | 0.587938526 |             |          |         |       |       |
| RNU6-905P  | ENSG00000207163 | 0.44528  | 0.32806     | 0.38678     | 0.34946     | 1.1163   |         |       |       |
|            | 0.13215         | 0.44528  | 0.32806     | 0.13215     | 0.587938526 |          |         |       |       |
| RAD1P1     | ENSG00000234569 | 0.064943 | 0.47411     | 0.45065     | 0.32612     | 1.1162   |         |       |       |
|            | 0.13216         | 1.1162   | 0.13216     | 0.13216     | 0.587938526 |          |         |       |       |
| CYP20A1    | ENSG00000119004 | 0.8107   | 0.20877     | 0.96915     | 0.16623     | -1.0735  |         |       |       |
|            | 0.85848         | 1.1162   | 0.13217     | 0.13217     | 0.587938526 |          |         |       |       |
| EIF4A1P9   | ENSG00000262953 | 1.1162   | 0.13217     | 1.1162      | 0.13217     | -0.37526 |         |       |       |
|            | 0.64627         | -0.37526 | 0.64627     | 0.13217     | 0.587938526 |          |         |       |       |
| RNU6-165P  | ENSG00000252979 | 1.1161   | 0.13219     | 1.1161      | 0.13219     | 1.1161   |         |       |       |
|            | 0.13219         | 1.1161   | 0.13219     | 0.13219     | 0.587938526 |          |         |       |       |
| DNAJB4     | ENSG00000162616 | 1.1161   | 0.1322      | -0.33401    | 0.63081     | 1.1161   |         |       |       |
|            | 0.1322          | 1.1161   | 0.1322      | 0.1322      | 0.587938526 |          |         |       |       |
| ANGPTL5    | ENSG00000187151 | 1.116    | 0.1322      | -1.4233     | 0.92268     | -1.4233  | 0.92268 |       |       |
|            | -1.4233         | 0.92268  | 0.1322      | 0.587938526 |             |          |         |       |       |
| OR51V1     | ENSG00000176742 | 1.116    | 0.13222     | 1.116       | 0.13222     | 1.116    | 0.13222 | 1.116 |       |
|            | 0.13222         | 0.13222  | 0.587938526 |             |             |          |         |       |       |
| RNF13      | ENSG00000082996 | 0.051091 | 0.47963     | 1.1159      | 0.13223     | -0.93092 | 0.82405 |       |       |
|            | -0.81107        | 0.79134  | 0.13223     | 0.587938526 |             |          |         |       |       |
| OGG1       | ENSG00000114026 | 0.79425  | 0.21352     | -0.27843    | 0.60966     | -0.1358  | 0.55401 |       |       |
|            | 1.1159          | 0.13224  | 0.13224     | 0.587938526 |             |          |         |       |       |
| RNU6-199P  | ENSG00000199824 | 0.95852  | 0.1689      | 0.95852     | 0.1689      | 1.1158   |         |       |       |
|            | 0.13225         | 0.20477  | 0.41888     | 0.13225     | 0.587938526 |          |         |       |       |
| FRG2DP     | ENSG00000261711 | 1.1158   | 0.13225     | 0.33094     | 0.37035     | 1.1158   |         |       |       |
|            | 0.13225         | 1.1158   | 0.13225     | 0.13225     | 0.587938526 |          |         |       |       |
| NA         | ENSG00000275719 | 1.1158   | 0.13225     | 1.1158      | 0.13225     | 1.1158   | 0.13225 |       |       |
|            | 1.1158          | 0.13225  | 0.13225     | 0.587938526 |             |          |         |       |       |
| NA         | ENSG00000238528 | 1.1157   | 0.13227     | 1.1157      | 0.13227     | 1.1157   | 0.13227 |       |       |
|            | 1.1157          | 0.13227  | 0.13227     | 0.587938526 |             |          |         |       |       |
| LINC01362  | ENSG00000230817 | 1.1156   | 0.13229     | -0.69094    | 0.7552      | 0.55109  |         |       |       |
|            | 0.29079         | -0.64612 | 0.7409      | 0.13229     | 0.587938526 |          |         |       |       |
| NA         | ENSG00000278654 | 1.1156   | 0.13229     | 1.1156      | 0.13229     | 1.1156   | 0.13229 |       |       |
|            | 0.97316         | 0.16524  | 0.13229     | 0.587938526 |             |          |         |       |       |
| NA         | ENSG00000279925 | 1.1155   | 0.13232     | 1.1155      | 0.13232     | 1.1155   | 0.13232 |       |       |
|            | 1.1155          | 0.13232  | 0.13232     | 0.587938526 |             |          |         |       |       |
| MSH2-OT1   | ENSG00000235760 | 1.1154   | 0.13233     | -1.0535     | 0.85395     | 1.0246   |         |       |       |
|            | 0.15278         | 1.1154   | 0.13233     | 0.13233     | 0.587938526 |          |         |       |       |
| NA         | ENSG00000234120 | 0.36561  | 0.35733     | -0.45499    | 0.67544     | 1.1154   | 0.13234 |       |       |
|            | 0.13221         | 0.44741  | 0.13234     | 0.587938526 |             |          |         |       |       |
| SLC25A39P2 | ENSG00000257016 | 0.70616  | 0.24005     | 0.29752     | 0.38304     | 1.1153   |         |       |       |
|            | 0.13236         | 1.1153   | 0.13236     | 0.13236     | 0.587938526 |          |         |       |       |
| GPR89B     | ENSG00000188092 | 0.89477  | 0.18546     | 1.1152      | 0.13238     | 0.26905  |         |       |       |
|            | 0.39394         | 0.31873  | 0.37497     | 0.13238     | 0.587938526 |          |         |       |       |
| ADARB1     | ENSG00000197381 | 0.63996  | 0.2611      | 0.70439     | 0.2406      | 0.69129  |         |       |       |
|            | 0.24469         | 1.1152   | 0.13239     | 0.13239     | 0.587938526 |          |         |       |       |
| MACC1-AS1  | ENSG00000228598 | 1.1152   | 0.13239     | 1.1152      | 0.13239     | 1.1152   |         |       |       |
|            | 0.13239         | 1.1152   | 0.13239     | 0.13239     | 0.587938526 |          |         |       |       |
| TRDJ4      | ENSG00000211826 | 0.12827  | 0.44897     | -0.27356    | 0.60779     | 1.1151   | 0.1324  |       |       |
|            | -0.070061       | 0.52793  | 0.1324      | 0.587938526 |             |          |         |       |       |
| NA         | ENSG00000267618 | 1.1151   | 0.1324      | 1.1151      | 0.1324      | 1.1151   | 0.1324  |       |       |

|           |                 |             |             |             |             |          |         |       |
|-----------|-----------------|-------------|-------------|-------------|-------------|----------|---------|-------|
|           | 1.1151          | 0.1324      | 0.1324      | 0.587938526 |             |          |         |       |
| NA        | ENSG00000259677 | 1.1151      | 0.13241     | 0.36097     | 0.35906     | 0.36097  | 0.35906 |       |
|           | 0.36097         | 0.35906     | 0.13241     | 0.587938526 |             |          |         |       |
| NA        | ENSG00000275445 | 1.1150      | 0.13242     | 1.1150      | 0.13242     | 1.1150   | 0.13242 |       |
|           | 0.13242         | 0.587938526 |             |             |             |          |         |       |
| NLGN2     | ENSG00000169992 | 0.1784      | 0.4292      | -0.36653    | 0.64302     | -0.36653 | 0.64302 |       |
|           | 1.1149          | 0.13244     | 0.13244     | 0.587938526 |             |          |         |       |
| PEX12P1   | ENSG00000215418 | 1.1149      | 0.13244     | 1.1149      | 0.13244     | 1.1149   |         |       |
|           | 0.13244         | 1.1149      | 0.13244     | 0.13244     | 0.587938526 |          |         |       |
| MIR7-3HG  | ENSG00000176840 | 0.8442      | 0.19928     | 0.76399     | 0.22244     | 1.1147   |         |       |
|           | 0.13248         | -0.2021     | 0.58008     | 0.13248     | 0.587981818 |          |         |       |
| EIF1      | ENSG00000173812 | -0.88167    | 0.81102     | -0.88167    | 0.81102     | 1.1146   | 0.13251 |       |
|           | -0.88167        | 0.81102     | 0.13251     | 0.587981818 |             |          |         |       |
| NA        | ENSG00000222997 | 0.19673     | 0.42202     | 0.14301     | 0.44314     | 1.1144   | 0.13254 |       |
|           | -0.35197        | 0.63757     | 0.13254     | 0.587981818 |             |          |         |       |
| CNOT11    | ENSG00000158435 | 1.1143      | 0.13258     | -0.044159   | 0.51761     | -0.85721 |         |       |
|           | 0.80433         | -0.052055   | 0.52076     | 0.13258     | 0.587981818 |          |         |       |
| TRIB2     | ENSG00000071575 | -1.1083     | 0.86614     | -0.52119    | 0.69888     | -0.09805 | 0.53905 |       |
|           | 1.1143          | 0.13259     | 0.13259     | 0.587981818 |             |          |         |       |
| NA        | ENSG00000253832 | -0.090539   | 0.53607     | 1.1142      | 0.1326      | -0.4353  | 0.66833 |       |
|           | 1.1142          | 0.1326      | 0.1326      | 0.587981818 |             |          |         |       |
| NA        | ENSG00000249729 | 0.30475     | 0.38028     | 0.22672     | 0.41032     | 0.77056  | 0.22048 |       |
|           | 1.1142          | 0.13261     | 0.13261     | 0.587981818 |             |          |         |       |
| MIR5002   | ENSG00000266383 | 1.0565      | 0.14536     | -0.67773    | 0.75103     | 1.1141   |         |       |
|           | 0.13261         | -0.67773    | 0.75103     | 0.13261     | 0.587981818 |          |         |       |
| NA        | ENSG00000276569 | 0.32174     | 0.37382     | 1.1141      | 0.13261     | 1.1141   | 0.13261 |       |
|           | 1.1141          | 0.13261     | 0.13261     | 0.587981818 |             |          |         |       |
| FABP5P12  | ENSG00000249367 | 1.1140      | 0.13263     | 1.1140      | 0.13263     | -0.29839 | 0.6173  | 1.114 |
|           | 0.13263         | 0.13263     | 0.587981818 |             |             |          |         |       |
| IFI27L1   | ENSG00000165948 | -0.37682    | 0.64685     | -0.37682    | 0.64685     | -0.37682 |         |       |
|           | 0.64685         | 1.1140      | 0.13265     | 0.13265     | 0.587981818 |          |         |       |
| STX3      | ENSG00000166900 | 0.98954     | 0.1612      | 1.1140      | 0.13265     | 0.3313   | 0.37021 |       |
|           | 1.0923          | 0.13735     | 0.13265     | 0.587981818 |             |          |         |       |
| MIR4664   | ENSG00000265660 | 1.1140      | 0.13265     | 1.1140      | 0.13265     | 1.1140   | 0.13265 | 1.114 |
|           | 0.13265         | 0.13265     | 0.587981818 |             |             |          |         |       |
| ANKRD61   | ENSG00000157999 | 1.1139      | 0.13266     | 1.1139      | 0.13266     | 1.1139   |         |       |
|           | 0.13266         | 1.1139      | 0.13266     | 0.13266     | 0.587981818 |          |         |       |
| NA        | ENSG00000230107 | 1.0222      | 0.15335     | 0.88584     | 0.18785     | 0.67159  | 0.25092 |       |
|           | 1.1138          | 0.13269     | 0.13269     | 0.587981818 |             |          |         |       |
| MET       | ENSG00000105976 | 1.1137      | 0.1327      | 0.38567     | 0.34987     | 1.1137   | 0.1327  |       |
|           | 0.20774         | 0.41772     | 0.1327      | 0.587981818 |             |          |         |       |
| SAP25     | ENSG00000205307 | -1.6689     | 0.95243     | 1.1136      | 0.13272     | -1.0195  | 0.84601 |       |
|           | -1.0195         | 0.84601     | 0.13272     | 0.587981818 |             |          |         |       |
| SSC5D     | ENSG00000179954 | 0.81517     | 0.20749     | -0.34611    | 0.63537     | -0.25937 | 0.60233 |       |
|           | 1.1135          | 0.13274     | 0.13274     | 0.587981818 |             |          |         |       |
| NA        | ENSG00000279557 | 1.1135      | 0.13275     | 1.1135      | 0.13275     | 1.1135   | 0.13275 |       |
|           | 1.1135          | 0.13275     | 0.13275     | 0.587981818 |             |          |         |       |
| RPL9P28   | ENSG00000242067 | 0.26538     | 0.39536     | 0.26538     | 0.39536     | 1.1134   |         |       |
|           | 0.13276         | -0.80265    | 0.78891     | 0.13276     | 0.587981818 |          |         |       |
| MORN1     | ENSG00000116151 | 1.1134      | 0.13277     | -0.74944    | 0.7732      | 0.28371  | 0.38831 |       |
|           | 0.86968         | 0.19224     | 0.13277     | 0.587981818 |             |          |         |       |
| NA        | ENSG00000218536 | 1.1134      | 0.13278     | 1.1134      | 0.13278     | 1.1134   | 0.13278 |       |
|           | 1.1134          | 0.13278     | 0.13278     | 0.587981818 |             |          |         |       |
| ALDOAP1   | ENSG00000242849 | 1.0774      | 0.14065     | 1.0774      | 0.14065     | 1.1133   |         |       |
|           | 0.13279         | 1.0027      | 0.15801     | 0.13279     | 0.587981818 |          |         |       |
| MINDY1    | ENSG00000143409 | 1.0376      | 0.14973     | 1.1133      | 0.1328      | 0.25871  |         |       |
|           | 0.39793         | 0.19913     | 0.42108     | 0.1328      | 0.587981818 |          |         |       |
| NEFMP1    | ENSG00000224697 | 1.1133      | 0.1328      | 1.1133      | 0.1328      | 1.1133   |         |       |
|           | 0.1328          | 1.1133      | 0.1328      | 0.1328      | 0.587981818 |          |         |       |
| RN7SL573P | ENSG00000239607 | 1.1132      | 0.1328      | 1.1132      | 0.1328      | 1.1132   |         |       |
|           | 0.1328          | 1.1132      | 0.1328      | 0.1328      | 0.587981818 |          |         |       |
| NA        | ENSG00000274723 | -1.1683     | 0.87865     | -0.40591    | 0.6576      | 1.1132   | 0.1328  |       |

|            |                 |               |                   |               |               |           |         |  |
|------------|-----------------|---------------|-------------------|---------------|---------------|-----------|---------|--|
|            | -0.20457        | 0.58105       | 0.1328            | 0.587981818   |               |           |         |  |
| TULP2      | ENSG00000104804 | -0.13644      | 0.55426           | 1.1131        | 0.13283       | 0.23441   | 0.40733 |  |
|            | 0.21625         | 0.4144        | 0.13283           | 0.587981818   |               |           |         |  |
| TWISTNB    | ENSG00000105849 | 1.1131        | 0.13283           | 1.0766        | 0.14082       | 1.0779    |         |  |
|            | 0.14053         | 1.0999        | 0.13568           | 0.13283       | 0.587981818   |           |         |  |
| NA         | ENSG00000245648 | 0.46375       | 0.32141           | 1.1131        | 0.13283       | 1.1131    | 0.13283 |  |
|            | 1.1131          | 0.13283       | 0.13283           | 0.587981818   |               |           |         |  |
| NA         | ENSG00000278918 | 1.1131        | 0.13283           | 1.1131        | 0.13283       | 1.1131    | 0.13283 |  |
|            | 1.1131          | 0.13283       | 0.13283           | 0.587981818   |               |           |         |  |
| DHPS       | ENSG00000095059 | -1.3082       | 0.90459           | 1.113 0.13285 | -1.3082       | 0.90459   |         |  |
|            | -1.3082         | 0.90459       | 0.13285           | 0.587981818   |               |           |         |  |
| MRGPRX10P  | ENSG00000254720 | -1.6348       | 0.94896           | 1.113 0.13285 | 1.113 0.13285 |           |         |  |
|            | -1.023          | 0.84685       | 0.13285           | 0.587981818   |               |           |         |  |
| MAP2K2     | ENSG00000126934 | 1.113 0.13286 | 0.56366           | 0.28649       | 0.32536       | 0.37246   |         |  |
|            | 0.32536         | 0.37246       | 0.13286           | 0.587981818   |               |           |         |  |
| RPL31P45   | ENSG00000233318 | 1.1128        | 0.1329            | 1.1128        | 0.1329        | 1.1128    |         |  |
|            | 0.1329          | 0.22336       | 0.41163           | 0.1329        | 0.58810543    |           |         |  |
| ENO1P3     | ENSG00000243986 | 1.1126        | 0.13293           | 0.47808       | 0.3163        | -0.043032 |         |  |
|            | 0.51716         | 0.9729        | 0.1653            | 0.13293       | 0.588175613   |           |         |  |
| MIR3149    | ENSG00000266712 | 1.1126        | 0.13294           | 1.1126        | 0.13294       | 1.1126    |         |  |
|            | 0.13294         | 1.1126        | 0.13294           | 0.13294       | 0.588175613   |           |         |  |
| NA         | ENSG00000229955 | -0.089257     | 0.53556           | 1.1125        | 0.13296       | 0.16268   | 0.43539 |  |
|            | 1.0609          | 0.14436       | 0.13296           | 0.588201534   |               |           |         |  |
| TXNRD2     | ENSG00000184470 | -0.081352     | 0.53242           | -0.06379      | 0.52543       | -0.98903  |         |  |
|            | 0.83868         | 1.1125        | 0.13297           | 0.13297       | 0.588201534   |           |         |  |
| NA         | ENSG00000236905 | 1.1123        | 0.13299           | 1.1123        | 0.13299       | 1.0973    | 0.13627 |  |
|            | 0.77448         | 0.21932       | 0.13299           | 0.588227446   |               |           |         |  |
| GAS7       | ENSG00000007237 | 0.8752        | 0.19073           | 0.74059       | 0.22947       | 1.1123    | 0.133   |  |
|            | 0.29358         | 0.38454       | 0.133 0.588227446 |               |               |           |         |  |
| ELL        | ENSG00000105656 | 0.31013       | 0.37823           | 0.52848       | 0.29858       | 0.54195   | 0.29393 |  |
|            | 1.1122          | 0.13303       | 0.13303           | 0.588253348   |               |           |         |  |
| SLFNL1     | ENSG00000171790 | 1.1122        | 0.13303           | 1.1122        | 0.13303       | 1.1122    |         |  |
|            | 0.13303         | 1.1122        | 0.13303           | 0.13303       | 0.588253348   |           |         |  |
| OBP2A      | ENSG00000122136 | -0.12459      | 0.54958           | 0.47882       | 0.31603       | 1.1118    | 0.13312 |  |
|            | 1.034 0.15056   | 0.13312       | 0.588504386       |               |               |           |         |  |
| SCN4A      | ENSG00000007314 | -0.72685      | 0.76634           | -1.1757       | 0.88015       | -1.1757   | 0.88015 |  |
|            | 1.1117          | 0.13313       | 0.13313           | 0.588504386   |               |           |         |  |
| NA         | ENSG00000274421 | 1.1117        | 0.13313           | 1.1117        | 0.13313       | 1.1117    | 0.13313 |  |
|            | 1.1117          | 0.13313       | 0.13313           | 0.588504386   |               |           |         |  |
| ABHD16B    | ENSG00000183260 | 1.1116        | 0.13315           | 1.1116        | 0.13315       | 1.1116    |         |  |
|            | 0.13315         | 1.1116        | 0.13315           | 0.13315       | 0.588504386   |           |         |  |
| IL24       | ENSG00000162892 | 1.1115        | 0.13318           | -0.49321      | 0.68907       | -0.95627  | 0.83053 |  |
|            | -0.34541        | 0.63511       | 0.13318           | 0.588504386   |               |           |         |  |
| NA         | ENSG00000277911 | 1.1115        | 0.13319           | 0.94681       | 0.17187       | 0.94681   | 0.17187 |  |
|            | 0.94681         | 0.17187       | 0.13319           | 0.588504386   |               |           |         |  |
| MAP3K5-AS1 | ENSG00000234263 | -0.61598      | 0.73105           | 1.1113        | 0.13321       | -0.61598  |         |  |
|            | 0.73105         | -0.61598      | 0.73105           | 0.13321       | 0.588504386   |           |         |  |
| MRPS31P1   | ENSG00000275256 | 0.18223       | 0.4277            | 0.30657       | 0.37959       | 0.5054    |         |  |
|            | 0.30664         | 1.1114        | 0.13321           | 0.13321       | 0.588504386   |           |         |  |
| PTPN6      | ENSG00000111679 | 0.53244       | 0.29721           | 0.42433       | 0.33566       | 1.1113    | 0.13323 |  |
|            | 0.42433         | 0.33566       | 0.13323           | 0.588504386   |               |           |         |  |
| NA         | ENSG00000228335 | 1.1113        | 0.13323           | 1.1113        | 0.13323       | 1.1113    | 0.13323 |  |
|            | 1.1113          | 0.13323       | 0.13323           | 0.588504386   |               |           |         |  |
| PREPL      | ENSG00000138078 | 1.1112        | 0.13325           | -1.1208       | 0.86881       | -1.1717   | 0.87933 |  |
|            | -1.1248         | 0.86966       | 0.13325           | 0.588504386   |               |           |         |  |
| NA         | ENSG00000239532 | 0.7032        | 0.24097           | 0.95995       | 0.16854       | 1.1111    | 0.13325 |  |
|            | 1.1111          | 0.13325       | 0.13325           | 0.588504386   |               |           |         |  |
| LINC01486  | ENSG00000256560 | 1.1112        | 0.13325           | 0.19307       | 0.42345       | -0.65511  |         |  |
|            | 0.7438          | 0.19307       | 0.42345           | 0.13325       | 0.588504386   |           |         |  |
| RRAGC      | ENSG00000116954 | -0.40441      | 0.65704           | 0.47186       | 0.31851       | 0.56041   | 0.2876  |  |
|            | 1.1111          | 0.13326       | 0.13326           | 0.588504386   |               |           |         |  |
| RNA5SP180  | ENSG00000251990 | -0.33546      | 0.63136           | 0.34834       | 0.36379       | 1.1111    |         |  |

|            |                 |           |             |             |             |          |         |       |
|------------|-----------------|-----------|-------------|-------------|-------------|----------|---------|-------|
|            | 0.13327         | 0.40027   | 0.34448     | 0.13327     | 0.588504386 |          |         |       |
| GPALPP1    | ENSG00000133114 | -0.097174 | 0.53871     | -0.85657    | 0.80416     | -0.46322 |         |       |
|            | 0.6784          | 1.111     | 0.13328     | 0.13328     | 0.588504386 |          |         |       |
| MIR181A1HG | ENSG00000229989 | -0.56747  | 0.7148      | 1.1109      | 0.1333      | 0.24834  |         |       |
|            | 0.40193         | -0.55628  | 0.71099     | 0.1333      | 0.588539368 |          |         |       |
| RASSF6     | ENSG00000169435 | 0.57146   | 0.28384     | 0.3064      | 0.37965     | 0.38753  |         |       |
|            | 0.34918         | 1.1109    | 0.13332     | 0.13332     | 0.588574343 |          |         |       |
| NA         | ENSG00000265356 | 0.19648   | 0.42212     | 1.1107      | 0.13335     | 0.19648  | 0.42212 |       |
|            | -1.5376         | 0.93793   | 0.13335     | 0.588596661 |             |          |         |       |
| HSP90AA5P  | ENSG00000205955 | -0.74203  | 0.77097     | -0.34158    | 0.63367     | -0.34158 |         |       |
|            | 0.63367         | 1.1106    | 0.13337     | 0.13337     | 0.588596661 |          |         |       |
| CCT8L1P    | ENSG0000020219  | 1.1106    | 0.13338     | 1.1106      | 0.13338     | -0.81103 |         |       |
|            | 0.79132         | -0.27512  | 0.60839     | 0.13338     | 0.588596661 |          |         |       |
| ARID2      | ENSG00000189079 | 0.12275   | 0.45115     | 0.34446     | 0.36525     | 0.92     | 0.17879 |       |
|            | 1.1106          | 0.13338   | 0.13338     | 0.588596661 |             |          |         |       |
| DDX52      | ENSG00000278053 | 1.0471    | 0.14753     | 0.96875     | 0.16633     | 1.1105   | 0.13339 |       |
|            | 0.99524         | 0.15981   | 0.13339     | 0.588596661 |             |          |         |       |
| SLCO4A1    | ENSG00000101187 | -2.1136   | 0.98273     | 1.1104      | 0.13342     | -1.5606  |         |       |
|            | 0.9407          | -0.18531  | 0.57351     | 0.13342     | 0.588596661 |          |         |       |
| CNTNAP1    | ENSG00000108797 | 0.70175   | 0.24142     | 1.1103      | 0.13343     | 0.70175  |         |       |
|            | 0.24142         | 0.34564   | 0.36481     | 0.13343     | 0.588596661 |          |         |       |
| RAC2       | ENSG00000128340 | 1.1103    | 0.13344     | 1.1103      | 0.13344     | 0.11556  | 0.454   |       |
|            | 0.15994         | 0.43646   | 0.13344     | 0.588596661 |             |          |         |       |
| ACE3P      | ENSG00000224353 | 0.87477   | 0.19085     | 0.87477     | 0.19085     | 0.87477  | 0.19085 |       |
|            | 1.1102          | 0.13345   | 0.13345     | 0.588596661 |             |          |         |       |
| NA         | ENSG00000280177 | 1.1102    | 0.13346     | 1.1102      | 0.13346     | 1.1102   | 0.13346 |       |
|            | 1.1102          | 0.13346   | 0.13346     | 0.588596661 |             |          |         |       |
| OR10P1     | ENSG00000175398 | 1.1101    | 0.13347     | -1.7238     | 0.95763     | -1.0714  | 0.858   |       |
|            | -0.82249        | 0.7946    | 0.13347     | 0.588596661 |             |          |         |       |
| SNX18P14   | ENSG00000235571 | -0.80649  | 0.79002     | -0.85651    | 0.80414     | -0.21611 |         |       |
|            | 0.58555         | 1.1101    | 0.13347     | 0.13347     | 0.588596661 |          |         |       |
| NA         | ENSG00000282718 | 1.1098    | 0.13353     | 1.1098      | 0.13353     | 1.1098   | 0.13353 |       |
|            | -0.32478        | 0.62733   | 0.13353     | 0.588807972 |             |          |         |       |
| NA         | ENSG00000226134 | 1.1097    | 0.13356     | 0.65665     | 0.2557      | -0.81312 | 0.79192 |       |
|            | -0.99721        | 0.84067   | 0.13356     | 0.588833692 |             |          |         |       |
| NA         | ENSG00000259869 | 1.1004    | 0.13557     | 1.1004      | 0.13557     | 1.1097   | 0.13356 |       |
|            | 1.1004          | 0.13557   | 0.13356     | 0.588833692 |             |          |         |       |
| NBPF2P     | ENSG00000227001 | 0.68824   | 0.24565     | 1.1095      | 0.1336      | 0.099041 |         |       |
|            | 0.46055         | 0.099041  | 0.46055     | 0.1336      | 0.588929176 |          |         |       |
| RN7SKP124  | ENSG00000201600 | 1.1095    | 0.13362     | 1.1095      | 0.13362     | 1.1095   |         |       |
|            | 0.13362         | 1.1095    | 0.13362     | 0.13362     | 0.588929176 |          |         |       |
| NA         | ENSG00000214280 | 1.1095    | 0.13362     | 1.1095      | 0.13362     | 1.1095   | 0.13362 |       |
|            | 1.1095          | 0.13362   | 0.13362     | 0.588929176 |             |          |         |       |
| FAM81A     | ENSG00000157470 | 0.68451   | 0.24683     | 1.1094      | 0.13363     | 1.0901   |         |       |
|            | 0.13783         | 0.31271   | 0.37725     | 0.13363     | 0.588929176 |          |         |       |
| CTNNA1     | ENSG00000119326 | -0.31663  | 0.62424     | 1.1092      | 0.13367     | -0.11921 |         |       |
|            | 0.54745         | -0.02017  | 0.50805     | 0.13367     | 0.588980535 |          |         |       |
| FDPSP6     | ENSG00000233676 | 1.1092    | 0.13367     | -0.029639   | 0.51182     | 0.41697  |         |       |
|            | 0.33835         | 1.1092    | 0.13367     | 0.13367     | 0.588980535 |          |         |       |
| NA         | ENSG00000242150 | 1.1092    | 0.13368     | 1.1092      | 0.13368     | 1.1092   | 0.13368 |       |
|            | 1.1092          | 0.13368   | 0.13368     | 0.588980535 |             |          |         |       |
| NA         | ENSG00000250111 | -0.64363  | 0.74009     | 0.2818      | 0.38905     | 0.98221  | 0.163   |       |
|            | 1.1091          | 0.13369   | 0.13369     | 0.588980535 |             |          |         |       |
| RN7SL868P  | ENSG00000242928 | 1.109     | 0.13372     | 1.109       | 0.13372     | 1.109    | 0.13372 | 1.109 |
|            | 0.13372         | 0.13372   | 0.589041052 |             |             |          |         |       |
| NA         | ENSG00000250626 | 1.1089    | 0.13373     | 0.18517     | 0.42655     | 1.1089   | 0.13373 |       |
|            | 0.11876         | 0.45273   | 0.13373     | 0.589041052 |             |          |         |       |
| CILP       | ENSG00000138615 | 0.60025   | 0.27417     | 0.67807     | 0.24886     | 0.33863  | 0.36745 |       |
|            | 1.1089          | 0.13374   | 0.13374     | 0.589041052 |             |          |         |       |
| LINC01151  | ENSG00000253819 | 0.70698   | 0.23979     | 1.1088      | 0.13376     | -1.513   |         |       |
|            | 0.93485         | 0.060995  | 0.47568     | 0.13376     | 0.589056992 |          |         |       |
| C4orf46    | ENSG00000205208 | 1.1087    | 0.13379     | 1.1087      | 0.13379     | 1.1087   |         |       |

|           |                 |             |         |             |             |          |         |  |
|-----------|-----------------|-------------|---------|-------------|-------------|----------|---------|--|
|           | 0.13379         | 0.92316     | 0.17796 | 0.13379     | 0.589056992 |          |         |  |
| NA        | ENSG00000277482 | 1.1086      | 0.1338  | 1.1086      | 0.1338      | 1.1086   | 0.1338  |  |
|           | 1.1086          | 0.1338      | 0.1338  | 0.589056992 |             |          |         |  |
| HACL1     | ENSG00000131373 | -0.02177    | 0.50868 | -1.2023     | 0.88537     | 1.1085   | 0.13381 |  |
|           | 0.26037         | 0.39729     | 0.13381 | 0.589056992 |             |          |         |  |
| NA        | ENSG00000249240 | 1.1085      | 0.13382 | 1.1085      | 0.13382     | 1.1085   | 0.13382 |  |
|           | 1.1085          | 0.13382     | 0.13382 | 0.589056992 |             |          |         |  |
| IFNWP5    | ENSG00000232138 | 1.1085      | 0.13383 | 0.86569     | 0.19333     | -0.33778 |         |  |
|           | 0.63224         | -0.33778    | 0.63224 | 0.13383     | 0.589056992 |          |         |  |
| NA        | ENSG00000283573 | -0.45189    | 0.67433 | -1.7948     | 0.96366     | 1.1085   | 0.13383 |  |
|           | -0.30071        | 0.61818     | 0.13383 | 0.589056992 |             |          |         |  |
| ST13      | ENSG00000100380 | 1.1082      | 0.1339  | 0.43346     | 0.33234     | -0.31068 | 0.62198 |  |
|           | -1.0523         | 0.85368     | 0.1339  | 0.589056992 |             |          |         |  |
| ST6GAL2   | ENSG00000144057 | -0.86006    | 0.80512 | -0.85191    | 0.80287     | 0.06866  |         |  |
|           | 0.47263         | 1.1081      | 0.13391 | 0.13391     | 0.589056992 |          |         |  |
| FRMD4B    | ENSG00000114541 | 1.1081      | 0.13392 | -0.012087   | 0.50482     | 0.28329  |         |  |
|           | 0.38848         | 0.042688    | 0.48298 | 0.13392     | 0.589056992 |          |         |  |
| NA        | ENSG00000224478 | 1.108       | 0.13392 | 0.69642     | 0.24308     | 0.54385  | 0.29327 |  |
|           | 0.68584         | 0.24641     | 0.13392 | 0.589056992 |             |          |         |  |
| NA        | ENSG00000255397 | 1.1079      | 0.13395 | 1.1079      | 0.13395     | 1.1079   | 0.13395 |  |
|           | 0.59649         | 0.27542     | 0.13395 | 0.589056992 |             |          |         |  |
| COPRS     | ENSG00000172301 | -0.66961    | 0.74845 | 1.1078      | 0.13397     | -0.13484 | 0.55363 |  |
|           | -0.27267        | 0.60745     | 0.13397 | 0.589056992 |             |          |         |  |
| CASC11    | ENSG00000249375 | -0.641      | 0.73924 | 1.1077      | 0.13399     | -1.3718  |         |  |
|           | 0.91494         | -1.5716     | 0.94198 | 0.13399     | 0.589056992 |          |         |  |
| ATP8A1    | ENSG00000124406 | -0.22034    | 0.5872  | 0.60279     | 0.27333     | 1.1077   | 0.134   |  |
|           | 0.76898         | 0.22095     | 0.134   | 0.589056992 |             |          |         |  |
| DLX1      | ENSG00000144355 | -0.71798    | 0.76362 | 0.77207     | 0.22004     | 1.1077   | 0.134   |  |
|           | 1.0891          | 0.13805     | 0.134   | 0.589056992 |             |          |         |  |
| FEZ2      | ENSG00000171055 | 1.1077      | 0.134   | 0.68636     | 0.24624     | -0.58387 | 0.72035 |  |
|           | -0.9426         | 0.82706     | 0.134   | 0.589056992 |             |          |         |  |
| KHDC4     | ENSG00000132680 | 0.43537     | 0.33165 | 1.1076      | 0.13401     | 0.43537  | 0.33165 |  |
|           | 0.92474         | 0.17755     | 0.13401 | 0.589056992 |             |          |         |  |
| TMEM155   | ENSG00000164112 | 1.1076      | 0.13401 | 1.1076      | 0.13401     | 1.1076   |         |  |
|           | 0.13401         | 1.1076      | 0.13401 | 0.13401     | 0.589056992 |          |         |  |
| NA        | ENSG00000255415 | 0.019568    | 0.49219 | -0.1894     | 0.57511     | 1.1076   | 0.13402 |  |
|           | -0.19491        | 0.57727     | 0.13402 | 0.589056992 |             |          |         |  |
| KRT8P19   | ENSG00000257528 | 1.1076      | 0.13402 | -0.49687    | 0.69036     | 1.1076   |         |  |
|           | 0.13402         | 1.1076      | 0.13402 | 0.13402     | 0.589056992 |          |         |  |
| MIR4428   | ENSG00000266262 | 1.1076      | 0.13402 | 1.1076      | 0.13402     | 1.1076   |         |  |
|           | 0.13402         | 1.1076      | 0.13402 | 0.13402     | 0.589056992 |          |         |  |
| SACS-AS1  | ENSG00000229558 | 1.1075      | 0.13404 | 0.22444     | 0.41121     | 0.9223   |         |  |
|           | 0.17819         | -0.15758    | 0.5626  | 0.13404     | 0.589056992 |          |         |  |
| NA        | ENSG00000206847 | 0.41017     | 0.34084 | 1.1075      | 0.13405     | 1.1075   | 0.13405 |  |
|           | 1.1075          | 0.13405     | 0.13405 | 0.589056992 |             |          |         |  |
| MIR586    | ENSG00000207769 | -1.0905     | 0.86225 | -1.0905     | 0.86225     | -1.0905  |         |  |
|           | 0.86225         | 1.1074      | 0.13405 | 0.13405     | 0.589056992 |          |         |  |
| CALN1     | ENSG00000183166 | 0.59998     | 0.27426 | 0.97126     | 0.16571     | 0.70276  | 0.2411  |  |
|           | 1.1074          | 0.13406     | 0.13406 | 0.589056992 |             |          |         |  |
| NA        | ENSG00000279746 | 1.1074      | 0.13407 | 1.1074      | 0.13407     | 1.1074   | 0.13407 |  |
|           | 1.1074          | 0.13407     | 0.13407 | 0.589056992 |             |          |         |  |
| RNU7-126P | ENSG00000238632 | 1.1072      | 0.1341  | 1.1072      | 0.1341      | -0.48505 |         |  |
|           | 0.68618         | 0.14299     | 0.44315 | 0.1341      | 0.589135683 |          |         |  |
| RN7SKP276 | ENSG00000252051 | 0.24031     | 0.40504 | 1.1071      | 0.13413     | 0.19917  |         |  |
|           | 0.42106         | 1.1071      | 0.13413 | 0.13413     | 0.589142889 |          |         |  |
| MIR2117HG | ENSG00000267151 | 1.1071      | 0.13414 | 1.1071      | 0.13414     | 1.1071   |         |  |
|           | 0.13414         | 1.1071      | 0.13414 | 0.13414     | 0.589142889 |          |         |  |
| NA        | ENSG00000273210 | 1.1071      | 0.13414 | 0.51359     | 0.30377     | 1.1071   | 0.13414 |  |
|           | 1.1071          | 0.13414     | 0.13414 | 0.589142889 |             |          |         |  |
| NA        | ENSG00000261324 | 1.107       | 0.13415 | 1.107       | 0.13415     | 1.107    | 0.13415 |  |
|           | 0.13415         | 0.589142889 |         |             |             |          |         |  |
| NA        | ENSG00000267665 | 1.1065      | 0.13426 | 0.40896     | 0.34128     | 0.86314  | 0.19403 |  |

|              |                 |          |             |             |             |           |         |          |
|--------------|-----------------|----------|-------------|-------------|-------------|-----------|---------|----------|
|              | 0.029621        | 0.48818  | 0.13426     | 0.589448347 |             |           |         |          |
| POLQ         | ENSG00000051341 | -0.72107 | 0.76457     | 0.54581     | 0.2926      | 1.1063    | 0.1343  |          |
|              | 0.68532         | 0.24657  | 0.1343      | 0.589448347 |             |           |         |          |
| DCUN1D4      | ENSG00000109184 | 0.8429   | 0.19964     | 1.0747      | 0.14124     | 1.1062    |         |          |
|              | 0.13431         | 0.92018  | 0.17874     | 0.13431     | 0.589448347 |           |         |          |
| RPL7L1P7     | ENSG00000251137 | -0.20301 | 0.58043     | 1.1062      | 0.13431     | -0.31333  |         |          |
|              | 0.62299         | 0.068291 | 0.47278     | 0.13431     | 0.589448347 |           |         |          |
| DPP3P2       | ENSG00000221844 | 0.68684  | 0.24609     | 1.1062      | 0.13432     | 0.024231  |         |          |
|              | 0.49033         | -0.5361  | 0.70406     | 0.13432     | 0.589448347 |           |         |          |
| ERVMER34-1   | ENSG00000226887 | -1.7543  | 0.96031     | -1.8674     | 0.96907     | 0.0029042 |         |          |
|              | 0.49884         | 1.1061   | 0.13434     | 0.13434     | 0.589448347 |           |         |          |
| NA           | ENSG00000233060 | 1.1061   | 0.13434     | 1.1061      | 0.13434     | 1.1061    | 0.13434 |          |
|              | 1.1061          | 0.13434  | 0.13434     | 0.589448347 |             |           |         |          |
| CBY3         | ENSG00000204659 | 0.84651  | 0.19863     | 1.106       | 0.13436     | -0.0172   | 0.50686 |          |
|              | -0.72599        | 0.76608  | 0.13436     | 0.589448347 |             |           |         |          |
| NA           | ENSG00000225084 | 1.1059   | 0.13438     | 1.1059      | 0.13438     | 1.1059    | 0.13438 |          |
|              | 1.1059          | 0.13438  | 0.13438     | 0.589448347 |             |           |         |          |
| PSMB10       | ENSG00000205220 | 1.1059   | 0.13439     | 0.62601     | 0.26565     | 1.1059    |         |          |
|              | 0.13439         | 1.1059   | 0.13439     | 0.13439     | 0.589448347 |           |         |          |
| GAPDHP74     | ENSG00000232780 | 0.86379  | 0.19385     | 0.74027     | 0.22957     | 1.1059    |         |          |
|              | 0.13439         | 1.1059   | 0.13439     | 0.13439     | 0.589448347 |           |         |          |
| ZNF628       | ENSG00000197483 | 1.1058   | 0.13441     | 1.07        | 0.14232     | 1.0378    | 0.14967 |          |
|              | 1.1058          | 0.13441  | 0.13441     | 0.589448347 |             |           |         |          |
| C1QTNF8      | ENSG00000184471 | 0.50593  | 0.30645     | 0.5361      | 0.29595     | 1.1057    |         |          |
|              | 0.13442         | 1.1057   | 0.13442     | 0.13442     | 0.589448347 |           |         |          |
| NA           | ENSG00000255355 | 0.9928   | 0.1604      | 0.92449     | 0.17761     | 1.1057    | 0.13442 |          |
|              | 1.1057          | 0.13442  | 0.13442     | 0.589448347 |             |           |         |          |
| NA           | ENSG00000278896 | 0.7979   | 0.21246     | 0.16032     | 0.43632     | -0.23938  | 0.5946  |          |
|              | 1.1056          | 0.13445  | 0.13445     | 0.589448347 |             |           |         |          |
| SMC5         | ENSG00000198887 | 0.41753  | 0.33815     | 0.024038    | 0.49041     | 0.68835   | 0.24562 |          |
|              | 1.1056          | 0.13446  | 0.13446     | 0.589448347 |             |           |         |          |
| GKN3P        | ENSG00000283586 | 1.1056   | 0.13446     | 0.31552     | 0.37618     | 0.72492   | 0.23425 |          |
|              | -0.32936        | 0.62906  | 0.13446     | 0.589448347 |             |           |         |          |
| KSR1P1       | ENSG00000229485 | -0.39826 | 0.65478     | -0.44165    | 0.67063     | 1.1055    |         |          |
|              | 0.13447         | -0.86156 | 0.80553     | 0.13447     | 0.589448347 |           |         |          |
| RPS16P8      | ENSG00000213664 | 1.1055   | 0.13448     | 0.57837     | 0.28151     | 0.70617   |         |          |
|              | 0.24004         | 0.60228  | 0.27349     | 0.13448     | 0.589448347 |           |         |          |
| RECQL4       | ENSG00000160957 | 0.12471  | 0.45037     | 1.1053      | 0.13451     | 1.1053    |         |          |
|              | 0.13451         | 1.1053   | 0.13451     | 0.13451     | 0.589448347 |           |         |          |
| GAMT         | ENSG00000130005 | 1.1052   | 0.13454     | 1.1052      | 0.13454     | 1.1052    | 0.13454 |          |
|              | 1.1052          | 0.13454  | 0.13454     | 0.589448347 |             |           |         |          |
| TAF11        | ENSG00000064995 | 0.31687  | 0.37567     | 1.1051      | 0.13456     | 1.1051    | 0.13456 |          |
|              | -0.024875       | 0.50992  | 0.13456     | 0.589448347 |             |           |         |          |
| UBAC2-AS1    | ENSG00000228889 | 0.33787  | 0.36773     | 0.36499     | 0.35756     | 1.1051    |         |          |
|              | 0.13456         | 0.59989  | 0.27429     | 0.13456     | 0.589448347 |           |         |          |
| SNX6         | ENSG00000129515 | 0.32077  | 0.37419     | 0.54441     | 0.29308     | 1.105     | 0.13458 |          |
|              | 0.4688          | 0.31961  | 0.13458     | 0.589448347 |             |           |         |          |
| CSNK1G2-AS1  | ENSG00000180846 | 0.38282  | 0.35093     | 0.68984     | 0.24515     | -0.99551  |         |          |
|              | 0.84026         | 1.105    | 0.13458     | 0.13458     | 0.589448347 |           |         |          |
| NA           | ENSG00000236921 | 1.105    | 0.13458     | 1.105       | 0.13458     | 0.10064   | 0.45992 | 0.070552 |
|              | 0.47188         | 0.13458  | 0.589448347 |             |             |           |         |          |
| SNX29P1      | ENSG00000158482 | 1.105    | 0.13459     | -0.50718    | 0.69399     | -0.024283 | 0.50969 |          |
|              | -0.59591        | 0.72438  | 0.13459     | 0.589448347 |             |           |         |          |
| LINC01609    | ENSG00000253103 | 1.0118   | 0.15583     | -0.96302    | 0.83223     | 1.1049    |         |          |
|              | 0.1346          | 0.65692  | 0.25562     | 0.1346      | 0.589448347 |           |         |          |
| SLC25A30-AS1 | ENSG00000251015 | 0.2659   | 0.39516     | 1.1049      | 0.13461     | 1.1049    |         |          |
|              | 0.13461         | 1.1049   | 0.13461     | 0.13461     | 0.589448347 |           |         |          |
| NA           | ENSG00000235581 | 0.43895  | 0.33035     | 0.29256     | 0.38493     | 1.1047    | 0.13464 |          |
|              | 0.3787          | 0.35245  | 0.13464     | 0.589448347 |             |           |         |          |
| RIOK3P1      | ENSG00000225944 | 1.1018   | 0.13528     | 1.1018      | 0.13528     | 1.1018    |         |          |
|              | 0.13528         | 1.1047   | 0.13465     | 0.13465     | 0.589448347 |           |         |          |
| MTND1P11     | ENSG00000228166 | 1.1046   | 0.13466     | 1.1046      | 0.13466     | 1.1046    |         |          |

|            |                  |             |             |             |             |             |             |  |
|------------|------------------|-------------|-------------|-------------|-------------|-------------|-------------|--|
|            | 0.13466          | 1.1046      | 0.13466     | 0.13466     | 0.589448347 |             |             |  |
| KANSL2     | ENSG00000139620  | -0.42739    | 0.66545     | 1.1046      | 0.13468     | 1.1046      |             |  |
|            | 0.13468          | 1.1046      | 0.13468     | 0.13468     | 0.589448347 |             |             |  |
| ZNF454     | ENSG00000178187  | 1.069014252 | -0.2865     | 0.61275     | -0.2865     | 0.61275     |             |  |
|            | 1.1045           | 0.13468     | 0.13468     | 0.589448347 |             |             |             |  |
| DLGAP3     | ENSG00000116544  | 0.21637     | 0.41435     | 1.1044      | 0.1347      | 1.1044      |             |  |
|            | 0.1347           | 0.21672     | 0.41421     | 0.1347      | 0.589448347 |             |             |  |
| SFN        | ENSG00000175793  | 0.13484     | 0.44637     | 0.13484     | 0.44637     | 1.1044      | 0.13472     |  |
|            | 0.22054          | 0.41272     | 0.13472     | 0.589448347 |             |             |             |  |
| CASP4      | ENSG00000196954  | -0.57288    | 0.71664     | -1.4695     | 0.92914     | 1.1043      | 0.13472     |  |
|            | -1.2645          | 0.89698     | 0.13472     | 0.589448347 |             |             |             |  |
| NA         | ENSG00000228700  | -0.40847    | 0.65854     | -0.61051    | 0.72924     | 0.11054     | 0.45599     |  |
|            | 1.1044           | 0.13472     | 0.13472     | 0.589448347 |             |             |             |  |
| CENPW      | ENSG00000203760  | -0.67147    | 0.74904     | 0.72747     | 0.23347     | 0.57031     | 0.28423     |  |
|            | 1.1043           | 0.13473     | 0.13473     | 0.589448347 |             |             |             |  |
| PDZD2      | ENSG00000133401  | -0.2778     | 0.60942     | 0.12564     | 0.45001     | 1.1042      | 0.13476     |  |
|            | -0.65879         | 0.74499     | 0.13476     | 0.589448347 |             |             |             |  |
| NA         | ENSG00000196390  | -0.56964    | 0.71554     | -0.88608    | 0.81221     | 1.1042      | 0.13476     |  |
|            | 1.1042           | 0.13476     | 0.13476     | 0.589448347 |             |             |             |  |
| NA         | ENSG00000239517  | 1.1042      | 0.13476     | 1.1042      | 0.13476     | 1.1042      | 0.13476     |  |
|            | 1.1042           | 0.13476     | 0.13476     | 0.589448347 |             |             |             |  |
| NA         | ENSG00000259341  | 1.1042      | 0.13476     | 0.17341     | 0.43116     | 1.1042      | 0.13476     |  |
|            | 0.53473          | 0.29642     | 0.13476     | 0.589448347 |             |             |             |  |
| NA         | ENSG00000244176  | 1.1041      | 0.13477     | 1.1041      | 0.13477     | 1.1041      | 0.13477     |  |
|            | 0.65541          | 0.2561      | 0.13477     | 0.589448347 |             |             |             |  |
| OR4K11P    | ENSG00000179381  | 1.104013479 | 1.104013479 | 0.41762     | 0.33811     |             |             |  |
|            | -0.029106        | 0.51161     | 0.13479     | 0.589448347 |             |             |             |  |
| RPS2P44    | ENSG00000243609  | -0.51537    | 0.69685     | 1.1039      | 0.13483     | -0.6704     |             |  |
|            | 0.7487           | 1.1039      | 0.13483     | 0.13483     | 0.589448347 |             |             |  |
| ENOX1      | ENSG00000120658  | 1.1038      | 0.13485     | 0.70599     | 0.2401      | 0.63539     | 0.26259     |  |
|            | 0.63512          | 0.26267     | 0.13485     | 0.589448347 |             |             |             |  |
| RNU6-1065P | ENSG00000207242  | 1.1036      | 0.13488     | 0.77921     | 0.21793     | -0.043804   |             |  |
|            | 0.51747          | -0.66078    | 0.74562     | 0.13488     | 0.589448347 |             |             |  |
| NA         | ENSG00000269752  | 1.1036      | 0.13489     | 1.1036      | 0.13489     | 1.1036      | 0.13489     |  |
|            | 1.1036           | 0.13489     | 0.13489     | 0.589448347 |             |             |             |  |
| EIF4A1P6   | ENSG00000236608  | 1.1035      | 0.1349      | -0.60812    | 0.72845     | 1.1035      |             |  |
|            | 0.1349           | 1.1035      | 0.1349      | 0.1349      | 0.589448347 |             |             |  |
| ACAA2      | ENSG00000167315  | 1.1035      | 0.13491     | 1.0985      | 0.13599     | 1.0124      | 0.15567     |  |
|            | 0.65929          | 0.25485     | 0.13491     | 0.589448347 |             |             |             |  |
| NA         | ENSG00000267678  | 1.1035      | 0.13491     | 1.1035      | 0.13491     | 1.1035      | 0.13491     |  |
|            | 1.1035           | 0.13491     | 0.13491     | 0.589448347 |             |             |             |  |
| LINC01999  | ENSG00000267772  | 1.1035      | 0.13491     | 1.1035      | 0.13491     | 1.1035      |             |  |
|            | 0.13491          | 1.1035      | 0.13491     | 0.13491     | 0.589448347 |             |             |  |
| RNU6-349P  | ENSG00000199272  | 1.1034      | 0.13493     | 0.89927     | 0.18425     | 1.1034      |             |  |
|            | 0.13493          | 0.86056     | 0.19474     | 0.13493     | 0.589448347 |             |             |  |
| ADCY2      | ENSG00000078295  | 1.1033      | 0.13494     | 0.40609     | 0.34234     | 0.71552     | 0.23714     |  |
|            | 1.0372           | 0.14983     | 0.13494     | 0.589448347 |             |             |             |  |
| NIPA2P5    | ENSG00000236277  | 0.61818     | 0.26823     | 0.11448     | 0.45443     | 1.1033      |             |  |
|            | 0.13495          | 1.1033      | 0.13495     | 0.13495     | 0.589448347 |             |             |  |
| NA         | ENSG00000260573  | 0.95899     | 0.16878     | 1.1033      | 0.13496     | 0.95899     | 0.16878     |  |
|            | 0.95899          | 0.16878     | 0.13496     | 0.589448347 |             |             |             |  |
| WDR49      | ENSG00000174776  | 0.17704     | 0.42974     | 1.1032      | 0.13497     | -0.40954    | 0.65893     |  |
|            | 1.1032           | 0.13497     | 0.13497     | 0.589448347 |             |             |             |  |
| NA         | ENSG00000260467  | 1.1032      | 0.13498     | 1.1032      | 0.13498     | 1.1032      | 0.13498     |  |
|            | 1.1032           | 0.13498     | 0.13498     | 0.589448347 |             |             |             |  |
| NA         | ENSG00000235356  | 1.1031      | 0.13511031  | 0.13511031  | 0.13511031  | 0.13511031  | 0.13511031  |  |
|            | 0.1350.589448347 |             |             |             |             |             |             |  |
| MIR589     | ENSG00000207973  | 1.103013501 | 1.103013501 | 1.103013501 | 1.103013501 | 1.103013501 | 1.103013501 |  |
|            | 0.13501          | 0.13501     | 0.589448347 |             |             |             |             |  |
| CDK3       | ENSG00000250506  | 1.103013501 | 0.46087     | 0.32245     | 0.46087     | 0.32245     |             |  |
|            | -0.0022489       | 0.5009      | 0.13501     | 0.589448347 |             |             |             |  |
| NA         | ENSG00000257169  | 1.103013501 | 0.76708     | 0.22152     | 0.49406     | 0.31063     |             |  |



|             |                 |           |         |             |             |           |         |  |
|-------------|-----------------|-----------|---------|-------------|-------------|-----------|---------|--|
|             | 0.85456         | 0.1964    | 0.13501 | 0.589448347 |             |           |         |  |
| UGT1A11P    | ENSG00000227846 | 1.103     | 0.13502 | 0.59016     | 0.27754     | 0.94024   | 0.17355 |  |
|             | 1.0018          | 0.15821   | 0.13502 | 0.589448347 |             |           |         |  |
| HNRNPA2B1   | ENSG00000122566 | 0.35524   | 0.36121 | 1.1029      | 0.13503     | -1.0256   |         |  |
|             | 0.84746         | -0.89497  | 0.8146  | 0.13503     | 0.589448347 |           |         |  |
| ADH5P2      | ENSG00000232676 | 1.1029    | 0.13503 | -1.0929     | 0.86278     | 1.1029    |         |  |
|             | 0.13503         | 1.1029    | 0.13503 | 0.13503     | 0.589448347 |           |         |  |
| NA          | ENSG00000279918 | 0.23639   | 0.40656 | 0.034493    | 0.48624     | 1.1029    | 0.13503 |  |
|             | 0.5613          | 0.2873    | 0.13503 | 0.589448347 |             |           |         |  |
| LINC00649   | ENSG00000237945 | 0.99256   | 0.16046 | 1.1028      | 0.13506     | 0.065444  |         |  |
|             | 0.47391         | 0.35737   | 0.36041 | 0.13506     | 0.589499033 |           |         |  |
| TECTB       | ENSG00000119913 | 0.42162   | 0.33665 | 0.45587     | 0.32424     | 1.1026    | 0.13509 |  |
|             | 0.42162         | 0.33665   | 0.13509 | 0.589499033 |             |           |         |  |
| H3P26       | ENSG00000224447 | 1.1027    | 0.13509 | 1.1027      | 0.13509     | 1.1027    | 0.13509 |  |
|             | 1.1027          | 0.13509   | 0.13509 | 0.589499033 |             |           |         |  |
| LINC02306   | ENSG00000257986 | 0.71251   | 0.23807 | 0.71251     | 0.23807     | 1.1026    |         |  |
|             | 0.13509         | -0.20455  | 0.58104 | 0.13509     | 0.589499033 |           |         |  |
| ACSM4       | ENSG00000215009 | -0.15239  | 0.56056 | 0.72061     | 0.23557     | 1.1025    | 0.13512 |  |
|             | -0.29205        | 0.61488   | 0.13512 | 0.589549682 |             |           |         |  |
| ATP5MGP4    | ENSG00000225176 | -0.22891  | 0.59053 | -0.22891    | 0.59053     | 1.1024    |         |  |
|             | 0.13513         | 0.77242   | 0.21993 | 0.13513     | 0.589549682 |           |         |  |
| CASP16P     | ENSG00000228146 | 1.1024    | 0.13515 | 1.1024      | 0.13515     | 1.1024    |         |  |
|             | 0.13515         | 1.1024    | 0.13515 | 0.13515     | 0.589549682 |           |         |  |
| NA          | ENSG00000230084 | 0.61891   | 0.26799 | 1.1024      | 0.13515     | 1.1024    | 0.13515 |  |
|             | 1.1024          | 0.13515   | 0.13515 | 0.589549682 |             |           |         |  |
| ACTE1P      | ENSG00000172900 | 1.1023    | 0.13518 | 0.46083     | 0.32246     | 0.13854   |         |  |
|             | 0.44491         | 1.0791    | 0.14026 | 0.13518     | 0.589574993 |           |         |  |
| RNU2-69P    | ENSG00000251870 | -0.077969 | 0.53107 | -0.11915    | 0.54742     | -0.11783  |         |  |
|             | 0.5469          | 1.1023    | 0.13518 | 0.13518     | 0.589574993 |           |         |  |
| EXOC4       | ENSG00000131558 | 0.70922   | 0.23909 | -0.78467    | 0.78368     | 1.0094    | 0.15638 |  |
|             | 1.1021          | 0.1352    | 0.1352  | 0.589600295 |             |           |         |  |
| IRX1        | ENSG00000170549 | -0.48882  | 0.68752 | 0.32872     | 0.37118     | 0.066141  | 0.47363 |  |
|             | 1.1021          | 0.13521   | 0.13521 | 0.589600295 |             |           |         |  |
| CACNB1      | ENSG00000067191 | 0.58401   | 0.27961 | 1.102       | 0.13523     | 0.75654   | 0.22466 |  |
|             | 0.51688         | 0.30262   | 0.13523 | 0.589616434 |             |           |         |  |
| ACSF3       | ENSG00000176715 | 0.76054   | 0.22347 | 1.1019      | 0.13525     | -0.12835  | 0.55107 |  |
|             | 1.0005          | 0.15854   | 0.13525 | 0.589616434 |             |           |         |  |
| MIR3163     | ENSG00000266423 | 1.1019    | 0.13525 | -0.35246    | 0.63775     | -0.11419  |         |  |
|             | 0.54546         | -0.2953   | 0.61612 | 0.13525     | 0.589616434 |           |         |  |
| NA          | ENSG00000252670 | 1.1018    | 0.13528 | 1.1018      | 0.13528     | 1.1018    | 0.13528 |  |
|             | 1.1018          | 0.13528   | 0.13528 | 0.589694463 |             |           |         |  |
| NA          | ENSG00000239381 | -1.5153   | 0.93515 | 0.63986     | 0.26113     | 0.2263    | 0.41048 |  |
|             | 1.1017          | 0.1353    | 0.1353  | 0.589728891 |             |           |         |  |
| LINC01056   | ENSG00000237119 | 0.91465   | 0.18019 | 0.65276     | 0.25695     | 0.8066    |         |  |
|             | 0.20995         | 1.1015    | 0.13535 | 0.13535     | 0.589770237 |           |         |  |
| NA          | ENSG00000274383 | 1.1014    | 0.13535 | 1.1014      | 0.13535     | 1.1014    | 0.13535 |  |
|             | 1.1014          | 0.13535   | 0.13535 | 0.589770237 |             |           |         |  |
| PLA2G4C-AS1 | ENSG00000269420 | 1.1014    | 0.13536 | 1.1014      | 0.13536     | 1.1014    |         |  |
|             | 0.13536         | 1.1014    | 0.13536 | 0.13536     | 0.589770237 |           |         |  |
| NA          | ENSG00000279842 | 1.1014    | 0.13536 | -0.2074     | 0.58215     | 0.60757   | 0.27174 |  |
|             | -0.096021       | 0.53825   | 0.13536 | 0.589770237 |             |           |         |  |
| CCDC102B    | ENSG00000150636 | 0.60728   | 0.27183 | 0.17048     | 0.43232     | -0.98276  |         |  |
|             | 0.83714         | 1.1013    | 0.13537 | 0.13537     | 0.589770237 |           |         |  |
| DNTT        | ENSG00000107447 | 1.1013    | 0.13539 | -0.113      | 0.54498     | 1.1013    | 0.13539 |  |
|             | 0.69429         | 0.24375   | 0.13539 | 0.589795477 |             |           |         |  |
| NA          | ENSG00000273154 | 1.1012    | 0.1354  | 1.1012      | 0.1354      | 1.1012    | 0.1354  |  |
|             | 1.1012          | 0.1354    | 0.1354  | 0.589795477 |             |           |         |  |
| LCLAT1      | ENSG00000172954 | 0.47951   | 0.31579 | 0.04931     | 0.48034     | 1.1011    |         |  |
|             | 0.13543         | -0.6907   | 0.75512 | 0.13543     | 0.589820708 |           |         |  |
| ARID3C      | ENSG00000205143 | 1.1011    | 0.13543 | 1.1011      | 0.13543     | 1.1011    |         |  |
|             | 0.13543         | 1.1011    | 0.13543 | 0.13543     | 0.589820708 |           |         |  |
| COX7A2P2    | ENSG00000236764 | -0.39768  | 0.65457 | 1.101       | 0.13546     | -0.076454 | 0.53047 |  |

|           |                 |           |         |             |             |           |         |         |
|-----------|-----------------|-----------|---------|-------------|-------------|-----------|---------|---------|
|           | 0.50522         | 0.3067    | 0.13546 | 0.589898642 |             |           |         |         |
| RPL35P9   | ENSG00000174418 | 1.1008    | 0.13549 | 1.1008      | 0.13549     | 1.1008    | 0.13549 | 1.1008  |
|           | 0.13549         | 1.1008    | 0.13549 | 0.13549     | 0.589976562 |           |         |         |
| IL13      | ENSG00000169194 | 0.23994   | 0.40519 | 0.23994     | 0.40519     | 0.23994   | 0.40519 | 0.40519 |
|           | 1.1007          | 0.13552   | 0.13552 | 0.590001751 |             |           |         |         |
| LINC01060 | ENSG00000249378 | 1.1007    | 0.13552 | 0.23481     | 0.40718     | -0.35995  |         |         |
|           | 0.64056         | -0.80003  | 0.78815 | 0.13552     | 0.590001751 |           |         |         |
| OR1M1     | ENSG00000170929 | 1.1006    | 0.13554 | 0.18022     | 0.42849     | -1.1255   | 0.86982 |         |
|           | -1.1255         | 0.86982   | 0.13554 | 0.590017756 |             |           |         |         |
| LGALS3    | ENSG00000131981 | 1.0651    | 0.14341 | 0.6009      | 0.27395     | 1.0651    |         |         |
|           | 0.14341         | 1.1005    | 0.13556 | 0.13556     | 0.590017756 |           |         |         |
| NA        | ENSG00000266908 | 1.1005    | 0.13556 | 1.1005      | 0.13556     | 1.1005    | 0.13556 |         |
|           | 1.1005          | 0.13556   | 0.13556 | 0.590017756 |             |           |         |         |
| UGT1A5    | ENSG00000240224 | 1.1004    | 0.13558 | 0.48447     | 0.31403     | 0.48447   |         |         |
|           | 0.31403         | 0.48447   | 0.31403 | 0.13558     | 0.590042927 |           |         |         |
| NNT-AS1   | ENSG00000248092 | 1.1003    | 0.13559 | 0.80617     | 0.21007     | 1.1003    |         |         |
|           | 0.13559         | 1.1003    | 0.13559 | 0.13559     | 0.590042927 |           |         |         |
| OR8G1     | ENSG00000197849 | 1.1002    | 0.13562 | 1.1002      | 0.13562     | 1.1002    | 0.13562 |         |
|           | 1.1002          | 0.13562   | 0.13562 | 0.59004476  |             |           |         |         |
| NA        | ENSG00000231393 | 1.0656    | 0.1433  | 1.1001      | 0.13564     | 1.0656    | 0.1433  |         |
|           | 1.0656          | 0.1433    | 0.13564 | 0.59004476  |             |           |         |         |
| ZNF487    | ENSG00000243660 | 0.22547   | 0.41081 | 0.2071      | 0.41797     | 0.22547   |         |         |
|           | 0.41081         | 1.1       | 0.13566 | 0.13566     | 0.59004476  |           |         |         |
| C3orf84   | ENSG00000236980 | 1.0228    | 0.1532  | 1.1         | 0.13567     | -0.33187  | 0.63001 |         |
|           | 0.61384         | 0.26966   | 0.13567 | 0.59004476  |             |           |         |         |
| GPLD1     | ENSG00000112293 | -0.26039  | 0.60272 | -0.2441     | 0.59642     | -0.80455  | 0.78946 |         |
|           | 1.0999          | 0.13568   | 0.13568 | 0.59004476  |             |           |         |         |
| DYNLRB1   | ENSG00000125971 | 0.05571   | 0.47779 | 0.11875     | 0.45274     | 1.0998    |         |         |
|           | 0.13571         | 1.0998    | 0.13571 | 0.13571     | 0.59004476  |           |         |         |
| MGAT4D    | ENSG00000205301 | -0.60771  | 0.72831 | -0.60771    | 0.72831     | -0.60771  |         |         |
|           | 0.72831         | 1.0998    | 0.13572 | 0.13572     | 0.59004476  |           |         |         |
| ENPP4     | ENSG00000001561 | 1.0996    | 0.13575 | 1.0996      | 0.13575     | 1.0996    | 0.13575 |         |
|           | 0.020303        | 0.4919    | 0.13575 | 0.59004476  |             |           |         |         |
| PURG      | ENSG00000172733 | 1.0996    | 0.13575 | -0.21957    | 0.5869      | 0.71876   | 0.23615 |         |
|           | -0.21957        | 0.5869    | 0.13575 | 0.59004476  |             |           |         |         |
| NA        | ENSG00000277501 | 1.0995    | 0.13577 | -0.19756    | 0.5783      | -0.19756  | 0.5783  |         |
|           | -0.19756        | 0.5783    | 0.13577 | 0.59004476  |             |           |         |         |
| NA        | ENSG00000258615 | 1.0995    | 0.13578 | 1.0995      | 0.13578     | 1.0995    | 0.13578 |         |
|           | 1.0995          | 0.13578   | 0.13578 | 0.59004476  |             |           |         |         |
| NA        | ENSG00000261770 | 1.0995    | 0.13578 | -1.3013     | 0.90343     | -0.24243  | 0.59578 |         |
|           | -0.0030362      | 0.50121   | 0.13578 | 0.59004476  |             |           |         |         |
| CST2      | ENSG00000170369 | -0.056811 | 0.52265 | 1.0993      | 0.13581     | 0.63396   | 0.26305 |         |
|           | 0.56095         | 0.28742   | 0.13581 | 0.59004476  |             |           |         |         |
| NA        | ENSG00000258525 | 1.0993    | 0.13582 | 1.0993      | 0.13582     | 1.0993    | 0.13582 |         |
|           | 1.0993          | 0.13582   | 0.13582 | 0.59004476  |             |           |         |         |
| PPIAP46   | ENSG00000260266 | -0.075467 | 0.53008 | 1.0993      | 0.13582     | -0.34886  |         |         |
|           | 0.6364          | -0.34886  | 0.6364  | 0.13582     | 0.59004476  |           |         |         |
| C7orf50   | ENSG00000146540 | 0.97521   | 0.16473 | 0.041947    | 0.48327     | 1.0992    |         |         |
|           | 0.13584         | 0.097751  | 0.46106 | 0.13584     | 0.59004476  |           |         |         |
| POLH      | ENSG00000170734 | 0.11985   | 0.4523  | 0.36354     | 0.3581      | 1.0992    | 0.13584 |         |
|           | -0.68085        | 0.75202   | 0.13584 | 0.59004476  |             |           |         |         |
| RN7SL634P | ENSG00000242894 | 1.0992    | 0.13584 | 0.0043817   | 0.49825     | 0.0043817 |         |         |
|           | 0.49825         | 0.0043817 | 0.49825 | 0.13584     | 0.59004476  |           |         |         |
| SH3PXD2B  | ENSG00000174705 | 0.65257   | 0.25702 | 1.0991      | 0.13586     | 0.40139   |         |         |
|           | 0.34407         | 0.56462   | 0.28617 | 0.13586     | 0.59004476  |           |         |         |
| NA        | ENSG00000279485 | -0.2039   | 0.58078 | 1.099       | 0.13588     | 0.72172   | 0.23523 |         |
|           | 0.14052         | 0.44412   | 0.13588 | 0.59004476  |             |           |         |         |
| NA        | ENSG00000259707 | 1.0989    | 0.1359  | 1.0989      | 0.1359      | 1.0989    | 0.1359  |         |
|           | 1.0989          | 0.1359    | 0.1359  | 0.59004476  |             |           |         |         |
| NA        | ENSG00000261267 | 0.77262   | 0.21987 | 1.0989      | 0.1359      | 1.0989    | 0.1359  |         |
|           | 1.0989          | 0.1359    | 0.1359  | 0.59004476  |             |           |         |         |
| NA        | ENSG00000267177 | 1.0989    | 0.1359  | -0.88353    | 0.81153     | 0.044173  | 0.48238 |         |

|           |                 |             |         |             |             |           |         |  |
|-----------|-----------------|-------------|---------|-------------|-------------|-----------|---------|--|
|           | -0.39507        | 0.65361     | 0.1359  | 0.59004476  |             |           |         |  |
| MT1P3     | ENSG00000229230 | -0.11766    | 0.54683 | -0.11766    | 0.54683     | 1.0988    | 0.13592 |  |
|           | -0.5129         | 0.69599     | 0.13592 | 0.59004476  |             |           |         |  |
| NA        | ENSG00000232097 | 0.66294     | 0.25369 | 1.0988      | 0.13592     | 0.0035974 | 0.49856 |  |
|           | -0.15661        | 0.56222     | 0.13592 | 0.59004476  |             |           |         |  |
| UBA3      | ENSG00000144744 | 0.27965     | 0.38987 | 0.75244     | 0.22589     | 0.64432   | 0.25968 |  |
|           | 1.0988          | 0.13593     | 0.13593 | 0.59004476  |             |           |         |  |
| NA        | ENSG00000225794 | 1.0987      | 0.13595 | 1.0987      | 0.13595     | 1.0987    | 0.13595 |  |
|           | 1.0987          | 0.13595     | 0.13595 | 0.59004476  |             |           |         |  |
| NA        | ENSG00000260920 | -0.56327    | 0.71338 | 1.0987      | 0.13595     | 1.0987    | 0.13595 |  |
|           | 0.99276         | 0.16041     | 0.13595 | 0.59004476  |             |           |         |  |
| CALCRL    | ENSG00000064989 | 0.39403     | 0.34678 | 1.0986      | 0.13596     | 0.20006   |         |  |
|           | 0.42072         | 0.30472     | 0.38029 | 0.13596     | 0.59004476  |           |         |  |
| RPLP1P6   | ENSG00000213433 | -0.73355    | 0.76839 | -0.73355    | 0.76839     | -0.73355  |         |  |
|           | 0.76839         | 1.0986      | 0.13596 | 0.13596     | 0.59004476  |           |         |  |
| CD83      | ENSG00000112149 | -0.40434    | 0.65702 | 0.010968    | 0.49562     | 1.0986    | 0.13598 |  |
|           | 0.64766         | 0.2586      | 0.13598 | 0.59004476  |             |           |         |  |
| MAPK6P6   | ENSG00000226389 | 1.0986      | 0.13598 | -0.76144    | 0.7768      | 0.89355   |         |  |
|           | 0.18578         | 0.28952     | 0.38609 | 0.13598     | 0.59004476  |           |         |  |
| ZKSCAN7   | ENSG00000196345 | -0.37029    | 0.64442 | 1.0985      | 0.13599     | 0.54891   |         |  |
|           | 0.29153         | -0.1984     | 0.57864 | 0.13599     | 0.59004476  |           |         |  |
| NA        | ENSG00000225537 | 0.18017     | 0.42851 | -0.171      | 0.56789     | 1.0984    | 0.13601 |  |
|           | -0.11086        | 0.54414     | 0.13601 | 0.590069848 |             |           |         |  |
| NA        | ENSG00000258975 | 1.0984      | 0.13602 | 1.0984      | 0.13602     | 1.0984    | 0.13602 |  |
|           | 1.0984          | 0.13602     | 0.13602 | 0.590069848 |             |           |         |  |
| EEF1A1P33 | ENSG00000258846 | -0.24573    | 0.59705 | 1.0982      | 0.13606     | 1.0982    |         |  |
|           | 0.13606         | 1.0982      | 0.13606 | 0.13606     | 0.590190831 |           |         |  |
| CDCA4P4   | ENSG00000234219 | 1.0979      | 0.13612 | 1.0979      | 0.13612     | 1.0979    |         |  |
|           | 0.13612         | 1.0979      | 0.13612 | 0.13612     | 0.59038019  |           |         |  |
| RN7SL318P | ENSG00000242079 | 1.066       | 0.14322 | 1.0979      | 0.13613     | 0.80836   | 0.20944 |  |
|           | 1.0434          | 0.14838     | 0.13613 | 0.59038019  |             |           |         |  |
| NA        | ENSG00000284196 | 1.0978      | 0.13614 | -0.071388   | 0.52846     | 1.0978    | 0.13614 |  |
|           | 0.81035         | 0.20887     | 0.13614 | 0.59038019  |             |           |         |  |
| NT5DC4    | ENSG00000144130 | -0.6124     | 0.72987 | 1.0112      | 0.15596     | 1.0976    |         |  |
|           | 0.13619         | -0.459      | 0.67688 | 0.13619     | 0.590439386 |           |         |  |
| NA        | ENSG00000236505 | 0.82684     | 0.20416 | 0.2626      | 0.39643     | -0.17691  | 0.57021 |  |
|           | 1.0976          | 0.13619     | 0.13619 | 0.590439386 |             |           |         |  |
| NA        | ENSG00000256342 | 0.42526     | 0.33532 | 0.42526     | 0.33532     | 1.0976    | 0.13619 |  |
|           | 0.42526         | 0.33532     | 0.13619 | 0.590439386 |             |           |         |  |
| NA        | ENSG00000274261 | 1.0974      | 0.13622 | -0.80074    | 0.78836     | -0.80074  | 0.78836 |  |
|           | 0.47279         | 0.31818     | 0.13622 | 0.59050773  |             |           |         |  |
| MRGPRE    | ENSG00000184350 | 1.0974      | 0.13623 | 1.0974      | 0.13623     | 0.7511    |         |  |
|           | 0.2263          | 1.0974      | 0.13623 | 0.13623     | 0.59050773  |           |         |  |
| LINC01758 | ENSG00000229639 | -0.65899    | 0.74505 | 1.0971      | 0.13629     | -0.65899  |         |  |
|           | 0.74505         | 0.76331     | 0.22264 | 0.13629     | 0.590715263 |           |         |  |
| LAX1      | ENSG00000122188 | 0.82667     | 0.20421 | 1.097       | 0.13632     | 0.20347   | 0.41938 |  |
|           | 0.24934         | 0.40155     | 0.13632 | 0.590783539 |             |           |         |  |
| NA        | ENSG00000214999 | 1.097       | 0.13633 | 1.097       | 0.13633     | 1.097     | 0.13633 |  |
|           | 0.13633         | 0.590783539 |         |             |             |           |         |  |
| NA        | ENSG00000176882 | 1.0968      | 0.13636 | 1.0968      | 0.13636     | 1.0968    | 0.13636 |  |
|           | 0.83306         | 0.20241     | 0.13636 | 0.590808464 |             |           |         |  |
| H3P8      | ENSG00000270915 | 0.23499     | 0.40711 | -0.075351   | 0.53003     | 1.0968    | 0.13636 |  |
|           | 0.45451         | 0.32473     | 0.13636 | 0.590808464 |             |           |         |  |
| FOXN3     | ENSG00000053254 | -1.3082     | 0.90459 | -0.61869    | 0.73194     | 0.027421  | 0.48906 |  |
|           | 1.0966          | 0.1364      | 0.1364  | 0.590914548 |             |           |         |  |
| NA        | ENSG00000271248 | -0.77452    | 0.78069 | 1.0966      | 0.13641     | 0.89305   | 0.18592 |  |
|           | 0.20639         | 0.41824     | 0.13641 | 0.590914548 |             |           |         |  |
| RNU6-268P | ENSG00000201044 | -0.85834    | 0.80465 | -0.85834    | 0.80465     | -2.1536   |         |  |
|           | 0.98436         | 1.0964      | 0.13645 | 0.13645     | 0.590914548 |           |         |  |
| PGAM1P2   | ENSG00000225639 | -0.017654   | 0.50704 | 1.0964      | 0.13645     | 0.10498   |         |  |
|           | 0.4582          | 1.0964      | 0.13645 | 0.13645     | 0.590914548 |           |         |  |
| FAM186B   | ENSG00000135436 | 1.0963      | 0.13648 | 0.032231    | 0.48714     | 1.0963    |         |  |

|           |                 |           |         |             |             |            |         |  |
|-----------|-----------------|-----------|---------|-------------|-------------|------------|---------|--|
|           | 0.13648         | 0.70651   | 0.23994 | 0.13648     | 0.590914548 |            |         |  |
| HCG4      | ENSG00000176998 | 1.0962    | 0.1365  | 0.41054     | 0.34071     | -0.52917   | 0.70166 |  |
|           | 0.34969         | 0.36328   | 0.1365  | 0.590914548 |             |            |         |  |
| NA        | ENSG00000229727 | -1.0549   | 0.85427 | -1.0217     | 0.84654     | 1.0962     | 0.1365  |  |
|           | -0.67518        | 0.75022   | 0.1365  | 0.590914548 |             |            |         |  |
| NA        | ENSG00000275620 | 1.0962    | 0.1365  | 1.0962      | 0.1365      | 1.0962     | 0.1365  |  |
|           | 0.71292         | 0.23795   | 0.1365  | 0.590914548 |             |            |         |  |
| GSK3A     | ENSG00000105723 | 0.59591   | 0.27562 | 1.0034      | 0.15783     | 1.0961     | 0.13652 |  |
|           | 0.94552         | 0.1722    | 0.13652 | 0.590914548 |             |            |         |  |
| NA        | ENSG00000279539 | 1.0961    | 0.13652 | 1.0961      | 0.13652     | 1.0961     | 0.13652 |  |
|           | 1.0961          | 0.13652   | 0.13652 | 0.590914548 |             |            |         |  |
| NA        | ENSG00000204957 | 1.0961    | 0.13652 | 1.0961      | 0.13652     | 1.0961     | 0.13652 |  |
|           | 1.0961          | 0.13652   | 0.13652 | 0.590914548 |             |            |         |  |
| COX6CP16  | ENSG00000270313 | 0.21883   | 0.41339 | 0.11592     | 0.45386     | 1.096      | 0.13653 |  |
|           | 1.096           | 0.13653   | 0.13653 | 0.590914548 |             |            |         |  |
| HEATR6    | ENSG00000068097 | -1.4682   | 0.92897 | 1.096       | 0.13655     | -1.4682    | 0.92897 |  |
|           | -1.4682         | 0.92897   | 0.13655 | 0.590948623 |             |            |         |  |
| ITCH-IT1  | ENSG00000231795 | 0.95232   | 0.17047 | 1.0958      | 0.13657     | 0.95232    |         |  |
|           | 0.17047         | 0.95232   | 0.17047 | 0.13657     | 0.590949583 |            |         |  |
| CYP27B1   | ENSG00000111012 | 1.0958    | 0.13658 | 1.0958      | 0.13658     | 1.0958     |         |  |
|           | 0.13658         | 1.0958    | 0.13658 | 0.13658     | 0.590949583 |            |         |  |
| NA        | ENSG00000224884 | -0.065096 | 0.52595 | 1.0956      | 0.13663     | 1.0956     | 0.13663 |  |
|           | 0.17986         | 0.42863   | 0.13663 | 0.590949583 |             |            |         |  |
| SEPTIN4   | ENSG00000108387 | 1.0955    | 0.13664 | -0.13922    | 0.55536     | -0.30294   |         |  |
|           | 0.61903         | -0.22728  | 0.5899  | 0.13664     | 0.590949583 |            |         |  |
| NA        | ENSG00000249856 | 0.69484   | 0.24358 | 0.44539     | 0.32802     | 1.0955     | 0.13665 |  |
|           | -0.25969        | 0.60245   | 0.13665 | 0.590949583 |             |            |         |  |
| NA        | ENSG00000251313 | -0.46198  | 0.67795 | 1.0955      | 0.13665     | 0.31594    | 0.37602 |  |
|           | 0.67212         | 0.25075   | 0.13665 | 0.590949583 |             |            |         |  |
| ANKRD33B  | ENSG00000164236 | 1.0954    | 0.13666 | -0.26243    | 0.6035      | -0.4071    |         |  |
|           | 0.65803         | 0.26624   | 0.39503 | 0.13666     | 0.590949583 |            |         |  |
| NA        | ENSG00000226548 | 0.7237    | 0.23463 | 1.0954      | 0.13667     | 0.66761    | 0.25219 |  |
|           | 0.040018        | 0.48404   | 0.13667 | 0.590949583 |             |            |         |  |
| EHMT2     | ENSG00000204371 | 0.75942   | 0.2238  | -0.97132    | 0.83431     | 1.0954     | 0.13668 |  |
|           | 1.0954          | 0.13668   | 0.13668 | 0.590949583 |             |            |         |  |
| NA        | ENSG00000253269 | 0.25302   | 0.40013 | 0.99147     | 0.16073     | 1.0954     | 0.13668 |  |
|           | 0.25401         | 0.39974   | 0.13668 | 0.590949583 |             |            |         |  |
| NPIPB3    | ENSG00000169246 | 0.37225   | 0.35485 | -1.3557     | 0.9124      | -0.0092765 |         |  |
|           | 0.5037          | 1.0953    | 0.13669 | 0.13669     | 0.590949583 |            |         |  |
| CYP3A5    | ENSG00000106258 | 1.0952    | 0.13671 | 0.026452    | 0.48945     | 0.27394    |         |  |
|           | 0.39206         | 0.1525    | 0.4394  | 0.13671     | 0.590949583 |            |         |  |
| TINAGL1   | ENSG00000142910 | -0.18019  | 0.5715  | -0.038097   | 0.51519     | 1.0952     |         |  |
|           | 0.13671         | -0.10325  | 0.54112 | 0.13671     | 0.590949583 |            |         |  |
| NA        | ENSG00000235361 | 1.0952    | 0.13672 | 1.0952      | 0.13672     | 1.0952     | 0.13672 |  |
|           | 1.0952          | 0.13672   | 0.13672 | 0.590949583 |             |            |         |  |
| PTMA      | ENSG00000187514 | 1.0951    | 0.13675 | 1.0951      | 0.13675     | -0.99777   | 0.8408  |  |
|           | 0.49845         | 0.30908   | 0.13675 | 0.591024051 |             |            |         |  |
| PHKBP1    | ENSG00000226262 | 1.0949    | 0.13678 | -0.22276    | 0.58814     | -0.50522   |         |  |
|           | 0.6933          | 0.86813   | 0.19266 | 0.13678     | 0.591024051 |            |         |  |
| ABCG8     | ENSG00000143921 | 1.0948    | 0.13679 | -0.40819    | 0.65843     | -0.99344   | 0.83975 |  |
|           | -0.93947        | 0.82625   | 0.13679 | 0.591024051 |             |            |         |  |
| SNED1     | ENSG00000162804 | -0.73221  | 0.76798 | -0.67757    | 0.75098     | -1.3483    | 0.91122 |  |
|           | 1.0948          | 0.13681   | 0.13681 | 0.591024051 |             |            |         |  |
| CD200R1   | ENSG00000163606 | 0.93993   | 0.17363 | 1.0948      | 0.13681     | 0.70662    |         |  |
|           | 0.2399          | 0.9016    | 0.18363 | 0.13681     | 0.591024051 |            |         |  |
| LINC02175 | ENSG00000262155 | 1.0948    | 0.13681 | 1.0948      | 0.13681     | 0.28443    |         |  |
|           | 0.38804         | 1.0948    | 0.13681 | 0.13681     | 0.591024051 |            |         |  |
| NA        | ENSG00000250522 | 0.54181   | 0.29397 | 1.0943      | 0.13691     | 0.54181    | 0.29397 |  |
|           | 0.54181         | 0.29397   | 0.13691 | 0.591394398 |             |            |         |  |
| ADCY4     | ENSG00000129467 | -0.47408  | 0.68228 | 0.552       | 0.29047     | -0.47154   | 0.68137 |  |
|           | 1.0942          | 0.13692   | 0.13692 | 0.591394398 |             |            |         |  |
| MIR5093   | ENSG00000266307 | -0.78664  | 0.78425 | 1.0941      | 0.13695     | -0.015296  |         |  |

|              |                 |           |             |             |             |          |          |
|--------------|-----------------|-----------|-------------|-------------|-------------|----------|----------|
|              | 0.5061          | -0.78664  | 0.78425     | 0.13695     | 0.59147155  |          |          |
| MRRF         | ENSG00000148187 | 1.0304    | 0.1514      | 1.094       | 0.13697     | 0.096457 | 0.46158  |
|              | 0.29413         | 0.38433   | 0.13697     | 0.591496269 |             |          |          |
| IGSF5        | ENSG00000183067 | 1.094     | 0.13698     | 0.45655     | 0.324       | 0.97418  | 0.16498  |
|              | 0.21227         | 0.13698   | 0.591496269 |             |             |          | 0.79857  |
| SNRNP200     | ENSG00000144028 | 0.34127   | 0.36645     | -0.15897    | 0.56316     |          | 1.0937   |
|              | 0.13704         | 0.72415   | 0.23449     | 0.13704     | 0.591502787 |          |          |
| STXBP5       | ENSG00000164506 | 1.0937    | 0.13705     | 0.2946      | 0.38415     |          | 0.66759  |
|              | 0.2522          | 0.67754   | 0.24903     | 0.13705     | 0.591502787 |          |          |
| MRPL11       | ENSG00000174547 | 0.036791  | 0.48533     | 0.036791    | 0.48533     |          | -0.67606 |
|              | 0.7505          | 1.0935    | 0.13709     | 0.13709     | 0.591502787 |          |          |
| RNU6-1031P   | ENSG00000207504 | -1.3933   | 0.91823     | 1.0935      | 0.13709     |          | 0.016155 |
|              | 0.49356         | 0.21702   | 0.4141      | 0.13709     | 0.591502787 |          |          |
| ZNF625-ZNF20 | ENSG00000213297 | 1.0935    | 0.1371      | 0.97267     | 0.16536     |          | 0.25134  |
|              | 0.40078         | 1.0935    | 0.1371      | 0.1371      | 0.591502787 |          |          |
| BDH2P1       | ENSG00000232699 | 1.0934    | 0.1371      | 1.0934      | 0.1371      |          | 1.0934   |
|              | 0.1371          | 1.0934    | 0.1371      | 0.1371      | 0.591502787 |          |          |
| ZNF625       | ENSG00000257591 | 1.0935    | 0.1371      | 1.0935      | 0.1371      |          | 1.0935   |
|              | 0.1371          | 1.0935    | 0.1371      | 0.1371      | 0.591502787 |          |          |
| GALNT12      | ENSG00000119514 | -0.13564  | 0.55395     | -0.11347    | 0.54517     |          | 1.0934   |
|              | 0.13712         | 0.85387   | 0.19659     | 0.13712     | 0.591502787 |          |          |
| PLPBP        | ENSG00000147471 | 0.73715   | 0.23051     | 1.0932      | 0.13715     | 0.41824  | 0.33789  |
|              | -0.4919         | 0.6886    | 0.13715     | 0.591502787 |             |          |          |
| MRPL21       | ENSG00000197345 | -0.84871  | 0.80198     | -1.1534     | 0.87563     |          | 1.0932   |
|              | 0.13715         | -0.87749  | 0.80989     | 0.13715     | 0.591502787 |          |          |
| NA           | ENSG00000259839 | 1.0932    | 0.13715     | -0.20527    | 0.58132     | 0.21744  | 0.41393  |
|              | 0.9422          | 0.17304   | 0.13715     | 0.591502787 |             |          |          |
| QRICH2       | ENSG00000129646 | 1.0931    | 0.13717     | 0.17189     | 0.43176     |          | -0.35301 |
|              | 0.63796         | -1.5243   | 0.93629     | 0.13717     | 0.591502787 |          |          |
| NA           | ENSG00000252239 | 1.0931    | 0.13717     | 0.61052     | 0.27076     | 0.46084  | 0.32246  |
|              | 0.46084         | 0.32246   | 0.13717     | 0.591502787 |             |          |          |
| Clorf112     | ENSG00000000460 | -0.19705  | 0.5781      | -0.38382    | 0.64944     |          | -0.38382 |
|              | 0.64944         | 1.0931    | 0.13718     | 0.13718     | 0.591502787 |          |          |
| RNASEH1      | ENSG00000171865 | 0.91616   | 0.17979     | 1.0233      | 0.15308     |          | 0.91616  |
|              | 0.17979         | 1.0931    | 0.13718     | 0.13718     | 0.591502787 |          |          |
| LINC02494    | ENSG00000250340 | 1.0931    | 0.13718     | -0.85015    | 0.80238     |          | 0.2884   |
|              | 0.38652         | 0.2884    | 0.38652     | 0.13718     | 0.591502787 |          |          |
| GMDS-DT      | ENSG00000250903 | 0.10248   | 0.45919     | 0.47928     | 0.31587     | 1.093    | 0.13719  |
|              | -0.096345       | 0.53838   | 0.13719     | 0.591502787 |             |          |          |
| NA           | ENSG00000284327 | 1.093     | 0.1372      | 0.72769     | 0.2334      | 0.48597  | 0.31349  |
|              | 0.54837         | 0.29172   | 0.1372      | 0.591502787 |             |          |          |
| MTND4P3      | ENSG00000225959 | 1.0884    | 0.13822     | 1.0884      | 0.13822     |          | 1.0929   |
|              | 0.13722         | 1.0884    | 0.13822     | 0.13722     | 0.591518238 |          |          |
| MEF2C-AS1    | ENSG00000248309 | 0.599     | 0.27459     | 1.0928      | 0.13724     | -1.2533  | 0.89495  |
|              | 1.0561          | 0.14546   | 0.13724     | 0.591518238 |             |          |          |
| LINC01970    | ENSG00000265692 | 1.0928    | 0.13724     | 1.0928      | 0.13724     |          | 0.11326  |
|              | 0.45491         | -0.061916 | 0.52469     | 0.13724     | 0.591518238 |          |          |
| NA           | ENSG00000251284 | 1.0927    | 0.13726     | -1.1413     | 0.87313     | 0.91084  | 0.18119  |
|              | 0.91084         | 0.18119   | 0.13726     | 0.591533681 |             |          |          |
| UQCRC1       | ENSG00000010256 | 0.5111    | 0.30464     | 0.5111      | 0.30464     |          | 1.0926   |
|              | 0.13728         | 0.61969   | 0.26773     | 0.13728     | 0.591533681 |          |          |
| ARHGEF18     | ENSG00000104880 | 0.5437    | 0.29332     | 1.0926      | 0.13728     |          | 0.94116  |
|              | 0.17331         | 1.0436    | 0.14834     | 0.13728     | 0.591533681 |          |          |
| NA           | ENSG00000258758 | 0.0037156 | 0.49852     | -0.31363    | 0.6231      | 1.0924   | 0.13733  |
|              | -0.31363        | 0.6231    | 0.13733     | 0.59167224  |             |          |          |
| NA           | ENSG00000271459 | 1.0922    | 0.13737     | 1.0922      | 0.13737     | 1.0922   | 0.13737  |
|              | 1.0922          | 0.13737   | 0.13737     | 0.59167224  |             |          |          |
| NA           | ENSG00000206784 | -0.64519  | 0.7406      | 1.0922      | 0.13738     | 0.042779 | 0.48294  |
|              | 0.042779        | 0.48294   | 0.13738     | 0.59167224  |             |          |          |
| MTND1P8      | ENSG00000263177 | 1.0922    | 0.13738     | 0.57332     | 0.28321     |          | 1.0922   |
|              | 0.13738         | 1.0922    | 0.13738     | 0.13738     | 0.59167224  |          |          |
| NA           | ENSG00000221418 | 1.0922    | 0.13738     | 1.0922      | 0.13738     | 1.0922   | 0.13738  |

|           |                 |               |               |               |               |           |         |  |
|-----------|-----------------|---------------|---------------|---------------|---------------|-----------|---------|--|
|           | 0.25341         | 0.39998       | 0.13738       | 0.59167224    |               |           |         |  |
| TMEM181   | ENSG00000146433 | -0.23273      | 0.59201       | -0.3317       | 0.62994       | 0.78304   |         |  |
|           | 0.2168          | 1.092 0.13741 | 0.13741       | 0.59167224    |               |           |         |  |
| IFNA11P   | ENSG00000231195 | 1.092 0.13742 | 1.092 0.13742 | 1.092 0.13742 | 1.092 0.13742 | 0.78369   |         |  |
|           | 0.21661         | 0.13742       | 0.59167224    |               |               |           |         |  |
| NA        | ENSG00000249803 | 0.16561       | 0.43423       | 1.0919        | 0.13743       | 0.85135   | 0.19729 |  |
|           | 1.0919          | 0.13743       | 0.13743       | 0.59167224    |               |           |         |  |
| NA        | ENSG00000260857 | 1.0919        | 0.13744       | 1.0919        | 0.13744       | 1.0919    | 0.13744 |  |
|           | 1.0919          | 0.13744       | 0.13744       | 0.59167224    |               |           |         |  |
| TP53TG3HP | ENSG00000269622 | 1.0919        | 0.13744       | 1.0919        | 0.13744       | 1.0919    |         |  |
|           | 0.13744         | 1.0919        | 0.13744       | 0.13744       | 0.59167224    |           |         |  |
| LAMC3     | ENSG00000050555 | -0.49352      | 0.68918       | 1.0918        | 0.13746       | -0.25469  | 0.60052 |  |
|           | -0.76264        | 0.77716       | 0.13746       | 0.59167224    |               |           |         |  |
| RGS6      | ENSG00000182732 | 0.89274       | 0.186 0.64048 | 0.26093       | 0.53141       | 0.29757   |         |  |
|           | 1.0918          | 0.13746       | 0.13746       | 0.59167224    |               |           |         |  |
| RNA5SP241 | ENSG00000212628 | 1.0918        | 0.13747       | 0.47283       | 0.31817       | -0.062693 |         |  |
|           | 0.52499         | 0.33123       | 0.37023       | 0.13747       | 0.59167224    |           |         |  |
| NA        | ENSG00000222588 | 1.0917        | 0.13749       | 1.0917        | 0.13749       | 1.0917    | 0.13749 |  |
|           | 1.0917          | 0.13749       | 0.13749       | 0.591706058   |               |           |         |  |
| CABP1     | ENSG00000157782 | 1.03          | 0.1515        | 1.0916        | 0.13751       | 0.89481   | 0.18544 |  |
|           | 0.33079         | 0.3704        | 0.13751       | 0.591739871   |               |           |         |  |
| CALM2P4   | ENSG00000233662 | 1.0914        | 0.13755       | 0.89333       | 0.18584       | 0.82717   |         |  |
|           | 0.20407         | -0.70099      | 0.75835       | 0.13755       | 0.591742875   |           |         |  |
| NA        | ENSG00000270140 | 1.0913        | 0.13756       | 1.0913        | 0.13756       | 1.0913    | 0.13756 |  |
|           | 1.0913          | 0.13756       | 0.13756       | 0.591742875   |               |           |         |  |
| NPM1P42   | ENSG00000259259 | 1.0912        | 0.13758       | 1.0912        | 0.13758       | 1.0912    |         |  |
|           | 0.13758         | 1.0912        | 0.13758       | 0.13758       | 0.591742875   |           |         |  |
| LAMTOR3   | ENSG00000109270 | 0.1556        | 0.43817       | 1.0912        | 0.1376        | 0.2036    |         |  |
|           | 0.41933         | -0.065014     | 0.52592       | 0.1376        | 0.591742875   |           |         |  |
| OR6A2     | ENSG00000184933 | 0.32345       | 0.37318       | 1.0912        | 0.1376        | 0.32345   | 0.37318 |  |
|           | 0.32345         | 0.37318       | 0.1376        | 0.591742875   |               |           |         |  |
| OSTC      | ENSG00000198856 | 0.14141       | 0.44377       | 0.36012       | 0.35938       | 1.0911    | 0.13761 |  |
|           | 0.86583         | 0.19329       | 0.13761       | 0.591742875   |               |           |         |  |
| TERF2IP   | ENSG00000166848 | 0.79482       | 0.21336       | 1.0911        | 0.13762       | 1.0911    |         |  |
|           | 0.13762         | 0.15296       | 0.43922       | 0.13762       | 0.591742875   |           |         |  |
| DCHS2     | ENSG00000197410 | 0.88611       | 0.18778       | 0.78791       | 0.21538       | 0.33781   | 0.36775 |  |
|           | 1.0911          | 0.13762       | 0.13762       | 0.591742875   |               |           |         |  |
| TCN1      | ENSG00000134827 | 1.0908        | 0.13768       | 1.0669        | 0.14301       | 1.0669    | 0.14301 |  |
|           | 0.24952         | 0.40148       | 0.13768       | 0.591742875   |               |           |         |  |
| CSPP1     | ENSG00000104218 | 1.0907        | 0.1377        | 0.91325       | 0.18056       | 0.91325   | 0.18056 |  |
|           | -0.86898        | 0.80757       | 0.1377        | 0.591742875   |               |           |         |  |
| DEFB132   | ENSG00000186458 | -0.28811      | 0.61337       | 1.0906        | 0.13772       | -1.3092   |         |  |
|           | 0.90477         | -1.2946       | 0.90228       | 0.13772       | 0.591742875   |           |         |  |
| MIR548J   | ENSG00000221760 | 1.0906        | 0.13772       | 1.0906        | 0.13772       | 1.0906    |         |  |
|           | 0.13772         | 1.0906        | 0.13772       | 0.13772       | 0.591742875   |           |         |  |
| NA        | ENSG00000228814 | -0.2787       | 0.60976       | -0.2787       | 0.60976       | 0.63498   | 0.26272 |  |
|           | 1.0905          | 0.13774       | 0.13774       | 0.591742875   |               |           |         |  |
| SNORA79   | ENSG00000221303 | 1.0905        | 0.13775       | 1.0905        | 0.13775       | 1.0905    |         |  |
|           | 0.13775         | 1.0905        | 0.13775       | 0.13775       | 0.591742875   |           |         |  |
| NA        | ENSG00000269106 | 1.0903        | 0.13778       | 1.0903        | 0.13778       | 1.0903    | 0.13778 |  |
|           | 1.0903          | 0.13778       | 0.13778       | 0.591742875   |               |           |         |  |
| NA        | ENSG00000275197 | 0.15957       | 0.43661       | -0.33665      | 0.63181       | 1.0903    | 0.13779 |  |
|           | 1.0903          | 0.13779       | 0.13779       | 0.591742875   |               |           |         |  |
| THG1L     | ENSG00000113272 | 0.59347       | 0.27643       | 1.0903        | 0.1378        | 0.63359   | 0.26317 |  |
|           | 0.73158         | 0.23221       | 0.1378        | 0.591742875   |               |           |         |  |
| BAZ1A     | ENSG00000198604 | 0.1767        | 0.42987       | 0.16779       | 0.43337       | -0.23148  | 0.59153 |  |
|           | 1.0903          | 0.1378        | 0.1378        | 0.591742875   |               |           |         |  |
| NA        | ENSG00000277096 | -1.6023       | 0.94546       | -1.7401       | 0.95908       | -1.6023   | 0.94546 |  |
|           | 1.0903          | 0.1378        | 0.1378        | 0.591742875   |               |           |         |  |
| KYNU      | ENSG00000115919 | 1.0902        | 0.13782       | 0.97022       | 0.16597       | 0.57213   | 0.28362 |  |
|           | 0.95246         | 0.17043       | 0.13782       | 0.591742875   |               |           |         |  |
| NINJ1     | ENSG00000131669 | 1.0902        | 0.13782       | -1.1922       | 0.8834        | -0.72115  | 0.76459 |  |

|             |                 |           |         |             |             |          |         |  |
|-------------|-----------------|-----------|---------|-------------|-------------|----------|---------|--|
|             | 0.9064          | 0.18236   | 0.13782 | 0.591742875 |             |          |         |  |
| PGD         | ENSG00000142657 | 1.0901    | 0.13783 | -0.6855     | 0.75348     | 0.37418  | 0.35413 |  |
|             | 0.50721         | 0.306     | 0.13783 | 0.591742875 |             |          |         |  |
| KCNH7-AS1   | ENSG00000237750 | -0.50401  | 0.69287 | 1.0901      | 0.13784     | -0.50401 |         |  |
|             | 0.69287         | -1.2905   | 0.90157 | 0.13784     | 0.591742875 |          |         |  |
| Clorf216    | ENSG00000142686 | 0.53939   | 0.29481 | 1.09        | 0.13785     | 0.54239  | 0.29378 |  |
|             | 0.48725         | 0.31304   | 0.13785 | 0.591742875 |             |          |         |  |
| RN7SL757P   | ENSG00000239249 | 0.5215    | 0.30101 | 1.09        | 0.13785     | 0.76982  | 0.2207  |  |
|             | 0.59855         | 0.27474   | 0.13785 | 0.591742875 |             |          |         |  |
| PKIA        | ENSG00000171033 | 0.29951   | 0.38228 | 0.53655     | 0.29579     | 0.93092  | 0.17595 |  |
|             | 1.09            | 0.13786   | 0.13786 | 0.591742875 |             |          |         |  |
| SEPHS1      | ENSG00000086475 | -0.056789 | 0.52264 | 0.95053     | 0.17092     | 1.0899   |         |  |
|             | 0.13788         | -0.10597  | 0.5422  | 0.13788     | 0.591742875 |          |         |  |
| S100A7A     | ENSG00000184330 | 1.0899    | 0.13789 | -0.55576    | 0.71081     | 0.55232  |         |  |
|             | 0.29037         | -0.64709  | 0.74121 | 0.13789     | 0.591742875 |          |         |  |
| KLHL41      | ENSG00000239474 | 1.0898    | 0.1379  | 0.43562     | 0.33156     | 1.0245   |         |  |
|             | 0.15279         | 1.0245    | 0.15279 | 0.1379      | 0.591742875 |          |         |  |
| DPH6-DT     | ENSG00000248079 | 0.011154  | 0.49555 | 1.0898      | 0.1379      | 0.9704   |         |  |
|             | 0.16592         | 1.0898    | 0.1379  | 0.1379      | 0.591742875 |          |         |  |
| NA          | ENSG00000267222 | 1.0898    | 0.1379  | 1.0898      | 0.1379      | 1.0898   | 0.1379  |  |
|             | 1.0898          | 0.1379    | 0.1379  | 0.591742875 |             |          |         |  |
| MIR3147     | ENSG00000266168 | 1.0897    | 0.13792 | 1.0897      | 0.13792     | 1.0897   |         |  |
|             | 0.13792         | 0.90797   | 0.18195 | 0.13792     | 0.591742875 |          |         |  |
| LCE4A       | ENSG00000187170 | 1.0897    | 0.13793 | 0.84884     | 0.19798     | 0.84884  | 0.19798 |  |
|             | 0.84884         | 0.19798   | 0.13793 | 0.591742875 |             |          |         |  |
| NA          | ENSG00000272988 | -1.8299   | 0.96637 | -0.58464    | 0.72061     | 1.0896   | 0.13794 |  |
|             | 1.0896          | 0.13794   | 0.13794 | 0.591742875 |             |          |         |  |
| FAM135A-AS1 | ENSG00000224349 | 1.0895    | 0.13796 | 1.0895      | 0.13796     | 1.0895   |         |  |
|             | 0.13796         | 1.0895    | 0.13796 | 0.13796     | 0.591742875 |          |         |  |
| RPL12P21    | ENSG00000242683 | 1.0895    | 0.13796 | 1.0895      | 0.13796     | 1.0895   |         |  |
|             | 0.13796         | 1.0895    | 0.13796 | 0.13796     | 0.591742875 |          |         |  |
| NA          | ENSG00000236947 | 1.0895    | 0.13796 | 0.64369     | 0.25989     | 0.33777  | 0.36777 |  |
|             | -0.31326        | 0.62296   | 0.13796 | 0.591742875 |             |          |         |  |
| PTBP2       | ENSG00000117569 | 1.0513    | 0.14655 | 0.60113     | 0.27388     | 1.0894   | 0.13799 |  |
|             | 1.0894          | 0.13799   | 0.13799 | 0.59180716  |             |          |         |  |
| ABCD1P5     | ENSG00000214330 | 1.0893    | 0.13801 | 1.0893      | 0.13801     | 1.0893   |         |  |
|             | 0.13801         | 1.0893    | 0.13801 | 0.13801     | 0.59180716  |          |         |  |
| CST12P      | ENSG00000226344 | -0.27267  | 0.60745 | 1.025       | 0.15268     | 0.90528  | 0.18266 |  |
|             | 1.0893          | 0.13802   | 0.13802 | 0.59180716  |             |          |         |  |
| SLC38A3     | ENSG00000188338 | 0.65371   | 0.25665 | 0.65371     | 0.25665     | 0.65371  |         |  |
|             | 0.25665         | 1.0892    | 0.13803 | 0.13803     | 0.59180716  |          |         |  |
| NA          | ENSG00000224905 | 0.23273   | 0.40799 | 0.58967     | 0.27771     | -0.19199 | 0.57612 |  |
|             | 1.0891          | 0.13805   | 0.13805 | 0.59180716  |             |          |         |  |
| NA          | ENSG00000231487 | 1.0891    | 0.13806 | -0.14532    | 0.55777     | 0.55458  | 0.28959 |  |
|             | 0.55458         | 0.28959   | 0.13806 | 0.59180716  |             |          |         |  |
| OR7E46P     | ENSG00000234485 | 0.50978   | 0.3051  | 1.0891      | 0.13806     | -0.27324 |         |  |
|             | 0.60766         | 0.76888   | 0.22098 | 0.13806     | 0.59180716  |          |         |  |
| RNU6-271P   | ENSG00000200728 | 1.0889    | 0.1381  | 1.0889      | 0.1381      | 1.0889   |         |  |
|             | 0.1381          | 1.0889    | 0.1381  | 0.1381      | 0.591851227 |          |         |  |
| NA          | ENSG00000170647 | 1.0889    | 0.1381  | 1.0889      | 0.1381      | 1.0889   | 0.1381  |  |
|             | 1.0889          | 0.1381    | 0.1381  | 0.591851227 |             |          |         |  |
| HDC         | ENSG00000140287 | -0.69117  | 0.75527 | -0.69117    | 0.75527     | 1.0889   | 0.13811 |  |
|             | -0.69117        | 0.75527   | 0.13811 | 0.591851227 |             |          |         |  |
| ECM1        | ENSG00000143369 | 0.062782  | 0.47497 | 0.062782    | 0.47497     | 1.0887   | 0.13815 |  |
|             | 0.062782        | 0.47497   | 0.13815 | 0.591851227 |             |          |         |  |
| NME3        | ENSG00000103024 | 1.0885    | 0.13819 | 1.0885      | 0.13819     | 1.0885   | 0.13819 |  |
|             | 1.0885          | 0.13819   | 0.13819 | 0.591851227 |             |          |         |  |
| RN7SL130P   | ENSG00000244256 | 1.0883    | 0.13823 | 1.0883      | 0.13823     | 1.0883   |         |  |
|             | 0.13823         | 1.0883    | 0.13823 | 0.13823     | 0.591851227 |          |         |  |
| CYP4F24P    | ENSG00000267594 | -1.0096   | 0.84365 | 1.0882      | 0.13825     | -1.14    | 0.87287 |  |
|             | 0.21181         | 0.41613   | 0.13825 | 0.591851227 |             |          |         |  |
| TOMM40P3    | ENSG00000249360 | 0.83739   | 0.20119 | 1.088       | 0.1383      | -0.68944 | 0.75473 |  |

|           |                 |           |             |             |             |           |         |       |
|-----------|-----------------|-----------|-------------|-------------|-------------|-----------|---------|-------|
|           | -0.68944        | 0.75473   | 0.1383      | 0.591851227 |             |           |         |       |
| MIR4421   | ENSG00000265538 | 1.0879    | 0.13832     | 0.15039     | 0.44023     | 0.059266  |         |       |
|           | 0.47637         | 0.059266  | 0.47637     | 0.13832     | 0.591851227 |           |         |       |
| CLBA1     | ENSG00000140104 | 0.31277   | 0.37723     | 0.095448    | 0.46198     | 0.095448  | 0.46198 |       |
|           | 1.0878          | 0.13834   | 0.13834     | 0.591851227 |             |           |         |       |
| NA        | ENSG00000253471 | 1.0878    | 0.13834     | 1.0878      | 0.13834     | 1.0878    | 0.13834 |       |
|           | 1.0878          | 0.13834   | 0.13834     | 0.591851227 |             |           |         |       |
| NA        | ENSG00000268333 | 1.0878    | 0.13835     | 1.0837      | 0.13926     | 0.81862   | 0.2065  |       |
|           | 0.81862         | 0.2065    | 0.13835     | 0.591851227 |             |           |         |       |
| ADAM20P2  | ENSG00000248574 | -0.48363  | 0.68567     | 1.0877      | 0.13836     | -0.17022  |         |       |
|           | 0.56758         | 0.25585   | 0.39903     | 0.13836     | 0.591851227 |           |         |       |
| BMS1P7    | ENSG00000270025 | -2.1377   | 0.98373     | -0.8059     | 0.78985     | -0.17824  |         |       |
|           | 0.57073         | 1.0877    | 0.13836     | 0.13836     | 0.591851227 |           |         |       |
| PDE1A     | ENSG00000115252 | 0.41367   | 0.33956     | 0.1696      | 0.43266     | 1.0876    | 0.1384  |       |
|           | 0.49127         | 0.31162   | 0.1384      | 0.591851227 |             |           |         |       |
| EMID1     | ENSG00000186998 | -0.60586  | 0.7277      | 1.0875      | 0.13841     | 0.13332   | 0.44697 |       |
|           | -1.302          | 0.90354   | 0.13841     | 0.591851227 |             |           |         |       |
| THAP12P6  | ENSG00000227882 | -0.20094  | 0.57963     | 1.0874      | 0.13843     | -1.1706   |         |       |
|           | 0.87911         | -1.3297   | 0.90818     | 0.13843     | 0.591851227 |           |         |       |
| NA        | ENSG00000228863 | 1.0874    | 0.13843     | 0.62834     | 0.26489     | 0.33589   | 0.36848 |       |
|           | 0.92807         | 0.17668   | 0.13843     | 0.591851227 |             |           |         |       |
| EIF4G1    | ENSG00000114867 | 1.0872    | 0.13847     | -0.83871    | 0.79918     | 0.28894   |         |       |
|           | 0.38631         | -0.098086 | 0.53907     | 0.13847     | 0.591851227 |           |         |       |
| LINC02260 | ENSG00000250456 | -0.99931  | 0.84118     | 0.18139     | 0.42803     | 0.75757   |         |       |
|           | 0.22435         | 1.0872    | 0.13847     | 0.13847     | 0.591851227 |           |         |       |
| NA        | ENSG00000239065 | -1.2542   | 0.89511     | 1.0872      | 0.13848     | 0.037369  | 0.4851  |       |
|           | 0.12837         | 0.44893   | 0.13848     | 0.591851227 |             |           |         |       |
| NA        | ENSG00000253204 | 0.97187   | 0.16556     | 1.0871      | 0.13849     | 0.41446   | 0.33927 |       |
|           | -0.23617        | 0.59335   | 0.13849     | 0.591851227 |             |           |         |       |
| SLF2      | ENSG00000119906 | 0.77945   | 0.21786     | 0.82658     | 0.20424     | 1.087     | 0.13852 |       |
|           | -0.61385        | 0.73034   | 0.13852     | 0.591851227 |             |           |         |       |
| RNU1-19P  | ENSG00000200176 | 1.087     | 0.13852     | 0.69185     | 0.24452     | 1.087     | 0.13852 | 1.087 |
|           | 0.13852         | 0.13852   | 0.591851227 |             |             |           |         |       |
| IGF1R     | ENSG00000140443 | 0.049026  | 0.48045     | 1.087       | 0.13853     | -0.94122  | 0.8267  |       |
|           | -1.621          | 0.94749   | 0.13853     | 0.591851227 |             |           |         |       |
| NA        | ENSG00000239870 | 0.47403   | 0.31774     | 0.20124     | 0.42025     | 0.47403   | 0.31774 |       |
|           | 1.087           | 0.13853   | 0.13853     | 0.591851227 |             |           |         |       |
| NA        | ENSG00000232597 | -0.46528  | 0.67914     | -0.46528    | 0.67914     | 0.89069   | 0.18655 |       |
|           | 1.0868          | 0.13855   | 0.13855     | 0.591851227 |             |           |         |       |
| NEK1      | ENSG00000137601 | 0.041331  | 0.48352     | 1.0868      | 0.13856     | -0.67962  | 0.75163 |       |
|           | 0.095556        | 0.46194   | 0.13856     | 0.591851227 |             |           |         |       |
| LCE1B     | ENSG00000196734 | 1.0868    | 0.13856     | 1.0868      | 0.13856     | -0.50731  | 0.69403 |       |
|           | -0.75565        | 0.77507   | 0.13856     | 0.591851227 |             |           |         |       |
| NA        | ENSG00000260625 | -0.25847  | 0.60198     | -0.25847    | 0.60198     | 1.0868    | 0.13857 |       |
|           | -0.54481        | 0.70706   | 0.13857     | 0.591851227 |             |           |         |       |
| PXN-AS1   | ENSG00000255857 | 1.0867    | 0.13858     | 0.49301     | 0.311       | -0.083715 | 0.53336 |       |
|           | -0.083715       | 0.53336   | 0.13858     | 0.591851227 |             |           |         |       |
| RNU6-239P | ENSG00000212292 | -1.1687   | 0.87874     | -1.1687     | 0.87874     | 0.42257   |         |       |
|           | 0.3363          | 1.0866    | 0.1386      | 0.1386      | 0.591851227 |           |         |       |
| MRPS34    | ENSG00000074071 | 1.0865    | 0.13862     | 1.0865      | 0.13862     | 1.0865    |         |       |
|           | 0.13862         | 0.57714   | 0.28192     | 0.13862     | 0.591851227 |           |         |       |
| EME2      | ENSG00000197774 | 1.0865    | 0.13862     | 1.0865      | 0.13862     | 1.0865    | 0.13862 |       |
|           | 1.0865          | 0.13862   | 0.13862     | 0.591851227 |             |           |         |       |
| NA        | ENSG00000201502 | 1.0866    | 0.13862     | 1.0866      | 0.13862     | 1.0866    | 0.13862 |       |
|           | -0.18896        | 0.57494   | 0.13862     | 0.591851227 |             |           |         |       |
| C1R       | ENSG00000159403 | 0.1056    | 0.45795     | 1.0865      | 0.13864     | 0.1066    | 0.45755 |       |
|           | -0.42336        | 0.66399   | 0.13864     | 0.591851227 |             |           |         |       |
| GNA15     | ENSG00000060558 | -1.0648   | 0.85652     | -0.51974    | 0.69838     | 0.90463   | 0.18283 |       |
|           | 1.0864          | 0.13865   | 0.13865     | 0.591851227 |             |           |         |       |
| NA        | ENSG00000227438 | 1.0864    | 0.13865     | -0.27604    | 0.60874     | 1.0864    | 0.13865 |       |
|           | 1.0864          | 0.13865   | 0.13865     | 0.591851227 |             |           |         |       |
| LINC01754 | ENSG00000224565 | -0.41206  | 0.65985     | 1.0863      | 0.13866     | 0.41342   |         |       |



|           |                 |           |             |             |             |           |         |         |
|-----------|-----------------|-----------|-------------|-------------|-------------|-----------|---------|---------|
|           | 0.33965         | -0.61194  | 0.72971     | 0.13866     | 0.591851227 |           |         |         |
| CAST      | ENSG00000153113 | 1.0863    | 0.13868     | 1.0182      | 0.15428     | 0.57607   | 0.28228 |         |
|           | 0.96481         | 0.16732   | 0.13868     | 0.591851227 |             |           |         |         |
| NA        | ENSG00000233757 | -1.0325   | 0.84908     | 1.0863      | 0.13868     | -0.70897  | 0.76083 |         |
|           | -0.51849        | 0.69794   | 0.13868     | 0.591851227 |             |           |         |         |
| LINC02775 | ENSG00000283518 | 1.0863    | 0.13868     | 0.97353     | 0.16514     | 1.079     | 0.14029 |         |
|           | 0.34355         | 0.36559   | 0.13868     | 0.591851227 |             |           |         |         |
| FSTL4     | ENSG00000053108 | -1.7091   | 0.95628     | 1.0861      | 0.13872     | 0.80172   | 0.21136 |         |
|           | -0.54776        | 0.70807   | 0.13872     | 0.591851227 |             |           |         |         |
| NA        | ENSG00000280414 | -0.17774  | 0.57054     | 1.086       | 0.13874     | 0.99076   | 0.1609  |         |
|           | 0.99076         | 0.1609    | 0.13874     | 0.591851227 |             |           |         |         |
| EGR1      | ENSG00000120738 | 0.65443   | 0.25642     | 0.25565     | 0.39911     | 1.0859    | 0.13875 |         |
|           | 0.90415         | 0.18296   | 0.13875     | 0.591851227 |             |           |         |         |
| XPOT      | ENSG00000184575 | -0.55696  | 0.71122     | 1.086       | 0.13875     | 1.086     | 0.13875 | 0.80416 |
|           | 0.21065         | 0.13875   | 0.591851227 |             |             |           |         |         |
| NA        | ENSG00000274682 | 0.87185   | 0.19165     | 1.0857      | 0.1388      | 0.87185   | 0.19165 |         |
|           | 0.87185         | 0.19165   | 0.1388      | 0.591851227 |             |           |         |         |
| PSTPIP2   | ENSG00000152229 | 0.30984   | 0.37834     | 0.5762      | 0.28224     | 0.30984   |         |         |
|           | 0.37834         | 1.0857    | 0.13881     | 0.13881     | 0.591851227 |           |         |         |
| NA        | ENSG00000238629 | -0.19586  | 0.57764     | 1.0251      | 0.15265     | -0.59393  | 0.72372 |         |
|           | 1.0857          | 0.13881   | 0.13881     | 0.591851227 |             |           |         |         |
| BCL2      | ENSG00000171791 | 0.96506   | 0.16726     | 0.87388     | 0.19109     | 1.0856    | 0.13882 |         |
|           | 0.83457         | 0.20198   | 0.13882     | 0.591851227 |             |           |         |         |
| RFC5P1    | ENSG00000233526 | 1.0856    | 0.13882     | 1.0856      | 0.13882     | 0.84029   |         |         |
|           | 0.20037         | -0.25009  | 0.59874     | 0.13882     | 0.591851227 |           |         |         |
| ADAM10    | ENSG00000137845 | 1.0856    | 0.13883     | 0.29579     | 0.38369     | 0.66752   |         |         |
|           | 0.25222         | 0.73075   | 0.23247     | 0.13883     | 0.591851227 |           |         |         |
| NA        | ENSG00000234350 | 0.50182   | 0.3079      | 0.74537     | 0.22803     | 0.53293   | 0.29704 |         |
|           | 1.0852          | 0.13891   | 0.13891     | 0.591851227 |             |           |         |         |
| SEPTIN2P1 | ENSG00000227850 | -0.18318  | 0.57267     | 1.085       | 0.13895     | 0.77927   | 0.21791 |         |
|           | -1.0014         | 0.84168   | 0.13895     | 0.591851227 |             |           |         |         |
| NA        | ENSG00000259931 | 1.0851    | 0.13895     | 1.0851      | 0.13895     | 1.0851    | 0.13895 |         |
|           | 1.0851          | 0.13895   | 0.13895     | 0.591851227 |             |           |         |         |
| NYAP2     | ENSG00000144460 | 1.0749    | 0.14121     | 0.18706     | 0.42581     | 1.085     | 0.13896 |         |
|           | 0.71848         | 0.23623   | 0.13896     | 0.591851227 |             |           |         |         |
| NA        | ENSG00000253986 | -0.90394  | 0.81699     | 1.085       | 0.13896     | 1.0306    | 0.15136 |         |
|           | -0.90394        | 0.81699   | 0.13896     | 0.591851227 |             |           |         |         |
| NA        | ENSG00000228590 | 0.23649   | 0.40653     | 0.090103    | 0.4641      | 0.23649   | 0.40653 |         |
|           | 1.085           | 0.13897   | 0.13897     | 0.591851227 |             |           |         |         |
| RN7SL271P | ENSG00000239250 | 0.59065   | 0.27738     | 0.66085     | 0.25435     | 1.085     | 0.13897 |         |
|           | -0.86329        | 0.80601   | 0.13897     | 0.591851227 |             |           |         |         |
| NA        | ENSG00000259381 | -0.28793  | 0.6133      | 1.0849      | 0.13898     | 1.0849    | 0.13898 |         |
|           | 1.0849          | 0.13898   | 0.13898     | 0.591851227 |             |           |         |         |
| RN7SL164P | ENSG00000242614 | 0.38116   | 0.35154     | 0.14245     | 0.44336     | 1.0848    | 0.139   |         |
|           | 0.36828         | 0.35633   | 0.139       | 0.591851227 |             |           |         |         |
| NA        | ENSG00000282924 | 0.71671   | 0.23678     | -0.45811    | 0.67656     | 1.0848    | 0.139   |         |
|           | -0.069357       | 0.52765   | 0.139       | 0.591851227 |             |           |         |         |
| NA        | ENSG00000225637 | 1.0238    | 0.15296     | 1.0238      | 0.15296     | 1.0238    | 0.15296 |         |
|           | 1.0847          | 0.13903   | 0.13903     | 0.591851227 |             |           |         |         |
| C20orf144 | ENSG00000149609 | -0.017219 | 0.50687     | 1.0845      | 0.13906     | -0.017219 |         |         |
|           | 0.50687         | -0.017219 | 0.50687     | 0.13906     | 0.591851227 |           |         |         |
| C2orf27B  | ENSG00000186825 | 1.0845    | 0.13906     | 0.46805     | 0.31988     | -0.34206  |         |         |
|           | 0.63385         | 0.46805   | 0.31988     | 0.13906     | 0.591851227 |           |         |         |
| NA        | ENSG00000259287 | 1.0845    | 0.13907     | 1.0845      | 0.13907     | 1.0845    | 0.13907 |         |
|           | 1.0845          | 0.13907   | 0.13907     | 0.591851227 |             |           |         |         |
| SLC25A45  | ENSG00000162241 | -0.15999  | 0.56355     | -0.1797     | 0.57131     | -0.57786  |         |         |
|           | 0.71832         | 1.0845    | 0.13908     | 0.13908     | 0.591851227 |           |         |         |
| RNA5SP265 | ENSG00000222955 | 1.0844    | 0.13908     | 1.0844      | 0.13908     | 1.0844    |         |         |
|           | 0.13908         | 1.0844    | 0.13908     | 0.13908     | 0.591851227 |           |         |         |
| AAMDC     | ENSG00000087884 | 1.0843    | 0.13911     | 1.0843      | 0.13911     | 0.26861   | 0.39411 |         |
|           | 0.3456          | 0.36482   | 0.13911     | 0.591851227 |             |           |         |         |
| NA        | ENSG00000233713 | 1.0841    | 0.13915     | 1.0841      | 0.13915     | 1.0841    | 0.13915 |         |

|           |                 |             |         |             |             |          |         |        |
|-----------|-----------------|-------------|---------|-------------|-------------|----------|---------|--------|
|           | 1.0841          | 0.13915     | 0.13915 | 0.591851227 |             |          |         |        |
| RNU6-881P | ENSG00000252622 | 1.0842      | 0.13915 | 1.0842      | 0.13915     | 1.0842   | 0.13915 | 1.0842 |
|           | 0.13915         | 1.0842      | 0.13915 | 0.13915     | 0.591851227 |          |         |        |
| PAK4      | ENSG00000130669 | 1.0841      | 0.13916 | 0.37984     | 0.35203     | 0.23283  | 0.40795 |        |
|           | 1.0841          | 0.13916     | 0.13916 | 0.591851227 |             |          |         |        |
| PTAR1     | ENSG00000188647 | 0.12772     | 0.44919 | 0.094938    | 0.46218     | 1.084    | 0.13918 |        |
|           | 0.018301        | 0.4927      | 0.13918 | 0.591851227 |             |          |         |        |
| HNRNPA0   | ENSG00000177733 | 0.74934     | 0.22683 | -0.8117     | 0.79152     | 0.73898  |         |        |
|           | 0.22996         | 1.084       | 0.13919 | 0.13919     | 0.591851227 |          |         |        |
| NA        | ENSG00000239544 | 1.0133      | 0.15547 | 1.0839      | 0.1392      | 1.0133   | 0.15547 |        |
|           | 1.0133          | 0.15547     | 0.1392  | 0.591851227 |             |          |         |        |
| PELI3     | ENSG00000174516 | -0.15839    | 0.56292 | -0.35076    | 0.63711     | -0.42604 | 0.66496 |        |
|           | 1.0838          | 0.13923     | 0.13923 | 0.591851227 |             |          |         |        |
| RN7SL354P | ENSG00000243027 | 1.0838      | 0.13923 | -0.64197    | 0.73955     | 1.0838   |         |        |
|           | 0.13923         | 1.0838      | 0.13923 | 0.13923     | 0.591851227 |          |         |        |
| RNA5SP122 | ENSG00000207186 | 1.0837      | 0.13925 | 1.0837      | 0.13925     | 1.0837   |         |        |
|           | 0.13925         | 1.0837      | 0.13925 | 0.13925     | 0.591851227 |          |         |        |
| DENND1A   | ENSG00000119522 | 0.93046     | 0.17607 | 0.31622     | 0.37592     | 0.25003  |         |        |
|           | 0.40128         | 1.0837      | 0.13926 | 0.13926     | 0.591851227 |          |         |        |
| PEAK1     | ENSG00000173517 | 1.0835      | 0.13928 | 0.71904     | 0.23606     | 0.87587  | 0.19055 |        |
|           | 0.16144         | 0.43587     | 0.13928 | 0.591851227 |             |          |         |        |
| GTF2IP20  | ENSG00000272645 | 0.80081     | 0.21162 | 1.0836      | 0.13928     | -1.1294  |         |        |
|           | 0.87064         | 0.11286     | 0.45507 | 0.13928     | 0.591851227 |          |         |        |
| SLC16A3   | ENSG00000141526 | -1.5067     | 0.93405 | 1.0835      | 0.1393      | -0.94598 |         |        |
|           | 0.82792         | -0.88851    | 0.81287 | 0.1393      | 0.591851227 |          |         |        |
| NA        | ENSG00000224064 | 1.0835      | 0.1393  | 1.0835      | 0.1393      | 1.0835   | 0.1393  |        |
|           | 0.91554         | 0.17996     | 0.1393  | 0.591851227 |             |          |         |        |
| KLHL18    | ENSG00000114648 | -1.6485     | 0.95038 | -2.0923     | 0.9818      | 0.62637  |         |        |
|           | 0.26554         | 1.0834      | 0.13931 | 0.13931     | 0.591851227 |          |         |        |
| ZNF443    | ENSG00000180855 | -1.4624     | 0.92818 | 0.67907     | 0.24855     | 1.0834   |         |        |
|           | 0.13932         | -0.25975    | 0.60247 | 0.13932     | 0.591851227 |          |         |        |
| LINC01548 | ENSG00000229086 | 1.0832      | 0.13935 | -0.1143     | 0.5455      | 1.0832   |         |        |
|           | 0.13935         | 0.13412     | 0.44665 | 0.13935     | 0.591851227 |          |         |        |
| NA        | ENSG00000250354 | 1.0832      | 0.13935 | 1.0832      | 0.13935     | 1.0832   | 0.13935 |        |
|           | 1.0832          | 0.13935     | 0.13935 | 0.591851227 |             |          |         |        |
| HMGCR     | ENSG00000113161 | 0.028315    | 0.48871 | 1.0832      | 0.13937     | -2.0014  | 0.97733 |        |
|           | 0.31336         | 0.377       | 0.13937 | 0.591851227 |             |          |         |        |
| FOXM1     | ENSG00000111206 | -0.069561   | 0.52773 | -0.60103    | 0.72609     | 1.0831   | 0.13939 |        |
|           | 0.35258         | 0.3622      | 0.13939 | 0.591851227 |             |          |         |        |
| TNIP1     | ENSG00000145901 | 1.021       | 0.15363 | 0.061627    | 0.47543     | 1.0831   | 0.13939 |        |
|           | 0.75516         | 0.22508     | 0.13939 | 0.591851227 |             |          |         |        |
| NA        | ENSG00000233990 | 1.083       | 0.1394  | 1.083       | 0.1394      | 1.083    | 0.1394  |        |
|           | 0.1394          | 0.591851227 |         |             |             |          |         |        |
| BTN3A1    | ENSG00000026950 | 1.0829      | 0.13942 | 0.99732     | 0.1593      | 0.90025  |         |        |
|           | 0.18399         | 0.98816     | 0.16154 | 0.13942     | 0.591851227 |          |         |        |
| RPS12P10  | ENSG00000225147 | -1.1096     | 0.8664  | -1.1096     | 0.8664      | 1.0829   |         |        |
|           | 0.13943         | 0.31218     | 0.37745 | 0.13943     | 0.591851227 |          |         |        |
| SLC1A6    | ENSG00000105143 | 0.53966     | 0.29471 | -0.4072     | 0.65807     | 1.0828   |         |        |
|           | 0.13945         | 0.53966     | 0.29471 | 0.13945     | 0.591851227 |          |         |        |
| CDC42P1   | ENSG00000234933 | 1.0828      | 0.13945 | 1.0049      | 0.15747     | 1.0828   |         |        |
|           | 0.13945         | 1.0828      | 0.13945 | 0.13945     | 0.591851227 |          |         |        |
| OR8B5P    | ENSG00000255030 | -0.84537    | 0.80105 | 0.50328     | 0.30738     | 1.0828   |         |        |
|           | 0.13946         | 1.0828      | 0.13946 | 0.13946     | 0.591851227 |          |         |        |
| NA        | ENSG00000273597 | -0.90098    | 0.8162  | 1.0827      | 0.13946     | -0.77681 | 0.78136 |        |
|           | 0.71545         | 0.23717     | 0.13946 | 0.591851227 |             |          |         |        |
| NA        | ENSG00000253628 | 0.60474     | 0.27268 | 0.42402     | 0.33578     | 0.42402  | 0.33578 |        |
|           | 1.0827          | 0.13947     | 0.13947 | 0.591851227 |             |          |         |        |
| DNM1P49   | ENSG00000261820 | 1.0827      | 0.13947 | -1.3285     | 0.90799     | -1.3285  |         |        |
|           | 0.90799         | -1.3285     | 0.90799 | 0.13947     | 0.591851227 |          |         |        |
| TRIM67    | ENSG00000119283 | 1.0826      | 0.13948 | 0.94852     | 0.17143     | 1.0306   |         |        |
|           | 0.15136         | 0.11254     | 0.4552  | 0.13948     | 0.591851227 |          |         |        |
| CA10      | ENSG00000154975 | 1.0826      | 0.13949 | -0.64781    | 0.74145     | 0.43325  | 0.33242 |        |

|           |                 |           |             |             |             |           |         |       |
|-----------|-----------------|-----------|-------------|-------------|-------------|-----------|---------|-------|
|           | 0.24508         | 0.4032    | 0.13949     | 0.591851227 |             |           |         |       |
| NA        | ENSG00000257004 | 0.2044    | 0.41902     | -0.21734    | 0.58603     | 0.72411   | 0.2345  |       |
|           | 1.0826          | 0.13949   | 0.13949     | 0.591851227 |             |           |         |       |
| CNNM1     | ENSG00000119946 | -0.28118  | 0.61071     | -0.23649    | 0.59347     | 0.92218   | 0.17822 |       |
|           | 1.0825          | 0.13951   | 0.13951     | 0.591851227 |             |           |         |       |
| VPS35P1   | ENSG00000260809 | 1.0825    | 0.13951     | 0.11607     | 0.4538      | 1.0317    |         |       |
|           | 0.1511          | 0.90429   | 0.18292     | 0.13951     | 0.591851227 |           |         |       |
| RPSAP28   | ENSG00000214484 | 1.0825    | 0.13952     | 1.0825      | 0.13952     | 1.0825    |         |       |
|           | 0.13952         | 1.0825    | 0.13952     | 0.13952     | 0.591851227 |           |         |       |
| LINC01997 | ENSG00000241383 | 0.5038    | 0.3072      | 1.0825      | 0.13952     | 0.82119   |         |       |
|           | 0.20577         | 0.82119   | 0.20577     | 0.13952     | 0.591851227 |           |         |       |
| SPOP      | ENSG00000121067 | 0.92226   | 0.1782      | 1.0825      | 0.13953     | 0.66615   | 0.25266 |       |
|           | -0.72505        | 0.76579   | 0.13953     | 0.591851227 |             |           |         |       |
| CCDC50    | ENSG00000152492 | -0.68938  | 0.75471     | -0.88423    | 0.81172     | 0.28045   |         |       |
|           | 0.38957         | 1.0824    | 0.13953     | 0.13953     | 0.591851227 |           |         |       |
| LINC02371 | ENSG00000274659 | 1.0823    | 0.13957     | -0.062058   | 0.52474     | 1.0823    |         |       |
|           | 0.13957         | 0.053303  | 0.47875     | 0.13957     | 0.591851227 |           |         |       |
| CRIP3     | ENSG00000146215 | 1.0821    | 0.1396      | 1.0821      | 0.1396      | 1.0821    | 0.1396  |       |
|           | 1.0821          | 0.1396    | 0.1396      | 0.591851227 |             |           |         |       |
| RPL12P47  | ENSG00000219222 | 1.0821    | 0.1396      | 1.0821      | 0.1396      | 1.0821    |         |       |
|           | 0.1396          | 1.0821    | 0.1396      | 0.1396      | 0.591851227 |           |         |       |
| SCAND1    | ENSG00000171222 | 1.0821    | 0.13961     | 1.0821      | 0.13961     | 0.74378   |         |       |
|           | 0.2285          | 0.057327  | 0.47714     | 0.13961     | 0.591851227 |           |         |       |
| PSEN2     | ENSG00000143801 | 1.082     | 0.13962     | 0.54421     | 0.29315     | 0.4703    | 0.31907 |       |
|           | 0.15585         | 0.43807   | 0.13962     | 0.591851227 |             |           |         |       |
| HLA-DQB3  | ENSG00000226030 | 0.8542    | 0.1965      | 0.96144     | 0.16816     | 1.082     | 0.13962 |       |
|           | 0.8542          | 0.1965    | 0.13962     | 0.591851227 |             |           |         |       |
| RNU7-6P   | ENSG00000252654 | 1.082     | 0.13963     | 1.082       | 0.13963     | 1.082     | 0.13963 | 1.082 |
|           | 0.13963         | 0.13963   | 0.591851227 |             |             |           |         |       |
| DHRS7C    | ENSG00000184544 | 1.0818    | 0.13968     | 0.064892    | 0.47413     | -1.2013   |         |       |
|           | 0.88517         | -1.1896   | 0.88289     | 0.13968     | 0.591851227 |           |         |       |
| PMS2P1    | ENSG00000078319 | -0.39079  | 0.65202     | -0.0013781  | 0.50055     | 1.0817    |         |       |
|           | 0.13969         | 0.16116   | 0.43598     | 0.13969     | 0.591851227 |           |         |       |
| CLEC1B    | ENSG00000165682 | -0.067424 | 0.52688     | 1.0817      | 0.13969     | 0.20368   |         |       |
|           | 0.4193          | 0.20368   | 0.4193      | 0.13969     | 0.591851227 |           |         |       |
| KRT18P18  | ENSG00000261764 | 0.48652   | 0.3133      | 0.48652     | 0.3133      | 0.48652   |         |       |
|           | 0.3133          | 1.0817    | 0.13969     | 0.13969     | 0.591851227 |           |         |       |
| RFK       | ENSG00000135002 | -0.34249  | 0.63401     | -0.84397    | 0.80066     | 1.0816    | 0.13971 |       |
|           | -0.16138        | 0.5641    | 0.13971     | 0.591851227 |             |           |         |       |
| SLC26A2   | ENSG00000155850 | -1.3575   | 0.91269     | 0.28836     | 0.38654     | 1.0816    |         |       |
|           | 0.13972         | 0.74681   | 0.22759     | 0.13972     | 0.591851227 |           |         |       |
| PEA15     | ENSG00000162734 | 1.0816    | 0.13972     | 1.0248      | 0.15274     | 1.0248    | 0.15274 |       |
|           | 1.0248          | 0.15274   | 0.13972     | 0.591851227 |             |           |         |       |
| ABCG1     | ENSG00000160179 | 1.0815    | 0.13974     | 0.38198     | 0.35124     | 0.34208   | 0.36615 |       |
|           | 0.49298         | 0.31101   | 0.13974     | 0.591851227 |             |           |         |       |
| HOXB-AS3  | ENSG00000233101 | 1.0815    | 0.13974     | 1.0815      | 0.13974     | 1.0815    |         |       |
|           | 0.13974         | 1.0815    | 0.13974     | 0.13974     | 0.591851227 |           |         |       |
| CHEK2P4   | ENSG00000235969 | -1.399    | 0.91909     | -0.41373    | 0.66046     | 0.31903   |         |       |
|           | 0.37485         | 1.0815    | 0.13974     | 0.13974     | 0.591851227 |           |         |       |
| NA        | ENSG00000249574 | -0.79955  | 0.78801     | 0.55885     | 0.28813     | 0.795     | 0.21331 |       |
|           | 1.0815          | 0.13974   | 0.13974     | 0.591851227 |             |           |         |       |
| SLCO2A1   | ENSG00000174640 | 1.0814    | 0.13976     | 0.16651     | 0.43388     | 0.8054    |         |       |
|           | 0.21029         | -0.68578  | 0.75357     | 0.13976     | 0.591851227 |           |         |       |
| RNU6-517P | ENSG00000207090 | 1.0814    | 0.13977     | 1.0814      | 0.13977     | 1.0814    |         |       |
|           | 0.13977         | 1.0814    | 0.13977     | 0.13977     | 0.591851227 |           |         |       |
| RN7SKP171 | ENSG00000201287 | 1.0385    | 0.14951     | 0.57351     | 0.28315     | 1.0813    |         |       |
|           | 0.13978         | 1.0813    | 0.13978     | 0.13978     | 0.591851227 |           |         |       |
| NA        | ENSG00000283431 | 1.0813    | 0.13979     | -0.74178    | 0.77089     | -0.82866  | 0.79635 |       |
|           | -0.82866        | 0.79635   | 0.13979     | 0.591851227 |             |           |         |       |
| LINC00511 | ENSG00000227036 | -0.77447  | 0.78067     | 1.0812      | 0.13981     | 0.15795   |         |       |
|           | 0.43725         | -1.3911   | 0.9179      | 0.13981     | 0.591851227 |           |         |       |
| ACADSB    | ENSG00000196177 | 0.042656  | 0.48299     | -0.2204     | 0.58722     | -0.079173 |         |       |

|             |                 |           |             |             |             |            |         |       |
|-------------|-----------------|-----------|-------------|-------------|-------------|------------|---------|-------|
|             | 0.53155         | 1.0811    | 0.13982     | 0.13982     | 0.591851227 |            |         |       |
| LINC02222   | ENSG00000248717 | 0.063818  | 0.47456     | 1.0811      | 0.13983     | 0.27381    |         |       |
|             | 0.39211         | -0.91928  | 0.82103     | 0.13983     | 0.591851227 |            |         |       |
| PRCP        | ENSG00000137509 | 1.0811    | 0.13984     | 0.34456     | 0.36521     | 0.2176     | 0.41387 |       |
|             | 0.12155         | 0.45163   | 0.13984     | 0.591851227 |             |            |         |       |
| RPS4XP4     | ENSG00000215520 | -0.58181  | 0.71965     | -0.038034   | 0.51517     | -0.90494   |         |       |
|             | 0.81725         | 1.0811    | 0.13984     | 0.13984     | 0.591851227 |            |         |       |
| LINC02585   | ENSG00000228350 | 1.081     | 0.13985     | 1.081       | 0.13985     | 1.081      | 0.13985 | 1.081 |
|             | 0.13985         | 0.13985   | 0.591851227 |             |             |            |         |       |
| PPCDC       | ENSG00000138621 | 0.87297   | 0.19134     | 0.71309     | 0.2379      | 0.29241    | 0.38499 |       |
|             | 1.0809          | 0.13986   | 0.13986     | 0.591851227 |             |            |         |       |
| ATAD3B      | ENSG00000160072 | -0.20597  | 0.58159     | -0.041813   | 0.51668     | 1.0809     |         |       |
|             | 0.13986         | 0.25281   | 0.40021     | 0.13986     | 0.591851227 |            |         |       |
| DNAJB14     | ENSG00000164031 | 1.0809    | 0.13986     | 0.98627     | 0.162       | 0.17963    | 0.42872 |       |
|             | -0.11069        | 0.54407   | 0.13986     | 0.591851227 |             |            |         |       |
| CCDC185     | ENSG00000178395 | -0.16479  | 0.56545     | -0.16479    | 0.56545     | -0.16479   |         |       |
|             | 0.56545         | 1.081     | 0.13986     | 0.13986     | 0.591851227 |            |         |       |
| NA          | ENSG00000200737 | 1.081     | 0.13986     | 1.0266      | 0.15231     | 1.081      | 0.13986 | 1.081 |
|             | 0.13986         | 0.13986   | 0.591851227 |             |             |            |         |       |
| VDAC2P4     | ENSG00000234682 | -0.89491  | 0.81458     | 1.0808      | 0.13989     | -0.46119   |         |       |
|             | 0.67767         | -0.89491  | 0.81458     | 0.13989     | 0.591851227 |            |         |       |
| U2SURP      | ENSG00000163714 | 0.33615   | 0.36838     | 0.26594     | 0.39514     | 1.0807     |         |       |
|             | 0.13991         | -0.28497  | 0.61216     | 0.13991     | 0.591851227 |            |         |       |
| NA          | ENSG00000279778 | 1.0807    | 0.13991     | 0.44342     | 0.32873     | 0.21611    | 0.41445 |       |
|             | 0.44342         | 0.32873   | 0.13991     | 0.591851227 |             |            |         |       |
| ABHD10      | ENSG00000144827 | 1.0807    | 0.13992     | 0.026909    | 0.48927     | 1.0807     |         |       |
|             | 0.13992         | 1.0427    | 0.14855     | 0.13992     | 0.591851227 |            |         |       |
| EML1        | ENSG00000066629 | 1.0806    | 0.13993     | -0.036022   | 0.51437     | 0.53454    | 0.29648 |       |
|             | -0.03592        | 0.51433   | 0.13993     | 0.591851227 |             |            |         |       |
| CAMSAP3     | ENSG00000076826 | 1.0736    | 0.14149     | 1.0806      | 0.13993     | 1.0736     |         |       |
|             | 0.14149         | -0.16047  | 0.56374     | 0.13993     | 0.591851227 |            |         |       |
| SERPINF1    | ENSG00000132386 | 1.0806    | 0.13994     | -0.049042   | 0.51956     | 0.63767    |         |       |
|             | 0.26185         | -0.049042 | 0.51956     | 0.13994     | 0.591851227 |            |         |       |
| LINC01589   | ENSG00000238120 | 1.0806    | 0.13994     | 0.46068     | 0.32251     | -0.57985   |         |       |
|             | 0.71899         | 0.37012   | 0.35564     | 0.13994     | 0.591851227 |            |         |       |
| NA          | ENSG00000243584 | 0.318     | 0.37524     | 1.0733      | 0.14157     | 1.0805     | 0.13995 |       |
|             | -0.12933        | 0.55145   | 0.13995     | 0.591851227 |             |            |         |       |
| ADAM21      | ENSG00000139985 | 0.75265   | 0.22583     | 0.75265     | 0.22583     | 1.0805     |         |       |
|             | 0.13996         | 0.75265   | 0.22583     | 0.13996     | 0.591851227 |            |         |       |
| NA          | ENSG00000229447 | 1.0805    | 0.13996     | 1.0805      | 0.13996     | 1.0805     | 0.13996 |       |
|             | 1.0805          | 0.13996   | 0.13996     | 0.591851227 |             |            |         |       |
| KIF27       | ENSG00000165115 | 1.0805    | 0.13997     | 0.32893     | 0.3711      | -0.46475   | 0.67894 |       |
|             | -0.85108        | 0.80264   | 0.13997     | 0.591851227 |             |            |         |       |
| ZNF277      | ENSG00000198839 | 1.0804    | 0.13997     | -0.12394    | 0.54932     | 1.0804     |         |       |
|             | 0.13997         | -0.28911  | 0.61375     | 0.13997     | 0.591851227 |            |         |       |
| LINC01077   | ENSG00000233456 | 0.77505   | 0.21916     | -1.2824     | 0.90015     | 0.39149    |         |       |
|             | 0.34772         | 1.0803    | 0.13999     | 0.13999     | 0.591851227 |            |         |       |
| NA          | ENSG00000279164 | -0.021831 | 0.50871     | 1.0804      | 0.13999     | 1.0804     | 0.13999 |       |
|             | 1.0804          | 0.13999   | 0.13999     | 0.591851227 |             |            |         |       |
| NA          | ENSG00000225315 | 0.16838   | 0.43314     | 0.16838     | 0.43314     | 1.0803     | 0.14001 |       |
|             | 0.99606         | 0.15961   | 0.14001     | 0.591851227 |             |            |         |       |
| ANKRD44-IT1 | ENSG00000236977 | -0.67848  | 0.75127     | -0.99498    | 0.84013     | -0.93141   |         |       |
|             | 0.82418         | 1.0803    | 0.14001     | 0.14001     | 0.591851227 |            |         |       |
| ESR2        | ENSG00000140009 | 0.8802    | 0.18938     | 1.0802      | 0.14002     | 1.0612     | 0.14429 |       |
|             | 0.80157         | 0.2114    | 0.14002     | 0.591851227 |             |            |         |       |
| NA          | ENSG00000252485 | 1.0802    | 0.14002     | 1.0802      | 0.14002     | 1.0802     | 0.14002 |       |
|             | 1.0802          | 0.14002   | 0.14002     | 0.591851227 |             |            |         |       |
| NA          | ENSG00000236168 | -0.37898  | 0.64765     | 1.0802      | 0.14003     | -0.0080455 | 0.50321 |       |
|             | -0.0080455      | 0.50321   | 0.14003     | 0.591851227 |             |            |         |       |
| EREG        | ENSG00000124882 | 1.0801    | 0.14005     | 0.24502     | 0.40322     | 0.52356    | 0.30029 |       |
|             | 0.0070724       | 0.49718   | 0.14005     | 0.591851227 |             |            |         |       |
| LINC01043   | ENSG00000260343 | 0.88971   | 0.18681     | 0.62199     | 0.26697     | 1.0801     |         |       |

|            |                 |          |             |             |             |          |         |          |
|------------|-----------------|----------|-------------|-------------|-------------|----------|---------|----------|
|            | 0.14005         | 0.77994  | 0.21771     | 0.14005     | 0.591851227 |          |         |          |
| NA         | ENSG00000254076 | 0.95048  | 0.17093     | 1.08        | 0.14007     | 1.08     | 0.14007 | -0.37749 |
|            | 0.64709         | 0.14007  | 0.591884417 |             |             |          |         |          |
| SERP1      | ENSG00000120742 | 1.0798   | 0.14011     | 1.0798      | 0.14011     | 1.0798   | 0.14011 |          |
|            | 0.17936         | 0.42883  | 0.14011     | 0.592002107 |             |          |         |          |
| PMPCAP1    | ENSG00000248817 | 0.59459  | 0.27606     | 0.60931     | 0.27116     | 1.0797   |         |          |
|            | 0.14013         | 1.0797   | 0.14013     | 0.14013     | 0.592035278 |          |         |          |
| GRPEL2P1   | ENSG00000233211 | 1.0797   | 0.14015     | 1.0797      | 0.14015     | 1.0797   |         |          |
|            | 0.14015         | 1.0797   | 0.14015     | 0.14015     | 0.592059362 |          |         |          |
| NA         | ENSG00000229779 | 0.019912 | 0.49206     | -0.020856   | 0.50832     | 1.0796   | 0.14016 |          |
|            | 0.30138         | 0.38156  | 0.14016     | 0.592059362 |             |          |         |          |
| NA         | ENSG00000275611 | 1.0795   | 0.14018     | 1.0795      | 0.14018     | 1.0795   | 0.14018 |          |
|            | 1.0795          | 0.14018  | 0.14018     | 0.59209252  |             |          |         |          |
| NA         | ENSG00000256209 | 1.0794   | 0.1402      | -0.3558     | 0.63901     | -1.2633  | 0.89676 |          |
|            | 0.95738         | 0.16919  | 0.1402      | 0.592125672 |             |          |         |          |
| DCTN1      | ENSG00000204843 | -1.2546  | 0.89518     | -1.2546     | 0.89518     | 1.0793   | 0.14022 |          |
|            | -0.62804        | 0.73501  | 0.14022     | 0.592149731 |             |          |         |          |
| SP140L     | ENSG00000185404 | 0.028069 | 0.4888      | 0.46812     | 0.31985     | 0.024565 |         |          |
|            | 0.4902          | 1.0793   | 0.14023     | 0.14023     | 0.592149731 |          |         |          |
| UQCR10     | ENSG00000184076 | 1.0792   | 0.14025     | 1.0792      | 0.14025     | 1.0792   |         |          |
|            | 0.14025         | 1.0792   | 0.14025     | 0.14025     | 0.59218287  |          |         |          |
| NA         | ENSG00000267113 | 1.0791   | 0.14028     | 1.0791      | 0.14028     | 1.0791   | 0.14028 |          |
|            | -0.93735        | 0.82571  | 0.14028     | 0.592258222 |             |          |         |          |
| EEF1E1     | ENSG00000124802 | 1.0788   | 0.14034     | 0.75553     | 0.22496     | 0.75553  |         |          |
|            | 0.22496         | 0.75553  | 0.22496     | 0.14034     | 0.592297177 |          |         |          |
| SATB1      | ENSG00000182568 | -0.11187 | 0.54454     | 1.0788      | 0.14034     | 0.032939 | 0.48686 |          |
|            | 1.0633          | 0.14383  | 0.14034     | 0.592297177 |             |          |         |          |
| NA         | ENSG00000260769 | 1.0788   | 0.14034     | 1.0788      | 0.14034     | 1.0788   | 0.14034 |          |
|            | 1.0788          | 0.14034  | 0.14034     | 0.592297177 |             |          |         |          |
| NA         | ENSG00000231949 | 0.3458   | 0.36475     | 0.14242     | 0.44338     | 0.94675  | 0.17188 |          |
|            | 1.0788          | 0.14035  | 0.14035     | 0.592297177 |             |          |         |          |
| NA         | ENSG00000250164 | 1.0787   | 0.14035     | 1.0787      | 0.14035     | 1.0787   | 0.14035 |          |
|            | 1.0787          | 0.14035  | 0.14035     | 0.592297177 |             |          |         |          |
| PHOSPHO2   | ENSG00000144362 | 0.97345  | 0.16516     | 0.97345     | 0.16516     | 1.0787   |         |          |
|            | 0.14037         | 1.0787   | 0.14037     | 0.14037     | 0.592330282 |          |         |          |
| TRAJ12     | ENSG00000211877 | 1.0786   | 0.14039     | 1.0786      | 0.14039     | 1.0786   |         |          |
|            | 0.14039         | 1.0786   | 0.14039     | 0.14039     | 0.592354286 |          |         |          |
| PLEKHA3P1  | ENSG00000269800 | 1.0785   | 0.1404      | 0.76948     | 0.2208      | 1.0785   |         |          |
|            | 0.1404          | 1.0785   | 0.1404      | 0.1404      | 0.592354286 |          |         |          |
| MIR596     | ENSG00000207826 | -0.64982 | 0.7421      | -0.24591    | 0.59713     | 1.0784   |         |          |
|            | 0.14042         | -0.64982 | 0.7421      | 0.14042     | 0.592387378 |          |         |          |
| RBMX2P5    | ENSG00000227087 | 1.0783   | 0.14044     | 0.18468     | 0.42674     | 1.0783   |         |          |
|            | 0.14044         | 1.0783   | 0.14044     | 0.14044     | 0.592420464 |          |         |          |
| SREK1IP1P1 | ENSG00000229336 | 1.0783   | 0.14046     | -0.12026    | 0.54786     | 1.0783   |         |          |
|            | 0.14046         | 1.0783   | 0.14046     | 0.14046     | 0.592435344 |          |         |          |
| CCT6B      | ENSG00000132141 | 1.0782   | 0.14048     | 0.97628     | 0.16446     | 1.0185   | 0.15422 |          |
|            | -1.1683         | 0.87865  | 0.14048     | 0.592435344 |             |          |         |          |
| PCDHGA10   | ENSG00000253846 | 1.0781   | 0.14048     | 1.0781      | 0.14048     | 1.0781   |         |          |
|            | 0.14048         | 1.0781   | 0.14048     | 0.14048     | 0.592435344 |          |         |          |
| DOCK3      | ENSG00000088538 | 0.92846  | 0.17658     | 0.87361     | 0.19117     | 0.87667  | 0.19033 |          |
|            | 1.0781          | 0.1405   | 0.1405      | 0.592468415 |             |          |         |          |
| DNAJC3-DT  | ENSG00000247400 | 1.078    | 0.14053     | 0.60957     | 0.27107     | 0.60957  | 0.27107 |          |
|            | 0.18379         | 0.42709  | 0.14053     | 0.592522077 |             |          |         |          |
| UNKL       | ENSG00000059145 | 0.11134  | 0.45567     | 1.0779      | 0.14055     | 0.99704  | 0.15937 |          |
|            | 0.89348         | 0.1858   | 0.14055     | 0.592522077 |             |          |         |          |
| PRSS46P    | ENSG00000261603 | 0.79395  | 0.21361     | -0.0058716  | 0.50234     | 0.92014  |         |          |
|            | 0.17875         | 1.0777   | 0.14058     | 0.14058     | 0.592522077 |          |         |          |
| RNU6-558P  | ENSG00000201382 | 1.0777   | 0.14059     | 1.0777      | 0.14059     | 0.63122  |         |          |
|            | 0.26395         | 1.0777   | 0.14059     | 0.14059     | 0.592522077 |          |         |          |
| RPL37P13   | ENSG00000233702 | 1.0777   | 0.14059     | 1.0777      | 0.14059     | 1.0777   |         |          |
|            | 0.14059         | 1.0777   | 0.14059     | 0.14059     | 0.592522077 |          |         |          |
| INSYN1     | ENSG00000205363 | -2.0102  | 0.97779     | 1.0776      | 0.1406      | -1.0943  |         |          |

|           |                 |           |             |             |             |          |         |       |
|-----------|-----------------|-----------|-------------|-------------|-------------|----------|---------|-------|
|           | 0.86308         | -0.70149  | 0.7585      | 0.1406      | 0.592522077 |          |         |       |
| RFPL4A    | ENSG00000223638 | 0.71901   | 0.23607     | -0.14941    | 0.55939     | 0.96648  |         |       |
|           | 0.1669          | 1.0776    | 0.1406      | 0.1406      | 0.592522077 |          |         |       |
| CYP2A7P1  | ENSG00000213908 | 0.51945   | 0.30172     | 1.0776      | 0.14061     | 0.13977  |         |       |
|           | 0.44442         | 0.13977   | 0.44442     | 0.14061     | 0.592522077 |          |         |       |
| RNU7-51P  | ENSG00000252369 | 1.0775    | 0.14064     | 0.14064     | 1.0775      | 0.14064  | 1.0775  |       |
|           | 0.14064         | 1.0775    | 0.14064     | 0.14064     | 0.592560844 |          |         |       |
| NA        | ENSG00000234136 | 1.0774    | 0.14065     | 1.0774      | 0.14065     | 1.0774   | 0.14065 |       |
|           | 1.0774          | 0.14065   | 0.14065     | 0.592560844 |             |          |         |       |
| GTF2A1    | ENSG00000165417 | -1.2164   | 0.88809     | 0.7856      | 0.21605     | -0.94136 |         |       |
|           | 0.82674         | 1.0773    | 0.14066     | 0.14066     | 0.592560844 |          |         |       |
| RNU6-220P | ENSG00000212221 | 0.44894   | 0.32674     | -0.66555    | 0.74715     | -0.33792 |         |       |
|           | 0.63229         | 1.0773    | 0.14067     | 0.14067     | 0.592560844 |          |         |       |
| RPL9P15   | ENSG00000240601 | 1.0773    | 0.14068     | 1.0773      | 0.14068     | 1.0773   |         |       |
|           | 0.14068         | 1.0773    | 0.14068     | 0.14068     | 0.592560844 |          |         |       |
| PDCD4-AS1 | ENSG00000203497 | -1.1656   | 0.87811     | -0.03294    | 0.51314     | -0.06571 |         |       |
|           | 0.5262          | 1.0772    | 0.1407      | 0.1407      | 0.592584764 |          |         |       |
| NA        | ENSG00000254248 | 1.0771    | 0.14071     | 1.0771      | 0.14071     | 1.0771   | 0.14071 |       |
|           | 0.58427         | 0.27952   | 0.14071     | 0.592584764 |             |          |         |       |
| ZNF729    | ENSG00000196350 | 1.077     | 0.14073     | -1.1802     | 0.88104     | -1.4763  | 0.93006 |       |
|           | -0.91907        | 0.82097   | 0.14073     | 0.592599577 |             |          |         |       |
| SOX21-AS1 | ENSG00000227640 | 1.077     | 0.14074     | 1.077       | 0.14074     | 1.077    | 0.14074 | 1.077 |
|           | 0.14074         | 0.14074   | 0.592599577 |             |             |          |         |       |
| RN7SKP47  | ENSG00000202217 | 1.0769    | 0.14075     | 1.0769      | 0.14075     | 1.0769   |         |       |
|           | 0.14075         | 1.0769    | 0.14075     | 0.14075     | 0.592599577 |          |         |       |
| RPSAP44   | ENSG00000220773 | 1.0768    | 0.14079     | 0.1189      | 0.45268     | 0.1189   |         |       |
|           | 0.45268         | 0.1189    | 0.45268     | 0.14079     | 0.592665575 |          |         |       |
| NA        | ENSG00000253983 | 0.80278   | 0.21105     | -0.14588    | 0.55799     | 0.80278  | 0.21105 |       |
|           | 1.0768          | 0.14079   | 0.14079     | 0.592665575 |             |          |         |       |
| CYP7B1    | ENSG00000172817 | 0.94584   | 0.17212     | -0.40884    | 0.65867     | 1.0766   |         |       |
|           | 0.14084         | 0.0046167 | 0.49816     | 0.14084     | 0.592751972 |          |         |       |
| KBTBD7    | ENSG00000120696 | 1.0764    | 0.14087     | 1.0764      | 0.14087     | 0.95617  |         |       |
|           | 0.16949         | 0.95617   | 0.16949     | 0.14087     | 0.592751972 |          |         |       |
| MIR4325   | ENSG00000266666 | -0.7452   | 0.77193     | 1.0764      | 0.14087     | -1.2815  |         |       |
|           | 0.89999         | 0.88818   | 0.18722     | 0.14087     | 0.592751972 |          |         |       |
| FAM210A   | ENSG00000177150 | 1.0764    | 0.14088     | -0.008797   | 0.50351     | 0.13562  |         |       |
|           | 0.44606         | 0.12915   | 0.44862     | 0.14088     | 0.592751972 |          |         |       |
| NA        | ENSG00000272936 | 1.0764    | 0.14088     | 1.0764      | 0.14088     | 1.0764   | 0.14088 |       |
|           | 1.0764          | 0.14088   | 0.14088     | 0.592751972 |             |          |         |       |
| NA        | ENSG00000227139 | 1.0763    | 0.1409      | 1.0763      | 0.1409      | -0.36133 | 0.64107 |       |
|           | 1.0763          | 0.1409    | 0.1409      | 0.592751972 |             |          |         |       |
| UBE2FP3   | ENSG00000233337 | 1.0763    | 0.1409      | 1.0763      | 0.1409      | 1.0763   |         |       |
|           | 0.1409          | 1.0763    | 0.1409      | 0.1409      | 0.592751972 |          |         |       |
| NA        | ENSG00000252612 | 1.0763    | 0.14091     | 1.0763      | 0.14091     | 1.0763   | 0.14091 |       |
|           | 1.0763          | 0.14091   | 0.14091     | 0.592751972 |             |          |         |       |
| NA        | ENSG00000269307 | 1.0762    | 0.14092     | 1.0762      | 0.14092     | 1.0762   | 0.14092 |       |
|           | 1.0762          | 0.14092   | 0.14092     | 0.592751972 |             |          |         |       |
| HS6ST1P1  | ENSG00000187952 | 0.099041  | 0.46055     | 0.099041    | 0.46055     | 1.0761   |         |       |
|           | 0.14095         | 0.55443   | 0.28964     | 0.14095     | 0.592808776 |          |         |       |
| ZNF503    | ENSG00000165655 | 0.20497   | 0.4188      | 0.6485      | 0.25833     | -0.40551 |         |       |
|           | 0.65745         | 1.076     | 0.14097     | 0.14097     | 0.592808776 |          |         |       |
| NA        | ENSG00000238156 | -0.59396  | 0.72373     | -0.59396    | 0.72373     | 1.076    | 0.14097 |       |
|           | 0.076773        | 0.4694    | 0.14097     | 0.592808776 |             |          |         |       |
| NA        | ENSG00000255506 | 1.0759    | 0.14099     | 0.99968     | 0.15873     | 0.99968  | 0.15873 |       |
|           | 0.99968         | 0.15873   | 0.14099     | 0.592841721 |             |          |         |       |
| RBM12B    | ENSG00000183808 | 1.0758    | 0.14101     | 1.0758      | 0.14101     | 0.66699  |         |       |
|           | 0.25239         | 0.52592   | 0.29947     | 0.14101     | 0.592874659 |          |         |       |
| NA        | ENSG00000224569 | 1.0756    | 0.14104     | 1.0756      | 0.14104     | -0.96203 | 0.83198 |       |
|           | 0.12373         | 0.45076   | 0.14104     | 0.592924364 |             |          |         |       |
| NOL9      | ENSG00000162408 | 1.006     | 0.15721     | 1.0754      | 0.14109     | 1.0368   | 0.1499  |       |
|           | 0.62402         | 0.26631   | 0.14109     | 0.592924364 |             |          |         |       |
| CC2D2B    | ENSG00000188649 | -0.055154 | 0.52199     | 1.0755      | 0.14109     | 0.49601  |         |       |

|           |                 |           |         |             |             |           |         |  |
|-----------|-----------------|-----------|---------|-------------|-------------|-----------|---------|--|
|           | 0.30994         | -0.23057  | 0.59117 | 0.14109     | 0.592924364 |           |         |  |
| NA        | ENSG00000232646 | -0.92833  | 0.82338 | 1.0754      | 0.1411      | -0.92833  | 0.82338 |  |
|           | -0.92833        | 0.82338   | 0.1411  | 0.592924364 |             |           |         |  |
| ZNFX1     | ENSG00000124201 | 0.97684   | 0.16432 | 1.0753      | 0.14112     | -0.31055  | 0.62193 |  |
|           | 0.86492         | 0.19354   | 0.14112 | 0.592924364 |             |           |         |  |
| NA        | ENSG00000256663 | -0.48056  | 0.68458 | 1.0753      | 0.14112     | 1.0753    | 0.14112 |  |
|           | 1.0753          | 0.14112   | 0.14112 | 0.592924364 |             |           |         |  |
| KRT8P52   | ENSG00000232479 | 1.0753    | 0.14113 | 0.74648     | 0.22769     | 1.0753    |         |  |
|           | 0.14113         | 1.0753    | 0.14113 | 0.14113     | 0.592924364 |           |         |  |
| NA        | ENSG00000227088 | -0.23399  | 0.5925  | 1.0752      | 0.14114     | -1.064    | 0.85634 |  |
|           | -0.63593        | 0.73759   | 0.14114 | 0.592924364 |             |           |         |  |
| ATOH8     | ENSG00000168874 | -0.16655  | 0.56614 | 1.0751      | 0.14116     | -0.31121  | 0.62218 |  |
|           | 0.63805         | 0.26172   | 0.14116 | 0.592924364 |             |           |         |  |
| NA        | ENSG00000237016 | 0.99912   | 0.15887 | 0.93532     | 0.17481     | 1.0751    | 0.14116 |  |
|           | 0.67712         | 0.24916   | 0.14116 | 0.592924364 |             |           |         |  |
| NA        | ENSG00000277235 | -0.3566   | 0.6393  | 1.0751      | 0.14116     | -0.31289  | 0.62282 |  |
|           | -0.3566         | 0.6393    | 0.14116 | 0.592924364 |             |           |         |  |
| WT1       | ENSG00000184937 | 1.0151    | 0.15502 | 0.20726     | 0.4179      | 1.075     | 0.14118 |  |
|           | 0.53613         | 0.29593   | 0.14118 | 0.592924364 |             |           |         |  |
| NA        | ENSG00000279193 | 1.0751    | 0.14118 | 0.65305     | 0.25686     | 1.0751    | 0.14118 |  |
|           | -1.0016         | 0.84173   | 0.14118 | 0.592924364 |             |           |         |  |
| RCHY1     | ENSG00000163743 | -0.45819  | 0.67659 | 1.0748      | 0.14122     | -0.5856   | 0.72093 |  |
|           | 0.23245         | 0.4081    | 0.14122 | 0.593013914 |             |           |         |  |
| NA        | ENSG00000199476 | 1.0552    | 0.14568 | 1.0748      | 0.14124     | 1.0748    | 0.14124 |  |
|           | 1.0748          | 0.14124   | 0.14124 | 0.593013914 |             |           |         |  |
| NA        | ENSG00000201680 | 0.84302   | 0.19961 | 0.84302     | 0.19961     | 1.0748    | 0.14124 |  |
|           | 0.97395         | 0.16504   | 0.14124 | 0.593013914 |             |           |         |  |
| DUSP6     | ENSG00000139318 | -0.10215  | 0.54068 | 0.55457     | 0.2896      | 1.0747    | 0.14125 |  |
|           | 0.18158         | 0.42795   | 0.14125 | 0.593013914 |             |           |         |  |
| KRT18P39  | ENSG00000224791 | -0.019744 | 0.50788 | 1.0746      | 0.14127     | 0.7402    |         |  |
|           | 0.22959         | 0.7402    | 0.22959 | 0.14127     | 0.593025011 |           |         |  |
| PIMREGP2  | ENSG00000216425 | -0.27432  | 0.60808 | 1.0745      | 0.1413      | 0.0081969 |         |  |
|           | 0.49673         | -0.61067  | 0.72929 | 0.1413      | 0.593025011 |           |         |  |
| ZNF524    | ENSG00000171443 | 1.0745    | 0.14131 | 1.0745      | 0.14131     | 0.84684   |         |  |
|           | 0.19854         | 1.0745    | 0.14131 | 0.14131     | 0.593025011 |           |         |  |
| KRT18P50  | ENSG00000219941 | 0.66131   | 0.25421 | 0.66131     | 0.25421     | 1.0745    |         |  |
|           | 0.14131         | 0.79887   | 0.21218 | 0.14131     | 0.593025011 |           |         |  |
| TLDC2     | ENSG00000101342 | -0.24877  | 0.59823 | -0.52056    | 0.69866     | 0.3112    | 0.37783 |  |
|           | 1.0744          | 0.14133   | 0.14133 | 0.593025011 |             |           |         |  |
| PRKAR1A   | ENSG00000108946 | -0.10592  | 0.54218 | 1.0743      | 0.14134     | 0.54355   |         |  |
|           | 0.29338         | -0.0945   | 0.53764 | 0.14134     | 0.593025011 |           |         |  |
| HSPE1P25  | ENSG00000232015 | 1.0743    | 0.14135 | 1.0743      | 0.14135     | 1.0743    |         |  |
|           | 0.14135         | 1.0743    | 0.14135 | 0.14135     | 0.593025011 |           |         |  |
| LINC01856 | ENSG00000237574 | 0.2281    | 0.40978 | 1.0611      | 0.14432     | 1.0743    |         |  |
|           | 0.14135         | 0.27817   | 0.39044 | 0.14135     | 0.593025011 |           |         |  |
| SLC7A11   | ENSG00000151012 | -0.98831  | 0.8385  | -1.3103     | 0.90495     | -1.058    |         |  |
|           | 0.85498         | 1.0742    | 0.14138 | 0.14138     | 0.593048756 |           |         |  |
| EIF5AP3   | ENSG00000267346 | 1.0741    | 0.14138 | 1.0741      | 0.14138     | 1.0741    |         |  |
|           | 0.14138         | 1.0741    | 0.14138 | 0.14138     | 0.593048756 |           |         |  |
| AP2M1     | ENSG00000161203 | 0.66809   | 0.25204 | 0.66809     | 0.25204     | 0.66809   | 0.25204 |  |
|           | 1.074           | 0.14142   | 0.14142 | 0.593102262 |             |           |         |  |
| NA        | ENSG00000225603 | 1.0738    | 0.14145 | -1.699      | 0.95535     | 0.78017   | 0.21765 |  |
|           | -1.5433         | 0.93863   | 0.14145 | 0.593102262 |             |           |         |  |
| RPL23AP70 | ENSG00000241052 | 1.0738    | 0.14145 | -0.17177    | 0.56819     | -0.59379  |         |  |
|           | 0.72367         | 0.36134   | 0.35892 | 0.14145     | 0.593102262 |           |         |  |
| NA        | ENSG00000207286 | 1.0736    | 0.14149 | 1.0736      | 0.14149     | 1.0736    | 0.14149 |  |
|           | 1.0736          | 0.14149   | 0.14149 | 0.593102262 |             |           |         |  |
| SOX1-OT   | ENSG00000224243 | 0.59203   | 0.27691 | -0.034531   | 0.51377     | 1.0736    |         |  |
|           | 0.14151         | -0.64644  | 0.741   | 0.14151     | 0.593102262 |           |         |  |
| TERF1     | ENSG00000147601 | 0.20422   | 0.41909 | -0.89244    | 0.81392     | -0.38057  | 0.64824 |  |
|           | 1.0735          | 0.14152   | 0.14152 | 0.593102262 |             |           |         |  |
| SLC6A6P1  | ENSG00000226818 | 1.0734    | 0.14154 | 1.0734      | 0.14154     | 1.0734    |         |  |

|             |                 |             |             |             |             |           |         |       |
|-------------|-----------------|-------------|-------------|-------------|-------------|-----------|---------|-------|
|             | 0.14154         | 1.0734      | 0.14154     | 0.14154     | 0.593102262 |           |         |       |
| MIR4429     | ENSG00000264010 | 1.0734      | 0.14154     | 0.14154     | 1.0734      | 0.14154   | 1.0734  |       |
|             | 0.14154         | 1.0734      | 0.14154     | 0.14154     | 0.593102262 |           |         |       |
| PTBP1       | ENSG0000011304  | 0.89543     | 0.18528     | 1.0734      | 0.14155     | 1.0734    | 0.14155 |       |
|             | 0.84655         | 0.19862     | 0.14155     | 0.593102262 |             |           |         |       |
| LINC01307   | ENSG00000231671 | 0.16429     | 0.43475     | 1.0734      | 0.14155     | 0.87094   |         |       |
|             | 0.19189         | 1.0734      | 0.14155     | 0.593102262 |             |           |         |       |
| HNRNPH1P1   | ENSG00000220305 | 0.75171     | 0.22611     | 1.0733      | 0.14156     | -0.096162 |         |       |
|             | 0.5383          | 0.90573     | 0.18254     | 0.14156     | 0.593102262 |           |         |       |
| OR2C3       | ENSG00000196242 | 1.0732      | 0.14159     | 1.0732      | 0.14159     | 1.0732    | 0.14159 |       |
|             | 1.0732          | 0.14159     | 0.14159     | 0.593102262 |             |           |         |       |
| CAMSAP1     | ENSG00000130559 | 0.42263     | 0.33628     | 1.0731      | 0.14161     | -0.46471  |         |       |
|             | 0.67893         | 1.0425      | 0.1486      | 0.14161     | 0.593102262 |           |         |       |
| LINC02790   | ENSG00000237435 | 0.59409     | 0.27623     | 1.0731      | 0.14162     | 0.53845   |         |       |
|             | 0.29513         | 1.0041      | 0.15768     | 0.14162     | 0.593102262 |           |         |       |
| NA          | ENSG00000267248 | 1.0731      | 0.14162     | 0.14288     | 0.44319     | 0.82025   | 0.20604 |       |
|             | 0.26476         | 0.3956      | 0.14162     | 0.593102262 |             |           |         |       |
| FCAMR       | ENSG00000162897 | 0.54395     | 0.29324     | 0.30815     | 0.37898     | 1.073     | 0.14163 | 1.073 |
|             | 0.14163         | 0.14163     | 0.593102262 |             |             |           |         |       |
| KRT8P3      | ENSG00000254285 | 0.37639     | 0.35331     | 1.073       | 0.14163     | 0.58986   | 0.27764 |       |
|             | 0.58986         | 0.27764     | 0.14163     | 0.593102262 |             |           |         |       |
| NA          | ENSG00000267160 | 1.073       | 0.14163     | 1.073       | 0.14163     | 1.073     | 0.14163 |       |
|             | 0.14163         | 0.593102262 |             |             |             |           |         |       |
| MIR1251     | ENSG00000221479 | 1.0727      | 0.1417      | 1.0727      | 0.1417      | 1.0727    |         |       |
|             | 0.1417          | 1.0727      | 0.1417      | 0.1417      | 0.593102262 |           |         |       |
| PCID2       | ENSG00000126226 | -1.0757     | 0.85898     | -0.53116    | 0.70235     | 0.82829   | 0.20375 |       |
|             | 1.0727          | 0.14171     | 0.14171     | 0.593102262 |             |           |         |       |
| MTND1P28    | ENSG00000230158 | 0.051098    | 0.47962     | -0.091245   | 0.53635     | 1.0726    |         |       |
|             | 0.14172         | -0.87464    | 0.80912     | 0.14172     | 0.593102262 |           |         |       |
| ZNF334      | ENSG00000198185 | 0.44546     | 0.32799     | 1.0726      | 0.14173     | 0.44546   |         |       |
|             | 0.32799         | 0.99284     | 0.1604      | 0.14173     | 0.593102262 |           |         |       |
| TBC1D8-AS1  | ENSG00000272902 | 0.242       | 0.40439     | 0.87582     | 0.19056     | 1.0726    | 0.14173 |       |
|             | 0.63937         | 0.26129     | 0.14173     | 0.593102262 |             |           |         |       |
| NA          | ENSG00000231039 | -0.48716    | 0.68693     | 1.0725      | 0.14175     | -0.48716  | 0.68693 |       |
|             | -0.48716        | 0.68693     | 0.14175     | 0.593102262 |             |           |         |       |
| LINC01517   | ENSG00000232624 | -0.60922    | 0.72881     | -0.60922    | 0.72881     | -0.84785  |         |       |
|             | 0.80174         | 1.0724      | 0.14176     | 0.14176     | 0.593102262 |           |         |       |
| LINC01772   | ENSG00000226029 | 1.0724      | 0.14177     | 1.0724      | 0.14177     | 1.0724    |         |       |
|             | 0.14177         | 1.0724      | 0.14177     | 0.14177     | 0.593102262 |           |         |       |
| RSPH10B2    | ENSG00000169402 | 0.32477     | 0.37268     | 0.75816     | 0.22418     | 1.0724    |         |       |
|             | 0.14178         | -0.7372     | 0.7695      | 0.14178     | 0.593102262 |           |         |       |
| LINC00996   | ENSG00000242258 | -0.63518    | 0.73734     | 1.0723      | 0.14178     | -0.317    |         |       |
|             | 0.62438         | -0.58475    | 0.72064     | 0.14178     | 0.593102262 |           |         |       |
| NA          | ENSG00000221807 | 0.92891     | 0.17647     | 1.0723      | 0.1418      | 0.79752   | 0.21258 |       |
|             | -0.070215       | 0.52799     | 0.1418      | 0.593102262 |             |           |         |       |
| RNA5SP51    | ENSG00000201620 | 1.0722      | 0.14182     | 1.0722      | 0.14182     | 1.0722    |         |       |
|             | 0.14182         | 1.0722      | 0.14182     | 0.14182     | 0.593102262 |           |         |       |
| RNU7-176P   | ENSG00000238962 | 1.0722      | 0.14182     | 1.0722      | 0.14182     | 1.0722    |         |       |
|             | 0.14182         | 1.0722      | 0.14182     | 0.14182     | 0.593102262 |           |         |       |
| ASB4        | ENSG00000005981 | 1.0721      | 0.14183     | -0.79803    | 0.78757     | -0.41074  | 0.65937 |       |
|             | -0.90609        | 0.81756     | 0.14183     | 0.593102262 |             |           |         |       |
| SNORA19     | ENSG00000207468 | 1.0721      | 0.14184     | 1.0721      | 0.14184     | 1.0721    |         |       |
|             | 0.14184         | 1.0721      | 0.14184     | 0.14184     | 0.593102262 |           |         |       |
| RNU6ATAC37P | ENSG00000221255 | 1.0721      | 0.14184     | 0.73678     | 0.23063     | 0.83264   |         |       |
|             | 0.20253         | 1.0721      | 0.14184     | 0.14184     | 0.593102262 |           |         |       |
| WDR46       | ENSG00000227057 | 1.0721      | 0.14184     | -0.27703    | 0.60912     | 0.9301    | 0.17616 |       |
|             | 0.63599         | 0.26239     | 0.14184     | 0.593102262 |             |           |         |       |
| PRAMENP     | ENSG00000197549 | 1.0721      | 0.14185     | 0.98209     | 0.16303     | -0.85748  |         |       |
|             | 0.80441         | -0.85748    | 0.80441     | 0.14185     | 0.593102262 |           |         |       |
| EYA4        | ENSG00000112319 | 0.60582     | 0.27232     | 0.83388     | 0.20217     | 1.072     | 0.14186 |       |
|             | 0.20388         | 0.41922     | 0.14186     | 0.593102262 |             |           |         |       |
| NA          | ENSG00000226782 | 0.12841     | 0.44891     | 0.15658     | 0.43779     | -0.64812  | 0.74155 |       |



|            |                 |             |             |             |             |            |         |      |
|------------|-----------------|-------------|-------------|-------------|-------------|------------|---------|------|
|            | 1.0717          | 0.14193     | 0.14193     | 0.593102262 |             |            |         |      |
| NA         | ENSG00000261418 | -1.7149     | 0.95682     | -1.0502     | 0.85318     | 1.0717     | 0.14193 |      |
|            | 0.7834          | 0.21669     | 0.14193     | 0.593102262 |             |            |         |      |
| RAPGEF5    | ENSG00000136237 | -1.5434     | 0.93864     | 0.71512     | 0.23727     | -0.59841   |         |      |
|            | 0.72522         | 1.0716      | 0.14194     | 0.14194     | 0.593102262 |            |         |      |
| TMEM184A   | ENSG00000164855 | 1.0716      | 0.14194     | -0.034648   | 0.51382     | -0.1306    |         |      |
|            | 0.55195         | 0.0019475   | 0.49922     | 0.14194     | 0.593102262 |            |         |      |
| KRT18P25   | ENSG00000249064 | -0.67612    | 0.75052     | 0.45661     | 0.32397     | -0.41536   |         |      |
|            | 0.66106         | 1.0716      | 0.14194     | 0.14194     | 0.593102262 |            |         |      |
| FTH1P12    | ENSG00000213362 | 1.0716      | 0.14195     | 1.0716      | 0.14195     | 1.0716     |         |      |
|            | 0.14195         | 1.0716      | 0.14195     | 0.14195     | 0.593102262 |            |         |      |
| NA         | ENSG00000231892 | 0.98162     | 0.16314     | 1.0716      | 0.14195     | 0.76137    | 0.22322 |      |
|            | 1.0716          | 0.14195     | 0.14195     | 0.593102262 |             |            |         |      |
| CNTN6      | ENSG00000134115 | -2.2015     | 0.98615     | 0.56259     | 0.28686     | -0.63176   | 0.73623 |      |
|            | 1.0715          | 0.14196     | 0.14196     | 0.593102262 |             |            |         |      |
| TPTE2P6    | ENSG00000205822 | 1.0715      | 0.14197     | -0.75623    | 0.77524     | 0.7029     |         |      |
|            | 0.24106         | 0.58289     | 0.27998     | 0.14197     | 0.593102262 |            |         |      |
| KRTAP13-2  | ENSG00000182816 | 1.0714      | 0.14199     | 1.0714      | 0.14199     | 1.0714     |         |      |
|            | 0.14199         | 1.0714      | 0.14199     | 0.14199     | 0.593102262 |            |         |      |
| STAG1      | ENSG00000118007 | 0.75133     | 0.22623     | 0.070252    | 0.472       | 0.10416    | 0.45852 |      |
|            | 1.0713          | 0.14202     | 0.14202     | 0.593102262 |             |            |         |      |
| NA         | ENSG00000236129 | 1.0712      | 0.14204     | 1.0712      | 0.14204     | 1.0712     | 0.14204 |      |
|            | -0.51113        | 0.69537     | 0.14204     | 0.593102262 |             |            |         |      |
| RNF138     | ENSG00000134758 | 0.69553     | 0.24336     | 0.69553     | 0.24336     | 1.0711     |         |      |
|            | 0.14205         | 0.35797     | 0.36018     | 0.14205     | 0.593102262 |            |         |      |
| LMO7DN-IT1 | ENSG00000223458 | 0.83346     | 0.20229     | 1.0215      | 0.15351     | 1.0712     |         |      |
|            | 0.14205         | 1.0712      | 0.14205     | 0.14205     | 0.593102262 |            |         |      |
| NA         | ENSG00000236109 | -0.77752    | 0.78158     | -0.77752    | 0.78158     | 1.0712     | 0.14205 |      |
|            | -0.77752        | 0.78158     | 0.14205     | 0.593102262 |             |            |         |      |
| NA         | ENSG00000269583 | 1.0712      | 0.14205     | 1.0712      | 0.14205     | 1.0712     | 0.14205 |      |
|            | 1.0712          | 0.14205     | 0.14205     | 0.593102262 |             |            |         |      |
| NA         | ENSG00000271195 | 1.0712      | 0.14205     | 1.0712      | 0.14205     | 1.0712     | 0.14205 |      |
|            | 1.0712          | 0.14205     | 0.14205     | 0.593102262 |             |            |         |      |
| ZNF267     | ENSG00000185947 | 0.41632     | 0.33859     | 1.0711      | 0.14207     | -0.17056   |         |      |
|            | 0.56771         | -0.044425   | 0.51772     | 0.14207     | 0.593107752 |            |         |      |
| NA         | ENSG00000238295 | 1.071       | 0.14209     | 1.071       | 0.14209     | 1.071      | 0.14209 |      |
|            | 0.14209         | 0.593107752 |             |             |             |            |         |      |
| UIMC1      | ENSG00000087206 | -0.68938    | 0.75471     | 0.54758     | 0.29199     | 0.61787    | 0.26833 |      |
|            | 1.0709          | 0.1421      | 0.1421      | 0.593107752 |             |            |         |      |
| CD164      | ENSG00000135535 | 0.71303     | 0.23791     | 1.0709      | 0.1421      | 0.5758     | 0.28238 |      |
|            | 0.97739         | 0.16419     | 0.1421      | 0.593107752 |             |            |         |      |
| MDF1C      | ENSG00000135272 | -0.53672    | 0.70427     | 1.0708      | 0.14214     | 1.0708     | 0.14214 |      |
|            | 1.0708          | 0.14214     | 0.14214     | 0.593173092 |             |            |         |      |
| RN7SL448P  | ENSG00000264322 | 1.0708      | 0.14214     | 1.0708      | 0.14214     | 1.0708     |         |      |
|            | 0.14214         | 1.0708      | 0.14214     | 0.14214     | 0.593173092 |            |         |      |
| RNU1-88P   | ENSG00000238554 | -0.065717   | 0.5262      | 0.65824     | 0.25519     | -0.0075275 | 0.503   |      |
|            | 1.0706          | 0.14218     | 0.14218     | 0.593280135 |             |            |         |      |
| NA         | ENSG00000258683 | 1.0705      | 0.14219     | 0.43814     | 0.33064     | 0.43814    | 0.33064 |      |
|            | 0.43814         | 0.33064     | 0.14219     | 0.593280135 |             |            |         |      |
| NA         | ENSG00000230612 | 1.0703      | 0.14224     | 1.0703      | 0.14224     | 1.0703     | 0.14224 |      |
|            | 1.0703          | 0.14224     | 0.14224     | 0.593437945 |             |            |         |      |
| CISD1P1    | ENSG00000213403 | 1.0702      | 0.14227     | 0.56161     | 0.28719     | 0.56161    |         |      |
|            | 0.28719         | 0.88884     | 0.18704     | 0.14227     | 0.593457765 |            |         |      |
| PCDHGB4    | ENSG00000253953 | 0.95581     | 0.16958     | 1.0701      | 0.14228     | 0.95581    |         |      |
|            | 0.16958         | 0.95581     | 0.16958     | 0.14228     | 0.593457765 |            |         |      |
| TRAJ13     | ENSG00000211876 | 0.19475     | 0.4228      | 1.0701      | 0.1423      | 0.68741    |         |      |
|            | 0.24591         | 0.32932     | 0.37096     | 0.1423      | 0.593457765 |            |         |      |
| PCDHGB7    | ENSG00000254122 | 1.07        | 0.14231     | 1.07        | 0.14231     | 1.07       | 0.14231 | 1.07 |
|            | 0.14231         | 0.14231     | 0.593457765 |             |             |            |         |      |
| PAFAH2     | ENSG00000158006 | 1.0699      | 0.14233     | 0.81387     | 0.20786     | 0.058966   |         |      |
|            | 0.47649         | 0.38903     | 0.34863     | 0.14233     | 0.593457765 |            |         |      |
| LCORL      | ENSG00000178177 | 1.0119      | 0.1558      | 1.0699      | 0.14233     | 0.49504    | 0.31029 |      |

|            |                 |          |         |             |             |          |         |  |
|------------|-----------------|----------|---------|-------------|-------------|----------|---------|--|
|            | 1.044           | 0.14825  | 0.14233 | 0.593457765 |             |          |         |  |
| NCOA6      | ENSG00000198646 | 1.0699   | 0.14233 | 0.96016     | 0.16849     | -0.24535 | 0.59691 |  |
|            | 0.80968         | 0.20906  | 0.14233 | 0.593457765 |             |          |         |  |
| THBS4      | ENSG00000113296 | 0.077616 | 0.46907 | 1.0614      | 0.14424     | 1.0695   | 0.14241 |  |
|            | -0.12319        | 0.54902  | 0.14241 | 0.593736689 |             |          |         |  |
| NA         | ENSG00000237212 | 0.050139 | 0.48001 | 1.0693      | 0.14246     | 0.050139 | 0.48001 |  |
|            | 0.050139        | 0.48001  | 0.14246 | 0.593736689 |             |          |         |  |
| NA         | ENSG00000244733 | -0.22325 | 0.58833 | 0.70129     | 0.24156     | 0.43986  | 0.33002 |  |
|            | 1.0693          | 0.14246  | 0.14246 | 0.593736689 |             |          |         |  |
| ST6GALNAC2 | ENSG00000070731 | 0.4341   | 0.33211 | 0.36807     | 0.35641     | 1.0693   |         |  |
|            | 0.14247         | 0.31567  | 0.37613 | 0.14247     | 0.593736689 |          |         |  |
| RNU6-129P  | ENSG00000212324 | 1.0693   | 0.14247 | 1.0693      | 0.14247     | 1.0693   |         |  |
|            | 0.14247         | 1.0693   | 0.14247 | 0.14247     | 0.593736689 |          |         |  |
| NA         | ENSG00000279098 | 1.0693   | 0.14247 | 1.0693      | 0.14247     | 1.0693   | 0.14247 |  |
|            | 1.0693          | 0.14247  | 0.14247 | 0.593736689 |             |          |         |  |
| SRSF5      | ENSG00000100650 | 1.0691   | 0.14251 | -1.7854     | 0.9629      | -0.59467 | 0.72397 |  |
|            | -0.63186        | 0.73626  | 0.14251 | 0.59380706  |             |          |         |  |
| MAML3      | ENSG00000196782 | 0.37988  | 0.35202 | 0.84439     | 0.19923     | 0.84542  | 0.19894 |  |
|            | 1.069           | 0.14254  | 0.14254 | 0.59380706  |             |          |         |  |
| AKR1B10P1  | ENSG00000213606 | -0.38349 | 0.64932 | 0.70807     | 0.23945     | 1.069    | 0.14254 |  |
|            | 0.075504        | 0.46991  | 0.14254 | 0.59380706  |             |          |         |  |
| NA         | ENSG00000270058 | 0.78664  | 0.21575 | 0.73795     | 0.23027     | 1.0689   | 0.14255 |  |
|            | 1.0689          | 0.14255  | 0.14255 | 0.59380706  |             |          |         |  |
| POU3F1     | ENSG00000185668 | 0.16675  | 0.43378 | 1.0689      | 0.14256     | 0.15547  |         |  |
|            | 0.43823         | -1.5626  | 0.94093 | 0.14256     | 0.59380706  |          |         |  |
| NA         | ENSG00000266335 | 1.0689   | 0.14256 | -0.13216    | 0.55257     | -0.1092  | 0.54348 |  |
|            | -0.1092         | 0.54348  | 0.14256 | 0.59380706  |             |          |         |  |
| NA         | ENSG00000272529 | 1.0687   | 0.14259 | 1.0687      | 0.14259     | 1.0687   | 0.14259 |  |
|            | 1.0687          | 0.14259  | 0.14259 | 0.593881256 |             |          |         |  |
| ZC2HC1B    | ENSG00000118491 | 1.0686   | 0.14263 | -0.505      | 0.69322     | 1.0686   |         |  |
|            | 0.14263         | -0.88146 | 0.81097 | 0.14263     | 0.593987968 |          |         |  |
| NA         | ENSG00000272622 | -0.71988 | 0.7642  | -0.72437    | 0.76558     | -0.28784 | 0.61327 |  |
|            | 1.0685          | 0.14264  | 0.14264 | 0.593987968 |             |          |         |  |
| FTLP4      | ENSG00000214020 | 1.0683   | 0.14269 | 1.0683      | 0.14269     | 1.0683   | 0.14269 |  |
|            | 1.0683          | 0.14269  | 0.14269 | 0.594094643 |             |          |         |  |
| NA         | ENSG00000267506 | -1.7471  | 0.95969 | 1.0683      | 0.14269     | 0.22475  | 0.41109 |  |
|            | -0.25256        | 0.5997   | 0.14269 | 0.594094643 |             |          |         |  |
| OR7E28P    | ENSG00000251491 | 1.0681   | 0.14274 | 1.0681      | 0.14274     | 1.0681   |         |  |
|            | 0.14274         | 1.0681   | 0.14274 | 0.14274     | 0.594146516 |          |         |  |
| DRAP1      | ENSG00000175550 | 1.0681   | 0.14275 | 1.0681      | 0.14275     | 0.7371   | 0.23053 |  |
|            | 0.87627         | 0.19044  | 0.14275 | 0.594146516 |             |          |         |  |
| C11orf68   | ENSG00000175573 | 0.11735  | 0.45329 | 0.97645     | 0.16442     | 1.0681   |         |  |
|            | 0.14275         | 1.0681   | 0.14275 | 0.14275     | 0.594146516 |          |         |  |
| TNRC6C     | ENSG00000078687 | 1.068    | 0.14276 | -0.058544   | 0.52334     | 0.82808  | 0.20381 |  |
|            | -0.80436        | 0.78941  | 0.14276 | 0.594146516 |             |          |         |  |
| RBM6       | ENSG00000004534 | -1.6062  | 0.94588 | -1.6192     | 0.9473      | 0.063589 | 0.47465 |  |
|            | 1.0679          | 0.14278  | 0.14278 | 0.594146516 |             |          |         |  |
| NA         | ENSG00000236468 | 1.0679   | 0.14278 | 1.0679      | 0.14278     | 1.0679   | 0.14278 |  |
|            | 1.0679          | 0.14278  | 0.14278 | 0.594146516 |             |          |         |  |
| GPS2P2     | ENSG00000230951 | 1.0679   | 0.14279 | -0.27141    | 0.60696     | -0.27141 |         |  |
|            | 0.60696         | -0.27141 | 0.60696 | 0.14279     | 0.594146516 |          |         |  |
| RNU2-21P   | ENSG00000222300 | 1.0678   | 0.1428  | 0.70798     | 0.23948     | 1.0678   |         |  |
|            | 0.1428          | 1.0678   | 0.1428  | 0.1428      | 0.594146516 |          |         |  |
| NA         | ENSG00000283679 | 1.0675   | 0.14288 | 1.0675      | 0.14288     | 1.0675   | 0.14288 |  |
|            | 1.0675          | 0.14288  | 0.14288 | 0.594428618 |             |          |         |  |
| NA         | ENSG00000234173 | 1.0671   | 0.14297 | 1.0671      | 0.14297     | 1.0671   | 0.14297 |  |
|            | 1.0671          | 0.14297  | 0.14297 | 0.594752271 |             |          |         |  |
| SLC43A2    | ENSG00000167703 | 1.0668   | 0.14302 | 0.075501    | 0.46991     | -1.2274  |         |  |
|            | 0.89017         | -0.22193 | 0.58782 | 0.14302     | 0.594840348 |          |         |  |
| TFR2       | ENSG00000106327 | -0.35658 | 0.6393  | 0.29684     | 0.3833      | 1.0667   | 0.14304 |  |
|            | -0.64141        | 0.73937  | 0.14304 | 0.594840348 |             |          |         |  |
| NA         | ENSG00000227055 | 1.0668   | 0.14304 | 0.96129     | 0.1682      | 1.0668   | 0.14304 |  |

|           |                 |           |         |             |             |           |         |  |
|-----------|-----------------|-----------|---------|-------------|-------------|-----------|---------|--|
|           | 1.0668          | 0.14304   | 0.14304 | 0.594840348 |             |           |         |  |
| NA        | ENSG00000258760 | 0.26694   | 0.39476 | -0.76722    | 0.77852     | -1.7768   | 0.9622  |  |
|           | 1.0668          | 0.14304   | 0.14304 | 0.594840348 |             |           |         |  |
| TEX9      | ENSG00000151575 | 1.0666    | 0.14307 | 0.030476    | 0.48784     | -0.49979  | 0.69139 |  |
|           | 0.16138         | 0.4359    | 0.14307 | 0.594863575 |             |           |         |  |
| SNAPC3    | ENSG00000164975 | -0.39558  | 0.65379 | 1.0666      | 0.14307     | 0.6481    |         |  |
|           | 0.25846         | 0.64565   | 0.25925 | 0.14307     | 0.594863575 |           |         |  |
| ETF1      | ENSG00000120705 | 0.83892   | 0.20076 | 1.0665      | 0.1431      | 0.75701   | 0.22452 |  |
|           | -0.34382        | 0.63451   | 0.1431  | 0.594937548 |             |           |         |  |
| TNFRSF14  | ENSG00000157873 | -0.50131  | 0.69192 | -0.2231     | 0.58827     | -0.9691   |         |  |
|           | 0.83375         | 1.0663    | 0.14315 | 0.14315     | 0.595094651 |           |         |  |
| LY6H      | ENSG00000176956 | -0.27932  | 0.61    | 1.0661      | 0.14319     | -0.24579  | 0.59708 |  |
|           | -1.1191         | 0.86846   | 0.14319 | 0.595150192 |             |           |         |  |
| MTND4LP18 | ENSG00000254747 | 0.058552  | 0.47665 | 1.0661      | 0.14319     | 0.058552  |         |  |
|           | 0.47665         | 0.058552  | 0.47665 | 0.14319     | 0.595150192 |           |         |  |
| FERMT2    | ENSG00000073712 | 1.066     | 0.1432  | 0.27039     | 0.39343     | 1.066     | 0.1432  |  |
|           | 0.57086         | 0.28405   | 0.1432  | 0.595150192 |             |           |         |  |
| FAM71C    | ENSG00000180219 | 0.6361    | 0.26236 | 0.67286     | 0.25052     | 0.71966   |         |  |
|           | 0.23587         | 1.0659    | 0.14324 | 0.14324     | 0.595205704 |           |         |  |
| LYSMD2    | ENSG00000140280 | 1.0658    | 0.14325 | 1.0658      | 0.14325     | 1.0658    |         |  |
|           | 0.14325         | -1.2166   | 0.88812 | 0.14325     | 0.595205704 |           |         |  |
| NA        | ENSG00000253946 | 1.0658    | 0.14325 | 1.0658      | 0.14325     | 1.0658    | 0.14325 |  |
|           | 1.0658          | 0.14325   | 0.14325 | 0.595205704 |             |           |         |  |
| SNORD42B  | ENSG00000238423 | 1.0656    | 0.14331 | 1.0656      | 0.14331     | 1.0656    |         |  |
|           | 0.14331         | 1.0656    | 0.14331 | 0.14331     | 0.595265914 |           |         |  |
| SNORD4A   | ENSG00000238578 | 1.0656    | 0.14331 | 1.0656      | 0.14331     | 1.0656    |         |  |
|           | 0.14331         | 1.0656    | 0.14331 | 0.14331     | 0.595265914 |           |         |  |
| PTP4A1P1  | ENSG00000231158 | 1.0655    | 0.14332 | -0.94105    | 0.82666     | -1.7349   |         |  |
|           | 0.95862         | -1.7349   | 0.95862 | 0.14332     | 0.595265914 |           |         |  |
| NA        | ENSG00000260422 | 0.40844   | 0.34147 | 1.0655      | 0.14332     | 0.50301   | 0.30748 |  |
|           | 0.50301         | 0.30748   | 0.14332 | 0.595265914 |             |           |         |  |
| PLD5      | ENSG00000180287 | -0.026029 | 0.51038 | 1.0655      | 0.14333     | 0.36454   | 0.35773 |  |
|           | 0.53719         | 0.29557   | 0.14333 | 0.595265914 |             |           |         |  |
| GMEB2     | ENSG00000101216 | 1.0654    | 0.14335 | 0.55604     | 0.28909     | 0.85531   | 0.19619 |  |
|           | 0.79643         | 0.21289   | 0.14335 | 0.595265914 |             |           |         |  |
| NA        | ENSG00000279555 | 0.95495   | 0.1698  | 0.95495     | 0.1698      | 1.0654    | 0.14335 |  |
|           | 0.95495         | 0.1698    | 0.14335 | 0.595265914 |             |           |         |  |
| PWWP2A    | ENSG00000170234 | 0.80285   | 0.21103 | -0.77241    | 0.78006     | 1.0653    |         |  |
|           | 0.14337         | 0.15739   | 0.43747 | 0.14337     | 0.595270636 |           |         |  |
| LINC01698 | ENSG00000231648 | -0.37719  | 0.64698 | -0.37719    | 0.64698     | 1.0652    |         |  |
|           | 0.14339         | -0.1658   | 0.56584 | 0.14339     | 0.595270636 |           |         |  |
| HSPA8P14  | ENSG00000257539 | 1.0652    | 0.1434  | 0.81309     | 0.20808     | 0.62834   |         |  |
|           | 0.26489         | -0.77007  | 0.77937 | 0.1434      | 0.595270636 |           |         |  |
| NA        | ENSG00000283142 | 1.0652    | 0.1434  | 0.20276     | 0.41966     | 1.0652    | 0.1434  |  |
|           | 1.0652          | 0.1434    | 0.1434  | 0.595270636 |             |           |         |  |
| RPS27P25  | ENSG00000239881 | 1.0646    | 0.14353 | 1.0646      | 0.14353     | 1.0646    |         |  |
|           | 0.14353         | 1.0646    | 0.14353 | 0.14353     | 0.59557967  |           |         |  |
| TRMT112P5 | ENSG00000250161 | -0.77662  | 0.78131 | 1.0646      | 0.14353     | -1.0301   |         |  |
|           | 0.84852         | 0.60591   | 0.27229 | 0.14353     | 0.59557967  |           |         |  |
| FOXF1     | ENSG00000103241 | 1.0645    | 0.14355 | 1.0645      | 0.14355     | 1.0645    | 0.14355 |  |
|           | -0.19729        | 0.5782    | 0.14355 | 0.59557967  |             |           |         |  |
| NA        | ENSG00000256496 | 1.0645    | 0.14355 | 1.0645      | 0.14355     | 1.0645    | 0.14355 |  |
|           | 1.0645          | 0.14355   | 0.14355 | 0.59557967  |             |           |         |  |
| NA        | ENSG00000279400 | 0.016653  | 0.49336 | 1.0645      | 0.14355     | 0.016653  | 0.49336 |  |
|           | 0.016653        | 0.49336   | 0.14355 | 0.59557967  |             |           |         |  |
| NPM2      | ENSG00000158806 | 1.0645    | 0.14356 | 0.47953     | 0.31578     | -0.089196 | 0.53554 |  |
|           | -0.13905        | 0.55529   | 0.14356 | 0.59557967  |             |           |         |  |
| COL6A3    | ENSG00000163359 | 1.0645    | 0.14356 | 1.0007      | 0.15849     | 1.0308    |         |  |
|           | 0.15132         | 0.5973    | 0.27515 | 0.14356     | 0.59557967  |           |         |  |
| PANTR1    | ENSG00000233639 | 1.0642    | 0.14362 | 0.13874     | 0.44483     | -0.71501  |         |  |
|           | 0.7627          | 0.351     | 0.36279 | 0.14362     | 0.595727154 |           |         |  |
| NA        | ENSG00000252150 | 1.0642    | 0.14362 | 1.0642      | 0.14362     | 1.0642    | 0.14362 |  |

|           |                 |          |         |             |             |          |         |  |
|-----------|-----------------|----------|---------|-------------|-------------|----------|---------|--|
|           | 1.0642          | 0.14362  | 0.14362 | 0.595727154 |             |          |         |  |
| NA        | ENSG00000275371 | 1.0641   | 0.14364 | 1.0641      | 0.14364     | 1.0641   | 0.14364 |  |
|           | 1.0641          | 0.14364  | 0.14364 | 0.595759401 |             |          |         |  |
| RBX1P1    | ENSG00000226860 | 1.0638   | 0.14371 | 1.0638      | 0.14371     | 1.0638   | 0.14371 |  |
|           | 0.14371         | 1.0638   | 0.14371 | 0.14371     | 0.595896632 |          |         |  |
| NA        | ENSG00000232879 | 0.36303  | 0.35829 | 1.0638      | 0.14371     | 1.0638   | 0.14371 |  |
|           | 1.0638          | 0.14371  | 0.14371 | 0.595896632 |             |          |         |  |
| NA        | ENSG00000201384 | 0.20231  | 0.41984 | -1.6426     | 0.94977     | -1.6426  | 0.94977 |  |
|           | 1.0637          | 0.14374  | 0.14374 | 0.595896632 |             |          |         |  |
| LINC01850 | ENSG00000227708 | 1.0637   | 0.14374 | 1.0637      | 0.14374     | 1.0637   | 0.14374 |  |
|           | 0.14374         | 1.0637   | 0.14374 | 0.14374     | 0.595896632 |          |         |  |
| DDX59-AS1 | ENSG00000260088 | -1.0822  | 0.86041 | -1.0822     | 0.86041     | -0.46873 |         |  |
|           | 0.68037         | 1.0636   | 0.14376 | 0.14376     | 0.595896632 |          |         |  |
| ZNF683    | ENSG00000176083 | 0.31413  | 0.37671 | 1.0635      | 0.14377     | 1.0635   |         |  |
|           | 0.14377         | 1.0635   | 0.14377 | 0.14377     | 0.595896632 |          |         |  |
| NA        | ENSG00000234271 | 0.68128  | 0.24785 | 1.0635      | 0.14378     | 0.68128  | 0.24785 |  |
|           | 0.68128         | 0.24785  | 0.14378 | 0.595896632 |             |          |         |  |
| NA        | ENSG00000253722 | 1.0634   | 0.14379 | 1.0634      | 0.14379     | 1.0634   | 0.14379 |  |
|           | 1.0634          | 0.14379  | 0.14379 | 0.595896632 |             |          |         |  |
| KLHL21    | ENSG00000162413 | 1.0631   | 0.14386 | 1.0631      | 0.14386     | 0.79982  |         |  |
|           | 0.21191         | 0.90963  | 0.18151 | 0.14386     | 0.595896632 |          |         |  |
| DCUN1D3   | ENSG00000188215 | 0.028773 | 0.48852 | 0.028773    | 0.48852     | 1.0631   |         |  |
|           | 0.14386         | 0.028773 | 0.48852 | 0.14386     | 0.595896632 |          |         |  |
| NA        | ENSG00000272895 | 1.0631   | 0.14386 | 1.0631      | 0.14386     | 1.0631   | 0.14386 |  |
|           | 1.0631          | 0.14386  | 0.14386 | 0.595896632 |             |          |         |  |
| NA        | ENSG00000273375 | 1.0631   | 0.14386 | 1.0631      | 0.14386     | 1.0631   | 0.14386 |  |
|           | 1.0631          | 0.14386  | 0.14386 | 0.595896632 |             |          |         |  |
| NA        | ENSG00000276632 | 1.0631   | 0.14386 | 1.0631      | 0.14386     | 1.0631   | 0.14386 |  |
|           | 0.84936         | 0.19784  | 0.14386 | 0.595896632 |             |          |         |  |
| FLVCR1-DT | ENSG00000198468 | 1.0631   | 0.14387 | 1.0631      | 0.14387     | 1.0631   |         |  |
|           | 0.14387         | 1.0631   | 0.14387 | 0.14387     | 0.595896632 |          |         |  |
| NA        | ENSG00000257202 | 1.0631   | 0.14387 | 1.0631      | 0.14387     | 1.0631   | 0.14387 |  |
|           | 1.0631          | 0.14387  | 0.14387 | 0.595896632 |             |          |         |  |
| LINC02108 | ENSG00000250127 | -0.27385 | 0.6079  | 0.1842      | 0.42693     | 0.94379  |         |  |
|           | 0.17264         | 1.0630   | 0.14388 | 0.14388     | 0.595896632 |          |         |  |
| PACS2     | ENSG00000179364 | 1.0629   | 0.1439  | -1.5789     | 0.94282     | -0.26079 | 0.60287 |  |
|           | 0.9660          | 0.16702  | 0.1439  | 0.595896632 |             |          |         |  |
| NA        | ENSG00000236390 | -0.15518 | 0.56166 | 0.97473     | 0.16485     | 1.0629   | 0.1439  |  |
|           | -0.15518        | 0.56166  | 0.1439  | 0.595896632 |             |          |         |  |
| RUNDC3B   | ENSG00000105784 | 0.57933  | 0.28118 | 1.0629      | 0.14391     | -0.61686 |         |  |
|           | 0.73134         | 0.50689  | 0.30612 | 0.14391     | 0.595896632 |          |         |  |
| NTM       | ENSG00000182667 | 0.11624  | 0.45373 | 0.80738     | 0.20973     | 1.0628   | 0.14394 |  |
|           | 0.51563         | 0.30306  | 0.14394 | 0.595896632 |             |          |         |  |
| CCNA2     | ENSG00000145386 | 1.0626   | 0.14398 | 0.92374     | 0.17781     | 0.92374  | 0.17781 |  |
|           | 0.92374         | 0.17781  | 0.14398 | 0.595896632 |             |          |         |  |
| KLHL23    | ENSG00000213160 | -0.47858 | 0.68388 | 0.81358     | 0.20794     | 1.0626   |         |  |
|           | 0.14398         | 0.90284  | 0.18331 | 0.14398     | 0.595896632 |          |         |  |
| ZNF595    | ENSG00000272602 | 0.43064  | 0.33336 | 0.42006     | 0.33722     | 0.51103  |         |  |
|           | 0.30467         | 1.0626   | 0.14399 | 0.14399     | 0.595896632 |          |         |  |
| CYP11A1   | ENSG00000140459 | 0.52661  | 0.29923 | 1.0625      | 0.1440      | 0.7056   | 0.24022 |  |
|           | 0.55796         | 0.28844  | 0.1440  | 0.595896632 |             |          |         |  |
| FAF1      | ENSG00000185104 | 0.89729  | 0.18478 | 0.98932     | 0.16125     | 1.0625   | 0.144   |  |
|           | 0.50285         | 0.30753  | 0.1440  | 0.595896632 |             |          |         |  |
| VPS26C    | ENSG00000157538 | 1.0624   | 0.14402 | 0.8636      | 0.1939      | 0.96344  |         |  |
|           | 0.16766         | -0.20214 | 0.58009 | 0.14402     | 0.595896632 |          |         |  |
| NA        | ENSG00000265511 | 1.0624   | 0.14402 | 1.0624      | 0.14402     | 1.0624   | 0.14402 |  |
|           | 1.0624          | 0.14402  | 0.14402 | 0.595896632 |             |          |         |  |
| RN7SL435P | ENSG00000263944 | -0.40037 | 0.65556 | 1.0624      | 0.14403     | -0.16975 |         |  |
|           | 0.5674          | -0.40037 | 0.65556 | 0.14403     | 0.595896632 |          |         |  |
| NA        | ENSG00000177340 | 1.0623   | 0.14405 | 1.0623      | 0.14405     | 1.0623   | 0.14405 |  |
|           | 1.0623          | 0.14405  | 0.14405 | 0.595896632 |             |          |         |  |
| NA        | ENSG00000253493 | 0.95726  | 0.16922 | 0.95726     | 0.16922     | 1.0621   | 0.14408 |  |

|           |                 |          |             |             |             |           |          |       |
|-----------|-----------------|----------|-------------|-------------|-------------|-----------|----------|-------|
|           | 0.95726         | 0.16922  | 0.14408     | 0.595896632 |             |           |          |       |
| NA        | ENSG00000260431 | 0.19414  | 0.42303     | 1.0622      | 0.14408     | 0.19414   | 0.42303  |       |
|           | -0.040766       | 0.51626  | 0.14408     | 0.595896632 |             |           |          |       |
| PHC1      | ENSG00000111752 | 0.43827  | 0.3306      | -0.51027    | 0.69507     | 1.062     | 0.14411  | 1.062 |
|           | 0.14411         | 0.14411  | 0.595896632 |             |             |           |          |       |
| BACH1     | ENSG00000156273 | 1.062    | 0.14412     | 0.76794     | 0.22126     | 0.40685   | 0.34206  |       |
|           | 0.35539         | 0.36115  | 0.14412     | 0.595896632 |             |           |          |       |
| HDAC4     | ENSG00000068024 | -0.91389 | 0.81961     | -0.56509    | 0.714       | 1.0619    | 0.14413  |       |
|           | 0.70985         | 0.2389   | 0.14413     | 0.595896632 |             |           |          |       |
| SRRM2-AS1 | ENSG00000205913 | 1.0619   | 0.14413     | 1.0619      | 0.14413     | 1.0619    | 1.0619   |       |
|           | 0.14413         | 1.0619   | 0.14413     | 0.14413     | 0.595896632 |           |          |       |
| ARHGEF38  | ENSG00000236699 | 0.27905  | 0.3901      | 0.71663     | 0.2368      | 1.0619    | 1.0619   |       |
|           | 0.14414         | 1.0619   | 0.14414     | 0.14414     | 0.595896632 |           |          |       |
| NA        | ENSG00000280351 | 1.0619   | 0.14414     | 1.0619      | 0.14414     | 1.0619    | 0.14414  |       |
|           | 1.0619          | 0.14414  | 0.14414     | 0.595896632 |             |           |          |       |
| ELDR      | ENSG00000280890 | 0.43448  | 0.33197     | 0.52481     | 0.29986     | -0.019176 | 0.50765  |       |
|           | 1.0619          | 0.14414  | 0.14414     | 0.595896632 |             |           |          |       |
| NA        | ENSG00000237704 | 1.0618   | 0.14415     | -0.044737   | 0.51784     | 1.0618    | 0.14415  |       |
|           | 1.0618          | 0.14415  | 0.14415     | 0.595896632 |             |           |          |       |
| NA        | ENSG00000282478 | 1.0616   | 0.1442      | -0.49775    | 0.69067     | 0.2827    | 0.3887   |       |
|           | 0.2827          | 0.3887   | 0.1442      | 0.595922391 |             |           |          |       |
| NA        | ENSG00000206846 | 0.74534  | 0.22803     | 1.0616      | 0.14421     | -0.59263  | 0.72329  |       |
|           | -0.72341        | 0.76529  | 0.14421     | 0.595922391 |             |           |          |       |
| OSTM1-AS1 | ENSG00000225174 | -0.75163 | 0.77386     | 0.65422     | 0.25648     | 1.0614    | 1.0614   |       |
|           | 0.14425         | -1.1318  | 0.87114     | 0.14425     | 0.595922391 |           |          |       |
| SMIM11A   | ENSG00000205670 | -0.15298 | 0.56079     | 0.031013    | 0.48763     | -0.10485  | -0.10485 |       |
|           | 0.54175         | 1.0614   | 0.14426     | 0.14426     | 0.595922391 |           |          |       |
| RNU7-110P | ENSG00000252700 | 1.0614   | 0.14426     | 1.0614      | 0.14426     | 1.0614    | 1.0614   |       |
|           | 0.14426         | 1.0614   | 0.14426     | 0.14426     | 0.595922391 |           |          |       |
| NA        | ENSG00000261866 | 1.0613   | 0.14427     | 1.0613      | 0.14427     | 1.0613    | 0.14427  |       |
|           | 1.0613          | 0.14427  | 0.14427     | 0.595922391 |             |           |          |       |
| ZNF710    | ENSG00000140548 | 0.75326  | 0.22565     | 1.0612      | 0.14429     | -0.83767  | -0.83767 |       |
|           | 0.79889         | 0.691    | 0.24478     | 0.14429     | 0.595922391 |           |          |       |
| SMCP      | ENSG00000163206 | 0.57475  | 0.28273     | 1.0611      | 0.14432     | -0.40686  | 0.65794  |       |
|           | 0.21229         | 0.41594  | 0.14432     | 0.595922391 |             |           |          |       |
| OR7A15P   | ENSG00000176923 | 1.0611   | 0.14433     | 0.0064674   | 0.49742     | 1.0611    | 1.0611   |       |
|           | 0.14433         | 1.0611   | 0.14433     | 0.14433     | 0.595922391 |           |          |       |
| NDE1P2    | ENSG00000271337 | 1.061    | 0.14434     | 1.061       | 0.14434     | 1.061     | 0.14434  | 1.061 |
|           | 0.14434         | 0.14434  | 0.595922391 |             |             |           |          |       |
| NA        | ENSG00000228586 | -0.1504  | 0.55978     | -0.1504     | 0.55978     | -0.13203  | 0.55252  |       |
|           | 1.061           | 0.14435  | 0.14435     | 0.595922391 |             |           |          |       |
| NA        | ENSG00000243024 | 1.0608   | 0.14438     | 1.0608      | 0.14438     | 0.070232  | 0.472    |       |
|           | 1.0608          | 0.14438  | 0.14438     | 0.595922391 |             |           |          |       |
| FRG2HP    | ENSG00000260846 | 1.0608   | 0.14439     | 0.60564     | 0.27238     | 0.73251   | 0.73251  |       |
|           | 0.23193         | 0.73251  | 0.23193     | 0.14439     | 0.595922391 |           |          |       |
| H3C7      | ENSG00000277775 | 1.0608   | 0.14439     | 0.36338     | 0.35816     | 0.36338   | 0.35816  |       |
|           | 0.36338         | 0.35816  | 0.14439     | 0.595922391 |             |           |          |       |
| NCAPH     | ENSG00000121152 | 0.22301  | 0.41176     | 1.0608      | 0.1444      | 0.056618  | 0.47742  |       |
|           | 0.7309          | 0.23242  | 0.1444      | 0.595922391 |             |           |          |       |
| NA        | ENSG00000201465 | 0.92279  | 0.17806     | 0.799       | 0.21214     | 1.0607    | 0.14442  |       |
|           | 0.5986          | 0.27472  | 0.14442     | 0.595922391 |             |           |          |       |
| NA        | ENSG00000279459 | 0.46556  | 0.32077     | 1.0606      | 0.14442     | 0.027094  | 0.48919  |       |
|           | -0.16809        | 0.56674  | 0.14442     | 0.595922391 |             |           |          |       |
| NA        | ENSG00000265023 | 1.0607   | 0.14442     | 1.0233      | 0.15308     | 1.0607    | 0.14442  |       |
|           | 1.0607          | 0.14442  | 0.14442     | 0.595922391 |             |           |          |       |
| NA        | ENSG00000264272 | 1.0606   | 0.14443     | 0.44152     | 0.32942     | 1.0606    | 0.14443  |       |
|           | 1.0606          | 0.14443  | 0.14443     | 0.595922391 |             |           |          |       |
| NA        | ENSG00000279154 | -0.46533 | 0.67915     | 1.0606      | 0.14444     | -0.34726  | 0.6358   |       |
|           | -0.34726        | 0.6358   | 0.14444     | 0.595922391 |             |           |          |       |
| PCDH10    | ENSG00000138650 | 0.053409 | 0.4787      | 1.0606      | 0.14445     | 0.32937   | 0.32937  |       |
|           | 0.37094         | 0.32937  | 0.37094     | 0.14445     | 0.595922391 |           |          |       |
| NA        | ENSG00000279786 | -0.85584 | 0.80396     | 1.0605      | 0.14445     | -0.50474  | 0.69313  |       |

|           |                 |            |             |             |             |           |         |       |
|-----------|-----------------|------------|-------------|-------------|-------------|-----------|---------|-------|
|           | 0.91682         | 0.17962    | 0.14445     | 0.595922391 |             |           |         |       |
| ACSL6     | ENSG00000164398 | 1.0604     | 0.14448     | 0.19031     | 0.42453     | 0.48762   | 0.31291 |       |
|           | 0.30268         | 0.38107    | 0.14448     | 0.595922391 |             |           |         |       |
| RNU6-411P | ENSG00000207180 | 1.0604     | 0.14449     | 1.0604      | 0.14449     | 0.19626   |         |       |
|           | 0.4222          | 1.0604     | 0.14449     | 0.14449     | 0.595922391 |           |         |       |
| ZBTB7C    | ENSG00000184828 | 0.096247   | 0.46166     | 1.0602      | 0.14452     | 0.38602   |         |       |
|           | 0.34974         | 0.91317    | 0.18058     | 0.14452     | 0.595922391 |           |         |       |
| ADH1C     | ENSG00000248144 | 0.32473    | 0.37269     | -0.43611    | 0.66862     | 1.0602    | 0.14452 |       |
|           | 0.82274         | 0.20533    | 0.14452     | 0.595922391 |             |           |         |       |
| PDXK      | ENSG00000160209 | -0.0036267 | 0.50145     | 1.0601      | 0.14455     | 0.29109   | 0.38549 |       |
|           | 0.77837         | 0.21818    | 0.14455     | 0.595922391 |             |           |         |       |
| FZD9      | ENSG00000188763 | -0.41705   | 0.66168     | -0.41705    | 0.66168     | -0.41705  | 0.66168 |       |
|           | 1.06            | 0.14456    | 0.14456     | 0.595922391 |             |           |         |       |
| RNU6-684P | ENSG00000222761 | 0.71445    | 0.23747     | 1.0599      | 0.14459     | 0.71445   |         |       |
|           | 0.23747         | 0.71445    | 0.23747     | 0.14459     | 0.595922391 |           |         |       |
| FXNP2     | ENSG00000177736 | 1.0059     | 0.15723     | 1.0599      | 0.1446      | 1.0059    | 0.15723 |       |
|           | 1.0059          | 0.15723    | 0.1446      | 0.595922391 |             |           |         |       |
| NA        | ENSG00000278824 | -0.16389   | 0.56509     | 0.24531     | 0.40311     | 0.63423   | 0.26297 |       |
|           | 1.0598          | 0.14461    | 0.14461     | 0.595922391 |             |           |         |       |
| B4GALNT3  | ENSG00000139044 | 0.86693    | 0.19299     | 1.0596      | 0.14466     | -0.21295  |         |       |
|           | 0.58432         | -0.22496   | 0.58899     | 0.14466     | 0.595922391 |           |         |       |
| NA        | ENSG00000231662 | 1.0596     | 0.14466     | 0.56468     | 0.28615     | 0.78928   | 0.21497 |       |
|           | -0.19529        | 0.57742    | 0.14466     | 0.595922391 |             |           |         |       |
| YDJC      | ENSG00000161179 | 1.0595     | 0.14469     | 1.0595      | 0.14469     | 1.0595    | 0.14469 |       |
|           | 1.0595          | 0.14469    | 0.14469     | 0.595922391 |             |           |         |       |
| HOXA9     | ENSG00000078399 | 1.0594     | 0.14471     | 0.40528     | 0.34264     | -0.57016  | 0.71571 |       |
|           | -0.57016        | 0.71571    | 0.14471     | 0.595922391 |             |           |         |       |
| BRD4      | ENSG00000141867 | 0.05945    | 0.4763      | -0.41747    | 0.66183     | 1.0594    | 0.14471 |       |
|           | -0.98412        | 0.83747    | 0.14471     | 0.595922391 |             |           |         |       |
| ASCL1     | ENSG00000139352 | 0.84896    | 0.19795     | 1.0267      | 0.15227     | 1.0593    | 0.14472 |       |
|           | -0.36932        | 0.64406    | 0.14472     | 0.595922391 |             |           |         |       |
| NA        | ENSG00000223730 | 1.0593     | 0.14473     | 1.0593      | 0.14473     | 1.0593    | 0.14473 |       |
|           | 1.0593          | 0.14473    | 0.14473     | 0.595922391 |             |           |         |       |
| USP38     | ENSG00000170185 | 0.45085    | 0.32605     | -0.27685    | 0.60905     | 1.0592    | 0.14474 |       |
|           | 0.28211         | 0.38893    | 0.14474     | 0.595922391 |             |           |         |       |
| NA        | ENSG00000265400 | 0.37971    | 0.35208     | 1.059       | 0.14479     | 1.0453    | 0.14794 |       |
|           | -0.25787        | 0.60174    | 0.14479     | 0.595922391 |             |           |         |       |
| NA        | ENSG00000284490 | 1.059      | 0.1448      | 1.059       | 0.1448      | -0.020139 | 0.50803 | 1.059 |
|           | 0.1448          | 0.1448     | 0.595922391 |             |             |           |         |       |
| UNC5D     | ENSG00000156687 | 0.59292    | 0.27662     | 1.0589      | 0.14483     | -0.28686  | 0.61289 |       |
|           | -0.21064        | 0.58342    | 0.14483     | 0.595922391 |             |           |         |       |
| NA        | ENSG00000268120 | 1.0589     | 0.14483     | 1.0589      | 0.14483     | 1.0589    | 0.14483 |       |
|           | 1.0589          | 0.14483    | 0.14483     | 0.595922391 |             |           |         |       |
| LINC01965 | ENSG00000256637 | 0.0055165  | 0.4978      | 0.49567     | 0.31006     | 1.0588    |         |       |
|           | 0.14485         | 0.6742     | 0.25009     | 0.14485     | 0.595922391 |           |         |       |
| PDPK1     | ENSG00000140992 | -0.64199   | 0.73956     | 1.0585      | 0.1449      | 0.61307   | 0.26992 |       |
|           | 0.79224         | 0.21411    | 0.1449      | 0.595922391 |             |           |         |       |
| RN7SL236P | ENSG00000243870 | 1.0585     | 0.14491     | 0.48595     | 0.3135      | 0.70781   |         |       |
|           | 0.23953         | -0.29242   | 0.61502     | 0.14491     | 0.595922391 |           |         |       |
| LGALS14   | ENSG00000006659 | -0.25046   | 0.59889     | 1.0584      | 0.14493     | -0.49546  |         |       |
|           | 0.68986         | -1.0234    | 0.84694     | 0.14493     | 0.595922391 |           |         |       |
| TAF5      | ENSG00000219438 | -1.3406    | 0.90998     | -1.086      | 0.86125     | -0.12041  | 0.54792 |       |
|           | 1.0584          | 0.14494    | 0.14494     | 0.595922391 |             |           |         |       |
| S1PR4     | ENSG00000125910 | 0.39523    | 0.34634     | 0.51694     | 0.3026      | 1.0583    | 0.14495 |       |
|           | -0.53783        | 0.70465    | 0.14495     | 0.595922391 |             |           |         |       |
| LINC02286 | ENSG00000258098 | 0.92786    | 0.17674     | 1.0583      | 0.14496     | 0.042652  |         |       |
|           | 0.48299         | -0.015489  | 0.50618     | 0.14496     | 0.595922391 |           |         |       |
| NA        | ENSG00000266765 | 1.0583     | 0.14497     | 1.0583      | 0.14497     | 1.0583    | 0.14497 |       |
|           | -0.5453         | 0.70722    | 0.14497     | 0.595922391 |             |           |         |       |
| NA        | ENSG00000259920 | 0.26271    | 0.39639     | 1.0582      | 0.14499     | -1.2303   | 0.89071 |       |
|           | -1.2303         | 0.89071    | 0.14499     | 0.595922391 |             |           |         |       |
| NA        | ENSG00000254164 | 1.0581     | 0.145       | 1.0581      | 0.145       | 1.0581    | 0.145   | 0.145 |

|           |                 |             |             |             |             |          |         |       |
|-----------|-----------------|-------------|-------------|-------------|-------------|----------|---------|-------|
|           | 0.145           | 0.595922391 |             |             |             |          |         |       |
| MIR4646   | ENSG00000266776 | 1.0581      | 0.14501     | 1.0581      | 0.14501     | 1.0581   |         |       |
|           | 0.14501         | 1.0581      | 0.14501     | 0.14501     | 0.595922391 |          |         |       |
| OC90      | ENSG00000253117 | 0.9454      | 0.17223     | 1.0579      | 0.14506     | 0.27862  | 0.39027 |       |
|           | -0.73714        | 0.76948     | 0.14506     | 0.595922391 |             |          |         |       |
| ERI2      | ENSG00000196678 | 0.26134     | 0.39691     | 0.26134     | 0.39691     | 0.26134  | 0.39691 |       |
|           | 1.0578          | 0.14507     | 0.14507     | 0.595922391 |             |          |         |       |
| LINC01287 | ENSG00000234722 | 1.0578      | 0.14507     | 0.83732     | 0.20121     | 0.10139  |         |       |
|           | 0.45962         | -0.73579    | 0.76907     | 0.14507     | 0.595922391 |          |         |       |
| NA        | ENSG00000206738 | 1.0577      | 0.1451      | 1.0577      | 0.1451      | 1.0577   | 0.1451  |       |
|           | 0.56204         | 0.28705     | 0.1451      | 0.595922391 |             |          |         |       |
| NA        | ENSG00000263946 | 1.0577      | 0.1451      | 1.0577      | 0.1451      | 1.0577   | 0.1451  |       |
|           | 1.0577          | 0.1451      | 0.1451      | 0.595922391 |             |          |         |       |
| CCDC182   | ENSG00000166329 | -0.92147    | 0.8216      | -0.14636    | 0.55818     | -1.3346  | 0.909   |       |
|           | 1.0576          | 0.14511     | 0.14511     | 0.595922391 |             |          |         |       |
| BAHD1     | ENSG00000140320 | 1.0576      | 0.14512     | -0.47949    | 0.68421     | -1.0423  | 0.85137 |       |
|           | -0.72258        | 0.76503     | 0.14512     | 0.595922391 |             |          |         |       |
| ATP4A     | ENSG00000105675 | 1.0575      | 0.14515     | 1.0575      | 0.14515     | 1.0575   | 0.14515 |       |
|           | 1.0575          | 0.14515     | 0.14515     | 0.595922391 |             |          |         |       |
| MON2      | ENSG00000061987 | -0.034454   | 0.51374     | 0.59333     | 0.27648     | 1.0574   | 0.14516 |       |
|           | 0.4568          | 0.32391     | 0.14516     | 0.595922391 |             |          |         |       |
| NA        | ENSG00000279679 | -0.59266    | 0.7233      | -0.74588    | 0.77213     | -0.59266 | 0.7233  |       |
|           | 1.0574          | 0.14516     | 0.14516     | 0.595922391 |             |          |         |       |
| GDF7      | ENSG00000143869 | 1.0573      | 0.14518     | -0.26027    | 0.60267     | -0.1866  | 0.57401 |       |
|           | -0.38819        | 0.65106     | 0.14518     | 0.595922391 |             |          |         |       |
| TULP3     | ENSG00000078246 | 0.9739      | 0.16505     | 0.62304     | 0.26663     | -0.35144 | 0.63737 |       |
|           | 1.0571          | 0.14523     | 0.14523     | 0.595922391 |             |          |         |       |
| RPL13P2   | ENSG00000213820 | 0.16948     | 0.43271     | 1.0571      | 0.14523     | -0.52525 |         |       |
|           | 0.70029         | 0.2055      | 0.41859     | 0.14523     | 0.595922391 |          |         |       |
| NA        | ENSG00000255107 | -0.15219    | 0.56048     | 1.0571      | 0.14523     | 0.11966  | 0.45237 |       |
|           | 0.10038         | 0.46002     | 0.14523     | 0.595922391 |             |          |         |       |
| RPL35AP21 | ENSG00000229814 | 1.0571      | 0.14524     | 1.0571      | 0.14524     | 1.0571   |         |       |
|           | 0.14524         | 1.0571      | 0.14524     | 0.14524     | 0.595922391 |          |         |       |
| NA        | ENSG00000248705 | 0.64159     | 0.26057     | 0.95761     | 0.16913     | 1.057    | 0.14525 | 1.057 |
|           | 0.14525         | 0.14525     | 0.595922391 |             |             |          |         |       |
| SNORD12   | ENSG00000212304 | 1.057       | 0.14527     | 1.057       | 0.14527     | 1.057    | 0.14527 | 1.057 |
|           | 0.14527         | 0.14527     | 0.595922391 |             |             |          |         |       |
| NA        | ENSG00000279818 | 0.78466     | 0.21633     | 0.78466     | 0.21633     | 0.78466  | 0.21633 |       |
|           | 1.0569          | 0.14528     | 0.14528     | 0.595922391 |             |          |         |       |
| NA        | ENSG00000224100 | 1.0568      | 0.14531     | -0.78462    | 0.78366     | -0.3292  | 0.629   |       |
|           | 0.38595         | 0.34977     | 0.14531     | 0.595922391 |             |          |         |       |
| YWHAZP3   | ENSG00000229932 | 0.12399     | 0.45066     | 0.12399     | 0.45066     | 0.12399  |         |       |
|           | 0.45066         | 1.0568      | 0.14531     | 0.14531     | 0.595922391 |          |         |       |
| NA        | ENSG00000231829 | -0.62072    | 0.73261     | 0.39638     | 0.34591     | -0.39984 | 0.65536 |       |
|           | 1.0568          | 0.14531     | 0.14531     | 0.595922391 |             |          |         |       |
| SPCS2P4   | ENSG00000228589 | 1.0567      | 0.14532     | 0.19058     | 0.42443     | -0.87981 |         |       |
|           | 0.81052         | -0.87981    | 0.81052     | 0.14532     | 0.595922391 |          |         |       |
| WSPAR     | ENSG00000249073 | 0.66969     | 0.25153     | 1.0567      | 0.14532     | 0.65828  | 0.25518 |       |
|           | 0.78375         | 0.21659     | 0.14532     | 0.595922391 |             |          |         |       |
| CCDC75P1  | ENSG00000182921 | 1.0566      | 0.14536     | 1.0566      | 0.14536     | 1.0566   |         |       |
|           | 0.14536         | 1.0566      | 0.14536     | 0.14536     | 0.595922391 |          |         |       |
| STEAP1B   | ENSG00000105889 | 1.0565      | 0.14537     | 0.52888     | 0.29844     | 0.22924  |         |       |
|           | 0.40934         | 0.60753     | 0.27175     | 0.14537     | 0.595922391 |          |         |       |
| ZNF707    | ENSG00000181135 | 0.86802     | 0.19269     | 0.76493     | 0.22216     | 1.0565   |         |       |
|           | 0.14537         | 1.0433      | 0.1484      | 0.14537     | 0.595922391 |          |         |       |
| NA        | ENSG00000273481 | 1.0565      | 0.14538     | 1.0565      | 0.14538     | 1.0565   | 0.14538 |       |
|           | 1.0565          | 0.14538     | 0.14538     | 0.595922391 |             |          |         |       |
| MIR646    | ENSG00000207802 | 1.0564      | 0.14539     | 1.0564      | 0.14539     | 0.44439  |         |       |
|           | 0.32838         | 1.0468      | 0.14759     | 0.14539     | 0.595922391 |          |         |       |
| EXTL3-AS1 | ENSG00000246339 | -1.7163     | 0.95695     | 0.70847     | 0.23933     | -0.94786 |         |       |
|           | 0.8284          | 1.0564      | 0.14539     | 0.14539     | 0.595922391 |          |         |       |
| LINC02507 | ENSG00000251688 | 1.0563      | 0.14541     | -0.97051    | 0.8341      | -0.91461 |         |       |

|           |                 |             |         |             |             |           |         |  |
|-----------|-----------------|-------------|---------|-------------|-------------|-----------|---------|--|
|           | 0.8198          | 0.1369      | 0.44556 | 0.14541     | 0.595922391 |           |         |  |
| NT5DC1    | ENSG00000178425 | 0.9777      | 0.16411 | 0.62421     | 0.26624     | 1.0562    |         |  |
|           | 0.14543         | 0.92182     | 0.17831 | 0.14543     | 0.595922391 |           |         |  |
| CAP2      | ENSG00000112186 | -0.99323    | 0.8397  | -1.2156     | 0.88793     | -0.47356  | 0.68209 |  |
|           | 1.0562          | 0.14544     | 0.14544 | 0.595922391 |             |           |         |  |
| KLHDC8B   | ENSG00000185909 | 1.0562      | 0.14545 | 0.62824     | 0.26492     | 0.82563   |         |  |
|           | 0.20451         | 0.82563     | 0.20451 | 0.14545     | 0.595922391 |           |         |  |
| NA        | ENSG00000223711 | 1.056       | 0.14548 | 1.056       | 0.14548     | 1.056     | 0.14548 |  |
|           | 0.14548         | 0.595922391 |         |             |             |           |         |  |
| UBE3AP2   | ENSG00000228941 | 0.50444     | 0.30697 | -0.20497    | 0.5812      | 0.50444   |         |  |
|           | 0.30697         | 1.056       | 0.14548 | 0.14548     | 0.595922391 |           |         |  |
| CELSR2    | ENSG00000143126 | -0.2426     | 0.59584 | 0.19152     | 0.42406     | -1.0101   |         |  |
|           | 0.84378         | 1.0559      | 0.14551 | 0.14551     | 0.595922391 |           |         |  |
| NA        | ENSG00000282965 | -0.89438    | 0.81444 | 0.78364     | 0.21663     | 0.71642   | 0.23687 |  |
|           | 1.0558          | 0.14552     | 0.14552 | 0.595922391 |             |           |         |  |
| NA        | ENSG00000228141 | 1.0558      | 0.14553 | 1.0558      | 0.14553     | 0.57733   | 0.28186 |  |
|           | 0.088355        | 0.4648      | 0.14553 | 0.595922391 |             |           |         |  |
| NA        | ENSG00000226965 | 1.0557      | 0.14556 | 0.34618     | 0.3646      | 0.20953   | 0.41702 |  |
|           | 0.00064905      | 0.49974     | 0.14556 | 0.595922391 |             |           |         |  |
| C19orf84  | ENSG00000262874 | 1.0557      | 0.14556 | 1.0557      | 0.14556     | 1.0557    |         |  |
|           | 0.14556         | 1.0557      | 0.14556 | 0.14556     | 0.595922391 |           |         |  |
| NA        | ENSG00000258810 | 1.0556      | 0.14557 | 1.0556      | 0.14557     | 1.0556    | 0.14557 |  |
|           | 1.0556          | 0.14557     | 0.14557 | 0.595922391 |             |           |         |  |
| GOLGA6D   | ENSG00000140478 | 0.54076     | 0.29434 | 0.8054      | 0.21029     | 1.0556    |         |  |
|           | 0.14559         | 0.46243     | 0.32189 | 0.14559     | 0.595922391 |           |         |  |
| CERS6     | ENSG00000172292 | -1.2553     | 0.89531 | -0.03159    | 0.5126      | 1.0555    | 0.14559 |  |
|           | -0.75957        | 0.77624     | 0.14559 | 0.595922391 |             |           |         |  |
| AMY2A     | ENSG00000243480 | -0.033302   | 0.51328 | 0.098004    | 0.46096     | 1.0555    | 0.14559 |  |
|           | -0.21033        | 0.58329     | 0.14559 | 0.595922391 |             |           |         |  |
| NA        | ENSG00000271187 | 1.0555      | 0.14559 | 1.0555      | 0.14559     | 1.0555    | 0.14559 |  |
|           | 1.0555          | 0.14559     | 0.14559 | 0.595922391 |             |           |         |  |
| TUBG1     | ENSG00000131462 | 0.21913     | 0.41327 | 0.21913     | 0.41327     | 1.0555    | 0.1456  |  |
|           | 1.0555          | 0.1456      | 0.1456  | 0.595922391 |             |           |         |  |
| MINDY4B   | ENSG00000214237 | 1.0555      | 0.1456  | -0.7166     | 0.76319     | 1.0555    |         |  |
|           | 0.1456          | -0.074922   | 0.52986 | 0.1456      | 0.595922391 |           |         |  |
| PSMD12P1  | ENSG00000240135 | 1.0555      | 0.1456  | 1.0555      | 0.1456      | 1.0555    |         |  |
|           | 0.1456          | 1.0555      | 0.1456  | 0.1456      | 0.595922391 |           |         |  |
| FGFR1     | ENSG00000077782 | 1.0554      | 0.14562 | 0.78763     | 0.21546     | 0.70761   | 0.2396  |  |
|           | 0.32244         | 0.37356     | 0.14562 | 0.595922391 |             |           |         |  |
| ETV5      | ENSG00000244405 | -0.02517    | 0.51004 | 0.88704     | 0.18753     | 0.67961   | 0.24838 |  |
|           | 1.0554          | 0.14562     | 0.14562 | 0.595922391 |             |           |         |  |
| NA        | ENSG00000273001 | 1.0554      | 0.14562 | 1.0554      | 0.14562     | 1.0554    | 0.14562 |  |
|           | 1.0554          | 0.14562     | 0.14562 | 0.595922391 |             |           |         |  |
| DUTP3     | ENSG00000226857 | 1.0553      | 0.14563 | 1.0553      | 0.14563     | 1.0553    | 0.14563 |  |
|           | 1.0553          | 0.14563     | 0.14563 | 0.595922391 |             |           |         |  |
| NA        | ENSG00000270976 | 0.81076     | 0.20875 | 1.0553      | 0.14564     | 1.0553    | 0.14564 |  |
|           | 1.0553          | 0.14564     | 0.14564 | 0.595922391 |             |           |         |  |
| GREM2     | ENSG00000180875 | 0.28779     | 0.38676 | 0.59625     | 0.2755      | -0.017516 | 0.50699 |  |
|           | 1.0552          | 0.14566     | 0.14566 | 0.595922391 |             |           |         |  |
| RN7SKP150 | ENSG00000222448 | 1.0552      | 0.14567 | 1.0552      | 0.14567     | 1.0552    |         |  |
|           | 0.14567         | 1.0552      | 0.14567 | 0.14567     | 0.595922391 |           |         |  |
| RNU6-770P | ENSG00000200799 | 0.16448     | 0.43468 | 0.78084     | 0.21745     | 0.31545   |         |  |
|           | 0.37621         | 1.0551      | 0.14568 | 0.14568     | 0.595922391 |           |         |  |
| NA        | ENSG00000227602 | 0.83957     | 0.20057 | 1.0551      | 0.14568     | -0.17941  | 0.57119 |  |
|           | 1.0551          | 0.14568     | 0.14568 | 0.595922391 |             |           |         |  |
| LINC00327 | ENSG00000232977 | -0.078198   | 0.53116 | 1.0549      | 0.14572     | 0.26468   |         |  |
|           | 0.39563         | 0.63963     | 0.26121 | 0.14572     | 0.595922391 |           |         |  |
| CDC42SE2  | ENSG00000158985 | 1.0548      | 0.14575 | 0.78715     | 0.2156      | 0.18438   |         |  |
|           | 0.42686         | 0.60336     | 0.27314 | 0.14575     | 0.595922391 |           |         |  |
| NA        | ENSG00000276915 | 1.0548      | 0.14575 | 1.0548      | 0.14575     | 1.0548    | 0.14575 |  |
|           | 1.0548          | 0.14575     | 0.14575 | 0.595922391 |             |           |         |  |
| NLGN1     | ENSG00000169760 | 0.048555    | 0.48064 | 1.0548      | 0.14577     | 0.13949   | 0.44453 |  |



|           |                 |           |             |             |             |           |         |         |
|-----------|-----------------|-----------|-------------|-------------|-------------|-----------|---------|---------|
|           | -0.65592        | 0.74406   | 0.14577     | 0.595922391 |             |           |         |         |
| OPCML-IT1 | ENSG00000254896 | 0.063343  | 0.47475     | 0.063343    | 0.47475     | 1.0547    |         |         |
|           | 0.14578         | 0.063343  | 0.47475     | 0.14578     | 0.595922391 |           |         |         |
| RPL24P4   | ENSG00000181524 | 1.0546    | 0.1458      | 0.016381    | 0.49347     | 0.72525   |         |         |
|           | 0.23415         | 0.72525   | 0.23415     | 0.1458      | 0.595922391 |           |         |         |
| CARMIL2   | ENSG00000159753 | 1.0546    | 0.14581     | 0.72023     | 0.23569     | 1.0546    |         |         |
|           | 0.14581         | -0.3587   | 0.64009     | 0.14581     | 0.595922391 |           |         |         |
| SQSTM1    | ENSG00000161011 | 1.0546    | 0.14581     | 0.70962     | 0.23897     | -0.94198  |         |         |
|           | 0.8269          | 0.27923   | 0.39004     | 0.14581     | 0.595922391 |           |         |         |
| ALDH7A1P2 | ENSG00000232292 | 1.0545    | 0.14584     | 0.33708     | 0.36803     | 1.0545    |         |         |
|           | 0.14584         | 0.12583   | 0.44993     | 0.14584     | 0.595922391 |           |         |         |
| ATP2A2    | ENSG00000174437 | 0.55495   | 0.28946     | -0.074247   | 0.52959     | 1.0543    |         |         |
|           | 0.14586         | 0.53121   | 0.29764     | 0.14586     | 0.595922391 |           |         |         |
| IFNLR1    | ENSG00000185436 | 0.85807   | 0.19543     | 0.88687     | 0.18757     | 0.51929   |         |         |
|           | 0.30178         | 1.0544    | 0.14586     | 0.14586     | 0.595922391 |           |         |         |
| NA        | ENSG00000236627 | 0.032742  | 0.48694     | 0.84909     | 0.19792     | 1.0543    | 0.14587 |         |
|           | 0.032742        | 0.48694   | 0.14587     | 0.595922391 |             |           |         |         |
| NA        | ENSG00000237414 | -0.23043  | 0.59112     | 1.0543      | 0.14587     | 1.0543    | 0.14587 |         |
|           | 1.0543          | 0.14587   | 0.14587     | 0.595922391 |             |           |         |         |
| TMEM270   | ENSG00000175877 | -1.1351   | 0.87183     | -1.3828     | 0.91664     | -0.82627  |         |         |
|           | 0.79568         | 1.0542    | 0.14589     | 0.14589     | 0.595922391 |           |         |         |
| HLFP1     | ENSG00000218194 | 0.97293   | 0.1653      | 1.0542      | 0.14591     | 1.0469    | 0.14758 |         |
|           | 0.75775         | 0.2243    | 0.14591     | 0.595922391 |             |           |         |         |
| KRT19P4   | ENSG00000234102 | 0.64747   | 0.25866     | 1.0541      | 0.14593     | 0.64747   |         |         |
|           | 0.25866         | 0.64747   | 0.25866     | 0.14593     | 0.595922391 |           |         |         |
| OR7E7P    | ENSG00000238228 | -0.87395  | 0.80893     | 0.81758     | 0.2068      | -0.69616  |         |         |
|           | 0.75684         | 1.0541    | 0.14593     | 0.14593     | 0.595922391 |           |         |         |
| LINC00161 | ENSG00000226935 | -0.60798  | 0.7284      | -0.63381    | 0.7369      | 1.054     | 0.14595 |         |
|           | -0.60798        | 0.7284    | 0.14595     | 0.595922391 |             |           |         |         |
| ZNF847P   | ENSG00000215812 | -0.093863 | 0.53739     | 1.0539      | 0.14596     | 0.13188   |         |         |
|           | 0.44754         | 1.0454    | 0.14791     | 0.14596     | 0.595922391 |           |         |         |
| NUP214    | ENSG00000126883 | -0.12224  | 0.54865     | -0.57069    | 0.7159      | 0.17913   |         |         |
|           | 0.42892         | 1.0539    | 0.14597     | 0.14597     | 0.595922391 |           |         |         |
| SBK1      | ENSG00000188322 | 0.44315   | 0.32883     | 0.55478     | 0.28952     | 1.0539    | 0.14597 |         |
|           | 0.94592         | 0.17209   | 0.14597     | 0.595922391 |             |           |         |         |
| PRAC2     | ENSG00000229637 | 1.0539    | 0.14597     | 1.0539      | 0.14597     | 1.0539    | 0.14597 |         |
|           | 1.0539          | 0.14597   | 0.14597     | 0.595922391 |             |           |         |         |
| LINC00499 | ENSG00000251372 | 0.36452   | 0.35773     | 1.0539      | 0.14597     | 0.89242   |         |         |
|           | 0.18608         | -0.37749  | 0.64709     | 0.14597     | 0.595922391 |           |         |         |
| MREG      | ENSG00000118242 | 1.0537    | 0.146       | 1.0537      | 0.146       | 1.0537    | 0.146   | 0.21791 |
|           | 0.41375         | 0.146     | 0.595922391 |             |             |           |         |         |
| HIGD1B    | ENSG00000131097 | 1.0538    | 0.146       | 1.0538      | 0.146       | 1.0538    | 0.146   | 1.0538  |
|           | 0.146           | 0.146     | 0.595922391 |             |             |           |         |         |
| ADGRG5    | ENSG00000159618 | 0.060567  | 0.47585     | 1.0536      | 0.14603     | -0.082203 |         |         |
|           | 0.53276         | 1.0256    | 0.15254     | 0.14603     | 0.595922391 |           |         |         |
| FEZF2     | ENSG00000153266 | -0.41583  | 0.66123     | -0.41583    | 0.66123     | 1.0536    | 0.14604 |         |
|           | 0.72321         | 0.23478   | 0.14604     | 0.595922391 |             |           |         |         |
| OR52K1    | ENSG00000196778 | 1.0536    | 0.14604     | 0.12318     | 0.45098     | -0.43633  |         |         |
|           | 0.6687          | 0.66023   | 0.25455     | 0.14604     | 0.595922391 |           |         |         |
| C2-AS1    | ENSG00000281756 | 1.0535    | 0.14605     | 1.0535      | 0.14605     | 1.0535    |         |         |
|           | 0.14605         | 1.0535    | 0.14605     | 0.14605     | 0.595922391 |           |         |         |
| NA        | ENSG00000259418 | -0.23247  | 0.59191     | -0.30627    | 0.6203      | -0.03942  | 0.51572 |         |
|           | 1.0535          | 0.14607   | 0.14607     | 0.595922391 |             |           |         |         |
| NA        | ENSG00000259061 | 1.0531    | 0.14614     | 0.79409     | 0.21357     | 0.8761    | 0.19049 |         |
|           | 0.8761          | 0.19049   | 0.14614     | 0.595922391 |             |           |         |         |
| PGLYRP3   | ENSG00000159527 | 1.0531    | 0.14615     | 0.66752     | 0.25222     | -0.47995  |         |         |
|           | 0.68437         | 0.80043   | 0.21173     | 0.14615     | 0.595922391 |           |         |         |
| TNR-IT1   | ENSG00000235628 | 0.67188   | 0.25083     | 0.64804     | 0.25848     | 1.0529    |         |         |
|           | 0.14619         | 0.84002   | 0.20045     | 0.14619     | 0.595922391 |           |         |         |
| MIR4791   | ENSG00000271898 | 0.33799   | 0.36768     | 0.33799     | 0.36768     | 0.33799   |         |         |
|           | 0.36768         | 1.0529    | 0.14619     | 0.14619     | 0.595922391 |           |         |         |
| NA        | ENSG00000257095 | -1.5978   | 0.94496     | 0.30649     | 0.37962     | 1.0529    | 0.1462  |         |

|           |                 |          |         |             |             |           |         |  |
|-----------|-----------------|----------|---------|-------------|-------------|-----------|---------|--|
|           | -1.5978         | 0.94496  | 0.1462  | 0.595922391 |             |           |         |  |
| NA        | ENSG00000261218 | 1.0529   | 0.1462  | 0.77162     | 0.22017     | 0.17495   | 0.43056 |  |
|           | -0.8129         | 0.79186  | 0.1462  | 0.595922391 |             |           |         |  |
| LINC02716 | ENSG00000205106 | -0.13098 | 0.5521  | 0.46634     | 0.32048     | 1.0528    |         |  |
|           | 0.14621         | -1.0362  | 0.84993 | 0.14621     | 0.595922391 |           |         |  |
| RPL22P3   | ENSG00000226457 | 1.0528   | 0.14621 | 1.0528      | 0.14621     | 1.0528    |         |  |
|           | 0.14621         | 1.0528   | 0.14621 | 0.14621     | 0.595922391 |           |         |  |
| NA        | ENSG00000232751 | 1.0528   | 0.14621 | 0.92044     | 0.17867     | 1.0528    | 0.14621 |  |
|           | 1.0528          | 0.14621  | 0.14621 | 0.595922391 |             |           |         |  |
| NA        | ENSG00000255504 | -0.1612  | 0.56403 | 0.65781     | 0.25533     | 1.0528    | 0.14621 |  |
|           | -0.92829        | 0.82337  | 0.14621 | 0.595922391 |             |           |         |  |
| CHGA      | ENSG00000100604 | 0.41956  | 0.3374  | 0.13885     | 0.44478     | 1.0527    | 0.14624 |  |
|           | -0.61823        | 0.73179  | 0.14624 | 0.595922391 |             |           |         |  |
| NA        | ENSG00000219682 | 0.60562  | 0.27238 | 1.0527      | 0.14624     | -0.67875  | 0.75135 |  |
|           | 1.0527          | 0.14624  | 0.14624 | 0.595922391 |             |           |         |  |
| NA        | ENSG00000277182 | 0.35018  | 0.3631  | 0.35018     | 0.3631      | 0.35018   | 0.3631  |  |
|           | 1.0526          | 0.14626  | 0.14626 | 0.595922391 |             |           |         |  |
| MTMR3     | ENSG00000100330 | -0.54248 | 0.70626 | 0.85059     | 0.1975      | 1.0046    | 0.15754 |  |
|           | 1.0526          | 0.14627  | 0.14627 | 0.595922391 |             |           |         |  |
| MIPEPP3   | ENSG00000233325 | 0.25971  | 0.39754 | -0.53116    | 0.70234     | 1.0526    |         |  |
|           | 0.14627         | 1.0526   | 0.14627 | 0.14627     | 0.595922391 |           |         |  |
| CRB1      | ENSG00000134376 | 0.30721  | 0.37934 | 1.0513      | 0.14655     | 1.0524    | 0.1463  |  |
|           | 0.74329         | 0.22865  | 0.1463  | 0.595922391 |             |           |         |  |
| SLN       | ENSG00000170290 | 0.075023 | 0.4701  | 1.0524      | 0.1463      | -0.33137  | 0.62982 |  |
|           | -0.0049083      | 0.50196  | 0.1463  | 0.595922391 |             |           |         |  |
| NAT1      | ENSG00000171428 | 1.0286   | 0.15184 | 1.0525      | 0.1463      | -0.094946 | 0.53782 |  |
|           | 0.993           | 0.16036  | 0.1463  | 0.595922391 |             |           |         |  |
| PSG9      | ENSG00000183668 | 1.0524   | 0.14631 | 0.35946     | 0.35963     | -0.34661  | 0.63556 |  |
|           | 0.13971         | 0.44445  | 0.14631 | 0.595922391 |             |           |         |  |
| CELA3A    | ENSG00000142789 | 0.51656  | 0.30273 | -0.91403    | 0.81965     | 1.0523    |         |  |
|           | 0.14632         | 0.95936  | 0.16869 | 0.14632     | 0.595922391 |           |         |  |
| RUBCN     | ENSG00000145016 | 0.35111  | 0.36275 | 1.0523      | 0.14633     | 0.45168   | 0.32575 |  |
|           | 0.45402         | 0.32491  | 0.14633 | 0.595922391 |             |           |         |  |
| NA        | ENSG00000226994 | -0.46989 | 0.68078 | -0.98489    | 0.83766     | -1.4382   | 0.92482 |  |
|           | 1.0522          | 0.14636  | 0.14636 | 0.595922391 |             |           |         |  |
| NA        | ENSG00000280183 | 1.0522   | 0.14636 | 1.0522      | 0.14636     | 1.0522    | 0.14636 |  |
|           | 0.69194         | 0.24449  | 0.14636 | 0.595922391 |             |           |         |  |
| OLA1P1    | ENSG00000213790 | -0.73619 | 0.76919 | 0.97295     | 0.16529     | 1.0521    |         |  |
|           | 0.14638         | 1.0521   | 0.14638 | 0.14638     | 0.595922391 |           |         |  |
| OR1L3     | ENSG00000171481 | 1.052    | 0.14639 | -2.3786     | 0.99131     | -2.3786   | 0.99131 |  |
|           | -2.3786         | 0.99131  | 0.14639 | 0.595922391 |             |           |         |  |
| PFN1P10   | ENSG00000176378 | -0.51316 | 0.69608 | 1.0521      | 0.14639     | -1.4153   |         |  |
|           | 0.92151         | 0.11148  | 0.45562 | 0.14639     | 0.595922391 |           |         |  |
| NA        | ENSG00000260253 | -0.58949 | 0.72223 | 1.052       | 0.14639     | -0.84561  | 0.80111 |  |
|           | -1.2939         | 0.90215  | 0.14639 | 0.595922391 |             |           |         |  |
| LSG1      | ENSG00000041802 | 1.052    | 0.14641 | 0.099585    | 0.46034     | -0.2965   | 0.61658 |  |
|           | 0.45119         | 0.32593  | 0.14641 | 0.595922391 |             |           |         |  |
| MTR       | ENSG00000116984 | -0.12192 | 0.54852 | -0.032474   | 0.51295     | -0.6375   | 0.7381  |  |
|           | 1.052           | 0.14641  | 0.14641 | 0.595922391 |             |           |         |  |
| NA        | ENSG00000266114 | 1.0519   | 0.14642 | 1.0519      | 0.14642     | 1.0519    | 0.14642 |  |
|           | 1.0519          | 0.14642  | 0.14642 | 0.595922391 |             |           |         |  |
| RHOA-IT1  | ENSG00000235908 | 1.0519   | 0.14643 | 1.0519      | 0.14643     | 1.0519    |         |  |
|           | 0.14643         | 1.0519   | 0.14643 | 0.14643     | 0.595922391 |           |         |  |
| LAMTOR4   | ENSG00000188186 | 0.59496  | 0.27593 | 0.75201     | 0.22602     | 1.0518    |         |  |
|           | 0.14646         | 0.84708  | 0.19848 | 0.14646     | 0.595922391 |           |         |  |
| NOTO      | ENSG00000214513 | 1.0517   | 0.14648 | 0.9358      | 0.17469     | -0.276    | 0.60873 |  |
|           | 0.77377         | 0.21953  | 0.14648 | 0.595922391 |             |           |         |  |
| NA        | ENSG00000225813 | -0.97343 | 0.83483 | -0.97343    | 0.83483     | -0.97343  | 0.83483 |  |
|           | 1.0517          | 0.14648  | 0.14648 | 0.595922391 |             |           |         |  |
| RN7SL597P | ENSG00000244264 | 1.0515   | 0.14652 | 1.0515      | 0.14652     | -1.2819   |         |  |
|           | 0.90007         | 0.62533  | 0.26588 | 0.14652     | 0.595922391 |           |         |  |
| NA        | ENSG00000254941 | 0.19596  | 0.42232 | 0.19596     | 0.42232     | 0.19596   | 0.42232 |  |

|            |                 |             |         |             |             |           |         |  |
|------------|-----------------|-------------|---------|-------------|-------------|-----------|---------|--|
|            | 1.0515          | 0.14652     | 0.14652 | 0.595922391 |             |           |         |  |
| LINC02739  | ENSG00000255008 | 0.54963     | 0.29129 | 0.54963     | 0.29129     | 1.0515    |         |  |
|            | 0.14652         | 0.54963     | 0.29129 | 0.14652     | 0.595922391 |           |         |  |
| SRSF8      | ENSG00000263465 | 1.0515      | 0.14652 | -0.76357    | 0.77744     | -0.62086  | 0.73265 |  |
|            | -0.90348        | 0.81686     | 0.14652 | 0.595922391 |             |           |         |  |
| SNTB1      | ENSG00000172164 | -0.30955    | 0.62155 | -0.30955    | 0.62155     | -0.30955  | 0.62155 |  |
|            | 1.0514          | 0.14653     | 0.14653 | 0.595922391 |             |           |         |  |
| NA         | ENSG00000272140 | -0.53812    | 0.70475 | 0.49102     | 0.3117      | 1.0514    | 0.14653 |  |
|            | 1.0514          | 0.14653     | 0.14653 | 0.595922391 |             |           |         |  |
| RNU6-1022P | ENSG00000201919 | 0.88818     | 0.18722 | 0.88818     | 0.18722     | 1.0513    |         |  |
|            | 0.14655         | 0.63121     | 0.26395 | 0.14655     | 0.595922391 |           |         |  |
| NA         | ENSG00000271047 | 1.0513      | 0.14655 | -1.1495     | 0.87483     | -0.43277  | 0.66741 |  |
|            | -0.43277        | 0.66741     | 0.14655 | 0.595922391 |             |           |         |  |
| RPL17P51   | ENSG00000271429 | 1.0513      | 0.14655 | 1.0513      | 0.14655     | 1.0513    |         |  |
|            | 0.14655         | 1.0513      | 0.14655 | 0.14655     | 0.595922391 |           |         |  |
| COX6A1P2   | ENSG00000226976 | -0.72275    | 0.76508 | 1.0513      | 0.14657     | 0.20166   |         |  |
|            | 0.42009         | 0.39037     | 0.34813 | 0.14657     | 0.595922391 |           |         |  |
| NA         | ENSG00000237609 | 1.0512      | 0.14657 | 1.0512      | 0.14657     | 1.0512    | 0.14657 |  |
|            | 1.0512          | 0.14657     | 0.14657 | 0.595922391 |             |           |         |  |
| NA         | ENSG00000253207 | 1.0512      | 0.14659 | 0.13262     | 0.44725     | 0.13262   | 0.44725 |  |
|            | 0.13262         | 0.44725     | 0.14659 | 0.595922391 |             |           |         |  |
| GPD2       | ENSG00000115159 | 0.4071      | 0.34197 | 1.0511      | 0.1466      | 0.25128   | 0.4008  |  |
|            | -0.63128        | 0.73607     | 0.1466  | 0.595922391 |             |           |         |  |
| FSIP2      | ENSG00000188738 | 0.20707     | 0.41798 | 0.20707     | 0.41798     | 0.11041   | 0.45604 |  |
|            | 1.0511          | 0.1466      | 0.1466  | 0.595922391 |             |           |         |  |
| SYNE2      | ENSG00000054654 | 0.89132     | 0.18638 | 1.0511      | 0.14661     | -0.039484 | 0.51575 |  |
|            | -0.10873        | 0.54329     | 0.14661 | 0.595922391 |             |           |         |  |
| NA         | ENSG00000253322 | 1.0511      | 0.14661 | 0.6175      | 0.26845     | -0.2561   | 0.60106 |  |
|            | 0.57573         | 0.2824      | 0.14661 | 0.595922391 |             |           |         |  |
| NA         | ENSG00000269095 | 1.051       | 0.14664 | 1.051       | 0.14664     | 1.051     | 0.14664 |  |
|            | 0.14664         | 0.595922391 |         |             |             |           |         |  |
| RCAN1      | ENSG00000159200 | 0.82522     | 0.20462 | 0.072783    | 0.47099     | 1.0509    | 0.14665 |  |
|            | 0.70831         | 0.23938     | 0.14665 | 0.595922391 |             |           |         |  |
| OPRL1      | ENSG00000125510 | 1.0509      | 0.14666 | -0.018522   | 0.50739     | 0.77552   | 0.21902 |  |
|            | 0.15472         | 0.43852     | 0.14666 | 0.595922391 |             |           |         |  |
| ACYP2      | ENSG00000170634 | 1.0508      | 0.14666 | 0.46609     | 0.32057     | 0.2772    | 0.39081 |  |
|            | 0.048336        | 0.48072     | 0.14666 | 0.595922391 |             |           |         |  |
| AKAP5      | ENSG00000179841 | 1.0508      | 0.14666 | 1.0306      | 0.15137     | 1.0508    | 0.14666 |  |
|            | 1.0508          | 0.14666     | 0.14666 | 0.595922391 |             |           |         |  |
| NA         | ENSG00000257433 | 1.0509      | 0.14666 | 0.4048      | 0.34281     | 0.69308   | 0.24413 |  |
|            | 0.69308         | 0.24413     | 0.14666 | 0.595922391 |             |           |         |  |
| RNU6-1181P | ENSG00000206918 | 1.0508      | 0.14667 | 1.0508      | 0.14667     | 1.0508    |         |  |
|            | 0.14667         | 1.0508      | 0.14667 | 0.14667     | 0.595922391 |           |         |  |
| TMEM59L    | ENSG00000105696 | 0.70149     | 0.2415  | 0.70149     | 0.2415      | 1.0508    |         |  |
|            | 0.14668         | 0.43863     | 0.33047 | 0.14668     | 0.595922391 |           |         |  |
| RNA5SP65   | ENSG00000200036 | 1.0508      | 0.14668 | 1.0508      | 0.14668     | 1.0508    |         |  |
|            | 0.14668         | 1.0508      | 0.14668 | 0.14668     | 0.595922391 |           |         |  |
| NA         | ENSG00000239395 | -0.37019    | 0.64438 | -0.37995    | 0.64801     | 1.0507    | 0.14669 |  |
|            | 1.0507          | 0.14669     | 0.14669 | 0.595922391 |             |           |         |  |
| NA         | ENSG00000280042 | 1.0507      | 0.14669 | -0.31098    | 0.62209     | 1.0507    | 0.14669 |  |
|            | 1.0507          | 0.14669     | 0.14669 | 0.595922391 |             |           |         |  |
| NA         | ENSG00000245466 | -0.39521    | 0.65366 | 1.0507      | 0.1467      | -0.39521  | 0.65366 |  |
|            | -0.39521        | 0.65366     | 0.1467  | 0.595922391 |             |           |         |  |
| NA         | ENSG00000215288 | 0.4517      | 0.32574 | 1.0507      | 0.14671     | -0.079151 | 0.53154 |  |
|            | -0.19111        | 0.57578     | 0.14671 | 0.595922391 |             |           |         |  |
| NA         | ENSG00000265458 | 1.0506      | 0.14671 | 1.0506      | 0.14671     | 1.0506    | 0.14671 |  |
|            | 1.0506          | 0.14671     | 0.14671 | 0.595922391 |             |           |         |  |
| NA         | ENSG00000229722 | 0.29814     | 0.3828  | 0.29814     | 0.3828      | 0.29814   | 0.3828  |  |
|            | 1.0506          | 0.14673     | 0.14673 | 0.595922391 |             |           |         |  |
| NA         | ENSG00000273245 | -0.53592    | 0.70399 | -0.36714    | 0.64324     | 0.29115   | 0.38547 |  |
|            | 1.0505          | 0.14675     | 0.14675 | 0.595922391 |             |           |         |  |
| AMMECR1LP1 | ENSG00000233273 | 1.0504      | 0.14676 | 1.0504      | 0.14676     | 1.0504    |         |  |

|            |                 |          |             |             |             |            |         |      |
|------------|-----------------|----------|-------------|-------------|-------------|------------|---------|------|
|            | 0.14676         | 0.70901  | 0.23916     | 0.14676     | 0.595922391 |            |         |      |
| RN7SKP289  | ENSG00000253053 | 0.38867  | 0.34876     | 1.0504      | 0.14676     | 1.0504     |         |      |
|            | 0.14676         | 1.0504   | 0.14676     | 0.14676     | 0.595922391 |            |         |      |
| ADI1P3     | ENSG00000258369 | 1.0503   | 0.14678     | 0.65622     | 0.25584     | -0.47138   |         |      |
|            | 0.68132         | -0.47138 | 0.68132     | 0.14678     | 0.595922391 |            |         |      |
| PLPP3      | ENSG00000162407 | -0.8632  | 0.80599     | -0.22005    | 0.58708     | 0.3475     | 0.36411 |      |
|            | 1.0503          | 0.14679  | 0.14679     | 0.595922391 |             |            |         |      |
| NA         | ENSG00000233877 | 1.0503   | 0.14679     | 1.0503      | 0.14679     | 1.0503     | 0.14679 |      |
|            | 0.62379         | 0.26638  | 0.14679     | 0.595922391 |             |            |         |      |
| FMN2       | ENSG00000155816 | 0.81243  | 0.20827     | 0.81791     | 0.2067      | 0.70472    | 0.24049 |      |
|            | 1.0503          | 0.1468   | 0.1468      | 0.595922391 |             |            |         |      |
| HNRNPR     | ENSG00000125944 | 0.91983  | 0.17883     | 0.52873     | 0.2985      | 1.0502     |         |      |
|            | 0.14682         | 0.71879  | 0.23614     | 0.14682     | 0.595922391 |            |         |      |
| LINC00612  | ENSG00000214851 | 1.0502   | 0.14682     | 1.0502      | 0.14682     | 1.0502     |         |      |
|            | 0.14682         | 1.0502   | 0.14682     | 0.14682     | 0.595922391 |            |         |      |
| PKMP3      | ENSG00000220563 | 1.0501   | 0.14683     | 0.17856     | 0.42914     | 1.0501     | 0.14683 |      |
|            | 1.0501          | 0.14683  | 0.14683     | 0.595922391 |             |            |         |      |
| NA         | ENSG00000223660 | 1.0501   | 0.14684     | 1.0501      | 0.14684     | 1.0501     | 0.14684 |      |
|            | 1.0501          | 0.14684  | 0.14684     | 0.595922391 |             |            |         |      |
| EEF1B2P7   | ENSG00000213055 | 1.05     | 0.14685     | 0.36835     | 0.3563      | -0.36554   | 0.64265 |      |
|            | -0.36554        | 0.64265  | 0.14685     | 0.595922391 |             |            |         |      |
| GTF2IP2    | ENSG00000226930 | -0.2787  | 0.60976     | 1.05        | 0.14685     | 0.33983    | 0.36699 |      |
|            | 0.49428         | 0.31056  | 0.14685     | 0.595922391 |             |            |         |      |
| RN7SL297P  | ENSG00000240183 | 1.05     | 0.14686     | 1.05        | 0.14686     | 1.05       | 0.14686 | 1.05 |
|            | 0.14686         | 0.14686  | 0.595922391 |             |             |            |         |      |
| SNORD3H    | ENSG00000207215 | 0.64466  | 0.25957     | 0.66757     | 0.25221     | 1.05       | 0.14687 |      |
|            | 0.60832         | 0.27149  | 0.14687     | 0.595922391 |             |            |         |      |
| HESX1      | ENSG00000163666 | 1.0499   | 0.14688     | 1.0499      | 0.14688     | 1.0499     | 0.14688 |      |
|            | 0.45127         | 0.3259   | 0.14688     | 0.595922391 |             |            |         |      |
| NA         | ENSG00000278963 | 0.51017  | 0.30497     | 0.51017     | 0.30497     | 1.0498     | 0.14689 |      |
|            | 0.51017         | 0.30497  | 0.14689     | 0.595922391 |             |            |         |      |
| NA         | ENSG00000260599 | 1.0498   | 0.1469      | 0.41235     | 0.34004     | 0.89706    | 0.18484 |      |
|            | 0.90849         | 0.18181  | 0.1469      | 0.595922391 |             |            |         |      |
| HNRNPA1P65 | ENSG00000248444 | 1.0498   | 0.14691     | 1.0498      | 0.14691     | 1.0498     |         |      |
|            | 0.14691         | 1.0498   | 0.14691     | 0.14691     | 0.595922391 |            |         |      |
| CPHXL      | ENSG00000283755 | 1.0497   | 0.14692     | 0.90043     | 0.18395     | 0.44525    | 0.32807 |      |
|            | 0.53768         | 0.2954   | 0.14692     | 0.595922391 |             |            |         |      |
| NA         | ENSG00000199444 | -0.74755 | 0.77263     | 1.0495      | 0.14697     | 1.0495     | 0.14697 |      |
|            | 1.0495          | 0.14697  | 0.14697     | 0.596074489 |             |            |         |      |
| NA         | ENSG00000257738 | 0.31723  | 0.37554     | 0.31723     | 0.37554     | 1.0494     | 0.14701 |      |
|            | 0.31723         | 0.37554  | 0.14701     | 0.596074489 |             |            |         |      |
| GAS5-AS1   | ENSG00000270084 | 1.0492   | 0.14704     | 1.0492      | 0.14704     | 1.0492     |         |      |
|            | 0.14704         | 1.0492   | 0.14704     | 0.14704     | 0.596074489 |            |         |      |
| MAD1L1     | ENSG00000002822 | -0.17958 | 0.57126     | 1.0491      | 0.14706     | -0.83258   |         |      |
|            | 0.79746         | 0.27052  | 0.39338     | 0.14706     | 0.596074489 |            |         |      |
| NA         | ENSG00000259530 | -0.17758 | 0.57047     | 1.0491      | 0.14707     | -0.17758   | 0.57047 |      |
|            | -0.17758        | 0.57047  | 0.14707     | 0.596074489 |             |            |         |      |
| GALNT13    | ENSG00000144278 | 0.36815  | 0.35638     | 0.054721    | 0.47818     | 1.0491     |         |      |
|            | 0.14708         | 0.04966  | 0.4802      | 0.14708     | 0.596074489 |            |         |      |
| ERRFI1     | ENSG00000116285 | 0.94406  | 0.17257     | -0.26835    | 0.60579     | 1.049      | 0.14709 |      |
|            | 0.54067         | 0.29437  | 0.14709     | 0.596074489 |             |            |         |      |
| NA         | ENSG00000278002 | -0.6201  | 0.7324      | -0.14622    | 0.55813     | 1.0489     | 0.14712 |      |
|            | 0.70082         | 0.24171  | 0.14712     | 0.596074489 |             |            |         |      |
| HABP2      | ENSG00000148702 | -0.75571 | 0.77509     | 1.0488      | 0.14713     | -0.29917   | 0.61759 |      |
|            | -0.36639        | 0.64296  | 0.14713     | 0.596074489 |             |            |         |      |
| NA         | ENSG00000271919 | 1.0488   | 0.14713     | 1.0488      | 0.14713     | -0.0045142 | 0.5018  |      |
|            | 1.0488          | 0.14713  | 0.14713     | 0.596074489 |             |            |         |      |
| LINC02693  | ENSG00000212719 | -0.28176 | 0.61094     | 0.10441     | 0.45842     | -0.87091   |         |      |
|            | 0.8081          | 1.0488   | 0.14714     | 0.14714     | 0.596074489 |            |         |      |
| RBMXP4     | ENSG00000249465 | 0.73069  | 0.23248     | 1.0488      | 0.14714     | 0.86082    |         |      |
|            | 0.19467         | 0.86082  | 0.19467     | 0.14714     | 0.596074489 |            |         |      |
| TASOR2     | ENSG00000108021 | 0.41778  | 0.33805     | 1.0488      | 0.14715     | -0.44407   |         |      |

|             |                 |            |         |             |             |           |         |  |
|-------------|-----------------|------------|---------|-------------|-------------|-----------|---------|--|
|             | 0.6715          | 0.47873    | 0.31606 | 0.14715     | 0.596074489 |           |         |  |
| DNAJC11     | ENSG00000007923 | 1.0487     | 0.14716 | 0.72573     | 0.234       | -0.022596 | 0.50901 |  |
|             | -0.15577        | 0.56189    | 0.14716 | 0.596074489 |             |           |         |  |
| HILPDA      | ENSG00000135245 | 0.55896    | 0.28809 | 0.55896     | 0.28809     | 1.0487    |         |  |
|             | 0.14717         | 0.2533     | 0.40002 | 0.14717     | 0.596074489 |           |         |  |
| NA          | ENSG00000281657 | -0.6295    | 0.73549 | -0.64366    | 0.7401      | 1.0487    | 0.14717 |  |
|             | -1.642          | 0.9497     | 0.14717 | 0.596074489 |             |           |         |  |
| UBE2Q2      | ENSG00000140367 | 0.50685    | 0.30613 | 1.0485      | 0.1472      | 0.71534   |         |  |
|             | 0.2372          | -0.8123    | 0.79169 | 0.1472      | 0.596074489 |           |         |  |
| MEIOB       | ENSG00000162039 | 0.33087    | 0.37037 | 0.65262     | 0.257       | 0.85737   | 0.19562 |  |
|             | 1.0485          | 0.1472     | 0.1472  | 0.596074489 |             |           |         |  |
| MIR4290HG   | ENSG00000227555 | 1.0485     | 0.14722 | 0.37708     | 0.35306     | 0.28857   |         |  |
|             | 0.38645         | -0.029115  | 0.51161 | 0.14722     | 0.596074489 |           |         |  |
| UBE2D1      | ENSG00000072401 | 1.0483     | 0.14724 | 1.0483      | 0.14724     | 1.0483    |         |  |
|             | 0.14724         | -1.2077    | 0.88643 | 0.14724     | 0.596074489 |           |         |  |
| GYPE        | ENSG00000197465 | 0.23809    | 0.4059  | -0.24837    | 0.59808     | -0.27497  | 0.60833 |  |
|             | 1.0482          | 0.14727    | 0.14727 | 0.596074489 |             |           |         |  |
| LINC01971   | ENSG00000278200 | 1.0482     | 0.14727 | 0.85662     | 0.19583     | -0.075183 |         |  |
|             | 0.52997         | -0.075183  | 0.52997 | 0.14727     | 0.596074489 |           |         |  |
| VDAC2P3     | ENSG00000213262 | 1.0482     | 0.14728 | 1.0482      | 0.14728     | 1.0482    |         |  |
|             | 0.14728         | 1.0482     | 0.14728 | 0.14728     | 0.596074489 |           |         |  |
| NA          | ENSG00000229418 | 1.0482     | 0.14728 | 0.90171     | 0.18361     | 1.0054    | 0.15735 |  |
|             | 0.13313         | 0.44705    | 0.14728 | 0.596074489 |             |           |         |  |
| SERBP1P3    | ENSG00000242142 | -0.11055   | 0.54402 | 1.0481      | 0.14729     | -0.22068  |         |  |
|             | 0.58733         | 0.094833   | 0.46222 | 0.14729     | 0.596074489 |           |         |  |
| NA          | ENSG00000260092 | 0.95863    | 0.16887 | 1.0481      | 0.14729     | 0.95863   | 0.16887 |  |
|             | 0.95863         | 0.16887    | 0.14729 | 0.596074489 |             |           |         |  |
| OR4C2P      | ENSG00000182565 | 0.32723    | 0.37175 | 1.0481      | 0.1473      | -0.99818  |         |  |
|             | 0.8409          | -0.81257   | 0.79177 | 0.1473      | 0.596074489 |           |         |  |
| RN7SKP223   | ENSG00000222514 | 1.0481     | 0.1473  | 1.0481      | 0.1473      | 1.0481    |         |  |
|             | 0.1473          | 1.0481     | 0.1473  | 0.1473      | 0.596074489 |           |         |  |
| HOXC13-AS   | ENSG00000249641 | 1.0477     | 0.1474  | 0.90073     | 0.18387     | 0.9485    |         |  |
|             | 0.17144         | -1.2575    | 0.89572 | 0.1474      | 0.596266255 |           |         |  |
| VPS13B-DT   | ENSG00000253948 | 0.00066728 | 0.49973 | 0.23324     | 0.40779     | 1.0477    |         |  |
|             | 0.1474          | 1.0477     | 0.1474  | 0.1474      | 0.596266255 |           |         |  |
| NA          | ENSG00000254310 | 0.91935    | 0.17896 | 0.91935     | 0.17896     | 0.91935   | 0.17896 |  |
|             | 1.0476          | 0.1474     | 0.1474  | 0.596266255 |             |           |         |  |
| PRXL2AP1    | ENSG00000257220 | 1.0476     | 0.14742 | 1.0476      | 0.14742     | 1.0476    |         |  |
|             | 0.14742         | 1.0476     | 0.14742 | 0.14742     | 0.596266255 |           |         |  |
| ITIH1       | ENSG00000055957 | 0.36835    | 0.35631 | 0.8523      | 0.19702     | 1.0474    | 0.14745 |  |
|             | 0.6798          | 0.24832    | 0.14745 | 0.596266255 |             |           |         |  |
| TTC28-AS1   | ENSG00000235954 | 1.031      | 0.15127 | 1.0475      | 0.14745     | 0.86359   | 0.19391 |  |
|             | 0.79286         | 0.21393    | 0.14745 | 0.596266255 |             |           |         |  |
| SNORD116-30 | ENSG00000252277 | 1.0474     | 0.14745 | 1.0474      | 0.14745     | 1.0474    |         |  |
|             | 0.14745         | 1.0474     | 0.14745 | 0.14745     | 0.596266255 |           |         |  |
| NA          | ENSG00000243300 | 0.63308    | 0.26334 | 1.0473      | 0.14747     | 0.55124   | 0.29074 |  |
|             | 0.55124         | 0.29074    | 0.14747 | 0.596266255 |             |           |         |  |
| NA          | ENSG00000258232 | 1.0473     | 0.14748 | 1.0473      | 0.14748     | 1.0473    | 0.14748 |  |
|             | 1.0473          | 0.14748    | 0.14748 | 0.596266255 |             |           |         |  |
| NA          | ENSG00000264324 | 1.0473     | 0.14748 | 1.0473      | 0.14748     | 1.0473    | 0.14748 |  |
|             | 1.0473          | 0.14748    | 0.14748 | 0.596266255 |             |           |         |  |
| LAYN        | ENSG00000204381 | 0.82855    | 0.20368 | 1.0472      | 0.1475      | 1.0456    | 0.14788 |  |
|             | 1.0184          | 0.15424    | 0.1475  | 0.596266255 |             |           |         |  |
| NDC80       | ENSG00000080986 | 1.0471     | 0.14752 | 1.0458      | 0.14783     | 1.0471    | 0.14752 |  |
|             | 0.79141         | 0.21435    | 0.14752 | 0.596266255 |             |           |         |  |
| RPL31P11    | ENSG00000213075 | 1.0471     | 0.14752 | 0.8061      | 0.21009     | 0.27298   |         |  |
|             | 0.39243         | 0.8061     | 0.21009 | 0.14752     | 0.596266255 |           |         |  |
| RNU1-38P    | ENSG00000199687 | 0.66512    | 0.25299 | -0.32558    | 0.62763     | 0.60136   |         |  |
|             | 0.2738          | 1.047      | 0.14755 | 0.14755     | 0.596266255 |           |         |  |
| RNU6-1027P  | ENSG00000206725 | 1.047      | 0.14756 | -0.38329    | 0.64925     | -0.79281  | 0.78606 |  |
|             | -0.98972        | 0.83885    | 0.14756 | 0.596266255 |             |           |         |  |
| RABPKP1     | ENSG00000225801 | 1.0231     | 0.15313 | 1.0469      | 0.14758     | 1.0231    |         |  |

|             |                 |           |             |             |             |           |         |       |
|-------------|-----------------|-----------|-------------|-------------|-------------|-----------|---------|-------|
|             | 0.15313         | 0.88809   | 0.18725     | 0.14758     | 0.596266255 |           |         |       |
| PHBP4       | ENSG00000230251 | 0.12271   | 0.45117     | -0.5748     | 0.71729     | 0.12271   | 0.45117 |       |
|             | 1.0468          | 0.14759   | 0.14759     | 0.596266255 |             |           |         |       |
| PROZ        | ENSG00000126231 | 0.34972   | 0.36327     | -0.17933    | 0.57116     | 1.0468    | 0.1476  |       |
|             | 0.89196         | 0.18621   | 0.1476      | 0.596266255 |             |           |         |       |
| SDHA        | ENSG00000073578 | -0.12654  | 0.55035     | 0.46708     | 0.32022     | 0.20341   | 0.41941 |       |
|             | 1.0467          | 0.14762   | 0.14762     | 0.596266255 |             |           |         |       |
| ZNF799      | ENSG00000196466 | 0.20854   | 0.4174      | 1.0467      | 0.14762     | -1.1948   |         |       |
|             | 0.88392         | 0.066822  | 0.47336     | 0.14762     | 0.596266255 |           |         |       |
| TGM1        | ENSG00000092295 | 1.0466    | 0.14764     | 1.0466      | 0.14764     | 1.0466    | 0.14764 |       |
|             | 1.0466          | 0.14764   | 0.14764     | 0.596266255 |             |           |         |       |
| MTND1P19    | ENSG00000251449 | 1.0466    | 0.14764     | 1.0466      | 0.14764     | -0.026273 |         |       |
|             | 0.51048         | 1.0466    | 0.14764     | 0.14764     | 0.596266255 |           |         |       |
| NA          | ENSG00000260918 | 0.89501   | 0.18539     | 0.51328     | 0.30388     | 1.0466    | 0.14764 |       |
|             | 1.0466          | 0.14764   | 0.14764     | 0.596266255 |             |           |         |       |
| ITM2C       | ENSG00000135916 | -0.46047  | 0.67741     | 0.33529     | 0.3687      | -0.40698  | 0.65799 |       |
|             | 1.0465          | 0.14766   | 0.14766     | 0.596266255 |             |           |         |       |
| GAPDHP76    | ENSG00000249840 | -0.96538  | 0.83282     | 1.0465      | 0.14766     | -0.96538  |         |       |
|             | 0.83282         | 1.0465    | 0.14766     | 0.14766     | 0.596266255 |           |         |       |
| NECTIN3     | ENSG00000177707 | 0.28543   | 0.38766     | 0.28543     | 0.38766     | 1.0464    |         |       |
|             | 0.14769         | 0.28543   | 0.38766     | 0.14769     | 0.596266255 |           |         |       |
| NA          | ENSG00000227908 | 1.0464    | 0.14769     | 1.0464      | 0.14769     | 1.0464    | 0.14769 |       |
|             | 1.0464          | 0.14769   | 0.14769     | 0.596266255 |             |           |         |       |
| LINC00330   | ENSG00000235097 | 0.25427   | 0.39964     | -1.3358     | 0.90919     | 0.75228   |         |       |
|             | 0.22594         | 1.0464    | 0.14769     | 0.14769     | 0.596266255 |           |         |       |
| SENP5       | ENSG00000119231 | -0.9949   | 0.84011     | 1.0461      | 0.14776     | 0.46458   | 0.32112 |       |
|             | 0.52024         | 0.30145   | 0.14776     | 0.596296542 |             |           |         |       |
| NA          | ENSG00000271397 | 0.21885   | 0.41338     | 0.97123     | 0.16572     | 1.046     | 0.14777 | 1.046 |
|             | 0.14777         | 0.14777   | 0.596296542 |             |             |           |         |       |
| ZNF566      | ENSG00000186017 | 0.29365   | 0.38451     | -0.096021   | 0.53825     | 1.046     | 0.14778 |       |
|             | -0.096021       | 0.53825   | 0.14778     | 0.596296542 |             |           |         |       |
| CYFIP2      | ENSG00000055163 | 1.0014    | 0.15831     | -0.22848    | 0.59036     | 0.59138   |         |       |
|             | 0.27713         | 1.046     | 0.14779     | 0.14779     | 0.596296542 |           |         |       |
| BNIP3P29    | ENSG00000269742 | 0.3306    | 0.37047     | 1.046       | 0.14779     | 1.046     | 0.14779 | 1.046 |
|             | 0.14779         | 0.14779   | 0.596296542 |             |             |           |         |       |
| UBASH3A     | ENSG00000160185 | 1.0459    | 0.1478      | 1.0459      | 0.1478      | 0.030872  |         |       |
|             | 0.48769         | 0.8769    | 0.19027     | 0.1478      | 0.596296542 |           |         |       |
| TPCN1       | ENSG00000186815 | 1.0458    | 0.14782     | 1.0458      | 0.14782     | 0.77251   | 0.21991 |       |
|             | 0.96114         | 0.16824   | 0.14782     | 0.596296542 |             |           |         |       |
| AURKAP1     | ENSG00000213033 | 1.0458    | 0.14783     | 0.33248     | 0.36976     | 1.0458    |         |       |
|             | 0.14783         | 1.0458    | 0.14783     | 0.14783     | 0.596296542 |           |         |       |
| ENTPD1-AS1  | ENSG00000226688 | 0.64731   | 0.25871     | 0.93105     | 0.17591     | 1.0457    |         |       |
|             | 0.14785         | 1.0457    | 0.14785     | 0.14785     | 0.596296542 |           |         |       |
| NA          | ENSG00000256176 | 1.0457    | 0.14785     | 0.91989     | 0.17881     | 1.0457    | 0.14785 |       |
|             | 1.0457          | 0.14785   | 0.14785     | 0.596296542 |             |           |         |       |
| NA          | ENSG00000257759 | -0.011178 | 0.50446     | 1.0457      | 0.14785     | -1.2724   | 0.89839 |       |
|             | -1.6947         | 0.95494   | 0.14785     | 0.596296542 |             |           |         |       |
| ITPK1-AS1   | ENSG00000258730 | 1.0333    | 0.15072     | -0.39836    | 0.65482     | 1.0457    |         |       |
|             | 0.14786         | 0.82017   | 0.20606     | 0.14786     | 0.596296542 |           |         |       |
| GAD2        | ENSG00000136750 | -0.44784  | 0.67287     | 1.0455      | 0.14789     | -0.14474  | 0.55754 |       |
|             | 0.88763         | 0.18737   | 0.14789     | 0.596296542 |             |           |         |       |
| RN7SKP202   | ENSG00000222371 | 1.0455    | 0.1479      | 0.69636     | 0.2431      | 1.0455    |         |       |
|             | 0.1479          | 1.0455    | 0.1479      | 0.1479      | 0.596296542 |           |         |       |
| VN1R6P      | ENSG00000174677 | -0.037566 | 0.51498     | 1.0454      | 0.14792     | 1.0454    |         |       |
|             | 0.14792         | 1.0454    | 0.14792     | 0.14792     | 0.596296542 |           |         |       |
| RNU6-1331P  | ENSG00000200528 | 1.0454    | 0.14792     | 1.0454      | 0.14792     | 1.0454    |         |       |
|             | 0.14792         | 1.0454    | 0.14792     | 0.14792     | 0.596296542 |           |         |       |
| MIR3912     | ENSG00000264249 | 0.41438   | 0.3393      | 1.0454      | 0.14792     | 0.41438   |         |       |
|             | 0.3393          | 0.41438   | 0.3393      | 0.14792     | 0.596296542 |           |         |       |
| N4BP2L2-IT2 | ENSG00000281026 | 0.10279   | 0.45906     | 1.0454      | 0.14792     | -0.32878  |         |       |
|             | 0.62884         | -0.32878  | 0.62884     | 0.14792     | 0.596296542 |           |         |       |
| DUOX1       | ENSG00000137857 | 1.0454    | 0.14793     | 0.40217     | 0.34378     | -0.77245  | 0.78008 |       |

|            |                 |             |         |             |             |           |         |  |
|------------|-----------------|-------------|---------|-------------|-------------|-----------|---------|--|
|            | -0.93075        | 0.82401     | 0.14793 | 0.596296542 |             |           |         |  |
| ARHGAP21   | ENSG00000107863 | 1.0451      | 0.14799 | 0.82596     | 0.20441     | 0.69231   |         |  |
|            | 0.24437         | 0.6492      | 0.2581  | 0.14799     | 0.596331513 |           |         |  |
| NA         | ENSG00000224700 | 1.045       | 0.14802 | 1.045       | 0.14802     | 1.045     | 0.14802 |  |
|            | 0.14802         | 0.596331513 |         |             |             |           |         |  |
| NA         | ENSG00000270680 | 1.045       | 0.14802 | 0.15418     | 0.43873     | 0.27347   | 0.39224 |  |
|            | -0.024196       | 0.50965     | 0.14802 | 0.596331513 |             |           |         |  |
| DNAJB8-AS1 | ENSG00000242049 | 1.028       | 0.15196 | 1.0449      | 0.14804     | 1.0449    | 0.14804 |  |
|            | 1.0449          | 0.14804     | 0.14804 | 0.596331513 |             |           |         |  |
| SELENOP    | ENSG00000250722 | 1.0448      | 0.14806 | -0.43834    | 0.66943     | -0.22052  |         |  |
|            | 0.58727         | -0.3206     | 0.62574 | 0.14806     | 0.596331513 |           |         |  |
| IL15RA     | ENSG00000134470 | 0.69722     | 0.24283 | 1.0448      | 0.14807     | 0.57938   |         |  |
|            | 0.28117         | 0.48519     | 0.31377 | 0.14807     | 0.596331513 |           |         |  |
| NA         | ENSG00000217746 | -0.43046    | 0.66657 | 1.0448      | 0.14807     | -0.43046  | 0.66657 |  |
|            | -0.43046        | 0.66657     | 0.14807 | 0.596331513 |             |           |         |  |
| PLPPR2     | ENSG00000105520 | -0.035905   | 0.51432 | 1.0447      | 0.14808     | -0.035905 |         |  |
|            | 0.51432         | -0.035905   | 0.51432 | 0.14808     | 0.596331513 |           |         |  |
| RNU6-767P  | ENSG00000206859 | 1.0447      | 0.14808 | 1.0447      | 0.14808     | 1.0447    |         |  |
|            | 0.14808         | 1.0447      | 0.14808 | 0.14808     | 0.596331513 |           |         |  |
| NA         | ENSG00000254178 | 1.0447      | 0.14808 | 1.0447      | 0.14808     | 1.0447    | 0.14808 |  |
|            | 1.0447          | 0.14808     | 0.14808 | 0.596331513 |             |           |         |  |
| TPM3P8     | ENSG00000183022 | 1.0446      | 0.1481  | 1.0446      | 0.1481      | -0.074655 |         |  |
|            | 0.52976         | 1.0446      | 0.1481  | 0.1481      | 0.596331513 |           |         |  |
| PAPOLB     | ENSG00000218823 | 1.0446      | 0.1481  | -0.34415    | 0.63463     | -0.095799 |         |  |
|            | 0.53816         | 0.11357     | 0.45479 | 0.1481      | 0.596331513 |           |         |  |
| CCT6P2     | ENSG00000250526 | -1.0097     | 0.84367 | -0.8171     | 0.79306     | -1.0085   |         |  |
|            | 0.8434          | 1.0446      | 0.1481  | 0.1481      | 0.596331513 |           |         |  |
| NA         | ENSG00000279952 | 1.0446      | 0.14811 | 1.0446      | 0.14811     | 1.0446    | 0.14811 |  |
|            | 1.0446          | 0.14811     | 0.14811 | 0.596331513 |             |           |         |  |
| NA         | ENSG00000226160 | -0.82959    | 0.79661 | -0.82959    | 0.79661     | 1.0445    | 0.14814 |  |
|            | -0.72504        | 0.76579     | 0.14814 | 0.596403024 |             |           |         |  |
| R3HDM2P2   | ENSG00000216817 | 1.0442      | 0.1482  | 1.0442      | 0.1482      | 1.0442    |         |  |
|            | 0.1482          | 1.0442      | 0.1482  | 0.1482      | 0.596586263 |           |         |  |
| ZNF22-AS1  | ENSG00000165511 | 1.0441      | 0.14821 | 1.0441      | 0.14821     | 1.0441    |         |  |
|            | 0.14821         | 1.0441      | 0.14821 | 0.14821     | 0.596586263 |           |         |  |
| NA         | ENSG00000252824 | 1.0439      | 0.14825 | 1.0439      | 0.14825     | -0.022391 | 0.50893 |  |
|            | 1.0439          | 0.14825     | 0.14825 | 0.596633993 |             |           |         |  |
| RPL15      | ENSG00000174748 | -0.54512    | 0.70716 | 0.69776     | 0.24266     | 0.69776   | 0.24266 |  |
|            | 1.0439          | 0.14827     | 0.14827 | 0.596633993 |             |           |         |  |
| NA         | ENSG00000266106 | 1.0439      | 0.14828 | 1.0439      | 0.14828     | 1.0439    | 0.14828 |  |
|            | 1.0439          | 0.14828     | 0.14828 | 0.596633993 |             |           |         |  |
| CLDN18     | ENSG00000066405 | 0.20648     | 0.41821 | 1.0437      | 0.14831     | 0.96293   |         |  |
|            | 0.16779         | 0.9724      | 0.16543 | 0.14831     | 0.596633993 |           |         |  |
| FBXL12     | ENSG00000127452 | 1.0437      | 0.14831 | 0.62893     | 0.2647      | 0.95601   |         |  |
|            | 0.16953         | 0.20957     | 0.417   | 0.14831     | 0.596633993 |           |         |  |
| LCEP4      | ENSG00000226947 | 1.0437      | 0.14831 | -0.43823    | 0.66939     | 1.0437    | 0.14831 |  |
|            | 1.0437          | 0.14831     | 0.14831 | 0.596633993 |             |           |         |  |
| NA         | ENSG00000261541 | 1.0437      | 0.14832 | 0.93485     | 0.17493     | 1.0437    | 0.14832 |  |
|            | 1.0437          | 0.14832     | 0.14832 | 0.596633993 |             |           |         |  |
| RNA5SP356  | ENSG00000251781 | 1.0436      | 0.14833 | 0.047174    | 0.48119     | -0.72424  |         |  |
|            | 0.76554         | -0.72424    | 0.76554 | 0.14833     | 0.596633993 |           |         |  |
| NA         | ENSG00000188242 | 0.56024     | 0.28766 | 1.0436      | 0.14834     | 1.0316    | 0.15113 |  |
|            | 1.0316          | 0.15113     | 0.14834 | 0.596633993 |             |           |         |  |
| NA         | ENSG00000258411 | -0.27159    | 0.60703 | -0.27159    | 0.60703     | 0.44164   | 0.32938 |  |
|            | 1.0435          | 0.14835     | 0.14835 | 0.596633993 |             |           |         |  |
| LINC02629  | ENSG00000223470 | 1.0435      | 0.14837 | -0.77577    | 0.78106     | 1.0435    |         |  |
|            | 0.14837         | 1.0435      | 0.14837 | 0.14837     | 0.596633993 |           |         |  |
| NA         | ENSG00000248878 | 1.0434      | 0.14838 | 1.0434      | 0.14838     | 1.0434    | 0.14838 |  |
|            | -0.76136        | 0.77678     | 0.14838 | 0.596633993 |             |           |         |  |
| MIR3686    | ENSG00000263763 | 1.0433      | 0.14839 | 1.0433      | 0.14839     | 1.0433    |         |  |
|            | 0.14839         | 1.0433      | 0.14839 | 0.14839     | 0.596633993 |           |         |  |
| KIF2B      | ENSG00000141200 | 1.0433      | 0.14841 | 1.0433      | 0.14841     | 1.0433    | 0.14841 |  |

|            |                 |             |         |             |             |           |         |  |
|------------|-----------------|-------------|---------|-------------|-------------|-----------|---------|--|
|            | 1.0433          | 0.14841     | 0.14841 | 0.596633993 |             |           |         |  |
| ACBD3      | ENSG00000182827 | 1.0433      | 0.14841 | -0.23187    | 0.59168     | 1.0433    | 0.14841 |  |
|            | 0.19855         | 0.42131     | 0.14841 | 0.596633993 |             |           |         |  |
| KLF16      | ENSG00000129911 | -0.81683    | 0.79299 | -0.81683    | 0.79299     | -0.81683  | 0.79299 |  |
|            | 1.0432          | 0.14843     | 0.14843 | 0.596633993 |             |           |         |  |
| ADRA2B     | ENSG00000274286 | 1.0432      | 0.14843 | 0.82793     | 0.20385     | -0.36873  |         |  |
|            | 0.64383         | -0.73467    | 0.76873 | 0.14843     | 0.596633993 |           |         |  |
| NA         | ENSG00000214846 | 1.043       | 0.14847 | 1.043       | 0.14847     | 1.043     | 0.14847 |  |
|            | 0.14847         | 0.596669278 |         |             |             |           |         |  |
| SALL4P1    | ENSG00000250308 | 1.0429      | 0.14849 | -0.17361    | 0.56891     | 1.0429    |         |  |
|            | 0.14849         | 1.0429      | 0.14849 | 0.14849     | 0.596669278 |           |         |  |
| ZC3H18     | ENSG00000158545 | -0.84509    | 0.80097 | 0.37167     | 0.35507     | 1.0429    |         |  |
|            | 0.1485          | 0.5593      | 0.28798 | 0.1485      | 0.596669278 |           |         |  |
| NA         | ENSG00000243280 | 1.0429      | 0.1485  | 1.0429      | 0.1485      | 1.0429    | 0.1485  |  |
|            | 1.0429          | 0.1485      | 0.1485  | 0.596669278 |             |           |         |  |
| NA         | ENSG00000267666 | 1.0429      | 0.1485  | 1.0429      | 0.1485      | 1.0429    | 0.1485  |  |
|            | 1.0429          | 0.1485      | 0.1485  | 0.596669278 |             |           |         |  |
| MIR1538    | ENSG00000223109 | 0.091004    | 0.46374 | 1.0428      | 0.14853     | 1.0428    |         |  |
|            | 0.14853         | 1.0428      | 0.14853 | 0.14853     | 0.59672257  |           |         |  |
| MANSC1     | ENSG00000111261 | 0.72465     | 0.23433 | 0.96412     | 0.16749     | 1.0427    |         |  |
|            | 0.14855         | -0.40828    | 0.65847 | 0.14855     | 0.59672257  |           |         |  |
| RPL12P31   | ENSG00000241228 | 1.0427      | 0.14855 | 1.0427      | 0.14855     | 1.0427    |         |  |
|            | 0.14855         | 1.0427      | 0.14855 | 0.14855     | 0.59672257  |           |         |  |
| RB1        | ENSG00000139687 | 0.36776     | 0.35653 | 1.0425      | 0.14859     | 1.0294    | 0.15164 |  |
|            | 0.9399          | 0.17364     | 0.14859 | 0.59683405  |             |           |         |  |
| BTG2       | ENSG00000159388 | 1.0423      | 0.14863 | 1.0423      | 0.14863     | 0.28868   | 0.38642 |  |
|            | 1.0423          | 0.14863     | 0.14863 | 0.596896316 |             |           |         |  |
| PRR27      | ENSG00000187533 | 1.0423      | 0.14863 | 1.0423      | 0.14863     | 1.0423    | 0.14863 |  |
|            | -0.22833        | 0.59031     | 0.14863 | 0.596896316 |             |           |         |  |
| NA         | ENSG00000242029 | 1.0423      | 0.14865 | -0.25702    | 0.60142     | 0.65433   | 0.25645 |  |
|            | 0.98419         | 0.16251     | 0.14865 | 0.596918408 |             |           |         |  |
| NFIC       | ENSG00000141905 | 1.0422      | 0.14866 | -0.77524    | 0.7809      | -1.0956   | 0.86337 |  |
|            | -0.30154        | 0.6185      | 0.14866 | 0.596918408 |             |           |         |  |
| NA         | ENSG00000254478 | 0.53236     | 0.29724 | -0.33735    | 0.63207     | -0.84875  | 0.80199 |  |
|            | 1.0421          | 0.14869     | 0.14869 | 0.596931461 |             |           |         |  |
| EXOC5P1    | ENSG00000180673 | 1.042       | 0.1487  | 0.28504     | 0.38781     | 0.33961   | 0.36707 |  |
|            | 0.33961         | 0.36707     | 0.1487  | 0.596931461 |             |           |         |  |
| NA         | ENSG00000263110 | 0.32702     | 0.37183 | 0.84578     | 0.19884     | 1.042     | 0.1487  |  |
|            | 0.3566          | 0.3607      | 0.1487  | 0.596931461 |             |           |         |  |
| SMPDL3B    | ENSG00000130768 | 0.35689     | 0.36059 | 0.89591     | 0.18515     | 0.30287   |         |  |
|            | 0.38099         | 1.0418      | 0.14875 | 0.14875     | 0.597033811 |           |         |  |
| NA         | ENSG00000225394 | 0.16389     | 0.43491 | 1.0418      | 0.14875     | -0.078262 | 0.53119 |  |
|            | 1.0418          | 0.14875     | 0.14875 | 0.597033811 |             |           |         |  |
| STYK1      | ENSG00000060140 | 0.54094     | 0.29427 | 1.0417      | 0.14878     | 1.0417    | 0.14878 |  |
|            | -0.88223        | 0.81117     | 0.14878 | 0.59710504  |             |           |         |  |
| MIR638     | ENSG00000207972 | 1.0415      | 0.14883 | -0.036435   | 0.51453     | 1.0415    |         |  |
|            | 0.14883         | 1.0415      | 0.14883 | 0.14883     | 0.597151904 |           |         |  |
| ZNF687-AS1 | ENSG00000232671 | 1.0414      | 0.14884 | 1.0414      | 0.14884     | 1.0414    |         |  |
|            | 0.14884         | 1.0414      | 0.14884 | 0.14884     | 0.597151904 |           |         |  |
| NA         | ENSG00000207300 | 1.0412      | 0.14888 | 1.0412      | 0.14888     | -0.45233  | 0.67449 |  |
|            | 1.0412          | 0.14888     | 0.14888 | 0.597151904 |             |           |         |  |
| AARS2      | ENSG00000124608 | 0.93874     | 0.17393 | 1.0412      | 0.14889     | 0.97982   | 0.16359 |  |
|            | 1.0412          | 0.14889     | 0.14889 | 0.597151904 |             |           |         |  |
| NA         | ENSG00000249678 | 0.77522     | 0.2191  | -0.008449   | 0.50337     | 0.77522   | 0.2191  |  |
|            | 1.0412          | 0.14889     | 0.14889 | 0.597151904 |             |           |         |  |
| NA         | ENSG00000262714 | 1.0412      | 0.14889 | 1.0412      | 0.14889     | 1.0412    | 0.14889 |  |
|            | 1.0412          | 0.14889     | 0.14889 | 0.597151904 |             |           |         |  |
| NA         | ENSG00000283205 | 1.0412      | 0.14889 | -1.4559     | 0.9273      | 0.53294   | 0.29704 |  |
|            | 0.37596         | 0.35347     | 0.14889 | 0.597151904 |             |           |         |  |
| MESTP4     | ENSG00000215004 | 1.0411      | 0.14891 | 0.32225     | 0.37363     | -0.96487  |         |  |
|            | 0.8327          | -0.96487    | 0.8327  | 0.14891     | 0.597151904 |           |         |  |
| NA         | ENSG00000258964 | 1.0411      | 0.14892 | 1.0411      | 0.14892     | 1.0411    | 0.14892 |  |



|           |                 |           |             |             |             |           |         |       |
|-----------|-----------------|-----------|-------------|-------------|-------------|-----------|---------|-------|
|           | 1.0411          | 0.14892   | 0.14892     | 0.597151904 |             |           |         |       |
| FLII      | ENSG00000177731 | 0.45475   | 0.32464     | 0.25356     | 0.39992     | 1.041     | 0.14893 | 1.041 |
|           | 0.14893         | 0.14893   | 0.597151904 |             |             |           |         |       |
| NA        | ENSG00000234393 | 1.041     | 0.14894     | 0.29011     | 0.38587     | 0.29011   | 0.38587 |       |
|           | 0.29011         | 0.38587   | 0.14894     | 0.597151904 |             |           |         |       |
| NA        | ENSG00000260660 | 0.10154   | 0.45956     | 1.041       | 0.14895     | -0.97311  | 0.83475 |       |
|           | -0.73354        | 0.76839   | 0.14895     | 0.597151904 |             |           |         |       |
| RN7SL310P | ENSG00000240663 | 1.0409    | 0.14897     | 0.14897     | -0.78293    | 0.78317   | 1.0409  |       |
|           | 0.14897         | 1.0409    | 0.14897     | 0.14897     | 0.597151904 |           |         |       |
| NA        | ENSG00000215922 | 1.0408    | 0.14898     | -0.66589    | 0.74726     | -0.43205  | 0.66715 |       |
|           | -0.43205        | 0.66715   | 0.14898     | 0.597151904 |             |           |         |       |
| NA        | ENSG00000249738 | 0.55261   | 0.29027     | 0.73455     | 0.23131     | -0.36839  | 0.64371 |       |
|           | 1.0408          | 0.14899   | 0.14899     | 0.597151904 |             |           |         |       |
| GCNT2     | ENSG00000111846 | 0.52043   | 0.30138     | 0.71314     | 0.23788     | 1.0407    | 0.149   |       |
|           | 0.08972         | 0.46425   | 0.149       | 0.597151904 |             |           |         |       |
| NA        | ENSG00000231397 | -2.2829   | 0.98878     | -0.58924    | 0.72215     | -0.26972  | 0.60631 |       |
|           | 1.0407          | 0.149     | 0.149       | 0.597151904 |             |           |         |       |
| IHO1      | ENSG00000173421 | 1.0406    | 0.14903     | 0.69983     | 0.24202     | 0.95114   | 0.17077 |       |
|           | -0.51758        | 0.69762   | 0.14903     | 0.597223018 |             |           |         |       |
| RNA5SP30  | ENSG00000202422 | 1.0405    | 0.14906     | 0.99457     | 0.15997     | 0.99457   |         |       |
|           | 0.15997         | 0.99457   | 0.15997     | 0.14906     | 0.597245009 |           |         |       |
| NA        | ENSG00000239106 | 1.0405    | 0.14906     | -0.15325    | 0.5609      | -0.15325  | 0.5609  |       |
|           | 0.64827         | 0.25841   | 0.14906     | 0.597245009 |             |           |         |       |
| SPHK2     | ENSG00000063176 | -0.079942 | 0.53186     | 1.0403      | 0.1491      | -0.079942 | 0.53186 |       |
|           | -0.079942       | 0.53186   | 0.1491      | 0.597257953 |             |           |         |       |
| NA        | ENSG00000206961 | 0.78039   | 0.21758     | 0.78039     | 0.21758     | 0.78039   | 0.21758 |       |
|           | 1.0403          | 0.1491    | 0.1491      | 0.597257953 |             |           |         |       |
| NA        | ENSG00000279061 | 0.64997   | 0.25786     | 1.0403      | 0.1491      | -0.029527 | 0.51178 |       |
|           | -0.029527       | 0.51178   | 0.1491      | 0.597257953 |             |           |         |       |
| TMEM231   | ENSG00000205084 | 0.92788   | 0.17673     | 0.92788     | 0.17673     | 0.92788   |         |       |
|           | 0.17673         | 1.0401    | 0.14916     | 0.14916     | 0.597440133 |           |         |       |
| NA        | ENSG00000233251 | -0.27873  | 0.60978     | 1.04        | 0.14917     | 0.29869   | 0.38259 |       |
|           | -1.4115         | 0.92095   | 0.14917     | 0.597440133 |             |           |         |       |
| RPL17P25  | ENSG00000219547 | 1.0398    | 0.14921     | -0.074908   | 0.52986     | 1.0398    |         |       |
|           | 0.14921         | 1.0398    | 0.14921     | 0.14921     | 0.597542165 |           |         |       |
| DDX17     | ENSG00000100201 | 1.0223    | 0.15331     | 1.0223      | 0.15331     | 1.0398    | 0.14922 |       |
|           | 1.0317          | 0.1511    | 0.14922     | 0.597542165 |             |           |         |       |
| DCAF8     | ENSG00000132716 | 0.078404  | 0.46875     | 0.8264      | 0.20429     | -0.39277  | 0.65275 |       |
|           | 1.0396          | 0.14925   | 0.14925     | 0.597613188 |             |           |         |       |
| MTCO2P4   | ENSG00000253977 | 1.0394    | 0.14931     | 1.0394      | 0.14931     | 1.0394    |         |       |
|           | 0.14931         | 1.0394    | 0.14931     | 0.14931     | 0.597804314 |           |         |       |
| MYO15B    | ENSG00000266714 | 1.0393    | 0.14933     | 0.98395     | 0.16257     | 0.72839   |         |       |
|           | 0.23319         | 0.96385   | 0.16756     | 0.14933     | 0.597835269 |           |         |       |
| ST13P14   | ENSG00000240959 | 0.80324   | 0.21092     | 1.0389      | 0.14942     | 0.84208   |         |       |
|           | 0.19987         | 0.83176   | 0.20277     | 0.14942     | 0.598039085 |           |         |       |
| NA        | ENSG00000269667 | 1.0389    | 0.14942     | -1.0002     | 0.84139     | 1.0389    | 0.14942 |       |
|           | 1.0389          | 0.14942   | 0.14942     | 0.598039085 |             |           |         |       |
| PPM1M     | ENSG00000164088 | 0.68379   | 0.24705     | 1.0389      | 0.14943     | 0.9058    | 0.18252 |       |
|           | 0.68379         | 0.24705   | 0.14943     | 0.598039085 |             |           |         |       |
| TUFM      | ENSG00000178952 | 0.55982   | 0.2878      | 0.80824     | 0.20947     | 1.0389    | 0.14943 |       |
|           | 1.0389          | 0.14943   | 0.14943     | 0.598039085 |             |           |         |       |
| SLC9A3    | ENSG00000066230 | -3.2855   | 0.99949     | 1.0388      | 0.14946     | -0.5367   |         |       |
|           | 0.70426         | -0.99655  | 0.84051     | 0.14946     | 0.598110027 |           |         |       |
| NA        | ENSG00000243402 | 1.0386    | 0.14949     | 1.0386      | 0.14949     | 1.0386    | 0.14949 |       |
|           | 1.0386          | 0.14949   | 0.14949     | 0.598180957 |             |           |         |       |
| NA        | ENSG00000282804 | 1.0385    | 0.14952     | 1.0385      | 0.14952     | 1.0385    | 0.14952 |       |
|           | 1.0385          | 0.14952   | 0.14952     | 0.598251876 |             |           |         |       |
| NA        | ENSG00000199404 | 1.0384    | 0.14955     | 1.0384      | 0.14955     | 1.0384    | 0.14955 |       |
|           | 1.0384          | 0.14955   | 0.14955     | 0.598264554 |             |           |         |       |
| QRSL1P2   | ENSG00000227613 | 1.0383    | 0.14956     | -0.67124    | 0.74897     | 1.0383    |         |       |
|           | 0.14956         | 1.0383    | 0.14956     | 0.14956     | 0.598264554 |           |         |       |
| NA        | ENSG00000267243 | -0.04897  | 0.51953     | -0.1156     | 0.54601     | 1.0383    | 0.14956 |       |

|             |                 |           |             |             |             |          |         |          |
|-------------|-----------------|-----------|-------------|-------------|-------------|----------|---------|----------|
|             | 1.0383          | 0.14956   | 0.14956     | 0.598264554 |             |          |         |          |
| NA          | ENSG00000275827 | 0.63568   | 0.26249     | -0.26809    | 0.60568     | 1.0382   | 0.1496  |          |
|             | 0.4102          | 0.34083   | 0.1496      | 0.598342523 |             |          |         |          |
| RAX         | ENSG00000134438 | -0.10257  | 0.54085     | 1.0381      | 0.14961     | -0.74571 | 0.77208 |          |
|             | 0.11795         | 0.45305   | 0.14961     | 0.598342523 |             |          |         |          |
| CARMIL3     | ENSG00000186648 | 1.038     | 0.14963     | 1.038       | 0.14963     | 1.038    | 0.14963 | -0.50519 |
|             | 0.69329         | 0.14963   | 0.598342523 |             |             |          |         |          |
| NA          | ENSG00000231781 | 1.038     | 0.14963     | 0.88788     | 0.1873      | 1.038    | 0.14963 | 1.038    |
|             | 0.14963         | 0.14963   | 0.598342523 |             |             |          |         |          |
| BMS1P21     | ENSG00000283101 | 1.0379    | 0.14966     | 1.0379      | 0.14966     | 1.0379   |         |          |
|             | 0.14966         | 0.74611   | 0.2278      | 0.14966     | 0.598342523 |          |         |          |
| CD36        | ENSG00000135218 | 1.0379    | 0.14967     | -0.085868   | 0.53421     | 0.54959  | 0.2913  |          |
|             | 0.1124          | 0.45526   | 0.14967     | 0.598342523 |             |          |         |          |
| NA          | ENSG00000279399 | 1.0378    | 0.14967     | 1.0378      | 0.14967     | 1.0378   | 0.14967 |          |
|             | 1.0378          | 0.14967   | 0.14967     | 0.598342523 |             |          |         |          |
| PAM16       | ENSG00000217930 | -0.34156  | 0.63366     | 1.0377      | 0.14969     | 0.41805  | 0.33795 |          |
|             | 0.41805         | 0.33795   | 0.14969     | 0.598342523 |             |          |         |          |
| NA          | ENSG00000226798 | 1.0378    | 0.14969     | 1.0378      | 0.14969     | 1.0378   | 0.14969 |          |
|             | 1.0378          | 0.14969   | 0.14969     | 0.598342523 |             |          |         |          |
| JUN         | ENSG00000177606 | -0.005087 | 0.50203     | -0.099398   | 0.53959     | 1.0376   | 0.14972 |          |
|             | 0.049596        | 0.48022   | 0.14972     | 0.598413353 |             |          |         |          |
| NA          | ENSG00000226304 | 1.0376    | 0.14974     | 1.0376      | 0.14974     | 1.0376   | 0.14974 |          |
|             | 0.28155         | 0.38914   | 0.14974     | 0.598435091 |             |          |         |          |
| LINC02682   | ENSG00000254661 | -0.85714  | 0.80432     | 1.0375      | 0.14975     | 0.36459  |         |          |
|             | 0.35771         | 0.78096   | 0.21741     | 0.14975     | 0.598435091 |          |         |          |
| RPS15AP6    | ENSG00000233072 | 1.0373    | 0.1498      | 0.3635      | 0.35812     | 1.0337   |         |          |
|             | 0.15065         | 0.23541   | 0.40695     | 0.1498      | 0.598494633 |          |         |          |
| EXOSC7      | ENSG00000075914 | 0.84485   | 0.1991      | 1.0372      | 0.14982     | 0.47586  |         |          |
|             | 0.31709         | 0.70145   | 0.24151     | 0.14982     | 0.598494633 |          |         |          |
| BORCS8      | ENSG00000254901 | 1.0371    | 0.14984     | 1.0371      | 0.14984     | 1.0371   |         |          |
|             | 0.14984         | 1.0371    | 0.14984     | 0.14984     | 0.598494633 |          |         |          |
| RPL31P50    | ENSG00000231788 | -0.38163  | 0.64863     | 1.037       | 0.14987     | 0.32557  | 0.37237 |          |
|             | 0.36947         | 0.35589   | 0.14987     | 0.598494633 |             |          |         |          |
| NA          | ENSG00000232999 | -0.62636  | 0.73446     | 1.037       | 0.14987     | -0.62636 | 0.73446 |          |
|             | -0.62636        | 0.73446   | 0.14987     | 0.598494633 |             |          |         |          |
| NA          | ENSG00000253955 | -0.3218   | 0.6262      | 1.037       | 0.14987     | 0.17276  | 0.43142 |          |
|             | -0.259          | 0.60218   | 0.14987     | 0.598494633 |             |          |         |          |
| RPGRIP1L    | ENSG00000103494 | 0.26449   | 0.3957      | 1.0369      | 0.14989     | 0.26449  |         |          |
|             | 0.3957          | 0.26449   | 0.3957      | 0.14989     | 0.598494633 |          |         |          |
| CHST15      | ENSG00000182022 | 0.030507  | 0.48783     | -1.045      | 0.85198     | -0.79726 |         |          |
|             | 0.78735         | 1.0369    | 0.14989     | 0.14989     | 0.598494633 |          |         |          |
| NECAP1      | ENSG00000089818 | 0.45258   | 0.32543     | 0.42302     | 0.33614     | -0.11439 |         |          |
|             | 0.54553         | 1.0368    | 0.1499      | 0.1499      | 0.598494633 |          |         |          |
| CDK18       | ENSG00000117266 | -0.11722  | 0.54666     | 0.62204     | 0.26696     | 0.31887  | 0.37491 |          |
|             | 1.0369          | 0.1499    | 0.1499      | 0.598494633 |             |          |         |          |
| NA          | ENSG00000229911 | -1.2442   | 0.89329     | 1.0369      | 0.1499      | 0.1903   | 0.42454 |          |
|             | -1.2442         | 0.89329   | 0.1499      | 0.598494633 |             |          |         |          |
| MTRNR2L11   | ENSG00000270188 | 1.0368    | 0.14992     | 1.0368      | 0.14992     | 1.0368   |         |          |
|             | 0.14992         | 1.0368    | 0.14992     | 0.14992     | 0.598525447 |          |         |          |
| NA          | ENSG00000214301 | 0.26754   | 0.39453     | 1.0365      | 0.14998     | 0.26754  | 0.39453 |          |
|             | 0.26754         | 0.39453   | 0.14998     | 0.598666891 |             |          |         |          |
| JAKMIP2-AS1 | ENSG00000280780 | 0.073136  | 0.47085     | 1.0365      | 0.14998     | -0.71639 |         |          |
|             | 0.76312         | -0.18389  | 0.57295     | 0.14998     | 0.598666891 |          |         |          |
| HNRNPA3     | ENSG00000170144 | -0.39391  | 0.65318     | 1.0364      | 0.15001     | -1.3982  |         |          |
|             | 0.91897         | 0.19014   | 0.4246      | 0.15001     | 0.598711329 |          |         |          |
| NA          | ENSG00000251498 | 1.0364    | 0.15002     | -0.36985    | 0.64425     | -0.54098 | 0.70574 |          |
|             | -0.59899        | 0.72541   | 0.15002     | 0.598711329 |             |          |         |          |
| NUPR1       | ENSG00000176046 | 0.10647   | 0.45761     | 0.90176     | 0.18359     | 0.58374  | 0.2797  |          |
|             | 1.0362          | 0.15004   | 0.15004     | 0.598711329 |             |          |         |          |
| NA          | ENSG00000231521 | 1.0362    | 0.15006     | 1.0362      | 0.15006     | 1.0362   | 0.15006 |          |
|             | 1.0362          | 0.15006   | 0.15006     | 0.598711329 |             |          |         |          |
| NA          | ENSG00000261821 | 1.0361    | 0.15007     | 0.79503     | 0.2133      | 1.0306   | 0.15137 |          |

|            |                 |          |             |             |             |           |         |       |
|------------|-----------------|----------|-------------|-------------|-------------|-----------|---------|-------|
|            | 1.0306          | 0.15137  | 0.15007     | 0.598711329 |             |           |         |       |
| ASXL1      | ENSG00000171456 | 0.98109  | 0.16328     | 1.036       | 0.15011     | 0.88136   | 0.18906 |       |
|            | 0.62877         | 0.26475  | 0.15011     | 0.598711329 |             |           |         |       |
| SMCR2      | ENSG00000223979 | 1.036    | 0.15011     | 0.5477      | 0.29195     | 0.52697   | 0.29911 |       |
|            | 0.5477          | 0.29195  | 0.15011     | 0.598711329 |             |           |         |       |
| ZNF213-AS1 | ENSG00000263072 | 1.036    | 0.15011     | 0.53306     | 0.29699     | 1.036     | 0.15011 | 1.036 |
|            | 0.15011         | 0.15011  | 0.598711329 |             |             |           |         |       |
| COL6A2     | ENSG00000142173 | -0.41507 | 0.66096     | 0.21068     | 0.41657     | 0.32239   |         |       |
|            | 0.37358         | 1.0359   | 0.15012     | 0.15012     | 0.598711329 |           |         |       |
| NA         | ENSG00000272916 | 1.0359   | 0.15013     | 1.0359      | 0.15013     | 1.0359    | 0.15013 |       |
|            | 1.0359          | 0.15013  | 0.15013     | 0.598711329 |             |           |         |       |
| MORN3      | ENSG00000139714 | -0.54794 | 0.70813     | -0.4827     | 0.68535     | 1.0355    | 0.15022 |       |
|            | 1.0358          | 0.15014  | 0.15014     | 0.598711329 |             |           |         |       |
| FLAD1      | ENSG00000160688 | 1.0358   | 0.15016     | 1.0358      | 0.15016     | 1.0358    | 0.15016 |       |
|            | 0.90986         | 0.18145  | 0.15016     | 0.598711329 |             |           |         |       |
| NA         | ENSG00000279460 | 0.80812  | 0.20951     | 1.0357      | 0.15017     | 0.13488   | 0.44635 |       |
|            | 1.0357          | 0.15017  | 0.15017     | 0.598711329 |             |           |         |       |
| ASPHD2     | ENSG00000128203 | 0.31725  | 0.37553     | 1.0356      | 0.15019     | 1.0356    |         |       |
|            | 0.15019         | 1.0356   | 0.15019     | 0.15019     | 0.598711329 |           |         |       |
| SOAT2      | ENSG00000167780 | -0.71619 | 0.76306     | -0.21404    | 0.58474     | 0.3259    | 0.37225 |       |
|            | 1.0356          | 0.15019  | 0.15019     | 0.598711329 |             |           |         |       |
| RBM39      | ENSG00000131051 | 0.84023  | 0.20039     | 0.95051     | 0.17093     | 0.61601   | 0.26894 |       |
|            | 1.0356          | 0.1502   | 0.1502      | 0.598711329 |             |           |         |       |
| ZNF876P    | ENSG00000198155 | 0.25763  | 0.39835     | 0.68421     | 0.24692     | 1.0356    |         |       |
|            | 0.1502          | 0.714    | 0.23761     | 0.1502      | 0.598711329 |           |         |       |
| NA         | ENSG00000257647 | 1.0355   | 0.15022     | 1.0355      | 0.15022     | 1.0355    | 0.15022 |       |
|            | 1.0355          | 0.15022  | 0.15022     | 0.598742074 |             |           |         |       |
| NA         | ENSG00000279662 | 0.32714  | 0.37178     | 1.0354      | 0.15024     | 1.0354    | 0.15024 |       |
|            | 0.92718         | 0.17692  | 0.15024     | 0.598772814 |             |           |         |       |
| RNU1-104P  | ENSG00000253089 | 1.0353   | 0.15026     | 1.0353      | 0.15026     | 1.0353    |         |       |
|            | 0.15026         | 1.0353   | 0.15026     | 0.15026     | 0.598785315 |           |         |       |
| GRWD1      | ENSG00000105447 | 1.0353   | 0.15028     | -0.67449    | 0.75        | -0.63617  | 0.73767 |       |
|            | -0.38078        | 0.64832  | 0.15028     | 0.598785315 |             |           |         |       |
| NA         | ENSG00000235122 | 1.0352   | 0.15028     | 0.48532     | 0.31372     | 0.086516  | 0.46553 |       |
|            | 0.48532         | 0.31372  | 0.15028     | 0.598785315 |             |           |         |       |
| PCNPP3     | ENSG00000213344 | 1.0351   | 0.15031     | 0.41298     | 0.33981     | 1.0351    |         |       |
|            | 0.15031         | 1.0351   | 0.15031     | 0.15031     | 0.598855883 |           |         |       |
| NA         | ENSG00000264212 | 0.63638  | 0.26226     | 0.60923     | 0.27119     | 1.0349    | 0.15035 |       |
|            | 0.28439         | 0.38805  | 0.15035     | 0.598929773 |             |           |         |       |
| DLGAP5     | ENSG00000126787 | 0.34644  | 0.36451     | 0.85702     | 0.19572     | 1.0348    |         |       |
|            | 0.15037         | 0.16613  | 0.43403     | 0.15037     | 0.598929773 |           |         |       |
| NA         | ENSG00000227745 | 1.0348   | 0.15039     | 0.63741     | 0.26193     | 0.36183   | 0.35874 |       |
|            | 0.36183         | 0.35874  | 0.15039     | 0.598929773 |             |           |         |       |
| NA         | ENSG00000233064 | 1.0347   | 0.15039     | 0.63752     | 0.26189     | -0.018908 | 0.50754 |       |
|            | 0.35284         | 0.3621   | 0.15039     | 0.598929773 |             |           |         |       |
| NA         | ENSG00000278071 | 1.0348   | 0.15039     | 1.0348      | 0.15039     | 1.0348    | 0.15039 |       |
|            | 1.0348          | 0.15039  | 0.15039     | 0.598929773 |             |           |         |       |
| COQ8A      | ENSG00000163050 | 0.8566   | 0.19583     | 0.46858     | 0.31969     | -0.48312  | 0.6855  |       |
|            | 1.0345          | 0.15045  | 0.15045     | 0.598954672 |             |           |         |       |
| LINC01068  | ENSG00000227676 | -0.63803 | 0.73827     | -0.61262    | 0.72994     | 1.0344    |         |       |
|            | 0.15046         | -0.36617 | 0.64288     | 0.15046     | 0.598954672 |           |         |       |
| NA         | ENSG00000228982 | 1.0345   | 0.15046     | 1.0345      | 0.15046     | 1.0345    | 0.15046 |       |
|            | 0.40951         | 0.34108  | 0.15046     | 0.598954672 |             |           |         |       |
| TRAV37     | ENSG00000259068 | 1.0345   | 0.15046     | 1.008       | 0.15674     | 1.008     | 0.15674 | 1.008 |
|            | 0.15674         | 0.15046  | 0.598954672 |             |             |           |         |       |
| NA         | ENSG00000279326 | 1.0344   | 0.15047     | 1.0344      | 0.15047     | 1.0344    | 0.15047 |       |
|            | 1.0344          | 0.15047  | 0.15047     | 0.598954672 |             |           |         |       |
| NA         | ENSG00000239475 | 0.5225   | 0.30066     | -0.6191     | 0.73208     | 1.0344    | 0.15047 |       |
|            | 0.70343         | 0.24089  | 0.15047     | 0.598954672 |             |           |         |       |
| RPS2       | ENSG00000140988 | -1.4881  | 0.93164     | -1.4881     | 0.93164     | 1.0343    | 0.1505  |       |
|            | -1.4881         | 0.93164  | 0.1505      | 0.598976233 |             |           |         |       |
| MIR1976    | ENSG00000238705 | 1.0343   | 0.1505      | 1.0343      | 0.1505      | 1.0343    |         |       |

|             |                 |             |             |             |             |          |         |  |
|-------------|-----------------|-------------|-------------|-------------|-------------|----------|---------|--|
|             | 0.1505          | 1.0343      | 0.1505      | 0.1505      | 0.598976233 |          |         |  |
| ZNF462      | ENSG00000148143 | 0.030273    | 0.48792     | 1.034       | 0.15056     | -0.16325 | 0.56484 |  |
|             | -0.73005        | 0.76732     | 0.15056     | 0.59905912  |             |          |         |  |
| LINC02282   | ENSG00000257056 | 0.4828      | 0.31462     | 0.4828      | 0.31462     | 1.034    | 0.15056 |  |
|             | 1.034           | 0.15056     | 0.15056     | 0.59905912  |             |          |         |  |
| NA          | ENSG00000214559 | -0.3342     | 0.63089     | -0.3342     | 0.63089     | -0.3342  | 0.63089 |  |
|             | 1.034           | 0.15057     | 0.15057     | 0.59905912  |             |          |         |  |
| LINC02063   | ENSG00000250921 | 1.034       | 0.15057     | 0.20986     | 0.41689     | 0.2291   | 0.40939 |  |
|             | -0.67128        | 0.74898     | 0.15057     | 0.59905912  |             |          |         |  |
| ZNF805      | ENSG00000204524 | 1.0339      | 0.15059     | -0.28251    | 0.61122     | -0.28251 |         |  |
|             | 0.61122         | -0.28251    | 0.61122     | 0.15059     | 0.599089779 |          |         |  |
| YIPF7       | ENSG00000177752 | 0.00094783  | 0.49962     | -0.21976    | 0.58697     | 0.64058  | 0.2609  |  |
|             | 1.0338          | 0.15061     | 0.15061     | 0.599102179 |             |          |         |  |
| NA          | ENSG00000282024 | -1.4147     | 0.92142     | 1.0338      | 0.15062     | 0.62649  | 0.2655  |  |
|             | 0.62649         | 0.2655      | 0.15062     | 0.599102179 |             |          |         |  |
| NSMCE2      | ENSG00000156831 | 1.0337      | 0.15063     | -0.62721    | 0.73474     | 0.58437  |         |  |
|             | 0.27949         | -0.019881   | 0.50793     | 0.15063     | 0.599102179 |          |         |  |
| NA          | ENSG00000267637 | -0.087111   | 0.53471     | 0.72864     | 0.23311     | 1.0335   | 0.15068 |  |
|             | 1.0335          | 0.15068     | 0.15068     | 0.599252134 |             |          |         |  |
| NA          | ENSG00000281938 | 1.0334      | 0.1507      | 1.0334      | 0.1507      | 1.0334   | 0.1507  |  |
|             | 1.0334          | 0.1507      | 0.1507      | 0.599282765 |             |          |         |  |
| TTC13       | ENSG00000143643 | 1.0332      | 0.15075     | -0.51025    | 0.69506     | -0.71582 | 0.76295 |  |
|             | 0.53823         | 0.29521     | 0.15075     | 0.599316592 |             |          |         |  |
| MYB         | ENSG00000118513 | 1.0332      | 0.15076     | 1.0332      | 0.15076     | 1.0332   | 0.15076 |  |
|             | 1.0332          | 0.15076     | 0.15076     | 0.599316592 |             |          |         |  |
| HIGD2A      | ENSG00000146066 | 1.0332      | 0.15076     | 1.0332      | 0.15076     | 1.0332   |         |  |
|             | 0.15076         | 1.0332      | 0.15076     | 0.15076     | 0.599316592 |          |         |  |
| NA          | ENSG00000277692 | 1.0332      | 0.15076     | 1.0332      | 0.15076     | 1.0332   | 0.15076 |  |
|             | 1.0332          | 0.15076     | 0.15076     | 0.599316592 |             |          |         |  |
| GNAQ        | ENSG00000156052 | 0.99112     | 0.16081     | -0.26864    | 0.6059      | 1.0332   | 0.15077 |  |
|             | 0.46598         | 0.32061     | 0.15077     | 0.599316592 |             |          |         |  |
| NA          | ENSG00000271664 | 1.0093      | 0.15641     | 1.0331      | 0.15079     | 1.0093   | 0.15641 |  |
|             | 1.0093          | 0.15641     | 0.15079     | 0.599347202 |             |          |         |  |
| LINC01005   | ENSG00000228564 | 1.0326      | 0.15089     | -0.94838    | 0.82853     | -0.81908 |         |  |
|             | 0.79363         | 0.15529     | 0.4383      | 0.15089     | 0.599656325 |          |         |  |
| GSTA9P      | ENSG00000243236 | 0.91556     | 0.17995     | 1.0325      | 0.15093     | 1.0325   |         |  |
|             | 0.15093         | 1.0325      | 0.15093     | 0.15093     | 0.599656325 |          |         |  |
| NA          | ENSG00000255275 | 0.95907     | 0.16876     | 1.0324      | 0.15093     | 0.99663  | 0.15947 |  |
|             | 0.99663         | 0.15947     | 0.15093     | 0.599656325 |             |          |         |  |
| ALMS1P1     | ENSG00000163016 | 0.27893     | 0.39015     | 0.087733    | 0.46504     | 0.87215  |         |  |
|             | 0.19156         | 1.0324      | 0.15094     | 0.15094     | 0.599656325 |          |         |  |
| PRKAR2B-AS1 | ENSG00000243193 | -0.017756   | 0.50708     | -0.68575    | 0.75357     | -1.2929  |         |  |
|             | 0.90197         | 1.0324      | 0.15094     | 0.15094     | 0.599656325 |          |         |  |
| NA          | ENSG00000260605 | 1.0322      | 0.15098     | -0.26532    | 0.60462     | -0.67607 | 0.7505  |  |
|             | 0.88989         | 0.18676     | 0.15098     | 0.599656325 |             |          |         |  |
| HTR6        | ENSG00000158748 | 0.63395     | 0.26306     | 1.0322      | 0.15099     | 0.74646  | 0.22769 |  |
|             | 1.0043          | 0.15761     | 0.15099     | 0.599656325 |             |          |         |  |
| EMX2        | ENSG00000170370 | -0.15985    | 0.5635      | 0.95593     | 0.16955     | -1.5213  | 0.93591 |  |
|             | 1.0322          | 0.15099     | 0.15099     | 0.599656325 |             |          |         |  |
| LINC02344   | ENSG00000227911 | -0.5279     | 0.70122     | 1.0321      | 0.15102     | -0.5279  |         |  |
|             | 0.70122         | -0.33537    | 0.63133     | 0.15102     | 0.599656325 |          |         |  |
| HMG1P32     | ENSG00000237589 | 1.032       | 0.15103     | 1.032       | 0.15103     | 1.032    | 0.15103 |  |
|             | 0.15103         | 0.15103     | 0.599656325 |             |             |          |         |  |
| NA          | ENSG00000200579 | 1.032       | 0.15104     | 1.032       | 0.15104     | 1.032    | 0.15104 |  |
|             | 0.15104         | 0.599656325 |             |             |             |          |         |  |
| NA          | ENSG00000231912 | -0.033186   | 0.51324     | 0.46181     | 0.32211     | 1.0319   | 0.15105 |  |
|             | 0.55977         | 0.28782     | 0.15105     | 0.599656325 |             |          |         |  |
| NA          | ENSG00000261693 | 1.0318      | 0.15108     | 1.0318      | 0.15108     | 1.0318   | 0.15108 |  |
|             | 1.0318          | 0.15108     | 0.15108     | 0.599656325 |             |          |         |  |
| C1QBPP2     | ENSG00000213409 | 1.0318      | 0.15109     | 1.0318      | 0.15109     | 1.0318   |         |  |
|             | 0.15109         | 1.0318      | 0.15109     | 0.15109     | 0.599656325 |          |         |  |
| TVP23A      | ENSG00000166676 | 0.91655     | 0.17969     | 0.91655     | 0.17969     | 1.0317   |         |  |

|             |                 |          |             |             |             |            |         |          |
|-------------|-----------------|----------|-------------|-------------|-------------|------------|---------|----------|
|             | 0.1511          | -0.19094 | 0.57571     | 0.1511      | 0.599656325 |            |         |          |
| COPS6       | ENSG00000168090 | 0.71579  | 0.23706     | -0.46628    | 0.67949     | 1.0317     | 0.1511  |          |
|             | 0.59706         | 0.27523  | 0.1511      | 0.599656325 |             |            |         |          |
| NA          | ENSG00000200496 | -1.5329  | 0.93735     | -0.38859    | 0.65121     | 1.0317     | 0.1511  |          |
|             | -0.39605        | 0.65397  | 0.1511      | 0.599656325 |             |            |         |          |
| DBR1        | ENSG00000138231 | -2.0123  | 0.97791     | -2.0123     | 0.97791     | -1.1427    | 0.87342 |          |
|             | 1.0317          | 0.15111  | 0.15111     | 0.599656325 |             |            |         |          |
| MIR4520-1   | ENSG00000264468 | 1.0316   | 0.15112     | 1.0316      | 0.15112     | 1.0316     |         |          |
|             | 0.15112         | 1.0316   | 0.15112     | 0.15112     | 0.599656325 |            |         |          |
| NA          | ENSG00000216516 | 0.18933  | 0.42492     | 0.18933     | 0.42492     | 1.0316     | 0.15113 |          |
|             | 0.18933         | 0.42492  | 0.15113     | 0.599656325 |             |            |         |          |
| ARFGAP1     | ENSG00000101199 | 0.41714  | 0.33829     | 1.0315      | 0.15115     | 0.36707    |         |          |
|             | 0.35678         | -0.40438 | 0.65703     | 0.15115     | 0.599656325 |            |         |          |
| NA          | ENSG00000274299 | 0.47518  | 0.31733     | 1.0315      | 0.15116     | 0.40727    | 0.34191 |          |
|             | 0.66251         | 0.25382  | 0.15116     | 0.599656325 |             |            |         |          |
| C12orf76    | ENSG00000174456 | 0.93014  | 0.17615     | 0.79368     | 0.21369     | 1.0313     |         |          |
|             | 0.1512          | 0.54769  | 0.29195     | 0.1512      | 0.599656325 |            |         |          |
| RPL26P31    | ENSG00000242807 | 1.0313   | 0.15121     | -0.057897   | 0.52308     | 1.0313     |         |          |
|             | 0.15121         | 1.0313   | 0.15121     | 0.15121     | 0.599656325 |            |         |          |
| SNHG7       | ENSG00000233016 | 0.5945   | 0.27609     | 0.5945      | 0.27609     | 0.5945     | 0.27609 |          |
|             | 1.0312          | 0.15122  | 0.15122     | 0.599656325 |             |            |         |          |
| DIS3L2P1    | ENSG00000223788 | 0.48472  | 0.31394     | 0.8451      | 0.19903     | 1.0169     |         |          |
|             | 0.1546          | 1.0311   | 0.15124     | 0.15124     | 0.599656325 |            |         |          |
| NA          | ENSG00000237655 | 0.96404  | 0.16751     | 0.96404     | 0.16751     | 1.0311     | 0.15124 |          |
|             | 0.96404         | 0.16751  | 0.15124     | 0.599656325 |             |            |         |          |
| NA          | ENSG00000250650 | 1.0311   | 0.15124     | -1.124      | 0.8695      | 0.040464   | 0.48386 |          |
|             | 0.040464        | 0.48386  | 0.15124     | 0.599656325 |             |            |         |          |
| NA          | ENSG00000267509 | 1.0311   | 0.15125     | 0.43658     | 0.33121     | -0.52126   | 0.69891 |          |
|             | -0.52126        | 0.69891  | 0.15125     | 0.599656325 |             |            |         |          |
| RRS1-AS1    | ENSG00000246145 | 1.0310   | 0.15126     | 0.10547     | 0.458       | 0.70038    | 0.24185 |          |
|             | -0.20985        | 0.58311  | 0.15126     | 0.599656325 |             |            |         |          |
| SLC36A4     | ENSG00000180773 | 0.71894  | 0.23609     | 0.45675     | 0.32392     | 1.0310     | 0.15128 |          |
|             | 0.98446         | 0.16244  | 0.15128     | 0.599656325 |             |            |         |          |
| C17orf75    | ENSG00000108666 | 1.0309   | 0.1513      | -0.139      | 0.55528     | -1.0577    |         |          |
|             | 0.85491         | -0.139   | 0.55528     | 0.1513      | 0.599656325 |            |         |          |
| KRT18P57    | ENSG00000215867 | 0.117    | 0.45343     | 1.0308      | 0.15131     | 0.117      | 0.45343 | 0.117    |
|             | 0.45343         | 0.15131  | 0.599656325 |             |             |            |         |          |
| NA          | ENSG00000259601 | 0.4047   | 0.34285     | 1.0308      | 0.15131     | 1.0308     | 0.15131 |          |
|             | 1.0308          | 0.15131  | 0.15131     | 0.599656325 |             |            |         |          |
| NA          | ENSG00000227330 | 1.0307   | 0.15133     | 1.0307      | 0.15133     | 1.0307     | 0.15133 |          |
|             | 1.0307          | 0.15133  | 0.15133     | 0.599656325 |             |            |         |          |
| GAPDHP41    | ENSG00000277172 | 0.65314  | 0.25683     | 1.0307      | 0.15133     | -0.67886   |         |          |
|             | 0.75139         | -0.62344 | 0.7335      | 0.15133     | 0.599656325 |            |         |          |
| RNU4ATAC18P | ENSG00000251988 | 0.037934 | 0.48487     | 1.0307      | 0.15134     | 0.037934   |         |          |
|             | 0.48487         | 0.037934 | 0.48487     | 0.15134     | 0.599656325 |            |         |          |
| SYT6        | ENSG00000134207 | 1.0307   | 0.15135     | -1.3802     | 0.91623     | -1.3802    | 0.91623 |          |
|             | -1.3802         | 0.91623  | 0.15135     | 0.599656325 |             |            |         |          |
| GSX2        | ENSG00000180613 | 1.0306   | 0.15136     | -0.64354    | 0.74006     | -0.64354   | 0.74006 |          |
|             | -0.64354        | 0.74006  | 0.15136     | 0.599656325 |             |            |         |          |
| NA          | ENSG00000255381 | 1.0306   | 0.15136     | 0.2839      | 0.38824     | 1.0306     | 0.15136 |          |
|             | 1.0306          | 0.15136  | 0.15136     | 0.599656325 |             |            |         |          |
| SEPTIN8     | ENSG00000164402 | 1.0134   | 0.15544     | 1.0306      | 0.15138     | 0.83188    |         |          |
|             | 0.20274         | 0.3888   | 0.34871     | 0.15138     | 0.599686806 |            |         |          |
| CDIP1       | ENSG00000089486 | 1.0302   | 0.15147     | 1.0302      | 0.15147     | -0.0023279 | 0.50093 |          |
|             | 0.48359         | 0.31434  | 0.15147     | 0.599994562 |             |            |         |          |
| LINC02685   | ENSG00000254654 | 1.03     | 0.15151     | 1.03        | 0.15151     | 1.03       | 0.15151 | 1.03     |
|             | 0.15151         | 0.15151  | 0.600104227 |             |             |            |         |          |
| NA          | ENSG00000213514 | -0.64004 | 0.73893     | -0.73137    | 0.76772     | -0.73137   | 0.76772 |          |
|             | 1.0299          | 0.15153  | 0.15153     | 0.600134664 |             |            |         |          |
| TANC2       | ENSG00000170921 | 0.28193  | 0.389       | 1.0298      | 0.15155     | 0.1312     | 0.44781 |          |
|             | 0.1499          | 0.44042  | 0.15155     | 0.600165095 |             |            |         |          |
| NA          | ENSG00000222509 | 0.60075  | 0.274       | 0.60075     | 0.274       | 1.0297     | 0.15158 | 0.040173 |

|            |                 |           |             |             |             |          |          |  |
|------------|-----------------|-----------|-------------|-------------|-------------|----------|----------|--|
|            | 0.48398         | 0.15158   | 0.600235121 |             |             |          |          |  |
| RNU6-486P  | ENSG00000199986 | -0.59744  | 0.72489     | -0.18457    | 0.57322     | -0.9833  |          |  |
|            | 0.83727         | 1.0296    | 0.1516      | 0.1516      | 0.600247185 |          |          |  |
| NA         | ENSG00000202251 | 1.0295    | 0.15162     | -0.015308   | 0.50611     | 1.0295   | 0.15162  |  |
|            | 1.0295          | 0.15162   | 0.15162     | 0.600247185 |             |          |          |  |
| RN7SL531P  | ENSG00000264071 | 1.0295    | 0.15162     | 1.0295      | 0.15162     | 0.83196  |          |  |
|            | 0.20272         | 1.0295    | 0.15162     | 0.15162     | 0.600247185 |          |          |  |
| SLC7A15P   | ENSG00000232800 | 1.0294    | 0.15164     | 0.15164     | 0.93852     | 0.17399  | -0.34313 |  |
|            | 0.63425         | 0.69132   | 0.24468     | 0.15164     | 0.600252951 |          |          |  |
| ASPSCR1    | ENSG00000169696 | -0.44703  | 0.67257     | -0.38055    | 0.64823     | -0.31005 |          |  |
|            | 0.62174         | 1.0293    | 0.15166     | 0.15166     | 0.600252951 |          |          |  |
| NA         | ENSG00000248564 | 1.0293    | 0.15167     | 1.0293      | 0.15167     | 1.0293   | 0.15167  |  |
|            | 1.0293          | 0.15167   | 0.15167     | 0.600252951 |             |          |          |  |
| NA         | ENSG00000269489 | 1.0292    | 0.15169     | -0.8837     | 0.81157     | -0.8837  | 0.81157  |  |
|            | -0.8837         | 0.81157   | 0.15169     | 0.600252951 |             |          |          |  |
| LINC02857  | ENSG00000230852 | 1.0292    | 0.1517      | 1.0292      | 0.1517      | 1.0292   |          |  |
|            | 0.1517          | 0.83797   | 0.20102     | 0.1517      | 0.600252951 |          |          |  |
| TACC2      | ENSG00000138162 | 1.0291    | 0.15171     | 1.0291      | 0.15171     | 0.027438 | 0.48906  |  |
|            | 0.11276         | 0.45511   | 0.15171     | 0.600252951 |             |          |          |  |
| MIR29B2CHG | ENSG00000203709 | 0.29817   | 0.38279     | -0.46683    | 0.67969     | -0.46683 |          |  |
|            | 0.67969         | 1.0291    | 0.15172     | 0.15172     | 0.600252951 |          |          |  |
| RPS12P26   | ENSG00000225193 | 1.0291    | 0.15172     | -0.60009    | 0.72578     | -1.7753  |          |  |
|            | 0.96208         | -0.17454  | 0.56928     | 0.15172     | 0.600252951 |          |          |  |
| ABCD3      | ENSG00000117528 | 0.43912   | 0.33029     | 0.81337     | 0.2081.0289 | 0.15175  |          |  |
|            | 0.75512         | 0.22509   | 0.15175     | 0.600313137 |             |          |          |  |
| RNU7-128P  | ENSG00000253056 | 1.0288    | 0.15178     | 0.83387     | 0.20218     | 0.83387  |          |  |
|            | 0.20218         | 0.83387   | 0.20218     | 0.15178     | 0.600313137 |          |          |  |
| NA         | ENSG00000202332 | -0.25192  | 0.59945     | 1.0287      | 0.1518      | -0.25192 | 0.59945  |  |
|            | -0.25192        | 0.59945   | 0.1518      | 0.600313137 |             |          |          |  |
| TNS1       | ENSG00000079308 | 0.75586   | 0.22487     | 0.91705     | 0.17956     | 0.75483  | 0.22517  |  |
|            | 1.0287          | 0.15181   | 0.15181     | 0.600313137 |             |          |          |  |
| RPL27AP5   | ENSG00000182383 | 1.0287    | 0.15182     | 1.0287      | 0.15182     | 1.0222   |          |  |
|            | 0.15333         | 1.0287    | 0.15182     | 0.15182     | 0.600313137 |          |          |  |
| NA         | ENSG00000231982 | -0.69356  | 0.75602     | -0.69356    | 0.75602     | -0.936   | 0.82536  |  |
|            | 1.0287          | 0.15182   | 0.15182     | 0.600313137 |             |          |          |  |
| NA         | ENSG00000260030 | 1.0286    | 0.15184     | 1.0286      | 0.15184     | -0.59335 | 0.72353  |  |
|            | -0.85954        | 0.80498   | 0.15184     | 0.600313137 |             |          |          |  |
| NA         | ENSG00000201088 | 1.0285    | 0.15185     | 0.30402     | 0.38056     | 1.0285   | 0.15185  |  |
|            | 1.0285          | 0.15185   | 0.15185     | 0.600313137 |             |          |          |  |
| NA         | ENSG00000271565 | 0.54285   | 0.29362     | 1.0285      | 0.15186     | 1.0285   | 0.15186  |  |
|            | 1.0285          | 0.15186   | 0.15186     | 0.600313137 |             |          |          |  |
| RPS16P2    | ENSG00000213729 | 0.51233   | 0.30421     | 0.51233     | 0.30421     | 1.0284   |          |  |
|            | 0.15187         | 0.51233   | 0.30421     | 0.15187     | 0.600313137 |          |          |  |
| ZDHHC18    | ENSG00000204160 | 1.0284    | 0.15188     | 0.53591     | 0.29601     | 0.93723  |          |  |
|            | 0.17432         | 0.5011    | 0.30815     | 0.15188     | 0.600313137 |          |          |  |
| NA         | ENSG00000257823 | 1.0283    | 0.1519      | 0.34345     | 0.36563     | 1.0283   | 0.1519   |  |
|            | 1.0283          | 0.1519    | 0.1519      | 0.600313137 |             |          |          |  |
| NA         | ENSG00000243160 | 1.0282    | 0.15192     | -0.16538    | 0.56568     | -0.88483 | 0.81188  |  |
|            | -0.88483        | 0.81188   | 0.15192     | 0.600313137 |             |          |          |  |
| AACSP1     | ENSG00000250420 | -1.6005   | 0.94526     | -1.6526     | 0.9508      | 1.0282   |          |  |
|            | 0.15192         | -0.42386  | 0.66417     | 0.15192     | 0.600313137 |          |          |  |
| NA         | ENSG00000273759 | 0.64718   | 0.25876     | 1.0282      | 0.15192     | 1.0282   | 0.15192  |  |
|            | 1.0282          | 0.15192   | 0.15192     | 0.600313137 |             |          |          |  |
| PHAX       | ENSG00000164902 | 0.0019258 | 0.49923     | 1.0281      | 0.15195     | 1.005    | 0.15746  |  |
|            | 0.95866         | 0.16886   | 0.15195     | 0.600373828 |             |          |          |  |
| LINC02644  | ENSG00000230720 | 0.75247   | 0.22589     | 1.0281      | 0.15196     | 1.0031   |          |  |
|            | 0.1579          | -1.4251   | 0.92293     | 0.15196     | 0.600373828 |          |          |  |
| MIR582     | ENSG00000202601 | 0.6279    | 0.26503     | 1.0277      | 0.15203     | 0.10909  |          |  |
|            | 0.45656         | -0.58722  | 0.72147     | 0.15203     | 0.600437318 |          |          |  |
| NA         | ENSG00000250999 | 1.0278    | 0.15203     | 0.33406     | 0.36917     | 0.2748   | 0.39173  |  |
|            | 0.78906         | 0.21504   | 0.15203     | 0.600437318 |             |          |          |  |
| CYP39A1    | ENSG00000146233 | 0.037947  | 0.48486     | 0.86593     | 0.19326     | 0.44508  |          |  |

|           |                 |          |             |             |             |          |         |       |
|-----------|-----------------|----------|-------------|-------------|-------------|----------|---------|-------|
|           | 0.32813         | 1.0277   | 0.15204     | 0.15204     | 0.600437318 |          |         |       |
| LINC02112 | ENSG00000249781 | 0.47206  | 0.31844     | 1.0277      | 0.15204     | -0.20997 |         |       |
|           | 0.58315         | 0.51087  | 0.30472     | 0.15204     | 0.600437318 |          |         |       |
| IRF5P1    | ENSG00000251347 | 1.0277   | 0.15204     | 0.78894     | 0.21507     | 0.98361  |         |       |
|           | 0.16265         | 0.98361  | 0.16265     | 0.15204     | 0.600437318 |          |         |       |
| CACNA2D4  | ENSG00000151062 | 0.89597  | 0.18513     | 1.0277      | 0.15205     | 0.65273  |         |       |
|           | 0.25696         | 0.49908  | 0.30886     | 0.15205     | 0.600437318 |          |         |       |
| PRKCE     | ENSG00000171132 | 0.60215  | 0.27354     | 0.58234     | 0.28017     | 0.64352  | 0.25994 |       |
|           | 1.0276          | 0.15208  | 0.15208     | 0.600475287 |             |          |         |       |
| MICALL1   | ENSG00000100139 | 0.19919  | 0.42106     | 1.0274      | 0.15211     | 0.19919  |         |       |
|           | 0.42106         | 1.0224   | 0.1533      | 0.15211     | 0.600475287 |          |         |       |
| SFXN4     | ENSG00000183605 | 0.99048  | 0.16097     | 0.91067     | 0.18124     | 1.0274   | 0.15211 |       |
|           | -0.26019        | 0.60264  | 0.15211     | 0.600475287 |             |          |         |       |
| RN7SKP52  | ENSG00000252028 | 0.13539  | 0.44615     | 1.0274      | 0.15212     | 0.13539  |         |       |
|           | 0.44615         | 0.13539  | 0.44615     | 0.15212     | 0.600475287 |          |         |       |
| NA        | ENSG00000225325 | 1.0272   | 0.15217     | 0.51745     | 0.30242     | 0.15924  | 0.43674 |       |
|           | 1.0106          | 0.1561   | 0.15217     | 0.600475287 |             |          |         |       |
| RN7SKP180 | ENSG00000200783 | 1.0271   | 0.15219     | 1.0271      | 0.15219     | 1.0271   |         |       |
|           | 0.15219         | 1.0271   | 0.15219     | 0.15219     | 0.600475287 |          |         |       |
| RPL36AP48 | ENSG00000213180 | 1.0271   | 0.15219     | 1.0271      | 0.15219     | 0.26612  |         |       |
|           | 0.39507         | 1.0271   | 0.15219     | 0.15219     | 0.600475287 |          |         |       |
| NA        | ENSG00000264421 | 1.0271   | 0.15219     | 1.0271      | 0.15219     | 1.0271   | 0.15219 |       |
|           | 1.0271          | 0.15219  | 0.15219     | 0.600475287 |             |          |         |       |
| LINC00659 | ENSG00000228705 | 0.77908  | 0.21797     | 0.77164     | 0.22016     | 0.85078  |         |       |
|           | 0.19744         | 1.0271   | 0.1522      | 0.1522      | 0.600475287 |          |         |       |
| NA        | ENSG00000229797 | -0.44629 | 0.6723      | -0.64014    | 0.73896     | 1.027    | 0.1522  | 1.027 |
|           | 0.1522          | 0.1522   | 0.600475287 |             |             |          |         |       |
| PPP1R42   | ENSG00000178125 | -0.19089 | 0.5757      | -0.18616    | 0.57384     | -0.28846 |         |       |
|           | 0.6135          | 1.027    | 0.15221     | 0.15221     | 0.600475287 |          |         |       |
| ARF1P1    | ENSG00000219807 | 1.027    | 0.15222     | 1.027       | 0.15222     | 1.027    | 0.15222 | 1.027 |
|           | 0.15222         | 0.15222  | 0.600475287 |             |             |          |         |       |
| SLC43A1   | ENSG00000149150 | 0.70004  | 0.24195     | -0.52032    | 0.69858     | 0.79921  |         |       |
|           | 0.21208         | 1.0269   | 0.15223     | 0.15223     | 0.600475287 |          |         |       |
| NA        | ENSG00000228876 | 0.10183  | 0.45945     | 1.0268      | 0.15225     | 0.38481  | 0.35019 |       |
|           | -0.60067        | 0.72597  | 0.15225     | 0.600475287 |             |          |         |       |
| MAFTRR    | ENSG00000261390 | -0.65413 | 0.74348     | 1.0268      | 0.15225     | 0.34052  |         |       |
|           | 0.36673         | 1.0268   | 0.15225     | 0.15225     | 0.600475287 |          |         |       |
| MIR548H5  | ENSG00000266807 | 0.17757  | 0.42953     | -0.21366    | 0.58459     | 0.17757  |         |       |
|           | 0.42953         | 1.0267   | 0.15227     | 0.15227     | 0.600475287 |          |         |       |
| NA        | ENSG00000266743 | 0.72619  | 0.23386     | 1.0267      | 0.15229     | 0.54246  | 0.29375 |       |
|           | 1.0267          | 0.15229  | 0.15229     | 0.600475287 |             |          |         |       |
| YPEL3     | ENSG00000090238 | 1.0265   | 0.15233     | 1.0265      | 0.15233     | -0.32854 | 0.62875 |       |
|           | 1.0265          | 0.15233  | 0.15233     | 0.600475287 |             |          |         |       |
| GPN2      | ENSG00000142751 | 0.54777  | 0.29192     | 1.0265      | 0.15233     | 0.49081  | 0.31178 |       |
|           | 0.65243         | 0.25706  | 0.15233     | 0.600475287 |             |          |         |       |
| NA        | ENSG00000250616 | 1.0265   | 0.15233     | 1.0265      | 0.15233     | 1.0265   | 0.15233 |       |
|           | 1.0265          | 0.15233  | 0.15233     | 0.600475287 |             |          |         |       |
| NA        | ENSG00000283029 | 1.0265   | 0.15233     | 1.0265      | 0.15233     | 1.0265   | 0.15233 |       |
|           | 1.0265          | 0.15233  | 0.15233     | 0.600475287 |             |          |         |       |
| NA        | ENSG00000270127 | 1.0264   | 0.15234     | -0.18413    | 0.57304     | -0.31441 | 0.62339 |       |
|           | -0.31441        | 0.62339  | 0.15234     | 0.600475287 |             |          |         |       |
| NA        | ENSG00000238502 | 1.0264   | 0.15235     | 1.0264      | 0.15235     | 1.0264   | 0.15235 |       |
|           | 1.0264          | 0.15235  | 0.15235     | 0.600475287 |             |          |         |       |
| RAB33B    | ENSG00000172007 | 0.68948  | 0.24526     | 0.68948     | 0.24526     | 0.68948  |         |       |
|           | 0.24526         | 1.0264   | 0.15236     | 0.15236     | 0.600475287 |          |         |       |
| UBE2E2    | ENSG00000182247 | 0.63223  | 0.26362     | 0.50177     | 0.30792     | -0.32884 |         |       |
|           | 0.62886         | 1.0263   | 0.15238     | 0.15238     | 0.600475287 |          |         |       |
| NA        | ENSG00000270710 | -0.79619 | 0.78704     | -0.79619    | 0.78704     | 1.0263   | 0.15238 |       |
|           | 0.19714         | 0.42186  | 0.15238     | 0.600475287 |             |          |         |       |
| TMEM104   | ENSG00000109066 | 0.90656  | 0.18232     | 0.85632     | 0.19591     | 1.0003   |         |       |
|           | 0.15859         | 1.0258   | 0.15248     | 0.15248     | 0.600763012 |          |         |       |
| LINC01728 | ENSG00000233277 | 1.0258   | 0.15249     | 1.0258      | 0.15249     | 1.0258   |         |       |

|            |                 |           |             |             |             |          |         |          |
|------------|-----------------|-----------|-------------|-------------|-------------|----------|---------|----------|
|            | 0.15249         | 1.0258    | 0.15249     | 0.15249     | 0.600763012 |          |         |          |
| PNMA8C     | ENSG00000277531 | -0.69076  | 0.75514     | -0.45402    | 0.67509     | 1.0258   |         |          |
|            | 0.15249         | 1.0258    | 0.15249     | 0.15249     | 0.600763012 |          |         |          |
| TRIML2     | ENSG00000179046 | 1.0256    | 0.15253     | 0.80071     | 0.21165     | 1.0256   |         |          |
|            | 0.15253         | 0.53331   | 0.29691     | 0.15253     | 0.600792142 |          |         |          |
| LINC02192  | ENSG00000261325 | -0.77409  | 0.78056     | 1.0256      | 0.15255     | -0.33492 |         |          |
|            | 0.63116         | -0.19446  | 0.57709     | 0.15255     | 0.600792142 |          |         |          |
| GOLGA8A    | ENSG00000175265 | 1.0254    | 0.15258     | -0.65645    | 0.74423     | -0.49783 |         |          |
|            | 0.6907          | -0.24796  | 0.59792     | 0.15258     | 0.600792142 |          |         |          |
| NA         | ENSG00000236712 | -0.37815  | 0.64734     | 1.0254      | 0.15258     | 1.0254   | 0.15258 |          |
|            | 1.0254          | 0.15258   | 0.15258     | 0.600792142 |             |          |         |          |
| ARHGEF15   | ENSG00000198844 | 0.68076   | 0.24801     | 1.0254      | 0.15259     | 0.96335  |         |          |
|            | 0.16768         | 0.64896   | 0.25818     | 0.15259     | 0.600792142 |          |         |          |
| NA         | ENSG00000261362 | 1.0254    | 0.15259     | 0.85111     | 0.19735     | -1.3918  | 0.918   |          |
|            | -0.51377        | 0.69629   | 0.15259     | 0.600792142 |             |          |         |          |
| NA         | ENSG00000271137 | 1.0254    | 0.1526      | 1.0254      | 0.1526      | 1.0254   | 0.1526  |          |
|            | 1.0254          | 0.1526    | 0.1526      | 0.600792142 |             |          |         |          |
| LINC01977  | ENSG00000262772 | 0.69217   | 0.24442     | 0.69217     | 0.24442     | 0.84909  |         |          |
|            | 0.19792         | 1.0253    | 0.15262     | 0.15262     | 0.600792142 |          |         |          |
| SCMH1      | ENSG00000010803 | 0.96244   | 0.16792     | 1.0252      | 0.15265     | 0.7145   | 0.23746 |          |
|            | 0.76111         | 0.2233    | 0.15265     | 0.600792142 |             |          |         |          |
| TRIM77     | ENSG00000214414 | -0.89401  | 0.81434     | -1.0888     | 0.86189     | -0.80292 |         |          |
|            | 0.78899         | 1.0251    | 0.15266     | 0.15266     | 0.600792142 |          |         |          |
| NA         | ENSG00000235495 | 1.0251    | 0.15266     | 0.71091     | 0.23857     | 1.0251   | 0.15266 |          |
|            | 1.0251          | 0.15266   | 0.15266     | 0.600792142 |             |          |         |          |
| RNA5SP268  | ENSG00000252637 | 1.0251    | 0.15266     | 1.0251      | 0.15266     | 1.0251   |         |          |
|            | 0.15266         | 1.0251    | 0.15266     | 0.15266     | 0.600792142 |          |         |          |
| NA         | ENSG00000261261 | 1.0251    | 0.15266     | 0.90739     | 0.1821      | 1.0251   | 0.15266 |          |
|            | 1.0251          | 0.15266   | 0.15266     | 0.600792142 |             |          |         |          |
| RNA5SP309  | ENSG00000252479 | -0.37629  | 0.64665     | -1.343      | 0.91036     | 1.0251   |         |          |
|            | 0.15267         | 1.0251    | 0.15267     | 0.15267     | 0.600792142 |          |         |          |
| PPP2R3C    | ENSG00000092020 | 1.0249    | 0.15271     | 0.77801     | 0.21828     | 0.29207  |         |          |
|            | 0.38512         | -0.45366  | 0.67496     | 0.15271     | 0.600836119 |          |         |          |
| VTRNA1-3   | ENSG00000202515 | 1.0247    | 0.15275     | -0.8681     | 0.80733     | -0.8981  |         |          |
|            | 0.81543         | -0.53765  | 0.70459     | 0.15275     | 0.600836119 |          |         |          |
| OR7E59P    | ENSG00000250561 | 1.0247    | 0.15275     | -0.31421    | 0.62332     | 0.77122  |         |          |
|            | 0.22029         | -0.95284  | 0.82966     | 0.15275     | 0.600836119 |          |         |          |
| NA         | ENSG00000199392 | -1.5359   | 0.93771     | 1.0246      | 0.15279     | 0.092174 | 0.46328 |          |
|            | 0.059477        | 0.47629   | 0.15279     | 0.600836119 |             |          |         |          |
| RLBP1      | ENSG00000140522 | -0.40043  | 0.65558     | -0.40043    | 0.65558     | -0.40043 | 0.65558 |          |
|            | 1.0245          | 0.1528    | 0.1528      | 0.600836119 |             |          |         |          |
| MAB21L4    | ENSG00000172478 | 0.23783   | 0.40601     | 0.56564     | 0.28582     | 1.0245   |         |          |
|            | 0.1528          | 0.15341   | 0.43904     | 0.1528      | 0.600836119 |          |         |          |
| RAD52      | ENSG00000002016 | -0.083066 | 0.5331      | 0.38416     | 0.35043     | 0.73641  | 0.23074 |          |
|            | 1.0245          | 0.15281   | 0.15281     | 0.600836119 |             |          |         |          |
| DRAIC      | ENSG00000245750 | 0.82065   | 0.20592     | 0.54824     | 0.29176     | 1.0244   | 0.15282 |          |
|            | 0.38357         | 0.35065   | 0.15282     | 0.600836119 |             |          |         |          |
| SNRPCP8    | ENSG00000250580 | -0.11657  | 0.5464      | 1.0243      | 0.15284     | 0.49515  |         |          |
|            | 0.31025         | -0.28359  | 0.61164     | 0.15284     | 0.600836119 |          |         |          |
| NA         | ENSG00000257831 | 1.0243    | 0.15285     | 1.0243      | 0.15285     | 1.0243   | 0.15285 |          |
|            | -0.70262        | 0.75885   | 0.15285     | 0.600836119 |             |          |         |          |
| NA         | ENSG00000226785 | 0.451     | 0.326       | -0.61276    | 0.72998     | 1.0242   | 0.15286 | -0.14867 |
|            | 0.55909         | 0.15286   | 0.600836119 |             |             |          |         |          |
| ANP32B     | ENSG00000136938 | 0.029204  | 0.48835     | -1.2862     | 0.90081     | -1.2862  |         |          |
|            | 0.90081         | 1.0242    | 0.15287     | 0.15287     | 0.600836119 |          |         |          |
| RNU6-1037P | ENSG00000238680 | 1.0242    | 0.15287     | 1.0242      | 0.15287     | 1.0242   |         |          |
|            | 0.15287         | 1.0242    | 0.15287     | 0.15287     | 0.600836119 |          |         |          |
| PROX1      | ENSG00000117707 | -0.79385  | 0.78636     | 1.0242      | 0.15288     | 0.76589  | 0.22187 |          |
|            | -0.08433        | 0.5336    | 0.15288     | 0.600836119 |             |          |         |          |
| ZNF329     | ENSG00000181894 | 1.0241    | 0.15289     | 0.72628     | 0.23383     | 0.97869  |         |          |
|            | 0.16387         | -0.44285  | 0.67106     | 0.15289     | 0.600836119 |          |         |          |
| DPPA3      | ENSG00000187569 | 0.60896   | 0.27128     | -0.16255    | 0.56456     | 1.0241   | 0.1529  |          |



|            |                 |           |         |             |             |           |         |  |
|------------|-----------------|-----------|---------|-------------|-------------|-----------|---------|--|
|            | 0.99589         | 0.15965   | 0.1529  | 0.600836119 |             |           |         |  |
| RNU6-911P  | ENSG00000252332 | -0.13882  | 0.55521 | 1.0241      | 0.1529      | -0.13882  |         |  |
|            | 0.55521         | -0.13882  | 0.55521 | 0.1529      | 0.600836119 |           |         |  |
| PEX6       | ENSG00000124587 | 0.71708   | 0.23666 | 0.71443     | 0.23748     | 1.0239    | 0.15294 |  |
|            | 0.51091         | 0.30471   | 0.15294 | 0.600836119 |             |           |         |  |
| GOLGA6L3   | ENSG00000188388 | 0.078157  | 0.46885 | -0.30473    | 0.61972     | 1.0239    |         |  |
|            | 0.15294         | -0.14183  | 0.55639 | 0.15294     | 0.600836119 |           |         |  |
| NA         | ENSG00000277200 | 1.0239    | 0.15295 | 1.0239      | 0.15295     | 1.0239    | 0.15295 |  |
|            | 1.0239          | 0.15295   | 0.15295 | 0.600836119 |             |           |         |  |
| CHMP6      | ENSG00000176108 | -0.41501  | 0.66093 | -0.41501    | 0.66093     | -0.46461  | 0.67889 |  |
|            | 1.0237          | 0.15298   | 0.15298 | 0.600836119 |             |           |         |  |
| HMGB4      | ENSG00000176256 | -0.31945  | 0.62531 | 0.98128     | 0.16323     | 0.81371   | 0.2079  |  |
|            | 1.0237          | 0.15299   | 0.15299 | 0.600836119 |             |           |         |  |
| TAB1       | ENSG00000100324 | -0.29988  | 0.61787 | 1.0236      | 0.15301     | 1.0236    | 0.15301 |  |
|            | -0.0020066      | 0.5008    | 0.15301 | 0.600836119 |             |           |         |  |
| CHCHD2P9   | ENSG00000186940 | 0.39642   | 0.3459  | 0.13108     | 0.44786     | 0.55468   |         |  |
|            | 0.28956         | 1.0235    | 0.15304 | 0.15304     | 0.600836119 |           |         |  |
| VDAC2      | ENSG00000165637 | 0.16562   | 0.43423 | 1.0234      | 0.15305     | 0.16562   | 0.43423 |  |
|            | 0.66538         | 0.2529    | 0.15305 | 0.600836119 |             |           |         |  |
| MYOM3      | ENSG00000142661 | 1.0234    | 0.15306 | -1.1973     | 0.88441     | 0.78329   | 0.21673 |  |
|            | 0.076392        | 0.46955   | 0.15306 | 0.600836119 |             |           |         |  |
| TALDO1     | ENSG00000177156 | 0.23861   | 0.40571 | 0.28175     | 0.38907     | -0.098087 |         |  |
|            | 0.53907         | 1.0234    | 0.15306 | 0.15306     | 0.600836119 |           |         |  |
| RPS7P6     | ENSG00000215278 | 1.0234    | 0.15307 | -0.028507   | 0.51137     | -0.23708  |         |  |
|            | 0.5937          | -0.040935 | 0.51633 | 0.15307     | 0.600836119 |           |         |  |
| MRPL37     | ENSG00000116221 | 1.0233    | 0.15308 | 1.0233      | 0.15308     | -0.24634  |         |  |
|            | 0.59729         | -0.99815  | 0.8409  | 0.15308     | 0.600836119 |           |         |  |
| PRKCB      | ENSG00000166501 | 0.38694   | 0.3494  | 1.0233      | 0.15308     | -0.21966  | 0.58693 |  |
|            | 0.44333         | 0.32876   | 0.15308 | 0.600836119 |             |           |         |  |
| TMEM9B     | ENSG00000175348 | 0.7127    | 0.23802 | 0.7127      | 0.23802     | 1.0233    |         |  |
|            | 0.15309         | 0.7127    | 0.23802 | 0.15309     | 0.600836119 |           |         |  |
| NA         | ENSG00000249316 | 0.55506   | 0.28943 | 0.3822      | 0.35116     | 1.0232    | 0.15311 |  |
|            | 0.64324         | 0.26003   | 0.15311 | 0.600836119 |             |           |         |  |
| TMEM256P2  | ENSG00000226726 | -1.3206   | 0.90668 | 0.82606     | 0.20438     | -1.3206   |         |  |
|            | 0.90668         | 1.0232    | 0.15312 | 0.15312     | 0.600836119 |           |         |  |
| RPL23AP63  | ENSG00000243721 | 1.0111    | 0.15599 | 1.0232      | 0.15312     | 1.0232    |         |  |
|            | 0.15312         | 1.0232    | 0.15312 | 0.15312     | 0.600836119 |           |         |  |
| CHTF8      | ENSG00000168802 | 1.023     | 0.15316 | -1.549      | 0.9393      | -1.549    | 0.9393  |  |
|            | -1.549          | 0.9393    | 0.15316 | 0.600836119 |             |           |         |  |
| DDX54      | ENSG00000123064 | 0.93269   | 0.17549 | 0.93269     | 0.17549     | 0.64283   | 0.26017 |  |
|            | 1.0229          | 0.15317   | 0.15317 | 0.600836119 |             |           |         |  |
| NA         | ENSG00000270330 | 1.0229    | 0.15318 | 1.0229      | 0.15318     | 1.0229    | 0.15318 |  |
|            | 1.0229          | 0.15318   | 0.15318 | 0.600836119 |             |           |         |  |
| KLF7P1     | ENSG00000240704 | 1.0228    | 0.15319 | 0.58421     | 0.27954     | 0.075415  |         |  |
|            | 0.46994         | 0.65882   | 0.25501 | 0.15319     | 0.600836119 |           |         |  |
| RNU6-1232P | ENSG00000252108 | 0.67891   | 0.2486  | 0.37604     | 0.35344     | 1.0228    |         |  |
|            | 0.1532          | 1.0228    | 0.1532  | 0.1532      | 0.600836119 |           |         |  |
| GDPD4      | ENSG00000178795 | -0.15358  | 0.56103 | -0.10059    | 0.54006     | 1.0226    | 0.15324 |  |
|            | -0.15358        | 0.56103   | 0.15324 | 0.600836119 |             |           |         |  |
| TOGARAM2   | ENSG00000189350 | 0.092079  | 0.46332 | 1.0226      | 0.15324     | -0.3907   |         |  |
|            | 0.65199         | 1.0223    | 0.15331 | 0.15324     | 0.600836119 |           |         |  |
| NA         | ENSG00000254869 | 0.08581   | 0.46581 | 1.0226      | 0.15324     | 1.0226    | 0.15324 |  |
|            | -0.14289        | 0.55681   | 0.15324 | 0.600836119 |             |           |         |  |
| MTCO2P27   | ENSG00000230321 | -0.625    | 0.73401 | 1.0226      | 0.15325     | -0.625    |         |  |
|            | 0.73401         | -0.625    | 0.73401 | 0.15325     | 0.600836119 |           |         |  |
| SPEM2      | ENSG00000184560 | 1.0225    | 0.15326 | 1.0225      | 0.15326     | 1.0225    | 0.15326 |  |
|            | 1.0225          | 0.15326   | 0.15326 | 0.600836119 |             |           |         |  |
| RNA5SP227  | ENSG00000251993 | 1.0226    | 0.15326 | 1.0226      | 0.15326     | 1.0226    |         |  |
|            | 0.15326         | 1.0226    | 0.15326 | 0.15326     | 0.600836119 |           |         |  |
| NA         | ENSG00000269189 | 1.0225    | 0.15328 | 1.0225      | 0.15328     | 1.0225    | 0.15328 |  |
|            | 1.0225          | 0.15328   | 0.15328 | 0.600836119 |             |           |         |  |
| MIR5699    | ENSG00000263511 | -0.26218  | 0.60341 | -2.5098     | 0.99396     | -0.27415  |         |  |

|           |                 |          |             |             |             |          |          |       |
|-----------|-----------------|----------|-------------|-------------|-------------|----------|----------|-------|
|           | 0.60802         | 1.0224   | 0.15329     | 0.15329     | 0.600836119 |          |          |       |
| RNU6-590P | ENSG00000201909 | 0.011266 | 0.49551     | 0.49551     | 1.0224      | 0.1533   | 0.011266 |       |
|           | 0.49551         | 0.011266 | 0.49551     | 0.1533      | 0.600836119 |          |          |       |
| RTRAF     | ENSG00000087302 | 1.0224   | 0.15331     | -0.21798    | 0.58628     | -0.21798 | 0.58628  |       |
|           | -0.058773       | 0.52343  | 0.15331     | 0.600836119 |             |          |          |       |
| C8orf74   | ENSG00000171060 | 1.0223   | 0.15331     | 0.34631     | 0.36455     | 0.70242  |          |       |
|           | 0.24121         | -0.31003 | 0.62173     | 0.15331     | 0.600836119 |          |          |       |
| LINC01818 | ENSG00000230645 | -0.35817 | 0.63989     | 1.0223      | 0.15331     | -0.16347 |          |       |
|           | 0.56493         | 0.64121  | 0.26069     | 0.15331     | 0.600836119 |          |          |       |
| GOLT1A    | ENSG00000174567 | 1.0223   | 0.15333     | -0.56863    | 0.7152      | 1.0223   |          |       |
|           | 0.15333         | 0.058232 | 0.47678     | 0.15333     | 0.600857044 |          |          |       |
| NXF1      | ENSG00000162231 | -0.4291  | 0.66608     | -0.4291     | 0.66608     | -0.4291  | 0.66608  |       |
|           | 1.0222          | 0.15334  | 0.15334     | 0.600857044 |             |          |          |       |
| RPS10P21  | ENSG00000232881 | -0.20675 | 0.5819      | 0.5365      | 0.2958      | 1.0221   |          |       |
|           | 0.15336         | 1.0221   | 0.15336     | 0.15336     | 0.600887095 |          |          |       |
| YBX3P1    | ENSG00000261614 | 0.93887  | 0.1739      | 0.85121     | 0.19733     | 1.022    | 0.15338  |       |
|           | 0.85121         | 0.19733  | 0.15338     | 0.600908007 |             |          |          |       |
| NA        | ENSG00000258196 | -1.787   | 0.96303     | -1.1522     | 0.87537     | 1.022    | 0.15339  | 1.022 |
|           | 0.15339         | 0.15339  | 0.600908007 |             |             |          |          |       |
| NA        | ENSG00000236669 | 1.0217   | 0.15345     | 0.7354      | 0.23105     | -0.77748 | 0.78156  |       |
|           | 0.63214         | 0.26365  | 0.15345     | 0.601060749 |             |          |          |       |
| ZSCAN32   | ENSG00000140987 | 0.89584  | 0.18517     | 0.38853     | 0.34881     | 0.62224  |          |       |
|           | 0.26689         | 1.0217   | 0.15346     | 0.15346     | 0.601060749 |          |          |       |
| LINC01578 | ENSG00000272888 | 0.72204  | 0.23514     | 0.83432     | 0.20205     | 0.82691  |          |       |
|           | 0.20414         | 1.0217   | 0.15347     | 0.15347     | 0.601060749 |          |          |       |
| GLYATL1B  | ENSG00000255151 | 0.37895  | 0.35236     | 0.82551     | 0.20454     | 0.66247  |          |       |
|           | 0.25384         | 1.0216   | 0.15349     | 0.15349     | 0.601060749 |          |          |       |
| PCSK1     | ENSG00000175426 | 0.43418  | 0.33208     | 1.0215      | 0.15351     | -0.45006 | 0.67367  |       |
|           | -0.0132         | 0.50527  | 0.15351     | 0.601060749 |             |          |          |       |
| RUNDC3A   | ENSG00000108309 | 0.5718   | 0.28373     | 0.75159     | 0.22615     | 0.74128  |          |       |
|           | 0.22926         | 1.0215   | 0.15352     | 0.15352     | 0.601060749 |          |          |       |
| PLEKHH3   | ENSG00000068137 | -1.4114  | 0.92094     | -1.4114     | 0.92094     | -1.4114  |          |       |
|           | 0.92094         | 1.0214   | 0.15353     | 0.15353     | 0.601060749 |          |          |       |
| CYP2AC1P  | ENSG00000216998 | 0.92942  | 0.17633     | 1.0214      | 0.15353     | 0.23362  |          |       |
|           | 0.40764         | -0.28409 | 0.61183     | 0.15353     | 0.601060749 |          |          |       |
| NA        | ENSG00000265946 | 1.0213   | 0.15354     | 1.0213      | 0.15354     | 0.63523  | 0.26264  |       |
|           | 1.0213          | 0.15354  | 0.15354     | 0.601060749 |             |          |          |       |
| NKD1      | ENSG00000140807 | 1.0213   | 0.15357     | -0.63248    | 0.73646     | 0.25186  | 0.40057  |       |
|           | 0.66174         | 0.25407  | 0.15357     | 0.601129898 |             |          |          |       |
| FAM227A   | ENSG00000184949 | 0.99031  | 0.16101     | 1.0211      | 0.15361     | 0.58404  |          |       |
|           | 0.2796          | 0.62217  | 0.26692     | 0.15361     | 0.601133593 |          |          |       |
| NA        | ENSG00000282890 | 1.021    | 0.15363     | 0.44136     | 0.32948     | 0.29843  | 0.38269  | 1.021 |
|           | 0.15363         | 0.15363  | 0.601133593 |             |             |          |          |       |
| NA        | ENSG00000237445 | 1.0209   | 0.15364     | 0.68175     | 0.2477      | 0.70546  | 0.24026  |       |
|           | 0.12179         | 0.45153  | 0.15364     | 0.601133593 |             |          |          |       |
| AIRE      | ENSG00000160224 | 0.51036  | 0.3049      | 1.0209      | 0.15366     | 0.5324   | 0.29723  |       |
|           | 0.57772         | 0.28173  | 0.15366     | 0.601133593 |             |          |          |       |
| LRRC61    | ENSG00000127399 | 0.25707  | 0.39856     | 1.0208      | 0.15367     | 0.23367  |          |       |
|           | 0.40762         | 0.33509  | 0.36878     | 0.15367     | 0.601133593 |          |          |       |
| PTX3      | ENSG00000163661 | -0.5167  | 0.69732     | -0.3272     | 0.62824     | -0.22895 | 0.59054  |       |
|           | 1.0208          | 0.15367  | 0.15367     | 0.601133593 |             |          |          |       |
| NABP1     | ENSG00000173559 | 1.0208   | 0.15368     | -0.17585    | 0.56979     | 1.0208   | 0.15368  |       |
|           | -0.031243       | 0.51246  | 0.15368     | 0.601133593 |             |          |          |       |
| YPEL1     | ENSG00000100027 | 0.39185  | 0.34758     | -1.6839     | 0.9539      | 1.0208   | 0.15369  |       |
|           | -0.12744        | 0.55071  | 0.15369     | 0.601133593 |             |          |          |       |
| RMI2      | ENSG00000175643 | -1.7683  | 0.96149     | -1.444      | 0.92563     | 1.0207   | 0.15369  |       |
|           | -2.3862         | 0.99149  | 0.15369     | 0.601133593 |             |          |          |       |
| FGF10     | ENSG00000070193 | 0.89184  | 0.18624     | -0.26683    | 0.6052      | 1.0206   | 0.15372  |       |
|           | 0.9797          | 0.16362  | 0.15372     | 0.601133593 |             |          |          |       |
| QDPR      | ENSG00000151552 | 0.43458  | 0.33193     | -0.19399    | 0.57691     | 1.0205   | 0.15375  |       |
|           | -1.1734         | 0.87969  | 0.15375     | 0.601133593 |             |          |          |       |
| RN7SL265P | ENSG00000241709 | 0.090992 | 0.46375     | 1.0204      | 0.15376     | 0.090992 |          |       |

|           |                 |            |             |             |             |            |         |        |
|-----------|-----------------|------------|-------------|-------------|-------------|------------|---------|--------|
|           | 0.46375         | 0.090992   | 0.46375     | 0.15376     | 0.601133593 |            |         |        |
| PLGLA     | ENSG00000240935 | -0.99736   | 0.84071     | 1.0204      | 0.15377     | -1.1802    | 0.88104 |        |
|           | -1.1802         | 0.88104    | 0.15377     | 0.601133593 |             |            |         |        |
| FOXP4-AS1 | ENSG00000234753 | 0.80068    | 0.21166     | 0.72399     | 0.23454     | 1.0203     |         |        |
|           | 0.15378         | -0.10022   | 0.53991     | 0.15378     | 0.601133593 |            |         |        |
| LINC01558 | ENSG00000146521 | 0.51061    | 0.30481     | 1.0203      | 0.15379     | -0.01441   |         |        |
|           | 0.50575         | -0.81279   | 0.79183     | 0.15379     | 0.601133593 |            |         |        |
| SLC27A2   | ENSG00000140284 | 0.66849    | 0.25191     | -0.74217    | 0.77101     | 1.0202     |         |        |
|           | 0.15381         | 0.16811    | 0.43325     | 0.15381     | 0.601133593 |            |         |        |
| JCAD      | ENSG00000165757 | 0.49582    | 0.31001     | -0.44213    | 0.6708      | 0.45095    | 0.32601 |        |
|           | 1.0202          | 0.15381    | 0.15381     | 0.601133593 |             |            |         |        |
| NA        | ENSG00000260878 | 0.79763    | 0.21254     | 0.79763     | 0.21254     | 1.0202     | 0.15381 |        |
|           | -0.13026        | 0.55182    | 0.15381     | 0.601133593 |             |            |         |        |
| COPS5P1   | ENSG00000213187 | 1.0202     | 0.15382     | 1.0202      | 0.15382     | 1.0202     |         |        |
|           | 0.15382         | 1.0202     | 0.15382     | 0.15382     | 0.601133593 |            |         |        |
| NA        | ENSG00000242615 | 1.0202     | 0.15382     | 1.0202      | 0.15382     | 1.0202     | 0.15382 |        |
|           | 1.0202          | 0.15382    | 0.15382     | 0.601133593 |             |            |         |        |
| NA        | ENSG00000255977 | 1.0201     | 0.15383     | 1.0201      | 0.15383     | -1.091     | 0.86237 |        |
|           | -0.32736        | 0.6283     | 0.15383     | 0.601133593 |             |            |         |        |
| NA        | ENSG00000234206 | 1.0201     | 0.15385     | 1.0201      | 0.15385     | 1.0201     | 0.15385 |        |
|           | 1.0201          | 0.15385    | 0.15385     | 0.601163539 |             |            |         |        |
| SV2B      | ENSG00000185518 | -0.05438   | 0.52168     | 0.26437     | 0.39575     | 1.02       | 0.15387 |        |
|           | -0.18073        | 0.57171    | 0.15387     | 0.601193481 |             |            |         |        |
| POLR2C    | ENSG00000102978 | -0.73807   | 0.76977     | -0.73807    | 0.76977     | -0.48532   |         |        |
|           | 0.68628         | 1.0198     | 0.15392     | 0.15392     | 0.601275074 |            |         |        |
| NA        | ENSG00000267693 | 1.0198     | 0.15392     | 1.0198      | 0.15392     | 1.0198     | 0.15392 |        |
|           | 1.0198          | 0.15392    | 0.15392     | 0.601275074 |             |            |         |        |
| MIR4787   | ENSG00000272543 | 0.95335    | 0.17021     | 1.0196      | 0.15396     | 0.62654    |         |        |
|           | 0.26548         | 0.62654    | 0.26548     | 0.15396     | 0.601275074 |            |         |        |
| NA        | ENSG00000218048 | 1.0195     | 0.15397     | 0.63935     | 0.2613      | -0.83731   | 0.79879 |        |
|           | -0.021246       | 0.50848    | 0.15397     | 0.601275074 |             |            |         |        |
| NA        | ENSG00000249262 | -0.40815   | 0.65842     | -1.3816     | 0.91645     | -0.40815   | 0.65842 |        |
|           | 1.0195          | 0.15397    | 0.15397     | 0.601275074 |             |            |         |        |
| GNB1      | ENSG00000078369 | 0.71448    | 0.23747     | 0.49181     | 0.31143     | 1.0195     | 0.15398 |        |
|           | -0.55051        | 0.70901    | 0.15398     | 0.601275074 |             |            |         |        |
| HMG2P24   | ENSG00000229072 | 1.0194     | 0.154       | 0.96633     | 0.16694     | 0.67354    | 0.2503  |        |
|           | -0.083096       | 0.53311    | 0.154       | 0.601275074 |             |            |         |        |
| NA        | ENSG00000275115 | 0.10841    | 0.45684     | 1.0194      | 0.154       | 1.0194     | 0.154   | 1.0194 |
|           | 0.154           | 0.154      | 0.601275074 |             |             |            |         |        |
| NA        | ENSG00000229853 | -2.1946    | 0.9859      | 0.81728     | 0.20689     | 1.0193     | 0.15403 |        |
|           | 1.0193          | 0.15403    | 0.15403     | 0.601275074 |             |            |         |        |
| NA        | ENSG00000280400 | 1.0193     | 0.15404     | 1.0193      | 0.15404     | 1.0193     | 0.15404 |        |
|           | 1.0193          | 0.15404    | 0.15404     | 0.601275074 |             |            |         |        |
| NA        | ENSG00000233884 | -0.0064871 | 0.50259     | -0.0064871  | 0.50259     | -0.0064871 | 0.50259 |        |
|           | 1.0192          | 0.15406    | 0.15406     | 0.601275074 |             |            |         |        |
| PDXP      | ENSG00000241360 | 1.0192     | 0.15406     | 1.0192      | 0.15406     | 1.0192     | 0.15406 |        |
|           | 1.0192          | 0.15406    | 0.15406     | 0.601275074 |             |            |         |        |
| SERPINA12 | ENSG00000165953 | -0.64751   | 0.74135     | 0.86658     | 0.19309     | 1.0191     |         |        |
|           | 0.15408         | 1.0191     | 0.15408     | 0.15408     | 0.601275074 |            |         |        |
| NA        | ENSG00000271882 | -0.60284   | 0.72669     | 0.25691     | 0.39862     | 1.0191     | 0.15408 |        |
|           | -0.60284        | 0.72669    | 0.15408     | 0.601275074 |             |            |         |        |
| KIZ-AS1   | ENSG00000232712 | 1.0191     | 0.15409     | 1.0191      | 0.15409     | 1.0191     |         |        |
|           | 0.15409         | 1.0191     | 0.15409     | 0.15409     | 0.601275074 |            |         |        |
| NA        | ENSG00000273584 | 1.0191     | 0.15409     | 0.8848      | 0.18813     | 1.0191     | 0.15409 |        |
|           | 1.0191          | 0.15409    | 0.15409     | 0.601275074 |             |            |         |        |
| LINC02153 | ENSG00000253199 | 1.0189     | 0.15412     | 0.59332     | 0.27648     | -0.37221   |         |        |
|           | 0.64513         | 0.039287   | 0.48433     | 0.15412     | 0.601275074 |            |         |        |
| REX1BD    | ENSG00000006015 | 1.0189     | 0.15413     | -0.29408    | 0.61565     | -0.29408   |         |        |
|           | 0.61565         | 0.82091    | 0.20585     | 0.15413     | 0.601275074 |            |         |        |
| NA        | ENSG00000260611 | 0.7593     | 0.22384     | 0.75033     | 0.22653     | 0.67169    | 0.25089 |        |
|           | 1.0188          | 0.15414    | 0.15414     | 0.601275074 |             |            |         |        |
| MTATP6P24 | ENSG00000262381 | 1.0188     | 0.15415     | 1.0188      | 0.15415     | 1.0188     |         |        |

|           |                 |          |         |             |             |           |         |         |
|-----------|-----------------|----------|---------|-------------|-------------|-----------|---------|---------|
|           | 0.15415         | 1.0188   | 0.15415 | 0.15415     | 0.601275074 |           |         |         |
| NA        | ENSG00000272328 | 1.0188   | 0.15415 | 0.15415     | 1.0188      | 0.15415   | 1.0188  | 0.15415 |
|           | 1.0188          | 0.15415  | 0.15415 | 0.601275074 |             |           |         |         |
| MEP1A     | ENSG00000112818 | -0.73548 | 0.76898 | 1.0187      | 0.15418     | -0.55569  | 0.71079 |         |
|           | -0.38424        | 0.6496   | 0.15418 | 0.601289216 |             |           |         |         |
| RNU7-24P  | ENSG00000239081 | 1.0185   | 0.15421 | -1.9258     | 0.97294     | -1.9258   |         |         |
|           | 0.97294         | -1.164   | 0.8778  | 0.15421     | 0.601289216 |           |         |         |
| PSMD7     | ENSG00000103035 | 0.060185 | 0.476   | 1.0185      | 0.15423     | -1.4744   | 0.92981 |         |
|           | -0.94772        | 0.82836  | 0.15423 | 0.601289216 |             |           |         |         |
| DPH3P1    | ENSG00000233838 | 1.0184   | 0.15423 | 1.0184      | 0.15423     | 1.0184    |         |         |
|           | 0.15423         | 1.0184   | 0.15423 | 0.15423     | 0.601289216 |           |         |         |
| RNA5SP262 | ENSG00000252261 | -1.6157  | 0.94692 | 1.0184      | 0.15423     | 0.71942   |         |         |
|           | 0.23594         | -0.46423 | 0.67876 | 0.15423     | 0.601289216 |           |         |         |
| RN7SL488P | ENSG00000264271 | 1.0184   | 0.15424 | 1.0184      | 0.15424     | 1.0184    |         |         |
|           | 0.15424         | 1.0184   | 0.15424 | 0.15424     | 0.601289216 |           |         |         |
| MIR3922   | ENSG00000264295 | 1.0184   | 0.15424 | 1.0184      | 0.15424     | 1.0184    |         |         |
|           | 0.15424         | 0.27694  | 0.39091 | 0.15424     | 0.601289216 |           |         |         |
| NA        | ENSG00000259655 | 0.4727   | 0.31821 | -1.486      | 0.93136     | -0.3352   | 0.63126 |         |
|           | 1.0183          | 0.15426  | 0.15426 | 0.60130084  |             |           |         |         |
| NA        | ENSG00000258510 | 0.4568   | 0.32391 | 0.4568      | 0.32391     | 0.4568    | 0.32391 |         |
|           | 1.0183          | 0.15427  | 0.15427 | 0.60130084  |             |           |         |         |
| NA        | ENSG00000213940 | 1.0183   | 0.15428 | 0.062013    | 0.47528     | -0.77004  | 0.77936 |         |
|           | 0.062013        | 0.47528  | 0.15428 | 0.60130084  |             |           |         |         |
| NA        | ENSG00000238176 | 0.060899 | 0.47572 | 0.028726    | 0.48854     | -0.1257   | 0.55001 |         |
|           | 1.0181          | 0.15431  | 0.15431 | 0.601360544 |             |           |         |         |
| CMAHP     | ENSG00000168405 | 0.69387  | 0.24388 | 1.0181      | 0.15432     | -0.34871  | 0.63635 |         |
|           | 0.68073         | 0.24802  | 0.15432 | 0.601360544 |             |           |         |         |
| NA        | ENSG00000217576 | 1.0179   | 0.15435 | 0.21946     | 0.41315     | 0.44646   | 0.32763 |         |
|           | 0.075554        | 0.46989  | 0.15435 | 0.601385301 |             |           |         |         |
| PRR36     | ENSG00000183248 | 1.0178   | 0.15438 | 0.62685     | 0.26538     | 1.0178    | 0.15438 |         |
|           | 0.010134        | 0.49596  | 0.15438 | 0.601385301 |             |           |         |         |
| NA        | ENSG00000279015 | 1.0178   | 0.15438 | 0.432       | 0.33287     | 0.7347    | 0.23126 |         |
|           | 0.7347          | 0.23126  | 0.15438 | 0.601385301 |             |           |         |         |
| NA        | ENSG00000260715 | -0.53428 | 0.70343 | 1.0177      | 0.15441     | 0.0837    | 0.46665 |         |
|           | 1.0177          | 0.15441  | 0.15441 | 0.601385301 |             |           |         |         |
| TTC22     | ENSG00000006555 | 0.39711  | 0.34564 | -0.76489    | 0.77783     | 1.0176    | 0.15443 |         |
|           | -0.57545        | 0.71751  | 0.15443 | 0.601385301 |             |           |         |         |
| NA        | ENSG00000260148 | 1.0176   | 0.15443 | 0.66672     | 0.25248     | 0.66672   | 0.25248 |         |
|           | 0.66672         | 0.25248  | 0.15443 | 0.601385301 |             |           |         |         |
| NA        | ENSG00000260975 | -1.0596  | 0.85533 | 0.32982     | 0.37077     | -1.0596   | 0.85533 |         |
|           | 1.0176          | 0.15443  | 0.15443 | 0.601385301 |             |           |         |         |
| NA        | ENSG00000267558 | 1.0175   | 0.15445 | 1.0175      | 0.15445     | 1.0175    | 0.15445 |         |
|           | 1.0175          | 0.15445  | 0.15445 | 0.601385301 |             |           |         |         |
| FOXO6     | ENSG00000204060 | 0.22392  | 0.41141 | 1.0175      | 0.15447     | 0.42243   | 0.33636 |         |
|           | 0.038364        | 0.4847   | 0.15447 | 0.601385301 |             |           |         |         |
| NA        | ENSG00000280387 | 1.0174   | 0.15449 | 1.0174      | 0.15449     | 1.0174    | 0.15449 |         |
|           | 1.0174          | 0.15449  | 0.15449 | 0.601385301 |             |           |         |         |
| MIR550A3  | ENSG00000212024 | -0.22787 | 0.59013 | -0.4663     | 0.6795      | -0.016072 |         |         |
|           | 0.50641         | 1.0173   | 0.15451 | 0.15451     | 0.601385301 |           |         |         |
| PCBD2     | ENSG00000132570 | -0.43438 | 0.66799 | -0.3383     | 0.63243     | -1.5048   | 0.93381 |         |
|           | 1.0173          | 0.15452  | 0.15452 | 0.601385301 |             |           |         |         |
| RN7SKP137 | ENSG00000223006 | 1.0172   | 0.15453 | -0.55482    | 0.71049     | 0.43783   |         |         |
|           | 0.33076         | 0.20141  | 0.42019 | 0.15453     | 0.601385301 |           |         |         |
| NA        | ENSG00000201830 | 1.0171   | 0.15454 | 1.0171      | 0.15454     | 1.0171    | 0.15454 |         |
|           | 1.0171          | 0.15454  | 0.15454 | 0.601385301 |             |           |         |         |
| ISCA2P1   | ENSG00000226912 | 1.0171   | 0.15454 | 1.0171      | 0.15454     | 1.0171    |         |         |
|           | 0.15454         | 1.0171   | 0.15454 | 0.15454     | 0.601385301 |           |         |         |
| NA        | ENSG00000252021 | -0.80165 | 0.78862 | 1.0171      | 0.15454     | 0.27943   | 0.38996 |         |
|           | 1.0171          | 0.15454  | 0.15454 | 0.601385301 |             |           |         |         |
| ITLN2     | ENSG00000158764 | 1.0171   | 0.15455 | 1.0171      | 0.15455     | 0.79855   | 0.21227 |         |
|           | 0.30751         | 0.37923  | 0.15455 | 0.601385301 |             |           |         |         |
| DLG4      | ENSG00000132535 | 0.19754  | 0.4217  | 0.19754     | 0.4217      | 0.42737   | 0.33455 |         |

|           |                 |             |             |             |             |         |         |         |
|-----------|-----------------|-------------|-------------|-------------|-------------|---------|---------|---------|
|           | 1.017           | 0.15457     | 0.15457     | 0.601385301 |             |         |         |         |
| DEFA7P    | ENSG00000206042 | 1.017       | 0.15457     | 1.017       | 0.15457     | 1.017   | 0.15457 | 1.017   |
|           | 0.15457         | 0.15457     | 0.601385301 |             |             |         |         |         |
| NA        | ENSG00000277270 | 0.40123     | 0.34412     | 0.46993     | 0.3192      | 1.017   | 0.15458 |         |
|           | 0.59168         | 0.27703     | 0.15458     | 0.601385301 |             |         |         |         |
| NA        | ENSG00000220110 | -0.4495     | 0.67346     | 1.0168      | 0.15463     | 0.57372 | 0.28308 |         |
|           | 0.38947         | 0.34846     | 0.15463     | 0.601385301 |             |         |         |         |
| NA        | ENSG00000255273 | -0.95337    | 0.8298      | -0.29087    | 0.61442     | 0.21592 | 0.41452 |         |
|           | 1.0168          | 0.15463     | 0.15463     | 0.601385301 |             |         |         |         |
| PTPRG     | ENSG00000144724 | 0.74155     | 0.22918     | 0.62377     | 0.26639     | 0.72359 | 0.23466 |         |
|           | 1.0167          | 0.15464     | 0.15464     | 0.601385301 |             |         |         |         |
| EGFLAM    | ENSG00000164318 | 0.35091     | 0.36283     | 0.28178     | 0.38906     | 1.0168  |         |         |
|           | 0.15464         | 0.51229     | 0.30422     | 0.15464     | 0.601385301 |         |         |         |
| TCEA2     | ENSG00000171703 | 0.61526     | 0.26919     | 1.0166      | 0.15466     | 0.91166 | 0.18097 |         |
|           | -0.77302        | 0.78025     | 0.15466     | 0.601385301 |             |         |         |         |
| ECE1      | ENSG00000117298 | 0.39348     | 0.34698     | 0.8308      | 0.20304     | 1.0165  | 0.15469 |         |
|           | 0.82888         | 0.20359     | 0.15469     | 0.601385301 |             |         |         |         |
| POLK      | ENSG00000122008 | -1.6122     | 0.94654     | -1.6122     | 0.94654     | -1.6122 | 0.94654 |         |
|           | 1.0165          | 0.1547      | 0.1547      | 0.601385301 |             |         |         |         |
| NA        | ENSG00000255127 | 1.0165      | 0.1547      | 1.0165      | 0.1547      | 1.0165  | 0.1547  |         |
|           | 1.0165          | 0.1547      | 0.1547      | 0.601385301 |             |         |         |         |
| RAI14     | ENSG00000039560 | 1.0164      | 0.15471     | 0.27533     | 0.39153     | 0.16598 | 0.43409 |         |
|           | 0.43486         | 0.33183     | 0.15471     | 0.601385301 |             |         |         |         |
| RPL3L     | ENSG00000140986 | -1.2002     | 0.88497     | -1.2002     | 0.88497     | -1.2002 | 0.88497 |         |
|           | 1.0164          | 0.15472     | 0.15472     | 0.601385301 |             |         |         |         |
| LINC00315 | ENSG00000184274 | -0.69049    | 0.75506     | 0.77815     | 0.21824     | 0.362   | 0.35868 |         |
|           | 1.0163          | 0.15474     | 0.15474     | 0.601385301 |             |         |         |         |
| CDS1      | ENSG00000163624 | 0.9449      | 0.17235     | 1.0163      | 0.15475     | 0.9449  | 0.17235 |         |
|           | 0.3224          | 0.37357     | 0.15475     | 0.601385301 |             |         |         |         |
| HHLA2     | ENSG00000114455 | 1.0162      | 0.15477     | 0.068548    | 0.47267     | 0.29467 | 0.38412 |         |
|           | 0.36984         | 0.35575     | 0.15477     | 0.601385301 |             |         |         |         |
| NPR1      | ENSG00000169418 | -0.50477    | 0.69314     | 0.76714     | 0.2215      | 0.48177 | 0.31498 |         |
|           | 1.0162          | 0.15477     | 0.15477     | 0.601385301 |             |         |         |         |
| NA        | ENSG00000280154 | 1.0162      | 0.15477     | 1.0162      | 0.15477     | 1.0162  | 0.15477 |         |
|           | 1.0162          | 0.15477     | 0.15477     | 0.601385301 |             |         |         |         |
| IDH2-DT   | ENSG00000259685 | 1.0161      | 0.15479     | 1.0161      | 0.15479     | 1.0161  |         |         |
|           | 0.15479         | 0.74674     | 0.22761     | 0.15479     | 0.601385301 |         |         |         |
| RNU7-25P  | ENSG00000252353 | 1.0161      | 0.1548      | 1.0161      | 0.1548      | 1.0161  |         |         |
|           | 0.1548          | 1.0161      | 0.1548      | 0.1548      | 0.601385301 |         |         |         |
| CEACAMP7  | ENSG00000227349 | 1.002       | 0.15816     | 1.002       | 0.15816     | 1.016   | 0.15481 | 0.37734 |
|           | 0.35296         | 0.15481     | 0.601385301 |             |             |         |         |         |
| HNRNFPF1  | ENSG00000227538 | 1.016       | 0.15482     | 0.114       | 0.45462     | 0.619   | 0.26796 | 0.28485 |
|           | 0.38788         | 0.15482     | 0.601385301 |             |             |         |         |         |
| NA        | ENSG00000269439 | 1.016       | 0.15482     | 1.016       | 0.15482     | 1.016   | 0.15482 | 1.016   |
|           | 0.15482         | 0.601385301 |             |             |             |         |         |         |
| ST7-AS2   | ENSG00000226367 | 1.0159      | 0.15484     | 0.91081     | 0.1812      | 1.0093  |         |         |
|           | 0.15641         | 1.0093      | 0.15641     | 0.15484     | 0.601415049 |         |         |         |
| ZNF213    | ENSG00000085644 | 1.0158      | 0.15486     | 0.6654      | 0.2529      | 1.0158  |         |         |
|           | 0.15486         | 1.0158      | 0.15486     | 0.15486     | 0.601444792 |         |         |         |
| ANKRD16   | ENSG00000134461 | 1.0155      | 0.15494     | 0.6325      | 0.26353     | 0.65554 |         |         |
|           | 0.25606         | 0.60495     | 0.27261     | 0.15494     | 0.601689307 |         |         |         |
| RPL7P9    | ENSG00000137970 | 1.0154      | 0.15496     | 0.51443     | 0.30347     | 0.407   | 0.34201 |         |
|           | 1.0154          | 0.15496     | 0.15496     | 0.601689307 |             |         |         |         |
| HSPBAP1   | ENSG00000169087 | -0.39194    | 0.65245     | 1.0154      | 0.15496     | 1.0154  |         |         |
|           | 0.15496         | 1.0154      | 0.15496     | 0.15496     | 0.601689307 |         |         |         |
| NA        | ENSG00000257157 | 0.46583     | 0.32067     | -0.14636    | 0.55818     | 1.0153  | 0.15499 |         |
|           | 0.73425         | 0.2314      | 0.15499     | 0.601742546 |             |         |         |         |
| RPL39P36  | ENSG00000239912 | 1.015       | 0.15504     | 1.015       | 0.15504     | 1.015   | 0.15504 | 1.015   |
|           | 0.15504         | 0.15504     | 0.601742546 |             |             |         |         |         |
| NA        | ENSG00000252236 | 1.015       | 0.15504     | 0.42699     | 0.33469     | 0.16472 | 0.43458 |         |
|           | 0.16472         | 0.43458     | 0.15504     | 0.601742546 |             |         |         |         |
| ASH1L     | ENSG00000116539 | 0.5035      | 0.30731     | 0.6423      | 0.26034     | 0.6765  | 0.24936 |         |

|            |                 |           |             |             |             |          |         |       |
|------------|-----------------|-----------|-------------|-------------|-------------|----------|---------|-------|
|            | 1.015           | 0.15506   | 0.15506     | 0.601742546 |             |          |         |       |
| SCN7A      | ENSG00000136546 | -0.95349  | 0.82983     | 1.015       | 0.15506     | -1.5102  | 0.93451 |       |
|            | -0.96737        | 0.83332   | 0.15506     | 0.601742546 |             |          |         |       |
| RNA5SP304  | ENSG00000223131 | 1.0149    | 0.15508     | -0.24861    | 0.59817     | -0.32291 |         |       |
|            | 0.62662         | -0.32291  | 0.62662     | 0.15508     | 0.601742546 |          |         |       |
| CYP4F11    | ENSG00000171903 | -0.60042  | 0.72589     | -0.27139    | 0.60695     | 1.0149   |         |       |
|            | 0.15509         | -1.1292   | 0.87059     | 0.15509     | 0.601742546 |          |         |       |
| ATP8A2P2   | ENSG00000229800 | 1.0148    | 0.1551      | 1.0148      | 0.1551      | 1.0148   |         |       |
|            | 0.1551          | 0.4713    | 0.31871     | 0.1551      | 0.601742546 |          |         |       |
| NA         | ENSG00000240888 | 1.0147    | 0.15513     | 1.0147      | 0.15513     | 1.0147   | 0.15513 |       |
|            | 1.0147          | 0.15513   | 0.15513     | 0.601742546 |             |          |         |       |
| RNU6-1294P | ENSG00000251804 | 1.0146    | 0.15515     | 1.0146      | 0.15515     | 1.0146   |         |       |
|            | 0.15515         | 1.0146    | 0.15515     | 0.15515     | 0.601742546 |          |         |       |
| NA         | ENSG00000265712 | 1.0146    | 0.15515     | 0.34234     | 0.36605     | 0.18151  | 0.42798 |       |
|            | 0.15666         | 0.43776   | 0.15515     | 0.601742546 |             |          |         |       |
| NA         | ENSG00000226919 | 1.0146    | 0.15516     | 0.45429     | 0.32481     | 0.5334   | 0.29688 |       |
|            | -0.3658         | 0.64274   | 0.15516     | 0.601742546 |             |          |         |       |
| AKT3       | ENSG00000117020 | 0.26539   | 0.39536     | 0.017648    | 0.49296     | 1.0144   | 0.15519 |       |
|            | 0.47498         | 0.3174    | 0.15519     | 0.601742546 |             |          |         |       |
| NA         | ENSG00000259683 | -0.08091  | 0.53224     | 0.35851     | 0.35998     | 1.0144   | 0.1552  |       |
|            | 1.0144          | 0.1552    | 0.1552      | 0.601742546 |             |          |         |       |
| SNORD53    | ENSG00000265145 | 1.0143    | 0.15522     | 1.0143      | 0.15522     | 1.0143   |         |       |
|            | 0.15522         | 1.0143    | 0.15522     | 0.15522     | 0.601742546 |          |         |       |
| SLC22A2    | ENSG00000112499 | 0.52912   | 0.29836     | -1.3937     | 0.9183      | 0.84253  |         |       |
|            | 0.19975         | 1.0142    | 0.15524     | 0.15524     | 0.601742546 |          |         |       |
| NA         | ENSG00000276916 | 1.0142    | 0.15524     | 1.0142      | 0.15524     | 1.0142   | 0.15524 |       |
|            | 1.0142          | 0.15524   | 0.15524     | 0.601742546 |             |          |         |       |
| DND1P1     | ENSG00000264070 | -0.034624 | 0.51381     | -0.16851    | 0.56691     | 1.0141   |         |       |
|            | 0.15528         | -1.3326   | 0.90866     | 0.15528     | 0.601742546 |          |         |       |
| NA         | ENSG00000201724 | -0.019656 | 0.50784     | -0.20467    | 0.58109     | 1.014    | 0.1553  |       |
|            | 0.088274        | 0.46483   | 0.1553      | 0.601742546 |             |          |         |       |
| RN7SL560P  | ENSG00000264438 | 1.014     | 0.1553      | -0.47326    | 0.68199     | 1.014    | 0.1553  | 1.014 |
|            | 0.1553          | 0.1553    | 0.601742546 |             |             |          |         |       |
| SCAP       | ENSG00000114650 | 0.005522  | 0.4978      | -0.081568   | 0.5325      | 1.0139   | 0.15531 |       |
|            | -0.24501        | 0.59678   | 0.15531     | 0.601742546 |             |          |         |       |
| HACD1      | ENSG00000165996 | 1.0139    | 0.15531     | -0.51013    | 0.69502     | -0.56583 | 0.71424 |       |
|            | -1.0176         | 0.84557   | 0.15531     | 0.601742546 |             |          |         |       |
| NA         | ENSG00000230936 | 1.0139    | 0.15532     | 1.0139      | 0.15532     | 1.0139   | 0.15532 |       |
|            | 0.72244         | 0.23501   | 0.15532     | 0.601742546 |             |          |         |       |
| NA         | ENSG00000253991 | -0.17813  | 0.57069     | -0.17813    | 0.57069     | -0.17813 | 0.57069 |       |
|            | 1.0139          | 0.15533   | 0.15533     | 0.601742546 |             |          |         |       |
| NA         | ENSG00000267255 | 1.0138    | 0.15533     | 1.0138      | 0.15533     | 1.0138   | 0.15533 |       |
|            | 1.0138          | 0.15533   | 0.15533     | 0.601742546 |             |          |         |       |
| C3orf14    | ENSG00000114405 | 1.0138    | 0.15534     | -0.09258    | 0.53688     | 0.76788  |         |       |
|            | 0.22128         | -0.18018  | 0.57149     | 0.15534     | 0.601742546 |          |         |       |
| NA         | ENSG00000271350 | -1.6483   | 0.95036     | 0.60005     | 0.27424     | 1.0138   | 0.15534 |       |
|            | 1.0138          | 0.15534   | 0.15534     | 0.601742546 |             |          |         |       |
| KLHL9      | ENSG00000198642 | 0.73926   | 0.22987     | 0.73926     | 0.22987     | 1.0137   | 0.15536 |       |
|            | 0.71111         | 0.23851   | 0.15536     | 0.601742546 |             |          |         |       |
| LINC00470  | ENSG00000132204 | -0.25823  | 0.60188     | 0.24343     | 0.40384     | 1.0137   |         |       |
|            | 0.15537         | 0.59955   | 0.2744      | 0.15537     | 0.601742546 |          |         |       |
| C17orf98   | ENSG00000275489 | 1.0136    | 0.15538     | 1.0136      | 0.15538     | 1.0136   |         |       |
|            | 0.15538         | 1.0136    | 0.15538     | 0.15538     | 0.601742546 |          |         |       |
| C8orf58    | ENSG00000241852 | 0.055135  | 0.47802     | 1.0135      | 0.15542     | 0.62618  |         |       |
|            | 0.2656          | 0.62618   | 0.2656      | 0.15542     | 0.601742546 |          |         |       |
| NA         | ENSG00000276668 | 1.0135    | 0.15542     | 1.0135      | 0.15542     | 1.0135   | 0.15542 |       |
|            | 1.0135          | 0.15542   | 0.15542     | 0.601742546 |             |          |         |       |
| NA         | ENSG00000270457 | 0.44173   | 0.32934     | 1.0134      | 0.15544     | -0.65632 | 0.74419 |       |
|            | -0.67637        | 0.7506    | 0.15544     | 0.601742546 |             |          |         |       |
| NA         | ENSG00000270699 | 1.0134    | 0.15544     | 1.0134      | 0.15544     | 1.0134   | 0.15544 |       |
|            | 1.0134          | 0.15544   | 0.15544     | 0.601742546 |             |          |         |       |
| APTX       | ENSG00000137074 | 0.32161   | 0.37388     | -0.37397    | 0.64579     | 1.0133   | 0.15545 |       |

|            |                 |            |         |             |             |          |         |  |
|------------|-----------------|------------|---------|-------------|-------------|----------|---------|--|
|            | 0.25147         | 0.40072    | 0.15545 | 0.601742546 |             |          |         |  |
| IL6-AS1    | ENSG00000179428 | 0.66443    | 0.25321 | 1.0133      | 0.15547     | 0.66443  |         |  |
|            | 0.25321         | 0.66443    | 0.25321 | 0.15547     | 0.601742546 |          |         |  |
| HOTAIR     | ENSG00000228630 | 1.0132     | 0.15547 | 1.0132      | 0.15547     | 1.0132   |         |  |
|            | 0.15547         | 1.0132     | 0.15547 | 0.15547     | 0.601742546 |          |         |  |
| NA         | ENSG00000271179 | -1.0379    | 0.85033 | -1.5475     | 0.93913     | 1.0132   | 0.15547 |  |
|            | 0.98698         | 0.16183    | 0.15547 | 0.601742546 |             |          |         |  |
| RCAN2      | ENSG00000172348 | 0.4786     | 0.31611 | -0.55007    | 0.70887     | -0.41798 | 0.66202 |  |
|            | 1.0132          | 0.15548    | 0.15548 | 0.601742546 |             |          |         |  |
| OR2T1      | ENSG00000175143 | 1.0132     | 0.15548 | -1.0278     | 0.84798     | -1.1131  | 0.86717 |  |
|            | 0.23452         | 0.40729    | 0.15548 | 0.601742546 |             |          |         |  |
| ZNF461     | ENSG00000197808 | 0.25453    | 0.39954 | 1.0132      | 0.15548     | 1.0132   |         |  |
|            | 0.15548         | 1.0132     | 0.15548 | 0.15548     | 0.601742546 |          |         |  |
| CFB        | ENSG00000243649 | 1.0129     | 0.15555 | 1.0129      | 0.15555     | 1.0129   | 0.15555 |  |
|            | 1.0129          | 0.15555    | 0.15555 | 0.60175453  |             |          |         |  |
| NA         | ENSG00000269302 | 1.0129     | 0.15555 | 1.0129      | 0.15555     | 1.0129   | 0.15555 |  |
|            | 1.0129          | 0.15555    | 0.15555 | 0.60175453  |             |          |         |  |
| NA         | ENSG00000279209 | -0.33323   | 0.63052 | -0.33323    | 0.63052     | 1.0129   | 0.15556 |  |
|            | 0.47549         | 0.31722    | 0.15556 | 0.60175453  |             |          |         |  |
| NA         | ENSG00000279304 | 1.0129     | 0.15556 | 1.0129      | 0.15556     | 1.0129   | 0.15556 |  |
|            | -0.3486         | 0.63631    | 0.15556 | 0.60175453  |             |          |         |  |
| CYP2U1     | ENSG00000155016 | -1.776     | 0.96213 | -1.776      | 0.96213     | -0.53865 |         |  |
|            | 0.70494         | 1.0128     | 0.15557 | 0.15557     | 0.60175453  |          |         |  |
| NA         | ENSG00000236347 | -0.067262  | 0.52681 | 1.0128      | 0.15557     | -0.31359 | 0.62308 |  |
|            | 0.096761        | 0.46146    | 0.15557 | 0.60175453  |             |          |         |  |
| NIFKP6     | ENSG00000268144 | 1.0128     | 0.15558 | 1.0128      | 0.15558     | 1.0128   |         |  |
|            | 0.15558         | 1.0128     | 0.15558 | 0.15558     | 0.60175453  |          |         |  |
| APBA1      | ENSG00000107282 | 0.67718    | 0.24915 | 1.0127      | 0.1556      | 0.50755  | 0.30589 |  |
|            | 0.34005         | 0.36691    | 0.1556  | 0.60175453  |             |          |         |  |
| SULT1C2    | ENSG00000198203 | -0.9329    | 0.82456 | -0.66766    | 0.74783     | -0.8846  |         |  |
|            | 0.81181         | 1.0127     | 0.15561 | 0.15561     | 0.60175453  |          |         |  |
| NA         | ENSG00000200270 | 1.0125     | 0.15565 | 1.0125      | 0.15565     | -0.92336 | 0.82209 |  |
|            | 0.4979          | 0.30928    | 0.15565 | 0.60175453  |             |          |         |  |
| KRT8P37    | ENSG00000213771 | 1.0124     | 0.15566 | 1.0124      | 0.15566     | 1.0124   |         |  |
|            | 0.15566         | 1.0124     | 0.15566 | 0.15566     | 0.60175453  |          |         |  |
| RNF217-AS1 | ENSG00000236548 | -0.26534   | 0.60463 | 1.0125      | 0.15566     | -0.26534 |         |  |
|            | 0.60463         | -0.26534   | 0.60463 | 0.15566     | 0.60175453  |          |         |  |
| SRD5A3-AS1 | ENSG00000249700 | -0.0047501 | 0.50189 | 0.004408    | 0.49824     | 0.55337  |         |  |
|            | 0.29001         | 1.0123     | 0.15569 | 0.15569     | 0.60175453  |          |         |  |
| NA         | ENSG00000263821 | -0.63791   | 0.73823 | -0.63791    | 0.73823     | 1.0124   | 0.15569 |  |
|            | -0.63791        | 0.73823    | 0.15569 | 0.60175453  |             |          |         |  |
| LINC00355  | ENSG00000227674 | -0.58955   | 0.72225 | 1.0122      | 0.15571     | 0.84234  |         |  |
|            | 0.1998          | -1.4355    | 0.92443 | 0.15571     | 0.60175453  |          |         |  |
| RHAG       | ENSG00000112077 | 1.0122     | 0.15573 | 0.5979      | 0.27495     | -1.2831  | 0.90026 |  |
|            | 0.012391        | 0.49506    | 0.15573 | 0.60175453  |             |          |         |  |
| RMND5A     | ENSG00000153561 | 1.0122     | 0.15573 | 0.054509    | 0.47826     | 0.66976  |         |  |
|            | 0.2515          | -0.015635  | 0.50624 | 0.15573     | 0.60175453  |          |         |  |
| C2orf91    | ENSG00000205086 | 0.11663    | 0.45358 | 1.0122      | 0.15573     | 0.38565  |         |  |
|            | 0.34988         | -0.12953   | 0.55153 | 0.15573     | 0.60175453  |          |         |  |
| TIAL1      | ENSG00000151923 | 0.30341    | 0.38079 | 1.0121      | 0.15575     | 0.078948 | 0.46854 |  |
|            | 0.048878        | 0.48051    | 0.15575 | 0.60175453  |             |          |         |  |
| PNKP       | ENSG00000039650 | 1.012      | 0.15577 | -0.65322    | 0.74319     | -0.65322 | 0.74319 |  |
|            | -0.65322        | 0.74319    | 0.15577 | 0.60175453  |             |          |         |  |
| FSTL5      | ENSG00000168843 | -1.433     | 0.92406 | -0.8282     | 0.79622     | 1.012    | 0.15578 |  |
|            | -0.7945         | 0.78655    | 0.15578 | 0.60175453  |             |          |         |  |
| DDX39B-AS1 | ENSG00000234006 | 1.0119     | 0.1558  | 1.0119      | 0.1558      | 1.0119   |         |  |
|            | 0.1558          | 1.0119     | 0.1558  | 0.1558      | 0.60175453  |          |         |  |
| NA         | ENSG00000236335 | 1.0119     | 0.1558  | 1.0119      | 0.1558      | 1.0119   | 0.1558  |  |
|            | 1.0119          | 0.1558     | 0.1558  | 0.60175453  |             |          |         |  |
| NA         | ENSG00000260711 | 1.0119     | 0.1558  | 1.0119      | 0.1558      | 1.0119   | 0.1558  |  |
|            | 1.0119          | 0.1558     | 0.1558  | 0.60175453  |             |          |         |  |
| SNORD84    | ENSG00000265236 | 1.0119     | 0.1558  | 1.0119      | 0.1558      | 1.0119   |         |  |

|            |                 |          |             |             |             |            |         |      |
|------------|-----------------|----------|-------------|-------------|-------------|------------|---------|------|
|            | 0.1558          | 1.0119   | 0.1558      | 0.1558      | 0.60175453  |            |         |      |
| RPAIN      | ENSG00000129197 | 1.0117   | 0.15584     | 1.0117      | 0.15584     | 1.0117     | 0.15584 |      |
|            | 1.0117          | 0.15584  | 0.15584     | 0.60175453  |             |            |         |      |
| PPP6C      | ENSG00000119414 | 0.68621  | 0.24629     | 0.78217     | 0.21706     | 1.0117     | 0.15585 |      |
|            | -1.1614         | 0.87726  | 0.15585     | 0.60175453  |             |            |         |      |
| ANKRD19P   | ENSG00000187984 | 0.83868  | 0.20082     | 0.51181     | 0.30439     | 1.0115     |         |      |
|            | 0.15588         | 0.20105  | 0.42033     | 0.15588     | 0.60175453  |            |         |      |
| PPIAP68    | ENSG00000213739 | 1.0115   | 0.15588     | 0.41529     | 0.33896     | 1.0115     |         |      |
|            | 0.15588         | 1.0115   | 0.15588     | 0.60175453  |             |            |         |      |
| NA         | ENSG00000278408 | 1.0116   | 0.15588     | 1.0116      | 0.15588     | 1.0116     | 0.15588 |      |
|            | 1.0116          | 0.15588  | 0.15588     | 0.60175453  |             |            |         |      |
| OR7G1      | ENSG00000161807 | 1.0114   | 0.1559      | 1.0114      | 0.1559      | 1.0114     | 0.1559  |      |
|            | 1.0114          | 0.1559   | 0.1559      | 0.60175453  |             |            |         |      |
| RN7SKP54   | ENSG00000222636 | 1.0115   | 0.1559      | 1.0115      | 0.1559      | 1.0115     |         |      |
|            | 0.1559          | 1.0115   | 0.1559      | 0.60175453  |             |            |         |      |
| DAP3P1     | ENSG00000225082 | 0.8618   | 0.1944      | 0.77317     | 0.21971     | 1.0115     |         |      |
|            | 0.1559          | 0.71916  | 0.23602     | 0.1559      | 0.60175453  |            |         |      |
| NA         | ENSG00000248281 | 1.0114   | 0.15591     | -0.48475    | 0.68607     | -1.2765    | 0.89912 |      |
|            | -0.55987        | 0.71221  | 0.15591     | 0.60175453  |             |            |         |      |
| KIF23      | ENSG00000137807 | -0.79706 | 0.78729     | -0.23306    | 0.59214     | -0.15853   | 0.56298 |      |
|            | 1.0114          | 0.15592  | 0.15592     | 0.60175453  |             |            |         |      |
| OR2BH1P    | ENSG00000272882 | -0.21092 | 0.58353     | 0.3187      | 0.37498     | 1.0113     |         |      |
|            | 0.15593         | 1.0113   | 0.15593     | 0.15593     | 0.60175453  |            |         |      |
| NA         | ENSG00000206895 | 1.0113   | 0.15594     | -0.67911    | 0.75147     | -0.62107   | 0.73272 |      |
|            | -0.62107        | 0.73272  | 0.15594     | 0.60175453  |             |            |         |      |
| ANO9       | ENSG00000185101 | 1.0112   | 0.15596     | 0.39234     | 0.3474      | 0.54516    | 0.29282 |      |
|            | 0.42944         | 0.3338   | 0.15596     | 0.601774988 |             |            |         |      |
| NA         | ENSG00000222374 | 1.0111   | 0.15597     | 1.0111      | 0.15597     | 1.0111     | 0.15597 |      |
|            | 1.0111          | 0.15597  | 0.15597     | 0.601774988 |             |            |         |      |
| NA         | ENSG00000260510 | 1.0111   | 0.15599     | 1.0111      | 0.15599     | 1.0111     | 0.15599 |      |
|            | 1.0111          | 0.15599  | 0.15599     | 0.601804505 |             |            |         |      |
| LRP1B      | ENSG00000168702 | 0.11958  | 0.45241     | -0.63145    | 0.73613     | -0.70013   | 0.75808 |      |
|            | 1.0109          | 0.15603  | 0.15603     | 0.601863524 |             |            |         |      |
| KCNK9      | ENSG00000169427 | 0.29476  | 0.38409     | -0.41969    | 0.66265     | -0.071568  | 0.52853 |      |
|            | 1.0109          | 0.15603  | 0.15603     | 0.601863524 |             |            |         |      |
| STING1     | ENSG00000184584 | 0.30444  | 0.3804      | 0.30444     | 0.3804      | 1.0108     |         |      |
|            | 0.15605         | 0.30444  | 0.3804      | 0.15605     | 0.601893027 |            |         |      |
| BICD1P1    | ENSG00000224346 | 1.0106   | 0.1561      | 1.0106      | 0.1561      | 1.0106     |         |      |
|            | 0.1561          | 1.0106   | 0.1561      | 0.1561      | 0.602029147 |            |         |      |
| KRT19P3    | ENSG00000249681 | 1.0106   | 0.15611     | 1.0106      | 0.15611     | 1.0106     |         |      |
|            | 0.15611         | -0.3517  | 0.63747     | 0.15611     | 0.602029147 |            |         |      |
| CNTNAP3    | ENSG00000106714 | 1.0105   | 0.15613     | -0.42077    | 0.66304     | -1.4658    |         |      |
|            | 0.92865         | 0.53573  | 0.29607     | 0.15613     | 0.602058629 |            |         |      |
| NA         | ENSG00000255790 | 1.0103   | 0.15616     | 0.692       | 0.24447     | 0.36128    | 0.35894 |      |
|            | -0.38317        | 0.6492   | 0.15616     | 0.602126666 |             |            |         |      |
| HNRNPKP1   | ENSG00000250859 | 1.0103   | 0.15618     | -0.37692    | 0.64688     | -0.017064  |         |      |
|            | 0.50681         | -0.11901 | 0.54736     | 0.15618     | 0.602151463 |            |         |      |
| CYCSP27    | ENSG00000255444 | 1.0102   | 0.1562      | 1.0102      | 0.1562      | 1.0102     |         |      |
|            | 0.1562          | 1.0102   | 0.1562      | 0.1562      | 0.602151463 |            |         |      |
| TOX3       | ENSG00000103460 | 1.0101   | 0.15622     | 0.8728      | 0.19139     | 0.8728     | 0.19139 |      |
|            | 0.8728          | 0.19139  | 0.15622     | 0.602151463 |             |            |         |      |
| RNU6-1080P | ENSG00000206709 | 0.66438  | 0.25322     | 1.01        | 0.15624     | 1.01       | 0.15624 | 1.01 |
|            | 0.15624         | 0.15624  | 0.602151463 |             |             |            |         |      |
| FAM185BP   | ENSG00000214439 | 1.01     | 0.15624     | 0.79538     | 0.2132      | -0.11497   | 0.54577 |      |
|            | 0.17342         | 0.43116  | 0.15624     | 0.602151463 |             |            |         |      |
| RN7SL30P   | ENSG00000243845 | 1.0099   | 0.15626     | 1.0099      | 0.15626     | 0.089317   |         |      |
|            | 0.46442         | 1.0099   | 0.15626     | 0.15626     | 0.602151463 |            |         |      |
| RAB3GAP2   | ENSG00000118873 | -0.10838 | 0.54315     | 0.15387     | 0.43885     | -0.0050372 |         |      |
|            | 0.50201         | 1.0099   | 0.15628     | 0.15628     | 0.602151463 |            |         |      |
| SYT9       | ENSG00000170743 | -0.64591 | 0.74083     | 0.53248     | 0.2972      | 0.81019    | 0.20891 |      |
|            | 1.0099          | 0.15628  | 0.15628     | 0.602151463 |             |            |         |      |
| GPR149     | ENSG00000174948 | -0.73998 | 0.77035     | 1.0098      | 0.15629     | 0.12031    |         |      |



|             |                 |            |             |             |             |           |         |         |
|-------------|-----------------|------------|-------------|-------------|-------------|-----------|---------|---------|
|             | 0.45212         | -0.0061426 | 0.50245     | 0.15629     | 0.602151463 |           |         |         |
| NA          | ENSG00000234104 | 1.0098     | 0.15629     | -0.19653    | 0.5779      | -0.19653  | 0.5779  |         |
|             | -0.19653        | 0.5779     | 0.15629     | 0.602151463 |             |           |         |         |
| EXOC5       | ENSG00000070367 | -0.70624   | 0.75998     | -1.0954     | 0.86334     | 1.0097    | 0.15631 |         |
|             | 0.38518         | 0.35005    | 0.15631     | 0.602171826 |             |           |         |         |
| NDUFB9P1    | ENSG00000271045 | -1.4086    | 0.92052     | 1.0097      | 0.15632     | -1.4086   |         |         |
|             | 0.92052         | -1.4086    | 0.92052     | 0.15632     | 0.602171826 |           |         |         |
| ITGA9       | ENSG00000144668 | -0.29254   | 0.61506     | 0.32366     | 0.3731      | -0.91394  | 0.81963 |         |
|             | 1.0094          | 0.15638    | 0.15638     | 0.602355339 |             |           |         |         |
| MFFP1       | ENSG00000215720 | -0.30941   | 0.62149     | -0.30941    | 0.62149     | -0.3629   | 0.64166 |         |
|             | 1.0093          | 0.1564     | 0.1564      | 0.602384761 |             |           |         |         |
| NA          | ENSG00000235728 | 1.0093     | 0.15642     | 1.0093      | 0.15642     | 1.0093    | 0.15642 |         |
|             | 1.0093          | 0.15642    | 0.15642     | 0.602398112 |             |           |         |         |
| TRAV12-1    | ENSG00000211785 | 1.0093     | 0.15643     | 0.17255     | 0.4315      | 0.17255   |         |         |
|             | 0.4315          | 0.17255    | 0.4315      | 0.15643     | 0.602398112 |           |         |         |
| LINC02264   | ENSG00000229565 | 1.0091     | 0.15645     | -0.7673     | 0.77855     | -0.86959  |         |         |
|             | 0.80774         | -0.62515   | 0.73406     | 0.15645     | 0.602398112 |           |         |         |
| ANKRD10-IT1 | ENSG00000229152 | 1.0091     | 0.15647     | 1.0091      | 0.15647     | 1.0091    |         |         |
|             | 0.15647         | 1.0091     | 0.15647     | 0.15647     | 0.602398112 |           |         |         |
| NA          | ENSG00000232245 | -1.3063    | 0.90427     | -1.3063     | 0.90427     | -0.83546  | 0.79827 |         |
|             | 1.009           | 0.15648    | 0.15648     | 0.602398112 |             |           |         |         |
| STAT5A      | ENSG00000126561 | 1.009      | 0.15649     | 0.045348    | 0.48191     | 0.13123   | 0.4478  |         |
|             | 0.62399         | 0.26632    | 0.15649     | 0.602398112 |             |           |         |         |
| SAMD9       | ENSG00000205413 | -0.81994   | 0.79387     | -0.94239    | 0.827       | 1.009     | 0.15649 | -1.3497 |
|             | 0.91145         | 0.15649    | 0.602398112 |             |             |           |         |         |
| MIR4479     | ENSG00000266507 | 1.0088     | 0.15654     | 1.0088      | 0.15654     | 1.0088    |         |         |
|             | 0.15654         | 1.0088     | 0.15654     | 0.15654     | 0.602413567 |           |         |         |
| MINDY2      | ENSG00000128923 | 0.99122    | 0.16079     | 0.44446     | 0.32836     | 0.32301   |         |         |
|             | 0.37334         | 1.0087     | 0.15656     | 0.15656     | 0.602413567 |           |         |         |
| NA          | ENSG00000253208 | 0.68459    | 0.2468      | 0.38986     | 0.34832     | 1.0087    | 0.15656 |         |
|             | 0.68459         | 0.2468     | 0.15656     | 0.602413567 |             |           |         |         |
| RPL23AP75   | ENSG00000240125 | 1.0087     | 0.15657     | 1.0087      | 0.15657     | 1.0087    |         |         |
|             | 0.15657         | 1.0087     | 0.15657     | 0.15657     | 0.602413567 |           |         |         |
| FXR1        | ENSG00000114416 | -0.032639  | 0.51302     | 0.1323      | 0.44738     | 1.0086    | 0.15658 |         |
|             | 0.047078        | 0.48123    | 0.15658     | 0.602413567 |             |           |         |         |
| ARL17B      | ENSG00000228696 | 0.3047     | 0.3803      | 0.12186     | 0.45151     | 1.0086    |         |         |
|             | 0.15659         | 0.49744    | 0.30944     | 0.15659     | 0.602413567 |           |         |         |
| NA          | ENSG00000221753 | -0.19303   | 0.57653     | -0.19303    | 0.57653     | -0.19303  | 0.57653 |         |
|             | 1.0085          | 0.1566     | 0.1566      | 0.602413567 |             |           |         |         |
| FAM153CP    | ENSG00000204677 | 0.32542    | 0.37243     | -0.23614    | 0.59334     | 1.0085    |         |         |
|             | 0.15661         | -1.3687    | 0.91445     | 0.15661     | 0.602413567 |           |         |         |
| PYGL        | ENSG00000100504 | 0.2822     | 0.38889     | 1.0085      | 0.15662     | -0.004199 | 0.50168 |         |
|             | -0.40017        | 0.65549    | 0.15662     | 0.602413567 |             |           |         |         |
| VSTM2B      | ENSG00000187135 | -0.4298    | 0.66633     | 0.94624     | 0.17201     | -0.16083  |         |         |
|             | 0.56389         | 1.0084     | 0.15663     | 0.15663     | 0.602413567 |           |         |         |
| PITPNM2-AS1 | ENSG00000251497 | 1.0084     | 0.15663     | 1.0084      | 0.15663     | 1.0084    |         |         |
|             | 0.15663         | 1.0084     | 0.15663     | 0.15663     | 0.602413567 |           |         |         |
| PTPN14      | ENSG00000152104 | -0.81866   | 0.79351     | -1.5114     | 0.93465     | 1.0082    |         |         |
|             | 0.15668         | -1.7019    | 0.95561     | 0.15668     | 0.602558314 |           |         |         |
| NA          | ENSG00000228289 | 0.43533    | 0.33166     | -1.1013     | 0.86462     | 1.008     | 0.15672 |         |
|             | 0.89864         | 0.18442    | 0.15672     | 0.602646378 |             |           |         |         |
| NA          | ENSG00000238019 | 0.85406    | 0.19653     | 0.98186     | 0.16308     | 1.008     | 0.15673 |         |
|             | -0.34863        | 0.63632    | 0.15673     | 0.602646378 |             |           |         |         |
| RPL32P26    | ENSG00000241941 | 1.0079     | 0.15674     | 1.0079      | 0.15674     | 1.0079    |         |         |
|             | 0.15674         | 0.16793    | 0.43332     | 0.15674     | 0.602646378 |           |         |         |
| PTGFRN      | ENSG00000134247 | 1.0079     | 0.15676     | 0.87119     | 0.19183     | 0.7923    |         |         |
|             | 0.21409         | -0.45153   | 0.6742      | 0.15676     | 0.602675724 |           |         |         |
| NA          | ENSG00000213661 | 1.0077     | 0.15679     | -0.25441    | 0.60041     | 0.22253   | 0.41195 |         |
|             | -0.45324        | 0.67481    | 0.15679     | 0.602743507 |             |           |         |         |
| NA          | ENSG00000223727 | 1.0074     | 0.15686     | -0.50365    | 0.69275     | 0.39037   | 0.34813 |         |
|             | -0.15657        | 0.56221    | 0.15686     | 0.602965039 |             |           |         |         |
| BICD2       | ENSG00000185963 | 0.69509    | 0.2435      | 0.3775      | 0.3529      | 0.69509   | 0.2435  |         |

|           |                 |           |            |             |             |           |         |         |
|-----------|-----------------|-----------|------------|-------------|-------------|-----------|---------|---------|
|           | 1.0074          | 0.15688   | 0.15688    | 0.602976104 |             |           |         |         |
| RWDD1     | ENSG00000111832 | -0.088036 | 0.53508    | 1.0073      | 0.15689     | 1.0073    | 0.15689 |         |
|           | 1.0073          | 0.15689   | 0.15689    | 0.602976104 |             |           |         |         |
| RNU7-123P | ENSG00000251720 | 1.0073    | 0.1569     | 0.68481     | 0.24673     | 0.33939   |         |         |
|           | 0.36716         | 0.3772    | 0.35301    | 0.1569      | 0.602976104 |           |         |         |
| CCDC69    | ENSG00000198624 | 1.0071    | 0.15693    | 1.0071      | 0.15693     | 1.0071    |         |         |
|           | 0.15693         | 0.76212   | 0.22299    | 0.15693     | 0.602996286 |           |         |         |
| NA        | ENSG00000225386 | 0.0049366 | 0.49803    | 1.0071      | 0.15693     | 0.0049366 | 0.49803 |         |
|           | 0.0049366       | 0.49803   | 0.15693    | 0.602996286 |             |           |         |         |
| NKX2-8    | ENSG00000136327 | 1.0069    | 0.1571     | 1.0069      | 0.1571      | 1.0069    | 0.1571  | 0.72622 |
|           | 0.23385         | 0.1571    | 0.60303855 |             |             |           |         |         |
| NA        | ENSG00000201314 | 0.90924   | 0.18161    | 0.14678     | 0.44165     | 0.14678   | 0.44165 |         |
|           | 1.0068          | 0.15701   | 0.15701    | 0.60303855  |             |           |         |         |
| LSR       | ENSG00000105699 | 0.96099   | 0.16828    | 0.96099     | 0.16828     | 0.96099   | 0.16828 |         |
|           | 1.0068          | 0.15703   | 0.15703    | 0.60303855  |             |           |         |         |
| NOMO2     | ENSG00000185164 | 0.66238   | 0.25386    | 1.0067      | 0.15703     | -0.27395  | 0.60794 |         |
|           | -0.49767        | 0.69064   | 0.15703    | 0.60303855  |             |           |         |         |
| NA        | ENSG00000228528 | 0.69763   | 0.2427     | 0.69763     | 0.2427      | 1.0067    | 0.15703 |         |
|           | 0.69763         | 0.2427    | 0.15703    | 0.60303855  |             |           |         |         |
| NA        | ENSG00000258435 | 1.0067    | 0.15703    | -0.25992    | 0.60254     | 0.88272   | 0.18869 |         |
|           | 0.97774         | 0.1641    | 0.15703    | 0.60303855  |             |           |         |         |
| NIPSNAP1  | ENSG00000184117 | -0.57981  | 0.71898    | -1.2461     | 0.89363     | 1.0067    |         |         |
|           | 0.15704         | -0.57981  | 0.71898    | 0.15704     | 0.60303855  |           |         |         |
| NA        | ENSG00000252461 | 1.0067    | 0.15704    | 1.0067      | 0.15704     | 1.0067    | 0.15704 |         |
|           | 1.0067          | 0.15704   | 0.15704    | 0.60303855  |             |           |         |         |
| BHLHE22   | ENSG00000180828 | 0.047454  | 0.48108    | 0.16848     | 0.4331      | 0.21009   |         |         |
|           | 0.4168          | 1.0066    | 0.15706    | 0.15706     | 0.603067828 |           |         |         |
| CYP3A43   | ENSG00000021461 | 0.21462   | 0.41503    | -0.037816   | 0.51508     | 1.0065    |         |         |
|           | 0.15709         | 0.8359    | 0.20161    | 0.15709     | 0.603087978 |           |         |         |
| NA        | ENSG00000132832 | 0.57783   | 0.28169    | -1.7397     | 0.95904     | 1.0065    | 0.15709 |         |
|           | -0.56527        | 0.71405   | 0.15709    | 0.603087978 |             |           |         |         |
| NA        | ENSG00000223834 | 1.0062    | 0.15715    | 1.0062      | 0.15715     | 1.0062    | 0.15715 |         |
|           | 1.0062          | 0.15715   | 0.15715    | 0.603270797 |             |           |         |         |
| APOL4     | ENSG00000100336 | 1.0061    | 0.15718    | -0.24561    | 0.59701     | 0.028301  | 0.48871 |         |
|           | -0.10601        | 0.54221   | 0.15718    | 0.603338432 |             |           |         |         |
| LSINCT5   | ENSG00000281560 | -1.3614   | 0.91331    | 1.006       | 0.15722     | 0.48634   | 0.31336 |         |
|           | 0.15344         | 0.43903   | 0.15722    | 0.603426146 |             |           |         |         |
| RNA5SP144 | ENSG00000222778 | 1.0059    | 0.15723    | 0.61514     | 0.26923     | 0.61514   |         |         |
|           | 0.26923         | 0.61514   | 0.26923    | 0.15723     | 0.603426146 |           |         |         |
| RN7SL128P | ENSG00000240869 | -0.13552  | 0.5539     | -0.13552    | 0.5539      | -0.13552  |         |         |
|           | 0.5539          | 1.0059    | 0.15724    | 0.15724     | 0.603426146 |           |         |         |
| CHRD      | ENSG00000090539 | -0.32455  | 0.62724    | 1.0058      | 0.15726     | -0.90157  | 0.81636 |         |
|           | -1.7384         | 0.95893   | 0.15726    | 0.603455374 |             |           |         |         |
| NA        | ENSG00000207283 | -0.65983  | 0.74532    | -0.65983    | 0.74532     | 1.0056    | 0.1573  |         |
|           | -0.65983        | 0.74532   | 0.1573     | 0.603552185 |             |           |         |         |
| NA        | ENSG00000231562 | 1.0056    | 0.15731    | 1.0056      | 0.15731     | 1.0056    | 0.15731 |         |
|           | 1.0056          | 0.15731   | 0.15731    | 0.603552185 |             |           |         |         |
| NA        | ENSG00000270243 | 0.24114   | 0.40472    | 1.0055      | 0.15733     | 0.68367   | 0.24709 |         |
|           | -0.52546        | 0.70037   | 0.15733    | 0.603581397 |             |           |         |         |
| HEY1      | ENSG00000164683 | 0.51199   | 0.30433    | 1.0012      | 0.15836     | 0.86439   | 0.19369 |         |
|           | 1.0054          | 0.15736   | 0.15736    | 0.603648965 |             |           |         |         |
| YY1       | ENSG00000100811 | 1.0053    | 0.15738    | -0.53327    | 0.70308     | 0.34376   | 0.36551 |         |
|           | 0.89754         | 0.18472   | 0.15738    | 0.603678164 |             |           |         |         |
| MAP3K5    | ENSG00000197442 | 0.090104  | 0.4641     | -0.22092    | 0.58742     | 1.0051    |         |         |
|           | 0.15742         | -0.026322 | 0.5105     | 0.15742     | 0.603784069 |           |         |         |
| LINC02237 | ENSG00000253434 | 1.0048    | 0.15749    | -0.093414   | 0.53721     | 1.0048    |         |         |
|           | 0.15749         | 0.93261   | 0.17551    | 0.15749     | 0.603979084 |           |         |         |
| IGKV1D-42 | ENSG00000211633 | 0.57036   | 0.28422    | 1.0046      | 0.15754     | 1.0046    |         |         |
|           | 0.15754         | 1.0046    | 0.15754    | 0.15754     | 0.603979084 |           |         |         |
| NA        | ENSG00000226207 | 0.7667    | 0.22163    | 1.0046      | 0.15754     | 1.0046    | 0.15754 |         |
|           | -0.41431        | 0.66067   | 0.15754    | 0.603979084 |             |           |         |         |
| NA        | ENSG00000278133 | 1.0046    | 0.15754    | 1.0046      | 0.15754     | 1.0046    | 0.15754 |         |

|           |                 |             |         |             |             |          |         |        |
|-----------|-----------------|-------------|---------|-------------|-------------|----------|---------|--------|
|           | 1.0046          | 0.15754     | 0.15754 | 0.603979084 |             |          |         |        |
| MTATP6P11 | ENSG00000228097 | 0.15438     | 0.43865 | 1.0046      | 0.15755     | 1.0046   |         |        |
|           | 0.15755         | 0.26546     | 0.39533 | 0.15755     | 0.603979084 |          |         |        |
| NA        | ENSG00000228886 | 1.0046      | 0.15756 | 0.93216     | 0.17563     | 1.0046   | 0.15756 |        |
|           | 1.0046          | 0.15756     | 0.15756 | 0.603979084 |             |          |         |        |
| NA        | ENSG00000237193 | 0.11623     | 0.45373 | -0.039158   | 0.51562     | 1.0045   | 0.15756 |        |
|           | -0.17532        | 0.56959     | 0.15756 | 0.603979084 |             |          |         |        |
| RPL35AP19 | ENSG00000239872 | -0.45378    | 0.67501 | -0.45378    | 0.67501     | 1.0045   |         |        |
|           | 0.15757         | -0.45378    | 0.67501 | 0.15757     | 0.603979084 |          |         |        |
| APRT      | ENSG00000198931 | 1.0044      | 0.15759 | 1.0044      | 0.15759     | 1.0044   | 0.15759 |        |
|           | 1.0044          | 0.15759     | 0.15759 | 0.603999056 |             |          |         |        |
| NA        | ENSG00000235140 | -0.86634    | 0.80685 | -0.90358    | 0.81689     | 1.0044   | 0.1576  |        |
|           | 0.35524         | 0.36121     | 0.1576  | 0.603999056 |             |          |         |        |
| TGM4      | ENSG00000163810 | 1.0042      | 0.15764 | -0.32991    | 0.62926     | 0.35372  | 0.36177 |        |
|           | -0.34734        | 0.63583     | 0.15764 | 0.604104844 |             |          |         |        |
| NA        | ENSG00000266222 | 1.0039      | 0.15771 | 1.0039      | 0.15771     | 1.0039   | 0.15771 |        |
|           | 1.0039          | 0.15771     | 0.15771 | 0.604259647 |             |          |         |        |
| IGLJ5     | ENSG00000211681 | 1.0039      | 0.15772 | 1.0039      | 0.15772     | 1.0039   | 0.15772 |        |
|           | 1.0039          | 0.15772     | 0.15772 | 0.604259647 |             |          |         |        |
| HAT1      | ENSG00000128708 | 1.0038      | 0.15773 | 0.2878      | 0.38675     | 0.70894  | 0.23918 |        |
|           | 0.38832         | 0.34889     | 0.15773 | 0.604259647 |             |          |         |        |
| SNRPF4    | ENSG00000235627 | 1.0038      | 0.15773 | 1.0038      | 0.15773     | 1.0038   |         |        |
|           | 0.15773         | 1.0038      | 0.15773 | 0.15773     | 0.604259647 |          |         |        |
| LINC01063 | ENSG00000232065 | 0.77628     | 0.21879 | 1.0036      | 0.15778     | 0.77628  |         |        |
|           | 0.21879         | 0.77628     | 0.21879 | 0.15778     | 0.604259647 |          |         |        |
| NA        | ENSG00000254989 | 0.37134     | 0.35519 | -1.0531     | 0.85386     | 0.23464  | 0.40724 |        |
|           | 1.0036          | 0.15779     | 0.15779 | 0.604259647 |             |          |         |        |
| SYT17     | ENSG00000103528 | 1.0035      | 0.1578  | 0.59655     | 0.2754      | -0.91105 | 0.81887 |        |
|           | 1.0035          | 0.1578      | 0.1578  | 0.604259647 |             |          |         |        |
| NA        | ENSG00000226058 | 1.0035      | 0.1578  | 0.98309     | 0.16278     | 1.0035   | 0.1578  |        |
|           | 1.0035          | 0.1578      | 0.1578  | 0.604259647 |             |          |         |        |
| WDR33     | ENSG00000136709 | 0.66586     | 0.25275 | 1.0035      | 0.15782     | 0.7766   | 0.2187  |        |
|           | 0.62165         | 0.26709     | 0.15782 | 0.604259647 |             |          |         |        |
| PKMP4     | ENSG00000254023 | -0.78884    | 0.7849  | 0.83246     | 0.20257     | -0.78884 | 0.7849  |        |
|           | 1.0035          | 0.15782     | 0.15782 | 0.604259647 |             |          |         |        |
| LRRIQ4    | ENSG00000188306 | 1.0033      | 0.15785 | 1.0033      | 0.15785     | 1.0033   |         |        |
|           | 0.15785         | 1.0033      | 0.15785 | 0.15785     | 0.604259647 |          |         |        |
| SLC35A3   | ENSG00000117620 | 1.0033      | 0.15786 | -0.24351    | 0.5962      | 0.94806  |         |        |
|           | 0.17155         | 0.46322     | 0.32161 | 0.15786     | 0.604259647 |          |         |        |
| NA        | ENSG00000249971 | 1.0033      | 0.15786 | 1.0033      | 0.15786     | 1.0033   | 0.15786 |        |
|           | 1.0033          | 0.15786     | 0.15786 | 0.604259647 |             |          |         |        |
| NA        | ENSG00000250667 | 0.97993     | 0.16356 | 0.97993     | 0.16356     | 1.0033   | 0.15786 |        |
|           | 0.1521          | 0.43955     | 0.15786 | 0.604259647 |             |          |         |        |
| NA        | ENSG00000224342 | 0.6993      | 0.24218 | 0.6993      | 0.24218     | 1.0033   | 0.15787 |        |
|           | 0.6993          | 0.24218     | 0.15787 | 0.604259647 |             |          |         |        |
| NA        | ENSG00000280333 | 1.003       | 0.15793 | 1.003       | 0.15793     | 1.003    | 0.15793 |        |
|           | 0.15793         | 0.604259647 |         |             |             |          |         |        |
| NA        | ENSG00000233787 | 1.003       | 0.15794 | 1.003       | 0.15794     | 1.003    | 0.15794 |        |
|           | 0.15794         | 0.604259647 |         |             |             |          |         |        |
| NA        | ENSG00000261786 | -1.9278     | 0.97306 | 1.003       | 0.15794     | -1.101   | 0.86454 |        |
|           | -0.21573        | 0.5854      | 0.15794 | 0.604259647 |             |          |         |        |
| SIRPB3P   | ENSG00000223750 | 0.62119     | 0.26724 | -0.19237    | 0.57627     | 0.1853   |         |        |
|           | 0.4265          | 1.0029      | 0.15795 | 0.15795     | 0.604259647 |          |         |        |
| RN7SKP7   | ENSG00000222472 | 0.2383      | 0.40582 | 0.2383      | 0.40582     | 1.0028   |         |        |
|           | 0.15797         | 0.35952     | 0.3596  | 0.15797     | 0.604259647 |          |         |        |
| NA        | ENSG00000279982 | -0.12602    | 0.55014 | 0.98339     | 0.16271     | 1.0028   | 0.15797 |        |
|           | 0.98339         | 0.16271     | 0.15797 | 0.604259647 |             |          |         |        |
| PSTPIP1   | ENSG00000140368 | 0.7568      | 0.22458 | 1.0028      | 0.15798     | 0.66013  |         |        |
|           | 0.25459         | 0.922       | 0.17826 | 0.15798     | 0.604259647 |          |         |        |
| NA        | ENSG00000236658 | 1.0027      | 0.15799 | 0.97282     | 0.16532     | 1.0027   | 0.15799 |        |
|           | 0.53095         | 0.29773     | 0.15799 | 0.604259647 |             |          |         |        |
| NA        | ENSG00000228480 | 1.0027      | 0.158   | 1.0027      | 0.158       | 0.72611  | 0.23389 | 1.0027 |

|           |                 |           |             |             |             |           |         |  |
|-----------|-----------------|-----------|-------------|-------------|-------------|-----------|---------|--|
|           | 0.158           | 0.158     | 0.604259647 |             |             |           |         |  |
| AKAP13    | ENSG00000170776 | 1.0027    | 0.15801     | -0.23301    | 0.59212     | 0.038603  |         |  |
|           | 0.4846          | 0.12819   | 0.449       | 0.15801     | 0.604259647 |           |         |  |
| LINC01015 | ENSG00000224582 | 1.0026    | 0.15802     | 1.0026      | 0.15802     | 1.0026    |         |  |
|           | 0.15802         | 1.0026    | 0.15802     | 0.15802     | 0.604259647 |           |         |  |
| KBTBD11   | ENSG00000176595 | 1.0025    | 0.15804     | 0.097013    | 0.46136     | 0.70026   |         |  |
|           | 0.24188         | -0.38382  | 0.64945     | 0.15804     | 0.604259647 |           |         |  |
| RNU5B-1   | ENSG00000200156 | 1.0026    | 0.15804     | 1.0026      | 0.15804     | 0.72958   |         |  |
|           | 0.23282         | 1.0026    | 0.15804     | 0.15804     | 0.604259647 |           |         |  |
| NA        | ENSG00000272799 | 0.467     | 0.32025     | 1.0025      | 0.15804     | 0.29136   | 0.38539 |  |
|           | 0.29136         | 0.38539   | 0.15804     | 0.604259647 |             |           |         |  |
| NA        | ENSG00000253175 | 0.5508    | 0.29089     | 0.30131     | 0.38159     | 1.0025    | 0.15806 |  |
|           | 0.59629         | 0.27549   | 0.15806     | 0.604270348 |             |           |         |  |
| SRMP1     | ENSG00000215448 | 0.074714  | 0.47022     | 0.80717     | 0.20978     | 0.074714  | 0.47022 |  |
|           | 1.0024          | 0.15808   | 0.15808     | 0.604270348 |             |           |         |  |
| RN7SL111P | ENSG00000243510 | 1.0024    | 0.15808     | 1.0024      | 0.15808     | 1.0024    |         |  |
|           | 0.15808         | 1.0024    | 0.15808     | 0.15808     | 0.604270348 |           |         |  |
| NA        | ENSG00000246528 | -0.28551  | 0.61237     | 1.0023      | 0.1581      | -0.28551  | 0.61237 |  |
|           | 0.11391         | 0.45465   | 0.1581      | 0.60429022  |             |           |         |  |
| ENG       | ENSG00000106991 | -0.58011  | 0.71908     | -1.3762     | 0.91562     | 0.22377   | 0.41147 |  |
|           | 1.0023          | 0.15811   | 0.15811     | 0.60429022  |             |           |         |  |
| NA        | ENSG00000279684 | -0.31044  | 0.62189     | 0.69367     | 0.24394     | 1.0021    | 0.15814 |  |
|           | 1.0021          | 0.15814   | 0.15814     | 0.604357478 |             |           |         |  |
| RRN3      | ENSG00000085721 | 0.4724    | 0.31832     | 0.61397     | 0.26962     | 0.26426   | 0.39579 |  |
|           | 1.002           | 0.15817   | 0.15817     | 0.604424726 |             |           |         |  |
| NA        | ENSG00000201596 | -0.58199  | 0.71971     | 1.0018      | 0.15821     | -0.93688  | 0.82559 |  |
|           | 0.83874         | 0.20081   | 0.15821     | 0.604502603 |             |           |         |  |
| NA        | ENSG00000272128 | 0.93154   | 0.17579     | 0.93154     | 0.17579     | 1.0018    | 0.15822 |  |
|           | 0.20054         | 0.42053   | 0.15822     | 0.604502603 |             |           |         |  |
| PTPN18    | ENSG00000072135 | 1.0017    | 0.15824     | 0.58953     | 0.27775     | 0.95467   |         |  |
|           | 0.16987         | 0.96229   | 0.16795     | 0.15824     | 0.604502603 |           |         |  |
| NA        | ENSG00000254606 | 0.72233   | 0.23504     | -0.75311    | 0.77431     | 1.0017    | 0.15824 |  |
|           | 0.78724         | 0.21557   | 0.15824     | 0.604502603 |             |           |         |  |
| NA        | ENSG00000228079 | -0.27427  | 0.60806     | 1.0017      | 0.15826     | -0.27427  | 0.60806 |  |
|           | -0.27427        | 0.60806   | 0.15826     | 0.604531614 |             |           |         |  |
| NEK4P3    | ENSG00000270754 | -0.078305 | 0.53121     | -0.078305   | 0.53121     | -0.078305 |         |  |
|           | 0.53121         | 1.0015    | 0.15829     | 0.15829     | 0.604598816 |           |         |  |
| LINC00092 | ENSG00000225194 | 0.82959   | 0.20338     | 1.0014      | 0.15831     | 0.82168   |         |  |
|           | 0.20563         | 0.82168   | 0.20563     | 0.15831     | 0.604618621 |           |         |  |
| MT1H      | ENSG00000205358 | 1.0014    | 0.15832     | 1.0014      | 0.15832     | 1.0014    | 0.15832 |  |
|           | 1.0014          | 0.15832   | 0.15832     | 0.604618621 |             |           |         |  |
| ACACA     | ENSG00000278540 | 0.20118   | 0.42028     | 0.32804     | 0.37144     | 0.97859   | 0.16389 |  |
|           | 1.0011          | 0.15839   | 0.15839     | 0.604747883 |             |           |         |  |
| NA        | ENSG00000230694 | 1.0011    | 0.1584      | 1.0011      | 0.1584      | 1.0011    | 0.1584  |  |
|           | -1.1806         | 0.88111   | 0.1584      | 0.604747883 |             |           |         |  |
| RIC1      | ENSG00000107036 | 0.48307   | 0.31452     | 0.24396     | 0.40363     | -0.52386  | 0.69981 |  |
|           | 1.001           | 0.15842   | 0.15842     | 0.604747883 |             |           |         |  |
| COX7A2    | ENSG00000112695 | -0.89107  | 0.81355     | -0.32088    | 0.62585     | 1.0009    |         |  |
|           | 0.15843         | -0.41715  | 0.66171     | 0.15843     | 0.604747883 |           |         |  |
| H3C9P     | ENSG00000220875 | 0.87019   | 0.1921      | 0.68917     | 0.24536     | 1.0009    | 0.15843 |  |
|           | 0.94003         | 0.1736    | 0.15843     | 0.604747883 |             |           |         |  |
| MIR483    | ENSG00000207805 | 1.0009    | 0.15844     | 1.0009      | 0.15844     | 1.0009    |         |  |
|           | 0.15844         | 1.0009    | 0.15844     | 0.15844     | 0.604747883 |           |         |  |
| NA        | ENSG00000261552 | -1.1963   | 0.88422     | 1.0009      | 0.15845     | 1.0009    | 0.15845 |  |
|           | 1.0009          | 0.15845   | 0.15845     | 0.604747883 |             |           |         |  |
| HIC2      | ENSG00000169635 | 0.10907   | 0.45657     | -0.32999    | 0.6293      | 1.0008    | 0.15847 |  |
|           | -0.11686        | 0.54652   | 0.15847     | 0.604747883 |             |           |         |  |
| CLYBL-AS2 | ENSG00000227659 | 1.0008    | 0.15847     | 1.0008      | 0.15847     | 0.70532   |         |  |
|           | 0.24031         | 1.0008    | 0.15847     | 0.15847     | 0.604747883 |           |         |  |
| CASC9     | ENSG00000249395 | 1.0007    | 0.1585      | -0.046987   | 0.51874     | -0.18948  | 0.57514 |  |
|           | -1.2709         | 0.89812   | 0.1585      | 0.604747883 |             |           |         |  |
| NA        | ENSG00000250284 | 0.42135   | 0.33675     | 0.88554     | 0.18793     | 1.0007    | 0.1585  |  |

|            |                 |             |         |             |             |            |         |  |
|------------|-----------------|-------------|---------|-------------|-------------|------------|---------|--|
|            | -0.99576        | 0.84032     | 0.1585  | 0.604747883 |             |            |         |  |
| ZC3H3      | ENSG00000014164 | 0.84069     | 0.20026 | -0.24676    | 0.59745     | 1.0005     | 0.15852 |  |
|            | 0.25754         | 0.39838     | 0.15852 | 0.604747883 |             |            |         |  |
| PLA2G7     | ENSG00000146070 | 0.098592    | 0.46073 | 1.0005      | 0.15854     | 0.098592   |         |  |
|            | 0.46073         | 0.7282      | 0.23325 | 0.15854     | 0.604747883 |            |         |  |
| NA         | ENSG00000253844 | -0.54687    | 0.70777 | -0.54687    | 0.70777     | 1.0005     | 0.15854 |  |
|            | -0.20152        | 0.57985     | 0.15854 | 0.604747883 |             |            |         |  |
| NA         | ENSG00000258843 | 1.0005      | 0.15854 | 1.0005      | 0.15854     | 1.0005     | 0.15854 |  |
|            | 1.0005          | 0.15854     | 0.15854 | 0.604747883 |             |            |         |  |
| DHRS7B     | ENSG00000109016 | -0.4608     | 0.67753 | 0.14059     | 0.4441      | 0.44193    |         |  |
|            | 0.32927         | 1.0003      | 0.15858 | 0.15858     | 0.60479658  |            |         |  |
| NA         | ENSG00000254290 | 1.0003      | 0.15858 | 1.0003      | 0.15858     | 0.60971    | 0.27103 |  |
|            | 1.0003          | 0.15858     | 0.15858 | 0.60479658  |             |            |         |  |
| SRP54      | ENSG00000100883 | 0.97135     | 0.16569 | 0.94189     | 0.17312     | 1.0003     | 0.15859 |  |
|            | 0.81529         | 0.20745     | 0.15859 | 0.60479658  |             |            |         |  |
| NA         | ENSG00000266216 | 0.27692     | 0.39092 | -0.43542    | 0.66837     | -0.68      | 0.75175 |  |
|            | 1.0002          | 0.15861     | 0.15861 | 0.604797935 |             |            |         |  |
| HNF1A      | ENSG00000135100 | 1.0001      | 0.15863 | 0.19908     | 0.4211      | 0.83043    | 0.20315 |  |
|            | 0.607           | 0.27193     | 0.15863 | 0.604797935 |             |            |         |  |
| NA         | ENSG00000233870 | 1           | 0.15864 | 1           | 0.15864     | 1          | 0.15864 |  |
|            | 0.15864         | 0.604797935 |         |             |             |            |         |  |
| NA         | ENSG00000238888 | 1           | 0.15864 | -1.4787     | 0.93038     | -0.90221   | 0.81653 |  |
|            | -1.0969         | 0.86366     | 0.15864 | 0.604797935 |             |            |         |  |
| RN7SKP218  | ENSG00000222154 | 0.99985     | 0.15869 | 0.99985     | 0.15869     | -0.69019   |         |  |
|            | 0.75496         | 0.5183      | 0.30212 | 0.15869     | 0.604941227 |            |         |  |
| RNU6-1198P | ENSG00000252713 | 0.99971     | 0.15873 | 0.99971     | 0.15873     | 0.99971    |         |  |
|            | 0.15873         | 0.99971     | 0.15873 | 0.15873     | 0.605046378 |            |         |  |
| NA         | ENSG00000229263 | -0.42249    | 0.66367 | 0.97319     | 0.16523     | -0.81929   | 0.79369 |  |
|            | 0.99958         | 0.15876     | 0.15876 | 0.605094971 |             |            |         |  |
| SVIL2P     | ENSG00000234814 | 0.045043    | 0.48204 | 0.99955     | 0.15877     | -0.68005   |         |  |
|            | 0.75176         | 0.99556     | 0.15973 | 0.15877     | 0.605094971 |            |         |  |
| RPL7AP34   | ENSG00000213312 | -0.16       | 0.56356 | 0.99951     | 0.15878     | -0.82157   | 0.79434 |  |
|            | 0.99951         | 0.15878     | 0.15878 | 0.605094971 |             |            |         |  |
| NA         | ENSG00000279071 | 0.99928     | 0.15883 | 0.99928     | 0.15883     | 0.99928    | 0.15883 |  |
|            | 0.99928         | 0.15883     | 0.15883 | 0.605238184 |             |            |         |  |
| NA         | ENSG00000240874 | -0.0043968  | 0.50175 | -0.0043968  | 0.50175     | -0.0043968 | 0.50175 |  |
|            | 0.99916         | 0.15886     | 0.15886 | 0.605277494 |             |            |         |  |
| RNU6-227P  | ENSG00000199735 | 0.99907     | 0.15888 | -0.075906   | 0.53025     | -0.075906  |         |  |
|            | 0.53025         | 0.073335    | 0.47077 | 0.15888     | 0.605277494 |            |         |  |
| NA         | ENSG00000280037 | 0.99906     | 0.15888 | 0.99906     | 0.15888     | 0.99906    | 0.15888 |  |
|            | 0.99906         | 0.15888     | 0.15888 | 0.605277494 |             |            |         |  |
| NA         | ENSG00000273901 | 0.99901     | 0.15889 | 0.99901     | 0.15889     | 0.99901    | 0.15889 |  |
|            | 0.99901         | 0.15889     | 0.15889 | 0.605277494 |             |            |         |  |
| LAMP3      | ENSG00000078081 | 0.99869     | 0.15897 | -0.19928    | 0.57898     | -0.59223   | 0.72315 |  |
|            | 0.44311         | 0.32884     | 0.15897 | 0.605525668 |             |            |         |  |
| NPM1P35    | ENSG00000255213 | 0.34623     | 0.36458 | 0.34623     | 0.36458     | 0.34623    |         |  |
|            | 0.36458         | 0.99865     | 0.15898 | 0.15898     | 0.605525668 |            |         |  |
| ADAM33     | ENSG00000149451 | 0.99852     | 0.15901 | -0.69512    | 0.75651     | -0.88209   |         |  |
|            | 0.81114         | -1.2905     | 0.90156 | 0.15901     | 0.605592599 |            |         |  |
| OR7E12P    | ENSG00000189398 | -2.1432     | 0.98395 | -0.75477    | 0.77481     | 0.99846    |         |  |
|            | 0.15903         | -0.42982    | 0.66634 | 0.15903     | 0.605621436 |            |         |  |
| RNU6-228P  | ENSG00000199570 | 0.99823     | 0.15908 | -0.31999    | 0.62551     | 0.75864    |         |  |
|            | 0.22403         | 0.30883     | 0.37872 | 0.15908     | 0.605745996 |            |         |  |
| SEMA3F     | ENSG00000001617 | -0.90521    | 0.81732 | 0.99816     | 0.1591      | 0.39409    |         |  |
|            | 0.34676         | 0.17428     | 0.43082 | 0.1591      | 0.605745996 |            |         |  |
| LINC00620  | ENSG00000224514 | 0.44857     | 0.32687 | 0.99816     | 0.1591      | -0.11564   |         |  |
|            | 0.54603         | -0.53669    | 0.70426 | 0.1591      | 0.605745996 |            |         |  |
| LAMC1      | ENSG00000135862 | 0.71685     | 0.23673 | 0.78816     | 0.2153      | 0.99785    | 0.15918 |  |
|            | 0.71608         | 0.23697     | 0.15918 | 0.606003234 |             |            |         |  |
| RIOK2      | ENSG00000058729 | 0.99757     | 0.15924 | 0.36968     | 0.35581     | 0.26839    | 0.3942  |  |
|            | 0.64089         | 0.2608      | 0.15924 | 0.606007132 |             |            |         |  |
| LNC-LBCS   | ENSG00000228412 | 0.68555     | 0.2465  | 0.43899     | 0.33034     | 0.9975     |         |  |

|             |                 |           |             |             |             |          |         |         |
|-------------|-----------------|-----------|-------------|-------------|-------------|----------|---------|---------|
|             | 0.15926         | 0.20687   | 0.41805     | 0.15926     | 0.606007132 |          |         |         |
| OR6C76      | ENSG00000185821 | 0.99745   | 0.15927     | -0.18759    | 0.5744      | -0.25819 |         |         |
|             | 0.60187         | -0.18759  | 0.5744      | 0.15927     | 0.606007132 |          |         |         |
| NA          | ENSG00000275454 | 0.99746   | 0.15927     | 0.99746     | 0.15927     | 0.99746  | 0.15927 |         |
|             | 0.99746         | 0.15927   | 0.15927     | 0.606007132 |             |          |         |         |
| RBFOX1      | ENSG00000078328 | 0.99743   | 0.15928     | 0.086048    | 0.46571     | 0.45175  |         |         |
|             | 0.32572         | -0.018906 | 0.50754     | 0.15928     | 0.606007132 |          |         |         |
| TMEM65      | ENSG00000164983 | -1.4516   | 0.92669     | 0.99739     | 0.15929     | -0.63933 |         |         |
|             | 0.73869         | 0.01265   | 0.49495     | 0.15929     | 0.606007132 |          |         |         |
| B4GALT1-AS1 | ENSG00000233554 | 0.99737   | 0.15929     | 0.99737     | 0.15929     | 0.99737  |         |         |
|             | 0.15929         | 0.99737   | 0.15929     | 0.15929     | 0.606007132 |          |         |         |
| FOXO1B      | ENSG00000214295 | -0.60832  | 0.72851     | 0.99728     | 0.15931     | -0.84962 |         |         |
|             | 0.80223         | -0.022135 | 0.50883     | 0.15931     | 0.606007132 |          |         |         |
| FAM66C      | ENSG00000226711 | 0.99728   | 0.15931     | 0.74893     | 0.22695     | 0.05331  |         |         |
|             | 0.47874         | 0.2102    | 0.41676     | 0.15931     | 0.606007132 |          |         |         |
| RIMKLB      | ENSG00000166532 | 0.49569   | 0.31006     | -0.72115    | 0.76459     | 0.43631  |         |         |
|             | 0.33131         | 0.99721   | 0.15933     | 0.15933     | 0.606007132 |          |         |         |
| CCN6        | ENSG00000112761 | -0.61108  | 0.72943     | -1.1041     | 0.86522     | -1.1795  | 0.8809  |         |
|             | 0.99718         | 0.15934   | 0.15934     | 0.606007132 |             |          |         |         |
| RNA5SP96    | ENSG00000251850 | 0.99713   | 0.15935     | 0.99713     | 0.15935     | 0.99713  |         |         |
|             | 0.15935         | 0.99713   | 0.15935     | 0.15935     | 0.606007132 |          |         |         |
| CADM3-AS1   | ENSG00000225670 | 0.99711   | 0.15936     | 0.99711     | 0.15936     | 0.99711  |         |         |
|             | 0.15936         | 0.99711   | 0.15936     | 0.15936     | 0.606007132 |          |         |         |
| NA          | ENSG00000256481 | 0.49198   | 0.31137     | 0.81806     | 0.20666     | 0.99708  | 0.15936 |         |
|             | 0.83805         | 0.201     | 0.15936     | 0.606007132 |             |          |         |         |
| CHST5       | ENSG00000135702 | 0.997     | 0.15938     | 0.997       | 0.15938     | 0.997    | 0.15938 | 0.54735 |
|             | 0.29207         | 0.15938   | 0.606007132 |             |             |          |         |         |
| NDUFA3P2    | ENSG00000254856 | 0.997     | 0.15938     | -0.52276    | 0.69943     | 0.997    | 0.15938 | 0.997   |
|             | 0.15938         | 0.15938   | 0.606007132 |             |             |          |         |         |
| CCDC27      | ENSG00000162592 | 0.74814   | 0.22719     | 0.99688     | 0.15941     | 0.99688  |         |         |
|             | 0.15941         | 0.70952   | 0.239       | 0.15941     | 0.60607391  |          |         |         |
| KLF3P2      | ENSG00000241879 | 0.99675   | 0.15944     | -0.36113    | 0.641       | 0.99675  | 0.15944 |         |
|             | 0.99675         | 0.15944   | 0.15944     | 0.606093393 |             |          |         |         |
| NA          | ENSG00000270317 | -1.0271   | 0.84781     | 0.65689     | 0.25563     | 0.99676  | 0.15944 |         |
|             | 0.65689         | 0.25563   | 0.15944     | 0.606093393 |             |          |         |         |
| NA          | ENSG00000270248 | 0.99668   | 0.15946     | 0.99668     | 0.15946     | 0.99668  | 0.15946 |         |
|             | 0.99668         | 0.15946   | 0.15946     | 0.606094338 |             |          |         |         |
| SLC10A1     | ENSG00000100652 | -0.65905  | 0.74507     | -0.82164    | 0.79436     | 0.78249  |         |         |
|             | 0.21696         | 0.99662   | 0.15947     | 0.15947     | 0.606094338 |          |         |         |
| FSIP1       | ENSG00000150667 | 0.99655   | 0.15949     | -0.76257    | 0.77714     | 0.75057  | 0.22645 |         |
|             | 0.58451         | 0.27944   | 0.15949     | 0.606094338 |             |          |         |         |
| NA          | ENSG00000232389 | -0.20378  | 0.58074     | -0.20378    | 0.58074     | 0.99655  | 0.15949 |         |
|             | -0.44085        | 0.67034   | 0.15949     | 0.606094338 |             |          |         |         |
| SUMO1P1     | ENSG00000241721 | 0.56617   | 0.28564     | 0.99644     | 0.15952     | 0.3726   |         |         |
|             | 0.35472         | -0.27813  | 0.60955     | 0.15952     | 0.606161073 |          |         |         |
| KLHDC7A     | ENSG00000179023 | 0.46946   | 0.31937     | 0.9963      | 0.15955     | 0.11801  |         |         |
|             | 0.45303         | 0.8377    | 0.2011      | 0.15955     | 0.606220124 |          |         |         |
| MIR4309     | ENSG00000266015 | 0.9962    | 0.15958     | -0.44742    | 0.67271     | 0.59042  |         |         |
|             | 0.27746         | 0.43266   | 0.33263     | 0.15958     | 0.606220124 |          |         |         |
| BCLAF1      | ENSG00000029363 | -1.3302   | 0.90827     | -1.3302     | 0.90827     | -0.84749 |         |         |
|             | 0.80164         | 0.99615   | 0.15959     | 0.15959     | 0.606220124 |          |         |         |
| DUSP1       | ENSG00000120129 | 0.97179   | 0.16558     | 0.97179     | 0.16558     | 0.96295  | 0.16779 |         |
|             | 0.99605         | 0.15961   | 0.15961     | 0.606220124 |             |          |         |         |
| LINC00111   | ENSG00000227702 | -0.76847  | 0.7789      | -0.96769    | 0.8334      | -0.76847 |         |         |
|             | 0.7789          | 0.99607   | 0.15961     | 0.15961     | 0.606220124 |          |         |         |
| OR6C75      | ENSG00000187857 | -0.52641  | 0.7007      | 0.21506     | 0.41486     | 0.99593  |         |         |
|             | 0.15964         | 0.21506   | 0.41486     | 0.15964     | 0.606220124 |          |         |         |
| CYP4F32P    | ENSG00000223564 | 0.76543   | 0.22201     | -0.6879     | 0.75424     | 0.86543  |         |         |
|             | 0.1934          | 0.9959    | 0.15965     | 0.15965     | 0.606220124 |          |         |         |
| GNRHR2      | ENSG00000211451 | 0.99586   | 0.15966     | 0.99586     | 0.15966     | 0.99586  |         |         |
|             | 0.15966         | 0.99586   | 0.15966     | 0.15966     | 0.606220124 |          |         |         |
| ZDHHC5      | ENSG00000156599 | 0.61314   | 0.26989     | 0.99579     | 0.15968     | 0.63331  |         |         |

|             |                 |           |             |             |             |           |         |         |
|-------------|-----------------|-----------|-------------|-------------|-------------|-----------|---------|---------|
|             | 0.26326         | 0.47593   | 0.31706     | 0.15968     | 0.606220124 |           |         |         |
| LAMP5-AS1   | ENSG00000225988 | 0.65007   | 0.25782     | 0.99573     | 0.15969     | 0.65007   |         |         |
|             | 0.25782         | 0.65007   | 0.25782     | 0.15969     | 0.606220124 |           |         |         |
| CCNG1P1     | ENSG00000218991 | 0.9957    | 0.1597      | -0.29421    | 0.6157      | -0.29421  |         |         |
|             | 0.6157          | -0.29421  | 0.6157      | 0.1597      | 0.606220124 |           |         |         |
| RNU6ATAC14P | ENSG00000252027 | 0.99569   | 0.1597      | 0.99569     | 0.1597      | 0.99569   |         |         |
|             | 0.1597          | 0.99569   | 0.1597      | 0.1597      | 0.606220124 |           |         |         |
| OSBPL9P1    | ENSG00000271389 | 0.99564   | 0.15971     | 0.99564     | 0.15971     | 0.99564   |         |         |
|             | 0.15971         | 0.99564   | 0.15971     | 0.15971     | 0.606220124 |           |         |         |
| C1S         | ENSG00000182326 | 0.46001   | 0.32275     | 0.43243     | 0.33271     | 0.25783   | 0.39827 |         |
|             | 0.99555         | 0.15973   | 0.15973     | 0.606220124 |             |           |         |         |
| TOP2B       | ENSG00000077097 | 0.91648   | 0.17971     | 0.99554     | 0.15974     | -0.063818 | 0.52544 |         |
|             | 0.45465         | 0.32468   | 0.15974     | 0.606220124 |             |           |         |         |
| TMEM9       | ENSG00000116857 | 0.7587    | 0.22402     | 0.11346     | 0.45483     | 0.99543   | 0.15976 |         |
|             | 0.11346         | 0.45483   | 0.15976     | 0.606220124 |             |           |         |         |
| STX12       | ENSG00000117758 | 0.86572   | 0.19332     | 0.94551     | 0.1722      | 0.99546   | 0.15976 |         |
|             | 0.86711         | 0.19294   | 0.15976     | 0.606220124 |             |           |         |         |
| SLC45A1     | ENSG00000162426 | 0.91771   | 0.17938     | 0.35607     | 0.36089     | 0.99546   |         |         |
|             | 0.15976         | 0.89903   | 0.18432     | 0.15976     | 0.606220124 |           |         |         |
| C15orf40    | ENSG00000169609 | 0.71581   | 0.23705     | 0.9953      | 0.15979     | 0.076696  |         |         |
|             | 0.46943         | 0.092276  | 0.46324     | 0.15979     | 0.606220124 |           |         |         |
| NA          | ENSG00000254927 | 0.99532   | 0.15979     | 0.99532     | 0.15979     | 0.99532   | 0.15979 |         |
|             | -0.087481       | 0.53486   | 0.15979     | 0.606220124 |             |           |         |         |
| FBP1        | ENSG00000165140 | 0.99522   | 0.15981     | -0.63529    | 0.73738     | -1.1361   | 0.87204 |         |
|             | -1.3238         | 0.90722   | 0.15981     | 0.606220124 |             |           |         |         |
| EIF4A3      | ENSG00000141543 | -0.39684  | 0.65426     | 0.99519     | 0.15982     | -0.76557  |         |         |
|             | 0.77803         | 0.66089   | 0.25434     | 0.15982     | 0.606220124 |           |         |         |
| NA          | ENSG00000272568 | 0.99513   | 0.15984     | 0.99513     | 0.15984     | 0.8092    | 0.2092  |         |
|             | 0.99513         | 0.15984   | 0.15984     | 0.606220124 |             |           |         |         |
| FOXB1       | ENSG00000171956 | -0.2288   | 0.59049     | -0.2288     | 0.59049     | -0.2288   | 0.59049 |         |
|             | 0.99507         | 0.15985   | 0.15985     | 0.606220124 |             |           |         |         |
| P4HA1       | ENSG00000122884 | 0.43951   | 0.33014     | -0.38382    | 0.64944     | 0.99504   | 0.15986 |         |
|             | -1.1775         | 0.88049   | 0.15986     | 0.606220124 |             |           |         |         |
| BPIFB9P     | ENSG00000125997 | -0.80954  | 0.7909      | 0.995       | 0.15987     | 0.995     | 0.15987 | 0.995   |
|             | 0.15987         | 0.15987   | 0.606220124 |             |             |           |         |         |
| FTLP1       | ENSG00000235525 | 0.99496   | 0.15988     | 0.99496     | 0.15988     | 0.99496   | 0.15988 |         |
|             | 0.99496         | 0.15988   | 0.15988     | 0.606220124 |             |           |         |         |
| OR5AH1P     | ENSG00000268067 | 0.99491   | 0.15989     | -0.035313   | 0.51409     | -0.035313 |         |         |
|             | 0.51409         | -0.035313 | 0.51409     | 0.15989     | 0.606220124 |           |         |         |
| ACTB        | ENSG00000075624 | 0.99482   | 0.15991     | 0.050274    | 0.47995     | -0.23293  | 0.59209 |         |
|             | 0.22135         | 0.41241   | 0.15991     | 0.606220124 |             |           |         |         |
| ATP2B1-AS1  | ENSG00000271614 | 0.99477   | 0.15992     | 0.99477     | 0.15992     | 0.99477   |         |         |
|             | 0.15992         | 0.99477   | 0.15992     | 0.15992     | 0.606220124 |           |         |         |
| SPATA31C2   | ENSG00000177910 | -0.10929  | 0.54351     | -0.15914    | 0.56322     | 0.99472   |         |         |
|             | 0.15994         | 0.81062   | 0.20879     | 0.15994     | 0.606220124 |           |         |         |
| CFAP77      | ENSG00000188523 | 0.99467   | 0.15995     | -0.3032     | 0.61913     | -2.0465   |         |         |
|             | 0.97965         | 0.27913   | 0.39007     | 0.15995     | 0.606220124 |           |         |         |
| RNU6-1066P  | ENSG00000200443 | 0.99467   | 0.15995     | -0.29015    | 0.61415     | 0.99467   |         |         |
|             | 0.15995         | 0.99467   | 0.15995     | 0.15995     | 0.606220124 |           |         |         |
| ARHGEF12    | ENSG00000196914 | 0.71538   | 0.23719     | -0.089884   | 0.53581     | 0.99461   |         |         |
|             | 0.15996         | -1.024    | 0.84709     | 0.15996     | 0.606220124 |           |         |         |
| NIFKP3      | ENSG00000256331 | -0.17526  | 0.56956     | 0.024806    | 0.4901      | 0.9945    |         |         |
|             | 0.15999         | 0.9945    | 0.15999     | 0.15999     | 0.606220124 |           |         |         |
| NA          | ENSG00000224504 | 0.99446   | 0.16        | 0.79521     | 0.21324     | 0.99446   | 0.16    | 0.31964 |
|             | 0.37462         | 0.16      | 0.606220124 |             |             |           |         |         |
| NA          | ENSG00000280059 | 0.99442   | 0.16001     | 0.31768     | 0.37536     | 0.99442   | 0.16001 |         |
|             | 0.22593         | 0.41063   | 0.16001     | 0.606220124 |             |           |         |         |
| IL20        | ENSG00000162891 | -1.4629   | 0.92826     | 0.99433     | 0.16003     | -1.4629   | 0.92826 |         |
|             | 0.61264         | 0.27006   | 0.16003     | 0.606220124 |             |           |         |         |
| MTND5P25    | ENSG00000227348 | 0.99427   | 0.16005     | 0.99427     | 0.16005     | 0.99427   |         |         |
|             | 0.16005         | 0.99427   | 0.16005     | 0.16005     | 0.606220124 |           |         |         |
| CLUHP11     | ENSG00000278138 | 0.99419   | 0.16006     | 0.99419     | 0.16006     | 0.99419   |         |         |

|           |                 |           |         |             |             |          |         |  |
|-----------|-----------------|-----------|---------|-------------|-------------|----------|---------|--|
|           | 0.16006         | 0.99419   | 0.16006 | 0.16006     | 0.606220124 |          |         |  |
| SERPINB12 | ENSG00000166634 | -3.0305   | 0.99878 | -3.0305     | 0.99878     | 0.99416  |         |  |
|           | 0.16007         | -2.3714   | 0.99114 | 0.16007     | 0.606220124 |          |         |  |
| WDR12     | ENSG00000138442 | 0.95439   | 0.16994 | 0.9941      | 0.16009     | 0.71808  | 0.23635 |  |
|           | 0.38538         | 0.34998   | 0.16009 | 0.606220124 |             |          |         |  |
| RHOA      | ENSG00000067560 | 0.994     | 0.16011 | 0.60695     | 0.27194     | -0.2497  | 0.59859 |  |
|           | 0.69738         | 0.24278   | 0.16011 | 0.606220124 |             |          |         |  |
| SEC63P2   | ENSG00000250416 | 0.99398   | 0.16012 | 0.99398     | 0.16012     | 0.99398  |         |  |
|           | 0.16012         | 0.99398   | 0.16012 | 0.16012     | 0.606220124 |          |         |  |
| RNU6-213P | ENSG00000206778 | 0.9939    | 0.16014 | 0.47485     | 0.31745     | 0.9939   |         |  |
|           | 0.16014         | 0.9939    | 0.16014 | 0.16014     | 0.606220124 |          |         |  |
| GMIP      | ENSG00000089639 | -0.33762  | 0.63217 | -0.050803   | 0.52026     | 0.079636 | 0.46826 |  |
|           | 0.99384         | 0.16015   | 0.16015 | 0.606220124 |             |          |         |  |
| PDE7B     | ENSG00000171408 | 0.99385   | 0.16015 | 0.5636      | 0.28651     | 0.13774  | 0.44522 |  |
|           | 0.0059064       | 0.49764   | 0.16015 | 0.606220124 |             |          |         |  |
| CFL1P1    | ENSG00000223820 | 0.36009   | 0.35939 | 0.19647     | 0.42212     | -0.19395 |         |  |
|           | 0.57689         | 0.99384   | 0.16015 | 0.16015     | 0.606220124 |          |         |  |
| SESN2     | ENSG00000130766 | 0.65935   | 0.25484 | 0.43291     | 0.33254     | 0.99379  | 0.16016 |  |
|           | 0.18098         | 0.42819   | 0.16016 | 0.606220124 |             |          |         |  |
| NA        | ENSG00000272692 | 0.99375   | 0.16017 | 0.36072     | 0.35915     | 0.15868  | 0.43696 |  |
|           | 0.15868         | 0.43696   | 0.16017 | 0.606220124 |             |          |         |  |
| NA        | ENSG00000272814 | 0.99376   | 0.16017 | -0.9402     | 0.82644     | -0.9402  | 0.82644 |  |
|           | -0.9402         | 0.82644   | 0.16017 | 0.606220124 |             |          |         |  |
| RPS23P9   | ENSG00000231586 | -0.070922 | 0.52827 | 0.99369     | 0.16019     | 0.38166  |         |  |
|           | 0.35136         | -0.28971  | 0.61398 | 0.16019     | 0.606248734 |          |         |  |
| ERGIC3    | ENSG00000125991 | 0.17769   | 0.42948 | 0.99351     | 0.16023     | -0.3183  |         |  |
|           | 0.62487         | 0.47476   | 0.31748 | 0.16023     | 0.60634378  |          |         |  |
| AKAP8L    | ENSG00000011243 | 0.38461   | 0.35026 | 0.99348     | 0.16024     | 0.99348  |         |  |
|           | 0.16024         | 0.99348   | 0.16024 | 0.16024     | 0.60634378  |          |         |  |
| NA        | ENSG00000230355 | -0.85591  | 0.80398 | -0.85591    | 0.80398     | 0.99337  | 0.16027 |  |
|           | -0.85591        | 0.80398   | 0.16027 | 0.606400963 |             |          |         |  |
| MFSD12    | ENSG00000161091 | 0.99332   | 0.16028 | -0.32174    | 0.62617     | -0.32174 |         |  |
|           | 0.62617         | -0.32174  | 0.62617 | 0.16028     | 0.606400963 |          |         |  |
| NPIP15    | ENSG00000196436 | 0.99296   | 0.16036 | 0.80737     | 0.20973     | 0.39508  |         |  |
|           | 0.34639         | -0.63078  | 0.73591 | 0.16036     | 0.606656533 |          |         |  |
| KNCN      | ENSG00000162456 | -0.16491  | 0.56549 | -0.16491    | 0.56549     | -0.16491 | 0.56549 |  |
|           | 0.99271         | 0.16042   | 0.16042 | 0.606827129 |             |          |         |  |
| FAM66A    | ENSG00000227888 | 0.88126   | 0.18909 | -0.23526    | 0.593       | 0.99271  | 0.16043 |  |
|           | 0.34866         | 0.36367   | 0.16043 | 0.606827129 |             |          |         |  |
| ZNF285B   | ENSG00000176761 | 0.76738   | 0.22143 | 0.94473     | 0.1724      | 0.99261  |         |  |
|           | 0.16045         | 0.99261   | 0.16045 | 0.16045     | 0.606855674 |          |         |  |
| MCUB      | ENSG00000005059 | -0.48995  | 0.68791 | 0.99243     | 0.16049     | -0.59082 | 0.72268 |  |
|           | -1.0904         | 0.86224   | 0.16049 | 0.606894188 |             |          |         |  |
| TNFSF14   | ENSG00000125735 | -1.2228   | 0.8893  | -1.2228     | 0.8893      | -1.2228  |         |  |
|           | 0.8893          | 0.99246   | 0.16049 | 0.16049     | 0.606894188 |          |         |  |
| NA        | ENSG00000277704 | 0.88379   | 0.18841 | -0.34686    | 0.63565     | -0.43222 | 0.66721 |  |
|           | 0.99241         | 0.1605    | 0.1605  | 0.606894188 |             |          |         |  |
| RN7SKP113 | ENSG00000200761 | -1.0535   | 0.85394 | 0.99235     | 0.16051     | -0.36334 |         |  |
|           | 0.64183         | -1.049    | 0.85292 | 0.16051     | 0.606894188 |          |         |  |
| NA        | ENSG00000206717 | 0.033694  | 0.48656 | 0.99227     | 0.16053     | 0.033694 | 0.48656 |  |
|           | 0.033694        | 0.48656   | 0.16053 | 0.606904158 |             |          |         |  |
| KRT18P64  | ENSG00000213211 | 0.99224   | 0.16054 | 0.99224     | 0.16054     | 0.99224  |         |  |
|           | 0.16054         | 0.99224   | 0.16054 | 0.16054     | 0.606904158 |          |         |  |
| UBTFL2    | ENSG00000234376 | 0.9922    | 0.16055 | 0.9922      | 0.16055     | -1.7537  |         |  |
|           | 0.96026         | -1.4978   | 0.93291 | 0.16055     | 0.606904158 |          |         |  |
| NA        | ENSG00000226375 | 0.99207   | 0.16058 | 0.99207     | 0.16058     | 0.99207  | 0.16058 |  |
|           | 0.99207         | 0.16058   | 0.16058 | 0.606948039 |             |          |         |  |
| NR3C1     | ENSG00000113580 | 0.99195   | 0.16061 | 0.70211     | 0.2413      | 0.14795  | 0.44119 |  |
|           | 0.75802         | 0.22422   | 0.16061 | 0.606948039 |             |          |         |  |
| NA        | ENSG00000255313 | -0.94824  | 0.8285  | -0.42975    | 0.66631     | 0.99193  | 0.16062 |  |
|           | -1.0633         | 0.85619   | 0.16062 | 0.606948039 |             |          |         |  |
| NA        | ENSG00000235308 | 0.99189   | 0.16063 | -0.85019    | 0.80239     | -0.85019 | 0.80239 |  |



|            |                 |          |            |             |             |          |            |  |
|------------|-----------------|----------|------------|-------------|-------------|----------|------------|--|
|            | -1.5552         | 0.94005  | 0.16063    | 0.606948039 |             |          |            |  |
| NA         | ENSG00000271600 | 0.99182  | 0.16064    | 0.99182     | 0.16064     | 0.99182  | 0.16064    |  |
|            | 0.99182         | 0.16064  | 0.16064    | 0.606948039 |             |          |            |  |
| PIK3CD-AS2 | ENSG00000231789 | 0.99179  | 0.16065    | -0.031802   | 0.51269     | 0.76715  |            |  |
|            | 0.2215          | 0.46696  | 0.32027    | 0.16065     | 0.606948039 |          |            |  |
| NA         | ENSG00000275833 | 0.10788  | 0.45704    | -0.84026    | 0.79962     | 0.99175  | 0.16066    |  |
|            | 0.99175         | 0.16066  | 0.16066    | 0.606948039 |             |          |            |  |
| AKR1C2     | ENSG00000151632 | 0.71585  | 0.23704    | 0.90795     | 0.18195     | 0.95148  |            |  |
|            | 0.17068         | 0.99161  | 0.16069    | 0.16069     | 0.606948039 |          |            |  |
| TNFAIP2    | ENSG00000185215 | 0.62279  | 0.26671    | 0.95806     | 0.16902     | 0.99163  |            |  |
|            | 0.16069         | 0.70937  | 0.23905    | 0.16069     | 0.606948039 |          |            |  |
| GMCL2      | ENSG00000244234 | 0.99145  | 0.16073    | 0.99145     | 0.16073     | 0.99145  | 0.16073    |  |
|            | 0.99145         | 0.16073  | 0.16073    | 0.606948039 |             |          |            |  |
| RNU6-431P  | ENSG00000206601 | 0.99135  | 0.16076    | 0.99135     | 0.16076     | 0.99135  |            |  |
|            | 0.16076         | 0.99135  | 0.16076    | 0.16076     | 0.606948039 |          |            |  |
| CTBP2P5    | ENSG00000214602 | 0.99134  | 0.16076    | 0.99134     | 0.16076     | 0.99134  |            |  |
|            | 0.16076         | 0.99134  | 0.16076    | 0.16076     | 0.606948039 |          |            |  |
| LYPD2      | ENSG00000197353 | -0.93649 | 0.82549    | -0.93649    | 0.82549     | -0.11731 | 0.54669    |  |
|            | 0.99131         | 0.16077  | 0.16077    | 0.606948039 |             |          |            |  |
| NA         | ENSG00000277566 | 0.9913   | 0.16077    | 0.9913      | 0.16077     | 0.9913   | 0.16077    |  |
|            | 0.9913          | 0.16077  | 0.16077    | 0.606948039 |             |          |            |  |
| NA         | ENSG00000280198 | 0.99126  | 0.16078    | 0.99126     | 0.16078     | 0.99126  | 0.16078    |  |
|            | 0.99126         | 0.16078  | 0.16078    | 0.606948039 |             |          |            |  |
| DSCAM-IT1  | ENSG00000233756 | -0.10562 | 0.54206    | 0.99113     | 0.16081     | 0.59412  |            |  |
|            | 0.27622         | -0.16169 | 0.56423    | 0.16081     | 0.606948039 |          |            |  |
| NA         | ENSG00000255923 | 0.99109  | 0.16082    | 0.99109     | 0.16082     | 0.99109  | 0.16082    |  |
|            | 0.99109         | 0.16082  | 0.16082    | 0.606948039 |             |          |            |  |
| NA         | ENSG00000254502 | -0.26527 | 0.6046     | -0.26527    | 0.6046      | -0.26527 | 0.6046     |  |
|            | 0.99106         | 0.16083  | 0.16083    | 0.606948039 |             |          |            |  |
| NA         | ENSG00000283384 | 0.32693  | 0.37186    | 0.99106     | 0.16083     | 0.27779  | 0.39059    |  |
|            | -0.57169        | 0.71623  | 0.16083    | 0.606948039 |             |          |            |  |
| RNU6-1214P | ENSG00000200520 | 0.25881  | 0.39789    | 0.58148     | 0.28046     | 0.99092  |            |  |
|            | 0.16086         | 0.99092  | 0.16086    | 0.16086     | 0.606948039 |          |            |  |
| NA         | ENSG00000252802 | 0.99094  | 0.16086    | 0.99094     | 0.16086     | 0.99094  | 0.16086    |  |
|            | 0.99094         | 0.16086  | 0.16086    | 0.606948039 |             |          |            |  |
| GSTK1      | ENSG00000197448 | 0.99089  | 0.16087    | 0.99089     | 0.16087     | 0.99089  | 0.16087    |  |
|            | 0.99089         | 0.16087  | 0.16087    | 0.606948039 |             |          |            |  |
| POU2F3     | ENSG00000137709 | -0.54734 | 0.70793    | 0.19464     | 0.42284     | 0.99085  |            |  |
|            | 0.16088         | -0.34429 | 0.63469    | 0.16088     | 0.606948039 |          |            |  |
| SNRNP27    | ENSG00000124380 | 0.36393  | 0.35796    | 0.5906      | 0.27739     | 0.99077  |            |  |
|            | 0.1609          | 0.90426  | 0.18293    | 0.1609      | 0.606948039 |          |            |  |
| IGFL4      | ENSG00000204869 | 0.99077  | 0.1609     | -0.81695    | 0.79302     | -1.1187  | 0.86836    |  |
|            | 0.29995         | 0.38211  | 0.1609     | 0.606948039 |             |          |            |  |
| DIAPH3-AS2 | ENSG00000223815 | 0.99076  | 0.1609     | 0.99076     | 0.1609      | 0.99076  |            |  |
|            | 0.1609          | 0.99076  | 0.1609     | 0.1609      | 0.606948039 |          |            |  |
| NA         | ENSG00000258653 | 0.99069  | 0.16092    | 0.99069     | 0.16092     | 0.99069  | 0.16092    |  |
|            | 0.99069         | 0.16092  | 0.16092    | 0.606948039 |             |          |            |  |
| NA         | ENSG00000248560 | 0.99066  | 0.16093    | 0.8505      | 0.19752     | 0.99066  | 0.16093    |  |
|            | 0.99066         | 0.16093  | 0.16093    | 0.606948039 |             |          |            |  |
| NANOGP5    | ENSG00000231697 | -0.18474 | 0.57328    | -0.18474    | 0.57328     | -0.18474 |            |  |
|            | 0.57328         | 0.9906   | 0.16094    | 0.16094     | 0.606948039 |          |            |  |
| GRTP1      | ENSG00000139835 | -1.5373  | 0.93789    | 0.99058     | 0.16095     | -0.19468 | 0.57718    |  |
|            | -1.0108         | 0.84395  | 0.16095    | 0.606948039 |             |          |            |  |
| NA         | ENSG00000243018 | 0.99051  | 0.16096    | 0.34042     | 0.36677     | 0.99051  | 0.16096    |  |
|            | 0.99051         | 0.16096  | 0.16096    | 0.606948039 |             |          |            |  |
| NA         | ENSG00000279288 | 0.99039  | 0.16099    | -0.847      | 0.8015      | -1.6211  | 0.9475     |  |
|            | -1.3247         | 0.90737  | 0.16099    | 0.606948039 |             |          |            |  |
| DCDC2      | ENSG00000146038 | 0.99036  | 0.16106814 | 0.24781     | -0.25946    | 0.60236  |            |  |
|            | 0.73539         | 0.23105  | 0.16106814 | 0.606948039 |             |          |            |  |
| LUC7L2     | ENSG00000146963 | 0.42886  | 0.33401    | 0.82653     | 0.20425     | 0.99035  | 0.161      |  |
|            | 0.43406         | 0.33212  | 0.16106814 | 0.606948039 |             |          |            |  |
| NA         | ENSG00000268582 | 0.30831  | 0.37892    | 0.99035     | 0.16106814  | 0.99035  | 0.16106814 |  |

|           |                 |            |             |             |             |           |         |  |
|-----------|-----------------|------------|-------------|-------------|-------------|-----------|---------|--|
|           | 0.161           | 0.161      | 0.606948039 |             |             |           |         |  |
| NA        | ENSG00000279123 | -0.32082   | 0.62583     | 0.99031     | 0.16101     | 0.99031   | 0.16101 |  |
|           | 0.99031         | 0.16101    | 0.16101     | 0.606948039 |             |           |         |  |
| HIPK3     | ENSG00000110422 | -0.21482   | 0.58505     | 0.51329     | 0.30387     | -0.25285  | 0.59981 |  |
|           | 0.99021         | 0.16104    | 0.16104     | 0.606967888 |             |           |         |  |
| CEP192    | ENSG00000101639 | 0.56439    | 0.28624     | 0.99012     | 0.16106     | -0.034489 |         |  |
|           | 0.51376         | -0.19825   | 0.57858     | 0.16106     | 0.606967888 |           |         |  |
| JPH1      | ENSG00000104369 | -0.53656   | 0.70421     | -0.12796    | 0.55091     | -1.003    | 0.84206 |  |
|           | 0.99002         | 0.16108    | 0.16108     | 0.606967888 |             |           |         |  |
| CHST12    | ENSG00000136213 | -0.22592   | 0.58937     | 0.49936     | 0.30876     | 0.99003   |         |  |
|           | 0.16108         | -0.99633   | 0.84045     | 0.16108     | 0.606967888 |           |         |  |
| CBX6      | ENSG00000183741 | -0.62988   | 0.73561     | 0.036202    | 0.48556     | 0.98997   | 0.16109 |  |
|           | -0.20881        | 0.5827     | 0.16109     | 0.606967888 |             |           |         |  |
| NA        | ENSG00000202001 | 0.98998    | 0.16109     | 0.98998     | 0.16109     | 0.98998   | 0.16109 |  |
|           | -0.62488        | 0.73397    | 0.16109     | 0.606967888 |             |           |         |  |
| RNU6-4P   | ENSG00000206932 | 0.16839    | 0.43314     | -0.024834   | 0.50991     | 0.9898    |         |  |
|           | 0.16114         | -1.1048    | 0.86537     | 0.16114     | 0.606969303 |           |         |  |
| NA        | ENSG00000260072 | 0.98975    | 0.16115     | -0.54198    | 0.70608     | -0.18982  | 0.57528 |  |
|           | 0.45022         | 0.32628    | 0.16115     | 0.606969303 |             |           |         |  |
| NA        | ENSG00000249746 | 0.98966    | 0.16117     | 0.98966     | 0.16117     | 0.98966   | 0.16117 |  |
|           | 0.98966         | 0.16117    | 0.16117     | 0.606969303 |             |           |         |  |
| TEKT5     | ENSG00000153060 | 0.040925   | 0.48368     | 0.98949     | 0.16121     | 0.20567   | 0.41853 |  |
|           | 0.66128         | 0.25422    | 0.16121     | 0.606969303 |             |           |         |  |
| MTCYBP13  | ENSG00000266529 | 0.98946    | 0.16122     | 0.80014     | 0.21182     | 0.80014   |         |  |
|           | 0.21182         | 0.80014    | 0.21182     | 0.16122     | 0.606969303 |           |         |  |
| MSANTD2P1 | ENSG00000231058 | 0.98937    | 0.16124     | 0.98937     | 0.16124     | 0.98937   |         |  |
|           | 0.16124         | 0.98937    | 0.16124     | 0.16124     | 0.606969303 |           |         |  |
| RPS7P3    | ENSG00000231940 | 0.55104    | 0.2908      | 0.55104     | 0.2908      | 0.55104   |         |  |
|           | 0.2908          | 0.98932    | 0.16125     | 0.16125     | 0.606969303 |           |         |  |
| NA        | ENSG00000275720 | -0.32792   | 0.62851     | 0.033355    | 0.4867      | 0.98935   | 0.16125 |  |
|           | -0.70847        | 0.76067    | 0.16125     | 0.606969303 |             |           |         |  |
| NA        | ENSG00000267250 | -0.0058991 | 0.50235     | -0.88914    | 0.81304     | 0.98922   | 0.16128 |  |
|           | -1.2432         | 0.89311    | 0.16128     | 0.606969303 |             |           |         |  |
| H1-10-AS1 | ENSG00000206417 | -1.0059    | 0.84276     | -1.0059     | 0.84276     | -1.0059   |         |  |
|           | 0.84276         | 0.98919    | 0.16129     | 0.16129     | 0.606969303 |           |         |  |
| PIPSL     | ENSG00000180764 | -1.9418    | 0.97392     | -0.99992    | 0.84133     | -0.26525  | 0.60459 |  |
|           | 0.98914         | 0.1613     | 0.1613      | 0.606969303 |             |           |         |  |
| NA        | ENSG00000272719 | -0.25314   | 0.59992     | -0.25314    | 0.59992     | 0.98911   | 0.1613  |  |
|           | -1.0153         | 0.84502    | 0.1613      | 0.606969303 |             |           |         |  |
| NA        | ENSG00000226836 | 0.98903    | 0.16132     | 0.98903     | 0.16132     | 0.98903   | 0.16132 |  |
|           | -0.16126        | 0.56406    | 0.16132     | 0.606969303 |             |           |         |  |
| NA        | ENSG00000267466 | -0.24741   | 0.59771     | -0.37545    | 0.64634     | -0.19305  | 0.57654 |  |
|           | 0.98904         | 0.16132    | 0.16132     | 0.606969303 |             |           |         |  |
| RNA5SP162 | ENSG00000251823 | 0.98902    | 0.16133     | 0.98902     | 0.16133     | 0.98902   |         |  |
|           | 0.16133         | 0.98902    | 0.16133     | 0.16133     | 0.606969303 |           |         |  |
| NA        | ENSG00000224739 | 0.98893    | 0.16135     | 0.46071     | 0.3225      | -0.48962  | 0.6878  |  |
|           | -0.61895        | 0.73203    | 0.16135     | 0.606969303 |             |           |         |  |
| RN7SL617P | ENSG00000241162 | 0.98892    | 0.16135     | 0.98892     | 0.16135     | 0.98892   |         |  |
|           | 0.16135         | 0.98892    | 0.16135     | 0.16135     | 0.606969303 |           |         |  |
| NDUFC1    | ENSG00000109390 | 0.4006     | 0.34436     | 0.28817     | 0.38661     | 0.98886   |         |  |
|           | 0.16137         | 0.74145    | 0.22921     | 0.16137     | 0.606969303 |           |         |  |
| RPL5P20   | ENSG00000218643 | -0.60066   | 0.72597     | -0.60066    | 0.72597     | -0.60066  |         |  |
|           | 0.72597         | 0.98884    | 0.16137     | 0.16137     | 0.606969303 |           |         |  |
| RNA5SP402 | ENSG00000252957 | 0.23562    | 0.40686     | -0.44105    | 0.67041     | 0.67971   |         |  |
|           | 0.24834         | 0.98871    | 0.1614      | 0.1614      | 0.606969303 |           |         |  |
| PLB1      | ENSG00000163803 | -0.089397  | 0.53562     | 0.899       | 0.18433     | -0.021557 | 0.5086  |  |
|           | 0.98868         | 0.16141    | 0.16141     | 0.606969303 |             |           |         |  |
| TRAV38-1  | ENSG00000211816 | 0.98862    | 0.16143     | 0.98862     | 0.16143     | 0.98862   |         |  |
|           | 0.16143         | 0.98862    | 0.16143     | 0.16143     | 0.606969303 |           |         |  |
| MRFAP1    | ENSG00000179010 | -0.27636   | 0.60886     | 0.98845     | 0.16147     | -1.0971   |         |  |
|           | 0.8637          | -1.0971    | 0.8637      | 0.16147     | 0.606969303 |           |         |  |
| BCL7C     | ENSG00000099385 | 0.98832    | 0.1615      | 0.11865     | 0.45278     | 0.59134   | 0.27715 |  |

|            |                 |            |         |             |             |          |         |  |
|------------|-----------------|------------|---------|-------------|-------------|----------|---------|--|
|            | 0.49365         | 0.31078    | 0.1615  | 0.606969303 |             |          |         |  |
| CD2AP      | ENSG00000198087 | 0.98829    | 0.1615  | -0.053112   | 0.52118     | -0.64804 | 0.74152 |  |
|            | -0.097863       | 0.53898    | 0.1615  | 0.606969303 |             |          |         |  |
| LINC01497  | ENSG00000237560 | 0.98829    | 0.1615  | 0.98829     | 0.1615      | 0.98829  |         |  |
|            | 0.1615          | 0.98829    | 0.1615  | 0.1615      | 0.606969303 |          |         |  |
| NA         | ENSG00000273478 | 0.98833    | 0.1615  | 0.98554     | 0.16218     | 0.82809  | 0.20381 |  |
|            | 0.82809         | 0.20381    | 0.1615  | 0.606969303 |             |          |         |  |
| PCYOX1     | ENSG00000116005 | 0.35769    | 0.36029 | 0.35769     | 0.36029     | 0.094937 |         |  |
|            | 0.46218         | 0.98827    | 0.16151 | 0.16151     | 0.606969303 |          |         |  |
| GPR160P2   | ENSG00000265863 | 0.98818    | 0.16153 | 0.98818     | 0.16153     | 0.98818  |         |  |
|            | 0.16153         | 0.98818    | 0.16153 | 0.16153     | 0.606969303 |          |         |  |
| NA         | ENSG00000273151 | 0.53379    | 0.29674 | 0.98815     | 0.16154     | 0.5531   | 0.2901  |  |
|            | 0.5531          | 0.2901     | 0.16154 | 0.606969303 |             |          |         |  |
| DSG1       | ENSG00000134760 | 0.98813    | 0.16155 | 0.98813     | 0.16155     | 0.98813  | 0.16155 |  |
|            | 0.7946          | 0.21342    | 0.16155 | 0.606969303 |             |          |         |  |
| FAM193B    | ENSG00000146067 | -0.59815   | 0.72513 | 0.9881      | 0.16155     | 0.79028  |         |  |
|            | 0.21468         | -0.60288   | 0.72671 | 0.16155     | 0.606969303 |          |         |  |
| RPL31P17   | ENSG00000235225 | 0.98809    | 0.16155 | 0.12141     | 0.45168     | -0.9097  |         |  |
|            | 0.81851         | 0.12141    | 0.45168 | 0.16155     | 0.606969303 |          |         |  |
| NA         | ENSG00000257355 | 0.98808    | 0.16156 | 0.31686     | 0.37567     | 0.31686  | 0.37567 |  |
|            | 0.31686         | 0.37567    | 0.16156 | 0.606969303 |             |          |         |  |
| MYO1G      | ENSG00000136286 | 0.98802    | 0.16157 | 0.8133      | 0.20802     | 0.28011  | 0.3897  |  |
|            | -1.2236         | 0.88944    | 0.16157 | 0.606969303 |             |          |         |  |
| RFFL       | ENSG00000092871 | -1.729     | 0.9581  | -0.067113   | 0.52675     | 0.98797  | 0.16158 |  |
|            | -1.516          | 0.93524    | 0.16158 | 0.606969303 |             |          |         |  |
| FLYWCH1    | ENSG00000059122 | -0.32014   | 0.62557 | 0.98791     | 0.1616      | 0.93354  |         |  |
|            | 0.17527         | 0.22807    | 0.4098  | 0.1616      | 0.606969303 |          |         |  |
| ACVR2A     | ENSG00000121989 | -0.19237   | 0.57627 | -0.13364    | 0.55316     | 0.98788  |         |  |
|            | 0.16161         | 0.75143    | 0.2262  | 0.16161     | 0.606969303 |          |         |  |
| FKBP2      | ENSG00000173486 | 0.86362    | 0.1939  | 0.86362     | 0.1939      | 0.98785  | 0.16161 |  |
|            | 0.98785         | 0.16161    | 0.16161 | 0.606969303 |             |          |         |  |
| A1CF       | ENSG00000148584 | 0.4795     | 0.31579 | 0.6125      | 0.2701      | 0.6125   | 0.2701  |  |
|            | 0.98782         | 0.16162    | 0.16162 | 0.606969303 |             |          |         |  |
| NA         | ENSG00000227907 | 0.98776    | 0.16164 | 0.094633    | 0.4623      | 0.55263  | 0.29026 |  |
|            | 0.55263         | 0.29026    | 0.16164 | 0.606969303 |             |          |         |  |
| HNRNPA3P13 | ENSG00000250826 | 0.98772    | 0.16164 | -1.2978     | 0.90282     | 0.35396  |         |  |
|            | 0.36168         | 0.39076    | 0.34799 | 0.16164     | 0.606969303 |          |         |  |
| DDB1       | ENSG00000167986 | -0.0025422 | 0.50101 | 0.43228     | 0.33277     | 0.98772  | 0.16165 |  |
|            | -0.0051952      | 0.50207    | 0.16165 | 0.606969303 |             |          |         |  |
| NA         | ENSG00000279125 | 0.98766    | 0.16166 | 0.18523     | 0.42652     | 0.18523  | 0.42652 |  |
|            | 0.59903         | 0.27458    | 0.16166 | 0.606969303 |             |          |         |  |
| SIRPG      | ENSG00000089012 | -0.045751  | 0.51825 | 0.21624     | 0.4144      | 0.98753  | 0.16169 |  |
|            | -0.25464        | 0.6005     | 0.16169 | 0.606969303 |             |          |         |  |
| DLGAP4     | ENSG00000080845 | -0.38242   | 0.64892 | -0.32284    | 0.62659     | -0.87957 |         |  |
|            | 0.81045         | 0.98751    | 0.1617  | 0.1617      | 0.606969303 |          |         |  |
| MPPE1      | ENSG00000154889 | -0.09838   | 0.53918 | 0.98746     | 0.16171     | -0.39735 | 0.65445 |  |
|            | -0.13822        | 0.55497    | 0.16171 | 0.606969303 |             |          |         |  |
| MTCO3P1    | ENSG00000235040 | 0.78993    | 0.21479 | 0.96383     | 0.16757     | 0.94753  |         |  |
|            | 0.17169         | 0.98741    | 0.16172 | 0.16172     | 0.606969303 |          |         |  |
| NA         | ENSG00000248738 | 0.98729    | 0.16175 | 0.61006     | 0.27091     | 0.50994  | 0.30505 |  |
|            | 0.6641          | 0.25331    | 0.16175 | 0.606969303 |             |          |         |  |
| IL25       | ENSG00000166090 | 0.554      | 0.28979 | 0.81518     | 0.20748     | 0.98727  | 0.16176 |  |
|            | -0.25482        | 0.60057    | 0.16176 | 0.606969303 |             |          |         |  |
| SETP9      | ENSG00000235101 | 0.79765    | 0.21254 | 0.98725     | 0.16176     | 0.93893  | 0.17388 |  |
|            | 0.95008         | 0.17103    | 0.16176 | 0.606969303 |             |          |         |  |
| NWD2       | ENSG00000174145 | 0.98719    | 0.16177 | 0.29459     | 0.38415     | 0.15085  | 0.44005 |  |
|            | 0.76901         | 0.22094    | 0.16177 | 0.606969303 |             |          |         |  |
| ADH7       | ENSG00000196344 | -0.2819    | 0.61099 | 0.75228     | 0.22594     | 0.93581  | 0.17469 |  |
|            | 0.98721         | 0.16177    | 0.16177 | 0.606969303 |             |          |         |  |
| NA         | ENSG00000230928 | 0.98716    | 0.16178 | 0.98716     | 0.16178     | 0.98716  | 0.16178 |  |
|            | 0.98716         | 0.16178    | 0.16178 | 0.606969303 |             |          |         |  |
| CGNL1      | ENSG00000128849 | 0.40444    | 0.34294 | 0.27543     | 0.39149     | 0.98705  | 0.16181 |  |

|           |                 |           |             |             |             |          |         |       |
|-----------|-----------------|-----------|-------------|-------------|-------------|----------|---------|-------|
|           | -0.80119        | 0.78849   | 0.16181     | 0.606969303 |             |          |         |       |
| CRTC3     | ENSG00000140577 | 0.27229   | 0.3927      | -0.40728    | 0.6581      | 0.98705  | 0.16181 |       |
|           | 0.29456         | 0.38416   | 0.16181     | 0.606969303 |             |          |         |       |
| NA        | ENSG00000266840 | 0.98688   | 0.16185     | 0.77549     | 0.21902     | 0.29684  | 0.3833  |       |
|           | 0.78325         | 0.21674   | 0.16185     | 0.606969303 |             |          |         |       |
| OR6E1P    | ENSG00000235213 | 0.98684   | 0.16186     | 0.69977     | 0.24204     | 0.72878  |         |       |
|           | 0.23307         | 0.72878   | 0.23307     | 0.16186     | 0.606969303 |          |         |       |
| HMG2P9    | ENSG00000180150 | 0.98681   | 0.16187     | 0.34458     | 0.36521     | -0.86635 |         |       |
|           | 0.80685         | 0.34458   | 0.36521     | 0.16187     | 0.606969303 |          |         |       |
| NA        | ENSG00000281706 | 0.98679   | 0.16187     | -0.48256    | 0.68529     | -0.35194 | 0.63756 |       |
|           | 0.98679         | 0.16187   | 0.16187     | 0.606969303 |             |          |         |       |
| LY6E      | ENSG00000160932 | 0.63576   | 0.26246     | 0.63576     | 0.26246     | 0.98677  | 0.16188 |       |
|           | 0.74816         | 0.22718   | 0.16188     | 0.606969303 |             |          |         |       |
| LHFPL5    | ENSG00000197753 | -0.038195 | 0.51523     | 0.53524     | 0.29624     | 0.98672  |         |       |
|           | 0.16189         | 0.80438   | 0.21059     | 0.16189     | 0.606969303 |          |         |       |
| NA        | ENSG00000250315 | 0.98672   | 0.16189     | 0.21596     | 0.41451     | 0.21596  | 0.41451 |       |
|           | 0.21596         | 0.41451   | 0.16189     | 0.606969303 |             |          |         |       |
| NA        | ENSG00000229878 | 0.9867    | 0.1619      | 0.9867      | 0.1619      | 0.9867   | 0.1619  |       |
|           | 0.9867          | 0.1619    | 0.1619      | 0.606969303 |             |          |         |       |
| PCAT4     | ENSG00000251321 | 0.98668   | 0.1619      | 0.4185      | 0.33779     | 0.31726  | 0.37552 |       |
|           | 0.31726         | 0.37552   | 0.1619      | 0.606969303 |             |          |         |       |
| NA        | ENSG00000224469 | -1.37     | 0.91466     | 0.98657     | 0.16193     | 0.98034  | 0.16346 | -1.37 |
|           | 0.91466         | 0.16193   | 0.606988377 |             |             |          |         |       |
| NA        | ENSG00000256540 | -0.28966  | 0.61396     | 0.98656     | 0.16193     | 0.98656  | 0.16193 |       |
|           | 0.98656         | 0.16193   | 0.16193     | 0.606988377 |             |          |         |       |
| RAB1F     | ENSG00000183155 | 0.98637   | 0.16197     | 0.98637     | 0.16197     | -0.43285 | 0.66744 |       |
|           | 0.19685         | 0.42197   | 0.16197     | 0.607035715 |             |          |         |       |
| MIR599    | ENSG00000207804 | 0.98635   | 0.16198     | 0.98635     | 0.16198     | 0.98635  |         |       |
|           | 0.16198         | 0.98635   | 0.16198     | 0.16198     | 0.607035715 |          |         |       |
| MIR875    | ENSG00000216069 | 0.98635   | 0.16198     | 0.98635     | 0.16198     | 0.98635  |         |       |
|           | 0.16198         | 0.98635   | 0.16198     | 0.16198     | 0.607035715 |          |         |       |
| NA        | ENSG00000176349 | 0.2263    | 0.41048     | 0.57435     | 0.28287     | 0.98628  | 0.162   |       |
|           | 0.7496          | 0.22675   | 0.162       | 0.607045564 |             |          |         |       |
| HERC2P4   | ENSG00000230267 | 0.78997   | 0.21477     | 0.85641     | 0.19589     | 0.87687  |         |       |
|           | 0.19028         | 0.98625   | 0.16201     | 0.16201     | 0.607045564 |          |         |       |
| NA        | ENSG00000227155 | 0.60853   | 0.27142     | 0.60853     | 0.27142     | 0.60853  | 0.27142 |       |
|           | 0.98621         | 0.16202   | 0.16202     | 0.607045564 |             |          |         |       |
| NA        | ENSG00000266400 | 0.92146   | 0.1784      | 0.98603     | 0.16206     | -1.1529  | 0.87552 |       |
|           | -1.3783         | 0.91595   | 0.16206     | 0.607139537 |             |          |         |       |
| XIRP2-AS1 | ENSG00000254552 | 0.98599   | 0.16207     | -1.2744     | 0.89874     | -0.95951 |         |       |
|           | 0.83135         | -0.95951  | 0.83135     | 0.16207     | 0.607139537 |          |         |       |
| TAL1      | ENSG00000162367 | 0.75807   | 0.2242      | 0.75807     | 0.2242      | 0.98571  | 0.16214 |       |
|           | -0.53708        | 0.70439   | 0.16214     | 0.607234063 |             |          |         |       |
| NA        | ENSG00000231675 | 0.98569   | 0.16214     | 0.15588     | 0.43806     | 0.98569  | 0.16214 |       |
|           | 0.98569         | 0.16214   | 0.16214     | 0.607234063 |             |          |         |       |
| NLRP3     | ENSG00000162711 | 0.11275   | 0.45511     | -0.13193    | 0.55248     | 0.77833  | 0.21819 |       |
|           | 0.98559         | 0.16217   | 0.16217     | 0.607234063 |             |          |         |       |
| RNU6-302P | ENSG00000202119 | 0.98557   | 0.16217     | 0.98557     | 0.16217     | 0.98557  |         |       |
|           | 0.16217         | 0.98557   | 0.16217     | 0.16217     | 0.607234063 |          |         |       |
| LINC02106 | ENSG00000251573 | 0.98557   | 0.16217     | 0.98557     | 0.16217     | 0.98557  |         |       |
|           | 0.16217         | 0.98557   | 0.16217     | 0.16217     | 0.607234063 |          |         |       |
| BRWD1P2   | ENSG00000258290 | -0.46069  | 0.67749     | 0.80334     | 0.21089     | 0.98557  |         |       |
|           | 0.16217         | 0.98557   | 0.16217     | 0.16217     | 0.607234063 |          |         |       |
| CEMIP2    | ENSG00000135048 | -0.55828  | 0.71167     | 0.98551     | 0.16219     | 0.44695  |         |       |
|           | 0.32745         | 0.876     | 0.19051     | 0.16219     | 0.607238702 |          |         |       |
| NA        | ENSG00000269779 | -1.4275   | 0.92329     | -1.3614     | 0.91331     | -0.13277 | 0.55281 |       |
|           | 0.98541         | 0.16221   | 0.16221     | 0.607238702 |             |          |         |       |
| MIR10B    | ENSG00000207744 | 0.9321    | 0.17564     | -0.133      | 0.5529      | 0.9853   |         |       |
|           | 0.16224         | 0.9853    | 0.16224     | 0.16224     | 0.607238702 |          |         |       |
| AJUBA     | ENSG00000129474 | 0.28993   | 0.38593     | 0.22191     | 0.41219     | 0.98524  | 0.16225 |       |
|           | 0.3846          | 0.35027   | 0.16225     | 0.607238702 |             |          |         |       |
| TEX46     | ENSG00000227868 | 0.60912   | 0.27122     | 0.98516     | 0.16227     | 0.64207  | 0.26041 |       |

|             |                 |           |         |             |             |           |         |  |
|-------------|-----------------|-----------|---------|-------------|-------------|-----------|---------|--|
|             | 0.64207         | 0.26041   | 0.16227 | 0.607238702 |             |           |         |  |
| ELMOD1      | ENSG00000110675 | 0.76462   | 0.22225 | 0.027773    | 0.48892     | 0.98506   |         |  |
|             | 0.1623          | 0.55527   | 0.28935 | 0.1623      | 0.607238702 |           |         |  |
| NA          | ENSG00000236391 | -0.24398  | 0.59638 | -0.033737   | 0.51346     | 0.98493   | 0.16233 |  |
|             | -0.13533        | 0.55382   | 0.16233 | 0.607238702 |             |           |         |  |
| FABP5P6     | ENSG00000249919 | 0.98493   | 0.16233 | 0.98493     | 0.16233     | 0.98493   |         |  |
|             | 0.16233         | 0.98493   | 0.16233 | 0.607238702 |             |           |         |  |
| GRIP2       | ENSG00000144596 | 0.15796   | 0.43724 | -1.4267     | 0.92317     | 0.67929   | 0.24848 |  |
|             | 0.98489         | 0.16234   | 0.16234 | 0.607238702 |             |           |         |  |
| ATP11AUN    | ENSG00000197595 | 0.9849    | 0.16234 | -0.40907    | 0.65876     | -0.39353  |         |  |
|             | 0.65303         | 0.0027182 | 0.49892 | 0.16234     | 0.607238702 |           |         |  |
| TOM1        | ENSG00000100284 | 0.98483   | 0.16235 | -0.44635    | 0.67233     | 0.7663    | 0.22175 |  |
|             | 0.60187         | 0.27363   | 0.16235 | 0.607238702 |             |           |         |  |
| ADA2        | ENSG00000093072 | 0.25206   | 0.4005  | 0.45708     | 0.32381     | -0.74635  | 0.77227 |  |
|             | 0.9848          | 0.16236   | 0.16236 | 0.607238702 |             |           |         |  |
| NA          | ENSG00000250762 | 0.98481   | 0.16236 | 0.98481     | 0.16236     | 0.98481   | 0.16236 |  |
|             | 0.98481         | 0.16236   | 0.16236 | 0.607238702 |             |           |         |  |
| MTCO1P11    | ENSG00000224083 | 0.98477   | 0.16237 | 0.98477     | 0.16237     | 0.98477   |         |  |
|             | 0.16237         | 0.98477   | 0.16237 | 0.607238702 |             |           |         |  |
| NA          | ENSG00000251293 | 0.98473   | 0.16238 | 0.98473     | 0.16238     | 0.98473   | 0.16238 |  |
|             | -0.70623        | 0.75998   | 0.16238 | 0.607238702 |             |           |         |  |
| PIEZO1P1    | ENSG00000233686 | 0.32439   | 0.37282 | 0.46518     | 0.3209      | 0.98465   |         |  |
|             | 0.1624          | 0.46518   | 0.3209  | 0.1624      | 0.607238702 |           |         |  |
| RN7SL750P   | ENSG00000263672 | 0.98463   | 0.1624  | 0.98463     | 0.1624      | 0.98463   |         |  |
|             | 0.1624          | 0.98463   | 0.1624  | 0.607238702 |             |           |         |  |
| DIPK1A      | ENSG00000154511 | 0.94908   | 0.17129 | 0.98444     | 0.16245     | 0.43039   |         |  |
|             | 0.33346         | 0.80036   | 0.21175 | 0.16245     | 0.607238702 |           |         |  |
| FGF14       | ENSG00000102466 | 0.98439   | 0.16246 | -0.091704   | 0.53653     | 0.60448   | 0.27276 |  |
|             | 0.50827         | 0.30563   | 0.16246 | 0.607238702 |             |           |         |  |
| KDM8        | ENSG00000155666 | -1.5487   | 0.93927 | -2.405      | 0.99191     | -1.5487   | 0.93927 |  |
|             | 0.98441         | 0.16246   | 0.16246 | 0.607238702 |             |           |         |  |
| C1QTNF1-AS1 | ENSG00000265096 | 0.98437   | 0.16247 | 0.98437     | 0.16247     | 0.98437   |         |  |
|             | 0.16247         | 0.98437   | 0.16247 | 0.607238702 |             |           |         |  |
| PLEKHN1     | ENSG00000187583 | 0.98432   | 0.16248 | -0.10705    | 0.54263     | 0.23415   |         |  |
|             | 0.40743         | -0.27828  | 0.6096  | 0.16248     | 0.607238702 |           |         |  |
| NA          | ENSG00000276790 | 0.98432   | 0.16248 | 0.98432     | 0.16248     | 0.98432   | 0.16248 |  |
|             | 0.98432         | 0.16248   | 0.16248 | 0.607238702 |             |           |         |  |
| SUCLG1      | ENSG00000163541 | 0.02113   | 0.49157 | 0.98428     | 0.16249     | -0.08414  |         |  |
|             | 0.53353         | -1.254    | 0.89508 | 0.16249     | 0.607238702 |           |         |  |
| RPS9        | ENSG00000170889 | 0.98429   | 0.16249 | 0.98429     | 0.16249     | 0.98429   | 0.16249 |  |
|             | 0.98429         | 0.16249   | 0.16249 | 0.607238702 |             |           |         |  |
| MTCO1P2     | ENSG00000259045 | -0.079228 | 0.53157 | 0.52158     | 0.30098     | -0.079228 |         |  |
|             | 0.53157         | 0.98419   | 0.16251 | 0.16251     | 0.607238702 |           |         |  |
| NA          | ENSG00000261337 | 0.98406   | 0.16254 | 0.98406     | 0.16254     | 0.98406   | 0.16254 |  |
|             | 0.98406         | 0.16254   | 0.16254 | 0.607238702 |             |           |         |  |
| ZCCHC17     | ENSG00000121766 | 0.48004   | 0.3156  | -0.24187    | 0.59556     | 0.98403   |         |  |
|             | 0.16255         | -0.16668  | 0.56619 | 0.16255     | 0.607238702 |           |         |  |
| NA          | ENSG00000250869 | 0.98399   | 0.16256 | 0.98399     | 0.16256     | 0.98399   | 0.16256 |  |
|             | 0.98399         | 0.16256   | 0.16256 | 0.607238702 |             |           |         |  |
| NA          | ENSG00000261482 | 0.98399   | 0.16256 | 0.98399     | 0.16256     | 0.98399   | 0.16256 |  |
|             | 0.98399         | 0.16256   | 0.16256 | 0.607238702 |             |           |         |  |
| ANKRD60     | ENSG00000124227 | 0.090132  | 0.46409 | -0.48252    | 0.68528     | -0.71391  |         |  |
|             | 0.76236         | 0.98393   | 0.16257 | 0.16257     | 0.607238702 |           |         |  |
| RNU6-804P   | ENSG00000207013 | 0.63553   | 0.26254 | -0.55877    | 0.71184     | 0.98394   |         |  |
|             | 0.16257         | 0.63553   | 0.26254 | 0.16257     | 0.607238702 |           |         |  |
| RNA5SP465   | ENSG00000212497 | 0.6812    | 0.24787 | 0.89269     | 0.18601     | 0.27297   |         |  |
|             | 0.39244         | 0.98375   | 0.16262 | 0.16262     | 0.607360503 |           |         |  |
| NA          | ENSG00000250383 | 0.98367   | 0.16264 | 0.98367     | 0.16264     | 0.60705   | 0.27191 |  |
|             | 0.98367         | 0.16264   | 0.16264 | 0.607360503 |             |           |         |  |
| NA          | ENSG00000254971 | 0.98365   | 0.16264 | 0.98365     | 0.16264     | 0.98365   | 0.16264 |  |
|             | 0.98365         | 0.16264   | 0.16264 | 0.607360503 |             |           |         |  |
| LINC02770   | ENSG00000228215 | 0.9835    | 0.16268 | 0.26265     | 0.39641     | 0.26265   |         |  |

|            |                 |            |         |             |             |            |         |
|------------|-----------------|------------|---------|-------------|-------------|------------|---------|
|            | 0.39641         | 0.26265    | 0.39641 | 0.16268     | 0.607361584 |            |         |
| SIGLEC22P  | ENSG00000268849 | 0.88549    | 0.18795 | 0.18795     | 0.98346     | 0.16269    | 0.88549 |
|            | 0.18795         | 0.88549    | 0.18795 | 0.16269     | 0.607361584 |            |         |
| PAXIP1-AS2 | ENSG00000214106 | 0.73327    | 0.2317  | 0.2317      | 0.98338     | 0.16271    | 0.67472 |
|            | 0.24993         | 0.16639    | 0.43392 | 0.16271     | 0.607361584 |            |         |
| NA         | ENSG00000259351 | -0.37803   | 0.6473  | 0.98338     | 0.16271     | 0.98338    | 0.16271 |
|            | 0.98338         | 0.16271    | 0.16271 | 0.607361584 |             |            |         |
| TULP4      | ENSG00000130338 | 0.91255    | 0.18074 | 0.98334     | 0.16272     | 0.62426    | 0.26623 |
|            | 0.43617         | 0.33136    | 0.16272 | 0.607361584 |             |            |         |
| BOLA3P2    | ENSG00000267332 | 0.21407    | 0.41525 | -0.40219    | 0.65623     | 0.98334    |         |
|            | 0.16272         | 0.38275    | 0.35095 | 0.16272     | 0.607361584 |            |         |
| NA         | ENSG00000253508 | -0.25732   | 0.60154 | -0.37209    | 0.64509     | 0.9833     | 0.16273 |
|            | 0.9833          | 0.16273    | 0.16273 | 0.607361584 |             |            |         |
| BST1       | ENSG00000109743 | 0.98327    | 0.16274 | 0.073051    | 0.47088     | 0.54912    | 0.29146 |
|            | -0.16833        | 0.56684    | 0.16274 | 0.607361584 |             |            |         |
| CSTF3-DT   | ENSG00000247151 | 0.97531    | 0.1647  | 0.98296     | 0.16281     | 0.98296    |         |
|            | 0.16281         | 0.98296    | 0.16281 | 0.16281     | 0.607548672 |            |         |
| NA         | ENSG00000253288 | -0.39733   | 0.65444 | -0.71584    | 0.76296     | -1.9053    | 0.97163 |
|            | 0.98288         | 0.16283    | 0.16283 | 0.607548672 |             |            |         |
| C11orf97   | ENSG00000257057 | -0.017086  | 0.50682 | 0.98286     | 0.16284     | 0.98286    |         |
|            | 0.16284         | -0.11498   | 0.54577 | 0.16284     | 0.607548672 |            |         |
| VN1R92P    | ENSG00000268908 | 0.98286    | 0.16284 | 0.80503     | 0.2104      | 0.52197    |         |
|            | 0.30085         | 0.98286    | 0.16284 | 0.16284     | 0.607548672 |            |         |
| SNHG26     | ENSG00000228649 | 0.98272    | 0.16287 | 0.71291     | 0.23795     | 0.00025766 |         |
|            | 0.4999          | 0.00025766 | 0.4999  | 0.16287     | 0.60759566  |            |         |
| YTHDF2     | ENSG00000198492 | 0.86334    | 0.19397 | 0.98265     | 0.16289     | 0.061987   |         |
|            | 0.47529         | 0.0052361  | 0.49791 | 0.16289     | 0.60759566  |            |         |
| NA         | ENSG00000261028 | 0.98264    | 0.16289 | 0.43168     | 0.33299     | 0.43168    | 0.33299 |
|            | 0.43168         | 0.33299    | 0.16289 | 0.60759566  |             |            |         |
| HPGD       | ENSG00000164120 | 0.35516    | 0.36124 | 0.07996     | 0.46813     | 0.98253    | 0.16292 |
|            | 0.07996         | 0.46813    | 0.16292 | 0.607614542 |             |            |         |
| NA         | ENSG00000259116 | 0.64048    | 0.26093 | 0.98251     | 0.16292     | 0.64048    | 0.26093 |
|            | 0.64048         | 0.26093    | 0.16292 | 0.607614542 |             |            |         |
| RPL23AP27  | ENSG00000225669 | -0.89572   | 0.8148  | -0.89572    | 0.8148      | -0.89572   |         |
|            | 0.8148          | 0.98239    | 0.16295 | 0.16295     | 0.607671152 |            |         |
| HCN3       | ENSG00000143630 | 0.98234    | 0.16297 | 0.8026      | 0.2111      | 0.59072    | 0.27735 |
|            | 0.89844         | 0.18447    | 0.16297 | 0.607671152 |             |            |         |
| CCER1      | ENSG00000197651 | 0.98228    | 0.16298 | 0.98228     | 0.16298     | 0.98228    | 0.16298 |
|            | 0.98228         | 0.16298    | 0.16298 | 0.607671152 |             |            |         |
| SPO11      | ENSG00000054796 | 0.0073095  | 0.49708 | -0.99048    | 0.83903     | 0.98224    | 0.16299 |
|            | -0.59046        | 0.72256    | 0.16299 | 0.607671152 |             |            |         |
| LINC01393  | ENSG00000225535 | 0.98214    | 0.16301 | 0.98214     | 0.16301     | 0.98214    |         |
|            | 0.16301         | 0.98214    | 0.16301 | 0.16301     | 0.607671152 |            |         |
| NA         | ENSG00000283393 | 0.98218    | 0.16301 | 0.98218     | 0.16301     | 0.98218    | 0.16301 |
|            | 0.98218         | 0.16301    | 0.16301 | 0.607671152 |             |            |         |
| NA         | ENSG00000272644 | -0.56795   | 0.71497 | -0.56795    | 0.71497     | -0.56795   | 0.71497 |
|            | 0.98202         | 0.16304    | 0.16304 | 0.607727283 |             |            |         |
| DHRS12     | ENSG00000102796 | 0.97632    | 0.16445 | 0.98199     | 0.16305     | 0.07212    |         |
|            | 0.47125         | -1.1108    | 0.86668 | 0.16305     | 0.607727283 |            |         |
| RNU6-1034P | ENSG00000202205 | 0.98192    | 0.16307 | 0.98192     | 0.16307     | 0.98192    |         |
|            | 0.16307         | 0.98192    | 0.16307 | 0.16307     | 0.60773692  |            |         |
| HOMER2     | ENSG00000103942 | 0.2969     | 0.38327 | 0.98183     | 0.16309     | -0.30214   |         |
|            | 0.61873         | 0.6324     | 0.26356 | 0.16309     | 0.60773692  |            |         |
| RPS15      | ENSG00000115268 | 0.85334    | 0.19673 | 0.24752     | 0.40225     | 0.98182    | 0.16309 |
|            | -0.30086        | 0.61824    | 0.16309 | 0.60773692  |             |            |         |
| ZBTB20-AS2 | ENSG00000241295 | 0.98175    | 0.16311 | 0.98175     | 0.16311     | 0.98175    |         |
|            | 0.16311         | 0.98175    | 0.16311 | 0.16311     | 0.607739463 |            |         |
| PPP1R3G    | ENSG00000219607 | 0.25332    | 0.40001 | 0.98163     | 0.16314     | 0.089575   |         |
|            | 0.46431         | 0.089575   | 0.46431 | 0.16314     | 0.607739463 |            |         |
| NA         | ENSG00000274691 | 0.32804    | 0.37144 | 0.98163     | 0.16314     | 0.39015    | 0.34821 |
|            | 0.39015         | 0.34821    | 0.16314 | 0.607739463 |             |            |         |
| CNIH2      | ENSG00000174871 | 0.32551    | 0.3724  | 0.98152     | 0.16317     | 0.98152    | 0.16317 |

|             |                 |          |         |             |             |           |         |  |
|-------------|-----------------|----------|---------|-------------|-------------|-----------|---------|--|
|             | 0.98152         | 0.16317  | 0.16317 | 0.607739463 |             |           |         |  |
| RPS26P3     | ENSG00000212829 | 0.98153  | 0.16317 | 0.85359     | 0.19667     | -0.20938  |         |  |
|             | 0.58292         | -0.74507 | 0.77189 | 0.16317     | 0.607739463 |           |         |  |
| B4GAT1      | ENSG00000174684 | 0.98144  | 0.16319 | 0.98144     | 0.16319     | 0.98144   |         |  |
|             | 0.16319         | 0.98144  | 0.16319 | 0.16319     | 0.607739463 |           |         |  |
| MROCKI      | ENSG00000227502 | 0.98141  | 0.1632  | 0.27305     | 0.39241     | 0.054311  |         |  |
|             | 0.47834         | -0.35012 | 0.63688 | 0.1632      | 0.607739463 |           |         |  |
| NA          | ENSG00000218073 | -0.32745 | 0.62833 | 0.98126     | 0.16323     | -0.06576  | 0.52622 |  |
|             | -0.06576        | 0.52622  | 0.16323 | 0.607739463 |             |           |         |  |
| IVL         | ENSG00000163207 | 0.4073   | 0.34189 | 0.98121     | 0.16324     | 0.73059   | 0.23252 |  |
|             | 0.98121         | 0.16324  | 0.16324 | 0.607739463 |             |           |         |  |
| LINC01515   | ENSG00000228065 | 0.39304  | 0.34714 | 0.98123     | 0.16324     | 0.68      | 0.24825 |  |
|             | -0.31639        | 0.62415  | 0.16324 | 0.607739463 |             |           |         |  |
| RPS19P3     | ENSG00000240463 | 0.98123  | 0.16324 | 0.98123     | 0.16324     | 0.98123   |         |  |
|             | 0.16324         | 0.98123  | 0.16324 | 0.16324     | 0.607739463 |           |         |  |
| NA          | ENSG00000266149 | 0.37727  | 0.35299 | 0.50696     | 0.30609     | 0.098273  | 0.46086 |  |
|             | 0.9812          | 0.16325  | 0.16325 | 0.607739463 |             |           |         |  |
| NA          | ENSG00000199934 | 0.98101  | 0.16329 | 0.98101     | 0.16329     | -0.52553  | 0.70039 |  |
|             | -0.91109        | 0.81888  | 0.16329 | 0.607739463 |             |           |         |  |
| NA          | ENSG00000264148 | 0.48808  | 0.31275 | 0.011581    | 0.49538     | 0.52241   | 0.30069 |  |
|             | 0.98084         | 0.16334  | 0.16334 | 0.607739463 |             |           |         |  |
| NA          | ENSG00000225487 | 0.6314   | 0.26389 | 0.98078     | 0.16335     | 0.6314    | 0.26389 |  |
|             | 0.6314          | 0.26389  | 0.16335 | 0.607739463 |             |           |         |  |
| NA          | ENSG00000266929 | 0.98079  | 0.16335 | 0.98079     | 0.16335     | 0.98079   | 0.16335 |  |
|             | 0.98079         | 0.16335  | 0.16335 | 0.607739463 |             |           |         |  |
| ZNF366      | ENSG00000178175 | 0.20074  | 0.42045 | -0.11968    | 0.54763     | 0.98076   |         |  |
|             | 0.16336         | -0.40794 | 0.65834 | 0.16336     | 0.607739463 |           |         |  |
| NA          | ENSG00000237003 | 0.98075  | 0.16336 | 0.98075     | 0.16336     | 0.98075   | 0.16336 |  |
|             | 0.98075         | 0.16336  | 0.16336 | 0.607739463 |             |           |         |  |
| RGS22       | ENSG00000132554 | 0.98071  | 0.16337 | 0.42726     | 0.3346      | 0.58693   | 0.27863 |  |
|             | 0.64489         | 0.2595   | 0.16337 | 0.607739463 |             |           |         |  |
| SPNS2       | ENSG00000183018 | 0.98064  | 0.16338 | 0.98064     | 0.16338     | 0.98064   | 0.16338 |  |
|             | -0.56625        | 0.71439  | 0.16338 | 0.607739463 |             |           |         |  |
| ZNF652P1    | ENSG00000235278 | 0.9017   | 0.18361 | 0.81178     | 0.20846     | 0.65425   |         |  |
|             | 0.25648         | 0.9806   | 0.16339 | 0.16339     | 0.607739463 |           |         |  |
| FOXD1       | ENSG00000251493 | 0.98062  | 0.16339 | 0.059661    | 0.47621     | 0.16391   | 0.4349  |  |
|             | 0.16391         | 0.4349   | 0.16339 | 0.607739463 |             |           |         |  |
| RNU6-264P   | ENSG00000252943 | 0.98062  | 0.16339 | 0.98062     | 0.16339     | 0.98062   |         |  |
|             | 0.16339         | 0.98062  | 0.16339 | 0.16339     | 0.607739463 |           |         |  |
| OR2AG1      | ENSG00000279486 | 0.98062  | 0.16339 | -0.031054   | 0.51239     | 0.57892   |         |  |
|             | 0.28132         | 0.57892  | 0.28132 | 0.16339     | 0.607739463 |           |         |  |
| TCF3        | ENSG00000071564 | -0.19744 | 0.57826 | 0.16621     | 0.434       | -0.18096  | 0.5718  |  |
|             | 0.98056         | 0.16341  | 0.16341 | 0.607739886 |             |           |         |  |
| NA          | ENSG00000263004 | 0.95436  | 0.16995 | 0.95436     | 0.16995     | -0.14139  | 0.55622 |  |
|             | 0.9805          | 0.16342  | 0.16342 | 0.607739886 |             |           |         |  |
| TBC1D32     | ENSG00000146350 | 0.48401  | 0.31419 | 0.07341     | 0.47074     | 0.0078885 |         |  |
|             | 0.49685         | 0.98047  | 0.16343 | 0.16343     | 0.607739886 |           |         |  |
| NA          | ENSG00000230118 | 0.9804   | 0.16344 | 0.9804      | 0.16344     | 0.9804    | 0.16344 |  |
|             | 0.9804          | 0.16344  | 0.16344 | 0.607739886 |             |           |         |  |
| NSMCE3      | ENSG00000185115 | 0.98035  | 0.16346 | 0.37068     | 0.35544     | 0.37068   |         |  |
|             | 0.35544         | 0.35729  | 0.36044 | 0.16346     | 0.607767877 |           |         |  |
| NA          | ENSG00000248624 | 0.98017  | 0.1635  | 0.98017     | 0.1635      | 0.98017   | 0.1635  |  |
|             | 0.85716         | 0.19568  | 0.1635  | 0.607787896 |             |           |         |  |
| RN7SL19P    | ENSG00000243532 | 0.98012  | 0.16351 | 0.98012     | 0.16351     | 0.98012   |         |  |
|             | 0.16351         | 0.98012  | 0.16351 | 0.16351     | 0.607787896 |           |         |  |
| EIF3LP1     | ENSG00000258501 | 0.98011  | 0.16352 | 0.98011     | 0.16352     | 0.98011   |         |  |
|             | 0.16352         | 0.98011  | 0.16352 | 0.16352     | 0.607787896 |           |         |  |
| NA          | ENSG00000228667 | 0.43326  | 0.33241 | 0.43326     | 0.33241     | 0.98003   | 0.16354 |  |
|             | 0.67666         | 0.24931  | 0.16354 | 0.607787896 |             |           |         |  |
| ASCC2       | ENSG00000100325 | 0.97998  | 0.16355 | 0.97998     | 0.16355     | 0.96119   | 0.16823 |  |
|             | -1.0632         | 0.85615  | 0.16355 | 0.607787896 |             |           |         |  |
| PHACTR3-AS1 | ENSG00000238194 | 0.9747   | 0.16486 | 0.97993     | 0.16356     | 0.9747    |         |  |

|           |                 |            |         |             |             |           |         |  |
|-----------|-----------------|------------|---------|-------------|-------------|-----------|---------|--|
|           | 0.16486         | 0.9747     | 0.16486 | 0.16356     | 0.607787896 |           |         |  |
| RN7SL376P | ENSG00000265814 | 0.97995    | 0.16356 | 0.16356     | 0.97995     | 0.16356   | 0.97995 |  |
|           | 0.16356         | 0.97995    | 0.16356 | 0.16356     | 0.607787896 |           |         |  |
| PRSS57    | ENSG00000185198 | 0.97986    | 0.16358 | 0.16358     | 0.73526     | 0.23109   | 0.13593 |  |
|           | 0.44594         | 0.81039    | 0.20886 | 0.16358     | 0.607787896 |           |         |  |
| NA        | ENSG00000270773 | -0.13878   | 0.55519 | 0.97987     | 0.16358     | 0.31211   | 0.37748 |  |
|           | 0.033093        | 0.4868     | 0.16358 | 0.607787896 |             |           |         |  |
| WDTC1     | ENSG00000142784 | 0.46688    | 0.32029 | 0.64394     | 0.25981     | 0.97979   | 0.1636  |  |
|           | 0.39725         | 0.34559    | 0.1636  | 0.607787896 |             |           |         |  |
| RNU7-66P  | ENSG00000238949 | 0.15678    | 0.43771 | 0.15678     | 0.43771     | 0.97968   |         |  |
|           | 0.16362         | 0.15678    | 0.43771 | 0.16362     | 0.607787896 |           |         |  |
| NA        | ENSG00000273100 | -0.0079466 | 0.50317 | 0.9797      | 0.16362     | 0.81605   | 0.20724 |  |
|           | 0.16458         | 0.43464    | 0.16362 | 0.607787896 |             |           |         |  |
| ZNF20     | ENSG00000132010 | 0.84764    | 0.19832 | 0.2527      | 0.40025     | 0.84764   | 0.19832 |  |
|           | 0.97965         | 0.16363    | 0.16363 | 0.607787896 |             |           |         |  |
| NA        | ENSG00000248975 | -1.6099    | 0.94629 | 0.97962     | 0.16364     | -0.64502  | 0.74054 |  |
|           | -0.40221        | 0.65624    | 0.16364 | 0.607787896 |             |           |         |  |
| GGT8P     | ENSG00000236969 | 0.97948    | 0.16367 | 0.97948     | 0.16367     | 0.31437   | 0.37662 |  |
|           | 0.091971        | 0.46336    | 0.16367 | 0.607790744 |             |           |         |  |
| NA        | ENSG00000254559 | 0.97944    | 0.16368 | 0.97944     | 0.16368     | 0.97944   | 0.16368 |  |
|           | 0.97944         | 0.16368    | 0.16368 | 0.607790744 |             |           |         |  |
| LINC02860 | ENSG00000222004 | 0.086252   | 0.46563 | 0.36861     | 0.35621     | -1.3467   |         |  |
|           | 0.91095         | 0.97935    | 0.1637  | 0.1637      | 0.607790744 |           |         |  |
| NA        | ENSG00000224790 | 0.97927    | 0.16372 | 0.97927     | 0.16372     | 0.97927   | 0.16372 |  |
|           | 0.97927         | 0.16372    | 0.16372 | 0.607790744 |             |           |         |  |
| ATP5BPB3  | ENSG00000214003 | 0.97919    | 0.16374 | 0.97919     | 0.16374     | 0.97919   |         |  |
|           | 0.16374         | 0.97919    | 0.16374 | 0.16374     | 0.607790744 |           |         |  |
| NA        | ENSG00000207417 | -0.43209   | 0.66716 | -0.16136    | 0.5641      | 0.97909   | 0.16377 |  |
|           | 0.13626         | 0.44581    | 0.16377 | 0.607790744 |             |           |         |  |
| UTP14C    | ENSG00000253797 | 0.97895    | 0.1638  | 0.97895     | 0.1638      | 0.97895   |         |  |
|           | 0.1638          | 0.97895    | 0.1638  | 0.1638      | 0.607790744 |           |         |  |
| NA        | ENSG00000267461 | -1.1169    | 0.86799 | -1.4368     | 0.92461     | 0.9789    | 0.16381 |  |
|           | -1.4368         | 0.92461    | 0.16381 | 0.607790744 |             |           |         |  |
| LINC02390 | ENSG00000256582 | 0.97889    | 0.16382 | -0.0097582  | 0.50389     | 0.0080153 |         |  |
|           | 0.4968          | 0.0080153  | 0.4968  | 0.16382     | 0.607790744 |           |         |  |
| CC2D2A    | ENSG00000048342 | 0.97886    | 0.16383 | -0.035474   | 0.51415     | -0.090073 |         |  |
|           | 0.53589         | 0.78834    | 0.21525 | 0.16383     | 0.607790744 |           |         |  |
| TMA7      | ENSG00000232112 | 0.97885    | 0.16383 | 0.97885     | 0.16383     | 0.97885   | 0.16383 |  |
|           | 0.97885         | 0.16383    | 0.16383 | 0.607790744 |             |           |         |  |
| LINC01902 | ENSG00000283503 | 0.97877    | 0.16385 | 0.97877     | 0.16385     | 0.97877   |         |  |
|           | 0.16385         | -0.079601  | 0.53172 | 0.16385     | 0.607790744 |           |         |  |
| ATXN7L1   | ENSG00000146776 | -1.7718    | 0.96178 | -0.92935    | 0.82365     | -1.3252   |         |  |
|           | 0.90745         | 0.97864    | 0.16388 | 0.16388     | 0.607790744 |           |         |  |
| LINC02550 | ENSG00000271584 | 0.19446    | 0.42291 | 0.97865     | 0.16388     | -0.011867 |         |  |
|           | 0.50473         | 0.73031    | 0.2326  | 0.16388     | 0.607790744 |           |         |  |
| AZI2      | ENSG00000163512 | 0.9786     | 0.16389 | 0.59784     | 0.27497     | -0.61976  | 0.73229 |  |
|           | -0.48976        | 0.68785    | 0.16389 | 0.607790744 |             |           |         |  |
| LINC01376 | ENSG00000236204 | 0.028153   | 0.48877 | 0.035683    | 0.48577     | -0.29753  |         |  |
|           | 0.61697         | 0.97858    | 0.16389 | 0.16389     | 0.607790744 |           |         |  |
| SNCA-AS1  | ENSG00000247775 | 0.61609    | 0.26892 | 0.97856     | 0.1639      | -0.68965  |         |  |
|           | 0.75479         | 0.86683    | 0.19302 | 0.1639      | 0.607790744 |           |         |  |
| LINC01128 | ENSG00000228794 | -0.35179   | 0.6375  | 0.17675     | 0.42985     | -0.48808  |         |  |
|           | 0.68725         | 0.97851    | 0.16391 | 0.16391     | 0.607790744 |           |         |  |
| CYP1A2    | ENSG00000140505 | 0.72543    | 0.23409 | -0.49306    | 0.68902     | 0.97839   |         |  |
|           | 0.16394         | 0.7993     | 0.21206 | 0.16394     | 0.607790744 |           |         |  |
| ZCCHC7    | ENSG00000147905 | -0.34346   | 0.63437 | 0.78694     | 0.21566     | 0.97837   |         |  |
|           | 0.16395         | -0.31638   | 0.62414 | 0.16395     | 0.607790744 |           |         |  |
| NA        | ENSG00000258401 | 0.97833    | 0.16395 | 0.97833     | 0.16395     | 0.97833   | 0.16395 |  |
|           | 0.97833         | 0.16395    | 0.16395 | 0.607790744 |             |           |         |  |
| MIR4472-1 | ENSG00000265247 | -1.2428    | 0.89303 | -1.2289     | 0.89044     | -0.87429  |         |  |
|           | 0.80902         | 0.97834    | 0.16395 | 0.16395     | 0.607790744 |           |         |  |
| FBXW11    | ENSG00000072803 | 0.46515    | 0.32091 | 0.83813     | 0.20098     | 0.53862   |         |  |



|           |                 |           |         |             |             |          |         |  |
|-----------|-----------------|-----------|---------|-------------|-------------|----------|---------|--|
|           | 0.29508         | 0.97831   | 0.16396 | 0.16396     | 0.607790744 |          |         |  |
| TTLL3     | ENSG00000214021 | 0.70762   | 0.23959 | -0.053981   | 0.52152     | 0.97829  | 0.16396 |  |
|           | -0.81426        | 0.79225   | 0.16396 | 0.607790744 |             |          |         |  |
| NA        | ENSG00000240881 | -0.24451  | 0.59658 | -0.90012    | 0.81597     | 0.97828  | 0.16397 |  |
|           | 0.97828         | 0.16397   | 0.16397 | 0.607790744 |             |          |         |  |
| NA        | ENSG00000258793 | 0.97828   | 0.16397 | 0.97828     | 0.16397     | 0.97828  | 0.16397 |  |
|           | 0.97828         | 0.16397   | 0.16397 | 0.607790744 |             |          |         |  |
| NA        | ENSG00000183663 | 0.97819   | 0.16399 | -0.39132    | 0.65222     | 0.10023  | 0.46008 |  |
|           | -0.043021       | 0.51716   | 0.16399 | 0.607790744 |             |          |         |  |
| GDAP2     | ENSG00000196505 | 0.62355   | 0.26646 | 0.9782      | 0.16399     | 0.90381  | 0.18305 |  |
|           | -0.074136       | 0.52955   | 0.16399 | 0.607790744 |             |          |         |  |
| ZNF638    | ENSG00000075292 | 0.97807   | 0.16402 | 0.76995     | 0.22066     | 0.56261  |         |  |
|           | 0.28685         | 0.66494   | 0.25304 | 0.16402     | 0.607846532 |          |         |  |
| RPS3AP26  | ENSG00000214389 | -0.50058  | 0.69167 | -0.50058    | 0.69167     | -0.50058 |         |  |
|           | 0.69167         | 0.97803   | 0.16403 | 0.16403     | 0.607846532 |          |         |  |
| SLAMF9    | ENSG00000162723 | 0.12759   | 0.44924 | 0.97796     | 0.16405     | 0.12759  |         |  |
|           | 0.44924         | 0.12759   | 0.44924 | 0.16405     | 0.60787442  |          |         |  |
| NA        | ENSG00000251600 | 0.97746   | 0.16417 | 0.5186      | 0.30202     | -0.4657  | 0.67929 |  |
|           | 0.2315          | 0.40846   | 0.16417 | 0.608143586 |             |          |         |  |
| RPL21P92  | ENSG00000225922 | 0.97744   | 0.16418 | 0.97744     | 0.16418     | 0.97744  |         |  |
|           | 0.16418         | 0.97744   | 0.16418 | 0.16418     | 0.608143586 |          |         |  |
| SETD3     | ENSG00000183576 | 0.97738   | 0.16419 | 0.97738     | 0.16419     | 0.97738  | 0.16419 |  |
|           | 0.97738         | 0.16419   | 0.16419 | 0.608143586 |             |          |         |  |
| DUSP27    | ENSG00000198842 | 0.9774    | 0.16419 | 0.94854     | 0.17143     | 0.9774   |         |  |
|           | 0.16419         | 0.7907    | 0.21456 | 0.16419     | 0.608143586 |          |         |  |
| ZNF808    | ENSG00000198482 | 0.97735   | 0.1642  | -0.92013    | 0.82125     | -0.58868 |         |  |
|           | 0.72196         | 0.78513   | 0.21619 | 0.1642      | 0.608143586 |          |         |  |
| RN7SKP246 | ENSG00000201423 | 0.97733   | 0.1642  | 0.71822     | 0.23631     | 0.71822  |         |  |
|           | 0.23631         | 0.71822   | 0.23631 | 0.1642      | 0.608143586 |          |         |  |
| ARHGAP32  | ENSG00000134909 | 0.9773    | 0.16421 | 0.1634      | 0.4351      | 0.57966  |         |  |
|           | 0.28107         | -0.099419 | 0.5396  | 0.16421     | 0.608143586 |          |         |  |
| GIN52     | ENSG00000131153 | 0.58242   | 0.28014 | 0.084484    | 0.46634     | 0.084484 | 0.46634 |  |
|           | 0.97724         | 0.16423   | 0.16423 | 0.608162249 |             |          |         |  |
| PSMC1P11  | ENSG00000217385 | 0.15107   | 0.43996 | 0.97718     | 0.16424     | 0.97718  |         |  |
|           | 0.16424         | 0.97718   | 0.16424 | 0.16424     | 0.608162249 |          |         |  |
| LINC02695 | ENSG00000254699 | -0.26527  | 0.6046  | 0.97705     | 0.16427     | -0.26527 |         |  |
|           | 0.6046          | -0.26527  | 0.6046  | 0.16427     | 0.608227118 |          |         |  |
| DNASE2    | ENSG00000105612 | 0.33854   | 0.36748 | 0.97692     | 0.1643      | 0.97692  |         |  |
|           | 0.1643          | 0.97692   | 0.1643  | 0.1643      | 0.608255218 |          |         |  |
| RNU6-287P | ENSG00000252039 | 0.9769    | 0.16431 | 0.9769      | 0.16431     | 0.9769   |         |  |
|           | 0.16431         | 0.9769    | 0.16431 | 0.16431     | 0.608255218 |          |         |  |
| RNU6-603P | ENSG00000223335 | 0.41685   | 0.33839 | 0.97687     | 0.16432     | 0.41685  |         |  |
|           | 0.33839         | 0.41685   | 0.33839 | 0.16432     | 0.608255218 |          |         |  |
| CLCN3P1   | ENSG00000232000 | 0.4724    | 0.31832 | 0.59155     | 0.27708     | 0.77005  |         |  |
|           | 0.22064         | 0.97682   | 0.16433 | 0.16433     | 0.608255218 |          |         |  |
| NA        | ENSG00000267585 | 0.97678   | 0.16434 | 0.94858     | 0.17142     | 0.94858  | 0.17142 |  |
|           | 0.94858         | 0.17142   | 0.16434 | 0.608255218 |             |          |         |  |
| ZMYND15   | ENSG00000141497 | 0.97659   | 0.16439 | 0.061397    | 0.47552     | 0.061397 |         |  |
|           | 0.47552         | 0.66987   | 0.25147 | 0.16439     | 0.608329484 |          |         |  |
| PLAG1     | ENSG00000181690 | -0.71808  | 0.76365 | 0.97653     | 0.1644      | 0.97653  | 0.1644  |  |
|           | 0.97653         | 0.1644    | 0.1644  | 0.608329484 |             |          |         |  |
| IL1B      | ENSG00000125538 | 0.245     | 0.40323 | 0.97649     | 0.16441     | 0.97649  | 0.16441 |  |
|           | -0.49078        | 0.68821   | 0.16441 | 0.608329484 |             |          |         |  |
| NAT8      | ENSG00000144035 | 0.6453    | 0.25937 | 0.97647     | 0.16441     | 0.83266  | 0.20252 |  |
|           | 0.83266         | 0.20252   | 0.16441 | 0.608329484 |             |          |         |  |
| RAVER1    | ENSG00000161847 | -0.11841  | 0.54713 | -0.11841    | 0.54713     | 0.9763   |         |  |
|           | 0.16446         | 0.9763    | 0.16446 | 0.16446     | 0.608459087 |          |         |  |
| TREML3P   | ENSG00000184106 | 0.94366   | 0.17267 | 0.97624     | 0.16447     | 0.97624  |         |  |
|           | 0.16447         | 0.97624   | 0.16447 | 0.16447     | 0.608459087 |          |         |  |
| LINC02223 | ENSG00000249937 | -0.11237  | 0.54474 | 0.01859     | 0.49258     | -0.11237 |         |  |
|           | 0.54474         | 0.97606   | 0.16452 | 0.16452     | 0.608496464 |          |         |  |
| MAU2      | ENSG00000129933 | 0.97601   | 0.16453 | 0.66109     | 0.25428     | 0.97601  | 0.16453 |  |

|            |                 |           |         |             |             |           |         |  |
|------------|-----------------|-----------|---------|-------------|-------------|-----------|---------|--|
|            | 0.97601         | 0.16453   | 0.16453 | 0.608496464 |             |           |         |  |
| EFR3B      | ENSG00000084710 | 0.45756   | 0.32363 | 0.71233     | 0.23813     | 0.97587   | 0.16456 |  |
|            | -0.23928        | 0.59456   | 0.16456 | 0.608496464 |             |           |         |  |
| CACNB4     | ENSG00000182389 | 0.97587   | 0.16456 | -0.28568    | 0.61244     | -0.33867  |         |  |
|            | 0.63257         | -0.064175 | 0.52558 | 0.16456     | 0.608496464 |           |         |  |
| NA         | ENSG00000224653 | 0.97587   | 0.16457 | 0.97587     | 0.16457     | 0.97587   | 0.16457 |  |
|            | 0.97587         | 0.16457   | 0.16457 | 0.608496464 |             |           |         |  |
| NA         | ENSG00000226345 | 0.97585   | 0.16457 | 0.28921     | 0.38621     | 0.97585   | 0.16457 |  |
|            | 0.97585         | 0.16457   | 0.16457 | 0.608496464 |             |           |         |  |
| NLRP2      | ENSG00000022556 | 0.97583   | 0.16458 | -0.14212    | 0.55651     | 0.078998  | 0.46852 |  |
|            | -0.67845        | 0.75126   | 0.16458 | 0.608496464 |             |           |         |  |
| LCE2C      | ENSG00000187180 | 0.18887   | 0.4251  | 0.85832     | 0.19536     | 0.78305   | 0.2168  |  |
|            | 0.97581         | 0.16458   | 0.16458 | 0.608496464 |             |           |         |  |
| HNRNPC6    | ENSG00000213305 | -0.37234  | 0.64518 | 0.97571     | 0.1646      | -0.37234  |         |  |
|            | 0.64518         | 0.92328   | 0.17793 | 0.1646      | 0.608524239 |           |         |  |
| NA         | ENSG00000248378 | 0.47424   | 0.31766 | 0.47424     | 0.31766     | -1.5385   | 0.93804 |  |
|            | 0.97557         | 0.16464   | 0.16464 | 0.608533796 |             |           |         |  |
| RNA5SP360  | ENSG00000252364 | 0.97552   | 0.16465 | 0.20329     | 0.41946     | 0.16075   |         |  |
|            | 0.43615         | 0.48306   | 0.31453 | 0.16465     | 0.608533796 |           |         |  |
| UCN3       | ENSG00000178473 | 0.97549   | 0.16466 | 0.71984     | 0.23581     | -1.0971   | 0.8637  |  |
|            | -1.0971         | 0.8637    | 0.16466 | 0.608533796 |             |           |         |  |
| NA         | ENSG00000230828 | 0.97543   | 0.16467 | 0.97543     | 0.16467     | 0.97543   | 0.16467 |  |
|            | 0.97543         | 0.16467   | 0.16467 | 0.608533796 |             |           |         |  |
| LINC02574  | ENSG00000233975 | 0.21386   | 0.41533 | -0.14543    | 0.55781     | 0.75487   |         |  |
|            | 0.22516         | 0.97543   | 0.16467 | 0.16467     | 0.608533796 |           |         |  |
| RPS17P15   | ENSG00000239354 | 0.97538   | 0.16469 | 0.97538     | 0.16469     | 0.97538   |         |  |
|            | 0.16469         | 0.97538   | 0.16469 | 0.16469     | 0.608533796 |           |         |  |
| NA         | ENSG00000254325 | 0.97535   | 0.16469 | 0.97535     | 0.16469     | 0.97535   | 0.16469 |  |
|            | 0.54135         | 0.29413   | 0.16469 | 0.608533796 |             |           |         |  |
| CYB5AP2    | ENSG00000214369 | -0.48308  | 0.68548 | 0.90641     | 0.18236     | 0.97503   |         |  |
|            | 0.16477         | 0.97503   | 0.16477 | 0.16477     | 0.60857192  |           |         |  |
| EBPL       | ENSG00000123179 | 0.19655   | 0.42209 | 0.96296     | 0.16778     | 0.97501   | 0.16478 |  |
|            | 0.65489         | 0.25627   | 0.16478 | 0.60857192  |             |           |         |  |
| RNU6-1105P | ENSG00000207505 | 0.97495   | 0.16479 | -1.4564     | 0.92735     | -0.27141  |         |  |
|            | 0.60696         | -0.27141  | 0.60696 | 0.16479     | 0.60857192  |           |         |  |
| FANK1      | ENSG00000203780 | -1.2031   | 0.88554 | -1.7082     | 0.9562      | 0.97486   | 0.16482 |  |
|            | -0.43931        | 0.66978   | 0.16482 | 0.60857192  |             |           |         |  |
| ZNF720P1   | ENSG00000260010 | 0.73121   | 0.23233 | 0.56079     | 0.28747     | 0.97484   |         |  |
|            | 0.16482         | 0.56079   | 0.28747 | 0.16482     | 0.60857192  |           |         |  |
| MIR3135A   | ENSG00000266745 | 0.97482   | 0.16482 | 0.97482     | 0.16482     | 0.97482   |         |  |
|            | 0.16482         | 0.97482   | 0.16482 | 0.16482     | 0.60857192  |           |         |  |
| DOCK9-DT   | ENSG00000260992 | 0.97462   | 0.16488 | 0.97462     | 0.16488     | 0.97462   |         |  |
|            | 0.16488         | 0.97462   | 0.16488 | 0.16488     | 0.60857192  |           |         |  |
| DNAJC12    | ENSG00000108176 | 0.41027   | 0.3408  | 0.41027     | 0.3408      | 0.41027   |         |  |
|            | 0.3408          | 0.97456   | 0.16489 | 0.16489     | 0.60857192  |           |         |  |
| BBS9       | ENSG00000122507 | 0.57226   | 0.28357 | -0.56324    | 0.71336     | 0.97455   | 0.16489 |  |
|            | -1.2851         | 0.90062   | 0.16489 | 0.60857192  |             |           |         |  |
| OR6C68     | ENSG00000205327 | -1.9934   | 0.97689 | 0.97456     | 0.16489     | -0.75982  |         |  |
|            | 0.77632         | -0.75982  | 0.77632 | 0.16489     | 0.60857192  |           |         |  |
| UQCC1      | ENSG00000101019 | -0.27703  | 0.60912 | -0.26054    | 0.60278     | -0.018156 | 0.50724 |  |
|            | 0.97453         | 0.1649    | 0.1649  | 0.60857192  |             |           |         |  |
| AP4M1      | ENSG00000221838 | 0.97446   | 0.16491 | 0.97446     | 0.16491     | 0.97446   | 0.16491 |  |
|            | 0.97446         | 0.16491   | 0.16491 | 0.60857192  |             |           |         |  |
| NA         | ENSG00000255230 | 0.97445   | 0.16492 | -0.44072    | 0.67029     | -0.97683  | 0.83567 |  |
|            | -0.78301        | 0.78319   | 0.16492 | 0.60857192  |             |           |         |  |
| TMPRSS7    | ENSG00000176040 | -2.2618   | 0.98815 | -0.87675    | 0.80969     | 0.97438   |         |  |
|            | 0.16493         | -1.0355   | 0.84979 | 0.16493     | 0.60857192  |           |         |  |
| TRPS1      | ENSG00000104447 | -0.082021 | 0.53269 | -0.88295    | 0.81137     | 0.97437   | 0.16494 |  |
|            | 0.80354         | 0.21083   | 0.16494 | 0.60857192  |             |           |         |  |
| HLA-DMA    | ENSG00000204257 | -0.69225  | 0.75561 | -0.30074    | 0.61819     | 0.16441   |         |  |
|            | 0.43471         | 0.97434   | 0.16494 | 0.16494     | 0.60857192  |           |         |  |
| GPIHBP1    | ENSG00000277494 | -0.51083  | 0.69526 | -0.37338    | 0.64557     | -0.75004  |         |  |

|             |                 |           |            |             |             |           |         |
|-------------|-----------------|-----------|------------|-------------|-------------|-----------|---------|
|             | 0.77339         | 0.97434   | 0.16494    | 0.16494     | 0.60857192  |           |         |
| CCDC73      | ENSG00000186714 | -0.010478 | 0.50418    | 0.30835     | 0.37891     | 0.5759    |         |
|             | 0.28234         | 0.97428   | 0.16496    | 0.16496     | 0.60857192  |           |         |
| NA          | ENSG00000277020 | 0.47957   | 0.31577    | 0.4702      | 0.31911     | -0.63242  | 0.73644 |
|             | 0.9742          | 0.16498   | 0.16498    | 0.60857192  |             |           |         |
| TFAP4       | ENSG00000090447 | 0.97413   | 0.165      | 0.021323    | 0.49149     | -0.15457  | 0.56142 |
|             | 0.55636         | 0.28898   | 0.165      | 0.60857192  |             |           |         |
| RABGAP1L-DT | ENSG00000227373 | -0.056614 | 0.52257    | 0.97413     | 0.165       | 0.7942    |         |
|             | 0.21354         | 0.97413   | 0.165      | 0.165       | 0.60857192  |           |         |
| NA          | ENSG00000250400 | -0.70069  | 0.75825    | 0.9741      | 0.165       | 0.9741    | 0.165   |
|             | 0.165           | 0.165     | 0.60857192 |             |             |           |         |
| NTF6A       | ENSG00000267019 | 0.97406   | 0.16501    | 0.97406     | 0.16501     | 0.97406   | 0.16501 |
|             | 0.97406         | 0.16501   | 0.16501    | 0.60857192  |             |           |         |
| ATP5PBP6    | ENSG00000219806 | 0.76817   | 0.22119    | 0.97398     | 0.16503     | -0.89663  |         |
|             | 0.81504         | -0.89663  | 0.81504    | 0.16503     | 0.60857192  |           |         |
| HOMEZ       | ENSG00000215271 | 0.13112   | 0.44784    | -0.036148   | 0.51442     | 0.97394   | 0.16504 |
|             | 0.24544         | 0.40306   | 0.16504    | 0.60857192  |             |           |         |
| NA          | ENSG00000258039 | 0.97394   | 0.16504    | -0.69341    | 0.75597     | 0.39727   | 0.34559 |
|             | -0.58016        | 0.7191    | 0.16504    | 0.60857192  |             |           |         |
| MPND        | ENSG00000008382 | 0.72188   | 0.23518    | 0.45916     | 0.32306     | 0.28293   | 0.38862 |
|             | 0.97393         | 0.16505   | 0.16505    | 0.60857192  |             |           |         |
| NA          | ENSG00000250031 | 0.45146   | 0.32583    | -0.25211    | 0.59952     | -0.090362 | 0.536   |
|             | 0.97392         | 0.16505   | 0.16505    | 0.60857192  |             |           |         |
| NA          | ENSG00000239121 | 0.25493   | 0.39939    | 0.25493     | 0.39939     | 0.97381   | 0.16508 |
|             | 0.25493         | 0.39939   | 0.16508    | 0.608627304 |             |           |         |
| SPRED1      | ENSG00000166068 | 0.58344   | 0.2798     | 0.86045     | 0.19477     | 0.97375   |         |
|             | 0.16509         | 0.17379   | 0.43101    | 0.16509     | 0.608627304 |           |         |
| GRK5        | ENSG00000198873 | 0.45948   | 0.32294    | 0.97364     | 0.16512     | -0.2508   | 0.59901 |
|             | -0.339          | 0.63269   | 0.16512    | 0.608627454 |             |           |         |
| NA          | ENSG00000257531 | 0.91479   | 0.18015    | 0.89563     | 0.18522     | 0.97364   | 0.16512 |
|             | 0.97364         | 0.16512   | 0.16512    | 0.608627454 |             |           |         |
| HNRNPA1P48  | ENSG00000224578 | 0.29132   | 0.3854     | 0.97358     | 0.16513     | 0.34833   |         |
|             | 0.3638          | 0.29132   | 0.3854     | 0.16513     | 0.608627454 |           |         |
| TXNP6       | ENSG00000234036 | 0.97356   | 0.16514    | 0.97356     | 0.16514     | 0.97356   | 0.16514 |
|             | 0.97356         | 0.16514   | 0.16514    | 0.608627454 |             |           |         |
| ZSWIM8      | ENSG00000214655 | 0.97339   | 0.16518    | 0.6431      | 0.26008     | 0.6431    |         |
|             | 0.26008         | -0.1658   | 0.56584    | 0.16518     | 0.608719654 |           |         |
| NA          | ENSG00000270236 | 0.0066592 | 0.49734    | 0.97333     | 0.16519     | 0.97333   | 0.16519 |
|             | -0.85756        | 0.80443   | 0.16519    | 0.608719654 |             |           |         |
| NA          | ENSG00000266839 | 0.97314   | 0.16524    | 0.97314     | 0.16524     | 0.97314   | 0.16524 |
|             | 0.97314         | 0.16524   | 0.16524    | 0.608729195 |             |           |         |
| SEPTIN14P12 | ENSG00000235748 | 0.97311   | 0.16525    | 0.97311     | 0.16525     | 0.97311   | 0.16525 |
|             | 0.16525         | 0.97311   | 0.16525    | 0.16525     | 0.608729195 |           |         |
| RPL23AP71   | ENSG00000237450 | -0.66191  | 0.74598    | -0.41239    | 0.65997     | 0.97309   |         |
|             | 0.16525         | 0.92824   | 0.17664    | 0.16525     | 0.608729195 |           |         |
| PBLD        | ENSG00000108187 | 0.50592   | 0.30645    | -0.17174    | 0.56818     | 0.97308   | 0.16526 |
|             | 0.24917         | 0.40162   | 0.16526    | 0.608729195 |             |           |         |
| LINC01160   | ENSG00000231346 | -0.21584  | 0.58544    | -0.21584    | 0.58544     | -0.21584  |         |
|             | 0.58544         | 0.97301   | 0.16527    | 0.16527     | 0.608729195 |           |         |
| KMT5AP2     | ENSG00000232531 | 0.97295   | 0.16529    | 0.97295     | 0.16529     | 0.97295   |         |
|             | 0.16529         | 0.97295   | 0.16529    | 0.16529     | 0.608729195 |           |         |
| MRPL57P6    | ENSG00000249449 | 0.97291   | 0.1653     | 0.97291     | 0.1653      | 0.97291   |         |
|             | 0.1653          | 0.97291   | 0.1653     | 0.1653      | 0.608729195 |           |         |
| PRR15L      | ENSG00000167183 | 0.94379   | 0.17264    | 0.94379     | 0.17264     | 0.94379   |         |
|             | 0.17264         | 0.97286   | 0.16531    | 0.16531     | 0.608729195 |           |         |
| NA          | ENSG00000228082 | 0.96798   | 0.16653    | 0.96798     | 0.16653     | -0.03932  | 0.51568 |
|             | 0.97284         | 0.16532   | 0.16532    | 0.608729195 |             |           |         |
| CADM3       | ENSG00000162706 | 0.9728    | 0.16533    | -1.4963     | 0.93271     | 0.95723   | 0.16923 |
|             | 0.76629         | 0.22175   | 0.16533    | 0.608729195 |             |           |         |
| P4HTM       | ENSG00000178467 | 0.97279   | 0.16533    | 0.39901     | 0.34494     | 0.50195   | 0.30785 |
|             | -0.57417        | 0.71707   | 0.16533    | 0.608729195 |             |           |         |
| NA          | ENSG00000279368 | 0.97267   | 0.16536    | 0.97267     | 0.16536     | 0.97267   | 0.16536 |

|           |                 |          |         |             |             |          |         |  |
|-----------|-----------------|----------|---------|-------------|-------------|----------|---------|--|
|           | 0.97267         | 0.16536  | 0.16536 | 0.608766123 |             |          |         |  |
| NA        | ENSG00000280272 | -0.19573 | 0.57759 | 0.65947     | 0.2548      | 0.97264  | 0.16537 |  |
|           | -1.0688         | 0.85741  | 0.16537 | 0.608766123 |             |          |         |  |
| NDST2     | ENSG00000166507 | -0.29368 | 0.6155  | 0.97254     | 0.16539     | 0.97254  | 0.16539 |  |
|           | 0.97254         | 0.16539  | 0.16539 | 0.608766123 |             |          |         |  |
| UBE2V1P15 | ENSG00000217680 | 0.97254  | 0.16539 | 0.66743     | 0.25225     | 0.97254  |         |  |
|           | 0.16539         | 0.97254  | 0.16539 | 0.608766123 |             |          |         |  |
| EIF4EP2   | ENSG00000229944 | -1.3105  | 0.90499 | 0.97244     | 0.16542     | -0.82585 |         |  |
|           | 0.79556         | -0.82585 | 0.79556 | 0.16542     | 0.608784578 |          |         |  |
| CLEC5A    | ENSG00000258227 | 0.97242  | 0.16542 | 0.77244     | 0.21993     | -2.369   |         |  |
|           | 0.99108         | -1.4428  | 0.92546 | 0.16542     | 0.608784578 |          |         |  |
| UGT3A1    | ENSG00000145626 | -0.46576 | 0.67931 | 0.97228     | 0.16546     | -0.81481 |         |  |
|           | 0.79241         | -0.58713 | 0.72144 | 0.16546     | 0.608867442 |          |         |  |
| NA        | ENSG00000244932 | -0.26781 | 0.60558 | 0.49599     | 0.30995     | 0.97223  | 0.16547 |  |
|           | 0.43305         | 0.33249  | 0.16547 | 0.608867442 |             |          |         |  |
| NA        | ENSG00000272320 | 0.3079   | 0.37908 | 0.3079      | 0.37908     | 0.3079   | 0.37908 |  |
|           | 0.97217         | 0.16548  | 0.16548 | 0.608867442 |             |          |         |  |
| LINC02167 | ENSG00000261122 | 0.85022  | 0.1976  | 0.97209     | 0.1655      | 0.85022  |         |  |
|           | 0.1976          | 0.85022  | 0.1976  | 0.1655      | 0.608895055 |          |         |  |
| SNX20     | ENSG00000167208 | 0.41209  | 0.34014 | 0.41209     | 0.34014     | 0.33826  | 0.36758 |  |
|           | 0.97192         | 0.16555  | 0.16555 | 0.608922908 |             |          |         |  |
| NA        | ENSG00000264327 | -1.2135  | 0.88753 | 0.24441     | 0.40346     | -1.7817  | 0.9626  |  |
|           | 0.97191         | 0.16555  | 0.16555 | 0.608922908 |             |          |         |  |
| RPS2P4    | ENSG00000196183 | 0.97186  | 0.16556 | -0.3085     | 0.62115     | 0.56847  |         |  |
|           | 0.28486         | 0.25735  | 0.39845 | 0.16556     | 0.608922908 |          |         |  |
| ANKRD26   | ENSG00000107890 | -0.49106 | 0.68831 | 0.97177     | 0.16558     | -1.1159  |         |  |
|           | 0.86777         | -1.3345  | 0.90899 | 0.16558     | 0.608922908 |          |         |  |
| RNA5SP53  | ENSG00000212601 | -1.3887  | 0.91753 | -1.3887     | 0.91753     | 0.97164  |         |  |
|           | 0.16561         | -1.3887  | 0.91753 | 0.16561     | 0.608922908 |          |         |  |
| NA        | ENSG00000236710 | 0.19098  | 0.42427 | -0.3304     | 0.62945     | 0.97167  | 0.16561 |  |
|           | 0.97167         | 0.16561  | 0.16561 | 0.608922908 |             |          |         |  |
| RNU6-464P | ENSG00000253026 | -0.50541 | 0.69337 | 0.036702    | 0.48536     | 0.97157  |         |  |
|           | 0.16563         | 0.97157  | 0.16563 | 0.16563     | 0.608922908 |          |         |  |
| SLCO1B3   | ENSG00000111700 | 0.34191  | 0.36621 | 0.97152     | 0.16564     | 0.11966  |         |  |
|           | 0.45238         | 0.57964  | 0.28108 | 0.16564     | 0.608922908 |          |         |  |
| SCGB3A1   | ENSG00000161055 | 0.97153  | 0.16564 | 0.46074     | 0.32249     | -0.69656 |         |  |
|           | 0.75696         | -0.4874  | 0.68701 | 0.16564     | 0.608922908 |          |         |  |
| LINC02869 | ENSG00000228208 | -0.11326 | 0.54509 | -0.11326    | 0.54509     | -0.21479 |         |  |
|           | 0.58503         | 0.97152  | 0.16564 | 0.16564     | 0.608922908 |          |         |  |
| MRPS18A   | ENSG00000096080 | -0.40999 | 0.65909 | -0.40999    | 0.65909     | 0.52031  |         |  |
|           | 0.30142         | 0.97146  | 0.16566 | 0.16566     | 0.608922908 |          |         |  |
| IFI6      | ENSG00000126709 | 0.16213  | 0.4356  | 0.16213     | 0.4356      | 0.16213  | 0.4356  |  |
|           | 0.97142         | 0.16567  | 0.16567 | 0.608922908 |             |          |         |  |
| RNA5SP449 | ENSG00000252680 | 0.80076  | 0.21164 | 0.97131     | 0.1657      | 0.97131  |         |  |
|           | 0.1657          | 0.97131  | 0.1657  | 0.1657      | 0.608922908 |          |         |  |
| NA        | ENSG00000258177 | -0.16982 | 0.56742 | -0.71772    | 0.76353     | 0.97128  | 0.1657  |  |
|           | 0.97128         | 0.1657   | 0.1657  | 0.608922908 |             |          |         |  |
| MAPK1IP1L | ENSG00000168175 | 0.97125  | 0.16571 | 0.94512     | 0.1723      | 0.97125  |         |  |
|           | 0.16571         | 0.97125  | 0.16571 | 0.16571     | 0.608922908 |          |         |  |
| NA        | ENSG00000233755 | 0.97124  | 0.16571 | -0.64664    | 0.74107     | 0.97124  | 0.16571 |  |
|           | -1.1529         | 0.87552  | 0.16571 | 0.608922908 |             |          |         |  |
| RPL31P54  | ENSG00000229865 | 0.97123  | 0.16572 | 0.86756     | 0.19282     | 0.86756  |         |  |
|           | 0.19282         | 0.86756  | 0.19282 | 0.16572     | 0.608922908 |          |         |  |
| RBISP1    | ENSG00000226209 | 0.97104  | 0.16576 | 0.97104     | 0.16576     | 0.97104  |         |  |
|           | 0.16576         | 0.97104  | 0.16576 | 0.16576     | 0.608941363 |          |         |  |
| NA        | ENSG00000274677 | 0.13354  | 0.44688 | 0.041199    | 0.48357     | 0.97108  | 0.16576 |  |
|           | 0.97108         | 0.16576  | 0.16576 | 0.608941363 |             |          |         |  |
| STKLD1    | ENSG00000198870 | 0.72871  | 0.23309 | 0.052607    | 0.47902     | 0.97102  |         |  |
|           | 0.16577         | 0.046699 | 0.48138 | 0.16577     | 0.608941363 |          |         |  |
| LAGE3P1   | ENSG00000225693 | 0.97092  | 0.16579 | 0.97092     | 0.16579     | 0.73334  |         |  |
|           | 0.23168         | 0.34966  | 0.3633  | 0.16579     | 0.608941363 |          |         |  |
| NA        | ENSG00000213240 | -1.0802  | 0.85997 | 0.45866     | 0.32324     | 0.97092  | 0.16579 |  |

|            |                 |             |         |             |             |          |         |  |
|------------|-----------------|-------------|---------|-------------|-------------|----------|---------|--|
|            | 0.84067         | 0.20027     | 0.16579 | 0.608941363 |             |          |         |  |
| NA         | ENSG00000279914 | 0.97089     | 0.1658  | 0.97089     | 0.1658      | 0.97089  | 0.1658  |  |
|            | 0.97089         | 0.1658      | 0.1658  | 0.608941363 |             |          |         |  |
| CCKBR      | ENSG00000110148 | -0.59214    | 0.72312 | -0.59214    | 0.72312     | 0.97084  | 0.16582 |  |
|            | -0.59214        | 0.72312     | 0.16582 | 0.60896892  |             |          |         |  |
| NA         | ENSG00000201619 | 0.9706      | 0.16587 | 0.68978     | 0.24517     | 0.9706   | 0.16587 |  |
|            | 0.9706          | 0.16587     | 0.16587 | 0.609079108 |             |          |         |  |
| TUBB2BP1   | ENSG00000216819 | 0.97055     | 0.16589 | -1.4476     | 0.92614     | 0.18579  |         |  |
|            | 0.42631         | 0.65157     | 0.25734 | 0.16589     | 0.609079108 |          |         |  |
| NA         | ENSG00000231098 | 0.97053     | 0.16589 | 0.97053     | 0.16589     | 0.97053  | 0.16589 |  |
|            | 0.97053         | 0.16589     | 0.16589 | 0.609079108 |             |          |         |  |
| NA         | ENSG00000257323 | 0.7753      | 0.21908 | 0.9705      | 0.1659      | 0.9705   | 0.1659  |  |
|            | 0.9705          | 0.1659      | 0.1659  | 0.609079108 |             |          |         |  |
| C2orf27A   | ENSG00000197927 | 0.4459      | 0.32783 | 0.97032     | 0.16594     | 0.019696 |         |  |
|            | 0.49214         | 0.75233     | 0.22593 | 0.16594     | 0.609125    |          |         |  |
| NA         | ENSG00000236389 | -0.66691    | 0.74759 | 0.14266     | 0.44328     | 0.97029  | 0.16595 |  |
|            | 0.14266         | 0.44328     | 0.16595 | 0.609125    |             |          |         |  |
| NA         | ENSG00000249409 | 0.9703      | 0.16595 | 0.9703      | 0.16595     | 0.49669  | 0.30971 |  |
|            | 0.9703          | 0.16595     | 0.16595 | 0.609125    |             |          |         |  |
| UBR4       | ENSG00000127481 | 0.85048     | 0.19753 | 0.97023     | 0.16597     | 0.70325  | 0.24095 |  |
|            | 0.8251          | 0.20466     | 0.16597 | 0.609152502 |             |          |         |  |
| NA         | ENSG00000240393 | 0.9701      | 0.166   | 0.9701      | 0.166       | 0.9701   | 0.166   |  |
|            | 0.166           | 0.609152502 |         |             |             |          |         |  |
| NA         | ENSG00000265643 | 0.24335     | 0.40387 | 0.52254     | 0.30065     | 0.97005  | 0.16601 |  |
|            | -0.30662        | 0.62044     | 0.16601 | 0.609152502 |             |          |         |  |
| PITPNM1    | ENSG00000110697 | -0.12164    | 0.54841 | 0.96994     | 0.16604     | -0.46644 |         |  |
|            | 0.67955         | 0.08473     | 0.46624 | 0.16604     | 0.609152502 |          |         |  |
| PARVG      | ENSG00000138964 | 0.03321     | 0.48675 | 0.96995     | 0.16604     | -0.65626 | 0.74417 |  |
|            | 0.13574         | 0.44601     | 0.16604 | 0.609152502 |             |          |         |  |
| IFNA6      | ENSG00000120235 | 0.96991     | 0.16605 | -0.3061     | 0.62024     | 0.96991  | 0.16605 |  |
|            | 0.88593         | 0.18783     | 0.16605 | 0.609152502 |             |          |         |  |
| STAMBPL1   | ENSG00000138134 | -0.22577    | 0.58931 | -0.54801    | 0.70816     | -1.0697  |         |  |
|            | 0.85762         | 0.96983     | 0.16607 | 0.16607     | 0.609152502 |          |         |  |
| IL9        | ENSG00000145839 | 0.96979     | 0.16608 | 0.67628     | 0.24943     | 0.2308   | 0.40873 |  |
|            | -0.67795        | 0.7511      | 0.16608 | 0.609152502 |             |          |         |  |
| MYL10      | ENSG00000106436 | 0.21391     | 0.41531 | 0.96974     | 0.16609     | 0.17294  | 0.43135 |  |
|            | -0.50599        | 0.69357     | 0.16609 | 0.609152502 |             |          |         |  |
| NA         | ENSG00000253489 | 0.2377      | 0.40606 | 0.96974     | 0.16609     | 0.96974  | 0.16609 |  |
|            | 0.96974         | 0.16609     | 0.16609 | 0.609152502 |             |          |         |  |
| NA         | ENSG00000217477 | -0.036626   | 0.51461 | 0.96968     | 0.1661      | 0.96968  | 0.1661  |  |
|            | -0.77221        | 0.78001     | 0.1661  | 0.609152502 |             |          |         |  |
| RAP1A      | ENSG00000116473 | -0.40023    | 0.65551 | -0.59943    | 0.72556     | -0.59943 | 0.72556 |  |
|            | 0.96961         | 0.16612     | 0.16612 | 0.609152502 |             |          |         |  |
| HNRNPA1P59 | ENSG00000230280 | 0.96962     | 0.16612 | 0.96962     | 0.16612     | 0.96962  |         |  |
|            | 0.16612         | 0.96962     | 0.16612 | 0.16612     | 0.609152502 |          |         |  |
| NA         | ENSG00000212187 | 0.96951     | 0.16615 | 0.96951     | 0.16615     | 0.96951  | 0.16615 |  |
|            | 0.96951         | 0.16615     | 0.16615 | 0.609216667 |             |          |         |  |
| NA         | ENSG00000221322 | -0.56436    | 0.71375 | 0.9694      | 0.16617     | -0.56436 | 0.71375 |  |
|            | -0.56436        | 0.71375     | 0.16617 | 0.609244158 |             |          |         |  |
| ITGB1BP1   | ENSG00000119185 | 0.96919     | 0.16623 | 0.20182     | 0.42003     | 0.17711  |         |  |
|            | 0.42971         | 0.61544     | 0.26913 | 0.16623     | 0.609409103 |          |         |  |
| NA         | ENSG00000257286 | 0.96912     | 0.16624 | 0.96912     | 0.16624     | 0.96912  | 0.16624 |  |
|            | 0.96912         | 0.16624     | 0.16624 | 0.609409103 |             |          |         |  |
| NA         | ENSG00000216718 | -0.56766    | 0.71487 | -0.56766    | 0.71487     | 0.96895  | 0.16628 |  |
|            | -0.39433        | 0.65333     | 0.16628 | 0.609463733 |             |          |         |  |
| NA         | ENSG00000258851 | 0.96898     | 0.16628 | 0.96898     | 0.16628     | 0.96898  | 0.16628 |  |
|            | 0.96898         | 0.16628     | 0.16628 | 0.609463733 |             |          |         |  |
| MTCO1P42   | ENSG00000230327 | 0.9689      | 0.1663  | 0.9689      | 0.1663      | 0.9689   |         |  |
|            | 0.1663          | 0.9689      | 0.1663  | 0.1663      | 0.609463733 |          |         |  |
| IRF8       | ENSG00000140968 | 0.5502      | 0.29109 | 0.96884     | 0.16631     | 0.41215  | 0.34011 |  |
|            | 0.41215         | 0.34011     | 0.16631 | 0.609463733 |             |          |         |  |
| CYP4F29P   | ENSG00000228314 | 0.64156     | 0.26058 | 0.027879    | 0.48888     | 0.96874  |         |  |

|           |                 |           |         |             |             |           |         |  |
|-----------|-----------------|-----------|---------|-------------|-------------|-----------|---------|--|
|           | 0.16634         | 0.30099   | 0.38171 | 0.16634     | 0.609463733 |           |         |  |
| LINC00618 | ENSG00000225163 | 0.67809   | 0.67809 | 0.24886     | 0.7463      | 0.22774   | 0.67809 |  |
|           | 0.24886         | 0.96869   | 0.16635 | 0.16635     | 0.609463733 |           |         |  |
| NA        | ENSG00000260235 | 0.96868   | 0.16635 | 0.96868     | 0.16635     | 0.96868   | 0.16635 |  |
|           | 0.96868         | 0.16635   | 0.16635 | 0.609463733 |             |           |         |  |
| FBXO21    | ENSG00000135108 | 0.96855   | 0.16638 | -0.1575     | 0.56258     | 0.90174   |         |  |
|           | 0.1836          | -0.79562  | 0.78687 | 0.16638     | 0.609463733 |           |         |  |
| KRT87P    | ENSG00000135477 | -0.12007  | 0.54779 | 0.04754     | 0.48104     | -0.90038  |         |  |
|           | 0.81604         | 0.96858   | 0.16638 | 0.16638     | 0.609463733 |           |         |  |
| MYL12A    | ENSG00000101608 | -1.5709   | 0.9419  | -0.69517    | 0.75653     | -2.2569   |         |  |
|           | 0.98799         | 0.96855   | 0.16639 | 0.16639     | 0.609463733 |           |         |  |
| DPH1      | ENSG00000108963 | 0.96845   | 0.16641 | 0.94557     | 0.17218     | -0.024422 | 0.50974 |  |
|           | -0.54849        | 0.70832   | 0.16641 | 0.609463733 |             |           |         |  |
| CAPN12    | ENSG00000182472 | 0.32644   | 0.37205 | 0.15537     | 0.43826     | 0.96846   |         |  |
|           | 0.16641         | -0.16584  | 0.56586 | 0.16641     | 0.609463733 |           |         |  |
| PDRG1     | ENSG00000088356 | 0.23985   | 0.40522 | 0.23985     | 0.40522     | -0.49509  | 0.68973 |  |
|           | 0.96838         | 0.16643   | 0.16643 | 0.609463733 |             |           |         |  |
| CWC22     | ENSG00000163510 | 0.96837   | 0.16643 | 0.96837     | 0.16643     | 0.72031   | 0.23567 |  |
|           | 0.95081         | 0.17085   | 0.16643 | 0.609463733 |             |           |         |  |
| MAN2B1    | ENSG00000104774 | 0.96822   | 0.16647 | -0.56151    | 0.71277     | -1.241    |         |  |
|           | 0.8927          | 0.046661  | 0.48139 | 0.16647     | 0.60950024  |           |         |  |
| PSMB7     | ENSG00000136930 | -0.33141  | 0.62983 | 0.96818     | 0.16648     | -0.28843  | 0.61349 |  |
|           | 0.08781         | 0.46501   | 0.16648 | 0.60950024  |             |           |         |  |
| NA        | ENSG00000259252 | 0.5947    | 0.27602 | -0.19124    | 0.57583     | 0.96812   | 0.16649 |  |
|           | 0.5947          | 0.27602   | 0.16649 | 0.60950024  |             |           |         |  |
| NA        | ENSG00000272079 | 0.96811   | 0.16649 | 0.96811     | 0.16649     | 0.96811   | 0.16649 |  |
|           | 0.96811         | 0.16649   | 0.16649 | 0.60950024  |             |           |         |  |
| NPFFR2    | ENSG00000056291 | -0.17388  | 0.56902 | 0.9679      | 0.16655     | 0.18463   |         |  |
|           | 0.42676         | 0.2015    | 0.42016 | 0.16655     | 0.609674091 |           |         |  |
| NR6A1     | ENSG00000148200 | -0.18762  | 0.57441 | 0.26934     | 0.39383     | 0.19246   | 0.42369 |  |
|           | 0.96781         | 0.16657   | 0.16657 | 0.609701502 |             |           |         |  |
| NA        | ENSG00000284591 | 0.96769   | 0.1666  | 0.96769     | 0.1666      | 0.96769   | 0.1666  |  |
|           | 0.96769         | 0.1666    | 0.1666  | 0.60976551  |             |           |         |  |
| NA        | ENSG00000256950 | 0.96752   | 0.16664 | 0.96752     | 0.16664     | 0.96752   | 0.16664 |  |
|           | 0.96752         | 0.16664   | 0.16664 | 0.609847698 |             |           |         |  |
| AP3B1     | ENSG00000132842 | 0.77169   | 0.22015 | 0.96749     | 0.16665     | 0.77434   | 0.21936 |  |
|           | 0.63658         | 0.2622    | 0.16665 | 0.609847698 |             |           |         |  |
| HSP90AB1  | ENSG00000096384 | 0.38282   | 0.35093 | 0.31737     | 0.37548     | 0.96744   |         |  |
|           | 0.16666         | 0.4983    | 0.30914 | 0.16666     | 0.609847698 |           |         |  |
| NA        | ENSG00000229635 | -0.65329  | 0.74322 | 0.2247      | 0.41111     | 0.96712   | 0.16674 |  |
|           | 0.96712         | 0.16674   | 0.16674 | 0.610094624 |             |           |         |  |
| LINC01537 | ENSG00000227467 | 0.96701   | 0.16677 | -0.24194    | 0.59559     | 0.96701   |         |  |
|           | 0.16677         | 0.96701   | 0.16677 | 0.16677     | 0.610120496 |           |         |  |
| RNU6-7    | ENSG00000201654 | -0.53115  | 0.70234 | 0.37066     | 0.35544     | -0.30652  |         |  |
|           | 0.6204          | 0.96692   | 0.16679 | 0.16679     | 0.610120496 |           |         |  |
| NA        | ENSG00000250905 | 0.68842   | 0.24559 | 0.29535     | 0.38386     | 0.96692   | 0.16679 |  |
|           | -0.25259        | 0.59971   | 0.16679 | 0.610120496 |             |           |         |  |
| RAB25     | ENSG00000132698 | 0.44051   | 0.32979 | 0.96681     | 0.16682     | 0.61015   | 0.27088 |  |
|           | 0.94458         | 0.17244   | 0.16682 | 0.610120496 |             |           |         |  |
| STX17     | ENSG00000136874 | 0.068866  | 0.47255 | 0.36111     | 0.35901     | 0.65963   | 0.25475 |  |
|           | 0.96682         | 0.16682   | 0.16682 | 0.610120496 |             |           |         |  |
| GPR85     | ENSG00000164604 | -1.3405   | 0.90996 | -1.3405     | 0.90996     | 0.96677   | 0.16683 |  |
|           | -1.3405         | 0.90996   | 0.16683 | 0.610120496 |             |           |         |  |
| PSMC1P2   | ENSG00000213781 | -0.015525 | 0.50619 | 0.96666     | 0.16686     | -0.015525 |         |  |
|           | 0.50619         | -0.015525 | 0.50619 | 0.16686     | 0.610120496 |           |         |  |
| PACRG-AS3 | ENSG00000225683 | -0.04538  | 0.5181  | -0.40326    | 0.65662     | 0.96653   |         |  |
|           | 0.16689         | -0.65787  | 0.74469 | 0.16689     | 0.610120496 |           |         |  |
| LATS2-AS1 | ENSG00000233851 | 0.91338   | 0.18052 | 0.96653     | 0.16689     | 0.96653   |         |  |
|           | 0.16689         | 0.86649   | 0.19311 | 0.16689     | 0.610120496 |           |         |  |
| NA        | ENSG00000266199 | 0.96652   | 0.16689 | 0.96652     | 0.16689     | -0.56395  | 0.71361 |  |
|           | -0.99654        | 0.84051   | 0.16689 | 0.610120496 |             |           |         |  |
| RPS23P2   | ENSG00000213448 | 0.9665    | 0.1669  | 0.9665      | 0.1669      | 0.9665    |         |  |

|             |                 |          |         |             |             |          |         |  |
|-------------|-----------------|----------|---------|-------------|-------------|----------|---------|--|
|             | 0.1669          | 0.9665   | 0.1669  | 0.1669      | 0.610120496 |          |         |  |
| AGRN        | ENSG00000188157 | 0.92814  | 0.17667 | 0.12259     | 0.45122     | 0.96635  | 0.16694 |  |
|             | 0.2792          | 0.39005  | 0.16694 | 0.610120496 |             |          |         |  |
| NA          | ENSG00000283010 | 0.96631  | 0.16695 | 0.79258     | 0.21401     | 0.55675  | 0.28885 |  |
|             | 0.4157          | 0.33881  | 0.16695 | 0.610120496 |             |          |         |  |
| ARID5A      | ENSG00000196843 | 0.38773  | 0.34911 | -0.070441   | 0.52808     | -0.21147 |         |  |
|             | 0.58374         | 0.96624  | 0.16696 | 0.16696     | 0.610120496 |          |         |  |
| RNU6-400P   | ENSG00000212475 | -1.9025  | 0.97145 | -0.35804    | 0.63985     | -0.68418 |         |  |
|             | 0.75307         | 0.96627  | 0.16696 | 0.16696     | 0.610120496 |          |         |  |
| SLC35E1P1   | ENSG00000238286 | 0.96625  | 0.16696 | 0.21607     | 0.41447     | 0.96625  |         |  |
|             | 0.16696         | 0.96625  | 0.16696 | 0.16696     | 0.610120496 |          |         |  |
| OR7A11P     | ENSG00000198367 | 0.96617  | 0.16698 | 0.96617     | 0.16698     | 0.96617  |         |  |
|             | 0.16698         | 0.96617  | 0.16698 | 0.16698     | 0.610120496 |          |         |  |
| RPL7AP33    | ENSG00000254200 | 0.96616  | 0.16698 | 0.96616     | 0.16698     | 0.96616  |         |  |
|             | 0.16698         | 0.96616  | 0.16698 | 0.16698     | 0.610120496 |          |         |  |
| MRPL50P4    | ENSG00000235469 | 0.96615  | 0.16699 | 0.96615     | 0.16699     | 0.96615  |         |  |
|             | 0.16699         | -0.15146 | 0.56019 | 0.16699     | 0.610120496 |          |         |  |
| CHD4        | ENSG00000111642 | 0.10201  | 0.45938 | 0.9661      | 0.167       | -0.6655  | 0.74713 |  |
|             | -0.099561       | 0.53965  | 0.167   | 0.610120496 |             |          |         |  |
| LINC01876   | ENSG00000226383 | 0.35153  | 0.36259 | -0.79789    | 0.78753     | 0.42245  |         |  |
|             | 0.33635         | 0.96605  | 0.16701 | 0.16701     | 0.610120496 |          |         |  |
| NA          | ENSG00000240729 | 0.96594  | 0.16704 | -0.31459    | 0.62346     | -0.31459 | 0.62346 |  |
|             | -0.31459        | 0.62346  | 0.16704 | 0.61013861  |             |          |         |  |
| ANKRD20A18P | ENSG00000249493 | 0.23033  | 0.40892 | -0.74153    | 0.77081     | 0.96595  |         |  |
|             | 0.16704         | 0.51734  | 0.30246 | 0.16704     | 0.61013861  |          |         |  |
| NA          | ENSG00000251135 | 0.96583  | 0.16706 | 0.43141     | 0.33309     | 0.96583  | 0.16706 |  |
|             | 0.96583         | 0.16706  | 0.16706 | 0.610147512 |             |          |         |  |
| HMGA2-AS1   | ENSG00000197301 | 0.83647  | 0.20145 | 0.56441     | 0.28624     | 0.96576  |         |  |
|             | 0.16708         | 0.96576  | 0.16708 | 0.16708     | 0.610147512 |          |         |  |
| NA          | ENSG00000238153 | 0.96578  | 0.16708 | 0.96578     | 0.16708     | 0.96578  | 0.16708 |  |
|             | 0.96578         | 0.16708  | 0.16708 | 0.610147512 |             |          |         |  |
| NA          | ENSG00000273844 | 0.96563  | 0.16712 | 0.96563     | 0.16712     | 0.96563  | 0.16712 |  |
|             | 0.96563         | 0.16712  | 0.16712 | 0.610238641 |             |          |         |  |
| DYNLT3P2    | ENSG00000229758 | 0.96555  | 0.16713 | 0.96555     | 0.16713     | 0.96555  |         |  |
|             | 0.16713         | 0.96555  | 0.16713 | 0.16713     | 0.610238641 |          |         |  |
| RNU6-14P    | ENSG00000207360 | 0.96542  | 0.16717 | 0.96542     | 0.16717     | 0.96542  |         |  |
|             | 0.16717         | 0.96542  | 0.16717 | 0.16717     | 0.610274465 |          |         |  |
| RPL5P25     | ENSG00000225251 | 0.69529  | 0.24344 | -0.048417   | 0.51931     | 0.96542  |         |  |
|             | 0.16717         | 0.18361  | 0.42716 | 0.16717     | 0.610274465 |          |         |  |
| MIR196A1    | ENSG00000210741 | 0.96527  | 0.1672  | 0.96527     | 0.1672      | 0.96527  |         |  |
|             | 0.1672          | 0.96527  | 0.1672  | 0.1672      | 0.610274465 |          |         |  |
| OR52B2      | ENSG00000255307 | 0.96528  | 0.1672  | -0.37518    | 0.64624     | -0.37518 |         |  |
|             | 0.64624         | -0.37518 | 0.64624 | 0.1672      | 0.610274465 |          |         |  |
| SLC22A18    | ENSG00000110628 | -1.0184  | 0.84575 | -0.52391    | 0.69983     | 0.96526  |         |  |
|             | 0.16721         | 0.31854  | 0.37504 | 0.16721     | 0.610274465 |          |         |  |
| NA          | ENSG00000278012 | 0.96522  | 0.16722 | 0.96522     | 0.16722     | 0.96522  | 0.16722 |  |
|             | 0.96522         | 0.16722  | 0.16722 | 0.610274465 |             |          |         |  |
| NDUFB8      | ENSG00000166136 | 0.080444 | 0.46794 | 0.25222     | 0.40044     | 0.080444 |         |  |
|             | 0.46794         | 0.96516  | 0.16723 | 0.16723     | 0.610274465 |          |         |  |
| NA          | ENSG00000232519 | 0.96514  | 0.16724 | 0.96514     | 0.16724     | 0.96514  | 0.16724 |  |
|             | 0.96514         | 0.16724  | 0.16724 | 0.610274465 |             |          |         |  |
| LINC00366   | ENSG00000229437 | -1.0803  | 0.85999 | -0.11641    | 0.54634     | 0.96503  |         |  |
|             | 0.16727         | 0.74161  | 0.22916 | 0.16727     | 0.610338233 |          |         |  |
| RGS9BP      | ENSG00000186326 | 0.9648   | 0.16732 | 0.9648      | 0.16732     | 0.9648   |         |  |
|             | 0.16732         | 0.9648   | 0.16732 | 0.16732     | 0.610465339 |          |         |  |
| OR10D1P     | ENSG00000196403 | 0.62696  | 0.26534 | 0.62696     | 0.26534     | 0.96473  |         |  |
|             | 0.16734         | 0.62696  | 0.26534 | 0.16734     | 0.610465339 |          |         |  |
| NA          | ENSG00000264108 | 0.28701  | 0.38705 | 0.35108     | 0.36276     | 0.96469  | 0.16735 |  |
|             | -0.090946       | 0.53623  | 0.16735 | 0.610465339 |             |          |         |  |
| NA          | ENSG00000264488 | -0.51631 | 0.69718 | -1.1599     | 0.87696     | 0.96465  | 0.16736 |  |
|             | -1.0173         | 0.84549  | 0.16736 | 0.610465339 |             |          |         |  |
| KRT18P33    | ENSG00000214533 | 0.14126  | 0.44383 | 0.49678     | 0.30967     | 0.2352   |         |  |

|             |                 |             |         |             |             |          |         |         |
|-------------|-----------------|-------------|---------|-------------|-------------|----------|---------|---------|
|             | 0.40703         | 0.96457     | 0.16738 | 0.16738     | 0.610465339 |          |         |         |
| NA          | ENSG00000268592 | 0.96455     | 0.16738 | 0.16738     | 0.96455     | 0.16738  | 0.96455 | 0.16738 |
|             | 0.96455         | 0.16738     | 0.16738 | 0.610465339 |             |          |         |         |
| RNU6ATAC16P | ENSG00000221518 | 0.9644      | 0.9644  | 0.16742     | 0.16742     | 0.9644   | 0.16742 | 0.9644  |
|             | 0.16742         | 0.9644      | 0.16742 | 0.16742     | 0.610492182 |          |         |         |
| PICALM      | ENSG00000073921 | -0.61227    | 0.72982 | 0.72982     | 0.96438     | 0.16743  | 0.92348 |         |
|             | 0.17788         | 0.35153     | 0.3626  | 0.16743     | 0.610492182 |          |         |         |
| TCTN1       | ENSG00000204852 | 0.9643      | 0.16745 | 0.16745     | 0.49778     | 0.30932  | 0.82308 | 0.20523 |
|             | 0.37708         | 0.35306     | 0.16745 | 0.610492182 |             |          |         |         |
| NA          | ENSG00000243273 | 0.96428     | 0.16745 | 0.16745     | 0.96428     | 0.16745  | 0.96428 | 0.16745 |
|             | 0.96428         | 0.16745     | 0.16745 | 0.610492182 |             |          |         |         |
| NA          | ENSG00000249815 | 0.45697     | 0.32385 | -0.59259    | 0.72327     | -0.52584 | 0.7005  |         |
|             | 0.96429         | 0.16745     | 0.16745 | 0.610492182 |             |          |         |         |
| NA          | ENSG00000204055 | -0.82809    | 0.79619 | -0.072293   | 0.52882     | 0.96421  | 0.16747 |         |
|             | 0.7298          | 0.23276     | 0.16747 | 0.610519421 |             |          |         |         |
| NA          | ENSG00000226780 | 0.10394     | 0.45861 | -0.33349    | 0.63062     | 0.96403  | 0.16752 |         |
|             | -0.085961       | 0.53425     | 0.16752 | 0.610610337 |             |          |         |         |
| NA          | ENSG00000279910 | 0.84803     | 0.19821 | 0.96401     | 0.16752     | 0.76356  | 0.22257 |         |
|             | 0.76356         | 0.22257     | 0.16752 | 0.610610337 |             |          |         |         |
| RNU6-110P   | ENSG00000207237 | 0.17648     | 0.42996 | 0.96392     | 0.16754     | 0.96392  |         |         |
|             | 0.16754         | 0.96392     | 0.16754 | 0.16754     | 0.610637562 |          |         |         |
| MRPS33P2    | ENSG00000249649 | -0.083745   | 0.53337 | 0.40424     | 0.34302     | 0.96386  |         |         |
|             | 0.16756         | -0.083745   | 0.53337 | 0.16756     | 0.610664782 |          |         |         |
| LINC02380   | ENSG00000248505 | 0.44059     | 0.32976 | -0.64425    | 0.74029     | 0.96379  |         |         |
|             | 0.16758         | 0.96379     | 0.16758 | 0.16758     | 0.610691998 |          |         |         |
| MRPS12      | ENSG00000128626 | 0.96369     | 0.1676  | 0.96369     | 0.1676      | 0.96369  |         |         |
|             | 0.1676          | 0.96369     | 0.1676  | 0.1676      | 0.61071921  |          |         |         |
| NRBF2P1     | ENSG00000267797 | -1.4079     | 0.92042 | 0.25531     | 0.39924     | 0.96352  |         |         |
|             | 0.16764         | -1.7066     | 0.95605 | 0.16764     | 0.610819291 |          |         |         |
| NA          | ENSG00000223428 | 0.96324     | 0.16771 | 0.96324     | 0.16771     | 0.96324  | 0.16771 |         |
|             | 0.15931         | 0.43671     | 0.16771 | 0.610955243 |             |          |         |         |
| KRT18P29    | ENSG00000213958 | -0.26595    | 0.60486 | -0.26595    | 0.60486     | -0.26595 |         |         |
|             | 0.60486         | 0.96321     | 0.16772 | 0.16772     | 0.610955243 |          |         |         |
| NA          | ENSG00000274340 | -0.99819    | 0.84091 | 0.9632      | 0.16772     | 0.31606  | 0.37598 |         |
|             | 0.65642         | 0.25578     | 0.16772 | 0.610955243 |             |          |         |         |
| RNA5SP184   | ENSG00000223003 | 0.27182     | 0.39288 | 0.27182     | 0.39288     | 0.96313  |         |         |
|             | 0.16774         | 0.27182     | 0.39288 | 0.16774     | 0.610955243 |          |         |         |
| NA          | ENSG00000274310 | 0.47508     | 0.31737 | 0.47508     | 0.31737     | 0.96312  | 0.16774 |         |
|             | 0.47508         | 0.31737     | 0.16774 | 0.610955243 |             |          |         |         |
| TP73-AS1    | ENSG00000227372 | 0.95428     | 0.16997 | 0.96307     | 0.16776     | 0.96307  |         |         |
|             | 0.16776         | 0.96307     | 0.16776 | 0.16776     | 0.610982422 |          |         |         |
| RNU6-1299P  | ENSG00000252125 | -0.14044    | 0.55585 | -1.0175     | 0.84555     | 0.33337  |         |         |
|             | 0.36943         | 0.9628      | 0.16782 | 0.16782     | 0.611155265 |          |         |         |
| MARK2P8     | ENSG00000239503 | -0.22318    | 0.5883  | -0.66987    | 0.74853     | 0.96272  |         |         |
|             | 0.16785         | -1.0879     | 0.86168 | 0.16785     | 0.611218839 |          |         |         |
| OR4D7P      | ENSG00000254770 | 0.69642     | 0.24308 | 0.96253     | 0.16789     | 0.80119  |         |         |
|             | 0.21151         | -0.15183    | 0.56034 | 0.16789     | 0.611263877 |          |         |         |
| NA          | ENSG00000283879 | 0.96252     | 0.16789 | 0.96252     | 0.16789     | 0.96252  | 0.16789 |         |
|             | 0.96252         | 0.16789     | 0.16789 | 0.611263877 |             |          |         |         |
| IGLV4-60    | ENSG00000211639 | 0.86102     | 0.19461 | 0.86102     | 0.19461     | 0.86102  |         |         |
|             | 0.19461         | 0.96248     | 0.1679  | 0.1679      | 0.611263877 |          |         |         |
| MSLNL       | ENSG00000162006 | -0.49727    | 0.6905  | 0.96225     | 0.16796     | 0.19264  | 0.42362 |         |
|             | -0.064425       | 0.52568     | 0.16796 | 0.611333391 |             |          |         |         |
| DOK7        | ENSG00000175920 | 0.12781     | 0.44915 | 0.44158     | 0.3294      | 0.96211  | 0.168   |         |
|             | -0.018032       | 0.50719     | 0.168   | 0.611333391 |             |          |         |         |
| NA          | ENSG00000279068 | 0.96209     | 0.168   | 0.96209     | 0.168       | 0.96209  | 0.168   | 0.168   |
|             | 0.168           | 0.611333391 |         |             |             |          |         |         |
| RPL39P25    | ENSG00000227271 | 0.96205     | 0.16801 | 0.96205     | 0.16801     | 0.96205  |         |         |
|             | 0.16801         | 0.96205     | 0.16801 | 0.16801     | 0.611333391 |          |         |         |
| NA          | ENSG00000229969 | -0.45677    | 0.67608 | 0.96199     | 0.16803     | -0.10608 | 0.54224 |         |
|             | 0.63454         | 0.26287     | 0.16803 | 0.611333391 |             |          |         |         |
| NA          | ENSG00000239696 | 0.96196     | 0.16804 | 0.57737     | 0.28184     | -0.19175 | 0.57603 |         |



|              |                 |           |         |             |             |          |         |  |
|--------------|-----------------|-----------|---------|-------------|-------------|----------|---------|--|
|              | -0.19175        | 0.57603   | 0.16804 | 0.611333391 |             |          |         |  |
| NUBPL        | ENSG00000151413 | 0.83943   | 0.20061 | 0.96191     | 0.16805     | 0.80879  | 0.20932 |  |
|              | 0.57439         | 0.28285   | 0.16805 | 0.611333391 |             |          |         |  |
| NA           | ENSG00000273382 | 0.96191   | 0.16805 | 0.96191     | 0.16805     | 0.96191  | 0.16805 |  |
|              | 0.96191         | 0.16805   | 0.16805 | 0.611333391 |             |          |         |  |
| PAPLN        | ENSG00000100767 | 0.96186   | 0.16806 | 0.68035     | 0.24814     | 0.32052  | 0.37429 |  |
|              | 0.82474         | 0.20476   | 0.16806 | 0.611333391 |             |          |         |  |
| NA           | ENSG00000226649 | 0.89684   | 0.1849  | 0.89684     | 0.1849      | 0.89684  | 0.1849  |  |
|              | 0.96181         | 0.16807   | 0.16807 | 0.611333391 |             |          |         |  |
| NA           | ENSG00000254020 | 0.96172   | 0.16809 | 0.96172     | 0.16809     | 0.96172  | 0.16809 |  |
|              | 0.96172         | 0.16809   | 0.16809 | 0.611333391 |             |          |         |  |
| NA           | ENSG00000274387 | -0.43395  | 0.66784 | 0.96174     | 0.16809     | 0.080568 | 0.46789 |  |
|              | 0.080568        | 0.46789   | 0.16809 | 0.611333391 |             |          |         |  |
| CD200R1L-AS1 | ENSG00000242770 | 0.96171   | 0.1681  | 0.010647    | 0.49575     | 0.96171  |         |  |
|              | 0.1681          | 0.96171   | 0.1681  | 0.611333391 |             |          |         |  |
| SLC20A1      | ENSG00000144136 | -0.013143 | 0.50524 | -0.013143   | 0.50524     | -0.34764 |         |  |
|              | 0.63594         | 0.96166   | 0.16811 | 0.16811     | 0.611333391 |          |         |  |
| RNU6-729P    | ENSG00000207128 | -0.22901  | 0.59057 | -0.22901    | 0.59057     | 0.96166  |         |  |
|              | 0.16811         | 0.085602  | 0.46589 | 0.16811     | 0.611333391 |          |         |  |
| NA           | ENSG00000239983 | 0.38112   | 0.35156 | -0.4305     | 0.66659     | 0.96159  | 0.16813 |  |
|              | 0.96159         | 0.16813   | 0.16813 | 0.611333391 |             |          |         |  |
| ATG16L1      | ENSG00000085978 | 0.96152   | 0.16815 | -0.39036    | 0.65186     | -0.27056 |         |  |
|              | 0.60664         | -0.3502   | 0.6369  | 0.16815     | 0.611333391 |          |         |  |
| TRMT6        | ENSG00000089195 | 0.96152   | 0.16815 | -0.25117    | 0.59916     | -1.018   | 0.84566 |  |
|              | -0.25819        | 0.60187   | 0.16815 | 0.611333391 |             |          |         |  |
| NA           | ENSG00000245688 | -0.13982  | 0.5556  | 0.96146     | 0.16816     | -0.4305  | 0.66658 |  |
|              | -0.4305         | 0.66658   | 0.16816 | 0.611333391 |             |          |         |  |
| NDRG4        | ENSG00000103034 | -0.56658  | 0.7145  | 0.96143     | 0.16817     | 0.94007  | 0.17359 |  |
|              | 0.16731         | 0.43356   | 0.16817 | 0.611333391 |             |          |         |  |
| CXXC1        | ENSG00000154832 | 0.96129   | 0.1682  | 0.96129     | 0.1682      | 0.96129  | 0.1682  |  |
|              | -0.13908        | 0.55531   | 0.1682  | 0.611351234 |             |          |         |  |
| Clorf226     | ENSG00000239887 | 0.31591   | 0.37603 | 0.96131     | 0.1682      | 0.96131  |         |  |
|              | 0.1682          | 0.33683   | 0.36812 | 0.1682      | 0.611351234 |          |         |  |
| NA           | ENSG00000218730 | 0.96111   | 0.16825 | 0.96111     | 0.16825     | 0.96111  | 0.16825 |  |
|              | 0.96111         | 0.16825   | 0.16825 | 0.611487358 |             |          |         |  |
| NA           | ENSG00000202335 | 0.96085   | 0.16831 | 0.96085     | 0.16831     | 0.96085  | 0.16831 |  |
|              | 0.96085         | 0.16831   | 0.16831 | 0.611609744 |             |          |         |  |
| NA           | ENSG00000254205 | 0.65099   | 0.25753 | 0.56654     | 0.28551     | 0.65099  | 0.25753 |  |
|              | 0.96082         | 0.16832   | 0.16832 | 0.611609744 |             |          |         |  |
| LINC02669    | ENSG00000233321 | -0.69835  | 0.75752 | 0.9226      | 0.17811     | 0.96074  |         |  |
|              | 0.16834         | -0.33379  | 0.63073 | 0.16834     | 0.611609744 |          |         |  |
| NA           | ENSG00000269415 | -0.01738  | 0.50693 | 0.96076     | 0.16834     | -1.6502  | 0.95055 |  |
|              | -1.6502         | 0.95055   | 0.16834 | 0.611609744 |             |          |         |  |
| KLF3         | ENSG00000109787 | 0.96067   | 0.16836 | 0.87262     | 0.19143     | 0.56882  | 0.28474 |  |
|              | 0.92526         | 0.17742   | 0.16836 | 0.611609744 |             |          |         |  |
| SLC6A3       | ENSG00000142319 | 0.34807   | 0.3639  | 0.2853      | 0.38771     | 0.85845  |         |  |
|              | 0.19532         | 0.96059   | 0.16838 | 0.16838     | 0.611609744 |          |         |  |
| RNA5SP207    | ENSG00000212176 | 0.96058   | 0.16838 | 0.96058     | 0.16838     | 0.96058  |         |  |
|              | 0.16838         | 0.96058   | 0.16838 | 0.16838     | 0.611609744 |          |         |  |
| NA           | ENSG00000260387 | -0.86813  | 0.80734 | 0.96037     | 0.16843     | -1.3541  | 0.91215 |  |
|              | 0.12078         | 0.45193   | 0.16843 | 0.611609744 |             |          |         |  |
| NRG4         | ENSG00000169752 | -0.72334  | 0.76527 | 0.8901      | 0.18671     | -0.5868  | 0.72133 |  |
|              | 0.9603          | 0.16845   | 0.16845 | 0.611609744 |             |          |         |  |
| MALRD1       | ENSG00000204740 | 0.96018   | 0.16848 | -0.64524    | 0.74061     | -0.85782 |         |  |
|              | 0.8045          | -0.045785 | 0.51826 | 0.16848     | 0.611609744 |          |         |  |
| NA           | ENSG00000230387 | 0.96019   | 0.16848 | 0.96019     | 0.16848     | 0.62607  | 0.26564 |  |
|              | 0.86004         | 0.19488   | 0.16848 | 0.611609744 |             |          |         |  |
| B3GLCT       | ENSG00000187676 | 0.96009   | 0.1685  | 0.073651    | 0.47064     | 0.6573   |         |  |
|              | 0.25549         | -0.029753 | 0.51187 | 0.1685      | 0.611609744 |          |         |  |
| GOLIM4       | ENSG00000173905 | -1.769    | 0.96155 | 0.20125     | 0.42025     | 0.96008  |         |  |
|              | 0.16851         | -0.053254 | 0.52124 | 0.16851     | 0.611609744 |          |         |  |
| NA           | ENSG00000213153 | 0.96008   | 0.16851 | 0.96008     | 0.16851     | 0.69842  | 0.24246 |  |

|           |                 |            |         |             |             |          |         |  |
|-----------|-----------------|------------|---------|-------------|-------------|----------|---------|--|
|           | 0.49142         | 0.31156    | 0.16851 | 0.611609744 |             |          |         |  |
| VN1R66P   | ENSG00000237185 | 0.18062    | 0.42833 | 0.29006     | 0.38589     | 0.96008  |         |  |
|           | 0.16851         | 0.51691    | 0.30261 | 0.16851     | 0.611609744 |          |         |  |
| PEBP1P1   | ENSG00000259059 | 0.9272     | 0.17691 | -0.029493   | 0.51176     | 0.96005  |         |  |
|           | 0.16851         | 0.91674    | 0.17964 | 0.16851     | 0.611609744 |          |         |  |
| NA        | ENSG00000263271 | 0.96008    | 0.16851 | 0.69347     | 0.24401     | 0.69347  | 0.24401 |  |
|           | 0.69347         | 0.24401    | 0.16851 | 0.611609744 |             |          |         |  |
| LINC01262 | ENSG00000250739 | 0.96002    | 0.16852 | -0.16933    | 0.56723     | -0.36948 |         |  |
|           | 0.64411         | -0.0067174 | 0.50268 | 0.16852     | 0.611609744 |          |         |  |
| NA        | ENSG00000260635 | 0.95998    | 0.16853 | 0.95998     | 0.16853     | 0.95998  | 0.16853 |  |
|           | 0.95998         | 0.16853    | 0.16853 | 0.611609744 |             |          |         |  |
| ACTG1P15  | ENSG00000259904 | 0.95994    | 0.16854 | 0.95994     | 0.16854     | 0.92637  |         |  |
|           | 0.17713         | 0.92637    | 0.17713 | 0.16854     | 0.611609744 |          |         |  |
| APOA5     | ENSG00000110243 | 0.43405    | 0.33213 | -0.18276    | 0.57251     | 0.95988  | 0.16856 |  |
|           | 0.12347         | 0.45087    | 0.16856 | 0.611609744 |             |          |         |  |
| NA        | ENSG00000182376 | 0.043689   | 0.48258 | 0.95985     | 0.16857     | 0.043689 | 0.48258 |  |
|           | 0.043689        | 0.48258    | 0.16857 | 0.611609744 |             |          |         |  |
| GJA3      | ENSG00000121743 | -0.93272   | 0.82452 | -0.57608    | 0.71772     | 0.9598   | 0.16858 |  |
|           | -0.048073       | 0.51917    | 0.16858 | 0.611609744 |             |          |         |  |
| BSND      | ENSG00000162399 | 0.62647    | 0.2655  | 0.95977     | 0.16859     | 0.62647  | 0.2655  |  |
|           | 0.95089         | 0.17083    | 0.16859 | 0.611609744 |             |          |         |  |
| RERGL     | ENSG00000111404 | 0.9597     | 0.1686  | 0.9597      | 0.1686      | 0.9597   | 0.1686  |  |
|           | 0.9597          | 0.1686     | 0.1686  | 0.611609744 |             |          |         |  |
| MGARP     | ENSG00000137463 | 0.33502    | 0.3688  | 0.36649     | 0.357       | 0.95968  | 0.16861 |  |
|           | 0.16375         | 0.43497    | 0.16861 | 0.611609744 |             |          |         |  |
| NA        | ENSG00000231794 | 0.95948    | 0.16866 | 0.95948     | 0.16866     | 0.95948  | 0.16866 |  |
|           | 0.95948         | 0.16866    | 0.16866 | 0.611672275 |             |          |         |  |
| NA        | ENSG00000272100 | 0.95944    | 0.16867 | 0.95944     | 0.16867     | 0.95944  | 0.16867 |  |
|           | 0.95944         | 0.16867    | 0.16867 | 0.611672275 |             |          |         |  |
| PLA2G2D   | ENSG00000117215 | -0.66692   | 0.74759 | 0.45427     | 0.32482     | -0.50645 |         |  |
|           | 0.69373         | 0.95939    | 0.16868 | 0.16868     | 0.611672275 |          |         |  |
| LINC01974 | ENSG00000262031 | 0.82235    | 0.20544 | 0.83706     | 0.20128     | 0.95941  |         |  |
|           | 0.16868         | 0.95941    | 0.16868 | 0.16868     | 0.611672275 |          |         |  |
| MAP2K4    | ENSG00000065559 | 0.95934    | 0.16869 | 0.4437      | 0.32863     | -0.29727 |         |  |
|           | 0.61687         | -0.061011  | 0.52432 | 0.16869     | 0.611672275 |          |         |  |
| NA        | ENSG00000240052 | -0.29388   | 0.61557 | -0.55782    | 0.71152     | -0.23852 | 0.59426 |  |
|           | 0.95922         | 0.16872    | 0.16872 | 0.611726278 |             |          |         |  |
| NA        | ENSG00000204752 | 0.95918    | 0.16873 | 0.95918     | 0.16873     | 0.95918  | 0.16873 |  |
|           | 0.95918         | 0.16873    | 0.16873 | 0.611726278 |             |          |         |  |
| NA        | ENSG00000276612 | 0.9591     | 0.16875 | 0.9591      | 0.16875     | 0.9591   | 0.16875 |  |
|           | 0.9591          | 0.16875    | 0.16875 | 0.611752491 |             |          |         |  |
| TMCC3     | ENSG00000057704 | -1.5467    | 0.93904 | 0.959       | 0.16878     | -0.16516 | 0.56559 |  |
|           | -0.14733        | 0.55856    | 0.16878 | 0.611752491 |             |          |         |  |
| ZNF705E   | ENSG00000214534 | 0.018085   | 0.49279 | 0.21876     | 0.41342     | 0.95898  |         |  |
|           | 0.16878         | -0.71842   | 0.76375 | 0.16878     | 0.611752491 |          |         |  |
| RNU7-96P  | ENSG00000238719 | 0.95892    | 0.1688  | 0.95892     | 0.1688      | 0.95892  |         |  |
|           | 0.1688          | 0.95892    | 0.1688  | 0.1688      | 0.611752491 |          |         |  |
| NA        | ENSG00000211732 | 0.56292    | 0.28674 | -0.23345    | 0.5923      | 0.95894  | 0.1688  |  |
|           | 0.10927         | 0.45649    | 0.1688  | 0.611752491 |             |          |         |  |
| ZNF585A   | ENSG00000196967 | 0.37591    | 0.35349 | 0.95879     | 0.16883     | 0.7801   |         |  |
|           | 0.21767         | 0.77838    | 0.21817 | 0.16883     | 0.611770219 |          |         |  |
| CPEB2-DT  | ENSG00000247624 | 0.47745    | 0.31652 | -0.89934    | 0.81577     | 0.95882  |         |  |
|           | 0.16883         | -0.24873   | 0.59822 | 0.16883     | 0.611770219 |          |         |  |
| CCDC58P1  | ENSG00000264311 | 0.95868    | 0.16886 | 0.95868     | 0.16886     | 0.95868  |         |  |
|           | 0.16886         | 0.95868    | 0.16886 | 0.16886     | 0.61183343  |          |         |  |
| ECI2      | ENSG00000198721 | 0.95857    | 0.16889 | 0.85016     | 0.19762     | 0.85016  | 0.19762 |  |
|           | 0.85016         | 0.19762    | 0.16889 | 0.611896632 |             |          |         |  |
| SAMD3     | ENSG00000164483 | 0.95827    | 0.16896 | 0.85811     | 0.19542     | 0.90719  | 0.18215 |  |
|           | -0.25476        | 0.60055    | 0.16896 | 0.612059233 |             |          |         |  |
| RN7SKP49  | ENSG00000252484 | -0.84221   | 0.80016 | -0.84221    | 0.80016     | 0.95829  |         |  |
|           | 0.16896         | -0.84221   | 0.80016 | 0.16896     | 0.612059233 |          |         |  |
| NA        | ENSG00000228510 | -1.2941    | 0.90219 | 0.95821     | 0.16898     | 0.26799  | 0.39435 |  |

|            |                 |          |         |             |             |           |         |  |
|------------|-----------------|----------|---------|-------------|-------------|-----------|---------|--|
|            | 0.015796        | 0.4937   | 0.16898 | 0.612076906 |             |           |         |  |
| NA         | ENSG00000228702 | 0.67807  | 0.24886 | 0.95816     | 0.16899     | -1.3855   | 0.91704 |  |
|            | -1.3855         | 0.91704  | 0.16899 | 0.612076906 |             |           |         |  |
| NA         | ENSG00000250195 | 0.78834  | 0.21525 | 0.087203    | 0.46526     | 0.9581    | 0.16901 |  |
|            | 0.55363         | 0.28992  | 0.16901 | 0.61210385  |             |           |         |  |
| RSF1-IT2   | ENSG00000254985 | 0.95793  | 0.16905 | 0.95793     | 0.16905     | 0.95793   |         |  |
|            | 0.16905         | 0.95793  | 0.16905 | 0.16905     | 0.612184656 |           |         |  |
| OR7E8P     | ENSG00000177400 | 0.95788  | 0.16906 | 0.60666     | 0.27204     | 0.14515   |         |  |
|            | 0.44229         | 0.82862  | 0.20366 | 0.16906     | 0.612184656 |           |         |  |
| TFAP2E     | ENSG00000116819 | 0.95784  | 0.16907 | 0.016256    | 0.49351     | -0.13264  |         |  |
|            | 0.55276         | 0.55162  | 0.2906  | 0.16907     | 0.612184656 |           |         |  |
| NA         | ENSG00000282418 | -0.65834 | 0.74484 | 0.95767     | 0.16911     | 0.61088   | 0.27064 |  |
|            | -0.14451        | 0.55745  | 0.16911 | 0.612246862 |             |           |         |  |
| INO80B     | ENSG00000115274 | 0.95761  | 0.16913 | 0.90426     | 0.18293     | 0.95761   |         |  |
|            | 0.16913         | 0.94978  | 0.17111 | 0.16913     | 0.612246862 |           |         |  |
| LRRC66     | ENSG00000188993 | 0.95759  | 0.16913 | 0.90165     | 0.18362     | 0.74756   |         |  |
|            | 0.22736         | 0.74756  | 0.22736 | 0.16913     | 0.612246862 |           |         |  |
| NA         | ENSG00000224887 | 0.95754  | 0.16915 | 0.95754     | 0.16915     | 0.95754   | 0.16915 |  |
|            | 0.95754         | 0.16915  | 0.16915 | 0.612246862 |             |           |         |  |
| NA         | ENSG00000277684 | 0.50634  | 0.30631 | -0.05744    | 0.5229      | 0.95754   | 0.16915 |  |
|            | 0.95754         | 0.16915  | 0.16915 | 0.612246862 |             |           |         |  |
| ZNRF2      | ENSG00000180233 | 0.32648  | 0.37203 | 0.95745     | 0.16917     | -0.72306  | 0.76518 |  |
|            | 0.64606         | 0.25912  | 0.16917 | 0.612273775 |             |           |         |  |
| TTC39C-AS1 | ENSG00000264745 | 0.20626  | 0.41829 | -1.5626     | 0.94093     | 0.95735   |         |  |
|            | 0.1692          | 0.051131 | 0.47961 | 0.1692      | 0.612282119 |           |         |  |
| POLR3B     | ENSG00000013503 | 0.8876   | 0.18738 | 0.70206     | 0.24132     | 0.0033298 |         |  |
|            | 0.49867         | 0.9573   | 0.16921 | 0.16921     | 0.612282119 |           |         |  |
| NA         | ENSG00000257700 | 0.95731  | 0.16921 | 0.95731     | 0.16921     | 0.95731   | 0.16921 |  |
|            | 0.95731         | 0.16921  | 0.16921 | 0.612282119 |             |           |         |  |
| HMGB1P10   | ENSG00000213707 | 0.95721  | 0.16923 | 0.95721     | 0.16923     | 0.95721   |         |  |
|            | 0.16923         | 0.95721  | 0.16923 | 0.16923     | 0.61229974  |           |         |  |
| RHOBTB3    | ENSG00000164292 | 0.95719  | 0.16924 | -1.329      | 0.90808     | 0.037284  |         |  |
|            | 0.48513         | -0.54453 | 0.70696 | 0.16924     | 0.61229974  |           |         |  |
| NA         | ENSG00000250421 | -0.78983 | 0.78519 | -1.1615     | 0.87729     | 0.033256  | 0.48674 |  |
|            | 0.95692         | 0.1693   | 0.1693  | 0.612471344 |             |           |         |  |
| GPRIN1     | ENSG00000169258 | 0.47873  | 0.31606 | 0.11009     | 0.45617     | 0.9568    |         |  |
|            | 0.16933         | -0.52647 | 0.70072 | 0.16933     | 0.612488933 |           |         |  |
| RIPPLY2    | ENSG00000203877 | 0.62173  | 0.26706 | 0.95682     | 0.16933     | 0.62173   |         |  |
|            | 0.26706         | 0.62173  | 0.26706 | 0.16933     | 0.612488933 |           |         |  |
| NA         | ENSG00000279703 | 0.95667  | 0.16937 | 0.95667     | 0.16937     | 0.95667   | 0.16937 |  |
|            | -1.2569         | 0.8956   | 0.16937 | 0.612545028 |             |           |         |  |
| TNF        | ENSG00000232810 | 0.95653  | 0.1694  | 0.95653     | 0.1694      | 0.95653   | 0.1694  |  |
|            | 0.95653         | 0.1694   | 0.1694  | 0.612545028 |             |           |         |  |
| NA         | ENSG00000271498 | 0.95648  | 0.16941 | 0.95648     | 0.16941     | 0.95648   | 0.16941 |  |
|            | 0.95648         | 0.16941  | 0.16941 | 0.612545028 |             |           |         |  |
| OOEP-AS1   | ENSG00000231332 | 0.95641  | 0.16943 | 0.95641     | 0.16943     | 0.95641   |         |  |
|            | 0.16943         | 0.62967  | 0.26446 | 0.16943     | 0.612545028 |           |         |  |
| RNA5SP297  | ENSG00000212331 | 0.95639  | 0.16944 | 0.085587    | 0.4659      | -1.4219   |         |  |
|            | 0.92248         | -0.50255 | 0.69236 | 0.16944     | 0.612545028 |           |         |  |
| WRAP73     | ENSG00000116213 | 0.95634  | 0.16945 | 0.95634     | 0.16945     | 0.95634   |         |  |
|            | 0.16945         | 0.95634  | 0.16945 | 0.16945     | 0.612545028 |           |         |  |
| MIR4689    | ENSG00000264101 | 0.020268 | 0.49191 | 0.95631     | 0.16946     | 0.95631   |         |  |
|            | 0.16946         | 0.95631  | 0.16946 | 0.16946     | 0.612545028 |           |         |  |
| BIVM       | ENSG00000134897 | 0.15261  | 0.43935 | 0.75879     | 0.22399     | 0.95609   | 0.16951 |  |
|            | 0.32551         | 0.3724   | 0.16951 | 0.612545028 |             |           |         |  |
| TSPY26P    | ENSG00000235217 | 0.95611  | 0.16951 | 0.95611     | 0.16951     | 0.95611   |         |  |
|            | 0.16951         | 0.95611  | 0.16951 | 0.16951     | 0.612545028 |           |         |  |
| NA         | ENSG00000236408 | 0.29335  | 0.38463 | 0.95607     | 0.16952     | 0.2064    | 0.41824 |  |
|            | 0.2064          | 0.41824  | 0.16952 | 0.612545028 |             |           |         |  |
| HNRNPA1P18 | ENSG00000229910 | 0.95598  | 0.16954 | -1.0235     | 0.84695     | 0.95598   |         |  |
|            | 0.16954         | 0.95598  | 0.16954 | 0.16954     | 0.612545028 |           |         |  |
| NFKBIL1    | ENSG00000204498 | 0.047197 | 0.48118 | 0.44377     | 0.3286      | 0.95588   |         |  |

|            |                 |           |         |             |             |           |         |  |
|------------|-----------------|-----------|---------|-------------|-------------|-----------|---------|--|
|            | 0.16957         | -0.20488  | 0.58117 | 0.16957     | 0.612545028 |           |         |  |
| FBLN1      | ENSG00000077942 | 0.95572   | 0.16961 | -0.46423    | 0.67876     | 0.80083   | 0.21161 |  |
|            | 0.80948         | 0.20912   | 0.16961 | 0.612545028 |             |           |         |  |
| NA         | ENSG00000220548 | 0.83496   | 0.20187 | 0.44193     | 0.32927     | 0.24587   | 0.40289 |  |
|            | 0.95569         | 0.16962   | 0.16962 | 0.612545028 |             |           |         |  |
| PSD4       | ENSG00000125637 | -0.24573  | 0.59705 | 0.95565     | 0.16963     | -0.95491  | 0.83019 |  |
|            | -0.24573        | 0.59705   | 0.16963 | 0.612545028 |             |           |         |  |
| NA         | ENSG00000227360 | 0.19877   | 0.42122 | 0.95558     | 0.16964     | -0.30175  | 0.61858 |  |
|            | 0.19877         | 0.42122   | 0.16964 | 0.612545028 |             |           |         |  |
| LINC02097  | ENSG00000226101 | 0.18966   | 0.42479 | -1.0192     | 0.84596     | 0.56102   |         |  |
|            | 0.28739         | 0.95555   | 0.16965 | 0.16965     | 0.612545028 |           |         |  |
| ZNF792     | ENSG00000180884 | 0.9555    | 0.16966 | 0.59188     | 0.27697     | 0.59188   |         |  |
|            | 0.27697         | 0.59188   | 0.27697 | 0.16966     | 0.612545028 |           |         |  |
| DCBLD2     | ENSG00000057019 | -0.10913  | 0.54345 | -0.094456   | 0.53763     | 0.22222   |         |  |
|            | 0.41207         | 0.95544   | 0.16968 | 0.16968     | 0.612545028 |           |         |  |
| NA         | ENSG00000267529 | 0.95544   | 0.16968 | 0.95544     | 0.16968     | 0.95544   | 0.16968 |  |
|            | 0.95544         | 0.16968   | 0.16968 | 0.612545028 |             |           |         |  |
| RNF185-AS1 | ENSG00000254835 | 0.95538   | 0.16969 | 0.95538     | 0.16969     | 0.95538   |         |  |
|            | 0.16969         | 0.95538   | 0.16969 | 0.16969     | 0.612545028 |           |         |  |
| NA         | ENSG00000269066 | -0.10884  | 0.54334 | 0.95527     | 0.16972     | -0.10884  | 0.54334 |  |
|            | -1.4221         | 0.92251   | 0.16972 | 0.612545028 |             |           |         |  |
| NF1P3      | ENSG00000183249 | -0.21454  | 0.58494 | 0.64282     | 0.26017     | 0.95522   | 0.16973 |  |
|            | 0.038578        | 0.48461   | 0.16973 | 0.612545028 |             |           |         |  |
| MED28P1    | ENSG00000214875 | 0.34463   | 0.36519 | 0.95514     | 0.16975     | 0.80507   |         |  |
|            | 0.21039         | 0.80507   | 0.21039 | 0.16975     | 0.612545028 |           |         |  |
| HOXC13     | ENSG00000123364 | 0.88583   | 0.18785 | 0.95507     | 0.16977     | 0.69939   |         |  |
|            | 0.24215         | -1.786    | 0.96295 | 0.16977     | 0.612545028 |           |         |  |
| NA         | ENSG00000268889 | 0.95502   | 0.16978 | 0.95502     | 0.16978     | 0.95502   | 0.16978 |  |
|            | 0.95502         | 0.16978   | 0.16978 | 0.612545028 |             |           |         |  |
| CD244      | ENSG00000122223 | 0.31756   | 0.37541 | 0.31756     | 0.37541     | 0.31756   | 0.37541 |  |
|            | 0.9549          | 0.16981   | 0.16981 | 0.612545028 |             |           |         |  |
| DACT1      | ENSG00000165617 | -0.024579 | 0.5098  | 0.176       | 0.43015     | 0.95491   | 0.16981 |  |
|            | 0.5401          | 0.29456   | 0.16981 | 0.612545028 |             |           |         |  |
| NA         | ENSG00000173966 | 0.95487   | 0.16982 | 0.95487     | 0.16982     | 0.95487   | 0.16982 |  |
|            | 0.95487         | 0.16982   | 0.16982 | 0.612545028 |             |           |         |  |
| NA         | ENSG00000243696 | 0.95483   | 0.16983 | 0.95483     | 0.16983     | 0.95483   | 0.16983 |  |
|            | 0.95483         | 0.16983   | 0.16983 | 0.612545028 |             |           |         |  |
| C1orf141   | ENSG00000203963 | 0.9548    | 0.16984 | 0.46537     | 0.32083     | 0.9548    |         |  |
|            | 0.16984         | 0.17912   | 0.42892 | 0.16984     | 0.612545028 |           |         |  |
| NA         | ENSG00000241525 | 0.71187   | 0.23827 | -0.0082915  | 0.50331     | 0.95468   | 0.16987 |  |
|            | 0.31594         | 0.37602   | 0.16987 | 0.612545028 |             |           |         |  |
| RNU7-129P  | ENSG00000251937 | -1.1905   | 0.88308 | -0.75874    | 0.77599     | 0.95466   |         |  |
|            | 0.16988         | 0.95466   | 0.16988 | 0.16988     | 0.612545028 |           |         |  |
| RPAP1      | ENSG00000103932 | 0.13609   | 0.44588 | 0.52544     | 0.29964     | 0.47295   | 0.31812 |  |
|            | 0.95462         | 0.16989   | 0.16989 | 0.612545028 |             |           |         |  |
| SOCS1      | ENSG00000185338 | -0.41036  | 0.65923 | -1.5395     | 0.93816     | -1.2578   | 0.89576 |  |
|            | 0.9546          | 0.16989   | 0.16989 | 0.612545028 |             |           |         |  |
| SRFBP1     | ENSG00000151304 | 0.95457   | 0.1699  | -0.60602    | 0.72775     | 0.95457   |         |  |
|            | 0.1699          | 0.95457   | 0.1699  | 0.1699      | 0.612545028 |           |         |  |
| NA         | ENSG00000279217 | 0.31863   | 0.375   | 0.030251    | 0.48793     | 0.95449   | 0.16992 |  |
|            | -0.66571        | 0.7472    | 0.16992 | 0.612545028 |             |           |         |  |
| AQP12B     | ENSG00000185176 | -0.10502  | 0.54182 | -0.076698   | 0.53057     | 0.95441   |         |  |
|            | 0.16994         | -0.31518  | 0.62369 | 0.16994     | 0.612545028 |           |         |  |
| NA         | ENSG00000229224 | 0.95438   | 0.16995 | -0.62133    | 0.73281     | -0.31148  | 0.62228 |  |
|            | -0.31148        | 0.62228   | 0.16995 | 0.612545028 |             |           |         |  |
| WDR63      | ENSG00000162643 | -0.84623  | 0.80129 | 0.042965    | 0.48286     | -0.90371  | 0.81692 |  |
|            | 0.95429         | 0.16997   | 0.16997 | 0.612545028 |             |           |         |  |
| BLZF2P     | ENSG00000258565 | 0.91847   | 0.17919 | 0.95427     | 0.16997     | 0.41774   |         |  |
|            | 0.33807         | 0.052331  | 0.47913 | 0.16997     | 0.612545028 |           |         |  |
| CRYGGP     | ENSG00000223710 | 0.95426   | 0.16998 | -0.48917    | 0.68764     | -0.48917  |         |  |
|            | 0.68764         | -0.48917  | 0.68764 | 0.16998     | 0.612545028 |           |         |  |
| CD9        | ENSG00000010278 | -0.65955  | 0.74523 | 0.9542      | 0.16999     | 0.0049158 | 0.49804 |  |

|                |                 |          |             |             |             |             |         |         |
|----------------|-----------------|----------|-------------|-------------|-------------|-------------|---------|---------|
|                | -0.59002        | 0.72241  | 0.16999     | 0.612545028 |             |             |         |         |
| LINC01216      | ENSG00000250223 | 0.95421  | 0.16999     | 0.95421     | 0.16999     | 0.95421     | 0.16999 | 0.95421 |
|                | 0.16999         | 0.95421  | 0.16999     | 0.16999     | 0.612545028 |             |         |         |
| NA             | ENSG00000199636 | 0.95413  | 0.17001     | 0.95413     | 0.17001     | 0.95413     | 0.17001 | 0.95413 |
|                | 0.95413         | 0.17001  | 0.17001     | 0.17001     | 0.612545028 |             |         |         |
| RNU6-752P      | ENSG00000252185 | 0.95413  | 0.17001     | 0.17001     | -0.6939     | 0.75613     | 0.95413 | 0.95413 |
|                | 0.17001         | 0.95413  | 0.17001     | 0.17001     | 0.17001     | 0.612545028 |         |         |
| RN7SKP213      | ENSG00000222678 | 0.94652  | 0.17194     | 0.94652     | 0.17194     | 0.94652     | 0.17194 | 0.94652 |
|                | 0.17194         | 0.95408  | 0.17002     | 0.17002     | 0.17002     | 0.612545028 |         |         |
| RPL31P47       | ENSG00000233541 | 0.95409  | 0.17002     | 0.95409     | 0.17002     | 0.95409     | 0.17002 | 0.95409 |
|                | 0.17002         | 0.95409  | 0.17002     | 0.17002     | 0.17002     | 0.612545028 |         |         |
| PSG10P         | ENSG00000248257 | -0.22121 | 0.58754     | 0.20255     | 0.41975     | 0.9541      |         |         |
|                | 0.17002         | 0.11309  | 0.45498     | 0.17002     | 0.612545028 |             |         |         |
| HSPB2-C11orf52 | ENSG00000254445 | 0.95408  | 0.17002     | 0.95408     | 0.17002     | 0.95408     | 0.17002 | 0.95408 |
|                | 0.17002         | 0.95408  | 0.17002     | 0.17002     | 0.17002     | 0.612545028 |         |         |
| AS3MT          | ENSG00000214435 | 0.31426  | 0.37666     | -0.79796    | 0.78755     | 0.38952     | 0.34845 | 0.34845 |
|                | 0.95402         | 0.17004  | 0.17004     | 0.17004     | 0.612545028 |             |         |         |
| ATP2A3         | ENSG00000074370 | -0.74682 | 0.77241     | 0.95397     | 0.17005     | -0.8498     |         |         |
|                | 0.80228         | -0.23595 | 0.59326     | 0.17005     | 0.612545028 |             |         |         |
| GOLGA6C        | ENSG00000167195 | 0.12699  | 0.44948     | -0.14688    | 0.55839     | 0.95393     |         |         |
|                | 0.17006         | -0.17541 | 0.56962     | 0.17006     | 0.612545028 |             |         |         |
| MAGEF1         | ENSG00000177383 | 0.051743 | 0.47937     | -0.55546    | 0.71071     | 0.95394     |         |         |
|                | 0.17006         | 0.94645  | 0.17196     | 0.17006     | 0.612545028 |             |         |         |
| DFFBP1         | ENSG00000232303 | 0.37104  | 0.3553      | 0.38686     | 0.34943     | 0.38686     |         |         |
|                | 0.34943         | 0.95393  | 0.17006     | 0.17006     | 0.612545028 |             |         |         |
| SPART          | ENSG00000133104 | 0.88902  | 0.187       | 0.61318     | 0.26988     | 0.3572      | 0.36047 | 0.36047 |
|                | 0.95387         | 0.17007  | 0.17007     | 0.17007     | 0.612545028 |             |         |         |
| CBX4           | ENSG00000141582 | -0.43468 | 0.6681      | -0.34007    | 0.6331      | 0.9539      | 0.17007 | 0.17007 |
|                | 0.3184          | 0.37509  | 0.17007     | 0.612545028 |             |             |         |         |
| SUSD5          | ENSG00000173705 | 0.90713  | 0.18217     | 0.95385     | 0.17008     | 0.95385     | 0.17008 | 0.17008 |
|                | 0.95385         | 0.17008  | 0.17008     | 0.612545028 |             |             |         |         |
| CDK5RAP1       | ENSG00000101391 | 0.24817  | 0.402       | 0.95381     | 0.17009     | -0.3059     | 0.62016 | 0.62016 |
|                | -0.27191        | 0.60715  | 0.17009     | 0.612545028 |             |             |         |         |
| NA             | ENSG00000231557 | 0.5436   | 0.29336     | 0.95374     | 0.17011     | 0.77477     | 0.21924 | 0.21924 |
|                | -0.22906        | 0.59059  | 0.17011     | 0.612545028 |             |             |         |         |
| LINC02343      | ENSG00000271850 | 0.95368  | 0.17012     | 0.95368     | 0.17012     | -0.44711    |         |         |
|                | 0.6726          | 0.95368  | 0.17012     | 0.17012     | 0.612545028 |             |         |         |
| IGKV1D-17      | ENSG00000242766 | 0.95367  | 0.17013     | 0.95367     | 0.17013     | 0.95367     |         |         |
|                | 0.17013         | 0.95367  | 0.17013     | 0.17013     | 0.612545028 |             |         |         |
| ZFP91-CNTF     | ENSG00000255073 | 0.95359  | 0.17014     | 0.95359     | 0.17014     | 0.95359     |         |         |
|                | 0.17014         | 0.95359  | 0.17014     | 0.17014     | 0.612545028 |             |         |         |
| INMT-MINDY4    | ENSG00000254959 | -2.0612  | 0.98036     | -2.0612     | 0.98036     | 0.34706     |         |         |
|                | 0.36427         | 0.95356  | 0.17015     | 0.17015     | 0.612545028 |             |         |         |
| NA             | ENSG00000282906 | 0.95348  | 0.17017     | 0.12955     | 0.44846     | 0.95348     | 0.17017 | 0.17017 |
|                | 0.85167         | 0.1972   | 0.17017     | 0.612571774 |             |             |         |         |
| NA             | ENSG00000225069 | -0.10547 | 0.542       | 0.95341     | 0.17019     | -0.81129    | 0.7914  | 0.7914  |
|                | -0.13817        | 0.55495  | 0.17019     | 0.612589261 |             |             |         |         |
| NA             | ENSG00000278698 | 0.95339  | 0.1702      | 0.95339     | 0.1702      | 0.95339     | 0.1702  | 0.1702  |
|                | 0.95339         | 0.1702   | 0.1702      | 0.612589261 |             |             |         |         |
| LMBRD1         | ENSG00000168216 | -0.98121 | 0.83676     | -1.088      | 0.86169     | 0.95328     |         |         |
|                | 0.17022         | 0.45444  | 0.32476     | 0.17022     | 0.612613936 |             |         |         |
| NUDT7          | ENSG00000140876 | 0.36977  | 0.35578     | 0.39886     | 0.345       | 0.39886     | 0.345   | 0.9532  |
|                | 0.17024         | 0.17024  | 0.612613936 |             |             |             |         |         |
| GPR33          | ENSG00000214943 | 0.95315  | 0.17026     | -0.44256    | 0.67096     | -1.414      | 0.92131 | 0.92131 |
|                | 0.27507         | 0.39163  | 0.17026     | 0.612613936 |             |             |         |         |
| NA             | ENSG00000250049 | 0.95314  | 0.17026     | -1.0518     | 0.85355     | -1.0518     | 0.85355 | 0.85355 |
|                | -1.0518         | 0.85355  | 0.17026     | 0.612613936 |             |             |         |         |
| FANCF          | ENSG00000183161 | 0.062457 | 0.4751      | 0.95299     | 0.1703      | 0.16082     | 0.43612 | 0.43612 |
|                | 0.95299         | 0.1703   | 0.1703      | 0.612613936 |             |             |         |         |
| TTC25          | ENSG00000204815 | 0.47482  | 0.31746     | 0.47482     | 0.31746     | 0.95298     | 0.1703  | 0.1703  |
|                | -1.033          | 0.84921  | 0.1703      | 0.612613936 |             |             |         |         |
| ELF3           | ENSG00000163435 | 0.53185  | 0.29742     | 0.50633     | 0.30631     | 0.78594     | 0.21595 | 0.21595 |

|           |                 |           |         |             |             |           |         |  |
|-----------|-----------------|-----------|---------|-------------|-------------|-----------|---------|--|
|           | 0.95293         | 0.17031   | 0.17031 | 0.612613936 |             |           |         |  |
| UPF3AP1   | ENSG00000226478 | 0.95291   | 0.17032 | -1.3792     | 0.91608     | -0.52289  |         |  |
|           | 0.69947         | -0.12514  | 0.54979 | 0.17032     | 0.612613936 |           |         |  |
| RPS3AP49  | ENSG00000242060 | 0.19134   | 0.42413 | 0.95289     | 0.17032     | 0.19134   |         |  |
|           | 0.42413         | -0.97427  | 0.83504 | 0.17032     | 0.612613936 |           |         |  |
| NA        | ENSG00000279833 | 0.9528    | 0.17034 | 0.9528      | 0.17034     | 0.9528    | 0.17034 |  |
|           | 0.9528          | 0.17034   | 0.17034 | 0.61262009  |             |           |         |  |
| NA        | ENSG00000234210 | -0.42446  | 0.66439 | -0.10392    | 0.54138     | 0.9527    | 0.17037 |  |
|           | 0.083102        | 0.46689   | 0.17037 | 0.61262009  |             |           |         |  |
| NA        | ENSG00000248648 | 0.95254   | 0.17041 | 0.95254     | 0.17041     | 0.95254   | 0.17041 |  |
|           | 0.95254         | 0.17041   | 0.17041 | 0.61262009  |             |           |         |  |
| TUSC3     | ENSG00000104723 | 0.15218   | 0.43952 | 0.95244     | 0.17044     | 0.3668    | 0.35689 |  |
|           | -0.25969        | 0.60245   | 0.17044 | 0.61262009  |             |           |         |  |
| SURF6     | ENSG00000148296 | 0.12097   | 0.45186 | 0.91324     | 0.18056     | 0.95241   | 0.17044 |  |
|           | -0.10223        | 0.54071   | 0.17044 | 0.61262009  |             |           |         |  |
| TAF11L13  | ENSG00000283776 | 0.95242   | 0.17044 | -0.34862    | 0.63631     | -0.63005  |         |  |
|           | 0.73567         | -0.63005  | 0.73567 | 0.17044     | 0.61262009  |           |         |  |
| ELK1P1    | ENSG00000234359 | 0.41299   | 0.33981 | -0.95032    | 0.82903     | 0.9524    |         |  |
|           | 0.17045         | 0.9524    | 0.17045 | 0.17045     | 0.61262009  |           |         |  |
| STK16     | ENSG00000115661 | 0.91422   | 0.1803  | 0.91422     | 0.1803      | 0.91422   | 0.1803  |  |
|           | 0.95236         | 0.17046   | 0.17046 | 0.61262009  |             |           |         |  |
| RSPH3     | ENSG00000130363 | 0.76287   | 0.22277 | 0.66876     | 0.25183     | 0.95234   | 0.17046 |  |
|           | 0.36668         | 0.35693   | 0.17046 | 0.61262009  |             |           |         |  |
| RNU6-376P | ENSG00000207462 | 0.43178   | 0.33295 | 0.90681     | 0.18225     | 0.91896   |         |  |
|           | 0.17906         | 0.95234   | 0.17046 | 0.17046     | 0.61262009  |           |         |  |
| NA        | ENSG00000269481 | 0.95235   | 0.17046 | 0.95235     | 0.17046     | 0.95235   | 0.17046 |  |
|           | 0.95235         | 0.17046   | 0.17046 | 0.61262009  |             |           |         |  |
| U2AF1L5   | ENSG00000275895 | 0.95217   | 0.1705  | 0.95217     | 0.1705      | 0.95217   |         |  |
|           | 0.1705          | 0.95217   | 0.1705  | 0.1705      | 0.612709409 |           |         |  |
| LINC01107 | ENSG00000225493 | 0.46281   | 0.32175 | 0.50194     | 0.30786     | 0.74852   |         |  |
|           | 0.22707         | 0.95214   | 0.17051 | 0.17051     | 0.612709409 |           |         |  |
| NA        | ENSG00000265490 | 0.95193   | 0.17056 | 0.95193     | 0.17056     | 0.95193   | 0.17056 |  |
|           | 0.95193         | 0.17056   | 0.17056 | 0.612778045 |             |           |         |  |
| DGCR2     | ENSG00000070413 | 0.29581   | 0.38369 | 0.29581     | 0.38369     | 0.67415   | 0.25011 |  |
|           | 0.95191         | 0.17057   | 0.17057 | 0.612778045 |             |           |         |  |
| RNA5SP190 | ENSG00000202092 | 0.49316   | 0.31095 | 0.95178     | 0.1706      | -0.87755  |         |  |
|           | 0.80991         | -0.49111  | 0.68833 | 0.1706      | 0.612778045 |           |         |  |
| NA        | ENSG00000234361 | -0.25044  | 0.59888 | 0.95179     | 0.1706      | -0.25044  | 0.59888 |  |
|           | -0.067676       | 0.52698   | 0.1706  | 0.612778045 |             |           |         |  |
| NA        | ENSG00000276007 | -0.17544  | 0.56963 | 0.95181     | 0.1706      | -0.17544  | 0.56963 |  |
|           | -0.17544        | 0.56963   | 0.1706  | 0.612778045 |             |           |         |  |
| CGB3      | ENSG00000104827 | 0.95175   | 0.17061 | 0.95175     | 0.17061     | 0.95175   | 0.17061 |  |
|           | 0.95175         | 0.17061   | 0.17061 | 0.612778045 |             |           |         |  |
| SNORD38C  | ENSG00000207109 | 0.9517    | 0.17063 | 0.9517      | 0.17063     | 0.9517    |         |  |
|           | 0.17063         | 0.9517    | 0.17063 | 0.17063     | 0.612778045 |           |         |  |
| NA        | ENSG00000270585 | 0.2263    | 0.41048 | -0.40427    | 0.65699     | 0.95168   | 0.17063 |  |
|           | 0.95168         | 0.17063   | 0.17063 | 0.612778045 |             |           |         |  |
| BZW1      | ENSG00000082153 | 0.95153   | 0.17067 | 0.42219     | 0.33644     | 0.95153   | 0.17067 |  |
|           | 0.13369         | 0.44683   | 0.17067 | 0.612778045 |             |           |         |  |
| UBB       | ENSG00000170315 | 0.95153   | 0.17067 | 0.54509     | 0.29285     | 0.95153   | 0.17067 |  |
|           | 0.95153         | 0.17067   | 0.17067 | 0.612778045 |             |           |         |  |
| NA        | ENSG00000230607 | 0.95154   | 0.17067 | 0.95154     | 0.17067     | 0.95154   | 0.17067 |  |
|           | 0.95154         | 0.17067   | 0.17067 | 0.612778045 |             |           |         |  |
| NA        | ENSG00000256321 | -0.82576  | 0.79553 | 0.95148     | 0.17068     | -0.82576  | 0.79553 |  |
|           | -0.82576        | 0.79553   | 0.17068 | 0.612778045 |             |           |         |  |
| RBFOX3    | ENSG00000167281 | -0.43932  | 0.66979 | 0.044167    | 0.48239     | 0.73041   |         |  |
|           | 0.23257         | 0.9513    | 0.17073 | 0.17073     | 0.612866146 |           |         |  |
| NA        | ENSG00000249022 | 0.78242   | 0.21698 | 0.18656     | 0.426085262 | 0.19693   |         |  |
|           | 0.9513          | 0.17073   | 0.17073 | 0.612866146 |             |           |         |  |
| NA        | ENSG00000255480 | -0.080371 | 0.53203 | 0.9512      | 0.17075     | -0.080371 | 0.53203 |  |
|           | -0.080371       | 0.53203   | 0.17075 | 0.612866146 |             |           |         |  |
| EIPR1-IT1 | ENSG00000224885 | -0.61078  | 0.72933 | -0.8824     | 0.81122     | -0.88154  |         |  |

|             |                 |           |         |             |             |           |         |
|-------------|-----------------|-----------|---------|-------------|-------------|-----------|---------|
|             | 0.81099         | 0.95115   | 0.17076 | 0.17076     | 0.612866146 |           |         |
| ARHGEF4     | ENSG00000136002 | 0.30315   | 0.38089 | 0.95113     | 0.17077     | -0.71956  |         |
|             | 0.7641          | -0.38798  | 0.65099 | 0.17077     | 0.612866146 |           |         |
| UBTD1       | ENSG00000165886 | 0.82583   | 0.20445 | 0.95109     | 0.17078     | 0.8954    | 0.18529 |
|             | -0.94121        | 0.8267    | 0.17078 | 0.612866146 |             |           |         |
| FAM219A     | ENSG00000164970 | -1.1041   | 0.86522 | -0.66437    | 0.74677     | 0.95101   |         |
|             | 0.1708          | -0.63541  | 0.73742 | 0.1708      | 0.612892784 |           |         |
| NA          | ENSG00000224136 | 0.95085   | 0.17084 | 0.95085     | 0.17084     | -0.55166  | 0.70941 |
|             | 0.95085         | 0.17084   | 0.17084 | 0.612991179 |             |           |         |
| PHKG2       | ENSG00000156873 | 0.95076   | 0.17086 | 0.22254     | 0.41195     | 0.31088   | 0.37795 |
|             | 0.23189         | 0.40831   | 0.17086 | 0.613017803 |             |           |         |
| PELI2       | ENSG00000139946 | 0.1978    | 0.4216  | 0.036527    | 0.48543     | 0.95051   | 0.17093 |
|             | 0.31807         | 0.37522   | 0.17093 | 0.613223802 |             |           |         |
| TUT4        | ENSG00000134744 | 0.95039   | 0.17096 | -1.3197     | 0.90653     | -0.0309   | 0.51233 |
|             | -0.17983        | 0.57136   | 0.17096 | 0.613238711 |             |           |         |
| NA          | ENSG00000234318 | -0.076376 | 0.53044 | 0.95036     | 0.17096     | -0.076376 | 0.53044 |
|             | -0.076376       | 0.53044   | 0.17096 | 0.613238711 |             |           |         |
| MIR134      | ENSG00000207993 | 0.95026   | 0.17099 | 0.95026     | 0.17099     | 0.95026   |         |
|             | 0.17099         | 0.95026   | 0.17099 | 0.17099     | 0.613238711 |           |         |
| NA          | ENSG00000226291 | 0.95018   | 0.17101 | 0.95018     | 0.17101     | 0.95018   | 0.17101 |
|             | 0.95018         | 0.17101   | 0.17101 | 0.613238711 |             |           |         |
| PGGHG       | ENSG00000142102 | 0.95015   | 0.17102 | -1.5427     | 0.93855     | -1.5427   | 0.93855 |
|             | -1.5427         | 0.93855   | 0.17102 | 0.613238711 |             |           |         |
| ATF6B       | ENSG00000213676 | 0.95016   | 0.17102 | 0.16854     | 0.43308     | -0.15482  | 0.56152 |
|             | -0.71442        | 0.76252   | 0.17102 | 0.613238711 |             |           |         |
| ZNF787      | ENSG00000142409 | 0.95009   | 0.17103 | 0.95009     | 0.17103     | 0.95009   |         |
|             | 0.17103         | 0.95009   | 0.17103 | 0.17103     | 0.613238711 |           |         |
| SDS         | ENSG00000135094 | 0.7981    | 0.21241 | 0.95007     | 0.17104     | -0.78595  | 0.78405 |
|             | -0.11701        | 0.54657   | 0.17104 | 0.613238711 |             |           |         |
| GSR         | ENSG00000104687 | 0.48077   | 0.31534 | -1.5489     | 0.9393      | 0.95004   | 0.17105 |
|             | -0.85515        | 0.80377   | 0.17105 | 0.613238711 |             |           |         |
| NA          | ENSG00000103200 | 0.27764   | 0.39064 | 0.94999     | 0.17106     | 0.94999   | 0.17106 |
|             | 0.67775         | 0.24896   | 0.17106 | 0.613238711 |             |           |         |
| NA          | ENSG00000216307 | 0.94985   | 0.17109 | -0.062873   | 0.52507     | 0.46312   | 0.32164 |
|             | 0.59921         | 0.27452   | 0.17109 | 0.61330114  |             |           |         |
| PUDPP3      | ENSG00000214245 | 0.94972   | 0.17113 | 0.94972     | 0.17113     | 0.94972   |         |
|             | 0.17113         | 0.94972   | 0.17113 | 0.17113     | 0.613399404 |           |         |
| NA          | ENSG00000230003 | 0.94964   | 0.17115 | 0.94964     | 0.17115     | -0.64614  | 0.74091 |
|             | -0.90637        | 0.81763   | 0.17115 | 0.613415433 |             |           |         |
| RPS3AP27    | ENSG00000226205 | 0.94957   | 0.17117 | 0.47254     | 0.31827     | 0.47254   |         |
|             | 0.31827         | 0.40029   | 0.34447 | 0.17117     | 0.613415433 |           |         |
| CCDC42      | ENSG00000161973 | 0.19272   | 0.42359 | 0.54416     | 0.29316     | 0.89913   |         |
|             | 0.18429         | 0.94947   | 0.17119 | 0.17119     | 0.613415433 |           |         |
| SOWAHA      | ENSG00000198944 | -0.28234  | 0.61116 | -0.066573   | 0.52654     | 0.56491   |         |
|             | 0.28607         | 0.94942   | 0.1712  | 0.1712      | 0.613415433 |           |         |
| NA          | ENSG00000266460 | 0.70786   | 0.23952 | -0.12436    | 0.54949     | -0.10048  | 0.54002 |
|             | 0.94939         | 0.17121   | 0.17121 | 0.613415433 |             |           |         |
| NA          | ENSG00000279791 | 0.94938   | 0.17121 | 0.94938     | 0.17121     | 0.94938   | 0.17121 |
|             | 0.94938         | 0.17121   | 0.17121 | 0.613415433 |             |           |         |
| ADGRD2      | ENSG00000180264 | -1.058    | 0.85497 | -1.9766     | 0.97595     | -0.88264  |         |
|             | 0.81128         | 0.94915   | 0.17127 | 0.17127     | 0.613585289 |           |         |
| TRBV6-5     | ENSG00000211721 | 0.94881   | 0.17136 | 0.94881     | 0.17136     | 0.94881   |         |
|             | 0.17136         | -0.24686  | 0.59749 | 0.17136     | 0.613770982 |           |         |
| NA          | ENSG00000253523 | 0.94879   | 0.17136 | 0.45581     | 0.32426     | 0.45581   | 0.32426 |
|             | 0.45581         | 0.32426   | 0.17136 | 0.613770982 |             |           |         |
| NECTIN1-AS1 | ENSG00000255247 | 0.94881   | 0.17136 | 0.9341      | 0.17513     | -0.39997  |         |
|             | 0.65541         | 0.94881   | 0.17136 | 0.17136     | 0.613770982 |           |         |
| CUL3        | ENSG00000036257 | 0.27123   | 0.39311 | 0.28302     | 0.38858     | 0.2562    | 0.3989  |
|             | 0.94866         | 0.1714    | 0.1714  | 0.613770982 |             |           |         |
| NA          | ENSG00000199566 | 0.89462   | 0.1855  | 0.89462     | 0.1855      | 0.89462   | 0.1855  |
|             | 0.94863         | 0.1714    | 0.1714  | 0.613770982 |             |           |         |
| IL1R1-AS1   | ENSG00000226925 | 0.94862   | 0.17141 | 0.94862     | 0.17141     | 0.94862   |         |

|             |                 |           |         |             |             |           |         |         |
|-------------|-----------------|-----------|---------|-------------|-------------|-----------|---------|---------|
|             | 0.17141         | 0.94862   | 0.17141 | 0.17141     | 0.613770982 |           |         |         |
| NA          | ENSG00000273071 | 0.94863   | 0.17141 | 0.17141     | 0.94863     | 0.17141   | 0.94863 | 0.17141 |
|             | 0.94863         | 0.17141   | 0.17141 | 0.613770982 |             |           |         |         |
| NA          | ENSG00000279416 | -0.40745  | 0.65816 | 0.94838     | 0.17147     | 0.42478   | 0.3355  |         |
|             | -0.01063        | 0.50424   | 0.17147 | 0.613912804 |             |           |         |         |
| RPL17P13    | ENSG00000223604 | 0.94835   | 0.17148 | 0.94835     | 0.17148     | 0.94835   |         |         |
|             | 0.17148         | 0.94835   | 0.17148 | 0.613912804 |             |           |         |         |
| SCAI        | ENSG00000173611 | 0.73566   | 0.23097 | 0.94828     | 0.17149     | 0.47886   | 0.31602 |         |
|             | 0.10286         | 0.45904   | 0.17149 | 0.613912804 |             |           |         |         |
| KMT2E       | ENSG00000005483 | -0.38084  | 0.64834 | 0.34882     | 0.36361     | 0.94824   | 0.1715  |         |
|             | -1.0901         | 0.86216   | 0.1715  | 0.613912804 |             |           |         |         |
| RNU6-117P   | ENSG00000202285 | 0.94811   | 0.17154 | 0.94811     | 0.17154     | 0.94811   |         |         |
|             | 0.17154         | 0.94811   | 0.17154 | 0.613992274 |             |           |         |         |
| LINC02508   | ENSG00000251619 | 0.94805   | 0.17155 | 0.94805     | 0.17155     | 0.94805   |         |         |
|             | 0.17155         | 0.94805   | 0.17155 | 0.613992274 |             |           |         |         |
| SLC5A4      | ENSG00000100191 | 0.94803   | 0.17156 | 0.94803     | 0.17156     | 0.94803   |         |         |
|             | 0.17156         | -0.52843  | 0.7014  | 0.613992274 |             |           |         |         |
| NA          | ENSG00000259636 | 0.9479    | 0.17159 | 0.16598     | 0.43408     | 0.046643  | 0.4814  |         |
|             | -0.45296        | 0.67471   | 0.17159 | 0.614015883 |             |           |         |         |
| ATP5MFP5    | ENSG00000256103 | 0.94784   | 0.17161 | 0.076974    | 0.46932     | -0.47214  |         |         |
|             | 0.68159         | 0.68108   | 0.24791 | 0.614015883 |             |           |         |         |
| MIR99AHG    | ENSG00000215386 | -0.40987  | 0.65905 | 0.94776     | 0.17162     | 0.4506    |         |         |
|             | 0.32614         | -0.16048  | 0.56375 | 0.614015883 |             |           |         |         |
| NA          | ENSG00000213663 | 0.94773   | 0.17163 | -0.88296    | 0.81137     | -0.88296  | 0.81137 |         |
|             | -0.88296        | 0.81137   | 0.17163 | 0.614015883 |             |           |         |         |
| NA          | ENSG00000257470 | -0.21712  | 0.58594 | 0.65358     | 0.25669     | 0.94772   | 0.17163 |         |
|             | -0.21712        | 0.58594   | 0.17163 | 0.614015883 |             |           |         |         |
| NA          | ENSG00000260300 | 0.94765   | 0.17165 | 0.94765     | 0.17165     | 0.94765   | 0.17165 |         |
|             | 0.94765         | 0.17165   | 0.17165 | 0.614015883 |             |           |         |         |
| DBX1        | ENSG00000109851 | -0.63224  | 0.73639 | 0.94755     | 0.17168     | -0.086354 | 0.53441 |         |
|             | -0.63224        | 0.73639   | 0.17168 | 0.614015883 |             |           |         |         |
| RNU5E-10P   | ENSG00000200376 | 0.94756   | 0.17168 | 0.94756     | 0.17168     | 0.94756   |         |         |
|             | 0.17168         | 0.94756   | 0.17168 | 0.614015883 |             |           |         |         |
| NA          | ENSG00000231880 | 0.94756   | 0.17168 | 0.94756     | 0.17168     | 0.94756   | 0.17168 |         |
|             | 0.94756         | 0.17168   | 0.17168 | 0.614015883 |             |           |         |         |
| ASTN2       | ENSG00000148219 | 0.2015    | 0.42016 | 0.94745     | 0.1717      | -0.8256   | 0.79548 |         |
|             | -1.0792         | 0.85975   | 0.1717  | 0.614022308 |             |           |         |         |
| MCMBP       | ENSG00000197771 | -0.43601  | 0.66859 | 0.94726     | 0.17175     | 0.56789   | 0.28506 |         |
|             | -0.81921        | 0.79367   | 0.17175 | 0.614022308 |             |           |         |         |
| MBNL1-AS1   | ENSG00000229619 | 0.94726   | 0.17175 | 0.94726     | 0.17175     | 0.94726   |         |         |
|             | 0.17175         | 0.94726   | 0.17175 | 0.614022308 |             |           |         |         |
| GOLGA2P4    | ENSG00000229608 | 0.94723   | 0.17176 | 0.56082     | 0.28746     | 0.56082   |         |         |
|             | 0.28746         | -0.045955 | 0.51833 | 0.614022308 |             |           |         |         |
| CORO7-PAM16 | ENSG00000103426 | 0.61181   | 0.27033 | 0.84587     | 0.19881     | 0.94721   |         |         |
|             | 0.17177         | 0.24329   | 0.40389 | 0.614022308 |             |           |         |         |
| NA          | ENSG00000234810 | 0.94721   | 0.17177 | 0.75844     | 0.22409     | 0.32723   | 0.37175 |         |
|             | -0.82413        | 0.79507   | 0.17177 | 0.614022308 |             |           |         |         |
| PHBP21      | ENSG00000260326 | 0.44898   | 0.32672 | 0.94721     | 0.17177     | 0.81978   |         |         |
|             | 0.20617         | 0.77595   | 0.21889 | 0.614022308 |             |           |         |         |
| NA          | ENSG00000243779 | -0.59034  | 0.72252 | 0.23441     | 0.40733     | 0.94703   | 0.17181 |         |
|             | 0.94703         | 0.17181   | 0.17181 | 0.614038019 |             |           |         |         |
| NA          | ENSG00000256948 | 0.947     | 0.17182 | 0.58605     | 0.27892     | -0.62899  | 0.73532 |         |
|             | -0.42966        | 0.66628   | 0.17182 | 0.614038019 |             |           |         |         |
| RPS21P8     | ENSG00000223782 | 0.26774   | 0.39445 | 0.78702     | 0.21563     | 0.94696   |         |         |
|             | 0.17183         | -0.63533  | 0.73739 | 0.614038019 |             |           |         |         |
| PBX1-AS1    | ENSG00000233693 | -0.64488  | 0.7405  | -0.76669    | 0.77837     | 0.94695   |         |         |
|             | 0.17183         | -0.65026  | 0.74224 | 0.614038019 |             |           |         |         |
| RNASEH1-AS1 | ENSG00000234171 | 0.94686   | 0.17185 | 0.94686     | 0.17185     | 0.94686   |         |         |
|             | 0.17185         | 0.94686   | 0.17185 | 0.614038019 |             |           |         |         |
| NA          | ENSG00000258738 | 0.94687   | 0.17185 | 0.94687     | 0.17185     | 0.94687   | 0.17185 |         |
|             | 0.94687         | 0.17185   | 0.17185 | 0.614038019 |             |           |         |         |
| PLBD1       | ENSG00000121316 | 0.9468    | 0.17187 | 0.9468      | 0.17187     | -0.14734  | 0.55857 |         |



|           |                 |          |         |             |             |            |         |  |
|-----------|-----------------|----------|---------|-------------|-------------|------------|---------|--|
|           | 0.10004         | 0.46016  | 0.17187 | 0.614053716 |             |            |         |  |
| NLRP14    | ENSG00000158077 | 0.94674  | 0.17188 | -0.69047    | 0.75505     | 0.93454    |         |  |
|           | 0.17501         | 0.53947  | 0.29478 | 0.17188     | 0.614053716 |            |         |  |
| NA        | ENSG00000260142 | 0.78575  | 0.21601 | 0.94665     | 0.17191     | 0.78575    | 0.21601 |  |
|           | 0.78575         | 0.21601  | 0.17191 | 0.614053716 |             |            |         |  |
| RPL31P53  | ENSG00000225352 | 0.94661  | 0.17192 | 0.94661     | 0.17192     | 0.94661    |         |  |
|           | 0.17192         | 0.94661  | 0.17192 | 0.17192     | 0.614053716 |            |         |  |
| ALG1L3P   | ENSG00000251087 | -2.3245  | 0.98995 | 0.64032     | 0.26098     | -1.0532    |         |  |
|           | 0.85388         | 0.9466   | 0.17192 | 0.17192     | 0.614053716 |            |         |  |
| WFDC11    | ENSG00000180083 | -0.51808 | 0.6978  | 0.94656     | 0.17193     | -0.82795   |         |  |
|           | 0.79615         | -1.1382  | 0.87249 | 0.17193     | 0.614053716 |            |         |  |
| HNRNP11   | ENSG00000143889 | -1.1456  | 0.87401 | 0.94651     | 0.17195     | 0.7104     |         |  |
|           | 0.23873         | -0.29536 | 0.61614 | 0.17195     | 0.614080139 |            |         |  |
| CACNG2    | ENSG00000166862 | 0.94608  | 0.17205 | 0.26335     | 0.39614     | -0.79526   |         |  |
|           | 0.78677         | 0.031051 | 0.48761 | 0.17205     | 0.614181348 |            |         |  |
| NA        | ENSG00000258772 | -0.29582 | 0.61631 | 0.49972     | 0.30864     | -0.21591   | 0.58547 |  |
|           | 0.94611         | 0.17205  | 0.17205 | 0.614181348 |             |            |         |  |
| NA        | ENSG00000268203 | 0.94607  | 0.17206 | 0.94607     | 0.17206     | 0.94607    | 0.17206 |  |
|           | 0.94607         | 0.17206  | 0.17206 | 0.614181348 |             |            |         |  |
| DUSP16    | ENSG00000111266 | 0.94603  | 0.17207 | 0.762       | 0.22303     | 0.65288    | 0.25692 |  |
|           | 0.52751         | 0.29892  | 0.17207 | 0.614181348 |             |            |         |  |
| NA        | ENSG00000275995 | -0.11421 | 0.54546 | 0.60612     | 0.27222     | 0.946      | 0.17208 |  |
|           | -0.11421        | 0.54546  | 0.17208 | 0.614181348 |             |            |         |  |
| NA        | ENSG00000279091 | 0.94598  | 0.17208 | 0.94598     | 0.17208     | 0.94598    | 0.17208 |  |
|           | 0.94598         | 0.17208  | 0.17208 | 0.614181348 |             |            |         |  |
| RN7SL290P | ENSG00000264613 | -0.58197 | 0.71971 | 0.94595     | 0.17209     | -0.0034921 |         |  |
|           | 0.50139         | -0.58197 | 0.71971 | 0.17209     | 0.614181348 |            |         |  |
| MIR640    | ENSG00000207821 | 0.94591  | 0.1721  | 0.94591     | 0.1721      | 0.94591    |         |  |
|           | 0.1721          | 0.94591  | 0.1721  | 0.1721      | 0.614181348 |            |         |  |
| ATG10-AS1 | ENSG00000248192 | 0.94584  | 0.17211 | 0.94584     | 0.17211     | 0.94584    |         |  |
|           | 0.17211         | 0.94584  | 0.17211 | 0.17211     | 0.614181348 |            |         |  |
| NAMPTP3   | ENSG00000261053 | 0.16811  | 0.43325 | 0.55597     | 0.28912     | 0.94584    |         |  |
|           | 0.17211         | 0.94584  | 0.17211 | 0.17211     | 0.614181348 |            |         |  |
| NA        | ENSG00000239005 | 0.94576  | 0.17214 | 0.94576     | 0.17214     | 0.94576    | 0.17214 |  |
|           | 0.94576         | 0.17214  | 0.17214 | 0.614181348 |             |            |         |  |
| MIR4518   | ENSG00000266305 | 0.94573  | 0.17214 | 0.94573     | 0.17214     | 0.94573    |         |  |
|           | 0.17214         | 0.94573  | 0.17214 | 0.17214     | 0.614181348 |            |         |  |
| C21orf58  | ENSG00000160298 | 0.18472  | 0.42673 | 0.062649    | 0.47502     | -0.14355   |         |  |
|           | 0.55707         | 0.94572  | 0.17215 | 0.17215     | 0.614181348 |            |         |  |
| EPHB3     | ENSG00000182580 | 0.31041  | 0.37812 | 0.3258      | 0.37229     | 0.18888    | 0.4251  |  |
|           | 0.94561         | 0.17217  | 0.17217 | 0.614181348 |             |            |         |  |
| ZNF716    | ENSG00000182111 | 0.23941  | 0.4054  | 0.94558     | 0.17218     | 0.64459    |         |  |
|           | 0.2596          | -0.49841 | 0.6909  | 0.17218     | 0.614181348 |            |         |  |
| NA        | ENSG00000238207 | -0.73976 | 0.77028 | -0.36308    | 0.64173     | 0.63885    | 0.26146 |  |
|           | 0.94557         | 0.17218  | 0.17218 | 0.614181348 |             |            |         |  |
| BMS1      | ENSG00000165733 | -0.1744  | 0.56922 | 0.36123     | 0.35896     | 0.94551    | 0.1722  |  |
|           | 0.17223         | 0.43163  | 0.1722  | 0.614207729 |             |            |         |  |
| MARK1     | ENSG00000116141 | 0.94535  | 0.17224 | 0.22446     | 0.4112      | 0.867      | 0.19297 |  |
|           | -1.8427         | 0.96731  | 0.17224 | 0.614238906 |             |            |         |  |
| EDARADD   | ENSG00000186197 | 0.94525  | 0.17227 | 0.94525     | 0.17227     | 0.60959    |         |  |
|           | 0.27107         | 0.34243  | 0.36602 | 0.17227     | 0.614238906 |            |         |  |
| MITD1     | ENSG00000158411 | 0.83822  | 0.20095 | 0.65754     | 0.25542     | 0.65754    | 0.25542 |  |
|           | 0.94516         | 0.17229  | 0.17229 | 0.614238906 |             |            |         |  |
| NA        | ENSG00000224079 | 0.050978 | 0.47967 | 0.13745     | 0.44534     | 0.050978   | 0.47967 |  |
|           | 0.94515         | 0.17229  | 0.17229 | 0.614238906 |             |            |         |  |
| NA        | ENSG00000259560 | 0.45563  | 0.32433 | -0.44069    | 0.67028     | 0.94517    | 0.17229 |  |
|           | -0.60364        | 0.72696  | 0.17229 | 0.614238906 |             |            |         |  |
| NA        | ENSG00000235574 | 0.61018  | 0.27087 | 0.94511     | 0.1723      | 0.94511    | 0.1723  |  |
|           | 0.94511         | 0.1723   | 0.1723  | 0.614238906 |             |            |         |  |
| EIF4BP3   | ENSG00000224546 | 0.2928   | 0.38484 | -0.70036    | 0.75815     | -0.81554   |         |  |
|           | 0.79262         | 0.94502  | 0.17232 | 0.17232     | 0.614238906 |            |         |  |
| OR5BD1P   | ENSG00000254749 | 0.26234  | 0.39653 | 0.94501     | 0.17233     | -2.0358    |         |  |

|           |                 |             |         |             |             |          |         |  |
|-----------|-----------------|-------------|---------|-------------|-------------|----------|---------|--|
|           | 0.97912         | -2.0358     | 0.97912 | 0.17233     | 0.614238906 |          |         |  |
| PSMA2P2   | ENSG00000251234 | 0.94497     | 0.17234 | 0.94497     | 0.17234     | -1.0055  |         |  |
|           | 0.84268         | -1.4737     | 0.92972 | 0.17234     | 0.614238906 |          |         |  |
| NA        | ENSG00000221458 | -1.1212     | 0.8689  | 0.94493     | 0.17235     | -0.84103 | 0.79983 |  |
|           | 0.68123         | 0.24786     | 0.17235 | 0.614238906 |             |          |         |  |
| RN7SKP291 | ENSG00000199831 | 0.94489     | 0.17236 | -0.84001    | 0.79955     | -1.3197  |         |  |
|           | 0.90653         | 0.94489     | 0.17236 | 0.17236     | 0.614238906 |          |         |  |
| NA        | ENSG00000261813 | 0.94488     | 0.17236 | 0.25889     | 0.39786     | 0.35893  | 0.35982 |  |
|           | 0.25363         | 0.39989     | 0.17236 | 0.614238906 |             |          |         |  |
| NA        | ENSG00000262408 | 0.94479     | 0.17238 | 0.94479     | 0.17238     | 0.94479  | 0.17238 |  |
|           | 0.94479         | 0.17238     | 0.17238 | 0.614265258 |             |          |         |  |
| PDK4      | ENSG00000004799 | 0.9446      | 0.17243 | 0.39658     | 0.34584     | 0.9446   | 0.17243 |  |
|           | -0.42068        | 0.663       | 0.17243 | 0.614398501 |             |          |         |  |
| DUSP11    | ENSG00000144048 | 0.94454     | 0.17245 | -0.014189   | 0.50566     | -0.56411 |         |  |
|           | 0.71366         | -0.80446    | 0.78943 | 0.17245     | 0.614424837 |          |         |  |
| C4orf45   | ENSG00000164123 | 0.40658     | 0.34216 | -1.2102     | 0.88689     | -0.46811 |         |  |
|           | 0.68015         | 0.94432     | 0.1725  | 0.1725      | 0.614513122 |          |         |  |
| KCNQ1OT1  | ENSG00000269821 | 0.30332     | 0.38082 | 0.82514     | 0.20465     | 0.94432  |         |  |
|           | 0.1725          | 0.53456     | 0.29648 | 0.1725      | 0.614513122 |          |         |  |
| RBM11     | ENSG00000185272 | 0.94421     | 0.17253 | -0.65878    | 0.74498     | -1.69    | 0.95449 |  |
|           | -1.0781         | 0.85952     | 0.17253 | 0.614575066 |             |          |         |  |
| ZNF354C   | ENSG00000177932 | -0.32344    | 0.62682 | -0.9181     | 0.82072     | 0.81027  |         |  |
|           | 0.20889         | 0.9441      | 0.17256 | 0.17256     | 0.614592077 |          |         |  |
| LINC00446 | ENSG00000229249 | 0.94409     | 0.17256 | 0.34746     | 0.36412     | 0.94409  |         |  |
|           | 0.17256         | 0.94409     | 0.17256 | 0.17256     | 0.614592077 |          |         |  |
| NA        | ENSG00000226838 | -0.48775    | 0.68714 | 0.37207     | 0.35492     | 0.94401  | 0.17258 |  |
|           | 0.85863         | 0.19527     | 0.17258 | 0.614618388 |             |          |         |  |
| NA        | ENSG00000254321 | 0.94386     | 0.17262 | 0.85262     | 0.19693     | 0.78242  | 0.21698 |  |
|           | 0.019017        | 0.49241     | 0.17262 | 0.614715916 |             |          |         |  |
| STK10     | ENSG00000072786 | 0.85485     | 0.19632 | 0.94367     | 0.17267     | 0.47235  | 0.31834 |  |
|           | 0.62412         | 0.26627     | 0.17267 | 0.614729626 |             |          |         |  |
| SMYD4     | ENSG00000186532 | 0.94366     | 0.17267 | 0.80795     | 0.20956     | 0.94366  | 0.17267 |  |
|           | 0.94366         | 0.17267     | 0.17267 | 0.614729626 |             |          |         |  |
| RPL23P4   | ENSG00000223903 | 0.94368     | 0.17267 | 0.94368     | 0.17267     | 0.94368  |         |  |
|           | 0.17267         | 0.94368     | 0.17267 | 0.17267     | 0.614729626 |          |         |  |
| LSM2      | ENSG00000204392 | 0.94361     | 0.17269 | 0.94361     | 0.17269     | 0.94361  | 0.17269 |  |
|           | -0.60599        | 0.72774     | 0.17269 | 0.614729626 |             |          |         |  |
| NA        | ENSG00000226442 | -0.24165    | 0.59547 | -0.44156    | 0.6706      | 0.94347  | 0.17272 |  |
|           | 0.94347         | 0.17272     | 0.17272 | 0.614729626 |             |          |         |  |
| MOB1AP1   | ENSG00000228241 | 0.94342     | 0.17273 | 0.76402     | 0.22243     | 0.94342  |         |  |
|           | 0.17273         | 0.94342     | 0.17273 | 0.17273     | 0.614729626 |          |         |  |
| TWIST2    | ENSG00000233608 | 0.94341     | 0.17274 | -0.20133    | 0.57978     | -0.38457 |         |  |
|           | 0.64972         | 0.24406     | 0.40359 | 0.17274     | 0.614729626 |          |         |  |
| NA        | ENSG00000264238 | 0.16975     | 0.4326  | 0.94339     | 0.17274     | 0.63157  | 0.26384 |  |
|           | 0.031014        | 0.48763     | 0.17274 | 0.614729626 |             |          |         |  |
| DDX10P1   | ENSG00000237135 | 0.73056     | 0.23252 | 0.94337     | 0.17275     | 0.54693  |         |  |
|           | 0.29221         | 0.058507    | 0.47667 | 0.17275     | 0.614729626 |          |         |  |
| NA        | ENSG00000250948 | -0.93908    | 0.82616 | -0.93908    | 0.82616     | -0.93908 | 0.82616 |  |
|           | 0.94337         | 0.17275     | 0.17275 | 0.614729626 |             |          |         |  |
| MTCO2P11  | ENSG00000235917 | 0.94329     | 0.17277 | 0.94329     | 0.17277     | 0.94329  |         |  |
|           | 0.17277         | 0.94329     | 0.17277 | 0.17277     | 0.614755904 |          |         |  |
| H1-3      | ENSG00000124575 | -1.4969     | 0.93279 | -1.4969     | 0.93279     | 0.94315  | 0.1728  |  |
|           | -0.65396        | 0.74343     | 0.1728  | 0.614806788 |             |          |         |  |
| SH3D19    | ENSG00000109686 | 0.94308     | 0.17282 | -0.70137    | 0.75846     | -0.28024 |         |  |
|           | 0.61035         | -0.54881    | 0.70843 | 0.17282     | 0.614806788 |          |         |  |
| FBH1      | ENSG00000134452 | 0.943       | 0.17284 | 0.943       | 0.17284     | 0.41518  | 0.339   |  |
|           | 0.17284         | 0.614806788 |         |             |             |          |         |  |
| IFT52     | ENSG00000101052 | 0.94297     | 0.17285 | 0.79934     | 0.21205     | 0.73627  | 0.23078 |  |
|           | 0.93755         | 0.17424     | 0.17285 | 0.614806788 |             |          |         |  |
| KLHL32    | ENSG00000186231 | 0.26615     | 0.39506 | 0.94294     | 0.17286     | -0.64569 |         |  |
|           | 0.74076         | -0.92459    | 0.82241 | 0.17286     | 0.614806788 |          |         |  |
| RNU6-44P  | ENSG00000206772 | 0.94294     | 0.17286 | 0.94294     | 0.17286     | 0.94294  |         |  |

|              |                 |          |         |             |             |          |         |  |
|--------------|-----------------|----------|---------|-------------|-------------|----------|---------|--|
|              | 0.17286         | 0.94294  | 0.17286 | 0.17286     | 0.614806788 |          |         |  |
| OR1S2        | ENSG00000197887 | 0.57969  | 0.28106 | 0.94281     | 0.17289     | 0.94281  | 0.17289 |  |
|              | -0.55274        | 0.70978  | 0.17289 | 0.61483138  |             |          |         |  |
| SOAT1        | ENSG00000057252 | 0.41592  | 0.33873 | 0.52361     | 0.30027     | 0.94271  | 0.17291 |  |
|              | -0.57757        | 0.71822  | 0.17291 | 0.61483138  |             |          |         |  |
| GSTM3P1      | ENSG00000227693 | -1.0094  | 0.84361 | -1.0094     | 0.84361     | 0.94264  |         |  |
|              | 0.17293         | 0.80023  | 0.21179 | 0.17293     | 0.61483138  |          |         |  |
| NA           | ENSG00000253775 | -1.0135  | 0.84459 | -0.92406    | 0.82227     | 0.94266  | 0.17293 |  |
|              | -0.085493       | 0.53407  | 0.17293 | 0.61483138  |             |          |         |  |
| NA           | ENSG00000268209 | 0.69928  | 0.24219 | -0.18328    | 0.57271     | 0.94266  | 0.17293 |  |
|              | 0.94266         | 0.17293  | 0.17293 | 0.61483138  |             |          |         |  |
| RNY1P6       | ENSG00000206920 | 0.9425   | 0.17297 | 0.9425      | 0.17297     | 0.9425   |         |  |
|              | 0.17297         | 0.9425   | 0.17297 | 0.17297     | 0.61492873  |          |         |  |
| NA           | ENSG00000261117 | 0.94242  | 0.17299 | 0.81285     | 0.20815     | 0.37301  | 0.35457 |  |
|              | 0.37301         | 0.35457  | 0.17299 | 0.614954968 |             |          |         |  |
| PM20D2       | ENSG00000146281 | 0.84887  | 0.19798 | 0.94236     | 0.17301     | 0.93728  |         |  |
|              | 0.17431         | 0.93728  | 0.17431 | 0.17301     | 0.614962577 |          |         |  |
| CDKN2AIPNLP1 | ENSG00000177770 | 0.94225  | 0.17303 | -1.7684     | 0.9615      | -1.7684  |         |  |
|              | 0.9615          | -1.3739  | 0.91526 | 0.17303     | 0.614962577 |          |         |  |
| NA           | ENSG00000243302 | 0.096898 | 0.4614  | -0.59114    | 0.72279     | 0.94227  | 0.17303 |  |
|              | -0.93626        | 0.82543  | 0.17303 | 0.614962577 |             |          |         |  |
| GRK1         | ENSG00000185974 | 0.54977  | 0.29124 | 0.94211     | 0.17307     | -1.5909  | 0.94418 |  |
|              | -1.5558         | 0.94012  | 0.17307 | 0.61504711  |             |          |         |  |
| NA           | ENSG00000249887 | 0.94197  | 0.1731  | 0.94197     | 0.1731      | 0.94197  | 0.1731  |  |
|              | 0.94197         | 0.1731   | 0.1731  | 0.61504711  |             |          |         |  |
| NA           | ENSG00000261229 | 0.94196  | 0.17311 | 0.72275     | 0.23492     | -0.89701 | 0.81514 |  |
|              | -0.89701        | 0.81514  | 0.17311 | 0.61504711  |             |          |         |  |
| NA           | ENSG00000264754 | 0.94195  | 0.17311 | 0.94195     | 0.17311     | 0.94195  | 0.17311 |  |
|              | 0.94195         | 0.17311  | 0.17311 | 0.61504711  |             |          |         |  |
| ETS1-AS1     | ENSG00000254588 | 0.94187  | 0.17313 | 0.94187     | 0.17313     | 0.94187  |         |  |
|              | 0.17313         | 0.33189  | 0.36998 | 0.17313     | 0.61504711  |          |         |  |
| SLC25A24     | ENSG00000085491 | -0.70806 | 0.76055 | 0.38948     | 0.34846     | 0.94177  |         |  |
|              | 0.17316         | -0.48595 | 0.6865  | 0.17316     | 0.61504711  |          |         |  |
| MIXL1        | ENSG00000185155 | 0.94177  | 0.17316 | 0.94177     | 0.17316     | 0.94177  | 0.17316 |  |
|              | 0.94177         | 0.17316  | 0.17316 | 0.61504711  |             |          |         |  |
| MEF2B        | ENSG00000213999 | 0.94172  | 0.17317 | 0.94172     | 0.17317     | 0.94172  | 0.17317 |  |
|              | 0.13845         | 0.44494  | 0.17317 | 0.61504711  |             |          |         |  |
| KLHL3        | ENSG00000146021 | 0.60351  | 0.27308 | 0.75797     | 0.22424     | 0.94168  | 0.17318 |  |
|              | 0.63903         | 0.2614   | 0.17318 | 0.61504711  |             |          |         |  |
| NA           | ENSG00000236079 | -2.8526  | 0.99783 | 0.72849     | 0.23316     | -2.8526  | 0.99783 |  |
|              | 0.94166         | 0.17318  | 0.17318 | 0.61504711  |             |          |         |  |
| TPTE2P2      | ENSG00000272281 | 0.45605  | 0.32418 | 0.31102     | 0.37789     | 0.55502  |         |  |
|              | 0.28944         | 0.94158  | 0.1732  | 0.1732      | 0.615064002 |          |         |  |
| DELEC1       | ENSG00000173077 | 0.48036  | 0.31549 | 0.82746     | 0.20399     | 0.87915  |         |  |
|              | 0.18966         | 0.94154  | 0.17321 | 0.17321     | 0.615064002 |          |         |  |
| MRPS23       | ENSG00000181610 | 0.9185   | 0.17918 | 0.88574     | 0.18788     | 0.94145  |         |  |
|              | 0.17324         | -0.18414 | 0.57305 | 0.17324     | 0.615125707 |          |         |  |
| NA           | ENSG00000225832 | 0.9412   | 0.1733  | 0.40077     | 0.3443      | 0.9412   | 0.1733  |  |
|              | 0.9412          | 0.1733   | 0.1733  | 0.615249089 |             |          |         |  |
| YWHAZP1      | ENSG00000259148 | 0.94119  | 0.1733  | 0.94119     | 0.1733      | 0.94119  |         |  |
|              | 0.1733          | 0.94119  | 0.1733  | 0.1733      | 0.615249089 |          |         |  |
| SPAG16       | ENSG00000144451 | 0.32126  | 0.37401 | 0.94108     | 0.17333     | 0.88295  |         |  |
|              | 0.18863         | -0.17738 | 0.57039 | 0.17333     | 0.615290323 |          |         |  |
| NA           | ENSG00000199291 | -0.02301 | 0.50918 | 0.42284     | 0.33621     | 0.42284  | 0.33621 |  |
|              | 0.94102         | 0.17335  | 0.17335 | 0.615290323 |             |          |         |  |
| NA           | ENSG00000249157 | -0.52031 | 0.69858 | 0.74064     | 0.22946     | 0.94095  | 0.17336 |  |
|              | 0.94095         | 0.17336  | 0.17336 | 0.615290323 |             |          |         |  |
| NA           | ENSG00000236045 | 0.94091  | 0.17338 | -0.26073    | 0.60285     | -0.26073 | 0.60285 |  |
|              | -0.26073        | 0.60285  | 0.17338 | 0.615290323 |             |          |         |  |
| Clorf162     | ENSG00000143110 | 0.11857  | 0.45281 | 0.94086     | 0.17339     | 0.08362  |         |  |
|              | 0.46668         | 0.073829 | 0.47057 | 0.17339     | 0.615290323 |          |         |  |
| LINC01845    | ENSG00000253298 | 0.9408   | 0.1734  | 0.40379     | 0.34318     | 0.40379  |         |  |

|           |                 |           |         |             |             |           |         |  |
|-----------|-----------------|-----------|---------|-------------|-------------|-----------|---------|--|
|           | 0.34318         | -0.47265  | 0.68177 | 0.1734      | 0.615290323 |           |         |  |
| NA        | ENSG00000280852 | 0.57603   | 0.2823  | 0.94083     | 0.1734      | 0.64641   | 0.25901 |  |
|           | -0.78281        | 0.78313   | 0.1734  | 0.615290323 |             |           |         |  |
| SHPRH     | ENSG00000146414 | 0.28918   | 0.38622 | 0.69406     | 0.24382     | 0.032052  | 0.48722 |  |
|           | 0.9407          | 0.17343   | 0.17343 | 0.615307164 |             |           |         |  |
| NA        | ENSG00000267478 | 0.78977   | 0.21483 | 0.94071     | 0.17343     | 0.94071   | 0.17343 |  |
|           | 0.94071         | 0.17343   | 0.17343 | 0.615307164 |             |           |         |  |
| FHAD1-AS1 | ENSG00000233485 | 0.94047   | 0.17349 | 0.19638     | 0.42216     | 0.94047   |         |  |
|           | 0.17349         | 0.94047   | 0.17349 | 0.17349     | 0.615475226 |           |         |  |
| LAMB2     | ENSG00000172037 | 0.58901   | 0.27793 | 0.26112     | 0.397       | 0.94038   | 0.17351 |  |
|           | -1.4414         | 0.92526   | 0.17351 | 0.615482706 |             |           |         |  |
| PPIL6     | ENSG00000185250 | -0.20807  | 0.58241 | 0.9403      | 0.17353     | 0.92116   | 0.17848 |  |
|           | -0.65294        | 0.7431    | 0.17353 | 0.615482706 |             |           |         |  |
| TMEM273   | ENSG00000204161 | -1.0816   | 0.86029 | 0.31761     | 0.37539     | 0.9403    |         |  |
|           | 0.17353         | -0.098703 | 0.53931 | 0.17353     | 0.615482706 |           |         |  |
| RN7SL40P  | ENSG00000242696 | 0.4221    | 0.33647 | 0.8456      | 0.19889     | 0.94019   |         |  |
|           | 0.17356         | 0.79985   | 0.2119  | 0.17356     | 0.615506985 |           |         |  |
| NA        | ENSG00000278859 | 0.94015   | 0.17357 | 0.94015     | 0.17357     | 0.94015   | 0.17357 |  |
|           | 0.94015         | 0.17357   | 0.17357 | 0.615506985 |             |           |         |  |
| ANTKMT    | ENSG00000103254 | -1.4989   | 0.93304 | 0.94012     | 0.17358     | -1.9277   |         |  |
|           | 0.97305         | -1.9277   | 0.97305 | 0.17358     | 0.615506985 |           |         |  |
| SLC17A2   | ENSG00000112337 | 0.94007   | 0.17359 | 0.72146     | 0.23531     | -0.17737  |         |  |
|           | 0.57039         | 0.15116   | 0.43992 | 0.17359     | 0.615506985 |           |         |  |
| NA        | ENSG00000266290 | 0.94005   | 0.1736  | 0.94005     | 0.1736      | 0.94005   | 0.1736  |  |
|           | 0.94005         | 0.1736    | 0.1736  | 0.615506985 |             |           |         |  |
| MIR512-2  | ENSG00000207644 | 0.93989   | 0.17364 | 0.93989     | 0.17364     | 0.93989   |         |  |
|           | 0.17364         | 0.93989   | 0.17364 | 0.17364     | 0.615604016 |           |         |  |
| HOXD4     | ENSG00000170166 | 0.93978   | 0.17367 | 0.93978     | 0.17367     | 0.43634   | 0.3313  |  |
|           | -0.7139         | 0.76236   | 0.17367 | 0.615624338 |             |           |         |  |
| NA        | ENSG00000265094 | 0.93974   | 0.17368 | 0.93974     | 0.17368     | 0.93974   | 0.17368 |  |
|           | 0.93974         | 0.17368   | 0.17368 | 0.615624338 |             |           |         |  |
| FEM1AP3   | ENSG00000217770 | 0.27907   | 0.3901  | 0.9396      | 0.17371     | 0.9396    |         |  |
|           | 0.17371         | 0.9396    | 0.17371 | 0.17371     | 0.615624338 |           |         |  |
| NA        | ENSG00000249870 | 0.9396    | 0.17371 | 0.51853     | 0.30204     | 0.51853   | 0.30204 |  |
|           | 0.51853         | 0.30204   | 0.17371 | 0.615624338 |             |           |         |  |
| PPIAP50   | ENSG00000261330 | 0.9395    | 0.17374 | 0.9395      | 0.17374     | 0.9395    |         |  |
|           | 0.17374         | 0.8404    | 0.20034 | 0.17374     | 0.615624338 |           |         |  |
| NA        | ENSG00000231464 | 0.93933   | 0.17378 | -0.097231   | 0.53873     | -0.032525 | 0.51297 |  |
|           | -0.22002        | 0.58707   | 0.17378 | 0.615624338 |             |           |         |  |
| RUFY1-AS1 | ENSG00000244945 | 0.93934   | 0.17378 | 0.17261     | 0.43148     | 0.1669    |         |  |
|           | 0.43372         | 0.1669    | 0.43372 | 0.17378     | 0.615624338 |           |         |  |
| DSCAM-AS1 | ENSG00000235123 | 0.93931   | 0.17379 | 0.93931     | 0.17379     | -0.20415  |         |  |
|           | 0.58088         | -0.20415  | 0.58088 | 0.17379     | 0.615624338 |           |         |  |
| LINC00426 | ENSG00000238121 | 0.80223   | 0.21121 | 0.024261    | 0.49032     | 0.93928   |         |  |
|           | 0.17379         | 0.33082   | 0.37039 | 0.17379     | 0.615624338 |           |         |  |
| NA        | ENSG00000253266 | 0.93009   | 0.17616 | 0.076899    | 0.46935     | 0.93928   | 0.17379 |  |
|           | 0.269           | 0.39397   | 0.17379 | 0.615624338 |             |           |         |  |
| RTF1      | ENSG00000137815 | 0.86958   | 0.19227 | -0.49689    | 0.69037     | 0.93927   | 0.1738  |  |
|           | 0.76186         | 0.22307   | 0.1738  | 0.615624338 |             |           |         |  |
| NA        | ENSG00000267234 | -0.25549  | 0.60083 | 0.81853     | 0.20653     | 0.8682    | 0.19264 |  |
|           | 0.93922         | 0.17381   | 0.17381 | 0.615624338 |             |           |         |  |
| CTSA      | ENSG00000064601 | -1.1977   | 0.88448 | -1.1977     | 0.88448     | 0.67002   | 0.25142 |  |
|           | 0.9391          | 0.17384   | 0.17384 | 0.615624338 |             |           |         |  |
| NUP155    | ENSG00000113569 | 0.83695   | 0.20131 | 0.17054     | 0.43229     | 0.93907   |         |  |
|           | 0.17385         | 0.12432   | 0.45053 | 0.17385     | 0.615624338 |           |         |  |
| NA        | ENSG00000252374 | 0.93908   | 0.17385 | -0.86791    | 0.80728     | -0.86791  | 0.80728 |  |
|           | -0.86791        | 0.80728   | 0.17385 | 0.615624338 |             |           |         |  |
| PSMC1P9   | ENSG00000255993 | 0.93903   | 0.17386 | 0.93903     | 0.17386     | 0.93903   |         |  |
|           | 0.17386         | 0.93903   | 0.17386 | 0.17386     | 0.615624338 |           |         |  |
| KRTAP11-1 | ENSG00000182591 | 0.93898   | 0.17387 | 0.93898     | 0.17387     | 0.93898   |         |  |
|           | 0.17387         | 0.93898   | 0.17387 | 0.17387     | 0.615624338 |           |         |  |
| NA        | ENSG00000176183 | 0.93881   | 0.17391 | -1.1904     | 0.88306     | -0.56491  | 0.71393 |  |

|           |                 |          |         |             |             |           |         |         |
|-----------|-----------------|----------|---------|-------------|-------------|-----------|---------|---------|
|           | -1.665          | 0.95205  | 0.17391 | 0.615624338 |             |           |         |         |
| NA        | ENSG00000255284 | 0.93877  | 0.17392 | 0.93877     | 0.17392     | 0.93877   | 0.17392 | 0.17392 |
|           | 0.93877         | 0.17392  | 0.17392 | 0.615624338 |             |           |         |         |
| MTCO3P11  | ENSG00000237711 | 0.93874  | 0.17393 | 0.93874     | 0.17393     | 0.93874   | 0.17393 | 0.93874 |
|           | 0.17393         | 0.93874  | 0.17393 | 0.17393     | 0.615624338 |           |         |         |
| SPDYE6    | ENSG00000260097 | 0.93876  | 0.17393 | 0.51885     | 0.30193     | -0.23447  |         |         |
|           | 0.59269         | -0.23447 | 0.59269 | 0.17393     | 0.615624338 |           |         |         |
| RPSAP6    | ENSG00000214629 | 0.9387   | 0.17394 | 0.71209     | 0.23821     | 0.1138    |         |         |
|           | 0.4547          | 0.78308  | 0.21679 | 0.17394     | 0.615624338 |           |         |         |
| NA        | ENSG00000211515 | 0.9387   | 0.17394 | 0.9387      | 0.17394     | 0.9387    | 0.17394 | 0.17394 |
|           | 0.9387          | 0.17394  | 0.17394 | 0.615624338 |             |           |         |         |
| USP40     | ENSG00000085982 | 0.44967  | 0.32648 | 0.93859     | 0.17397     | 0.29331   | 0.38464 | 0.38464 |
|           | 0.746           | 0.22784  | 0.17397 | 0.615624338 |             |           |         |         |
| NA        | ENSG00000258380 | 0.39089  | 0.34794 | 0.93858     | 0.17397     | -0.071944 | 0.52868 | 0.52868 |
|           | 0.6017          | 0.27369  | 0.17397 | 0.615624338 |             |           |         |         |
| PPIG      | ENSG00000138398 | 0.33252  | 0.36975 | 0.34069     | 0.36667     | 0.93842   | 0.17401 | 0.17401 |
|           | 0.76234         | 0.22293  | 0.17401 | 0.615624338 |             |           |         |         |
| IGLC6     | ENSG00000222037 | 0.93842  | 0.17401 | 0.93842     | 0.17401     | 0.93842   | 0.17401 | 0.17401 |
|           | 0.93842         | 0.17401  | 0.17401 | 0.615624338 |             |           |         |         |
| NA        | ENSG00000270347 | 0.93842  | 0.17402 | 0.93842     | 0.17402     | 0.93842   | 0.17402 | 0.17402 |
|           | 0.93842         | 0.17402  | 0.17402 | 0.615624338 |             |           |         |         |
| NA        | ENSG00000213865 | -1.1775  | 0.88051 | 0.9384      | 0.17402     | -1.1775   | 0.88051 | 0.88051 |
|           | 0.19763         | 0.42167  | 0.17402 | 0.615624338 |             |           |         |         |
| LINC02576 | ENSG00000232613 | -0.21597 | 0.5855  | -1.2433     | 0.89312     | -0.87266  |         |         |
|           | 0.80858         | 0.93835  | 0.17403 | 0.17403     | 0.615624338 |           |         |         |
| CHST11    | ENSG00000171310 | 0.93833  | 0.17404 | 0.16693     | 0.43371     | -0.052734 |         |         |
|           | 0.52103         | 0.16693  | 0.43371 | 0.17404     | 0.615624338 |           |         |         |
| FCER1A    | ENSG00000179639 | 0.34594  | 0.36469 | 0.14474     | 0.44246     | 0.14474   |         |         |
|           | 0.44246         | 0.9383   | 0.17405 | 0.17405     | 0.615624338 |           |         |         |
| RPS27P21  | ENSG00000240759 | 0.93821  | 0.17407 | 0.93821     | 0.17407     | 0.93821   |         |         |
|           | 0.17407         | 0.93821  | 0.17407 | 0.17407     | 0.615650392 |           |         |         |
| MVB12B    | ENSG00000196814 | -0.32242 | 0.62643 | -0.06196    | 0.5247      | -0.50836  |         |         |
|           | 0.6944          | 0.93804  | 0.17411 | 0.17411     | 0.615700355 |           |         |         |
| MIR653    | ENSG00000208014 | 0.93806  | 0.17411 | 0.93806     | 0.17411     | 0.93806   |         |         |
|           | 0.17411         | 0.93806  | 0.17411 | 0.17411     | 0.615700355 |           |         |         |
| VTRNA2-2P | ENSG00000251900 | 0.42269  | 0.33626 | 0.93786     | 0.17416     | 0.93786   |         |         |
|           | 0.17416         | -0.16816 | 0.56677 | 0.17416     | 0.615700355 |           |         |         |
| CYP4F27P  | ENSG00000248313 | 0.93782  | 0.17417 | 0.93782     | 0.17417     | 0.93782   |         |         |
|           | 0.17417         | 0.93782  | 0.17417 | 0.17417     | 0.615700355 |           |         |         |
| RPL7AP25  | ENSG00000235294 | 0.93778  | 0.17418 | 0.93778     | 0.17418     | 0.93778   |         |         |
|           | 0.17418         | 0.93778  | 0.17418 | 0.17418     | 0.615700355 |           |         |         |
| NA        | ENSG00000270584 | 0.93773  | 0.17419 | 0.93773     | 0.17419     | 0.12761   | 0.44923 | 0.44923 |
|           | 0.93773         | 0.17419  | 0.17419 | 0.615700355 |             |           |         |         |
| MRPL45P1  | ENSG00000232508 | 0.83566  | 0.20167 | 0.93769     | 0.1742      | 0.6978    |         |         |
|           | 0.24265         | 0.83566  | 0.20167 | 0.1742      | 0.615700355 |           |         |         |
| ENTPD4    | ENSG00000197217 | 0.69804  | 0.24258 | 0.93765     | 0.17421     | 0.91212   |         |         |
|           | 0.18085         | 0.50994  | 0.30505 | 0.17421     | 0.615700355 |           |         |         |
| NA        | ENSG00000231207 | 0.9375   | 0.17425 | -0.78633    | 0.78416     | -0.78633  | 0.78416 | 0.78416 |
|           | -0.78633        | 0.78416  | 0.17425 | 0.615700355 |             |           |         |         |
| NA        | ENSG00000236073 | 0.61939  | 0.26783 | 0.93751     | 0.17425     | 0.91636   | 0.17974 | 0.17974 |
|           | -0.50208        | 0.69219  | 0.17425 | 0.615700355 |             |           |         |         |
| CCR7      | ENSG00000126353 | 0.57499  | 0.28265 | 0.93739     | 0.17428     | -0.70311  | 0.75901 | 0.75901 |
|           | 0.10667         | 0.45752  | 0.17428 | 0.615700355 |             |           |         |         |
| CPNE4     | ENSG00000196353 | -0.4791  | 0.68407 | -0.32151    | 0.62609     | 0.030634  | 0.48778 | 0.48778 |
|           | 0.9374          | 0.17428  | 0.17428 | 0.615700355 |             |           |         |         |
| C20orf202 | ENSG00000215595 | -0.75453 | 0.77473 | -0.75453    | 0.77473     | -0.75453  |         |         |
|           | 0.77473         | 0.9374   | 0.17428 | 0.17428     | 0.615700355 |           |         |         |
| POMT2     | ENSG00000009830 | 0.7125   | 0.23808 | 0.72633     | 0.23382     | 0.25027   | 0.40119 | 0.40119 |
|           | 0.93729         | 0.1743   | 0.1743  | 0.615700355 |             |           |         |         |
| NA        | ENSG00000237280 | -0.3811  | 0.64844 | 0.15994     | 0.43647     | -0.23842  | 0.59422 | 0.59422 |
|           | 0.93729         | 0.1743   | 0.1743  | 0.615700355 |             |           |         |         |
| NA        | ENSG00000280082 | 0.93732  | 0.1743  | 0.93732     | 0.1743      | 0.93732   | 0.1743  | 0.1743  |

|           |                 |           |         |             |             |          |         |  |
|-----------|-----------------|-----------|---------|-------------|-------------|----------|---------|--|
|           | 0.93732         | 0.1743    | 0.1743  | 0.615700355 |             |          |         |  |
| EVL       | ENSG00000196405 | 0.12728   | 0.44936 | 0.104       | 0.45858     | 0.20496  | 0.4188  |  |
|           | 0.93718         | 0.17433   | 0.17433 | 0.615700355 |             |          |         |  |
| RN7SL789P | ENSG00000242436 | 0.93718   | 0.17433 | 0.17433     | 0.93718     | 0.17433  | 0.93718 |  |
|           | 0.17433         | 0.93718   | 0.17433 | 0.17433     | 0.615700355 |          |         |  |
| PNMA8B    | ENSG00000204851 | 0.44259   | 0.32903 | 0.9371      | 0.17435     | 0.80216  |         |  |
|           | 0.21123         | 0.9371    | 0.17435 | 0.17435     | 0.615700355 |          |         |  |
| NRXN1     | ENSG00000179915 | 0.30632   | 0.37968 | -1.0239     | 0.84705     | 0.93708  | 0.17436 |  |
|           | 0.16546         | 0.43429   | 0.17436 | 0.615700355 |             |          |         |  |
| DNAH9     | ENSG00000007174 | 0.73686   | 0.2306  | 0.93699     | 0.17438     | 0.86288  | 0.1941  |  |
|           | -1.4194         | 0.9221    | 0.17438 | 0.615700355 |             |          |         |  |
| RBBP4P6   | ENSG00000248674 | 0.93698   | 0.17438 | 0.93698     | 0.17438     | 0.93698  |         |  |
|           | 0.17438         | 0.93698   | 0.17438 | 0.17438     | 0.615700355 |          |         |  |
| DLEU2L    | ENSG00000116652 | 0.93696   | 0.17439 | 0.93696     | 0.17439     | 0.81467  |         |  |
|           | 0.20763         | 0.93696   | 0.17439 | 0.17439     | 0.615700355 |          |         |  |
| LINC00643 | ENSG00000186369 | 0.11172   | 0.45552 | 0.45296     | 0.32529     | 0.93691  |         |  |
|           | 0.1744          | 0.28515   | 0.38776 | 0.1744      | 0.615700355 |          |         |  |
| PCNAP1    | ENSG00000249065 | 0.93691   | 0.1744  | -0.71389    | 0.76235     | -0.71389 |         |  |
|           | 0.76235         | -0.71389  | 0.76235 | 0.1744      | 0.615700355 |          |         |  |
| CCT3      | ENSG00000163468 | 0.93683   | 0.17442 | 0.46688     | 0.32029     | 0.46688  | 0.32029 |  |
|           | 0.22144         | 0.41238   | 0.17442 | 0.615726355 |             |          |         |  |
| FIS1      | ENSG00000214253 | 0.91333   | 0.18053 | 0.93668     | 0.17446     | 0.93668  | 0.17446 |  |
|           | 0.93668         | 0.17446   | 0.17446 | 0.61574113  |             |          |         |  |
| HCP5      | ENSG00000206337 | -0.6103   | 0.72917 | 0.34034     | 0.3668      | 0.34034  | 0.3668  |  |
|           | 0.93666         | 0.17447   | 0.17447 | 0.61574113  |             |          |         |  |
| SAMM50    | ENSG00000100347 | -0.66921  | 0.74832 | -1.0986     | 0.86403     | -0.75212 |         |  |
|           | 0.77401         | 0.93652   | 0.1745  | 0.1745      | 0.61574113  |          |         |  |
| HPCAL4    | ENSG00000116983 | -1.1849   | 0.88197 | -0.78477    | 0.78371     | 0.1704   |         |  |
|           | 0.43235         | 0.93651   | 0.1745  | 0.1745      | 0.61574113  |          |         |  |
| FAM242C   | ENSG00000250432 | -0.33667  | 0.63182 | 0.5273      | 0.29899     | 0.13532  |         |  |
|           | 0.44618         | 0.93652   | 0.1745  | 0.1745      | 0.61574113  |          |         |  |
| NA        | ENSG00000272545 | 0.93653   | 0.1745  | 0.93653     | 0.1745      | 0.93653  | 0.1745  |  |
|           | 0.93653         | 0.1745    | 0.1745  | 0.61574113  |             |          |         |  |
| EEF1G     | ENSG00000254772 | 0.93631   | 0.17456 | 0.11502     | 0.45421     | 0.11502  | 0.45421 |  |
|           | 0.11502         | 0.45421   | 0.17456 | 0.615908247 |             |          |         |  |
| RNA5SP36  | ENSG00000222129 | 0.93621   | 0.17458 | -0.63069    | 0.73588     | -0.54191 |         |  |
|           | 0.70606         | -0.91828  | 0.82076 | 0.17458     | 0.615924904 |          |         |  |
| FGFR3P5   | ENSG00000260984 | 0.16231   | 0.43553 | 0.5443      | 0.29312     | 0.93616  |         |  |
|           | 0.17459         | -0.45635  | 0.67593 | 0.17459     | 0.615924904 |          |         |  |
| SMCO4     | ENSG00000166002 | 0.80826   | 0.20947 | 0.93609     | 0.17461     | 0.68085  | 0.24798 |  |
|           | 0.70632         | 0.24      | 0.17461 | 0.61593564  |             |          |         |  |
| OR8G3P    | ENSG00000255425 | 0.93602   | 0.17463 | 0.93602     | 0.17463     | 0.93602  |         |  |
|           | 0.17463         | 0.93602   | 0.17463 | 0.17463     | 0.61593564  |          |         |  |
| GHRH      | ENSG00000118702 | 0.71726   | 0.23661 | 0.93592     | 0.17466     | 0.6207   | 0.2674  |  |
|           | 0.53065         | 0.29783   | 0.17466 | 0.61593564  |             |          |         |  |
| ZNRF3     | ENSG00000183579 | 0.18415   | 0.42695 | 0.24844     | 0.4019      | 0.93592  | 0.17466 |  |
|           | 0.56485         | 0.28609   | 0.17466 | 0.61593564  |             |          |         |  |
| IFNA17    | ENSG00000234829 | 0.93569   | 0.17472 | 0.18412     | 0.42696     | -0.66595 |         |  |
|           | 0.74728         | -0.21138  | 0.5837  | 0.17472     | 0.61593564  |          |         |  |
| NA        | ENSG00000267644 | 0.79398   | 0.2136  | 0.79398     | 0.2136      | 0.79398  | 0.2136  |  |
|           | 0.93568         | 0.17472   | 0.17472 | 0.61593564  |             |          |         |  |
| NA        | ENSG00000231705 | 0.9356    | 0.17474 | 0.9356      | 0.17474     | 0.9356   | 0.17474 |  |
|           | 0.9356          | 0.17474   | 0.17474 | 0.61593564  |             |          |         |  |
| MIR633    | ENSG00000207552 | -0.017024 | 0.50679 | -0.14279    | 0.55677     | 0.93556  |         |  |
|           | 0.17475         | -0.0643   | 0.52563 | 0.17475     | 0.61593564  |          |         |  |
| CLEC18B   | ENSG00000140839 | -1.4549   | 0.92715 | 0.93553     | 0.17476     | -0.6132  |         |  |
|           | 0.73013         | 0.31975   | 0.37458 | 0.17476     | 0.61593564  |          |         |  |
| NA        | ENSG00000201196 | 0.93553   | 0.17476 | 0.92886     | 0.17648     | 0.93553  | 0.17476 |  |
|           | 0.93553         | 0.17476   | 0.17476 | 0.61593564  |             |          |         |  |
| MS4A13    | ENSG00000204979 | 0.79242   | 0.21406 | -1.1028     | 0.86493     | 0.93553  |         |  |
|           | 0.17476         | 0.6585    | 0.25511 | 0.17476     | 0.61593564  |          |         |  |
| CACNA1G   | ENSG00000006283 | -0.79383  | 0.78635 | 0.93547     | 0.17477     | -0.63078 |         |  |

|            |                 |           |         |             |             |          |         |  |
|------------|-----------------|-----------|---------|-------------|-------------|----------|---------|--|
|            | 0.73591         | -0.94032  | 0.82647 | 0.17477     | 0.61593564  |          |         |  |
| FHDC1      | ENSG00000137460 | 0.53147   | 0.29755 | 0.41318     | 0.33974     | 0.7613   | 0.22324 |  |
|            | 0.93548         | 0.17477   | 0.17477 | 0.61593564  |             |          |         |  |
| GAPDHP24   | ENSG00000185221 | 0.9355    | 0.17477 | 0.9355      | 0.17477     | 0.9355   |         |  |
|            | 0.17477         | 0.9355    | 0.17477 | 0.17477     | 0.61593564  |          |         |  |
| NA         | ENSG00000221612 | -0.058745 | 0.52342 | 0.29026     | 0.38581     | 0.93533  | 0.17481 |  |
|            | -0.039222       | 0.51564   | 0.17481 | 0.615998172 |             |          |         |  |
| ZNF44      | ENSG00000197857 | 0.40148   | 0.34403 | 0.93514     | 0.17486     | 0.40148  | 0.34403 |  |
|            | 0.40148         | 0.34403   | 0.17486 | 0.615998172 |             |          |         |  |
| NA         | ENSG00000271032 | 0.93513   | 0.17486 | 0.93513     | 0.17486     | 0.93513  | 0.17486 |  |
|            | 0.93513         | 0.17486   | 0.17486 | 0.615998172 |             |          |         |  |
| KCTD5P1    | ENSG00000224232 | 0.93505   | 0.17488 | 0.93505     | 0.17488     | 0.93505  |         |  |
|            | 0.17488         | 0.93505   | 0.17488 | 0.17488     | 0.615998172 |          |         |  |
| NA         | ENSG00000207525 | 0.93495   | 0.17491 | 0.93495     | 0.17491     | 0.93495  | 0.17491 |  |
|            | 0.93495         | 0.17491   | 0.17491 | 0.615998172 |             |          |         |  |
| MDGA1      | ENSG00000112139 | -1.0728   | 0.85832 | -1.2663     | 0.89729     | -0.50576 | 0.69349 |  |
|            | 0.93489         | 0.17492   | 0.17492 | 0.615998172 |             |          |         |  |
| NA         | ENSG00000226842 | 0.93489   | 0.17492 | 0.93489     | 0.17492     | 0.93489  | 0.17492 |  |
|            | 0.93489         | 0.17492   | 0.17492 | 0.615998172 |             |          |         |  |
| PLPP4      | ENSG00000203805 | 0.93485   | 0.17493 | -0.71593    | 0.76298     | -0.55203 | 0.70954 |  |
|            | -0.71593        | 0.76298   | 0.17493 | 0.615998172 |             |          |         |  |
| NA         | ENSG00000240207 | 0.54948   | 0.29134 | 0.54948     | 0.29134     | 0.93484  | 0.17494 |  |
|            | 0.82397         | 0.20498   | 0.17494 | 0.615998172 |             |          |         |  |
| RPL12P46   | ENSG00000255903 | -0.17551  | 0.56966 | 0.93483     | 0.17494     | -0.26067 |         |  |
|            | 0.60283         | -0.94751  | 0.82831 | 0.17494     | 0.615998172 |          |         |  |
| OR52R1     | ENSG00000279270 | 0.93482   | 0.17494 | 0.26904     | 0.39395     | 0.93482  |         |  |
|            | 0.17494         | 0.93482   | 0.17494 | 0.17494     | 0.615998172 |          |         |  |
| RNA5SP258  | ENSG00000199620 | 0.38394   | 0.35051 | 0.77375     | 0.21954     | 0.61098  |         |  |
|            | 0.27061         | 0.93476   | 0.17496 | 0.17496     | 0.615998172 |          |         |  |
| NA         | ENSG00000282946 | 0.93474   | 0.17496 | 0.93474     | 0.17496     | 0.93474  | 0.17496 |  |
|            | 0.93474         | 0.17496   | 0.17496 | 0.615998172 |             |          |         |  |
| MIR548T    | ENSG00000221296 | 0.93472   | 0.17497 | 0.75012     | 0.22659     | 0.50971  |         |  |
|            | 0.30513         | -0.2797   | 0.61014 | 0.17497     | 0.615998172 |          |         |  |
| RNU6-295P  | ENSG00000252710 | -0.32384  | 0.62697 | 0.93467     | 0.17498     | -0.30481 |         |  |
|            | 0.61975         | -0.65522  | 0.74384 | 0.17498     | 0.615998172 |          |         |  |
| MAN2C1     | ENSG00000140400 | -0.70475  | 0.75952 | 0.93463     | 0.17499     | -0.79668 |         |  |
|            | 0.78718         | 0.7088    | 0.23922 | 0.17499     | 0.615998172 |          |         |  |
| DCPS       | ENSG00000110063 | -1.2725   | 0.8984  | -1.1447     | 0.87382     | -1.2725  | 0.8984  |  |
|            | 0.93456         | 0.17501   | 0.17501 | 0.616024075 |             |          |         |  |
| NA         | ENSG00000215972 | 0.93447   | 0.17503 | 0.93447     | 0.17503     | 0.93447  | 0.17503 |  |
|            | 0.93447         | 0.17503   | 0.17503 | 0.616040676 |             |          |         |  |
| IGKV3D-11  | ENSG00000211632 | 0.93442   | 0.17504 | 0.93442     | 0.17504     | 0.93442  |         |  |
|            | 0.17504         | 0.93442   | 0.17504 | 0.17504     | 0.616040676 |          |         |  |
| NA         | ENSG00000233234 | -0.67651  | 0.75064 | 0.93429     | 0.17508     | 0.71401  | 0.23761 |  |
|            | -0.72536        | 0.76589   | 0.17508 | 0.616136954 |             |          |         |  |
| NSG2       | ENSG00000170091 | -0.78638  | 0.78418 | 0.93412     | 0.17512     | -1.6005  | 0.94526 |  |
|            | -1.3005         | 0.90328   | 0.17512 | 0.616233218 |             |          |         |  |
| NA         | ENSG00000235023 | 0.93398   | 0.17516 | 0.48015     | 0.31556     | 0.93398  | 0.17516 |  |
|            | -0.69732        | 0.7572    | 0.17516 | 0.616266344 |             |          |         |  |
| PPP2R5A    | ENSG00000066027 | 0.7959    | 0.21305 | 0.90516     | 0.18269     | 0.93394  |         |  |
|            | 0.17517         | 0.90653   | 0.18233 | 0.17517     | 0.616266344 |          |         |  |
| NA         | ENSG00000238090 | 0.070918  | 0.47173 | 0.93394     | 0.17517     | 0.93394  | 0.17517 |  |
|            | 0.93394         | 0.17517   | 0.17517 | 0.616266344 |             |          |         |  |
| NA         | ENSG00000249142 | -0.60279  | 0.72668 | -0.68331    | 0.75279     | -0.76715 | 0.7785  |  |
|            | 0.93389         | 0.17518   | 0.17518 | 0.616266344 |             |          |         |  |
| NA         | ENSG00000254429 | -0.82367  | 0.79494 | -0.37733    | 0.64703     | 0.93345  | 0.17529 |  |
|            | 0.93345         | 0.17529   | 0.17529 | 0.616587979 |             |          |         |  |
| RNU6-1148P | ENSG00000222924 | 0.81515   | 0.20749 | 0.93337     | 0.17531     | 0.93337  |         |  |
|            | 0.17531         | 0.93337   | 0.17531 | 0.17531     | 0.616587979 |          |         |  |
| PPIAP23    | ENSG00000214178 | 0.93336   | 0.17532 | 0.93336     | 0.17532     | 0.93336  |         |  |
|            | 0.17532         | 0.93336   | 0.17532 | 0.17532     | 0.616587979 |          |         |  |
| NA         | ENSG00000260603 | 0.93328   | 0.17534 | 0.93328     | 0.17534     | 0.93328  | 0.17534 |  |

|              |                 |           |             |             |             |          |         |       |
|--------------|-----------------|-----------|-------------|-------------|-------------|----------|---------|-------|
|              | 0.93328         | 0.17534   | 0.17534     | 0.616587979 |             |          |         |       |
| DCBLD1       | ENSG00000164465 | 0.93322   | 0.17535     | -0.37034    | 0.64444     | -0.40185 |         |       |
|              | 0.6561          | -0.37183  | 0.64499     | 0.17535     | 0.616587979 |          |         |       |
| TPM1-AS      | ENSG00000259498 | 0.93324   | 0.17535     | 0.53523     | 0.29624     | 0.93324  |         |       |
|              | 0.17535         | 0.93324   | 0.17535     | 0.17535     | 0.616587979 |          |         |       |
| NA           | ENSG00000268953 | -0.29119  | 0.61455     | 0.93319     | 0.17536     | 0.93319  | 0.17536 |       |
|              | 0.93319         | 0.17536   | 0.17536     | 0.616587979 |             |          |         |       |
| CLP1         | ENSG00000172409 | 0.93292   | 0.17543     | 0.93292     | 0.17543     | 0.12854  | 0.44886 |       |
|              | 0.13809         | 0.44509   | 0.17543     | 0.616723178 |             |          |         |       |
| GALNT16      | ENSG00000100626 | -0.42568  | 0.66483     | 0.9329      | 0.17544     | -1.2691  |         |       |
|              | 0.89781         | -0.67899  | 0.75143     | 0.17544     | 0.616723178 |          |         |       |
| C9orf135     | ENSG00000204711 | 0.3298    | 0.37078     | 0.67675     | 0.24928     | -0.82602 |         |       |
|              | 0.7956          | 0.93289   | 0.17544     | 0.17544     | 0.616723178 |          |         |       |
| RN7SL307P    | ENSG00000243338 | 0.93284   | 0.17545     | 0.26793     | 0.39438     | 0.93284  |         |       |
|              | 0.17545         | 0.93284   | 0.17545     | 0.17545     | 0.616723178 |          |         |       |
| LINC01519    | ENSG00000237267 | 0.9326    | 0.17551     | -0.75169    | 0.77388     | -0.41536 |         |       |
|              | 0.66106         | -0.41536  | 0.66106     | 0.17551     | 0.616723178 |          |         |       |
| YEATS2       | ENSG00000163872 | 0.47053   | 0.31899     | -0.059085   | 0.52356     | -0.40649 |         |       |
|              | 0.65781         | 0.93256   | 0.17552     | 0.17552     | 0.616723178 |          |         |       |
| RRAS2P2      | ENSG00000233751 | 0.14754   | 0.44135     | -0.14738    | 0.55858     | -0.44445 |         |       |
|              | 0.67164         | 0.93257   | 0.17552     | 0.17552     | 0.616723178 |          |         |       |
| NA           | ENSG00000273980 | 0.93249   | 0.17554     | -1.1045     | 0.86531     | -1.37    | 0.91466 | -1.37 |
|              | 0.91466         | 0.17554   | 0.616723178 |             |             |          |         |       |
| FNDC3A       | ENSG00000102531 | -0.31949  | 0.62532     | -0.31705    | 0.6244      | 0.039475 |         |       |
|              | 0.48426         | 0.93219   | 0.17562     | 0.17562     | 0.616723178 |          |         |       |
| MCTP1-AS1    | ENSG00000249545 | 0.9322    | 0.17562     | -0.85368    | 0.80336     | -0.35001 |         |       |
|              | 0.63683         | -0.33583  | 0.6315      | 0.17562     | 0.616723178 |          |         |       |
| NA           | ENSG00000253416 | 0.26037   | 0.39729     | 0.93218     | 0.17562     | 0.93218  | 0.17562 |       |
|              | 0.012406        | 0.49505   | 0.17562     | 0.616723178 |             |          |         |       |
| UBE3C        | ENSG00000009335 | 0.70411   | 0.24068     | 0.91255     | 0.18074     | 0.8514   | 0.19727 |       |
|              | 0.93209         | 0.17564   | 0.17564     | 0.616723178 |             |          |         |       |
| CLIC4        | ENSG00000169504 | -0.3246   | 0.62726     | -0.67531    | 0.75026     | 0.93209  | 0.17564 |       |
|              | 0.30679         | 0.3795    | 0.17564     | 0.616723178 |             |          |         |       |
| ARMC6        | ENSG00000105676 | -1.5773   | 0.94264     | 0.93209     | 0.17565     | -1.0289  | 0.84823 |       |
|              | -1.0289         | 0.84823   | 0.17565     | 0.616723178 |             |          |         |       |
| BNIP3P33     | ENSG00000268717 | -0.26863  | 0.60589     | 0.93206     | 0.17565     | -0.26863 |         |       |
|              | 0.60589         | -0.26863  | 0.60589     | 0.17565     | 0.616723178 |          |         |       |
| ARMC3        | ENSG00000165309 | 0.45184   | 0.32569     | 0.65657     | 0.25573     | 0.93203  | 0.17566 |       |
|              | 0.5761          | 0.28228   | 0.17566     | 0.616723178 |             |          |         |       |
| PITPNB       | ENSG00000180957 | 0.93198   | 0.17567     | 0.63791     | 0.26177     | 0.42876  |         |       |
|              | 0.33405         | 0.73217   | 0.23203     | 0.17567     | 0.616723178 |          |         |       |
| PKD2L2       | ENSG00000078795 | 0.93192   | 0.17569     | -0.22263    | 0.58809     | 0.27886  |         |       |
|              | 0.39018         | 0.68655   | 0.24618     | 0.17569     | 0.616723178 |          |         |       |
| STXBP6       | ENSG00000168952 | 0.49655   | 0.30975     | 0.28682     | 0.38712     | 0.58677  |         |       |
|              | 0.27868         | 0.93192   | 0.17569     | 0.17569     | 0.616723178 |          |         |       |
| NA           | ENSG00000270165 | 0.9319    | 0.17569     | 0.9319      | 0.17569     | 0.9319   | 0.17569 |       |
|              | 0.9319          | 0.17569   | 0.17569     | 0.616723178 |             |          |         |       |
| TXNDC9       | ENSG00000115514 | 0.39735   | 0.34555     | -0.23347    | 0.5923      | 0.20008  |         |       |
|              | 0.42071         | 0.93179   | 0.17572     | 0.17572     | 0.616723178 |          |         |       |
| KCTD2        | ENSG00000180901 | -0.095887 | 0.53819     | -0.092815   | 0.53697     | 0.93173  | 0.17574 |       |
|              | 0.30252         | 0.38113   | 0.17574     | 0.616723178 |             |          |         |       |
| RNU6-475P    | ENSG00000251882 | 0.9317    | 0.17575     | -1.0305     | 0.8486      | 0.3      | 0.38209 |       |
|              | -0.21606        | 0.58553   | 0.17575     | 0.616723178 |             |          |         |       |
| RNU7-197P    | ENSG00000239168 | 0.93159   | 0.17577     | 0.93159     | 0.17577     | 0.93159  |         |       |
|              | 0.17577         | 0.65148   | 0.25737     | 0.17577     | 0.616723178 |          |         |       |
| TRIM6-TRIM34 | ENSG00000258588 | 0.93148   | 0.1758      | 0.93148     | 0.1758      | 0.93148  |         |       |
|              | 0.1758          | 0.93148   | 0.1758      | 0.1758      | 0.616723178 |          |         |       |
| AGAP12P      | ENSG00000265018 | -0.32197  | 0.62626     | 0.65058     | 0.25766     | 0.93147  |         |       |
|              | 0.1758          | 0.064913  | 0.47412     | 0.1758      | 0.616723178 |          |         |       |
| FIZ1         | ENSG00000179943 | 0.93146   | 0.17581     | 0.93146     | 0.17581     | 0.93146  | 0.17581 |       |
|              | 0.93146         | 0.17581   | 0.17581     | 0.616723178 |             |          |         |       |
| NA           | ENSG00000232286 | 0.93144   | 0.17581     | 0.93144     | 0.17581     | 0.93144  | 0.17581 |       |



|            |                 |            |         |             |             |           |         |  |
|------------|-----------------|------------|---------|-------------|-------------|-----------|---------|--|
|            | 0.93144         | 0.17581    | 0.17581 | 0.616723178 |             |           |         |  |
| BNIP3P32   | ENSG00000268830 | 0.93144    | 0.17581 | -0.77009    | 0.77938     | 0.31768   |         |  |
|            | 0.37537         | 0.31768    | 0.37537 | 0.17581     | 0.616723178 |           |         |  |
| SCGB2B3P   | ENSG00000269811 | 0.93144    | 0.17581 | 0.17581     | 0.93144     | 0.17581   | 0.93144 |  |
|            | 0.17581         | 0.93144    | 0.17581 | 0.17581     | 0.616723178 |           |         |  |
| NA         | ENSG00000279971 | 0.93144    | 0.17581 | 0.93144     | 0.17581     | 0.93144   | 0.17581 |  |
|            | 0.93144         | 0.17581    | 0.17581 | 0.616723178 |             |           |         |  |
| CATSPERB   | ENSG00000133962 | 0.56828    | 0.28492 | -0.42433    | 0.66434     | 0.41143   |         |  |
|            | 0.34038         | 0.93137    | 0.17583 | 0.17583     | 0.616723178 |           |         |  |
| NA         | ENSG00000237747 | -1.6449    | 0.95    | 0.93138     | 0.17583     | -2.0684   | 0.9807  |  |
|            | -2.0684         | 0.9807     | 0.17583 | 0.616723178 |             |           |         |  |
| NA         | ENSG00000224579 | 0.93126    | 0.17586 | 0.93126     | 0.17586     | 0.93126   | 0.17586 |  |
|            | 0.93126         | 0.17586    | 0.17586 | 0.616723178 |             |           |         |  |
| ABHD17C    | ENSG00000136379 | 0.93124    | 0.17587 | 0.93124     | 0.17587     | 0.20987   |         |  |
|            | 0.41688         | 0.43445    | 0.33198 | 0.17587     | 0.616723178 |           |         |  |
| RNU6-653P  | ENSG00000199944 | -0.19698   | 0.57808 | -0.19698    | 0.57808     | 0.34728   |         |  |
|            | 0.36419         | 0.93118    | 0.17588 | 0.17588     | 0.616723178 |           |         |  |
| RPS26P43   | ENSG00000244641 | 0.20187    | 0.42001 | 0.93117     | 0.17588     | 0.93117   |         |  |
|            | 0.17588         | 0.93117    | 0.17588 | 0.17588     | 0.616723178 |           |         |  |
| FARS2      | ENSG00000145982 | 0.77324    | 0.21969 | 0.36724     | 0.35672     | 0.93104   | 0.17592 |  |
|            | 0.68652         | 0.24619    | 0.17592 | 0.616723178 |             |           |         |  |
| ZNF491     | ENSG00000177599 | 0.93105    | 0.17592 | 0.91038     | 0.18131     | 0.13816   |         |  |
|            | 0.44506         | 0.63681    | 0.26212 | 0.17592     | 0.616723178 |           |         |  |
| NA         | ENSG00000256625 | 0.93103    | 0.17592 | -1.902      | 0.97142     | -1.6556   | 0.9511  |  |
|            | -1.1573         | 0.87643    | 0.17592 | 0.616723178 |             |           |         |  |
| NA         | ENSG00000279162 | 0.93103    | 0.17592 | 0.11553     | 0.45401     | 0.93103   | 0.17592 |  |
|            | 0.93103         | 0.17592    | 0.17592 | 0.616723178 |             |           |         |  |
| VASH1      | ENSG00000071246 | -0.083056  | 0.5331  | 0.39412     | 0.34675     | -0.083056 | 0.5331  |  |
|            | 0.93099         | 0.17593    | 0.17593 | 0.616723178 |             |           |         |  |
| ARHGAP23P1 | ENSG00000260781 | 0.93091    | 0.17595 | 0.62019     | 0.26757     | 0.005232  |         |  |
|            | 0.49791         | -0.72669   | 0.76629 | 0.17595     | 0.61673961  |           |         |  |
| PLCL1      | ENSG00000115896 | -0.81766   | 0.79322 | 0.93088     | 0.17596     | -0.25073  | 0.59899 |  |
|            | 0.43446         | 0.33198    | 0.17596 | 0.61673961  |             |           |         |  |
| NA         | ENSG00000264976 | -0.22717   | 0.58985 | -0.22717    | 0.58985     | 0.93071   | 0.176   |  |
|            | -0.22717        | 0.58985    | 0.176   | 0.61675876  |             |           |         |  |
| TCP11      | ENSG00000124678 | 0.048315   | 0.48073 | 0.91872     | 0.17912     | 0.38223   | 0.35114 |  |
|            | 0.9307          | 0.17601    | 0.17601 | 0.61675876  |             |           |         |  |
| PCDHGA4    | ENSG00000262576 | 0.93066    | 0.17601 | 0.93066     | 0.17601     | 0.93066   |         |  |
|            | 0.17601         | 0.93066    | 0.17601 | 0.17601     | 0.61675876  |           |         |  |
| VCL        | ENSG00000035403 | 0.84562    | 0.19888 | 0.93051     | 0.17605     | -0.042797 | 0.51707 |  |
|            | 0.54551         | 0.2927     | 0.17605 | 0.61675876  |             |           |         |  |
| DIO2-AS1   | ENSG00000258766 | -1.0647    | 0.85649 | 0.93054     | 0.17605     | 0.47566   |         |  |
|            | 0.31716         | 0.35436    | 0.36153 | 0.17605     | 0.61675876  |           |         |  |
| NA         | ENSG00000250546 | 0.153      | 0.4392  | 0.93049     | 0.17606     | 0.7547    | 0.22521 |  |
|            | 0.74975         | 0.2267     | 0.17606 | 0.61675876  |             |           |         |  |
| NA         | ENSG00000248125 | 0.33138    | 0.37018 | 0.12546     | 0.45008     | 0.93043   | 0.17607 |  |
|            | 0.56789         | 0.28506    | 0.17607 | 0.61675876  |             |           |         |  |
| USP43      | ENSG00000154914 | -0.044536  | 0.51776 | 0.93038     | 0.17609     | 0.34373   | 0.36552 |  |
|            | -0.17726        | 0.57035    | 0.17609 | 0.61675876  |             |           |         |  |
| RAD54L     | ENSG00000085999 | 0.2668     | 0.39481 | 0.77085     | 0.2204      | 0.93032   |         |  |
|            | 0.1761          | -0.45947   | 0.67705 | 0.1761      | 0.61675876  |           |         |  |
| SALRNA1    | ENSG00000258952 | 0.93031    | 0.1761  | -0.022162   | 0.50884     | -0.8619   |         |  |
|            | 0.80563         | -0.39764   | 0.65455 | 0.1761      | 0.61675876  |           |         |  |
| GCNT1      | ENSG00000187210 | 0.30892    | 0.37869 | 0.16404     | 0.43485     | -0.084003 | 0.53347 |  |
|            | 0.93021         | 0.17613    | 0.17613 | 0.61675876  |             |           |         |  |
| NA         | ENSG00000229019 | -0.0083663 | 0.50334 | 0.28746     | 0.38688     | -0.257    | 0.60141 |  |
|            | 0.9302          | 0.17613    | 0.17613 | 0.61675876  |             |           |         |  |
| NA         | ENSG00000280665 | -0.16092   | 0.56392 | 0.93021     | 0.17613     | 0.45433   | 0.3248  |  |
|            | 0.033007        | 0.48683    | 0.17613 | 0.61675876  |             |           |         |  |
| IQCA1-AS1  | ENSG00000232893 | 0.024153   | 0.49037 | 0.83831     | 0.20093     | 0.038105  |         |  |
|            | 0.4848          | 0.93013    | 0.17615 | 0.17615     | 0.616768579 |           |         |  |
| RN7SL807P  | ENSG00000243125 | 0.93001    | 0.17618 | 0.93001     | 0.17618     | 0.93001   |         |  |

|                   |                 |             |         |             |             |             |         |         |
|-------------------|-----------------|-------------|---------|-------------|-------------|-------------|---------|---------|
|                   | 0.17618         | 0.93001     | 0.17618 | 0.17618     | 0.616768579 |             |         |         |
| DBIP1             | ENSG00000218748 | 0.93        | 0.17619 | 0.93        | 0.17619     | 0.93        | 0.17619 | 0.93    |
|                   | 0.17619         | 0.616768579 |         |             |             |             |         |         |
| NA                | ENSG00000261845 | 0.92995     | 0.1762  | 0.92995     | 0.1762      | 0.92995     | 0.1762  | 0.1762  |
|                   | 0.92995         | 0.1762      | 0.1762  | 0.616768579 |             |             |         |         |
| TMEM106B          | ENSG00000106460 | 0.77766     | 0.21838 | 0.80333     | 0.21089     | -0.03911    |         |         |
|                   | 0.5156          | 0.92986     | 0.17622 | 0.17622     | 0.616768579 |             |         |         |
| NA                | ENSG00000261398 | 0.92982     | 0.17623 | 0.92982     | 0.17623     | 0.92982     | 0.17623 | 0.17623 |
|                   | 0.92982         | 0.17623     | 0.17623 | 0.616768579 |             |             |         |         |
| OCLN              | ENSG00000197822 | 0.92971     | 0.17626 | -0.25797    | 0.60178     | 0.58739     | 0.27847 |         |
|                   | 0.73728         | 0.23048     | 0.17626 | 0.616768579 |             |             |         |         |
| EID2              | ENSG00000176396 | -0.023949   | 0.50955 | 0.28525     | 0.38773     | 0.28525     | 0.38773 |         |
|                   | 0.92966         | 0.17627     | 0.17627 | 0.616768579 |             |             |         |         |
| NA                | ENSG00000279962 | 0.45845     | 0.32332 | 0.92969     | 0.17627     | 0.92969     | 0.17627 | 0.17627 |
|                   | 0.92969         | 0.17627     | 0.17627 | 0.616768579 |             |             |         |         |
| TNFRSF1A          | ENSG00000067182 | -0.57373    | 0.71693 | -0.45624    | 0.67589     | -0.060884   |         |         |
|                   | 0.52427         | 0.92955     | 0.1763  | 0.1763      | 0.616768579 |             |         |         |
| GSTA12P           | ENSG00000217228 | -0.6992     | 0.75779 | 0.92957     | 0.1763      | -0.81193    |         |         |
|                   | 0.79158         | -1.3705     | 0.91473 | 0.1763      | 0.616768579 |             |         |         |
| NA                | ENSG00000237821 | 0.073849    | 0.47057 | 0.92954     | 0.1763      | 0.92954     | 0.1763  | 0.1763  |
|                   | 0.92954         | 0.1763      | 0.1763  | 0.616768579 |             |             |         |         |
| NA                | ENSG00000255745 | -0.97639    | 0.83556 | 0.47811     | 0.31629     | 0.92954     | 0.1763  | 0.1763  |
|                   | -2.1975         | 0.98601     | 0.1763  | 0.616768579 |             |             |         |         |
| SLC38A2           | ENSG00000134294 | -0.38123    | 0.64848 | 0.31866     | 0.37499     | 0.92952     |         |         |
|                   | 0.17631         | 0.68401     | 0.24698 | 0.17631     | 0.616768579 |             |         |         |
| NA                | ENSG00000237982 | 0.92934     | 0.17636 | 0.92934     | 0.17636     | 0.92934     | 0.17636 | 0.17636 |
|                   | 0.92934         | 0.17636     | 0.17636 | 0.616899203 |             |             |         |         |
| ENPP7P1           | ENSG00000249188 | -0.25185    | 0.59942 | -0.18948    | 0.57514     | -0.58438    |         |         |
|                   | 0.72052         | 0.92919     | 0.1764  | 0.1764      | 0.616976216 |             |         |         |
| N4BP2L2           | ENSG00000244754 | -0.35091    | 0.63717 | 0.42664     | 0.33482     | 0.92914     |         |         |
|                   | 0.17641         | 0.22626     | 0.4105  | 0.17641     | 0.616976216 |             |         |         |
| ALDH7A1P4         | ENSG00000234489 | 0.92911     | 0.17642 | 0.92911     | 0.17642     | 0.92911     |         |         |
|                   | 0.17642         | 0.92911     | 0.17642 | 0.17642     | 0.616976216 |             |         |         |
| MLXIPL            | ENSG00000009950 | 0.92903     | 0.17644 | -0.15078    | 0.55993     | 0.40856     |         |         |
|                   | 0.34143         | 0.59281     | 0.27666 | 0.17644     | 0.616983268 |             |         |         |
| NA                | ENSG00000272732 | 0.92897     | 0.17645 | 0.26389     | 0.39593     | -0.23385    | 0.59245 | 0.59245 |
|                   | -0.10759        | 0.54284     | 0.17645 | 0.616983268 |             |             |         |         |
| NA                | ENSG00000272444 | 0.92892     | 0.17646 | 0.92892     | 0.17646     | 0.92892     | 0.17646 | 0.17646 |
|                   | 0.92892         | 0.17646     | 0.17646 | 0.616983268 |             |             |         |         |
| PTAFR             | ENSG00000169403 | 0.76571     | 0.22192 | 0.47901     | 0.31597     | 0.92883     | 0.17649 | 0.17649 |
|                   | 0.37233         | 0.35483     | 0.17649 | 0.61699962  |             |             |         |         |
| NA                | ENSG00000240842 | 0.92883     | 0.17649 | 0.88911     | 0.18697     | 0.16819     | 0.43322 | 0.43322 |
|                   | 0.88911         | 0.18697     | 0.17649 | 0.61699962  |             |             |         |         |
| NA                | ENSG00000231769 | 0.044415    | 0.48229 | 0.92871     | 0.17652     | 0.29015     | 0.38585 | 0.38585 |
|                   | 0.59842         | 0.27478     | 0.17652 | 0.617023006 |             |             |         |         |
| ANKRD62P1-PARP4P3 | ENSG00000189295 | 0.72287     | 0.23488 | -0.42634    | 0.66507     |             |         |         |
|                   | -0.62895        | 0.73531     | 0.92869 | 0.17653     | 0.17653     | 0.617023006 |         |         |
| DZANK1            | ENSG00000089091 | 0.92859     | 0.17655 | 0.92859     | 0.17655     | 0.92859     |         |         |
|                   | 0.17655         | -0.78547    | 0.78391 | 0.17655     | 0.617023006 |             |         |         |
| NA                | ENSG00000267265 | 0.92861     | 0.17655 | 0.92861     | 0.17655     | 0.92861     | 0.17655 | 0.17655 |
|                   | 0.92861         | 0.17655     | 0.17655 | 0.617023006 |             |             |         |         |
| NMD3P1            | ENSG00000226342 | 0.92857     | 0.17656 | 0.63158     | 0.26383     | -1.0717     |         |         |
|                   | 0.85808         | -1.4516     | 0.92669 | 0.17656     | 0.617023006 |             |         |         |
| TMPRSS4           | ENSG00000137648 | 0.92841     | 0.1766  | 0.32068     | 0.37423     | 0.92841     |         |         |
|                   | 0.1766          | 0.39872     | 0.34505 | 0.1766      | 0.617109228 |             |         |         |
| NA                | ENSG00000223716 | -0.27285    | 0.60752 | 0.44533     | 0.32804     | 0.26255     | 0.39645 | 0.39645 |
|                   | 0.92838         | 0.17661     | 0.17661 | 0.617109228 |             |             |         |         |
| RNU6-597P         | ENSG00000202490 | 0.92819     | 0.17665 | 0.92819     | 0.17665     | 0.92819     |         |         |
|                   | 0.17665         | -0.66496    | 0.74696 | 0.17665     | 0.617160489 |             |         |         |
| NA                | ENSG00000238713 | -0.64308    | 0.73991 | 0.59032     | 0.27749     | 0.92822     | 0.17665 | 0.17665 |
|                   | 0.92822         | 0.17665     | 0.17665 | 0.617160489 |             |             |         |         |
| LINC01982         | ENSG00000263317 | 0.92809     | 0.17668 | 0.83826     | 0.20094     | 0.71632     |         |         |

|           |                 |           |         |             |             |           |         |  |
|-----------|-----------------|-----------|---------|-------------|-------------|-----------|---------|--|
|           | 0.2369          | 0.71632   | 0.2369  | 0.17668     | 0.617176803 |           |         |  |
| NA        | ENSG00000269693 | 0.9281    | 0.17668 | 0.9281      | 0.17668     | 0.9281    | 0.17668 |  |
|           | 0.9281          | 0.17668   | 0.17668 | 0.617176803 |             |           |         |  |
| NA        | ENSG00000234132 | 0.92797   | 0.17671 | 0.92797     | 0.17671     | 0.92797   | 0.17671 |  |
|           | 0.92797         | 0.17671   | 0.17671 | 0.617197898 |             |           |         |  |
| RNU6-483P | ENSG00000206815 | 0.92794   | 0.17672 | 0.92794     | 0.17672     | 0.92794   |         |  |
|           | 0.17672         | 0.92794   | 0.17672 | 0.617197898 |             |           |         |  |
| NA        | ENSG00000236986 | 0.92789   | 0.17673 | 0.091655    | 0.46349     | 0.63274   | 0.26345 |  |
|           | 0.63274         | 0.26345   | 0.17673 | 0.617197898 |             |           |         |  |
| RN7SL28P  | ENSG00000244512 | -0.46102  | 0.67761 | 0.52484     | 0.29985     | 0.75374   |         |  |
|           | 0.2255          | 0.9278    | 0.17675 | 0.17675     | 0.617197898 |           |         |  |
| RNU7-62P  | ENSG00000238653 | 0.10831   | 0.45688 | 0.9277      | 0.17678     | 0.74682   |         |  |
|           | 0.22758         | 0.9277    | 0.17678 | 0.17678     | 0.617197898 |           |         |  |
| MOB2      | ENSG00000182208 | -0.55088  | 0.70914 | -0.014953   | 0.50597     | 0.92768   | 0.17679 |  |
|           | -0.36049        | 0.64076   | 0.17679 | 0.617197898 |             |           |         |  |
| RNU6-374P | ENSG00000201016 | 0.92767   | 0.17679 | -0.36717    | 0.64326     | 0.92767   |         |  |
|           | 0.17679         | 0.92767   | 0.17679 | 0.17679     | 0.617197898 |           |         |  |
| LINC02156 | ENSG00000257906 | 0.92763   | 0.1768  | 0.56514     | 0.28599     | 0.92763   |         |  |
|           | 0.1768          | 0.15271   | 0.43931 | 0.1768      | 0.617197898 |           |         |  |
| ST3GAL4   | ENSG00000110080 | 0.84972   | 0.19774 | 0.84972     | 0.19774     | 0.50466   |         |  |
|           | 0.3069          | 0.9276    | 0.17681 | 0.17681     | 0.617197898 |           |         |  |
| FAM153A   | ENSG00000170074 | 0.1606    | 0.4362  | 0.8998      | 0.18411     | -1.2043   |         |  |
|           | 0.88576         | 0.92754   | 0.17682 | 0.17682     | 0.617197898 |           |         |  |
| CMC1      | ENSG00000187118 | -0.32069  | 0.62578 | -0.092016   | 0.53666     | 0.86414   | 0.19376 |  |
|           | 0.92746         | 0.17685   | 0.17685 | 0.617197898 |             |           |         |  |
| TUBE1     | ENSG00000074935 | 0.89479   | 0.18545 | -0.18677    | 0.57408     | 0.89479   | 0.18545 |  |
|           | 0.9274          | 0.17686   | 0.17686 | 0.617197898 |             |           |         |  |
| ZNF438    | ENSG00000183621 | 0.64361   | 0.25992 | 0.15075     | 0.44009     | 0.92736   |         |  |
|           | 0.17687         | -0.033449 | 0.51334 | 0.17687     | 0.617197898 |           |         |  |
| MRPS21P2  | ENSG00000227425 | 0.92724   | 0.1769  | 0.92724     | 0.1769      | 0.92724   |         |  |
|           | 0.1769          | 0.92724   | 0.1769  | 0.1769      | 0.617197898 |           |         |  |
| NA        | ENSG00000261292 | -0.89059  | 0.81343 | 0.92718     | 0.17692     | -0.89059  | 0.81343 |  |
|           | -0.89059        | 0.81343   | 0.17692 | 0.617197898 |             |           |         |  |
| ASH2L     | ENSG00000129691 | 0.7767    | 0.21867 | 0.92709     | 0.17694     | 0.10326   | 0.45888 |  |
|           | 0.7767          | 0.21867   | 0.17694 | 0.617197898 |             |           |         |  |
| PPIAP26   | ENSG00000150276 | 0.92708   | 0.17694 | 0.92708     | 0.17694     | 0.92708   |         |  |
|           | 0.17694         | -0.14278  | 0.55677 | 0.17694     | 0.617197898 |           |         |  |
| NAXE      | ENSG00000163382 | 0.92706   | 0.17695 | 0.68853     | 0.24556     | 0.68853   | 0.24556 |  |
|           | 0.68853         | 0.24556   | 0.17695 | 0.617197898 |             |           |         |  |
| NA        | ENSG00000203644 | 0.92699   | 0.17697 | 0.92699     | 0.17697     | 0.18051   | 0.42837 |  |
|           | 0.92699         | 0.17697   | 0.17697 | 0.617197898 |             |           |         |  |
| APTR      | ENSG00000214293 | 0.62306   | 0.26662 | 0.82531     | 0.2046      | 0.42922   | 0.33388 |  |
|           | 0.92699         | 0.17697   | 0.17697 | 0.617197898 |             |           |         |  |
| NA        | ENSG00000273143 | 0.33297   | 0.36958 | 0.92694     | 0.17698     | 0.60752   | 0.27175 |  |
|           | -1.6209         | 0.94748   | 0.17698 | 0.617197898 |             |           |         |  |
| VASP      | ENSG00000125753 | 0.92691   | 0.17699 | 0.32276     | 0.37344     | 0.92691   | 0.17699 |  |
|           | 0.92691         | 0.17699   | 0.17699 | 0.617197898 |             |           |         |  |
| NA        | ENSG00000240197 | -0.57412  | 0.71706 | 0.9269      | 0.17699     | 0.3248    | 0.37267 |  |
|           | 0.32276         | 0.37344   | 0.17699 | 0.617197898 |             |           |         |  |
| NA        | ENSG00000243613 | 0.9268    | 0.17702 | 0.9268      | 0.17702     | 0.9268    | 0.17702 |  |
|           | 0.9268          | 0.17702   | 0.17702 | 0.617197898 |             |           |         |  |
| TSKU      | ENSG00000182704 | -0.68027  | 0.75183 | 0.92669     | 0.17704     | 0.66569   | 0.25281 |  |
|           | 0.042184        | 0.48318   | 0.17704 | 0.617197898 |             |           |         |  |
| NUDCD1    | ENSG00000120526 | 0.92668   | 0.17705 | 0.73011     | 0.23266     | -0.072175 |         |  |
|           | 0.52877         | 0.57009   | 0.28431 | 0.17705     | 0.617197898 |           |         |  |
| PLEKHH1   | ENSG00000054690 | -0.67682  | 0.75074 | -0.40521    | 0.65734     | 0.92651   |         |  |
|           | 0.17709         | -1.1974   | 0.88442 | 0.17709     | 0.617197898 |           |         |  |
| PARVA     | ENSG00000197702 | -0.37863  | 0.64752 | 0.9265      | 0.17709     | -0.12183  | 0.54848 |  |
|           | -1.1073         | 0.86591   | 0.17709 | 0.617197898 |             |           |         |  |
| ZNF441    | ENSG00000197044 | 0.92647   | 0.1771  | -0.97876    | 0.83615     | -1.2805   |         |  |
|           | 0.89981         | -1.3908   | 0.91786 | 0.1771      | 0.617197898 |           |         |  |
| NA        | ENSG00000260255 | 0.64264   | 0.26023 | 0.92648     | 0.1771      | 0.75619   | 0.22477 |  |

|            |                 |          |         |             |             |          |         |  |
|------------|-----------------|----------|---------|-------------|-------------|----------|---------|--|
|            | 0.75619         | 0.22477  | 0.1771  | 0.617197898 |             |          |         |  |
| NA         | ENSG00000250509 | -0.27416 | 0.60802 | 0.17717     | 0.42969     | -0.9697  | 0.8339  |  |
|            | 0.92645         | 0.17711  | 0.17711 | 0.617197898 |             |          |         |  |
| NA         | ENSG00000266772 | -0.33918 | 0.63276 | -0.72856    | 0.76687     | -1.5211  | 0.93588 |  |
|            | 0.92645         | 0.17711  | 0.17711 | 0.617197898 |             |          |         |  |
| NA         | ENSG00000227757 | 0.52138  | 0.30105 | 0.92639     | 0.17712     | -0.47894 | 0.68401 |  |
|            | 0.52138         | 0.30105  | 0.17712 | 0.617197898 |             |          |         |  |
| ABI2       | ENSG00000138443 | 0.38045  | 0.35181 | 0.90254     | 0.18339     | 0.87651  | 0.19038 |  |
|            | 0.92635         | 0.17713  | 0.17713 | 0.617197898 |             |          |         |  |
| NA         | ENSG00000249295 | 0.92635  | 0.17713 | 0.92635     | 0.17713     | -0.43503 | 0.66823 |  |
|            | 0.92635         | 0.17713  | 0.17713 | 0.617197898 |             |          |         |  |
| NA         | ENSG00000260066 | 0.92627  | 0.17715 | 0.10907     | 0.45657     | -0.79972 | 0.78806 |  |
|            | 0.80724         | 0.20976  | 0.17715 | 0.617197898 |             |          |         |  |
| C14orf180  | ENSG00000184601 | 0.67167  | 0.2509  | 0.1878      | 0.42551     | 0.92619  |         |  |
|            | 0.17717         | 0.63952  | 0.26124 | 0.17717     | 0.617197898 |          |         |  |
| MOSMO      | ENSG00000185716 | 0.92617  | 0.17718 | 0.92617     | 0.17718     | 0.92617  | 0.17718 |  |
|            | 0.25944         | 0.39765  | 0.17718 | 0.617197898 |             |          |         |  |
| NA         | ENSG00000272632 | 0.92616  | 0.17718 | -0.34101    | 0.63345     | -0.82532 | 0.79541 |  |
|            | -0.82532        | 0.79541  | 0.17718 | 0.617197898 |             |          |         |  |
| ABITRAM    | ENSG00000119328 | 0.92604  | 0.17721 | 0.92604     | 0.17721     | 0.92604  |         |  |
|            | 0.17721         | 0.92604  | 0.17721 | 0.17721     | 0.617258277 |          |         |  |
| CNMD       | ENSG00000136110 | 0.42195  | 0.33653 | -1.2541     | 0.8951      | 0.92597  | 0.17723 |  |
|            | 0.62811         | 0.26497  | 0.17723 | 0.61726524  |             |          |         |  |
| VPS13A     | ENSG00000197969 | 0.06684  | 0.47335 | 0.92588     | 0.17725     | 0.49751  |         |  |
|            | 0.30941         | 0.39588  | 0.3461  | 0.17725     | 0.61726524  |          |         |  |
| NA         | ENSG00000212445 | 0.80634  | 0.21002 | 0.92591     | 0.17725     | 0.80634  | 0.21002 |  |
|            | 0.80634         | 0.21002  | 0.17725 | 0.61726524  |             |          |         |  |
| NA         | ENSG00000257703 | 0.92582  | 0.17727 | -0.6117     | 0.72963     | -0.6117  | 0.72963 |  |
|            | -0.6117         | 0.72963  | 0.17727 | 0.617281486 |             |          |         |  |
| NA         | ENSG00000202385 | 0.92576  | 0.17728 | 0.92576     | 0.17728     | 0.92576  | 0.17728 |  |
|            | 0.92576         | 0.17728  | 0.17728 | 0.617281486 |             |          |         |  |
| NA         | ENSG00000265995 | 0.92562  | 0.17732 | 0.45132     | 0.32588     | 0.68343  | 0.24717 |  |
|            | 0.011884        | 0.49526  | 0.17732 | 0.617346426 |             |          |         |  |
| HMGB1P28   | ENSG00000249745 | 0.92556  | 0.17734 | 0.92556     | 0.17734     | 0.92556  |         |  |
|            | 0.17734         | 0.92556  | 0.17734 | 0.17734     | 0.617346426 |          |         |  |
| RNU6-1187P | ENSG00000201641 | 0.57643  | 0.28216 | 0.92543     | 0.17737     | 0.80977  |         |  |
|            | 0.20904         | 0.80977  | 0.20904 | 0.17737     | 0.617346426 |          |         |  |
| MIR592     | ENSG00000207692 | 0.47238  | 0.31833 | 0.92537     | 0.17739     | 0.92537  |         |  |
|            | 0.17739         | 0.92537  | 0.17739 | 0.17739     | 0.617346426 |          |         |  |
| RNA5SP76   | ENSG00000252086 | 0.77958  | 0.21782 | 0.92536     | 0.17739     | 0.92536  |         |  |
|            | 0.17739         | 0.92536  | 0.17739 | 0.17739     | 0.617346426 |          |         |  |
| RN7SL188P  | ENSG00000241943 | 0.92532  | 0.1774  | -0.26348    | 0.60391     | 0.50133  |         |  |
|            | 0.30807         | -0.6911  | 0.75525 | 0.1774      | 0.617346426 |          |         |  |
| MIR378D1   | ENSG00000263631 | 0.061536 | 0.47547 | 0.92532     | 0.1774      | 0.16606  |         |  |
|            | 0.43405         | 0.13544  | 0.44613 | 0.1774      | 0.617346426 |          |         |  |
| NA         | ENSG00000279541 | 0.92532  | 0.1774  | 0.92532     | 0.1774      | 0.92532  | 0.1774  |  |
|            | 0.92532         | 0.1774   | 0.1774  | 0.617346426 |             |          |         |  |
| ABCC10     | ENSG00000124574 | 0.92514  | 0.17745 | 0.55239     | 0.29034     | 0.55167  |         |  |
|            | 0.29059         | -0.22687 | 0.58974 | 0.17745     | 0.617388155 |          |         |  |
| LINC02789  | ENSG00000231718 | 0.92512  | 0.17745 | 0.92512     | 0.17745     | 0.7763   |         |  |
|            | 0.21879         | 0.92512  | 0.17745 | 0.17745     | 0.617388155 |          |         |  |
| NA         | ENSG00000279589 | 0.92511  | 0.17745 | 0.92511     | 0.17745     | 0.92511  | 0.17745 |  |
|            | 0.92511         | 0.17745  | 0.17745 | 0.617388155 |             |          |         |  |
| NA         | ENSG00000235410 | 0.49594  | 0.30997 | 0.15675     | 0.43772     | 0.925    | 0.17748 |  |
|            | 0.49594         | 0.30997  | 0.17748 | 0.617411291 |             |          |         |  |
| CNGA3      | ENSG00000144191 | -0.3269  | 0.62813 | -0.27977    | 0.61017     | 0.92497  | 0.17749 |  |
|            | -0.0049135      | 0.50196  | 0.17749 | 0.617411291 |             |          |         |  |
| CADM1      | ENSG00000182985 | 0.51245  | 0.30417 | -0.053166   | 0.5212      | 0.92492  | 0.1775  |  |
|            | 0.31151         | 0.37771  | 0.1775  | 0.617411291 |             |          |         |  |
| TRGVA      | ENSG00000225992 | 0.018868 | 0.49247 | 0.92491     | 0.17751     | 0.018868 | 0.49247 |  |
|            | 0.018868        | 0.49247  | 0.17751 | 0.617411291 |             |          |         |  |
| OR4X1      | ENSG00000176567 | -0.23626 | 0.59338 | -0.77393    | 0.78051     | 0.92486  | 0.17752 |  |

|            |                 |           |         |             |             |          |         |  |
|------------|-----------------|-----------|---------|-------------|-------------|----------|---------|--|
|            | 0.21902         | 0.41332   | 0.17752 | 0.617411291 |             |          |         |  |
| NA         | ENSG00000238472 | -0.1754   | 0.56962 | 0.38356     | 0.35065     | 0.45336  | 0.32515 |  |
|            | 0.92473         | 0.17755   | 0.17755 | 0.617443696 |             |          |         |  |
| ZSCAN18    | ENSG00000121413 | 0.92465   | 0.17757 | 0.92465     | 0.17757     | 0.92465  |         |  |
|            | 0.17757         | 0.92465   | 0.17757 | 0.17757     | 0.617443696 |          |         |  |
| TTYH2      | ENSG00000141540 | 0.92461   | 0.17758 | 0.7664      | 0.22172     | -1.0855  | 0.86114 |  |
|            | 0.6657          | 0.2528    | 0.17758 | 0.617443696 |             |          |         |  |
| BEST1      | ENSG00000167995 | 0.34929   | 0.36344 | -0.33979    | 0.63299     | 0.17104  | 0.43209 |  |
|            | 0.92461         | 0.17758   | 0.17758 | 0.617443696 |             |          |         |  |
| RAC1P2     | ENSG00000249936 | -1.6913   | 0.95461 | -2.1467     | 0.98409     | 0.28285  |         |  |
|            | 0.38865         | 0.92447   | 0.17762 | 0.17762     | 0.617538713 |          |         |  |
| RNA5SP294  | ENSG00000223238 | 0.92429   | 0.17767 | 0.92429     | 0.17767     | 0.92429  |         |  |
|            | 0.17767         | 0.92429   | 0.17767 | 0.17767     | 0.617659181 |          |         |  |
| DSN1       | ENSG00000149636 | -0.69493  | 0.75645 | -1.4737     | 0.92973     | -0.69493 | 0.75645 |  |
|            | 0.92423         | 0.17768   | 0.17768 | 0.617659181 |             |          |         |  |
| AK5        | ENSG00000154027 | -0.20659  | 0.58183 | -0.36723    | 0.64328     | -0.46657 | 0.6796  |  |
|            | 0.92412         | 0.17771   | 0.17771 | 0.6177101   |             |          |         |  |
| RPL19P1    | ENSG00000226217 | 0.8203    | 0.20602 | 0.92411     | 0.17772     | 0.8203   |         |  |
|            | 0.20602         | 0.8203    | 0.20602 | 0.17772     | 0.6177101   |          |         |  |
| SYT1       | ENSG00000067715 | -1.0842   | 0.86086 | -0.12653    | 0.55034     | 0.92388  | 0.17777 |  |
|            | -0.18786        | 0.57451   | 0.17777 | 0.617777146 |             |          |         |  |
| NA         | ENSG00000250997 | 0.92387   | 0.17778 | 0.92387     | 0.17778     | 0.92387  | 0.17778 |  |
|            | 0.92387         | 0.17778   | 0.17778 | 0.617777146 |             |          |         |  |
| NA         | ENSG00000203396 | -0.86769  | 0.80722 | 0.92383     | 0.17779     | 0.46246  | 0.32188 |  |
|            | 0.46246         | 0.32188   | 0.17779 | 0.617777146 |             |          |         |  |
| NA         | ENSG00000270571 | 0.92381   | 0.17779 | 0.92381     | 0.17779     | 0.92381  | 0.17779 |  |
|            | 0.92381         | 0.17779   | 0.17779 | 0.617777146 |             |          |         |  |
| CBX7       | ENSG00000100307 | 0.92369   | 0.17782 | -0.04326    | 0.51725     | 0.35827  | 0.36007 |  |
|            | 0.15681         | 0.4377    | 0.17782 | 0.617837333 |             |          |         |  |
| NA         | ENSG00000266101 | 0.9236    | 0.17785 | 0.9236      | 0.17785     | 0.9236   | 0.17785 |  |
|            | 0.9236          | 0.17785   | 0.17785 | 0.617878892 |             |          |         |  |
| ANKRD26P4  | ENSG00000229427 | 0.16308   | 0.43523 | 0.6169      | 0.26865     | 0.92356  |         |  |
|            | 0.17786         | 0.11195   | 0.45543 | 0.17786     | 0.617878892 |          |         |  |
| GPT        | ENSG00000167701 | 0.21359   | 0.41543 | 0.35911     | 0.35976     | 0.92352  | 0.17787 |  |
|            | 0.92352         | 0.17787   | 0.17787 | 0.617878892 |             |          |         |  |
| NA         | ENSG00000261997 | 0.92341   | 0.1779  | 0.92341     | 0.1779      | 0.92341  | 0.1779  |  |
|            | 0.92341         | 0.1779    | 0.1779  | 0.617939055 |             |          |         |  |
| UPB1       | ENSG00000100024 | -0.014359 | 0.50573 | -0.13645    | 0.55427     | 0.10935  | 0.45646 |  |
|            | 0.92329         | 0.17793   | 0.17793 | 0.617999209 |             |          |         |  |
| CACNA1C    | ENSG00000151067 | 0.31846   | 0.37507 | 0.65396     | 0.25657     | 0.47306  |         |  |
|            | 0.31808         | 0.92318   | 0.17796 | 0.17796     | 0.618015308 |          |         |  |
| CST2P1     | ENSG00000232595 | 0.23545   | 0.40693 | 0.92315     | 0.17796     | 0.2513   |         |  |
|            | 0.40079         | -0.18176  | 0.57211 | 0.17796     | 0.618015308 |          |         |  |
| NA         | ENSG00000267606 | -0.65157  | 0.74266 | -0.65157    | 0.74266     | 0.92299  | 0.17801 |  |
|            | -0.65157        | 0.74266   | 0.17801 | 0.618132057 |             |          |         |  |
| NA         | ENSG00000250560 | 0.83802   | 0.20101 | -0.010518   | 0.5042      | 0.83802  | 0.20101 |  |
|            | 0.92285         | 0.17804   | 0.17804 | 0.618132057 |             |          |         |  |
| RPL5P8     | ENSG00000213917 | 0.92276   | 0.17807 | 0.024123    | 0.49038     | 0.024123 |         |  |
|            | 0.49038         | 0.024123  | 0.49038 | 0.17807     | 0.618132057 |          |         |  |
| CPO        | ENSG00000144410 | -0.48821  | 0.6873  | 0.44093     | 0.32963     | -0.43381 | 0.66779 |  |
|            | 0.92263         | 0.1781    | 0.1781  | 0.618132057 |             |          |         |  |
| SLC16A1P1  | ENSG00000242280 | 0.92253   | 0.17813 | 0.92253     | 0.17813     | 0.92253  |         |  |
|            | 0.17813         | 0.92253   | 0.17813 | 0.17813     | 0.618132057 |          |         |  |
| NA         | ENSG00000248935 | -0.20866  | 0.58264 | 0.42377     | 0.33587     | 0.9225   | 0.17813 |  |
|            | 0.42377         | 0.33587   | 0.17813 | 0.618132057 |             |          |         |  |
| NUDT5      | ENSG00000165609 | 0.89755   | 0.18471 | 0.69059     | 0.24491     | 0.92249  | 0.17814 |  |
|            | 0.72205         | 0.23513   | 0.17814 | 0.618132057 |             |          |         |  |
| ATP2A1-AS1 | ENSG00000260442 | 0.92247   | 0.17814 | 0.92247     | 0.17814     | 0.92247  |         |  |
|            | 0.17814         | 0.92247   | 0.17814 | 0.17814     | 0.618132057 |          |         |  |
| SOD2       | ENSG00000112096 | 0.92244   | 0.17815 | 0.89999     | 0.18406     | 0.87579  | 0.19057 |  |
|            | 0.36186         | 0.35873   | 0.17815 | 0.618132057 |             |          |         |  |
| MIR5692C2  | ENSG00000266668 | 0.92238   | 0.17816 | 0.92238     | 0.17816     | 0.92238  |         |  |

|           |                 |             |         |             |             |           |         |  |
|-----------|-----------------|-------------|---------|-------------|-------------|-----------|---------|--|
|           | 0.17816         | 0.92238     | 0.17816 | 0.17816     | 0.618132057 |           |         |  |
| NA        | ENSG00000234087 | -0.32984    | 0.62924 | 0.92235     | 0.17817     | 0.92235   | 0.17817 |  |
|           | 0.92235         | 0.17817     | 0.17817 | 0.618132057 |             |           |         |  |
| LINC02621 | ENSG00000234756 | 0.92236     | 0.17817 | 0.019695    | 0.49214     | 0.92236   |         |  |
|           | 0.17817         | 0.92236     | 0.17817 | 0.17817     | 0.618132057 |           |         |  |
| NA        | ENSG00000235181 | 0.72366     | 0.23464 | 0.92237     | 0.17817     | 0.72366   | 0.23464 |  |
|           | 0.72366         | 0.23464     | 0.17817 | 0.618132057 |             |           |         |  |
| PDE4D     | ENSG00000113448 | -0.81061    | 0.79121 | 0.29828     | 0.38274     | 0.14887   | 0.44083 |  |
|           | 0.92226         | 0.1782      | 0.1782  | 0.618132057 |             |           |         |  |
| LINC01729 | ENSG00000225640 | 0.92221     | 0.17821 | 0.75385     | 0.22547     | 0.018168  |         |  |
|           | 0.49275         | -0.25841    | 0.60195 | 0.17821     | 0.618132057 |           |         |  |
| NA        | ENSG00000240562 | 0.92218     | 0.17822 | 0.92218     | 0.17822     | 0.92218   | 0.17822 |  |
|           | 0.92218         | 0.17822     | 0.17822 | 0.618132057 |             |           |         |  |
| NA        | ENSG00000260570 | 0.92218     | 0.17822 | 0.92218     | 0.17822     | 0.92218   | 0.17822 |  |
|           | 0.92218         | 0.17822     | 0.17822 | 0.618132057 |             |           |         |  |
| LRCH3     | ENSG00000186001 | 0.77923     | 0.21792 | 0.61751     | 0.26845     | 0.66827   | 0.25198 |  |
|           | 0.92214         | 0.17823     | 0.17823 | 0.618132057 |             |           |         |  |
| TMCO3     | ENSG00000150403 | 0.81789     | 0.20671 | 0.92207     | 0.17825     | -0.53028  | 0.70204 |  |
|           | 0.43615         | 0.33137     | 0.17825 | 0.618132057 |             |           |         |  |
| MIR494    | ENSG00000194717 | -0.046174   | 0.51841 | -0.046174   | 0.51841     | -0.046174 |         |  |
|           | 0.51841         | 0.92201     | 0.17826 | 0.17826     | 0.618132057 |           |         |  |
| NA        | ENSG00000230929 | 0.922       | 0.17826 | 0.922       | 0.17826     | 0.922     | 0.17826 |  |
|           | 0.17826         | 0.618132057 |         |             |             |           |         |  |
| NA        | ENSG00000272166 | 0.21608     | 0.41446 | 0.92193     | 0.17828     | 0.77847   | 0.21815 |  |
|           | 0.77847         | 0.21815     | 0.17828 | 0.618157421 |             |           |         |  |
| KLC3      | ENSG00000104892 | 0.92172     | 0.17834 | 0.92172     | 0.17834     | 0.92172   | 0.17834 |  |
|           | 0.92172         | 0.17834     | 0.17834 | 0.618265557 |             |           |         |  |
| TRPM3     | ENSG00000083067 | 0.39792     | 0.34534 | 0.72275     | 0.23492     | 0.17615   | 0.43009 |  |
|           | 0.92163         | 0.17836     | 0.17836 | 0.618265557 |             |           |         |  |
| NA        | ENSG00000240440 | 0.92152     | 0.17839 | 0.92152     | 0.17839     | 0.92152   | 0.17839 |  |
|           | 0.92152         | 0.17839     | 0.17839 | 0.618265557 |             |           |         |  |
| FBXO36P1  | ENSG00000266117 | 0.92151     | 0.17839 | -1.1077     | 0.866       | -1.6796   | 0.95348 |  |
|           | -1.6796         | 0.95348     | 0.17839 | 0.618265557 |             |           |         |  |
| SEC14L5   | ENSG00000103184 | -1.0866     | 0.86139 | -0.97368    | 0.83489     | -0.97368  |         |  |
|           | 0.83489         | 0.92147     | 0.1784  | 0.1784      | 0.618265557 |           |         |  |
| AIDA      | ENSG00000186063 | 0.92147     | 0.1784  | -0.51079    | 0.69525     | -0.51079  | 0.69525 |  |
|           | -0.51079        | 0.69525     | 0.1784  | 0.618265557 |             |           |         |  |
| PHBP13    | ENSG00000234835 | 0.10468     | 0.45831 | -0.024816   | 0.5099      | 0.92147   |         |  |
|           | 0.1784          | 0.10468     | 0.45831 | 0.1784      | 0.618265557 |           |         |  |
| RNA5SP477 | ENSG00000199509 | 0.92139     | 0.17842 | 0.92139     | 0.17842     | 0.92139   |         |  |
|           | 0.17842         | 0.92139     | 0.17842 | 0.17842     | 0.61827227  |           |         |  |
| CCR10     | ENSG00000184451 | 0.92136     | 0.17843 | 0.92136     | 0.17843     | 0.92136   | 0.17843 |  |
|           | 0.92136         | 0.17843     | 0.17843 | 0.61827227  |             |           |         |  |
| ADGRG6    | ENSG00000112414 | 0.10205     | 0.45936 | 0.90866     | 0.18176     | 0.92133   |         |  |
|           | 0.17844         | 0.83442     | 0.20202 | 0.17844     | 0.61827227  |           |         |  |
| KLRK1     | ENSG00000213809 | 0.92107     | 0.17851 | -0.057477   | 0.52292     | 0.58987   | 0.27764 |  |
|           | 0.58987         | 0.27764     | 0.17851 | 0.618283082 |             |           |         |  |
| NA        | ENSG00000278332 | -0.63198    | 0.7363  | 0.92102     | 0.17852     | -0.99172  | 0.83933 |  |
|           | -0.99172        | 0.83933     | 0.17852 | 0.618283082 |             |           |         |  |
| ESS2      | ENSG00000100056 | 0.92099     | 0.17853 | 0.86326     | 0.194       | 0.6193    | 0.26786 |  |
|           | 0.6105          | 0.27076     | 0.17853 | 0.618283082 |             |           |         |  |
| THAP2     | ENSG00000173451 | 0.92097     | 0.17853 | 0.92097     | 0.17853     | 0.92097   | 0.17853 |  |
|           | -1.1747         | 0.87995     | 0.17853 | 0.618283082 |             |           |         |  |
| LEPROT    | ENSG00000213625 | 0.92094     | 0.17854 | 0.88013     | 0.18939     | 0.88013   |         |  |
|           | 0.18939         | 0.88013     | 0.18939 | 0.17854     | 0.618283082 |           |         |  |
| TSHZ3     | ENSG00000121297 | 0.57253     | 0.28348 | -0.19833    | 0.57861     | 0.9209    | 0.17855 |  |
|           | 0.9005          | 0.18393     | 0.17855 | 0.618283082 |             |           |         |  |
| NA        | ENSG00000272909 | 0.92091     | 0.17855 | 0.92091     | 0.17855     | 0.92091   | 0.17855 |  |
|           | 0.92091         | 0.17855     | 0.17855 | 0.618283082 |             |           |         |  |
| NA        | ENSG00000199899 | 0.92086     | 0.17856 | 0.92086     | 0.17856     | 0.92086   | 0.17856 |  |
|           | 0.92086         | 0.17856     | 0.17856 | 0.618283082 |             |           |         |  |
| ERMN      | ENSG00000136541 | 0.92081     | 0.17857 | 0.92081     | 0.17857     | 0.92081   | 0.17857 |  |

|            |                 |           |         |             |             |          |         |         |
|------------|-----------------|-----------|---------|-------------|-------------|----------|---------|---------|
|            | 0.92081         | 0.17857   | 0.17857 | 0.618283082 |             |          |         |         |
| LRRC34P1   | ENSG00000256371 | 0.92083   | 0.17857 | 0.92083     | 0.17857     | 0.92083  | 0.17857 | 0.92083 |
|            | 0.17857         | 0.92083   | 0.17857 | 0.17857     | 0.618283082 |          |         |         |
| ANKRD13C   | ENSG00000118454 | 0.92072   | 0.1786  | -1.9611     | 0.97506     | -1.9611  |         |         |
|            | 0.97506         | -1.9611   | 0.97506 | 0.1786      | 0.61834302  |          |         |         |
| ATP13A1    | ENSG00000105726 | -0.030021 | 0.51197 | -0.28115    | 0.6107      | 0.60215  |         |         |
|            | 0.27354         | 0.92056   | 0.17864 | 0.17864     | 0.618393635 |          |         |         |
| NA         | ENSG00000256988 | 0.92055   | 0.17864 | -0.52219    | 0.69923     | 0.92055  | 0.17864 |         |
|            | 0.92055         | 0.17864   | 0.17864 | 0.618393635 |             |          |         |         |
| NA         | ENSG00000252789 | -1.1159   | 0.86778 | 0.92047     | 0.17866     | 0.55255  | 0.29029 |         |
|            | 0.48214         | 0.31485   | 0.17866 | 0.618418937 |             |          |         |         |
| WFS1       | ENSG00000109501 | -0.92517  | 0.82256 | -0.7628     | 0.77721     | 0.9009   | 0.18382 |         |
|            | 0.92027         | 0.17872   | 0.17872 | 0.618582683 |             |          |         |         |
| NA         | ENSG00000260861 | 0.92004   | 0.17878 | 0.92004     | 0.17878     | 0.92004  | 0.17878 |         |
|            | 0.92004         | 0.17878   | 0.17878 | 0.618637173 |             |          |         |         |
| CPT1C      | ENSG00000169169 | 0.91994   | 0.1788  | 0.91994     | 0.1788      | -0.90458 | 0.81716 |         |
|            | 0.91994         | 0.1788    | 0.1788  | 0.618637173 |             |          |         |         |
| MGST2      | ENSG00000085871 | 0.81142   | 0.20856 | 0.9199      | 0.17881     | 0.79484  | 0.21335 |         |
|            | 0.88241         | 0.18878   | 0.17881 | 0.618637173 |             |          |         |         |
| AKIRIN2P1  | ENSG00000251482 | 0.25667   | 0.39872 | 0.11086     | 0.45586     | 0.91991  |         |         |
|            | 0.17881         | 0.91991   | 0.17881 | 0.17881     | 0.618637173 |          |         |         |
| TRNAU1AP   | ENSG00000180098 | 0.37322   | 0.35449 | 0.37322     | 0.35449     | 0.91987  |         |         |
|            | 0.17882         | -0.29709  | 0.6168  | 0.17882     | 0.618637173 |          |         |         |
| NA         | ENSG00000267292 | 0.91988   | 0.17882 | 0.62383     | 0.26637     | 0.62383  | 0.26637 |         |
|            | 0.62383         | 0.26637   | 0.17882 | 0.618637173 |             |          |         |         |
| NA         | ENSG00000248567 | -0.41328  | 0.6603  | -0.64158    | 0.73943     | 0.39268  | 0.34728 |         |
|            | 0.91983         | 0.17883   | 0.17883 | 0.618637173 |             |          |         |         |
| NA         | ENSG00000219681 | 0.57396   | 0.283   | 0.23862     | 0.4057      | 0.14439  | 0.4426  |         |
|            | 0.91975         | 0.17885   | 0.17885 | 0.618637173 |             |          |         |         |
| NA         | ENSG00000230975 | -0.33322  | 0.63051 | 0.91975     | 0.17885     | 0.91975  | 0.17885 |         |
|            | -1.1499         | 0.87491   | 0.17885 | 0.618637173 |             |          |         |         |
| ABL1       | ENSG00000097007 | 0.91954   | 0.17891 | 0.64213     | 0.26039     | 0.86714  | 0.19293 |         |
|            | 0.4422          | 0.32917   | 0.17891 | 0.618747541 |             |          |         |         |
| NA         | ENSG00000236907 | 0.88935   | 0.18691 | 0.91953     | 0.17891     | 0.91953  | 0.17891 |         |
|            | 0.91953         | 0.17891   | 0.17891 | 0.618747541 |             |          |         |         |
| Clorf195   | ENSG00000204464 | 0.91947   | 0.17892 | -1.4235     | 0.92271     | 0.039284 |         |         |
|            | 0.48433         | -0.88804  | 0.81274 | 0.17892     | 0.618747541 |          |         |         |
| NA         | ENSG00000212565 | 0.6134    | 0.26981 | 0.91931     | 0.17897     | -0.29207 | 0.61488 |         |
|            | -0.27218        | 0.60726   | 0.17897 | 0.618776644 |             |          |         |         |
| NA         | ENSG00000229668 | 0.91928   | 0.17897 | 0.5801      | 0.28092     | 0.58691  | 0.27863 |         |
|            | -0.52728        | 0.701     | 0.17897 | 0.618776644 |             |          |         |         |
| NA         | ENSG00000248895 | 0.91931   | 0.17897 | 0.91931     | 0.17897     | 0.91931  | 0.17897 |         |
|            | 0.91931         | 0.17897   | 0.17897 | 0.618776644 |             |          |         |         |
| CEP89      | ENSG00000121289 | 0.91923   | 0.17899 | -0.24401    | 0.59639     | 0.63934  | 0.2613  |         |
|            | 0.52756         | 0.2989    | 0.17899 | 0.618776644 |             |          |         |         |
| RNF115     | ENSG00000265491 | 0.91913   | 0.17901 | 0.69607     | 0.24319     | -0.878   |         |         |
|            | 0.81003         | 0.52598   | 0.29945 | 0.17901     | 0.618776644 |          |         |         |
| NA         | ENSG00000258538 | -1.3172   | 0.90611 | -0.59862    | 0.72529     | -1.3172  | 0.90611 |         |
|            | 0.9191          | 0.17902   | 0.17902 | 0.618776644 |             |          |         |         |
| HNRNPA1P52 | ENSG00000269119 | -0.64012  | 0.73895 | 0.26189     | 0.3967      | 0.9191   |         |         |
|            | 0.17902         | 0.26189   | 0.3967  | 0.17902     | 0.618776644 |          |         |         |
| RASSF10    | ENSG00000189431 | 0.91907   | 0.17903 | 0.91907     | 0.17903     | 0.91907  |         |         |
|            | 0.17903         | 0.91907   | 0.17903 | 0.17903     | 0.618776644 |          |         |         |
| FUT8       | ENSG00000033170 | -0.36452  | 0.64226 | -0.10147    | 0.54041     | 0.058512 | 0.47667 |         |
|            | 0.9189          | 0.17907   | 0.17907 | 0.618787072 |             |          |         |         |
| MRPL13     | ENSG00000172172 | 0.84769   | 0.1983  | 0.34985     | 0.36323     | -0.17107 |         |         |
|            | 0.56791         | 0.91892   | 0.17907 | 0.17907     | 0.618787072 |          |         |         |
| OR7E116P   | ENSG00000225072 | 0.25478   | 0.39945 | -0.03062    | 0.51221     | -0.49825 |         |         |
|            | 0.69085         | 0.91887   | 0.17908 | 0.17908     | 0.618787072 |          |         |         |
| NA         | ENSG00000274235 | 0.25426   | 0.39965 | 0.91885     | 0.17909     | 0.69383  | 0.24389 |         |
|            | -1.4832         | 0.93098   | 0.17909 | 0.618787072 |             |          |         |         |
| NA         | ENSG00000254935 | 0.91878   | 0.17911 | 0.22441     | 0.41122     | 0.91064  | 0.18124 |         |

|           |                 |          |         |             |             |            |         |  |
|-----------|-----------------|----------|---------|-------------|-------------|------------|---------|--|
|           | 0.63377         | 0.26312  | 0.17911 | 0.618787072 |             |            |         |  |
| NA        | ENSG00000271537 | -0.9215  | 0.8216  | -0.9215     | 0.8216      | -1.093     | 0.8628  |  |
|           | 0.91871         | 0.17912  | 0.17912 | 0.618787072 |             |            |         |  |
| NA        | ENSG00000258210 | 0.91869  | 0.17913 | 0.91869     | 0.17913     | 0.91869    | 0.17913 |  |
|           | 0.91869         | 0.17913  | 0.17913 | 0.618787072 |             |            |         |  |
| NA        | ENSG00000269895 | 0.91863  | 0.17915 | 0.91863     | 0.17915     | 0.91863    | 0.17915 |  |
|           | 0.91863         | 0.17915  | 0.17915 | 0.618787072 |             |            |         |  |
| NA        | ENSG00000176075 | -0.11238 | 0.54474 | 0.9186      | 0.17915     | -0.11238   | 0.54474 |  |
|           | 0.9186          | 0.17915  | 0.17915 | 0.618787072 |             |            |         |  |
| SECTM1    | ENSG00000141574 | 0.36254  | 0.35847 | -0.16717    | 0.56638     | -0.18257   |         |  |
|           | 0.57243         | 0.91857  | 0.17916 | 0.17916     | 0.618787072 |            |         |  |
| NA        | ENSG00000257497 | 0.91843  | 0.1792  | 0.27955     | 0.38991     | 0.27955    | 0.38991 |  |
|           | 0.27955         | 0.38991  | 0.1792  | 0.618881361 |             |            |         |  |
| NA        | ENSG00000229102 | 0.91823  | 0.17925 | -0.13151    | 0.55231     | -0.87065   | 0.80803 |  |
|           | -0.12814        | 0.55098  | 0.17925 | 0.619010169 |             |            |         |  |
| RNY3P9    | ENSG00000207458 | 0.62043  | 0.26749 | 0.62043     | 0.26749     | 0.62043    |         |  |
|           | 0.26749         | 0.91793  | 0.17933 | 0.17933     | 0.619126783 |            |         |  |
| MIR30A    | ENSG00000207827 | -1.926   | 0.97295 | 0.91792     | 0.17933     | -1.926     |         |  |
|           | 0.97295         | -1.926   | 0.97295 | 0.17933     | 0.619126783 |            |         |  |
| NA        | ENSG00000243929 | 0.48921  | 0.31235 | 0.81566     | 0.20735     | 0.91792    | 0.17933 |  |
|           | 0.41708         | 0.33831  | 0.17933 | 0.619126783 |             |            |         |  |
| FSIP2-AS1 | ENSG00000231646 | 0.9179   | 0.17934 | 0.9179      | 0.17934     | 0.9179     |         |  |
|           | 0.17934         | 0.9179   | 0.17934 | 0.17934     | 0.619126783 |            |         |  |
| NA        | ENSG00000230248 | 0.91782  | 0.17936 | 0.91782     | 0.17936     | 0.91782    | 0.17936 |  |
|           | 0.91782         | 0.17936  | 0.17936 | 0.619126783 |             |            |         |  |
| NA        | ENSG00000254192 | 0.6342   | 0.26298 | -1.2115     | 0.88715     | 0.9178     | 0.17936 |  |
|           | 0.9178          | 0.17936  | 0.17936 | 0.619126783 |             |            |         |  |
| SLC25A32  | ENSG00000164933 | 0.13641  | 0.44575 | -1.5437     | 0.93867     | -0.51582   |         |  |
|           | 0.69701         | 0.91752  | 0.17943 | 0.17943     | 0.619187267 |            |         |  |
| NA        | ENSG00000226335 | 0.3214   | 0.37395 | 0.91754     | 0.17943     | 0.8625     | 0.19421 |  |
|           | 0.87957         | 0.18955  | 0.17943 | 0.619187267 |             |            |         |  |
| NA        | ENSG00000200314 | 0.58035  | 0.28084 | 0.91747     | 0.17945     | 0.91747    | 0.17945 |  |
|           | 0.91747         | 0.17945  | 0.17945 | 0.619187267 |             |            |         |  |
| NA        | ENSG00000270120 | 0.91734  | 0.17948 | 0.91734     | 0.17948     | 0.91734    | 0.17948 |  |
|           | 0.91734         | 0.17948  | 0.17948 | 0.619187267 |             |            |         |  |
| TPGS2     | ENSG00000134779 | -0.29249 | 0.61504 | -0.094523   | 0.53765     | -0.61149   | 0.72956 |  |
|           | 0.9173          | 0.17949  | 0.17949 | 0.619187267 |             |            |         |  |
| ARNT      | ENSG00000143437 | -0.39842 | 0.65484 | 0.91731     | 0.17949     | -0.81843   | 0.79345 |  |
|           | 0.26451         | 0.3957   | 0.17949 | 0.619187267 |             |            |         |  |
| PINX1     | ENSG00000254093 | 0.70393  | 0.24074 | 0.22727     | 0.41011     | 0.6945     | 0.24369 |  |
|           | 0.91732         | 0.17949  | 0.17949 | 0.619187267 |             |            |         |  |
| GUK1      | ENSG00000143774 | -0.7574  | 0.77559 | -0.49711    | 0.69045     | 0.91727    | 0.1795  |  |
|           | -0.73063        | 0.7675   | 0.1795  | 0.619187267 |             |            |         |  |
| NA        | ENSG00000235277 | 0.91726  | 0.1795  | 0.91726     | 0.1795      | -0.8029    | 0.78898 |  |
|           | 0.91726         | 0.1795   | 0.1795  | 0.619187267 |             |            |         |  |
| NA        | ENSG00000267350 | 0.91723  | 0.17951 | 0.91723     | 0.17951     | 0.91723    | 0.17951 |  |
|           | 0.91723         | 0.17951  | 0.17951 | 0.619187267 |             |            |         |  |
| LINC01344 | ENSG00000228918 | 0.28514  | 0.38777 | 0.04567     | 0.48179     | 0.15016    |         |  |
|           | 0.44032         | 0.91719  | 0.17952 | 0.17952     | 0.619187267 |            |         |  |
| EBLN1     | ENSG00000223601 | 0.91715  | 0.17953 | 0.91715     | 0.17953     | 0.91715    | 0.17953 |  |
|           | 0.91715         | 0.17953  | 0.17953 | 0.619187267 |             |            |         |  |
| DPYD      | ENSG00000188641 | 0.91696  | 0.17958 | 0.43506     | 0.33176     | 0.10561    | 0.45794 |  |
|           | 0.55169         | 0.29058  | 0.17958 | 0.619306539 |             |            |         |  |
| HEY2      | ENSG00000135547 | 0.34761  | 0.36407 | 0.91692     | 0.17959     | -0.0010099 | 0.5004  |  |
|           | -0.31406        | 0.62326  | 0.17959 | 0.619306539 |             |            |         |  |
| BIN1      | ENSG00000136717 | 0.47471  | 0.3175  | 0.30262     | 0.38109     | 0.91677    | 0.17963 |  |
|           | 0.38872         | 0.34874  | 0.17963 | 0.619400644 |             |            |         |  |
| NA        | ENSG00000268568 | 0.91665  | 0.17966 | 0.91665     | 0.17966     | 0.91665    | 0.17966 |  |
|           | 0.91665         | 0.17966  | 0.17966 | 0.619460256 |             |            |         |  |
| POLE2     | ENSG00000100479 | 0.91651  | 0.1797  | 0.61981     | 0.26769     | 0.91651    | 0.1797  |  |
|           | -0.12302        | 0.54895  | 0.1797  | 0.619535625 |             |            |         |  |
| NA        | ENSG00000279159 | 0.91647  | 0.17971 | 0.91647     | 0.17971     | 0.91647    | 0.17971 |  |



|            |                 |          |         |             |             |          |         |  |
|------------|-----------------|----------|---------|-------------|-------------|----------|---------|--|
|            | 0.91647         | 0.17971  | 0.17971 | 0.619535625 |             |          |         |  |
| NA         | ENSG00000278266 | 0.91644  | 0.17972 | 0.91644     | 0.17972     | 0.91644  | 0.17972 |  |
|            | 0.91644         | 0.17972  | 0.17972 | 0.619535625 |             |          |         |  |
| CYP2C56P   | ENSG00000229641 | 0.10517  | 0.45812 | -0.3475     | 0.63589     | 0.91631  |         |  |
|            | 0.17975         | -0.3475  | 0.63589 | 0.17975     | 0.619542033 |          |         |  |
| NA         | ENSG00000271976 | 0.91632  | 0.17975 | 0.91632     | 0.17975     | 0.91632  | 0.17975 |  |
|            | 0.91632         | 0.17975  | 0.17975 | 0.619542033 |             |          |         |  |
| NA         | ENSG00000280352 | 0.91629  | 0.17976 | 0.91629     | 0.17976     | 0.91629  | 0.17976 |  |
|            | 0.91629         | 0.17976  | 0.17976 | 0.619542033 |             |          |         |  |
| NPRL3      | ENSG00000103148 | 0.16607  | 0.43405 | -0.35602    | 0.63909     | -0.33804 | 0.63233 |  |
|            | 0.91582         | 0.17988  | 0.17988 | 0.619858556 |             |          |         |  |
| ARMT1      | ENSG00000146476 | -0.72345 | 0.7653  | 0.21672     | 0.41421     | 0.91582  | 0.17988 |  |
|            | -1.0607         | 0.85558  | 0.17988 | 0.619858556 |             |          |         |  |
| NA         | ENSG00000227485 | 0.91578  | 0.17989 | 0.91578     | 0.17989     | 0.66988  | 0.25147 |  |
|            | 0.29881         | 0.38254  | 0.17989 | 0.619858556 |             |          |         |  |
| NA         | ENSG00000227175 | 0.9156   | 0.17994 | 0.618026829 | 0.71235     | 0.23812  |         |  |
|            | -0.08504        | 0.53389  | 0.17994 | 0.619906126 |             |          |         |  |
| NA         | ENSG00000265100 | 0.91558  | 0.17994 | 0.91558     | 0.17994     | 0.91558  | 0.17994 |  |
|            | 0.91558         | 0.17994  | 0.17994 | 0.619906126 |             |          |         |  |
| NA         | ENSG00000273680 | 0.91546  | 0.17997 | 0.91546     | 0.17997     | 0.91546  | 0.17997 |  |
|            | 0.91546         | 0.17997  | 0.17997 | 0.619906126 |             |          |         |  |
| SPSB1      | ENSG00000171621 | -0.18972 | 0.57524 | -0.067648   | 0.52697     | 0.91545  | 0.17998 |  |
|            | -0.17159        | 0.56812  | 0.17998 | 0.619906126 |             |          |         |  |
| NA         | ENSG00000253177 | 0.91539  | 0.17999 | 0.91539     | 0.17999     | 0.91539  | 0.17999 |  |
|            | 0.91539         | 0.17999  | 0.17999 | 0.619906126 |             |          |         |  |
| MIR5705    | ENSG00000263981 | 0.91532  | 0.18001 | 0.91532     | 0.18001     | 0.91532  |         |  |
|            | 0.18001         | 0.91532  | 0.18001 | 0.18001     | 0.619906126 |          |         |  |
| NA         | ENSG00000230030 | 0.051943 | 0.47929 | 0.051943    | 0.47929     | 0.9153   | 0.18002 |  |
|            | 0.1737          | 0.43105  | 0.18002 | 0.619906126 |             |          |         |  |
| MAP2K6     | ENSG00000108984 | -0.86944 | 0.8077  | -0.84925    | 0.80213     | -1.1319  |         |  |
|            | 0.87115         | 0.91508  | 0.18008 | 0.18008     | 0.619906126 |          |         |  |
| RBISP2     | ENSG00000271378 | 0.50137  | 0.30806 | 0.91505     | 0.18008     | 0.91505  |         |  |
|            | 0.18008         | 0.91505  | 0.18008 | 0.18008     | 0.619906126 |          |         |  |
| PIWIL4     | ENSG00000134627 | 0.91502  | 0.18009 | -0.1191     | 0.5474      | -0.6607  |         |  |
|            | 0.7456          | 0.029835 | 0.4881  | 0.18009     | 0.619906126 |          |         |  |
| NA         | ENSG00000229229 | -0.33272 | 0.63033 | 0.91501     | 0.18009     | -0.14668 | 0.55831 |  |
|            | -0.14668        | 0.55831  | 0.18009 | 0.619906126 |             |          |         |  |
| IARS1      | ENSG00000196305 | -0.87751 | 0.80989 | 0.40077     | 0.3443      | 0.91497  | 0.1801  |  |
|            | 0.1763          | 0.43003  | 0.1801  | 0.619906126 |             |          |         |  |
| RNU6-1074P | ENSG00000206722 | 0.45035  | 0.32623 | 0.89003     | 0.18672     | 0.91495  |         |  |
|            | 0.18011         | 0.89003  | 0.18672 | 0.18011     | 0.619906126 |          |         |  |
| ROMO1      | ENSG00000125995 | 0.61802  | 0.26828 | 0.61802     | 0.26828     | 0.9149   | 0.18012 |  |
|            | 0.61802         | 0.26828  | 0.18012 | 0.619906126 |             |          |         |  |
| NA         | ENSG00000256967 | 0.91485  | 0.18013 | 0.91485     | 0.18013     | 0.91485  | 0.18013 |  |
|            | 0.91485         | 0.18013  | 0.18013 | 0.619906126 |             |          |         |  |
| MIR3680-2  | ENSG00000266758 | 0.91483  | 0.18014 | 0.21665     | 0.41424     | 0.33322  |         |  |
|            | 0.36949         | 0.33322  | 0.36949 | 0.18014     | 0.619906126 |          |         |  |
| NA         | ENSG00000228140 | 0.91481  | 0.18015 | 0.91481     | 0.18015     | 0.19847  | 0.42134 |  |
|            | 0.19847         | 0.42134  | 0.18015 | 0.619906126 |             |          |         |  |
| KRTAP19-6  | ENSG00000186925 | 0.91463  | 0.18019 | 0.91463     | 0.18019     | 0.91463  |         |  |
|            | 0.18019         | 0.91463  | 0.18019 | 0.18019     | 0.619906126 |          |         |  |
| NA         | ENSG00000261468 | -0.24445 | 0.59656 | -0.25055    | 0.59892     | 0.91462  | 0.1802  |  |
|            | -0.25055        | 0.59892  | 0.1802  | 0.619906126 |             |          |         |  |
| RNU7-48P   | ENSG00000238386 | -1.1375  | 0.87234 | 0.91458     | 0.18021     | -1.1375  |         |  |
|            | 0.87234         | -1.1375  | 0.87234 | 0.18021     | 0.619906126 |          |         |  |
| ECPAS      | ENSG00000136813 | -0.46666 | 0.67963 | 0.91454     | 0.18022     | -0.28399 | 0.61179 |  |
|            | -1.5039         | 0.93369  | 0.18022 | 0.619906126 |             |          |         |  |
| SLC6A1-AS1 | ENSG00000232287 | 0.18383  | 0.42707 | 0.18383     | 0.42707     | 0.18383  |         |  |
|            | 0.42707         | 0.91453  | 0.18022 | 0.18022     | 0.619906126 |          |         |  |
| CCDC28A    | ENSG00000024862 | 0.9145   | 0.18023 | -0.57445    | 0.71717     | -1.4433  |         |  |
|            | 0.92554         | -0.57445 | 0.71717 | 0.18023     | 0.619906126 |          |         |  |
| NA         | ENSG00000276672 | 0.46972  | 0.31928 | 0.91448     | 0.18023     | 0.91448  | 0.18023 |  |

|             |                 |           |         |             |             |          |         |  |
|-------------|-----------------|-----------|---------|-------------|-------------|----------|---------|--|
|             | 0.91448         | 0.18023   | 0.18023 | 0.619906126 |             |          |         |  |
| KDM1A       | ENSG00000004487 | 0.63567   | 0.26249 | 0.50386     | 0.30718     | 0.40708  | 0.34197 |  |
|             | 0.91446         | 0.18024   | 0.18024 | 0.619906126 |             |          |         |  |
| RNU6-622P   | ENSG00000206999 | 0.9144    | 0.18025 | -0.28428    | 0.6119      | -0.14286 |         |  |
|             | 0.5568          | -1.6031   | 0.94554 | 0.18025     | 0.619906126 |          |         |  |
| NA          | ENSG00000212585 | -0.89015  | 0.81331 | 0.9144      | 0.18025     | 0.89953  | 0.18418 |  |
|             | 0.89953         | 0.18418   | 0.18025 | 0.619906126 |             |          |         |  |
| TGDS        | ENSG00000088451 | 0.32032   | 0.37436 | 0.91437     | 0.18026     | 0.32032  | 0.37436 |  |
|             | -1.1527         | 0.87548   | 0.18026 | 0.619906126 |             |          |         |  |
| NA          | ENSG00000272416 | 0.6829    | 0.24733 | 0.91429     | 0.18028     | 0.6829   | 0.24733 |  |
|             | 0.6829          | 0.24733   | 0.18028 | 0.619921797 |             |          |         |  |
| RSPO4       | ENSG00000101282 | 0.91427   | 0.18029 | 0.43073     | 0.33333     | -0.81826 | 0.7934  |  |
|             | -0.141          | 0.55606   | 0.18029 | 0.619921797 |             |          |         |  |
| FMO3        | ENSG00000007933 | -0.63284  | 0.73658 | -0.13613    | 0.55414     | -0.5436  | 0.70664 |  |
|             | 0.91413         | 0.18032   | 0.18032 | 0.619937463 |             |          |         |  |
| PSMA2P1     | ENSG00000254582 | 0.0745    | 0.47031 | -0.17839    | 0.57079     | 0.91414  |         |  |
|             | 0.18032         | 0.91414   | 0.18032 | 0.18032     | 0.619937463 |          |         |  |
| MRC2        | ENSG00000011028 | 0.51459   | 0.30342 | 0.041449    | 0.48347     | 0.037971 | 0.48486 |  |
|             | 0.91398         | 0.18036   | 0.18036 | 0.620003153 |             |          |         |  |
| TMC1        | ENSG00000165091 | 0.58743   | 0.27846 | 0.78907     | 0.21503     | 0.91395  | 0.18037 |  |
|             | 0.828           | 0.20383   | 0.18037 | 0.620003153 |             |          |         |  |
| CSTF3       | ENSG00000176102 | 0.91391   | 0.18038 | 0.7914      | 0.21435     | -0.27298 | 0.60757 |  |
|             | 0.63747         | 0.26191   | 0.18038 | 0.620003153 |             |          |         |  |
| NA          | ENSG00000279631 | 0.91389   | 0.18039 | -0.57162    | 0.71621     | 0.91389  | 0.18039 |  |
|             | 0.91389         | 0.18039   | 0.18039 | 0.620003153 |             |          |         |  |
| ALG1L5P     | ENSG00000226943 | 0.0091711 | 0.49634 | 0.0087857   | 0.4965      | -0.14588 |         |  |
|             | 0.55799         | 0.91367   | 0.18044 | 0.18044     | 0.620131265 |          |         |  |
| C11orf53    | ENSG00000150750 | -1.0092   | 0.84356 | 0.28237     | 0.38883     | 0.42201  |         |  |
|             | 0.33651         | 0.91361   | 0.18046 | 0.18046     | 0.620156262 |          |         |  |
| NA          | ENSG00000250068 | 0.91348   | 0.18049 | 0.91348     | 0.18049     | 0.91348  | 0.18049 |  |
|             | 0.91348         | 0.18049   | 0.18049 | 0.620215619 |             |          |         |  |
| CAV1        | ENSG00000105974 | -0.20564  | 0.58146 | 0.91329     | 0.18055     | -0.48247 | 0.68526 |  |
|             | -0.24803        | 0.59794   | 0.18055 | 0.620334309 |             |          |         |  |
| TSACC       | ENSG00000163467 | 0.91326   | 0.18055 | 0.91326     | 0.18055     | 0.6924   | 0.24434 |  |
|             | 0.078005        | 0.46891   | 0.18055 | 0.620334309 |             |          |         |  |
| PRR7        | ENSG00000131188 | 0.9132    | 0.18057 | -0.09841    | 0.5392      | -0.09841 | 0.5392  |  |
|             | -0.09841        | 0.5392    | 0.18057 | 0.620359285 |             |          |         |  |
| CINP        | ENSG00000100865 | -1.1221   | 0.8691  | -1.1221     | 0.8691      | -1.1004  | 0.86441 |  |
|             | 0.91311         | 0.18059   | 0.18059 | 0.620384258 |             |          |         |  |
| ODF3L1      | ENSG00000182950 | -1.6758   | 0.95311 | 0.91299     | 0.18062     | -0.7363  |         |  |
|             | 0.76923         | 0.31665   | 0.37576 | 0.18062     | 0.620415427 |          |         |  |
| ADK         | ENSG00000156110 | 0.56402   | 0.28637 | 0.85222     | 0.19705     | 0.91293  | 0.18064 |  |
|             | 0.52018         | 0.30147   | 0.18064 | 0.620415427 |             |          |         |  |
| RPL9P6      | ENSG00000241891 | 0.91288   | 0.18065 | 0.91288     | 0.18065     | 0.91288  |         |  |
|             | 0.18065         | 0.91288   | 0.18065 | 0.18065     | 0.620415427 |          |         |  |
| NA          | ENSG00000255445 | 0.91288   | 0.18065 | 0.91288     | 0.18065     | 0.91288  | 0.18065 |  |
|             | 0.91288         | 0.18065   | 0.18065 | 0.620415427 |             |          |         |  |
| SLC17A4     | ENSG00000146039 | 0.91278   | 0.18068 | -0.98209    | 0.83697     | 0.41869  |         |  |
|             | 0.33772         | -0.83496  | 0.79813 | 0.18068     | 0.620446579 |          |         |  |
| PHBP20      | ENSG00000271072 | 0.91269   | 0.1807  | 0.91269     | 0.1807      | 0.91269  |         |  |
|             | 0.1807          | 0.91269   | 0.1807  | 0.1807      | 0.620446579 |          |         |  |
| HAUS1P3     | ENSG00000253226 | 0.91266   | 0.18071 | 0.91266     | 0.18071     | 0.91266  |         |  |
|             | 0.18071         | 0.91266   | 0.18071 | 0.18071     | 0.620446579 |          |         |  |
| VN1R9P      | ENSG00000276400 | 0.91268   | 0.18071 | -0.54277    | 0.70636     | 0.54459  |         |  |
|             | 0.29302         | 0.91268   | 0.18071 | 0.18071     | 0.620446579 |          |         |  |
| LINC02423   | ENSG00000256750 | 0.91246   | 0.18076 | -1.2708     | 0.89811     | -0.63219 |         |  |
|             | 0.73637         | -1.3749   | 0.91542 | 0.18076     | 0.620449577 |          |         |  |
| LINC00703   | ENSG00000224382 | 0.71162   | 0.23835 | 0.9124      | 0.18078     | 0.69369  |         |  |
|             | 0.24394         | 0.66969   | 0.25153 | 0.18078     | 0.620449577 |          |         |  |
| NA          | ENSG00000227747 | 0.80352   | 0.21084 | -0.41198    | 0.65982     | 0.59732  | 0.27515 |  |
|             | 0.91241         | 0.18078   | 0.18078 | 0.620449577 |             |          |         |  |
| DENND5B-AS1 | ENSG00000255867 | -0.2907   | 0.61436 | 0.47423     | 0.31767     | 0.9124   |         |  |

|             |                 |          |             |             |             |           |         |         |
|-------------|-----------------|----------|-------------|-------------|-------------|-----------|---------|---------|
|             | 0.18078         | 0.9124   | 0.18078     | 0.18078     | 0.620449577 |           |         |         |
| ERFE        | ENSG00000178752 | 0.91236  | 0.18079     | 0.18079     | 0.91236     | 0.18079   | 0.91236 | 0.18079 |
|             | 0.91236         | 0.18079  | 0.18079     | 0.620449577 |             |           |         |         |
| RN7SL426P   | ENSG00000263815 | 0.91234  | 0.18079     | 0.18079     | 0.91234     | 0.18079   | 0.91234 |         |
|             | 0.18079         | 0.91234  | 0.18079     | 0.18079     | 0.620449577 |           |         |         |
| NA          | ENSG00000249086 | 0.91233  | 0.1808      | 0.1808      | 0.91233     | 0.1808    | 0.91233 | 0.1808  |
|             | 0.91233         | 0.1808   | 0.1808      | 0.620449577 |             |           |         |         |
| RPS3P1      | ENSG00000230935 | 0.91222  | 0.18083     | 0.18083     | 0.91222     | 0.18083   | 0.91222 |         |
|             | 0.18083         | 0.91222  | 0.18083     | 0.18083     | 0.620465139 |           |         |         |
| RNU5F-8P    | ENSG00000251750 | 0.9122   | 0.18083     | 0.18083     | -0.086574   | 0.53449   | -1.8831 |         |
|             | 0.97016         | -1.8831  | 0.97016     | 0.18083     | 0.620465139 |           |         |         |
| NA          | ENSG00000232835 | -1.0329  | 0.84917     | -1.0329     | 0.84917     | 0.91213   | 0.18085 |         |
|             | 0.91213         | 0.18085  | 0.18085     | 0.620490073 |             |           |         |         |
| BTRC        | ENSG00000166167 | 0.43925  | 0.33024     | 0.28473     | 0.38793     | 0.91207   | 0.18087 |         |
|             | 0.55152         | 0.29064  | 0.18087     | 0.620507876 |             |           |         |         |
| ALDH1L1-AS1 | ENSG00000250218 | 0.9118   | 0.18094     | 0.18094     | 0.9118      | 0.18094   | 0.9118  |         |
|             | 0.18094         | 0.9118   | 0.18094     | 0.18094     | 0.620507876 |           |         |         |
| DEDD2       | ENSG00000160570 | 0.35104  | 0.36278     | 0.57459     | 0.28278     | 0.65047   | 0.2577  |         |
|             | 0.91173         | 0.18095  | 0.18095     | 0.620507876 |             |           |         |         |
| NA          | ENSG00000273013 | -0.30297 | 0.61904     | 0.91173     | 0.18095     | -0.30297  | 0.61904 |         |
|             | -0.30297        | 0.61904  | 0.18095     | 0.620507876 |             |           |         |         |
| RYR2        | ENSG00000198626 | 0.91162  | 0.18098     | 0.034124    | 0.48639     | 0.40119   | 0.34414 |         |
|             | -1.5032         | 0.93361  | 0.18098     | 0.620507876 |             |           |         |         |
| NA          | ENSG00000206682 | 0.91164  | 0.18098     | 0.91164     | 0.18098     | 0.91164   | 0.18098 |         |
|             | 0.91164         | 0.18098  | 0.18098     | 0.620507876 |             |           |         |         |
| PPP2R3A     | ENSG00000073711 | 0.41917  | 0.33754     | 0.2784      | 0.39035     | 0.9116    |         |         |
|             | 0.18099         | -0.36418 | 0.64214     | 0.18099     | 0.620507876 |           |         |         |
| MSX1        | ENSG00000163132 | -1.1217  | 0.869       | -1.5012     | 0.93335     | -1.5389   | 0.93808 |         |
|             | 0.9116          | 0.18099  | 0.18099     | 0.620507876 |             |           |         |         |
| NA          | ENSG00000248447 | -0.10481 | 0.54174     | 0.91157     | 0.181       | 0.91157   | 0.181   | 0.91157 |
|             | 0.181           | 0.181    | 0.620507876 |             |             |           |         |         |
| ASB17       | ENSG00000154007 | 0.91153  | 0.18101     | 0.91153     | 0.18101     | 0.91153   | 0.18101 |         |
|             | 0.91153         | 0.18101  | 0.18101     | 0.620507876 |             |           |         |         |
| ZNRF2P3     | ENSG00000235924 | -0.6859  | 0.75361     | 0.91147     | 0.18102     | 0.91147   |         |         |
|             | 0.18102         | 0.91147  | 0.18102     | 0.18102     | 0.620507876 |           |         |         |
| GNL3LP1     | ENSG00000215032 | 0.91145  | 0.18103     | 0.91145     | 0.18103     | 0.91145   |         |         |
|             | 0.18103         | 0.91145  | 0.18103     | 0.18103     | 0.620507876 |           |         |         |
| ABCC1       | ENSG00000103222 | -0.22664 | 0.58965     | 0.21621     | 0.41441     | 0.84321   | 0.19956 |         |
|             | 0.91139         | 0.18105  | 0.18105     | 0.620507876 |             |           |         |         |
| NA          | ENSG00000250914 | -0.18311 | 0.57264     | -0.18311    | 0.57264     | 0.91132   | 0.18106 |         |
|             | 0.84729         | 0.19842  | 0.18106     | 0.620507876 |             |           |         |         |
| RNU6-704P   | ENSG00000201032 | 0.91119  | 0.1811      | 0.91119     | 0.1811      | 0.91119   |         |         |
|             | 0.1811          | 0.88168  | 0.18898     | 0.1811      | 0.620507876 |           |         |         |
| PLCD3       | ENSG00000161714 | 0.91111  | 0.18112     | -0.27251    | 0.60738     | -0.021587 | 0.50861 |         |
|             | -0.75551        | 0.77503  | 0.18112     | 0.620507876 |             |           |         |         |
| OR51F3P     | ENSG00000272559 | 0.91108  | 0.18113     | 0.91108     | 0.18113     | 0.91108   |         |         |
|             | 0.18113         | -0.29614 | 0.61644     | 0.18113     | 0.620507876 |           |         |         |
| RNU6ATAC38P | ENSG00000221046 | 0.91103  | 0.18114     | 0.91103     | 0.18114     | 0.91103   |         |         |
|             | 0.18114         | 0.91103  | 0.18114     | 0.18114     | 0.620507876 |           |         |         |
| VN1R11P     | ENSG00000219770 | -0.38784 | 0.65093     | 0.91092     | 0.18117     | -0.70124  |         |         |
|             | 0.75842         | -0.70124 | 0.75842     | 0.18117     | 0.620507876 |           |         |         |
| CCDC127     | ENSG00000164366 | 0.23283  | 0.40795     | 0.18842     | 0.42527     | 0.91084   |         |         |
|             | 0.18119         | 0.78636  | 0.21583     | 0.18119     | 0.620507876 |           |         |         |
| RPS2P39     | ENSG00000240698 | -0.16463 | 0.56538     | -0.22999    | 0.59095     | 0.91085   |         |         |
|             | 0.18119         | 0.91085  | 0.18119     | 0.18119     | 0.620507876 |           |         |         |
| SLC3A2      | ENSG00000168003 | 0.91081  | 0.1812      | -1.5763     | 0.94253     | -0.57968  |         |         |
|             | 0.71894         | -0.51816 | 0.69783     | 0.1812      | 0.620507876 |           |         |         |
| RNU6-280P   | ENSG00000201015 | 0.9108   | 0.1812      | 0.68311     | 0.24727     | 0.9108    |         |         |
|             | 0.1812          | 0.9108   | 0.1812      | 0.1812      | 0.620507876 |           |         |         |
| NA          | ENSG00000223837 | 0.9108   | 0.1812      | 0.9108      | 0.1812      | 0.9108    | 0.1812  |         |
|             | 0.9108          | 0.1812   | 0.1812      | 0.620507876 |             |           |         |         |
| RPL7P17     | ENSG00000214062 | -0.41266 | 0.66007     | 0.14452     | 0.44254     | -0.046712 |         |         |

|           |                 |           |             |             |             |           |         |       |
|-----------|-----------------|-----------|-------------|-------------|-------------|-----------|---------|-------|
|           | 0.51863         | 0.91075   | 0.18121     | 0.18121     | 0.620507876 |           |         |       |
| LINC01832 | ENSG00000224231 | 0.91076   | 0.18121     | 0.18121     | 0.91076     | 0.18121   | 0.91076 |       |
|           | 0.18121         | 0.91076   | 0.18121     | 0.18121     | 0.620507876 |           |         |       |
| CRISP3    | ENSG00000096006 | 0.91074   | 0.18122     | 0.18122     | 0.91074     | 0.18122   | 0.91074 |       |
|           | 0.18122         | 0.91074   | 0.18122     | 0.18122     | 0.620507876 |           |         |       |
| RPL21P109 | ENSG00000237816 | 0.91072   | 0.18122     | 0.18122     | 0.91072     | 0.18122   | 0.91072 |       |
|           | 0.18122         | 0.91072   | 0.18122     | 0.18122     | 0.620507876 |           |         |       |
| CPEB2     | ENSG00000137449 | -0.038837 | 0.51549     | 0.91065     | 0.18124     | 0.21346   | 0.41548 |       |
|           | 0.22032         | 0.41281   | 0.18124     | 0.620507876 |             |           |         |       |
| LINC00626 | ENSG00000225826 | 0.16388   | 0.43491     | 0.80442     | 0.21058     | 0.16388   |         |       |
|           | 0.43491         | 0.91057   | 0.18126     | 0.18126     | 0.620507876 |           |         |       |
| RN7SKP96  | ENSG00000252757 | -0.39767  | 0.65456     | -0.39767    | 0.65456     | -0.39767  |         |       |
|           | 0.65456         | 0.91046   | 0.18129     | 0.18129     | 0.620507876 |           |         |       |
| AHSG      | ENSG00000145192 | 0.87219   | 0.19155     | 0.91039     | 0.18131     | -0.58768  | 0.72163 |       |
|           | 0.017731        | 0.49293   | 0.18131     | 0.620507876 |             |           |         |       |
| RSPO2     | ENSG00000147655 | 0.9103    | 0.18133     | 0.73471     | 0.23126     | 0.6481    | 0.25846 |       |
|           | 0.32374         | 0.37307   | 0.18133     | 0.620507876 |             |           |         |       |
| LINC02688 | ENSG00000254872 | 0.44484   | 0.32822     | 0.032244    | 0.48714     | 0.91032   |         |       |
|           | 0.18133         | -0.13644  | 0.55426     | 0.18133     | 0.620507876 |           |         |       |
| PCDHB16   | ENSG00000272674 | 0.91031   | 0.18133     | 0.91031     | 0.18133     | 0.91031   |         |       |
|           | 0.18133         | 0.91031   | 0.18133     | 0.18133     | 0.620507876 |           |         |       |
| UBL3      | ENSG00000122042 | 0.24756   | 0.40224     | 0.7272      | 0.23355     | -0.35157  | 0.63742 |       |
|           | 0.91028         | 0.18134   | 0.18134     | 0.620507876 |             |           |         |       |
| NA        | ENSG00000226063 | 0.91022   | 0.18135     | 0.91022     | 0.18135     | 0.91022   | 0.18135 |       |
|           | 0.91022         | 0.18135   | 0.18135     | 0.620507876 |             |           |         |       |
| NA        | ENSG00000182625 | 0.91019   | 0.18136     | 0.91019     | 0.18136     | 0.91019   | 0.18136 |       |
|           | 0.91019         | 0.18136   | 0.18136     | 0.620507876 |             |           |         |       |
| MARK2P17  | ENSG00000244065 | 0.9102    | 0.18136     | -1.98       | 0.97615     | -1.98     | 0.97615 | -1.98 |
|           | 0.97615         | 0.18136   | 0.620507876 |             |             |           |         |       |
| NA        | ENSG00000225017 | 0.9101    | 0.18138     | 0.68777     | 0.2458      | 0.81304   | 0.2081  |       |
|           | 0.9101          | 0.18138   | 0.18138     | 0.620507876 |             |           |         |       |
| C19orf18  | ENSG00000177025 | 0.91006   | 0.18139     | -0.74136    | 0.77076     | -0.74136  |         |       |
|           | 0.77076         | -0.058024 | 0.52314     | 0.18139     | 0.620507876 |           |         |       |
| CCDC159   | ENSG00000183401 | 0.9101    | 0.18139     | 0.9101      | 0.18139     | 0.9101    |         |       |
|           | 0.18139         | 0.9101    | 0.18139     | 0.18139     | 0.620507876 |           |         |       |
| NXPE1     | ENSG00000095110 | -0.70636  | 0.76002     | 0.40715     | 0.34195     | 0.90991   | 0.18143 |       |
|           | -0.082324       | 0.53281   | 0.18143     | 0.620520181 |             |           |         |       |
| NA        | ENSG00000250644 | 0.90991   | 0.18143     | 0.028167    | 0.48876     | 0.18953   | 0.42484 |       |
|           | 0.18953         | 0.42484   | 0.18143     | 0.620520181 |             |           |         |       |
| NFS1      | ENSG00000244005 | -0.20096  | 0.57964     | 0.90986     | 0.18145     | 0.57539   | 0.28251 |       |
|           | 0.51076         | 0.30476   | 0.18145     | 0.620520181 |             |           |         |       |
| RN7SL703P | ENSG00000266317 | -1.2027   | 0.88545     | -1.2027     | 0.88545     | -1.4932   |         |       |
|           | 0.93231         | 0.90987   | 0.18145     | 0.18145     | 0.620520181 |           |         |       |
| RNU6-441P | ENSG00000207275 | 0.14256   | 0.44332     | -0.53952    | 0.70523     | -0.37556  |         |       |
|           | 0.64638         | 0.90983   | 0.18146     | 0.18146     | 0.620520181 |           |         |       |
| TMEM63B   | ENSG00000137216 | 0.90976   | 0.18147     | 0.1411      | 0.4439      | 0.70549   |         |       |
|           | 0.24025         | -0.12597  | 0.55012     | 0.18147     | 0.620520181 |           |         |       |
| NA        | ENSG00000248652 | 0.90959   | 0.18152     | 0.90959     | 0.18152     | 0.90959   | 0.18152 |       |
|           | 0.90959         | 0.18152   | 0.18152     | 0.620600835 |             |           |         |       |
| NA        | ENSG00000279677 | -0.86799  | 0.8073      | 0.35095     | 0.36281     | -0.86799  | 0.8073  |       |
|           | 0.90959         | 0.18152   | 0.18152     | 0.620600835 |             |           |         |       |
| NA        | ENSG00000282021 | 0.23272   | 0.40799     | -2.2393     | 0.98743     | -2.2393   | 0.98743 |       |
|           | 0.90952         | 0.18154   | 0.18154     | 0.620600835 |             |           |         |       |
| ENPP7P3   | ENSG00000248618 | 0.90947   | 0.18155     | -0.14997    | 0.55961     | -0.023039 |         |       |
|           | 0.50919         | 0.48031   | 0.3155      | 0.18155     | 0.620600835 |           |         |       |
| UVRAG     | ENSG00000198382 | -0.72739  | 0.76651     | -0.19149    | 0.57593     | 0.90938   | 0.18157 |       |
|           | -1.0758         | 0.85899   | 0.18157     | 0.620600835 |             |           |         |       |
| LINC01734 | ENSG00000230324 | 0.15893   | 0.43686     | 0.78482     | 0.21628     | 0.15893   |         |       |
|           | 0.43686         | 0.90938   | 0.18157     | 0.18157     | 0.620600835 |           |         |       |
| BEST4     | ENSG00000142959 | -0.11757  | 0.5468      | -1.4429     | 0.92548     | 0.90925   | 0.18161 |       |
|           | -1.1165         | 0.86789   | 0.18161     | 0.620675309 |             |           |         |       |
| NUTM2HP   | ENSG00000232706 | -1.5417   | 0.93843     | 0.90921     | 0.18162     | -0.13574  |         |       |

|           |                 |          |         |             |             |           |         |
|-----------|-----------------|----------|---------|-------------|-------------|-----------|---------|
|           | 0.55399         | -1.0354  | 0.84976 | 0.18162     | 0.620675309 |           |         |
| MTG2      | ENSG00000101181 | 0.002653 | 0.49894 | 0.56632     | 0.28559     | 0.56632   | 0.28559 |
|           | 0.90916         | 0.18163  | 0.18163 | 0.620675309 |             |           |         |
| NA        | ENSG00000235056 | 0.79719  | 0.21267 | 0.6104      | 0.2708      | 0.90909   | 0.18165 |
|           | 0.90909         | 0.18165  | 0.18165 | 0.62067818  |             |           |         |
| KIF26A    | ENSG00000066735 | -0.542   | 0.70609 | -0.35076    | 0.63712     | 0.909     | 0.18167 |
|           | -1.2648         | 0.89703  | 0.18167 | 0.62067818  |             |           |         |
| NA        | ENSG00000279174 | 0.90903  | 0.18167 | 0.90903     | 0.18167     | 0.90903   | 0.18167 |
|           | 0.90903         | 0.18167  | 0.18167 | 0.62067818  |             |           |         |
| COMMD8    | ENSG00000169019 | 0.90895  | 0.18169 | 0.16815     | 0.43323     | 0.90895   |         |
|           | 0.18169         | 0.16815  | 0.43323 | 0.18169     | 0.62067818  |           |         |
| FBXW2     | ENSG00000119402 | 0.90892  | 0.1817  | 0.50894     | 0.3054      | 0.69116   | 0.24473 |
|           | 0.24286         | 0.40406  | 0.1817  | 0.62067818  |             |           |         |
| NA        | ENSG00000253693 | 0.90889  | 0.18171 | 0.90889     | 0.18171     | 0.90889   | 0.18171 |
|           | 0.90889         | 0.18171  | 0.18171 | 0.62067818  |             |           |         |
| NEMF      | ENSG00000165525 | 0.90883  | 0.18172 | 0.49846     | 0.30908     | -0.49933  | 0.69123 |
|           | -0.51008        | 0.695    | 0.18172 | 0.62067818  |             |           |         |
| RPL5P31   | ENSG00000214878 | 0.90876  | 0.18174 | 0.72096     | 0.23547     | 0.53518   |         |
|           | 0.29626         | 0.65401  | 0.25655 | 0.18174     | 0.620702986 |           |         |
| FABP7P1   | ENSG00000226766 | 0.90859  | 0.18178 | 0.90859     | 0.18178     | 0.90859   |         |
|           | 0.18178         | -0.41876 | 0.6623  | 0.18178     | 0.620724536 |           |         |
| KRT18P61  | ENSG00000267083 | 0.90857  | 0.18179 | 0.90857     | 0.18179     | 0.90857   |         |
|           | 0.18179         | 0.90857  | 0.18179 | 0.18179     | 0.620724536 |           |         |
| INKA2     | ENSG00000197852 | 0.90853  | 0.1818  | 0.058033    | 0.47686     | 0.058033  | 0.47686 |
|           | 0.59663         | 0.27538  | 0.1818  | 0.620724536 |             |           |         |
| HERC2P2   | ENSG00000276550 | 0.10114  | 0.45972 | 0.90853     | 0.1818      | -1.5576   |         |
|           | 0.94033         | 0.19845  | 0.42134 | 0.1818      | 0.620724536 |           |         |
| NA        | ENSG00000254102 | 0.90848  | 0.18181 | 0.90848     | 0.18181     | 0.90848   | 0.18181 |
|           | 0.90848         | 0.18181  | 0.18181 | 0.620724536 |             |           |         |
| ENPP7     | ENSG00000182156 | -0.30521 | 0.6199  | -0.74813    | 0.77281     | -1.2017   | 0.88526 |
|           | 0.9084          | 0.18183  | 0.18183 | 0.620730223 |             |           |         |
| Clorf100  | ENSG00000173728 | -0.95848 | 0.83109 | -0.95848    | 0.83109     | -0.95848  |         |
|           | 0.83109         | 0.90836  | 0.18185 | 0.18185     | 0.620730223 |           |         |
| MUC20-OT1 | ENSG00000242086 | 0.90831  | 0.18186 | 0.61643     | 0.2688      | 0.80316   |         |
|           | 0.21094         | 0.47375  | 0.31784 | 0.18186     | 0.620730223 |           |         |
| PI4K2A    | ENSG00000155252 | 0.60705  | 0.27191 | -0.29737    | 0.61691     | 0.6626    |         |
|           | 0.25379         | 0.90826  | 0.18187 | 0.18187     | 0.620730223 |           |         |
| DDX50P2   | ENSG00000240048 | -0.73929 | 0.77013 | -0.12928    | 0.55143     | -0.31413  |         |
|           | 0.62329         | 0.90821  | 0.18188 | 0.18188     | 0.620730223 |           |         |
| NA        | ENSG00000272994 | 0.19672  | 0.42202 | 0.0085779   | 0.49658     | 0.90809   | 0.18191 |
|           | 0.90809         | 0.18191  | 0.18191 | 0.620730223 |             |           |         |
| NA        | ENSG00000235070 | 0.33899  | 0.36731 | 0.90807     | 0.18192     | -0.47433  | 0.68237 |
|           | -0.47433        | 0.68237  | 0.18192 | 0.620730223 |             |           |         |
| FOXO3B    | ENSG00000240445 | 0.90802  | 0.18194 | -0.67467    | 0.75006     | 0.50124   |         |
|           | 0.3081          | 0.24922  | 0.40159 | 0.18194     | 0.620730223 |           |         |
| MIR548AG1 | ENSG00000265829 | 0.90792  | 0.18196 | 0.90792     | 0.18196     | 0.90792   |         |
|           | 0.18196         | 0.90792  | 0.18196 | 0.18196     | 0.620730223 |           |         |
| IPPK      | ENSG00000127080 | -0.17604 | 0.56987 | -0.25095    | 0.59907     | 0.0089064 | 0.49645 |
|           | 0.90787         | 0.18197  | 0.18197 | 0.620730223 |             |           |         |
| RN7SKP250 | ENSG00000200794 | 0.90786  | 0.18198 | -0.18264    | 0.57246     | -1.2645   |         |
|           | 0.89697         | 0.80564  | 0.21022 | 0.18198     | 0.620730223 |           |         |
| ANP32AP1  | ENSG00000259516 | -0.35927 | 0.6403  | 0.90784     | 0.18198     | -0.35927  |         |
|           | 0.6403          | -0.35927 | 0.6403  | 0.18198     | 0.620730223 |           |         |
| NA        | ENSG00000258188 | 0.90785  | 0.18198 | 0.091624    | 0.4635      | 0.61835   | 0.26817 |
|           | -0.7431         | 0.77129  | 0.18198 | 0.620730223 |             |           |         |
| RPL23AP59 | ENSG00000215002 | -0.10068 | 0.5401  | 0.90781     | 0.18199     | 0.90781   |         |
|           | 0.18199         | 0.90781  | 0.18199 | 0.18199     | 0.620730223 |           |         |
| NA        | ENSG00000207302 | -0.17166 | 0.56815 | -0.17166    | 0.56815     | -0.17166  | 0.56815 |
|           | 0.90771         | 0.18201  | 0.18201 | 0.62075499  |             |           |         |
| LINC02139 | ENSG00000278214 | 0.34014  | 0.36687 | 0.53461     | 0.29646     | 0.60294   |         |
|           | 0.27327         | 0.90765  | 0.18203 | 0.18203     | 0.620779754 |           |         |
| NA        | ENSG00000183729 | 0.90752  | 0.18207 | -0.08748    | 0.53485     | 0.10893   | 0.45663 |

|            |                 |           |             |             |             |          |         |       |
|------------|-----------------|-----------|-------------|-------------|-------------|----------|---------|-------|
|            | 0.31863         | 0.375     | 0.18207     | 0.620872715 |             |          |         |       |
| NA         | ENSG00000270708 | 0.25202   | 0.40051     | 0.90744     | 0.18209     | 0.90744  | 0.18209 |       |
|            | 0.90744         | 0.18209   | 0.18209     | 0.620897467 |             |          |         |       |
| GGT3P      | ENSG00000197421 | -1.3841   | 0.91684     | 0.57901     | 0.28129     | 0.90732  | 0.18212 |       |
|            | -0.95613        | 0.8305    | 0.18212     | 0.62094696  |             |          |         |       |
| HNRNPA1P23 | ENSG00000240236 | 0.40245   | 0.34368     | -0.62377    | 0.73361     | -0.55702 |         |       |
|            | 0.71124         | 0.90726   | 0.18213     | 0.18213     | 0.62094696  |          |         |       |
| FER1L5     | ENSG00000249715 | 0.90721   | 0.18215     | -0.23392    | 0.59247     | -0.73812 |         |       |
|            | 0.76978         | -0.059615 | 0.52377     | 0.18215     | 0.620971701 |          |         |       |
| NA         | ENSG00000213587 | 0.71462   | 0.23742     | 0.89856     | 0.18444     | 0.90711  | 0.18217 |       |
|            | 0.4875          | 0.31295   | 0.18217     | 0.620974421 |             |          |         |       |
| RNY3P14    | ENSG00000207036 | 0.90708   | 0.18218     | 0.90708     | 0.18218     | 0.56668  |         |       |
|            | 0.28546         | 0.90708   | 0.18218     | 0.18218     | 0.620974421 |          |         |       |
| FABP5P5    | ENSG00000213716 | 0.907     | 0.1822      | 0.907       | 0.1822      | 0.907    | 0.1822  | 0.907 |
|            | 0.1822          | 0.1822    | 0.620974421 |             |             |          |         |       |
| NA         | ENSG00000230746 | 0.90699   | 0.18221     | 0.05311     | 0.47882     | 0.05311  | 0.47882 |       |
|            | 0.05311         | 0.47882   | 0.18221     | 0.620974421 |             |          |         |       |
| CHST6      | ENSG00000183196 | 0.47461   | 0.31753     | 0.90694     | 0.18222     | 0.48469  | 0.31395 |       |
|            | 0.75334         | 0.22562   | 0.18222     | 0.620974421 |             |          |         |       |
| NA         | ENSG00000254740 | -0.52302  | 0.69952     | 0.90688     | 0.18223     | -0.52302 | 0.69952 |       |
|            | -0.52302        | 0.69952   | 0.18223     | 0.620974421 |             |          |         |       |
| NA         | ENSG00000229387 | 0.90687   | 0.18224     | 0.90687     | 0.18224     | 0.90687  | 0.18224 |       |
|            | 0.90687         | 0.18224   | 0.18224     | 0.620974421 |             |          |         |       |
| LINC02883  | ENSG00000259416 | 0.90676   | 0.18227     | 0.90676     | 0.18227     | 0.90676  |         |       |
|            | 0.18227         | 0.90676   | 0.18227     | 0.18227     | 0.620989799 |          |         |       |
| NA         | ENSG00000259932 | 0.90675   | 0.18227     | 0.90675     | 0.18227     | 0.90675  | 0.18227 |       |
|            | 0.90675         | 0.18227   | 0.18227     | 0.620989799 |             |          |         |       |
| NA         | ENSG00000266950 | -0.045028 | 0.51796     | 0.37301     | 0.35457     | 0.90667  | 0.18229 |       |
|            | 0.046838        | 0.48132   | 0.18229     | 0.62101452  |             |          |         |       |
| UBP1       | ENSG00000153560 | -0.16993  | 0.56747     | 0.9065      | 0.18233     | 0.55113  | 0.29077 |       |
|            | -0.077163       | 0.53075   | 0.18233     | 0.621045254 |             |          |         |       |
| NA         | ENSG00000236319 | -0.25951  | 0.60238     | -0.19578    | 0.57761     | -0.7467  | 0.77238 |       |
|            | 0.9065          | 0.18234   | 0.18234     | 0.621045254 |             |          |         |       |
| ANGEL1     | ENSG00000013523 | 0.6716    | 0.25092     | 0.6716      | 0.25092     | 0.90645  |         |       |
|            | 0.18235         | 0.41396   | 0.33945     | 0.18235     | 0.621045254 |          |         |       |
| RN7SL269P  | ENSG00000243051 | 0.90643   | 0.18235     | 0.90643     | 0.18235     | 0.90643  |         |       |
|            | 0.18235         | 0.90643   | 0.18235     | 0.18235     | 0.621045254 |          |         |       |
| SLAMF1     | ENSG00000117090 | -0.077625 | 0.53094     | 0.90635     | 0.18238     | 0.14674  |         |       |
|            | 0.44167         | -1.1336   | 0.87151     | 0.18238     | 0.621104018 |          |         |       |
| NA         | ENSG00000228505 | -1.3056   | 0.90415     | -0.2849     | 0.61214     | 0.90618  | 0.18242 |       |
|            | -0.25579        | 0.60094   | 0.18242     | 0.62114071  |             |          |         |       |
| FOXH1      | ENSG00000160973 | 0.069494  | 0.4723      | -0.36647    | 0.64299     | 0.90612  | 0.18244 |       |
|            | 0.63903         | 0.2614    | 0.18244     | 0.62114071  |             |          |         |       |
| RN7SL387P  | ENSG00000263537 | -0.17769  | 0.57052     | 0.90605     | 0.18245     | 0.90605  |         |       |
|            | 0.18245         | 0.90605   | 0.18245     | 0.18245     | 0.62114071  |          |         |       |
| DTL        | ENSG00000143476 | 0.649     | 0.25817     | 0.71101     | 0.23854     | 0.55916  | 0.28802 | 0.906 |
|            | 0.18247         | 0.18247   | 0.62114071  |             |             |          |         |       |
| NA         | ENSG00000254143 | 0.906     | 0.18247     | 0.70322     | 0.24096     | -0.98443 | 0.83755 |       |
|            | -0.46438        | 0.67881   | 0.18247     | 0.62114071  |             |          |         |       |
| ITGB1      | ENSG00000150093 | -1.2169   | 0.88818     | -0.96859    | 0.83363     | 0.90597  | 0.18248 |       |
|            | -0.72269        | 0.76507   | 0.18248     | 0.62114071  |             |          |         |       |
| H2AC5P     | ENSG00000234816 | -0.9033   | 0.81682     | -0.9033     | 0.81682     | 0.049574 |         |       |
|            | 0.48023         | 0.90594   | 0.18248     | 0.18248     | 0.62114071  |          |         |       |
| NA         | ENSG00000279428 | 0.90588   | 0.1825      | 0.90588     | 0.1825      | 0.90588  | 0.1825  |       |
|            | 0.90588         | 0.1825    | 0.1825      | 0.621165398 |             |          |         |       |
| RNU6-667P  | ENSG00000252995 | 0.69034   | 0.24499     | -0.66236    | 0.74613     | 0.90569  |         |       |
|            | 0.18255         | -0.52986  | 0.70189     | 0.18255     | 0.621292185 |          |         |       |
| VN1R28P    | ENSG00000227182 | 0.53981   | 0.29466     | 0.72151     | 0.2353      | 0.15448  |         |       |
|            | 0.43861         | 0.90546   | 0.18261     | 0.18261     | 0.621409588 |          |         |       |
| NA         | ENSG00000248491 | 0.90545   | 0.18261     | -0.6196     | 0.73224     | 0.43275  | 0.3326  |       |
|            | -1.3264         | 0.90764   | 0.18261     | 0.621409588 |             |          |         |       |
| NA         | ENSG00000265644 | -0.63217  | 0.73636     | -0.096222   | 0.53833     | 0.90537  | 0.18263 |       |

|             |                 |           |           |           |             |             |         |  |
|-------------|-----------------|-----------|-----------|-----------|-------------|-------------|---------|--|
|             |                 | -0.86532  | 0.80657   | 0.18263   | 0.621424885 |             |         |  |
| CREB3L2     | ENSG00000182158 | -0.79548  | 0.78683   | -0.47809  | 0.68371     | -0.14734    |         |  |
|             |                 | 0.55857   | 0.90535   | 0.18264   | 0.18264     | 0.621424885 |         |  |
| KCNT1       | ENSG00000107147 | -0.19884  | 0.57881   | 0.90529   | 0.18266     | -0.32586    | 0.62773 |  |
|             |                 | -0.78078  | 0.78253   | 0.18266   | 0.621449543 |             |         |  |
| NA          | ENSG00000253106 | 0.90521   | 0.18268   | 0.90521   | 0.18268     | 0.90521     | 0.18268 |  |
|             |                 | 0.90521   | 0.18268   | 0.18268   | 0.621464831 |             |         |  |
| NA          | ENSG00000259434 | 0.90518   | 0.18269   | 0.90518   | 0.18269     | 0.73946     | 0.22981 |  |
|             |                 | 0.90518   | 0.18269   | 0.18269   | 0.621464831 |             |         |  |
| RN7SKP186   | ENSG00000202241 | 0.053299  | 0.47875   | 0.905     | 0.18273     | -0.25207    | 0.5995  |  |
|             |                 | -0.77256  | 0.78011   | 0.18273   | 0.621491942 |             |         |  |
| NA          | ENSG00000260144 | -0.60035  | 0.72586   | 0.90497   | 0.18274     | 0.094203    | 0.46247 |  |
|             |                 | 0.094203  | 0.46247   | 0.18274   | 0.621491942 |             |         |  |
| SNORA2B     | ENSG00000207313 | -1.8408   | 0.96718   | -0.64473  | 0.74045     | 0.9049      |         |  |
|             |                 | 0.18276   | 0.9049    | 0.18276   | 0.18276     | 0.621491942 |         |  |
| CCER2       | ENSG00000262484 | 0.9049    | 0.18276   | 0.9049    | 0.18276     | 0.9049      | 0.18276 |  |
|             |                 | 0.9049    | 0.18276   | 0.18276   | 0.621491942 |             |         |  |
| NA          | ENSG00000257256 | 0.6744    | 0.25003   | 0.49267   | 0.31112     | 0.90477     | 0.18279 |  |
|             |                 | 0.90477   | 0.18279   | 0.18279   | 0.621491942 |             |         |  |
| GUCA2B      | ENSG00000044012 | 0.48057   | 0.31541   | -0.047761 | 0.51905     | 0.21055     |         |  |
|             |                 | 0.41662   | 0.90475   | 0.1828    | 0.1828      | 0.621491942 |         |  |
| SHLD2       | ENSG00000122376 | 0.063642  | 0.47463   | 0.90476   | 0.1828      | 0.63847     | 0.26158 |  |
|             |                 | 0.18711   | 0.42579   | 0.1828    | 0.621491942 |             |         |  |
| VANGL1      | ENSG00000173218 | -0.30567  | 0.62007   | 0.90473   | 0.1828      | 0.50768     |         |  |
|             |                 | 0.30584   | -0.25406  | 0.60028   | 0.1828      | 0.621491942 |         |  |
| NA          | ENSG00000229839 | 0.27376   | 0.39214   | 0.86135   | 0.19452     | 0.87905     | 0.18969 |  |
|             |                 | 0.90459   | 0.18284   | 0.18284   | 0.621577618 |             |         |  |
| FGFR4       | ENSG00000160867 | 0.83702   | 0.20129   | 0.35794   | 0.3602      | 0.90449     | 0.18287 |  |
|             |                 | 0.60196   | 0.2736    | 0.18287   | 0.621577618 |             |         |  |
| NA          | ENSG00000250038 | 0.88548   | 0.18795   | -0.31437  | 0.62338     | -0.31437    | 0.62338 |  |
|             |                 | 0.90441   | 0.18289   | 0.18289   | 0.621577618 |             |         |  |
| NA          | ENSG00000272572 | 0.68186   | 0.24766   | 0.90431   | 0.18291     | 0.71438     | 0.2375  |  |
|             |                 | 0.71438   | 0.2375    | 0.18291   | 0.621577618 |             |         |  |
| RN7SKP208   | ENSG00000202344 | 0.7466    | 0.22765   | 0.59202   | 0.27692     | 0.90427     |         |  |
|             |                 | 0.18292   | -0.67123  | 0.74896   | 0.18292     | 0.621577618 |         |  |
| RNU6ATAC18P | ENSG00000221340 | 0.77253   | 0.2199    | 0.90431   | 0.18292     | 0.77253     |         |  |
|             |                 | 0.2199    | 0.77253   | 0.2199    | 0.18292     | 0.621577618 |         |  |
| ZNF669      | ENSG00000188295 | 0.53961   | 0.29473   | -0.25454  | 0.60046     | -0.51967    |         |  |
|             |                 | 0.69835   | 0.90427   | 0.18293   | 0.18293     | 0.621577618 |         |  |
| ZUP1        | ENSG00000153975 | -0.72554  | 0.76594   | -1.587    | 0.94374     | 0.90423     | 0.18294 |  |
|             |                 | 0.033582  | 0.48661   | 0.18294   | 0.621577618 |             |         |  |
| NA          | ENSG00000272301 | 0.90422   | 0.18294   | 0.16263   | 0.43541     | 0.90422     | 0.18294 |  |
|             |                 | 0.90422   | 0.18294   | 0.18294   | 0.621577618 |             |         |  |
| PRICKLE2    | ENSG00000163637 | -0.052804 | 0.52106   | -0.20811  | 0.58243     | 0.90399     | 0.183   |  |
|             |                 | 0.47558   | 0.31719   | 0.183     | 0.621597681 |             |         |  |
| NA          | ENSG00000237551 | 0.90391   | 0.18302   | -0.65752  | 0.74458     | -0.65752    | 0.74458 |  |
|             |                 | -0.30569  | 0.62008   | 0.18302   | 0.621597681 |             |         |  |
| PTPRZ1      | ENSG00000106278 | 0.14698   | 0.44157   | 0.54841   | 0.29171     | 0.9038      |         |  |
|             |                 | 0.18305   | 0.71617   | 0.23694   | 0.18305     | 0.621597681 |         |  |
| HELB        | ENSG00000127311 | 0.9038    | 0.18305   | 0.9038    | 0.18305     | 0.9038      | 0.18305 |  |
|             |                 | 0.9038    | 0.18305   | 0.18305   | 0.621597681 |             |         |  |
| CCDC116     | ENSG00000161180 | 0.9038    | 0.18305   | 0.9038    | 0.18305     | 0.9038      |         |  |
|             |                 | 0.18305   | 0.9038    | 0.18305   | 0.18305     | 0.621597681 |         |  |
| NA          | ENSG00000267142 | -0.59695  | 0.72473   | 0.90381   | 0.18305     | 0.19786     | 0.42158 |  |
|             |                 | 0.19786   | 0.42158   | 0.18305   | 0.621597681 |             |         |  |
| NA          | ENSG00000270174 | -0.5819   | 0.71968   | -0.43705  | 0.66896     | 0.9038      | 0.18305 |  |
|             |                 | 0.28136   | 0.38922   | 0.18305   | 0.621597681 |             |         |  |
| LRRN1       | ENSG00000175928 | -0.19863  | 0.57872   | -0.22267  | 0.5881      | -0.15775    | 0.56267 |  |
|             |                 | 0.90369   | 0.18308   | 0.18308   | 0.621597681 |             |         |  |
| LINC00412   | ENSG00000234772 | -0.072948 | 0.52908   | 0.90371   | 0.18308     | -0.072948   |         |  |
|             |                 | 0.52908   | -0.072948 | 0.52908   | 0.18308     | 0.621597681 |         |  |
| NA          | ENSG00000274351 | 0.90359   | 0.18311   | 0.13302   | 0.44709     | 0.90359     | 0.18311 |  |

|           |                 |           |         |             |             |           |         |  |
|-----------|-----------------|-----------|---------|-------------|-------------|-----------|---------|--|
|           | 0.90359         | 0.18311   | 0.18311 | 0.621597681 |             |           |         |  |
| COL9A1    | ENSG00000112280 | -0.047708 | 0.51903 | -0.21228    | 0.58405     | -0.33975  |         |  |
|           | 0.63298         | 0.90353   | 0.18312 | 0.18312     | 0.621597681 |           |         |  |
| GNG7      | ENSG00000176533 | -0.37275  | 0.64533 | 0.9035      | 0.18313     | -0.079687 | 0.53176 |  |
|           | -0.47293        | 0.68187   | 0.18313 | 0.621597681 |             |           |         |  |
| SNORA7B   | ENSG00000207088 | 0.90349   | 0.18313 | 0.90349     | 0.18313     | 0.90349   |         |  |
|           | 0.18313         | 0.84605   | 0.19876 | 0.18313     | 0.621597681 |           |         |  |
| NA        | ENSG00000239568 | 0.88329   | 0.18854 | 0.88329     | 0.18854     | 0.90348   | 0.18314 |  |
|           | -0.4603         | 0.67735   | 0.18314 | 0.621597681 |             |           |         |  |
| ZNF460    | ENSG00000197714 | 0.90342   | 0.18315 | 0.28806     | 0.38665     | 0.28806   |         |  |
|           | 0.38665         | 0.28806   | 0.38665 | 0.18315     | 0.621597681 |           |         |  |
| NA        | ENSG00000236856 | 0.90341   | 0.18315 | 0.059353    | 0.47634     | -0.25693  | 0.60138 |  |
|           | -0.7065         | 0.76006   | 0.18315 | 0.621597681 |             |           |         |  |
| NA        | ENSG00000228573 | 0.61675   | 0.2687  | 0.90335     | 0.18317     | 0.42519   | 0.33535 |  |
|           | -0.84788        | 0.80175   | 0.18317 | 0.621622265 |             |           |         |  |
| NA        | ENSG00000259644 | 0.90325   | 0.1832  | 0.90325     | 0.1832      | 0.90325   | 0.1832  |  |
|           | 0.90325         | 0.1832    | 0.1832  | 0.621652712 |             |           |         |  |
| INCA1     | ENSG00000196388 | 0.90316   | 0.18322 | 0.90316     | 0.18322     | 0.90316   | 0.18322 |  |
|           | 0.90316         | 0.18322   | 0.18322 | 0.621652712 |             |           |         |  |
| PDS5B     | ENSG00000083642 | 0.68938   | 0.24529 | 0.45104     | 0.32598     | -0.10295  | 0.541   |  |
|           | 0.90312         | 0.18323   | 0.18323 | 0.621652712 |             |           |         |  |
| RN7SKP62  | ENSG00000207269 | 0.90313   | 0.18323 | -0.0040711  | 0.50162     | 0.90313   |         |  |
|           | 0.18323         | 0.90313   | 0.18323 | 0.18323     | 0.621652712 |           |         |  |
| OR13C6P   | ENSG00000179443 | 0.90301   | 0.18326 | -0.24818    | 0.598       | -1.074    | 0.85859 |  |
|           | -0.31496        | 0.62361   | 0.18326 | 0.621683142 |             |           |         |  |
| CEACAMP4  | ENSG00000230681 | 0.90292   | 0.18328 | 0.20767     | 0.41774     | 0.90292   |         |  |
|           | 0.18328         | 0.90292   | 0.18328 | 0.18328     | 0.621683142 |           |         |  |
| NA        | ENSG00000251410 | 0.90294   | 0.18328 | 0.26337     | 0.39613     | 0.26337   | 0.39613 |  |
|           | 0.26337         | 0.39613   | 0.18328 | 0.621683142 |             |           |         |  |
| NA        | ENSG00000264693 | -1.3822   | 0.91655 | -0.52098    | 0.69881     | 0.90289   | 0.18329 |  |
|           | -0.52098        | 0.69881   | 0.18329 | 0.621683142 |             |           |         |  |
| NA        | ENSG00000279558 | -0.70017  | 0.75809 | 0.90277     | 0.18332     | -0.37145  | 0.64485 |  |
|           | 0.28611         | 0.3874    | 0.18332 | 0.62174162  |             |           |         |  |
| CAB39     | ENSG00000135932 | 0.89997   | 0.18407 | 0.31411     | 0.37672     | 0.9027    | 0.18334 |  |
|           | -0.03651        | 0.51456   | 0.18334 | 0.621766177 |             |           |         |  |
| LRRC20    | ENSG00000172731 | 0.25509   | 0.39933 | 0.90261     | 0.18337     | 0.88943   |         |  |
|           | 0.18689         | 0.14097   | 0.44395 | 0.18337     | 0.621781372 |           |         |  |
| MRPL42P3  | ENSG00000219297 | -1.1437   | 0.87362 | 0.90259     | 0.18337     | -1.1437   |         |  |
|           | 0.87362         | -0.29497  | 0.61599 | 0.18337     | 0.621781372 |           |         |  |
| LINC01522 | ENSG00000237423 | 0.90245   | 0.18341 | 0.42067     | 0.337       | -1.4516   | 0.92669 |  |
|           | -0.22647        | 0.58958   | 0.18341 | 0.621873734 |             |           |         |  |
| IGKV1-6   | ENSG00000239855 | 0.90214   | 0.18349 | 0.90214     | 0.18349     | 0.48065   |         |  |
|           | 0.31538         | 0.90214   | 0.18349 | 0.18349     | 0.622049043 |           |         |  |
| GNAT1     | ENSG00000114349 | 0.90211   | 0.1835  | 0.49289     | 0.31104     | 0.24993   | 0.40132 |  |
|           | 0.90211         | 0.1835    | 0.1835  | 0.622049043 |             |           |         |  |
| NA        | ENSG00000226900 | -0.5101   | 0.69501 | 0.90212     | 0.1835      | 0.24773   | 0.40217 |  |
|           | 0.23512         | 0.40706   | 0.1835  | 0.622049043 |             |           |         |  |
| NA        | ENSG00000248518 | 0.90198   | 0.18353 | 0.90198     | 0.18353     | 0.90198   | 0.18353 |  |
|           | -0.16565        | 0.56578   | 0.18353 | 0.622064193 |             |           |         |  |
| NA        | ENSG00000257509 | 0.90198   | 0.18353 | 0.90198     | 0.18353     | 0.90198   | 0.18353 |  |
|           | 0.90198         | 0.18353   | 0.18353 | 0.622064193 |             |           |         |  |
| WWP1      | ENSG00000123124 | 0.90174   | 0.1836  | 0.74266     | 0.22884     | 0.90174   | 0.1836  |  |
|           | 0.3252          | 0.37251   | 0.1836  | 0.622107391 |             |           |         |  |
| NA        | ENSG00000269155 | 0.90165   | 0.18362 | 0.90165     | 0.18362     | 0.90165   | 0.18362 |  |
|           | 0.90165         | 0.18362   | 0.18362 | 0.622107391 |             |           |         |  |
| NA        | ENSG00000258458 | -0.056549 | 0.52255 | -0.40035    | 0.65555     | 0.90163   | 0.18363 |  |
|           | 0.90163         | 0.18363   | 0.18363 | 0.622107391 |             |           |         |  |
| PDLIM4    | ENSG00000131435 | 0.66065   | 0.25442 | 0.16068     | 0.43617     | 0.66065   |         |  |
|           | 0.25442         | 0.90142   | 0.18368 | 0.18368     | 0.622107391 |           |         |  |
| NA        | ENSG00000246225 | 0.052036  | 0.47925 | 0.9014      | 0.18369     | 0.9014    | 0.18369 |  |
|           | 0.9014          | 0.18369   | 0.18369 | 0.622107391 |             |           |         |  |
| ELSPBP1   | ENSG00000169393 | 0.79016   | 0.21472 | 0.90136     | 0.1837      | 0.90136   |         |  |



|             |                 |          |             |             |             |           |         |         |
|-------------|-----------------|----------|-------------|-------------|-------------|-----------|---------|---------|
|             | 0.1837          | 0.90136  | 0.1837      | 0.1837      | 0.622107391 |           |         |         |
| NA          | ENSG00000250280 | -0.9085  | 0.81819     | 0.90135     | 0.1837      | -1.0228   | 0.84679 |         |
|             | -0.37593        | 0.64652  | 0.1837      | 0.622107391 |             |           |         |         |
| NA          | ENSG00000253519 | 0.90137  | 0.1837      | 0.90137     | 0.1837      | 0.90137   | 0.1837  |         |
|             | 0.90137         | 0.1837   | 0.1837      | 0.622107391 |             |           |         |         |
| SNRPGP16    | ENSG00000255287 | 0.90134  | 0.1837      | 0.68039     | 0.24813     | 0.38528   |         |         |
|             | 0.35002         | -0.26206 | 0.60336     | 0.1837      | 0.622107391 |           |         |         |
| HYI         | ENSG00000178922 | 0.90124  | 0.18373     | 0.90124     | 0.18373     | 0.90124   | 0.18373 |         |
|             | 0.069348        | 0.47236  | 0.18373     | 0.622107391 |             |           |         |         |
| NPM1P36     | ENSG00000214604 | 0.77822  | 0.21822     | -1.337      | 0.90939     | -0.060814 |         |         |
|             | 0.52425         | 0.90111  | 0.18376     | 0.18376     | 0.622107391 |           |         |         |
| SLC25A51P3  | ENSG00000254181 | 0.90111  | 0.18376     | -0.11393    | 0.54535     | 0.71029   |         |         |
|             | 0.23876         | 0.71029  | 0.23876     | 0.18376     | 0.622107391 |           |         |         |
| SRPK1       | ENSG00000096063 | 0.90111  | 0.18377     | 0.73612     | 0.23083     | 0.52045   | 0.30137 |         |
|             | -1.2212         | 0.88899  | 0.18377     | 0.622107391 |             |           |         |         |
| MAPK1       | ENSG00000100030 | 0.82642  | 0.20428     | 0.21534     | 0.41475     | 0.9011    | 0.18377 |         |
|             | 0.36121         | 0.35897  | 0.18377     | 0.622107391 |             |           |         |         |
| SUGP1       | ENSG00000105705 | 0.13327  | 0.44699     | 0.2614      | 0.39689     | 0.13327   | 0.44699 |         |
|             | 0.90101         | 0.18379  | 0.18379     | 0.622107391 |             |           |         |         |
| RPS7P11     | ENSG00000213326 | 0.90102  | 0.18379     | 0.90102     | 0.18379     | 0.90102   |         |         |
|             | 0.18379         | 0.90102  | 0.18379     | 0.18379     | 0.622107391 |           |         |         |
| CACNA1G-AS1 | ENSG00000250107 | 0.90093  | 0.18381     | 0.90093     | 0.18381     | 0.90093   |         |         |
|             | 0.18381         | 0.90093  | 0.18381     | 0.18381     | 0.622107391 |           |         |         |
| LMBR1       | ENSG00000105983 | 0.11819  | 0.45296     | -0.99151    | 0.83928     | 0.90086   | 0.18383 |         |
|             | -0.18772        | 0.57445  | 0.18383     | 0.622107391 |             |           |         |         |
| C9          | ENSG00000113600 | -1.1144  | 0.86744     | -0.66651    | 0.74746     | -0.99517  | 0.84017 |         |
|             | 0.90087         | 0.18383  | 0.18383     | 0.622107391 |             |           |         |         |
| MBTPS1      | ENSG00000140943 | -0.62995 | 0.73564     | 0.90086     | 0.18383     | -0.62045  |         |         |
|             | 0.73252         | 0.27284  | 0.39249     | 0.18383     | 0.622107391 |           |         |         |
| LIG4        | ENSG00000174405 | 0.7411   | 0.22932     | 0.89338     | 0.18583     | 0.90087   | 0.18383 |         |
|             | -0.88646        | 0.81232  | 0.18383     | 0.622107391 |             |           |         |         |
| KRT16       | ENSG00000186832 | 0.63523  | 0.26264     | 0.079861    | 0.46817     | 0.18726   | 0.42573 |         |
|             | 0.90083         | 0.18384  | 0.18384     | 0.622107391 |             |           |         |         |
| ENKUR       | ENSG00000151023 | 0.26472  | 0.39561     | 0.90078     | 0.18385     | 0.19465   | 0.42283 |         |
|             | 0.20654         | 0.41818  | 0.18385     | 0.622107391 |             |           |         |         |
| NA          | ENSG00000249923 | -0.979   | 0.83621     | 0.90079     | 0.18385     | -0.78618  | 0.78412 |         |
|             | -0.77616        | 0.78117  | 0.18385     | 0.622107391 |             |           |         |         |
| IARS2       | ENSG00000067704 | -0.17877 | 0.57094     | 0.90069     | 0.18388     | 0.10003   | 0.46016 |         |
|             | 0.57947         | 0.28114  | 0.18388     | 0.622107391 |             |           |         |         |
| INTS4       | ENSG00000149262 | 0.39823  | 0.34523     | 0.63451     | 0.26288     | 0.90053   | 0.18392 |         |
|             | 0.22346         | 0.41159  | 0.18392     | 0.622107391 |             |           |         |         |
| RPL7AP23    | ENSG00000241367 | -0.16704 | 0.56633     | 0.82471     | 0.20477     | 0.90051   |         |         |
|             | 0.18392         | 0.90051  | 0.18392     | 0.18392     | 0.622107391 |           |         |         |
| MGAT3-AS1   | ENSG00000227188 | 0.90044  | 0.18394     | 0.90044     | 0.18394     | 0.90044   |         |         |
|             | 0.18394         | 0.90044  | 0.18394     | 0.18394     | 0.622107391 |           |         |         |
| NA          | ENSG00000226277 | 0.90042  | 0.18395     | 0.90042     | 0.18395     | 0.31931   | 0.37475 |         |
|             | 0.19825         | 0.42142  | 0.18395     | 0.622107391 |             |           |         |         |
| SUCLA2-AS1  | ENSG00000227848 | 0.90043  | 0.18395     | 0.90043     | 0.18395     | 0.90043   |         |         |
|             | 0.18395         | 0.90043  | 0.18395     | 0.18395     | 0.622107391 |           |         |         |
| MIR3678     | ENSG00000264511 | 0.90035  | 0.18397     | 0.90035     | 0.18397     | 0.90035   |         |         |
|             | 0.18397         | 0.90035  | 0.18397     | 0.18397     | 0.622107391 |           |         |         |
| MPV17L      | ENSG00000156968 | -2.0804  | 0.98125     | 0.90032     | 0.18398     | -1.768    |         |         |
|             | 0.96147         | -0.19935 | 0.57901     | 0.18398     | 0.622107391 |           |         |         |
| NA          | ENSG00000237385 | 0.90022  | 0.184       | -0.10354    | 0.54123     | 0.90022   | 0.184   | 0.90022 |
|             | 0.184           | 0.184    | 0.622107391 |             |             |           |         |         |
| NA          | ENSG00000255866 | 0.90006  | 0.18404     | 0.90006     | 0.18404     | 0.90006   | 0.18404 |         |
|             | 0.90006         | 0.18404  | 0.18404     | 0.622107391 |             |           |         |         |
| H3P42       | ENSG00000271626 | 0.90007  | 0.18404     | 0.90007     | 0.18404     | 0.90007   | 0.18404 |         |
|             | 0.90007         | 0.18404  | 0.18404     | 0.622107391 |             |           |         |         |
| NA          | ENSG00000231316 | 0.9      | 0.18406     | 0.9         | 0.18406     | 0.9       | 0.18406 | -1.3474 |
|             | 0.91107         | 0.18406  | 0.622107391 |             |             |           |         |         |
| NA          | ENSG00000221123 | 0.90002  | 0.18406     | -0.32446    | 0.62721     | -1.2055   | 0.886   |         |

|           |                 |           |         |             |         |          |         |  |
|-----------|-----------------|-----------|---------|-------------|---------|----------|---------|--|
|           | 0.12743         | 0.4493    | 0.18406 | 0.622107391 |         |          |         |  |
| NA        | ENSG00000207922 | -0.91652  | 0.8203  | 0.89997     | 0.18407 | 0.70471  | 0.2405  |  |
|           | 0.70471         | 0.2405    | 0.18407 | 0.622107391 |         |          |         |  |
| RPL22     | ENSG00000116251 | 0.47406   | 0.31773 | 0.89994     | 0.18408 | 0.031828 | 0.4873  |  |
|           | -0.44597        | 0.67219   | 0.18408 | 0.622107391 |         |          |         |  |
| GPR18     | ENSG00000125245 | 0.89994   | 0.18408 | 0.25426     | 0.39965 | 0.016154 | 0.49356 |  |
|           | 0.26048         | 0.39725   | 0.18408 | 0.622107391 |         |          |         |  |
| GRHL3     | ENSG00000158055 | -1.1278   | 0.8703  | -1.2497     | 0.8943  | 0.89982  | 0.18411 |  |
|           | -0.89719        | 0.81519   | 0.18411 | 0.622107391 |         |          |         |  |
| SPZ1      | ENSG00000164299 | 0.89981   | 0.18411 | 0.89981     | 0.18411 | 0.89981  | 0.18411 |  |
|           | 0.89981         | 0.18411   | 0.18411 | 0.622107391 |         |          |         |  |
| SNORD70B  | ENSG00000212309 | 0.89982   | 0.18411 | 0.89982     | 0.18411 | 0.89982  |         |  |
|           | 0.18411         | 0.89982   | 0.18411 | 0.622107391 |         |          |         |  |
| FBXO22    | ENSG00000167196 | 0.89976   | 0.18412 | 0.89976     | 0.18412 | 0.89976  |         |  |
|           | 0.18412         | 0.89976   | 0.18412 | 0.622107391 |         |          |         |  |
| UBE2F     | ENSG00000184182 | -0.63397  | 0.73695 | -0.1838     | 0.57291 | -1.1114  | 0.86681 |  |
|           | 0.89978         | 0.18412   | 0.18412 | 0.622107391 |         |          |         |  |
| NA        | ENSG00000234716 | 0.89973   | 0.18413 | 0.67004     | 0.25142 | 0.53145  | 0.29755 |  |
|           | -0.029368       | 0.51171   | 0.18413 | 0.622107391 |         |          |         |  |
| RNU6-57P  | ENSG00000223280 | 0.28464   | 0.38796 | -0.13656    | 0.55431 | 0.89961  |         |  |
|           | 0.18416         | 0.89961   | 0.18416 | 0.622113136 |         |          |         |  |
| LARS2     | ENSG00000011376 | 0.8996    | 0.18417 | -0.10976    | 0.5437  | 0.47299  | 0.31811 |  |
|           | 0.48967         | 0.31218   | 0.18417 | 0.622113136 |         |          |         |  |
| NA        | ENSG00000238316 | 0.89957   | 0.18417 | 0.89957     | 0.18417 | 0.89957  | 0.18417 |  |
|           | 0.89957         | 0.18417   | 0.18417 | 0.622113136 |         |          |         |  |
| AAR2      | ENSG00000131043 | 0.89928   | 0.18425 | 0.082965    | 0.46694 | 0.71085  | 0.23859 |  |
|           | -0.032441       | 0.51294   | 0.18425 | 0.622204164 |         |          |         |  |
| PPIAP69   | ENSG00000228337 | 0.55471   | 0.28955 | 0.47994     | 0.31563 | 0.86707  |         |  |
|           | 0.19295         | 0.89925   | 0.18426 | 0.622204164 |         |          |         |  |
| FBXO41    | ENSG00000163013 | -0.28742  | 0.61311 | 0.89919     | 0.18427 | -1.5808  |         |  |
|           | 0.94304         | -0.72457  | 0.76564 | 0.622204164 |         |          |         |  |
| UGGT1     | ENSG00000136731 | 0.22526   | 0.41089 | -0.51942    | 0.69827 | 0.80627  | 0.21004 |  |
|           | 0.89916         | 0.18428   | 0.18428 | 0.622204164 |         |          |         |  |
| SGCD      | ENSG00000170624 | -0.40674  | 0.6579  | 0.89918     | 0.18428 | -0.56062 | 0.71247 |  |
|           | 0.51944         | 0.30173   | 0.18428 | 0.622204164 |         |          |         |  |
| LHCGR     | ENSG00000138039 | 0.025009  | 0.49002 | 0.0058824   | 0.49765 | -0.24131 | 0.59534 |  |
|           | 0.89914         | 0.18429   | 0.18429 | 0.622204164 |         |          |         |  |
| NA        | ENSG00000279505 | 0.89914   | 0.18429 | 0.89914     | 0.18429 | 0.89914  | 0.18429 |  |
|           | 0.89914         | 0.18429   | 0.18429 | 0.622204164 |         |          |         |  |
| BECN1P2   | ENSG00000219669 | -0.36285  | 0.64164 | 0.89906     | 0.18431 | -0.36285 |         |  |
|           | 0.64164         | -0.36285  | 0.64164 | 0.622204164 |         |          |         |  |
| LINC01568 | ENSG00000258779 | -0.34719  | 0.63578 | 0.89879     | 0.18438 | 0.59047  |         |  |
|           | 0.27744         | 0.59047   | 0.27744 | 0.622204164 |         |          |         |  |
| NA        | ENSG00000260276 | 0.89881   | 0.18438 | 0.8285      | 0.20369 | 0.54601  | 0.29253 |  |
|           | 0.24214         | 0.40434   | 0.18438 | 0.622204164 |         |          |         |  |
| NA        | ENSG00000272512 | -0.3555   | 0.63889 | 0.89877     | 0.18439 | -0.3555  | 0.63889 |  |
|           | -0.3555         | 0.63889   | 0.18439 | 0.622204164 |         |          |         |  |
| PTGR1     | ENSG00000106853 | 0.89865   | 0.18442 | 0.89865     | 0.18442 | -0.40479 | 0.65718 |  |
|           | -0.2837         | 0.61168   | 0.18442 | 0.622204164 |         |          |         |  |
| CDC42EP5  | ENSG00000167617 | 0.45175   | 0.32572 | 0.45175     | 0.32572 | 0.41895  |         |  |
|           | 0.33763         | 0.89865   | 0.18442 | 0.622204164 |         |          |         |  |
| RN7SL754P | ENSG00000239822 | 0.14994   | 0.44041 | 0.8986      | 0.18443 | 0.82026  |         |  |
|           | 0.20604         | 0.76713   | 0.2215  | 0.622204164 |         |          |         |  |
| INTS3     | ENSG00000143624 | -0.14731  | 0.55856 | 0.44441     | 0.32837 | 0.71196  | 0.23825 |  |
|           | 0.89856         | 0.18444   | 0.18444 | 0.622204164 |         |          |         |  |
| NA        | ENSG00000241722 | -0.41345  | 0.66036 | 0.14201     | 0.44353 | 0.89854  | 0.18445 |  |
|           | -0.39815        | 0.65474   | 0.18445 | 0.622204164 |         |          |         |  |
| PFN2      | ENSG00000070087 | -0.073823 | 0.52942 | -0.23767    | 0.59393 | 0.89847  | 0.18447 |  |
|           | 0.28857         | 0.38646   | 0.18447 | 0.622204164 |         |          |         |  |
| EIF1B     | ENSG00000114784 | 0.098802  | 0.46065 | 0.098802    | 0.46065 | -0.58849 | 0.7219  |  |
|           | 0.89848         | 0.18447   | 0.18447 | 0.622204164 |         |          |         |  |
| TRAV39    | ENSG00000211818 | 0.89847   | 0.18447 | 0.47862     | 0.3161  | 0.89847  |         |  |

|            |                 |          |         |             |             |          |         |  |
|------------|-----------------|----------|---------|-------------|-------------|----------|---------|--|
|            | 0.18447         | 0.89847  | 0.18447 | 0.18447     | 0.622204164 |          |         |  |
| NA         | ENSG00000281167 | 0.89845  | 0.18447 | -0.35377    | 0.63824     | 0.89845  | 0.18447 |  |
|            | 0.34363         | 0.36556  | 0.18447 | 0.622204164 |             |          |         |  |
| LHX5       | ENSG00000089116 | 0.34101  | 0.36655 | 0.45795     | 0.3235      | -0.5755  | 0.71752 |  |
|            | 0.89826         | 0.18452  | 0.18452 | 0.622204164 |             |          |         |  |
| NA         | ENSG00000249249 | 0.32051  | 0.37429 | 0.89827     | 0.18452     | 0.89827  | 0.18452 |  |
|            | 0.89827         | 0.18452  | 0.18452 | 0.622204164 |             |          |         |  |
| RNA5SP494  | ENSG00000222585 | 0.89822  | 0.18453 | 0.89822     | 0.18453     | 0.89822  |         |  |
|            | 0.18453         | 0.89822  | 0.18453 | 0.622204164 |             |          |         |  |
| RNU6-608P  | ENSG00000206654 | 0.60417  | 0.27286 | 0.65195     | 0.25722     | 0.89818  |         |  |
|            | 0.18454         | 0.4563   | 0.32409 | 0.18454     | 0.622204164 |          |         |  |
| CCNB1IP1   | ENSG00000100814 | -1.8554  | 0.96823 | -0.96222    | 0.83203     | 0.89816  |         |  |
|            | 0.18455         | -0.72849 | 0.76684 | 0.18455     | 0.622204164 |          |         |  |
| RPS6KA1    | ENSG00000117676 | 0.55609  | 0.28907 | 0.69207     | 0.24445     | 0.4863   |         |  |
|            | 0.31338         | 0.89818  | 0.18455 | 0.18455     | 0.622204164 |          |         |  |
| PIGM       | ENSG00000143315 | -0.11311 | 0.54503 | -0.11311    | 0.54503     | 0.18188  | 0.42784 |  |
|            | 0.89812         | 0.18456  | 0.18456 | 0.622204164 |             |          |         |  |
| MIR323A    | ENSG00000199069 | 0.89806  | 0.18458 | 0.89806     | 0.18458     | 0.89806  |         |  |
|            | 0.18458         | 0.89806  | 0.18458 | 0.18458     | 0.622204164 |          |         |  |
| MIR1197    | ENSG00000221745 | 0.89806  | 0.18458 | 0.89806     | 0.18458     | 0.89806  |         |  |
|            | 0.18458         | 0.89806  | 0.18458 | 0.18458     | 0.622204164 |          |         |  |
| RNU6-1052P | ENSG00000223330 | -1.2148  | 0.88777 | 0.89803     | 0.18458     | 0.014377 |         |  |
|            | 0.49426         | -0.35092 | 0.63717 | 0.18458     | 0.622204164 |          |         |  |
| STON1      | ENSG00000243244 | -0.08345 | 0.53325 | -0.38521    | 0.64996     | -0.08345 | 0.53325 |  |
|            | 0.89792         | 0.18461  | 0.18461 | 0.622262247 |             |          |         |  |
| CXCL17     | ENSG00000189377 | 0.023554 | 0.4906  | 0.89774     | 0.18466     | 0.023554 |         |  |
|            | 0.4906          | 0.023554 | 0.4906  | 0.18466     | 0.622298002 |          |         |  |
| RNA5SP194  | ENSG00000201532 | 0.66012  | 0.25459 | -0.51992    | 0.69844     | 0.89774  |         |  |
|            | 0.18466         | -0.19213 | 0.57618 | 0.18466     | 0.622298002 |          |         |  |
| LINC02518  | ENSG00000232316 | 0.10992  | 0.45623 | 0.89777     | 0.18466     | 0.10992  |         |  |
|            | 0.45623         | 0.10992  | 0.45623 | 0.18466     | 0.622298002 |          |         |  |
| NA         | ENSG00000257045 | -0.23254 | 0.59194 | 0.5248      | 0.29986     | 0.89767  | 0.18468 |  |
|            | 0.89767         | 0.18468  | 0.18468 | 0.622298002 |             |          |         |  |
| ZDHHC8P1   | ENSG00000133519 | 0.89759  | 0.1847  | 0.3878      | 0.34908     | -0.41505 |         |  |
|            | 0.66095         | -1.1325  | 0.87128 | 0.1847      | 0.622298002 |          |         |  |
| DIPK2A     | ENSG00000181744 | 0.11494  | 0.45425 | 0.83315     | 0.20238     | 0.89756  |         |  |
|            | 0.18471         | 0.51369  | 0.30374 | 0.18471     | 0.622298002 |          |         |  |
| MIR1205    | ENSG00000221771 | 0.89757  | 0.18471 | 0.74938     | 0.22681     | 0.74938  |         |  |
|            | 0.22681         | -0.76049 | 0.77652 | 0.18471     | 0.622298002 |          |         |  |
| NA         | ENSG00000260877 | 0.89724  | 0.18479 | 0.89724     | 0.18479     | 0.89724  | 0.18479 |  |
|            | 0.89724         | 0.18479  | 0.18479 | 0.622425408 |             |          |         |  |
| LTK        | ENSG00000062524 | -0.35498 | 0.6387  | 0.12434     | 0.45052     | 0.8972   | 0.18481 |  |
|            | -0.27816        | 0.60955  | 0.18481 | 0.622425408 |             |          |         |  |
| SPATS2     | ENSG00000123352 | 0.77769  | 0.21837 | 0.89716     | 0.18482     | 0.71723  |         |  |
|            | 0.23662         | 0.19569  | 0.42243 | 0.18482     | 0.622425408 |          |         |  |
| SNUPN      | ENSG00000169371 | 0.73295  | 0.2318  | 0.50297     | 0.30749     | 0.89717  | 0.18482 |  |
|            | 0.8805          | 0.18929  | 0.18482 | 0.622425408 |             |          |         |  |
| RPL7AP50   | ENSG00000213609 | 0.89711  | 0.18483 | 0.89711     | 0.18483     | 0.54641  |         |  |
|            | 0.29239         | -0.11011 | 0.54384 | 0.18483     | 0.622425408 |          |         |  |
| PSMD7P1    | ENSG00000266707 | 0.47859  | 0.31612 | 0.8971      | 0.18483     | 0.27507  |         |  |
|            | 0.39163         | -0.05934 | 0.52366 | 0.18483     | 0.622425408 |          |         |  |
| ST6GALNAC5 | ENSG00000117069 | 0.89704  | 0.18485 | 0.17842     | 0.4292      | -0.74809 |         |  |
|            | 0.7728          | -0.79021 | 0.7853  | 0.18485     | 0.622425408 |          |         |  |
| NA         | ENSG00000227562 | 0.33828  | 0.36758 | 0.89703     | 0.18485     | 0.29909  | 0.38243 |  |
|            | 0.89703         | 0.18485  | 0.18485 | 0.622425408 |             |          |         |  |
| AMFR       | ENSG00000159461 | 0.89689  | 0.18489 | -1.4974     | 0.93286     | -1.1202  | 0.86868 |  |
|            | -1.8014         | 0.96418  | 0.18489 | 0.622431067 |             |          |         |  |
| BHLHA9     | ENSG00000205899 | -1.6127  | 0.94659 | 0.70361     | 0.24084     | 0.89687  |         |  |
|            | 0.18489         | 0.35313  | 0.362   | 0.18489     | 0.622431067 |          |         |  |
| NA         | ENSG00000267173 | 0.27688  | 0.39094 | 0.89688     | 0.18489     | 0.17841  | 0.4292  |  |
|            | 0.3575          | 0.36036  | 0.18489 | 0.622431067 |             |          |         |  |
| NA         | ENSG00000231811 | 0.20552  | 0.41858 | 0.20552     | 0.41858     | 0.20552  | 0.41858 |  |

|            |                 |             |             |             |             |          |         |  |
|------------|-----------------|-------------|-------------|-------------|-------------|----------|---------|--|
|            | 0.89676         | 0.18492     | 0.18492     | 0.622489058 |             |          |         |  |
| FAM238B    | ENSG00000231976 | 0.89661     | 0.18496     | -0.067714   | 0.52699     | -0.68075 |         |  |
|            | 0.75198         | -0.68075    | 0.75198     | 0.18496     | 0.6225807   |          |         |  |
| RPL23P2    | ENSG00000176054 | 0.83565     | 0.20168     | 0.88775     | 0.18734     | 0.83565  |         |  |
|            | 0.20168         | 0.89646     | 0.1850185   | 0.622608805 |             |          |         |  |
| NA         | ENSG00000248699 | 0.89639     | 0.18502     | 0.38971     | 0.34837     | -1.7103  | 0.9564  |  |
|            | -0.23148        | 0.59153     | 0.18502     | 0.622608805 |             |          |         |  |
| CRLS1      | ENSG00000088766 | 0.40787     | 0.34168     | 0.051499    | 0.47946     | -1.0545  | 0.85418 |  |
|            | 0.89635         | 0.18503     | 0.18503     | 0.622608805 |             |          |         |  |
| NA         | ENSG00000242488 | 0.011987    | 0.49522     | 0.011987    | 0.49522     | 0.011987 | 0.49522 |  |
|            | 0.89625         | 0.18506     | 0.18506     | 0.622608805 |             |          |         |  |
| RNU6-703P  | ENSG00000252755 | -0.41383    | 0.6605      | 0.89625     | 0.18506     | 0.89625  |         |  |
|            | 0.18506         | -0.73635    | 0.76924     | 0.18506     | 0.622608805 |          |         |  |
| NA         | ENSG00000270393 | -1.8011     | 0.96415     | -0.97943    | 0.83632     | -1.8011  | 0.96415 |  |
|            | 0.89626         | 0.18506     | 0.18506     | 0.622608805 |             |          |         |  |
| LINC01520  | ENSG00000230962 | 0.89616     | 0.18508     | 0.76634     | 0.22174     | 0.29631  |         |  |
|            | 0.3835          | 0.45399     | 0.32492     | 0.18508     | 0.622608805 |          |         |  |
| NA         | ENSG00000263622 | 0.53369     | 0.29678     | 0.89606     | 0.18511     | 0.63044  | 0.2642  |  |
|            | 0.07212         | 0.47125     | 0.18511     | 0.622608805 |             |          |         |  |
| NA         | ENSG00000227680 | 0.89599     | 0.18513     | 0.89599     | 0.18513     | 0.89599  | 0.18513 |  |
|            | 0.89599         | 0.18513     | 0.18513     | 0.622608805 |             |          |         |  |
| OR8B10P    | ENSG00000254646 | 0.896018513 | 0.896018513 | 0.896018513 | 0.896018513 | 0.896    |         |  |
|            | 0.18513         | 0.18513     | 0.622608805 |             |             |          |         |  |
| NA         | ENSG00000275120 | 0.896018513 | 0.8327      | 0.20251     | 0.61244     | 0.27012  |         |  |
|            | 0.61244         | 0.27012     | 0.18513     | 0.622608805 |             |          |         |  |
| NA         | ENSG00000259505 | 0.30612     | 0.37976     | 0.30612     | 0.37976     | 0.30612  | 0.37976 |  |
|            | 0.89596         | 0.18514     | 0.18514     | 0.622608805 |             |          |         |  |
| FAM87A     | ENSG00000182366 | 0.69192     | 0.24449     | 0.33361     | 0.36934     | 0.48118  |         |  |
|            | 0.31519         | 0.89593     | 0.18515     | 0.18515     | 0.622608805 |          |         |  |
| RPL23P10   | ENSG00000244708 | -2.135      | 0.98362     | 0.89593     | 0.18515     | -2.135   |         |  |
|            | 0.98362         | -2.135      | 0.98362     | 0.18515     | 0.622608805 |          |         |  |
| NA         | ENSG00000266625 | 0.89588     | 0.18516     | 0.89588     | 0.18516     | 0.89588  | 0.18516 |  |
|            | 0.89588         | 0.18516     | 0.18516     | 0.622608805 |             |          |         |  |
| RNA5SP277  | ENSG00000202356 | -0.21446    | 0.58491     | 0.89574     | 0.1852      | -0.21446 |         |  |
|            | 0.58491         | -0.21446    | 0.58491     | 0.1852      | 0.622648037 |          |         |  |
| SIKE1      | ENSG00000052723 | 0.8957      | 0.18521     | 0.23883     | 0.40562     | 0.8957   | 0.18521 |  |
|            | 0.8957          | 0.18521     | 0.18521     | 0.622648037 |             |          |         |  |
| NA         | ENSG00000265188 | 0.89569     | 0.18521     | 0.89569     | 0.18521     | 0.89569  | 0.18521 |  |
|            | 0.89569         | 0.18521     | 0.18521     | 0.622648037 |             |          |         |  |
| IFIT5      | ENSG00000152778 | -1.6229     | 0.94769     | 0.89547     | 0.18527     | -0.56939 | 0.71546 |  |
|            | -1.6229         | 0.94769     | 0.18527     | 0.622806781 |             |          |         |  |
| RPL7P48    | ENSG00000187504 | 0.89532     | 0.18531     | 0.75877     | 0.224089532 | 0.18531  |         |  |
|            | 0.89532         | 0.18531     | 0.18531     | 0.622860872 |             |          |         |  |
| RNU6ATAC6P | ENSG00000221059 | 0.28705     | 0.38704     | -1.2893     | 0.90135     | -1.1004  |         |  |
|            | 0.86442         | 0.89529     | 0.18532     | 0.18532     | 0.622860872 |          |         |  |
| RPL10AP6   | ENSG00000226360 | 0.8952      | 0.18534     | 0.8952      | 0.18534     | 0.8952   |         |  |
|            | 0.18534         | 0.8952      | 0.18534     | 0.18534     | 0.622860872 |          |         |  |
| NA         | ENSG00000272668 | 0.89521     | 0.18534     | 0.89521     | 0.18534     | 0.89521  | 0.18534 |  |
|            | 0.89521         | 0.18534     | 0.18534     | 0.622860872 |             |          |         |  |
| ARRB1      | ENSG00000137486 | 0.27778     | 0.39059     | -0.2507     | 0.59898     | -0.97499 | 0.83522 |  |
|            | 0.89515         | 0.18535     | 0.18535     | 0.622860872 |             |          |         |  |
| NA         | ENSG00000254629 | 0.31286     | 0.37719     | 0.89485     | 0.18543     | 0.30697  | 0.37943 |  |
|            | 0.33249         | 0.36976     | 0.18543     | 0.622944707 |             |          |         |  |
| NA         | ENSG00000280093 | -0.45544    | 0.6756      | 0.89488     | 0.18543     | -0.45544 | 0.6756  |  |
|            | -0.45544        | 0.6756      | 0.18543     | 0.622944707 |             |          |         |  |
| NA         | ENSG00000233235 | 0.89478     | 0.18545     | 0.078516    | 0.46871     | 0.75629  | 0.22474 |  |
|            | 0.79007         | 0.21474     | 0.18545     | 0.622944707 |             |          |         |  |
| RNU6-1128P | ENSG00000199695 | 0.8947      | 0.18547     | 0.8947      | 0.18547     | 0.8947   |         |  |
|            | 0.18547         | 0.8947      | 0.18547     | 0.18547     | 0.622944707 |          |         |  |
| SLC16A11   | ENSG00000174326 | 0.27089     | 0.39324     | 0.89467     | 0.18548     | -0.26616 |         |  |
|            | 0.60494         | 0.22648     | 0.41041     | 0.18548     | 0.622944707 |          |         |  |
| SNORD86    | ENSG00000212498 | 0.8947      | 0.18548     | 0.8947      | 0.18548     | 0.8947   |         |  |

|             |                 |          |         |             |             |         |           |         |
|-------------|-----------------|----------|---------|-------------|-------------|---------|-----------|---------|
|             | 0.18548         | 0.8947   | 0.18548 | 0.18548     | 0.622944707 |         |           |         |
| NA          | ENSG00000260095 | 0.89467  | 0.18548 | 0.18548     | 0.89467     | 0.18548 | 0.89467   | 0.18548 |
|             | 0.89467         | 0.18548  | 0.18548 | 0.622944707 |             |         |           |         |
| SNORA51     | ENSG00000271798 | 0.8947   | 0.18548 | 0.18548     | 0.8947      | 0.18548 | 0.8947    |         |
|             | 0.18548         | 0.8947   | 0.18548 | 0.18548     | 0.622944707 |         |           |         |
| NA          | ENSG00000216085 | 0.89463  | 0.18549 | 0.18549     | 0.89463     | 0.18549 | 0.89463   | 0.18549 |
|             | 0.89463         | 0.18549  | 0.18549 | 0.622944707 |             |         |           |         |
| NA          | ENSG00000250007 | 0.89453  | 0.18552 | 0.18552     | 0.89453     | 0.18552 | 0.89453   | 0.18552 |
|             | 0.89453         | 0.18552  | 0.18552 | 0.623002522 |             |         |           |         |
| NA          | ENSG00000260774 | 0.65391  | 0.25658 | 0.25658     | 0.89419     | 0.18561 | 0.50631   | 0.30632 |
|             | 0.50631         | 0.30632  | 0.18561 | 0.623233703 |             |         |           |         |
| SMIM19      | ENSG00000176209 | 0.066261 | 0.47358 | 0.47358     | 0.053297    | 0.47875 | 0.89416   |         |
|             | 0.18562         | 0.06879  | 0.47258 | 0.18562     | 0.623233703 |         |           |         |
| SPATA31B1P  | ENSG00000231649 | 0.66427  | 0.25326 | 0.25326     | 0.033272    | 0.48673 | -0.2726   |         |
|             | 0.60742         | 0.89412  | 0.18563 | 0.18563     | 0.623233703 |         |           |         |
| NA          | ENSG00000226849 | -0.86351 | 0.80607 | 0.80607     | 0.8941      | 0.18564 | -0.86351  | 0.80607 |
|             | -0.86351        | 0.80607  | 0.18564 | 0.623233703 |             |         |           |         |
| C1DP4       | ENSG00000227515 | 0.89399  | 0.18566 | 0.18566     | 0.89399     | 0.18566 | 0.89399   | 0.18566 |
|             | 0.89399         | 0.18566  | 0.18566 | 0.623257909 |             |         |           |         |
| TAS2R9      | ENSG00000121381 | -1.0155  | 0.84507 | 0.84507     | -0.22773    | 0.59007 | 0.8938    |         |
|             | 0.18571         | 0.8938   | 0.18571 | 0.18571     | 0.623339875 |         |           |         |
| RNU6ATAC40P | ENSG00000221507 | 0.89382  | 0.18571 | 0.18571     | 0.89382     | 0.18571 | 0.89382   |         |
|             | 0.18571         | 0.89382  | 0.18571 | 0.18571     | 0.623339875 |         |           |         |
| RNU1-78P    | ENSG00000212550 | -0.57981 | 0.71898 | 0.71898     | 0.53799     | 0.29529 | 0.89358   |         |
|             | 0.18577         | -0.38101 | 0.6484  | 0.18577     | 0.623359281 |         |           |         |
| NA          | ENSG00000276097 | 0.89355  | 0.18578 | 0.18578     | 0.89355     | 0.18578 | 0.89355   | 0.18578 |
|             | 0.89355         | 0.18578  | 0.18578 | 0.623359281 |             |         |           |         |
| RABGAP1L    | ENSG00000152061 | 0.89347  | 0.1858  | 0.1858      | 0.86042     | 0.19478 | 0.69478   |         |
|             | 0.2436          | 0.85923  | 0.19511 | 0.1858      | 0.623359281 |         |           |         |
| NA          | ENSG00000199273 | 0.89345  | 0.18581 | 0.18581     | 0.89345     | 0.18581 | 0.89345   | 0.18581 |
|             | 0.89345         | 0.18581  | 0.18581 | 0.623359281 |             |         |           |         |
| VN1R85P     | ENSG00000269345 | -1.7777  | 0.96227 | 0.96227     | -0.95296    | 0.8297  | -1.0585   |         |
|             | 0.85509         | 0.89323  | 0.18587 | 0.18587     | 0.623359281 |         |           |         |
| NA          | ENSG00000226396 | -1.0921  | 0.86261 | 0.86261     | 0.89319     | 0.18588 | -0.092226 | 0.53674 |
|             | -0.15578        | 0.5619   | 0.18588 | 0.623359281 |             |         |           |         |
| NA          | ENSG00000249309 | 0.89316  | 0.18589 | 0.18589     | 0.89316     | 0.18589 | 0.89316   | 0.18589 |
|             | 0.89316         | 0.18589  | 0.18589 | 0.623359281 |             |         |           |         |
| NA          | ENSG00000261710 | -0.40021 | 0.6555  | 0.6555      | -0.90947    | 0.81845 | 0.89312   | 0.1859  |
|             | -0.41953        | 0.66259  | 0.1859  | 0.623359281 |             |         |           |         |
| BCL2L2      | ENSG00000129473 | 0.68178  | 0.24769 | 0.24769     | 0.89306     | 0.18591 | 0.46093   |         |
|             | 0.32242         | 0.20962  | 0.41698 | 0.18591     | 0.623359281 |         |           |         |
| OR14K1      | ENSG00000153230 | -0.91269 | 0.8193  | 0.8193      | -0.29495    | 0.61598 | 0.89308   |         |
|             | 0.18591         | 0.15033  | 0.44025 | 0.18591     | 0.623359281 |         |           |         |
| METAP1      | ENSG00000164024 | -1.392   | 0.91803 | 0.91803     | -0.71282    | 0.76202 | -1.1072   |         |
|             | 0.86589         | 0.89305  | 0.18591 | 0.18591     | 0.623359281 |         |           |         |
| NR4A2       | ENSG00000153234 | 0.37473  | 0.35393 | 0.35393     | 0.84768     | 0.19831 | 0.89305   | 0.18592 |
|             | 0.43159         | 0.33302  | 0.18592 | 0.623359281 |             |         |           |         |
| RNU6-765P   | ENSG00000252725 | 0.40092  | 0.34424 | 0.34424     | 0.89299     | 0.18593 | 0.40092   |         |
|             | 0.34424         | -0.29284 | 0.61518 | 0.18593     | 0.623359281 |         |           |         |
| NA          | ENSG00000251445 | 0.89296  | 0.18594 | 0.18594     | 0.89296     | 0.18594 | 0.89296   | 0.18594 |
|             | 0.89296         | 0.18594  | 0.18594 | 0.623359281 |             |         |           |         |
| FOXJ2       | ENSG00000065970 | -0.4612  | 0.67767 | 0.67767     | 0.52301     | 0.30048 | 0.7493    | 0.22684 |
|             | 0.89289         | 0.18596  | 0.18596 | 0.623359281 |             |         |           |         |
| ASB5        | ENSG00000164122 | -1.4093  | 0.92062 | 0.92062     | -1.4093     | 0.92062 | -0.34428  | 0.63468 |
|             | 0.89289         | 0.18596  | 0.18596 | 0.623359281 |             |         |           |         |
| NA          | ENSG00000253841 | 0.89285  | 0.18597 | 0.18597     | 0.89285     | 0.18597 | 0.89285   | 0.18597 |
|             | 0.89285         | 0.18597  | 0.18597 | 0.623359281 |             |         |           |         |
| NA          | ENSG00000270688 | 0.89282  | 0.18598 | 0.18598     | 0.89282     | 0.18598 | 0.89282   | 0.18598 |
|             | 0.89282         | 0.18598  | 0.18598 | 0.623359281 |             |         |           |         |
| CCDC168     | ENSG00000175820 | 0.56559  | 0.28584 | 0.28584     | 0.89278     | 0.18599 | 0.89278   |         |
|             | 0.18599         | 0.89278  | 0.18599 | 0.18599     | 0.623359281 |         |           |         |
| LINC02363   | ENSG00000180712 | 0.11712  | 0.45338 | 0.45338     | -0.60305    | 0.72676 | -0.27438  |         |

|           |                 |           |         |             |             |          |         |  |
|-----------|-----------------|-----------|---------|-------------|-------------|----------|---------|--|
|           | 0.6081          | 0.89279   | 0.18599 | 0.18599     | 0.623359281 |          |         |  |
| ZNF717    | ENSG00000227124 | 0.89277   | 0.18599 | -0.37545    | 0.64634     | 0.42325  |         |  |
|           | 0.33606         | -0.56196  | 0.71293 | 0.18599     | 0.623359281 |          |         |  |
| PDHX      | ENSG00000110435 | -0.057534 | 0.52294 | -1.1772     | 0.88044     | 0.89268  | 0.18601 |  |
|           | 0.014245        | 0.49432   | 0.18601 | 0.623359281 |             |          |         |  |
| NA        | ENSG00000271936 | 0.89271   | 0.18601 | 0.89271     | 0.18601     | 0.89271  | 0.18601 |  |
|           | 0.89271         | 0.18601   | 0.18601 | 0.623359281 |             |          |         |  |
| PCCA      | ENSG00000175198 | 0.013653  | 0.49455 | 0.89251     | 0.18606     | 0.77542  | 0.21905 |  |
|           | 0.26891         | 0.394     | 0.18606 | 0.623431731 |             |          |         |  |
| NA        | ENSG00000206990 | 0.89251   | 0.18606 | 0.89251     | 0.18606     | 0.89251  | 0.18606 |  |
|           | 0.89251         | 0.18606   | 0.18606 | 0.623431731 |             |          |         |  |
| NA        | ENSG00000228033 | -0.3678   | 0.64349 | 0.89248     | 0.18607     | 0.59685  | 0.2753  |  |
|           | 0.59685         | 0.2753    | 0.18607 | 0.623431731 |             |          |         |  |
| NA        | ENSG00000238323 | 0.89227   | 0.18612 | 0.27267     | 0.39255     | -0.64051 | 0.73908 |  |
|           | 0.69436         | 0.24373   | 0.18612 | 0.62349084  |             |          |         |  |
| IGF1      | ENSG00000017427 | 0.89213   | 0.18616 | 0.49786     | 0.30929     | 0.21479  | 0.41496 |  |
|           | 0.53402         | 0.29666   | 0.18616 | 0.62349084  |             |          |         |  |
| NA        | ENSG00000213963 | 0.37231   | 0.35483 | 0.68522     | 0.2466      | 0.7618   | 0.22309 |  |
|           | 0.89214         | 0.18616   | 0.18616 | 0.62349084  |             |          |         |  |
| SKP2      | ENSG00000145604 | 0.89209   | 0.18617 | -0.53808    | 0.70474     | -0.36671 | 0.64308 |  |
|           | 0.36294         | 0.35833   | 0.18617 | 0.62349084  |             |          |         |  |
| LINC01629 | ENSG00000258602 | 0.89204   | 0.18618 | 0.63423     | 0.26297     | 0.49966  |         |  |
|           | 0.30866         | -1.845    | 0.96748 | 0.18618     | 0.62349084  |          |         |  |
| H3C8      | ENSG00000273983 | 0.89206   | 0.18618 | 0.037039    | 0.48523     | -0.31566 | 0.62387 |  |
|           | 0.18889         | 0.42509   | 0.18618 | 0.62349084  |             |          |         |  |
| CALM2     | ENSG00000143933 | -0.40423  | 0.65698 | -0.93156    | 0.82422     | 0.89202  | 0.18619 |  |
|           | -0.9479         | 0.82841   | 0.18619 | 0.62349084  |             |          |         |  |
| CELP      | ENSG00000170827 | -0.91     | 0.81859 | -0.32754    | 0.62837     | 0.89204  | 0.18619 |  |
|           | 0.10796         | 0.45701   | 0.18619 | 0.62349084  |             |          |         |  |
| RCC2P8    | ENSG00000250185 | -0.085768 | 0.53417 | 0.89183     | 0.18624     | 0.53513  |         |  |
|           | 0.29628         | -0.97143  | 0.83433 | 0.18624     | 0.623577962 |          |         |  |
| NA        | ENSG00000256975 | -0.72341  | 0.76529 | 0.89179     | 0.18625     | 0.61089  | 0.27064 |  |
|           | 0.2987          | 0.38258   | 0.18625 | 0.623577962 |             |          |         |  |
| GABRB1    | ENSG00000163288 | 0.14233   | 0.44341 | -0.12817    | 0.55099     | 0.89174  |         |  |
|           | 0.18627         | 0.43873   | 0.33043 | 0.18627     | 0.623577962 |          |         |  |
| MAP3K11   | ENSG00000173327 | -0.65785  | 0.74468 | 0.030998    | 0.48764     | 0.89173  |         |  |
|           | 0.18627         | -0.97047  | 0.83409 | 0.18627     | 0.623577962 |          |         |  |
| HIF1AN    | ENSG00000166135 | 0.13867   | 0.44485 | -0.098396   | 0.53919     | 0.20682  |         |  |
|           | 0.41807         | 0.8917    | 0.18628 | 0.18628     | 0.623577962 |          |         |  |
| NA        | ENSG00000253623 | -0.97562  | 0.83537 | -0.50223    | 0.69225     | -0.50223 | 0.69225 |  |
|           | 0.89161         | 0.1863    | 0.1863  | 0.623602074 |             |          |         |  |
| CCDC162P  | ENSG00000203799 | 0.036957  | 0.48526 | 0.010884    | 0.49566     | 0.15274  |         |  |
|           | 0.4393          | 0.89143   | 0.18635 | 0.18635     | 0.623726595 |          |         |  |
| DCN       | ENSG00000011465 | 0.89125   | 0.1864  | 0.89125     | 0.1864      | 0.89125  | 0.1864  |  |
|           | 0.49428         | 0.31055   | 0.1864  | 0.623841721 |             |          |         |  |
| LINC02244 | ENSG00000259590 | 0.8912    | 0.18641 | 0.8912      | 0.18641     | 0.8912   |         |  |
|           | 0.18641         | 0.8912    | 0.18641 | 0.18641     | 0.623841721 |          |         |  |
| LINC02878 | ENSG00000181097 | 0.89113   | 0.18643 | 0.77902     | 0.21798     | 0.89113  |         |  |
|           | 0.18643         | 0.67301   | 0.25047 | 0.18643     | 0.623865808 |          |         |  |
| WDPCP     | ENSG00000143951 | 0.89096   | 0.18647 | 0.23557     | 0.40688     | 0.5692   | 0.28461 |  |
|           | 0.66071         | 0.2544    | 0.18647 | 0.623885838 |             |          |         |  |
| F5        | ENSG00000198734 | 0.26123   | 0.39696 | 0.89094     | 0.18648     | 0.82642  | 0.20428 |  |
|           | 0.14868         | 0.4409    | 0.18648 | 0.623885838 |             |          |         |  |
| MEPE      | ENSG00000152595 | 0.75487   | 0.22516 | 0.89092     | 0.18649     | 0.48604  | 0.31347 |  |
|           | 0.048002        | 0.48086   | 0.18649 | 0.623885838 |             |          |         |  |
| ARRDC5    | ENSG00000205784 | 0.4918    | 0.31143 | 0.4918      | 0.31143     | -0.74498 |         |  |
|           | 0.77186         | 0.89086   | 0.1865  | 0.1865      | 0.623885838 |          |         |  |
| NA        | ENSG00000220447 | 0.89086   | 0.1865  | 0.89086     | 0.1865      | 0.89086  | 0.1865  |  |
|           | 0.89086         | 0.1865    | 0.1865  | 0.623885838 |             |          |         |  |
| NA        | ENSG00000229985 | 0.77674   | 0.21866 | 0.50528     | 0.30668     | 0.89079  | 0.18652 |  |
|           | 0.2627          | 0.39639   | 0.18652 | 0.623909912 |             |          |         |  |
| NA        | ENSG00000269458 | -0.07543  | 0.53006 | 0.89073     | 0.18654     | -0.69231 | 0.75563 |  |

|           |                 |           |         |             |             |           |         |  |
|-----------|-----------------|-----------|---------|-------------|-------------|-----------|---------|--|
|           | -0.26351        | 0.60392   | 0.18654 | 0.623933983 |             |           |         |  |
| AGTPBP1   | ENSG00000135049 | 0.89064   | 0.18656 | -0.3863     | 0.65036     | -0.24645  |         |  |
|           | 0.59733         | 0.14231   | 0.44342 | 0.18656     | 0.623958051 |           |         |  |
| NA        | ENSG00000279588 | 0.52365   | 0.30026 | 0.47512     | 0.31735     | -0.4678   | 0.68004 |  |
|           | 0.89054         | 0.18659   | 0.18659 | 0.623992715 |             |           |         |  |
| LINC00342 | ENSG00000232931 | 0.42054   | 0.33704 | 0.89042     | 0.18662     | 0.33286   |         |  |
|           | 0.36962         | -0.50852  | 0.69446 | 0.18662     | 0.623992715 |           |         |  |
| BCYRN1    | ENSG00000236824 | 0.89038   | 0.18663 | 0.89038     | 0.18663     | 0.89038   |         |  |
|           | 0.18663         | 0.89038   | 0.18663 | 0.18663     | 0.623992715 |           |         |  |
| NA        | ENSG00000227606 | -0.64975  | 0.74207 | -0.12426    | 0.54944     | -0.15031  | 0.55974 |  |
|           | 0.89034         | 0.18664   | 0.18664 | 0.623992715 |             |           |         |  |
| NA        | ENSG00000237101 | 0.89033   | 0.18664 | 0.89033     | 0.18664     | 0.89033   | 0.18664 |  |
|           | 0.89033         | 0.18664   | 0.18664 | 0.623992715 |             |           |         |  |
| NA        | ENSG00000258399 | 0.89031   | 0.18665 | 0.89031     | 0.18665     | 0.89031   | 0.18665 |  |
|           | 0.89031         | 0.18665   | 0.18665 | 0.623992715 |             |           |         |  |
| MIR141    | ENSG00000207708 | 0.89028   | 0.18666 | 0.89028     | 0.18666     | 0.89028   |         |  |
|           | 0.18666         | 0.89028   | 0.18666 | 0.18666     | 0.623992715 |           |         |  |
| RPA1      | ENSG00000132383 | -1.0133   | 0.84453 | -1.0133     | 0.84453     | 0.099082  | 0.46054 |  |
|           | 0.89015         | 0.18669   | 0.18669 | 0.624027345 |             |           |         |  |
| BMP10     | ENSG00000163217 | 0.89008   | 0.18671 | -1.1424     | 0.87336     | -1.1424   | 0.87336 |  |
|           | -1.1424         | 0.87336   | 0.18671 | 0.624027345 |             |           |         |  |
| NA        | ENSG00000261215 | 0.89003   | 0.18672 | 0.89003     | 0.18672     | 0.89003   | 0.18672 |  |
|           | 0.89003         | 0.18672   | 0.18672 | 0.624027345 |             |           |         |  |
| GDF10     | ENSG00000266524 | 0.16744   | 0.43351 | 0.41146     | 0.34037     | 0.89001   | 0.18673 |  |
|           | 0.40819         | 0.34157   | 0.18673 | 0.624027345 |             |           |         |  |
| LINC01090 | ENSG00000231689 | 0.52484   | 0.29985 | 0.88998     | 0.18674     | -1.2211   |         |  |
|           | 0.88899         | 0.72584   | 0.23397 | 0.18674     | 0.624027345 |           |         |  |
| EDNRB     | ENSG00000136160 | 0.32252   | 0.37353 | 0.88991     | 0.18676     | 0.88991   | 0.18676 |  |
|           | 0.88991         | 0.18676   | 0.18676 | 0.624027345 |             |           |         |  |
| NA        | ENSG00000283973 | 0.88989   | 0.18676 | 0.88989     | 0.18676     | 0.88989   | 0.18676 |  |
|           | 0.88989         | 0.18676   | 0.18676 | 0.624027345 |             |           |         |  |
| ARPP19P2  | ENSG00000204637 | 0.8895    | 0.18687 | 0.8895      | 0.18687     | -0.37119  |         |  |
|           | 0.64475         | -0.091305 | 0.53637 | 0.18687     | 0.624352081 |           |         |  |
| NA        | ENSG00000258887 | 0.50222   | 0.30775 | 0.88942     | 0.18689     | -0.096209 | 0.53832 |  |
|           | 0.095653        | 0.4619    | 0.18689 | 0.624376094 |             |           |         |  |
| SELENOWP1 | ENSG00000215900 | 0.28043   | 0.38957 | 0.28043     | 0.38957     | 0.88922   |         |  |
|           | 0.18694         | 0.28079   | 0.38944 | 0.18694     | 0.624448112 |           |         |  |
| RBM7P1    | ENSG00000223427 | 0.88922   | 0.18694 | 0.88922     | 0.18694     | 0.88922   |         |  |
|           | 0.18694         | -0.72776  | 0.76662 | 0.18694     | 0.624448112 |           |         |  |
| RPS5P2    | ENSG00000224598 | 0.88919   | 0.18695 | 0.88919     | 0.18695     | 0.88919   |         |  |
|           | 0.18695         | 0.88919   | 0.18695 | 0.18695     | 0.624448112 |           |         |  |
| DHRS9     | ENSG00000073737 | 0.64056   | 0.26091 | 0.88911     | 0.18697     | 0.88911   | 0.18697 |  |
|           | 0.88911         | 0.18697   | 0.18697 | 0.624472111 |             |           |         |  |
| CTU2      | ENSG00000174177 | -0.30985  | 0.62166 | 0.88893     | 0.18702     | -0.30985  | 0.62166 |  |
|           | -0.30985        | 0.62166   | 0.18702 | 0.624549267 |             |           |         |  |
| RPL23AP57 | ENSG00000206147 | 0.88894   | 0.18702 | 0.88894     | 0.18702     | 0.88894   |         |  |
|           | 0.18702         | 0.88894   | 0.18702 | 0.18702     | 0.624549267 |           |         |  |
| RASEF     | ENSG00000165105 | -1.0369   | 0.85012 | -0.92518    | 0.82256     | 0.88886   | 0.18704 |  |
|           | -0.36643        | 0.64298   | 0.18704 | 0.624549267 |             |           |         |  |
| REER-AS1  | ENSG00000232912 | -0.19322  | 0.57661 | 0.66383     | 0.2534      | 0.88877   |         |  |
|           | 0.18706         | 0.82131   | 0.20573 | 0.18706     | 0.624549267 |           |         |  |
| NA        | ENSG00000264334 | -0.72804  | 0.7667  | -0.72804    | 0.7667      | 0.88877   | 0.18706 |  |
|           | -0.72804        | 0.7667    | 0.18706 | 0.624549267 |             |           |         |  |
| COX5BP8   | ENSG00000223794 | 0.88875   | 0.18707 | 0.88875     | 0.18707     | 0.88875   |         |  |
|           | 0.18707         | 0.88875   | 0.18707 | 0.18707     | 0.624549267 |           |         |  |
| MIR541    | ENSG00000216179 | 0.88858   | 0.18711 | 0.88858     | 0.18711     | 0.88858   |         |  |
|           | 0.18711         | 0.88858   | 0.18711 | 0.18711     | 0.624640015 |           |         |  |
| NSD1      | ENSG00000165671 | 0.686     | 0.24636 | 0.57939     | 0.28116     | 0.57199   | 0.28367 |  |
|           | 0.88838         | 0.18717   | 0.18717 | 0.624778678 |             |           |         |  |
| CD34      | ENSG00000174059 | 0.88835   | 0.18718 | 0.49865     | 0.30901     | 0.72565   | 0.23403 |  |
|           | 0.31173         | 0.37762   | 0.18718 | 0.624778678 |             |           |         |  |
| GUSBP12   | ENSG00000169325 | 0.76279   | 0.2228  | 0.88829     | 0.18719     | -0.11148  |         |  |

|               |                 |           |         |             |             |           |         |
|---------------|-----------------|-----------|---------|-------------|-------------|-----------|---------|
|               | 0.54438         | -0.068276 | 0.52722 | 0.18719     | 0.624778678 |           |         |
| CSNKA2IP      | ENSG00000283434 | -0.064056 | 0.52554 | 0.88818     | 0.18722     | 0.18819   |         |
|               | 0.42536         | -0.9513   | 0.82927 | 0.18722     | 0.624784641 |           |         |
| NA            | ENSG00000181514 | -0.44936  | 0.67341 | 0.34437     | 0.36528     | 0.12557   | 0.45003 |
|               | 0.88815         | 0.18723   | 0.18723 | 0.624784641 |             |           |         |
| NA            | ENSG00000262362 | 0.53221   | 0.29729 | 0.53221     | 0.29729     | 0.53221   | 0.29729 |
|               | 0.88799         | 0.18727   | 0.18727 | 0.624784641 |             |           |         |
| EDDM13        | ENSG00000267710 | 0.88799   | 0.18727 | 0.88799     | 0.18727     | 0.88799   |         |
|               | 0.18727         | 0.88799   | 0.18727 | 0.18727     | 0.624784641 |           |         |
| NA            | ENSG00000212371 | 0.88795   | 0.18728 | 0.88795     | 0.18728     | 0.88795   | 0.18728 |
|               | 0.88795         | 0.18728   | 0.18728 | 0.624784641 |             |           |         |
| RNU6-539P     | ENSG00000252474 | 0.88798   | 0.18728 | 0.88798     | 0.18728     | 0.88798   |         |
|               | 0.18728         | 0.88798   | 0.18728 | 0.18728     | 0.624784641 |           |         |
| GLYATL3       | ENSG00000203972 | -0.98515  | 0.83773 | 0.14438     | 0.4426      | 0.88791   |         |
|               | 0.1873          | -0.16563  | 0.56578 | 0.1873      | 0.624784641 |           |         |
| APOBEC3A      | ENSG00000128383 | -1.0683   | 0.8573  | 0.015229    | 0.49392     | -1.2026   |         |
|               | 0.88543         | 0.88784   | 0.18731 | 0.18731     | 0.624784641 |           |         |
| NA            | ENSG00000199713 | -1.7227   | 0.95753 | -1.7227     | 0.95753     | 0.88787   | 0.18731 |
|               | -0.51254        | 0.69586   | 0.18731 | 0.624784641 |             |           |         |
| KCNE1         | ENSG00000180509 | -0.7842   | 0.78354 | 0.063096    | 0.47485     | 0.88783   | 0.18732 |
|               | -0.23912        | 0.59449   | 0.18732 | 0.624784641 |             |           |         |
| NA            | ENSG00000229986 | 0.69862   | 0.2424  | 0.69862     | 0.2424      | 0.4545    | 0.32473 |
|               | 0.88775         | 0.18734   | 0.18734 | 0.624799172 |             |           |         |
| RNA5SP26      | ENSG00000199276 | -0.010093 | 0.50403 | 0.15505     | 0.43839     | 0.88769   |         |
|               | 0.18735         | 0.52755   | 0.2989  | 0.18735     | 0.624799172 |           |         |
| OR5E1P        | ENSG00000170688 | 0.88764   | 0.18737 | 0.88764     | 0.18737     | 0.046609  |         |
|               | 0.48141         | 0.88764   | 0.18737 | 0.18737     | 0.624813699 |           |         |
| NA            | ENSG00000227270 | 0.88759   | 0.18738 | -1.309      | 0.90473     | -0.94123  | 0.82671 |
|               | -0.30898        | 0.62133   | 0.18738 | 0.624813699 |             |           |         |
| NA            | ENSG00000225000 | 0.74447   | 0.2283  | 0.74447     | 0.2283      | 0.88751   | 0.1874  |
|               | -0.19738        | 0.57823   | 0.1874  | 0.624828222 |             |           |         |
| SCD5          | ENSG00000145284 | 0.88748   | 0.18741 | 0.72578     | 0.23399     | -0.057538 | 0.52294 |
|               | -0.69817        | 0.75747   | 0.18741 | 0.624828222 |             |           |         |
| RBM33         | ENSG00000184863 | 0.47594   | 0.31706 | 0.56408     | 0.28635     | 0.7536    | 0.22554 |
|               | 0.88725         | 0.18747   | 0.18747 | 0.624924687 |             |           |         |
| NA            | ENSG00000252891 | 0.88722   | 0.18748 | 0.88722     | 0.18748     | 0.88722   | 0.18748 |
|               | 0.88722         | 0.18748   | 0.18748 | 0.624924687 |             |           |         |
| MIR655        | ENSG00000207646 | 0.88709   | 0.18751 | 0.88709     | 0.18751     | 0.88709   |         |
|               | 0.18751         | 0.88709   | 0.18751 | 0.18751     | 0.624924687 |           |         |
| NA            | ENSG00000214215 | 0.88709   | 0.18752 | 0.88709     | 0.18752     | 0.88709   | 0.18752 |
|               | 0.79256         | 0.21402   | 0.18752 | 0.624924687 |             |           |         |
| COX6B1P6      | ENSG00000253349 | 0.4788    | 0.31604 | 0.4788      | 0.31604     | 0.4788    |         |
|               | 0.31604         | 0.88703   | 0.18753 | 0.18753     | 0.624924687 |           |         |
| RNA5SP41      | ENSG00000222952 | 0.88697   | 0.18755 | 0.88697     | 0.18755     | 0.88697   |         |
|               | 0.18755         | 0.88697   | 0.18755 | 0.18755     | 0.624924687 |           |         |
| LINC02853     | ENSG00000259245 | 0.88692   | 0.18756 | 0.54808     | 0.29182     | 0.88692   |         |
|               | 0.18756         | 0.88692   | 0.18756 | 0.18756     | 0.624924687 |           |         |
| RNU6-1134P    | ENSG00000202026 | 0.32636   | 0.37207 | 0.32636     | 0.37207     | 0.32636   |         |
|               | 0.37207         | 0.88687   | 0.18757 | 0.18757     | 0.624924687 |           |         |
| FGF4          | ENSG00000075388 | 0.673     | 0.25047 | 0.88685     | 0.18758     | 0.39549   |         |
|               | 0.49808         | 0.30921   | 0.18758 | 0.624924687 |             |           |         |
| EMSY          | ENSG00000158636 | -0.17542  | 0.56963 | 0.3911      | 0.34786     | 0.88684   | 0.18758 |
|               | -0.1947         | 0.57719   | 0.18758 | 0.624924687 |             |           |         |
| NA            | ENSG00000223530 | 0.88685   | 0.18758 | 0.88685     | 0.18758     | 0.88685   | 0.18758 |
|               | 0.88685         | 0.18758   | 0.18758 | 0.624924687 |             |           |         |
| RN7SL277P     | ENSG00000240490 | 0.88668   | 0.18763 | 0.88668     | 0.18763     | 0.88668   |         |
|               | 0.18763         | 0.88668   | 0.18763 | 0.18763     | 0.625005804 |           |         |
| TNFRSF10A-AS1 | ENSG00000253930 | 0.88665   | 0.18763 | 0.88665     | 0.18763     | 0.88665   |         |
|               | 0.18763         | 0.88665   | 0.18763 | 0.18763     | 0.625005804 |           |         |
| RPL23AP41     | ENSG00000224085 | -1.6657   | 0.95211 | 0.8324      | 0.20259     | 0.88638   |         |
|               | 0.18771         | 0.67647   | 0.24937 | 0.18771     | 0.625191848 |           |         |
| NA            | ENSG00000280241 | 0.88631   | 0.18772 | 0.12162     | 0.4516      | 0.13653   | 0.4457  |



|             |                 |          |         |             |             |           |         |  |
|-------------|-----------------|----------|---------|-------------|-------------|-----------|---------|--|
|             | 0.13653         | 0.4457   | 0.18772 | 0.625191848 |             |           |         |  |
| ZNF587      | ENSG00000198466 | 0.88626  | 0.18774 | 0.88626     | 0.18774     | 0.1571    |         |  |
|             | 0.43758         | 0.79817  | 0.21239 | 0.18774     | 0.625191848 |           |         |  |
| GNL1        | ENSG00000204590 | -0.33284 | 0.63037 | -0.52143    | 0.69897     | -0.2385   | 0.59425 |  |
|             | 0.88622         | 0.18775  | 0.18775 | 0.625191848 |             |           |         |  |
| NA          | ENSG00000272175 | 0.88622  | 0.18775 | 0.88622     | 0.18775     | 0.88622   | 0.18775 |  |
|             | 0.88622         | 0.18775  | 0.18775 | 0.625191848 |             |           |         |  |
| LINC01880   | ENSG00000232002 | -0.16289 | 0.5647  | 0.88616     | 0.18777     | -0.16289  |         |  |
|             | 0.5647          | -0.16289 | 0.5647  | 0.18777     | 0.625215723 |           |         |  |
| PIK3C2A     | ENSG00000011405 | 0.16688  | 0.43373 | -0.11826    | 0.54707     | -0.11826  |         |  |
|             | 0.54707         | 0.88592  | 0.18783 | 0.18783     | 0.625368333 |           |         |  |
| MBOAT1      | ENSG00000172197 | -0.79953 | 0.78801 | -0.79953    | 0.78801     | 0.88585   |         |  |
|             | 0.18785         | -0.86655 | 0.80691 | 0.18785     | 0.625368333 |           |         |  |
| FAM184B     | ENSG00000047662 | 0.88576  | 0.18787 | 0.21276     | 0.41576     | -0.95579  |         |  |
|             | 0.83041         | 0.22718  | 0.41014 | 0.18787     | 0.625368333 |           |         |  |
| DEUP1       | ENSG00000165325 | 0.51714  | 0.30253 | 0.11419     | 0.45454     | 0.88576   | 0.18787 |  |
|             | 0.31047         | 0.3781   | 0.18787 | 0.625368333 |             |           |         |  |
| CGB1        | ENSG00000267631 | 0.88574  | 0.18788 | 0.88574     | 0.18788     | 0.88574   | 0.18788 |  |
|             | 0.88574         | 0.18788  | 0.18788 | 0.625368333 |             |           |         |  |
| HSD3B1      | ENSG00000203857 | -1.6798  | 0.9535  | 0.3165      | 0.37581     | 0.8855    |         |  |
|             | 0.18794         | 0.8855   | 0.18794 | 0.18794     | 0.625525319 |           |         |  |
| SEPSECS-AS1 | ENSG00000281501 | 0.88536  | 0.18798 | 0.69447     | 0.24369     | 0.69447   |         |  |
|             | 0.24369         | 0.69447  | 0.24369 | 0.18798     | 0.625606276 |           |         |  |
| TICRR       | ENSG00000140534 | 0.88533  | 0.18799 | 0.44909     | 0.32668     | -0.040335 | 0.51609 |  |
|             | -0.20949        | 0.58297  | 0.18799 | 0.625606276 |             |           |         |  |
| CHST4       | ENSG00000140835 | 0.88526  | 0.18801 | 0.88526     | 0.18801     | -0.32365  | 0.6269  |  |
|             | 0.38635         | 0.34962  | 0.18801 | 0.625630108 |             |           |         |  |
| UPP2-IT1    | ENSG00000237327 | 0.88517  | 0.18803 | 0.81435     | 0.20772     | 0.81435   |         |  |
|             | 0.20772         | 0.81435  | 0.20772 | 0.18803     | 0.625653936 |           |         |  |
| CDH26       | ENSG00000124215 | -1.0047  | 0.84248 | 0.85342     | 0.19671     | 0.6471    | 0.25878 |  |
|             | 0.885           | 0.18808  | 0.18808 | 0.625763579 |             |           |         |  |
| MIR574      | ENSG00000207944 | 0.88486  | 0.18812 | 0.88486     | 0.18812     | 0.88486   |         |  |
|             | 0.18812         | 0.88486  | 0.18812 | 0.18812     | 0.625763579 |           |         |  |
| NA          | ENSG00000225177 | 0.88485  | 0.18812 | 0.88485     | 0.18812     | 0.88485   | 0.18812 |  |
|             | 0.61579         | 0.26902  | 0.18812 | 0.625763579 |             |           |         |  |
| TRDC        | ENSG00000211829 | 0.056828 | 0.47734 | 0.056828    | 0.47734     | -0.62707  | 0.73469 |  |
|             | 0.88481         | 0.18813  | 0.18813 | 0.625763579 |             |           |         |  |
| NA          | ENSG00000251987 | 0.8848   | 0.18813 | 0.47464     | 0.31752     | -0.39294  | 0.65282 |  |
|             | 0.47464         | 0.31752  | 0.18813 | 0.625763579 |             |           |         |  |
| NA          | ENSG00000237901 | 0.88476  | 0.18814 | -0.25805    | 0.60182     | 0.88476   | 0.18814 |  |
|             | 0.88476         | 0.18814  | 0.18814 | 0.625763579 |             |           |         |  |
| NA          | ENSG00000248870 | -1.0094  | 0.84361 | 0.65969     | 0.25473     | 0.88468   | 0.18816 |  |
|             | 0.81614         | 0.20721  | 0.18816 | 0.625787387 |             |           |         |  |
| EIF4A2P2    | ENSG00000227382 | -0.50887 | 0.69458 | 0.88463     | 0.18818     | -0.50887  |         |  |
|             | 0.69458         | -0.50887 | 0.69458 | 0.18818     | 0.625792289 |           |         |  |
| RRAGD       | ENSG00000025039 | 0.10366  | 0.45872 | 0.88454     | 0.1882      | 0.19709   | 0.42188 |  |
|             | 0.7381          | 0.23023  | 0.1882  | 0.625792289 |             |           |         |  |
| NA          | ENSG00000279172 | 0.88455  | 0.1882  | 0.88455     | 0.1882      | 0.88455   | 0.1882  |  |
|             | 0.88455         | 0.1882   | 0.1882  | 0.625792289 |             |           |         |  |
| LINC01493   | ENSG00000254562 | -0.17866 | 0.5709  | -0.50104    | 0.69183     | 0.78935   |         |  |
|             | 0.21495         | 0.88429  | 0.18827 | 0.18827     | 0.625982335 |           |         |  |
| TLX2        | ENSG00000115297 | 0.88401  | 0.18835 | 0.66688     | 0.25242     | 0.88401   | 0.18835 |  |
|             | 0.88401         | 0.18835  | 0.18835 | 0.626205601 |             |           |         |  |
| PARP11-AS1  | ENSG00000256862 | -2.6545  | 0.99603 | 0.29324     | 0.38467     | 0.88385   |         |  |
|             | 0.18839         | -0.86698 | 0.80702 | 0.18839     | 0.626286493 |           |         |  |
| HCRTR2      | ENSG00000137252 | -0.29192 | 0.61482 | -0.82073    | 0.7941      | -1.4199   |         |  |
|             | 0.92218         | 0.88374  | 0.18842 | 0.18842     | 0.626286493 |           |         |  |
| KIRREL3-AS1 | ENSG00000257271 | 0.71895  | 0.23609 | -0.31308    | 0.62289     | 0.88375   |         |  |
|             | 0.18842         | -0.84062 | 0.79972 | 0.18842     | 0.626286493 |           |         |  |
| NA          | ENSG00000248103 | -1.3244  | 0.90731 | -0.24096    | 0.59521     | -1.3244   | 0.90731 |  |
|             | 0.8837          | 0.18843  | 0.18843 | 0.626286493 |             |           |         |  |
| NA          | ENSG00000225612 | 0.024849 | 0.49009 | 0.024849    | 0.49009     | 0.88366   | 0.18844 |  |

|            |                 |           |         |             |             |          |         |  |
|------------|-----------------|-----------|---------|-------------|-------------|----------|---------|--|
|            | -0.083004       | 0.53308   | 0.18844 | 0.626286493 |             |          |         |  |
| C9orf163   | ENSG00000196366 | 0.55024   | 0.29108 | 0.828       | 0.20384     | 0.88356  | 0.18847 |  |
|            | 0.88356         | 0.18847   | 0.18847 | 0.626286493 |             |          |         |  |
| TPBG       | ENSG00000146242 | 0.12024   | 0.45214 | 0.8835      | 0.18848     | -1.0332  | 0.84924 |  |
|            | 0.12024         | 0.45214   | 0.18848 | 0.626286493 |             |          |         |  |
| RUFY1      | ENSG00000176783 | -0.63134  | 0.73609 | 0.31619     | 0.37593     | 0.88348  | 0.18849 |  |
|            | 0.59954         | 0.27441   | 0.18849 | 0.626286493 |             |          |         |  |
| NA         | ENSG00000229305 | 0.88349   | 0.18849 | 0.81041     | 0.20885     | -0.17863 | 0.57088 |  |
|            | 0.24387         | 0.40367   | 0.18849 | 0.626286493 |             |          |         |  |
| CMC2       | ENSG00000103121 | 0.85149   | 0.19725 | 0.88338     | 0.18851     | 0.88338  | 0.18851 |  |
|            | 0.871           | 0.19188   | 0.18851 | 0.626305555 |             |          |         |  |
| RNU1-133P  | ENSG00000201737 | 0.88329   | 0.18854 | 0.73723     | 0.23049     | 0.88329  |         |  |
|            | 0.18854         | 0.88329   | 0.18854 | 0.18854     | 0.626305555 |          |         |  |
| MIR302C    | ENSG00000199102 | 0.88324   | 0.18855 | 0.88324     | 0.18855     | 0.88324  |         |  |
|            | 0.18855         | 0.88324   | 0.18855 | 0.18855     | 0.626305555 |          |         |  |
| MIR302A    | ENSG00000207927 | 0.88324   | 0.18855 | 0.88324     | 0.18855     | 0.88324  |         |  |
|            | 0.18855         | 0.88324   | 0.18855 | 0.18855     | 0.626305555 |          |         |  |
| NA         | ENSG00000276505 | 0.88323   | 0.18856 | 0.88323     | 0.18856     | 0.88323  | 0.18856 |  |
|            | 0.88323         | 0.18856   | 0.18856 | 0.626305555 |             |          |         |  |
| LINC01846  | ENSG00000248901 | 0.74159   | 0.22917 | 0.52489     | 0.29983     | 0.74753  |         |  |
|            | 0.22737         | 0.88291   | 0.18864 | 0.18864     | 0.626462177 |          |         |  |
| NA         | ENSG00000235782 | 0.26398   | 0.3959  | 0.8829      | 0.18865     | 0.8829   | 0.18865 |  |
|            | 0.8829          | 0.18865   | 0.18865 | 0.626462177 |             |          |         |  |
| LINC00437  | ENSG00000236354 | 0.35872   | 0.3599  | 0.75907     | 0.22391     | 0.85699  |         |  |
|            | 0.19573         | 0.88288   | 0.18865 | 0.18865     | 0.626462177 |          |         |  |
| PPIAP45    | ENSG00000258116 | 0.88277   | 0.18868 | 0.25072     | 0.40101     | 0.88277  |         |  |
|            | 0.18868         | 0.88277   | 0.18868 | 0.18868     | 0.626462177 |          |         |  |
| CCNB1IP1P1 | ENSG00000229815 | -0.033308 | 0.51329 | 0.8827      | 0.1887      | 0.1939   |         |  |
|            | 0.42313         | -0.38287  | 0.64909 | 0.1887      | 0.626462177 |          |         |  |
| NA         | ENSG00000267426 | 0.88271   | 0.1887  | 0.88271     | 0.1887      | 0.88271  | 0.1887  |  |
|            | 0.88271         | 0.1887    | 0.1887  | 0.626462177 |             |          |         |  |
| TBL3       | ENSG00000183751 | 0.15677   | 0.43771 | 0.88265     | 0.18871     | -0.15951 | 0.56337 |  |
|            | 0.16599         | 0.43408   | 0.18871 | 0.626462177 |             |          |         |  |
| BICRA-AS1  | ENSG00000269806 | 0.88267   | 0.18871 | 0.88267     | 0.18871     | 0.88267  |         |  |
|            | 0.18871         | 0.88267   | 0.18871 | 0.18871     | 0.626462177 |          |         |  |
| ALPK1      | ENSG00000073331 | 0.33753   | 0.36786 | 0.424       | 0.33578     | -0.33428 | 0.63091 |  |
|            | 0.8826          | 0.18873   | 0.18873 | 0.626485892 |             |          |         |  |
| TRMT112P7  | ENSG00000270275 | -0.69791  | 0.75738 | -0.69791    | 0.75738     | -0.69791 |         |  |
|            | 0.75738         | 0.88244   | 0.18877 | 0.18877     | 0.626533313 |          |         |  |
| NA         | ENSG00000280053 | -0.19911  | 0.57891 | 0.22816     | 0.40976     | -0.48896 | 0.68757 |  |
|            | 0.88243         | 0.18877   | 0.18877 | 0.626533313 |             |          |         |  |
| TMEM97P1   | ENSG00000234030 | 0.88224   | 0.18882 | 0.39473     | 0.34652     | -0.88756 |         |  |
|            | 0.81261         | -0.88756  | 0.81261 | 0.18882     | 0.626552259 |          |         |  |
| SAP18P1    | ENSG00000249777 | 0.88217   | 0.18884 | -0.88388    | 0.81162     | 0.34978  |         |  |
|            | 0.36325         | 0.34978   | 0.36325 | 0.18884     | 0.626552259 |          |         |  |
| MIR3150BHG | ENSG00000245080 | 0.88215   | 0.18885 | 0.88215     | 0.18885     | 0.88215  |         |  |
|            | 0.18885         | 0.88215   | 0.18885 | 0.18885     | 0.626552259 |          |         |  |
| NA         | ENSG00000263571 | 0.88207   | 0.18887 | 0.88207     | 0.18887     | 0.88207  | 0.18887 |  |
|            | 0.88207         | 0.18887   | 0.18887 | 0.626552259 |             |          |         |  |
| SNRPCP6    | ENSG00000254683 | 0.28662   | 0.3872  | 0.14618     | 0.44189     | 0.88201  |         |  |
|            | 0.18888         | -0.50115  | 0.69187 | 0.18888     | 0.626552259 |          |         |  |
| TTLL11-IT1 | ENSG00000237548 | 0.018453  | 0.49264 | 0.88199     | 0.18889     | 0.6482   |         |  |
|            | 0.25843         | -0.91679  | 0.82037 | 0.18889     | 0.626552259 |          |         |  |
| NA         | ENSG00000206912 | -0.79288  | 0.78608 | 0.88194     | 0.1889      | 0.1559   | 0.43806 |  |
|            | -0.94226        | 0.82697   | 0.1889  | 0.626552259 |             |          |         |  |
| RNA5SP232  | ENSG00000201014 | 0.78764   | 0.21545 | 0.88194     | 0.18891     | 0.70065  |         |  |
|            | 0.24176         | 0.74566   | 0.22794 | 0.18891     | 0.626552259 |          |         |  |
| CAPN2      | ENSG00000162909 | 0.26556   | 0.39529 | 0.47482     | 0.31746     | 0.42905  | 0.33394 |  |
|            | 0.88187         | 0.18892   | 0.18892 | 0.626552259 |             |          |         |  |
| LINC00222  | ENSG00000203801 | 0.88186   | 0.18893 | 0.47882     | 0.31603     | 0.29556  |         |  |
|            | 0.38378         | 0.7041    | 0.24069 | 0.18893     | 0.626552259 |          |         |  |
| MTND4LP19  | ENSG00000219087 | 0.88184   | 0.18893 | 0.88184     | 0.18893     | 0.88184  |         |  |

|             |                 |          |            |             |             |           |         |        |
|-------------|-----------------|----------|------------|-------------|-------------|-----------|---------|--------|
|             | 0.18893         | 0.88184  | 0.18893    | 0.18893     | 0.626552259 |           |         |        |
| MTATP6P25   | ENSG00000262095 | 0.88184  | 0.18893    | 0.18893     | -1.076      | 0.85905   | 0.88184 |        |
|             | 0.18893         | 0.88184  | 0.18893    | 0.18893     | 0.626552259 |           |         |        |
| RN7SL385P   | ENSG00000241333 | 0.88175  | 0.18895    | 0.18895     | 0.88175     | 0.18895   | 0.88175 |        |
|             | 0.18895         | 0.85086  | 0.19742    | 0.18895     | 0.626566467 |           |         |        |
| NA          | ENSG00000283999 | 0.88174  | 0.18896    | 0.88174     | 0.18896     | 0.88174   | 0.18896 |        |
|             | 0.88174         | 0.18896  | 0.18896    | 0.626566467 |             |           |         |        |
| NA          | ENSG00000249994 | -0.43301 | 0.6675     | -0.43301    | 0.6675      | 0.88161   | 0.18899 |        |
|             | -0.43301        | 0.6675   | 0.18899    | 0.626623304 |             |           |         |        |
| PLAU        | ENSG00000122861 | -0.86146 | 0.80551    | -0.86146    | 0.80551     | 0.88153   | 0.18902 |        |
|             | -0.38862        | 0.65122  | 0.18902    | 0.62662802  |             |           |         |        |
| RPL23AP40   | ENSG00000242321 | -0.108   | 0.543      | -0.108      | 0.543       | -0.108    | 0.543   | 0.8815 |
|             | 0.18902         | 0.18902  | 0.62662802 |             |             |           |         |        |
| RNU6-613P   | ENSG00000222344 | 0.69309  | 0.24413    | 0.76021     | 0.22357     | 0.58286   |         |        |
|             | 0.27999         | 0.88146  | 0.18903    | 0.18903     | 0.62662802  |           |         |        |
| SCGB1D5P    | ENSG00000248287 | 0.88138  | 0.18906    | -0.46201    | 0.67796     | 0.35221   |         |        |
|             | 0.36234         | -0.92666 | 0.82295    | 0.18906     | 0.626684838 |           |         |        |
| NA          | ENSG00000242034 | -0.13677 | 0.55439    | 0.88124     | 0.18909     | -0.42033  | 0.66288 |        |
|             | -0.42033        | 0.66288  | 0.18909    | 0.626741647 |             |           |         |        |
| NA          | ENSG00000213172 | 0.88109  | 0.18914    | 0.53642     | 0.29583     | 0.78422   | 0.21646 |        |
|             | 0.37611         | 0.35342  | 0.18914    | 0.626793642 |             |           |         |        |
| EFEMP2      | ENSG00000172638 | 0.88104  | 0.18915    | 0.88104     | 0.18915     | 0.64136   |         |        |
|             | 0.26064         | 0.88104  | 0.18915    | 0.18915     | 0.626793642 |           |         |        |
| FOSL1       | ENSG00000175592 | 0.88101  | 0.18916    | -0.025067   | 0.51        | 0.78263   | 0.21692 |        |
|             | 0.78263         | 0.21692  | 0.18916    | 0.626793642 |             |           |         |        |
| NA          | ENSG00000279083 | 0.73289  | 0.23181    | 0.881       | 0.18916     | 0.73289   | 0.23181 |        |
|             | 0.73289         | 0.23181  | 0.18916    | 0.626793642 |             |           |         |        |
| NTF6G       | ENSG00000267099 | 0.88096  | 0.18917    | 0.88096     | 0.18917     | 0.88096   | 0.18917 |        |
|             | 0.88096         | 0.18917  | 0.18917    | 0.626793642 |             |           |         |        |
| NA          | ENSG00000279591 | 0.88081  | 0.18921    | 0.88081     | 0.18921     | 0.88081   | 0.18921 |        |
|             | 0.88081         | 0.18921  | 0.18921    | 0.626855088 |             |           |         |        |
| NA          | ENSG00000223675 | 0.88074  | 0.18923    | 0.88074     | 0.18923     | 0.88074   | 0.18923 |        |
|             | 0.88074         | 0.18923  | 0.18923    | 0.626855088 |             |           |         |        |
| NA          | ENSG00000231996 | 0.88071  | 0.18924    | 0.88071     | 0.18924     | -0.02826  | 0.51127 |        |
|             | 0.88071         | 0.18924  | 0.18924    | 0.626855088 |             |           |         |        |
| NA          | ENSG00000257415 | -0.08231 | 0.5328     | 0.88071     | 0.18924     | 0.25553   | 0.39916 |        |
|             | -0.25209        | 0.59951  | 0.18924    | 0.626855088 |             |           |         |        |
| IQCF1       | ENSG00000173389 | 0.1694   | 0.43274    | 0.25595     | 0.39899     | 0.59251   | 0.27675 |        |
|             | 0.88052         | 0.18929  | 0.18929    | 0.626968599 |             |           |         |        |
| NA          | ENSG00000255132 | 0.44485  | 0.32821    | -0.38748    | 0.6508      | 0.88047   | 0.1893  |        |
|             | 0.88047         | 0.1893   | 0.1893     | 0.626968599 |             |           |         |        |
| PLA2G4E-AS1 | ENSG00000246740 | -1.3818  | 0.91648    | -1.2878     | 0.90109     | 0.88036   |         |        |
|             | 0.18933         | 0.88036  | 0.18933    | 0.18933     | 0.627025343 |           |         |        |
| NARF        | ENSG00000141562 | 0.76927  | 0.22087    | 0.88013     | 0.18939     | -0.17103  | 0.5679  |        |
|             | 0.048586        | 0.48062  | 0.18939    | 0.627091312 |             |           |         |        |
| NA          | ENSG00000262786 | -1.3694  | 0.91456    | 0.88014     | 0.18939     | 0.78074   | 0.21748 |        |
|             | 0.64154         | 0.26059  | 0.18939    | 0.627091312 |             |           |         |        |
| SPAG16-DT   | ENSG00000196096 | 0.88007  | 0.18941    | 0.88007     | 0.18941     | 0.88007   |         |        |
|             | 0.18941         | 0.88007  | 0.18941    | 0.18941     | 0.627091312 |           |         |        |
| RN7SKP173   | ENSG00000199691 | 0.88007  | 0.18941    | 0.11205     | 0.45539     | 0.11205   |         |        |
|             | 0.45539         | 0.11205  | 0.45539    | 0.18941     | 0.627091312 |           |         |        |
| NA          | ENSG00000236119 | 0.88001  | 0.18943    | 0.88001     | 0.18943     | 0.88001   | 0.18943 |        |
|             | 0.64886         | 0.25821  | 0.18943    | 0.627091312 |             |           |         |        |
| NA          | ENSG00000243144 | 0.79243  | 0.21405    | 0.88001     | 0.18943     | 0.76603   | 0.22183 |        |
|             | 0.22338         | 0.41162  | 0.18943    | 0.627091312 |             |           |         |        |
| ZKSCAN1     | ENSG00000106261 | 0.87997  | 0.18944    | 0.50037     | 0.30841     | -0.023832 |         |        |
|             | 0.50951         | 0.59917  | 0.27453    | 0.18944     | 0.627091312 |           |         |        |
| RAD21-AS1   | ENSG00000253327 | 0.87988  | 0.18946    | 0.87988     | 0.18946     | 0.87988   |         |        |
|             | 0.18946         | 0.87988  | 0.18946    | 0.18946     | 0.62710542  |           |         |        |
| NA          | ENSG00000224876 | 0.87984  | 0.18947    | -0.67505    | 0.75018     | 0.87984   | 0.18947 |        |
|             | 0.87984         | 0.18947  | 0.18947    | 0.62710542  |             |           |         |        |
| LRRC45      | ENSG00000169683 | -0.25575 | 0.60093    | 0.87971     | 0.18951     | 0.10525   |         |        |

|           |                 |          |         |             |             |            |         |  |
|-----------|-----------------|----------|---------|-------------|-------------|------------|---------|--|
|           | 0.45809         | -0.16685 | 0.56625 | 0.18951     | 0.627180497 |            |         |  |
| CIZ1      | ENSG00000148337 | 0.87955  | 0.18955 | -0.84112    | 0.79986     | -0.35177   | 0.63749 |  |
|           | -1.5571         | 0.94028  | 0.18955 | 0.627180497 |             |            |         |  |
| NA        | ENSG00000201548 | 0.87957  | 0.18955 | 0.87957     | 0.18955     | 0.87957    | 0.18955 |  |
|           | 0.87957         | 0.18955  | 0.18955 | 0.627180497 |             |            |         |  |
| KCNQ5-AS1 | ENSG00000229154 | 0.87953  | 0.18956 | -0.68642    | 0.75378     | -0.63114   |         |  |
|           | 0.73602         | -0.37677 | 0.64683 | 0.18956     | 0.627180497 |            |         |  |
| NA        | ENSG00000280144 | -0.54625 | 0.70755 | 0.87943     | 0.18958     | 0.39393    | 0.34682 |  |
|           | -1.8487         | 0.96775  | 0.18958 | 0.627180497 |             |            |         |  |
| NA        | ENSG00000218834 | 0.17376  | 0.43103 | -0.59767    | 0.72497     | 0.87936    | 0.1896  |  |
|           | -0.60481        | 0.72735  | 0.1896  | 0.627180497 |             |            |         |  |
| KRT8P29   | ENSG00000236430 | 0.8793   | 0.18962 | 0.076568    | 0.46948     | 0.30386    |         |  |
|           | 0.38062         | 0.82911  | 0.20352 | 0.18962     | 0.627180497 |            |         |  |
| VNN2      | ENSG00000112303 | 0.029411 | 0.48827 | 0.029411    | 0.48827     | 0.87926    | 0.18963 |  |
|           | 0.80764         | 0.20965  | 0.18963 | 0.627180497 |             |            |         |  |
| LINC02184 | ENSG00000260854 | -0.21379 | 0.58465 | 0.87928     | 0.18963     | 0.64934    |         |  |
|           | 0.25806         | 0.36565  | 0.35731 | 0.18963     | 0.627180497 |            |         |  |
| BIN2P1    | ENSG00000234568 | 0.18999  | 0.42466 | -0.20749    | 0.58219     | 0.8792     |         |  |
|           | 0.18965         | 0.71293  | 0.23794 | 0.18965     | 0.627180497 |            |         |  |
| NA        | ENSG00000270116 | 0.87917  | 0.18965 | 0.87917     | 0.18965     | 0.87917    | 0.18965 |  |
|           | 0.87917         | 0.18965  | 0.18965 | 0.627180497 |             |            |         |  |
| HLA-G     | ENSG00000204632 | 0.64964  | 0.25796 | 0.87915     | 0.18966     | -0.3178    | 0.62468 |  |
|           | 0.69402         | 0.24383  | 0.18966 | 0.627180497 |             |            |         |  |
| NA        | ENSG00000269987 | 0.87914  | 0.18966 | 0.87914     | 0.18966     | 0.87914    | 0.18966 |  |
|           | 0.87914         | 0.18966  | 0.18966 | 0.627180497 |             |            |         |  |
| NA        | ENSG00000265239 | 0.60418  | 0.27286 | 0.879       | 0.1897      | 0.60418    | 0.27286 |  |
|           | -0.073528       | 0.52931  | 0.1897  | 0.627270204 |             |            |         |  |
| SVEP1     | ENSG00000165124 | 0.87886  | 0.18974 | -0.3839     | 0.64947     | 0.26298    | 0.39628 |  |
|           | -0.18788        | 0.57452  | 0.18974 | 0.6273599   |             |            |         |  |
| GPR148    | ENSG00000173302 | -0.12445 | 0.54952 | -0.42579    | 0.66487     | 0.87879    |         |  |
|           | 0.18976         | 0.12517  | 0.45019 | 0.18976     | 0.627383459 |            |         |  |
| CLEC4C    | ENSG00000198178 | 0.87864  | 0.1898  | -0.247      | 0.59754     | 0.39821    |         |  |
|           | 0.34524         | 0.74844  | 0.2271  | 0.1898      | 0.627392553 |            |         |  |
| NA        | ENSG00000253513 | -0.22962 | 0.59081 | 0.87863     | 0.1898      | 0.49952    | 0.30871 |  |
|           | 0.87863         | 0.1898   | 0.1898  | 0.627392553 |             |            |         |  |
| NA        | ENSG00000259006 | 0.87859  | 0.18981 | 0.87859     | 0.18981     | 0.87859    | 0.18981 |  |
|           | 0.87859         | 0.18981  | 0.18981 | 0.627392553 |             |            |         |  |
| KRT86     | ENSG00000170442 | 0.87855  | 0.18982 | -0.72789    | 0.76666     | -1.1914    | 0.88325 |  |
|           | -1.9833         | 0.97633  | 0.18982 | 0.627392553 |             |            |         |  |
| NA        | ENSG00000229532 | 0.87852  | 0.18983 | 0.87852     | 0.18983     | 0.87852    | 0.18983 |  |
|           | 0.87852         | 0.18983  | 0.18983 | 0.627392553 |             |            |         |  |
| SNRPCP11  | ENSG00000241346 | 0.25775  | 0.3983  | 0.22289     | 0.41181     | 0.43733    |         |  |
|           | 0.33094         | 0.87848  | 0.18984 | 0.18984     | 0.627392553 |            |         |  |
| COX5A     | ENSG00000178741 | -1.6202  | 0.94741 | 0.3445      | 0.36524     | 0.044803   | 0.48213 |  |
|           | 0.87843         | 0.18986  | 0.18986 | 0.627396697 |             |            |         |  |
| KCNQ2     | ENSG00000075043 | 0.87838  | 0.18987 | 0.22409     | 0.41134     | 0.41847    | 0.3378  |  |
|           | -0.14204        | 0.55647  | 0.18987 | 0.627396697 |             |            |         |  |
| LCE2D     | ENSG00000187223 | 0.60841  | 0.27146 | -0.41198    | 0.65982     | 0.15811    | 0.43718 |  |
|           | 0.87827         | 0.1899   | 0.1899  | 0.627396697 |             |            |         |  |
| JPH4      | ENSG00000092051 | 0.87816  | 0.18993 | -0.73447    | 0.76867     | 0.7159     | 0.23703 |  |
|           | -0.23674        | 0.59357  | 0.18993 | 0.627396697 |             |            |         |  |
| SCG3      | ENSG00000104112 | -0.60563 | 0.72762 | -0.60563    | 0.72762     | 0.1017     | 0.4595  |  |
|           | 0.87815         | 0.18993  | 0.18993 | 0.627396697 |             |            |         |  |
| GAPDHP62  | ENSG00000251013 | 0.87812  | 0.18994 | -0.96413    | 0.83251     | -1.3504    |         |  |
|           | 0.91155         | -0.50304 | 0.69253 | 0.18994     | 0.627396697 |            |         |  |
| NA        | ENSG00000254554 | 0.87811  | 0.18994 | -0.17143    | 0.56806     | -0.0098487 | 0.50393 |  |
|           | -0.0098487      | 0.50393  | 0.18994 | 0.627396697 |             |            |         |  |
| CRIP1P2   | ENSG00000238225 | 0.87803  | 0.18996 | -0.463      | 0.67832     | -0.463     |         |  |
|           | 0.67832         | -0.463   | 0.67832 | 0.18996     | 0.627396697 |            |         |  |
| SPON1-AS1 | ENSG00000254418 | -1.9297  | 0.97318 | 0.8779      | 0.19        | 0.8779     | 0.19    |  |
|           | 0.73531         | 0.23107  | 0.19    | 0.627396697 |             |            |         |  |
| NA        | ENSG00000259998 | 0.87785  | 0.19001 | 0.74819     | 0.22717     | 0.87785    | 0.19001 |  |

|            |                 |          |         |             |             |           |         |  |
|------------|-----------------|----------|---------|-------------|-------------|-----------|---------|--|
|            | 0.87785         | 0.19001  | 0.19001 | 0.627396697 |             |           |         |  |
| NA         | ENSG00000228751 | 0.87781  | 0.19002 | 0.87781     | 0.19002     | 0.87781   | 0.19002 |  |
|            | 0.87781         | 0.19002  | 0.19002 | 0.627396697 |             |           |         |  |
| LINC00665  | ENSG00000232677 | 0.87783  | 0.19002 | 0.48522     | 0.31376     | -0.14939  |         |  |
|            | 0.55938         | -0.15791 | 0.56274 | 0.19002     | 0.627396697 |           |         |  |
| OR52X1P    | ENSG00000234895 | -1.1485  | 0.87461 | 0.87781     | 0.19002     | -1.1422   |         |  |
|            | 0.87332         | 0.46343  | 0.32153 | 0.19002     | 0.627396697 |           |         |  |
| ILF2       | ENSG00000143621 | 0.59059  | 0.2774  | 0.18586     | 0.42628     | -0.13238  | 0.55266 |  |
|            | 0.87766         | 0.19006  | 0.19006 | 0.627396697 |             |           |         |  |
| LRRC37A    | ENSG00000176681 | 0.87757  | 0.19009 | 0.56284     | 0.28677     | -0.27356  |         |  |
|            | 0.60779         | 0.58279  | 0.28002 | 0.19009     | 0.627396697 |           |         |  |
| MRPL16     | ENSG00000166902 | 0.33888  | 0.36735 | 0.3971      | 0.34565     | 0.87753   |         |  |
|            | 0.1901          | 0.3971   | 0.34565 | 0.1901      | 0.627396697 |           |         |  |
| HVCN1      | ENSG00000122986 | 0.78644  | 0.21581 | 0.87748     | 0.19011     | 0.60671   | 0.27202 |  |
|            | 0.62405         | 0.2663   | 0.19011 | 0.627396697 |             |           |         |  |
| ELL2       | ENSG00000118985 | 0.87742  | 0.19013 | -0.52674    | 0.70081     | 0.87742   | 0.19013 |  |
|            | 0.51619         | 0.30286  | 0.19013 | 0.627396697 |             |           |         |  |
| EDRF1      | ENSG00000107938 | 0.87736  | 0.19014 | -0.47894    | 0.68401     | -0.06887  | 0.52745 |  |
|            | -0.86321        | 0.80599  | 0.19014 | 0.627396697 |             |           |         |  |
| PDCD6IPP1  | ENSG00000275325 | 0.87733  | 0.19015 | -1.0533     | 0.85389     | -0.12985  |         |  |
|            | 0.55166         | -0.79609 | 0.78701 | 0.19015     | 0.627396697 |           |         |  |
| LUZP1      | ENSG00000169641 | 0.36787  | 0.35649 | 0.75079     | 0.22639     | 0.87729   | 0.19016 |  |
|            | -0.052834       | 0.52107  | 0.19016 | 0.627396697 |             |           |         |  |
| FGF22      | ENSG00000070388 | -0.82407 | 0.79505 | 0.87726     | 0.19017     | -0.66367  | 0.74655 |  |
|            | 0.0036442       | 0.49855  | 0.19017 | 0.627396697 |             |           |         |  |
| RHBDD3     | ENSG00000100263 | -1.5951  | 0.94466 | -0.24218    | 0.59568     | 0.87727   |         |  |
|            | 0.19017         | 0.51829  | 0.30213 | 0.19017     | 0.627396697 |           |         |  |
| NA         | ENSG00000228137 | 0.87722  | 0.19018 | 0.87722     | 0.19018     | 0.87722   | 0.19018 |  |
|            | 0.87722         | 0.19018  | 0.19018 | 0.627396697 |             |           |         |  |
| TMEM238L   | ENSG00000263429 | 0.65354  | 0.25671 | 0.8771      | 0.19022     | 0.65354   |         |  |
|            | 0.25671         | 0.65354  | 0.25671 | 0.19022     | 0.627396697 |           |         |  |
| NA         | ENSG00000273017 | 0.87708  | 0.19022 | 0.77243     | 0.21993     | 0.77243   | 0.21993 |  |
|            | 0.77243         | 0.21993  | 0.19022 | 0.627396697 |             |           |         |  |
| LIN28A     | ENSG00000131914 | 0.12538  | 0.45011 | 0.87703     | 0.19024     | 0.87703   |         |  |
|            | 0.19024         | 0.87703  | 0.19024 | 0.19024     | 0.627396697 |           |         |  |
| B4GALNT2P1 | ENSG00000248883 | 0.87702  | 0.19024 | 0.87702     | 0.19024     | 0.87702   |         |  |
|            | 0.19024         | 0.87702  | 0.19024 | 0.19024     | 0.627396697 |           |         |  |
| NA         | ENSG00000230063 | 0.82402  | 0.20496 | 0.87693     | 0.19026     | 0.37943   | 0.35218 |  |
|            | -0.4925         | 0.68882  | 0.19026 | 0.627396697 |             |           |         |  |
| NA         | ENSG00000200897 | 0.87691  | 0.19027 | 0.87691     | 0.19027     | 0.30969   | 0.3784  |  |
|            | 0.30969         | 0.3784   | 0.19027 | 0.627396697 |             |           |         |  |
| FOXP1-IT1  | ENSG00000242094 | 0.79088  | 0.21451 | -0.086472   | 0.53445     | 0.87679   |         |  |
|            | 0.1903          | 0.028728 | 0.48854 | 0.1903      | 0.627396697 |           |         |  |
| SRD5A1     | ENSG00000145545 | 0.87677  | 0.19031 | 0.87677     | 0.19031     | 0.87677   |         |  |
|            | 0.19031         | 0.20331  | 0.41945 | 0.19031     | 0.627396697 |           |         |  |
| RPA2P3     | ENSG00000255547 | 0.87674  | 0.19031 | -0.92024    | 0.82128     | 0.87674   |         |  |
|            | 0.19031         | 0.87674  | 0.19031 | 0.19031     | 0.627396697 |           |         |  |
| HERC2P10   | ENSG00000259845 | -0.26899 | 0.60603 | -0.22882    | 0.5905      | 0.87672   |         |  |
|            | 0.19032         | -1.0164  | 0.84527 | 0.19032     | 0.627396697 |           |         |  |
| NA         | ENSG00000279276 | 0.8767   | 0.19033 | 0.8767      | 0.19033     | 0.8767    | 0.19033 |  |
|            | 0.8767          | 0.19033  | 0.19033 | 0.627396697 |             |           |         |  |
| NA         | ENSG00000233942 | -0.44934 | 0.67341 | 0.87661     | 0.19035     | -0.065767 | 0.52622 |  |
|            | -0.59538        | 0.72421  | 0.19035 | 0.627396697 |             |           |         |  |
| NOP16      | ENSG00000048162 | 0.87657  | 0.19036 | 0.87657     | 0.19036     | 0.87657   | 0.19036 |  |
|            | -0.28266        | 0.61128  | 0.19036 | 0.627396697 |             |           |         |  |
| HEPN1      | ENSG00000221932 | 0.87635  | 0.19042 | 0.87635     | 0.19042     | 0.87635   | 0.19042 |  |
|            | 0.87635         | 0.19042  | 0.19042 | 0.627396697 |             |           |         |  |
| NA         | ENSG00000279261 | -0.22073 | 0.58735 | -1.1071     | 0.86587     | -0.22073  | 0.58735 |  |
|            | 0.87633         | 0.19042  | 0.19042 | 0.627396697 |             |           |         |  |
| MIR548AC   | ENSG00000264419 | 0.20498  | 0.41879 | -1.2868     | 0.90092     | 0.7614    |         |  |
|            | 0.22321         | 0.87633  | 0.19043 | 0.19043     | 0.627396697 |           |         |  |
| RNU6-33P   | ENSG00000207524 | 0.87628  | 0.19044 | 0.87628     | 0.19044     | 0.87628   |         |  |

|            |                 |          |         |             |             |          |          |         |
|------------|-----------------|----------|---------|-------------|-------------|----------|----------|---------|
|            | 0.19044         | 0.87628  | 0.19044 | 0.19044     | 0.627396697 |          |          |         |
| IMPACT     | ENSG00000154059 | 0.66567  | 0.66567 | 0.25281     | 0.59098     | 0.27727  | -0.34456 |         |
|            | 0.63479         | 0.87625  | 0.19045 | 0.19045     | 0.627396697 |          |          |         |
| NA         | ENSG00000271257 | 0.87621  | 0.19046 | 0.19046     | 0.87621     | 0.19046  | 0.87621  | 0.19046 |
|            | 0.87621         | 0.19046  | 0.19046 | 0.627396697 |             |          |          |         |
| DDR1-DT    | ENSG00000237775 | 0.87616  | 0.87616 | 0.19047     | -0.37189    | 0.64501  | -0.37189 |         |
|            | 0.64501         | -0.37189 | 0.64501 | 0.19047     | 0.627396697 |          |          |         |
| NA         | ENSG00000278102 | 0.87617  | 0.19047 | 0.19047     | 0.87617     | 0.19047  | 0.87617  | 0.19047 |
|            | 0.87617         | 0.19047  | 0.19047 | 0.627396697 |             |          |          |         |
| NA         | ENSG00000199677 | 0.70089  | 0.24168 | 0.70089     | 0.24168     | 0.87606  | 0.1905   |         |
|            | -0.013453       | 0.50537  | 0.1905  | 0.627396697 |             |          |          |         |
| FAM210CP   | ENSG00000213770 | 0.87605  | 0.87605 | 0.1905      | 0.61352     | 0.26976  | -0.86445 |         |
|            | 0.80633         | -0.86445 | 0.80633 | 0.1905      | 0.627396697 |          |          |         |
| NA         | ENSG00000251668 | -0.78551 | 0.78392 | -1.6538     | 0.95092     | 0.87605  | 0.1905   |         |
|            | -0.78551        | 0.78392  | 0.1905  | 0.627396697 |             |          |          |         |
| SMN1       | ENSG00000172062 | 0.876    | 0.19052 | 0.65185     | 0.25725     | -0.17418 | 0.56914  |         |
|            | -0.031089       | 0.5124   | 0.19052 | 0.627396697 |             |          |          |         |
| NA         | ENSG00000258965 | 0.87598  | 0.19052 | -0.25724    | 0.6015      | 0.87598  | 0.19052  |         |
|            | 0.87598         | 0.19052  | 0.19052 | 0.627396697 |             |          |          |         |
| PAH        | ENSG00000171759 | 0.3792   | 0.35227 | 0.87594     | 0.19053     | 0.67866  | 0.24868  |         |
|            | 0.69868         | 0.24238  | 0.19053 | 0.627396697 |             |          |          |         |
| MIR381     | ENSG00000199020 | 0.87585  | 0.87585 | 0.19056     | 0.87585     | 0.19056  | 0.87585  |         |
|            | 0.19056         | 0.87585  | 0.19056 | 0.19056     | 0.627396697 |          |          |         |
| MIR487B    | ENSG00000207754 | 0.87585  | 0.87585 | 0.19056     | 0.87585     | 0.19056  | 0.87585  |         |
|            | 0.19056         | 0.87585  | 0.19056 | 0.19056     | 0.627396697 |          |          |         |
| OR2F2      | ENSG00000221910 | 0.87583  | 0.19056 | 0.52654     | 0.29926     | 0.52654  | 0.29926  |         |
|            | 0.52654         | 0.29926  | 0.19056 | 0.627396697 |             |          |          |         |
| NA         | ENSG00000254789 | 0.82765  | 0.20393 | -0.70183    | 0.75861     | 0.87583  | 0.19056  |         |
|            | 0.63717         | 0.26201  | 0.19056 | 0.627396697 |             |          |          |         |
| RNU6-1245P | ENSG00000223062 | 0.87581  | 0.87581 | 0.19057     | 0.87581     | 0.19057  | 0.87581  |         |
|            | 0.19057         | 0.87581  | 0.19057 | 0.19057     | 0.627396697 |          |          |         |
| SLC25A6P2  | ENSG00000232203 | 0.87571  | 0.87571 | 0.19059     | -0.40239    | 0.6563   | -0.81426 |         |
|            | 0.79225         | -0.38664 | 0.65049 | 0.19059     | 0.627396697 |          |          |         |
| LINC02271  | ENSG00000240152 | -0.97709 | 0.83574 | -0.97709    | 0.83574     | 0.87573  |          |         |
|            | 0.19059         | -0.97709 | 0.83574 | 0.19059     | 0.627396697 |          |          |         |
| CDKN2B     | ENSG00000147883 | -0.16503 | 0.56554 | 0.6831      | 0.24727     | 0.87557  |          |         |
|            | 0.19063         | 0.87557  | 0.19063 | 0.19063     | 0.627396697 |          |          |         |
| NA         | ENSG00000224448 | 0.87555  | 0.19064 | 0.87555     | 0.19064     | 0.87555  | 0.19064  |         |
|            | 0.87555         | 0.19064  | 0.19064 | 0.627396697 |             |          |          |         |
| RASIP1     | ENSG00000105538 | 0.87552  | 0.87552 | 0.19065     | 0.87552     | 0.19065  | 0.092513 |         |
|            | 0.46315         | 0.13999  | 0.44433 | 0.19065     | 0.627396697 |          |          |         |
| NA         | ENSG00000216084 | 0.87535  | 0.19069 | 0.48727     | 0.31303     | 0.87535  | 0.19069  |         |
|            | 0.87535         | 0.19069  | 0.19069 | 0.627396697 |             |          |          |         |
| LINC02340  | ENSG00000275294 | 0.59698  | 0.27526 | -0.88366    | 0.81156     | 0.44711  |          |         |
|            | 0.3274          | 0.87531  | 0.1907  | 0.1907      | 0.627396697 |          |          |         |
| NA         | ENSG00000227723 | -0.83817 | 0.79903 | 0.87521     | 0.19073     | 0.30265  | 0.38108  |         |
|            | -0.97965        | 0.83637  | 0.19073 | 0.627396697 |             |          |          |         |
| MIR539     | ENSG00000202560 | 0.87511  | 0.87511 | 0.19076     | 0.87511     | 0.19076  | 0.87511  |         |
|            | 0.19076         | 0.87511  | 0.19076 | 0.19076     | 0.627396697 |          |          |         |
| RNA5SP64   | ENSG00000207341 | 0.51726  | 0.30249 | 0.87511     | 0.19076     | 0.87511  |          |         |
|            | 0.19076         | -0.18564 | 0.57364 | 0.19076     | 0.627396697 |          |          |         |
| NA         | ENSG00000213067 | 0.049205 | 0.48038 | 0.74881     | 0.22699     | 0.8751   | 0.19076  |         |
|            | 0.483           | 0.31455  | 0.19076 | 0.627396697 |             |          |          |         |
| MIR889     | ENSG00000216099 | 0.87511  | 0.87511 | 0.19076     | 0.87511     | 0.19076  | 0.87511  |         |
|            | 0.19076         | 0.87511  | 0.19076 | 0.19076     | 0.627396697 |          |          |         |
| NA         | ENSG00000229169 | 0.87511  | 0.19076 | 0.87511     | 0.19076     | 0.016733 | 0.49332  |         |
|            | 0.016733        | 0.49332  | 0.19076 | 0.627396697 |             |          |          |         |
| NA         | ENSG00000260808 | -0.23268 | 0.592   | 0.8751      | 0.19076     | -0.78657 | 0.78423  |         |
|            | -0.78657        | 0.78423  | 0.19076 | 0.627396697 |             |          |          |         |
| MIR4478    | ENSG00000266583 | -1.4949  | 0.93253 | -0.77489    | 0.7808      | 0.35752  |          |         |
|            | 0.36035         | 0.87507  | 0.19077 | 0.19077     | 0.627396697 |          |          |         |
| NA         | ENSG00000225303 | -1.4276  | 0.92329 | -0.9682     | 0.83353     | -1.4276  | 0.92329  |         |

|            |                 |             |         |             |             |           |         |         |
|------------|-----------------|-------------|---------|-------------|-------------|-----------|---------|---------|
|            | 0.87498         | 0.19079     | 0.19079 | 0.627396697 |             |           |         |         |
| RNA5SP139  | ENSG00000201210 | 0.87494     | 0.1908  | 0.87494     | 0.1908      | 0.87494   | 0.1908  | 0.87494 |
|            | 0.1908          | 0.87494     | 0.1908  | 0.1908      | 0.627396697 |           |         |         |
| C16orf82   | ENSG00000234186 | -0.59456    | 0.72393 | 0.029248    | 0.48833     | 0.48433   |         |         |
|            | 0.31408         | 0.87484     | 0.19083 | 0.19083     | 0.627396697 |           |         |         |
| SLC4A1APP1 | ENSG00000232060 | 0.8747      | 0.19087 | 0.71402     | 0.23761     | 0.71402   |         |         |
|            | 0.23761         | 0.71402     | 0.23761 | 0.19087     | 0.627396697 |           |         |         |
| ELOCP19    | ENSG00000241975 | 0.8747      | 0.19087 | 0.8747      | 0.19087     | 0.8747    |         |         |
|            | 0.19087         | 0.8747      | 0.19087 | 0.19087     | 0.627396697 |           |         |         |
| MTRNR2L1   | ENSG00000256618 | 0.87464     | 0.19089 | 0.87464     | 0.19089     | 0.87464   |         |         |
|            | 0.19089         | 0.87464     | 0.19089 | 0.19089     | 0.627396697 |           |         |         |
| NDC1       | ENSG00000058804 | 0.017792    | 0.4929  | -0.35711    | 0.6395      | 0.2709    | 0.39323 |         |
|            | 0.87458         | 0.1909      | 0.1909  | 0.627396697 |             |           |         |         |
| MFSD14A    | ENSG00000156875 | 0.7882      | 0.21529 | 0.7882      | 0.21529     | 0.7882    |         |         |
|            | 0.21529         | 0.87459     | 0.1909  | 0.1909      | 0.627396697 |           |         |         |
| TTC30B     | ENSG00000196659 | 0.87446     | 0.19093 | 0.87446     | 0.19093     | 0.87446   |         |         |
|            | 0.19093         | 0.87446     | 0.19093 | 0.19093     | 0.627396697 |           |         |         |
| POM121L13P | ENSG00000236339 | 0.87442     | 0.19094 | 0.87442     | 0.19094     | -0.40571  |         |         |
|            | 0.65752         | -0.78055    | 0.78247 | 0.19094     | 0.627396697 |           |         |         |
| NA         | ENSG00000225026 | -0.3864     | 0.6504  | -0.3864     | 0.6504      | 0.87439   | 0.19095 |         |
|            | -0.3864         | 0.6504      | 0.19095 | 0.627396697 |             |           |         |         |
| KRT18P46   | ENSG00000235716 | 0.87432     | 0.19097 | 0.67442     | 0.25002     | 0.87432   |         |         |
|            | 0.19097         | -0.15614    | 0.56204 | 0.19097     | 0.627396697 |           |         |         |
| NA         | ENSG00000187186 | 0.87429     | 0.19098 | 0.87429     | 0.19098     | 0.87429   | 0.19098 |         |
|            | 0.87429         | 0.19098     | 0.19098 | 0.627396697 |             |           |         |         |
| NA         | ENSG00000242861 | 0.87429     | 0.19098 | 0.87429     | 0.19098     | 0.87429   | 0.19098 |         |
|            | 0.87429         | 0.19098     | 0.19098 | 0.627396697 |             |           |         |         |
| CDCP2      | ENSG00000157211 | 0.6508      | 0.25759 | 0.87426     | 0.19099     | 0.064715  | 0.4742  |         |
|            | 0.18961         | 0.42481     | 0.19099 | 0.627396697 |             |           |         |         |
| FBXO34     | ENSG00000178974 | 0.65996     | 0.25464 | 0.87427     | 0.19099     | 0.65996   |         |         |
|            | 0.25464         | 0.58252     | 0.28011 | 0.19099     | 0.627396697 |           |         |         |
| EIF4A1P1   | ENSG00000233300 | 0.68886     | 0.24546 | 0.87426     | 0.19099     | -0.3827   |         |         |
|            | 0.64903         | -0.3827     | 0.64903 | 0.19099     | 0.627396697 |           |         |         |
| LRRC37A17P | ENSG00000263142 | 0.87426     | 0.19099 | 0.87426     | 0.19099     | 0.87426   |         |         |
|            | 0.19099         | 0.87426     | 0.19099 | 0.19099     | 0.627396697 |           |         |         |
| NA         | ENSG00000230291 | 0.87422     | 0.191   | 0.87422     | 0.191       | 0.87422   | 0.191   | 0.87422 |
|            | 0.191           | 0.627396697 |         |             |             |           |         |         |
| NA         | ENSG00000258464 | 0.87407     | 0.19104 | -0.021861   | 0.50872     | -0.046817 | 0.51867 |         |
|            | 0.29394         | 0.3844      | 0.19104 | 0.627485791 |             |           |         |         |
| NA         | ENSG00000279622 | 0.31034     | 0.37815 | 0.87401     | 0.19106     | -1.1879   | 0.88256 |         |
|            | -0.27015        | 0.60648     | 0.19106 | 0.627509186 |             |           |         |         |
| NPAS2      | ENSG00000170485 | 0.44909     | 0.32668 | 0.87378     | 0.19112     | 0.012264  | 0.49511 |         |
|            | -0.46326        | 0.67841     | 0.19112 | 0.627621646 |             |           |         |         |
| NA         | ENSG00000215246 | 0.87377     | 0.19112 | -1.2676     | 0.89753     | -1.2676   | 0.89753 |         |
|            | 0.42651         | 0.33487     | 0.19112 | 0.627621646 |             |           |         |         |
| SUGT1      | ENSG00000165416 | -0.3814     | 0.64855 | -0.20115    | 0.57971     | 0.32566   | 0.37234 |         |
|            | 0.8737          | 0.19114     | 0.19114 | 0.627626115 |             |           |         |         |
| NA         | ENSG00000237633 | 0.60743     | 0.27178 | -0.1346     | 0.55353     | 0.87366   | 0.19115 |         |
|            | -0.86067        | 0.80529     | 0.19115 | 0.627626115 |             |           |         |         |
| NA         | ENSG00000253395 | 0.87362     | 0.19116 | 0.29592     | 0.38365     | 0.13882   | 0.4448  |         |
|            | -2.0699         | 0.98077     | 0.19116 | 0.627626115 |             |           |         |         |
| GGACT      | ENSG00000134864 | 0.78939     | 0.21494 | 0.78939     | 0.21494     | -0.54374  | 0.70669 |         |
|            | 0.87353         | 0.19119     | 0.19119 | 0.627644501 |             |           |         |         |
| NA         | ENSG00000229607 | 0.69748     | 0.24275 | 0.87344     | 0.19121     | 0.059796  | 0.47616 |         |
|            | 0.0055048       | 0.4978      | 0.19121 | 0.627644501 |             |           |         |         |
| NA         | ENSG00000236968 | 0.71774     | 0.23646 | 0.87343     | 0.19121     | -1.5927   | 0.94439 |         |
|            | -2.1122         | 0.98267     | 0.19121 | 0.627644501 |             |           |         |         |
| LYN        | ENSG00000254087 | -0.6117     | 0.72963 | 0.72526     | 0.23415     | -0.82867  | 0.79636 |         |
|            | 0.87341         | 0.19122     | 0.19122 | 0.627644501 |             |           |         |         |
| COL5A2     | ENSG00000204262 | 0.65768     | 0.25537 | 0.59443     | 0.27611     | 0.16636   |         |         |
|            | 0.43394         | 0.87338     | 0.19123 | 0.19123     | 0.627644501 |           |         |         |
| POU6F1     | ENSG00000184271 | 0.87329     | 0.19125 | 0.16997     | 0.43252     | -0.15192  |         |         |

|           |                 |          |         |             |             |           |         |  |
|-----------|-----------------|----------|---------|-------------|-------------|-----------|---------|--|
|           | 0.56037         | 0.18374  | 0.42711 | 0.19125     | 0.627667868 |           |         |  |
| NA        | ENSG00000215795 | 0.044908 | 0.48209 | 0.76255     | 0.22287     | 0.87316   | 0.19129 |  |
|           | 0.51245         | 0.30417  | 0.19129 | 0.627756866 |             |           |         |  |
| BIRC7     | ENSG00000101197 | 0.76429  | 0.22235 | 0.67244     | 0.25065     | 0.50322   | 0.30741 |  |
|           | 0.87307         | 0.19131  | 0.19131 | 0.627780222 |             |           |         |  |
| RPS8P3    | ENSG00000215457 | 0.77089  | 0.22038 | 0.87296     | 0.19134     | 0.87296   |         |  |
|           | 0.19134         | 0.87296  | 0.19134 | 0.627794115 |             |           |         |  |
| NA        | ENSG00000279738 | 0.77667  | 0.21868 | 0.87298     | 0.19134     | 0.76699   | 0.22154 |  |
|           | 0.77667         | 0.21868  | 0.19134 | 0.627794115 |             |           |         |  |
| KCND3     | ENSG00000171385 | 0.38665  | 0.34951 | -0.2124     | 0.5841      | 0.8727    | 0.19141 |  |
|           | 0.49889         | 0.30893  | 0.19141 | 0.627953096 |             |           |         |  |
| SRSF6     | ENSG00000124193 | 0.83866  | 0.20083 | 0.1004      | 0.46001     | 0.87263   | 0.19143 |  |
|           | -0.21871        | 0.58656  | 0.19143 | 0.627953096 |             |           |         |  |
| KCNG2     | ENSG00000178342 | 0.80025  | 0.21178 | -0.16849    | 0.5669      | 0.8726    | 0.19144 |  |
|           | -0.3043         | 0.61955  | 0.19144 | 0.627953096 |             |           |         |  |
| NA        | ENSG00000215805 | 0.8726   | 0.19144 | 0.8726      | 0.19144     | 0.8726    | 0.19144 |  |
|           | 0.8726          | 0.19144  | 0.19144 | 0.627953096 |             |           |         |  |
| PFN1P9    | ENSG00000227205 | -1.0813  | 0.86022 | 0.39331     | 0.34705     | -1.6896   |         |  |
|           | 0.95445         | 0.87252  | 0.19146 | 0.19146     | 0.627976429 |           |         |  |
| FERMT3    | ENSG00000149781 | 0.87229  | 0.19153 | -0.29736    | 0.6169      | -0.18966  |         |  |
|           | 0.57521         | 0.62203  | 0.26696 | 0.19153     | 0.628121799 |           |         |  |
| TRAV27    | ENSG00000211809 | 0.87215  | 0.19156 | 0.87215     | 0.19156     | 0.87215   |         |  |
|           | 0.19156         | 0.87215  | 0.19156 | 0.19156     | 0.628121799 |           |         |  |
| NA        | ENSG00000253123 | 0.10829  | 0.45688 | 0.87214     | 0.19157     | 0.10829   | 0.45688 |  |
|           | 0.51314         | 0.30393  | 0.19157 | 0.628121799 |             |           |         |  |
| NA        | ENSG00000279900 | 0.76362  | 0.22255 | 0.76362     | 0.22255     | 0.76362   | 0.22255 |  |
|           | 0.87208         | 0.19158  | 0.19158 | 0.628121799 |             |           |         |  |
| ATP5F1D   | ENSG00000099624 | -0.3265  | 0.62798 | -0.3265     | 0.62798     | -0.3265   |         |  |
|           | 0.62798         | 0.87206  | 0.19159 | 0.19159     | 0.628121799 |           |         |  |
| MSRB1     | ENSG00000198736 | 0.8325   | 0.20256 | 0.87201     | 0.1916      | 0.8325    | 0.20256 |  |
|           | 0.62973         | 0.26444  | 0.1916  | 0.628121799 |             |           |         |  |
| OR2T34    | ENSG00000183310 | 0.095503 | 0.46196 | 0.22395     | 0.4114      | 0.87195   |         |  |
|           | 0.19162         | -0.66464 | 0.74686 | 0.19162     | 0.628121799 |           |         |  |
| NDUFA6-DT | ENSG00000237037 | 0.79604  | 0.213   | 0.87193     | 0.19162     | 0.87193   | 0.19162 |  |
|           | 0.87193         | 0.19162  | 0.19162 | 0.628121799 |             |           |         |  |
| MED6P1    | ENSG00000227905 | 0.87192  | 0.19163 | 0.87192     | 0.19163     | 0.87192   |         |  |
|           | 0.19163         | 0.87192  | 0.19163 | 0.19163     | 0.628121799 |           |         |  |
| KRT26     | ENSG00000186393 | 0.87185  | 0.19165 | -0.77279    | 0.78018     | 0.87185   | 0.19165 |  |
|           | 0.87185         | 0.19165  | 0.19165 | 0.628121799 |             |           |         |  |
| IFNNP1    | ENSG00000230208 | 0.8718   | 0.19166 | -0.58492    | 0.7207      | -0.58492  |         |  |
|           | 0.7207          | -0.58492 | 0.7207  | 0.19166     | 0.628121799 |           |         |  |
| MUC2      | ENSG00000198788 | -0.13759 | 0.55472 | 0.76292     | 0.22276     | 0.87176   | 0.19167 |  |
|           | -1.0264         | 0.84765  | 0.19167 | 0.628121799 |             |           |         |  |
| NA        | ENSG00000263437 | -0.78816 | 0.7847  | -0.78816    | 0.7847      | -0.78816  | 0.7847  |  |
|           | 0.87173         | 0.19168  | 0.19168 | 0.628121799 |             |           |         |  |
| NA        | ENSG00000271358 | 0.87165  | 0.1917  | -1.2429     | 0.89305     | -0.1375   | 0.55468 |  |
|           | -1.3154         | 0.90582  | 0.1917  | 0.628121799 |             |           |         |  |
| NA        | ENSG00000270988 | 0.87162  | 0.19171 | 0.87162     | 0.19171     | 0.87162   | 0.19171 |  |
|           | 0.87162         | 0.19171  | 0.19171 | 0.628121799 |             |           |         |  |
| MTFR1     | ENSG00000066855 | 0.13927  | 0.44462 | 0.28108     | 0.38932     | 0.87146   | 0.19175 |  |
|           | 0.24172         | 0.4045   | 0.19175 | 0.628121799 |             |           |         |  |
| NA        | ENSG00000258677 | 0.87148  | 0.19175 | 0.87148     | 0.19175     | 0.87148   | 0.19175 |  |
|           | 0.87148         | 0.19175  | 0.19175 | 0.628121799 |             |           |         |  |
| LINC02530 | ENSG00000234015 | -0.74876 | 0.773   | 0.87132     | 0.19179     | -1.041    | 0.85107 |  |
|           | -1.0114         | 0.8441   | 0.19179 | 0.628121799 |             |           |         |  |
| NA        | ENSG00000264514 | -1.8708  | 0.96932 | 0.87129     | 0.1918      | -1.8708   | 0.96932 |  |
|           | -1.8708         | 0.96932  | 0.1918  | 0.628121799 |             |           |         |  |
| OPTC      | ENSG00000188770 | -1.0562  | 0.85456 | 0.87126     | 0.19181     | 0.51617   | 0.30287 |  |
|           | 0.81821         | 0.20662  | 0.19181 | 0.628121799 |             |           |         |  |
| RNA5SP264 | ENSG00000199985 | 0.87122  | 0.19182 | 0.87122     | 0.19182     | 0.11615   |         |  |
|           | 0.45377         | 0.87122  | 0.19182 | 0.19182     | 0.628121799 |           |         |  |
| FAM86DP   | ENSG00000244026 | 0.87119  | 0.19182 | 0.053786    | 0.47855     | -0.065234 |         |  |



|           |                 |            |             |             |             |           |         |          |
|-----------|-----------------|------------|-------------|-------------|-------------|-----------|---------|----------|
|           | 0.52601         | 0.2246     | 0.41115     | 0.19182     | 0.628121799 |           |         |          |
| NA        | ENSG00000273119 | 0.87114    | 0.19184     | -0.31685    | 0.62432     | -0.31685  | 0.62432 |          |
|           | -0.87679        | 0.8097     | 0.19184     | 0.628121799 |             |           |         |          |
| LINC02293 | ENSG00000257185 | 0.03254    | 0.48702     | -0.37617    | 0.6466      | 0.8711    |         |          |
|           | 0.19185         | -0.58665   | 0.72128     | 0.19185     | 0.628121799 |           |         |          |
| NA        | ENSG00000250865 | 0.7869     | 0.21567     | 0.7869      | 0.21567     | 0.7869    | 0.21567 |          |
|           | 0.87106         | 0.19186    | 0.19186     | 0.628121799 |             |           |         |          |
| MIR4774   | ENSG00000265694 | -1.1253    | 0.86977     | 0.87105     | 0.19186     | -0.58291  |         |          |
|           | 0.72002         | -0.39817   | 0.65475     | 0.19186     | 0.628121799 |           |         |          |
| RPS6P23   | ENSG00000230871 | -0.10338   | 0.54117     | -0.050526   | 0.52015     | 0.87093   |         |          |
|           | 0.1919          | 0.26488    | 0.39555     | 0.1919      | 0.628121799 |           |         |          |
| NA        | ENSG00000249135 | -0.0079663 | 0.50318     | 0.87091     | 0.1919      | -1.255    | 0.89525 |          |
|           | -0.47058        | 0.68103    | 0.1919      | 0.628121799 |             |           |         |          |
| GATAD2A   | ENSG00000167491 | 0.87072    | 0.19195     | 0.75936     | 0.22382     | 0.088608  |         |          |
|           | 0.4647          | 0.82847    | 0.2037      | 0.19195     | 0.628121799 |           |         |          |
| OR6K2     | ENSG00000196171 | 0.87055    | 0.192       | 0.48821     | 0.3127      | 0.48821   | 0.3127  |          |
|           | 0.48821         | 0.3127     | 0.192       | 0.628121799 |             |           |         |          |
| NA        | ENSG00000270691 | -0.95653   | 0.8306      | 0.87052     | 0.19201     | -0.95653  | 0.8306  |          |
|           | -0.95653        | 0.8306     | 0.19201     | 0.628121799 |             |           |         |          |
| ETNPPL    | ENSG00000164089 | 0.63696    | 0.26207     | 0.78198     | 0.21711     | 0.74563   |         |          |
|           | 0.22794         | 0.87046    | 0.19202     | 0.19202     | 0.628121799 |           |         |          |
| IDH3B     | ENSG00000101365 | 0.63606    | 0.26237     | 0.63606     | 0.26237     | 0.87039   | 0.19204 |          |
|           | -1.3793         | 0.91609    | 0.19204     | 0.628121799 |             |           |         |          |
| MIR3156-1 | ENSG00000263476 | 0.87029    | 0.19207     | 0.87029     | 0.19207     | 0.87029   |         |          |
|           | 0.19207         | 0.87029    | 0.19207     | 0.19207     | 0.628121799 |           |         |          |
| MRPL48P1  | ENSG00000238076 | 0.87022    | 0.19209     | 0.043956    | 0.48247     | 0.87022   |         |          |
|           | 0.19209         | 0.87022    | 0.19209     | 0.19209     | 0.628121799 |           |         |          |
| SETD4     | ENSG00000185917 | 0.0017772  | 0.49929     | -0.3503     | 0.63694     | -0.091589 | 0.53649 |          |
|           | 0.87015         | 0.19211    | 0.19211     | 0.628121799 |             |           |         |          |
| NA        | ENSG00000226211 | 0.87001    | 0.19215     | 0.87001     | 0.19215     | 0.87001   | 0.19215 |          |
|           | 0.87001         | 0.19215    | 0.19215     | 0.628121799 |             |           |         |          |
| OR7E121P  | ENSG00000244222 | 0.38681    | 0.34945     | 0.33916     | 0.36724     | 0.86995   |         |          |
|           | 0.19216         | -0.12375   | 0.54924     | 0.19216     | 0.628121799 |           |         |          |
| TAF3      | ENSG00000165632 | -0.14878   | 0.55913     | 0.86992     | 0.19217     | -0.49447  | 0.68951 |          |
|           | 0.86992         | 0.19217    | 0.19217     | 0.628121799 |             |           |         |          |
| NA        | ENSG00000240499 | 0.86992    | 0.19217     | 0.11612     | 0.45378     | 0.11612   | 0.45378 |          |
|           | 0.11612         | 0.45378    | 0.19217     | 0.628121799 |             |           |         |          |
| LINC02481 | ENSG00000246526 | 0.14267    | 0.44327     | 0.45797     | 0.32349     | -0.1928   |         |          |
|           | 0.57644         | 0.86994    | 0.19217     | 0.19217     | 0.628121799 |           |         |          |
| TRIL      | ENSG00000255690 | 0.86993    | 0.19217     | -0.25059    | 0.59894     | 0.23007   | 0.40902 |          |
|           | 0.23007         | 0.40902    | 0.19217     | 0.628121799 |             |           |         |          |
| GLIPR1    | ENSG00000139278 | 0.8698     | 0.19221     | 0.8698      | 0.19221     | 0.8698    |         |          |
|           | 0.19221         | 0.8698     | 0.19221     | 0.19221     | 0.628121799 |           |         |          |
| NA        | ENSG00000213028 | 0.86976    | 0.19221     | -0.47537    | 0.68274     | 0.64659   | 0.25895 |          |
|           | 0.64659         | 0.25895    | 0.19221     | 0.628121799 |             |           |         |          |
| NA        | ENSG00000231132 | 0.25335    | 0.4         | 0.25335     | 0.4         | 0.86978   | 0.19221 | -0.25665 |
|           | 0.60128         | 0.19221    | 0.628121799 |             |             |           |         |          |
| NA        | ENSG00000267765 | 0.86977    | 0.19221     | 0.86977     | 0.19221     | 0.86977   | 0.19221 |          |
|           | 0.86977         | 0.19221    | 0.19221     | 0.628121799 |             |           |         |          |
| NA        | ENSG00000275119 | -0.080349  | 0.53202     | 0.0010503   | 0.49958     | 0.86969   | 0.19223 |          |
|           | -0.82357        | 0.79491    | 0.19223     | 0.628121799 |             |           |         |          |
| ATG4C     | ENSG00000125703 | 0.86969    | 0.19224     | 0.60336     | 0.27314     | 0.82495   | 0.2047  |          |
|           | 0.33148         | 0.37014    | 0.19224     | 0.628121799 |             |           |         |          |
| NA        | ENSG00000267581 | 0.86959    | 0.19226     | 0.86959     | 0.19226     | 0.86959   | 0.19226 |          |
|           | 0.86959         | 0.19226    | 0.19226     | 0.628121799 |             |           |         |          |
| NA        | ENSG00000228513 | 0.86934    | 0.19233     | 0.86934     | 0.19233     | 0.86934   | 0.19233 |          |
|           | 0.86934         | 0.19233    | 0.19233     | 0.628121799 |             |           |         |          |
| NA        | ENSG00000228351 | 0.86923    | 0.19236     | -0.48213    | 0.68514     | -0.24985  | 0.59865 |          |
|           | 0.13831         | 0.445      | 0.19236     | 0.628121799 |             |           |         |          |
| NA        | ENSG00000253878 | 0.86922    | 0.19236     | 0.86922     | 0.19236     | 0.86922   | 0.19236 |          |
|           | 0.86922         | 0.19236    | 0.19236     | 0.628121799 |             |           |         |          |
| NA        | ENSG00000259350 | 0.86924    | 0.19236     | 0.86924     | 0.19236     | -0.021666 | 0.50864 |          |

|            |                 |           |             |             |             |          |         |         |
|------------|-----------------|-----------|-------------|-------------|-------------|----------|---------|---------|
|            | -0.4441         | 0.67152   | 0.19236     | 0.628121799 |             |          |         |         |
| NA         | ENSG00000223869 | 0.86919   | 0.19237     | 0.86919     | 0.19237     | 0.86919  | 0.19237 |         |
|            | 0.86919         | 0.19237   | 0.19237     | 0.628121799 |             |          |         |         |
| NA         | ENSG00000280302 | 0.86914   | 0.19238     | 0.86914     | 0.19238     | 0.86914  | 0.19238 |         |
|            | 0.86914         | 0.19238   | 0.19238     | 0.628121799 |             |          |         |         |
| OXNAD1     | ENSG00000154814 | 0.86912   | 0.19239     | 0.54028     | 0.2945      | 0.67348  |         |         |
|            | 0.25032         | 0.60541   | 0.27245     | 0.19239     | 0.628121799 |          |         |         |
| AIDAP2     | ENSG00000251429 | 0.007179  | 0.49714     | 0.17283     | 0.43139     | 0.86913  |         |         |
|            | 0.19239         | 0.76199   | 0.22303     | 0.19239     | 0.628121799 |          |         |         |
| KRTAP5-14P | ENSG00000249387 | 0.86908   | 0.1924      | 0.86908     | 0.1924      | 0.86908  |         |         |
|            | 0.1924          | 0.86908   | 0.1924      | 0.1924      | 0.628121799 |          |         |         |
| LINC00518  | ENSG00000183674 | 0.53974   | 0.29469     | 0.53974     | 0.29469     | 0.53974  |         |         |
|            | 0.29469         | 0.86905   | 0.19241     | 0.19241     | 0.628121799 |          |         |         |
| NA         | ENSG00000213144 | 0.86896   | 0.19243     | 0.86896     | 0.19243     | 0.86896  | 0.19243 |         |
|            | 0.86896         | 0.19243   | 0.19243     | 0.628121799 |             |          |         |         |
| NA         | ENSG00000230597 | -0.29457  | 0.61584     | -0.29457    | 0.61584     | 0.86897  | 0.19243 |         |
|            | 0.37649         | 0.35328   | 0.19243     | 0.628121799 |             |          |         |         |
| LINC01602  | ENSG00000205293 | 0.5935    | 0.27642     | 0.86896     | 0.19244     | -0.33097 |         |         |
|            | 0.62967         | 0.86896   | 0.19244     | 0.19244     | 0.628121799 |          |         |         |
| HNRNPU     | ENSG00000153187 | 0.8689    | 0.19245     | -0.96159    | 0.83187     | -0.23664 |         |         |
|            | 0.59353         | -0.18357  | 0.57283     | 0.19245     | 0.628121799 |          |         |         |
| NA         | ENSG00000273175 | 0.8689    | 0.19245     | 0.8689      | 0.19245     | 0.8689   | 0.19245 |         |
|            | 0.8689          | 0.19245   | 0.19245     | 0.628121799 |             |          |         |         |
| LTV1P1     | ENSG00000250219 | 0.78389   | 0.21655     | -0.2708     | 0.60673     | 0.84267  |         |         |
|            | 0.19971         | 0.86875   | 0.19249     | 0.19249     | 0.628121799 |          |         |         |
| PPIAP71    | ENSG00000244183 | 0.86868   | 0.19251     | 0.86868     | 0.19251     | 0.86868  |         |         |
|            | 0.19251         | 0.86868   | 0.19251     | 0.19251     | 0.628121799 |          |         |         |
| SNORA79B   | ENSG00000222489 | 0.86859   | 0.19253     | -0.80271    | 0.78893     | -0.80271 |         |         |
|            | 0.78893         | -0.80271  | 0.78893     | 0.19253     | 0.628121799 |          |         |         |
| PLSCR3     | ENSG00000187838 | 0.86859   | 0.19254     | 0.86859     | 0.19254     | 0.86859  |         |         |
|            | 0.19254         | 0.86859   | 0.19254     | 0.19254     | 0.628121799 |          |         |         |
| NA         | ENSG00000266680 | 0.86856   | 0.19254     | -0.8375     | 0.79884     | 0.86856  | 0.19254 |         |
|            | 0.86856         | 0.19254   | 0.19254     | 0.628121799 |             |          |         |         |
| NA         | ENSG00000267421 | 0.86857   | 0.19254     | 0.86857     | 0.19254     | 0.86857  | 0.19254 |         |
|            | 0.86857         | 0.19254   | 0.19254     | 0.628121799 |             |          |         |         |
| DERL1      | ENSG00000136986 | 0.44906   | 0.32669     | 0.86855     | 0.19255     | 0.59941  | 0.27445 |         |
|            | 0.038373        | 0.4847    | 0.19255     | 0.628121799 |             |          |         |         |
| SLC24A4    | ENSG00000140090 | 0.86844   | 0.19258     | 0.32971     | 0.37081     | 0.61393  |         |         |
|            | 0.26963         | -0.63581  | 0.73755     | 0.19258     | 0.628121799 |          |         |         |
| NA         | ENSG00000279472 | 0.86841   | 0.19258     | 0.86841     | 0.19258     | 0.86841  | 0.19258 |         |
|            | 0.86841         | 0.19258   | 0.19258     | 0.628121799 |             |          |         |         |
| ZBTB46     | ENSG00000130584 | 0.22909   | 0.4094      | 0.05752     | 0.47707     | 0.83204  |         |         |
|            | 0.20269         | 0.86832   | 0.19261     | 0.19261     | 0.628121799 |          |         |         |
| SEC24B-AS1 | ENSG00000247950 | 0.35772   | 0.36027     | -0.38254    | 0.64897     | 0.56212  |         |         |
|            | 0.28702         | 0.86811   | 0.19267     | 0.19267     | 0.628121799 |          |         |         |
| NA         | ENSG00000207379 | 0.74214   | 0.229       | 0.74214     | 0.229       | 0.86805  | 0.19268 | 0.74214 |
|            | 0.229           | 0.19268   | 0.628121799 |             |             |          |         |         |
| KLLN       | ENSG00000227268 | -0.14191  | 0.55642     | 0.25327     | 0.40003     | 0.86804  | 0.19269 |         |
|            | 0.21326         | 0.41556   | 0.19269     | 0.628121799 |             |          |         |         |
| LINC00421  | ENSG00000236834 | -1.4808   | 0.93067     | 0.86802     | 0.19269     | -0.25876 |         |         |
|            | 0.60209         | -0.017213 | 0.50687     | 0.19269     | 0.628121799 |          |         |         |
| FAUP2      | ENSG00000237806 | 0.86799   | 0.1927      | 0.86799     | 0.1927      | 0.86799  | 0.1927  |         |
|            | 0.86799         | 0.1927    | 0.1927      | 0.628121799 |             |          |         |         |
| ACSBG2     | ENSG00000130377 | -0.47843  | 0.68383     | 0.78544     | 0.2161      | 0.86797  |         |         |
|            | 0.19271         | -1.0819   | 0.86036     | 0.19271     | 0.628121799 |          |         |         |
| LINC01338  | ENSG00000281327 | 0.59138   | 0.27713     | -0.068783   | 0.52742     | 0.86795  |         |         |
|            | 0.19271         | -0.068783 | 0.52742     | 0.19271     | 0.628121799 |          |         |         |
| NA         | ENSG00000201151 | 0.86792   | 0.19272     | 0.86792     | 0.19272     | 0.86792  | 0.19272 |         |
|            | 0.86792         | 0.19272   | 0.19272     | 0.628121799 |             |          |         |         |
| DPPA5      | ENSG00000203909 | 0.86792   | 0.19272     | 0.86792     | 0.19272     | 0.86792  | 0.19272 |         |
|            | 0.86792         | 0.19272   | 0.19272     | 0.628121799 |             |          |         |         |
| EPB41L2    | ENSG00000079819 | 0.7149    | 0.23734     | -0.64087    | 0.7392      | 0.86787  |         |         |

|             |                 |          |         |             |             |          |          |
|-------------|-----------------|----------|---------|-------------|-------------|----------|----------|
|             | 0.19273         | -0.89582 | 0.81483 | 0.19273     | 0.628121799 |          |          |
| TPT1P4      | ENSG00000217027 | -0.44111 | 0.67043 | 0.67043     | 0.86789     | 0.19273  | -0.44111 |
|             | 0.67043         | -1.0483  | 0.85275 | 0.19273     | 0.628121799 |          |          |
| RPL34-DT    | ENSG00000234492 | 0.86788  | 0.19273 | 0.19273     | 0.55049     | 0.29099  | 0.69679  |
|             | 0.24297         | 0.63925  | 0.26133 | 0.19273     | 0.628121799 |          |          |
| ARHGFEF40   | ENSG00000165801 | 0.34696  | 0.36431 | 0.36431     | -0.032728   | 0.51305  | 0.86784  |
|             | 0.19274         | 0.34696  | 0.36431 | 0.19274     | 0.628121799 |          |          |
| RNU6-936P   | ENSG00000206732 | 0.86784  | 0.19274 | 0.19274     | 0.86784     | 0.19274  | 0.86784  |
|             | 0.19274         | 0.86784  | 0.19274 | 0.19274     | 0.628121799 |          |          |
| NA          | ENSG00000252011 | 0.86784  | 0.19274 | 0.86784     | 0.19274     | 0.86784  | 0.19274  |
|             | 0.86784         | 0.19274  | 0.19274 | 0.628121799 |             |          |          |
| RN7SL120P   | ENSG00000244169 | 0.29677  | 0.38332 | 0.38332     | -0.37436    | 0.64593  | 0.022672 |
|             | 0.49096         | 0.86782  | 0.19275 | 0.19275     | 0.628121799 |          |          |
| SH3PXD2A    | ENSG00000107957 | -0.58465 | 0.72061 | 0.72061     | 0.48351     | 0.31437  | 0.86761  |
|             | 0.1928          | 0.21623  | 0.4144  | 0.1928      | 0.628121799 |          |          |
| WDR91       | ENSG00000105875 | 0.07365  | 0.47064 | 0.47064     | 0.86759     | 0.19281  | 0.71234  |
|             | 0.71234         | 0.23813  | 0.19281 | 0.628121799 |             |          | 0.23813  |
| RNF167      | ENSG00000108523 | 0.86756  | 0.19282 | 0.19282     | 0.86756     | 0.19282  | 0.86756  |
|             | 0.19282         | 0.86756  | 0.19282 | 0.19282     | 0.628121799 |          |          |
| CATSPER4    | ENSG00000188782 | -1.4199  | 0.92218 | 0.92218     | -1.4199     | 0.92218  | -1.4199  |
|             | 0.92218         | 0.86743  | 0.19285 | 0.19285     | 0.628121799 |          |          |
| CASC3       | ENSG00000108349 | 0.45951  | 0.32293 | 0.32293     | 0.86737     | 0.19287  | 0.41534  |
|             | 0.45951         | 0.32293  | 0.19287 | 0.628121799 |             |          | 0.33895  |
| RPS27P1     | ENSG00000223876 | 0.20423  | 0.41909 | 0.41909     | 0.20423     | 0.41909  | 0.20423  |
|             | 0.41909         | 0.86736  | 0.19287 | 0.19287     | 0.628121799 |          |          |
| CTAGE3P     | ENSG00000232872 | 0.20303  | 0.41956 | 0.41956     | 0.86733     | 0.19288  | 0.789    |
|             | 0.15143         | 0.43982  | 0.19288 | 0.628121799 |             |          | 0.21506  |
| NA          | ENSG00000240131 | 0.62949  | 0.26452 | 0.26452     | 0.62949     | 0.26452  | 0.86725  |
|             | 0.21638         | 0.41435  | 0.1929  | 0.628121799 |             |          | 0.1929   |
| HSPH1       | ENSG00000120694 | 0.85472  | 0.19635 | -0.16407    | 0.56516     | 0.86723  | 0.19291  |
|             | -0.063168       | 0.52518  | 0.19291 | 0.628121799 |             |          |          |
| CLN5        | ENSG00000102805 | 0.86714  | 0.19293 | 0.86714     | 0.19293     | 0.86714  | 0.19293  |
|             | 0.34906         | 0.36352  | 0.19293 | 0.628121799 |             |          |          |
| TRBJ2-1     | ENSG00000211764 | 0.86715  | 0.19293 | 0.86715     | 0.19293     | 0.19293  | -0.72409 |
|             | 0.76549         | -0.78063 | 0.78249 | 0.19293     | 0.628121799 |          |          |
| TRBD1       | ENSG00000282431 | -1.2512  | 0.89456 | 0.86715     | 0.19293     | 0.86715  | 0.19293  |
|             | 0.86715         | 0.19293  | 0.19293 | 0.628121799 |             |          |          |
| TDRD7       | ENSG00000196116 | -0.47927 | 0.68413 | 0.14737     | 0.44142     | 0.14737  | 0.44142  |
|             | 0.86713         | 0.19294  | 0.19294 | 0.628121799 |             |          |          |
| ARHGAP42P2  | ENSG00000231147 | 0.86708  | 0.19295 | -0.81494    | 0.79245     | 0.3198   |          |
|             | 0.37456         | 0.088974 | 0.46455 | 0.19295     | 0.628121799 |          |          |
| NA          | ENSG00000237955 | 0.86708  | 0.19295 | 0.776       | 0.21887     | 0.86708  | 0.19295  |
|             | 0.86708         | 0.19295  | 0.19295 | 0.628121799 |             |          |          |
| AKIRIN1     | ENSG00000174574 | -0.39799 | 0.65468 | -0.39799    | 0.65468     | 0.86705  |          |
|             | 0.19296         | -1.526   | 0.93649 | 0.19296     | 0.628121799 |          |          |
| NA          | ENSG00000237699 | 0.86701  | 0.19297 | 0.86701     | 0.19297     | 0.86701  | 0.19297  |
|             | 0.86701         | 0.19297  | 0.19297 | 0.628121799 |             |          |          |
| SNORD115-34 | ENSG00000199311 | -1.6866  | 0.95416 | -1.6866     | 0.95416     | 0.95416  | -1.6866  |
|             | 0.95416         | 0.86696  | 0.19298 | 0.19298     | 0.628121799 |          |          |
| ZNF510      | ENSG00000081386 | 0.044015 | 0.48245 | 0.73647     | 0.23072     | 0.86693  |          |
|             | 0.19299         | -0.41031 | 0.65921 | 0.19299     | 0.628121799 |          |          |
| ROBO1       | ENSG00000169855 | -0.25584 | 0.60096 | 0.86694     | 0.19299     | -0.2031  | 0.58047  |
|             | 0.79681         | 0.21278  | 0.19299 | 0.628121799 |             |          |          |
| C5orf64     | ENSG00000178722 | 0.17636  | 0.43001 | 0.28682     | 0.38713     | -0.13205 |          |
|             | 0.55253         | 0.86685  | 0.19301 | 0.19301     | 0.628121799 |          |          |
| NA          | ENSG00000227914 | 0.20628  | 0.41829 | 0.20628     | 0.41829     | 0.20628  | 0.41829  |
|             | 0.86684         | 0.19301  | 0.19301 | 0.628121799 |             |          |          |
| NA          | ENSG00000233262 | 0.8668   | 0.19302 | 0.8668      | 0.19302     | 0.8668   | 0.19302  |
|             | 0.8668          | 0.19302  | 0.19302 | 0.628121799 |             |          |          |
| DHRS4L2     | ENSG00000187630 | 0.6793   | 0.24847 | 0.86676     | 0.19304     | 0.10554  |          |
|             | 0.45798         | 0.23466  | 0.40723 | 0.19304     | 0.628121799 |          |          |
| NA          | ENSG00000233926 | 0.86673  | 0.19304 | 0.86673     | 0.19304     | 0.50545  | 0.30662  |

|           |                 |           |         |             |             |           |         |  |
|-----------|-----------------|-----------|---------|-------------|-------------|-----------|---------|--|
|           | 0.76069         | 0.22342   | 0.19304 | 0.628121799 |             |           |         |  |
| SPRYD7    | ENSG00000123178 | -0.82452  | 0.79518 | 0.86669     | 0.19306     | -0.85595  |         |  |
|           | 0.80399         | -1.0233   | 0.84691 | 0.19306     | 0.628121799 |           |         |  |
| NA        | ENSG00000260580 | -0.11952  | 0.54757 | 0.86668     | 0.19306     | 0.067915  | 0.47293 |  |
|           | -0.86309        | 0.80596   | 0.19306 | 0.628121799 |             |           |         |  |
| ZNF749    | ENSG00000186230 | 0.53425   | 0.29659 | 0.86659     | 0.19308     | -0.32905  |         |  |
|           | 0.62894         | 0.51846   | 0.30207 | 0.19308     | 0.628121799 |           |         |  |
| CSRP3-AS1 | ENSG00000255308 | 0.8666    | 0.19308 | -0.3004     | 0.61806     | 0.77777   |         |  |
|           | 0.21835         | 0.13454   | 0.44649 | 0.19308     | 0.628121799 |           |         |  |
| NRAS      | ENSG00000213281 | 0.86648   | 0.19311 | 0.86648     | 0.19311     | 0.86648   | 0.19311 |  |
|           | 0.86648         | 0.19311   | 0.19311 | 0.628121799 |             |           |         |  |
| NA        | ENSG00000275438 | 0.8665    | 0.19311 | 0.15134     | 0.43985     | 0.49463   | 0.31043 |  |
|           | -0.25478        | 0.60056   | 0.19311 | 0.628121799 |             |           |         |  |
| NA        | ENSG00000233862 | 0.031092  | 0.4876  | 0.86643     | 0.19313     | 0.57167   | 0.28377 |  |
|           | 0.58853         | 0.27809   | 0.19313 | 0.628121799 |             |           |         |  |
| UGT2B17   | ENSG00000197888 | -0.93859  | 0.82603 | 0.82905     | 0.20354     | 0.86637   |         |  |
|           | 0.19314         | -0.18043  | 0.57159 | 0.19314     | 0.628121799 |           |         |  |
| ZNF549    | ENSG00000121406 | 0.06474   | 0.47419 | -0.45376    | 0.675       | -0.01713  | 0.50683 |  |
|           | 0.86633         | 0.19315   | 0.19315 | 0.628121799 |             |           |         |  |
| RPL29P19  | ENSG00000224594 | -0.12346  | 0.54913 | 0.8663      | 0.19316     | -1.3263   |         |  |
|           | 0.90763         | 0.40736   | 0.34187 | 0.19316     | 0.628121799 |           |         |  |
| NA        | ENSG00000238045 | 0.86631   | 0.19316 | 0.86631     | 0.19316     | 0.86631   | 0.19316 |  |
|           | 0.86631         | 0.19316   | 0.19316 | 0.628121799 |             |           |         |  |
| NA        | ENSG00000272051 | -0.19666  | 0.57796 | 0.47235     | 0.31834     | 0.8663    | 0.19316 |  |
|           | 0.61654         | 0.26877   | 0.19316 | 0.628121799 |             |           |         |  |
| RNU6-244P | ENSG00000212330 | 0.86627   | 0.19317 | 0.86627     | 0.19317     | 0.86627   |         |  |
|           | 0.19317         | 0.86627   | 0.19317 | 0.19317     | 0.628121799 |           |         |  |
| NA        | ENSG00000199591 | 0.84037   | 0.20035 | 0.86624     | 0.19318     | 0.86624   | 0.19318 |  |
|           | 0.86624         | 0.19318   | 0.19318 | 0.628121799 |             |           |         |  |
| NA        | ENSG00000244471 | 0.86622   | 0.19318 | -0.2352     | 0.59297     | -0.16422  | 0.56522 |  |
|           | 0.48132         | 0.31514   | 0.19318 | 0.628121799 |             |           |         |  |
| NA        | ENSG00000256552 | -0.76956  | 0.77922 | 0.86608     | 0.19322     | -0.086038 | 0.53428 |  |
|           | -0.086038       | 0.53428   | 0.19322 | 0.628128207 |             |           |         |  |
| PRR20A    | ENSG00000204919 | -1.1012   | 0.8646  | -0.714      | 0.76239     | -0.714    |         |  |
|           | 0.76239         | 0.86597   | 0.19325 | 0.19325     | 0.628128207 |           |         |  |
| UBR7      | ENSG00000012963 | -0.38836  | 0.65112 | 0.019371    | 0.49227     | -1.0951   | 0.86325 |  |
|           | 0.86588         | 0.19328   | 0.19328 | 0.628128207 |             |           |         |  |
| NA        | ENSG00000227186 | 0.86585   | 0.19329 | 0.86585     | 0.19329     | 0.86585   | 0.19329 |  |
|           | 0.86585         | 0.19329   | 0.19329 | 0.628128207 |             |           |         |  |
| NA        | ENSG00000235485 | 0.86582   | 0.19329 | -0.04505    | 0.51797     | 0.86582   | 0.19329 |  |
|           | 0.86582         | 0.19329   | 0.19329 | 0.628128207 |             |           |         |  |
| RBM22P12  | ENSG00000260631 | 0.57786   | 0.28168 | 0.86582     | 0.19329     | 0.1032    |         |  |
|           | 0.4589          | -0.025245 | 0.51007 | 0.19329     | 0.628128207 |           |         |  |
| KCTD14    | ENSG00000151364 | 0.54307   | 0.29354 | 0.86575     | 0.19331     | 0.54307   |         |  |
|           | 0.29354         | 0.54307   | 0.29354 | 0.19331     | 0.628128207 |           |         |  |
| C6orf120  | ENSG00000185127 | 0.86574   | 0.19332 | 0.86574     | 0.19332     | 0.86574   |         |  |
|           | 0.19332         | 0.86574   | 0.19332 | 0.19332     | 0.628128207 |           |         |  |
| FTH1P4    | ENSG00000242992 | -0.95575  | 0.8304  | -0.99933    | 0.84118     | -0.55446  |         |  |
|           | 0.71037         | 0.86575   | 0.19332 | 0.19332     | 0.628128207 |           |         |  |
| LINC01951 | ENSG00000204754 | 0.42772   | 0.33443 | -0.68191    | 0.75235     | 0.86564   |         |  |
|           | 0.19334         | -0.53023  | 0.70203 | 0.19334     | 0.628128207 |           |         |  |
| VPS29     | ENSG00000111237 | 0.16115   | 0.43599 | 0.40913     | 0.34122     | 0.71083   | 0.23859 |  |
|           | 0.8656          | 0.19335   | 0.19335 | 0.628128207 |             |           |         |  |
| AP5Z1     | ENSG00000242802 | -0.37868  | 0.64754 | 0.29635     | 0.38348     | -0.19971  | 0.57915 |  |
|           | 0.86553         | 0.19337   | 0.19337 | 0.628128207 |             |           |         |  |
| NA        | ENSG00000200142 | 0.86544   | 0.1934  | 0.86544     | 0.1934      | 0.86544   | 0.1934  |  |
|           | 0.86544         | 0.1934    | 0.1934  | 0.628128207 |             |           |         |  |
| MIR4450   | ENSG00000263445 | 0.12231   | 0.45133 | 0.12231     | 0.45133     | 0.86544   |         |  |
|           | 0.1934          | 0.12231   | 0.45133 | 0.1934      | 0.628128207 |           |         |  |
| IGDCC4    | ENSG00000103742 | 0.26721   | 0.39465 | 0.13567     | 0.44604     | 0.86528   |         |  |
|           | 0.19344         | 0.26721   | 0.39465 | 0.19344     | 0.628128207 |           |         |  |
| ARSK      | ENSG00000164291 | 0.55716   | 0.28871 | -0.421      | 0.66312     | 0.55716   | 0.28871 |  |

|             |                 |            |         |             |             |          |         |  |
|-------------|-----------------|------------|---------|-------------|-------------|----------|---------|--|
|             | 0.86528         | 0.19344    | 0.19344 | 0.628128207 |             |          |         |  |
| AADAT       | ENSG00000109576 | -0.49999   | 0.69146 | 0.86525     | 0.19345     | 0.86525  | 0.19345 |  |
|             | 0.86525         | 0.19345    | 0.19345 | 0.628128207 |             |          |         |  |
| GAL3ST2     | ENSG00000154252 | -0.56252   | 0.71312 | 0.86517     | 0.19347     | -0.56252 |         |  |
|             | 0.71312         | -0.56252   | 0.71312 | 0.19347     | 0.628128207 |          |         |  |
| NA          | ENSG00000274341 | 0.86517    | 0.19347 | 0.86517     | 0.19347     | 0.86517  | 0.19347 |  |
|             | 0.86517         | 0.19347    | 0.19347 | 0.628128207 |             |          |         |  |
| NMD3P2      | ENSG00000231504 | 0.42733    | 0.33457 | -0.79049    | 0.78538     | 0.74351  |         |  |
|             | 0.22859         | 0.86512    | 0.19349 | 0.19349     | 0.628128207 |          |         |  |
| NA          | ENSG00000241002 | -0.53353   | 0.70317 | -0.53353    | 0.70317     | -0.53353 | 0.70317 |  |
|             | 0.86512         | 0.19349    | 0.19349 | 0.628128207 |             |          |         |  |
| MRM3        | ENSG00000171861 | 0.38517    | 0.35006 | 0.84764     | 0.19832     | 0.86508  | 0.1935  |  |
|             | -0.48938        | 0.68771    | 0.1935  | 0.628128207 |             |          |         |  |
| NA          | ENSG00000233031 | 0.86508    | 0.1935  | 0.86508     | 0.1935      | 0.86508  | 0.1935  |  |
|             | 0.86508         | 0.1935     | 0.1935  | 0.628128207 |             |          |         |  |
| ERFL        | ENSG00000268041 | 0.86505    | 0.19351 | -0.58749    | 0.72156     | -0.58749 | 0.72156 |  |
|             | -0.58749        | 0.72156    | 0.19351 | 0.628128207 |             |          |         |  |
| DBT         | ENSG00000137992 | 0.24127    | 0.40467 | -0.10618    | 0.54228     | 0.86498  | 0.19352 |  |
|             | -0.59426        | 0.72383    | 0.19352 | 0.628128207 |             |          |         |  |
| NA          | ENSG00000273733 | 0.86501    | 0.19352 | 0.86501     | 0.19352     | 0.86501  | 0.19352 |  |
|             | 0.86501         | 0.19352    | 0.19352 | 0.628128207 |             |          |         |  |
| NA          | ENSG00000266346 | 0.86497    | 0.19353 | 0.86497     | 0.19353     | 0.86497  | 0.19353 |  |
|             | 0.86497         | 0.19353    | 0.19353 | 0.628128207 |             |          |         |  |
| FAM76A      | ENSG00000009780 | 0.14314    | 0.44309 | 0.31092     | 0.37793     | -0.20303 |         |  |
|             | 0.58044         | 0.86483    | 0.19357 | 0.19357     | 0.628192344 |          |         |  |
| INTS6-AS1   | ENSG00000236778 | 0.56173    | 0.28715 | -0.46539    | 0.67917     | 0.86475  |         |  |
|             | 0.19359         | 0.84589    | 0.19881 | 0.19359     | 0.628192344 |          |         |  |
| NA          | ENSG00000259415 | 0.86473    | 0.19359 | 0.86473     | 0.19359     | 0.86473  | 0.19359 |  |
|             | 0.86473         | 0.19359    | 0.19359 | 0.628192344 |             |          |         |  |
| ERVW-1      | ENSG00000242950 | -0.51961   | 0.69833 | 0.49084     | 0.31177     | 0.86469  |         |  |
|             | 0.19361         | -0.37372   | 0.6457  | 0.19361     | 0.628192344 |          |         |  |
| PLXNA1      | ENSG00000114554 | 0.46248    | 0.32187 | 0.23202     | 0.40826     | 0.86458  |         |  |
|             | 0.19363         | 0.56094    | 0.28742 | 0.19363     | 0.628192344 |          |         |  |
| NA          | ENSG00000281195 | 0.86461    | 0.19363 | 0.86461     | 0.19363     | 0.86461  | 0.19363 |  |
|             | 0.86461         | 0.19363    | 0.19363 | 0.628192344 |             |          |         |  |
| DNAJC3      | ENSG00000102580 | 0.86455    | 0.19364 | 0.54256     | 0.29372     | 0.86455  |         |  |
|             | 0.19364         | 0.47779    | 0.3164  | 0.19364     | 0.628192344 |          |         |  |
| CBWD3       | ENSG00000196873 | 0.86445    | 0.19367 | -1.5514     | 0.93959     | -1.9872  | 0.97655 |  |
|             | -0.14163        | 0.55631    | 0.19367 | 0.628196645 |             |          |         |  |
| ARF4P4      | ENSG00000231222 | 0.86446    | 0.19367 | 0.86446     | 0.19367     | -0.1915  |         |  |
|             | 0.57593         | 0.86446    | 0.19367 | 0.19367     | 0.628196645 |          |         |  |
| LINC01399   | ENSG00000233080 | -0.71121   | 0.76152 | -1.3751     | 0.91544     | 0.86442  |         |  |
|             | 0.19368         | -0.2943    | 0.61573 | 0.19368     | 0.628196645 |          |         |  |
| NA          | ENSG00000248419 | 0.86435    | 0.1937  | 0.86435     | 0.1937      | 0.86435  | 0.1937  |  |
|             | 0.86435         | 0.1937     | 0.1937  | 0.628210322 |             |          |         |  |
| NA          | ENSG00000222335 | 0.86429    | 0.19371 | 0.86429     | 0.19371     | 0.86429  | 0.19371 |  |
|             | 0.86429         | 0.19371    | 0.19371 | 0.628210322 |             |          |         |  |
| RPL35       | ENSG00000136942 | 0.86398    | 0.1938  | 0.86398     | 0.1938      | 0.86398  | 0.1938  |  |
|             | 0.86398         | 0.1938     | 0.1938  | 0.628441586 |             |          |         |  |
| RHBDD2      | ENSG00000005486 | 0.04872    | 0.48057 | -0.21869    | 0.58655     | 0.86395  |         |  |
|             | 0.19381         | -0.0059838 | 0.50239 | 0.19381     | 0.628441586 |          |         |  |
| NA          | ENSG00000262061 | 0.8639     | 0.19382 | 0.8639      | 0.19382     | 0.8639   | 0.19382 |  |
|             | 0.8639          | 0.19382    | 0.19382 | 0.628441586 |             |          |         |  |
| H2BC9       | ENSG00000275713 | 0.2431     | 0.40396 | 0.2431      | 0.40396     | -0.63528 | 0.73738 |  |
|             | 0.86371         | 0.19387    | 0.19387 | 0.628561883 |             |          |         |  |
| PPP2CB      | ENSG00000104695 | -0.4527    | 0.67462 | -0.65163    | 0.74268     | 0.86362  |         |  |
|             | 0.1939          | -0.73628   | 0.76922 | 0.1939      | 0.628575506 |          |         |  |
| HTR5A       | ENSG00000157219 | 0.86362    | 0.1939  | 0.86362     | 0.1939      | 0.86362  | 0.1939  |  |
|             | 0.86362         | 0.1939     | 0.1939  | 0.628575506 |             |          |         |  |
| KATNB1      | ENSG00000140854 | -0.56181   | 0.71288 | 0.86352     | 0.19393     | 0.11079  |         |  |
|             | 0.45589         | 0.30953    | 0.37846 | 0.19393     | 0.628579727 |          |         |  |
| C9orf135-DT | ENSG00000225626 | 0.86349    | 0.19393 | 0.86349     | 0.19393     | 0.86349  | 0.19393 |  |

|             |                 |           |             |             |             |          |         |         |
|-------------|-----------------|-----------|-------------|-------------|-------------|----------|---------|---------|
|             | 0.19393         | 0.86349   | 0.19393     | 0.19393     | 0.628579727 |          |         |         |
| RCBTB2      | ENSG00000136161 | 0.86345   | 0.19394     | 0.19394     | -0.091639   | 0.53651  | 0.2699  |         |
|             | 0.39362         | 0.2134    | 0.41551     | 0.19394     | 0.628579727 |          |         |         |
| IFNA7       | ENSG00000214042 | -0.058448 | 0.5233      | 0.86336     | 0.19397     | -0.94938 | 0.82879 |         |
|             | -0.94938        | 0.82879   | 0.19397     | 0.628587208 |             |          |         |         |
| ALG1L7P     | ENSG00000251271 | -0.942    | 0.8269      | -0.72553    | 0.76594     | 0.86318  |         |         |
|             | 0.19402         | 0.47554   | 0.3172      | 0.19402     | 0.628587208 |          |         |         |
| FPGT-TNNI3K | ENSG00000259030 | 0.86318   | 0.19402     | 0.19402     | 0.78203     | 0.2171   | 0.86318 |         |
|             | 0.19402         | 0.86318   | 0.19402     | 0.19402     | 0.628587208 |          |         |         |
| TNRC18      | ENSG00000182095 | 0.65092   | 0.25755     | 0.35698     | 0.36055     | -0.95001 |         |         |
|             | 0.82895         | 0.86312   | 0.19404     | 0.19404     | 0.628587208 |          |         |         |
| LINC01438   | ENSG00000249519 | 0.53534   | 0.29621     | 0.53534     | 0.29621     | 0.86311  |         |         |
|             | 0.19404         | 0.7045    | 0.24056     | 0.19404     | 0.628587208 |          |         |         |
| VN1R12P     | ENSG00000220581 | -1.0668   | 0.85697     | 0.84469     | 0.19914     | 0.86308  |         |         |
|             | 0.19405         | 0.84469   | 0.19914     | 0.19405     | 0.628587208 |          |         |         |
| NA          | ENSG00000214144 | 0.33154   | 0.37012     | 0.86303     | 0.19406     | 0.86303  | 0.19406 |         |
|             | -0.30387        | 0.61938   | 0.19406     | 0.628587208 |             |          |         |         |
| MRPL15P1    | ENSG00000259441 | 0.86303   | 0.19406     | 0.86303     | 0.19406     | 0.86303  |         |         |
|             | 0.19406         | 0.86303   | 0.19406     | 0.19406     | 0.628587208 |          |         |         |
| AP3M1       | ENSG00000185009 | 0.4187    | 0.33772     | 0.15968     | 0.43657     | 0.86297  | 0.19408 |         |
|             | 0.5788          | 0.28136   | 0.19408     | 0.628587208 |             |          |         |         |
| NA          | ENSG00000271370 | 0.86291   | 0.19409     | 0.86291     | 0.19409     | 0.86291  | 0.19409 |         |
|             | 0.86291         | 0.19409   | 0.19409     | 0.628587208 |             |          |         |         |
| SELENON     | ENSG00000162430 | -1.8803   | 0.96997     | -1.8803     | 0.96997     | -1.8803  |         |         |
|             | 0.96997         | 0.86287   | 0.1941      | 0.1941      | 0.628587208 |          |         |         |
| HSPA14      | ENSG00000187522 | -0.39084  | 0.65204     | -1.3528     | 0.91193     | -0.39084 |         |         |
|             | 0.65204         | 0.86284   | 0.19411     | 0.19411     | 0.628587208 |          |         |         |
| NA          | ENSG00000261367 | 0.86284   | 0.19411     | 0.86284     | 0.19411     | 0.86284  | 0.19411 |         |
|             | 0.86284         | 0.19411   | 0.19411     | 0.628587208 |             |          |         |         |
| MIR200B     | ENSG00000207730 | 0.8627    | 0.19415     | 0.8627      | 0.19415     | 0.8627   |         |         |
|             | 0.19415         | 0.8627    | 0.19415     | 0.19415     | 0.628651492 |          |         |         |
| MRTFB       | ENSG00000186260 | 0.86265   | 0.19417     | 0.16687     | 0.43374     | 0.56224  | 0.28698 |         |
|             | 0.27796         | 0.39052   | 0.19417     | 0.628651492 |             |          |         |         |
| JRKL        | ENSG00000183340 | 0.86247   | 0.19421     | 0.86247     | 0.19421     | 0.86247  | 0.19421 |         |
|             | 0.86247         | 0.19421   | 0.19421     | 0.628651492 |             |          |         |         |
| NA          | ENSG00000200026 | 0.86245   | 0.19422     | 0.86245     | 0.19422     | 0.087451 | 0.46516 |         |
|             | -0.35141        | 0.63736   | 0.19422     | 0.628651492 |             |          |         |         |
| NA          | ENSG00000267116 | 0.19764   | 0.42166     | -0.66758    | 0.7478      | 0.86237  | 0.19424 |         |
|             | -1.251          | 0.89452   | 0.19424     | 0.628651492 |             |          |         |         |
| RAB31       | ENSG00000168461 | 0.86222   | 0.19428     | 0.50033     | 0.30842     | 0.2713   | 0.39308 |         |
|             | -0.29641        | 0.61654   | 0.19428     | 0.628651492 |             |          |         |         |
| FRG1-DT     | ENSG00000245685 | 0.15814   | 0.43717     | 0.43753     | 0.33087     | 0.86219  |         |         |
|             | 0.19429         | 0.43482   | 0.33185     | 0.19429     | 0.628651492 |          |         |         |
| NA          | ENSG00000229065 | 0.86211   | 0.19431     | 0.86211     | 0.19431     | 0.86211  | 0.19431 |         |
|             | 0.86211         | 0.19431   | 0.19431     | 0.628651492 |             |          |         |         |
| RNA5SP155   | ENSG00000223086 | 0.86204   | 0.19433     | -0.65396    | 0.74343     | -0.65396 |         |         |
|             | 0.74343         | -0.65396  | 0.74343     | 0.19433     | 0.628651492 |          |         |         |
| NA          | ENSG00000258702 | 0.3115    | 0.37771     | 0.86207     | 0.19433     | 0.39168  | 0.34765 |         |
|             | 0.43926         | 0.33024   | 0.19433     | 0.628651492 |             |          |         |         |
| KRTAP9-3    | ENSG00000204873 | 0.86201   | 0.19434     | 0.86201     | 0.19434     | 0.47835  |         |         |
|             | 0.3162          | -1.9734   | 0.97577     | 0.19434     | 0.628651492 |          |         |         |
| NA          | ENSG00000224400 | 0.86195   | 0.19436     | 0.23268     | 0.40801     | -0.47634 | 0.68308 |         |
|             | -0.47634        | 0.68308   | 0.19436     | 0.628651492 |             |          |         |         |
| ZNF317      | ENSG00000130803 | 0.082298  | 0.4672      | 0.21191     | 0.41609     | 0.74984  |         |         |
|             | 0.22668         | 0.86185   | 0.19438     | 0.19438     | 0.628651492 |          |         |         |
| NA          | ENSG00000219039 | -0.069433 | 0.52768     | 0.86188     | 0.19438     | 0.86188  | 0.19438 |         |
|             | 0.75214         | 0.22598   | 0.19438     | 0.628651492 |             |          |         |         |
| LINC01127   | ENSG00000281162 | 0.17824   | 0.42927     | 0.73121     | 0.23232     | 0.86186  |         |         |
|             | 0.19438         | 0.47541   | 0.31725     | 0.19438     | 0.628651492 |          |         |         |
| IL2         | ENSG00000109471 | 0.84519   | 0.199       | 0.86181     | 0.1944      | 0.84519  | 0.199   | 0.84519 |
|             | 0.199           | 0.1944    | 0.628651492 |             |             |          |         |         |
| NA          | ENSG00000228923 | 0.86176   | 0.19441     | 0.86176     | 0.19441     | 0.86176  | 0.19441 |         |

|           |                 |           |         |             |             |           |         |  |
|-----------|-----------------|-----------|---------|-------------|-------------|-----------|---------|--|
|           | 0.86176         | 0.19441   | 0.19441 | 0.628651492 |             |           |         |  |
| NA        | ENSG00000267327 | -0.038476 | 0.51535 | 0.77936     | 0.21788     | 0.86178   | 0.19441 |  |
|           | -0.74971        | 0.77329   | 0.19441 | 0.628651492 |             |           |         |  |
| CFAP52    | ENSG00000166596 | 0.86172   | 0.19442 | -1.5828     | 0.94327     | -0.56343  |         |  |
|           | 0.71343         | -0.30546  | 0.61999 | 0.19442     | 0.628651492 |           |         |  |
| NA        | ENSG00000256626 | 0.86169   | 0.19443 | 0.86169     | 0.19443     | 0.86169   | 0.19443 |  |
|           | 0.86169         | 0.19443   | 0.19443 | 0.628651492 |             |           |         |  |
| NA        | ENSG00000249984 | -0.048677 | 0.51941 | 0.58315     | 0.2799      | -0.34765  | 0.63595 |  |
|           | 0.86157         | 0.19446   | 0.19446 | 0.628651492 |             |           |         |  |
| NA        | ENSG00000255281 | -0.093347 | 0.53719 | 0.86146     | 0.19449     | -0.49519  | 0.68977 |  |
|           | -0.49519        | 0.68977   | 0.19449 | 0.628651492 |             |           |         |  |
| AKT1      | ENSG00000142208 | -0.65775  | 0.74465 | 0.3788      | 0.35242     | -0.21063  | 0.58341 |  |
|           | 0.86125         | 0.19455   | 0.19455 | 0.628651492 |             |           |         |  |
| RPSAP54   | ENSG00000213621 | 0.86125   | 0.19455 | 0.86125     | 0.19455     | 0.86125   |         |  |
|           | 0.19455         | -0.26268  | 0.6036  | 0.19455     | 0.628651492 |           |         |  |
| NA        | ENSG00000274173 | 0.13823   | 0.44503 | -0.37565    | 0.64641     | 0.86125   | 0.19455 |  |
|           | -0.50195        | 0.69215   | 0.19455 | 0.628651492 |             |           |         |  |
| NA        | ENSG00000248305 | -0.13885  | 0.55522 | -0.13885    | 0.55522     | -0.13885  | 0.55522 |  |
|           | 0.86121         | 0.19456   | 0.19456 | 0.628651492 |             |           |         |  |
| FAM218BP  | ENSG00000221891 | 0.86117   | 0.19457 | 0.096095    | 0.46172     | 0.86117   |         |  |
|           | 0.19457         | 0.86117   | 0.19457 | 0.19457     | 0.628651492 |           |         |  |
| NA        | ENSG00000257105 | 0.86118   | 0.19457 | -0.43542    | 0.66837     | -0.42909  | 0.66607 |  |
|           | 0.085217        | 0.46604   | 0.19457 | 0.628651492 |             |           |         |  |
| RNU7-106P | ENSG00000238842 | 0.86114   | 0.19458 | 0.86114     | 0.19458     | 0.86114   |         |  |
|           | 0.19458         | 0.86114   | 0.19458 | 0.19458     | 0.628651492 |           |         |  |
| NA        | ENSG00000222412 | -0.9361   | 0.82539 | 0.86111     | 0.19459     | -0.046198 | 0.51842 |  |
|           | -0.43871        | 0.66956   | 0.19459 | 0.628651492 |             |           |         |  |
| FCRL1     | ENSG00000163534 | 0.75406   | 0.22541 | -0.12643    | 0.5503      | 0.86103   | 0.19461 |  |
|           | -0.95795        | 0.83096   | 0.19461 | 0.628651492 |             |           |         |  |
| NA        | ENSG00000250577 | 0.86104   | 0.19461 | 0.86104     | 0.19461     | 0.86104   | 0.19461 |  |
|           | 0.86104         | 0.19461   | 0.19461 | 0.628651492 |             |           |         |  |
| LINC01097 | ENSG00000281202 | 0.86093   | 0.19464 | -0.2445     | 0.59658     | -1.1286   |         |  |
|           | 0.87046         | -1.1561   | 0.87618 | 0.19464     | 0.628651492 |           |         |  |
| MYH1      | ENSG00000109061 | 0.39181   | 0.3476  | 0.86089     | 0.19465     | 0.86089   | 0.19465 |  |
|           | 0.86089         | 0.19465   | 0.19465 | 0.628651492 |             |           |         |  |
| PTP4A2P1  | ENSG00000267185 | 0.86077   | 0.19468 | 0.86077     | 0.19468     | 0.86077   |         |  |
|           | 0.19468         | 0.86077   | 0.19468 | 0.19468     | 0.628651492 |           |         |  |
| NA        | ENSG00000277435 | 0.86079   | 0.19468 | 0.33369     | 0.36931     | 0.33369   | 0.36931 |  |
|           | 0.33369         | 0.36931   | 0.19468 | 0.628651492 |             |           |         |  |
| NA        | ENSG00000267455 | 0.051779  | 0.47935 | 0.86074     | 0.19469     | 0.77699   | 0.21858 |  |
|           | -0.3034         | 0.61921   | 0.19469 | 0.628651492 |             |           |         |  |
| CKS2      | ENSG00000123975 | 0.86067   | 0.19471 | 0.67464     | 0.24995     | 0.84353   | 0.19947 |  |
|           | 0.74561         | 0.22795   | 0.19471 | 0.628651492 |             |           |         |  |
| MIR5692A1 | ENSG00000266318 | -0.8794   | 0.81041 | -1.0439     | 0.85173     | 0.86053   |         |  |
|           | 0.19475         | 0.86053   | 0.19475 | 0.19475     | 0.628651492 |           |         |  |
| OTOP3     | ENSG00000182938 | 0.58081   | 0.28069 | 0.58081     | 0.28069     | 0.58081   | 0.28069 |  |
|           | 0.8605          | 0.19476   | 0.19476 | 0.628651492 |             |           |         |  |
| MYH10     | ENSG00000133026 | -1.2573   | 0.89568 | 0.86047     | 0.19477     | -1.0483   | 0.85276 |  |
|           | -0.34613        | 0.63538   | 0.19477 | 0.628651492 |             |           |         |  |
| EDEM2     | ENSG00000088298 | 0.52882   | 0.29846 | 0.52882     | 0.29846     | 0.8604    | 0.19478 |  |
|           | 0.56096         | 0.28741   | 0.19478 | 0.628651492 |             |           |         |  |
| SCARNA17  | ENSG00000251992 | 0.86042   | 0.19478 | 0.86042     | 0.19478     | 0.86042   |         |  |
|           | 0.19478         | 0.86042   | 0.19478 | 0.19478     | 0.628651492 |           |         |  |
| DGCR8     | ENSG00000128191 | -0.84547  | 0.80108 | -0.24476    | 0.59668     | -0.65691  | 0.74438 |  |
|           | 0.86037         | 0.19479   | 0.19479 | 0.628651492 |             |           |         |  |
| RPL21P6   | ENSG00000239199 | 0.86039   | 0.19479 | 0.86039     | 0.19479     | 0.86039   |         |  |
|           | 0.19479         | 0.86039   | 0.19479 | 0.19479     | 0.628651492 |           |         |  |
| NA        | ENSG00000221704 | -1.1509   | 0.87512 | 0.86039     | 0.19479     | 0.85054   | 0.19751 |  |
|           | -1.123          | 0.86929   | 0.19479 | 0.628651492 |             |           |         |  |
| SAR1A     | ENSG00000079332 | 0.86032   | 0.19481 | 0.11066     | 0.45594     | 0.7889    | 0.21508 |  |
|           | 0.33621         | 0.36836   | 0.19481 | 0.628651492 |             |           |         |  |
| NA        | ENSG00000256070 | -1.1897   | 0.88291 | -2.1589     | 0.98457     | 0.86031   | 0.19481 |  |

|              |                 |           |             |             |             |          |         |         |
|--------------|-----------------|-----------|-------------|-------------|-------------|----------|---------|---------|
|              | 0.30375         | 0.38066   | 0.19481     | 0.628651492 |             |          |         |         |
| STUB1P1      | ENSG00000226273 | -0.31949  | 0.62532     | -0.31949    | 0.62532     | -0.64366 |         |         |
|              | 0.7401          | 0.86027   | 0.19482     | 0.19482     | 0.628651492 |          |         |         |
| FAM177A1     | ENSG00000151327 | 0.24315   | 0.40395     | 0.30467     | 0.38031     | 0.86019  |         |         |
|              | 0.19484         | 0.7188    | 0.23613     | 0.19484     | 0.628651492 |          |         |         |
| SLC17A3      | ENSG00000124564 | -0.098366 | 0.53918     | -0.098366   | 0.53918     | 0.27292  |         |         |
|              | 0.39246         | 0.86015   | 0.19485     | 0.19485     | 0.628651492 |          |         |         |
| NA           | ENSG00000240484 | 0.86013   | 0.19486     | 0.38122     | 0.35152     | -0.26888 | 0.60599 |         |
|              | 0.40183         | 0.3439    | 0.19486     | 0.628651492 |             |          |         |         |
| OSMR-AS1     | ENSG00000249740 | 0.86014   | 0.19486     | 0.72539     | 0.23411     | -0.29372 |         |         |
|              | 0.61551         | -0.99031  | 0.83899     | 0.19486     | 0.628651492 |          |         |         |
| RNU6-1141P   | ENSG00000201390 | 0.86007   | 0.19487     | 0.86007     | 0.19487     | 0.86007  |         |         |
|              | 0.19487         | 0.86007   | 0.19487     | 0.19487     | 0.628651492 |          |         |         |
| RNU6-143P    | ENSG00000252751 | -0.79786  | 0.78753     | -1.2625     | 0.89662     | 0.86011  |         |         |
|              | 0.19487         | 0.37694   | 0.35311     | 0.19487     | 0.628651492 |          |         |         |
| VN2R19P      | ENSG00000235974 | -0.20462  | 0.58107     | -0.20462    | 0.58107     | -0.44868 |         |         |
|              | 0.67317         | 0.85999   | 0.1949      | 0.1949      | 0.628651492 |          |         |         |
| MSTN         | ENSG00000138379 | 0.31556   | 0.37617     | -0.16032    | 0.56368     | 0.8599   | 0.19492 |         |
|              | -0.12433        | 0.54947   | 0.19492     | 0.628651492 |             |          |         |         |
| OR8B8        | ENSG00000197125 | 0.85991   | 0.19492     | 0.85991     | 0.19492     | -0.26682 | 0.6052  |         |
|              | 0.52898         | 0.29841   | 0.19492     | 0.628651492 |             |          |         |         |
| ZNF587P1     | ENSG00000223965 | 0.24661   | 0.40261     | 0.85991     | 0.19492     | -0.52646 |         |         |
|              | 0.70072         | 0.272     | 0.39281     | 0.19492     | 0.628651492 |          |         |         |
| NA           | ENSG00000250657 | 0.14638   | 0.44181     | 0.14638     | 0.44181     | 0.85989  | 0.19492 |         |
|              | 0.14638         | 0.44181   | 0.19492     | 0.628651492 |             |          |         |         |
| RNA5SP193    | ENSG00000222285 | 0.022603  | 0.49098     | 0.022603    | 0.49098     | -0.29472 |         |         |
|              | 0.6159          | 0.85978   | 0.19495     | 0.19495     | 0.628651492 |          |         |         |
| RN7SKP109    | ENSG00000222524 | 0.85978   | 0.19495     | 0.85978     | 0.19495     | 0.85978  |         |         |
|              | 0.19495         | 0.85978   | 0.19495     | 0.19495     | 0.628651492 |          |         |         |
| RPS10P7      | ENSG00000223396 | 0.23241   | 0.40811     | 0.004931    | 0.49803     | -0.56826 |         |         |
|              | 0.71507         | 0.85975   | 0.19496     | 0.19496     | 0.628651492 |          |         |         |
| UNG          | ENSG00000076248 | -0.22912  | 0.59061     | 0.85969     | 0.19498     | -0.55081 | 0.70912 |         |
|              | -0.19506        | 0.57733   | 0.19498     | 0.628651492 |             |          |         |         |
| PRR5-ARHGAP8 | ENSG00000248405 | 0.85962   | 0.195       | 0.85962     | 0.195       | 0.85962  | 0.195   |         |
|              | 0.85962         | 0.195     | 0.195       | 0.628651492 |             |          |         |         |
| CENPS-CORT   | ENSG00000251503 | 0.85961   | 0.195       | 0.85961     | 0.195       | 0.85961  | 0.195   | 0.85961 |
|              | 0.195           | 0.195     | 0.628651492 |             |             |          |         |         |
| NA           | ENSG00000240086 | -0.38612  | 0.65029     | 0.85958     | 0.19501     | -0.72765 | 0.76659 |         |
|              | 0.77365         | 0.21957   | 0.19501     | 0.628651492 |             |          |         |         |
| NA           | ENSG00000253582 | 0.85958   | 0.19501     | -2.0352     | 0.97909     | -2.0352  | 0.97909 |         |
|              | -2.0352         | 0.97909   | 0.19501     | 0.628651492 |             |          |         |         |
| LINC00605    | ENSG00000251533 | 0.85954   | 0.19502     | 0.85954     | 0.19502     | 0.61668  |         |         |
|              | 0.26872         | 0.85954   | 0.19502     | 0.19502     | 0.628651492 |          |         |         |
| TIMP4        | ENSG00000157150 | 0.75559   | 0.22495     | 0.85943     | 0.19505     | 0.75559  | 0.22495 |         |
|              | 0.75559         | 0.22495   | 0.19505     | 0.628697255 |             |          |         |         |
| NA           | ENSG00000276949 | 0.12872   | 0.44879     | 0.8594      | 0.19506     | -1.4359  | 0.92448 |         |
|              | -1.4359         | 0.92448   | 0.19506     | 0.628697255 |             |          |         |         |
| MAPKAP1      | ENSG00000119487 | 0.63067   | 0.26413     | 0.43033     | 0.33348     | 0.8592   |         |         |
|              | 0.19512         | -0.36227  | 0.64142     | 0.19512     | 0.62874717  |          |         |         |
| NRBP2        | ENSG00000185189 | 0.85917   | 0.19512     | -1.139      | 0.87264     | -0.72596 | 0.76607 |         |
|              | -0.72596        | 0.76607   | 0.19512     | 0.62874717  |             |          |         |         |
| SVOP         | ENSG00000166111 | -0.97004  | 0.83399     | 0.85912     | 0.19514     | -0.73365 | 0.76842 |         |
|              | -0.098647       | 0.53929   | 0.19514     | 0.62874717  |             |          |         |         |
| KRT18P51     | ENSG00000250504 | 0.85912   | 0.19514     | 0.68817     | 0.24567     | -0.85418 |         |         |
|              | 0.8035          | -0.22498  | 0.589       | 0.19514     | 0.62874717  |          |         |         |
| MIR548AO     | ENSG00000263372 | 0.8591    | 0.19514     | 0.8591      | 0.19514     | 0.8591   |         |         |
|              | 0.19514         | 0.8591    | 0.19514     | 0.19514     | 0.62874717  |          |         |         |
| NA           | ENSG00000255451 | 0.014488  | 0.49422     | 0.51126     | 0.30459     | 0.24619  | 0.40277 |         |
|              | 0.85905         | 0.19516   | 0.19516     | 0.628770036 |             |          |         |         |
| NA           | ENSG00000235010 | 0.0029922 | 0.49881     | 0.85875     | 0.19524     | 0.85875  | 0.19524 |         |
|              | 0.85875         | 0.19524   | 0.19524     | 0.628869746 |             |          |         |         |
| NA           | ENSG00000272604 | 0.85871   | 0.19525     | 0.85871     | 0.19525     | 0.85871  | 0.19525 |         |



|          |                 |            |         |             |             |            |         |  |
|----------|-----------------|------------|---------|-------------|-------------|------------|---------|--|
|          | 0.85871         | 0.19525    | 0.19525 | 0.628869746 |             |            |         |  |
| DYNLL2   | ENSG00000264364 | 0.34042    | 0.36677 | 0.85864     | 0.19527     | 0.85864    |         |  |
|          | 0.19527         | 0.39245    | 0.34736 | 0.19527     | 0.628869746 |            |         |  |
| HSPD1P16 | ENSG00000218792 | 0.85856    | 0.19529 | 0.095991    | 0.46176     | 0.095991   |         |  |
|          | 0.46176         | 0.095991   | 0.46176 | 0.19529     | 0.628869746 |            |         |  |
| PIEZO2   | ENSG00000154864 | -1.1447    | 0.87384 | -0.9078     | 0.81801     | -0.57011   |         |  |
|          | 0.7157          | 0.85852    | 0.1953  | 0.1953      | 0.628869746 |            |         |  |
| CALM2P2  | ENSG00000229097 | 0.85852    | 0.1953  | 0.85852     | 0.1953      | 0.85852    |         |  |
|          | 0.1953          | 0.85852    | 0.1953  | 0.1953      | 0.628869746 |            |         |  |
| NA       | ENSG00000237501 | 0.34845    | 0.36375 | 0.85855     | 0.1953      | 0.34845    | 0.36375 |  |
|          | 0.34845         | 0.36375    | 0.1953  | 0.628869746 |             |            |         |  |
| NA       | ENSG00000279114 | 0.19362    | 0.42324 | 0.85851     | 0.19531     | 0.19362    | 0.42324 |  |
|          | 0.19362         | 0.42324    | 0.19531 | 0.628869746 |             |            |         |  |
| CAMK2G   | ENSG00000148660 | 0.60079    | 0.27399 | -0.057535   | 0.52294     | 0.85844    |         |  |
|          | 0.19532         | 0.32615    | 0.37216 | 0.19532     | 0.628869746 |            |         |  |
| NA       | ENSG00000249053 | -0.0017015 | 0.50068 | -0.0017015  | 0.50068     | -0.0017015 | 0.50068 |  |
|          | 0.85847         | 0.19532    | 0.19532 | 0.628869746 |             |            |         |  |
| NA       | ENSG00000202078 | 0.85835    | 0.19535 | 0.85835     | 0.19535     | 0.85835    | 0.19535 |  |
|          | 0.85835         | 0.19535    | 0.19535 | 0.628906071 |             |            |         |  |
| RFC3     | ENSG00000133119 | -0.69769   | 0.75731 | -0.10152    | 0.54043     | 0.28762    | 0.38682 |  |
|          | 0.85832         | 0.19536    | 0.19536 | 0.628906071 |             |            |         |  |
| FBXO45   | ENSG00000174013 | -0.54812   | 0.7082  | -1.084      | 0.86083     | 0.85827    |         |  |
|          | 0.19537         | -1.5436    | 0.93865 | 0.19537     | 0.628906071 |            |         |  |
| LILRB5   | ENSG00000105609 | 0.85819    | 0.19539 | 0.85819     | 0.19539     | 0.85819    |         |  |
|          | 0.19539         | 0.142      | 0.44354 | 0.19539     | 0.628928905 |            |         |  |
| NA       | ENSG00000279117 | 0.8581     | 0.19542 | 0.8581      | 0.19542     | 0.8581     | 0.19542 |  |
|          | 0.8581          | 0.19542    | 0.19542 | 0.628983923 |             |            |         |  |
| LYPLA1   | ENSG00000120992 | 0.43472    | 0.33188 | 0.43472     | 0.33188     | 0.85796    |         |  |
|          | 0.19546         | 0.13778    | 0.44521 | 0.19546     | 0.629071118 |            |         |  |
| NA       | ENSG00000233635 | 0.8578     | 0.1955  | 0.8578      | 0.1955      | 0.8578     | 0.1955  |  |
|          | 0.8578          | 0.1955     | 0.1955  | 0.629158301 |             |            |         |  |
| RPS4XP11 | ENSG00000234335 | -0.8733    | 0.80875 | -0.51304    | 0.69604     | 0.85773    |         |  |
|          | 0.19552         | 0.85773    | 0.19552 | 0.19552     | 0.629181113 |            |         |  |
| NA       | ENSG00000265229 | 0.85762    | 0.19555 | 0.75407     | 0.2254      | -0.085236  | 0.53396 |  |
|          | -0.085236       | 0.53396    | 0.19555 | 0.6292361   |             |            |         |  |
| PARP12   | ENSG00000059378 | 0.85744    | 0.1956  | 0.85744     | 0.1956      | 0.85744    |         |  |
|          | 0.1956          | 0.12798    | 0.44908 | 0.1956      | 0.629355431 |            |         |  |
| NA       | ENSG00000223866 | 0.85734    | 0.19563 | 0.85734     | 0.19563     | 0.85734    | 0.19563 |  |
|          | 0.85734         | 0.19563    | 0.19563 | 0.629362192 |             |            |         |  |
| MED16    | ENSG00000175221 | -0.079918  | 0.53185 | 0.85727     | 0.19565     | 0.55247    | 0.29031 |  |
|          | -0.75744        | 0.77561    | 0.19565 | 0.629362192 |             |            |         |  |
| NA       | ENSG00000221734 | 0.85725    | 0.19565 | 0.85725     | 0.19565     | 0.85725    | 0.19565 |  |
|          | 0.85725         | 0.19565    | 0.19565 | 0.629362192 |             |            |         |  |
| ZNF77    | ENSG00000175691 | 0.24419    | 0.40354 | -0.60559    | 0.72761     | 0.85716    | 0.19568 |  |
|          | 0.44058         | 0.32976    | 0.19568 | 0.629362192 |             |            |         |  |
| MEOX1    | ENSG00000005102 | 0.63211    | 0.26366 | 0.50025     | 0.30845     | 0.48209    | 0.31487 |  |
|          | 0.85707         | 0.1957     | 0.1957  | 0.629362192 |             |            |         |  |
| ATP4B    | ENSG00000186009 | 0.052029   | 0.47925 | -1.5933     | 0.94445     | 0.85704    | 0.19571 |  |
|          | -1.3238         | 0.90722    | 0.19571 | 0.629362192 |             |            |         |  |
| GPRC5D   | ENSG00000111291 | 0.85697    | 0.19573 | 0.85697     | 0.19573     | 0.85697    |         |  |
|          | 0.19573         | 0.85697    | 0.19573 | 0.19573     | 0.629362192 |            |         |  |
| RAE1     | ENSG00000101146 | 0.53274    | 0.29711 | 0.40371     | 0.34321     | 0.85695    | 0.19574 |  |
|          | -1.5217         | 0.93595    | 0.19574 | 0.629362192 |             |            |         |  |
| H3P28    | ENSG00000220347 | -0.32289   | 0.62661 | -0.15768    | 0.56264     | -0.46261   | 0.67818 |  |
|          | 0.85693         | 0.19574    | 0.19574 | 0.629362192 |             |            |         |  |
| SUCLG2P4 | ENSG00000249226 | 0.027798   | 0.48891 | 0.8569      | 0.19575     | -0.23563   |         |  |
|          | 0.59314         | -0.14177   | 0.55637 | 0.19575     | 0.629362192 |            |         |  |
| NA       | ENSG00000212712 | 0.85685    | 0.19576 | 0.85685     | 0.19576     | 0.79743    | 0.2126  |  |
|          | 0.85685         | 0.19576    | 0.19576 | 0.629362192 |             |            |         |  |
| FAM78B   | ENSG00000188859 | 0.069395   | 0.47234 | -1.4697     | 0.92918     | -0.31265   |         |  |
|          | 0.62273         | 0.85685    | 0.19577 | 0.19577     | 0.629362192 |            |         |  |
| NA       | ENSG00000250969 | 0.85684    | 0.19577 | -0.31943    | 0.6253      | 0.85684    | 0.19577 |  |

|            |                 |             |         |             |             |          |         |       |
|------------|-----------------|-------------|---------|-------------|-------------|----------|---------|-------|
|            | 0.18202         | 0.42778     | 0.19577 | 0.629362192 |             |          |         |       |
| KLHDC8A    | ENSG00000162873 | -0.20851    | 0.58258 | 0.14097     | 0.44395     | -0.7061  |         |       |
|            | 0.75994         | 0.85676     | 0.19579 | 0.19579     | 0.629384966 |          |         |       |
| HAUS6P1    | ENSG00000227344 | 0.85662     | 0.19583 | 0.85662     | 0.19583     | 0.85662  |         |       |
|            | 0.19583         | 0.75157     | 0.22615 | 0.19583     | 0.629472025 |          |         |       |
| NA         | ENSG00000279214 | 0.85649     | 0.19586 | 0.85649     | 0.19586     | 0.85649  | 0.19586 |       |
|            | 0.85649         | 0.19586     | 0.19586 | 0.629514793 |             |          |         |       |
| RNU6-1242P | ENSG00000212354 | 0.85643     | 0.19588 | 0.85643     | 0.19588     | 0.85643  |         |       |
|            | 0.19588         | 0.85643     | 0.19588 | 0.19588     | 0.629514793 |          |         |       |
| MIR30E     | ENSG00000198974 | 0.85633     | 0.19591 | 0.80652     | 0.20997     | 0.80652  |         |       |
|            | 0.20997         | 0.80652     | 0.20997 | 0.19591     | 0.629514793 |          |         |       |
| HNRNPRP1   | ENSG00000223984 | 0.85633     | 0.19591 | 0.85633     | 0.19591     | 0.85633  |         |       |
|            | 0.19591         | 0.85633     | 0.19591 | 0.19591     | 0.629514793 |          |         |       |
| NA         | ENSG00000267683 | 0.43653     | 0.33123 | 0.26704     | 0.39472     | 0.85631  | 0.19591 |       |
|            | 0.85631         | 0.19591     | 0.19591 | 0.629514793 |             |          |         |       |
| BRD3       | ENSG00000169925 | 0.50896     | 0.30539 | -0.11433    | 0.54551     | 0.44183  | 0.32931 |       |
|            | 0.85609         | 0.19597     | 0.19597 | 0.629514793 |             |          |         |       |
| GRIA1      | ENSG00000155511 | 0.84359     | 0.19945 | -0.048543   | 0.51936     | 0.85608  | 0.19598 |       |
|            | 0.16501         | 0.43447     | 0.19598 | 0.629514793 |             |          |         |       |
| RORB       | ENSG00000198963 | 0.85605     | 0.19599 | -0.52132    | 0.69893     | -0.73062 | 0.76749 |       |
|            | -0.62737        | 0.73479     | 0.19599 | 0.629514793 |             |          |         |       |
| NA         | ENSG00000237188 | 0.85598     | 0.196   | 0.85598     | 0.196       | 0.85598  | 0.196   | 0.196 |
|            | 0.196           | 0.629514793 |         |             |             |          |         |       |
| NA         | ENSG00000248506 | 0.85594     | 0.19601 | 0.63291     | 0.2634      | -1.0591  | 0.85522 |       |
|            | 0.75349         | 0.22558     | 0.19601 | 0.629514793 |             |          |         |       |
| NA         | ENSG00000279758 | 0.85595     | 0.19601 | 0.85595     | 0.19601     | 0.85595  | 0.19601 |       |
|            | 0.85595         | 0.19601     | 0.19601 | 0.629514793 |             |          |         |       |
| CEP112     | ENSG00000154240 | -0.15585    | 0.56192 | 0.85591     | 0.19602     | 0.37962  |         |       |
|            | 0.35212         | 0.3718      | 0.35502 | 0.19602     | 0.629514793 |          |         |       |
| ZNF426-DT  | ENSG00000278611 | 0.79699     | 0.21273 | 0.85593     | 0.19602     | 0.48813  |         |       |
|            | 0.31273         | 0.48813     | 0.31273 | 0.19602     | 0.629514793 |          |         |       |
| DIP2A      | ENSG00000160305 | 0.85588     | 0.19603 | 0.26248     | 0.39647     | 0.39478  | 0.3465  |       |
|            | 0.39478         | 0.3465      | 0.19603 | 0.629514793 |             |          |         |       |
| TRAPPC10   | ENSG00000160218 | 0.40036     | 0.34444 | 0.77916     | 0.21794     | 0.85585  |         |       |
|            | 0.19604         | 0.72254     | 0.23498 | 0.19604     | 0.629514793 |          |         |       |
| FOXO6-AS1  | ENSG00000229901 | 0.8558      | 0.19605 | 0.29856     | 0.38264     | 0.23067  |         |       |
|            | 0.40878         | 0.23067     | 0.40878 | 0.19605     | 0.629514793 |          |         |       |
| ADAD1P2    | ENSG00000267511 | 0.85573     | 0.19607 | 0.8506      | 0.1975      | 0.60315  |         |       |
|            | 0.2732          | 0.60315     | 0.2732  | 0.19607     | 0.62953753  |          |         |       |
| NA         | ENSG00000270941 | 0.85568     | 0.19609 | 0.85568     | 0.19609     | 0.85568  | 0.19609 |       |
|            | 0.34297         | 0.36581     | 0.19609 | 0.629540133 |             |          |         |       |
| IGLC2      | ENSG00000211677 | 0.85555     | 0.19612 | 0.85555     | 0.19612     | 0.85555  | 0.19612 |       |
|            | 0.85555         | 0.19612     | 0.19612 | 0.629540133 |             |          |         |       |
| LINC00283  | ENSG00000231633 | 0.85553     | 0.19613 | 0.85553     | 0.19613     | 0.85553  |         |       |
|            | 0.19613         | 0.85553     | 0.19613 | 0.19613     | 0.629540133 |          |         |       |
| SERPINB5   | ENSG00000206075 | -1.255      | 0.89525 | 0.85542     | 0.19616     | -0.98013 |         |       |
|            | 0.83649         | -0.39029    | 0.65184 | 0.19616     | 0.629540133 |          |         |       |
| DAB1       | ENSG00000173406 | -0.19692    | 0.57806 | -0.04739    | 0.5189      | 0.59481  | 0.27598 |       |
|            | 0.85539         | 0.19617     | 0.19617 | 0.629540133 |             |          |         |       |
| TMF1       | ENSG00000144747 | 0.42411     | 0.33574 | 0.52099     | 0.30119     | 0.42411  | 0.33574 |       |
|            | 0.85535         | 0.19618     | 0.19618 | 0.629540133 |             |          |         |       |
| NA         | ENSG00000267984 | 0.85532     | 0.19619 | 0.85532     | 0.19619     | 0.85532  | 0.19619 |       |
|            | 0.85532         | 0.19619     | 0.19619 | 0.629540133 |             |          |         |       |
| C3orf70    | ENSG00000187068 | 0.85528     | 0.1962  | -0.57039    | 0.71579     | 0.33961  |         |       |
|            | 0.36707         | -0.13358    | 0.55313 | 0.1962      | 0.629540133 |          |         |       |
| NA         | ENSG00000255188 | 0.044003    | 0.48245 | 0.85528     | 0.1962      | -1.2209  | 0.88894 |       |
|            | -1.2209         | 0.88894     | 0.1962  | 0.629540133 |             |          |         |       |
| NA         | ENSG00000258632 | 0.85529     | 0.1962  | -1.3471     | 0.91103     | -3.2688  | 0.99946 |       |
|            | -3.2688         | 0.99946     | 0.1962  | 0.629540133 |             |          |         |       |
| RGS3       | ENSG00000138835 | 0.66337     | 0.25355 | 0.56393     | 0.2864      | 0.85509  | 0.19625 |       |
|            | 0.61545         | 0.26913     | 0.19625 | 0.629659106 |             |          |         |       |
| RPSAP26    | ENSG00000242735 | 0.85504     | 0.19627 | 0.85504     | 0.19627     | 0.85504  |         |       |

|             |                 |          |         |             |             |           |         |  |
|-------------|-----------------|----------|---------|-------------|-------------|-----------|---------|--|
|             | 0.19627         | 0.85504  | 0.19627 | 0.19627     | 0.629681816 |           |         |  |
| QRFP        | ENSG00000188710 | 0.8549   | 0.1963  | 0.05075     | 0.47976     | 0.05075   | 0.47976 |  |
|             | 0.05075         | 0.47976  | 0.1963  | 0.629708478 |             |           |         |  |
| TMEM79      | ENSG00000163472 | 0.85489  | 0.19631 | 0.85489     | 0.19631     | 0.85489   |         |  |
|             | 0.19631         | 0.85489  | 0.19631 | 0.629708478 |             |           |         |  |
| DENND3      | ENSG00000105339 | 0.14067  | 0.44406 | 0.85482     | 0.19633     | 0.41788   |         |  |
|             | 0.33802         | 0.1529   | 0.43924 | 0.19633     | 0.629708478 |           |         |  |
| NA          | ENSG00000261804 | 0.85479  | 0.19633 | 0.85479     | 0.19633     | 0.65554   | 0.25606 |  |
|             | 0.5571          | 0.28873  | 0.19633 | 0.629708478 |             |           |         |  |
| FRY-AS1     | ENSG00000237637 | -0.34333 | 0.63432 | 0.85474     | 0.19635     | 0.30366   |         |  |
|             | 0.38069         | 0.34377  | 0.36551 | 0.19635     | 0.629724281 |           |         |  |
| NA          | ENSG00000273035 | 0.85463  | 0.19638 | 0.85463     | 0.19638     | 0.85463   | 0.19638 |  |
|             | 0.85463         | 0.19638  | 0.19638 | 0.629724281 |             |           |         |  |
| COL18A1-AS1 | ENSG00000183535 | -0.68177 | 0.75231 | -1.2245     | 0.88963     | 0.68161   |         |  |
|             | 0.24774         | 0.85459  | 0.19639 | 0.19639     | 0.629724281 |           |         |  |
| NA          | ENSG00000258580 | -0.29123 | 0.61456 | 0.85454     | 0.1964      | -0.29123  | 0.61456 |  |
|             | -0.16867        | 0.56697  | 0.1964  | 0.629724281 |             |           |         |  |
| RPS9P1      | ENSG00000214889 | 0.85448  | 0.19642 | 0.85448     | 0.19642     | 0.85448   |         |  |
|             | 0.19642         | 0.85448  | 0.19642 | 0.19642     | 0.629724281 |           |         |  |
| NA          | ENSG00000279755 | 0.13846  | 0.44494 | 0.13846     | 0.44494     | 0.13846   | 0.44494 |  |
|             | 0.85437         | 0.19645  | 0.19645 | 0.629724281 |             |           |         |  |
| NA          | ENSG00000225792 | 0.85435  | 0.19646 | 0.85435     | 0.19646     | 0.85435   | 0.19646 |  |
|             | 0.85435         | 0.19646  | 0.19646 | 0.629724281 |             |           |         |  |
| TRAJ14      | ENSG00000211875 | 0.85431  | 0.19647 | 0.85431     | 0.19647     | 0.85431   |         |  |
|             | 0.19647         | 0.85431  | 0.19647 | 0.19647     | 0.629724281 |           |         |  |
| OR52P2P     | ENSG00000171999 | 0.85426  | 0.19648 | 0.85426     | 0.19648     | 0.85426   |         |  |
|             | 0.19648         | 0.85426  | 0.19648 | 0.19648     | 0.629724281 |           |         |  |
| UBE2V1P11   | ENSG00000231124 | 0.85427  | 0.19648 | 0.85427     | 0.19648     | 0.85427   |         |  |
|             | 0.19648         | 0.85427  | 0.19648 | 0.19648     | 0.629724281 |           |         |  |
| TRIM38      | ENSG00000112343 | 0.37957  | 0.35213 | 0.70394     | 0.24073     | 0.85423   |         |  |
|             | 0.19649         | 0.56578  | 0.28577 | 0.19649     | 0.629724281 |           |         |  |
| NA          | ENSG00000244756 | 0.32911  | 0.37104 | 0.85421     | 0.19649     | -0.14086  | 0.55601 |  |
|             | -0.14086        | 0.55601  | 0.19649 | 0.629724281 |             |           |         |  |
| NA          | ENSG00000267764 | 0.85409  | 0.19653 | -0.057143   | 0.52278     | -0.70643  | 0.76004 |  |
|             | -0.39626        | 0.65404  | 0.19653 | 0.62976421  |             |           |         |  |
| C12orf42    | ENSG00000179088 | 0.85405  | 0.19654 | 0.026301    | 0.48951     | -0.010439 |         |  |
|             | 0.50416         | 0.80714  | 0.20979 | 0.19654     | 0.62976421  |           |         |  |
| ST13P5      | ENSG00000212789 | 0.85399  | 0.19656 | 0.34516     | 0.36499     | 0.85399   |         |  |
|             | 0.19656         | 0.85399  | 0.19656 | 0.19656     | 0.62976421  |           |         |  |
| NA          | ENSG00000232754 | 0.85398  | 0.19656 | 0.85398     | 0.19656     | 0.85398   | 0.19656 |  |
|             | 0.85398         | 0.19656  | 0.19656 | 0.62976421  |             |           |         |  |
| OR10H4      | ENSG00000176231 | 0.85389  | 0.19658 | 0.15239     | 0.43944     | -1.6819   |         |  |
|             | 0.9537          | -1.6819  | 0.9537  | 0.19658     | 0.62976421  |           |         |  |
| GSTP1P1     | ENSG00000257569 | 0.85392  | 0.19658 | 0.50072     | 0.30828     | 0.85392   |         |  |
|             | 0.19658         | 0.85392  | 0.19658 | 0.19658     | 0.62976421  |           |         |  |
| NPM1P46     | ENSG00000213104 | -0.38749 | 0.6508  | -0.1607     | 0.56383     | -0.11311  |         |  |
|             | 0.54503         | 0.85378  | 0.19661 | 0.19661     | 0.629772084 |           |         |  |
| ZNF480      | ENSG00000198464 | 0.023255 | 0.49072 | 0.60863     | 0.27139     | 0.25733   |         |  |
|             | 0.39846         | 0.85365  | 0.19665 | 0.19665     | 0.629772084 |           |         |  |
| NDRG1       | ENSG00000104419 | 0.85363  | 0.19666 | 0.85363     | 0.19666     | 0.85363   | 0.19666 |  |
|             | 0.47481         | 0.31746  | 0.19666 | 0.629772084 |             |           |         |  |
| PRDX3       | ENSG00000165672 | -0.48912 | 0.68762 | -0.7501     | 0.7734      | 0.85361   | 0.19666 |  |
|             | -0.13889        | 0.55523  | 0.19666 | 0.629772084 |             |           |         |  |
| CLDN6       | ENSG00000184697 | -0.87493 | 0.8092  | 0.85362     | 0.19666     | 0.11847   | 0.45285 |  |
|             | 0.11847         | 0.45285  | 0.19666 | 0.629772084 |             |           |         |  |
| NA          | ENSG00000271335 | 0.8536   | 0.19666 | 0.8536      | 0.19666     | 0.42847   | 0.33416 |  |
|             | -0.51574        | 0.69698  | 0.19666 | 0.629772084 |             |           |         |  |
| CLU         | ENSG00000120885 | -0.40068 | 0.65567 | -0.698      | 0.75741     | 0.85347   | 0.1967  |  |
|             | -1.5638         | 0.94107  | 0.1967  | 0.629808035 |             |           |         |  |
| LIG3        | ENSG00000005156 | -0.42791 | 0.66564 | -0.40736    | 0.65813     | 0.85344   | 0.19671 |  |
|             | -0.48975        | 0.68785  | 0.19671 | 0.629808035 |             |           |         |  |
| NA          | ENSG00000251243 | -0.80183 | 0.78867 | -1.647      | 0.95022     | -1.647    | 0.95022 |  |

|           |                 |           |         |             |             |          |         |  |
|-----------|-----------------|-----------|---------|-------------|-------------|----------|---------|--|
|           | 0.85342         | 0.19671   | 0.19671 | 0.629808035 |             |          |         |  |
| IBA57     | ENSG00000181873 | -0.59067  | 0.72263 | -1.3329     | 0.90872     | 0.85329  | 0.19675 |  |
|           | -0.28462        | 0.61203   | 0.19675 | 0.62988535  |             |          |         |  |
| LINC02875 | ENSG00000187013 | 0.25947   | 0.39764 | 0.85326     | 0.19676     | -1.3094  |         |  |
|           | 0.9048          | 0.46479   | 0.32104 | 0.19676     | 0.62988535  |          |         |  |
| ZCCHC24   | ENSG00000165424 | 0.85309   | 0.1968  | -0.63449    | 0.73712     | -0.22362 |         |  |
|           | 0.58847         | -0.090345 | 0.53599 | 0.1968      | 0.629930636 |          |         |  |
| CD55      | ENSG00000196352 | 0.8531    | 0.1968  | 0.20738     | 0.41786     | -0.12663 | 0.55038 |  |
|           | 0.20738         | 0.41786   | 0.1968  | 0.629930636 |             |          |         |  |
| ERVE-1    | ENSG00000267259 | 0.5474    | 0.29205 | 0.72827     | 0.23323     | 0.85303  |         |  |
|           | 0.19682         | 0.16848   | 0.4331  | 0.19682     | 0.629943905 |          |         |  |
| LINC01825 | ENSG00000223466 | -0.78229  | 0.78298 | 0.85301     | 0.19683     | 0.85301  |         |  |
|           | 0.19683         | 0.13297   | 0.44711 | 0.19683     | 0.629943905 |          |         |  |
| RPS29P33  | ENSG00000226470 | 0.21529   | 0.41477 | 0.15137     | 0.43984     | 0.85285  |         |  |
|           | 0.19687         | 0.21529   | 0.41477 | 0.19687     | 0.630030544 |          |         |  |
| NA        | ENSG00000267044 | 0.079937  | 0.46814 | 0.079937    | 0.46814     | 0.85279  | 0.19689 |  |
|           | 0.079937        | 0.46814   | 0.19689 | 0.630053172 |             |          |         |  |
| SERPINF2  | ENSG00000167711 | 0.85259   | 0.19694 | 0.23615     | 0.40666     | 0.70019  |         |  |
|           | 0.24191         | 0.70019   | 0.24191 | 0.19694     | 0.630166264 |          |         |  |
| NA        | ENSG00000266806 | 0.85249   | 0.19697 | 0.85249     | 0.19697     | 0.39113  | 0.34785 |  |
|           | -0.25974        | 0.60247   | 0.19697 | 0.630166264 |             |          |         |  |
| SPART-AS1 | ENSG00000120664 | 0.69131   | 0.24468 | 0.85247     | 0.19698     | 0.84143  |         |  |
|           | 0.20005         | -0.29862  | 0.61739 | 0.19698     | 0.630166264 |          |         |  |
| FRA10AC1  | ENSG00000148690 | 0.85245   | 0.19698 | -1.5965     | 0.94482     | -1.44    | 0.92507 |  |
|           | -0.50976        | 0.69489   | 0.19698 | 0.630166264 |             |          |         |  |
| MRTO4     | ENSG00000053372 | 0.85241   | 0.19699 | 0.56401     | 0.28637     | 0.48984  | 0.31212 |  |
|           | 0.25107         | 0.40088   | 0.19699 | 0.630166264 |             |          |         |  |
| NA        | ENSG00000280083 | 0.85236   | 0.19701 | -0.29448    | 0.6158      | 0.25005  | 0.40127 |  |
|           | 0.62887         | 0.26472   | 0.19701 | 0.630188874 |             |          |         |  |
| CFHR2     | ENSG00000080910 | 0.7449    | 0.22817 | 0.85219     | 0.19705     | 0.21565  | 0.41463 |  |
|           | -0.40928        | 0.65883   | 0.19705 | 0.630266067 |             |          |         |  |
| RPL21P136 | ENSG00000271215 | 0.85216   | 0.19706 | 0.85216     | 0.19706     | 0.85216  |         |  |
|           | 0.19706         | 0.85216   | 0.19706 | 0.19706     | 0.630266067 |          |         |  |
| MRPS22    | ENSG00000175110 | -1.1645   | 0.87789 | -0.39664    | 0.65418     | -1.7487  |         |  |
|           | 0.95983         | 0.85202   | 0.1971  | 0.1971      | 0.630300144 |          |         |  |
| NA        | ENSG00000253845 | -0.37457  | 0.64601 | 0.85194     | 0.19712     | -0.37457 | 0.64601 |  |
|           | -0.37457        | 0.64601   | 0.19712 | 0.630300144 |             |          |         |  |
| TAF13     | ENSG00000197780 | 0.037587  | 0.48501 | 0.037587    | 0.48501     | 0.85184  | 0.19715 |  |
|           | -1.0317         | 0.84889   | 0.19715 | 0.630300144 |             |          |         |  |
| NA        | ENSG00000253271 | 0.85181   | 0.19716 | 0.85181     | 0.19716     | 0.85181  | 0.19716 |  |
|           | 0.85181         | 0.19716   | 0.19716 | 0.630300144 |             |          |         |  |
| NA        | ENSG00000261663 | 0.85182   | 0.19716 | 0.85182     | 0.19716     | 0.85182  | 0.19716 |  |
|           | 0.85182         | 0.19716   | 0.19716 | 0.630300144 |             |          |         |  |
| NA        | ENSG00000266196 | 0.85182   | 0.19716 | 0.85182     | 0.19716     | 0.85182  | 0.19716 |  |
|           | 0.85182         | 0.19716   | 0.19716 | 0.630300144 |             |          |         |  |
| MORC2-AS1 | ENSG00000235989 | -2.0545   | 0.98004 | -1.5156     | 0.93519     | 0.85171  |         |  |
|           | 0.19719         | -0.5552   | 0.71062 | 0.19719     | 0.630300144 |          |         |  |
| RILPL2    | ENSG00000150977 | -1.1899   | 0.88297 | -1.0232     | 0.8469      | 0.85168  |         |  |
|           | 0.1972          | -0.55783  | 0.71152 | 0.1972      | 0.630300144 |          |         |  |
| TMEM229B  | ENSG00000198133 | 0.85165   | 0.1972  | 0.61898     | 0.26796     | 0.1781   |         |  |
|           | 0.42932         | -0.24716  | 0.59761 | 0.1972      | 0.630300144 |          |         |  |
| NA        | ENSG00000279333 | 0.85167   | 0.1972  | 0.85167     | 0.1972      | 0.85167  | 0.1972  |  |
|           | 0.85167         | 0.1972    | 0.1972  | 0.630300144 |             |          |         |  |
| SENP2     | ENSG00000163904 | 0.14246   | 0.44336 | -0.2941     | 0.61566     | 0.8516   | 0.19722 |  |
|           | 0.45775         | 0.32357   | 0.19722 | 0.630322726 |             |          |         |  |
| SERPINI1  | ENSG00000163536 | 0.8514    | 0.19727 | 0.8514      | 0.19727     | 0.05089  |         |  |
|           | 0.47971         | 0.8514    | 0.19727 | 0.19727     | 0.630371689 |          |         |  |
| RPL35P8   | ENSG00000226142 | 0.85137   | 0.19728 | 0.22615     | 0.41054     | 0.85137  |         |  |
|           | 0.19728         | 0.84631   | 0.19869 | 0.19728     | 0.630371689 |          |         |  |
| MIR466    | ENSG00000265376 | 0.85137   | 0.19728 | 0.85137     | 0.19728     | 0.85137  |         |  |
|           | 0.19728         | 0.85137   | 0.19728 | 0.19728     | 0.630371689 |          |         |  |
| PSMD5     | ENSG00000095261 | -0.67979  | 0.75168 | -1.6264     | 0.94806     | 0.85131  | 0.1973  |  |

|            |                 |          |         |             |             |           |         |  |
|------------|-----------------|----------|---------|-------------|-------------|-----------|---------|--|
|            | -0.18151        | 0.57202  | 0.1973  | 0.630371689 |             |           |         |  |
| TRAV8-1    | ENSG00000211782 | 0.38254  | 0.35103 | 0.38254     | 0.35103     | 0.85132   |         |  |
|            | 0.1973          | 0.38254  | 0.35103 | 0.1973      | 0.630371689 |           |         |  |
| MIR623     | ENSG00000207719 | 0.25732  | 0.39847 | 0.85123     | 0.19732     | 0.25732   |         |  |
|            | 0.39847         | 0.25732  | 0.39847 | 0.19732     | 0.630394257 |           |         |  |
| LRRC69     | ENSG00000214954 | 0.70628  | 0.24001 | 0.85112     | 0.19735     | 0.85112   |         |  |
|            | 0.19735         | 0.10127  | 0.45967 | 0.19735     | 0.630448768 |           |         |  |
| DMRT3      | ENSG00000064218 | 0.851    | 0.19738 | -0.98815    | 0.83846     | 0.73256   | 0.23191 |  |
|            | -1.249          | 0.89417  | 0.19738 | 0.630461943 |             |           |         |  |
| BCAS2P3    | ENSG00000226670 | -0.55819 | 0.71164 | 0.85103     | 0.19738     | -1.66     | 0.95154 |  |
|            | -0.088501       | 0.53526  | 0.19738 | 0.630461943 |             |           |         |  |
| ALMS1      | ENSG00000116127 | 0.73741  | 0.23044 | 0.8509      | 0.19741     | 0.16085   | 0.4361  |  |
|            | -0.27636        | 0.60886  | 0.19741 | 0.630507052 |             |           |         |  |
| FAXDC2     | ENSG00000170271 | 0.27466  | 0.39179 | 0.23751     | 0.40613     | -0.073729 |         |  |
|            | 0.52939         | 0.85087  | 0.19742 | 0.19742     | 0.630507052 |           |         |  |
| NA         | ENSG00000249199 | 0.10199  | 0.45938 | 0.49213     | 0.31131     | 0.85077   | 0.19745 |  |
|            | 0.10091         | 0.45981  | 0.19745 | 0.630561537 |             |           |         |  |
| ABCA5      | ENSG00000154265 | 0.85068  | 0.19747 | -0.18039    | 0.57158     | 0.37131   | 0.3552  |  |
|            | 0.85068         | 0.19747  | 0.19747 | 0.630584083 |             |           |         |  |
| NA         | ENSG00000225087 | 0.85058  | 0.1975  | -0.12365    | 0.54921     | -0.36238  | 0.64147 |  |
|            | 0.73978         | 0.22972  | 0.1975  | 0.630638556 |             |           |         |  |
| LRRC18     | ENSG00000165383 | -0.71963 | 0.76412 | -0.44707    | 0.67259     | -0.43825  |         |  |
|            | 0.6694          | 0.85052  | 0.19752 | 0.19752     | 0.63065545  |           |         |  |
| NA         | ENSG00000258957 | -1.4132  | 0.92121 | -1.4132     | 0.92121     | -0.57423  | 0.71709 |  |
|            | 0.85044         | 0.19754  | 0.19754 | 0.63065545  |             |           |         |  |
| NA         | ENSG00000230537 | 0.85037  | 0.19756 | 0.85037     | 0.19756     | 0.85037   | 0.19756 |  |
|            | 0.85037         | 0.19756  | 0.19756 | 0.63065545  |             |           |         |  |
| NA         | ENSG00000260364 | -0.76742 | 0.77858 | 0.11366     | 0.45475     | -0.48285  | 0.6854  |  |
|            | 0.85032         | 0.19757  | 0.19757 | 0.63065545  |             |           |         |  |
| NA         | ENSG00000279423 | 0.18542  | 0.42645 | 0.10313     | 0.45893     | 0.85034   | 0.19757 |  |
|            | 0.85034         | 0.19757  | 0.19757 | 0.63065545  |             |           |         |  |
| ZBTB37     | ENSG00000185278 | 0.35715  | 0.36049 | 0.35715     | 0.36049     | 0.85028   |         |  |
|            | 0.19759         | 0.35715  | 0.36049 | 0.19759     | 0.630677979 |           |         |  |
| SPRR2B     | ENSG00000196805 | -0.55362 | 0.71008 | -0.55362    | 0.71008     | -0.94498  |         |  |
|            | 0.82766         | 0.8501   | 0.19763 | 0.19763     | 0.630685465 |           |         |  |
| ADI1P2     | ENSG00000250684 | 0.85008  | 0.19764 | 0.85008     | 0.19764     | 0.85008   |         |  |
|            | 0.19764         | 0.85008  | 0.19764 | 0.19764     | 0.630685465 |           |         |  |
| TSPAN15    | ENSG00000099282 | -1.043   | 0.85153 | 0.85004     | 0.19765     | 0.249     | 0.40168 |  |
|            | -0.67489        | 0.75013  | 0.19765 | 0.630685465 |             |           |         |  |
| NA         | ENSG00000229652 | 0.85006  | 0.19765 | 0.85006     | 0.19765     | 0.85006   | 0.19765 |  |
|            | 0.85006         | 0.19765  | 0.19765 | 0.630685465 |             |           |         |  |
| RPL7P36    | ENSG00000234109 | 0.42382  | 0.33585 | 0.85002     | 0.19766     | 0.85002   |         |  |
|            | 0.19766         | -0.2546  | 0.60048 | 0.19766     | 0.630685465 |           |         |  |
| MROH7-TTC4 | ENSG00000271723 | 0.84999  | 0.19767 | 0.84999     | 0.19767     | 0.84999   |         |  |
|            | 0.19767         | 0.84999  | 0.19767 | 0.19767     | 0.630685465 |           |         |  |
| OR9K1P     | ENSG00000196534 | 0.036193 | 0.48556 | -0.27311    | 0.60762     | 0.8498    |         |  |
|            | 0.19772         | -0.27311 | 0.60762 | 0.19772     | 0.630724838 |           |         |  |
| NA         | ENSG00000277491 | 0.8498   | 0.19772 | 0.8498      | 0.19772     | 0.8498    | 0.19772 |  |
|            | 0.8498          | 0.19772  | 0.19772 | 0.630724838 |             |           |         |  |
| NLRP1      | ENSG00000091592 | 0.75566  | 0.22493 | -0.013805   | 0.50551     | -0.90612  | 0.81756 |  |
|            | 0.84974         | 0.19773  | 0.19773 | 0.630724838 |             |           |         |  |
| RN7SL678P  | ENSG00000263969 | 0.84971  | 0.19774 | 0.84971     | 0.19774     | 0.84971   |         |  |
|            | 0.19774         | 0.84971  | 0.19774 | 0.19774     | 0.630724838 |           |         |  |
| RPL31P12   | ENSG00000227207 | 0.79826  | 0.21236 | 0.84967     | 0.19775     | 0.6696    |         |  |
|            | 0.25155         | 0.84967  | 0.19775 | 0.19775     | 0.630724838 |           |         |  |
| MIR770     | ENSG00000211574 | 0.84966  | 0.19776 | 0.84966     | 0.19776     | 0.84966   |         |  |
|            | 0.19776         | 0.84966  | 0.19776 | 0.19776     | 0.630724838 |           |         |  |
| OR1K1      | ENSG00000165204 | 0.3783   | 0.3526  | 0.21796     | 0.41373     | 0.21205   | 0.41603 |  |
|            | 0.84942         | 0.19782  | 0.19782 | 0.630758519 |             |           |         |  |
| NA         | ENSG00000233648 | -1.3287  | 0.90803 | -1.3287     | 0.90803     | -0.90144  | 0.81632 |  |
|            | 0.84941         | 0.19783  | 0.19783 | 0.630758519 |             |           |         |  |
| NA         | ENSG00000269901 | 0.84937  | 0.19784 | -0.032708   | 0.51305     | 0.31564   | 0.37614 |  |

|            |                 |          |         |             |             |           |         |  |
|------------|-----------------|----------|---------|-------------|-------------|-----------|---------|--|
|            | 0.66132         | 0.2542   | 0.19784 | 0.630758519 |             |           |         |  |
| PRR26      | ENSG00000180525 | -0.13734 | 0.55462 | -0.62887    | 0.73528     | 0.8493    | 0.19786 |  |
|            | -1.6242         | 0.94783  | 0.19786 | 0.630758519 |             |           |         |  |
| OR2M3      | ENSG00000228198 | -0.66723 | 0.74769 | -0.66723    | 0.74769     | 0.84931   | 0.19786 |  |
|            | -0.47857        | 0.68388  | 0.19786 | 0.630758519 |             |           |         |  |
| CAPN8      | ENSG00000203697 | 0.053045 | 0.47885 | 0.84924     | 0.19787     | 0.075285  | 0.46999 |  |
|            | 0.68601         | 0.24635  | 0.19787 | 0.630758519 |             |           |         |  |
| DENND10    | ENSG00000119979 | -0.5948  | 0.72401 | 0.24948     | 0.4015      | 0.81723   |         |  |
|            | 0.2069          | 0.84922  | 0.19788 | 0.19788     | 0.630758519 |           |         |  |
| VAV1       | ENSG00000141968 | 0.3172   | 0.37555 | -0.15599    | 0.56198     | -1.3269   | 0.90773 |  |
|            | 0.84924         | 0.19788  | 0.19788 | 0.630758519 |             |           |         |  |
| NEK6       | ENSG00000119408 | -1.0104  | 0.84386 | 0.84918     | 0.19789     | 0.70729   | 0.23969 |  |
|            | 0.4702          | 0.31911  | 0.19789 | 0.630758519 |             |           |         |  |
| NSMCE1-DT  | ENSG00000245888 | 0.52837  | 0.29862 | 0.52837     | 0.29862     | 0.39597   |         |  |
|            | 0.34606         | 0.84913  | 0.1979  | 0.1979      | 0.630758519 |           |         |  |
| USHBP1     | ENSG00000130307 | 0.76155  | 0.22316 | 0.84897     | 0.19795     | -0.1942   |         |  |
|            | 0.57699         | 0.026256 | 0.48953 | 0.19795     | 0.630825974 |           |         |  |
| KPNA7      | ENSG00000185467 | -1.1775  | 0.8805  | -0.69124    | 0.75529     | -0.38013  | 0.64808 |  |
|            | 0.84898         | 0.19795  | 0.19795 | 0.630825974 |             |           |         |  |
| ANO1       | ENSG00000131620 | 0.81175  | 0.20847 | 0.84892     | 0.19796     | -0.20145  | 0.57983 |  |
|            | -0.33227        | 0.63016  | 0.19796 | 0.630825974 |             |           |         |  |
| KRTAP21-4P | ENSG00000236400 | 0.84868  | 0.19803 | 0.84868     | 0.19803     | 0.84868   |         |  |
|            | 0.19803         | 0.84868  | 0.19803 | 0.19803     | 0.630932638 |           |         |  |
| NA         | ENSG00000262833 | 0.68314  | 0.24726 | 0.84869     | 0.19803     | 0.72895   | 0.23302 |  |
|            | -0.26346        | 0.6039   | 0.19803 | 0.630932638 |             |           |         |  |
| IGFBP3     | ENSG00000146674 | 0.29272  | 0.38487 | 0.84862     | 0.19805     | -0.069353 |         |  |
|            | 0.52765         | 0.29466  | 0.38413 | 0.19805     | 0.630932638 |           |         |  |
| NA         | ENSG00000248988 | 0.84859  | 0.19806 | 0.84859     | 0.19806     | 0.84859   | 0.19806 |  |
|            | 0.84859         | 0.19806  | 0.19806 | 0.630932638 |             |           |         |  |
| NA         | ENSG00000231403 | -1.1254  | 0.86979 | 0.84851     | 0.19808     | -1.1254   | 0.86979 |  |
|            | -0.23677        | 0.59358  | 0.19808 | 0.630932638 |             |           |         |  |
| NA         | ENSG00000257398 | 0.31181  | 0.37759 | 0.70339     | 0.24091     | 0.84841   | 0.1981  |  |
|            | 0.84841         | 0.1981   | 0.1981  | 0.630932638 |             |           |         |  |
| TRIM9      | ENSG00000100505 | 0.50741  | 0.30593 | 0.02361     | 0.49058     | 0.84838   | 0.19811 |  |
|            | 0.5583          | 0.28832  | 0.19811 | 0.630932638 |             |           |         |  |
| CEPT1      | ENSG00000134255 | 0.19324  | 0.42339 | 0.84837     | 0.19811     | 0.84837   | 0.19811 |  |
|            | 0.84837         | 0.19811  | 0.19811 | 0.630932638 |             |           |         |  |
| NA         | ENSG00000224935 | 0.84839  | 0.19811 | 0.021124    | 0.49157     | 0.014987  | 0.49402 |  |
|            | 0.69255         | 0.2443   | 0.19811 | 0.630932638 |             |           |         |  |
| ZNF785     | ENSG00000197162 | 0.84826  | 0.19815 | 0.84826     | 0.19815     | 0.84826   |         |  |
|            | 0.19815         | 0.84826  | 0.19815 | 0.19815     | 0.630977553 |           |         |  |
| NA         | ENSG00000239791 | 0.84826  | 0.19815 | 0.84826     | 0.19815     | 0.84826   | 0.19815 |  |
|            | 0.84826         | 0.19815  | 0.19815 | 0.630977553 |             |           |         |  |
| TUBB1      | ENSG00000101162 | 0.84814  | 0.19818 | 0.10891     | 0.45664     | 0.84814   | 0.19818 |  |
|            | -0.46237        | 0.67809  | 0.19818 | 0.630984103 |             |           |         |  |
| NA         | ENSG00000254680 | 0.84796  | 0.19823 | 0.84796     | 0.19823     | 0.84796   | 0.19823 |  |
|            | 0.84796         | 0.19823  | 0.19823 | 0.630984103 |             |           |         |  |
| ILKAP      | ENSG00000132323 | 0.84783  | 0.19827 | 0.40785     | 0.34169     | 0.51087   | 0.30472 |  |
|            | 0.27833         | 0.39038  | 0.19827 | 0.630984103 |             |           |         |  |
| NA         | ENSG00000212197 | 0.84782  | 0.19827 | 0.84782     | 0.19827     | 0.84782   | 0.19827 |  |
|            | 0.84782         | 0.19827  | 0.19827 | 0.630984103 |             |           |         |  |
| NA         | ENSG00000255365 | 0.8478   | 0.19828 | 0.8478      | 0.19828     | 0.8478    | 0.19828 |  |
|            | 0.8478          | 0.19828  | 0.19828 | 0.630984103 |             |           |         |  |
| ZMYND11    | ENSG00000015171 | -0.44266 | 0.67099 | 0.082868    | 0.46698     | 0.84772   |         |  |
|            | 0.1983          | 0.14916  | 0.44071 | 0.1983      | 0.630984103 |           |         |  |
| CASC17     | ENSG00000260785 | 0.84759  | 0.19833 | -0.21251    | 0.58414     | 0.27647   |         |  |
|            | 0.39109         | 0.46642  | 0.32046 | 0.19833     | 0.630984103 |           |         |  |
| KRT18P66   | ENSG00000235626 | 0.84746  | 0.19837 | 0.84746     | 0.19837     | 0.84746   |         |  |
|            | 0.19837         | 0.84746  | 0.19837 | 0.19837     | 0.630984103 |           |         |  |
| SLC23A1    | ENSG00000170482 | 0.68217  | 0.24756 | 0.5144      | 0.30349     | 0.84741   |         |  |
|            | 0.19838         | -0.27295 | 0.60755 | 0.19838     | 0.630984103 |           |         |  |
| NA         | ENSG00000226425 | -0.36355 | 0.6419  | 0.84741     | 0.19838     | -0.36355  | 0.6419  |  |

|           |                 |          |         |             |             |           |         |  |
|-----------|-----------------|----------|---------|-------------|-------------|-----------|---------|--|
|           | -0.36355        | 0.6419   | 0.19838 | 0.630984103 |             |           |         |  |
| NA        | ENSG00000261044 | -1.0308  | 0.84869 | -0.35385    | 0.63828     | -0.95095  | 0.82919 |  |
|           | 0.84741         | 0.19838  | 0.19838 | 0.630984103 |             |           |         |  |
| NA        | ENSG00000255767 | 0.84742  | 0.19838 | 0.84742     | 0.19838     | 0.84742   | 0.19838 |  |
|           | 0.84742         | 0.19838  | 0.19838 | 0.630984103 |             |           |         |  |
| TRIM32    | ENSG00000119401 | 0.8474   | 0.19839 | 0.8474      | 0.19839     | 0.8474    |         |  |
|           | 0.19839         | 0.8474   | 0.19839 | 0.19839     | 0.630984103 |           |         |  |
| GRIK5     | ENSG00000105737 | -0.91185 | 0.81908 | 0.29496     | 0.38401     | -0.17347  | 0.56886 |  |
|           | 0.84736         | 0.1984   | 0.1984  | 0.630984103 |             |           |         |  |
| PWWP2B    | ENSG00000171813 | 0.84735  | 0.1984  | -0.43717    | 0.66901     | -0.63694  |         |  |
|           | 0.73792         | -0.29682 | 0.6167  | 0.1984      | 0.630984103 |           |         |  |
| NA        | ENSG00000272848 | -1.7668  | 0.96137 | 0.84736     | 0.1984      | -0.29737  | 0.61691 |  |
|           | 0.73932         | 0.22986  | 0.1984  | 0.630984103 |             |           |         |  |
| UGT1A2P   | ENSG00000228445 | 0.84732  | 0.19841 | 0.84732     | 0.19841     | 0.84732   |         |  |
|           | 0.19841         | 0.84732  | 0.19841 | 0.19841     | 0.630984103 |           |         |  |
| RGS5      | ENSG00000143248 | -0.48556 | 0.68636 | 0.50248     | 0.30767     | 0.44153   | 0.32942 |  |
|           | 0.84723         | 0.19843  | 0.19843 | 0.630984103 |             |           |         |  |
| NA        | ENSG00000261996 | 0.65599  | 0.25592 | 0.84721     | 0.19844     | 0.56108   | 0.28737 |  |
|           | 0.82806         | 0.20382  | 0.19844 | 0.630984103 |             |           |         |  |
| CALML3    | ENSG00000178363 | 0.84716  | 0.19845 | 0.84716     | 0.19845     | 0.84716   |         |  |
|           | 0.19845         | 0.84716  | 0.19845 | 0.19845     | 0.630984103 |           |         |  |
| BRD2      | ENSG00000204256 | 0.80893  | 0.20928 | 0.847       | 0.1985      | 0.81971   | 0.20619 |  |
|           | 0.73237         | 0.23197  | 0.1985  | 0.630984103 |             |           |         |  |
| RPL31P13  | ENSG00000228646 | 0.84691  | 0.19852 | 0.84691     | 0.19852     | 0.76731   |         |  |
|           | 0.22145         | 0.84691  | 0.19852 | 0.19852     | 0.630984103 |           |         |  |
| NA        | ENSG00000255115 | 0.84684  | 0.19854 | 0.84684     | 0.19854     | 0.84684   | 0.19854 |  |
|           | 0.84684         | 0.19854  | 0.19854 | 0.630984103 |             |           |         |  |
| NA        | ENSG00000283045 | 0.84684  | 0.19854 | 0.14867     | 0.44091     | -0.021769 | 0.50868 |  |
|           | 0.14867         | 0.44091  | 0.19854 | 0.630984103 |             |           |         |  |
| RPS26P54  | ENSG00000224161 | 0.84682  | 0.19855 | -0.66702    | 0.74762     | 0.13331   |         |  |
|           | 0.44697         | -1.0004  | 0.84143 | 0.19855     | 0.630984103 |           |         |  |
| RPSAP22   | ENSG00000229648 | 0.84681  | 0.19855 | 0.5223      | 0.30073     | -0.90572  |         |  |
|           | 0.81746         | -1.0665  | 0.8569  | 0.19855     | 0.630984103 |           |         |  |
| RBMS3-AS1 | ENSG00000235593 | 0.84677  | 0.19856 | 0.84677     | 0.19856     | 0.84677   |         |  |
|           | 0.19856         | 0.84677  | 0.19856 | 0.19856     | 0.630984103 |           |         |  |
| LMTK3     | ENSG00000142235 | 0.67032  | 0.25133 | 0.67032     | 0.25133     | 0.67032   | 0.25133 |  |
|           | 0.84667         | 0.19859  | 0.19859 | 0.630984103 |             |           |         |  |
| CEACAMP8  | ENSG00000236932 | -1.2565  | 0.89552 | -1.2565     | 0.89552     | -1.2565   |         |  |
|           | 0.89552         | 0.84668  | 0.19859 | 0.19859     | 0.630984103 |           |         |  |
| NA        | ENSG00000250448 | 0.84664  | 0.1986  | 0.84664     | 0.1986      | 0.84664   | 0.1986  |  |
|           | 0.84664         | 0.1986   | 0.1986  | 0.630984103 |             |           |         |  |
| NA        | ENSG00000273507 | 0.84664  | 0.1986  | 0.84664     | 0.1986      | -0.79384  | 0.78636 |  |
|           | -0.67216        | 0.74926  | 0.1986  | 0.630984103 |             |           |         |  |
| EEF1A1P6  | ENSG00000233476 | 0.67559  | 0.24965 | 0.84661     | 0.19861     | 0.75148   |         |  |
|           | 0.22618         | 0.084238 | 0.46643 | 0.19861     | 0.630984103 |           |         |  |
| NA        | ENSG00000278500 | 0.84661  | 0.19861 | 0.84661     | 0.19861     | 0.84661   | 0.19861 |  |
|           | 0.84661         | 0.19861  | 0.19861 | 0.630984103 |             |           |         |  |
| NA        | ENSG00000276434 | 0.84655  | 0.19862 | 0.84655     | 0.19862     | 0.84655   | 0.19862 |  |
|           | 0.84655         | 0.19862  | 0.19862 | 0.630984103 |             |           |         |  |
| TLL2      | ENSG00000095587 | 0.66012  | 0.25459 | 0.64732     | 0.25871     | -0.058379 | 0.52328 |  |
|           | 0.84647         | 0.19864  | 0.19864 | 0.630984103 |             |           |         |  |
| CLRN1     | ENSG00000163646 | 0.70454  | 0.24055 | 0.84648     | 0.19864     | 0.70454   | 0.24055 |  |
|           | 0.70454         | 0.24055  | 0.19864 | 0.630984103 |             |           |         |  |
| NA        | ENSG00000273102 | 0.84647  | 0.19865 | 0.84647     | 0.19865     | 0.84647   | 0.19865 |  |
|           | 0.84647         | 0.19865  | 0.19865 | 0.630984103 |             |           |         |  |
| VN1R51P   | ENSG00000228038 | -0.24378 | 0.5963  | -0.16778    | 0.56662     | 0.84641   |         |  |
|           | 0.19866         | 0.2266   | 0.41037 | 0.19866     | 0.630984103 |           |         |  |
| NDUFA5P5  | ENSG00000242365 | -0.56486 | 0.71392 | -0.56486    | 0.71392     | 0.84641   |         |  |
|           | 0.19866         | -0.56486 | 0.71392 | 0.19866     | 0.630984103 |           |         |  |
| UBE2V1P8  | ENSG00000233118 | 0.8464   | 0.19867 | -0.28023    | 0.61035     | 0.8464    |         |  |
|           | 0.19867         | -0.0565  | 0.52253 | 0.19867     | 0.630984103 |           |         |  |
| NA        | ENSG00000244310 | -0.95644 | 0.83058 | -1.0212     | 0.84642     | 0.84626   | 0.1987  |  |

|           |                 |             |         |             |             |          |         |       |
|-----------|-----------------|-------------|---------|-------------|-------------|----------|---------|-------|
|           | -0.60989        | 0.72903     | 0.1987  | 0.631038256 |             |          |         |       |
| PABPC1P10 | ENSG00000239443 | 0.84615     | 0.19873 | -0.10035    | 0.53997     | -0.614   |         |       |
|           | 0.73039         | 0.29041     | 0.38575 | 0.19873     | 0.631092401 |          |         |       |
| NA        | ENSG00000261568 | 0.84592     | 0.1988  | 0.84592     | 0.1988      | 0.5377   | 0.29539 |       |
|           | 0.84592         | 0.1988      | 0.1988  | 0.631223045 |             |          |         |       |
| NA        | ENSG00000234431 | 0.84587     | 0.19881 | 0.84587     | 0.19881     | 0.84587  | 0.19881 |       |
|           | 0.84587         | 0.19881     | 0.19881 | 0.631223045 |             |          |         |       |
| NA        | ENSG00000283117 | 0.67609     | 0.24949 | 0.84587     | 0.19881     | -0.10564 | 0.54207 |       |
|           | -0.57562        | 0.71756     | 0.19881 | 0.631223045 |             |          |         |       |
| NA        | ENSG00000267213 | 0.84566     | 0.19887 | 0.84566     | 0.19887     | 0.84566  | 0.19887 |       |
|           | 0.84566         | 0.19887     | 0.19887 | 0.631233893 |             |          |         |       |
| FAHD2B    | ENSG00000144199 | 0.81875     | 0.20646 | 0.26537     | 0.39536     | 0.84562  |         |       |
|           | 0.19888         | 0.24135     | 0.40464 | 0.19888     | 0.631233893 |          |         |       |
| NA        | ENSG00000241008 | 0.32912     | 0.37103 | 0.82132     | 0.20573     | 0.84564  | 0.19888 |       |
|           | 0.27438         | 0.3919      | 0.19888 | 0.631233893 |             |          |         |       |
| NA        | ENSG00000271536 | 0.84563     | 0.19888 | 0.84563     | 0.19888     | 0.84563  | 0.19888 |       |
|           | 0.84563         | 0.19888     | 0.19888 | 0.631233893 |             |          |         |       |
| MGAT4EP   | ENSG00000184774 | -0.08691    | 0.53463 | -0.08691    | 0.53463     | -0.08691 |         |       |
|           | 0.53463         | 0.84554     | 0.19891 | 0.19891     | 0.631233893 |          |         |       |
| NA        | ENSG00000275130 | -0.089502   | 0.53566 | 0.84552     | 0.19891     | -1.4339  | 0.9242  |       |
|           | -0.50929        | 0.69472     | 0.19891 | 0.631233893 |             |          |         |       |
| DRD5      | ENSG00000169676 | 0.84543     | 0.19893 | 0.56196     | 0.28707     | 0.80559  | 0.21024 |       |
|           | 0.75586         | 0.22487     | 0.19893 | 0.631233893 |             |          |         |       |
| RNU6-183P | ENSG00000200331 | -0.072074   | 0.52873 | -0.27778    | 0.60941     | 0.22712  |         |       |
|           | 0.41017         | 0.84546     | 0.19893 | 0.19893     | 0.631233893 |          |         |       |
| NA        | ENSG00000206714 | 0.84546     | 0.19893 | 0.84546     | 0.19893     | 0.84546  | 0.19893 |       |
|           | 0.84546         | 0.19893     | 0.19893 | 0.631233893 |             |          |         |       |
| NA        | ENSG00000228318 | 0.84521     | 0.199   | 0.84521     | 0.199       | 0.84521  | 0.199   | 0.199 |
|           | 0.199           | 0.631272837 |         |             |             |          |         |       |
| PPP1R11P1 | ENSG00000236216 | -0.59193    | 0.72305 | -0.83321    | 0.79764     | -0.35472 |         |       |
|           | 0.6386          | 0.84519     | 0.199   | 0.199       | 0.631272837 |          |         |       |
| LILRB3    | ENSG00000204577 | 0.84515     | 0.19901 | -0.43999    | 0.67003     | -0.43999 |         |       |
|           | 0.67003         | 0.68435     | 0.24688 | 0.19901     | 0.631272837 |          |         |       |
| NA        | ENSG00000249101 | 0.54865     | 0.29162 | 0.81487     | 0.20757     | 0.84516  | 0.19901 |       |
|           | 0.66384         | 0.2534      | 0.19901 | 0.631272837 |             |          |         |       |
| NA        | ENSG00000253749 | 0.57719     | 0.28191 | 0.84512     | 0.19902     | 0.57719  | 0.28191 |       |
|           | 0.66194         | 0.25401     | 0.19902 | 0.631272837 |             |          |         |       |
| NA        | ENSG00000272456 | 0.84514     | 0.19902 | 0.84514     | 0.19902     | 0.29268  | 0.38488 |       |
|           | -0.10011        | 0.53987     | 0.19902 | 0.631272837 |             |          |         |       |
| RPL10P7   | ENSG00000242052 | 0.84505     | 0.19904 | 0.027382    | 0.48908     | 0.84505  |         |       |
|           | 0.19904         | -0.28441    | 0.61195 | 0.19904     | 0.631295184 |          |         |       |
| MPTX1     | ENSG00000215846 | 0.84497     | 0.19906 | 0.7341      | 0.23144     | 0.7341   | 0.23144 |       |
|           | 0.7341          | 0.23144     | 0.19906 | 0.631317527 |             |          |         |       |
| LINC02232 | ENSG00000250125 | 0.036809    | 0.48532 | 0.74485     | 0.22818     | 0.78931  |         |       |
|           | 0.21497         | 0.84484     | 0.1991  | 0.1991      | 0.631403293 |          |         |       |
| RNU1-64P  | ENSG00000202313 | 0.73297     | 0.23179 | -1.3126     | 0.90535     | -0.54097 |         |       |
|           | 0.70574         | 0.84472     | 0.19913 | 0.19913     | 0.631457337 |          |         |       |
| CALCOCO2  | ENSG00000136436 | 0.016641    | 0.49336 | -0.56552    | 0.71414     | -0.25318 |         |       |
|           | 0.59994         | 0.84462     | 0.19916 | 0.19916     | 0.631480973 |          |         |       |
| NA        | ENSG00000226332 | 0.84442     | 0.19922 | -0.40345    | 0.65669     | 0.28935  | 0.38616 |       |
|           | 0.28935         | 0.38616     | 0.19922 | 0.631480973 |             |          |         |       |
| NA        | ENSG00000255250 | 0.84442     | 0.19922 | 0.84442     | 0.19922     | 0.84442  | 0.19922 |       |
|           | 0.84442         | 0.19922     | 0.19922 | 0.631480973 |             |          |         |       |
| APOBEC3F  | ENSG00000128394 | -0.2923     | 0.61497 | 0.038716    | 0.48456     | 0.84438  |         |       |
|           | 0.19923         | 0.1933      | 0.42336 | 0.19923     | 0.631480973 |          |         |       |
| NA        | ENSG00000260685 | 0.84434     | 0.19924 | 0.84434     | 0.19924     | 0.84434  | 0.19924 |       |
|           | 0.84434         | 0.19924     | 0.19924 | 0.631480973 |             |          |         |       |
| TMEM274P  | ENSG00000283611 | -0.98905    | 0.83868 | 0.84435     | 0.19924     | 0.84435  |         |       |
|           | 0.19924         | 0.84435     | 0.19924 | 0.19924     | 0.631480973 |          |         |       |
| RNU7-18P  | ENSG00000252174 | 0.8443      | 0.19925 | 0.8443      | 0.19925     | 0.8443   |         |       |
|           | 0.19925         | 0.8443      | 0.19925 | 0.19925     | 0.631480973 |          |         |       |
| NA        | ENSG00000246541 | -0.48022    | 0.68446 | 0.84428     | 0.19926     | -0.4374  | 0.66909 |       |



|                |                 |           |         |             |             |           |         |  |
|----------------|-----------------|-----------|---------|-------------|-------------|-----------|---------|--|
|                | 0.34885         | 0.3636    | 0.19926 | 0.631480973 |             |           |         |  |
| MKNK1-AS1      | ENSG00000269956 | 0.84428   | 0.19926 | -1.2744     | 0.89874     | 0.84428   |         |  |
|                | 0.19926         | 0.44262   | 0.32902 | 0.19926     | 0.631480973 |           |         |  |
| MYL6P1         | ENSG00000226543 | 0.84423   | 0.19927 | -0.1365     | 0.55429     | 0.38648   |         |  |
|                | 0.34957         | -1.4809   | 0.93068 | 0.19927     | 0.631480973 |           |         |  |
| CISD1          | ENSG00000122873 | 0.73809   | 0.23023 | 0.71679     | 0.23675     | 0.71679   | 0.23675 |  |
|                | 0.8442          | 0.19928   | 0.19928 | 0.631480973 |             |           |         |  |
| ZNF225         | ENSG00000256294 | 0.44699   | 0.32744 | 0.84402     | 0.19933     | 0.84402   |         |  |
|                | 0.19933         | 0.84402   | 0.19933 | 0.19933     | 0.631598342 |           |         |  |
| NA             | ENSG00000222072 | 0.26621   | 0.39504 | 0.84383     | 0.19938     | 0.81927   | 0.20632 |  |
|                | 0.79355         | 0.21373   | 0.19938 | 0.631696918 |             |           |         |  |
| NA             | ENSG00000275576 | 0.84382   | 0.19939 | 0.070602    | 0.47186     | 0.84382   | 0.19939 |  |
|                | 0.84382         | 0.19939   | 0.19939 | 0.631696918 |             |           |         |  |
| TMPRSS12       | ENSG00000186452 | 0.84375   | 0.1994  | 0.82711     | 0.20409     | 0.49964   |         |  |
|                | 0.30867         | -0.78133  | 0.7827  | 0.1994      | 0.631696918 |           |         |  |
| NA             | ENSG00000248605 | -0.049923 | 0.51991 | 0.84368     | 0.19943     | -1.014    | 0.84472 |  |
|                | -0.069757       | 0.52781   | 0.19943 | 0.631741498 |             |           |         |  |
| MGAM           | ENSG00000257335 | 0.84361   | 0.19944 | 0.011434    | 0.49544     | -0.87895  | 0.81029 |  |
|                | 0.1269          | 0.44951   | 0.19944 | 0.631741498 |             |           |         |  |
| NA             | ENSG00000270997 | -0.59424  | 0.72383 | 0.60333     | 0.27315     | -1.5007   | 0.93328 |  |
|                | 0.84354         | 0.19946   | 0.19946 | 0.631763783 |             |           |         |  |
| NA             | ENSG00000273073 | -0.16619  | 0.566   | -0.22107    | 0.58748     | -0.01095  | 0.50437 |  |
|                | 0.84344         | 0.19949   | 0.19949 | 0.631817737 |             |           |         |  |
| RPSAP40        | ENSG00000231368 | 0.042566  | 0.48302 | -0.025566   | 0.5102      | 0.8433    |         |  |
|                | 0.19953         | 0.8433    | 0.19953 | 0.19953     | 0.631834111 |           |         |  |
| RN7SL547P      | ENSG00000240584 | 0.84329   | 0.19953 | 0.84329     | 0.19953     | 0.84329   |         |  |
|                | 0.19953         | 0.84329   | 0.19953 | 0.19953     | 0.631834111 |           |         |  |
| NA             | ENSG00000282987 | 0.023815  | 0.4905  | 0.49965     | 0.30866     | 0.84324   | 0.19955 |  |
|                | 0.49965         | 0.30866   | 0.19955 | 0.631834111 |             |           |         |  |
| NA             | ENSG00000225140 | 0.84318   | 0.19956 | -1.451      | 0.92661     | -0.53903  | 0.70507 |  |
|                | 0.44926         | 0.32662   | 0.19956 | 0.631834111 |             |           |         |  |
| NA             | ENSG00000232896 | -1.0238   | 0.84704 | 0.84321     | 0.19956     | -1.1425   | 0.87338 |  |
|                | -0.20043        | 0.57943   | 0.19956 | 0.631834111 |             |           |         |  |
| NXPE2P1        | ENSG00000255982 | 0.84287   | 0.19965 | 0.84287     | 0.19965     | 0.84287   |         |  |
|                | 0.19965         | 0.84287   | 0.19965 | 0.19965     | 0.631958287 |           |         |  |
| EEF1E1-BLOC1S5 | ENSG00000265818 | 0.84287   | 0.19965 | 0.84287     | 0.19965     | 0.84287   |         |  |
|                | 0.19965         | 0.84287   | 0.19965 | 0.19965     | 0.631958287 |           |         |  |
| NA             | ENSG00000258717 | -1.4297   | 0.9236  | 0.84283     | 0.19966     | -0.83538  | 0.79825 |  |
|                | -0.83538        | 0.79825   | 0.19966 | 0.631958287 |             |           |         |  |
| RNU6-363P      | ENSG00000199765 | -0.074165 | 0.52956 | 0.75929     | 0.22384     | -0.044431 |         |  |
|                | 0.51772         | 0.84277   | 0.19968 | 0.19968     | 0.631958287 |           |         |  |
| TPT1P5         | ENSG00000214108 | -0.070598 | 0.52814 | -0.3255     | 0.6276      | -0.070598 |         |  |
|                | 0.52814         | 0.84277   | 0.19968 | 0.19968     | 0.631958287 |           |         |  |
| BPIFB4         | ENSG00000186191 | 0.11727   | 0.45332 | -0.62513    | 0.73406     | 0.84272   |         |  |
|                | 0.19969         | -0.62513  | 0.73406 | 0.19969     | 0.631958287 |           |         |  |
| RTP2           | ENSG00000198471 | 0.84273   | 0.19969 | -0.90338    | 0.81684     | -0.55809  | 0.71161 |  |
|                | -0.92204        | 0.82175   | 0.19969 | 0.631958287 |             |           |         |  |
| PIK3CA         | ENSG00000121879 | 0.24488   | 0.40328 | -0.19953    | 0.57907     | 0.84262   |         |  |
|                | 0.19972         | -0.66116  | 0.74575 | 0.19972     | 0.632012183 |           |         |  |
| NA             | ENSG00000235733 | 0.84242   | 0.19978 | 0.60797     | 0.2716      | 0.37425   | 0.35411 |  |
|                | -0.22924        | 0.59066   | 0.19978 | 0.63209952  |             |           |         |  |
| SPDYE3         | ENSG00000214300 | 0.84236   | 0.19979 | -0.34721    | 0.63579     | 0.51328   |         |  |
|                | 0.30388         | -1.8129   | 0.96508 | 0.19979     | 0.63209952  |           |         |  |
| NA             | ENSG00000244337 | 0.089388  | 0.46439 | -0.14046    | 0.55585     | 0.84234   | 0.1998  |  |
|                | 0.001954        | 0.49922   | 0.1998  | 0.63209952  |             |           |         |  |
| RNU4-5P        | ENSG00000272160 | 0.84232   | 0.19981 | 0.84232     | 0.19981     | 0.84232   |         |  |
|                | 0.19981         | 0.84232   | 0.19981 | 0.19981     | 0.63209952  |           |         |  |
| COX5BP1        | ENSG00000248448 | 0.51373   | 0.30372 | 0.84224     | 0.19983     | 0.51373   |         |  |
|                | 0.30372         | -0.3218   | 0.6262  | 0.19983     | 0.63209952  |           |         |  |
| NA             | ENSG00000223436 | -0.78641  | 0.78418 | 0.21821     | 0.41363     | 0.84204   | 0.19988 |  |
|                | -0.35129        | 0.63731   | 0.19988 | 0.63209952  |             |           |         |  |
| GUSBP4         | ENSG00000239650 | -1.0344   | 0.84952 | 0.84202     | 0.19989     | 0.098955  |         |  |

|                |                 |            |         |             |             |           |         |       |
|----------------|-----------------|------------|---------|-------------|-------------|-----------|---------|-------|
|                | 0.46059         | -1.0255    | 0.84743 | 0.19989     | 0.63209952  |           |         |       |
| NA             | ENSG00000254676 | 0.842      | 0.19989 | 0.842       | 0.19989     | 0.842     | 0.19989 | 0.842 |
|                | 0.19989         | 0.63209952 |         |             |             |           |         |       |
| CENPV          | ENSG00000166582 | 0.66253    | 0.25381 | 0.80141     | 0.21145     | 0.039636  | 0.48419 |       |
|                | 0.84191         | 0.19992    | 0.19992 | 0.63209952  |             |           |         |       |
| ZDHHC24        | ENSG00000174165 | -0.40495   | 0.65724 | -0.50087    | 0.69177     | 0.84181   |         |       |
|                | 0.19995         | 0.12033    | 0.45211 | 0.19995     | 0.63209952  |           |         |       |
| MIR412         | ENSG00000199012 | 0.84178    | 0.84178 | 0.19996     | 0.84178     | 0.19996   | 0.13086 |       |
|                | 0.44794         | 0.84178    | 0.19996 | 0.19996     | 0.63209952  |           |         |       |
| MIR369         | ENSG00000199025 | 0.84178    | 0.84178 | 0.19996     | 0.84178     | 0.19996   | 0.84178 |       |
|                | 0.19996         | 0.84178    | 0.19996 | 0.19996     | 0.63209952  |           |         |       |
| MIR409         | ENSG00000199107 | 0.84178    | 0.84178 | 0.19996     | 0.84178     | 0.19996   | 0.84178 |       |
|                | 0.19996         | 0.84178    | 0.19996 | 0.19996     | 0.63209952  |           |         |       |
| NA             | ENSG00000267130 | 0.31136    | 0.37776 | 0.84168     | 0.19998     | -0.61303  | 0.73007 |       |
|                | 0.31136         | 0.37776    | 0.19998 | 0.63209952  |             |           |         |       |
| ASB10          | ENSG00000146926 | -1.8753    | 0.96963 | -1.8753     | 0.96963     | -1.8753   | 0.96963 |       |
|                | 0.84165         | 0.19999    | 0.19999 | 0.63209952  |             |           |         |       |
| TMEM94         | ENSG00000177728 | 0.079891   | 0.46816 | 0.78074     | 0.21748     | 0.079891  |         |       |
|                | 0.46816         | 0.8416     | 0.2     | 0.2         | 0.63209952  |           |         |       |
| RBM43P1        | ENSG00000239263 | 0.84162    | 0.2     | -0.75472    | 0.77479     | -0.14729  | 0.55855 |       |
|                | -0.13199        | 0.5525     | 0.2     | 0.63209952  |             |           |         |       |
| CEP72          | ENSG00000112877 | 0.84159    | 0.20001 | 0.76088     | 0.22336     | 0.70552   | 0.24024 |       |
|                | 0.55166         | 0.29059    | 0.20001 | 0.63209952  |             |           |         |       |
| EEF1A1P24      | ENSG00000223668 | -0.13511   | 0.55374 | 0.43645     | 0.33125     | 0.84156   |         |       |
|                | 0.20002         | -0.063873  | 0.52546 | 0.20002     | 0.63209952  |           |         |       |
| LINC00639      | ENSG00000259070 | 0.84155    | 0.20002 | -1.0962     | 0.86351     | -0.33591  |         |       |
|                | 0.63153         | -0.2362    | 0.59336 | 0.20002     | 0.63209952  |           |         |       |
| NA             | ENSG00000261832 | 0.84154    | 0.20002 | 0.84154     | 0.20002     | 0.84154   | 0.20002 |       |
|                | 0.84154         | 0.20002    | 0.20002 | 0.63209952  |             |           |         |       |
| RPL5P17        | ENSG00000243859 | -0.39379   | 0.65313 | -0.27045    | 0.60659     | 0.23116   |         |       |
|                | 0.40859         | 0.84139    | 0.20006 | 0.20006     | 0.632119192 |           |         |       |
| NA             | ENSG00000244358 | -0.9125    | 0.81925 | 0.8414      | 0.20006     | -0.9125   | 0.81925 |       |
|                | -0.9125         | 0.81925    | 0.20006 | 0.632119192 |             |           |         |       |
| CEP55          | ENSG00000138180 | -0.26372   | 0.604   | 0.84136     | 0.20007     | 0.84136   | 0.20007 |       |
|                | -0.91047        | 0.81871    | 0.20007 | 0.632119192 |             |           |         |       |
| NA             | ENSG00000254373 | 0.84133    | 0.20008 | 0.84133     | 0.20008     | 0.84133   | 0.20008 |       |
|                | 0.84133         | 0.20008    | 0.20008 | 0.632119192 |             |           |         |       |
| NA             | ENSG00000275807 | 0.84118    | 0.20012 | 0.84118     | 0.20012     | 0.84118   | 0.20012 |       |
|                | 0.84118         | 0.20012    | 0.20012 | 0.632119192 |             |           |         |       |
| MCM8           | ENSG00000125885 | -0.36142   | 0.64111 | -0.63538    | 0.73741     | -0.63538  | 0.73741 |       |
|                | 0.84116         | 0.20013    | 0.20013 | 0.632119192 |             |           |         |       |
| TCTE3          | ENSG00000184786 | 0.84116    | 0.20013 | -1.7671     | 0.96139     | -1.0603   | 0.8555  |       |
|                | -0.93005        | 0.82383    | 0.20013 | 0.632119192 |             |           |         |       |
| LINC01863      | ENSG00000253959 | 0.023794   | 0.49051 | -0.89859    | 0.81557     | -0.30428  |         |       |
|                | 0.61954         | 0.84114    | 0.20013 | 0.20013     | 0.632119192 |           |         |       |
| DHRS4          | ENSG00000157326 | 0.84099    | 0.20018 | 0.39856     | 0.34511     | 0.79716   | 0.21268 |       |
|                | 0.60643         | 0.27212    | 0.20018 | 0.632132882 |             |           |         |       |
| RPL17-C18orf32 | ENSG00000215472 | 0.84098    | 0.20018 | 0.84098     | 0.20018     | 0.84098   | 0.20018 |       |
|                | 0.20018         | 0.84098    | 0.20018 | 0.20018     | 0.632132882 |           |         |       |
| RPL17          | ENSG00000265681 | 0.84098    | 0.20018 | 0.84098     | 0.20018     | 0.84098   | 0.20018 |       |
|                | 0.84098         | 0.20018    | 0.20018 | 0.632132882 |             |           |         |       |
| TRAV40         | ENSG00000211819 | 0.84091    | 0.2002  | 0.78416     | 0.21647     | 0.78416   |         |       |
|                | 0.21647         | 0.71727    | 0.2366  | 0.2002      | 0.632132882 |           |         |       |
| AKAP8          | ENSG00000105127 | -1.1308    | 0.87093 | 0.84084     | 0.20022     | 0.3404    | 0.36678 |       |
|                | 0.84084         | 0.20022    | 0.20022 | 0.632132882 |             |           |         |       |
| LINC02575      | ENSG00000228709 | 0.84083    | 0.20022 | 0.84083     | 0.20022     | 0.84083   |         |       |
|                | 0.20022         | -0.10192   | 0.54059 | 0.20022     | 0.632132882 |           |         |       |
| FUT10          | ENSG00000172728 | 0.84081    | 0.20023 | 0.56702     | 0.28535     | -0.080396 | 0.53204 |       |
|                | 0.45392         | 0.32494    | 0.20023 | 0.632132882 |             |           |         |       |
| NA             | ENSG00000267166 | 0.45328    | 0.32517 | 0.84078     | 0.20024     | 0.013252  | 0.49471 |       |
|                | -0.61232        | 0.72984    | 0.20024 | 0.632132882 |             |           |         |       |
| LINC01966      | ENSG00000268580 | 0.70584    | 0.24014 | 0.8407      | 0.20026     | 0.8407    |         |       |

|           |                 |           |         |             |             |           |         |  |
|-----------|-----------------|-----------|---------|-------------|-------------|-----------|---------|--|
|           | 0.20026         | 0.8407    | 0.20026 | 0.20026     | 0.632132882 |           |         |  |
| NIP7P1    | ENSG00000232805 | 0.84066   | 0.20027 | -0.06586    | 0.52626     | -0.06586  |         |  |
|           | 0.52626         | -0.06586  | 0.52626 | 0.20027     | 0.632132882 |           |         |  |
| CREBBP    | ENSG00000005339 | -0.25081  | 0.59902 | 0.8406      | 0.20029     | -0.91688  |         |  |
|           | 0.8204          | 0.73826   | 0.23018 | 0.20029     | 0.632132882 |           |         |  |
| LINC02006 | ENSG00000238755 | 0.84057   | 0.20029 | 0.51208     | 0.3043      | 0.50764   |         |  |
|           | 0.30585         | 0.16469   | 0.4346  | 0.20029     | 0.632132882 |           |         |  |
| DYNC1H1   | ENSG00000197102 | 0.61831   | 0.26818 | 0.51522     | 0.3032      | 0.70172   |         |  |
|           | 0.24143         | 0.84051   | 0.20031 | 0.20031     | 0.632145681 |           |         |  |
| NRBF2     | ENSG00000148572 | -1.4279   | 0.92334 | -0.20854    | 0.5826      | 0.11311   | 0.45497 |  |
|           | 0.84047         | 0.20032   | 0.20032 | 0.632145681 |             |           |         |  |
| NA        | ENSG00000260777 | 0.30807   | 0.37901 | 0.30807     | 0.37901     | 0.30807   | 0.37901 |  |
|           | 0.84028         | 0.20037   | 0.20037 | 0.63222404  |             |           |         |  |
| NA        | ENSG00000262621 | 0.5434    | 0.29343 | -0.18675    | 0.57407     | 0.84026   | 0.20038 |  |
|           | 0.84026         | 0.20038   | 0.20038 | 0.63222404  |             |           |         |  |
| MYL12AP1  | ENSG00000254387 | 0.84021   | 0.2004  | 0.84021     | 0.2004      | 0.84021   |         |  |
|           | 0.2004          | -0.79303  | 0.78612 | 0.2004      | 0.63222404  |           |         |  |
| NA        | ENSG00000253363 | 0.84011   | 0.20042 | 0.84011     | 0.20042     | 0.21421   | 0.41519 |  |
|           | 0.84011         | 0.20042   | 0.20042 | 0.63222404  |             |           |         |  |
| CREBL2    | ENSG00000111269 | 0.5671    | 0.28532 | 0.84004     | 0.20044     | 0.64976   |         |  |
|           | 0.25792         | 0.33169   | 0.37006 | 0.20044     | 0.63222404  |           |         |  |
| KATNAL2   | ENSG00000167216 | 0.33649   | 0.36825 | 0.1411      | 0.4439      | 0.044865  |         |  |
|           | 0.48211         | 0.84003   | 0.20045 | 0.20045     | 0.63222404  |           |         |  |
| RNU7-157P | ENSG00000238431 | -0.53927  | 0.70515 | 0.8399      | 0.20048     | 0.79449   |         |  |
|           | 0.21346         | 0.0036692 | 0.49854 | 0.20048     | 0.63222404  |           |         |  |
| GLIPR2    | ENSG00000122694 | 0.60743   | 0.27178 | 0.66703     | 0.25238     | 0.83986   |         |  |
|           | 0.20049         | -0.89833  | 0.8155  | 0.20049     | 0.63222404  |           |         |  |
| NA        | ENSG00000271618 | 0.83983   | 0.2005  | 0.83983     | 0.2005      | 0.83983   | 0.2005  |  |
|           | -0.18671        | 0.57406   | 0.2005  | 0.63222404  |             |           |         |  |
| RNY4P29   | ENSG00000222733 | 0.11393   | 0.45465 | 0.83975     | 0.20052     | -0.77125  |         |  |
|           | 0.77972         | -0.77125  | 0.77972 | 0.20052     | 0.63222404  |           |         |  |
| BNIP3P31  | ENSG00000270191 | 0.83978   | 0.20052 | 0.83978     | 0.20052     | 0.83978   |         |  |
|           | 0.20052         | 0.83978   | 0.20052 | 0.20052     | 0.63222404  |           |         |  |
| TYMSP2    | ENSG00000267190 | 0.83972   | 0.20053 | 0.83972     | 0.20053     | 0.83972   |         |  |
|           | 0.20053         | 0.83972   | 0.20053 | 0.20053     | 0.63222404  |           |         |  |
| RNA5SP164 | ENSG00000252342 | 0.83971   | 0.20054 | -0.32579    | 0.62771     | -0.32579  |         |  |
|           | 0.62771         | -0.32579  | 0.62771 | 0.20054     | 0.63222404  |           |         |  |
| WDR34     | ENSG00000119333 | 0.8039    | 0.21073 | 0.83959     | 0.20057     | 0.026745  | 0.48933 |  |
|           | 0.25474         | 0.39946   | 0.20057 | 0.63222404  |             |           |         |  |
| PHF23     | ENSG00000040633 | -0.16695  | 0.5663  | 0.83952     | 0.20059     | -0.79988  | 0.78811 |  |
|           | 0.83952         | 0.20059   | 0.20059 | 0.63222404  |             |           |         |  |
| FAM174C   | ENSG00000228300 | 0.83953   | 0.20059 | 0.83953     | 0.20059     | 0.83953   |         |  |
|           | 0.20059         | 0.83953   | 0.20059 | 0.20059     | 0.63222404  |           |         |  |
| NA        | ENSG00000251417 | 0.83946   | 0.2006  | 0.088584    | 0.46471     | 0.83946   | 0.2006  |  |
|           | 0.38387         | 0.35054   | 0.2006  | 0.63222404  |             |           |         |  |
| BDKRB1    | ENSG00000100739 | 0.83945   | 0.20061 | -0.34432    | 0.6347      | -0.028151 |         |  |
|           | 0.51123         | -1.3047   | 0.90401 | 0.20061     | 0.63222404  |           |         |  |
| TMED5     | ENSG00000117500 | 0.83933   | 0.20064 | -0.32377    | 0.62694     | 0.83933   | 0.20064 |  |
|           | 0.3378          | 0.36776   | 0.20064 | 0.63222404  |             |           |         |  |
| ROPN1L    | ENSG00000145491 | 0.79191   | 0.21421 | -0.53345    | 0.70314     | 0.40438   |         |  |
|           | 0.34297         | 0.8393    | 0.20065 | 0.20065     | 0.63222404  |           |         |  |
| WDR27     | ENSG00000184465 | 0.16557   | 0.43425 | -0.57486    | 0.71731     | -0.78354  | 0.78334 |  |
|           | 0.83927         | 0.20066   | 0.20066 | 0.63222404  |             |           |         |  |
| OR9K2     | ENSG00000170605 | -0.28951  | 0.6139  | -0.28951    | 0.6139      | -1.1712   | 0.87924 |  |
|           | 0.83923         | 0.20067   | 0.20067 | 0.63222404  |             |           |         |  |
| HCG4B     | ENSG00000227262 | -0.073886 | 0.52945 | -1.9203     | 0.97259     | 0.8392    | 0.20068 |  |
|           | -1.364          | 0.91372   | 0.20068 | 0.63222404  |             |           |         |  |
| FTH1P5    | ENSG00000230204 | -0.13014  | 0.55177 | -0.39431    | 0.65332     | -0.10695  |         |  |
|           | 0.54259         | 0.83917   | 0.20069 | 0.20069     | 0.63222404  |           |         |  |
| MUCL1     | ENSG00000172551 | -0.20428  | 0.58093 | 0.82519     | 0.20463     | 0.83912   | 0.2007  |  |
|           | 0.82519         | 0.20463   | 0.2007  | 0.63222404  |             |           |         |  |
| G6PC      | ENSG00000131482 | -0.53038  | 0.70208 | -0.53038    | 0.70208     | -0.53038  | 0.70208 |  |

|            |                 |           |         |             |             |          |         |  |
|------------|-----------------|-----------|---------|-------------|-------------|----------|---------|--|
|            | 0.83905         | 0.20072   | 0.20072 | 0.63222404  |             |          |         |  |
| TSHZ2      | ENSG00000182463 | 0.83905   | 0.20072 | 0.52228     | 0.30074     | -0.7     | 0.75804 |  |
|            | -1.0869         | 0.86146   | 0.20072 | 0.63222404  |             |          |         |  |
| NA         | ENSG00000199571 | 0.83904   | 0.20072 | 0.83904     | 0.20072     | 0.83904  | 0.20072 |  |
|            | 0.83904         | 0.20072   | 0.20072 | 0.63222404  |             |          |         |  |
| MPHOSPH6P1 | ENSG00000271428 | 0.83902   | 0.20073 | 0.83902     | 0.20073     | 0.83902  |         |  |
|            | 0.20073         | 0.83902   | 0.20073 | 0.20073     | 0.63222404  |          |         |  |
| ZNF322     | ENSG00000181315 | 0.83896   | 0.20074 | 0.77852     | 0.21813     | 0.45584  |         |  |
|            | 0.32425         | 0.4856    | 0.31362 | 0.20074     | 0.63222404  |          |         |  |
| NA         | ENSG00000237594 | -0.16953  | 0.56731 | 0.8389      | 0.20076     | -0.81811 | 0.79335 |  |
|            | 0.80881         | 0.20931   | 0.20076 | 0.63222404  |             |          |         |  |
| NA         | ENSG00000249106 | -1.035    | 0.84965 | 0.010262    | 0.49591     | 0.83891  | 0.20076 |  |
|            | -0.21323        | 0.58443   | 0.20076 | 0.63222404  |             |          |         |  |
| NA         | ENSG00000255669 | 0.83886   | 0.20078 | 0.83886     | 0.20078     | 0.83886  | 0.20078 |  |
|            | -0.1877         | 0.57445   | 0.20078 | 0.632246165 |             |          |         |  |
| EGR4       | ENSG00000135625 | -0.29214  | 0.61491 | -0.59073    | 0.72265     | -0.45247 | 0.67453 |  |
|            | 0.83876         | 0.2008    | 0.2008  | 0.63225892  |             |          |         |  |
| NA         | ENSG00000258387 | 0.36456   | 0.35772 | -0.96914    | 0.83376     | 0.83872  | 0.20081 |  |
|            | -0.8963         | 0.81495   | 0.20081 | 0.63225892  |             |          |         |  |
| KAZN       | ENSG00000189337 | -0.5677   | 0.71488 | -0.33734    | 0.63207     | 0.83858  | 0.20085 |  |
|            | -0.42272        | 0.66375   | 0.20085 | 0.632334634 |             |          |         |  |
| MEMO1P1    | ENSG00000226054 | 0.83854   | 0.20086 | 0.27065     | 0.39333     | 0.83854  |         |  |
|            | 0.20086         | 0.83854   | 0.20086 | 0.20086     | 0.632334634 |          |         |  |
| TAC4       | ENSG00000176358 | 0.83845   | 0.20089 | -1.0245     | 0.8472      | -1.8523  | 0.96801 |  |
|            | -1.0245         | 0.8472    | 0.20089 | 0.632388224 |             |          |         |  |
| NA         | ENSG00000234105 | 0.83823   | 0.20095 | 0.83823     | 0.20095     | 0.83823  | 0.20095 |  |
|            | 0.83823         | 0.20095   | 0.20095 | 0.632467252 |             |          |         |  |
| NA         | ENSG00000262668 | 0.51449   | 0.30345 | 0.059319    | 0.47635     | 0.83823  | 0.20095 |  |
|            | 0.51449         | 0.30345   | 0.20095 | 0.632467252 |             |          |         |  |
| NA         | ENSG00000252040 | 0.83814   | 0.20097 | -0.45904    | 0.6769      | 0.83814  | 0.20097 |  |
|            | 0.83814         | 0.20097   | 0.20097 | 0.632467252 |             |          |         |  |
| RNU4-22P   | ENSG00000222990 | 0.70754   | 0.23962 | 0.83811     | 0.20098     | 0.83811  |         |  |
|            | 0.20098         | 0.83811   | 0.20098 | 0.20098     | 0.632467252 |          |         |  |
| NA         | ENSG00000282022 | 0.83813   | 0.20098 | 0.83813     | 0.20098     | 0.83813  | 0.20098 |  |
|            | 0.83813         | 0.20098   | 0.20098 | 0.632467252 |             |          |         |  |
| DBH        | ENSG00000123454 | 0.21729   | 0.41399 | -0.18227    | 0.57231     | 0.67402  | 0.25015 |  |
|            | 0.83802         | 0.20101   | 0.20101 | 0.632511435 |             |          |         |  |
| KRT77      | ENSG00000189182 | 0.83797   | 0.20102 | -0.5926     | 0.72328     | 0.48512  | 0.31379 |  |
|            | -0.72266        | 0.76505   | 0.20102 | 0.632511435 |             |          |         |  |
| MIR1302-4  | ENSG00000221628 | 0.21983   | 0.413   | 0.21983     | 0.413       | 0.8379   | 0.20104 |  |
|            | 0.21983         | 0.413     | 0.20104 | 0.632533523 |             |          |         |  |
| MIR4439    | ENSG00000263828 | 0.83777   | 0.20108 | 0.14996     | 0.4404      | 0.83777  |         |  |
|            | 0.20108         | 0.83777   | 0.20108 | 0.20108     | 0.632568311 |          |         |  |
| TAF6L      | ENSG00000162227 | -0.020936 | 0.50835 | -0.80215    | 0.78877     | 0.035755 | 0.48574 |  |
|            | 0.83773         | 0.20109   | 0.20109 | 0.632568311 |             |          |         |  |
| NA         | ENSG00000255886 | 0.83773   | 0.20109 | -0.26658    | 0.6051      | 0.83773  | 0.20109 |  |
|            | 0.83773         | 0.20109   | 0.20109 | 0.632568311 |             |          |         |  |
| PLCL2      | ENSG00000154822 | 0.61522   | 0.26921 | 0.019781    | 0.49211     | 0.83763  | 0.20112 |  |
|            | 0.38585         | 0.34981   | 0.20112 | 0.632621844 |             |          |         |  |
| DDX39AP1   | ENSG00000225777 | 0.47454   | 0.31756 | -0.63989    | 0.73888     | 0.83746  |         |  |
|            | 0.20117         | 0.54359   | 0.29336 | 0.20117     | 0.632637846 |          |         |  |
| LINC01935  | ENSG00000224095 | 0.83743   | 0.20118 | 0.83743     | 0.20118     | 0.83743  |         |  |
|            | 0.20118         | 0.83743   | 0.20118 | 0.20118     | 0.632637846 |          |         |  |
| OR1D4      | ENSG00000255095 | -0.023503 | 0.50938 | 0.83742     | 0.20118     | 0.45745  | 0.32367 |  |
|            | -0.61792        | 0.73169   | 0.20118 | 0.632637846 |             |          |         |  |
| LINC02335  | ENSG00000278630 | 0.83741   | 0.20118 | -1.0683     | 0.8573      | 0.83741  |         |  |
|            | 0.20118         | -0.27819  | 0.60956 | 0.20118     | 0.632637846 |          |         |  |
| NA         | ENSG00000283342 | 0.73637   | 0.23075 | -0.69666    | 0.75699     | 0.83737  | 0.20119 |  |
|            | -0.3911         | 0.65214   | 0.20119 | 0.632637846 |             |          |         |  |
| NA         | ENSG00000268735 | -0.021406 | 0.50854 | -0.021406   | 0.50854     | 0.83729  | 0.20121 |  |
|            | 0.022902        | 0.49086   | 0.20121 | 0.632659911 |             |          |         |  |
| NA         | ENSG00000225123 | 0.83718   | 0.20125 | 0.83718     | 0.20125     | -0.3415  | 0.63364 |  |

|           |                 |          |         |             |             |          |         |  |
|-----------|-----------------|----------|---------|-------------|-------------|----------|---------|--|
|           | -1.0859         | 0.86124  | 0.20125 | 0.632744855 |             |          |         |  |
| LINC00348 | ENSG00000226846 | 0.71805  | 0.23636 | 0.71805     | 0.23636     | -0.1015  |         |  |
|           | 0.54042         | 0.83691  | 0.20132 | 0.20132     | 0.632814286 |          |         |  |
| RN7SL323P | ENSG00000241997 | 0.11326  | 0.45491 | 0.11326     | 0.45491     | 0.3521   |         |  |
|           | 0.36238         | 0.8369   | 0.20132 | 0.20132     | 0.632814286 |          |         |  |
| ARHGAP20  | ENSG00000137727 | 0.49286  | 0.31106 | 0.83683     | 0.20134     | -0.39423 |         |  |
|           | 0.65329         | 0.54297  | 0.29357 | 0.20134     | 0.632814286 |          |         |  |
| NA        | ENSG00000254821 | -0.52516 | 0.70026 | 0.83685     | 0.20134     | -0.57091 | 0.71597 |  |
|           | 0.83685         | 0.20134  | 0.20134 | 0.632814286 |             |          |         |  |
| NA        | ENSG00000278977 | 0.83684  | 0.20134 | 0.83684     | 0.20134     | 0.83684  | 0.20134 |  |
|           | 0.83684         | 0.20134  | 0.20134 | 0.632814286 |             |          |         |  |
| CRABP2    | ENSG00000143320 | 0.83681  | 0.20135 | 0.83681     | 0.20135     | 0.12383  |         |  |
|           | 0.45073         | -0.75411 | 0.77461 | 0.20135     | 0.632814286 |          |         |  |
| LINC00052 | ENSG00000259527 | -0.61107 | 0.72942 | 0.8367      | 0.20138     | -0.50197 |         |  |
|           | 0.69216         | -0.50197 | 0.69216 | 0.20138     | 0.632867754 |          |         |  |
| NCAPH2    | ENSG00000025770 | -0.73833 | 0.76984 | -0.43227    | 0.66723     | -1.1734  |         |  |
|           | 0.87968         | 0.83654  | 0.20143 | 0.20143     | 0.632890179 |          |         |  |
| OOSP1P1   | ENSG00000238037 | 0.83651  | 0.20143 | 0.83651     | 0.20143     | 0.83651  |         |  |
|           | 0.20143         | 0.83651  | 0.20143 | 0.20143     | 0.632890179 |          |         |  |
| NA        | ENSG00000249865 | -0.52726 | 0.70099 | 0.83641     | 0.20146     | -0.52726 | 0.70099 |  |
|           | -0.52726        | 0.70099  | 0.20146 | 0.632890179 |             |          |         |  |
| HDGFL1    | ENSG00000112273 | -0.66017 | 0.74543 | 0.83636     | 0.20148     | -0.66017 |         |  |
|           | 0.74543         | -0.66017 | 0.74543 | 0.20148     | 0.632890179 |          |         |  |
| NA        | ENSG00000257524 | 0.83632  | 0.20149 | 0.83632     | 0.20149     | 0.83632  | 0.20149 |  |
|           | 0.83632         | 0.20149  | 0.20149 | 0.632890179 |             |          |         |  |
| EIF4A2    | ENSG00000156976 | 0.83628  | 0.2015  | 0.83628     | 0.2015      | 0.83628  |         |  |
|           | 0.2015          | 0.83628  | 0.2015  | 0.2015      | 0.632890179 |          |         |  |
| CCT8P1    | ENSG00000226015 | 0.83627  | 0.2015  | 0.83627     | 0.2015      | 0.83627  |         |  |
|           | 0.2015          | 0.83627  | 0.2015  | 0.2015      | 0.632890179 |          |         |  |
| NA        | ENSG00000248115 | -1.2414  | 0.89277 | 0.39065     | 0.34803     | -0.15712 | 0.56243 |  |
|           | 0.83628         | 0.2015   | 0.2015  | 0.632890179 |             |          |         |  |
| RPL7P18   | ENSG00000243806 | 0.83626  | 0.20151 | 0.83626     | 0.20151     | 0.83626  |         |  |
|           | 0.20151         | 0.83626  | 0.20151 | 0.20151     | 0.632890179 |          |         |  |
| NA        | ENSG00000253940 | 0.83622  | 0.20152 | 0.13089     | 0.44793     | 0.83622  | 0.20152 |  |
|           | 0.83622         | 0.20152  | 0.20152 | 0.632890179 |             |          |         |  |
| ZNF37BP   | ENSG00000234420 | 0.5776   | 0.28177 | 0.16543     | 0.4343      | 0.16942  |         |  |
|           | 0.43273         | 0.83616  | 0.20153 | 0.20153     | 0.632890179 |          |         |  |
| RANBP10   | ENSG00000141084 | 0.82532  | 0.20459 | 0.83602     | 0.20157     | -0.66369 |         |  |
|           | 0.74655         | -0.39172 | 0.65237 | 0.20157     | 0.632965616 |          |         |  |
| NA        | ENSG00000223036 | -0.92781 | 0.82325 | -0.92781    | 0.82325     | 0.836    | 0.20158 |  |
|           | 0.78941         | 0.21494  | 0.20158 | 0.632965616 |             |          |         |  |
| NA        | ENSG00000247877 | 0.83564  | 0.20168 | -0.060155   | 0.52398     | 0.63208  | 0.26367 |  |
|           | -0.7065         | 0.76006  | 0.20168 | 0.633238814 |             |          |         |  |
| OR8D2     | ENSG00000279116 | -0.40477 | 0.65718 | -0.80609    | 0.7899      | 0.83551  | 0.20172 |  |
|           | 0.83551         | 0.20172  | 0.20172 | 0.633257773 |             |          |         |  |
| NA        | ENSG00000279756 | 0.83546  | 0.20173 | 0.83546     | 0.20173     | 0.83546  | 0.20173 |  |
|           | 0.83546         | 0.20173  | 0.20173 | 0.633257773 |             |          |         |  |
| NA        | ENSG00000254003 | 0.83538  | 0.20175 | 0.83538     | 0.20175     | 0.83538  | 0.20175 |  |
|           | 0.83538         | 0.20175  | 0.20175 | 0.633257773 |             |          |         |  |
| LIMCH1    | ENSG00000064042 | 0.83531  | 0.20177 | 0.037205    | 0.48516     | 0.65109  |         |  |
|           | 0.25749         | 0.081534 | 0.46751 | 0.20177     | 0.633257773 |          |         |  |
| MIB2      | ENSG00000197530 | 0.83526  | 0.20178 | 0.42962     | 0.33374     | 0.83526  | 0.20178 |  |
|           | 0.56489         | 0.28608  | 0.20178 | 0.633257773 |             |          |         |  |
| RNU2-54P  | ENSG00000222231 | 0.83529  | 0.20178 | 0.81481     | 0.20759     | 0.83529  |         |  |
|           | 0.20178         | 0.83529  | 0.20178 | 0.20178     | 0.633257773 |          |         |  |
| NA        | ENSG00000227163 | -0.9313  | 0.82415 | -0.9313     | 0.82415     | 0.83523  | 0.20179 |  |
|           | -0.9313         | 0.82415  | 0.20179 | 0.633257773 |             |          |         |  |
| NA        | ENSG00000254295 | 0.83525  | 0.20179 | 0.83525     | 0.20179     | 0.83525  | 0.20179 |  |
|           | 0.83525         | 0.20179  | 0.20179 | 0.633257773 |             |          |         |  |
| NA        | ENSG00000249627 | 0.83509  | 0.20183 | 0.83509     | 0.20183     | 0.83509  | 0.20183 |  |
|           | 0.83509         | 0.20183  | 0.20183 | 0.633292331 |             |          |         |  |
| CORO7     | ENSG00000262246 | 0.83511  | 0.20183 | 0.83511     | 0.20183     | 0.83511  | 0.20183 |  |

|             |                 |           |         |             |             |          |         |  |
|-------------|-----------------|-----------|---------|-------------|-------------|----------|---------|--|
|             | 0.83511         | 0.20183   | 0.20183 | 0.633292331 |             |          |         |  |
| S100A8      | ENSG00000143546 | 0.83505   | 0.20184 | 0.83505     | 0.20184     | 0.7458   |         |  |
|             | 0.22789         | 0.5319    | 0.2974  | 0.20184     | 0.633292331 |          |         |  |
| RN7SL728P   | ENSG00000241144 | 0.83496   | 0.20187 | 0.83496     | 0.20187     | 0.83496  |         |  |
|             | 0.20187         | 0.64251   | 0.26027 | 0.20187     | 0.63334568  |          |         |  |
| ZNF236-DT   | ENSG00000264278 | 0.83488   | 0.20189 | 0.419       | 0.33761     | 0.060272 | 0.47597 |  |
|             | 0.77767         | 0.21838   | 0.20189 | 0.63336765  |             |          |         |  |
| MIR2355     | ENSG00000253008 | 0.42041   | 0.33709 | 0.42041     | 0.33709     | 0.83452  |         |  |
|             | 0.20199         | 0.65055   | 0.25767 | 0.20199     | 0.633640576 |          |         |  |
| NA          | ENSG00000236118 | 0.83438   | 0.20203 | 0.61001     | 0.27093     | 0.61001  | 0.27093 |  |
|             | 0.61001         | 0.27093   | 0.20203 | 0.633678147 |             |          |         |  |
| RNU6-150P   | ENSG00000252046 | 0.27449   | 0.39185 | 0.27449     | 0.39185     | 0.043164 |         |  |
|             | 0.48279         | 0.83436   | 0.20204 | 0.20204     | 0.633678147 |          |         |  |
| NA          | ENSG00000253051 | 0.83432   | 0.20205 | 0.83432     | 0.20205     | 0.83432  | 0.20205 |  |
|             | 0.83432         | 0.20205   | 0.20205 | 0.633678147 |             |          |         |  |
| BHLHE40-AS1 | ENSG00000235831 | 0.83425   | 0.20207 | -0.55483    | 0.7105      | 0.33157  |         |  |
|             | 0.37011         | -0.14391  | 0.55721 | 0.20207     | 0.633678147 |          |         |  |
| LINC01230   | ENSG00000281769 | 0.18782   | 0.42551 | -0.29596    | 0.61637     | 0.83425  |         |  |
|             | 0.20207         | 0.83425   | 0.20207 | 0.20207     | 0.633678147 |          |         |  |
| OR1D3P      | ENSG00000262106 | -1.3551   | 0.91231 | -0.12672    | 0.55042     | 0.37384  |         |  |
|             | 0.35426         | 0.83423   | 0.20208 | 0.20208     | 0.633678147 |          |         |  |
| REXO1L5P    | ENSG00000277436 | 0.83413   | 0.2021  | -1.0616     | 0.8558      | -0.58024 |         |  |
|             | 0.71912         | -1.0515   | 0.85347 | 0.2021      | 0.633700084 |          |         |  |
| NA          | ENSG00000200547 | -0.98016  | 0.8365  | 0.83408     | 0.20212     | -0.73442 | 0.76865 |  |
|             | -0.73442        | 0.76865   | 0.20212 | 0.633722018 |             |          |         |  |
| MACF1       | ENSG00000127603 | 0.25879   | 0.3979  | 0.3295      | 0.37089     | 0.83389  | 0.20217 |  |
|             | 0.4515          | 0.32581   | 0.20217 | 0.633756284 |             |          |         |  |
| NDUFB1P1    | ENSG00000231884 | 0.83387   | 0.20218 | 0.83387     | 0.20218     | 0.83387  |         |  |
|             | 0.20218         | 0.83387   | 0.20218 | 0.20218     | 0.633756284 |          |         |  |
| GPR171      | ENSG00000174946 | 0.83382   | 0.20219 | 0.83382     | 0.20219     | 0.83382  |         |  |
|             | 0.20219         | 0.83382   | 0.20219 | 0.20219     | 0.633756284 |          |         |  |
| NA          | ENSG00000230920 | 0.83383   | 0.20219 | 0.15729     | 0.43751     | -0.72344 | 0.76529 |  |
|             | -0.23939        | 0.5946    | 0.20219 | 0.633756284 |             |          |         |  |
| CCDC198     | ENSG00000100557 | 0.8338    | 0.2022  | 0.041819    | 0.48332     | -0.50226 |         |  |
|             | 0.69226         | -1.1971   | 0.88437 | 0.2022      | 0.633756284 |          |         |  |
| NA          | ENSG00000254684 | 0.83371   | 0.20222 | -0.49233    | 0.68876     | -0.93449 | 0.82497 |  |
|             | -0.49233        | 0.68876   | 0.20222 | 0.633756284 |             |          |         |  |
| MPHOSPH10   | ENSG00000124383 | -0.023703 | 0.50946 | 0.4884      | 0.31263     | 0.83364  |         |  |
|             | 0.20224         | 0.4884    | 0.31263 | 0.20224     | 0.633756284 |          |         |  |
| NA          | ENSG00000272327 | 0.8336    | 0.20225 | 0.8336      | 0.20225     | 0.8336   | 0.20225 |  |
|             | 0.8336          | 0.20225   | 0.20225 | 0.633756284 |             |          |         |  |
| TIGIT       | ENSG00000181847 | 0.1485    | 0.44097 | 0.83357     | 0.20226     | 0.1485   | 0.44097 |  |
|             | 0.53045         | 0.2979    | 0.20226 | 0.633756284 |             |          |         |  |
| ZNF570      | ENSG00000171827 | 0.83349   | 0.20228 | -1.4467     | 0.92601     | -1.4467  |         |  |
|             | 0.92601         | -1.4467   | 0.92601 | 0.20228     | 0.633756284 |          |         |  |
| ARFGEF1     | ENSG00000066777 | 0.83348   | 0.20229 | -1.2067     | 0.88622     | -1.2067  |         |  |
|             | 0.88622         | -0.18855  | 0.57478 | 0.20229     | 0.633756284 |          |         |  |
| CHCHD4P5    | ENSG00000225222 | 0.67462   | 0.24996 | 0.83348     | 0.20229     | 0.83348  |         |  |
|             | 0.20229         | 0.83348   | 0.20229 | 0.20229     | 0.633756284 |          |         |  |
| YIPF4       | ENSG00000119820 | 0.83343   | 0.2023  | 0.42486     | 0.33547     | 0.36983  | 0.35575 |  |
|             | 0.1316          | 0.44765   | 0.2023  | 0.633756284 |             |          |         |  |
| SSUH2       | ENSG00000125046 | -0.74919  | 0.77313 | -1.6947     | 0.95493     | 0.83329  | 0.20234 |  |
|             | -1.8906         | 0.97066   | 0.20234 | 0.633784346 |             |          |         |  |
| TMED8       | ENSG00000100580 | 0.83321   | 0.20236 | 0.83321     | 0.20236     | 0.83321  | 0.20236 |  |
|             | -0.17371        | 0.56895   | 0.20236 | 0.633784346 |             |          |         |  |
| NA          | ENSG00000267503 | 0.35348   | 0.36186 | -0.0090134  | 0.5036      | 0.68508  | 0.24665 |  |
|             | 0.83318         | 0.20237   | 0.20237 | 0.633784346 |             |          |         |  |
| MRI1        | ENSG00000037757 | 0.40191   | 0.34387 | 0.83313     | 0.20239     | 0.78022  | 0.21763 |  |
|             | -0.01653        | 0.50659   | 0.20239 | 0.633784346 |             |          |         |  |
| NA          | ENSG00000249808 | 0.64071   | 0.26086 | 0.14322     | 0.44306     | 0.83313  | 0.20239 |  |
|             | -0.72401        | 0.76547   | 0.20239 | 0.633784346 |             |          |         |  |
| RN7SL843P   | ENSG00000239547 | 0.83307   | 0.2024  | 0.41708     | 0.33831     | -0.69347 |         |  |

|           |                 |          |         |             |             |          |         |  |
|-----------|-----------------|----------|---------|-------------|-------------|----------|---------|--|
|           | 0.75599         | 0.41708  | 0.33831 | 0.2024      | 0.633784346 |          |         |  |
| NA        | ENSG00000266100 | 0.83309  | 0.2024  | 0.83309     | 0.2024      | 0.83309  | 0.2024  |  |
|           | 0.83309         | 0.2024   | 0.2024  | 0.633784346 |             |          |         |  |
| NOM1      | ENSG00000146909 | 0.70771  | 0.23956 | 0.8327      | 0.20251     | 0.31105  | 0.37788 |  |
|           | 0.45734         | 0.32371  | 0.20251 | 0.633940624 |             |          |         |  |
| ZNF525    | ENSG00000203326 | 0.64822  | 0.25842 | -0.10021    | 0.53991     | -0.10021 |         |  |
|           | 0.53991         | 0.83265  | 0.20252 | 0.20252     | 0.633940624 |          |         |  |
| NA        | ENSG00000218577 | 0.83267  | 0.20252 | -0.73856    | 0.76991     | 0.70953  | 0.239   |  |
|           | -1.4494         | 0.92638  | 0.20252 | 0.633940624 |             |          |         |  |
| NA        | ENSG00000223970 | 0.83258  | 0.20254 | 0.83258     | 0.20254     | 0.83258  | 0.20254 |  |
|           | 0.83258         | 0.20254  | 0.20254 | 0.633940624 |             |          |         |  |
| PDYN-AS1  | ENSG00000233896 | -0.31653 | 0.6242  | 0.17196     | 0.43174     | -0.31653 |         |  |
|           | 0.6242          | 0.83258  | 0.20254 | 0.20254     | 0.633940624 |          |         |  |
| SRRM4     | ENSG00000139767 | 0.73425  | 0.2314  | 0.1653      | 0.43436     | -0.7854  | 0.78389 |  |
|           | 0.83249         | 0.20257  | 0.20257 | 0.633940624 |             |          |         |  |
| NA        | ENSG00000258424 | 0.83249  | 0.20257 | 0.83249     | 0.20257     | 0.83249  | 0.20257 |  |
|           | 0.83249         | 0.20257  | 0.20257 | 0.633940624 |             |          |         |  |
| HCFC1R1   | ENSG00000103145 | 0.83243  | 0.20258 | 0.83243     | 0.20258     | 0.83243  |         |  |
|           | 0.20258         | 0.83243  | 0.20258 | 0.20258     | 0.633940624 |          |         |  |
| THOC6     | ENSG00000131652 | 0.83243  | 0.20258 | 0.83243     | 0.20258     | 0.83243  | 0.20258 |  |
|           | 0.83243         | 0.20258  | 0.20258 | 0.633940624 |             |          |         |  |
| CYFIP1    | ENSG00000273749 | -1.2747  | 0.89878 | -1.1857     | 0.88213     | -0.12987 |         |  |
|           | 0.55166         | 0.83244  | 0.20258 | 0.20258     | 0.633940624 |          |         |  |
| NA        | ENSG00000253525 | -0.28741 | 0.6131  | -0.382      | 0.64877     | 0.83238  | 0.2026  |  |
|           | -0.83564        | 0.79832  | 0.2026  | 0.633943666 |             |          |         |  |
| NA        | ENSG00000258716 | 0.83233  | 0.20261 | 0.83233     | 0.20261     | 0.83233  | 0.20261 |  |
|           | 0.83233         | 0.20261  | 0.20261 | 0.633943666 |             |          |         |  |
| NA        | ENSG00000227711 | 0.68904  | 0.2454  | 0.33363     | 0.36933     | 0.83229  | 0.20262 |  |
|           | 0.6412          | 0.2607   | 0.20262 | 0.633943666 |             |          |         |  |
| ERN1      | ENSG00000178607 | 0.11587  | 0.45388 | 0.8322      | 0.20265     | 0.15209  | 0.43956 |  |
|           | 0.11587         | 0.45388  | 0.20265 | 0.633996822 |             |          |         |  |
| HMG1P4    | ENSG00000234705 | 0.39596  | 0.34607 | 0.83189     | 0.20274     | -1.2039  |         |  |
|           | 0.88569         | 0.83189  | 0.20274 | 0.20274     | 0.634209377 |          |         |  |
| LARP7     | ENSG00000174720 | 0.8318   | 0.20276 | -1.2797     | 0.89967     | -0.82092 | 0.79415 |  |
|           | -0.80467        | 0.78949  | 0.20276 | 0.634209377 |             |          |         |  |
| DLK1      | ENSG00000185559 | -0.33481 | 0.63112 | 0.83179     | 0.20276     | -0.19885 | 0.57881 |  |
|           | -0.51546        | 0.69688  | 0.20276 | 0.634209377 |             |          |         |  |
| NA        | ENSG00000253197 | -0.10561 | 0.54206 | 0.83175     | 0.20277     | 0.83175  | 0.20277 |  |
|           | 0.75577         | 0.22489  | 0.20277 | 0.634209377 |             |          |         |  |
| KIR2DL1   | ENSG00000125498 | 0.38026  | 0.35187 | 0.82629     | 0.20432     | 0.83171  |         |  |
|           | 0.20279         | 0.6542   | 0.25649 | 0.20279     | 0.634212366 |          |         |  |
| SDF2      | ENSG00000132581 | 0.83163  | 0.20281 | 0.83163     | 0.20281     | 0.83163  | 0.20281 |  |
|           | 0.83163         | 0.20281  | 0.20281 | 0.634212366 |             |          |         |  |
| MIR3609   | ENSG00000266019 | 0.83163  | 0.20281 | 0.83163     | 0.20281     | 0.83163  |         |  |
|           | 0.20281         | 0.83163  | 0.20281 | 0.20281     | 0.634212366 |          |         |  |
| NA        | ENSG00000225216 | 0.8315   | 0.20285 | 0.3278      | 0.37153     | 0.8315   | 0.20285 |  |
|           | 0.8315          | 0.20285  | 0.20285 | 0.634256047 |             |          |         |  |
| NA        | ENSG00000249380 | -0.10255 | 0.54084 | 0.56021     | 0.28767     | 0.83147  | 0.20285 |  |
|           | 0.48169         | 0.31501  | 0.20285 | 0.634256047 |             |          |         |  |
| RLN2      | ENSG00000107014 | -1.3493  | 0.91137 | 0.29119     | 0.38545     | -0.37622 | 0.64662 |  |
|           | 0.83132         | 0.2029   | 0.2029  | 0.634330981 |             |          |         |  |
| KCNE1B    | ENSG00000276289 | 0.8313   | 0.2029  | 0.8313      | 0.2029      | 0.8313   |         |  |
|           | 0.2029          | 0.8313   | 0.2029  | 0.2029      | 0.634330981 |          |         |  |
| OR13C5    | ENSG00000277556 | -0.25632 | 0.60115 | 0.83122     | 0.20292     | -0.25959 |         |  |
|           | 0.60241         | -0.25959 | 0.60241 | 0.20292     | 0.634343377 |          |         |  |
| KANSL1L   | ENSG00000144445 | -0.79324 | 0.78618 | -1.0458     | 0.85217     | 0.83119  |         |  |
|           | 0.20293         | -0.85953 | 0.80498 | 0.20293     | 0.634343377 |          |         |  |
| LYZL2     | ENSG00000151033 | 0.03444  | 0.48626 | -0.33457    | 0.63103     | 0.83108  | 0.20296 |  |
|           | 0.82886         | 0.20359  | 0.20296 | 0.634360569 |             |          |         |  |
| ENOX1-AS1 | ENSG00000233821 | 0.83083  | 0.20303 | 0.83083     | 0.20303     | 0.83083  |         |  |
|           | 0.20303         | 0.83083  | 0.20303 | 0.20303     | 0.634360569 |          |         |  |
| RNU6-775P | ENSG00000238619 | 0.8308   | 0.20304 | 0.62181     | 0.26703     | 0.62181  |         |  |

|           |                 |             |         |             |             |           |         |  |  |
|-----------|-----------------|-------------|---------|-------------|-------------|-----------|---------|--|--|
|           | 0.26703         | 0.7094      | 0.23904 | 0.20304     | 0.634360569 |           |         |  |  |
| RSU1P1    | ENSG00000230425 | -0.57848    | 0.71853 | -0.34468    | 0.63483     | 0.0084398 |         |  |  |
|           | 0.49663         | 0.83077     | 0.20305 | 0.20305     | 0.634360569 |           |         |  |  |
| NA        | ENSG00000233987 | 0.83064     | 0.20309 | 0.73399     | 0.23148     | 0.67888   | 0.24861 |  |  |
|           | -1.0235         | 0.84697     | 0.20309 | 0.634360569 |             |           |         |  |  |
| LINC01219 | ENSG00000232987 | 0.83055     | 0.20311 | 0.83055     | 0.20311     | 0.83055   |         |  |  |
|           | 0.20311         | 0.83055     | 0.20311 | 0.20311     | 0.634360569 |           |         |  |  |
| MSI1      | ENSG00000135097 | 0.046517    | 0.48145 | -0.2084     | 0.58254     | -0.033604 | 0.5134  |  |  |
|           | 0.83053         | 0.20312     | 0.20312 | 0.634360569 |             |           |         |  |  |
| RPL23AP18 | ENSG00000225338 | 0.83054     | 0.20312 | 0.83054     | 0.20312     | 0.83054   |         |  |  |
|           | 0.20312         | 0.83054     | 0.20312 | 0.20312     | 0.634360569 |           |         |  |  |
| NA        | ENSG00000242279 | 0.83043     | 0.20315 | 0.83043     | 0.20315     | 0.83043   | 0.20315 |  |  |
|           | 0.83043         | 0.20315     | 0.20315 | 0.634360569 |             |           |         |  |  |
| NA        | ENSG00000279184 | 0.43379     | 0.33222 | 0.83042     | 0.20315     | 0.78748   | 0.2155  |  |  |
|           | 0.78748         | 0.2155      | 0.20315 | 0.634360569 |             |           |         |  |  |
| SELENOH   | ENSG00000211450 | 0.8304      | 0.20316 | 0.1423      | 0.44342     | 0.44496   |         |  |  |
|           | 0.32818         | 0.016623    | 0.49337 | 0.20316     | 0.634360569 |           |         |  |  |
| KANSL3    | ENSG00000114982 | 0.27819     | 0.39043 | 0.83036     | 0.20317     | 0.023651  |         |  |  |
|           | 0.49057         | 0.074374    | 0.47036 | 0.20317     | 0.634360569 |           |         |  |  |
| SLC38A10  | ENSG00000157637 | -0.062915   | 0.52508 | -0.028524   | 0.51138     | -0.23699  |         |  |  |
|           | 0.59367         | 0.83028     | 0.20319 | 0.20319     | 0.634360569 |           |         |  |  |
| NA        | ENSG00000223542 | 0.83023     | 0.20321 | -0.75968    | 0.77628     | -0.45172  | 0.67426 |  |  |
|           | -0.75968        | 0.77628     | 0.20321 | 0.634360569 |             |           |         |  |  |
| NFIB      | ENSG00000147862 | -0.21043    | 0.58333 | 0.83017     | 0.20322     | -0.48965  | 0.68781 |  |  |
|           | 0.31319         | 0.37707     | 0.20322 | 0.634360569 |             |           |         |  |  |
| OTUD7A    | ENSG00000169918 | -1.0404     | 0.85091 | -0.030738   | 0.51226     | 0.25302   |         |  |  |
|           | 0.40013         | 0.83018     | 0.20322 | 0.20322     | 0.634360569 |           |         |  |  |
| NA        | ENSG00000260461 | 0.042471    | 0.48306 | 0.33098     | 0.37033     | 0.83018   | 0.20322 |  |  |
|           | 0.33098         | 0.37033     | 0.20322 | 0.634360569 |             |           |         |  |  |
| NA        | ENSG00000280266 | 0.83019     | 0.20322 | 0.83019     | 0.20322     | 0.83019   | 0.20322 |  |  |
|           | 0.83019         | 0.20322     | 0.20322 | 0.634360569 |             |           |         |  |  |
| RNU6-356P | ENSG00000206867 | 0.83014     | 0.20323 | -0.50425    | 0.69296     | -1.0517   |         |  |  |
|           | 0.85352         | -0.96775    | 0.83341 | 0.20323     | 0.634360569 |           |         |  |  |
| NA        | ENSG00000203472 | 0.83009     | 0.20325 | 0.83009     | 0.20325     | 0.83009   | 0.20325 |  |  |
|           | 0.83009         | 0.20325     | 0.20325 | 0.634360569 |             |           |         |  |  |
| PWP2      | ENSG00000241945 | 0.63684     | 0.26212 | 0.37909     | 0.35231     | 0.50506   | 0.30676 |  |  |
|           | 0.83009         | 0.20325     | 0.20325 | 0.634360569 |             |           |         |  |  |
| NA        | ENSG00000275769 | 0.83        | 0.20327 | 0.83        | 0.20327     | 0.83      | 0.20327 |  |  |
|           | 0.20327         | 0.634360569 |         |             |             |           |         |  |  |
| ZSCAN5B   | ENSG00000197213 | 0.82995     | 0.20328 | 0.82995     | 0.20328     | 0.82995   |         |  |  |
|           | 0.20328         | 0.82995     | 0.20328 | 0.20328     | 0.634360569 |           |         |  |  |
| NA        | ENSG00000207244 | 0.82998     | 0.20328 | 0.82998     | 0.20328     | 0.82998   | 0.20328 |  |  |
|           | 0.82998         | 0.20328     | 0.20328 | 0.634360569 |             |           |         |  |  |
| MPDZ      | ENSG00000107186 | 0.82993     | 0.20329 | 0.82993     | 0.20329     | -0.015445 | 0.50616 |  |  |
|           | 0.82993         | 0.20329     | 0.20329 | 0.634360569 |             |           |         |  |  |
| BRWD1-AS2 | ENSG00000255568 | 0.82992     | 0.20329 | 0.82992     | 0.20329     | 0.82992   |         |  |  |
|           | 0.20329         | 0.82992     | 0.20329 | 0.20329     | 0.634360569 |           |         |  |  |
| NA        | ENSG00000260015 | 0.82992     | 0.20329 | 0.82992     | 0.20329     | 0.82992   | 0.20329 |  |  |
|           | 0.82992         | 0.20329     | 0.20329 | 0.634360569 |             |           |         |  |  |
| SAG       | ENSG00000130561 | 0.8299      | 0.2033  | -0.19524    | 0.5774      | -0.55578  | 0.71082 |  |  |
|           | -0.93841        | 0.82598     | 0.2033  | 0.634360569 |             |           |         |  |  |
| NA        | ENSG00000254867 | -0.80838    | 0.79056 | 0.82978     | 0.20333     | -0.80838  | 0.79056 |  |  |
|           | -0.80838        | 0.79056     | 0.20333 | 0.634413555 |             |           |         |  |  |
| NA        | ENSG00000252831 | 0.78078     | 0.21747 | 0.60358     | 0.27306     | -0.11313  | 0.54504 |  |  |
|           | 0.82966         | 0.20336     | 0.20336 | 0.634457113 |             |           |         |  |  |
| RPL7P24   | ENSG00000240003 | 0.82963     | 0.20337 | 0.82963     | 0.20337     | 0.82963   |         |  |  |
|           | 0.20337         | 0.82963     | 0.20337 | 0.20337     | 0.634457113 |           |         |  |  |
| NA        | ENSG00000250017 | 0.059316    | 0.47635 | -0.001588   | 0.50063     | -0.42529  | 0.66469 |  |  |
|           | 0.82955         | 0.2034      | 0.2034  | 0.634510083 |             |           |         |  |  |
| NA        | ENSG00000250839 | 0.82934     | 0.20345 | 0.82934     | 0.20345     | -0.28671  | 0.61283 |  |  |
|           | 0.82934         | 0.20345     | 0.20345 | 0.634537019 |             |           |         |  |  |
| C3orf18   | ENSG00000088543 | -0.27444    | 0.60813 | 0.82933     | 0.20346     | -0.34486  |         |  |  |



|             |                 |           |         |             |             |           |         |  |
|-------------|-----------------|-----------|---------|-------------|-------------|-----------|---------|--|
|             | 0.6349          | 0.21659   | 0.41426 | 0.20346     | 0.634537019 |           |         |  |
| B3GAT2      | ENSG00000112309 | 0.82934   | 0.20346 | 0.82934     | 0.20346     | 0.78971   |         |  |
|             | 0.21485         | 0.58035   | 0.28084 | 0.20346     | 0.634537019 |           |         |  |
| NA          | ENSG00000258660 | 0.82921   | 0.20349 | 0.82921     | 0.20349     | 0.82921   | 0.20349 |  |
|             | 0.82921         | 0.20349   | 0.20349 | 0.634537019 |             |           |         |  |
| NA          | ENSG00000237251 | 0.26212   | 0.39662 | 0.82918     | 0.2035      | 0.29664   | 0.38337 |  |
|             | 0.29664         | 0.38337   | 0.2035  | 0.634537019 |             |           |         |  |
| NA          | ENSG00000269124 | 0.8292    | 0.2035  | 0.8292      | 0.2035      | 0.8292    | 0.2035  |  |
|             | 0.8292          | 0.2035    | 0.2035  | 0.634537019 |             |           |         |  |
| KRTAP21-2   | ENSG00000187026 | 0.82915   | 0.20351 | 0.82915     | 0.20351     | 0.82915   |         |  |
|             | 0.20351         | 0.82915   | 0.20351 | 0.20351     | 0.634537019 |           |         |  |
| NA          | ENSG00000284418 | -0.076508 | 0.53049 | 0.20015     | 0.42068     | 0.82906   | 0.20353 |  |
|             | -0.066147       | 0.52637   | 0.20353 | 0.634537019 |             |           |         |  |
| NA          | ENSG00000265037 | 0.82906   | 0.20353 | 0.82906     | 0.20353     | 0.82906   | 0.20353 |  |
|             | 0.82906         | 0.20353   | 0.20353 | 0.634537019 |             |           |         |  |
| CCT8        | ENSG00000156261 | 0.82898   | 0.20356 | 0.82898     | 0.20356     | 0.82898   | 0.20356 |  |
|             | 0.82898         | 0.20356   | 0.20356 | 0.634537019 |             |           |         |  |
| RNU6-1335P  | ENSG00000202296 | 0.82892   | 0.20357 | -0.65491    | 0.74374     | 0.23515   |         |  |
|             | 0.40705         | 0.017986  | 0.49283 | 0.20357     | 0.634537019 |           |         |  |
| IGHV1OR15-2 | ENSG00000259337 | 0.8289    | 0.20358 | 0.49268     | 0.31112     | 0.8289    |         |  |
|             | 0.20358         | 0.8289    | 0.20358 | 0.20358     | 0.634537019 |           |         |  |
| EXTL2       | ENSG00000162694 | 0.82882   | 0.2036  | 0.37714     | 0.35303     | -0.26386  | 0.60406 |  |
|             | -0.57303        | 0.71669   | 0.2036  | 0.634537019 |             |           |         |  |
| NA          | ENSG00000228622 | 0.82882   | 0.2036  | 0.82882     | 0.2036      | 0.82882   | 0.2036  |  |
|             | 0.82882         | 0.2036    | 0.2036  | 0.634537019 |             |           |         |  |
| BHLHE40     | ENSG00000134107 | 0.4512    | 0.32592 | 0.80637     | 0.21001     | 0.37132   |         |  |
|             | 0.3552          | 0.82874   | 0.20362 | 0.20362     | 0.634537019 |           |         |  |
| RNU6-898P   | ENSG00000202497 | -0.57202  | 0.71635 | -0.57202    | 0.71635     | 0.82872   |         |  |
|             | 0.20363         | -0.14482  | 0.55757 | 0.20363     | 0.634537019 |           |         |  |
| NME1P1      | ENSG00000237175 | -0.71722  | 0.76338 | 0.82873     | 0.20363     | -1.2765   |         |  |
|             | 0.89912         | -0.71722  | 0.76338 | 0.20363     | 0.634537019 |           |         |  |
| LINC00443   | ENSG00000230156 | 0.82858   | 0.20367 | 0.82858     | 0.20367     | 0.053875  |         |  |
|             | 0.47852         | 0.82858   | 0.20367 | 0.20367     | 0.63459573  |           |         |  |
| NA          | ENSG00000243995 | -0.30539  | 0.61997 | -0.84177    | 0.80004     | 0.82854   | 0.20368 |  |
|             | -0.84177        | 0.80004   | 0.20368 | 0.63459573  |             |           |         |  |
| NA          | ENSG00000228962 | 0.33214   | 0.36989 | 0.4352      | 0.33171     | -0.5379   | 0.70468 |  |
|             | 0.8285          | 0.20369   | 0.20369 | 0.63459573  |             |           |         |  |
| RPL35P6     | ENSG00000244018 | 0.046018  | 0.48165 | 0.82839     | 0.20373     | -0.61764  |         |  |
|             | 0.73159         | 0.82839   | 0.20373 | 0.20373     | 0.63459573  |           |         |  |
| SDAD1P3     | ENSG00000227707 | 0.82834   | 0.20374 | -0.7576     | 0.77566     | -0.7576   |         |  |
|             | 0.77566         | -0.7576   | 0.77566 | 0.20374     | 0.63459573  |           |         |  |
| NA          | ENSG00000270951 | -1.0148   | 0.8449  | 0.82834     | 0.20374     | 0.15075   | 0.44009 |  |
|             | 0.15075         | 0.44009   | 0.20374 | 0.63459573  |             |           |         |  |
| NA          | ENSG00000266577 | -0.27725  | 0.60921 | 0.03883     | 0.48451     | -0.092307 | 0.53677 |  |
|             | 0.82834         | 0.20374   | 0.20374 | 0.63459573  |             |           |         |  |
| NA          | ENSG00000261026 | -0.13858  | 0.55511 | 0.82825     | 0.20376     | 0.0026254 | 0.49895 |  |
|             | -0.96804        | 0.83349   | 0.20376 | 0.634617461 |             |           |         |  |
| MAB21L1     | ENSG00000180660 | 0.82809   | 0.20381 | 0.82809     | 0.20381     | 0.82809   |         |  |
|             | 0.20381         | 0.82809   | 0.20381 | 0.20381     | 0.63467322  |           |         |  |
| BARD1       | ENSG00000138376 | -0.22356  | 0.58845 | 0.14053     | 0.44412     | -0.12298  | 0.54894 |  |
|             | 0.82806         | 0.20382   | 0.20382 | 0.63467322  |             |           |         |  |
| LINC01802   | ENSG00000225064 | 0.82801   | 0.20383 | 0.63378     | 0.26311     | -0.35482  |         |  |
|             | 0.63864         | 0.63378   | 0.26311 | 0.20383     | 0.63467322  |           |         |  |
| NA          | ENSG00000234174 | -0.546    | 0.70747 | -1.1275     | 0.87024     | 0.82801   | 0.20383 |  |
|             | -0.546          | 0.70747   | 0.20383 | 0.63467322  |             |           |         |  |
| PRMT2       | ENSG00000160310 | 0.82788   | 0.20387 | 0.82788     | 0.20387     | 0.82788   | 0.20387 |  |
|             | 0.82788         | 0.20387   | 0.20387 | 0.63475721  |             |           |         |  |
| LINC02285   | ENSG00000259004 | 0.8191    | 0.20636 | 0.82774     | 0.20391     | 0.8191    |         |  |
|             | 0.20636         | 0.59621   | 0.27552 | 0.20391     | 0.63484119  |           |         |  |
| UBTF        | ENSG00000108312 | 0.40912   | 0.34123 | 0.82767     | 0.20393     | 0.19339   | 0.42333 |  |
|             | 0.17395         | 0.43095   | 0.20393 | 0.634862895 |             |           |         |  |
| SNORD31B    | ENSG00000201847 | 0.20233   | 0.41983 | 0.20233     | 0.41983     | 0.20233   |         |  |

|            |                 |             |                 |             |             |           |            |         |
|------------|-----------------|-------------|-----------------|-------------|-------------|-----------|------------|---------|
|            | 0.41983         | 0.82759     | 0.20395         | 0.20395     | 0.634884598 |           |            |         |
| NA         | ENSG00000212538 | 0.82754     | 0.20397         | 0.20397     | 0.82754     | 0.20397   | 0.82754    | 0.20397 |
|            | 0.82754         | 0.20397     | 0.20397         | 0.634906298 |             |           |            |         |
| ZNF300     | ENSG00000145908 | -0.82786    | 0.79612         | 0.79612     | 0.72409     | 0.2345    | 0.82741    | 0.204   |
|            | -0.82786        | 0.79612     | 0.2040634916849 |             |             |           |            |         |
| ZNF223     | ENSG00000178386 | 0.13941     | 0.44456         | 0.44456     | 0.82738     | 0.20401   | -0.0026625 |         |
|            | 0.50106         | 0.13941     | 0.44456         | 0.20401     | 0.634916849 |           |            |         |
| LDHAL6DP   | ENSG00000250257 | 0.56425     | 0.28629         | 0.28629     | 0.46239     | 0.3219    | 0.82726    |         |
|            | 0.20405         | 0.71499     | 0.23731         | 0.20405     | 0.634916849 |           |            |         |
| RPL39P     | ENSG00000228601 | 0.82722     | 0.20406         | 0.20406     | 0.82722     | 0.20406   | 0.82722    |         |
|            | 0.20406         | 0.82722     | 0.20406         | 0.20406     | 0.634916849 |           |            |         |
| CAVIN3     | ENSG00000170955 | -0.14745    | 0.55861         | 0.55861     | -0.14745    | 0.55861   | -0.43238   |         |
|            | 0.66727         | 0.827020412 | 0.20412         | 0.634916849 |             |           |            |         |
| TUSC8      | ENSG00000237361 | 0.827020412 | -0.092078       | 0.53668     | -0.3605     | 0.64076   |            |         |
|            | -1.3542         | 0.91216     | 0.20412         | 0.634916849 |             |           |            |         |
| NA         | ENSG00000283125 | 0.82696     | 0.20413         | 0.58912     | 0.27789     | 0.82696   | 0.20413    |         |
|            | 0.82696         | 0.20413     | 0.20413         | 0.634916849 |             |           |            |         |
| RNU6-1210P | ENSG00000200645 | 0.82694     | 0.20414         | 0.82694     | 0.20414     | 0.82694   |            |         |
|            | 0.20414         | 0.82694     | 0.20414         | 0.20414     | 0.634916849 |           |            |         |
| NA         | ENSG00000231020 | 0.034482    | 0.48625         | 0.17704     | 0.42974     | 0.82693   | 0.20414    |         |
|            | 0.82693         | 0.20414     | 0.20414         | 0.634916849 |             |           |            |         |
| SLC11A2    | ENSG00000110911 | 0.8269      | 0.20415         | -1.3921     | 0.91805     | -8.12E-05 |            |         |
|            | 0.50003         | -1.0978     | 0.86386         | 0.20415     | 0.634916849 |           |            |         |
| LINC02571  | ENSG00000256166 | -0.53563    | 0.70389         | -0.54603    | 0.70748     | 0.26225   |            |         |
|            | 0.39657         | 0.82679     | 0.20418         | 0.20418     | 0.634916849 |           |            |         |
| NA         | ENSG00000213080 | 0.3494      | 0.36339         | 0.82672     | 0.2042      | 0.71122   | 0.23847    |         |
|            | 0.3494          | 0.36339     | 0.2042          | 0.634916849 |             |           |            |         |
| ITGAD      | ENSG00000156886 | 0.74033     | 0.22955         | 0.13606     | 0.44589     | -0.75163  | 0.77386    |         |
|            | 0.82661         | 0.20423     | 0.20423         | 0.634916849 |             |           |            |         |
| NA         | ENSG00000256306 | 0.2208      | 0.41263         | 0.2208      | 0.41263     | 0.82661   | 0.20423    |         |
|            | -0.13914        | 0.55533     | 0.20423         | 0.634916849 |             |           |            |         |
| GABARAPL2  | ENSG00000034713 | 0.48565     | 0.31361         | 0.82657     | 0.20424     | 0.82657   |            |         |
|            | 0.20424         | 0.82657     | 0.20424         | 0.20424     | 0.634916849 |           |            |         |
| NA         | ENSG00000220734 | -0.028767   | 0.51147         | -0.028767   | 0.51147     | 0.29141   | 0.38537    |         |
|            | 0.82659         | 0.20424     | 0.20424         | 0.634916849 |             |           |            |         |
| NA         | ENSG00000224984 | -0.58406    | 0.72041         | -0.58406    | 0.72041     | 0.82656   | 0.20424    |         |
|            | -0.58406        | 0.72041     | 0.20424         | 0.634916849 |             |           |            |         |
| NA         | ENSG00000235564 | 0.82658     | 0.20424         | 0.31765     | 0.37538     | 0.31765   | 0.37538    |         |
|            | 0.31765         | 0.37538     | 0.20424         | 0.634916849 |             |           |            |         |
| NA         | ENSG00000188850 | -0.00048293 | 0.50019         | -0.38096    | 0.64838     | 0.79078   |            |         |
|            | 0.21453         | 0.82644     | 0.20428         | 0.20428     | 0.634916849 |           |            |         |
| NA         | ENSG00000267786 | 0.82637     | 0.2043          | 0.82637     | 0.2043      | 0.82637   | 0.2043     |         |
|            | 0.82637         | 0.2043      | 0.2043          | 0.634916849 |             |           |            |         |
| NA         | ENSG00000268805 | 0.82638     | 0.2043          | 0.82638     | 0.2043      | -1.2703   | 0.89801    |         |
|            | -2.0098         | 0.97778     | 0.2043          | 0.634916849 |             |           |            |         |
| NA         | ENSG00000226403 | 0.8262      | 0.20434         | 0.8262      | 0.20434     | 0.8262    | 0.20434    |         |
|            | 0.8262          | 0.20434     | 0.20434         | 0.634916849 |             |           |            |         |
| COQ10BP2   | ENSG00000251552 | -0.38352    | 0.64933         | 0.82623     | 0.20434     | -0.38352  |            |         |
|            | 0.64933         | -0.96375    | 0.83241         | 0.20434     | 0.634916849 |           |            |         |
| NA         | ENSG00000277901 | 0.82623     | 0.20434         | -0.30428    | 0.61954     | -0.54022  | 0.70548    |         |
|            | 0.52322         | 0.30041     | 0.20434         | 0.634916849 |             |           |            |         |
| NA         | ENSG00000207231 | 0.82611     | 0.20437         | 0.82611     | 0.20437     | 0.82611   | 0.20437    |         |
|            | 0.82611         | 0.20437     | 0.20437         | 0.634916849 |             |           |            |         |
| NA         | ENSG00000270149 | 0.8261      | 0.20437         | 0.8261      | 0.20437     | 0.8261    | 0.20437    |         |
|            | 0.8261          | 0.20437     | 0.20437         | 0.634916849 |             |           |            |         |
| NA         | ENSG00000253985 | -0.60145    | 0.72623         | 0.28132     | 0.38923     | -0.59772  | 0.72499    |         |
|            | 0.82603         | 0.20439     | 0.20439         | 0.634916849 |             |           |            |         |
| ICOSLG     | ENSG00000160223 | -0.28911    | 0.61375         | 0.82599     | 0.2044      | 0.82599   |            |         |
|            | 0.2044          | 0.1577      | 0.43735         | 0.2044      | 0.634916849 |           |            |         |
| NA         | ENSG00000229494 | -0.40654    | 0.65783         | -1.2752     | 0.89888     | 0.82589   | 0.20443    |         |
|            | -0.40654        | 0.65783     | 0.20443         | 0.634916849 |             |           |            |         |
| CDKN1C     | ENSG00000129757 | 0.82586     | 0.20444         | -0.87536    | 0.80931     | 0.40719   |            |         |

|            |                 |            |         |             |             |          |         |  |
|------------|-----------------|------------|---------|-------------|-------------|----------|---------|--|
|            | 0.34193         | -0.87536   | 0.80931 | 0.20444     | 0.634916849 |          |         |  |
| NA         | ENSG00000201807 | 0.82581    | 0.20446 | 0.82581     | 0.20446     | 0.82581  | 0.20446 |  |
|            | 0.50223         | 0.30775    | 0.20446 | 0.634916849 |             |          |         |  |
| HDAC11-AS1 | ENSG00000244502 | -0.041803  | 0.51667 | 0.82575     | 0.20447     | 0.29779  |         |  |
|            | 0.38293         | 0.52794    | 0.29877 | 0.20447     | 0.634916849 |          |         |  |
| SLC9A1     | ENSG00000090020 | 0.37619    | 0.35339 | 0.82567     | 0.20449     | 0.15345  |         |  |
|            | 0.43902         | 0.17739    | 0.4296  | 0.20449     | 0.634916849 |          |         |  |
| NA         | ENSG00000199962 | 0.82569    | 0.20449 | 0.82569     | 0.20449     | 0.82569  | 0.20449 |  |
|            | 0.82569         | 0.20449    | 0.20449 | 0.634916849 |             |          |         |  |
| RUNX3      | ENSG00000020633 | 0.80185    | 0.21132 | 0.61667     | 0.26873     | 0.82566  | 0.2045  |  |
|            | 0.76529         | 0.22205    | 0.2045  | 0.634916849 |             |          |         |  |
| BFAR       | ENSG00000103429 | -0.057018  | 0.52273 | 0.82567     | 0.2045      | 0.75974  | 0.22371 |  |
|            | 0.6585          | 0.25511    | 0.2045  | 0.634916849 |             |          |         |  |
| NA         | ENSG00000255483 | 0.82561    | 0.20451 | 0.82561     | 0.20451     | 0.82561  | 0.20451 |  |
|            | 0.82561         | 0.20451    | 0.20451 | 0.634916849 |             |          |         |  |
| NA         | ENSG00000241667 | -0.16487   | 0.56548 | 0.8256      | 0.20452     | 0.8256   | 0.20452 |  |
|            | 0.8256          | 0.20452    | 0.20452 | 0.634916849 |             |          |         |  |
| KRT18P45   | ENSG00000249438 | 0.35578    | 0.361   | 0.35578     | 0.361       | 0.57967  | 0.28107 |  |
|            | 0.82557         | 0.20452    | 0.20452 | 0.634916849 |             |          |         |  |
| RIPOR2     | ENSG00000111913 | 0.8197     | 0.20619 | 0.82551     | 0.20454     | 0.3094   |         |  |
|            | 0.37851         | 0.16561    | 0.43423 | 0.20454     | 0.634916849 |          |         |  |
| LRRIQ3     | ENSG00000162620 | -0.2193    | 0.58679 | 0.82551     | 0.20454     | 0.61361  |         |  |
|            | 0.26974         | 0.61361    | 0.26974 | 0.20454     | 0.634916849 |          |         |  |
| LINC02796  | ENSG00000227016 | 0.82551    | 0.20454 | 0.82551     | 0.20454     | 0.82551  |         |  |
|            | 0.20454         | 0.82551    | 0.20454 | 0.20454     | 0.634916849 |          |         |  |
| TRMT2A     | ENSG00000099899 | 0.82547    | 0.20455 | -1.392      | 0.91803     | -0.44379 |         |  |
|            | 0.6714          | -0.18666   | 0.57404 | 0.20455     | 0.634916849 |          |         |  |
| SKIDA1     | ENSG00000180592 | 0.42136    | 0.33675 | 0.64867     | 0.25827     | 0.82547  |         |  |
|            | 0.20455         | 0.082179   | 0.46725 | 0.20455     | 0.634916849 |          |         |  |
| ANGEL2     | ENSG00000174606 | 0.74689    | 0.22756 | 0.74689     | 0.22756     | 0.74689  |         |  |
|            | 0.22756         | 0.82544    | 0.20456 | 0.20456     | 0.634916849 |          |         |  |
| AHRR       | ENSG00000063438 | 0.20346    | 0.41939 | 0.47959     | 0.31576     | 0.82531  | 0.2046  |  |
|            | 0.44218         | 0.32918    | 0.2046  | 0.634916849 |             |          |         |  |
| NA         | ENSG00000258091 | 0.81269    | 0.2082  | -0.43613    | 0.66863     | 0.81269  | 0.2082  |  |
|            | 0.82528         | 0.20461    | 0.20461 | 0.634916849 |             |          |         |  |
| NA         | ENSG00000258375 | 0.82523    | 0.20462 | 0.82523     | 0.20462     | 0.82523  | 0.20462 |  |
|            | 0.82523         | 0.20462    | 0.20462 | 0.634916849 |             |          |         |  |
| LINC01628  | ENSG00000232688 | 0.8252     | 0.20463 | 0.8252      | 0.20463     | 0.8252   |         |  |
|            | 0.20463         | 0.8252     | 0.20463 | 0.20463     | 0.634916849 |          |         |  |
| RBM28      | ENSG00000106344 | -0.74045   | 0.77049 | 0.43362     | 0.33228     | -0.38242 | 0.64892 |  |
|            | 0.82515         | 0.20464    | 0.20464 | 0.634916849 |             |          |         |  |
| NA         | ENSG00000257863 | 0.82509    | 0.20466 | 0.82509     | 0.20466     | 0.82509  | 0.20466 |  |
|            | 0.82509         | 0.20466    | 0.20466 | 0.634916849 |             |          |         |  |
| RPL18AP3   | ENSG00000213442 | 0.46216    | 0.32198 | 0.46216     | 0.32198     | 0.62943  |         |  |
|            | 0.26453         | 0.82505    | 0.20467 | 0.20467     | 0.634916849 |          |         |  |
| TMEM143    | ENSG00000161558 | -0.0089461 | 0.50357 | 0.19541     | 0.42253     | -1.2066  |         |  |
|            | 0.88621         | 0.82499    | 0.20469 | 0.20469     | 0.634916849 |          |         |  |
| RPL4P3     | ENSG00000230364 | 0.82499    | 0.20469 | 0.82499     | 0.20469     | 0.82499  |         |  |
|            | 0.20469         | 0.82499    | 0.20469 | 0.20469     | 0.634916849 |          |         |  |
| NA         | ENSG00000279637 | -1.001     | 0.84157 | -0.66297    | 0.74633     | 0.82497  | 0.20469 |  |
|            | -0.59317        | 0.72347    | 0.20469 | 0.634916849 |             |          |         |  |
| ASF1B      | ENSG00000105011 | 0.82477    | 0.20475 | -1.3762     | 0.91562     | 0.040556 | 0.48383 |  |
|            | -1.5718         | 0.942      | 0.20475 | 0.634995772 |             |          |         |  |
| NIPAL2     | ENSG00000104361 | 0.82475    | 0.20476 | 0.093162    | 0.46289     | 0.57207  |         |  |
|            | 0.28364         | 0.19104    | 0.42425 | 0.20476     | 0.634995772 |          |         |  |
| RPL23AP80  | ENSG00000213035 | 0.82474    | 0.20476 | 0.82474     | 0.20476     | 0.82474  |         |  |
|            | 0.20476         | 0.82474    | 0.20476 | 0.20476     | 0.634995772 |          |         |  |
| NA         | ENSG00000279411 | 0.82459    | 0.2048  | 0.82459     | 0.2048      | 0.82459  | 0.2048  |  |
|            | 0.82459         | 0.2048     | 0.2048  | 0.634995772 |             |          |         |  |
| THY1       | ENSG00000154096 | -0.59069   | 0.72264 | -1.4345     | 0.92429     | -1.12    | 0.86865 |  |
|            | 0.82445         | 0.20484    | 0.20484 | 0.634995772 |             |          |         |  |
| SEPTIN10   | ENSG00000186522 | 0.65107    | 0.2575  | 0.82445     | 0.20484     | 0.14807  |         |  |

|          |                 |          |         |             |             |          |         |
|----------|-----------------|----------|---------|-------------|-------------|----------|---------|
|          | 0.44114         | -0.12295 | 0.54893 | 0.20484     | 0.634995772 |          |         |
| RNU6-84P | ENSG00000272445 | -1.9003  | 0.9713  | 0.30125     | 0.38161     | 0.82446  |         |
|          | 0.20484         | 0.82446  | 0.20484 | 0.20484     | 0.634995772 |          |         |
| NA       | ENSG00000199894 | -0.80661 | 0.79005 | -1.004      | 0.8423      | -0.26444 | 0.60428 |
|          | 0.82443         | 0.20485  | 0.20485 | 0.634995772 |             |          |         |
| NA       | ENSG00000270799 | 0.82432  | 0.20488 | 0.82432     | 0.20488     | 0.32489  | 0.37263 |
|          | 0.82432         | 0.20488  | 0.20488 | 0.634995772 |             |          |         |
| RNY3P4   | ENSG00000207157 | 0.82428  | 0.20489 | -1.3094     | 0.9048      | -1.3094  |         |
|          | 0.9048          | -1.3094  | 0.9048  | 0.20489     | 0.634995772 |          |         |
| CYP4Z1   | ENSG00000186160 | -1.3492  | 0.91137 | -0.72934    | 0.7671      | 0.8242   |         |
|          | 0.20491         | -0.65014 | 0.7422  | 0.20491     | 0.634995772 |          |         |
| LHFPL3   | ENSG00000187416 | 0.82423  | 0.20491 | 0.0017792   | 0.49929     | 0.060338 |         |
|          | 0.47594         | -0.2004  | 0.57942 | 0.20491     | 0.634995772 |          |         |
| NA       | ENSG00000270207 | 0.065346 | 0.47395 | 0.70948     | 0.23901     | 0.82423  | 0.20491 |
|          | -0.17547        | 0.56964  | 0.20491 | 0.634995772 |             |          |         |
| NA       | ENSG00000245482 | -2.0736  | 0.98094 | -0.94628    | 0.828       | -1.9719  | 0.97569 |
|          | 0.82414         | 0.20493  | 0.20493 | 0.634995772 |             |          |         |
| UBE2W    | ENSG00000104343 | 0.59812  | 0.27488 | -0.72961    | 0.76719     | 0.82411  | 0.20494 |
|          | 0.54075         | 0.29434  | 0.20494 | 0.634995772 |             |          |         |
| NA       | ENSG00000216754 | -0.18052 | 0.57163 | 0.40707     | 0.34198     | -0.5993  | 0.72551 |
|          | 0.82406         | 0.20495  | 0.20495 | 0.634995772 |             |          |         |
| NA       | ENSG00000276742 | 0.82407  | 0.20495 | 0.82407     | 0.20495     | 0.82407  | 0.20495 |
|          | 0.82407         | 0.20495  | 0.20495 | 0.634995772 |             |          |         |
| NA       | ENSG00000283982 | -0.90779 | 0.818   | 0.82407     | 0.20495     | 0.27668  | 0.39101 |
|          | 0.25096         | 0.40092  | 0.20495 | 0.634995772 |             |          |         |
| NA       | ENSG00000254461 | 0.82395  | 0.20499 | 0.82395     | 0.20499     | 0.82395  | 0.20499 |
|          | 0.82395         | 0.20499  | 0.20499 | 0.635079325 |             |          |         |
| MPLKIP   | ENSG00000168303 | 0.82387  | 0.20501 | 0.82387     | 0.20501     | 0.82387  |         |
|          | 0.20501         | 0.82387  | 0.20501 | 0.20501     | 0.635080098 |          |         |
| CDYL     | ENSG00000153046 | 0.82383  | 0.20502 | -0.85593    | 0.80398     | -0.10568 | 0.54208 |
|          | -0.45546        | 0.67561  | 0.20502 | 0.635080098 |             |          |         |
| NA       | ENSG00000268390 | 0.82377  | 0.20504 | 0.82377     | 0.20504     | 0.82377  | 0.20504 |
|          | 0.82377         | 0.20504  | 0.20504 | 0.635080098 |             |          |         |
| NA       | ENSG00000259273 | 0.69087  | 0.24482 | -0.18635    | 0.57392     | -0.18635 | 0.57392 |
|          | 0.82356         | 0.20509  | 0.20509 | 0.635080098 |             |          |         |
| SERPING1 | ENSG00000149131 | 0.10676  | 0.45749 | 0.82349     | 0.20511     | 0.10676  |         |
|          | 0.45749         | 0.129    | 0.44868 | 0.20511     | 0.635080098 |          |         |
| NA       | ENSG00000223624 | 0.8235   | 0.20511 | 0.8235      | 0.20511     | 0.8235   | 0.20511 |
|          | 0.8235          | 0.20511  | 0.20511 | 0.635080098 |             |          |         |
| NA       | ENSG00000254111 | 0.82351  | 0.20511 | -0.72822    | 0.76676     | -0.72822 | 0.76676 |
|          | -1.1317         | 0.87112  | 0.20511 | 0.635080098 |             |          |         |
| NA       | ENSG00000279779 | 0.82331  | 0.20517 | 0.82331     | 0.20517     | 0.82331  | 0.20517 |
|          | 0.82331         | 0.20517  | 0.20517 | 0.635080098 |             |          |         |
| NA       | ENSG00000266233 | 0.8233   | 0.20517 | 0.8233      | 0.20517     | 0.8233   | 0.20517 |
|          | 0.8233          | 0.20517  | 0.20517 | 0.635080098 |             |          |         |
| SLAIN2   | ENSG00000109171 | -0.53085 | 0.70224 | -0.1227     | 0.54883     | -0.86764 |         |
|          | 0.8072          | 0.82322  | 0.20519 | 0.20519     | 0.635080098 |          |         |
| GAPDHP59 | ENSG00000231739 | 0.82316  | 0.20521 | -0.0030463  | 0.50122     | -1.6263  |         |
|          | 0.94805         | -1.6263  | 0.94805 | 0.20521     | 0.635080098 |          |         |
| PRPF31   | ENSG00000105618 | -0.70548 | 0.75974 | -0.70548    | 0.75974     | 0.82312  |         |
|          | 0.20522         | -0.80694 | 0.79015 | 0.20522     | 0.635080098 |          |         |
| FABP7    | ENSG00000164434 | -1.293   | 0.90199 | -1.293      | 0.90199     | 0.82313  | 0.20522 |
|          | -1.293          | 0.90199  | 0.20522 | 0.635080098 |             |          |         |
| RPL21P32 | ENSG00000224019 | 0.82305  | 0.20524 | 0.82305     | 0.20524     | 0.82305  |         |
|          | 0.20524         | 0.82305  | 0.20524 | 0.20524     | 0.635080098 |          |         |
| NA       | ENSG00000260038 | 0.82306  | 0.20524 | 0.82306     | 0.20524     | 0.82306  | 0.20524 |
|          | 0.82306         | 0.20524  | 0.20524 | 0.635080098 |             |          |         |
| MIR548AK | ENSG00000265653 | 0.82303  | 0.20525 | 0.82303     | 0.20525     | 0.82303  |         |
|          | 0.20525         | 0.82303  | 0.20525 | 0.20525     | 0.635080098 |          |         |
| MTSS2    | ENSG00000132613 | -0.95274 | 0.82964 | 0.82296     | 0.20526     | 0.79398  | 0.2136  |
|          | 0.10409         | 0.45855  | 0.20526 | 0.635080098 |             |          |         |
| NA       | ENSG00000227498 | 0.34037  | 0.36679 | 0.823       | 0.20526     | -0.4164  | 0.66144 |

|          |                 |           |         |             |             |           |         |  |
|----------|-----------------|-----------|---------|-------------|-------------|-----------|---------|--|
|          | -0.1661         | 0.56596   | 0.20526 | 0.635080098 |             |           |         |  |
| OLFML3   | ENSG00000116774 | 0.7877    | 0.21544 | 0.7877      | 0.21544     | 0.82295   |         |  |
|          | 0.20527         | 0.81053   | 0.20882 | 0.20527     | 0.635080098 |           |         |  |
| GDNF     | ENSG00000168621 | 0.82286   | 0.20529 | 0.15836     | 0.43709     | 0.82286   | 0.20529 |  |
|          | 0.42069         | 0.33699   | 0.20529 | 0.635080098 |             |           |         |  |
| RPL34P19 | ENSG00000230240 | 0.82286   | 0.20529 | 0.82286     | 0.20529     | -0.75071  |         |  |
|          | 0.77359         | -0.56486  | 0.71391 | 0.20529     | 0.635080098 |           |         |  |
| NA       | ENSG00000235993 | 0.82287   | 0.20529 | -0.13908    | 0.55531     | -0.13908  | 0.55531 |  |
|          | -0.46391        | 0.67864   | 0.20529 | 0.635080098 |             |           |         |  |
| NA       | ENSG00000271413 | 0.82287   | 0.20529 | 0.82287     | 0.20529     | 0.82287   | 0.20529 |  |
|          | 0.82287         | 0.20529   | 0.20529 | 0.635080098 |             |           |         |  |
| SH3BP1   | ENSG00000100092 | -0.1824   | 0.57237 | -0.071114   | 0.52835     | 0.35106   |         |  |
|          | 0.36277         | 0.82279   | 0.20531 | 0.20531     | 0.635081878 |           |         |  |
| NA       | ENSG00000250155 | -0.061811 | 0.52464 | -0.48119    | 0.68481     | 0.077595  | 0.46907 |  |
|          | 0.8227          | 0.20534   | 0.20534 | 0.635081878 |             |           |         |  |
| NA       | ENSG00000238520 | 0.82262   | 0.20536 | 0.82262     | 0.20536     | 0.82262   | 0.20536 |  |
|          | 0.40174         | 0.34394   | 0.20536 | 0.635081878 |             |           |         |  |
| SLC11A1  | ENSG00000018280 | -0.66283  | 0.74628 | -0.55753    | 0.71142     | -0.34317  |         |  |
|          | 0.63427         | 0.82259   | 0.20537 | 0.20537     | 0.635081878 |           |         |  |
| PLD6     | ENSG00000179598 | -0.12056  | 0.54798 | 0.82253     | 0.20539     | 0.82253   | 0.20539 |  |
|          | -0.088587       | 0.5353    | 0.20539 | 0.635081878 |             |           |         |  |
| DPP3     | ENSG00000254986 | -0.52177  | 0.69909 | -0.39348    | 0.65302     | -0.91105  | 0.81887 |  |
|          | 0.82253         | 0.20539   | 0.20539 | 0.635081878 |             |           |         |  |
| UNC93B6  | ENSG00000255562 | 0.82249   | 0.2054  | 0.82249     | 0.2054      | 0.82249   |         |  |
|          | 0.2054          | 0.82249   | 0.2054  | 0.2054      | 0.635081878 |           |         |  |
| SMAP2    | ENSG00000084070 | 0.29901   | 0.38247 | 0.82241     | 0.20542     | 0.0014251 | 0.49943 |  |
|          | -0.079415       | 0.53165   | 0.20542 | 0.635081878 |             |           |         |  |
| NA       | ENSG00000259753 | 0.82242   | 0.20542 | 0.82242     | 0.20542     | 0.82242   | 0.20542 |  |
|          | 0.82242         | 0.20542   | 0.20542 | 0.635081878 |             |           |         |  |
| NDUFA11  | ENSG00000174886 | 0.52397   | 0.30015 | 0.82232     | 0.20545     | 0.52397   |         |  |
|          | 0.30015         | -0.49208  | 0.68867 | 0.20545     | 0.635081878 |           |         |  |
| CNN2P10  | ENSG00000232223 | 0.8223    | 0.20545 | 0.8223      | 0.20545     | 0.8223    |         |  |
|          | 0.20545         | 0.8223    | 0.20545 | 0.20545     | 0.635081878 |           |         |  |
| NA       | ENSG00000249433 | 0.8223    | 0.20545 | 0.8223      | 0.20545     | 0.8223    | 0.20545 |  |
|          | -0.72065        | 0.76444   | 0.20545 | 0.635081878 |             |           |         |  |
| MEX3C    | ENSG00000176624 | 0.82227   | 0.20546 | 0.82227     | 0.20546     | 0.82227   | 0.20546 |  |
|          | -0.50499        | 0.69322   | 0.20546 | 0.635081878 |             |           |         |  |
| KIF25    | ENSG00000125337 | -0.81956  | 0.79377 | 0.82216     | 0.20549     | -1.3497   | 0.91144 |  |
|          | 0.2783          | 0.39039   | 0.20549 | 0.635094038 |             |           |         |  |
| C1orf131 | ENSG00000143633 | 0.23875   | 0.40565 | 0.82219     | 0.20549     | 0.82219   |         |  |
|          | 0.20549         | 0.57565   | 0.28243 | 0.20549     | 0.635094038 |           |         |  |
| DAP      | ENSG00000112977 | -0.15126  | 0.56011 | -0.51293    | 0.696       | 0.2798    | 0.38982 |  |
|          | 0.82204         | 0.20553   | 0.20553 | 0.635107952 |             |           |         |  |
| C10orf99 | ENSG00000188373 | -0.57004  | 0.71567 | 0.12246     | 0.45127     | -0.86232  |         |  |
|          | 0.80574         | 0.82187   | 0.20558 | 0.20558     | 0.635107952 |           |         |  |
| ADH1A    | ENSG00000187758 | -1.1035   | 0.86509 | -0.94572    | 0.82785     | 0.16066   | 0.43618 |  |
|          | 0.82183         | 0.20559   | 0.20559 | 0.635107952 |             |           |         |  |
| NA       | ENSG00000232959 | 0.82183   | 0.20559 | 0.13542     | 0.44614     | 0.13542   | 0.44614 |  |
|          | 0.13542         | 0.44614   | 0.20559 | 0.635107952 |             |           |         |  |
| NA       | ENSG00000264303 | -0.55067  | 0.70907 | 0.042382    | 0.4831      | 0.82182   | 0.20559 |  |
|          | 0.082058        | 0.4673    | 0.20559 | 0.635107952 |             |           |         |  |
| ZBTB2    | ENSG00000181472 | 0.82178   | 0.2056  | 0.82178     | 0.2056      | 0.66706   | 0.25237 |  |
|          | -0.44761        | 0.67278   | 0.2056  | 0.635107952 |             |           |         |  |
| NA       | ENSG00000256927 | 0.62474   | 0.26607 | 0.82179     | 0.2056      | -1.8589   | 0.96848 |  |
|          | -1.8589         | 0.96848   | 0.2056  | 0.635107952 |             |           |         |  |
| TMEM160  | ENSG00000130748 | -0.34333  | 0.63432 | -0.39763    | 0.65455     | -0.34333  |         |  |
|          | 0.63432         | 0.82172   | 0.20562 | 0.20562     | 0.635107952 |           |         |  |
| NA       | ENSG00000270694 | 0.51712   | 0.30254 | 0.50586     | 0.30648     | 0.39403   | 0.34678 |  |
|          | 0.82169         | 0.20563   | 0.20563 | 0.635107952 |             |           |         |  |
| NA       | ENSG00000201980 | 0.82164   | 0.20564 | 0.82164     | 0.20564     | 0.82164   | 0.20564 |  |
|          | 0.82164         | 0.20564   | 0.20564 | 0.635107952 |             |           |         |  |
| FOXE3    | ENSG00000186790 | -0.083541 | 0.53329 | -0.083541   | 0.53329     | -0.083541 | 0.53329 |  |

|           |                 |          |         |             |             |          |         |  |
|-----------|-----------------|----------|---------|-------------|-------------|----------|---------|--|
|           | 0.82162         | 0.20565  | 0.20565 | 0.635107952 |             |          |         |  |
| PHTF1     | ENSG00000116793 | 0.82157  | 0.20566 | -1.329      | 0.90808     | -0.69421 | 0.75622 |  |
|           | -1.1942         | 0.8838   | 0.20566 | 0.635107952 |             |          |         |  |
| FNDC1-IT1 | ENSG00000235086 | 0.82151  | 0.20568 | 0.82151     | 0.20568     | 0.82151  |         |  |
|           | 0.20568         | 0.82151  | 0.20568 | 0.20568     | 0.635107952 |          |         |  |
| NA        | ENSG00000264051 | 0.82151  | 0.20568 | 0.82151     | 0.20568     | 0.82151  | 0.20568 |  |
|           | 0.82151         | 0.20568  | 0.20568 | 0.635107952 |             |          |         |  |
| NA        | ENSG00000249429 | 0.82148  | 0.20569 | 0.82148     | 0.20569     | 0.81918  | 0.20634 |  |
|           | 0.17229         | 0.43161  | 0.20569 | 0.635107952 |             |          |         |  |
| NA        | ENSG00000243305 | 0.82125  | 0.20575 | 0.82125     | 0.20575     | 0.82125  | 0.20575 |  |
|           | 0.82125         | 0.20575  | 0.20575 | 0.635212715 |             |          |         |  |
| NA        | ENSG00000261393 | 0.82127  | 0.20575 | 0.82127     | 0.20575     | 0.82127  | 0.20575 |  |
|           | 0.82127         | 0.20575  | 0.20575 | 0.635212715 |             |          |         |  |
| NA        | ENSG00000229395 | 0.7777   | 0.21837 | -0.52132    | 0.69893     | 0.82118  | 0.20577 |  |
|           | -0.43848        | 0.66948  | 0.20577 | 0.635234216 |             |          |         |  |
| FAM245A   | ENSG00000228055 | 0.21812  | 0.41367 | 0.82093     | 0.20584     | -0.91719 |         |  |
|           | 0.82048         | 0.046641 | 0.4814  | 0.20584     | 0.635288189 |          |         |  |
| NA        | ENSG00000241157 | 0.82094  | 0.20584 | 0.82094     | 0.20584     | 0.82094  | 0.20584 |  |
|           | 0.82094         | 0.20584  | 0.20584 | 0.635288189 |             |          |         |  |
| ZNF92P2   | ENSG00000269505 | 0.82089  | 0.20586 | 0.82089     | 0.20586     | 0.82089  |         |  |
|           | 0.20586         | 0.82089  | 0.20586 | 0.20586     | 0.635288189 |          |         |  |
| CECR2     | ENSG00000099954 | -0.7764  | 0.78124 | 0.82082     | 0.20587     | 0.74407  | 0.22842 |  |
|           | -0.87897        | 0.81029  | 0.20587 | 0.635288189 |             |          |         |  |
| EAF2      | ENSG00000145088 | 0.82079  | 0.20588 | -0.9644     | 0.83258     | -0.15809 | 0.56281 |  |
|           | -0.9644         | 0.83258  | 0.20588 | 0.635288189 |             |          |         |  |
| OR2C1     | ENSG00000168158 | 0.81357  | 0.20794 | 0.69625     | 0.24314     | 0.58275  | 0.28003 |  |
|           | 0.82079         | 0.20588  | 0.20588 | 0.635288189 |             |          |         |  |
| NA        | ENSG00000257964 | 0.82077  | 0.20589 | -0.36394    | 0.64205     | 0.82077  | 0.20589 |  |
|           | 0.82077         | 0.20589  | 0.20589 | 0.635288189 |             |          |         |  |
| NA        | ENSG00000230908 | -0.19081 | 0.57566 | 0.82061     | 0.20593     | -0.16942 | 0.56727 |  |
|           | -0.048321       | 0.51927  | 0.20593 | 0.635288189 |             |          |         |  |
| KRTAP5-6  | ENSG00000205864 | 0.36145  | 0.35888 | 0.36145     | 0.35888     | -1.3979  |         |  |
|           | 0.91893         | 0.8206   | 0.20594 | 0.20594     | 0.635288189 |          |         |  |
| NA        | ENSG00000247810 | 0.25197  | 0.40053 | 0.093727    | 0.46266     | 0.093727 | 0.46266 |  |
|           | 0.82054         | 0.20595  | 0.20595 | 0.635288189 |             |          |         |  |
| NA        | ENSG00000277608 | 0.82052  | 0.20596 | 0.37903     | 0.35233     | 0.37903  | 0.35233 |  |
|           | 0.37903         | 0.35233  | 0.20596 | 0.635288189 |             |          |         |  |
| NA        | ENSG00000251506 | -0.7576  | 0.77565 | 0.82048     | 0.20597     | 0.18287  | 0.42745 |  |
|           | 0.18287         | 0.42745  | 0.20597 | 0.635288189 |             |          |         |  |
| RFPL4AP7  | ENSG00000254268 | 0.4938   | 0.31073 | 0.4938      | 0.31073     | 0.8205   |         |  |
|           | 0.20597         | 0.4938   | 0.31073 | 0.20597     | 0.635288189 |          |         |  |
| NA        | ENSG00000255468 | 0.82049  | 0.20597 | 0.46718     | 0.32018     | 0.82049  | 0.20597 |  |
|           | 0.82049         | 0.20597  | 0.20597 | 0.635288189 |             |          |         |  |
| DNAJC5G   | ENSG00000163793 | 0.82036  | 0.20601 | 0.82036     | 0.20601     | 0.82036  |         |  |
|           | 0.20601         | 0.82036  | 0.20601 | 0.20601     | 0.635371348 |          |         |  |
| RPSAP45   | ENSG00000219773 | 0.82027  | 0.20603 | 0.82027     | 0.20603     | 0.82027  |         |  |
|           | 0.20603         | 0.19191  | 0.42391 | 0.20603     | 0.635392817 |          |         |  |
| TKT       | ENSG00000163931 | -0.36027 | 0.64068 | 0.11213     | 0.45536     | 0.82022  | 0.20605 |  |
|           | 0.21038         | 0.41669  | 0.20605 | 0.63540491  |             |          |         |  |
| CDC34     | ENSG00000099804 | 0.50309  | 0.30745 | -0.010897   | 0.50435     | 0.060343 | 0.47594 |  |
|           | 0.82018         | 0.20606  | 0.20606 | 0.63540491  |             |          |         |  |
| NA        | ENSG00000241690 | 0.81997  | 0.20612 | 0.81997     | 0.20612     | 0.81997  | 0.20612 |  |
|           | 0.81997         | 0.20612  | 0.20612 | 0.635413066 |             |          |         |  |
| OTOA      | ENSG00000155719 | -0.12071 | 0.54804 | 0.81992     | 0.20613     | -0.956   | 0.83046 |  |
|           | -0.31059        | 0.62194  | 0.20613 | 0.635413066 |             |          |         |  |
| RABEP1    | ENSG00000029725 | 0.78471  | 0.21631 | 0.81986     | 0.20615     | 0.81986  |         |  |
|           | 0.20615         | 0.75221  | 0.22596 | 0.20615     | 0.635413066 |          |         |  |
| DHFRP1    | ENSG00000188985 | 0.10289  | 0.45903 | 0.81987     | 0.20615     | 0.10289  |         |  |
|           | 0.45903         | 0.10289  | 0.45903 | 0.20615     | 0.635413066 |          |         |  |
| SRSF3P5   | ENSG00000235325 | 0.35147  | 0.36262 | 0.35147     | 0.36262     | -0.15307 |         |  |
|           | 0.56083         | 0.81984  | 0.20615 | 0.20615     | 0.635413066 |          |         |  |
| NA        | ENSG00000251229 | 0.81986  | 0.20615 | 0.81986     | 0.20615     | 0.81986  | 0.20615 |  |

|           |                 |           |         |             |             |           |         |  |
|-----------|-----------------|-----------|---------|-------------|-------------|-----------|---------|--|
|           | 0.81986         | 0.20615   | 0.20615 | 0.635413066 |             |           |         |  |
| NFKB2     | ENSG00000077150 | 0.20346   | 0.41939 | 0.8198      | 0.20617     | 0.8198    | 0.20617 |  |
|           | 0.8198          | 0.20617   | 0.20617 | 0.635413066 |             |           |         |  |
| LINC02075 | ENSG00000249497 | 0.81979   | 0.20617 | -0.37013    | 0.64436     | 0.81979   |         |  |
|           | 0.20617         | 0.81979   | 0.20617 | 0.20617     | 0.635413066 |           |         |  |
| PI4KB     | ENSG00000143393 | 0.077468  | 0.46913 | -0.32145    | 0.62606     | 0.81976   | 0.20618 |  |
|           | 0.54086         | 0.2943    | 0.20618 | 0.635413066 |             |           |         |  |
| CXCL1P1   | ENSG00000250339 | 0.58664   | 0.27872 | -0.44617    | 0.67226     | 0.81966   |         |  |
|           | 0.20621         | 0.80172   | 0.21136 | 0.20621     | 0.635465332 |           |         |  |
| EPB41L3   | ENSG00000082397 | -1.8612   | 0.96864 | 0.81917     | 0.20634     | 0.61617   |         |  |
|           | 0.26889         | -1.1695   | 0.87889 | 0.20634     | 0.635825737 |           |         |  |
| TACSTD2   | ENSG00000184292 | 0.8191    | 0.20636 | 0.8191      | 0.20636     | 0.8191    |         |  |
|           | 0.20636         | 0.8191    | 0.20636 | 0.20636     | 0.635837766 |           |         |  |
| OR13Z2P   | ENSG00000272443 | 0.81908   | 0.20637 | 0.81908     | 0.20637     | 0.80083   |         |  |
|           | 0.21161         | 0.32842   | 0.3713  | 0.20637     | 0.635837766 |           |         |  |
| CRADD     | ENSG00000169372 | 0.81903   | 0.20639 | 0.81903     | 0.20639     | 0.81903   | 0.20639 |  |
|           | 0.38268         | 0.35098   | 0.20639 | 0.635859183 |             |           |         |  |
| GATD3A    | ENSG00000160221 | 0.57214   | 0.28361 | 0.81886     | 0.20643     | 0.13447   |         |  |
|           | 0.44651         | 0.46555   | 0.32077 | 0.20643     | 0.635879088 |           |         |  |
| NA        | ENSG00000121388 | 0.81881   | 0.20645 | 0.22317     | 0.4117      | 0.0036531 | 0.49854 |  |
|           | 0.76123         | 0.22326   | 0.20645 | 0.635879088 |             |           |         |  |
| NLRC3     | ENSG00000167984 | 0.81877   | 0.20646 | 0.33706     | 0.36804     | 0.67419   | 0.2501  |  |
|           | 0.55115         | 0.29077   | 0.20646 | 0.635879088 |             |           |         |  |
| NA        | ENSG00000227965 | 0.81878   | 0.20646 | 0.81878     | 0.20646     | 0.81878   | 0.20646 |  |
|           | 0.81878         | 0.20646   | 0.20646 | 0.635879088 |             |           |         |  |
| NA        | ENSG00000244255 | 0.81875   | 0.20647 | 0.81875     | 0.20647     | 0.81875   | 0.20647 |  |
|           | 0.81875         | 0.20647   | 0.20647 | 0.635879088 |             |           |         |  |
| NA        | ENSG00000279620 | 0.73048   | 0.23255 | 0.81868     | 0.20648     | -0.13446  | 0.55348 |  |
|           | 0.81868         | 0.20648   | 0.20648 | 0.635879088 |             |           |         |  |
| NA        | ENSG00000200891 | -0.37832  | 0.6474  | 0.81855     | 0.20652     | -0.37832  | 0.6474  |  |
|           | -0.37832        | 0.6474    | 0.20652 | 0.635879088 |             |           |         |  |
| RPLP0     | ENSG00000089157 | 0.81847   | 0.20654 | 0.81847     | 0.20654     | 0.81847   | 0.20654 |  |
|           | 0.81847         | 0.20654   | 0.20654 | 0.635879088 |             |           |         |  |
| CAB39L    | ENSG00000102547 | 0.50546   | 0.30662 | 0.50402     | 0.30712     | 0.8185    |         |  |
|           | 0.20654         | 0.11558   | 0.45399 | 0.20654     | 0.635879088 |           |         |  |
| SLC27A1   | ENSG00000130304 | -0.57371  | 0.71692 | -0.064838   | 0.52585     | 0.33566   |         |  |
|           | 0.36857         | 0.81847   | 0.20654 | 0.20654     | 0.635879088 |           |         |  |
| NA        | ENSG00000279093 | 0.8185    | 0.20654 | 0.8185      | 0.20654     | 0.8185    | 0.20654 |  |
|           | 0.8185          | 0.20654   | 0.20654 | 0.635879088 |             |           |         |  |
| CPA2      | ENSG00000158516 | 0.81835   | 0.20658 | -0.50566    | 0.69345     | -0.0429   | 0.51711 |  |
|           | 0.44987         | 0.3264    | 0.20658 | 0.635962057 |             |           |         |  |
| SMARCA5   | ENSG00000153147 | -0.1342   | 0.55338 | 0.10281     | 0.45906     | 0.81822   |         |  |
|           | 0.20662         | 0.0054885 | 0.49781 | 0.20662     | 0.636004839 |           |         |  |
| VTI1BP2   | ENSG00000213434 | 0.73367   | 0.23158 | 0.20969     | 0.41696     | 0.81822   |         |  |
|           | 0.20662         | -0.55234  | 0.70964 | 0.20662     | 0.636004839 |           |         |  |
| GTF2IP6   | ENSG00000266736 | -0.59028  | 0.7225  | 0.11878     | 0.45273     | -0.52138  |         |  |
|           | 0.69895         | 0.81815   | 0.20664 | 0.20664     | 0.636026225 |           |         |  |
| NA        | ENSG00000262434 | 0.81805   | 0.20666 | 0.81805     | 0.20666     | 0.81805   | 0.20666 |  |
|           | 0.81805         | 0.20666   | 0.20666 | 0.636038215 |             |           |         |  |
| MYO1H     | ENSG00000174527 | 0.25885   | 0.39788 | -0.10485    | 0.54175     | 0.70765   | 0.23958 |  |
|           | 0.81802         | 0.20667   | 0.20667 | 0.636038215 |             |           |         |  |
| RN7SL205P | ENSG00000241392 | 0.81796   | 0.20669 | -0.97989    | 0.83643     | -0.68354  |         |  |
|           | 0.75287         | -0.17313  | 0.56872 | 0.20669     | 0.636040809 |           |         |  |
| NA        | ENSG00000278532 | 0.81793   | 0.2067  | -0.80706    | 0.79018     | -1.4994   | 0.93311 |  |
|           | -1.4994         | 0.93311   | 0.2067  | 0.636040809 |             |           |         |  |
| NA        | ENSG00000248148 | 0.72196   | 0.23516 | 0.4952      | 0.31023     | 0.8179    | 0.20671 |  |
|           | 0.6698          | 0.25149   | 0.20671 | 0.636040809 |             |           |         |  |
| NA        | ENSG00000276663 | 0.81772   | 0.20676 | 0.81772     | 0.20676     | 0.81772   | 0.20676 |  |
|           | 0.81772         | 0.20676   | 0.20676 | 0.636135694 |             |           |         |  |
| SMAD6     | ENSG00000137834 | 0.062559  | 0.47506 | 0.13407     | 0.44667     | -0.89938  | 0.81578 |  |
|           | 0.81765         | 0.20678   | 0.20678 | 0.636135694 |             |           |         |  |
| NA        | ENSG00000230333 | 0.55063   | 0.29094 | 0.81765     | 0.20678     | 0.45699   | 0.32384 |  |

|              |                 |           |          |           |             |             |         |  |  |
|--------------|-----------------|-----------|----------|-----------|-------------|-------------|---------|--|--|
|              |                 | -0.20586  | 0.58155  | 0.20678   | 0.636135694 |             |         |  |  |
| NA           | ENSG00000282375 | 0.81757   | 0.2068   | -0.10381  | 0.54134     | -0.40507    | 0.65729 |  |  |
|              |                 | -0.012622 | 0.50504  | 0.2068    | 0.636157061 |             |         |  |  |
| ATP6V1E1P1   | ENSG00000225099 | 0.8174    | 0.20685  | 0.8174    | 0.20685     | -0.23851    |         |  |  |
|              |                 | 0.59426   | -1.6404  | 0.94954   | 0.20685     | 0.636270704 |         |  |  |
| NOS2P3       | ENSG00000230528 | -2.1182   | 0.98292  | -1.5469   | 0.93905     | 0.81732     |         |  |  |
|              |                 | 0.20687   | -1.8363  | 0.96684   | 0.20687     | 0.63629206  |         |  |  |
| NA           | ENSG00000272397 | -0.098554 | 0.53925  | -0.098554 | 0.53925     | -0.098554   | 0.53925 |  |  |
|              |                 | 0.81727   | 0.20689  | 0.20689   | 0.636313412 |             |         |  |  |
| NA           | ENSG00000254007 | -0.3176   | 0.6246   | -1.5013   | 0.93336     | 0.81717     | 0.20692 |  |  |
|              |                 | 0.18068   | 0.42831  | 0.20692   | 0.636346703 |             |         |  |  |
| MIR1915HG    | ENSG00000204682 | 0.21449   | 0.41508  | 0.78874   | 0.21513     | 0.81712     |         |  |  |
|              |                 | 0.20693   | 0.43159  | 0.33302   | 0.20693     | 0.636346703 |         |  |  |
| UGT2B15      | ENSG00000196620 | -1.8672   | 0.96906  | -0.44596  | 0.67219     | -0.69897    |         |  |  |
|              |                 | 0.75772   | 0.81708  | 0.20694   | 0.20694     | 0.636346703 |         |  |  |
| NA           | ENSG00000261723 | 0.81694   | 0.20698  | 0.81694   | 0.20698     | 0.81694     | 0.20698 |  |  |
|              |                 | 0.81694   | 0.20698  | 0.20698   | 0.636429543 |             |         |  |  |
| SVOPL        | ENSG00000157703 | 0.058779  | 0.47656  | -1.4725   | 0.92956     | 0.81679     | 0.20702 |  |  |
|              |                 | -0.5173   | 0.69753  | 0.20702   | 0.636512373 |             |         |  |  |
| NRG2         | ENSG00000158458 | -0.24452  | 0.59659  | 0.81673   | 0.20704     | -1.0144     | 0.8448  |  |  |
|              |                 | -1.7207   | 0.95735  | 0.20704   | 0.636526788 |             |         |  |  |
| NA           | ENSG00000257262 | -0.40974  | 0.659    | -0.13899  | 0.55527     | -0.34634    | 0.63546 |  |  |
|              |                 | 0.81663   | 0.20707  | 0.20707   | 0.636526788 |             |         |  |  |
| PHETA2       | ENSG00000177096 | 0.43286   | 0.33256  | 0.81659   | 0.20708     | 0.37902     |         |  |  |
|              |                 | 0.35234   | 0.54754  | 0.292     | 0.20708     | 0.636526788 |         |  |  |
| GGT1         | ENSG00000100031 | 0.59502   | 0.27591  | -0.98616  | 0.83797     | 0.81655     | 0.20709 |  |  |
|              |                 | -0.0604   | 0.52408  | 0.20709   | 0.636526788 |             |         |  |  |
| NA           | ENSG00000238871 | 0.81657   | 0.20709  | 0.70841   | 0.23935     | 0.62401     | 0.26631 |  |  |
|              |                 | 0.62401   | 0.26631  | 0.20709   | 0.636526788 |             |         |  |  |
| LINC01967    | ENSG00000235493 | -0.88112  | 0.81087  | 0.8164    | 0.20714     | 0.51754     |         |  |  |
|              |                 | 0.30239   | 0.8164   | 0.20714   | 0.20714     | 0.636640315 |         |  |  |
| RNU6-560P    | ENSG00000200877 | -0.51512  | 0.69677  | -0.51512  | 0.69677     | -0.51512    |         |  |  |
|              |                 | 0.69677   | 0.81627  | 0.20717   | 0.20717     | 0.63665221  |         |  |  |
| EFCAB8       | ENSG00000215529 | 0.81627   | 0.20717  | 0.64939   | 0.25804     | 0.096975    |         |  |  |
|              |                 | 0.46137   | -0.28994 | 0.61407   | 0.20717     | 0.63665221  |         |  |  |
| TBC1D22A-AS1 | ENSG00000280080 | 0.81618   | 0.2072   | 0.81618   | 0.2072      | 0.81618     |         |  |  |
|              |                 | 0.2072    | 0.81618  | 0.2072    | 0.2072      | 0.636654685 |         |  |  |
| ABL2         | ENSG00000143322 | 0.02978   | 0.48812  | 0.65845   | 0.25512     | 0.78459     | 0.21635 |  |  |
|              |                 | 0.81614   | 0.20721  | 0.20721   | 0.636654685 |             |         |  |  |
| NA           | ENSG00000212428 | 0.81613   | 0.20721  | 0.81613   | 0.20721     | 0.81613     | 0.20721 |  |  |
|              |                 | 0.81613   | 0.20721  | 0.20721   | 0.636654685 |             |         |  |  |
| NA           | ENSG00000280222 | 0.81603   | 0.20724  | 0.59288   | 0.27663     | 0.81603     | 0.20724 |  |  |
|              |                 | 0.81603   | 0.20724  | 0.20724   | 0.636706715 |             |         |  |  |
| RPL7L1P12    | ENSG00000231981 | 0.81592   | 0.20727  | 0.5053    | 0.30667     | 0.81592     |         |  |  |
|              |                 | 0.20727   | 0.81592  | 0.20727   | 0.20727     | 0.636718597 |         |  |  |
| NA           | ENSG00000236544 | 0.81591   | 0.20727  | 0.81591   | 0.20727     | 0.67552     | 0.24967 |  |  |
|              |                 | 0.48859   | 0.31256  | 0.20727   | 0.636718597 |             |         |  |  |
| NA           | ENSG00000243781 | 0.81568   | 0.20734  | 0.81568   | 0.20734     | 0.81568     | 0.20734 |  |  |
|              |                 | 0.81568   | 0.20734  | 0.20734   | 0.636843912 |             |         |  |  |
| NA           | ENSG00000221565 | 0.81567   | 0.20734  | 0.81567   | 0.20734     | 0.81567     | 0.20734 |  |  |
|              |                 | 0.81567   | 0.20734  | 0.20734   | 0.636843912 |             |         |  |  |
| ADIRF-AS1    | ENSG00000272734 | 0.80914   | 0.20922  | 0.81566   | 0.20735     | 0.81566     |         |  |  |
|              |                 | 0.20735   | 0.81566  | 0.20735   | 0.20735     | 0.636843912 |         |  |  |
| DTD1         | ENSG00000125821 | -1.8918   | 0.97074  | -1.8547   | 0.96818     | 0.8155      | 0.20739 |  |  |
|              |                 | -0.094782 | 0.53776  | 0.20739   | 0.636926621 |             |         |  |  |
| RHOG         | ENSG00000177105 | 0.81542   | 0.20742  | -1.0873   | 0.86154     | -1.7108     | 0.95644 |  |  |
|              |                 | -0.56176  | 0.71286  | 0.20742   | 0.636978611 |             |         |  |  |
| Clorf94      | ENSG00000142698 | 0.81534   | 0.20744  | 0.41147   | 0.34036     | -0.88035    |         |  |  |
|              |                 | 0.81066   | -1.057   | 0.85474   | 0.20744     | 0.636999887 |         |  |  |
| ABRACL       | ENSG00000146386 | 0.81486   | 0.20758  | 0.81486   | 0.20758     | 0.81486     |         |  |  |
|              |                 | 0.20758   | 0.81486  | 0.20758   | 0.20758     | 0.637361261 |         |  |  |
| NA           | ENSG00000253796 | -0.039243 | 0.51565  | 0.81482   | 0.20759     | 0.27805     | 0.39049 |  |  |



|            |                 |           |             |             |             |           |         |       |
|------------|-----------------|-----------|-------------|-------------|-------------|-----------|---------|-------|
|            | 0.09182         | 0.46342   | 0.20759     | 0.637361261 |             |           |         |       |
| CPXM1      | ENSG00000088882 | 0.81474   | 0.20761     | 0.81474     | 0.20761     | 0.81474   | 0.20761 |       |
|            | 0.81474         | 0.20761   | 0.20761     | 0.637361261 |             |           |         |       |
| LINC00547  | ENSG00000275226 | 0.68114   | 0.24789     | 0.43013     | 0.33355     | 0.52703   |         |       |
|            | 0.29909         | 0.81475   | 0.20761     | 0.20761     | 0.637361261 |           |         |       |
| NA         | ENSG00000231335 | -1.2954   | 0.90242     | -1.2569     | 0.89561     | -1.263    | 0.89671 |       |
|            | 0.81463         | 0.20764   | 0.20764     | 0.637413204 |             |           |         |       |
| NA         | ENSG00000259541 | -0.55745  | 0.71139     | -1.0257     | 0.84749     | 0.81449   | 0.20768 |       |
|            | 0.81449         | 0.20768   | 0.20768     | 0.637464955 |             |           |         |       |
| LINC02245  | ENSG00000237638 | -0.12635  | 0.55027     | 0.8144      | 0.20771     | -1.0897   |         |       |
|            | 0.86209         | 0.72321   | 0.23478     | 0.20771     | 0.637464955 |           |         |       |
| EGLN1P1    | ENSG00000254779 | 0.8144    | 0.20771     | 0.8144      | 0.20771     | 0.8144    |         |       |
|            | 0.20771         | 0.8144    | 0.20771     | 0.20771     | 0.637464955 |           |         |       |
| BLCAP      | ENSG00000166619 | -0.18341  | 0.57276     | 0.81422     | 0.20776     | 0.174     | 0.43093 | 0.174 |
|            | 0.43093         | 0.20776   | 0.637464955 |             |             |           |         |       |
| NA         | ENSG00000207407 | -0.66181  | 0.74595     | 0.81421     | 0.20776     | -0.02585  | 0.51031 |       |
|            | 0.15819         | 0.43715   | 0.20776     | 0.637464955 |             |           |         |       |
| NA         | ENSG00000278305 | -0.18071  | 0.5717      | 0.81421     | 0.20776     | -0.10851  | 0.5432  |       |
|            | 0.17611         | 0.4301    | 0.20776     | 0.637464955 |             |           |         |       |
| EIF4A1P8   | ENSG00000213484 | 0.089326  | 0.46441     | -0.94019    | 0.82644     | 0.52886   |         |       |
|            | 0.29845         | 0.81414   | 0.20778     | 0.20778     | 0.637464955 |           |         |       |
| NA         | ENSG00000231977 | 0.19209   | 0.42384     | 0.41545     | 0.3389      | 0.81415   | 0.20778 |       |
|            | 0.22371         | 0.41149   | 0.20778     | 0.637464955 |             |           |         |       |
| NA         | ENSG00000264921 | 0.81409   | 0.2078      | 0.81409     | 0.2078      | 0.81409   | 0.2078  |       |
|            | 0.81409         | 0.2078    | 0.2078      | 0.637464955 |             |           |         |       |
| NDUFA6     | ENSG00000184983 | 0.81399   | 0.20782     | 0.81399     | 0.20782     | 0.81399   |         |       |
|            | 0.20782         | 0.81399   | 0.20782     | 0.20782     | 0.637464955 |           |         |       |
| NA         | ENSG00000261884 | 0.81402   | 0.20782     | 0.81402     | 0.20782     | 0.81402   | 0.20782 |       |
|            | 0.81402         | 0.20782   | 0.20782     | 0.637464955 |             |           |         |       |
| PRR33      | ENSG00000283787 | 0.50569   | 0.30654     | 0.81398     | 0.20783     | 0.50569   | 0.30654 |       |
|            | 0.50569         | 0.30654   | 0.20783     | 0.637464955 |             |           |         |       |
| FAM83A     | ENSG00000147689 | 0.45351   | 0.32509     | 0.70846     | 0.23933     | 0.81392   |         |       |
|            | 0.20784         | 0.81169   | 0.20848     | 0.20784     | 0.637464955 |           |         |       |
| IGKV1OR2-6 | ENSG00000271569 | 0.81395   | 0.20784     | -0.67906    | 0.75145     | -0.67906  |         |       |
|            | 0.75145         | -0.83883  | 0.79922     | 0.20784     | 0.637464955 |           |         |       |
| FMO11P     | ENSG00000232148 | -0.12013  | 0.54781     | -0.6034     | 0.72688     | 0.0052056 |         |       |
|            | 0.49792         | 0.81382   | 0.20787     | 0.20787     | 0.637467271 |           |         |       |
| SEC63      | ENSG00000025796 | 0.81379   | 0.20788     | 0.6939      | 0.24387     | -0.31751  | 0.62457 |       |
|            | -0.024546       | 0.50979   | 0.20788     | 0.637467271 |             |           |         |       |
| NA         | ENSG00000225588 | 0.15238   | 0.43944     | 0.68815     | 0.24568     | 0.81379   | 0.20788 |       |
|            | 0.60404         | 0.27291   | 0.20788     | 0.637467271 |             |           |         |       |
| OR8Q1P     | ENSG00000255341 | -0.88974  | 0.8132      | -0.041356   | 0.51649     | -0.9412   |         |       |
|            | 0.8267          | 0.81364   | 0.20793     | 0.20793     | 0.637556707 |           |         |       |
| NA         | ENSG00000260536 | 0.81354   | 0.20795     | -0.50079    | 0.69174     | -0.50079  | 0.69174 |       |
|            | -0.50079        | 0.69174   | 0.20795     | 0.637556707 |             |           |         |       |
| NPM1P37    | ENSG00000219085 | 0.81345   | 0.20798     | 0.81345     | 0.20798     | 0.81345   |         |       |
|            | 0.20798         | 0.81345   | 0.20798     | 0.20798     | 0.637556707 |           |         |       |
| NA         | ENSG00000234703 | 0.24019   | 0.40509     | 0.45422     | 0.32484     | 0.24019   | 0.40509 |       |
|            | 0.81346         | 0.20798   | 0.20798     | 0.637556707 |             |           |         |       |
| OLA1P3     | ENSG00000257966 | 0.81338   | 0.208       | 0.72325     | 0.23476     | 0.72325   | 0.23476 |       |
|            | 0.72325         | 0.23476   | 0.208       | 0.637556707 |             |           |         |       |
| NA         | ENSG00000235612 | 0.81335   | 0.20801     | -0.65652    | 0.74425     | 0.81335   | 0.20801 |       |
|            | 0.81335         | 0.20801   | 0.20801     | 0.637556707 |             |           |         |       |
| KDM4B      | ENSG00000127663 | -0.61892  | 0.73202     | -0.64534    | 0.74065     | 0.81332   | 0.20802 |       |
|            | -1.511          | 0.93461   | 0.20802     | 0.637556707 |             |           |         |       |
| ITIH2      | ENSG00000151655 | 0.68798   | 0.24573     | 0.68798     | 0.24573     | 0.81327   | 0.20803 |       |
|            | -0.39658        | 0.65416   | 0.20803     | 0.637556707 |             |           |         |       |
| NA         | ENSG00000230794 | -0.014116 | 0.50563     | 0.29056     | 0.38569     | 0.38822   | 0.34893 |       |
|            | 0.81327         | 0.20803   | 0.20803     | 0.637556707 |             |           |         |       |
| NA         | ENSG00000244468 | 0.64051   | 0.26092     | 0.81323     | 0.20804     | 0.64218   | 0.26038 |       |
|            | 0.64218         | 0.26038   | 0.20804     | 0.637556707 |             |           |         |       |
| CIRBP-AS1  | ENSG00000267493 | 0.81297   | 0.20812     | 0.81297     | 0.20812     | 0.81297   |         |       |

|           |                 |           |         |             |             |           |         |  |
|-----------|-----------------|-----------|---------|-------------|-------------|-----------|---------|--|
|           | 0.20812         | 0.81297   | 0.20812 | 0.20812     | 0.637761766 |           |         |  |
| NA        | ENSG00000271156 | 0.22709   | 0.41018 | 0.37567     | 0.35358     | 0.81289   | 0.20814 |  |
|           | 0.81289         | 0.20814   | 0.20814 | 0.637782947 |             |           |         |  |
| LINC01840 | ENSG00000230215 | -0.055474 | 0.52212 | 0.15329     | 0.43908     | 0.49866   |         |  |
|           | 0.30901         | 0.81275   | 0.20818 | 0.20818     | 0.637828345 |           |         |  |
| NA        | ENSG00000272984 | 0.81266   | 0.20821 | 0.81266     | 0.20821     | 0.81266   | 0.20821 |  |
|           | 0.81266         | 0.20821   | 0.20821 | 0.637828345 |             |           |         |  |
| FAM89B    | ENSG00000176973 | 0.5513    | 0.29071 | 0.67361     | 0.25028     | 0.81263   |         |  |
|           | 0.20822         | 0.81263   | 0.20822 | 0.20822     | 0.637828345 |           |         |  |
| MIEF1     | ENSG00000100335 | -0.90786  | 0.81802 | -1.1565     | 0.87626     | -0.56185  | 0.71289 |  |
|           | 0.81254         | 0.20824   | 0.20824 | 0.637828345 |             |           |         |  |
| POLR2KP1  | ENSG00000258284 | 0.8125    | 0.20825 | 0.8125      | 0.20825     | 0.8125    |         |  |
|           | 0.20825         | 0.8125    | 0.20825 | 0.20825     | 0.637828345 |           |         |  |
| LINC02633 | ENSG00000224265 | 0.10078   | 0.45986 | 0.10078     | 0.45986     | 0.81238   |         |  |
|           | 0.20829         | -1.0783   | 0.85955 | 0.20829     | 0.637828345 |           |         |  |
| LINC02473 | ENSG00000261121 | -0.064817 | 0.52584 | -0.064817   | 0.52584     | 0.81234   |         |  |
|           | 0.2083          | 0.13159   | 0.44765 | 0.2083      | 0.637828345 |           |         |  |
| NA        | ENSG00000283328 | 0.81232   | 0.2083  | 0.81232     | 0.2083      | 0.81232   | 0.2083  |  |
|           | 0.81232         | 0.2083    | 0.2083  | 0.637828345 |             |           |         |  |
| RPL23AP38 | ENSG00000184423 | -0.33579  | 0.63149 | 0.57585     | 0.28236     | 0.81224   |         |  |
|           | 0.20833         | -0.23811  | 0.5941  | 0.20833     | 0.637828345 |           |         |  |
| NA        | ENSG00000283761 | 0.8122    | 0.20834 | 0.8122      | 0.20834     | 0.8122    | 0.20834 |  |
|           | 0.8122          | 0.20834   | 0.20834 | 0.637828345 |             |           |         |  |
| TSHB      | ENSG00000134200 | 0.81217   | 0.20835 | 0.81217     | 0.20835     | 0.81217   | 0.20835 |  |
|           | 0.81217         | 0.20835   | 0.20835 | 0.637828345 |             |           |         |  |
| PABPC4    | ENSG00000090621 | -1.2754   | 0.89892 | 0.81214     | 0.20836     | 0.010781  |         |  |
|           | 0.4957          | -1.1709   | 0.87918 | 0.20836     | 0.637828345 |           |         |  |
| DHX36     | ENSG00000174953 | 0.68213   | 0.24758 | 0.090384    | 0.46399     | 0.27269   | 0.39255 |  |
|           | 0.81197         | 0.20841   | 0.20841 | 0.637828345 |             |           |         |  |
| MIR4633   | ENSG00000264563 | 0.81194   | 0.20841 | 0.81194     | 0.20841     | 0.81194   |         |  |
|           | 0.20841         | 0.81194   | 0.20841 | 0.20841     | 0.637828345 |           |         |  |
| NA        | ENSG00000268293 | 0.81196   | 0.20841 | 0.81196     | 0.20841     | 0.81196   | 0.20841 |  |
|           | 0.81196         | 0.20841   | 0.20841 | 0.637828345 |             |           |         |  |
| CHD8      | ENSG00000100888 | 0.81187   | 0.20843 | -0.76195    | 0.77695     | 0.70968   | 0.23895 |  |
|           | -0.69344        | 0.75598   | 0.20843 | 0.637828345 |             |           |         |  |
| AIMP1P1   | ENSG00000234187 | 0.81185   | 0.20844 | 0.81185     | 0.20844     | 0.81185   |         |  |
|           | 0.20844         | 0.81185   | 0.20844 | 0.20844     | 0.637828345 |           |         |  |
| CACNA1A   | ENSG00000141837 | -0.75238  | 0.77409 | -0.50665    | 0.6938      | -0.042587 |         |  |
|           | 0.51698         | 0.8118    | 0.20845 | 0.20845     | 0.637828345 |           |         |  |
| PCF11     | ENSG00000165494 | 0.47477   | 0.31748 | 0.81182     | 0.20845     | 0.47477   | 0.31748 |  |
|           | 0.61747         | 0.26846   | 0.20845 | 0.637828345 |             |           |         |  |
| NA        | ENSG00000266774 | -1.2856   | 0.90072 | 0.54442     | 0.29308     | -1.2856   | 0.90072 |  |
|           | 0.81182         | 0.20845   | 0.20845 | 0.637828345 |             |           |         |  |
| EIF2S2    | ENSG00000125977 | 0.8117    | 0.20848 | 0.53919     | 0.29488     | -0.51049  |         |  |
|           | 0.69515         | -0.13575  | 0.55399 | 0.20848     | 0.637828345 |           |         |  |
| RPS2P17   | ENSG00000213399 | 0.81168   | 0.20849 | -0.38898    | 0.65135     | -0.38898  |         |  |
|           | 0.65135         | -0.38898  | 0.65135 | 0.20849     | 0.637828345 |           |         |  |
| PPTC7     | ENSG00000196850 | 0.81156   | 0.20852 | 0.40938     | 0.34113     | -0.56224  | 0.71302 |  |
|           | -0.4704         | 0.68096   | 0.20852 | 0.637828345 |             |           |         |  |
| CYP2J2    | ENSG00000134716 | 0.8115    | 0.20854 | -0.15361    | 0.56104     | 0.8115    |         |  |
|           | 0.20854         | 0.8115    | 0.20854 | 0.20854     | 0.637828345 |           |         |  |
| NA        | ENSG00000233271 | 0.81145   | 0.20855 | 0.81145     | 0.20855     | 0.81145   | 0.20855 |  |
|           | 0.81145         | 0.20855   | 0.20855 | 0.637828345 |             |           |         |  |
| HSD3B2    | ENSG00000203859 | -0.78306  | 0.7832  | -0.61969    | 0.73227     | 0.54507   |         |  |
|           | 0.29285         | 0.81139   | 0.20857 | 0.20857     | 0.637828345 |           |         |  |
| C22orf39  | ENSG00000242259 | 0.81135   | 0.20858 | 0.81135     | 0.20858     | 0.81135   |         |  |
|           | 0.20858         | 0.81135   | 0.20858 | 0.20858     | 0.637828345 |           |         |  |
| MAS1      | ENSG00000130368 | -0.10268  | 0.54089 | 0.2423      | 0.40427     | 0.81127   | 0.2086  |  |
|           | -0.47137        | 0.68131   | 0.2086  | 0.637828345 |             |           |         |  |
| LINC01280 | ENSG00000224391 | 0.81126   | 0.20861 | -0.82397    | 0.79502     | -0.61816  |         |  |
|           | 0.73177         | -1.1446   | 0.87382 | 0.20861     | 0.637828345 |           |         |  |
| CHST13    | ENSG00000180767 | 0.14794   | 0.4412  | -0.49858    | 0.69096     | 0.79412   |         |  |

|            |                 |           |         |             |             |          |         |  |
|------------|-----------------|-----------|---------|-------------|-------------|----------|---------|--|
|            | 0.21356         | 0.8112    | 0.20862 | 0.20862     | 0.637828345 |          |         |  |
| MIR613     | ENSG00000207983 | 0.81123   | 0.20862 | 0.20862     | 0.54682     | 0.29225  | 0.81123 |  |
|            | 0.20862         | 0.0025769 | 0.49897 | 0.20862     | 0.637828345 |          |         |  |
| TMEM11     | ENSG00000178307 | -0.25586  | 0.60097 | 0.81119     | 0.20863     | 0.56215  |         |  |
|            | 0.28701         | 0.28603   | 0.38743 | 0.20863     | 0.637828345 |          |         |  |
| NA         | ENSG00000236213 | 0.81114   | 0.20864 | -0.27181    | 0.60712     | 0.025721 | 0.48974 |  |
|            | 0.81114         | 0.20864   | 0.20864 | 0.637828345 |             |          |         |  |
| PTMAP8     | ENSG00000243014 | 0.81113   | 0.20864 | 0.56477     | 0.28612     | -0.54225 |         |  |
|            | 0.70618         | -1.0599   | 0.8554  | 0.20864     | 0.637828345 |          |         |  |
| NA         | ENSG00000251172 | 0.81115   | 0.20864 | 0.81115     | 0.20864     | 0.81115  | 0.20864 |  |
|            | 0.81115         | 0.20864   | 0.20864 | 0.637828345 |             |          |         |  |
| HIGD1AP8   | ENSG00000237303 | 0.81105   | 0.20867 | 0.81105     | 0.20867     | 0.81105  |         |  |
|            | 0.20867         | -0.95213  | 0.82949 | 0.20867     | 0.637828345 |          |         |  |
| NT5DC3     | ENSG00000111696 | 0.54309   | 0.29353 | 0.54309     | 0.29353     | 0.54309  |         |  |
|            | 0.29353         | 0.81102   | 0.20868 | 0.20868     | 0.637828345 |          |         |  |
| NA         | ENSG00000231266 | 0.81101   | 0.20868 | 0.81101     | 0.20868     | 0.81101  | 0.20868 |  |
|            | 0.81101         | 0.20868   | 0.20868 | 0.637828345 |             |          |         |  |
| ANXA3      | ENSG00000138772 | 0.81091   | 0.20871 | 0.12034     | 0.45211     | -0.45654 | 0.676   |  |
|            | -0.13367        | 0.55317   | 0.20871 | 0.637828345 |             |          |         |  |
| MIR518A2   | ENSG00000207699 | 0.81089   | 0.20871 | -0.47626    | 0.68305     | 0.28045  |         |  |
|            | 0.38957         | 0.34688   | 0.36434 | 0.20871     | 0.637828345 |          |         |  |
| NA         | ENSG00000272299 | 0.81086   | 0.20872 | 0.78159     | 0.21723     | 0.37151  | 0.35513 |  |
|            | 0.37151         | 0.35513   | 0.20872 | 0.637828345 |             |          |         |  |
| RTN3P1     | ENSG00000251333 | 0.34689   | 0.36434 | -1.2849     | 0.90059     | 0.81083  |         |  |
|            | 0.20873         | -0.25856  | 0.60201 | 0.20873     | 0.637828345 |          |         |  |
| RNU6-176P  | ENSG00000253005 | 0.81085   | 0.20873 | 0.65382     | 0.25661     | 0.81085  |         |  |
|            | 0.20873         | 0.81085   | 0.20873 | 0.20873     | 0.637828345 |          |         |  |
| NA         | ENSG00000275348 | -0.70215  | 0.75871 | -0.49682    | 0.69034     | 0.81081  | 0.20874 |  |
|            | -0.49682        | 0.69034   | 0.20874 | 0.637828345 |             |          |         |  |
| SMIM15-AS1 | ENSG00000251279 | -0.011663 | 0.50465 | -1.0451     | 0.85201     | 0.81076  |         |  |
|            | 0.20875         | -0.53013  | 0.70199 | 0.20875     | 0.637828345 |          |         |  |
| INF2       | ENSG00000203485 | -0.94721  | 0.82824 | -1.113      | 0.86715     | -1.3334  | 0.90881 |  |
|            | 0.81073         | 0.20876   | 0.20876 | 0.637828345 |             |          |         |  |
| NA         | ENSG00000226599 | 0.81069   | 0.20877 | 0.81069     | 0.20877     | 0.81069  | 0.20877 |  |
|            | 0.81069         | 0.20877   | 0.20877 | 0.637828345 |             |          |         |  |
| RNU6-726P  | ENSG00000201550 | 0.81053   | 0.20882 | -1.1129     | 0.86712     | 0.016591 |         |  |
|            | 0.49338         | 0.81053   | 0.20882 | 0.20882     | 0.637941107 |          |         |  |
| RPL7P38    | ENSG00000239473 | 0.81043   | 0.20885 | 0.81043     | 0.20885     | 0.81043  |         |  |
|            | 0.20885         | 0.81043   | 0.20885 | 0.20885     | 0.63799276  |          |         |  |
| NA         | ENSG00000267672 | 0.8103    | 0.20888 | 0.8103      | 0.20888     | 0.8103   | 0.20888 |  |
|            | 0.8103          | 0.20888   | 0.20888 | 0.638044405 |             |          |         |  |
| NA         | ENSG00000273449 | 0.81025   | 0.2089  | 0.81025     | 0.2089      | 0.81025  | 0.2089  |  |
|            | 0.81025         | 0.2089    | 0.2089  | 0.638065501 |             |          |         |  |
| NR1I3      | ENSG00000143257 | 0.81019   | 0.20892 | 0.81019     | 0.20892     | 0.43881  | 0.3304  |  |
|            | -0.20186        | 0.57999   | 0.20892 | 0.638086594 |             |          |         |  |
| NRN1       | ENSG00000124785 | -0.47346  | 0.68206 | 0.11532     | 0.4541      | 0.80998  | 0.20898 |  |
|            | 0.59131         | 0.27716   | 0.20898 | 0.638210929 |             |          |         |  |
| NA         | ENSG00000280374 | 0.80992   | 0.20899 | 0.80992     | 0.20899     | 0.80992  | 0.20899 |  |
|            | 0.80992         | 0.20899   | 0.20899 | 0.638210929 |             |          |         |  |
| NA         | ENSG00000215146 | -0.84009  | 0.79957 | -0.28289    | 0.61137     | -0.7977  | 0.78748 |  |
|            | 0.8099          | 0.209     | 0.209   | 0.638210929 |             |          |         |  |
| ZC2HC1A    | ENSG00000104427 | -1.1609   | 0.87716 | 0.16281     | 0.43533     | -1.3469  | 0.911   |  |
|            | 0.8098          | 0.20903   | 0.20903 | 0.638213094 |             |          |         |  |
| MIR199A2   | ENSG00000208024 | 0.80979   | 0.20903 | 0.80979     | 0.20903     | 0.80979  |         |  |
|            | 0.20903         | 0.80979   | 0.20903 | 0.20903     | 0.638213094 |          |         |  |
| NA         | ENSG00000280604 | 0.80976   | 0.20904 | 0.80976     | 0.20904     | 0.80976  | 0.20904 |  |
|            | 0.80976         | 0.20904   | 0.20904 | 0.638213094 |             |          |         |  |
| NA         | ENSG00000249513 | 0.80968   | 0.20906 | 0.80968     | 0.20906     | 0.80968  | 0.20906 |  |
|            | 0.80968         | 0.20906   | 0.20906 | 0.638224713 |             |          |         |  |
| NA         | ENSG00000258595 | -0.036488 | 0.51455 | -0.075245   | 0.52999     | 0.24126  | 0.40468 |  |
|            | 0.80965         | 0.20907   | 0.20907 | 0.638224713 |             |          |         |  |
| LINC01194  | ENSG00000248131 | 0.80953   | 0.2091  | 0.16176     | 0.43575     | 0.16176  |         |  |

|           |                 |           |         |             |             |           |         |
|-----------|-----------------|-----------|---------|-------------|-------------|-----------|---------|
|           | 0.43575         | -0.54475  | 0.70704 | 0.2091      | 0.638238489 |           |         |
| CPLX1     | ENSG00000168993 | 0.80951   | 0.20911 | -0.023109   | 0.50922     | -0.040095 | 0.51599 |
|           | -0.26143        | 0.60312   | 0.20911 | 0.638238489 |             |           |         |
| CFAP97    | ENSG00000164323 | -0.53027  | 0.70204 | -0.29264    | 0.6151      | 0.80946   |         |
|           | 0.20913         | -0.40335  | 0.65666 | 0.20913     | 0.638238489 |           |         |
| LINC00211 | ENSG00000237803 | -0.095286 | 0.53796 | 0.80945     | 0.20913     | 0.14132   |         |
|           | 0.44381         | -0.6544   | 0.74357 | 0.20913     | 0.638238489 |           |         |
| GRXCR1    | ENSG00000215203 | -0.35435  | 0.63846 | -0.73689    | 0.7694      | 0.48786   |         |
|           | 0.31282         | 0.80942   | 0.20914 | 0.20914     | 0.638238489 |           |         |
| PCDHGB1   | ENSG00000254221 | 0.80926   | 0.20918 | 0.80926     | 0.20918     | 0.80926   |         |
|           | 0.20918         | 0.80926   | 0.20918 | 0.20918     | 0.638320584 |           |         |
| RNU5A-4P  | ENSG00000252397 | 0.80919   | 0.2092  | 0.80919     | 0.2092      | 0.80919   |         |
|           | 0.2092          | 0.80919   | 0.2092  | 0.2092      | 0.638336465 |           |         |
| NA        | ENSG00000257890 | -1.5941   | 0.94455 | -0.93905    | 0.82615     | -1.5406   | 0.93829 |
|           | 0.80907         | 0.20924   | 0.20924 | 0.638336465 |             |           |         |
| NA        | ENSG00000262526 | 0.80901   | 0.20925 | 0.80901     | 0.20925     | 0.80901   | 0.20925 |
|           | 0.80901         | 0.20925   | 0.20925 | 0.638336465 |             |           |         |
| NA        | ENSG00000259280 | -0.44432  | 0.67159 | -0.14008    | 0.5557      | -0.4011   | 0.65583 |
|           | 0.80895         | 0.20927   | 0.20927 | 0.638336465 |             |           |         |
| TREML4    | ENSG00000188056 | 0.69598   | 0.24322 | 0.49478     | 0.31038     | 0.4232    |         |
|           | 0.33607         | 0.80893   | 0.20928 | 0.20928     | 0.638336465 |           |         |
| ZNF137P   | ENSG00000123870 | 0.48664   | 0.31326 | 0.80889     | 0.20929     | 0.48664   |         |
|           | 0.31326         | 0.48664   | 0.31326 | 0.20929     | 0.638336465 |           |         |
| CHCHD3P1  | ENSG00000236420 | 0.8089    | 0.20929 | 0.8089      | 0.20929     | 0.8089    |         |
|           | 0.20929         | 0.8089    | 0.20929 | 0.20929     | 0.638336465 |           |         |
| REELD1    | ENSG00000250673 | -0.93867  | 0.82605 | -0.028375   | 0.51132     | 0.80889   |         |
|           | 0.20929         | 0.56578   | 0.28577 | 0.20929     | 0.638336465 |           |         |
| NA        | ENSG00000257797 | 0.80883   | 0.20931 | 0.80883     | 0.20931     | 0.80883   | 0.20931 |
|           | 0.80883         | 0.20931   | 0.20931 | 0.638348057 |             |           |         |
| GNGT1     | ENSG00000127928 | -0.53132  | 0.7024  | -0.74154    | 0.77082     | -0.25657  | 0.60125 |
|           | 0.8088          | 0.20932   | 0.20932 | 0.638348057 |             |           |         |
| RALGDS    | ENSG00000160271 | 0.30294   | 0.38097 | 0.69216     | 0.24442     | 0.80858   |         |
|           | 0.20938         | 0.4671    | 0.32021 | 0.20938     | 0.638481616 |           |         |
| NA        | ENSG00000260322 | -1.4455   | 0.92585 | 0.80855     | 0.20939     | -1.4455   | 0.92585 |
|           | -1.4455         | 0.92585   | 0.20939 | 0.638481616 |             |           |         |
| MTND4LP9  | ENSG00000227795 | 0.80847   | 0.20941 | 0.80847     | 0.20941     | -0.7054   |         |
|           | 0.75972         | 0.80847   | 0.20941 | 0.20941     | 0.638502647 |           |         |
| TRGJP2    | ENSG00000211688 | 0.80837   | 0.20944 | 0.80837     | 0.20944     | 0.80837   |         |
|           | 0.20944         | 0.80837   | 0.20944 | 0.20944     | 0.638554164 |           |         |
| OR11A1    | ENSG00000204694 | 0.80816   | 0.2095  | 0.80816     | 0.2095      | 0.80816   |         |
|           | 0.2095          | 0.80816   | 0.2095  | 0.2095      | 0.638697135 |           |         |
| NA        | ENSG00000254581 | 0.11836   | 0.45289 | 0.80796     | 0.20956     | 0.31403   | 0.37675 |
|           | 0.31403         | 0.37675   | 0.20956 | 0.638781973 |             |           |         |
| NA        | ENSG00000254084 | 0.58956   | 0.27774 | 0.58956     | 0.27774     | 0.58956   | 0.27774 |
|           | 0.80792         | 0.20957   | 0.20957 | 0.638781973 |             |           |         |
| GJE1      | ENSG00000203733 | 0.80785   | 0.20959 | 0.80785     | 0.20959     | 0.80785   | 0.20959 |
|           | 0.80785         | 0.20959   | 0.20959 | 0.638781973 |             |           |         |
| SLC35A5   | ENSG00000138459 | -0.13348  | 0.55309 | -0.36713    | 0.64324     | -0.15806  |         |
|           | 0.56279         | 0.80782   | 0.2096  | 0.2096      | 0.638781973 |           |         |
| ABHD14A   | ENSG00000248487 | 0.80782   | 0.2096  | 0.80782     | 0.2096      | 0.80782   |         |
|           | 0.2096          | 0.80782   | 0.2096  | 0.2096      | 0.638781973 |           |         |
| SNORD2    | ENSG00000238942 | 0.80766   | 0.20964 | 0.80766     | 0.20964     | 0.80766   |         |
|           | 0.20964         | 0.80766   | 0.20964 | 0.20964     | 0.638781973 |           |         |
| NA        | ENSG00000236267 | 0.80762   | 0.20965 | 0.80762     | 0.20965     | 0.80762   | 0.20965 |
|           | -0.12728        | 0.55064   | 0.20965 | 0.638781973 |             |           |         |
| NA        | ENSG00000255491 | 0.37477   | 0.35392 | 0.80765     | 0.20965     | 0.52528   | 0.2997  |
|           | -0.40667        | 0.65787   | 0.20965 | 0.638781973 |             |           |         |
| MIR548AE1 | ENSG00000266808 | -0.26886  | 0.60598 | 0.70671     | 0.23987     | 0.80758   |         |
|           | 0.20967         | 0.80758   | 0.20967 | 0.20967     | 0.638781973 |           |         |
| USP14     | ENSG00000101557 | -1.3025   | 0.90362 | -1.2002     | 0.88497     | -1.2576   | 0.89574 |
|           | 0.80752         | 0.20968   | 0.20968 | 0.638781973 |             |           |         |
| RAD23B    | ENSG00000119318 | 0.32612   | 0.37217 | -0.93091    | 0.82405     | -0.93091  |         |

|           |                 |           |         |             |             |          |         |  |
|-----------|-----------------|-----------|---------|-------------|-------------|----------|---------|--|
|           | 0.82405         | 0.80745   | 0.2097  | 0.2097      | 0.638781973 |          |         |  |
| NA        | ENSG00000250344 | 0.80746   | 0.2097  | 0.26654     | 0.39491     | 0.025383 | 0.48987 |  |
|           | -0.97097        | 0.83422   | 0.2097  | 0.638781973 |             |          |         |  |
| NVL       | ENSG00000143748 | 0.80739   | 0.20972 | 0.50967     | 0.30514     | 0.48541  | 0.31369 |  |
|           | 0.60604         | 0.27224   | 0.20972 | 0.638781973 |             |          |         |  |
| NA        | ENSG00000232935 | 0.80732   | 0.20974 | 0.80732     | 0.20974     | 0.80732  | 0.20974 |  |
|           | 0.80732         | 0.20974   | 0.20974 | 0.638781973 |             |          |         |  |
| NA        | ENSG00000236777 | 0.80732   | 0.20974 | 0.80732     | 0.20974     | 0.80732  | 0.20974 |  |
|           | 0.80732         | 0.20974   | 0.20974 | 0.638781973 |             |          |         |  |
| PLAAT3    | ENSG00000176485 | -0.62269  | 0.73325 | -1.2853     | 0.90066     | 0.80729  |         |  |
|           | 0.20975         | -1.4286   | 0.92343 | 0.20975     | 0.638781973 |          |         |  |
| FAM117B   | ENSG00000138439 | 0.80725   | 0.20976 | -0.953      | 0.82971     | 0.077025 |         |  |
|           | 0.4693          | 0.18433   | 0.42688 | 0.20976     | 0.638781973 |          |         |  |
| PTGES2    | ENSG00000148334 | 0.80719   | 0.20978 | 0.80719     | 0.20978     | 0.80719  |         |  |
|           | 0.20978         | 0.80719   | 0.20978 | 0.20978     | 0.638781973 |          |         |  |
| NA        | ENSG00000232850 | 0.80719   | 0.20978 | 0.80719     | 0.20978     | 0.80719  | 0.20978 |  |
|           | 0.80719         | 0.20978   | 0.20978 | 0.638781973 |             |          |         |  |
| RNU7-165P | ENSG00000238380 | -0.92494  | 0.8225  | 0.80715     | 0.20979     | -1.0836  |         |  |
|           | 0.86073         | 0.32326   | 0.37325 | 0.20979     | 0.638781973 |          |         |  |
| NA        | ENSG00000261067 | 0.8071    | 0.20981 | 0.8071      | 0.20981     | 0.8071   | 0.20981 |  |
|           | 0.8071          | 0.20981   | 0.20981 | 0.63879349  |             |          |         |  |
| NA        | ENSG00000270447 | 0.79407   | 0.21358 | 0.80705     | 0.20982     | 0.79407  | 0.21358 |  |
|           | 0.79407         | 0.21358   | 0.20982 | 0.63879349  |             |          |         |  |
| NA        | ENSG00000236583 | 0.80695   | 0.20985 | 0.76283     | 0.22278     | 0.28944  | 0.38612 |  |
|           | 0.60523         | 0.27251   | 0.20985 | 0.638844912 |             |          |         |  |
| HKDC1     | ENSG00000156510 | -0.18205  | 0.57223 | 0.16203     | 0.43564     | -0.98527 | 0.83775 |  |
|           | 0.80689         | 0.20987   | 0.20987 | 0.638865886 |             |          |         |  |
| NKG7      | ENSG00000105374 | 0.80677   | 0.2099  | 0.80677     | 0.2099      | 0.80677  | 0.2099  |  |
|           | 0.80677         | 0.2099    | 0.2099  | 0.638867922 |             |          |         |  |
| NA        | ENSG00000240687 | 0.80676   | 0.2099  | 0.42052     | 0.33705     | 0.013474 | 0.49462 |  |
|           | 0.013474        | 0.49462   | 0.2099  | 0.638867922 |             |          |         |  |
| NA        | ENSG00000267630 | -0.54481  | 0.70706 | 0.80673     | 0.20991     | 0.80673  | 0.20991 |  |
|           | 0.80673         | 0.20991   | 0.20991 | 0.638867922 |             |          |         |  |
| RNU6-830P | ENSG00000252162 | 0.80649   | 0.20998 | -0.40852    | 0.65856     | 0.80649  |         |  |
|           | 0.20998         | 0.80649   | 0.20998 | 0.20998     | 0.638974749 |          |         |  |
| CRYGFP    | ENSG00000232799 | 0.28416   | 0.38814 | -1.6794     | 0.95346     | -0.356   |         |  |
|           | 0.63908         | 0.80644   | 0.20999 | 0.20999     | 0.638974749 |          |         |  |
| NA        | ENSG00000266153 | 0.45032   | 0.32624 | 0.12973     | 0.44839     | 0.80642  | 0.21    |  |
|           | -0.18397        | 0.57298   | 0.21    | 0.638974749 |             |          |         |  |
| RAB28     | ENSG00000157869 | -0.34878  | 0.63637 | 0.80632     | 0.21003     | -0.20719 | 0.58207 |  |
|           | -1.0714         | 0.858     | 0.21003 | 0.638974749 |             |          |         |  |
| NA        | ENSG00000249253 | 0.28815   | 0.38662 | 0.80629     | 0.21004     | -0.13519 | 0.55377 |  |
|           | -0.86483        | 0.80643   | 0.21004 | 0.638974749 |             |          |         |  |
| RNU7-10P  | ENSG00000271841 | 0.80628   | 0.21004 | 0.80628     | 0.21004     | 0.80628  |         |  |
|           | 0.21004         | 0.80628   | 0.21004 | 0.21004     | 0.638974749 |          |         |  |
| BTG4      | ENSG00000137707 | 0.65979   | 0.25469 | 0.65979     | 0.25469     | -0.63697 | 0.73793 |  |
|           | 0.80624         | 0.21005   | 0.21005 | 0.638974749 |             |          |         |  |
| NA        | ENSG00000221011 | -0.41789  | 0.66199 | 0.80626     | 0.21005     | -0.60533 | 0.72752 |  |
|           | -0.0087023      | 0.50347   | 0.21005 | 0.638974749 |             |          |         |  |
| Clorf147  | ENSG00000162888 | 0.80609   | 0.2101  | 0.80609     | 0.2101      | -0.71427 |         |  |
|           | 0.76247         | 0.80609   | 0.2101  | 0.2101      | 0.639037592 |          |         |  |
| WHSC1L2P  | ENSG00000267253 | 0.80607   | 0.2101  | 0.80607     | 0.2101      | 0.80607  |         |  |
|           | 0.2101          | 0.017758  | 0.49292 | 0.2101      | 0.639037592 |          |         |  |
| MTND5P17  | ENSG00000236626 | -0.028541 | 0.51138 | -1.4255     | 0.92299     | 0.80603  |         |  |
|           | 0.21011         | 0.80603   | 0.21011 | 0.21011     | 0.639037592 |          |         |  |
| MAT2A     | ENSG00000168906 | -0.2942   | 0.6157  | -0.0091811  | 0.50366     | 0.26461  | 0.39566 |  |
|           | 0.8059          | 0.21015   | 0.21015 | 0.63911936  |             |          |         |  |
| NA        | ENSG00000252409 | 0.80578   | 0.21018 | 0.2578      | 0.39828     | 0.2578   | 0.39828 |  |
|           | 0.80578         | 0.21018   | 0.21018 | 0.639161229 |             |          |         |  |
| TMEM213   | ENSG00000214128 | 0.80576   | 0.21019 | -0.20433    | 0.58095     | -0.20433 |         |  |
|           | 0.58095         | -0.20433  | 0.58095 | 0.21019     | 0.639161229 |          |         |  |
| CNN3      | ENSG00000117519 | 0.44224   | 0.32916 | 0.80569     | 0.21021     | 0.44224  | 0.32916 |  |

|             |                 |           |         |             |             |          |         |  |
|-------------|-----------------|-----------|---------|-------------|-------------|----------|---------|--|
|             | 0.44224         | 0.32916   | 0.21021 | 0.63918216  |             |          |         |  |
| NA          | ENSG00000254569 | 0.047707  | 0.48097 | -0.53198    | 0.70263     | -0.31633 | 0.62412 |  |
|             | 0.80555         | 0.21025   | 0.21025 | 0.639263898 |             |          |         |  |
| LINC00411   | ENSG00000229599 | 0.80546   | 0.21028 | -0.40352    | 0.65672     | -1.2981  |         |  |
|             | 0.90287         | -0.40352  | 0.65672 | 0.21028     | 0.63930574  |          |         |  |
| MTRNR2L9    | ENSG00000255633 | 0.80542   | 0.21029 | -0.28847    | 0.61351     | -1.2657  |         |  |
|             | 0.89719         | 0.14279   | 0.44323 | 0.21029     | 0.63930574  |          |         |  |
| TRIM21      | ENSG00000132109 | -0.15185  | 0.56035 | 0.80535     | 0.21031     | -0.27605 |         |  |
|             | 0.60875         | 0.56724   | 0.28528 | 0.21031     | 0.639307691 |          |         |  |
| NA          | ENSG00000221031 | -0.048556 | 0.51936 | 0.80532     | 0.21032     | -0.94098 | 0.82664 |  |
|             | -0.2892         | 0.61379   | 0.21032 | 0.639307691 |             |          |         |  |
| FAM3B       | ENSG00000183844 | 0.53865   | 0.29506 | 0.80528     | 0.21033     | 0.74896  | 0.22694 |  |
|             | -0.2708         | 0.60673   | 0.21033 | 0.639307691 |             |          |         |  |
| NA          | ENSG00000216802 | 0.80521   | 0.21035 | 0.80521     | 0.21035     | 0.80521  | 0.21035 |  |
|             | 0.80521         | 0.21035   | 0.21035 | 0.639309641 |             |          |         |  |
| ABLIM1      | ENSG00000099204 | -0.4848   | 0.68609 | -0.28456    | 0.61201     | 0.55373  |         |  |
|             | 0.28988         | 0.80518   | 0.21036 | 0.21036     | 0.639309641 |          |         |  |
| ALDH1L1-AS2 | ENSG00000246022 | -0.24608  | 0.59719 | 0.80513     | 0.21037     | -0.4455  |         |  |
|             | 0.67202         | -0.4455   | 0.67202 | 0.21037     | 0.639309641 |          |         |  |
| NA          | ENSG00000279474 | 0.80502   | 0.2104  | 0.80502     | 0.2104      | 0.80502  | 0.2104  |  |
|             | 0.80502         | 0.2104    | 0.2104  | 0.639323017 |             |          |         |  |
| NA          | ENSG00000234352 | 0.80493   | 0.21043 | 0.047407    | 0.48109     | -0.7376  | 0.76962 |  |
|             | 0.35933         | 0.35968   | 0.21043 | 0.639323017 |             |          |         |  |
| BBC3        | ENSG00000105327 | -0.77194  | 0.77993 | -1.2935     | 0.90207     | 0.8049   | 0.21044 |  |
|             | -1.2935         | 0.90207   | 0.21044 | 0.639323017 |             |          |         |  |
| NA          | ENSG00000219273 | 0.8049    | 0.21044 | 0.8049      | 0.21044     | 0.8049   | 0.21044 |  |
|             | 0.8049          | 0.21044   | 0.21044 | 0.639323017 |             |          |         |  |
| RN7SL446P   | ENSG00000244544 | 0.80491   | 0.21044 | 0.80491     | 0.21044     | 0.80491  |         |  |
|             | 0.21044         | 0.80491   | 0.21044 | 0.21044     | 0.639323017 |          |         |  |
| RNU6-642P   | ENSG00000200029 | 0.19126   | 0.42416 | 0.75674     | 0.2246      | 0.80477  |         |  |
|             | 0.21048         | 0.80477   | 0.21048 | 0.21048     | 0.639347803 |          |         |  |
| LINC01712   | ENSG00000231364 | -1.384    | 0.91682 | -0.30612    | 0.62024     | 0.80477  |         |  |
|             | 0.21048         | 0.57879   | 0.28136 | 0.21048     | 0.639347803 |          |         |  |
| LINC01738   | ENSG00000227947 | -0.15076  | 0.55992 | -3.0665     | 0.99892     | -3.0665  |         |  |
|             | 0.99892         | 0.80463   | 0.21052 | 0.21052     | 0.639347803 |          |         |  |
| NA          | ENSG00000243062 | -0.40698  | 0.65799 | -0.40698    | 0.65799     | -0.40698 | 0.65799 |  |
|             | 0.80461         | 0.21052   | 0.21052 | 0.639347803 |             |          |         |  |
| NA          | ENSG00000265890 | 0.80462   | 0.21052 | 0.80462     | 0.21052     | 0.80462  | 0.21052 |  |
|             | 0.80462         | 0.21052   | 0.21052 | 0.639347803 |             |          |         |  |
| IL1R1       | ENSG00000115594 | -0.42306  | 0.66388 | 0.63819     | 0.26167     | 0.80453  | 0.21054 |  |
|             | 0.19807         | 0.4215    | 0.21054 | 0.639347803 |             |          |         |  |
| NA          | ENSG00000282827 | 0.80455   | 0.21054 | 0.80455     | 0.21054     | 0.80455  | 0.21054 |  |
|             | 0.80455         | 0.21054   | 0.21054 | 0.639347803 |             |          |         |  |
| NA          | ENSG00000226286 | 0.2334    | 0.40772 | 0.80433     | 0.2106      | 0.18058  | 0.42835 |  |
|             | 0.3415          | 0.36636   | 0.2106  | 0.639382041 |             |          |         |  |
| WDR48       | ENSG00000114742 | -1.3836   | 0.91676 | -1.3836     | 0.91676     | 0.80431  | 0.21061 |  |
|             | -0.46267        | 0.6782    | 0.21061 | 0.639382041 |             |          |         |  |
| FCER1G      | ENSG00000158869 | 0.80431   | 0.21061 | 0.80431     | 0.21061     | 0.80431  |         |  |
|             | 0.21061         | 0.80431   | 0.21061 | 0.21061     | 0.639382041 |          |         |  |
| FOXF2       | ENSG00000137273 | -0.67416  | 0.7499  | 0.80426     | 0.21062     | -0.1509  | 0.55997 |  |
|             | -0.885          | 0.81192   | 0.21062 | 0.639382041 |             |          |         |  |
| ATP6V0CP3   | ENSG00000213435 | 0.80428   | 0.21062 | 0.80428     | 0.21062     | 0.80428  |         |  |
|             | 0.21062         | 0.80428   | 0.21062 | 0.21062     | 0.639382041 |          |         |  |
| TNRC6C-AS1  | ENSG00000204282 | 0.80425   | 0.21063 | 0.80425     | 0.21063     | 0.80425  |         |  |
|             | 0.21063         | 0.80425   | 0.21063 | 0.21063     | 0.639382041 |          |         |  |
| TIMM8BP1    | ENSG00000236258 | -0.45255  | 0.67456 | 0.15112     | 0.43994     | 0.8041   |         |  |
|             | 0.21067         | 0.8041    | 0.21067 | 0.21067     | 0.639463629 |          |         |  |
| NA          | ENSG00000254573 | -0.31999  | 0.62551 | 0.80386     | 0.21074     | 0.16263  | 0.43541 |  |
|             | 0.082663        | 0.46706   | 0.21074 | 0.639636263 |             |          |         |  |
| NA          | ENSG00000273320 | 0.80368   | 0.21079 | 0.80368     | 0.21079     | 0.80368  | 0.21079 |  |
|             | 0.80368         | 0.21079   | 0.21079 | 0.639748175 |             |          |         |  |
| CYCSP55     | ENSG00000214810 | -1.04     | 0.85083 | 0.80353     | 0.21083     | -1.3604  | 0.91315 |  |

|           |                 |          |         |             |             |           |         |  |
|-----------|-----------------|----------|---------|-------------|-------------|-----------|---------|--|
|           | -0.0072751      | 0.5029   | 0.21083 | 0.639755632 |             |           |         |  |
| NA        | ENSG00000264227 | 0.80355  | 0.21083 | 0.80355     | 0.21083     | 0.78853   | 0.21519 |  |
|           | 0.80355         | 0.21083  | 0.21083 | 0.639755632 |             |           |         |  |
| HAUS4     | ENSG00000092036 | 0.80347  | 0.21085 | 0.64606     | 0.25912     | 0.80347   | 0.21085 |  |
|           | 0.67672         | 0.24929  | 0.21085 | 0.639755632 |             |           |         |  |
| SH2B1     | ENSG00000178188 | 0.51371  | 0.30373 | 0.78279     | 0.21688     | 0.80343   | 0.21086 |  |
|           | 0.75404         | 0.22541  | 0.21086 | 0.639755632 |             |           |         |  |
| LCN9      | ENSG00000148386 | 0.35282  | 0.36211 | -0.74002    | 0.77036     | 0.13463   | 0.44645 |  |
|           | 0.80335         | 0.21089  | 0.21089 | 0.639755632 |             |           |         |  |
| SMAD3     | ENSG00000166949 | 0.80322  | 0.21092 | 0.51001     | 0.30502     | 0.80322   | 0.21092 |  |
|           | 0.56937         | 0.28455  | 0.21092 | 0.639755632 |             |           |         |  |
| MCHR1     | ENSG00000128285 | 0.80318  | 0.21093 | 0.80318     | 0.21093     | 0.80318   | 0.21093 |  |
|           | 0.80318         | 0.21093  | 0.21093 | 0.639755632 |             |           |         |  |
| IPLL3P    | ENSG00000206066 | 0.76186  | 0.22307 | 0.55822     | 0.28835     | 0.052969  |         |  |
|           | 0.47888         | 0.80319  | 0.21093 | 0.21093     | 0.639755632 |           |         |  |
| MIR570    | ENSG00000207650 | 0.80316  | 0.21094 | 0.80316     | 0.21094     | 0.80316   |         |  |
|           | 0.21094         | 0.80316  | 0.21094 | 0.21094     | 0.639755632 |           |         |  |
| NA        | ENSG00000226509 | 0.80317  | 0.21094 | -0.48052    | 0.68457     | -0.58351  | 0.72022 |  |
|           | -1.0664         | 0.85687  | 0.21094 | 0.639755632 |             |           |         |  |
| NA        | ENSG00000274653 | 0.80317  | 0.21094 | 0.80317     | 0.21094     | 0.80317   | 0.21094 |  |
|           | 0.80317         | 0.21094  | 0.21094 | 0.639755632 |             |           |         |  |
| HIGD1C    | ENSG00000214511 | -0.36446 | 0.64224 | -0.10962    | 0.54365     | 0.80315   |         |  |
|           | 0.21095         | 0.02724  | 0.48913 | 0.21095     | 0.639755632 |           |         |  |
| PTGES     | ENSG00000148344 | 0.80289  | 0.21102 | -0.014884   | 0.50594     | 0.80289   | 0.21102 |  |
|           | -0.30307        | 0.61908  | 0.21102 | 0.639899608 |             |           |         |  |
| PEF1-AS1  | ENSG00000235790 | 0.80284  | 0.21103 | 0.80284     | 0.21103     | 0.80284   |         |  |
|           | 0.21103         | 0.80284  | 0.21103 | 0.21103     | 0.639899608 |           |         |  |
| CD37      | ENSG00000104894 | 0.80279  | 0.21105 | 0.80279     | 0.21105     | 0.80279   | 0.21105 |  |
|           | 0.61144         | 0.27046  | 0.21105 | 0.639899608 |             |           |         |  |
| TMEM198B  | ENSG00000182796 | 0.80277  | 0.21105 | 0.70312     | 0.24099     | 0.70312   |         |  |
|           | 0.24099         | 0.70312  | 0.24099 | 0.21105     | 0.639899608 |           |         |  |
| ZNF580    | ENSG00000213015 | 0.80263  | 0.21109 | 0.80263     | 0.21109     | 0.80263   |         |  |
|           | 0.21109         | 0.80263  | 0.21109 | 0.21109     | 0.639981068 |           |         |  |
| NEFH1P1   | ENSG00000223489 | 0.80249  | 0.21113 | 0.65487     | 0.25628     | -0.53514  |         |  |
|           | 0.70372         | 0.29609  | 0.38358 | 0.21113     | 0.640062517 |           |         |  |
| NA        | ENSG00000250081 | -0.73164 | 0.76781 | -0.57978    | 0.71897     | -0.083677 | 0.53334 |  |
|           | 0.80218         | 0.21123  | 0.21123 | 0.64028601  |             |           |         |  |
| NA        | ENSG00000272462 | 0.80216  | 0.21123 | 0.36821     | 0.35636     | 0.36821   | 0.35636 |  |
|           | 0.68771         | 0.24582  | 0.21123 | 0.64028601  |             |           |         |  |
| MTCO1P14  | ENSG00000232551 | -0.79905 | 0.78787 | -0.79905    | 0.78787     | 0.30516   |         |  |
|           | 0.38012         | 0.80207  | 0.21126 | 0.21126     | 0.640337115 |           |         |  |
| NA        | ENSG00000240015 | 0.80195  | 0.21129 | -1.0615     | 0.85577     | 0.80195   | 0.21129 |  |
|           | 0.80195         | 0.21129  | 0.21129 | 0.640388214 |             |           |         |  |
| MIR3928   | ENSG00000264141 | 0.80174  | 0.21135 | 0.80174     | 0.21135     | 0.80174   |         |  |
|           | 0.21135         | 0.80174  | 0.21135 | 0.21135     | 0.640524133 |           |         |  |
| TNS4      | ENSG00000131746 | 0.80164  | 0.21138 | 0.57753     | 0.28179     | 0.80164   | 0.21138 |  |
|           | 0.80164         | 0.21138  | 0.21138 | 0.640524133 |             |           |         |  |
| NA        | ENSG00000214772 | 0.80157  | 0.2114  | -0.58074    | 0.71929     | 0.80157   | 0.2114  |  |
|           | 0.80157         | 0.2114   | 0.2114  | 0.640524133 |             |           |         |  |
| ZMYND19P1 | ENSG00000258917 | 0.80156  | 0.2114  | 0.80156     | 0.2114      | 0.80156   |         |  |
|           | 0.2114          | 0.80156  | 0.2114  | 0.2114      | 0.640524133 |           |         |  |
| NA        | ENSG00000253764 | 0.80154  | 0.21141 | 0.80154     | 0.21141     | 0.80154   | 0.21141 |  |
|           | 0.80154         | 0.21141  | 0.21141 | 0.640524133 |             |           |         |  |
| SERF2     | ENSG00000140264 | 0.80148  | 0.21143 | 0.80148     | 0.21143     | 0.80148   | 0.21143 |  |
|           | -0.38172        | 0.64866  | 0.21143 | 0.640524133 |             |           |         |  |
| RPS3AP54  | ENSG00000229057 | -0.60477 | 0.72733 | -0.60477    | 0.72733     | 0.80146   |         |  |
|           | 0.21143         | -0.60477 | 0.72733 | 0.21143     | 0.640524133 |           |         |  |
| NA        | ENSG00000259950 | 0.80144  | 0.21144 | 0.80144     | 0.21144     | 0.80144   | 0.21144 |  |
|           | 0.80144         | 0.21144  | 0.21144 | 0.640524133 |             |           |         |  |
| SERTAD2   | ENSG00000179833 | -0.88327 | 0.81146 | 0.80134     | 0.21147     | -0.096328 |         |  |
|           | 0.53837         | -0.32711 | 0.62821 | 0.21147     | 0.640535374 |           |         |  |
| BPIFA4P   | ENSG00000183566 | 0.80134  | 0.21147 | -0.076195   | 0.53037     | -0.78231  |         |  |

|                 |                 |           |         |             |             |            |         |  |
|-----------------|-----------------|-----------|---------|-------------|-------------|------------|---------|--|
|                 | 0.78298         | -0.076195 | 0.53037 | 0.21147     | 0.640535374 |            |         |  |
| RNF10           | ENSG00000022840 | 0.80125   | 0.21149 | 0.48114     | 0.31521     | -0.41085   | 0.65941 |  |
|                 | -0.40674        | 0.6579    | 0.21149 | 0.640546613 |             |            |         |  |
| SLCO1B3-SLCO1B7 | ENSG00000257046 | 0.80124   | 0.2115  | 0.18886     | 0.4251      | 0.18886    |         |  |
|                 | 0.4251          | 0.18886   | 0.4251  | 0.2115      | 0.640546613 |            |         |  |
| NA              | ENSG00000225726 | 0.55334   | 0.29001 | 0.75689     | 0.22456     | 0.8011     | 0.21154 |  |
|                 | -0.69771        | 0.75732   | 0.21154 | 0.640627941 |             |            |         |  |
| NA              | ENSG00000259681 | 0.80094   | 0.21158 | 0.80094     | 0.21158     | 0.80094    | 0.21158 |  |
|                 | 0.80094         | 0.21158   | 0.21158 | 0.640666677 |             |            |         |  |
| MAP4K3          | ENSG00000011566 | 0.56997   | 0.28435 | 0.8009      | 0.2116      | 0.64326    |         |  |
|                 | 0.26003         | 0.54097   | 0.29427 | 0.2116      | 0.640666677 |            |         |  |
| KRTAP21-1       | ENSG00000187005 | 0.80082   | 0.21162 | 0.80082     | 0.21162     | 0.68435    |         |  |
|                 | 0.24688         | 0.80082   | 0.21162 | 0.21162     | 0.640666677 |            |         |  |
| CUTC            | ENSG00000119929 | -1.4481   | 0.9262  | 0.15393     | 0.43883     | 0.15393    | 0.43883 |  |
|                 | 0.80076         | 0.21163   | 0.21163 | 0.640666677 |             |            |         |  |
| AMT             | ENSG00000145020 | 0.80076   | 0.21164 | 0.80076     | 0.21164     | 0.80076    | 0.21164 |  |
|                 | -0.75878        | 0.77601   | 0.21164 | 0.640666677 |             |            |         |  |
| MICAL2          | ENSG00000133816 | 0.80057   | 0.21169 | -0.59764    | 0.72496     | -0.56613   |         |  |
|                 | 0.71435         | -0.84578  | 0.80116 | 0.21169     | 0.640666677 |            |         |  |
| TSPAN2          | ENSG00000134198 | 0.6322    | 0.26363 | 0.80056     | 0.21169     | 0.76969    |         |  |
|                 | 0.22074         | 0.76969   | 0.22074 | 0.21169     | 0.640666677 |            |         |  |
| FAM168B         | ENSG00000152102 | 0.80054   | 0.2117  | -1.4441     | 0.92565     | -0.0090543 |         |  |
|                 | 0.50361         | 0.16491   | 0.43451 | 0.2117      | 0.640666677 |            |         |  |
| LARP1BP1        | ENSG00000231442 | 0.62015   | 0.26758 | 0.71955     | 0.2359      | 0.71955    |         |  |
|                 | 0.2359          | 0.80055   | 0.2117  | 0.2117      | 0.640666677 |            |         |  |
| RPS15AP16       | ENSG00000239483 | 0.8005    | 0.21171 | 0.8005      | 0.21171     | 0.8005     |         |  |
|                 | 0.21171         | 0.8005    | 0.21171 | 0.21171     | 0.640666677 |            |         |  |
| ZNF883          | ENSG00000228623 | -0.2552   | 0.60072 | -0.70408    | 0.75931     | 0.32992    |         |  |
|                 | 0.37073         | 0.80042   | 0.21173 | 0.21173     | 0.640666677 |            |         |  |
| NA              | ENSG00000248762 | 0.80045   | 0.21173 | -0.092882   | 0.537       | 0.21128    | 0.41633 |  |
|                 | 0.21128         | 0.41633   | 0.21173 | 0.640666677 |             |            |         |  |
| TTC30A          | ENSG00000197557 | 0.8004    | 0.21174 | 0.8004      | 0.21174     | 0.8004     |         |  |
|                 | 0.21174         | 0.8004    | 0.21174 | 0.21174     | 0.640666677 |            |         |  |
| TAPBPL          | ENSG00000139192 | 0.80038   | 0.21175 | -0.77438    | 0.78065     | 0.6674     |         |  |
|                 | 0.25226         | -1.6685   | 0.95239 | 0.21175     | 0.640666677 |            |         |  |
| NA              | ENSG00000232056 | -0.42937  | 0.66617 | 0.80035     | 0.21175     | 0.11765    | 0.45317 |  |
|                 | 0.44207         | 0.32922   | 0.21175 | 0.640666677 |             |            |         |  |
| NA              | ENSG00000230968 | 0.22067   | 0.41267 | 0.80028     | 0.21177     | -0.26605   | 0.6049  |  |
|                 | 0.080421        | 0.46795   | 0.21177 | 0.640687409 |             |            |         |  |
| NA              | ENSG00000279649 | 0.80019   | 0.2118  | 0.80019     | 0.2118      | 0.80019    | 0.2118  |  |
|                 | 0.80019         | 0.2118    | 0.2118  | 0.640738391 |             |            |         |  |
| NA              | ENSG00000280089 | 0.80011   | 0.21182 | 0.80011     | 0.21182     | 0.80011    | 0.21182 |  |
|                 | 0.80011         | 0.21182   | 0.21182 | 0.640759116 |             |            |         |  |
| NA              | ENSG00000225881 | -0.23949  | 0.59464 | -0.23949    | 0.59464     | -0.23949   | 0.59464 |  |
|                 | 0.79999         | 0.21186   | 0.21186 | 0.640827909 |             |            |         |  |
| GLP2R           | ENSG00000065325 | 0.79987   | 0.21189 | 0.23751     | 0.40613     | 0.57092    | 0.28403 |  |
|                 | 0.55032         | 0.29105   | 0.21189 | 0.640827909 |             |            |         |  |
| SFXN2           | ENSG00000156398 | -0.3985   | 0.65487 | 0.51427     | 0.30353     | -0.23964   | 0.59469 |  |
|                 | 0.79988         | 0.21189   | 0.21189 | 0.640827909 |             |            |         |  |
| NA              | ENSG00000267275 | 0.79973   | 0.21193 | 0.79973     | 0.21193     | 0.24661    | 0.4026  |  |
|                 | 0.24661         | 0.4026    | 0.21193 | 0.640827909 |             |            |         |  |
| NA              | ENSG00000214669 | -0.85119  | 0.80267 | 0.59962     | 0.27438     | 0.79971    | 0.21194 |  |
|                 | 0.79971         | 0.21194   | 0.21194 | 0.640827909 |             |            |         |  |
| GPX2            | ENSG00000176153 | 0.79968   | 0.21195 | 0.79968     | 0.21195     | 0.79968    | 0.21195 |  |
|                 | 0.79968         | 0.21195   | 0.21195 | 0.640827909 |             |            |         |  |
| GAPDHP46        | ENSG00000224678 | -1.6996   | 0.95539 | 0.79966     | 0.21195     | -0.59267   |         |  |
|                 | 0.7233          | -0.59267  | 0.7233  | 0.21195     | 0.640827909 |            |         |  |
| TSN             | ENSG00000211460 | 0.79952   | 0.21199 | 0.79952     | 0.21199     | 0.79952    | 0.21199 |  |
|                 | -0.6437         | 0.74011   | 0.21199 | 0.640827909 |             |            |         |  |
| RPL12P8         | ENSG00000219932 | 0.74396   | 0.22845 | 0.79955     | 0.21199     | 0.74396    |         |  |
|                 | 0.22845         | 0.69591   | 0.24324 | 0.21199     | 0.640827909 |            |         |  |
| AKR1A1          | ENSG00000117448 | 0.79949   | 0.212   | 0.0021702   | 0.49913     | 0.0021702  | 0.49913 |  |



|           |                 |          |         |             |             |           |         |  |
|-----------|-----------------|----------|---------|-------------|-------------|-----------|---------|--|
|           | -1.2465         | 0.89371  | 0.212   | 0.640827909 |             |           |         |  |
| MEX3B     | ENSG00000183496 | 0.57465  | 0.28276 | 0.79947     | 0.21201     | 0.09776   | 0.46106 |  |
|           | -0.2932         | 0.61532  | 0.21201 | 0.640827909 |             |           |         |  |
| BRD1      | ENSG00000100425 | 0.79942  | 0.21202 | -0.65098    | 0.74247     | 0.31581   | 0.37608 |  |
|           | 0.28132         | 0.38923  | 0.21202 | 0.640827909 |             |           |         |  |
| ELN       | ENSG00000049540 | 0.22141  | 0.41239 | 0.25312     | 0.40009     | -1.3169   | 0.90606 |  |
|           | 0.79939         | 0.21203  | 0.21203 | 0.640827909 |             |           |         |  |
| CHST9     | ENSG00000154080 | -1.2855  | 0.90068 | 0.056575    | 0.47744     | 0.79941   | 0.21203 |  |
|           | 0.19944         | 0.42096  | 0.21203 | 0.640827909 |             |           |         |  |
| NA        | ENSG00000257726 | 0.79935  | 0.21204 | 0.47167     | 0.31858     | 0.40745   | 0.34184 |  |
|           | 0.019792        | 0.4921   | 0.21204 | 0.640827909 |             |           |         |  |
| TRDN-AS1  | ENSG00000235535 | 0.48954  | 0.31223 | 0.79925     | 0.21207     | -0.089186 |         |  |
|           | 0.53553         | 0.53463  | 0.29645 | 0.21207     | 0.640839086 |           |         |  |
| NA        | ENSG00000251409 | 0.79924  | 0.21207 | 0.79924     | 0.21207     | 0.79924   | 0.21207 |  |
|           | 0.79924         | 0.21207  | 0.21207 | 0.640839086 |             |           |         |  |
| LINC01079 | ENSG00000229609 | 0.60437  | 0.2728  | 0.036154    | 0.48558     | -0.82464  |         |  |
|           | 0.79521         | 0.79919  | 0.21209 | 0.21209     | 0.64085026  |           |         |  |
| NA        | ENSG00000271947 | 0.79917  | 0.2121  | -0.10115    | 0.54029     | -0.31061  | 0.62195 |  |
|           | -0.38987        | 0.65168  | 0.2121  | 0.64085026  |             |           |         |  |
| TRPV5     | ENSG00000127412 | 0.69974  | 0.24204 | 0.69974     | 0.24204     | 0.69974   | 0.24204 |  |
|           | 0.79879         | 0.21221  | 0.21221 | 0.641077737 |             |           |         |  |
| NA        | ENSG00000253848 | 0.79873  | 0.21222 | 0.79873     | 0.21222     | 0.79873   | 0.21222 |  |
|           | 0.79873         | 0.21222  | 0.21222 | 0.641077737 |             |           |         |  |
| RN7SKP59  | ENSG00000222452 | 0.7987   | 0.21223 | -0.12317    | 0.54902     | 0.62096   |         |  |
|           | 0.26731         | -0.12317 | 0.54902 | 0.21223     | 0.641077737 |           |         |  |
| NA        | ENSG00000246203 | 0.79867  | 0.21224 | 0.79867     | 0.21224     | 0.79867   | 0.21224 |  |
|           | 0.79867         | 0.21224  | 0.21224 | 0.641077737 |             |           |         |  |
| MISP3     | ENSG00000141854 | -0.29902 | 0.61754 | 0.79859     | 0.21226     | -0.23887  | 0.5944  |  |
|           | 0.79859         | 0.21226  | 0.21226 | 0.641077737 |             |           |         |  |
| B3GAT3P1  | ENSG00000244009 | 0.79852  | 0.21228 | 0.79852     | 0.21228     | 0.79852   |         |  |
|           | 0.21228         | 0.5144   | 0.30349 | 0.21228     | 0.641077737 |           |         |  |
| NA        | ENSG00000251332 | -0.51619 | 0.69714 | -0.51619    | 0.69714     | 0.79852   | 0.21228 |  |
|           | 0.79852         | 0.21228  | 0.21228 | 0.641077737 |             |           |         |  |
| TCEA3     | ENSG00000204219 | 0.55361  | 0.28992 | 0.18567     | 0.42635     | 0.7985    | 0.21229 |  |
|           | -0.43629        | 0.66869  | 0.21229 | 0.641077737 |             |           |         |  |
| LINC02070 | ENSG00000241328 | -0.31229 | 0.62259 | -0.31229    | 0.62259     | -0.31229  |         |  |
|           | 0.62259         | 0.79848  | 0.2123  | 0.2123      | 0.641077737 |           |         |  |
| NA        | ENSG00000202283 | 0.79839  | 0.21232 | -1.0221     | 0.84664     | -0.14094  | 0.55604 |  |
|           | -0.14094        | 0.55604  | 0.21232 | 0.641077737 |             |           |         |  |
| VTRNA2-1  | ENSG00000270123 | 0.064872 | 0.47414 | 0.79838     | 0.21232     | -0.33867  |         |  |
|           | 0.63257         | -0.54653 | 0.70765 | 0.21232     | 0.641077737 |           |         |  |
| NA        | ENSG00000207069 | 0.58753  | 0.27842 | 0.53542     | 0.29618     | 0.59044   | 0.27745 |  |
|           | 0.79833         | 0.21234  | 0.21234 | 0.641098401 |             |           |         |  |
| HSD3BP2   | ENSG00000203858 | -0.27176 | 0.6071  | 0.76983     | 0.2207      | 0.79825   |         |  |
|           | 0.21236         | -0.60075 | 0.726   | 0.21236     | 0.641119063 |           |         |  |
| DENND2B   | ENSG00000166444 | -0.99242 | 0.8395  | -0.77717    | 0.78147     | 0.79816   |         |  |
|           | 0.21239         | -1.3452  | 0.91072 | 0.21239     | 0.641169911 |           |         |  |
| RERG-AS1  | ENSG00000255660 | 0.79808  | 0.21241 | 0.79808     | 0.21241     | 0.25256   |         |  |
|           | 0.4003          | 0.2075   | 0.41781 | 0.21241     | 0.641190566 |           |         |  |
| S100A14   | ENSG00000189334 | 0.79796  | 0.21245 | 0.79796     | 0.21245     | 0.79796   |         |  |
|           | 0.21245         | 0.79796  | 0.21245 | 0.21245     | 0.641271587 |           |         |  |
| NOL8      | ENSG00000198000 | 0.10733  | 0.45726 | 0.22176     | 0.41225     | -0.4916   | 0.6885  |  |
|           | 0.79782         | 0.21249  | 0.21249 | 0.641312876 |             |           |         |  |
| LINC01947 | ENSG00000254130 | 0.79782  | 0.21249 | 0.79782     | 0.21249     | 0.79782   |         |  |
|           | 0.21249         | -0.45607 | 0.67583 | 0.21249     | 0.641312876 |           |         |  |
| LINC01425 | ENSG00000233997 | 0.79769  | 0.21252 | -0.62628    | 0.73443     | 0.79769   |         |  |
|           | 0.21252         | 0.66971  | 0.25152 | 0.21252     | 0.641363696 |           |         |  |
| NA        | ENSG00000235523 | 0.79756  | 0.21256 | 0.11223     | 0.45532     | 0.75343   | 0.2256  |  |
|           | -0.069405       | 0.52767  | 0.21256 | 0.641425598 |             |           |         |  |
| ENTR1     | ENSG00000165689 | 0.62963  | 0.26447 | 0.79753     | 0.21257     | -0.38023  | 0.64811 |  |
|           | -0.38023        | 0.64811  | 0.21257 | 0.641425598 |             |           |         |  |
| KRT18P15  | ENSG00000234737 | 0.57125  | 0.28392 | 0.3925      | 0.34734     | 0.7975    |         |  |

|           |                 |            |         |             |             |          |          |         |
|-----------|-----------------|------------|---------|-------------|-------------|----------|----------|---------|
|           | 0.21258         | -0.0081991 | 0.50327 | 0.21258     | 0.641425598 |          |          |         |
| FAM229B   | ENSG00000203778 | 0.79739    | 0.79739 | 0.21261     | 0.79739     | 0.21261  | -0.16023 |         |
|           | 0.56365         | 0.79739    | 0.21261 | 0.21261     | 0.64142714  |          |          |         |
| NA        | ENSG00000201340 | 0.79737    | 0.21262 | 0.21262     | 0.79737     | 0.21262  | 0.79737  | 0.21262 |
|           | 0.79737         | 0.21262    | 0.21262 | 0.64142714  |             |          |          |         |
| RNA5SP339 | ENSG00000212289 | 0.79735    | 0.79735 | 0.21262     | 0.79735     | 0.21262  | 0.79735  |         |
|           | 0.21262         | 0.79735    | 0.21262 | 0.21262     | 0.64142714  |          |          |         |
| TFAP2A    | ENSG00000137203 | 0.65       | 0.25785 | -1.2586     | 0.89591     | 0.79711  | 0.21269  |         |
|           | 0.45129         | 0.32589    | 0.21269 | 0.641579494 |             |          |          |         |
| MAP3K8    | ENSG00000107968 | -0.14185   | 0.5564  | -0.62747    | 0.73482     | -0.14185 |          |         |
|           | 0.5564          | 0.79707    | 0.2127  | 0.2127      | 0.641579494 |          |          |         |
| RNU1-11P  | ENSG00000206702 | 0.79704    | 0.79704 | 0.21271     | 0.79704     | 0.21271  | -1.1371  |         |
|           | 0.87225         | 0.76515    | 0.22209 | 0.21271     | 0.641579494 |          |          |         |
| RAD17P1   | ENSG00000232400 | 0.79687    | 0.79687 | 0.21276     | 0.79687     | 0.21276  | 0.79687  |         |
|           | 0.21276         | 0.79687    | 0.21276 | 0.21276     | 0.641671477 |          |          |         |
| CHD1L     | ENSG00000131778 | 0.58284    | 0.28    | 0.58073     | 0.28071     | 0.3629   | 0.35834  |         |
|           | 0.79684         | 0.21277    | 0.21277 | 0.641671477 |             |          |          |         |
| NA        | ENSG00000232355 | -0.14687   | 0.55838 | 0.79682     | 0.21278     | -1.571   | 0.94191  |         |
|           | -0.00054275     | 0.50022    | 0.21278 | 0.641671477 |             |          |          |         |
| SDSL      | ENSG00000139410 | -0.55284   | 0.70981 | 0.79669     | 0.21281     | -0.25402 | 0.60026  |         |
|           | -0.96427        | 0.83254    | 0.21281 | 0.641682526 |             |          |          |         |
| RNU6-970P | ENSG00000252121 | 0.79671    | 0.79671 | 0.21281     | -1.204      | 0.8857   | -1.204   |         |
|           | 0.8857          | -1.204     | 0.8857  | 0.21281     | 0.641682526 |          |          |         |
| NA        | ENSG00000267615 | 0.79659    | 0.21284 | 0.79659     | 0.21284     | 0.79659  | 0.21284  |         |
|           | 0.79659         | 0.21284    | 0.21284 | 0.641733276 |             |          |          |         |
| NPHS2     | ENSG00000116218 | 0.49293    | 0.31103 | 0.25324     | 0.40004     | 0.79642  | 0.21289  |         |
|           | 0.48775         | 0.31286    | 0.21289 | 0.641826664 |             |          |          |         |
| GABPA     | ENSG00000154727 | 0.78053    | 0.21754 | -0.91768    | 0.82061     | 0.79639  | 0.2129   |         |
|           | -0.72071        | 0.76445    | 0.2129  | 0.641826664 |             |          |          |         |
| ALOXE3    | ENSG00000179148 | 0.7963     | 0.7963  | 0.21293     | 0.7963      | 0.21293  | 0.7963   |         |
|           | 0.21293         | 0.7963     | 0.21293 | 0.21293     | 0.641826664 |          |          |         |
| FAM214B   | ENSG00000005238 | -0.22929   | 0.59068 | -0.173      | 0.56867     | 0.79626  |          |         |
|           | 0.21294         | 0.024531   | 0.49021 | 0.21294     | 0.641826664 |          |          |         |
| RNU7-92P  | ENSG00000238785 | 0.1554     | 0.1554  | 0.43825     | -0.059496   | 0.52372  | 0.79626  |         |
|           | 0.21294         | -0.75383   | 0.77452 | 0.21294     | 0.641826664 |          |          |         |
| NA        | ENSG00000259819 | -0.2662    | 0.60496 | 0.79623     | 0.21295     | -1.6066  | 0.94593  |         |
|           | -1.6066         | 0.94593    | 0.21295 | 0.641826664 |             |          |          |         |
| FUT5      | ENSG00000130383 | 0.79617    | 0.21297 | 0.32742     | 0.37167     | -0.12159 | 0.54839  |         |
|           | -0.12159        | 0.54839    | 0.21297 | 0.641840616 |             |          |          |         |
| TRDD3     | ENSG00000228985 | 0.79608    | 0.21299 | 0.79608     | 0.21299     | 0.79608  | 0.21299  |         |
|           | 0.79608         | 0.21299    | 0.21299 | 0.641840616 |             |          |          |         |
| NA        | ENSG00000256810 | 0.79602    | 0.21301 | -1.0177     | 0.84559     | -0.23042 | 0.59112  |         |
|           | 0.57706         | 0.28195    | 0.21301 | 0.641840616 |             |          |          |         |
| NA        | ENSG00000281016 | -0.53747   | 0.70453 | 0.79601     | 0.21301     | 0.79601  | 0.21301  |         |
|           | 0.79601         | 0.21301    | 0.21301 | 0.641840616 |             |          |          |         |
| RNU6-680P | ENSG00000207333 | 0.79587    | 0.79587 | 0.21305     | 0.79587     | 0.21305  | 0.79587  |         |
|           | 0.21305         | 0.79587    | 0.21305 | 0.21305     | 0.641840616 |          |          |         |
| LINC00519 | ENSG00000258955 | 0.10314    | 0.10314 | 0.45892     | 0.79587     | 0.21305  | 0.06352  |         |
|           | 0.47468         | -0.97192   | 0.83445 | 0.21305     | 0.641840616 |          |          |         |
| RXFP4     | ENSG00000173080 | 0.79586    | 0.21306 | 0.66926     | 0.25167     | 0.66926  | 0.25167  |         |
|           | 0.66926         | 0.25167    | 0.21306 | 0.641840616 |             |          |          |         |
| UMODL1    | ENSG00000177398 | 0.79586    | 0.79586 | 0.21306     | -0.64367    | 0.74011  | -1.5869  |         |
|           | 0.94373         | -0.75766   | 0.77567 | 0.21306     | 0.641840616 |          |          |         |
| MIR544A   | ENSG00000207587 | 0.79578    | 0.79578 | 0.21308     | 0.79578     | 0.21308  | 0.79578  |         |
|           | 0.21308         | 0.79578    | 0.21308 | 0.21308     | 0.641858933 |          |          |         |
| NA        | ENSG00000283415 | 0.24235    | 0.40425 | -0.35968    | 0.64046     | 0.29093  | 0.38555  |         |
|           | 0.79573         | 0.2131     | 0.2131  | 0.641858933 |             |          |          |         |
| NA        | ENSG00000267146 | 0.37909    | 0.35231 | 0.7956      | 0.21313     | -0.73099 | 0.76761  |         |
|           | -0.99301        | 0.83965    | 0.21313 | 0.641858933 |             |          |          |         |
| PRR13P2   | ENSG00000254884 | 0.7955     | 0.7955  | 0.21316     | 0.7955      | 0.21316  | 0.7955   |         |
|           | 0.21316         | 0.7955     | 0.21316 | 0.21316     | 0.641858933 |          |          |         |
| CIR1P2    | ENSG00000250215 | 0.79547    | 0.79547 | 0.21317     | 0.79547     | 0.21317  | 0.79547  |         |

|           |                 |           |         |             |             |          |         |  |
|-----------|-----------------|-----------|---------|-------------|-------------|----------|---------|--|
|           | 0.21317         | 0.79547   | 0.21317 | 0.21317     | 0.641858933 |          |         |  |
| NA        | ENSG00000275785 | 0.38641   | 0.3496  | 0.79546     | 0.21317     | 0.22546  | 0.41081 |  |
|           | -0.018527       | 0.50739   | 0.21317 | 0.641858933 |             |          |         |  |
| MIR3185   | ENSG00000263602 | 0.79536   | 0.2132  | 0.79536     | 0.2132      | 0.79536  |         |  |
|           | 0.2132          | 0.79536   | 0.2132  | 0.641858933 |             |          |         |  |
| PA2G4P6   | ENSG00000231799 | 0.79534   | 0.21321 | -1.2748     | 0.89881     | 0.79534  |         |  |
|           | 0.21321         | 0.79534   | 0.21321 | 0.641858933 |             |          |         |  |
| FSHB      | ENSG00000131808 | 0.50158   | 0.30798 | 0.50158     | 0.30798     | 0.031061 | 0.48761 |  |
|           | 0.79531         | 0.21322   | 0.21322 | 0.641858933 |             |          |         |  |
| CAMK1G    | ENSG00000008118 | 0.061749  | 0.47538 | -0.40053    | 0.65562     | -0.11672 |         |  |
|           | 0.54646         | 0.79528   | 0.21323 | 0.641858933 |             |          |         |  |
| CFAP206   | ENSG00000272514 | 0.79522   | 0.21324 | 0.79522     | 0.21324     | 0.79522  |         |  |
|           | 0.21324         | 0.79522   | 0.21324 | 0.641858933 |             |          |         |  |
| LINC01957 | ENSG00000251542 | 0.79518   | 0.21325 | 0.025436    | 0.48985     | 0.79518  |         |  |
|           | 0.21325         | 0.79518   | 0.21325 | 0.641858933 |             |          |         |  |
| BUB3      | ENSG00000154473 | -0.26372  | 0.604   | -1.5243     | 0.93628     | 0.79513  | 0.21327 |  |
|           | -0.26372        | 0.604     | 0.21327 | 0.641858933 |             |          |         |  |
| PMF1      | ENSG00000160783 | -0.076735 | 0.53058 | -0.13069    | 0.55199     | -0.13069 | 0.55199 |  |
|           | 0.79511         | 0.21327   | 0.21327 | 0.641858933 |             |          |         |  |
| NA        | ENSG00000228714 | 0.49663   | 0.30973 | 0.36499     | 0.35756     | 0.79506  | 0.21329 |  |
|           | 0.79506         | 0.21329   | 0.21329 | 0.641858933 |             |          |         |  |
| HSPA8P9   | ENSG00000241478 | 0.20117   | 0.42028 | 0.67484     | 0.24989     | 0.79506  |         |  |
|           | 0.21329         | -0.77475  | 0.78076 | 0.641858933 |             |          |         |  |
| RNA5SP444 | ENSG00000252653 | -0.93542  | 0.82521 | 0.79507     | 0.21329     | -0.15705 |         |  |
|           | 0.5624          | 0.41673   | 0.33844 | 0.641858933 |             |          |         |  |
| ARL6IP1P2 | ENSG00000225355 | -0.4468   | 0.67249 | -0.82721    | 0.79594     | 0.79497  |         |  |
|           | 0.21332         | -0.25546  | 0.60082 | 0.641880935 |             |          |         |  |
| RPS14     | ENSG00000164587 | 0.79488   | 0.21334 | -0.13185    | 0.55245     | 0.010421 | 0.49584 |  |
|           | 0.13536         | 0.44616   | 0.21334 | 0.641880935 |             |          |         |  |
| NA        | ENSG00000240458 | -0.34774  | 0.63598 | 0.34897     | 0.36355     | -2.1995  | 0.98608 |  |
|           | 0.79489         | 0.21334   | 0.21334 | 0.641880935 |             |          |         |  |
| NA        | ENSG00000248778 | 0.79484   | 0.21335 | 0.79484     | 0.21335     | 0.79484  | 0.21335 |  |
|           | 0.79484         | 0.21335   | 0.21335 | 0.641880935 |             |          |         |  |
| SLC22A16  | ENSG00000004809 | -0.17909  | 0.57107 | 0.65644     | 0.25577     | 0.79468  |         |  |
|           | 0.2134          | 0.024625  | 0.49018 | 0.641991727 |             |          |         |  |
| MIR4436A  | ENSG00000265510 | 0.7946    | 0.21342 | 0.7946      | 0.21342     | 0.7946   |         |  |
|           | 0.21342         | 0.7946    | 0.21342 | 0.64201226  |             |          |         |  |
| C14orf132 | ENSG00000227051 | 0.77187   | 0.22009 | -0.81024    | 0.7911      | 0.79441  |         |  |
|           | 0.21348         | -1.1426   | 0.8734  | 0.642153111 |             |          |         |  |
| NA        | ENSG00000250418 | -0.39998  | 0.65542 | 0.63227     | 0.26361     | -1.259   | 0.89599 |  |
|           | 0.79435         | 0.2135    | 0.2135  | 0.642154515 |             |          |         |  |
| MUC15     | ENSG00000169550 | 0.79428   | 0.21352 | 0.79428     | 0.21352     | 0.79428  | 0.21352 |  |
|           | -0.54875        | 0.70841   | 0.21352 | 0.642154515 |             |          |         |  |
| NA        | ENSG00000256304 | 0.79426   | 0.21352 | 0.79426     | 0.21352     | 0.79426  | 0.21352 |  |
|           | 0.79426         | 0.21352   | 0.21352 | 0.642154515 |             |          |         |  |
| RSL24D1P6 | ENSG00000224452 | 0.79416   | 0.21355 | -0.011568   | 0.50462     | 0.60937  |         |  |
|           | 0.27114         | 0.79416   | 0.21355 | 0.642195545 |             |          |         |  |
| RPS15AP13 | ENSG00000228568 | 0.79414   | 0.21356 | 0.79414     | 0.21356     | 0.79414  |         |  |
|           | 0.21356         | 0.67321   | 0.25041 | 0.642195545 |             |          |         |  |
| LINC02707 | ENSG00000255427 | 0.13728   | 0.4454  | 0.794       | 0.2136      | 0.061473 | 0.47549 |  |
|           | 0.13728         | 0.4454    | 0.2136  | 0.642199729 |             |          |         |  |
| PLA2G6    | ENSG00000184381 | 0.17964   | 0.42872 | 0.17964     | 0.42872     | 0.14039  |         |  |
|           | 0.44417         | 0.79394   | 0.21361 | 0.642199729 |             |          |         |  |
| LHX6      | ENSG00000106852 | -0.43102  | 0.66677 | -0.96544    | 0.83284     | 0.79388  | 0.21363 |  |
|           | -0.96544        | 0.83284   | 0.21363 | 0.642199729 |             |          |         |  |
| TMEM255B  | ENSG00000184497 | 0.67909   | 0.24854 | 0.79385     | 0.21364     | 0.72461  |         |  |
|           | 0.23435         | -0.50019  | 0.69153 | 0.642199729 |             |          |         |  |
| BORCS6    | ENSG00000196544 | 0.79382   | 0.21365 | -0.063247   | 0.52521     | 0.49517  |         |  |
|           | 0.31024         | 0.16058   | 0.43621 | 0.642199729 |             |          |         |  |
| NA        | ENSG00000233457 | 0.79382   | 0.21365 | 0.79382     | 0.21365     | 0.65122  | 0.25745 |  |
|           | 0.79382         | 0.21365   | 0.21365 | 0.642199729 |             |          |         |  |
| YRDCP2    | ENSG00000236745 | 0.79378   | 0.21366 | 0.79378     | 0.21366     | 0.79378  |         |  |

|            |                 |           |         |             |             |          |         |  |
|------------|-----------------|-----------|---------|-------------|-------------|----------|---------|--|
|            | 0.21366         | 0.79378   | 0.21366 | 0.21366     | 0.642199729 |          |         |  |
| NA         | ENSG00000251537 | -1.7613   | 0.9609  | 0.14545     | 0.44218     | -1.0695  | 0.85758 |  |
|            | 0.79376         | 0.21367   | 0.21367 | 0.642199729 |             |          |         |  |
| LINC01646  | ENSG00000232596 | 0.79371   | 0.21368 | -0.26564    | 0.60474     | 0.66664  |         |  |
|            | 0.2525          | 0.020404  | 0.49186 | 0.21368     | 0.642199729 |          |         |  |
| FOXN4      | ENSG00000139445 | -0.73704  | 0.76945 | -0.73704    | 0.76945     | -1.1833  | 0.88166 |  |
|            | 0.79362         | 0.21371   | 0.21371 | 0.642201122 |             |          |         |  |
| FAM72A     | ENSG00000196550 | 0.34941   | 0.36339 | -0.68453    | 0.75318     | -0.5667  |         |  |
|            | 0.71454         | 0.79359   | 0.21372 | 0.21372     | 0.642201122 |          |         |  |
| PCDHGC4    | ENSG00000242419 | 0.79359   | 0.21372 | 0.21372     | 0.0292      | 0.48835  | 0.79359 |  |
|            | 0.21372         | 0.79359   | 0.21372 | 0.21372     | 0.642201122 |          |         |  |
| SLC6A1     | ENSG00000157103 | 0.20064   | 0.42049 | 0.79345     | 0.21376     | 0.75924  |         |  |
|            | 0.22385         | 0.42404   | 0.33577 | 0.21376     | 0.642213457 |          |         |  |
| NA         | ENSG00000270868 | 0.79343   | 0.21376 | -0.46938    | 0.6806      | 0.51607  | 0.3029  |  |
|            | -0.075099       | 0.52993   | 0.21376 | 0.642213457 |             |          |         |  |
| XXYLT1-AS2 | ENSG00000230266 | 0.79338   | 0.21378 | 0.59358     | 0.2764      | -0.42222 |         |  |
|            | 0.66357         | 0.79338   | 0.21378 | 0.21378     | 0.642213457 |          |         |  |
| RN7SL36P   | ENSG00000244314 | 0.61787   | 0.26833 | -0.077571   | 0.53092     | 0.79338  |         |  |
|            | 0.21378         | 0.79338   | 0.21378 | 0.21378     | 0.642213457 |          |         |  |
| NA         | ENSG00000231139 | 0.79334   | 0.21379 | 0.79334     | 0.21379     | -0.12496 | 0.54972 |  |
|            | 0.53246         | 0.2972    | 0.21379 | 0.642213457 |             |          |         |  |
| ADCY10P1   | ENSG00000161912 | -0.094744 | 0.53774 | -0.46163    | 0.67783     | 0.79326  |         |  |
|            | 0.21381         | -1.9062   | 0.97169 | 0.21381     | 0.642233946 |          |         |  |
| NA         | ENSG00000216184 | 0.79321   | 0.21383 | -0.96575    | 0.83292     | 0.11991  | 0.45228 |  |
|            | -0.062077       | 0.52475   | 0.21383 | 0.642254432 |             |          |         |  |
| SMG7       | ENSG00000116698 | -0.068239 | 0.5272  | 0.79315     | 0.21385     | -0.78397 | 0.78347 |  |
|            | -0.11615        | 0.54623   | 0.21385 | 0.642274915 |             |          |         |  |
| LINC02577  | ENSG00000228742 | -0.27677  | 0.60902 | 0.79292     | 0.21391     | -0.44915 |         |  |
|            | 0.67334         | -0.77165  | 0.77984 | 0.21391     | 0.642339085 |          |         |  |
| HELLPAR    | ENSG00000281344 | 0.79288   | 0.21392 | 0.61256     | 0.27008     | 0.73041  |         |  |
|            | 0.23257         | 0.67624   | 0.24945 | 0.21392     | 0.642339085 |          |         |  |
| EXOC2      | ENSG00000112685 | -0.56054  | 0.71244 | -0.19304    | 0.57653     | 0.019509 | 0.49222 |  |
|            | 0.79284         | 0.21394   | 0.21394 | 0.642339085 |             |          |         |  |
| HSPB2      | ENSG00000170276 | 0.79281   | 0.21394 | 0.79281     | 0.21394     | 0.79281  | 0.21394 |  |
|            | 0.79281         | 0.21394   | 0.21394 | 0.642339085 |             |          |         |  |
| GPR157     | ENSG00000180758 | -0.94562  | 0.82783 | 0.6691      | 0.25171     | -1.0714  | 0.858   |  |
|            | 0.79283         | 0.21394   | 0.21394 | 0.642339085 |             |          |         |  |
| DPPA2      | ENSG00000163530 | -0.54492  | 0.7071  | -0.54492    | 0.7071      | 0.79268  | 0.21398 |  |
|            | -1.5659         | 0.94131   | 0.21398 | 0.642339085 |             |          |         |  |
| NA         | ENSG00000250503 | 0.60526   | 0.2725  | 0.79267     | 0.21398     | 0.36972  | 0.35579 |  |
|            | 0.34124         | 0.36646   | 0.21398 | 0.642339085 |             |          |         |  |
| NA         | ENSG00000254811 | 0.79268   | 0.21398 | 0.054274    | 0.47836     | 0.41471  | 0.33918 |  |
|            | 0.55592         | 0.28913   | 0.21398 | 0.642339085 |             |          |         |  |
| SEPTIN7P1  | ENSG00000259090 | 0.79267   | 0.21399 | -0.15995    | 0.56354     | 0.16409  |         |  |
|            | 0.43483         | -0.42791  | 0.66564 | 0.21399     | 0.642339085 |          |         |  |
| NA         | ENSG00000250159 | -0.48921  | 0.68765 | 0.26991     | 0.39361     | 0.58003  | 0.28095 |  |
|            | 0.79248         | 0.21404   | 0.21404 | 0.642446773 |             |          |         |  |
| NA         | ENSG00000249710 | 0.79241   | 0.21406 | 0.79241     | 0.21406     | 0.79241  | 0.21406 |  |
|            | 0.79241         | 0.21406   | 0.21406 | 0.642446773 |             |          |         |  |
| CPA4       | ENSG00000128510 | 0.79236   | 0.21407 | 0.26826     | 0.39425     | -0.883   | 0.81138 |  |
|            | 0.032748        | 0.48694   | 0.21407 | 0.642446773 |             |          |         |  |
| RN7SL268P  | ENSG00000244425 | 0.79234   | 0.21408 | 0.79234     | 0.21408     | 0.79234  |         |  |
|            | 0.21408         | 0.79234   | 0.21408 | 0.21408     | 0.642446773 |          |         |  |
| VAMP2      | ENSG00000220205 | 0.79223   | 0.21411 | 0.79223     | 0.21411     | 0.79223  | 0.21411 |  |
|            | 0.78307         | 0.21679   | 0.21411 | 0.642446773 |             |          |         |  |
| NA         | ENSG00000255029 | -0.036212 | 0.51444 | 0.79226     | 0.21411     | 0.79226  | 0.21411 |  |
|            | 0.79226         | 0.21411   | 0.21411 | 0.642446773 |             |          |         |  |
| LINC00320  | ENSG00000224924 | 0.10192   | 0.45941 | 0.32799     | 0.37146     | 0.79219  |         |  |
|            | 0.21412         | -0.81578  | 0.79269 | 0.21412     | 0.642446773 |          |         |  |
| PUSL1      | ENSG00000169972 | 0.79214   | 0.21414 | 0.79214     | 0.21414     | 0.79214  | 0.21414 |  |
|            | 0.79214         | 0.21414   | 0.21414 | 0.642446773 |             |          |         |  |
| PSKH2      | ENSG00000147613 | -1.2022   | 0.88536 | 0.79202     | 0.21417     | -0.45562 | 0.67567 |  |

|            |                 |           |          |            |             |             |          |         |
|------------|-----------------|-----------|----------|------------|-------------|-------------|----------|---------|
|            |                 | -0.49185  | 0.68859  | 0.21417    | 0.642446773 |             |          |         |
| NA         | ENSG00000269918 | 0.79203   | 0.79203  | 0.21417    | 0.79203     | 0.21417     | 0.79203  | 0.21417 |
|            |                 | 0.79203   | 0.21417  | 0.21417    | 0.642446773 |             |          |         |
| NA         | ENSG00000267674 | 0.74674   | 0.74674  | 0.22761    | 0.60999     | 0.27093     | 0.79192  | 0.2142  |
|            |                 | -0.25969  | 0.60245  | 0.2142     | 0.642446773 |             |          |         |
| SEC13      | ENSG00000157020 | 0.79185   | 0.79185  | 0.21422    | 0.12332     | 0.45093     | -0.23381 | 0.59243 |
|            |                 | 0.66812   | 0.25203  | 0.21422    | 0.642446773 |             |          |         |
| NA         | ENSG00000271781 | 0.79186   | 0.79186  | 0.21422    | 0.12804     | 0.44906     | -0.95315 | 0.82974 |
|            |                 | -0.95315  | 0.82974  | 0.21422    | 0.642446773 |             |          |         |
| GNB1L      | ENSG00000185838 | 0.79184   | 0.79184  | 0.21423    | 0.6627      | 0.25376     | 0.79184  | 0.21423 |
|            |                 | -0.68749  | 0.75411  | 0.21423    | 0.642446773 |             |          |         |
| RNU6-586P  | ENSG00000253074 | -0.097605 | 0.53888  | 0.79184    | 0.21423     | 0.52759     |          |         |
|            |                 | 0.29889   | 0.52759  | 0.29889    | 0.21423     | 0.642446773 |          |         |
| ANKRD30BP3 | ENSG00000230501 | 0.7918    | 0.7918   | 0.21424    | 0.76781     | 0.2213      | -0.64638 |         |
|            |                 | 0.74098   | 0.76781  | 0.2213     | 0.21424     | 0.642446773 |          |         |
| C20orf197  | ENSG00000176659 | -0.40494  | 0.65724  | -0.07325   | 0.5292      | 0.022565    | 0.491    |         |
|            |                 | 0.79178   | 0.21425  | 0.21425    | 0.642446773 |             |          |         |
| ADAM8      | ENSG00000151651 | -1.2858   | 0.90074  | 0.79168    | 0.21427     | -1.2858     | 0.90074  |         |
|            |                 | -1.2858   | 0.90074  | 0.21427    | 0.642457663 |             |          |         |
| PRR16      | ENSG00000184838 | 0.29562   | 0.38376  | -0.29291   | 0.6152      | -0.17917    | 0.5711   |         |
|            |                 | 0.79165   | 0.21428  | 0.21428    | 0.642457663 |             |          |         |
| CHAF1B     | ENSG00000159259 | 0.4814    | 0.31512  | 0.79154    | 0.21431     | -0.43749    |          |         |
|            |                 | 0.66912   | 0.21621  | 0.41441    | 0.21431     | 0.642488983 |          |         |
| AKR1B1P7   | ENSG00000266899 | -0.10749  | 0.5428   | 0.79151    | 0.21432     | 0.79151     |          |         |
|            |                 | 0.21432   | 0.79151  | 0.21432    | 0.21432     | 0.642488983 |          |         |
| RELN       | ENSG00000189056 | -0.41016  | 0.65916  | -1.2037    | 0.88565     | 0.7915      | 0.21433  |         |
|            |                 | -0.61938  | 0.73217  | 0.21433    | 0.642488983 |             |          |         |
| NA         | ENSG00000233256 | -0.3741   | 0.64583  | 0.79143    | 0.21435     | -0.3741     | 0.64583  |         |
|            |                 | 0.69866   | 0.24238  | 0.21435    | 0.642509411 |             |          |         |
| NA         | ENSG00000224018 | 0.59835   | 0.2748   | 0.79131    | 0.21438     | 0.79131     | 0.21438  |         |
|            |                 | 0.035532  | 0.48583  | 0.21438    | 0.642559811 |             |          |         |
| NA         | ENSG00000261538 | 0.79124   | 0.2144   | 0.3599     | 0.35946     | 0.79124     | 0.2144   |         |
|            |                 | 0.31542   | 0.37622  | 0.2144     | 0.642570683 |             |          |         |
| RNU6-324P  | ENSG00000200827 | 0.79121   | 0.79121  | 0.21441    | 0.79121     | 0.21441     | 0.79121  |         |
|            |                 | 0.21441   | 0.79121  | 0.21441    | 0.21441     | 0.642570683 |          |         |
| RN7SKP283  | ENSG00000253006 | 0.79102   | 0.79102  | 0.21447    | -0.33442    | 0.63097     | 0.3492   |         |
|            |                 | 0.36347   | 0.54635  | 0.29241    | 0.21447     | 0.642701414 |          |         |
| PNPLA8     | ENSG00000135241 | 0.37142   | 0.35516  | 0.79097    | 0.21448     | 0.40204     |          |         |
|            |                 | 0.34383   | -0.12644 | 0.55031    | 0.21448     | 0.642701414 |          |         |
| MIR876     | ENSG00000215966 | 0.79086   | 0.79086  | 0.21451    | 0.79086     | 0.21451     | 0.79086  |         |
|            |                 | 0.21451   | 0.79086  | 0.21451    | 0.21451     | 0.642742381 |          |         |
| NECAB1     | ENSG00000123119 | 0.79079   | 0.79079  | 0.21453    | -0.0194     | 0.50774     | 0.71394  |         |
|            |                 | 0.23763   | 0.58904  | 0.27792    | 0.21453     | 0.642742381 |          |         |
| LINC00960  | ENSG00000242516 | 0.79075   | 0.79075  | 0.21454    | -0.13213    | 0.55256     | -0.19463 |         |
|            |                 | 0.57716   | 0.030875 | 0.48768    | 0.21454     | 0.642742381 |          |         |
| MIR4252    | ENSG00000265392 | 0.79065   | 0.79065  | 0.21457    | 0.50791     | 0.30576     | -0.13949 |         |
|            |                 | 0.55547   | -0.28605 | 0.61258    | 0.21457     | 0.642742381 |          |         |
| R3HDML     | ENSG00000101074 | -2.0406   | 0.97936  | 0.57891    | 0.28132     | -2.0501     |          |         |
|            |                 | 0.97982   | 0.79064  | 0.21458    | 0.21458     | 0.642742381 |          |         |
| EVC        | ENSG00000072840 | -0.20931  | 0.5829   | 0.79051    | 0.21462     | -1.0537     | 0.85398  |         |
|            |                 | -2.338    | 0.99031  | 0.21462    | 0.642742381 |             |          |         |
| NA         | ENSG00000261430 | 0.79037   | 0.79037  | 0.21465    | 0.79037     | 0.21465     | 0.79037  | 0.21465 |
|            |                 | 0.79037   | 0.21465  | 0.21465    | 0.642742381 |             |          |         |
| AKAP1      | ENSG00000121057 | 0.54322   | 0.29349  | 0.37277    | 0.35466     | 0.7903      | 0.21468  |         |
|            |                 | 0.16687   | 0.43373  | 0.21468    | 0.642742381 |             |          |         |
| SCIMP      | ENSG00000161929 | 0.59928   | 0.27449  | -0.0051104 | 0.50204     | -0.0051104  | 0.50204  |         |
|            |                 | 0.7902    | 0.21471  | 0.21471    | 0.642742381 |             |          |         |
| RNU6-377P  | ENSG00000251774 | 0.79015   | 0.79015  | 0.21472    | 0.79015     | 0.21472     | 0.79015  |         |
|            |                 | 0.21472   | 0.79015  | 0.21472    | 0.21472     | 0.642742381 |          |         |
| MPRIP      | ENSG00000133030 | 0.66085   | 0.25435  | 0.72546    | 0.23408     | 0.79012     | 0.21473  |         |
|            |                 | 0.1545    | 0.43861  | 0.21473    | 0.642742381 |             |          |         |
| NA         | ENSG00000264151 | 0.79013   | 0.79013  | 0.21473    | 0.40127     | 0.34411     | -0.58301 | 0.72006 |

|           |                 |          |         |             |             |          |         |         |
|-----------|-----------------|----------|---------|-------------|-------------|----------|---------|---------|
|           | 0.1726          | 0.43148  | 0.21473 | 0.642742381 |             |          |         |         |
| MIR519C   | ENSG00000207788 | 0.79002  | 0.21476 | 0.79002     | 0.21476     | 0.79002  | 0.21476 | 0.79002 |
|           | 0.21476         | 0.79002  | 0.21476 | 0.21476     | 0.642742381 |          |         |         |
| GOLGA8UP  | ENSG00000103832 | 0.098977 | 0.46058 | -0.42655    | 0.66515     | 0.78996  |         |         |
|           | 0.21477         | 0.1316   | 0.44765 | 0.21477     | 0.642742381 |          |         |         |
| LINC01896 | ENSG00000263146 | 0.17246  | 0.43154 | -0.21233    | 0.58408     | 0.78999  |         |         |
|           | 0.21477         | -0.95522 | 0.83027 | 0.21477     | 0.642742381 |          |         |         |
| NA        | ENSG00000240040 | 0.78988  | 0.2148  | -0.6447     | 0.74044     | 0.78988  | 0.2148  |         |
|           | 0.78988         | 0.2148   | 0.2148  | 0.642742381 |             |          |         |         |
| LINC02392 | ENSG00000258183 | 0.78987  | 0.2148  | 0.74346     | 0.2286      | 0.78987  |         |         |
|           | 0.2148          | 0.78987  | 0.2148  | 0.2148      | 0.642742381 |          |         |         |
| SLC25A10  | ENSG00000183048 | -1.0705  | 0.85781 | -0.94586    | 0.82789     | -0.73655 |         |         |
|           | 0.7693          | 0.78981  | 0.21482 | 0.21482     | 0.642742381 |          |         |         |
| PTP4A1P4  | ENSG00000250359 | -0.22017 | 0.58713 | 0.7898      | 0.21482     | 0.49949  |         |         |
|           | 0.30872         | 0.49949  | 0.30872 | 0.21482     | 0.642742381 |          |         |         |
| OTOGL     | ENSG00000165899 | 0.31944  | 0.3747  | 0.71815     | 0.23633     | 0.78978  | 0.21483 |         |
|           | 0.49609         | 0.30992  | 0.21483 | 0.642742381 |             |          |         |         |
| GPR27     | ENSG00000170837 | 0.78978  | 0.21483 | 0.78978     | 0.21483     | 0.78978  | 0.21483 |         |
|           | 0.78978         | 0.21483  | 0.21483 | 0.642742381 |             |          |         |         |
| ENSAP3    | ENSG00000177261 | 0.61856  | 0.2681  | 0.61856     | 0.2681      | 0.61856  |         |         |
|           | 0.2681          | 0.78974  | 0.21484 | 0.21484     | 0.642742381 |          |         |         |
| NA        | ENSG00000251458 | 0.1594   | 0.43668 | 0.78965     | 0.21487     | -0.84021 | 0.79961 |         |
|           | 0.12603         | 0.44986  | 0.21487 | 0.642742381 |             |          |         |         |
| C5orf24   | ENSG00000181904 | 0.78952  | 0.2149  | 0.088462    | 0.46475     | 0.78952  |         |         |
|           | 0.2149          | 0.27142  | 0.39304 | 0.2149      | 0.642742381 |          |         |         |
| NA        | ENSG00000279110 | 0.78951  | 0.21491 | 0.73424     | 0.2314      | 0.78951  | 0.21491 |         |
|           | 0.78951         | 0.21491  | 0.21491 | 0.642742381 |             |          |         |         |
| PGM3      | ENSG00000013375 | -0.22983 | 0.59089 | 0.7894      | 0.21494     | -0.22983 | 0.59089 |         |
|           | 0.015389        | 0.49386  | 0.21494 | 0.642742381 |             |          |         |         |
| EPYC      | ENSG00000083782 | 0.40422  | 0.34303 | 0.34072     | 0.36666     | 0.7893   | 0.21497 |         |
|           | 0.38531         | 0.35     | 0.21497 | 0.642742381 |             |          |         |         |
| ACTR2     | ENSG00000138071 | 0.099342 | 0.46043 | 0.78914     | 0.21501     | 0.48799  | 0.31278 |         |
|           | 0.057793        | 0.47696  | 0.21501 | 0.642742381 |             |          |         |         |
| NA        | ENSG00000220130 | 0.7891   | 0.21503 | 0.70293     | 0.24105     | 0.46327  | 0.32159 |         |
|           | 0.7891          | 0.21503  | 0.21503 | 0.642742381 |             |          |         |         |
| NA        | ENSG00000272088 | -0.54515 | 0.70717 | 0.78908     | 0.21503     | 0.072803 | 0.47098 |         |
|           | 0.072803        | 0.47098  | 0.21503 | 0.642742381 |             |          |         |         |
| PPP1R2P10 | ENSG00000213232 | -0.16761 | 0.56656 | -1.0348     | 0.84961     | 0.78905  |         |         |
|           | 0.21504         | 0.029659 | 0.48817 | 0.21504     | 0.642742381 |          |         |         |
| OR52B4    | ENSG00000221996 | -0.35336 | 0.63809 | -0.48905    | 0.6876      | -1.2303  |         |         |
|           | 0.89071         | 0.78905  | 0.21504 | 0.21504     | 0.642742381 |          |         |         |
| LINC00601 | ENSG00000235180 | 0.078532 | 0.4687  | 0.78902     | 0.21505     | -0.24496 |         |         |
|           | 0.59676         | 0.78902  | 0.21505 | 0.21505     | 0.642742381 |          |         |         |
| NA        | ENSG00000251775 | 0.78898  | 0.21506 | 0.23905     | 0.40553     | 0.23905  | 0.40553 |         |
|           | 0.23905         | 0.40553  | 0.21506 | 0.642742381 |             |          |         |         |
| BMT2      | ENSG00000164603 | -0.80367 | 0.78921 | 0.78894     | 0.21507     | -0.25092 | 0.59906 |         |
|           | 0.33468         | 0.36893  | 0.21507 | 0.642742381 |             |          |         |         |
| NA        | ENSG00000268310 | 0.78891  | 0.21508 | 0.78891     | 0.21508     | 0.78891  | 0.21508 |         |
|           | 0.78891         | 0.21508  | 0.21508 | 0.642742381 |             |          |         |         |
| THOC7     | ENSG00000163634 | 0.78887  | 0.21509 | 0.78887     | 0.21509     | 0.78887  | 0.21509 |         |
|           | 0.06305         | 0.47486  | 0.21509 | 0.642742381 |             |          |         |         |
| NA        | ENSG00000276809 | 0.78887  | 0.21509 | 0.60251     | 0.27342     | 0.78887  | 0.21509 |         |
|           | 0.78887         | 0.21509  | 0.21509 | 0.642742381 |             |          |         |         |
| STAG3L4   | ENSG00000106610 | -0.99713 | 0.84065 | -0.99713    | 0.84065     | -0.99713 |         |         |
|           | 0.84065         | 0.78887  | 0.2151  | 0.2151      | 0.642742381 |          |         |         |
| ARHGAP10  | ENSG00000071205 | 0.6594   | 0.25482 | 0.78874     | 0.21513     | 0.42591  |         |         |
|           | 0.33509         | 0.30964  | 0.37842 | 0.21513     | 0.642742381 |          |         |         |
| MRPL2     | ENSG00000112651 | 0.7887   | 0.21514 | 0.7887      | 0.21514     | 0.7887   | 0.21514 |         |
|           | 0.7887          | 0.21514  | 0.21514 | 0.642742381 |             |          |         |         |
| NA        | ENSG00000206699 | 0.55163  | 0.2906  | 0.7887      | 0.21514     | 0.7887   | 0.21514 |         |
|           | 0.7887          | 0.21514  | 0.21514 | 0.642742381 |             |          |         |         |
| NA        | ENSG00000215840 | 0.78873  | 0.21514 | 0.78873     | 0.21514     | 0.78873  | 0.21514 |         |

|             |                 |           |         |             |             |          |         |  |
|-------------|-----------------|-----------|---------|-------------|-------------|----------|---------|--|
|             | 0.78873         | 0.21514   | 0.21514 | 0.642742381 |             |          |         |  |
| FRG2MP      | ENSG00000275170 | 0.084968  | 0.46614 | 0.56969     | 0.28444     | 0.78865  |         |  |
|             | 0.21516         | 0.78865   | 0.21516 | 0.21516     | 0.642742381 |          |         |  |
| MRPL42      | ENSG00000198015 | 0.20659   | 0.41816 | 0.7886      | 0.21517     | 0.090085 |         |  |
|             | 0.46411         | 0.46415   | 0.32127 | 0.21517     | 0.642742381 |          |         |  |
| NA          | ENSG00000270807 | -1.7247   | 0.95771 | 0.78859     | 0.21517     | -1.0977  | 0.86383 |  |
|             | -1.0977         | 0.86383   | 0.21517 | 0.642742381 |             |          |         |  |
| NA          | ENSG00000273063 | 0.78857   | 0.21518 | 0.78857     | 0.21518     | 0.78857  | 0.21518 |  |
|             | 0.78857         | 0.21518   | 0.21518 | 0.642742381 |             |          |         |  |
| NA          | ENSG00000236989 | -1.0935   | 0.86292 | 0.78856     | 0.21519     | -1.0935  | 0.86292 |  |
|             | -1.0935         | 0.86292   | 0.21519 | 0.642742381 |             |          |         |  |
| CLEC40      | ENSG00000267453 | 0.43854   | 0.3305  | -0.97084    | 0.83419     | -0.97084 |         |  |
|             | 0.83419         | 0.78851   | 0.2152  | 0.2152      | 0.642742381 |          |         |  |
| NA          | ENSG00000243349 | 0.78849   | 0.21521 | 0.78849     | 0.21521     | 0.78849  | 0.21521 |  |
|             | 0.78849         | 0.21521   | 0.21521 | 0.642742381 |             |          |         |  |
| CHL1-AS2    | ENSG00000224318 | -0.42323  | 0.66394 | 0.050299    | 0.47994     | -1.1664  |         |  |
|             | 0.87827         | 0.78845   | 0.21522 | 0.21522     | 0.642742381 |          |         |  |
| COLGALT2    | ENSG00000198756 | 0.46789   | 0.31993 | 0.65709     | 0.25556     | 0.78841  |         |  |
|             | 0.21523         | 0.49904   | 0.30888 | 0.21523     | 0.642742381 |          |         |  |
| TARM1       | ENSG00000248385 | 0.78833   | 0.21525 | 0.060125    | 0.47603     | 0.060125 | 0.47603 |  |
|             | 0.060125        | 0.47603   | 0.21525 | 0.642742381 |             |          |         |  |
| SCD         | ENSG00000099194 | 0.78797   | 0.21536 | -0.22993    | 0.59093     | -1.1507  | 0.87507 |  |
|             | -1.6736         | 0.95289   | 0.21536 | 0.642742381 |             |          |         |  |
| NA          | ENSG00000206704 | 0.78797   | 0.21536 | 0.78797     | 0.21536     | 0.78797  | 0.21536 |  |
|             | 0.78797         | 0.21536   | 0.21536 | 0.642742381 |             |          |         |  |
| NA          | ENSG00000259038 | 0.78792   | 0.21537 | -0.43296    | 0.66748     | -0.30126 | 0.61839 |  |
|             | -0.43296        | 0.66748   | 0.21537 | 0.642742381 |             |          |         |  |
| NA          | ENSG00000266802 | 0.78794   | 0.21537 | 0.78794     | 0.21537     | 0.78794  | 0.21537 |  |
|             | 0.78794         | 0.21537   | 0.21537 | 0.642742381 |             |          |         |  |
| DTX4        | ENSG00000110042 | 0.36797   | 0.35645 | 0.78787     | 0.21539     | 0.27658  | 0.39105 |  |
|             | 0.5518          | 0.29054   | 0.21539 | 0.642742381 |             |          |         |  |
| NA          | ENSG00000213328 | 0.63157   | 0.26384 | 0.78784     | 0.21539     | 0.63157  | 0.26384 |  |
|             | 0.63157         | 0.26384   | 0.21539 | 0.642742381 |             |          |         |  |
| NA          | ENSG00000252615 | 0.78779   | 0.21541 | 0.78779     | 0.21541     | 0.78779  | 0.21541 |  |
|             | 0.78779         | 0.21541   | 0.21541 | 0.642742381 |             |          |         |  |
| CAMKV       | ENSG00000164076 | 0.31984   | 0.37454 | 0.31984     | 0.37454     | 0.31984  | 0.37454 |  |
|             | 0.78759         | 0.21547   | 0.21547 | 0.642742381 |             |          |         |  |
| C12orf56    | ENSG00000185306 | 0.78757   | 0.21547 | 0.78757     | 0.21547     | -1.6872  |         |  |
|             | 0.95422         | -1.4787   | 0.93039 | 0.21547     | 0.642742381 |          |         |  |
| RNU6-1154P  | ENSG00000212303 | -0.033223 | 0.51325 | -0.033223   | 0.51325     | -0.76734 |         |  |
|             | 0.77856         | 0.7875    | 0.2155  | 0.2155      | 0.642742381 |          |         |  |
| NA          | ENSG00000225241 | 0.46692   | 0.32028 | 0.78745     | 0.21551     | -0.73791 | 0.76971 |  |
|             | -0.092926       | 0.53702   | 0.21551 | 0.642742381 |             |          |         |  |
| ACSM3       | ENSG00000005187 | 0.78742   | 0.21552 | -0.86705    | 0.80704     | 0.78742  | 0.21552 |  |
|             | 0.78742         | 0.21552   | 0.21552 | 0.642742381 |             |          |         |  |
| TPST2       | ENSG00000128294 | 0.75699   | 0.22453 | 0.75699     | 0.22453     | 0.78737  | 0.21553 |  |
|             | -0.49492        | 0.68967   | 0.21553 | 0.642742381 |             |          |         |  |
| NA          | ENSG00000280149 | 0.78732   | 0.21555 | 0.78732     | 0.21555     | 0.78732  | 0.21555 |  |
|             | 0.78732         | 0.21555   | 0.21555 | 0.642742381 |             |          |         |  |
| HJV         | ENSG00000168509 | 0.66919   | 0.25169 | 0.78726     | 0.21556     | 0.39877  | 0.34503 |  |
|             | 0.42099         | 0.33688   | 0.21556 | 0.642742381 |             |          |         |  |
| IGHVII-33-1 | ENSG00000254203 | 0.78725   | 0.21557 | -0.52325    | 0.6996      | 0.78725  |         |  |
|             | 0.21557         | 0.78725   | 0.21557 | 0.21557     | 0.642742381 |          |         |  |
| LGALS4      | ENSG00000171747 | 0.78722   | 0.21558 | -0.25897    | 0.60217     | -0.25897 |         |  |
|             | 0.60217         | -0.25897  | 0.60217 | 0.21558     | 0.642742381 |          |         |  |
| ZNF568      | ENSG00000198453 | 0.48299   | 0.31455 | 0.5381      | 0.29525     | 0.78722  |         |  |
|             | 0.21558         | 0.74517   | 0.22808 | 0.21558     | 0.642742381 |          |         |  |
| LINC02527   | ENSG00000227012 | 0.19258   | 0.42364 | 0.19258     | 0.42364     | 0.78715  |         |  |
|             | 0.2156          | -0.37395  | 0.64578 | 0.2156      | 0.642742381 |          |         |  |
| LINC01713   | ENSG00000228482 | 0.78713   | 0.2156  | 0.78713     | 0.2156      | 0.78713  |         |  |
|             | 0.2156          | 0.78713   | 0.2156  | 0.2156      | 0.642742381 |          |         |  |
| LINC01184   | ENSG00000245937 | 0.78715   | 0.2156  | -0.59069    | 0.72264     | 0.16892  |         |  |

|            |                 |             |         |             |               |               |         |  |
|------------|-----------------|-------------|---------|-------------|---------------|---------------|---------|--|
|            | 0.43293         | 0.00046618  | 0.49981 | 0.2156      | 0.642742381   |               |         |  |
| PURB       | ENSG00000146676 | 0.51659     | 0.30272 | 0.78708     | 0.21562       | -0.57646      | 0.71785 |  |
|            | -1.4111         | 0.92089     | 0.21562 | 0.642742381 |               |               |         |  |
| OR6R1P     | ENSG00000230576 | 0.78705     | 0.21563 | 0.78705     | 0.21563       | 0.78705       |         |  |
|            | 0.21563         | 0.78705     | 0.21563 | 0.21563     | 0.642742381   |               |         |  |
| NA         | ENSG00000253227 | 0.78704     | 0.21563 | 0.78704     | 0.21563       | 0.78704       | 0.21563 |  |
|            | 0.66078         | 0.25438     | 0.21563 | 0.642742381 |               |               |         |  |
| LINC00029  | ENSG00000125514 | 0.26159     | 0.39682 | 0.78702     | 0.21564       | 0.72438       |         |  |
|            | 0.23442         | 0.78702     | 0.21564 | 0.21564     | 0.642742381   |               |         |  |
| AMD1P3     | ENSG00000249286 | 0.78701     | 0.21564 | 0.78701     | 0.21564       | 0.78701       |         |  |
|            | 0.21564         | 0.78701     | 0.21564 | 0.21564     | 0.642742381   |               |         |  |
| NA         | ENSG00000267443 | -0.39336    | 0.65297 | 0.36777     | 0.35652       | 0.78702       | 0.21564 |  |
|            | -0.29475        | 0.61591     | 0.21564 | 0.642742381 |               |               |         |  |
| NA         | ENSG00000251264 | 0.43634     | 0.3313  | 0.77656     | 0.21871       | 0.78696       | 0.21565 |  |
|            | -0.4129         | 0.66016     | 0.21565 | 0.642742381 |               |               |         |  |
| HMGB2      | ENSG00000164104 | 0.38379     | 0.35057 | 0.38379     | 0.35057       | 0.64243       | 0.2603  |  |
|            | 0.78689         | 0.21567     | 0.21567 | 0.642742381 |               |               |         |  |
| ZNF879     | ENSG00000234284 | 0.61904     | 0.26794 | -0.24327    | 0.5961        | -0.24327      |         |  |
|            | 0.5961          | 0.78687     | 0.21568 | 0.21568     | 0.642742381   |               |         |  |
| NA         | ENSG00000274248 | 0.78688     | 0.21568 | -0.8926     | 0.81396       | 0.17772       | 0.42947 |  |
|            | -0.24014        | 0.59489     | 0.21568 | 0.642742381 |               |               |         |  |
| NA         | ENSG00000282759 | 0.42781     | 0.3344  | 0.78685     | 0.21568       | 0.42781       | 0.3344  |  |
|            | -0.11902        | 0.54737     | 0.21568 | 0.642742381 |               |               |         |  |
| GCNT1P5    | ENSG00000237620 | 0.78678     | 0.21571 | 0.78678     | 0.21571       | 0.78678       |         |  |
|            | 0.21571         | 0.78678     | 0.21571 | 0.21571     | 0.642742381   |               |         |  |
| NOP53      | ENSG00000105373 | -0.62108    | 0.73273 | -0.62108    | 0.73273       | 0.78671       | 0.21573 |  |
|            | -0.62108        | 0.73273     | 0.21573 | 0.642742381 |               |               |         |  |
| NR1H4      | ENSG00000012504 | 0.65456     | 0.25638 | 0.097054    | 0.46134       | 0.78666       | 0.21574 |  |
|            | -0.35975        | 0.64048     | 0.21574 | 0.642742381 |               |               |         |  |
| DR1        | ENSG00000117505 | 0.78663     | 0.21575 | 0.78663     | 0.21575       | 0.78663       | 0.21575 |  |
|            | 0.36425         | 0.35784     | 0.21575 | 0.642742381 |               |               |         |  |
| NA         | ENSG00000228793 | 0.33733     | 0.36794 | 0.50642     | 0.30628       | 0.78661       | 0.21575 |  |
|            | -0.22282        | 0.58816     | 0.21575 | 0.642742381 |               |               |         |  |
| CFAP46     | ENSG00000171811 | -0.074933   | 0.52987 | 0.76933     | 0.22085       | 0.63431       |         |  |
|            | 0.26294         | 0.78656     | 0.21577 | 0.21577     | 0.642742381   |               |         |  |
| ZBTB8OSP2  | ENSG00000172799 | -0.99243    | 0.83951 | -0.70564    | 0.75979       | -0.50648      |         |  |
|            | 0.69374         | 0.7865      | 0.21579 | 0.21579     | 0.642742381   |               |         |  |
| RNU6-602P  | ENSG00000223087 | 0.7865      | 0.21579 | -0.10726    | 0.54271       | 0.7865        |         |  |
|            | 0.21579         | 0.097544    | 0.46115 | 0.21579     | 0.642742381   |               |         |  |
| RPS4XP7    | ENSG00000218265 | -0.04231    | 0.51687 | 0.78647     | 0.2158        | -0.72611      |         |  |
|            | 0.76611         | -0.04231    | 0.51687 | 0.2158      | 0.642742381   |               |         |  |
| MTCO1P22   | ENSG00000271207 | 0.78646     | 0.2158  | -0.36306    | 0.64172       | -0.46331      |         |  |
|            | 0.67843         | -0.19094    | 0.57571 | 0.2158      | 0.642742381   |               |         |  |
| NA         | ENSG00000224025 | 0.78638     | 0.21582 | 0.52726     | 0.299 0.52726 | 0.299 0.52726 |         |  |
|            | 0.299 0.21582   | 0.642742381 |         |             |               |               |         |  |
| NA         | ENSG00000251049 | 0.42318     | 0.33608 | 0.78631     | 0.21584       | -1.0091       | 0.84354 |  |
|            | 0.78631         | 0.21584     | 0.21584 | 0.642742381 |               |               |         |  |
| CNN3P1     | ENSG00000218868 | 0.78614     | 0.21589 | 0.78614     | 0.21589       | 0.78614       |         |  |
|            | 0.21589         | 0.78614     | 0.21589 | 0.21589     | 0.642742381   |               |         |  |
| MIR3192    | ENSG00000265137 | 0.78614     | 0.21589 | 0.78614     | 0.21589       | 0.78614       |         |  |
|            | 0.21589         | 0.78614     | 0.21589 | 0.21589     | 0.642742381   |               |         |  |
| KCNG4      | ENSG00000168418 | -2.0101     | 0.97779 | 0.78606     | 0.21592       | -0.42451      | 0.6644  |  |
|            | -2.5998         | 0.99534     | 0.21592 | 0.642742381 |               |               |         |  |
| NA         | ENSG00000271983 | 0.78606     | 0.21592 | 0.78606     | 0.21592       | 0.78606       | 0.21592 |  |
|            | 0.78606         | 0.21592     | 0.21592 | 0.642742381 |               |               |         |  |
| TBXAS1     | ENSG00000059377 | -0.075751   | 0.53019 | 0.78603     | 0.21593       | -0.32923      |         |  |
|            | 0.62901         | -0.11934    | 0.5475  | 0.21593     | 0.642742381   |               |         |  |
| FABP12P1   | ENSG00000216265 | 0.35276     | 0.36214 | 0.78598     | 0.21594       | 0.35276       |         |  |
|            | 0.36214         | 0.35276     | 0.36214 | 0.21594     | 0.642742381   |               |         |  |
| EIF4EBP2P3 | ENSG00000220505 | 0.78591     | 0.21596 | 0.78591     | 0.21596       | -0.071772     |         |  |
|            | 0.52861         | 0.52309     | 0.30046 | 0.21596     | 0.642742381   |               |         |  |
| NA         | ENSG00000265101 | 0.17504     | 0.43052 | 0.7858      | 0.21599       | -0.044533     | 0.51776 |  |



|           |                 |           |         |             |             |           |         |  |
|-----------|-----------------|-----------|---------|-------------|-------------|-----------|---------|--|
|           | 0.45652         | 0.32401   | 0.21599 | 0.642742381 |             |           |         |  |
| MED10     | ENSG00000133398 | 0.78577   | 0.216   | -1.7895     | 0.96324     | -0.73811  | 0.76978 |  |
|           | -1.4857         | 0.93132   | 0.216   | 0.642742381 |             |           |         |  |
| PSG8-AS1  | ENSG00000225877 | 0.78574   | 0.21601 | -0.69922    | 0.75779     | -1.3042   |         |  |
|           | 0.90392         | 0.65712   | 0.25555 | 0.21601     | 0.642742381 |           |         |  |
| NA        | ENSG00000250697 | 0.054759  | 0.47817 | 0.78569     | 0.21602     | -0.17373  | 0.56896 |  |
|           | -0.60908        | 0.72876   | 0.21602 | 0.642742381 |             |           |         |  |
| NA        | ENSG00000267074 | -0.14544  | 0.55782 | 0.78568     | 0.21603     | -1.0913   | 0.86244 |  |
|           | -0.9434         | 0.82726   | 0.21603 | 0.642742381 |             |           |         |  |
| TNNC2     | ENSG00000101470 | -1.0196   | 0.84604 | 0.72629     | 0.23383     | -1.5555   | 0.94009 |  |
|           | 0.78559         | 0.21606   | 0.21606 | 0.642742381 |             |           |         |  |
| OR8B12    | ENSG00000170953 | 0.78552   | 0.21607 | 0.78552     | 0.21607     | 0.78552   |         |  |
|           | 0.21607         | 0.78552   | 0.21607 | 0.21607     | 0.642742381 |           |         |  |
| DEFB108B  | ENSG00000184276 | 0.78555   | 0.21607 | -1.0208     | 0.84633     | 0.52176   |         |  |
|           | 0.30092         | -0.081784 | 0.53259 | 0.21607     | 0.642742381 |           |         |  |
| OR10S1    | ENSG00000196248 | -1.1162   | 0.86783 | -1.1162     | 0.86783     | 0.78553   |         |  |
|           | 0.21607         | -1.1162   | 0.86783 | 0.21607     | 0.642742381 |           |         |  |
| NA        | ENSG00000258274 | 0.28508   | 0.38779 | 0.10024     | 0.46008     | 0.78552   | 0.21607 |  |
|           | 0.78552         | 0.21607   | 0.21607 | 0.642742381 |             |           |         |  |
| CALM3     | ENSG00000160014 | 0.78545   | 0.2161  | 0.78545     | 0.2161      | -0.090038 | 0.53587 |  |
|           | 0.047908        | 0.48089   | 0.2161  | 0.642742381 |             |           |         |  |
| DCC       | ENSG00000187323 | -0.95939  | 0.83132 | 0.11486     | 0.45428     | 0.78537   | 0.21612 |  |
|           | -0.60617        | 0.7278    | 0.21612 | 0.642742381 |             |           |         |  |
| NA        | ENSG00000230372 | -0.20178  | 0.57995 | -0.20178    | 0.57995     | 0.78531   | 0.21614 |  |
|           | 0.13281         | 0.44717   | 0.21614 | 0.642742381 |             |           |         |  |
| CYP4F2    | ENSG00000186115 | 0.47614   | 0.31699 | 0.78528     | 0.21615     | -0.26932  |         |  |
|           | 0.60616         | 0.13169   | 0.44761 | 0.21615     | 0.642742381 |           |         |  |
| NA        | ENSG00000254604 | -0.20232  | 0.58017 | -0.20232    | 0.58017     | -0.38089  | 0.64836 |  |
|           | 0.78511         | 0.21619   | 0.21619 | 0.642742381 |             |           |         |  |
| HNRNPH1   | ENSG00000169045 | 0.7851    | 0.2162  | -0.013338   | 0.50532     | 0.25469   |         |  |
|           | 0.39948         | -0.61165  | 0.72962 | 0.2162      | 0.642742381 |           |         |  |
| LINC01381 | ENSG00000230452 | 0.78508   | 0.2162  | 0.78508     | 0.2162      | -0.25353  |         |  |
|           | 0.60007         | -0.122    | 0.54855 | 0.2162      | 0.642742381 |           |         |  |
| FLNB      | ENSG00000136068 | 0.78501   | 0.21622 | -0.28267    | 0.61128     | -0.6081   | 0.72844 |  |
|           | 0.075436        | 0.46993   | 0.21622 | 0.642742381 |             |           |         |  |
| PYCARD    | ENSG00000103490 | 0.78499   | 0.21623 | 0.76843     | 0.22112     | 0.75865   |         |  |
|           | 0.22403         | 0.22605   | 0.41058 | 0.21623     | 0.642742381 |           |         |  |
| G6PC2     | ENSG00000152254 | -0.1711   | 0.56793 | -0.55603    | 0.7109      | 0.60481   | 0.27265 |  |
|           | 0.78496         | 0.21624   | 0.21624 | 0.642742381 |             |           |         |  |
| NA        | ENSG00000272323 | 0.78489   | 0.21626 | 0.78489     | 0.21626     | 0.78489   | 0.21626 |  |
|           | 0.78489         | 0.21626   | 0.21626 | 0.642742381 |             |           |         |  |
| NA        | ENSG00000259630 | 0.7848    | 0.21628 | 0.7848      | 0.21628     | 0.7848    | 0.21628 |  |
|           | 0.7848          | 0.21628   | 0.21628 | 0.642742381 |             |           |         |  |
| PKP3      | ENSG00000184363 | -0.48965  | 0.68781 | -0.15321    | 0.56088     | -0.48965  | 0.68781 |  |
|           | 0.78479         | 0.21629   | 0.21629 | 0.642742381 |             |           |         |  |
| NA        | ENSG00000237173 | 0.37289   | 0.35462 | 0.78479     | 0.21629     | 0.37289   | 0.35462 |  |
|           | -1.0284         | 0.84813   | 0.21629 | 0.642742381 |             |           |         |  |
| LINC02493 | ENSG00000250819 | -0.72642  | 0.76621 | 0.78479     | 0.21629     | 0.10682   |         |  |
|           | 0.45747         | 0.78479   | 0.21629 | 0.21629     | 0.642742381 |           |         |  |
| GTDC1     | ENSG00000121964 | 0.78471   | 0.21631 | 0.50956     | 0.30518     | -0.43732  | 0.66906 |  |
|           | 0.12575         | 0.44996   | 0.21631 | 0.642742381 |             |           |         |  |
| LAMA5-AS1 | ENSG00000228812 | -0.38678  | 0.65054 | -0.94406    | 0.82743     | 0.78472   |         |  |
|           | 0.21631         | 0.78472   | 0.21631 | 0.21631     | 0.642742381 |           |         |  |
| NA        | ENSG00000274903 | -0.021482 | 0.50857 | -0.23687    | 0.59362     | 0.60178   | 0.27366 |  |
|           | 0.7847          | 0.21631   | 0.21631 | 0.642742381 |             |           |         |  |
| SRRM1     | ENSG00000133226 | 0.66598   | 0.25271 | 0.27899     | 0.39013     | 0.10209   | 0.45934 |  |
|           | 0.78466         | 0.21633   | 0.21633 | 0.642742381 |             |           |         |  |
| NA        | ENSG00000250567 | 0.78465   | 0.21633 | 0.78465     | 0.21633     | 0.78465   | 0.21633 |  |
|           | 0.78465         | 0.21633   | 0.21633 | 0.642742381 |             |           |         |  |
| RNU2-28P  | ENSG00000222389 | 0.78459   | 0.21635 | 0.14647     | 0.44178     | 0.78459   |         |  |
|           | 0.21635         | 0.78459   | 0.21635 | 0.21635     | 0.642742381 |           |         |  |
| GAS5      | ENSG00000234741 | 0.78458   | 0.21635 | 0.78458     | 0.21635     | 0.78458   | 0.21635 |  |

|              |                 |           |         |             |             |          |         |  |
|--------------|-----------------|-----------|---------|-------------|-------------|----------|---------|--|
|              | 0.78458         | 0.21635   | 0.21635 | 0.642742381 |             |          |         |  |
| NA           | ENSG00000257835 | 0.78457   | 0.21635 | 0.78457     | 0.21635     | 0.78457  | 0.21635 |  |
|              | 0.78457         | 0.21635   | 0.21635 | 0.642742381 |             |          |         |  |
| NA           | ENSG00000238567 | -0.27256  | 0.6074  | -0.78444    | 0.78361     | -0.27256 | 0.6074  |  |
|              | 0.78451         | 0.21637   | 0.21637 | 0.642742381 |             |          |         |  |
| NA           | ENSG00000207391 | -1.3421   | 0.91022 | 0.78448     | 0.21638     | 0.59225  | 0.27684 |  |
|              | -1.3421         | 0.91022   | 0.21638 | 0.642742381 |             |          |         |  |
| ARHGAP26-AS1 | ENSG00000226272 | 0.7843    | 0.21643 | 0.34233     | 0.36605     | 0.12988  |         |  |
|              | 0.44833         | -0.047907 | 0.5191  | 0.21643     | 0.642742381 |          |         |  |
| SCGB1D2      | ENSG00000124935 | 0.076833  | 0.46938 | -0.23328    | 0.59223     | 0.076833 |         |  |
|              | 0.46938         | 0.78428   | 0.21644 | 0.21644     | 0.642742381 |          |         |  |
| IST1         | ENSG00000182149 | 0.78427   | 0.21644 | 0.78427     | 0.21644     | 0.78427  | 0.21644 |  |
|              | 0.78427         | 0.21644   | 0.21644 | 0.642742381 |             |          |         |  |
| NA           | ENSG00000213204 | 0.045808  | 0.48173 | 0.55342     | 0.28999     | 0.78428  | 0.21644 |  |
|              | 0.78428         | 0.21644   | 0.21644 | 0.642742381 |             |          |         |  |
| SLPI         | ENSG00000124107 | -0.45541  | 0.67559 | -0.45541    | 0.67559     | 0.78422  | 0.21646 |  |
|              | -1.0554         | 0.85437   | 0.21646 | 0.642742381 |             |          |         |  |
| NRP2         | ENSG00000118257 | -0.31596  | 0.62398 | -0.025591   | 0.51021     | 0.092428 | 0.46318 |  |
|              | 0.78415         | 0.21648   | 0.21648 | 0.642742381 |             |          |         |  |
| CEACAM19     | ENSG00000186567 | 0.78412   | 0.21649 | 0.78412     | 0.21649     | 0.78412  |         |  |
|              | 0.21649         | -0.22474  | 0.58891 | 0.21649     | 0.642742381 |          |         |  |
| LINC01927    | ENSG00000266312 | 0.62578   | 0.26573 | -1.5494     | 0.93935     | -1.5546  |         |  |
|              | 0.93998         | 0.78411   | 0.21649 | 0.21649     | 0.642742381 |          |         |  |
| MVD          | ENSG00000167508 | 0.73098   | 0.23239 | -0.57099    | 0.716       | 0.16956  | 0.43268 |  |
|              | 0.78405         | 0.2165    | 0.2165  | 0.642742381 |             |          |         |  |
| ANAPC5       | ENSG00000089053 | -0.098142 | 0.53909 | 0.78392     | 0.21654     | -0.43448 |         |  |
|              | 0.66803         | -0.66702  | 0.74762 | 0.21654     | 0.642742381 |          |         |  |
| FYTTD1P1     | ENSG00000234502 | 0.78391   | 0.21655 | 0.78391     | 0.21655     | 0.78391  |         |  |
|              | 0.21655         | 0.78391   | 0.21655 | 0.21655     | 0.642742381 |          |         |  |
| NA           | ENSG00000277532 | 0.78389   | 0.21655 | 0.78389     | 0.21655     | 0.78389  | 0.21655 |  |
|              | 0.78389         | 0.21655   | 0.21655 | 0.642742381 |             |          |         |  |
| BRIP1        | ENSG00000136492 | 0.39478   | 0.3465  | -0.76751    | 0.77861     | 0.78387  | 0.21656 |  |
|              | 0.42174         | 0.33661   | 0.21656 | 0.642742381 |             |          |         |  |
| CCZ1B        | ENSG00000146574 | -0.20288  | 0.58039 | 0.78379     | 0.21658     | 0.47294  | 0.31813 |  |
|              | 0.6904          | 0.24497   | 0.21658 | 0.642742381 |             |          |         |  |
| RN7SL169P    | ENSG00000242547 | -0.38024  | 0.64812 | 0.78379     | 0.21658     | 0.78379  |         |  |
|              | 0.21658         | -0.39961  | 0.65528 | 0.21658     | 0.642742381 |          |         |  |
| LINC02701    | ENSG00000250508 | -0.79275  | 0.78604 | -1.1441     | 0.87371     | -0.64231 |         |  |
|              | 0.73966         | 0.78381   | 0.21658 | 0.21658     | 0.642742381 |          |         |  |
| C5orf52      | ENSG00000187658 | -0.023717 | 0.50946 | -0.023717   | 0.50946     | 0.59459  |         |  |
|              | 0.27606         | 0.78377   | 0.21659 | 0.21659     | 0.642742381 |          |         |  |
| SPACA4       | ENSG00000177202 | 0.78367   | 0.21662 | 0.78367     | 0.21662     | 0.78367  |         |  |
|              | 0.21662         | 0.78367   | 0.21662 | 0.21662     | 0.642742381 |          |         |  |
| STAMPB       | ENSG00000124356 | 0.78364   | 0.21663 | 0.66795     | 0.25208     | -0.30197 |         |  |
|              | 0.61866         | -0.031347 | 0.5125  | 0.21663     | 0.642742381 |          |         |  |
| GAREM2       | ENSG00000157833 | 0.039052  | 0.48442 | 0.4495      | 0.32653     | 0.78362  |         |  |
|              | 0.21663         | 0.78362   | 0.21663 | 0.21663     | 0.642742381 |          |         |  |
| NA           | ENSG00000272113 | -0.25749  | 0.6016  | 0.63285     | 0.26342     | 0.19531  | 0.42258 |  |
|              | 0.78362         | 0.21663   | 0.21663 | 0.642742381 |             |          |         |  |
| HDAC2-AS2    | ENSG00000228624 | -0.78621  | 0.78413 | -1.0331     | 0.84923     | -0.72488 |         |  |
|              | 0.76574         | 0.78356   | 0.21665 | 0.21665     | 0.642742381 |          |         |  |
| HNRNPDP2     | ENSG00000234890 | 0.64658   | 0.25895 | 0.64658     | 0.25895     | 0.64658  |         |  |
|              | 0.25895         | 0.78355   | 0.21665 | 0.21665     | 0.642742381 |          |         |  |
| FZD8         | ENSG00000177283 | 0.78354   | 0.21666 | -0.17637    | 0.57        | -0.29212 | 0.6149  |  |
|              | -0.69127        | 0.7553    | 0.21666 | 0.642742381 |             |          |         |  |
| NA           | ENSG00000258224 | -0.52425  | 0.69995 | 0.40943     | 0.34111     | -0.52425 | 0.69995 |  |
|              | 0.78352         | 0.21666   | 0.21666 | 0.642742381 |             |          |         |  |
| MTND4P23     | ENSG00000225796 | 0.7835    | 0.21667 | 0.7835      | 0.21667     | 0.7835   |         |  |
|              | 0.21667         | 0.7835    | 0.21667 | 0.21667     | 0.642742381 |          |         |  |
| NA           | ENSG00000283202 | -0.28582  | 0.61249 | 0.78342     | 0.21669     | -0.37672 | 0.64681 |  |
|              | -0.37672        | 0.64681   | 0.21669 | 0.642762582 |             |          |         |  |
| KRT28        | ENSG00000173908 | -1.3116   | 0.90517 | 0.7833      | 0.21672     | -1.601   | 0.94531 |  |

|           |                 |          |         |             |             |          |         |  |
|-----------|-----------------|----------|---------|-------------|-------------|----------|---------|--|
|           | -1.0929         | 0.86277  | 0.21672 | 0.642773317 |             |          |         |  |
| NA        | ENSG00000266667 | 0.78332  | 0.21672 | -0.4552     | 0.67552     | -0.18136 | 0.57196 |  |
|           | 0.78332         | 0.21672  | 0.21672 | 0.642773317 |             |          |         |  |
| NA        | ENSG00000258268 | 0.7832   | 0.21675 | 0.7832      | 0.21675     | 0.7832   | 0.21675 |  |
|           | 0.7832          | 0.21675  | 0.21675 | 0.642774588 |             |          |         |  |
| FUT3      | ENSG00000171124 | 0.24373  | 0.40372 | 0.7832      | 0.21676     | 0.64921  | 0.2581  |  |
|           | 0.43717         | 0.33099  | 0.21676 | 0.642774588 |             |          |         |  |
| MAP3K19   | ENSG00000176601 | 0.5042   | 0.30706 | 0.78317     | 0.21676     | 0.51749  |         |  |
|           | 0.30241         | 0.34021  | 0.36685 | 0.21676     | 0.642774588 |          |         |  |
| LINC02827 | ENSG00000236908 | 0.65101  | 0.25752 | 0.066304    | 0.47357     | -0.57357 |         |  |
|           | 0.71687         | 0.78305  | 0.2168  | 0.2168      | 0.642816231 |          |         |  |
| FOXL1     | ENSG00000176678 | -0.25701 | 0.60142 | 0.12086     | 0.4519      | 0.78301  | 0.21681 |  |
|           | 0.48087         | 0.3153   | 0.21681 | 0.642816231 |             |          |         |  |
| CECR7     | ENSG00000237438 | -0.27594 | 0.6087  | 0.08396     | 0.46654     | 0.78293  | 0.21683 |  |
|           | 0.018589        | 0.49258  | 0.21683 | 0.642816231 |             |          |         |  |
| TRIM75P   | ENSG00000250374 | -0.40479 | 0.65718 | -0.40479    | 0.65718     | -0.16495 |         |  |
|           | 0.56551         | 0.78295  | 0.21683 | 0.21683     | 0.642816231 |          |         |  |
| NA        | ENSG00000255136 | 0.78291  | 0.21684 | 0.2415      | 0.40458     | -0.82877 | 0.79638 |  |
|           | -1.2193         | 0.88864  | 0.21684 | 0.642816231 |             |          |         |  |
| LIPE-AS1  | ENSG00000213904 | -1.3992  | 0.91913 | -0.67059    | 0.74876     | 0.78281  |         |  |
|           | 0.21687         | -0.13292 | 0.55287 | 0.21687     | 0.642826953 |          |         |  |
| NA        | ENSG00000252425 | 0.78281  | 0.21687 | 0.69195     | 0.24448     | 0.037587 | 0.48501 |  |
|           | -0.21634        | 0.58564  | 0.21687 | 0.642826953 |             |          |         |  |
| UBE2L3    | ENSG00000185651 | -0.38285 | 0.64908 | 0.78267     | 0.21691     | -0.51714 |         |  |
|           | 0.69747         | -0.21333 | 0.58446 | 0.21691     | 0.642906411 |          |         |  |
| NA        | ENSG00000261573 | -0.79866 | 0.78776 | 0.78259     | 0.21693     | 0.78259  | 0.21693 |  |
|           | 0.78259         | 0.21693  | 0.21693 | 0.642926584 |             |          |         |  |
| RNU6-335P | ENSG00000201433 | 0.78253  | 0.21695 | 0.78253     | 0.21695     | 0.78253  |         |  |
|           | 0.21695         | 0.78253  | 0.21695 | 0.21695     | 0.642946755 |          |         |  |
| FAM13A    | ENSG00000138640 | 0.24271  | 0.40412 | -0.054214   | 0.52162     | 0.78244  |         |  |
|           | 0.21698         | -0.1765  | 0.57005 | 0.21698     | 0.642996558 |          |         |  |
| NA        | ENSG00000201074 | 0.78235  | 0.217   | -0.16957    | 0.56733     | -0.64613 | 0.7409  |  |
|           | 0.78235         | 0.217    | 0.217   | 0.643016722 |             |          |         |  |
| SCGB2B2   | ENSG00000205209 | 0.78225  | 0.21703 | 0.013422    | 0.49465     | 0.013422 |         |  |
|           | 0.49465         | 0.013422 | 0.49465 | 0.21703     | 0.643027415 |          |         |  |
| MIR3918   | ENSG00000265558 | 0.78227  | 0.21703 | 0.78227     | 0.21703     | 0.78227  |         |  |
|           | 0.21703         | 0.78227  | 0.21703 | 0.21703     | 0.643027415 |          |         |  |
| MDC1      | ENSG00000137337 | -0.85647 | 0.80413 | -0.65043    | 0.74229     | 0.50963  | 0.30516 |  |
|           | 0.78217         | 0.21706  | 0.21706 | 0.643077201 |             |          |         |  |
| NA        | ENSG00000258342 | 0.78198  | 0.21711 | -0.37634    | 0.64667     | 0.53166  | 0.29748 |  |
|           | -0.20011        | 0.5793   | 0.21711 | 0.643082053 |             |          |         |  |
| OR14L1P   | ENSG00000198452 | -0.4635  | 0.6785  | -0.8415     | 0.79997     | -0.56246 |         |  |
|           | 0.7131          | 0.78194  | 0.21713 | 0.21713     | 0.643082053 |          |         |  |
| MIR3170   | ENSG00000263399 | 0.78189  | 0.21714 | -1.3491     | 0.91135     | -0.56593 |         |  |
|           | 0.71428         | -0.56593 | 0.71428 | 0.21714     | 0.643082053 |          |         |  |
| NEK5      | ENSG00000197168 | -0.43556 | 0.66842 | 0.78182     | 0.21716     | 0.17738  | 0.4296  |  |
|           | 0.65729         | 0.2555   | 0.21716 | 0.643082053 |             |          |         |  |
| RPL7L1P2  | ENSG00000231490 | 0.78183  | 0.21716 | 0.78183     | 0.21716     | 0.78183  |         |  |
|           | 0.21716         | 0.78183  | 0.21716 | 0.21716     | 0.643082053 |          |         |  |
| LINC00886 | ENSG00000240875 | 0.71033  | 0.23875 | 0.71033     | 0.23875     | 0.78181  |         |  |
|           | 0.21716         | 0.71033  | 0.23875 | 0.21716     | 0.643082053 |          |         |  |
| DDX50     | ENSG00000107625 | -0.14855 | 0.55905 | 0.78177     | 0.21717     | 0.78177  | 0.21717 |  |
|           | 0.78177         | 0.21717  | 0.21717 | 0.643082053 |             |          |         |  |
| LINC01132 | ENSG00000227630 | 0.78179  | 0.21717 | 0.78179     | 0.21717     | 0.78179  |         |  |
|           | 0.21717         | 0.56059  | 0.28754 | 0.21717     | 0.643082053 |          |         |  |
| AASDHPPT  | ENSG00000149313 | 0.78168  | 0.2172  | -0.2546     | 0.60048     | 0.13704  |         |  |
|           | 0.4455          | -0.44642 | 0.67235 | 0.2172      | 0.643082053 |          |         |  |
| NA        | ENSG00000227309 | -0.2158  | 0.58543 | -0.2158     | 0.58543     | -0.2158  | 0.58543 |  |
|           | 0.78164         | 0.21721  | 0.21721 | 0.643082053 |             |          |         |  |
| TBC1D2    | ENSG00000095383 | 0.78163  | 0.21722 | 0.61848     | 0.26813     | 0.35001  |         |  |
|           | 0.36317         | -0.14985 | 0.55956 | 0.21722     | 0.643082053 |          |         |  |
| GLRX      | ENSG00000173221 | 0.78162  | 0.21722 | 0.33625     | 0.36834     | 0.78162  | 0.21722 |  |

|            |                 |           |         |             |             |          |         |  |
|------------|-----------------|-----------|---------|-------------|-------------|----------|---------|--|
|            | 0.78162         | 0.21722   | 0.21722 | 0.643082053 |             |          |         |  |
| NA         | ENSG00000250938 | -0.14504  | 0.55766 | -0.89575    | 0.81481     | -0.49983 | 0.6914  |  |
|            | 0.78148         | 0.21726   | 0.21726 | 0.643151932 |             |          |         |  |
| NA         | ENSG00000248965 | 0.55037   | 0.29103 | 0.43664     | 0.33119     | 0.78146  | 0.21727 |  |
|            | -0.40565        | 0.6575    | 0.21727 | 0.643151932 |             |          |         |  |
| NA         | ENSG00000227492 | 0.78134   | 0.2173  | 0.78134     | 0.2173      | 0.78134  | 0.2173  |  |
|            | 0.78134         | 0.2173    | 0.2173  | 0.643162597 |             |          |         |  |
| NA         | ENSG00000280105 | 0.78133   | 0.2173  | 0.78133     | 0.2173      | 0.78133  | 0.2173  |  |
|            | 0.78133         | 0.2173    | 0.2173  | 0.643162597 |             |          |         |  |
| CORO1A     | ENSG00000102879 | 0.78125   | 0.21733 | -1.1185     | 0.86832     | 0.077724 |         |  |
|            | 0.46902         | 0.077724  | 0.46902 | 0.21733     | 0.643202854 |          |         |  |
| NA         | ENSG00000254583 | -0.86923  | 0.80764 | 0.78122     | 0.21734     | -0.86923 | 0.80764 |  |
|            | -0.86923        | 0.80764   | 0.21734 | 0.643202854 |             |          |         |  |
| RNU6-1093P | ENSG00000212496 | 0.57368   | 0.28309 | 0.78108     | 0.21738     | 0.57368  |         |  |
|            | 0.28309         | 0.075398  | 0.46995 | 0.21738     | 0.643282164 |          |         |  |
| MEAF6      | ENSG00000163875 | 0.78095   | 0.21741 | 0.56272     | 0.28681     | 0.78095  | 0.21741 |  |
|            | 0.78095         | 0.21741   | 0.21741 | 0.643292811 |             |          |         |  |
| RN7SKP204  | ENSG00000202351 | 0.78096   | 0.21741 | -0.078899   | 0.53144     | -0.20801 |         |  |
|            | 0.58239         | 0.68362   | 0.24711 | 0.21741     | 0.643292811 |          |         |  |
| NA         | ENSG00000243888 | 0.78091   | 0.21743 | 0.78091     | 0.21743     | 0.78091  | 0.21743 |  |
|            | 0.78091         | 0.21743   | 0.21743 | 0.643303455 |             |          |         |  |
| NA         | ENSG00000239465 | -0.96606  | 0.83299 | 0.13446     | 0.44652     | -0.29373 | 0.61552 |  |
|            | 0.78086         | 0.21744   | 0.21744 | 0.643303455 |             |          |         |  |
| NA         | ENSG00000200991 | 0.78078   | 0.21747 | 0.36414     | 0.35788     | 0.78078  | 0.21747 |  |
|            | 0.78078         | 0.21747   | 0.21747 | 0.643353151 |             |          |         |  |
| UNC13A     | ENSG00000130477 | 0.75231   | 0.22593 | -0.0073527  | 0.50293     | 0.75231  |         |  |
|            | 0.22593         | 0.78062   | 0.21751 | 0.21751     | 0.643374417 |          |         |  |
| PCDHA8     | ENSG00000204962 | -1.4245   | 0.92286 | 0.65304     | 0.25687     | 0.78062  |         |  |
|            | 0.21751         | 0.78062   | 0.21751 | 0.21751     | 0.643374417 |          |         |  |
| PRUNE2     | ENSG00000106772 | 0.7806    | 0.21752 | -0.13535    | 0.55383     | 0.13259  |         |  |
|            | 0.44726         | -0.072534 | 0.52891 | 0.21752     | 0.643374417 |          |         |  |
| RNU6-1208P | ENSG00000238482 | -2.193    | 0.98585 | 0.78058     | 0.21753     | -1.1336  |         |  |
|            | 0.87151         | -1.6446   | 0.94997 | 0.21753     | 0.643374417 |          |         |  |
| ANAPC7     | ENSG00000196510 | 0.34739   | 0.36415 | 0.78032     | 0.2176      | 0.42081  |         |  |
|            | 0.33695         | 0.73275   | 0.23186 | 0.2176      | 0.643542392 |          |         |  |
| NEURL1     | ENSG00000107954 | 0.7802    | 0.21764 | -0.063056   | 0.52514     | -0.35148 |         |  |
|            | 0.63739         | 0.16207   | 0.43563 | 0.21764     | 0.643580407 |          |         |  |
| NA         | ENSG00000266069 | 0.78017   | 0.21765 | 0.78017     | 0.21765     | 0.78017  | 0.21765 |  |
|            | 0.2744          | 0.39189   | 0.21765 | 0.643580407 |             |          |         |  |
| GSTM4      | ENSG00000168765 | 0.56      | 0.28774 | 0.78004     | 0.21768     | 0.41043  | 0.34074 |  |
|            | -0.62728        | 0.73476   | 0.21768 | 0.643580407 |             |          |         |  |
| RGS20      | ENSG00000147509 | -0.52551  | 0.70039 | 0.77999     | 0.2177      | 0.72717  | 0.23356 |  |
|            | -1.1565         | 0.87625   | 0.2177  | 0.643580407 |             |          |         |  |
| NA         | ENSG00000226595 | -0.16717  | 0.56638 | -0.36428    | 0.64218     | 0.77997  | 0.21771 |  |
|            | -0.32495        | 0.62739   | 0.21771 | 0.643580407 |             |          |         |  |
| NA         | ENSG00000259276 | 0.77993   | 0.21771 | 0.77993     | 0.21771     | 0.77993  | 0.21771 |  |
|            | 0.77993         | 0.21771   | 0.21771 | 0.643580407 |             |          |         |  |
| LNCPRESS2  | ENSG00000249152 | 0.77977   | 0.21776 | -0.73097    | 0.7676      | 0.40007  |         |  |
|            | 0.34455         | 0.51435   | 0.3035  | 0.21776     | 0.643580407 |          |         |  |
| NA         | ENSG00000232768 | 0.77976   | 0.21777 | 0.32334     | 0.37322     | 0.69472  | 0.24361 |  |
|            | 0.32334         | 0.37322   | 0.21777 | 0.643580407 |             |          |         |  |
| BCL2L13    | ENSG00000099968 | 0.7797    | 0.21778 | 0.60631     | 0.27216     | 0.7797   |         |  |
|            | 0.21778         | -0.41667  | 0.66154 | 0.21778     | 0.643580407 |          |         |  |
| TLCD1      | ENSG00000160606 | 0.77969   | 0.21779 | 0.77969     | 0.21779     | 0.77969  | 0.21779 |  |
|            | 0.77969         | 0.21779   | 0.21779 | 0.643580407 |             |          |         |  |
| LINC00431  | ENSG00000225760 | 0.32042   | 0.37432 | -0.17701    | 0.57025     | 0.77963  |         |  |
|            | 0.2178          | 0.48494   | 0.31386 | 0.2178      | 0.643580407 |          |         |  |
| KCNA6      | ENSG00000151079 | 0.7796    | 0.21781 | 0.7796      | 0.21781     | 0.7796   | 0.21781 |  |
|            | 0.7796          | 0.21781   | 0.21781 | 0.643580407 |             |          |         |  |
| RNU6-574P  | ENSG00000206992 | 0.77949   | 0.21784 | 0.77949     | 0.21784     | 0.77949  |         |  |
|            | 0.21784         | 0.77949   | 0.21784 | 0.21784     | 0.643580407 |          |         |  |
| MIR4432    | ENSG00000266078 | 0.77951   | 0.21784 | 0.77951     | 0.21784     | 0.77951  |         |  |

|           |                 |             |             |             |             |           |         |         |
|-----------|-----------------|-------------|-------------|-------------|-------------|-----------|---------|---------|
|           | 0.21784         | 0.77951     | 0.21784     | 0.21784     | 0.643580407 |           |         |         |
| TAAR1     | ENSG00000146399 | 0.77927     | 0.21791     | 0.21791     | 0.41819     | 0.3379    | 0.77927 | 0.21791 |
|           | 0.77927         | 0.21791     | 0.21791     | 0.643580407 |             |           |         |         |
| CEP164    | ENSG00000110274 | 0.44443     | 0.32837     | -0.21904    | 0.58669     | 0.77924   |         |         |
|           | 0.21792         | -0.033606   | 0.5134      | 0.21792     | 0.643580407 |           |         |         |
| SNHG12    | ENSG00000197989 | 0.77924     | 0.21792     | 0.77924     | 0.21792     | 0.77924   |         |         |
|           | 0.21792         | 0.77924     | 0.21792     | 0.21792     | 0.643580407 |           |         |         |
| NA        | ENSG00000234740 | 0.77924     | 0.21792     | 0.77924     | 0.21792     | 0.77924   | 0.21792 |         |
|           | 0.77924         | 0.21792     | 0.21792     | 0.643580407 |             |           |         |         |
| RPS29P24  | ENSG00000244253 | 0.77922     | 0.21793     | 0.77922     | 0.21793     | 0.77922   |         |         |
|           | 0.21793         | 0.77922     | 0.21793     | 0.21793     | 0.643580407 |           |         |         |
| NA        | ENSG00000278754 | 0.77921     | 0.21793     | 0.77921     | 0.21793     | 0.77921   | 0.21793 |         |
|           | 0.77921         | 0.21793     | 0.21793     | 0.643580407 |             |           |         |         |
| RNA5SP52  | ENSG00000199318 | -0.78698    | 0.78435     | 0.77915     | 0.21794     | 0.40535   |         |         |
|           | 0.34261         | 0.1169      | 0.45347     | 0.21794     | 0.643580407 |           |         |         |
| NA        | ENSG00000263870 | 0.77912     | 0.21795     | 0.77912     | 0.21795     | 0.77912   | 0.21795 |         |
|           | 0.77912         | 0.21795     | 0.21795     | 0.643580407 |             |           |         |         |
| CD40      | ENSG00000101017 | 0.77904     | 0.21798     | 0.085598    | 0.46589     | 0.76723   | 0.22147 |         |
|           | -0.12759        | 0.55076     | 0.21798     | 0.643580407 |             |           |         |         |
| NA        | ENSG00000267093 | 0.77896     | 0.218       | 0.77896     | 0.218       | 0.77896   | 0.218   | 0.218   |
|           | 0.218           | 0.643580407 |             |             |             |           |         |         |
| NA        | ENSG00000236754 | 0.7789      | 0.21802     | 0.7789      | 0.21802     | 0.7789    | 0.21802 |         |
|           | 0.7789          | 0.21802     | 0.21802     | 0.643580407 |             |           |         |         |
| NA        | ENSG00000237074 | 0.51878     | 0.30196     | 0.73226     | 0.232       | 0.73226   | 0.232   | 0.77886 |
|           | 0.21803         | 0.21803     | 0.643580407 |             |             |           |         |         |
| CNTRL     | ENSG00000119397 | 0.12455     | 0.45044     | 0.77881     | 0.21805     | -0.18658  | 0.57401 |         |
|           | -0.94307        | 0.82718     | 0.21805     | 0.643580407 |             |           |         |         |
| COX6B1P3  | ENSG00000172912 | 0.7788      | 0.21805     | 0.40244     | 0.34368     | 0.7788    |         |         |
|           | 0.21805         | 0.7788      | 0.21805     | 0.21805     | 0.643580407 |           |         |         |
| PLAAT5    | ENSG00000168004 | 0.77875     | 0.21806     | -0.18059    | 0.57165     | -0.41605  |         |         |
|           | 0.66131         | -0.20103    | 0.57966     | 0.21806     | 0.643580407 |           |         |         |
| NA        | ENSG00000237472 | 0.77877     | 0.21806     | 0.77877     | 0.21806     | 0.77877   | 0.21806 |         |
|           | 0.77877         | 0.21806     | 0.21806     | 0.643580407 |             |           |         |         |
| NA        | ENSG00000254786 | 0.72608     | 0.23389     | 0.72608     | 0.23389     | 0.77877   | 0.21806 |         |
|           | 0.72608         | 0.23389     | 0.21806     | 0.643580407 |             |           |         |         |
| NA        | ENSG00000263553 | 0.77876     | 0.21806     | 0.62678     | 0.2654      | 0.77876   | 0.21806 |         |
|           | -0.12505        | 0.54976     | 0.21806     | 0.643580407 |             |           |         |         |
| MCMDC2    | ENSG00000178460 | 0.77872     | 0.21807     | -0.42496    | 0.66457     | -0.42496  |         |         |
|           | 0.66457         | -0.89439    | 0.81444     | 0.21807     | 0.643580407 |           |         |         |
| RPL9P31   | ENSG00000239659 | 0.77868     | 0.21808     | 0.77868     | 0.21808     | 0.77868   |         |         |
|           | 0.21808         | 0.77868     | 0.21808     | 0.21808     | 0.643580407 |           |         |         |
| C2orf49   | ENSG00000135974 | 0.77861     | 0.2181      | -0.11376    | 0.54529     | 0.258     | 0.3982  |         |
|           | -0.078162       | 0.53115     | 0.2181      | 0.643580407 |             |           |         |         |
| C1QTNF12  | ENSG00000184163 | -0.94196    | 0.82689     | 0.77854     | 0.21812     | 0.29561   |         |         |
|           | 0.38376         | 0.29561     | 0.38376     | 0.21812     | 0.643580407 |           |         |         |
| LINC02778 | ENSG00000238242 | -2.2413     | 0.9875      | 0.77856     | 0.21812     | 0.67277   |         |         |
|           | 0.25055         | -1.1766     | 0.88032     | 0.21812     | 0.643580407 |           |         |         |
| NA        | ENSG00000261889 | 0.46472     | 0.32107     | 0.049407    | 0.4803      | 0.54417   | 0.29316 |         |
|           | 0.77855         | 0.21812     | 0.21812     | 0.643580407 |             |           |         |         |
| NA        | ENSG00000236510 | 0.77836     | 0.21818     | 0.77836     | 0.21818     | 0.77836   | 0.21818 |         |
|           | 0.77836         | 0.21818     | 0.21818     | 0.643580407 |             |           |         |         |
| NA        | ENSG00000259692 | 0.7783      | 0.21819     | -0.66877    | 0.74818     | -0.91961  | 0.82111 |         |
|           | -0.80591        | 0.78985     | 0.21819     | 0.643580407 |             |           |         |         |
| HEATR1    | ENSG00000119285 | -0.821      | 0.79418     | 0.77825     | 0.21821     | -0.58967  |         |         |
|           | 0.7223          | 0.68545     | 0.24653     | 0.21821     | 0.643580407 |           |         |         |
| NA        | ENSG00000231409 | 0.77825     | 0.21821     | 0.77825     | 0.21821     | 0.77825   | 0.21821 |         |
|           | 0.77825         | 0.21821     | 0.21821     | 0.643580407 |             |           |         |         |
| SPTLC3    | ENSG00000172296 | 0.52232     | 0.30072     | 0.19828     | 0.42141     | 0.2276    |         |         |
|           | 0.40998         | 0.77821     | 0.21822     | 0.21822     | 0.643580407 |           |         |         |
| TNFSF8    | ENSG00000106952 | 0.77819     | 0.21823     | -0.70796    | 0.76051     | -0.057085 |         |         |
|           | 0.52276         | 0.011686    | 0.49534     | 0.21823     | 0.643580407 |           |         |         |
| DBI       | ENSG00000155368 | 0.029316    | 0.48831     | -0.10863    | 0.54325     | 0.77819   | 0.21823 |         |

|           |                 |          |         |             |             |          |         |  |
|-----------|-----------------|----------|---------|-------------|-------------|----------|---------|--|
|           | 0.1708          | 0.43219  | 0.21823 | 0.643580407 |             |          |         |  |
| TTC21A    | ENSG00000168026 | 0.076866 | 0.46937 | 0.68395     | 0.247       | 0.7782   | 0.21823 |  |
|           | -0.019084       | 0.50761  | 0.21823 | 0.643580407 |             |          |         |  |
| NA        | ENSG00000228084 | 0.77815  | 0.21824 | 0.77815     | 0.21824     | 0.77815  | 0.21824 |  |
|           | 0.77815         | 0.21824  | 0.21824 | 0.643580407 |             |          |         |  |
| NA        | ENSG00000227338 | -0.47642 | 0.68311 | -0.47642    | 0.68311     | 0.77813  | 0.21825 |  |
|           | -0.45664        | 0.67604  | 0.21825 | 0.643580407 |             |          |         |  |
| NA        | ENSG00000248621 | 0.77807  | 0.21826 | -0.20819    | 0.58246     | 0.77807  | 0.21826 |  |
|           | -0.20819        | 0.58246  | 0.21826 | 0.643580407 |             |          |         |  |
| TEX30     | ENSG00000151287 | 0.36322  | 0.35822 | -0.21653    | 0.58571     | 0.015781 | 0.4937  |  |
|           | 0.77796         | 0.21829  | 0.21829 | 0.643602661 |             |          |         |  |
| CCNT2P1   | ENSG00000225672 | 0.77794  | 0.2183  | 0.25285     | 0.40019     | -0.33226 |         |  |
|           | 0.63015         | -0.69708 | 0.75713 | 0.2183      | 0.643602661 |          |         |  |
| NA        | ENSG00000256691 | 0.77787  | 0.21832 | 0.77787     | 0.21832     | 0.77787  | 0.21832 |  |
|           | 0.77787         | 0.21832  | 0.21832 | 0.643602661 |             |          |         |  |
| SLC30A9   | ENSG00000014824 | 0.77786  | 0.21833 | 0.70582     | 0.24015     | 0.76852  |         |  |
|           | 0.22109         | -1.1702  | 0.87904 | 0.21833     | 0.643602661 |          |         |  |
| ACER3     | ENSG00000078124 | 0.7778   | 0.21834 | -0.29922    | 0.61761     | -0.26487 | 0.60444 |  |
|           | 0.59337         | 0.27647  | 0.21834 | 0.643602661 |             |          |         |  |
| EN1       | ENSG00000163064 | 0.087336 | 0.4652  | 0.77776     | 0.21835     | 0.060511 | 0.47587 |  |
|           | -0.16128        | 0.56406  | 0.21835 | 0.643602661 |             |          |         |  |
| HEBP1     | ENSG00000013583 | -0.89186 | 0.81377 | -0.89186    | 0.81377     | 0.77774  | 0.21836 |  |
|           | 0.26532         | 0.39538  | 0.21836 | 0.643602661 |             |          |         |  |
| RNF144A   | ENSG00000151692 | 0.77746  | 0.21844 | 0.58548     | 0.27911     | 0.43361  |         |  |
|           | 0.33228         | -0.27502 | 0.60835 | 0.21844     | 0.643771125 |          |         |  |
| TFPI      | ENSG00000003436 | 0.54431  | 0.29312 | 0.056878    | 0.47732     | 0.77736  | 0.21847 |  |
|           | -0.83096        | 0.797    | 0.21847 | 0.643771125 |             |          |         |  |
| MIR4286   | ENSG00000263762 | 0.20132  | 0.42022 | 0.77737     | 0.21847     | 0.77737  |         |  |
|           | 0.21847         | 0.77737  | 0.21847 | 0.21847     | 0.643771125 |          |         |  |
| NA        | ENSG00000263812 | 0.77736  | 0.21847 | -0.57854    | 0.71855     | -1.0732  | 0.85842 |  |
|           | -0.34665        | 0.63557  | 0.21847 | 0.643771125 |             |          |         |  |
| HSPE1P11  | ENSG00000187762 | -0.78373 | 0.7834  | -1.2813     | 0.89995     | 0.77718  |         |  |
|           | 0.21853         | 0.77718  | 0.21853 | 0.21853     | 0.643880588 |          |         |  |
| ADGRB3    | ENSG00000135298 | 0.77714  | 0.21854 | -0.14146    | 0.55624     | 0.40346  |         |  |
|           | 0.34331         | -1.3359  | 0.9092  | 0.21854     | 0.643880588 |          |         |  |
| FLG2      | ENSG00000143520 | 0.77707  | 0.21856 | 0.77707     | 0.21856     | 0.53266  | 0.29714 |  |
|           | 0.77707         | 0.21856  | 0.21856 | 0.643880588 |             |          |         |  |
| NA        | ENSG00000260196 | 0.34666  | 0.36442 | 0.77705     | 0.21856     | 0.77705  | 0.21856 |  |
|           | 0.77705         | 0.21856  | 0.21856 | 0.643880588 |             |          |         |  |
| COL11A2   | ENSG00000204248 | 0.33589  | 0.36848 | -0.46563    | 0.67926     | -1.1986  |         |  |
|           | 0.88466         | 0.77697  | 0.21859 | 0.21859     | 0.643881649 |          |         |  |
| NA        | ENSG00000235787 | 0.77696  | 0.21859 | -0.60586    | 0.7277      | -0.22973 | 0.59085 |  |
|           | 0.77696         | 0.21859  | 0.21859 | 0.643881649 |             |          |         |  |
| ANKRD26P3 | ENSG00000237636 | -0.92039 | 0.82132 | -1.1445     | 0.8738      | 0.132    | 0.44749 |  |
|           | 0.77692         | 0.2186   | 0.2186  | 0.643881649 |             |          |         |  |
| SDHDP1    | ENSG00000267162 | 0.77684  | 0.21863 | 0.6472      | 0.25875     | 0.6472   |         |  |
|           | 0.25875         | 0.6472   | 0.25875 | 0.21863     | 0.643921625 |          |         |  |
| MAPK3     | ENSG00000102882 | -0.41812 | 0.66207 | 0.7768      | 0.21864     | -0.01207 | 0.50482 |  |
|           | 0.48765         | 0.3129   | 0.21864 | 0.643921625 |             |          |         |  |
| ANKRD27   | ENSG00000105186 | 0.57372  | 0.28308 | 0.7766      | 0.2187      | 0.60904  |         |  |
|           | 0.27125         | -0.2889  | 0.61367 | 0.2187      | 0.644059407 |          |         |  |
| MAST1     | ENSG00000105613 | 0.77644  | 0.21874 | 0.24938     | 0.40153     | 0.20941  | 0.41707 |  |
|           | -0.37058        | 0.64453  | 0.21874 | 0.644064545 |             |          |         |  |
| KCTD4     | ENSG00000180332 | 0.18636  | 0.42608 | 0.77647     | 0.21874     | 0.18636  | 0.42608 |  |
|           | -0.95388        | 0.82993  | 0.21874 | 0.644064545 |             |          |         |  |
| NA        | ENSG00000258784 | 0.77642  | 0.21875 | -0.13477    | 0.5536      | 0.77642  | 0.21875 |  |
|           | 0.77642         | 0.21875  | 0.21875 | 0.644064545 |             |          |         |  |
| FASTKD1   | ENSG00000138399 | -0.50111 | 0.69185 | 0.69672     | 0.24299     | 0.77631  |         |  |
|           | 0.21878         | 0.36552  | 0.35736 | 0.21878     | 0.644064545 |          |         |  |
| TMCO1     | ENSG00000143183 | -0.92898 | 0.82355 | -0.82597    | 0.79559     | 0.77624  | 0.2188  |  |
|           | -0.69489        | 0.75644  | 0.2188  | 0.644064545 |             |          |         |  |
| TUBB8P9   | ENSG00000235827 | 0.77626  | 0.2188  | -0.95908    | 0.83124     | 0.45969  |         |  |

|            |                 |           |         |             |             |          |         |  |
|------------|-----------------|-----------|---------|-------------|-------------|----------|---------|--|
|            | 0.32287         | 0.45969   | 0.32287 | 0.2188      | 0.644064545 |          |         |  |
| NA         | ENSG00000242009 | -1.6583   | 0.95137 | 0.77624     | 0.2188      | -1.4168  | 0.92173 |  |
|            | -0.71271        | 0.76199   | 0.2188  | 0.644064545 |             |          |         |  |
| LINC01808  | ENSG00000237992 | 0.77621   | 0.21881 | 0.67542     | 0.24971     | 0.67542  |         |  |
|            | 0.24971         | 0.67542   | 0.24971 | 0.21881     | 0.644064545 |          |         |  |
| NA         | ENSG00000250126 | -0.25241  | 0.59964 | -0.25241    | 0.59964     | -0.25241 | 0.59964 |  |
|            | 0.77609         | 0.21885   | 0.21885 | 0.644064545 |             |          |         |  |
| BNIP3P1    | ENSG00000197358 | -0.60421  | 0.72715 | 0.11408     | 0.45459     | 0.77605  |         |  |
|            | 0.21886         | 0.77605   | 0.21886 | 0.21886     | 0.644064545 |          |         |  |
| KCNQ4      | ENSG00000117013 | 0.25233   | 0.40039 | 0.77603     | 0.21887     | -0.93472 | 0.82503 |  |
|            | -0.48038        | 0.68452   | 0.21887 | 0.644064545 |             |          |         |  |
| NA         | ENSG00000274064 | -0.22741  | 0.58995 | -1.5099     | 0.93446     | -0.62982 | 0.73559 |  |
|            | 0.77603         | 0.21887   | 0.21887 | 0.644064545 |             |          |         |  |
| LINC01692  | ENSG00000226983 | -0.048243 | 0.51924 | 0.14144     | 0.44376     | 0.776    | 0.21888 |  |
|            | 0.776           | 0.21888   | 0.21888 | 0.644064545 |             |          |         |  |
| NA         | ENSG00000273247 | 0.51209   | 0.30429 | 0.51209     | 0.30429     | 0.67884  | 0.24862 |  |
|            | 0.77594         | 0.21889   | 0.21889 | 0.644064545 |             |          |         |  |
| C16orf74   | ENSG00000154102 | 0.18298   | 0.42741 | 0.77591     | 0.2189      | 0.053307 |         |  |
|            | 0.47874         | 0.55744   | 0.28861 | 0.2189      | 0.644064545 |          |         |  |
| RNA5SP301  | ENSG00000199407 | 0.77582   | 0.21893 | 0.77582     | 0.21893     | 0.77582  |         |  |
|            | 0.21893         | -1.2558   | 0.8954  | 0.21893     | 0.644075036 |          |         |  |
| NA         | ENSG00000226043 | 0.67835   | 0.24878 | 0.7758      | 0.21893     | 0.7758   | 0.21893 |  |
|            | 0.7758          | 0.21893   | 0.21893 | 0.644075036 |             |          |         |  |
| NA         | ENSG00000235979 | -0.70238  | 0.75878 | -0.70238    | 0.75878     | -2.1565  | 0.98448 |  |
|            | 0.7757          | 0.21896   | 0.21896 | 0.644076061 |             |          |         |  |
| IGKV1D-8   | ENSG00000239819 | 0.6783    | 0.24879 | 0.55564     | 0.28923     | 0.77567  |         |  |
|            | 0.21897         | 0.77567   | 0.21897 | 0.21897     | 0.644076061 |          |         |  |
| MIR5094    | ENSG00000264966 | 0.50171   | 0.30794 | 0.77567     | 0.21897     | 0.50171  |         |  |
|            | 0.30794         | 0.17244   | 0.43155 | 0.21897     | 0.644076061 |          |         |  |
| NOL11      | ENSG00000130935 | 0.34684   | 0.36436 | -0.21131    | 0.58368     | 0.77559  | 0.219   |  |
|            | 0.26974         | 0.39368   | 0.219   | 0.644106494 |             |          |         |  |
| LINC02208  | ENSG00000250891 | 0.01909   | 0.49238 | -0.4537     | 0.67498     | 0.77555  |         |  |
|            | 0.21901         | -0.49058  | 0.68814 | 0.21901     | 0.644106494 |          |         |  |
| ST6GALNAC6 | ENSG00000160408 | -0.67228  | 0.7493  | 0.77551     | 0.21902     | 0.77551  |         |  |
|            | 0.21902         | 0.77551   | 0.21902 | 0.21902     | 0.644106494 |          |         |  |
| VAC14      | ENSG00000103043 | -0.25513  | 0.60069 | 0.77542     | 0.21905     | 0.08278  | 0.46701 |  |
|            | 0.30579         | 0.37988   | 0.21905 | 0.644107512 |             |          |         |  |
| RN7SL60P   | ENSG00000243366 | 0.54239   | 0.29378 | 0.087917    | 0.46497     | -1.018   |         |  |
|            | 0.84567         | 0.7754    | 0.21905 | 0.21905     | 0.644107512 |          |         |  |
| NA         | ENSG00000234287 | 0.77538   | 0.21906 | 0.77538     | 0.21906     | 0.77538  | 0.21906 |  |
|            | 0.77538         | 0.21906   | 0.21906 | 0.644107512 |             |          |         |  |
| GPAT2P1    | ENSG00000237510 | -0.67757  | 0.75098 | -1.2169     | 0.88818     | 0.22094  |         |  |
|            | 0.41257         | 0.77525   | 0.2191  | 0.2191      | 0.644186256 |          |         |  |
| NA         | ENSG00000270996 | 0.77509   | 0.21914 | -1.3841     | 0.91683     | 0.77509  | 0.21914 |  |
|            | 0.77509         | 0.21914   | 0.21914 | 0.644198278 |             |          |         |  |
| NPIPB11    | ENSG00000254206 | 0.775     | 0.21917 | -0.10292    | 0.54099     | 0.041201 | 0.48357 |  |
|            | 0.36927         | 0.35597   | 0.21917 | 0.644198278 |             |          |         |  |
| TMPRSS2    | ENSG00000184012 | 0.77495   | 0.21918 | 0.7354      | 0.23105     | 0.77495  |         |  |
|            | 0.21918         | -0.72421  | 0.76553 | 0.21918     | 0.644198278 |          |         |  |
| PRAMEF4    | ENSG00000243073 | -2.025    | 0.97857 | -1.7865     | 0.96299     | -0.78209 |         |  |
|            | 0.78292         | 0.77497   | 0.21918 | 0.21918     | 0.644198278 |          |         |  |
| KARS1      | ENSG00000065427 | 0.77482   | 0.21922 | 0.77482     | 0.21922     | 0.77482  | 0.21922 |  |
|            | 0.77482         | 0.21922   | 0.21922 | 0.644198278 |             |          |         |  |
| NA         | ENSG00000249688 | -1.0661   | 0.85682 | 0.77482     | 0.21922     | -1.0661  | 0.85682 |  |
|            | -0.86285        | 0.80589   | 0.21922 | 0.644198278 |             |          |         |  |
| NA         | ENSG00000236255 | 0.77481   | 0.21923 | 0.75798     | 0.22423     | 0.76279  | 0.2228  |  |
|            | 0.76279         | 0.2228    | 0.21923 | 0.644198278 |             |          |         |  |
| KIF3B      | ENSG00000101350 | -0.1216   | 0.54839 | 0.66056     | 0.25445     | 0.58511  | 0.27924 |  |
|            | 0.77469         | 0.21926   | 0.21926 | 0.644198278 |             |          |         |  |
| OR2D2      | ENSG00000166368 | -2.5036   | 0.99385 | -2.5036     | 0.99385     | 0.77463  | 0.21928 |  |
|            | 0.11506         | 0.4542    | 0.21928 | 0.644198278 |             |          |         |  |
| GPA33      | ENSG00000143167 | -0.48378  | 0.68573 | -0.28297    | 0.6114      | -0.62847 | 0.73515 |  |

|             |                 |            |         |             |             |           |         |  |
|-------------|-----------------|------------|---------|-------------|-------------|-----------|---------|--|
|             | 0.7746          | 0.21929    | 0.21929 | 0.644198278 |             |           |         |  |
| BORCS5      | ENSG00000165714 | 0.77459    | 0.21929 | 0.77459     | 0.21929     | -0.042424 |         |  |
|             | 0.51692         | -0.23823   | 0.59415 | 0.21929     | 0.644198278 |           |         |  |
| SVIP        | ENSG00000198168 | 0.77452    | 0.21931 | 0.74949     | 0.22678     | 0.74949   | 0.22678 |  |
|             | 0.74949         | 0.22678    | 0.21931 | 0.644198278 |             |           |         |  |
| KRTAP9-6    | ENSG00000212659 | 0.77448    | 0.21932 | 0.77448     | 0.21932     | -0.61637  |         |  |
|             | 0.73117         | -0.14503   | 0.55766 | 0.21932     | 0.644198278 |           |         |  |
| RNF7        | ENSG00000114125 | 0.7744     | 0.21935 | -0.59258    | 0.72327     | -0.43409  | 0.66789 |  |
|             | -0.81904        | 0.79362    | 0.21935 | 0.644198278 |             |           |         |  |
| GCSAM       | ENSG00000174500 | -1.6881    | 0.95431 | 0.77438     | 0.21935     | -0.85305  | 0.80318 |  |
|             | -0.85305        | 0.80318    | 0.21935 | 0.644198278 |             |           |         |  |
| UBQLN1      | ENSG00000135018 | 0.21411    | 0.41523 | 0.67655     | 0.24935     | 0.77436   |         |  |
|             | 0.21936         | 0.67655    | 0.24935 | 0.21936     | 0.644198278 |           |         |  |
| SNORA15B-2  | ENSG00000206785 | 0.77428    | 0.21938 | 0.77428     | 0.21938     | 0.77428   |         |  |
|             | 0.21938         | 0.77428    | 0.21938 | 0.21938     | 0.644198278 |           |         |  |
| OR2A9P      | ENSG00000228960 | 0.44097    | 0.32962 | 0.22433     | 0.41125     | 0.7743    |         |  |
|             | 0.21938         | -0.36897   | 0.64393 | 0.21938     | 0.644198278 |           |         |  |
| HSD3BP3     | ENSG00000249798 | 0.77426    | 0.21939 | 0.77426     | 0.21939     | 0.77426   |         |  |
|             | 0.21939         | 0.77426    | 0.21939 | 0.21939     | 0.644198278 |           |         |  |
| SF3B3       | ENSG00000189091 | -1.136     | 0.87202 | -1.2382     | 0.89219     | 0.77424   | 0.2194  |  |
|             | -1.7933         | 0.96354    | 0.2194  | 0.644198278 |             |           |         |  |
| CDC14C      | ENSG00000218305 | -1.0172    | 0.84546 | -1.2193     | 0.88863     | 0.77414   |         |  |
|             | 0.21943         | -0.88849   | 0.81286 | 0.21943     | 0.644198278 |           |         |  |
| NA          | ENSG00000264015 | 0.77403    | 0.21946 | -0.81007    | 0.79105     | 0.52412   | 0.3001  |  |
|             | 0.40394         | 0.34313    | 0.21946 | 0.644198278 |             |           |         |  |
| NA          | ENSG00000279860 | 0.77401    | 0.21946 | 0.77401     | 0.21946     | 0.77401   | 0.21946 |  |
|             | 0.77401         | 0.21946    | 0.21946 | 0.644198278 |             |           |         |  |
| ANKRD31     | ENSG00000145700 | -0.67007   | 0.74859 | 0.43862     | 0.33047     | 0.77397   |         |  |
|             | 0.21947         | -0.0077135 | 0.50308 | 0.21947     | 0.644198278 |           |         |  |
| MIPOL1      | ENSG00000151338 | 0.77399    | 0.21947 | 0.13068     | 0.44801     | 0.31301   |         |  |
|             | 0.37714         | -0.67539   | 0.75029 | 0.21947     | 0.644198278 |           |         |  |
| TNFAIP6     | ENSG00000123610 | -0.35509   | 0.63874 | -0.35509    | 0.63874     | -0.65643  |         |  |
|             | 0.74423         | 0.77387    | 0.2195  | 0.2195      | 0.644198278 |           |         |  |
| ANKRA2      | ENSG00000164331 | 0.77387    | 0.2195  | -0.92174    | 0.82167     | -0.25971  |         |  |
|             | 0.60246         | 0.77387    | 0.2195  | 0.2195      | 0.644198278 |           |         |  |
| NA          | ENSG00000273117 | 0.77389    | 0.2195  | 0.77389     | 0.2195      | 0.77389   | 0.2195  |  |
|             | 0.77389         | 0.2195     | 0.2195  | 0.644198278 |             |           |         |  |
| RPL35AP18   | ENSG00000220311 | 0.77386    | 0.21951 | 0.77386     | 0.21951     | 0.77386   |         |  |
|             | 0.21951         | 0.77386    | 0.21951 | 0.21951     | 0.644198278 |           |         |  |
| NA          | ENSG00000255321 | 0.60475    | 0.27267 | 0.60475     | 0.27267     | 0.77386   | 0.21951 |  |
|             | 0.60475         | 0.27267    | 0.21951 | 0.644198278 |             |           |         |  |
| NA          | ENSG00000224252 | 0.77379    | 0.21953 | -0.56748    | 0.7148      | -0.33566  | 0.63144 |  |
|             | 0.32678         | 0.37192    | 0.21953 | 0.644198278 |             |           |         |  |
| C1GALT1P2   | ENSG00000251435 | -0.17066   | 0.56775 | 0.77377     | 0.21953     | -0.17066  |         |  |
|             | 0.56775         | -0.17066   | 0.56775 | 0.21953     | 0.644198278 |           |         |  |
| NA          | ENSG00000254943 | 0.77367    | 0.21956 | 0.77367     | 0.21956     | 0.77367   | 0.21956 |  |
|             | 0.77367         | 0.21956    | 0.21956 | 0.644198278 |             |           |         |  |
| RNF133      | ENSG00000188050 | 0.21375    | 0.41537 | 0.7736      | 0.21958     | 0.7736    |         |  |
|             | 0.21958         | 0.7736     | 0.21958 | 0.21958     | 0.644198278 |           |         |  |
| NA          | ENSG00000258455 | 0.7736     | 0.21958 | 0.7736      | 0.21958     | 0.7736    | 0.21958 |  |
|             | 0.58482         | 0.27933    | 0.21958 | 0.644198278 |             |           |         |  |
| NA          | ENSG00000270960 | 0.77362    | 0.21958 | 0.77362     | 0.21958     | 0.77362   | 0.21958 |  |
|             | 0.77362         | 0.21958    | 0.21958 | 0.644198278 |             |           |         |  |
| RN7SL68P    | ENSG00000242020 | 0.77348    | 0.21962 | 0.77348     | 0.21962     | 0.77348   |         |  |
|             | 0.21962         | 0.77348    | 0.21962 | 0.21962     | 0.644276841 |           |         |  |
| NA          | ENSG00000253356 | 0.7733     | 0.21967 | 0.59217     | 0.27687     | 0.7733    | 0.21967 |  |
|             | 0.7733          | 0.21967    | 0.21967 | 0.644297707 |             |           |         |  |
| NA          | ENSG00000258481 | 0.77331    | 0.21967 | 0.29622     | 0.38353     | 0.63554   | 0.26254 |  |
|             | -0.94092        | 0.82663    | 0.21967 | 0.644297707 |             |           |         |  |
| RNU6ATAC20P | ENSG00000221363 | -1.5573    | 0.9403  | -0.68882    | 0.75453     | 0.20677   |         |  |
|             | 0.4181          | 0.77328    | 0.21968 | 0.21968     | 0.644297707 |           |         |  |
| NA          | ENSG00000237326 | -0.078232  | 0.53118 | -0.078232   | 0.53118     | -0.078232 | 0.53118 |  |



|             |                 |          |             |             |             |           |         |
|-------------|-----------------|----------|-------------|-------------|-------------|-----------|---------|
|             | 0.77328         | 0.21968  | 0.21968     | 0.644297707 |             |           |         |
| RNU6-1175P  | ENSG00000202070 | 0.77316  | 0.21971     | 0.77316     | 0.21971     | 0.77316   |         |
|             | 0.21971         | 0.77316  | 0.21971     | 0.21971     | 0.644337462 |           |         |
| CEP76       | ENSG00000101624 | -0.43381 | 0.66779     | 0.098376    | 0.46082     | 0.77313   | 0.21972 |
|             | 0.74649         | 0.22768  | 0.21972     | 0.644337462 |             |           |         |
| C4orf50     | ENSG00000181215 | -0.10541 | 0.54198     | 0.47131     | 0.31871     | 0.18021   |         |
|             | 0.4285          | 0.77296  | 0.21977     | 0.21977     | 0.644367756 |           |         |
| PRELID2P1   | ENSG00000257336 | 0.77296  | 0.21977     | 0.77296     | 0.21977     | 0.77296   |         |
|             | 0.21977         | 0.77296  | 0.21977     | 0.21977     | 0.644367756 |           |         |
| NA          | ENSG00000251749 | 0.77297  | 0.21977     | 0.77297     | 0.21977     | 0.77297   | 0.21977 |
|             | 0.77297         | 0.21977  | 0.21977     | 0.644367756 |             |           |         |
| TMEM61      | ENSG00000143001 | 0.67589  | 0.24955     | 0.77286     | 0.2198      | 0.67589   |         |
|             | 0.24955         | 0.032281 | 0.48712     | 0.2198      | 0.644376458 |           |         |
| LYPLA2P1    | ENSG00000228285 | 0.33444  | 0.36902     | 0.77277     | 0.21983     | 0.33444   |         |
|             | 0.36902         | 0.5464   | 0.2924      | 0.21983     | 0.644376458 |           |         |
| NA          | ENSG00000244235 | 0.77272  | 0.21984     | 0.77272     | 0.21984     | -0.46537  | 0.67917 |
|             | -0.35297        | 0.63795  | 0.21984     | 0.644376458 |             |           |         |
| RAET1M      | ENSG00000216444 | -1.1982  | 0.88458     | -1.1982     | 0.88458     | 0.77261   |         |
|             | 0.21988         | -1.1982  | 0.88458     | 0.21988     | 0.644376458 |           |         |
| SLC25A6P5   | ENSG00000228948 | 0.77259  | 0.21988     | 0.77259     | 0.21988     | 0.1105    |         |
|             | 0.45601         | 0.77259  | 0.21988     | 0.21988     | 0.644376458 |           |         |
| IGF2BP3     | ENSG00000136231 | 0.77258  | 0.21989     | -0.059569   | 0.52375     | 0.4103    |         |
|             | 0.34079         | -0.12682 | 0.55046     | 0.21989     | 0.644376458 |           |         |
| NA          | ENSG00000250622 | 0.77254  | 0.2199      | 0.77254     | 0.2199      | 0.77254   | 0.2199  |
|             | 0.77254         | 0.2199   | 0.2199      | 0.644376458 |             |           |         |
| ZDHHC14     | ENSG00000175048 | 0.75374  | 0.2255      | 0.31882     | 0.37493     | -0.02132  |         |
|             | 0.5085          | 0.77248  | 0.21992     | 0.21992     | 0.644376458 |           |         |
| SNX18P2     | ENSG00000232843 | 0.77245  | 0.21992     | 0.77245     | 0.21992     | 0.77245   |         |
|             | 0.21992         | 0.77245  | 0.21992     | 0.21992     | 0.644376458 |           |         |
| NA          | ENSG00000270812 | 0.77239  | 0.21994     | 0.77239     | 0.21994     | 0.77239   | 0.21994 |
|             | 0.77239         | 0.21994  | 0.21994     | 0.644376458 |             |           |         |
| OR4D11      | ENSG00000176200 | -0.29894 | 0.61751     | 0.77236     | 0.21995     | 0.77236   |         |
|             | 0.21995         | 0.77236  | 0.21995     | 0.21995     | 0.644376458 |           |         |
| TRIM60      | ENSG00000176979 | 0.77233  | 0.21996     | 0.55953     | 0.2879      | 0.59127   |         |
|             | 0.27717         | 0.77233  | 0.21996     | 0.21996     | 0.644376458 |           |         |
| ZDHHC20P3   | ENSG00000255460 | -1.5779  | 0.9427      | 0.57687     | 0.28201     | -1.3265   |         |
|             | 0.90767         | 0.77234  | 0.21996     | 0.21996     | 0.644376458 |           |         |
| FEM1AP2     | ENSG00000265296 | 0.7702   | 0.22059     | -0.90776    | 0.818       | 0.64585   | 0.25919 |
|             | 0.77232         | 0.21996  | 0.21996     | 0.644376458 |             |           |         |
| NA          | ENSG00000254330 | -0.47963 | 0.68425     | 0.77222     | 0.21999     | -0.35957  | 0.64042 |
|             | -0.58971        | 0.72231  | 0.21999     | 0.644376458 |             |           |         |
| MTND5P21    | ENSG00000255123 | 0.77224  | 0.21999     | 0.035322    | 0.48591     | 0.77224   |         |
|             | 0.21999         | 0.77224  | 0.21999     | 0.21999     | 0.644376458 |           |         |
| SLC8A1-AS1  | ENSG00000227028 | -0.16021 | 0.56364     | -0.37073    | 0.64458     | -0.070955 |         |
|             | 0.52828         | 0.77217  | 0.22001     | 0.22001     | 0.644376458 |           |         |
| PAWR        | ENSG00000177425 | 0.7721   | 0.22003     | 0.26112     | 0.397       | 0.65362   | 0.25668 |
|             | 0.68303         | 0.24729  | 0.22003     | 0.644376458 |             |           |         |
| C5orf49     | ENSG00000215217 | 0.772    | 0.22006     | 0.772       | 0.22006     | 0.772     | 0.772   |
|             | 0.22006         | 0.22006  | 0.644376458 |             |             |           |         |
| OR7E122P    | ENSG00000215160 | -0.77066 | 0.77955     | -0.46765    | 0.67998     | 0.77193   |         |
|             | 0.22008         | 0.089958 | 0.46416     | 0.22008     | 0.644376458 |           |         |
| RNU6ATAC24P | ENSG00000252620 | 0.77193  | 0.22008     | 0.77193     | 0.22008     | 0.77193   |         |
|             | 0.22008         | 0.77193  | 0.22008     | 0.22008     | 0.644376458 |           |         |
| RNU6-645P   | ENSG00000201519 | 0.33998  | 0.36693     | 0.33998     | 0.36693     | 0.33998   |         |
|             | 0.36693         | 0.7719   | 0.22009     | 0.22009     | 0.644376458 |           |         |
| RFPL4AP3    | ENSG00000251220 | 0.77187  | 0.22009     | 0.77187     | 0.22009     | 0.77187   |         |
|             | 0.22009         | 0.77187  | 0.22009     | 0.22009     | 0.644376458 |           |         |
| FNDC1       | ENSG00000164694 | 0.14552  | 0.44215     | -0.30033    | 0.61804     | 0.44479   | 0.32824 |
|             | 0.77184         | 0.2201   | 0.2201      | 0.644376458 |             |           |         |
| ZNF567      | ENSG00000189042 | -0.85229 | 0.80297     | 0.77184     | 0.22011     | 0.4649    | 0.321   |
|             | 0.4649          | 0.321    | 0.22011     | 0.644376458 |             |           |         |
| NA          | ENSG00000254980 | 0.77179  | 0.22012     | 0.77179     | 0.22012     | 0.77179   | 0.22012 |

|           |                 |          |         |             |             |           |         |
|-----------|-----------------|----------|---------|-------------|-------------|-----------|---------|
|           | 0.77179         | 0.22012  | 0.22012 | 0.644376458 |             |           |         |
| PPIAP57   | ENSG00000266809 | 0.77176  | 0.22013 | 0.77176     | 0.22013     | 0.77176   | 0.77176 |
|           | 0.22013         | 0.77176  | 0.22013 | 0.22013     | 0.644376458 |           |         |
| NA        | ENSG00000269495 | 0.77162  | 0.22017 | 0.77162     | 0.22017     | 0.77162   | 0.22017 |
|           | 0.77162         | 0.22017  | 0.22017 | 0.64443797  |             |           |         |
| NA        | ENSG00000260018 | 0.77158  | 0.22018 | 0.77158     | 0.22018     | 0.77158   | 0.22018 |
|           | -1.1405         | 0.87295  | 0.22018 | 0.64443797  |             |           |         |
| NA        | ENSG00000226992 | -0.15211 | 0.56045 | 0.5118      | 0.3044      | -0.20627  | 0.58171 |
|           | 0.7715          | 0.2202   | 0.2202  | 0.64443797  |             |           |         |
| LCE2A     | ENSG00000187173 | -0.21302 | 0.58435 | -0.12743    | 0.5507      | -0.026421 | 0.51054 |
|           | 0.77144         | 0.22022  | 0.22022 | 0.64443797  |             |           |         |
| OR8X1P    | ENSG00000255048 | -0.22596 | 0.58939 | 0.3419      | 0.36621     | 0.77143   |         |
|           | 0.22023         | -0.22596 | 0.58939 | 0.22023     | 0.64443797  |           |         |
| SSBP3P2   | ENSG00000224425 | 0.77138  | 0.22024 | 0.11712     | 0.45338     | -1.0782   |         |
|           | 0.85952         | -0.54531 | 0.70723 | 0.22024     | 0.64443797  |           |         |
| UBE2G2    | ENSG00000184787 | 0.77132  | 0.22026 | 0.60247     | 0.27343     | 0.15412   |         |
|           | 0.43876         | -1.1628  | 0.87754 | 0.22026     | 0.64443797  |           |         |
| WDR53     | ENSG00000185798 | 0.77124  | 0.22028 | -1.3822     | 0.91655     | 0.77124   | 0.22028 |
|           | 0.77124         | 0.22028  | 0.22028 | 0.64443797  |             |           |         |
| NA        | ENSG00000230273 | 0.77124  | 0.22028 | 0.77124     | 0.22028     | 0.77124   | 0.22028 |
|           | 0.77124         | 0.22028  | 0.22028 | 0.64443797  |             |           |         |
| RYR1      | ENSG00000196218 | 0.7711   | 0.22032 | -0.21452    | 0.58493     | 0.56539   | 0.2859  |
|           | -0.58159        | 0.71958  | 0.22032 | 0.64443797  |             |           |         |
| NA        | ENSG00000239701 | 0.39808  | 0.34529 | 0.29313     | 0.38471     | 0.38076   | 0.35169 |
|           | 0.77107         | 0.22033  | 0.22033 | 0.64443797  |             |           |         |
| MACROD1   | ENSG00000133315 | -0.25791 | 0.60176 | -0.12332    | 0.54907     | 0.77105   |         |
|           | 0.22034         | 0.098476 | 0.46078 | 0.22034     | 0.64443797  |           |         |
| NA        | ENSG00000260795 | 0.22121  | 0.41246 | -0.43339    | 0.66763     | 0.77095   | 0.22037 |
|           | 0.76861         | 0.22106  | 0.22037 | 0.64443797  |             |           |         |
| NOL12     | ENSG00000273899 | 0.77092  | 0.22038 | 0.77092     | 0.22038     | 0.77092   | 0.22038 |
|           | 0.77092         | 0.22038  | 0.22038 | 0.64443797  |             |           |         |
| RNU1-39P  | ENSG00000206624 | 0.77089  | 0.22039 | 0.77089     | 0.22039     | 0.77089   |         |
|           | 0.22039         | 0.77089  | 0.22039 | 0.22039     | 0.64443797  |           |         |
| IRF1-AS1  | ENSG00000197536 | 0.67693  | 0.24923 | 0.77085     | 0.2204      | 0.32551   |         |
|           | 0.3724          | 0.37035  | 0.35556 | 0.2204      | 0.64443797  |           |         |
| NA        | ENSG00000253536 | 0.77086  | 0.2204  | 0.0039006   | 0.49844     | 0.0039006 | 0.49844 |
|           | 0.0039006       | 0.49844  | 0.2204  | 0.64443797  |             |           |         |
| C1QBPP1   | ENSG00000215353 | -1.4843  | 0.93114 | -0.83582    | 0.79837     | 0.77082   |         |
|           | 0.22041         | -1.4843  | 0.93114 | 0.22041     | 0.64443797  |           |         |
| NA        | ENSG00000233005 | 0.77078  | 0.22042 | 0.77078     | 0.22042     | 0.77078   | 0.22042 |
|           | -0.44675        | 0.67247  | 0.22042 | 0.64443797  |             |           |         |
| SELENOF   | ENSG00000183291 | 0.77074  | 0.22043 | -1.148      | 0.87451     | -1.148    |         |
|           | 0.87451         | -1.148   | 0.87451 | 0.22043     | 0.64443797  |           |         |
| YWHAZP6   | ENSG00000215199 | 0.77069  | 0.22044 | -0.25694    | 0.60139     | 0.53309   |         |
|           | 0.29699         | -0.16628 | 0.56603 | 0.22044     | 0.64443797  |           |         |
| NA        | ENSG00000233918 | 0.77065  | 0.22046 | 0.56652     | 0.28552     | -1.175    | 0.88    |
|           | -0.22519        | 0.58908  | 0.22046 | 0.64443797  |             |           |         |
| NA        | ENSG00000250060 | -0.60647 | 0.7279  | 0.77058     | 0.22048     | -1.0348   | 0.84962 |
|           | -1.2679         | 0.89758  | 0.22048 | 0.64443797  |             |           |         |
| SMIM2-AS1 | ENSG00000227258 | 0.77053  | 0.22049 | 0.77053     | 0.22049     | 0.71115   |         |
|           | 0.2385          | 0.12118  | 0.45177 | 0.22049     | 0.64443797  |           |         |
| SLC25A1P3 | ENSG00000213645 | 0.77049  | 0.2205  | 0.32383     | 0.37303     | -0.7236   |         |
|           | 0.76534         | -1.6426  | 0.94977 | 0.2205      | 0.64443797  |           |         |
| NA        | ENSG00000277159 | 0.51228  | 0.30423 | 0.67088     | 0.25115     | 0.70355   | 0.24086 |
|           | 0.7705          | 0.2205   | 0.2205  | 0.64443797  |             |           |         |
| NA        | ENSG00000278683 | 0.77045  | 0.22052 | 0.77045     | 0.22052     | 0.77045   | 0.22052 |
|           | 0.77045         | 0.22052  | 0.22052 | 0.64443797  |             |           |         |
| NA        | ENSG00000259426 | -0.4897  | 0.68783 | 0.55824     | 0.28834     | 0.77033   | 0.22055 |
|           | 0.77033         | 0.22055  | 0.22055 | 0.64443797  |             |           |         |
| ST13P21   | ENSG00000227832 | 0.77023  | 0.22058 | 0.77023     | 0.22058     | -0.47434  |         |
|           | 0.68237         | 0.77023  | 0.22058 | 0.22058     | 0.64443797  |           |         |
| NA        | ENSG00000283354 | 0.72754  | 0.23345 | -0.6527     | 0.74303     | 0.77023   | 0.22058 |

|            |                 |             |         |            |             |            |         |  |
|------------|-----------------|-------------|---------|------------|-------------|------------|---------|--|
|            | 0.068482        | 0.4727      | 0.22058 | 0.64443797 |             |            |         |  |
| ACP2       | ENSG00000134575 | 0.77021     | 0.22059 | 0.77021    | 0.22059     | 0.77021    | 0.22059 |  |
|            | 0.77021         | 0.22059     | 0.22059 | 0.64443797 |             |            |         |  |
| SNORD115-4 | ENSG00000200680 | 0.77012     | 0.22061 | 0.77012    | 0.22061     | 0.77012    | 0.22061 |  |
|            | 0.22061         | 0.77012     | 0.22061 | 0.22061    | 0.64443797  |            |         |  |
| NPM1P52    | ENSG00000253663 | -1.6346     | 0.94894 | 0.7701     | 0.22062     | 0.7701     | 0.22062 |  |
|            | 0.22062         | 0.7701      | 0.22062 | 0.22062    | 0.64443797  |            |         |  |
| FOXI2      | ENSG00000186766 | 0.76999     | 0.22065 | 0.76999    | 0.22065     | 0.76999    | 0.22065 |  |
|            | 0.76999         | 0.22065     | 0.22065 | 0.64443797 |             |            |         |  |
| NA         | ENSG00000249626 | -0.19843    | 0.57864 | 0.52168    | 0.30095     | 0.33143    | 0.37016 |  |
|            | 0.76999         | 0.22065     | 0.22065 | 0.64443797 |             |            |         |  |
| NA         | ENSG00000264876 | 0.76999     | 0.22065 | 0.63472    | 0.26281     | 0.43024    | 0.33351 |  |
|            | 0.49361         | 0.31079     | 0.22065 | 0.64443797 |             |            |         |  |
| NIBAN1     | ENSG00000135842 | -0.31246    | 0.62266 | 0.76998    | 0.22066     | 0.26195    |         |  |
|            | 0.39668         | 0.441032961 | 0.22066 | 0.64443797 |             |            |         |  |
| GBP4       | ENSG00000162654 | 0.39679     | 0.34576 | 0.39679    | 0.34576     | 0.39679    | 0.34576 |  |
|            | 0.76997         | 0.22066     | 0.22066 | 0.64443797 |             |            |         |  |
| RPS12P15   | ENSG00000240724 | 0.49126     | 0.31162 | 0.52446    | 0.29998     | 0.49126    |         |  |
|            | 0.31162         | 0.76993     | 0.22067 | 0.22067    | 0.64443797  |            |         |  |
| TDP2       | ENSG00000111802 | -0.54349    | 0.7066  | -0.32104   | 0.62591     | -0.014599  | 0.50582 |  |
|            | 0.76991         | 0.22068     | 0.22068 | 0.64443797 |             |            |         |  |
| SNORD13D   | ENSG00000239035 | -0.073189   | 0.52917 | 0.76962    | 0.22076     | -0.073189  |         |  |
|            | 0.52917         | -0.073189   | 0.52917 | 0.22076    | 0.64462353  |            |         |  |
| SCAND2P    | ENSG00000176700 | 0.76961     | 0.22077 | 0.37097    | 0.35533     | 0.63151    |         |  |
|            | 0.26385         | 0.37097     | 0.35533 | 0.22077    | 0.64462353  |            |         |  |
| NA         | ENSG00000236295 | 0.76941     | 0.22083 | 0.76941    | 0.22083     | 0.76941    | 0.22083 |  |
|            | 0.76941         | 0.22083     | 0.22083 | 0.64476009 |             |            |         |  |
| MIR548L    | ENSG00000221230 | 0.76934     | 0.22085 | 0.76934    | 0.22085     | 0.76934    |         |  |
|            | 0.22085         | 0.76934     | 0.22085 | 0.22085    | 0.644779851 |            |         |  |
| NANOGP4    | ENSG00000237065 | 0.76923     | 0.22088 | 0.76923    | 0.22088     | 0.76923    |         |  |
|            | 0.22088         | 0.76923     | 0.22088 | 0.22088    | 0.644809932 |            |         |  |
| GPATCH2    | ENSG00000092978 | -0.5422     | 0.70616 | 0.25919    | 0.39774     | 0.76915    |         |  |
|            | 0.2209          | 0.17869     | 0.42909 | 0.2209     | 0.644809932 |            |         |  |
| TUB-AS1    | ENSG00000248332 | 0.76916     | 0.2209  | -0.079442  | 0.53166     | 0.76916    |         |  |
|            | 0.2209          | 0.064032    | 0.47447 | 0.2209     | 0.644809932 |            |         |  |
| UBL5       | ENSG00000198258 | 0.76894     | 0.22096 | 0.76894    | 0.22096     | 0.76894    | 0.22096 |  |
|            | 0.76894         | 0.22096     | 0.22096 | 0.64485975 |             |            |         |  |
| MIR1256    | ENSG00000221808 | 0.76893     | 0.22097 | 0.73394    | 0.23149     | 0.76893    |         |  |
|            | 0.22097         | 0.26158     | 0.39682 | 0.22097    | 0.64485975  |            |         |  |
| NA         | ENSG00000235526 | -0.5816     | 0.71958 | 0.76891    | 0.22097     | 0.00042092 | 0.49983 |  |
|            | 0.53517         | 0.29627     | 0.22097 | 0.64485975 |             |            |         |  |
| NA         | ENSG00000272223 | 0.76891     | 0.22097 | 0.71234    | 0.23813     | 0.74247    | 0.2289  |  |
|            | 0.74247         | 0.2289      | 0.22097 | 0.64485975 |             |            |         |  |
| NA         | ENSG00000259562 | 0.76885     | 0.22099 | 0.76885    | 0.22099     | 0.76885    | 0.22099 |  |
|            | 0.76885         | 0.22099     | 0.22099 | 0.64486325 |             |            |         |  |
| PDILT      | ENSG00000169340 | 0.76869     | 0.22104 | 0.38405    | 0.35047     | 0.028138   | 0.48878 |  |
|            | -0.45332        | 0.67484     | 0.22104 | 0.64486325 |             |            |         |  |
| CYP4X1     | ENSG00000186377 | 0.76869     | 0.22104 | -1.3453    | 0.91074     | -0.18964   |         |  |
|            | 0.5752          | -0.61041    | 0.7292  | 0.22104    | 0.64486325  |            |         |  |
| CCDC58     | ENSG00000160124 | -1.9145     | 0.97222 | 0.76866    | 0.22105     | -0.34847   |         |  |
|            | 0.63626         | -1.3959     | 0.91862 | 0.22105    | 0.64486325  |            |         |  |
| NA         | ENSG00000269915 | 0.76862     | 0.22106 | 0.76862    | 0.22106     | 0.76862    | 0.22106 |  |
|            | 0.76862         | 0.22106     | 0.22106 | 0.64486325 |             |            |         |  |
| PLD2       | ENSG00000129219 | 0.30804     | 0.37903 | -1.2521    | 0.89473     | 0.7686     | 0.22107 |  |
|            | -1.5347         | 0.93757     | 0.22107 | 0.64486325 |             |            |         |  |
| ST8SIA4    | ENSG00000113532 | -0.39753    | 0.65451 | 0.76844    | 0.22111     | -0.49956   |         |  |
|            | 0.69131         | -0.49956    | 0.69131 | 0.22111    | 0.64486325  |            |         |  |
| NA         | ENSG00000250071 | 0.76846     | 0.22111 | 0.76846    | 0.22111     | 0.76846    | 0.22111 |  |
|            | 0.76846         | 0.22111     | 0.22111 | 0.64486325 |             |            |         |  |
| OR7E2P     | ENSG00000255203 | 0.14538     | 0.44221 | -0.53267   | 0.70287     | -0.5533    |         |  |
|            | 0.70997         | 0.76845     | 0.22111 | 0.22111    | 0.64486325  |            |         |  |
| NA         | ENSG00000258034 | 0.76845     | 0.22111 | -0.76482   | 0.77781     | 0.10028    | 0.46006 |  |

|           |                 |          |         |             |             |           |         |  |
|-----------|-----------------|----------|---------|-------------|-------------|-----------|---------|--|
|           | 0.10028         | 0.46006  | 0.22111 | 0.64486325  |             |           |         |  |
| HIGD2AP1  | ENSG00000230047 | -0.9424  | 0.82701 | 0.76841     | 0.22112     | -0.10916  |         |  |
|           | 0.54346         | 0.76841  | 0.22112 | 0.22112     | 0.64486325  |           |         |  |
| CACNA1D   | ENSG00000157388 | 0.22173  | 0.41226 | 0.65188     | 0.25724     | -0.059932 |         |  |
|           | 0.52389         | 0.76837  | 0.22113 | 0.22113     | 0.64486325  |           |         |  |
| LINC02319 | ENSG00000258694 | -0.98476 | 0.83763 | -0.98476    | 0.83763     | -0.55164  |         |  |
|           | 0.7094          | 0.7683   | 0.22115 | 0.22115     | 0.644864124 |           |         |  |
| NA        | ENSG00000235615 | 0.76826  | 0.22117 | 0.52446     | 0.29998     | 0.52446   | 0.29998 |  |
|           | -0.66833        | 0.74804  | 0.22117 | 0.644864124 |             |           |         |  |
| MIR3171   | ENSG00000264657 | 0.57824  | 0.28155 | 0.76826     | 0.22117     | -0.26674  |         |  |
|           | 0.60516         | -0.26674 | 0.60516 | 0.22117     | 0.644864124 |           |         |  |
| NA        | ENSG00000228113 | 0.5043   | 0.30702 | 0.5043      | 0.30702     | 0.21374   | 0.41538 |  |
|           | 0.76816         | 0.2212   | 0.2212  | 0.644903578 |             |           |         |  |
| VPS35     | ENSG00000069329 | -0.39302 | 0.65285 | -0.43773    | 0.66921     | -0.059554 | 0.52374 |  |
|           | 0.76812         | 0.22121  | 0.22121 | 0.644903578 |             |           |         |  |
| CXCR2P1   | ENSG00000229754 | 0.76805  | 0.22123 | -1.4434     | 0.92555     | -1.4434   |         |  |
|           | 0.92555         | -0.8988  | 0.81562 | 0.22123     | 0.644913872 |           |         |  |
| PEX5L-AS2 | ENSG00000244302 | 0.44871  | 0.32682 | 0.768       | 0.22124     | 0.768     | 0.22124 |  |
|           | -0.73246        | 0.76806  | 0.22124 | 0.644913872 |             |           |         |  |
| NA        | ENSG00000216378 | 0.7679   | 0.22127 | 0.54079     | 0.29433     | 0.7679    | 0.22127 |  |
|           | 0.38951         | 0.34845  | 0.22127 | 0.644962741 |             |           |         |  |
| DHRS1     | ENSG00000157379 | 0.43918  | 0.33027 | 0.76778     | 0.22131     | -0.11201  | 0.54459 |  |
|           | 0.18138         | 0.42804  | 0.22131 | 0.644996139 |             |           |         |  |
| C6orf141  | ENSG00000197261 | -1.3465  | 0.91093 | -1.3465     | 0.91093     | -1.3465   |         |  |
|           | 0.91093         | 0.76767  | 0.22134 | 0.22134     | 0.644996139 |           |         |  |
| NA        | ENSG00000270755 | 0.76763  | 0.22135 | 0.76763     | 0.22135     | 0.76763   | 0.22135 |  |
|           | 0.76763         | 0.22135  | 0.22135 | 0.644996139 |             |           |         |  |
| CFAP69    | ENSG00000105792 | -0.30846 | 0.62113 | 0.29367     | 0.38451     | 0.20692   |         |  |
|           | 0.41804         | 0.76762  | 0.22136 | 0.22136     | 0.644996139 |           |         |  |
| NA        | ENSG00000224573 | 0.76762  | 0.22136 | 0.76762     | 0.22136     | 0.76762   | 0.22136 |  |
|           | 0.76762         | 0.22136  | 0.22136 | 0.644996139 |             |           |         |  |
| NA        | ENSG00000239397 | -0.20634 | 0.58174 | 0.50676     | 0.30616     | 0.76758   | 0.22137 |  |
|           | 0.39279         | 0.34724  | 0.22137 | 0.644996139 |             |           |         |  |
| SAP18P2   | ENSG00000223873 | 0.76748  | 0.2214  | 0.76748     | 0.2214      | 0.76748   |         |  |
|           | 0.2214          | 0.48469  | 0.31395 | 0.2214      | 0.644996139 |           |         |  |
| PHBP17    | ENSG00000254407 | 0.76745  | 0.22141 | 0.76745     | 0.22141     | -1.6393   |         |  |
|           | 0.94942         | 0.76745  | 0.22141 | 0.22141     | 0.644996139 |           |         |  |
| LBX2      | ENSG00000179528 | 0.76736  | 0.22143 | 0.76736     | 0.22143     | 0.76736   | 0.22143 |  |
|           | 0.76736         | 0.22143  | 0.22143 | 0.644996139 |             |           |         |  |
| GATD3B    | ENSG00000280071 | 0.76735  | 0.22144 | 0.76735     | 0.22144     | 0.76735   |         |  |
|           | 0.22144         | 0.76735  | 0.22144 | 0.22144     | 0.644996139 |           |         |  |
| NA        | ENSG00000214650 | 0.51124  | 0.30459 | 0.76731     | 0.22145     | 0.075624  | 0.46986 |  |
|           | -1.0387         | 0.85053  | 0.22145 | 0.644996139 |             |           |         |  |
| NA        | ENSG00000250704 | 0.02148  | 0.49143 | 0.76727     | 0.22146     | 0.70247   | 0.24119 |  |
|           | 0.02148         | 0.49143  | 0.22146 | 0.644996139 |             |           |         |  |
| MIR758    | ENSG00000211582 | 0.76725  | 0.22147 | 0.76725     | 0.22147     | 0.76725   |         |  |
|           | 0.22147         | 0.76725  | 0.22147 | 0.22147     | 0.644996139 |           |         |  |
| NA        | ENSG00000265090 | 0.76725  | 0.22147 | 0.76725     | 0.22147     | 0.76725   | 0.22147 |  |
|           | 0.76725         | 0.22147  | 0.22147 | 0.644996139 |             |           |         |  |
| NA        | ENSG00000230309 | 0.76722  | 0.22148 | 0.76722     | 0.22148     | 0.76722   | 0.22148 |  |
|           | 0.76722         | 0.22148  | 0.22148 | 0.644996139 |             |           |         |  |
| RARRES1   | ENSG00000118849 | 0.28646  | 0.38726 | 0.40727     | 0.34191     | 0.76715   |         |  |
|           | 0.2215          | 0.42822  | 0.33425 | 0.2215      | 0.645015836 |           |         |  |
| LINC00440 | ENSG00000234660 | 0.76698  | 0.22155 | 0.76698     | 0.22155     | 0.76698   |         |  |
|           | 0.22155         | 0.76698  | 0.22155 | 0.22155     | 0.645074912 |           |         |  |
| NA        | ENSG00000271177 | 0.76696  | 0.22155 | 0.76696     | 0.22155     | 0.76696   | 0.22155 |  |
|           | 0.76696         | 0.22155  | 0.22155 | 0.645074912 |             |           |         |  |
| IL17RB    | ENSG00000056736 | -0.35339 | 0.6381  | 0.76692     | 0.22156     | 0.76692   |         |  |
|           | 0.22156         | 0.76692  | 0.22156 | 0.22156     | 0.645074912 |           |         |  |
| SIDT1     | ENSG00000072858 | -1.096   | 0.86347 | -1.3234     | 0.90715     | 0.76681   | 0.2216  |  |
|           | -0.62719        | 0.73473  | 0.2216  | 0.645125364 |             |           |         |  |
| NA        | ENSG00000200222 | 0.76677  | 0.22161 | 0.76677     | 0.22161     | 0.02992   | 0.48807 |  |

|           |                 |             |             |             |             |           |         |         |
|-----------|-----------------|-------------|-------------|-------------|-------------|-----------|---------|---------|
|           | -0.71986        | 0.7642      | 0.22161     | 0.645125364 |             |           |         |         |
| SNCG      | ENSG00000173267 | 0.76672     | 0.22162     | 0.76672     | 0.22162     | 0.76672   | 0.22162 |         |
|           | 0.76672         | 0.22162     | 0.22162     | 0.645125364 |             |           |         |         |
| HES7      | ENSG00000179111 | 0.76661     | 0.22166     | 0.3697      | 0.3558      | 0.47077   | 0.3189  |         |
|           | 0.45174         | 0.32573     | 0.22166     | 0.645125364 |             |           |         |         |
| PABPN1    | ENSG00000100836 | 0.47028     | 0.31908     | 0.00070283  | 0.49972     | 0.2525    |         |         |
|           | 0.40033         | 0.76657     | 0.22167     | 0.22167     | 0.645125364 |           |         |         |
| SELENOS   | ENSG00000131871 | -0.83912    | 0.7993      | 0.76657     | 0.22167     | 0.082115  |         |         |
|           | 0.46728         | 0.54033     | 0.29448     | 0.22167     | 0.645125364 |           |         |         |
| NA        | ENSG00000226084 | -1.4542     | 0.92705     | 0.76655     | 0.22167     | -0.74853  | 0.77293 |         |
|           | 0.66911         | 0.25171     | 0.22167     | 0.645125364 |             |           |         |         |
| NA        | ENSG00000228625 | 0.69323     | 0.24408     | 0.76648     | 0.22169     | 0.76648   | 0.22169 |         |
|           | 0.76648         | 0.22169     | 0.22169     | 0.645135614 |             |           |         |         |
| LINC01897 | ENSG00000267209 | -0.62081    | 0.73264     | -0.81025    | 0.7911      | 0.76647   |         |         |
|           | 0.2217          | -0.10185    | 0.54056     | 0.2217      | 0.645135614 |           |         |         |
| NA        | ENSG00000272711 | 0.76626     | 0.22176     | -0.971      | 0.83422     | 0.76626   | 0.22176 |         |
|           | 0.76626         | 0.22176     | 0.22176     | 0.645271679 |             |           |         |         |
| MOCS3     | ENSG00000124217 | 0.61984     | 0.26768     | -0.19851    | 0.57868     | -0.74458  | 0.77174 |         |
|           | 0.76617         | 0.22179     | 0.22179     | 0.645320438 |             |           |         |         |
| GLULP3    | ENSG00000254572 | 0.014916    | 0.49405     | 0.76607     | 0.22182     | 0.11025   |         |         |
|           | 0.45611         | -0.80363    | 0.7892      | 0.22182     | 0.645369192 |           |         |         |
| TMPRSS15  | ENSG00000154646 | 0.76594     | 0.22186     | -1.014      | 0.84472     | 0.76594   |         |         |
|           | 0.22186         | 0.76594     | 0.22186     | 0.22186     | 0.645428152 |           |         |         |
| LINC01419 | ENSG00000253898 | 0.76588     | 0.22187     | 0.76588     | 0.22187     | 0.76588   |         |         |
|           | 0.22187         | -1.0297     | 0.84842     | 0.22187     | 0.645428152 |           |         |         |
| NA        | ENSG00000235726 | -0.25015    | 0.59876     | 0.76587     | 0.22188     | -1.251    | 0.89453 |         |
|           | -0.37811        | 0.64733     | 0.22188     | 0.645428152 |             |           |         |         |
| MROH5     | ENSG00000226807 | 0.32834     | 0.37133     | -0.45043    | 0.6738      | 0.022636  | 0.49097 |         |
|           | 0.76575         | 0.22191     | 0.22191     | 0.645467447 |             |           |         |         |
| LINC02147 | ENSG00000249797 | 0.76573     | 0.22192     | 0.26285     | 0.39633     | 0.4701    |         |         |
|           | 0.31914         | 0.5765      | 0.28214     | 0.22192     | 0.645467447 |           |         |         |
| NA        | ENSG00000235242 | 0.76566     | 0.22194     | 0.76566     | 0.22194     | 0.76566   | 0.22194 |         |
|           | 0.76566         | 0.22194     | 0.22194     | 0.64547765  |             |           |         |         |
| TPSD1     | ENSG00000095917 | 0.28731     | 0.38694     | 0.63511     | 0.26268     | 0.76563   | 0.22195 |         |
|           | 0.76563         | 0.22195     | 0.22195     | 0.64547765  |             |           |         |         |
| NTPCR     | ENSG00000135778 | 0.4162      | 0.33863     | 0.76551     | 0.22198     | 0.079835  | 0.46818 |         |
|           | 0.3426          | 0.36595     | 0.22198     | 0.645484943 |             |           |         |         |
| LINC01047 | ENSG00000232225 | 0.76551     | 0.22198     | 0.76551     | 0.22198     | 0.76551   |         |         |
|           | 0.22198         | 0.76551     | 0.22198     | 0.22198     | 0.645484943 |           |         |         |
| NA        | ENSG00000267939 | 0.76546     | 0.222       | 0.76546     | 0.222       | 0.34629   | 0.36456 | 0.76546 |
|           | 0.222           | 0.222       | 0.645484943 |             |             |           |         |         |
| ILF3-DT   | ENSG00000267100 | 0.76537     | 0.22202     | 0.76537     | 0.22202     | 0.76537   |         |         |
|           | 0.22202         | 0.76537     | 0.22202     | 0.22202     | 0.645484943 |           |         |         |
| GHRHR     | ENSG00000106128 | -0.26164    | 0.6032      | 0.76531     | 0.22204     | -0.050862 | 0.52028 |         |
|           | -0.53549        | 0.70384     | 0.22204     | 0.645484943 |             |           |         |         |
| ITGB1-DT  | ENSG00000229656 | 0.10893     | 0.45663     | 0.10893     | 0.45663     | -0.42184  |         |         |
|           | 0.66343         | 0.76527     | 0.22206     | 0.22206     | 0.645484943 |           |         |         |
| RPS6P12   | ENSG00000233309 | -0.11773    | 0.54686     | -0.11773    | 0.54686     | -0.11773  |         |         |
|           | 0.54686         | 0.7652      | 0.22208     | 0.22208     | 0.645484943 |           |         |         |
| ANKRD54P1 | ENSG00000236442 | 0.76514     | 0.2221      | 0.76514     | 0.2221      | 0.76514   |         |         |
|           | 0.2221          | 0.76514     | 0.2221      | 0.2221      | 0.645484943 |           |         |         |
| NA        | ENSG00000250659 | 0.765       | 0.22214     | 0.765       | 0.22214     | 0.765     | 0.22214 |         |
|           | 0.22214         | 0.645484943 |             |             |             |           |         |         |
| NA        | ENSG00000278936 | 0.765       | 0.22214     | 0.765       | 0.22214     | 0.765     | 0.22214 |         |
|           | 0.22214         | 0.645484943 |             |             |             |           |         |         |
| PDXDC1    | ENSG00000179889 | 0.7649      | 0.22216     | 0.63887     | 0.26145     | -0.67955  |         |         |
|           | 0.75161         | -0.78455    | 0.78364     | 0.22216     | 0.645484943 |           |         |         |
| DYNLT1    | ENSG00000146425 | 0.065921    | 0.47372     | 0.065921    | 0.47372     | 0.065921  |         |         |
|           | 0.47372         | 0.76482     | 0.22219     | 0.22219     | 0.645484943 |           |         |         |
| ISLR      | ENSG00000129009 | 0.76476     | 0.22221     | 0.76476     | 0.22221     | 0.76476   | 0.22221 |         |
|           | 0.76476         | 0.22221     | 0.22221     | 0.645484943 |             |           |         |         |
| NA        | ENSG00000230648 | 0.76475     | 0.22221     | 0.76475     | 0.22221     | 0.76475   | 0.22221 |         |

|             |                 |          |         |             |             |           |         |  |
|-------------|-----------------|----------|---------|-------------|-------------|-----------|---------|--|
|             | 0.43807         | 0.33067  | 0.22221 | 0.645484943 |             |           |         |  |
| LSM1P2      | ENSG00000271679 | 0.76472  | 0.22222 | 0.76472     | 0.22222     | 0.22222   | 0.76472 |  |
|             | 0.22222         | 0.76472  | 0.22222 | 0.22222     | 0.645484943 |           |         |  |
| BNIP1       | ENSG00000113734 | -1.9983  | 0.97716 | -1.9983     | 0.97716     | -1.0166   | 0.84533 |  |
|             | 0.76459         | 0.22226  | 0.22226 | 0.645484943 |             |           |         |  |
| YY1AP1      | ENSG00000163374 | 0.76455  | 0.22227 | 0.76455     | 0.22227     | 0.76455   |         |  |
|             | 0.22227         | -0.3575  | 0.63964 | 0.22227     | 0.645484943 |           |         |  |
| AKR1B10     | ENSG00000198074 | 0.76456  | 0.22227 | -1.2358     | 0.89174     | -0.6059   |         |  |
|             | 0.72771         | -0.76855 | 0.77892 | 0.22227     | 0.645484943 |           |         |  |
| IFT43       | ENSG00000119650 | -0.75051 | 0.77353 | 0.032258    | 0.48713     | -0.036884 | 0.51471 |  |
|             | 0.76445         | 0.2223   | 0.2223  | 0.645484943 |             |           |         |  |
| RSL24D1P3   | ENSG00000231556 | 0.76442  | 0.22231 | 0.46554     | 0.32077     | -0.4014   |         |  |
|             | 0.65594         | -0.68038 | 0.75187 | 0.22231     | 0.645484943 |           |         |  |
| NA          | ENSG00000260865 | 0.76423  | 0.22236 | 0.76423     | 0.22236     | 0.76423   | 0.22236 |  |
|             | 0.76423         | 0.22236  | 0.22236 | 0.645484943 |             |           |         |  |
| ACTL8       | ENSG00000117148 | -0.39438 | 0.65335 | -1.3978     | 0.91892     | 0.20327   | 0.41946 |  |
|             | 0.7642          | 0.22237  | 0.22237 | 0.645484943 |             |           |         |  |
| NA          | ENSG00000260479 | -0.17226 | 0.56838 | -0.17226    | 0.56838     | -0.17226  | 0.56838 |  |
|             | 0.76414         | 0.22239  | 0.22239 | 0.645484943 |             |           |         |  |
| NA          | ENSG00000267913 | 0.50685  | 0.30613 | 0.0048977   | 0.49805     | -0.079905 | 0.53184 |  |
|             | 0.76415         | 0.22239  | 0.22239 | 0.645484943 |             |           |         |  |
| LINC01346   | ENSG00000233304 | 0.12837  | 0.44893 | -0.61868    | 0.73194     | 0.76408   |         |  |
|             | 0.22241         | -1.2463  | 0.89368 | 0.22241     | 0.645484943 |           |         |  |
| HDAC7       | ENSG00000061273 | 0.76404  | 0.22242 | 0.76404     | 0.22242     | 0.76404   | 0.22242 |  |
|             | -1.4903         | 0.93193  | 0.22242 | 0.645484943 |             |           |         |  |
| MCRS1       | ENSG00000187778 | 0.76405  | 0.22242 | 0.5551      | 0.28941     | 0.68338   | 0.24718 |  |
|             | 0.68338         | 0.24718  | 0.22242 | 0.645484943 |             |           |         |  |
| JTB         | ENSG00000143543 | 0.079132 | 0.46846 | -0.27587    | 0.60868     | 0.39704   | 0.34567 |  |
|             | 0.764           | 0.22243  | 0.22243 | 0.645484943 |             |           |         |  |
| NA          | ENSG00000258619 | 0.76394  | 0.22245 | -0.0021359  | 0.50085     | 0.64336   | 0.26    |  |
|             | -0.87077        | 0.80806  | 0.22245 | 0.645484943 |             |           |         |  |
| RNU6ATAC34P | ENSG00000221806 | -0.22921 | 0.59065 | 0.3361      | 0.3684      | -0.075031 |         |  |
|             | 0.5299          | 0.76389  | 0.22247 | 0.22247     | 0.645484943 |           |         |  |
| NA          | ENSG00000279965 | 0.34337  | 0.36566 | 0.76387     | 0.22247     | 0.75191   | 0.22605 |  |
|             | 0.75191         | 0.22605  | 0.22247 | 0.645484943 |             |           |         |  |
| SULT1C2P2   | ENSG00000261209 | 0.76384  | 0.22248 | -0.92987    | 0.82378     | 0.76384   |         |  |
|             | 0.22248         | 0.76384  | 0.22248 | 0.22248     | 0.645484943 |           |         |  |
| NNAT        | ENSG00000053438 | 0.76371  | 0.22252 | 0.58869     | 0.27803     | 0.13712   | 0.44547 |  |
|             | 0.3855          | 0.34993  | 0.22252 | 0.645484943 |             |           |         |  |
| SUMO1       | ENSG00000116030 | -0.74303 | 0.77127 | -0.067593   | 0.52695     | -0.81446  | 0.79231 |  |
|             | 0.76372         | 0.22252  | 0.22252 | 0.645484943 |             |           |         |  |
| RBMXP2      | ENSG00000215210 | -2.0722  | 0.98088 | -0.21875    | 0.58658     | 0.7637    |         |  |
|             | 0.22252         | 0.010913 | 0.49565 | 0.22252     | 0.645484943 |           |         |  |
| NCAM2       | ENSG00000154654 | 0.71015  | 0.23881 | 0.76366     | 0.22253     | 0.76366   | 0.22253 |  |
|             | -0.065372       | 0.52606  | 0.22253 | 0.645484943 |             |           |         |  |
| ERVK9-11    | ENSG00000269486 | 0.76369  | 0.22253 | 0.76369     | 0.22253     | 0.76369   |         |  |
|             | 0.22253         | 0.76369  | 0.22253 | 0.22253     | 0.645484943 |           |         |  |
| NA          | ENSG00000238034 | -0.29285 | 0.61518 | -0.29285    | 0.61518     | -0.52076  | 0.69873 |  |
|             | 0.76364         | 0.22254  | 0.22254 | 0.645484943 |             |           |         |  |
| NA          | ENSG00000260113 | -0.41111 | 0.6595  | -0.41111    | 0.6595      | -0.41111  | 0.6595  |  |
|             | 0.7636          | 0.22255  | 0.22255 | 0.645484943 |             |           |         |  |
| F10         | ENSG00000126218 | -0.33845 | 0.63249 | 0.37315     | 0.35452     | 0.76353   | 0.22257 |  |
|             | 0.74545         | 0.228    | 0.22257 | 0.645484943 |             |           |         |  |
| ZNF180      | ENSG00000167384 | -0.76569 | 0.77807 | -0.044842   | 0.51788     | 0.71168   |         |  |
|             | 0.23833         | 0.76347  | 0.22259 | 0.22259     | 0.645484943 |           |         |  |
| HIGD1AP16   | ENSG00000219608 | 0.6853   | 0.24658 | 0.76346     | 0.22259     | 0.16325   |         |  |
|             | 0.43516         | 0.33482  | 0.36888 | 0.22259     | 0.645484943 |           |         |  |
| FENDRR      | ENSG00000268388 | -0.31355 | 0.62307 | 0.27359     | 0.3922      | -0.33499  |         |  |
|             | 0.63118         | 0.76344  | 0.2226  | 0.2226      | 0.645484943 |           |         |  |
| NA          | ENSG00000272473 | 0.76346  | 0.2226  | 0.76346     | 0.2226      | 0.76346   | 0.2226  |  |
|             | 0.76346         | 0.2226   | 0.2226  | 0.645484943 |             |           |         |  |
| TXLNA       | ENSG00000084652 | 0.76329  | 0.22264 | 0.70132     | 0.24155     | 0.2582    | 0.39813 |  |

|           |                 |            |         |             |             |          |         |  |
|-----------|-----------------|------------|---------|-------------|-------------|----------|---------|--|
|           | 0.67164         | 0.25091    | 0.22264 | 0.645484943 |             |          |         |  |
| UGT1A6    | ENSG00000167165 | 0.76326    | 0.22266 | 0.45665     | 0.32396     | 0.45665  |         |  |
|           | 0.32396         | 0.61841    | 0.26815 | 0.22266     | 0.645484943 |          |         |  |
| NA        | ENSG00000263547 | 0.76324    | 0.22266 | 0.54059     | 0.29439     | 0.76324  | 0.22266 |  |
|           | 0.76324         | 0.22266    | 0.22266 | 0.645484943 |             |          |         |  |
| GLCCI1-DT | ENSG00000233108 | 0.76322    | 0.22267 | 0.76322     | 0.22267     | -1.8893  |         |  |
|           | 0.97057         | 0.76322    | 0.22267 | 0.22267     | 0.645484943 |          |         |  |
| NA        | ENSG00000236744 | -0.42644   | 0.66511 | -0.31762    | 0.62462     | 0.76321  | 0.22267 |  |
|           | -0.31762        | 0.62462    | 0.22267 | 0.645484943 |             |          |         |  |
| CTDSP2    | ENSG00000175215 | -0.43782   | 0.66924 | -0.43782    | 0.66924     | -1.0248  |         |  |
|           | 0.84727         | 0.76317    | 0.22268 | 0.22268     | 0.645484943 |          |         |  |
| RNASE11   | ENSG00000173464 | -0.47926   | 0.68412 | -0.47926    | 0.68412     | 0.76314  |         |  |
|           | 0.22269         | -0.1496    | 0.55946 | 0.22269     | 0.645484943 |          |         |  |
| NA        | ENSG00000271330 | 0.057949   | 0.47689 | 0.76313     | 0.22269     | 0.1998   | 0.42082 |  |
|           | 0.1998          | 0.42082    | 0.22269 | 0.645484943 |             |          |         |  |
| NA        | ENSG00000254812 | -0.35587   | 0.63903 | 0.76312     | 0.2227      | 0.51004  | 0.30501 |  |
|           | 0.51004         | 0.30501    | 0.2227  | 0.645484943 |             |          |         |  |
| ZNF217    | ENSG00000171940 | 0.70444    | 0.24058 | -1.0757     | 0.85897     | -0.83658 |         |  |
|           | 0.79859         | 0.76307    | 0.22271 | 0.22271     | 0.645484943 |          |         |  |
| LINC01767 | ENSG00000223956 | 0.76308    | 0.22271 | 0.3184      | 0.37509     | 0.5544   |         |  |
|           | 0.28965         | 0.5544     | 0.28965 | 0.22271     | 0.645484943 |          |         |  |
| NA        | ENSG00000225314 | -0.24808   | 0.59796 | 0.76301     | 0.22273     | -0.40652 | 0.65782 |  |
|           | 0.3403          | 0.36682    | 0.22273 | 0.645484943 |             |          |         |  |
| LINC01023 | ENSG00000272523 | 0.30078    | 0.38179 | 0.69474     | 0.24361     | 0.76298  |         |  |
|           | 0.22274         | 0.085445   | 0.46595 | 0.22274     | 0.645484943 |          |         |  |
| PPIL2     | ENSG00000100023 | -0.20076   | 0.57956 | 0.76289     | 0.22276     | 0.31523  | 0.37629 |  |
|           | -1.8451         | 0.96749    | 0.22276 | 0.645484943 |             |          |         |  |
| SRP72P2   | ENSG00000188451 | 0.35628    | 0.36081 | 0.48023     | 0.31553     | 0.76289  |         |  |
|           | 0.22276         | 0.68579    | 0.24642 | 0.22276     | 0.645484943 |          |         |  |
| NA        | ENSG00000213302 | -0.1343    | 0.55342 | 0.51565     | 0.30305     | 0.10499  | 0.45819 |  |
|           | 0.76292         | 0.22276    | 0.22276 | 0.645484943 |             |          |         |  |
| NA        | ENSG00000255097 | 0.76283    | 0.22278 | 0.5114      | 0.30454     | 0.76283  | 0.22278 |  |
|           | 0.50457         | 0.30693    | 0.22278 | 0.645484943 |             |          |         |  |
| POU5F1B   | ENSG00000212993 | 0.76281    | 0.22279 | 0.76281     | 0.22279     | 0.76281  |         |  |
|           | 0.22279         | 0.082339   | 0.46719 | 0.22279     | 0.645484943 |          |         |  |
| SRCIN1    | ENSG00000277363 | -0.54656   | 0.70766 | 0.49371     | 0.31076     | 0.76281  |         |  |
|           | 0.22279         | -0.41299   | 0.66019 | 0.22279     | 0.645484943 |          |         |  |
| NA        | ENSG00000259793 | 0.76275    | 0.22281 | 0.76275     | 0.22281     | 0.76275  | 0.22281 |  |
|           | 0.76275         | 0.22281    | 0.22281 | 0.645484943 |             |          |         |  |
| PIGX      | ENSG00000163964 | 0.76267    | 0.22283 | 0.39765     | 0.34544     | 0.024903 | 0.49007 |  |
|           | -1.1511         | 0.87515    | 0.22283 | 0.645484943 |             |          |         |  |
| CROCCP3   | ENSG00000080947 | 0.73807    | 0.23024 | -0.05376    | 0.52144     | 0.76265  |         |  |
|           | 0.22284         | 0.57386    | 0.28303 | 0.22284     | 0.645484943 |          |         |  |
| ATXN10    | ENSG00000130638 | 0.00063103 | 0.49975 | 0.76264     | 0.22284     | 0.76264  |         |  |
|           | 0.22284         | 0.76264    | 0.22284 | 0.22284     | 0.645484943 |          |         |  |
| DNAH10OS  | ENSG00000250091 | 0.76249    | 0.22288 | 0.76249     | 0.22288     | 0.76249  |         |  |
|           | 0.22288         | 0.76249    | 0.22288 | 0.22288     | 0.645553028 |          |         |  |
| ATP5MC2   | ENSG00000135390 | 0.39068    | 0.34802 | 0.67197     | 0.2508      | 0.76248  |         |  |
|           | 0.22289         | 0.15357    | 0.43897 | 0.22289     | 0.645553028 |          |         |  |
| MIR380    | ENSG00000198982 | 0.76231    | 0.22294 | 0.76231     | 0.22294     | 0.76231  |         |  |
|           | 0.22294         | 0.76231    | 0.22294 | 0.22294     | 0.64563343  |          |         |  |
| NA        | ENSG00000270285 | 0.76223    | 0.22296 | 0.76223     | 0.22296     | 0.76223  | 0.22296 |  |
|           | -0.17197        | 0.56827    | 0.22296 | 0.64563343  |             |          |         |  |
| OR2M5     | ENSG00000162727 | 0.29113    | 0.38547 | 0.24376     | 0.40371     | 0.76219  | 0.22297 |  |
|           | 0.40771         | 0.34174    | 0.22297 | 0.64563343  |             |          |         |  |
| RAB23     | ENSG00000112210 | 0.16291    | 0.4353  | 0.76212     | 0.223       | -0.67875 | 0.75135 |  |
|           | -0.67875        | 0.75135    | 0.223   | 0.64563343  |             |          |         |  |
| NA        | ENSG00000211525 | 0.33174    | 0.37004 | -0.32969    | 0.62918     | 0.33174  | 0.37004 |  |
|           | 0.76208         | 0.223      | 0.223   | 0.64563343  |             |          |         |  |
| TRPM1     | ENSG00000134160 | 0.31835    | 0.37511 | -0.12648    | 0.55032     | -0.72314 | 0.7652  |  |
|           | 0.76204         | 0.22302    | 0.22302 | 0.64563343  |             |          |         |  |
| CBS       | ENSG00000160200 | 0.76201    | 0.22303 | -0.066482   | 0.5265      | 0.11192  | 0.45544 |  |

|             |                 |           |         |             |             |           |         |  |
|-------------|-----------------|-----------|---------|-------------|-------------|-----------|---------|--|
|             | 0.033186        | 0.48676   | 0.22303 | 0.64563343  |             |           |         |  |
| H3P29       | ENSG00000228783 | -0.49319  | 0.68906 | 0.762       | 0.22303     | 0.37771   | 0.35282 |  |
|             | -0.15821        | 0.56286   | 0.22303 | 0.64563343  |             |           |         |  |
| NA          | ENSG00000274832 | 0.76196   | 0.22304 | 0.76196     | 0.22304     | 0.76196   | 0.22304 |  |
|             | 0.76196         | 0.22304   | 0.22304 | 0.64563343  |             |           |         |  |
| NA          | ENSG00000272800 | 0.76189   | 0.22306 | 0.76189     | 0.22306     | 0.76189   | 0.22306 |  |
|             | 0.76189         | 0.22306   | 0.22306 | 0.64563343  |             |           |         |  |
| FMO7P       | ENSG00000230231 | -0.77056  | 0.77952 | -0.046725   | 0.51863     | 0.76184   | 0.22308 |  |
|             | -0.25781        | 0.60172   | 0.22308 | 0.64563343  |             |           |         |  |
| UFL1-AS1    | ENSG00000233797 | 0.4042    | 0.34303 | -0.90116    | 0.81625     | 0.76179   |         |  |
|             | 0.22309         | -0.5587   | 0.71182 | 0.22309     | 0.64563343  |           |         |  |
| BRWD1-IT1   | ENSG00000237373 | 0.76181   | 0.22309 | 0.76181     | 0.22309     | 0.76181   |         |  |
|             | 0.22309         | 0.76181   | 0.22309 | 0.22309     | 0.64563343  |           |         |  |
| LMLN        | ENSG00000185621 | -0.054474 | 0.52172 | 0.49019     | 0.312       | -0.11163  | 0.54444 |  |
|             | 0.76173         | 0.22311   | 0.22311 | 0.645652966 |             |           |         |  |
| CD3EAP      | ENSG00000117877 | 0.76149   | 0.22318 | 0.76149     | 0.22318     | 0.76149   |         |  |
|             | 0.22318         | 0.76149   | 0.22318 | 0.22318     | 0.645731087 |           |         |  |
| SNX18P7     | ENSG00000234373 | 0.76146   | 0.22319 | 0.76146     | 0.22319     | 0.76146   |         |  |
|             | 0.22319         | 0.76146   | 0.22319 | 0.22319     | 0.645731087 |           |         |  |
| NA          | ENSG00000265935 | -0.12864  | 0.55118 | 0.58603     | 0.27893     | 0.76147   | 0.22319 |  |
|             | 0.72324         | 0.23477   | 0.22319 | 0.645731087 |             |           |         |  |
| NA          | ENSG00000277089 | -0.71226  | 0.76185 | -1.0808     | 0.86011     | 0.76146   | 0.22319 |  |
|             | 0.28323         | 0.3885    | 0.22319 | 0.645731087 |             |           |         |  |
| CCDC34      | ENSG00000109881 | -0.41265  | 0.66007 | 0.019394    | 0.49226     | 0.76137   |         |  |
|             | 0.22322         | 0.76137   | 0.22322 | 0.22322     | 0.645770134 |           |         |  |
| ALDOC       | ENSG00000109107 | 0.76134   | 0.22323 | 0.76134     | 0.22323     | 0.76134   | 0.22323 |  |
|             | 0.76134         | 0.22323   | 0.22323 | 0.645770134 |             |           |         |  |
| PPBP        | ENSG00000163736 | 0.76115   | 0.22328 | -0.080449   | 0.53206     | -0.080449 | 0.53206 |  |
|             | -0.080449       | 0.53206   | 0.22328 | 0.645819277 |             |           |         |  |
| SLC7A10     | ENSG00000130876 | 0.76112   | 0.22329 | 0.72128     | 0.23537     | 0.3944    |         |  |
|             | 0.34664         | 0.6039    | 0.27295 | 0.22329     | 0.645819277 |           |         |  |
| WTAP        | ENSG00000146457 | 0.45512   | 0.32451 | 0.76113     | 0.22329     | -0.007211 | 0.50288 |  |
|             | 0.28572         | 0.38755   | 0.22329 | 0.645819277 |             |           |         |  |
| NA          | ENSG00000248736 | 0.76108   | 0.2233  | -0.048192   | 0.51922     | 0.76108   | 0.2233  |  |
|             | 0.76108         | 0.2233    | 0.2233  | 0.645819277 |             |           |         |  |
| PPP2R2DP1   | ENSG00000231668 | 0.76097   | 0.22334 | 0.76097     | 0.22334     | 0.76097   |         |  |
|             | 0.22334         | -1.1698   | 0.87896 | 0.22334     | 0.64582067  |           |         |  |
| ANKRD20A19P | ENSG00000196593 | -0.85554  | 0.80387 | -1.188      | 0.88258     | -0.31688  |         |  |
|             | 0.62433         | 0.76092   | 0.22335 | 0.22335     | 0.64582067  |           |         |  |
| TAS2R8      | ENSG00000121314 | 0.76091   | 0.22336 | 0.76091     | 0.22336     | 0.76091   |         |  |
|             | 0.22336         | 0.76091   | 0.22336 | 0.22336     | 0.64582067  |           |         |  |
| CD180       | ENSG00000134061 | 0.2699    | 0.39362 | 0.16252     | 0.43545     | 0.2699    | 0.39362 |  |
|             | 0.76084         | 0.22338   | 0.22338 | 0.64582067  |             |           |         |  |
| PLK3        | ENSG00000173846 | 0.76083   | 0.22338 | -1.1604     | 0.87705     | -0.021392 | 0.50853 |  |
|             | -1.3062         | 0.90426   | 0.22338 | 0.64582067  |             |           |         |  |
| RPL17P15    | ENSG00000229326 | 0.76084   | 0.22338 | 0.76084     | 0.22338     | 0.76084   |         |  |
|             | 0.22338         | 0.76084   | 0.22338 | 0.22338     | 0.64582067  |           |         |  |
| GPN3        | ENSG00000111231 | 0.76075   | 0.2234  | 0.54888     | 0.29154     | 0.31662   | 0.37577 |  |
|             | 0.069452        | 0.47232   | 0.2234  | 0.645840176 |             |           |         |  |
| NA          | ENSG00000216811 | -0.32437  | 0.62717 | -0.32437    | 0.62717     | -0.32437  | 0.62717 |  |
|             | 0.76065         | 0.22343   | 0.22343 | 0.645888586 |             |           |         |  |
| TTLL6       | ENSG00000170703 | 0.7605    | 0.22348 | 0.61855     | 0.26811     | 0.16611   | 0.43403 |  |
|             | 0.76021         | 0.22356   | 0.22348 | 0.645957158 |             |           |         |  |
| NA          | ENSG00000261766 | 0.76047   | 0.22349 | 0.76047     | 0.22349     | 0.76047   | 0.22349 |  |
|             | 0.76047         | 0.22349   | 0.22349 | 0.645957158 |             |           |         |  |
| NA          | ENSG00000239373 | 0.76041   | 0.22351 | 0.76041     | 0.22351     | 0.76041   | 0.22351 |  |
|             | 0.76041         | 0.22351   | 0.22351 | 0.645957158 |             |           |         |  |
| NA          | ENSG00000258503 | -0.21109  | 0.58359 | -0.21109    | 0.58359     | 0.76035   | 0.22352 |  |
|             | -0.4325         | 0.66731   | 0.22352 | 0.645957158 |             |           |         |  |
| NA          | ENSG00000271821 | 0.76037   | 0.22352 | 0.76037     | 0.22352     | 0.76037   | 0.22352 |  |
|             | 0.76037         | 0.22352   | 0.22352 | 0.645957158 |             |           |         |  |
| NA          | ENSG00000233724 | 0.76025   | 0.22355 | 0.76025     | 0.22355     | 0.76025   | 0.22355 |  |



|           |                 |             |         |             |             |           |         |       |
|-----------|-----------------|-------------|---------|-------------|-------------|-----------|---------|-------|
|           | 0.76025         | 0.22355     | 0.22355 | 0.645967908 |             |           |         |       |
| MOGS      | ENSG00000115275 | -0.072215   | 0.47122 | 0.76014     | 0.22359     | 0.76014   | 0.22359 |       |
|           | -0.39797        | 0.65467     | 0.22359 | 0.645967908 |             |           |         |       |
| LINC01823 | ENSG00000224655 | 0.76014     | 0.22359 | 0.76014     | 0.22359     | 0.76014   |         |       |
|           | 0.22359         | 0.76014     | 0.22359 | 0.22359     | 0.645967908 |           |         |       |
| NA        | ENSG00000233565 | 0.76011     | 0.22359 | 0.76011     | 0.22359     | 0.76011   | 0.22359 |       |
|           | 0.76011         | 0.22359     | 0.22359 | 0.645967908 |             |           |         |       |
| MICOS10P2 | ENSG00000270714 | 0.76013     | 0.22359 | 0.76013     | 0.22359     | 0.76013   |         |       |
|           | 0.22359         | 0.76013     | 0.22359 | 0.22359     | 0.645967908 |           |         |       |
| LINC02141 | ENSG00000261807 | -0.31518    | 0.62369 | 0.32595     | 0.37223     | 0.76007   |         |       |
|           | 0.22361         | -0.24499    | 0.59677 | 0.22361     | 0.645968577 |           |         |       |
| LEUTX     | ENSG00000213921 | -0.88404    | 0.81166 | 0.75998     | 0.22363     | -0.88404  | 0.81166 |       |
|           | -0.88404        | 0.81166     | 0.22363 | 0.645968577 |             |           |         |       |
| NA        | ENSG00000267034 | 0.45542     | 0.3244  | 0.3541      | 0.36163     | 0.76001   | 0.22363 |       |
|           | 0.76001         | 0.22363     | 0.22363 | 0.645968577 |             |           |         |       |
| TUFMP1    | ENSG00000265646 | 0.75993     | 0.22365 | -0.22186    | 0.58779     | -1.1362   |         |       |
|           | 0.87205         | 0.75993     | 0.22365 | 0.22365     | 0.645988056 |           |         |       |
| PDZD8     | ENSG00000165650 | 0.50552     | 0.3066  | 0.70855     | 0.2393      | 0.7598    | 0.22369 |       |
|           | 0.50552         | 0.3066      | 0.22369 | 0.646027008 |             |           |         |       |
| NA        | ENSG00000278908 | 0.63387     | 0.26308 | 0.75979     | 0.22369     | 0.2943    | 0.38427 |       |
|           | -0.10985        | 0.54374     | 0.22369 | 0.646027008 |             |           |         |       |
| RPUSD2    | ENSG00000166133 | 0.15506     | 0.43839 | 0.26871     | 0.39407     | 0.26871   |         |       |
|           | 0.39407         | 0.7597      | 0.22372 | 0.22372     | 0.646075359 |           |         |       |
| LSM4      | ENSG00000130520 | 0.75956     | 0.22376 | -1.1294     | 0.87063     | -0.61966  | 0.73226 |       |
|           | -0.77533        | 0.78093     | 0.22376 | 0.646152581 |             |           |         |       |
| IYD       | ENSG00000009765 | -0.61841    | 0.73185 | -0.32472    | 0.6273      | -0.40428  | 0.65699 |       |
|           | 0.75947         | 0.22378     | 0.22378 | 0.646153217 |             |           |         |       |
| TUBB8     | ENSG00000261456 | 0.54172     | 0.29401 | -0.78256    | 0.78306     | 9.35E-06  | 0.5     |       |
|           | 0.75942         | 0.2238      | 0.2238  | 0.646153217 |             |           |         |       |
| NA        | ENSG00000266294 | 0.75943     | 0.2238  | 0.75943     | 0.2238      | 0.75943   | 0.2238  |       |
|           | 0.75943         | 0.2238      | 0.2238  | 0.646153217 |             |           |         |       |
| RNU6-280P | ENSG00000252303 | -0.22993    | 0.59093 | -0.22993    | 0.59093     | -0.22993  |         |       |
|           | 0.59093         | 0.7593      | 0.22384 | 0.22384     | 0.646230416 |           |         |       |
| C11orf58  | ENSG00000110696 | 0.75915     | 0.22388 | -0.28827    | 0.61343     | 0.52348   |         |       |
|           | 0.30032         | 0.23962     | 0.40531 | 0.22388     | 0.646307607 |           |         |       |
| GRM3-AS1  | ENSG00000233073 | 0.75903     | 0.22392 | -0.25911    | 0.60223     | -0.25911  |         |       |
|           | 0.60223         | -0.25911    | 0.60223 | 0.22392     | 0.646375364 |           |         |       |
| NA        | ENSG00000251159 | 0.13398     | 0.44671 | 0.073308    | 0.47078     | 0.75898   | 0.22393 |       |
|           | -0.75452        | 0.77473     | 0.22393 | 0.646375364 |             |           |         |       |
| NA        | ENSG00000261476 | 0.75875     | 0.224   | 0.75875     | 0.224       | 0.75875   | 0.224   | 0.224 |
|           | 0.224           | 0.646510831 |         |             |             |           |         |       |
| EXOC8     | ENSG00000116903 | 0.75868     | 0.22402 | 0.024193    | 0.49035     | 0.024193  | 0.49035 |       |
|           | 0.75868         | 0.22402     | 0.22402 | 0.646510831 |             |           |         |       |
| NA        | ENSG00000253766 | -1.3002     | 0.90324 | 0.75868     | 0.22402     | -0.29604  | 0.6164  |       |
|           | -0.39168        | 0.65235     | 0.22402 | 0.646510831 |             |           |         |       |
| LINC02259 | ENSG00000259783 | 0.49891     | 0.30892 | 0.75865     | 0.22403     | 0.45524   |         |       |
|           | 0.32447         | 0.18914     | 0.42499 | 0.22403     | 0.646510831 |           |         |       |
| LINC02458 | ENSG00000246363 | 0.58668     | 0.27871 | 0.75858     | 0.22405     | 0.50926   |         |       |
|           | 0.30528         | 0.68385     | 0.24703 | 0.22405     | 0.64653026  |           |         |       |
| NA        | ENSG00000250064 | 0.75848     | 0.22408 | 0.75848     | 0.22408     | 0.17015   | 0.43245 |       |
|           | -0.57749        | 0.7182      | 0.22408 | 0.646578541 |             |           |         |       |
| NR0B2     | ENSG00000131910 | -0.19208    | 0.57616 | -0.19208    | 0.57616     | -0.49004  | 0.68795 |       |
|           | 0.75825         | 0.22415     | 0.22415 | 0.646637351 |             |           |         |       |
| RNU6-193P | ENSG00000222909 | 0.75825     | 0.22415 | 0.75825     | 0.22415     | -0.084396 |         |       |
|           | 0.53363         | 0.21066     | 0.41658 | 0.22415     | 0.646637351 |           |         |       |
| PEPD      | ENSG00000124299 | 0.095571    | 0.46193 | -0.97968    | 0.83638     | 0.75309   | 0.2257  |       |
|           | 0.75821         | 0.22416     | 0.22416 | 0.646637351 |             |           |         |       |
| NA        | ENSG00000238963 | -1.6225     | 0.94766 | -1.6225     | 0.94766     | 0.15894   | 0.43686 |       |
|           | 0.75822         | 0.22416     | 0.22416 | 0.646637351 |             |           |         |       |
| ZNF887P   | ENSG00000267500 | 0.75817     | 0.22417 | 0.75817     | 0.22417     | 0.75817   |         |       |
|           | 0.22417         | 0.75817     | 0.22417 | 0.22417     | 0.646637351 |           |         |       |
| NA        | ENSG00000265798 | 0.75815     | 0.22418 | 0.61097     | 0.27061     | 0.43583   | 0.33148 |       |

|             |                 |          |         |             |             |          |         |  |
|-------------|-----------------|----------|---------|-------------|-------------|----------|---------|--|
|             | -1.4811         | 0.93071  | 0.22418 | 0.646637351 |             |          |         |  |
| FSCN3       | ENSG00000106328 | 0.28309  | 0.38855 | -0.71972    | 0.76415     | -0.71972 | 0.76415 |  |
|             | 0.75793         | 0.22425  | 0.22425 | 0.646678342 |             |          |         |  |
| OR2H1       | ENSG00000204688 | 0.75789  | 0.22426 | 0.75789     | 0.22426     | 0.63454  | 0.26286 |  |
|             | -0.78405        | 0.78349  | 0.22426 | 0.646678342 |             |          |         |  |
| USP24P1     | ENSG00000229375 | -1.031   | 0.84872 | -0.027576   | 0.511       | 0.75787  | 0.22427 |  |
|             | 0.57345         | 0.28317  | 0.22427 | 0.646678342 |             |          |         |  |
| NA          | ENSG00000261384 | 0.75782  | 0.22428 | 0.75782     | 0.22428     | 0.009943 | 0.49603 |  |
|             | 0.37169         | 0.35506  | 0.22428 | 0.646678342 |             |          |         |  |
| NA          | ENSG00000270712 | 0.021352 | 0.49148 | 0.10307     | 0.45895     | -0.17838 | 0.57079 |  |
|             | 0.75779         | 0.22429  | 0.22429 | 0.646678342 |             |          |         |  |
| NA          | ENSG00000205745 | 0.75772  | 0.22431 | 0.75772     | 0.22431     | 0.75772  | 0.22431 |  |
|             | 0.75772         | 0.22431  | 0.22431 | 0.646678342 |             |          |         |  |
| RPL5P14     | ENSG00000243914 | 0.75771  | 0.22431 | 0.75771     | 0.22431     | 0.75771  |         |  |
|             | 0.22431         | 0.75771  | 0.22431 | 0.22431     | 0.646678342 |          |         |  |
| PTPRT-AS1   | ENSG00000227599 | 0.75769  | 0.22432 | 0.2166      | 0.41426     | 0.75769  |         |  |
|             | 0.22432         | 0.75769  | 0.22432 | 0.22432     | 0.646678342 |          |         |  |
| CTNND1      | ENSG00000198561 | 0.75757  | 0.22435 | 0.022953    | 0.49084     | 0.24688  |         |  |
|             | 0.4025          | 0.16732  | 0.43356 | 0.22435     | 0.646678342 |          |         |  |
| VAX2        | ENSG00000116035 | -1.0227  | 0.84679 | -1.084      | 0.86082     | 0.44945  | 0.32655 |  |
|             | 0.75752         | 0.22437  | 0.22437 | 0.646678342 |             |          |         |  |
| NA          | ENSG00000236494 | 0.36429  | 0.35782 | -0.88599    | 0.81219     | 0.7575   | 0.22437 |  |
|             | 0.18208         | 0.42776  | 0.22437 | 0.646678342 |             |          |         |  |
| NA          | ENSG00000267406 | 0.75752  | 0.22437 | 0.75752     | 0.22437     | 0.75752  | 0.22437 |  |
|             | 0.60923         | 0.27119  | 0.22437 | 0.646678342 |             |          |         |  |
| ADGRE3      | ENSG00000131355 | 0.038645 | 0.48459 | 0.75748     | 0.22438     | -0.16653 |         |  |
|             | 0.56613         | 0.2216   | 0.41231 | 0.22438     | 0.646678342 |          |         |  |
| INO80B-WBP1 | ENSG00000274049 | 0.75748  | 0.22438 | 0.75748     | 0.22438     | 0.75748  |         |  |
|             | 0.22438         | 0.75748  | 0.22438 | 0.22438     | 0.646678342 |          |         |  |
| TUBAP       | ENSG00000237569 | 0.75733  | 0.22443 | 0.75733     | 0.22443     | 0.75733  | 0.22443 |  |
|             | 0.75733         | 0.22443  | 0.22443 | 0.646784192 |             |          |         |  |
| CMTM2       | ENSG00000140932 | 0.75726  | 0.22445 | 0.75726     | 0.22445     | 0.75726  | 0.22445 |  |
|             | 0.75726         | 0.22445  | 0.22445 | 0.646803578 |             |          |         |  |
| NA          | ENSG00000221461 | 0.75714  | 0.22448 | 0.75714     | 0.22448     | 0.75714  | 0.22448 |  |
|             | 0.75714         | 0.22448  | 0.22448 | 0.646813529 |             |          |         |  |
| NA          | ENSG00000224001 | 0.75713  | 0.22448 | 0.75713     | 0.22448     | 0.75713  | 0.22448 |  |
|             | 0.75713         | 0.22448  | 0.22448 | 0.646813529 |             |          |         |  |
| OCA2        | ENSG00000104044 | 0.75694  | 0.22454 | -0.19346    | 0.5767      | -0.68859 | 0.75446 |  |
|             | -2.5903         | 0.99521  | 0.22454 | 0.646818699 |             |          |         |  |
| CLEC4M      | ENSG00000104938 | 0.54224  | 0.29383 | 0.75692     | 0.22455     | -0.88679 |         |  |
|             | 0.8124          | -0.22225 | 0.58794 | 0.22455     | 0.646818699 |          |         |  |
| NA          | ENSG00000260990 | 0.75692  | 0.22455 | 0.75692     | 0.22455     | 0.75692  | 0.22455 |  |
|             | -0.33255        | 0.63026  | 0.22455 | 0.646818699 |             |          |         |  |
| UNC5B       | ENSG00000107731 | -1.1226  | 0.8692  | 0.75687     | 0.22457     | -1.4291  | 0.92351 |  |
|             | -1.0679         | 0.85722  | 0.22457 | 0.646818699 |             |          |         |  |
| NA          | ENSG00000248828 | 0.75678  | 0.22459 | 0.39606     | 0.34603     | -0.46398 | 0.67867 |  |
|             | -0.1507         | 0.55989  | 0.22459 | 0.646818699 |             |          |         |  |
| NA          | ENSG00000225616 | 0.75663  | 0.22463 | 0.75663     | 0.22463     | 0.75663  | 0.22463 |  |
|             | 0.75663         | 0.22463  | 0.22463 | 0.646818699 |             |          |         |  |
| RPS8P6      | ENSG00000231660 | 0.71487  | 0.23734 | 0.75663     | 0.22464     | 0.29429  |         |  |
|             | 0.38427         | -1.3752  | 0.91547 | 0.22464     | 0.646818699 |          |         |  |
| CARF        | ENSG00000138380 | 0.75658  | 0.22465 | 0.61866     | 0.26807     | 0.18512  | 0.42657 |  |
|             | 0.21399         | 0.41528  | 0.22465 | 0.646818699 |             |          |         |  |
| NA          | ENSG00000237347 | 0.75646  | 0.22469 | 0.75646     | 0.22469     | 0.75646  | 0.22469 |  |
|             | 0.75646         | 0.22469  | 0.22469 | 0.646818699 |             |          |         |  |
| DDX18       | ENSG00000088205 | 0.7098   | 0.23891 | 0.73969     | 0.22974     | 0.74006  | 0.22963 |  |
|             | 0.7564          | 0.2247   | 0.2247  | 0.646818699 |             |          |         |  |
| NA          | ENSG00000252613 | 0.75631  | 0.22473 | 0.75631     | 0.22473     | 0.75631  | 0.22473 |  |
|             | 0.75631         | 0.22473  | 0.22473 | 0.646818699 |             |          |         |  |
| OR5P3       | ENSG00000182334 | 0.75627  | 0.22474 | 0.29928     | 0.38236     | 0.29928  | 0.38236 |  |
|             | 0.29928         | 0.38236  | 0.22474 | 0.646818699 |             |          |         |  |
| KLF2P1      | ENSG00000231240 | 0.75624  | 0.22475 | 0.75624     | 0.22475     | 0.75624  |         |  |

|            |                 |          |           |           |             |             |         |
|------------|-----------------|----------|-----------|-----------|-------------|-------------|---------|
| ORAI1      | ENSG00000276045 | 0.7451   | 0.2281    | 0.3855    | 0.34993     | 0.75626     | 0.22475 |
|            |                 | 0.75626  | 0.22475   | 0.22475   | 0.646818699 |             |         |
| BPHL       | ENSG00000137274 | 0.75615  | 0.22478   | -0.60316  | 0.7268      | -0.14624    | 0.55814 |
|            |                 | -0.24084 | 0.59516   | 0.22478   | 0.646818699 |             |         |
| TMEM238    | ENSG00000233493 | 0.75616  | 0.22478   | 0.75616   | 0.22478     | 0.75616     |         |
|            |                 | 0.22478  | 0.75616   | 0.22478   | 0.646818699 |             |         |
| RNU6-438P  | ENSG00000202431 | -0.52901 | 0.7016    | -0.077253 | 0.53079     | 0.75612     |         |
|            |                 | 0.22479  | 0.15937   | 0.43669   | 0.22479     | 0.646818699 |         |
| SAPCD1-AS1 | ENSG00000235663 | 0.75612  | 0.22479   | 0.75612   | 0.22479     | 0.75612     |         |
|            |                 | 0.22479  | 0.75612   | 0.22479   | 0.646818699 |             |         |
| NA         | ENSG00000185332 | 0.75609  | 0.2248    | 0.75609   | 0.2248      | 0.75609     | 0.2248  |
|            |                 | 0.75609  | 0.2248    | 0.2248    | 0.646818699 |             |         |
| RPL17P10   | ENSG00000224672 | 0.75607  | 0.2248    | 0.75607   | 0.2248      | -0.048623   |         |
|            |                 | 0.51939  | 0.75607   | 0.2248    | 0.646818699 |             |         |
| CHORDC1P3  | ENSG00000248162 | 0.36474  | 0.35765   | -0.87648  | 0.80962     | -0.85498    |         |
|            |                 | 0.80372  | 0.75603   | 0.22482   | 0.22482     | 0.646818699 |         |
| SLC20A1P3  | ENSG00000258706 | 0.75597  | 0.22483   | 0.75597   | 0.22483     | 0.75597     |         |
|            |                 | 0.22483  | 0.75597   | 0.22483   | 0.646818699 |             |         |
| LINC02231  | ENSG00000248995 | 0.75594  | 0.22484   | 0.75594   | 0.22484     | 0.75594     |         |
|            |                 | 0.22484  | 0.75594   | 0.22484   | 0.646818699 |             |         |
| NA         | ENSG00000254014 | 0.75596  | 0.22484   | -0.32991  | 0.62927     | -0.36209    | 0.64136 |
|            |                 | -1.0627  | 0.85604   | 0.22484   | 0.646818699 |             |         |
| TSPEAR     | ENSG00000175894 | 0.33263  | 0.36971   | 0.75591   | 0.22485     | 0.69922     |         |
|            |                 | 0.24221  | -0.96162  | 0.83188   | 0.22485     | 0.646818699 |         |
| RNF6P1     | ENSG00000227406 | 0.75593  | 0.22485   | 0.75593   | 0.22485     | 0.75593     |         |
|            |                 | 0.22485  | 0.75593   | 0.22485   | 0.646818699 |             |         |
| NA         | ENSG00000232153 | 0.75587  | 0.22486   | 0.75587   | 0.22486     | 0.75587     | 0.22486 |
|            |                 | 0.75587  | 0.22486   | 0.22486   | 0.646818699 |             |         |
| RN7SL150P  | ENSG00000240626 | 0.75587  | 0.22486   | 0.65179   | 0.25727     | 0.75587     |         |
|            |                 | 0.22486  | -0.092684 | 0.53692   | 0.22486     | 0.646818699 |         |
| EEFSEC     | ENSG00000132394 | 0.69582  | 0.24327   | 0.22407   | 0.41135     | 0.39964     |         |
|            |                 | 0.34471  | 0.75583   | 0.22487   | 0.22487     | 0.646818699 |         |
| IGLV2-34   | ENSG00000253120 | 0.66324  | 0.25359   | 0.7558    | 0.22488     | -0.016331   |         |
|            |                 | 0.50651  | 0.7558    | 0.22488   | 0.22488     | 0.646818699 |         |
| CLDN14     | ENSG00000159261 | -0.21016 | 0.58323   | 0.21132   | 0.41632     | -0.76955    |         |
|            |                 | 0.77922  | 0.75572   | 0.22491   | 0.22491     | 0.646847973 |         |
| EFTUD2     | ENSG00000108883 | 0.43936  | 0.3302    | 0.39776   | 0.3454      | 0.75566     |         |
|            |                 | 0.22493  | 0.23912   | 0.40551   | 0.22493     | 0.646847973 |         |
| NA         | ENSG00000238724 | 0.75565  | 0.22493   | 0.75565   | 0.22493     | 0.75565     | 0.22493 |
|            |                 | 0.75565  | 0.22493   | 0.22493   | 0.646847973 |             |         |
| NA         | ENSG00000276854 | -0.66165 | 0.7459    | 0.75559   | 0.22495     | -1.191      | 0.88318 |
|            |                 | -1.2433  | 0.89311   | 0.22495   | 0.646867314 |             |         |
| C19orf47   | ENSG00000160392 | 0.7552   | 0.22506   | 0.7552    | 0.22506     | 0.7552      |         |
|            |                 | 0.22506  | 0.7552    | 0.22506   | 0.22506     | 0.647107257 |         |
| NA         | ENSG00000251371 | 0.75523  | 0.22506   | 0.75523   | 0.22506     | 0.75523     | 0.22506 |
|            |                 | 0.75523  | 0.22506   | 0.22506   | 0.647107257 |             |         |
| RPSAP67    | ENSG00000266858 | 0.75513  | 0.22509   | 0.75513   | 0.22509     | 0.75513     |         |
|            |                 | 0.22509  | 0.75513   | 0.22509   | 0.22509     | 0.64710958  |         |
| GSTA10P    | ENSG00000230845 | 0.75507  | 0.2251    | 0.75507   | 0.2251      | 0.75507     |         |
|            |                 | 0.2251   | 0.75507   | 0.2251    | 0.2251      | 0.64710958  |         |
| VIM        | ENSG00000026025 | 0.22802  | 0.40982   | -0.77037  | 0.77946     | 0.75506     | 0.22511 |
|            |                 | -0.77964 | 0.7822    | 0.22511   | 0.64710958  |             |         |
| GON4L      | ENSG00000116580 | -0.56663 | 0.71452   | -0.92559  | 0.82267     | 0.75501     | 0.22512 |
|            |                 | 0.62018  | 0.26757   | 0.22512   | 0.64710958  |             |         |
| CERNA3     | ENSG00000253603 | 0.75488  | 0.22516   | 0.75488   | 0.22516     | 0.75488     |         |
|            |                 | 0.22516  | 0.75488   | 0.22516   | 0.22516     | 0.64710958  |         |
| BIVM-ERCC5 | ENSG00000270181 | 0.75485  | 0.22517   | 0.75485   | 0.22517     | 0.75485     |         |
|            |                 | 0.22517  | 0.75485   | 0.22517   | 0.22517     | 0.64710958  |         |
| ZSCAN25    | ENSG00000197037 | 0.13805  | 0.4451    | 0.72388   | 0.23457     | 0.7548      |         |
|            |                 | 0.22518  | 0.69544   | 0.24339   | 0.22518     | 0.64710958  |         |
| RPL37P21   | ENSG00000236433 | 0.75481  | 0.22518   | 0.069866  | 0.47215     | -1.0819     |         |

|               |                 |            |         |             |             |           |         |  |
|---------------|-----------------|------------|---------|-------------|-------------|-----------|---------|--|
|               | 0.86035         | -0.93005   | 0.82383 | 0.22518     | 0.64710958  |           |         |  |
| CEP350        | ENSG00000135837 | -0.0027041 | 0.50108 | -1.7201     | 0.95729     | 0.75474   |         |  |
|               | 0.2252          | -0.46286   | 0.67827 | 0.2252      | 0.64710958  |           |         |  |
| AZU1          | ENSG00000172232 | 0.75464    | 0.22523 | -0.39795    | 0.65467     | 0.56224   | 0.28698 |  |
|               | 0.75464         | 0.22523    | 0.22523 | 0.64710958  |             |           |         |  |
| AP3S2         | ENSG00000157823 | 0.48873    | 0.31252 | 0.39347     | 0.34699     | 0.75463   | 0.22524 |  |
|               | 0.43271         | 0.33261    | 0.22524 | 0.64710958  |             |           |         |  |
| DHDH          | ENSG00000104808 | 0.75456    | 0.22526 | 0.75456     | 0.22526     | -0.11046  | 0.54398 |  |
|               | -0.54935        | 0.70862    | 0.22526 | 0.64710958  |             |           |         |  |
| PAX1          | ENSG00000125813 | 0.63824    | 0.26166 | 0.75454     | 0.22526     | -0.26733  | 0.60539 |  |
|               | 0.75454         | 0.22526    | 0.22526 | 0.64710958  |             |           |         |  |
| NA            | ENSG00000223732 | 0.75453    | 0.22526 | -0.62922    | 0.7354      | -0.33857  | 0.63253 |  |
|               | -0.15214        | 0.56046    | 0.22526 | 0.64710958  |             |           |         |  |
| NA            | ENSG00000267768 | 0.75455    | 0.22526 | 0.75455     | 0.22526     | 0.75455   | 0.22526 |  |
|               | 0.75455         | 0.22526    | 0.22526 | 0.64710958  |             |           |         |  |
| MMP25         | ENSG00000008516 | 0.75441    | 0.2253  | 0.40058     | 0.34436     | 0.10024   | 0.46008 |  |
|               | -0.081899       | 0.53264    | 0.2253  | 0.647178267 |             |           |         |  |
| NA            | ENSG00000238000 | 0.55556    | 0.28926 | 0.75436     | 0.22532     | 0.65407   | 0.25653 |  |
|               | -1.3502         | 0.91152    | 0.22532 | 0.647178267 |             |           |         |  |
| RNU6-939P     | ENSG00000207364 | 0.7543     | 0.22533 | 0.7543      | 0.22533     | 0.7543    |         |  |
|               | 0.22533         | 0.7543     | 0.22533 | 0.22533     | 0.647178267 |           |         |  |
| MIR4503       | ENSG00000266327 | 0.75419    | 0.22537 | 0.41493     | 0.3391      | 0.75419   |         |  |
|               | 0.22537         | 0.75419    | 0.22537 | 0.22537     | 0.647178267 |           |         |  |
| ARID3BP1      | ENSG00000227288 | 0.75416    | 0.22538 | 0.75416     | 0.22538     | 0.75416   |         |  |
|               | 0.22538         | 0.75416    | 0.22538 | 0.22538     | 0.647178267 |           |         |  |
| WNT5A-AS1     | ENSG00000244586 | 0.75416    | 0.22538 | 0.75416     | 0.22538     | 0.75416   |         |  |
|               | 0.22538         | 0.75416    | 0.22538 | 0.22538     | 0.647178267 |           |         |  |
| MTND3P6       | ENSG00000242214 | 0.75408    | 0.2254  | 0.75408     | 0.2254      | 0.75408   |         |  |
|               | 0.2254          | 0.75408    | 0.2254  | 0.2254      | 0.647178267 |           |         |  |
| JMJD7-PLA2G4B | ENSG00000168970 | 0.75402    | 0.22542 | 0.75402     | 0.22542     | -0.032806 |         |  |
|               | 0.51309         | -0.078615  | 0.53133 | 0.22542     | 0.647178267 |           |         |  |
| USP32         | ENSG00000170832 | 0.754      | 0.22543 | 0.52189     | 0.30087     | 0.39658   | 0.34584 |  |
|               | 0.40738         | 0.34186    | 0.22543 | 0.647178267 |             |           |         |  |
| NA            | ENSG00000260274 | 0.75397    | 0.22543 | 0.75397     | 0.22543     | 0.75397   | 0.22543 |  |
|               | 0.75397         | 0.22543    | 0.22543 | 0.647178267 |             |           |         |  |
| NA            | ENSG00000271166 | 0.75398    | 0.22543 | 0.2767      | 0.39101     | 0.51883   | 0.30194 |  |
|               | -0.40646        | 0.6578     | 0.22543 | 0.647178267 |             |           |         |  |
| NA            | ENSG00000230731 | -0.40292   | 0.6565  | -0.36848    | 0.64374     | 0.036817  | 0.48532 |  |
|               | 0.75392         | 0.22545    | 0.22545 | 0.647197555 |             |           |         |  |
| BAALC         | ENSG00000164929 | 0.62868    | 0.26478 | 0.75383     | 0.22548     | 0.62868   | 0.26478 |  |
|               | 0.37587         | 0.35351    | 0.22548 | 0.647236125 |             |           |         |  |
| LINC02138     | ENSG00000205015 | 0.7538     | 0.22549 | 0.7538      | 0.22549     | 0.7538    |         |  |
|               | 0.22549         | 0.7538     | 0.22549 | 0.22549     | 0.647236125 |           |         |  |
| NA            | ENSG00000200693 | 0.75364    | 0.22553 | -0.054665   | 0.5218      | -0.054665 | 0.5218  |  |
|               | -0.054665       | 0.5218     | 0.22553 | 0.647255845 |             |           |         |  |
| CD163         | ENSG00000177575 | -0.58992   | 0.72238 | 0.75358     | 0.22555     | -0.41938  | 0.66253 |  |
|               | 0.22924         | 0.40934    | 0.22555 | 0.647255845 |             |           |         |  |
| TDGF1P2       | ENSG00000183514 | 0.75357    | 0.22555 | 0.40497     | 0.34275     | 0.40497   |         |  |
|               | 0.34275         | 0.40497    | 0.34275 | 0.22555     | 0.647255845 |           |         |  |
| NA            | ENSG00000237365 | -1.4666    | 0.92876 | -1.0064     | 0.84289     | -1.3566   | 0.91255 |  |
|               | 0.75359         | 0.22555    | 0.22555 | 0.647255845 |             |           |         |  |
| ALK           | ENSG00000171094 | 0.75346    | 0.22559 | 0.31761     | 0.37539     | 0.60048   | 0.27409 |  |
|               | -0.22652        | 0.5896     | 0.22559 | 0.647256282 |             |           |         |  |
| LINC01490     | ENSG00000257741 | -0.31308   | 0.62289 | 0.75345     | 0.22559     | -0.76406  |         |  |
|               | 0.77758         | -0.31308   | 0.62289 | 0.22559     | 0.647256282 |           |         |  |
| MIR3934       | ENSG00000266509 | 0.75344    | 0.22559 | 0.75344     | 0.22559     | 0.75344   |         |  |
|               | 0.22559         | 0.75344    | 0.22559 | 0.22559     | 0.647256282 |           |         |  |
| SIN3A         | ENSG00000169375 | 0.61077    | 0.27068 | 0.75325     | 0.22565     | 0.42693   | 0.33472 |  |
|               | 0.60953         | 0.27109    | 0.22565 | 0.647267879 |             |           |         |  |
| C9orf72       | ENSG00000147894 | 0.75321    | 0.22566 | -0.37429    | 0.6459      | -0.51397  |         |  |
|               | 0.69636         | -1.5307    | 0.93708 | 0.22566     | 0.647267879 |           |         |  |
| JKAMPP1       | ENSG00000231491 | 0.7532     | 0.22566 | 0.7532      | 0.22566     | 0.7532    |         |  |

|           |                 |           |         |             |             |           |         |
|-----------|-----------------|-----------|---------|-------------|-------------|-----------|---------|
|           | 0.22566         | 0.7532    | 0.22566 | 0.22566     | 0.647267879 |           |         |
| PLA2G15   | ENSG00000103066 | -0.90668  | 0.81771 | 0.75314     | 0.22568     | -0.93887  |         |
|           | 0.8261          | 0.27079   | 0.39328 | 0.22568     | 0.647267879 |           |         |
| RAB30     | ENSG00000137502 | -0.067892 | 0.52706 | -0.067892   | 0.52706     | -0.067892 | 0.52706 |
|           | 0.75317         | 0.22568   | 0.22568 | 0.647267879 |             |           |         |
| CDH17     | ENSG00000079112 | 0.59257   | 0.27674 | -1.5173     | 0.9354      | 0.75313   | 0.22569 |
|           | -0.32484        | 0.62735   | 0.22569 | 0.647267879 |             |           |         |
| NA        | ENSG00000277855 | 0.7531    | 0.22569 | 0.72647     | 0.23378     | 0.23762   | 0.40609 |
|           | -0.51847        | 0.69793   | 0.22569 | 0.647267879 |             |           |         |
| LINC01386 | ENSG00000251324 | -0.28817  | 0.61339 | -0.17312    | 0.56872     | -0.17312  |         |
|           | 0.56872         | 0.75296   | 0.22574 | 0.22574     | 0.647267879 |           |         |
| ZNF529    | ENSG00000186020 | -0.2398   | 0.59476 | 0.075121    | 0.47006     | 0.38819   |         |
|           | 0.34894         | 0.75292   | 0.22575 | 0.22575     | 0.647267879 |           |         |
| NA        | ENSG00000251044 | -0.69124  | 0.75529 | 0.75289     | 0.22576     | -0.67765  | 0.751   |
|           | 0.75289         | 0.22576   | 0.22576 | 0.647267879 |             |           |         |
| TSPAN11   | ENSG00000110900 | 0.61064   | 0.27072 | 0.5494      | 0.29137     | -0.33437  |         |
|           | 0.63095         | 0.75285   | 0.22577 | 0.22577     | 0.647267879 |           |         |
| NA        | ENSG00000201663 | 0.40929   | 0.34116 | 0.75284     | 0.22577     | -1.2593   | 0.89604 |
|           | -1.2593         | 0.89604   | 0.22577 | 0.647267879 |             |           |         |
| VENTX     | ENSG00000151650 | 0.75282   | 0.22578 | 0.54294     | 0.29359     | 0.75282   | 0.22578 |
|           | -0.1175         | 0.54677   | 0.22578 | 0.647267879 |             |           |         |
| NA        | ENSG00000280148 | 0.75283   | 0.22578 | 0.75283     | 0.22578     | 0.75283   | 0.22578 |
|           | 0.75283         | 0.22578   | 0.22578 | 0.647267879 |             |           |         |
| POMT1     | ENSG00000130714 | 0.54652   | 0.29236 | -0.89358    | 0.81423     | 0.75267   | 0.22582 |
|           | -0.45956        | 0.67708   | 0.22582 | 0.647344467 |             |           |         |
| HECW2-AS1 | ENSG00000229056 | 0.75258   | 0.22585 | 0.75258     | 0.22585     | 0.75258   |         |
|           | 0.22585         | 0.75258   | 0.22585 | 0.22585     | 0.647371221 |           |         |
| SLC9A3R1  | ENSG00000109062 | 0.35868   | 0.35992 | 0.35868     | 0.35992     | -0.04879  |         |
|           | 0.51946         | 0.75251   | 0.22587 | 0.22587     | 0.647371221 |           |         |
| LINC01648 | ENSG00000233399 | 0.7525    | 0.22587 | -1.1261     | 0.86994     | -2.0503   |         |
|           | 0.97983         | 0.018947  | 0.49244 | 0.22587     | 0.647371221 |           |         |
| NA        | ENSG00000252774 | 0.37787   | 0.35276 | 0.3625      | 0.35849     | 0.75246   | 0.22589 |
|           | 0.63214         | 0.26365   | 0.22589 | 0.647371221 |             |           |         |
| NA        | ENSG00000238171 | -0.56433  | 0.71373 | 0.30075     | 0.3818      | -0.69741  | 0.75723 |
|           | 0.75243         | 0.2259    | 0.2259  | 0.647371221 |             |           |         |
| GZMB      | ENSG00000100453 | 0.75232   | 0.22593 | 0.46214     | 0.32199     | 0.32488   | 0.37264 |
|           | 0.75232         | 0.22593   | 0.22593 | 0.647371221 |             |           |         |
| TRIM10    | ENSG00000204613 | 0.18317   | 0.42733 | 0.27607     | 0.39125     | 0.27607   |         |
|           | 0.39125         | 0.75231   | 0.22593 | 0.22593     | 0.647371221 |           |         |
| LINC02146 | ENSG00000249490 | 0.75226   | 0.22595 | 0.75226     | 0.22595     | -0.22572  |         |
|           | 0.58929         | 0.75226   | 0.22595 | 0.22595     | 0.647371221 |           |         |
| NA        | ENSG00000275418 | 0.020275  | 0.49191 | 0.43268     | 0.33263     | 0.48243   | 0.31475 |
|           | 0.75226         | 0.22595   | 0.22595 | 0.647371221 |             |           |         |
| TMEM154   | ENSG00000170006 | 0.75212   | 0.22599 | 0.36156     | 0.35884     | 0.29399   |         |
|           | 0.38438         | 0.36905   | 0.35604 | 0.22599     | 0.647371221 |           |         |
| PURA      | ENSG00000185129 | 0.1765    | 0.42995 | -0.10462    | 0.54166     | 0.26366   | 0.39602 |
|           | 0.75208         | 0.226     | 0.226   | 0.647371221 |             |           |         |
| GNB3      | ENSG00000111664 | 0.75205   | 0.22601 | 0.75205     | 0.22601     | 0.75205   | 0.22601 |
|           | 0.75205         | 0.22601   | 0.22601 | 0.647371221 |             |           |         |
| NA        | ENSG00000275562 | 0.75198   | 0.22603 | 0.75198     | 0.22603     | 0.75198   | 0.22603 |
|           | 0.75198         | 0.22603   | 0.22603 | 0.647371221 |             |           |         |
| ATP5F1AP3 | ENSG00000263232 | 0.75194   | 0.22604 | 0.75194     | 0.22604     | 0.75194   |         |
|           | 0.22604         | 0.75194   | 0.22604 | 0.22604     | 0.647371221 |           |         |
| SNX6P1    | ENSG00000267920 | -1.1353   | 0.87187 | -0.058019   | 0.52313     | -0.93281  |         |
|           | 0.82454         | 0.75196   | 0.22604 | 0.22604     | 0.647371221 |           |         |
| METTL7A   | ENSG00000185432 | -0.65     | 0.74216 | -0.65       | 0.74216     | 0.75188   | 0.22606 |
|           | -0.0045449      | 0.50181   | 0.22606 | 0.647371221 |             |           |         |
| RNU6-381P | ENSG00000212561 | 0.47518   | 0.31733 | 0.75185     | 0.22607     | 0.50407   |         |
|           | 0.3071          | 0.50407   | 0.3071  | 0.22607     | 0.647371221 |           |         |
| NA        | ENSG00000173727 | 0.40849   | 0.34146 | 0.40849     | 0.34146     | 0.75174   | 0.2261  |
|           | 0.60473         | 0.27268   | 0.2261  | 0.647371221 |             |           |         |
| NA        | ENSG00000261076 | 0.75175   | 0.2261  | 0.75175     | 0.2261      | 0.75175   | 0.2261  |

|            |                 |              |             |              |             |              |         |         |
|------------|-----------------|--------------|-------------|--------------|-------------|--------------|---------|---------|
|            | 0.75175         | 0.2261       | 0.2261      | 0.647371221  |             |              |         |         |
| RNU4-17P   | ENSG00000202468 | 0.75166      | 0.22613     | 0.75166      | 0.22613     | 0.75166      | 0.22613 | 0.75166 |
|            | 0.22613         | 0.75166      | 0.22613     | 0.22613      | 0.647371221 |              |         |         |
| DNM2       | ENSG00000079805 | -0.29497     | 0.61599     | 0.75162      | 0.22614     | -0.12274     | 0.54884 |         |
|            | 0.5370.29563    | 0.22614      | 0.647371221 |              |             |              |         |         |
| RNA5SP90   | ENSG00000201671 | 0.75161      | 0.22614     | 0.75161      | 0.22614     | 0.75161      | 0.22614 | 0.75161 |
|            | 0.22614         | 0.75161      | 0.22614     | 0.22614      | 0.647371221 |              |         |         |
| KIF1A      | ENSG00000130294 | 0.75158      | 0.22615     | 0.15842      | 0.43706     | 0.43034      | 0.33347 |         |
|            | 0.12912         | 0.44863      | 0.22615     | 0.647371221  |             |              |         |         |
| NA         | ENSG00000283491 | -0.47761     | 0.68354     | 0.75156      | 0.22616     | -0.51378     | 0.6963  |         |
|            | -0.51378        | 0.6963       | 0.22616     | 0.647371221  |             |              |         |         |
| BCL2A1     | ENSG00000140379 | 0.75149      | 0.22618     | 0.11765      | 0.45317     | -0.68118     |         |         |
|            | 0.75212         | 0.69438      | 0.24372     | 0.22618      | 0.647371221 |              |         |         |
| NA         | ENSG00000229271 | 0.75148      | 0.22618     | 0.40764      | 0.34177     | 0.40764      | 0.34177 |         |
|            | -0.018437       | 0.50735      | 0.22618     | 0.647371221  |             |              |         |         |
| GCSAML     | ENSG00000169224 | 0.75147      | 0.22619     | -1.1067      | 0.86579     | -1.265       |         |         |
|            | 0.89707         | -0.59425     | 0.72383     | 0.22619      | 0.647371221 |              |         |         |
| HNRNPA1P57 | ENSG00000237442 | 0.75136      | 0.22622     | 0.75136      | 0.22622     | 0.75136      |         |         |
|            | 0.22622         | 0.62182      | 0.26703     | 0.22622      | 0.647371221 |              |         |         |
| NA         | ENSG00000260209 | 0.75136      | 0.22622     | -0.21751     | 0.58609     | -0.02722     | 0.51086 |         |
|            | -0.77897        | 0.7820.22622 | 0.647371221 |              |             |              |         |         |
| FXNP1      | ENSG00000258421 | 0.7513       | 0.22624     | 0.7513       | 0.22624     | 0.7513       | 0.22624 |         |
|            | 0.7513          | 0.22624      | 0.22624     | 0.647371221  |             |              |         |         |
| FUT6       | ENSG00000156413 | 0.4683       | 0.31978     | 0.75121      | 0.22626     | 0.75121      | 0.22626 |         |
|            | 0.75121         | 0.22626      | 0.22626     | 0.647371221  |             |              |         |         |
| LINC02870  | ENSG00000180066 | 0.57067      | 0.28411     | 0.18117      | 0.42812     | 0.1580.43723 |         |         |
|            | 0.75121         | 0.22626      | 0.22626     | 0.647371221  |             |              |         |         |
| ZBED8      | ENSG00000221886 | 0.75118      | 0.22627     | -0.66894     | 0.74823     | -0.66894     | 0.74823 |         |
|            | -0.66894        | 0.74823      | 0.22627     | 0.647371221  |             |              |         |         |
| NA         | ENSG00000233616 | 0.75112      | 0.22629     | -0.1486      | 0.55907     | 0.75112      | 0.22629 |         |
|            | 0.75112         | 0.22629      | 0.22629     | 0.647371221  |             |              |         |         |
| CHCHD3P3   | ENSG00000214973 | -0.52054     | 0.69866     | 0.75107      | 0.22631     | 0.72894      |         |         |
|            | 0.23302         | 0.16497      | 0.43448     | 0.22631      | 0.647371221 |              |         |         |
| NA         | ENSG00000243861 | 0.75101      | 0.22632     | 0.14101      | 0.44393     | 0.14101      | 0.44393 |         |
|            | 0.14101         | 0.44393      | 0.22632     | 0.647371221  |             |              |         |         |
| NA         | ENSG00000253616 | 0.1507       | 0.44011     | 0.7510.22633 | 0.1507      | 0.44011      |         |         |
|            | 0.1507          | 0.44011      | 0.22633     | 0.647371221  |             |              |         |         |
| C5orf38    | ENSG00000186493 | 0.75087      | 0.22637     | 0.75087      | 0.22637     | 0.75087      |         |         |
|            | 0.22637         | 0.75087      | 0.22637     | 0.22637      | 0.647371221 |              |         |         |
| SLC16A8    | ENSG00000100156 | 0.75083      | 0.22638     | 0.75083      | 0.22638     | 0.75083      |         |         |
|            | 0.22638         | 0.75083      | 0.22638     | 0.22638      | 0.647371221 |              |         |         |
| NA         | ENSG00000233427 | 0.75074      | 0.22641     | -0.206       | 0.5816      | -1.5788      | 0.94281 |         |
|            | -1.5788         | 0.94281      | 0.22641     | 0.647371221  |             |              |         |         |
| NA         | ENSG00000267550 | 0.75069      | 0.22642     | 0.75069      | 0.22642     | -0.92126     | 0.82154 |         |
|            | 0.75069         | 0.22642      | 0.22642     | 0.647371221  |             |              |         |         |
| NA         | ENSG00000228417 | 0.75059      | 0.22645     | 0.75059      | 0.22645     | 0.75059      | 0.22645 |         |
|            | 0.75059         | 0.22645      | 0.22645     | 0.647371221  |             |              |         |         |
| MMP3       | ENSG00000149968 | 0.75055      | 0.22646     | 0.75055      | 0.22646     | 0.75055      | 0.22646 |         |
|            | -0.31946        | 0.62531      | 0.22646     | 0.647371221  |             |              |         |         |
| NA         | ENSG00000264520 | -0.46663     | 0.67962     | 0.75053      | 0.22647     | -0.74871     | 0.77298 |         |
|            | -0.74871        | 0.77298      | 0.22647     | 0.647371221  |             |              |         |         |
| MINK1      | ENSG00000141503 | -1.1602      | 0.87702     | 0.37017      | 0.35563     | 0.75045      | 0.22649 |         |
|            | -0.37401        | 0.6458       | 0.22649     | 0.647371221  |             |              |         |         |
| NA         | ENSG00000239432 | 0.75045      | 0.22649     | 0.67984      | 0.2483      | -0.15906     | 0.56319 |         |
|            | 0.031857        | 0.48729      | 0.22649     | 0.647371221  |             |              |         |         |
| NA         | ENSG00000225424 | -1.4963      | 0.93271     | -0.46057     | 0.67745     | 0.7504       | 0.22651 |         |
|            | -1.7729         | 0.96188      | 0.22651     | 0.647371221  |             |              |         |         |
| CASR       | ENSG00000036828 | 0.17976      | 0.42867     | 0.31102      | 0.37789     | 0.75037      | 0.22652 |         |
|            | 0.73557         | 0.2310.22652 | 0.647371221 |              |             |              |         |         |
| SRBD1      | ENSG00000068784 | 0.6384       | 0.26161     | 0.75036      | 0.22652     | 0.68751      | 0.24588 |         |
|            | 0.73007         | 0.23267      | 0.22652     | 0.647371221  |             |              |         |         |
| KMT5B      | ENSG00000110066 | 0.75032      | 0.22653     | -1.3107      | 0.90502     | 0.56875      | 0.28476 |         |

|            |                 |           |         |             |             |           |         |  |
|------------|-----------------|-----------|---------|-------------|-------------|-----------|---------|--|
|            | -0.60613        | 0.72779   | 0.22653 | 0.647371221 |             |           |         |  |
| LINC02873  | ENSG00000175728 | 0.75031   | 0.22653 | -0.50136    | 0.69194     | 0.47731   |         |  |
|            | 0.31657         | 0.1258    | 0.44995 | 0.22653     | 0.647371221 |           |         |  |
| NA         | ENSG00000252404 | 0.049878  | 0.48011 | 0.75025     | 0.22655     | -0.060951 | 0.5243  |  |
|            | 0.049878        | 0.48011   | 0.22655 | 0.647371221 |             |           |         |  |
| RNU7-156P  | ENSG00000253023 | 0.75027   | 0.22655 | 0.75027     | 0.22655     | 0.75027   |         |  |
|            | 0.22655         | 0.22884   | 0.4095  | 0.22655     | 0.647371221 |           |         |  |
| ZNF783     | ENSG00000204946 | -0.99004  | 0.83892 | -0.88146    | 0.81097     | -0.38713  |         |  |
|            | 0.65067         | 0.75022   | 0.22656 | 0.22656     | 0.647371221 |           |         |  |
| NA         | ENSG00000266961 | 0.062531  | 0.47507 | -1.0105     | 0.84388     | -0.33077  | 0.62959 |  |
|            | 0.75021         | 0.22656   | 0.22656 | 0.647371221 |             |           |         |  |
| UBE2I      | ENSG00000103275 | 0.25074   | 0.40101 | 0.30226     | 0.38123     | 0.74997   | 0.22664 |  |
|            | 0.514           | 0.30363   | 0.22664 | 0.64754305  |             |           |         |  |
| PTCH1      | ENSG00000185920 | 0.39493   | 0.34645 | 0.74992     | 0.22665     | 0.50685   | 0.30613 |  |
|            | -0.14583        | 0.55797   | 0.22665 | 0.64754305  |             |           |         |  |
| SUN3       | ENSG00000164744 | 0.7499    | 0.22666 | -0.12233    | 0.54868     | 0.7499    | 0.22666 |  |
|            | 0.7499          | 0.22666   | 0.22666 | 0.64754305  |             |           |         |  |
| UGT1A9     | ENSG00000241119 | 0.16386   | 0.43492 | 0.023976    | 0.49044     | 0.74971   |         |  |
|            | 0.22671         | 0.22788   | 0.40987 | 0.22671     | 0.647629497 |           |         |  |
| KCNMB4     | ENSG00000135643 | -1.3341   | 0.90892 | 0.23768     | 0.40606     | 0.68779   |         |  |
|            | 0.24579         | 0.74966   | 0.22673 | 0.22673     | 0.647629497 |           |         |  |
| NA         | ENSG00000250983 | 0.74961   | 0.22675 | 0.74961     | 0.22675     | 0.74961   | 0.22675 |  |
|            | -0.39774        | 0.65459   | 0.22675 | 0.647629497 |             |           |         |  |
| NA         | ENSG00000260277 | 0.74957   | 0.22676 | -0.18466    | 0.57325     | -0.18466  | 0.57325 |  |
|            | -0.18466        | 0.57325   | 0.22676 | 0.647629497 |             |           |         |  |
| MTARC2     | ENSG00000117791 | 0.30455   | 0.38035 | 0.74953     | 0.22677     | 0.55035   |         |  |
|            | 0.29104         | 0.0053357 | 0.49787 | 0.22677     | 0.647629497 |           |         |  |
| WDR60      | ENSG00000126870 | 0.74953   | 0.22677 | -1.8724     | 0.96942     | -1.1731   | 0.87962 |  |
|            | -0.67526        | 0.75024   | 0.22677 | 0.647629497 |             |           |         |  |
| DHTKD1     | ENSG00000181192 | -0.8927   | 0.81399 | -1.3755     | 0.91551     | -0.16938  |         |  |
|            | 0.56725         | 0.74938   | 0.22681 | 0.22681     | 0.647667817 |           |         |  |
| LINC01786  | ENSG00000230415 | 0.74938   | 0.22681 | 0.57563     | 0.28243     | 0.74938   |         |  |
|            | 0.22681         | 0.74938   | 0.22681 | 0.22681     | 0.647667817 |           |         |  |
| NA         | ENSG00000180015 | 0.74927   | 0.22685 | -0.58366    | 0.72028     | -0.19763  | 0.57833 |  |
|            | -0.19763        | 0.57833   | 0.22685 | 0.647734681 |             |           |         |  |
| MESP2      | ENSG00000188095 | 0.54124   | 0.29417 | 0.67836     | 0.24877     | 0.48373   | 0.31429 |  |
|            | 0.74923         | 0.22686   | 0.22686 | 0.647734681 |             |           |         |  |
| HLA-V      | ENSG00000181126 | 0.6059    | 0.27229 | 0.74904     | 0.22692     | 0.74904   | 0.22692 |  |
|            | 0.74904         | 0.22692   | 0.22692 | 0.647868034 |             |           |         |  |
| RNU6-1280P | ENSG00000202081 | 0.74895   | 0.22694 | 0.74895     | 0.22694     | 0.74895   |         |  |
|            | 0.22694         | 0.74895   | 0.22694 | 0.22694     | 0.647868362 |           |         |  |
| STRIP1     | ENSG00000143093 | 0.74893   | 0.22695 | -0.14548    | 0.55783     | -0.92973  |         |  |
|            | 0.82374         | 0.10104   | 0.45976 | 0.22695     | 0.647868362 |           |         |  |
| VN1R93P    | ENSG00000269320 | 0.74891   | 0.22696 | 0.74891     | 0.22696     | 0.74891   |         |  |
|            | 0.22696         | 0.74891   | 0.22696 | 0.22696     | 0.647868362 |           |         |  |
| TCTN2      | ENSG00000168778 | -0.95851  | 0.8311  | -0.68211    | 0.75242     | -0.54859  | 0.70836 |  |
|            | 0.74884         | 0.22698   | 0.22698 | 0.6478875   |             |           |         |  |
| ELMO2P1    | ENSG00000276172 | -0.20248  | 0.58023 | -0.05578    | 0.52224     | 0.069169  |         |  |
|            | 0.47243         | 0.74874   | 0.22701 | 0.22701     | 0.647935178 |           |         |  |
| NA         | ENSG00000227589 | 0.74864   | 0.22704 | -0.11951    | 0.54756     | -0.11951  | 0.54756 |  |
|            | 0.16724         | 0.43359   | 0.22704 | 0.647944902 |             |           |         |  |
| NA         | ENSG00000277619 | 0.74865   | 0.22704 | -0.71489    | 0.76266     | 0.74865   | 0.22704 |  |
|            | 0.74865         | 0.22704   | 0.22704 | 0.647944902 |             |           |         |  |
| EXO5       | ENSG00000164002 | -0.50903  | 0.69464 | -0.50903    | 0.69464     | 0.74836   | 0.22712 |  |
|            | 0.102           | 0.45938   | 0.22712 | 0.648031415 |             |           |         |  |
| GLTP       | ENSG00000139433 | 0.12423   | 0.45057 | 0.12423     | 0.45057     | 0.12423   | 0.45057 |  |
|            | 0.74827         | 0.22715   | 0.22715 | 0.648031415 |             |           |         |  |
| NA         | ENSG00000232360 | -0.67096  | 0.74888 | -0.4544     | 0.67523     | 0.74826   | 0.22715 |  |
|            | 0.74826         | 0.22715   | 0.22715 | 0.648031415 |             |           |         |  |
| RIDA       | ENSG00000132541 | 0.74824   | 0.22716 | 0.74824     | 0.22716     | 0.74824   | 0.22716 |  |
|            | 0.042093        | 0.48321   | 0.22716 | 0.648031415 |             |           |         |  |
| HDHD2      | ENSG00000167220 | -1.4762   | 0.93005 | -0.27173    | 0.60709     | 0.74825   | 0.22716 |  |

|            |                 |          |         |             |             |           |         |  |
|------------|-----------------|----------|---------|-------------|-------------|-----------|---------|--|
|            | -1.1333         | 0.87145  | 0.22716 | 0.648031415 |             |           |         |  |
| NA         | ENSG00000224311 | -1.2939  | 0.90216 | -1.2939     | 0.90216     | 0.74823   | 0.22716 |  |
|            | 0.72039         | 0.23564  | 0.22716 | 0.648031415 |             |           |         |  |
| OLIG1      | ENSG00000184221 | -0.44424 | 0.67156 | 0.21168     | 0.41618     | -0.86292  | 0.80591 |  |
|            | 0.7482          | 0.22717  | 0.22717 | 0.648031415 |             |           |         |  |
| NA         | ENSG00000267218 | 0.74816  | 0.22718 | 0.29028     | 0.3858      | 0.74632   | 0.22774 |  |
|            | 0.74632         | 0.22774  | 0.22718 | 0.648031415 |             |           |         |  |
| PHLDA1     | ENSG00000139289 | 0.11326  | 0.45491 | -0.25489    | 0.6006      | 0.74814   |         |  |
|            | 0.22719         | 0.18762  | 0.42559 | 0.22719     | 0.648031415 |           |         |  |
| RN7SL320P  | ENSG00000243900 | 0.74804  | 0.22722 | 0.74804     | 0.22722     | 0.74804   |         |  |
|            | 0.22722         | 0.74804  | 0.22722 | 0.22722     | 0.648041121 |           |         |  |
| LINC02019  | ENSG00000273356 | 0.55229  | 0.29038 | 0.63766     | 0.26185     | 0.73657   |         |  |
|            | 0.23069         | 0.74802  | 0.22722 | 0.22722     | 0.648041121 |           |         |  |
| NA         | ENSG00000232135 | 0.74793  | 0.22725 | 0.74793     | 0.22725     | 0.74793   | 0.22725 |  |
|            | 0.74793         | 0.22725  | 0.22725 | 0.648079342 |             |           |         |  |
| NA         | ENSG00000258856 | 0.25184  | 0.40058 | -0.12219    | 0.54862     | 0.7479    | 0.22726 |  |
|            | 0.042949        | 0.48287  | 0.22726 | 0.648079342 |             |           |         |  |
| RPL37P6    | ENSG00000241431 | 0.74783  | 0.22728 | 0.74783     | 0.22728     | 0.74783   |         |  |
|            | 0.22728         | 0.74783  | 0.22728 | 0.22728     | 0.64808904  |           |         |  |
| KPNA1      | ENSG00000114030 | -0.96869 | 0.83365 | 0.7478      | 0.22729     | -0.5387   | 0.70495 |  |
|            | -0.53453        | 0.70351  | 0.22729 | 0.64808904  |             |           |         |  |
| RNU6-834P  | ENSG00000199237 | 0.74771  | 0.22732 | 0.74771     | 0.22732     | 0.74771   |         |  |
|            | 0.22732         | 0.74771  | 0.22732 | 0.22732     | 0.648118121 |           |         |  |
| NA         | ENSG00000267591 | 0.74765  | 0.22734 | 0.74765     | 0.22734     | 0.74765   | 0.22734 |  |
|            | 0.74765         | 0.22734  | 0.22734 | 0.648118121 |             |           |         |  |
| NA         | ENSG00000218187 | -0.94915 | 0.82873 | -0.12594    | 0.55011     | -0.94915  | 0.82873 |  |
|            | 0.74756         | 0.22736  | 0.22736 | 0.648118121 |             |           |         |  |
| SOX30      | ENSG00000039600 | -0.11033 | 0.54393 | 0.47484     | 0.31745     | 0.74754   | 0.22737 |  |
|            | -0.38216        | 0.64883  | 0.22737 | 0.648118121 |             |           |         |  |
| KCNN1      | ENSG00000105642 | -0.3439  | 0.63454 | 0.74752     | 0.22737     | -0.1569   | 0.56234 |  |
|            | 0.084795        | 0.46621  | 0.22737 | 0.648118121 |             |           |         |  |
| SLCO5A1    | ENSG00000137571 | 0.41211  | 0.34013 | 0.74751     | 0.22738     | -0.88608  |         |  |
|            | 0.81221         | -0.27236 | 0.60733 | 0.22738     | 0.648118121 |           |         |  |
| RNU6-218P  | ENSG00000252929 | 0.74741  | 0.22741 | 0.74741     | 0.22741     | 0.74741   |         |  |
|            | 0.22741         | 0.74741  | 0.22741 | 0.22741     | 0.64812781  |           |         |  |
| UGT2A2     | ENSG00000271271 | 0.74739  | 0.22741 | 0.74739     | 0.22741     | 0.74739   |         |  |
|            | 0.22741         | 0.74739  | 0.22741 | 0.22741     | 0.64812781  |           |         |  |
| RNU7-74P   | ENSG00000239010 | 0.74729  | 0.22744 | 0.099368    | 0.46042     | 0.74729   |         |  |
|            | 0.22744         | 0.74729  | 0.22744 | 0.22744     | 0.648156587 |           |         |  |
| GSTA5      | ENSG00000182793 | 0.74726  | 0.22745 | -1.5691     | 0.94169     | 0.67913   | 0.24853 |  |
|            | -0.57354        | 0.71686  | 0.22745 | 0.648156587 |             |           |         |  |
| ACTG1P23   | ENSG00000230362 | 0.74722  | 0.22746 | 0.74722     | 0.22746     | -0.066717 |         |  |
|            | 0.5266          | 0.41889  | 0.33765 | 0.22746     | 0.648156587 |           |         |  |
| RN7SKP6    | ENSG00000201665 | 0.74707  | 0.22751 | 0.74707     | 0.22751     | 0.74707   |         |  |
|            | 0.22751         | 0.74707  | 0.22751 | 0.22751     | 0.648232926 |           |         |  |
| NA         | ENSG00000258993 | 0.14468  | 0.44248 | 0.14468     | 0.44248     | 0.74704   | 0.22752 |  |
|            | 0.14468         | 0.44248  | 0.22752 | 0.648232926 |             |           |         |  |
| OR8B7P     | ENSG00000254976 | 0.74701  | 0.22753 | 0.74701     | 0.22753     | 0.32415   |         |  |
|            | 0.37291         | 0.74701  | 0.22753 | 0.22753     | 0.648232926 |           |         |  |
| NA         | ENSG00000214278 | -0.26478 | 0.60441 | 0.74698     | 0.22754     | -0.43723  | 0.66903 |  |
|            | 0.74698         | 0.22754  | 0.22754 | 0.648232926 |             |           |         |  |
| NA         | ENSG00000279719 | 0.74672  | 0.22761 | 0.74672     | 0.22761     | 0.74672   | 0.22761 |  |
|            | 0.74672         | 0.22761  | 0.22761 | 0.648394441 |             |           |         |  |
| HMG2P28    | ENSG00000236086 | 0.25274  | 0.40023 | 0.65323     | 0.2568      | 0.74656   |         |  |
|            | 0.22766         | -0.32937 | 0.62906 | 0.22766     | 0.648461505 |           |         |  |
| JTBP1      | ENSG00000233603 | 0.74651  | 0.22768 | 0.74651     | 0.22768     | 0.74651   | 0.22768 |  |
|            | 0.74651         | 0.22768  | 0.22768 | 0.648461505 |             |           |         |  |
| AQP4       | ENSG00000171885 | 0.74647  | 0.22769 | 0.74647     | 0.22769     | 0.74647   | 0.22769 |  |
|            | 0.56248         | 0.2869   | 0.22769 | 0.648461505 |             |           |         |  |
| PLCXD2-AS1 | ENSG00000240766 | -0.27547 | 0.60852 | -0.27547    | 0.60852     | 0.71315   |         |  |
|            | 0.23788         | 0.74641  | 0.22771 | 0.22771     | 0.648461505 |           |         |  |
| NA         | ENSG00000200008 | 0.74636  | 0.22773 | 0.27654     | 0.39107     | 0.27654   | 0.39107 |  |



|           |                 |          |             |             |             |           |         |
|-----------|-----------------|----------|-------------|-------------|-------------|-----------|---------|
|           | 0.27654         | 0.39107  | 0.22773     | 0.648461505 |             |           |         |
| DLX4      | ENSG00000108813 | 0.18401  | 0.427       | 0.74632     | 0.22774     | 0.74632   | 0.22774 |
|           | -0.50871        | 0.69452  | 0.22774     | 0.648461505 |             |           |         |
| DLL1      | ENSG00000198719 | 0.7463   | 0.22774     | 0.65669     | 0.25569     | 0.7463    | 0.22774 |
|           | 0.7463          | 0.22774  | 0.22774     | 0.648461505 |             |           |         |
| ZBTB2P1   | ENSG00000278480 | -0.50092 | 0.69179     | 0.68258     | 0.24744     | 0.68258   |         |
|           | 0.24744         | 0.74632  | 0.22774     | 0.22774     | 0.648461505 |           |         |
| LRIF1     | ENSG00000121931 | 0.74625  | 0.22776     | 0.74625     | 0.22776     | 0.74625   | 0.22776 |
|           | 0.74625         | 0.22776  | 0.22776     | 0.648480561 |             |           |         |
| PANK1     | ENSG00000152782 | 0.74616  | 0.22778     | 0.55841     | 0.28828     | 0.74616   | 0.22778 |
|           | 0.55841         | 0.28828  | 0.22778     | 0.648499614 |             |           |         |
| NA        | ENSG00000231955 | 0.74606  | 0.22781     | 0.74606     | 0.22781     | 0.74606   | 0.22781 |
|           | 0.74606         | 0.22781  | 0.22781     | 0.648537715 |             |           |         |
| METTL17   | ENSG00000165792 | -1.6685  | 0.95239     | -1.6685     | 0.95239     | 0.74603   |         |
|           | 0.22782         | -0.9392  | 0.82619     | 0.22782     | 0.648537715 |           |         |
| NA        | ENSG00000281120 | -0.15085 | 0.55995     | -1.4236     | 0.92272     | -0.019892 | 0.50794 |
|           | 0.74598         | 0.22784  | 0.22784     | 0.648556761 |             |           |         |
| SELENOK   | ENSG00000113811 | 0.74586  | 0.22787     | 0.74586     | 0.22787     | 0.74586   |         |
|           | 0.22787         | 0.6665   | 0.25255     | 0.22787     | 0.64860427  |           |         |
| NA        | ENSG00000263082 | 0.74577  | 0.2279      | 0.74577     | 0.2279      | 0.74577   | 0.2279  |
|           | 0.74577         | 0.2279   | 0.2279      | 0.648651773 |             |           |         |
| NA        | ENSG00000237317 | 0.74571  | 0.22792     | 0.74571     | 0.22792     | 0.74571   | 0.22792 |
|           | 0.74571         | 0.22792  | 0.22792     | 0.648670809 |             |           |         |
| FBP2P1    | ENSG00000237743 | 0.74544  | 0.228       | 0.74544     | 0.228       | 0.74544   | 0.228   |
|           | 0.228           | 0.228    | 0.648756533 |             |             |           |         |
| VIPR2     | ENSG00000106018 | -0.14898 | 0.55921     | 0.64282     | 0.26017     | 0.3034    | 0.38079 |
|           | 0.7454          | 0.22801  | 0.22801     | 0.648756533 |             |           |         |
| USP8P1    | ENSG00000214892 | 0.53124  | 0.29763     | 0.57358     | 0.28312     | 0.74541   |         |
|           | 0.22801         | 0.26919  | 0.39389     | 0.22801     | 0.648756533 |           |         |
| NA        | ENSG00000249056 | -0.28689 | 0.6129      | 0.039244    | 0.48435     | 0.66444   | 0.2532  |
|           | 0.74539         | 0.22802  | 0.22802     | 0.648756533 |             |           |         |
| IGSF9     | ENSG00000085552 | 0.74534  | 0.22803     | 0.74534     | 0.22803     | 0.2526    | 0.40029 |
|           | 0.38103         | 0.35159  | 0.22803     | 0.648756533 |             |           |         |
| RNU6-487P | ENSG00000202300 | 0.74537  | 0.22803     | 0.4079      | 0.34168     | -0.60044  |         |
|           | 0.72589         | 0.17077  | 0.4322      | 0.22803     | 0.648756533 |           |         |
| MAL2-AS1  | ENSG00000253972 | 0.74529  | 0.22805     | 0.74529     | 0.22805     | 0.74529   |         |
|           | 0.22805         | 0.74529  | 0.22805     | 0.22805     | 0.648775556 |           |         |
| MIR7853   | ENSG00000263572 | 0.74523  | 0.22807     | 0.74523     | 0.22807     | 0.74523   |         |
|           | 0.22807         | 0.74523  | 0.22807     | 0.22807     | 0.648794577 |           |         |
| FGF1      | ENSG00000113578 | 0.31668  | 0.37574     | -0.70611    | 0.75994     | -0.22964  | 0.59081 |
|           | 0.74512         | 0.2281   | 0.2281      | 0.648794905 |             |           |         |
| NA        | ENSG00000251452 | -0.50654 | 0.69376     | -0.50654    | 0.69376     | 0.74507   | 0.22811 |
|           | 0.39121         | 0.34782  | 0.22811     | 0.648794905 |             |           |         |
| NA        | ENSG00000250735 | -0.32875 | 0.62883     | -0.93519    | 0.82515     | 0.74498   | 0.22814 |
|           | -0.33278        | 0.63035  | 0.22814     | 0.648794905 |             |           |         |
| SEC61A2   | ENSG00000065665 | -0.62143 | 0.73284     | 0.74494     | 0.22815     | -0.53816  |         |
|           | 0.70477         | 0.73955  | 0.22979     | 0.22815     | 0.648794905 |           |         |
| NA        | ENSG00000197644 | 0.61769  | 0.26839     | 0.62209     | 0.26694     | 0.74495   | 0.22815 |
|           | 0.26378         | 0.39597  | 0.22815     | 0.648794905 |             |           |         |
| NA        | ENSG00000255395 | -0.77181 | 0.77989     | 0.74496     | 0.22815     | -0.11437  | 0.54553 |
|           | 0.50876         | 0.30546  | 0.22815     | 0.648794905 |             |           |         |
| DTNA      | ENSG00000134769 | 0.7449   | 0.22817     | -0.70315    | 0.75902     | 0.33769   | 0.3678  |
|           | -0.19587        | 0.57764  | 0.22817     | 0.648813917 |             |           |         |
| CPEB1-AS1 | ENSG00000259462 | 0.74483  | 0.22819     | 0.74483     | 0.22819     | 0.74483   |         |
|           | 0.22819         | -0.39346 | 0.65301     | 0.22819     | 0.648832927 |           |         |
| SNORD93   | ENSG00000221740 | 0.64216  | 0.26038     | 0.64216     | 0.26038     | 0.74473   |         |
|           | 0.22822         | 0.64216  | 0.26038     | 0.22822     | 0.648833084 |           |         |
| TPT1P11   | ENSG00000239995 | -0.10888 | 0.54335     | -0.10888    | 0.54335     | -0.10888  |         |
|           | 0.54335         | 0.74471  | 0.22822     | 0.22822     | 0.648833084 |           |         |
| NA        | ENSG00000283138 | -0.53404 | 0.70334     | 0.74468     | 0.22823     | -0.11464  | 0.54564 |
|           | -0.11464        | 0.54564  | 0.22823     | 0.648833084 |             |           |         |
| TMEM39B   | ENSG00000121775 | 0.62077  | 0.26738     | 0.36493     | 0.35758     | 0.35637   |         |

|           |                 |          |         |             |             |          |         |  |
|-----------|-----------------|----------|---------|-------------|-------------|----------|---------|--|
|           | 0.36078         | 0.74459  | 0.22826 | 0.22826     | 0.648880516 |          |         |  |
| LINC02124 | ENSG00000259947 | 0.74454  | 0.22828 | 0.22828     | -1.3122     | 0.90528  | -1.3122 |  |
|           | 0.90528         | -1.3122  | 0.90528 | 0.22828     | 0.648880665 |          |         |  |
| FBXL16    | ENSG00000127585 | 0.61311  | 0.2699  | 0.74449     | 0.22829     | -0.41843 |         |  |
|           | 0.66218         | 0.42977  | 0.33368 | 0.22829     | 0.648880665 |          |         |  |
| TRPV3     | ENSG00000167723 | -1.0785  | 0.85961 | -0.083801   | 0.53339     | 0.74445  | 0.2283  |  |
|           | -0.26797        | 0.60564  | 0.2283  | 0.648880665 |             |          |         |  |
| NA        | ENSG00000253258 | 0.74422  | 0.22837 | 0.74422     | 0.22837     | 0.74422  | 0.22837 |  |
|           | 0.74422         | 0.22837  | 0.22837 | 0.648919226 |             |          |         |  |
| ISCU1     | ENSG00000238051 | 0.41515  | 0.33901 | -0.20939    | 0.58293     | 0.7442   |         |  |
|           | 0.22838         | 0.054407 | 0.47831 | 0.22838     | 0.648919226 |          |         |  |
| AGBL3     | ENSG00000146856 | 0.065803 | 0.47377 | -0.75556    | 0.77504     | 0.74409  | 0.22841 |  |
|           | -0.24317        | 0.59606  | 0.22841 | 0.648919226 |             |          |         |  |
| TSNAXIP1  | ENSG00000102904 | 0.74407  | 0.22842 | 0.74407     | 0.22842     | 0.74407  |         |  |
|           | 0.22842         | 0.60638  | 0.27213 | 0.22842     | 0.648919226 |          |         |  |
| NA        | ENSG00000252566 | 0.74399  | 0.22844 | -0.47527    | 0.6827      | -0.86917 | 0.80762 |  |
|           | -0.031573       | 0.51259  | 0.22844 | 0.648919226 |             |          |         |  |
| PRAMEF7   | ENSG00000204510 | 0.74396  | 0.22845 | -1.7554     | 0.9604      | -0.61323 |         |  |
|           | 0.73014         | 0.19569  | 0.42243 | 0.22845     | 0.648919226 |          |         |  |
| NA        | ENSG00000252367 | 0.74396  | 0.22845 | 0.74396     | 0.22845     | 0.74396  | 0.22845 |  |
|           | 0.74396         | 0.22845  | 0.22845 | 0.648919226 |             |          |         |  |
| NA        | ENSG00000262516 | 0.59561  | 0.27572 | 0.59561     | 0.27572     | 0.74397  | 0.22845 |  |
|           | -1.0438         | 0.8517   | 0.22845 | 0.648919226 |             |          |         |  |
| HMG2P22   | ENSG00000227259 | -0.6929  | 0.75581 | 0.74392     | 0.22846     | -0.90747 |         |  |
|           | 0.81792         | -0.58674 | 0.72131 | 0.22846     | 0.648919226 |          |         |  |
| TTC39B    | ENSG00000155158 | 0.12678  | 0.44956 | 0.40403     | 0.34309     | 0.64782  |         |  |
|           | 0.25855         | 0.74391  | 0.22847 | 0.22847     | 0.648919226 |          |         |  |
| MIR4258   | ENSG00000264349 | 0.74391  | 0.22847 | 0.74391     | 0.22847     | 0.74391  |         |  |
|           | 0.22847         | 0.74391  | 0.22847 | 0.22847     | 0.648919226 |          |         |  |
| NA        | ENSG00000240820 | -0.81424 | 0.79225 | 0.74383     | 0.22849     | 0.74383  | 0.22849 |  |
|           | -0.81424        | 0.79225  | 0.22849 | 0.648919226 |             |          |         |  |
| AOC1      | ENSG00000002726 | 0.21355  | 0.41545 | 0.74381     | 0.2285      | 0.58955  | 0.27774 |  |
|           | 0.74381         | 0.2285   | 0.2285  | 0.648919226 |             |          |         |  |
| NFE2L2    | ENSG00000116044 | 0.7438   | 0.2285  | 0.7438      | 0.2285      | 0.46614  |         |  |
|           | 0.32056         | 0.24763  | 0.40221 | 0.2285      | 0.648919226 |          |         |  |
| NA        | ENSG00000238260 | -1.3761  | 0.9156  | -0.62411    | 0.73372     | 0.74364  | 0.22855 |  |
|           | -0.74612        | 0.7722   | 0.22855 | 0.648938344 |             |          |         |  |
| NA        | ENSG00000275278 | 0.43082  | 0.3333  | 0.43082     | 0.3333      | 0.43082  | 0.3333  |  |
|           | 0.74363         | 0.22855  | 0.22855 | 0.648938344 |             |          |         |  |
| TMEM150A  | ENSG00000168890 | 0.74361  | 0.22856 | 0.74361     | 0.22856     | 0.74361  |         |  |
|           | 0.22856         | 0.74361  | 0.22856 | 0.22856     | 0.648938344 |          |         |  |
| SNORD90   | ENSG00000212447 | 0.74358  | 0.22856 | 0.74358     | 0.22856     | 0.74358  |         |  |
|           | 0.22856         | 0.74358  | 0.22856 | 0.22856     | 0.648938344 |          |         |  |
| NA        | ENSG00000236332 | 0.033134 | 0.48678 | 0.74342     | 0.22861     | 0.033134 | 0.48678 |  |
|           | 0.17315         | 0.43127  | 0.22861 | 0.64904249  |             |          |         |  |
| NA        | ENSG00000248369 | 0.74338  | 0.22863 | 0.73883     | 0.23        | 0.72647  | 0.23378 |  |
|           | 0.47444         | 0.31759  | 0.22863 | 0.649061456 |             |          |         |  |
| NA        | ENSG00000249405 | 0.7433   | 0.22865 | -0.16533    | 0.56566     | 0.028646 | 0.48857 |  |
|           | 0.7433          | 0.22865  | 0.22865 | 0.649080421 |             |          |         |  |
| CEP170B   | ENSG00000099814 | 0.035269 | 0.48593 | 0.31404     | 0.37675     | 0.7432   |         |  |
|           | 0.22868         | -0.42262 | 0.66372 | 0.22868     | 0.649118342 |          |         |  |
| CYP4A11   | ENSG00000187048 | -1.0171  | 0.84545 | -0.16521    | 0.56561     | -0.20763 |         |  |
|           | 0.58224         | 0.74316  | 0.22869 | 0.22869     | 0.649118342 |          |         |  |
| NA        | ENSG00000283133 | -1.3174  | 0.90615 | -1.7752     | 0.96207     | -1.1245  | 0.8696  |  |
|           | 0.74309         | 0.22871  | 0.22871 | 0.6491373   |             |          |         |  |
| RNA5SP33  | ENSG00000252496 | 0.74297  | 0.22875 | 0.74297     | 0.22875     | 0.74297  |         |  |
|           | 0.22875         | 0.74297  | 0.22875 | 0.22875     | 0.649213017 |          |         |  |
| NA        | ENSG00000223836 | 0.7428   | 0.2288  | 0.7428      | 0.2288      | 0.7428   | 0.2288  |  |
|           | 0.47379         | 0.31783  | 0.2288  | 0.649307744 |             |          |         |  |
| ALDH3A2   | ENSG00000072210 | -0.71082 | 0.7614  | 0.72206     | 0.23513     | 0.7427   |         |  |
|           | 0.22883         | -0.87534 | 0.80931 | 0.22883     | 0.649307744 |          |         |  |
| RNA5SP223 | ENSG00000202044 | 0.74271  | 0.22883 | 0.74271     | 0.22883     | 0.74271  |         |  |

|             |                 |            |         |             |             |           |         |
|-------------|-----------------|------------|---------|-------------|-------------|-----------|---------|
|             | 0.22883         | 0.74271    | 0.22883 | 0.22883     | 0.649307744 |           |         |
| NA          | ENSG00000197815 | 0.74265    | 0.22885 | 0.74265     | 0.22885     | 0.74265   | 0.22885 |
|             | 0.74265         | 0.22885    | 0.22885 | 0.649307744 |             |           |         |
| SNORD115-25 | ENSG00000199489 | 0.68078    | 0.24801 | 0.74263     | 0.22885     | 0.68078   | 0.68078 |
|             | 0.24801         | 0.06663    | 0.47344 | 0.22885     | 0.649307744 |           |         |
| NA          | ENSG00000284242 | 0.2101     | 0.4168  | 0.2101      | 0.4168      | 0.1136    | 0.45478 |
|             | 0.74257         | 0.22887    | 0.22887 | 0.649326683 |             |           |         |
| NA          | ENSG00000260670 | 0.7425     | 0.22889 | -1.5901     | 0.94409     | -1.5901   | 0.94409 |
|             | -0.35083        | 0.63714    | 0.22889 | 0.649336186 |             |           |         |
| RNA5SP47    | ENSG00000253039 | 0.74246    | 0.2289  | 0.74246     | 0.2289      | 0.74246   |         |
|             | 0.2289          | 0.74246    | 0.2289  | 0.649336186 |             |           |         |
| LINC02242   | ENSG00000249736 | 0.32649    | 0.37203 | 0.74242     | 0.22892     | 0.43231   |         |
|             | 0.33276         | -1.1964    | 0.88423 | 0.22892     | 0.64935512  |           |         |
| MIR3976     | ENSG00000272380 | 0.74231    | 0.22895 | 0.63794     | 0.26176     | -0.068176 |         |
|             | 0.52718         | -0.097044  | 0.53865 | 0.22895     | 0.649383547 |           |         |
| SRSF10P1    | ENSG00000267717 | 0.61105    | 0.27058 | 0.61105     | 0.27058     | 0.61105   |         |
|             | 0.27058         | 0.74226    | 0.22896 | 0.22896     | 0.649383547 |           |         |
| NA          | ENSG00000250267 | -0.011048  | 0.50441 | 0.6949      | 0.24356     | 0.74225   | 0.22897 |
|             | 0.72153         | 0.23529    | 0.22897 | 0.649383547 |             |           |         |
| RAB11FIP4   | ENSG00000131242 | -0.67209   | 0.74924 | 0.74186     | 0.22908     | 0.3837    |         |
|             | 0.3506          | -0.40012   | 0.65546 | 0.22908     | 0.649657708 |           |         |
| AHCYL1      | ENSG00000168710 | -0.18299   | 0.5726  | -0.03958    | 0.51579     | -0.11119  |         |
|             | 0.54427         | 0.74179    | 0.22911 | 0.22911     | 0.649667169 |           |         |
| FCF1P8      | ENSG00000251111 | 0.74178    | 0.22911 | 0.74178     | 0.22911     | 0.74178   |         |
|             | 0.22911         | 0.74178    | 0.22911 | 0.22911     | 0.649667169 |           |         |
| MIR3164     | ENSG00000265539 | -0.31214   | 0.62253 | 0.073308    | 0.47078     | 0.74171   |         |
|             | 0.22913         | 0.74171    | 0.22913 | 0.22913     | 0.649686076 |           |         |
| HMGN1P28    | ENSG00000254114 | 0.74161    | 0.22916 | 0.74161     | 0.22916     | 0.74161   |         |
|             | 0.22916         | 0.74161    | 0.22916 | 0.22916     | 0.649733333 |           |         |
| NA          | ENSG00000278997 | -0.18158   | 0.57204 | -0.56577    | 0.71422     | 0.74148   | 0.2292  |
|             | -1.0643         | 0.85639    | 0.2292  | 0.649808936 |             |           |         |
| ANGPT4      | ENSG00000101280 | -0.16267   | 0.56461 | 0.0279      | 0.48887     | 0.036759  |         |
|             | 0.48534         | 0.74141    | 0.22922 | 0.22922     | 0.649827832 |           |         |
| NA          | ENSG00000241828 | 0.74137    | 0.22924 | -0.052541   | 0.52095     | 0.29649   | 0.38343 |
|             | 0.29649         | 0.38343    | 0.22924 | 0.649846725 |             |           |         |
| NA          | ENSG00000239556 | -0.0083093 | 0.50331 | -1.4197     | 0.92215     | 0.74124   | 0.22927 |
|             | 0.74124         | 0.22927    | 0.22927 | 0.649884504 |             |           |         |
| NA          | ENSG00000213560 | -0.68205   | 0.7524  | -0.68205    | 0.7524      | 0.74122   | 0.22928 |
|             | -0.68205        | 0.7524     | 0.22928 | 0.649884504 |             |           |         |
| NA          | ENSG00000267372 | 0.74116    | 0.2293  | 0.74116     | 0.2293      | 0.30524   | 0.38009 |
|             | -0.13938        | 0.55543    | 0.2293  | 0.649903391 |             |           |         |
| RPS24       | ENSG00000138326 | -0.80072   | 0.78835 | -0.36612    | 0.64286     | -0.25525  | 0.60074 |
|             | 0.74107         | 0.22933    | 0.22933 | 0.649950314 |             |           |         |
| KLHL22      | ENSG00000099910 | -0.76827   | 0.77884 | 0.74083     | 0.2294      | 0.41629   |         |
|             | 0.3386          | -0.51802   | 0.69778 | 0.2294      | 0.649950314 |           |         |
| NA          | ENSG00000258136 | 0.58479    | 0.27934 | 0.74081     | 0.2294      | 0.74081   | 0.2294  |
|             | 0.74081         | 0.2294     | 0.2294  | 0.649950314 |             |           |         |
| TDRD3       | ENSG00000083544 | -0.5734    | 0.71681 | 0.74061     | 0.22946     | -0.16464  | 0.56538 |
|             | -1.3408         | 0.91001    | 0.22946 | 0.649950314 |             |           |         |
| RNF166      | ENSG00000158717 | -0.026089  | 0.51041 | -0.86659    | 0.80692     | 0.74064   |         |
|             | 0.22946         | -0.71478   | 0.76263 | 0.22946     | 0.649950314 |           |         |
| NA          | ENSG00000261265 | 0.74063    | 0.22946 | 0.74063     | 0.22946     | 0.74063   | 0.22946 |
|             | 0.74063         | 0.22946    | 0.22946 | 0.649950314 |             |           |         |
| NA          | ENSG00000261471 | -0.81371   | 0.7921  | -0.21772    | 0.58618     | -1.5422   | 0.93849 |
|             | 0.74064         | 0.22946    | 0.22946 | 0.649950314 |             |           |         |
| RNA5SP308   | ENSG00000199402 | 0.74058    | 0.22947 | 0.74058     | 0.22947     | 0.74058   |         |
|             | 0.22947         | 0.74058    | 0.22947 | 0.22947     | 0.649950314 |           |         |
| OR52A5      | ENSG00000171944 | -1.3103    | 0.90496 | -0.92261    | 0.82189     | 0.74057   |         |
|             | 0.22948         | 0.74057    | 0.22948 | 0.22948     | 0.649950314 |           |         |
| LINC02673   | ENSG00000260151 | 0.74045    | 0.22951 | 0.74045     | 0.22951     | 0.74045   |         |
|             | 0.22951         | 0.74045    | 0.22951 | 0.22951     | 0.649950314 |           |         |
| INSL4       | ENSG00000120211 | 0.47834    | 0.3162  | -0.28306    | 0.61144     | 0.74039   | 0.22953 |

|            |                 |           |             |             |             |          |         |         |
|------------|-----------------|-----------|-------------|-------------|-------------|----------|---------|---------|
|            | 0.090702        | 0.46386   | 0.22953     | 0.649950314 |             |          |         |         |
| RNF181     | ENSG00000168894 | 0.74041   | 0.22953     | 0.74041     | 0.22953     | 0.74041  |         |         |
|            | 0.22953         | 0.74041   | 0.22953     | 0.22953     | 0.649950314 |          |         |         |
| NA         | ENSG00000280446 | 0.059338  | 0.47634     | 0.18923     | 0.42496     | 0.36038  | 0.35928 |         |
|            | 0.74039         | 0.22953   | 0.22953     | 0.649950314 |             |          |         |         |
| DIAPH1-AS1 | ENSG00000246422 | -0.74029  | 0.77044     | 0.74036     | 0.22954     | -0.74029 |         |         |
|            | 0.77044         | -0.74029  | 0.77044     | 0.22954     | 0.649950314 |          |         |         |
| SEMA6A-AS1 | ENSG00000248445 | 0.74032   | 0.22955     | 0.74032     | 0.22955     | 0.74032  |         |         |
|            | 0.22955         | 0.74032   | 0.22955     | 0.22955     | 0.649950314 |          |         |         |
| RPL21P13   | ENSG00000242837 | 0.59816   | 0.27487     | 0.19359     | 0.42325     | 0.5331   |         |         |
|            | 0.29698         | 0.74026   | 0.22957     | 0.22957     | 0.649950314 |          |         |         |
| NA         | ENSG00000279284 | -0.48942  | 0.68773     | -1.5632     | 0.94099     | -1.2617  | 0.89648 |         |
|            | 0.74025         | 0.22958   | 0.22958     | 0.649950314 |             |          |         |         |
| ASZ1       | ENSG00000154438 | -1.184    | 0.8818      | 0.74021     | 0.22959     | -1.1645  | 0.87788 |         |
|            | -0.61027        | 0.72916   | 0.22959     | 0.649950314 |             |          |         |         |
| PIGL       | ENSG00000108474 | -1.1726   | 0.87951     | 0.74015     | 0.22961     | -1.1515  | 0.87523 |         |
|            | 0.15651         | 0.43781   | 0.22961     | 0.649950314 |             |          |         |         |
| LINC02341  | ENSG00000283554 | 0.74015   | 0.22961     | -1.4492     | 0.92636     | -0.32087 |         |         |
|            | 0.62584         | -0.35086  | 0.63715     | 0.22961     | 0.649950314 |          |         |         |
| RPL7P60    | ENSG00000214142 | 0.74008   | 0.22962     | 0.46541     | 0.32082     | 0.64424  |         |         |
|            | 0.25971         | 0.31059   | 0.37806     | 0.22962     | 0.649950314 |          |         |         |
| CT75       | ENSG00000237732 | 0.7401    | 0.22962     | 0.7401      | 0.22962     | 0.7401   | 0.22962 |         |
|            | 0.53699         | 0.29564   | 0.22962     | 0.649950314 |             |          |         |         |
| ZNF837     | ENSG00000152475 | 0.60748   | 0.27177     | 0.74004     | 0.22964     | 0.69704  |         |         |
|            | 0.24289         | 0.69704   | 0.24289     | 0.22964     | 0.649950314 |          |         |         |
| CALHM1     | ENSG00000185933 | 0.74001   | 0.22965     | 0.74001     | 0.22965     | 0.74001  |         |         |
|            | 0.22965         | 0.74001   | 0.22965     | 0.22965     | 0.649950314 |          |         |         |
| NA         | ENSG00000226483 | 0.74      | 0.22965     | 0.74        | 0.22965     | -0.35427 | 0.63843 | 0.13494 |
|            | 0.44633         | 0.22965   | 0.649950314 |             |             |          |         |         |
| CCDC24     | ENSG00000159214 | 0.068426  | 0.47272     | -0.61047    | 0.72923     | 0.38597  |         |         |
|            | 0.34976         | 0.73979   | 0.22971     | 0.22971     | 0.650035114 |          |         |         |
| PNRC1      | ENSG00000146278 | -0.12013  | 0.54781     | -0.12013    | 0.54781     | -0.12013 | 0.54781 |         |
|            | 0.73975         | 0.22972   | 0.22972     | 0.650035114 |             |          |         |         |
| TTC3-AS1   | ENSG00000228677 | 0.73971   | 0.22974     | 0.73971     | 0.22974     | 0.73971  |         |         |
|            | 0.22974         | 0.73971   | 0.22974     | 0.22974     | 0.650035114 |          |         |         |
| HNF1A-AS1  | ENSG00000241388 | 0.73966   | 0.22975     | 0.50589     | 0.30647     | -0.6413  |         |         |
|            | 0.73934         | -0.18574  | 0.57368     | 0.22975     | 0.650035114 |          |         |         |
| NA         | ENSG00000273180 | 0.65975   | 0.25471     | -0.40366    | 0.65677     | 0.019696 | 0.49214 |         |
|            | 0.73967         | 0.22975   | 0.22975     | 0.650035114 |             |          |         |         |
| DAOA       | ENSG00000182346 | -0.57649  | 0.71786     | -0.57649    | 0.71786     | -0.57649 | 0.71786 |         |
|            | 0.73963         | 0.22976   | 0.22976     | 0.650035114 |             |          |         |         |
| TTC24      | ENSG00000187862 | 0.60256   | 0.2734      | 0.53282     | 0.29708     | 0.73958  | 0.22978 |         |
|            | 0.60256         | 0.2734    | 0.22978     | 0.650053956 |             |          |         |         |
| DRD2       | ENSG00000149295 | 0.4952    | 0.31023     | 0.7394      | 0.22983     | 0.4952   | 0.31023 |         |
|            | -0.14962        | 0.55947   | 0.22983     | 0.650063291 |             |          |         |         |
| LINC02333  | ENSG00000271564 | -0.092829 | 0.53698     | -0.33323    | 0.63052     | -0.37364 |         |         |
|            | 0.64566         | 0.73941   | 0.22983     | 0.22983     | 0.650063291 |          |         |         |
| RALGAPA2   | ENSG00000188559 | 0.13122   | 0.4478      | 0.48164     | 0.31503     | 0.40504  |         |         |
|            | 0.34273         | 0.73938   | 0.22984     | 0.22984     | 0.650063291 |          |         |         |
| RNU6-113P  | ENSG00000252462 | 0.73934   | 0.22985     | 0.73934     | 0.22985     | 0.73934  |         |         |
|            | 0.22985         | 0.73934   | 0.22985     | 0.22985     | 0.650063291 |          |         |         |
| LINC02302  | ENSG00000258998 | 0.73935   | 0.22985     | 0.73935     | 0.22985     | 0.73935  |         |         |
|            | 0.22985         | 0.73935   | 0.22985     | 0.22985     | 0.650063291 |          |         |         |
| NA         | ENSG00000261379 | 0.73921   | 0.22989     | 0.73921     | 0.22989     | 0.73921  | 0.22989 |         |
|            | 0.73921         | 0.22989   | 0.22989     | 0.650138686 |             |          |         |         |
| COX4I2     | ENSG00000131055 | 0.73904   | 0.22994     | 0.39198     | 0.34754     | 0.36741  |         |         |
|            | 0.35666         | -0.025117 | 0.51002     | 0.22994     | 0.650232896 |          |         |         |
| SNX16      | ENSG00000104497 | 0.73901   | 0.22995     | 0.73901     | 0.22995     | 0.73901  | 0.22995 |         |
|            | 0.14856         | 0.44095   | 0.22995     | 0.650232896 |             |          |         |         |
| EIF1B-AS1  | ENSG00000280739 | 0.73884   | 0.23        | 0.30979     | 0.37836     | 0.50315  | 0.30743 |         |
|            | 0.041391        | 0.48349   | 0.23        | 0.650260898 |             |          |         |         |
| NA         | ENSG00000226655 | 0.73873   | 0.23004     | 0.73873     | 0.23004     | 0.73873  | 0.23004 |         |

|             |                 |             |         |             |             |           |         |  |
|-------------|-----------------|-------------|---------|-------------|-------------|-----------|---------|--|
|             | 0.73873         | 0.23004     | 0.23004 | 0.650260898 |             |           |         |  |
| PDCL3P6     | ENSG00000224255 | -0.96356    | 0.83237 | -0.72079    | 0.76448     | 0.0012891 |         |  |
|             | 0.49949         | 0.73866     | 0.23006 | 0.23006     | 0.650260898 |           |         |  |
| NA          | ENSG00000249772 | 0.45658     | 0.32399 | 0.73864     | 0.23006     | 0.73864   | 0.23006 |  |
|             | 0.73864         | 0.23006     | 0.23006 | 0.650260898 |             |           |         |  |
| RN7SL37P    | ENSG00000242493 | 0.73861     | 0.23007 | 0.73861     | 0.23007     | 0.73861   |         |  |
|             | 0.23007         | 0.73861     | 0.23007 | 0.23007     | 0.650260898 |           |         |  |
| ARPIN       | ENSG00000242498 | 0.73862     | 0.23007 | 0.20928     | 0.41712     | -0.53622  | 0.7041  |  |
|             | -0.53622        | 0.7041      | 0.23007 | 0.650260898 |             |           |         |  |
| MTCO1P24    | ENSG00000249448 | 0.73862     | 0.23007 | 0.73862     | 0.23007     | 0.73862   |         |  |
|             | 0.23007         | 0.73862     | 0.23007 | 0.23007     | 0.650260898 |           |         |  |
| NA          | ENSG00000259953 | 0.73861     | 0.23007 | -1.2631     | 0.89673     | -1.2631   | 0.89673 |  |
|             | -1.2631         | 0.89673     | 0.23007 | 0.650260898 |             |           |         |  |
| HMCES       | ENSG00000183624 | 0.73859     | 0.23008 | -0.6762     | 0.75054     | 0.30246   | 0.38115 |  |
|             | -0.034019       | 0.51357     | 0.23008 | 0.650260898 |             |           |         |  |
| NA          | ENSG00000260261 | 0.066217    | 0.4736  | -0.15574    | 0.56188     | 0.73839   | 0.23014 |  |
|             | 0.051101        | 0.47962     | 0.23014 | 0.650391377 |             |           |         |  |
| NA          | ENSG00000218476 | 0.73825     | 0.23018 | 0.73825     | 0.23018     | 0.73825   | 0.23018 |  |
|             | 0.73825         | 0.23018     | 0.23018 | 0.650391377 |             |           |         |  |
| RNU6ATAC19P | ENSG00000221023 | -0.69669    | 0.757   | -0.027207   | 0.51085     | 0.73825   |         |  |
|             | 0.23018         | -0.69001    | 0.75491 | 0.23018     | 0.650391377 |           |         |  |
| LINC02483   | ENSG00000251383 | 0.73822     | 0.23019 | 0.73822     | 0.23019     | 0.73822   |         |  |
|             | 0.23019         | 0.73822     | 0.23019 | 0.23019     | 0.650391377 |           |         |  |
| LINC00705   | ENSG00000225269 | 0.2645      | 0.3957  | 0.2645      | 0.3957      | 0.73814   |         |  |
|             | 0.23022         | 0.51139     | 0.30454 | 0.23022     | 0.650391377 |           |         |  |
| NA          | ENSG00000249955 | 0.73808     | 0.23023 | -0.91967    | 0.82113     | 0.73808   | 0.23023 |  |
|             | 0.73808         | 0.23023     | 0.23023 | 0.650391377 |             |           |         |  |
| LINC01921   | ENSG00000223874 | 0.73807     | 0.23024 | 0.73807     | 0.23024     | 0.22938   |         |  |
|             | 0.40929         | -0.00097359 | 0.50039 | 0.23024     | 0.650391377 |           |         |  |
| NA          | ENSG00000237527 | 0.67157     | 0.25093 | 0.73806     | 0.23024     | 0.73806   | 0.23024 |  |
|             | 0.73806         | 0.23024     | 0.23024 | 0.650391377 |             |           |         |  |
| NA          | ENSG00000234940 | 0.73802     | 0.23025 | 0.73802     | 0.23025     | 0.73802   | 0.23025 |  |
|             | 0.73802         | 0.23025     | 0.23025 | 0.650391377 |             |           |         |  |
| HNRNPCL2    | ENSG00000275774 | 0.73796     | 0.23027 | -0.76232    | 0.77706     | -0.76232  |         |  |
|             | 0.77706         | -0.76232    | 0.77706 | 0.23027     | 0.650391377 |           |         |  |
| SENCR       | ENSG00000254703 | 0.73787     | 0.2303  | 0.73787     | 0.2303      | 0.73787   | 0.2303  |  |
|             | 0.73787         | 0.2303      | 0.2303  | 0.650391377 |             |           |         |  |
| MKRN1       | ENSG00000133606 | 0.37215     | 0.35489 | 0.37215     | 0.35489     | -0.89049  | 0.8134  |  |
|             | 0.73774         | 0.23034     | 0.23034 | 0.650391377 |             |           |         |  |
| NA          | ENSG00000233268 | 0.11117     | 0.45574 | 0.73773     | 0.23034     | -0.82588  | 0.79556 |  |
|             | -1.4498         | 0.92644     | 0.23034 | 0.650391377 |             |           |         |  |
| NA          | ENSG00000259515 | 0.7377      | 0.23035 | 0.7377      | 0.23035     | 0.7377    | 0.23035 |  |
|             | 0.7377          | 0.23035     | 0.23035 | 0.650391377 |             |           |         |  |
| ELFN2       | ENSG00000166897 | -0.26561    | 0.60473 | -0.081232   | 0.53237     | 0.73757   | 0.23039 |  |
|             | 0.34117         | 0.36649     | 0.23039 | 0.650391377 |             |           |         |  |
| LINC02450   | ENSG00000257114 | -0.28006    | 0.61029 | 0.16062     | 0.4362      | -0.135    |         |  |
|             | 0.55369         | 0.73757     | 0.23039 | 0.23039     | 0.650391377 |           |         |  |
| NOD2        | ENSG00000167207 | 0.73745     | 0.23042 | 0.55932     | 0.28797     | -0.61185  | 0.72968 |  |
|             | 0.20113         | 0.4203      | 0.23042 | 0.650391377 |             |           |         |  |
| CRYGEP      | ENSG00000229150 | -1.2757     | 0.89897 | 0.73747     | 0.23042     | -0.76577  |         |  |
|             | 0.77809         | 0.73747     | 0.23042 | 0.23042     | 0.650391377 |           |         |  |
| NA          | ENSG00000278593 | 0.73741     | 0.23044 | 0.50932     | 0.30526     | 0.73741   | 0.23044 |  |
|             | 0.73741         | 0.23044     | 0.23044 | 0.650391377 |             |           |         |  |
| RPS29P26    | ENSG00000239320 | 0.73734     | 0.23046 | 0.73734     | 0.23046     | 0.73734   |         |  |
|             | 0.23046         | 0.73734     | 0.23046 | 0.23046     | 0.650391377 |           |         |  |
| RNU1-138P   | ENSG00000206820 | -2.5937     | 0.99525 | -2.5937     | 0.99525     | 0.73726   |         |  |
|             | 0.23048         | -0.82712    | 0.79591 | 0.23048     | 0.650391377 |           |         |  |
| VPS36       | ENSG00000136100 | 0.55864     | 0.2882  | 0.55864     | 0.2882      | 0.65583   | 0.25597 |  |
|             | 0.73724         | 0.23049     | 0.23049 | 0.650391377 |             |           |         |  |
| GFPT2       | ENSG00000131459 | 0.13782     | 0.44519 | -0.76034    | 0.77647     | 0.73715   | 0.23052 |  |
|             | -0.35305        | 0.63797     | 0.23052 | 0.650391377 |             |           |         |  |
| DNAH7       | ENSG00000118997 | 0.73711     | 0.23053 | -1.0103     | 0.84383     | -0.36803  | 0.64357 |  |

|             |                 |             |             |             |             |           |         |       |
|-------------|-----------------|-------------|-------------|-------------|-------------|-----------|---------|-------|
|             | -0.90194        | 0.81646     | 0.23053     | 0.650391377 |             |           |         |       |
| NA          | ENSG00000186275 | 0.59288     | 0.27663     | 0.08926     | 0.46444     | 0.73709   | 0.23053 |       |
|             | -0.07219        | 0.52877     | 0.23053     | 0.650391377 |             |           |         |       |
| RAB39A      | ENSG00000179331 | 0.73703     | 0.23055     | 0.73703     | 0.23055     | 0.73703   |         |       |
|             | 0.23055         | -0.50739    | 0.69406     | 0.23055     | 0.650391377 |           |         |       |
| WDR78       | ENSG00000152763 | -0.1747     | 0.56934     | -1.2747     | 0.89879     | 0.737     | 0.23056 |       |
|             | -0.23331        | 0.59224     | 0.23056     | 0.650391377 |             |           |         |       |
| MIR3162     | ENSG00000264559 | 0.737       | 0.23056     | 0.737       | 0.23056     | 0.737     | 0.23056 | 0.737 |
|             | 0.23056         | 0.23056     | 0.650391377 |             |             |           |         |       |
| NA          | ENSG00000227138 | -0.12547    | 0.54992     | -0.32502    | 0.62742     | 0.73696   | 0.23057 |       |
|             | -0.12547        | 0.54992     | 0.23057     | 0.650391377 |             |           |         |       |
| ARVCF       | ENSG00000099889 | 0.73694     | 0.23058     | 0.48809     | 0.31274     | 0.04741   | 0.48109 |       |
|             | -0.043378       | 0.5173      | 0.23058     | 0.650391377 |             |           |         |       |
| HMGB1P19    | ENSG00000253463 | 0.73695     | 0.23058     | 0.73695     | 0.23058     | 0.73695   |         |       |
|             | 0.23058         | 0.73695     | 0.23058     | 0.23058     | 0.650391377 |           |         |       |
| SMAGP       | ENSG00000170545 | -0.56389    | 0.71359     | -1.0064     | 0.84289     | -0.91436  | 0.81974 |       |
|             | 0.73691         | 0.23059     | 0.23059     | 0.650391377 |             |           |         |       |
| SMDT1       | ENSG00000183172 | 0.73692     | 0.23059     | 0.73692     | 0.23059     | -0.62637  | 0.73446 |       |
|             | 0.45782         | 0.32354     | 0.23059     | 0.650391377 |             |           |         |       |
| DPEP3       | ENSG00000141096 | -0.16251    | 0.56455     | -0.16251    | 0.56455     | 0.09125   | 0.46365 |       |
|             | 0.73686         | 0.2306      | 0.2306      | 0.650391377 |             |           |         |       |
| SORCS3-AS1  | ENSG00000226387 | 0.73685     | 0.23061     | 0.73685     | 0.23061     | 0.73685   |         |       |
|             | 0.23061         | 0.73685     | 0.23061     | 0.23061     | 0.650391377 |           |         |       |
| ZNF840P     | ENSG00000184617 | -0.50429    | 0.69297     | -0.50429    | 0.69297     | -0.50429  |         |       |
|             | 0.69297         | 0.73681     | 0.23062     | 0.23062     | 0.650391377 |           |         |       |
| RPS24P7     | ENSG00000227361 | -2.3683     | 0.99106     | -0.60731    | 0.72818     | -0.82135  |         |       |
|             | 0.79428         | 0.73682     | 0.23062     | 0.23062     | 0.650391377 |           |         |       |
| NA          | ENSG00000270403 | -0.58928    | 0.72216     | -0.58928    | 0.72216     | -0.36066  | 0.64082 |       |
|             | 0.73675         | 0.23064     | 0.23064     | 0.650407447 |             |           |         |       |
| IGF2BP2-AS1 | ENSG00000163915 | -0.019429   | 0.50775     | -0.69047    | 0.75505     | 0.7366    |         |       |
|             | 0.23068         | -0.019429   | 0.50775     | 0.23068     | 0.650407447 |           |         |       |
| ZNF425      | ENSG00000204947 | 0.73662     | 0.23068     | 0.33229     | 0.36983     | -2.458    |         |       |
|             | 0.99301         | -0.87229    | 0.80848     | 0.23068     | 0.650407447 |           |         |       |
| NA          | ENSG00000227475 | 0.22056     | 0.41272     | 0.09795     | 0.46099     | 0.73652   | 0.23071 |       |
|             | -0.95148        | 0.82932     | 0.23071     | 0.650407447 |             |           |         |       |
| PPIL1P1     | ENSG00000237951 | 0.73651     | 0.23071     | 0.73651     | 0.23071     | 0.73651   |         |       |
|             | 0.23071         | 0.73651     | 0.23071     | 0.23071     | 0.650407447 |           |         |       |
| HMGB1P44    | ENSG00000248956 | -0.89911    | 0.8157      | -0.57768    | 0.71826     | -0.77602  |         |       |
|             | 0.78113         | 0.73652     | 0.23071     | 0.23071     | 0.650407447 |           |         |       |
| TTC14       | ENSG00000163728 | 0.32622     | 0.37213     | 0.73644     | 0.23073     | 0.53215   | 0.29731 |       |
|             | -0.050786       | 0.52025     | 0.23073     | 0.650407447 |             |           |         |       |
| NA          | ENSG00000276418 | 0.7364      | 0.23074     | 0.55511     | 0.28941     | -0.63385  | 0.73691 |       |
|             | -0.19394        | 0.57689     | 0.23074     | 0.650407447 |             |           |         |       |
| ZNF660      | ENSG00000144792 | 0.41463     | 0.33921     | 0.41463     | 0.33921     | -0.8371   |         |       |
|             | 0.79873         | 0.73634     | 0.23076     | 0.23076     | 0.650407447 |           |         |       |
| NA          | ENSG00000263620 | 0.73621     | 0.2308      | 0.73621     | 0.2308      | 0.73621   | 0.2308  |       |
|             | 0.73621         | 0.2308      | 0.2308      | 0.650407447 |             |           |         |       |
| IDH1        | ENSG00000138413 | -0.12528    | 0.54985     | -1.0956     | 0.86338     | 0.73616   | 0.23082 |       |
|             | 0.22285         | 0.41183     | 0.23082     | 0.650407447 |             |           |         |       |
| NA          | ENSG00000224245 | -0.4684     | 0.68025     | -0.32837    | 0.62868     | 0.73614   | 0.23082 |       |
|             | 0.73614         | 0.23082     | 0.23082     | 0.650407447 |             |           |         |       |
| NA          | ENSG00000266767 | 0.72296     | 0.23485     | -0.80605    | 0.78989     | 0.73615   | 0.23082 |       |
|             | 0.73615         | 0.23082     | 0.23082     | 0.650407447 |             |           |         |       |
| NA          | ENSG00000273269 | 0.73614     | 0.23082     | 0.73614     | 0.23082     | -0.70194  | 0.75864 |       |
|             | 0.73614         | 0.23082     | 0.23082     | 0.650407447 |             |           |         |       |
| TPTE2P1     | ENSG00000253771 | -1.0275     | 0.84791     | -0.11127    | 0.5443      | 0.73608   |         |       |
|             | 0.23084         | 0.20943     | 0.41706     | 0.23084     | 0.650407447 |           |         |       |
| NA          | ENSG00000272754 | 0.736       | 0.23087     | 0.736       | 0.23087     | 0.736     | 0.23087 |       |
|             | 0.23087         | 0.650407447 |             |             |             |           |         |       |
| MIF-AS1     | ENSG00000218537 | 0.73592     | 0.23089     | 0.73592     | 0.23089     | 0.69198   |         |       |
|             | 0.24447         | 0.73592     | 0.23089     | 0.23089     | 0.650407447 |           |         |       |
| SLC22A17    | ENSG00000092096 | 0.077019    | 0.4693      | 0.73586     | 0.23091     | -0.094624 |         |       |

|            |                 |             |             |             |             |             |         |       |
|------------|-----------------|-------------|-------------|-------------|-------------|-------------|---------|-------|
|            | 0.53769         | 0.6975      | 0.24274     | 0.23091     | 0.650407447 |             |         |       |
| CALHM5     | ENSG00000178033 | -0.16655    | 0.56614     | 0.12323     | 0.45096     | 0.73562     |         |       |
|            | 0.23098         | -0.013378   | 0.50534     | 0.23098     | 0.650407447 |             |         |       |
| MIR4452    | ENSG00000266515 | 0.73562     | 0.23098     | -0.59991    | 0.72572     | -0.52294    |         |       |
|            | 0.69949         | -0.18708    | 0.5742      | 0.23098     | 0.650407447 |             |         |       |
| NA         | ENSG00000284393 | 0.55931     | 0.28798     | 0.55931     | 0.28798     | 0.73563     | 0.23098 |       |
|            | 0.26723         | 0.39465     | 0.23098     | 0.650407447 |             |             |         |       |
| NA         | ENSG00000261177 | 0.50739     | 0.30594     | 0.73557     | 0.231       | 0.14011     | 0.44429 |       |
|            | 0.71176         | 0.23831     | 0.231       | 0.650407447 |             |             |         |       |
| PLK4       | ENSG00000142731 | -0.71799    | 0.76362     | -0.98588    | 0.8379      | -0.71799    | 0.76362 |       |
|            | 0.7355          | 0.23102     | 0.23102     | 0.650407447 |             |             |         |       |
| NA         | ENSG00000255973 | 0.73544     | 0.23104     | 0.73544     | 0.23104     | 0.73544     | 0.23104 |       |
|            | 0.73544         | 0.23104     | 0.23104     | 0.650407447 |             |             |         |       |
| MIR3174    | ENSG00000265871 | -1.7514     | 0.96006     | -1.7514     | 0.96006     | 0.73525     |         |       |
|            | 0.23109         | -1.7514     | 0.96006     | 0.23109     | 0.650407447 |             |         |       |
| NET1       | ENSG00000173848 | 0.37417     | 0.35414     | 0.034425    | 0.48627     | 0.73519     | 0.23111 |       |
|            | 0.30628         | 0.3797      | 0.23111     | 0.650407447 |             |             |         |       |
| ABTB1      | ENSG00000114626 | -0.90325    | 0.8168      | -0.90325    | 0.8168      | 0.73501     | 0.23117 |       |
|            | 0.075129        | 0.47006     | 0.23117     | 0.650407447 |             |             |         |       |
| RAB1B      | ENSG00000174903 | -0.50995    | 0.69496     | -0.50995    | 0.69496     | 0.4913      | 0.31161 |       |
|            | 0.735           | 0.23117     | 0.23117     | 0.650407447 |             |             |         |       |
| HIGD1A     | ENSG00000181061 | -1.7775     | 0.96226     | 0.3466      | 0.36445     | 0.735       | 0.23117 |       |
|            | -0.42359        | 0.66407     | 0.23117     | 0.650407447 |             |             |         |       |
| THOC7-AS1  | ENSG00000240549 | 0.735       | 0.23117     | 0.51679     | 0.30265     | 0.735       | 0.23117 | 0.735 |
|            | 0.23117         | 0.23117     | 0.650407447 |             |             |             |         |       |
| NA         | ENSG00000235811 | 0.62373     | 0.2664      | 0.62373     | 0.2664      | 0.73491     | 0.2312  |       |
|            | -1.4693         | 0.92912     | 0.2312      | 0.650407447 |             |             |         |       |
| NA         | ENSG00000255330 | 0.7349      | 0.2312      | 0.7349      | 0.2312      | 0.7349      | 0.2312  |       |
|            | 0.7349          | 0.2312      | 0.2312      | 0.650407447 |             |             |         |       |
| TRIM24     | ENSG00000122779 | 0.25431     | 0.39963     | 0.73485     | 0.23121     | -0.098433   |         |       |
|            | 0.53921         | 0.58985     | 0.27765     | 0.23121     | 0.650407447 |             |         |       |
| CNP        | ENSG00000173786 | -0.54186    | 0.70604     | 0.73477     | 0.23124     | -0.54186    | 0.70604 |       |
|            | -0.88222        | 0.81117     | 0.23124     | 0.650407447 |             |             |         |       |
| NA         | ENSG00000253045 | 0.73475     | 0.23125     | 0.73475     | 0.23125     | 0.73475     | 0.23125 |       |
|            | 0.73475         | 0.23125     | 0.23125     | 0.650407447 |             |             |         |       |
| NDUFB9     | ENSG00000147684 | -1.0008     | 0.84154     | 0.11781     | 0.45311     | 0.13048     |         |       |
|            | 0.44809         | 0.73471     | 0.23126     | 0.23126     | 0.650407447 |             |         |       |
| SNORD71    | ENSG00000223224 | 0.7347      | 0.23126     | 0.7347      | 0.23126     | 0.7347      |         |       |
|            | 0.23126         | 0.7347      | 0.23126     | 0.23126     | 0.650407447 |             |         |       |
| NA         | ENSG00000223528 | 0.73464     | 0.23128     | 0.73464     | 0.23128     | 0.73464     | 0.23128 |       |
|            | 0.73464         | 0.23128     | 0.23128     | 0.650407447 |             |             |         |       |
| NA         | ENSG00000272106 | 0.73463     | 0.23128     | 0.73463     | 0.23128     | 0.73463     | 0.23128 |       |
|            | 0.73463         | 0.23128     | 0.23128     | 0.650407447 |             |             |         |       |
| TTC39C     | ENSG00000168234 | 0.7346      | 0.23129     | -1.6755     | 0.95308     | -0.898      |         |       |
|            | 0.81541         | -0.80327    | 0.78909     | 0.23129     | 0.650407447 |             |         |       |
| RNU6-1219P | ENSG00000251952 | 0.73455     | 0.23131     | 0.73455     | 0.23131     | 0.73455     |         |       |
|            | 0.23131         | 0.73455     | 0.23131     | 0.23131     | 0.650407447 |             |         |       |
| IPO11      | ENSG00000086200 | -1.1334     | 0.87147     | -0.039565   | 0.51578     | -0.95661    | 0.83062 |       |
|            | 0.7345          | 0.23132     | 0.23132     | 0.650407447 |             |             |         |       |
| SNORA108   | ENSG00000252284 | -0.00015366 | 0.50006     | 0.1993      | 0.42101     |             |         |       |
|            | -0.00015366     | 0.50006     | 0.73444     | 0.23134     | 0.23134     | 0.650407447 |         |       |
| CD274      | ENSG00000120217 | 0.70567     | 0.2402      | -0.87293    | 0.80865     | -0.309      | 0.62134 |       |
|            | 0.73441         | 0.23135     | 0.23135     | 0.650407447 |             |             |         |       |
| NA         | ENSG00000201426 | -0.84328    | 0.80046     | 0.73442     | 0.23135     | -0.84328    | 0.80046 |       |
|            | -0.84328        | 0.80046     | 0.23135     | 0.650407447 |             |             |         |       |
| NA         | ENSG00000273368 | 0.64265     | 0.26023     | 0.73438     | 0.23136     | 0.56277     | 0.28679 |       |
|            | -0.5258         | 0.70049     | 0.23136     | 0.650407447 |             |             |         |       |
| NA         | ENSG00000244055 | 0.24764     | 0.4022      | 0.42248     | 0.33634     | 0.73434     | 0.23137 |       |
|            | 0.73434         | 0.23137     | 0.23137     | 0.650407447 |             |             |         |       |
| NA         | ENSG00000261135 | 0.73435     | 0.23137     | 0.40195     | 0.34386     | 0.73435     | 0.23137 |       |
|            | 0.73435         | 0.23137     | 0.23137     | 0.650407447 |             |             |         |       |
| ZAN        | ENSG00000146839 | -0.58354    | 0.72023     | 0.73431     | 0.23138     | 0.49125     | 0.31163 |       |

|            |                 |          |         |             |             |           |         |
|------------|-----------------|----------|---------|-------------|-------------|-----------|---------|
|            | 0.32035         | 0.37435  | 0.23138 | 0.650407447 |             |           |         |
| PPM1K-DT   | ENSG00000246375 | -0.40762 | 0.65822 | 0.73432     | 0.23138     | 0.37849   |         |
|            | 0.35253         | 0.37849  | 0.35253 | 0.23138     | 0.650407447 |           |         |
| NA         | ENSG00000233626 | 0.73427  | 0.23139 | 0.017798    | 0.4929      | 0.73427   | 0.23139 |
|            | 0.73427         | 0.23139  | 0.23139 | 0.650407447 |             |           |         |
| SPATA31D2P | ENSG00000237770 | -0.13634 | 0.55422 | -0.13634    | 0.55422     | 0.73426   |         |
|            | 0.23139         | -0.15881 | 0.56309 | 0.23139     | 0.650407447 |           |         |
| COL11A1    | ENSG00000060718 | 0.11776  | 0.45313 | 0.37897     | 0.35235     | 0.73423   |         |
|            | 0.2314          | 0.20104  | 0.42034 | 0.2314      | 0.650407447 |           |         |
| NA         | ENSG00000201042 | 0.73424  | 0.2314  | 0.15641     | 0.43786     | 0.33726   | 0.36796 |
|            | 0.33726         | 0.36796  | 0.2314  | 0.650407447 |             |           |         |
| RNA5SP75   | ENSG00000252650 | 0.73422  | 0.23141 | 0.082678    | 0.46705     | -0.1066   |         |
|            | 0.54245         | 0.73422  | 0.23141 | 0.23141     | 0.650407447 |           |         |
| NA         | ENSG00000229334 | 0.3117   | 0.37763 | 0.73417     | 0.23142     | 0.41925   | 0.33752 |
|            | 0.41925         | 0.33752  | 0.23142 | 0.650407447 |             |           |         |
| TATDN2P2   | ENSG00000218226 | 0.56756  | 0.28517 | 0.56756     | 0.28517     | 0.56756   |         |
|            | 0.28517         | 0.73416  | 0.23143 | 0.23143     | 0.650407447 |           |         |
| ACSL6-AS1  | ENSG00000223548 | -0.16089 | 0.56391 | 0.73415     | 0.23143     | 0.025992  |         |
|            | 0.48963         | 0.025992 | 0.48963 | 0.23143     | 0.650407447 |           |         |
| PTH1R      | ENSG00000160801 | 0.73404  | 0.23146 | -1.178      | 0.88059     | -1.0747   | 0.85874 |
|            | 0.46141         | 0.32225  | 0.23146 | 0.650407447 |             |           |         |
| PI16       | ENSG00000164530 | 0.73404  | 0.23146 | 0.67372     | 0.25025     | -0.40401  | 0.6569  |
|            | -0.42549        | 0.66476  | 0.23146 | 0.650407447 |             |           |         |
| YIF1A      | ENSG00000174851 | 0.73404  | 0.23146 | 0.73404     | 0.23146     | 0.20051   | 0.42054 |
|            | 0.073359        | 0.47076  | 0.23146 | 0.650407447 |             |           |         |
| OR10R2     | ENSG00000198965 | 0.064958 | 0.4741  | 0.73406     | 0.23146     | 0.064958  |         |
|            | 0.4741          | 0.064958 | 0.4741  | 0.23146     | 0.650407447 |           |         |
| MIR5009    | ENSG00000264796 | 0.73394  | 0.23149 | 0.73394     | 0.23149     | 0.73394   |         |
|            | 0.23149         | 0.73394  | 0.23149 | 0.23149     | 0.650407447 |           |         |
| NA         | ENSG00000259135 | 0.16944  | 0.43273 | 0.73389     | 0.23151     | 0.16944   | 0.43273 |
|            | 0.16944         | 0.43273  | 0.23151 | 0.650407447 |             |           |         |
| PCDHB9     | ENSG00000177839 | 0.73385  | 0.23152 | 0.73385     | 0.23152     | 0.73385   |         |
|            | 0.23152         | 0.73385  | 0.23152 | 0.23152     | 0.650407447 |           |         |
| DDX58      | ENSG00000107201 | 0.26978  | 0.39366 | 0.73382     | 0.23153     | -0.47592  | 0.68293 |
|            | -0.2256         | 0.58924  | 0.23153 | 0.650407447 |             |           |         |
| ARHGAP18   | ENSG00000146376 | 0.73378  | 0.23154 | 0.011399    | 0.49545     | -0.67924  |         |
|            | 0.75151         | -1.4321  | 0.92394 | 0.23154     | 0.650407447 |           |         |
| SOCS5P2    | ENSG00000224682 | -0.398   | 0.65469 | 0.73378     | 0.23154     | 0.60066   |         |
|            | 0.27403         | -1.1937  | 0.88369 | 0.23154     | 0.650407447 |           |         |
| RNU6-174P  | ENSG00000222338 | 0.18749  | 0.42564 | 0.18749     | 0.42564     | 0.73375   |         |
|            | 0.23155         | 0.033623 | 0.48659 | 0.23155     | 0.650407447 |           |         |
| NA         | ENSG00000243312 | 0.7337   | 0.23156 | -0.93557    | 0.82525     | -0.93557  | 0.82525 |
|            | -1.2738         | 0.89864  | 0.23156 | 0.650407447 |             |           |         |
| NA         | ENSG00000249443 | 0.7336   | 0.2316  | -0.52812    | 0.70129     | 0.03229   | 0.48712 |
|            | -1.4962         | 0.93269  | 0.2316  | 0.650482176 |             |           |         |
| NXT1-AS1   | ENSG00000234832 | -0.31016 | 0.62178 | -0.31016    | 0.62178     | 0.73348   |         |
|            | 0.23163         | -0.31016 | 0.62178 | 0.23163     | 0.650482176 |           |         |
| NA         | ENSG00000249404 | -1.0261  | 0.84759 | 0.077077    | 0.46928     | -0.078253 | 0.53119 |
|            | 0.73347         | 0.23164  | 0.23164 | 0.650482176 |             |           |         |
| NA         | ENSG00000250274 | 0.73346  | 0.23164 | 0.73346     | 0.23164     | 0.73346   | 0.23164 |
|            | 0.73346         | 0.23164  | 0.23164 | 0.650482176 |             |           |         |
| NA         | ENSG00000253564 | 0.73331  | 0.23169 | -1.9615     | 0.97509     | 0.54102   | 0.29425 |
|            | -1.9615         | 0.97509  | 0.23169 | 0.650585093 |             |           |         |
| NA         | ENSG00000259476 | 0.73313  | 0.23174 | 0.73313     | 0.23174     | 0.73313   | 0.23174 |
|            | 0.73313         | 0.23174  | 0.23174 | 0.650669171 |             |           |         |
| ADAP1      | ENSG00000105963 | 0.63848  | 0.26158 | 0.7331      | 0.23175     | 0.51126   | 0.30458 |
|            | 0.42729         | 0.33458  | 0.23175 | 0.650669171 |             |           |         |
| NA         | ENSG00000215381 | 0.73305  | 0.23176 | 0.73305     | 0.23176     | 0.73305   | 0.23176 |
|            | 0.73305         | 0.23176  | 0.23176 | 0.650669171 |             |           |         |
| LRRFIP1    | ENSG00000124831 | 0.73298  | 0.23178 | -0.5641     | 0.71366     | -0.52372  |         |
|            | 0.69976         | -1.2836  | 0.90037 | 0.23178     | 0.650687833 |           |         |
| TAB2       | ENSG00000055208 | 0.7327   | 0.23187 | 0.71851     | 0.23622     | 0.22861   | 0.40959 |



|           |                 |             |         |             |             |          |         |  |
|-----------|-----------------|-------------|---------|-------------|-------------|----------|---------|--|
|           | 0.26032         | 0.39731     | 0.23187 | 0.650874135 |             |          |         |  |
| AGBL2     | ENSG00000165923 | -0.3121     | 0.62252 | 0.42831     | 0.33421     | -0.52151 | 0.699   |  |
|           | 0.73268         | 0.23188     | 0.23188 | 0.650874135 |             |          |         |  |
| NA        | ENSG00000255595 | 0.73257     | 0.23191 | 0.73257     | 0.23191     | 0.73257  | 0.23191 |  |
|           | 0.73257         | 0.23191     | 0.23191 | 0.650874135 |             |          |         |  |
| NA        | ENSG00000265624 | 0.73252     | 0.23193 | 0.73252     | 0.23193     | 0.73252  | 0.23193 |  |
|           | 0.73252         | 0.23193     | 0.23193 | 0.650874135 |             |          |         |  |
| RHOT1P3   | ENSG00000242756 | -1.1498     | 0.87489 | 0.057212    | 0.47719     | 0.73239  |         |  |
|           | 0.23197         | 0.73239     | 0.23197 | 0.23197     | 0.650874135 |          |         |  |
| NA        | ENSG00000255558 | 0.73235     | 0.23198 | 0.73235     | 0.23198     | 0.73235  | 0.23198 |  |
|           | 0.73235         | 0.23198     | 0.23198 | 0.650874135 |             |          |         |  |
| TADA3     | ENSG00000171148 | -0.70068    | 0.75825 | 0.73232     | 0.23199     | 0.71049  | 0.2387  |  |
|           | -0.46577        | 0.67931     | 0.23199 | 0.650874135 |             |          |         |  |
| NPM1P14   | ENSG00000182965 | -0.029979   | 0.51196 | 0.7323      | 0.23199     | 0.7323   |         |  |
|           | 0.23199         | 0.7323      | 0.23199 | 0.23199     | 0.650874135 |          |         |  |
| NA        | ENSG00000282988 | 0.73227     | 0.232   | 0.73227     | 0.232       | 0.73227  | 0.232   |  |
|           | 0.232           | 0.650874135 |         |             |             |          |         |  |
| IGLV2-33  | ENSG00000211656 | 0.73224     | 0.23201 | 0.73224     | 0.23201     | 0.73224  |         |  |
|           | 0.23201         | 0.73224     | 0.23201 | 0.23201     | 0.650874135 |          |         |  |
| NA        | ENSG00000228429 | -0.35577    | 0.63899 | -0.35577    | 0.63899     | -0.35577 | 0.63899 |  |
|           | 0.73226         | 0.23201     | 0.23201 | 0.650874135 |             |          |         |  |
| RN7SL403P | ENSG00000240625 | 0.73223     | 0.23201 | 0.73223     | 0.23201     | 0.73223  |         |  |
|           | 0.23201         | 0.73223     | 0.23201 | 0.23201     | 0.650874135 |          |         |  |
| NA        | ENSG00000221043 | -0.055332   | 0.52206 | -0.055332   | 0.52206     | 0.071147 | 0.47164 |  |
|           | 0.73223         | 0.23202     | 0.23202 | 0.650874135 |             |          |         |  |
| MELK      | ENSG00000165304 | -0.21975    | 0.58697 | 0.73211     | 0.23205     | -0.46191 | 0.67793 |  |
|           | -0.5107         | 0.69522     | 0.23205 | 0.650883155 |             |          |         |  |
| MIR3657   | ENSG00000266370 | 0.73207     | 0.23206 | 0.73207     | 0.23206     | 0.73207  |         |  |
|           | 0.23206         | 0.73207     | 0.23206 | 0.23206     | 0.650883155 |          |         |  |
| NA        | ENSG00000255871 | -0.63301    | 0.73664 | -0.47925    | 0.68412     | 0.73204  | 0.23207 |  |
|           | -0.47925        | 0.68412     | 0.23207 | 0.650883155 |             |          |         |  |
| NA        | ENSG00000232059 | 0.73198     | 0.23209 | 0.73198     | 0.23209     | 0.73198  | 0.23209 |  |
|           | 0.73198         | 0.23209     | 0.23209 | 0.650883155 |             |          |         |  |
| NA        | ENSG00000257572 | 0.73198     | 0.23209 | 0.73198     | 0.23209     | 0.73198  | 0.23209 |  |
|           | 0.73198         | 0.23209     | 0.23209 | 0.650883155 |             |          |         |  |
| RN7SKP51  | ENSG00000222713 | 0.73188     | 0.23212 | 0.73188     | 0.23212     | 0.73188  |         |  |
|           | 0.23212         | 0.73188     | 0.23212 | 0.23212     | 0.650929827 |          |         |  |
| NA        | ENSG00000232876 | 0.73173     | 0.23217 | -0.43601    | 0.66858     | -0.43601 | 0.66858 |  |
|           | -0.43601        | 0.66858     | 0.23217 | 0.651032576 |             |          |         |  |
| AKR1C8P   | ENSG00000264006 | 0.7315      | 0.23224 | -0.89312    | 0.8141      | 0.7      | 0.24196 |  |
|           | 0.151           | 0.43999     | 0.23224 | 0.651133379 |             |          |         |  |
| POGLUT2   | ENSG00000134901 | 0.43512     | 0.33174 | 0.73135     | 0.23228     | 0.36452  |         |  |
|           | 0.35774         | 0.71054     | 0.23868 | 0.23228     | 0.651133379 |          |         |  |
| VANGL2    | ENSG00000162738 | -0.81328    | 0.79197 | 0.73135     | 0.23228     | 0.23815  |         |  |
|           | 0.40588         | 0.077286    | 0.4692  | 0.23228     | 0.651133379 |          |         |  |
| LILRB4    | ENSG00000186818 | 0.73122     | 0.23232 | -0.54566    | 0.70735     | -0.54566 |         |  |
|           | 0.70735         | -0.54566    | 0.70735 | 0.23232     | 0.651133379 |          |         |  |
| RNA5SP39  | ENSG00000223177 | -0.77366    | 0.78043 | 0.73122     | 0.23232     | 0.1035   |         |  |
|           | 0.45878         | 0.1035      | 0.45878 | 0.23232     | 0.651133379 |          |         |  |
| NA        | ENSG00000268854 | 0.73113     | 0.23235 | 0.73113     | 0.23235     | 0.73113  | 0.23235 |  |
|           | 0.73113         | 0.23235     | 0.23235 | 0.651133379 |             |          |         |  |
| NA        | ENSG00000261346 | 0.73109     | 0.23236 | 0.73109     | 0.23236     | 0.73109  | 0.23236 |  |
|           | 0.73109         | 0.23236     | 0.23236 | 0.651133379 |             |          |         |  |
| EPHA5-AS1 | ENSG00000250846 | 0.73102     | 0.23238 | -0.64811    | 0.74154     | -0.7692  |         |  |
|           | 0.77911         | 0.041805    | 0.48333 | 0.23238     | 0.651133379 |          |         |  |
| PHRF1     | ENSG00000070047 | -0.1346     | 0.55354 | -0.096182   | 0.53831     | -0.61324 | 0.73014 |  |
|           | 0.73094         | 0.23241     | 0.23241 | 0.651133379 |             |          |         |  |
| BCL9L     | ENSG00000186174 | 0.45484     | 0.32461 | 0.14041     | 0.44417     | 0.73095  | 0.23241 |  |
|           | -0.25307        | 0.59989     | 0.23241 | 0.651133379 |             |          |         |  |
| PTGES3P4  | ENSG00000236937 | 0.73095     | 0.23241 | 0.73095     | 0.23241     | 0.73095  |         |  |
|           | 0.23241         | 0.73095     | 0.23241 | 0.23241     | 0.651133379 |          |         |  |
| NA        | ENSG00000280453 | 0.7309      | 0.23242 | 0.7309      | 0.23242     | 0.7309   | 0.23242 |  |

|           |                 |          |         |             |             |          |         |  |
|-----------|-----------------|----------|---------|-------------|-------------|----------|---------|--|
|           | 0.7309          | 0.23242  | 0.23242 | 0.651133379 |             |          |         |  |
| RPS20     | ENSG00000008988 | 0.40224  | 0.34375 | 0.48717     | 0.31307     | -1.2065  | 0.88619 |  |
|           | 0.73086         | 0.23243  | 0.23243 | 0.651133379 |             |          |         |  |
| NA        | ENSG00000259377 | 0.73087  | 0.23243 | 0.73087     | 0.23243     | 0.73087  | 0.23243 |  |
|           | 0.73087         | 0.23243  | 0.23243 | 0.651133379 |             |          |         |  |
| H2AC7     | ENSG00000196866 | 0.73083  | 0.23244 | 0.73083     | 0.23244     | 0.73083  | 0.23244 |  |
|           | -0.075879       | 0.53024  | 0.23244 | 0.651133379 |             |          |         |  |
| NA        | ENSG00000237370 | 0.73077  | 0.23246 | 0.73077     | 0.23246     | 0.73077  | 0.23246 |  |
|           | 0.73077         | 0.23246  | 0.23246 | 0.651133379 |             |          |         |  |
| OR9I3P    | ENSG00000272685 | 0.73072  | 0.23248 | 0.27805     | 0.39049     | 0.2939   |         |  |
|           | 0.38442         | 0.27805  | 0.39049 | 0.23248     | 0.651133379 |          |         |  |
| NA        | ENSG00000254830 | -0.8226  | 0.79463 | -0.60823    | 0.72848     | 0.73065  | 0.2325  |  |
|           | 0.73065         | 0.2325   | 0.2325  | 0.651133379 |             |          |         |  |
| HMOX1     | ENSG00000100292 | -1.7169  | 0.957   | -1.6279     | 0.94823     | 0.70634  | 0.23999 |  |
|           | 0.73061         | 0.23251  | 0.23251 | 0.651133379 |             |          |         |  |
| MAK16     | ENSG00000198042 | 0.43861  | 0.33047 | 0.43861     | 0.33047     | 0.43861  | 0.33047 |  |
|           | 0.7306          | 0.23251  | 0.23251 | 0.651133379 |             |          |         |  |
| HLA-DQB2  | ENSG00000232629 | 0.73059  | 0.23251 | 0.73059     | 0.23251     | 0.73059  |         |  |
|           | 0.23251         | 0.73059  | 0.23251 | 0.23251     | 0.651133379 |          |         |  |
| RPL23AP52 | ENSG00000230370 | 0.73055  | 0.23253 | 0.73055     | 0.23253     | 0.73055  |         |  |
|           | 0.23253         | 0.73055  | 0.23253 | 0.23253     | 0.651133379 |          |         |  |
| NPM1P51   | ENSG00000230913 | 0.73055  | 0.23253 | -0.31092    | 0.62207     | -0.31092 |         |  |
|           | 0.62207         | -0.31092 | 0.62207 | 0.23253     | 0.651133379 |          |         |  |
| MIR3195   | ENSG00000265306 | 0.73053  | 0.23253 | 0.73053     | 0.23253     | 0.73053  |         |  |
|           | 0.23253         | 0.73053  | 0.23253 | 0.23253     | 0.651133379 |          |         |  |
| PMP2      | ENSG00000147588 | 0.73051  | 0.23254 | 0.73051     | 0.23254     | -0.03688 | 0.51471 |  |
|           | -0.46496        | 0.67902  | 0.23254 | 0.651133379 |             |          |         |  |
| CEACAMP1  | ENSG00000233681 | 0.37623  | 0.35337 | 0.48337     | 0.31442     | 0.7304   |         |  |
|           | 0.23257         | -0.70307 | 0.75899 | 0.23257     | 0.651179964 |          |         |  |
| ATP6V0B   | ENSG00000117410 | -0.33193 | 0.63003 | 0.7303      | 0.2326      | 0.7303   |         |  |
|           | 0.2326          | 0.092657 | 0.46309 | 0.2326      | 0.65118913  |          |         |  |
| RN7SKP167 | ENSG00000222979 | 0.73031  | 0.2326  | 0.73031     | 0.2326      | 0.029708 |         |  |
|           | 0.48815         | 0.73031  | 0.2326  | 0.2326      | 0.65118913  |          |         |  |
| LINC01471 | ENSG00000239921 | 0.67367  | 0.25026 | 0.2997      | 0.3822      | 0.13421  |         |  |
|           | 0.44662         | 0.73021  | 0.23263 | 0.23263     | 0.651235445 |          |         |  |
| ALDH5A1   | ENSG00000112294 | 0.045001 | 0.48205 | -0.24565    | 0.59702     | 0.46423  |         |  |
|           | 0.32124         | 0.7301   | 0.23266 | 0.23266     | 0.651235445 |          |         |  |
| TM4SF5    | ENSG00000142484 | -0.59565 | 0.7243  | -0.91857    | 0.82084     | -0.91857 |         |  |
|           | 0.82084         | 0.73013  | 0.23266 | 0.23266     | 0.651235445 |          |         |  |
| KCNK2     | ENSG00000082482 | -0.74695 | 0.77245 | -0.24934    | 0.59845     | -0.10994 | 0.54377 |  |
|           | 0.73008         | 0.23267  | 0.23267 | 0.651235445 |             |          |         |  |
| TANC1     | ENSG00000115183 | -0.30944 | 0.62151 | 0.66439     | 0.25322     | 0.72999  | 0.2327  |  |
|           | 0.10312         | 0.45893  | 0.2327  | 0.651253756 |             |          |         |  |
| LINC02334 | ENSG00000274317 | -0.10609 | 0.54225 | -0.87571    | 0.80941     | 0.72996  |         |  |
|           | 0.23271         | -0.21423 | 0.58481 | 0.23271     | 0.651253756 |          |         |  |
| BMPR2     | ENSG00000204217 | 0.72987  | 0.23273 | 0.56109     | 0.28737     | 0.63543  | 0.26257 |  |
|           | 0.091977        | 0.46336  | 0.23273 | 0.651253756 |             |          |         |  |
| MYO3B-AS1 | ENSG00000231898 | 0.54792  | 0.29187 | 0.7299      | 0.23273     | 0.61007  |         |  |
|           | 0.27091         | 0.31161  | 0.37767 | 0.23273     | 0.651253756 |          |         |  |
| MIR1252   | ENSG00000221788 | 0.72982  | 0.23275 | 0.70945     | 0.23902     | 0.72982  |         |  |
|           | 0.23275         | -0.41693 | 0.66164 | 0.23275     | 0.651262908 |          |         |  |
| MIR4643   | ENSG00000263734 | 0.7298   | 0.23276 | 0.7298      | 0.23276     | 0.7298   |         |  |
|           | 0.23276         | -0.84266 | 0.80029 | 0.23276     | 0.651262908 |          |         |  |
| TRAV13-1  | ENSG00000211788 | -1.0461  | 0.85224 | -1.0461     | 0.85224     | 0.72949  |         |  |
|           | 0.23285         | -1.0461  | 0.85224 | 0.23285     | 0.651477321 |          |         |  |
| TTC9      | ENSG00000133985 | 0.72944  | 0.23287 | 0.72944     | 0.23287     | 0.72944  | 0.23287 |  |
|           | 0.72944         | 0.23287  | 0.23287 | 0.651495872 |             |          |         |  |
| NA        | ENSG00000272319 | 0.70933  | 0.23906 | 0.70933     | 0.23906     | 0.72935  | 0.23289 |  |
|           | -0.30307        | 0.61908  | 0.23289 | 0.651504994 |             |          |         |  |
| MROH8     | ENSG00000101353 | 0.14511  | 0.44231 | 0.72933     | 0.2329      | -0.27052 | 0.60662 |  |
|           | -0.27052        | 0.60662  | 0.2329  | 0.651504994 |             |          |         |  |
| NA        | ENSG00000278943 | 0.72921  | 0.23294 | 0.72921     | 0.23294     | 0.72921  | 0.23294 |  |

|            |                 |           |         |             |             |           |         |  |
|------------|-----------------|-----------|---------|-------------|-------------|-----------|---------|--|
|            | 0.72921         | 0.23294   | 0.23294 | 0.651510137 |             |           |         |  |
| NA         | ENSG00000262089 | 0.72912   | 0.23296 | 0.72912     | 0.23296     | 0.72912   | 0.23296 |  |
|            | 0.72912         | 0.23296   | 0.23296 | 0.651510137 |             |           |         |  |
| KLHL30     | ENSG00000168427 | -0.79098  | 0.78552 | 0.72903     | 0.23299     | 0.30927   |         |  |
|            | 0.37856         | -0.063107 | 0.52516 | 0.23299     | 0.651510137 |           |         |  |
| LINC01798  | ENSG00000232046 | 0.72901   | 0.233   | -0.27294    | 0.60755     | 0.67066   | 0.25122 |  |
|            | -0.66097        | 0.74569   | 0.233   | 0.651510137 |             |           |         |  |
| RN7SKP60   | ENSG00000252794 | 0.72896   | 0.23301 | 0.72896     | 0.23301     | 0.72896   |         |  |
|            | 0.23301         | 0.72896   | 0.23301 | 0.23301     | 0.651510137 |           |         |  |
| NA         | ENSG00000279065 | 0.72894   | 0.23302 | -1.4061     | 0.92015     | -0.24636  | 0.5973  |  |
|            | 0.17322         | 0.43124   | 0.23302 | 0.651510137 |             |           |         |  |
| LINC01669  | ENSG00000280191 | 0.22965   | 0.40918 | 0.72894     | 0.23302     | 0.22965   |         |  |
|            | 0.40918         | -0.3375   | 0.63213 | 0.23302     | 0.651510137 |           |         |  |
| NA         | ENSG00000243714 | 0.72889   | 0.23303 | 0.72889     | 0.23303     | -1.0618   | 0.85583 |  |
|            | 0.72889         | 0.23303   | 0.23303 | 0.651510137 |             |           |         |  |
| NA         | ENSG00000265324 | -0.27078  | 0.60672 | 0.39201     | 0.34752     | 0.25346   | 0.39996 |  |
|            | 0.72891         | 0.23303   | 0.23303 | 0.651510137 |             |           |         |  |
| FHL5       | ENSG00000112214 | -1.0791   | 0.85973 | 0.72883     | 0.23305     | -0.92521  | 0.82257 |  |
|            | 0.56984         | 0.28439   | 0.23305 | 0.651510137 |             |           |         |  |
| NA         | ENSG00000279099 | 0.47669   | 0.31679 | 0.012253    | 0.49511     | 0.72874   | 0.23308 |  |
|            | 0.061877        | 0.47533   | 0.23308 | 0.651510137 |             |           |         |  |
| KRT75      | ENSG00000170454 | 0.72872   | 0.23309 | 0.72872     | 0.23309     | 0.72872   | 0.23309 |  |
|            | 0.57049         | 0.28417   | 0.23309 | 0.651510137 |             |           |         |  |
| TM4SF18    | ENSG00000163762 | 0.33664   | 0.3682  | -0.72825    | 0.76677     | 0.33664   |         |  |
|            | 0.3682          | 0.72868   | 0.2331  | 0.2331      | 0.651510137 |           |         |  |
| PSME2P2    | ENSG00000225131 | 0.17586   | 0.4302  | 0.044275    | 0.48234     | 0.22481   |         |  |
|            | 0.41106         | 0.72863   | 0.23311 | 0.23311     | 0.651510137 |           |         |  |
| RNU6-739P  | ENSG00000212340 | 0.28925   | 0.3862  | 0.72851     | 0.23315     | 0.2946    |         |  |
|            | 0.38415         | -0.42452  | 0.66441 | 0.23315     | 0.651510137 |           |         |  |
| NA         | ENSG00000280365 | 0.72849   | 0.23316 | 0.72849     | 0.23316     | 0.72849   | 0.23316 |  |
|            | -0.61423        | 0.73047   | 0.23316 | 0.651510137 |             |           |         |  |
| NA         | ENSG00000257766 | 0.72838   | 0.23319 | 0.72838     | 0.23319     | 0.72838   | 0.23319 |  |
|            | 0.72838         | 0.23319   | 0.23319 | 0.651510137 |             |           |         |  |
| NA         | ENSG00000283128 | -0.087919 | 0.53503 | 0.72835     | 0.2332      | -0.087919 | 0.53503 |  |
|            | 0.67266         | 0.25058   | 0.2332  | 0.651510137 |             |           |         |  |
| RANBP3L    | ENSG00000164188 | 0.36396   | 0.35794 | 0.72832     | 0.23321     | 0.28848   |         |  |
|            | 0.38649         | -0.031189 | 0.51244 | 0.23321     | 0.651510137 |           |         |  |
| NA         | ENSG00000253100 | -1.1306   | 0.87088 | -1.1306     | 0.87088     | 0.72827   | 0.23322 |  |
|            | -1.1306         | 0.87088   | 0.23322 | 0.651510137 |             |           |         |  |
| LRRC49     | ENSG00000137821 | -0.47931  | 0.68414 | 0.72824     | 0.23323     | -1.0971   |         |  |
|            | 0.8637          | -0.9476   | 0.82833 | 0.23323     | 0.651510137 |           |         |  |
| CHUK       | ENSG00000213341 | 0.38665   | 0.34951 | 0.22277     | 0.41186     | 0.72826   | 0.23323 |  |
|            | 0.50094         | 0.30821   | 0.23323 | 0.651510137 |             |           |         |  |
| NA         | ENSG00000250259 | 0.72825   | 0.23323 | 0.72825     | 0.23323     | 0.72825   | 0.23323 |  |
|            | 0.72825         | 0.23323   | 0.23323 | 0.651510137 |             |           |         |  |
| VPS53      | ENSG00000141252 | -0.50273  | 0.69242 | 0.72822     | 0.23324     | -0.26284  | 0.60366 |  |
|            | -1.2679         | 0.89758   | 0.23324 | 0.651510137 |             |           |         |  |
| OR10D3     | ENSG00000197309 | -0.46985  | 0.68077 | 0.72817     | 0.23326     | 0.72817   |         |  |
|            | 0.23326         | 0.72817   | 0.23326 | 0.23326     | 0.651510137 |           |         |  |
| CAMTA1-AS2 | ENSG00000237728 | 0.72811   | 0.23327 | 0.34545     | 0.36488     | 0.13192   |         |  |
|            | 0.44752         | -0.61117  | 0.72946 | 0.23327     | 0.651510137 |           |         |  |
| HSPG2      | ENSG00000142798 | -0.42806  | 0.6657  | 0.65152     | 0.25736     | 0.72799   | 0.23331 |  |
|            | 0.57893         | 0.28132   | 0.23331 | 0.651510137 |             |           |         |  |
| ZFYVE1     | ENSG00000165861 | 0.728     | 0.23331 | 0.728       | 0.23331     | 0.68814   | 0.24568 |  |
|            | 0.57877         | 0.28137   | 0.23331 | 0.651510137 |             |           |         |  |
| NA         | ENSG00000269172 | 0.72798   | 0.23331 | 0.63449     | 0.26288     | 0.72798   | 0.23331 |  |
|            | 0.72798         | 0.23331   | 0.23331 | 0.651510137 |             |           |         |  |
| NA         | ENSG00000272764 | 0.72791   | 0.23333 | 0.72791     | 0.23333     | 0.72791   | 0.23333 |  |
|            | 0.72791         | 0.23333   | 0.23333 | 0.651510137 |             |           |         |  |
| LPO        | ENSG00000167419 | 0.72787   | 0.23335 | 0.72787     | 0.23335     | 0.72787   | 0.23335 |  |
|            | -0.036573       | 0.51459   | 0.23335 | 0.651510137 |             |           |         |  |
| FAM27E5    | ENSG00000178130 | 0.72783   | 0.23336 | 0.72783     | 0.23336     | 0.72783   |         |  |

|            |                 |          |         |             |             |            |         |  |
|------------|-----------------|----------|---------|-------------|-------------|------------|---------|--|
|            | 0.23336         | 0.40448  | 0.34293 | 0.23336     | 0.651510137 |            |         |  |
| NA         | ENSG00000233018 | 0.72782  | 0.23336 | -0.6637     | 0.74656     | -0.98707   | 0.83819 |  |
|            | 0.15884         | 0.4369   | 0.23336 | 0.651510137 |             |            |         |  |
| TMEM33     | ENSG00000109133 | 0.64275  | 0.26019 | 0.64275     | 0.26019     | 0.72777    |         |  |
|            | 0.23338         | 0.63075  | 0.2641  | 0.23338     | 0.651510137 |            |         |  |
| LINC01644  | ENSG00000218357 | -0.66985 | 0.74852 | 0.72776     | 0.23338     | 0.72776    |         |  |
|            | 0.23338         | 0.72776  | 0.23338 | 0.651510137 |             |            |         |  |
| FAM86EP    | ENSG00000251669 | 0.30579  | 0.37988 | 0.32453     | 0.37277     | 0.72772    |         |  |
|            | 0.23339         | 0.63661  | 0.26219 | 0.23339     | 0.651510137 |            |         |  |
| RNU6-70P   | ENSG00000252247 | -0.72695 | 0.76637 | -0.72098    | 0.76454     | 0.72765    |         |  |
|            | 0.23341         | -0.97592 | 0.83545 | 0.23341     | 0.651510137 |            |         |  |
| RNU6-1216P | ENSG00000199460 | 0.72756  | 0.23344 | 0.72756     | 0.23344     | 0.72756    |         |  |
|            | 0.23344         | 0.72756  | 0.23344 | 0.23344     | 0.651510137 |            |         |  |
| NA         | ENSG00000250748 | 0.72366  | 0.23464 | 0.72758     | 0.23344     | 0.72366    | 0.23464 |  |
|            | 0.13337         | 0.44695  | 0.23344 | 0.651510137 |             |            |         |  |
| RN7SKP157  | ENSG00000251983 | 0.72757  | 0.23344 | 0.57636     | 0.28219     | 0.57636    |         |  |
|            | 0.28219         | 0.57636  | 0.28219 | 0.23344     | 0.651510137 |            |         |  |
| EP400P1    | ENSG00000185684 | -1.297   | 0.90268 | -0.35816    | 0.63989     | -1.0899    |         |  |
|            | 0.86212         | 0.72755  | 0.23345 | 0.23345     | 0.651510137 |            |         |  |
| LINC00395  | ENSG00000231061 | 0.25074  | 0.40101 | -0.18331    | 0.57272     | 0.72745    |         |  |
|            | 0.23348         | -0.10584 | 0.54215 | 0.23348     | 0.651556546 |            |         |  |
| PRANCR     | ENSG00000257815 | 0.72729  | 0.23353 | 0.69138     | 0.24466     | 0.69138    |         |  |
|            | 0.24466         | 0.69138  | 0.24466 | 0.23353     | 0.651574728 |            |         |  |
| BDP1       | ENSG00000145734 | 0.20348  | 0.41938 | 0.20441     | 0.41902     | 0.72724    | 0.23354 |  |
|            | 0.018849        | 0.49248  | 0.23354 | 0.651574728 |             |            |         |  |
| RAG1       | ENSG00000166349 | 0.72724  | 0.23354 | 0.72724     | 0.23354     | -0.51587   | 0.69703 |  |
|            | -0.18928        | 0.57506  | 0.23354 | 0.651574728 |             |            |         |  |
| LINC02698  | ENSG00000256717 | -0.9586  | 0.83112 | 0.72724     | 0.23354     | -0.0088016 |         |  |
|            | 0.50351         | 0.25777  | 0.39829 | 0.23354     | 0.651574728 |            |         |  |
| NA         | ENSG00000233511 | 0.72711  | 0.23358 | 0.72711     | 0.23358     | 0.72711    | 0.23358 |  |
|            | 0.72711         | 0.23358  | 0.23358 | 0.651602307 |             |            |         |  |
| NA         | ENSG00000202190 | 0.72707  | 0.23359 | 0.72707     | 0.23359     | 0.72707    | 0.23359 |  |
|            | 0.72707         | 0.23359  | 0.23359 | 0.651602307 |             |            |         |  |
| MIR3141    | ENSG00000264760 | 0.72708  | 0.23359 | 0.72708     | 0.23359     | 0.72708    |         |  |
|            | 0.23359         | -2.204   | 0.98624 | 0.23359     | 0.651602307 |            |         |  |
| LINC02029  | ENSG00000241544 | 0.72694  | 0.23363 | 0.72694     | 0.23363     | 0.19805    |         |  |
|            | 0.4215          | 0.31324  | 0.37705 | 0.23363     | 0.651638301 |            |         |  |
| FUT11      | ENSG00000196968 | 0.72691  | 0.23364 | 0.72691     | 0.23364     | 0.72691    | 0.23364 |  |
|            | 0.72691         | 0.23364  | 0.23364 | 0.651638301 |             |            |         |  |
| RN7SL198P  | ENSG00000264036 | 0.72681  | 0.23367 | -0.42447    | 0.66439     | -0.70328   |         |  |
|            | 0.75906         | -1.0919  | 0.86257 | 0.23367     | 0.651638301 |            |         |  |
| OSCP1      | ENSG00000116885 | -0.67533 | 0.75027 | 0.72679     | 0.23368     | -0.43949   | 0.66985 |  |
|            | -0.67533        | 0.75027  | 0.23368 | 0.651638301 |             |            |         |  |
| ZNF608     | ENSG00000168916 | 0.32737  | 0.37169 | 0.60876     | 0.27134     | 0.35847    | 0.36    |  |
|            | 0.72674         | 0.23369  | 0.23369 | 0.651638301 |             |            |         |  |
| NA         | ENSG00000267150 | 0.72667  | 0.23371 | -0.38639    | 0.65039     | 0.1605     | 0.43625 |  |
|            | -0.633          | 0.73663  | 0.23371 | 0.651638301 |             |            |         |  |
| FAM189B    | ENSG00000160767 | 0.19463  | 0.42284 | 0.72664     | 0.23372     | -0.088151  |         |  |
|            | 0.53512         | 0.2462   | 0.40276 | 0.23372     | 0.651638301 |            |         |  |
| NA         | ENSG00000259270 | -0.11828 | 0.54708 | -0.41182    | 0.65976     | 0.72666    | 0.23372 |  |
|            | -1.4197         | 0.92216  | 0.23372 | 0.651638301 |             |            |         |  |
| TMED10     | ENSG00000170348 | 0.72661  | 0.23373 | -0.20743    | 0.58216     | -0.9164    |         |  |
|            | 0.82027         | -1.1667  | 0.87833 | 0.23373     | 0.651638301 |            |         |  |
| NA         | ENSG00000225213 | 0.51297  | 0.30399 | 0.72657     | 0.23375     | 0.45753    | 0.32365 |  |
|            | 0.5182          | 0.30216  | 0.23375 | 0.651638301 |             |            |         |  |
| NA         | ENSG00000262952 | -0.60499 | 0.72741 | 0.72657     | 0.23375     | -0.88174   | 0.81104 |  |
|            | 0.18064         | 0.42833  | 0.23375 | 0.651638301 |             |            |         |  |
| CNTNAP2    | ENSG00000174469 | -0.9283  | 0.82337 | 0.72646     | 0.23378     | -1.1541    |         |  |
|            | 0.87576         | -1.5356  | 0.93768 | 0.23378     | 0.651656446 |            |         |  |
| PIGV       | ENSG00000060642 | 0.72025  | 0.23569 | 0.72642     | 0.23379     | -0.38294   | 0.64912 |  |
|            | -0.66439        | 0.74678  | 0.23379 | 0.651656446 |             |            |         |  |
| NA         | ENSG00000248428 | 0.39109  | 0.34786 | 0.72639     | 0.2338      | 0.72639    | 0.2338  |  |

|            |                 |           |         |             |             |           |         |         |
|------------|-----------------|-----------|---------|-------------|-------------|-----------|---------|---------|
|            | 0.72639         | 0.2338    | 0.2338  | 0.651656446 |             |           |         |         |
| TEX51      | ENSG00000237524 | 0.72636   | 0.23381 | 0.72636     | 0.23381     | 0.72636   | 0.23381 | 0.23381 |
|            | 0.43232         | 0.33275   | 0.23381 | 0.651656446 |             |           |         |         |
| RN7SL851P  | ENSG00000240718 | 0.7263    | 0.23383 | 0.7263      | 0.23383     | 0.7263    | 0.23383 | 0.7263  |
|            | 0.23383         | 0.7263    | 0.23383 | 0.651674916 |             |           |         |         |
| NA         | ENSG00000232774 | -0.27457  | 0.60817 | -0.27457    | 0.60817     | -0.27457  | 0.60817 | 0.60817 |
|            | 0.72604         | 0.23391   | 0.23391 | 0.651851181 |             |           |         |         |
| DPPA3P2    | ENSG00000188831 | -0.22007  | 0.58709 | 0.32929     | 0.37097     | -0.13291  |         |         |
|            | 0.55287         | 0.72601   | 0.23392 | 0.23392     | 0.651851181 |           |         |         |
| SCARB1     | ENSG00000073060 | 0.72587   | 0.23396 | 0.28327     | 0.38849     | -0.52914  |         |         |
|            | 0.70164         | 0.15395   | 0.43883 | 0.23396     | 0.651915579 |           |         |         |
| NA         | ENSG00000268278 | 0.72581   | 0.23398 | -0.96946    | 0.83384     | -1.3402   | 0.9099  |         |
|            | 0.067013        | 0.47329   | 0.23398 | 0.651915579 |             |           |         |         |
| TOMM7      | ENSG00000196683 | -0.3356   | 0.63141 | -0.3356     | 0.63141     | 0.72575   | 0.234   |         |
|            | 0.16063         | 0.43619   | 0.234   | 0.651915579 |             |           |         |         |
| LINC02664  | ENSG00000272381 | -0.86812  | 0.80734 | -0.53996    | 0.70539     | 0.15432   |         |         |
|            | 0.43868         | 0.72574   | 0.234   | 0.234       | 0.651915579 |           |         |         |
| NA         | ENSG00000232130 | 0.7257    | 0.23401 | 0.67405     | 0.25014     | 0.7257    | 0.23401 |         |
|            | 0.7257          | 0.23401   | 0.23401 | 0.651915579 |             |           |         |         |
| HNRNPA1P24 | ENSG00000241947 | 0.39355   | 0.34696 | -0.20736    | 0.58214     | 0.39355   |         |         |
|            | 0.34696         | 0.72559   | 0.23404 | 0.23404     | 0.651952469 |           |         |         |
| NA         | ENSG00000255333 | 0.72559   | 0.23405 | -0.065094   | 0.52595     | -0.065094 | 0.52595 |         |
|            | -0.065094       | 0.52595   | 0.23405 | 0.651952469 |             |           |         |         |
| TBX5       | ENSG00000089225 | -0.81614  | 0.79279 | 0.7254      | 0.2341      | -0.81614  | 0.79279 |         |
|            | -1.29           | 0.90148   | 0.2341  | 0.65203564  |             |           |         |         |
| TGIF2P1    | ENSG00000225401 | 0.49624   | 0.30986 | 0.49624     | 0.30986     | 0.49624   |         |         |
|            | 0.30986         | 0.72534   | 0.23412 | 0.23412     | 0.65203564  |           |         |         |
| LCE6A      | ENSG00000235942 | 0.72534   | 0.23412 | 0.72534     | 0.23412     | 0.72534   | 0.23412 |         |
|            | 0.72534         | 0.23412   | 0.23412 | 0.65203564  |             |           |         |         |
| MYL6P3     | ENSG00000227173 | 0.72513   | 0.23419 | 0.65364     | 0.25667     | 0.66579   |         |         |
|            | 0.25277         | 0.72513   | 0.23419 | 0.23419     | 0.652193319 |           |         |         |
| NA         | ENSG00000279138 | 0.72505   | 0.23421 | 0.72505     | 0.23421     | 0.72505   | 0.23421 |         |
|            | 0.72505         | 0.23421   | 0.23421 | 0.652211319 |             |           |         |         |
| NRIP1      | ENSG00000180530 | -0.88375  | 0.81158 | 0.57157     | 0.28381     | 0.72498   | 0.23423 |         |
|            | 0.43333         | 0.33239   | 0.23423 | 0.652211319 |             |           |         |         |
| TNFRSF19   | ENSG00000127863 | 0.72495   | 0.23424 | -0.23118    | 0.59141     | -0.37069  |         |         |
|            | 0.64457         | -0.28287  | 0.61136 | 0.23424     | 0.652211319 |           |         |         |
| UBA52P9    | ENSG00000244329 | 0.72492   | 0.23425 | 0.72492     | 0.23425     | 0.72492   |         |         |
|            | 0.23425         | 0.2625    | 0.39647 | 0.23425     | 0.652211319 |           |         |         |
| OR7E145P   | ENSG00000235855 | -0.55274  | 0.70978 | -0.29102    | 0.61448     | -0.47852  |         |         |
|            | 0.68386         | 0.72484   | 0.23427 | 0.23427     | 0.652229738 |           |         |         |
| HAP1       | ENSG00000173805 | 0.7248    | 0.23429 | 0.7248      | 0.23429     | 0.7248    | 0.23429 |         |
|            | 0.65866         | 0.25506   | 0.23429 | 0.652248155 |             |           |         |         |
| NA         | ENSG00000259238 | 0.30097   | 0.38172 | 0.72472     | 0.23431     | 0.32612   | 0.37217 |         |
|            | 0.32612         | 0.37217   | 0.23431 | 0.65226657  |             |           |         |         |
| ZNF766     | ENSG00000196214 | -0.013621 | 0.50543 | 0.72462     | 0.23434     | 0.34027   |         |         |
|            | 0.36683         | 0.40662   | 0.34214 | 0.23434     | 0.652303393 |           |         |         |
| NA         | ENSG00000247372 | -0.036948 | 0.51474 | 0.72459     | 0.23435     | -1.6436   | 0.94987 |         |
|            | -1.6436         | 0.94987   | 0.23435 | 0.652303393 |             |           |         |         |
| NA         | ENSG00000225421 | 0.72449   | 0.23438 | -0.39935    | 0.65518     | -0.60457  | 0.72727 |         |
|            | 0.45656         | 0.32399   | 0.23438 | 0.652330782 |             |           |         |         |
| MYF6       | ENSG00000111046 | 0.72446   | 0.23439 | 0.72446     | 0.23439     | 0.72446   | 0.23439 |         |
|            | 0.72446         | 0.23439   | 0.23439 | 0.652330782 |             |           |         |         |
| ZBTB26     | ENSG00000171448 | 0.46274   | 0.32178 | -0.16296    | 0.56472     | 0.72443   |         |         |
|            | 0.2344          | -0.53528  | 0.70377 | 0.2344      | 0.652330782 |           |         |         |
| LINC02049  | ENSG00000243593 | -0.70075  | 0.75827 | 0.72435     | 0.23443     | -0.050659 |         |         |
|            | 0.5202          | -0.08048  | 0.53207 | 0.23443     | 0.652367588 |           |         |         |
| FAM20B     | ENSG00000116199 | -0.76823  | 0.77882 | 0.30752     | 0.37922     | 0.72429   |         |         |
|            | 0.23444         | 0.41539   | 0.33893 | 0.23444     | 0.652367588 |           |         |         |
| DFFB       | ENSG00000169598 | 0.72424   | 0.23446 | 0.72424     | 0.23446     | 0.33248   | 0.36976 |         |
|            | 0.48489         | 0.31388   | 0.23446 | 0.652385988 |             |           |         |         |
| NA         | ENSG00000264808 | 0.059344  | 0.47634 | 0.48804     | 0.31276     | -0.47401  | 0.68225 |         |

|           |                 |           |         |             |             |           |         |  |
|-----------|-----------------|-----------|---------|-------------|-------------|-----------|---------|--|
|           | 0.72414         | 0.23449   | 0.23449 | 0.652432209 |             |           |         |  |
| GIN3      | ENSG00000181938 | 0.72399   | 0.23454 | 0.72399     | 0.23454     | 0.72399   | 0.23454 |  |
|           | 0.72399         | 0.23454   | 0.23454 | 0.652486912 |             |           |         |  |
| NA        | ENSG00000256256 | 0.72396   | 0.23454 | -0.83779    | 0.79892     | 0.72396   | 0.23454 |  |
|           | -0.82779        | 0.79611   | 0.23454 | 0.652486912 |             |           |         |  |
| NA        | ENSG00000257474 | 0.72392   | 0.23456 | 0.62549     | 0.26582     | 0.011259  | 0.49551 |  |
|           | 0.65549         | 0.25608   | 0.23456 | 0.652486912 |             |           |         |  |
| ZNF131    | ENSG00000172262 | -0.46491  | 0.679   | -0.28928    | 0.61381     | 0.72389   | 0.23457 |  |
|           | -1.0359         | 0.84988   | 0.23457 | 0.652486912 |             |           |         |  |
| NA        | ENSG00000275550 | 0.72382   | 0.23459 | 0.72382     | 0.23459     | 0.72382   | 0.23459 |  |
|           | 0.72382         | 0.23459   | 0.23459 | 0.652486912 |             |           |         |  |
| NA        | ENSG00000264560 | 0.72382   | 0.23459 | -1.9697     | 0.97556     | 0.72382   | 0.23459 |  |
|           | 0.72382         | 0.23459   | 0.23459 | 0.652486912 |             |           |         |  |
| NA        | ENSG00000276972 | -1.4231   | 0.92265 | 0.7237      | 0.23462     | -1.4231   | 0.92265 |  |
|           | -1.4231         | 0.92265   | 0.23462 | 0.652495868 |             |           |         |  |
| NA        | ENSG00000264609 | 0.72371   | 0.23462 | 0.72371     | 0.23462     | 0.72371   | 0.23462 |  |
|           | 0.72371         | 0.23462   | 0.23462 | 0.652495868 |             |           |         |  |
| LINC00290 | ENSG00000248197 | 0.72358   | 0.23466 | -0.063023   | 0.52513     | 0.35369   |         |  |
|           | 0.36179         | 0.39424   | 0.3467  | 0.23466     | 0.652519862 |           |         |  |
| PARM1     | ENSG00000169116 | 0.72345   | 0.2347  | -0.73492    | 0.76881     | 0.54088   | 0.29429 |  |
|           | 0.23385         | 0.40755   | 0.2347  | 0.652519862 |             |           |         |  |
| CNOT4P1   | ENSG00000236704 | 0.72341   | 0.23472 | 0.38347     | 0.35068     | -1.0987   |         |  |
|           | 0.86404         | -0.7194   | 0.76405 | 0.23472     | 0.652519862 |           |         |  |
| RNVU1-6   | ENSG00000201558 | 0.72328   | 0.23475 | 0.72328     | 0.23475     | 0.72328   |         |  |
|           | 0.23475         | 0.72328   | 0.23475 | 0.23475     | 0.652519862 |           |         |  |
| NA        | ENSG00000273217 | 0.7233    | 0.23475 | 0.7233      | 0.23475     | 0.7233    | 0.23475 |  |
|           | 0.7233          | 0.23475   | 0.23475 | 0.652519862 |             |           |         |  |
| NA        | ENSG00000238334 | 0.7233    | 0.23475 | 0.7233      | 0.23475     | 0.7233    | 0.23475 |  |
|           | 0.7233          | 0.23475   | 0.23475 | 0.652519862 |             |           |         |  |
| ALG6      | ENSG00000088035 | 0.72327   | 0.23476 | 0.32296     | 0.37336     | 0.23908   | 0.40552 |  |
|           | 0.43951         | 0.33015   | 0.23476 | 0.652519862 |             |           |         |  |
| NA        | ENSG00000263808 | 0.72327   | 0.23476 | 0.34529     | 0.36494     | 0.27652   | 0.39107 |  |
|           | -0.41512        | 0.66097   | 0.23476 | 0.652519862 |             |           |         |  |
| SEL1L3    | ENSG00000091490 | 0.21271   | 0.41578 | 0.72323     | 0.23477     | 0.16937   |         |  |
|           | 0.43275         | -0.29813  | 0.6172  | 0.23477     | 0.652519862 |           |         |  |
| MIR4803   | ENSG00000264099 | 0.72321   | 0.23477 | 0.72321     | 0.23477     | 0.72321   |         |  |
|           | 0.23477         | 0.72321   | 0.23477 | 0.23477     | 0.652519862 |           |         |  |
| LINC01737 | ENSG00000232964 | 0.72316   | 0.23479 | -0.26422    | 0.60419     | 0.72316   |         |  |
|           | 0.23479         | 0.72316   | 0.23479 | 0.23479     | 0.652519862 |           |         |  |
| NA        | ENSG00000228106 | 0.42478   | 0.3355  | 0.52823     | 0.29867     | 0.72314   | 0.2348  |  |
|           | 0.6984          | 0.24246   | 0.2348  | 0.652519862 |             |           |         |  |
| PFN1      | ENSG00000108518 | -0.33277  | 0.63035 | 0.72308     | 0.23482     | 0.72308   | 0.23482 |  |
|           | 0.72308         | 0.23482   | 0.23482 | 0.652519862 |             |           |         |  |
| ULBP3     | ENSG00000131019 | 0.1708    | 0.43219 | 0.72294     | 0.23486     | 0.50147   | 0.30802 |  |
|           | 0.4414          | 0.32946   | 0.23486 | 0.652519862 |             |           |         |  |
| NA        | ENSG00000213115 | -1.928    | 0.97308 | 0.72294     | 0.23486     | -0.80446  | 0.78944 |  |
|           | -2.2221         | 0.98686   | 0.23486 | 0.652519862 |             |           |         |  |
| NA        | ENSG00000267942 | -0.015055 | 0.50601 | 0.37882     | 0.35241     | 0.72286   | 0.23488 |  |
|           | -0.015055       | 0.50601   | 0.23488 | 0.652519862 |             |           |         |  |
| MRPS17P1  | ENSG00000268949 | 0.72282   | 0.23489 | 0.72282     | 0.23489     | 0.72282   |         |  |
|           | 0.23489         | 0.72282   | 0.23489 | 0.23489     | 0.652519862 |           |         |  |
| RBM19     | ENSG00000122965 | 0.50017   | 0.30848 | 0.0048659   | 0.49806     | -0.097079 | 0.53867 |  |
|           | 0.72281         | 0.2349    | 0.2349  | 0.652519862 |             |           |         |  |
| NA        | ENSG00000253041 | -0.073502 | 0.5293  | -0.073502   | 0.5293      | 0.72282   | 0.2349  |  |
|           | 0.72282         | 0.2349    | 0.2349  | 0.652519862 |             |           |         |  |
| NA        | ENSG00000226668 | 0.47614   | 0.31699 | 0.69437     | 0.24372     | 0.72276   | 0.23491 |  |
|           | 0.076478        | 0.46952   | 0.23491 | 0.652519862 |             |           |         |  |
| NA        | ENSG00000262580 | 0.72274   | 0.23492 | 0.72274     | 0.23492     | 0.72274   | 0.23492 |  |
|           | 0.72274         | 0.23492   | 0.23492 | 0.652519862 |             |           |         |  |
| CCDC74A   | ENSG00000163040 | -1.6252   | 0.94794 | 0.72267     | 0.23494     | -0.70552  |         |  |
|           | 0.75976         | -1.6413   | 0.94964 | 0.23494     | 0.652519862 |           |         |  |
| MTDH      | ENSG00000147649 | -0.25446  | 0.60043 | 0.72265     | 0.23495     | -0.31703  | 0.62439 |  |

|            |                 |             |             |             |             |           |         |       |
|------------|-----------------|-------------|-------------|-------------|-------------|-----------|---------|-------|
|            | -0.57129        | 0.7161      | 0.23495     | 0.652519862 |             |           |         |       |
| DYNLL1P3   | ENSG00000235282 | 0.19246     | 0.42369     | -0.064386   | 0.52567     | -0.62917  |         |       |
|            | 0.73538         | 0.72263     | 0.23495     | 0.23495     | 0.652519862 |           |         |       |
| APOC1      | ENSG00000130208 | -0.19631    | 0.57782     | -0.19631    | 0.57782     | 0.72247   | 0.235   |       |
|            | 0.079189        | 0.46844     | 0.235       | 0.652621531 |             |           |         |       |
| NA         | ENSG00000233983 | -0.31364    | 0.6231      | 0.0044589   | 0.49822     | -0.2691   | 0.60607 |       |
|            | 0.72241         | 0.23502     | 0.23502     | 0.652639879 |             |           |         |       |
| C9orf16    | ENSG00000171159 | 0.17952     | 0.42876     | 0.72221     | 0.23508     | 0.5827    |         |       |
|            | 0.28005         | 0.5827      | 0.28005     | 0.23508     | 0.652732103 |           |         |       |
| PRELID3BP7 | ENSG00000250711 | 0.24819     | 0.40199     | 0.72223     | 0.23508     | 0.24819   |         |       |
|            | 0.40199         | -0.16058    | 0.56379     | 0.23508     | 0.652732103 |           |         |       |
| RNU1-93P   | ENSG00000201574 | -0.50152    | 0.692       | 0.43013     | 0.33355     | -0.040659 | 0.51622 |       |
|            | 0.72197         | 0.23516     | 0.23516     | 0.652849937 |             |           |         |       |
| PCDHB3     | ENSG00000113205 | 0.72193     | 0.23517     | 0.72193     | 0.23517     | 0.72193   |         |       |
|            | 0.23517         | 0.052477    | 0.47907     | 0.23517     | 0.652849937 |           |         |       |
| MIR3182    | ENSG00000263785 | 0.037139    | 0.48519     | 0.72188     | 0.23518     | 0.72188   |         |       |
|            | 0.23518         | 0.72188     | 0.23518     | 0.23518     | 0.652849937 |           |         |       |
| MYO16-AS1  | ENSG00000236242 | 0.72184     | 0.2352      | 0.054886    | 0.47811     | 0.054886  |         |       |
|            | 0.47811         | 0.054886    | 0.47811     | 0.2352      | 0.652849937 |           |         |       |
| DHX8       | ENSG00000067596 | -0.068532   | 0.52732     | -0.54528    | 0.70722     | -0.15823  | 0.56286 |       |
|            | 0.72181         | 0.23521     | 0.23521     | 0.652849937 |             |           |         |       |
| NA         | ENSG00000261800 | 0.049496    | 0.48026     | -0.1881     | 0.5746      | 0.72164   | 0.23526 |       |
|            | -0.15513        | 0.56164     | 0.23526     | 0.652849937 |             |           |         |       |
| NA         | ENSG00000270896 | 0.19389     | 0.42313     | -0.41401    | 0.66057     | 0.72163   | 0.23526 |       |
|            | -0.27246        | 0.60737     | 0.23526     | 0.652849937 |             |           |         |       |
| RPS2P6     | ENSG00000214255 | 0.7216      | 0.23527     | 0.56997     | 0.28435     | 0.47581   |         |       |
|            | 0.31711         | 0.47207     | 0.31844     | 0.23527     | 0.652849937 |           |         |       |
| LCTL       | ENSG00000188501 | -0.10332    | 0.54115     | 0.72158     | 0.23528     | 0.72158   | 0.23528 |       |
|            | -1.8798         | 0.96993     | 0.23528     | 0.652849937 |             |           |         |       |
| PRRT2      | ENSG00000167371 | 0.72154     | 0.23529     | 0.72154     | 0.23529     | 0.72154   | 0.23529 |       |
|            | 0.72154         | 0.23529     | 0.23529     | 0.652849937 |             |           |         |       |
| PAGR1      | ENSG00000280789 | 0.72154     | 0.23529     | 0.72154     | 0.23529     | 0.72154   | 0.23529 |       |
|            | 0.72154         | 0.23529     | 0.23529     | 0.652849937 |             |           |         |       |
| TES        | ENSG00000135269 | 0.7215      | 0.2353      | -1.3373     | 0.90944     | 0.28036   | 0.3896  |       |
|            | -0.92164        | 0.82164     | 0.2353      | 0.652849937 |             |           |         |       |
| SPATA4     | ENSG00000150628 | 0.72151     | 0.2353      | 0.72151     | 0.2353      | 0.72151   |         |       |
|            | 0.2353          | -1.4163     | 0.92166     | 0.2353      | 0.652849937 |           |         |       |
| TRIP12     | ENSG00000153827 | -0.1773     | 0.57036     | 0.61936     | 0.26784     | 0.72148   |         |       |
|            | 0.23531         | 0.40384     | 0.34317     | 0.23531     | 0.652849937 |           |         |       |
| NA         | ENSG00000266323 | 0.7213      | 0.23536     | 0.7213      | 0.23536     | 0.7213    | 0.23536 |       |
|            | 0.7213          | 0.23536     | 0.23536     | 0.652951483 |             |           |         |       |
| CDC42P4    | ENSG00000249965 | 0.72125     | 0.23538     | 0.72125     | 0.23538     | 0.72125   |         |       |
|            | 0.23538         | 0.72125     | 0.23538     | 0.23538     | 0.652960363 |           |         |       |
| NA         | ENSG00000170409 | 0.72122     | 0.23539     | 0.72122     | 0.23539     | 0.72122   | 0.23539 |       |
|            | 0.72122         | 0.23539     | 0.23539     | 0.652960363 |             |           |         |       |
| RP1L1      | ENSG00000183638 | 0.72111     | 0.23542     | 0.67165     | 0.2509      | -0.010577 | 0.50422 |       |
|            | -0.10163        | 0.54048     | 0.23542     | 0.653005851 |             |           |         |       |
| NA         | ENSG00000273919 | 0.721       | 0.23545     | 0.721       | 0.23545     | 0.44501   | 0.32816 | 0.721 |
|            | 0.23545         | 0.23545     | 0.653005851 |             |             |           |         |       |
| NA         | ENSG00000279689 | 0.721       | 0.23545     | 0.721       | 0.23545     | 0.721     | 0.23545 |       |
|            | 0.23545         | 0.653005851 |             |             |             |           |         |       |
| NA         | ENSG00000224815 | -1.0916     | 0.86249     | -0.80731    | 0.79026     | 0.72098   | 0.23546 |       |
|            | -0.8587         | 0.80475     | 0.23546     | 0.653005851 |             |           |         |       |
| NA         | ENSG00000278610 | 0.72091     | 0.23548     | 0.72091     | 0.23548     | 0.72091   | 0.23548 |       |
|            | 0.72091         | 0.23548     | 0.23548     | 0.653024152 |             |           |         |       |
| NA         | ENSG00000223991 | 0.7207      | 0.23555     | -1.7067     | 0.95606     | -1.0565   | 0.85463 |       |
|            | -1.1476         | 0.87443     | 0.23555     | 0.65309275  |             |           |         |       |
| NBPF7      | ENSG00000215864 | 0.72065     | 0.23556     | -0.63532    | 0.73739     | -0.70402  | 0.75929 |       |
|            | -0.43618        | 0.66865     | 0.23556     | 0.65309275  |             |           |         |       |
| RNU6-163P  | ENSG00000207124 | -1.2471     | 0.89382     | -0.70704    | 0.76023     | 0.72058   |         |       |
|            | 0.23559         | -1.2471     | 0.89382     | 0.23559     | 0.65309275  |           |         |       |
| RUSC1      | ENSG00000160753 | 0.30227     | 0.38122     | 0.21023     | 0.41675     | 0.72047   | 0.23562 |       |

|            |                 |           |         |             |             |           |         |  |
|------------|-----------------|-----------|---------|-------------|-------------|-----------|---------|--|
|            | 0.72047         | 0.23562   | 0.23562 | 0.65309275  |             |           |         |  |
| FIGLA      | ENSG00000183733 | -0.013615 | 0.50543 | 0.72038     | 0.23564     | -0.084721 | 0.53376 |  |
|            | -0.23326        | 0.59222   | 0.23564 | 0.65309275  |             |           |         |  |
| HTR1B      | ENSG00000135312 | 0.72037   | 0.23565 | 0.71572     | 0.23708     | -0.26364  | 0.60397 |  |
|            | 0.71572         | 0.23708   | 0.23565 | 0.65309275  |             |           |         |  |
| NA         | ENSG00000226542 | 0.21539   | 0.41473 | 0.21539     | 0.41473     | 0.12366   | 0.45079 |  |
|            | 0.72034         | 0.23566   | 0.23566 | 0.65309275  |             |           |         |  |
| RNU6-446P  | ENSG00000199697 | 0.7203    | 0.23567 | 0.7203      | 0.23567     | 0.7203    |         |  |
|            | 0.23567         | 0.7203    | 0.23567 | 0.23567     | 0.65309275  |           |         |  |
| CASZ1      | ENSG00000130940 | -0.70947  | 0.76098 | 0.72027     | 0.23568     | -0.32011  | 0.62556 |  |
|            | -0.18121        | 0.5719    | 0.23568 | 0.65309275  |             |           |         |  |
| MAGI1      | ENSG00000151276 | 0.48257   | 0.3147  | 0.16999     | 0.43251     | 0.72026   | 0.23568 |  |
|            | 0.43209         | 0.33284   | 0.23568 | 0.65309275  |             |           |         |  |
| PCGF1      | ENSG00000115289 | 0.72023   | 0.23569 | 0.72023     | 0.23569     | 0.72023   | 0.23569 |  |
|            | 0.72023         | 0.23569   | 0.23569 | 0.65309275  |             |           |         |  |
| PDE11A     | ENSG00000128655 | 0.7202    | 0.2357  | -0.57739    | 0.71816     | 0.46357   |         |  |
|            | 0.32148         | 0.35857   | 0.35996 | 0.2357      | 0.65309275  |           |         |  |
| RNU6-1003P | ENSG00000252908 | 0.72018   | 0.23571 | 0.41535     | 0.33894     | -1.472    |         |  |
|            | 0.9295          | -0.017681 | 0.50705 | 0.23571     | 0.65309275  |           |         |  |
| NA         | ENSG00000213542 | 0.72012   | 0.23573 | 0.72012     | 0.23573     | 0.52329   | 0.30038 |  |
|            | 0.20745         | 0.41783   | 0.23573 | 0.65309275  |             |           |         |  |
| NA         | ENSG00000273179 | 0.72001   | 0.23576 | 0.72001     | 0.23576     | 0.72001   | 0.23576 |  |
|            | 0.72001         | 0.23576   | 0.23576 | 0.65309275  |             |           |         |  |
| RWDD2A     | ENSG00000013392 | 0.71995   | 0.23578 | 0.71995     | 0.23578     | 0.71995   |         |  |
|            | 0.23578         | 0.71995   | 0.23578 | 0.23578     | 0.65309275  |           |         |  |
| SLC38A11   | ENSG00000169507 | 0.40865   | 0.3414  | -0.41681    | 0.66159     | 0.45914   |         |  |
|            | 0.32307         | 0.71992   | 0.23579 | 0.23579     | 0.65309275  |           |         |  |
| MYT1L      | ENSG00000186487 | -0.1688   | 0.56702 | -1.2904     | 0.90154     | 0.71987   | 0.2358  |  |
|            | -0.50072        | 0.69172   | 0.2358  | 0.65309275  |             |           |         |  |
| OSTCP1     | ENSG00000243775 | -0.12079  | 0.54807 | 0.7198      | 0.23582     | 0.30354   |         |  |
|            | 0.38074         | 0.49596   | 0.30996 | 0.23582     | 0.65309275  |           |         |  |
| NA         | ENSG00000256984 | 0.71982   | 0.23582 | 0.71982     | 0.23582     | 0.71982   | 0.23582 |  |
|            | 0.71982         | 0.23582   | 0.23582 | 0.65309275  |             |           |         |  |
| GEMIN2P1   | ENSG00000235015 | 0.71976   | 0.23584 | 0.71976     | 0.23584     | -0.46699  |         |  |
|            | 0.67975         | 0.71976   | 0.23584 | 0.23584     | 0.65309275  |           |         |  |
| NA         | ENSG00000265554 | 0.41111   | 0.3405  | 0.71971     | 0.23585     | -0.70463  | 0.75948 |  |
|            | 0.71971         | 0.23585   | 0.23585 | 0.65309275  |             |           |         |  |
| NA         | ENSG00000252820 | -0.074955 | 0.52987 | 0.39608     | 0.34602     | 0.71969   | 0.23586 |  |
|            | -0.12133        | 0.54828   | 0.23586 | 0.65309275  |             |           |         |  |
| MT1F       | ENSG00000198417 | 0.71966   | 0.23587 | 0.71966     | 0.23587     | 0.45986   | 0.32281 |  |
|            | -0.43308        | 0.66752   | 0.23587 | 0.65309275  |             |           |         |  |
| KRTAP9-2   | ENSG00000239886 | 0.71966   | 0.23587 | 0.71966     | 0.23587     | 0.71966   |         |  |
|            | 0.23587         | 0.71966   | 0.23587 | 0.23587     | 0.65309275  |           |         |  |
| NA         | ENSG00000260350 | 0.71966   | 0.23587 | 0.71966     | 0.23587     | 0.71966   | 0.23587 |  |
|            | 0.71966         | 0.23587   | 0.23587 | 0.65309275  |             |           |         |  |
| CYRIB      | ENSG00000153310 | 0.71962   | 0.23588 | -1.9758     | 0.97591     | 0.079842  | 0.46818 |  |
|            | -1.9109         | 0.97199   | 0.23588 | 0.65309275  |             |           |         |  |
| RNA5SP107  | ENSG00000223290 | -0.12948  | 0.55151 | 0.71962     | 0.23588     | -1.3514   |         |  |
|            | 0.91172         | -1.3514   | 0.91172 | 0.23588     | 0.65309275  |           |         |  |
| WDFY2      | ENSG00000139668 | 0.71951   | 0.23591 | 0.58694     | 0.27862     | 0.014912  | 0.49405 |  |
|            | 0.6322          | 0.26363   | 0.23591 | 0.653138702 |             |           |         |  |
| NA         | ENSG00000229559 | -0.098066 | 0.53906 | 0.71945     | 0.23593     | 0.24837   | 0.40192 |  |
|            | 0.24837         | 0.40192   | 0.23593 | 0.653156965 |             |           |         |  |
| SLC46A3    | ENSG00000139508 | 0.71934   | 0.23597 | 0.48663     | 0.31326     | 0.15714   |         |  |
|            | 0.43757         | -0.71727  | 0.7634  | 0.23597     | 0.653184061 |           |         |  |
| RPS18P12   | ENSG00000230897 | 0.71932   | 0.23597 | -1.0689     | 0.85743     | -0.55325  |         |  |
|            | 0.70995         | -1.0689   | 0.85743 | 0.23597     | 0.653184061 |           |         |  |
| TEX21P     | ENSG00000234911 | 0.71929   | 0.23598 | 0.71929     | 0.23598     | 0.71929   |         |  |
|            | 0.23598         | -0.19911  | 0.57891 | 0.23598     | 0.653184061 |           |         |  |
| PCP2       | ENSG00000174788 | 0.7192    | 0.23601 | 0.7192      | 0.23601     | 0.7192    | 0.23601 |  |
|            | 0.7192          | 0.23601   | 0.23601 | 0.653229995 |             |           |         |  |
| MBD4       | ENSG00000129071 | 0.719     | 0.23607 | 0.079531    | 0.46831     | -0.48913  | 0.68762 |  |



|           |                 |          |         |             |             |            |         |  |
|-----------|-----------------|----------|---------|-------------|-------------|------------|---------|--|
|           | -0.022817       | 0.5091   | 0.23607 | 0.653237629 |             |            |         |  |
| RC3H1     | ENSG00000135870 | -0.30026 | 0.61801 | -1.0357     | 0.84984     | -0.46621   | 0.67947 |  |
|           | 0.719           | 0.23607  | 0.23607 | 0.653237629 |             |            |         |  |
| RIMKLBP2  | ENSG00000225920 | 0.71893  | 0.23609 | 0.63322     | 0.26329     | -0.34417   |         |  |
|           | 0.63464         | 0.096555 | 0.46154 | 0.23609     | 0.653237629 |            |         |  |
| MNX1-AS1  | ENSG00000243479 | 0.71889  | 0.2361  | 0.71889     | 0.2361      | 0.71889    |         |  |
|           | 0.2361          | 0.71889  | 0.2361  | 0.2361      | 0.653237629 |            |         |  |
| LINC01197 | ENSG00000248441 | -1.0979  | 0.86387 | -1.8867     | 0.9704      | -0.096556  |         |  |
|           | 0.53846         | 0.71889  | 0.2361  | 0.2361      | 0.653237629 |            |         |  |
| ZNF195    | ENSG00000005801 | 0.62157  | 0.26711 | 0.71888     | 0.23611     | 0.047372   |         |  |
|           | 0.48111         | 0.42005  | 0.33722 | 0.23611     | 0.653237629 |            |         |  |
| RPS29P2   | ENSG00000239281 | 0.71886  | 0.23611 | 0.71886     | 0.23611     | 0.71886    |         |  |
|           | 0.23611         | 0.71886  | 0.23611 | 0.23611     | 0.653237629 |            |         |  |
| EEF1AKMT1 | ENSG00000150456 | 0.71884  | 0.23612 | -1.0645     | 0.85644     | -0.39628   |         |  |
|           | 0.65405         | -1.1059  | 0.86562 | 0.23612     | 0.653237629 |            |         |  |
| TPK1      | ENSG00000196511 | 0.49297  | 0.31102 | 0.71876     | 0.23615     | -0.37646   | 0.64671 |  |
|           | 0.1942          | 0.42301  | 0.23615 | 0.653264693 |             |            |         |  |
| NA        | ENSG00000249175 | 0.7187   | 0.23616 | 0.19069     | 0.42438     | 0.7187     | 0.23616 |  |
|           | 0.7187          | 0.23616  | 0.23616 | 0.653264693 |             |            |         |  |
| NA        | ENSG00000273388 | 0.71868  | 0.23617 | 0.71868     | 0.23617     | 0.13659    | 0.44568 |  |
|           | 0.71868         | 0.23617  | 0.23617 | 0.653264693 |             |            |         |  |
| NA        | ENSG00000236068 | 0.7186   | 0.23619 | -0.37039    | 0.64445     | 0.056847   | 0.47733 |  |
|           | -0.11418        | 0.54545  | 0.23619 | 0.653282932 |             |            |         |  |
| NA        | ENSG00000249257 | 0.32629  | 0.3721  | 0.71841     | 0.23625     | -1.0161    | 0.84522 |  |
|           | 0.71841         | 0.23625  | 0.23625 | 0.653308157 |             |            |         |  |
| NA        | ENSG00000226640 | -0.20722 | 0.58208 | 0.71831     | 0.23628     | 0.71831    | 0.23628 |  |
|           | 0.71831         | 0.23628  | 0.23628 | 0.653308157 |             |            |         |  |
| SNX30     | ENSG00000148158 | 0.71829  | 0.23629 | 0.32844     | 0.37129     | 0.33897    | 0.36732 |  |
|           | -0.50054        | 0.69165  | 0.23629 | 0.653308157 |             |            |         |  |
| RNU1-101P | ENSG00000212473 | -0.35459 | 0.63855 | 0.28774     | 0.38677     | 0.20743    |         |  |
|           | 0.41784         | 0.71829  | 0.23629 | 0.23629     | 0.653308157 |            |         |  |
| Clorf109  | ENSG00000116922 | 0.13843  | 0.44495 | 0.71823     | 0.23631     | 0.51202    |         |  |
|           | 0.30432         | -0.2253  | 0.58913 | 0.23631     | 0.653308157 |            |         |  |
| MIER2     | ENSG00000105556 | -0.59403 | 0.72375 | -0.614      | 0.73039     | -0.94105   | 0.82666 |  |
|           | 0.71816         | 0.23633  | 0.23633 | 0.653308157 |             |            |         |  |
| EVX2      | ENSG00000174279 | 0.18483  | 0.42668 | 0.71814     | 0.23633     | -0.0066789 | 0.50266 |  |
|           | 0.065309        | 0.47396  | 0.23633 | 0.653308157 |             |            |         |  |
| NA        | ENSG00000212517 | 0.71816  | 0.23633 | 0.71816     | 0.23633     | 0.71816    | 0.23633 |  |
|           | 0.71816         | 0.23633  | 0.23633 | 0.653308157 |             |            |         |  |
| DDTL      | ENSG00000099974 | 0.71814  | 0.23634 | -0.42579    | 0.66487     | -0.46638   | 0.67953 |  |
|           | -1.0138         | 0.84466  | 0.23634 | 0.653308157 |             |            |         |  |
| RNU6-861P | ENSG00000252554 | 0.71811  | 0.23635 | 0.71811     | 0.23635     | 0.71811    |         |  |
|           | 0.23635         | 0.71811  | 0.23635 | 0.23635     | 0.653308157 |            |         |  |
| ILK       | ENSG00000166333 | -0.6762  | 0.75054 | 0.44305     | 0.32886     | 0.71805    | 0.23636 |  |
|           | 0.44305         | 0.32886  | 0.23636 | 0.653308157 |             |            |         |  |
| NA        | ENSG00000212461 | 0.71806  | 0.23636 | 0.71806     | 0.23636     | 0.71806    | 0.23636 |  |
|           | 0.71806         | 0.23636  | 0.23636 | 0.653308157 |             |            |         |  |
| NA        | ENSG00000278343 | -0.76488 | 0.77783 | 0.718       | 0.23638     | 0.084538   | 0.46631 |  |
|           | -0.57047        | 0.71582  | 0.23638 | 0.653316963 |             |            |         |  |
| H1-0      | ENSG00000189060 | 0.26651  | 0.39492 | 0.11584     | 0.45389     | 0.71796    | 0.23639 |  |
|           | 0.24216         | 0.40433  | 0.23639 | 0.653316963 |             |            |         |  |
| ASTL      | ENSG00000188886 | -0.30064 | 0.61816 | 0.12958     | 0.44845     | 0.71776    | 0.23645 |  |
|           | -0.032905       | 0.51312  | 0.23645 | 0.653352787 |             |            |         |  |
| NA        | ENSG00000254853 | -0.16346 | 0.56492 | 0.71774     | 0.23646     | 0.66848    | 0.25191 |  |
|           | -0.81263        | 0.79179  | 0.23646 | 0.653352787 |             |            |         |  |
| NA        | ENSG00000260104 | 0.71775  | 0.23646 | -0.61675    | 0.7313      | 0.010093   | 0.49597 |  |
|           | 0.483           | 0.31455  | 0.23646 | 0.653352787 |             |            |         |  |
| VAPB      | ENSG00000124164 | 0.28075  | 0.38945 | 0.14997     | 0.44039     | 0.026194   | 0.48955 |  |
|           | 0.7177          | 0.23647  | 0.23647 | 0.653352787 |             |            |         |  |
| DSPP      | ENSG00000152591 | 0.71769  | 0.23647 | 0.71769     | 0.23647     | 0.71769    | 0.23647 |  |
|           | 0.71769         | 0.23647  | 0.23647 | 0.653352787 |             |            |         |  |
| NA        | ENSG00000222503 | -1.1222  | 0.86912 | 0.71759     | 0.2365      | 0.0041107  | 0.49836 |  |

|           |                 |           |         |             |             |           |         |  |
|-----------|-----------------|-----------|---------|-------------|-------------|-----------|---------|--|
|           | -0.91922        | 0.82101   | 0.2365  | 0.653398628 |             |           |         |  |
| LINC02691 | ENSG00000258913 | -0.56302  | 0.71329 | 0.53127     | 0.29761     | -0.17088  |         |  |
|           | 0.56784         | 0.71726   | 0.23661 | 0.23661     | 0.653665474 |           |         |  |
| ABT1      | ENSG00000146109 | 0.48193   | 0.31493 | 0.088132    | 0.46489     | 0.71708   | 0.23666 |  |
|           | 0.24531         | 0.40311   | 0.23666 | 0.653729482 |             |           |         |  |
| ACSL3-AS1 | ENSG00000234193 | 0.71709   | 0.23666 | 0.71709     | 0.23666     | 0.71709   |         |  |
|           | 0.23666         | 0.71709   | 0.23666 | 0.23666     | 0.653729482 |           |         |  |
| NA        | ENSG00000238383 | 0.17398   | 0.43094 | 0.71703     | 0.23668     | 0.50212   | 0.30779 |  |
|           | 0.10421         | 0.4585    | 0.23668 | 0.65374767  |             |           |         |  |
| SNORA14A  | ENSG00000201643 | -0.54595  | 0.70745 | 0.71696     | 0.2367      | -0.3021   |         |  |
|           | 0.61871         | -0.3021   | 0.61871 | 0.2367      | 0.653765856 |           |         |  |
| NCOA2     | ENSG00000140396 | 0.71689   | 0.23672 | 0.61762     | 0.26841     | 0.55424   | 0.28971 |  |
|           | 0.54529         | 0.29278   | 0.23672 | 0.65378404  |             |           |         |  |
| WBP2NL    | ENSG00000183066 | 0.71681   | 0.23674 | 0.71681     | 0.23674     | 0.71681   |         |  |
|           | 0.23674         | 0.71681   | 0.23674 | 0.23674     | 0.653802222 |           |         |  |
| NA        | ENSG00000253372 | 0.71672   | 0.23677 | -0.31703    | 0.62439     | 0.71672   | 0.23677 |  |
|           | 0.71672         | 0.23677   | 0.23677 | 0.653819706 |             |           |         |  |
| TTC38     | ENSG00000075234 | 0.71666   | 0.23679 | 0.072478    | 0.47111     | 0.42336   | 0.33602 |  |
|           | 0.36907         | 0.35604   | 0.23679 | 0.653819706 |             |           |         |  |
| NA        | ENSG00000252660 | 0.71666   | 0.23679 | 0.71666     | 0.23679     | 0.71666   | 0.23679 |  |
|           | 0.71666         | 0.23679   | 0.23679 | 0.653819706 |             |           |         |  |
| YRDC      | ENSG00000196449 | 0.71664   | 0.2368  | 0.71664     | 0.2368      | 0.71664   | 0.2368  |  |
|           | 0.71664         | 0.2368    | 0.2368  | 0.653819706 |             |           |         |  |
| NA        | ENSG00000266448 | 0.71649   | 0.23684 | 0.71649     | 0.23684     | 0.71649   | 0.23684 |  |
|           | 0.71649         | 0.23684   | 0.23684 | 0.653882251 |             |           |         |  |
| AIFM2     | ENSG00000042286 | 0.56027   | 0.28765 | 0.71643     | 0.23686     | -1.2006   | 0.88505 |  |
|           | -0.54858        | 0.70835   | 0.23686 | 0.653882251 |             |           |         |  |
| NA        | ENSG00000259394 | -2.2829   | 0.98878 | 0.71642     | 0.23687     | -2.2829   | 0.98878 |  |
|           | -2.2829         | 0.98878   | 0.23687 | 0.653882251 |             |           |         |  |
| CDT1      | ENSG00000167513 | 0.71627   | 0.23691 | 0.26485     | 0.39556     | -0.13828  | 0.55499 |  |
|           | 0.12304         | 0.45104   | 0.23691 | 0.653882251 |             |           |         |  |
| RPS26P6   | ENSG00000212994 | -0.25576  | 0.60093 | -0.42526    | 0.66468     | 0.71628   |         |  |
|           | 0.23691         | 0.71628   | 0.23691 | 0.23691     | 0.653882251 |           |         |  |
| NA        | ENSG00000259182 | 0.71628   | 0.23691 | -0.20723    | 0.58208     | -1.68     | 0.95353 |  |
|           | -0.96693        | 0.83321   | 0.23691 | 0.653882251 |             |           |         |  |
| NA        | ENSG00000280381 | 0.52935   | 0.29828 | -0.038582   | 0.51539     | 0.52935   | 0.29828 |  |
|           | 0.71625         | 0.23692   | 0.23692 | 0.653882251 |             |           |         |  |
| IFNG      | ENSG00000111537 | -1.2218   | 0.88911 | 0.71621     | 0.23693     | -0.19046  | 0.57553 |  |
|           | -0.19046        | 0.57553   | 0.23693 | 0.653882251 |             |           |         |  |
| CIBAR1P1  | ENSG00000157021 | 0.077182  | 0.46924 | -0.38341    | 0.64929     | 0.077182  |         |  |
|           | 0.46924         | 0.71613   | 0.23695 | 0.23695     | 0.653900413 |           |         |  |
| NA        | ENSG00000260426 | 0.71602   | 0.23699 | 0.71602     | 0.23699     | 0.71602   | 0.23699 |  |
|           | -0.18592        | 0.57375   | 0.23699 | 0.653973764 |             |           |         |  |
| NA        | ENSG00000254018 | -1.0768   | 0.85921 | 0.71586     | 0.23704     | -1.0768   | 0.85921 |  |
|           | -1.0768         | 0.85921   | 0.23704 | 0.6540747   |             |           |         |  |
| NA        | ENSG00000213779 | 0.71577   | 0.23707 | 0.71577     | 0.23707     | 0.71577   | 0.23707 |  |
|           | 0.71577         | 0.23707   | 0.23707 | 0.654101551 |             |           |         |  |
| LZTR1     | ENSG00000099949 | 0.71571   | 0.23709 | -0.042671   | 0.51702     | -0.042671 | 0.51702 |  |
|           | -0.40901        | 0.65873   | 0.23709 | 0.654101551 |             |           |         |  |
| LINC02274 | ENSG00000258586 | -0.023567 | 0.5094  | -0.51566    | 0.69696     | 0.23207   |         |  |
|           | 0.40824         | 0.71569   | 0.23709 | 0.23709     | 0.654101551 |           |         |  |
| NA        | ENSG00000237862 | 0.31077   | 0.37799 | -0.42522    | 0.66466     | -0.69174  | 0.75545 |  |
|           | 0.71561         | 0.23712   | 0.23712 | 0.654147283 |             |           |         |  |
| CAPZA3    | ENSG00000177938 | 0.71546   | 0.23716 | 0.71546     | 0.23716     | 0.71546   |         |  |
|           | 0.23716         | 0.71546   | 0.23716 | 0.23716     | 0.654172608 |           |         |  |
| NA        | ENSG00000263252 | 0.71548   | 0.23716 | 0.71548     | 0.23716     | 0.71548   | 0.23716 |  |
|           | 0.13545         | 0.44613   | 0.23716 | 0.654172608 |             |           |         |  |
| NA        | ENSG00000254420 | -0.012308 | 0.50491 | -0.012308   | 0.50491     | -0.012308 | 0.50491 |  |
|           | 0.71541         | 0.23718   | 0.23718 | 0.654172608 |             |           |         |  |
| NA        | ENSG00000259995 | 0.53518   | 0.29626 | 0.71536     | 0.23719     | 0.71536   | 0.23719 |  |
|           | 0.71536         | 0.23719   | 0.23719 | 0.654172608 |             |           |         |  |
| CYRIA     | ENSG00000197872 | 0.55768   | 0.28853 | 0.71528     | 0.23722     | -0.28476  | 0.61209 |  |

|           |                 |           |         |           |             |             |         |  |
|-----------|-----------------|-----------|---------|-----------|-------------|-------------|---------|--|
|           |                 | -0.15431  | 0.56132 | 0.23722   | 0.654172608 |             |         |  |
| NA        | ENSG00000240913 | 0.71527   | 0.23722 | 0.71527   | 0.23722     | 0.71527     | 0.23722 |  |
|           |                 | 0.64062   | 0.26088 | 0.23722   | 0.654172608 |             |         |  |
| NA        | ENSG00000217030 | -0.067828 | 0.52704 | 0.14101   | 0.44393     | 0.71521     | 0.23724 |  |
|           |                 | 0.63186   | 0.26374 | 0.23724   | 0.654172608 |             |         |  |
| NA        | ENSG00000237073 | 0.71519   | 0.23725 | 0.65953   | 0.25478     | 0.63954     | 0.26123 |  |
|           |                 | 0.54797   | 0.29186 | 0.23725   | 0.654172608 |             |         |  |
| NA        | ENSG00000251038 | 0.44436   | 0.32839 | 0.71517   | 0.23725     | -0.64299    | 0.73989 |  |
|           |                 | -0.64299  | 0.73989 | 0.23725   | 0.654172608 |             |         |  |
| NA        | ENSG00000237716 | 0.71512   | 0.23727 | -0.062873 | 0.52507     | -0.062873   | 0.52507 |  |
|           |                 | -0.062873 | 0.52507 | 0.23727   | 0.654190738 |             |         |  |
| NA        | ENSG00000238246 | -1.0217   | 0.84655 | 0.71502   | 0.2373      | 0.71502     | 0.2373  |  |
|           |                 | -0.27001  | 0.60642 | 0.2373    | 0.654217548 |             |         |  |
| XBP1      | ENSG00000100219 | 0.19803   | 0.42151 | 0.71496   | 0.23732     | 0.050031    | 0.48005 |  |
|           |                 | 0.71496   | 0.23732 | 0.23732   | 0.654217548 |             |         |  |
| MBL2      | ENSG00000165471 | 0.71496   | 0.23732 | 0.55604   | 0.28909     | 0.52456     | 0.29994 |  |
|           |                 | 0.35976   | 0.35951 | 0.23732   | 0.654217548 |             |         |  |
| C9orf147  | ENSG00000230185 | 0.71484   | 0.23735 | 0.50995   | 0.30504     | 0.50995     |         |  |
|           |                 | 0.30504   | 0.50995 | 0.30504   | 0.23735     | 0.654263237 |         |  |
| OGFR      | ENSG00000060491 | 0.71472   | 0.23739 | -0.94084  | 0.82661     | -0.45359    | 0.67494 |  |
|           |                 | 0.20673   | 0.41811 | 0.23739   | 0.654336484 |             |         |  |
| RPL21P34  | ENSG00000238180 | 0.71462   | 0.23742 | 0.71462   | 0.23742     | 0.71462     |         |  |
|           |                 | 0.23742   | 0.71462 | 0.23742   | 0.23742     | 0.654353814 |         |  |
| NA        | ENSG00000237011 | 0.71455   | 0.23744 | -0.54109  | 0.70578     | 0.71455     | 0.23744 |  |
|           |                 | 0.71455   | 0.23744 | 0.23744   | 0.654353814 |             |         |  |
| NA        | ENSG00000207075 | 0.71454   | 0.23745 | -0.62831  | 0.7351      | -1.1754     | 0.88009 |  |
|           |                 | 0.71454   | 0.23745 | 0.23745   | 0.654353814 |             |         |  |
| NA        | ENSG00000253014 | -0.95622  | 0.83052 | -0.10954  | 0.54361     | -0.44452    | 0.67167 |  |
|           |                 | 0.71451   | 0.23745 | 0.23745   | 0.654353814 |             |         |  |
| NA        | ENSG00000231050 | 0.71448   | 0.23747 | 0.71448   | 0.23747     | 0.71448     | 0.23747 |  |
|           |                 | 0.71448   | 0.23747 | 0.23747   | 0.654371137 |             |         |  |
| NA        | ENSG00000259065 | 0.7144    | 0.23749 | 0.7144    | 0.23749     | 0.7144      | 0.23749 |  |
|           |                 | 0.7144    | 0.23749 | 0.23749   | 0.654371137 |             |         |  |
| MATN1-AS1 | ENSG00000186056 | 0.38811   | 0.34897 | 0.71434   | 0.23751     | 0.26064     |         |  |
|           |                 | 0.39718   | 0.26064 | 0.39718   | 0.23751     | 0.654371137 |         |  |
| NA        | ENSG00000212391 | -0.2626   | 0.60357 | -0.70673  | 0.76013     | 0.71435     | 0.23751 |  |
|           |                 | 0.61068   | 0.2707  | 0.23751   | 0.654371137 |             |         |  |
| NA        | ENSG00000235298 | 0.15917   | 0.43677 | 0.71424   | 0.23754     | 0.71424     | 0.23754 |  |
|           |                 | 0.71424   | 0.23754 | 0.23754   | 0.654388452 |             |         |  |
| NA        | ENSG00000215869 | -2.3126   | 0.98963 | -0.23555  | 0.59311     | 0.71421     | 0.23755 |  |
|           |                 | -0.25837  | 0.60194 | 0.23755   | 0.654388452 |             |         |  |
| DTX2P1    | ENSG00000186704 | 0.53075   | 0.2978  | 0.67314   | 0.25043     | 0.26664     |         |  |
|           |                 | 0.39487   | 0.71416 | 0.23756   | 0.23756     | 0.654388452 |         |  |
| ISG20     | ENSG00000172183 | 0.71414   | 0.23757 | 0.39676   | 0.34577     | 0.54942     | 0.29136 |  |
|           |                 | -0.3514   | 0.63736 | 0.23757   | 0.654388452 |             |         |  |
| NA        | ENSG00000169075 | 0.71387   | 0.23765 | -1.1473   | 0.87437     | -0.66591    | 0.74726 |  |
|           |                 | -1.1593   | 0.87682 | 0.23765   | 0.654478927 |             |         |  |
| RPL23AP16 | ENSG00000228190 | 0.71387   | 0.23765 | 0.71387   | 0.23765     | 0.71387     |         |  |
|           |                 | 0.23765   | 0.71387 | 0.23765   | 0.23765     | 0.654478927 |         |  |
| TENT5B    | ENSG00000158246 | -0.57468  | 0.71725 | -0.073523 | 0.52931     | 0.20311     |         |  |
|           |                 | 0.41952   | 0.71384 | 0.23766   | 0.23766     | 0.654478927 |         |  |
| NA        | ENSG00000274356 | 0.71387   | 0.23766 | 0.71387   | 0.23766     | 0.71387     | 0.23766 |  |
|           |                 | 0.71387   | 0.23766 | 0.23766   | 0.654478927 |             |         |  |
| PTRHD1    | ENSG00000184924 | 0.71382   | 0.23767 | -0.41692  | 0.66163     | 0.71382     |         |  |
|           |                 | 0.23767   | 0.71382 | 0.23767   | 0.23767     | 0.654478927 |         |  |
| NA        | ENSG00000262950 | -0.98708  | 0.8382  | 0.40269   | 0.34359     | 0.25147     | 0.40072 |  |
|           |                 | 0.71376   | 0.23769 | 0.23769   | 0.654497016 |             |         |  |
| SCARNA7   | ENSG00000238741 | 0.71368   | 0.23771 | 0.71368   | 0.23771     | 0.71368     |         |  |
|           |                 | 0.23771   | 0.71368 | 0.23771   | 0.23771     | 0.654515103 |         |  |
| LINC02474 | ENSG00000228437 | 0.71355   | 0.23775 | 0.35332   | 0.36192     | -1.6238     |         |  |
|           |                 | 0.9478    | -1.6238 | 0.9478    | 0.23775     | 0.654530749 |         |  |
| NA        | ENSG00000248898 | 0.71354   | 0.23775 | -0.82282  | 0.79469     | -0.94277    | 0.8271  |  |

|           |                 |           |          |           |             |             |         |  |
|-----------|-----------------|-----------|----------|-----------|-------------|-------------|---------|--|
|           |                 | -0.18759  | 0.5744   | 0.23775   | 0.654530749 |             |         |  |
| NA        | ENSG00000280485 | 0.71351   | 0.23777  | 0.71351   | 0.23777     | 0.71351     | 0.23777 |  |
|           |                 | 0.71351   | 0.23777  | 0.23777   | 0.654530749 |             |         |  |
| NA        | ENSG00000225906 | 0.71347   | 0.23778  | 0.71347   | 0.23778     | 0.71347     | 0.23778 |  |
|           |                 | 0.71347   | 0.23778  | 0.23778   | 0.654530749 |             |         |  |
| NA        | ENSG00000218793 | 0.71336   | 0.23781  | 0.71336   | 0.23781     | 0.71336     | 0.23781 |  |
|           |                 | 0.71336   | 0.23781  | 0.23781   | 0.654530749 |             |         |  |
| C10orf120 | ENSG00000183559 | 0.71334   | 0.23782  | 0.71334   | 0.23782     | 0.71334     |         |  |
|           |                 | 0.23782   | -1.4299  | 0.92362   | 0.23782     | 0.654530749 |         |  |
| LINC02498 | ENSG00000283083 | 0.71335   | 0.23782  | -1.3471   | 0.91103     | 0.22871     |         |  |
|           |                 | 0.40955   | 0.42212  | 0.33647   | 0.23782     | 0.654530749 |         |  |
| NA        | ENSG00000240758 | -0.73889  | 0.77001  | 0.30049   | 0.3819      | 0.71327     | 0.23784 |  |
|           |                 | 0.087014  | 0.46533  | 0.23784   | 0.654530749 |             |         |  |
| VTA1      | ENSG00000009844 | 0.71324   | 0.23785  | 0.088565  | 0.46471     | -0.3111     | 0.62214 |  |
|           |                 | -0.69921  | 0.75779  | 0.23785   | 0.654530749 |             |         |  |
| IRAK1BP1  | ENSG00000146243 | 0.012068  | 0.49519  | 0.71325   | 0.23785     | 0.54941     |         |  |
|           |                 | 0.29136   | 0.46517  | 0.3209    | 0.23785     | 0.654530749 |         |  |
| NEFH      | ENSG00000100285 | -0.12428  | 0.54945  | -0.12428  | 0.54945     | 0.71308     | 0.2379  |  |
|           |                 | -0.34326  | 0.6343   | 0.2379    | 0.65455745  |             |         |  |
| GULP1     | ENSG00000144366 | 0.53147   | 0.29755  | 0.32263   | 0.37349     | 0.69503     | 0.24352 |  |
|           |                 | 0.71307   | 0.2379   | 0.2379    | 0.65455745  |             |         |  |
| NA        | ENSG00000240174 | 0.089211  | 0.46446  | 0.070408  | 0.47193     | 0.71307     | 0.2379  |  |
|           |                 | 0.070408  | 0.47193  | 0.2379    | 0.65455745  |             |         |  |
| NA        | ENSG00000280070 | 0.71302   | 0.23792  | 0.71302   | 0.23792     | 0.71302     | 0.23792 |  |
|           |                 | 0.71302   | 0.23792  | 0.23792   | 0.654566076 |             |         |  |
| NA        | ENSG00000263819 | 0.71299   | 0.23793  | -0.36096  | 0.64094     | 0.25256     | 0.4003  |  |
|           |                 | -0.68785  | 0.75423  | 0.23793   | 0.654566076 |             |         |  |
| SOST      | ENSG00000167941 | -0.58886  | 0.72202  | -2.0363   | 0.97914     | -0.54395    | 0.70676 |  |
|           |                 | 0.71291   | 0.23795  | 0.23795   | 0.654584142 |             |         |  |
| RN7SL814P | ENSG00000244326 | 0.66467   | 0.25313  | -0.41308  | 0.66023     | 0.71274     | 0.238   |  |
|           |                 | 0.65538   | 0.25611  | 0.238     | 0.654663331 |             |         |  |
| NA        | ENSG00000266717 | 0.71266   | 0.23803  | 0.71266   | 0.23803     | 0.71266     | 0.23803 |  |
|           |                 | 0.71266   | 0.23803  | 0.23803   | 0.654663331 |             |         |  |
| NDST3     | ENSG00000164100 | -0.87784  | 0.80998  | -0.54696  | 0.7078      | -0.67652    | 0.75064 |  |
|           |                 | 0.71264   | 0.23804  | 0.23804   | 0.654663331 |             |         |  |
| NA        | ENSG00000224918 | 0.71254   | 0.23806  | -0.032168 | 0.51283     | 0.20809     | 0.41758 |  |
|           |                 | 0.037587  | 0.48501  | 0.23806   | 0.654663331 |             |         |  |
| MIR4786   | ENSG00000264279 | 0.6503    | 0.25775  | -0.039585 | 0.51579     | -0.78197    |         |  |
|           |                 | 0.78288   | 0.71257  | 0.23806   | 0.23806     | 0.654663331 |         |  |
| NA        | ENSG00000276407 | -0.42328  | 0.66396  | -0.62925  | 0.73541     | 0.7125      | 0.23808 |  |
|           |                 | -1.3991   | 0.91912  | 0.23808   | 0.654663331 |             |         |  |
| NA        | ENSG00000267379 | 0.71242   | 0.2381   | 0.71242   | 0.2381      | 0.71242     | 0.2381  |  |
|           |                 | 0.71242   | 0.2381   | 0.2381    | 0.654663331 |             |         |  |
| TRAV11    | ENSG00000256474 | 0.71239   | 0.23811  | 0.71239   | 0.23811     | 0.71239     |         |  |
|           |                 | 0.23811   | 0.71239  | 0.23811   | 0.23811     | 0.654663331 |         |  |
| MTND4LP11 | ENSG00000234163 | 0.71237   | 0.23812  | 0.71237   | 0.23812     | 0.71237     |         |  |
|           |                 | 0.23812   | 0.71237  | 0.23812   | 0.23812     | 0.654663331 |         |  |
| NA        | ENSG00000261817 | -0.91133  | 0.81894  | -0.91133  | 0.81894     | 0.4055      | 0.34256 |  |
|           |                 | 0.71237   | 0.23812  | 0.23812   | 0.654663331 |             |         |  |
| HMG2P8    | ENSG00000212769 | 0.71229   | 0.23814  | -0.42722  | 0.66539     | 0.71229     |         |  |
|           |                 | 0.23814   | -0.8953  | 0.81469   | 0.23814     | 0.654663331 |         |  |
| NA        | ENSG00000215835 | 0.71229   | 0.23814  | -0.047267 | 0.51885     | 0.15106     | 0.43996 |  |
|           |                 | -0.082489 | 0.53287  | 0.23814   | 0.654663331 |             |         |  |
| ALCAM     | ENSG00000170017 | -1.5756   | 0.94244  | 0.71209   | 0.2382      | -0.84335    | 0.80048 |  |
|           |                 | -0.86166  | 0.80556  | 0.2382    | 0.654791335 |             |         |  |
| IFNGR1    | ENSG00000027697 | 0.069207  | 0.47241  | 0.71181   | 0.23829     | 0.71181     |         |  |
|           |                 | 0.23829   | -0.91702 | 0.82043   | 0.23829     | 0.654853166 |         |  |
| NA        | ENSG00000265445 | 0.71182   | 0.23829  | 0.71182   | 0.23829     | 0.71182     | 0.23829 |  |
|           |                 | 0.71182   | 0.23829  | 0.23829   | 0.654853166 |             |         |  |
| NA        | ENSG00000279660 | 0.71182   | 0.23829  | 0.71182   | 0.23829     | 0.71182     | 0.23829 |  |
|           |                 | 0.71182   | 0.23829  | 0.23829   | 0.654853166 |             |         |  |
| RPL38P5   | ENSG00000235579 | 0.71177   | 0.2383   | 0.71177   | 0.2383      | 0.71177     |         |  |

|            |                 |           |         |             |             |           |         |
|------------|-----------------|-----------|---------|-------------|-------------|-----------|---------|
|            | 0.2383          | 0.71177   | 0.2383  | 0.2383      | 0.654853166 |           |         |
| KRTAP9-7   | ENSG00000180386 | 0.71173   | 0.23831 | -2.3616     | 0.9909      | -2.0328   |         |
|            | 0.97896         | -0.1396   | 0.55551 | 0.23831     | 0.654853166 |           |         |
| PPIAP15    | ENSG00000244196 | 0.71176   | 0.23831 | 0.71176     | 0.23831     | 0.10412   |         |
|            | 0.45854         | -0.25218  | 0.59955 | 0.23831     | 0.654853166 |           |         |
| NA         | ENSG00000266977 | -0.80367  | 0.78921 | 0.71169     | 0.23833     | -0.20851  | 0.58259 |
|            | -1.1564         | 0.87624   | 0.23833 | 0.654853166 |             |           |         |
| NA         | ENSG00000280139 | 0.7117    | 0.23833 | 0.7117      | 0.23833     | -0.79983  | 0.7881  |
|            | -1.5672         | 0.94146   | 0.23833 | 0.654853166 |             |           |         |
| MTNR1B     | ENSG00000134640 | 0.71158   | 0.23836 | 0.71158     | 0.23836     | 0.71158   |         |
|            | 0.23836         | 0.71158   | 0.23836 | 0.23836     | 0.654860879 |           |         |
| OR1F2P     | ENSG00000203581 | 0.71152   | 0.23838 | 0.22287     | 0.41182     | 0.18354   |         |
|            | 0.42719         | 0.71152   | 0.23838 | 0.23838     | 0.654860879 |           |         |
| RN7SL98P   | ENSG00000240613 | 0.71151   | 0.23838 | 0.71151     | 0.23838     | 0.71151   |         |
|            | 0.23838         | 0.71151   | 0.23838 | 0.23838     | 0.654860879 |           |         |
| NA         | ENSG00000276214 | -0.78378  | 0.78341 | 0.7115      | 0.23839     | -0.78378  | 0.78341 |
|            | -0.74393        | 0.77154   | 0.23839 | 0.654860879 |             |           |         |
| LINC02454  | ENSG00000256268 | 0.71147   | 0.2384  | 0.71147     | 0.2384      | 0.71147   |         |
|            | 0.2384          | 0.71147   | 0.2384  | 0.2384      | 0.654860879 |           |         |
| UGP2       | ENSG00000169764 | 0.44776   | 0.32716 | 0.16964     | 0.43265     | 0.7114    | 0.23842 |
|            | 0.28181         | 0.38905   | 0.23842 | 0.654869457 |             |           |         |
| NA         | ENSG00000223669 | 0.5958    | 0.27565 | 0.71135     | 0.23843     | -0.50225  | 0.69225 |
|            | 0.69422         | 0.24377   | 0.23843 | 0.654869457 |             |           |         |
| GDNF-AS1   | ENSG00000248587 | 0.71122   | 0.23847 | -0.0148     | 0.5059      | 0.71122   |         |
|            | 0.23847         | 0.55188   | 0.29052 | 0.23847     | 0.65489605  |           |         |
| NA         | ENSG00000251196 | 0.71125   | 0.23847 | 0.71125     | 0.23847     | 0.71125   | 0.23847 |
|            | 0.71125         | 0.23847   | 0.23847 | 0.65489605  |             |           |         |
| KIN        | ENSG00000151657 | -0.41909  | 0.66242 | -0.41909    | 0.66242     | -0.41909  | 0.66242 |
|            | 0.71119         | 0.23848   | 0.23848 | 0.65489605  |             |           |         |
| RNU6-1200P | ENSG00000206889 | 0.71115   | 0.2385  | 0.71115     | 0.2385      | 0.39409   |         |
|            | 0.34676         | 0.018108  | 0.49278 | 0.2385      | 0.654914065 |           |         |
| SYNJ1      | ENSG00000159082 | 0.33006   | 0.37068 | 0.71101     | 0.23854     | -2.3037   | 0.98938 |
|            | -2.7125         | 0.99666   | 0.23854 | 0.654921757 |             |           |         |
| KIR2DP1    | ENSG00000242473 | 0.0090667 | 0.49638 | -0.70139    | 0.75847     | 0.57195   |         |
|            | 0.28368         | 0.71097   | 0.23855 | 0.23855     | 0.654921757 |           |         |
| NA         | ENSG00000267643 | 0.71098   | 0.23855 | 0.71098     | 0.23855     | -1.9901   | 0.97671 |
|            | -0.78874        | 0.78487   | 0.23855 | 0.654921757 |             |           |         |
| SMO        | ENSG00000128602 | -0.17055  | 0.56771 | -0.21145    | 0.58373     | 0.71094   | 0.23856 |
|            | 0.19814         | 0.42147   | 0.23856 | 0.654921757 |             |           |         |
| UBE2H      | ENSG00000186591 | 0.7109    | 0.23857 | 0.3925      | 0.34735     | 0.33091   | 0.37036 |
|            | 0.075727        | 0.46982   | 0.23857 | 0.654921757 |             |           |         |
| NA         | ENSG00000255368 | -1.9137   | 0.97217 | -1.661      | 0.95164     | 0.71083   | 0.23859 |
|            | -0.40993        | 0.65907   | 0.23859 | 0.654930322 |             |           |         |
| SLC44A3    | ENSG00000143036 | -0.32157  | 0.62611 | 0.36876     | 0.35615     | 0.54844   |         |
|            | 0.29169         | 0.71082   | 0.2386  | 0.2386      | 0.654930322 |           |         |
| STARD4     | ENSG00000164211 | -0.5012   | 0.69188 | -0.5012     | 0.69188     | 0.71074   |         |
|            | 0.23862         | 0.45549   | 0.32438 | 0.23862     | 0.654938885 |           |         |
| KNTC1      | ENSG00000184445 | 0.71072   | 0.23863 | 0.41974     | 0.33734     | 0.67707   | 0.24918 |
|            | 0.15498         | 0.43842   | 0.23863 | 0.654938885 |             |           |         |
| RNU1-74P   | ENSG00000206835 | -0.07004  | 0.52792 | 0.71063     | 0.23866     | 0.71063   |         |
|            | 0.23866         | 0.71063   | 0.23866 | 0.23866     | 0.654984332 |           |         |
| MIR28      | ENSG00000207651 | 0.71051   | 0.23869 | 0.71051     | 0.23869     | -0.059934 | 0.5239  |
|            | 0.71051         | 0.23869   | 0.23869 | 0.654992888 |             |           |         |
| SIRLNT     | ENSG00000253802 | -1.5697   | 0.94175 | -0.093064   | 0.53707     | 0.044073  |         |
|            | 0.48242         | 0.71053   | 0.23869 | 0.23869     | 0.654992888 |           |         |
| NLRP12     | ENSG00000142405 | -0.29701  | 0.61677 | -0.090608   | 0.5361      | 0.084809  |         |
|            | 0.46621         | 0.7104    | 0.23873 | 0.23873     | 0.655009102 |           |         |
| RPL24P8    | ENSG00000236801 | 0.71037   | 0.23874 | 0.71037     | 0.23874     | 0.71037   |         |
|            | 0.23874         | 0.71037   | 0.23874 | 0.23874     | 0.655009102 |           |         |
| LMO7-AS1   | ENSG00000261105 | 0.71022   | 0.23878 | 0.71022     | 0.23878     | 0.71022   |         |
|            | 0.23878         | 0.71022   | 0.23878 | 0.23878     | 0.655009102 |           |         |
| NA         | ENSG00000280095 | 0.71022   | 0.23878 | 0.71022     | 0.23878     | 0.71022   | 0.23878 |

|            |                 |           |             |             |             |           |         |          |
|------------|-----------------|-----------|-------------|-------------|-------------|-----------|---------|----------|
|            | 0.71022         | 0.23878   | 0.23878     | 0.655009102 |             |           |         |          |
| LINC01844  | ENSG00000236714 | -1.0138   | 0.84467     | 0.71019     | 0.23879     | -0.51868  |         |          |
|            | 0.69801         | -1.7524   | 0.96015     | 0.23879     | 0.655009102 |           |         |          |
| NA         | ENSG00000268744 | 0.71019   | 0.23879     | 0.71019     | 0.23879     | 0.71019   | 0.23879 |          |
|            | 0.71019         | 0.23879   | 0.23879     | 0.655009102 |             |           |         |          |
| NA         | ENSG00000120586 | 0.71021   | 0.23879     | -1.1992     | 0.88478     | -1.1164   | 0.86787 |          |
|            | -0.17516        | 0.56952   | 0.23879     | 0.655009102 |             |           |         |          |
| TCOF1      | ENSG00000070814 | 0.71008   | 0.23883     | 0.69168     | 0.24457     | 0.34236   | 0.36604 |          |
|            | -0.079136       | 0.53154   | 0.23883     | 0.655035637 |             |           |         |          |
| NA         | ENSG00000260273 | 0.71008   | 0.23883     | 0.71008     | 0.23883     | 0.71008   | 0.23883 |          |
|            | 0.71008         | 0.23883   | 0.23883     | 0.655035637 |             |           |         |          |
| DCUN1D1    | ENSG00000043093 | 0.34868   | 0.36367     | 0.033476    | 0.48665     | 0.71004   |         |          |
|            | 0.23884         | 0.067577  | 0.47306     | 0.23884     | 0.655035637 |           |         |          |
| IL36A      | ENSG00000136694 | 0.70998   | 0.23886     | -0.39571    | 0.65384     | 0.13576   | 0.446   |          |
|            | -0.39571        | 0.65384   | 0.23886     | 0.655053621 |             |           |         |          |
| KLK4       | ENSG00000167749 | 0.42653   | 0.33486     | -0.071799   | 0.52862     | 0.70988   | 0.23889 |          |
|            | -1.2494         | 0.89425   | 0.23889     | 0.655099026 |             |           |         |          |
| RPL21P28   | ENSG00000220749 | 0.7098    | 0.23891     | 0.7098      | 0.23891     | 0.7098    |         |          |
|            | 0.23891         | 0.7098    | 0.23891     | 0.23891     | 0.655105749 |           |         |          |
| NA         | ENSG00000199303 | 0.70974   | 0.23893     | 0.70974     | 0.23893     | 0.70974   | 0.23893 |          |
|            | 0.70974         | 0.23893   | 0.23893     | 0.655105749 |             |           |         |          |
| CCSER1     | ENSG00000184305 | -0.80952  | 0.79089     | 0.70964     | 0.23896     | -0.070426 |         |          |
|            | 0.52807         | -1.372    | 0.91497     | 0.23896     | 0.655105749 |           |         |          |
| NA         | ENSG00000238911 | -0.33332  | 0.63055     | -1.0596     | 0.85534     | 0.70967   | 0.23896 |          |
|            | -1.0774         | 0.85934   | 0.23896     | 0.655105749 |             |           |         |          |
| TNNI3K     | ENSG00000116783 | 0.70958   | 0.23898     | -1.2404     | 0.89258     | 0.30819   |         |          |
|            | 0.37897         | -0.34439  | 0.63472     | 0.23898     | 0.655105749 |           |         |          |
| NAALADL1   | ENSG00000168060 | -0.15913  | 0.56322     | -0.15913    | 0.56322     | 0.70955   |         |          |
|            | 0.23899         | -0.4655   | 0.67921     | 0.23899     | 0.655105749 |           |         |          |
| NA         | ENSG00000232590 | 0.70955   | 0.23899     | 0.48491     | 0.31387     | -0.26381  | 0.60404 |          |
|            | 0.091526        | 0.46354   | 0.23899     | 0.655105749 |             |           |         |          |
| NPM1P21    | ENSG00000248578 | 0.70953   | 0.239       | 0.70953     | 0.239       | 0.70953   | 0.239   | -0.43727 |
|            | 0.66904         | 0.239     | 0.655105749 |             |             |           |         |          |
| CKAP2LP1   | ENSG00000271461 | 0.7094    | 0.23904     | 0.7094      | 0.23904     | 0.7094    |         |          |
|            | 0.23904         | 0.41212   | 0.34013     | 0.23904     | 0.655178536 |           |         |          |
| KCNH4      | ENSG00000089558 | -0.4862   | 0.68659     | 0.70934     | 0.23906     | -0.48211  | 0.68514 |          |
|            | -1.3407         | 0.91      | 0.23906     | 0.655192817 |             |           |         |          |
| NA         | ENSG00000257752 | 0.70926   | 0.23908     | 0.70926     | 0.23908     | 0.70926   | 0.23908 |          |
|            | 0.70926         | 0.23908   | 0.23908     | 0.655192817 |             |           |         |          |
| NA         | ENSG00000235431 | 0.70924   | 0.23909     | 0.70924     | 0.23909     | -0.17568  | 0.56973 |          |
|            | -0.64344        | 0.74003   | 0.23909     | 0.655192817 |             |           |         |          |
| NA         | ENSG00000236844 | 0.70898   | 0.23917     | 0.70898     | 0.23917     | 0.70898   | 0.23917 |          |
|            | 0.70898         | 0.23917   | 0.23917     | 0.655192817 |             |           |         |          |
| CNTNAP5    | ENSG00000155052 | -0.79053  | 0.78539     | -2.422      | 0.99228     | -2.551    |         |          |
|            | 0.99463         | 0.7089    | 0.23919     | 0.23919     | 0.655192817 |           |         |          |
| DHFRP5     | ENSG00000216859 | 0.7089    | 0.23919     | -0.79692    | 0.78725     | -0.79692  |         |          |
|            | 0.78725         | -0.79692  | 0.78725     | 0.23919     | 0.655192817 |           |         |          |
| DDX39BP2   | ENSG00000238024 | -0.029729 | 0.51186     | -0.42497    | 0.66457     | 0.7089    |         |          |
|            | 0.23919         | 0.7089    | 0.23919     | 0.23919     | 0.655192817 |           |         |          |
| GTF2IRD2P1 | ENSG00000214544 | 0.25342   | 0.39997     | 0.64365     | 0.2599      | 0.70889   |         |          |
|            | 0.2392          | -0.1231   | 0.54899     | 0.2392      | 0.655192817 |           |         |          |
| PIRT       | ENSG00000233670 | 0.64819   | 0.25843     | -0.34606    | 0.63535     | 0.62326   | 0.26656 |          |
|            | 0.70887         | 0.2392    | 0.2392      | 0.655192817 |             |           |         |          |
| LINC00555  | ENSG00000261057 | 0.49349   | 0.31083     | 0.70888     | 0.2392      | -0.1328   |         |          |
|            | 0.55282         | -0.1328   | 0.55282     | 0.2392      | 0.655192817 |           |         |          |
| DEFB131A   | ENSG00000186146 | 0.70886   | 0.23921     | -0.32717    | 0.62823     | -0.48062  |         |          |
|            | 0.68461         | -0.79945  | 0.78798     | 0.23921     | 0.655192817 |           |         |          |
| NA         | ENSG00000206808 | -1.0702   | 0.85774     | -1.6141     | 0.94675     | 0.70886   | 0.23921 |          |
|            | -0.60642        | 0.72788   | 0.23921     | 0.655192817 |             |           |         |          |
| NA         | ENSG00000243771 | 0.50089   | 0.30822     | 0.50089     | 0.30822     | 0.50089   | 0.30822 |          |
|            | 0.70881         | 0.23922   | 0.23922     | 0.655192817 |             |           |         |          |
| IVNS1ABP   | ENSG00000116679 | 0.70855   | 0.2393      | -0.72852    | 0.76685     | -0.4737   |         |          |

|            |                 |           |         |             |             |          |         |  |
|------------|-----------------|-----------|---------|-------------|-------------|----------|---------|--|
|            | 0.68214         | -1.1955   | 0.88406 | 0.2393      | 0.655355253 |          |         |  |
| NA         | ENSG00000279848 | 0.70849   | 0.23932 | 0.70849     | 0.23932     | 0.70849  | 0.23932 |  |
|            | 0.70849         | 0.23932   | 0.23932 | 0.655355253 |             |          |         |  |
| ITGA4      | ENSG00000115232 | 0.70846   | 0.23933 | 0.4618      | 0.32211     | 0.16741  | 0.43353 |  |
|            | 0.44288         | 0.32892   | 0.23933 | 0.655355253 |             |          |         |  |
| NA         | ENSG00000229352 | -1.2644   | 0.89696 | -1.4786     | 0.93038     | -1.4615  | 0.92806 |  |
|            | 0.70839         | 0.23935   | 0.23935 | 0.655355253 |             |          |         |  |
| RPS3AP6    | ENSG00000234797 | -0.58036  | 0.71916 | -0.487      | 0.68687     | 0.7084   |         |  |
|            | 0.23935         | -0.58036  | 0.71916 | 0.23935     | 0.655355253 |          |         |  |
| KRTAP13-6P | ENSG00000250973 | 0.70836   | 0.23936 | 0.70836     | 0.23936     | 0.599    | 0.27458 |  |
|            | 0.70836         | 0.23936   | 0.23936 | 0.655355253 |             |          |         |  |
| YLPM1      | ENSG00000119596 | 0.33276   | 0.36966 | -1.4333     | 0.92411     | -0.13904 | 0.55529 |  |
|            | 0.70828         | 0.23939   | 0.23939 | 0.655400567 |             |          |         |  |
| PTPRA      | ENSG00000132670 | 0.26368   | 0.39601 | 0.12413     | 0.45061     | 0.70821  | 0.23941 |  |
|            | 0.10495         | 0.45821   | 0.23941 | 0.655409056 |             |          |         |  |
| DVL1       | ENSG00000107404 | -0.015048 | 0.506   | -0.34849    | 0.63626     | 0.70816  | 0.23942 |  |
|            | -0.81612        | 0.79278   | 0.23942 | 0.655409056 |             |          |         |  |
| OR2V1      | ENSG00000185372 | 0.70806   | 0.23946 | 0.38209     | 0.3512      | 0.70806  | 0.23946 |  |
|            | 0.70806         | 0.23946   | 0.23946 | 0.655434509 |             |          |         |  |
| KIAA1586   | ENSG00000168116 | 0.35777   | 0.36026 | 0.708       | 0.23947     | 0.052895 | 0.47891 |  |
|            | 0.708           | 0.23947   | 0.23947 | 0.655434509 |             |          |         |  |
| OR6M3P     | ENSG00000254430 | 0.70793   | 0.23949 | -1.7283     | 0.95803     | -1.7283  |         |  |
|            | 0.95803         | -1.7283   | 0.95803 | 0.23949     | 0.655434509 |          |         |  |
| CD177      | ENSG00000204936 | -0.6978   | 0.75735 | 0.70791     | 0.2395      | 0.65561  | 0.25604 |  |
|            | -0.24183        | 0.59554   | 0.2395  | 0.655434509 |             |          |         |  |
| CYCSP22    | ENSG00000254358 | -0.18346  | 0.57278 | 0.70791     | 0.2395      | 0.31096  |         |  |
|            | 0.37791         | 0.31096   | 0.37791 | 0.2395      | 0.655434509 |          |         |  |
| DSG2       | ENSG00000046604 | 0.48377   | 0.31428 | 0.70787     | 0.23951     | 0.48377  | 0.31428 |  |
|            | 0.33153         | 0.37012   | 0.23951 | 0.655434509 |             |          |         |  |
| NA         | ENSG00000249478 | -0.043807 | 0.51747 | 0.70774     | 0.23955     | 0.70774  | 0.23955 |  |
|            | 0.70774         | 0.23955   | 0.23955 | 0.655472061 |             |          |         |  |
| ANP32BP3   | ENSG00000259461 | -0.027685 | 0.51104 | -0.90557    | 0.81742     | 0.70771  |         |  |
|            | 0.23956         | -0.59612  | 0.72445 | 0.23956     | 0.655472061 |          |         |  |
| NA         | ENSG00000279232 | -0.6303   | 0.73575 | -0.12025    | 0.54786     | 0.70766  | 0.23958 |  |
|            | 0.70766         | 0.23958   | 0.23958 | 0.655472061 |             |          |         |  |
| RNA5SP274  | ENSG00000222416 | -0.55543  | 0.7107  | -0.55543    | 0.7107      | 0.38632  |         |  |
|            | 0.34963         | 0.70761   | 0.23959 | 0.23959     | 0.655472061 |          |         |  |
| RNA5SP147  | ENSG00000252302 | 0.70753   | 0.23962 | 0.68242     | 0.24749     | 0.68242  |         |  |
|            | 0.24749         | 0.68242   | 0.24749 | 0.23962     | 0.655472061 |          |         |  |
| HOTTIP     | ENSG00000243766 | 0.4103    | 0.34079 | 0.436       | 0.33142     | 0.46071  | 0.3225  |  |
|            | 0.70747         | 0.23964   | 0.23964 | 0.655472061 |             |          |         |  |
| FAM205BP   | ENSG00000257198 | 0.70747   | 0.23964 | -0.57612    | 0.71773     | 0.26165  |         |  |
|            | 0.3968          | -0.57476  | 0.71727 | 0.23964     | 0.655472061 |          |         |  |
| ZNF720     | ENSG00000197302 | 0.70744   | 0.23965 | 0.3675      | 0.35662     | -0.17473 |         |  |
|            | 0.56935         | 0.46383   | 0.32138 | 0.23965     | 0.655472061 |          |         |  |
| KDELR3     | ENSG00000100196 | 0.70737   | 0.23967 | 0.70737     | 0.23967     | 0.70737  |         |  |
|            | 0.23967         | 0.70737   | 0.23967 | 0.23967     | 0.655472061 |          |         |  |
| NA         | ENSG00000258764 | -0.38568  | 0.65013 | -0.08678    | 0.53458     | 0.7073   | 0.23969 |  |
|            | -0.81617        | 0.7928    | 0.23969 | 0.655472061 |             |          |         |  |
| IGLV5-52   | ENSG00000211643 | 0.7072    | 0.23972 | 0.12105     | 0.45183     | 0.7072   |         |  |
|            | 0.23972         | 0.7072    | 0.23972 | 0.23972     | 0.655472061 |          |         |  |
| KPNB1      | ENSG00000108424 | -0.13962  | 0.55552 | 0.707       | 0.23978     | 0.36075  | 0.35914 |  |
|            | 0.36075         | 0.35914   | 0.23978 | 0.655472061 |             |          |         |  |
| MTND1P14   | ENSG00000227225 | 0.70701   | 0.23978 | 0.70701     | 0.23978     | 0.70701  |         |  |
|            | 0.23978         | 0.70701   | 0.23978 | 0.23978     | 0.655472061 |          |         |  |
| LINC01904  | ENSG00000259837 | 0.70701   | 0.23978 | 0.1246      | 0.45042     | 0.29295  |         |  |
|            | 0.38478         | 0.34827   | 0.36382 | 0.23978     | 0.655472061 |          |         |  |
| NA         | ENSG00000207105 | 0.70697   | 0.23979 | 0.70697     | 0.23979     | 0.70697  | 0.23979 |  |
|            | 0.70697         | 0.23979   | 0.23979 | 0.655472061 |             |          |         |  |
| RPS12P2    | ENSG00000234319 | 0.70698   | 0.23979 | 0.3516      | 0.36257     | -0.86931 |         |  |
|            | 0.80766         | -0.86931  | 0.80766 | 0.23979     | 0.655472061 |          |         |  |
| KLB        | ENSG00000134962 | -0.56605  | 0.71432 | 0.70695     | 0.2398      | -0.54733 | 0.70792 |  |

|            |                 |           |          |             |             |             |         |  |  |
|------------|-----------------|-----------|----------|-------------|-------------|-------------|---------|--|--|
|            |                 | -0.24823  | 0.59802  | 0.2398      | 0.655472061 |             |         |  |  |
| ARNT2      | ENSG00000172379 | -0.25206  | 0.5995   | -0.23124    | 0.59144     | 0.70692     | 0.23981 |  |  |
|            |                 | -0.472    | 0.68154  | 0.23981     | 0.655472061 |             |         |  |  |
| KCTD3      | ENSG00000136636 | 0.70689   | 0.23982  | -0.59702    | 0.72475     | -0.48371    | 0.68571 |  |  |
|            |                 | 0.70689   | 0.23982  | 0.655472061 |             |             |         |  |  |
| CD59       | ENSG00000085063 | 0.57417   | 0.28293  | 0.47689     | 0.31672     | 0.70682     | 0.23984 |  |  |
|            |                 | -0.36354  | 0.6419   | 0.23984     | 0.655472061 |             |         |  |  |
| MED22      | ENSG00000148297 | 0.70679   | 0.23985  | 0.49302     | 0.311       | 0.70679     | 0.23985 |  |  |
|            |                 | 0.70679   | 0.23985  | 0.655472061 |             |             |         |  |  |
| PHACTR4    | ENSG00000204138 | 0.65194   | 0.25722  | 0.27896     | 0.39014     | 0.70678     |         |  |  |
|            |                 | 0.23985   | 0.65577  | 0.25599     | 0.23985     | 0.655472061 |         |  |  |
| MIR4460    | ENSG00000265691 | 0.70677   | 0.23985  | 0.70677     | 0.23985     | 0.70677     |         |  |  |
|            |                 | 0.23985   | 0.70677  | 0.23985     | 0.23985     | 0.655472061 |         |  |  |
| NA         | ENSG00000234791 | -0.66806  | 0.74795  | -1.4266     | 0.92315     | -0.048085   | 0.51918 |  |  |
|            |                 | 0.70675   | 0.23986  | 0.23986     | 0.655472061 |             |         |  |  |
| NA         | ENSG00000256254 | 0.70674   | 0.23986  | 0.70674     | 0.23986     | 0.70674     | 0.23986 |  |  |
|            |                 | 0.70674   | 0.23986  | 0.23986     | 0.655472061 |             |         |  |  |
| PKMYT1     | ENSG00000127564 | -0.78411  | 0.78351  | -0.78411    | 0.78351     | -0.78411    |         |  |  |
|            |                 | 0.78351   | 0.70666  | 0.23989     | 0.23989     | 0.655480526 |         |  |  |
| TRPV2      | ENSG00000187688 | 0.56684   | 0.28541  | 0.075919    | 0.46974     | 0.70666     | 0.23989 |  |  |
|            |                 | 0.59916   | 0.27453  | 0.23989     | 0.655480526 |             |         |  |  |
| ARHGFEF28  | ENSG00000214944 | 0.70638   | 0.23998  | 0.45643     | 0.32404     | 0.22044     |         |  |  |
|            |                 | 0.41277   | 0.68468  | 0.24677     | 0.23998     | 0.65554622  |         |  |  |
| RNU1-139P  | ENSG00000212609 | 0.26772   | 0.39446  | -0.64567    | 0.74075     | 0.70634     |         |  |  |
|            |                 | 0.23999   | 0.70634  | 0.23999     | 0.23999     | 0.65554622  |         |  |  |
| RPL21P67   | ENSG00000219776 | -1.4449   | 0.92575  | -1.4449     | 0.92575     | -0.74354    |         |  |  |
|            |                 | 0.77142   | 0.70627  | 0.24001     | 0.24001     | 0.65554622  |         |  |  |
| NA         | ENSG00000231965 | 0.5553    | 0.28934  | -0.7111     | 0.76149     | -0.24522    | 0.59686 |  |  |
|            |                 | 0.70627   | 0.24001  | 0.24001     | 0.65554622  |             |         |  |  |
| NA         | ENSG00000240553 | 0.70616   | 0.24005  | 0.70616     | 0.24005     | 0.70616     | 0.24005 |  |  |
|            |                 | 0.70616   | 0.24005  | 0.24005     | 0.65554622  |             |         |  |  |
| HNRNPA1P29 | ENSG00000235784 | -0.033725 | 0.51345  | 0.7061      | 0.24006     | 0.7061      |         |  |  |
|            |                 | 0.24006   | 0.7061   | 0.24006     | 0.24006     | 0.65554622  |         |  |  |
| NGB        | ENSG00000165553 | -0.93164  | 0.82424  | -0.26202    | 0.60335     | 0.70609     | 0.24007 |  |  |
|            |                 | 0.70609   | 0.24007  | 0.24007     | 0.65554622  |             |         |  |  |
| NA         | ENSG00000262885 | 0.70608   | 0.24007  | 0.70608     | 0.24007     | 0.70608     | 0.24007 |  |  |
|            |                 | 0.70608   | 0.24007  | 0.24007     | 0.65554622  |             |         |  |  |
| LINC01793  | ENSG00000222030 | 0.70604   | 0.24008  | 0.64185     | 0.26049     | -0.87445    |         |  |  |
|            |                 | 0.80906   | -0.16562 | 0.56577     | 0.24008     | 0.65554622  |         |  |  |
| NA         | ENSG00000260566 | 0.70602   | 0.24009  | 0.70602     | 0.24009     | 0.70602     | 0.24009 |  |  |
|            |                 | 0.70602   | 0.24009  | 0.24009     | 0.65554622  |             |         |  |  |
| BCKDHB     | ENSG00000083123 | 0.14194   | 0.44356  | -0.1364     | 0.55425     | 0.67309     |         |  |  |
|            |                 | 0.25045   | 0.70597  | 0.2401      | 0.2401      | 0.65554622  |         |  |  |
| DAG1       | ENSG00000173402 | 0.020995  | 0.49162  | 0.55733     | 0.28865     | -0.26483    | 0.60443 |  |  |
|            |                 | 0.7059    | 0.24012  | 0.24012     | 0.65554622  |             |         |  |  |
| CHEK2      | ENSG00000183765 | 0.073721  | 0.47062  | 0.70591     | 0.24012     | 0.68285     | 0.24735 |  |  |
|            |                 | -0.27312  | 0.60762  | 0.24012     | 0.65554622  |             |         |  |  |
| HLA-S      | ENSG00000225851 | 0.52212   | 0.30079  | 0.36668     | 0.35693     | 0.52212     | 0.30079 |  |  |
|            |                 | 0.70589   | 0.24013  | 0.24013     | 0.65554622  |             |         |  |  |
| NA         | ENSG00000259583 | 0.7059    | 0.24013  | -0.90033    | 0.81603     | -0.90033    | 0.81603 |  |  |
|            |                 | -0.90033  | 0.81603  | 0.24013     | 0.65554622  |             |         |  |  |
| RPL23AP28  | ENSG00000226331 | 0.40497   | 0.34275  | 0.41099     | 0.34054     | 0.5246      |         |  |  |
|            |                 | 0.29993   | 0.70582  | 0.24015     | 0.24015     | 0.65554622  |         |  |  |
| MATK       | ENSG00000007264 | 0.70576   | 0.24017  | -0.40668    | 0.65788     | 0.68057     | 0.24807 |  |  |
|            |                 | 0.68057   | 0.24807  | 0.24017     | 0.65554622  |             |         |  |  |
| NA         | ENSG00000273149 | 0.70575   | 0.24017  | 0.70575     | 0.24017     | 0.70575     | 0.24017 |  |  |
|            |                 | 0.70575   | 0.24017  | 0.24017     | 0.65554622  |             |         |  |  |
| NA         | ENSG00000256673 | 0.023713  | 0.49054  | -0.45524    | 0.67553     | 0.41201     | 0.34017 |  |  |
|            |                 | 0.70571   | 0.24018  | 0.24018     | 0.65554622  |             |         |  |  |
| NA         | ENSG00000261574 | 0.18033   | 0.42845  | 0.4297      | 0.33371     | 0.052105    | 0.47922 |  |  |
|            |                 | 0.70569   | 0.24019  | 0.24019     | 0.65554622  |             |         |  |  |
| NAGA       | ENSG00000198951 | 0.70561   | 0.24021  | 0.70561     | 0.24021     | 0.70561     | 0.24021 |  |  |



|           |                 |          |         |             |             |           |         |  |
|-----------|-----------------|----------|---------|-------------|-------------|-----------|---------|--|
|           | 0.70561         | 0.24021  | 0.24021 | 0.65554622  |             |           |         |  |
| LINC01831 | ENSG00000225765 | -0.10032 | 0.53995 | 0.70563     | 0.24021     | -0.18751  |         |  |
|           | 0.57437         | 0.17071  | 0.43223 | 0.24021     | 0.65554622  |           |         |  |
| RPS13P5   | ENSG00000237953 | 0.7055   | 0.24025 | 0.7055      | 0.24025     | 0.7055    |         |  |
|           | 0.24025         | 0.7055   | 0.24025 | 0.24025     | 0.655570568 |           |         |  |
| NA        | ENSG00000275448 | 0.70548  | 0.24025 | 0.12148     | 0.45165     | 0.70548   | 0.24025 |  |
|           | 0.70548         | 0.24025  | 0.24025 | 0.655570568 |             |           |         |  |
| ROS1      | ENSG0000047936  | 0.70546  | 0.24026 | -1.4923     | 0.93219     | -1.1836   | 0.88171 |  |
|           | 0.18622         | 0.42613  | 0.24026 | 0.655570568 |             |           |         |  |
| NA        | ENSG00000200714 | 0.70536  | 0.24029 | 0.70536     | 0.24029     | 0.70536   | 0.24029 |  |
|           | 0.70536         | 0.24029  | 0.24029 | 0.655570568 |             |           |         |  |
| FIGNL1    | ENSG00000132436 | -1.1692  | 0.87885 | -0.60406    | 0.7271      | -0.40513  |         |  |
|           | 0.65731         | 0.7053   | 0.24031 | 0.24031     | 0.655570568 |           |         |  |
| NA        | ENSG00000249111 | 0.70527  | 0.24032 | 0.70527     | 0.24032     | 0.69317   | 0.2441  |  |
|           | 0.70527         | 0.24032  | 0.24032 | 0.655570568 |             |           |         |  |
| LINC01017 | ENSG00000250716 | 0.70524  | 0.24033 | -0.32946    | 0.6291      | 0.44658   |         |  |
|           | 0.32759         | -0.21884 | 0.58661 | 0.24033     | 0.655570568 |           |         |  |
| RUNX2-AS1 | ENSG00000261080 | -0.46616 | 0.67945 | 0.70524     | 0.24033     | -0.46616  |         |  |
|           | 0.67945         | -0.46616 | 0.67945 | 0.24033     | 0.655570568 |           |         |  |
| LINC01124 | ENSG00000222033 | 0.70522  | 0.24034 | 0.44477     | 0.32824     | -0.70596  |         |  |
|           | 0.75989         | -1.1439  | 0.87368 | 0.24034     | 0.655570568 |           |         |  |
| NA        | ENSG00000251861 | 0.70498  | 0.24041 | 0.70498     | 0.24041     | 0.38914   | 0.34859 |  |
|           | 0.70498         | 0.24041  | 0.24041 | 0.655705949 |             |           |         |  |
| PIGZ      | ENSG00000119227 | 0.70493  | 0.24043 | 0.70493     | 0.24043     | -1.2674   | 0.8975  |  |
|           | -0.35208        | 0.63761  | 0.24043 | 0.655705949 |             |           |         |  |
| NIPAL1    | ENSG00000163293 | -0.16549 | 0.56572 | 0.56741     | 0.28522     | 0.34605   |         |  |
|           | 0.36465         | 0.70493  | 0.24043 | 0.24043     | 0.655705949 |           |         |  |
| DRGX      | ENSG00000165606 | -0.2689  | 0.606   | -0.54203    | 0.7061      | 0.70478   | 0.24048 |  |
|           | -1.3401         | 0.90989  | 0.24048 | 0.655805607 |             |           |         |  |
| CAMLG     | ENSG00000164615 | -1.616   | 0.94695 | -0.38251    | 0.64896     | -0.99784  | 0.84082 |  |
|           | 0.70469         | 0.2405   | 0.2405  | 0.655823447 |             |           |         |  |
| NA        | ENSG00000259848 | 0.70457  | 0.24054 | 0.33697     | 0.36807     | -0.05162  | 0.52058 |  |
|           | -0.51388        | 0.69633  | 0.24054 | 0.655892718 |             |           |         |  |
| ITK       | ENSG00000113263 | -1.4108  | 0.92085 | -1.4108     | 0.92085     | 0.70438   | 0.2406  |  |
|           | -0.012846       | 0.50512  | 0.2406  | 0.655892718 |             |           |         |  |
| NA        | ENSG00000260537 | 0.7043   | 0.24062 | 0.7043      | 0.24062     | 0.7043    | 0.24062 |  |
|           | 0.7043          | 0.24062  | 0.24062 | 0.655892718 |             |           |         |  |
| NA        | ENSG00000275443 | 0.70432  | 0.24062 | -0.15147    | 0.5602      | -0.78761  | 0.78454 |  |
|           | 0.44038         | 0.32983  | 0.24062 | 0.655892718 |             |           |         |  |
| PPIAP83   | ENSG00000242978 | 0.23487  | 0.40715 | 0.70429     | 0.24063     | -0.34343  |         |  |
|           | 0.63436         | -0.34343 | 0.63436 | 0.24063     | 0.655892718 |           |         |  |
| NA        | ENSG00000272702 | 0.70429  | 0.24063 | 0.70429     | 0.24063     | 0.70429   | 0.24063 |  |
|           | 0.70429         | 0.24063  | 0.24063 | 0.655892718 |             |           |         |  |
| KPNA2P1   | ENSG00000236530 | 0.069487 | 0.4723  | 0.70421     | 0.24065     | 0.63975   |         |  |
|           | 0.26117         | 0.63975  | 0.26117 | 0.24065     | 0.655892718 |           |         |  |
| RNY4P20   | ENSG00000252487 | -0.68415 | 0.75306 | 0.078277    | 0.4688      | 0.7042    |         |  |
|           | 0.24065         | 0.60023  | 0.27418 | 0.24065     | 0.655892718 |           |         |  |
| NA        | ENSG00000268560 | -0.92849 | 0.82342 | 0.70421     | 0.24065     | 0.70421   | 0.24065 |  |
|           | 0.70421         | 0.24065  | 0.24065 | 0.655892718 |             |           |         |  |
| DDOST     | ENSG00000244038 | 0.60523  | 0.27251 | 0.60523     | 0.27251     | 0.70419   | 0.24066 |  |
|           | 0.60523         | 0.27251  | 0.24066 | 0.655892718 |             |           |         |  |
| NA        | ENSG00000259508 | 0.39884  | 0.345   | 0.7041      | 0.24068     | 0.0024047 | 0.49904 |  |
|           | -0.027764       | 0.51107  | 0.24068 | 0.655903296 |             |           |         |  |
| PLK1      | ENSG00000166851 | 0.704    | 0.24072 | 0.13979     | 0.44441     | 0.35289   | 0.36209 |  |
|           | 0.59537         | 0.2758   | 0.24072 | 0.655903296 |             |           |         |  |
| NA        | ENSG00000241219 | -0.47189 | 0.6815  | 0.68785     | 0.24577     | -0.46686  | 0.6797  |  |
|           | 0.70391         | 0.24074  | 0.24074 | 0.655903296 |             |           |         |  |
| SMARCE1P6 | ENSG00000214465 | -1.2005  | 0.88503 | 0.70391     | 0.24075     | 0.70391   |         |  |
|           | 0.24075         | 0.70391  | 0.24075 | 0.24075     | 0.655903296 |           |         |  |
| NA        | ENSG00000249001 | -0.19222 | 0.57622 | -0.8539     | 0.80342     | 0.7039    | 0.24075 |  |
|           | -0.99321        | 0.8397   | 0.24075 | 0.655903296 |             |           |         |  |
| OR4C5     | ENSG00000176540 | 0.70383  | 0.24077 | -1.489      | 0.93176     | -0.16533  | 0.56566 |  |

|           |                 |             |             |             |             |          |         |  |
|-----------|-----------------|-------------|-------------|-------------|-------------|----------|---------|--|
|           | -1.1147         | 0.8675      | 0.24077     | 0.655903296 |             |          |         |  |
| NA        | ENSG00000199884 | 0.52606     | 0.29942     | 0.70379     | 0.24078     | -0.3736  | 0.64565 |  |
|           | -0.36804        | 0.64358     | 0.24078     | 0.655903296 |             |          |         |  |
| NA        | ENSG00000263574 | 0.70376     | 0.24079     | 0.58106     | 0.2806      | 0.70376  | 0.24079 |  |
|           | 0.70376         | 0.24079     | 0.24079     | 0.655903296 |             |          |         |  |
| PAXBP1    | ENSG00000159086 | -1.5993     | 0.94512     | -1.6901     | 0.9545      | -2.0039  |         |  |
|           | 0.97746         | 0.70369     | 0.24081     | 0.24081     | 0.655903296 |          |         |  |
| NA        | ENSG00000272789 | 0.70368     | 0.24082     | 0.70368     | 0.24082     | 0.70368  | 0.24082 |  |
|           | 0.70368         | 0.24082     | 0.24082     | 0.655903296 |             |          |         |  |
| BCCIP     | ENSG00000107949 | 0.25069     | 0.40103     | 0.18095     | 0.4282      | 0.70364  | 0.24083 |  |
|           | 0.70364         | 0.24083     | 0.24083     | 0.655903296 |             |          |         |  |
| NA        | ENSG00000280377 | -1.1222     | 0.86911     | -1.1222     | 0.86911     | -1.1222  | 0.86911 |  |
|           | 0.70364         | 0.24083     | 0.24083     | 0.655903296 |             |          |         |  |
| RPL7AP66  | ENSG00000175886 | 0.70353     | 0.24086     | 0.70353     | 0.24086     | 0.70353  |         |  |
|           | 0.24086         | 0.70353     | 0.24086     | 0.24086     | 0.655903296 |          |         |  |
| OAZ1      | ENSG00000104904 | 0.70351     | 0.24087     | 0.41912     | 0.33756     | -0.83868 | 0.79917 |  |
|           | 0.55849         | 0.28826     | 0.24087     | 0.655903296 |             |          |         |  |
| CBLB      | ENSG00000114423 | -0.53779    | 0.70464     | -0.15051    | 0.55982     | -0.10691 | 0.54257 |  |
|           | 0.70337         | 0.24091     | 0.24091     | 0.655903296 |             |          |         |  |
| NA        | ENSG00000260939 | 0.70337     | 0.24091     | 0.61056     | 0.27075     | -0.20978 | 0.58308 |  |
|           | 0.42032         | 0.33713     | 0.24091     | 0.655903296 |             |          |         |  |
| NA        | ENSG00000224629 | -0.56244    | 0.71309     | 0.70336     | 0.24092     | 0.4891   | 0.31239 |  |
|           | -0.49973        | 0.69137     | 0.24092     | 0.655903296 |             |          |         |  |
| RNU1-24P  | ENSG00000201155 | 0.70329     | 0.24094     | -0.30614    | 0.62025     | 0.5331   |         |  |
|           | 0.29698         | -0.30614    | 0.62025     | 0.24094     | 0.655903296 |          |         |  |
| TMEM117   | ENSG00000139173 | 0.70324     | 0.24095     | 0.16083     | 0.43611     | 0.47992  |         |  |
|           | 0.31564         | -0.13349    | 0.5531      | 0.24095     | 0.655903296 |          |         |  |
| UBXN7-AS1 | ENSG00000225822 | 0.70323     | 0.24095     | 0.70323     | 0.24095     | 0.70323  |         |  |
|           | 0.24095         | 0.70323     | 0.24095     | 0.24095     | 0.655903296 |          |         |  |
| LINC01006 | ENSG00000182648 | 0.70322     | 0.24096     | -0.018872   | 0.50753     | -0.19752 |         |  |
|           | 0.57829         | 0.18679     | 0.42591     | 0.24096     | 0.655903296 |          |         |  |
| NA        | ENSG00000201398 | 0.70321     | 0.24096     | 0.57874     | 0.28138     | 0.70321  | 0.24096 |  |
|           | 0.59615         | 0.27554     | 0.24096     | 0.655903296 |             |          |         |  |
| NA        | ENSG00000212338 | 0.29543     | 0.38383     | 0.29543     | 0.38383     | 0.29543  | 0.38383 |  |
|           | 0.70311         | 0.24099     | 0.24099     | 0.655947275 |             |          |         |  |
| NA        | ENSG00000201843 | 0.15254     | 0.43938     | 0.15254     | 0.43938     | 0.11755  | 0.45321 |  |
|           | 0.70305         | 0.24101     | 0.24101     | 0.655947275 |             |          |         |  |
| LINC02833 | ENSG00000258742 | 0.70302     | 0.24102     | 0.70302     | 0.24102     | -0.24404 |         |  |
|           | 0.5964          | 0.70302     | 0.24102     | 0.24102     | 0.655947275 |          |         |  |
| SERPINC1  | ENSG00000117601 | 0.703024103 | 0.703024103 | 0.703024103 | 0.703024103 | 0.66645  |         |  |
|           | 0.25256         | 0.24103     | 0.655947275 |             |             |          |         |  |
| LINC02234 | ENSG00000248202 | -0.49331    | 0.6891      | 0.70286     | 0.24107     | 0.21445  |         |  |
|           | 0.4151          | 0.68666     | 0.24615     | 0.24107     | 0.656010074 |          |         |  |
| DUXAP9    | ENSG00000225210 | 0.70282     | 0.24108     | -0.17547    | 0.56965     | 0.20344  |         |  |
|           | 0.41939         | -0.18527    | 0.57349     | 0.24108     | 0.656010074 |          |         |  |
| RSPH14    | ENSG00000100218 | -0.15636    | 0.56213     | 0.70276     | 0.2411      | -1.1062  |         |  |
|           | 0.86568         | -1.1062     | 0.86568     | 0.2411      | 0.656018442 |          |         |  |
| NA        | ENSG00000267138 | 0.70272     | 0.24111     | 0.70272     | 0.24111     | 0.70272  | 0.24111 |  |
|           | 0.70272         | 0.24111     | 0.24111     | 0.656018442 |             |          |         |  |
| PPIAP42   | ENSG00000213592 | 0.70268     | 0.24113     | 0.70268     | 0.24113     | 0.70268  |         |  |
|           | 0.24113         | 0.70268     | 0.24113     | 0.24113     | 0.656036229 |          |         |  |
| CCDC138   | ENSG00000163006 | -0.31808    | 0.62479     | 0.7025      | 0.24118     | 0.67691  |         |  |
|           | 0.24923         | 0.089229    | 0.46445     | 0.24118     | 0.65613563  |          |         |  |
| NA        | ENSG00000216475 | 0.70238     | 0.24122     | 0.70238     | 0.24122     | 0.70238  | 0.24122 |  |
|           | 0.70238         | 0.24122     | 0.24122     | 0.656207816 |             |          |         |  |
| DGUOK-AS1 | ENSG00000237883 | -0.78537    | 0.78388     | 0.70229     | 0.24125     | -0.78537 |         |  |
|           | 0.78388         | -1.4082     | 0.92046     | 0.24125     | 0.656252791 |          |         |  |
| NA        | ENSG00000279769 | 0.70192     | 0.24136     | 0.47759     | 0.31647     | 0.47759  | 0.31647 |  |
|           | 0.47759         | 0.31647     | 0.24136     | 0.656410413 |             |          |         |  |
| PHF10     | ENSG00000130024 | -1.4038     | 0.91981     | -1.5804     | 0.94299     | -0.28388 | 0.61175 |  |
|           | 0.70179         | 0.2414      | 0.2414      | 0.656410413 |             |          |         |  |
| IL34      | ENSG00000157368 | 0.3583      | 0.36006     | 0.7018      | 0.2414      | 0.65797  | 0.25528 |  |

|            |                 |           |         |             |             |           |         |  |
|------------|-----------------|-----------|---------|-------------|-------------|-----------|---------|--|
|            | 0.12843         | 0.4489    | 0.2414  | 0.656410413 |             |           |         |  |
| KPNA6      | ENSG00000025800 | 0.59897   | 0.2746  | 0.38988     | 0.34831     | 0.70179   | 0.24141 |  |
|            | -0.11224        | 0.54468   | 0.24141 | 0.656410413 |             |           |         |  |
| NA         | ENSG00000244151 | 0.70176   | 0.24141 | 0.70176     | 0.24141     | 0.70176   | 0.24141 |  |
|            | 0.70176         | 0.24141   | 0.24141 | 0.656410413 |             |           |         |  |
| RUFY3      | ENSG00000018189 | 0.70166   | 0.24145 | 0.23013     | 0.409       | -0.07096  | 0.52829 |  |
|            | 0.11245         | 0.45523   | 0.24145 | 0.656410413 |             |           |         |  |
| MTUS1      | ENSG00000129422 | 0.70165   | 0.24145 | -0.14068    | 0.55594     | 0.63217   | 0.26364 |  |
|            | 0.70084         | 0.2417    | 0.24145 | 0.656410413 |             |           |         |  |
| FXYD4      | ENSG00000150201 | 0.26055   | 0.39722 | 0.26055     | 0.39722     | 0.26055   | 0.39722 |  |
|            | 0.70163         | 0.24145   | 0.24145 | 0.656410413 |             |           |         |  |
| WDR62      | ENSG00000075702 | 0.70162   | 0.24146 | -0.8601     | 0.80513     | 0.41696   | 0.33835 |  |
|            | 0.41696         | 0.33835   | 0.24146 | 0.656410413 |             |           |         |  |
| RNU6-1195P | ENSG00000207198 | 0.70163   | 0.24146 | -0.74408    | 0.77158     | 0.1286    |         |  |
|            | 0.44884         | 0.011247  | 0.49551 | 0.24146     | 0.656410413 |           |         |  |
| RPL7P8     | ENSG00000235045 | 0.70156   | 0.24148 | -0.049571   | 0.51977     | -0.049571 |         |  |
|            | 0.51977         | -0.049571 | 0.51977 | 0.24148     | 0.656410413 |           |         |  |
| PEX11G     | ENSG00000104883 | 0.70149   | 0.2415  | 0.70149     | 0.2415      | 0.70149   |         |  |
|            | 0.2415          | 0.70149   | 0.2415  | 0.2415      | 0.656410413 |           |         |  |
| RN7SKP119  | ENSG00000222685 | 0.70148   | 0.2415  | 0.70148     | 0.2415      | 0.70148   |         |  |
|            | 0.2415          | 0.70148   | 0.2415  | 0.2415      | 0.656410413 |           |         |  |
| NA         | ENSG00000250831 | 0.70149   | 0.2415  | 0.70149     | 0.2415      | 0.70149   | 0.2415  |  |
|            | 0.70149         | 0.2415    | 0.2415  | 0.656410413 |             |           |         |  |
| TMPRSS3    | ENSG00000160183 | 0.70146   | 0.24151 | 0.70146     | 0.24151     | -0.12704  |         |  |
|            | 0.55055         | -0.31281  | 0.62279 | 0.24151     | 0.656410413 |           |         |  |
| RN7SL151P  | ENSG00000244230 | 0.70133   | 0.24155 | 0.70133     | 0.24155     | 0.70133   |         |  |
|            | 0.24155         | 0.70133   | 0.24155 | 0.24155     | 0.656436471 |           |         |  |
| RNU4-9P    | ENSG00000201821 | 0.70131   | 0.24156 | 0.08551     | 0.46593     | 0.70131   |         |  |
|            | 0.24156         | 0.70131   | 0.24156 | 0.24156     | 0.656436471 |           |         |  |
| ME2P1      | ENSG00000230097 | 0.70128   | 0.24156 | -0.76837    | 0.77887     | -1.6873   | 0.95422 |  |
|            | -0.76837        | 0.77887   | 0.24156 | 0.656436471 |             |           |         |  |
| NA         | ENSG00000224856 | 0.7012    | 0.24159 | 0.7012      | 0.24159     | 0.7012    | 0.24159 |  |
|            | 0.7012          | 0.24159   | 0.24159 | 0.656448596 |             |           |         |  |
| CD72       | ENSG00000137101 | -0.96759  | 0.83338 | 0.70108     | 0.24163     | -0.96759  | 0.83338 |  |
|            | -0.96759        | 0.83338   | 0.24163 | 0.656448596 |             |           |         |  |
| OACYLP     | ENSG00000224367 | 0.25531   | 0.39924 | 0.70103     | 0.24164     | -0.30226  |         |  |
|            | 0.61877         | -0.01449  | 0.50578 | 0.24164     | 0.656448596 |           |         |  |
| NA         | ENSG00000234504 | -1.721    | 0.95738 | 0.70087     | 0.24169     | -0.99991  | 0.84132 |  |
|            | -0.79671        | 0.78719   | 0.24169 | 0.656448596 |             |           |         |  |
| NA         | ENSG00000235149 | 0.18357   | 0.42718 | 0.70086     | 0.2417      | 0.34484   | 0.36511 |  |
|            | 0.36172         | 0.35878   | 0.2417  | 0.656448596 |             |           |         |  |
| ASPM       | ENSG00000066279 | 0.47682   | 0.31674 | 0.70078     | 0.24172     | 0.47682   | 0.31674 |  |
|            | 0.47682         | 0.31674   | 0.24172 | 0.656448596 |             |           |         |  |
| NA         | ENSG00000258535 | 0.53701   | 0.29563 | -0.45874    | 0.67679     | 0.70079   | 0.24172 |  |
|            | 0.68873         | 0.2455    | 0.24172 | 0.656448596 |             |           |         |  |
| FPGT       | ENSG00000254685 | 0.41019   | 0.34083 | 0.70075     | 0.24173     | 0.70075   | 0.24173 |  |
|            | 0.70075         | 0.24173   | 0.24173 | 0.656448596 |             |           |         |  |
| NA         | ENSG00000206925 | 0.7007    | 0.24175 | 0.7007      | 0.24175     | 0.7007    | 0.24175 |  |
|            | 0.7007          | 0.24175   | 0.24175 | 0.656448596 |             |           |         |  |
| NA         | ENSG00000254002 | 0.64661   | 0.25894 | -0.64566    | 0.74075     | 0.70069   | 0.24175 |  |
|            | -0.1464         | 0.5582    | 0.24175 | 0.656448596 |             |           |         |  |
| CCDC39     | ENSG00000145075 | 0.050693  | 0.47979 | -0.0087323  | 0.50348     | -0.79341  |         |  |
|            | 0.78623         | 0.70065   | 0.24176 | 0.24176     | 0.656448596 |           |         |  |
| TRAM1L1    | ENSG00000174599 | 0.70064   | 0.24176 | -0.82159    | 0.79434     | -0.82159  |         |  |
|            | 0.79434         | -0.82159  | 0.79434 | 0.24176     | 0.656448596 |           |         |  |
| SLC25A5P2  | ENSG00000235064 | -1.0686   | 0.85738 | 0.70066     | 0.24176     | -1.0686   |         |  |
|            | 0.85738         | -1.0686   | 0.85738 | 0.24176     | 0.656448596 |           |         |  |
| NA         | ENSG00000259468 | 0.0070054 | 0.49721 | 0.0070054   | 0.49721     | 0.70065   | 0.24176 |  |
|            | 0.70065         | 0.24176   | 0.24176 | 0.656448596 |             |           |         |  |
| SRP9       | ENSG00000143742 | 0.28479   | 0.3879  | 0.35585     | 0.36098     | 0.059808  | 0.47615 |  |
|            | 0.70059         | 0.24178   | 0.24178 | 0.656448596 |             |           |         |  |
| MTND6P7    | ENSG00000224695 | -0.67691  | 0.75077 | -0.67691    | 0.75077     | -0.67691  |         |  |

|                 |                 |           |         |             |             |           |         |  |
|-----------------|-----------------|-----------|---------|-------------|-------------|-----------|---------|--|
| NA              | 0.75077         | 0.7006    | 0.24178 | 0.24178     | 0.656448596 |           |         |  |
| ENSG00000271938 | 0.06064         | 0.47582   | 0.29902 | 0.38246     | 0.70049     | 0.24181   |         |  |
|                 | -0.66672        | 0.74752   | 0.24181 | 0.656451283 |             |           |         |  |
| LINC02000       | ENSG00000243832 | 0.70038   | 0.24184 | 0.70038     | 0.24184     | 0.70038   |         |  |
|                 | 0.24184         | 0.70038   | 0.24184 | 0.24184     | 0.656451283 |           |         |  |
| SLC35C1         | ENSG00000181830 | 0.45252   | 0.32545 | 0.45252     | 0.32545     | 0.70033   |         |  |
|                 | 0.24186         | 0.21191   | 0.41609 | 0.24186     | 0.656451283 |           |         |  |
| ZNF845          | ENSG00000213799 | 0.575     | 0.28265 | 0.70034     | 0.24186     | 0.34435   | 0.36529 |  |
|                 | -0.42442        | 0.66437   | 0.24186 | 0.656451283 |             |           |         |  |
| LY6E-DT         | ENSG00000247317 | -1.0726   | 0.85828 | 0.12383     | 0.45073     | 0.70029   |         |  |
|                 | 0.24187         | 0.70029   | 0.24187 | 0.24187     | 0.656451283 |           |         |  |
| NA              | ENSG00000255467 | 0.26682   | 0.3948  | 0.70029     | 0.24187     | 0.26682   | 0.3948  |  |
|                 | 0.22614         | 0.41054   | 0.24187 | 0.656451283 |             |           |         |  |
| NA              | ENSG00000240107 | -0.93239  | 0.82443 | -1.4641     | 0.92842     | 0.49091   | 0.31175 |  |
|                 | 0.70022         | 0.24189   | 0.24189 | 0.656451283 |             |           |         |  |
| PCDHGA8         | ENSG00000253767 | 0.70022   | 0.2419  | 0.70022     | 0.2419      | 0.70022   |         |  |
|                 | 0.2419          | 0.38059   | 0.35175 | 0.2419      | 0.656451283 |           |         |  |
| NA              | ENSG00000249572 | 0.49311   | 0.31097 | -0.35314    | 0.63801     | 0.70018   | 0.24191 |  |
|                 | 0.26851         | 0.39415   | 0.24191 | 0.656451283 |             |           |         |  |
| GOLGA2P9        | ENSG00000269332 | 0.70014   | 0.24192 | -0.14713    | 0.55849     | 0.60736   |         |  |
|                 | 0.27181         | -0.14713  | 0.55849 | 0.24192     | 0.656451283 |           |         |  |
| KDM5A           | ENSG00000073614 | -0.28342  | 0.61157 | -0.30002    | 0.61792     | 0.70005   | 0.24195 |  |
|                 | 0.4865          | 0.31331   | 0.24195 | 0.656451283 |             |           |         |  |
| NA              | ENSG00000245025 | 0.70005   | 0.24195 | 0.70005     | 0.24195     | 0.70005   | 0.24195 |  |
|                 | 0.70005         | 0.24195   | 0.24195 | 0.656451283 |             |           |         |  |
| C1RL            | ENSG00000139178 | 0.54649   | 0.29237 | 0.69896     | 0.24229     | 0.69998   | 0.24197 |  |
|                 | -1.0699         | 0.85767   | 0.24197 | 0.656451283 |             |           |         |  |
| SNORD113-9      | ENSG00000201950 | 0.69993   | 0.24198 | 0.69993     | 0.24198     | 0.69993   |         |  |
|                 | 0.24198         | 0.69993   | 0.24198 | 0.24198     | 0.656451283 |           |         |  |
| SLC38A7         | ENSG00000103042 | 0.43656   | 0.33122 | 0.55326     | 0.29004     | 0.69987   | 0.242   |  |
|                 | 0.57964         | 0.28108   | 0.242   | 0.656451283 |             |           |         |  |
| SNAPIN          | ENSG00000143553 | -0.39221  | 0.65255 | 0.69985     | 0.24201     | -0.77308  |         |  |
|                 | 0.78026         | 0.30752   | 0.37922 | 0.24201     | 0.656451283 |           |         |  |
| TMPRSS9         | ENSG00000178297 | 0.22819   | 0.40975 | -0.43033    | 0.66652     | 0.69985   |         |  |
|                 | 0.24201         | 0.013054  | 0.49479 | 0.24201     | 0.656451283 |           |         |  |
| CCDC174         | ENSG00000154781 | 0.21522   | 0.4148  | 0.33612     | 0.36839     | 0.69977   |         |  |
|                 | 0.24204         | 0.27129   | 0.39308 | 0.24204     | 0.656496115 |           |         |  |
| NA              | ENSG00000231183 | 0.30375   | 0.38066 | 0.62803     | 0.26499     | 0.69965   | 0.24207 |  |
|                 | -0.11106        | 0.54422   | 0.24207 | 0.656531523 |             |           |         |  |
| EIF3LP3         | ENSG00000226086 | -0.90475  | 0.8172  | -0.72557    | 0.76595     | 0.69962   |         |  |
|                 | 0.24208         | -0.22003  | 0.58708 | 0.24208     | 0.656531523 |           |         |  |
| RPL29P7         | ENSG00000213063 | -0.50173  | 0.69207 | -0.50173    | 0.69207     | -0.50173  |         |  |
|                 | 0.69207         | 0.6994    | 0.24215 | 0.24215     | 0.656637699 |           |         |  |
| NA              | ENSG00000280319 | 0.69939   | 0.24215 | -1.3485     | 0.91125     | -1.614    | 0.94674 |  |
|                 | -0.9263         | 0.82286   | 0.24215 | 0.656637699 |             |           |         |  |
| CHURC1-FNTB     | ENSG00000125954 | -0.032987 | 0.51316 | -0.032987   | 0.51316     | -0.032987 |         |  |
|                 | 0.51316         | 0.6993    | 0.24218 | 0.24218     | 0.656637699 |           |         |  |
| NA              | ENSG00000234261 | 0.51748   | 0.30241 | 0.6993      | 0.24218     | -0.29926  | 0.61763 |  |
|                 | 0.34433         | 0.3653    | 0.24218 | 0.656637699 |             |           |         |  |
| SERPINI2        | ENSG00000114204 | 0.13616   | 0.44585 | -0.10091    | 0.54019     | 0.69928   |         |  |
|                 | 0.24219         | -1.0809   | 0.86014 | 0.24219     | 0.656637699 |           |         |  |
| NA              | ENSG00000254526 | 0.3348    | 0.36889 | 0.085246    | 0.46603     | 0.69924   | 0.2422  |  |
|                 | 0.69924         | 0.2422    | 0.2422  | 0.656637699 |             |           |         |  |
| SLC44A2         | ENSG00000129353 | 0.42815   | 0.33427 | 0.34853     | 0.36372     | 0.59285   |         |  |
|                 | 0.27664         | 0.69905   | 0.24226 | 0.24226     | 0.656733213 |           |         |  |
| MTDHP1          | ENSG00000270948 | 0.3176    | 0.37539 | -0.33562    | 0.63142     | 0.69897   |         |  |
|                 | 0.24228         | 0.17669   | 0.42988 | 0.24228     | 0.656733213 |           |         |  |
| ADAMDEC1        | ENSG00000134028 | -0.045943 | 0.51832 | 0.073011    | 0.4709      | 0.69896   |         |  |
|                 | 0.24229         | -0.020425 | 0.50815 | 0.24229     | 0.656733213 |           |         |  |
| JAZF1           | ENSG00000153814 | 0.6988    | 0.24234 | 0.074374    | 0.47036     | 0.6988    | 0.24234 |  |
|                 | 0.23368         | 0.40762   | 0.24234 | 0.656733213 |             |           |         |  |
| NA              | ENSG00000221139 | 0.69875   | 0.24235 | 0.69875     | 0.24235     | 0.69875   | 0.24235 |  |

|           |                 |           |         |             |             |          |         |  |
|-----------|-----------------|-----------|---------|-------------|-------------|----------|---------|--|
|           | 0.69875         | 0.24235   | 0.24235 | 0.656733213 |             |          |         |  |
| MTCYBP40  | ENSG00000248931 | 0.69876   | 0.24235 | -1.0528     | 0.85379     | -1.0806  |         |  |
|           | 0.86006         | -0.17643  | 0.57002 | 0.24235     | 0.656733213 |          |         |  |
| NA        | ENSG00000265751 | -0.65975  | 0.74529 | 0.69875     | 0.24235     | 0.69875  | 0.24235 |  |
|           | 0.69875         | 0.24235   | 0.24235 | 0.656733213 |             |          |         |  |
| AGBL1     | ENSG00000273540 | -0.2675   | 0.60546 | -0.64973    | 0.74207     | -1.0747  | 0.85875 |  |
|           | 0.69877         | 0.24235   | 0.24235 | 0.656733213 |             |          |         |  |
| NA        | ENSG00000236507 | 0.69875   | 0.24236 | 0.69875     | 0.24236     | 0.69875  | 0.24236 |  |
|           | 0.69875         | 0.24236   | 0.24236 | 0.656733213 |             |          |         |  |
| FER1L6    | ENSG00000214814 | 0.2024    | 0.4198  | 0.6987      | 0.24237     | 0.51972  |         |  |
|           | 0.30163         | -0.081758 | 0.53258 | 0.24237     | 0.656733213 |          |         |  |
| LINC01719 | ENSG00000233396 | 0.69857   | 0.24241 | 0.69857     | 0.24241     | 0.69857  |         |  |
|           | 0.24241         | 0.69857   | 0.24241 | 0.24241     | 0.656768559 |          |         |  |
| NA        | ENSG00000270103 | 0.69857   | 0.24241 | 0.69857     | 0.24241     | 0.69857  | 0.24241 |  |
|           | 0.69857         | 0.24241   | 0.24241 | 0.656768559 |             |          |         |  |
| H1-8      | ENSG00000178804 | 0.69851   | 0.24243 | 0.41562     | 0.33884     | 0.48348  | 0.31438 |  |
|           | 0.69851         | 0.24243   | 0.24243 | 0.656786229 |             |          |         |  |
| HOXD9     | ENSG00000128709 | 0.69833   | 0.24248 | 0.69833     | 0.24248     | -1.2389  | 0.89231 |  |
|           | -0.50357        | 0.69272   | 0.24248 | 0.656818019 |             |          |         |  |
| MYL6P4    | ENSG00000240677 | 0.69834   | 0.24248 | 0.69834     | 0.24248     | 0.69834  |         |  |
|           | 0.24248         | 0.69834   | 0.24248 | 0.24248     | 0.656818019 |          |         |  |
| SEPTIN9   | ENSG00000184640 | -0.12234  | 0.54869 | -0.64703    | 0.74119     | 0.6983   |         |  |
|           | 0.24249         | -0.74047  | 0.77049 | 0.24249     | 0.656818019 |          |         |  |
| NA        | ENSG00000235775 | 0.032021  | 0.48723 | -0.69177    | 0.75546     | -0.66011 | 0.74541 |  |
|           | 0.69826         | 0.24251   | 0.24251 | 0.656818019 |             |          |         |  |
| NA        | ENSG00000270202 | 0.69818   | 0.24253 | 0.40858     | 0.34142     | -0.51379 | 0.6963  |  |
|           | 0.69818         | 0.24253   | 0.24253 | 0.656818019 |             |          |         |  |
| CPLANE1   | ENSG00000197603 | 0.69816   | 0.24254 | 0.68095     | 0.24795     | 0.38288  |         |  |
|           | 0.35091         | 0.65914   | 0.2549  | 0.24254     | 0.656818019 |          |         |  |
| NA        | ENSG00000241666 | 0.69809   | 0.24256 | 0.69809     | 0.24256     | 0.69809  | 0.24256 |  |
|           | 0.69809         | 0.24256   | 0.24256 | 0.656818019 |             |          |         |  |
| PSG1      | ENSG00000231924 | 0.21012   | 0.41679 | -0.34513    | 0.635       | 0.69805  | 0.24257 |  |
|           | -0.71149        | 0.76161   | 0.24257 | 0.656818019 |             |          |         |  |
| NA        | ENSG00000234428 | -0.49507  | 0.68972 | 0.69805     | 0.24257     | 0.69805  | 0.24257 |  |
|           | 0.69805         | 0.24257   | 0.24257 | 0.656818019 |             |          |         |  |
| PRKCQ     | ENSG00000065675 | -0.71975  | 0.76416 | 0.49637     | 0.30982     | 0.28327  | 0.38848 |  |
|           | 0.69799         | 0.24259   | 0.24259 | 0.656818019 |             |          |         |  |
| ARAP1-AS2 | ENSG00000245148 | 0.69799   | 0.24259 | 0.69799     | 0.24259     | 0.69799  |         |  |
|           | 0.24259         | 0.69799   | 0.24259 | 0.24259     | 0.656818019 |          |         |  |
| ORMDL2    | ENSG00000123353 | 0.69784   | 0.24264 | 0.69784     | 0.24264     | 0.69784  |         |  |
|           | 0.24264         | -0.47122  | 0.68126 | 0.24264     | 0.656834491 |          |         |  |
| MAP3K21   | ENSG00000143674 | 0.42026   | 0.33715 | 0.22864     | 0.40957     | -0.48377 |         |  |
|           | 0.68573         | 0.69782   | 0.24264 | 0.24264     | 0.656834491 |          |         |  |
| NA        | ENSG00000264451 | -0.20373  | 0.58072 | -0.20373    | 0.58072     | 0.69783  | 0.24264 |  |
|           | -0.20373        | 0.58072   | 0.24264 | 0.656834491 |             |          |         |  |
| MRGPRG    | ENSG00000182170 | 0.25768   | 0.39833 | -0.40602    | 0.65764     | -0.24802 |         |  |
|           | 0.59794         | 0.69779   | 0.24265 | 0.24265     | 0.656834491 |          |         |  |
| PRIMPOL   | ENSG00000164306 | 0.19179   | 0.42396 | 0.16244     | 0.43548     | 0.69764  |         |  |
|           | 0.2427          | 0.24712   | 0.40241 | 0.2427      | 0.656856811 |          |         |  |
| POLR2J4   | ENSG00000214783 | -0.37589  | 0.6465  | 0.49217     | 0.3113      | 0.69764  |         |  |
|           | 0.2427          | 0.27595   | 0.39129 | 0.2427      | 0.656856811 |          |         |  |
| NA        | ENSG00000197332 | -0.63798  | 0.73826 | -0.54966    | 0.70872     | -0.61496 | 0.73071 |  |
|           | 0.69753         | 0.24274   | 0.24274 | 0.656856811 |             |          |         |  |
| RSPO1     | ENSG00000169218 | -0.10556  | 0.54203 | -0.1722     | 0.56836     | -0.10556 | 0.54203 |  |
|           | 0.69749         | 0.24275   | 0.24275 | 0.656856811 |             |          |         |  |
| LINC01364 | ENSG00000227290 | -1.0944   | 0.8631  | 0.69741     | 0.24277     | -0.11537 |         |  |
|           | 0.54592         | -0.81512  | 0.7925  | 0.24277     | 0.656856811 |          |         |  |
| NA        | ENSG00000259026 | 0.69742   | 0.24277 | 0.69742     | 0.24277     | 0.69742  | 0.24277 |  |
|           | 0.69742         | 0.24277   | 0.24277 | 0.656856811 |             |          |         |  |
| LINC02656 | ENSG00000212743 | -1.1419   | 0.87325 | -1.5295     | 0.93693     | 0.69738  |         |  |
|           | 0.24278         | -0.22153  | 0.58766 | 0.24278     | 0.656856811 |          |         |  |
| NA        | ENSG00000260541 | 0.69738   | 0.24278 | 0.69738     | 0.24278     | 0.69738  | 0.24278 |  |

|           |                 |          |         |             |             |          |         |  |
|-----------|-----------------|----------|---------|-------------|-------------|----------|---------|--|
|           | 0.69738         | 0.24278  | 0.24278 | 0.656856811 |             |          |         |  |
| NA        | ENSG00000224541 | 0.22037  | 0.41279 | -0.14664    | 0.55829     | 0.69734  | 0.24279 |  |
|           | -1.3159         | 0.90589  | 0.24279 | 0.656856811 |             |          |         |  |
| PNPLA5    | ENSG00000100341 | 0.69731  | 0.2428  | 0.49255     | 0.31117     | 0.54648  |         |  |
|           | 0.29237         | -0.33516 | 0.63125 | 0.2428      | 0.656856811 |          |         |  |
| RN7SKP191 | ENSG00000201583 | 0.69725  | 0.24282 | 0.69725     | 0.24282     | 0.69725  |         |  |
|           | 0.24282         | 0.69725  | 0.24282 | 0.24282     | 0.656856811 |          |         |  |
| HNRNPA1P6 | ENSG00000229887 | -0.25596 | 0.60101 | 0.69726     | 0.24282     | -0.80479 |         |  |
|           | 0.78953         | -0.80479 | 0.78953 | 0.24282     | 0.656856811 |          |         |  |
| LINC02074 | ENSG00000266357 | 0.53204  | 0.29735 | 0.43364     | 0.33228     | 0.6972   |         |  |
|           | 0.24284         | -0.33892 | 0.63266 | 0.24284     | 0.656874449 |          |         |  |
| OR10G8    | ENSG00000234560 | 0.14468  | 0.44248 | 0.69715     | 0.24286     | 0.14468  |         |  |
|           | 0.44248         | 0.14468  | 0.44248 | 0.24286     | 0.656892085 |          |         |  |
| PARP10    | ENSG00000178685 | 0.44569  | 0.32791 | 0.69698     | 0.24291     | 0.69698  |         |  |
|           | 0.24291         | 0.69698  | 0.24291 | 0.24291     | 0.656926153 |          |         |  |
| GCGR      | ENSG00000215644 | 0.69695  | 0.24292 | -0.64571    | 0.74077     | -0.6248  | 0.73395 |  |
|           | -0.75082        | 0.77362  | 0.24292 | 0.656926153 |             |          |         |  |
| NA        | ENSG00000263731 | 0.01923  | 0.49233 | 0.096498    | 0.46156     | 0.01923  | 0.49233 |  |
|           | 0.69695         | 0.24292  | 0.24292 | 0.656926153 |             |          |         |  |
| ANP32BP2  | ENSG00000231801 | 0.23549  | 0.40691 | -0.57585    | 0.71764     | 0.69691  |         |  |
|           | 0.24293         | -0.70999 | 0.76114 | 0.24293     | 0.656926153 |          |         |  |
| COL8A1    | ENSG00000144810 | 0.69687  | 0.24294 | 0.22412     | 0.41133     | -1.7323  |         |  |
|           | 0.95839         | 0.12911  | 0.44864 | 0.24294     | 0.656926153 |          |         |  |
| NA        | ENSG00000260402 | -0.56806 | 0.715   | 0.3478      | 0.36399     | 0.69677  | 0.24297 |  |
|           | 0.38961         | 0.34841  | 0.24297 | 0.656960202 |             |          |         |  |
| NA        | ENSG00000199780 | 0.69672  | 0.24299 | -0.68336    | 0.75281     | -0.68336 | 0.75281 |  |
|           | -0.68336        | 0.75281  | 0.24299 | 0.656960202 |             |          |         |  |
| IFNA1     | ENSG00000197919 | 0.69664  | 0.24301 | 0.69664     | 0.24301     | 0.69664  | 0.24301 |  |
|           | 0.0035401       | 0.49859  | 0.24301 | 0.656960202 |             |          |         |  |
| FDXR      | ENSG00000161513 | -1.1704  | 0.87908 | -0.21124    | 0.58365     | 0.020258 | 0.49192 |  |
|           | 0.69663         | 0.24302  | 0.24302 | 0.656960202 |             |          |         |  |
| NA        | ENSG00000269487 | 0.69662  | 0.24302 | 0.69662     | 0.24302     | 0.69662  | 0.24302 |  |
|           | 0.69662         | 0.24302  | 0.24302 | 0.656960202 |             |          |         |  |
| RNU5E-9P  | ENSG00000223096 | 0.30516  | 0.38012 | -0.43928    | 0.66977     | 0.17339  |         |  |
|           | 0.43117         | 0.69653  | 0.24305 | 0.24305     | 0.65696841  |          |         |  |
| NA        | ENSG00000278879 | 0.69653  | 0.24305 | 0.69653     | 0.24305     | 0.69653  | 0.24305 |  |
|           | 0.69653         | 0.24305  | 0.24305 | 0.65696841  |             |          |         |  |
| MIR601    | ENSG00000207991 | 0.69644  | 0.24308 | 0.69644     | 0.24308     | 0.69644  |         |  |
|           | 0.24308         | 0.69644  | 0.24308 | 0.24308     | 0.656982409 |          |         |  |
| NA        | ENSG00000253180 | 0.69631  | 0.24312 | 0.69631     | 0.24312     | 0.69631  | 0.24312 |  |
|           | -0.23929        | 0.59456  | 0.24312 | 0.656982409 |             |          |         |  |
| RNU6-126P | ENSG00000252494 | 0.69628  | 0.24313 | -0.25686    | 0.60136     | 0.69628  |         |  |
|           | 0.24313         | 0.13943  | 0.44456 | 0.24313     | 0.656982409 |          |         |  |
| NA        | ENSG00000262267 | 0.60136  | 0.2738  | -0.27977    | 0.61017     | 0.69627  | 0.24313 |  |
|           | 0.45764         | 0.3236   | 0.24313 | 0.656982409 |             |          |         |  |
| NA        | ENSG00000234768 | 0.69619  | 0.24315 | 0.39356     | 0.34695     | -0.53058 | 0.70215 |  |
|           | 0.57013         | 0.28429  | 0.24315 | 0.656982409 |             |          |         |  |
| NA        | ENSG00000248715 | -0.36318 | 0.64177 | -0.53011    | 0.70198     | 0.6962   | 0.24315 |  |
|           | -0.53011        | 0.70198  | 0.24315 | 0.656982409 |             |          |         |  |
| NA        | ENSG00000258413 | 0.69618  | 0.24316 | 0.60179     | 0.27366     | 0.69618  | 0.24316 |  |
|           | 0.69618         | 0.24316  | 0.24316 | 0.656982409 |             |          |         |  |
| GRIP1     | ENSG00000155974 | -0.55306 | 0.70989 | -1.1836     | 0.88171     | 0.69614  | 0.24317 |  |
|           | -1.834          | 0.96667  | 0.24317 | 0.656982409 |             |          |         |  |
| NA        | ENSG00000236978 | 0.15485  | 0.43847 | -0.20302    | 0.58044     | -0.39512 | 0.65362 |  |
|           | 0.69607         | 0.24319  | 0.24319 | 0.656982409 |             |          |         |  |
| RPL15P2   | ENSG00000240914 | -0.4535  | 0.6749  | -0.059257   | 0.52363     | 0.27954  |         |  |
|           | 0.38991         | 0.69608  | 0.24319 | 0.24319     | 0.656982409 |          |         |  |
| NA        | ENSG00000260438 | 0.69602  | 0.24321 | 0.69602     | 0.24321     | 0.69602  | 0.24321 |  |
|           | 0.69602         | 0.24321  | 0.24321 | 0.656989403 |             |          |         |  |
| RNMT      | ENSG00000101654 | 0.046356 | 0.48151 | 0.69589     | 0.24325     | 0.43149  | 0.33306 |  |
|           | 0.26002         | 0.39742  | 0.24325 | 0.656989403 |             |          |         |  |
| NA        | ENSG00000226862 | 0.69589  | 0.24325 | 0.69589     | 0.24325     | 0.69589  | 0.24325 |  |

|            |                 |           |         |             |             |           |         |  |
|------------|-----------------|-----------|---------|-------------|-------------|-----------|---------|--|
|            | 0.69589         | 0.24325   | 0.24325 | 0.656989403 |             |           |         |  |
| NA         | ENSG00000241889 | 0.6959    | 0.24325 | 0.6959      | 0.24325     | 0.6959    | 0.24325 |  |
|            | 0.6959          | 0.24325   | 0.24325 | 0.656989403 |             |           |         |  |
| METTL7AP1  | ENSG00000257649 | 0.0047333 | 0.49811 | 0.69585     | 0.24326     | 0.69585   |         |  |
|            | 0.24326         | 0.69585   | 0.24326 | 0.24326     | 0.656989403 |           |         |  |
| LHFPL3-AS1 | ENSG00000226869 | 0.15623   | 0.43793 | 0.69567     | 0.24332     | 0.69567   |         |  |
|            | 0.24332         | 0.69567   | 0.24332 | 0.24332     | 0.657039774 |           |         |  |
| NA         | ENSG00000279127 | 0.69561   | 0.24334 | 0.69561     | 0.24334     | 0.69561   | 0.24334 |  |
|            | 0.69561         | 0.24334   | 0.24334 | 0.657039774 |             |           |         |  |
| NA         | ENSG00000265008 | 0.69553   | 0.24336 | 0.69553     | 0.24336     | 0.69553   | 0.24336 |  |
|            | 0.69553         | 0.24336   | 0.24336 | 0.657039774 |             |           |         |  |
| PPIAP25    | ENSG00000229303 | 0.69549   | 0.24337 | 0.69549     | 0.24337     | 0.17393   |         |  |
|            | 0.43096         | -0.91812  | 0.82072 | 0.24337     | 0.657039774 |           |         |  |
| C2CD3      | ENSG00000168014 | -0.65911  | 0.74509 | -0.20632    | 0.58173     | -0.5637   | 0.71352 |  |
|            | 0.69547         | 0.24338   | 0.24338 | 0.657039774 |             |           |         |  |
| ZNF282     | ENSG00000170265 | -1.5411   | 0.93835 | 0.69542     | 0.24339     | 0.31555   |         |  |
|            | 0.37617         | 0.22832   | 0.4097  | 0.24339     | 0.657039774 |           |         |  |
| NA         | ENSG00000277705 | 0.69543   | 0.24339 | 0.69543     | 0.24339     | 0.69543   | 0.24339 |  |
|            | 0.69543         | 0.24339   | 0.24339 | 0.657039774 |             |           |         |  |
| CAMK2A     | ENSG00000070808 | -0.041424 | 0.51652 | 0.68436     | 0.24688     | 0.6954    |         |  |
|            | 0.2434          | 0.69269   | 0.24425 | 0.2434      | 0.657039774 |           |         |  |
| NA         | ENSG00000229848 | 0.6954    | 0.2434  | -1.0327     | 0.84913     | 0.21144   | 0.41627 |  |
|            | -1.0327         | 0.84913   | 0.2434  | 0.657039774 |             |           |         |  |
| MTND2P30   | ENSG00000227937 | 0.69535   | 0.24342 | -0.081655   | 0.53254     | -0.081655 |         |  |
|            | 0.53254         | -0.081655 | 0.53254 | 0.24342     | 0.657047962 |           |         |  |
| NA         | ENSG00000228170 | 0.6953    | 0.24343 | 0.6953      | 0.24343     | 0.6953    | 0.24343 |  |
|            | 0.6953          | 0.24343   | 0.24343 | 0.657047962 |             |           |         |  |
| NA         | ENSG00000241640 | 0.69516   | 0.24348 | 0.69516     | 0.24348     | 0.69516   | 0.24348 |  |
|            | 0.69516         | 0.24348   | 0.24348 | 0.657054931 |             |           |         |  |
| NA         | ENSG00000276282 | 0.69516   | 0.24348 | 0.69516     | 0.24348     | 0.69516   | 0.24348 |  |
|            | 0.69516         | 0.24348   | 0.24348 | 0.657054931 |             |           |         |  |
| NA         | ENSG00000228734 | 0.69512   | 0.24349 | 0.69512     | 0.24349     | 0.69512   | 0.24349 |  |
|            | 0.69512         | 0.24349   | 0.24349 | 0.657054931 |             |           |         |  |
| TRAP1      | ENSG00000126602 | 0.36637   | 0.35705 | 0.55526     | 0.28936     | 0.08075   | 0.46782 |  |
|            | 0.69507         | 0.2435    | 0.2435  | 0.657054931 |             |           |         |  |
| LINC00316  | ENSG00000237664 | -0.52298  | 0.69951 | 0.69508     | 0.2435      | -0.52298  |         |  |
|            | 0.69951         | -0.52298  | 0.69951 | 0.2435      | 0.657054931 |           |         |  |
| RAB15      | ENSG00000139998 | 0.6949    | 0.24356 | -0.063917   | 0.52548     | 0.6949    | 0.24356 |  |
|            | 0.52994         | 0.29808   | 0.24356 | 0.65708972  |             |           |         |  |
| RNF14      | ENSG00000013561 | -0.0702   | 0.52798 | -0.0702     | 0.52798     | 0.69478   | 0.2436  |  |
|            | -0.21456        | 0.58495   | 0.2436  | 0.65708972  |             |           |         |  |
| UNC93B7    | ENSG00000251624 | -0.3101   | 0.62176 | -0.79124    | 0.7856      | -0.09179  |         |  |
|            | 0.53657         | 0.69473   | 0.24361 | 0.24361     | 0.65708972  |           |         |  |
| NA         | ENSG00000233372 | 0.35563   | 0.36106 | 0.69458     | 0.24366     | 0.56236   | 0.28694 |  |
|            | 0.56236         | 0.28694   | 0.24366 | 0.65708972  |             |           |         |  |
| NA         | ENSG00000253196 | 0.69458   | 0.24366 | -0.86316    | 0.80597     | -1.6695   | 0.95249 |  |
|            | -1.6695         | 0.95249   | 0.24366 | 0.65708972  |             |           |         |  |
| NA         | ENSG00000251095 | 0.69454   | 0.24367 | 0.10032     | 0.46005     | 0.28459   | 0.38798 |  |
|            | 0.31628         | 0.3759    | 0.24367 | 0.65708972  |             |           |         |  |
| NA         | ENSG00000205414 | 0.35586   | 0.36097 | 0.6945      | 0.24368     | 0.35586   | 0.36097 |  |
|            | 0.35586         | 0.36097   | 0.24368 | 0.65708972  |             |           |         |  |
| VCAN-AS1   | ENSG00000249835 | 0.6945    | 0.24368 | -0.60379    | 0.72701     | -0.60379  |         |  |
|            | 0.72701         | -0.60379  | 0.72701 | 0.24368     | 0.65708972  |           |         |  |
| ERMARD     | ENSG00000130023 | 0.69448   | 0.24369 | -1.2153     | 0.88788     | 0.35381   |         |  |
|            | 0.36174         | -0.10703  | 0.54262 | 0.24369     | 0.65708972  |           |         |  |
| SNORD83B   | ENSG00000209480 | 0.69437   | 0.24372 | 0.69437     | 0.24372     | 0.69437   |         |  |
|            | 0.24372         | 0.69437   | 0.24372 | 0.24372     | 0.65708972  |           |         |  |
| SMCO1      | ENSG00000214097 | 0.69439   | 0.24372 | -1.1725     | 0.8795      | -0.15169  | 0.56028 |  |
|            | -1.1725         | 0.8795    | 0.24372 | 0.65708972  |             |           |         |  |
| HMGB1P42   | ENSG00000254735 | -0.50939  | 0.69476 | 0.6944      | 0.24372     | -1.6716   |         |  |
|            | 0.9527          | -2.1934   | 0.98586 | 0.24372     | 0.65708972  |           |         |  |
| CYP2C61P   | ENSG00000270648 | 0.14367   | 0.44288 | 0.69436     | 0.24373     | 0.69436   |         |  |

|             |                 |           |            |             |             |           |         |       |
|-------------|-----------------|-----------|------------|-------------|-------------|-----------|---------|-------|
|             | 0.24373         | 0.69436   | 0.24373    | 0.24373     | 0.65708972  |           |         |       |
| NDUFA4L2    | ENSG00000185633 | -0.33432  | 0.63093    | 0.69432     | 0.24374     | -0.021105 |         |       |
|             | 0.50842         | -0.021105 | 0.50842    | 0.24374     | 0.65708972  |           |         |       |
| PLEKHF1     | ENSG00000166289 | 0.69428   | 0.24375    | 0.69428     | 0.24375     | 0.64492   |         |       |
|             | 0.25949         | 0.69428   | 0.24375    | 0.24375     | 0.65708972  |           |         |       |
| LRR37A14P   | ENSG00000215771 | 0.69421   | 0.24377    | 0.69421     | 0.24377     | 0.69421   |         |       |
|             | 0.24377         | -0.88933  | 0.81309    | 0.24377     | 0.65708972  |           |         |       |
| NA          | ENSG00000257265 | 0.11763   | 0.45318    | 0.69422     | 0.24377     | 0.69422   | 0.24377 |       |
|             | 0.69422         | 0.24377   | 0.24377    | 0.65708972  |             |           |         |       |
| NA          | ENSG00000237626 | -0.3641   | 0.64211    | -1.1098     | 0.86646     | 0.69413   | 0.2438  |       |
|             | -1.3498         | 0.91146   | 0.2438     | 0.65708972  |             |           |         |       |
| TNFRSF10A   | ENSG00000104689 | 0.056117  | 0.47762    | 0.69403     | 0.24383     | 0.025733  |         |       |
|             | 0.48974         | 0.40799   | 0.34164    | 0.24383     | 0.65708972  |           |         |       |
| RNU6-413P   | ENSG00000206842 | -0.35144  | 0.63737    | -0.35144    | 0.63737     | -0.35144  |         |       |
|             | 0.63737         | 0.69404   | 0.24383    | 0.24383     | 0.65708972  |           |         |       |
| AKR1C7P     | ENSG00000215267 | -0.47705  | 0.68334    | 0.32014     | 0.37443     | 0.69401   |         |       |
|             | 0.24384         | -0.47705  | 0.68334    | 0.24384     | 0.65708972  |           |         |       |
| ZNF807P     | ENSG00000248830 | 0.56073   | 0.28749    | 0.694       | 0.24384     | 0.694     | 0.24384 | 0.694 |
|             | 0.24384         | 0.24384   | 0.65708972 |             |             |           |         |       |
| C5orf17     | ENSG00000248874 | 0.69399   | 0.24384    | -0.42       | 0.66276     | -0.42     | 0.66276 |       |
|             | 0.1662          | 0.434     | 0.24384    | 0.65708972  |             |           |         |       |
| WWC2-AS2    | ENSG00000251359 | 0.69397   | 0.24385    | 0.42398     | 0.33579     | 0.69397   |         |       |
|             | 0.24385         | 0.30623   | 0.37971    | 0.24385     | 0.65708972  |           |         |       |
| NA          | ENSG00000263911 | -1.2284   | 0.89034    | 0.69396     | 0.24385     | -0.26878  | 0.60595 |       |
|             | -0.87612        | 0.80952   | 0.24385    | 0.65708972  |             |           |         |       |
| LINC01689   | ENSG00000224832 | 0.32005   | 0.37447    | 0.32005     | 0.37447     | -0.17095  |         |       |
|             | 0.56787         | 0.69377   | 0.24391    | 0.24391     | 0.657123996 |           |         |       |
| TBL1XR1-AS1 | ENSG00000231310 | -1.1291   | 0.87057    | 0.69365     | 0.24395     | -0.43127  |         |       |
|             | 0.66687         | -0.43127  | 0.66687    | 0.24395     | 0.657123996 |           |         |       |
| MIR1185-2   | ENSG00000221614 | 0.69362   | 0.24396    | 0.13298     | 0.44711     | -0.23322  |         |       |
|             | 0.5922          | -0.23322  | 0.5922     | 0.24396     | 0.657123996 |           |         |       |
| OR7E130P    | ENSG00000234458 | 0.69361   | 0.24396    | 0.39155     | 0.3477      | 0.038541  |         |       |
|             | 0.48463         | -0.80842  | 0.79058    | 0.24396     | 0.657123996 |           |         |       |
| GRID2       | ENSG00000152208 | 0.69357   | 0.24397    | 0.58906     | 0.27791     | 0.26861   | 0.39411 |       |
|             | 0.44924         | 0.32663   | 0.24397    | 0.657123996 |             |           |         |       |
| FBXO30      | ENSG00000118496 | 0.69352   | 0.24399    | 0.18236     | 0.42765     | 0.18125   |         |       |
|             | 0.42809         | 0.12851   | 0.44887    | 0.24399     | 0.657123996 |           |         |       |
| KRT8        | ENSG00000170421 | 0.6935    | 0.244      | -0.44041    | 0.67018     | -2.1393   | 0.98379 |       |
|             | -0.44041        | 0.67018   | 0.244      | 0.657123996 |             |           |         |       |
| RANBP6      | ENSG00000137040 | 0.69346   | 0.24401    | 0.69346     | 0.24401     | 0.69346   |         |       |
|             | 0.24401         | 0.1805    | 0.42838    | 0.24401     | 0.657123996 |           |         |       |
| LINC01389   | ENSG00000225762 | 0.46564   | 0.32074    | 0.12166     | 0.45158     | -0.38315  |         |       |
|             | 0.64919         | 0.69342   | 0.24402    | 0.24402     | 0.657123996 |           |         |       |
| HSPD1P9     | ENSG00000228036 | 0.6934    | 0.24403    | 0.3251      | 0.37255     | 0.3251    |         |       |
|             | 0.37255         | 0.3251    | 0.37255    | 0.24403     | 0.657123996 |           |         |       |
| TRPC7-AS2   | ENSG00000250947 | -0.71483  | 0.76264    | 0.69341     | 0.24403     | -0.28077  |         |       |
|             | 0.61056         | 0.28677   | 0.38714    | 0.24403     | 0.657123996 |           |         |       |
| MTX1P1      | ENSG00000236675 | 0.51073   | 0.30477    | 0.026264    | 0.48952     | 0.69337   |         |       |
|             | 0.24404         | 0.69337   | 0.24404    | 0.24404     | 0.657123996 |           |         |       |
| LINC02236   | ENSG00000251365 | 0.25995   | 0.39745    | 0.69326     | 0.24407     | -0.014791 |         |       |
|             | 0.5059          | -0.37762  | 0.64714    | 0.24407     | 0.657123996 |           |         |       |
| NA          | ENSG00000264458 | 0.55527   | 0.28935    | 0.69321     | 0.24409     | -0.46474  | 0.67894 |       |
|             | -0.43702        | 0.66895   | 0.24409    | 0.657123996 |             |           |         |       |
| IGHV3-38    | ENSG00000211958 | 0.69315   | 0.24411    | 0.69315     | 0.24411     | 0.69315   |         |       |
|             | 0.24411         | 0.69315   | 0.24411    | 0.24411     | 0.657123996 |           |         |       |
| NA          | ENSG00000279772 | 0.69314   | 0.24411    | -0.17484    | 0.5694      | 0.69314   | 0.24411 |       |
|             | 0.69314         | 0.24411   | 0.24411    | 0.657123996 |             |           |         |       |
| LINC01550   | ENSG00000246223 | 0.69307   | 0.24413    | -0.071176   | 0.52837     | 0.39033   |         |       |
|             | 0.34815         | 0.3825    | 0.35105    | 0.24413     | 0.657123996 |           |         |       |
| NMUR2       | ENSG00000132911 | 0.69296   | 0.24417    | -0.7716     | 0.77983     | 0.69296   | 0.24417 |       |
|             | 0.046005        | 0.48165   | 0.24417    | 0.657123996 |             |           |         |       |
| CAVIN1      | ENSG00000177469 | 0.56733   | 0.28524    | 0.50465     | 0.3069      | 0.56242   |         |       |



|            |                 |             |         |             |             |           |         |  |
|------------|-----------------|-------------|---------|-------------|-------------|-----------|---------|--|
|            | 0.28691         | 0.69297     | 0.24417 | 0.24417     | 0.657123996 |           |         |  |
| SCYL2      | ENSG00000136021 | -0.69021    | 0.75497 | 0.66839     | 0.25194     | 0.53585   | 0.29603 |  |
|            | 0.69292         | 0.24418     | 0.24418 | 0.657123996 |             |           |         |  |
| NPM1P25    | ENSG00000229417 | 0.5918      | 0.27699 | 0.69293     | 0.24418     | 0.69293   |         |  |
|            | 0.24418         | 0.081166    | 0.46765 | 0.24418     | 0.657123996 |           |         |  |
| LINC01250  | ENSG00000234423 | 0.26543     | 0.39534 | 0.45399     | 0.32492     | 0.53677   |         |  |
|            | 0.29571         | 0.69286     | 0.2442  | 0.2442      | 0.657123996 |           |         |  |
| GAL        | ENSG00000069482 | 0.24755     | 0.40224 | 0.69279     | 0.24422     | 0.24755   | 0.40224 |  |
|            | 0.24755         | 0.40224     | 0.24422 | 0.657123996 |             |           |         |  |
| NA         | ENSG00000252190 | 0.6928      | 0.24422 | 0.59113     | 0.27722     | 0.6928    | 0.24422 |  |
|            | 0.6928          | 0.24422     | 0.24422 | 0.657123996 |             |           |         |  |
| NA         | ENSG00000252691 | 0.6928      | 0.24422 | 0.6928      | 0.24422     | 0.6928    | 0.24422 |  |
|            | 0.6928          | 0.24422     | 0.24422 | 0.657123996 |             |           |         |  |
| UBDP1      | ENSG00000225797 | 0.69271     | 0.24425 | 0.69271     | 0.24425     | 0.69271   | 0.24425 |  |
|            | 0.69271         | 0.24425     | 0.24425 | 0.657123996 |             |           |         |  |
| FAM13A-AS1 | ENSG00000248019 | -0.22395    | 0.5886  | 0.69269     | 0.24425     | 0.058106  |         |  |
|            | 0.47683         | 0.033196    | 0.48676 | 0.24425     | 0.657123996 |           |         |  |
| NA         | ENSG00000280443 | 0.69268     | 0.24426 | 0.69268     | 0.24426     | 0.69268   | 0.24426 |  |
|            | 0.69268         | 0.24426     | 0.24426 | 0.657123996 |             |           |         |  |
| DENND2C    | ENSG00000175984 | 0.48285     | 0.3146  | 0.69253     | 0.2443      | -0.095014 |         |  |
|            | 0.53785         | -1.0759     | 0.85902 | 0.2443      | 0.657123996 |           |         |  |
| HMG3P1     | ENSG00000183586 | 0.67022     | 0.25136 | 0.6925      | 0.24431     | -1.6857   |         |  |
|            | 0.95407         | -1.6857     | 0.95407 | 0.24431     | 0.657123996 |           |         |  |
| GTF2A1L    | ENSG00000242441 | 0.69245     | 0.24433 | -0.62462    | 0.73389     | 0.69245   |         |  |
|            | 0.24433         | 0.69245     | 0.24433 | 0.24433     | 0.657123996 |           |         |  |
| NA         | ENSG00000273002 | 0.69243     | 0.24433 | 0.12289     | 0.4511      | 0.69243   | 0.24433 |  |
|            | 0.69243         | 0.24433     | 0.24433 | 0.657123996 |             |           |         |  |
| TCF7L2     | ENSG00000148737 | 0.065009    | 0.47408 | 0.69243     | 0.24434     | -0.36428  |         |  |
|            | 0.64218         | -1.3573     | 0.91266 | 0.24434     | 0.657123996 |           |         |  |
| NA         | ENSG00000279725 | 0.69234     | 0.24436 | -0.35892    | 0.64017     | 0.69234   | 0.24436 |  |
|            | 0.69234         | 0.24436     | 0.24436 | 0.657123996 |             |           |         |  |
| MRPS33P4   | ENSG00000234821 | 0.6923      | 0.24438 | 0.6923      | 0.24438     | 0.6923    |         |  |
|            | 0.24438         | 0.6923      | 0.24438 | 0.24438     | 0.657123996 |           |         |  |
| UQCRC2P1   | ENSG00000236736 | 0.69225     | 0.24439 | 0.22514     | 0.41093     | 0.1909    |         |  |
|            | 0.4243          | 0.69225     | 0.24439 | 0.24439     | 0.657123996 |           |         |  |
| NA         | ENSG00000259326 | 0.69226     | 0.24439 | 0.69226     | 0.24439     | 0.69226   | 0.24439 |  |
|            | 0.69226         | 0.24439     | 0.24439 | 0.657123996 |             |           |         |  |
| NA         | ENSG00000224613 | -0.22109    | 0.58749 | 0.25143     | 0.40074     | 0.69218   | 0.24441 |  |
|            | 0.32543         | 0.37243     | 0.24441 | 0.657123996 |             |           |         |  |
| MTBP       | ENSG00000172167 | 0.15328     | 0.43909 | 0.66722     | 0.25232     | 0.69216   | 0.24442 |  |
|            | 0.3169          | 0.37566     | 0.24442 | 0.657123996 |             |           |         |  |
| DPP10      | ENSG00000175497 | 0.69213     | 0.24443 | -0.76288    | 0.77723     | -0.32114  | 0.62595 |  |
|            | -0.19249        | 0.57632     | 0.24443 | 0.657123996 |             |           |         |  |
| NA         | ENSG00000267762 | -0.3924     | 0.65262 | -0.32808    | 0.62858     | 0.69213   | 0.24443 |  |
|            | 0.35991         | 0.35946     | 0.24443 | 0.657123996 |             |           |         |  |
| ZNF610     | ENSG00000167554 | -0.67554    | 0.75033 | -0.88235    | 0.81121     | 0.11289   |         |  |
|            | 0.45506         | 0.69203     | 0.24446 | 0.24446     | 0.657123996 |           |         |  |
| NA         | ENSG00000233483 | 0.692       | 0.24447 | 0.692       | 0.24447     | 0.692     | 0.24447 |  |
|            | 0.24447         | 0.657123996 |         |             |             |           |         |  |
| SLC44A4    | ENSG00000204385 | 0.69196     | 0.24448 | 0.69196     | 0.24448     | 0.69196   |         |  |
|            | 0.24448         | 0.69196     | 0.24448 | 0.24448     | 0.657123996 |           |         |  |
| TAS2R14    | ENSG00000212127 | -0.86873    | 0.8075  | -0.86873    | 0.8075      | 0.69193   |         |  |
|            | 0.24449         | -1.2822     | 0.90011 | 0.24449     | 0.657123996 |           |         |  |
| FAM41C     | ENSG00000230368 | 0.070409    | 0.47193 | 0.67604     | 0.24951     | 0.69192   |         |  |
|            | 0.24449         | -0.14469    | 0.55752 | 0.24449     | 0.657123996 |           |         |  |
| METTL4     | ENSG00000101574 | 0.69192     | 0.2445  | 0.25685     | 0.39865     | -0.21935  |         |  |
|            | 0.58681         | 0.38453     | 0.35029 | 0.2445      | 0.657123996 |           |         |  |
| RNF216P1   | ENSG00000196204 | -0.42381    | 0.66415 | -0.76123    | 0.77674     | -0.3129   |         |  |
|            | 0.62282         | 0.69188     | 0.24451 | 0.24451     | 0.657123996 |           |         |  |
| NA         | ENSG00000261098 | 0.64692     | 0.25884 | 0.64692     | 0.25884     | 0.64692   | 0.25884 |  |
|            | 0.69178         | 0.24454     | 0.24454 | 0.657168378 |             |           |         |  |
| ATAD5      | ENSG00000176208 | 0.69168     | 0.24457 | 0.42234     | 0.33639     | -0.18557  | 0.57361 |  |

|            |                 |          |         |             |             |           |         |  |
|------------|-----------------|----------|---------|-------------|-------------|-----------|---------|--|
|            | -1.048          | 0.85268  | 0.24457 | 0.657192784 |             |           |         |  |
| NA         | ENSG00000271900 | 0.69164  | 0.24458 | 0.69164     | 0.24458     | 0.69164   | 0.24458 |  |
|            | 0.69164         | 0.24458  | 0.24458 | 0.657192784 |             |           |         |  |
| NA         | ENSG00000232175 | 0.69159  | 0.2446  | 0.69159     | 0.2446      | 0.69159   | 0.2446  |  |
|            | 0.69159         | 0.2446   | 0.2446  | 0.657192784 |             |           |         |  |
| OR2Y1      | ENSG00000174339 | 0.69153  | 0.24462 | 0.12363     | 0.4508      | 0.12363   | 0.4508  |  |
|            | 0.12363         | 0.4508   | 0.24462 | 0.657192784 |             |           |         |  |
| NA         | ENSG00000274215 | 0.69151  | 0.24462 | 0.69151     | 0.24462     | 0.69151   | 0.24462 |  |
|            | 0.69151         | 0.24462  | 0.24462 | 0.657192784 |             |           |         |  |
| NA         | ENSG00000236512 | -0.35267 | 0.63783 | 0.6915      | 0.24463     | 0.6915    | 0.24463 |  |
|            | 0.6915          | 0.24463  | 0.24463 | 0.657192784 |             |           |         |  |
| SRSF4      | ENSG00000116350 | -0.65838 | 0.74485 | -0.65838    | 0.74485     | -0.54455  | 0.70697 |  |
|            | 0.69135         | 0.24467  | 0.24467 | 0.657245271 |             |           |         |  |
| RBPM5      | ENSG00000166831 | 0.69133  | 0.24468 | -0.63825    | 0.73834     | -0.77654  |         |  |
|            | 0.78129         | 0.54065  | 0.29438 | 0.24468     | 0.657245271 |           |         |  |
| GRK7       | ENSG00000114124 | 0.21489  | 0.41493 | 0.6913      | 0.24469     | 0.21489   | 0.41493 |  |
|            | 0.21489         | 0.41493  | 0.24469 | 0.657245271 |             |           |         |  |
| RNU6-619P  | ENSG00000202016 | -0.40444 | 0.65706 | -0.40444    | 0.65706     | 0.69118   |         |  |
|            | 0.24472         | -0.40444 | 0.65706 | 0.24472     | 0.657289621 |           |         |  |
| CIDEA      | ENSG00000176194 | 0.69113  | 0.24474 | -0.69161    | 0.75541     | 0.29614   | 0.38356 |  |
|            | -0.63794        | 0.73824  | 0.24474 | 0.65730711  |             |           |         |  |
| IRX4       | ENSG00000113430 | 0.69101  | 0.24478 | -0.60188    | 0.72637     | -1.4175   | 0.92184 |  |
|            | 0.16667         | 0.43382  | 0.24478 | 0.657377044 |             |           |         |  |
| PIAS1      | ENSG00000033800 | 0.16077  | 0.43614 | 0.51784     | 0.30229     | 0.69087   | 0.24482 |  |
|            | 0.37287         | 0.35462  | 0.24482 | 0.657377044 |             |           |         |  |
| NA         | ENSG00000239227 | 0.69089  | 0.24482 | 0.40554     | 0.34254     | 0.16632   | 0.43395 |  |
|            | 0.3351          | 0.36877  | 0.24482 | 0.657377044 |             |           |         |  |
| RN7SL670P  | ENSG00000264041 | 0.65586  | 0.25596 | 0.69087     | 0.24482     | 0.65586   |         |  |
|            | 0.25596         | 0.61191  | 0.2703  | 0.24482     | 0.657377044 |           |         |  |
| NA         | ENSG00000206850 | 0.41998  | 0.33725 | -1.4568     | 0.92741     | 0.1466    | 0.44173 |  |
|            | 0.69078         | 0.24485  | 0.24485 | 0.657412    |             |           |         |  |
| MIR3140    | ENSG00000264678 | 0.69077  | 0.24486 | -1.1668     | 0.87836     | 0.0087837 |         |  |
|            | 0.4965          | 0.5805   | 0.28079 | 0.24486     | 0.657412    |           |         |  |
| ZNF761     | ENSG00000160336 | 0.69052  | 0.24493 | 0.61711     | 0.26858     | 0.64367   |         |  |
|            | 0.2599          | 0.43617  | 0.33136 | 0.24493     | 0.657502312 |           |         |  |
| LINC00598  | ENSG00000215483 | -0.8032  | 0.78907 | -1.4775     | 0.93023     | 0.69055   |         |  |
|            | 0.24493         | -0.37272 | 0.64532 | 0.24493     | 0.657502312 |           |         |  |
| NA         | ENSG00000279936 | -1.3678  | 0.91431 | 0.69043     | 0.24496     | -1.3678   | 0.91431 |  |
|            | -1.3678         | 0.91431  | 0.24496 | 0.657502312 |             |           |         |  |
| NA         | ENSG00000259177 | 0.53204  | 0.29735 | 0.53204     | 0.29735     | 0.20077   | 0.42044 |  |
|            | 0.69041         | 0.24497  | 0.24497 | 0.657502312 |             |           |         |  |
| CLN3       | ENSG00000188603 | 0.69039  | 0.24498 | 0.30284     | 0.38101     | 0.69039   | 0.24498 |  |
|            | 0.64839         | 0.25837  | 0.24498 | 0.657502312 |             |           |         |  |
| MRPS18CP4  | ENSG00000255763 | 0.69023  | 0.24502 | 0.44534     | 0.32804     | 0.14204   |         |  |
|            | 0.44352         | 0.44055  | 0.32977 | 0.24502     | 0.657502312 |           |         |  |
| CCR3       | ENSG00000183625 | 0.038281 | 0.48473 | -0.11594    | 0.54615     | -0.095899 | 0.5382  |  |
|            | 0.69019         | 0.24504  | 0.24504 | 0.657502312 |             |           |         |  |
| PARAL1     | ENSG00000243961 | 0.11855  | 0.45282 | 0.69016     | 0.24505     | 0.034153  |         |  |
|            | 0.48638         | 0.64457  | 0.2596  | 0.24505     | 0.657502312 |           |         |  |
| NA         | ENSG00000279372 | 0.69014  | 0.24505 | 0.69014     | 0.24505     | 0.69014   | 0.24505 |  |
|            | 0.69014         | 0.24505  | 0.24505 | 0.657502312 |             |           |         |  |
| FAM25A     | ENSG00000188100 | 0.048742 | 0.48056 | -1.0984     | 0.86397     | 0.69011   |         |  |
|            | 0.24506         | 0.13221  | 0.44741 | 0.24506     | 0.657502312 |           |         |  |
| CHRM3-AS2  | ENSG00000233355 | 0.35946  | 0.35962 | 0.69012     | 0.24506     | 0.69012   |         |  |
|            | 0.24506         | 0.69012  | 0.24506 | 0.24506     | 0.657502312 |           |         |  |
| CCDC25     | ENSG00000147419 | -0.12541 | 0.5499  | 0.6901      | 0.24507     | -1.0606   |         |  |
|            | 0.85556         | -1.1886  | 0.8827  | 0.24507     | 0.657502312 |           |         |  |
| RNU6-1145P | ENSG00000206973 | 0.69009  | 0.24507 | 0.69009     | 0.24507     | 0.084294  |         |  |
|            | 0.46641         | -0.97999 | 0.83645 | 0.24507     | 0.657502312 |           |         |  |
| ABCA1      | ENSG00000165029 | 0.68999  | 0.2451  | 0.41738     | 0.3382      | 0.16263   | 0.43541 |  |
|            | 0.57957         | 0.2811   | 0.2451  | 0.657502312 |             |           |         |  |
| PCDHB10    | ENSG00000120324 | 0.6899   | 0.24513 | 0.6899      | 0.24513     | 0.6899    |         |  |

|                |                 |          |         |             |             |            |         |          |
|----------------|-----------------|----------|---------|-------------|-------------|------------|---------|----------|
|                | 0.24513         | 0.3698   | 0.35576 | 0.24513     | 0.657502312 |            |         |          |
| ZSCAN5DP       | ENSG00000267908 | 0.051118 | 0.47962 | 0.051118    | 0.47962     | 0.051118   | 0.47962 | 0.051118 |
|                | 0.47962         | 0.68991  | 0.24513 | 0.24513     | 0.657502312 |            |         |          |
| RBFA           | ENSG00000101546 | -0.32023 | 0.6256  | 0.68983     | 0.24515     | 0.24014    | 0.40511 |          |
|                | -0.03581        | 0.51428  | 0.24515 | 0.657502312 |             |            |         |          |
| BTG1           | ENSG00000133639 | 0.28129  | 0.38924 | 0.28129     | 0.38924     | 0.68985    | 0.24515 |          |
|                | -0.0055371      | 0.50221  | 0.24515 | 0.657502312 |             |            |         |          |
| NA             | ENSG00000267127 | 0.68983  | 0.24515 | 0.44968     | 0.32647     | 0.68983    | 0.24515 |          |
|                | 0.68983         | 0.24515  | 0.24515 | 0.657502312 |             |            |         |          |
| RARRES2P5      | ENSG00000260967 | 0.28883  | 0.38636 | 0.65775     | 0.25535     | 0.65775    |         |          |
|                | 0.25535         | 0.68978  | 0.24517 | 0.24517     | 0.657519763 |            |         |          |
| CASS4          | ENSG00000087589 | 0.68968  | 0.2452  | 0.24202     | 0.40438     | 0.27505    | 0.39164 |          |
|                | -0.024632       | 0.50983  | 0.2452  | 0.657564031 |             |            |         |          |
| NA             | ENSG00000253859 | -1.2687  | 0.89773 | -1.1493     | 0.87479     | 0.68951    | 0.24525 |          |
|                | -1.1552         | 0.87601  | 0.24525 | 0.657606993 |             |            |         |          |
| LINC02247      | ENSG00000223729 | -1.3393  | 0.90977 | -0.38349    | 0.64932     | -0.36213   |         |          |
|                | 0.64137         | 0.68948  | 0.24526 | 0.24526     | 0.657606993 |            |         |          |
| ETHE1          | ENSG00000105755 | -0.33452 | 0.63101 | 0.68946     | 0.24527     | -1.2662    | 0.89728 |          |
|                | -0.33452        | 0.63101  | 0.24527 | 0.657606993 |             |            |         |          |
| KTN1           | ENSG00000126777 | 0.60164  | 0.27371 | 0.68944     | 0.24527     | 0.46091    | 0.32243 |          |
|                | 0.58213         | 0.28024  | 0.24527 | 0.657606993 |             |            |         |          |
| NA             | ENSG00000248265 | 0.68939  | 0.24529 | 0.47375     | 0.31784     | -1.5556    | 0.9401  |          |
|                | -1.5556         | 0.9401   | 0.24529 | 0.657615063 |             |            |         |          |
| RNY4P37        | ENSG00000252034 | 0.68936  | 0.2453  | 0.68936     | 0.2453      | 0.68936    |         |          |
|                | 0.2453          | 0.68936  | 0.2453  | 0.2453      | 0.657615063 |            |         |          |
| NA             | ENSG00000270523 | 0.68923  | 0.24534 | 0.68923     | 0.24534     | 0.32989    | 0.37074 |          |
|                | -0.45742        | 0.67632  | 0.24534 | 0.657667371 |             |            |         |          |
| NA             | ENSG00000272010 | -0.34034 | 0.6332  | 0.68919     | 0.24535     | 0.68919    | 0.24535 |          |
|                | 0.68919         | 0.24535  | 0.24535 | 0.657667371 |             |            |         |          |
| IGLVI-63       | ENSG00000253752 | 0.68915  | 0.24536 | 0.68915     | 0.24536     | 0.68915    |         |          |
|                | 0.24536         | 0.68915  | 0.24536 | 0.24536     | 0.657667371 |            |         |          |
| LGR4           | ENSG00000205213 | 0.6891   | 0.24538 | 0.59562     | 0.27571     | -0.33665   | 0.63181 |          |
|                | -0.75478        | 0.77481  | 0.24538 | 0.657679558 |             |            |         |          |
| NA             | ENSG00000275389 | 0.68905  | 0.2454  | 0.57416     | 0.28293     | 0.68905    | 0.2454  |          |
|                | 0.68905         | 0.2454   | 0.2454  | 0.657679558 |             |            |         |          |
| NA             | ENSG00000249970 | -0.92002 | 0.82122 | -0.64406    | 0.74023     | 0.689      | 0.24541 |          |
|                | -0.32872        | 0.62882  | 0.24541 | 0.657679558 |             |            |         |          |
| SLC2A5         | ENSG00000142583 | 0.61007  | 0.27091 | 0.68884     | 0.24546     | 0.16989    |         |          |
|                | 0.43255         | -0.33807 | 0.63234 | 0.24546     | 0.657679558 |            |         |          |
| RINT1          | ENSG00000135249 | -0.92363 | 0.82216 | -1.2018     | 0.88528     | -0.0017251 | 0.50069 |          |
|                | 0.68882         | 0.24547  | 0.24547 | 0.657679558 |             |            |         |          |
| TRMT10C        | ENSG00000174173 | -0.54358 | 0.70664 | 0.19574     | 0.42241     | 0.1292     |         |          |
|                | 0.4486          | 0.6888   | 0.24547 | 0.24547     | 0.657679558 |            |         |          |
| LSS            | ENSG00000160285 | 0.08752  | 0.46513 | -0.10779    | 0.54292     | 0.68879    | 0.24548 |          |
|                | 0.40625         | 0.34228  | 0.24548 | 0.657679558 |             |            |         |          |
| H3P18          | ENSG00000249620 | -1.2451  | 0.89345 | 0.68873     | 0.2455      | -0.98799   | 0.83842 |          |
|                | -0.37591        | 0.64651  | 0.2455  | 0.657679558 |             |            |         |          |
| NA             | ENSG00000246308 | 0.68868  | 0.24551 | -0.13389    | 0.55326     | 0.68868    | 0.24551 |          |
|                | 0.68868         | 0.24551  | 0.24551 | 0.657679558 |             |            |         |          |
| STIMATE-MUSTN1 | ENSG00000248592 | 0.68868  | 0.24551 | 0.68868     | 0.24551     | 0.68868    | 0.24551 |          |
|                | 0.24551         | 0.68868  | 0.24551 | 0.24551     | 0.657679558 |            |         |          |
| WDR45P1        | ENSG00000248208 | 0.23596  | 0.40673 | 0.68861     | 0.24553     | 0.59845    |         |          |
|                | 0.27477         | 0.68861  | 0.24553 | 0.24553     | 0.657679558 |            |         |          |
| VSIG10L        | ENSG00000186806 | 0.6886   | 0.24554 | 0.6886      | 0.24554     | 0.6886     |         |          |
|                | 0.24554         | 0.6886   | 0.24554 | 0.24554     | 0.657679558 |            |         |          |
| KRTAP25-1      | ENSG00000232263 | 0.68861  | 0.24554 | 0.24437     | 0.40347     | 0.24437    |         |          |
|                | 0.40347         | 0.24437  | 0.40347 | 0.24554     | 0.657679558 |            |         |          |
| SPIC           | ENSG00000166211 | -0.80974 | 0.79096 | -0.80974    | 0.79096     | 0.68839    | 0.2456  |          |
|                | -0.80974        | 0.79096  | 0.2456  | 0.657718494 |             |            |         |          |
| NA             | ENSG00000280237 | 0.68841  | 0.2456  | 0.53473     | 0.29642     | 0.68841    | 0.2456  |          |
|                | 0.68841         | 0.2456   | 0.2456  | 0.657718494 |             |            |         |          |
| RPS20P31       | ENSG00000240925 | 0.68835  | 0.24562 | 0.68835     | 0.24562     | 0.68835    |         |          |

|            |                 |             |         |             |             |          |         |       |
|------------|-----------------|-------------|---------|-------------|-------------|----------|---------|-------|
|            | 0.24562         | 0.68835     | 0.24562 | 0.24562     | 0.657718494 |          |         |       |
| IGLON5     | ENSG00000142549 | 0.68825     | 0.68825 | 0.24565     | 0.68825     | 0.24565  | 0.68825 |       |
|            | 0.24565         | 0.68825     | 0.24565 | 0.24565     | 0.657718494 |          |         |       |
| NA         | ENSG00000255482 | -0.34024    | 0.63316 | 0.68826     | 0.24565     | -0.64625 | 0.74094 |       |
|            | -0.043551       | 0.51737     | 0.24565 | 0.657718494 |             |          |         |       |
| ZNF350-AS1 | ENSG00000269235 | -0.41608    | 0.66132 | 0.68825     | 0.24565     | 0.1644   |         |       |
|            | 0.43471         | 0.1644      | 0.43471 | 0.24565     | 0.657718494 |          |         |       |
| PP2D1      | ENSG00000183977 | 0.68807     | 0.2457  | -0.10746    | 0.54279     | -0.42295 | 0.66383 |       |
|            | -0.22193        | 0.58782     | 0.2457  | 0.657718494 |             |          |         |       |
| DPPA2P2    | ENSG00000224129 | 0.29022     | 0.38582 | 0.19774     | 0.42162     | 0.68807  |         |       |
|            | 0.2457          | 0.21303     | 0.41565 | 0.2457      | 0.657718494 |          |         |       |
| RTN4R      | ENSG00000040608 | -0.72337    | 0.76527 | 0.11078     | 0.4559      | 0.39682  | 0.34575 |       |
|            | 0.68806         | 0.24571     | 0.24571 | 0.657718494 |             |          |         |       |
| NA         | ENSG00000269591 | -0.50859    | 0.69448 | -0.70935    | 0.76094     | 0.68804  | 0.24571 |       |
|            | -0.56669        | 0.71454     | 0.24571 | 0.657718494 |             |          |         |       |
| KIF7       | ENSG00000166813 | -0.39449    | 0.65339 | -0.10266    | 0.54088     | 0.68801  | 0.24572 |       |
|            | 0.12507         | 0.45023     | 0.24572 | 0.657718494 |             |          |         |       |
| KIF21B     | ENSG00000116852 | 0.68799     | 0.24573 | 0.32042     | 0.37433     | -0.37242 |         |       |
|            | 0.64521         | -0.15856    | 0.56299 | 0.24573     | 0.657718494 |          |         |       |
| FAM110D    | ENSG00000197245 | 0.68798     | 0.24573 | 0.67266     | 0.25058     | -0.14573 |         |       |
|            | 0.55793         | 0.056787    | 0.47736 | 0.24573     | 0.657718494 |          |         |       |
| SEMA4D     | ENSG00000187764 | 0.68793     | 0.24575 | 0.03949     | 0.48425     | 0.30109  |         |       |
|            | 0.38167         | 0.37604     | 0.35344 | 0.24575     | 0.657726538 |          |         |       |
| KRT15      | ENSG00000171346 | 0.68789     | 0.24576 | 0.68789     | 0.24576     | 0.68789  | 0.24576 |       |
|            | 0.68789         | 0.24576     | 0.24576 | 0.657726538 |             |          |         |       |
| RNU7-136P  | ENSG00000238427 | 0.68775     | 0.24581 | 0.68775     | 0.24581     | 0.68775  |         |       |
|            | 0.24581         | 0.68775     | 0.24581 | 0.24581     | 0.657769377 |          |         |       |
| NA         | ENSG00000224721 | 0.6877      | 0.24582 | -1.9376     | 0.97366     | 0.6877   | 0.24582 |       |
|            | 0.6877          | 0.24582     | 0.24582 | 0.657769377 |             |          |         |       |
| CHCHD1     | ENSG00000172586 | 0.68768     | 0.24583 | 0.68768     | 0.24583     | 0.68768  |         |       |
|            | 0.24583         | 0.68768     | 0.24583 | 0.24583     | 0.657769377 |          |         |       |
| NA         | ENSG00000258594 | 0.68767     | 0.24583 | 0.46305     | 0.32166     | 0.67994  | 0.24827 |       |
|            | 0.67994         | 0.24827     | 0.24583 | 0.657769377 |             |          |         |       |
| NA         | ENSG00000226946 | 0.38467     | 0.35024 | -0.94626    | 0.82799     | 0.68749  | 0.24589 |       |
|            | 0.34411         | 0.36538     | 0.24589 | 0.657816234 |             |          |         |       |
| NA         | ENSG00000201410 | 0.68742     | 0.24591 | 0.68742     | 0.24591     | 0.68742  | 0.24591 |       |
|            | 0.68742         | 0.24591     | 0.24591 | 0.657816234 |             |          |         |       |
| UBA52P6    | ENSG00000215221 | 0.68731     | 0.24594 | 0.68731     | 0.24594     | 0.68731  |         |       |
|            | 0.24594         | 0.68731     | 0.24594 | 0.24594     | 0.657816234 |          |         |       |
| NA         | ENSG00000222529 | -0.80077    | 0.78837 | 0.68731     | 0.24595     | 0.12173  | 0.45155 |       |
|            | 0.12173         | 0.45155     | 0.24595 | 0.657816234 |             |          |         |       |
| NA         | ENSG00000264956 | 0.68725     | 0.24596 | -0.18546    | 0.57356     | 0.68725  | 0.24596 |       |
|            | -0.062197       | 0.5248      | 0.24596 | 0.657816234 |             |          |         |       |
| LINC02569  | ENSG00000235781 | 0.41326     | 0.33971 | 0.68722     | 0.24597     | -0.62718 |         |       |
|            | 0.73473         | 0.56795     | 0.28503 | 0.24597     | 0.657816234 |          |         |       |
| PALB2      | ENSG00000083093 | -0.040166   | 0.51602 | 0.68718     | 0.24598     | 0.079976 | 0.46813 |       |
|            | -0.23455        | 0.59272     | 0.24598 | 0.657816234 |             |          |         |       |
| NA         | ENSG00000258334 | -0.086762   | 0.53457 | 0.68718     | 0.24598     | -0.4595  | 0.67706 |       |
|            | -0.4595         | 0.67706     | 0.24598 | 0.657816234 |             |          |         |       |
| COPRSP1    | ENSG00000236440 | 0.68717     | 0.24599 | 0.68717     | 0.24599     | 0.68717  |         |       |
|            | 0.24599         | 0.68717     | 0.24599 | 0.24599     | 0.657816234 |          |         |       |
| NA         | ENSG00000259181 | 0.68713     | 0.246   | 0.68713     | 0.246       | 0.68713  | 0.246   | 0.246 |
|            | 0.246           | 0.657816234 |         |             |             |          |         |       |
| NA         | ENSG00000267198 | 0.35976     | 0.35951 | 0.1766      | 0.42991     | 0.5341   | 0.29664 |       |
|            | 0.68712         | 0.246       | 0.246   | 0.657816234 |             |          |         |       |
| NA         | ENSG00000243345 | 0.68712     | 0.24601 | 0.68712     | 0.24601     | 0.68712  | 0.24601 |       |
|            | 0.68712         | 0.24601     | 0.24601 | 0.657816234 |             |          |         |       |
| PRECSIT    | ENSG00000255874 | 0.62766     | 0.26511 | -0.40168    | 0.65604     | 0.68705  |         |       |
|            | 0.24603         | 0.68705     | 0.24603 | 0.24603     | 0.657816234 |          |         |       |
| BIRC3      | ENSG00000023445 | -0.68924    | 0.75466 | 0.037531    | 0.48503     | 0.54176  | 0.29399 |       |
|            | 0.687           | 0.24604     | 0.24604 | 0.657816234 |             |          |         |       |
| NA         | ENSG00000248311 | 0.68697     | 0.24605 | 0.68697     | 0.24605     | 0.68697  | 0.24605 |       |

|             |                 |           |         |             |             |           |         |  |
|-------------|-----------------|-----------|---------|-------------|-------------|-----------|---------|--|
|             | 0.68697         | 0.24605   | 0.24605 | 0.657816234 |             |           |         |  |
| BIRC5       | ENSG00000089685 | 0.39218   | 0.34746 | -0.45892    | 0.67685     | 0.68687   | 0.24608 |  |
|             | -1.1434         | 0.87356   | 0.24608 | 0.657829754 |             |           |         |  |
| ZBTB40      | ENSG00000184677 | -1.1032   | 0.86502 | 0.68684     | 0.24609     | -0.81186  |         |  |
|             | 0.79157         | 0.12669   | 0.44959 | 0.24609     | 0.657829754 |           |         |  |
| KCNJ9       | ENSG00000162728 | 0.30283   | 0.38101 | 0.39483     | 0.34648     | 0.68679   | 0.24611 |  |
|             | 0.54605         | 0.29252   | 0.24611 | 0.657829754 |             |           |         |  |
| NA          | ENSG00000265359 | 0.68669   | 0.24614 | 0.68669     | 0.24614     | 0.36074   | 0.35915 |  |
|             | -0.47959        | 0.68424   | 0.24614 | 0.657829754 |             |           |         |  |
| SLC26A5     | ENSG00000170615 | -0.22741  | 0.58995 | -0.26427    | 0.60421     | -0.70507  |         |  |
|             | 0.75962         | 0.68662   | 0.24616 | 0.24616     | 0.657829754 |           |         |  |
| LINC02227   | ENSG00000276778 | 0.68663   | 0.24616 | 0.68663     | 0.24616     | 0.68663   |         |  |
|             | 0.24616         | 0.12801   | 0.44907 | 0.24616     | 0.657829754 |           |         |  |
| NA          | ENSG00000243885 | 0.68658   | 0.24617 | 0.68658     | 0.24617     | 0.68658   | 0.24617 |  |
|             | 0.68658         | 0.24617   | 0.24617 | 0.657829754 |             |           |         |  |
| STARD10     | ENSG00000214530 | 0.68657   | 0.24618 | -1.0282     | 0.84807     | -0.073083 |         |  |
|             | 0.52913         | -0.11234  | 0.54472 | 0.24618     | 0.657829754 |           |         |  |
| NA          | ENSG00000278985 | 0.6865    | 0.2462  | 0.6865      | 0.2462      | 0.6865    | 0.2462  |  |
|             | 0.6865          | 0.2462    | 0.2462  | 0.657829754 |             |           |         |  |
| NA          | ENSG00000234268 | 0.22651   | 0.4104  | 0.68645     | 0.24622     | 0.68645   | 0.24622 |  |
|             | 0.010782        | 0.4957    | 0.24622 | 0.657829754 |             |           |         |  |
| NA          | ENSG00000280415 | -0.97441  | 0.83507 | 0.6864      | 0.24623     | -0.97441  | 0.83507 |  |
|             | -0.97441        | 0.83507   | 0.24623 | 0.657829754 |             |           |         |  |
| NA          | ENSG00000253143 | -0.5284   | 0.70139 | 0.68631     | 0.24626     | 0.68631   | 0.24626 |  |
|             | -0.30991        | 0.62169   | 0.24626 | 0.657829754 |             |           |         |  |
| CDADC1      | ENSG00000102543 | -0.23949  | 0.59464 | 0.68618     | 0.2463      | 0.63662   |         |  |
|             | 0.26219         | -0.76349  | 0.77741 | 0.2463      | 0.657829754 |           |         |  |
| SLC35G4     | ENSG00000236396 | 0.48209   | 0.31487 | 0.53905     | 0.29493     | 0.68619   |         |  |
|             | 0.2463          | 0.29821   | 0.38277 | 0.2463      | 0.657829754 |           |         |  |
| RPSAP35     | ENSG00000237684 | 0.68617   | 0.2463  | 0.68617     | 0.2463      | 0.68617   |         |  |
|             | 0.2463          | 0.68617   | 0.2463  | 0.2463      | 0.657829754 |           |         |  |
| FAT1        | ENSG00000083857 | 0.68606   | 0.24634 | -0.86786    | 0.80726     | -0.72825  | 0.76677 |  |
|             | -0.46399        | 0.67867   | 0.24634 | 0.657829754 |             |           |         |  |
| NA          | ENSG00000233995 | 0.68275   | 0.24738 | 0.68275     | 0.24738     | 0.68601   | 0.24635 |  |
|             | 0.68275         | 0.24738   | 0.24635 | 0.657829754 |             |           |         |  |
| CRBN        | ENSG00000113851 | 0.46572   | 0.32071 | 0.60583     | 0.27231     | 0.18918   | 0.42497 |  |
|             | 0.68589         | 0.24639   | 0.24639 | 0.657829754 |             |           |         |  |
| ZNF852      | ENSG00000178917 | -0.80913  | 0.79078 | 0.68582     | 0.24641     | -2.019    |         |  |
|             | 0.97826         | 0.21534   | 0.41475 | 0.24641     | 0.657829754 |           |         |  |
| FAM160A1-DT | ENSG00000251611 | 0.68584   | 0.24641 | -0.94256    | 0.82705     | 0.18253   |         |  |
|             | 0.42758         | 0.20507   | 0.41876 | 0.24641     | 0.657829754 |           |         |  |
| NA          | ENSG00000202041 | 0.45037   | 0.32622 | 0.61148     | 0.27044     | 0.68581   | 0.24642 |  |
|             | 0.10937         | 0.45646   | 0.24642 | 0.657829754 |             |           |         |  |
| CMTR2       | ENSG00000180917 | 0.56984   | 0.28439 | 0.68573     | 0.24644     | 0.42095   | 0.3369  |  |
|             | 0.56026         | 0.28765   | 0.24644 | 0.657829754 |             |           |         |  |
| ZNF479      | ENSG00000185177 | 0.048202  | 0.48078 | -0.13683    | 0.55442     | 0.58137   |         |  |
|             | 0.2805          | 0.68571   | 0.24645 | 0.24645     | 0.657829754 |           |         |  |
| TREX1       | ENSG00000213689 | 0.68571   | 0.24645 | 0.68571     | 0.24645     | 0.68571   | 0.24645 |  |
|             | 0.68571         | 0.24645   | 0.24645 | 0.657829754 |             |           |         |  |
| NSMCE1      | ENSG00000169189 | 0.61643   | 0.26881 | 0.68563     | 0.24647     | 0.68563   |         |  |
|             | 0.24647         | -0.20888  | 0.58273 | 0.24647     | 0.657829754 |           |         |  |
| LINC02252   | ENSG00000261304 | 0.68562   | 0.24648 | -0.026173   | 0.51044     | -0.026173 |         |  |
|             | 0.51044         | -0.026173 | 0.51044 | 0.24648     | 0.657829754 |           |         |  |
| ALG1        | ENSG00000033011 | -1.1552   | 0.876   | -0.8984     | 0.81551     | -0.13988  | 0.55562 |  |
|             | 0.68557         | 0.24649   | 0.24649 | 0.657829754 |             |           |         |  |
| NA          | ENSG00000206690 | 0.68542   | 0.24654 | 0.68542     | 0.24654     | 0.20823   | 0.41752 |  |
|             | 0.0079676       | 0.49682   | 0.24654 | 0.657829754 |             |           |         |  |
| CEBPD       | ENSG00000221869 | -1.3241   | 0.90727 | 0.68536     | 0.24656     | -0.65039  | 0.74228 |  |
|             | -0.32243        | 0.62644   | 0.24656 | 0.657829754 |             |           |         |  |
| LINC01803   | ENSG00000228909 | 0.68536   | 0.24656 | 0.68536     | 0.24656     | 0.68536   |         |  |
|             | 0.24656         | 0.68536   | 0.24656 | 0.24656     | 0.657829754 |           |         |  |
| RNA5SP181   | ENSG00000222178 | -0.45534  | 0.67557 | -0.45534    | 0.67557     | -0.45534  |         |  |

|           |                 |           |         |             |             |           |         |  |
|-----------|-----------------|-----------|---------|-------------|-------------|-----------|---------|--|
|           | 0.67557         | 0.68531   | 0.24657 | 0.24657     | 0.657829754 |           |         |  |
| COL6A1    | ENSG00000142156 | -0.20981  | 0.58309 | 0.14232     | 0.44341     | -0.83656  |         |  |
|           | 0.79858         | 0.68529   | 0.24658 | 0.24658     | 0.657829754 |           |         |  |
| PTMAP5    | ENSG00000214182 | 0.68529   | 0.24658 | 0.24658     | 0.68529     | 0.24658   | 0.68529 |  |
|           | 0.24658         | 0.68529   | 0.24658 | 0.24658     | 0.657829754 |           |         |  |
| NA        | ENSG00000271996 | 0.68525   | 0.24659 | 0.68525     | 0.24659     | 0.68525   | 0.24659 |  |
|           | 0.68525         | 0.24659   | 0.24659 | 0.657829754 |             |           |         |  |
| KRTAP21-3 | ENSG00000231068 | 0.68515   | 0.24662 | 0.68515     | 0.24662     | 0.68515   |         |  |
|           | 0.24662         | 0.68515   | 0.24662 | 0.24662     | 0.657829754 |           |         |  |
| ID2       | ENSG00000115738 | 0.65224   | 0.25712 | 0.42309     | 0.33612     | -0.32234  | 0.6264  |  |
|           | 0.68514         | 0.24663   | 0.24663 | 0.657829754 |             |           |         |  |
| NFYA      | ENSG00000001167 | 0.68511   | 0.24664 | 0.13526     | 0.4462      | 0.35394   | 0.36169 |  |
|           | 0.13526         | 0.4462    | 0.24664 | 0.657829754 |             |           |         |  |
| RNU6-921P | ENSG00000207089 | 0.056396  | 0.47751 | -0.34549    | 0.63514     | 0.16731   |         |  |
|           | 0.43356         | 0.68505   | 0.24666 | 0.24666     | 0.657829754 |           |         |  |
| NA        | ENSG00000235036 | -0.087103 | 0.53471 | 0.68503     | 0.24666     | 0.68503   | 0.24666 |  |
|           | -0.70801        | 0.76053   | 0.24666 | 0.657829754 |             |           |         |  |
| COL26A1   | ENSG00000160963 | 0.038275  | 0.48473 | -0.53097    | 0.70228     | 0.68498   |         |  |
|           | 0.24668         | 0.64217   | 0.26038 | 0.24668     | 0.657829754 |           |         |  |
| GATB      | ENSG00000059691 | -0.40707  | 0.65802 | -0.58065    | 0.71926     | -0.73669  | 0.76935 |  |
|           | 0.68492         | 0.2467    | 0.2467  | 0.657829754 |             |           |         |  |
| SST       | ENSG00000157005 | 0.033053  | 0.48682 | -0.80006    | 0.78816     | 0.68489   | 0.24671 |  |
|           | -0.11094        | 0.54417   | 0.24671 | 0.657829754 |             |           |         |  |
| NA        | ENSG00000253050 | 0.68483   | 0.24673 | 0.68483     | 0.24673     | 0.68483   | 0.24673 |  |
|           | 0.68483         | 0.24673   | 0.24673 | 0.657829754 |             |           |         |  |
| NA        | ENSG00000235429 | 0.2353    | 0.40699 | 0.68477     | 0.24674     | -0.50175  | 0.69208 |  |
|           | -0.50175        | 0.69208   | 0.24674 | 0.657829754 |             |           |         |  |
| POU4F2    | ENSG00000151615 | 0.62791   | 0.26503 | 0.68474     | 0.24675     | 0.62791   |         |  |
|           | 0.26503         | 0.35004   | 0.36316 | 0.24675     | 0.657829754 |           |         |  |
| NA        | ENSG00000250078 | 0.68475   | 0.24675 | -0.10489    | 0.54177     | -0.017754 | 0.50708 |  |
|           | -0.017754       | 0.50708   | 0.24675 | 0.657829754 |             |           |         |  |
| SOWAHP5   | ENSG00000278631 | 0.68475   | 0.24675 | 0.68475     | 0.24675     | 0.68475   |         |  |
|           | 0.24675         | 0.68475   | 0.24675 | 0.24675     | 0.657829754 |           |         |  |
| RN7SL826P | ENSG00000240151 | 0.68468   | 0.24677 | 0.68468     | 0.24677     | 0.68468   |         |  |
|           | 0.24677         | 0.68468   | 0.24677 | 0.24677     | 0.657829754 |           |         |  |
| NA        | ENSG00000269867 | 0.6847    | 0.24677 | 0.6847      | 0.24677     | 0.6847    | 0.24677 |  |
|           | 0.6847          | 0.24677   | 0.24677 | 0.657829754 |             |           |         |  |
| MED15P5   | ENSG00000236595 | 0.68467   | 0.24678 | 0.29033     | 0.38578     | 0.57311   |         |  |
|           | 0.28328         | -0.98158  | 0.83685 | 0.24678     | 0.657829754 |           |         |  |
| DLX3      | ENSG00000064195 | -0.1626   | 0.56458 | -0.15621    | 0.56207     | 0.41308   | 0.33977 |  |
|           | 0.68461         | 0.24679   | 0.24679 | 0.657829754 |             |           |         |  |
| MIR4484   | ENSG00000265092 | 0.68458   | 0.2468  | 0.68458     | 0.2468      | 0.68458   |         |  |
|           | 0.2468          | 0.68458   | 0.2468  | 0.2468      | 0.657829754 |           |         |  |
| NA        | ENSG00000256315 | 0.68449   | 0.24683 | -0.52553    | 0.70039     | 0.55882   | 0.28814 |  |
|           | 0.31233         | 0.37739   | 0.24683 | 0.657829754 |             |           |         |  |
| NA        | ENSG00000257151 | 0.53102   | 0.2977  | 0.68449     | 0.24683     | 0.68449   | 0.24683 |  |
|           | 0.59976         | 0.27433   | 0.24683 | 0.657829754 |             |           |         |  |
| PRRC1     | ENSG00000164244 | -0.26034  | 0.6027  | 0.43231     | 0.33276     | 0.27561   | 0.39143 |  |
|           | 0.68442         | 0.24685   | 0.24685 | 0.657829754 |             |           |         |  |
| GLRA3     | ENSG00000145451 | 0.68432   | 0.24689 | -0.41314    | 0.66025     | -0.87015  | 0.80789 |  |
|           | -0.86468        | 0.80639   | 0.24689 | 0.657829754 |             |           |         |  |
| NA        | ENSG00000206905 | 0.025738  | 0.48973 | -0.32139    | 0.62604     | 0.68428   | 0.2469  |  |
|           | -1.2905         | 0.90155   | 0.2469  | 0.657829754 |             |           |         |  |
| TACO1     | ENSG00000136463 | 0.33797   | 0.36769 | 0.68409     | 0.24696     | 0.24338   | 0.40386 |  |
|           | -1.2033         | 0.88558   | 0.24696 | 0.657829754 |             |           |         |  |
| SMG1P4    | ENSG00000185710 | -0.056032 | 0.52234 | 0.68398     | 0.24699     | 0.54433   |         |  |
|           | 0.29311         | 0.16274   | 0.43536 | 0.24699     | 0.657829754 |           |         |  |
| MOG       | ENSG00000204655 | 0.65989   | 0.25466 | -0.1873     | 0.57429     | 0.684     | 0.24699 |  |
|           | -0.71933        | 0.76403   | 0.24699 | 0.657829754 |             |           |         |  |
| RIBC2     | ENSG00000128408 | 0.68394   | 0.24701 | 0.68394     | 0.24701     | -0.79917  | 0.7879  |  |
|           | 0.68394         | 0.24701   | 0.24701 | 0.657829754 |             |           |         |  |
| NA        | ENSG00000255945 | 0.36657   | 0.35697 | 0.68392     | 0.24701     | 0.36657   | 0.35697 |  |

|           |                 |           |         |             |             |           |         |  |
|-----------|-----------------|-----------|---------|-------------|-------------|-----------|---------|--|
|           | -1.1817         | 0.88134   | 0.24701 | 0.657829754 |             |           |         |  |
| RAG2      | ENSG00000175097 | 0.68385   | 0.24703 | 0.68385     | 0.24703     | 0.68385   | 0.24703 |  |
|           | 0.68385         | 0.24703   | 0.24703 | 0.657829754 |             |           |         |  |
| NA        | ENSG00000246090 | 0.061842  | 0.47534 | 0.68381     | 0.24705     | -0.67958  | 0.75161 |  |
|           | 0.10407         | 0.45856   | 0.24705 | 0.657829754 |             |           |         |  |
| MYLRF     | ENSG00000180209 | 0.68378   | 0.24706 | 0.68378     | 0.24706     | 0.68378   | 0.24706 |  |
|           | 0.68378         | 0.24706   | 0.24706 | 0.657829754 |             |           |         |  |
| NA        | ENSG00000269792 | 0.68376   | 0.24706 | 0.68376     | 0.24706     | 0.68376   | 0.24706 |  |
|           | 0.68376         | 0.24706   | 0.24706 | 0.657829754 |             |           |         |  |
| TGFB2     | ENSG00000092969 | 0.17593   | 0.43017 | -0.18744    | 0.57434     | 0.68374   | 0.24707 |  |
|           | 0.14045         | 0.44415   | 0.24707 | 0.657829754 |             |           |         |  |
| NA        | ENSG00000264911 | 0.6837    | 0.24708 | 0.6837      | 0.24708     | 0.6837    | 0.24708 |  |
|           | 0.6837          | 0.24708   | 0.24708 | 0.657829754 |             |           |         |  |
| NA        | ENSG00000237721 | 0.66595   | 0.25272 | 0.68367     | 0.24709     | 0.66595   | 0.25272 |  |
|           | 0.66595         | 0.25272   | 0.24709 | 0.657829754 |             |           |         |  |
| NA        | ENSG00000233760 | 0.68365   | 0.2471  | 0.62445     | 0.26617     | 0.62445   | 0.26617 |  |
|           | 0.49341         | 0.31086   | 0.2471  | 0.657829754 |             |           |         |  |
| TRAV35    | ENSG00000211814 | 0.68361   | 0.24711 | -1.5554     | 0.94007     | -0.82699  |         |  |
|           | 0.79588         | -1.5554   | 0.94007 | 0.24711     | 0.657829754 |           |         |  |
| DNMT3L    | ENSG00000142182 | 0.68357   | 0.24712 | -0.15292    | 0.56077     | 0.6208    |         |  |
|           | 0.26736         | 0.5842    | 0.27954 | 0.24712     | 0.657829754 |           |         |  |
| NA        | ENSG00000252249 | 0.68357   | 0.24712 | 0.68357     | 0.24712     | 0.68357   | 0.24712 |  |
|           | 0.68357         | 0.24712   | 0.24712 | 0.657829754 |             |           |         |  |
| TMEM174   | ENSG00000164325 | -0.65407  | 0.74347 | 0.21437     | 0.41513     | 0.6835    |         |  |
|           | 0.24715         | 0.6835    | 0.24715 | 0.24715     | 0.657829754 |           |         |  |
| NA        | ENSG00000207164 | 0.68345   | 0.24716 | -2.1377     | 0.98373     | -2.1377   | 0.98373 |  |
|           | -2.1377         | 0.98373   | 0.24716 | 0.657829754 |             |           |         |  |
| NA        | ENSG00000262521 | 0.68344   | 0.24716 | 0.25305     | 0.40012     | 0.41901   | 0.3376  |  |
|           | 0.41901         | 0.3376    | 0.24716 | 0.657829754 |             |           |         |  |
| MINDY3    | ENSG00000148481 | 0.6834    | 0.24718 | -0.083462   | 0.53326     | -0.14726  |         |  |
|           | 0.55854         | -0.026106 | 0.51041 | 0.24718     | 0.657829754 |           |         |  |
| MTRNR2L8  | ENSG00000255823 | 0.68338   | 0.24718 | 0.68338     | 0.24718     | 0.68338   |         |  |
|           | 0.24718         | 0.68338   | 0.24718 | 0.24718     | 0.657829754 |           |         |  |
| NA        | ENSG00000259737 | 0.68339   | 0.24718 | 0.079066    | 0.46849     | -0.039765 | 0.51586 |  |
|           | 0.68339         | 0.24718   | 0.24718 | 0.657829754 |             |           |         |  |
| NA        | ENSG00000207080 | 0.68335   | 0.24719 | 0.68335     | 0.24719     | 0.68335   | 0.24719 |  |
|           | 0.68335         | 0.24719   | 0.24719 | 0.657829754 |             |           |         |  |
| PPP1R2    | ENSG00000184203 | -0.34636  | 0.63546 | 0.68327     | 0.24722     | -0.44121  |         |  |
|           | 0.67047         | -0.9604   | 0.83157 | 0.24722     | 0.657829754 |           |         |  |
| NA        | ENSG00000259446 | -0.3795   | 0.64784 | 0.29723     | 0.38314     | 0.68323   | 0.24723 |  |
|           | -0.32598        | 0.62778   | 0.24723 | 0.657829754 |             |           |         |  |
| URB2      | ENSG00000135763 | 0.02712   | 0.48918 | 0.29577     | 0.3837      | 0.68317   | 0.24725 |  |
|           | 0.54342         | 0.29342   | 0.24725 | 0.657829754 |             |           |         |  |
| LINC01581 | ENSG00000259724 | 0.68316   | 0.24725 | -0.60582    | 0.72768     | 0.4905    |         |  |
|           | 0.31189         | -1.2734   | 0.89856 | 0.24725     | 0.657829754 |           |         |  |
| NA        | ENSG00000225703 | 0.68315   | 0.24726 | -0.18322    | 0.57269     | 0.68315   | 0.24726 |  |
|           | 0.68315         | 0.24726   | 0.24726 | 0.657829754 |             |           |         |  |
| NA        | ENSG00000246316 | -0.27931  | 0.61    | -0.17826    | 0.57074     | -0.12531  | 0.54986 |  |
|           | 0.68313         | 0.24726   | 0.24726 | 0.657829754 |             |           |         |  |
| TMEM126B  | ENSG00000171204 | 0.68311   | 0.24727 | -0.69179    | 0.75547     | 0.40741   |         |  |
|           | 0.34185         | 0.40741   | 0.34185 | 0.24727     | 0.657829754 |           |         |  |
| C17orf99  | ENSG00000187997 | -0.47444  | 0.68241 | -0.56115    | 0.71265     | 0.68311   |         |  |
|           | 0.24727         | 0.68311   | 0.24727 | 0.24727     | 0.657829754 |           |         |  |
| RXFP3     | ENSG00000182631 | -0.23071  | 0.59123 | 0.68303     | 0.2473      | -0.19811  | 0.57852 |  |
|           | -0.12222        | 0.54864   | 0.2473  | 0.657829754 |             |           |         |  |
| AP1B1P2   | ENSG00000232707 | 0.45582   | 0.32426 | 0.48888     | 0.31246     | 0.68302   |         |  |
|           | 0.2473          | 0.43176   | 0.33296 | 0.2473      | 0.657829754 |           |         |  |
| C10orf88  | ENSG00000119965 | -0.67971  | 0.75166 | -0.67971    | 0.75166     | -1.2249   |         |  |
|           | 0.8897          | 0.68298   | 0.24731 | 0.24731     | 0.657829754 |           |         |  |
| NA        | ENSG00000233417 | 0.68297   | 0.24731 | 0.68297     | 0.24731     | 0.68297   | 0.24731 |  |
|           | 0.68297         | 0.24731   | 0.24731 | 0.657829754 |             |           |         |  |
| RAD23BP2  | ENSG00000230244 | 0.6829    | 0.24734 | 0.6829      | 0.24734     | 0.6829    |         |  |

|          |                 |          |         |             |             |           |         |
|----------|-----------------|----------|---------|-------------|-------------|-----------|---------|
|          | 0.24734         | 0.6829   | 0.24734 | 0.24734     | 0.657829754 |           |         |
| DLL3     | ENSG00000090932 | 0.67043  | 0.25129 | 0.67043     | 0.25129     | 0.67043   | 0.25129 |
|          | 0.68278         | 0.24737  | 0.24737 | 0.657829754 |             |           |         |
| RNU7-94P | ENSG00000238609 | -1.328   | 0.90791 | 0.68276     | 0.24738     | -1.328    |         |
|          | 0.90791         | -1.328   | 0.90791 | 0.24738     | 0.657829754 |           |         |
| NA       | ENSG00000279503 | 0.55951  | 0.28791 | 0.023173    | 0.49076     | 0.6091    | 0.27123 |
|          | 0.68263         | 0.24742  | 0.24742 | 0.657829754 |             |           |         |
| KRT33B   | ENSG00000131738 | -1.2589  | 0.89596 | 0.6826      | 0.24743     | 0.15992   |         |
|          | 0.43647         | -0.86774 | 0.80723 | 0.24743     | 0.657829754 |           |         |
| ZNF718   | ENSG00000250312 | -0.56001 | 0.71226 | 0.29579     | 0.3837      | 0.68259   |         |
|          | 0.24743         | 0.36597  | 0.3572  | 0.24743     | 0.657829754 |           |         |
| LARP7P1  | ENSG00000271588 | 0.68256  | 0.24744 | 0.4585      | 0.32329     | -0.5965   |         |
|          | 0.72458         | 0.60408  | 0.2729  | 0.24744     | 0.657829754 |           |         |
| IPO9-AS1 | ENSG00000231871 | 0.49189  | 0.3114  | -0.75527    | 0.77496     | 0.39669   |         |
|          | 0.3458          | 0.68255  | 0.24745 | 0.24745     | 0.657829754 |           |         |
| VWA5B2   | ENSG00000145198 | 0.68249  | 0.24746 | -0.54628    | 0.70756     | -0.54628  |         |
|          | 0.70756         | -0.54628 | 0.70756 | 0.24746     | 0.657829754 |           |         |
| SNORD13  | ENSG00000239039 | 0.68246  | 0.24747 | 0.68246     | 0.24747     | 0.68246   |         |
|          | 0.24747         | 0.68246  | 0.24747 | 0.24747     | 0.657829754 |           |         |
| NA       | ENSG00000280707 | 0.68247  | 0.24747 | -0.65401    | 0.74345     | 0.14183   | 0.44361 |
|          | -0.45365        | 0.67496  | 0.24747 | 0.657829754 |             |           |         |
| ACVR1C   | ENSG00000123612 | -0.22234 | 0.58797 | -0.44461    | 0.6717      | 0.68243   |         |
|          | 0.24748         | -0.49596 | 0.69004 | 0.24748     | 0.657829754 |           |         |
| NA       | ENSG00000272862 | 0.19695  | 0.42193 | 0.6824      | 0.24749     | 0.39798   | 0.34532 |
|          | 0.39798         | 0.34532  | 0.24749 | 0.657829754 |             |           |         |
| GPR158   | ENSG00000151025 | 0.68234  | 0.24751 | -0.60689    | 0.72804     | 0.61485   |         |
|          | 0.26933         | -0.42504 | 0.6646  | 0.24751     | 0.657829754 |           |         |
| RERG-IT1 | ENSG00000256650 | 0.68236  | 0.24751 | 0.68236     | 0.24751     | 0.68236   |         |
|          | 0.24751         | 0.68236  | 0.24751 | 0.24751     | 0.657829754 |           |         |
| ADAM22   | ENSG00000008277 | -0.28724 | 0.61304 | 0.68228     | 0.24753     | -0.82689  |         |
|          | 0.79585         | -1.1797  | 0.88094 | 0.24753     | 0.657829754 |           |         |
| ART1     | ENSG00000129744 | 0.42051  | 0.33706 | 0.42051     | 0.33706     | 0.68225   | 0.24754 |
|          | -0.63326        | 0.73672  | 0.24754 | 0.657829754 |             |           |         |
| RPSAP49  | ENSG00000226327 | 0.68224  | 0.24754 | 0.53637     | 0.29585     | 0.68224   |         |
|          | 0.24754         | 0.68224  | 0.24754 | 0.24754     | 0.657829754 |           |         |
| RIIAD1   | ENSG00000178796 | -0.12397 | 0.54933 | -0.05565    | 0.52219     | -0.2505   |         |
|          | 0.5989          | 0.6822   | 0.24756 | 0.24756     | 0.657837728 |           |         |
| NA       | ENSG00000250543 | 0.68216  | 0.24757 | 0.68216     | 0.24757     | -0.89438  | 0.81444 |
|          | -0.22574        | 0.5893   | 0.24757 | 0.657837728 |             |           |         |
| RAP1GAP  | ENSG00000076864 | -1.1443  | 0.87375 | 0.6271      | 0.2653      | 0.68208   |         |
|          | 0.2476          | 0.57118  | 0.28394 | 0.2476      | 0.65788157  |           |         |
| NA       | ENSG00000279879 | 0.68192  | 0.24765 | 0.68192     | 0.24765     | 0.68192   | 0.24765 |
|          | 0.68192         | 0.24765  | 0.24765 | 0.65796924  |             |           |         |
| DUSP10   | ENSG00000143507 | 0.68187  | 0.24766 | 0.34868     | 0.36366     | 0.46783   |         |
|          | 0.31995         | 0.42795  | 0.33434 | 0.24766     | 0.65796924  |           |         |
| LASTR    | ENSG00000242147 | 0.68177  | 0.24769 | 0.16045     | 0.43626     | 0.68177   | 0.24769 |
|          | 0.48235         | 0.31478  | 0.24769 | 0.658013068 |             |           |         |
| NA       | ENSG00000231901 | 0.68164  | 0.24773 | 0.68164     | 0.24773     | 0.68164   | 0.24773 |
|          | 0.68164         | 0.24773  | 0.24773 | 0.658083455 |             |           |         |
| LPAR2    | ENSG00000064547 | 0.68152  | 0.24777 | 0.68152     | 0.24777     | 0.51283   | 0.30404 |
|          | 0.51283         | 0.30404  | 0.24777 | 0.65813521  |             |           |         |
| NECTIN1  | ENSG00000110400 | -0.4081  | 0.6584  | 0.069005    | 0.47249     | 0.0090483 |         |
|          | 0.49639         | 0.68145  | 0.24779 | 0.24779     | 0.65813521  |           |         |
| NA       | ENSG00000273253 | 0.68145  | 0.24779 | 0.68145     | 0.24779     | 0.68145   | 0.24779 |
|          | 0.68145         | 0.24779  | 0.24779 | 0.65813521  |             |           |         |
| NA       | ENSG00000234306 | 0.68139  | 0.24781 | -0.70955    | 0.76101     | -0.14567  | 0.55791 |
|          | -0.1713         | 0.56801  | 0.24781 | 0.658140398 |             |           |         |
| LRRC14B  | ENSG00000185028 | 0.68134  | 0.24783 | 0.68134     | 0.24783     | 0.68134   |         |
|          | 0.24783         | 0.68134  | 0.24783 | 0.24783     | 0.658140398 |           |         |
| MIR3157  | ENSG00000266407 | 0.68131  | 0.24784 | 0.68131     | 0.24784     | 0.68131   |         |
|          | 0.24784         | 0.68131  | 0.24784 | 0.24784     | 0.658140398 |           |         |
| RNF222   | ENSG00000189051 | -0.56466 | 0.71385 | -0.1525     | 0.5606      | 0.68127   |         |



|            |                 |           |         |             |             |           |         |
|------------|-----------------|-----------|---------|-------------|-------------|-----------|---------|
|            | 0.24785         | -0.15751  | 0.56258 | 0.24785     | 0.658140398 |           |         |
| LINC01352  | ENSG00000238078 | 0.68122   | 0.24787 | 0.68122     | 0.24787     | 0.68122   |         |
|            | 0.24787         | 0.60094   | 0.27394 | 0.24787     | 0.658140398 |           |         |
| NHSL1      | ENSG00000135540 | 0.68115   | 0.24789 | -0.55037    | 0.70897     | -1.5443   | 0.93874 |
|            | -1.1961         | 0.88417   | 0.24789 | 0.658140398 |             |           |         |
| GKN1       | ENSG00000169605 | -0.70725  | 0.76029 | -0.70725    | 0.76029     | 0.6811    | 0.2479  |
|            | -0.70725        | 0.76029   | 0.2479  | 0.658140398 |             |           |         |
| PPIAP44    | ENSG00000258118 | -0.37798  | 0.64728 | 0.36241     | 0.35852     | 0.6811    |         |
|            | 0.2479          | -0.31392  | 0.62321 | 0.2479      | 0.658140398 |           |         |
| PRKAR2B    | ENSG00000005249 | 0.6810    | 0.24793 | -0.68035    | 0.75186     | 0.19166   | 0.424   |
|            | -1.097          | 0.86367   | 0.24793 | 0.658184185 |             |           |         |
| FCRL2      | ENSG00000132704 | 0.68088   | 0.24797 | -0.62604    | 0.73435     | -0.62604  | 0.73435 |
|            | -0.96556        | 0.83287   | 0.24797 | 0.658224387 |             |           |         |
| GRM1       | ENSG00000152822 | 0.25725   | 0.39849 | 0.68083     | 0.24799     | 0.6662    | 0.25264 |
|            | 0.34467         | 0.36517   | 0.24799 | 0.658224387 |             |           |         |
| MIR3908    | ENSG00000266655 | 0.68082   | 0.24799 | 0.68082     | 0.24799     | 0.68082   |         |
|            | 0.24799         | 0.68082   | 0.24799 | 0.24799     | 0.658224387 |           |         |
| NA         | ENSG00000228860 | 0.6808    | 0.248   | -0.19012    | 0.57539     | -0.19012  | 0.57539 |
|            | -0.19012        | 0.57539   | 0.248   | 0.658224387 |             |           |         |
| RPPH1-3P   | ENSG00000252350 | -1.0428   | 0.85147 | -0.38693    | 0.6506      | 0.10258   |         |
|            | 0.45915         | 0.68074   | 0.24802 | 0.24802     | 0.658224387 |           |         |
| PGBD4P2    | ENSG00000277708 | -0.53033  | 0.70206 | -0.53033    | 0.70206     | -1.0227   |         |
|            | 0.84676         | 0.68066   | 0.24804 | 0.24804     | 0.658224387 |           |         |
| RPL5P21    | ENSG00000218689 | -1.5037   | 0.93367 | 0.68056     | 0.24807     | -1.0283   |         |
|            | 0.84811         | -0.74549  | 0.77201 | 0.24807     | 0.658224387 |           |         |
| NA         | ENSG00000278446 | -0.68075  | 0.75198 | 0.68047     | 0.2481      | -0.81397  | 0.79217 |
|            | 0.13466         | 0.44644   | 0.2481  | 0.658224387 |             |           |         |
| ATP11A-AS1 | ENSG00000232684 | 0.44148   | 0.32943 | -0.1938     | 0.57683     | -0.59842  |         |
|            | 0.72522         | 0.6804    | 0.24812 | 0.24812     | 0.658224387 |           |         |
| NA         | ENSG00000255266 | 0.68039   | 0.24813 | 0.39755     | 0.34548     | 0.68039   | 0.24813 |
|            | 0.68039         | 0.24813   | 0.24813 | 0.658224387 |             |           |         |
| NA         | ENSG00000268482 | 0.68038   | 0.24813 | 0.68038     | 0.24813     | 0.68038   | 0.24813 |
|            | 0.68038         | 0.24813   | 0.24813 | 0.658224387 |             |           |         |
| EI24P4     | ENSG00000236343 | 0.68024   | 0.24817 | 0.48168     | 0.31502     | -0.67939  |         |
|            | 0.75155         | -0.67939  | 0.75155 | 0.24817     | 0.658224387 |           |         |
| LINC00572  | ENSG00000224405 | 0.68023   | 0.24818 | 0.62014     | 0.26758     | 0.68023   |         |
|            | 0.24818         | 0.68023   | 0.24818 | 0.24818     | 0.658224387 |           |         |
| RUBCNL     | ENSG00000102445 | -1.0935   | 0.86291 | -1.1307     | 0.8709      | 0.68015   |         |
|            | 0.24821         | -0.18325  | 0.5727  | 0.24821     | 0.658224387 |           |         |
| IGLV1-62   | ENSG00000253823 | 0.68009   | 0.24822 | 0.68009     | 0.24822     | 0.68009   |         |
|            | 0.24822         | 0.68009   | 0.24822 | 0.24822     | 0.658224387 |           |         |
| NA         | ENSG00000267727 | 0.68009   | 0.24822 | 0.68009     | 0.24822     | 0.68009   | 0.24822 |
|            | 0.68009         | 0.24822   | 0.24822 | 0.658224387 |             |           |         |
| NA         | ENSG00000275361 | 0.68009   | 0.24822 | 0.68009     | 0.24822     | 0.68009   | 0.24822 |
|            | 0.68009         | 0.24822   | 0.24822 | 0.658224387 |             |           |         |
| NA         | ENSG00000262223 | 0.68001   | 0.24825 | 0.68001     | 0.24825     | -0.36125  | 0.64104 |
|            | -0.33377        | 0.63072   | 0.24825 | 0.658224387 |             |           |         |
| DCAF12     | ENSG00000198876 | -0.034795 | 0.51388 | -0.044239   | 0.51764     | 0.027482  |         |
|            | 0.48904         | 0.67997   | 0.24826 | 0.24826     | 0.658224387 |           |         |
| COLEC10    | ENSG00000184374 | -0.38028  | 0.64813 | -0.38028    | 0.64813     | 0.35386   |         |
|            | 0.36172         | 0.67993   | 0.24827 | 0.24827     | 0.658224387 |           |         |
| RN7SKP2    | ENSG00000252812 | 0.67995   | 0.24827 | 0.67995     | 0.24827     | 0.67995   |         |
|            | 0.24827         | 0.67995   | 0.24827 | 0.24827     | 0.658224387 |           |         |
| RN7SL440P  | ENSG00000264963 | 0.6799    | 0.24828 | 0.6799      | 0.24828     | 0.6799    |         |
|            | 0.24828         | 0.6799    | 0.24828 | 0.24828     | 0.658224387 |           |         |
| CCDC70     | ENSG00000123171 | -0.035821 | 0.51429 | 0.67977     | 0.24833     | -0.071633 |         |
|            | 0.52855         | 0.58648   | 0.27878 | 0.24833     | 0.658224387 |           |         |
| NA         | ENSG00000250300 | 0.25108   | 0.40088 | 0.67972     | 0.24834     | 0.074203  | 0.47042 |
|            | -0.0060263      | 0.5024    | 0.24834 | 0.658224387 |             |           |         |
| CBY1       | ENSG00000100211 | 0.48944   | 0.31227 | 0.48944     | 0.31227     | 0.67044   | 0.25129 |
|            | 0.67967         | 0.24836   | 0.24836 | 0.658224387 |             |           |         |
| CBFA2T2    | ENSG00000078699 | -0.087583 | 0.5349  | 0.13707     | 0.44549     | 0.67561   |         |

|           |                 |          |             |             |             |           |         |          |
|-----------|-----------------|----------|-------------|-------------|-------------|-----------|---------|----------|
|           | 0.24964         | 0.67963  | 0.24837     | 0.24837     | 0.658224387 |           |         |          |
| INAVA     | ENSG00000163362 | -0.15483 | 0.56152     | 0.67957     | 0.24839     | -0.43669  | 0.66883 |          |
|           | -0.6135         | 0.73023  | 0.24839     | 0.658224387 |             |           |         |          |
| ETV2      | ENSG00000105672 | 0.67952  | 0.2484      | 0.67952     | 0.2484      | 0.57162   | 0.28379 |          |
|           | 0.070033        | 0.47208  | 0.2484      | 0.658224387 |             |           |         |          |
| ZNF473    | ENSG00000142528 | 0.67951  | 0.24841     | -0.14455    | 0.55747     | -0.14455  |         |          |
|           | 0.55747         | -0.14455 | 0.55747     | 0.24841     | 0.658224387 |           |         |          |
| NA        | ENSG00000248656 | 0.67946  | 0.24842     | 0.52643     | 0.2993      | -0.075637 | 0.53015 |          |
|           | -0.10997        | 0.54378  | 0.24842     | 0.658224387 |             |           |         |          |
| H2BP5     | ENSG00000277410 | 0.67947  | 0.24842     | 0.67947     | 0.24842     | 0.67947   | 0.24842 |          |
|           | 0.67947         | 0.24842  | 0.24842     | 0.658224387 |             |           |         |          |
| CRYAA     | ENSG00000160202 | 0.67944  | 0.24843     | -0.17344    | 0.56885     | 0.12916   | 0.44861 |          |
|           | -0.0094383      | 0.50377  | 0.24843     | 0.658224387 |             |           |         |          |
| AGAP11    | ENSG00000271880 | 0.27435  | 0.39191     | 0.67943     | 0.24843     | 0.62988   |         |          |
|           | 0.26439         | 0.67943  | 0.24843     | 0.24843     | 0.658224387 |           |         |          |
| CRYAA2    | ENSG00000276076 | 0.67944  | 0.24843     | 0.67944     | 0.24843     | 0.67944   |         |          |
|           | 0.24843         | 0.67944  | 0.24843     | 0.24843     | 0.658224387 |           |         |          |
| NA        | ENSG00000260838 | 0.67933  | 0.24846     | -0.29499    | 0.616       | -0.29499  | 0.616   | -0.29499 |
|           | 0.616           | 0.24846  | 0.658224387 |             |             |           |         |          |
| GAPDHP32  | ENSG00000226443 | 0.6793   | 0.24847     | 0.6793      | 0.24847     | 0.6793    |         |          |
|           | 0.24847         | 0.6793   | 0.24847     | 0.24847     | 0.658224387 |           |         |          |
| MTHFD1L   | ENSG00000120254 | 0.57143  | 0.28385     | 0.59525     | 0.27584     | 0.67925   |         |          |
|           | 0.24849         | -0.13947 | 0.55546     | 0.24849     | 0.658224387 |           |         |          |
| NA        | ENSG00000253581 | 0.67924  | 0.24849     | 0.67924     | 0.24849     | 0.67924   | 0.24849 |          |
|           | 0.67924         | 0.24849  | 0.24849     | 0.658224387 |             |           |         |          |
| TAGLN3    | ENSG00000144834 | 0.67921  | 0.2485      | 0.67921     | 0.2485      | 0.67921   |         |          |
|           | 0.2485          | 0.67921  | 0.2485      | 0.2485      | 0.658224387 |           |         |          |
| LINC00677 | ENSG00000259717 | -1.7386  | 0.95895     | 0.67922     | 0.2485      | -1.7386   |         |          |
|           | 0.95895         | -1.7386  | 0.95895     | 0.2485      | 0.658224387 |           |         |          |
| TBXA2R    | ENSG00000006638 | 0.6792   | 0.24851     | -0.4277     | 0.66557     | 0.6792    |         |          |
|           | 0.24851         | 0.47045  | 0.31902     | 0.24851     | 0.658224387 |           |         |          |
| NA        | ENSG00000253142 | 0.51206  | 0.3043      | 0.033876    | 0.48649     | 0.67915   | 0.24852 |          |
|           | 0.19468         | 0.42282  | 0.24852     | 0.658224387 |             |           |         |          |
| BTBD9-AS1 | ENSG00000226533 | 0.67914  | 0.24853     | 0.0074269   | 0.49704     | -0.15405  |         |          |
|           | 0.56121         | -0.73404 | 0.76854     | 0.24853     | 0.658224387 |           |         |          |
| NA        | ENSG00000226883 | 0.67906  | 0.24855     | 0.28873     | 0.38639     | 0.67906   | 0.24855 |          |
|           | 0.67906         | 0.24855  | 0.24855     | 0.658224387 |             |           |         |          |
| RAD21     | ENSG00000164754 | 0.67899  | 0.24857     | 0.67899     | 0.24857     | 0.67899   | 0.24857 |          |
|           | 0.49905         | 0.30887  | 0.24857     | 0.658224387 |             |           |         |          |
| NA        | ENSG00000230571 | 0.67901  | 0.24857     | 0.67901     | 0.24857     | 0.67901   | 0.24857 |          |
|           | 0.67901         | 0.24857  | 0.24857     | 0.658224387 |             |           |         |          |
| THAP10    | ENSG00000129028 | -0.1099  | 0.54375     | -0.79148    | 0.78567     | -0.39398  |         |          |
|           | 0.6532          | 0.67896  | 0.24858     | 0.24858     | 0.658224387 |           |         |          |
| FAHD2CP   | ENSG00000231584 | -0.82745 | 0.79601     | -0.69375    | 0.75608     | -0.45392  |         |          |
|           | 0.67506         | 0.6788   | 0.24863     | 0.24863     | 0.658321012 |           |         |          |
| MIR3135B  | ENSG00000263649 | 0.67872  | 0.24866     | 0.67872     | 0.24866     | 0.67872   |         |          |
|           | 0.24866         | 0.67872  | 0.24866     | 0.24866     | 0.658328904 |           |         |          |
| NA        | ENSG00000268355 | 0.67871  | 0.24866     | 0.67871     | 0.24866     | 0.67871   | 0.24866 |          |
|           | 0.67871         | 0.24866  | 0.24866     | 0.658328904 |             |           |         |          |
| PVRIG     | ENSG00000213413 | 0.67847  | 0.24874     | 0.67847     | 0.24874     | 0.67847   | 0.24874 |          |
|           | 0.67847         | 0.24874  | 0.24874     | 0.658486327 |             |           |         |          |
| NA        | ENSG00000259564 | 0.14838  | 0.44102     | 0.38745     | 0.34921     | 0.47915   | 0.31592 |          |
|           | 0.67843         | 0.24875  | 0.24875     | 0.658486327 |             |           |         |          |
| RNU1-80P  | ENSG00000238898 | -1.7704  | 0.96167     | -0.37177    | 0.64497     | 0.67841   |         |          |
|           | 0.24876         | -0.64686 | 0.74114     | 0.24876     | 0.658486327 |           |         |          |
| METTL24   | ENSG00000053328 | 0.67829  | 0.24879     | 0.20513     | 0.41874     | -0.94731  |         |          |
|           | 0.82826         | -0.74529 | 0.77195     | 0.24879     | 0.658494199 |           |         |          |
| MYH6      | ENSG00000197616 | -0.75053 | 0.77353     | -0.29158    | 0.6147      | -0.49685  | 0.69035 |          |
|           | 0.67829         | 0.24879  | 0.24879     | 0.658494199 |             |           |         |          |
| NA        | ENSG00000279360 | 0.45109  | 0.32596     | 0.121       | 0.45185     | 0.67816   | 0.24884 |          |
|           | 0.67816         | 0.24884  | 0.24884     | 0.658545699 |             |           |         |          |
| NA        | ENSG00000235035 | 0.67811  | 0.24885     | 0.67811     | 0.24885     | 0.67811   | 0.24885 |          |

|           |                 |             |         |             |             |           |         |
|-----------|-----------------|-------------|---------|-------------|-------------|-----------|---------|
|           | 0.67811         | 0.24885     | 0.24885 | 0.658545699 |             |           |         |
| NA        | ENSG00000264771 | 0.67812     | 0.24885 | 0.67812     | 0.24885     | 0.67812   | 0.24885 |
|           | 0.67812         | 0.24885     | 0.24885 | 0.658545699 |             |           |         |
| NAGS      | ENSG00000161653 | 0.67784     | 0.24894 | 0.67784     | 0.24894     | 0.67784   | 0.24894 |
|           | 0.67784         | 0.24894     | 0.24894 | 0.658719232 |             |           |         |
| ZNF174    | ENSG00000103343 | 0.67779     | 0.24895 | 0.67779     | 0.24895     | 0.44874   |         |
|           | 0.32681         | 0.46741     | 0.3201  | 0.24895     | 0.658719232 |           |         |
| RHPN1     | ENSG00000158106 | -0.56368    | 0.71351 | -1.0377     | 0.85029     | 0.67776   | 0.24896 |
|           | 0.67776         | 0.24896     | 0.24896 | 0.658719232 |             |           |         |
| NOSTRIN   | ENSG00000163072 | 0.51984     | 0.30159 | 0.67773     | 0.24897     | -1.1562   |         |
|           | 0.87621         | 0.027553    | 0.48901 | 0.24897     | 0.658719232 |           |         |
| KPRP      | ENSG00000203786 | 0.67764     | 0.249   | 0.67764     | 0.249       | 0.67764   | 0.249   |
|           | 0.249           | 0.658719232 |         |             |             |           |         |
| SLC17A6   | ENSG00000091664 | -0.080943   | 0.53226 | 0.0049144   | 0.49804     | 0.67756   |         |
|           | 0.24902         | -0.81848    | 0.79346 | 0.24902     | 0.658719232 |           |         |
| MIR4743   | ENSG00000266276 | 0.67756     | 0.24903 | 0.67756     | 0.24903     | 0.67756   |         |
|           | 0.24903         | 0.67756     | 0.24903 | 0.24903     | 0.658719232 |           |         |
| VPS26BP1  | ENSG00000224895 | 0.46953     | 0.31934 | 0.55448     | 0.28963     | 0.56735   |         |
|           | 0.28524         | 0.67747     | 0.24905 | 0.24905     | 0.658719232 |           |         |
| NA        | ENSG00000255347 | 0.67741     | 0.24907 | 0.67741     | 0.24907     | 0.67741   | 0.24907 |
|           | -1.0154         | 0.84504     | 0.24907 | 0.658719232 |             |           |         |
| NA        | ENSG00000229262 | 0.67737     | 0.24909 | 0.67737     | 0.24909     | 0.67737   | 0.24909 |
|           | 0.67737         | 0.24909     | 0.24909 | 0.658719232 |             |           |         |
| ENOX1-AS2 | ENSG00000238189 | 0.67734     | 0.24909 | 0.67734     | 0.24909     | 0.67734   |         |
|           | 0.24909         | 0.67734     | 0.24909 | 0.24909     | 0.658719232 |           |         |
| VSIG8     | ENSG00000243284 | 0.67732     | 0.2491  | 0.67732     | 0.2491      | 0.67732   | 0.2491  |
|           | 0.67732         | 0.2491      | 0.2491  | 0.658719232 |             |           |         |
| CHMP2A    | ENSG00000130724 | 0.46977     | 0.31926 | 0.46977     | 0.31926     | 0.6491    |         |
|           | 0.25814         | 0.67731     | 0.24911 | 0.24911     | 0.658719232 |           |         |
| MIR4756   | ENSG00000265595 | 0.67729     | 0.24911 | 0.67729     | 0.24911     | 0.67729   |         |
|           | 0.24911         | 0.67729     | 0.24911 | 0.24911     | 0.658719232 |           |         |
| HLA-DRB5  | ENSG00000198502 | -0.8319     | 0.79727 | -0.63314    | 0.73668     | 0.67724   |         |
|           | 0.24913         | -0.44551    | 0.67202 | 0.24913     | 0.658719232 |           |         |
| NES       | ENSG00000132688 | -0.59614    | 0.72446 | -0.59614    | 0.72446     | -0.3093   | 0.62145 |
|           | 0.67721         | 0.24914     | 0.24914 | 0.658719232 |             |           |         |
| INO80     | ENSG00000128908 | 0.49374     | 0.31075 | 0.67711     | 0.24917     | -1.6009   | 0.9453  |
|           | 0.18179         | 0.42788     | 0.24917 | 0.658719232 |             |           |         |
| TAGAP     | ENSG00000164691 | 0.67712     | 0.24917 | -0.065523   | 0.52612     | -0.19217  | 0.5762  |
|           | 0.28989         | 0.38595     | 0.24917 | 0.658719232 |             |           |         |
| SEC31B    | ENSG00000075826 | -0.36829    | 0.64367 | 0.67695     | 0.24922     | 0.64123   |         |
|           | 0.26069         | -0.83896    | 0.79925 | 0.24922     | 0.658719232 |           |         |
| MIR4492   | ENSG00000264211 | 0.67694     | 0.24922 | 0.67694     | 0.24922     | 0.67694   |         |
|           | 0.24922         | 0.67694     | 0.24922 | 0.24922     | 0.658719232 |           |         |
| RSL24D1P1 | ENSG00000218069 | -0.60278    | 0.72667 | 0.35857     | 0.35996     | 0.67691   |         |
|           | 0.24923         | -0.80668    | 0.79008 | 0.24923     | 0.658719232 |           |         |
| EPOP      | ENSG00000273604 | -0.13084    | 0.55205 | 0.67691     | 0.24923     | -0.45251  | 0.67455 |
|           | -0.13084        | 0.55205     | 0.24923 | 0.658719232 |             |           |         |
| NA        | ENSG00000227671 | 0.67689     | 0.24924 | 0.55395     | 0.28981     | -0.016415 | 0.50655 |
|           | -0.19656        | 0.57791     | 0.24924 | 0.658719232 |             |           |         |
| NA        | ENSG00000267335 | 0.67687     | 0.24924 | 0.67687     | 0.24924     | 0.67687   | 0.24924 |
|           | 0.67687         | 0.24924     | 0.24924 | 0.658719232 |             |           |         |
| TMEM235   | ENSG00000204278 | 0.67681     | 0.24926 | -0.74534    | 0.77197     | 0.67681   |         |
|           | 0.24926         | 0.67681     | 0.24926 | 0.24926     | 0.658736363 |           |         |
| RN7SL159P | ENSG00000242281 | 0.67649     | 0.24936 | 0.67649     | 0.24936     | 0.67649   |         |
|           | 0.24936         | 0.67649     | 0.24936 | 0.24936     | 0.658910557 |           |         |
| OR11G2    | ENSG00000196832 | 0.67648     | 0.24937 | 0.67648     | 0.24937     | 0.67648   |         |
|           | 0.24937         | 0.67648     | 0.24937 | 0.24937     | 0.658910557 |           |         |
| NA        | ENSG00000183239 | 0.25491     | 0.3994  | 0.51554     | 0.30309     | 0.67643   | 0.24938 |
|           | 0.47873         | 0.31606     | 0.24938 | 0.658910557 |             |           |         |
| NA        | ENSG00000272858 | 0.30122     | 0.38162 | 0.67645     | 0.24938     | 0.67645   | 0.24938 |
|           | 0.67645         | 0.24938     | 0.24938 | 0.658910557 |             |           |         |
| NA        | ENSG00000201573 | 0.67637     | 0.2494  | 0.67637     | 0.2494      | 0.67637   | 0.2494  |

|           |                 |          |         |             |             |           |         |  |
|-----------|-----------------|----------|---------|-------------|-------------|-----------|---------|--|
|           | 0.67637         | 0.2494   | 0.2494  | 0.658927673 |             |           |         |  |
| DEGS1     | ENSG00000143753 | 0.67625  | 0.24944 | 0.67625     | 0.24944     | 0.67625   | 0.24944 |  |
|           | 0.48116         | 0.3152   | 0.24944 | 0.658965794 |             |           |         |  |
| CPSF2     | ENSG00000165934 | 0.17062  | 0.43226 | -0.58502    | 0.72073     | 0.27963   | 0.38988 |  |
|           | 0.67621         | 0.24945  | 0.24945 | 0.658965794 |             |           |         |  |
| TYW1B     | ENSG00000277149 | 0.65334  | 0.25677 | 0.67612     | 0.24948     | 0.3243    | 0.37286 |  |
|           | 0.45595         | 0.32421  | 0.24948 | 0.658965794 |             |           |         |  |
| PA2G4P4   | ENSG00000230457 | 0.67602  | 0.24951 | 0.67602     | 0.24951     | 0.67602   |         |  |
|           | 0.24951         | 0.67602  | 0.24951 | 0.24951     | 0.658965794 |           |         |  |
| MYT1L-AS1 | ENSG00000225619 | 0.6759   | 0.24955 | 0.21025     | 0.41674     | 0.58558   |         |  |
|           | 0.27908         | 0.17114  | 0.43206 | 0.24955     | 0.658965794 |           |         |  |
| NA        | ENSG00000228021 | 0.67591  | 0.24955 | -0.93149    | 0.8242      | 0.1318    | 0.44757 |  |
|           | -0.68883        | 0.75453  | 0.24955 | 0.658965794 |             |           |         |  |
| NA        | ENSG00000272057 | 0.6759   | 0.24955 | 0.6759      | 0.24955     | 0.6759    | 0.24955 |  |
|           | 0.6759          | 0.24955  | 0.24955 | 0.658965794 |             |           |         |  |
| NA        | ENSG00000244245 | 0.25994  | 0.39746 | 0.67585     | 0.24957     | 0.25994   | 0.39746 |  |
|           | 0.25994         | 0.39746  | 0.24957 | 0.658965794 |             |           |         |  |
| NA        | ENSG00000239767 | -1.1734  | 0.87968 | 0.6757      | 0.24962     | -0.52615  | 0.70061 |  |
|           | -1.1734         | 0.87968  | 0.24962 | 0.658965794 |             |           |         |  |
| MTND2P7   | ENSG00000253970 | -0.40122 | 0.65587 | -0.11466    | 0.54564     | 0.67564   |         |  |
|           | 0.24963         | 0.67564  | 0.24963 | 0.24963     | 0.658965794 |           |         |  |
| HNRNRP2   | ENSG00000255047 | 0.13734  | 0.44538 | 0.13734     | 0.44538     | 0.13734   |         |  |
|           | 0.44538         | 0.67565  | 0.24963 | 0.24963     | 0.658965794 |           |         |  |
| NA        | ENSG00000266921 | 0.67556  | 0.24966 | 0.67556     | 0.24966     | 0.67556   | 0.24966 |  |
|           | 0.67556         | 0.24966  | 0.24966 | 0.658965794 |             |           |         |  |
| NA        | ENSG00000267952 | 0.67548  | 0.24969 | 0.67548     | 0.24969     | 0.67548   | 0.24969 |  |
|           | 0.67548         | 0.24969  | 0.24969 | 0.658965794 |             |           |         |  |
| SNRPGP17  | ENSG00000271063 | 0.67547  | 0.24969 | 0.67547     | 0.24969     | 0.67547   |         |  |
|           | 0.24969         | 0.67547  | 0.24969 | 0.24969     | 0.658965794 |           |         |  |
| NA        | ENSG00000264860 | 0.67538  | 0.24972 | 0.67538     | 0.24972     | 0.67538   | 0.24972 |  |
|           | 0.67538         | 0.24972  | 0.24972 | 0.658965794 |             |           |         |  |
| SLC2A14   | ENSG00000173262 | 0.58163  | 0.28041 | 0.21512     | 0.41484     | 0.67534   |         |  |
|           | 0.24973         | 0.097398 | 0.46121 | 0.24973     | 0.658965794 |           |         |  |
| EML2      | ENSG00000125746 | 0.67529  | 0.24975 | -0.92821    | 0.82335     | -0.083468 | 0.53326 |  |
|           | -0.4541         | 0.67512  | 0.24975 | 0.658965794 |             |           |         |  |
| CNGA1     | ENSG00000198515 | -0.6289  | 0.73529 | -0.37881    | 0.64758     | 0.67528   | 0.24975 |  |
|           | -0.022383       | 0.50893  | 0.24975 | 0.658965794 |             |           |         |  |
| OTX1      | ENSG00000115507 | 0.20937  | 0.41708 | 0.67521     | 0.24977     | 0.67521   | 0.24977 |  |
|           | -0.39194        | 0.65245  | 0.24977 | 0.658965794 |             |           |         |  |
| NA        | ENSG00000258962 | 0.67519  | 0.24978 | 0.67519     | 0.24978     | 0.67519   | 0.24978 |  |
|           | 0.67519         | 0.24978  | 0.24978 | 0.658965794 |             |           |         |  |
| ZNF347    | ENSG00000197937 | 0.67504  | 0.24982 | 0.67504     | 0.24982     | 0.67504   |         |  |
|           | 0.24982         | 0.23686  | 0.40638 | 0.24982     | 0.658965794 |           |         |  |
| KHDC3L    | ENSG00000203908 | -0.40054 | 0.65562 | 0.67505     | 0.24982     | 0.67505   |         |  |
|           | 0.24982         | 0.67505  | 0.24982 | 0.24982     | 0.658965794 |           |         |  |
| OR5B2     | ENSG00000172365 | -0.45158 | 0.67421 | 0.67494     | 0.24986     | -0.62865  | 0.73521 |  |
|           | 0.17207         | 0.43169  | 0.24986 | 0.658965794 |             |           |         |  |
| ETV7      | ENSG00000010030 | -1.0428  | 0.85148 | -0.85807    | 0.80457     | -0.41564  | 0.66116 |  |
|           | 0.67487         | 0.24988  | 0.24988 | 0.658965794 |             |           |         |  |
| RAP1BP1   | ENSG00000236857 | -0.6372  | 0.738   | 0.67486     | 0.24988     | 0.46476   | 0.32105 |  |
|           | -0.54561        | 0.70733  | 0.24988 | 0.658965794 |             |           |         |  |
| RGS16     | ENSG00000143333 | 0.245    | 0.40323 | 0.67482     | 0.24989     | 0.55215   | 0.29042 |  |
|           | 0.24383         | 0.40368  | 0.24989 | 0.658965794 |             |           |         |  |
| OR7K1P    | ENSG00000258275 | 0.6748   | 0.2499  | 0.6748      | 0.2499      | 0.31127   |         |  |
|           | 0.3778          | 0.6748   | 0.2499  | 0.2499      | 0.658965794 |           |         |  |
| NA        | ENSG00000220240 | 0.67474  | 0.24992 | 0.67474     | 0.24992     | 0.67474   | 0.24992 |  |
|           | 0.67474         | 0.24992  | 0.24992 | 0.658965794 |             |           |         |  |
| PRR34     | ENSG00000182257 | 0.6747   | 0.24993 | 0.6747      | 0.24993     | 0.6747    | 0.24993 |  |
|           | -0.50991        | 0.69494  | 0.24993 | 0.658965794 |             |           |         |  |
| NA        | ENSG00000207195 | 0.67471  | 0.24993 | 0.67471     | 0.24993     | 0.67471   | 0.24993 |  |
|           | 0.67471         | 0.24993  | 0.24993 | 0.658965794 |             |           |         |  |
| PRR34-AS1 | ENSG00000241990 | 0.6747   | 0.24993 | 0.6747      | 0.24993     | 0.6747    |         |  |

|           |                 |           |         |             |             |           |           |  |
|-----------|-----------------|-----------|---------|-------------|-------------|-----------|-----------|--|
|           | 0.24993         | 0.6747    | 0.24993 | 0.24993     | 0.658965794 |           |           |  |
| H2AC3P    | ENSG00000242387 | -0.028037 | 0.51118 | 0.51118     | 0.67471     | 0.24993   | -0.028037 |  |
|           | 0.51118         | -0.028037 | 0.51118 | 0.24993     | 0.658965794 |           |           |  |
| LCP1      | ENSG00000136167 | -0.59386  | 0.7237  | -1.4629     | 0.92826     | 0.068988  | 0.4725    |  |
|           | 0.67465         | 0.24995   | 0.24995 | 0.658965794 |             |           |           |  |
| FANCD2    | ENSG00000144554 | 0.11856   | 0.45281 | 0.27641     | 0.39112     | -0.02672  |           |  |
|           | 0.51066         | 0.67463   | 0.24995 | 0.24995     | 0.658965794 |           |           |  |
| DCAF16    | ENSG00000163257 | 0.59807   | 0.2749  | 0.35343     | 0.36188     | -1.5609   |           |  |
|           | 0.94073         | 0.67464   | 0.24995 | 0.24995     | 0.658965794 |           |           |  |
| NA        | ENSG00000230385 | 0.67463   | 0.24995 | 0.67463     | 0.24995     | 0.67463   | 0.24995   |  |
|           | 0.67463         | 0.24995   | 0.24995 | 0.658965794 |             |           |           |  |
| PROB1     | ENSG00000228672 | 0.67462   | 0.24996 | 0.67462     | 0.24996     | 0.67462   | 0.24996   |  |
|           | 0.67462         | 0.24996   | 0.24996 | 0.658965794 |             |           |           |  |
| TUG1      | ENSG00000253352 | 0.67457   | 0.24998 | 0.67457     | 0.24998     | 0.67457   | 0.24998   |  |
|           | 0.67457         | 0.24998   | 0.24998 | 0.658965794 |             |           |           |  |
| PCLAF     | ENSG00000166803 | 0.39568   | 0.34617 | 0.25171     | 0.40063     | -0.076986 | 0.53068   |  |
|           | 0.67452         | 0.24999   | 0.24999 | 0.658965794 |             |           |           |  |
| NA        | ENSG00000250629 | -0.55794  | 0.71156 | -0.66267    | 0.74623     | 0.46822   | 0.31981   |  |
|           | 0.6745          | 0.25      | 0.25    | 0.658965794 |             |           |           |  |
| DOCK6     | ENSG00000130158 | -0.4919   | 0.6886  | -2.1873     | 0.98564     | -1.4833   | 0.93101   |  |
|           | 0.67446         | 0.25001   | 0.25001 | 0.658965794 |             |           |           |  |
| RN7SL221P | ENSG00000239472 | 0.67446   | 0.25001 | -0.49219    | 0.68871     | -0.19447  |           |  |
|           | 0.5771          | -0.19447  | 0.5771  | 0.25001     | 0.658965794 |           |           |  |
| NA        | ENSG00000251516 | -0.62989  | 0.73562 | 0.67447     | 0.25001     | -0.40709  | 0.65803   |  |
|           | -0.41508        | 0.66096   | 0.25001 | 0.658965794 |             |           |           |  |
| ADAM7     | ENSG00000069206 | 0.67442   | 0.25002 | -0.84658    | 0.80138     | 0.51484   | 0.30333   |  |
|           | 0.16639         | 0.43392   | 0.25002 | 0.658965794 |             |           |           |  |
| NA        | ENSG00000222012 | 0.6744    | 0.25003 | -0.21028    | 0.58328     | 0.32639   | 0.37206   |  |
|           | -0.56905        | 0.71534   | 0.25003 | 0.658965794 |             |           |           |  |
| PRPF40A   | ENSG00000196504 | -0.77592  | 0.7811  | 0.67436     | 0.25004     | -0.67984  |           |  |
|           | 0.7517          | -0.51368  | 0.69626 | 0.25004     | 0.658965794 |           |           |  |
| LINC01435 | ENSG00000229981 | -1.0279   | 0.848   | 0.67432     | 0.25005     | -0.54075  | 0.70566   |  |
|           | -0.3888         | 0.65129   | 0.25005 | 0.658965794 |             |           |           |  |
| RIT2      | ENSG00000152214 | 0.19678   | 0.422   | -0.34182    | 0.63376     | 0.050709  | 0.47978   |  |
|           | 0.67423         | 0.25008   | 0.25008 | 0.658981363 |             |           |           |  |
| BNIP2     | ENSG00000140299 | 0.23987   | 0.40522 | -0.21467    | 0.58499     | -0.2977   | 0.61704   |  |
|           | 0.67415         | 0.25011   | 0.25011 | 0.658981363 |             |           |           |  |
| NDUFS6    | ENSG00000145494 | 0.6356    | 0.26252 | 0.67416     | 0.25011     | 0.6356    |           |  |
|           | 0.26252         | 0.13249   | 0.4473  | 0.25011     | 0.658981363 |           |           |  |
| ZNF138    | ENSG00000197008 | 0.2434    | 0.40385 | -0.13972    | 0.55556     | 0.67414   |           |  |
|           | 0.25011         | -0.23281  | 0.59205 | 0.25011     | 0.658981363 |           |           |  |
| RN7SKP205 | ENSG00000222931 | 0.35575   | 0.36101 | 0.64333     | 0.26        | 0.34801   | 0.36392   |  |
|           | 0.67398         | 0.25016   | 0.25016 | 0.659041834 |             |           |           |  |
| NA        | ENSG00000229882 | -0.66297  | 0.74632 | -0.66297    | 0.74632     | -0.66297  | 0.74632   |  |
|           | 0.67399         | 0.25016   | 0.25016 | 0.659041834 |             |           |           |  |
| MED18     | ENSG00000130772 | 0.67381   | 0.25022 | 0.34022     | 0.36685     | -0.21978  | 0.58698   |  |
|           | -0.20512        | 0.58126   | 0.25022 | 0.659162737 |             |           |           |  |
| NA        | ENSG00000251447 | 0.67373   | 0.25024 | 0.67373     | 0.25024     | 0.67373   | 0.25024   |  |
|           | 0.67373         | 0.25024   | 0.25024 | 0.659162737 |             |           |           |  |
| RN7SKP266 | ENSG00000222164 | -0.052377 | 0.52089 | -0.064976   | 0.5259      | 0.67366   |           |  |
|           | 0.25026         | 0.67366   | 0.25026 | 0.25026     | 0.659162737 |           |           |  |
| LINC00658 | ENSG00000226995 | 0.67366   | 0.25026 | 0.11335     | 0.45488     | 0.17024   |           |  |
|           | 0.43241         | 0.42318   | 0.33608 | 0.25026     | 0.659162737 |           |           |  |
| TTI2      | ENSG00000129696 | 0.67359   | 0.25028 | 0.5639      | 0.28641     | 0.67359   | 0.25028   |  |
|           | 0.59457         | 0.27606   | 0.25028 | 0.659170497 |             |           |           |  |
| NA        | ENSG00000263938 | 0.67357   | 0.25029 | 0.67357     | 0.25029     | 0.67357   | 0.25029   |  |
|           | 0.67357         | 0.25029   | 0.25029 | 0.659170497 |             |           |           |  |
| NA        | ENSG00000254762 | 0.67321   | 0.25041 | 0.67321     | 0.25041     | 0.67321   | 0.25041   |  |
|           | 0.67321         | 0.25041   | 0.25041 | 0.659450892 |             |           |           |  |
| NA        | ENSG00000227616 | 0.054857  | 0.47813 | -0.99692    | 0.8406      | -0.99692  | 0.8406    |  |
|           | 0.67309         | 0.25045   | 0.25045 | 0.65947249  |             |           |           |  |
| RPL7AP61  | ENSG00000233291 | 0.4695    | 0.31936 | -1.0073     | 0.8431      | 0.67301   |           |  |

|           |                 |            |         |             |             |          |         |  |
|-----------|-----------------|------------|---------|-------------|-------------|----------|---------|--|
|           | 0.25047         | 0.4695     | 0.31936 | 0.25047     | 0.65947249  |          |         |  |
| FAM98B    | ENSG00000171262 | 0.67295    | 0.25049 | 0.3125      | 0.37733     | -0.93269 |         |  |
|           | 0.82451         | 0.48278    | 0.31463 | 0.25049     | 0.65947249  |          |         |  |
| NA        | ENSG00000283504 | -0.42256   | 0.66369 | -0.28005    | 0.61028     | 0.67296  | 0.25049 |  |
|           | 0.24646         | 0.40266    | 0.25049 | 0.65947249  |             |          |         |  |
| DPPA4     | ENSG00000121570 | -0.74735   | 0.77257 | 0.67293     | 0.2505      | -1.375   | 0.91543 |  |
|           | -0.74735        | 0.77257    | 0.2505  | 0.65947249  |             |          |         |  |
| NA        | ENSG00000250899 | 0.67289    | 0.25051 | 0.67289     | 0.25051     | 0.67289  | 0.25051 |  |
|           | -0.83636        | 0.79852    | 0.25051 | 0.65947249  |             |          |         |  |
| SELENOM   | ENSG00000198832 | 0.67286    | 0.25052 | 0.67286     | 0.25052     | 0.67286  |         |  |
|           | 0.25052         | 0.67286    | 0.25052 | 0.25052     | 0.65947249  |          |         |  |
| FAR2P4    | ENSG00000231431 | 0.37862    | 0.35249 | 0.037069    | 0.48521     | 0.67283  |         |  |
|           | 0.25053         | -0.60902   | 0.72874 | 0.25053     | 0.65947249  |          |         |  |
| NA        | ENSG00000264535 | 0.67279    | 0.25054 | 0.67279     | 0.25054     | 0.67279  | 0.25054 |  |
|           | 0.67279         | 0.25054    | 0.25054 | 0.65947249  |             |          |         |  |
| N6AMT1    | ENSG00000156239 | 0.67266    | 0.25058 | 0.67266     | 0.25058     | 0.50402  |         |  |
|           | 0.30712         | 0.67266    | 0.25058 | 0.25058     | 0.659542152 |          |         |  |
| NA        | ENSG00000272477 | 0.2696     | 0.39373 | 0.6726      | 0.2506      | 0.44982  | 0.32642 |  |
|           | 0.44982         | 0.32642    | 0.2506  | 0.659546448 |             |          |         |  |
| ASAP2     | ENSG00000151693 | -0.32462   | 0.62726 | 0.67247     | 0.25064     | -0.19494 | 0.57728 |  |
|           | -0.6494         | 0.74196    | 0.25064 | 0.659546448 |             |          |         |  |
| DNAH17    | ENSG00000187775 | 0.35933    | 0.35967 | 0.57604     | 0.28229     | 0.52178  |         |  |
|           | 0.30091         | 0.67246    | 0.25065 | 0.25065     | 0.659546448 |          |         |  |
| DACT3-AS1 | ENSG00000245598 | 0.67228    | 0.2507  | 0.67228     | 0.2507      | 0.67228  |         |  |
|           | 0.2507          | 0.67228    | 0.2507  | 0.2507      | 0.659546448 |          |         |  |
| CHRM5     | ENSG00000184984 | 0.67225    | 0.25071 | -1.66       | 0.95154     | -0.83353 | 0.79773 |  |
|           | 0.25218         | 0.40045    | 0.25071 | 0.659546448 |             |          |         |  |
| CSTP2     | ENSG00000277975 | 0.15931    | 0.43671 | 0.67225     | 0.25071     | -0.57507 | 0.71738 |  |
|           | 0.16039         | 0.43629    | 0.25071 | 0.659546448 |             |          |         |  |
| NA        | ENSG00000187695 | 0.52176    | 0.30092 | 0.48718     | 0.31306     | 0.67224  | 0.25072 |  |
|           | 0.52176         | 0.30092    | 0.25072 | 0.659546448 |             |          |         |  |
| ZNF433    | ENSG00000197647 | -0.39375   | 0.65312 | 0.67219     | 0.25073     | -1.0561  |         |  |
|           | 0.85454         | -0.18899   | 0.57495 | 0.25073     | 0.659546448 |          |         |  |
| LINC01429 | ENSG00000227964 | -0.27648   | 0.60891 | -0.27648    | 0.60891     | -0.55481 |         |  |
|           | 0.71049         | 0.67215    | 0.25074 | 0.25074     | 0.659546448 |          |         |  |
| NA        | ENSG00000247732 | 0.67216    | 0.25074 | 0.44471     | 0.32826     | 0.088254 | 0.46484 |  |
|           | 0.088254        | 0.46484    | 0.25074 | 0.659546448 |             |          |         |  |
| KRTAP5-3  | ENSG00000196224 | 0.67212    | 0.25075 | 0.54079     | 0.29433     | -1.4556  |         |  |
|           | 0.92725         | -0.28449   | 0.61198 | 0.25075     | 0.659546448 |          |         |  |
| PANX2     | ENSG00000073150 | 0.67211    | 0.25076 | 0.17078     | 0.4322      | 0.67211  | 0.25076 |  |
|           | -0.3008         | 0.61822    | 0.25076 | 0.659546448 |             |          |         |  |
| HSP90AA4P | ENSG00000205100 | -0.0016351 | 0.50065 | 0.67211     | 0.25076     | -0.74221 |         |  |
|           | 0.77102         | 0.43538    | 0.33164 | 0.25076     | 0.659546448 |          |         |  |
| SULF1     | ENSG00000137573 | 0.2827     | 0.3887  | 0.63457     | 0.26286     | 0.31356  | 0.37693 |  |
|           | 0.67202         | 0.25079    | 0.25079 | 0.659546448 |             |          |         |  |
| MMP25-AS1 | ENSG00000261971 | 0.67198    | 0.2508  | 0.67198     | 0.2508      | 0.67198  |         |  |
|           | 0.2508          | 0.67198    | 0.2508  | 0.2508      | 0.659546448 |          |         |  |
| SYTL3     | ENSG00000164674 | 0.6718     | 0.25086 | 0.47984     | 0.31567     | 0.27513  | 0.39161 |  |
|           | 0.34813         | 0.36387    | 0.25086 | 0.659546448 |             |          |         |  |
| BCL2L1    | ENSG00000171552 | -0.38151   | 0.64859 | -0.36364    | 0.64194     | -0.23574 |         |  |
|           | 0.59318         | 0.67175    | 0.25087 | 0.25087     | 0.659546448 |          |         |  |
| NA        | ENSG00000229717 | 0.67171    | 0.25088 | 0.67171     | 0.25088     | 0.67171  | 0.25088 |  |
|           | 0.67171         | 0.25088    | 0.25088 | 0.659546448 |             |          |         |  |
| MAP4K3-DT | ENSG00000231312 | 0.4942     | 0.31058 | 0.6717      | 0.25089     | 0.081029 |         |  |
|           | 0.46771         | -0.18938   | 0.5751  | 0.25089     | 0.659546448 |          |         |  |
| NA        | ENSG00000249049 | 0.67168    | 0.25089 | 0.24223     | 0.4043      | 0.67168  | 0.25089 |  |
|           | 0.67168         | 0.25089    | 0.25089 | 0.659546448 |             |          |         |  |
| NA        | ENSG00000267677 | 0.21713    | 0.41406 | 0.070655    | 0.47184     | -1.1044  | 0.8653  |  |
|           | 0.67169         | 0.25089    | 0.25089 | 0.659546448 |             |          |         |  |
| PRMT5     | ENSG00000100462 | 0.67164    | 0.25091 | 0.67164     | 0.25091     | 0.67164  | 0.25091 |  |
|           | 0.14543         | 0.44219    | 0.25091 | 0.659546448 |             |          |         |  |
| NA        | ENSG00000252049 | 0.67163    | 0.25091 | 0.67163     | 0.25091     | -0.43538 | 0.66836 |  |

|           |                 |           |         |             |             |           |         |  |
|-----------|-----------------|-----------|---------|-------------|-------------|-----------|---------|--|
|           | -0.053052       | 0.52115   | 0.25091 | 0.659546448 |             |           |         |  |
| NA        | ENSG00000277840 | 0.67161   | 0.25091 | 0.67161     | 0.25091     | 0.67161   | 0.25091 |  |
|           | 0.67161         | 0.25091   | 0.25091 | 0.659546448 |             |           |         |  |
| TUBB4BP7  | ENSG00000217372 | -0.010462 | 0.50417 | 0.67158     | 0.25092     | 0.67158   |         |  |
|           | 0.25092         | 0.67158   | 0.25092 | 0.25092     | 0.659546448 |           |         |  |
| LAMC2     | ENSG00000058085 | 0.67143   | 0.25097 | -1.0033     | 0.84214     | 0.079151  | 0.46846 |  |
|           | -1.0517         | 0.85352   | 0.25097 | 0.659597422 |             |           |         |  |
| TMEM120B  | ENSG00000188735 | -0.35823  | 0.63992 | -0.67201    | 0.74921     | -0.92519  |         |  |
|           | 0.82257         | 0.67145   | 0.25097 | 0.25097     | 0.659597422 |           |         |  |
| NA        | ENSG00000273138 | 0.67141   | 0.25098 | 0.67141     | 0.25098     | 0.67141   | 0.25098 |  |
|           | 0.67141         | 0.25098   | 0.25098 | 0.659597422 |             |           |         |  |
| NA        | ENSG00000265122 | 0.64792   | 0.25852 | 0.67135     | 0.251       | -1.1376   | 0.87237 |  |
|           | -1.4407         | 0.92516   | 0.251   | 0.65961441  |             |           |         |  |
| NPC1      | ENSG00000141458 | -1.585    | 0.94351 | 0.44156     | 0.3294      | -0.55195  | 0.70951 |  |
|           | 0.6712          | 0.25105   | 0.25105 | 0.659646776 |             |           |         |  |
| RNU6-160P | ENSG00000207321 | 0.6712    | 0.25105 | 0.6712      | 0.25105     | 0.6712    |         |  |
|           | 0.25105         | 0.6712    | 0.25105 | 0.25105     | 0.659646776 |           |         |  |
| DDX6      | ENSG00000110367 | 0.56936   | 0.28456 | 0.67111     | 0.25108     | 0.1311    | 0.44785 |  |
|           | -0.11511        | 0.54582   | 0.25108 | 0.659646776 |             |           |         |  |
| TUBB8P1   | ENSG00000229298 | 0.6711    | 0.25108 | -0.19506    | 0.57733     | -0.067942 |         |  |
|           | 0.52708         | -0.067942 | 0.52708 | 0.25108     | 0.659646776 |           |         |  |
| NA        | ENSG00000230498 | -1.2354   | 0.89167 | 0.6711      | 0.25108     | -0.51648  | 0.69724 |  |
|           | -0.51648        | 0.69724   | 0.25108 | 0.659646776 |             |           |         |  |
| LINC01226 | ENSG00000284543 | 0.67102   | 0.2511  | 0.63159     | 0.26383     | 0.17302   |         |  |
|           | 0.43132         | 0.61784   | 0.26834 | 0.2511      | 0.659663755 |           |         |  |
| RBBP4     | ENSG00000162521 | -0.77566  | 0.78103 | 0.49224     | 0.31127     | -0.52434  | 0.69998 |  |
|           | 0.67073         | 0.2512    | 0.2512  | 0.659715905 |             |           |         |  |
| RNA5SP261 | ENSG00000222468 | -0.24308  | 0.59603 | 0.54819     | 0.29178     | -0.40628  |         |  |
|           | 0.65773         | 0.67066   | 0.25122 | 0.25122     | 0.659715905 |           |         |  |
| NA        | ENSG00000279305 | 0.67066   | 0.25122 | 0.49574     | 0.31004     | -0.27119  | 0.60688 |  |
|           | -0.27119        | 0.60688   | 0.25122 | 0.659715905 |             |           |         |  |
| NA        | ENSG00000268326 | -0.29762  | 0.617   | 0.6706      | 0.25124     | -0.84468  | 0.80085 |  |
|           | 0.14682         | 0.44164   | 0.25124 | 0.659715905 |             |           |         |  |
| UFM1      | ENSG00000120686 | 0.093809  | 0.46263 | 0.67057     | 0.25125     | 0.096835  | 0.46143 |  |
|           | 0.096835        | 0.46143   | 0.25125 | 0.659715905 |             |           |         |  |
| OR4Q2     | ENSG00000196383 | -0.51084  | 0.69527 | 0.014482    | 0.49422     | 0.46665   | 0.32038 |  |
|           | 0.67051         | 0.25127   | 0.25127 | 0.659715905 |             |           |         |  |
| NA        | ENSG00000229321 | -0.28033  | 0.61039 | -0.29118    | 0.61454     | -0.29118  | 0.61454 |  |
|           | 0.67051         | 0.25127   | 0.25127 | 0.659715905 |             |           |         |  |
| HDGFL2    | ENSG00000167674 | 0.17722   | 0.42967 | 0.34654     | 0.36447     | 0.4384    |         |  |
|           | 0.33055         | 0.67047   | 0.25128 | 0.25128     | 0.659715905 |           |         |  |
| NA        | ENSG00000267502 | 0.67039   | 0.2513  | 0.67039     | 0.2513      | 0.67039   | 0.2513  |  |
|           | 0.67039         | 0.2513    | 0.2513  | 0.659715905 |             |           |         |  |
| C4BPAP1   | ENSG00000224462 | 0.67038   | 0.25131 | 0.60797     | 0.2716      | 0.60797   |         |  |
|           | 0.2716          | 0.60797   | 0.2716  | 0.25131     | 0.659715905 |           |         |  |
| SEPHS1P2  | ENSG00000258787 | 0.67031   | 0.25133 | 0.67031     | 0.25133     | -1.0999   |         |  |
|           | 0.86431         | 0.67031   | 0.25133 | 0.25133     | 0.659715905 |           |         |  |
| MIR4679-2 | ENSG00000265375 | 0.67032   | 0.25133 | 0.67032     | 0.25133     | 0.67032   |         |  |
|           | 0.25133         | 0.67032   | 0.25133 | 0.25133     | 0.659715905 |           |         |  |
| CCL3      | ENSG00000277632 | 0.6703    | 0.25133 | 0.6703      | 0.25133     | 0.6703    | 0.25133 |  |
|           | 0.6703          | 0.25133   | 0.25133 | 0.659715905 |             |           |         |  |
| NA        | ENSG00000236261 | 0.67028   | 0.25134 | 0.67028     | 0.25134     | 0.67028   | 0.25134 |  |
|           | 0.67028         | 0.25134   | 0.25134 | 0.659715905 |             |           |         |  |
| TIPRL     | ENSG00000143155 | -0.87625  | 0.80955 | -0.87625    | 0.80955     | -0.87625  | 0.80955 |  |
|           | 0.67025         | 0.25135   | 0.25135 | 0.659715905 |             |           |         |  |
| TMEM250   | ENSG00000238227 | -0.31612  | 0.62404 | 0.2651      | 0.39547     | 0.48541   |         |  |
|           | 0.31369         | 0.67025   | 0.25135 | 0.25135     | 0.659715905 |           |         |  |
| NA        | ENSG00000259097 | 0.67025   | 0.25135 | 0.2364      | 0.40656     | 0.67025   | 0.25135 |  |
|           | -0.055293       | 0.52205   | 0.25135 | 0.659715905 |             |           |         |  |
| YTHDF1P1  | ENSG00000251389 | 0.67017   | 0.25137 | -0.33965    | 0.63294     | -0.38281  |         |  |
|           | 0.64907         | 0.67017   | 0.25137 | 0.25137     | 0.659723578 |           |         |  |
| C8orf87   | ENSG00000279847 | 0.34842   | 0.36376 | 0.4259      | 0.33509     | 0.34842   |         |  |

|           |                 |           |         |             |             |           |         |  |
|-----------|-----------------|-----------|---------|-------------|-------------|-----------|---------|--|
|           | 0.36376         | 0.67014   | 0.25138 | 0.25138     | 0.659723578 |           |         |  |
| SUOX      | ENSG00000139531 | 0.67005   | 0.25141 | 0.67005     | 0.25141     | 0.67005   | 0.25141 |  |
|           | 0.67005         | 0.25141   | 0.25141 | 0.659729634 |             |           |         |  |
| LINC02728 | ENSG00000251323 | 0.53078   | 0.29779 | 0.41081     | 0.34061     | 0.67004   |         |  |
|           | 0.25142         | 0.58838   | 0.27814 | 0.25142     | 0.659729634 |           |         |  |
| NA        | ENSG00000228322 | -0.5299   | 0.70191 | -0.57822    | 0.71844     | 0.66998   | 0.25144 |  |
|           | 0.66998         | 0.25144   | 0.25144 | 0.659729634 |             |           |         |  |
| NA        | ENSG00000249744 | 0.43181   | 0.33294 | 0.54525     | 0.29279     | 0.66995   | 0.25144 |  |
|           | 0.2371          | 0.40629   | 0.25144 | 0.659729634 |             |           |         |  |
| TARBP1    | ENSG00000059588 | 0.66994   | 0.25145 | -0.089188   | 0.53553     | 0.24167   |         |  |
|           | 0.40452         | 0.22727   | 0.41011 | 0.25145     | 0.659729634 |           |         |  |
| THOC1     | ENSG00000079134 | 0.66982   | 0.25149 | -0.11929    | 0.54748     | -1.4874   | 0.93155 |  |
|           | -0.7455         | 0.77201   | 0.25149 | 0.659789771 |             |           |         |  |
| NA        | ENSG00000277559 | 0.66978   | 0.2515  | 0.66978     | 0.2515      | 0.66978   | 0.2515  |  |
|           | 0.66978         | 0.2515    | 0.2515  | 0.659789771 |             |           |         |  |
| RPL30P2   | ENSG00000234272 | 0.66967   | 0.25153 | 0.66967     | 0.25153     | 0.66967   |         |  |
|           | 0.25153         | 0.66967   | 0.25153 | 0.25153     | 0.659797432 |           |         |  |
| NA        | ENSG00000266049 | 0.66969   | 0.25153 | -0.79573    | 0.78691     | 0.24197   | 0.4044  |  |
|           | -1.3462         | 0.91087   | 0.25153 | 0.659797432 |             |           |         |  |
| VAMP4     | ENSG00000117533 | 0.012433  | 0.49504 | 0.66955     | 0.25157     | 0.54553   | 0.2927  |  |
|           | -0.74453        | 0.77172   | 0.25157 | 0.65983132  |             |           |         |  |
| SLC25A44  | ENSG00000160785 | 0.66956   | 0.25157 | 0.17078     | 0.4322      | 0.66956   |         |  |
|           | 0.25157         | 0.17078   | 0.4322  | 0.25157     | 0.65983132  |           |         |  |
| LINC02101 | ENSG00000248132 | 0.6694    | 0.25162 | -0.4764     | 0.68311     | -1.3545   |         |  |
|           | 0.91221         | 0.6694    | 0.25162 | 0.25162     | 0.659917652 |           |         |  |
| NA        | ENSG00000257517 | 0.66937   | 0.25163 | 0.66937     | 0.25163     | 0.66937   | 0.25163 |  |
|           | 0.66937         | 0.25163   | 0.25163 | 0.659917652 |             |           |         |  |
| SEMA4F    | ENSG00000135622 | -0.22042  | 0.58723 | 0.012059    | 0.49519     | 0.14297   |         |  |
|           | 0.44316         | 0.66928   | 0.25166 | 0.25166     | 0.659960812 |           |         |  |
| RPL35AP22 | ENSG00000235133 | 0.6692    | 0.25168 | 0.6692      | 0.25168     | 0.6692    |         |  |
|           | 0.25168         | 0.6692    | 0.25168 | 0.25168     | 0.65997609  |           |         |  |
| RRP15     | ENSG00000067533 | 0.60155   | 0.27374 | 0.30024     | 0.382       | 0.66909   | 0.25172 |  |
|           | 0.53206         | 0.29734   | 0.25172 | 0.65997609  |             |           |         |  |
| PRDM10    | ENSG00000170325 | 0.30545   | 0.38001 | -0.43743    | 0.6691      | 0.6691    |         |  |
|           | 0.25172         | 0.43027   | 0.3335  | 0.25172     | 0.65997609  |           |         |  |
| SUMO2P12  | ENSG00000218893 | 0.66908   | 0.25172 | -0.28476    | 0.61209     | -0.075935 |         |  |
|           | 0.53026         | -0.38153  | 0.6486  | 0.25172     | 0.65997609  |           |         |  |
| CAPN9     | ENSG00000135773 | 0.041935  | 0.48328 | -0.59364    | 0.72362     | -0.15441  | 0.56136 |  |
|           | 0.66895         | 0.25176   | 0.25176 | 0.660009942 |             |           |         |  |
| SERPINB4  | ENSG00000206073 | 0.4634    | 0.32154 | 0.66897     | 0.25176     | -1.171    |         |  |
|           | 0.87919         | -0.053943 | 0.52151 | 0.25176     | 0.660009942 |           |         |  |
| NA        | ENSG00000202402 | -0.34548  | 0.63513 | 0.38379     | 0.35057     | 0.6689    | 0.25178 |  |
|           | 0.38379         | 0.35057   | 0.25178 | 0.660026865 |             |           |         |  |
| NKX2-3    | ENSG00000119919 | 0.66885   | 0.2518  | 0.66885     | 0.2518      | 0.66885   |         |  |
|           | 0.2518          | 0.12516   | 0.4502  | 0.2518      | 0.660032833 |           |         |  |
| TIMM9P1   | ENSG00000236900 | 0.2065    | 0.4182  | 0.66882     | 0.25181     | 0.60647   |         |  |
|           | 0.2721          | 0.60507   | 0.27256 | 0.25181     | 0.660032833 |           |         |  |
| TOPORS    | ENSG00000197579 | 0.058564  | 0.47665 | -0.045211   | 0.51803     | 0.66871   |         |  |
|           | 0.25184         | -0.24487  | 0.59672 | 0.25184     | 0.660032833 |           |         |  |
| NA        | ENSG00000273973 | 0.66871   | 0.25184 | 0.66871     | 0.25184     | 0.66871   | 0.25184 |  |
|           | 0.66871         | 0.25184   | 0.25184 | 0.660032833 |             |           |         |  |
| RNU4-2    | ENSG00000202538 | 0.66869   | 0.25185 | 0.66869     | 0.25185     | 0.66869   |         |  |
|           | 0.25185         | 0.66869   | 0.25185 | 0.25185     | 0.660032833 |           |         |  |
| SLC25A37  | ENSG00000147454 | 0.45561   | 0.32433 | -1.2512     | 0.89456     | 0.66851   |         |  |
|           | 0.25191         | -0.72049  | 0.76439 | 0.25191     | 0.660091198 |           |         |  |
| CCDC188   | ENSG00000234409 | 0.60224   | 0.27351 | 0.66848     | 0.25191     | 0.66848   |         |  |
|           | 0.25191         | 0.66848   | 0.25191 | 0.25191     | 0.660091198 |           |         |  |
| MRPS31P5  | ENSG00000243406 | 0.66842   | 0.25193 | -0.26137    | 0.6031      | -0.29868  |         |  |
|           | 0.61741         | 0.17404   | 0.43092 | 0.25193     | 0.660091198 |           |         |  |
| NA        | ENSG00000236924 | 0.6684    | 0.25194 | 0.6684      | 0.25194     | 0.6684    | 0.25194 |  |
|           | 0.6684          | 0.25194   | 0.25194 | 0.660091198 |             |           |         |  |
| PCDHGA6   | ENSG00000253731 | 0.66841   | 0.25194 | 0.66841     | 0.25194     | 0.66841   |         |  |



|            |                 |            |         |             |             |           |         |        |
|------------|-----------------|------------|---------|-------------|-------------|-----------|---------|--------|
|            | 0.25194         | 0.66841    | 0.25194 | 0.25194     | 0.660091198 |           |         |        |
| NA         | ENSG00000240624 | 0.41944    | 0.33745 | 0.62218     | 0.26691     | 0.6683    | 0.25197 |        |
|            | 0.19275         | 0.42358    | 0.25197 | 0.660134306 |             |           |         |        |
| PRKAG2-AS1 | ENSG00000239911 | 0.6682     | 0.252   | 0.6682      | 0.252       | 0.6682    | 0.252   | 0.6682 |
|            | 0.252           | 0.66017741 |         |             |             |           |         |        |
| NA         | ENSG00000270766 | 0.66808    | 0.25204 | -0.92462    | 0.82242     | -0.92462  | 0.82242 |        |
|            | -0.92462        | 0.82242    | 0.25204 | 0.660246705 |             |           |         |        |
| RNU1-44P   | ENSG00000207182 | 0.66802    | 0.25206 | 0.66802     | 0.25206     | 0.66802   |         |        |
|            | 0.25206         | 0.66802    | 0.25206 | 0.660263603 |             |           |         |        |
| PPP1R3E    | ENSG00000235194 | 0.13084    | 0.44795 | -0.29076    | 0.61438     | 0.6679    |         |        |
|            | 0.2521          | 0.6679     | 0.2521  | 0.660278798 |             |           |         |        |
| CCNJ       | ENSG00000107443 | 0.66787    | 0.25211 | -0.019088   | 0.50761     | -0.019088 | 0.50761 |        |
|            | -0.60445        | 0.72723    | 0.25211 | 0.660278798 |             |           |         |        |
| CTSLP8     | ENSG00000234575 | 0.14596    | 0.44198 | 0.66786     | 0.25211     | 0.4888    |         |        |
|            | 0.31249         | 0.4888     | 0.31249 | 0.25211     | 0.660278798 |           |         |        |
| GPR160     | ENSG00000173890 | -0.78385   | 0.78343 | -0.78385    | 0.78343     | -1.0836   |         |        |
|            | 0.86072         | 0.66784    | 0.25212 | 0.25212     | 0.660278798 |           |         |        |
| TAF1       | ENSG00000183662 | 0.25262    | 0.40028 | 0.32821     | 0.37138     | -0.88545  | 0.81204 |        |
|            | 0.66774         | 0.25215    | 0.25215 | 0.660303283 |             |           |         |        |
| NPR2       | ENSG00000159899 | -1.2554    | 0.89532 | -1.2554     | 0.89532     | -1.2494   | 0.89423 |        |
|            | 0.66766         | 0.25217    | 0.25217 | 0.660303283 |             |           |         |        |
| NA         | ENSG00000249734 | 0.66767    | 0.25217 | 0.58878     | 0.278       | 0.5671    | 0.28532 |        |
|            | -0.008439       | 0.50337    | 0.25217 | 0.660303283 |             |           |         |        |
| FBXL3      | ENSG00000005812 | 0.6676     | 0.25219 | 0.6676      | 0.25219     | 0.48369   | 0.3143  |        |
|            | 0.20849         | 0.41742    | 0.25219 | 0.660320171 |             |           |         |        |
| NA         | ENSG00000283366 | -0.4992    | 0.69118 | -0.43225    | 0.66722     | -1.2829   | 0.90023 |        |
|            | 0.66749         | 0.25223    | 0.25223 | 0.660370823 |             |           |         |        |
| NA         | ENSG00000224549 | 0.66744    | 0.25225 | 0.66744     | 0.25225     | 0.66744   | 0.25225 |        |
|            | 0.018667        | 0.49255    | 0.25225 | 0.660370823 |             |           |         |        |
| OR7E24     | ENSG00000237521 | 0.66742    | 0.25225 | 0.66742     | 0.25225     | 0.66742   |         |        |
|            | 0.25225         | -0.20322   | 0.58052 | 0.25225     | 0.660370823 |           |         |        |
| DEPDC7     | ENSG00000121690 | 0.66727    | 0.2523  | 0.66727     | 0.2523      | 0.66727   |         |        |
|            | 0.2523          | 0.66727    | 0.2523  | 0.660466237 |             |           |         |        |
| NA         | ENSG00000227267 | -0.39196   | 0.65246 | -0.36058    | 0.64079     | 0.2634    | 0.39612 |        |
|            | 0.66719         | 0.25232    | 0.25232 | 0.660473809 |             |           |         |        |
| RPL7L1P9   | ENSG00000231035 | 0.66718    | 0.25233 | 0.66718     | 0.25233     | -0.073413 |         |        |
|            | 0.52926         | 0.025748   | 0.48973 | 0.25233     | 0.660473809 |           |         |        |
| NA         | ENSG00000271029 | 0.66709    | 0.25236 | 0.66709     | 0.25236     | 0.45146   | 0.32583 |        |
|            | 0.66709         | 0.25236    | 0.25236 | 0.660516855 |             |           |         |        |
| SCARF2     | ENSG00000244486 | 0.6669     | 0.25242 | 0.6669      | 0.25242     | 0.6669    |         |        |
|            | 0.25242         | -0.54406   | 0.7068  | 0.25242     | 0.660629103 |           |         |        |
| NA         | ENSG00000273492 | -1.5368    | 0.93782 | -1.5368     | 0.93782     | 0.66687   | 0.25243 |        |
|            | -0.91895        | 0.82094    | 0.25243 | 0.660629103 |             |           |         |        |
| NA         | ENSG00000256293 | -0.94019   | 0.82644 | -0.94019    | 0.82644     | 0.66678   | 0.25246 |        |
|            | -0.94019        | 0.82644    | 0.25246 | 0.660661063 |             |           |         |        |
| HPCAL1     | ENSG00000115756 | -0.26759   | 0.60549 | 0.66671     | 0.25248     | -1.0766   |         |        |
|            | 0.85917         | 0.1831     | 0.42736 | 0.25248     | 0.660661063 |           |         |        |
| NA         | ENSG00000232696 | -0.65392   | 0.74342 | 0.0023494   | 0.49906     | 0.66666   | 0.25249 |        |
|            | -0.19257        | 0.57635    | 0.25249 | 0.660661063 |             |           |         |        |
| NA         | ENSG00000250564 | -1.117     | 0.86801 | -0.82398    | 0.79502     | -0.70788  | 0.76049 |        |
|            | 0.66664         | 0.2525     | 0.2525  | 0.660661063 |             |           |         |        |
| IRF2BP1    | ENSG00000170604 | 0.66661    | 0.25251 | 0.66661     | 0.25251     | 0.66661   |         |        |
|            | 0.25251         | 0.66661    | 0.25251 | 0.25251     | 0.660661063 |           |         |        |
| LMOD3      | ENSG00000163380 | 0.66652    | 0.25254 | 0.5167      | 0.30268     | 0.27262   | 0.39257 |        |
|            | -0.48765        | 0.6871     | 0.25254 | 0.660672632 |             |           |         |        |
| GRM7       | ENSG00000196277 | 0.35933    | 0.35967 | -1.615      | 0.94685     | -0.22476  | 0.58892 |        |
|            | 0.66648         | 0.25255    | 0.25255 | 0.660672632 |             |           |         |        |
| CDRT15P1   | ENSG00000141028 | 0.66642    | 0.25257 | -0.87538    | 0.80932     | 0.42163   |         |        |
|            | 0.33665         | 0.42163    | 0.33665 | 0.25257     | 0.660672632 |           |         |        |
| SP8        | ENSG00000164651 | 0.24967    | 0.40142 | 0.66631     | 0.25261     | 0.42202   | 0.33651 |        |
|            | -0.24328        | 0.59611    | 0.25261 | 0.660672632 |             |           |         |        |
| SAMD8      | ENSG00000156671 | 0.59412    | 0.27622 | 0.1946      | 0.42285     | 0.17123   | 0.43202 |        |

|             |                 |           |             |             |             |          |         |       |
|-------------|-----------------|-----------|-------------|-------------|-------------|----------|---------|-------|
|             | 0.66628         | 0.25262   | 0.25262     | 0.660672632 |             |          |         |       |
| NA          | ENSG00000279025 | 0.66623   | 0.25263     | 0.66623     | 0.25263     | 0.66623  | 0.25263 |       |
|             | 0.66623         | 0.25263   | 0.25263     | 0.660672632 |             |          |         |       |
| IFNL4       | ENSG00000272395 | 0.66621   | 0.25264     | 0.66621     | 0.25264     | 0.66621  | 0.25264 |       |
|             | 0.66621         | 0.25264   | 0.25264     | 0.660672632 |             |          |         |       |
| NA          | ENSG00000223872 | 0.34847   | 0.36374     | 0.34847     | 0.36374     | 0.4827   | 0.31466 |       |
|             | 0.66618         | 0.25265   | 0.25265     | 0.660672632 |             |          |         |       |
| LNCAROD     | ENSG00000231131 | 0.66617   | 0.25265     | -1.1481     | 0.87453     | -1.8209  |         |       |
|             | 0.96569         | 0.27809   | 0.39047     | 0.25265     | 0.660672632 |          |         |       |
| NA          | ENSG00000257999 | -1.578    | 0.94271     | 0.66617     | 0.25265     | -0.78026 | 0.78238 |       |
|             | -1.0272         | 0.84784   | 0.25265     | 0.660672632 |             |          |         |       |
| NA          | ENSG00000278874 | -0.1314   | 0.55227     | -0.1314     | 0.55227     | -0.1314  | 0.55227 |       |
|             | 0.66606         | 0.25269   | 0.25269     | 0.660712091 |             |          |         |       |
| RANBP17     | ENSG00000204764 | -0.079976 | 0.53187     | 0.52185     | 0.30089     | -0.60096 |         |       |
|             | 0.72607         | 0.66601   | 0.2527      | 0.2527      | 0.660712091 |          |         |       |
| NA          | ENSG00000255067 | 0.56345   | 0.28656     | 0.666       | 0.25271     | -0.86253 | 0.8058  |       |
|             | -0.79396        | 0.78639   | 0.25271     | 0.660712091 |             |          |         |       |
| NA          | ENSG00000265139 | 0.66597   | 0.25272     | 0.66597     | 0.25272     | 0.66597  | 0.25272 |       |
|             | 0.66597         | 0.25272   | 0.25272     | 0.660712091 |             |          |         |       |
| HPRT1P1     | ENSG00000251644 | -0.054767 | 0.52184     | 0.66589     | 0.25274     | 0.66589  |         |       |
|             | 0.25274         | 0.66589   | 0.25274     | 0.25274     | 0.660712091 |          |         |       |
| NA          | ENSG00000267582 | 0.66582   | 0.25276     | 0.66582     | 0.25276     | 0.66582  | 0.25276 |       |
|             | 0.66582         | 0.25276   | 0.25276     | 0.660712091 |             |          |         |       |
| NA          | ENSG00000279233 | 0.66582   | 0.25276     | 0.66582     | 0.25276     | 0.66582  | 0.25276 |       |
|             | 0.66582         | 0.25276   | 0.25276     | 0.660712091 |             |          |         |       |
| MED19       | ENSG00000156603 | 0.56832   | 0.28491     | 0.6657      | 0.2528      | 0.6657   | 0.2528  |       |
|             | 0.6657          | 0.2528    | 0.2528      | 0.660745763 |             |          |         |       |
| NA          | ENSG00000243675 | 0.089072  | 0.46451     | 0.66571     | 0.2528      | 0.089072 | 0.46451 |       |
|             | 0.089072        | 0.46451   | 0.2528      | 0.660745763 |             |          |         |       |
| SLFN13      | ENSG00000154760 | 0.66542   | 0.25289     | 0.66542     | 0.25289     | 0.66542  |         |       |
|             | 0.25289         | 0.66542   | 0.25289     | 0.25289     | 0.660856041 |          |         |       |
| WASHC5      | ENSG00000164961 | -0.56485  | 0.71391     | 0.66544     | 0.25289     | 0.1556   |         |       |
|             | 0.43818         | -0.20459  | 0.58106     | 0.25289     | 0.660856041 |          |         |       |
| ANKRD20A11P | ENSG00000215559 | -0.49567  | 0.68993     | 0.23628     | 0.40661     | -0.12066 |         |       |
|             | 0.54802         | 0.66544   | 0.25289     | 0.25289     | 0.660856041 |          |         |       |
| RPL23AP8    | ENSG00000241582 | -0.28793  | 0.6133      | 0.66538     | 0.2529      | -0.28793 |         |       |
|             | 0.6133          | -0.10952  | 0.54361     | 0.2529      | 0.660856041 |          |         |       |
| ZNF681      | ENSG00000196172 | -0.649    | 0.74183     | 0.66538     | 0.25291     | -0.649   |         |       |
|             | 0.74183         | -0.649    | 0.74183     | 0.25291     | 0.660856041 |          |         |       |
| NA          | ENSG00000232594 | 0.66529   | 0.25293     | 0.16272     | 0.43537     | 0.4311   | 0.3332  |       |
|             | -1.5477         | 0.93915   | 0.25293     | 0.660872863 |             |          |         |       |
| ZDHHC7      | ENSG00000153786 | -0.39564  | 0.65381     | 0.66518     | 0.25297     | 0.15243  |         |       |
|             | 0.43943         | 0.58219   | 0.28022     | 0.25297     | 0.660921521 |          |         |       |
| VSTM4       | ENSG00000165633 | 0.66512   | 0.25299     | 0.41254     | 0.33997     | 0.62927  | 0.26459 |       |
|             | 0.19659         | 0.42208   | 0.25299     | 0.660921521 |             |          |         |       |
| RNU6-685P   | ENSG00000252897 | 0.665     | 0.25302     | 0.665       | 0.25302     | 0.665    | 0.25302 | 0.665 |
|             | 0.25302         | 0.25302   | 0.660921521 |             |             |          |         |       |
| NDUFV1      | ENSG00000167792 | 0.66498   | 0.25303     | -0.26403    | 0.60412     | -0.57136 |         |       |
|             | 0.71612         | -0.57136  | 0.71612     | 0.25303     | 0.660921521 |          |         |       |
| OR5AN1      | ENSG00000176495 | -0.69854  | 0.75758     | 0.66499     | 0.25303     | -0.69854 |         |       |
|             | 0.75758         | -0.69854  | 0.75758     | 0.25303     | 0.660921521 |          |         |       |
| ZFP90       | ENSG00000184939 | 0.66498   | 0.25303     | 0.49383     | 0.31071     | -0.58106 | 0.7194  |       |
|             | -0.070289       | 0.52802   | 0.25303     | 0.660921521 |             |          |         |       |
| NA          | ENSG00000271267 | 0.66476   | 0.2531      | 0.66476     | 0.2531      | 0.66476  | 0.2531  |       |
|             | 0.66476         | 0.2531    | 0.2531      | 0.661068929 |             |          |         |       |
| NA          | ENSG00000235464 | 0.00612   | 0.49756     | -0.044166   | 0.51761     | 0.66469  | 0.25312 |       |
|             | 0.00612         | 0.49756   | 0.25312     | 0.661076419 |             |          |         |       |
| TMED2       | ENSG00000086598 | -0.84005  | 0.79956     | -0.71262    | 0.76196     | -0.51135 | 0.69545 |       |
|             | 0.66467         | 0.25313   | 0.25313     | 0.661076419 |             |          |         |       |
| PSMB7P1     | ENSG00000259074 | 0.66462   | 0.25315     | 0.66462     | 0.25315     | 0.66462  |         |       |
|             | 0.25315         | 0.66462   | 0.25315     | 0.25315     | 0.661083908 |          |         |       |
| PLBD2       | ENSG00000151176 | -0.040219 | 0.51604     | 0.038282    | 0.48473     | 0.50596  | 0.30644 |       |

|            |                 |          |         |             |             |            |         |  |
|------------|-----------------|----------|---------|-------------|-------------|------------|---------|--|
|            | 0.66458         | 0.25316  | 0.25316 | 0.661083908 |             |            |         |  |
| DDX60L     | ENSG00000181381 | -0.57072 | 0.71591 | 0.66438     | 0.25322     | -0.97715   |         |  |
|            | 0.83575         | -0.15227 | 0.56051 | 0.25322     | 0.66116041  |            |         |  |
| CES5AP1    | ENSG00000215478 | -0.44809 | 0.67296 | -0.38222    | 0.64885     | 0.66436    |         |  |
|            | 0.25323         | -0.28411 | 0.61184 | 0.25323     | 0.66116041  |            |         |  |
| MTND2P33   | ENSG00000248907 | 0.66436  | 0.25323 | 0.66436     | 0.25323     | -0.35919   |         |  |
|            | 0.64027         | -0.33636 | 0.6317  | 0.25323     | 0.66116041  |            |         |  |
| NA         | ENSG00000257237 | 0.6643   | 0.25325 | 0.6643      | 0.25325     | 0.6643     | 0.25325 |  |
|            | 0.6643          | 0.25325  | 0.25325 | 0.661177203 |             |            |         |  |
| NA         | ENSG00000279104 | -1.9121  | 0.97207 | 0.66424     | 0.25327     | -1.9121    | 0.97207 |  |
|            | -1.9121         | 0.97207  | 0.25327 | 0.661193994 |             |            |         |  |
| TYSND1     | ENSG00000156521 | 0.66401  | 0.25334 | 0.66401     | 0.25334     | 0.66401    |         |  |
|            | 0.25334         | 0.66401  | 0.25334 | 0.25334     | 0.661223878 |            |         |  |
| SCG5       | ENSG00000166922 | -1.2023  | 0.88537 | 0.36211     | 0.35864     | 0.66402    | 0.25334 |  |
|            | -0.76779        | 0.77869  | 0.25334 | 0.661223878 |             |            |         |  |
| NA         | ENSG00000231485 | 0.664    | 0.25335 | -1.3022     | 0.90358     | 0.40249    | 0.34366 |  |
|            | -1.3022         | 0.90358  | 0.25335 | 0.661223878 |             |            |         |  |
| ANKIB1     | ENSG00000001629 | 0.66396  | 0.25336 | -0.39913    | 0.6551      | -0.0022895 |         |  |
|            | 0.50091         | -0.80921 | 0.7908  | 0.25336     | 0.661223878 |            |         |  |
| SNORD73B   | ENSG00000201264 | 0.66388  | 0.25338 | 0.66388     | 0.25338     | 0.66388    |         |  |
|            | 0.25338         | 0.66388  | 0.25338 | 0.25338     | 0.661223878 |            |         |  |
| NA         | ENSG00000249349 | -0.99092 | 0.83914 | -0.99092    | 0.83914     | 0.66387    | 0.25339 |  |
|            | -0.99092        | 0.83914  | 0.25339 | 0.661223878 |             |            |         |  |
| NA         | ENSG00000259639 | 0.52716  | 0.29904 | 0.66386     | 0.25339     | 0.52716    | 0.29904 |  |
|            | 0.52716         | 0.29904  | 0.25339 | 0.661223878 |             |            |         |  |
| BNIP3P8    | ENSG00000269431 | 0.66387  | 0.25339 | 0.66387     | 0.25339     | 0.66387    |         |  |
|            | 0.25339         | 0.66387  | 0.25339 | 0.25339     | 0.661223878 |            |         |  |
| TRAV8-6    | ENSG00000211795 | -1.1892  | 0.88282 | 0.66374     | 0.25343     | -0.5935    |         |  |
|            | 0.72358         | -0.5935  | 0.72358 | 0.25343     | 0.661292846 |            |         |  |
| INPPL1     | ENSG00000165458 | 0.6634   | 0.25354 | 0.6634      | 0.25354     | 0.6634     |         |  |
|            | 0.25354         | 0.6634   | 0.25354 | 0.25354     | 0.661367366 |            |         |  |
| CKMT2      | ENSG00000131730 | -0.13807 | 0.55491 | -0.48086    | 0.68469     | 0.66337    | 0.25355 |  |
|            | -0.54928        | 0.70859  | 0.25355 | 0.661367366 |             |            |         |  |
| LINC02800  | ENSG00000230023 | -0.20165 | 0.5799  | 0.66337     | 0.25355     | -0.055546  |         |  |
|            | 0.52215         | 0.27614  | 0.39122 | 0.25355     | 0.661367366 |            |         |  |
| CORO1B     | ENSG00000172725 | -0.48185 | 0.68504 | -1.6761     | 0.95314     | 0.66329    |         |  |
|            | 0.25357         | -2.3096  | 0.98954 | 0.25357     | 0.661367366 |            |         |  |
| RNU6-1102P | ENSG00000251958 | 0.6633   | 0.25357 | -0.04972    | 0.51985     | -0.04972   |         |  |
|            | 0.51985         | -0.04972 | 0.51985 | 0.25357     | 0.661367366 |            |         |  |
| EGLN3P1    | ENSG00000256134 | 0.66329  | 0.25357 | 0.66329     | 0.25357     | 0.66329    |         |  |
|            | 0.25357         | 0.66329  | 0.25357 | 0.25357     | 0.661367366 |            |         |  |
| NA         | ENSG00000275437 | 0.66326  | 0.25358 | 0.66326     | 0.25358     | 0.66326    | 0.25358 |  |
|            | 0.66326         | 0.25358  | 0.25358 | 0.661367366 |             |            |         |  |
| NA         | ENSG00000270957 | 0.4605   | 0.32258 | 0.66323     | 0.25359     | 0.66323    | 0.25359 |  |
|            | 0.66323         | 0.25359  | 0.25359 | 0.661367366 |             |            |         |  |
| RPS29P7    | ENSG00000231622 | -1.0817  | 0.86031 | 0.66321     | 0.2536      | -1.0817    |         |  |
|            | 0.86031         | -1.0817  | 0.86031 | 0.2536      | 0.661367366 |            |         |  |
| CEACAM8    | ENSG00000124469 | -0.17703 | 0.57026 | -0.73815    | 0.76979     | 0.66317    |         |  |
|            | 0.25361         | 0.55777  | 0.2885  | 0.25361     | 0.661367366 |            |         |  |
| NA         | ENSG00000231922 | 0.66309  | 0.25364 | 0.66309     | 0.25364     | 0.66309    | 0.25364 |  |
|            | 0.66309         | 0.25364  | 0.25364 | 0.661367366 |             |            |         |  |
| GRAMD1A    | ENSG00000089351 | 0.66297  | 0.25368 | -0.97814    | 0.836       | -0.97814   | 0.836   |  |
|            | -0.97814        | 0.836    | 0.25368 | 0.661367366 |             |            |         |  |
| NA         | ENSG00000267722 | 0.66293  | 0.25369 | -0.6161     | 0.73109     | 0.54368    | 0.29333 |  |
|            | 0.15382         | 0.43888  | 0.25369 | 0.661367366 |             |            |         |  |
| ANXA11     | ENSG00000122359 | 0.46043  | 0.32261 | 0.55544     | 0.2893      | 0.6629     |         |  |
|            | 0.2537          | 0.6255   | 0.26582 | 0.2537      | 0.661367366 |            |         |  |
| TRIM28     | ENSG00000130726 | 0.027951 | 0.48885 | 0.66286     | 0.25371     | 0.57884    |         |  |
|            | 0.28135         | 0.66286  | 0.25371 | 0.25371     | 0.661367366 |            |         |  |
| CCDC105    | ENSG00000160994 | -0.75974 | 0.77629 | -0.47549    | 0.68278     | 0.66287    |         |  |
|            | 0.25371         | 0.66287  | 0.25371 | 0.25371     | 0.661367366 |            |         |  |
| RPL22P24   | ENSG00000231084 | 0.66287  | 0.25371 | -0.46659    | 0.6796      | 0.66287    |         |  |

|             |                 |          |         |             |             |           |         |  |
|-------------|-----------------|----------|---------|-------------|-------------|-----------|---------|--|
|             | 0.25371         | 0.66287  | 0.25371 | 0.25371     | 0.661367366 |           |         |  |
| NA          | ENSG00000274712 | -1.3559  | 0.91243 | -0.60954    | 0.72892     | -0.60954  | 0.72892 |  |
|             | 0.66287         | 0.25371  | 0.25371 | 0.661367366 |             |           |         |  |
| CHRNA1      | ENSG00000170175 | 0.50904  | 0.30536 | 0.66283     | 0.25372     | 0.58418   |         |  |
|             | 0.27955         | 0.58418  | 0.27955 | 0.25372     | 0.661367366 |           |         |  |
| FAM183BP    | ENSG00000164556 | 0.66279  | 0.25373 | 0.023255    | 0.49072     | 0.66279   |         |  |
|             | 0.25373         | 0.66279  | 0.25373 | 0.25373     | 0.661367366 |           |         |  |
| IGHVIII-5-2 | ENSG00000254053 | 0.66272  | 0.25376 | -0.16072    | 0.56384     | 0.66272   |         |  |
|             | 0.25376         | -1.2465  | 0.89371 | 0.25376     | 0.661410184 |           |         |  |
| NA          | ENSG00000228999 | 0.66257  | 0.2538  | 0.53474     | 0.29641     | 0.53474   | 0.29641 |  |
|             | 0.53474         | 0.29641  | 0.2538  | 0.661471223 |             |           |         |  |
| NA          | ENSG00000261938 | 0.66252  | 0.25382 | 0.66252     | 0.25382     | 0.66252   | 0.25382 |  |
|             | 0.66252         | 0.25382  | 0.25382 | 0.661471223 |             |           |         |  |
| TMEFF2      | ENSG00000144339 | 0.66242  | 0.25385 | -0.53643    | 0.70417     | -0.74336  |         |  |
|             | 0.77137         | -0.50536 | 0.69335 | 0.25385     | 0.661471223 |           |         |  |
| PRSS38      | ENSG00000185888 | -0.42392 | 0.66419 | -0.42392    | 0.66419     | -0.9063   |         |  |
|             | 0.81761         | 0.66242  | 0.25385 | 0.25385     | 0.661471223 |           |         |  |
| RNU6-1088P  | ENSG00000252659 | 0.66228  | 0.2539  | 0.66228     | 0.2539      | 0.66228   |         |  |
|             | 0.2539          | 0.66228  | 0.2539  | 0.2539      | 0.661471223 |           |         |  |
| NA          | ENSG00000258028 | 0.66226  | 0.2539  | -1.2334     | 0.89128     | -0.7765   | 0.78127 |  |
|             | -0.50055        | 0.69166  | 0.2539  | 0.661471223 |             |           |         |  |
| NA          | ENSG00000257000 | 0.66224  | 0.25391 | 0.66224     | 0.25391     | 0.66224   | 0.25391 |  |
|             | 0.66224         | 0.25391  | 0.25391 | 0.661471223 |             |           |         |  |
| NA          | ENSG00000275374 | -0.55913 | 0.71196 | -0.44757    | 0.67277     | -0.3643   | 0.64218 |  |
|             | 0.66218         | 0.25393  | 0.25393 | 0.661471223 |             |           |         |  |
| MTND5P22    | ENSG00000238046 | 0.6621   | 0.25395 | -0.56668    | 0.71453     | -0.13047  |         |  |
|             | 0.5519          | 0.6621   | 0.25395 | 0.25395     | 0.661471223 |           |         |  |
| LINC02376   | ENSG00000256292 | 0.66211  | 0.25395 | 0.42978     | 0.33368     | 0.66211   |         |  |
|             | 0.25395         | -0.26961 | 0.60627 | 0.25395     | 0.661471223 |           |         |  |
| MIR544B     | ENSG00000265981 | 0.66209  | 0.25396 | 0.66209     | 0.25396     | 0.66209   |         |  |
|             | 0.25396         | 0.66209  | 0.25396 | 0.25396     | 0.661471223 |           |         |  |
| SORBS1      | ENSG00000095637 | -0.30118 | 0.61836 | -0.30575    | 0.6201      | 0.5817    |         |  |
|             | 0.28039         | 0.66201  | 0.25398 | 0.25398     | 0.661471223 |           |         |  |
| HSPA4       | ENSG00000170606 | 0.66188  | 0.25402 | 0.63745     | 0.26191     | 0.66186   | 0.25403 |  |
|             | -0.42411        | 0.66426  | 0.25402 | 0.661471223 |             |           |         |  |
| NA          | ENSG00000244791 | 0.66178  | 0.25405 | 0.66178     | 0.25405     | 0.66178   | 0.25405 |  |
|             | 0.66178         | 0.25405  | 0.25405 | 0.661471223 |             |           |         |  |
| ZNF497      | ENSG00000174586 | 0.66175  | 0.25407 | 0.66175     | 0.25407     | 0.66175   |         |  |
|             | 0.25407         | 0.66175  | 0.25407 | 0.25407     | 0.661471223 |           |         |  |
| A2MP1       | ENSG00000256069 | 0.62086  | 0.26735 | 0.59287     | 0.27663     | 0.59287   | 0.27663 |  |
|             | 0.66174         | 0.25407  | 0.25407 | 0.661471223 |             |           |         |  |
| NA          | ENSG00000268230 | 0.66175  | 0.25407 | 0.66175     | 0.25407     | 0.66175   | 0.25407 |  |
|             | 0.66175         | 0.25407  | 0.25407 | 0.661471223 |             |           |         |  |
| NA          | ENSG00000269482 | 0.66174  | 0.25407 | -0.68758    | 0.75414     | -2.2024   | 0.98618 |  |
|             | -2.2024         | 0.98618  | 0.25407 | 0.661471223 |             |           |         |  |
| LINC01654   | ENSG00000261781 | 0.66163  | 0.25411 | -0.50651    | 0.69375     | 0.6294    |         |  |
|             | 0.26454         | 0.49693  | 0.30962 | 0.25411     | 0.661471223 |           |         |  |
| SRSF12      | ENSG00000154548 | -0.32247 | 0.62645 | -0.32247    | 0.62645     | -0.32247  |         |  |
|             | 0.62645         | 0.66159  | 0.25412 | 0.25412     | 0.661471223 |           |         |  |
| PCDHA5      | ENSG00000204965 | -0.79414 | 0.78644 | -0.79414    | 0.78644     | -0.79414  |         |  |
|             | 0.78644         | 0.66158  | 0.25412 | 0.25412     | 0.661471223 |           |         |  |
| MPPED1      | ENSG00000186732 | -0.35446 | 0.6385  | -0.9098     | 0.81854     | -0.041855 |         |  |
|             | 0.51669         | 0.66154  | 0.25413 | 0.25413     | 0.661471223 |           |         |  |
| NA          | ENSG00000222432 | 0.66151  | 0.25414 | 0.66151     | 0.25414     | 0.66151   | 0.25414 |  |
|             | 0.66151         | 0.25414  | 0.25414 | 0.661471223 |             |           |         |  |
| LY6L        | ENSG00000261667 | 0.25354  | 0.39992 | 0.42194     | 0.33654     | 0.66141   | 0.25417 |  |
|             | 0.42194         | 0.33654  | 0.25417 | 0.661471223 |             |           |         |  |
| NA          | ENSG00000268677 | 0.66143  | 0.25417 | 0.66143     | 0.25417     | 0.66143   | 0.25417 |  |
|             | 0.66143         | 0.25417  | 0.25417 | 0.661471223 |             |           |         |  |
| RPL31P40    | ENSG00000253964 | 0.6614   | 0.25418 | 0.6614      | 0.25418     | 0.6614    |         |  |
|             | 0.25418         | 0.6614   | 0.25418 | 0.25418     | 0.661471223 |           |         |  |
| FIG4        | ENSG00000112367 | 0.33902  | 0.3673  | 0.66136     | 0.25419     | -1.1805   | 0.88109 |  |

|             |                 |             |             |             |             |             |         |  |
|-------------|-----------------|-------------|-------------|-------------|-------------|-------------|---------|--|
|             | 0.29004         | 0.38589     | 0.25419     | 0.661471223 |             |             |         |  |
| NA          | ENSG00000254054 | 0.66137     | 0.25419     | -0.65471    | 0.74367     | -0.44674    | 0.67247 |  |
|             | -0.44674        | 0.67247     | 0.25419     | 0.661471223 |             |             |         |  |
| SSB         | ENSG00000138385 | 0.66131     | 0.25421     | -1.7891     | 0.9632      | -1.7891     | 0.9632  |  |
|             | -1.7891         | 0.9632      | 0.25421     | 0.661471223 |             |             |         |  |
| CCDC148-AS1 | ENSG00000227480 | 0.4809      | 0.31529     | -0.0015071  | 0.5006      | 0.4809      |         |  |
|             | 0.31529         | 0.66129     | 0.25421     | 0.25421     | 0.661471223 |             |         |  |
| PARN        | ENSG00000140694 | 0.28556     | 0.38761     | 0.66128     | 0.25422     | 0.34775     | 0.36401 |  |
|             | -0.25535        | 0.60077     | 0.25422     | 0.661471223 |             |             |         |  |
| FBXO48      | ENSG00000204923 | -1.033      | 0.84921     | -1.1308     | 0.87092     | 0.089983    |         |  |
|             | 0.46415         | 0.6612      | 0.25424     | 0.25424     | 0.661471223 |             |         |  |
| OR2R1P      | ENSG00000236853 | 0.66121     | 0.25424     | 0.66121     | 0.25424     | 0.66121     |         |  |
|             | 0.25424         | 0.66121     | 0.25424     | 0.25424     | 0.661471223 |             |         |  |
| NA          | ENSG00000278911 | 0.66111     | 0.25427     | -0.31546    | 0.62379     | -0.098517   | 0.53924 |  |
|             | -0.8977         | 0.81533     | 0.25427     | 0.661471223 |             |             |         |  |
| UGT1A13P    | ENSG00000234143 | 0.66107     | 0.25428     | -0.53273    | 0.70289     | 0.13649     |         |  |
|             | 0.44572         | -0.0031564  | 0.50126     | 0.25428     | 0.661471223 |             |         |  |
| NA          | ENSG00000237631 | 0.661025431 | 0.661025431 | 0.661025431 | 0.661025431 | 0.661025431 |         |  |
|             | 0.25431         | 0.661471223 |             |             |             |             |         |  |
| FMO8P       | ENSG00000238087 | 0.66098     | 0.25431     | 0.64926     | 0.25808     | 0.64926     | 0.25808 |  |
|             | 0.64926         | 0.25808     | 0.25431     | 0.661471223 |             |             |         |  |
| TUSC7       | ENSG00000243197 | -0.014316   | 0.50571     | 0.35078     | 0.36288     | 0.36599     | 0.35719 |  |
|             | 0.66095         | 0.25432     | 0.25432     | 0.661471223 |             |             |         |  |
| NA          | ENSG00000253740 | 0.66096     | 0.25432     | 0.66096     | 0.25432     | 0.66096     | 0.25432 |  |
|             | 0.66096         | 0.25432     | 0.25432     | 0.661471223 |             |             |         |  |
| NA          | ENSG00000283483 | 0.6609      | 0.25434     | 0.6609      | 0.25434     | 0.6609      | 0.25434 |  |
|             | 0.6609          | 0.25434     | 0.25434     | 0.661471223 |             |             |         |  |
| NA          | ENSG00000250362 | 0.66087     | 0.25435     | 0.66087     | 0.25435     | -0.17537    | 0.56961 |  |
|             | -0.41203        | 0.65984     | 0.25435     | 0.661471223 |             |             |         |  |
| RN7SKP212   | ENSG00000222783 | 0.66084     | 0.25436     | 0.66084     | 0.25436     | 0.66084     |         |  |
|             | 0.25436         | 0.66084     | 0.25436     | 0.25436     | 0.661471223 |             |         |  |
| NA          | ENSG00000233728 | 0.6608      | 0.25437     | 0.6608      | 0.25437     | 0.6608      | 0.25437 |  |
|             | 0.6608          | 0.25437     | 0.25437     | 0.661471223 |             |             |         |  |
| NA          | ENSG00000272631 | 0.66067     | 0.25441     | 0.66067     | 0.25441     | 0.66067     | 0.25441 |  |
|             | 0.66067         | 0.25441     | 0.25441     | 0.661471223 |             |             |         |  |
| NA          | ENSG00000273978 | 0.66065     | 0.25442     | 0.66065     | 0.25442     | 0.66065     | 0.25442 |  |
|             | 0.66065         | 0.25442     | 0.25442     | 0.661471223 |             |             |         |  |
| SPACA3      | ENSG00000141316 | 0.66061     | 0.25443     | -0.1468     | 0.55836     | -0.15108    |         |  |
|             | 0.56004         | 0.23544     | 0.40693     | 0.25443     | 0.661471223 |             |         |  |
| MRPS30-DT   | ENSG00000251141 | -0.50471    | 0.69312     | -1.2982     | 0.9029      | 0.38968     |         |  |
|             | 0.34839         | 0.66059     | 0.25444     | 0.25444     | 0.661471223 |             |         |  |
| RBM22P4     | ENSG00000277769 | 0.66056     | 0.25445     | 0.66056     | 0.25445     | 0.66056     |         |  |
|             | 0.25445         | 0.66056     | 0.25445     | 0.25445     | 0.661471223 |             |         |  |
| NA          | ENSG00000267501 | 0.66048     | 0.25447     | 0.66048     | 0.25447     | 0.66048     | 0.25447 |  |
|             | 0.66048         | 0.25447     | 0.25447     | 0.661471223 |             |             |         |  |
| NA          | ENSG00000221428 | 0.66044     | 0.25449     | 0.66044     | 0.25449     | 0.66044     | 0.25449 |  |
|             | 0.66044         | 0.25449     | 0.25449     | 0.661471223 |             |             |         |  |
| ALDH9A1     | ENSG00000143149 | 0.66037     | 0.25451     | 0.66037     | 0.25451     | 0.66037     |         |  |
|             | 0.25451         | -0.85606    | 0.80402     | 0.25451     | 0.661471223 |             |         |  |
| C16orf92    | ENSG00000167194 | 0.66038     | 0.25451     | 0.66038     | 0.25451     | 0.66038     |         |  |
|             | 0.25451         | 0.66038     | 0.25451     | 0.25451     | 0.661471223 |             |         |  |
| RNU6-1160P  | ENSG00000207276 | -1.4749     | 0.92988     | 0.66034     | 0.25452     | 0.66034     |         |  |
|             | 0.25452         | 0.66034     | 0.25452     | 0.25452     | 0.661471223 |             |         |  |
| NA          | ENSG00000225885 | -0.73264    | 0.76811     | -0.72951    | 0.76716     | 0.041097    | 0.48361 |  |
|             | 0.66033         | 0.25452     | 0.25452     | 0.661471223 |             |             |         |  |
| KIAA1109    | ENSG00000138688 | -0.45129    | 0.67411     | 0.16334     | 0.43513     | 0.4019      |         |  |
|             | 0.34388         | 0.66031     | 0.25453     | 0.25453     | 0.661471223 |             |         |  |
| NA          | ENSG00000260410 | 0.66025     | 0.25455     | 0.66025     | 0.25455     | 0.66025     | 0.25455 |  |
|             | 0.66025         | 0.25455     | 0.25455     | 0.661478633 |             |             |         |  |
| RPL32P28    | ENSG00000232105 | 0.66022     | 0.25456     | 0.66022     | 0.25456     | 0.66022     |         |  |
|             | 0.25456         | 0.66022     | 0.25456     | 0.25456     | 0.661478633 |             |         |  |
| SRSF3       | ENSG00000112081 | -0.49381    | 0.68928     | -0.14355    | 0.55707     | 0.56245     | 0.2869  |  |

|             |                 |           |         |             |             |            |         |  |
|-------------|-----------------|-----------|---------|-------------|-------------|------------|---------|--|
|             | 0.66005         | 0.25461   | 0.25461 | 0.661538006 |             |            |         |  |
| KRT79       | ENSG00000185640 | 0.66005   | 0.25461 | -0.72716    | 0.76643     | -0.045021  | 0.51795 |  |
|             | 0.66005         | 0.25461   | 0.25461 | 0.661538006 |             |            |         |  |
| RPL9P16     | ENSG00000214676 | -0.23681  | 0.5936  | -1.4339     | 0.9242      | -0.23681   |         |  |
|             | 0.5936          | 0.65981   | 0.25469 | 0.25469     | 0.661666009 |            |         |  |
| RNU6-758P   | ENSG00000252101 | 0.20053   | 0.42053 | 0.65979     | 0.25469     | 0.65979    |         |  |
|             | 0.25469         | 0.65979   | 0.25469 | 0.25469     | 0.661666009 |            |         |  |
| GLULP5      | ENSG00000257915 | 0.65979   | 0.2547  | 0.65979     | 0.2547      | 0.65979    |         |  |
|             | 0.2547          | 0.65979   | 0.2547  | 0.2547      | 0.661666009 |            |         |  |
| TSPAN32     | ENSG00000064201 | -0.23726  | 0.59377 | -0.22118    | 0.58752     | 0.42193    |         |  |
|             | 0.33654         | 0.65963   | 0.25475 | 0.25475     | 0.66168078  |            |         |  |
| FOXJ3       | ENSG00000198815 | -1.0146   | 0.84486 | -1.2993     | 0.90308     | 0.6596     | 0.25475 |  |
|             | -0.39376        | 0.65312   | 0.25475 | 0.66168078  |             |            |         |  |
| LINC01019   | ENSG00000248118 | -0.037083 | 0.51479 | 0.65963     | 0.25475     | -0.53013   |         |  |
|             | 0.70199         | -0.35579  | 0.639   | 0.25475     | 0.66168078  |            |         |  |
| TNFRSF10D   | ENSG00000173530 | 0.65958   | 0.25476 | 0.52472     | 0.29989     | 0.24011    |         |  |
|             | 0.40512         | 0.062118  | 0.47523 | 0.25476     | 0.66168078  |            |         |  |
| NPM1P6      | ENSG00000213881 | 0.65953   | 0.25478 | 0.65953     | 0.25478     | 0.65953    |         |  |
|             | 0.25478         | 0.65953   | 0.25478 | 0.25478     | 0.661688164 |            |         |  |
| AK4P1       | ENSG00000263535 | 0.65951   | 0.25479 | 0.65951     | 0.25479     | 0.65951    | 0.25479 |  |
|             | 0.65951         | 0.25479   | 0.25479 | 0.661688164 |             |            |         |  |
| NPHS1       | ENSG00000161270 | 0.42902   | 0.33395 | 0.42902     | 0.33395     | 0.42902    | 0.33395 |  |
|             | 0.65922         | 0.25488   | 0.25488 | 0.661735669 |             |            |         |  |
| NA          | ENSG00000270937 | 0.59248   | 0.27677 | 0.59248     | 0.27677     | 0.65919    | 0.25489 |  |
|             | 0.59248         | 0.27677   | 0.25489 | 0.661735669 |             |            |         |  |
| KRT18P19    | ENSG00000213601 | 0.1285    | 0.44888 | 0.65914     | 0.2549      | -0.0029975 |         |  |
|             | 0.5012          | 0.1285    | 0.44888 | 0.2549      | 0.661735669 |            |         |  |
| C16orf96    | ENSG00000205832 | 0.65912   | 0.25491 | 0.37614     | 0.3534      | 0.22996    |         |  |
|             | 0.40906         | 0.44267   | 0.329   | 0.25491     | 0.661735669 |            |         |  |
| RNA5SP104   | ENSG00000222921 | 0.65907   | 0.25492 | 0.65907     | 0.25492     | 0.65907    |         |  |
|             | 0.25492         | 0.64288   | 0.26015 | 0.25492     | 0.661735669 |            |         |  |
| NA          | ENSG00000259136 | 0.65908   | 0.25492 | 0.65908     | 0.25492     | -0.61775   | 0.73163 |  |
|             | 0.65908         | 0.25492   | 0.25492 | 0.661735669 |             |            |         |  |
| NA          | ENSG00000232739 | -1.6087   | 0.94615 | -1.6087     | 0.94615     | -1.6087    | 0.94615 |  |
|             | 0.65906         | 0.25493   | 0.25493 | 0.661735669 |             |            |         |  |
| NA          | ENSG00000259133 | 0.65906   | 0.25493 | -0.064755   | 0.52582     | 0.090755   | 0.46384 |  |
|             | 0.45811         | 0.32344   | 0.25493 | 0.661735669 |             |            |         |  |
| NA          | ENSG00000279704 | 0.65903   | 0.25494 | 0.58724     | 0.27852     | 0.58724    | 0.27852 |  |
|             | -1.1531         | 0.87557   | 0.25494 | 0.661735669 |             |            |         |  |
| C11orf71    | ENSG00000180425 | -0.17798  | 0.57063 | -0.17798    | 0.57063     | -0.17798   |         |  |
|             | 0.57063         | 0.65896   | 0.25496 | 0.25496     | 0.661735669 |            |         |  |
| NA          | ENSG00000223059 | 0.65893   | 0.25497 | 0.65893     | 0.25497     | -0.34044   | 0.63324 |  |
|             | 0.65893         | 0.25497   | 0.25497 | 0.661735669 |             |            |         |  |
| SEPTIN14P21 | ENSG00000231512 | -1.2998   | 0.90316 | 0.65884     | 0.255       | -0.93764   |         |  |
|             | 0.82578         | 0.12602   | 0.44986 | 0.255       | 0.661735669 |            |         |  |
| NA          | ENSG00000260454 | 0.38983   | 0.34833 | 0.3011      | 0.38167     | 0.65884    | 0.255   |  |
|             | 0.57615         | 0.28226   | 0.255   | 0.661735669 |             |            |         |  |
| BTF3P7      | ENSG00000219986 | 0.65875   | 0.25503 | 0.65875     | 0.25503     | 0.093272   |         |  |
|             | 0.46284         | -0.54445  | 0.70694 | 0.25503     | 0.661735669 |            |         |  |
| MIR3148     | ENSG00000264788 | 0.65876   | 0.25503 | 0.65876     | 0.25503     | 0.65876    |         |  |
|             | 0.25503         | 0.65876   | 0.25503 | 0.25503     | 0.661735669 |            |         |  |
| PPFIA1P1    | ENSG00000271639 | 0.65861   | 0.25507 | 0.65861     | 0.25507     | 0.65861    |         |  |
|             | 0.25507         | 0.65861   | 0.25507 | 0.25507     | 0.661735669 |            |         |  |
| RNA5SP203   | ENSG00000222383 | 0.6585    | 0.25511 | 0.6585      | 0.25511     | 0.6585     |         |  |
|             | 0.25511         | 0.6585    | 0.25511 | 0.25511     | 0.661735669 |            |         |  |
| RPS26P38    | ENSG00000234192 | 0.33342   | 0.36941 | 0.33342     | 0.36941     | 0.33342    |         |  |
|             | 0.36941         | 0.65849   | 0.25511 | 0.25511     | 0.661735669 |            |         |  |
| TMEM38A     | ENSG00000072954 | 0.65847   | 0.25512 | 0.24898     | 0.40169     | 0.38135    |         |  |
|             | 0.35147         | 0.041548  | 0.48343 | 0.25512     | 0.661735669 |            |         |  |
| SGTA        | ENSG00000104969 | 0.65846   | 0.25512 | -0.1457     | 0.55792     | -0.32077   | 0.62581 |  |
|             | 0.27282         | 0.3925    | 0.25512 | 0.661735669 |             |            |         |  |
| NA          | ENSG00000259859 | 0.65847   | 0.25512 | 0.65847     | 0.25512     | 0.65847    | 0.25512 |  |

|           |                 |           |         |             |             |          |         |         |
|-----------|-----------------|-----------|---------|-------------|-------------|----------|---------|---------|
|           | 0.65847         | 0.25512   | 0.25512 | 0.661735669 |             |          |         |         |
| C22orf24  | ENSG00000128254 | 0.65839   | 0.25514 | 0.65839     | 0.25514     | 0.65839  | 0.25514 | 0.65839 |
|           | 0.25514         | 0.65839   | 0.25514 | 0.25514     | 0.661735669 |          |         |         |
| KRTAP3-3  | ENSG00000212899 | 0.65829   | 0.25518 | 0.65829     | 0.25518     | 0.65829  | 0.25518 | 0.65829 |
|           | 0.25518         | 0.65829   | 0.25518 | 0.25518     | 0.661735669 |          |         |         |
| CORT      | ENSG00000241563 | 0.65829   | 0.25518 | 0.65829     | 0.25518     | 0.65829  | 0.25518 | 0.65829 |
|           | 0.65829         | 0.25518   | 0.25518 | 0.661735669 |             |          |         |         |
| NA        | ENSG00000248955 | 0.53354   | 0.29683 | -0.23262    | 0.59197     | 0.65824  | 0.25519 |         |
|           | -0.28202        | 0.61104   | 0.25519 | 0.661735669 |             |          |         |         |
| ZDHHC11   | ENSG00000188818 | 0.27048   | 0.39339 | 0.30518     | 0.38012     | 0.65815  |         |         |
|           | 0.25522         | 0.20643   | 0.41823 | 0.25522     | 0.661735669 |          |         |         |
| NCOR1P1   | ENSG00000240108 | 0.16942   | 0.43273 | 0.65815     | 0.25522     | -0.57117 |         |         |
|           | 0.71606         | 0.088762  | 0.46464 | 0.25522     | 0.661735669 |          |         |         |
| SLC7A14   | ENSG00000013293 | 0.65812   | 0.25523 | 0.29591     | 0.38365     | 0.17719  |         |         |
|           | 0.42968         | -1.741    | 0.95916 | 0.25523     | 0.661735669 |          |         |         |
| OR7E13P   | ENSG00000197882 | -1.3635   | 0.91364 | -0.94829    | 0.82851     | 0.31515  |         |         |
|           | 0.37632         | 0.65813   | 0.25523 | 0.25523     | 0.661735669 |          |         |         |
| NA        | ENSG00000224417 | -0.78081  | 0.78254 | 0.65813     | 0.25523     | -0.78081 | 0.78254 |         |
|           | -0.78081        | 0.78254   | 0.25523 | 0.661735669 |             |          |         |         |
| SULT4A1   | ENSG00000130540 | 0.56536   | 0.28591 | 0.65809     | 0.25524     | -0.70159 |         |         |
|           | 0.75853         | -0.64461  | 0.74041 | 0.25524     | 0.661735669 |          |         |         |
| CES1P1    | ENSG00000228695 | -0.096345 | 0.53838 | -1.0415     | 0.85117     | -0.96125 |         |         |
|           | 0.83179         | 0.65807   | 0.25525 | 0.25525     | 0.661735669 |          |         |         |
| NA        | ENSG00000206898 | -0.97361  | 0.83488 | -0.44945    | 0.67345     | 0.65799  | 0.25527 |         |
|           | 0.007804        | 0.49689   | 0.25527 | 0.661735669 |             |          |         |         |
| NA        | ENSG00000213650 | 0.65798   | 0.25527 | -0.28828    | 0.61343     | 0.58593  | 0.27896 |         |
|           | -0.71586        | 0.76296   | 0.25527 | 0.661735669 |             |          |         |         |
| RPA2      | ENSG00000117748 | 0.65795   | 0.25529 | -0.72508    | 0.7658      | 0.36177  | 0.35876 |         |
|           | 0.291           | 0.38552   | 0.25529 | 0.661740513 |             |          |         |         |
| NA        | ENSG00000271815 | -1.6799   | 0.95351 | 0.65786     | 0.25531     | -1.6799  | 0.95351 |         |
|           | -1.6799         | 0.95351   | 0.25531 | 0.661740513 |             |          |         |         |
| MIR5583-1 | ENSG00000266148 | 0.65784   | 0.25532 | 0.65784     | 0.25532     | 0.65784  |         |         |
|           | 0.25532         | 0.65784   | 0.25532 | 0.25532     | 0.661740513 |          |         |         |
| ATP10A    | ENSG00000206190 | 0.32624   | 0.37212 | 0.21494     | 0.41491     | 0.65782  |         |         |
|           | 0.25533         | -1.2821   | 0.9001  | 0.25533     | 0.661740513 |          |         |         |
| NA        | ENSG00000231329 | 0.5493    | 0.2914  | 0.65773     | 0.25536     | 0.65773  | 0.25536 |         |
|           | 0.10254         | 0.45917   | 0.25536 | 0.661740513 |             |          |         |         |
| MIR548AQ  | ENSG00000265470 | 0.4205    | 0.33706 | -0.15189    | 0.56036     | 0.1623   |         |         |
|           | 0.43553         | 0.65768   | 0.25537 | 0.25537     | 0.661740513 |          |         |         |
| NA        | ENSG00000253630 | 0.65761   | 0.25539 | 0.65761     | 0.25539     | 0.65761  | 0.25539 |         |
|           | 0.65761         | 0.25539   | 0.25539 | 0.661740513 |             |          |         |         |
| NA        | ENSG00000257435 | 0.65754   | 0.25542 | 0.65754     | 0.25542     | 0.65754  | 0.25542 |         |
|           | 0.65754         | 0.25542   | 0.25542 | 0.661740513 |             |          |         |         |
| RNU1-117P | ENSG00000252850 | 0.65751   | 0.25543 | 0.65751     | 0.25543     | 0.65751  |         |         |
|           | 0.25543         | 0.65751   | 0.25543 | 0.25543     | 0.661740513 |          |         |         |
| EGLN3-AS1 | ENSG00000258897 | 0.65749   | 0.25543 | -1.0513     | 0.85343     | 0.010801 |         |         |
|           | 0.49569         | 0.65749   | 0.25543 | 0.25543     | 0.661740513 |          |         |         |
| NA        | ENSG00000281333 | 0.65751   | 0.25543 | 0.65751     | 0.25543     | 0.65751  | 0.25543 |         |
|           | 0.65751         | 0.25543   | 0.25543 | 0.661740513 |             |          |         |         |
| ANKRD50   | ENSG00000151458 | 0.65747   | 0.25544 | 0.3146      | 0.37653     | 0.20827  |         |         |
|           | 0.41751         | -0.31446  | 0.62341 | 0.25544     | 0.661740513 |          |         |         |
| FDSP2     | ENSG00000233980 | -0.27007  | 0.60645 | 0.16585     | 0.43414     | 0.65732  |         |         |
|           | 0.25549         | 0.65732   | 0.25549 | 0.25549     | 0.661740513 |          |         |         |
| NA        | ENSG00000266208 | 0.65727   | 0.2555  | 0.65727     | 0.2555      | 0.65727  | 0.2555  |         |
|           | 0.65727         | 0.2555    | 0.2555  | 0.661740513 |             |          |         |         |
| CRIP2     | ENSG00000182809 | 0.65725   | 0.25551 | 0.24636     | 0.4027      | 0.65725  | 0.25551 |         |
|           | 0.43545         | 0.33162   | 0.25551 | 0.661740513 |             |          |         |         |
| NA        | ENSG00000232325 | 0.65726   | 0.25551 | -0.67102    | 0.7489      | -1.0994  | 0.8642  |         |
|           | 0.031398        | 0.48748   | 0.25551 | 0.661740513 |             |          |         |         |
| LSM3P2    | ENSG00000257847 | 0.65721   | 0.25552 | 0.65721     | 0.25552     | 0.65721  |         |         |
|           | 0.25552         | 0.44938   | 0.32658 | 0.25552     | 0.661740513 |          |         |         |
| POGK      | ENSG00000143157 | -0.28352  | 0.61161 | 0.64622     | 0.25907     | 0.65719  | 0.25553 |         |

|            |                 |             |         |             |             |          |         |  |
|------------|-----------------|-------------|---------|-------------|-------------|----------|---------|--|
|            | 0.2116          | 0.41621     | 0.25553 | 0.661740513 |             |          |         |  |
| SMG5       | ENSG00000198952 | 0.65714     | 0.25554 | 0.56369     | 0.28648     | 0.56369  | 0.28648 |  |
|            | 0.56369         | 0.28648     | 0.25554 | 0.661740513 |             |          |         |  |
| MIR320C1   | ENSG00000221493 | 0.65711     | 0.25555 | 0.65711     | 0.25555     | 0.65711  | 0.65711 |  |
|            | 0.25555         | 0.65711     | 0.25555 | 0.25555     | 0.661740513 |          |         |  |
| MTA2       | ENSG00000149480 | 0.45484     | 0.32461 | 0.65705     | 0.25558     | 0.45484  | 0.32461 |  |
|            | 0.45484         | 0.32461     | 0.25558 | 0.661740513 |             |          |         |  |
| ZNF254     | ENSG00000213096 | -0.049682   | 0.51981 | 0.65702     | 0.25559     | 0.50617  |         |  |
|            | 0.30637         | 0.26502     | 0.3955  | 0.25559     | 0.661740513 |          |         |  |
| NA         | ENSG00000201990 | 0.65692     | 0.25561 | 0.65692     | 0.25561     | 0.65692  | 0.25561 |  |
|            | 0.65692         | 0.25561     | 0.25561 | 0.661740513 |             |          |         |  |
| ALG11      | ENSG00000253710 | -0.38201    | 0.64877 | 0.65687     | 0.25563     | 0.65687  | 0.25563 |  |
|            | 0.65687         | 0.25563     | 0.25563 | 0.661740513 |             |          |         |  |
| NA         | ENSG00000269510 | 0.65687     | 0.25563 | 0.65687     | 0.25563     | 0.65687  | 0.25563 |  |
|            | 0.65687         | 0.25563     | 0.25563 | 0.661740513 |             |          |         |  |
| GFM1       | ENSG00000168827 | 0.65685     | 0.25564 | 0.3575      | 0.36036     | 0.3575   | 0.36036 |  |
|            | 0.3575          | 0.36036     | 0.25564 | 0.661740513 |             |          |         |  |
| NA         | ENSG00000236013 | 0.099557    | 0.46035 | 0.65675     | 0.25567     | 0.34355  | 0.36559 |  |
|            | 0.22499         | 0.41099     | 0.25567 | 0.661740513 |             |          |         |  |
| NA         | ENSG00000260378 | 0.017847    | 0.49288 | 0.017847    | 0.49288     | 0.017847 | 0.49288 |  |
|            | 0.65676         | 0.25567     | 0.25567 | 0.661740513 |             |          |         |  |
| NA         | ENSG00000223947 | 0.046616    | 0.48141 | 0.65672     | 0.25568     | 0.13755  | 0.4453  |  |
|            | 0.13755         | 0.4453      | 0.25568 | 0.661740513 |             |          |         |  |
| RGS13      | ENSG00000127074 | 0.65667     | 0.2557  | 0.65667     | 0.2557      | 0.65667  | 0.2557  |  |
|            | 0.65667         | 0.2557      | 0.2557  | 0.661740513 |             |          |         |  |
| NA         | ENSG00000258902 | 0.2877      | 0.38679 | 0.65666     | 0.2557      | 0.65666  | 0.2557  |  |
|            | 0.65666         | 0.2557      | 0.2557  | 0.661740513 |             |          |         |  |
| LBP        | ENSG00000129988 | 0.18374     | 0.42711 | -0.28216    | 0.61109     | 0.65662  | 0.25571 |  |
|            | -0.39188        | 0.65243     | 0.25571 | 0.661740513 |             |          |         |  |
| ANG        | ENSG00000214274 | 0.41965     | 0.33737 | 0.41965     | 0.33737     | -0.24093 | 0.5952  |  |
|            | 0.65659         | 0.25572     | 0.25572 | 0.661740513 |             |          |         |  |
| LMLN-AS1   | ENSG00000232832 | 0.65649     | 0.25575 | 0.65649     | 0.25575     | 0.65649  | 0.65649 |  |
|            | 0.25575         | 0.65649     | 0.25575 | 0.25575     | 0.661745949 |          |         |  |
| NA         | ENSG00000270978 | -1.4988     | 0.93303 | -0.57864    | 0.71859     | 0.65648  | 0.25576 |  |
|            | -0.57864        | 0.71859     | 0.25576 | 0.661745949 |             |          |         |  |
| LY96       | ENSG00000154589 | -0.62075    | 0.73262 | -0.62075    | 0.73262     | 0.65644  | 0.25577 |  |
|            | -0.82482        | 0.79526     | 0.25577 | 0.661745949 |             |          |         |  |
| RPSA       | ENSG00000168028 | -0.36243    | 0.64148 | -0.83949    | 0.7994      | 0.6564   | 0.25578 |  |
|            | -0.57203        | 0.71635     | 0.25578 | 0.661745949 |             |          |         |  |
| SCLT1      | ENSG00000151466 | 0.19068     | 0.42439 | 0.65636     | 0.25579     | -0.61484 | 0.73067 |  |
|            | -0.56916        | 0.71538     | 0.25579 | 0.661745949 |             |          |         |  |
| CHST10     | ENSG00000115526 | 0.65609     | 0.25588 | 0.65609     | 0.25588     | 0.51485  |         |  |
|            | 0.30333         | 0.5014      | 0.30804 | 0.25588     | 0.661889557 |          |         |  |
| NA         | ENSG00000253944 | 0.23728     | 0.40622 | 0.65602     | 0.2559      | 0.18779  | 0.42552 |  |
|            | 0.46524         | 0.32088     | 0.2559  | 0.661889557 |             |          |         |  |
| OR13J1     | ENSG00000168828 | -0.51256    | 0.69587 | 0.65597     | 0.25592     | -0.56888 |         |  |
|            | 0.71528         | -0.52695    | 0.70089 | 0.25592     | 0.661889557 |          |         |  |
| NA         | ENSG00000254787 | 0.47541     | 0.31725 | 0.65598     | 0.25592     | 0.29666  | 0.38336 |  |
|            | 0.28107         | 0.38933     | 0.25592 | 0.661889557 |             |          |         |  |
| NA         | ENSG00000258056 | 0.65595     | 0.25593 | 0.65595     | 0.25593     | 0.65595  | 0.25593 |  |
|            | 0.65595         | 0.25593     | 0.25593 | 0.661889557 |             |          |         |  |
| NA         | ENSG00000216906 | 0.65586     | 0.25596 | 0.65586     | 0.25596     | 0.65586  | 0.25596 |  |
|            | 0.65586         | 0.25596     | 0.25596 | 0.661889557 |             |          |         |  |
| STAB2      | ENSG00000136011 | 0.38715     | 0.34932 | 0.10206     | 0.45935     | 0.65583  | 0.25597 |  |
|            | 0.57556         | 0.28246     | 0.25597 | 0.661889557 |             |          |         |  |
| UBE2L6     | ENSG00000156587 | -0.96773    | 0.83341 | -0.42647    | 0.66512     | -0.91342 |         |  |
|            | 0.81949         | 0.6558      | 0.25598 | 0.25598     | 0.661889557 |          |         |  |
| NA         | ENSG00000258691 | 0.65572     | 0.256   | 0.65572     | 0.256       | 0.65572  | 0.256   |  |
|            | 0.256           | 0.661889557 |         |             |             |          |         |  |
| TRIM33     | ENSG00000197323 | -1.2923     | 0.90188 | 0.65571     | 0.25601     | -0.88126 |         |  |
|            | 0.81091         | -0.54094    | 0.70572 | 0.25601     | 0.661889557 |          |         |  |
| POU6F2-AS2 | ENSG00000233854 | -0.21727    | 0.586   | 0.54883     | 0.29156     | 0.30558  | 0.37996 |  |



|             |                 |           |         |             |             |           |         |
|-------------|-----------------|-----------|---------|-------------|-------------|-----------|---------|
|             | 0.65563         | 0.25603   | 0.25603 | 0.661889557 |             |           |         |
| RNF144B     | ENSG00000137393 | 0.47148   | 0.31865 | 0.47227     | 0.31837     | 0.65561   |         |
|             | 0.25604         | 0.32406   | 0.37295 | 0.25604     | 0.661889557 |           |         |
| NA          | ENSG00000274612 | 0.65561   | 0.25604 | -0.56693    | 0.71462     | 0.35528   | 0.36119 |
|             | -0.39246        | 0.65264   | 0.25604 | 0.661889557 |             |           |         |
| NA          | ENSG00000241809 | -0.38713  | 0.65067 | 0.65557     | 0.25605     | -0.38713  | 0.65067 |
|             | -0.38713        | 0.65067   | 0.25605 | 0.661889557 |             |           |         |
| SIK1        | ENSG00000142178 | 0.58887   | 0.27798 | 0.46328     | 0.32158     | 0.0060804 | 0.49757 |
|             | 0.65555         | 0.25606   | 0.25606 | 0.661889557 |             |           |         |
| GOLGA7B     | ENSG00000155265 | -0.052868 | 0.52108 | -0.96785    | 0.83344     | -0.052868 |         |
|             | 0.52108         | 0.65548   | 0.25608 | 0.25608     | 0.661889557 |           |         |
| IGFBP7-AS1  | ENSG00000245067 | 0.65547   | 0.25608 | -0.84468    | 0.80086     | -0.84468  |         |
|             | 0.80086         | -0.84468  | 0.80086 | 0.25608     | 0.661889557 |           |         |
| ACSL3       | ENSG00000123983 | -0.65125  | 0.74256 | -0.73328    | 0.76831     | -1.4603   | 0.9279  |
|             | 0.65543         | 0.25609   | 0.25609 | 0.661889557 |             |           |         |
| IL9RP2      | ENSG00000232420 | -0.88554  | 0.81207 | -0.30591    | 0.62016     | 0.65537   |         |
|             | 0.25611         | -0.062759 | 0.52502 | 0.25611     | 0.661904205 |           |         |
| SNORD116-24 | ENSG00000207279 | 0.65529   | 0.25614 | 0.65529     | 0.25614     | 0.65529   |         |
|             | 0.25614         | 0.65529   | 0.25614 | 0.25614     | 0.661904205 |           |         |
| PISD        | ENSG00000241878 | -0.29189  | 0.61482 | -0.31538    | 0.62376     | 0.65529   | 0.25614 |
|             | -0.43801        | 0.66931   | 0.25614 | 0.661904205 |             |           |         |
| CACNG8      | ENSG00000142408 | 0.51927   | 0.30179 | 0.55953     | 0.2879      | 0.65527   |         |
|             | 0.25615         | 0.51927   | 0.30179 | 0.25615     | 0.661904205 |           |         |
| NA          | ENSG00000238313 | 0.27687   | 0.39094 | 0.65517     | 0.25618     | -0.106    | 0.54221 |
|             | -0.67587        | 0.75044   | 0.25618 | 0.661946625 |             |           |         |
| ATXN7L3B    | ENSG00000253719 | 0.65506   | 0.25621 | 0.65506     | 0.25621     | 0.65506   |         |
|             | 0.25621         | 0.65506   | 0.25621 | 0.25621     | 0.66198904  |           |         |
| NA          | ENSG00000255910 | -0.56721  | 0.71471 | 0.65503     | 0.25623     | -0.29651  | 0.61658 |
|             | -0.72849        | 0.76684   | 0.25623 | 0.662003663 |             |           |         |
| NA          | ENSG00000219757 | 0.072941  | 0.47093 | -0.5001     | 0.6915      | 0.65494   | 0.25625 |
|             | 0.65494         | 0.25625   | 0.25625 | 0.662003663 |             |           |         |
| NA          | ENSG00000255946 | 0.65493   | 0.25626 | 0.57941     | 0.28116     | 0.2161    | 0.41446 |
|             | 0.42304         | 0.33613   | 0.25626 | 0.662003663 |             |           |         |
| RNU7-8P     | ENSG00000251767 | 0.65488   | 0.25627 | 0.65488     | 0.25627     | 0.65488   |         |
|             | 0.25627         | 0.65488   | 0.25627 | 0.25627     | 0.662003663 |           |         |
| NIPSNAP2    | ENSG00000146729 | -0.12733  | 0.55066 | -0.56783    | 0.71493     | 0.65473   |         |
|             | 0.25632         | -0.43084  | 0.66671 | 0.25632     | 0.662016327 |           |         |
| AGT         | ENSG00000135744 | -0.10206  | 0.54064 | 0.6547      | 0.25633     | -0.10206  | 0.54064 |
|             | -0.086987       | 0.53466   | 0.25633 | 0.662016327 |             |           |         |
| SSR1P1      | ENSG00000220598 | 0.4073    | 0.3419  | 0.6547      | 0.25633     | -0.24513  |         |
|             | 0.59682         | 0.4073    | 0.3419  | 0.25633     | 0.662016327 |           |         |
| STRIT1      | ENSG00000240045 | 0.65471   | 0.25633 | 0.5892      | 0.27786     | -0.093641 |         |
|             | 0.5373          | 0.26338   | 0.39613 | 0.25633     | 0.662016327 |           |         |
| NA          | ENSG00000279839 | 0.65463   | 0.25635 | 0.30386     | 0.38062     | 0.13026   | 0.44818 |
|             | -0.46678        | 0.67967   | 0.25635 | 0.662016327 |             |           |         |
| OPRK1       | ENSG00000082556 | -0.17843  | 0.57081 | 0.65461     | 0.25636     | 0.65461   | 0.25636 |
|             | 0.65461         | 0.25636   | 0.25636 | 0.662016327 |             |           |         |
| CXCL5       | ENSG00000163735 | 0.65456   | 0.25637 | 0.1124      | 0.45525     | 0.1124    | 0.45525 |
|             | 0.1124          | 0.45525   | 0.25637 | 0.662016327 |             |           |         |
| COL20A1     | ENSG00000101203 | 0.33221   | 0.36987 | 0.5504      | 0.29102     | 0.27322   |         |
|             | 0.39234         | 0.65442   | 0.25642 | 0.25642     | 0.662110354 |           |         |
| MTCO1P49    | ENSG00000253916 | 0.6543    | 0.25646 | 0.6543      | 0.25646     | 0.6543    |         |
|             | 0.25646         | 0.6048    | 0.27266 | 0.25646     | 0.662178551 |           |         |
| RPEL1       | ENSG00000235376 | -0.31182  | 0.62241 | 0.27136     | 0.39306     | 0.6542    | 0.25649 |
|             | 0.2721          | 0.39277   | 0.25649 | 0.662211656 |             |           |         |
| NA          | ENSG00000231467 | 0.65418   | 0.2565  | 0.65418     | 0.2565      | 0.65418   | 0.2565  |
|             | 0.65418         | 0.2565    | 0.2565  | 0.662211656 |             |           |         |
| ATP8B3      | ENSG00000130270 | 0.64443   | 0.25965 | -0.17524    | 0.56956     | 0.39287   |         |
|             | 0.34721         | 0.6541    | 0.25652 | 0.25652     | 0.662214971 |           |         |
| SLC16A1     | ENSG00000155380 | -0.36285  | 0.64164 | -0.64661    | 0.74106     | -0.59986  |         |
|             | 0.7257          | 0.65404   | 0.25654 | 0.25654     | 0.662214971 |           |         |
| TSPAN9      | ENSG00000011105 | 0.63938   | 0.26129 | -0.34037    | 0.63321     | 0.65392   |         |

|             |                 |          |         |             |             |          |         |
|-------------|-----------------|----------|---------|-------------|-------------|----------|---------|
|             | 0.25658         | 0.53338  | 0.29689 | 0.25658     | 0.662214971 |          |         |
| ZNF114-AS1  | ENSG00000268186 | 0.65392  | 0.25658 | 0.65392     | 0.25658     | 0.65392  |         |
|             | 0.25658         | 0.65392  | 0.25658 | 0.662214971 |             |          |         |
| EEF1A1P9    | ENSG00000249264 | 0.4092   | 0.3412  | 0.62297     | 0.26665     | 0.62297  |         |
|             | 0.26665         | 0.65388  | 0.25659 | 0.25659     | 0.662214971 |          |         |
| RNU6ATAC41P | ENSG00000221527 | 0.65387  | 0.2566  | 0.65387     | 0.2566      | 0.65387  |         |
|             | 0.2566          | -0.33461 | 0.63104 | 0.2566      | 0.662214971 |          |         |
| LARP4       | ENSG00000161813 | -0.92572 | 0.8227  | -0.71169    | 0.76167     | -0.94403 | 0.82742 |
|             | 0.65382         | 0.25661  | 0.25661 | 0.662214971 |             |          |         |
| RNA5SP239   | ENSG00000222150 | -0.11531 | 0.5459  | 0.65382     | 0.25661     | 0.52236  |         |
|             | 0.30071         | -0.4368  | 0.66887 | 0.25661     | 0.662214971 |          |         |
| KCNS1       | ENSG00000124134 | -1.4209  | 0.92233 | 0.65368     | 0.25666     | -1.4209  | 0.92233 |
|             | 0.22655         | 0.41039  | 0.25666 | 0.662308928 |             |          |         |
| ERCC8       | ENSG00000049167 | 0.6536   | 0.25669 | 0.43587     | 0.33147     | 0.34507  | 0.36502 |
|             | -0.15674        | 0.56228  | 0.25669 | 0.662351268 |             |          |         |
| HIP1        | ENSG00000127946 | -0.99023 | 0.83897 | 0.65344     | 0.25674     | -0.56729 | 0.71474 |
|             | -0.13049        | 0.55191  | 0.25674 | 0.662400863 |             |          |         |
| FAM149A     | ENSG00000109794 | 0.65339  | 0.25675 | 0.65339     | 0.25675     | 0.65339  |         |
|             | 0.25675         | 0.22801  | 0.40982 | 0.25675     | 0.662400863 |          |         |
| CCDC26      | ENSG00000229140 | 0.046094 | 0.48162 | 0.65339     | 0.25675     | 0.046094 |         |
|             | 0.48162         | 0.046094 | 0.48162 | 0.25675     | 0.662400863 |          |         |
| ATP1B1      | ENSG00000143153 | -0.2649  | 0.60446 | -0.071116   | 0.52835     | 0.096802 |         |
|             | 0.46144         | 0.65335  | 0.25677 | 0.25677     | 0.662417391 |          |         |
| PES1P2      | ENSG00000229268 | 0.018674 | 0.49255 | 0.018674    | 0.49255     | 0.65323  |         |
|             | 0.2568          | -0.28176 | 0.61093 | 0.2568      | 0.662450442 |          |         |
| EBF4        | ENSG00000088881 | -0.80786 | 0.79041 | 0.65322     | 0.25681     | -0.80678 | 0.7901  |
|             | 0.35035         | 0.36304  | 0.25681 | 0.662450442 |             |          |         |
| ANGPT2      | ENSG00000091879 | -0.60118 | 0.72614 | -0.75373    | 0.77449     | -0.76717 |         |
|             | 0.77851         | 0.65314  | 0.25683 | 0.25683     | 0.662466965 |          |         |
| ST7-AS1     | ENSG00000227199 | 0.65307  | 0.25685 | 0.65307     | 0.25685     | 0.65307  |         |
|             | 0.25685         | 0.65307  | 0.25685 | 0.25685     | 0.662472191 |          |         |
| SEPTIN7P8   | ENSG00000229000 | 0.65303  | 0.25687 | 0.65303     | 0.25687     | -0.42388 |         |
|             | 0.66417         | 0.41165  | 0.3403  | 0.25687     | 0.662472191 |          |         |
| NA          | ENSG00000225472 | 0.42448  | 0.33561 | -0.069616   | 0.52775     | 0.29814  | 0.3828  |
|             | 0.65299         | 0.25688  | 0.25688 | 0.662472191 |             |          |         |
| ZFP30       | ENSG00000120784 | 0.65293  | 0.2569  | 0.56684     | 0.28541     | -0.55116 | 0.70924 |
|             | 0.22595         | 0.41062  | 0.2569  | 0.662472191 |             |          |         |
| NA          | ENSG00000258560 | 0.1839   | 0.42705 | 0.054934    | 0.4781      | 0.65293  | 0.2569  |
|             | 0.61022         | 0.27086  | 0.2569  | 0.662472191 |             |          |         |
| TPSAB1      | ENSG00000172236 | 0.6095   | 0.2711  | -1.4667     | 0.92877     | 0.65278  |         |
|             | 0.25695         | -0.78157 | 0.78277 | 0.25695     | 0.662531007 |          |         |
| NA          | ENSG00000241634 | 0.65277  | 0.25695 | 0.069598    | 0.47226     | 0.65277  | 0.25695 |
|             | 0.65277         | 0.25695  | 0.25695 | 0.662531007 |             |          |         |
| NA          | ENSG00000207098 | -0.78801 | 0.78465 | -0.78801    | 0.78465     | 0.65252  | 0.25703 |
|             | -0.37823        | 0.64737  | 0.25703 | 0.662583691 |             |          |         |
| NA          | ENSG00000261176 | 0.65254  | 0.25703 | 0.63655     | 0.26221     | -0.21054 | 0.58338 |
|             | 0.65254         | 0.25703  | 0.25703 | 0.662583691 |             |          |         |
| ADCK5       | ENSG00000173137 | 0.6525   | 0.25704 | 0.6083      | 0.2715      | 0.6525   | 0.25704 |
|             | 0.37103         | 0.35531  | 0.25704 | 0.662583691 |             |          |         |
| NA          | ENSG00000230944 | 0.65248  | 0.25705 | 0.65248     | 0.25705     | 0.65248  | 0.25705 |
|             | 0.65248         | 0.25705  | 0.25705 | 0.662583691 |             |          |         |
| FABP6       | ENSG00000170231 | -0.3569  | 0.63942 | -0.03892    | 0.51552     | 0.65245  | 0.25706 |
|             | 0.44109         | 0.32957  | 0.25706 | 0.662583691 |             |          |         |
| PATE4       | ENSG00000237353 | 0.65241  | 0.25707 | 0.65241     | 0.25707     | -0.34325 | 0.63429 |
|             | 0.65241         | 0.25707  | 0.25707 | 0.662583691 |             |          |         |
| OSTF1P1     | ENSG00000258244 | 0.65242  | 0.25707 | 0.65242     | 0.25707     | 0.65242  |         |
|             | 0.25707         | -0.87455 | 0.80909 | 0.25707     | 0.662583691 |          |         |
| BAMBI       | ENSG00000095739 | -0.27974 | 0.61016 | 0.61032     | 0.27083     | 0.65233  | 0.25709 |
|             | 0.50111         | 0.30815  | 0.25709 | 0.662583691 |             |          |         |
| MYRF        | ENSG00000124920 | -0.20282 | 0.58036 | 0.006207    | 0.49752     | 0.65228  | 0.25711 |
|             | 0.55316         | 0.29008  | 0.25711 | 0.662583691 |             |          |         |
| VDAC1P7     | ENSG00000213450 | -0.26805 | 0.60567 | 0.107       | 0.45739     | -0.4802  | 0.68446 |

|             |                 |          |         |             |             |           |         |  |
|-------------|-----------------|----------|---------|-------------|-------------|-----------|---------|--|
|             | 0.65226         | 0.25712  | 0.25712 | 0.662583691 |             |           |         |  |
| NA          | ENSG00000266401 | 0.65226  | 0.25712 | -0.74292    | 0.77124     | 0.24793   | 0.40209 |  |
|             | 0.24793         | 0.40209  | 0.25712 | 0.662583691 |             |           |         |  |
| ZNF146      | ENSG00000167635 | 0.57888  | 0.28133 | 0.50415     | 0.30708     | 0.65198   |         |  |
|             | 0.25721         | -0.96466 | 0.83264 | 0.25721     | 0.662652801 |           |         |  |
| ALG1L2      | ENSG00000251287 | 0.65196  | 0.25721 | -0.29871    | 0.61742     | 0.22676   |         |  |
|             | 0.4103          | -1.3826  | 0.91661 | 0.25721     | 0.662652801 |           |         |  |
| CYP2E1      | ENSG00000130649 | 0.56013  | 0.2877  | 0.6519      | 0.25723     | -0.13759  |         |  |
|             | 0.55472         | 0.6519   | 0.25723 | 0.25723     | 0.662652801 |           |         |  |
| HOXD3       | ENSG00000128652 | 0.65187  | 0.25724 | 0.32478     | 0.37267     | 0.65187   | 0.25724 |  |
|             | 0.47411         | 0.31771  | 0.25724 | 0.662652801 |             |           |         |  |
| NA          | ENSG00000232344 | 0.65188  | 0.25724 | 0.65188     | 0.25724     | 0.65188   | 0.25724 |  |
|             | 0.65188         | 0.25724  | 0.25724 | 0.662652801 |             |           |         |  |
| NA          | ENSG00000225943 | 0.57202  | 0.28366 | 0.030185    | 0.48796     | 0.65181   | 0.25726 |  |
|             | 0.60055         | 0.27407  | 0.25726 | 0.662652801 |             |           |         |  |
| NA          | ENSG00000253942 | 0.65182  | 0.25726 | 0.55167     | 0.29059     | -0.75944  | 0.77621 |  |
|             | -0.52043        | 0.69862  | 0.25726 | 0.662652801 |             |           |         |  |
| NA          | ENSG00000266691 | 0.51347  | 0.30381 | 0.65182     | 0.25726     | -0.045215 | 0.51803 |  |
|             | -0.10861        | 0.54324  | 0.25726 | 0.662652801 |             |           |         |  |
| PHF5A       | ENSG00000100410 | 0.42287  | 0.33619 | 0.65172     | 0.25729     | 0.42287   | 0.33619 |  |
|             | 0.42287         | 0.33619  | 0.25729 | 0.662652801 |             |           |         |  |
| NA          | ENSG00000212455 | -0.15327 | 0.56091 | 0.65169     | 0.2573      | 0.65169   | 0.2573  |  |
|             | 0.18787         | 0.42549  | 0.2573  | 0.662652801 |             |           |         |  |
| VWCE        | ENSG00000167992 | 0.37646  | 0.35329 | 0.46301     | 0.32168     | 0.65166   | 0.25731 |  |
|             | -0.50343        | 0.69267  | 0.25731 | 0.662652801 |             |           |         |  |
| SNRPCP13    | ENSG00000249799 | -1.1607  | 0.87712 | -0.54123    | 0.70583     | 0.65167   |         |  |
|             | 0.25731         | 0.27467  | 0.39178 | 0.25731     | 0.662652801 |           |         |  |
| NA          | ENSG00000251127 | 0.65159  | 0.25733 | 0.65159     | 0.25733     | 0.65159   | 0.25733 |  |
|             | 0.65159         | 0.25733  | 0.25733 | 0.662669286 |             |           |         |  |
| HMGB1P31    | ENSG00000233266 | 0.65153  | 0.25735 | 0.65153     | 0.25735     | 0.65153   |         |  |
|             | 0.25735         | 0.65153  | 0.25735 | 0.25735     | 0.662685769 |           |         |  |
| HACE1       | ENSG00000085382 | 0.32205  | 0.37371 | 0.091071    | 0.46372     | 0.32205   | 0.37371 |  |
|             | 0.65135         | 0.25741  | 0.25741 | 0.662720818 |             |           |         |  |
| CHI3L2      | ENSG00000064886 | 0.6513   | 0.25743 | 0.099077    | 0.46054     | 0.14819   |         |  |
|             | 0.4411          | 0.4623   | 0.32193 | 0.25743     | 0.662720818 |           |         |  |
| PCCA-DT     | ENSG00000274605 | 0.65122  | 0.25745 | 0.61313     | 0.2699      | 0.45826   |         |  |
|             | 0.32338         | -0.50163 | 0.69204 | 0.25745     | 0.662720818 |           |         |  |
| ANKRD42     | ENSG00000137494 | 0.65109  | 0.25749 | 0.22245     | 0.41198     | 0.64063   |         |  |
|             | 0.26088         | -0.31371 | 0.62313 | 0.25749     | 0.662720818 |           |         |  |
| FAM170B-AS1 | ENSG00000234736 | 0.22167  | 0.41228 | 0.54615     | 0.29248     | 0.4599    |         |  |
|             | 0.32279         | 0.65096  | 0.25754 | 0.25754     | 0.662720818 |           |         |  |
| NA          | ENSG00000267751 | 0.53918  | 0.29488 | 0.65094     | 0.25754     | 0.53502   | 0.29632 |  |
|             | 0.53502         | 0.29632  | 0.25754 | 0.662720818 |             |           |         |  |
| MEG3        | ENSG00000214548 | -0.13003 | 0.55173 | 0.49446     | 0.31049     | 0.65091   | 0.25755 |  |
|             | -0.22543        | 0.58918  | 0.25755 | 0.662720818 |             |           |         |  |
| FGFR2       | ENSG00000066468 | -1.326   | 0.90758 | -1.0296     | 0.84839     | -1.6049   | 0.94574 |  |
|             | 0.65075         | 0.2576   | 0.2576  | 0.662720818 |             |           |         |  |
| NA          | ENSG00000235096 | 0.35234  | 0.36229 | -0.077336   | 0.53082     | 0.65078   | 0.2576  |  |
|             | -1.823          | 0.96585  | 0.2576  | 0.662720818 |             |           |         |  |
| NA          | ENSG00000213972 | 0.65063  | 0.25764 | 0.59844     | 0.27477     | 0.59844   | 0.27477 |  |
|             | 0.59844         | 0.27477  | 0.25764 | 0.662720818 |             |           |         |  |
| TRG-AS1     | ENSG00000281103 | 0.65065  | 0.25764 | -0.9479     | 0.82841     | -0.45061  |         |  |
|             | 0.67386         | -0.45061 | 0.67386 | 0.25764     | 0.662720818 |           |         |  |
| LINC02528   | ENSG00000226004 | -0.97393 | 0.83495 | -1.4156     | 0.92156     | 0.65061   |         |  |
|             | 0.25765         | -0.97332 | 0.8348  | 0.25765     | 0.662720818 |           |         |  |
| NA          | ENSG00000228293 | 0.6506   | 0.25765 | 0.6506      | 0.25765     | 0.6506    | 0.25765 |  |
|             | 0.6506          | 0.25765  | 0.25765 | 0.662720818 |             |           |         |  |
| KYAT3       | ENSG00000137944 | 0.63899  | 0.26141 | 0.19731     | 0.42179     | 0.65045   | 0.2577  |  |
|             | -0.14104        | 0.55608  | 0.2577  | 0.662720818 |             |           |         |  |
| NA          | ENSG00000271897 | -0.7952  | 0.78675 | 0.31149     | 0.37772     | 0.49184   | 0.31141 |  |
|             | 0.65033         | 0.25774  | 0.25774 | 0.662720818 |             |           |         |  |
| NA          | ENSG00000270477 | -0.62067 | 0.73259 | 0.10317     | 0.45892     | 0.65027   | 0.25776 |  |

|              |                 |          |         |             |             |           |         |  |
|--------------|-----------------|----------|---------|-------------|-------------|-----------|---------|--|
|              | -1.589          | 0.94397  | 0.25776 | 0.662720818 |             |           |         |  |
| RNU6-556P    | ENSG00000199468 | 0.21689  | 0.41415 | 0.2499      | 0.40133     | 0.27766   |         |  |
|              | 0.39064         | 0.65024  | 0.25777 | 0.25777     | 0.662720818 |           |         |  |
| SETP10       | ENSG00000231905 | 0.072841 | 0.47097 | 0.65017     | 0.25779     | -1.7514   |         |  |
|              | 0.96006         | 0.072841 | 0.47097 | 0.25779     | 0.662720818 |           |         |  |
| ID2-AS1      | ENSG00000235092 | 0.1392   | 0.44465 | 0.39249     | 0.34735     | 0.019397  |         |  |
|              | 0.49226         | 0.65018  | 0.25779 | 0.25779     | 0.662720818 |           |         |  |
| INS          | ENSG00000254647 | 0.65018  | 0.25779 | -0.10906    | 0.54342     | -0.10906  | 0.54342 |  |
|              | -0.10906        | 0.54342  | 0.25779 | 0.662720818 |             |           |         |  |
| SLC9A9-AS1   | ENSG00000240012 | 0.65015  | 0.2578  | 0.65015     | 0.2578      | 0.65015   |         |  |
|              | 0.2578          | 0.65015  | 0.2578  | 0.2578      | 0.662720818 |           |         |  |
| MRNIP        | ENSG00000161010 | 0.6501   | 0.25781 | 0.6007      | 0.27402     | 0.51431   | 0.30352 |  |
|              | -0.70144        | 0.75848  | 0.25781 | 0.662720818 |             |           |         |  |
| ZNRF3-IT1    | ENSG00000235786 | 0.14447  | 0.44256 | 0.64995     | 0.25786     | 0.38625   |         |  |
|              | 0.34965         | 0.38625  | 0.34965 | 0.25786     | 0.662720818 |           |         |  |
| MIR4789      | ENSG00000264974 | 0.64996  | 0.25786 | -1.1229     | 0.86927     | -1.9079   |         |  |
|              | 0.9718          | -1.9079  | 0.9718  | 0.25786     | 0.662720818 |           |         |  |
| NXP3         | ENSG00000182575 | 0.50334  | 0.30736 | 0.48842     | 0.31263     | 0.64988   | 0.25788 |  |
|              | 0.52934         | 0.29828  | 0.25788 | 0.662720818 |             |           |         |  |
| NA           | ENSG00000260604 | -1.0124  | 0.84433 | -1.0124     | 0.84433     | -1.0124   | 0.84433 |  |
|              | 0.64986         | 0.25789  | 0.25789 | 0.662720818 |             |           |         |  |
| NA           | ENSG00000278650 | -1.0488  | 0.85286 | -0.0084637  | 0.50338     | -1.0488   | 0.85286 |  |
|              | 0.64987         | 0.25789  | 0.25789 | 0.662720818 |             |           |         |  |
| LATS2        | ENSG00000150457 | 0.34927  | 0.36344 | 0.64984     | 0.2579      | -0.085376 | 0.53402 |  |
|              | 0.27937         | 0.38998  | 0.2579  | 0.662720818 |             |           |         |  |
| SNORA70I     | ENSG00000207274 | 0.64983  | 0.2579  | 0.64983     | 0.2579      | 0.64983   |         |  |
|              | 0.2579          | 0.64983  | 0.2579  | 0.2579      | 0.662720818 |           |         |  |
| RPL10P6      | ENSG00000230076 | 0.64983  | 0.2579  | 0.64983     | 0.2579      | 0.64983   |         |  |
|              | 0.2579          | 0.64983  | 0.2579  | 0.2579      | 0.662720818 |           |         |  |
| MIR1203      | ENSG00000221739 | 0.64981  | 0.25791 | 0.64981     | 0.25791     | 0.64981   |         |  |
|              | 0.25791         | 0.64981  | 0.25791 | 0.25791     | 0.662720818 |           |         |  |
| SH2D7        | ENSG00000183476 | 0.59893  | 0.27461 | 0.59893     | 0.27461     | 0.64976   | 0.25793 |  |
|              | 0.61261         | 0.27007  | 0.25793 | 0.662720818 |             |           |         |  |
| NA           | ENSG00000260759 | -1.1133  | 0.8672  | 0.027756    | 0.48893     | -0.8711   | 0.80815 |  |
|              | 0.64973         | 0.25793  | 0.25793 | 0.662720818 |             |           |         |  |
| LINC01819    | ENSG00000231826 | -1.3313  | 0.90846 | 0.6497      | 0.25794     | 0.47269   |         |  |
|              | 0.31822         | -1.8745  | 0.96957 | 0.25794     | 0.662720818 |           |         |  |
| TRIM43B      | ENSG00000144010 | -0.37444 | 0.64596 | 0.46875     | 0.31962     | 0.64969   |         |  |
|              | 0.25795         | -0.34476 | 0.63486 | 0.25795     | 0.662720818 |           |         |  |
| H2BP1        | ENSG00000223345 | -0.38755 | 0.65082 | -0.38755    | 0.65082     | 0.6496    | 0.25797 |  |
|              | -0.38755        | 0.65082  | 0.25797 | 0.662720818 |             |           |         |  |
| NA           | ENSG00000260398 | 0.24648  | 0.40266 | 0.25028     | 0.40118     | 0.64962   | 0.25797 |  |
|              | 0.078792        | 0.4686   | 0.25797 | 0.662720818 |             |           |         |  |
| PER2         | ENSG00000132326 | -0.90542 | 0.81738 | -0.213      | 0.58434     | 0.2716    | 0.39296 |  |
|              | 0.6496          | 0.25798  | 0.25798 | 0.662720818 |             |           |         |  |
| LIMD1-AS1    | ENSG00000230530 | 0.64956  | 0.25799 | 0.64956     | 0.25799     | 0.64956   |         |  |
|              | 0.25799         | 0.64956  | 0.25799 | 0.25799     | 0.662720818 |           |         |  |
| AEBP1        | ENSG00000106624 | 0.64941  | 0.25804 | 0.39911     | 0.34491     | 0.373     | 0.35457 |  |
|              | 0.58341         | 0.27981  | 0.25804 | 0.662720818 |             |           |         |  |
| NA           | ENSG00000271657 | 0.64936  | 0.25805 | 0.64936     | 0.25805     | 0.15602   | 0.43801 |  |
|              | 0.64936         | 0.25805  | 0.25805 | 0.662720818 |             |           |         |  |
| FBXW11P1     | ENSG00000230870 | -0.16009 | 0.56359 | 0.64932     | 0.25806     | -0.075076 |         |  |
|              | 0.52992         | -0.67387 | 0.7498  | 0.25806     | 0.662720818 |           |         |  |
| NA           | ENSG00000236231 | 0.64932  | 0.25806 | 0.64932     | 0.25806     | 0.64932   | 0.25806 |  |
|              | 0.64932         | 0.25806  | 0.25806 | 0.662720818 |             |           |         |  |
| ARHGAP42-AS1 | ENSG00000248027 | 0.64931  | 0.25807 | 0.14972     | 0.44049     | -0.43678  |         |  |
|              | 0.66886         | -0.6948  | 0.75641 | 0.25807     | 0.662720818 |           |         |  |
| MRLN         | ENSG00000227877 | 0.64928  | 0.25808 | -1.8908     | 0.97067     | -1.8908   | 0.97067 |  |
|              | -1.8908         | 0.97067  | 0.25808 | 0.662720818 |             |           |         |  |
| RN7SL63P     | ENSG00000239744 | 0.64926  | 0.25808 | 0.64926     | 0.25808     | 0.64926   |         |  |
|              | 0.25808         | 0.64926  | 0.25808 | 0.25808     | 0.662720818 |           |         |  |
| NA           | ENSG00000262636 | 0.64928  | 0.25808 | 0.50519     | 0.30671     | -0.91823  | 0.82075 |  |

|            |                 |           |         |             |             |           |         |  |
|------------|-----------------|-----------|---------|-------------|-------------|-----------|---------|--|
|            | -0.91823        | 0.82075   | 0.25808 | 0.662720818 |             |           |         |  |
| PLEKHM1    | ENSG00000225190 | -0.52585  | 0.7005  | -0.16879    | 0.56702     | -0.71542  |         |  |
|            | 0.76282         | 0.64921   | 0.2581  | 0.2581      | 0.662720818 |           |         |  |
| IRF7       | ENSG00000185507 | 0.64918   | 0.25811 | 0.64918     | 0.25811     | 0.64918   | 0.25811 |  |
|            | 0.64918         | 0.25811   | 0.25811 | 0.662720818 |             |           |         |  |
| S100A11P1  | ENSG00000237632 | -2.4028   | 0.99187 | -0.57019    | 0.71572     | -0.30859  |         |  |
|            | 0.62118         | 0.64919   | 0.25811 | 0.25811     | 0.662720818 |           |         |  |
| SEM1       | ENSG00000127922 | 0.64912   | 0.25813 | -0.96834    | 0.83356     | -1.0335   | 0.84931 |  |
|            | -1.6976         | 0.9552    | 0.25813 | 0.662720818 |             |           |         |  |
| POLR3KP1   | ENSG00000232647 | 0.64911   | 0.25813 | 0.64911     | 0.25813     | 0.64911   |         |  |
|            | 0.25813         | 0.64911   | 0.25813 | 0.25813     | 0.662720818 |           |         |  |
| NA         | ENSG00000267580 | 0.64913   | 0.25813 | 0.64913     | 0.25813     | 0.64913   | 0.25813 |  |
|            | 0.64913         | 0.25813   | 0.25813 | 0.662720818 |             |           |         |  |
| PTP4A2     | ENSG00000184007 | -0.19237  | 0.57627 | -2.1779     | 0.98529     | -2.1779   |         |  |
|            | 0.98529         | 0.64905   | 0.25815 | 0.25815     | 0.662720818 |           |         |  |
| GATA4      | ENSG00000136574 | -0.46643  | 0.67955 | -0.51617    | 0.69713     | -0.62653  | 0.73452 |  |
|            | 0.64897         | 0.25818   | 0.25818 | 0.662720818 |             |           |         |  |
| CRYGA      | ENSG00000168582 | -0.31271  | 0.62275 | 0.64895     | 0.25818     | 0.64895   | 0.25818 |  |
|            | 0.64895         | 0.25818   | 0.25818 | 0.662720818 |             |           |         |  |
| PTPRN2-AS1 | ENSG00000233038 | 0.5374    | 0.29549 | 0.18985     | 0.42471     | -0.58966  |         |  |
|            | 0.72229         | 0.64897   | 0.25818 | 0.25818     | 0.662720818 |           |         |  |
| NA         | ENSG00000219190 | -1.3124   | 0.90532 | -1.4006     | 0.91934     | -1.521    | 0.93587 |  |
|            | 0.64892         | 0.2582    | 0.2582  | 0.662720818 |             |           |         |  |
| NA         | ENSG00000231496 | -0.17437  | 0.56921 | -0.17437    | 0.56921     | -0.17437  | 0.56921 |  |
|            | 0.64886         | 0.25821   | 0.25821 | 0.662720818 |             |           |         |  |
| ST13P12    | ENSG00000248400 | -0.26672  | 0.60516 | 0.34437     | 0.36528     | 0.64887   |         |  |
|            | 0.25821         | 0.64887   | 0.25821 | 0.25821     | 0.662720818 |           |         |  |
| NA         | ENSG00000207196 | -0.58687  | 0.72135 | 0.64874     | 0.25825     | 0.47774   | 0.31642 |  |
|            | 0.17754         | 0.42954   | 0.25825 | 0.662720818 |             |           |         |  |
| NA         | ENSG00000257052 | 0.64876   | 0.25825 | 0.64876     | 0.25825     | 0.64876   | 0.25825 |  |
|            | 0.64876         | 0.25825   | 0.25825 | 0.662720818 |             |           |         |  |
| NA         | ENSG00000266373 | 0.12844   | 0.4489  | 0.33017     | 0.37064     | 0.64869   | 0.25827 |  |
|            | 0.64869         | 0.25827   | 0.25827 | 0.662720818 |             |           |         |  |
| NA         | ENSG00000269952 | 0.64868   | 0.25827 | 0.64868     | 0.25827     | 0.64868   | 0.25827 |  |
|            | 0.64868         | 0.25827   | 0.25827 | 0.662720818 |             |           |         |  |
| TTC7A      | ENSG00000068724 | -0.24887  | 0.59827 | 0.64866     | 0.25828     | -0.87553  | 0.80936 |  |
|            | -0.23555        | 0.59311   | 0.25828 | 0.662720818 |             |           |         |  |
| LINC02288  | ENSG00000246548 | -1.4121   | 0.92104 | 0.64862     | 0.25829     | 0.51652   |         |  |
|            | 0.30275         | 0.24382   | 0.40369 | 0.25829     | 0.662720818 |           |         |  |
| NA         | ENSG00000239143 | 0.64859   | 0.2583  | -0.0723     | 0.52882     | 0.64859   | 0.2583  |  |
|            | 0.64859         | 0.2583    | 0.2583  | 0.662720818 |             |           |         |  |
| RNU6-1291P | ENSG00000252400 | 0.38414   | 0.35044 | 0.64857     | 0.25831     | 0.38414   |         |  |
|            | 0.35044         | 0.38414   | 0.35044 | 0.25831     | 0.662720818 |           |         |  |
| LINC00561  | ENSG00000261206 | 0.64847   | 0.25834 | -0.4857     | 0.68641     | -0.47755  |         |  |
|            | 0.68351         | -0.52188  | 0.69912 | 0.25834     | 0.662720818 |           |         |  |
| NA         | ENSG00000221189 | 0.64846   | 0.25834 | 0.2544      | 0.39959     | -1.062    | 0.85589 |  |
|            | -0.33461        | 0.63104   | 0.25834 | 0.662720818 |             |           |         |  |
| THEMIS3P   | ENSG00000229442 | 0.19468   | 0.42282 | -0.0075996  | 0.50303     | 0.17295   |         |  |
|            | 0.43135         | 0.6484    | 0.25836 | 0.25836     | 0.662720818 |           |         |  |
| ASTN2-AS1  | ENSG00000229105 | -0.98246  | 0.83706 | -1.3675     | 0.91426     | -0.094306 |         |  |
|            | 0.53757         | 0.64838   | 0.25837 | 0.25837     | 0.662720818 |           |         |  |
| NA         | ENSG00000243165 | -0.041367 | 0.5165  | 0.64839     | 0.25837     | -0.041367 | 0.5165  |  |
|            | -0.041367       | 0.5165    | 0.25837 | 0.662720818 |             |           |         |  |
| RN7SKP256  | ENSG00000253010 | -0.44259  | 0.67097 | 0.5622      | 0.28699     | 0.021026  |         |  |
|            | 0.49161         | 0.64837   | 0.25837 | 0.25837     | 0.662720818 |           |         |  |
| TMSB10     | ENSG00000034510 | 0.64827   | 0.2584  | 0.64827     | 0.2584      | 0.64827   |         |  |
|            | 0.2584          | 0.64827   | 0.2584  | 0.2584      | 0.662728    |           |         |  |
| LDHAP1     | ENSG00000251587 | 0.39986   | 0.34463 | -0.81399    | 0.79217     | -1.7401   |         |  |
|            | 0.95908         | 0.64828   | 0.2584  | 0.2584      | 0.662728    |           |         |  |
| WDR5B      | ENSG00000196981 | 0.64816   | 0.25844 | 0.64816     | 0.25844     | 0.64816   | 0.25844 |  |
|            | 0.64816         | 0.25844   | 0.25844 | 0.662751592 |             |           |         |  |
| NA         | ENSG00000201376 | 0.64817   | 0.25844 | 0.64817     | 0.25844     | 0.64817   | 0.25844 |  |

|           |                 |             |             |             |             |           |         |         |
|-----------|-----------------|-------------|-------------|-------------|-------------|-----------|---------|---------|
|           | 0.64817         | 0.25844     | 0.25844     | 0.662751592 |             |           |         |         |
| NA        | ENSG00000254303 | -0.77554    | 0.78099     | 0.64813     | 0.25845     | 0.36944   | 0.3559  |         |
|           | 0.36944         | 0.3559      | 0.25845     | 0.662751592 |             |           |         |         |
| LARGE2    | ENSG00000165905 | 0.64794     | 0.25851     | 0.61173     | 0.27036     | 0.64794   |         |         |
|           | 0.25851         | 0.64794     | 0.25851     | 0.25851     | 0.662831555 |           |         |         |
| ADAMTS14  | ENSG00000138316 | 0.15308     | 0.43917     | 0.64791     | 0.25852     | 0.4938    |         |         |
|           | 0.31072         | 0.29288     | 0.38481     | 0.25852     | 0.662831555 |           |         |         |
| BATF3     | ENSG00000123685 | 0.6478      | 0.25856     | 0.038067    | 0.48482     | 0.038067  | 0.48482 |         |
|           | 0.038067        | 0.48482     | 0.25856     | 0.662831555 |             |           |         |         |
| TXNL4A    | ENSG00000141759 | 0.6478      | 0.25856     | -0.025541   | 0.51019     | 0.33738   |         |         |
|           | 0.36792         | 0.33738     | 0.36792     | 0.25856     | 0.662831555 |           |         |         |
| NA        | ENSG00000202517 | -0.1275     | 0.55073     | 0.64779     | 0.25856     | 0.64779   | 0.25856 |         |
|           | 0.64779         | 0.25856     | 0.25856     | 0.662831555 |             |           |         |         |
| NA        | ENSG00000206822 | 0.64772     | 0.25858     | 0.64772     | 0.25858     | 0.64772   | 0.25858 |         |
|           | 0.64772         | 0.25858     | 0.25858     | 0.662831555 |             |           |         |         |
| NA        | ENSG00000242527 | 0.64772     | 0.25858     | 0.64772     | 0.25858     | -1.2567   | 0.89556 |         |
|           | -1.266          | 0.89724     | 0.25858     | 0.662831555 |             |           |         |         |
| NA        | ENSG00000223649 | 0.64771     | 0.25859     | 0.64771     | 0.25859     | 0.64771   | 0.25859 |         |
|           | 0.64771         | 0.25859     | 0.25859     | 0.662831555 |             |           |         |         |
| KPNA2     | ENSG00000182481 | 0.64763     | 0.25861     | -0.80282    | 0.78896     | -2.0073   | 0.97764 |         |
|           | -2.0073         | 0.97764     | 0.25861     | 0.662847954 |             |           |         |         |
| TSSK2     | ENSG00000206203 | 0.64756     | 0.25864     | 0.64756     | 0.25864     | 0.64756   | 0.25864 |         |
|           | 0.64756         | 0.25864     | 0.25864     | 0.662853047 |             |           |         |         |
| NA        | ENSG00000221487 | 0.6475      | 0.25865     | -0.1458     | 0.55796     | -0.1458   | 0.55796 |         |
|           | -0.1458         | 0.55796     | 0.25865     | 0.662853047 |             |           |         |         |
| TCL6      | ENSG00000187621 | -0.3003     | 0.61803     | -0.3003     | 0.61803     | 0.64745   | 0.25867 |         |
|           | 0.12994         | 0.44831     | 0.25867     | 0.662853047 |             |           |         |         |
| PRPF19P1  | ENSG00000264685 | 0.64744     | 0.25867     | 0.64744     | 0.25867     | 0.64744   |         |         |
|           | 0.25867         | 0.64744     | 0.25867     | 0.25867     | 0.662853047 |           |         |         |
| LRATD1    | ENSG00000162981 | -1.0761     | 0.85907     | 0.64741     | 0.25868     | -0.70634  |         |         |
|           | 0.76001         | -0.14373    | 0.55714     | 0.25868     | 0.662853047 |           |         |         |
| UBE2J2    | ENSG00000160087 | 0.64736     | 0.2587      | 0.64736     | 0.2587      | 0.64736   |         |         |
|           | 0.2587          | 0.29122     | 0.38544     | 0.2587      | 0.662869439 |           |         |         |
| LEFTY1    | ENSG00000243709 | 0.64727     | 0.25873     | 0.64727     | 0.25873     | 0.64727   |         |         |
|           | 0.25873         | 0.64727     | 0.25873     | 0.25873     | 0.662892987 |           |         |         |
| DIRC1     | ENSG00000174325 | 0.22836     | 0.40968     | 0.22836     | 0.40968     | 0.22836   | 0.40968 |         |
|           | 0.64722         | 0.25874     | 0.25874     | 0.662892987 |             |           |         |         |
| NA        | ENSG00000256029 | 0.64721     | 0.25875     | 0.64721     | 0.25875     | 0.64721   | 0.25875 |         |
|           | 0.64721         | 0.25875     | 0.25875     | 0.662892987 |             |           |         |         |
| NA        | ENSG00000267924 | 0.64715     | 0.25877     | 0.64715     | 0.25877     | 0.64715   | 0.25877 |         |
|           | 0.13683         | 0.44558     | 0.25877     | 0.662909373 |             |           |         |         |
| NA        | ENSG00000249170 | 0.64676     | 0.25889     | -0.055071   | 0.52196     | -0.055071 | 0.52196 |         |
|           | -0.055071       | 0.52196     | 0.25889     | 0.663083552 |             |           |         |         |
| CEBPA     | ENSG00000245848 | 0.64666     | 0.25893     | 0.64666     | 0.25893     | 0.64666   | 0.25893 |         |
|           | 0.64666         | 0.25893     | 0.25893     | 0.663083552 |             |           |         |         |
| LINC02758 | ENSG00000248990 | -0.041379   | 0.5165      | 0.64664     | 0.25893     | -1.7982   |         |         |
|           | 0.96393         | -0.72604    | 0.76609     | 0.25893     | 0.663083552 |           |         |         |
| RAB19     | ENSG00000146955 | 0.64657     | 0.25895     | 0.18101     | 0.42818     | -0.92058  | 0.82137 |         |
|           | -0.24338        | 0.59614     | 0.25895     | 0.663083552 |             |           |         |         |
| LINC01010 | ENSG00000236700 | 0.64649     | 0.25898     | 0.64649     | 0.25898     | 0.64649   |         |         |
|           | 0.25898         | 0.64649     | 0.25898     | 0.25898     | 0.663083552 |           |         |         |
| ATP8A2P3  | ENSG00000233963 | 0.25654     | 0.39877     | 0.10912     | 0.45655     | -1.4029   |         |         |
|           | 0.91968         | 0.64645     | 0.25899     | 0.25899     | 0.663083552 |           |         |         |
| NA        | ENSG00000269072 | 0.64643     | 0.259       | 0.64643     | 0.259       | -0.55784  | 0.71152 | 0.64643 |
|           | 0.259           | 0.259       | 0.663083552 |             |             |           |         |         |
| NA        | ENSG00000283347 | 0.64644     | 0.259       | 0.64644     | 0.259       | 0.64644   | 0.259   | 0.64644 |
|           | 0.259           | 0.663083552 |             |             |             |           |         |         |
| RALYL     | ENSG00000184672 | 0.64641     | 0.25901     | 0.34293     | 0.36583     | 0.64641   | 0.25901 |         |
|           | -0.47541        | 0.68275     | 0.25901     | 0.663083552 |             |           |         |         |
| NA        | ENSG00000280056 | 0.4461      | 0.32776     | 0.64641     | 0.25901     | 0.64641   | 0.25901 |         |
|           | 0.64641         | 0.25901     | 0.25901     | 0.663083552 |             |           |         |         |
| GASAL1    | ENSG00000253669 | -0.58347    | 0.72021     | -0.93417    | 0.82489     | -0.75529  |         |         |

|            |                 |           |         |             |             |           |         |
|------------|-----------------|-----------|---------|-------------|-------------|-----------|---------|
|            | 0.77496         | 0.64636   | 0.25902 | 0.25902     | 0.663083552 |           |         |
| RPL21P50   | ENSG00000228489 | 0.64632   | 0.25904 | 0.25904     | 0.64632     | 0.25904   | 0.64632 |
|            | 0.25904         | 0.64632   | 0.25904 | 0.25904     | 0.663083552 |           |         |
| GIPC1      | ENSG00000123159 | 0.0036213 | 0.49856 | 0.0036213   | 0.49856     | 0.0036213 | 0.49856 |
|            | 0.64618         | 0.25908   | 0.25908 | 0.663083552 |             |           |         |
| NA         | ENSG00000259222 | 0.64619   | 0.25908 | -1.0677     | 0.85717     | -1.0677   | 0.85717 |
|            | -1.0677         | 0.85717   | 0.25908 | 0.663083552 |             |           |         |
| CROCCP2    | ENSG00000215908 | -0.48453  | 0.686   | 0.23806     | 0.40592     | -0.19647  | 0.57788 |
|            | 0.64599         | 0.25914   | 0.25914 | 0.663083552 |             |           |         |
| RETREG1    | ENSG00000154153 | 0.1231    | 0.45101 | 0.64596     | 0.25915     | 0.084291  |         |
|            | 0.46641         | 0.28208   | 0.38894 | 0.25915     | 0.663083552 |           |         |
| HCG4P8     | ENSG00000229142 | 0.64596   | 0.25915 | 0.64596     | 0.25915     | 0.64596   |         |
|            | 0.25915         | 0.64596   | 0.25915 | 0.25915     | 0.663083552 |           |         |
| MTND4P16   | ENSG00000241787 | 0.64591   | 0.25917 | 0.64591     | 0.25917     | 0.64591   |         |
|            | 0.25917         | 0.64591   | 0.25917 | 0.25917     | 0.663083552 |           |         |
| NA         | ENSG00000259347 | 0.27132   | 0.39307 | -0.15643    | 0.56215     | 0.6459    | 0.25917 |
|            | -0.77088        | 0.77961   | 0.25917 | 0.663083552 |             |           |         |
| NA         | ENSG00000238503 | 0.64581   | 0.2592  | 0.64581     | 0.2592      | 0.64581   | 0.2592  |
|            | 0.45559         | 0.32434   | 0.2592  | 0.663083552 |             |           |         |
| KCMF1      | ENSG00000176407 | -0.18143  | 0.57199 | 0.64578     | 0.25921     | -0.022282 | 0.50889 |
|            | -0.06226        | 0.52482   | 0.25921 | 0.663083552 |             |           |         |
| SNORD54    | ENSG00000238650 | 0.64578   | 0.25921 | 0.64578     | 0.25921     | 0.64578   |         |
|            | 0.25921         | 0.64578   | 0.25921 | 0.25921     | 0.663083552 |           |         |
| RNU7-77P   | ENSG00000253054 | 0.64575   | 0.25922 | 0.64575     | 0.25922     | 0.64575   |         |
|            | 0.25922         | 0.64575   | 0.25922 | 0.25922     | 0.663083552 |           |         |
| NAT8L      | ENSG00000185818 | 0.64571   | 0.25923 | 0.018989    | 0.49242     | 0.2384    | 0.40578 |
|            | 0.25612         | 0.39893   | 0.25923 | 0.663083552 |             |           |         |
| NA         | ENSG00000225582 | 0.64572   | 0.25923 | 0.10177     | 0.45947     | -1.1006   | 0.86448 |
|            | -0.13           | 0.55172   | 0.25923 | 0.663083552 |             |           |         |
| NA         | ENSG00000259031 | 0.64571   | 0.25923 | 0.64571     | 0.25923     | 0.64571   | 0.25923 |
|            | 0.64571         | 0.25923   | 0.25923 | 0.663083552 |             |           |         |
| PRXL2C     | ENSG00000158122 | -1.2682   | 0.89764 | -0.96536    | 0.83282     | -1.3262   |         |
|            | 0.90762         | 0.6457    | 0.25924 | 0.25924     | 0.663083552 |           |         |
| RNU6-634P  | ENSG00000239189 | 0.64563   | 0.25926 | 0.64563     | 0.25926     | 0.64563   |         |
|            | 0.25926         | 0.64563   | 0.25926 | 0.25926     | 0.663083552 |           |         |
| NA         | ENSG00000254473 | 0.64562   | 0.25926 | 0.64562     | 0.25926     | 0.64562   | 0.25926 |
|            | 0.64562         | 0.25926   | 0.25926 | 0.663083552 |             |           |         |
| KRTAP6-2   | ENSG00000186930 | 0.3481    | 0.36388 | 0.64556     | 0.25928     | 0.3481    |         |
|            | 0.36388         | 0.3481    | 0.36388 | 0.25928     | 0.663083552 |           |         |
| CHN2       | ENSG00000106069 | 0.64547   | 0.25931 | -0.65662    | 0.74429     | 0.37663   | 0.35322 |
|            | 0.2048          | 0.41886   | 0.25931 | 0.663083552 |             |           |         |
| TINCR      | ENSG00000223573 | 0.62718   | 0.26527 | -0.2279     | 0.59014     | 0.64535   | 0.25935 |
|            | -1.2278         | 0.89023   | 0.25935 | 0.663083552 |             |           |         |
| ELFN1      | ENSG00000225968 | 0.41676   | 0.33843 | 0.64529     | 0.25937     | 0.55735   | 0.28865 |
|            | 0.36629         | 0.35707   | 0.25937 | 0.663083552 |             |           |         |
| LINC02150  | ENSG00000248150 | 0.64192   | 0.26046 | -0.0018535  | 0.50074     | 0.15201   |         |
|            | 0.43959         | 0.6453    | 0.25937 | 0.25937     | 0.663083552 |           |         |
| CSH1       | ENSG00000136488 | -0.41642  | 0.66145 | 0.1878      | 0.42552     | 0.64526   | 0.25938 |
|            | 0.078339        | 0.46878   | 0.25938 | 0.663083552 |             |           |         |
| FMO9P      | ENSG00000215834 | 0.64526   | 0.25938 | -0.11489    | 0.54573     | -0.13213  | 0.55256 |
|            | -0.27001        | 0.60643   | 0.25938 | 0.663083552 |             |           |         |
| RNU6-1133P | ENSG00000222895 | -0.3417   | 0.63371 | -1.1892     | 0.88283     | 0.64519   |         |
|            | 0.2594          | -0.3417   | 0.63371 | 0.2594      | 0.663083552 |           |         |
| RN7SKP231  | ENSG00000200151 | 0.64508   | 0.25944 | 0.64508     | 0.25944     | 0.64508   |         |
|            | 0.25944         | 0.64508   | 0.25944 | 0.25944     | 0.663083552 |           |         |
| NA         | ENSG00000225112 | -0.23006  | 0.59098 | -0.23006    | 0.59098     | -0.23006  | 0.59098 |
|            | 0.64506         | 0.25944   | 0.25944 | 0.663083552 |             |           |         |
| LINC00667  | ENSG00000263753 | 0.64507   | 0.25944 | 0.30425     | 0.38047     | 0.64507   |         |
|            | 0.25944         | 0.45435   | 0.32479 | 0.25944     | 0.663083552 |           |         |
| G2E3-AS1   | ENSG00000257636 | 0.64505   | 0.25945 | -0.19494    | 0.57728     | -0.58339  |         |
|            | 0.72018         | -0.19494  | 0.57728 | 0.25945     | 0.663083552 |           |         |
| NA         | ENSG00000279332 | 0.64499   | 0.25947 | 0.64499     | 0.25947     | 0.64499   | 0.25947 |

|            |                 |           |         |             |             |           |         |
|------------|-----------------|-----------|---------|-------------|-------------|-----------|---------|
|            | 0.64499         | 0.25947   | 0.25947 | 0.663083552 |             |           |         |
| BPIFB6     | ENSG00000167104 | -0.04571  | 0.51823 | 0.64493     | 0.25949     | 0.35305   |         |
|            | 0.36203         | -0.91662  | 0.82033 | 0.25949     | 0.663083552 |           |         |
| NA         | ENSG00000232395 | 0.64491   | 0.25949 | 0.64491     | 0.25949     | 0.21844   | 0.41354 |
|            | 0.0036903       | 0.49853   | 0.25949 | 0.663083552 |             |           |         |
| NA         | ENSG00000275756 | -0.74033  | 0.77045 | -0.33686    | 0.63189     | 0.64491   | 0.25949 |
|            | 0.011709        | 0.49533   | 0.25949 | 0.663083552 |             |           |         |
| NA         | ENSG00000250619 | 0.56522   | 0.28596 | 0.6449      | 0.2595      | -0.76401  | 0.77757 |
|            | -0.13044        | 0.55189   | 0.2595  | 0.663083552 |             |           |         |
| DHX32      | ENSG00000089876 | 0.55862   | 0.28821 | 0.18653     | 0.42602     | 0.64481   | 0.25953 |
|            | 0.39213         | 0.34748   | 0.25953 | 0.663083552 |             |           |         |
| NA         | ENSG00000234337 | 0.64478   | 0.25953 | -1.1058     | 0.8656      | -1.1058   | 0.8656  |
|            | -1.1058         | 0.8656    | 0.25953 | 0.663083552 |             |           |         |
| NA         | ENSG00000271385 | 0.64463   | 0.25958 | 0.64463     | 0.25958     | 0.64463   | 0.25958 |
|            | 0.64463         | 0.25958   | 0.25958 | 0.663083552 |             |           |         |
| QRSL1      | ENSG00000130348 | 0.22187   | 0.41221 | 0.6446      | 0.25959     | -0.16852  | 0.56691 |
|            | -0.16852        | 0.56691   | 0.25959 | 0.663083552 |             |           |         |
| NA         | ENSG00000229192 | -0.77969  | 0.78221 | 0.64462     | 0.25959     | -0.77969  | 0.78221 |
|            | -0.77969        | 0.78221   | 0.25959 | 0.663083552 |             |           |         |
| LRP4-AS1   | ENSG00000247675 | 0.6446    | 0.25959 | 0.40335     | 0.34335     | -2.6066   |         |
|            | 0.99543         | -2.6066   | 0.99543 | 0.25959     | 0.663083552 |           |         |
| NA         | ENSG00000260068 | 0.64461   | 0.25959 | 0.64461     | 0.25959     | 0.64461   | 0.25959 |
|            | 0.64461         | 0.25959   | 0.25959 | 0.663083552 |             |           |         |
| NA         | ENSG00000270966 | 0.64461   | 0.25959 | -0.038578   | 0.51539     | 0.64461   | 0.25959 |
|            | 0.64461         | 0.25959   | 0.25959 | 0.663083552 |             |           |         |
| SEPTIN7P3  | ENSG00000226102 | -0.67512  | 0.7502  | -0.1854     | 0.57354     | 0.64457   |         |
|            | 0.2596          | -1.0531   | 0.85386 | 0.2596      | 0.663083552 |           |         |
| NA         | ENSG00000267950 | 0.64458   | 0.2596  | 0.64458     | 0.2596      | 0.64458   | 0.2596  |
|            | 0.64458         | 0.2596    | 0.2596  | 0.663083552 |             |           |         |
| HCK        | ENSG00000101336 | 0.29499   | 0.384   | 0.64446     | 0.25964     | -0.036494 | 0.51456 |
|            | 0.36912         | 0.35602   | 0.25964 | 0.663150962 |             |           |         |
| NMNAT2     | ENSG00000157064 | 0.6443    | 0.25969 | -0.52945    | 0.70175     | -0.47222  |         |
|            | 0.68161         | -0.52945  | 0.70175 | 0.25969     | 0.663239657 |           |         |
| HINT3      | ENSG00000111911 | -2.214    | 0.98659 | 0.64423     | 0.25971     | -0.70843  | 0.76066 |
|            | -0.54944        | 0.70865   | 0.25971 | 0.663239657 |             |           |         |
| NA         | ENSG00000279678 | 0.64416   | 0.25973 | -0.53988    | 0.70536     | 0.64416   | 0.25973 |
|            | 0.64416         | 0.25973   | 0.25973 | 0.663239657 |             |           |         |
| TENM3      | ENSG00000218336 | -0.56346  | 0.71344 | 0.64411     | 0.25975     | 0.33807   | 0.36766 |
|            | 0.39424         | 0.3467    | 0.25975 | 0.663239657 |             |           |         |
| TMX1       | ENSG00000139921 | -0.46456  | 0.67888 | -0.057893   | 0.52308     | -0.58594  | 0.72104 |
|            | 0.64404         | 0.25977   | 0.25977 | 0.663239657 |             |           |         |
| NA         | ENSG00000226645 | 0.64404   | 0.25977 | 0.64404     | 0.25977     | 0.64404   | 0.25977 |
|            | 0.64404         | 0.25977   | 0.25977 | 0.663239657 |             |           |         |
| ATP6V1G1P4 | ENSG00000233343 | 0.64405   | 0.25977 | 0.64405     | 0.25977     | 0.64405   |         |
|            | 0.25977         | 0.64405   | 0.25977 | 0.25977     | 0.663239657 |           |         |
| NA         | ENSG00000251066 | -0.87933  | 0.81039 | 0.64386     | 0.25983     | 0.64386   | 0.25983 |
|            | 0.35988         | 0.35947   | 0.25983 | 0.663260937 |             |           |         |
| SAT2       | ENSG00000141504 | -0.31181  | 0.62241 | -0.36188    | 0.64128     | 0.64383   | 0.25984 |
|            | -0.69416        | 0.75621   | 0.25984 | 0.663260937 |             |           |         |
| FLNC-AS1   | ENSG00000242902 | 0.64384   | 0.25984 | 0.64384     | 0.25984     | 0.64384   |         |
|            | 0.25984         | 0.64384   | 0.25984 | 0.25984     | 0.663260937 |           |         |
| NA         | ENSG00000279653 | -0.031361 | 0.51251 | 0.64383     | 0.25984     | -0.95093  | 0.82918 |
|            | 0.64383         | 0.25984   | 0.25984 | 0.663260937 |             |           |         |
| NA         | ENSG00000248406 | -0.024008 | 0.50958 | 0.23217     | 0.4082      | 0.64381   | 0.25985 |
|            | -0.89574        | 0.8148    | 0.25985 | 0.663260937 |             |           |         |
| NA         | ENSG00000243596 | 0.64379   | 0.25986 | 0.64379     | 0.25986     | 0.64379   | 0.25986 |
|            | 0.64379         | 0.25986   | 0.25986 | 0.663260937 |             |           |         |
| PRXL2B     | ENSG00000157870 | -0.9183   | 0.82077 | 0.64365     | 0.2599      | 0.0055414 |         |
|            | 0.49779         | -0.10896  | 0.54338 | 0.2599      | 0.663264486 |           |         |
| NA         | ENSG00000253979 | 0.64362   | 0.25991 | 0.52395     | 0.30016     | 0.64362   | 0.25991 |
|            | 0.64362         | 0.25991   | 0.25991 | 0.663264486 |             |           |         |
| LINC01915  | ENSG00000265485 | 0.060727  | 0.47579 | 0.64359     | 0.25992     | -0.096532 |         |



|           |                 |             |             |             |             |             |             |  |
|-----------|-----------------|-------------|-------------|-------------|-------------|-------------|-------------|--|
|           | 0.53845         | -0.88608    | 0.81221     | 0.25992     | 0.663264486 |             |             |  |
| NA        | ENSG00000283084 | 0.6436      | 0.25992     | 0.6436      | 0.25992     | 0.6436      | 0.25992     |  |
|           | 0.6436          | 0.25992     | 0.25992     | 0.663264486 |             |             |             |  |
| Clorf115  | ENSG00000162817 | 0.38968     | 0.34839     | 0.38968     | 0.34839     | 0.64351     |             |  |
|           | 0.25995         | 0.38968     | 0.34839     | 0.25995     | 0.663264486 |             |             |  |
| PCNX2     | ENSG00000135749 | 0.64348     | 0.25996     | 0.42109     | 0.33685     | -0.21249    | 0.58414     |  |
|           | 0.44034         | 0.32985     | 0.25996     | 0.663264486 |             |             |             |  |
| LINC02836 | ENSG00000237567 | 0.64325     | 0.26003     | 0.40275     | 0.34356     | 0.035304    |             |  |
|           | 0.48592         | 0.48128     | 0.31516     | 0.26003     | 0.663264486 |             |             |  |
| NA        | ENSG00000250665 | -0.6538     | 0.74338     | 0.20742     | 0.41784     | -0.6538     | 0.74338     |  |
|           | 0.64316         | 0.26006     | 0.26006     | 0.663264486 |             |             |             |  |
| PCDHB19P  | ENSG00000262096 | 0.64311     | 0.26007     | -0.17304    | 0.56869     | 0.64311     |             |  |
|           | 0.26007         | 0.64311     | 0.26007     | 0.26007     | 0.663264486 |             |             |  |
| DDX11-AS1 | ENSG00000245614 | 0.13055     | 0.44807     | 0.40446     | 0.34294     | -1.2615     |             |  |
|           | 0.89643         | 0.64309     | 0.26008     | 0.26008     | 0.663264486 |             |             |  |
| SYNM      | ENSG00000182253 | 0.64307     | 0.26009     | -0.04345    | 0.51733     | -1.0579     | 0.85495     |  |
|           | -0.034624       | 0.51381     | 0.26009     | 0.663264486 |             |             |             |  |
| TMX2      | ENSG00000213593 | 0.46581     | 0.32067     | 0.64303     | 0.2601      | 0.46581     | 0.32067     |  |
|           | 0.46581         | 0.32067     | 0.2601      | 0.663264486 |             |             |             |  |
| NA        | ENSG00000253391 | -1.2437     | 0.8932      | 0.43519     | 0.33171     | 0.64304     | 0.2601      |  |
|           | -1.2437         | 0.8932      | 0.2601      | 0.663264486 |             |             |             |  |
| KRT126P   | ENSG00000257402 | 0.29681     | 0.38331     | 0.64303     | 0.2601      | 0.29681     |             |  |
|           | 0.38331         | 0.29681     | 0.38331     | 0.2601      | 0.663264486 |             |             |  |
| NA        | ENSG00000237418 | 0.643026011 | 0.643026011 | 0.643026011 | 0.643026011 | 0.643026011 | 0.643026011 |  |
|           | 0.26011         | 0.663264486 |             |             |             |             |             |  |
| LINC01777 | ENSG00000235054 | 0.56254     | 0.28687     | -0.80415    | 0.78934     | 0.64297     |             |  |
|           | 0.26012         | 0.64297     | 0.26012     | 0.26012     | 0.663264486 |             |             |  |
| NA        | ENSG00000248262 | -0.35683    | 0.63939     | 0.64297     | 0.26012     | -0.35683    | 0.63939     |  |
|           | -0.16523        | 0.56562     | 0.26012     | 0.663264486 |             |             |             |  |
| NA        | ENSG00000263588 | 0.11987     | 0.45229     | 0.64296     | 0.26012     | -0.65942    | 0.74519     |  |
|           | 0.20242         | 0.41979     | 0.26012     | 0.663264486 |             |             |             |  |
| NA        | ENSG00000280270 | -0.82717    | 0.79593     | 0.64298     | 0.26012     | -1.6679     | 0.95233     |  |
|           | -0.22645        | 0.58957     | 0.26012     | 0.663264486 |             |             |             |  |
| NA        | ENSG00000254712 | 0.6429      | 0.26015     | -0.90332    | 0.81682     | -0.90332    | 0.81682     |  |
|           | -0.90332        | 0.81682     | 0.26015     | 0.663306274 |             |             |             |  |
| ERAP1     | ENSG00000164307 | 0.43444     | 0.33199     | 0.43444     | 0.33199     | 0.43444     | 0.33199     |  |
|           | 0.64271         | 0.26021     | 0.26021     | 0.663380623 |             |             |             |  |
| LINC02705 | ENSG00000254952 | 0.37537     | 0.35369     | 0.6427      | 0.26021     | 0.6427      |             |  |
|           | 0.26021         | 0.6427      | 0.26021     | 0.26021     | 0.663380623 |             |             |  |
| NA        | ENSG00000240424 | -1.0461     | 0.85225     | 0.64266     | 0.26022     | -1.0461     | 0.85225     |  |
|           | -1.0461         | 0.85225     | 0.26022     | 0.663380623 |             |             |             |  |
| LSM12     | ENSG00000161654 | 0.64259     | 0.26025     | -0.87833    | 0.81012     | 0.0063301   | 0.49747     |  |
|           | -0.93899        | 0.82613     | 0.26025     | 0.663394759 |             |             |             |  |
| NA        | ENSG00000200706 | 0.64254     | 0.26026     | 0.64254     | 0.26026     | 0.64254     | 0.26026     |  |
|           | 0.64254         | 0.26026     | 0.26026     | 0.663394759 |             |             |             |  |
| SYNE1     | ENSG00000131018 | -0.45057    | 0.67385     | -0.48282    | 0.68539     | 0.5518      | 0.29054     |  |
|           | 0.64252         | 0.26027     | 0.26027     | 0.663394759 |             |             |             |  |
| NA        | ENSG00000259957 | -0.63732    | 0.73804     | -0.2655     | 0.60469     | 0.64249     | 0.26028     |  |
|           | -0.12759        | 0.55077     | 0.26028     | 0.663394759 |             |             |             |  |
| ACTR6P1   | ENSG00000248915 | -0.59713    | 0.72479     | 0.31172     | 0.37763     | 0.64239     |             |  |
|           | 0.26031         | -0.63003    | 0.73566     | 0.26031     | 0.663436522 |             |             |  |
| TMED4     | ENSG00000158604 | -0.2514     | 0.59925     | 0.29242     | 0.38498     | -0.28033    | 0.61039     |  |
|           | 0.64229         | 0.26034     | 0.26034     | 0.66347828  |             |             |             |  |
| ALG1L15P  | ENSG00000242017 | 0.13756     | 0.44529     | -0.068639   | 0.52736     | 0.13756     |             |  |
|           | 0.44529         | 0.64216     | 0.26038     | 0.26038     | 0.663545518 |             |             |  |
| NA        | ENSG00000213209 | 0.64201     | 0.26043     | 0.64201     | 0.26043     | 0.64201     | 0.26043     |  |
|           | 0.64201         | 0.26043     | 0.26043     | 0.66360353  |             |             |             |  |
| TULP3P1   | ENSG00000234267 | 0.64203     | 0.26043     | 0.24465     | 0.40336     | -0.079272   |             |  |
|           | 0.53159         | 0.24465     | 0.40336     | 0.26043     | 0.66360353  |             |             |  |
| GOT2      | ENSG00000125166 | 0.64185     | 0.26049     | 0.64185     | 0.26049     | 0.64185     | 0.26049     |  |
|           | 0.64185         | 0.26049     | 0.26049     | 0.663630011 |             |             |             |  |
| MTND1P4   | ENSG00000230764 | 0.64185     | 0.26049     | -1.6841     | 0.95392     | -1.6841     |             |  |

|          |                 |           |         |             |             |           |         |
|----------|-----------------|-----------|---------|-------------|-------------|-----------|---------|
|          | 0.95392         | -1.6841   | 0.95392 | 0.26049     | 0.663630011 |           |         |
| KRT18P7  | ENSG00000258951 | 0.64178   | 0.26051 | 0.64178     | 0.26051     | 0.64178   |         |
|          | 0.26051         | 0.64178   | 0.26051 | 0.26051     | 0.663630011 |           |         |
| NA       | ENSG00000230534 | 0.6417    | 0.26053 | 0.37138     | 0.35518     | 0.6417    | 0.26053 |
|          | 0.076925        | 0.46934   | 0.26053 | 0.663630011 |             |           |         |
| C7orf61  | ENSG00000185955 | 0.62373   | 0.2664  | -0.1183     | 0.54709     | -1.364    |         |
|          | 0.91372         | 0.64153   | 0.26059 | 0.26059     | 0.663630011 |           |         |
| KRT8P21  | ENSG00000229636 | -0.19476  | 0.57721 | -1.0068     | 0.84299     | 0.051295  |         |
|          | 0.47955         | 0.64151   | 0.2606  | 0.2606      | 0.663630011 |           |         |
| NA       | ENSG00000251477 | 0.47797   | 0.31634 | 0.64149     | 0.2606      | 0.64149   | 0.2606  |
|          | 0.64149         | 0.2606    | 0.2606  | 0.663630011 |             |           |         |
| NA       | ENSG00000224413 | -1.053    | 0.85382 | -0.20622    | 0.58169     | 0.64143   | 0.26062 |
|          | 0.23747         | 0.40615   | 0.26062 | 0.663630011 |             |           |         |
| NA       | ENSG00000229297 | 0.64143   | 0.26062 | 0.64143     | 0.26062     | 0.64143   | 0.26062 |
|          | 0.065258        | 0.47398   | 0.26062 | 0.663630011 |             |           |         |
| NA       | ENSG00000244429 | 0.64145   | 0.26062 | 0.64145     | 0.26062     | 0.24321   | 0.40392 |
|          | 0.14651         | 0.44176   | 0.26062 | 0.663630011 |             |           |         |
| SRM      | ENSG00000116649 | 0.23076   | 0.40875 | 0.012641    | 0.49496     | 0.64142   | 0.26063 |
|          | -0.04122        | 0.51644   | 0.26063 | 0.663630011 |             |           |         |
| CD300LB  | ENSG00000178789 | -0.8328   | 0.79752 | 0.64142     | 0.26063     | -0.8328   |         |
|          | 0.79752         | -0.82514  | 0.79535 | 0.26063     | 0.663630011 |           |         |
| ZC3H7B   | ENSG00000100403 | 0.39454   | 0.34659 | 0.64133     | 0.26065     | 0.26406   |         |
|          | 0.39587         | -0.40466  | 0.65713 | 0.26065     | 0.663630011 |           |         |
| NA       | ENSG00000270083 | 0.64135   | 0.26065 | 0.64135     | 0.26065     | 0.64135   | 0.26065 |
|          | 0.64135         | 0.26065   | 0.26065 | 0.663630011 |             |           |         |
| CTTN     | ENSG00000085733 | 0.6413    | 0.26066 | -0.34738    | 0.63585     | -1.2877   | 0.90107 |
|          | -0.22793        | 0.59015   | 0.26066 | 0.663630011 |             |           |         |
| FAHD1    | ENSG00000180185 | 0.078799  | 0.4686  | 0.47704     | 0.31667     | 0.64122   | 0.26069 |
|          | 0.64122         | 0.26069   | 0.26069 | 0.663630011 |             |           |         |
| NA       | ENSG00000243903 | -1.4237   | 0.92274 | -0.8534     | 0.80328     | -0.8534   | 0.80328 |
|          | 0.64119         | 0.2607    | 0.2607  | 0.663630011 |             |           |         |
| LILRA6   | ENSG00000244482 | -1.4459   | 0.9259  | -0.88587    | 0.81216     | 0.64118   |         |
|          | 0.2607          | 0.20619   | 0.41832 | 0.2607      | 0.663630011 |           |         |
| NA       | ENSG00000228204 | 0.64111   | 0.26073 | -0.17864    | 0.57089     | 0.64111   | 0.26073 |
|          | 0.64111         | 0.26073   | 0.26073 | 0.663630011 |             |           |         |
| MAPK8IP3 | ENSG00000138834 | -0.096834 | 0.53857 | 0.64106     | 0.26074     | 0.1457    |         |
|          | 0.44208         | -0.018965 | 0.50757 | 0.26074     | 0.663630011 |           |         |
| SNORD100 | ENSG00000221500 | 0.64106   | 0.26074 | 0.64106     | 0.26074     | 0.64106   |         |
|          | 0.26074         | 0.64106   | 0.26074 | 0.26074     | 0.663630011 |           |         |
| NA       | ENSG00000231317 | -0.68239  | 0.75251 | -0.13852    | 0.55509     | -0.44334  | 0.67124 |
|          | 0.64106         | 0.26074   | 0.26074 | 0.663630011 |             |           |         |
| NA       | ENSG00000248426 | 0.64087   | 0.2608  | 0.64087     | 0.2608      | 0.64087   | 0.2608  |
|          | 0.64087         | 0.2608    | 0.2608  | 0.663748055 |             |           |         |
| SLC12A3  | ENSG00000070915 | -0.37575  | 0.64645 | 0.16724     | 0.43359     | 0.64083   |         |
|          | 0.26082         | -0.84719  | 0.80156 | 0.26082     | 0.663762091 |           |         |
| C11orf21 | ENSG00000110665 | -0.80327  | 0.78909 | 0.64074     | 0.26085     | 0.0068638 |         |
|          | 0.49726         | -1.2398   | 0.89247 | 0.26085     | 0.663762091 |           |         |
| NA       | ENSG00000242540 | 0.64073   | 0.26085 | 0.64073     | 0.26085     | 0.64073   | 0.26085 |
|          | 0.64073         | 0.26085   | 0.26085 | 0.663762091 |             |           |         |
| IAH1     | ENSG00000134330 | 0.43804   | 0.33068 | 0.64068     | 0.26086     | 0.64068   | 0.26086 |
|          | 0.29386         | 0.38443   | 0.26086 | 0.663762091 |             |           |         |
| NA       | ENSG00000278518 | 0.6406    | 0.26089 | 0.6406      | 0.26089     | 0.6406    | 0.26089 |
|          | 0.6406          | 0.26089   | 0.26089 | 0.663803765 |             |           |         |
| RTN4     | ENSG00000115310 | -0.87926  | 0.81037 | 0.37907     | 0.35232     | -0.82531  | 0.7954  |
|          | 0.64044         | 0.26094   | 0.26094 | 0.663883728 |             |           |         |
| ZBP1     | ENSG00000124256 | -0.045739 | 0.51824 | -0.40229    | 0.65626     | 0.18326   | 0.4273  |
|          | 0.64037         | 0.26097   | 0.26097 | 0.663883728 |             |           |         |
| AP1B1    | ENSG00000100280 | 0.64032   | 0.26098 | 0.10166     | 0.45951     | -0.23215  | 0.59179 |
|          | 0.36691         | 0.35684   | 0.26098 | 0.663883728 |             |           |         |
| NA       | ENSG00000259011 | 0.64028   | 0.26099 | 0.64028     | 0.26099     | 0.64028   | 0.26099 |
|          | 0.64028         | 0.26099   | 0.26099 | 0.663883728 |             |           |         |
| NSUN5    | ENSG00000130305 | 0.64015   | 0.26104 | -0.35444    | 0.6385      | -0.55708  | 0.71126 |

|            |                 |           |         |             |             |           |         |  |
|------------|-----------------|-----------|---------|-------------|-------------|-----------|---------|--|
|            | -1.1888         | 0.88273   | 0.26104 | 0.663883728 |             |           |         |  |
| RPL7AP15   | ENSG00000236806 | 0.045259  | 0.48195 | 0.64009     | 0.26106     | 0.045259  |         |  |
|            | 0.48195         | 0.045259  | 0.48195 | 0.26106     | 0.663883728 |           |         |  |
| RNU6-937P  | ENSG00000207053 | 0.64006   | 0.26107 | 0.64006     | 0.26107     | 0.64006   |         |  |
|            | 0.26107         | 0.64006   | 0.26107 | 0.26107     | 0.663883728 |           |         |  |
| TESMIN     | ENSG00000132749 | 0.17998   | 0.42858 | -0.087877   | 0.53501     | -0.50229  |         |  |
|            | 0.69227         | 0.64001   | 0.26108 | 0.26108     | 0.663883728 |           |         |  |
| NOS2P4     | ENSG00000264892 | 0.57133   | 0.28389 | -0.41285    | 0.66014     | -0.31917  |         |  |
|            | 0.6252          | 0.64003   | 0.26108 | 0.26108     | 0.663883728 |           |         |  |
| MIR4519    | ENSG00000265991 | 0.64003   | 0.26108 | 0.64003     | 0.26108     | 0.64003   |         |  |
|            | 0.26108         | 0.64003   | 0.26108 | 0.26108     | 0.663883728 |           |         |  |
| NA         | ENSG00000242586 | -0.37215  | 0.64511 | 0.63993     | 0.26111     | -0.25372  | 0.60014 |  |
|            | -0.67849        | 0.75127   | 0.26111 | 0.663883728 |             |           |         |  |
| EBF3       | ENSG00000108001 | 0.094456  | 0.46237 | -0.031467   | 0.51255     | 0.63988   | 0.26112 |  |
|            | -0.57111        | 0.71604   | 0.26112 | 0.663883728 |             |           |         |  |
| NA         | ENSG00000280238 | 0.63987   | 0.26113 | 0.63987     | 0.26113     | 0.63987   | 0.26113 |  |
|            | 0.63987         | 0.26113   | 0.26113 | 0.663883728 |             |           |         |  |
| NA         | ENSG00000234117 | 0.060035  | 0.47606 | 0.63983     | 0.26114     | 0.63983   | 0.26114 |  |
|            | 0.63983         | 0.26114   | 0.26114 | 0.663883728 |             |           |         |  |
| NA         | ENSG00000248209 | -0.33452  | 0.631   | -0.75398    | 0.77457     | 0.63982   | 0.26115 |  |
|            | -0.75398        | 0.77457   | 0.26115 | 0.663883728 |             |           |         |  |
| RNU6ATAC5P | ENSG00000210839 | 0.05209   | 0.47923 | 0.55877     | 0.28816     | 0.55696   |         |  |
|            | 0.28878         | 0.63976   | 0.26116 | 0.26116     | 0.663883728 |           |         |  |
| PDE1C      | ENSG00000154678 | -0.043685 | 0.51742 | -0.51142    | 0.69547     | 0.6397    | 0.26118 |  |
|            | -0.44999        | 0.67364   | 0.26118 | 0.663883728 |             |           |         |  |
| PLLIP      | ENSG00000102934 | -0.73452  | 0.76868 | -0.20442    | 0.58099     | 0.63968   | 0.26119 |  |
|            | -0.71823        | 0.76369   | 0.26119 | 0.663883728 |             |           |         |  |
| NA         | ENSG00000228729 | 0.63964   | 0.2612  | -0.4165     | 0.66148     | 0.3851    | 0.35008 |  |
|            | 0.32815         | 0.3714    | 0.2612  | 0.663883728 |             |           |         |  |
| LAMA5      | ENSG00000130702 | 0.11576   | 0.45392 | 0.63957     | 0.26123     | -0.020189 | 0.50805 |  |
|            | -0.1279         | 0.55089   | 0.26123 | 0.663883728 |             |           |         |  |
| KRT8P2     | ENSG00000258828 | 0.63957   | 0.26123 | 0.63957     | 0.26123     | 0.5006    |         |  |
|            | 0.30833         | 0.63957   | 0.26123 | 0.26123     | 0.663883728 |           |         |  |
| RGL4       | ENSG00000159496 | 0.63954   | 0.26124 | 0.63954     | 0.26124     | 0.63954   | 0.26124 |  |
|            | 0.63954         | 0.26124   | 0.26124 | 0.663883728 |             |           |         |  |
| GPR3       | ENSG00000181773 | -1.4695   | 0.92916 | -0.54492    | 0.7071      | -1.2966   | 0.90261 |  |
|            | 0.63947         | 0.26126   | 0.26126 | 0.663883728 |             |           |         |  |
| RNA5SP167  | ENSG00000202331 | 0.63936   | 0.2613  | 0.3787      | 0.35245     | 0.53481   |         |  |
|            | 0.29639         | 0.53481   | 0.29639 | 0.2613      | 0.663883728 |           |         |  |
| ZBED2      | ENSG00000177494 | 0.63932   | 0.26131 | 0.63932     | 0.26131     | 0.63932   | 0.26131 |  |
|            | 0.63932         | 0.26131   | 0.26131 | 0.663883728 |             |           |         |  |
| NA         | ENSG00000248597 | 0.63931   | 0.26131 | 0.19917     | 0.42106     | 0.63931   | 0.26131 |  |
|            | 0.63931         | 0.26131   | 0.26131 | 0.663883728 |             |           |         |  |
| RPS29P17   | ENSG00000227852 | 0.63929   | 0.26132 | 0.63929     | 0.26132     | -0.30768  |         |  |
|            | 0.62084         | 0.31076   | 0.37799 | 0.26132     | 0.663883728 |           |         |  |
| NA         | ENSG00000258053 | 0.63929   | 0.26132 | -0.048717   | 0.51943     | 0.63929   | 0.26132 |  |
|            | 0.63929         | 0.26132   | 0.26132 | 0.663883728 |             |           |         |  |
| HFE        | ENSG00000010704 | 0.60832   | 0.27149 | 0.63922     | 0.26134     | 0.35126   | 0.3627  |  |
|            | 0.21716         | 0.41404   | 0.26134 | 0.663883728 |             |           |         |  |
| NA         | ENSG00000207271 | 0.17321   | 0.43124 | 0.63922     | 0.26134     | 0.17321   | 0.43124 |  |
|            | -0.23873        | 0.59434   | 0.26134 | 0.663883728 |             |           |         |  |
| SNAI3      | ENSG00000185669 | 0.63918   | 0.26135 | 0.63918     | 0.26135     | 0.63918   | 0.26135 |  |
|            | 0.63918         | 0.26135   | 0.26135 | 0.663883728 |             |           |         |  |
| NA         | ENSG00000224172 | 0.24879   | 0.40176 | 0.63916     | 0.26136     | -0.52393  | 0.69984 |  |
|            | 0.63916         | 0.26136   | 0.26136 | 0.663883728 |             |           |         |  |
| NA         | ENSG00000250431 | -1.8939   | 0.97088 | -1.0949     | 0.86321     | 0.63902   | 0.2614  |  |
|            | 0.63902         | 0.2614    | 0.2614  | 0.663883728 |             |           |         |  |
| NA         | ENSG00000255457 | -1.2319   | 0.89102 | 0.63904     | 0.2614      | -1.0924   | 0.86267 |  |
|            | -1.0924         | 0.86267   | 0.2614  | 0.663883728 |             |           |         |  |
| NUCB2      | ENSG00000070081 | 0.37828   | 0.35261 | -0.97655    | 0.8356      | -2.0934   | 0.98184 |  |
|            | 0.639           | 0.26141   | 0.26141 | 0.663883728 |             |           |         |  |
| IL1RAP     | ENSG00000196083 | -0.78945  | 0.78508 | -0.39016    | 0.65179     | -0.6052   |         |  |

|           |                 |           |          |          |             |             |         |  |
|-----------|-----------------|-----------|----------|----------|-------------|-------------|---------|--|
|           | 0.72748         | 0.6389    | 0.26144  | 0.26144  | 0.663883728 |             |         |  |
| NA        | ENSG00000253449 | -0.36282  | 0.64163  | 0.63886  | 0.26146     | -0.34167    | 0.6337  |  |
|           |                 | -0.34167  | 0.6337   | 0.26146  | 0.663883728 |             |         |  |
| LETM2     | ENSG00000165046 | -0.27906  | 0.6099   | -0.11776 | 0.54687     | 0.47549     | 0.31722 |  |
|           |                 | 0.63882   | 0.26147  | 0.26147  | 0.663883728 |             |         |  |
| ZNF296    | ENSG00000170684 | 0.63883   | 0.26147  | 0.63883  | 0.26147     | 0.63883     |         |  |
|           |                 | 0.26147   | 0.63883  | 0.26147  | 0.26147     | 0.663883728 |         |  |
| HOXD11    | ENSG00000128713 | 0.35299   | 0.36205  | 0.2876   | 0.38683     | -0.38407    |         |  |
|           |                 | 0.64954   | 0.63878  | 0.26148  | 0.26148     | 0.663883728 |         |  |
| CERS3     | ENSG00000154227 | 0.6388    | 0.26148  | -0.4974  | 0.69055     | -0.46728    | 0.67985 |  |
|           |                 | -0.020043 | 0.508    | 0.26148  | 0.663883728 |             |         |  |
| NA        | ENSG00000267188 | 0.40733   | 0.34188  | -0.42241 | 0.66364     | -1.4211     | 0.92236 |  |
|           |                 | 0.63872   | 0.2615   | 0.2615   | 0.663899917 |             |         |  |
| NA        | ENSG00000264093 | 0.6386    | 0.26154  | 0.6386   | 0.26154     | 0.6386      | 0.26154 |  |
|           |                 | 0.6386    | 0.26154  | 0.26154  | 0.663955451 |             |         |  |
| PSMA6     | ENSG00000100902 | 0.35124   | 0.3627   | 0.096451 | 0.46158     | 0.54839     | 0.29171 |  |
|           |                 | 0.63851   | 0.26157  | 0.26157  | 0.663955451 |             |         |  |
| LINC00870 | ENSG00000243083 | 0.19202   | 0.42386  | 0.63852  | 0.26157     | 0.50093     |         |  |
|           |                 | 0.30821   | -1.0224  | 0.84671  | 0.26157     | 0.663955451 |         |  |
| NSA2P7    | ENSG00000238251 | -1.0809   | 0.86013  | 0.63848  | 0.26158     | -0.14271    |         |  |
|           |                 | 0.55674   | -0.14271 | 0.55674  | 0.26158     | 0.663955451 |         |  |
| RNU7-97P  | ENSG00000238704 | 0.63846   | 0.26159  | 0.63846  | 0.26159     | 0.63846     |         |  |
|           |                 | 0.26159   | 0.63846  | 0.26159  | 0.26159     | 0.663955451 |         |  |
| NA        | ENSG00000283213 | 0.63837   | 0.26162  | 0.63837  | 0.26162     | 0.63837     | 0.26162 |  |
|           |                 | -0.10067  | 0.5401   | 0.26162  | 0.66399701  |             |         |  |
| NA        | ENSG00000238761 | 0.20549   | 0.4186   | 0.20549  | 0.4186      | -0.34887    | 0.63641 |  |
|           |                 | 0.63828   | 0.26165  | 0.26165  | 0.664003984 |             |         |  |
| NA        | ENSG00000241204 | -0.28851  | 0.61352  | 0.63827  | 0.26165     | -0.28851    | 0.61352 |  |
|           |                 | -0.28851  | 0.61352  | 0.26165  | 0.664003984 |             |         |  |
| MBD5      | ENSG00000204406 | 0.63811   | 0.2617   | 0.62326  | 0.26656     | 0.55778     | 0.2885  |  |
|           |                 | 0.432     | 0.33287  | 0.2617   | 0.664029631 |             |         |  |
| TXNRD1    | ENSG00000198431 | 0.39976   | 0.34467  | -0.4383  | 0.66941     | 0.63796     |         |  |
|           |                 | 0.26175   | -0.62645 | 0.73449  | 0.26175     | 0.664029631 |         |  |
| NA        | ENSG00000258393 | 0.63795   | 0.26175  | 0.63795  | 0.26175     | 0.63795     | 0.26175 |  |
|           |                 | 0.63795   | 0.26175  | 0.26175  | 0.664029631 |             |         |  |
| RBM4B     | ENSG00000173914 | -0.17534  | 0.56959  | -1.3421  | 0.91022     | -1.3421     | 0.91022 |  |
|           |                 | 0.63793   | 0.26176  | 0.26176  | 0.664029631 |             |         |  |
| LARP6     | ENSG00000166173 | -1.5129   | 0.93484  | -1.5129  | 0.93484     | 0.6379      | 0.26177 |  |
|           |                 | -0.36629  | 0.64292  | 0.26177  | 0.664029631 |             |         |  |
| RPL4P6    | ENSG00000230071 | -0.1163   | 0.54629  | 0.6379   | 0.26177     | -0.1163     |         |  |
|           |                 | 0.54629   | -0.1163  | 0.54629  | 0.26177     | 0.664029631 |         |  |
| RPL32P9   | ENSG00000241143 | 0.63789   | 0.26177  | 0.63789  | 0.26177     | 0.63789     |         |  |
|           |                 | 0.26177   | 0.63789  | 0.26177  | 0.26177     | 0.664029631 |         |  |
| NA        | ENSG00000259100 | 0.63785   | 0.26179  | 0.63785  | 0.26179     | 0.63785     | 0.26179 |  |
|           |                 | 0.63785   | 0.26179  | 0.26179  | 0.664029631 |             |         |  |
| NA        | ENSG00000232979 | 0.63781   | 0.2618   | 0.63781  | 0.2618      | 0.63781     | 0.2618  |  |
|           |                 | 0.63781   | 0.2618   | 0.2618   | 0.664029631 |             |         |  |
| NA        | ENSG00000268059 | 0.33111   | 0.37028  | 0.6378   | 0.2618      | 0.6378      | 0.2618  |  |
|           |                 | 0.6378    | 0.2618   | 0.2618   | 0.664029631 |             |         |  |
| SPINK6    | ENSG00000178172 | 0.45402   | 0.32491  | -0.43816 | 0.66937     | 0.63779     |         |  |
|           |                 | 0.26181   | 0.63779  | 0.26181  | 0.26181     | 0.664029631 |         |  |
| GLIS3     | ENSG00000107249 | 0.61141   | 0.27046  | 0.63768  | 0.26184     | 0.029429    | 0.48826 |  |
|           |                 | -0.58261  | 0.71992  | 0.26184  | 0.664036596 |             |         |  |
| FOXL3     | ENSG00000248767 | 0.63767   | 0.26184  | 0.6044   | 0.27279     | 0.17945     | 0.42879 |  |
|           |                 | 0.40762   | 0.34178  | 0.26184  | 0.664036596 |             |         |  |
| SMARCD3   | ENSG00000082014 | -0.54073  | 0.70565  | -1.0664  | 0.85687     | 0.23409     |         |  |
|           |                 | 0.40746   | 0.63751  | 0.2619   | 0.2619      | 0.664075878 |         |  |
| NA        | ENSG00000229569 | 0.63748   | 0.26191  | -0.52471 | 0.70011     | -0.34632    | 0.63545 |  |
|           |                 | 0.59305   | 0.27657  | 0.26191  | 0.664075878 |             |         |  |
| RNA5SP137 | ENSG00000252642 | 0.63746   | 0.26191  | 0.63746  | 0.26191     | 0.63746     |         |  |
|           |                 | 0.26191   | 0.63746  | 0.26191  | 0.26191     | 0.664075878 |         |  |
| NA        | ENSG00000250003 | 0.24218   | 0.40432  | 0.29748  | 0.38305     | 0.63747     | 0.26191 |  |

|                |                 |            |             |             |             |            |         |         |
|----------------|-----------------|------------|-------------|-------------|-------------|------------|---------|---------|
|                | -0.48576        | 0.68643    | 0.26191     | 0.664075878 |             |            |         |         |
| SIRT5          | ENSG00000124523 | -0.012824  | 0.50512     | 0.63734     | 0.26195     | -0.36278   | 0.64162 |         |
|                | -0.43908        | 0.6697     | 0.26195     | 0.664108189 |             |            |         |         |
| NCMAP-DT       | ENSG00000264443 | 0.63736    | 0.26195     | -0.086378   | 0.53442     | -0.086378  |         |         |
|                | 0.53442         | -1.4128    | 0.92114     | 0.26195     | 0.664108189 |            |         |         |
| MIR548C        | ENSG00000207546 | 0.63719    | 0.262       | 0.63719     | 0.262       | 0.63719    | 0.262   | 0.63719 |
|                | 0.262           | 0.262      | 0.664181991 |             |             |            |         |         |
| LINC02668      | ENSG00000226762 | 0.63716    | 0.26201     | 0.27857     | 0.39029     | -0.25819   |         |         |
|                | 0.60187         | 0.1021     | 0.45934     | 0.26201     | 0.664181991 |            |         |         |
| NA             | ENSG00000218713 | 0.63713    | 0.26202     | 0.63713     | 0.26202     | 0.63713    | 0.26202 |         |
|                | 0.63713         | 0.26202    | 0.26202     | 0.664181991 |             |            |         |         |
| NA             | ENSG00000260411 | -0.37986   | 0.64797     | 0.065283    | 0.47397     | 0.63701    | 0.26206 |         |
|                | 0.29532         | 0.38388    | 0.26206     | 0.664248832 |             |            |         |         |
| RN7SL444P      | ENSG00000265753 | 0.63692    | 0.26209     | 0.63692     | 0.26209     | 0.63692    |         |         |
|                | 0.26209         | 0.63692    | 0.26209     | 0.26209     | 0.664281115 |            |         |         |
| NA             | ENSG00000268833 | 0.63688    | 0.2621      | 0.58        | 0.28096     | -2.2458    | 0.98764 |         |
|                | -0.65543        | 0.74391    | 0.2621      | 0.664281115 |             |            |         |         |
| IPMK           | ENSG00000151151 | -0.896     | 0.81487     | 0.60914     | 0.27121     | 0.63677    | 0.26214 |         |
|                | 0.63677         | 0.26214    | 0.26214     | 0.66428124  |             |            |         |         |
| NA             | ENSG00000233727 | 0.63673    | 0.26215     | -0.12685    | 0.55047     | 0.63673    | 0.26215 |         |
|                | 0.63673         | 0.26215    | 0.26215     | 0.66428124  |             |            |         |         |
| NA             | ENSG00000244062 | 0.63672    | 0.26215     | 0.63672     | 0.26215     | 0.63672    | 0.26215 |         |
|                | 0.63672         | 0.26215    | 0.26215     | 0.66428124  |             |            |         |         |
| CREM           | ENSG00000095794 | 0.43919    | 0.33026     | 0.63664     | 0.26218     | 0.61259    | 0.27007 |         |
|                | 0.5809          | 0.28065    | 0.26218     | 0.66428124  |             |            |         |         |
| SLC34A2        | ENSG00000157765 | 0.065792   | 0.47377     | 0.60684     | 0.27198     | -0.44434   |         |         |
|                | 0.6716          | 0.63663    | 0.26218     | 0.26218     | 0.66428124  |            |         |         |
| NA             | ENSG00000227489 | 0.63659    | 0.26219     | -0.41452    | 0.66075     | -0.41621   | 0.66137 |         |
|                | -0.41621        | 0.66137    | 0.26219     | 0.66428124  |             |            |         |         |
| BCAR4          | ENSG00000262117 | 0.63658    | 0.2622      | 0.63658     | 0.2622      | 0.63658    | 0.2622  |         |
|                | 0.63658         | 0.2622     | 0.2622      | 0.66428124  |             |            |         |         |
| NA             | ENSG00000267000 | 0.00075301 | 0.4997      | -0.42494    | 0.66456     | 0.63649    | 0.26223 |         |
|                | 0.63649         | 0.26223    | 0.26223     | 0.66428124  |             |            |         |         |
| RN7SKP193      | ENSG00000201358 | -0.48589   | 0.68648     | 0.63645     | 0.26224     | 0.62545    |         |         |
|                | 0.26584         | -0.055638  | 0.52219     | 0.26224     | 0.66428124  |            |         |         |
| NA             | ENSG00000238394 | 0.63645    | 0.26224     | 0.63645     | 0.26224     | 0.63645    | 0.26224 |         |
|                | 0.63645         | 0.26224    | 0.26224     | 0.66428124  |             |            |         |         |
| TPT1P9         | ENSG00000234782 | -0.90695   | 0.81778     | 0.63642     | 0.26225     | 0.63642    |         |         |
|                | 0.26225         | 0.63642    | 0.26225     | 0.26225     | 0.66428124  |            |         |         |
| DNAJB13        | ENSG00000187726 | 0.3417     | 0.36629     | 0.49953     | 0.3087      | 0.63627    |         |         |
|                | 0.2623          | -0.091494  | 0.53645     | 0.2623      | 0.664373356 |            |         |         |
| OR51B4         | ENSG00000183251 | 0.63616    | 0.26233     | -0.0019401  | 0.50077     | -0.0019401 |         |         |
|                | 0.50077         | -0.0019401 | 0.50077     | 0.26233     | 0.664414808 |            |         |         |
| LINC01320      | ENSG00000228262 | 0.27683    | 0.39095     | 0.13507     | 0.44628     | 0.63609    |         |         |
|                | 0.26236         | 0.40327    | 0.34338     | 0.26236     | 0.664456255 |            |         |         |
| TMEM171        | ENSG00000157111 | 0.63592    | 0.26241     | -0.14557    | 0.55787     | -0.14557   |         |         |
|                | 0.55787         | -0.14557   | 0.55787     | 0.26241     | 0.664476983 |            |         |         |
| GCNT1P1        | ENSG00000236474 | 0.63593    | 0.26241     | 0.63593     | 0.26241     | 0.63593    |         |         |
|                | 0.26241         | 0.63593    | 0.26241     | 0.26241     | 0.664476983 |            |         |         |
| MARCHF7        | ENSG00000136536 | 0.63588    | 0.26243     | -0.28972    | 0.61399     | -1.3196    |         |         |
|                | 0.90651         | -1.0688    | 0.85741     | 0.26243     | 0.664476983 |            |         |         |
| ICAM1          | ENSG00000090339 | -0.45103   | 0.67401     | 0.63585     | 0.26244     | -0.79996   | 0.78813 |         |
|                | 0.63585         | 0.26244    | 0.26244     | 0.664476983 |             |            |         |         |
| ICAM4          | ENSG00000105371 | 0.63585    | 0.26244     | 0.63585     | 0.26244     | 0.63585    | 0.26244 |         |
|                | 0.63585         | 0.26244    | 0.26244     | 0.664476983 |             |            |         |         |
| RSPO3          | ENSG00000146374 | -1.3061    | 0.90423     | 0.0021434   | 0.49914     | -0.80086   | 0.78839 |         |
|                | 0.6358          | 0.26245    | 0.26245     | 0.664476983 |             |            |         |         |
| LRRC27         | ENSG00000148814 | 0.17428    | 0.43082     | 0.19557     | 0.42247     | 0.57707    |         |         |
|                | 0.28195         | 0.63562    | 0.26251     | 0.26251     | 0.664477062 |            |         |         |
| NDUFC2         | ENSG00000151366 | 0.27622    | 0.39119     | 0.27622     | 0.39119     | 0.63558    |         |         |
|                | 0.26252         | 0.27622    | 0.39119     | 0.26252     | 0.664477062 |            |         |         |
| CCDC169-SOHLH2 | ENSG00000250709 | 0.57897    | 0.28131     | 0.63553     | 0.26254     | 0.35264    |         |         |

|            |                 |          |         |             |             |          |         |  |
|------------|-----------------|----------|---------|-------------|-------------|----------|---------|--|
|            | 0.36218         | 0.35264  | 0.36218 | 0.26254     | 0.664477062 |          |         |  |
| CCK        | ENSG00000187094 | -0.20326 | 0.58053 | 0.24979     | 0.40138     | 0.038891 | 0.48449 |  |
|            | 0.63544         | 0.26257  | 0.26257 | 0.664477062 |             |          |         |  |
| NA         | ENSG00000248490 | 0.6354   | 0.26258 | 0.6354      | 0.26258     | 0.6354   | 0.26258 |  |
|            | -0.60921        | 0.72881  | 0.26258 | 0.664477062 |             |          |         |  |
| NA         | ENSG00000249201 | 0.63539  | 0.26259 | -0.69023    | 0.75497     | 0.060957 | 0.4757  |  |
|            | 0.41185         | 0.34022  | 0.26259 | 0.664477062 |             |          |         |  |
| OCM2       | ENSG00000135175 | 0.63532  | 0.26261 | -0.4623     | 0.67807     | 0.081314 | 0.4676  |  |
|            | -1.0592         | 0.85524  | 0.26261 | 0.664477062 |             |          |         |  |
| NA         | ENSG00000276693 | 0.63504  | 0.2627  | 0.38073     | 0.3517      | -1.9995  | 0.97722 |  |
|            | -0.5265         | 0.70073  | 0.2627  | 0.664477062 |             |          |         |  |
| RNU6-811P  | ENSG00000206796 | 0.63498  | 0.26272 | 0.63498     | 0.26272     | 0.63498  |         |  |
|            | 0.26272         | 0.63498  | 0.26272 | 0.26272     | 0.664477062 |          |         |  |
| NA         | ENSG00000251126 | -0.2787  | 0.60976 | 0.63498     | 0.26272     | -0.2787  | 0.60976 |  |
|            | -0.2787         | 0.60976  | 0.26272 | 0.664477062 |             |          |         |  |
| NA         | ENSG00000283058 | 0.63498  | 0.26272 | 0.63498     | 0.26272     | 0.63498  | 0.26272 |  |
|            | 0.63498         | 0.26272  | 0.26272 | 0.664477062 |             |          |         |  |
| LRRC43     | ENSG00000158113 | 0.11639  | 0.45367 | -1.0347     | 0.84959     | -1.0187  |         |  |
|            | 0.84583         | 0.63496  | 0.26273 | 0.26273     | 0.664477062 |          |         |  |
| NPAP1P6    | ENSG00000238002 | -0.81112 | 0.79135 | -0.81112    | 0.79135     | -0.81112 |         |  |
|            | 0.79135         | 0.63487  | 0.26276 | 0.26276     | 0.664477062 |          |         |  |
| NA         | ENSG00000257629 | 0.34012  | 0.36688 | 0.29881     | 0.38254     | 0.63485  | 0.26276 |  |
|            | -2.0896         | 0.98167  | 0.26276 | 0.664477062 |             |          |         |  |
| NA         | ENSG00000221042 | 0.6348   | 0.26278 | 0.6348      | 0.26278     | 0.6348   | 0.26278 |  |
|            | 0.6348          | 0.26278  | 0.26278 | 0.664477062 |             |          |         |  |
| MIR133A1HG | ENSG00000265142 | 0.6348   | 0.26278 | -0.15652    | 0.56219     | -0.15652 |         |  |
|            | 0.56219         | -0.15652 | 0.56219 | 0.26278     | 0.664477062 |          |         |  |
| TEX26      | ENSG00000175664 | -0.38779 | 0.65092 | 0.63475     | 0.26279     | -0.23522 | 0.59298 |  |
|            | 0.2793          | 0.39001  | 0.26279 | 0.664477062 |             |          |         |  |
| NA         | ENSG00000267834 | 0.63476  | 0.26279 | 0.63476     | 0.26279     | 0.63476  | 0.26279 |  |
|            | 0.63476         | 0.26279  | 0.26279 | 0.664477062 |             |          |         |  |
| VDAC1      | ENSG00000213585 | 0.018993 | 0.49242 | 0.63473     | 0.2628      | 0.28709  | 0.38702 |  |
|            | -0.53459        | 0.70353  | 0.2628  | 0.664477062 |             |          |         |  |
| RPPH1-2P   | ENSG00000252497 | 0.63475  | 0.2628  | 0.63475     | 0.2628      | 0.16475  |         |  |
|            | 0.43457         | 0.52171  | 0.30094 | 0.2628      | 0.664477062 |          |         |  |
| FAM32A     | ENSG00000105058 | -1.2139  | 0.88761 | -0.92228    | 0.82181     | -0.88051 |         |  |
|            | 0.81071         | 0.6347   | 0.26281 | 0.26281     | 0.664477062 |          |         |  |
| NA         | ENSG00000277513 | 0.066963 | 0.47331 | -0.87587    | 0.80945     | 0.63464  | 0.26283 |  |
|            | 0.26619         | 0.39505  | 0.26283 | 0.664477062 |             |          |         |  |
| NA         | ENSG00000280309 | 0.45824  | 0.32339 | 0.57632     | 0.2822      | 0.63465  | 0.26283 |  |
|            | 0.63465         | 0.26283  | 0.26283 | 0.664477062 |             |          |         |  |
| COL6A5     | ENSG00000172752 | -0.35574 | 0.63898 | -0.50265    | 0.6924      | 0.63463  |         |  |
|            | 0.26284         | 0.24295  | 0.40402 | 0.26284     | 0.664477062 |          |         |  |
| TAGLN      | ENSG00000149591 | 0.63455  | 0.26286 | 0.58791     | 0.2783      | -0.7914  | 0.78565 |  |
|            | -1.2106         | 0.88698  | 0.26286 | 0.664477062 |             |          |         |  |
| LINC02636  | ENSG00000224222 | -1.0318  | 0.84893 | -0.19201    | 0.57613     | 0.63457  |         |  |
|            | 0.26286         | 0.21763  | 0.41386 | 0.26286     | 0.664477062 |          |         |  |
| NA         | ENSG00000266283 | 0.63456  | 0.26286 | 0.63456     | 0.26286     | 0.63456  | 0.26286 |  |
|            | 0.63456         | 0.26286  | 0.26286 | 0.664477062 |             |          |         |  |
| NA         | ENSG00000272440 | 0.63456  | 0.26286 | 0.63456     | 0.26286     | 0.63456  | 0.26286 |  |
|            | 0.63456         | 0.26286  | 0.26286 | 0.664477062 |             |          |         |  |
| ARHGAP42   | ENSG00000165895 | 0.63453  | 0.26287 | 0.24497     | 0.40324     | -0.87252 |         |  |
|            | 0.80854         | 0.59012  | 0.27755 | 0.26287     | 0.664477062 |          |         |  |
| MOB1B      | ENSG00000173542 | 0.63445  | 0.26289 | -0.25745    | 0.60158     | -1.0691  | 0.8575  |  |
|            | 0.16147         | 0.43586  | 0.26289 | 0.664477062 |             |          |         |  |
| NA         | ENSG00000271522 | -0.65676 | 0.74433 | -0.14099    | 0.55606     | 0.2455   | 0.40303 |  |
|            | 0.63442         | 0.2629   | 0.2629  | 0.664477062 |             |          |         |  |
| NA         | ENSG00000256249 | 0.63424  | 0.26296 | -0.37725    | 0.64701     | -1.3765  | 0.91567 |  |
|            | -0.9197         | 0.82114  | 0.26296 | 0.664477062 |             |          |         |  |
| RPS6P4     | ENSG00000244571 | 0.6342   | 0.26297 | -0.83463    | 0.79804     | -0.83463 |         |  |
|            | 0.79804         | -0.83463 | 0.79804 | 0.26297     | 0.664477062 |          |         |  |
| NA         | ENSG00000199633 | 0.63418  | 0.26298 | 0.13223     | 0.4474      | 0.63418  | 0.26298 |  |

|              |                 |           |         |             |             |           |         |  |
|--------------|-----------------|-----------|---------|-------------|-------------|-----------|---------|--|
|              | 0.63418         | 0.26298   | 0.26298 | 0.664477062 |             |           |         |  |
| GPR42        | ENSG00000126251 | 0.63414   | 0.26299 | 0.12422     | 0.45057     | -0.54246  | 0.70625 |  |
|              | -0.46064        | 0.67747   | 0.26299 | 0.664477062 |             |           |         |  |
| PMIS2        | ENSG00000283758 | 0.32631   | 0.3721  | 0.63411     | 0.263       | 0.32631   | 0.3721  |  |
|              | 0.32631         | 0.3721    | 0.263   | 0.664477062 |             |           |         |  |
| DDI2         | ENSG00000197312 | 0.634     | 0.26304 | 0.2114      | 0.41629     | 0.081259  | 0.46762 |  |
|              | 0.35797         | 0.36018   | 0.26304 | 0.664477062 |             |           |         |  |
| HMGB3P22     | ENSG00000225051 | 0.61257   | 0.26305 | 0.27008     | -0.11765    | 0.54683   | 0.63398 |  |
|              | 0.26305         | 0.63398   | 0.26305 | 0.664477062 |             |           |         |  |
| RPS29P25     | ENSG00000243581 | 0.63396   | 0.26305 | 0.63396     | 0.26305     | 0.63396   | 0.63396 |  |
|              | 0.26305         | 0.63396   | 0.26305 | 0.664477062 |             |           |         |  |
| NA           | ENSG00000264304 | 0.63396   | 0.26305 | 0.63396     | 0.26305     | 0.63396   | 0.26305 |  |
|              | 0.63396         | 0.26305   | 0.26305 | 0.664477062 |             |           |         |  |
| PIK3CG       | ENSG00000105851 | -0.58364  | 0.72027 | 0.63393     | 0.26306     | 0.012579  |         |  |
|              | 0.49498         | -0.97979  | 0.83641 | 0.26306     | 0.664477062 |           |         |  |
| NA           | ENSG00000223504 | 0.6339    | 0.26307 | 0.40117     | 0.34415     | 0.6339    | 0.26307 |  |
|              | 0.6339          | 0.26307   | 0.26307 | 0.664477062 |             |           |         |  |
| TMEM139      | ENSG00000178826 | 0.63368   | 0.26315 | 0.63368     | 0.26315     | 0.63368   |         |  |
|              | 0.26315         | -0.63091  | 0.73595 | 0.26315     | 0.664477062 |           |         |  |
| ZBTB43       | ENSG00000169155 | -0.039878 | 0.5159  | 0.46433     | 0.32121     | 0.63358   |         |  |
|              | 0.26318         | -0.73392  | 0.7685  | 0.26318     | 0.664477062 |           |         |  |
| NAALADL2-AS3 | ENSG00000230292 | -1.0371   | 0.85014 | 0.63358     | 0.26318     | -0.071977 |         |  |
|              | 0.52869         | 0.093813  | 0.46263 | 0.26318     | 0.664477062 |           |         |  |
| NA           | ENSG00000234699 | -1.2069   | 0.88627 | -0.21109    | 0.58359     | -1.2069   | 0.88627 |  |
|              | 0.63355         | 0.26319   | 0.26319 | 0.664477062 |             |           |         |  |
| NA           | ENSG00000250158 | -1.2443   | 0.8933  | -0.38591    | 0.65022     | 0.63355   | 0.26319 |  |
|              | -1.2443         | 0.8933    | 0.26319 | 0.664477062 |             |           |         |  |
| NA           | ENSG00000264344 | -0.29067  | 0.61435 | 0.63355     | 0.26319     | 0.63355   | 0.26319 |  |
|              | 0.63355         | 0.26319   | 0.26319 | 0.664477062 |             |           |         |  |
| KRT8P51      | ENSG00000223657 | 0.6335    | 0.2632  | 0.6335      | 0.2632      | 0.6335    |         |  |
|              | 0.2632          | 0.6335    | 0.2632  | 0.2632      | 0.664477062 |           |         |  |
| RN7SKP182    | ENSG00000222704 | 0.63343   | 0.26322 | -0.2013     | 0.57977     | 0.63343   |         |  |
|              | 0.26322         | 0.63343   | 0.26322 | 0.26322     | 0.664477062 |           |         |  |
| NA           | ENSG00000259962 | 0.63344   | 0.26322 | 0.50872     | 0.30547     | 0.63344   | 0.26322 |  |
|              | 0.63344         | 0.26322   | 0.26322 | 0.664477062 |             |           |         |  |
| GOLGA1       | ENSG00000136935 | 0.63343   | 0.26323 | 0.25325     | 0.40004     | 0.49538   |         |  |
|              | 0.31017         | 0.41806   | 0.33795 | 0.26323     | 0.664477062 |           |         |  |
| NA           | ENSG00000269374 | 0.63342   | 0.26323 | 0.63342     | 0.26323     | 0.63342   | 0.26323 |  |
|              | 0.63342         | 0.26323   | 0.26323 | 0.664477062 |             |           |         |  |
| GPRIN3       | ENSG00000185477 | 0.6334    | 0.26324 | -0.22282    | 0.58816     | 0.30488   |         |  |
|              | 0.38023         | -0.64405  | 0.74023 | 0.26324     | 0.664477062 |           |         |  |
| NA           | ENSG00000227838 | -0.81148  | 0.79145 | 0.63337     | 0.26325     | 0.0010066 | 0.4996  |  |
|              | -0.31487        | 0.62357   | 0.26325 | 0.664477062 |             |           |         |  |
| TMEM19       | ENSG00000139291 | 0.63332   | 0.26326 | 0.63332     | 0.26326     | 0.63332   |         |  |
|              | 0.26326         | 0.63332   | 0.26326 | 0.26326     | 0.664477062 |           |         |  |
| STK38L       | ENSG00000211455 | -0.66189  | 0.74598 | 0.37548     | 0.35365     | 0.63329   |         |  |
|              | 0.26327         | -0.56634  | 0.71442 | 0.26327     | 0.664477062 |           |         |  |
| NA           | ENSG00000227017 | -1.0409   | 0.85104 | -1.0409     | 0.85104     | -0.98555  | 0.83782 |  |
|              | 0.63331         | 0.26327   | 0.26327 | 0.664477062 |             |           |         |  |
| NA           | ENSG00000260735 | -0.46542  | 0.67918 | -0.21795    | 0.58626     | 0.63325   | 0.26328 |  |
|              | 0.63325         | 0.26328   | 0.26328 | 0.664477062 |             |           |         |  |
| DYNC1LI1     | ENSG00000144635 | 0.63319   | 0.2633  | 0.34382     | 0.36549     | 0.63319   |         |  |
|              | 0.2633          | 0.41619   | 0.33864 | 0.2633      | 0.664477062 |           |         |  |
| GRAMD4P7     | ENSG00000266242 | 0.63322   | 0.2633  | -0.21489    | 0.58507     | -0.21489  |         |  |
|              | 0.58507         | -0.21489  | 0.58507 | 0.2633      | 0.664477062 |           |         |  |
| ARHGAP27P2   | ENSG00000267472 | 0.63312   | 0.26333 | -1.0721     | 0.85817     | -1.0721   |         |  |
|              | 0.85817         | 0.39116   | 0.34784 | 0.26333     | 0.664477062 |           |         |  |
| NA           | ENSG00000250253 | 0.63304   | 0.26335 | 0.63304     | 0.26335     | 0.63304   | 0.26335 |  |
|              | 0.63304         | 0.26335   | 0.26335 | 0.664477062 |             |           |         |  |
| NA           | ENSG00000253344 | 0.63305   | 0.26335 | -0.97865    | 0.83612     | -1.0278   | 0.84798 |  |
|              | 0.39022         | 0.34819   | 0.26335 | 0.664477062 |             |           |         |  |
| LINC02825    | ENSG00000256494 | -0.80957  | 0.79091 | 0.63306     | 0.26335     | -0.80957  |         |  |

|             |                 |           |         |             |             |          |         |  |
|-------------|-----------------|-----------|---------|-------------|-------------|----------|---------|--|
|             | 0.79091         | -0.80957  | 0.79091 | 0.26335     | 0.664477062 |          |         |  |
| LHX1        | ENSG00000273706 | 0.63305   | 0.26335 | -0.11457    | 0.54561     | 0.045636 | 0.4818  |  |
|             | -0.023234       | 0.50927   | 0.26335 | 0.664477062 |             |          |         |  |
| NA          | ENSG00000279376 | 0.63285   | 0.26342 | 0.63285     | 0.26342     | 0.63285  | 0.26342 |  |
|             | 0.63285         | 0.26342   | 0.26342 | 0.664619271 |             |          |         |  |
| NA          | ENSG00000253248 | -0.059832 | 0.52386 | -0.778      | 0.78172     | 0.63271  | 0.26346 |  |
|             | -1.1737         | 0.87973   | 0.26346 | 0.664658231 |             |          |         |  |
| TUBA3E      | ENSG00000152086 | -0.2306   | 0.59119 | -0.1246     | 0.54958     | 0.23055  |         |  |
|             | 0.40883         | 0.63266   | 0.26348 | 0.26348     | 0.664658231 |          |         |  |
| BTNL3       | ENSG00000168903 | 0.63263   | 0.26349 | -0.38165    | 0.64864     | 0.10673  | 0.4575  |  |
|             | -0.47275        | 0.68181   | 0.26349 | 0.664658231 |             |          |         |  |
| NA          | ENSG00000186019 | 0.63264   | 0.26349 | 0.63264     | 0.26349     | 0.63264  | 0.26349 |  |
|             | 0.63264         | 0.26349   | 0.26349 | 0.664658231 |             |          |         |  |
| NA          | ENSG00000263280 | 0.63256   | 0.26351 | 0.63256     | 0.26351     | 0.63256  | 0.26351 |  |
|             | 0.63256         | 0.26351   | 0.26351 | 0.664669539 |             |          |         |  |
| GABPB1      | ENSG00000104064 | -1.3915   | 0.91797 | -0.24072    | 0.59511     | 0.63249  |         |  |
|             | 0.26353         | -0.72298  | 0.76515 | 0.26353     | 0.664669539 |          |         |  |
| ZNF114      | ENSG00000178150 | 0.4967    | 0.3097  | 0.63235     | 0.26358     | 0.3969   |         |  |
|             | 0.34572         | 0.3969    | 0.34572 | 0.26358     | 0.664669539 |          |         |  |
| BASP1P1     | ENSG00000230535 | 0.63231   | 0.26359 | 0.63231     | 0.26359     | 0.39474  |         |  |
|             | 0.34652         | -0.27497  | 0.60833 | 0.26359     | 0.664669539 |          |         |  |
| UGT2B25P    | ENSG00000215110 | 0.63226   | 0.26361 | -0.8817     | 0.81103     | 0.094202 |         |  |
|             | 0.46247         | 0.48759   | 0.31292 | 0.26361     | 0.664669539 |          |         |  |
| GNL2P1      | ENSG00000223893 | -0.13539  | 0.55385 | 0.16962     | 0.43265     | 0.63218  |         |  |
|             | 0.26363         | 0.63218   | 0.26363 | 0.26363     | 0.664669539 |          |         |  |
| CDKN1A      | ENSG00000124762 | 0.039111  | 0.4844  | 0.039111    | 0.4844      | -0.3192  |         |  |
|             | 0.62521         | 0.63217   | 0.26364 | 0.26364     | 0.664669539 |          |         |  |
| NA          | ENSG00000270878 | 0.63218   | 0.26364 | 0.63218     | 0.26364     | 0.63218  | 0.26364 |  |
|             | 0.63218         | 0.26364   | 0.26364 | 0.664669539 |             |          |         |  |
| GIPR        | ENSG00000010310 | 0.63214   | 0.26365 | 0.63214     | 0.26365     | 0.63214  | 0.26365 |  |
|             | 0.63214         | 0.26365   | 0.26365 | 0.664669539 |             |          |         |  |
| ORC4        | ENSG00000115947 | -0.6302   | 0.73572 | 0.63209     | 0.26366     | 0.21813  | 0.41367 |  |
|             | 0.25238         | 0.40037   | 0.26366 | 0.664669539 |             |          |         |  |
| C5orf66-AS1 | ENSG00000249082 | 0.6321    | 0.26366 | 0.6321      | 0.26366     | 0.6321   | 0.26366 |  |
|             | 0.26366         | 0.6321    | 0.26366 | 0.26366     | 0.664669539 |          |         |  |
| NA          | ENSG00000258895 | 0.63209   | 0.26366 | 0.63209     | 0.26366     | 0.63209  | 0.26366 |  |
|             | 0.63209         | 0.26366   | 0.26366 | 0.664669539 |             |          |         |  |
| SMCR8       | ENSG00000176994 | 0.63203   | 0.26368 | 0.63203     | 0.26368     | 0.63203  | 0.26368 |  |
|             | -0.59676        | 0.72467   | 0.26368 | 0.664669539 |             |          |         |  |
| NA          | ENSG00000213210 | -1.7132   | 0.95666 | -0.14617    | 0.55811     | 0.11843  | 0.45286 |  |
|             | 0.63201         | 0.26369   | 0.26369 | 0.664669539 |             |          |         |  |
| NA          | ENSG00000200860 | 0.63194   | 0.26371 | 0.63194     | 0.26371     | 0.63194  | 0.26371 |  |
|             | 0.63194         | 0.26371   | 0.26371 | 0.664669539 |             |          |         |  |
| MIR3122     | ENSG00000264358 | 0.63189   | 0.26373 | 0.14786     | 0.44123     | 0.63189  |         |  |
|             | 0.26373         | 0.63189   | 0.26373 | 0.26373     | 0.664669539 |          |         |  |
| NA          | ENSG00000276523 | 0.63185   | 0.26374 | 0.63185     | 0.26374     | 0.63185  | 0.26374 |  |
|             | 0.63185         | 0.26374   | 0.26374 | 0.664669539 |             |          |         |  |
| NA          | ENSG00000153666 | -1.0294   | 0.84836 | 0.63187     | 0.26374     | -0.39713 | 0.65437 |  |
|             | -0.11786        | 0.54691   | 0.26374 | 0.664669539 |             |          |         |  |
| SPATA2P1    | ENSG00000228319 | -0.37601  | 0.64655 | -0.37601    | 0.64655     | 0.63177  |         |  |
|             | 0.26377         | -0.37601  | 0.64655 | 0.26377     | 0.664671564 |          |         |  |
| ZFP37       | ENSG00000136866 | 0.63173   | 0.26378 | 0.60091     | 0.27395     | 0.19212  | 0.42382 |  |
|             | -0.6371         | 0.73797   | 0.26378 | 0.664671564 |             |          |         |  |
| NA          | ENSG00000180019 | 0.6317    | 0.26379 | 0.6317      | 0.26379     | 0.6317   | 0.26379 |  |
|             | 0.6317          | 0.26379   | 0.26379 | 0.664671564 |             |          |         |  |
| UBE2Q2P9    | ENSG00000244130 | 0.27936   | 0.38998 | 0.091784    | 0.46343     | 0.63162  |         |  |
|             | 0.26382         | -0.021205 | 0.50846 | 0.26382     | 0.664671564 |          |         |  |
| ZNF460-AS1  | ENSG00000267871 | 0.63153   | 0.26385 | 0.63153     | 0.26385     | 0.63153  |         |  |
|             | 0.26385         | 0.11639   | 0.45367 | 0.26385     | 0.664671564 |          |         |  |
| PDGFB       | ENSG00000100311 | 0.63136   | 0.2639  | 0.018044    | 0.4928      | 0.040606 | 0.4838  |  |
|             | -0.31918        | 0.62521   | 0.2639  | 0.664671564 |             |          |         |  |
| HMG2P25     | ENSG00000228398 | 0.63123   | 0.26395 | 0.18339     | 0.42724     | -1.8959  |         |  |



|            |                 |             |         |             |             |           |         |       |
|------------|-----------------|-------------|---------|-------------|-------------|-----------|---------|-------|
|            | 0.97101         | 0.62139     | 0.26717 | 0.26395     | 0.664671564 |           |         |       |
| NA         | ENSG00000265656 | 0.6312      | 0.26395 | 0.6312      | 0.26395     | -0.33504  | 0.6312  |       |
|            | -0.71923        | 0.764       | 0.26395 | 0.664671564 |             |           |         |       |
| NA         | ENSG00000278351 | 0.63121     | 0.26395 | 0.63121     | 0.26395     | 0.63121   | 0.26395 |       |
|            | 0.63121         | 0.26395     | 0.26395 | 0.664671564 |             |           |         |       |
| TEX264     | ENSG00000164081 | -0.55605    | 0.71091 | -0.92193    | 0.82172     | -0.92193  |         |       |
|            | 0.82172         | 0.63119     | 0.26396 | 0.26396     | 0.664671564 |           |         |       |
| ISM1-AS1   | ENSG00000226263 | 0.6312      | 0.26396 | 0.6312      | 0.26396     | 0.42256   |         |       |
|            | 0.33631         | 0.6312      | 0.26396 | 0.26396     | 0.664671564 |           |         |       |
| NA         | ENSG00000278866 | 0.63119     | 0.26396 | 0.63119     | 0.26396     | 0.63119   | 0.26396 |       |
|            | 0.27427         | 0.39194     | 0.26396 | 0.664671564 |             |           |         |       |
| NA         | ENSG00000279171 | 0.63119     | 0.26396 | 0.63119     | 0.26396     | 0.63119   | 0.26396 |       |
|            | 0.63119         | 0.26396     | 0.26396 | 0.664671564 |             |           |         |       |
| RNU6-1303P | ENSG00000201711 | -0.093578   | 0.53728 | -0.44232    | 0.67087     | -0.093578 |         |       |
|            | 0.53728         | 0.63112     | 0.26398 | 0.26398     | 0.664671564 |           |         |       |
| NA         | ENSG00000254538 | 0.63112     | 0.26398 | 0.63112     | 0.26398     | 0.63112   | 0.26398 |       |
|            | -0.49865        | 0.69099     | 0.26398 | 0.664671564 |             |           |         |       |
| DENND4C    | ENSG00000137145 | 0.11048     | 0.45602 | 0.11048     | 0.45602     | 0.071064  |         |       |
|            | 0.47167         | 0.63105     | 0.264   | 0.264       | 0.664671564 |           |         |       |
| IQSEC1     | ENSG00000144711 | 0.080551    | 0.4679  | 0.63106     | 0.264       | 0.34883   | 0.36361 |       |
|            | -0.24543        | 0.59694     | 0.264   | 0.664671564 |             |           |         |       |
| NA         | ENSG00000226659 | 0.63106     | 0.264   | 0.63106     | 0.264       | 0.63106   | 0.264   | 0.264 |
|            | 0.264           | 0.664671564 |         |             |             |           |         |       |
| NA         | ENSG00000271757 | 0.63099     | 0.26402 | 0.63099     | 0.26402     | 0.63099   | 0.26402 |       |
|            | -0.31154        | 0.6223      | 0.26402 | 0.664671564 |             |           |         |       |
| ALG3P1     | ENSG00000251568 | 0.26261     | 0.39643 | 0.1182      | 0.45295     | 0.1375    |         |       |
|            | 0.44532         | 0.63087     | 0.26406 | 0.26406     | 0.664671564 |           |         |       |
| CEP70      | ENSG00000114107 | 0.52        | 0.30153 | 0.46873     | 0.31963     | 0.63085   | 0.26407 |       |
|            | -0.179          | 0.57103     | 0.26407 | 0.664671564 |             |           |         |       |
| ANKRD36C   | ENSG00000174501 | -0.45938    | 0.67702 | 0.63086     | 0.26407     | -0.40873  |         |       |
|            | 0.65863         | -0.10201    | 0.54063 | 0.26407     | 0.664671564 |           |         |       |
| HCN2       | ENSG00000099822 | 0.63081     | 0.26408 | 0.1478      | 0.44125     | 0.19256   | 0.42365 |       |
|            | 0.27393         | 0.39207     | 0.26408 | 0.664671564 |             |           |         |       |
| OR5M1      | ENSG00000255012 | -0.64327    | 0.73997 | 0.63083     | 0.26408     | 0.63083   | 0.26408 |       |
|            | -0.86734        | 0.80712     | 0.26408 | 0.664671564 |             |           |         |       |
| ZBTB17     | ENSG00000116809 | 0.45664     | 0.32397 | -0.59053    | 0.72258     | -0.61064  |         |       |
|            | 0.72928         | 0.63075     | 0.2641  | 0.2641      | 0.664671564 |           |         |       |
| DYM        | ENSG00000141627 | -0.92492    | 0.8225  | 0.11721     | 0.45335     | 0.15294   | 0.43922 |       |
|            | 0.6307          | 0.26412     | 0.26412 | 0.664671564 |             |           |         |       |
| G3BP1      | ENSG00000145907 | 0.6307      | 0.26412 | -1.4389     | 0.92491     | 0.40471   | 0.34284 |       |
|            | -0.092351       | 0.53679     | 0.26412 | 0.664671564 |             |           |         |       |
| BPTF       | ENSG00000171634 | -0.80262    | 0.7889  | -0.52023    | 0.69855     | 0.63067   | 0.26413 |       |
|            | 0.1526          | 0.43936     | 0.26413 | 0.664671564 |             |           |         |       |
| COPS7A     | ENSG00000111652 | -0.72649    | 0.76623 | -0.51583    | 0.69701     | 0.57157   |         |       |
|            | 0.28381         | 0.63063     | 0.26414 | 0.26414     | 0.664671564 |           |         |       |
| EYA1       | ENSG00000104313 | -0.85243    | 0.80301 | 0.11204     | 0.4554      | -0.11262  | 0.54483 |       |
|            | 0.63061         | 0.26415     | 0.26415 | 0.664671564 |             |           |         |       |
| LINC01725  | ENSG00000233008 | 0.34346     | 0.36563 | 0.63045     | 0.2642      | -0.14121  |         |       |
|            | 0.55615         | 0.5257      | 0.29955 | 0.2642      | 0.664763051 |           |         |       |
| NA         | ENSG00000205236 | 0.63026     | 0.26426 | -0.26842    | 0.60581     | -0.83527  | 0.79822 |       |
|            | -1.6597         | 0.95151     | 0.26426 | 0.664879688 |             |           |         |       |
| NA         | ENSG00000283043 | 0.63015     | 0.2643  | 0.4745      | 0.31757     | 0.63015   | 0.2643  |       |
|            | 0.63015         | 0.2643      | 0.2643  | 0.664902499 |             |           |         |       |
| NA         | ENSG00000252359 | 0.63015     | 0.2643  | -1.0368     | 0.85008     | 0.57974   | 0.28104 |       |
|            | -0.089223       | 0.53555     | 0.2643  | 0.664902499 |             |           |         |       |
| SH3TC2-DT  | ENSG00000250072 | 0.63012     | 0.26431 | 0.09337     | 0.46281     | -0.75735  |         |       |
|            | 0.77558         | -0.4484     | 0.67307 | 0.26431     | 0.664902499 |           |         |       |
| NA         | ENSG00000258443 | 0.63006     | 0.26433 | 0.63006     | 0.26433     | 0.63006   | 0.26433 |       |
|            | 0.63006         | 0.26433     | 0.26433 | 0.664918485 |             |           |         |       |
| NA         | ENSG00000253330 | 0.42472     | 0.33552 | 0.62996     | 0.26436     | -0.85107  | 0.80264 |       |
|            | 0.62996         | 0.26436     | 0.26436 | 0.664950454 |             |           |         |       |
| ACSM5P1    | ENSG00000260762 | -1.3257     | 0.90753 | 0.23838     | 0.40579     | 0.62994   |         |       |

|           |                 |           |         |             |             |           |         |  |
|-----------|-----------------|-----------|---------|-------------|-------------|-----------|---------|--|
|           | 0.26437         | 0.26378   | 0.39597 | 0.26437     | 0.664950454 |           |         |  |
| RNPC3     | ENSG00000185946 | 0.62814   | 0.26496 | 0.62977     | 0.26442     | -0.65441  | 0.74358 |  |
|           | 0.33543         | 0.36865   | 0.26442 | 0.664998395 |             |           |         |  |
| NA        | ENSG00000257113 | 0.62977   | 0.26442 | 0.62977     | 0.26442     | 0.40994   | 0.34093 |  |
|           | 0.31517         | 0.37632   | 0.26442 | 0.664998395 |             |           |         |  |
| RNA5SP45  | ENSG00000252563 | 0.53149   | 0.29754 | 0.53149     | 0.29754     | 0.62974   |         |  |
|           | 0.26443         | 0.53149   | 0.29754 | 0.26443     | 0.664998395 |           |         |  |
| RPL37AP8  | ENSG00000176343 | -0.14418  | 0.55732 | 0.62969     | 0.26445     | 0.62969   |         |  |
|           | 0.26445         | -0.20615  | 0.58166 | 0.26445     | 0.665004915 |           |         |  |
| NA        | ENSG00000213293 | -0.53112  | 0.70233 | 0.62965     | 0.26446     | 0.12078   | 0.45193 |  |
|           | 0.62965         | 0.26446   | 0.26446 | 0.665004915 |             |           |         |  |
| ACTG1P17  | ENSG00000259315 | 0.6296    | 0.26448 | 0.49399     | 0.31066     | 0.49399   |         |  |
|           | 0.31066         | -0.23018  | 0.59102 | 0.26448     | 0.665004915 |           |         |  |
| MTG1      | ENSG00000148824 | 0.62948   | 0.26452 | -1.8085     | 0.96473     | -0.78441  | 0.7836  |  |
|           | -0.14512        | 0.55769   | 0.26452 | 0.665004915 |             |           |         |  |
| MAPKAPK3  | ENSG00000114738 | 0.089439  | 0.46437 | 0.62939     | 0.26455     | 0.40606   |         |  |
|           | 0.34235         | 0.59298   | 0.2766  | 0.26455     | 0.665004915 |           |         |  |
| RN7SKP48  | ENSG00000201901 | -0.91602  | 0.82017 | -0.64612    | 0.7409      | -1.1215   |         |  |
|           | 0.86896         | 0.62938   | 0.26455 | 0.26455     | 0.665004915 |           |         |  |
| NA        | ENSG00000221756 | -2.2109   | 0.98648 | -2.2109     | 0.98648     | -0.33867  | 0.63257 |  |
|           | 0.62937         | 0.26455   | 0.26455 | 0.665004915 |             |           |         |  |
| NA        | ENSG00000228512 | -1.0912   | 0.8624  | -0.21013    | 0.58322     | 0.6294    | 0.26455 |  |
|           | 0.46743         | 0.32009   | 0.26455 | 0.665004915 |             |           |         |  |
| NA        | ENSG00000225417 | 0.62937   | 0.26456 | 0.62937     | 0.26456     | 0.62937   | 0.26456 |  |
|           | 0.62937         | 0.26456   | 0.26456 | 0.665004915 |             |           |         |  |
| RN7SKP100 | ENSG00000223190 | 0.62927   | 0.26459 | -0.37326    | 0.64552     | 0.58493   |         |  |
|           | 0.2793          | -0.35196  | 0.63757 | 0.26459     | 0.665004915 |           |         |  |
| NA        | ENSG00000223908 | 0.62925   | 0.26459 | 0.14402     | 0.44274     | -0.21902  | 0.58668 |  |
|           | 0.12652         | 0.44966   | 0.26459 | 0.665004915 |             |           |         |  |
| NA        | ENSG00000201157 | -0.42155  | 0.66332 | -0.42155    | 0.66332     | 0.62922   | 0.2646  |  |
|           | -0.25007        | 0.59873   | 0.2646  | 0.665004915 |             |           |         |  |
| ERC2-IT1  | ENSG00000281708 | -0.021842 | 0.50871 | 0.62921     | 0.26461     | -0.72393  |         |  |
|           | 0.76544         | -0.021842 | 0.50871 | 0.26461     | 0.665004915 |           |         |  |
| LINC02059 | ENSG00000250544 | 0.62911   | 0.26464 | -1.0141     | 0.84472     | 0.4875    |         |  |
|           | 0.31295         | 0.43349   | 0.33233 | 0.26464     | 0.665036845 |           |         |  |
| TAF4      | ENSG00000130699 | -0.19454  | 0.57712 | 0.62908     | 0.26465     | -0.61811  | 0.73175 |  |
|           | 0.32006         | 0.37446   | 0.26465 | 0.665036845 |             |           |         |  |
| NA        | ENSG00000260569 | 0.62898   | 0.26468 | -1.0975     | 0.8638      | 0.38799   | 0.34901 |  |
|           | -0.40475        | 0.65717   | 0.26468 | 0.665068769 |             |           |         |  |
| RNU6-191P | ENSG00000252104 | 0.62896   | 0.26469 | 0.62896     | 0.26469     | 0.62896   |         |  |
|           | 0.26469         | 0.62896   | 0.26469 | 0.26469     | 0.665068769 |           |         |  |
| LRFN2     | ENSG00000156564 | 0.62884   | 0.26473 | 0.43827     | 0.33059     | -0.057292 | 0.52284 |  |
|           | 0.3097          | 0.37839   | 0.26473 | 0.66510981  |             |           |         |  |
| LINC02268 | ENSG00000248174 | 0.62871   | 0.26477 | -1.1191     | 0.86844     | -0.01057  |         |  |
|           | 0.50422         | -0.56224  | 0.71302 | 0.26477     | 0.66510981  |           |         |  |
| MRPS36P2  | ENSG00000249539 | -0.044393 | 0.5177  | 0.6286      | 0.26481     | 0.6286    |         |  |
|           | 0.26481         | 0.6286    | 0.26481 | 0.26481     | 0.66510981  |           |         |  |
| NA        | ENSG00000278180 | 0.62858   | 0.26481 | 0.62858     | 0.26481     | 0.62858   | 0.26481 |  |
|           | 0.62858         | 0.26481   | 0.26481 | 0.66510981  |             |           |         |  |
| TAF1L     | ENSG00000122728 | -0.18152  | 0.57202 | 0.62851     | 0.26484     | -1.3415   | 0.91011 |  |
|           | 0.33479         | 0.36889   | 0.26484 | 0.66510981  |             |           |         |  |
| NA        | ENSG00000274021 | 0.62847   | 0.26485 | 0.62847     | 0.26485     | 0.62847   | 0.26485 |  |
|           | 0.62847         | 0.26485   | 0.26485 | 0.66510981  |             |           |         |  |
| PFKFB4    | ENSG00000114268 | -0.32227  | 0.62638 | 0.49508     | 0.31027     | 0.099759  |         |  |
|           | 0.46027         | 0.62844   | 0.26486 | 0.26486     | 0.66510981  |           |         |  |
| SMG1P1    | ENSG00000237296 | 0.62844   | 0.26486 | 0.56407     | 0.28635     | -0.78402  |         |  |
|           | 0.78349         | -0.61854  | 0.73189 | 0.26486     | 0.66510981  |           |         |  |
| NCOR2     | ENSG00000196498 | 0.26476   | 0.3956  | 0.62836     | 0.26488     | 0.55466   | 0.28956 |  |
|           | -0.077117       | 0.53073   | 0.26488 | 0.66510981  |             |           |         |  |
| ANKRD22   | ENSG00000152766 | -0.69337  | 0.75596 | 0.27263     | 0.39257     | 0.6283    |         |  |
|           | 0.2649          | 0.41785   | 0.33803 | 0.2649      | 0.66510981  |           |         |  |
| LINC01345 | ENSG00000226374 | -0.65925  | 0.74513 | -0.65925    | 0.74513     | -1.5289   |         |  |

|             |                 |           |         |            |            |           |         |  |
|-------------|-----------------|-----------|---------|------------|------------|-----------|---------|--|
|             | 0.93686         | 0.62829   | 0.26491 | 0.26491    | 0.66510981 |           |         |  |
| MSTO1       | ENSG00000125459 | 0.62819   | 0.26494 | 0.1558     | 0.4381     | 0.1558    | 0.4381  |  |
|             | -0.52494        | 0.70019   | 0.26494 | 0.66510981 |            |           |         |  |
| NAPB        | ENSG00000125814 | 0.62819   | 0.26494 | -0.95163   | 0.82936    | -0.04268  | 0.51702 |  |
|             | -0.80393        | 0.78928   | 0.26494 | 0.66510981 |            |           |         |  |
| RNU6-849P   | ENSG00000206818 | -0.043684 | 0.51742 | 0.62817    | 0.26495    | -0.57499  |         |  |
|             | 0.71735         | -0.57499  | 0.71735 | 0.26495    | 0.66510981 |           |         |  |
| MIR3133     | ENSG00000263752 | 0.62813   | 0.26496 | 0.62813    | 0.26496    | 0.62813   |         |  |
|             | 0.26496         | 0.62813   | 0.26496 | 0.26496    | 0.66510981 |           |         |  |
| NA          | ENSG00000212522 | 0.065588  | 0.47385 | 0.62795    | 0.26502    | 0.065588  | 0.47385 |  |
|             | 0.065588        | 0.47385   | 0.26502 | 0.66510981 |            |           |         |  |
| NA          | ENSG00000223842 | -0.27826  | 0.6096  | -0.51384   | 0.69632    | 0.62789   | 0.26504 |  |
|             | 0.62789         | 0.26504   | 0.26504 | 0.66510981 |            |           |         |  |
| NA          | ENSG00000271148 | 0.62784   | 0.26506 | 0.30387    | 0.38061    | -0.76416  | 0.77761 |  |
|             | -0.36107        | 0.64098   | 0.26506 | 0.66510981 |            |           |         |  |
| NA          | ENSG00000243099 | -0.37516  | 0.64623 | -0.0092099 | 0.50367    | 0.62775   | 0.26508 |  |
|             | -1.7721         | 0.96181   | 0.26508 | 0.66510981 |            |           |         |  |
| NA          | ENSG00000249219 | 0.62777   | 0.26508 | 0.62777    | 0.26508    | 0.62777   | 0.26508 |  |
|             | 0.62777         | 0.26508   | 0.26508 | 0.66510981 |            |           |         |  |
| MORF4L2P1   | ENSG00000250147 | 0.62762   | 0.26513 | -0.23531   | 0.59302    | 0.62762   |         |  |
|             | 0.26513         | 0.45049   | 0.32618 | 0.26513    | 0.66510981 |           |         |  |
| NA          | ENSG00000279521 | -0.83531  | 0.79823 | 0.62762    | 0.26513    | 0.62762   | 0.26513 |  |
|             | 0.62762         | 0.26513   | 0.26513 | 0.66510981 |            |           |         |  |
| ACACB       | ENSG00000076555 | -0.08245  | 0.53286 | 0.20369    | 0.4193     | 0.037896  | 0.48489 |  |
|             | 0.62756         | 0.26514   | 0.26514 | 0.66510981 |            |           |         |  |
| RELL2       | ENSG00000164620 | 0.62754   | 0.26515 | 0.62754    | 0.26515    | -0.028943 | 0.51155 |  |
|             | -0.75007        | 0.77339   | 0.26515 | 0.66510981 |            |           |         |  |
| VN1R65P     | ENSG00000260883 | -0.65524  | 0.74384 | -0.65524   | 0.74384    | -0.65524  |         |  |
|             | 0.74384         | 0.62755   | 0.26515 | 0.26515    | 0.66510981 |           |         |  |
| NA          | ENSG00000269236 | 0.62752   | 0.26516 | 0.62752    | 0.26516    | 0.62752   | 0.26516 |  |
|             | 0.62752         | 0.26516   | 0.26516 | 0.66510981 |            |           |         |  |
| NA          | ENSG00000279133 | 0.62749   | 0.26517 | 0.62749    | 0.26517    | 0.62749   | 0.26517 |  |
|             | 0.62749         | 0.26517   | 0.26517 | 0.66510981 |            |           |         |  |
| NA          | ENSG00000272375 | -0.29283  | 0.61517 | 0.62747    | 0.26518    | -0.076405 | 0.53045 |  |
|             | -0.26915        | 0.60609   | 0.26518 | 0.66510981 |            |           |         |  |
| NA          | ENSG00000223432 | -1.4845   | 0.93116 | -1.1536    | 0.87566    | 0.62742   | 0.26519 |  |
|             | -1.0065         | 0.84291   | 0.26519 | 0.66510981 |            |           |         |  |
| NA          | ENSG00000258931 | 0.62741   | 0.26519 | 0.62741    | 0.26519    | 0.62741   | 0.26519 |  |
|             | 0.62741         | 0.26519   | 0.26519 | 0.66510981 |            |           |         |  |
| DAZL        | ENSG00000092345 | 0.47489   | 0.31743 | 0.22548    | 0.4108     | 0.62739   | 0.2652  |  |
|             | 0.58295         | 0.27996   | 0.2652  | 0.66510981 |            |           |         |  |
| RPL29P23    | ENSG00000241950 | 0.62739   | 0.2652  | 0.62739    | 0.2652     | 0.62739   |         |  |
|             | 0.2652          | 0.62739   | 0.2652  | 0.2652     | 0.66510981 |           |         |  |
| NA          | ENSG00000277022 | 0.058493  | 0.47668 | 0.62732    | 0.26522    | -0.80013  | 0.78818 |  |
|             | 0.45919         | 0.32305   | 0.26522 | 0.66510981 |            |           |         |  |
| LINC01841   | ENSG00000266913 | -1.917    | 0.97238 | -2.0677    | 0.98067    | -1.0507   |         |  |
|             | 0.85329         | 0.62729   | 0.26524 | 0.26524    | 0.66510981 |           |         |  |
| NA          | ENSG00000277479 | -0.42269  | 0.66374 | 0.19083    | 0.42433    | 0.62729   | 0.26524 |  |
|             | 0.62729         | 0.26524   | 0.26524 | 0.66510981 |            |           |         |  |
| NGDN        | ENSG00000129460 | 0.61613   | 0.2689  | 0.62722    | 0.26526    | -0.25846  | 0.60197 |  |
|             | 0.59518         | 0.27586   | 0.26526 | 0.66510981 |            |           |         |  |
| IQCG        | ENSG00000114473 | -0.14788  | 0.55878 | 0.62715    | 0.26528    | 0.14186   | 0.4436  |  |
|             | -0.46721        | 0.67983   | 0.26528 | 0.66510981 |            |           |         |  |
| LINC02042   | ENSG00000240893 | 0.62702   | 0.26532 | -0.44273   | 0.67102    | -1.1968   |         |  |
|             | 0.8843          | -0.044805 | 0.51787 | 0.26532    | 0.66510981 |           |         |  |
| NA          | ENSG00000253407 | 0.62702   | 0.26532 | 0.62702    | 0.26532    | 0.62702   | 0.26532 |  |
|             | 0.62702         | 0.26532   | 0.26532 | 0.66510981 |            |           |         |  |
| DNAJC27-AS1 | ENSG00000224165 | 0.37911   | 0.3523  | 0.54022    | 0.29452    | 0.62698   |         |  |
|             | 0.26533         | -0.015054 | 0.50601 | 0.26533    | 0.66510981 |           |         |  |
| NA          | ENSG00000271327 | 0.62701   | 0.26533 | 0.62701    | 0.26533    | 0.62701   | 0.26533 |  |
|             | 0.62701         | 0.26533   | 0.26533 | 0.66510981 |            |           |         |  |
| FGF14-AS2   | ENSG00000272143 | 0.62689   | 0.26536 | 0.62689    | 0.26536    | 0.62689   |         |  |

|             |                 |          |         |            |            |          |         |         |
|-------------|-----------------|----------|---------|------------|------------|----------|---------|---------|
|             | 0.26536         | 0.62689  | 0.26536 | 0.26536    | 0.66510981 |          |         |         |
| RNU6-211P   | ENSG00000206774 | 0.24038  | 0.40502 | 0.24038    | 0.40502    | 0.24038  | 0.40502 | 0.24038 |
|             | 0.40502         | 0.62679  | 0.2654  | 0.2654     | 0.66510981 |          |         |         |
| MLYCD       | ENSG00000103150 | -0.86369 | 0.80612 | 0.62676    | 0.26541    | 0.05873  | 0.47658 |         |
|             | -1.5434         | 0.93863  | 0.26541 | 0.66510981 |            |          |         |         |
| ZNF259P1    | ENSG00000219565 | 0.62674  | 0.26542 | 0.62674    | 0.26542    | -0.75606 |         |         |
|             | 0.77519         | -0.73845 | 0.76988 | 0.26542    | 0.66510981 |          |         |         |
| FAM8A3P     | ENSG00000224337 | 0.3122   | 0.37744 | 0.43163    | 0.33301    | 0.43163  |         |         |
|             | 0.33301         | 0.62673  | 0.26542 | 0.26542    | 0.66510981 |          |         |         |
| NA          | ENSG00000237083 | 0.62673  | 0.26542 | 0.62673    | 0.26542    | 0.62673  | 0.26542 |         |
|             | -0.47256        | 0.68174  | 0.26542 | 0.66510981 |            |          |         |         |
| NA          | ENSG00000221391 | -0.54298 | 0.70643 | 0.62674    | 0.26542    | 0.62674  | 0.26542 |         |
|             | 0.62674         | 0.26542  | 0.26542 | 0.66510981 |            |          |         |         |
| LINC01535   | ENSG00000226686 | 0.43955  | 0.33013 | -0.19873   | 0.57876    | 0.6267   |         |         |
|             | 0.26543         | -0.74809 | 0.7728  | 0.26543    | 0.66510981 |          |         |         |
| PCSK6       | ENSG00000140479 | 0.15411  | 0.43876 | -0.32324   | 0.62674    | 0.27036  | 0.39344 |         |
|             | 0.62667         | 0.26544  | 0.26544 | 0.66510981 |            |          |         |         |
| NA          | ENSG00000279551 | 0.62664  | 0.26545 | 0.62664    | 0.26545    | 0.62664  | 0.26545 |         |
|             | 0.62664         | 0.26545  | 0.26545 | 0.66510981 |            |          |         |         |
| LINC02048   | ENSG00000228271 | -0.22373 | 0.58852 | -1.0058    | 0.84274    | 0.2832   |         |         |
|             | 0.38851         | 0.6266   | 0.26546 | 0.26546    | 0.66510981 |          |         |         |
| ZP3P1       | ENSG00000250013 | 0.62652  | 0.26549 | 0.62652    | 0.26549    | 0.62652  | 0.26549 |         |
|             | 0.62652         | 0.26549  | 0.26549 | 0.66510981 |            |          |         |         |
| NA          | ENSG00000271820 | 0.62651  | 0.26549 | 0.62651    | 0.26549    | 0.62651  | 0.26549 |         |
|             | 0.62651         | 0.26549  | 0.26549 | 0.66510981 |            |          |         |         |
| NA          | ENSG00000233820 | 0.62647  | 0.2655  | 0.62647    | 0.2655     | 0.62647  | 0.2655  |         |
|             | 0.47716         | 0.31663  | 0.2655  | 0.66510981 |            |          |         |         |
| RNF8        | ENSG00000112130 | 0.62643  | 0.26551 | -0.23111   | 0.59138    | -0.48527 | 0.68626 |         |
|             | -0.27674        | 0.60901  | 0.26551 | 0.66510981 |            |          |         |         |
| FLYWCH2     | ENSG00000162076 | 0.62636  | 0.26554 | 0.62636    | 0.26554    | 0.62636  |         |         |
|             | 0.26554         | 0.017541 | 0.493   | 0.26554    | 0.66510981 |          |         |         |
| CDRT15P2    | ENSG00000227255 | -0.43933 | 0.66979 | -1.087     | 0.86147    | -0.76311 |         |         |
|             | 0.7773          | 0.62634  | 0.26555 | 0.26555    | 0.66510981 |          |         |         |
| MUC5B-AS1   | ENSG00000255177 | 0.62634  | 0.26555 | 0.62634    | 0.26555    | 0.62634  |         |         |
|             | 0.26555         | 0.62634  | 0.26555 | 0.26555    | 0.66510981 |          |         |         |
| MS4A19P     | ENSG00000283601 | -0.12032 | 0.54789 | 0.62629    | 0.26556    | -1.0379  |         |         |
|             | 0.85035         | -0.56763 | 0.71486 | 0.26556    | 0.66510981 |          |         |         |
| SRI         | ENSG00000075142 | 0.62627  | 0.26557 | 0.62627    | 0.26557    | -0.40195 | 0.65614 |         |
|             | -0.035962       | 0.51434  | 0.26557 | 0.66510981 |            |          |         |         |
| ACO1        | ENSG00000122729 | 0.62625  | 0.26557 | 0.27941    | 0.38997    | 0.38287  | 0.35091 |         |
|             | 0.50319         | 0.30741  | 0.26557 | 0.66510981 |            |          |         |         |
| RNU2-52P    | ENSG00000222612 | 0.6262   | 0.26559 | 0.29872    | 0.38258    | 0.6262   |         |         |
|             | 0.26559         | 0.6262   | 0.26559 | 0.26559    | 0.66510981 |          |         |         |
| SUPV3L1     | ENSG00000156502 | 0.60855  | 0.27141 | 0.59217    | 0.27687    | -0.66346 |         |         |
|             | 0.74648         | 0.62606  | 0.26564 | 0.26564    | 0.66510981 |          |         |         |
| NA          | ENSG00000269107 | 0.62606  | 0.26564 | -1.2681    | 0.89762    | -0.65291 | 0.74309 |         |
|             | 0.15037         | 0.44024  | 0.26564 | 0.66510981 |            |          |         |         |
| NA          | ENSG00000280399 | 0.61541  | 0.26914 | 0.61541    | 0.26914    | 0.62605  | 0.26564 |         |
|             | 0.61541         | 0.26914  | 0.26564 | 0.66510981 |            |          |         |         |
| SCNM1       | ENSG00000163156 | 0.62601  | 0.26565 | 0.62601    | 0.26565    | 0.62601  | 0.26565 |         |
|             | 0.62601         | 0.26565  | 0.26565 | 0.66510981 |            |          |         |         |
| LINC01993   | ENSG00000204277 | 0.626    | 0.26566 | -0.36159   | 0.64117    | -0.29653 | 0.61659 |         |
|             | -0.20743        | 0.58216  | 0.26566 | 0.66510981 |            |          |         |         |
| AAGAB       | ENSG00000103591 | -0.59505 | 0.72409 | -0.75728   | 0.77556    | -0.79403 | 0.78641 |         |
|             | 0.62594         | 0.26568  | 0.26568 | 0.66510981 |            |          |         |         |
| TRIM62      | ENSG00000116525 | 0.040041 | 0.48403 | -0.75171   | 0.77389    | -1.1213  |         |         |
|             | 0.86892         | 0.62588  | 0.2657  | 0.2657     | 0.66510981 |          |         |         |
| CLDN17      | ENSG00000156282 | 0.62588  | 0.2657  | 0.62588    | 0.2657     | 0.62588  |         |         |
|             | 0.2657          | 0.62588  | 0.2657  | 0.2657     | 0.66510981 |          |         |         |
| MSMO1       | ENSG00000052802 | 0.62582  | 0.26572 | -0.26993   | 0.60639    | -0.19494 | 0.57728 |         |
|             | -0.25371        | 0.60014  | 0.26572 | 0.66510981 |            |          |         |         |
| TMEM202-AS1 | ENSG00000261423 | 0.6258   | 0.26572 | 0.30436    | 0.38043    | 0.6258   |         |         |

|           |                 |          |            |             |             |            |         |  |
|-----------|-----------------|----------|------------|-------------|-------------|------------|---------|--|
|           | 0.26572         | 0.13409  | 0.44666    | 0.26572     | 0.66510981  |            |         |  |
| SNORD65C  | ENSG00000212264 | 0.068255 | 0.47279    | 0.62578     | 0.26573     | -2.0346    |         |  |
|           | 0.97905         | -2.0346  | 0.97905    | 0.26573     | 0.66510981  |            |         |  |
| MIR1260A  | ENSG00000221754 | 0.62578  | 0.26573    | 0.62578     | 0.26573     | 0.62578    |         |  |
|           | 0.26573         | 0.62578  | 0.26573    | 0.66510981  |             |            |         |  |
| TMBIM7P   | ENSG00000230927 | -0.39766 | 0.65456    | -0.34405    | 0.6346      | 0.62569    |         |  |
|           | 0.26576         | -2.4078  | 0.99198    | 0.26576     | 0.665116573 |            |         |  |
| ETV5-AS1  | ENSG00000234197 | 0.42228  | 0.33641    | 0.62569     | 0.26576     | 0.42228    |         |  |
|           | 0.33641         | 0.42228  | 0.33641    | 0.26576     | 0.665116573 |            |         |  |
| NA        | ENSG00000254974 | 0.62558  | 0.26579    | 0.62558     | 0.26579     | 0.62558    | 0.26579 |  |
|           | 0.62558         | 0.26579  | 0.26579    | 0.665152742 |             |            |         |  |
| NA        | ENSG00000228073 | 0.62508  | 0.26596    | 0.6255      | 0.26582     | 0.62508    | 0.26596 |  |
|           | 0.62508         | 0.26596  | 0.26582    | 0.665152742 |             |            |         |  |
| NA        | ENSG00000283648 | -1.4892  | 0.93179    | -1.4892     | 0.93179     | -1.8395    | 0.96708 |  |
|           | 0.62547         | 0.26583  | 0.26583    | 0.665152742 |             |            |         |  |
| CELF6     | ENSG00000140488 | 0.44162  | 0.32938    | 0.44162     | 0.32938     | 0.44162    | 0.32938 |  |
|           | 0.62541         | 0.26585  | 0.26585    | 0.665152742 |             |            |         |  |
| NA        | ENSG00000255252 | 0.62539  | 0.26586    | 0.62539     | 0.26586     | 0.62539    | 0.26586 |  |
|           | 0.62539         | 0.26586  | 0.26586    | 0.665152742 |             |            |         |  |
| NA        | ENSG00000253636 | 0.36376  | 0.35802    | 0.62535     | 0.26587     | -1.2951    | 0.90236 |  |
|           | -1.2951         | 0.90236  | 0.26587    | 0.665152742 |             |            |         |  |
| NA        | ENSG00000271347 | 0.62537  | 0.26587    | 0.62537     | 0.26587     | 0.62537    | 0.26587 |  |
|           | 0.62537         | 0.26587  | 0.26587    | 0.665152742 |             |            |         |  |
| PRDX3P4   | ENSG00000239926 | 0.62519  | 0.26592    | 0.59534     | 0.27581     | 0.16601    |         |  |
|           | 0.43407         | 0.54266  | 0.29368    | 0.26592     | 0.665220639 |            |         |  |
| MUCL3     | ENSG00000168631 | 0.063577 | 0.47465    | 0.62518     | 0.26593     | -0.78864   | 0.78484 |  |
|           | -0.62929        | 0.73542  | 0.26593    | 0.665220639 |             |            |         |  |
| NA        | ENSG00000202479 | 0.62506  | 0.26597    | 0.62506     | 0.26597     | 0.62506    | 0.26597 |  |
|           | 0.62506         | 0.26597  | 0.26597    | 0.665220639 |             |            |         |  |
| NA        | ENSG00000258740 | 0.62502  | 0.26598    | -0.071039   | 0.52832     | -0.0015833 | 0.50063 |  |
|           | 0.14339         | 0.44299  | 0.26598    | 0.665220639 |             |            |         |  |
| TECRP2    | ENSG00000248565 | -1.6167  | 0.94703    | -1.6167     | 0.94703     | 0.62497    |         |  |
|           | 0.26599         | 0.51629  | 0.30283    | 0.26599     | 0.665220639 |            |         |  |
| NA        | ENSG00000254672 | 0.62498  | 0.26599    | 0.62498     | 0.26599     | 0.62498    | 0.26599 |  |
|           | 0.62498         | 0.26599  | 0.26599    | 0.665220639 |             |            |         |  |
| NA        | ENSG00000271114 | 0.62497  | 0.26601245 | 0.45046     | 0.2607      | 0.39716    |         |  |
|           | -0.59187        | 0.72303  | 0.26601245 | 0.665220639 |             |            |         |  |
| NA        | ENSG00000200508 | -2.5571  | 0.99472    | 0.62492     | 0.26601     | -2.5571    | 0.99472 |  |
|           | -2.5571         | 0.99472  | 0.26601    | 0.665220639 |             |            |         |  |
| ERN2      | ENSG00000134398 | -0.25821 | 0.60188    | -0.54384    | 0.70672     | -0.25821   | 0.60188 |  |
|           | 0.6249          | 0.26602  | 0.26602    | 0.665220639 |             |            |         |  |
| IL27RA    | ENSG00000104998 | 0.6248   | 0.26605    | -0.27872    | 0.60977     | 0.50723    | 0.306   |  |
|           | -0.27872        | 0.60977  | 0.26605    | 0.66526152  |             |            |         |  |
| MYH7B     | ENSG00000078814 | -0.27348 | 0.60776    | 0.62468     | 0.26609     | -0.42721   | 0.66539 |  |
|           | -0.2357         | 0.59317  | 0.26609    | 0.665318266 |             |            |         |  |
| NA        | ENSG00000221070 | 0.62464  | 0.2661     | 0.62464     | 0.2661      | 0.62464    | 0.2661  |  |
|           | 0.62464         | 0.2661   | 0.2661     | 0.665318266 |             |            |         |  |
| CYP2W1    | ENSG00000073067 | 0.62459  | 0.26612    | 0.58409     | 0.27958     | 0.388      | 0.34901 |  |
|           | 0.011126        | 0.49556  | 0.26612    | 0.665334134 |             |            |         |  |
| SCAPER    | ENSG00000140386 | 0.62451  | 0.26615    | -0.38856    | 0.6512      | -0.34245   |         |  |
|           | 0.63399         | 0.30824  | 0.37895    | 0.26615     | 0.665365865 |            |         |  |
| RNA5SP462 | ENSG00000252539 | 0.26879  | 0.39405    | 0.57497     | 0.28266     | 0.62446    |         |  |
|           | 0.26616         | 0.62446  | 0.26616    | 0.26616     | 0.665365865 |            |         |  |
| WWC2      | ENSG00000151718 | 0.032664 | 0.48697    | -0.096114   | 0.53828     | 0.62432    | 0.26621 |  |
|           | -1.0697         | 0.85761  | 0.26621    | 0.665395179 |             |            |         |  |
| RPL34P26  | ENSG00000223676 | 0.62431  | 0.26621    | -0.49798    | 0.69075     | -1.158     |         |  |
|           | 0.87656         | -1.158   | 0.87656    | 0.26621     | 0.665395179 |            |         |  |
| STARD5    | ENSG00000172345 | 0.24429  | 0.4035     | 0.54646     | 0.29238     | 0.15749    |         |  |
|           | 0.43743         | 0.62427  | 0.26622    | 0.26622     | 0.665395179 |            |         |  |
| SLC26A4   | ENSG00000091137 | 0.62425  | 0.26623    | -0.80919    | 0.7908      | -1.1512    |         |  |
|           | 0.87517         | -1.2336  | 0.89133    | 0.26623     | 0.665395179 |            |         |  |
| NA        | ENSG00000268352 | -0.27582 | 0.60866    | 0.18415     | 0.42695     | -0.050077  | 0.51997 |  |

|             |                 |            |         |             |             |            |         |         |
|-------------|-----------------|------------|---------|-------------|-------------|------------|---------|---------|
|             | 0.62423         | 0.26624    | 0.26624 | 0.665395179 |             |            |         |         |
| NA          | ENSG00000235810 | 0.6241     | 0.26628 | -0.53125    | 0.70238     | -0.53125   | 0.70238 |         |
|             | -0.96156        | 0.83186    | 0.26628 | 0.665426892 |             |            |         |         |
| NA          | ENSG00000259041 | 0.62411    | 0.26628 | 0.62411     | 0.26628     | 0.62411    | 0.26628 |         |
|             | 0.62411         | 0.26628    | 0.26628 | 0.665426892 |             |            |         |         |
| NMRAL1      | ENSG00000153406 | -0.049328  | 0.51967 | 0.62401     | 0.26631     | 0.45656    |         |         |
|             | 0.32399         | 0.45656    | 0.32399 | 0.26631     | 0.665449464 |            |         |         |
| NA          | ENSG00000232760 | 0.62398    | 0.26632 | -0.29487    | 0.61595     | 0.10837    | 0.45685 |         |
|             | 0.60536         | 0.27247    | 0.26632 | 0.665449464 |             |            |         |         |
| PEX11B      | ENSG00000131779 | 0.085989   | 0.46574 | 0.40048     | 0.3444      | 0.62396    |         |         |
|             | 0.26633         | 0.62396    | 0.26633 | 0.26633     | 0.665449464 |            |         |         |
| TMOD1       | ENSG00000136842 | 0.6239     | 0.26635 | 0.6239      | 0.26635     | -0.0025479 | 0.50102 |         |
|             | 0.25265         | 0.40027    | 0.26635 | 0.665465315 |             |            |         |         |
| SLC26A4-AS1 | ENSG00000233705 | 0.62384    | 0.26637 | 0.62384     | 0.26637     | 0.62384    | 0.26637 | 0.62384 |
|             | 0.26637         | 0.39683    | 0.34575 | 0.26637     | 0.665481164 |            |         |         |
| AP1AR       | ENSG00000138660 | -0.94491   | 0.82765 | -0.94491    | 0.82765     | 0.62367    | 0.26642 |         |
|             | 0.050527        | 0.47985    | 0.26642 | 0.665497186 |             |            |         |         |
| NA          | ENSG00000276332 | 0.57209    | 0.28363 | 0.51454     | 0.30344     | 0.62369    | 0.26642 |         |
|             | 0.3252          | 0.37251    | 0.26642 | 0.665497186 |             |            |         |         |
| NA          | ENSG00000220105 | 0.40778    | 0.34172 | 0.40778     | 0.34172     | 0.47864    | 0.3161  |         |
|             | 0.62363         | 0.26644    | 0.26644 | 0.665497186 |             |            |         |         |
| NA          | ENSG00000227015 | 0.62352    | 0.26647 | 0.62352     | 0.26647     | 0.62352    | 0.26647 |         |
|             | 0.62352         | 0.26647    | 0.26647 | 0.665497186 |             |            |         |         |
| UBE2C       | ENSG00000175063 | 0.62347    | 0.26649 | 0.62347     | 0.26649     | 0.62347    | 0.26649 |         |
|             | 0.62347         | 0.26649    | 0.26649 | 0.665497186 |             |            |         |         |
| CAPN1       | ENSG00000014216 | -0.072416  | 0.52886 | -0.18146    | 0.572       | 0.62342    | 0.26651 |         |
|             | -0.21578        | 0.58542    | 0.26651 | 0.665497186 |             |            |         |         |
| THEMIS2     | ENSG00000130775 | 0.55572    | 0.2892  | 0.17967     | 0.4287      | 0.26369    |         |         |
|             | 0.39601         | 0.62339    | 0.26651 | 0.26651     | 0.665497186 |            |         |         |
| NADK2       | ENSG00000152620 | 0.17472    | 0.43065 | 0.033895    | 0.48648     | 0.10383    | 0.45865 |         |
|             | 0.62337         | 0.26652    | 0.26652 | 0.665497186 |             |            |         |         |
| NA          | ENSG00000261490 | -0.62678   | 0.7346  | 0.62336     | 0.26652     | 0.62336    | 0.26652 |         |
|             | 0.62336         | 0.26652    | 0.26652 | 0.665497186 |             |            |         |         |
| NA          | ENSG00000277882 | 0.60888    | 0.2713  | 0.60888     | 0.2713      | 0.62338    | 0.26652 |         |
|             | 0.60888         | 0.2713     | 0.26652 | 0.665497186 |             |            |         |         |
| CDCA7L      | ENSG00000164649 | -0.4825    | 0.68527 | -0.48453    | 0.686       | 0.62316    | 0.26659 |         |
|             | -0.53009        | 0.70198    | 0.26659 | 0.665497186 |             |            |         |         |
| NA          | ENSG00000271969 | 0.6231     | 0.26661 | 0.6231      | 0.26661     | 0.6231     | 0.26661 |         |
|             | 0.6231          | 0.26661    | 0.26661 | 0.665497186 |             |            |         |         |
| NA          | ENSG00000274987 | 0.62305    | 0.26663 | 0.62305     | 0.26663     | 0.62305    | 0.26663 |         |
|             | 0.62305         | 0.26663    | 0.26663 | 0.665497186 |             |            |         |         |
| MIR1202     | ENSG00000221456 | -0.0083729 | 0.50334 | 0.62289     | 0.26668     | 0.62289    |         |         |
|             | 0.26668         | 0.62289    | 0.26668 | 0.26668     | 0.665497186 |            |         |         |
| ETS2        | ENSG00000157557 | -0.14541   | 0.55781 | -0.25008    | 0.59874     | -0.083623  | 0.53332 |         |
|             | 0.62281         | 0.2667     | 0.2667  | 0.665497186 |             |            |         |         |
| NA          | ENSG00000272072 | 0.62279    | 0.26671 | 0.62279     | 0.26671     | 0.62279    | 0.26671 |         |
|             | 0.62279         | 0.26671    | 0.26671 | 0.665497186 |             |            |         |         |
| LHFPL2      | ENSG00000145685 | 0.070789   | 0.47178 | 0.29975     | 0.38218     | 0.62276    |         |         |
|             | 0.26672         | 0.11003    | 0.45619 | 0.26672     | 0.665497186 |            |         |         |
| RPL14P6     | ENSG00000185631 | 0.62269    | 0.26674 | 0.62269     | 0.26674     | -0.31758   |         |         |
|             | 0.6246          | 0.62269    | 0.26674 | 0.26674     | 0.665497186 |            |         |         |
| NA          | ENSG00000201624 | 0.51072    | 0.30477 | -0.11329    | 0.5451      | 0.31249    | 0.37733 |         |
|             | 0.62271         | 0.26674    | 0.26674 | 0.665497186 |             |            |         |         |
| RNU6-1023P  | ENSG00000251946 | 0.6227     | 0.26674 | 0.40051     | 0.34439     | 0.27759    |         |         |
|             | 0.39066         | -0.35866   | 0.64008 | 0.26674     | 0.665497186 |            |         |         |
| NA          | ENSG00000279286 | 0.6227     | 0.26674 | -0.53712    | 0.70441     | -0.53712   | 0.70441 |         |
|             | -0.53712        | 0.70441    | 0.26674 | 0.665497186 |             |            |         |         |
| KRT6B       | ENSG00000185479 | -0.13241   | 0.55267 | 0.4347      | 0.33189     | 0.62259    | 0.26678 |         |
|             | 0.62259         | 0.26678    | 0.26678 | 0.665497186 |             |            |         |         |
| RPS3AP25    | ENSG00000232385 | 0.5738     | 0.28305 | 0.5738      | 0.28305     | 0.62255    |         |         |
|             | 0.26679         | 0.5738     | 0.28305 | 0.26679     | 0.665497186 |            |         |         |
| NA          | ENSG00000248925 | 0.61829    | 0.26819 | 0.62256     | 0.26679     | -0.16472   | 0.56542 |         |

|           |                 |           |             |             |             |             |         |  |
|-----------|-----------------|-----------|-------------|-------------|-------------|-------------|---------|--|
|           |                 | -0.65988  | 0.74533     | 0.26679     | 0.665497186 |             |         |  |
| NA        | ENSG00000259017 | -0.58855  | 0.72192     | -0.58855    | 0.72192     | -0.58855    | 0.72192 |  |
|           |                 | 0.62253   | 0.2668      | 0.2668      | 0.665497186 |             |         |  |
| NA        | ENSG00000267051 | 0.62249   | 0.26681     | 0.3515      | 0.36261     | 0.079017    | 0.46851 |  |
|           |                 | 0.41118   | 0.34047     | 0.26681     | 0.665497186 |             |         |  |
| DEFB133   | ENSG00000214643 | 0.62247   | 0.26682     | 0.62247     | 0.26682     | 0.62247     |         |  |
|           |                 | 0.26682   | 0.24662     | 0.4026      | 0.26682     | 0.665497186 |         |  |
| NA        | ENSG00000260714 | 0.48879   | 0.3125      | 0.48879     | 0.3125      | 0.48879     | 0.3125  |  |
|           |                 | 0.62245   | 0.26682     | 0.26682     | 0.665497186 |             |         |  |
| IRX3      | ENSG00000177508 | -0.5918   | 0.72301     | 0.62244     | 0.26683     | -1.6572     | 0.95126 |  |
|           |                 | -0.072623 | 0.52895     | 0.26683     | 0.665497186 |             |         |  |
| KRTAP4-16 | ENSG00000241241 | 0.62242   | 0.26683     | 0.62242     | 0.26683     | 0.62242     |         |  |
|           |                 | 0.26683   | 0.62242     | 0.26683     | 0.26683     | 0.665497186 |         |  |
| KRT8P7    | ENSG00000230716 | 0.62239   | 0.26684     | -0.28703    | 0.61296     | 0.019433    |         |  |
|           |                 | 0.49225   | 0.019433    | 0.49225     | 0.26684     | 0.665497186 |         |  |
| DNAJA1P4  | ENSG00000218089 | 0.62238   | 0.26685     | 0.62238     | 0.26685     | 0.62238     |         |  |
|           |                 | 0.26685   | 0.62238     | 0.26685     | 0.26685     | 0.665497186 |         |  |
| ZNF490    | ENSG00000188033 | 0.62233   | 0.26686     | 0.49192     | 0.31139     | -0.0054964  |         |  |
|           |                 | 0.50219   | 0.28255     | 0.38876     | 0.26686     | 0.665497186 |         |  |
| NA        | ENSG00000207210 | 0.62235   | 0.26686     | -1.1662     | 0.87824     | -1.2608     | 0.8963  |  |
|           |                 | -1.2608   | 0.8963      | 0.26686     | 0.665497186 |             |         |  |
| POU5F1P3  | ENSG00000235602 | 0.62232   | 0.26687     | 0.62232     | 0.26687     | 0.62232     |         |  |
|           |                 | 0.26687   | 0.62232     | 0.26687     | 0.26687     | 0.665497186 |         |  |
| NA        | ENSG00000283383 | 0.62229   | 0.26687     | -0.61408    | 0.73042     | -0.61408    | 0.73042 |  |
|           |                 | -0.61408  | 0.73042     | 0.26687     | 0.665497186 |             |         |  |
| TWSG1     | ENSG00000128791 | -0.17461  | 0.56931     | -0.13968    | 0.55554     | 0.62224     | 0.26689 |  |
|           |                 | -0.20705  | 0.58201     | 0.26689     | 0.665497186 |             |         |  |
| CPSF7     | ENSG00000149532 | -0.46095  | 0.67758     | 0.58489     | 0.27931     | 0.62221     | 0.2669  |  |
|           |                 | -0.59438  | 0.72387     | 0.2669      | 0.665497186 |             |         |  |
| NA        | ENSG00000252349 | 0.6222    | 0.26691     | 0.6222      | 0.26691     | 0.6222      | 0.26691 |  |
|           |                 | 0.6222    | 0.26691     | 0.26691     | 0.665497186 |             |         |  |
| TRPC4AP   | ENSG00000100991 | 0.054228  | 0.47838     | 0.62212     | 0.26693     | 0.2532      |         |  |
|           |                 | 0.40006   | 0.099549    | 0.46035     | 0.26693     | 0.665497186 |         |  |
| NA        | ENSG00000200600 | 0.62206   | 0.26695     | 0.62206     | 0.26695     | 0.62206     | 0.26695 |  |
|           |                 | 0.62206   | 0.26695     | 0.26695     | 0.665497186 |             |         |  |
| NA        | ENSG00000280396 | 0.62207   | 0.26695     | 0.62207     | 0.26695     | 0.62207     | 0.26695 |  |
|           |                 | 0.62207   | 0.26695     | 0.26695     | 0.665497186 |             |         |  |
| KRT19P6   | ENSG00000249891 | 0.62201   | 0.26697     | -1.0986     | 0.86402     | -1.0986     |         |  |
|           |                 | 0.86402   | -1.0986     | 0.86402     | 0.26697     | 0.665512999 |         |  |
| DSCAML1   | ENSG00000177103 | 0.6219    | 0.267036801 | 0.35643     | 0.35131     | 0.36268     |         |  |
|           |                 | -0.58867  | 0.72196     | 0.267036801 | 0.665553737 |             |         |  |
| NA        | ENSG00000249921 | 0.62186   | 0.26702     | 0.62186     | 0.26702     | 0.62186     | 0.26702 |  |
|           |                 | -0.02059  | 0.50821     | 0.26702     | 0.665569545 |             |         |  |
| DNM3-IT1  | ENSG00000233540 | 0.62168   | 0.26707     | 0.62168     | 0.26707     | 0.62168     |         |  |
|           |                 | 0.26707   | 0.62168     | 0.26707     | 0.26707     | 0.665660125 |         |  |
| NA        | ENSG00000237852 | 0.62156   | 0.26712     | 0.62156     | 0.26712     | 0.62156     | 0.26712 |  |
|           |                 | 0.62156   | 0.26712     | 0.26712     | 0.665664359 |             |         |  |
| TBC1D20   | ENSG00000125875 | -0.51447  | 0.69654     | 0.62151     | 0.26713     | 0.38518     |         |  |
|           |                 | 0.35005   | -0.24564    | 0.59702     | 0.26713     | 0.665664359 |         |  |
| MGAT1     | ENSG00000131446 | -0.61472  | 0.73063     | 0.18676     | 0.42593     | 0.62152     | 0.26713 |  |
|           |                 | 0.22264   | 0.41191     | 0.26713     | 0.665664359 |             |         |  |
| NA        | ENSG00000150732 | 0.6215    | 0.26714     | 0.6215      | 0.26714     | 0.6215      | 0.26714 |  |
|           |                 | 0.6215    | 0.26714     | 0.26714     | 0.665664359 |             |         |  |
| KRT8P45   | ENSG00000224520 | 0.62149   | 0.26714     | 0.62149     | 0.26714     | 0.62149     |         |  |
|           |                 | 0.26714   | 0.62149     | 0.26714     | 0.26714     | 0.665664359 |         |  |
| TICAM2    | ENSG00000243414 | 0.62133   | 0.26719     | 0.62133     | 0.26719     | 0.62133     |         |  |
|           |                 | 0.26719   | -1.6447     | 0.94999     | 0.26719     | 0.665745082 |         |  |
| PPFIA4    | ENSG00000143847 | 0.62132   | 0.2672      | -0.43454    | 0.66805     | -0.65702    |         |  |
|           |                 | 0.74441   | -0.84785    | 0.80174     | 0.2672      | 0.665745082 |         |  |
| NA        | ENSG00000233625 | 0.44648   | 0.32763     | -0.095531   | 0.53805     | 0.56293     | 0.28674 |  |
|           |                 | 0.6212    | 0.26723     | 0.26723     | 0.665745082 |             |         |  |
| NA        | ENSG00000225795 | -0.51906  | 0.69814     | 0.62117     | 0.26724     | 0.62117     | 0.26724 |  |

|           |                 |            |         |             |             |          |         |  |
|-----------|-----------------|------------|---------|-------------|-------------|----------|---------|--|
|           | 0.62117         | 0.26724    | 0.26724 | 0.665745082 |             |          |         |  |
| NA        | ENSG00000226445 | -1.8939    | 0.97088 | 0.62116     | 0.26725     | 0.62116  | 0.26725 |  |
|           | 0.62116         | 0.26725    | 0.26725 | 0.665745082 |             |          |         |  |
| ENPP7P9   | ENSG00000250476 | 0.16912    | 0.43285 | -0.94356    | 0.8273      | 0.30858  |         |  |
|           | 0.37882         | 0.62114    | 0.26726 | 0.26726     | 0.665745082 |          |         |  |
| CCL26     | ENSG0000006606  | 0.62103    | 0.26729 | 0.4245      | 0.3356      | 0.48925  | 0.31233 |  |
|           | 0.58977         | 0.27767    | 0.26729 | 0.665745082 |             |          |         |  |
| FBXO38    | ENSG00000145868 | -1.1066    | 0.86576 | -1.9338     | 0.97343     | -0.109   |         |  |
|           | 0.5434          | 0.62099    | 0.2673  | 0.2673      | 0.665745082 |          |         |  |
| IFNA4     | ENSG00000236637 | 0.62096    | 0.26731 | 0.54229     | 0.29381     | -1.4179  | 0.92189 |  |
|           | -1.4179         | 0.92189    | 0.26731 | 0.665745082 |             |          |         |  |
| NA        | ENSG00000221451 | -0.66296   | 0.74632 | -0.25491    | 0.6006      | 0.30302  | 0.38094 |  |
|           | 0.62093         | 0.26732    | 0.26732 | 0.665745082 |             |          |         |  |
| NA        | ENSG00000256591 | 0.62092    | 0.26733 | 0.62092     | 0.26733     | 0.62092  | 0.26733 |  |
|           | 0.62092         | 0.26733    | 0.26733 | 0.665745082 |             |          |         |  |
| SNCA      | ENSG00000145335 | -0.38751   | 0.65081 | 0.49428     | 0.31055     | 0.62087  | 0.26734 |  |
|           | 0.097581        | 0.46113    | 0.26734 | 0.665745082 |             |          |         |  |
| NA        | ENSG00000279470 | -0.44319   | 0.67119 | 0.18063     | 0.42833     | -0.52632 | 0.70067 |  |
|           | 0.62085         | 0.26735    | 0.26735 | 0.665745082 |             |          |         |  |
| NA        | ENSG00000275464 | 0.6208     | 0.26737 | 0.6208      | 0.26737     | 0.6208   | 0.26737 |  |
|           | 0.6208          | 0.26737    | 0.26737 | 0.665760864 |             |          |         |  |
| NA        | ENSG00000233824 | 0.6206     | 0.26743 | -0.36721    | 0.64327     | 0.016731 | 0.49333 |  |
|           | 0.6206          | 0.26743    | 0.26743 | 0.665844136 |             |          |         |  |
| ALS2CL    | ENSG00000178038 | -1.4332    | 0.9241  | -1.3369     | 0.90937     | 0.62051  |         |  |
|           | 0.26746         | -1.3886    | 0.91752 | 0.26746     | 0.665844136 |          |         |  |
| NA        | ENSG00000256568 | -1.1923    | 0.88343 | -0.81595    | 0.79274     | -1.3201  | 0.9066  |  |
|           | 0.62039         | 0.2675     | 0.2675  | 0.665844136 |             |          |         |  |
| HSPA1A    | ENSG00000204389 | 0.62033    | 0.26752 | 0.62033     | 0.26752     | 0.62033  |         |  |
|           | 0.26752         | 0.62033    | 0.26752 | 0.26752     | 0.665844136 |          |         |  |
| HSPA1L    | ENSG00000204390 | 0.62033    | 0.26752 | 0.62033     | 0.26752     | 0.62033  |         |  |
|           | 0.26752         | 0.62033    | 0.26752 | 0.26752     | 0.665844136 |          |         |  |
| RNU6-891P | ENSG00000207007 | 0.62034    | 0.26752 | 0.62034     | 0.26752     | 0.62034  |         |  |
|           | 0.26752         | 0.62034    | 0.26752 | 0.26752     | 0.665844136 |          |         |  |
| NA        | ENSG00000229862 | 0.6203     | 0.26753 | 0.50189     | 0.30787     | 0.033178 | 0.48677 |  |
|           | 0.10866         | 0.45673    | 0.26753 | 0.665844136 |             |          |         |  |
| RN7SL447P | ENSG00000243991 | 0.44286    | 0.32893 | -0.93416    | 0.82489     | 0.6203   |         |  |
|           | 0.26753         | -1.4722    | 0.92952 | 0.26753     | 0.665844136 |          |         |  |
| FSCB      | ENSG00000189139 | 0.62017    | 0.26757 | 0.62017     | 0.26757     | 0.62017  | 0.26757 |  |
|           | 0.62017         | 0.26757    | 0.26757 | 0.665844136 |             |          |         |  |
| NA        | ENSG00000252189 | -0.0073343 | 0.50293 | 0.38567     | 0.34987     | 0.27827  | 0.3904  |  |
|           | 0.62017         | 0.26757    | 0.26757 | 0.665844136 |             |          |         |  |
| PPIAP84   | ENSG00000254152 | 0.62013    | 0.26759 | -0.039253   | 0.51566     | 0.62013  |         |  |
|           | 0.26759         | 0.62013    | 0.26759 | 0.26759     | 0.665844136 |          |         |  |
| SNX19P2   | ENSG00000235500 | -0.19688   | 0.57804 | -0.7202     | 0.7643      | 0.61998  |         |  |
|           | 0.26764         | -0.32007   | 0.62554 | 0.26764     | 0.665844136 |          |         |  |
| LINC01209 | ENSG00000228308 | 0.61994    | 0.26765 | 0.61994     | 0.26765     | 0.61994  |         |  |
|           | 0.26765         | 0.61994    | 0.26765 | 0.26765     | 0.665844136 |          |         |  |
| NA        | ENSG00000274331 | 0.61993    | 0.26765 | 0.61993     | 0.26765     | 0.40952  | 0.34108 |  |
|           | 0.61993         | 0.26765    | 0.26765 | 0.665844136 |             |          |         |  |
| CGB7      | ENSG00000196337 | -0.16537   | 0.56567 | 0.18797     | 0.42545     | 0.053556 | 0.47864 |  |
|           | 0.61989         | 0.26766    | 0.26766 | 0.665844136 |             |          |         |  |
| FAM86KP   | ENSG00000163612 | -0.81903   | 0.79362 | -1.0503     | 0.85321     | 0.51597  |         |  |
|           | 0.30294         | 0.61976    | 0.26771 | 0.26771     | 0.665844136 |          |         |  |
| CST9LP1   | ENSG00000204662 | 0.61975    | 0.26771 | 0.3435      | 0.36561     | 0.40184  |         |  |
|           | 0.3439          | 0.40184    | 0.3439  | 0.26771     | 0.665844136 |          |         |  |
| NA        | ENSG00000253348 | 0.42231    | 0.3364  | 0.15615     | 0.43796     | 0.5526   | 0.29027 |  |
|           | 0.61969         | 0.26773    | 0.26773 | 0.665844136 |             |          |         |  |
| NA        | ENSG00000255489 | -0.20186   | 0.57999 | 0.61964     | 0.26775     | -0.20186 | 0.57999 |  |
|           | -0.20186        | 0.57999    | 0.26775 | 0.665844136 |             |          |         |  |
| RPL7P16   | ENSG00000242899 | 0.37929    | 0.35224 | 0.6196      | 0.26776     | 0.55322  |         |  |
|           | 0.29006         | 0.37929    | 0.35224 | 0.26776     | 0.665844136 |          |         |  |
| NA        | ENSG00000249916 | -1.1138    | 0.86733 | 0.26149     | 0.39686     | 0.61959  | 0.26776 |  |



|            |                 |           |         |             |             |           |         |  |
|------------|-----------------|-----------|---------|-------------|-------------|-----------|---------|--|
|            | 0.61959         | 0.26776   | 0.26776 | 0.665844136 |             |           |         |  |
| NA         | ENSG00000274578 | 0.6196    | 0.26776 | 0.6196      | 0.26776     | 0.6196    | 0.26776 |  |
|            | 0.6196          | 0.26776   | 0.26776 | 0.665844136 |             |           |         |  |
| BBS2       | ENSG00000125124 | -0.58786  | 0.72169 | 0.61952     | 0.26779     | -0.33016  | 0.62936 |  |
|            | -1.3524         | 0.91188   | 0.26779 | 0.665844136 |             |           |         |  |
| CASP5      | ENSG00000137757 | -1.1491   | 0.87474 | 0.61949     | 0.2678      | -0.21795  | 0.58627 |  |
|            | -0.16416        | 0.5652    | 0.2678  | 0.665844136 |             |           |         |  |
| ANKRD30BL  | ENSG00000163046 | -1.3864   | 0.91718 | 0.61947     | 0.2678      | -0.42734  |         |  |
|            | 0.66544         | -1.128    | 0.87033 | 0.2678      | 0.665844136 |           |         |  |
| NME2P1     | ENSG00000123009 | 0.61941   | 0.26782 | 0.3389      | 0.36734     | 0.069536  |         |  |
|            | 0.47228         | -0.92081  | 0.82143 | 0.26782     | 0.665844136 |           |         |  |
| LINC01702  | ENSG00000235200 | 0.2421    | 0.40435 | 0.059418    | 0.47631     | 0.61941   |         |  |
|            | 0.26782         | 0.58824   | 0.27819 | 0.26782     | 0.665844136 |           |         |  |
| FAM160A1   | ENSG00000164142 | -0.42969  | 0.66629 | -0.61969    | 0.73227     | 0.6194    |         |  |
|            | 0.26783         | -0.3925   | 0.65266 | 0.26783     | 0.665844136 |           |         |  |
| NA         | ENSG00000229379 | 0.61935   | 0.26784 | 0.61935     | 0.26784     | 0.61935   | 0.26784 |  |
|            | 0.61935         | 0.26784   | 0.26784 | 0.665844136 |             |           |         |  |
| NA         | ENSG00000218561 | -0.11269  | 0.54486 | -1.0159     | 0.84517     | 0.6192    | 0.26789 |  |
|            | -0.21399        | 0.58472   | 0.26789 | 0.665844136 |             |           |         |  |
| NA         | ENSG00000187472 | -0.37375  | 0.6457  | 0.61919     | 0.2679      | -0.37375  | 0.6457  |  |
|            | -0.37375        | 0.6457    | 0.2679  | 0.665844136 |             |           |         |  |
| MCFD2      | ENSG00000180398 | 0.245     | 0.40323 | -0.51773    | 0.69768     | 0.53494   | 0.29635 |  |
|            | 0.61916         | 0.26791   | 0.26791 | 0.665844136 |             |           |         |  |
| LINC02408  | ENSG00000203585 | -0.69475  | 0.75639 | 0.45529     | 0.32445     | 0.61915   |         |  |
|            | 0.26791         | 0.56828   | 0.28492 | 0.26791     | 0.665844136 |           |         |  |
| CYP4A44P   | ENSG00000261290 | 0.61913   | 0.26791 | 0.14395     | 0.44277     | 0.61913   |         |  |
|            | 0.26791         | 0.035351  | 0.4859  | 0.26791     | 0.665844136 |           |         |  |
| CYP4A27P   | ENSG00000261593 | 0.61913   | 0.26791 | 0.61913     | 0.26791     | 0.61913   |         |  |
|            | 0.26791         | 0.61913   | 0.26791 | 0.26791     | 0.665844136 |           |         |  |
| PITX1      | ENSG00000069011 | 0.61912   | 0.26792 | 0.61912     | 0.26792     | 0.1389    | 0.44477 |  |
|            | 0.038843        | 0.48451   | 0.26792 | 0.665844136 |             |           |         |  |
| SETD6P1    | ENSG00000236877 | 0.51171   | 0.30443 | 0.61911     | 0.26792     | 0.61911   |         |  |
|            | 0.26792         | 0.61911   | 0.26792 | 0.26792     | 0.665844136 |           |         |  |
| SHC3       | ENSG00000148082 | 0.35897   | 0.35981 | 0.3967      | 0.34579     | 0.40924   | 0.34118 |  |
|            | 0.61901         | 0.26795   | 0.26795 | 0.665844136 |             |           |         |  |
| PDIA3P1    | ENSG00000180867 | 0.61904   | 0.26795 | 0.61904     | 0.26795     | 0.61904   |         |  |
|            | 0.26795         | 0.61904   | 0.26795 | 0.26795     | 0.665844136 |           |         |  |
| RNU6-1014P | ENSG00000238456 | -0.3221   | 0.62631 | 0.61903     | 0.26795     | -1.7149   |         |  |
|            | 0.95682         | 0.32571   | 0.37232 | 0.26795     | 0.665844136 |           |         |  |
| PDYN       | ENSG00000101327 | 0.61894   | 0.26798 | 0.61894     | 0.26798     | -0.069713 | 0.52779 |  |
|            | 0.34396         | 0.36544   | 0.26798 | 0.665884728 |             |           |         |  |
| PVALEF     | ENSG00000225180 | 0.61883   | 0.26801 | 0.61883     | 0.26801     | -0.099337 |         |  |
|            | 0.53956         | -0.53766  | 0.70459 | 0.26801     | 0.665891363 |           |         |  |
| HSD17B7P1  | ENSG00000232908 | 0.61885   | 0.26801 | 0.61885     | 0.26801     | 0.61885   |         |  |
|            | 0.26801         | 0.61885   | 0.26801 | 0.26801     | 0.665891363 |           |         |  |
| ERO1B      | ENSG00000086619 | -1.6108   | 0.94638 | -1.6108     | 0.94638     | -0.18373  | 0.57289 |  |
|            | 0.61868         | 0.26806   | 0.26806 | 0.665981636 |             |           |         |  |
| FTLP10     | ENSG00000250426 | 0.61853   | 0.26811 | -0.26296    | 0.60371     | -1.2748   |         |  |
|            | 0.89881         | -1.2748   | 0.89881 | 0.26811     | 0.666053673 |           |         |  |
| CERCAM     | ENSG00000167123 | -0.070929 | 0.52827 | -0.092571   | 0.53688     | -0.044196 |         |  |
|            | 0.51763         | 0.61849   | 0.26813 | 0.26813     | 0.666053673 |           |         |  |
| KRTAP5-1   | ENSG00000205869 | 0.61846   | 0.26813 | 0.61846     | 0.26813     | 0.61846   |         |  |
|            | 0.26813         | 0.61846   | 0.26813 | 0.26813     | 0.666053673 |           |         |  |
| NA         | ENSG00000270866 | -0.719    | 0.76393 | -1.0201     | 0.84615     | 0.61826   | 0.2682  |  |
|            | 0.61826         | 0.2682    | 0.2682  | 0.666071018 |             |           |         |  |
| LINC01109  | ENSG00000271167 | 0.61826   | 0.2682  | 0.61826     | 0.2682      | 0.61826   |         |  |
|            | 0.2682          | 0.61826   | 0.2682  | 0.2682      | 0.666071018 |           |         |  |
| DCAF4L1    | ENSG00000182308 | 0.61824   | 0.26821 | 0.61824     | 0.26821     | 0.61824   |         |  |
|            | 0.26821         | 0.61824   | 0.26821 | 0.26821     | 0.666071018 |           |         |  |
| NA         | ENSG00000264626 | 0.046113  | 0.48161 | 0.046113    | 0.48161     | 0.046113  | 0.48161 |  |
|            | 0.61819         | 0.26822   | 0.26822 | 0.666071018 |             |           |         |  |
| NA         | ENSG00000252158 | 0.61816   | 0.26823 | 0.61816     | 0.26823     | 0.61816   | 0.26823 |  |

|            |                 |           |         |             |             |           |         |         |
|------------|-----------------|-----------|---------|-------------|-------------|-----------|---------|---------|
|            | 0.61816         | 0.26823   | 0.26823 | 0.666071018 |             |           |         |         |
| SLC31A2    | ENSG00000136867 | 0.61815   | 0.26824 | 0.61815     | 0.26824     | 0.61815   | 0.26824 | 0.61815 |
|            | 0.26824         | 0.61815   | 0.26824 | 0.26824     | 0.666071018 |           |         |         |
| CALM2P1    | ENSG00000267170 | 0.61811   | 0.26825 | 0.61811     | 0.26825     | 0.61811   | 0.26825 | 0.61811 |
|            | 0.26825         | 0.61811   | 0.26825 | 0.26825     | 0.666071018 |           |         |         |
| BMF        | ENSG00000104081 | 0.6181    | 0.26826 | 0.24243     | 0.40422     | -0.37523  | 0.64626 |         |
|            | -0.12268        | 0.54882   | 0.26826 | 0.666071018 |             |           |         |         |
| NA         | ENSG00000230796 | 0.073741  | 0.47061 | 0.61808     | 0.26826     | -1.4058   | 0.9201  |         |
|            | -1.4058         | 0.9201    | 0.26826 | 0.666071018 |             |           |         |         |
| GDF5       | ENSG00000125965 | -0.31886  | 0.62508 | -0.31886    | 0.62508     | -0.60225  | 0.72649 |         |
|            | 0.61802         | 0.26828   | 0.26828 | 0.666086738 |             |           |         |         |
| PRSS56     | ENSG00000237412 | 0.61795   | 0.2683  | -0.58378    | 0.72032     | 0.61795   |         |         |
|            | 0.2683          | 0.61795   | 0.2683  | 0.2683      | 0.666093347 |           |         |         |
| NA         | ENSG00000229454 | 0.61794   | 0.26831 | -0.086737   | 0.53456     | -0.024946 | 0.50995 |         |
|            | 0.2745          | 0.39185   | 0.26831 | 0.666093347 |             |           |         |         |
| NA         | ENSG00000256923 | 0.61782   | 0.26835 | 0.61782     | 0.26835     | 0.61782   | 0.26835 |         |
|            | 0.61782         | 0.26835   | 0.26835 | 0.666158711 |             |           |         |         |
| NA         | ENSG00000279744 | 0.6177    | 0.26839 | 0.6177      | 0.26839     | 0.6177    | 0.26839 |         |
|            | 0.6177          | 0.26839   | 0.26839 | 0.666163448 |             |           |         |         |
| NA         | ENSG00000268455 | -1.3013   | 0.90342 | -0.40928    | 0.65883     | 0.61763   | 0.26841 |         |
|            | 0.61763         | 0.26841   | 0.26841 | 0.666163448 |             |           |         |         |
| MS4A2      | ENSG00000149534 | 0.049496  | 0.48026 | 0.049496    | 0.48026     | 0.049496  | 0.48026 |         |
|            | 0.61759         | 0.26842   | 0.26842 | 0.666163448 |             |           |         |         |
| GUSBP5     | ENSG00000236296 | -0.81121  | 0.79138 | -0.24829    | 0.59804     | -0.4341   |         |         |
|            | 0.66789         | 0.6175    | 0.26845 | 0.26845     | 0.666163448 |           |         |         |
| SLC17A9    | ENSG00000101194 | 0.033025  | 0.48683 | 0.61745     | 0.26847     | -0.55282  |         |         |
|            | 0.70981         | 0.022112  | 0.49118 | 0.26847     | 0.666163448 |           |         |         |
| SNX5P1     | ENSG00000249858 | 0.61737   | 0.2685  | 0.61737     | 0.2685      | 0.61737   |         |         |
|            | 0.2685          | 0.61737   | 0.2685  | 0.2685      | 0.666163448 |           |         |         |
| ADAMTS9    | ENSG00000163638 | 0.61725   | 0.26853 | 0.55415     | 0.28974     | 0.28163   |         |         |
|            | 0.38911         | 0.28151   | 0.38916 | 0.26853     | 0.666163448 |           |         |         |
| PRTN3      | ENSG00000196415 | -0.33453  | 0.63101 | 0.61727     | 0.26853     | -0.42734  | 0.66543 |         |
|            | -0.33453        | 0.63101   | 0.26853 | 0.666163448 |             |           |         |         |
| NA         | ENSG00000272660 | 0.6172    | 0.26855 | 0.6172      | 0.26855     | 0.6172    | 0.26855 |         |
|            | 0.6172          | 0.26855   | 0.26855 | 0.666163448 |             |           |         |         |
| NA         | ENSG00000272910 | -0.36329  | 0.64181 | -0.79479    | 0.78663     | 0.6172    | 0.26855 |         |
|            | 0.6172          | 0.26855   | 0.26855 | 0.666163448 |             |           |         |         |
| ARL2-SNX15 | ENSG00000273003 | 0.6172    | 0.26855 | 0.6172      | 0.26855     | 0.6172    |         |         |
|            | 0.26855         | 0.6172    | 0.26855 | 0.26855     | 0.666163448 |           |         |         |
| SLX4IP     | ENSG00000149346 | -0.097264 | 0.53874 | 0.23708     | 0.4063      | -0.47718  |         |         |
|            | 0.68338         | 0.61713   | 0.26857 | 0.26857     | 0.666163448 |           |         |         |
| BTNL2      | ENSG00000204290 | 0.1846    | 0.42677 | -0.6597     | 0.74528     | -0.6597   | 0.74528 |         |
|            | 0.61714         | 0.26857   | 0.26857 | 0.666163448 |             |           |         |         |
| GORAB      | ENSG00000120370 | 0.61712   | 0.26858 | 0.034831    | 0.48611     | -0.15214  | 0.56046 |         |
|            | -0.57581        | 0.71763   | 0.26858 | 0.666163448 |             |           |         |         |
| PRND       | ENSG00000171864 | -0.56547  | 0.71412 | -1.8239     | 0.96592     | 0.61711   | 0.26858 |         |
|            | -1.8239         | 0.96592   | 0.26858 | 0.666163448 |             |           |         |         |
| NA         | ENSG00000253968 | 0.24906   | 0.40166 | 0.61708     | 0.26859     | -0.36709  | 0.64322 |         |
|            | 0.3086          | 0.37881   | 0.26859 | 0.666163448 |             |           |         |         |
| PERM1      | ENSG00000187642 | 0.61692   | 0.26864 | 0.61692     | 0.26864     | 0.61692   | 0.26864 |         |
|            | 0.61692         | 0.26864   | 0.26864 | 0.666163448 |             |           |         |         |
| ZNF471     | ENSG00000196263 | 0.61695   | 0.26864 | 0.61695     | 0.26864     | 0.61695   |         |         |
|            | 0.26864         | 0.61695   | 0.26864 | 0.26864     | 0.666163448 |           |         |         |
| LINC00390  | ENSG00000226519 | -1.5701   | 0.9418  | 0.61693     | 0.26864     | -1.5701   |         |         |
|            | 0.9418          | -0.66651  | 0.74746 | 0.26864     | 0.666163448 |           |         |         |
| CRTC2      | ENSG00000160741 | 0.61686   | 0.26866 | -1.1259     | 0.8699      | -1.3189   | 0.90639 |         |
|            | -1.3189         | 0.90639   | 0.26866 | 0.666163448 |             |           |         |         |
| KCNMA1-AS3 | ENSG00000225652 | 0.61686   | 0.26866 | -0.35182    | 0.63751     | -0.35182  |         |         |
|            | 0.63751         | -0.35182  | 0.63751 | 0.26866     | 0.666163448 |           |         |         |
| NA         | ENSG00000258904 | 0.43692   | 0.33109 | 0.43692     | 0.33109     | 0.43692   | 0.33109 |         |
|            | 0.61687         | 0.26866   | 0.26866 | 0.666163448 |             |           |         |         |
| LRRC73     | ENSG00000204052 | 0.61681   | 0.26868 | 0.61681     | 0.26868     | 0.61681   |         |         |

|           |                 |          |             |             |             |           |         |       |
|-----------|-----------------|----------|-------------|-------------|-------------|-----------|---------|-------|
|           | 0.26868         | 0.61681  | 0.26868     | 0.26868     | 0.666163448 |           |         |       |
| NA        | ENSG00000274702 | 0.61682  | 0.26868     | -0.20776    | 0.58229     | -0.20776  | 0.58229 |       |
|           | -0.20776        | 0.58229  | 0.26868     | 0.666163448 |             |           |         |       |
| NA        | ENSG00000279698 | -0.51196 | 0.69566     | -0.51196    | 0.69566     | -0.51196  | 0.69566 |       |
|           | 0.61665         | 0.26873  | 0.26873     | 0.666253518 |             |           |         |       |
| TJP3      | ENSG00000105289 | -0.33791 | 0.63229     | -0.42656    | 0.66515     | -0.087432 | 0.53484 |       |
|           | 0.61639         | 0.26882  | 0.26882     | 0.666372402 |             |           |         |       |
| RPL22P2   | ENSG00000241081 | 0.045605 | 0.48181     | 0.44088     | 0.32965     | 0.61631   |         |       |
|           | 0.26885         | 0.61631  | 0.26885     | 0.26885     | 0.666372402 |           |         |       |
| RNA5SP290 | ENSG00000252942 | 0.61629  | 0.26885     | 0.61629     | 0.26885     | 0.61629   |         |       |
|           | 0.26885         | 0.61629  | 0.26885     | 0.26885     | 0.666372402 |           |         |       |
| PCDHGA11  | ENSG00000253873 | 0.6163   | 0.26885     | 0.6163      | 0.26885     | 0.6163    |         |       |
|           | 0.26885         | 0.6163   | 0.26885     | 0.26885     | 0.666372402 |           |         |       |
| LINC00622 | ENSG00000260941 | 0.61629  | 0.26885     | -0.7823     | 0.78298     | 0.61629   |         |       |
|           | 0.26885         | 0.61629  | 0.26885     | 0.26885     | 0.666372402 |           |         |       |
| ARAP2     | ENSG00000047365 | 0.61626  | 0.26886     | 0.61626     | 0.26886     | 0.61626   | 0.26886 |       |
|           | 0.036655        | 0.48538  | 0.26886     | 0.666372402 |             |           |         |       |
| NA        | ENSG00000274813 | 0.61614  | 0.2689      | -1.317      | 0.90608     | -1.5366   | 0.9378  |       |
|           | -0.23612        | 0.59333  | 0.2689      | 0.666437646 |             |           |         |       |
| PPIAP48   | ENSG00000260187 | 0.616    | 0.26895     | 0.616       | 0.26895     | 0.616     | 0.26895 | 0.616 |
|           | 0.26895         | 0.26895  | 0.666527666 |             |             |           |         |       |
| ARMC8     | ENSG00000114098 | 0.60863  | 0.27139     | 0.049359    | 0.48032     | 0.32812   | 0.37141 |       |
|           | 0.61575         | 0.26903  | 0.26903     | 0.666605984 |             |           |         |       |
| EIF4A1P5  | ENSG00000226161 | 0.61574  | 0.26903     | -0.5393     | 0.70516     | 0.31268   |         |       |
|           | 0.37726         | -0.36943 | 0.6441      | 0.26903     | 0.666605984 |           |         |       |
| ZNNT1     | ENSG00000261087 | 0.035334 | 0.48591     | -0.11975    | 0.54766     | -0.020526 | 0.50819 |       |
|           | 0.61575         | 0.26903  | 0.26903     | 0.666605984 |             |           |         |       |
| LINC02683 | ENSG00000254438 | 0.61573  | 0.26904     | 0.61573     | 0.26904     | 0.61573   |         |       |
|           | 0.26904         | 0.61573  | 0.26904     | 0.26904     | 0.666605984 |           |         |       |
| NA        | ENSG00000266032 | 0.15937  | 0.43669     | -1.1045     | 0.8653      | 0.61567   | 0.26905 |       |
|           | 0.15937         | 0.43669  | 0.26905     | 0.666605984 |             |           |         |       |
| PIGPP3    | ENSG00000228958 | -0.47543 | 0.68276     | -0.47543    | 0.68276     | -0.47543  |         |       |
|           | 0.68276         | 0.61559  | 0.26908     | 0.26908     | 0.666646418 |           |         |       |
| NA        | ENSG00000281969 | -0.12766 | 0.55079     | -0.12766    | 0.55079     | -0.12766  | 0.55079 |       |
|           | 0.61544         | 0.26913  | 0.26913     | 0.666736396 |             |           |         |       |
| RNA5SP292 | ENSG00000212276 | -0.51553 | 0.69691     | 0.61535     | 0.26916     | -0.18421  |         |       |
|           | 0.57307         | -0.18421 | 0.57307     | 0.26916     | 0.666767695 |           |         |       |
| RN7SKP240 | ENSG00000222515 | 0.61531  | 0.26917     | 0.61531     | 0.26917     | -0.27968  |         |       |
|           | 0.61014         | -0.33907 | 0.63272     | 0.26917     | 0.666767695 |           |         |       |
| NA        | ENSG00000195401 | -0.37729 | 0.64702     | -0.54288    | 0.70639     | 0.61526   | 0.26919 |       |
|           | 0.61526         | 0.26919  | 0.26919     | 0.666783343 |             |           |         |       |
| NA        | ENSG00000283451 | 0.61521  | 0.26921     | -0.29168    | 0.61473     | -0.29168  | 0.61473 |       |
|           | -0.29168        | 0.61473  | 0.26921     | 0.666798989 |             |           |         |       |
| NA        | ENSG00000242995 | 0.61491  | 0.26931     | -0.81219    | 0.79166     | -0.64094  | 0.73922 |       |
|           | -0.81219        | 0.79166  | 0.26931     | 0.666969741 |             |           |         |       |
| NA        | ENSG00000258072 | 0.61491  | 0.26931     | 0.61491     | 0.26931     | 0.61491   | 0.26931 |       |
|           | 0.61491         | 0.26931  | 0.26931     | 0.666969741 |             |           |         |       |
| ARHGAP26  | ENSG00000145819 | -1.311   | 0.90508     | -1.7243     | 0.95767     | -1.0278   |         |       |
|           | 0.84799         | 0.61486  | 0.26932     | 0.26932     | 0.666969741 |           |         |       |
| AP3D1     | ENSG00000065000 | 0.29051  | 0.38571     | 0.56464     | 0.28616     | 0.61474   | 0.26936 |       |
|           | 0.081493        | 0.46752  | 0.26936     | 0.667034902 |             |           |         |       |
| NA        | ENSG00000274457 | 0.6146   | 0.26941     | 0.6146      | 0.26941     | 0.6146    | 0.26941 |       |
|           | 0.6146          | 0.26941  | 0.26941     | 0.667124818 |             |           |         |       |
| NA        | ENSG00000279931 | 0.42309  | 0.33612     | 0.47234     | 0.31834     | 0.61453   | 0.26943 |       |
|           | -0.53753        | 0.70455  | 0.26943     | 0.667137789 |             |           |         |       |
| CD177P1   | ENSG00000204933 | -0.55693 | 0.71121     | 0.61446     | 0.26946     | 0.3015    |         |       |
|           | 0.38152         | 0.27938  | 0.38997     | 0.26946     | 0.667137789 |           |         |       |
| LOH12CR2  | ENSG00000205791 | 0.16826  | 0.43319     | 0.45267     | 0.32539     | 0.61441   |         |       |
|           | 0.26947         | 0.61441  | 0.26947     | 0.26947     | 0.667137789 |           |         |       |
| OR10G2    | ENSG00000255582 | -0.50027 | 0.69156     | 0.61441     | 0.26947     | -0.50027  |         |       |
|           | 0.69156         | -0.50027 | 0.69156     | 0.26947     | 0.667137789 |           |         |       |
| COPS8P3   | ENSG00000254697 | 0.61435  | 0.26949     | 0.61435     | 0.26949     | 0.61435   |         |       |

|           |                 |           |         |             |             |           |         |
|-----------|-----------------|-----------|---------|-------------|-------------|-----------|---------|
|           | 0.26949         | 0.61435   | 0.26949 | 0.26949     | 0.667153409 |           |         |
| NPM1P47   | ENSG00000259466 | 0.52841   | 0.29861 | 0.29861     | 0.61428     | 0.26951   | 0.52841 |
|           | 0.29861         | 0.52841   | 0.29861 | 0.26951     | 0.66715989  |           |         |
| CR2       | ENSG00000117322 | 0.2792    | 0.39005 | 0.61426     | 0.26952     | -0.1547   | 0.56147 |
|           | 0.36745         | 0.35664   | 0.26952 | 0.66715989  |             |           |         |
| EID3      | ENSG00000255150 | -0.16686  | 0.56626 | 0.61417     | 0.26955     | 0.50012   | 0.30849 |
|           | -0.16686        | 0.56626   | 0.26955 | 0.667200259 |             |           |         |
| ZYG11AP1  | ENSG00000232242 | -0.080191 | 0.53196 | 0.10803     | 0.45699     | 0.61413   |         |
|           | 0.26957         | 0.10803   | 0.45699 | 0.26957     | 0.667206735 |           |         |
| NA        | ENSG00000240103 | 0.61409   | 0.26958 | 0.61409     | 0.26958     | 0.61409   | 0.26958 |
|           | 0.61409         | 0.26958   | 0.26958 | 0.667206735 |             |           |         |
| APOL1     | ENSG00000100342 | 0.61398   | 0.26961 | 0.38722     | 0.3493      | -0.075487 | 0.53009 |
|           | -0.075487       | 0.53009   | 0.26961 | 0.667210546 |             |           |         |
| SNCAIP    | ENSG00000064692 | -0.55744  | 0.71139 | -0.33633    | 0.63169     | 0.61393   |         |
|           | 0.26963         | 0.61393   | 0.26963 | 0.26963     | 0.667210546 |           |         |
| NA        | ENSG00000200750 | -1.7947   | 0.96365 | -1.7947     | 0.96365     | 0.61393   | 0.26963 |
|           | -1.7947         | 0.96365   | 0.26963 | 0.667210546 |             |           |         |
| INSIG1    | ENSG00000186480 | 0.32558   | 0.37237 | 0.61389     | 0.26964     | -0.34997  |         |
|           | 0.63682         | -0.066923 | 0.52668 | 0.26964     | 0.667210546 |           |         |
| NA        | ENSG00000228806 | 0.61388   | 0.26965 | 0.61388     | 0.26965     | 0.61388   | 0.26965 |
|           | 0.61388         | 0.26965   | 0.26965 | 0.667210546 |             |           |         |
| PTGES3P1  | ENSG00000234518 | 0.18169   | 0.42791 | 0.61369     | 0.26971     | 0.61369   |         |
|           | 0.26971         | 0.61369   | 0.26971 | 0.26971     | 0.667291242 |           |         |
| NA        | ENSG00000278993 | 0.61368   | 0.26971 | 0.53089     | 0.29775     | -0.0428   | 0.51707 |
|           | -0.0428         | 0.51707   | 0.26971 | 0.667291242 |             |           |         |
| NA        | ENSG00000277458 | 0.61364   | 0.26973 | -0.19996    | 0.57925     | 0.045818  | 0.48173 |
|           | 0.045818        | 0.48173   | 0.26973 | 0.667306844 |             |           |         |
| NA        | ENSG00000266522 | 0.6135    | 0.26977 | 0.6135      | 0.26977     | 0.6135    | 0.26977 |
|           | 0.6135          | 0.26977   | 0.26977 | 0.667326224 |             |           |         |
| NA        | ENSG00000228629 | 0.61344   | 0.26979 | 0.61344     | 0.26979     | 0.61344   | 0.26979 |
|           | 0.27766         | 0.39064   | 0.26979 | 0.667326224 |             |           |         |
| NA        | ENSG00000249930 | -0.93993  | 0.82637 | 0.61344     | 0.26979     | -0.93993  | 0.82637 |
|           | 0.052396        | 0.47911   | 0.26979 | 0.667326224 |             |           |         |
| UBQLN4P2  | ENSG00000226213 | 0.61339   | 0.26981 | 0.24837     | 0.40192     | 0.61339   |         |
|           | 0.26981         | 0.61339   | 0.26981 | 0.26981     | 0.667326224 |           |         |
| LDHAL6CP  | ENSG00000250517 | -0.43487  | 0.66817 | -0.31335    | 0.62299     | 0.6134    |         |
|           | 0.26981         | 0.6134    | 0.26981 | 0.26981     | 0.667326224 |           |         |
| TMEM52B   | ENSG00000165685 | -0.69293  | 0.75582 | -0.69293    | 0.75582     | -0.69293  |         |
|           | 0.75582         | 0.61337   | 0.26982 | 0.26982     | 0.667326224 |           |         |
| SYT7      | ENSG00000011347 | -0.08386  | 0.53342 | -0.44411    | 0.67152     | 0.6132    | 0.26987 |
|           | -0.51363        | 0.69625   | 0.26987 | 0.667416012 |             |           |         |
| NA        | ENSG00000226521 | -1.9825   | 0.97629 | 0.61294     | 0.26996     | -1.1723   | 0.87946 |
|           | -1.3354         | 0.90913   | 0.26996 | 0.667570831 |             |           |         |
| NDUFB4P11 | ENSG00000259374 | 0.61292   | 0.26996 | 0.61292     | 0.26996     | 0.61292   |         |
|           | 0.26996         | 0.61292   | 0.26996 | 0.26996     | 0.667570831 |           |         |
| PRELID1P1 | ENSG00000217325 | 0.61287   | 0.26998 | 0.61287     | 0.26998     | 0.61287   |         |
|           | 0.26998         | 0.61287   | 0.26998 | 0.26998     | 0.667586411 |           |         |
| HMG1P5    | ENSG00000230942 | 0.61259   | 0.27007 | -1.4771     | 0.93017     | -0.99658  |         |
|           | 0.84052         | -1.4017   | 0.9195  | 0.27007     | 0.66776317  |           |         |
| NA        | ENSG00000248962 | 0.61257   | 0.27008 | 0.42259     | 0.3363      | -0.63238  | 0.73643 |
|           | 0.5211          | 0.30115   | 0.27008 | 0.66776317  |             |           |         |
| ATXN7L3   | ENSG00000087152 | 0.61253   | 0.2701  | -0.69293    | 0.75582     | 0.40874   |         |
|           | 0.34137         | -0.28585  | 0.6125  | 0.2701      | 0.66776317  |           |         |
| OR7A17    | ENSG00000185385 | -0.88039  | 0.81067 | 0.47038     | 0.31904     | -0.46412  |         |
|           | 0.67872         | 0.61245   | 0.27012 | 0.27012     | 0.66776317  |           |         |
| RNU6-650P | ENSG00000202528 | 0.61245   | 0.27012 | 0.61245     | 0.27012     | 0.61245   |         |
|           | 0.27012         | 0.61245   | 0.27012 | 0.27012     | 0.66776317  |           |         |
| VEGFC     | ENSG00000150630 | -0.77925  | 0.78208 | 0.040886    | 0.48369     | -0.99998  | 0.84134 |
|           | 0.6124          | 0.27014   | 0.27014 | 0.66776958  |             |           |         |
| LINC00379 | ENSG00000229557 | -0.49436  | 0.68947 | 0.61236     | 0.27015     | -0.49436  |         |
|           | 0.68947         | -1.2629   | 0.89668 | 0.27015     | 0.66776958  |           |         |
| NA        | ENSG00000255204 | -0.69915  | 0.75777 | -0.58733    | 0.72151     | 0.61227   | 0.27018 |

|            |                 |           |         |             |             |          |         |
|------------|-----------------|-----------|---------|-------------|-------------|----------|---------|
|            | 0.61227         | 0.27018   | 0.27018 | 0.667809861 |             |          |         |
| CARD10     | ENSG00000100065 | -0.15478  | 0.5615  | 0.6122      | 0.2702      | 0.6122   |         |
|            | 0.2702          | 0.6122    | 0.2702  | 0.2702      | 0.667825421 |          |         |
| NA         | ENSG00000237783 | 0.61202   | 0.27026 | 0.61202     | 0.27026     | 0.61202  | 0.27026 |
|            | 0.61202         | 0.27026   | 0.27026 | 0.667869334 |             |          |         |
| ZWINT      | ENSG00000122952 | 0.61196   | 0.27028 | 0.53714     | 0.29559     | 0.61196  | 0.27028 |
|            | 0.61196         | 0.27028   | 0.27028 | 0.667869334 |             |          |         |
| NMD3       | ENSG00000169251 | 0.37003   | 0.35568 | 0.11371     | 0.45473     | 0.61195  | 0.27029 |
|            | 0.19009         | 0.42462   | 0.27029 | 0.667869334 |             |          |         |
| TCTA       | ENSG00000145022 | 0.61191   | 0.2703  | 0.61191     | 0.2703      | 0.61191  | 0.2703  |
|            | 0.61191         | 0.2703    | 0.2703  | 0.667869334 |             |          |         |
| NA         | ENSG00000177738 | -0.22453  | 0.58883 | -0.22453    | 0.58883     | -0.79519 | 0.78675 |
|            | 0.61189         | 0.2703    | 0.2703  | 0.667869334 |             |          |         |
| NA         | ENSG00000259895 | 0.6119    | 0.2703  | 0.6119      | 0.2703      | 0.6119   | 0.2703  |
|            | 0.6119          | 0.2703    | 0.2703  | 0.667869334 |             |          |         |
| NA         | ENSG00000234004 | 0.61172   | 0.27036 | 0.61172     | 0.27036     | -0.15132 | 0.56014 |
|            | 0.59768         | 0.27503   | 0.27036 | 0.667983714 |             |          |         |
| GAPDHP14   | ENSG00000236056 | 0.61163   | 0.27039 | 0.61163     | 0.27039     | 0.61163  |         |
|            | 0.27039         | 0.61163   | 0.27039 | 0.27039     | 0.668023966 |          |         |
| NA         | ENSG00000213077 | 0.61149   | 0.27044 | 0.094605    | 0.46231     | -1.0634  | 0.85621 |
|            | -0.19991        | 0.57923   | 0.27044 | 0.668068599 |             |          |         |
| AAACL2-AS1 | ENSG00000242908 | -0.36863  | 0.6438  | -1.3839     | 0.91681     | 0.61144  |         |
|            | 0.27045         | 0.61144   | 0.27045 | 0.27045     | 0.668068599 |          |         |
| SLC22A1    | ENSG00000175003 | -0.36845  | 0.64373 | 0.61129     | 0.2705      | -1.588   |         |
|            | 0.94385         | -1.0967   | 0.86362 | 0.2705      | 0.668068599 |          |         |
| NA         | ENSG00000227257 | 0.6113    | 0.2705  | -1.5204     | 0.93579     | -0.97484 | 0.83518 |
|            | -0.1529         | 0.56076   | 0.2705  | 0.668068599 |             |          |         |
| IFNK       | ENSG00000147896 | -1.2747   | 0.8988  | 0.61128     | 0.27051     | -0.91391 | 0.81962 |
|            | -0.91391        | 0.81962   | 0.27051 | 0.668068599 |             |          |         |
| NA         | ENSG00000247137 | 0.39893   | 0.34497 | 0.61124     | 0.27052     | 0.61124  | 0.27052 |
|            | 0.61124         | 0.27052   | 0.27052 | 0.668068599 |             |          |         |
| NA         | ENSG00000270775 | 0.61116   | 0.27055 | -0.60807    | 0.72843     | -0.17317 | 0.56874 |
|            | -0.17317        | 0.56874   | 0.27055 | 0.668068599 |             |          |         |
| STX18-IT1  | ENSG00000248221 | 0.61112   | 0.27056 | -0.75055    | 0.77354     | -0.36406 |         |
|            | 0.64209         | -0.83921  | 0.79932 | 0.27056     | 0.668068599 |          |         |
| MAMDC2-AS1 | ENSG00000204706 | 0.56519   | 0.28597 | 0.083899    | 0.46657     | 0.61106  |         |
|            | 0.27058         | 0.61106   | 0.27058 | 0.27058     | 0.668068599 |          |         |
| NDST1-AS1  | ENSG00000254333 | -0.070249 | 0.528   | 0.61107     | 0.27058     | -0.21617 | 0.58557 |
|            | 0.22535         | 0.41085   | 0.27058 | 0.668068599 |             |          |         |
| NA         | ENSG00000271817 | 0.61105   | 0.27058 | 0.61105     | 0.27058     | 0.61105  | 0.27058 |
|            | 0.61105         | 0.27058   | 0.27058 | 0.668068599 |             |          |         |
| LINC00653  | ENSG00000273148 | 0.61106   | 0.27058 | 0.61106     | 0.27058     | 0.61106  |         |
|            | 0.27058         | 0.61106   | 0.27058 | 0.27058     | 0.668068599 |          |         |
| ACNATP     | ENSG00000227411 | -0.018428 | 0.50735 | 0.41175     | 0.34026     | 0.61102  |         |
|            | 0.27059         | -0.33519  | 0.63126 | 0.27059     | 0.668068599 |          |         |
| LINC01624  | ENSG00000227508 | 0.61098   | 0.2706  | 0.00027775  | 0.49989     | -0.41218 |         |
|            | 0.6599          | -0.30925  | 0.62143 | 0.2706      | 0.668068599 |          |         |
| CYP2D6     | ENSG00000100197 | 0.61093   | 0.27062 | -0.82406    | 0.79505     | 0.61093  |         |
|            | 0.27062         | -0.96643  | 0.83309 | 0.27062     | 0.66807497  |          |         |
| OSBPL10    | ENSG00000144645 | 0.61089   | 0.27063 | -0.12437    | 0.54949     | -1.5674  |         |
|            | 0.94149         | -0.47189  | 0.6815  | 0.27063     | 0.66807497  |          |         |
| NA         | ENSG00000254001 | 0.61071   | 0.2707  | 0.61071     | 0.2707      | 0.61071  | 0.2707  |
|            | 0.61071         | 0.2707    | 0.2707  | 0.668182328 |             |          |         |
| CHIAP2     | ENSG00000203878 | -0.79671  | 0.78719 | 0.61062     | 0.27073     | -0.75085 |         |
|            | 0.77363         | -0.75085  | 0.77363 | 0.27073     | 0.668182328 |          |         |
| NA         | ENSG00000270099 | 0.61052   | 0.27076 | 0.40853     | 0.34144     | 0.61052  | 0.27076 |
|            | 0.61052         | 0.27076   | 0.27076 | 0.668182328 |             |          |         |
| MRPS30     | ENSG00000112996 | 0.61043   | 0.27079 | -0.19524    | 0.5774      | -0.17618 |         |
|            | 0.56992         | -0.19524  | 0.5774  | 0.27079     | 0.668182328 |          |         |
| KLHL1      | ENSG00000150361 | -0.38903  | 0.65137 | -0.38903    | 0.65137     | 0.61042  | 0.27079 |
|            | -0.38903        | 0.65137   | 0.27079 | 0.668182328 |             |          |         |
| NA         | ENSG00000276952 | 0.61042   | 0.27079 | 0.61042     | 0.27079     | 0.61042  | 0.27079 |

|           |                 |            |         |             |             |           |         |  |
|-----------|-----------------|------------|---------|-------------|-------------|-----------|---------|--|
|           | 0.61042         | 0.27079    | 0.27079 | 0.668182328 |             |           |         |  |
| RNY4P27   | ENSG00000200211 | 0.61033    | 0.27082 | 0.61033     | 0.27082     | 0.61033   |         |  |
|           | 0.27082         | 0.61033    | 0.27082 | 0.27082     | 0.668182328 |           |         |  |
| NA        | ENSG00000206779 | 0.61034    | 0.27082 | 0.10707     | 0.45736     | 0.10707   | 0.45736 |  |
|           | 0.10707         | 0.45736    | 0.27082 | 0.668182328 |             |           |         |  |
| BLVRA     | ENSG00000106605 | -1.4326    | 0.92401 | -1.0701     | 0.85771     | -0.017227 | 0.50687 |  |
|           | 0.61029         | 0.27083    | 0.27083 | 0.668182328 |             |           |         |  |
| TOM1L2    | ENSG00000175662 | -0.20885   | 0.58272 | 0.61029     | 0.27084     | 0.55204   |         |  |
|           | 0.29046         | 0.16423    | 0.43478 | 0.27084     | 0.668182328 |           |         |  |
| RNA5SP72  | ENSG00000201312 | 0.61022    | 0.27086 | 0.61022     | 0.27086     | 0.61022   |         |  |
|           | 0.27086         | 0.61022    | 0.27086 | 0.27086     | 0.668182328 |           |         |  |
| MIR3929   | ENSG00000265641 | -0.558     | 0.71158 | -2.0772     | 0.98111     | -0.87422  | 0.809   |  |
|           | 0.61021         | 0.27086    | 0.27086 | 0.668182328 |             |           |         |  |
| NA        | ENSG00000238797 | 0.61012    | 0.27089 | 0.61012     | 0.27089     | 0.61012   | 0.27089 |  |
|           | 0.61012         | 0.27089    | 0.27089 | 0.668182328 |             |           |         |  |
| CASP6     | ENSG00000138794 | 0.61007    | 0.27091 | 0.60024     | 0.27417     | 0.61007   | 0.27091 |  |
|           | -0.021193       | 0.50845    | 0.27091 | 0.668182328 |             |           |         |  |
| LYPD6B    | ENSG00000150556 | -0.20175   | 0.57994 | 0.61        | 0.27093     | -0.11287  | 0.54493 |  |
|           | -0.32379        | 0.62695    | 0.27093 | 0.668182328 |             |           |         |  |
| ATP7B     | ENSG00000123191 | -0.0060886 | 0.50243 | 0.60985     | 0.27098     | 0.44255   | 0.32905 |  |
|           | -0.2428         | 0.59592    | 0.27098 | 0.668182328 |             |           |         |  |
| NA        | ENSG00000207404 | -0.27951   | 0.61007 | 0.60986     | 0.27098     | -0.27951  | 0.61007 |  |
|           | -0.27951        | 0.61007    | 0.27098 | 0.668182328 |             |           |         |  |
| NA        | ENSG00000224370 | 0.10928    | 0.45649 | -1.4289     | 0.92348     | 0.60986   | 0.27098 |  |
|           | -0.35842        | 0.63999    | 0.27098 | 0.668182328 |             |           |         |  |
| MRPS10    | ENSG00000048544 | -0.75879   | 0.77601 | -0.35786    | 0.63978     | -2.1302   |         |  |
|           | 0.98342         | 0.60979    | 0.271   | 0.271       | 0.668182328 |           |         |  |
| LINC01224 | ENSG00000269416 | 0.4268     | 0.33476 | 0.48018     | 0.31555     | 0.6098    | 0.271   |  |
|           | 0.60172         | 0.27368    | 0.271   | 0.668182328 |             |           |         |  |
| SKI       | ENSG00000157933 | 0.30101    | 0.3817  | 0.51287     | 0.30402     | 0.60977   | 0.27101 |  |
|           | 0.14651         | 0.44176    | 0.27101 | 0.668182328 |             |           |         |  |
| NA        | ENSG00000244503 | -0.83797   | 0.79897 | -0.33935    | 0.63283     | 0.60977   | 0.27101 |  |
|           | 0.60977         | 0.27101    | 0.27101 | 0.668182328 |             |           |         |  |
| SRGN      | ENSG00000122862 | -0.18601   | 0.57378 | 0.60974     | 0.27102     | -0.28415  | 0.61185 |  |
|           | 0.23704         | 0.40631    | 0.27102 | 0.668182328 |             |           |         |  |
| H3P11     | ENSG00000230111 | 0.60974    | 0.27102 | 0.60974     | 0.27102     | 0.60974   | 0.27102 |  |
|           | 0.60974         | 0.27102    | 0.27102 | 0.668182328 |             |           |         |  |
| NA        | ENSG00000237461 | -0.54635   | 0.70759 | -0.044536   | 0.51776     | 0.60972   | 0.27102 |  |
|           | -0.17575        | 0.56976    | 0.27102 | 0.668182328 |             |           |         |  |
| RNU6-858P | ENSG00000199306 | 0.40875    | 0.34136 | 0.6097      | 0.27103     | 0.55526   |         |  |
|           | 0.28936         | 0.40875    | 0.34136 | 0.27103     | 0.668182328 |           |         |  |
| NA        | ENSG00000280336 | 0.60962    | 0.27106 | 0.60962     | 0.27106     | 0.60962   | 0.27106 |  |
|           | 0.60962         | 0.27106    | 0.27106 | 0.668204178 |             |           |         |  |
| CDC42EP3  | ENSG00000163171 | -0.4058    | 0.65756 | -1.4792     | 0.93046     | 0.35465   |         |  |
|           | 0.36143         | 0.60956    | 0.27108 | 0.27108     | 0.668204178 |           |         |  |
| NA        | ENSG00000239670 | 0.60954    | 0.27108 | 0.60954     | 0.27108     | 0.60954   | 0.27108 |  |
|           | 0.60954         | 0.27108    | 0.27108 | 0.668204178 |             |           |         |  |
| HDAC9     | ENSG00000048052 | -1.1017    | 0.8647  | -0.84967    | 0.80225     | 0.60944   | 0.27112 |  |
|           | 0.13116         | 0.44782    | 0.27112 | 0.668235173 |             |           |         |  |
| NA        | ENSG00000279306 | 0.15335    | 0.43906 | 0.60944     | 0.27112     | 0.60944   | 0.27112 |  |
|           | 0.60944         | 0.27112    | 0.27112 | 0.668235173 |             |           |         |  |
| NA        | ENSG00000240571 | 0.60938    | 0.27114 | 0.39275     | 0.34725     | 0.60938   | 0.27114 |  |
|           | 0.60938         | 0.27114    | 0.27114 | 0.668250668 |             |           |         |  |
| NA        | ENSG00000243072 | 0.60918    | 0.2712  | 0.075474    | 0.46992     | -0.70511  | 0.75963 |  |
|           | 0.60918         | 0.2712     | 0.2712  | 0.668258449 |             |           |         |  |
| NA        | ENSG00000260406 | 0.6092     | 0.2712  | 0.6092      | 0.2712      | 0.6092    | 0.2712  |  |
|           | 0.6092          | 0.2712     | 0.2712  | 0.668258449 |             |           |         |  |
| BBX       | ENSG00000114439 | 0.60915    | 0.27121 | 0.45049     | 0.32618     | -0.25257  | 0.5997  |  |
|           | -0.677          | 0.7508     | 0.27121 | 0.668258449 |             |           |         |  |
| RPL23AP17 | ENSG00000215893 | 0.60912    | 0.27122 | 0.60912     | 0.27122     | 0.60912   |         |  |
|           | 0.27122         | 0.60912    | 0.27122 | 0.27122     | 0.668258449 |           |         |  |
| DMBT1L1   | ENSG00000176584 | -0.45428   | 0.67519 | 0.60908     | 0.27123     | 0.096306  |         |  |

|             |                 |            |         |             |             |           |         |  |
|-------------|-----------------|------------|---------|-------------|-------------|-----------|---------|--|
|             | 0.46164         | -0.0025104 | 0.501   | 0.27123     | 0.668258449 |           |         |  |
| STK32A      | ENSG00000169302 | -0.53905   | 0.70507 | 0.60908     | 0.27124     | -0.52204  |         |  |
|             | 0.69918         | -0.32492   | 0.62738 | 0.27124     | 0.668258449 |           |         |  |
| NA          | ENSG00000228174 | 0.60897    | 0.27127 | 0.60897     | 0.27127     | -1.3207   | 0.90669 |  |
|             | -1.5908         | 0.94417    | 0.27127 | 0.668258449 |             |           |         |  |
| CNOT2       | ENSG00000111596 | -0.5853    | 0.72083 | 0.60895     | 0.27128     | -0.47266  | 0.68177 |  |
|             | -0.49741        | 0.69055    | 0.27128 | 0.668258449 |             |           |         |  |
| CFAP45      | ENSG00000213085 | 0.60883    | 0.27132 | -1.4392     | 0.92495     | -0.49562  |         |  |
|             | 0.68992         | -0.32251   | 0.62647 | 0.27132     | 0.668258449 |           |         |  |
| LRRRC52-AS1 | ENSG00000237463 | 0.077739   | 0.46902 | 0.28092     | 0.38939     | -0.19916  |         |  |
|             | 0.57893         | 0.60878    | 0.27133 | 0.27133     | 0.668258449 |           |         |  |
| NA          | ENSG00000242288 | -0.13365   | 0.55316 | 0.36221     | 0.3586      | -0.36018  | 0.64065 |  |
|             | 0.60876         | 0.27134    | 0.27134 | 0.668258449 |             |           |         |  |
| NA          | ENSG00000261275 | -1.4298    | 0.92361 | 0.60877     | 0.27134     | -0.77436  | 0.78064 |  |
|             | -0.77436        | 0.78064    | 0.27134 | 0.668258449 |             |           |         |  |
| DCD         | ENSG00000161634 | 0.16974    | 0.43261 | 0.60874     | 0.27135     | -0.1795   | 0.57123 |  |
|             | -0.079819       | 0.53181    | 0.27135 | 0.668258449 |             |           |         |  |
| KCNT2       | ENSG00000162687 | -1.0285    | 0.84815 | 0.60867     | 0.27137     | 0.57746   | 0.28182 |  |
|             | -0.4739         | 0.68222    | 0.27137 | 0.668258449 |             |           |         |  |
| GCG         | ENSG00000115263 | -0.63914   | 0.73863 | -0.70744    | 0.76035     | 0.60865   | 0.27138 |  |
|             | 0.60865         | 0.27138    | 0.27138 | 0.668258449 |             |           |         |  |
| FYTTD1      | ENSG00000122068 | 0.60866    | 0.27138 | 0.0065067   | 0.4974      | 0.31724   |         |  |
|             | 0.37553         | 0.21755    | 0.41389 | 0.27138     | 0.668258449 |           |         |  |
| NA          | ENSG00000263264 | -0.7571    | 0.7755  | -1.1649     | 0.87796     | -0.70801  | 0.76053 |  |
|             | 0.60864         | 0.27138    | 0.27138 | 0.668258449 |             |           |         |  |
| C13orf42    | ENSG00000226792 | -0.35076   | 0.63712 | -0.35076    | 0.63712     | 0.44254   |         |  |
|             | 0.32905         | 0.6086     | 0.27139 | 0.27139     | 0.668258449 |           |         |  |
| NSMCE4A     | ENSG00000107672 | -0.10447   | 0.5416  | -0.10447    | 0.5416      | 0.60857   |         |  |
|             | 0.27141         | -1.0024    | 0.84193 | 0.27141     | 0.668273928 |           |         |  |
| TLNRD1      | ENSG00000140406 | 0.60848    | 0.27143 | 0.60848     | 0.27143     | 0.60848   |         |  |
|             | 0.27143         | 0.42936    | 0.33383 | 0.27143     | 0.668280261 |           |         |  |
| NA          | ENSG00000230526 | -1.1339    | 0.87157 | -0.76025    | 0.77645     | 0.60845   | 0.27144 |  |
|             | -1.1339         | 0.87157    | 0.27144 | 0.668280261 |             |           |         |  |
| CLN8        | ENSG00000182372 | -0.77634   | 0.78122 | 0.077569    | 0.46909     | -0.33336  | 0.63057 |  |
|             | 0.60831         | 0.27149    | 0.27149 | 0.668335827 |             |           |         |  |
| ANKRD45     | ENSG00000183831 | -0.19708   | 0.57812 | 0.36586     | 0.35723     | 0.60832   |         |  |
|             | 0.27149         | 0.60202    | 0.27358 | 0.27149     | 0.668335827 |           |         |  |
| SCRN1       | ENSG00000136193 | 0.60823    | 0.27152 | -0.90483    | 0.81722     | -0.65776  | 0.74465 |  |
|             | -0.77518        | 0.78088    | 0.27152 | 0.668342153 |             |           |         |  |
| VPS37B      | ENSG00000139722 | 0.60589    | 0.27229 | 0.60824     | 0.27152     | -2.1176   |         |  |
|             | 0.98289         | -0.99777   | 0.8408  | 0.27152     | 0.668342153 |           |         |  |
| PSD2        | ENSG00000146005 | 0.38238    | 0.35109 | -0.5516     | 0.70939     | 0.60815   | 0.27154 |  |
|             | -0.093929       | 0.53742    | 0.27154 | 0.668348477 |             |           |         |  |
| NA          | ENSG00000227312 | 0.22832    | 0.4097  | 0.22832     | 0.4097      | 0.60813   | 0.27155 |  |
|             | 0.068601        | 0.47265    | 0.27155 | 0.668348477 |             |           |         |  |
| TRMO        | ENSG00000136932 | 0.035635   | 0.48579 | 0.55159     | 0.29062     | 0.60808   | 0.27157 |  |
|             | -0.11667        | 0.54644    | 0.27157 | 0.668363944 |             |           |         |  |
| GLIS2-AS1   | ENSG00000262686 | -0.63137   | 0.7361  | 0.60795     | 0.27161     | -0.65691  |         |  |
|             | 0.74438         | -0.65691   | 0.74438 | 0.27161     | 0.668407508 |           |         |  |
| RN7SL688P   | ENSG00000239726 | 0.60792    | 0.27162 | 0.37772     | 0.35282     | -1.4951   |         |  |
|             | 0.93255         | 0.37772    | 0.35282 | 0.27162     | 0.668407508 |           |         |  |
| STAU2       | ENSG00000040341 | 0.60782    | 0.27165 | -0.25566    | 0.60089     | -0.91962  | 0.82111 |  |
|             | 0.36261         | 0.35845    | 0.27165 | 0.668407508 |             |           |         |  |
| NA          | ENSG00000178107 | 0.6078     | 0.27166 | 0.6078      | 0.27166     | 0.6078    | 0.27166 |  |
|             | -0.25186        | 0.59942    | 0.27166 | 0.668407508 |             |           |         |  |
| NA          | ENSG00000232716 | 0.11715    | 0.45337 | -0.22794    | 0.59015     | 0.60777   | 0.27167 |  |
|             | -1.3218         | 0.90688    | 0.27167 | 0.668407508 |             |           |         |  |
| NA          | ENSG00000259861 | -2.3677    | 0.99105 | -0.66944    | 0.74839     | 0.60778   | 0.27167 |  |
|             | -2.3677         | 0.99105    | 0.27167 | 0.668407508 |             |           |         |  |
| NA          | ENSG00000279140 | 0.60768    | 0.2717  | -0.91887    | 0.82092     | -0.040136 | 0.51601 |  |
|             | -0.040136       | 0.51601    | 0.2717  | 0.668447569 |             |           |         |  |
| TRPM2       | ENSG00000142185 | -0.09891   | 0.5394  | 0.48631     | 0.31337     | 0.25134   | 0.40078 |  |

|            |                 |             |         |             |             |          |         |
|------------|-----------------|-------------|---------|-------------|-------------|----------|---------|
|            | 0.60763         | 0.27172     | 0.27172 | 0.66845388  |             |          |         |
| HIRIP3     | ENSG00000149929 | 0.60759     | 0.27173 | 0.60759     | 0.27173     | 0.60759  | 0.60759 |
|            | 0.27173         | 0.60759     | 0.27173 | 0.27173     | 0.66845388  |          |         |
| LINC01405  | ENSG00000185847 | 0.54046     | 0.29444 | 0.56572     | 0.28579     | 0.60753  |         |
|            | 0.27175         | -0.11264    | 0.54484 | 0.27175     | 0.668469334 |          |         |
| RBM12B-AS1 | ENSG00000279331 | -1.9076     | 0.97178 | 0.60744     | 0.27178     | 0.60744  |         |
|            | 0.27178         | 0.60744     | 0.27178 | 0.27178     | 0.668509384 |          |         |
| LINC00642  | ENSG00000233208 | 0.60727     | 0.27184 | 0.60727     | 0.27184     | 0.60727  |         |
|            | 0.27184         | 0.60727     | 0.27184 | 0.27184     | 0.668516301 |          |         |
| NA         | ENSG00000259602 | 0.60724     | 0.27184 | 0.60724     | 0.27184     | 0.60724  | 0.27184 |
|            | -1.063          | 0.85611     | 0.27184 | 0.668516301 |             |          |         |
| ZNF813     | ENSG00000198346 | -0.30849    | 0.62115 | 0.51855     | 0.30204     | 0.51855  |         |
|            | 0.30204         | 0.6072      | 0.27186 | 0.27186     | 0.668516301 |          |         |
| CCDC151    | ENSG00000198003 | 0.60718     | 0.27187 | -0.94113    | 0.82668     | -1.6721  |         |
|            | 0.95275         | -0.94113    | 0.82668 | 0.27187     | 0.668516301 |          |         |
| NA         | ENSG00000250979 | -0.39797    | 0.65467 | -0.59788    | 0.72504     | -1.7314  | 0.95831 |
|            | 0.60716         | 0.27187     | 0.27187 | 0.668516301 |             |          |         |
| IFNWP19    | ENSG00000238271 | 0.60715     | 0.27188 | 0.60715     | 0.27188     | 0.60715  |         |
|            | 0.27188         | 0.60715     | 0.27188 | 0.27188     | 0.668516301 |          |         |
| ASIC2      | ENSG00000108684 | 0.60706     | 0.27191 | 0.3035      | 0.38075     | -0.68194 | 0.75236 |
|            | -0.37789        | 0.64725     | 0.27191 | 0.668516301 |             |          |         |
| TRBV5-1    | ENSG00000211734 | 0.60706     | 0.27191 | -0.13674    | 0.55438     | 0.60706  |         |
|            | 0.27191         | 0.60706     | 0.27191 | 0.27191     | 0.668516301 |          |         |
| NA         | ENSG00000256465 | 0.60705     | 0.27191 | 0.60705     | 0.27191     | 0.60705  | 0.27191 |
|            | 0.60705         | 0.27191     | 0.27191 | 0.668516301 |             |          |         |
| TRDN       | ENSG00000186439 | 0.60701     | 0.27192 | 0.13302     | 0.44709     | 0.062147 | 0.47522 |
|            | -0.040002       | 0.51595     | 0.27192 | 0.668516301 |             |          |         |
| NA         | ENSG00000272046 | 0.60689     | 0.27196 | 0.60689     | 0.27196     | 0.60689  | 0.27196 |
|            | 0.60689         | 0.27196     | 0.27196 | 0.668554675 |             |          |         |
| SEC61G-DT  | ENSG00000234707 | 0.60686     | 0.27197 | 0.55841     | 0.28828     | 0.39181  |         |
|            | 0.3476          | 0.3749      | 0.35387 | 0.27197     | 0.668554675 |          |         |
| FOX2       | ENSG00000176692 | 0.60676     | 0.272   | 0.14778     | 0.44126     | -1.6758  | 0.95311 |
|            | -0.96944        | 0.83384     | 0.272   | 0.668554675 |             |          |         |
| NA         | ENSG00000279583 | 0.60678     | 0.272   | 0.60678     | 0.272       | 0.60678  | 0.272   |
|            | 0.272           | 0.668554675 |         |             |             |          |         |
| RNU6-1266P | ENSG00000199664 | 0.60654     | 0.27208 | 0.60654     | 0.27208     | 0.60654  |         |
|            | 0.27208         | -0.57277    | 0.7166  | 0.27208     | 0.668554675 |          |         |
| NA         | ENSG00000248639 | -0.4583     | 0.67663 | -0.28389    | 0.61175     | 0.60652  | 0.27208 |
|            | -0.28389        | 0.61175     | 0.27208 | 0.668554675 |             |          |         |
| NA         | ENSG00000235774 | -0.90335    | 0.81683 | 0.6065      | 0.27209     | -1.4321  | 0.92394 |
|            | -0.9028         | 0.81668     | 0.27209 | 0.668554675 |             |          |         |
| NA         | ENSG00000224027 | -1.3099     | 0.90488 | 0.40136     | 0.34408     | 0.25192  | 0.40055 |
|            | 0.60649         | 0.2721      | 0.2721  | 0.668554675 |             |          |         |
| NA         | ENSG00000270048 | 0.60641     | 0.27212 | 0.60641     | 0.27212     | 0.60641  | 0.27212 |
|            | -0.072456       | 0.52888     | 0.27212 | 0.668554675 |             |          |         |
| PRAG1      | ENSG00000275342 | 0.26336     | 0.39613 | -0.76323    | 0.77734     | 0.60643  | 0.27212 |
|            | -1.2362         | 0.89182     | 0.27212 | 0.668554675 |             |          |         |
| SLC9A3P3   | ENSG00000226631 | 0.6064      | 0.27213 | 0.6064      | 0.27213     | 0.6064   |         |
|            | 0.27213         | 0.6064      | 0.27213 | 0.27213     | 0.668554675 |          |         |
| SHC1P2     | ENSG00000267691 | 0.60637     | 0.27213 | 0.60637     | 0.27213     | 0.60637  |         |
|            | 0.27213         | 0.60637     | 0.27213 | 0.27213     | 0.668554675 |          |         |
| NA         | ENSG00000283355 | 0.60634     | 0.27214 | 0.60634     | 0.27214     | 0.60634  | 0.27214 |
|            | 0.60634         | 0.27214     | 0.27214 | 0.668554675 |             |          |         |
| PKP4       | ENSG00000144283 | 0.39371     | 0.3469  | 0.60633     | 0.27215     | 0.60633  | 0.27215 |
|            | -0.03599        | 0.51435     | 0.27215 | 0.668554675 |             |          |         |
| NA         | ENSG00000271483 | 0.60628     | 0.27216 | -0.72004    | 0.76425     | -0.5244  | 0.7     |
|            | -0.72004        | 0.76425     | 0.27216 | 0.668554675 |             |          |         |
| NA         | ENSG00000255142 | 0.60623     | 0.27218 | 0.60623     | 0.27218     | 0.60623  | 0.27218 |
|            | 0.60623         | 0.27218     | 0.27218 | 0.668554675 |             |          |         |
| NA         | ENSG00000231865 | 0.45402     | 0.32491 | 0.18557     | 0.42639     | -0.84071 | 0.79975 |
|            | 0.60621         | 0.27219     | 0.27219 | 0.668554675 |             |          |         |
| CHAC2      | ENSG00000143942 | -0.53536    | 0.7038  | -0.53536    | 0.7038      | -0.53536 | 0.7038  |



|            |                 |           |         |             |             |          |         |  |
|------------|-----------------|-----------|---------|-------------|-------------|----------|---------|--|
|            | 0.60616         | 0.2722    | 0.2722  | 0.668554675 |             |          |         |  |
| TUBGCP5    | ENSG00000275835 | -0.71877  | 0.76386 | 0.60618     | 0.2722      | -0.4088  |         |  |
|            | 0.65866         | -1.1918   | 0.88333 | 0.2722      | 0.668554675 |          |         |  |
| SPATC1     | ENSG00000186583 | -0.38383  | 0.64945 | 0.60614     | 0.27221     | -0.71692 |         |  |
|            | 0.76329         | -0.06831  | 0.52723 | 0.27221     | 0.668554675 |          |         |  |
| NA         | ENSG00000259539 | 0.60605   | 0.27224 | 0.60605     | 0.27224     | 0.60605  | 0.27224 |  |
|            | 0.60605         | 0.27224   | 0.27224 | 0.668594658 |             |          |         |  |
| EMX2OS     | ENSG00000229847 | 0.28771   | 0.38678 | 0.60597     | 0.27227     | 0.14987  |         |  |
|            | 0.44043         | -0.38499  | 0.64988 | 0.27227     | 0.668616362 |          |         |  |
| NFYAP1     | ENSG00000237849 | 0.53568   | 0.29609 | 0.60589     | 0.27229     | 0.60589  |         |  |
|            | 0.27229         | 0.60589   | 0.27229 | 0.27229     | 0.668616362 |          |         |  |
| NA         | ENSG00000249417 | 0.6059    | 0.27229 | -0.16422    | 0.56522     | 0.6059   | 0.27229 |  |
|            | -0.42551        | 0.66477   | 0.27229 | 0.668616362 |             |          |         |  |
| CDK2AP2    | ENSG00000167797 | 0.60561   | 0.27239 | 0.60561     | 0.27239     | 0.60561  |         |  |
|            | 0.27239         | 0.60561   | 0.27239 | 0.27239     | 0.668782995 |          |         |  |
| KRT6C      | ENSG00000170465 | 0.6055    | 0.27242 | -0.10463    | 0.54167     | 0.6055   | 0.27242 |  |
|            | 0.46033         | 0.32264   | 0.27242 | 0.668782995 |             |          |         |  |
| NA         | ENSG00000225632 | -0.046513 | 0.51855 | 0.24592     | 0.40287     | 0.60551  | 0.27242 |  |
|            | -0.55242        | 0.70967   | 0.27242 | 0.668782995 |             |          |         |  |
| NA         | ENSG00000249099 | 0.60549   | 0.27243 | 0.42194     | 0.33653     | 0.60549  | 0.27243 |  |
|            | -0.20866        | 0.58264   | 0.27243 | 0.668782995 |             |          |         |  |
| MIR2467    | ENSG00000264292 | 0.60547   | 0.27243 | 0.57337     | 0.2832      | 0.57337  |         |  |
|            | 0.2832          | 0.57337   | 0.2832  | 0.27243     | 0.668782995 |          |         |  |
| MYT1       | ENSG00000196132 | 0.10042   | 0.46    | 0.60539     | 0.27246     | 0.40206  | 0.34382 |  |
|            | 0.36243         | 0.35851   | 0.27246 | 0.668782995 |             |          |         |  |
| RNU6-1251P | ENSG00000201372 | 0.6054    | 0.27246 | 0.6054      | 0.27246     | 0.6054   |         |  |
|            | 0.27246         | 0.6054    | 0.27246 | 0.27246     | 0.668782995 |          |         |  |
| NA         | ENSG00000264486 | 0.60535   | 0.27247 | 0.60535     | 0.27247     | 0.60535  | 0.27247 |  |
|            | 0.60535         | 0.27247   | 0.27247 | 0.668782995 |             |          |         |  |
| SETP20     | ENSG00000225094 | 0.6053    | 0.27249 | -0.7476     | 0.77265     | -0.31905 |         |  |
|            | 0.62515         | -0.88053  | 0.81071 | 0.27249     | 0.668782995 |          |         |  |
| BRD7       | ENSG00000166164 | 0.60517   | 0.27253 | -0.91315    | 0.81942     | 0.45248  | 0.32546 |  |
|            | 0.37728         | 0.35298   | 0.27253 | 0.668782995 |             |          |         |  |
| RNU6-132P  | ENSG00000206590 | 0.60519   | 0.27253 | 0.60519     | 0.27253     | 0.60519  |         |  |
|            | 0.27253         | 0.60519   | 0.27253 | 0.27253     | 0.668782995 |          |         |  |
| NA         | ENSG00000257426 | 0.60514   | 0.27254 | 0.60514     | 0.27254     | 0.60514  | 0.27254 |  |
|            | 0.60514         | 0.27254   | 0.27254 | 0.668782995 |             |          |         |  |
| SLC13A4    | ENSG00000164707 | 0.60512   | 0.27255 | -0.42242    | 0.66364     | -0.71114 |         |  |
|            | 0.7615          | -0.45453  | 0.67528 | 0.27255     | 0.668782995 |          |         |  |
| NA         | ENSG00000221523 | 0.4945    | 0.31048 | -0.079498   | 0.53168     | 0.60511  | 0.27255 |  |
|            | -0.21139        | 0.58371   | 0.27255 | 0.668782995 |             |          |         |  |
| TRIM49D2   | ENSG00000233802 | -0.43001  | 0.66641 | -0.43001    | 0.66641     | 0.60493  |         |  |
|            | 0.27261         | -0.43001  | 0.66641 | 0.27261     | 0.668786377 |          |         |  |
| NA         | ENSG00000236317 | 0.60493   | 0.27261 | 0.60493     | 0.27261     | 0.60493  | 0.27261 |  |
|            | 0.60493         | 0.27261   | 0.27261 | 0.668786377 |             |          |         |  |
| PON3       | ENSG00000105852 | -0.79563  | 0.78688 | -1.9779     | 0.97603     | -0.26525 | 0.60459 |  |
|            | 0.60492         | 0.27262   | 0.27262 | 0.668786377 |             |          |         |  |
| ERVK13-1   | ENSG00000260565 | 0.60492   | 0.27262 | -0.057539   | 0.52294     | -0.42258 |         |  |
|            | 0.6637          | -0.37752  | 0.64711 | 0.27262     | 0.668786377 |          |         |  |
| NA         | ENSG00000270440 | -0.46132  | 0.67772 | -0.90211    | 0.8165      | 0.60489  | 0.27262 |  |
|            | 0.60489         | 0.27262   | 0.27262 | 0.668786377 |             |          |         |  |
| FOXP4      | ENSG00000137166 | -0.89243  | 0.81392 | 0.60465     | 0.2727      | -0.94781 | 0.82839 |  |
|            | -0.53212        | 0.70268   | 0.2727  | 0.668894107 |             |          |         |  |
| LRRC40     | ENSG00000066557 | 0.60462   | 0.27272 | -1.2546     | 0.89518     | -1.2546  |         |  |
|            | 0.89518         | -1.2546   | 0.89518 | 0.27272     | 0.668894107 |          |         |  |
| AGFG1      | ENSG00000173744 | 0.10034   | 0.46004 | 0.60457     | 0.27273     | 0.4421   | 0.32921 |  |
|            | 0.030792        | 0.48772   | 0.27273 | 0.668894107 |             |          |         |  |
| GLRXP1     | ENSG00000228234 | -1.3973   | 0.91884 | -0.58414    | 0.72044     | -0.56962 |         |  |
|            | 0.71553         | 0.60456   | 0.27274 | 0.27274     | 0.668894107 |          |         |  |
| OR5G1P     | ENSG00000181296 | -0.80346  | 0.78914 | -0.85708    | 0.8043      | 0.60451  |         |  |
|            | 0.27275         | -0.76184  | 0.77692 | 0.27275     | 0.668894107 |          |         |  |
| TPRG1      | ENSG00000188001 | 0.34688   | 0.36434 | 0.60451     | 0.27275     | -1.2316  | 0.89095 |  |

|            |                 |           |         |             |             |           |         |  |
|------------|-----------------|-----------|---------|-------------|-------------|-----------|---------|--|
|            | 0.57565         | 0.28243   | 0.27275 | 0.668894107 |             |           |         |  |
| INTS6      | ENSG00000102786 | 0.6045    | 0.27276 | 0.34246     | 0.366       | 0.21006   | 0.41681 |  |
|            | -0.17806        | 0.57066   | 0.27276 | 0.668894107 |             |           |         |  |
| CSTF1      | ENSG00000101138 | 0.051485  | 0.47947 | 0.051485    | 0.47947     | 0.051485  | 0.47947 |  |
|            | 0.60436         | 0.2728    | 0.2728  | 0.668958535 |             |           |         |  |
| RPL37P18   | ENSG00000229235 | 0.55306   | 0.29011 | 0.55229     | 0.29037     | 0.60422   |         |  |
|            | 0.27285         | 0.22117   | 0.41248 | 0.27285     | 0.668998853 |           |         |  |
| PRAMEF1    | ENSG00000116721 | 0.6041    | 0.27289 | -1.5928     | 0.94439     | -2.3326   |         |  |
|            | 0.99017         | -0.92572  | 0.8227  | 0.27289     | 0.668998853 |           |         |  |
| ZNF177     | ENSG00000188629 | 0.60409   | 0.27289 | 0.59725     | 0.27517     | 0.59725   |         |  |
|            | 0.27517         | 0.13678   | 0.4456  | 0.27289     | 0.668998853 |           |         |  |
| NA         | ENSG00000271766 | 0.60407   | 0.2729  | -0.60733    | 0.72818     | 0.60407   | 0.2729  |  |
|            | 0.60407         | 0.2729    | 0.2729  | 0.668998853 |             |           |         |  |
| NA         | ENSG00000279929 | 0.60405   | 0.2729  | -1.7643     | 0.96116     | -0.96011  | 0.8315  |  |
|            | -0.15373        | 0.56109   | 0.2729  | 0.668998853 |             |           |         |  |
| NA         | ENSG00000272788 | -0.31456  | 0.62345 | 0.26279     | 0.39636     | 0.60404   | 0.27291 |  |
|            | 0.60404         | 0.27291   | 0.27291 | 0.668998853 |             |           |         |  |
| NA         | ENSG00000250728 | -0.1813   | 0.57193 | -0.34284    | 0.63414     | -0.30935  | 0.62147 |  |
|            | 0.604           | 0.27292   | 0.27292 | 0.668998853 |             |           |         |  |
| RNU6-979P  | ENSG00000206623 | 0.60398   | 0.27293 | 0.60398     | 0.27293     | 0.60398   |         |  |
|            | 0.27293         | 0.60398   | 0.27293 | 0.27293     | 0.668998853 |           |         |  |
| PCARE      | ENSG00000179270 | 0.60395   | 0.27294 | 0.35117     | 0.36273     | 0.60395   | 0.27294 |  |
|            | 0.4799          | 0.31565   | 0.27294 | 0.668998853 |             |           |         |  |
| RNU6-1038P | ENSG00000252325 | -0.6549   | 0.74374 | 0.47969     | 0.31572     | 0.30203   |         |  |
|            | 0.38132         | 0.60388   | 0.27296 | 0.27296     | 0.669014224 |           |         |  |
| WFDC5      | ENSG00000175121 | 0.60371   | 0.27302 | 0.60371     | 0.27302     | 0.60371   | 0.27302 |  |
|            | 0.60371         | 0.27302   | 0.27302 | 0.669109339 |             |           |         |  |
| NA         | ENSG00000270060 | 0.60365   | 0.27304 | 0.14192     | 0.44357     | 0.60365   | 0.27304 |  |
|            | 0.60365         | 0.27304   | 0.27304 | 0.669109339 |             |           |         |  |
| NA         | ENSG00000275488 | 0.60365   | 0.27304 | -0.37363    | 0.64566     | -0.37363  | 0.64566 |  |
|            | 0.60365         | 0.27304   | 0.27304 | 0.669109339 |             |           |         |  |
| ZNF611     | ENSG00000213020 | -0.17153  | 0.5681  | 0.60339     | 0.27312     | -0.20859  |         |  |
|            | 0.58261         | 0.23246   | 0.40809 | 0.27312     | 0.669198552 |           |         |  |
| RPL5P10    | ENSG00000234067 | -0.40515  | 0.65731 | 0.60338     | 0.27313     | -1.0462   |         |  |
|            | 0.85227         | -0.57888  | 0.71867 | 0.27313     | 0.669198552 |           |         |  |
| NA         | ENSG00000279042 | 0.60337   | 0.27313 | 0.60337     | 0.27313     | 0.60337   | 0.27313 |  |
|            | 0.60337         | 0.27313   | 0.27313 | 0.669198552 |             |           |         |  |
| C15orf39   | ENSG00000167173 | -0.024872 | 0.50992 | 0.35881     | 0.35987     | 0.35907   |         |  |
|            | 0.35977         | 0.60333   | 0.27315 | 0.27315     | 0.669198552 |           |         |  |
| NA         | ENSG00000278978 | 0.6033    | 0.27315 | 0.4376      | 0.33084     | 0.6033    | 0.27315 |  |
|            | 0.6033          | 0.27315   | 0.27315 | 0.669198552 |             |           |         |  |
| SPATA6     | ENSG00000132122 | 0.60323   | 0.27318 | -0.31677    | 0.62429     | -0.31677  |         |  |
|            | 0.62429         | -0.31677  | 0.62429 | 0.27318     | 0.669198552 |           |         |  |
| MIR107     | ENSG00000198997 | 0.60324   | 0.27318 | 0.60324     | 0.27318     | 0.60324   |         |  |
|            | 0.27318         | 0.60324   | 0.27318 | 0.27318     | 0.669198552 |           |         |  |
| RPL21P66   | ENSG00000225343 | 0.28507   | 0.38779 | 0.60319     | 0.27319     | -0.89954  |         |  |
|            | 0.81582         | -0.84104  | 0.79984 | 0.27319     | 0.669198552 |           |         |  |
| PBOV1      | ENSG00000254440 | 0.60315   | 0.2732  | 0.56061     | 0.28753     | 0.56061   | 0.28753 |  |
|            | 0.56061         | 0.28753   | 0.2732  | 0.669198552 |             |           |         |  |
| LINC00477  | ENSG00000197503 | -0.20931  | 0.5829  | -0.10851    | 0.54321     | 0.6031    |         |  |
|            | 0.27322         | 0.22223   | 0.41207 | 0.27322     | 0.669213903 |           |         |  |
| NA         | ENSG00000253903 | 0.32599   | 0.37222 | -0.096269   | 0.53835     | -0.029999 | 0.51197 |  |
|            | 0.60293         | 0.27328   | 0.27328 | 0.669327222 |             |           |         |  |
| MYL12BP2   | ENSG00000227765 | 0.53138   | 0.29758 | 0.60281     | 0.27332     | 0.23455   |         |  |
|            | 0.40728         | 0.10957   | 0.45637 | 0.27332     | 0.669391546 |           |         |  |
| BCR        | ENSG00000186716 | -0.71189  | 0.76173 | 0.36362     | 0.35807     | 0.60272   | 0.27335 |  |
|            | 0.46411         | 0.32128   | 0.27335 | 0.669397734 |             |           |         |  |
| NA         | ENSG00000258757 | 0.6027    | 0.27335 | 0.6027      | 0.27335     | 0.6027    | 0.27335 |  |
|            | 0.6027          | 0.27335   | 0.27335 | 0.669397734 |             |           |         |  |
| RPS6KA2    | ENSG00000071242 | 0.60258   | 0.27339 | -0.57983    | 0.71899     | 0.391     | 0.3479  |  |
|            | -0.66995        | 0.74855   | 0.27339 | 0.669462045 |             |           |         |  |
| SMAD9-IT1  | ENSG00000236711 | 0.60245   | 0.27344 | 0.60245     | 0.27344     | 0.60245   |         |  |

|            |                 |          |         |             |             |           |         |  |
|------------|-----------------|----------|---------|-------------|-------------|-----------|---------|--|
|            | 0.27344         | 0.60245  | 0.27344 | 0.27344     | 0.669508039 |           |         |  |
| TSSK4      | ENSG00000139908 | 0.60242  | 0.27345 | 0.60242     | 0.27345     | -0.47705  | 0.68334 |  |
|            | 0.60242         | 0.27345  | 0.27345 | 0.669508039 |             |           |         |  |
| RN7SL546P  | ENSG00000239224 | -0.81171 | 0.79152 | 0.33598     | 0.36844     | -0.81171  |         |  |
|            | 0.79152         | 0.6024   | 0.27345 | 0.27345     | 0.669508039 |           |         |  |
| JUP        | ENSG00000173801 | 0.60235  | 0.27347 | -0.76927    | 0.77913     | 0.15943   | 0.43666 |  |
|            | 0.37752         | 0.3529   | 0.27347 | 0.669514213 |             |           |         |  |
| LY86       | ENSG00000112799 | 0.60233  | 0.27348 | -1.8127     | 0.96506     | -0.86084  | 0.80534 |  |
|            | -0.87409        | 0.80897  | 0.27348 | 0.669514213 |             |           |         |  |
| ACTR3BP4   | ENSG00000249283 | 0.36376  | 0.35802 | -0.029198   | 0.51165     | 0.60223   |         |  |
|            | 0.27351         | -0.52492 | 0.70018 | 0.27351     | 0.669544864 |           |         |  |
| STARP1     | ENSG00000214266 | 0.60219  | 0.27352 | 0.60219     | 0.27352     | 0.60219   |         |  |
|            | 0.27352         | 0.60219  | 0.27352 | 0.27352     | 0.669544864 |           |         |  |
| NA         | ENSG00000256237 | -0.58063 | 0.71926 | 0.084105    | 0.46649     | 0.60202   | 0.27358 |  |
|            | 0.60202         | 0.27358  | 0.27358 | 0.669596992 |             |           |         |  |
| TMEM241    | ENSG00000134490 | -0.14199 | 0.55646 | 0.58437     | 0.27948     | 0.56304   |         |  |
|            | 0.2867          | 0.602    | 0.27359 | 0.27359     | 0.669596992 |           |         |  |
| SNRPF1     | ENSG00000231878 | 0.13659  | 0.44568 | 0.60197     | 0.2736      | 0.13659   |         |  |
|            | 0.44568         | 0.48506  | 0.31382 | 0.2736      | 0.669596992 |           |         |  |
| TCF15      | ENSG00000125878 | 0.19904  | 0.42112 | -0.21972    | 0.58696     | 0.60193   | 0.27361 |  |
|            | -1.1096         | 0.86642  | 0.27361 | 0.669596992 |             |           |         |  |
| ANKRD30BP1 | ENSG00000175302 | 0.31372  | 0.37687 | 0.19175     | 0.42397     | 0.60193   |         |  |
|            | 0.27361         | 0.19092  | 0.42429 | 0.27361     | 0.669596992 |           |         |  |
| MED11      | ENSG00000161920 | 0.13995  | 0.44435 | 0.30278     | 0.38103     | 0.30278   | 0.38103 |  |
|            | 0.60188         | 0.27363  | 0.27363 | 0.669612309 |             |           |         |  |
| TMEM209    | ENSG00000146842 | 0.60182  | 0.27365 | -1.4907     | 0.93198     | -1.4907   |         |  |
|            | 0.93198         | -1.7239  | 0.95763 | 0.27365     | 0.669627624 |           |         |  |
| NA         | ENSG00000235725 | 0.41876  | 0.3377  | -0.34469    | 0.63484     | -0.58796  | 0.72172 |  |
|            | 0.60165         | 0.2737   | 0.2737  | 0.669682717 |             |           |         |  |
| RPSAP36    | ENSG00000243175 | -0.18999 | 0.57534 | 0.60167     | 0.2737      | 0.60167   |         |  |
|            | 0.2737          | 0.60167  | 0.2737  | 0.2737      | 0.669682717 |           |         |  |
| CYP3A52P   | ENSG00000260524 | 0.60159  | 0.27372 | 0.60159     | 0.27372     | 0.60159   |         |  |
|            | 0.27372         | 0.60159  | 0.27372 | 0.27372     | 0.669698027 |           |         |  |
| NPL        | ENSG00000135838 | 0.60155  | 0.27374 | 0.31644     | 0.37584     | -0.064441 | 0.52569 |  |
|            | -0.21685        | 0.58584  | 0.27374 | 0.669704177 |             |           |         |  |
| NA         | ENSG00000227292 | -0.58466 | 0.72061 | -1.2091     | 0.88669     | 0.44802   | 0.32707 |  |
|            | 0.6015          | 0.27375  | 0.27375 | 0.669704177 |             |           |         |  |
| NA         | ENSG00000251250 | 0.60142  | 0.27378 | 0.60142     | 0.27378     | 0.60142   | 0.27378 |  |
|            | 0.60142         | 0.27378  | 0.27378 | 0.669734909 |             |           |         |  |
| HMG1P13    | ENSG00000249619 | -1.4356  | 0.92445 | -1.0135     | 0.8446      | -1.4114   |         |  |
|            | 0.92094         | 0.60136  | 0.2738  | 0.2738      | 0.669734909 |           |         |  |
| NA         | ENSG00000269102 | 0.60134  | 0.27381 | 0.60134     | 0.27381     | 0.60134   | 0.27381 |  |
|            | 0.60134         | 0.27381  | 0.27381 | 0.669734909 |             |           |         |  |
| NA         | ENSG00000272823 | 0.069798 | 0.47218 | 0.6013      | 0.27382     | 0.069798  | 0.47218 |  |
|            | 0.069798        | 0.47218  | 0.27382 | 0.669734909 |             |           |         |  |
| GSTO1      | ENSG00000148834 | 0.60123  | 0.27384 | 0.60123     | 0.27384     | 0.60123   | 0.27384 |  |
|            | 0.60123         | 0.27384  | 0.27384 | 0.669734909 |             |           |         |  |
| XIRP2      | ENSG00000163092 | 0.6012   | 0.27385 | -0.33462    | 0.63104     | 0.10018   | 0.4601  |  |
|            | -0.95105        | 0.82921  | 0.27385 | 0.669734909 |             |           |         |  |
| IHH        | ENSG00000163501 | -0.17446 | 0.56925 | -0.24189    | 0.59557     | 0.60117   | 0.27386 |  |
|            | -0.23051        | 0.59115  | 0.27386 | 0.669734909 |             |           |         |  |
| ZNF518A    | ENSG00000177853 | 0.60108  | 0.27389 | 0.60108     | 0.27389     | 0.37067   |         |  |
|            | 0.35544         | 0.35762  | 0.36031 | 0.27389     | 0.669734909 |           |         |  |
| LRIT3      | ENSG00000183423 | 0.51084  | 0.30473 | 0.60105     | 0.2739      | -0.35961  | 0.64043 |  |
|            | 0.60105         | 0.2739   | 0.2739  | 0.669734909 |             |           |         |  |
| NA         | ENSG00000268683 | 0.60105  | 0.2739  | 0.60105     | 0.2739      | 0.60105   | 0.2739  |  |
|            | 0.60105         | 0.2739   | 0.2739  | 0.669734909 |             |           |         |  |
| TARS2      | ENSG00000143374 | 0.6009   | 0.27395 | 0.22784     | 0.40988     | 0.23055   | 0.40883 |  |
|            | 0.27734         | 0.39076  | 0.27395 | 0.669756572 |             |           |         |  |
| NA         | ENSG00000253122 | -0.61279 | 0.72999 | 0.60091     | 0.27395     | 0.60091   | 0.27395 |  |
|            | -0.51208        | 0.6957   | 0.27395 | 0.669756572 |             |           |         |  |
| DUSP5      | ENSG00000138166 | 0.078793 | 0.4686  | -0.073543   | 0.52931     | 0.46534   | 0.32084 |  |

|             |                 |             |         |             |             |           |         |  |
|-------------|-----------------|-------------|---------|-------------|-------------|-----------|---------|--|
|             | 0.60089         | 0.27396     | 0.27396 | 0.669756572 |             |           |         |  |
| NA          | ENSG00000229203 | -0.20544    | 0.58139 | -0.20544    | 0.58139     | 0.60079   | 0.27399 |  |
|             | -0.55536        | 0.71067     | 0.27399 | 0.669756572 |             |           |         |  |
| NA          | ENSG00000266179 | 0.60074     | 0.27401 | 0.60074     | 0.27401     | 0.60074   | 0.27401 |  |
|             | 0.60074         | 0.27401     | 0.27401 | 0.669756572 |             |           |         |  |
| PTTG2       | ENSG00000250254 | 0.1803      | 0.42846 | 0.1803      | 0.42846     | -0.26302  | 0.60373 |  |
|             | 0.60063         | 0.27404     | 0.27404 | 0.669756572 |             |           |         |  |
| CASC1       | ENSG00000118307 | 0.60051     | 0.27408 | -0.79076    | 0.78546     | -1.2585   | 0.8959  |  |
|             | -0.56656        | 0.71449     | 0.27408 | 0.669756572 |             |           |         |  |
| NA          | ENSG00000261748 | -1.2669     | 0.8974  | 0.60045     | 0.2741      | -1.5027   | 0.93354 |  |
|             | -0.77178        | 0.77988     | 0.2741  | 0.669756572 |             |           |         |  |
| NA          | ENSG00000265654 | -2.0427     | 0.97946 | -2.0663     | 0.9806      | -1.1051   | 0.86544 |  |
|             | 0.60047         | 0.2741      | 0.2741  | 0.669756572 |             |           |         |  |
| NA          | ENSG00000231703 | 0.60043     | 0.27411 | 0.60043     | 0.27411     | -0.040358 | 0.5161  |  |
|             | 0.15885         | 0.43689     | 0.27411 | 0.669756572 |             |           |         |  |
| NA          | ENSG00000249388 | -1.5494     | 0.93935 | -1.5494     | 0.93935     | -1.5494   | 0.93935 |  |
|             | 0.60043         | 0.27411     | 0.27411 | 0.669756572 |             |           |         |  |
| EEF1GP4     | ENSG00000240138 | 0.6004      | 0.27412 | 0.6004      | 0.27412     | 0.6004    |         |  |
|             | 0.27412         | 0.6004      | 0.27412 | 0.27412     | 0.669756572 |           |         |  |
| TRAV3       | ENSG00000211777 | -1.3443     | 0.91058 | 0.60035     | 0.27414     | 0.60035   | 0.27414 |  |
|             | 0.60035         | 0.27414     | 0.27414 | 0.669756572 |             |           |         |  |
| ABHD11      | ENSG00000106077 | -0.18669    | 0.57405 | -0.18669    | 0.57405     | 0.6003    |         |  |
|             | 0.27415         | -0.36658    | 0.64303 | 0.27415     | 0.669756572 |           |         |  |
| SNORD115-14 | ENSG00000199960 | -1.431      | 0.92379 | 0.6003      | 0.27415     | -1.431    |         |  |
|             | 0.92379         | -0.815      | 0.79246 | 0.27415     | 0.669756572 |           |         |  |
| GCAT        | ENSG00000100116 | -0.22253    | 0.58805 | 0.60028     | 0.27416     | 0.52062   | 0.30132 |  |
|             | 0.52062         | 0.30132     | 0.27416 | 0.669756572 |             |           |         |  |
| NA          | ENSG00000259754 | 0.5511      | 0.29078 | -0.011941   | 0.50476     | 0.13455   | 0.44648 |  |
|             | 0.60027         | 0.27416     | 0.27416 | 0.669756572 |             |           |         |  |
| NA          | ENSG00000273186 | 0.60029     | 0.27416 | 0.60029     | 0.27416     | 0.60029   | 0.27416 |  |
|             | 0.60029         | 0.27416     | 0.27416 | 0.669756572 |             |           |         |  |
| NRBF2P3     | ENSG00000237415 | 0.60025     | 0.27417 | -0.45778    | 0.67645     | -0.22616  |         |  |
|             | 0.58946         | -0.22616    | 0.58946 | 0.27417     | 0.669756572 |           |         |  |
| OR5P4P      | ENSG00000227892 | 0.12468     | 0.45039 | 0.60016     | 0.2742      | -0.96884  |         |  |
|             | 0.83369         | -0.40872    | 0.65863 | 0.2742      | 0.669765828 |           |         |  |
| NA          | ENSG00000231699 | 0.18538     | 0.42646 | 0.60007     | 0.27423     | 0.60007   | 0.27423 |  |
|             | 0.60007         | 0.27423     | 0.27423 | 0.669765828 |             |           |         |  |
| BSN-DT      | ENSG00000226913 | 0.58913     | 0.27789 | 0.60003     | 0.27424     | 0.3426    |         |  |
|             | 0.36595         | -2.6322     | 0.99576 | 0.27424     | 0.669765828 |           |         |  |
| NA          | ENSG00000226565 | -0.012393   | 0.50494 | 0.60001     | 0.27425     | 0.60001   | 0.27425 |  |
|             | 0.60001         | 0.27425     | 0.27425 | 0.669765828 |             |           |         |  |
| NA          | ENSG00000227370 | 0.6         | 0.27425 | 0.6         | 0.27425     | 0.6       | 0.27425 |  |
|             | 0.27425         | 0.669765828 |         |             |             |           |         |  |
| RPL38P2     | ENSG00000237077 | -0.15324    | 0.56089 | 0.59997     | 0.27426     | 0.59997   |         |  |
|             | 0.27426         | 0.59997     | 0.27426 | 0.27426     | 0.669765828 |           |         |  |
| HAAO        | ENSG00000162882 | 0.59995     | 0.27427 | 0.59995     | 0.27427     | -0.61277  | 0.72999 |  |
|             | 0.12638         | 0.44972     | 0.27427 | 0.669765828 |             |           |         |  |
| NA          | ENSG00000280318 | -1.8399     | 0.96711 | 0.59989     | 0.27429     | -1.8399   | 0.96711 |  |
|             | -1.8399         | 0.96711     | 0.27429 | 0.669766263 |             |           |         |  |
| PRORP       | ENSG00000100890 | 0.0068504   | 0.49727 | -0.018741   | 0.50748     | 0.59981   | 0.27432 |  |
|             | 0.31365         | 0.37689     | 0.27432 | 0.669766263 |             |           |         |  |
| RN7SL767P   | ENSG00000241529 | -1.2134     | 0.88751 | 0.59972     | 0.27435     | 0.59972   |         |  |
|             | 0.27435         | 0.59972     | 0.27435 | 0.27435     | 0.669766263 |           |         |  |
| NA          | ENSG00000278880 | -1.2156     | 0.88793 | 0.59967     | 0.27436     | 0.59967   | 0.27436 |  |
|             | -0.65613        | 0.74413     | 0.27436 | 0.669766263 |             |           |         |  |
| RNU6-259P   | ENSG00000206726 | -0.70298    | 0.75896 | -0.70298    | 0.75896     | 0.59961   |         |  |
|             | 0.27438         | -1.6667     | 0.95221 | 0.27438     | 0.669766263 |           |         |  |
| TEF         | ENSG00000167074 | 0.59958     | 0.27439 | 0.45768     | 0.32359     | 0.12169   | 0.45157 |  |
|             | 0.45461         | 0.3247      | 0.27439 | 0.669766263 |             |           |         |  |
| NA          | ENSG00000242951 | -0.31022    | 0.6218  | 0.59956     | 0.2744      | -0.31022  | 0.6218  |  |
|             | -0.54208        | 0.70612     | 0.2744  | 0.669766263 |             |           |         |  |
| RNU6-548P   | ENSG00000252892 | 0.5995      | 0.27442 | 0.5995      | 0.27442     | 0.5995    |         |  |

|           |                 |           |         |             |             |            |         |  |
|-----------|-----------------|-----------|---------|-------------|-------------|------------|---------|--|
|           | 0.27442         | 0.5995    | 0.27442 | 0.27442     | 0.669766263 |            |         |  |
| RNA5SP211 | ENSG00000202386 | 0.49003   | 0.31206 | 0.59948     | 0.27443     | -0.34749   |         |  |
|           | 0.63589         | -0.34749  | 0.63589 | 0.27443     | 0.669766263 |            |         |  |
| NA        | ENSG00000249269 | 0.47221   | 0.31839 | -0.0051716  | 0.50206     | 0.59943    | 0.27444 |  |
|           | -1.0373         | 0.8502    | 0.27444 | 0.669766263 |             |            |         |  |
| NA        | ENSG00000278912 | 0.59939   | 0.27446 | 0.59939     | 0.27446     | 0.59939    | 0.27446 |  |
|           | 0.59939         | 0.27446   | 0.27446 | 0.669766263 |             |            |         |  |
| ZNF69     | ENSG00000198429 | 0.59936   | 0.27447 | 0.1578      | 0.43731     | 0.074704   | 0.47023 |  |
|           | -0.20524        | 0.58131   | 0.27447 | 0.669766263 |             |            |         |  |
| AP4B1     | ENSG00000134262 | 0.59922   | 0.27451 | 0.36326     | 0.35821     | 0.59922    | 0.27451 |  |
|           | -0.49686        | 0.69036   | 0.27451 | 0.669766263 |             |            |         |  |
| ADAMTS13  | ENSG00000160323 | 0.30467   | 0.38031 | 0.28781     | 0.38675     | 0.59922    |         |  |
|           | 0.27451         | 0.2354    | 0.40695 | 0.27451     | 0.669766263 |            |         |  |
| RORA-AS1  | ENSG00000245534 | 0.4375    | 0.33088 | 0.59923     | 0.27451     | 0.36377    |         |  |
|           | 0.35802         | -0.85421  | 0.8035  | 0.27451     | 0.669766263 |            |         |  |
| TCTE1     | ENSG00000146221 | -0.067877 | 0.52706 | 0.54947     | 0.29134     | 0.59919    | 0.27452 |  |
|           | 0.47974         | 0.3157    | 0.27452 | 0.669766263 |             |            |         |  |
| PPIAP73   | ENSG00000182000 | 0.59914   | 0.27454 | 0.59914     | 0.27454     | 0.59914    |         |  |
|           | 0.27454         | 0.59914   | 0.27454 | 0.27454     | 0.669766263 |            |         |  |
| CSHL1     | ENSG00000204414 | 0.59914   | 0.27454 | -0.27581    | 0.60865     | 0.28615    | 0.38738 |  |
|           | -0.49924        | 0.69119   | 0.27454 | 0.669766263 |             |            |         |  |
| TMEM183B  | ENSG00000224831 | 0.59914   | 0.27454 | -0.48588    | 0.68648     | 0.59914    |         |  |
|           | 0.27454         | 0.18941   | 0.42489 | 0.27454     | 0.669766263 |            |         |  |
| FAM189A2  | ENSG00000135063 | 0.59905   | 0.27457 | 0.59346     | 0.27644     | -0.067101  |         |  |
|           | 0.52675         | 0.22475   | 0.41109 | 0.27457     | 0.669766263 |            |         |  |
| NA        | ENSG00000242531 | 0.59906   | 0.27457 | 0.59906     | 0.27457     | 0.59906    | 0.27457 |  |
|           | 0.59906         | 0.27457   | 0.27457 | 0.669766263 |             |            |         |  |
| RPS13     | ENSG00000110700 | -0.34125  | 0.63354 | -0.34125    | 0.63354     | -0.34125   | 0.63354 |  |
|           | 0.59893         | 0.27461   | 0.27461 | 0.669766263 |             |            |         |  |
| KRT8P41   | ENSG00000213538 | 0.59892   | 0.27461 | 0.59892     | 0.27461     | 0.59892    |         |  |
|           | 0.27461         | 0.59892   | 0.27461 | 0.27461     | 0.669766263 |            |         |  |
| OR9Q1     | ENSG00000186509 | 0.53249   | 0.29719 | 0.59889     | 0.27462     | -0.40163   | 0.65602 |  |
|           | -0.33072        | 0.62957   | 0.27462 | 0.669766263 |             |            |         |  |
| NA        | ENSG00000257325 | 0.59881   | 0.27465 | 0.47482     | 0.31746     | 0.48777    | 0.31285 |  |
|           | 0.12599         | 0.44987   | 0.27465 | 0.669766263 |             |            |         |  |
| DHODH     | ENSG00000102967 | 0.59878   | 0.27466 | 0.59878     | 0.27466     | 0.59878    | 0.27466 |  |
|           | 0.59878         | 0.27466   | 0.27466 | 0.669766263 |             |            |         |  |
| NA        | ENSG00000283356 | -0.16117  | 0.56402 | -0.29145    | 0.61465     | 0.59877    | 0.27466 |  |
|           | -0.29145        | 0.61465   | 0.27466 | 0.669766263 |             |            |         |  |
| NA        | ENSG00000242119 | 0.59872   | 0.27468 | -0.82074    | 0.7941      | 0.59872    | 0.27468 |  |
|           | -0.37103        | 0.64469   | 0.27468 | 0.669766263 |             |            |         |  |
| LMO7DN    | ENSG00000178734 | 0.31836   | 0.3751  | 0.59869     | 0.27469     | -0.25608   |         |  |
|           | 0.60106         | 0.21332   | 0.41554 | 0.27469     | 0.669766263 |            |         |  |
| PTHLH     | ENSG00000087494 | -0.73468  | 0.76873 | -0.87636    | 0.80958     | -0.49078   | 0.68821 |  |
|           | 0.59865         | 0.2747    | 0.2747  | 0.669766263 |             |            |         |  |
| NA        | ENSG00000201118 | 0.59864   | 0.27471 | 0.59864     | 0.27471     | 0.59864    | 0.27471 |  |
|           | 0.59864         | 0.27471   | 0.27471 | 0.669766263 |             |            |         |  |
| NA        | ENSG00000227189 | 0.21352   | 0.41546 | 0.59863     | 0.27471     | 0.59863    | 0.27471 |  |
|           | 0.59863         | 0.27471   | 0.27471 | 0.669766263 |             |            |         |  |
| MCF2L-AS1 | ENSG00000235280 | 0.59854   | 0.27474 | 0.59854     | 0.27474     | 0.59854    |         |  |
|           | 0.27474         | 0.59854   | 0.27474 | 0.27474     | 0.669805894 |            |         |  |
| NA        | ENSG00000272321 | 0.59847   | 0.27476 | -0.39122    | 0.65218     | -0.61789   | 0.73168 |  |
|           | 0.59847         | 0.27476   | 0.27476 | 0.669821142 |             |            |         |  |
| CCL4      | ENSG00000275302 | 0.59833   | 0.27481 | -0.20033    | 0.57939     | 0.59833    | 0.27481 |  |
|           | -0.33909        | 0.63273   | 0.27481 | 0.669888227 |             |            |         |  |
| NA        | ENSG00000248479 | 0.1738    | 0.43101 | -0.24751    | 0.59774     | 0.59823    | 0.27484 |  |
|           | -0.59432        | 0.72385   | 0.27484 | 0.669888227 |             |            |         |  |
| NA        | ENSG00000249483 | -0.9843   | 0.83752 | 0.59824     | 0.27484     | -0.0064981 | 0.50259 |  |
|           | 0.071168        | 0.47163   | 0.27484 | 0.669888227 |             |            |         |  |
| LYPLA1P3  | ENSG00000218350 | 0.42069   | 0.33699 | 0.5982      | 0.27485     | 0.42069    |         |  |
|           | 0.33699         | 0.42069   | 0.33699 | 0.27485     | 0.669888227 |            |         |  |
| NA        | ENSG00000267312 | 0.146     | 0.44196 | 0.2152      | 0.4148      | 0.59819    | 0.27486 |  |

|             |                 |           |         |             |             |           |         |  |
|-------------|-----------------|-----------|---------|-------------|-------------|-----------|---------|--|
|             | 0.59819         | 0.27486   | 0.27486 | 0.669888227 |             |           |         |  |
| NA          | ENSG00000199331 | 0.59814   | 0.27487 | 0.59814     | 0.27487     | 0.59814   | 0.27487 |  |
|             | 0.59814         | 0.27487   | 0.27487 | 0.669888227 |             |           |         |  |
| NA          | ENSG00000228798 | -0.45795  | 0.67651 | -0.099932   | 0.5398      | -0.39946  | 0.65522 |  |
|             | 0.59807         | 0.2749    | 0.2749  | 0.669912648 |             |           |         |  |
| ERAP2       | ENSG00000164308 | 0.18605   | 0.4262  | 0.59791     | 0.27495     | 0.18605   | 0.4262  |  |
|             | 0.14428         | 0.44264   | 0.27495 | 0.669912648 |             |           |         |  |
| CEP295      | ENSG00000166004 | 0.59783   | 0.27498 | 0.18884     | 0.42511     | 0.54932   |         |  |
|             | 0.29139         | 0.009771  | 0.4961  | 0.27498     | 0.669912648 |           |         |  |
| NA          | ENSG00000272980 | 0.58631   | 0.27883 | 0.59781     | 0.27498     | 0.58631   | 0.27883 |  |
|             | 0.58631         | 0.27883   | 0.27498 | 0.669912648 |             |           |         |  |
| KRT18       | ENSG00000111057 | 0.33965   | 0.36706 | 0.33965     | 0.36706     | 0.33965   | 0.36706 |  |
|             | 0.59778         | 0.27499   | 0.27499 | 0.669912648 |             |           |         |  |
| NKX3-1      | ENSG00000167034 | -0.85193  | 0.80287 | -1.0305     | 0.84861     | 0.59779   |         |  |
|             | 0.27499         | -1.8493   | 0.96779 | 0.27499     | 0.669912648 |           |         |  |
| MIR378C     | ENSG00000264803 | 0.49712   | 0.30955 | 0.5978      | 0.27499     | -0.11192  |         |  |
|             | 0.54456         | -1.6296   | 0.94841 | 0.27499     | 0.669912648 |           |         |  |
| NA          | ENSG00000282904 | 0.59779   | 0.27499 | 0.59779     | 0.27499     | 0.59779   | 0.27499 |  |
|             | 0.59779         | 0.27499   | 0.27499 | 0.669912648 |             |           |         |  |
| LINC01332   | ENSG00000250446 | 0.5977    | 0.27502 | 0.5977      | 0.27502     | 0.5977    |         |  |
|             | 0.27502         | 0.5977    | 0.27502 | 0.27502     | 0.669943109 |           |         |  |
| KRTAP19-11P | ENSG00000236612 | 0.59766   | 0.27503 | 0.59766     | 0.27503     | 0.59766   | 0.27503 |  |
|             | 0.27503         | 0.59766   | 0.27503 | 0.27503     | 0.669943109 |           |         |  |
| NA          | ENSG00000261070 | -0.65858  | 0.74492 | -0.97388    | 0.83494     | 0.59753   | 0.27508 |  |
|             | -1.182          | 0.8814    | 0.27508 | 0.670031411 |             |           |         |  |
| TLCD5       | ENSG00000181264 | 0.46165   | 0.32217 | 0.59739     | 0.27512     | 0.59042   | 0.27746 |  |
|             | 0.50583         | 0.30649   | 0.27512 | 0.670086211 |             |           |         |  |
| NA          | ENSG00000235192 | 0.59738   | 0.27513 | 0.59738     | 0.27513     | 0.59738   | 0.27513 |  |
|             | 0.59738         | 0.27513   | 0.27513 | 0.670086211 |             |           |         |  |
| RN7SKP145   | ENSG00000200161 | 0.59726   | 0.27517 | 0.59726     | 0.27517     | 0.59726   |         |  |
|             | 0.27517         | -1.0726   | 0.85826 | 0.27517     | 0.670089242 |           |         |  |
| SLC2A3P4    | ENSG00000254088 | 0.59722   | 0.27518 | 0.59722     | 0.27518     | 0.59722   |         |  |
|             | 0.27518         | 0.59722   | 0.27518 | 0.27518     | 0.670089242 |           |         |  |
| PTPRE       | ENSG00000132334 | 0.26864   | 0.3941  | -0.4035     | 0.65671     | -0.45091  | 0.67397 |  |
|             | 0.59717         | 0.2752    | 0.2752  | 0.670089242 |             |           |         |  |
| BSG         | ENSG00000172270 | 0.12062   | 0.452   | 0.59717     | 0.2752      | 0.59717   | 0.2752  |  |
|             | 0.59717         | 0.2752    | 0.2752  | 0.670089242 |             |           |         |  |
| RPL27P6     | ENSG00000234488 | 0.59717   | 0.2752  | 0.092601    | 0.46311     | -0.049985 |         |  |
|             | 0.51993         | 0.44974   | 0.32645 | 0.2752      | 0.670089242 |           |         |  |
| NA          | ENSG00000236636 | 0.59701   | 0.27525 | 0.59701     | 0.27525     | 0.59701   | 0.27525 |  |
|             | 0.59701         | 0.27525   | 0.27525 | 0.670098327 |             |           |         |  |
| RNA5SP451   | ENSG00000222520 | 0.59693   | 0.27528 | 0.4119      | 0.34021     | 0.34934   |         |  |
|             | 0.36342         | 0.27985   | 0.38979 | 0.27528     | 0.670098327 |           |         |  |
| RELL1       | ENSG00000181826 | 0.31212   | 0.37747 | 0.59688     | 0.27529     | 0.43034   | 0.33347 |  |
|             | 0.057421        | 0.4771    | 0.27529 | 0.670098327 |             |           |         |  |
| RPL4P4      | ENSG00000229638 | 0.59688   | 0.27529 | 0.59688     | 0.27529     | 0.39063   |         |  |
|             | 0.34804         | 0.59688   | 0.27529 | 0.27529     | 0.670098327 |           |         |  |
| NA          | ENSG00000225460 | 0.25378   | 0.39983 | 0.20972     | 0.41694     | 0.59675   | 0.27534 |  |
|             | 0.25378         | 0.39983   | 0.27534 | 0.670098327 |             |           |         |  |
| NA          | ENSG00000228373 | -0.64877  | 0.74176 | 0.59674     | 0.27534     | -0.78462  | 0.78366 |  |
|             | 0.582           | 0.28028   | 0.27534 | 0.670098327 |             |           |         |  |
| RN7SL797P   | ENSG00000242560 | 0.59675   | 0.27534 | -0.54271    | 0.70633     | -0.54271  |         |  |
|             | 0.70633         | -0.54271  | 0.70633 | 0.27534     | 0.670098327 |           |         |  |
| NA          | ENSG00000261549 | 0.56765   | 0.28513 | 0.59674     | 0.27534     | 0.59674   | 0.27534 |  |
|             | 0.59674         | 0.27534   | 0.27534 | 0.670098327 |             |           |         |  |
| ARFGEF3     | ENSG00000112379 | -0.096101 | 0.53828 | 0.17963     | 0.42872     | -0.078181 |         |  |
|             | 0.53116         | 0.59673   | 0.27535 | 0.27535     | 0.670098327 |           |         |  |
| NA          | ENSG00000231232 | 0.59672   | 0.27535 | 0.59672     | 0.27535     | 0.59672   | 0.27535 |  |
|             | 0.59672         | 0.27535   | 0.27535 | 0.670098327 |             |           |         |  |
| RPL23       | ENSG00000125691 | 0.59665   | 0.27537 | 0.03826     | 0.48474     | -0.11864  | 0.54722 |  |
|             | -0.87268        | 0.80858   | 0.27537 | 0.670098327 |             |           |         |  |
| NA          | ENSG00000261728 | 0.37955   | 0.35214 | 0.59663     | 0.27538     | -0.34816  | 0.63614 |  |

|            |                 |           |          |             |             |             |         |  |
|------------|-----------------|-----------|----------|-------------|-------------|-------------|---------|--|
|            | 0.18938         | 0.4249    | 0.27538  | 0.670098327 |             |             |         |  |
| NA         | ENSG00000251405 | -0.68895  | 0.75457  | 0.59659     | 0.27539     | -0.68895    | 0.75457 |  |
|            |                 | -0.68895  | 0.75457  | 0.27539     | 0.670098327 |             |         |  |
| LINC01162  | ENSG00000232790 | -0.1121   | 0.54463  | 0.59652     | 0.27541     | -0.49701    |         |  |
|            |                 | 0.69041   | -0.49701 | 0.69041     | 0.27541     | 0.670098327 |         |  |
| NA         | ENSG00000265824 | -1.2426   | 0.893    | 0.2379      | 0.40598     | -0.33434    | 0.63094 |  |
|            |                 | 0.59653   | 0.27541  | 0.27541     | 0.670098327 |             |         |  |
| GSTO2      | ENSG00000065621 | 0.59643   | 0.27544  | 0.33932     | 0.36719     | 0.29465     | 0.38413 |  |
|            |                 | 0.29465   | 0.38413  | 0.27544     | 0.67013786  |             |         |  |
| NA         | ENSG00000230546 | 0.59633   | 0.27548  | 0.59633     | 0.27548     | 0.59633     | 0.27548 |  |
|            |                 | 0.59633   | 0.27548  | 0.27548     | 0.67015913  |             |         |  |
| NA         | ENSG00000267220 | -0.055653 | 0.52219  | 0.59631     | 0.27549     | -0.31237    | 0.62262 |  |
|            |                 | -1.4334   | 0.92413  | 0.27549     | 0.67015913  |             |         |  |
| NA         | ENSG00000270509 | 0.076819  | 0.46938  | 0.5963      | 0.27549     | 0.076819    | 0.46938 |  |
|            |                 | 0.076819  | 0.46938  | 0.27549     | 0.67015913  |             |         |  |
| RPS29P3    | ENSG00000225770 | 0.55195   | 0.29049  | 0.59608     | 0.27556     | 0.59608     |         |  |
|            |                 | 0.27556   | 0.5102   | 0.30496     | 0.27556     | 0.670295952 |         |  |
| PTDSS1     | ENSG00000156471 | -0.72     | 0.76424  | -0.34574    | 0.63523     | -1.1993     | 0.8848  |  |
|            |                 | 0.59602   | 0.27558  | 0.27558     | 0.670302006 |             |         |  |
| SALL4P5    | ENSG00000231915 | -0.72289  | 0.76513  | -0.81172    | 0.79152     | -0.5183     |         |  |
|            |                 | 0.69787   | 0.59599  | 0.27559     | 0.27559     | 0.670302006 |         |  |
| NA         | ENSG00000267670 | 0.59587   | 0.27563  | 0.59587     | 0.27563     | 0.59587     | 0.27563 |  |
|            |                 | 0.59587   | 0.27563  | 0.27563     | 0.670304873 |             |         |  |
| CNTN4-AS1  | ENSG00000237990 | 0.59579   | 0.27566  | 0.59579     | 0.27566     | 0.59579     |         |  |
|            |                 | 0.27566   | 0.59579  | 0.27566     | 0.27566     | 0.670304873 |         |  |
| EEF1A1P13  | ENSG00000250182 | 0.59579   | 0.27566  | -0.44064    | 0.67026     | -0.93055    |         |  |
|            |                 | 0.82396   | -1.0346  | 0.84957     | 0.27566     | 0.670304873 |         |  |
| NA         | ENSG00000267382 | -0.10139  | 0.54038  | -0.63373    | 0.73687     | 0.59577     | 0.27566 |  |
|            |                 | -0.95236  | 0.82954  | 0.27566     | 0.670304873 |             |         |  |
| RNU6-1068P | ENSG00000222890 | 0.59574   | 0.27568  | 0.59574     | 0.27568     | 0.59574     |         |  |
|            |                 | 0.27568   | 0.59574  | 0.27568     | 0.27568     | 0.670304873 |         |  |
| NA         | ENSG00000272155 | 0.59571   | 0.27569  | 0.59571     | 0.27569     | 0.59571     | 0.27569 |  |
|            |                 | 0.59571   | 0.27569  | 0.27569     | 0.670304873 |             |         |  |
| CABP7      | ENSG00000100314 | 0.59567   | 0.2757   | 0.59567     | 0.2757      | 0.59567     | 0.2757  |  |
|            |                 | 0.47381   | 0.31782  | 0.2757      | 0.670304873 |             |         |  |
| RNU6-672P  | ENSG00000206638 | 0.59551   | 0.27575  | 0.59551     | 0.27575     | -0.0069356  |         |  |
|            |                 | 0.50277   | 0.59551  | 0.27575     | 0.27575     | 0.670304873 |         |  |
| NA         | ENSG00000260882 | 0.5955    | 0.27575  | 0.5955      | 0.27575     | 0.5955      | 0.27575 |  |
|            |                 | 0.5955    | 0.27575  | 0.27575     | 0.670304873 |             |         |  |
| ANXA2P1    | ENSG00000213406 | 0.5955    | 0.27576  | -0.21866    | 0.58654     | 0.5955      |         |  |
|            |                 | 0.27576   | -0.51157 | 0.69553     | 0.27576     | 0.670304873 |         |  |
| EFNA4      | ENSG00000243364 | 0.59548   | 0.27576  | 0.59548     | 0.27576     | 0.59548     | 0.27576 |  |
|            |                 | -0.60038  | 0.72587  | 0.27576     | 0.670304873 |             |         |  |
| NA         | ENSG00000251246 | 0.59548   | 0.27576  | 0.59548     | 0.27576     | 0.59548     | 0.27576 |  |
|            |                 | 0.59548   | 0.27576  | 0.27576     | 0.670304873 |             |         |  |
| RNU6-1229P | ENSG00000201165 | -0.45358  | 0.67493  | -0.20492    | 0.58118     | -0.41991    |         |  |
|            |                 | 0.66272   | 0.59546  | 0.27577     | 0.27577     | 0.670304873 |         |  |
| SOHLH2     | ENSG00000120669 | 0.59537   | 0.2758   | -0.025357   | 0.51011     | 0.38666     |         |  |
|            |                 | 0.3495    | -0.4509  | 0.67397     | 0.2758      | 0.670325983 |         |  |
| NA         | ENSG00000230843 | 0.5953    | 0.27582  | 0.21538     | 0.41473     | 0.21538     | 0.41473 |  |
|            |                 | 0.21538   | 0.41473  | 0.27582     | 0.670325983 |             |         |  |
| NA         | ENSG00000260895 | -1.7072   | 0.95611  | 0.5953      | 0.27582     | 0.56282     | 0.28678 |  |
|            |                 | -1.1246   | 0.86961  | 0.27582     | 0.670325983 |             |         |  |
| TSNARE1    | ENSG00000171045 | 0.14398   | 0.44276  | 0.59524     | 0.27584     | -1.5327     |         |  |
|            |                 | 0.93732   | -0.70812 | 0.76057     | 0.27584     | 0.670325983 |         |  |
| NA         | ENSG00000219391 | -0.1208   | 0.54807  | 0.16568     | 0.4342      | -0.50359    | 0.69272 |  |
|            |                 | 0.59509   | 0.27589  | 0.27589     | 0.670325983 |             |         |  |
| EPRS1      | ENSG00000136628 | 0.035696  | 0.48576  | 0.59504     | 0.27591     | -0.0042232  | 0.50168 |  |
|            |                 | 0.59504   | 0.27591  | 0.27591     | 0.670325983 |             |         |  |
| RNF212     | ENSG00000178222 | 0.51074   | 0.30477  | 0.59503     | 0.27591     | -0.19848    |         |  |
|            |                 | 0.57867   | -0.73197 | 0.76791     | 0.27591     | 0.670325983 |         |  |
| RPS27P10   | ENSG00000231017 | -0.021663 | 0.50864  | 0.59503     | 0.27591     | -0.021663   |         |  |

|           |                 |           |         |             |             |          |         |
|-----------|-----------------|-----------|---------|-------------|-------------|----------|---------|
|           | 0.50864         | -0.021663 | 0.50864 | 0.27591     | 0.670325983 |          |         |
| OR51E2    | ENSG00000167332 | -0.91036  | 0.81868 | 0.59502     | 0.27592     | 0.59502  |         |
|           | 0.27592         | 0.59502   | 0.27592 | 0.27592     | 0.670325983 |          |         |
| KRT19     | ENSG00000171345 | 0.595     | 0.27592 | -0.53434    | 0.70345     | 0.2842   | 0.38813 |
|           | -1.0715         | 0.85804   | 0.27592 | 0.670325983 |             |          |         |
| GLB1L3    | ENSG00000166105 | -0.36789  | 0.64352 | 0.59496     | 0.27593     | -0.18796 |         |
|           | 0.57455         | 0.023356  | 0.49068 | 0.27593     | 0.670325983 |          |         |
| LYSMD3    | ENSG00000176018 | -1.2069   | 0.88626 | -0.52296    | 0.6995      | -1.2069  |         |
|           | 0.88626         | 0.5949    | 0.27595 | 0.27595     | 0.670341152 |          |         |
| ABCC6P1   | ENSG00000256340 | -0.97065  | 0.83414 | 0.054981    | 0.47808     | -1.7497  |         |
|           | 0.95991         | 0.59485   | 0.27597 | 0.27597     | 0.670347194 |          |         |
| FCHSD1    | ENSG00000197948 | -0.39517  | 0.65364 | 0.45714     | 0.32378     | 0.59484  |         |
|           | 0.27598         | 0.59484   | 0.27598 | 0.27598     | 0.670347194 |          |         |
| FLT1      | ENSG00000102755 | -0.99833  | 0.84094 | -1.4707     | 0.92931     | -1.4534  | 0.92695 |
|           | 0.59476         | 0.276     | 0.276   | 0.670362359 |             |          |         |
| RGS9      | ENSG00000108370 | 0.59469   | 0.27602 | 0.25502     | 0.39935     | 0.29406  | 0.38435 |
|           | 0.090266        | 0.46404   | 0.27602 | 0.670377522 |             |          |         |
| NA        | ENSG00000271721 | 0.59462   | 0.27605 | 0.59462     | 0.27605     | 0.59462  | 0.27605 |
|           | 0.59462         | 0.27605   | 0.27605 | 0.67041697  |             |          |         |
| NBPF13P   | ENSG00000227242 | 0.41326   | 0.33971 | 0.59455     | 0.27607     | -0.78588 |         |
|           | 0.78403         | -0.15396  | 0.56118 | 0.27607     | 0.670432129 |          |         |
| KCNK13    | ENSG00000152315 | 0.5944    | 0.27612 | 0.5944      | 0.27612     | -0.50405 |         |
|           | 0.69289         | -0.27223  | 0.60728 | 0.27612     | 0.670465371 |          |         |
| NA        | ENSG00000273476 | 0.59441   | 0.27612 | 0.59441     | 0.27612     | 0.59441  | 0.27612 |
|           | 0.59441         | 0.27612   | 0.27612 | 0.670465371 |             |          |         |
| NA        | ENSG00000231204 | 0.27928   | 0.39001 | 0.27928     | 0.39001     | -0.26832 | 0.60577 |
|           | 0.59437         | 0.27613   | 0.27613 | 0.670465371 |             |          |         |
| CDH12     | ENSG00000154162 | -0.86693  | 0.80701 | -0.82453    | 0.79518     | 0.59433  | 0.27615 |
|           | -1.1866         | 0.88232   | 0.27615 | 0.670465371 |             |          |         |
| NA        | ENSG00000206901 | 0.59427   | 0.27616 | 0.59427     | 0.27616     | 0.59427  | 0.27616 |
|           | -0.76575        | 0.77809   | 0.27616 | 0.670465371 |             |          |         |
| MTND5P4   | ENSG00000251212 | 0.59427   | 0.27617 | 0.59427     | 0.27617     | 0.59427  |         |
|           | 0.27617         | 0.59427   | 0.27617 | 0.27617     | 0.670465371 |          |         |
| NA        | ENSG00000248926 | 0.59422   | 0.27618 | 0.59422     | 0.27618     | 0.59422  | 0.27618 |
|           | 0.59422         | 0.27618   | 0.27618 | 0.670465371 |             |          |         |
| NA        | ENSG00000257181 | 0.59414   | 0.27621 | 0.59414     | 0.27621     | 0.59414  | 0.27621 |
|           | 0.59414         | 0.27621   | 0.27621 | 0.670480346 |             |          |         |
| NA        | ENSG00000249904 | 0.59404   | 0.27624 | 0.59404     | 0.27624     | 0.59404  | 0.27624 |
|           | 0.59404         | 0.27624   | 0.27624 | 0.670480346 |             |          |         |
| NA        | ENSG00000251704 | 0.59403   | 0.27625 | -0.44595    | 0.67219     | -0.44595 | 0.67219 |
|           | -0.44595        | 0.67219   | 0.27625 | 0.670480346 |             |          |         |
| MIR200CHG | ENSG00000257084 | 0.59391   | 0.27628 | 0.59391     | 0.27628     | 0.59391  |         |
|           | 0.27628         | 0.59391   | 0.27628 | 0.27628     | 0.670480346 |          |         |
| RN7SL47P  | ENSG00000244710 | -1.4355   | 0.92442 | -0.40133    | 0.65591     | 0.59391  |         |
|           | 0.27629         | -0.077841 | 0.53102 | 0.27629     | 0.670480346 |          |         |
| NA        | ENSG00000258926 | 0.59387   | 0.2763  | 0.27456     | 0.39183     | 0.59387  | 0.2763  |
|           | 0.59387         | 0.2763    | 0.2763  | 0.670480346 |             |          |         |
| RPUSD1    | ENSG00000007376 | -0.62996  | 0.73564 | -0.62996    | 0.73564     | 0.59385  |         |
|           | 0.27631         | -0.66172  | 0.74592 | 0.27631     | 0.670480346 |          |         |
| NA        | ENSG00000179447 | 0.59385   | 0.27631 | 0.18058     | 0.42835     | 0.18058  | 0.42835 |
|           | -0.27051        | 0.60662   | 0.27631 | 0.670480346 |             |          |         |
| PHF2P2    | ENSG00000226057 | -1.8207   | 0.96567 | -1.4388     | 0.9249      | -1.5411  |         |
|           | 0.93836         | 0.59384   | 0.27631 | 0.27631     | 0.670480346 |          |         |
| ZNF350    | ENSG00000256683 | 0.59379   | 0.27633 | 0.59379     | 0.27633     | 0.59379  |         |
|           | 0.27633         | 0.59379   | 0.27633 | 0.27633     | 0.670486367 |          |         |
| MT1L      | ENSG00000260549 | 0.59374   | 0.27634 | -0.032337   | 0.5129      | 0.59374  | 0.27634 |
|           | 0.59374         | 0.27634   | 0.27634 | 0.670486367 |             |          |         |
| CLUHP8    | ENSG00000258278 | -0.76386  | 0.77752 | -0.88011    | 0.8106      | -0.39396 |         |
|           | 0.65319         | 0.5937    | 0.27636 | 0.27636     | 0.670501509 |          |         |
| RN7SL621P | ENSG00000240189 | 0.59364   | 0.27638 | 0.59364     | 0.27638     | 0.59364  |         |
|           | 0.27638         | 0.58299   | 0.27995 | 0.27638     | 0.670507527 |          |         |
| MIR3186   | ENSG00000266189 | 0.59359   | 0.27639 | 0.59359     | 0.27639     | 0.59359  |         |



|           |                 |          |         |             |             |          |         |
|-----------|-----------------|----------|---------|-------------|-------------|----------|---------|
|           | 0.27639         | 0.59359  | 0.27639 | 0.27639     | 0.670507527 |          |         |
| NA        | ENSG00000248851 | -0.36558 | 0.64266 | -0.36728    | 0.6433      | 0.59334  | 0.27648 |
|           | 0.17598         | 0.43015  | 0.27648 | 0.670692473 |             |          |         |
| TMEM167B  | ENSG00000215717 | 0.59326  | 0.2765  | 0.59326     | 0.2765      | -0.33404 |         |
|           | 0.63082         | 0.59326  | 0.2765  | 0.670707601 |             |          |         |
| CFAP36    | ENSG00000163001 | -0.53993 | 0.70538 | 0.59317     | 0.27653     | 0.59317  |         |
|           | 0.27653         | 0.59317  | 0.27653 | 0.670737853 |             |          |         |
| NA        | ENSG00000225868 | 0.30984  | 0.37834 | 0.59316     | 0.27654     | 0.30984  | 0.37834 |
|           | -0.16329        | 0.56486  | 0.27654 | 0.670737853 |             |          |         |
| NRIP2     | ENSG00000053702 | 0.59308  | 0.27656 | 0.59308     | 0.27656     | -0.72646 | 0.76622 |
|           | 0.59308         | 0.27656  | 0.27656 | 0.670752976 |             |          |         |
| ELAVL1    | ENSG00000066044 | 0.59287  | 0.27663 | 0.12471     | 0.45038     | -0.24616 |         |
|           | 0.59722         | 0.44098  | 0.32961 | 0.27663     | 0.670813455 |          |         |
| ATG3P1    | ENSG00000224357 | 0.5929   | 0.27663 | -0.09665    | 0.5385      | 0.29549  |         |
|           | 0.38381         | 0.29549  | 0.38381 | 0.27663     | 0.670813455 |          |         |
| MARK2P10  | ENSG00000227284 | -0.73698 | 0.76943 | 0.59286     | 0.27664     | -1.3322  |         |
|           | 0.9086          | -2.1365  | 0.98368 | 0.27664     | 0.670813455 |          |         |
| WWTR1-IT1 | ENSG00000241985 | -0.5627  | 0.71318 | 0.59286     | 0.27664     | -0.5627  |         |
|           | 0.71318         | -0.43845 | 0.66947 | 0.27664     | 0.670813455 |          |         |
| UBL7      | ENSG00000138629 | 0.51638  | 0.30279 | 0.59279     | 0.27666     | 0.2607   | 0.39716 |
|           | 0.55263         | 0.29026  | 0.27666 | 0.670828571 |             |          |         |
| MUSTN1    | ENSG00000272573 | 0.59258  | 0.27673 | 0.59258     | 0.27673     | 0.59258  |         |
|           | 0.27673         | 0.59258  | 0.27673 | 0.27673     | 0.670861297 |          |         |
| LINC01492 | ENSG00000225564 | -0.89227 | 0.81388 | 0.59254     | 0.27674     | -0.35051 |         |
|           | 0.63702         | -1.2579  | 0.89578 | 0.27674     | 0.670861297 |          |         |
| NA        | ENSG00000267729 | 0.59255  | 0.27674 | 0.59255     | 0.27674     | 0.59255  | 0.27674 |
|           | 0.59255         | 0.27674  | 0.27674 | 0.670861297 |             |          |         |
| NA        | ENSG00000226987 | 0.59245  | 0.27677 | 0.59245     | 0.27677     | 0.59245  | 0.27677 |
|           | 0.59245         | 0.27677  | 0.27677 | 0.670861297 |             |          |         |
| NAMPTP2   | ENSG00000249229 | 0.5924   | 0.27679 | 0.5924      | 0.27679     | 0.5924   |         |
|           | 0.27679         | 0.5924   | 0.27679 | 0.27679     | 0.670861297 |          |         |
| NA        | ENSG00000235215 | 0.59234  | 0.27681 | 0.59234     | 0.27681     | 0.59234  | 0.27681 |
|           | 0.59234         | 0.27681  | 0.27681 | 0.670861297 |             |          |         |
| NA        | ENSG00000256458 | 0.59234  | 0.27681 | 0.59234     | 0.27681     | 0.59234  | 0.27681 |
|           | 0.59234         | 0.27681  | 0.27681 | 0.670861297 |             |          |         |
| NCALD     | ENSG00000104490 | -0.26323 | 0.60381 | 0.57548     | 0.28248     | -0.72524 | 0.76585 |
|           | 0.59231         | 0.27682  | 0.27682 | 0.670861297 |             |          |         |
| TXNP2     | ENSG00000225167 | 0.47374  | 0.31784 | 0.39602     | 0.34605     | 0.59228  | 0.27683 |
|           | 0.59228         | 0.27683  | 0.27683 | 0.670861297 |             |          |         |
| TUBA3GP   | ENSG00000249680 | -0.79329 | 0.7862  | 0.16504     | 0.43446     | 0.16504  |         |
|           | 0.43446         | 0.59226  | 0.27684 | 0.27684     | 0.670861297 |          |         |
| NA        | ENSG00000167765 | 0.5922   | 0.27686 | 0.5922      | 0.27686     | 0.5922   | 0.27686 |
|           | 0.5922          | 0.27686  | 0.27686 | 0.670861297 |             |          |         |
| NA        | ENSG00000268225 | 0.59219  | 0.27686 | 0.59219     | 0.27686     | 0.59219  | 0.27686 |
|           | 0.59219         | 0.27686  | 0.27686 | 0.670861297 |             |          |         |
| ADNP-AS1  | ENSG00000259456 | 0.59217  | 0.27687 | 0.4221      | 0.33648     | 0.59217  |         |
|           | 0.27687         | 0.59217  | 0.27687 | 0.27687     | 0.670861297 |          |         |
| ZNF770    | ENSG00000198146 | 0.59213  | 0.27688 | 0.59213     | 0.27688     | 0.59213  |         |
|           | 0.27688         | 0.43333  | 0.33239 | 0.27688     | 0.670861297 |          |         |
| SF3A3P2   | ENSG00000254449 | 0.59214  | 0.27688 | 0.59214     | 0.27688     | 0.59214  |         |
|           | 0.27688         | 0.59214  | 0.27688 | 0.27688     | 0.670861297 |          |         |
| LINC02294 | ENSG00000257845 | 0.18356  | 0.42718 | 0.59206     | 0.2769      | 0.59206  |         |
|           | 0.2769          | 0.59206  | 0.2769  | 0.2769      | 0.670867272 |          |         |
| INHBB     | ENSG00000163083 | -1.969   | 0.97553 | -1.8656     | 0.96895     | -0.46421 | 0.67875 |
|           | 0.59205         | 0.27691  | 0.27691 | 0.670867272 |             |          |         |
| NA        | ENSG00000272053 | -0.93433 | 0.82493 | -0.29058    | 0.61431     | 0.45474  | 0.32465 |
|           | 0.59196         | 0.27694  | 0.27694 | 0.670906597 |             |          |         |
| RCSD1     | ENSG00000198771 | 0.59185  | 0.27698 | 0.59185     | 0.27698     | 0.59185  | 0.27698 |
|           | -0.51569        | 0.69697  | 0.27698 | 0.670970143 |             |          |         |
| LINC01594 | ENSG00000225328 | -0.71257 | 0.76194 | -0.63468    | 0.73718     | 0.28748  |         |
|           | 0.38687         | 0.59173  | 0.27702 | 0.27702     | 0.671033683 |          |         |
| MIR154    | ENSG00000207978 | 0.5916   | 0.27706 | 0.5916      | 0.27706     | 0.5916   |         |

|            |                 |           |         |             |             |           |         |
|------------|-----------------|-----------|---------|-------------|-------------|-----------|---------|
|            | 0.27706         | 0.5916    | 0.27706 | 0.27706     | 0.671051548 |           |         |
| NUGGC      | ENSG00000189233 | 0.53653   | 0.2958  | 0.59157     | 0.27707     | -1.2961   | 0.90254 |
|            | 0.019069        | 0.49239   | 0.27707 | 0.671051548 |             |           |         |
| TOLLIP-AS1 | ENSG00000255153 | 0.59155   | 0.27708 | 0.59155     | 0.27708     | 0.59155   |         |
|            | 0.27708         | 0.59155   | 0.27708 | 0.27708     | 0.671051548 |           |         |
| CCAT2      | ENSG00000280997 | 0.59152   | 0.27709 | 0.59152     | 0.27709     | -0.19659  | 0.57792 |
|            | 0.59152         | 0.27709   | 0.27709 | 0.671051548 |             |           |         |
| DHX57      | ENSG00000163214 | 0.59149   | 0.2771  | 0.59149     | 0.2771      | 0.07669   | 0.46944 |
|            | -0.82289        | 0.79472   | 0.2771  | 0.671051548 |             |           |         |
| NA         | ENSG00000253558 | 0.59145   | 0.27711 | 0.59145     | 0.27711     | 0.59145   | 0.27711 |
|            | 0.59145         | 0.27711   | 0.27711 | 0.671051548 |             |           |         |
| IZUMO2     | ENSG00000161652 | 0.17316   | 0.43126 | 0.50765     | 0.30585     | 0.59125   |         |
|            | 0.27718         | 0.59125   | 0.27718 | 0.27718     | 0.671178569 |           |         |
| NA         | ENSG00000261136 | -0.47176  | 0.68145 | 0.59121     | 0.27719     | -0.47176  | 0.68145 |
|            | -0.47176        | 0.68145   | 0.27719 | 0.671178569 |             |           |         |
| NA         | ENSG00000266046 | 0.59116   | 0.27721 | 0.25279     | 0.40021     | -1.321    | 0.90676 |
|            | 0.033575        | 0.48661   | 0.27721 | 0.671193645 |             |           |         |
| C11orf1    | ENSG00000137720 | 0.59106   | 0.27724 | 0.59106     | 0.27724     | 0.59106   |         |
|            | 0.27724         | 0.35056   | 0.36296 | 0.27724     | 0.671223793 |           |         |
| CALCB      | ENSG00000175868 | 0.59104   | 0.27725 | -0.49791    | 0.69073     | 0.47721   | 0.31661 |
|            | 0.46627         | 0.32051   | 0.27725 | 0.671223793 |             |           |         |
| RAPGEF1    | ENSG00000107263 | -0.096931 | 0.53861 | 0.38656     | 0.34954     | -0.52456  |         |
|            | 0.70006         | 0.59095   | 0.27728 | 0.27728     | 0.671244797 |           |         |
| PLA1A      | ENSG00000144837 | 0.5909    | 0.2773  | -0.6252     | 0.73408     | 0.5909    | 0.2773  |
|            | 0.22708         | 0.41018   | 0.2773  | 0.671244797 |             |           |         |
| PITPNA     | ENSG00000174238 | 0.59087   | 0.2773  | 0.45714     | 0.32378     | 0.59087   |         |
|            | 0.2773          | -0.067374 | 0.52686 | 0.2773      | 0.671244797 |           |         |
| S100B      | ENSG00000160307 | -0.41421  | 0.66064 | 0.59064     | 0.27738     | -0.41421  | 0.66064 |
|            | -0.41421        | 0.66064   | 0.27738 | 0.67131268  |             |           |         |
| BARX2      | ENSG00000043039 | 0.0073155 | 0.49708 | -0.20022    | 0.57935     | -0.75347  | 0.77441 |
|            | 0.59057         | 0.2774    | 0.2774  | 0.67131268  |             |           |         |
| NA         | ENSG00000279452 | -1.756    | 0.96046 | -0.072806   | 0.52902     | 0.59047   | 0.27744 |
|            | 0.045432        | 0.48188   | 0.27744 | 0.67131268  |             |           |         |
| NA         | ENSG00000261810 | 0.54365   | 0.29334 | 0.37317     | 0.35451     | 0.59041   | 0.27746 |
|            | 0.59041         | 0.27746   | 0.27746 | 0.67131268  |             |           |         |
| MIR4282    | ENSG00000266180 | 0.28985   | 0.38597 | 0.28985     | 0.38597     | 0.28985   |         |
|            | 0.38597         | 0.59041   | 0.27746 | 0.27746     | 0.67131268  |           |         |
| WRNIP1     | ENSG00000124535 | -0.39693  | 0.65429 | -1.2805     | 0.89982     | -1.1902   |         |
|            | 0.88302         | 0.59035   | 0.27748 | 0.27748     | 0.67131268  |           |         |
| RNU6-221P  | ENSG00000238493 | 0.59034   | 0.27748 | 0.59034     | 0.27748     | 0.59034   |         |
|            | 0.27748         | 0.59034   | 0.27748 | 0.27748     | 0.67131268  |           |         |
| NA         | ENSG00000266073 | 0.59022   | 0.27752 | 0.59022     | 0.27752     | 0.59022   | 0.27752 |
|            | 0.59022         | 0.27752   | 0.27752 | 0.67131268  |             |           |         |
| NA         | ENSG00000249737 | 0.59011   | 0.27756 | 0.59011     | 0.27756     | -0.11219  | 0.54466 |
|            | -0.29975        | 0.61782   | 0.27756 | 0.67131268  |             |           |         |
| MCM10      | ENSG00000065328 | -0.32481  | 0.62734 | -1.064      | 0.85633     | 0.19964   | 0.42088 |
|            | 0.59007         | 0.27757   | 0.27757 | 0.67131268  |             |           |         |
| LINC01016  | ENSG00000249346 | -0.16909  | 0.56714 | 0.59006     | 0.27757     | -0.094343 |         |
|            | 0.53758         | -0.93129  | 0.82415 | 0.27757     | 0.67131268  |           |         |
| NA         | ENSG00000258557 | 0.59004   | 0.27758 | -0.64602    | 0.74087     | -0.83784  | 0.79894 |
|            | -0.83784        | 0.79894   | 0.27758 | 0.67131268  |             |           |         |
| LMF1-AS1   | ENSG00000260439 | -0.21699  | 0.58589 | 0.59005     | 0.27758     | -0.21699  |         |
|            | 0.58589         | 0.1298    | 0.44836 | 0.27758     | 0.67131268  |           |         |
| CD86       | ENSG00000114013 | 0.59003   | 0.27759 | 0.1081      | 0.45696     | 0.59003   | 0.27759 |
|            | 0.59003         | 0.27759   | 0.27759 | 0.67131268  |             |           |         |
| SNORD97    | ENSG00000238622 | 0.59003   | 0.27759 | 0.59003     | 0.27759     | 0.59003   |         |
|            | 0.27759         | 0.59003   | 0.27759 | 0.27759     | 0.67131268  |           |         |
| OR7G15P    | ENSG00000275787 | 0.58995   | 0.27761 | 0.58995     | 0.27761     | 0.58995   |         |
|            | 0.27761         | 0.58995   | 0.27761 | 0.27761     | 0.67131268  |           |         |
| NA         | ENSG00000273188 | 0.58991   | 0.27762 | 0.58991     | 0.27762     | 0.58991   | 0.27762 |
|            | 0.58991         | 0.27762   | 0.27762 | 0.67131268  |             |           |         |
| CDC42BPA   | ENSG00000143776 | 0.4651    | 0.32093 | 0.26758     | 0.39451     | 0.084218  |         |

|            |                 |             |             |             |             |             |         |
|------------|-----------------|-------------|-------------|-------------|-------------|-------------|---------|
|            | 0.46644         | 0.58987     | 0.27764     | 0.27764     | 0.67131268  |             |         |
| NA         | ENSG00000257027 | 0.58988     | 0.27764     | 0.58988     | 0.27764     | 0.58988     | 0.27764 |
|            | 0.58988         | 0.27764     | 0.27764     | 0.67131268  |             |             |         |
| DNAJC22    | ENSG00000178401 | -0.22101    | 0.58746     | -0.23504    | 0.59291     | -0.23504    |         |
|            | 0.59291         | 0.58983     | 0.27765     | 0.27765     | 0.67131268  |             |         |
| RGS14      | ENSG00000169220 | 0.33033     | 0.37058     | 0.58976     | 0.27767     | -0.32525    | 0.6275  |
|            | -1.6474         | 0.95026     | 0.27767     | 0.67131268  |             |             |         |
| NA         | ENSG00000212539 | 0.58977     | 0.27767     | 0.58977     | 0.27767     | 0.58977     | 0.27767 |
|            | 0.58977         | 0.27767     | 0.27767     | 0.67131268  |             |             |         |
| TMEM30B    | ENSG00000182107 | -0.25111    | 0.59913     | 0.58971     | 0.27769     | 0.39965     |         |
|            | 0.34471         | -0.63755    | 0.73812     | 0.27769     | 0.67131268  |             |         |
| HNRNPA1P12 | ENSG00000220157 | 0.58972     | 0.27769     | 0.58972     | 0.27769     | 0.58972     |         |
|            | 0.27769         | 0.58972     | 0.27769     | 0.27769     | 0.67131268  |             |         |
| HSP90AB6P  | ENSG00000235137 | 0.50972     | 0.30512     | -1.3567     | 0.91256     | -0.070706   |         |
|            | 0.52818         | 0.58971     | 0.27769     | 0.27769     | 0.67131268  |             |         |
| TRBV7-4    | ENSG00000253409 | 0.58971     | 0.27769     | 0.58971     | 0.27769     | 0.58971     |         |
|            | 0.27769         | 0.17907     | 0.42894     | 0.27769     | 0.67131268  |             |         |
| PVALB      | ENSG00000100362 | -1.0526     | 0.85375     | 0.58969     | 0.2777      | -1.0526     | 0.85375 |
|            | -1.0526         | 0.85375     | 0.2777      | 0.67131268  |             |             |         |
| MED30      | ENSG00000164758 | 0.58936     | 0.27781     | -0.63561    | 0.73749     | -0.67195    | 0.74919 |
|            | -0.67195        | 0.74919     | 0.27781     | 0.671442127 |             |             |         |
| GIN1       | ENSG00000145723 | -0.15203    | 0.56042     | -0.14747    | 0.55862     | 0.58932     | 0.27782 |
|            | 0.58932         | 0.27782     | 0.27782     | 0.671442127 |             |             |         |
| FZD4       | ENSG00000174804 | 0.56603     | 0.28569     | 0.15061     | 0.44014     | 0.58933     | 0.27782 |
|            | 0.31701         | 0.37562     | 0.27782     | 0.671442127 |             |             |         |
| NA         | ENSG00000229827 | 0.58934     | 0.27782     | 0.58934     | 0.27782     | 0.58934     | 0.27782 |
|            | 0.58934         | 0.27782     | 0.27782     | 0.671442127 |             |             |         |
| LNPk       | ENSG00000144320 | 0.09163     | 0.4635      | 0.58926     | 0.27784     | 0.4729      | 0.31814 |
|            | -0.6104         | 0.7292      | 0.27784     | 0.671442127 |             |             |         |
| ENDOD1     | ENSG00000149218 | -1.1676     | 0.87851     | -1.8528     | 0.96804     | -1.3259     |         |
|            | 0.90757         | 0.58927     | 0.27784     | 0.27784     | 0.671442127 |             |         |
| IGHV2-5    | ENSG00000211937 | 0.58924     | 0.27785     | 0.58924     | 0.27785     | 0.58924     |         |
|            | 0.27785         | -0.23448    | 0.59269     | 0.27785     | 0.671442127 |             |         |
| TECPR1     | ENSG00000205356 | -0.62873    | 0.73524     | -0.98464    | 0.8376      | -0.28773    |         |
|            | 0.61322         | 0.58902     | 0.27792     | 0.27792     | 0.671535546 |             |         |
| NA         | ENSG00000272209 | 0.36055     | 0.35922     | 0.58902     | 0.27792     | -0.13405    | 0.55332 |
|            | 0.36055         | 0.35922     | 0.27792     | 0.671535546 |             |             |         |
| PLCE1-AS1  | ENSG00000268894 | 0.58902     | 0.27793     | -0.10038    | 0.53998     | -1.3466     |         |
|            | 0.91094         | -1.3466     | 0.91094     | 0.27793     | 0.671535546 |             |         |
| CA11       | ENSG00000063180 | -1.1766     | 0.88032     | 0.10975     | 0.4563      | 0.10975     | 0.4563  |
|            | 0.58888         | 0.27797     | 0.27797     | 0.671571485 |             |             |         |
| NA         | ENSG00000232166 | 0.58886     | 0.27798     | 0.38229     | 0.35112     | 0.58886     | 0.27798 |
|            | 0.58886         | 0.27798     | 0.27798     | 0.671571485 |             |             |         |
| ASB6       | ENSG00000148331 | -0.23271    | 0.59201     | 0.58879     | 0.278029279 | 0.38484     |         |
|            | -1.0998         | 0.86429     | 0.278029279 | 0.671571485 |             |             |         |
| RPS2P5     | ENSG00000240342 | 0.58879     | 0.278029279 | 0.58879     | 0.278029279 | 0.278029279 | 0.58879 |
|            | 0.278029279     | 0.278029279 | 0.671571485 |             |             |             |         |
| NA         | ENSG00000252274 | 0.58864     | 0.27805     | 0.58864     | 0.27805     | 0.58864     | 0.27805 |
|            | 0.58864         | 0.27805     | 0.27805     | 0.671631562 |             |             |         |
| CCT7P1     | ENSG00000217733 | 0.58861     | 0.27806     | 0.58861     | 0.27806     | 0.58861     |         |
|            | 0.27806         | 0.58861     | 0.27806     | 0.27806     | 0.671631562 |             |         |
| LSM10      | ENSG00000181817 | -0.021791   | 0.50869     | 0.58858     | 0.27807     | -0.021791   | 0.50869 |
|            | -0.018821       | 0.50751     | 0.27807     | 0.671631562 |             |             |         |
| NA         | ENSG00000244237 | 0.11702     | 0.45342     | 0.58856     | 0.27808     | -0.26312    | 0.60377 |
|            | 0.58856         | 0.27808     | 0.27808     | 0.671631562 |             |             |         |
| ATPAF2     | ENSG00000171953 | 0.58832     | 0.27816     | 0.21388     | 0.41532     | 0.2338      |         |
|            | 0.40757         | -0.033356   | 0.5133      | 0.27816     | 0.671782342 |             |         |
| NA         | ENSG00000280138 | -0.0047064  | 0.50188     | 0.58827     | 0.27817     | 0.10144     | 0.4596  |
|            | -0.0047064      | 0.50188     | 0.27817     | 0.671782342 |             |             |         |
| ZBTB32     | ENSG00000011590 | 0.58814     | 0.27822     | 0.58814     | 0.27822     | 0.58814     |         |
|            | 0.27822         | 0.58814     | 0.27822     | 0.27822     | 0.671836501 |             |         |
| PIP4K2C    | ENSG00000166908 | 0.58814     | 0.27822     | 0.099033    | 0.46056     | 0.23739     |         |

|           |                 |           |         |             |             |          |         |
|-----------|-----------------|-----------|---------|-------------|-------------|----------|---------|
|           | 0.40618         | 0.23739   | 0.40618 | 0.27822     | 0.671836501 |          |         |
| RPL17P2   | ENSG00000242135 | 0.58804   | 0.27825 | 0.58804     | 0.27825     | 0.58804  | 0.58804 |
|           | 0.27825         | 0.58804   | 0.27825 | 0.27825     | 0.67184236  |          |         |
| NA        | ENSG00000273569 | 0.58804   | 0.27825 | 0.58804     | 0.27825     | 0.58804  | 0.27825 |
|           | 0.58804         | 0.27825   | 0.27825 | 0.67184236  |             |          |         |
| ZNRD2     | ENSG00000173465 | 0.58799   | 0.27827 | 0.58799     | 0.27827     | -0.24013 | 0.59489 |
|           | 0.58799         | 0.27827   | 0.27827 | 0.67184493  |             |          |         |
| PCDHGA9   | ENSG00000261934 | 0.58795   | 0.27828 | 0.58795     | 0.27828     | 0.58795  |         |
|           | 0.27828         | 0.58795   | 0.27828 | 0.27828     | 0.67184493  |          |         |
| MPV17L2   | ENSG00000254858 | 0.58786   | 0.27831 | 0.58786     | 0.27831     | 0.58786  |         |
|           | 0.27831         | 0.58786   | 0.27831 | 0.27831     | 0.67184493  |          |         |
| GATC      | ENSG00000257218 | -0.17457  | 0.56929 | 0.58784     | 0.27832     | -0.17457 | 0.56929 |
|           | -0.17457        | 0.56929   | 0.27832 | 0.67184493  |             |          |         |
| LINC01858 | ENSG00000261615 | -0.51152  | 0.69551 | -1.0206     | 0.84628     | 0.58785  |         |
|           | 0.27832         | -0.86936  | 0.80768 | 0.27832     | 0.67184493  |          |         |
| NA        | ENSG00000221606 | -1.3262   | 0.90762 | -0.98378    | 0.83739     | -1.5682  | 0.94158 |
|           | 0.58775         | 0.27835   | 0.27835 | 0.671884065 |             |          |         |
| THEGL     | ENSG00000249693 | 0.14306   | 0.44312 | -1.1553     | 0.87601     | -0.37002 | 0.64432 |
|           | 0.58758         | 0.27841   | 0.27841 | 0.671953177 |             |          |         |
| NPM1P10   | ENSG00000214428 | 0.58753   | 0.27842 | 0.58753     | 0.27842     | 0.58753  |         |
|           | 0.27842         | 0.58753   | 0.27842 | 0.27842     | 0.671953177 |          |         |
| NA        | ENSG00000273254 | 0.58755   | 0.27842 | 0.58755     | 0.27842     | 0.58755  | 0.27842 |
|           | 0.58755         | 0.27842   | 0.27842 | 0.671953177 |             |          |         |
| IGHV3-65  | ENSG00000253209 | 0.58743   | 0.27846 | 0.58743     | 0.27846     | 0.58743  |         |
|           | 0.27846         | 0.58743   | 0.27846 | 0.27846     | 0.671961561 |          |         |
| RN7SL592P | ENSG00000264615 | 0.58743   | 0.27846 | -0.34356    | 0.63441     | -0.37879 |         |
|           | 0.64758         | 0.41729   | 0.33823 | 0.27846     | 0.671961561 |          |         |
| NA        | ENSG00000269899 | 0.5874    | 0.27847 | 0.5874      | 0.27847     | 0.5874   | 0.27847 |
|           | 0.5874          | 0.27847   | 0.27847 | 0.671961561 |             |          |         |
| MIR5585   | ENSG00000266203 | 0.58736   | 0.27848 | -0.74623    | 0.77224     | 0.51217  |         |
|           | 0.30427         | 0.51217   | 0.30427 | 0.27848     | 0.671961561 |          |         |
| LINC02650 | ENSG00000233945 | 0.58731   | 0.2785  | 0.58731     | 0.2785      | 0.58731  |         |
|           | 0.2785          | 0.58731   | 0.2785  | 0.2785      | 0.671961561 |          |         |
| NA        | ENSG00000283390 | -0.016646 | 0.50664 | 0.58728     | 0.27851     | 0.55278  | 0.29021 |
|           | 0.55278         | 0.29021   | 0.27851 | 0.671961561 |             |          |         |
| USP12P2   | ENSG00000224007 | 0.58726   | 0.27852 | 0.58726     | 0.27852     | 0.58726  |         |
|           | 0.27852         | -0.21586  | 0.58545 | 0.27852     | 0.671961561 |          |         |
| NA        | ENSG00000270839 | 0.07103   | 0.47169 | 0.53624     | 0.2959      | 0.5871   | 0.27857 |
|           | 0.5871          | 0.27857   | 0.27857 | 0.671965111 |             |          |         |
| RNFT2     | ENSG00000135119 | 0.077136  | 0.46926 | 0.58703     | 0.27859     | -0.16134 | 0.56409 |
|           | -0.084675       | 0.53374   | 0.27859 | 0.671965111 |             |          |         |
| RN7SL503P | ENSG00000240374 | -0.73229  | 0.768   | 0.58701     | 0.2786      | -0.73229 | 0.768   |
|           | 0.25195         | 0.40054   | 0.2786  | 0.671965111 |             |          |         |
| NA        | ENSG00000230821 | 0.58684   | 0.27866 | -0.67483    | 0.75011     | -1.2399  | 0.89249 |
|           | 0.011898        | 0.49525   | 0.27866 | 0.671965111 |             |          |         |
| NA        | ENSG00000255580 | 0.18952   | 0.42484 | 0.58682     | 0.27866     | 0.58682  | 0.27866 |
|           | -0.72276        | 0.76509   | 0.27866 | 0.671965111 |             |          |         |
| NA        | ENSG00000252505 | 0.58681   | 0.27867 | 0.58681     | 0.27867     | 0.58681  | 0.27867 |
|           | 0.58681         | 0.27867   | 0.27867 | 0.671965111 |             |          |         |
| RPL10P18  | ENSG00000253995 | 0.58681   | 0.27867 | 0.58681     | 0.27867     | 0.58681  |         |
|           | 0.27867         | 0.58681   | 0.27867 | 0.27867     | 0.671965111 |          |         |
| NTF6B     | ENSG00000267685 | 0.58679   | 0.27867 | 0.58679     | 0.27867     | 0.58679  | 0.27867 |
|           | 0.58679         | 0.27867   | 0.27867 | 0.671965111 |             |          |         |
| DNLZ      | ENSG00000213221 | 0.58674   | 0.27869 | 0.58674     | 0.27869     | 0.58674  | 0.27869 |
|           | 0.58674         | 0.27869   | 0.27869 | 0.671965111 |             |          |         |
| KANK1     | ENSG00000107104 | 0.10595   | 0.45781 | -0.55712    | 0.71128     | -0.25572 | 0.60092 |
|           | 0.58666         | 0.27872   | 0.27872 | 0.671965111 |             |          |         |
| GHRLOS    | ENSG00000240288 | 0.58666   | 0.27872 | 0.58666     | 0.27872     | 0.58666  |         |
|           | 0.27872         | 0.58666   | 0.27872 | 0.27872     | 0.671965111 |          |         |
| IRAQ2     | ENSG00000134070 | -0.30375  | 0.61934 | -0.88771    | 0.81265     | 0.58657  | 0.27874 |
|           | -0.82594        | 0.79558   | 0.27874 | 0.671965111 |             |          |         |
| NA        | ENSG00000248585 | 0.58657   | 0.27874 | 0.41663     | 0.33848     | 0.4401   | 0.32993 |

|            |                 |          |         |             |             |          |         |  |
|------------|-----------------|----------|---------|-------------|-------------|----------|---------|--|
|            | 0.4401          | 0.32993  | 0.27874 | 0.671965111 |             |          |         |  |
| TRA2A      | ENSG00000164548 | 0.58646  | 0.27878 | 0.56256     | 0.28687     | 0.58646  | 0.27878 |  |
|            | 0.58646         | 0.27878  | 0.27878 | 0.671965111 |             |          |         |  |
| HNRNPKP4   | ENSG00000243547 | 0.41545  | 0.3389  | 0.58648     | 0.27878     | -0.36356 |         |  |
|            | 0.64191         | 0.14004  | 0.44431 | 0.27878     | 0.671965111 |          |         |  |
| NA         | ENSG00000258497 | -0.32286 | 0.6266  | 0.58648     | 0.27878     | -0.32286 | 0.6266  |  |
|            | -0.16414        | 0.56519  | 0.27878 | 0.671965111 |             |          |         |  |
| NA         | ENSG00000234519 | 0.58643  | 0.27879 | -0.80013    | 0.78818     | 0.47468  | 0.31751 |  |
|            | -0.43255        | 0.66733  | 0.27879 | 0.671965111 |             |          |         |  |
| GUCA1A     | ENSG00000048545 | 0.58635  | 0.27882 | 0.24837     | 0.40192     | 0.094324 |         |  |
|            | 0.46243         | -0.32939 | 0.62907 | 0.27882     | 0.671965111 |          |         |  |
| NA         | ENSG00000265975 | -0.19226 | 0.57623 | -0.75787    | 0.77574     | 0.58634  | 0.27882 |  |
|            | 0.22533         | 0.41086  | 0.27882 | 0.671965111 |             |          |         |  |
| SPP2       | ENSG00000072080 | 0.58632  | 0.27883 | 0.54168     | 0.29402     | 0.18978  | 0.42474 |  |
|            | 0.18978         | 0.42474  | 0.27883 | 0.671965111 |             |          |         |  |
| OR7E31P    | ENSG00000185074 | 0.52931  | 0.2983  | 0.58632     | 0.27883     | 0.10167  |         |  |
|            | 0.45951         | -0.16625 | 0.56602 | 0.27883     | 0.671965111 |          |         |  |
| TRAF3      | ENSG00000131323 | 0.48384  | 0.31425 | 0.23501     | 0.4071      | 0.40246  | 0.34367 |  |
|            | 0.58627         | 0.27885  | 0.27885 | 0.671965111 |             |          |         |  |
| CDH3       | ENSG00000062038 | -0.6411  | 0.73927 | -0.48447    | 0.68597     | -1.7241  | 0.95766 |  |
|            | 0.5862          | 0.27887  | 0.27887 | 0.671965111 |             |          |         |  |
| TBRG1      | ENSG00000154144 | 0.33861  | 0.36745 | 0.58618     | 0.27888     | 0.58618  | 0.27888 |  |
|            | 0.58618         | 0.27888  | 0.27888 | 0.671965111 |             |          |         |  |
| LDHAP5     | ENSG00000213574 | -0.55327 | 0.70996 | -0.55327    | 0.70996     | 0.58617  |         |  |
|            | 0.27888         | -0.44253 | 0.67095 | 0.27888     | 0.671965111 |          |         |  |
| NA         | ENSG00000258593 | 0.58617  | 0.27888 | -0.50545    | 0.69338     | -0.7768  | 0.78136 |  |
|            | -0.50545        | 0.69338  | 0.27888 | 0.671965111 |             |          |         |  |
| RNU7-41P   | ENSG00000251726 | 0.58603  | 0.27893 | 0.58603     | 0.27893     | 0.58603  |         |  |
|            | 0.27893         | 0.58603  | 0.27893 | 0.27893     | 0.672052356 |          |         |  |
| SLC25A5P1  | ENSG00000215347 | 0.58595  | 0.27895 | 0.58595     | 0.27895     | 0.58595  |         |  |
|            | 0.27895         | 0.58595  | 0.27895 | 0.27895     | 0.672067314 |          |         |  |
| NA         | ENSG00000265567 | 0.5859   | 0.27897 | 0.5859      | 0.27897     | 0.5859   | 0.27897 |  |
|            | 0.5859          | 0.27897  | 0.27897 | 0.672082271 |             |          |         |  |
| F7         | ENSG00000057593 | -0.622   | 0.73303 | 0.54427     | 0.29313     | 0.092074 | 0.46332 |  |
|            | 0.58585         | 0.27899  | 0.27899 | 0.672097227 |             |          |         |  |
| NA         | ENSG00000213549 | 0.58575  | 0.27902 | 0.58575     | 0.27902     | -1.3594  | 0.91299 |  |
|            | 0.58575         | 0.27902  | 0.27902 | 0.672103045 |             |          |         |  |
| NA         | ENSG00000279269 | -0.1989  | 0.57883 | 0.58577     | 0.27902     | -1.1243  | 0.86955 |  |
|            | -1.1243         | 0.86955  | 0.27902 | 0.672103045 |             |          |         |  |
| PALM2AKAP2 | ENSG00000157654 | -0.53371 | 0.70323 | -0.99054    | 0.83904     | -0.23463 |         |  |
|            | 0.59275         | 0.58566  | 0.27905 | 0.27905     | 0.672142084 |          |         |  |
| NBPF22P    | ENSG00000205449 | -0.17267 | 0.56854 | -0.32472    | 0.6273      | -0.55728 |         |  |
|            | 0.71133         | 0.58558  | 0.27908 | 0.27908     | 0.672181119 |          |         |  |
| NA         | ENSG00000243636 | 0.58544  | 0.27913 | 0.58544     | 0.27913     | 0.58544  | 0.27913 |  |
|            | 0.58544         | 0.27913  | 0.27913 | 0.672255838 |             |          |         |  |
| INPP5J     | ENSG00000185133 | 0.58537  | 0.27915 | 0.58537     | 0.27915     | 0.58537  |         |  |
|            | 0.27915         | 0.58537  | 0.27915 | 0.27915     | 0.672255838 |          |         |  |
| JAK2       | ENSG00000096968 | -0.91569 | 0.82008 | 0.55263     | 0.29026     | 0.58534  | 0.27916 |  |
|            | -0.16914        | 0.56715  | 0.27916 | 0.672255838 |             |          |         |  |
| TIMM44     | ENSG00000104980 | 0.58527  | 0.27918 | 0.57356     | 0.28313     | 0.25742  |         |  |
|            | 0.39843         | -0.30994 | 0.6217  | 0.27918     | 0.672255838 |          |         |  |
| FRAT1      | ENSG00000165879 | 0.58529  | 0.27918 | 0.58529     | 0.27918     | 0.58529  | 0.27918 |  |
|            | -0.72547        | 0.76592  | 0.27918 | 0.672255838 |             |          |         |  |
| LINC02364  | ENSG00000250190 | 0.58522  | 0.2792  | 0.32536     | 0.37245     | 0.58522  |         |  |
|            | 0.2792          | 0.58522  | 0.2792  | 0.2792      | 0.672261638 |          |         |  |
| MIR1302-6  | ENSG00000221393 | 0.58518  | 0.27921 | 0.58518     | 0.27921     | 0.58518  |         |  |
|            | 0.27921         | 0.58518  | 0.27921 | 0.27921     | 0.672261638 |          |         |  |
| LINC00423  | ENSG00000226968 | 0.58509  | 0.27924 | 0.58509     | 0.27924     | 0.58509  |         |  |
|            | 0.27924         | -1.1134  | 0.86723 | 0.27924     | 0.672264098 |          |         |  |
| TREHP1     | ENSG00000255239 | 0.1288   | 0.44876 | 0.056414    | 0.47751     | 0.58503  |         |  |
|            | 0.27926         | -0.89068 | 0.81345 | 0.27926     | 0.672264098 |          |         |  |
| NA         | ENSG00000272037 | 0.13462  | 0.44646 | 0.13462     | 0.44646     | 0.58502  | 0.27927 |  |

|            |                 |           |         |             |             |          |         |  |
|------------|-----------------|-----------|---------|-------------|-------------|----------|---------|--|
|            | 0.58502         | 0.27927   | 0.27927 | 0.672264098 |             |          |         |  |
| DRC3       | ENSG00000171962 | 0.58497   | 0.27928 | 0.40083     | 0.34427     | 0.35496  | 0.36131 |  |
|            | 0.042375        | 0.4831    | 0.27928 | 0.672264098 |             |          |         |  |
| MIR320E    | ENSG00000211513 | 0.58499   | 0.27928 | 0.58499     | 0.27928     | 0.58499  |         |  |
|            | 0.27928         | 0.58499   | 0.27928 | 0.672264098 |             |          |         |  |
| AACS       | ENSG00000081760 | 0.58484   | 0.27933 | 0.58484     | 0.27933     | -0.35595 | 0.63906 |  |
|            | -0.44056        | 0.67023   | 0.27933 | 0.672351242 |             |          |         |  |
| LONP2      | ENSG00000102910 | 0.098202  | 0.46089 | 0.58462     | 0.2794      | -0.9703  | 0.83405 |  |
|            | -0.61166        | 0.72962   | 0.2794  | 0.672406654 |             |          |         |  |
| NA         | ENSG00000250066 | 0.15302   | 0.43919 | -0.15078    | 0.55993     | 0.58456  | 0.27942 |  |
|            | 0.58456         | 0.27942   | 0.27942 | 0.672406654 |             |          |         |  |
| PTTG4P     | ENSG00000258571 | -0.50236  | 0.69229 | -1.7405     | 0.95911     | 0.5845   |         |  |
|            | 0.27944         | 0.5845    | 0.27944 | 0.27944     | 0.672406654 |          |         |  |
| NA         | ENSG00000249085 | 0.43571   | 0.33152 | 0.58444     | 0.27946     | -1.0752  | 0.85886 |  |
|            | 0.061865        | 0.47534   | 0.27946 | 0.672406654 |             |          |         |  |
| WDR54      | ENSG00000005448 | 0.58441   | 0.27947 | 0.58441     | 0.27947     | 0.58441  | 0.27947 |  |
|            | 0.58441         | 0.27947   | 0.27947 | 0.672406654 |             |          |         |  |
| PAPPA2     | ENSG00000116183 | 0.58441   | 0.27947 | 0.12394     | 0.45068     | 0.22751  |         |  |
|            | 0.41001         | 0.026806  | 0.48931 | 0.27947     | 0.672406654 |          |         |  |
| TP53I11    | ENSG00000175274 | 0.057089  | 0.47724 | -1.1475     | 0.87441     | -0.84614 |         |  |
|            | 0.80126         | 0.58442   | 0.27947 | 0.27947     | 0.672406654 |          |         |  |
| ZNF260     | ENSG00000254004 | 0.093739  | 0.46266 | 0.58435     | 0.27949     | 0.093739 |         |  |
|            | 0.46266         | 0.093739  | 0.46266 | 0.27949     | 0.672406654 |          |         |  |
| NA         | ENSG00000272635 | 0.58433   | 0.2795  | 0.58433     | 0.2795      | 0.58433  | 0.2795  |  |
|            | 0.58433         | 0.2795    | 0.2795  | 0.672406654 |             |          |         |  |
| SUN1       | ENSG00000164828 | 0.22593   | 0.41063 | -0.041207   | 0.51643     | 0.22858  | 0.4096  |  |
|            | 0.58426         | 0.27952   | 0.27952 | 0.672406654 |             |          |         |  |
| RNU6-896P  | ENSG00000199246 | -0.14069  | 0.55594 | 0.58427     | 0.27952     | 0.58427  |         |  |
|            | 0.27952         | 0.58427   | 0.27952 | 0.27952     | 0.672406654 |          |         |  |
| ZFP2       | ENSG00000198939 | -0.29581  | 0.61631 | 0.050253    | 0.47996     | -0.34272 | 0.6341  |  |
|            | 0.58423         | 0.27953   | 0.27953 | 0.672406654 |             |          |         |  |
| BTF3P4     | ENSG00000224820 | -0.082628 | 0.53293 | 0.5842      | 0.27954     | 0.5842   |         |  |
|            | 0.27954         | 0.5842    | 0.27954 | 0.27954     | 0.672406654 |          |         |  |
| H1-2       | ENSG00000187837 | -0.53174  | 0.70255 | 0.10838     | 0.45685     | 0.054835 | 0.47814 |  |
|            | 0.58418         | 0.27955   | 0.27955 | 0.672406654 |             |          |         |  |
| FBXO43     | ENSG00000156509 | -0.41867  | 0.66227 | -0.65647    | 0.74424     | -0.60024 |         |  |
|            | 0.72583         | 0.58416   | 0.27956 | 0.27956     | 0.672406654 |          |         |  |
| NA         | ENSG00000207094 | 0.58403   | 0.2796  | 0.58403     | 0.2796      | 0.58403  | 0.2796  |  |
|            | 0.58403         | 0.2796    | 0.2796  | 0.672436482 |             |          |         |  |
| EIF4A1P13  | ENSG00000225701 | 0.58403   | 0.2796  | 0.58403     | 0.2796      | 0.58403  |         |  |
|            | 0.2796          | 0.58403   | 0.2796  | 0.2796      | 0.672436482 |          |         |  |
| RHBDL2     | ENSG00000158315 | 0.58395   | 0.27963 | 0.56347     | 0.28656     | 0.44336  |         |  |
|            | 0.32875         | 0.39843   | 0.34516 | 0.27963     | 0.672475443 |          |         |  |
| POU6F2-AS1 | ENSG00000224122 | 0.074152  | 0.47044 | 0.58377     | 0.27969     | 0.58377  |         |  |
|            | 0.27969         | 0.58377   | 0.27969 | 0.27969     | 0.672577399 |          |         |  |
| C19orf12   | ENSG00000131943 | -0.46923  | 0.68055 | 0.3313      | 0.37021     | 0.58373  |         |  |
|            | 0.2797          | 0.25217   | 0.40045 | 0.2797      | 0.672577399 |          |         |  |
| PRUNEP1    | ENSG00000234706 | 0.58361   | 0.27974 | -1.3152     | 0.90578     | -1.3152  |         |  |
|            | 0.90578         | -1.3152   | 0.90578 | 0.27974     | 0.672622104 |          |         |  |
| NA         | ENSG00000243453 | 0.58359   | 0.27975 | 0.58359     | 0.27975     | 0.58359  | 0.27975 |  |
|            | 0.58359         | 0.27975   | 0.27975 | 0.672622104 |             |          |         |  |
| NA         | ENSG00000271299 | -0.35404  | 0.63834 | 0.58357     | 0.27976     | 0.43676  | 0.33114 |  |
|            | -0.35404        | 0.63834   | 0.27976 | 0.672622104 |             |          |         |  |
| FBXL12P1   | ENSG00000235968 | 0.58346   | 0.27979 | 0.053033    | 0.47885     | 0.58346  |         |  |
|            | 0.27979         | 0.58346   | 0.27979 | 0.27979     | 0.672661044 |          |         |  |
| RNU6-904P  | ENSG00000252015 | 0.58341   | 0.27981 | 0.58341     | 0.27981     | 0.58341  |         |  |
|            | 0.27981         | 0.58341   | 0.27981 | 0.27981     | 0.67267594  |          |         |  |
| GRIN2B     | ENSG00000273079 | 0.39659   | 0.34583 | 0.58335     | 0.27983     | 0.48333  |         |  |
|            | 0.31443         | 0.46626   | 0.32051 | 0.27983     | 0.672690834 |          |         |  |
| MAPKBP1    | ENSG00000137802 | -0.19705  | 0.57811 | 0.58326     | 0.27986     | 0.053301 |         |  |
|            | 0.47875         | -0.66802  | 0.74794 | 0.27986     | 0.672696582 |          |         |  |
| NA         | ENSG00000228496 | 0.58325   | 0.27986 | -0.0029324  | 0.50117     | 0.58325  | 0.27986 |  |

|            |                 |            |          |            |             |             |         |  |
|------------|-----------------|------------|----------|------------|-------------|-------------|---------|--|
|            |                 | -0.58136   | 0.7195   | 0.27986    | 0.672696582 |             |         |  |
| NA         | ENSG00000269188 | 0.58311    | 0.27991  | 0.58311    | 0.27991     | 0.58311     | 0.27991 |  |
|            |                 | 0.58311    | 0.27991  | 0.27991    | 0.672774432 |             |         |  |
| GCLC       | ENSG00000001084 | -0.012515  | 0.50499  | 0.58308    | 0.27992     | -0.69103    | 0.75523 |  |
|            |                 | -0.95717   | 0.83076  | 0.27992    | 0.672774432 |             |         |  |
| PMS2       | ENSG00000122512 | 0.58289    | 0.27998  | -0.38103   | 0.64841     | 0.058665    | 0.47661 |  |
|            |                 | -1.5441    | 0.93871  | 0.27998    | 0.672852266 |             |         |  |
| NA         | ENSG00000259213 | -0.96922   | 0.83378  | 0.58289    | 0.27998     | -0.80924    | 0.79081 |  |
|            |                 | -0.85331   | 0.80326  | 0.27998    | 0.672852266 |             |         |  |
| DNAJC19P2  | ENSG00000269266 | 0.58274    | 0.28003  | 0.58274    | 0.28003     | 0.58274     |         |  |
|            |                 | 0.28003    | 0.58274  | 0.28003    | 0.67293924  |             |         |  |
| REXO4      | ENSG00000148300 | 0.5619     | 0.28709  | 0.5619     | 0.28709     | 0.58263     | 0.28007 |  |
|            |                 | -0.30226   | 0.61877  | 0.28007    | 0.673002175 |             |         |  |
| LINC02425  | ENSG00000256259 | 0.58252    | 0.28011  | -0.5427    | 0.70633     | 0.015204    |         |  |
|            |                 | 0.49393    | -0.5427  | 0.70633    | 0.28011     | 0.673061653 |         |  |
| RPS2P48    | ENSG00000233380 | -0.1164    | 0.54633  | 0.5824     | 0.28015     | -0.23812    |         |  |
|            |                 | 0.59411    | -0.63794 | 0.73824    | 0.28015     | 0.673061653 |         |  |
| LHX5-AS1   | ENSG00000257935 | -0.24919   | 0.59839  | 0.58238    | 0.28015     | 0.58238     |         |  |
|            |                 | 0.28015    | 0.58238  | 0.28015    | 0.28015     | 0.673061653 |         |  |
| RN7SL378P  | ENSG00000265684 | -0.71874   | 0.76385  | -0.0039656 | 0.50158     | 0.58241     |         |  |
|            |                 | 0.28015    | -0.32513 | 0.62746    | 0.28015     | 0.673061653 |         |  |
| RNA5SP119  | ENSG00000199585 | -0.35739   | 0.6396   | 0.58231    | 0.28018     | -1.1547     |         |  |
|            |                 | 0.87589    | -0.65732 | 0.74451    | 0.28018     | 0.673099168 |         |  |
| MIR4284    | ENSG00000265724 | 0.58217    | 0.28023  | 0.58217    | 0.28023     | 0.58217     |         |  |
|            |                 | 0.28023    | 0.58217  | 0.28023    | 0.28023     | 0.673099168 |         |  |
| ATR        | ENSG00000175054 | -1.7531    | 0.96021  | -1.8235    | 0.96589     | -1.1975     | 0.88445 |  |
|            |                 | 0.58206    | 0.28026  | 0.28026    | 0.673099168 |             |         |  |
| GABRP      | ENSG00000094755 | 0.26874    | 0.39406  | 0.58203    | 0.28027     | 0.0091839   | 0.49634 |  |
|            |                 | -0.62966   | 0.73554  | 0.28027    | 0.673099168 |             |         |  |
| HSD17B11   | ENSG00000198189 | 0.21358    | 0.41544  | -0.022174  | 0.50885     | 0.38329     |         |  |
|            |                 | 0.35075    | 0.58202  | 0.28028    | 0.28028     | 0.673099168 |         |  |
| RNU4-1     | ENSG00000200795 | 0.57659    | 0.28211  | 0.58198    | 0.28029     | -0.45013    |         |  |
|            |                 | 0.67369    | 0.57659  | 0.28211    | 0.28029     | 0.673099168 |         |  |
| NA         | ENSG00000258271 | 0.56242    | 0.28691  | 0.58196    | 0.2803      | 0.58196     | 0.2803  |  |
|            |                 | 0.58196    | 0.2803   | 0.2803     | 0.673099168 |             |         |  |
| FAM200B    | ENSG00000237765 | 0.58189    | 0.28032  | 0.56327    | 0.28663     | 0.56327     |         |  |
|            |                 | 0.28663    | -0.30037 | 0.61805    | 0.28032     | 0.673099168 |         |  |
| LINC01682  | ENSG00000227043 | 0.58174    | 0.28037  | 0.58174    | 0.28037     | 0.58174     |         |  |
|            |                 | 0.28037    | 0.58174  | 0.28037    | 0.28037     | 0.673099168 |         |  |
| BCL11B     | ENSG00000127152 | 0.23051    | 0.40885  | 0.58166    | 0.2804      | -0.92146    |         |  |
|            |                 | 0.82159    | 0.09291  | 0.46299    | 0.2804      | 0.673099168 |         |  |
| C16orf72   | ENSG00000182831 | 0.58161    | 0.28041  | 0.58161    | 0.28041     | 0.58161     |         |  |
|            |                 | 0.28041    | 0.58161  | 0.28041    | 0.28041     | 0.673099168 |         |  |
| NA         | ENSG00000206790 | 0.58163    | 0.28041  | 0.58163    | 0.28041     | 0.58163     | 0.28041 |  |
|            |                 | 0.58163    | 0.28041  | 0.28041    | 0.673099168 |             |         |  |
| IL21       | ENSG00000138684 | 0.032475   | 0.48705  | 0.032475   | 0.48705     | 0.032475    | 0.48705 |  |
|            |                 | 0.58155    | 0.28043  | 0.28043    | 0.673099168 |             |         |  |
| RNA5SP172  | ENSG00000201931 | 0.58158    | 0.28043  | 0.58158    | 0.28043     | 0.58158     |         |  |
|            |                 | 0.28043    | 0.58158  | 0.28043    | 0.28043     | 0.673099168 |         |  |
| LINC00634  | ENSG00000205704 | -2.4033    | 0.99188  | -1.1035    | 0.8651      | -1.1035     |         |  |
|            |                 | 0.8651     | 0.58155  | 0.28043    | 0.28043     | 0.673099168 |         |  |
| USE1       | ENSG00000053501 | 0.011072   | 0.49558  | 0.011072   | 0.49558     | 0.58154     | 0.28044 |  |
|            |                 | -0.0015377 | 0.50061  | 0.28044    | 0.673099168 |             |         |  |
| RPL23AP50  | ENSG00000232778 | 0.5815     | 0.28045  | 0.5815     | 0.28045     | 0.5815      |         |  |
|            |                 | 0.28045    | 0.5815   | 0.28045    | 0.28045     | 0.673099168 |         |  |
| RNU6-1061P | ENSG00000252339 | 0.58148    | 0.28046  | 0.58148    | 0.28046     | 0.58148     |         |  |
|            |                 | 0.28046    | 0.58148  | 0.28046    | 0.28046     | 0.673099168 |         |  |
| NEAT1      | ENSG00000245532 | 0.027893   | 0.48887  | 0.58145    | 0.28047     | 0.3209      | 0.37414 |  |
|            |                 | 0.35591    | 0.36095  | 0.28047    | 0.673099168 |             |         |  |
| NA         | ENSG00000231078 | 0.5814     | 0.28048  | -0.9339    | 0.82482     | 0.5814      | 0.28048 |  |
|            |                 | -0.43268   | 0.66738  | 0.28048    | 0.673099168 |             |         |  |
| CUEDC2     | ENSG00000107874 | 0.20839    | 0.41746  | 0.58138    | 0.28049     | 0.58138     |         |  |

|           |                 |           |             |             |             |           |         |          |
|-----------|-----------------|-----------|-------------|-------------|-------------|-----------|---------|----------|
|           | 0.28049         | 0.56142   | 0.28726     | 0.28049     | 0.673099168 |           |         |          |
| LINC01621 | ENSG00000235357 | 0.5814    | 0.28049     | 0.11857     | 0.45281     | 0.5814    |         |          |
|           | 0.28049         | 0.5814    | 0.28049     | 0.28049     | 0.673099168 |           |         |          |
| SNRPCP4   | ENSG00000264186 | 0.58137   | 0.28049     | -0.016311   | 0.50651     | -0.016311 |         |          |
|           | 0.50651         | -0.016311 | 0.50651     | 0.28049     | 0.673099168 |           |         |          |
| NA        | ENSG00000235198 | -0.015947 | 0.50636     | 0.58134     | 0.2805      | -0.58543  | 0.72087 |          |
|           | -1.2125         | 0.88734   | 0.2805      | 0.673099168 |             |           |         |          |
| ALG5      | ENSG00000120697 | 0.58131   | 0.28052     | 0.51588     | 0.30297     | 0.040007  | 0.48404 |          |
|           | -0.55887        | 0.71187   | 0.28052     | 0.673099168 |             |           |         |          |
| ARG2      | ENSG00000081181 | 0.58121   | 0.28055     | -0.16411    | 0.56518     | 0.58121   | 0.28055 |          |
|           | 0.026476        | 0.48944   | 0.28055     | 0.673099168 |             |           |         |          |
| NA        | ENSG00000283088 | 0.58122   | 0.28055     | 0.58122     | 0.28055     | 0.58122   | 0.28055 |          |
|           | 0.58122         | 0.28055   | 0.28055     | 0.673099168 |             |           |         |          |
| RPL18     | ENSG00000063177 | 0.58118   | 0.28056     | -1.5036     | 0.93366     | 0.58118   | 0.28056 |          |
|           | 0.58118         | 0.28056   | 0.28056     | 0.673099168 |             |           |         |          |
| FADS2B    | ENSG00000274150 | -0.88032  | 0.81066     | 0.2408      | 0.40485     | 0.2408    |         |          |
|           | 0.40485         | 0.58113   | 0.28057     | 0.28057     | 0.673099168 |           |         |          |
| EIF3L     | ENSG00000100129 | 0.34604   | 0.36466     | 0.58113     | 0.28058     | -0.28001  | 0.61027 |          |
|           | 0.50345         | 0.30733   | 0.28058     | 0.673099168 |             |           |         |          |
| PEBP1     | ENSG00000089220 | 0.58098   | 0.28063     | -0.066769   | 0.52662     | 0.58098   | 0.28063 |          |
|           | -0.53485        | 0.70362   | 0.28063     | 0.673176825 |             |           |         |          |
| NA        | ENSG00000248734 | 0.49348   | 0.31084     | 0.58093     | 0.28064     | 0.58093   | 0.28064 |          |
|           | 0.58093         | 0.28064   | 0.28064     | 0.673176825 |             |           |         |          |
| WFDC3     | ENSG00000124116 | 0.58086   | 0.28067     | 0.2277      | 0.40994     | 0.23988   | 0.40521 |          |
|           | -0.18165        | 0.57207   | 0.28067     | 0.673206497 |             |           |         |          |
| NA        | ENSG00000226487 | -0.99162  | 0.83931     | -0.093786   | 0.53736     | 0.31775   | 0.37534 |          |
|           | 0.58084         | 0.28068   | 0.28068     | 0.673206497 |             |           |         |          |
| VCAN      | ENSG00000038427 | 0.58075   | 0.28071     | -0.29225    | 0.61495     | 0.1789    | 0.42901 |          |
|           | -0.011863       | 0.50473   | 0.28071     | 0.673234904 |             |           |         |          |
| NA        | ENSG00000268078 | 0.58061   | 0.28075     | -0.38445    | 0.64968     | -0.41758  | 0.66187 |          |
|           | -1.2961         | 0.90253   | 0.28075     | 0.673234904 |             |           |         |          |
| RNU6-151P | ENSG00000201028 | -0.13348  | 0.55309     | -0.13348    | 0.55309     | -0.1812   |         |          |
|           | 0.5719          | 0.58049   | 0.28079     | 0.28079     | 0.673234904 |           |         |          |
| N4BP1     | ENSG00000102921 | 0.58046   | 0.2808      | -0.71017    | 0.7612      | -0.78684  | 0.78431 |          |
|           | -0.76852        | 0.77891   | 0.2808      | 0.673234904 |             |           |         |          |
| NA        | ENSG00000267342 | 0.58046   | 0.2808      | 0.58046     | 0.2808      | 0.58046   | 0.2808  |          |
|           | 0.58046         | 0.2808    | 0.2808      | 0.673234904 |             |           |         |          |
| TMC6      | ENSG00000141524 | -0.81318  | 0.79194     | 0.58039     | 0.28082     | -0.52102  | 0.69882 |          |
|           | -1.9968         | 0.97707   | 0.28082     | 0.673234904 |             |           |         |          |
| NA        | ENSG00000236990 | 0.26285   | 0.39633     | -0.2238     | 0.58854     | 0.58039   | 0.28082 |          |
|           | -0.19841        | 0.57864   | 0.28082     | 0.673234904 |             |           |         |          |
| NA        | ENSG00000258448 | 0.58041   | 0.28082     | -0.61612    | 0.73109     | -0.61612  | 0.73109 |          |
|           | -0.61612        | 0.73109   | 0.28082     | 0.673234904 |             |           |         |          |
| TPTEP1    | ENSG00000100181 | 0.58039   | 0.28083     | -1.5339     | 0.93748     | -0.11784  |         |          |
|           | 0.5469          | -0.43255  | 0.66733     | 0.28083     | 0.673234904 |           |         |          |
| NA        | ENSG00000279878 | 0.58037   | 0.28083     | 0.58037     | 0.28083     | 0.58037   | 0.28083 |          |
|           | 0.58037         | 0.28083   | 0.28083     | 0.673234904 |             |           |         |          |
| NA        | ENSG00000274528 | 0.58029   | 0.28086     | 0.58029     | 0.28086     | 0.58029   | 0.28086 |          |
|           | 0.58029         | 0.28086   | 0.28086     | 0.673268956 |             |           |         |          |
| RNU6-325P | ENSG00000223064 | 0.5802    | 0.28089     | 0.5802      | 0.28089     | -0.5625   |         |          |
|           | 0.71311         | 0.5802    | 0.28089     | 0.28089     | 0.673268956 |           |         |          |
| NA        | ENSG00000239311 | 0.58011   | 0.28092     | 0.25075     | 0.401       | 0.25075   | 0.401   | -0.37131 |
|           | 0.6448          | 0.28092   | 0.673268956 |             |             |           |         |          |
| GOLGB1    | ENSG00000173230 | 0.58007   | 0.28093     | 0.075318    | 0.46998     | 0.075318  |         |          |
|           | 0.46998         | 0.024588  | 0.49019     | 0.28093     | 0.673268956 |           |         |          |
| NA        | ENSG00000253472 | 0.58004   | 0.28094     | -0.35491    | 0.63867     | -0.35491  | 0.63867 |          |
|           | -0.35491        | 0.63867   | 0.28094     | 0.673268956 |             |           |         |          |
| NA        | ENSG00000276650 | 0.52153   | 0.301       | -0.29035    | 0.61423     | 0.52962   | 0.29819 |          |
|           | 0.58004         | 0.28094   | 0.28094     | 0.673268956 |             |           |         |          |
| CDH9      | ENSG00000113100 | 0.044602  | 0.48221     | -0.42802    | 0.66568     | 0.57998   | 0.28096 |          |
|           | 0.57998         | 0.28096   | 0.28096     | 0.673268956 |             |           |         |          |
| LINC01886 | ENSG00000224568 | -0.5106   | 0.69518     | 0.57996     | 0.28097     | 0.081693  |         |          |



|             |                 |           |             |             |             |          |         |         |
|-------------|-----------------|-----------|-------------|-------------|-------------|----------|---------|---------|
|             | 0.46745         | -0.038556 | 0.51538     | 0.28097     | 0.673268956 |          |         |         |
| TBC1D7      | ENSG00000145979 | 0.57991   | 0.28099     | 0.067167    | 0.47322     | -0.56678 |         |         |
|             | 0.71457         | -0.20872  | 0.58267     | 0.28099     | 0.673268956 |          |         |         |
| IGHV3-64    | ENSG00000223648 | 0.57986   | 0.281       | 0.57986     | 0.281       | 0.57986  | 0.281   | 0.57986 |
|             | 0.281           | 0.281     | 0.673268956 |             |             |          |         |         |
| NA          | ENSG00000234713 | -0.29009  | 0.61412     | 0.57988     | 0.281       | 0.54396  | 0.29323 |         |
|             | -0.49495        | 0.68968   | 0.281       | 0.673268956 |             |          |         |         |
| E2F3P1      | ENSG00000267046 | 0.57984   | 0.28101     | 0.57984     | 0.28101     | 0.57984  |         |         |
|             | 0.28101         | 0.57984   | 0.28101     | 0.28101     | 0.673268956 |          |         |         |
| NA          | ENSG00000258875 | 0.5798    | 0.28103     | 0.5798      | 0.28103     | 0.5798   | 0.28103 |         |
|             | 0.5798          | 0.28103   | 0.28103     | 0.673283771 |             |          |         |         |
| NA          | ENSG00000279575 | 0.25431   | 0.39963     | 0.25431     | 0.39963     | 0.57962  | 0.28108 |         |
|             | -0.75024        | 0.77345   | 0.28108     | 0.673343015 |             |          |         |         |
| IGSF3       | ENSG00000143061 | 0.29556   | 0.38378     | -0.68454    | 0.75318     | -0.51151 | 0.6955  |         |
|             | 0.5796          | 0.28109   | 0.28109     | 0.673343015 |             |          |         |         |
| RASGRF2     | ENSG00000113319 | -0.60468  | 0.7273      | 0.21856     | 0.4135      | 0.028202 |         |         |
|             | 0.48875         | 0.57954   | 0.28111     | 0.28111     | 0.673343015 |          |         |         |
| C8orf34-AS1 | ENSG00000248801 | 0.57955   | 0.28111     | 0.57955     | 0.28111     | -0.27385 |         |         |
|             | 0.6079          | 0.57955   | 0.28111     | 0.28111     | 0.673343015 |          |         |         |
| NA          | ENSG00000258302 | 0.054336  | 0.47833     | 0.57947     | 0.28114     | -0.40004 | 0.65544 |         |
|             | 0.054336        | 0.47833   | 0.28114     | 0.673365659 |             |          |         |         |
| ZNF335      | ENSG00000198026 | 0.050364  | 0.47992     | -0.45709    | 0.6762      | 0.57941  |         |         |
|             | 0.28116         | -1.008    | 0.84326     | 0.28116     | 0.673365659 |          |         |         |
| ALS2        | ENSG00000003393 | -0.64389  | 0.74018     | -0.69459    | 0.75634     | -0.66212 | 0.74605 |         |
|             | 0.57933         | 0.28118   | 0.28118     | 0.673365659 |             |          |         |         |
| RAB29       | ENSG00000117280 | 0.57934   | 0.28118     | 0.49005     | 0.31205     | -0.10702 | 0.54261 |         |
|             | 0.13419         | 0.44663   | 0.28118     | 0.673365659 |             |          |         |         |
| NA          | ENSG00000250658 | 0.5793    | 0.28119     | 0.08032     | 0.46799     | 0.08032  | 0.46799 |         |
|             | -0.58233        | 0.71983   | 0.28119     | 0.673365659 |             |          |         |         |
| NA          | ENSG00000237473 | 0.11018   | 0.45613     | 0.57922     | 0.28122     | 0.15888  | 0.43688 |         |
|             | 0.15888         | 0.43688   | 0.28122     | 0.673365659 |             |          |         |         |
| TRBV21-1    | ENSG00000251578 | 0.57922   | 0.28122     | 0.57922     | 0.28122     | 0.57922  |         |         |
|             | 0.28122         | 0.57922   | 0.28122     | 0.28122     | 0.673365659 |          |         |         |
| WDR38       | ENSG00000136918 | 0.5792    | 0.28123     | -0.12273    | 0.54884     | 0.52217  | 0.30078 |         |
|             | 0.55763         | 0.28855   | 0.28123     | 0.673365659 |             |          |         |         |
| DHDDS-AS1   | ENSG00000225891 | 0.21074   | 0.41655     | 0.0088969   | 0.49645     | 0.57908  |         |         |
|             | 0.28127         | 0.57908   | 0.28127     | 0.28127     | 0.673395259 |          |         |         |
| NA          | ENSG00000243797 | 0.32232   | 0.37361     | 0.49755     | 0.3094      | 0.38416  | 0.35043 |         |
|             | 0.57907         | 0.28127   | 0.28127     | 0.673395259 |             |          |         |         |
| PCDHB7      | ENSG00000113212 | 0.57899   | 0.2813      | 0.57899     | 0.2813      | 0.57899  |         |         |
|             | 0.2813          | 0.57899   | 0.2813      | 0.2813      | 0.673406567 |          |         |         |
| TMEM126A    | ENSG00000171202 | 0.57892   | 0.28132     | 0.57892     | 0.28132     | -0.7278  |         |         |
|             | 0.76663         | -0.14492  | 0.55761     | 0.28132     | 0.673406567 |          |         |         |
| APOBEC4     | ENSG00000173627 | -0.68338  | 0.75282     | 0.26918     | 0.3939      | -0.81534 |         |         |
|             | 0.79256         | 0.57892   | 0.28132     | 0.28132     | 0.673406567 |          |         |         |
| GBA         | ENSG00000177628 | 0.57889   | 0.28133     | 0.3787      | 0.35245     | 0.49358  | 0.3108  |         |
|             | -0.1547         | 0.56147   | 0.28133     | 0.673406567 |             |          |         |         |
| NA          | ENSG00000272167 | 0.20256   | 0.41974     | 0.57882     | 0.28136     | -1.436   | 0.92449 |         |
|             | -1.436          | 0.92449   | 0.28136     | 0.673445297 |             |          |         |         |
| G2E3        | ENSG00000092140 | 0.57868   | 0.2814      | 0.57868     | 0.2814      | 0.57868  | 0.2814  |         |
|             | 0.57868         | 0.2814    | 0.2814      | 0.673456593 |             |          |         |         |
| NA          | ENSG00000253433 | 0.57868   | 0.2814      | 0.079305    | 0.4684      | 0.57868  | 0.2814  |         |
|             | 0.57868         | 0.2814    | 0.2814      | 0.673456593 |             |          |         |         |
| NA          | ENSG00000272715 | 0.57866   | 0.28141     | 0.57866     | 0.28141     | 0.57866  | 0.28141 |         |
|             | 0.57866         | 0.28141   | 0.28141     | 0.673456593 |             |          |         |         |
| HAGLR       | ENSG00000224189 | 0.57862   | 0.28142     | 0.57862     | 0.28142     | 0.57862  | 0.28142 |         |
|             | -0.11742        | 0.54673   | 0.28142     | 0.673456593 |             |          |         |         |
| NA          | ENSG00000258642 | 0.57856   | 0.28144     | 0.57856     | 0.28144     | 0.57856  | 0.28144 |         |
|             | 0.57856         | 0.28144   | 0.28144     | 0.673471381 |             |          |         |         |
| NA          | ENSG00000250850 | 0.57841   | 0.28149     | 0.57841     | 0.28149     | 0.57841  | 0.28149 |         |
|             | 0.57841         | 0.28149   | 0.28149     | 0.67352488  |             |          |         |         |
| NA          | ENSG00000278892 | 0.57843   | 0.28149     | 0.57843     | 0.28149     | 0.57843  | 0.28149 |         |

|           |                 |           |             |             |             |           |         |  |
|-----------|-----------------|-----------|-------------|-------------|-------------|-----------|---------|--|
|           | 0.57843         | 0.28149   | 0.28149     | 0.67352488  |             |           |         |  |
| GTPBP4    | ENSG00000107937 | 0.20577   | 0.41849     | 0.57833     | 0.28152     | -0.36583  |         |  |
|           | 0.64275         | -0.12183  | 0.54848     | 0.28152     | 0.673563588 |           |         |  |
| MIR377    | ENSG00000199015 | 0.57827   | 0.28154     | 0.57827     | 0.28154     | -0.095525 |         |  |
|           | 0.53805         | -0.74754  | 0.77263     | 0.28154     | 0.673578368 |           |         |  |
| SRL       | ENSG00000185739 | -0.29384  | 0.61556     | 0.57817     | 0.28157     | 0.31449   | 0.37658 |  |
|           | 0.36967         | 0.35581   | 0.28157     | 0.673584001 |             |           |         |  |
| NA        | ENSG00000269535 | 0.57818   | 0.28157     | 0.57818     | 0.28157     | 0.57818   | 0.28157 |  |
|           | 0.57818         | 0.28157   | 0.28157     | 0.673584001 |             |           |         |  |
| NA        | ENSG00000238652 | -0.74638  | 0.77228     | -0.74638    | 0.77228     | -0.74638  | 0.77228 |  |
|           | 0.57812         | 0.28159   | 0.28159     | 0.673598778 |             |           |         |  |
| NA        | ENSG00000254686 | 0.578     | 0.28163     | 0.578       | 0.28163     | 0.55406   |         |  |
|           | 0.28977         | 0.28163   | 0.673661393 |             |             |           |         |  |
| PRPF18    | ENSG00000165630 | -1.1589   | 0.87676     | -1.2548     | 0.89523     | -0.93687  |         |  |
|           | 0.82559         | 0.57787   | 0.28167     | 0.28167     | 0.673724002 |           |         |  |
| NA        | ENSG00000232811 | 0.57773   | 0.28172     | 0.57773     | 0.28172     | 0.57773   | 0.28172 |  |
|           | 0.57773         | 0.28172   | 0.28172     | 0.673810523 |             |           |         |  |
| NA        | ENSG00000198358 | 0.57766   | 0.28175     | 0.40526     | 0.34264     | 0.57766   | 0.28175 |  |
|           | 0.45389         | 0.32495   | 0.28175     | 0.673849202 |             |           |         |  |
| RPL12P16  | ENSG00000204196 | 0.57756   | 0.28178     | 0.57756     | 0.28178     | 0.57756   |         |  |
|           | 0.28178         | 0.57756   | 0.28178     | 0.28178     | 0.67386479  |           |         |  |
| RNA5SP437 | ENSG00000253058 | 0.57753   | 0.28179     | 0.57753     | 0.28179     | 0.26732   |         |  |
|           | 0.39461         | 0.57753   | 0.28179     | 0.28179     | 0.67386479  |           |         |  |
| NA        | ENSG00000273675 | 0.57747   | 0.28181     | 0.57747     | 0.28181     | 0.57747   | 0.28181 |  |
|           | 0.57747         | 0.28181   | 0.28181     | 0.67386479  |             |           |         |  |
| NA        | ENSG00000248924 | 0.57741   | 0.28183     | 0.57741     | 0.28183     | 0.57741   | 0.28183 |  |
|           | 0.57741         | 0.28183   | 0.28183     | 0.67386479  |             |           |         |  |
| RNU6-781P | ENSG00000252186 | 0.57743   | 0.28183     | 0.12185     | 0.45151     | -1.068    |         |  |
|           | 0.85725         | -0.038199 | 0.51524     | 0.28183     | 0.67386479  |           |         |  |
| TAS2R16   | ENSG00000128519 | 0.57735   | 0.28185     | 0.57735     | 0.28185     | 0.57735   |         |  |
|           | 0.28185         | -0.17791  | 0.5706      | 0.28185     | 0.67386479  |           |         |  |
| MRPL42P6  | ENSG00000242810 | 0.57733   | 0.28186     | 0.57733     | 0.28186     | 0.57733   |         |  |
|           | 0.28186         | 0.57733   | 0.28186     | 0.28186     | 0.67386479  |           |         |  |
| CBX1P5    | ENSG00000231516 | -0.44015  | 0.67008     | 0.57725     | 0.28189     | 0.57725   |         |  |
|           | 0.28189         | 0.57725   | 0.28189     | 0.28189     | 0.67386479  |           |         |  |
| NA        | ENSG00000270576 | 0.48677   | 0.31321     | 0.15079     | 0.44007     | 0.57717   | 0.28191 |  |
|           | 0.49564         | 0.31008   | 0.28191     | 0.67386479  |             |           |         |  |
| CCDC117   | ENSG00000159873 | 0.26182   | 0.39673     | 0.26182     | 0.39673     | 0.26182   |         |  |
|           | 0.39673         | 0.57702   | 0.28196     | 0.28196     | 0.67386479  |           |         |  |
| SELPLG    | ENSG00000110876 | 0.2153    | 0.41477     | 0.57698     | 0.28197     | -0.1458   |         |  |
|           | 0.55796         | -0.73269  | 0.76813     | 0.28197     | 0.67386479  |           |         |  |
| NA        | ENSG00000224271 | -0.37604  | 0.64656     | 0.3982      | 0.34524     | 0.57688   | 0.28201 |  |
|           | 0.57688         | 0.28201   | 0.28201     | 0.67386479  |             |           |         |  |
| SMIM24    | ENSG00000095932 | -0.73541  | 0.76896     | 0.13408     | 0.44667     | 0.5768    |         |  |
|           | 0.28204         | -0.29863  | 0.61739     | 0.28204     | 0.67386479  |           |         |  |
| RBM5      | ENSG00000003756 | 0.57676   | 0.28205     | -0.20972    | 0.58306     | -0.066995 | 0.52671 |  |
|           | -1.6837         | 0.95388   | 0.28205     | 0.67386479  |             |           |         |  |
| ENKD1     | ENSG00000124074 | 0.57677   | 0.28205     | 0.25376     | 0.39984     | -0.2828   | 0.61133 |  |
|           | -0.26445        | 0.60428   | 0.28205     | 0.67386479  |             |           |         |  |
| C16orf86  | ENSG00000159761 | 0.57677   | 0.28205     | 0.57677     | 0.28205     | 0.57677   |         |  |
|           | 0.28205         | 0.57677   | 0.28205     | 0.28205     | 0.67386479  |           |         |  |
| NA        | ENSG00000243044 | -0.17277  | 0.56858     | 0.57676     | 0.28205     | 0.57676   | 0.28205 |  |
|           | 0.57676         | 0.28205   | 0.28205     | 0.67386479  |             |           |         |  |
| RNMTL1P1  | ENSG00000231553 | 0.41634   | 0.33858     | 0.41634     | 0.33858     | 0.41634   |         |  |
|           | 0.33858         | 0.57669   | 0.28208     | 0.28208     | 0.67386479  |           |         |  |
| CEBPB-AS1 | ENSG00000277449 | -0.33828  | 0.63243     | -0.34706    | 0.63573     | 0.44374   |         |  |
|           | 0.32861         | 0.57664   | 0.28209     | 0.28209     | 0.67386479  |           |         |  |
| NA        | ENSG00000280196 | 0.57651   | 0.28213     | -0.77806    | 0.78173     | -0.10885  | 0.54334 |  |
|           | -1.3465         | 0.91092   | 0.28213     | 0.67386479  |             |           |         |  |
| RFX2      | ENSG00000087903 | 0.57648   | 0.28215     | 0.25871     | 0.39793     | 0.22409   | 0.41134 |  |
|           | -0.33511        | 0.63123   | 0.28215     | 0.67386479  |             |           |         |  |
| EIF1P2    | ENSG00000235549 | 0.5764    | 0.28217     | 0.5764      | 0.28217     | 0.5764    |         |  |

|           |                 |           |         |            |            |           |         |  |
|-----------|-----------------|-----------|---------|------------|------------|-----------|---------|--|
|           | 0.28217         | -0.95665  | 0.83063 | 0.28217    | 0.67386479 |           |         |  |
| SCLY      | ENSG00000132330 | 0.57638   | 0.28218 | -1.1994    | 0.88482    | -0.76952  | 0.77921 |  |
|           | -0.26124        | 0.60305   | 0.28218 | 0.67386479 |            |           |         |  |
| UNC50     | ENSG00000115446 | -1.4213   | 0.92239 | 0.57634    | 0.28219    | -1.4282   | 0.92338 |  |
|           | -0.22942        | 0.59073   | 0.28219 | 0.67386479 |            |           |         |  |
| RPL10P9   | ENSG00000233913 | -1.5341   | 0.93749 | -2.2337    | 0.98725    | -2.2337   |         |  |
|           | 0.98725         | 0.57632   | 0.2822  | 0.2822     | 0.67386479 |           |         |  |
| ANO1-AS1  | ENSG00000254902 | 0.57633   | 0.2822  | 0.2822     | 0.57633    | 0.2822    | 0.57633 |  |
|           | 0.2822          | 0.57633   | 0.2822  | 0.2822     | 0.67386479 |           |         |  |
| NA        | ENSG00000277135 | 0.57628   | 0.28221 | 0.57628    | 0.28221    | 0.57628   | 0.28221 |  |
|           | 0.57628         | 0.28221   | 0.28221 | 0.67386479 |            |           |         |  |
| NA        | ENSG00000212532 | 0.24911   | 0.40164 | 0.24911    | 0.40164    | 0.57627   | 0.28222 |  |
|           | 0.18078         | 0.42827   | 0.28222 | 0.67386479 |            |           |         |  |
| PGR-AS1   | ENSG00000282728 | -0.17049  | 0.56769 | 0.5762     | 0.28224    | -0.24352  |         |  |
|           | 0.5962          | 0.5762    | 0.28224 | 0.28224    | 0.67386479 |           |         |  |
| NA        | ENSG00000225947 | -0.038515 | 0.51536 | -0.038515  | 0.51536    | -0.91228  | 0.81919 |  |
|           | 0.57618         | 0.28225   | 0.28225 | 0.67386479 |            |           |         |  |
| NA        | ENSG00000250244 | 0.57617   | 0.28225 | -1.2476    | 0.89391    | -0.12597  | 0.55012 |  |
|           | -0.39386        | 0.65316   | 0.28225 | 0.67386479 |            |           |         |  |
| NA        | ENSG00000231569 | 0.38613   | 0.3497  | 0.2951     | 0.38396    | 0.57614   | 0.28226 |  |
|           | 0.38613         | 0.3497    | 0.28226 | 0.67386479 |            |           |         |  |
| NA        | ENSG00000283695 | 0.57609   | 0.28228 | 0.57609    | 0.28228    | 0.57609   | 0.28228 |  |
|           | 0.57609         | 0.28228   | 0.28228 | 0.67386479 |            |           |         |  |
| EZR       | ENSG00000092820 | 0.073758  | 0.4706  | 0.063123   | 0.47483    | 0.57606   | 0.28229 |  |
|           | 0.13214         | 0.44744   | 0.28229 | 0.67386479 |            |           |         |  |
| KCNJ5     | ENSG00000120457 | -0.45244  | 0.67452 | 0.12546    | 0.45008    | 0.46989   | 0.31922 |  |
|           | 0.57604         | 0.28229   | 0.28229 | 0.67386479 |            |           |         |  |
| GPR137C   | ENSG00000180998 | 0.57599   | 0.28231 | -0.89298   | 0.81407    | -0.95446  |         |  |
|           | 0.83008         | 0.061065  | 0.47565 | 0.28231    | 0.67386479 |           |         |  |
| NA        | ENSG00000228399 | -0.12695  | 0.55051 | 0.49065    | 0.31184    | 0.080415  | 0.46795 |  |
|           | 0.57593         | 0.28233   | 0.28233 | 0.67386479 |            |           |         |  |
| EDC3      | ENSG00000179151 | 0.57583   | 0.28236 | -0.53674   | 0.70428    | 0.46513   | 0.32092 |  |
|           | 0.39677         | 0.34577   | 0.28236 | 0.67386479 |            |           |         |  |
| ATP10D    | ENSG00000145246 | 0.5758    | 0.28237 | 0.31712    | 0.37558    | 0.021951  |         |  |
|           | 0.49124         | 0.31712   | 0.37558 | 0.28237    | 0.67386479 |           |         |  |
| NDUFS2    | ENSG00000158864 | 0.16122   | 0.43596 | 0.57578    | 0.28238    | -0.44983  |         |  |
|           | 0.67358         | -0.099382 | 0.53958 | 0.28238    | 0.67386479 |           |         |  |
| LINC01768 | ENSG00000228420 | 0.57578   | 0.28238 | -0.26535   | 0.60463    | 0.57578   |         |  |
|           | 0.28238         | 0.019607  | 0.49218 | 0.28238    | 0.67386479 |           |         |  |
| NA        | ENSG00000223740 | 0.0083504 | 0.49667 | -0.41971   | 0.66265    | -0.084071 | 0.5335  |  |
|           | 0.57568         | 0.28242   | 0.28242 | 0.67386479 |            |           |         |  |
| ABRA      | ENSG00000174429 | 0.57564   | 0.28243 | -0.41002   | 0.65911    | -0.72176  | 0.76478 |  |
|           | -0.52282        | 0.69945   | 0.28243 | 0.67386479 |            |           |         |  |
| NA        | ENSG00000238537 | 0.57553   | 0.28247 | 0.57553    | 0.28247    | -0.3194   | 0.62529 |  |
|           | -1.7863         | 0.96297   | 0.28247 | 0.67386479 |            |           |         |  |
| RNY4P30   | ENSG00000222148 | -1.094    | 0.86301 | 0.57546    | 0.28249    | -1.7294   |         |  |
|           | 0.95813         | -1.7294   | 0.95813 | 0.28249    | 0.67386479 |           |         |  |
| SLC25A33  | ENSG00000171612 | 0.18699   | 0.42583 | 0.5754     | 0.28251    | -0.41512  |         |  |
|           | 0.66097         | -0.11192  | 0.54456 | 0.28251    | 0.67386479 |           |         |  |
| DAGLA     | ENSG00000134780 | 0.055017  | 0.47806 | 0.29714    | 0.38318    | -0.63373  | 0.73687 |  |
|           | 0.57534         | 0.28253   | 0.28253 | 0.67386479 |            |           |         |  |
| NA        | ENSG00000231398 | 0.57527   | 0.28256 | 0.57527    | 0.28256    | 0.57527   | 0.28256 |  |
|           | 0.57527         | 0.28256   | 0.28256 | 0.67386479 |            |           |         |  |
| MIR548AR  | ENSG00000264539 | 0.57526   | 0.28256 | 0.57526    | 0.28256    | 0.57526   |         |  |
|           | 0.28256         | 0.57526   | 0.28256 | 0.28256    | 0.67386479 |           |         |  |
| NA        | ENSG00000268566 | 0.29258   | 0.38492 | 0.57526    | 0.28256    | -1.3431   | 0.91038 |  |
|           | -1.3431         | 0.91038   | 0.28256 | 0.67386479 |            |           |         |  |
| NPY       | ENSG00000122585 | 0.57523   | 0.28257 | 0.39748    | 0.34551    | -0.23938  | 0.5946  |  |
|           | 0.57523         | 0.28257   | 0.28257 | 0.67386479 |            |           |         |  |
| NA        | ENSG00000276131 | -0.24235  | 0.59575 | 0.5752     | 0.28258    | 0.5752    | 0.28258 |  |
|           | 0.5752          | 0.28258   | 0.28258 | 0.67386479 |            |           |         |  |
| OR51F2    | ENSG00000176925 | 0.57517   | 0.28259 | 0.57517    | 0.28259    | 0.57517   |         |  |

|           |                 |          |         |            |            |           |         |
|-----------|-----------------|----------|---------|------------|------------|-----------|---------|
|           | 0.28259         | 0.57517  | 0.28259 | 0.28259    | 0.67386479 |           |         |
| DZIP1L    | ENSG00000158163 | -0.30152 | 0.61849 | 0.089715   | 0.46426    | 0.0075784 |         |
|           | 0.49698         | 0.57513  | 0.2826  | 0.2826     | 0.67386479 |           |         |
| LGALS1    | ENSG00000100097 | 0.57511  | 0.28261 | 0.12796    | 0.44909    | -0.20325  |         |
|           | 0.58053         | 0.11599  | 0.45383 | 0.28261    | 0.67386479 |           |         |
| CYP51A1P2 | ENSG00000233588 | -0.22425 | 0.58872 | 0.45581    | 0.32426    | 0.57506   |         |
|           | 0.28263         | -1.1502  | 0.87498 | 0.28263    | 0.67386479 |           |         |
| NA        | ENSG00000249102 | 0.57502  | 0.28264 | 0.57502    | 0.28264    | 0.57502   | 0.28264 |
|           | 0.57502         | 0.28264  | 0.28264 | 0.67386479 |            |           |         |
| NA        | ENSG00000252014 | -0.4452  | 0.67191 | 0.575      | 0.28265    | -0.36621  | 0.64289 |
|           | -0.36621        | 0.64289  | 0.28265 | 0.67386479 |            |           |         |
| MICAL1    | ENSG00000135596 | 0.57496  | 0.28266 | 0.57496    | 0.28266    | 0.57496   |         |
|           | 0.28266         | 0.57496  | 0.28266 | 0.28266    | 0.67386479 |           |         |
| RWDD4P2   | ENSG00000175741 | 0.57495  | 0.28266 | 0.38143    | 0.35144    | 0.38143   |         |
|           | 0.35144         | 0.3683   | 0.35633 | 0.28266    | 0.67386479 |           |         |
| ZNF971P   | ENSG00000214581 | 0.57494  | 0.28266 | -0.19792   | 0.57845    | -0.19792  |         |
|           | 0.57845         | -0.19792 | 0.57845 | 0.28266    | 0.67386479 |           |         |
| NA        | ENSG00000280359 | 0.57497  | 0.28266 | 0.57497    | 0.28266    | 0.57497   | 0.28266 |
|           | 0.57497         | 0.28266  | 0.28266 | 0.67386479 |            |           |         |
| NA        | ENSG00000241439 | 0.57489  | 0.28268 | -0.118     | 0.54697    | -0.12888  | 0.55127 |
|           | 0.13656         | 0.44569  | 0.28268 | 0.67386479 |            |           |         |
| NA        | ENSG00000213226 | 0.52853  | 0.29857 | -0.37748   | 0.64709    | -0.91811  | 0.82072 |
|           | 0.57481         | 0.28271  | 0.28271 | 0.67386479 |            |           |         |
| FAR2P1    | ENSG00000180178 | 0.57478  | 0.28272 | -0.48347   | 0.68562    | -0.32447  |         |
|           | 0.62721         | -0.66063 | 0.74558 | 0.28272    | 0.67386479 |           |         |
| DDX55P1   | ENSG00000270863 | 0.059639 | 0.47622 | 0.059639   | 0.47622    | 0.26883   |         |
|           | 0.39403         | 0.57472  | 0.28274 | 0.28274    | 0.67386479 |           |         |
| NA        | ENSG00000260478 | 0.13904  | 0.44471 | 0.57461    | 0.28278    | 0.13904   | 0.44471 |
|           | 0.13904         | 0.44471  | 0.28278 | 0.67386479 |            |           |         |
| EPPK1     | ENSG00000261150 | -0.56038 | 0.71239 | -0.38525   | 0.64998    | -0.19695  | 0.57807 |
|           | 0.5745          | 0.28281  | 0.28281 | 0.67386479 |            |           |         |
| NA        | ENSG00000226552 | 0.5745   | 0.28282 | 0.5745     | 0.28282    | 0.5745    | 0.28282 |
|           | -0.092496       | 0.53685  | 0.28282 | 0.67386479 |            |           |         |
| NA        | ENSG00000253735 | -0.84875 | 0.80199 | 0.57448    | 0.28282    | 0.124     | 0.45066 |
|           | -0.076951       | 0.53067  | 0.28282 | 0.67386479 |            |           |         |
| NA        | ENSG00000270137 | 0.57445  | 0.28283 | 0.57445    | 0.28283    | 0.57445   | 0.28283 |
|           | 0.57445         | 0.28283  | 0.28283 | 0.67386479 |            |           |         |
| ISG15     | ENSG00000187608 | -1.0333  | 0.84928 | -1.0333    | 0.84928    | 0.45167   | 0.32575 |
|           | 0.57439         | 0.28285  | 0.28285 | 0.67386479 |            |           |         |
| ADGRA3    | ENSG00000152990 | -0.80545 | 0.78972 | -0.22049   | 0.58726    | 0.5743    |         |
|           | 0.28288         | -0.3526  | 0.63781 | 0.28288    | 0.67386479 |           |         |
| EEF1B2P1  | ENSG00000231169 | 0.57431  | 0.28288 | 0.57431    | 0.28288    | 0.57431   |         |
|           | 0.28288         | 0.57431  | 0.28288 | 0.28288    | 0.67386479 |           |         |
| NA        | ENSG00000259200 | -0.13157 | 0.55234 | 0.57431    | 0.28288    | -0.76038  | 0.77649 |
|           | -0.049999       | 0.51994  | 0.28288 | 0.67386479 |            |           |         |
| EIF3IP1   | ENSG00000237064 | 0.57429  | 0.28289 | 0.57429    | 0.28289    | 0.57429   |         |
|           | 0.28289         | 0.57429  | 0.28289 | 0.28289    | 0.67386479 |           |         |
| MIR345    | ENSG00000198984 | 0.57422  | 0.28291 | 0.57422    | 0.28291    | 0.57422   |         |
|           | 0.28291         | 0.57422  | 0.28291 | 0.28291    | 0.67386479 |           |         |
| NA        | ENSG00000254306 | 0.071856 | 0.47136 | 0.57421    | 0.28291    | 0.071856  | 0.47136 |
|           | -0.19767        | 0.57835  | 0.28291 | 0.67386479 |            |           |         |
| FAT2      | ENSG00000086570 | -0.94677 | 0.82812 | 0.57416    | 0.28293    | -1.0129   | 0.84444 |
|           | -0.96937        | 0.83382  | 0.28293 | 0.67386479 |            |           |         |
| NA        | ENSG00000249562 | 0.57409  | 0.28295 | 0.57409    | 0.28295    | 0.57409   | 0.28295 |
|           | 0.57409         | 0.28295  | 0.28295 | 0.67386479 |            |           |         |
| USP21     | ENSG00000143258 | 0.57407  | 0.28296 | 0.57407    | 0.28296    | 0.57407   | 0.28296 |
|           | 0.57407         | 0.28296  | 0.28296 | 0.67386479 |            |           |         |
| NA        | ENSG00000202146 | -0.10447 | 0.5416  | -2.1873    | 0.98564    | 0.57408   | 0.28296 |
|           | 0.36368         | 0.35805  | 0.28296 | 0.67386479 |            |           |         |
| NA        | ENSG00000224985 | 0.57407  | 0.28296 | 0.57407    | 0.28296    | 0.57407   | 0.28296 |
|           | 0.57407         | 0.28296  | 0.28296 | 0.67386479 |            |           |         |
| E4F1      | ENSG00000167967 | 0.57398  | 0.28299 | -0.34493   | 0.63493    | 0.57398   | 0.28299 |

|            |                 |          |         |             |             |           |         |  |
|------------|-----------------|----------|---------|-------------|-------------|-----------|---------|--|
|            | 0.57398         | 0.28299  | 0.28299 | 0.67386479  |             |           |         |  |
| ATP9B      | ENSG00000166377 | 0.016641 | 0.49336 | 0.57389     | 0.28302     | 0.28537   | 0.38768 |  |
|            | 0.063742        | 0.47459  | 0.28302 | 0.67386479  |             |           |         |  |
| MIR34C     | ENSG00000207562 | 0.57388  | 0.28302 | 0.57388     | 0.28302     | 0.57388   |         |  |
|            | 0.28302         | 0.57388  | 0.28302 | 0.67386479  |             |           |         |  |
| TSR3       | ENSG00000007520 | -1.5272  | 0.93664 | 0.57382     | 0.28304     | -0.55953  | 0.7121  |  |
|            | -1.3628         | 0.91353  | 0.28304 | 0.67386479  |             |           |         |  |
| FAM53A     | ENSG00000174137 | 0.5738   | 0.28305 | -0.62872    | 0.73523     | 0.44943   |         |  |
|            | 0.32656         | 0.36437  | 0.35779 | 0.28305     | 0.67386479  |           |         |  |
| NA         | ENSG00000250572 | 0.39082  | 0.34797 | 0.57378     | 0.28306     | 0.57378   | 0.28306 |  |
|            | -0.84241        | 0.80022  | 0.28306 | 0.67386479  |             |           |         |  |
| NA         | ENSG00000259504 | 0.57378  | 0.28306 | 0.57378     | 0.28306     | 0.10029   | 0.46006 |  |
|            | 0.57378         | 0.28306  | 0.28306 | 0.67386479  |             |           |         |  |
| KRT8P23    | ENSG00000259565 | 0.57378  | 0.28306 | 0.3634      | 0.35815     | -0.025849 |         |  |
|            | 0.51031         | -0.1837  | 0.57288 | 0.28306     | 0.67386479  |           |         |  |
| NA         | ENSG00000230621 | -1.3414  | 0.91011 | -1.3414     | 0.91011     | 0.57374   | 0.28307 |  |
|            | -1.3414         | 0.91011  | 0.28307 | 0.67386479  |             |           |         |  |
| RPS4XP10   | ENSG00000244217 | -0.16909 | 0.56714 | -1.2054     | 0.88598     | -1.5071   |         |  |
|            | 0.93411         | 0.57373  | 0.28307 | 0.28307     | 0.67386479  |           |         |  |
| NA         | ENSG00000255240 | 0.080886 | 0.46777 | -0.40964    | 0.65897     | 0.5737    | 0.28309 |  |
|            | 0.43324         | 0.33242  | 0.28309 | 0.67386479  |             |           |         |  |
| NA         | ENSG00000257258 | 0.57366  | 0.2831  | 0.50365     | 0.30726     | 0.57366   | 0.2831  |  |
|            | 0.57366         | 0.2831   | 0.2831  | 0.67386479  |             |           |         |  |
| NA         | ENSG00000267412 | 0.054793 | 0.47815 | -0.31401    | 0.62324     | 0.57364   | 0.2831  |  |
|            | 0.094387        | 0.4624   | 0.2831  | 0.67386479  |             |           |         |  |
| RNU6-371P  | ENSG00000201153 | 0.57359  | 0.28312 | 0.57359     | 0.28312     | 0.57359   |         |  |
|            | 0.28312         | -1.1882  | 0.88262 | 0.28312     | 0.67386479  |           |         |  |
| NA         | ENSG00000223697 | 0.57353  | 0.28314 | 0.57353     | 0.28314     | 0.57353   | 0.28314 |  |
|            | 0.57353         | 0.28314  | 0.28314 | 0.67386479  |             |           |         |  |
| MTRNR2L7   | ENSG00000256892 | 0.5735   | 0.28315 | 0.5735      | 0.28315     | 0.5735    |         |  |
|            | 0.28315         | 0.5735   | 0.28315 | 0.28315     | 0.67386479  |           |         |  |
| ACTN3      | ENSG00000248746 | -1.0546  | 0.8542  | -1.184      | 0.88178     | 0.040766  | 0.48374 |  |
|            | 0.5734          | 0.28319  | 0.28319 | 0.67386479  |             |           |         |  |
| RNU4ATAC9P | ENSG00000252955 | -0.35077 | 0.63712 | -0.73836    | 0.76985     | 0.5734    |         |  |
|            | 0.28319         | -0.90133 | 0.81629 | 0.28319     | 0.67386479  |           |         |  |
| NA         | ENSG00000278095 | 0.57329  | 0.28322 | 0.57329     | 0.28322     | 0.57329   | 0.28322 |  |
|            | 0.57329         | 0.28322  | 0.28322 | 0.67386479  |             |           |         |  |
| EMILIN3    | ENSG00000183798 | 0.57328  | 0.28323 | 0.57328     | 0.28323     | 0.57328   |         |  |
|            | 0.28323         | 0.57328  | 0.28323 | 0.28323     | 0.67386479  |           |         |  |
| DQX1       | ENSG00000144045 | 0.57326  | 0.28324 | -0.037887   | 0.51511     | 0.57326   | 0.28324 |  |
|            | 0.57326         | 0.28324  | 0.28324 | 0.67386479  |             |           |         |  |
| RN7SKP192  | ENSG00000223223 | -0.31192 | 0.62245 | 0.57323     | 0.28324     | 0.57323   |         |  |
|            | 0.28324         | 0.16941  | 0.43274 | 0.28324     | 0.67386479  |           |         |  |
| TPD52      | ENSG00000076554 | -0.10222 | 0.54071 | 0.57321     | 0.28325     | -0.42142  | 0.66327 |  |
|            | -1.5864         | 0.94367  | 0.28325 | 0.67386479  |             |           |         |  |
| PLCE1      | ENSG00000138193 | 0.36628  | 0.35708 | 0.57323     | 0.28325     | -0.27053  | 0.60662 |  |
|            | -0.25083        | 0.59903  | 0.28325 | 0.67386479  |             |           |         |  |
| LINC02469  | ENSG00000248408 | 0.041164 | 0.48358 | -0.11459    | 0.54562     | 0.57321   |         |  |
|            | 0.28325         | 0.051759 | 0.47936 | 0.28325     | 0.67386479  |           |         |  |
| NA         | ENSG00000216621 | 0.55437  | 0.28966 | 0.1405      | 0.44413     | -0.29163  | 0.61471 |  |
|            | 0.57314         | 0.28328  | 0.28328 | 0.673894152 |             |           |         |  |
| NACAP10    | ENSG00000254253 | -1.4539  | 0.92702 | -1.4539     | 0.92702     | 0.57308   |         |  |
|            | 0.28329         | -0.19906 | 0.57889 | 0.28329     | 0.673894152 |           |         |  |
| NA         | ENSG00000233720 | 0.57299  | 0.28333 | 0.57299     | 0.28333     | 0.57299   | 0.28333 |  |
|            | 0.57299         | 0.28333  | 0.28333 | 0.673901752 |             |           |         |  |
| CHL1-AS1   | ENSG00000234661 | -1.2764  | 0.8991  | -0.095048   | 0.53786     | 0.57296   |         |  |
|            | 0.28334         | 0.57296  | 0.28334 | 0.28334     | 0.673901752 |           |         |  |
| NA         | ENSG00000259109 | 0.57291  | 0.28335 | 0.57291     | 0.28335     | 0.57291   | 0.28335 |  |
|            | 0.57291         | 0.28335  | 0.28335 | 0.673901752 |             |           |         |  |
| RORC       | ENSG00000143365 | -0.54799 | 0.70815 | -0.12076    | 0.54806     | 0.57287   | 0.28337 |  |
|            | 0.57287         | 0.28337  | 0.28337 | 0.673901752 |             |           |         |  |
| NA         | ENSG00000203301 | -0.5558  | 0.71082 | 0.4982      | 0.30917     | 0.57287   | 0.28337 |  |

|            |                 |          |            |             |             |          |         |          |
|------------|-----------------|----------|------------|-------------|-------------|----------|---------|----------|
|            | -0.15772        | 0.56266  | 0.28337    | 0.673901752 |             |          |         |          |
| NA         | ENSG00000180458 | -1.1672  | 0.87844    | -1.1672     | 0.87844     | 0.57283  | 0.28338 |          |
|            | -1.1672         | 0.87844  | 0.28338    | 0.673901752 |             |          |         |          |
| IMPA2      | ENSG00000141401 | -0.44536 | 0.67197    | 0.47862     | 0.3161      | -0.30673 | 0.62048 |          |
|            | 0.57281         | 0.28339  | 0.28339    | 0.673901752 |             |          |         |          |
| NA         | ENSG00000272981 | -0.30234 | 0.6188     | 0.5727      | 0.28342     | -0.30234 | 0.6188  |          |
|            | -0.30234        | 0.6188   | 0.28342    | 0.673921991 |             |          |         |          |
| COL13A1    | ENSG00000197467 | 0.57269  | 0.28343    | -1.5094     | 0.9344      | -0.51028 |         |          |
|            | 0.69507         | -0.56268 | 0.71317    | 0.28343     | 0.673921991 |          |         |          |
| MRPL36     | ENSG00000171421 | 0.57265  | 0.28344    | 0.42667     | 0.33481     | 0.57265  |         |          |
|            | 0.28344         | 0.57265  | 0.28344    | 0.28344     | 0.673921991 |          |         |          |
| RN7SL42P   | ENSG00000263999 | 0.57256  | 0.28347    | 0.57256     | 0.28347     | 0.57256  |         |          |
|            | 0.28347         | 0.57256  | 0.28347    | 0.28347     | 0.673942224 |          |         |          |
| TMEM45B    | ENSG00000151715 | 0.40169  | 0.34396    | -0.082313   | 0.5328      | 0.57255  |         |          |
|            | 0.28348         | 0.25057  | 0.40107    | 0.28348     | 0.673942224 |          |         |          |
| GRIK1      | ENSG00000171189 | 0.52745  | 0.29894    | -0.72969    | 0.76721     | -1.9079  | 0.9718  |          |
|            | 0.57251         | 0.28349  | 0.28349    | 0.673942224 |             |          |         |          |
| UQCRH      | ENSG00000173660 | -1.6375  | 0.94923    | 0.19617     | 0.42224     | 0.57227  | 0.28357 |          |
|            | -0.6516         | 0.74267  | 0.28357    | 0.674099522 |             |          |         |          |
| NA         | ENSG00000248106 | 0.5722   | 0.28359    | -0.10711    | 0.54265     | 0.27801  | 0.3905  |          |
|            | -0.36142        | 0.64111  | 0.28359    | 0.67411418  |             |          |         |          |
| NA         | ENSG00000229567 | 0.57214  | 0.28361    | 0.57214     | 0.28361     | 0.57214  | 0.28361 |          |
|            | 0.57214         | 0.28361  | 0.28361    | 0.674128838 |             |          |         |          |
| HNRNPALP45 | ENSG00000259411 | 0.57205  | 0.28364    | 0.46707     | 0.32023     | 0.57205  |         |          |
|            | 0.28364         | 0.57205  | 0.28364    | 0.28364     | 0.674158148 |          |         |          |
| SNORD17    | ENSG00000212232 | 0.57205  | 0.28365    | 0.57205     | 0.28365     | 0.57205  |         |          |
|            | 0.28365         | 0.57205  | 0.28365    | 0.28365     | 0.674158148 |          |         |          |
| RNU11-4P   | ENSG00000212451 | 0.57187  | 0.28371    | 0.57187     | 0.28371     | 0.57187  |         |          |
|            | 0.28371         | 0.57187  | 0.28371    | 0.28371     | 0.674165651 |          |         |          |
| COL11A2P1  | ENSG00000228688 | 0.16945  | 0.43272    | 0.57186     | 0.28371     | 0.57186  |         |          |
|            | 0.28371         | 0.57186  | 0.28371    | 0.28371     | 0.674165651 |          |         |          |
| NA         | ENSG00000275467 | 0.30249  | 0.38114    | 0.30249     | 0.38114     | 0.30249  | 0.38114 |          |
|            | 0.57184         | 0.28371  | 0.28371    | 0.674165651 |             |          |         |          |
| IRF2BPL    | ENSG00000119669 | 0.57176  | 0.28374    | -0.059541   | 0.52374     | -0.13404 |         |          |
|            | 0.55331         | -1.4811  | 0.93071    | 0.28374     | 0.674165651 |          |         |          |
| LINC02876  | ENSG00000227011 | 0.57177  | 0.28374    | 0.57177     | 0.28374     | 0.57177  |         |          |
|            | 0.28374         | 0.57177  | 0.28374    | 0.28374     | 0.674165651 |          |         |          |
| MYO16      | ENSG00000041515 | 0.073753 | 0.4706     | 0.57173     | 0.28375     | -0.50272 | 0.69242 |          |
|            | 0.20129         | 0.42024  | 0.28375    | 0.674165651 |             |          |         |          |
| RPS24P13   | ENSG00000233190 | 0.57174  | 0.28375    | 0.57174     | 0.28375     | 0.57174  |         |          |
|            | 0.28375         | 0.57174  | 0.28375    | 0.28375     | 0.674165651 |          |         |          |
| PSIP1      | ENSG00000164985 | 0.5511   | 0.29078    | 0.57159     | 0.2838      | -0.27191 | 0.60715 |          |
|            | 0.05332         | 0.47874  | 0.2838     | 0.674251572 |             |          |         |          |
| MTAP       | ENSG00000099810 | -0.88983 | 0.81322    | 0.57147     | 0.28384     | 0.45192  | 0.32566 |          |
|            | -0.12342        | 0.54911  | 0.28384    | 0.674280856 |             |          |         |          |
| NA         | ENSG00000283462 | 0.57148  | 0.28384    | 0.57148     | 0.28384     | 0.57148  | 0.28384 |          |
|            | 0.57148         | 0.28384  | 0.28384    | 0.674280856 |             |          |         |          |
| NA         | ENSG00000232161 | -0.21383 | 0.58466    | 0.57129     | 0.2839      | 0.017879 | 0.49287 |          |
|            | 0.017879        | 0.49287  | 0.2839     | 0.67429052  |             |          |         |          |
| NA         | ENSG00000280474 | 0.5713   | 0.2839     | 0.5713      | 0.2839      | 0.5713   | 0.2839  |          |
|            | 0.5713          | 0.2839   | 0.2839     | 0.67429052  |             |          |         |          |
| GTF2H5     | ENSG00000272047 | 0.375    | 0.35383    | 0.25525     | 0.39927     | 0.57125  | 0.28392 |          |
|            | 0.18173         | 0.4279   | 0.28392    | 0.67429052  |             |          |         |          |
| VASN       | ENSG00000168140 | 0.57114  | 0.28395    | -0.46044    | 0.6774      | -0.42111 | 0.66316 |          |
|            | -0.42111        | 0.66316  | 0.28395    | 0.67429052  |             |          |         |          |
| NA         | ENSG00000241048 | 0.33263  | 0.36971    | 0.57112     | 0.28396     | -0.25802 | 0.60181 |          |
|            | 0.47979         | 0.31569  | 0.28396    | 0.67429052  |             |          |         |          |
| IBTK       | ENSG00000005700 | 0.57109  | 0.28397    | 0.5304      | 0.29792     | 0.062925 | 0.47491 |          |
|            | 0.39332         | 0.34704  | 0.28397    | 0.67429052  |             |          |         |          |
| NA         | ENSG00000225477 | 0.57107  | 0.28398    | -1.47       | 0.92922     | -1.47    | 0.92922 | -0.59124 |
|            | 0.72282         | 0.28398  | 0.67429052 |             |             |          |         |          |
| MIR4270    | ENSG00000263573 | 0.57105  | 0.28398    | 0.57105     | 0.28398     | 0.57105  |         |          |

|            |                 |          |         |             |             |          |         |  |
|------------|-----------------|----------|---------|-------------|-------------|----------|---------|--|
|            | 0.28398         | 0.57105  | 0.28398 | 0.28398     | 0.67429052  |          |         |  |
| NA         | ENSG00000267934 | -1.4058  | 0.9201  | -0.025189   | 0.51005     | 0.57105  | 0.28398 |  |
|            | -0.27848        | 0.60968  | 0.28398 | 0.67429052  |             |          |         |  |
| NUTM2A-AS1 | ENSG00000223482 | 0.2741   | 0.39201 | -0.054578   | 0.52176     | -0.25286 |         |  |
|            | 0.59981         | 0.57098  | 0.28401 | 0.28401     | 0.67429052  |          |         |  |
| SNHG29     | ENSG00000175061 | -0.74341 | 0.77138 | 0.57093     | 0.28402     | -0.74341 |         |  |
|            | 0.77138         | -1.1751  | 0.88002 | 0.28402     | 0.67429052  |          |         |  |
| MYO1C      | ENSG00000197879 | 0.57093  | 0.28402 | 0.027193    | 0.48915     | -1.0963  | 0.86352 |  |
|            | -0.0099575      | 0.50397  | 0.28402 | 0.67429052  |             |          |         |  |
| RNU7-179P  | ENSG00000252417 | 0.57091  | 0.28403 | 0.57091     | 0.28403     | 0.57091  |         |  |
|            | 0.28403         | 0.57091  | 0.28403 | 0.28403     | 0.67429052  |          |         |  |
| MIR762HG   | ENSG00000260083 | 0.57085  | 0.28405 | 0.21846     | 0.41353     | 0.21846  |         |  |
|            | 0.41353         | 0.45873  | 0.32322 | 0.28405     | 0.67429052  |          |         |  |
| SUPT16H    | ENSG00000092201 | 0.14928  | 0.44067 | -1.1413     | 0.87312     | -0.89669 |         |  |
|            | 0.81506         | 0.57076  | 0.28408 | 0.28408     | 0.67429052  |          |         |  |
| NA         | ENSG00000270719 | 0.57072  | 0.28409 | 0.57072     | 0.28409     | 0.57072  | 0.28409 |  |
|            | 0.57072         | 0.28409  | 0.28409 | 0.67429052  |             |          |         |  |
| CILP2      | ENSG00000160161 | 0.5707   | 0.2841  | 0.5707      | 0.2841      | -0.22887 | 0.59051 |  |
|            | -1.1542         | 0.8758   | 0.2841  | 0.67429052  |             |          |         |  |
| CRIP1P4    | ENSG00000182351 | -0.31897 | 0.62513 | 0.57064     | 0.28412     | 0.57064  |         |  |
|            | 0.28412         | 0.57064  | 0.28412 | 0.28412     | 0.67429052  |          |         |  |
| NA         | ENSG00000272784 | -0.31273 | 0.62276 | 0.39084     | 0.34796     | 0.57063  | 0.28412 |  |
|            | 0.57063         | 0.28412  | 0.28412 | 0.67429052  |             |          |         |  |
| THEG       | ENSG00000105549 | 0.53764  | 0.29541 | 0.57055     | 0.28415     | 0.53764  | 0.29541 |  |
|            | -0.048289       | 0.51926  | 0.28415 | 0.67429052  |             |          |         |  |
| LINC01718  | ENSG00000229606 | 0.57054  | 0.28416 | 0.57054     | 0.28416     | 0.57054  |         |  |
|            | 0.28416         | 0.57054  | 0.28416 | 0.28416     | 0.67429052  |          |         |  |
| UPP1       | ENSG00000183696 | 0.2127   | 0.41578 | 0.57049     | 0.28417     | -0.01946 | 0.50776 |  |
|            | -0.10366        | 0.54128  | 0.28417 | 0.67429052  |             |          |         |  |
| NA         | ENSG00000253114 | -0.66939 | 0.74838 | 0.57049     | 0.28417     | 0.038763 | 0.48454 |  |
|            | 0.038763        | 0.48454  | 0.28417 | 0.67429052  |             |          |         |  |
| MEIKIN     | ENSG00000239642 | -0.10713 | 0.54266 | 0.32055     | 0.37428     | 0.57047  |         |  |
|            | 0.28418         | 0.24781  | 0.40214 | 0.28418     | 0.67429052  |          |         |  |
| NA         | ENSG00000279657 | 0.049735 | 0.48017 | 0.57043     | 0.28419     | 0.43378  | 0.33222 |  |
|            | 0.43378         | 0.33222  | 0.28419 | 0.67429052  |             |          |         |  |
| DARS1      | ENSG00000115866 | -1.4923  | 0.93219 | 0.57034     | 0.28422     | 0.53355  | 0.29683 |  |
|            | -0.75107        | 0.7737   | 0.28422 | 0.674296037 |             |          |         |  |
| NA         | ENSG00000236701 | -0.41256 | 0.66003 | -0.097876   | 0.53898     | 0.57036  | 0.28422 |  |
|            | 0.57036         | 0.28422  | 0.28422 | 0.674296037 |             |          |         |  |
| NA         | ENSG00000273000 | 0.57019  | 0.28427 | 0.57019     | 0.28427     | 0.57019  | 0.28427 |  |
|            | 0.57019         | 0.28427  | 0.28427 | 0.674366202 |             |          |         |  |
| ARL15      | ENSG00000185305 | -0.04242 | 0.51692 | 0.16187     | 0.4357      | 0.57019  | 0.28428 |  |
|            | -0.57991        | 0.71901  | 0.28428 | 0.674366202 |             |          |         |  |
| FGL2       | ENSG00000127951 | -0.78335 | 0.78329 | -1.6075     | 0.94603     | 0.57011  | 0.2843  |  |
|            | 0.57011         | 0.2843   | 0.2843  | 0.674366202 |             |          |         |  |
| SLC52A1    | ENSG00000132517 | 0.56996  | 0.28435 | 0.56996     | 0.28435     | 0.56996  |         |  |
|            | 0.28435         | 0.56996  | 0.28435 | 0.28435     | 0.674366202 |          |         |  |
| NA         | ENSG00000250874 | -0.72356 | 0.76533 | -0.054532   | 0.52174     | -0.81735 | 0.79314 |  |
|            | 0.5698          | 0.28441  | 0.28441 | 0.674366202 |             |          |         |  |
| NA         | ENSG00000231985 | 0.56978  | 0.28442 | 0.42809     | 0.33429     | 0.42809  | 0.33429 |  |
|            | 0.42809         | 0.33429  | 0.28442 | 0.674366202 |             |          |         |  |
| MIR4420    | ENSG00000264773 | 0.56972  | 0.28443 | 0.56972     | 0.28443     | 0.56972  |         |  |
|            | 0.28443         | 0.56972  | 0.28443 | 0.28443     | 0.674366202 |          |         |  |
| NA         | ENSG00000229830 | 0.56968  | 0.28445 | -1.4188     | 0.92202     | 0.13323  | 0.447   |  |
|            | 0.13323         | 0.447    | 0.28445 | 0.674366202 |             |          |         |  |
| NA         | ENSG00000263244 | -0.45898 | 0.67687 | 0.56967     | 0.28445     | 0.56967  | 0.28445 |  |
|            | 0.56967         | 0.28445  | 0.28445 | 0.674366202 |             |          |         |  |
| NA         | ENSG00000264711 | 0.3925   | 0.34734 | -0.48145    | 0.6849      | 0.56963  | 0.28446 |  |
|            | 0.36846         | 0.35627  | 0.28446 | 0.674366202 |             |          |         |  |
| RNU6-491P  | ENSG00000251908 | 0.56961  | 0.28447 | 0.37141     | 0.35517     | 0.12213  |         |  |
|            | 0.4514          | 0.16514  | 0.43442 | 0.28447     | 0.674366202 |          |         |  |
| NBL1       | ENSG00000158747 | -1.14    | 0.87285 | 0.53072     | 0.29781     | 0.56958  | 0.28448 |  |

|           |                 |           |             |             |             |           |         |       |
|-----------|-----------------|-----------|-------------|-------------|-------------|-----------|---------|-------|
|           | -0.1984         | 0.57863   | 0.28448     | 0.674366202 |             |           |         |       |
| RPS20P22  | ENSG00000239218 | 0.56953   | 0.2845      | 0.22159     | 0.41232     | 0.56953   |         |       |
|           | 0.2845          | 0.56953   | 0.2845      | 0.2845      | 0.674366202 |           |         |       |
| NA        | ENSG00000219410 | 0.56949   | 0.28451     | 0.56949     | 0.28451     | 0.56949   | 0.28451 |       |
|           | 0.56949         | 0.28451   | 0.28451     | 0.674366202 |             |           |         |       |
| CAPZA1P5  | ENSG00000270729 | 0.31615   | 0.37595     | 0.5694      | 0.28454     | 0.5694    |         |       |
|           | 0.28454         | 0.5694    | 0.28454     | 0.28454     | 0.674366202 |           |         |       |
| OR2Q1P    | ENSG00000273377 | 0.5694    | 0.28454     | 0.5694      | 0.28454     | 0.5694    |         |       |
|           | 0.28454         | 0.5694    | 0.28454     | 0.28454     | 0.674366202 |           |         |       |
| PCDHB18P  | ENSG00000146001 | 0.25965   | 0.39757     | 0.56937     | 0.28455     | 0.25965   |         |       |
|           | 0.39757         | 0.25965   | 0.39757     | 0.28455     | 0.674366202 |           |         |       |
| RNU5A-1   | ENSG00000199568 | 0.56939   | 0.28455     | 0.56939     | 0.28455     | -0.42557  |         |       |
|           | 0.66479         | -0.54536  | 0.70725     | 0.28455     | 0.674366202 |           |         |       |
| NA        | ENSG00000278744 | 0.56936   | 0.28456     | 0.13378     | 0.44679     | 0.56936   | 0.28456 |       |
|           | 0.56936         | 0.28456   | 0.28456     | 0.674366202 |             |           |         |       |
| ZNF382    | ENSG00000161298 | -0.019881 | 0.50793     | -0.49534    | 0.68982     | -0.25233  |         |       |
|           | 0.59961         | 0.56924   | 0.2846      | 0.2846      | 0.674366202 |           |         |       |
| PRELID1P4 | ENSG00000259592 | 0.56924   | 0.2846      | 0.56924     | 0.2846      | 0.56924   |         |       |
|           | 0.2846          | 0.56924   | 0.2846      | 0.2846      | 0.674366202 |           |         |       |
| LINC01627 | ENSG00000224648 | -1.5157   | 0.9352      | 0.56914     | 0.28463     | -1.5157   |         |       |
|           | 0.9352          | -0.87584  | 0.80944     | 0.28463     | 0.674366202 |           |         |       |
| RN7SL713P | ENSG00000264128 | 0.56914   | 0.28463     | 0.56914     | 0.28463     | 0.56914   |         |       |
|           | 0.28463         | 0.56914   | 0.28463     | 0.28463     | 0.674366202 |           |         |       |
| NA        | ENSG00000270987 | 0.56912   | 0.28464     | 0.56912     | 0.28464     | 0.56912   | 0.28464 |       |
|           | 0.56912         | 0.28464   | 0.28464     | 0.674366202 |             |           |         |       |
| CIAO1     | ENSG00000144021 | 0.56899   | 0.28468     | 0.56899     | 0.28468     | 0.56899   | 0.28468 |       |
|           | 0.56899         | 0.28468   | 0.28468     | 0.674366202 |             |           |         |       |
| OR2A15P   | ENSG00000239981 | 0.569     | 0.28468     | 0.569       | 0.28468     | 0.569     | 0.28468 | 0.569 |
|           | 0.28468         | 0.28468   | 0.674366202 |             |             |           |         |       |
| NA        | ENSG00000280205 | 0.56893   | 0.2847      | -0.24623    | 0.59725     | -0.1816   | 0.57205 |       |
|           | -0.92747        | 0.82316   | 0.2847      | 0.674366202 |             |           |         |       |
| NA        | ENSG00000283360 | 0.5689    | 0.28471     | -1.5053     | 0.93387     | -0.58865  | 0.72195 |       |
|           | -0.56666        | 0.71453   | 0.28471     | 0.674366202 |             |           |         |       |
| ENY2      | ENSG00000120533 | 0.56882   | 0.28474     | -0.16568    | 0.56579     | -1.391    | 0.91789 |       |
|           | 0.32122         | 0.37402   | 0.28474     | 0.674366202 |             |           |         |       |
| OR4K4P    | ENSG00000258541 | 0.12307   | 0.45103     | 0.56882     | 0.28474     | -0.084313 |         |       |
|           | 0.5336          | -0.084313 | 0.5336      | 0.28474     | 0.674366202 |           |         |       |
| SCP2      | ENSG00000116171 | 0.20753   | 0.4178      | -0.60349    | 0.72691     | -0.69466  | 0.75636 |       |
|           | 0.5688          | 0.28475   | 0.28475     | 0.674366202 |             |           |         |       |
| SEC61G    | ENSG00000132432 | -0.69625  | 0.75686     | -0.69625    | 0.75686     | 0.48229   |         |       |
|           | 0.3148          | 0.56879   | 0.28475     | 0.28475     | 0.674366202 |           |         |       |
| LINC01807 | ENSG00000232023 | -0.5072   | 0.69399     | 0.56876     | 0.28476     | -0.88538  |         |       |
|           | 0.81202         | 0.35809   | 0.36014     | 0.28476     | 0.674366202 |           |         |       |
| NA        | ENSG00000255084 | 0.3336    | 0.36934     | -0.050261   | 0.52004     | 0.56875   | 0.28476 |       |
|           | 0.32325         | 0.37325   | 0.28476     | 0.674366202 |             |           |         |       |
| LINC00337 | ENSG00000225077 | 0.56871   | 0.28478     | 0.56871     | 0.28478     | 0.56871   |         |       |
|           | 0.28478         | 0.56871   | 0.28478     | 0.28478     | 0.674366202 |           |         |       |
| EHHADH    | ENSG00000113790 | 0.20385   | 0.41924     | 0.56868     | 0.28479     | -0.31606  |         |       |
|           | 0.62402         | 0.39047   | 0.3481      | 0.28479     | 0.674366202 |           |         |       |
| NA        | ENSG00000255233 | 0.14875   | 0.44087     | 0.21654     | 0.41428     | 0.56867   | 0.28479 |       |
|           | 0.2568          | 0.39867   | 0.28479     | 0.674366202 |             |           |         |       |
| NA        | ENSG00000270491 | -0.12022  | 0.54785     | 0.56863     | 0.2848      | 0.52025   | 0.30144 |       |
|           | -0.84989        | 0.80231   | 0.2848      | 0.674366202 |             |           |         |       |
| HAGH      | ENSG00000063854 | 0.37688   | 0.35313     | 0.090897    | 0.46379     | 0.56861   | 0.28481 |       |
|           | 0.23809         | 0.40591   | 0.28481     | 0.674366202 |             |           |         |       |
| NA        | ENSG00000274220 | 0.56862   | 0.28481     | 0.56862     | 0.28481     | 0.56862   | 0.28481 |       |
|           | 0.56862         | 0.28481   | 0.28481     | 0.674366202 |             |           |         |       |
| MRPS16P3  | ENSG00000226336 | -1.9189   | 0.9725      | 0.56855     | 0.28483     | -0.68466  |         |       |
|           | 0.75322         | -0.33334  | 0.63056     | 0.28483     | 0.674366202 |           |         |       |
| NA        | ENSG00000203469 | 0.56853   | 0.28484     | 0.56853     | 0.28484     | 0.56853   | 0.28484 |       |
|           | 0.56853         | 0.28484   | 0.28484     | 0.674366202 |             |           |         |       |
| NA        | ENSG00000248475 | 0.052087  | 0.47923     | 0.5685      | 0.28485     | 0.012262  | 0.49511 |       |



|            |                 |           |         |             |             |            |         |  |
|------------|-----------------|-----------|---------|-------------|-------------|------------|---------|--|
|            | -0.033153       | 0.51322   | 0.28485 | 0.674366202 |             |            |         |  |
| NA         | ENSG00000237268 | -0.26531  | 0.60461 | -0.27026    | 0.60652     | 0.56836    | 0.28489 |  |
|            | -1.5899         | 0.94407   | 0.28489 | 0.674366202 |             |            |         |  |
| NA         | ENSG00000261829 | 0.56833   | 0.2849  | 0.56833     | 0.2849      | 0.56833    | 0.2849  |  |
|            | 0.56833         | 0.2849    | 0.2849  | 0.674366202 |             |            |         |  |
| ZNF861P    | ENSG00000267235 | 0.56834   | 0.2849  | 0.56834     | 0.2849      | 0.56834    |         |  |
|            | 0.2849          | 0.56834   | 0.2849  | 0.2849      | 0.674366202 |            |         |  |
| NA         | ENSG00000275201 | 0.43624   | 0.33133 | -0.46368    | 0.67856     | -0.7173    | 0.7634  |  |
|            | 0.56835         | 0.2849    | 0.2849  | 0.674366202 |             |            |         |  |
| NA         | ENSG00000187811 | 0.56827   | 0.28493 | -0.87136    | 0.80822     | -0.0092536 | 0.50369 |  |
|            | -0.48801        | 0.68723   | 0.28493 | 0.67440086  |             |            |         |  |
| NPM1P45    | ENSG00000265593 | 0.56819   | 0.28495 | 0.56819     | 0.28495     | 0.56819    |         |  |
|            | 0.28495         | 0.56819   | 0.28495 | 0.28495     | 0.67440086  |            |         |  |
| LINGO1     | ENSG00000169783 | 0.3599    | 0.35946 | 0.3599      | 0.35946     | 0.56815    |         |  |
|            | 0.28497         | -0.45307  | 0.67475 | 0.28497     | 0.67440086  |            |         |  |
| ZBTB10     | ENSG00000205189 | -1.2994   | 0.9031  | -1.2994     | 0.9031      | -1.2994    |         |  |
|            | 0.9031          | 0.56813   | 0.28497 | 0.28497     | 0.67440086  |            |         |  |
| PFN1P1     | ENSG00000233328 | 0.56802   | 0.28501 | 0.56802     | 0.28501     | 0.56802    |         |  |
|            | 0.28501         | 0.56802   | 0.28501 | 0.28501     | 0.674462767 |            |         |  |
| LINC02404  | ENSG00000257893 | -0.12703  | 0.55054 | 0.56787     | 0.28506     | -0.12703   |         |  |
|            | 0.55054         | -0.12703  | 0.55054 | 0.28506     | 0.674548332 |            |         |  |
| SUSD3      | ENSG00000157303 | 0.56772   | 0.28511 | 0.56772     | 0.28511     | -0.049589  | 0.51978 |  |
|            | -0.045591       | 0.51818   | 0.28511 | 0.674612073 |             |            |         |  |
| RPS26P31   | ENSG00000235459 | 0.56768   | 0.28512 | 0.56768     | 0.28512     | 0.56768    |         |  |
|            | 0.28512         | 0.56768   | 0.28512 | 0.28512     | 0.674612073 |            |         |  |
| NA         | ENSG00000265379 | -0.33965  | 0.63294 | 0.56766     | 0.28513     | -0.33965   | 0.63294 |  |
|            | -0.33965        | 0.63294   | 0.28513 | 0.674612073 |             |            |         |  |
| KLHL17     | ENSG00000187961 | 0.56762   | 0.28515 | 0.13105     | 0.44787     | 0.47635    |         |  |
|            | 0.31691         | -0.1282   | 0.551   | 0.28515     | 0.674612073 |            |         |  |
| NEFM       | ENSG00000104722 | 0.56758   | 0.28516 | 0.56758     | 0.28516     | -2.0956    | 0.98194 |  |
|            | 0.26309         | 0.39624   | 0.28516 | 0.674612073 |             |            |         |  |
| ECHS1      | ENSG00000127884 | -0.89715  | 0.81518 | -0.89715    | 0.81518     | -0.89715   | 0.81518 |  |
|            | 0.56755         | 0.28517   | 0.28517 | 0.674612073 |             |            |         |  |
| CENPQ      | ENSG00000031691 | 0.5667    | 0.28546 | -0.25541    | 0.6008      | 0.56731    | 0.28525 |  |
|            | -0.25541        | 0.6008    | 0.28525 | 0.674701252 |             |            |         |  |
| NA         | ENSG00000231700 | 0.56727   | 0.28527 | 0.56727     | 0.28527     | 0.56727    | 0.28527 |  |
|            | 0.56727         | 0.28527   | 0.28527 | 0.674701252 |             |            |         |  |
| GLOD4      | ENSG00000167699 | 0.073416  | 0.47074 | 0.060115    | 0.47603     | 0.56722    | 0.28528 |  |
|            | 0.56722         | 0.28528   | 0.28528 | 0.674701252 |             |            |         |  |
| RPL21P121  | ENSG00000237382 | 0.56717   | 0.2853  | 0.56717     | 0.2853      | 0.56717    |         |  |
|            | 0.2853          | 0.56717   | 0.2853  | 0.2853      | 0.674701252 |            |         |  |
| RNU1-146P  | ENSG00000200885 | -0.027569 | 0.511   | 0.37867     | 0.35247     | 0.56715    | 0.28531 |  |
|            | -0.84336        | 0.80049   | 0.28531 | 0.674701252 |             |            |         |  |
| NA         | ENSG00000233415 | -0.11023  | 0.54389 | -0.46344    | 0.67848     | 0.56711    | 0.28532 |  |
|            | 0.56711         | 0.28532   | 0.28532 | 0.674701252 |             |            |         |  |
| RN7SL83P   | ENSG00000241756 | 0.56712   | 0.28532 | 0.56712     | 0.28532     | 0.56712    |         |  |
|            | 0.28532         | 0.56712   | 0.28532 | 0.28532     | 0.674701252 |            |         |  |
| ABCC11     | ENSG00000121270 | -0.50053  | 0.69165 | 0.49493     | 0.31032     | 0.37572    |         |  |
|            | 0.35356         | 0.56704   | 0.28534 | 0.28534     | 0.674701252 |            |         |  |
| PYM1       | ENSG00000170473 | 0.56705   | 0.28534 | 0.47164     | 0.31859     | -0.4918    | 0.68857 |  |
|            | -0.20596        | 0.58159   | 0.28534 | 0.674701252 |             |            |         |  |
| TRIM22     | ENSG00000132274 | -0.27662  | 0.60896 | 0.56701     | 0.28535     | 0.56701    |         |  |
|            | 0.28535         | -0.30209  | 0.61871 | 0.28535     | 0.674701252 |            |         |  |
| GABPB1-AS1 | ENSG00000244879 | -0.28333  | 0.61154 | -0.28333    | 0.61154     | -0.28333   |         |  |
|            | 0.61154         | 0.56699   | 0.28536 | 0.28536     | 0.674701252 |            |         |  |
| BCAR3-AS1  | ENSG00000224093 | 0.56693   | 0.28538 | 0.56693     | 0.28538     | 0.56693    |         |  |
|            | 0.28538         | 0.018754  | 0.49252 | 0.28538     | 0.674715802 |            |         |  |
| NA         | ENSG00000225570 | 0.56689   | 0.2854  | 0.56689     | 0.2854      | 0.56689    | 0.2854  |  |
|            | 0.56689         | 0.2854    | 0.2854  | 0.674730351 |             |            |         |  |
| F2RL2      | ENSG00000164220 | 0.56674   | 0.28545 | 0.56674     | 0.28545     | 0.56674    | 0.28545 |  |
|            | 0.18131         | 0.42806   | 0.28545 | 0.67481582  |             |            |         |  |
| SMTN       | ENSG00000183963 | 0.40964   | 0.34103 | 0.56664     | 0.28548     | -0.086122  | 0.53432 |  |

|          |                 |           |         |             |             |          |         |         |
|----------|-----------------|-----------|---------|-------------|-------------|----------|---------|---------|
|          | -0.29548        | 0.61619   | 0.28548 | 0.674854002 |             |          |         |         |
| LILRA1   | ENSG00000104974 | 0.078247  | 0.46882 | -0.00899    | 0.50359     | 0.093122 |         |         |
|          | 0.4629          | 0.56645   | 0.28554 | 0.28554     | 0.674921254 |          |         |         |
| SLC44A5  | ENSG00000137968 | 0.56645   | 0.28554 | -0.16711    | 0.56636     | 0.19343  |         |         |
|          | 0.42331         | -0.53285  | 0.70293 | 0.28554     | 0.674921254 |          |         |         |
| MYL3     | ENSG00000160808 | 0.56644   | 0.28555 | -1.6641     | 0.95195     | -1.6545  | 0.95098 |         |
|          | -0.21953        | 0.58688   | 0.28555 | 0.674921254 |             |          |         |         |
| ITIH5    | ENSG00000123243 | -0.95735  | 0.8308  | 0.56624     | 0.28562     | -0.63653 | 0.73778 |         |
|          | -0.45544        | 0.6756    | 0.28562 | 0.67497364  |             |          |         |         |
| SNORD68  | ENSG00000200084 | 0.56613   | 0.28565 | 0.56613     | 0.28565     | 0.56613  |         |         |
|          | 0.28565         | 0.56613   | 0.28565 | 0.28565     | 0.67497364  |          |         |         |
| SC5D     | ENSG00000109929 | 0.56607   | 0.28567 | -0.68524    | 0.7534      | -0.33188 | 0.63001 |         |
|          | 0.20051         | 0.42054   | 0.28567 | 0.67497364  |             |          |         |         |
| SLX4     | ENSG00000188827 | 0.56607   | 0.28567 | -0.19029    | 0.57546     | 0.44444  | 0.32836 |         |
|          | -0.020237       | 0.50807   | 0.28567 | 0.67497364  |             |          |         |         |
| NA       | ENSG00000233183 | 0.030909  | 0.48767 | -0.7229     | 0.76513     | 0.56606  | 0.28568 |         |
|          | -0.76853        | 0.77891   | 0.28568 | 0.67497364  |             |          |         |         |
| NA       | ENSG00000279532 | 0.56605   | 0.28568 | 0.56605     | 0.28568     | 0.56605  | 0.28568 |         |
|          | 0.56605         | 0.28568   | 0.28568 | 0.67497364  |             |          |         |         |
| NA       | ENSG00000231881 | 0.093129  | 0.4629  | -0.65867    | 0.74495     | -0.13992 | 0.55564 |         |
|          | 0.56603         | 0.28569   | 0.28569 | 0.67497364  |             |          |         |         |
| NA       | ENSG00000261630 | 0.56596   | 0.28571 | 0.56596     | 0.28571     | 0.56596  | 0.28571 |         |
|          | 0.56596         | 0.28571   | 0.28571 | 0.67497364  |             |          |         |         |
| NA       | ENSG00000279218 | 0.56593   | 0.28572 | 0.56593     | 0.28572     | 0.20129  | 0.42024 |         |
|          | -0.32701        | 0.62817   | 0.28572 | 0.67497364  |             |          |         |         |
| NA       | ENSG00000220913 | 0.56591   | 0.28573 | 0.56591     | 0.28573     | 0.56591  | 0.28573 |         |
|          | 0.56591         | 0.28573   | 0.28573 | 0.67497364  |             |          |         |         |
| AJAP1    | ENSG00000196581 | -0.4856   | 0.68637 | 0.49786     | 0.30929     | 0.56582  | 0.28576 |         |
|          | -0.1195         | 0.54756   | 0.28576 | 0.67497364  |             |          |         |         |
| NA       | ENSG00000255966 | 0.56571   | 0.2858  | 0.56571     | 0.2858      | 0.56571  | 0.2858  |         |
|          | 0.56571         | 0.2858    | 0.2858  | 0.67497364  |             |          |         |         |
| NA       | ENSG00000203266 | 0.064909  | 0.47412 | 0.56566     | 0.28581     | 0.56566  | 0.28581 |         |
|          | -0.082497       | 0.53287   | 0.28581 | 0.67497364  |             |          |         |         |
| HM13-IT1 | ENSG00000235313 | 0.56563   | 0.28582 | -0.038549   | 0.51538     | 0.56563  |         |         |
|          | 0.28582         | 0.56563   | 0.28582 | 0.28582     | 0.67497364  |          |         |         |
| NA       | ENSG00000251863 | 0.56565   | 0.28582 | -1.8645     | 0.96887     | -2.9616  | 0.99847 |         |
|          | -2.9616         | 0.99847   | 0.28582 | 0.67497364  |             |          |         |         |
| IGHA2    | ENSG00000211890 | 0.56562   | 0.28583 | 0.45959     | 0.32291     | -0.43687 | 0.6689  |         |
|          | 0.25785         | 0.39826   | 0.28583 | 0.67497364  |             |          |         |         |
| NA       | ENSG00000231601 | 0.56552   | 0.28586 | -0.076751   | 0.53059     | -1.0024  | 0.84192 |         |
|          | -0.026638       | 0.51063   | 0.28586 | 0.67497364  |             |          |         |         |
| MIR4804  | ENSG00000263593 | 0.56551   | 0.28586 | 0.56551     | 0.28586     | 0.56551  |         |         |
|          | 0.28586         | 0.56551   | 0.28586 | 0.28586     | 0.67497364  |          |         |         |
| C1QTNF1  | ENSG00000173918 | 0.47038   | 0.31904 | 0.12348     | 0.45086     | 0.56547  |         |         |
|          | 0.28588         | 0.029537  | 0.48822 | 0.28588     | 0.67497364  |          |         |         |
| DNM3OS   | ENSG00000230630 | 0.56546   | 0.28588 | 0.14341     | 0.44298     | 0.14341  |         |         |
|          | 0.44298         | 0.14341   | 0.44298 | 0.28588     | 0.67497364  |          |         |         |
| FAM85B   | ENSG00000253893 | 0.56545   | 0.28588 | 0.22355     | 0.41156     | -0.81846 |         |         |
|          | 0.79345         | -0.85156  | 0.80277 | 0.28588     | 0.67497364  |          |         |         |
| NA       | ENSG00000283585 | -0.63428  | 0.73705 | -1.1602     | 0.87701     | 0.56541  | 0.2859  |         |
|          | -0.72061        | 0.76442   | 0.2859  | 0.67497364  |             |          |         |         |
| MIR5008  | ENSG00000264483 | 0.56537   | 0.28591 | -0.32825    | 0.62864     | -0.32825 |         |         |
|          | 0.62864         | 0.0069104 | 0.49724 | 0.28591     | 0.67497364  |          |         |         |
| PSME4    | ENSG00000068878 | -0.17408  | 0.5691  | -0.15245    | 0.56059     | -0.17408 | 0.5691  |         |
|          | 0.56531         | 0.28593   | 0.28593 | 0.67497364  |             |          |         |         |
| TIGD7    | ENSG00000140993 | 0.42523   | 0.33534 | 0.56527     | 0.28594     | 0.48764  | 0.3129  |         |
|          | -0.64618        | 0.74092   | 0.28594 | 0.67497364  |             |          |         |         |
| CHCHD6   | ENSG00000159685 | -0.1295   | 0.55152 | -0.71786    | 0.76358     | 0.56529  |         |         |
|          | 0.28594         | -0.9254   | 0.82262 | 0.28594     | 0.67497364  |          |         |         |
| DLSTP1   | ENSG00000181227 | 0.56522   | 0.28596 | 0.56522     | 0.28596     | 0.56522  |         |         |
|          | 0.28596         | 0.56522   | 0.28596 | 0.28596     | 0.67497364  |          |         |         |
| NA       | ENSG00000282993 | -1.1552   | 0.876   | -1.1552     | 0.876       | 0.11759  | 0.4532  | 0.56521 |

|           |                 |           |            |             |             |           |         |  |
|-----------|-----------------|-----------|------------|-------------|-------------|-----------|---------|--|
|           | 0.28596         | 0.28596   | 0.67497364 |             |             |           |         |  |
| KNL1      | ENSG00000137812 | 0.022877  | 0.49087    | 0.56514     | 0.28599     | -0.2859   | 0.61252 |  |
|           | -0.28559        | 0.6124    | 0.28599    | 0.675011755 |             |           |         |  |
| TPM3P9    | ENSG00000241015 | 0.56505   | 0.28602    | 0.56505     | 0.28602     | 0.56505   |         |  |
|           | 0.28602         | 0.56505   | 0.28602    | 0.28602     | 0.675049867 |           |         |  |
| SLCO3A1   | ENSG00000176463 | 0.30354   | 0.38074    | -0.099846   | 0.53977     | 0.565     | 0.28604 |  |
|           | -0.22496        | 0.58899   | 0.28604    | 0.675055281 |             |           |         |  |
| LAMA3     | ENSG00000053747 | -0.52604  | 0.70057    | -1.4401     | 0.92508     | 0.56497   | 0.28605 |  |
|           | -0.93263        | 0.8245    | 0.28605    | 0.675055281 |             |           |         |  |
| SIX4      | ENSG00000100625 | -1.4882   | 0.93165    | -0.71405    | 0.7624      | -0.46253  | 0.67815 |  |
|           | 0.56488         | 0.28608   | 0.28608    | 0.675060694 |             |           |         |  |
| RPS18P6   | ENSG00000244048 | -0.21119  | 0.58363    | 0.56489     | 0.28608     | -0.14773  |         |  |
|           | 0.55872         | -0.14773  | 0.55872    | 0.28608     | 0.675060694 |           |         |  |
| EGFEM1P   | ENSG00000206120 | 0.56481   | 0.2861     | -0.73929    | 0.77014     | -0.49106  |         |  |
|           | 0.68831         | -0.22987  | 0.5909     | 0.2861      | 0.675075199 |           |         |  |
| ADAMTSL3  | ENSG00000156218 | -0.76683  | 0.77841    | -0.59714    | 0.72479     | -0.74055  |         |  |
|           | 0.77052         | 0.5647    | 0.28614    | 0.28614     | 0.675133201 |           |         |  |
| NA        | ENSG00000232240 | 0.5646    | 0.28617    | 0.5646      | 0.28617     | 0.5646    | 0.28617 |  |
|           | 0.5646          | 0.28617   | 0.28617    | 0.675133201 |             |           |         |  |
| NA        | ENSG00000257580 | -0.54583  | 0.70741    | 0.16757     | 0.43346     | 0.56461   | 0.28617 |  |
|           | 0.40515         | 0.34268   | 0.28617    | 0.675133201 |             |           |         |  |
| RECK      | ENSG00000122707 | 0.20381   | 0.41925    | 0.34768     | 0.36404     | -0.19405  | 0.57693 |  |
|           | 0.56457         | 0.28618   | 0.28618    | 0.675133201 |             |           |         |  |
| NA        | ENSG00000244545 | 0.56447   | 0.28622    | 0.56447     | 0.28622     | 0.56447   | 0.28622 |  |
|           | 0.56447         | 0.28622   | 0.28622    | 0.675176688 |             |           |         |  |
| PRR11     | ENSG00000068489 | -0.37505  | 0.64619    | -0.37505    | 0.64619     | -0.37505  | 0.64619 |  |
|           | 0.56439         | 0.28624   | 0.28624    | 0.675176688 |             |           |         |  |
| NCOA1     | ENSG00000084676 | 0.30574   | 0.3799     | 0.42865     | 0.33409     | 0.52992   | 0.29808 |  |
|           | 0.5644          | 0.28624   | 0.28624    | 0.675176688 |             |           |         |  |
| FBXW7     | ENSG00000109670 | 0.40559   | 0.34252    | 0.38715     | 0.34932     | 0.56433   | 0.28627 |  |
|           | -0.13974        | 0.55557   | 0.28627    | 0.675205673 |             |           |         |  |
| HAS2      | ENSG00000170961 | -0.012626 | 0.50504    | 0.36692     | 0.35684     | 0.094431  | 0.46238 |  |
|           | 0.5643          | 0.28628   | 0.28628    | 0.675205673 |             |           |         |  |
| ETFRF1    | ENSG00000205707 | -0.87732  | 0.80984    | -0.27074    | 0.6067      | 0.56413   |         |  |
|           | 0.28633         | 0.56413   | 0.28633    | 0.28633     | 0.675290916 |           |         |  |
| TMEM40    | ENSG00000088726 | -0.73971  | 0.77026    | -1.1528     | 0.8755      | 0.56396   |         |  |
|           | 0.28639         | 0.08372   | 0.46664    | 0.28639     | 0.675399734 |           |         |  |
| NA        | ENSG00000228048 | 0.30609   | 0.37977    | 0.30609     | 0.37977     | 0.56377   | 0.28645 |  |
|           | -0.40611        | 0.65767   | 0.28645    | 0.675412132 |             |           |         |  |
| NA        | ENSG00000271583 | 0.56374   | 0.28646    | 0.47599     | 0.31704     | 0.0034365 | 0.49863 |  |
|           | 0.0034365       | 0.49863   | 0.28646    | 0.675412132 |             |           |         |  |
| NA        | ENSG00000238938 | 0.56377   | 0.28646    | 0.20416     | 0.41912     | 0.24718   | 0.40239 |  |
|           | -0.37928        | 0.64776   | 0.28646    | 0.675412132 |             |           |         |  |
| IGLV11-55 | ENSG00000211641 | 0.56374   | 0.28647    | 0.56374     | 0.28647     | 0.56374   |         |  |
|           | 0.28647         | 0.56374   | 0.28647    | 0.28647     | 0.675412132 |           |         |  |
| TEX15     | ENSG00000133863 | -0.6113   | 0.7295     | -0.6113     | 0.7295      | 0.56368   | 0.28649 |  |
|           | 0.43941         | 0.33018   | 0.28649    | 0.675412132 |             |           |         |  |
| NA        | ENSG00000259124 | 0.56363   | 0.2865     | -0.2929     | 0.6152      | 0.56363   | 0.2865  |  |
|           | -0.61498        | 0.73071   | 0.2865     | 0.675412132 |             |           |         |  |
| LINC00492 | ENSG00000250958 | 0.54291   | 0.2936     | 0.5636      | 0.28651     | 0.47498   |         |  |
|           | 0.3174          | 0.55952   | 0.2879     | 0.28651     | 0.675412132 |           |         |  |
| NA        | ENSG00000225745 | 0.56361   | 0.28651    | -0.55423    | 0.71029     | -0.55423  | 0.71029 |  |
|           | -0.55423        | 0.71029   | 0.28651    | 0.675412132 |             |           |         |  |
| RN7SKP58  | ENSG00000222942 | 0.56358   | 0.28652    | -1.0185     | 0.84577     | -1.4527   |         |  |
|           | 0.92685         | -0.045144 | 0.518      | 0.28652     | 0.675412132 |           |         |  |
| SCARF1    | ENSG00000074660 | 0.36493   | 0.35758    | -0.92845    | 0.82341     | -0.41107  |         |  |
|           | 0.65949         | 0.5633    | 0.28661    | 0.28661     | 0.675447627 |           |         |  |
| UGT2A1    | ENSG00000173610 | -0.64184  | 0.73951    | -0.9722     | 0.83452     | -0.030099 |         |  |
|           | 0.51201         | 0.56328   | 0.28662    | 0.28662     | 0.675447627 |           |         |  |
| NA        | ENSG00000280420 | 0.56329   | 0.28662    | 0.56329     | 0.28662     | 0.56329   | 0.28662 |  |
|           | 0.56329         | 0.28662   | 0.28662    | 0.675447627 |             |           |         |  |
| VN1R42P   | ENSG00000223476 | -0.92319  | 0.82205    | 0.35864     | 0.35993     | -0.92319  |         |  |

|           |                 |            |         |             |             |           |         |
|-----------|-----------------|------------|---------|-------------|-------------|-----------|---------|
|           | 0.82205         | 0.56327    | 0.28663 | 0.28663     | 0.675447627 |           |         |
| DBF4P1    | ENSG00000235489 | 0.56324    | 0.28664 | 0.28664     | -0.029143   | 0.51162   | 0.56324 |
|           | 0.28664         | -1.1891    | 0.8828  | 0.28664     | 0.675447627 |           |         |
| NA        | ENSG00000280103 | 0.56324    | 0.28664 | 0.56324     | 0.28664     | 0.56324   | 0.28664 |
|           | 0.56324         | 0.28664    | 0.28664 | 0.675447627 |             |           |         |
| PLEKHG3   | ENSG00000126822 | 0.47196    | 0.31848 | 0.33861     | 0.36745     | 0.47196   |         |
|           | 0.31848         | 0.56321    | 0.28665 | 0.28665     | 0.675447627 |           |         |
| RPL7AP31  | ENSG00000242083 | 0.56307    | 0.28669 | 0.28669     | 0.56307     | 0.28669   | 0.56307 |
|           | 0.28669         | 0.56307    | 0.28669 | 0.28669     | 0.675447627 |           |         |
| LINC00841 | ENSG00000233395 | -1.2397    | 0.89246 | -1.0898     | 0.86209     | 0.56299   |         |
|           | 0.28672         | 0.56299    | 0.28672 | 0.28672     | 0.675447627 |           |         |
| C18orf63  | ENSG00000206043 | -1.0436    | 0.85166 | 0.36801     | 0.35643     | 0.56297   |         |
|           | 0.28673         | -0.0053173 | 0.50212 | 0.28673     | 0.675447627 |           |         |
| EIF4G3    | ENSG00000075151 | 0.49368    | 0.31077 | 0.33892     | 0.36734     | 0.56293   |         |
|           | 0.28674         | -0.16873   | 0.567   | 0.28674     | 0.675447627 |           |         |
| LINC01688 | ENSG00000227181 | 0.56293    | 0.28674 | 0.17289     | 0.43137     | 0.56293   |         |
|           | 0.28674         | 0.56293    | 0.28674 | 0.28674     | 0.675447627 |           |         |
| NA        | ENSG00000259641 | 0.56291    | 0.28675 | 0.18447     | 0.42682     | -0.27673  | 0.609   |
|           | 0.11942         | 0.45247    | 0.28675 | 0.675447627 |             |           |         |
| LSM14A    | ENSG00000257103 | 0.56284    | 0.28677 | -1.5943     | 0.94457     | 0.15626   |         |
|           | 0.43792         | 0.15626    | 0.43792 | 0.28677     | 0.675447627 |           |         |
| SLC31A1   | ENSG00000136868 | -0.056853  | 0.52267 | -0.056853   | 0.52267     | -0.056853 |         |
|           | 0.52267         | 0.56281    | 0.28678 | 0.28678     | 0.675447627 |           |         |
| RNFT1P3   | ENSG00000187870 | -1.0651    | 0.85658 | 0.284       | 0.3882      | -0.057282 | 0.52284 |
|           | 0.56283         | 0.28678    | 0.28678 | 0.675447627 |             |           |         |
| RNU7-116P | ENSG00000252749 | 0.56278    | 0.28679 | 0.56278     | 0.28679     | 0.56278   |         |
|           | 0.28679         | 0.56278    | 0.28679 | 0.28679     | 0.675447627 |           |         |
| MERTK     | ENSG00000153208 | 0.12097    | 0.45186 | 0.25515     | 0.39931     | 0.17087   | 0.43216 |
|           | 0.56274         | 0.28681    | 0.28681 | 0.675447627 |             |           |         |
| MIR670HG  | ENSG00000235661 | 0.31204    | 0.37751 | 0.4756      | 0.31718     | 0.5627    |         |
|           | 0.28682         | 0.4756     | 0.31718 | 0.28682     | 0.675447627 |           |         |
| NA        | ENSG00000232073 | 0.041511   | 0.48344 | 0.56266     | 0.28683     | -1.1508   | 0.87509 |
|           | -1.1508         | 0.87509    | 0.28683 | 0.675447627 |             |           |         |
| ATP1A2    | ENSG00000018625 | 0.40989    | 0.34094 | 0.56265     | 0.28684     | 0.2929    |         |
|           | 0.3848          | -0.41438   | 0.6607  | 0.28684     | 0.675447627 |           |         |
| RNU7-134P | ENSG00000238447 | 0.56265    | 0.28684 | 0.56265     | 0.28684     | 0.56265   |         |
|           | 0.28684         | 0.56265    | 0.28684 | 0.28684     | 0.675447627 |           |         |
| NA        | ENSG00000267760 | -0.4496    | 0.6735  | 0.08073     | 0.46783     | 0.25842   | 0.39804 |
|           | 0.56258         | 0.28686    | 0.28686 | 0.675462083 |             |           |         |
| ADRA1A    | ENSG00000120907 | -0.18219   | 0.57229 | 0.26031     | 0.39731     | -0.61147  |         |
|           | 0.72956         | 0.56253    | 0.28688 | 0.28688     | 0.675476537 |           |         |
| DDX56     | ENSG00000136271 | 0.56247    | 0.2869  | 0.042864    | 0.48291     | 0.56247   | 0.2869  |
|           | 0.2006          | 0.42051    | 0.2869  | 0.675490989 |             |           |         |
| SLC25A13  | ENSG00000004864 | 0.56236    | 0.28694 | -0.83731    | 0.79879     | -1.0455   |         |
|           | 0.85211         | -1.139     | 0.87264 | 0.28694     | 0.675501217 |           |         |
| CLMN      | ENSG00000165959 | 0.38383    | 0.35055 | 0.56232     | 0.28695     | -0.15571  | 0.56187 |
|           | -0.061339       | 0.52446    | 0.28695 | 0.675501217 |             |           |         |
| LPGAT1    | ENSG00000123684 | -0.050354  | 0.52008 | -0.27307    | 0.6076      | 0.16395   |         |
|           | 0.43489         | 0.56225    | 0.28697 | 0.28697     | 0.675501217 |           |         |
| UNC119B   | ENSG00000175970 | 0.025903   | 0.48967 | 0.56217     | 0.287       | 0.28161   | 0.38912 |
|           | 0.24857         | 0.40185    | 0.287   | 0.675501217 |             |           |         |
| NA        | ENSG00000233138 | -1.4935    | 0.93234 | -0.094962   | 0.53783     | -1.4935   | 0.93234 |
|           | 0.56216         | 0.287      | 0.287   | 0.675501217 |             |           |         |
| LY75      | ENSG00000054219 | 0.56212    | 0.28702 | 0.24806     | 0.40204     | -0.77663  | 0.78131 |
|           | -0.28794        | 0.61331    | 0.28702 | 0.675501217 |             |           |         |
| LINC01305 | ENSG00000231453 | 0.56206    | 0.28704 | -0.22946    | 0.59074     | 0.28763   |         |
|           | 0.38682         | -0.77911   | 0.78204 | 0.28704     | 0.675501217 |           |         |
| NA        | ENSG00000212175 | 0.56201    | 0.28705 | 0.56201     | 0.28705     | 0.56201   | 0.28705 |
|           | 0.56201         | 0.28705    | 0.28705 | 0.675501217 |             |           |         |
| BPNT1     | ENSG00000162813 | 0.45168    | 0.32575 | 0.45168     | 0.32575     | 0.56195   | 0.28707 |
|           | -0.24923        | 0.59841    | 0.28707 | 0.675501217 |             |           |         |
| DRD3      | ENSG00000151577 | -1.0162    | 0.84523 | 0.56193     | 0.28708     | -1.0042   | 0.84237 |

|              |                 |          |             |           |             |             |         |  |
|--------------|-----------------|----------|-------------|-----------|-------------|-------------|---------|--|
|              |                 | -0.52547 | 0.70037     | 0.28708   | 0.675501217 |             |         |  |
| NA           | ENSG00000224467 | 0.56188  | 0.2871      | -1.4722   | 0.92951     | -1.4722     | 0.92951 |  |
|              |                 | -1.4722  | 0.92951     | 0.2871    | 0.675501217 |             |         |  |
| NA           | ENSG00000264513 | 0.56189  | 0.2871      | 0.56189   | 0.2871      | 0.56189     | 0.2871  |  |
|              |                 | 0.56189  | 0.2871      | 0.2871    | 0.675501217 |             |         |  |
| NA           | ENSG00000278146 | 0.56186  | 0.28711     | 0.56186   | 0.28711     | 0.56186     | 0.28711 |  |
|              |                 | 0.56186  | 0.28711     | 0.28711   | 0.675501217 |             |         |  |
| NA           | ENSG00000248753 | 0.56183  | 0.28712     | 0.56183   | 0.28712     | 0.56183     | 0.28712 |  |
|              |                 | 0.56183  | 0.28712     | 0.28712   | 0.675501217 |             |         |  |
| HSPA12B      | ENSG00000132622 | -1.0032  | 0.84212     | -0.47923  | 0.68411     | 0.56176     |         |  |
|              |                 | 0.28714  | -0.54933    | 0.70861   | 0.28714     | 0.675501217 |         |  |
| NA           | ENSG00000227157 | 0.43914  | 0.33028     | 0.56176   | 0.28714     | 0.43914     | 0.33028 |  |
|              |                 | 0.43914  | 0.33028     | 0.28714   | 0.675501217 |             |         |  |
| NA           | ENSG00000261915 | 0.56176  | 0.28714     | 0.56176   | 0.28714     | 0.56176     | 0.28714 |  |
|              |                 | 0.56176  | 0.28714     | 0.28714   | 0.675501217 |             |         |  |
| NA           | ENSG00000259215 | 0.56171  | 0.28716     | 0.56171   | 0.28716     | 0.56171     | 0.28716 |  |
|              |                 | 0.56171  | 0.28716     | 0.28716   | 0.675515655 |             |         |  |
| NA           | ENSG00000267251 | 0.56151  | 0.28722     | 0.032663  | 0.48697     | 0.56151     | 0.28722 |  |
|              |                 | 0.56151  | 0.28722     | 0.28722   | 0.67556431  |             |         |  |
| TRPC2        | ENSG00000182048 | 0.56151  | 0.28723     | 0.56151   | 0.28723     | 0.40913     | 0.34122 |  |
|              |                 | 0.2267   | 0.41033     | 0.28723   | 0.67556431  |             |         |  |
| MEST         | ENSG00000106484 | -1.7534  | 0.96024     | 0.25877   | 0.39791     | 0.56148     | 0.28724 |  |
|              |                 | 0.20039  | 0.42059     | 0.28724   | 0.67556431  |             |         |  |
| MAGOH2P      | ENSG00000264176 | 0.56147  | 0.28724     | 0.56147   | 0.28724     | 0.56147     |         |  |
|              |                 | 0.28724  | 0.56147     | 0.28724   | 0.28724     | 0.67556431  |         |  |
| TEPP         | ENSG00000159648 | 0.22187  | 0.41221     | -0.51132  | 0.69544     | 0.56144     | 0.28725 |  |
|              |                 | -0.10648 | 0.5424      | 0.28725   | 0.67556431  |             |         |  |
| TRMT13       | ENSG00000122435 | -0.79358 | 0.78628     | 0.56123   | 0.28732     | -0.28566    |         |  |
|              |                 | 0.61243  | -0.28566    | 0.61243   | 0.28732     | 0.675645541 |         |  |
| NA           | ENSG00000214759 | 0.4116   | 0.34031     | 0.4116    | 0.34031     | 0.56124     | 0.28732 |  |
|              |                 | -0.43145 | 0.66693     | 0.28732   | 0.675645541 |             |         |  |
| NA           | ENSG00000233420 | 0.025034 | 0.49001     | -0.020405 | 0.50814     | -0.62999    | 0.73565 |  |
|              |                 | 0.56121  | 0.28733     | 0.28733   | 0.675645541 |             |         |  |
| RNU2-55P     | ENSG00000223078 | 0.56116  | 0.28734     | 0.56116   | 0.28734     | 0.56116     |         |  |
|              |                 | 0.28734  | 0.56116     | 0.28734   | 0.28734     | 0.675645541 |         |  |
| PTCH2        | ENSG00000117425 | 0.53153  | 0.29752     | 0.56111   | 0.28736     | -0.56748    | 0.71481 |  |
|              |                 | -0.88655 | 0.81234     | 0.28736   | 0.675659966 |             |         |  |
| EXOSC2       | ENSG00000130713 | 0.56097  | 0.28741     | 0.47203   | 0.31845     | -0.18753    |         |  |
|              |                 | 0.57438  | 0.40929     | 0.34116   | 0.28741     | 0.675735832 |         |  |
| HP1BP3       | ENSG00000127483 | -0.10887 | 0.54335     | 0.13256   | 0.44727     | 0.56095     |         |  |
|              |                 | 0.28742  | 0.198042152 | 0.28742   | 0.675735832 |             |         |  |
| NA           | ENSG00000257449 | 0.56079  | 0.28747     | 0.56079   | 0.28747     | 0.56079     | 0.28747 |  |
|              |                 | 0.56079  | 0.28747     | 0.28747   | 0.675820779 |             |         |  |
| UMPS         | ENSG00000114491 | -0.43684 | 0.66889     | 0.058041  | 0.47686     | -1.3249     | 0.9074  |  |
|              |                 | 0.56061  | 0.28753     | 0.28753   | 0.675855745 |             |         |  |
| RPL10P19     | ENSG00000233609 | -1.046   | 0.85223     | 0.56059   | 0.28754     | -0.13861    |         |  |
|              |                 | 0.55512  | -0.1568     | 0.5623    | 0.28754     | 0.675855745 |         |  |
| DPP4         | ENSG00000197635 | 0.56053  | 0.28756     | 0.56053   | 0.28756     | -0.53354    | 0.70317 |  |
|              |                 | 0.56053  | 0.28756     | 0.28756   | 0.675855745 |             |         |  |
| MIR1537      | ENSG00000222831 | 0.56053  | 0.28756     | 0.56053   | 0.28756     | 0.56053     |         |  |
|              |                 | 0.28756  | -0.12307    | 0.54898   | 0.28756     | 0.675855745 |         |  |
| HNRNPA1P15   | ENSG00000214761 | 0.56048  | 0.28757     | -0.34037  | 0.63321     | -0.34037    |         |  |
|              |                 | 0.63321  | -1.6398     | 0.94948   | 0.28757     | 0.675855745 |         |  |
| ARHGAP29-AS1 | ENSG00000226835 | -0.52434 | 0.69998     | -0.80541  | 0.78971     | -0.55518    |         |  |
|              |                 | 0.71061  | 0.56049     | 0.28757   | 0.28757     | 0.675855745 |         |  |
| DNAJC19P8    | ENSG00000232793 | 0.16859  | 0.43306     | 0.56034   | 0.28762     | -0.88111    |         |  |
|              |                 | 0.81087  | 0.081924    | 0.46735   | 0.28762     | 0.675855745 |         |  |
| MTRNR2L5     | ENSG00000249860 | -0.48814 | 0.68728     | 0.56034   | 0.28762     | -0.31937    |         |  |
|              |                 | 0.62528  | -0.31937    | 0.62528   | 0.28762     | 0.675855745 |         |  |
| PHOX2B-AS1   | ENSG00000250467 | 0.56009  | 0.28771     | 0.56009   | 0.28771     | -0.69888    |         |  |
|              |                 | 0.75769  | 0.56009     | 0.28771   | 0.28771     | 0.675855745 |         |  |
| NA           | ENSG00000250923 | 0.56009  | 0.28771     | 0.56009   | 0.28771     | 0.56009     | 0.28771 |  |

|             |                 |           |         |             |             |          |         |         |
|-------------|-----------------|-----------|---------|-------------|-------------|----------|---------|---------|
|             | 0.56009         | 0.28771   | 0.28771 | 0.675855745 |             |          |         |         |
| CLEC12A-AS1 | ENSG00000231560 | 0.56006   | 0.28772 | 0.56006     | 0.28772     | 0.56006  | 0.28772 | 0.56006 |
|             | 0.28772         | 0.56006   | 0.28772 | 0.28772     | 0.675855745 |          |         |         |
| NA          | ENSG00000267733 | -0.14053  | 0.55588 | 0.56006     | 0.28772     | 0.01715  | 0.49316 |         |
|             | -0.12738        | 0.55068   | 0.28772 | 0.675855745 |             |          |         |         |
| NA          | ENSG00000279375 | 0.56006   | 0.28772 | 0.56006     | 0.28772     | 0.56006  | 0.28772 |         |
|             | 0.56006         | 0.28772   | 0.28772 | 0.675855745 |             |          |         |         |
| NA          | ENSG00000272218 | 0.56002   | 0.28773 | 0.56002     | 0.28773     | 0.56002  | 0.28773 |         |
|             | 0.56002         | 0.28773   | 0.28773 | 0.675855745 |             |          |         |         |
| RPL5P2      | ENSG00000237068 | 0.55999   | 0.28774 | 0.55999     | 0.28774     | 0.55999  |         |         |
|             | 0.28774         | 0.55999   | 0.28774 | 0.28774     | 0.675855745 |          |         |         |
| RNU7-167P   | ENSG00000238584 | 0.55998   | 0.28775 | 0.55998     | 0.28775     | 0.55998  |         |         |
|             | 0.28775         | 0.55998   | 0.28775 | 0.28775     | 0.675855745 |          |         |         |
| NA          | ENSG00000259854 | -0.39473  | 0.65348 | 0.55997     | 0.28775     | 0.45222  | 0.32555 |         |
|             | -0.063043       | 0.52513   | 0.28775 | 0.675855745 |             |          |         |         |
| NA          | ENSG00000262539 | -0.036645 | 0.51462 | -0.54068    | 0.70564     | 0.55991  | 0.28777 |         |
|             | -0.54041        | 0.70554   | 0.28777 | 0.675855745 |             |          |         |         |
| PAK2        | ENSG00000180370 | -0.027567 | 0.511   | 0.13064     | 0.44803     | 0.55989  | 0.28778 |         |
|             | -0.051751       | 0.52064   | 0.28778 | 0.675855745 |             |          |         |         |
| NA          | ENSG00000272135 | 0.55987   | 0.28778 | 0.55987     | 0.28778     | 0.55987  | 0.28778 |         |
|             | 0.55987         | 0.28778   | 0.28778 | 0.675855745 |             |          |         |         |
| CABLES2     | ENSG00000149679 | -0.021804 | 0.5087  | 0.54628     | 0.29244     | 0.55984  |         |         |
|             | 0.28779         | 0.20126   | 0.42025 | 0.28779     | 0.675855745 |          |         |         |
| NA          | ENSG00000256050 | -1.3493   | 0.91139 | 0.015367    | 0.49387     | 0.55986  | 0.28779 |         |
|             | 0.55986         | 0.28779   | 0.28779 | 0.675855745 |             |          |         |         |
| LINC02410   | ENSG00000258292 | -0.10687  | 0.54255 | 0.55971     | 0.28784     | 0.25552  |         |         |
|             | 0.39916         | -0.1189   | 0.54732 | 0.28784     | 0.675933015 |          |         |         |
| SYNDIG1     | ENSG00000101463 | 0.55965   | 0.28786 | -0.28695    | 0.61292     | 0.11542  |         |         |
|             | 0.45406         | -0.46998  | 0.68081 | 0.28786     | 0.675933015 |          |         |         |
| SLIT1       | ENSG00000187122 | 0.5596    | 0.28787 | -0.069486   | 0.5277      | 0.4501   | 0.32632 |         |
|             | -0.76337        | 0.77738   | 0.28787 | 0.675933015 |             |          |         |         |
| GPATCH4     | ENSG00000160818 | 0.31257   | 0.3773  | 0.31257     | 0.3773      | 0.31257  |         |         |
|             | 0.3773          | 0.5596    | 0.28788 | 0.28788     | 0.675933015 |          |         |         |
| NA          | ENSG00000227075 | 0.55953   | 0.2879  | 0.55953     | 0.2879      | 0.55953  | 0.2879  |         |
|             | -0.010141       | 0.50405   | 0.2879  | 0.675933015 |             |          |         |         |
| TBX15       | ENSG00000092607 | -1.1696   | 0.87892 | -0.53646    | 0.70418     | 0.081322 | 0.46759 |         |
|             | 0.55948         | 0.28792   | 0.28792 | 0.675933015 |             |          |         |         |
| RELCH       | ENSG00000134444 | 0.55946   | 0.28792 | -0.47336    | 0.68202     | -0.89537 | 0.81471 |         |
|             | 0.3504          | 0.36302   | 0.28792 | 0.675933015 |             |          |         |         |
| CABP2       | ENSG00000167791 | -0.78768  | 0.78456 | 0.55934     | 0.28797     | 0.15144  | 0.43981 |         |
|             | -2.1525         | 0.98432   | 0.28797 | 0.675972324 |             |          |         |         |
| NTSR2       | ENSG00000169006 | 0.55931   | 0.28798 | 0.55931     | 0.28798     | 0.55931  | 0.28798 |         |
|             | 0.55931         | 0.28798   | 0.28798 | 0.675972324 |             |          |         |         |
| NA          | ENSG00000278869 | 0.55926   | 0.28799 | 0.55926     | 0.28799     | 0.55926  | 0.28799 |         |
|             | 0.55926         | 0.28799   | 0.28799 | 0.675972324 |             |          |         |         |
| RNU6-561P   | ENSG00000252031 | 0.55899   | 0.28808 | 0.55899     | 0.28808     | 0.55899  |         |         |
|             | 0.28808         | 0.55899   | 0.28808 | 0.28808     | 0.675972324 |          |         |         |
| NA          | ENSG00000262039 | 0.55894   | 0.2881  | 0.55894     | 0.2881      | 0.55894  | 0.2881  |         |
|             | 0.55894         | 0.2881    | 0.2881  | 0.675972324 |             |          |         |         |
| ARFIP1      | ENSG00000164144 | -0.91688  | 0.8204  | 0.55891     | 0.28811     | -0.61662 |         |         |
|             | 0.73126         | -0.59541  | 0.72421 | 0.28811     | 0.675972324 |          |         |         |
| THRAP3P2    | ENSG00000259057 | 0.5589    | 0.28812 | 0.5589      | 0.28812     | 0.5589   |         |         |
|             | 0.28812         | 0.5589    | 0.28812 | 0.28812     | 0.675972324 |          |         |         |
| NOL4        | ENSG00000101746 | 0.55884   | 0.28813 | -0.20474    | 0.58111     | -0.14879 | 0.55914 |         |
|             | -0.16858        | 0.56694   | 0.28813 | 0.675972324 |             |          |         |         |
| NA          | ENSG00000263863 | -0.11174  | 0.54449 | -1.0773     | 0.85933     | -0.11174 | 0.54449 |         |
|             | 0.55884         | 0.28813   | 0.28813 | 0.675972324 |             |          |         |         |
| SHROOM1     | ENSG00000164403 | 0.55877   | 0.28816 | -0.82715    | 0.79592     | 0.40198  |         |         |
|             | 0.34385         | -1.4746   | 0.92985 | 0.28816     | 0.675972324 |          |         |         |
| ROPN1       | ENSG00000065371 | 0.38257   | 0.35102 | -0.16455    | 0.56535     | -1.5544  | 0.93995 |         |
|             | 0.55863         | 0.28821   | 0.28821 | 0.675972324 |             |          |         |         |
| NA          | ENSG00000268116 | 0.55856   | 0.28823 | -0.16474    | 0.56543     | -0.31039 | 0.62187 |         |

|           |                 |           |         |             |             |          |         |  |
|-----------|-----------------|-----------|---------|-------------|-------------|----------|---------|--|
|           | -0.86894        | 0.80756   | 0.28823 | 0.675972324 |             |          |         |  |
| SNX15     | ENSG00000110025 | 0.020602  | 0.49178 | 0.55848     | 0.28826     | 0.12028  | 0.45213 |  |
|           | -0.28807        | 0.61335   | 0.28826 | 0.675972324 |             |          |         |  |
| KRT27     | ENSG00000171446 | -1.0194   | 0.846   | 0.55849     | 0.28826     | -0.5161  | 0.69711 |  |
|           | -0.93335        | 0.82468   | 0.28826 | 0.675972324 |             |          |         |  |
| TRAV6     | ENSG00000211780 | -1.0035   | 0.8422  | -0.82689    | 0.79585     | -0.89591 | 0.81485 |  |
|           | 0.55842         | 0.28828   | 0.28828 | 0.675972324 |             |          |         |  |
| PPIAP11   | ENSG00000251495 | 0.55838   | 0.28829 | 0.55838     | 0.28829     | 0.55838  |         |  |
|           | 0.28829         | 0.55838   | 0.28829 | 0.28829     | 0.675972324 |          |         |  |
| NA        | ENSG00000281961 | 0.55839   | 0.28829 | 0.55839     | 0.28829     | 0.29187  | 0.38519 |  |
|           | 0.47748         | 0.31651   | 0.28829 | 0.675972324 |             |          |         |  |
| NA        | ENSG00000228778 | 0.55835   | 0.2883  | 0.55835     | 0.2883      | 0.55835  | 0.2883  |  |
|           | 0.55835         | 0.2883    | 0.2883  | 0.675972324 |             |          |         |  |
| SF3B2     | ENSG00000087365 | 0.22865   | 0.40957 | 0.55833     | 0.28831     | -0.40704 | 0.65801 |  |
|           | -0.40704        | 0.65801   | 0.28831 | 0.675972324 |             |          |         |  |
| RN7SKP130 | ENSG00000201794 | 0.023644  | 0.49057 | 0.023644    | 0.49057     | 0.023644 |         |  |
|           | 0.49057         | 0.55833   | 0.28831 | 0.28831     | 0.675972324 |          |         |  |
| LINC01640 | ENSG00000231253 | 0.55833   | 0.28831 | 0.55833     | 0.28831     | 0.55833  |         |  |
|           | 0.28831         | 0.3177    | 0.37535 | 0.28831     | 0.675972324 |          |         |  |
| MAK       | ENSG00000111837 | -0.40371  | 0.65679 | 0.24257     | 0.40417     | 0.55831  | 0.28832 |  |
|           | 0.08748         | 0.46514   | 0.28832 | 0.675972324 |             |          |         |  |
| NA        | ENSG00000240996 | 0.5583    | 0.28832 | 0.5583      | 0.28832     | 0.5583   | 0.28832 |  |
|           | 0.5583          | 0.28832   | 0.28832 | 0.675972324 |             |          |         |  |
| STAT2     | ENSG00000170581 | -0.98223  | 0.83701 | -1.1804     | 0.88107     | -0.98223 | 0.83701 |  |
|           | 0.55828         | 0.28833   | 0.28833 | 0.675972324 |             |          |         |  |
| NA        | ENSG00000265629 | 0.55826   | 0.28833 | 0.55826     | 0.28833     | 0.55826  | 0.28833 |  |
|           | -0.38322        | 0.64922   | 0.28833 | 0.675972324 |             |          |         |  |
| WBP4      | ENSG00000120688 | 0.55825   | 0.28834 | -0.039086   | 0.51559     | -0.59148 | 0.7229  |  |
|           | -0.89027        | 0.81334   | 0.28834 | 0.675972324 |             |          |         |  |
| TRAV10    | ENSG00000211784 | 0.36695   | 0.35683 | 0.55822     | 0.28835     | 0.55822  |         |  |
|           | 0.28835         | 0.55822   | 0.28835 | 0.28835     | 0.675972324 |          |         |  |
| NA        | ENSG00000232200 | 0.5581    | 0.28839 | 0.5581      | 0.28839     | -1.4372  | 0.92467 |  |
|           | -1.0561         | 0.85453   | 0.28839 | 0.675972324 |             |          |         |  |
| NA        | ENSG00000236412 | 0.17226   | 0.43162 | 0.47338     | 0.31797     | 0.55806  | 0.2884  |  |
|           | 0.55806         | 0.2884    | 0.2884  | 0.675972324 |             |          |         |  |
| NA        | ENSG00000279995 | 0.28012   | 0.38969 | 0.55804     | 0.28841     | 0.11876  | 0.45273 |  |
|           | 0.11876         | 0.45273   | 0.28841 | 0.675972324 |             |          |         |  |
| NA        | ENSG00000266397 | 0.55801   | 0.28842 | -0.24456    | 0.5966      | 0.55801  | 0.28842 |  |
|           | 0.55801         | 0.28842   | 0.28842 | 0.675972324 |             |          |         |  |
| CD58      | ENSG00000116815 | 0.55795   | 0.28844 | -0.025784   | 0.51029     | -0.44521 | 0.67192 |  |
|           | -0.21401        | 0.58473   | 0.28844 | 0.675972324 |             |          |         |  |
| FGD2      | ENSG00000146192 | 0.22023   | 0.41285 | 0.55796     | 0.28844     | -0.41673 | 0.66156 |  |
|           | -0.034807       | 0.51388   | 0.28844 | 0.675972324 |             |          |         |  |
| TENM3-AS1 | ENSG00000177822 | 0.55795   | 0.28844 | -1.5237     | 0.93621     | -0.1407  |         |  |
|           | 0.55595         | -0.21733  | 0.58602 | 0.28844     | 0.675972324 |          |         |  |
| FAM20C    | ENSG00000177706 | 0.43179   | 0.33295 | 0.10914     | 0.45655     | 0.55793  |         |  |
|           | 0.28845         | 0.18997   | 0.42467 | 0.28845     | 0.675972324 |          |         |  |
| TRAJ47    | ENSG00000211842 | -0.67674  | 0.75072 | -0.67674    | 0.75072     | -0.67674 |         |  |
|           | 0.75072         | 0.55791   | 0.28845 | 0.28845     | 0.675972324 |          |         |  |
| NA        | ENSG00000250643 | 0.55791   | 0.28845 | -0.76656    | 0.77833     | 0.55791  | 0.28845 |  |
|           | 0.55791         | 0.28845   | 0.28845 | 0.675972324 |             |          |         |  |
| ADGRE1    | ENSG00000174837 | 0.55786   | 0.28847 | -0.28977    | 0.614       | 0.19493  | 0.42273 |  |
|           | -0.052668       | 0.521     | 0.28847 | 0.675982897 |             |          |         |  |
| LRRC37A3  | ENSG00000176809 | -0.70717  | 0.76027 | -1.385      | 0.91698     | 0.55777  |         |  |
|           | 0.2885          | -0.27342  | 0.60774 | 0.2885      | 0.675982897 |          |         |  |
| NA        | ENSG00000258778 | 0.55777   | 0.2885  | 0.55777     | 0.2885      | 0.55777  | 0.2885  |  |
|           | 0.55777         | 0.2885    | 0.2885  | 0.675982897 |             |          |         |  |
| DCXR-DT   | ENSG00000264569 | 0.55775   | 0.28851 | 0.55775     | 0.28851     | 0.55775  |         |  |
|           | 0.28851         | 0.55775   | 0.28851 | 0.28851     | 0.675982897 |          |         |  |
| SBSPON    | ENSG00000164764 | 0.55757   | 0.28857 | 0.55757     | 0.28857     | 0.55757  |         |  |
|           | 0.28857         | -0.078581 | 0.53132 | 0.28857     | 0.676049392 |          |         |  |
| KRT78     | ENSG00000170423 | 0.37946   | 0.35217 | -0.78398    | 0.78348     | 0.55756  | 0.28857 |  |

|           |                 |          |         |             |             |           |         |         |
|-----------|-----------------|----------|---------|-------------|-------------|-----------|---------|---------|
|           | -0.36163        | 0.64119  | 0.28857 | 0.676049392 |             |           |         |         |
| MIR609    | ENSG00000208033 | 0.55754  | 0.28858 | 0.55754     | 0.28858     | 0.55754   | 0.28858 | 0.55754 |
|           | 0.28858         | 0.55754  | 0.28858 | 0.28858     | 0.676049392 |           |         |         |
| LINC00641 | ENSG00000258441 | 0.23195  | 0.40829 | -0.21003    | 0.58318     | -0.51138  |         |         |
|           | 0.69546         | 0.55737  | 0.28864 | 0.28864     | 0.676139291 |           |         |         |
| TPM3P6    | ENSG00000250731 | 0.55734  | 0.28865 | 0.55734     | 0.28865     | 0.55734   | 0.28865 | 0.55734 |
|           | 0.28865         | 0.55734  | 0.28865 | 0.28865     | 0.676139291 |           |         |         |
| NA        | ENSG00000254871 | 0.55729  | 0.28866 | -1.9849     | 0.97642     | -1.9849   | 0.97642 | 0.97642 |
|           | -1.9849         | 0.97642  | 0.28866 | 0.676139291 |             |           |         |         |
| RNA5-8SP4 | ENSG00000201966 | 0.10973  | 0.45631 | -0.81898    | 0.7936      | 0.55721   |         |         |
|           | 0.28869         | -0.81898 | 0.7936  | 0.28869     | 0.676177058 |           |         |         |
| RPS27AP16 | ENSG00000224631 | -0.44421 | 0.67155 | 0.55691     | 0.28879     | 0.55691   |         |         |
|           | 0.28879         | 0.55691  | 0.28879 | 0.28879     | 0.676306959 |           |         |         |
| RNU5A-2P  | ENSG00000207065 | 0.55687  | 0.28881 | -1.2436     | 0.89317     | -0.29516  |         |         |
|           | 0.61606         | -0.5683  | 0.71508 | 0.28881     | 0.676306959 |           |         |         |
| ERVV-2    | ENSG00000268964 | 0.55683  | 0.28882 | 0.55683     | 0.28882     | 0.55683   |         |         |
|           | 0.28882         | -0.64856 | 0.74169 | 0.28882     | 0.676306959 |           |         |         |
| DRAM2     | ENSG00000156171 | 0.50288  | 0.30752 | 0.50288     | 0.30752     | 0.50288   | 0.30752 | 0.30752 |
|           | 0.55679         | 0.28883  | 0.28883 | 0.676306959 |             |           |         |         |
| HOXB9     | ENSG00000170689 | -0.06819 | 0.52718 | 0.55678     | 0.28884     | 0.55678   | 0.28884 | 0.28884 |
|           | 0.55678         | 0.28884  | 0.28884 | 0.676306959 |             |           |         |         |
| HTT-AS    | ENSG00000251075 | 0.55676  | 0.28885 | 0.2215      | 0.41235     | -0.089624 |         |         |
|           | 0.53571         | -0.10263 | 0.54087 | 0.28885     | 0.676306959 |           |         |         |
| ASB2      | ENSG00000100628 | 0.23028  | 0.40894 | 0.092143    | 0.46329     | 0.52522   | 0.29971 | 0.29971 |
|           | 0.55669         | 0.28887  | 0.28887 | 0.676306959 |             |           |         |         |
| ZBPB      | ENSG00000042813 | 0.55662  | 0.28889 | 0.55662     | 0.28889     | -0.36064  | 0.64081 | 0.64081 |
|           | 0.55662         | 0.28889  | 0.28889 | 0.676306959 |             |           |         |         |
| KRTAP2-5P | ENSG00000237230 | 0.5566   | 0.2889  | 0.5566      | 0.2889      | 0.5566    |         |         |
|           | 0.2889          | 0.5566   | 0.2889  | 0.2889      | 0.676306959 |           |         |         |
| ADH6      | ENSG00000172955 | -0.94614 | 0.82796 | -1.2926     | 0.90193     | 0.55658   | 0.28891 | 0.28891 |
|           | -1.2926         | 0.90193  | 0.28891 | 0.676306959 |             |           |         |         |
| RPL9      | ENSG00000163682 | -0.33162 | 0.62991 | -0.3902     | 0.65181     | 0.55642   | 0.28896 | 0.28896 |
|           | 0.55642         | 0.28896  | 0.28896 | 0.676306959 |             |           |         |         |
| LINC00458 | ENSG00000234787 | -0.37749 | 0.6471  | 0.20611     | 0.41835     | 0.20611   |         |         |
|           | 0.41835         | 0.55637  | 0.28898 | 0.28898     | 0.676306959 |           |         |         |
| NA        | ENSG00000249924 | -3.0109  | 0.9987  | 0.55636     | 0.28898     | -1.232    | 0.89102 | 0.89102 |
|           | -0.32396        | 0.62701  | 0.28898 | 0.676306959 |             |           |         |         |
| NOP58     | ENSG00000055044 | 0.29182  | 0.38521 | -0.28642    | 0.61272     | 0.55631   | 0.289   | 0.289   |
|           | 0.049999        | 0.48006  | 0.289   | 0.676306959 |             |           |         |         |
| C10orf105 | ENSG00000214688 | 0.046825 | 0.48133 | 0.55607     | 0.28908     | 0.55607   |         |         |
|           | 0.28908         | 0.55607  | 0.28908 | 0.28908     | 0.676306959 |           |         |         |
| DDX43P1   | ENSG00000248295 | 0.55601  | 0.2891  | 0.55601     | 0.2891      | 0.55601   |         |         |
|           | 0.2891          | 0.55601  | 0.2891  | 0.2891      | 0.676306959 |           |         |         |
| ARPC3     | ENSG00000111229 | 0.55595  | 0.28912 | 0.36065     | 0.35918     | 0.54813   | 0.2918  | 0.2918  |
|           | 0.18895         | 0.42507  | 0.28912 | 0.676306959 |             |           |         |         |
| MICOS10   | ENSG00000173436 | -0.26296 | 0.60371 | 0.55596     | 0.28912     | -0.61601  |         |         |
|           | 0.73105         | -0.11647 | 0.54636 | 0.28912     | 0.676306959 |           |         |         |
| HMGN2P19  | ENSG00000229367 | 0.55594  | 0.28912 | -0.48477    | 0.68608     | 0.49402   |         |         |
|           | 0.31065         | 0.39805  | 0.3453  | 0.28912     | 0.676306959 |           |         |         |
| HBE1      | ENSG00000213931 | -1.3186  | 0.90634 | 0.55594     | 0.28913     | -1.2073   | 0.88633 | 0.88633 |
|           | -1.1008         | 0.8645   | 0.28913 | 0.676306959 |             |           |         |         |
| DYNLL1P2  | ENSG00000258605 | 0.55593  | 0.28913 | 0.55593     | 0.28913     | 0.55593   |         |         |
|           | 0.28913         | 0.55593  | 0.28913 | 0.28913     | 0.676306959 |           |         |         |
| ADH4      | ENSG00000198099 | 0.5559   | 0.28914 | -0.071509   | 0.5285      | 0.11384   | 0.45468 | 0.45468 |
|           | -0.70867        | 0.76074  | 0.28914 | 0.676306959 |             |           |         |         |
| NA        | ENSG00000275898 | 0.55588  | 0.28914 | 0.55588     | 0.28914     | 0.55588   | 0.28914 | 0.28914 |
|           | 0.55588         | 0.28914  | 0.28914 | 0.676306959 |             |           |         |         |
| NA        | ENSG00000268184 | 0.50931  | 0.30527 | 0.55585     | 0.28916     | 0.37766   | 0.35284 | 0.35284 |
|           | 0.55585         | 0.28916  | 0.28916 | 0.676306959 |             |           |         |         |
| MFSD2B    | ENSG00000205639 | 0.49578  | 0.31002 | 0.49578     | 0.31002     | 0.49578   |         |         |
|           | 0.31002         | 0.5558   | 0.28917 | 0.28917     | 0.676306959 |           |         |         |
| NA        | ENSG00000274167 | -1.0144  | 0.84479 | 0.55575     | 0.28919     | -0.46511  | 0.67907 | 0.67907 |



|            |                 |           |         |             |             |           |         |  |
|------------|-----------------|-----------|---------|-------------|-------------|-----------|---------|--|
|            | 0.1245          | 0.45046   | 0.28919 | 0.676306959 |             |           |         |  |
| KLF13      | ENSG00000169926 | 0.10993   | 0.45623 | 0.55565     | 0.28923     | -0.91489  | 0.81987 |  |
|            | -0.3027         | 0.61894   | 0.28923 | 0.676306959 |             |           |         |  |
| MYOF       | ENSG00000138119 | 0.29586   | 0.38367 | 0.18938     | 0.4249      | -0.017264 | 0.50689 |  |
|            | 0.55557         | 0.28925   | 0.28925 | 0.676306959 |             |           |         |  |
| NA         | ENSG00000265767 | 0.55557   | 0.28925 | 0.55557     | 0.28925     | 0.55557   | 0.28925 |  |
|            | 0.55557         | 0.28925   | 0.28925 | 0.676306959 |             |           |         |  |
| FBXO7      | ENSG00000100225 | 0.55268   | 0.29024 | 0.55556     | 0.28926     | 0.38851   | 0.34882 |  |
|            | 0.38851         | 0.34882   | 0.28926 | 0.676306959 |             |           |         |  |
| EIF4BP1    | ENSG00000259019 | -0.41999  | 0.66275 | -1.0145     | 0.84483     | 0.55554   |         |  |
|            | 0.28926         | 0.55554   | 0.28926 | 0.28926     | 0.676306959 |           |         |  |
| TARID      | ENSG00000227954 | -0.1566   | 0.56222 | 0.55549     | 0.28928     | 0.31862   | 0.37501 |  |
|            | -0.1008         | 0.54015   | 0.28928 | 0.676306959 |             |           |         |  |
| LBR        | ENSG00000143815 | -0.76264  | 0.77716 | 0.043691    | 0.48258     | -0.39592  | 0.65392 |  |
|            | 0.55545         | 0.28929   | 0.28929 | 0.676306959 |             |           |         |  |
| MOXD2P     | ENSG00000240268 | 0.55545   | 0.28929 | 0.2126      | 0.41582     | 0.55545   |         |  |
|            | 0.28929         | 0.55545   | 0.28929 | 0.28929     | 0.676306959 |           |         |  |
| PTTG1IP    | ENSG00000183255 | 0.55542   | 0.2893  | 0.49075     | 0.3118      | -0.072285 |         |  |
|            | 0.52881         | 0.04875   | 0.48056 | 0.2893      | 0.676306959 |           |         |  |
| HECW1      | ENSG00000002746 | -0.061971 | 0.52471 | 0.55541     | 0.28931     | -0.46181  | 0.67789 |  |
|            | -0.92974        | 0.82375   | 0.28931 | 0.676306959 |             |           |         |  |
| SCAMP1     | ENSG00000085365 | -0.042542 | 0.51697 | -0.25002    | 0.59872     | -0.46371  |         |  |
|            | 0.67857         | 0.5554    | 0.28931 | 0.28931     | 0.676306959 |           |         |  |
| ARRDC2     | ENSG00000105643 | 0.30225   | 0.38123 | 0.55539     | 0.28931     | 0.30225   |         |  |
|            | 0.38123         | -0.49243  | 0.68879 | 0.28931     | 0.676306959 |           |         |  |
| CEBPA-DT   | ENSG00000267296 | 0.55539   | 0.28932 | 0.55539     | 0.28932     | 0.55539   |         |  |
|            | 0.28932         | 0.55539   | 0.28932 | 0.28932     | 0.676306959 |           |         |  |
| RAB8B      | ENSG00000166128 | 0.55535   | 0.28933 | -1.7018     | 0.95561     | -0.66936  | 0.74837 |  |
|            | -0.43298        | 0.66748   | 0.28933 | 0.676306959 |             |           |         |  |
| OR10AC1    | ENSG00000176510 | 0.55533   | 0.28934 | 0.55533     | 0.28934     | 0.55533   |         |  |
|            | 0.28934         | 0.55533   | 0.28934 | 0.28934     | 0.676306959 |           |         |  |
| NA         | ENSG00000275953 | -0.99136  | 0.83925 | -0.22228    | 0.58795     | 0.55533   | 0.28934 |  |
|            | 0.55533         | 0.28934   | 0.28934 | 0.676306959 |             |           |         |  |
| MIR3943    | ENSG00000264069 | 0.17872   | 0.42908 | 0.17872     | 0.42908     | 0.55529   |         |  |
|            | 0.28935         | 0.17872   | 0.42908 | 0.28935     | 0.676306959 |           |         |  |
| NA         | ENSG00000223561 | 0.55525   | 0.28936 | -0.16983    | 0.56743     | -0.35809  | 0.63986 |  |
|            | -0.46283        | 0.67826   | 0.28936 | 0.676306959 |             |           |         |  |
| NA         | ENSG00000213519 | 0.55524   | 0.28937 | 0.55524     | 0.28937     | 0.55524   | 0.28937 |  |
|            | 0.55524         | 0.28937   | 0.28937 | 0.676306959 |             |           |         |  |
| ATP1B1P1   | ENSG00000249212 | 0.55507   | 0.28942 | 0.41051     | 0.34072     | 0.55507   |         |  |
|            | 0.28942         | 0.55507   | 0.28942 | 0.28942     | 0.676391377 |           |         |  |
| TLL1       | ENSG00000038295 | -0.2024   | 0.5802  | 0.55495     | 0.28946     | -0.11476  | 0.54568 |  |
|            | -0.096047       | 0.53826   | 0.28946 | 0.676403236 |             |           |         |  |
| INPP5K     | ENSG00000132376 | -0.28552  | 0.61238 | -0.72975    | 0.76723     | 0.35545   |         |  |
|            | 0.36112         | 0.55491   | 0.28948 | 0.28948     | 0.676403236 |           |         |  |
| FAM47E     | ENSG00000189157 | 0.43849   | 0.33052 | 0.55484     | 0.2895      | 0.38183   |         |  |
|            | 0.35129         | 0.38183   | 0.35129 | 0.2895      | 0.676403236 |           |         |  |
| NEXN-AS1   | ENSG00000235927 | 0.55479   | 0.28952 | 0.55479     | 0.28952     | 0.55479   |         |  |
|            | 0.28952         | 0.55479   | 0.28952 | 0.28952     | 0.676403236 |           |         |  |
| NA         | ENSG00000257947 | -0.10955  | 0.54362 | 0.5548      | 0.28952     | -0.12985  | 0.55166 |  |
|            | 0.5548          | 0.28952   | 0.28952 | 0.676403236 |             |           |         |  |
| RNU6-1054P | ENSG00000223225 | 0.55475   | 0.28953 | 0.55475     | 0.28953     | -0.175    |         |  |
|            | 0.56946         | -0.78682  | 0.78431 | 0.28953     | 0.676403236 |           |         |  |
| CGB2       | ENSG00000104818 | 0.24217   | 0.40433 | 0.53161     | 0.2975      | -0.68604  | 0.75366 |  |
|            | 0.55474         | 0.28954   | 0.28954 | 0.676403236 |             |           |         |  |
| MTCYBP20   | ENSG00000254118 | -0.64607  | 0.74088 | -0.45933    | 0.677       | 0.55472   | 0.28954 |  |
|            | 0.55472         | 0.28954   | 0.28954 | 0.676403236 |             |           |         |  |
| NA         | ENSG00000231616 | 0.25586   | 0.39903 | 0.5547      | 0.28955     | -1.3226   | 0.90701 |  |
|            | -1.3226         | 0.90701   | 0.28955 | 0.676403236 |             |           |         |  |
| FYB1       | ENSG00000082074 | -0.067991 | 0.5271  | -0.25306    | 0.59989     | 0.55457   | 0.28959 |  |
|            | -1.3625         | 0.91349   | 0.28959 | 0.676464249 |             |           |         |  |
| NA         | ENSG00000266696 | -0.14276  | 0.55676 | 0.55437     | 0.28966     | 0.55437   | 0.28966 |  |

|            |                 |           |         |             |             |           |         |  |
|------------|-----------------|-----------|---------|-------------|-------------|-----------|---------|--|
|            | 0.55437         | 0.28966   | 0.28966 | 0.676570822 |             |           |         |  |
| KCNK15-AS1 | ENSG00000244558 | -0.15538  | 0.56174 | -0.28655    | 0.61277     | -0.15538  |         |  |
|            | 0.56174         | 0.5543    | 0.28969 | 0.28969     | 0.676570822 |           |         |  |
| MTND4P14   | ENSG00000236254 | 0.55423   | 0.28971 | 0.55423     | 0.28971     | 0.55423   |         |  |
|            | 0.28971         | 0.55423   | 0.28971 | 0.28971     | 0.676570822 |           |         |  |
| CYCSP42    | ENSG00000224524 | -0.37156  | 0.64489 | 0.55419     | 0.28972     | -0.90573  |         |  |
|            | 0.81746         | -0.90573  | 0.81746 | 0.28972     | 0.676570822 |           |         |  |
| NA         | ENSG00000279713 | 0.5542    | 0.28972 | 0.5542      | 0.28972     | 0.5542    | 0.28972 |  |
|            | 0.5542          | 0.28972   | 0.28972 | 0.676570822 |             |           |         |  |
| NA         | ENSG00000230569 | 0.55414   | 0.28974 | 0.55414     | 0.28974     | 0.55414   | 0.28974 |  |
|            | 0.55414         | 0.28974   | 0.28974 | 0.676570822 |             |           |         |  |
| NA         | ENSG00000256995 | 0.55414   | 0.28974 | 0.55414     | 0.28974     | 0.54143   | 0.29411 |  |
|            | -0.28296        | 0.61139   | 0.28974 | 0.676570822 |             |           |         |  |
| FAM201B    | ENSG00000230992 | 0.13134   | 0.44775 | 0.55406     | 0.28977     | -0.79271  |         |  |
|            | 0.78603         | -0.4312   | 0.66684 | 0.28977     | 0.676570822 |           |         |  |
| FBXO30-DT  | ENSG00000235652 | -0.091769 | 0.53656 | -0.10406    | 0.54144     | 0.55403   |         |  |
|            | 0.28978         | 0.16921   | 0.43282 | 0.28978     | 0.676570822 |           |         |  |
| LINC01058  | ENSG00000225039 | -1.5858   | 0.94361 | 0.55401     | 0.28979     | -0.98179  |         |  |
|            | 0.8369          | -0.63372  | 0.73687 | 0.28979     | 0.676570822 |           |         |  |
| TUBB8P3    | ENSG00000250307 | 0.55397   | 0.2898  | 0.55397     | 0.2898      | 0.55397   |         |  |
|            | 0.2898          | 0.55397   | 0.2898  | 0.2898      | 0.676570822 |           |         |  |
| FANCC      | ENSG00000158169 | -0.71762  | 0.7635  | -0.79924    | 0.78793     | 0.55393   | 0.28981 |  |
|            | -0.65007        | 0.74218   | 0.28981 | 0.676570822 |             |           |         |  |
| CRMP1      | ENSG00000072832 | 0.5539    | 0.28982 | -0.38985    | 0.65168     | 0.21097   | 0.41646 |  |
|            | 0.05472         | 0.47818   | 0.28982 | 0.676570822 |             |           |         |  |
| RHOJ       | ENSG00000126785 | 0.55389   | 0.28983 | 0.55389     | 0.28983     | 0.49321   | 0.31093 |  |
|            | 0.11639         | 0.45367   | 0.28983 | 0.676570822 |             |           |         |  |
| LINC02466  | ENSG00000246876 | 0.43167   | 0.33299 | 0.43167     | 0.33299     | 0.55378   |         |  |
|            | 0.28987         | -1.2644   | 0.89695 | 0.28987     | 0.676631783 |           |         |  |
| NA         | ENSG00000228181 | 0.55363   | 0.28992 | 0.55363     | 0.28992     | 0.55363   | 0.28992 |  |
|            | 0.55363         | 0.28992   | 0.28992 | 0.67671608  |             |           |         |  |
| NA         | ENSG00000259570 | 0.32808   | 0.37143 | 0.55345     | 0.28998     | 0.49841   | 0.3091  |  |
|            | 0.49841         | 0.3091    | 0.28998 | 0.676805556 |             |           |         |  |
| NA         | ENSG00000265417 | -0.12492  | 0.54971 | 0.55342     | 0.28999     | 0.55342   | 0.28999 |  |
|            | 0.55342         | 0.28999   | 0.28999 | 0.676805556 |             |           |         |  |
| AMYP1      | ENSG00000227408 | -0.23431  | 0.59263 | 0.55337     | 0.29        | -1.7071   | 0.9561  |  |
|            | -1.5528         | 0.93976   | 0.29    | 0.676805556 |             |           |         |  |
| OTUB1      | ENSG00000167770 | -0.3341   | 0.63085 | 0.26569     | 0.39524     | 0.5533    | 0.29003 |  |
|            | -1.3735         | 0.9152    | 0.29003 | 0.676825001 |             |           |         |  |
| NA         | ENSG00000230393 | -0.8433   | 0.80047 | -0.2062     | 0.58168     | -0.42653  | 0.66514 |  |
|            | 0.55322         | 0.29005   | 0.29005 | 0.676825001 |             |           |         |  |
| WBP1       | ENSG00000239779 | 0.55322   | 0.29005 | 0.55322     | 0.29005     | 0.55322   | 0.29005 |  |
|            | 0.55322         | 0.29005   | 0.29005 | 0.676825001 |             |           |         |  |
| NA         | ENSG00000273192 | 0.55313   | 0.29009 | 0.55313     | 0.29009     | 0.55313   | 0.29009 |  |
|            | 0.55313         | 0.29009   | 0.29009 | 0.676885927 |             |           |         |  |
| NA         | ENSG00000231840 | 0.0057177 | 0.49772 | 0.0057177   | 0.49772     | 0.0057177 | 0.49772 |  |
|            | 0.55294         | 0.29015   | 0.29015 | 0.676915611 |             |           |         |  |
| ZNF556     | ENSG00000172000 | -0.57308  | 0.71671 | -0.34888    | 0.63641     | -0.61031  |         |  |
|            | 0.72917         | 0.55289   | 0.29017 | 0.29017     | 0.676915611 |           |         |  |
| FABP9      | ENSG00000205186 | -1.3445   | 0.91061 | 0.55285     | 0.29018     | -1.3445   | 0.91061 |  |
|            | -0.12866        | 0.55119   | 0.29018 | 0.676915611 |             |           |         |  |
| EXTL3      | ENSG00000012232 | 0.36891   | 0.3561  | -0.26736    | 0.6054      | 0.55259   | 0.29027 |  |
|            | -0.011003       | 0.50439   | 0.29027 | 0.676915611 |             |           |         |  |
| LDHBP1     | ENSG00000232662 | 0.14178   | 0.44363 | 0.55259     | 0.29027     | -1.4739   |         |  |
|            | 0.92974         | -1.3268   | 0.90771 | 0.29027     | 0.676915611 |           |         |  |
| NA         | ENSG00000272977 | 0.55258   | 0.29028 | 0.55258     | 0.29028     | 0.068776  | 0.47258 |  |
|            | 0.55258         | 0.29028   | 0.29028 | 0.676915611 |             |           |         |  |
| NA         | ENSG00000230867 | -1.3315   | 0.90849 | -1.3315     | 0.90849     | -1.3315   | 0.90849 |  |
|            | 0.55253         | 0.29029   | 0.29029 | 0.676915611 |             |           |         |  |
| NA         | ENSG00000279640 | -2.429    | 0.99243 | -1.0219     | 0.84659     | 0.55254   | 0.29029 |  |
|            | 0.55254         | 0.29029   | 0.29029 | 0.676915611 |             |           |         |  |
| NA         | ENSG00000200998 | -0.68898  | 0.75458 | 0.55251     | 0.2903      | -1.1617   | 0.87731 |  |

|                |                 |           |         |             |             |           |         |         |
|----------------|-----------------|-----------|---------|-------------|-------------|-----------|---------|---------|
|                | -1.1617         | 0.87731   | 0.2903  | 0.676915611 |             |           |         |         |
| NA             | ENSG00000236065 | 0.55241   | 0.29033 | 0.55241     | 0.29033     | 0.55241   | 0.29033 |         |
|                | 0.55241         | 0.29033   | 0.29033 | 0.676915611 |             |           |         |         |
| VN1R46P        | ENSG00000253611 | -1.1172   | 0.86805 | -0.46005    | 0.67726     | 0.55243   |         |         |
|                | 0.29033         | 0.47388   | 0.31779 | 0.29033     | 0.676915611 |           |         |         |
| STRN3          | ENSG00000196792 | -0.14159  | 0.5563  | -0.069965   | 0.52789     | 0.55238   | 0.29034 |         |
|                | 0.55238         | 0.29034   | 0.29034 | 0.676915611 |             |           |         |         |
| HNRNPUL2       | ENSG00000214753 | 0.032741  | 0.48694 | 0.55237     | 0.29035     | -0.52164  |         |         |
|                | 0.69904         | -0.16592  | 0.56589 | 0.29035     | 0.676915611 |           |         |         |
| HNRNPUL2-BSCL2 | ENSG00000234857 | 0.55237   | 0.29035 | 0.55237     | 0.29035     | 0.55237   | 0.29035 | 0.55237 |
|                | 0.29035         | 0.55237   | 0.29035 | 0.29035     | 0.676915611 |           |         |         |
| CHCHD4P3       | ENSG00000236156 | 0.55237   | 0.29035 | 0.55237     | 0.29035     | 0.55237   | 0.29035 | 0.55237 |
|                | 0.29035         | 0.55237   | 0.29035 | 0.29035     | 0.676915611 |           |         |         |
| KRTAP7-1       | ENSG00000274749 | 0.55236   | 0.29035 | 0.55236     | 0.29035     | 0.55236   | 0.29035 | 0.55236 |
|                | 0.29035         | 0.55236   | 0.29035 | 0.29035     | 0.676915611 |           |         |         |
| PGGT1B         | ENSG00000164219 | 0.068395  | 0.47274 | -0.73753    | 0.7696      | 0.55233   |         |         |
|                | 0.29036         | -0.8813   | 0.81092 | 0.29036     | 0.676915611 |           |         |         |
| NA             | ENSG00000221058 | 0.36625   | 0.35709 | 0.34079     | 0.36663     | 0.55231   | 0.29037 |         |
|                | 0.36625         | 0.35709   | 0.29037 | 0.676915611 |             |           |         |         |
| DPRXP2         | ENSG00000271304 | 0.55219   | 0.29041 | -0.91018    | 0.81864     | -0.093919 |         |         |
|                | 0.53741         | -0.093919 | 0.53741 | 0.29041     | 0.676915611 |           |         |         |
| PPIAP2         | ENSG00000227379 | 0.48815   | 0.31272 | 0.55216     | 0.29042     | 0.23179   |         |         |
|                | 0.40835         | -0.68629  | 0.75373 | 0.29042     | 0.676915611 |           |         |         |
| NA             | ENSG00000260908 | 0.55215   | 0.29042 | 0.55215     | 0.29042     | 0.55215   | 0.29042 |         |
|                | 0.55215         | 0.29042   | 0.29042 | 0.676915611 |             |           |         |         |
| RN7SL525P      | ENSG00000264910 | 0.55213   | 0.29043 | 0.55213     | 0.29043     | 0.55213   |         |         |
|                | 0.29043         | 0.55213   | 0.29043 | 0.29043     | 0.676915611 |           |         |         |
| GTF3C5         | ENSG00000148308 | 0.13698   | 0.44552 | 0.5521      | 0.29044     | 0.181     | 0.42818 |         |
|                | 0.33937         | 0.36717   | 0.29044 | 0.676915611 |             |           |         |         |
| PRMT3          | ENSG00000185238 | 0.34862   | 0.36369 | 0.51874     | 0.30197     | 0.55207   | 0.29045 |         |
|                | 0.29077         | 0.38561   | 0.29045 | 0.676915611 |             |           |         |         |
| NA             | ENSG00000253744 | -0.64029  | 0.73901 | -0.83241    | 0.79741     | -1.119    | 0.86844 |         |
|                | 0.55208         | 0.29045   | 0.29045 | 0.676915611 |             |           |         |         |
| NA             | ENSG00000248954 | 0.55191   | 0.2905  | -0.30005    | 0.61793     | -0.68218  | 0.75244 |         |
|                | -0.71619        | 0.76306   | 0.2905  | 0.676933639 |             |           |         |         |
| LINC01990      | ENSG00000273125 | 0.45882   | 0.32318 | 0.45882     | 0.32318     | 0.55194   |         |         |
|                | 0.2905          | 0.40888   | 0.34131 | 0.2905      | 0.676933639 |           |         |         |
| PKNOX1         | ENSG00000160199 | 0.5278    | 0.29882 | 0.55191     | 0.29051     | 0.46241   |         |         |
|                | 0.3219          | 0.48008   | 0.31558 | 0.29051     | 0.676933639 |           |         |         |
| NA             | ENSG00000258478 | -0.42021  | 0.66283 | -0.42021    | 0.66283     | 0.55184   | 0.29053 |         |
|                | 0.21398         | 0.41528   | 0.29053 | 0.676933639 |             |           |         |         |
| MSH3           | ENSG00000113318 | 0.55178   | 0.29055 | -0.36395    | 0.64205     | -0.38025  | 0.64812 |         |
|                | -0.87003        | 0.80786   | 0.29055 | 0.676933639 |             |           |         |         |
| MAPK6-DT       | ENSG00000259438 | 0.55175   | 0.29056 | 0.48839     | 0.31264     | 0.48839   |         |         |
|                | 0.31264         | 0.48839   | 0.31264 | 0.29056     | 0.676933639 |           |         |         |
| NA             | ENSG00000276156 | 0.55173   | 0.29057 | -0.21362    | 0.58458     | 0.55173   | 0.29057 |         |
|                | 0.55173         | 0.29057   | 0.29057 | 0.676933639 |             |           |         |         |
| CPN1           | ENSG00000120054 | -1.4013   | 0.91944 | 0.23976     | 0.40526     | -0.99848  | 0.84098 |         |
|                | 0.55168         | 0.29058   | 0.29058 | 0.676933639 |             |           |         |         |
| RALY           | ENSG00000125970 | 0.55167   | 0.29059 | -0.57372    | 0.71692     | -0.15493  | 0.56156 |         |
|                | -0.41926        | 0.66249   | 0.29059 | 0.676933639 |             |           |         |         |
| RBM38-AS1      | ENSG00000218018 | 0.55154   | 0.29063 | 0.55154     | 0.29063     | 0.55154   |         |         |
|                | 0.29063         | 0.19583   | 0.42237 | 0.29063     | 0.676933639 |           |         |         |
| NA             | ENSG00000258050 | 0.55149   | 0.29065 | 0.55149     | 0.29065     | 0.55149   | 0.29065 |         |
|                | 0.55149         | 0.29065   | 0.29065 | 0.676933639 |             |           |         |         |
| NKD2           | ENSG00000145506 | -0.16197  | 0.56434 | -0.67971    | 0.75166     | 0.55147   | 0.29066 |         |
|                | -0.028568       | 0.5114    | 0.29066 | 0.676933639 |             |           |         |         |
| HINT1P1        | ENSG00000231531 | 0.55145   | 0.29066 | 0.55145     | 0.29066     | 0.55145   |         |         |
|                | 0.29066         | 0.55145   | 0.29066 | 0.29066     | 0.676933639 |           |         |         |
| ITGAX          | ENSG00000140678 | -0.19818  | 0.57855 | -0.82775    | 0.79609     | -0.43123  | 0.66685 |         |
|                | 0.55142         | 0.29067   | 0.29067 | 0.676933639 |             |           |         |         |
| PLPPR4         | ENSG00000117600 | 0.5514    | 0.29068 | 0.5514      | 0.29068     | -0.46052  |         |         |

|           |                 |            |         |             |             |           |         |  |
|-----------|-----------------|------------|---------|-------------|-------------|-----------|---------|--|
|           | 0.67743         | -0.39602   | 0.65395 | 0.29068     | 0.676933639 |           |         |  |
| NA        | ENSG00000249742 | 0.28678    | 0.38714 | 0.55139     | 0.29068     | -0.11387  | 0.54533 |  |
|           | 0.052012        | 0.47926    | 0.29068 | 0.676933639 |             |           |         |  |
| NA        | ENSG00000269894 | 0.55136    | 0.2907  | 0.55136     | 0.2907      | 0.55136   | 0.2907  |  |
|           | 0.55136         | 0.2907     | 0.2907  | 0.676943963 |             |           |         |  |
| FERMT1    | ENSG00000101311 | 0.55126    | 0.29073 | -0.79362    | 0.78629     | -0.40195  |         |  |
|           | 0.65614         | 0.21902    | 0.41332 | 0.29073     | 0.676943963 |           |         |  |
| CEP250    | ENSG00000126001 | 0.55123    | 0.29074 | 0.36536     | 0.35742     | -0.09984  |         |  |
|           | 0.53976         | 0.54599    | 0.29254 | 0.29074     | 0.676943963 |           |         |  |
| DPY19L4   | ENSG00000156162 | 0.55123    | 0.29074 | 0.55123     | 0.29074     | -0.2135   |         |  |
|           | 0.58453         | 0.1109     | 0.45585 | 0.29074     | 0.676943963 |           |         |  |
| RNU1-36P  | ENSG00000202000 | 0.43275    | 0.3326  | 0.43275     | 0.3326      | 0.43275   |         |  |
|           | 0.3326          | 0.55114    | 0.29077 | 0.29077     | 0.676981467 |           |         |  |
| NA        | ENSG00000255829 | -0.9799    | 0.83643 | -0.3253     | 0.62752     | 0.55104   | 0.2908  |  |
|           | -0.88254        | 0.81126    | 0.2908  | 0.676991779 |             |           |         |  |
| LINC01121 | ENSG00000205054 | -0.35583   | 0.63902 | -0.90403    | 0.81701     | -0.28873  |         |  |
|           | 0.61361         | 0.55102    | 0.29081 | 0.29081     | 0.676991779 |           |         |  |
| TPBGL     | ENSG00000261594 | -0.83812   | 0.79902 | -0.33636    | 0.6317      | -0.17348  | 0.56886 |  |
|           | 0.55098         | 0.29082    | 0.29082 | 0.676991779 |             |           |         |  |
| DYDC1     | ENSG00000170788 | 0.43601    | 0.33141 | 0.55095     | 0.29083     | 0.55095   | 0.29083 |  |
|           | 0.55095         | 0.29083    | 0.29083 | 0.676991779 |             |           |         |  |
| NA        | ENSG00000224536 | 0.36462    | 0.3577  | 0.55086     | 0.29086     | 0.14648   | 0.44177 |  |
|           | -1.2375         | 0.89206    | 0.29086 | 0.677002087 |             |           |         |  |
| TAS2R7    | ENSG00000121377 | -0.24183   | 0.59554 | 0.55086     | 0.29087     | 0.55086   |         |  |
|           | 0.29087         | 0.55086    | 0.29087 | 0.29087     | 0.677002087 |           |         |  |
| NA        | ENSG00000273619 | 0.12781    | 0.44915 | -0.60299    | 0.72674     | 0.55082   | 0.29088 |  |
|           | 0.55082         | 0.29088    | 0.29088 | 0.677002087 |             |           |         |  |
| NA        | ENSG00000226355 | 0.5508     | 0.29089 | 0.38347     | 0.35068     | 0.5508    | 0.29089 |  |
|           | 0.5508          | 0.29089    | 0.29089 | 0.677002087 |             |           |         |  |
| GSEC      | ENSG00000280832 | 0.55052    | 0.29098 | -0.16012    | 0.5636      | 0.55052   | 0.29098 |  |
|           | 0.55052         | 0.29098    | 0.29098 | 0.677179206 |             |           |         |  |
| RN7SL39P  | ENSG00000241223 | 0.55039    | 0.29103 | 0.31564     | 0.37614     | 0.55039   |         |  |
|           | 0.29103         | 0.55039    | 0.29103 | 0.29103     | 0.677236012 |           |         |  |
| XYLB      | ENSG00000093217 | -0.0022682 | 0.5009  | -0.43158    | 0.66698     | 0.55034   | 0.29104 |  |
|           | -0.36361        | 0.64193    | 0.29104 | 0.677236012 |             |           |         |  |
| KRTAP5-4  | ENSG00000241598 | 0.46613    | 0.32056 | 0.55033     | 0.29105     | 0.46613   |         |  |
|           | 0.32056         | 0.50284    | 0.30754 | 0.29105     | 0.677236012 |           |         |  |
| MIR1262   | ENSG00000221203 | 0.55029    | 0.29106 | 0.55029     | 0.29106     | 0.55029   |         |  |
|           | 0.29106         | 0.55029    | 0.29106 | 0.29106     | 0.677236012 |           |         |  |
| ADCY3     | ENSG00000138031 | -0.47376   | 0.68217 | 0.25665     | 0.39872     | 0.55014   | 0.29111 |  |
|           | 0.37796         | 0.35273    | 0.29111 | 0.677264013 |             |           |         |  |
| LINC02174 | ENSG00000249297 | -0.87117   | 0.80817 | -0.3186     | 0.62498     | 0.55007   |         |  |
|           | 0.29114         | -0.40094   | 0.65577 | 0.29114     | 0.677264013 |           |         |  |
| NA        | ENSG00000280155 | 0.55006    | 0.29114 | 0.55006     | 0.29114     | 0.55006   | 0.29114 |  |
|           | 0.55006         | 0.29114    | 0.29114 | 0.677264013 |             |           |         |  |
| LINC01232 | ENSG00000280734 | -0.20895   | 0.58275 | 0.55006     | 0.29114     | -0.022193 |         |  |
|           | 0.50885         | -0.4062    | 0.6577  | 0.29114     | 0.677264013 |           |         |  |
| RPL5P13   | ENSG00000242134 | -0.34051   | 0.63327 | 0.54994     | 0.29118     | 0.54994   |         |  |
|           | 0.29118         | 0.54994    | 0.29118 | 0.29118     | 0.677264013 |           |         |  |
| TRIM4     | ENSG00000146833 | 0.54991    | 0.29119 | -0.095608   | 0.53808     | -1.6036   | 0.9456  |  |
|           | -0.68237        | 0.7525     | 0.29119 | 0.677264013 |             |           |         |  |
| ACBD5     | ENSG00000107897 | 0.54989    | 0.2912  | -0.32879    | 0.62884     | 0.40461   | 0.34288 |  |
|           | -0.14694        | 0.55841    | 0.2912  | 0.677264013 |             |           |         |  |
| NA        | ENSG00000255555 | 0.5499     | 0.2912  | 0.52689     | 0.29913     | -0.55202  | 0.70953 |  |
|           | -0.55202        | 0.70953    | 0.2912  | 0.677264013 |             |           |         |  |
| NA        | ENSG00000254144 | 0.54982    | 0.29122 | 0.54982     | 0.29122     | 0.54982   | 0.29122 |  |
|           | 0.54982         | 0.29122    | 0.29122 | 0.677264013 |             |           |         |  |
| LINC00852 | ENSG00000231177 | 0.54976    | 0.29124 | 0.54976     | 0.29124     | 0.54976   |         |  |
|           | 0.29124         | 0.54976    | 0.29124 | 0.29124     | 0.677264013 |           |         |  |
| EIF3B     | ENSG00000106263 | 0.54224    | 0.29383 | 0.54971     | 0.29126     | 0.29461   | 0.38414 |  |
|           | 0.0089915       | 0.49641    | 0.29126 | 0.677264013 |             |           |         |  |
| NA        | ENSG00000267245 | 0.5497     | 0.29126 | 0.5497      | 0.29126     | 0.5497    | 0.29126 |  |

|             |                 |            |         |             |             |          |         |  |
|-------------|-----------------|------------|---------|-------------|-------------|----------|---------|--|
|             | 0.5497          | 0.29126    | 0.29126 | 0.677264013 |             |          |         |  |
| NA          | ENSG00000272694 | 0.54968    | 0.29127 | 0.54968     | 0.29127     | 0.54968  | 0.29127 |  |
|             | 0.54968         | 0.29127    | 0.29127 | 0.677264013 |             |          |         |  |
| NA          | ENSG00000232451 | 0.15409    | 0.43877 | 0.54965     | 0.29128     | -0.69029 | 0.755   |  |
|             | -0.3819         | 0.64873    | 0.29128 | 0.677264013 |             |          |         |  |
| NA          | ENSG00000279144 | 0.48069    | 0.31537 | 0.54951     | 0.29133     | -0.2587  | 0.60207 |  |
|             | -0.2587         | 0.60207    | 0.29133 | 0.677264013 |             |          |         |  |
| L2HGDH      | ENSG00000087299 | -1.352     | 0.91182 | -0.85935    | 0.80493     | -0.98666 |         |  |
|             | 0.8381          | 0.54949    | 0.29134 | 0.29134     | 0.677264013 |          |         |  |
| SLC30A8     | ENSG00000164756 | 0.54948    | 0.29134 | 0.16403     | 0.43485     | 0.36354  |         |  |
|             | 0.3581          | 0.36354    | 0.3581  | 0.29134     | 0.677264013 |          |         |  |
| NA          | ENSG00000241011 | 0.54948    | 0.29134 | 0.54948     | 0.29134     | 0.54948  | 0.29134 |  |
|             | 0.54948         | 0.29134    | 0.29134 | 0.677264013 |             |          |         |  |
| IQC�        | ENSG00000130518 | -0.3107    | 0.62199 | 0.28246     | 0.3888      | -0.5347  | 0.70357 |  |
|             | 0.54945         | 0.29135    | 0.29135 | 0.677264013 |             |          |         |  |
| ARPP21      | ENSG00000172995 | 0.54945    | 0.29135 | -0.75015    | 0.77342     | -0.74511 |         |  |
|             | 0.7719          | 0.29079    | 0.38561 | 0.29135     | 0.677264013 |          |         |  |
| LINC00311   | ENSG00000179219 | 0.54933    | 0.29139 | 0.54933     | 0.29139     | 0.44543  | 0.328   |  |
|             | 0.27772         | 0.39061    | 0.29139 | 0.677324685 |             |          |         |  |
| NA          | ENSG00000259921 | 0.5492     | 0.29143 | 0.5492      | 0.29143     | 0.5492   | 0.29143 |  |
|             | 0.5492          | 0.29143    | 0.29143 | 0.67733608  |             |          |         |  |
| NA          | ENSG00000267420 | 0.54917    | 0.29144 | 0.54917     | 0.29144     | 0.54917  | 0.29144 |  |
|             | 0.54917         | 0.29144    | 0.29144 | 0.67733608  |             |          |         |  |
| NA          | ENSG00000254370 | -0.0016438 | 0.50066 | 0.54915     | 0.29145     | -0.21102 | 0.58357 |  |
|             | -0.21102        | 0.58357    | 0.29145 | 0.67733608  |             |          |         |  |
| IRGM        | ENSG00000237693 | 0.54914    | 0.29146 | 0.54914     | 0.29146     | 0.54914  | 0.29146 |  |
|             | 0.31481         | 0.37645    | 0.29146 | 0.67733608  |             |          |         |  |
| LINC00560   | ENSG00000261666 | 0.54907    | 0.29148 | 0.54907     | 0.29148     | 0.54907  |         |  |
|             | 0.29148         | 0.29318    | 0.38469 | 0.29148     | 0.67733608  |          |         |  |
| AMER2       | ENSG00000165566 | -0.68246   | 0.75252 | -0.23855    | 0.59427     | 0.54904  | 0.29149 |  |
|             | 0.18092         | 0.42821    | 0.29149 | 0.67733608  |             |          |         |  |
| NA          | ENSG00000228470 | 0.54899    | 0.2915  | -1.1946     | 0.88389     | 0.54899  | 0.2915  |  |
|             | 0.54899         | 0.2915     | 0.2915  | 0.67733608  |             |          |         |  |
| UBE2Q1      | ENSG00000160714 | 0.54896    | 0.29152 | 0.18602     | 0.42621     | -0.53637 |         |  |
|             | 0.70415         | 0.13547    | 0.44612 | 0.29152     | 0.67733608  |          |         |  |
| RNA5SP267   | ENSG00000201763 | 0.54894    | 0.29152 | 0.54894     | 0.29152     | 0.54894  |         |  |
|             | 0.29152         | 0.54894    | 0.29152 | 0.29152     | 0.67733608  |          |         |  |
| ATP6V0E1    | ENSG00000113732 | 0.54887    | 0.29155 | -0.91492    | 0.81988     | -1.029   |         |  |
|             | 0.84825         | -0.57655   | 0.71788 | 0.29155     | 0.677355363 |          |         |  |
| C1orf159    | ENSG00000131591 | -0.82483   | 0.79527 | -0.39909    | 0.65509     | -0.43163 |         |  |
|             | 0.66699         | 0.54879    | 0.29157 | 0.29157     | 0.677355363 |          |         |  |
| NA          | ENSG00000238826 | 0.54881    | 0.29157 | -0.53249    | 0.70281     | -1.1696  | 0.87893 |  |
|             | 0.54881         | 0.29157    | 0.29157 | 0.677355363 |             |          |         |  |
| HMGB1P22    | ENSG00000250721 | 0.47947    | 0.3158  | 0.54871     | 0.2916      | 0.47947  |         |  |
|             | 0.3158          | 0.19271    | 0.42359 | 0.2916      | 0.677369721 |          |         |  |
| L3MBTL2-AS1 | ENSG00000235513 | 0.54869    | 0.29161 | 0.54869     | 0.29161     | 0.54869  |         |  |
|             | 0.29161         | 0.54869    | 0.29161 | 0.29161     | 0.677369721 |          |         |  |
| ARNY4       | ENSG00000252316 | 0.54845    | 0.29169 | 0.050181    | 0.47999     | -0.17351 | 0.56887 |  |
|             | 0.07393         | 0.47053    | 0.29169 | 0.677369721 |             |          |         |  |
| HSPE1P8     | ENSG00000217897 | 0.070941   | 0.47172 | 0.54841     | 0.29171     | 0.070941 |         |  |
|             | 0.47172         | 0.070941   | 0.47172 | 0.29171     | 0.677369721 |          |         |  |
| SCUBE3      | ENSG00000146197 | 0.54833    | 0.29173 | -0.030383   | 0.51212     | 0.54833  |         |  |
|             | 0.29173         | -0.14279   | 0.55677 | 0.29173     | 0.677369721 |          |         |  |
| CYP4F22     | ENSG00000171954 | 0.54832    | 0.29173 | -0.4886     | 0.68744     | -0.54702 |         |  |
|             | 0.70782         | -1.2317    | 0.89097 | 0.29173     | 0.677369721 |          |         |  |
| MIR3660     | ENSG00000264342 | 0.54835    | 0.29173 | 0.54835     | 0.29173     | 0.54835  |         |  |
|             | 0.29173         | 0.54835    | 0.29173 | 0.29173     | 0.677369721 |          |         |  |
| NA          | ENSG00000226014 | -1.0847    | 0.86097 | -1.0847     | 0.86097     | 0.54831  | 0.29174 |  |
|             | -1.0847         | 0.86097    | 0.29174 | 0.677369721 |             |          |         |  |
| NA          | ENSG00000263370 | 0.54825    | 0.29176 | 0.54825     | 0.29176     | 0.54825  | 0.29176 |  |
|             | 0.54825         | 0.29176    | 0.29176 | 0.677369721 |             |          |         |  |
| ADH1B       | ENSG00000196616 | 0.37836    | 0.35258 | 0.5482      | 0.29178     | -0.43115 | 0.66682 |  |

|            |                 |           |         |             |             |          |         |  |
|------------|-----------------|-----------|---------|-------------|-------------|----------|---------|--|
|            | 0.5482          | 0.29178   | 0.29178 | 0.677369721 |             |          |         |  |
| NA         | ENSG00000228675 | 0.46402   | 0.32132 | 0.17947     | 0.42879     | -2.0384  | 0.97924 |  |
|            | 0.54819         | 0.29178   | 0.29178 | 0.677369721 |             |          |         |  |
| NA         | ENSG00000221249 | 0.54818   | 0.29178 | 0.19226     | 0.42377     | 0.51722  | 0.3025  |  |
|            | -0.77204        | 0.77995   | 0.29178 | 0.677369721 |             |          |         |  |
| RPS11      | ENSG00000142534 | -0.36927  | 0.64404 | 0.54817     | 0.29179     | -0.36927 | 0.64404 |  |
|            | -1.2554         | 0.89533   | 0.29179 | 0.677369721 |             |          |         |  |
| NA         | ENSG00000243008 | -0.84679  | 0.80145 | 0.54812     | 0.2918      | 0.43881  | 0.3304  |  |
|            | -0.53061        | 0.70216   | 0.2918  | 0.677369721 |             |          |         |  |
| MIR329-2   | ENSG00000207762 | 0.54808   | 0.29182 | 0.54808     | 0.29182     | 0.54808  |         |  |
|            | 0.29182         | 0.54808   | 0.29182 | 0.29182     | 0.677369721 |          |         |  |
| LYPLA2P2   | ENSG00000269153 | 0.54808   | 0.29182 | 0.54808     | 0.29182     | -1.1414  |         |  |
|            | 0.87314         | 0.15507   | 0.43838 | 0.29182     | 0.677369721 |          |         |  |
| NA         | ENSG00000254669 | 0.17483   | 0.43061 | -0.66409    | 0.74668     | 0.54804  | 0.29183 |  |
|            | 0.17483         | 0.43061   | 0.29183 | 0.677369721 |             |          |         |  |
| OR51C4P    | ENSG00000272664 | -0.76322  | 0.77733 | 0.54796     | 0.29186     | 0.54796  |         |  |
|            | 0.29186         | 0.54796   | 0.29186 | 0.29186     | 0.677369721 |          |         |  |
| NA         | ENSG00000272829 | 0.54795   | 0.29186 | 0.54795     | 0.29186     | 0.54795  | 0.29186 |  |
|            | 0.54795         | 0.29186   | 0.29186 | 0.677369721 |             |          |         |  |
| NA         | ENSG00000270804 | 0.54792   | 0.29187 | 0.54792     | 0.29187     | 0.54792  | 0.29187 |  |
|            | 0.54792         | 0.29187   | 0.29187 | 0.677369721 |             |          |         |  |
| JPH2       | ENSG00000149596 | 0.088177  | 0.46487 | 0.54791     | 0.29188     | -0.50473 | 0.69313 |  |
|            | 0.23914         | 0.4055    | 0.29188 | 0.677369721 |             |          |         |  |
| MIR4327    | ENSG00000265007 | 0.54775   | 0.29193 | 0.54775     | 0.29193     | 0.54775  |         |  |
|            | 0.29193         | 0.54775   | 0.29193 | 0.29193     | 0.677369721 |          |         |  |
| PRM2       | ENSG00000122304 | 0.54772   | 0.29194 | 0.54772     | 0.29194     | 0.54772  | 0.29194 |  |
|            | 0.31153         | 0.3777    | 0.29194 | 0.677369721 |             |          |         |  |
| NA         | ENSG00000222024 | 0.54771   | 0.29194 | -0.47909    | 0.68406     | 0.16338  | 0.43511 |  |
|            | -0.47909        | 0.68406   | 0.29194 | 0.677369721 |             |          |         |  |
| RNU6-55P   | ENSG00000223024 | 0.54771   | 0.29195 | 0.54771     | 0.29195     | 0.54771  |         |  |
|            | 0.29195         | 0.54771   | 0.29195 | 0.29195     | 0.677369721 |          |         |  |
| RAB42      | ENSG00000188060 | -2.1057   | 0.98238 | 0.54767     | 0.29196     | 0.4653   | 0.32086 |  |
|            | -0.15442        | 0.56136   | 0.29196 | 0.677369721 |             |          |         |  |
| MALSU1     | ENSG00000156928 | 0.54756   | 0.2920  | 0.10435     | 0.45845     | 0.20477  | 0.41888 |  |
|            | 0.20477         | 0.41888   | 0.2920  | 0.677369721 |             |          |         |  |
| LINC02667  | ENSG00000224190 | 0.375     | 0.35383 | -2.259      | 0.98806     | 0.54753  | 0.29201 |  |
|            | 0.54753         | 0.29201   | 0.29201 | 0.677369721 |             |          |         |  |
| LINC01266  | ENSG00000224957 | 0.54753   | 0.29201 | -0.095527   | 0.53805     | -1.1253  |         |  |
|            | 0.86977         | -0.31942  | 0.62529 | 0.29201     | 0.677369721 |          |         |  |
| RPL21P111  | ENSG00000237109 | 0.1127    | 0.45513 | 0.54751     | 0.29201     | 0.54751  |         |  |
|            | 0.29201         | 0.54751   | 0.29201 | 0.29201     | 0.677369721 |          |         |  |
| SEMA3B-AS1 | ENSG00000232352 | 0.54748   | 0.29202 | 0.54748     | 0.29202     | 0.54748  |         |  |
|            | 0.29202         | 0.54748   | 0.29202 | 0.29202     | 0.677369721 |          |         |  |
| PLK2       | ENSG00000145632 | 0.29417   | 0.38431 | 0.020034    | 0.49201     | 0.39717  | 0.34562 |  |
|            | 0.54737         | 0.29206   | 0.29206 | 0.677369721 |             |          |         |  |
| ANXA10     | ENSG00000109511 | 0.0070325 | 0.49719 | -0.20694    | 0.58197     | 0.31238  |         |  |
|            | 0.37738         | 0.54729   | 0.29209 | 0.29209     | 0.677369721 |          |         |  |
| NA         | ENSG00000267131 | -0.65729  | 0.7445  | 0.5473      | 0.29209     | -0.40739 | 0.65814 |  |
|            | -0.40739        | 0.65814   | 0.29209 | 0.677369721 |             |          |         |  |
| GIMAP7     | ENSG00000179144 | 0.41147   | 0.34036 | 0.41147     | 0.34036     | 0.54725  |         |  |
|            | 0.2921          | -0.8037   | 0.78922 | 0.2921      | 0.677369721 |          |         |  |
| NA         | ENSG00000235419 | -0.73923  | 0.77012 | 0.20793     | 0.41764     | 0.54727  | 0.2921  |  |
|            | 0.54727         | 0.2921    | 0.2921  | 0.677369721 |             |          |         |  |
| SOX4       | ENSG00000124766 | 0.54718   | 0.29213 | -0.35797    | 0.63982     | 0.41516  | 0.33901 |  |
|            | -0.65712        | 0.74445   | 0.29213 | 0.677369721 |             |          |         |  |
| RNU6-595P  | ENSG00000200814 | 0.54715   | 0.29214 | 0.54715     | 0.29214     | 0.54715  |         |  |
|            | 0.29214         | 0.54715   | 0.29214 | 0.29214     | 0.677369721 |          |         |  |
| NA         | ENSG00000255146 | -0.74971  | 0.77328 | -1.5971     | 0.94488     | 0.54714  | 0.29214 |  |
|            | -1.4632         | 0.9283    | 0.29214 | 0.677369721 |             |          |         |  |
| EIF2AK4    | ENSG00000128829 | 0.5471    | 0.29215 | 0.063371    | 0.47474     | -0.49659 |         |  |
|            | 0.69026         | 0.38092   | 0.35163 | 0.29215     | 0.677369721 |          |         |  |
| RADIL      | ENSG00000157927 | -0.70327  | 0.75906 | -0.24199    | 0.5956      | 0.54709  | 0.29216 |  |

|            |                 |          |         |             |             |         |          |         |
|------------|-----------------|----------|---------|-------------|-------------|---------|----------|---------|
|            | -0.40582        | 0.65756  | 0.29216 | 0.677369721 |             |         |          |         |
| DNAJB6P3   | ENSG00000231802 | 0.54709  | 0.29216 | 0.29216     | 0.354       | 0.36167 | 0.54709  | 0.29216 |
|            | 0.54709         | 0.29216  | 0.29216 | 0.677369721 |             |         |          |         |
| CDC14B     | ENSG00000081377 | -0.55966 | 0.29219 | 0.71214     | 0.547       | 0.29219 | 0.29755  | 0.38302 |
|            | 0.15947         | 0.43665  | 0.29219 | 0.677407046 |             |         |          |         |
| SLC22A6    | ENSG00000197901 | -1.6465  | 0.29221 | 0.95017     | -1.2669     | 0.89741 | 0.54695  |         |
|            | 0.29221         | -0.71883 | 0.76388 | 0.29221     | 0.677421185 |         |          |         |
| NA         | ENSG00000259227 | -0.42293 | 0.66383 | 0.074101    | 0.47047     |         | 0.54688  | 0.29223 |
|            | 0.54688         | 0.29223  | 0.29223 | 0.677435322 |             |         |          |         |
| NA         | ENSG00000243507 | 0.54678  | 0.29227 | 0.54678     | 0.29227     |         | -0.29774 | 0.61705 |
|            | -0.29774        | 0.61705  | 0.29227 | 0.677495819 |             |         |          |         |
| MC4R       | ENSG00000166603 | 0.54671  | 0.29229 | -0.31134    | 0.62223     |         | -1.4589  | 0.92771 |
|            | 0.54671         | 0.29229  | 0.29229 | 0.677505988 |             |         |          |         |
| GFOD2      | ENSG00000141098 | 0.35836  | 0.36004 | 0.54664     | 0.29231     |         | 0.54664  | 0.29231 |
|            | 0.54664         | 0.29231  | 0.29231 | 0.677505988 |             |         |          |         |
| OR8A3P     | ENSG00000255315 | -0.51769 | 0.69766 | 0.14555     | 0.44214     |         | 0.54663  |         |
|            | 0.29232         | 0.54663  | 0.29232 | 0.29232     | 0.677505988 |         |          |         |
| NA         | ENSG00000261310 | -1.4746  | 0.92984 | 0.5466      | 0.29233     |         | -0.92537 | 0.82261 |
|            | -1.6453         | 0.95004  | 0.29233 | 0.677505988 |             |         |          |         |
| CCNA1      | ENSG00000133101 | -2.5577  | 0.99473 | -1.7258     | 0.95781     |         | 0.54643  | 0.29238 |
|            | 0.024205        | 0.49034  | 0.29238 | 0.677589642 |             |         |          |         |
| PPP1R11    | ENSG00000204619 | 0.54634  | 0.29242 | 0.54634     | 0.29242     |         | 0.54634  |         |
|            | 0.29242         | 0.54634  | 0.29242 | 0.29242     | 0.677626238 |         |          |         |
| NA         | ENSG00000270614 | 0.54626  | 0.29244 | 0.54626     | 0.29244     |         | 0.54626  | 0.29244 |
|            | 0.54626         | 0.29244  | 0.29244 | 0.677626238 |             |         |          |         |
| CCT4P1     | ENSG00000242703 | -0.99642 | 0.84048 | 0.54622     | 0.29246     |         | 0.54622  |         |
|            | 0.29246         | -0.45621 | 0.67588 | 0.29246     | 0.677626238 |         |          |         |
| OR1B1      | ENSG00000280094 | -0.37019 | 0.64438 | -1.0903     | 0.86221     |         | 0.54618  | 0.29247 |
|            | 0.54618         | 0.29247  | 0.29247 | 0.677626238 |             |         |          |         |
| VGFB       | ENSG00000128564 | 0.54612  | 0.29249 | 0.54612     | 0.29249     |         | 0.54612  | 0.29249 |
|            | 0.54612         | 0.29249  | 0.29249 | 0.677626238 |             |         |          |         |
| NA         | ENSG00000273288 | 0.54613  | 0.29249 | 0.54613     | 0.29249     |         | 0.54613  | 0.29249 |
|            | 0.54613         | 0.29249  | 0.29249 | 0.677626238 |             |         |          |         |
| NA         | ENSG00000221244 | 0.54601  | 0.29253 | 0.54601     | 0.29253     |         | 0.54601  | 0.29253 |
|            | 0.54601         | 0.29253  | 0.29253 | 0.677626238 |             |         |          |         |
| LINC01067  | ENSG00000236053 | -0.32398 | 0.62702 | -0.32398    | 0.62702     |         | 0.54593  |         |
|            | 0.29256         | 0.094523 | 0.46235 | 0.29256     | 0.677626238 |         |          |         |
| LINC00339  | ENSG00000218510 | 0.36608  | 0.35715 | 0.54588     | 0.29257     |         | 0.54588  |         |
|            | 0.29257         | 0.42411  | 0.33574 | 0.29257     | 0.677626238 |         |          |         |
| NA         | ENSG00000257241 | 0.5459   | 0.29257 | 0.5459      | 0.29257     |         | 0.5459   | 0.29257 |
|            | 0.5459          | 0.29257  | 0.29257 | 0.677626238 |             |         |          |         |
| NA         | ENSG00000282897 | 0.54588  | 0.29257 | 0.54588     | 0.29257     |         | 0.50612  | 0.30639 |
|            | 0.54588         | 0.29257  | 0.29257 | 0.677626238 |             |         |          |         |
| IGHG2      | ENSG00000211893 | -1.8524  | 0.96801 | -0.79902    | 0.78786     |         | -0.49802 | 0.69077 |
|            | 0.54587         | 0.29258  | 0.29258 | 0.677626238 |             |         |          |         |
| POU3F3     | ENSG00000198914 | -0.21576 | 0.58541 | -0.21576    | 0.58541     |         | -0.37905 |         |
|            | 0.64768         | 0.54576  | 0.29262 | 0.29262     | 0.677626238 |         |          |         |
| TTC23L     | ENSG00000205838 | 0.44471  | 0.32826 | -0.56081    | 0.71253     |         | 0.54576  |         |
|            | 0.29262         | -0.81395 | 0.79216 | 0.29262     | 0.677626238 |         |          |         |
| NA         | ENSG00000258868 | -0.2538  | 0.60017 | 0.54571     | 0.29263     |         | -0.2348  | 0.59282 |
|            | -0.7741         | 0.78057  | 0.29263 | 0.677626238 |             |         |          |         |
| TMEM92-AS1 | ENSG00000251179 | -1.3103  | 0.90495 | -0.89304    | 0.81408     |         | 0.021568 |         |
|            | 0.4914          | 0.54568  | 0.29264 | 0.29264     | 0.677626238 |         |          |         |
| CBR3-AS1   | ENSG00000236830 | -0.19669 | 0.57796 | -0.12795    | 0.5509      |         | 0.54565  |         |
|            | 0.29265         | -0.73408 | 0.76855 | 0.29265     | 0.677626238 |         |          |         |
| NCDN       | ENSG00000020129 | 0.29388  | 0.38442 | 0.54563     | 0.29266     |         | -0.40599 | 0.65763 |
|            | -0.093753       | 0.53735  | 0.29266 | 0.677626238 |             |         |          |         |
| PRKAB2     | ENSG00000131791 | 0.54562  | 0.29266 | 0.54562     | 0.29266     |         | 0.15103  |         |
|            | 0.43998         | 0.54562  | 0.29266 | 0.29266     | 0.677626238 |         |          |         |
| CSAD       | ENSG00000139631 | -1.0817  | 0.8603  | -1.2267     | 0.89004     |         | 0.54552  | 0.2927  |
|            | -1.2701         | 0.89797  | 0.2927  | 0.677645413 |             |         |          |         |
| NLRC5      | ENSG00000140853 | 0.3163   | 0.37589 | -0.10918    | 0.54347     |         | -1.4864  | 0.93141 |

|             |                 |           |         |             |             |           |         |         |
|-------------|-----------------|-----------|---------|-------------|-------------|-----------|---------|---------|
|             | 0.54552         | 0.2927    | 0.2927  | 0.677645413 |             |           |         |         |
| HSPD1P18    | ENSG00000248351 | 0.54547   | 0.29271 | 0.54547     | 0.29271     | 0.54547   | 0.29271 | 0.54547 |
|             | 0.29271         | 0.21067   | 0.41657 | 0.29271     | 0.677645413 |           |         |         |
| WDR43       | ENSG00000163811 | 0.54512   | 0.29283 | 0.24443     | 0.40345     | -1.0702   | 0.85774 |         |
|             | 0.22846         | 0.40964   | 0.29283 | 0.677841751 |             |           |         |         |
| C9orf129    | ENSG00000204352 | 0.54508   | 0.29285 | 0.27699     | 0.39089     | 0.036958  |         |         |
|             | 0.48526         | -0.14992  | 0.55959 | 0.29285     | 0.677841751 |           |         |         |
| NA          | ENSG00000253112 | 0.54504   | 0.29286 | 0.54504     | 0.29286     | 0.54504   | 0.29286 |         |
|             | 0.14987         | 0.44043   | 0.29286 | 0.677841751 |             |           |         |         |
| NDUFAF4     | ENSG00000123545 | -0.6739   | 0.74981 | 0.54496     | 0.29289     | -0.70037  |         |         |
|             | 0.75815         | -0.76607  | 0.77818 | 0.29289     | 0.677841751 |           |         |         |
| NA          | ENSG00000255537 | 0.54492   | 0.2929  | 0.0099347   | 0.49604     | 0.0099347 | 0.49604 |         |
|             | 0.0099347       | 0.49604   | 0.2929  | 0.677841751 |             |           |         |         |
| NA          | ENSG00000241185 | -0.076065 | 0.53032 | 0.54491     | 0.29291     | -0.076065 | 0.53032 |         |
|             | -0.076065       | 0.53032   | 0.29291 | 0.677841751 |             |           |         |         |
| NA          | ENSG00000229646 | -1.4662   | 0.92871 | 0.54488     | 0.29292     | 0.040554  | 0.48383 |         |
|             | -1.4662         | 0.92871   | 0.29292 | 0.677841751 |             |           |         |         |
| NA          | ENSG00000236009 | 0.097535  | 0.46115 | 0.54489     | 0.29292     | 0.18994   | 0.42468 |         |
|             | 0.0056302       | 0.49775   | 0.29292 | 0.677841751 |             |           |         |         |
| NA          | ENSG00000274844 | 0.21113   | 0.41639 | 0.058277    | 0.47676     | 0.54488   | 0.29292 |         |
|             | -0.03546        | 0.51414   | 0.29292 | 0.677841751 |             |           |         |         |
| TRBV11-2    | ENSG00000241657 | 0.54472   | 0.29297 | 0.54472     | 0.29297     | 0.54472   |         |         |
|             | 0.29297         | 0.54472   | 0.29297 | 0.29297     | 0.677863987 |           |         |         |
| LEMD1-AS1   | ENSG00000226235 | -0.99944  | 0.84121 | 0.54466     | 0.29299     | -1.7384   |         |         |
|             | 0.95893         | -0.6123   | 0.72983 | 0.29299     | 0.677863987 |           |         |         |
| NA          | ENSG00000226239 | 0.30515   | 0.38013 | 0.30515     | 0.38013     | 0.54466   | 0.29299 |         |
|             | 0.30515         | 0.38013   | 0.29299 | 0.677863987 |             |           |         |         |
| RBP1        | ENSG00000114115 | 0.54456   | 0.29303 | 0.54456     | 0.29303     | 0.54456   | 0.29303 |         |
|             | -0.559          | 0.71192   | 0.29303 | 0.677863987 |             |           |         |         |
| NA          | ENSG00000254732 | 0.54455   | 0.29303 | 0.36008     | 0.35939     | 0.54455   | 0.29303 |         |
|             | 0.54455         | 0.29303   | 0.29303 | 0.677863987 |             |           |         |         |
| MIR1827     | ENSG00000221476 | 0.5445    | 0.29305 | 0.5445      | 0.29305     | 0.5445    |         |         |
|             | 0.29305         | 0.5445    | 0.29305 | 0.29305     | 0.677863987 |           |         |         |
| NA          | ENSG00000273628 | 0.54449   | 0.29305 | 0.086202    | 0.46565     | -0.33345  | 0.6306  |         |
|             | -0.33345        | 0.6306    | 0.29305 | 0.677863987 |             |           |         |         |
| IGHVIII-5-1 | ENSG00000253387 | 0.54448   | 0.29306 | 0.54448     | 0.29306     | 0.54448   |         |         |
|             | 0.29306         | 0.54448   | 0.29306 | 0.29306     | 0.677863987 |           |         |         |
| HNRNPH3     | ENSG00000096746 | 0.54445   | 0.29307 | -0.94231    | 0.82698     | -0.50663  |         |         |
|             | 0.69379         | -0.19904  | 0.57888 | 0.29307     | 0.677863987 |           |         |         |
| DHRS3       | ENSG00000162496 | 0.20693   | 0.41803 | 0.062496    | 0.47508     | 0.54435   | 0.2931  |         |
|             | 0.40094         | 0.34423   | 0.2931  | 0.677863987 |             |           |         |         |
| C8orf86     | ENSG00000196166 | -0.28092  | 0.61062 | 0.077265    | 0.46921     | -1.1257   |         |         |
|             | 0.86986         | 0.54434   | 0.29311 | 0.29311     | 0.677863987 |           |         |         |
| RNU6ATAC17P | ENSG00000251883 | 0.54431   | 0.29311 | -0.84754    | 0.80165     | -0.37594  |         |         |
|             | 0.64652         | -0.37594  | 0.64652 | 0.29311     | 0.677863987 |           |         |         |
| SEMA6D      | ENSG00000137872 | -0.57611  | 0.71773 | -0.84889    | 0.80203     | 0.54429   |         |         |
|             | 0.29312         | 0.2278    | 0.4099  | 0.29312     | 0.677863987 |           |         |         |
| LINC00682   | ENSG00000245870 | -0.52653  | 0.70074 | 0.54427     | 0.29313     | -1.1211   |         |         |
|             | 0.86887         | -0.75119  | 0.77373 | 0.29313     | 0.677863987 |           |         |         |
| WHAMMP2     | ENSG00000248334 | -0.9798   | 0.83641 | -0.75495    | 0.77486     | 0.54423   |         |         |
|             | 0.29314         | -1.3317   | 0.90852 | 0.29314     | 0.677863987 |           |         |         |
| CLYBL       | ENSG00000125246 | 0.46391   | 0.32136 | 0.54416     | 0.29317     | 0.46171   | 0.32214 |         |
|             | -0.79251        | 0.78597   | 0.29317 | 0.677863987 |             |           |         |         |
| SRPRB       | ENSG00000144867 | 0.24887   | 0.40173 | 0.54412     | 0.29318     | -0.40148  | 0.65597 |         |
|             | 0.13809         | 0.44509   | 0.29318 | 0.677863987 |             |           |         |         |
| NA          | ENSG00000249945 | -0.24596  | 0.59714 | -1.4799     | 0.93056     | -0.252    | 0.59948 |         |
|             | 0.54412         | 0.29318   | 0.29318 | 0.677863987 |             |           |         |         |
| TPP2        | ENSG00000134900 | 0.54383   | 0.29328 | 0.44924     | 0.32663     | 0.53278   | 0.29709 |         |
|             | -0.075423       | 0.53006   | 0.29328 | 0.678063026 |             |           |         |         |
| SNORD14C    | ENSG00000202252 | 0.31637   | 0.37586 | 0.54378     | 0.2933      | 0.54378   |         |         |
|             | 0.2933          | 0.54378   | 0.2933  | 0.2933      | 0.678068044 |           |         |         |
| NA          | ENSG00000271418 | 0.54375   | 0.29331 | -1.6046     | 0.94571     | -0.4274   | 0.66546 |         |



|            |                 |          |         |             |             |           |         |  |
|------------|-----------------|----------|---------|-------------|-------------|-----------|---------|--|
|            | -0.70538        | 0.75971  | 0.29331 | 0.678068044 |             |           |         |  |
| ITLN1      | ENSG00000179914 | 0.16658  | 0.43385 | 0.54359     | 0.29336     | 0.16658   | 0.43385 |  |
|            | 0.44457         | 0.32831  | 0.29336 | 0.678151461 |             |           |         |  |
| VPS13D     | ENSG0000048707  | -0.49161 | 0.6885  | 0.54349     | 0.2934      | -0.41428  |         |  |
|            | 0.66066         | -0.25002 | 0.59871 | 0.2934      | 0.678179584 |           |         |  |
| NA         | ENSG00000239593 | 0.54347  | 0.2934  | 0.54347     | 0.2934      | 0.54347   | 0.2934  |  |
|            | 0.54347         | 0.2934   | 0.2934  | 0.678179584 |             |           |         |  |
| NA         | ENSG00000242798 | 0.54331  | 0.29346 | 0.54331     | 0.29346     | 0.54331   | 0.29346 |  |
|            | 0.54331         | 0.29346  | 0.29346 | 0.678253927 |             |           |         |  |
| NA         | ENSG00000253319 | -0.43174 | 0.66703 | -0.2482     | 0.59801     | -0.2162   | 0.58558 |  |
|            | 0.54331         | 0.29346  | 0.29346 | 0.678253927 |             |           |         |  |
| C16orf97   | ENSG00000261190 | 0.54324  | 0.29348 | 0.25846     | 0.39803     | 0.042287  |         |  |
|            | 0.48313         | -1.1843  | 0.88186 | 0.29348     | 0.678267982 |           |         |  |
| LHFPL6     | ENSG00000183722 | 0.15017  | 0.44032 | -0.097718   | 0.53892     | 0.47262   |         |  |
|            | 0.31824         | 0.54319  | 0.2935  | 0.2935      | 0.678272979 |           |         |  |
| LINC02442  | ENSG00000256077 | 0.54317  | 0.29351 | 0.54317     | 0.29351     | 0.54317   |         |  |
|            | 0.29351         | 0.54317  | 0.29351 | 0.29351     | 0.678272979 |           |         |  |
| TLK2P1     | ENSG00000226049 | 0.23616  | 0.40666 | 0.54311     | 0.29353     | 0.36745   |         |  |
|            | 0.35664         | 0.21237  | 0.41591 | 0.29353     | 0.678277974 |           |         |  |
| MYO10      | ENSG00000145555 | 0.097243 | 0.46127 | -0.12134    | 0.54829     | -0.95173  | 0.82938 |  |
|            | 0.54307         | 0.29354  | 0.29354 | 0.678277974 |             |           |         |  |
| RNU6-1001P | ENSG00000223197 | 0.54293  | 0.29359 | 0.54293     | 0.29359     | 0.54293   |         |  |
|            | 0.29359         | 0.54293  | 0.29359 | 0.29359     | 0.678320121 |           |         |  |
| PLIN2      | ENSG00000147872 | 0.5429   | 0.2936  | 0.5429      | 0.2936      | 0.5429    | 0.2936  |  |
|            | 0.16038         | 0.43629  | 0.2936  | 0.678320121 |             |           |         |  |
| MIR3127    | ENSG00000264157 | 0.54289  | 0.2936  | 0.54289     | 0.2936      | 0.54289   |         |  |
|            | 0.2936          | 0.54289  | 0.2936  | 0.2936      | 0.678320121 |           |         |  |
| MIR3611    | ENSG00000266228 | 0.54281  | 0.29363 | 0.54281     | 0.29363     | 0.54281   |         |  |
|            | 0.29363         | 0.54281  | 0.29363 | 0.29363     | 0.678348213 |           |         |  |
| NA         | ENSG00000237927 | 0.54277  | 0.29364 | -0.50151    | 0.69199     | -0.52292  | 0.69949 |  |
|            | -0.16914        | 0.56716  | 0.29364 | 0.678348213 |             |           |         |  |
| NA         | ENSG00000235138 | 0.32719  | 0.37176 | 0.32719     | 0.37176     | 0.32719   | 0.37176 |  |
|            | 0.54265         | 0.29369  | 0.29369 | 0.67841434  |             |           |         |  |
| CRYAB      | ENSG00000109846 | -0.38768 | 0.65088 | 0.22413     | 0.41133     | 0.22413   | 0.41133 |  |
|            | 0.54258         | 0.29371  | 0.29371 | 0.67841434  |             |           |         |  |
| MYO5A      | ENSG00000197535 | -0.18506 | 0.57341 | 0.54021     | 0.29453     | -0.46309  | 0.67835 |  |
|            | 0.54256         | 0.29372  | 0.29372 | 0.67841434  |             |           |         |  |
| AGR2       | ENSG00000106541 | 0.5425   | 0.29374 | 0.5425      | 0.29374     | 0.5425    | 0.29374 |  |
|            | 0.5425          | 0.29374  | 0.29374 | 0.67841434  |             |           |         |  |
| HSPE1P27   | ENSG00000235112 | 0.48201  | 0.3149  | 0.54239     | 0.29377     | -0.44032  |         |  |
|            | 0.67015         | 0.2953   | 0.38388 | 0.29377     | 0.67841434  |           |         |  |
| NA         | ENSG00000203334 | 0.28833  | 0.38655 | 0.54236     | 0.29378     | -0.95774  | 0.8309  |  |
|            | -0.34342        | 0.63436  | 0.29378 | 0.67841434  |             |           |         |  |
| LINC02499  | ENSG00000250436 | 0.40371  | 0.34321 | 0.40371     | 0.34321     | 0.40371   |         |  |
|            | 0.34321         | 0.54236  | 0.29378 | 0.29378     | 0.67841434  |           |         |  |
| NA         | ENSG00000259695 | -0.5183  | 0.69787 | -0.078679   | 0.53136     | -0.078679 | 0.53136 |  |
|            | 0.54236         | 0.29378  | 0.29378 | 0.67841434  |             |           |         |  |
| ATL1       | ENSG00000198513 | -0.19313 | 0.57657 | -0.28619    | 0.61263     | 0.13784   | 0.44518 |  |
|            | 0.54227         | 0.29382  | 0.29382 | 0.678424296 |             |           |         |  |
| AHNAK2     | ENSG00000185567 | -0.25012 | 0.59875 | 0.40625     | 0.34228     | -0.64481  |         |  |
|            | 0.74048         | 0.54221  | 0.29384 | 0.29384     | 0.678424296 |           |         |  |
| NA         | ENSG00000228086 | 0.5422   | 0.29384 | 0.5422      | 0.29384     | 0.5422    | 0.29384 |  |
|            | 0.5422          | 0.29384  | 0.29384 | 0.678424296 |             |           |         |  |
| RNU6-347P  | ENSG00000252467 | 0.5422   | 0.29384 | 0.5422      | 0.29384     | 0.14433   |         |  |
|            | 0.44262         | 0.5422   | 0.29384 | 0.29384     | 0.678424296 |           |         |  |
| NA         | ENSG00000223890 | 0.54216  | 0.29386 | 0.14622     | 0.44187     | -0.38833  | 0.65112 |  |
|            | -0.38833        | 0.65112  | 0.29386 | 0.678429273 |             |           |         |  |
| MIR4446    | ENSG00000265253 | 0.54211  | 0.29387 | 0.54211     | 0.29387     | 0.54211   |         |  |
|            | 0.29387         | 0.54211  | 0.29387 | 0.29387     | 0.678429273 |           |         |  |
| NPAS4      | ENSG00000174576 | -0.9635  | 0.83235 | -0.80058    | 0.78831     | -0.84773  | 0.80171 |  |
|            | 0.54201         | 0.2939   | 0.2939  | 0.678466389 |             |           |         |  |
| NA         | ENSG00000279166 | 0.54186  | 0.29396 | -0.51027    | 0.69507     | -0.75014  | 0.77341 |  |

|             |                 |           |           |          |             |             |         |  |
|-------------|-----------------|-----------|-----------|----------|-------------|-------------|---------|--|
|             |                 | -0.34133  | 0.63357   | 0.29396  | 0.678572752 |             |         |  |
| NBPF17P     | ENSG00000179571 | 0.54181   | 0.29398   | -2.0965  | 0.98198     | -0.97195    |         |  |
|             |                 | 0.83446   | -1.6487   | 0.95039  | 0.29398     | 0.678586775 |         |  |
| NA          | ENSG00000279142 | -0.25552  | 0.60084   | 0.54174  | 0.294       | 0.41529     | 0.33897 |  |
|             |                 | -1.6051   | 0.94576   | 0.294    | 0.678600796 |             |         |  |
| NA          | ENSG00000262231 | 0.36607   | 0.35716   | 0.54167  | 0.29402     | 0.36607     | 0.35716 |  |
|             |                 | 0.36607   | 0.35716   | 0.29402  | 0.678614816 |             |         |  |
| NA          | ENSG00000258637 | -0.93314  | 0.82463   | -0.42093 | 0.6631      | 0.54153     | 0.29407 |  |
|             |                 | 0.54153   | 0.29407   | 0.29407  | 0.678689008 |             |         |  |
| RPL5P28     | ENSG00000235264 | 0.31079   | 0.37798   | -0.81055 | 0.79119     | 0.54151     |         |  |
|             |                 | 0.29408   | -0.97577  | 0.83541  | 0.29408     | 0.678689008 |         |  |
| LINC00323   | ENSG00000226496 | -0.41901  | 0.6624    | 0.54146  | 0.2941      | -0.71475    |         |  |
|             |                 | 0.76262   | -0.54471  | 0.70702  | 0.2941      | 0.678703021 |         |  |
| ADAM23      | ENSG00000114948 | 0.54124   | 0.29417   | -0.81179 | 0.79154     | 0.24768     |         |  |
|             |                 | 0.40219   | 0.0050559 | 0.49798  | 0.29417     | 0.678832415 |         |  |
| NA          | ENSG00000237529 | 0.54104   | 0.29424   | 0.54104  | 0.29424     | 0.54104     | 0.29424 |  |
|             |                 | 0.54104   | 0.29424   | 0.29424  | 0.678907357 |             |         |  |
| POTEE       | ENSG00000188219 | -0.41318  | 0.66026   | -1.3334  | 0.9088      | 0.54098     | 0.29426 |  |
|             |                 | -0.84094  | 0.79981   | 0.29426  | 0.678907357 |             |         |  |
| NA          | ENSG00000258406 | 0.54097   | 0.29426   | -1.8609  | 0.96862     | -0.097666   | 0.5389  |  |
|             |                 | -0.88771  | 0.81265   | 0.29426  | 0.678907357 |             |         |  |
| B3GALT1-AS1 | ENSG00000235335 | -1.1347   | 0.87174   | 0.54096  | 0.29427     | -0.0085257  |         |  |
|             |                 | 0.5034    | -0.56689  | 0.71461  | 0.29427     | 0.678907357 |         |  |
| SPATA31E1   | ENSG00000177992 | 0.54091   | 0.29429   | 0.54091  | 0.29429     | 0.54091     |         |  |
|             |                 | 0.29429   | 0.54091   | 0.29429  | 0.29429     | 0.678907357 |         |  |
| INHBA-AS1   | ENSG00000224116 | -0.85454  | 0.8036    | 0.54087  | 0.2943      | -1.1354     |         |  |
|             |                 | 0.8719    | -1.259    | 0.89599  | 0.2943      | 0.678907357 |         |  |
| LINC00899   | ENSG00000231711 | 0.54086   | 0.2943    | 0.54086  | 0.2943      | 0.18205     |         |  |
|             |                 | 0.42777   | 0.18205   | 0.42777  | 0.2943      | 0.678907357 |         |  |
| RNU1-105P   | ENSG00000200340 | -1.2412   | 0.89274   | 0.5406   | 0.29439     | -1.7064     |         |  |
|             |                 | 0.95603   | -0.36805  | 0.64358  | 0.29439     | 0.67900274  |         |  |
| LINC01746   | ENSG00000274469 | -0.43083  | 0.6667    | -0.20629 | 0.58172     | 0.54058     |         |  |
|             |                 | 0.2944    | 0.072665  | 0.47104  | 0.2944      | 0.67900274  |         |  |
| EOMES       | ENSG00000163508 | -1.3453   | 0.91073   | 0.48863  | 0.31255     | 0.54055     | 0.29441 |  |
|             |                 | -1.3561   | 0.91247   | 0.29441  | 0.67900274  |             |         |  |
| UBIAD1      | ENSG00000120942 | 0.54041   | 0.29446   | -1.2658  | 0.8972      | -0.66367    |         |  |
|             |                 | 0.74655   | -1.015    | 0.84494  | 0.29446     | 0.67900274  |         |  |
| NA          | ENSG00000200922 | 0.5404    | 0.29446   | 0.5404   | 0.29446     | 0.5404      | 0.29446 |  |
|             |                 | 0.5404    | 0.29446   | 0.29446  | 0.67900274  |             |         |  |
| MPRIP-AS1   | ENSG00000225442 | 0.54014   | 0.29455   | 0.54014  | 0.29455     | 0.54014     |         |  |
|             |                 | 0.29455   | 0.54014   | 0.29455  | 0.29455     | 0.67900274  |         |  |
| NA          | ENSG00000261208 | 0.54015   | 0.29455   | -0.18278 | 0.57252     | 0.54015     | 0.29455 |  |
|             |                 | 0.54015   | 0.29455   | 0.29455  | 0.67900274  |             |         |  |
| CST11       | ENSG00000125831 | 0.54012   | 0.29456   | -0.37623 | 0.64663     | -0.85404    | 0.80346 |  |
|             |                 | -1.1716   | 0.87932   | 0.29456  | 0.67900274  |             |         |  |
| LINC02118   | ENSG00000248789 | -0.11818  | 0.54704   | 0.048747 | 0.48056     | 0.54006     |         |  |
|             |                 | 0.29458   | -0.91532  | 0.81999  | 0.29458     | 0.67900274  |         |  |
| ENPP7P5     | ENSG00000256589 | -0.12605  | 0.55015   | -0.56137 | 0.71273     | 0.090354    | 0.464   |  |
|             |                 | 0.5399    | 0.29463   | 0.29463  | 0.67900274  |             |         |  |
| RTKN2       | ENSG00000182010 | 0.15378   | 0.43889   | 0.53988  | 0.29464     | 0.33292     | 0.3696  |  |
|             |                 | 0.016315  | 0.49349   | 0.29464  | 0.67900274  |             |         |  |
| NA          | ENSG00000254194 | 0.53983   | 0.29466   | 0.53983  | 0.29466     | 0.53983     | 0.29466 |  |
|             |                 | -0.25041  | 0.59886   | 0.29466  | 0.67900274  |             |         |  |
| BCRP1       | ENSG00000225098 | 0.53978   | 0.29467   | 0.53978  | 0.29467     | 0.53978     | 0.29467 |  |
|             |                 | 0.53978   | 0.29467   | 0.29467  | 0.67900274  |             |         |  |
| PAN3        | ENSG00000152520 | -0.51062  | 0.69519   | 0.53972  | 0.2947      | -0.28294    | 0.61139 |  |
|             |                 | -0.1709   | 0.56785   | 0.2947   | 0.67900274  |             |         |  |
| NA          | ENSG00000267788 | -0.42383  | 0.66416   | 0.53968  | 0.29471     | 0.53968     | 0.29471 |  |
|             |                 | -1.0035   | 0.84219   | 0.29471  | 0.67900274  |             |         |  |
| IGFBP1      | ENSG00000146678 | -0.021264 | 0.50848   | 0.53965  | 0.29472     | -0.021264   |         |  |
|             |                 | 0.50848   | -0.021264 | 0.50848  | 0.29472     | 0.67900274  |         |  |
| ZNF273      | ENSG00000198039 | 0.53966   | 0.29472   | 0.39427  | 0.34669     | 0.036142    |         |  |

|            |                 |          |         |            |            |           |         |  |
|------------|-----------------|----------|---------|------------|------------|-----------|---------|--|
|            | 0.48558         | -0.35389 | 0.63829 | 0.29472    | 0.67900274 |           |         |  |
| RN7SL691P  | ENSG00000239464 | 0.34358  | 0.36558 | 0.53962    | 0.29473    | -0.87216  |         |  |
|            | 0.80844         | 0.34358  | 0.36558 | 0.29473    | 0.67900274 |           |         |  |
| NCAPD3     | ENSG00000151503 | 0.054762 | 0.47816 | -0.88338   | 0.81148    | 0.53937   |         |  |
|            | 0.29481         | 0.5396   | 0.29474 | 0.29474    | 0.67900274 |           |         |  |
| NA         | ENSG00000279607 | -0.45123 | 0.67409 | 0.53953    | 0.29476    | -0.45123  | 0.67409 |  |
|            | -0.45123        | 0.67409  | 0.29476 | 0.67900274 |            |           |         |  |
| NA         | ENSG00000248996 | 0.53944  | 0.29479 | 0.53944    | 0.29479    | 0.53944   | 0.29479 |  |
|            | 0.53944         | 0.29479  | 0.29479 | 0.67900274 |            |           |         |  |
| HSD17B1    | ENSG00000108786 | 0.53943  | 0.2948  | 0.53943    | 0.2948     | 0.53943   |         |  |
|            | 0.2948          | 0.53943  | 0.2948  | 0.2948     | 0.67900274 |           |         |  |
| TSEN54     | ENSG00000182173 | 0.53943  | 0.2948  | 0.53943    | 0.2948     | 0.53943   |         |  |
|            | 0.2948          | 0.53943  | 0.2948  | 0.2948     | 0.67900274 |           |         |  |
| NA         | ENSG00000261502 | -0.29408 | 0.61565 | 0.49274    | 0.3111     | -0.060384 | 0.52408 |  |
|            | 0.53935         | 0.29482  | 0.29482 | 0.67900274 |            |           |         |  |
| NA         | ENSG00000273300 | 0.53936  | 0.29482 | 0.53936    | 0.29482    | 0.53936   | 0.29482 |  |
|            | 0.53936         | 0.29482  | 0.29482 | 0.67900274 |            |           |         |  |
| PID1       | ENSG00000153823 | -1.3451  | 0.91071 | 0.53933    | 0.29483    | -0.40673  | 0.6579  |  |
|            | -0.46911        | 0.6805   | 0.29483 | 0.67900274 |            |           |         |  |
| THAP5P1    | ENSG00000224324 | -1.0154  | 0.84504 | -1.4133    | 0.92122    | -1.3341   |         |  |
|            | 0.90891         | 0.5393   | 0.29484 | 0.29484    | 0.67900274 |           |         |  |
| NA         | ENSG00000242993 | -0.33767 | 0.63219 | 0.53927    | 0.29485    | 0.53927   | 0.29485 |  |
|            | -0.49974        | 0.69137  | 0.29485 | 0.67900274 |            |           |         |  |
| SRIP1      | ENSG00000248660 | -1.1607  | 0.87712 | 0.53925    | 0.29486    | -1.1898   | 0.88294 |  |
|            | -1.6469         | 0.95021  | 0.29486 | 0.67900274 |            |           |         |  |
| SYF2P2     | ENSG00000233148 | 0.08585  | 0.46579 | -0.46226   | 0.67805    | 0.53922   |         |  |
|            | 0.29487         | 0.048062 | 0.48083 | 0.29487    | 0.67900274 |           |         |  |
| JUND       | ENSG00000130522 | -0.63409 | 0.73699 | 0.52578    | 0.29952    | 0.53917   | 0.29489 |  |
|            | -0.81485        | 0.79242  | 0.29489 | 0.67900274 |            |           |         |  |
| WASHC3     | ENSG00000120860 | -0.79684 | 0.78723 | 0.14502    | 0.44235    | 0.5391    |         |  |
|            | 0.29491         | 0.38646  | 0.34958 | 0.29491    | 0.67900274 |           |         |  |
| RNU6-1304P | ENSG00000223306 | 0.050816 | 0.47974 | 0.050816   | 0.47974    | 0.53911   |         |  |
|            | 0.29491         | -1.2195  | 0.88866 | 0.29491    | 0.67900274 |           |         |  |
| NA         | ENSG00000230955 | 0.53909  | 0.29491 | 0.53909    | 0.29491    | 0.53909   | 0.29491 |  |
|            | 0.53909         | 0.29491  | 0.29491 | 0.67900274 |            |           |         |  |
| NA         | ENSG00000257222 | 0.5391   | 0.29491 | 0.5391     | 0.29491    | 0.5391    | 0.29491 |  |
|            | 0.5391          | 0.29491  | 0.29491 | 0.67900274 |            |           |         |  |
| NA         | ENSG00000278819 | 0.53903  | 0.29493 | 0.53903    | 0.29493    | 0.53903   | 0.29493 |  |
|            | 0.53903         | 0.29493  | 0.29493 | 0.67900274 |            |           |         |  |
| TBC1D3P2   | ENSG00000188755 | 0.53897  | 0.29495 | -0.41434   | 0.66069    | -0.20082  |         |  |
|            | 0.57958         | -1.0332  | 0.84923 | 0.29495    | 0.67900274 |           |         |  |
| FAM8A6P    | ENSG00000218772 | 0.53897  | 0.29495 | -0.90042   | 0.81605    | 0.53897   |         |  |
|            | 0.29495         | 0.53897  | 0.29495 | 0.29495    | 0.67900274 |           |         |  |
| RPS20P20   | ENSG00000241942 | -0.15098 | 0.56001 | 0.53896    | 0.29496    | 0.53896   |         |  |
|            | 0.29496         | 0.53896  | 0.29496 | 0.29496    | 0.67900274 |           |         |  |
| NA         | ENSG00000270031 | 0.53895  | 0.29496 | 0.53895    | 0.29496    | 0.53895   | 0.29496 |  |
|            | 0.53895         | 0.29496  | 0.29496 | 0.67900274 |            |           |         |  |
| NA         | ENSG00000247130 | 0.53892  | 0.29497 | 0.53892    | 0.29497    | 0.53892   | 0.29497 |  |
|            | 0.53892         | 0.29497  | 0.29497 | 0.67900274 |            |           |         |  |
| SIX5       | ENSG00000177045 | 0.36601  | 0.35718 | 0.53717    | 0.29557    | 0.53717   | 0.29557 |  |
|            | 0.53885         | 0.29499  | 0.29499 | 0.67900274 |            |           |         |  |
| NA         | ENSG00000264546 | 0.53887  | 0.29499 | 0.53887    | 0.29499    | 0.53887   | 0.29499 |  |
|            | 0.53887         | 0.29499  | 0.29499 | 0.67900274 |            |           |         |  |
| PCGEM1     | ENSG00000227418 | -0.15928 | 0.56328 | 0.53884    | 0.295      | -0.15928  | 0.56328 |  |
|            | -0.15928        | 0.56328  | 0.295   | 0.67900274 |            |           |         |  |
| CCDC85B    | ENSG00000175602 | 0.53874  | 0.29503 | 0.53874    | 0.29503    | 0.53874   |         |  |
|            | 0.29503         | 0.53874  | 0.29503 | 0.29503    | 0.67900274 |           |         |  |
| NA         | ENSG00000227706 | 0.53874  | 0.29503 | -0.18207   | 0.57224    | -0.18207  | 0.57224 |  |
|            | -0.18207        | 0.57224  | 0.29503 | 0.67900274 |            |           |         |  |
| RNU7-4P    | ENSG00000252770 | 0.53867  | 0.29506 | 0.53867    | 0.29506    | 0.53867   |         |  |
|            | 0.29506         | 0.53867  | 0.29506 | 0.29506    | 0.67900274 |           |         |  |
| GRN        | ENSG00000030582 | 0.30408  | 0.38053 | 0.30408    | 0.38053    | 0.53864   | 0.29507 |  |

|           |                 |           |         |            |            |           |         |  |
|-----------|-----------------|-----------|---------|------------|------------|-----------|---------|--|
|           | 0.18284         | 0.42746   | 0.29507 | 0.67900274 |            |           |         |  |
| RFKP2     | ENSG00000239439 | -0.11166  | 0.54445 | 0.5386     | 0.29508    | -0.11166  | 0.54445 |  |
|           | -0.11166        | 0.54445   | 0.29508 | 0.67900274 |            |           |         |  |
| SNORA63B  | ENSG00000200418 | 0.53845   | 0.29513 | 0.53845    | 0.29513    | 0.53845   |         |  |
|           | 0.29513         | 0.53845   | 0.29513 | 0.67900274 |            |           |         |  |
| SNORA81   | ENSG00000221420 | 0.53845   | 0.29513 | 0.53845    | 0.29513    | 0.53845   |         |  |
|           | 0.29513         | 0.53845   | 0.29513 | 0.67900274 |            |           |         |  |
| NA        | ENSG00000202537 | -0.23619  | 0.59336 | -1.1298    | 0.87073    | -1.1218   | 0.86902 |  |
|           | 0.5384          | 0.29515   | 0.29515 | 0.67900274 |            |           |         |  |
| MEG9      | ENSG00000223403 | 0.5384    | 0.29515 | 0.5384     | 0.29515    | 0.5384    | 0.29515 |  |
|           | 0.5384          | 0.29515   | 0.29515 | 0.67900274 |            |           |         |  |
| KIF17     | ENSG00000117245 | 0.066068  | 0.47366 | 0.42428    | 0.33568    | 0.53836   | 0.29516 |  |
|           | 0.2678          | 0.39443   | 0.29516 | 0.67900274 |            |           |         |  |
| ABCA11P   | ENSG00000251595 | 0.53831   | 0.29518 | 0.5291     | 0.29837    | 0.53831   |         |  |
|           | 0.29518         | 0.53831   | 0.29518 | 0.67900274 |            |           |         |  |
| ETFA      | ENSG00000140374 | 0.53829   | 0.29519 | -0.61678   | 0.73131    | -0.50169  | 0.69206 |  |
|           | -0.57246        | 0.71649   | 0.29519 | 0.67900274 |            |           |         |  |
| PTP4A3    | ENSG00000184489 | -0.61488  | 0.73068 | -0.63874   | 0.7385     | 0.53823   |         |  |
|           | 0.29521         | -0.11363  | 0.54523 | 0.29521    | 0.67900274 |           |         |  |
| MIR924HG  | ENSG00000267374 | -0.05351  | 0.52134 | 0.53822    | 0.29521    | -0.85325  |         |  |
|           | 0.80324         | 0.043327  | 0.48272 | 0.29521    | 0.67900274 |           |         |  |
| PCDH8     | ENSG00000136099 | -1.0942   | 0.86307 | -1.0942    | 0.86307    | 0.53821   | 0.29522 |  |
|           | 0.51508         | 0.30325   | 0.29522 | 0.67900274 |            |           |         |  |
| LINC02703 | ENSG00000257067 | -0.31219  | 0.62255 | -0.50602   | 0.69358    | -0.50602  |         |  |
|           | 0.69358         | 0.53815   | 0.29524 | 0.29524    | 0.67900274 |           |         |  |
| LDLRAD3   | ENSG00000179241 | -0.41583  | 0.66123 | -0.45597   | 0.67579    | 0.53807   |         |  |
|           | 0.29526         | -0.29252  | 0.61506 | 0.29526    | 0.67900274 |           |         |  |
| FAM214A   | ENSG00000047346 | 0.53805   | 0.29527 | 0.3261     | 0.37218    | -0.74598  |         |  |
|           | 0.77216         | -1.4729   | 0.92961 | 0.29527    | 0.67900274 |           |         |  |
| NA        | ENSG00000280390 | 0.53801   | 0.29528 | 0.53801    | 0.29528    | 0.53801   | 0.29528 |  |
|           | 0.53801         | 0.29528   | 0.29528 | 0.67900274 |            |           |         |  |
| H3P33     | ENSG00000255492 | -0.85224  | 0.80296 | 0.077996   | 0.46892    | -0.27652  | 0.60893 |  |
|           | 0.53784         | 0.29534   | 0.29534 | 0.67900274 |            |           |         |  |
| BBIP1P1   | ENSG00000271532 | 0.53785   | 0.29534 | 0.53785    | 0.29534    | 0.53785   |         |  |
|           | 0.29534         | 0.53785   | 0.29534 | 0.67900274 |            |           |         |  |
| NA        | ENSG00000259495 | -0.68015  | 0.7518  | -0.39116   | 0.65216    | -0.83055  | 0.79689 |  |
|           | 0.53783         | 0.29535   | 0.29535 | 0.67900274 |            |           |         |  |
| MOGAT1    | ENSG00000124003 | 0.34637   | 0.36453 | 0.53775    | 0.29537    | -0.043948 |         |  |
|           | 0.51753         | -0.46906  | 0.68049 | 0.29537    | 0.67900274 |           |         |  |
| CHIT1     | ENSG00000133063 | 0.53777   | 0.29537 | 0.18099    | 0.42819    | 0.1833    | 0.42728 |  |
|           | -0.5757         | 0.71759   | 0.29537 | 0.67900274 |            |           |         |  |
| JPT1P1    | ENSG00000213148 | 0.028588  | 0.4886  | 0.53777    | 0.29537    | 0.028588  |         |  |
|           | 0.4886          | 0.028588  | 0.4886  | 0.29537    | 0.67900274 |           |         |  |
| PSG4      | ENSG00000243137 | 0.53777   | 0.29537 | -0.0059653 | 0.50238    | -0.11673  | 0.54646 |  |
|           | -0.11673        | 0.54646   | 0.29537 | 0.67900274 |            |           |         |  |
| NA        | ENSG00000226989 | -1.3802   | 0.91623 | -1.3802    | 0.91623    | -1.3802   | 0.91623 |  |
|           | 0.53772         | 0.29538   | 0.29538 | 0.67900274 |            |           |         |  |
| MTND4P15  | ENSG00000227321 | 0.53773   | 0.29538 | 0.53773    | 0.29538    | 0.53773   |         |  |
|           | 0.29538         | 0.53773   | 0.29538 | 0.67900274 |            |           |         |  |
| TBC1D28   | ENSG00000189375 | -0.062552 | 0.52494 | 0.53769    | 0.2954     | 0.53769   |         |  |
|           | 0.2954          | 0.48456   | 0.31399 | 0.2954     | 0.67900274 |           |         |  |
| NA        | ENSG00000248196 | 0.53764   | 0.29541 | 0.53764    | 0.29541    | 0.53764   | 0.29541 |  |
|           | 0.53764         | 0.29541   | 0.29541 | 0.67900274 |            |           |         |  |
| EEF2K     | ENSG00000103319 | -1.413    | 0.92118 | -1.1433    | 0.87355    | -1.4228   | 0.9226  |  |
|           | 0.53759         | 0.29543   | 0.29543 | 0.67900274 |            |           |         |  |
| RN7SL155P | ENSG00000263490 | 0.53758   | 0.29543 | 0.53758    | 0.29543    | 0.53758   |         |  |
|           | 0.29543         | 0.53758   | 0.29543 | 0.67900274 |            |           |         |  |
| OR56A5    | ENSG00000188691 | 0.53757   | 0.29544 | -2.424     | 0.99232    | -2.424    |         |  |
|           | 0.99232         | -2.424    | 0.99232 | 0.29544    | 0.67900274 |           |         |  |
| RN7SL177P | ENSG00000242976 | 0.53753   | 0.29545 | 0.53753    | 0.29545    | 0.53753   |         |  |
|           | 0.29545         | 0.53753   | 0.29545 | 0.67900274 |            |           |         |  |
| RN7SKP117 | ENSG00000222107 | 0.50331   | 0.30737 | 0.11963    | 0.45239    | 0.50331   |         |  |

|            |                 |          |         |             |             |          |         |
|------------|-----------------|----------|---------|-------------|-------------|----------|---------|
|            | 0.30737         | 0.53751  | 0.29546 | 0.29546     | 0.67900274  |          |         |
| HNRNPA1P36 | ENSG00000231942 | 0.53752  | 0.29546 | 0.29546     | 0.53752     | 0.29546  | 0.53752 |
|            | 0.29546         | 0.53752  | 0.29546 | 0.29546     | 0.67900274  |          |         |
| LINC01137  | ENSG00000233621 | -0.80249 | 0.78886 | 0.53747     | 0.29547     | -0.2231  |         |
|            | 0.58827         | -0.23709 | 0.59371 | 0.29547     | 0.67900274  |          |         |
| RNA5SP240  | ENSG00000202225 | 0.53741  | 0.29549 | 0.53741     | 0.29549     | 0.53741  |         |
|            | 0.29549         | 0.53741  | 0.29549 | 0.29549     | 0.679016679 |          |         |
| NA         | ENSG00000273203 | 0.5372   | 0.29557 | 0.09228     | 0.46324     | 0.45381  | 0.32498 |
|            | -0.61014        | 0.72911  | 0.29557 | 0.679131786 |             |          |         |
| OR8A2P     | ENSG00000255510 | 0.53717  | 0.29558 | -0.77284    | 0.78019     | 0.53717  |         |
|            | 0.29558         | 0.53717  | 0.29558 | 0.29558     | 0.679131786 |          |         |
| KRTAP4-2   | ENSG00000244537 | 0.3431   | 0.36576 | 0.53698     | 0.29564     | 0.53698  |         |
|            | 0.29564         | -0.38462 | 0.64974 | 0.29564     | 0.679131786 |          |         |
| TBX1       | ENSG00000184058 | 0.28869  | 0.38641 | -0.57101    | 0.716       | -0.5288  | 0.70153 |
|            | 0.53694         | 0.29565  | 0.29565 | 0.679131786 |             |          |         |
| RNU6-461P  | ENSG00000201065 | 0.53693  | 0.29566 | 0.019682    | 0.49215     | 0.019682 |         |
|            | 0.49215         | 0.019682 | 0.49215 | 0.29566     | 0.679131786 |          |         |
| NA         | ENSG00000283251 | 0.53691  | 0.29567 | 0.53691     | 0.29567     | 0.53691  | 0.29567 |
|            | 0.53691         | 0.29567  | 0.29567 | 0.679131786 |             |          |         |
| PHF20L1    | ENSG00000129292 | -0.10664 | 0.54246 | 0.34808     | 0.36389     | -0.73823 |         |
|            | 0.76981         | 0.53687  | 0.29568 | 0.29568     | 0.679131786 |          |         |
| NA         | ENSG00000232197 | -0.67597 | 0.75047 | -1.2055     | 0.88599     | -0.12013 | 0.54781 |
|            | 0.53683         | 0.29569  | 0.29569 | 0.679131786 |             |          |         |
| MAD2L1     | ENSG00000164109 | 0.5368   | 0.2957  | 0.5368      | 0.2957      | 0.5368   |         |
|            | 0.2957          | -1.1619  | 0.87737 | 0.2957      | 0.679131786 |          |         |
| IL7        | ENSG00000104432 | 0.11816  | 0.45297 | -0.54432    | 0.70689     | 0.53668  | 0.29574 |
|            | -0.42133        | 0.66324  | 0.29574 | 0.679131786 |             |          |         |
| ZDHHC4     | ENSG00000136247 | -1.6377  | 0.94925 | -1.1875     | 0.88248     | -1.6377  |         |
|            | 0.94925         | 0.53668  | 0.29574 | 0.29574     | 0.679131786 |          |         |
| NA         | ENSG00000266783 | -1.0219  | 0.84658 | 0.53667     | 0.29575     | -1.0219  | 0.84658 |
|            | -1.0219         | 0.84658  | 0.29575 | 0.679131786 |             |          |         |
| NA         | ENSG00000251871 | -1.2752  | 0.89888 | 0.53659     | 0.29578     | -0.14994 | 0.55959 |
|            | 0.51064         | 0.3048   | 0.29578 | 0.679131786 |             |          |         |
| NA         | ENSG00000263396 | 0.53652  | 0.2958  | 0.53652     | 0.2958      | 0.53652  | 0.2958  |
|            | 0.53652         | 0.2958   | 0.2958  | 0.679131786 |             |          |         |
| COQ10B     | ENSG00000115520 | 0.34199  | 0.36618 | 0.31326     | 0.37704     | 0.34199  |         |
|            | 0.36618         | 0.5365   | 0.29581 | 0.29581     | 0.679131786 |          |         |
| NA         | ENSG00000249638 | -0.57745 | 0.71818 | 0.53647     | 0.29582     | 0.53647  | 0.29582 |
|            | 0.53647         | 0.29582  | 0.29582 | 0.679131786 |             |          |         |
| CD27-AS1   | ENSG00000215039 | -2.2234  | 0.9869  | 0.11818     | 0.45296     | 0.53644  |         |
|            | 0.29583         | -1.3283  | 0.90795 | 0.29583     | 0.679131786 |          |         |
| MAPKAPK2   | ENSG00000162889 | 0.53641  | 0.29584 | -1.0036     | 0.84222     | -0.5147  |         |
|            | 0.69662         | -0.13235 | 0.55265 | 0.29584     | 0.679131786 |          |         |
| DRD4       | ENSG00000069696 | -0.21877 | 0.58659 | 0.53638     | 0.29585     | -0.11401 | 0.54538 |
|            | -0.67991        | 0.75172  | 0.29585 | 0.679131786 |             |          |         |
| NA         | ENSG00000248932 | -0.43171 | 0.66702 | 0.53638     | 0.29585     | -0.90478 | 0.81721 |
|            | -0.32751        | 0.62836  | 0.29585 | 0.679131786 |             |          |         |
| PHBP1      | ENSG00000213091 | 0.15064  | 0.44013 | 0.15064     | 0.44013     | 0.34501  | 0.36504 |
|            | 0.53625         | 0.29589  | 0.29589 | 0.679131786 |             |          |         |
| MIR5579    | ENSG00000266570 | 0.52206  | 0.30081 | 0.53625     | 0.29589     | 0.53625  |         |
|            | 0.29589         | 0.53625  | 0.29589 | 0.29589     | 0.679131786 |          |         |
| HLA-DRA    | ENSG00000204287 | 0.12812  | 0.44903 | 0.25746     | 0.39841     | -0.50489 |         |
|            | 0.69318         | 0.53622  | 0.2959  | 0.2959      | 0.679131786 |          |         |
| GPR183     | ENSG00000169508 | 0.53621  | 0.29591 | 0.21163     | 0.4162      | 0.53621  |         |
|            | 0.29591         | 0.010225 | 0.49592 | 0.29591     | 0.679131786 |          |         |
| NA         | ENSG00000258790 | 0.53617  | 0.29592 | 0.53617     | 0.29592     | 0.53617  | 0.29592 |
|            | 0.53617         | 0.29592  | 0.29592 | 0.679131786 |             |          |         |
| NA         | ENSG00000226349 | 0.53614  | 0.29593 | -0.31016    | 0.62178     | 0.21629  | 0.41438 |
|            | 0.21629         | 0.41438  | 0.29593 | 0.679131786 |             |          |         |
| MUC22      | ENSG00000261272 | 0.53612  | 0.29594 | -0.253      | 0.59986     | -0.88849 | 0.81286 |
|            | -0.88849        | 0.81286  | 0.29594 | 0.679131786 |             |          |         |
| NA         | ENSG00000229042 | 0.53605  | 0.29596 | 0.53605     | 0.29596     | 0.012948 | 0.49483 |

|           |                 |           |         |             |             |           |         |  |
|-----------|-----------------|-----------|---------|-------------|-------------|-----------|---------|--|
|           | 0.53605         | 0.29596   | 0.29596 | 0.679131786 |             |           |         |  |
| RNU7-13P  | ENSG00000252222 | 0.536     | 0.29598 | -0.90101    | 0.81621     | 0.049122  | 0.48041 |  |
|           | 0.049122        | 0.48041   | 0.29598 | 0.679131786 |             |           |         |  |
| KIFC2     | ENSG00000167702 | 0.53598   | 0.29599 | 0.53598     | 0.29599     | 0.53598   | 0.29599 |  |
|           | 0.53598         | 0.29599   | 0.29599 | 0.679131786 |             |           |         |  |
| ABCC13    | ENSG00000243064 | 0.53597   | 0.29599 | 0.17681     | 0.42983     | 0.32489   |         |  |
|           | 0.37263         | 0.066426  | 0.47352 | 0.29599     | 0.679131786 |           |         |  |
| OMP       | ENSG00000254550 | 0.48507   | 0.31381 | 0.53598     | 0.29599     | 0.48507   | 0.31381 |  |
|           | 0.48507         | 0.31381   | 0.29599 | 0.679131786 |             |           |         |  |
| NA        | ENSG00000218766 | -0.36051  | 0.64077 | 0.53594     | 0.296       | -0.44846  | 0.67309 |  |
|           | -0.028011       | 0.51117   | 0.296   | 0.679131786 |             |           |         |  |
| NAP1L4    | ENSG00000205531 | -0.60701  | 0.72808 | -0.3956     | 0.6538      | 0.53589   |         |  |
|           | 0.29602         | -1.5333   | 0.9374  | 0.29602     | 0.679145697 |           |         |  |
| NA        | ENSG00000224205 | -1.3482   | 0.9112  | 0.53579     | 0.29605     | -1.5328   | 0.93734 |  |
|           | 0.44927         | 0.32662   | 0.29605 | 0.679164482 |             |           |         |  |
| PPIAP66   | ENSG00000226131 | 0.53577   | 0.29606 | -0.20973    | 0.58306     | 0.12208   |         |  |
|           | 0.45142         | 0.53577   | 0.29606 | 0.29606     | 0.679164482 |           |         |  |
| ANTXRPL1  | ENSG00000263482 | -0.70041  | 0.75816 | 0.53575     | 0.29607     | -0.78764  |         |  |
|           | 0.78455         | -0.78764  | 0.78455 | 0.29607     | 0.679164482 |           |         |  |
| MIR5003   | ENSG00000265160 | 0.5356    | 0.29612 | 0.5356      | 0.29612     | 0.5356    |         |  |
|           | 0.29612         | 0.5356    | 0.29612 | 0.29612     | 0.679211069 |           |         |  |
| LINC02320 | ENSG00000258404 | -1.1968   | 0.88431 | -1.0817     | 0.86031     | 0.023473  |         |  |
|           | 0.49064         | 0.53557   | 0.29613 | 0.29613     | 0.679211069 |           |         |  |
| VCPKMT    | ENSG00000100483 | 0.53551   | 0.29615 | 0.27811     | 0.39046     | -0.029358 |         |  |
|           | 0.51171         | 0.37947   | 0.35217 | 0.29615     | 0.679211069 |           |         |  |
| NEK3      | ENSG00000136098 | -0.059874 | 0.52387 | 0.50678     | 0.30616     | 0.012631  | 0.49496 |  |
|           | 0.53548         | 0.29616   | 0.29616 | 0.679211069 |             |           |         |  |
| NA        | ENSG00000231842 | -0.10112  | 0.54027 | 0.53547     | 0.29616     | 0.52162   | 0.30097 |  |
|           | -0.015136       | 0.50604   | 0.29616 | 0.679211069 |             |           |         |  |
| NA        | ENSG00000240963 | 0.53536   | 0.2962  | 0.53536     | 0.2962      | 0.53536   | 0.2962  |  |
|           | 0.53536         | 0.2962    | 0.2962  | 0.679234706 |             |           |         |  |
| SRD5A3    | ENSG00000128039 | 0.53533   | 0.29621 | -0.41266    | 0.66007     | -0.21109  |         |  |
|           | 0.58359         | -0.23666  | 0.59354 | 0.29621     | 0.679234706 |           |         |  |
| INMT      | ENSG00000241644 | 0.53531   | 0.29622 | 0.53531     | 0.29622     | 0.53531   | 0.29622 |  |
|           | 0.14124         | 0.44384   | 0.29622 | 0.679234706 |             |           |         |  |
| NA        | ENSG00000272661 | 0.53529   | 0.29623 | 0.53529     | 0.29623     | 0.53529   | 0.29623 |  |
|           | 0.53529         | 0.29623   | 0.29623 | 0.679234706 |             |           |         |  |
| LINC02456 | ENSG00000283052 | 0.53523   | 0.29624 | 0.53523     | 0.29624     | 0.53523   |         |  |
|           | 0.29624         | 0.53523   | 0.29624 | 0.29624     | 0.679234706 |           |         |  |
| USF1      | ENSG00000158773 | 0.41817   | 0.33791 | 0.53518     | 0.29626     | 0.41817   | 0.33791 |  |
|           | 0.53518         | 0.29626   | 0.29626 | 0.679248603 |             |           |         |  |
| NA        | ENSG00000260997 | 0.28008   | 0.38971 | -0.50442    | 0.69302     | 0.53508   | 0.2963  |  |
|           | -0.52938        | 0.70173   | 0.2963  | 0.679296521 |             |           |         |  |
| RNU6-541P | ENSG00000207440 | 0.53487   | 0.29637 | 0.53487     | 0.29637     | 0.53487   |         |  |
|           | 0.29637         | 0.53487   | 0.29637 | 0.29637     | 0.679296521 |           |         |  |
| LINC02342 | ENSG00000280580 | 0.53487   | 0.29637 | -1.0014     | 0.84169     | -0.97946  |         |  |
|           | 0.83632         | -0.97946  | 0.83632 | 0.29637     | 0.679296521 |           |         |  |
| PTGES3    | ENSG00000110958 | -0.3559   | 0.63904 | 0.53483     | 0.29638     | -1.5352   |         |  |
|           | 0.93763         | -1.167    | 0.87839 | 0.29638     | 0.679296521 |           |         |  |
| NA        | ENSG00000232628 | 0.53483   | 0.29639 | 0.53483     | 0.29639     | 0.53483   | 0.29639 |  |
|           | 0.31986         | 0.37454   | 0.29639 | 0.679296521 |             |           |         |  |
| NA        | ENSG00000279598 | 0.53481   | 0.29639 | -1.4111     | 0.92089     | 0.53481   | 0.29639 |  |
|           | 0.53481         | 0.29639   | 0.29639 | 0.679296521 |             |           |         |  |
| RNU2-53P  | ENSG00000252066 | -0.76171  | 0.77688 | 0.5348      | 0.2964      | -0.057868 |         |  |
|           | 0.52307         | 0.5348    | 0.2964  | 0.2964      | 0.679296521 |           |         |  |
| NA        | ENSG00000264245 | 0.087817  | 0.46501 | 0.15953     | 0.43663     | -0.8001   | 0.78817 |  |
|           | 0.53475         | 0.29641   | 0.29641 | 0.679296521 |             |           |         |  |
| OTOAP1    | ENSG00000257838 | -0.13402  | 0.55331 | -0.32235    | 0.62641     | -1.0381   |         |  |
|           | 0.85038         | 0.53467   | 0.29644 | 0.29644     | 0.679296521 |           |         |  |
| NA        | ENSG00000277450 | 0.53463   | 0.29645 | 0.53463     | 0.29645     | 0.53463   | 0.29645 |  |
|           | 0.53463         | 0.29645   | 0.29645 | 0.679296521 |             |           |         |  |
| RPL23AP68 | ENSG00000242850 | -0.55239  | 0.70966 | -0.36984    | 0.64425     | 0.5346    |         |  |

|             |                 |           |            |             |             |           |         |       |
|-------------|-----------------|-----------|------------|-------------|-------------|-----------|---------|-------|
|             | 0.29646         | 0.5346    | 0.29646    | 0.29646     | 0.679296521 |           |         |       |
| CPSF1       | ENSG00000071894 | -1.1642   | 0.87782    | -0.36644    | 0.64298     | 0.53458   | 0.29647 |       |
|             | 0.16404         | 0.43485   | 0.29647    | 0.679296521 |             |           |         |       |
| ZNF705G     | ENSG00000215372 | 0.53455   | 0.29648    | -0.3525     | 0.63777     | -0.3525   |         |       |
|             | 0.63777         | -0.036331 | 0.51449    | 0.29648     | 0.679296521 |           |         |       |
| GOT2P1      | ENSG00000231900 | 0.53455   | 0.29648    | -0.37946    | 0.64783     | -0.47056  |         |       |
|             | 0.68102         | -0.47056  | 0.68102    | 0.29648     | 0.679296521 |           |         |       |
| NA          | ENSG00000228776 | 0.53454   | 0.29649    | -0.35975    | 0.64048     | -0.52058  | 0.69867 |       |
|             | -0.35975        | 0.64048   | 0.29649    | 0.679296521 |             |           |         |       |
| CYP3A7      | ENSG00000160870 | 0.035787  | 0.48573    | 0.24962     | 0.40144     | 0.53433   |         |       |
|             | 0.29656         | -0.1933   | 0.57664    | 0.29656     | 0.67931382  |           |         |       |
| TMEM30CP    | ENSG00000235156 | -0.73547  | 0.76897    | -0.28684    | 0.61288     | 0.5343    |         |       |
|             | 0.29657         | -0.77872  | 0.78193    | 0.29657     | 0.67931382  |           |         |       |
| NA          | ENSG00000261170 | 0.53424   | 0.29659    | 0.1485      | 0.44098     | 0.53424   | 0.29659 |       |
|             | -0.082286       | 0.53279   | 0.29659    | 0.67931382  |             |           |         |       |
| NA          | ENSG00000241170 | 0.53421   | 0.2966     | -0.35441    | 0.63848     | -0.64553  | 0.74071 |       |
|             | -0.64553        | 0.74071   | 0.2966     | 0.67931382  |             |           |         |       |
| GPR6        | ENSG00000146360 | -0.29693  | 0.61674    | 0.53414     | 0.29662     | -1.0729   | 0.85835 |       |
|             | -0.29693        | 0.61674   | 0.29662    | 0.67931382  |             |           |         |       |
| RNF138P2    | ENSG00000271194 | 0.534     | 0.29667    | 0.534       | 0.29667     | 0.40033   | 0.34446 | 0.534 |
|             | 0.29667         | 0.29667   | 0.67931382 |             |             |           |         |       |
| CSNK1G1     | ENSG00000169118 | 0.4184    | 0.33783    | 0.53389     | 0.29671     | 0.32547   |         |       |
|             | 0.37241         | -0.21318  | 0.58441    | 0.29671     | 0.67931382  |           |         |       |
| MIR659      | ENSG00000207696 | 0.53385   | 0.29672    | 0.53385     | 0.29672     | 0.53385   |         |       |
|             | 0.29672         | 0.53385   | 0.29672    | 0.29672     | 0.67931382  |           |         |       |
| SCAT8       | ENSG00000236345 | 0.53385   | 0.29672    | -1.1346     | 0.87173     | -1.1346   | 0.87173 |       |
|             | -1.1346         | 0.87173   | 0.29672    | 0.67931382  |             |           |         |       |
| NA          | ENSG00000231413 | 0.53382   | 0.29673    | 0.53382     | 0.29673     | 0.53382   | 0.29673 |       |
|             | 0.53382         | 0.29673   | 0.29673    | 0.67931382  |             |           |         |       |
| NA          | ENSG00000249122 | 0.53384   | 0.29673    | 0.53384     | 0.29673     | 0.53384   | 0.29673 |       |
|             | 0.53384         | 0.29673   | 0.29673    | 0.67931382  |             |           |         |       |
| NA          | ENSG00000235503 | 0.53377   | 0.29675    | 0.53377     | 0.29675     | 0.53377   | 0.29675 |       |
|             | 0.53377         | 0.29675   | 0.29675    | 0.67931382  |             |           |         |       |
| R3HDM1      | ENSG00000048991 | -0.14267  | 0.55673    | -0.88359    | 0.81154     | 0.38171   |         |       |
|             | 0.35134         | 0.53374   | 0.29676    | 0.29676     | 0.67931382  |           |         |       |
| NA          | ENSG00000248335 | -1.5503   | 0.93946    | 0.5337      | 0.29678     | -1.5503   | 0.93946 |       |
|             | -1.5503         | 0.93946   | 0.29678    | 0.67931382  |             |           |         |       |
| NA          | ENSG00000266237 | 0.53361   | 0.2968     | 0.53361     | 0.2968      | 0.53361   | 0.2968  |       |
|             | 0.53361         | 0.2968    | 0.2968     | 0.67931382  |             |           |         |       |
| LDLRAD4-AS1 | ENSG00000267690 | 0.42494   | 0.33544    | -0.47646    | 0.68313     | -0.092312 |         |       |
|             | 0.53677         | 0.53362   | 0.2968     | 0.2968      | 0.67931382  |           |         |       |
| NA          | ENSG00000273104 | -0.25271  | 0.59975    | -0.25271    | 0.59975     | -0.25271  | 0.59975 |       |
|             | 0.53363         | 0.2968    | 0.2968     | 0.67931382  |             |           |         |       |
| LDB1        | ENSG00000198728 | -1.0776   | 0.8594     | -0.71473    | 0.76261     | -0.52903  | 0.70161 |       |
|             | 0.5336          | 0.29681   | 0.29681    | 0.67931382  |             |           |         |       |
| NA          | ENSG00000228703 | 0.53361   | 0.29681    | 0.53361     | 0.29681     | 0.53361   | 0.29681 |       |
|             | 0.53361         | 0.29681   | 0.29681    | 0.67931382  |             |           |         |       |
| PHF21B      | ENSG00000056487 | 0.53354   | 0.29683    | 0.53354     | 0.29683     | 0.35637   |         |       |
|             | 0.36078         | 0.18197   | 0.4278     | 0.29683     | 0.67931382  |           |         |       |
| MBD1        | ENSG00000141644 | -0.23802  | 0.59407    | 0.53354     | 0.29683     | -0.23802  | 0.59407 |       |
|             | -1.1897         | 0.88291   | 0.29683    | 0.67931382  |             |           |         |       |
| NA          | ENSG00000268981 | 0.15534   | 0.43828    | -0.97681    | 0.83567     | 0.53355   | 0.29683 |       |
|             | -0.28551        | 0.61237   | 0.29683    | 0.67931382  |             |           |         |       |
| TCHP        | ENSG00000139437 | 0.53347   | 0.29685    | 0.53347     | 0.29685     | 0.53347   | 0.29685 |       |
|             | 0.53347         | 0.29685   | 0.29685    | 0.67931382  |             |           |         |       |
| ACTG1P18    | ENSG00000218475 | 0.53344   | 0.29686    | 0.53344     | 0.29686     | 0.53344   |         |       |
|             | 0.29686         | 0.53344   | 0.29686    | 0.29686     | 0.67931382  |           |         |       |
| RNU7-67P    | ENSG00000239115 | -0.047721 | 0.51903    | 0.53345     | 0.29686     | 0.39467   |         |       |
|             | 0.34654         | -1.5298   | 0.93697    | 0.29686     | 0.67931382  |           |         |       |
| NA          | ENSG00000273391 | 0.53345   | 0.29686    | 0.35963     | 0.35956     | 0.53345   | 0.29686 |       |
|             | 0.53345         | 0.29686   | 0.29686    | 0.67931382  |             |           |         |       |
| RPL12P45    | ENSG00000233940 | 0.43559   | 0.33157    | -0.87205    | 0.80841     | -0.34565  |         |       |

|              |                 |           |         |             |             |           |         |
|--------------|-----------------|-----------|---------|-------------|-------------|-----------|---------|
|              | 0.6352          | 0.53341   | 0.29688 | 0.29688     | 0.679327686 |           |         |
| ARGLU1       | ENSG00000134884 | 0.53334   | 0.2969  | 0.53334     | 0.2969      | -0.45419  |         |
|              | 0.67516         | -1.0829   | 0.86058 | 0.2969      | 0.679328365 |           |         |
| ZNF385D      | ENSG00000151789 | -0.58029  | 0.71914 | 0.53326     | 0.29693     | -0.12838  |         |
|              | 0.55107         | -0.44864  | 0.67315 | 0.29693     | 0.679328365 |           |         |
| MSL1         | ENSG00000188895 | 0.53324   | 0.29693 | 0.50329     | 0.30738     | 0.50329   | 0.30738 |
|              | 0.45988         | 0.3228    | 0.29693 | 0.679328365 |             |           |         |
| GJC1         | ENSG00000182963 | -0.40081  | 0.65572 | 0.46844     | 0.31974     | 0.53322   | 0.29694 |
|              | 0.22026         | 0.41283   | 0.29694 | 0.679328365 |             |           |         |
| PSMG3-AS1    | ENSG00000230487 | -0.027349 | 0.51091 | 0.53318     | 0.29695     | 0.31468   |         |
|              | 0.3765          | 0.14383   | 0.44282 | 0.29695     | 0.679328365 |           |         |
| POLRMTP1     | ENSG00000266066 | 0.48427   | 0.3141  | 0.49625     | 0.30986     | 0.49625   |         |
|              | 0.30986         | 0.533     | 0.29702 | 0.29702     | 0.679335243 |           |         |
| RNU6-1060P   | ENSG00000207394 | -0.00639  | 0.50255 | 0.53295     | 0.29703     | 0.20055   |         |
|              | 0.42052         | 0.20055   | 0.42052 | 0.29703     | 0.679335243 |           |         |
| MTERF2       | ENSG00000120832 | 0.53289   | 0.29705 | 0.53289     | 0.29705     | 0.53289   |         |
|              | 0.29705         | 0.53289   | 0.29705 | 0.29705     | 0.679335243 |           |         |
| NA           | ENSG00000254981 | 0.53288   | 0.29706 | 0.53288     | 0.29706     | 0.53288   | 0.29706 |
|              | 0.53288         | 0.29706   | 0.29706 | 0.679335243 |             |           |         |
| NA           | ENSG00000263301 | 0.53282   | 0.29708 | 0.53282     | 0.29708     | 0.53282   | 0.29708 |
|              | 0.53282         | 0.29708   | 0.29708 | 0.679335243 |             |           |         |
| MICOS10-NBL1 | ENSG00000270136 | 0.53281   | 0.29708 | 0.53281     | 0.29708     | 0.53281   |         |
|              | 0.29708         | 0.53281   | 0.29708 | 0.29708     | 0.679335243 |           |         |
| METTL27      | ENSG00000165171 | 0.21713   | 0.41405 | -0.032317   | 0.51289     | -0.050349 |         |
|              | 0.52008         | 0.53277   | 0.29709 | 0.29709     | 0.679335243 |           |         |
| NA           | ENSG00000259791 | 0.5328    | 0.29709 | 0.5328      | 0.29709     | 0.5328    | 0.29709 |
|              | 0.5328          | 0.29709   | 0.29709 | 0.679335243 |             |           |         |
| NA           | ENSG00000269554 | 0.53264   | 0.29714 | 0.53264     | 0.29714     | 0.53264   | 0.29714 |
|              | 0.53264         | 0.29714   | 0.29714 | 0.679335243 |             |           |         |
| TBC1D22B     | ENSG00000065491 | -0.10288  | 0.54097 | 0.46159     | 0.32219     | 0.53261   |         |
|              | 0.29715         | -0.44516  | 0.6719  | 0.29715     | 0.679335243 |           |         |
| TRDV2        | ENSG00000211821 | 0.53262   | 0.29715 | 0.27222     | 0.39273     | 0.27222   | 0.39273 |
|              | 0.27222         | 0.39273   | 0.29715 | 0.679335243 |             |           |         |
| NA           | ENSG00000266430 | -0.77042  | 0.77948 | 0.53261     | 0.29715     | -0.69263  | 0.75573 |
|              | -0.4927         | 0.68889   | 0.29715 | 0.679335243 |             |           |         |
| ACADS        | ENSG00000122971 | -0.5518   | 0.70946 | 0.53256     | 0.29717     | -0.5518   | 0.70946 |
|              | -0.5518         | 0.70946   | 0.29717 | 0.679335243 |             |           |         |
| PKIB         | ENSG00000135549 | -0.49949  | 0.69128 | 0.53257     | 0.29717     | -0.22447  | 0.5888  |
|              | -0.29905        | 0.61755   | 0.29717 | 0.679335243 |             |           |         |
| NA           | ENSG00000248912 | 0.53256   | 0.29717 | 0.53256     | 0.29717     | 0.53256   | 0.29717 |
|              | 0.53256         | 0.29717   | 0.29717 | 0.679335243 |             |           |         |
| DYDC2        | ENSG00000133665 | 0.53251   | 0.29718 | 0.53251     | 0.29718     | 0.53251   | 0.29718 |
|              | 0.53251         | 0.29718   | 0.29718 | 0.679335243 |             |           |         |
| EIF2AK2      | ENSG00000055332 | -0.36539  | 0.64259 | -0.36539    | 0.64259     | -0.36539  |         |
|              | 0.64259         | 0.53251   | 0.29719 | 0.29719     | 0.679335243 |           |         |
| SNX4         | ENSG00000114520 | 0.28213   | 0.38892 | -0.60354    | 0.72692     | 0.53238   | 0.29723 |
|              | -1.0751         | 0.85883   | 0.29723 | 0.679394807 |             |           |         |
| ANXA2        | ENSG00000182718 | 0.53215   | 0.29731 | 0.38593     | 0.34977     | 0.39464   | 0.34656 |
|              | -0.11412        | 0.54543   | 0.29731 | 0.679545793 |             |           |         |
| NA           | ENSG00000267040 | -0.83182  | 0.79724 | 0.53208     | 0.29734     | 0.0081048 | 0.49677 |
|              | -0.12278        | 0.54886   | 0.29734 | 0.679553116 |             |           |         |
| NA           | ENSG00000232053 | 0.051086  | 0.47963 | -1.1232     | 0.86931     | 0.53204   | 0.29735 |
|              | -0.38374        | 0.64942   | 0.29735 | 0.679553116 |             |           |         |
| NA           | ENSG00000263674 | 0.53199   | 0.29737 | 0.53199     | 0.29737     | 0.53199   | 0.29737 |
|              | -0.0069457      | 0.50277   | 0.29737 | 0.679553116 |             |           |         |
| DACT2        | ENSG00000164488 | -0.27504  | 0.60836 | -0.56464    | 0.71384     | 0.14927   | 0.44067 |
|              | 0.53196         | 0.29738   | 0.29738 | 0.679553116 |             |           |         |
| NA           | ENSG00000258731 | 0.53192   | 0.29739 | 0.53192     | 0.29739     | 0.53192   | 0.29739 |
|              | 0.53192         | 0.29739   | 0.29739 | 0.679553116 |             |           |         |
| GPC5-IT1     | ENSG00000236240 | 0.50962   | 0.30516 | 0.5318      | 0.29743     | 0.5318    |         |
|              | 0.29743         | 0.5318    | 0.29743 | 0.29743     | 0.679553116 |           |         |
| RRM2B        | ENSG00000048392 | 0.53179   | 0.29744 | -0.6404     | 0.73905     | -0.92892  | 0.82353 |



|          |                 |            |         |             |             |           |         |  |
|----------|-----------------|------------|---------|-------------|-------------|-----------|---------|--|
|          | -1.5408         | 0.93832    | 0.29744 | 0.679553116 |             |           |         |  |
| NA       | ENSG00000261882 | 0.53174    | 0.29745 | 0.53174     | 0.29745     | 0.53174   | 0.29745 |  |
|          | 0.53174         | 0.29745    | 0.29745 | 0.679553116 |             |           |         |  |
| NA       | ENSG00000236864 | 0.069813   | 0.47217 | 0.27211     | 0.39277     | 0.53172   | 0.29746 |  |
|          | -0.45589        | 0.67577    | 0.29746 | 0.679553116 |             |           |         |  |
| NA       | ENSG00000258206 | 0.53165    | 0.29748 | 0.53165     | 0.29748     | 0.53165   | 0.29748 |  |
|          | 0.53165         | 0.29748    | 0.29748 | 0.679553116 |             |           |         |  |
| PPP1R16A | ENSG00000160972 | 0.2634     | 0.39612 | 0.53164     | 0.29749     | -0.37023  |         |  |
|          | 0.6444          | 0.53164    | 0.29749 | 0.29749     | 0.679553116 |           |         |  |
| NA       | ENSG00000244249 | 0.53157    | 0.29751 | 0.16861     | 0.43305     | -0.64118  | 0.7393  |  |
|          | -0.44263        | 0.67098    | 0.29751 | 0.679553116 |             |           |         |  |
| NA       | ENSG00000283563 | 0.53154    | 0.29752 | -0.5911     | 0.72277     | -0.35974  | 0.64048 |  |
|          | -0.35974        | 0.64048    | 0.29752 | 0.679553116 |             |           |         |  |
| PYROXD2  | ENSG00000119943 | 0.53152    | 0.29753 | -0.45162    | 0.67423     | 0.48105   |         |  |
|          | 0.31524         | -0.45924   | 0.67697 | 0.29753     | 0.679553116 |           |         |  |
| OR6P1    | ENSG00000186440 | -1.5132    | 0.93488 | 0.53153     | 0.29753     | -1.4371   | 0.92465 |  |
|          | -1.4371         | 0.92465    | 0.29753 | 0.679553116 |             |           |         |  |
| NA       | ENSG00000254278 | -0.11777   | 0.54688 | 0.5315      | 0.29754     | 0.50851   | 0.30555 |  |
|          | 0.40496         | 0.34276    | 0.29754 | 0.679553116 |             |           |         |  |
| PPHLN1   | ENSG00000134283 | 0.5314     | 0.29757 | 0.23085     | 0.40872     | 0.15585   |         |  |
|          | 0.43808         | 0.00021737 | 0.49991 | 0.29757     | 0.679553116 |           |         |  |
| WDR82    | ENSG00000164091 | 0.53135    | 0.29759 | 0.37916     | 0.35228     | -0.26191  | 0.6033  |  |
|          | 0.2472          | 0.40238    | 0.29759 | 0.679553116 |             |           |         |  |
| SNHG18   | ENSG00000250786 | 0.24464    | 0.40337 | 0.083823    | 0.4666      | 0.53129   |         |  |
|          | 0.29761         | -0.05253   | 0.52095 | 0.29761     | 0.679553116 |           |         |  |
| LMX1A    | ENSG00000162761 | 0.53125    | 0.29762 | -0.073944   | 0.52947     | 0.0052764 | 0.4979  |  |
|          | -0.62154        | 0.73288    | 0.29762 | 0.679553116 |             |           |         |  |
| MIR4505  | ENSG00000264741 | -0.6385    | 0.73843 | 0.53127     | 0.29762     | -0.6385   |         |  |
|          | 0.73843         | -0.6385    | 0.73843 | 0.29762     | 0.679553116 |           |         |  |
| NA       | ENSG00000279905 | -0.86556   | 0.80663 | -1.4565     | 0.92737     | 0.53126   | 0.29762 |  |
|          | 0.53126         | 0.29762    | 0.29762 | 0.679553116 |             |           |         |  |
| RNY4P36  | ENSG00000212418 | 0.53107    | 0.29769 | 0.53107     | 0.29769     | 0.53107   |         |  |
|          | 0.29769         | 0.53107    | 0.29769 | 0.29769     | 0.679613825 |           |         |  |
| LRG1     | ENSG00000171236 | -0.5835    | 0.72022 | 0.14973     | 0.44049     | 0.19528   | 0.42259 |  |
|          | 0.53099         | 0.29771    | 0.29771 | 0.679613825 |             |           |         |  |
| NA       | ENSG00000258234 | -2.0819    | 0.98132 | -2.0819     | 0.98132     | -2.0819   | 0.98132 |  |
|          | 0.53107         | 0.29771    | 0.29771 | 0.679613825 |             |           |         |  |
| NA       | ENSG00000244381 | 0.53097    | 0.29772 | 0.03268     | 0.48697     | -0.021734 | 0.50867 |  |
|          | -0.35727        | 0.63955    | 0.29772 | 0.679613825 |             |           |         |  |
| MIR4659A | ENSG00000266038 | -0.034369  | 0.51371 | 0.5309      | 0.29774     | -0.27325  |         |  |
|          | 0.60767         | -0.27325   | 0.60767 | 0.29774     | 0.679613825 |           |         |  |
| MXRA7    | ENSG00000182534 | -0.50529   | 0.69332 | -0.50529    | 0.69332     | -0.60208  | 0.72644 |  |
|          | 0.53081         | 0.29777    | 0.29777 | 0.679613825 |             |           |         |  |
| NA       | ENSG00000248206 | 0.17489    | 0.43058 | 0.38785     | 0.34906     | -0.96359  | 0.83237 |  |
|          | 0.5308          | 0.29778    | 0.29778 | 0.679613825 |             |           |         |  |
| NA       | ENSG00000251214 | 0.5308     | 0.29778 | 0.5308      | 0.29778     | 0.5308    | 0.29778 |  |
|          | 0.5308          | 0.29778    | 0.29778 | 0.679613825 |             |           |         |  |
| RTTN     | ENSG00000176225 | -0.40825   | 0.65846 | 0.31245     | 0.37735     | 0.52065   | 0.30131 |  |
|          | 0.53076         | 0.29779    | 0.29779 | 0.679613825 |             |           |         |  |
| AK4      | ENSG00000162433 | 0.53073    | 0.2978  | 0.44924     | 0.32663     | 0.040359  | 0.4839  |  |
|          | 0.46993         | 0.3192     | 0.2978  | 0.679613825 |             |           |         |  |
| NFU1P1   | ENSG00000230757 | -1.0744    | 0.85868 | 0.53075     | 0.2978      | -0.052971 |         |  |
|          | 0.52112         | -1.0744    | 0.85868 | 0.2978      | 0.679613825 |           |         |  |
| NA       | ENSG00000269813 | 0.53065    | 0.29783 | 0.53065     | 0.29783     | 0.53065   | 0.29783 |  |
|          | 0.53065         | 0.29783    | 0.29783 | 0.679621067 |             |           |         |  |
| NA       | ENSG00000264829 | 0.53057    | 0.29786 | 0.53057     | 0.29786     | 0.53057   | 0.29786 |  |
|          | 0.53057         | 0.29786    | 0.29786 | 0.679621067 |             |           |         |  |
| NA       | ENSG00000280445 | 0.53047    | 0.29789 | 0.53047     | 0.29789     | 0.53047   | 0.29789 |  |
|          | 0.53047         | 0.29789    | 0.29789 | 0.679621067 |             |           |         |  |
| NAA11    | ENSG00000156269 | -1.4327    | 0.92403 | -1.4327     | 0.92403     | 0.53035   | 0.29793 |  |
|          | -0.13687        | 0.55443    | 0.29793 | 0.679621067 |             |           |         |  |
| ATP6V1G2 | ENSG00000213760 | 0.53037    | 0.29793 | 0.53037     | 0.29793     | 0.53037   |         |  |

|                 |                 |           |             |             |             |           |         |
|-----------------|-----------------|-----------|-------------|-------------|-------------|-----------|---------|
|                 | 0.29793         | 0.53037   | 0.29793     | 0.29793     | 0.679621067 |           |         |
| ATP6V1G2-DDX39B | ENSG00000254870 | 0.53037   | 0.29793     | 0.29793     | 0.53037     | 0.29793   | 0.53037 |
|                 | 0.29793         | 0.53037   | 0.29793     | 0.29793     | 0.679621067 |           |         |
| NA              | ENSG00000233081 | 0.53032   | 0.29795     | 0.53032     | 0.29795     | 0.53032   | 0.29795 |
|                 | 0.53032         | 0.29795   | 0.29795     | 0.679621067 |             |           |         |
| NA              | ENSG00000207020 | 0.53019   | 0.29799     | 0.53019     | 0.29799     | -0.38477  | 0.6498  |
|                 | 0.02394         | 0.49045   | 0.29799     | 0.679621067 |             |           |         |
| CKAP2P1         | ENSG00000258722 | 0.53015   | 0.29805     | 0.53015     | 0.29805     | 0.53015   | 0.29805 |
|                 | 0.29805         | 0.29805   | 0.679621067 |             |             |           |         |
| SMCO4P1         | ENSG00000267384 | 0.53017   | 0.29805     | 0.53017     | 0.29805     | 0.53017   | 0.29805 |
|                 | 0.29805         | 0.29805   | 0.679621067 |             |             |           |         |
| NA              | ENSG00000270449 | 0.53014   | 0.29801     | -2.8044     | 0.99748     | -2.8044   | 0.99748 |
|                 | -2.8044         | 0.99748   | 0.29801     | 0.679621067 |             |           |         |
| TP53INP1        | ENSG00000164938 | 0.25054   | 0.40109     | 0.12801     | 0.44907     | 0.5301    |         |
|                 | 0.29802         | 0.50231   | 0.30773     | 0.29802     | 0.679621067 |           |         |
| WASF3           | ENSG00000132970 | -0.68562  | 0.75352     | -0.22948    | 0.59075     | -0.025005 | 0.50997 |
|                 | 0.53004         | 0.29804   | 0.29804     | 0.679621067 |             |           |         |
| PNPLA2          | ENSG00000177666 | 0.53002   | 0.29805     | -0.8273     | 0.79597     | -0.048508 |         |
|                 | 0.51934         | -0.63684  | 0.73789     | 0.29805     | 0.679621067 |           |         |
| PLK5            | ENSG00000185988 | -0.98165  | 0.83686     | -1.0164     | 0.84528     | -1.4355   | 0.92442 |
|                 | 0.53002         | 0.29805   | 0.29805     | 0.679621067 |             |           |         |
| LINC00616       | ENSG00000248307 | -2.4874   | 0.99357     | -0.048202   | 0.51922     | -1.682    |         |
|                 | 0.95371         | 0.52998   | 0.29806     | 0.29806     | 0.679621067 |           |         |
| LINC02281       | ENSG00000257748 | -0.82875  | 0.79638     | 0.52997     | 0.29807     | 0.28146   |         |
|                 | 0.38918         | 0.52997   | 0.29807     | 0.29807     | 0.679621067 |           |         |
| LRRC75A         | ENSG00000181350 | -1.2173   | 0.88826     | -2.0998     | 0.98213     | -1.2173   |         |
|                 | 0.88826         | 0.52994   | 0.29808     | 0.29808     | 0.679621067 |           |         |
| NA              | ENSG00000254921 | 0.039825  | 0.48412     | 0.5299      | 0.29809     | 0.5299    | 0.29809 |
|                 | 0.5299          | 0.29809   | 0.29809     | 0.679621067 |             |           |         |
| NA              | ENSG00000268361 | 0.5299    | 0.29809     | 0.5299      | 0.29809     | 0.5299    | 0.29809 |
|                 | 0.5299          | 0.29809   | 0.29809     | 0.679621067 |             |           |         |
| TRBV6-1         | ENSG00000211706 | 0.52986   | 0.2981      | 0.52986     | 0.2981      | -0.13641  |         |
|                 | 0.55425         | -0.13641  | 0.55425     | 0.2981      | 0.679621067 |           |         |
| NA              | ENSG00000279156 | -0.63657  | 0.7378      | -0.63657    | 0.7378      | -0.63657  | 0.7378  |
|                 | 0.52986         | 0.29811   | 0.29811     | 0.679621067 |             |           |         |
| FBXW4P1         | ENSG00000230701 | 0.52971   | 0.29816     | 0.52971     | 0.29816     | 0.52971   |         |
|                 | 0.29816         | 0.52971   | 0.29816     | 0.29816     | 0.679703256 |           |         |
| NA              | ENSG00000231010 | 0.52966   | 0.29818     | 0.52966     | 0.29818     | 0.52966   | 0.29818 |
|                 | 0.52966         | 0.29818   | 0.29818     | 0.679717051 |             |           |         |
| NA              | ENSG00000231876 | 0.52952   | 0.29822     | 0.056256    | 0.47757     | -0.26499  | 0.60449 |
|                 | -0.45081        | 0.67394   | 0.29822     | 0.679776434 |             |           |         |
| AARD            | ENSG00000205002 | 0.52946   | 0.29824     | 0.52946     | 0.29824     | 0.52946   | 0.29824 |
|                 | 0.52946         | 0.29824   | 0.29824     | 0.679790224 |             |           |         |
| LRRC37A11P      | ENSG00000214553 | -0.73686  | 0.7694      | -0.73686    | 0.7694      | 0.52931   |         |
|                 | 0.29829         | -0.73686  | 0.7694      | 0.29829     | 0.67987239  |           |         |
| RSC1A1          | ENSG00000215695 | 0.52923   | 0.29832     | 0.52923     | 0.29832     | 0.52923   |         |
|                 | 0.29832         | 0.52923   | 0.29832     | 0.29832     | 0.679899958 |           |         |
| SIGLEC7         | ENSG00000168995 | -0.91939  | 0.82105     | -0.14411    | 0.5573      | 0.52922   |         |
|                 | 0.29833         | -0.11499  | 0.54577     | 0.29833     | 0.679899958 |           |         |
| NA              | ENSG00000253711 | 0.52908   | 0.29838     | 0.52908     | 0.29838     | 0.52908   | 0.29838 |
|                 | 0.52908         | 0.29838   | 0.29838     | 0.679973097 |             |           |         |
| NA              | ENSG00000265086 | 0.084272  | 0.46642     | 0.52903     | 0.29839     | 0.52903   | 0.29839 |
|                 | 0.52903         | 0.29839   | 0.29839     | 0.679973097 |             |           |         |
| NA              | ENSG00000267705 | 0.52886   | 0.29845     | 0.52886     | 0.29845     | 0.52886   | 0.29845 |
|                 | 0.52886         | 0.29845   | 0.29845     | 0.680078022 |             |           |         |
| RN7SL250P       | ENSG00000244107 | 0.52879   | 0.29847     | -0.85418    | 0.8035      | -1.6139   |         |
|                 | 0.94672         | -0.067948 | 0.52709     | 0.29847     | 0.680091794 |           |         |
| SPTSSB          | ENSG00000196542 | 0.054922  | 0.4781      | 0.12547     | 0.45007     | 0.5287    |         |
|                 | 0.29851         | 0.042272  | 0.48314     | 0.29851     | 0.680122276 |           |         |
| NT5C1B          | ENSG00000185013 | 0.28386   | 0.38826     | 0.52862     | 0.29853     | -0.10026  |         |
|                 | 0.53993         | -0.16903  | 0.56711     | 0.29853     | 0.680122276 |           |         |
| RNU6-300P       | ENSG00000238616 | 0.52864   | 0.29853     | -0.89205    | 0.81382     | -0.89205  |         |

|           |                 |           |         |             |             |          |         |  |
|-----------|-----------------|-----------|---------|-------------|-------------|----------|---------|--|
|           | 0.81382         | -1.498    | 0.93293 | 0.29853     | 0.680122276 |          |         |  |
| NA        | ENSG00000224475 | 0.027712  | 0.48895 | -1.097      | 0.86367     | -0.49747 | 0.69057 |  |
|           | 0.52851         | 0.29857   | 0.29857 | 0.680122276 |             |          |         |  |
| NA        | ENSG00000254566 | 0.37882   | 0.35241 | 0.37882     | 0.35241     | 0.52846  | 0.29859 |  |
|           | 0.47895         | 0.31599   | 0.29859 | 0.680122276 |             |          |         |  |
| NA        | ENSG00000267027 | -0.56431  | 0.71373 | -0.16833    | 0.56684     | -0.56431 | 0.71373 |  |
|           | 0.52845         | 0.29859   | 0.29859 | 0.680122276 |             |          |         |  |
| CPVL-AS1  | ENSG00000229452 | -0.5854   | 0.72086 | 0.52842     | 0.2986      | 0.10192  |         |  |
|           | 0.45941         | 0.10192   | 0.45941 | 0.2986      | 0.680122276 |          |         |  |
| NA        | ENSG00000201412 | 0.52829   | 0.29865 | 0.52829     | 0.29865     | 0.52829  | 0.29865 |  |
|           | -0.17597        | 0.56984   | 0.29865 | 0.680122276 |             |          |         |  |
| MYOCD-AS1 | ENSG00000227274 | -0.32695  | 0.62815 | 0.52822     | 0.29867     | 0.52822  |         |  |
|           | 0.29867         | 0.52822   | 0.29867 | 0.29867     | 0.680122276 |          |         |  |
| NA        | ENSG00000271922 | 0.52821   | 0.29868 | 0.52821     | 0.29868     | 0.52821  | 0.29868 |  |
|           | 0.52821         | 0.29868   | 0.29868 | 0.680122276 |             |          |         |  |
| DNAJB6P2  | ENSG00000251203 | 0.29924   | 0.38238 | 0.29924     | 0.38238     | 0.29924  |         |  |
|           | 0.38238         | 0.52817   | 0.29869 | 0.29869     | 0.680122276 |          |         |  |
| NA        | ENSG00000270969 | -0.19526  | 0.5774  | 0.52809     | 0.29872     | -0.56364 | 0.7135  |  |
|           | 0.30346         | 0.38077   | 0.29872 | 0.680122276 |             |          |         |  |
| VSIR      | ENSG00000107738 | 0.52804   | 0.29874 | 0.52804     | 0.29874     | 0.52804  | 0.29874 |  |
|           | 0.52804         | 0.29874   | 0.29874 | 0.680122276 |             |          |         |  |
| OXGR1     | ENSG00000165621 | 0.4703    | 0.31907 | 0.52801     | 0.29875     | 0.4703   | 0.31907 |  |
|           | 0.4703          | 0.31907   | 0.29875 | 0.680122276 |             |          |         |  |
| NA        | ENSG00000257360 | -1.1497   | 0.87487 | 0.52798     | 0.29876     | -1.3602  | 0.91311 |  |
|           | -0.55304        | 0.70988   | 0.29876 | 0.680122276 |             |          |         |  |
| NA        | ENSG00000238588 | -0.31301  | 0.62286 | 0.058247    | 0.47678     | -0.49502 | 0.68971 |  |
|           | 0.52794         | 0.29877   | 0.29877 | 0.680122276 |             |          |         |  |
| THAP12    | ENSG00000137492 | -0.73821  | 0.76981 | -1.3954     | 0.91856     | 0.52789  |         |  |
|           | 0.29879         | -0.22798  | 0.59017 | 0.29879     | 0.680122276 |          |         |  |
| OR7A1P    | ENSG00000268834 | 0.52788   | 0.29879 | 0.32627     | 0.37211     | 0.52788  |         |  |
|           | 0.29879         | -0.064854 | 0.52585 | 0.29879     | 0.680122276 |          |         |  |
| OR8D1     | ENSG00000196341 | -0.85817  | 0.8046  | 0.52785     | 0.2988      | 0.52785  | 0.2988  |  |
|           | 0.52785         | 0.2988    | 0.2988  | 0.680122276 |             |          |         |  |
| RN7SL237P | ENSG00000264767 | 0.52785   | 0.2988  | 0.52785     | 0.2988      | 0.52785  |         |  |
|           | 0.2988          | 0.52785   | 0.2988  | 0.2988      | 0.680122276 |          |         |  |
| NA        | ENSG00000254548 | 0.52764   | 0.29887 | 0.52764     | 0.29887     | 0.52764  | 0.29887 |  |
|           | 0.52764         | 0.29887   | 0.29887 | 0.680122276 |             |          |         |  |
| FGF6      | ENSG00000111241 | -0.12905  | 0.55134 | 0.52762     | 0.29888     | -0.33183 | 0.62999 |  |
|           | -1.1423         | 0.87333   | 0.29888 | 0.680122276 |             |          |         |  |
| ZNF285    | ENSG00000267508 | -0.38576  | 0.65016 | 0.52764     | 0.29888     | 0.52764  |         |  |
|           | 0.29888         | 0.52764   | 0.29888 | 0.29888     | 0.680122276 |          |         |  |
| TYROBP    | ENSG00000011600 | 0.5276    | 0.29889 | 0.5276      | 0.29889     | 0.5276   |         |  |
|           | 0.29889         | 0.5276    | 0.29889 | 0.29889     | 0.680122276 |          |         |  |
| TMSB4XP8  | ENSG00000187653 | -0.96554  | 0.83286 | 0.52761     | 0.29889     | -0.96554 |         |  |
|           | 0.83286         | -0.96554  | 0.83286 | 0.29889     | 0.680122276 |          |         |  |
| CEACAMP2  | ENSG00000230558 | -0.16644  | 0.56609 | -1.2522     | 0.89476     | -0.65592 |         |  |
|           | 0.74406         | 0.52759   | 0.29889 | 0.29889     | 0.680122276 |          |         |  |
| C17orf100 | ENSG00000256806 | 0.5276    | 0.29889 | 0.5276      | 0.29889     | 0.5276   |         |  |
|           | 0.29889         | 0.5276    | 0.29889 | 0.29889     | 0.680122276 |          |         |  |
| PRR14L    | ENSG00000183530 | -0.149    | 0.55922 | -0.149      | 0.55922     | -0.10372 |         |  |
|           | 0.5413          | 0.52756   | 0.2989  | 0.2989      | 0.680122276 |          |         |  |
| NA        | ENSG00000232887 | -0.35583  | 0.63902 | 0.52757     | 0.2989      | -0.73865 | 0.76994 |  |
|           | -0.21845        | 0.58646   | 0.2989  | 0.680122276 |             |          |         |  |
| ATG12     | ENSG00000145782 | -1.2501   | 0.89436 | 0.52755     | 0.29891     | -1.2501  | 0.89436 |  |
|           | -0.71133        | 0.76156   | 0.29891 | 0.680122276 |             |          |         |  |
| SEC14L1   | ENSG00000129657 | -0.29364  | 0.61548 | 0.45245     | 0.32547     | -0.24316 |         |  |
|           | 0.59606         | 0.5275    | 0.29892 | 0.29892     | 0.680122276 |          |         |  |
| NA        | ENSG00000221706 | 0.52749   | 0.29893 | 0.52749     | 0.29893     | 0.52749  | 0.29893 |  |
|           | 0.52749         | 0.29893   | 0.29893 | 0.680122276 |             |          |         |  |
| NA        | ENSG00000270842 | -2.0333   | 0.97899 | 0.5274      | 0.29896     | -0.12752 | 0.55074 |  |
|           | -0.12752        | 0.55074   | 0.29896 | 0.680127021 |             |          |         |  |
| NA        | ENSG00000277863 | -1.2493   | 0.89423 | -1.2493     | 0.89423     | -0.66395 | 0.74664 |  |

|             |                 |             |             |             |             |          |         |  |
|-------------|-----------------|-------------|-------------|-------------|-------------|----------|---------|--|
|             | 0.5274          | 0.29896     | 0.29896     | 0.680127021 |             |          |         |  |
| NA          | ENSG00000242001 | -0.70696    | 0.76021     | 0.52734     | 0.29898     | 0.14523  | 0.44226 |  |
|             | 0.13698         | 0.44552     | 0.29898     | 0.680132254 |             |          |         |  |
| KCNC1       | ENSG00000129159 | 0.22044     | 0.41277     | 0.22044     | 0.41277     | 0.37963  | 0.35211 |  |
|             | 0.52728         | 0.2990299   | 0.680132254 |             |             |          |         |  |
| NA          | ENSG00000249373 | 0.52725     | 0.29901     | 0.52725     | 0.29901     | 0.52725  | 0.29901 |  |
|             | 0.52725         | 0.29901     | 0.29901     | 0.680132254 |             |          |         |  |
| LINC01898   | ENSG00000261194 | 0.52719     | 0.29903     | -0.031596   | 0.5126      | 0.044986 |         |  |
|             | 0.48206         | 0.43899     | 0.33034     | 0.29903     | 0.680132254 |          |         |  |
| GALNTL6     | ENSG00000174473 | 0.47143     | 0.31867     | 0.40945     | 0.3411      | -0.79591 |         |  |
|             | 0.78696         | 0.52716     | 0.29904     | 0.29904     | 0.680132254 |          |         |  |
| RNU6-1049P  | ENSG00000252223 | 0.52714     | 0.29905     | 0.52714     | 0.29905     | 0.52714  |         |  |
|             | 0.29905         | 0.52714     | 0.29905     | 0.29905     | 0.680132254 |          |         |  |
| NA          | ENSG00000261789 | 0.52032     | 0.30142     | 0.088623    | 0.46469     | 0.5271   | 0.29906 |  |
|             | 0.5271          | 0.29906     | 0.29906     | 0.680132254 |             |          |         |  |
| CIITA       | ENSG00000179583 | 0.27037     | 0.39344     | 0.27037     | 0.39344     | 0.52665  | 0.29922 |  |
|             | 0.13528         | 0.4462      | 0.29922     | 0.680464374 |             |          |         |  |
| TRPC3       | ENSG00000138741 | -0.041555   | 0.51657     | 0.21484     | 0.41495     | 0.52656  | 0.29925 |  |
|             | 0.10374         | 0.45869     | 0.29925     | 0.680491825 |             |          |         |  |
| NA          | ENSG00000221094 | -1.1539     | 0.87573     | 0.52653     | 0.29926     | -1.1539  | 0.87573 |  |
|             | -1.1539         | 0.87573     | 0.29926     | 0.680491825 |             |          |         |  |
| NA          | ENSG00000278383 | 0.52645     | 0.29929     | 0.52645     | 0.29929     | 0.52645  | 0.29929 |  |
|             | 0.52645         | 0.29929     | 0.29929     | 0.68049424  |             |          |         |  |
| MIR572      | ENSG00000207716 | 0.19569     | 0.42243     | 0.52637     | 0.29931     | -0.3964  |         |  |
|             | 0.65409         | -0.80526    | 0.78967     | 0.29931     | 0.68049424  |          |         |  |
| SNRPGP8     | ENSG00000226718 | 0.52634     | 0.29933     | 0.52634     | 0.29933     | 0.33793  |         |  |
|             | 0.36771         | 0.32608     | 0.37218     | 0.29933     | 0.68049424  |          |         |  |
| NA          | ENSG00000269161 | 0.5263      | 0.29934     | 0.5263      | 0.29934     | 0.5263   | 0.29934 |  |
|             | 0.5263          | 0.29934     | 0.29934     | 0.68049424  |             |          |         |  |
| TIMM9P2     | ENSG00000232608 | 0.52615     | 0.29939     | 0.52615     | 0.29939     | 0.52615  |         |  |
|             | 0.29939         | 0.52615     | 0.29939     | 0.29939     | 0.68049424  |          |         |  |
| DAO         | ENSG00000110887 | -1.0438     | 0.85171     | -1.0438     | 0.85171     | -1.0438  | 0.85171 |  |
|             | 0.52604         | 0.29943     | 0.29943     | 0.68049424  |             |          |         |  |
| BFSP2-AS1   | ENSG00000249993 | -0.14223    | 0.55655     | -0.41685    | 0.66161     | -0.45163 |         |  |
|             | 0.67423         | 0.52605     | 0.29943     | 0.29943     | 0.68049424  |          |         |  |
| NA          | ENSG00000279695 | -0.55845    | 0.71173     | -0.55845    | 0.71173     | -0.3293  | 0.62903 |  |
|             | 0.52601         | 0.29944     | 0.29944     | 0.68049424  |             |          |         |  |
| TCEA1P1     | ENSG00000197214 | -0.34886    | 0.6364      | -0.27809    | 0.60953     | 0.20328  |         |  |
|             | 0.41946         | 0.52589     | 0.29948     | 0.29948     | 0.68049424  |          |         |  |
| NA          | ENSG00000257777 | -0.55443    | 0.71036     | 0.52591     | 0.29948     | -0.55443 | 0.71036 |  |
|             | -0.55443        | 0.71036     | 0.29948     | 0.68049424  |             |          |         |  |
| AQP4-AS1    | ENSG00000260372 | -0.13002    | 0.55173     | 0.52586     | 0.29949     | -1.4446  |         |  |
|             | 0.92572         | -0.9576     | 0.83087     | 0.29949     | 0.68049424  |          |         |  |
| NA          | ENSG00000198384 | 0.52587     | 0.29949     | 0.44037     | 0.32983     | 0.52541  | 0.29965 |  |
|             | -0.043759       | 0.51745     | 0.29949     | 0.68049424  |             |          |         |  |
| RNA5SP210   | ENSG00000212336 | -1.1226     | 0.8692      | 0.52585     | 0.2995      | 0.52585  |         |  |
|             | 0.2995          | -1.2544     | 0.89516     | 0.2995      | 0.68049424  |          |         |  |
| NA          | ENSG00000224879 | 0.52578     | 0.29952     | 0.34815     | 0.36386     | -0.57452 | 0.71719 |  |
|             | -0.57452        | 0.71719     | 0.29952     | 0.68049424  |             |          |         |  |
| CCT7        | ENSG00000135624 | -0.69077    | 0.75515     | -0.20189    | 0.58        | -0.99974 | 0.84128 |  |
|             | 0.52576         | 0.29953     | 0.29953     | 0.68049424  |             |          |         |  |
| PGM5-AS1    | ENSG00000224958 | -1.07085768 | -0.38538    | 0.65002     | 0.52575     | 0.29953  |         |  |
|             | 0.52575         | 0.29953     | 0.29953     | 0.68049424  |             |          |         |  |
| SLAMF8      | ENSG00000158714 | 0.52565     | 0.29956     | 0.52565     | 0.29956     | 0.52565  |         |  |
|             | 0.29956         | 0.52565     | 0.29956     | 0.29956     | 0.68049424  |          |         |  |
| RN7SKP292   | ENSG00000202392 | 0.5256      | 0.29958     | 0.5256      | 0.29958     | 0.5256   |         |  |
|             | 0.29958         | 0.5256      | 0.29958     | 0.29958     | 0.68049424  |          |         |  |
| HLA-C       | ENSG00000204525 | -0.137      | 0.55449     | 0.28603     | 0.38743     | 0.52562  | 0.29958 |  |
|             | -0.48742        | 0.68702     | 0.29958     | 0.68049424  |             |          |         |  |
| UMODL1-AS1  | ENSG00000184385 | 0.52558     | 0.29959     | 0.49697     | 0.30961     | 0.14902  |         |  |
|             | 0.44077         | 0.14902     | 0.44077     | 0.29959     | 0.68049424  |          |         |  |
| TRBV26OR9-2 | ENSG00000231165 | -0.20251    | 0.58024     | 0.52556     | 0.2996      | 0.26697  |         |  |

|            |                 |           |         |             |             |          |         |         |
|------------|-----------------|-----------|---------|-------------|-------------|----------|---------|---------|
|            | 0.39474         | 0.52556   | 0.2996  | 0.2996      | 0.68049424  |          |         |         |
| NA         | ENSG00000268790 | 0.52548   | 0.29962 | 0.29962     | 0.52548     | 0.29962  | 0.52548 | 0.29962 |
|            | 0.52548         | 0.29962   | 0.29962 | 0.68049424  |             |          |         |         |
| HMGB1P39   | ENSG00000203489 | 0.52543   | 0.29964 | 0.29964     | 0.52543     | 0.29964  | 0.52543 |         |
|            | 0.29964         | 0.52543   | 0.29964 | 0.29964     | 0.68049424  |          |         |         |
| NA         | ENSG00000242795 | 0.17827   | 0.42926 | 0.39726     | 0.34559     | 0.52543  | 0.29964 |         |
|            | 0.41541         | 0.33892   | 0.29964 | 0.68049424  |             |          |         |         |
| JMJD8      | ENSG00000161999 | 0.52541   | 0.29965 | 0.29965     | 0.52541     | 0.29965  | 0.52541 | 0.29965 |
|            | 0.52541         | 0.29965   | 0.29965 | 0.68049424  |             |          |         |         |
| MLPH       | ENSG00000115648 | 0.40295   | 0.34349 | 0.52539     | 0.29966     | -0.53822 | 0.70479 |         |
|            | -1.008          | 0.84328   | 0.29966 | 0.68049424  |             |          |         |         |
| RNA5SP140  | ENSG00000201394 | 0.52537   | 0.29966 | 0.29966     | 0.52537     | 0.29966  | 0.52537 |         |
|            | 0.29966         | 0.52537   | 0.29966 | 0.29966     | 0.68049424  |          |         |         |
| MRPL22P1   | ENSG00000250324 | 0.52538   | 0.29966 | 0.29966     | 0.52538     | 0.29966  | 0.52538 |         |
|            | 0.29966         | 0.52538   | 0.29966 | 0.29966     | 0.68049424  |          |         |         |
| RPL12P12   | ENSG00000236992 | 0.52536   | 0.29967 | 0.12469     | 0.45038     | 0.52536  |         |         |
|            | 0.29967         | 0.16254   | 0.43544 | 0.29967     | 0.68049424  |          |         |         |
| MIR3684    | ENSG00000265213 | 0.52531   | 0.29968 | 0.52531     | 0.29968     | 0.52531  |         |         |
|            | 0.29968         | 0.52531   | 0.29968 | 0.29968     | 0.68049424  |          |         |         |
| ABHD8      | ENSG00000127220 | 0.52521   | 0.29972 | 0.52521     | 0.29972     | 0.52521  | 0.29972 |         |
|            | 0.52521         | 0.29972   | 0.29972 | 0.680553357 |             |          |         |         |
| RNU6-1073P | ENSG00000252991 | -1.303    | 0.90371 | -1.44       | 0.92507     | -0.10909 | 0.54343 |         |
|            | 0.52514         | 0.29974   | 0.29974 | 0.680567058 |             |          |         |         |
| NA         | ENSG00000254231 | 0.1686    | 0.43306 | 0.52504     | 0.29978     | 0.1686   | 0.43306 |         |
|            | 0.1686          | 0.43306   | 0.29978 | 0.680626166 |             |          |         |         |
| RN7SL359P  | ENSG00000244384 | 0.52486   | 0.29984 | -0.70403    | 0.75929     | -0.31202 |         |         |
|            | 0.62249         | 0.18004   | 0.42856 | 0.29984     | 0.68066329  |          |         |         |
| PNRC2P1    | ENSG00000228217 | 0.52483   | 0.29985 | 0.52483     | 0.29985     | 0.52483  |         |         |
|            | 0.29985         | 0.52483   | 0.29985 | 0.29985     | 0.68066329  |          |         |         |
| NA         | ENSG00000240787 | 0.52482   | 0.29986 | 0.52482     | 0.29986     | 0.52482  | 0.29986 |         |
|            | 0.52482         | 0.29986   | 0.29986 | 0.68066329  |             |          |         |         |
| NA         | ENSG00000213393 | -0.40898  | 0.65872 | -0.43585    | 0.66853     | -0.33084 | 0.62962 |         |
|            | 0.52471         | 0.29989   | 0.29989 | 0.68066329  |             |          |         |         |
| MCM8-AS1   | ENSG00000278719 | 0.16589   | 0.43412 | 0.52472     | 0.29989     | 0.16589  |         |         |
|            | 0.43412         | 0.16589   | 0.43412 | 0.29989     | 0.68066329  |          |         |         |
| ESRRAP1    | ENSG00000215572 | 0.52463   | 0.29992 | -0.89708    | 0.81516     | 0.32561  |         |         |
|            | 0.37236         | -0.89708  | 0.81516 | 0.29992     | 0.68066329  |          |         |         |
| NA         | ENSG00000224352 | -1.0728   | 0.85833 | 0.39669     | 0.3458      | 0.52461  | 0.29993 |         |
|            | -0.4923         | 0.68875   | 0.29993 | 0.68066329  |             |          |         |         |
| MCM2       | ENSG00000073111 | -0.74034  | 0.77045 | -0.728      | 0.76669     | -0.28032 | 0.61038 |         |
|            | 0.52458         | 0.29994   | 0.29994 | 0.68066329  |             |          |         |         |
| CEP128     | ENSG00000100629 | -0.24794  | 0.59791 | 0.049638    | 0.48021     | 0.52458  |         |         |
|            | 0.29994         | -0.058419 | 0.52329 | 0.29994     | 0.68066329  |          |         |         |
| TMEM132E   | ENSG00000181291 | 0.17692   | 0.42979 | -0.27527    | 0.60845     | 0.52457  |         |         |
|            | 0.29994         | 0.26031   | 0.39731 | 0.29994     | 0.68066329  |          |         |         |
| LRRTM4     | ENSG00000176204 | -0.87357  | 0.80882 | 0.52453     | 0.29995     | -0.18992 |         |         |
|            | 0.57531         | 0.19477   | 0.42279 | 0.29995     | 0.68066329  |          |         |         |
| LPAR1      | ENSG00000198121 | 0.52439   | 0.3     | -1.3112     | 0.90511     | -0.21768 | 0.58616 |         |
|            | -0.41994        | 0.66274   | 0.3     | 0.680745052 |             |          |         |         |
| RNU6-200P  | ENSG00000201613 | 0.52397   | 0.30015 | 0.52397     | 0.30015     | 0.52397  |         |         |
|            | 0.30015         | 0.52397   | 0.30015 | 0.30015     | 0.681053711 |          |         |         |
| RPS6       | ENSG00000137154 | -1.4041   | 0.91985 | -1.4041     | 0.91985     | -1.4041  | 0.91985 |         |
|            | 0.52387         | 0.30018   | 0.30018 | 0.681067647 |             |          |         |         |
| RN7SL125P  | ENSG00000244514 | 0.52383   | 0.3002  | 0.52383     | 0.3002      | 0.52383  |         |         |
|            | 0.3002          | 0.52383   | 0.3002  | 0.3002      | 0.681067647 |          |         |         |
| MROH2B     | ENSG00000171495 | -1.0102   | 0.8438  | -0.16626    | 0.56603     | -1.257   |         |         |
|            | 0.89563         | 0.52379   | 0.30021 | 0.30021     | 0.681067647 |          |         |         |
| ZNF440     | ENSG00000171295 | 0.52372   | 0.30024 | -0.58584    | 0.72101     | 0.29597  |         |         |
|            | 0.38363         | -0.78898  | 0.78494 | 0.30024     | 0.681067647 |          |         |         |
| KCNJ10     | ENSG00000177807 | -0.61156  | 0.72959 | 0.52372     | 0.30024     | 0.38892  |         |         |
|            | 0.34867         | 0.44542   | 0.32801 | 0.30024     | 0.681067647 |          |         |         |
| NA         | ENSG00000277881 | 0.5237    | 0.30024 | 0.5237      | 0.30024     | 0.5237   | 0.30024 |         |

|           |                 |          |         |             |             |          |         |  |
|-----------|-----------------|----------|---------|-------------|-------------|----------|---------|--|
|           | 0.5237          | 0.30024  | 0.30024 | 0.681067647 |             |          |         |  |
| SATB2-AS1 | ENSG00000225953 | 0.52363  | 0.30027 | 0.051623    | 0.47941     | -1.4171  |         |  |
|           | 0.92178         | -1.0008  | 0.84155 | 0.30027     | 0.681103994 |          |         |  |
| NA        | ENSG00000225378 | 0.35419  | 0.3616  | 0.068175    | 0.47282     | 0.52341  | 0.30035 |  |
|           | 0.26804         | 0.39433  | 0.30035 | 0.68124472  |             |          |         |  |
| PCF11-AS1 | ENSG00000269939 | 0.52335  | 0.30036 | 0.52335     | 0.30036     | 0.52335  |         |  |
|           | 0.30036         | 0.52335  | 0.30036 | 0.30036     | 0.68124472  |          |         |  |
| LRRTM1    | ENSG00000162951 | 0.52315  | 0.30044 | 0.52315     | 0.30044     | 0.52315  |         |  |
|           | 0.30044         | -0.017   | 0.50678 | 0.30044     | 0.68125882  |          |         |  |
| ICE2P2    | ENSG00000242705 | 0.52313  | 0.30044 | 0.52313     | 0.30044     | 0.10734  |         |  |
|           | 0.45726         | -0.85703 | 0.80429 | 0.30044     | 0.68125882  |          |         |  |
| NA        | ENSG00000253643 | 0.038448 | 0.48467 | -0.35583    | 0.63902     | -0.71036 | 0.76126 |  |
|           | 0.5231          | 0.30045  | 0.30045 | 0.68125882  |             |          |         |  |
| CNDP1     | ENSG00000150656 | 0.52308  | 0.30046 | -0.95562    | 0.83037     | 0.52308  | 0.30046 |  |
|           | -1.2699         | 0.89795  | 0.30046 | 0.68125882  |             |          |         |  |
| LINC01810 | ENSG00000237266 | 0.52304  | 0.30047 | 0.52304     | 0.30047     | 0.52304  |         |  |
|           | 0.30047         | 0.52304  | 0.30047 | 0.30047     | 0.68125882  |          |         |  |
| NA        | ENSG00000206959 | 0.50952  | 0.30519 | -0.14833    | 0.55896     | 0.52303  | 0.30048 |  |
|           | 0.52303         | 0.30048  | 0.30048 | 0.68125882  |             |          |         |  |
| RN7SL222P | ENSG00000242165 | -1.0715  | 0.85803 | 0.52297     | 0.3005      | -1.0715  |         |  |
|           | 0.85803         | -1.0715  | 0.85803 | 0.3005      | 0.68125882  |          |         |  |
| NA        | ENSG00000269681 | 0.52296  | 0.3005  | 0.52296     | 0.3005      | 0.52296  | 0.3005  |  |
|           | 0.52296         | 0.3005   | 0.3005  | 0.68125882  |             |          |         |  |
| CCNYL2    | ENSG00000182632 | 0.1549   | 0.43845 | 0.52291     | 0.30052     | 0.2833   |         |  |
|           | 0.38847         | 0.080749 | 0.46782 | 0.30052     | 0.68125882  |          |         |  |
| BTNL10    | ENSG00000215811 | 0.52291  | 0.30052 | -0.39544    | 0.65374     | -0.22564 |         |  |
|           | 0.58926         | -0.4383  | 0.66942 | 0.30052     | 0.68125882  |          |         |  |
| NA        | ENSG00000268812 | 0.52289  | 0.30052 | 0.52289     | 0.30052     | 0.52289  | 0.30052 |  |
|           | 0.52289         | 0.30052  | 0.30052 | 0.68125882  |             |          |         |  |
| NA        | ENSG00000256343 | 0.52284  | 0.30054 | 0.43966     | 0.33009     | -1.032   | 0.84896 |  |
|           | 0.52284         | 0.30054  | 0.30054 | 0.681272466 |             |          |         |  |
| HRK       | ENSG00000135116 | 0.52278  | 0.30056 | 0.52278     | 0.30056     | 0.52278  | 0.30056 |  |
|           | -0.088454       | 0.53524  | 0.30056 | 0.68128611  |             |          |         |  |
| LINC01761 | ENSG00000233907 | -0.113   | 0.54498 | 0.5227      | 0.30059     | -0.113   |         |  |
|           | 0.54498         | -0.113   | 0.54498 | 0.30059     | 0.681313395 |          |         |  |
| SASH1     | ENSG00000111961 | -0.42498 | 0.66457 | -1.2962     | 0.90255     | 0.52267  | 0.3006  |  |
|           | -0.9313         | 0.82415  | 0.3006  | 0.681313395 |             |          |         |  |
| NA        | ENSG00000250213 | -0.52303 | 0.69952 | -0.014228   | 0.50568     | 0.2072   | 0.41793 |  |
|           | 0.52252         | 0.30065  | 0.30065 | 0.681395028 |             |          |         |  |
| TMEM272   | ENSG00000281106 | 0.2594   | 0.39766 | -0.026518   | 0.51058     | 0.24465  |         |  |
|           | 0.40336         | 0.52238  | 0.3007  | 0.3007      | 0.681476653 |          |         |  |
| SERPINE1  | ENSG00000106366 | 0.52229  | 0.30073 | -1.1455     | 0.87401     | 0.46541  |         |  |
|           | 0.32082         | -0.84119 | 0.79988 | 0.30073     | 0.681494885 |          |         |  |
| IGSF11    | ENSG00000144847 | 0.51298  | 0.30398 | -0.085883   | 0.53422     | 0.24259  |         |  |
|           | 0.40416         | 0.52225  | 0.30075 | 0.30075     | 0.681494885 |          |         |  |
| PLEKHM3   | ENSG00000178385 | -0.86005 | 0.80512 | -0.054606   | 0.52177     | -0.42708 |         |  |
|           | 0.66534         | 0.52225  | 0.30075 | 0.30075     | 0.681494885 |          |         |  |
| STK25P1   | ENSG00000267570 | 0.52217  | 0.30078 | -1.1848     | 0.88195     | 0.52217  |         |  |
|           | 0.30078         | 0.52217  | 0.30078 | 0.30078     | 0.681531173 |          |         |  |
| MIR4533   | ENSG00000266140 | -0.10927 | 0.54351 | 0.52192     | 0.30086     | 0.52192  |         |  |
|           | 0.30086         | 0.049181 | 0.48039 | 0.30086     | 0.681671708 |          |         |  |
| NA        | ENSG00000093100 | -0.6315  | 0.73614 | 0.52191     | 0.30087     | 0.029708 | 0.48815 |  |
|           | -0.80913        | 0.79078  | 0.30087 | 0.681671708 |             |          |         |  |
| MIR4790   | ENSG00000265180 | 0.52167  | 0.30095 | 0.52167     | 0.30095     | 0.52167  |         |  |
|           | 0.30095         | 0.52167  | 0.30095 | 0.30095     | 0.681771481 |          |         |  |
| NA        | ENSG00000279531 | 0.52167  | 0.30095 | 0.52167     | 0.30095     | 0.52167  | 0.30095 |  |
|           | 0.52167         | 0.30095  | 0.30095 | 0.681771481 |             |          |         |  |
| NA        | ENSG00000253139 | 0.52164  | 0.30096 | 0.52164     | 0.30096     | 0.52164  | 0.30096 |  |
|           | 0.52164         | 0.30096  | 0.30096 | 0.681771481 |             |          |         |  |
| NA        | ENSG00000280327 | 0.5216   | 0.30097 | 0.5216      | 0.30097     | 0.5216   | 0.30097 |  |
|           | 0.5216          | 0.30097  | 0.30097 | 0.681771481 |             |          |         |  |
| ZNRD2-AS1 | ENSG00000260233 | 0.52146  | 0.30102 | 0.31641     | 0.37585     | 0.52146  |         |  |

|             |                 |          |            |             |             |          |         |
|-------------|-----------------|----------|------------|-------------|-------------|----------|---------|
|             | 0.30102         | 0.52146  | 0.30102    | 0.30102     | 0.681848569 |          |         |
| RNU6-1129P  | ENSG00000251773 | 0.52142  | 0.30104    | -0.55394    | 0.71019     | 0.52142  |         |
|             | 0.30104         | 0.52142  | 0.30104    | 0.30104     | 0.681848569 |          |         |
| TRBV6-7     | ENSG00000253188 | 0.52137  | 0.30105    | 0.31537     | 0.37624     | 0.52137  |         |
|             | 0.30105         | 0.52137  | 0.30105    | 0.30105     | 0.681848569 |          |         |
| NA          | ENSG00000216913 | -0.25719 | 0.60148    | 0.52137     | 0.30106     | 0.52137  | 0.30106 |
|             | 0.058038        | 0.47686  | 0.30106    | 0.681848569 |             |          |         |
| NA          | ENSG00000226376 | 0.52127  | 0.30109    | -0.92873    | 0.82349     | 0.52127  | 0.30109 |
|             | 0.52127         | 0.30109  | 0.30109    | 0.681866736 |             |          |         |
| KLKB1       | ENSG00000164344 | 0.098137 | 0.46091    | 0.098137    | 0.46091     | 0.52124  | 0.3011  |
|             | -1.1292         | 0.87059  | 0.3011     | 0.681866736 |             |          |         |
| NA          | ENSG00000253619 | 0.52121  | 0.30111    | -0.094543   | 0.53766     | -2.0601  | 0.9803  |
|             | -1.6856         | 0.95407  | 0.30111    | 0.681866736 |             |          |         |
| MOAP1       | ENSG00000165943 | -1.6977  | 0.95521    | 0.49054     | 0.31188     | 0.52115  | 0.30113 |
|             | -2.3108         | 0.98958  | 0.30113    | 0.681880339 |             |          |         |
| PTCD2P2     | ENSG00000234256 | 0.521    | 0.30118    | 0.521       | 0.30118     | 0.521    | 0.30118 |
|             | 0.30118         | 0.30118  | 0.68196187 |             |             |          |         |
| RNY4P25     | ENSG00000238711 | -1.4998  | 0.93317    | 0.52081     | 0.30125     | 0.52081  |         |
|             | 0.30125         | 0.52081  | 0.30125    | 0.30125     | 0.681971031 |          |         |
| METTL15P1   | ENSG00000174912 | 0.52078  | 0.30126    | 0.52078     | 0.30126     | 0.52078  |         |
|             | 0.30126         | 0.52078  | 0.30126    | 0.30126     | 0.681971031 |          |         |
| NA          | ENSG00000232978 | 0.52079  | 0.30126    | 0.52079     | 0.30126     | 0.52079  | 0.30126 |
|             | 0.52079         | 0.30126  | 0.30126    | 0.681971031 |             |          |         |
| MRGPRX2     | ENSG00000183695 | -0.81817 | 0.79337    | 0.52074     | 0.30127     | 0.41839  |         |
|             | 0.33783         | -0.72623 | 0.76615    | 0.30127     | 0.681971031 |          |         |
| SPON2       | ENSG00000159674 | -1.1186  | 0.86835    | -0.5172     | 0.69749     | 0.52072  | 0.30128 |
|             | -0.63371        | 0.73687  | 0.30128    | 0.681971031 |             |          |         |
| NA          | ENSG00000256034 | 0.22605  | 0.41058    | 0.52066     | 0.3013      | 0.52066  | 0.3013  |
|             | 0.52066         | 0.3013   | 0.3013     | 0.681971031 |             |          |         |
| HMGCS1      | ENSG00000112972 | -0.17825 | 0.57074    | 0.52064     | 0.30131     | -1.0748  |         |
|             | 0.85877         | -1.4578  | 0.92756    | 0.30131     | 0.681971031 |          |         |
| ATG4D       | ENSG00000130734 | -0.30441 | 0.61959    | -0.30441    | 0.61959     | 0.52063  | 0.30131 |
|             | -0.71377        | 0.76231  | 0.30131    | 0.681971031 |             |          |         |
| CAB39P1     | ENSG00000251303 | -0.20752 | 0.5822     | 0.52064     | 0.30131     | 0.52064  |         |
|             | 0.30131         | -0.19111 | 0.57578    | 0.30131     | 0.681971031 |          |         |
| GFRA2       | ENSG00000168546 | 0.52057  | 0.30133    | -0.14047    | 0.55586     | -0.49554 | 0.68989 |
|             | -0.34287        | 0.63415  | 0.30133    | 0.681984622 |             |          |         |
| ADAMTS9-AS1 | ENSG00000241158 | -0.29871 | 0.61742    | 0.16688     | 0.43373     | 0.52042  |         |
|             | 0.30139         | 0.52042  | 0.30139    | 0.30139     | 0.682066213 |          |         |
| NA          | ENSG00000234149 | 0.062709 | 0.475      | 0.29381     | 0.38445     | 0.52031  | 0.30143 |
|             | 0.03059         | 0.4878   | 0.30143    | 0.682066213 |             |          |         |
| NA          | ENSG00000266869 | 0.5203   | 0.30143    | -0.034054   | 0.51358     | -0.54967 | 0.70873 |
|             | -0.93286        | 0.82455  | 0.30143    | 0.682066213 |             |          |         |
| ENSAP1      | ENSG00000224274 | 0.52022  | 0.30145    | 0.52022     | 0.30145     | 0.52022  |         |
|             | 0.30145         | 0.52022  | 0.30145    | 0.30145     | 0.682066213 |          |         |
| NA          | ENSG00000234537 | 0.24776  | 0.40216    | -0.28953    | 0.61391     | 0.52022  | 0.30146 |
|             | -1.1224         | 0.86915  | 0.30146    | 0.682066213 |             |          |         |
| RPL7AP65    | ENSG00000228000 | 0.52017  | 0.30147    | 0.52017     | 0.30147     | 0.52017  |         |
|             | 0.30147         | 0.52017  | 0.30147    | 0.30147     | 0.682066213 |          |         |
| SGCE        | ENSG00000127990 | 0.46908  | 0.31951    | 0.52013     | 0.30149     | -1.3319  | 0.90856 |
|             | -1.0643         | 0.8564   | 0.30149    | 0.682066213 |             |          |         |
| MS4A5       | ENSG00000166930 | 0.032151 | 0.48718    | 0.38838     | 0.34887     | 0.52009  | 0.3015  |
|             | 0.1839          | 0.42705  | 0.3015     | 0.682066213 |             |          |         |
| LINC00517   | ENSG00000259091 | -0.74128 | 0.77074    | -0.34085    | 0.63339     | -0.72223 |         |
|             | 0.76492         | 0.5201   | 0.3015     | 0.3015      | 0.682066213 |          |         |
| NA          | ENSG00000250806 | -1.0056  | 0.8427     | 0.049436    | 0.48029     | 0.52005  | 0.30151 |
|             | 0.52005         | 0.30151  | 0.30151    | 0.682066213 |             |          |         |
| GTF2H2      | ENSG00000145736 | 0.52001  | 0.30153    | -0.025976   | 0.51036     | -0.10231 |         |
|             | 0.54074         | -0.21188 | 0.5839     | 0.30153     | 0.682066213 |          |         |
| NA          | ENSG00000206964 | 0.51993  | 0.30156    | 0.51993     | 0.30156     | 0.51993  | 0.30156 |
|             | 0.51993         | 0.30156  | 0.30156    | 0.682066213 |             |          |         |
| RCN3        | ENSG00000142552 | 0.5199   | 0.30157    | 0.072992    | 0.47091     | 0.5199   | 0.30157 |

|            |                 |           |                  |             |              |          |         |  |
|------------|-----------------|-----------|------------------|-------------|--------------|----------|---------|--|
|            | -0.53453        | 0.70351   | 0.30157          | 0.682066213 |              |          |         |  |
| MIR4424    | ENSG00000266417 | 0.51986   | 0.30158          | 0.51986     | 0.30158      | 0.51986  |         |  |
|            | 0.30158         | 0.51986   | 0.30158          | 0.30158     | 0.682066213  |          |         |  |
| NA         | ENSG00000282952 | -1.1948   | 0.88392          | -1.1948     | 0.88392      | 0.51985  | 0.30158 |  |
|            | -2.5194         | 0.99412   | 0.30158          | 0.682066213 |              |          |         |  |
| SLC27A3    | ENSG00000143554 | 0.20254   | 0.41975          | 0.51983     | 0.30159      | -0.42647 |         |  |
|            | 0.66512         | -0.011669 | 0.50466          | 0.30159     | 0.682066213  |          |         |  |
| RPS29P4    | ENSG00000233946 | 0.51977   | 0.30161          | 0.40497     | 0.34275      | 0.51977  |         |  |
|            | 0.30161         | 0.51977   | 0.30161          | 0.30161     | 0.682079789  |          |         |  |
| NA         | ENSG00000234929 | -0.78107  | 0.78262          | 0.40082     | 0.34428      | 0.51965  | 0.30165 |  |
|            | -1.4136         | 0.92126   | 0.30165          | 0.68212955  |              |          |         |  |
| PDCD1      | ENSG00000188389 | 0.47875   | 0.31606          | 0.51962     | 0.30166      | 0.51962  | 0.30166 |  |
|            | 0.51962         | 0.30166   | 0.30166          | 0.68212955  |              |          |         |  |
| CTNNA1P1   | ENSG00000249026 | 0.28803   | 0.38666          | -0.81385    | 0.79214      | 0.51925  |         |  |
|            | 0.30179         | 0.28803   | 0.38666          | 0.30179     | 0.682373744  |          |         |  |
| FN3K       | ENSG00000167363 | -0.76763  | 0.77865          | -0.94082    | 0.8266       | 0.51921  | 0.30181 |  |
|            | -1.4907         | 0.93198   | 0.30181          | 0.682373744 |              |          |         |  |
| NA         | ENSG00000233363 | -0.25418  | 0.60032          | 0.5192      | 0.30181      | -0.10639 | 0.54237 |  |
|            | -0.61434        | 0.7305    | 0.30181          | 0.682373744 |              |          |         |  |
| NEK9       | ENSG00000119638 | 0.51912   | 0.30184          | -0.77013    | 0.77939      | -0.94345 | 0.82728 |  |
|            | 0.067934        | 0.47292   | 0.30184          | 0.68240991  |              |          |         |  |
| FER1L6-AS1 | ENSG00000181171 | 0.51905   | 0.30186          | 0.51905     | 0.30186      | 0.51905  |         |  |
|            | 0.30186         | -1.0377   | 0.85029          | 0.30186     | 0.682414414  |          |         |  |
| NA         | ENSG00000255487 | 0.51904   | 0.30187          | 0.51904     | 0.30187      | 0.51904  | 0.30187 |  |
|            | 0.51904         | 0.30187   | 0.30187          | 0.682414414 |              |          |         |  |
| PVR        | ENSG00000073008 | 0.4348    | 0.33185          | 0.21673     | 0.41421      | 0.51897  | 0.30189 |  |
|            | 0.16966         | 0.43264   | 0.30189          | 0.682427968 |              |          |         |  |
| NA         | ENSG00000254070 | 0.021671  | 0.49136          | 0.51887     | 0.30193      | -0.5704  | 0.7158  |  |
|            | 0.14241         | 0.44338   | 0.30193          | 0.682486729 |              |          |         |  |
| GLIS2      | ENSG00000126603 | -0.25421  | 0.60033          | 0.1534      | 0.43904      | 0.5188   | 0.30195 |  |
|            | -0.26467        | 0.60437   | 0.30195          | 0.682500278 |              |          |         |  |
| ZNF730     | ENSG00000183850 | -0.7509   | 0.77364          | -1.1624     | 0.87747      | 0.51868  |         |  |
|            | 0.30199         | -0.429    | 0.66604          | 0.30199     | 0.682549974  |          |         |  |
| NA         | ENSG00000247402 | 0.51789   | 0.30227          | 0.51866     | 0.3020.38016 | 0.35191  |         |  |
|            | 0.38016         | 0.35191   | 0.3020.682549974 |             |              |          |         |  |
| NA         | ENSG00000235445 | 0.51854   | 0.30204          | 0.51854     | 0.30204      | 0.51854  | 0.30204 |  |
|            | 0.51854         | 0.30204   | 0.30204          | 0.682608719 |              |          |         |  |
| SLC25A18   | ENSG00000182902 | -1.2351   | 0.89161          | -0.37881    | 0.64759      | 0.51846  |         |  |
|            | 0.30207         | -0.42894  | 0.66602          | 0.30207     | 0.682644859  |          |         |  |
| GPR75      | ENSG00000119737 | 0.10337   | 0.45883          | 0.10337     | 0.45883      | 0.10337  | 0.45883 |  |
|            | 0.51811         | 0.30219   | 0.30219          | 0.682866089 |              |          |         |  |
| RN7SL135P  | ENSG00000241964 | 0.51807   | 0.3022           | 0.51807     | 0.3022       | 0.51807  |         |  |
|            | 0.3022          | 0.51807   | 0.3022           | 0.3022      | 0.682866089  |          |         |  |
| NA         | ENSG00000276810 | 0.51799   | 0.30223          | -0.45966    | 0.67712      | -0.45966 | 0.67712 |  |
|            | -0.45966        | 0.67712   | 0.30223          | 0.682866089 |              |          |         |  |
| TSPAN8     | ENSG00000127324 | 0.51797   | 0.30224          | 0.51797     | 0.30224      | 0.51797  |         |  |
|            | 0.30224         | -0.37336  | 0.64556          | 0.30224     | 0.682866089  |          |         |  |
| POU5F1P2   | ENSG00000253382 | 0.51793   | 0.30225          | 0.1686      | 0.43305      | 0.51793  |         |  |
|            | 0.30225         | 0.51793   | 0.30225          | 0.30225     | 0.682866089  |          |         |  |
| MIR4735    | ENSG00000265986 | -0.25819  | 0.60187          | 0.51786     | 0.30228      | -0.25819 |         |  |
|            | 0.60187         | -0.25819  | 0.60187          | 0.30228     | 0.682866089  |          |         |  |
| RAP2CP1    | ENSG00000270938 | 0.51784   | 0.30228          | 0.47922     | 0.31589      | 0.47922  |         |  |
|            | 0.31589         | 0.47922   | 0.31589          | 0.30228     | 0.682866089  |          |         |  |
| NA         | ENSG00000283075 | -0.17327  | 0.56878          | -1.1899     | 0.88295      | 0.51784  | 0.30228 |  |
|            | -0.4871         | 0.68691   | 0.30228          | 0.682866089 |              |          |         |  |
| CRISP1     | ENSG00000124812 | -0.41276  | 0.66011          | 0.51767     | 0.30234      | -1.2535  |         |  |
|            | 0.89499         | -0.12901  | 0.55133          | 0.30234     | 0.682892356  |          |         |  |
| RNU6-507P  | ENSG00000251854 | 0.51764   | 0.30235          | 0.51764     | 0.30235      | 0.51764  |         |  |
|            | 0.30235         | 0.51764   | 0.30235          | 0.30235     | 0.682892356  |          |         |  |
| NA         | ENSG00000206356 | -0.64228  | 0.73966          | -0.036255   | 0.51446      | -0.32798 | 0.62854 |  |
|            | 0.51761         | 0.30236   | 0.30236          | 0.682892356 |              |          |         |  |
| NA         | ENSG00000270480 | -0.1206   | 0.54799          | 0.019544    | 0.4922       | 0.019544 | 0.4922  |  |



|             |                 |             |         |             |             |           |         |  |
|-------------|-----------------|-------------|---------|-------------|-------------|-----------|---------|--|
|             | 0.51757         | 0.30238     | 0.30238 | 0.682892356 |             |           |         |  |
| DIXDC1      | ENSG00000150764 | -0.48511    | 0.6862  | -0.30475    | 0.61972     | -0.73842  |         |  |
|             | 0.76987         | 0.51746     | 0.30242 | 0.30242     | 0.682892356 |           |         |  |
| NA          | ENSG00000234269 | 0.42259     | 0.3363  | 0.28119     | 0.38928     | 0.51742   | 0.30243 |  |
|             | 0.28119         | 0.38928     | 0.30243 | 0.682892356 |             |           |         |  |
| CLRN3       | ENSG00000180745 | -0.99859    | 0.841   | -0.98884    | 0.83863     | 0.5173    | 0.30247 |  |
|             | 0.17567         | 0.43028     | 0.30247 | 0.682892356 |             |           |         |  |
| NA          | ENSG00000212448 | 0.51727     | 0.30248 | 0.095859    | 0.46182     | -0.15517  | 0.56166 |  |
|             | 0.51727         | 0.30248     | 0.30248 | 0.682892356 |             |           |         |  |
| RPL19       | ENSG00000108298 | -0.83042    | 0.79685 | -1.1078     | 0.86602     | -0.83042  | 0.79685 |  |
|             | 0.51721         | 0.3025      | 0.3025  | 0.682892356 |             |           |         |  |
| NA          | ENSG00000214870 | 0.51721     | 0.30251 | -0.40065    | 0.65566     | 0.33537   | 0.36867 |  |
|             | -0.40065        | 0.65566     | 0.30251 | 0.682892356 |             |           |         |  |
| SLC22A20P   | ENSG00000197847 | 0.43647     | 0.33125 | 0.23918     | 0.40548     | 0.51717   |         |  |
|             | 0.30252         | -0.019324   | 0.50771 | 0.30252     | 0.682892356 |           |         |  |
| NA          | ENSG00000276508 | 0.51716     | 0.30252 | 0.51716     | 0.30252     | -0.71669  | 0.76322 |  |
|             | 0.51716         | 0.30252     | 0.30252 | 0.682892356 |             |           |         |  |
| MGLL        | ENSG00000074416 | -0.11291    | 0.54495 | 0.51709     | 0.30255     | 0.3601    | 0.35939 |  |
|             | 0.45351         | 0.32509     | 0.30255 | 0.682892356 |             |           |         |  |
| NA          | ENSG00000189316 | 0.44064     | 0.32974 | 0.41687     | 0.33839     | 0.51704   | 0.30256 |  |
|             | -0.32663        | 0.62803     | 0.30256 | 0.682892356 |             |           |         |  |
| NA          | ENSG00000226605 | -0.061848   | 0.52466 | 0.51706     | 0.30256     | 0.51706   | 0.30256 |  |
|             | 0.51706         | 0.30256     | 0.30256 | 0.682892356 |             |           |         |  |
| NA          | ENSG00000267122 | 0.51705     | 0.30256 | 0.51705     | 0.30256     | 0.51705   | 0.30256 |  |
|             | 0.51705         | 0.30256     | 0.30256 | 0.682892356 |             |           |         |  |
| NA          | ENSG00000252329 | 0.517       | 0.30258 | 0.517       | 0.30258     | 0.517     | 0.30258 |  |
|             | 0.30258         | 0.682892356 |         |             |             |           |         |  |
| SLC5A4P1    | ENSG00000255116 | 0.29912     | 0.38243 | 0.51696     | 0.30259     | 0.51696   |         |  |
|             | 0.30259         | 0.51696     | 0.30259 | 0.30259     | 0.682892356 |           |         |  |
| MIR3668     | ENSG00000263514 | 0.51696     | 0.30259 | -0.41305    | 0.66022     | 0.51696   |         |  |
|             | 0.30259         | 0.51696     | 0.30259 | 0.30259     | 0.682892356 |           |         |  |
| RNA5SP347   | ENSG00000199315 | 0.51694     | 0.3026  | 0.51694     | 0.3026      | 0.51694   |         |  |
|             | 0.3026          | 0.44377     | 0.3286  | 0.3026      | 0.682892356 |           |         |  |
| NA          | ENSG00000230120 | 0.51687     | 0.30262 | 0.51687     | 0.30262     | 0.51687   | 0.30262 |  |
|             | 0.51687         | 0.30262     | 0.30262 | 0.682892356 |             |           |         |  |
| NA          | ENSG00000280398 | -0.50961    | 0.69484 | 0.51688     | 0.30262     | -0.50961  | 0.69484 |  |
|             | -1.3372         | 0.90943     | 0.30262 | 0.682892356 |             |           |         |  |
| NOC3L       | ENSG00000173145 | 0.51685     | 0.30263 | -0.20355    | 0.58065     | -0.44653  | 0.67239 |  |
|             | -0.58555        | 0.72091     | 0.30263 | 0.682892356 |             |           |         |  |
| TNS2        | ENSG00000111077 | -0.65958    | 0.74524 | 0.3041      | 0.38053     | -0.29587  | 0.61634 |  |
|             | 0.51683         | 0.30264     | 0.30264 | 0.682892356 |             |           |         |  |
| GM2AP1      | ENSG00000241695 | 0.51676     | 0.30266 | 0.51676     | 0.30266     | 0.51676   |         |  |
|             | 0.30266         | 0.51676     | 0.30266 | 0.30266     | 0.682892356 |           |         |  |
| NA          | ENSG00000227834 | 0.51674     | 0.30267 | 0.19655     | 0.42209     | 0.29779   | 0.38293 |  |
|             | 0.29779         | 0.38293     | 0.30267 | 0.682892356 |             |           |         |  |
| NA          | ENSG00000283625 | -0.624      | 0.73369 | -0.25158    | 0.59932     | -0.30222  | 0.61876 |  |
|             | 0.51674         | 0.30267     | 0.30267 | 0.682892356 |             |           |         |  |
| GBP2        | ENSG00000162645 | 0.48281     | 0.31462 | 0.48281     | 0.31462     | 0.48281   | 0.31462 |  |
|             | 0.51656         | 0.30273     | 0.30273 | 0.682996106 |             |           |         |  |
| NA          | ENSG00000255413 | -0.71048    | 0.7613  | 0.5165      | 0.30275     | -0.95881  | 0.83117 |  |
|             | -0.71496        | 0.76268     | 0.30275 | 0.683009606 |             |           |         |  |
| STRADBP1    | ENSG00000213205 | 0.51638     | 0.30279 | 0.3603      | 0.35931     | 0.3603    |         |  |
|             | 0.35931         | 0.3603      | 0.35931 | 0.30279     | 0.683022734 |           |         |  |
| NA          | ENSG00000267774 | 0.51638     | 0.30279 | 0.51638     | 0.30279     | 0.51638   | 0.30279 |  |
|             | 0.51638         | 0.30279     | 0.30279 | 0.683022734 |             |           |         |  |
| KIRREL1-IT1 | ENSG00000226520 | 0.17138     | 0.43196 | 0.5162      | 0.30286     | 0.17138   |         |  |
|             | 0.43196         | 0.17138     | 0.43196 | 0.30286     | 0.683022734 |           |         |  |
| NA          | ENSG00000246214 | 0.51619     | 0.30286 | -0.37084    | 0.64462     | 0.25307   | 0.40011 |  |
|             | -0.2351         | 0.59293     | 0.30286 | 0.683022734 |             |           |         |  |
| MOB3A       | ENSG00000172081 | -0.064565   | 0.52574 | -1.0531     | 0.85385     | -0.015703 | 0.50626 |  |
|             | 0.51618         | 0.30287     | 0.30287 | 0.683022734 |             |           |         |  |
| RN7SKP153   | ENSG00000201896 | 0.12796     | 0.44909 | 0.13978     | 0.44442     | -0.20594  |         |  |

|            |                 |             |             |             |             |           |         |
|------------|-----------------|-------------|-------------|-------------|-------------|-----------|---------|
|            | 0.58158         | 0.51616     | 0.30287     | 0.30287     | 0.683022734 |           |         |
| ZFC3H1     | ENSG00000133858 | -0.19812    | 0.57852     | 0.51611     | 0.30289     | 0.23121   |         |
|            | 0.40858         | 0.23121     | 0.40858     | 0.30289     | 0.683022734 |           |         |
| NA         | ENSG00000249731 | 0.51611     | 0.30289     | 0.51611     | 0.30289     | 0.51611   | 0.30289 |
|            | 0.51611         | 0.30289     | 0.30289     | 0.683022734 |             |           |         |
| H3C4       | ENSG00000197409 | 0.51609     | 0.3029      | 0.51609     | 0.3029      | 0.51609   | 0.3029  |
|            | 0.51609         | 0.3029      | 0.3029      | 0.683022734 |             |           |         |
| SNORD14D   | ENSG00000207118 | 0.51608     | 0.3029      | 0.51608     | 0.3029      | 0.51608   |         |
|            | 0.3029          | 0.51608     | 0.3029      | 0.3029      | 0.683022734 |           |         |
| DNAH17-AS1 | ENSG00000267432 | 0.51605     | 0.30291     | 0.51605     | 0.30291     | 0.51605   |         |
|            | 0.30291         | 0.51605     | 0.30291     | 0.30291     | 0.683022734 |           |         |
| INPP5D     | ENSG00000168918 | -0.77648    | 0.78127     | 0.51591     | 0.30296     | -1.2613   |         |
|            | 0.8964          | -0.1742     | 0.56915     | 0.30296     | 0.683090179 |           |         |
| NA         | ENSG00000256084 | 0.25823     | 0.39812     | -0.027314   | 0.5109      | 0.51587   | 0.30297 |
|            | -0.24671        | 0.59743     | 0.30297     | 0.683090179 |             |           |         |
| SLC30A10   | ENSG00000196660 | -0.93082381 | -0.93082381 | -0.93082381 | -0.93082381 | 0.51582   |         |
|            | 0.30299         | 0.30299     | 0.683090179 |             |             |           |         |
| NA         | ENSG00000240611 | 0.51579     | 0.3030      | -0.20659    | 0.58183     | -1.4331   | 0.92409 |
|            | -2.1006         | 0.98216     | 0.3030      | 0.683090179 |             |           |         |
| CCDC14     | ENSG00000175455 | 0.043008    | 0.48285     | -0.74586    | 0.77212     | -0.64685  |         |
|            | 0.74114         | 0.51577     | 0.30301     | 0.30301     | 0.683090179 |           |         |
| TUBB8P11   | ENSG00000234711 | 0.51571     | 0.30303     | 0.51571     | 0.30303     | 0.51571   |         |
|            | 0.30303         | 0.51571     | 0.30303     | 0.30303     | 0.683094606 |           |         |
| HSPD1P8    | ENSG00000215357 | -0.30581    | 0.62012     | 0.51566     | 0.30304     | -0.30581  |         |
|            | 0.62012         | -0.34319    | 0.63427     | 0.30304     | 0.683094606 |           |         |
| NA         | ENSG00000213087 | 0.51559     | 0.30307     | -0.56421    | 0.71369     | 0.51559   | 0.30307 |
|            | 0.51559         | 0.30307     | 0.30307     | 0.683121573 |             |           |         |
| RAB11B     | ENSG00000185236 | 0.51557     | 0.30308     | -0.45106    | 0.67403     | 0.51557   |         |
|            | 0.30308         | -0.056346   | 0.52247     | 0.30308     | 0.683121573 |           |         |
| ARF1P3     | ENSG00000253885 | 0.51551     | 0.3031      | 0.51551     | 0.3031      | 0.51551   |         |
|            | 0.3031          | 0.51551     | 0.3031      | 0.3031      | 0.683135054 |           |         |
| MIR4482    | ENSG00000266852 | 0.51536     | 0.30315     | 0.51536     | 0.30315     | 0.51536   |         |
|            | 0.30315         | 0.51536     | 0.30315     | 0.30315     | 0.683216146 |           |         |
| NA         | ENSG00000267744 | 0.51519     | 0.30321     | 0.51519     | 0.30321     | 0.51519   | 0.30321 |
|            | 0.51519         | 0.30321     | 0.30321     | 0.683319766 |             |           |         |
| OR4C13     | ENSG00000258817 | -2.0464     | 0.97964     | -1.7025     | 0.95567     | 0.51501   |         |
|            | 0.30327         | -0.54234    | 0.70621     | 0.30327     | 0.683391503 |           |         |
| NDUFA3P4   | ENSG00000259262 | 0.51502     | 0.30327     | 0.51502     | 0.30327     | 0.51502   |         |
|            | 0.30327         | 0.51502     | 0.30327     | 0.30327     | 0.683391503 |           |         |
| LINC00707  | ENSG00000238266 | -0.25762    | 0.60165     | -0.29328    | 0.61535     | 0.51495   |         |
|            | 0.30329         | -0.86055    | 0.80526     | 0.30329     | 0.683391503 |           |         |
| NA         | ENSG00000259519 | 0.51489     | 0.30332     | 0.51489     | 0.30332     | 0.51489   | 0.30332 |
|            | 0.51489         | 0.30332     | 0.30332     | 0.683391503 |             |           |         |
| SIAE       | ENSG00000110013 | -0.26704    | 0.60528     | 0.51484     | 0.30333     | 0.25881   | 0.39789 |
|            | 0.21685         | 0.41416     | 0.30333     | 0.683391503 |             |           |         |
| SNORD114-4 | ENSG00000200832 | 0.51483     | 0.30334     | 0.51483     | 0.30334     | 0.51483   |         |
|            | 0.30334         | 0.51483     | 0.30334     | 0.30334     | 0.683391503 |           |         |
| NA         | ENSG00000258181 | 0.51483     | 0.30334     | -0.64445    | 0.74036     | -0.023382 | 0.50933 |
|            | -0.35309        | 0.63799     | 0.30334     | 0.683391503 |             |           |         |
| CCL14      | ENSG00000276409 | 0.51468     | 0.30339     | 0.51468     | 0.30339     | 0.51468   | 0.30339 |
|            | 0.51468         | 0.30339     | 0.30339     | 0.683418149 |             |           |         |
| CCDC89     | ENSG00000179071 | 0.51464     | 0.3034      | 0.51464     | 0.3034      | 0.51464   |         |
|            | 0.3034          | 0.51464     | 0.3034      | 0.3034      | 0.683418149 |           |         |
| NA         | ENSG00000264177 | 0.51462     | 0.30341     | 0.51462     | 0.30341     | 0.51462   | 0.30341 |
|            | 0.51462         | 0.30341     | 0.30341     | 0.683418149 |             |           |         |
| CCT6A      | ENSG00000146731 | 0.36511     | 0.35751     | -0.0064355  | 0.50257     | 0.51456   | 0.30343 |
|            | -0.45841        | 0.67667     | 0.30343     | 0.683418149 |             |           |         |
| NA         | ENSG00000253168 | 0.20834     | 0.41748     | 0.51453     | 0.30344     | 0.42787   | 0.33437 |
|            | -0.98197        | 0.83694     | 0.30344     | 0.683418149 |             |           |         |
| RPL3P11    | ENSG00000223568 | 0.51451     | 0.30345     | 0.26687     | 0.39478     | 0.51451   |         |
|            | 0.30345         | 0.51451     | 0.30345     | 0.30345     | 0.683418149 |           |         |
| LINC01141  | ENSG00000236963 | 0.51451     | 0.30345     | -0.68406    | 0.75303     | -0.56531  |         |

|            |                 |           |         |             |             |           |         |
|------------|-----------------|-----------|---------|-------------|-------------|-----------|---------|
|            | 0.71407         | -0.63235  | 0.73642 | 0.30345     | 0.683418149 |           |         |
| RNU1-109P  | ENSG00000206687 | 0.51435   | 0.3035  | 0.17217     | 0.43165     | 0.51435   |         |
|            | 0.3035          | -0.066702 | 0.52659 | 0.3035      | 0.683467582 |           |         |
| BTG4P1     | ENSG00000248156 | 0.51435   | 0.3035  | 0.51435     | 0.3035      | 0.51435   |         |
|            | 0.3035          | 0.51435   | 0.3035  | 0.3035      | 0.683467582 |           |         |
| RNU6-1233P | ENSG00000199792 | 0.51421   | 0.30355 | 0.51421     | 0.30355     | 0.51421   |         |
|            | 0.30355         | 0.51421   | 0.30355 | 0.30355     | 0.683539522 |           |         |
| ZNF446     | ENSG00000083838 | 0.51418   | 0.30356 | 0.51418     | 0.30356     | 0.51418   |         |
|            | 0.30356         | 0.51418   | 0.30356 | 0.30356     | 0.683539522 |           |         |
| NA         | ENSG00000232406 | 0.51411   | 0.30359 | 0.18079     | 0.42827     | 0.18079   | 0.42827 |
|            | 0.37462         | 0.35397   | 0.30359 | 0.683575487 |             |           |         |
| ATP6V1E1   | ENSG00000131100 | 0.19592   | 0.42234 | 0.40111     | 0.34417     | 0.51404   |         |
|            | 0.30361         | 0.42995   | 0.33362 | 0.30361     | 0.683584242 |           |         |
| CD47       | ENSG00000196776 | 0.51398   | 0.30363 | -0.021172   | 0.50845     | -0.021172 | 0.50845 |
|            | -0.021172       | 0.50845   | 0.30363 | 0.683584242 |             |           |         |
| C8orf31    | ENSG00000177335 | 0.51396   | 0.30364 | 0.41192     | 0.3402      | 0.41192   |         |
|            | 0.3402          | 0.25905   | 0.3978  | 0.30364     | 0.683584242 |           |         |
| KRT8P15    | ENSG00000233579 | -0.15663  | 0.56223 | 0.51394     | 0.30365     | -0.011548 |         |
|            | 0.50461         | 0.51394   | 0.30365 | 0.30365     | 0.683584242 |           |         |
| NA         | ENSG00000219302 | 0.51371   | 0.30373 | 0.51371     | 0.30373     | 0.38773   | 0.34911 |
|            | 0.51371         | 0.30373   | 0.30373 | 0.683671943 |             |           |         |
| NA         | ENSG00000247925 | 0.36927   | 0.35596 | -0.61139    | 0.72953     | 0.49836   | 0.30912 |
|            | 0.5137          | 0.30373   | 0.30373 | 0.683671943 |             |           |         |
| LINC00858  | ENSG00000229404 | -0.036809 | 0.51468 | -1.1136     | 0.86728     | 0.51368   |         |
|            | 0.30374         | -1.102    | 0.86477 | 0.30374     | 0.683671943 |           |         |
| BOD1P2     | ENSG00000215368 | -0.81973  | 0.79382 | -0.81973    | 0.79382     | -0.81973  |         |
|            | 0.79382         | 0.5136    | 0.30377 | 0.30377     | 0.683671943 |           |         |
| SLC31A1P1  | ENSG00000224426 | 0.31174   | 0.37762 | 0.51354     | 0.30379     | 0.31174   |         |
|            | 0.37762         | 0.31174   | 0.37762 | 0.30379     | 0.683671943 |           |         |
| ZNF623     | ENSG00000183309 | 0.5135    | 0.3038  | 0.30765     | 0.37917     | 0.30765   |         |
|            | 0.37917         | 0.22805   | 0.4098  | 0.3038      | 0.683671943 |           |         |
| RNU6-60P   | ENSG00000201662 | 0.51324   | 0.30389 | 0.51324     | 0.30389     | 0.51324   |         |
|            | 0.30389         | 0.51324   | 0.30389 | 0.30389     | 0.683671943 |           |         |
| NA         | ENSG00000224404 | -0.20677  | 0.58191 | 0.51324     | 0.30389     | 0.19296   | 0.4235  |
|            | 0.19296         | 0.4235    | 0.30389 | 0.683671943 |             |           |         |
| NA         | ENSG00000255234 | -0.052472 | 0.52092 | -0.052472   | 0.52092     | -0.75295  | 0.77426 |
|            | 0.51325         | 0.30389   | 0.30389 | 0.683671943 |             |           |         |
| NA         | ENSG00000233960 | 0.51315   | 0.30392 | 0.24452     | 0.40341     | -0.088934 | 0.53543 |
|            | -0.088934       | 0.53543   | 0.30392 | 0.683671943 |             |           |         |
| NA         | ENSG00000261211 | -1.0242   | 0.84714 | 0.51306     | 0.30395     | -0.41147  | 0.65964 |
|            | -0.21628        | 0.58562   | 0.30395 | 0.683671943 |             |           |         |
| RACGAP1    | ENSG00000161800 | -0.20249  | 0.58023 | -0.2253     | 0.58913     | -0.2617   |         |
|            | 0.60322         | 0.51304   | 0.30396 | 0.30396     | 0.683671943 |           |         |
| NA         | ENSG00000229755 | 0.51304   | 0.30396 | 0.40261     | 0.34362     | 0.40261   | 0.34362 |
|            | 0.40261         | 0.34362   | 0.30396 | 0.683671943 |             |           |         |
| TRIM49D1   | ENSG00000223417 | -0.70181  | 0.7586  | 0.51298     | 0.30398     | 0.063788  |         |
|            | 0.47457         | -1.3601   | 0.9131  | 0.30398     | 0.683671943 |           |         |
| NA         | ENSG00000236940 | 0.51299   | 0.30398 | 0.31856     | 0.37503     | 0.31856   | 0.37503 |
|            | 0.31856         | 0.37503   | 0.30398 | 0.683671943 |             |           |         |
| NA         | ENSG00000237513 | -0.69874  | 0.75764 | 0.51296     | 0.30399     | -0.69874  | 0.75764 |
|            | 0.40307         | 0.34345   | 0.30399 | 0.683671943 |             |           |         |
| NA         | ENSG00000230119 | 0.51288   | 0.30402 | 0.51288     | 0.30402     | 0.51288   | 0.30402 |
|            | 0.51288         | 0.30402   | 0.30402 | 0.683671943 |             |           |         |
| KRT8P44    | ENSG00000227913 | 0.19788   | 0.42157 | 0.51283     | 0.30403     | 0.19788   |         |
|            | 0.42157         | 0.19788   | 0.42157 | 0.30403     | 0.683671943 |           |         |
| ATP5MGP6   | ENSG00000267376 | 0.51275   | 0.30406 | 0.51275     | 0.30406     | 0.51275   |         |
|            | 0.30406         | 0.51275   | 0.30406 | 0.30406     | 0.683671943 |           |         |
| CSPG4      | ENSG00000173546 | 0.51268   | 0.30409 | -0.30414    | 0.61949     | 0.19911   | 0.42109 |
|            | -0.29119        | 0.61455   | 0.30409 | 0.683671943 |             |           |         |
| TRBJ2-2    | ENSG00000211765 | 0.51266   | 0.30409 | 0.51266     | 0.30409     | 0.51266   |         |
|            | 0.30409         | 0.51266   | 0.30409 | 0.30409     | 0.683671943 |           |         |
| TRBJ2-2P   | ENSG00000211766 | 0.51266   | 0.30409 | 0.51266     | 0.30409     | 0.51266   |         |

|           |                 |          |         |             |             |           |          |
|-----------|-----------------|----------|---------|-------------|-------------|-----------|----------|
|           | 0.30409         | 0.51266  | 0.30409 | 0.30409     | 0.683671943 |           |          |
| TRBJ2-3   | ENSG00000211767 | 0.51266  | 0.30409 | 0.30409     | 0.51266     | 0.30409   | 0.51266  |
|           | 0.30409         | 0.51266  | 0.30409 | 0.30409     | 0.683671943 |           |          |
| TRBJ2-4   | ENSG00000211768 | 0.51266  | 0.30409 | 0.30409     | 0.51266     | 0.30409   | 0.51266  |
|           | 0.30409         | 0.51266  | 0.30409 | 0.30409     | 0.683671943 |           |          |
| TRBJ2-5   | ENSG00000211769 | 0.51266  | 0.30409 | 0.30409     | 0.51266     | 0.30409   | 0.51266  |
|           | 0.30409         | 0.51266  | 0.30409 | 0.30409     | 0.683671943 |           |          |
| TRBJ2-6   | ENSG00000211770 | 0.51266  | 0.30409 | 0.30409     | 0.51266     | 0.30409   | 0.51266  |
|           | 0.30409         | 0.51266  | 0.30409 | 0.30409     | 0.683671943 |           |          |
| TRBJ2-7   | ENSG00000211771 | 0.51266  | 0.30409 | 0.30409     | 0.51266     | 0.30409   | 0.51266  |
|           | 0.30409         | 0.51266  | 0.30409 | 0.30409     | 0.683671943 |           |          |
| RNF125    | ENSG00000101695 | -0.58783 | 0.72168 | 0.72168     | -0.58783    | 0.72168   | 0.51265  |
|           | 0.3041          | 0.059811 | 0.47615 | 0.3041      | 0.683671943 |           |          |
| GSTCD-AS1 | ENSG00000251175 | 0.51258  | 0.30412 | 0.30412     | -1.0183     | 0.84574   | -0.28916 |
|           | 0.61377         | -0.77124 | 0.77972 | 0.30412     | 0.683671943 |           |          |
| EXOC3L2   | ENSG00000283632 | 0.51252  | 0.30414 | 0.30414     | 0.51252     | 0.30414   | 0.51252  |
|           | 0.30414         | 0.48853  | 0.31259 | 0.30414     | 0.683671943 |           |          |
| NA        | ENSG00000261168 | 0.5125   | 0.30415 | -0.84427    | 0.80074     | -0.84427  | 0.80074  |
|           | -0.84427        | 0.80074  | 0.30415 | 0.683671943 |             |           |          |
| ARL6IP4   | ENSG00000182196 | 0.51248  | 0.30416 | 0.30416     | 0.51248     | 0.30416   | 0.51248  |
|           | 0.30416         | 0.51248  | 0.30416 | 0.30416     | 0.683671943 |           |          |
| NA        | ENSG00000241956 | -0.49253 | 0.68883 | 0.35839     | 0.36003     | -0.093978 | 0.53744  |
|           | 0.51247         | 0.30416  | 0.30416 | 0.683671943 |             |           |          |
| RN7SKP188 | ENSG00000222721 | 0.077108 | 0.46927 | 0.5124      | 0.30418     | 0.077108  |          |
|           | 0.46927         | 0.077108 | 0.46927 | 0.30418     | 0.683671943 |           |          |
| NA        | ENSG00000239462 | -0.37822 | 0.64737 | -0.14757    | 0.55866     | -0.42038  | 0.6629   |
|           | 0.51243         | 0.30418  | 0.30418 | 0.683671943 |             |           |          |
| BTF3P15   | ENSG00000237242 | -1.3152  | 0.90578 | 0.5123      | 0.30422     | -0.57606  |          |
|           | 0.71771         | -0.76636 | 0.77827 | 0.30422     | 0.683694079 |           |          |
| NA        | ENSG00000248586 | 0.32551  | 0.3724  | 0.2881      | 0.38664     | 0.51225   | 0.30424  |
|           | -0.35766        | 0.6397   | 0.30424 | 0.683694079 |             |           |          |
| NA        | ENSG00000264924 | 0.18597  | 0.42624 | 0.51223     | 0.30424     | 0.51223   | 0.30424  |
|           | 0.51223         | 0.30424  | 0.30424 | 0.683694079 |             |           |          |
| LINC01335 | ENSG00000248942 | 0.29833  | 0.38273 | 0.29833     | 0.38273     | 0.44801   |          |
|           | 0.32707         | 0.51222  | 0.30425 | 0.30425     | 0.683694079 |           |          |
| PLAC9     | ENSG00000189129 | 0.51218  | 0.30426 | 0.49384     | 0.31071     | 0.49384   | 0.31071  |
|           | 0.49384         | 0.31071  | 0.30426 | 0.683694079 |             |           |          |
| OR7E29P   | ENSG00000243429 | 0.30211  | 0.38129 | -0.1786     | 0.57087     | 0.51203   |          |
|           | 0.30431         | -1.2632  | 0.89675 | 0.30431     | 0.683716205 |           |          |
| FAM98C    | ENSG00000130244 | -0.14598 | 0.55803 | 0.043751    | 0.48255     | 0.44281   |          |
|           | 0.32895         | 0.51199  | 0.30433 | 0.30433     | 0.683716205 |           |          |
| NA        | ENSG00000274929 | 0.51199  | 0.30433 | 0.51199     | 0.30433     | 0.51199   | 0.30433  |
|           | 0.51199         | 0.30433  | 0.30433 | 0.683716205 |             |           |          |
| NR4A3     | ENSG00000119508 | 0.21598  | 0.4145  | 0.51196     | 0.30434     | -0.11288  | 0.54494  |
|           | 0.17043         | 0.43234  | 0.30434 | 0.683716205 |             |           |          |
| ZNF431    | ENSG00000196705 | -1.3059  | 0.90421 | 0.51197     | 0.30434     | 0.12292   |          |
|           | 0.45109         | -1.5319  | 0.93722 | 0.30434     | 0.683716205 |           |          |
| PSPC1P2   | ENSG00000244615 | 0.059817 | 0.47615 | -0.81794    | 0.7933      | 0.51189   |          |
|           | 0.30436         | 0.51189  | 0.30436 | 0.30436     | 0.683729615 |           |          |
| RNU6-215P | ENSG00000202039 | 0.51182  | 0.30439 | 0.25701     | 0.39858     | 0.25701   |          |
|           | 0.39858         | 0.25535  | 0.39923 | 0.30439     | 0.68375643  |           |          |
| LINC02317 | ENSG00000258678 | 0.48719  | 0.31306 | -0.58594    | 0.72104     | 0.5118    |          |
|           | 0.3044          | -1.1562  | 0.87621 | 0.3044      | 0.68375643  |           |          |
| ANXA2P3   | ENSG00000216740 | 0.51161  | 0.30446 | 0.51161     | 0.30446     | 0.51161   |          |
|           | 0.30446         | 0.51161  | 0.30446 | 0.30446     | 0.683798808 |           |          |
| NA        | ENSG00000234586 | 0.51158  | 0.30447 | 0.51158     | 0.30447     | 0.51158   | 0.30447  |
|           | 0.51158         | 0.30447  | 0.30447 | 0.683798808 |             |           |          |
| C3orf62   | ENSG00000188315 | 0.51157  | 0.30448 | 0.51157     | 0.30448     | 0.51157   |          |
|           | 0.30448         | 0.51157  | 0.30448 | 0.30448     | 0.683798808 |           |          |
| TNFRSF11A | ENSG00000141655 | 0.51151  | 0.3045  | -0.02312    | 0.50922     | -0.96347  |          |
|           | 0.83234         | -1.0458  | 0.85218 | 0.3045      | 0.683798808 |           |          |
| NA        | ENSG00000260457 | -0.51563 | 0.69694 | 0.51135     | 0.30455     | 0.38538   | 0.34998  |

|           |                 |           |             |             |             |          |         |       |
|-----------|-----------------|-----------|-------------|-------------|-------------|----------|---------|-------|
|           | -0.30807        | 0.62098   | 0.30455     | 0.683798808 |             |          |         |       |
| NPNT      | ENSG00000168743 | 0.51133   | 0.30456     | 0.51133     | 0.30456     | -0.50079 | 0.69174 |       |
|           | -1.1003         | 0.8644    | 0.30456     | 0.683798808 |             |          |         |       |
| DLGAP1    | ENSG00000170579 | -0.90565  | 0.81744     | -0.87337    | 0.80877     | 0.51132  |         |       |
|           | 0.30456         | 0.11797   | 0.45305     | 0.30456     | 0.683798808 |          |         |       |
| SLC25A21  | ENSG00000183032 | -2.0117   | 0.97787     | -0.4302     | 0.66647     | -1.8618  |         |       |
|           | 0.96869         | 0.51131   | 0.30457     | 0.30457     | 0.683798808 |          |         |       |
| NA        | ENSG00000228768 | 0.51131   | 0.30457     | 0.51131     | 0.30457     | 0.51131  | 0.30457 |       |
|           | 0.51131         | 0.30457   | 0.30457     | 0.683798808 |             |          |         |       |
| NA        | ENSG00000237224 | 0.51129   | 0.30458     | -1.0759     | 0.85902     | 0.01552  | 0.49381 |       |
|           | 0.01552         | 0.49381   | 0.30458     | 0.683798808 |             |          |         |       |
| FMNL1     | ENSG00000184922 | 0.16544   | 0.4343      | 0.26566     | 0.39525     | 0.085999 | 0.46573 |       |
|           | 0.51126         | 0.30459   | 0.30459     | 0.683798808 |             |          |         |       |
| NA        | ENSG00000261296 | 0.5111    | 0.30464     | 0.043061    | 0.48283     | 0.5111   | 0.30464 |       |
|           | 0.5111          | 0.30464   | 0.30464     | 0.683798808 |             |          |         |       |
| NA        | ENSG00000279645 | 0.28258   | 0.38875     | 0.5111      | 0.30464     | 0.41968  | 0.33736 |       |
|           | 0.41968         | 0.33736   | 0.30464     | 0.683798808 |             |          |         |       |
| MIR187    | ENSG00000207797 | -0.33855  | 0.63252     | -1.1616     | 0.8773      | 0.51107  |         |       |
|           | 0.30465         | 0.51107   | 0.30465     | 0.30465     | 0.683798808 |          |         |       |
| HIPK1-AS1 | ENSG00000235527 | 0.32356   | 0.37314     | 0.511       | 0.30467     | 0.511    | 0.30467 | 0.511 |
|           | 0.30467         | 0.30467   | 0.683798808 |             |             |          |         |       |
| NA        | ENSG00000272482 | 0.40861   | 0.34141     | 0.39337     | 0.34702     | -0.11105 | 0.54421 |       |
|           | 0.51099         | 0.30468   | 0.30468     | 0.683798808 |             |          |         |       |
| RPL37P15  | ENSG00000216365 | 0.51096   | 0.30469     | 0.51096     | 0.30469     | -0.62984 |         |       |
|           | 0.7356          | 0.51096   | 0.30469     | 0.30469     | 0.683798808 |          |         |       |
| HAPLN2    | ENSG00000132702 | 0.053293  | 0.47875     | 0.51085     | 0.30473     | -0.36139 |         |       |
|           | 0.6411          | -0.26775  | 0.60555     | 0.30473     | 0.683798808 |          |         |       |
| ADPGK     | ENSG00000159322 | 0.31555   | 0.37617     | 0.083729    | 0.46664     | 0.088427 | 0.46477 |       |
|           | 0.51082         | 0.30474   | 0.30474     | 0.683798808 |             |          |         |       |
| COQ2      | ENSG00000173085 | 0.51081   | 0.30474     | -0.14424    | 0.55734     | -1.3084  | 0.90464 |       |
|           | 0.38875         | 0.34873   | 0.30474     | 0.683798808 |             |          |         |       |
| PCDHGA3   | ENSG00000254245 | 0.51072   | 0.30477     | 0.51072     | 0.30477     | 0.51072  |         |       |
|           | 0.30477         | 0.51072   | 0.30477     | 0.30477     | 0.683798808 |          |         |       |
| NA        | ENSG00000254140 | 0.51073   | 0.30477     | 0.18106     | 0.42816     | -0.61275 | 0.72998 |       |
|           | 0.21224         | 0.41596   | 0.30477     | 0.683798808 |             |          |         |       |
| SLC12A2   | ENSG00000064651 | 0.087409  | 0.46517     | 0.47651     | 0.31685     | 0.42711  |         |       |
|           | 0.33465         | 0.51065   | 0.3048      | 0.3048      | 0.683798808 |          |         |       |
| ZNF732    | ENSG00000186777 | 0.16315   | 0.4352      | -0.47763    | 0.68354     | -0.71151 |         |       |
|           | 0.76162         | 0.51062   | 0.30481     | 0.30481     | 0.683798808 |          |         |       |
| NA        | ENSG00000227785 | 0.5106    | 0.30481     | 0.5106      | 0.30481     | 0.5106   | 0.30481 |       |
|           | 0.5106          | 0.30481   | 0.30481     | 0.683798808 |             |          |         |       |
| RPS24P8   | ENSG00000224094 | 0.49255   | 0.31116     | 0.48948     | 0.31225     | 0.51058  |         |       |
|           | 0.30482         | 0.14847   | 0.44099     | 0.30482     | 0.683798808 |          |         |       |
| MTND3P21  | ENSG00000235794 | 0.5106    | 0.30482     | -0.302      | 0.61868     | -0.302   |         |       |
|           | 0.61868         | -0.302    | 0.61868     | 0.30482     | 0.683798808 |          |         |       |
| PDSS2     | ENSG00000164494 | 0.14784   | 0.44124     | 0.23833     | 0.40581     | 0.51054  | 0.30484 |       |
|           | -0.26297        | 0.60371   | 0.30484     | 0.683798808 |             |          |         |       |
| PLEKHM2   | ENSG00000116786 | -0.49211  | 0.68868     | -0.18926    | 0.57505     | -0.17324 |         |       |
|           | 0.56877         | 0.51051   | 0.30485     | 0.30485     | 0.683798808 |          |         |       |
| OR2T8     | ENSG00000177462 | -0.54629  | 0.70757     | 0.51049     | 0.30486     | -0.62872 | 0.73523 |       |
|           | -0.42769        | 0.66556   | 0.30486     | 0.683798808 |             |          |         |       |
| RALBP1P2  | ENSG00000238029 | 0.51043   | 0.30488     | 0.51043     | 0.30488     | -0.91316 |         |       |
|           | 0.81942         | -0.071971 | 0.52869     | 0.30488     | 0.683798808 |          |         |       |
| LINC01833 | ENSG00000259439 | -0.34974  | 0.63673     | 0.087736    | 0.46504     | 0.054408 |         |       |
|           | 0.47831         | 0.51042   | 0.30488     | 0.30488     | 0.683798808 |          |         |       |
| HNRNPA1P8 | ENSG00000229251 | 0.20357   | 0.41935     | 0.51032     | 0.30491     | -0.5808  |         |       |
|           | 0.71931         | 0.50012   | 0.30849     | 0.30491     | 0.683798808 |          |         |       |
| NA        | ENSG00000249617 | 0.51033   | 0.30491     | 0.51033     | 0.30491     | 0.51033  | 0.30491 |       |
|           | 0.51033         | 0.30491   | 0.30491     | 0.683798808 |             |          |         |       |
| NA        | ENSG00000268702 | 0.51033   | 0.30491     | 0.51033     | 0.30491     | 0.51033  | 0.30491 |       |
|           | 0.51033         | 0.30491   | 0.30491     | 0.683798808 |             |          |         |       |
| MIR548AA2 | ENSG00000207688 | 0.047584  | 0.48102     | 0.041447    | 0.48347     | 0.047584 |         |       |

|           |                 |          |         |             |             |          |         |
|-----------|-----------------|----------|---------|-------------|-------------|----------|---------|
|           | 0.48102         | 0.51021  | 0.30495 | 0.30495     | 0.683856288 |          |         |
| NA        | ENSG00000241723 | -0.95539 | 0.83031 | 0.51014     | 0.30498     | 0.51014  | 0.30498 |
|           | 0.51014         | 0.30498  | 0.30498 | 0.683856288 |             |          |         |
| NA        | ENSG00000260201 | 0.15984  | 0.4365  | -0.44104    | 0.67041     | 0.5101   | 0.30499 |
|           | -0.33429        | 0.63092  | 0.30499 | 0.683856288 |             |          |         |
| ERP44     | ENSG00000023318 | -0.32401 | 0.62704 | 0.50998     | 0.30503     | 0.064317 | 0.47436 |
|           | 0.0015917       | 0.49937  | 0.30503 | 0.683856288 |             |          |         |
| NA        | ENSG00000279717 | 0.50992  | 0.30505 | 0.50992     | 0.30505     | 0.50992  | 0.30505 |
|           | 0.50992         | 0.30505  | 0.30505 | 0.683856288 |             |          |         |
| RPL26P15  | ENSG00000233829 | 0.5099   | 0.30506 | 0.06409     | 0.47445     | -0.69693 |         |
|           | 0.75708         | -0.69693 | 0.75708 | 0.30506     | 0.683856288 |          |         |
| MTND3P23  | ENSG00000238288 | 0.5099   | 0.30506 | 0.5099      | 0.30506     | 0.5099   |         |
|           | 0.30506         | 0.5099   | 0.30506 | 0.30506     | 0.683856288 |          |         |
| MTND4LP7  | ENSG00000240791 | 0.5099   | 0.30506 | 0.5099      | 0.30506     | 0.5099   |         |
|           | 0.30506         | 0.5099   | 0.30506 | 0.30506     | 0.683856288 |          |         |
| EEF1D     | ENSG00000104529 | 0.090693 | 0.46387 | -0.15225    | 0.5605      | 0.50988  | 0.30507 |
|           | -0.24876        | 0.59823  | 0.30507 | 0.683856288 |             |          |         |
| PROKR1    | ENSG00000169618 | -0.12112 | 0.5482  | -0.50664    | 0.6938      | 0.50986  |         |
|           | 0.30508         | 0.50986  | 0.30508 | 0.30508     | 0.683856288 |          |         |
| RNU6-366P | ENSG00000201097 | 0.50981  | 0.30509 | 0.50981     | 0.30509     | 0.50981  |         |
|           | 0.30509         | 0.50981  | 0.30509 | 0.30509     | 0.683856288 |          |         |
| LAMB1     | ENSG00000091136 | 0.50958  | 0.30517 | 0.26061     | 0.39719     | 0.26061  | 0.39719 |
|           | 0.26061         | 0.39719  | 0.30517 | 0.683867766 |             |          |         |
| PRPF6     | ENSG00000101161 | -0.60853 | 0.72858 | -0.60853    | 0.72858     | -0.60853 | 0.72858 |
|           | 0.50958         | 0.30517  | 0.30517 | 0.683867766 |             |          |         |
| IQANK1    | ENSG00000203499 | 0.50958  | 0.30517 | -0.19358    | 0.57675     | 0.33574  |         |
|           | 0.36853         | -0.38729 | 0.65073 | 0.30517     | 0.683867766 |          |         |
| RBM22P1   | ENSG00000265097 | 0.50956  | 0.30518 | 0.50956     | 0.30518     | 0.50956  |         |
|           | 0.30518         | 0.45149  | 0.32582 | 0.30518     | 0.683867766 |          |         |
| SH2D1B    | ENSG00000198574 | 0.17425  | 0.43083 | 0.50941     | 0.30523     | -0.36444 |         |
|           | 0.64223         | 0.36533  | 0.35743 | 0.30523     | 0.683867766 |          |         |
| NA        | ENSG00000226744 | 0.50941  | 0.30523 | 0.50941     | 0.30523     | 0.50941  | 0.30523 |
|           | 0.50941         | 0.30523  | 0.30523 | 0.683867766 |             |          |         |
| NA        | ENSG00000234813 | 0.50942  | 0.30523 | 0.50942     | 0.30523     | 0.50942  | 0.30523 |
|           | 0.50942         | 0.30523  | 0.30523 | 0.683867766 |             |          |         |
| NA        | ENSG00000235377 | -0.74126 | 0.77073 | 0.50943     | 0.30523     | 0.50943  | 0.30523 |
|           | 0.50943         | 0.30523  | 0.30523 | 0.683867766 |             |          |         |
| DRC7      | ENSG00000159625 | -0.12192 | 0.54852 | 0.39708     | 0.34565     | 0.50931  | 0.30527 |
|           | 0.40506         | 0.34272  | 0.30527 | 0.683867766 |             |          |         |
| NA        | ENSG00000247199 | -0.76536 | 0.77797 | -0.76536    | 0.77797     | 0.39985  | 0.34463 |
|           | 0.50927         | 0.30528  | 0.30528 | 0.683867766 |             |          |         |
| PRRX2     | ENSG00000167157 | -0.18921 | 0.57504 | 0.50923     | 0.30529     | -0.18921 | 0.57504 |
|           | -0.13402        | 0.55331  | 0.30529 | 0.683867766 |             |          |         |
| TRHR      | ENSG00000174417 | 0.50924  | 0.30529 | 0.50924     | 0.30529     | 0.50924  | 0.30529 |
|           | 0.50924         | 0.30529  | 0.30529 | 0.683867766 |             |          |         |
| RIN1      | ENSG00000174791 | 0.48765  | 0.3129  | 0.50921     | 0.3053      | 0.076124 | 0.46966 |
|           | 0.076124        | 0.46966  | 0.3053  | 0.683867766 |             |          |         |
| NA        | ENSG00000258320 | 0.50922  | 0.3053  | -0.42712    | 0.66536     | -0.26004 | 0.60259 |
|           | 0.18484         | 0.42668  | 0.3053  | 0.683867766 |             |          |         |
| TTC41P    | ENSG00000214198 | 0.50917  | 0.30532 | 0.19292     | 0.42351     | 0.033976 |         |
|           | 0.48645         | -0.30936 | 0.62148 | 0.30532     | 0.683867766 |          |         |
| TRPA1     | ENSG00000104321 | -0.42713 | 0.66536 | -0.16225    | 0.56445     | -0.16225 | 0.56445 |
|           | 0.5091          | 0.30534  | 0.30534 | 0.683867766 |             |          |         |
| FASTKD3   | ENSG00000124279 | 0.50908  | 0.30535 | 0.50908     | 0.30535     | 0.50908  |         |
|           | 0.30535         | 0.50908  | 0.30535 | 0.30535     | 0.683867766 |          |         |
| FOXK1     | ENSG00000164916 | -0.51634 | 0.69719 | -0.87937    | 0.8104      | 0.50901  | 0.30537 |
|           | -1.9536         | 0.97463  | 0.30537 | 0.683867766 |             |          |         |
| UGT2B26P  | ENSG00000250919 | -0.27434 | 0.60809 | 0.039339    | 0.48431     | 0.50898  |         |
|           | 0.30538         | -1.0943  | 0.86308 | 0.30538     | 0.683867766 |          |         |
| NA        | ENSG00000206756 | 0.50896  | 0.30539 | 0.25249     | 0.40033     | 0.31474  | 0.37648 |
|           | 0.25249         | 0.40033  | 0.30539 | 0.683867766 |             |          |         |
| NA        | ENSG00000237262 | 0.50895  | 0.30539 | 0.50895     | 0.30539     | 0.50895  | 0.30539 |

|           |                 |           |         |             |             |           |         |  |
|-----------|-----------------|-----------|---------|-------------|-------------|-----------|---------|--|
|           | 0.50895         | 0.30539   | 0.30539 | 0.683867766 |             |           |         |  |
| CDKN2D    | ENSG00000129355 | 0.50888   | 0.30542 | 0.50888     | 0.30542     | 0.50888   |         |  |
|           | 0.30542         | 0.50888   | 0.30542 | 0.30542     | 0.683867766 |           |         |  |
| ENDOG     | ENSG00000167136 | 0.092527  | 0.46314 | -0.18565    | 0.57364     | 0.50884   | 0.30543 |  |
|           | -0.85021        | 0.8024    | 0.30543 | 0.683867766 |             |           |         |  |
| SLC15A2   | ENSG00000163406 | -0.15058  | 0.55985 | -0.28452    | 0.61199     | 0.50881   |         |  |
|           | 0.30544         | -0.33743  | 0.6321  | 0.30544     | 0.683867766 |           |         |  |
| TRMU      | ENSG00000100416 | 0.2213    | 0.41243 | 0.2213      | 0.41243     | 0.31812   | 0.3752  |  |
|           | 0.50878         | 0.30545   | 0.30545 | 0.683867766 |             |           |         |  |
| CMTM8     | ENSG00000170293 | -1.5659   | 0.94132 | -1.5222     | 0.93602     | -1.1009   | 0.86452 |  |
|           | 0.50877         | 0.30546   | 0.30546 | 0.683867766 |             |           |         |  |
| TPRG1-AS2 | ENSG00000230115 | 0.36227   | 0.35858 | 0.5087      | 0.30548     | 0.5087    |         |  |
|           | 0.30548         | 0.5087    | 0.30548 | 0.30548     | 0.683881123 |           |         |  |
| TDRG1     | ENSG00000204091 | -0.026528 | 0.51058 | 0.38312     | 0.35081     | 0.46054   | 0.32257 |  |
|           | 0.50843         | 0.30557   | 0.30557 | 0.684033105 |             |           |         |  |
| NA        | ENSG00000272123 | 0.50842   | 0.30558 | 0.50842     | 0.30558     | 0.50842   | 0.30558 |  |
|           | 0.50842         | 0.30558   | 0.30558 | 0.684033105 |             |           |         |  |
| NA        | ENSG00000198327 | 0.33472   | 0.36892 | 0.33472     | 0.36892     | 0.33472   | 0.36892 |  |
|           | 0.50838         | 0.30559   | 0.30559 | 0.684033105 |             |           |         |  |
| NA        | ENSG00000239392 | -0.17013  | 0.56755 | -0.17013    | 0.56755     | -0.17013  | 0.56755 |  |
|           | 0.5083          | 0.30562   | 0.30562 | 0.684062412 |             |           |         |  |
| ZNF835    | ENSG00000127903 | 0.50816   | 0.30567 | -0.68633    | 0.75375     | 0.50816   |         |  |
|           | 0.30567         | 0.50816   | 0.30567 | 0.30567     | 0.684062412 |           |         |  |
| GINS1     | ENSG00000101003 | -0.361    | 0.64095 | -1.0393     | 0.85066     | -0.32719  | 0.62824 |  |
|           | 0.50809         | 0.3057    | 0.3057  | 0.684062412 |             |           |         |  |
| REG4      | ENSG00000134193 | 0.41235   | 0.34004 | 0.50807     | 0.3057      | 0.50807   | 0.3057  |  |
|           | 0.50807         | 0.3057    | 0.3057  | 0.684062412 |             |           |         |  |
| KIF5C     | ENSG00000168280 | -0.30623  | 0.62029 | -0.20148    | 0.57984     | 0.50808   | 0.3057  |  |
|           | 0.11847         | 0.45285   | 0.3057  | 0.684062412 |             |           |         |  |
| ZNF849P   | ENSG00000198153 | -0.099029 | 0.53944 | 0.50805     | 0.30571     | -1.5889   |         |  |
|           | 0.94396         | -0.51292  | 0.696   | 0.30571     | 0.684062412 |           |         |  |
| RPL29P25  | ENSG00000241286 | 0.50791   | 0.30576 | -0.10257    | 0.54085     | -0.13003  |         |  |
|           | 0.55173         | -0.10257  | 0.54085 | 0.30576     | 0.684062412 |           |         |  |
| RNU6-635P | ENSG00000252460 | 0.50788   | 0.30577 | 0.30973     | 0.37838     | 0.293     | 0.38476 |  |
|           | 0.22729         | 0.4101    | 0.30577 | 0.684062412 |             |           |         |  |
| MIB1      | ENSG00000101752 | 0.2671    | 0.3947  | -1.0657     | 0.85671     | 0.50783   | 0.30578 |  |
|           | -0.7274         | 0.76651   | 0.30578 | 0.684062412 |             |           |         |  |
| APH1B     | ENSG00000138613 | -0.34444  | 0.63474 | 0.018167    | 0.49275     | -0.50271  | 0.69241 |  |
|           | 0.50785         | 0.30578   | 0.30578 | 0.684062412 |             |           |         |  |
| NA        | ENSG00000270538 | 0.50784   | 0.30578 | 0.50784     | 0.30578     | 0.50784   | 0.30578 |  |
|           | 0.50784         | 0.30578   | 0.30578 | 0.684062412 |             |           |         |  |
| NIFK      | ENSG00000155438 | 0.50779   | 0.3058  | 0.50779     | 0.3058      | -1.0388   | 0.85055 |  |
|           | -0.97416        | 0.83501   | 0.3058  | 0.684062412 |             |           |         |  |
| HDAC11    | ENSG00000163517 | -0.64747  | 0.74134 | 0.50778     | 0.3058      | -0.8504   |         |  |
|           | 0.80245         | -0.87544  | 0.80933 | 0.3058      | 0.684062412 |           |         |  |
| NA        | ENSG00000259725 | 0.42926   | 0.33387 | 0.5078      | 0.3058      | 0.4037    | 0.34322 |  |
|           | -0.82221        | 0.79452   | 0.3058  | 0.684062412 |             |           |         |  |
| NTF3      | ENSG00000185652 | -1.2039   | 0.88568 | -0.99272    | 0.83958     | -0.38038  | 0.64817 |  |
|           | 0.5077          | 0.30583   | 0.30583 | 0.684062412 |             |           |         |  |
| AIDAP1    | ENSG00000230154 | 0.50765   | 0.30585 | 0.50765     | 0.30585     | -0.094333 |         |  |
|           | 0.53758         | 0.50765   | 0.30585 | 0.30585     | 0.684062412 |           |         |  |
| NA        | ENSG00000279759 | 0.50753   | 0.30589 | 0.50753     | 0.30589     | 0.50753   | 0.30589 |  |
|           | 0.50753         | 0.30589   | 0.30589 | 0.684062412 |             |           |         |  |
| VRK2      | ENSG00000028116 | 0.50752   | 0.3059  | 0.019139    | 0.49237     | -1.051    | 0.85338 |  |
|           | -0.27232        | 0.60731   | 0.3059  | 0.684062412 |             |           |         |  |
| KCNAB3    | ENSG00000170049 | 0.11887   | 0.45269 | 0.11887     | 0.45269     | 0.50752   |         |  |
|           | 0.3059          | 0.11887   | 0.45269 | 0.3059      | 0.684062412 |           |         |  |
| THAP12P9  | ENSG00000248320 | -0.65097  | 0.74247 | -0.36006    | 0.6406      | -0.62966  |         |  |
|           | 0.73554         | 0.50745   | 0.30592 | 0.30592     | 0.684062412 |           |         |  |
| MIR3938   | ENSG00000264013 | 0.50744   | 0.30592 | 0.2555      | 0.39917     | 0.2555    |         |  |
|           | 0.39917         | -1.1038   | 0.86516 | 0.30592     | 0.684062412 |           |         |  |
| TOP2A     | ENSG00000131747 | -0.35606  | 0.6391  | -0.35606    | 0.6391      | -0.35606  | 0.6391  |  |

|           |                 |           |         |             |             |           |         |  |
|-----------|-----------------|-----------|---------|-------------|-------------|-----------|---------|--|
|           | 0.50742         | 0.30593   | 0.30593 | 0.684062412 |             |           |         |  |
| NA        | ENSG00000245552 | 0.50742   | 0.30593 | -0.20777    | 0.58229     | 0.22836   | 0.40968 |  |
|           | 0.32473         | 0.37269   | 0.30593 | 0.684062412 |             |           |         |  |
| ZNF212    | ENSG00000170260 | 0.41384   | 0.3395  | -0.27604    | 0.60874     | 0.50739   |         |  |
|           | 0.30594         | 0.49794   | 0.30926 | 0.30594     | 0.684062412 |           |         |  |
| TLR4      | ENSG00000136869 | 0.50725   | 0.30599 | 0.50725     | 0.30599     | 0.50725   | 0.30599 |  |
|           | 0.50725         | 0.30599   | 0.30599 | 0.684086502 |             |           |         |  |
| NA        | ENSG00000207439 | 0.50726   | 0.30599 | 0.50726     | 0.30599     | -0.040178 | 0.51602 |  |
|           | 0.50726         | 0.30599   | 0.30599 | 0.684086502 |             |           |         |  |
| NA        | ENSG00000256513 | -0.53794  | 0.70469 | 0.36947     | 0.35589     | 0.50718   | 0.30602 |  |
|           | -0.26155        | 0.60317   | 0.30602 | 0.684086502 |             |           |         |  |
| NA        | ENSG00000260345 | 0.50704   | 0.30606 | 0.50704     | 0.30606     | 0.50704   | 0.30606 |  |
|           | 0.50704         | 0.30606   | 0.30606 | 0.684086502 |             |           |         |  |
| PAQR7     | ENSG00000182749 | 0.50702   | 0.30607 | 0.50702     | 0.30607     | 0.50702   | 0.30607 |  |
|           | 0.50702         | 0.30607   | 0.30607 | 0.684086502 |             |           |         |  |
| NA        | ENSG00000267740 | 0.50703   | 0.30607 | 0.50703     | 0.30607     | 0.50703   | 0.30607 |  |
|           | 0.50703         | 0.30607   | 0.30607 | 0.684086502 |             |           |         |  |
| RNU6-859P | ENSG00000199598 | -0.95515  | 0.83025 | -1.0443     | 0.85183     | 0.50695   |         |  |
|           | 0.3061          | 0.50695   | 0.3061  | 0.3061      | 0.684086502 |           |         |  |
| BARX1-DT  | ENSG00000235601 | 0.50695   | 0.3061  | -1.0074     | 0.84313     | -0.079742 |         |  |
|           | 0.53178         | -1.0074   | 0.84313 | 0.3061      | 0.684086502 |           |         |  |
| KANSL1    | ENSG00000120071 | -0.22755  | 0.59    | 0.22124     | 0.41245     | 0.50688   | 0.30612 |  |
|           | -0.4459         | 0.67216   | 0.30612 | 0.684086502 |             |           |         |  |
| NA        | ENSG00000276807 | -0.38804  | 0.65101 | 0.50686     | 0.30612     | -0.38804  | 0.65101 |  |
|           | -0.38804        | 0.65101   | 0.30612 | 0.684086502 |             |           |         |  |
| NA        | ENSG00000271182 | -1.2896   | 0.90141 | 0.50679     | 0.30615     | 0.40277   | 0.34356 |  |
|           | -0.51738        | 0.69755   | 0.30615 | 0.684086502 |             |           |         |  |
| ZBTB4     | ENSG00000174282 | 0.50676   | 0.30616 | 0.50676     | 0.30616     | -0.5585   | 0.71175 |  |
|           | -0.054425       | 0.5217    | 0.30616 | 0.684086502 |             |           |         |  |
| PRSS35    | ENSG00000146250 | 0.42199   | 0.33652 | 0.50673     | 0.30617     | 0.25881   |         |  |
|           | 0.39789         | -0.15652  | 0.56219 | 0.30617     | 0.684086502 |           |         |  |
| DDX18P3   | ENSG00000217414 | 0.41803   | 0.33796 | 0.50675     | 0.30617     | 0.37467   |         |  |
|           | 0.35395         | 0.37467   | 0.35395 | 0.30617     | 0.684086502 |           |         |  |
| NA        | ENSG00000265244 | 0.50673   | 0.30617 | 0.50673     | 0.30617     | 0.50673   | 0.30617 |  |
|           | 0.50673         | 0.30617   | 0.30617 | 0.684086502 |             |           |         |  |
| NA        | ENSG00000275645 | 0.50671   | 0.30618 | 0.50671     | 0.30618     | 0.50671   | 0.30618 |  |
|           | 0.50671         | 0.30618   | 0.30618 | 0.684086502 |             |           |         |  |
| EPO       | ENSG00000130427 | -0.053641 | 0.52139 | -0.14821    | 0.55891     | -0.072413 | 0.52886 |  |
|           | 0.50656         | 0.30623   | 0.30623 | 0.684086502 |             |           |         |  |
| AP3B2     | ENSG00000103723 | -0.016892 | 0.50674 | 0.50653     | 0.30624     | 0.32255   | 0.37352 |  |
|           | 0.45484         | 0.32461   | 0.30624 | 0.684086502 |             |           |         |  |
| BRD9P1    | ENSG00000254736 | -0.96079  | 0.83167 | 0.50655     | 0.30624     | -0.97126  |         |  |
|           | 0.83429         | -1.3439   | 0.9105  | 0.30624     | 0.684086502 |           |         |  |
| NA        | ENSG00000261553 | 0.5065    | 0.30625 | -0.32479    | 0.62733     | 0.5065    | 0.30625 |  |
|           | 0.5065          | 0.30625   | 0.30625 | 0.684086502 |             |           |         |  |
| CCDC47    | ENSG00000108588 | -0.20449  | 0.58101 | -0.4128     | 0.66013     | -0.20449  |         |  |
|           | 0.58101         | 0.50645   | 0.30627 | 0.30627     | 0.684086502 |           |         |  |
| RPS4XP6   | ENSG00000244073 | -1.1804   | 0.88108 | 0.50644     | 0.30627     | 0.11464   |         |  |
|           | 0.45437         | -0.79397  | 0.78639 | 0.30627     | 0.684086502 |           |         |  |
| BRSK2     | ENSG00000174672 | 0.051644  | 0.47941 | 0.015671    | 0.49375     | 0.50635   | 0.30631 |  |
|           | -0.90146        | 0.81633   | 0.30631 | 0.684086502 |             |           |         |  |
| NA        | ENSG00000226394 | 0.50633   | 0.30631 | 0.50633     | 0.30631     | 0.50633   | 0.30631 |  |
|           | 0.50633         | 0.30631   | 0.30631 | 0.684086502 |             |           |         |  |
| RPL23AP22 | ENSG00000237213 | 0.50635   | 0.30631 | 0.50635     | 0.30631     | 0.50635   |         |  |
|           | 0.30631         | 0.50635   | 0.30631 | 0.30631     | 0.684086502 |           |         |  |
| INSRR     | ENSG00000027644 | 0.30171   | 0.38144 | 0.38339     | 0.35071     | 0.50627   | 0.30633 |  |
|           | 0.33183         | 0.37001   | 0.30633 | 0.684086502 |             |           |         |  |
| ENPP5     | ENSG00000112796 | 0.50625   | 0.30634 | 0.50625     | 0.30634     | 0.50625   | 0.30634 |  |
|           | 0.50625         | 0.30634   | 0.30634 | 0.684086502 |             |           |         |  |
| HIVEP3    | ENSG00000127124 | -1.0378   | 0.85031 | -0.23081    | 0.59127     | -0.88004  |         |  |
|           | 0.81058         | 0.50618   | 0.30637 | 0.30637     | 0.684086502 |           |         |  |
| SNORA27   | ENSG00000207051 | 0.50613   | 0.30638 | 0.50613     | 0.30638     | 0.50613   |         |  |



|           |                 |            |         |             |             |          |         |
|-----------|-----------------|------------|---------|-------------|-------------|----------|---------|
|           | 0.30638         | 0.50613    | 0.30638 | 0.30638     | 0.684086502 |          |         |
| KANK3     | ENSG00000186994 | -0.35826   | 0.63993 | -0.17907    | 0.57106     | 0.50612  | 0.30639 |
|           | -0.56315        | 0.71333    | 0.30639 | 0.684086502 |             |          |         |
| OR7E105P  | ENSG00000258423 | 0.50611    | 0.30639 | -0.89618    | 0.81492     | -0.74045 |         |
|           | 0.77049         | -0.71097   | 0.76145 | 0.30639     | 0.684086502 |          |         |
| NA        | ENSG00000254283 | 0.50608    | 0.3064  | 0.50608     | 0.3064      | 0.50608  | 0.3064  |
|           | 0.50608         | 0.3064     | 0.3064  | 0.684086502 |             |          |         |
| LINC02161 | ENSG00000250437 | 0.50598    | 0.30644 | -0.24385    | 0.59633     | 0.50598  |         |
|           | 0.30644         | 0.50598    | 0.30644 | 0.30644     | 0.684135445 |          |         |
| COX4I1P2  | ENSG00000228869 | 0.34624    | 0.36458 | -1.1802     | 0.88105     | -0.55979 |         |
|           | 0.71219         | 0.50594    | 0.30645 | 0.30645     | 0.684135445 |          |         |
| ZNF804A   | ENSG00000170396 | 0.50587    | 0.30648 | 0.50587     | 0.30648     | -0.33434 |         |
|           | 0.63094         | 0.42233    | 0.33639 | 0.30648     | 0.684162057 |          |         |
| LINC02729 | ENSG00000255335 | 0.50582    | 0.30649 | -1.2628     | 0.89667     | 0.50582  |         |
|           | 0.30649         | 0.50582    | 0.30649 | 0.30649     | 0.684162057 |          |         |
| PTGDR2    | ENSG00000183134 | 0.5057     | 0.30654 | 0.5057      | 0.30654     | 0.5057   |         |
|           | 0.30654         | 0.19663    | 0.42206 | 0.30654     | 0.684242325 |          |         |
| H3P17     | ENSG00000248205 | 0.50564    | 0.30656 | -0.022056   | 0.5088      | 0.10011  | 0.46013 |
|           | 0.3564          | 0.36077    | 0.30656 | 0.684254227 |             |          |         |
| NA        | ENSG00000212206 | 0.50545    | 0.30662 | 0.50545     | 0.30662     | 0.50545  | 0.30662 |
|           | 0.50545         | 0.30662    | 0.30662 | 0.684254227 |             |          |         |
| HMG2P26   | ENSG00000241203 | 0.50542    | 0.30663 | 0.50542     | 0.30663     | 0.50542  |         |
|           | 0.30663         | 0.50542    | 0.30663 | 0.30663     | 0.684254227 |          |         |
| PC        | ENSG00000173599 | 0.08159    | 0.46749 | -0.14516    | 0.55771     | 0.50541  | 0.30664 |
|           | -0.25138        | 0.59924    | 0.30664 | 0.684254227 |             |          |         |
| NA        | ENSG00000225711 | 0.50538    | 0.30665 | 0.50538     | 0.30665     | 0.50538  | 0.30665 |
|           | 0.50538         | 0.30665    | 0.30665 | 0.684254227 |             |          |         |
| LINC02367 | ENSG00000260423 | -0.18759   | 0.5744  | 0.33735     | 0.36793     | -0.47918 |         |
|           | 0.68409         | 0.5053     | 0.30667 | 0.30667     | 0.684254227 |          |         |
| DPYSL4    | ENSG00000151640 | 0.50526    | 0.30669 | 0.039652    | 0.48419     | 0.43463  |         |
|           | 0.33192         | -0.042226  | 0.51684 | 0.30669     | 0.684254227 |          |         |
| NA        | ENSG00000224987 | -1.8718    | 0.96938 | 0.50526     | 0.30669     | -1.7645  | 0.96118 |
|           | -1.6929         | 0.95476    | 0.30669 | 0.684254227 |             |          |         |
| RPL10P17  | ENSG00000225196 | 0.50519    | 0.30671 | -1.2811     | 0.89993     | 0.29606  |         |
|           | 0.38359         | 0.50519    | 0.30671 | 0.30671     | 0.684254227 |          |         |
| CLIP1     | ENSG00000130779 | -0.0056871 | 0.50227 | 0.12787     | 0.44912     | 0.50518  | 0.30672 |
|           | -0.3714         | 0.64483    | 0.30672 | 0.684254227 |             |          |         |
| HOXD13    | ENSG00000128714 | -0.014942  | 0.50596 | 0.1814      | 0.42803     | 0.20463  |         |
|           | 0.41893         | 0.50507    | 0.30675 | 0.30675     | 0.684254227 |          |         |
| TSGA10IP  | ENSG00000175513 | 0.50509    | 0.30675 | 0.50509     | 0.30675     | -0.31849 |         |
|           | 0.62494         | -0.31849   | 0.62494 | 0.30675     | 0.684254227 |          |         |
| MTND2P22  | ENSG00000231954 | -1.0256    | 0.84747 | 0.50507     | 0.30675     | -0.93883 |         |
|           | 0.82609         | -0.93883   | 0.82609 | 0.30675     | 0.684254227 |          |         |
| RPL31P59  | ENSG00000240364 | -0.36668   | 0.64307 | 0.50507     | 0.30675     | -0.60554 |         |
|           | 0.72759         | 0.50507    | 0.30675 | 0.30675     | 0.684254227 |          |         |
| CCDC149   | ENSG00000181982 | 0.35397    | 0.36168 | -0.73356    | 0.76839     | 0.083346 |         |
|           | 0.46679         | 0.50505    | 0.30676 | 0.30676     | 0.684254227 |          |         |
| NA        | ENSG00000279358 | 0.50504    | 0.30677 | 0.50504     | 0.30677     | 0.50504  | 0.30677 |
|           | 0.50504         | 0.30677    | 0.30677 | 0.684254227 |             |          |         |
| NA        | ENSG00000261123 | 0.50496    | 0.30679 | 0.50496     | 0.30679     | 0.50496  | 0.30679 |
|           | 0.50496         | 0.30679    | 0.30679 | 0.684267516 |             |          |         |
| NA        | ENSG00000248949 | 0.4991     | 0.30885 | 0.23971     | 0.40528     | 0.34877  | 0.36363 |
|           | 0.50493         | 0.30681    | 0.30681 | 0.684280805 |             |          |         |
| CEP135    | ENSG00000174799 | 0.40524    | 0.34265 | 0.045825    | 0.48172     | 0.50482  |         |
|           | 0.30684         | -0.0034202 | 0.50136 | 0.30684     | 0.684298362 |          |         |
| LAIR2     | ENSG00000167618 | 0.12497    | 0.45027 | 0.31856     | 0.37503     | 0.5048   | 0.30685 |
|           | 0.43667         | 0.33117    | 0.30685 | 0.684298362 |             |          |         |
| RBM7      | ENSG00000076053 | 0.50477    | 0.30686 | 0.50477     | 0.30686     | 0.50477  | 0.30686 |
|           | 0.50477         | 0.30686    | 0.30686 | 0.684298362 |             |          |         |
| MIR329-1  | ENSG00000207761 | 0.5046     | 0.30692 | 0.5046      | 0.30692     | 0.5046   |         |
|           | 0.30692         | 0.5046     | 0.30692 | 0.30692     | 0.684400842 |          |         |
| RPL31P20  | ENSG00000229756 | 0.5045     | 0.30695 | 0.5045      | 0.30695     | 0.5045   |         |

|            |                 |          |             |             |             |          |         |         |
|------------|-----------------|----------|-------------|-------------|-------------|----------|---------|---------|
|            | 0.30695         | 0.5045   | 0.30695     | 0.30695     | 0.684436419 |          |         |         |
| KRTAP4-17P | ENSG00000251439 | 0.50439  | 0.307       | 0.50439     | 0.307       | 0.50439  | 0.307   | 0.50439 |
|            | 0.307           | 0.307    | 0.684511813 |             |             |          |         |         |
| NA         | ENSG00000215158 | 0.019597 | 0.49218     | -0.85458    | 0.80361     | 0.50428  | 0.30703 |         |
|            | 0.49507         | 0.31027  | 0.30703     | 0.684511813 |             |          |         |         |
| TIGAR      | ENSG00000078237 | -1.7348  | 0.95861     | 0.47286     | 0.31816     | -0.72586 | 0.76604 |         |
|            | 0.50426         | 0.30704  | 0.30704     | 0.684511813 |             |          |         |         |
| NA         | ENSG00000248544 | 0.50426  | 0.30704     | 0.50426     | 0.30704     | 0.50426  | 0.30704 |         |
|            | 0.50426         | 0.30704  | 0.30704     | 0.684511813 |             |          |         |         |
| NA         | ENSG00000239686 | 0.48762  | 0.31291     | 0.50408     | 0.3071      | 0.48762  | 0.31291 |         |
|            | -0.27579        | 0.60865  | 0.3071      | 0.684555866 |             |          |         |         |
| NA         | ENSG00000252139 | 0.50403  | 0.30712     | 0.50403     | 0.30712     | 0.50403  | 0.30712 |         |
|            | 0.50403         | 0.30712  | 0.30712     | 0.684555866 |             |          |         |         |
| NA         | ENSG00000258417 | 0.50404  | 0.30712     | 0.50404     | 0.30712     | 0.50404  | 0.30712 |         |
|            | 0.50404         | 0.30712  | 0.30712     | 0.684555866 |             |          |         |         |
| RNU6-961P  | ENSG00000200763 | 0.50401  | 0.30713     | 0.50401     | 0.30713     | 0.50401  |         |         |
|            | 0.30713         | 0.50401  | 0.30713     | 0.30713     | 0.684555866 |          |         |         |
| RN7SL140P  | ENSG00000266059 | 0.50401  | 0.30713     | 0.50401     | 0.30713     | 0.50401  |         |         |
|            | 0.30713         | 0.50401  | 0.30713     | 0.30713     | 0.684555866 |          |         |         |
| NA         | ENSG00000251152 | -0.53672 | 0.70427     | 0.50382     | 0.30719     | -0.55229 | 0.70963 |         |
|            | 0.291           | 0.38553  | 0.30719     | 0.68455904  |             |          |         |         |
| SHISAL1    | ENSG00000138944 | 0.50371  | 0.30723     | -0.82222    | 0.79452     | 0.18154  |         |         |
|            | 0.42797         | 0.02829  | 0.48872     | 0.30723     | 0.68455904  |          |         |         |
| NA         | ENSG00000258670 | 0.50371  | 0.30723     | -0.49442    | 0.68949     | 0.072816 | 0.47098 |         |
|            | -0.088569       | 0.53529  | 0.30723     | 0.68455904  |             |          |         |         |
| HAS3       | ENSG00000103044 | -0.63681 | 0.73787     | 0.50366     | 0.30725     | -0.55784 | 0.71152 |         |
|            | -1.1137         | 0.8673   | 0.30725     | 0.68455904  |             |          |         |         |
| C2orf69P1  | ENSG00000261046 | 0.50367  | 0.30725     | 0.50367     | 0.30725     | 0.50367  |         |         |
|            | 0.30725         | 0.50367  | 0.30725     | 0.30725     | 0.68455904  |          |         |         |
| GAPDHP33   | ENSG00000240244 | 0.5036   | 0.30727     | 0.17397     | 0.43095     | 0.5036   |         |         |
|            | 0.30727         | 0.5036   | 0.30727     | 0.30727     | 0.68455904  |          |         |         |
| NA         | ENSG00000249171 | -0.41789 | 0.66199     | 0.015355    | 0.49387     | 0.50361  | 0.30727 |         |
|            | 0.36246         | 0.35851  | 0.30727     | 0.68455904  |             |          |         |         |
| NA         | ENSG00000252981 | 0.5036   | 0.30727     | 0.5036      | 0.30727     | 0.5036   | 0.30727 |         |
|            | 0.5036          | 0.30727  | 0.30727     | 0.68455904  |             |          |         |         |
| FBXO31     | ENSG00000103264 | -0.98137 | 0.8368      | -0.39852    | 0.65488     | 0.50358  |         |         |
|            | 0.30728         | -0.45821 | 0.6766      | 0.30728     | 0.68455904  |          |         |         |
| ALDH1A3    | ENSG00000184254 | -1.2743  | 0.89872     | 0.50351     | 0.3073      | -1.0105  |         |         |
|            | 0.84388         | -0.3884  | 0.65114     | 0.3073      | 0.68455904  |          |         |         |
| LINC00207  | ENSG00000187012 | -0.67119 | 0.74895     | -0.73154    | 0.76778     | 0.50353  |         |         |
|            | 0.3073          | 0.058691 | 0.4766      | 0.3073      | 0.68455904  |          |         |         |
| NA         | ENSG00000205976 | -0.11962 | 0.54761     | -0.27095    | 0.60679     | -0.53226 | 0.70273 |         |
|            | 0.50351         | 0.3073   | 0.3073      | 0.68455904  |             |          |         |         |
| RNA5SP473  | ENSG00000252211 | 0.50346  | 0.30732     | 0.50346     | 0.30732     | 0.50346  |         |         |
|            | 0.30732         | 0.50346  | 0.30732     | 0.30732     | 0.684572298 |          |         |         |
| RNASE4     | ENSG00000258818 | 0.45863  | 0.32325     | 0.50341     | 0.30734     | 0.45863  |         |         |
|            | 0.32325         | 0.45863  | 0.32325     | 0.30734     | 0.684585556 |          |         |         |
| LINC01776  | ENSG00000226053 | 0.50333  | 0.30737     | 0.50333     | 0.30737     | 0.50333  |         |         |
|            | 0.30737         | 0.50333  | 0.30737     | 0.30737     | 0.684592405 |          |         |         |
| NA         | ENSG00000267649 | 0.50329  | 0.30738     | 0.50329     | 0.30738     | 0.50329  | 0.30738 |         |
|            | 0.50329         | 0.30738  | 0.30738     | 0.684592405 |             |          |         |         |
| CEP104     | ENSG00000116198 | 0.36608  | 0.35715     | 0.36456     | 0.35772     | 0.50321  |         |         |
|            | 0.30741         | 0.1681   | 0.43325     | 0.30741     | 0.684592405 |          |         |         |
| LINC01046  | ENSG00000233405 | -0.16567 | 0.56579     | 0.29963     | 0.38223     | 0.50312  |         |         |
|            | 0.30744         | 0.50312  | 0.30744     | 0.30744     | 0.684592405 |          |         |         |
| NA         | ENSG00000278980 | -1.6094  | 0.94623     | 0.50312     | 0.30744     | -1.3668  | 0.91416 |         |
|            | -1.3668         | 0.91416  | 0.30744     | 0.684592405 |             |          |         |         |
| CEACAM22P  | ENSG00000230666 | -0.13721 | 0.55457     | 0.12121     | 0.45176     | -0.13721 |         |         |
|            | 0.55457         | 0.50301  | 0.30748     | 0.30748     | 0.684592405 |          |         |         |
| TM2D3      | ENSG00000184277 | -0.55885 | 0.71187     | 0.18253     | 0.42758     | -0.42203 | 0.6635  |         |
|            | 0.50297         | 0.30749  | 0.30749     | 0.684592405 |             |          |         |         |
| RXRA       | ENSG00000186350 | -0.38983 | 0.65167     | -0.17557    | 0.56968     | -0.66682 | 0.74756 |         |

|           |                 |          |         |             |             |            |         |         |
|-----------|-----------------|----------|---------|-------------|-------------|------------|---------|---------|
|           | 0.50297         | 0.30749  | 0.30749 | 0.684592405 |             |            |         |         |
| ZFAND6P1  | ENSG00000244213 | 0.50297  | 0.30749 | 0.50297     | 0.30749     | 0.50297    | 0.30749 | 0.50297 |
|           | 0.30749         | 0.50297  | 0.30749 | 0.30749     | 0.684592405 |            |         |         |
| NA        | ENSG00000253897 | -1.4242  | 0.9228  | 0.50294     | 0.3075      | -1.0356    | 0.8498  |         |
|           | -0.17813        | 0.57069  | 0.3075  | 0.684592405 |             |            |         |         |
| RPSAP75   | ENSG00000270954 | 0.50287  | 0.30753 | 0.50287     | 0.30753     | 0.50287    | 0.30753 | 0.50287 |
|           | 0.30753         | 0.50287  | 0.30753 | 0.30753     | 0.684592405 |            |         |         |
| HPRT1P3   | ENSG00000256752 | 0.50282  | 0.30754 | 0.50282     | 0.30754     | 0.50282    | 0.30754 | 0.50282 |
|           | 0.30754         | 0.50282  | 0.30754 | 0.30754     | 0.684592405 |            |         |         |
| GPR182    | ENSG00000166856 | -0.15768 | 0.56265 | 0.072806    | 0.47098     | -0.09979   |         |         |
|           | 0.53974         | 0.50271  | 0.30758 | 0.30758     | 0.684592405 |            |         |         |
| SDAD1-AS1 | ENSG00000245928 | 0.50272  | 0.30758 | -0.41326    | 0.66029     | 0.50272    |         |         |
|           | 0.30758         | 0.50272  | 0.30758 | 0.30758     | 0.684592405 |            |         |         |
| KCNE2     | ENSG00000159197 | 0.051625 | 0.47941 | -0.87122    | 0.80818     | 0.50268    | 0.30759 |         |
|           | 0.28858         | 0.38645  | 0.30759 | 0.684592405 |             |            |         |         |
| ITPK1     | ENSG00000100605 | 0.48554  | 0.31365 | -0.21172    | 0.58384     | 0.46269    | 0.32179 |         |
|           | 0.50266         | 0.3076   | 0.3076  | 0.684592405 |             |            |         |         |
| SIGLEC8   | ENSG00000105366 | -0.64843 | 0.74165 | 0.50268     | 0.3076      | -0.61242   |         |         |
|           | 0.72987         | -0.61242 | 0.72987 | 0.3076      | 0.684592405 |            |         |         |
| NFATC1    | ENSG00000131196 | 0.50268  | 0.3076  | -0.0027937  | 0.50111     | 0.24481    |         |         |
|           | 0.4033          | 0.26534  | 0.39537 | 0.3076      | 0.684592405 |            |         |         |
| RNU6-301P | ENSG00000207004 | 0.50265  | 0.30761 | 0.50265     | 0.30761     | 0.50265    |         |         |
|           | 0.30761         | 0.50265  | 0.30761 | 0.30761     | 0.684592405 |            |         |         |
| RNU6-40P  | ENSG00000206981 | 0.50229  | 0.30773 | 0.50229     | 0.30773     | 0.50229    |         |         |
|           | 0.30773         | -0.58082 | 0.71932 | 0.30773     | 0.684828191 |            |         |         |
| KCNV2     | ENSG00000168263 | -0.98878 | 0.83861 | -0.80202    | 0.78873     | -1.4669    | 0.9288  |         |
|           | 0.50214         | 0.30778  | 0.30778 | 0.684876908 |             |            |         |         |
| USP2-AS1  | ENSG00000245248 | -0.12402 | 0.54935 | -0.63838    | 0.73839     | -0.10977   |         |         |
|           | 0.5437          | 0.50216  | 0.30778 | 0.30778     | 0.684876908 |            |         |         |
| BRINP2    | ENSG00000198797 | -0.97822 | 0.83602 | 0.50204     | 0.30782     | -1.511     |         |         |
|           | 0.9346          | -0.97822 | 0.83602 | 0.30782     | 0.684934639 |            |         |         |
| NA        | ENSG00000254817 | 0.50198  | 0.30784 | -0.16337    | 0.56489     | -0.9172    | 0.82048 |         |
|           | -0.84549        | 0.80108  | 0.30784 | 0.684947243 |             |            |         |         |
| NA        | ENSG00000264920 | 0.39684  | 0.34574 | 0.50192     | 0.30786     | -0.46315   | 0.67837 |         |
|           | -0.46315        | 0.67837  | 0.30786 | 0.684947243 |             |            |         |         |
| MRPS31P4  | ENSG00000250299 | 0.50186  | 0.30788 | -0.70805    | 0.76054     | -0.24375   |         |         |
|           | 0.59629         | 0.32029  | 0.37437 | 0.30788     | 0.684947243 |            |         |         |
| SPX       | ENSG00000134548 | 0.50181  | 0.3079  | -0.15281    | 0.56073     | 0.50181    | 0.3079  |         |
|           | 0.50181         | 0.3079   | 0.3079  | 0.684947243 |             |            |         |         |
| ANO3-AS1  | ENSG00000254819 | -1.5326  | 0.93732 | -0.33388    | 0.63077     | -0.0016348 |         |         |
|           | 0.50065         | 0.50182  | 0.3079  | 0.3079      | 0.684947243 |            |         |         |
| LINC02016 | ENSG00000244215 | -0.47318 | 0.68196 | 0.31186     | 0.37757     | -0.084905  |         |         |
|           | 0.53383         | 0.50178  | 0.30791 | 0.30791     | 0.684947243 |            |         |         |
| NA        | ENSG00000260258 | -0.742   | 0.77096 | -0.742      | 0.77096     | -0.49837   | 0.69089 |         |
|           | 0.50173         | 0.30793  | 0.30793 | 0.684960465 |             |            |         |         |
| NA        | ENSG00000225869 | 0.4654   | 0.32082 | 0.4654      | 0.32082     | -0.055217  | 0.52202 |         |
|           | 0.50167         | 0.30795  | 0.30795 | 0.684973685 |             |            |         |         |
| TAF11L3   | ENSG00000284439 | 0.50157  | 0.30798 | 0.50157     | 0.30798     | 0.50157    |         |         |
|           | 0.30798         | 0.50157  | 0.30798 | 0.30798     | 0.685009147 |            |         |         |
| RNA5SP386 | ENSG00000272253 | 0.5015   | 0.30801 | 0.5015      | 0.30801     | 0.5015     |         |         |
|           | 0.30801         | 0.5015   | 0.30801 | 0.30801     | 0.68503558  |            |         |         |
| NA        | ENSG00000264753 | 0.50147  | 0.30802 | 0.083213    | 0.46684     | 0.083213   | 0.46684 |         |
|           | -0.79798        | 0.78756  | 0.30802 | 0.68503558  |             |            |         |         |
| CPDP1     | ENSG00000264240 | 0.50137  | 0.30806 | 0.50137     | 0.30806     | 0.50137    | 0.30806 |         |
|           | -0.33811        | 0.63236  | 0.30806 | 0.685057173 |             |            |         |         |
| NA        | ENSG00000241546 | 0.5013   | 0.30808 | 0.5013      | 0.30808     | 0.5013     | 0.30808 |         |
|           | 0.5013          | 0.30808  | 0.30808 | 0.685057173 |             |            |         |         |
| OR56B4    | ENSG00000180919 | -0.32698 | 0.62816 | 0.50127     | 0.30809     | -1.1877    |         |         |
|           | 0.88252         | -1.1877  | 0.88252 | 0.30809     | 0.685057173 |            |         |         |
| C17orf102 | ENSG00000197322 | 0.50128  | 0.30809 | 0.50128     | 0.30809     | 0.50128    |         |         |
|           | 0.30809         | 0.50128  | 0.30809 | 0.30809     | 0.685057173 |            |         |         |
| MIR378G   | ENSG00000263526 | -1.3647  | 0.91382 | -1.3882     | 0.91746     | 0.50125    |         |         |

|           |                 |           |         |             |             |           |         |  |
|-----------|-----------------|-----------|---------|-------------|-------------|-----------|---------|--|
|           | 0.3081          | -1.3647   | 0.91382 | 0.3081      | 0.685057173 |           |         |  |
| PSMC1     | ENSG00000100764 | 0.27961   | 0.38989 | 0.27961     | 0.38989     | 0.50119   | 0.30812 |  |
|           | 0.34933         | 0.36342   | 0.30812 | 0.685070384 |             |           |         |  |
| NA        | ENSG00000227077 | -0.1789   | 0.57099 | -0.86755    | 0.80718     | -0.81106  | 0.79134 |  |
|           | 0.50109         | 0.30815   | 0.30815 | 0.685096802 |             |           |         |  |
| NA        | ENSG00000260542 | 0.50107   | 0.30816 | -0.80345    | 0.78914     | -0.20339  | 0.58058 |  |
|           | -0.61107        | 0.72942   | 0.30816 | 0.685096802 |             |           |         |  |
| PFKFB3    | ENSG00000170525 | 0.50097   | 0.3082  | -1.272      | 0.89831     | -1.615    |         |  |
|           | 0.94684         | 0.18627   | 0.42612 | 0.3082      | 0.685127396 |           |         |  |
| LINC02024 | ENSG00000241213 | 0.02217   | 0.49116 | -0.71527    | 0.76278     | 0.50089   |         |  |
|           | 0.30822         | 0.50089   | 0.30822 | 0.30822     | 0.685127396 |           |         |  |
| PAXIP1    | ENSG00000157212 | 0.50087   | 0.30823 | 0.37207     | 0.35492     | 0.37207   |         |  |
|           | 0.35492         | -0.60299  | 0.72674 | 0.30823     | 0.685127396 |           |         |  |
| NA        | ENSG00000233968 | -0.81274  | 0.79182 | -0.81274    | 0.79182     | 0.50087   | 0.30823 |  |
|           | -2.7977         | 0.99743   | 0.30823 | 0.685127396 |             |           |         |  |
| R3HDM2P1  | ENSG00000248735 | 0.50082   | 0.30825 | 0.50082     | 0.30825     | 0.50082   |         |  |
|           | 0.30825         | 0.50082   | 0.30825 | 0.30825     | 0.685135755 |           |         |  |
| RANP2     | ENSG00000232391 | 0.50074   | 0.30828 | 0.50074     | 0.30828     | -0.32311  | 0.62669 |  |
|           | 0.50074         | 0.30828   | 0.30828 | 0.685135755 |             |           |         |  |
| PLIN1     | ENSG00000166819 | -0.060143 | 0.52398 | -0.060143   | 0.52398     | -0.060143 | 0.52398 |  |
|           | 0.50071         | 0.30829   | 0.30829 | 0.685135755 |             |           |         |  |
| OR6B1     | ENSG00000221813 | -0.83272  | 0.7975  | -0.83272    | 0.7975      | 0.50071   | 0.30829 |  |
|           | 0.3484          | 0.36377   | 0.30829 | 0.685135755 |             |           |         |  |
| NA        | ENSG00000258816 | -1.8851   | 0.97029 | 0.50058     | 0.30833     | -1.0893   | 0.86199 |  |
|           | -0.37343        | 0.64559   | 0.30833 | 0.685152464 |             |           |         |  |
| RFPL4AP1  | ENSG00000255238 | 0.50053   | 0.30835 | 0.50053     | 0.30835     | 0.50053   |         |  |
|           | 0.30835         | 0.50053   | 0.30835 | 0.30835     | 0.685152464 |           |         |  |
| KRT8P26   | ENSG00000214659 | -0.19009  | 0.57538 | -0.50025    | 0.69155     | 0.053753  |         |  |
|           | 0.47857         | 0.50051   | 0.30836 | 0.30836     | 0.685152464 |           |         |  |
| RNA5SP60  | ENSG00000222552 | 0.50051   | 0.30836 | 0.50051     | 0.30836     | 0.50051   |         |  |
|           | 0.30836         | 0.50051   | 0.30836 | 0.30836     | 0.685152464 |           |         |  |
| NA        | ENSG00000226410 | 0.50041   | 0.30839 | 0.50041     | 0.30839     | 0.50041   | 0.30839 |  |
|           | 0.50041         | 0.30839   | 0.30839 | 0.685152464 |             |           |         |  |
| MTND6P4   | ENSG00000249119 | 0.50042   | 0.30839 | 0.25737     | 0.39845     | 0.25737   |         |  |
|           | 0.39845         | 0.25737   | 0.39845 | 0.30839     | 0.685152464 |           |         |  |
| OCEL1     | ENSG00000099330 | 0.50037   | 0.30841 | 0.50037     | 0.30841     | 0.50037   | 0.30841 |  |
|           | 0.16579         | 0.43416   | 0.30841 | 0.685152464 |             |           |         |  |
| ARL8B     | ENSG00000134108 | 0.38368   | 0.35061 | -0.11526    | 0.54588     | 0.38368   | 0.35061 |  |
|           | 0.50037         | 0.30841   | 0.30841 | 0.685152464 |             |           |         |  |
| TIMM22    | ENSG00000177370 | -1.2362   | 0.89181 | -0.51167    | 0.69556     | -0.51167  |         |  |
|           | 0.69556         | 0.50012   | 0.30849 | 0.30849     | 0.68524897  |           |         |  |
| RAMP2     | ENSG00000131477 | -1.8126   | 0.96505 | -1.8126     | 0.96505     | -1.8126   | 0.96505 |  |
|           | 0.50007         | 0.30851   | 0.30851 | 0.68524897  |             |           |         |  |
| BHMT      | ENSG00000145692 | -1.2053   | 0.88596 | -0.56214    | 0.71299     | 0.50009   | 0.30851 |  |
|           | -0.66498        | 0.74697   | 0.30851 | 0.68524897  |             |           |         |  |
| NA        | ENSG00000248827 | 0.50002   | 0.30853 | 0.50002     | 0.30853     | 0.50002   | 0.30853 |  |
|           | 0.50002         | 0.30853   | 0.30853 | 0.68524897  |             |           |         |  |
| RPL12P6   | ENSG00000243824 | -0.53439  | 0.70347 | 0.47807     | 0.3163      | 0.064184  |         |  |
|           | 0.47441         | 0.49999   | 0.30854 | 0.30854     | 0.68524897  |           |         |  |
| XPO1      | ENSG00000082898 | -0.37589  | 0.6465  | -0.62051    | 0.73254     | -0.40348  | 0.6567  |  |
|           | 0.49994         | 0.30856   | 0.30856 | 0.68524897  |             |           |         |  |
| PSMC1P13  | ENSG00000232314 | 0.4999    | 0.30857 | -1.0492     | 0.85297     | -0.75993  |         |  |
|           | 0.77635         | -0.75993  | 0.77635 | 0.30857     | 0.68524897  |           |         |  |
| NA        | ENSG00000257405 | 0.16641   | 0.43392 | -0.36881    | 0.64386     | 0.49991   | 0.30857 |  |
|           | 0.16641         | 0.43392   | 0.30857 | 0.68524897  |             |           |         |  |
| RAF1      | ENSG00000132155 | -0.81964  | 0.79379 | -0.66276    | 0.74626     | -0.64866  | 0.74172 |  |
|           | 0.49987         | 0.30858   | 0.30858 | 0.68524897  |             |           |         |  |
| LINC00314 | ENSG00000178457 | -0.77977  | 0.78224 | 0.49976     | 0.30862     | -0.13865  |         |  |
|           | 0.55514         | -0.066037 | 0.52633 | 0.30862     | 0.685269787 |           |         |  |
| ENO2      | ENSG00000111674 | -0.77536  | 0.78094 | -0.64807    | 0.74153     | 0.49967   | 0.30865 |  |
|           | -0.77536        | 0.78094   | 0.30865 | 0.685269787 |             |           |         |  |
| NA        | ENSG00000253671 | 0.49969   | 0.30865 | 0.49969     | 0.30865     | 0.4126    | 0.33995 |  |

|           |                 |           |         |             |             |           |         |  |
|-----------|-----------------|-----------|---------|-------------|-------------|-----------|---------|--|
|           | -1.3077         | 0.90451   | 0.30865 | 0.685269787 |             |           |         |  |
| MIR3681   | ENSG00000264089 | 0.16052   | 0.43624 | 0.49964     | 0.30866     | 0.49964   |         |  |
|           | 0.30866         | 0.49964   | 0.30866 | 0.30866     | 0.685269787 |           |         |  |
| HERC4     | ENSG00000148634 | 0.21226   | 0.41595 | 0.39696     | 0.3457      | 0.38054   | 0.35177 |  |
|           | 0.49961         | 0.30867   | 0.30867 | 0.685269787 |             |           |         |  |
| MAP4K1    | ENSG00000104814 | 0.49959   | 0.30868 | -0.35534    | 0.63883     | 0.49959   |         |  |
|           | 0.30868         | 0.49959   | 0.30868 | 0.30868     | 0.685269787 |           |         |  |
| NA        | ENSG00000233069 | 0.49952   | 0.30871 | 0.39273     | 0.34726     | 0.49952   | 0.30871 |  |
|           | 0.49952         | 0.30871   | 0.30871 | 0.685269787 |             |           |         |  |
| TXNP5     | ENSG00000228236 | 0.4995    | 0.30872 | 0.4995      | 0.30872     | 0.4995    | 0.30872 |  |
|           | 0.4995          | 0.30872   | 0.30872 | 0.685269787 |             |           |         |  |
| LINC02194 | ENSG00000260264 | 0.12397   | 0.45067 | -0.50134    | 0.69193     | 0.49947   |         |  |
|           | 0.30872         | 0.12397   | 0.45067 | 0.30872     | 0.685269787 |           |         |  |
| NA        | ENSG00000268983 | 0.49946   | 0.30873 | 0.49946     | 0.30873     | 0.49946   | 0.30873 |  |
|           | 0.49946         | 0.30873   | 0.30873 | 0.685269787 |             |           |         |  |
| FKBP1B    | ENSG00000119782 | 0.4993    | 0.30878 | 0.029467    | 0.48825     | -0.027188 |         |  |
|           | 0.51084         | 0.23675   | 0.40643 | 0.30878     | 0.685349551 |           |         |  |
| ECD       | ENSG00000122882 | 0.49912   | 0.30885 | -0.93324    | 0.82465     | -1.0126   | 0.84438 |  |
|           | -0.84371        | 0.80059   | 0.30885 | 0.685464672 |             |           |         |  |
| RN7SL635P | ENSG00000243029 | 0.073639  | 0.47065 | 0.0484      | 0.4807      | -0.099348 |         |  |
|           | 0.53957         | 0.49908   | 0.30886 | 0.30886     | 0.685464672 |           |         |  |
| ITGA6-AS1 | ENSG00000232788 | 0.2355    | 0.40691 | 0.41276     | 0.33989     | 0.49897   |         |  |
|           | 0.3089          | 0.27936   | 0.38998 | 0.3089      | 0.685481981 |           |         |  |
| KCNK16    | ENSG00000095981 | -0.39146  | 0.65227 | -0.37854    | 0.64748     | -0.39146  |         |  |
|           | 0.65227         | 0.49893   | 0.30891 | 0.30891     | 0.685481981 |           |         |  |
| RNU6-510P | ENSG00000212541 | 0.49895   | 0.30891 | 0.49895     | 0.30891     | 0.49895   |         |  |
|           | 0.30891         | 0.49895   | 0.30891 | 0.30891     | 0.685481981 |           |         |  |
| SNORA33   | ENSG00000200534 | 0.49874   | 0.30898 | 0.49874     | 0.30898     | 0.49874   |         |  |
|           | 0.30898         | 0.49874   | 0.30898 | 0.30898     | 0.685606093 |           |         |  |
| CST7      | ENSG00000077984 | -0.57616  | 0.71775 | 0.49851     | 0.30906     | -0.6966   | 0.75697 |  |
|           | 0.33599         | 0.36844   | 0.30906 | 0.685662844 |             |           |         |  |
| LIN28B    | ENSG00000187772 | -0.022732 | 0.50907 | 0.49852     | 0.30906     | 0.48105   |         |  |
|           | 0.31524         | 0.046042  | 0.48164 | 0.30906     | 0.685662844 |           |         |  |
| ZNF354B   | ENSG00000178338 | 0.49849   | 0.30907 | -0.9271     | 0.82306     | -1.1112   |         |  |
|           | 0.86675         | -0.84866  | 0.80197 | 0.30907     | 0.685662844 |           |         |  |
| ACSL5     | ENSG00000197142 | -0.070443 | 0.52808 | -0.42304    | 0.66387     | 0.49843   | 0.30909 |  |
|           | 0.49843         | 0.30909   | 0.30909 | 0.685662844 |             |           |         |  |
| NAV2-AS2  | ENSG00000254453 | 0.49844   | 0.30909 | -0.21081    | 0.58348     | 0.49844   |         |  |
|           | 0.30909         | 0.49844   | 0.30909 | 0.30909     | 0.685662844 |           |         |  |
| LINC02326 | ENSG00000257523 | -1.5899   | 0.94407 | -1.5899     | 0.94407     | 0.49842   |         |  |
|           | 0.30909         | -1.1459   | 0.87408 | 0.30909     | 0.685662844 |           |         |  |
| NPIPA5    | ENSG00000183793 | -1.6072   | 0.94599 | -0.88987    | 0.81323     | 0.49838   |         |  |
|           | 0.30911         | -1.836    | 0.96682 | 0.30911     | 0.685675997 |           |         |  |
| KRTAP4-12 | ENSG00000213416 | 0.4982    | 0.30917 | 0.22107     | 0.41252     | 0.22107   |         |  |
|           | 0.41252         | 0.22107   | 0.41252 | 0.30917     | 0.685777873 |           |         |  |
| NA        | ENSG00000206914 | 0.4981    | 0.30921 | 0.4981      | 0.30921     | 0.4981    | 0.30921 |  |
|           | 0.4981          | 0.30921   | 0.30921 | 0.68583538  |             |           |         |  |
| GABARAP   | ENSG00000170296 | 0.49782   | 0.3093  | 0.49782     | 0.3093      | 0.49782   |         |  |
|           | 0.3093          | 0.49782   | 0.3093  | 0.3093      | 0.685972556 |           |         |  |
| NA        | ENSG00000279641 | 0.49782   | 0.3093  | 0.49782     | 0.3093      | 0.49782   | 0.3093  |  |
|           | 0.49782         | 0.3093    | 0.3093  | 0.685972556 |             |           |         |  |
| SRARP     | ENSG00000183888 | -0.22292  | 0.5882  | -0.22292    | 0.5882      | 0.49777   | 0.30932 |  |
|           | -0.22292        | 0.5882    | 0.30932 | 0.685985692 |             |           |         |  |
| CNIH1     | ENSG00000100528 | 0.0043502 | 0.49826 | -0.95844    | 0.83108     | 0.27913   | 0.39007 |  |
|           | 0.49773         | 0.30934   | 0.30934 | 0.685998826 |             |           |         |  |
| CEBPZOS   | ENSG00000218739 | -0.32896  | 0.62891 | 0.49763     | 0.30937     | -0.075216 |         |  |
|           | 0.52998         | -0.075216 | 0.52998 | 0.30937     | 0.686002917 |           |         |  |
| NA        | ENSG00000269321 | 0.49765   | 0.30937 | 0.49765     | 0.30937     | 0.49765   | 0.30937 |  |
|           | 0.49765         | 0.30937   | 0.30937 | 0.686002917 |             |           |         |  |
| HSD3BP5   | ENSG00000198857 | -1.1855   | 0.88209 | -0.33107    | 0.62971     | -0.011576 |         |  |
|           | 0.50462         | 0.49757   | 0.30939 | 0.30939     | 0.686016049 |           |         |  |
| MCTS2P    | ENSG00000101898 | 0.49753   | 0.30941 | 0.49753     | 0.30941     | 0.49753   |         |  |

|             |                 |            |             |             |             |           |         |         |
|-------------|-----------------|------------|-------------|-------------|-------------|-----------|---------|---------|
|             | 0.30941         | 0.49753    | 0.30941     | 0.30941     | 0.686020137 |           |         |         |
| NA          | ENSG00000234290 | 0.49749    | 0.30942     | 0.49749     | 0.30942     | 0.49749   | 0.30942 |         |
|             | 0.49749         | 0.30942    | 0.30942     | 0.686020137 |             |           |         |         |
| UROC1       | ENSG00000159650 | 0.34504    | 0.36503     | 0.30645     | 0.37963     | 0.27651   | 0.39108 |         |
|             | 0.49743         | 0.30944    | 0.30944     | 0.686033267 |             |           |         |         |
| NA          | ENSG00000225356 | 0.202      | 0.41996     | 0.45876     | 0.3232      | 0.49738   | 0.30946 |         |
|             | 0.14757         | 0.44134    | 0.30946     | 0.686046395 |             |           |         |         |
| LTBP2       | ENSG00000119681 | 0.37055    | 0.35549     | -0.065731   | 0.5262      | 0.49729   | 0.30949 |         |
|             | 0.48933         | 0.3123     | 0.30949     | 0.68608169  |             |           |         |         |
| TMEM216     | ENSG00000187049 | 0.49716    | 0.30954     | 0.49716     | 0.30954     | 0.49716   |         |         |
|             | 0.30954         | 0.25947    | 0.39764     | 0.30954     | 0.686134181 |           |         |         |
| ZNF101      | ENSG00000181896 | 0.49708    | 0.30957     | -0.12697    | 0.55052     | -1.4376   |         |         |
|             | 0.92472         | -0.89022   | 0.81333     | 0.30957     | 0.686134181 |           |         |         |
| LPA         | ENSG00000198670 | -0.73223   | 0.76799     | 0.49707     | 0.30957     | -0.87038  | 0.80795 |         |
|             | 0.44034         | 0.32985    | 0.30957     | 0.686134181 |             |           |         |         |
| NA          | ENSG00000250322 | -0.0035733 | 0.50143     | -0.052523   | 0.52094     | -0.072881 | 0.52905 |         |
|             | 0.49706         | 0.30957    | 0.30957     | 0.686134181 |             |           |         |         |
| KIF20B      | ENSG00000138182 | -0.8013    | 0.78852     | -1.0883     | 0.86177     | -1.0957   |         |         |
|             | 0.86339         | 0.49697    | 0.3096      | 0.3096      | 0.686138257 |           |         |         |
| NA          | ENSG00000283108 | 0.49698    | 0.3096      | 0.2525      | 0.40033     | 0.38482   | 0.35019 |         |
|             | 0.38482         | 0.35019    | 0.3096      | 0.686138257 |             |           |         |         |
| NA          | ENSG00000230479 | 0.49691    | 0.30963     | 0.49691     | 0.30963     | -0.69442  | 0.75629 |         |
|             | -0.61576        | 0.73097    | 0.30963     | 0.686159523 |             |           |         |         |
| TRAV17      | ENSG00000211797 | 0.31424    | 0.37667     | -0.019743   | 0.50788     | 0.49687   |         |         |
|             | 0.30964         | -0.019743  | 0.50788     | 0.30964     | 0.686159523 |           |         |         |
| BCL6B       | ENSG00000161940 | -0.12726   | 0.55063     | -0.12726    | 0.55063     | 0.49679   | 0.30967 |         |
|             | 0.18127         | 0.42808    | 0.30967     | 0.686159523 |             |           |         |         |
| NA          | ENSG00000255929 | 0.49676    | 0.30968     | 0.069548    | 0.47228     | 0.49676   | 0.30968 |         |
|             | 0.49676         | 0.30968    | 0.30968     | 0.686159523 |             |           |         |         |
| NA          | ENSG00000260005 | 0.49676    | 0.30968     | 0.49676     | 0.30968     | 0.49676   | 0.30968 |         |
|             | 0.49676         | 0.30968    | 0.30968     | 0.686159523 |             |           |         |         |
| CD44        | ENSG00000026508 | 0.098072   | 0.46094     | 0.49667     | 0.30971     | 0.098072  | 0.46094 |         |
|             | -0.068066       | 0.52713    | 0.30971     | 0.686188919 |             |           |         |         |
| UGT1A1      | ENSG00000241635 | 0.49663    | 0.30973     | 0.49663     | 0.30973     | 0.49663   |         |         |
|             | 0.30973         | 0.49663    | 0.30973     | 0.30973     | 0.686188919 |           |         |         |
| RASL11B     | ENSG00000128045 | 0.49657    | 0.30974     | -0.011228   | 0.50448     | -0.47604  |         |         |
|             | 0.68298         | -0.35604   | 0.63909     | 0.30974     | 0.686188919 |           |         |         |
| RNU2-14P    | ENSG00000222985 | -0.084421  | 0.53364     | -1.2926     | 0.90192     | 0.49651   |         |         |
|             | 0.30977         | -0.084974  | 0.53386     | 0.30977     | 0.686188919 |           |         |         |
| ANKRD34C    | ENSG00000235711 | 0.23477    | 0.40719     | 0.13105     | 0.44787     | 0.23477   |         |         |
|             | 0.40719         | 0.49651    | 0.30977     | 0.30977     | 0.686188919 |           |         |         |
| SNORD116-11 | ENSG00000206609 | 0.49647    | 0.30978     | 0.49647     | 0.30978     | 0.49647   |         |         |
|             | 0.30978         | 0.49647    | 0.30978     | 0.30978     | 0.686188919 |           |         |         |
| NA          | ENSG00000237874 | 0.49638    | 0.30981     | 0.49638     | 0.30981     | 0.0057148 | 0.49772 |         |
|             | 0.28216         | 0.38891    | 0.30981     | 0.686188919 |             |           |         |         |
| EML5        | ENSG00000165521 | -0.81716   | 0.79308     | -0.12851    | 0.55113     | -0.12851  | 0.55113 |         |
|             | 0.49637         | 0.30982    | 0.30982     | 0.686188919 |             |           |         |         |
| NA          | ENSG00000243483 | -0.16082   | 0.56388     | -0.19934    | 0.579       | -1.2446   | 0.89337 |         |
|             | 0.49637         | 0.30982    | 0.30982     | 0.686188919 |             |           |         |         |
| CMPK1       | ENSG00000162368 | 0.49626    | 0.30986     | 0.13571     | 0.44603     | -1.2568   | 0.89558 |         |
|             | -1.2568         | 0.89558    | 0.30986     | 0.686206094 |             |           |         |         |
| MTCO1P17    | ENSG00000223619 | -1.04      | 0.85083     | -1.04       | 0.85083     | -1.04     | 0.85083 | 0.49623 |
|             | 0.30986         | 0.30986    | 0.686206094 |             |             |           |         |         |
| RAB43       | ENSG00000172780 | 0.49622    | 0.30987     | -0.050748   | 0.52024     | -0.32     | 0.62552 |         |
|             | 0.17373         | 0.43104    | 0.30987     | 0.686206094 |             |           |         |         |
| NA          | ENSG00000283653 | 0.19794    | 0.42155     | 0.49612     | 0.3099      | -0.46814  | 0.68016 |         |
|             | -0.93389        | 0.82482    | 0.3099      | 0.686218291 |             |           |         |         |
| RB1CC1      | ENSG00000023287 | 0.057139   | 0.47722     | 0.057139    | 0.47722     | 0.49611   |         |         |
|             | 0.30991         | -0.79245   | 0.78595     | 0.30991     | 0.686218291 |           |         |         |
| OR51I2      | ENSG00000187918 | -0.19711   | 0.57813     | 0.49601     | 0.30995     | 0.22417   |         |         |
|             | 0.41131         | 0.49601    | 0.30995     | 0.30995     | 0.686218291 |           |         |         |
| MIR3671     | ENSG00000265996 | 0.496      | 0.30995     | 0.27131     | 0.39308     | 0.44417   | 0.32846 |         |

|           |                 |             |         |             |             |             |         |  |
|-----------|-----------------|-------------|---------|-------------|-------------|-------------|---------|--|
|           | 0.44417         | 0.32846     | 0.30995 | 0.686218291 |             |             |         |  |
| ACOT8     | ENSG00000101473 | -1.0137     | 0.84463 | 0.49597     | 0.30996     | -0.60356    | 0.72693 |  |
|           | 0.1976          | 0.42168     | 0.30996 | 0.686218291 |             |             |         |  |
| NA        | ENSG00000270204 | 0.49595     | 0.30996 | 0.49595     | 0.30996     | 0.49595     | 0.30996 |  |
|           | 0.49595         | 0.30996     | 0.30996 | 0.686218291 |             |             |         |  |
| NA        | ENSG00000236501 | -0.32284    | 0.62659 | -1.5183     | 0.93553     | -0.854      | 0.80345 |  |
|           | 0.49588         | 0.30999     | 0.30999 | 0.68625353  |             |             |         |  |
| VPS26CP1  | ENSG00000213083 | 0.25577     | 0.39906 | 0.23898     | 0.40556     | 0.49565     |         |  |
|           | 0.31007         | 0.48459     | 0.31398 | 0.31007     | 0.68633429  |             |         |  |
| NA        | ENSG00000278171 | 0.49565     | 0.31007 | 0.49565     | 0.31007     | 0.49565     | 0.31007 |  |
|           | 0.49565         | 0.31007     | 0.31007 | 0.68633429  |             |             |         |  |
| ZNF32     | ENSG00000169740 | -1.1004     | 0.86443 | 0.49562     | 0.31008     | -0.80002    | 0.78815 |  |
|           | -1.3495         | 0.91142     | 0.31008 | 0.68633429  |             |             |         |  |
| GCH1      | ENSG00000131979 | -1.1455     | 0.87399 | 0.10963     | 0.45635     | -0.80972    | 0.79095 |  |
|           | 0.49553         | 0.31011     | 0.31011 | 0.68633429  |             |             |         |  |
| NA        | ENSG00000249237 | 0.49552     | 0.31012 | 0.49552     | 0.31012     | 0.49552     | 0.31012 |  |
|           | 0.058584        | 0.47664     | 0.31012 | 0.68633429  |             |             |         |  |
| NA        | ENSG00000228426 | 0.49546     | 0.31014 | -0.86093    | 0.80536     | -1.8306     | 0.96642 |  |
|           | -1.8306         | 0.96642     | 0.31014 | 0.68633429  |             |             |         |  |
| LINC00578 | ENSG00000228221 | 0.12126     | 0.45174 | 0.49544     | 0.31015     | 0.03453     |         |  |
|           | 0.48623         | -0.1116     | 0.54443 | 0.31015     | 0.68633429  |             |         |  |
| NA        | ENSG00000272707 | 0.49536     | 0.31017 | 0.49536     | 0.31017     | 0.49536     | 0.31017 |  |
|           | 0.49536         | 0.31017     | 0.31017 | 0.68633429  |             |             |         |  |
| IDI1P2    | ENSG00000253654 | 0.32325     | 0.37325 | 0.32325     | 0.37325     | 0.35783     |         |  |
|           | 0.36024         | 0.49531     | 0.31019 | 0.31019     | 0.68633429  |             |         |  |
| NA        | ENSG00000260064 | 0.49532     | 0.31019 | 0.49532     | 0.31019     | 0.49532     | 0.31019 |  |
|           | 0.49532         | 0.31019     | 0.31019 | 0.68633429  |             |             |         |  |
| DSC3      | ENSG00000134762 | -0.012806   | 0.50511 | 0.4953      | 0.3102      | -0.23693    | 0.59365 |  |
|           | -0.96134        | 0.83181     | 0.3102  | 0.68633429  |             |             |         |  |
| NA        | ENSG00000244464 | -0.59378    | 0.72367 | -0.47081    | 0.68111     | 0.4952      | 0.31023 |  |
|           | -1.2867         | 0.90091     | 0.31023 | 0.68633429  |             |             |         |  |
| GJA1P1    | ENSG00000176857 | 0.49516     | 0.31024 | 0.49516     | 0.31024     | 0.49516     |         |  |
|           | 0.31024         | 0.49516     | 0.31024 | 0.31024     | 0.68633429  |             |         |  |
| GNG5P5    | ENSG00000234590 | -0.39606    | 0.65397 | -1.3159     | 0.9059      | -1.3159     |         |  |
|           | 0.9059          | 0.49516     | 0.31024 | 0.31024     | 0.68633429  |             |         |  |
| NA        | ENSG00000258638 | 0.080329    | 0.46799 | 0.49511     | 0.31026     | 0.49511     | 0.31026 |  |
|           | 0.49511         | 0.31026     | 0.31026 | 0.68633429  |             |             |         |  |
| NA        | ENSG00000270020 | -0.47584    | 0.68291 | -0.57383    | 0.71696     | 0.49508     | 0.31027 |  |
|           | 0.49508         | 0.31027     | 0.31027 | 0.68633429  |             |             |         |  |
| LINC01983 | ENSG00000223783 | -0.2084     | 0.58254 | 0.49506     | 0.31028     | -0.68466    |         |  |
|           | 0.75322         | 0.17005     | 0.43248 | 0.31028     | 0.68633429  |             |         |  |
| MIR5689   | ENSG00000263705 | 0.49505     | 0.31028 | 0.49505     | 0.31028     | 0.49505     |         |  |
|           | 0.31028         | 0.49505     | 0.31028 | 0.31028     | 0.68633429  |             |         |  |
| KTN1-AS1  | ENSG00000186615 | 0.096184    | 0.46169 | -0.48406    | 0.68583     | 0.23389     |         |  |
|           | 0.40753         | 0.49503103  | 0.3103  | 0.686347374 |             |             |         |  |
| NA        | ENSG00000272087 | 0.49492     | 0.31033 | 0.49492     | 0.31033     | 0.49492     | 0.31033 |  |
|           | 0.49492         | 0.31033     | 0.31033 | 0.686382575 |             |             |         |  |
| NA        | ENSG00000237062 | -0.00058168 | 0.50023 | 0.49479     | 0.31038     | -0.00058168 |         |  |
|           | 0.50023         | -0.00058168 | 0.50023 | 0.31038     | 0.686462007 |             |         |  |
| NA        | ENSG00000272501 | 0.49466     | 0.31042 | -0.7891     | 0.78497     | 0.18783     | 0.4255  |  |
|           | 0.18783         | 0.4255      | 0.31042 | 0.686464119 |             |             |         |  |
| ZBTB21    | ENSG00000173276 | -1.0037     | 0.84224 | -1.8754     | 0.96963     | 0.49459     |         |  |
|           | 0.31044         | 0.14034     | 0.4442  | 0.31044     | 0.686464119 |             |         |  |
| DNAH3     | ENSG00000158486 | 0.45826     | 0.32338 | 0.32762     | 0.3716      | 0.49456     | 0.31045 |  |
|           | -0.59794        | 0.72506     | 0.31045 | 0.686464119 |             |             |         |  |
| NA        | ENSG00000280137 | 0.49458     | 0.31045 | 0.49458     | 0.31045     | 0.49458     | 0.31045 |  |
|           | 0.49458         | 0.31045     | 0.31045 | 0.686464119 |             |             |         |  |
| LINC01096 | ENSG00000246095 | -0.27111    | 0.60685 | 0.48193     | 0.31493     | -0.12384    |         |  |
|           | 0.54928         | 0.49454     | 0.31046 | 0.31046     | 0.686464119 |             |         |  |
| NPM1P39   | ENSG00000225159 | 0.49451     | 0.31047 | 0.47489     | 0.31743     | 0.27947     |         |  |
|           | 0.38994         | 0.32579     | 0.37229 | 0.31047     | 0.686464119 |             |         |  |
| CEP170    | ENSG00000143702 | 0.49443     | 0.3105  | 0.42067     | 0.337026827 | 0.39425     |         |  |

|             |                 |           |         |             |             |           |         |         |
|-------------|-----------------|-----------|---------|-------------|-------------|-----------|---------|---------|
|             | -0.8376         | 0.79887   | 0.3105  | 0.686464119 |             |           |         |         |
| RNU7-14P    | ENSG00000238468 | 0.4944    | 0.31051 | 0.4944      | 0.31051     | 0.4944    | 0.31051 | 0.4944  |
|             | 0.31051         | 0.4944    | 0.31051 | 0.31051     | 0.686464119 |           |         |         |
| DHRS4-AS1   | ENSG00000215256 | 0.16567   | 0.43421 | 0.041122    | 0.4836      | 0.4759    |         |         |
|             | 0.31707         | 0.49439   | 0.31052 | 0.31052     | 0.686464119 |           |         |         |
| ZDHHC2      | ENSG00000104219 | -1.7886   | 0.96316 | -0.18157    | 0.57204     | -0.080507 |         |         |
|             | 0.53208         | 0.49435   | 0.31053 | 0.31053     | 0.686464119 |           |         |         |
| NA          | ENSG00000253708 | 0.4943    | 0.31055 | 0.4943      | 0.31055     | 0.4943    | 0.31055 | 0.4943  |
|             | 0.4943          | 0.31055   | 0.31055 | 0.686464119 |             |           |         |         |
| NA          | ENSG00000257905 | 0.49428   | 0.31055 | 0.49428     | 0.31055     | 0.49428   | 0.31055 | 0.49428 |
|             | 0.49428         | 0.31055   | 0.31055 | 0.686464119 |             |           |         |         |
| IGKV1-5     | ENSG00000243466 | 0.49416   | 0.3106  | -1.0147     | 0.84487     | -0.63004  |         |         |
|             | 0.73567         | 0.49416   | 0.3106  | 0.3106      | 0.686520421 |           |         |         |
| TMEM248P1   | ENSG00000249555 | 0.49412   | 0.31061 | -1.4541     | 0.92704     | -0.14656  |         |         |
|             | 0.55826         | 0.49412   | 0.31061 | 0.31061     | 0.686520421 |           |         |         |
| MTUS2-AS1   | ENSG00000179141 | -0.31485  | 0.62356 | 0.49403     | 0.31064     | -0.68537  |         |         |
|             | 0.75344         | -0.68537  | 0.75344 | 0.31064     | 0.686520421 |           |         |         |
| ZNF527      | ENSG00000189164 | 0.051369  | 0.47952 | 0.494       | 0.31065     | -1.5898   | 0.94406 |         |
|             | -1.5898         | 0.94406   | 0.31065 | 0.686520421 |             |           |         |         |
| NA          | ENSG00000253371 | 0.494     | 0.31065 | -0.32211    | 0.62631     | -0.21834  | 0.58642 |         |
|             | -1.0626         | 0.85602   | 0.31065 | 0.686520421 |             |           |         |         |
| NA          | ENSG00000241804 | 0.49399   | 0.31066 | 0.49399     | 0.31066     | -0.13245  | 0.55269 |         |
|             | 0.49399         | 0.31066   | 0.31066 | 0.686520421 |             |           |         |         |
| NA          | ENSG00000200753 | 0.49394   | 0.31068 | 0.49394     | 0.31068     | 0.49394   | 0.31068 | 0.49394 |
|             | 0.49394         | 0.31068   | 0.31068 | 0.686533484 |             |           |         |         |
| MIR5692A2   | ENSG00000264512 | 0.49383   | 0.31071 | -0.6106     | 0.72927     | -0.63979  |         |         |
|             | 0.73885         | -0.63979  | 0.73885 | 0.31071     | 0.686568644 |           |         |         |
| LINC00951   | ENSG00000204092 | -0.5679   | 0.71495 | -1.2557     | 0.89539     | -0.37824  |         |         |
|             | 0.64738         | 0.49374   | 0.31075 | 0.31075     | 0.686616858 |           |         |         |
| MBD6        | ENSG00000166987 | 0.4937    | 0.31076 | 0.4937      | 0.31076     | 0.4937    | 0.31076 | 0.4937  |
|             | 0.4937          | 0.31076   | 0.31076 | 0.686616858 |             |           |         |         |
| PNMA8A      | ENSG00000182013 | 0.49362   | 0.31079 | -1.1554     | 0.87603     | -0.37078  |         |         |
|             | 0.6446          | -0.99779  | 0.84081 | 0.31079     | 0.686652009 |           |         |         |
| NA          | ENSG00000252420 | 0.49354   | 0.31081 | 0.49354     | 0.31081     | 0.49354   | 0.31081 | 0.49354 |
|             | 0.49354         | 0.31081   | 0.31081 | 0.686660041 |             |           |         |         |
| LCN1P1      | ENSG00000119440 | 0.49351   | 0.31083 | -1.3888     | 0.91756     | 0.43631   |         |         |
|             | 0.33131         | -0.70382  | 0.75923 | 0.31083     | 0.686660041 |           |         |         |
| C4orf19     | ENSG00000154274 | -0.14442  | 0.55741 | 0.49346     | 0.31085     | 0.13464   |         |         |
|             | 0.44645         | -0.091479 | 0.53644 | 0.31085     | 0.686660041 |           |         |         |
| NA          | ENSG00000258400 | 0.49345   | 0.31085 | -0.32141    | 0.62605     | -0.32141  | 0.62605 | 0.62605 |
|             | -0.32141        | 0.62605   | 0.31085 | 0.686660041 |             |           |         |         |
| NA          | ENSG00000249452 | 0.4934    | 0.31087 | 0.19989     | 0.42078     | 0.4934    | 0.31087 | 0.4934  |
|             | 0.4934          | 0.31087   | 0.31087 | 0.686673093 |             |           |         |         |
| NA          | ENSG00000212608 | 0.4933    | 0.3109  | -0.29996    | 0.6179      | 0.43889   | 0.33037 | 0.33037 |
|             | 0.19425         | 0.42299   | 0.3109  | 0.686687119 |             |           |         |         |
| NA          | ENSG00000214776 | 0.3266    | 0.37199 | 0.49319     | 0.31094     | -0.108    | 0.543   | 0.543   |
|             | -0.085188       | 0.53394   | 0.31094 | 0.686687119 |             |           |         |         |
| NA          | ENSG00000233365 | -0.78041  | 0.78242 | 0.4932      | 0.31094     | -0.15112  | 0.56006 | 0.56006 |
|             | -0.28471        | 0.61207   | 0.31094 | 0.686687119 |             |           |         |         |
| NA          | ENSG00000231990 | 0.49315   | 0.31095 | 0.49315     | 0.31095     | 0.49315   | 0.31095 | 0.49315 |
|             | 0.49315         | 0.31095   | 0.31095 | 0.686687119 |             |           |         |         |
| HS6ST3      | ENSG00000185352 | 0.29069   | 0.38565 | 0.4111      | 0.3405      | 0.49312   |         |         |
|             | 0.31096         | 0.055967  | 0.47768 | 0.31096     | 0.686687119 |           |         |         |
| NA          | ENSG00000258505 | -1.3009   | 0.90336 | -0.72954    | 0.76716     | 0.49311   | 0.31097 | 0.31097 |
|             | -0.72954        | 0.76716   | 0.31097 | 0.686687119 |             |           |         |         |
| NA          | ENSG00000248850 | 0.49308   | 0.31098 | 0.49308     | 0.31098     | 0.49308   | 0.31098 | 0.49308 |
|             | 0.49308         | 0.31098   | 0.31098 | 0.686687119 |             |           |         |         |
| NA          | ENSG00000254145 | -0.59841  | 0.72522 | 0.49306     | 0.31099     | -0.59841  | 0.72522 | 0.72522 |
|             | -0.59841        | 0.72522   | 0.31099 | 0.686687119 |             |           |         |         |
| IGKV2OR22-4 | ENSG00000253691 | -0.3006   | 0.61814 | -0.0069656  | 0.50278     | 0.15042   |         |         |
|             | 0.44022         | 0.49298   | 0.31101 | 0.31101     | 0.686687119 |           |         |         |
| MMP7        | ENSG00000137673 | 0.49296   | 0.31102 | 0.49296     | 0.31102     | 0.22648   | 0.41041 | 0.41041 |



|           |                 |            |         |             |             |          |         |  |
|-----------|-----------------|------------|---------|-------------|-------------|----------|---------|--|
|           | 0.49296         | 0.31102    | 0.31102 | 0.686687119 |             |          |         |  |
| NA        | ENSG00000243295 | -0.39155   | 0.65231 | -0.39155    | 0.65231     | -0.39155 | 0.65231 |  |
|           | 0.49291         | 0.31104    | 0.31104 | 0.686687119 |             |          |         |  |
| CRTAM     | ENSG00000109943 | -0.40913   | 0.65878 | 0.10792     | 0.45703     | 0.036735 | 0.48535 |  |
|           | 0.49281         | 0.31107    | 0.31107 | 0.686687119 |             |          |         |  |
| RNU6-291P | ENSG00000207451 | 0.49279    | 0.31108 | -0.39535    | 0.65371     | -0.39535 |         |  |
|           | 0.65371         | -0.39535   | 0.65371 | 0.31108     | 0.686687119 |          |         |  |
| LINC01111 | ENSG00000254300 | 0.49274    | 0.3111  | -1.1683     | 0.87866     | -0.86125 |         |  |
|           | 0.80545         | -0.45634   | 0.67593 | 0.3111      | 0.686687119 |          |         |  |
| NFATC4    | ENSG00000100968 | 0.46978    | 0.31926 | 0.49267     | 0.31112     | 0.46978  |         |  |
|           | 0.31926         | 0.20001    | 0.42074 | 0.31112     | 0.686687119 |          |         |  |
| MS4A15    | ENSG00000166961 | -0.86555   | 0.80663 | -0.57887    | 0.71866     | 0.32011  |         |  |
|           | 0.37444         | 0.49269    | 0.31112 | 0.31112     | 0.686687119 |          |         |  |
| PATE2     | ENSG00000196844 | 0.49265    | 0.31113 | 0.49265     | 0.31113     | 0.49265  | 0.31113 |  |
|           | 0.49265         | 0.31113    | 0.31113 | 0.686687119 |             |          |         |  |
| RXR8      | ENSG00000204231 | 0.49264    | 0.31113 | 0.49264     | 0.31113     | 0.49264  | 0.31113 |  |
|           | 0.49264         | 0.31113    | 0.31113 | 0.686687119 |             |          |         |  |
| HTR2A     | ENSG00000102468 | -0.31912   | 0.62518 | 0.49254     | 0.31117     | 0.42548  | 0.33524 |  |
|           | -0.22819        | 0.59025    | 0.31117 | 0.686713197 |             |          |         |  |
| NA        | ENSG00000254043 | -0.88071   | 0.81076 | 0.49252     | 0.31117     | 0.49252  | 0.31117 |  |
|           | 0.49252         | 0.31117    | 0.31117 | 0.686713197 |             |          |         |  |
| RAD51AP1  | ENSG00000111247 | 0.49249    | 0.31119 | 0.49249     | 0.31119     | 0.49249  |         |  |
|           | 0.31119         | 0.49249    | 0.31119 | 0.31119     | 0.686726234 |          |         |  |
| ICE2      | ENSG00000128915 | 0.44993    | 0.32638 | 0.26315     | 0.39622     | 0.49229  | 0.31126 |  |
|           | 0.12336         | 0.45091    | 0.31126 | 0.686831533 |             |          |         |  |
| KLF5      | ENSG00000102554 | -0.37407   | 0.64583 | -0.59477    | 0.724       | 0.17878  | 0.42906 |  |
|           | 0.49226         | 0.31127    | 0.31127 | 0.686831533 |             |          |         |  |
| LINC01699 | ENSG00000179452 | 0.49222    | 0.31128 | 0.49222     | 0.31128     | 0.49222  |         |  |
|           | 0.31128         | 0.16273    | 0.43537 | 0.31128     | 0.686831533 |          |         |  |
| MYG1      | ENSG00000139637 | -1.1625    | 0.87749 | 0.49216     | 0.3113      | -1.1625  | 0.87749 |  |
|           | -1.1625         | 0.87749    | 0.3113  | 0.686844562 |             |          |         |  |
| SCRT2     | ENSG00000215397 | 0.49207    | 0.31133 | -0.26366    | 0.60398     | 0.49207  | 0.31133 |  |
|           | -0.25748        | 0.6016     | 0.31133 | 0.686879653 |             |          |         |  |
| RBM42     | ENSG00000126254 | 0.15444    | 0.43863 | 0.15444     | 0.43863     | 0.11346  | 0.45483 |  |
|           | 0.49199         | 0.31136    | 0.31136 | 0.686909692 |             |          |         |  |
| NA        | ENSG00000254885 | 0.49191    | 0.31139 | -0.11716    | 0.54663     | 0.49191  | 0.31139 |  |
|           | 0.49191         | 0.31139    | 0.31139 | 0.686909692 |             |          |         |  |
| MIR4652   | ENSG00000265423 | -0.70634   | 0.76001 | -0.70634    | 0.76001     | 0.49192  |         |  |
|           | 0.31139         | -0.70634   | 0.76001 | 0.31139     | 0.686909692 |          |         |  |
| NA        | ENSG00000256518 | 0.49188    | 0.3114  | 0.49188     | 0.3114      | 0.49188  | 0.3114  |  |
|           | -0.2671         | 0.60531    | 0.3114  | 0.686909692 |             |          |         |  |
| P2RX6     | ENSG00000099957 | 0.025306   | 0.48991 | -0.24192    | 0.59558     | 0.49177  | 0.31144 |  |
|           | 0.48302         | 0.31454    | 0.31144 | 0.686917665 |             |          |         |  |
| NA        | ENSG00000232085 | 0.090423   | 0.46398 | 0.49171     | 0.31146     | -0.83286 | 0.79754 |  |
|           | -0.83286        | 0.79754    | 0.31146 | 0.686917665 |             |          |         |  |
| NA        | ENSG00000238934 | 0.49172    | 0.31146 | 0.49172     | 0.31146     | 0.49172  | 0.31146 |  |
|           | 0.49172         | 0.31146    | 0.31146 | 0.686917665 |             |          |         |  |
| RPS27P29  | ENSG00000240231 | 0.49171    | 0.31146 | 0.49171     | 0.31146     | 0.49171  |         |  |
|           | 0.31146         | 0.49171    | 0.31146 | 0.31146     | 0.686917665 |          |         |  |
| NA        | ENSG00000239148 | 0.49162    | 0.3115  | 0.49162     | 0.3115      | 0.49162  | 0.3115  |  |
|           | 0.49162         | 0.3115     | 0.3115  | 0.686974792 |             |          |         |  |
| RNU6-370P | ENSG00000222940 | 0.49148    | 0.31154 | 0.49148     | 0.31154     | 0.49148  |         |  |
|           | 0.31154         | 0.49148    | 0.31154 | 0.31154     | 0.687031914 |          |         |  |
| SUCLA2P2  | ENSG00000233107 | 0.49141    | 0.31157 | 0.49141     | 0.31157     | 0.49141  |         |  |
|           | 0.31157         | -0.08704   | 0.53468 | 0.31157     | 0.687066979 |          |         |  |
| NA        | ENSG00000249684 | 0.49129    | 0.31161 | -0.024874   | 0.50992     | -0.30649 | 0.62038 |  |
|           | -0.5587         | 0.71182    | 0.31161 | 0.687124092 |             |          |         |  |
| SIRT3     | ENSG00000142082 | 0.49122    | 0.31164 | -0.32427    | 0.62713     | -0.25995 | 0.60255 |  |
|           | -0.21616        | 0.58557    | 0.31164 | 0.687150106 |             |          |         |  |
| HHIPL1    | ENSG00000182218 | 0.0044456  | 0.49823 | 0.062876    | 0.47493     | -0.24283 |         |  |
|           | 0.59593         | 0.49119    | 0.31165 | 0.31165     | 0.687150106 |          |         |  |
| WRN       | ENSG00000165392 | -0.0034181 | 0.50136 | 0.49107     | 0.31169     | -0.24453 | 0.59659 |  |

|            |                 |           |             |             |             |           |         |         |
|------------|-----------------|-----------|-------------|-------------|-------------|-----------|---------|---------|
|            | -0.016305       | 0.5065    | 0.31169     | 0.687176116 |             |           |         |         |
| NA         | ENSG00000223598 | -0.70082  | 0.75829     | 0.49107     | 0.31169     | 0.14631   | 0.44184 |         |
|            | -0.61256        | 0.72992   | 0.31169     | 0.687176116 |             |           |         |         |
| NA         | ENSG00000239038 | -0.59706  | 0.72477     | 0.24768     | 0.40219     | 0.28356   | 0.38837 |         |
|            | 0.49097         | 0.31173   | 0.31173     | 0.687233211 |             |           |         |         |
| PPME1      | ENSG00000214517 | 0.4909    | 0.31175     | 0.043354    | 0.48271     | -0.49289  | 0.68896 |         |
|            | -1.2751         | 0.89886   | 0.31175     | 0.687246211 |             |           |         |         |
| EGFLAM-AS2 | ENSG00000248572 | -0.53939  | 0.70519     | 0.49072     | 0.31181     | -1.262    |         |         |
|            | 0.89653         | -0.56354  | 0.71347     | 0.31181     | 0.687267114 |           |         |         |
| GORASP1    | ENSG00000114745 | 0.4907    | 0.31182     | -0.51692    | 0.6974      | -0.4927   |         |         |
|            | 0.68889         | 0.1571    | 0.43758     | 0.31182     | 0.687267114 |           |         |         |
| NA         | ENSG00000279420 | 0.4907    | 0.31182     | 0.4907      | 0.31182     | 0.4907    | 0.31182 |         |
|            | 0.4907          | 0.31182   | 0.31182     | 0.687267114 |             |           |         |         |
| NA         | ENSG00000229206 | 0.070399  | 0.47194     | 0.070399    | 0.47194     | 0.070399  | 0.47194 |         |
|            | 0.49067         | 0.31183   | 0.31183     | 0.687267114 |             |           |         |         |
| MTND5P14   | ENSG00000230225 | 0.49067   | 0.31183     | 0.19917     | 0.42107     | 0.49067   |         |         |
|            | 0.31183         | 0.49067   | 0.31183     | 0.31183     | 0.687267114 |           |         |         |
| NA         | ENSG00000248401 | 0.37871   | 0.35245     | 0.37871     | 0.35245     | 0.37871   | 0.35245 |         |
|            | 0.49061         | 0.31185   | 0.31185     | 0.687271065 |             |           |         |         |
| EEF1DP1    | ENSG00000228887 | 0.49059   | 0.31186     | 0.49059     | 0.31186     | 0.49059   |         |         |
|            | 0.31186         | 0.49059   | 0.31186     | 0.31186     | 0.687271065 |           |         |         |
| OR13C7     | ENSG00000243641 | 0.068492  | 0.4727      | 0.49052     | 0.31188     | 0.27066   |         |         |
|            | 0.39332         | 0.34076   | 0.36664     | 0.31188     | 0.687273253 |           |         |         |
| NA         | ENSG00000207091 | 0.49048   | 0.3119      | 0.49048     | 0.3119      | 0.49048   | 0.3119  |         |
|            | 0.49048         | 0.3119    | 0.3119      | 0.687273253 |             |           |         |         |
| SGF29      | ENSG00000176476 | 0.37801   | 0.35271     | 0.20759     | 0.41778     | 0.45519   | 0.32449 |         |
|            | 0.49043         | 0.31192   | 0.31192     | 0.687273253 |             |           |         |         |
| RANBP20P   | ENSG00000259144 | 0.3841    | 0.35045     | 0.3964      | 0.34591     | 0.49036   |         |         |
|            | 0.31194         | -0.056027 | 0.52234     | 0.31194     | 0.687273253 |           |         |         |
| NA         | ENSG00000202023 | 0.49026   | 0.31197     | 0.49026     | 0.31197     | 0.49026   | 0.31197 |         |
|            | -0.90762        | 0.81796   | 0.31197     | 0.687273253 |             |           |         |         |
| NA         | ENSG00000254988 | 0.04796   | 0.48087     | 0.49027     | 0.31197     | -0.056495 | 0.52253 |         |
|            | -0.056495       | 0.52253   | 0.31197     | 0.687273253 |             |           |         |         |
| ST6GALNAC1 | ENSG00000070526 | 0.49022   | 0.31199     | 0.49022     | 0.31199     | 0.49022   |         |         |
|            | 0.31199         | 0.3516    | 0.36257     | 0.31199     | 0.687273253 |           |         |         |
| NA         | ENSG00000261363 | -1.1988   | 0.8847      | -0.67497    | 0.75015     | 0.4902    | 0.31199 |         |
|            | -0.093359       | 0.53719   | 0.31199     | 0.687273253 |             |           |         |         |
| NA         | ENSG00000243181 | -1.0041   | 0.84233     | 0.49019     | 0.312       | 0.49019   | 0.312   | 0.49019 |
|            | 0.312           | 0.312     | 0.687273253 |             |             |           |         |         |
| SNURF      | ENSG00000273173 | 0.49013   | 0.31202     | 0.49013     | 0.31202     | 0.49013   | 0.31202 |         |
|            | 0.49013         | 0.31202   | 0.31202     | 0.687273253 |             |           |         |         |
| ALG10B     | ENSG00000175548 | -0.94912  | 0.82872     | -0.73231    | 0.76801     | -0.17899  |         |         |
|            | 0.57103         | 0.49      | 0.31207     | 0.31207     | 0.687273253 |           |         |         |
| LINC01804  | ENSG00000231031 | -0.7474   | 0.77259     | -0.62547    | 0.73417     | 0.25581   |         |         |
|            | 0.39905         | 0.48996   | 0.31208     | 0.31208     | 0.687273253 |           |         |         |
| PIK3IP1-DT | ENSG00000228839 | 0.48992   | 0.31209     | 0.48992     | 0.31209     | 0.48992   |         |         |
|            | 0.31209         | 0.48992   | 0.31209     | 0.31209     | 0.687273253 |           |         |         |
| RNA5SP289  | ENSG00000199202 | 0.4899    | 0.3121      | 0.4899      | 0.3121      | 0.4899    |         |         |
|            | 0.3121          | 0.4899    | 0.3121      | 0.3121      | 0.687273253 |           |         |         |
| NA         | ENSG00000231081 | 0.035346  | 0.4859      | 0.062034    | 0.47527     | 0.48989   | 0.31211 |         |
|            | -0.27365        | 0.60782   | 0.31211     | 0.687273253 |             |           |         |         |
| NA         | ENSG00000232517 | -0.34837  | 0.63622     | -0.071183   | 0.52837     | 0.48973   | 0.31216 |         |
|            | -0.050304       | 0.52006   | 0.31216     | 0.687273253 |             |           |         |         |
| RBM24      | ENSG00000112183 | -0.45652  | 0.67599     | -1.1296     | 0.87068     | 0.48971   | 0.31217 |         |
|            | -1.7528         | 0.96018   | 0.31217     | 0.687273253 |             |           |         |         |
| PINLYP     | ENSG00000234465 | 0.48972   | 0.31217     | 0.48972     | 0.31217     | 0.48972   |         |         |
|            | 0.31217         | 0.48972   | 0.31217     | 0.31217     | 0.687273253 |           |         |         |
| RNU7-95P   | ENSG00000239007 | 0.26026   | 0.39733     | 0.35929     | 0.35969     | 0.48968   |         |         |
|            | 0.31218         | 0.48968   | 0.31218     | 0.31218     | 0.687273253 |           |         |         |
| NA         | ENSG00000241473 | 0.48968   | 0.31218     | -0.022511   | 0.50898     | -0.022511 | 0.50898 |         |
|            | 0.48968         | 0.31218   | 0.31218     | 0.687273253 |             |           |         |         |
| NA         | ENSG00000253370 | 0.48953   | 0.31223     | 0.48953     | 0.31223     | 0.48953   | 0.31223 |         |

|           |                 |           |         |             |             |          |         |  |
|-----------|-----------------|-----------|---------|-------------|-------------|----------|---------|--|
|           | 0.48953         | 0.31223   | 0.31223 | 0.687273253 |             |          |         |  |
| NA        | ENSG00000201351 | 0.48951   | 0.31224 | 0.48951     | 0.31224     | 0.48951  | 0.31224 |  |
|           | 0.48951         | 0.31224   | 0.31224 | 0.687273253 |             |          |         |  |
| PPIAP59   | ENSG00000228674 | 0.040136  | 0.48399 | 0.4895      | 0.31224     | 0.4895   |         |  |
|           | 0.31224         | 0.18721   | 0.42575 | 0.31224     | 0.687273253 |          |         |  |
| ARTN      | ENSG00000117407 | -0.010332 | 0.50412 | 0.48948     | 0.31225     | -0.86965 | 0.80776 |  |
|           | -0.36125        | 0.64104   | 0.31225 | 0.687273253 |             |          |         |  |
| RN7SL740P | ENSG00000244294 | 0.48948   | 0.31225 | -0.26944    | 0.6062      | -0.30921 |         |  |
|           | 0.62142         | -0.30921  | 0.62142 | 0.31225     | 0.687273253 |          |         |  |
| ZNF532    | ENSG00000074657 | 0.188     | 0.42544 | 0.30292     | 0.38097     | 0.48941  | 0.31227 |  |
|           | 0.023433        | 0.49065   | 0.31227 | 0.687273253 |             |          |         |  |
| SQLE      | ENSG00000104549 | 0.4541    | 0.32488 | 0.4541      | 0.32488     | 0.4541   | 0.32488 |  |
|           | 0.48943         | 0.31227   | 0.31227 | 0.687273253 |             |          |         |  |
| TMEM41B   | ENSG00000166471 | 0.48221   | 0.31483 | 0.28708     | 0.38703     | -0.2671  |         |  |
|           | 0.6053          | 0.48941   | 0.31227 | 0.31227     | 0.687273253 |          |         |  |
| RPL21P104 | ENSG00000242922 | -1.0579   | 0.85496 | 0.48944     | 0.31227     | 0.48944  |         |  |
|           | 0.31227         | 0.48944   | 0.31227 | 0.31227     | 0.687273253 |          |         |  |
| NA        | ENSG00000272329 | 0.4893    | 0.31232 | 0.4893      | 0.31232     | 0.4893   | 0.31232 |  |
|           | 0.4893          | 0.31232   | 0.31232 | 0.687352254 |             |          |         |  |
| DTYMK     | ENSG00000168393 | -1.0804   | 0.86003 | 0.48919     | 0.31235     | 0.48919  | 0.31235 |  |
|           | -0.18979        | 0.57526   | 0.31235 | 0.687356191 |             |          |         |  |
| DEFB114   | ENSG00000177684 | 0.48921   | 0.31235 | 0.48921     | 0.31235     | 0.48921  |         |  |
|           | 0.31235         | 0.48921   | 0.31235 | 0.31235     | 0.687356191 |          |         |  |
| RPL23AP11 | ENSG00000230988 | -0.72485  | 0.76573 | 0.48908     | 0.31239     | -0.45045 |         |  |
|           | 0.67381         | 0.291     | 0.38552 | 0.31239     | 0.687413172 |          |         |  |
| ZNF93     | ENSG00000184635 | -0.84655  | 0.80138 | -0.3356     | 0.63141     | 0.48884  | 0.31248 |  |
|           | 0.14862         | 0.44093   | 0.31248 | 0.687509039 |             |          |         |  |
| NA        | ENSG00000207084 | -0.24311  | 0.59604 | 0.48883     | 0.31248     | -0.64049 | 0.73907 |  |
|           | -0.029548       | 0.51179   | 0.31248 | 0.687509039 |             |          |         |  |
| NA        | ENSG00000276067 | -0.25133  | 0.59922 | -0.12997    | 0.55171     | 0.25158  | 0.40068 |  |
|           | 0.48884         | 0.31248   | 0.31248 | 0.687509039 |             |          |         |  |
| LINC01072 | ENSG00000236076 | 0.48881   | 0.31249 | 0.48881     | 0.31249     | -0.21543 |         |  |
|           | 0.58529         | 0.48881   | 0.31249 | 0.31249     | 0.687509039 |          |         |  |
| NA        | ENSG00000238518 | 0.48875   | 0.31251 | 0.48875     | 0.31251     | 0.48875  | 0.31251 |  |
|           | 0.48875         | 0.31251   | 0.31251 | 0.687522    |             |          |         |  |
| NA        | ENSG00000267731 | -0.85386  | 0.80341 | 0.48852     | 0.31259     | -0.85386 | 0.80341 |  |
|           | -0.85386        | 0.80341   | 0.31259 | 0.687650323 |             |          |         |  |
| OR2L5     | ENSG00000197454 | -1.1306   | 0.87088 | 0.48846     | 0.31261     | -0.5057  | 0.69347 |  |
|           | -1.027          | 0.8478    | 0.31261 | 0.687650323 |             |          |         |  |
| CCDC112   | ENSG00000164221 | 0.4176    | 0.33812 | 0.18061     | 0.42834     | 0.40399  |         |  |
|           | 0.34311         | 0.48842   | 0.31263 | 0.31263     | 0.687650323 |          |         |  |
| MC5R      | ENSG00000176136 | -0.40875  | 0.65864 | -0.40875    | 0.65864     | 0.48838  | 0.31264 |  |
|           | 0.06084         | 0.47574   | 0.31264 | 0.687650323 |             |          |         |  |
| NA        | ENSG00000267735 | 0.48835   | 0.31265 | 0.48835     | 0.31265     | 0.48835  | 0.31265 |  |
|           | 0.48835         | 0.31265   | 0.31265 | 0.687650323 |             |          |         |  |
| RANP3     | ENSG00000254500 | -0.45418  | 0.67515 | 0.48831     | 0.31267     | -0.45418 | 0.67515 |  |
|           | -0.45418        | 0.67515   | 0.31267 | 0.687650323 |             |          |         |  |
| SYT14     | ENSG00000143469 | 0.48828   | 0.31268 | 0.19011     | 0.42461     | -1.373   | 0.91513 |  |
|           | -1.4595         | 0.92779   | 0.31268 | 0.687650323 |             |          |         |  |
| NTRK3     | ENSG00000140538 | -0.19797  | 0.57846 | 0.48815     | 0.31272     | -0.22102 | 0.58746 |  |
|           | -0.25512        | 0.60068   | 0.31272 | 0.687650323 |             |          |         |  |
| NA        | ENSG00000217644 | 0.20808   | 0.41758 | 0.20808     | 0.41758     | 0.20808  | 0.41758 |  |
|           | 0.48816         | 0.31272   | 0.31272 | 0.687650323 |             |          |         |  |
| RHOBTB2   | ENSG00000008853 | -1.2371   | 0.89197 | -1.2371     | 0.89197     | -1.2371  |         |  |
|           | 0.89197         | 0.48806   | 0.31275 | 0.31275     | 0.687650323 |          |         |  |
| KCNK15    | ENSG00000124249 | -1.0996   | 0.86425 | -0.22629    | 0.58951     | 0.43914  |         |  |
|           | 0.33028         | 0.48808   | 0.31275 | 0.31275     | 0.687650323 |          |         |  |
| IRAG1     | ENSG00000072952 | 0.488     | 0.31277 | -0.60023    | 0.72582     | -1.1775  | 0.8805  |  |
|           | -0.70629        | 0.76      | 0.31277 | 0.687650323 |             |          |         |  |
| LINC02275 | ENSG00000248319 | 0.48801   | 0.31277 | -1.0554     | 0.85437     | -0.79614 |         |  |
|           | 0.78703         | -0.82851  | 0.79631 | 0.31277     | 0.687650323 |          |         |  |
| NADK      | ENSG00000008130 | 0.39022   | 0.34819 | 0.48799     | 0.31278     | 0.11915  | 0.45258 |  |

|           |                 |           |         |             |             |           |         |  |
|-----------|-----------------|-----------|---------|-------------|-------------|-----------|---------|--|
|           | 0.18035         | 0.42844   | 0.31278 | 0.687650323 |             |           |         |  |
| NA        | ENSG00000269947 | 0.48798   | 0.31278 | 0.48798     | 0.31278     | 0.11302   | 0.45501 |  |
|           | 0.11302         | 0.45501   | 0.31278 | 0.687650323 |             |           |         |  |
| LINC00607 | ENSG00000235770 | -0.036784 | 0.51467 | 0.48794     | 0.3128      | -0.77926  |         |  |
|           | 0.78209         | 0.15495   | 0.43843 | 0.3128      | 0.687663268 |           |         |  |
| OR2G3     | ENSG00000177476 | 0.48772   | 0.31287 | 0.48772     | 0.31287     | 0.48772   | 0.31287 |  |
|           | -0.7085         | 0.76068   | 0.31287 | 0.68774606  |             |           |         |  |
| RN7SL339P | ENSG00000265740 | 0.48773   | 0.31287 | -0.18022    | 0.57151     | -0.011345 |         |  |
|           | 0.50453         | 0.46343   | 0.32153 | 0.31287     | 0.68774606  |           |         |  |
| RPL6P25   | ENSG00000213270 | -0.27238  | 0.60734 | -0.27238    | 0.60734     | -0.27238  |         |  |
|           | 0.60734         | 0.48771   | 0.31288 | 0.31288     | 0.68774606  |           |         |  |
| NA        | ENSG00000271945 | 0.48765   | 0.3129  | 0.48765     | 0.3129      | 0.48765   | 0.3129  |  |
|           | 0.48765         | 0.3129    | 0.3129  | 0.687753854 |             |           |         |  |
| NDEL1     | ENSG00000166579 | -0.49376  | 0.68926 | -0.49376    | 0.68926     | -0.49376  | 0.68926 |  |
|           | 0.48755         | 0.31293   | 0.31293 | 0.687753854 |             |           |         |  |
| NA        | ENSG00000272491 | 0.48755   | 0.31293 | 0.48755     | 0.31293     | 0.48755   | 0.31293 |  |
|           | 0.48755         | 0.31293   | 0.31293 | 0.687753854 |             |           |         |  |
| SCYL2P1   | ENSG00000213090 | 0.48754   | 0.31294 | 0.48754     | 0.31294     | 0.48754   |         |  |
|           | 0.31294         | 0.48754   | 0.31294 | 0.31294     | 0.687753854 |           |         |  |
| TRIM64FP  | ENSG00000226185 | -0.15421  | 0.56128 | 0.48736     | 0.313       | -0.15103  | 0.56002 |  |
|           | -0.83909        | 0.79929   | 0.313   | 0.687804332 |             |           |         |  |
| LINC01877 | ENSG00000238217 | -1.1604   | 0.87705 | 0.083598    | 0.46669     | -1.0261   |         |  |
|           | 0.84757         | 0.4873    | 0.31302 | 0.31302     | 0.687804332 |           |         |  |
| TMEM196   | ENSG00000173452 | 0.18361   | 0.42716 | 0.48726     | 0.31304     | -0.78818  |         |  |
|           | 0.78471         | -0.3069   | 0.62054 | 0.31304     | 0.687804332 |           |         |  |
| LINC01913 | ENSG00000214691 | 0.29752   | 0.38304 | -1.0972     | 0.86371     | -0.52066  |         |  |
|           | 0.6987          | 0.48724   | 0.31304 | 0.31304     | 0.687804332 |           |         |  |
| NA        | ENSG00000249741 | 0.48722   | 0.31305 | 0.38177     | 0.35132     | -0.029974 | 0.51196 |  |
|           | -0.69458        | 0.75634   | 0.31305 | 0.687804332 |             |           |         |  |
| APOA4     | ENSG00000110244 | -1.0224   | 0.8467  | 0.48716     | 0.31307     | 0.0094878 | 0.49621 |  |
|           | -0.18507        | 0.57341   | 0.31307 | 0.687804332 |             |           |         |  |
| ENAH      | ENSG00000154380 | 0.48717   | 0.31307 | -0.25203    | 0.59949     | -0.95122  | 0.82925 |  |
|           | 0.38297         | 0.35087   | 0.31307 | 0.687804332 |             |           |         |  |
| DUS3L     | ENSG00000141994 | 0.48712   | 0.31309 | 0.48712     | 0.31309     | -0.15192  | 0.56037 |  |
|           | -0.0017448      | 0.5007    | 0.31309 | 0.687804332 |             |           |         |  |
| RN7SL520P | ENSG00000240199 | 0.48712   | 0.31309 | 0.48712     | 0.31309     | 0.48712   |         |  |
|           | 0.31309         | 0.48712   | 0.31309 | 0.31309     | 0.687804332 |           |         |  |
| KDM4E     | ENSG00000235268 | -0.11658  | 0.5464  | -0.093771   | 0.53735     | 0.48703   | 0.31312 |  |
|           | -0.19508        | 0.57734   | 0.31312 | 0.687839228 |             |           |         |  |
| NA        | ENSG00000260109 | -0.25132  | 0.59922 | 0.4869      | 0.31316     | -1.6117   | 0.94649 |  |
|           | -1.6117         | 0.94649   | 0.31316 | 0.687863808 |             |           |         |  |
| NA        | ENSG00000283265 | 0.48686   | 0.31318 | -0.24695    | 0.59753     | -1.1792   | 0.88084 |  |
|           | -1.1792         | 0.88084   | 0.31318 | 0.687863808 |             |           |         |  |
| HAND2-AS1 | ENSG00000237125 | -1.315    | 0.90574 | -1.1158     | 0.86775     | -0.9121   |         |  |
|           | 0.81914         | 0.4868    | 0.3132  | 0.3132      | 0.687863808 |           |         |  |
| HTRA2     | ENSG00000115317 | 0.48676   | 0.31321 | 0.48676     | 0.31321     | 0.48676   | 0.31321 |  |
|           | 0.48676         | 0.31321   | 0.31321 | 0.687863808 |             |           |         |  |
| DFFA      | ENSG00000160049 | -1.5992   | 0.94511 | 0.48677     | 0.31321     | -0.23581  | 0.59321 |  |
|           | -0.61508        | 0.73075   | 0.31321 | 0.687863808 |             |           |         |  |
| VPS35L    | ENSG00000103544 | 0.4867    | 0.31323 | -0.1307     | 0.55199     | -0.28638  |         |  |
|           | 0.61271         | -0.64054  | 0.73909 | 0.31323     | 0.687863808 |           |         |  |
| GAREM1    | ENSG00000141441 | 0.48672   | 0.31323 | -0.47227    | 0.68163     | -0.045511 |         |  |
|           | 0.51815         | -0.65     | 0.74215 | 0.31323     | 0.687863808 |           |         |  |
| NA        | ENSG00000232667 | 0.15426   | 0.4387  | 0.15294     | 0.43922     | -0.24488  | 0.59673 |  |
|           | 0.48662         | 0.31326   | 0.31326 | 0.687867691 |             |           |         |  |
| NA        | ENSG00000269741 | 0.48663   | 0.31326 | 0.48663     | 0.31326     | 0.48663   | 0.31326 |  |
|           | 0.48663         | 0.31326   | 0.31326 | 0.687867691 |             |           |         |  |
| THBD      | ENSG00000178726 | 0.46102   | 0.32239 | -0.11315    | 0.54505     | 0.087943  | 0.46496 |  |
|           | 0.48653         | 0.3133    | 0.3133  | 0.687924526 |             |           |         |  |
| ZBED1P1   | ENSG00000250304 | -0.67291  | 0.7495  | 0.48644     | 0.31333     | -0.41481  |         |  |
|           | 0.66086         | -0.42196  | 0.66347 | 0.31333     | 0.687959399 |           |         |  |
| NA        | ENSG00000212278 | 0.38092   | 0.35163 | 0.38092     | 0.35163     | 0.38092   | 0.35163 |  |

|           |                 |          |         |             |             |           |         |  |
|-----------|-----------------|----------|---------|-------------|-------------|-----------|---------|--|
|           | 0.48637         | 0.31335  | 0.31335 | 0.687963273 |             |           |         |  |
| NA        | ENSG00000253108 | 0.41306  | 0.33978 | -0.43015    | 0.66646     | 0.48634   | 0.31336 |  |
|           | -0.14878        | 0.55914  | 0.31336 | 0.687963273 |             |           |         |  |
| NA        | ENSG00000278743 | -0.76017 | 0.77642 | 0.48617     | 0.31342     | 0.41538   | 0.33893 |  |
|           | 0.30979         | 0.37836  | 0.31342 | 0.688023961 |             |           |         |  |
| TEX50     | ENSG00000232113 | 0.48616  | 0.31343 | -0.86081    | 0.80533     | -0.86081  | 0.80533 |  |
|           | -0.86081        | 0.80533  | 0.31343 | 0.688023961 |             |           |         |  |
| RN7SL204P | ENSG00000264676 | -0.38866 | 0.65124 | 0.48615     | 0.31343     | 0.48615   |         |  |
|           | 0.31343         | -0.68257 | 0.75256 | 0.31343     | 0.688023961 |           |         |  |
| SPRTN     | ENSG00000010072 | 0.14687  | 0.44162 | 0.48578     | 0.31356     | 0.21421   | 0.41519 |  |
|           | 0.22066         | 0.41268  | 0.31356 | 0.688182641 |             |           |         |  |
| PPIAP82   | ENSG00000213455 | -0.93213 | 0.82437 | 0.48578     | 0.31356     | 0.48578   |         |  |
|           | 0.31356         | -1.3528  | 0.91194 | 0.31356     | 0.688182641 |           |         |  |
| LINC02587 | ENSG00000229108 | 0.48575  | 0.31357 | 0.48575     | 0.31357     | 0.48575   |         |  |
|           | 0.31357         | 0.48575  | 0.31357 | 0.31357     | 0.688182641 |           |         |  |
| RNU6-472P | ENSG00000207026 | 0.48571  | 0.31359 | -0.70787    | 0.76049     | -0.91355  |         |  |
|           | 0.81952         | -0.19995 | 0.57924 | 0.31359     | 0.688182641 |           |         |  |
| POMK      | ENSG00000185900 | 0.2807   | 0.38947 | 0.48564     | 0.31361     | -0.53363  | 0.7032  |  |
|           | 0.076921        | 0.46934  | 0.31361 | 0.688182641 |             |           |         |  |
| NA        | ENSG00000263453 | 0.48566  | 0.31361 | 0.38746     | 0.34921     | -0.85701  | 0.80428 |  |
|           | -0.031479       | 0.51256  | 0.31361 | 0.688182641 |             |           |         |  |
| LINC02082 | ENSG00000242268 | 0.11899  | 0.45264 | 0.42401     | 0.33578     | -0.090177 |         |  |
|           | 0.53593         | 0.48558  | 0.31363 | 0.31363     | 0.688182641 |           |         |  |
| NA        | ENSG00000268845 | 0.48559  | 0.31363 | 0.48559     | 0.31363     | 0.48559   | 0.31363 |  |
|           | 0.48559         | 0.31363  | 0.31363 | 0.688182641 |             |           |         |  |
| HECTD2    | ENSG00000165338 | -0.26692 | 0.60523 | -0.16465    | 0.56539     | -0.19842  |         |  |
|           | 0.57864         | 0.4855   | 0.31366 | 0.31366     | 0.688182641 |           |         |  |
| HLX-AS1   | ENSG00000257551 | 0.48551  | 0.31366 | 0.48551     | 0.31366     | 0.48551   |         |  |
|           | 0.31366         | 0.48551  | 0.31366 | 0.31366     | 0.688182641 |           |         |  |
| NA        | ENSG00000274364 | 0.16443  | 0.4347  | 0.48551     | 0.31366     | 0.48551   | 0.31366 |  |
|           | 0.48551         | 0.31366  | 0.31366 | 0.688182641 |             |           |         |  |
| MAD2L2    | ENSG00000116670 | 0.2741   | 0.392   | 0.48545     | 0.31368     | 0.48545   | 0.31368 |  |
|           | -1.5019         | 0.93344  | 0.31368 | 0.688182641 |             |           |         |  |
| POLR2J    | ENSG00000005075 | 0.092753 | 0.46305 | 0.092753    | 0.46305     | 0.48542   |         |  |
|           | 0.31369         | 0.092753 | 0.46305 | 0.31369     | 0.688182641 |           |         |  |
| RPEP2     | ENSG00000234158 | 0.4854   | 0.3137  | -1.0663     | 0.85686     | 0.4854    | 0.3137  |  |
|           | 0.4854          | 0.3137   | 0.3137  | 0.688182641 |             |           |         |  |
| MYOCOS    | ENSG00000283683 | -0.82865 | 0.79635 | -0.82865    | 0.79635     | -0.82865  |         |  |
|           | 0.79635         | 0.48531  | 0.31373 | 0.31373     | 0.688199383 |           |         |  |
| FOXRED1   | ENSG00000110074 | 0.48527  | 0.31374 | 0.48527     | 0.31374     | 0.48527   |         |  |
|           | 0.31374         | 0.48527  | 0.31374 | 0.31374     | 0.688199383 |           |         |  |
| NA        | ENSG00000277290 | -0.99657 | 0.84051 | 0.48524     | 0.31375     | -0.88775  | 0.81266 |  |
|           | -0.88775        | 0.81266  | 0.31375 | 0.688199383 |             |           |         |  |
| NA        | ENSG00000275318 | 0.48512  | 0.31379 | 0.48512     | 0.31379     | 0.48512   | 0.31379 |  |
|           | 0.48512         | 0.31379  | 0.31379 | 0.68822901  |             |           |         |  |
| RNA5SP269 | ENSG00000239184 | 0.39518  | 0.34635 | 0.4851      | 0.3138      | -0.96461  |         |  |
|           | 0.83263         | 0.1514   | 0.43983 | 0.3138      | 0.68822901  |           |         |  |
| NA        | ENSG00000227496 | 0.48508  | 0.31381 | -0.41933    | 0.66251     | -0.52371  | 0.69976 |  |
|           | -0.94578        | 0.82787  | 0.31381 | 0.68822901  |             |           |         |  |
| NA        | ENSG00000267437 | 0.48504  | 0.31382 | 0.48504     | 0.31382     | 0.48504   | 0.31382 |  |
|           | 0.48504         | 0.31382  | 0.31382 | 0.68822901  |             |           |         |  |
| APOBEC3C  | ENSG00000244509 | 0.48488  | 0.31388 | 0.48488     | 0.31388     | 0.48488   |         |  |
|           | 0.31388         | 0.48488  | 0.31388 | 0.31388     | 0.68832057  |           |         |  |
| TUBAL3    | ENSG00000178462 | -0.07269 | 0.52897 | 0.015034    | 0.494       | 0.48485   | 0.31389 |  |
|           | -0.021612       | 0.50862  | 0.31389 | 0.68832057  |             |           |         |  |
| LINC02414 | ENSG00000256424 | 0.081153 | 0.46766 | 0.081153    | 0.46766     | 0.48459   |         |  |
|           | 0.31398         | -0.78604 | 0.78408 | 0.31398     | 0.688486946 |           |         |  |
| LINC01180 | ENSG00000266979 | 0.48448  | 0.31402 | 0.48448     | 0.31402     | -1.4803   |         |  |
|           | 0.9306          | 0.48448  | 0.31402 | 0.31402     | 0.688543674 |           |         |  |
| ATOX1     | ENSG00000177556 | 0.4368   | 0.33113 | -1.9015     | 0.97138     | -1.0222   | 0.84666 |  |
|           | 0.48444         | 0.31404  | 0.31404 | 0.688556544 |             |           |         |  |
| DGKQ      | ENSG00000145214 | -0.76296 | 0.77726 | 0.4843      | 0.31409     | 0.4843    | 0.31409 |  |

|            |                 |           |             |             |             |           |         |         |
|------------|-----------------|-----------|-------------|-------------|-------------|-----------|---------|---------|
|            | 0.4843          | 0.31409   | 0.31409     | 0.68862613  |             |           |         |         |
| MIR548A1HG | ENSG00000283408 | 0.48426   | 0.3141      | 0.25487     | 0.39941     | 0.43985   |         |         |
|            | 0.33002         | 0.24795   | 0.40209     | 0.3141      | 0.68862613  |           |         |         |
| RN7SKP177  | ENSG00000222499 | 0.48419   | 0.31413     | 0.48419     | 0.31413     | 0.48419   |         |         |
|            | 0.31413         | 0.48419   | 0.31413     | 0.31413     | 0.688660919 |           |         |         |
| RPS20P12   | ENSG00000237784 | -0.62999  | 0.73565     | -0.53477    | 0.7036      | -0.23869  |         |         |
|            | 0.59433         | 0.48409   | 0.31416     | 0.31416     | 0.688663274 |           |         |         |
| NA         | ENSG00000251147 | -0.42696  | 0.6653      | -1.0036     | 0.84221     | 0.0024208 | 0.49903 |         |
|            | 0.48403         | 0.31418   | 0.31418     | 0.688663274 |             |           |         |         |
| PEX10      | ENSG00000157911 | 0.484     | 0.31419     | 0.18823     | 0.42535     | -0.61865  | 0.73193 |         |
|            | 0.4719          | 0.3185    | 0.31419     | 0.688663274 |             |           |         |         |
| NA         | ENSG00000261886 | 0.48395   | 0.31421     | 0.48395     | 0.31421     | 0.48395   | 0.31421 |         |
|            | 0.48395         | 0.31421   | 0.31421     | 0.688663274 |             |           |         |         |
| ZNF121     | ENSG00000197961 | 0.48392   | 0.31422     | 0.4347      | 0.33189     | -0.24405  |         |         |
|            | 0.5964          | 0.11196   | 0.45543     | 0.31422     | 0.688663274 |           |         |         |
| GAPDHP63   | ENSG00000218582 | 0.48388   | 0.31423     | 0.13479     | 0.44639     | 0.13479   |         |         |
|            | 0.44639         | 0.13479   | 0.44639     | 0.31423     | 0.688663274 |           |         |         |
| NA         | ENSG00000259058 | -0.23664  | 0.59353     | -0.079394   | 0.53164     | -1.2198   | 0.88872 |         |
|            | 0.48389         | 0.31423   | 0.31423     | 0.688663274 |             |           |         |         |
| NA         | ENSG00000249100 | 0.48371   | 0.3143      | 0.48371     | 0.3143      | 0.48371   | 0.3143  |         |
|            | 0.48371         | 0.3143    | 0.3143      | 0.688745674 |             |           |         |         |
| NA         | ENSG00000258312 | 0.48371   | 0.3143      | 0.15545     | 0.43823     | -0.62318  | 0.73342 |         |
|            | -0.13733        | 0.55462   | 0.3143      | 0.688745674 |             |           |         |         |
| NA         | ENSG00000227218 | 0.48368   | 0.31431     | 0.48368     | 0.31431     | 0.48368   | 0.31431 |         |
|            | 0.48368         | 0.31431   | 0.31431     | 0.688745674 |             |           |         |         |
| NA         | ENSG00000225916 | -0.10282  | 0.54095     | -0.10282    | 0.54095     | 0.48361   | 0.31433 |         |
|            | -0.10282        | 0.54095   | 0.31433     | 0.688758528 |             |           |         |         |
| FAM86HP    | ENSG00000253540 | 0.48352   | 0.31436     | -0.27984    | 0.6102      | 0.13182   |         |         |
|            | 0.44756         | 0.3655    | 0.35737     | 0.31436     | 0.688793291 |           |         |         |
| NA         | ENSG00000264188 | 0.23528   | 0.407       | 0.48341     | 0.3144      | 0.23528   | 0.407   | 0.23528 |
|            | 0.407           | 0.3144    | 0.688801885 |             |             |           |         |         |
| CBLC       | ENSG00000142273 | 0.48336   | 0.31442     | 0.18287     | 0.42745     | -1.2994   | 0.9031  |         |
|            | -1.248          | 0.89398   | 0.31442     | 0.688801885 |             |           |         |         |
| NA         | ENSG00000236159 | 0.48334   | 0.31443     | 0.48334     | 0.31443     | 0.48334   | 0.31443 |         |
|            | 0.48334         | 0.31443   | 0.31443     | 0.688801885 |             |           |         |         |
| LSM14B     | ENSG00000149657 | 0.48319   | 0.31448     | 0.24562     | 0.40299     | 0.45363   |         |         |
|            | 0.32505         | -0.42032  | 0.66287     | 0.31448     | 0.688801885 |           |         |         |
| MIR2052HG  | ENSG00000254349 | -1.2442   | 0.89329     | -1.3022     | 0.90358     | 0.48319   |         |         |
|            | 0.31448         | -0.19681  | 0.57801     | 0.31448     | 0.688801885 |           |         |         |
| GSE1       | ENSG00000131149 | 0.48317   | 0.31449     | -0.33012    | 0.62935     | -0.23794  | 0.59404 |         |
|            | -0.95621        | 0.83052   | 0.31449     | 0.688801885 |             |           |         |         |
| NA         | ENSG00000259868 | 0.3406    | 0.3667      | 0.3406      | 0.3667      | 0.3406    | 0.3667  |         |
|            | 0.4831          | 0.31451   | 0.31451     | 0.688801885 |             |           |         |         |
| HSPA8P6    | ENSG00000235864 | 0.48308   | 0.31452     | 0.35697     | 0.36056     | -1.4466   | 0.926   |         |
|            | 0.13134         | 0.44775   | 0.31452     | 0.688801885 |             |           |         |         |
| SIL1       | ENSG00000120725 | 0.35609   | 0.36089     | 0.48303     | 0.31454     | -1.065    | 0.85656 |         |
|            | -0.55463        | 0.71043   | 0.31454     | 0.688801885 |             |           |         |         |
| RN7SL7P    | ENSG00000266794 | 0.23494   | 0.40713     | 0.483       | 0.31455     | 0.23494   | 0.40713 |         |
|            | -0.32248        | 0.62646   | 0.31455     | 0.688801885 |             |           |         |         |
| HOXA10-AS  | ENSG00000253187 | 0.48297   | 0.31456     | 0.48297     | 0.31456     | -0.58928  |         |         |
|            | 0.72216         | 0.48297   | 0.31456     | 0.31456     | 0.688801885 |           |         |         |
| NA         | ENSG00000280157 | -0.025801 | 0.51029     | -0.96632    | 0.83306     | 0.31655   | 0.37579 |         |
|            | 0.48297         | 0.31456   | 0.31456     | 0.688801885 |             |           |         |         |
| RN7SL417P  | ENSG00000244056 | 0.48294   | 0.31457     | 0.48294     | 0.31457     | 0.48294   |         |         |
|            | 0.31457         | 0.48294   | 0.31457     | 0.31457     | 0.688801885 |           |         |         |
| MIR455     | ENSG00000207726 | 0.48278   | 0.31463     | 0.48278     | 0.31463     | 0.48278   |         |         |
|            | 0.31463         | 0.48278   | 0.31463     | 0.31463     | 0.688801885 |           |         |         |
| EDDM3CP    | ENSG00000234060 | 0.48276   | 0.31463     | 0.48276     | 0.31463     | 0.48276   |         |         |
|            | 0.31463         | 0.48276   | 0.31463     | 0.31463     | 0.688801885 |           |         |         |
| NA         | ENSG00000250430 | -0.58368  | 0.72028     | -0.58368    | 0.72028     | 0.48272   | 0.31465 |         |
|            | -0.58368        | 0.72028   | 0.31465     | 0.688801885 |             |           |         |         |
| HNRNPKP2   | ENSG00000227347 | -0.14427  | 0.55736     | -0.14427    | 0.55736     | -0.14427  |         |         |

|            |                 |             |             |             |             |           |         |         |
|------------|-----------------|-------------|-------------|-------------|-------------|-----------|---------|---------|
|            | 0.55736         | 0.48264     | 0.31467     | 0.31467     | 0.688801885 |           |         |         |
| RNU6-1261P | ENSG00000253003 | 0.45577     | 0.32428     | 0.48259     | 0.31469     | -1.537    |         |         |
|            | 0.93785         | -0.49601    | 0.69006     | 0.31469     | 0.688801885 |           |         |         |
| NA         | ENSG00000213777 | 0.48255     | 0.31471     | 0.48255     | 0.31471     | -0.32714  | 0.62822 |         |
|            | -0.64175        | 0.73948     | 0.31471     | 0.688801885 |             |           |         |         |
| NA         | ENSG00000267884 | -1.1248     | 0.86966     | 0.48245     | 0.31474     | -1.1248   | 0.86966 |         |
|            | 0.27229         | 0.3927      | 0.31474     | 0.688801885 |             |           |         |         |
| TLN1       | ENSG00000137076 | 0.48243     | 0.31475     | -0.82049    | 0.79403     | -1.2048   | 0.88587 |         |
|            | -0.88543        | 0.81204     | 0.31475     | 0.688801885 |             |           |         |         |
| NA         | ENSG00000229808 | 0.058349    | 0.47674     | 0.058349    | 0.47674     | 0.058349  | 0.47674 |         |
|            | 0.48244         | 0.31475     | 0.31475     | 0.688801885 |             |           |         |         |
| SLC25A39   | ENSG00000013306 | 0.48238     | 0.31477     | 0.1362      | 0.44583     | -0.11783  |         |         |
|            | 0.5469          | -0.27974    | 0.61016     | 0.31477     | 0.688801885 |           |         |         |
| LINC02159  | ENSG00000253417 | -1.2506     | 0.89446     | -0.63508    | 0.73731     | 0.48234   |         |         |
|            | 0.31478         | 0.48234     | 0.31478     | 0.31478     | 0.688801885 |           |         |         |
| SARNP      | ENSG00000205323 | -0.73526    | 0.76891     | -0.26223    | 0.60343     | -0.9659   | 0.83295 |         |
|            | 0.48226         | 0.31481     | 0.31481     | 0.688801885 |             |           |         |         |
| NA         | ENSG00000273568 | 0.48226     | 0.31481     | 0.48226     | 0.31481     | 0.48226   | 0.31481 |         |
|            | 0.48226         | 0.31481     | 0.31481     | 0.688801885 |             |           |         |         |
| YPEL5      | ENSG00000119801 | 0.48222     | 0.31482     | 0.48222     | 0.31482     | 0.027275  | 0.48912 |         |
|            | 0.018904        | 0.49246     | 0.31482     | 0.688801885 |             |           |         |         |
| NA         | ENSG00000279239 | 0.48223     | 0.31482     | 0.48223     | 0.31482     | 0.48223   | 0.31482 |         |
|            | 0.48223         | 0.31482     | 0.31482     | 0.688801885 |             |           |         |         |
| FRG1BP     | ENSG00000149531 | -0.60737    | 0.7282      | 0.48217     | 0.31484     | -0.20629  |         |         |
|            | 0.58172         | -0.20629    | 0.58172     | 0.31484     | 0.688801885 |           |         |         |
| ACSM2A     | ENSG00000183747 | -0.73969    | 0.77025     | -0.28429    | 0.61191     | -0.21232  |         |         |
|            | 0.58407         | 0.48217     | 0.31484     | 0.31484     | 0.688801885 |           |         |         |
| NA         | ENSG00000277440 | 0.48214     | 0.31485     | 0.48214     | 0.31485     | 0.48214   | 0.31485 |         |
|            | 0.48214         | 0.31485     | 0.31485     | 0.688801885 |             |           |         |         |
| RANP7      | ENSG00000226183 | 0.016413    | 0.49345     | 0.24121     | 0.4047      | 0.21721   | 0.41402 |         |
|            | 0.48209         | 0.31487     | 0.31487     | 0.688801885 |             |           |         |         |
| TMEM131L   | ENSG00000121210 | -0.040086   | 0.51599     | 0.33917     | 0.36724     | -0.19188  |         |         |
|            | 0.57608         | 0.48206     | 0.31488     | 0.31488     | 0.688801885 |           |         |         |
| EPS8L2     | ENSG00000177106 | 0.24715     | 0.4024      | -0.066527   | 0.52652     | 0.48207   |         |         |
|            | 0.31488         | -1.5231     | 0.93614     | 0.31488     | 0.688801885 |           |         |         |
| NA         | ENSG00000231064 | -0.48269    | 0.68534     | 0.48206     | 0.31488     | -0.13095  | 0.55209 |         |
|            | -0.13095        | 0.55209     | 0.31488     | 0.688801885 |             |           |         |         |
| MAMSTR     | ENSG00000176909 | 0.482       | 0.3149      | 0.482       | 0.3149      | 0.482     | 0.3149  | 0.20674 |
|            | 0.41811         | 0.3149      | 0.688801885 |             |             |           |         |         |
| ZNF304     | ENSG00000131845 | 0.48195     | 0.31492     | 0.48195     | 0.31492     | 0.48195   |         |         |
|            | 0.31492         | 0.48195     | 0.31492     | 0.31492     | 0.688801885 |           |         |         |
| NA         | ENSG00000267264 | 0.48191     | 0.31493     | -0.42071    | 0.66302     | -0.064139 | 0.52557 |         |
|            | 0.48191         | 0.31493     | 0.31493     | 0.688801885 |             |           |         |         |
| NA         | ENSG00000277763 | 0.075038    | 0.47009     | 0.22019     | 0.41286     | 0.48187   | 0.31495 |         |
|            | 0.48187         | 0.31495     | 0.31495     | 0.688801885 |             |           |         |         |
| RN7SL267P  | ENSG00000242121 | 0.48184     | 0.31496     | 0.48184     | 0.31496     | 0.48184   |         |         |
|            | 0.31496         | 0.48184     | 0.31496     | 0.31496     | 0.688801885 |           |         |         |
| NA         | ENSG00000254694 | 0.48182     | 0.31497     | 0.48182     | 0.31497     | 0.48182   | 0.31497 |         |
|            | 0.48182         | 0.31497     | 0.31497     | 0.688801885 |             |           |         |         |
| NA         | ENSG00000275485 | 0.48177     | 0.31499     | 0.43372     | 0.33225     | 0.43372   | 0.33225 |         |
|            | 0.43372         | 0.33225     | 0.31499     | 0.688801885 |             |           |         |         |
| NA         | ENSG00000227839 | -0.59524    | 0.72416     | -0.59524    | 0.72416     | -0.59524  | 0.72416 |         |
|            | 0.48177         | 0.31499     | 0.31499     | 0.688801885 |             |           |         |         |
| NA         | ENSG00000249577 | -1.3285     | 0.90799     | 0.48172     | 0.315       | -0.20254  | 0.58025 |         |
|            | -0.20254        | 0.58025     | 0.315       | 0.688801885 |             |           |         |         |
| NA         | ENSG00000260617 | 0.48173     | 0.315       | 0.48173     | 0.315       | 0.48173   | 0.315   | 0.48173 |
|            | 0.315           | 0.688801885 |             |             |             |           |         |         |
| NA         | ENSG00000228352 | -0.10551    | 0.54202     | 0.48164     | 0.31503     | 0.48164   | 0.31503 |         |
|            | 0.48164         | 0.31503     | 0.31503     | 0.688827532 |             |           |         |         |
| NA         | ENSG00000277130 | 0.48163     | 0.31504     | 0.48163     | 0.31504     | 0.48163   | 0.31504 |         |
|            | 0.48163         | 0.31504     | 0.31504     | 0.688827532 |             |           |         |         |
| SLC17A8    | ENSG00000179520 | 0.082504    | 0.46712     | 0.033885    | 0.48648     | -0.64663  |         |         |

|           |                 |            |         |             |             |          |         |  |
|-----------|-----------------|------------|---------|-------------|-------------|----------|---------|--|
|           | 0.74106         | 0.48156    | 0.31506 | 0.31506     | 0.688840354 |          |         |  |
| GBGT1     | ENSG00000148288 | 0.30055    | 0.38188 | -1.694      | 0.95486     | 0.32788  | 0.3715  |  |
|           | 0.4815          | 0.31508    | 0.31508 | 0.688844132 |             |          |         |  |
| RPS29P31  | ENSG00000224279 | 0.48148    | 0.31509 | 0.48148     | 0.31509     | 0.48148  |         |  |
|           | 0.31509         | 0.48148    | 0.31509 | 0.31509     | 0.688844132 |          |         |  |
| H2BC6     | ENSG00000274290 | -0.17162   | 0.56813 | -0.17162    | 0.56813     | -0.44835 | 0.67305 |  |
|           | 0.48143         | 0.31511    | 0.31511 | 0.688856951 |             |          |         |  |
| SCART1    | ENSG00000214279 | -0.53211   | 0.70267 | 0.48131     | 0.31515     | -1.3095  |         |  |
|           | 0.90482         | -0.98752   | 0.83831 | 0.31515     | 0.688913489 |          |         |  |
| SLC8A1    | ENSG00000183023 | 0.48125    | 0.31517 | -0.10356    | 0.54124     | -0.54819 |         |  |
|           | 0.70822         | 0.11311    | 0.45497 | 0.31517     | 0.688926304 |          |         |  |
| LINC01442 | ENSG00000227510 | 0.48121    | 0.31519 | 0.48121     | 0.31519     | -1.1784  |         |  |
|           | 0.88069         | -1.2098    | 0.88682 | 0.31519     | 0.688939118 |          |         |  |
| FAM241A   | ENSG00000174749 | 0.48114    | 0.31521 | 0.01049     | 0.49582     | 0.40732  |         |  |
|           | 0.34188         | -0.4127    | 0.66009 | 0.31521     | 0.688951931 |          |         |  |
| NA        | ENSG00000254482 | 0.3355     | 0.36862 | 0.48099     | 0.31526     | 0.42477  | 0.3355  |  |
|           | -0.65229        | 0.74289    | 0.31526 | 0.68903031  |             |          |         |  |
| NA        | ENSG00000230801 | -0.0033901 | 0.50135 | 0.48091     | 0.31529     | -0.32748 | 0.62835 |  |
|           | -0.21106        | 0.58358    | 0.31529 | 0.689050635 |             |          |         |  |
| ABCD1P4   | ENSG00000225293 | -0.18132   | 0.57194 | -0.49309    | 0.68902     | -1.5475  |         |  |
|           | 0.93913         | 0.48083    | 0.31532 | 0.31532     | 0.689050635 |          |         |  |
| NA        | ENSG00000225559 | 0.4808     | 0.31533 | 0.14912     | 0.44073     | -1.7312  | 0.95829 |  |
|           | -1.3373         | 0.90944    | 0.31533 | 0.689050635 |             |          |         |  |
| MED31     | ENSG00000108590 | 0.19605    | 0.42229 | 0.19605     | 0.42229     | 0.19605  | 0.42229 |  |
|           | 0.48078         | 0.31534    | 0.31534 | 0.689050635 |             |          |         |  |
| NA        | ENSG00000231509 | 0.34679    | 0.36438 | -1.3832     | 0.9167      | 0.34679  | 0.36438 |  |
|           | 0.48078         | 0.31534    | 0.31534 | 0.689050635 |             |          |         |  |
| SLC5A1    | ENSG00000100170 | 0.48065    | 0.31538 | -0.21937    | 0.58682     | -0.33666 |         |  |
|           | 0.63181         | -0.81189   | 0.79157 | 0.31538     | 0.689083749 |          |         |  |
| MIR4716   | ENSG00000264210 | 0.12181    | 0.45152 | 0.40218     | 0.34378     | 0.48063  |         |  |
|           | 0.31539         | 0.48063    | 0.31539 | 0.31539     | 0.689083749 |          |         |  |
| NA        | ENSG00000264300 | 0.4806     | 0.3154  | 0.4806      | 0.3154      | 0.4806   | 0.3154  |  |
|           | 0.4806          | 0.3154     | 0.3154  | 0.689083749 |             |          |         |  |
| FRG2IP    | ENSG00000260598 | 0.48052    | 0.31543 | 0.48052     | 0.31543     | 0.48052  |         |  |
|           | 0.31543         | 0.48052    | 0.31543 | 0.31543     | 0.689083749 |          |         |  |
| CHCHD2P6  | ENSG00000235084 | 0.48048    | 0.31544 | 0.48048     | 0.31544     | 0.48048  |         |  |
|           | 0.31544         | 0.48048    | 0.31544 | 0.31544     | 0.689083749 |          |         |  |
| NA        | ENSG00000270776 | -0.14082   | 0.55599 | 0.48049     | 0.31544     | 0.48049  | 0.31544 |  |
|           | 0.48049         | 0.31544    | 0.31544 | 0.689083749 |             |          |         |  |
| SLBP      | ENSG00000163950 | -0.13447   | 0.55348 | 0.36196     | 0.35869     | -0.30874 | 0.62124 |  |
|           | 0.48039         | 0.31547    | 0.31547 | 0.689109346 |             |          |         |  |
| NA        | ENSG00000259115 | 0.48038    | 0.31548 | 0.48038     | 0.31548     | 0.48038  | 0.31548 |  |
|           | 0.48038         | 0.31548    | 0.31548 | 0.689109346 |             |          |         |  |
| DUXAP6    | ENSG00000258726 | -0.27675   | 0.60901 | -1.4678     | 0.92892     | 0.48028  |         |  |
|           | 0.31552         | -0.27675   | 0.60901 | 0.31552     | 0.689111552 |          |         |  |
| NA        | ENSG00000263433 | 0.48022    | 0.31554 | -0.34075    | 0.63336     | -1.4166  | 0.92171 |  |
|           | -0.078155       | 0.53115    | 0.31554 | 0.689111552 |             |          |         |  |
| NA        | ENSG00000238041 | 0.48017    | 0.31555 | -0.88803    | 0.81274     | 0.41334  | 0.33968 |  |
|           | -0.88803        | 0.81274    | 0.31555 | 0.689111552 |             |          |         |  |
| NA        | ENSG00000252218 | 0.35602    | 0.36091 | -0.14352    | 0.55706     | 0.48017  | 0.31555 |  |
|           | 0.48017         | 0.31555    | 0.31555 | 0.689111552 |             |          |         |  |
| TRAPPC13  | ENSG00000113597 | 0.48014    | 0.31556 | 0.21343     | 0.4155      | -1.3756  |         |  |
|           | 0.91552         | 0.27555    | 0.39145 | 0.31556     | 0.689111552 |          |         |  |
| NA        | ENSG00000228818 | -0.17019   | 0.56757 | -0.17019    | 0.56757     | -0.17019 | 0.56757 |  |
|           | 0.48012         | 0.31557    | 0.31557 | 0.689111552 |             |          |         |  |
| TAB2-AS1  | ENSG00000225924 | -1.3229    | 0.90706 | 0.48011     | 0.31558     | -1.3229  |         |  |
|           | 0.90706         | -0.11975   | 0.54766 | 0.31558     | 0.689111552 |          |         |  |
| LINC02299 | ENSG00000258979 | -1.5929    | 0.94441 | -0.69432    | 0.75626     | 0.48     | 0.31561 |  |
|           | -0.77981        | 0.78225    | 0.31561 | 0.689121019 |             |          |         |  |
| UBE2D2    | ENSG00000131508 | -0.54172   | 0.70599 | -0.41766    | 0.6619      | 0.47999  |         |  |
|           | 0.31562         | -0.50861   | 0.69449 | 0.31562     | 0.689121019 |          |         |  |
| NA        | ENSG00000241884 | -1.4241    | 0.9228  | 0.41867     | 0.33773     | -1.5776  | 0.94267 |  |



|                |                 |            |             |             |             |            |         |        |
|----------------|-----------------|------------|-------------|-------------|-------------|------------|---------|--------|
|                | 0.47989         | 0.31565    | 0.31565     | 0.689121019 |             |            |         |        |
| ZFAND4         | ENSG00000172671 | -0.74974   | 0.77329     | -1.2813     | 0.89996     | 0.47986    |         |        |
|                | 0.31566         | -0.1424    | 0.55662     | 0.31566     | 0.689121019 |            |         |        |
| NA             | ENSG00000251844 | 0.47983    | 0.31568     | 0.47983     | 0.31568     | 0.47983    | 0.31568 |        |
|                | 0.47983         | 0.31568    | 0.31568     | 0.689121019 |             |            |         |        |
| UBAC2          | ENSG00000134882 | -0.0013001 | 0.50052     | 0.47974     | 0.3157      | -0.0013001 | 0.50052 |        |
|                | -0.096961       | 0.53862    | 0.3157      | 0.689121019 |             |            |         |        |
| OR4S2          | ENSG00000174982 | 0.47976    | 0.3157      | -0.92377    | 0.8222      | -1.5671    | 0.94145 |        |
|                | -0.54503        | 0.70713    | 0.3157      | 0.689121019 |             |            |         |        |
| CTSV           | ENSG00000136943 | 0.067216   | 0.4732      | -0.79763    | 0.78746     | 0.47971    | 0.31572 |        |
|                | 0.067216        | 0.4732     | 0.31572     | 0.689121019 |             |            |         |        |
| ROBO2          | ENSG00000185008 | -0.51663   | 0.69729     | 0.20019     | 0.42067     | -0.11484   | 0.54572 |        |
|                | 0.47967         | 0.31573    | 0.31573     | 0.689121019 |             |            |         |        |
| PPP2R2D        | ENSG00000175470 | 0.058295   | 0.47676     | 0.47964     | 0.31574     | 0.29165    |         |        |
|                | 0.38528         | 0.046433   | 0.48148     | 0.31574     | 0.689121019 |            |         |        |
| LINC01337      | ENSG00000251221 | 0.47959    | 0.31576     | 0.47959     | 0.31576     | 0.47959    |         |        |
|                | 0.31576         | 0.47959    | 0.31576     | 0.31576     | 0.689121019 |            |         |        |
| PPIAP78        | ENSG00000234838 | 0.34857    | 0.36371     | 0.47957     | 0.31577     | 0.47957    |         |        |
|                | 0.31577         | 0.2183     | 0.4136      | 0.31577     | 0.689121019 |            |         |        |
| BBS5           | ENSG00000163093 | 0.25566    | 0.39911     | 0.22241     | 0.412       | 0.47953    | 0.31578 |        |
|                | -0.48353        | 0.68564    | 0.31578     | 0.689121019 |             |            |         |        |
| NA             | ENSG00000280150 | 0.47951    | 0.31579     | 0.47951     | 0.31579     | 0.47951    | 0.31579 |        |
|                | 0.47951         | 0.31579    | 0.31579     | 0.689121019 |             |            |         |        |
| UBBP3          | ENSG00000223962 | -1.1769    | 0.88038     | -1.1769     | 0.88038     | 0.30075    | 0.3818  |        |
|                | 0.47945         | 0.31581    | 0.31581     | 0.689121019 |             |            |         |        |
| NA             | ENSG00000248409 | 0.47939    | 0.31583     | 0.47939     | 0.31583     | 0.47939    | 0.31583 |        |
|                | 0.47939         | 0.31583    | 0.31583     | 0.689121019 |             |            |         |        |
| LINC02725      | ENSG00000273415 | 0.37587    | 0.35351     | 0.47932     | 0.31586     | 0.41006    |         |        |
|                | 0.34088         | -0.039237  | 0.51565     | 0.31586     | 0.689121019 |            |         |        |
| SNORA30        | ENSG00000206755 | 0.47929    | 0.31587     | 0.47929     | 0.31587     | 0.47929    |         |        |
|                | 0.31587         | 0.47929    | 0.31587     | 0.31587     | 0.689121019 |            |         |        |
| DNMT3AP1       | ENSG00000224071 | 0.47914    | 0.31592     | 0.47914     | 0.31592     | 0.47914    |         |        |
|                | 0.31592         | 0.47914    | 0.31592     | 0.31592     | 0.689121019 |            |         |        |
| NA             | ENSG00000234022 | 0.47913    | 0.31592     | -0.70248    | 0.75881     | -0.99857   | 0.841   |        |
|                | -0.99857        | 0.841      | 0.31592     | 0.689121019 |             |            |         |        |
| ARHGAP19-SLIT1 | ENSG00000269891 | 0.028169   | 0.48876     | 0.47914     | 0.31592     | 0.47914    |         |        |
|                | 0.31592         | 0.47914    | 0.31592     | 0.31592     | 0.689121019 |            |         |        |
| NA             | ENSG00000266047 | -0.34468   | 0.63483     | 0.47909     | 0.31594     | 0.47909    | 0.31594 |        |
|                | 0.47909         | 0.31594    | 0.31594     | 0.689121019 |             |            |         |        |
| FAM170A        | ENSG00000164334 | 0.47904    | 0.31595     | 0.22458     | 0.41115     | 0.22458    |         |        |
|                | 0.41115         | -0.10763   | 0.54285     | 0.31595     | 0.689121019 |            |         |        |
| NA             | ENSG00000267623 | -1.1433    | 0.87354     | 0.021796    | 0.49131     | 0.47906    | 0.31595 |        |
|                | -0.089147       | 0.53552    | 0.31595     | 0.689121019 |             |            |         |        |
| ADIPOR1        | ENSG00000159346 | -1.2927    | 0.90194     | 0.29851     | 0.38266     | 0.29851    |         |        |
|                | 0.38266         | 0.47904    | 0.31596     | 0.31596     | 0.689121019 |            |         |        |
| NA             | ENSG00000279983 | 0.47899    | 0.31597     | 0.47899     | 0.31597     | 0.47899    | 0.31597 |        |
|                | 0.47899         | 0.31597    | 0.31597     | 0.689121019 |             |            |         |        |
| GSS            | ENSG00000100983 | -0.10555   | 0.54203     | 0.17346     | 0.43114     | -0.20908   | 0.58281 |        |
|                | 0.47895         | 0.31599    | 0.31599     | 0.689121019 |             |            |         |        |
| RNU6-437P      | ENSG00000238420 | 0.4789     | 0.316       | 0.4789      | 0.316       | 0.4789     | 0.316   | 0.4789 |
|                | 0.316           | 0.316      | 0.689121019 |             |             |            |         |        |
| TRIM60P13      | ENSG00000227247 | 0.47886    | 0.31602     | 0.47886     | 0.31602     | 0.47886    |         |        |
|                | 0.31602         | 0.47886    | 0.31602     | 0.31602     | 0.689121019 |            |         |        |
| ARF4P3         | ENSG00000214051 | -0.96755   | 0.83337     | -0.4596     | 0.6771      | -0.71935   |         |        |
|                | 0.76404         | 0.47877    | 0.31605     | 0.31605     | 0.689121019 |            |         |        |
| LMO7           | ENSG00000136153 | 0.3116     | 0.37767     | -0.48162    | 0.68496     | 0.055011   | 0.47806 |        |
|                | 0.47867         | 0.31609    | 0.31609     | 0.689121019 |             |            |         |        |
| NA             | ENSG00000263706 | 0.47866    | 0.31609     | 0.47866     | 0.31609     | 0.47866    | 0.31609 |        |
|                | 0.47866         | 0.31609    | 0.31609     | 0.689121019 |             |            |         |        |
| RNU6-1284P     | ENSG00000200571 | 0.47861    | 0.31611     | 0.47861     | 0.31611     | 0.47861    |         |        |
|                | 0.31611         | 0.47861    | 0.31611     | 0.31611     | 0.689121019 |            |         |        |
| RNU6-1         | ENSG00000206625 | 0.4786     | 0.31611     | 0.4786      | 0.31611     | 0.16745    |         |        |

|           |                 |           |         |             |             |           |         |  |
|-----------|-----------------|-----------|---------|-------------|-------------|-----------|---------|--|
|           | 0.43351         | -0.16133  | 0.56408 | 0.31611     | 0.689121019 |           |         |  |
| TEX47     | ENSG00000164645 | -0.34781  | 0.63601 | -0.52614    | 0.7006      | 0.47858   | 0.31612 |  |
|           | 0.36739         | 0.35666   | 0.31612 | 0.689121019 |             |           |         |  |
| NA        | ENSG00000260613 | 0.47859   | 0.31612 | 0.47859     | 0.31612     | 0.47859   | 0.31612 |  |
|           | 0.47859         | 0.31612   | 0.31612 | 0.689121019 |             |           |         |  |
| NA        | ENSG00000277332 | -1.0614   | 0.85574 | 0.47856     | 0.31613     | -0.25005  | 0.59873 |  |
|           | -0.24404        | 0.5964    | 0.31613 | 0.689121019 |             |           |         |  |
| USP28     | ENSG00000048028 | 0.47853   | 0.31614 | -1.2788     | 0.89952     | -0.61532  | 0.73083 |  |
|           | -0.15397        | 0.56118   | 0.31614 | 0.689121019 |             |           |         |  |
| NA        | ENSG00000276476 | -2.9203   | 0.99825 | 0.47851     | 0.31614     | -2.4376   | 0.99261 |  |
|           | -1.3524         | 0.91188   | 0.31614 | 0.689121019 |             |           |         |  |
| RPSAP4    | ENSG00000239269 | 0.40272   | 0.34358 | 0.47848     | 0.31615     | -0.088547 |         |  |
|           | 0.53528         | 0.47848   | 0.31615 | 0.31615     | 0.689121019 |           |         |  |
| LINC01785 | ENSG00000268038 | 0.47839   | 0.31619 | 0.25585     | 0.39903     | -0.98606  |         |  |
|           | 0.83795         | -0.98606  | 0.83795 | 0.31619     | 0.689177381 |           |         |  |
| DZIP3     | ENSG00000198919 | -0.3279   | 0.62851 | 0.47828     | 0.31623     | -0.27103  | 0.60682 |  |
|           | -0.388          | 0.65099   | 0.31623 | 0.689193555 |             |           |         |  |
| NA        | ENSG00000231559 | -0.17144  | 0.56806 | 0.47825     | 0.31624     | 0.47825   | 0.31624 |  |
|           | 0.45608         | 0.32417   | 0.31624 | 0.689193555 |             |           |         |  |
| COX6CP10  | ENSG00000238008 | 0.47824   | 0.31624 | 0.47824     | 0.31624     | 0.47824   |         |  |
|           | 0.31624         | 0.47824   | 0.31624 | 0.31624     | 0.689193555 |           |         |  |
| MIR552    | ENSG00000207941 | 0.47819   | 0.31626 | -0.57506    | 0.71737     | -0.24474  |         |  |
|           | 0.59667         | -0.58919  | 0.72213 | 0.31626     | 0.689193555 |           |         |  |
| ECM2      | ENSG00000106823 | -0.069782 | 0.52782 | 0.19446     | 0.42291     | 0.19446   | 0.42291 |  |
|           | 0.47809         | 0.31629   | 0.31629 | 0.689193555 |             |           |         |  |
| SIAH1     | ENSG00000196470 | -0.94936  | 0.82878 | -0.94936    | 0.82878     | -0.94936  | 0.82878 |  |
|           | 0.47804         | 0.31631   | 0.31631 | 0.689193555 |             |           |         |  |
| GUCY1B2   | ENSG00000123201 | 0.20136   | 0.42021 | 0.47796     | 0.31634     | 0.24524   |         |  |
|           | 0.40314         | 0.078594  | 0.46868 | 0.31634     | 0.689193555 |           |         |  |
| PPIAP31   | ENSG00000217094 | 0.11678   | 0.45352 | -0.20481    | 0.58114     | 0.38465   |         |  |
|           | 0.35025         | 0.47795   | 0.31634 | 0.31634     | 0.689193555 |           |         |  |
| NA        | ENSG00000225673 | 0.022014  | 0.49122 | 0.4779      | 0.31636     | 0.4779    | 0.31636 |  |
|           | 0.4779          | 0.31636   | 0.31636 | 0.689193555 |             |           |         |  |
| KIF4B     | ENSG00000226650 | -1.2759   | 0.89901 | -1.2759     | 0.89901     | 0.4779    | 0.31636 |  |
|           | -1.2759         | 0.89901   | 0.31636 | 0.689193555 |             |           |         |  |
| NA        | ENSG00000230912 | 0.47788   | 0.31637 | 0.47788     | 0.31637     | 0.47788   | 0.31637 |  |
|           | 0.47788         | 0.31637   | 0.31637 | 0.689193555 |             |           |         |  |
| SLC66A3   | ENSG00000162976 | -0.094923 | 0.53781 | -0.77236    | 0.78005     | 0.47785   |         |  |
|           | 0.31638         | 0.44491   | 0.32819 | 0.31638     | 0.689193555 |           |         |  |
| HMG2      | ENSG00000198830 | 0.29868   | 0.38259 | 0.29868     | 0.38259     | 0.47781   | 0.31639 |  |
|           | 0.25199         | 0.40053   | 0.31639 | 0.689193555 |             |           |         |  |
| MMRN1     | ENSG00000138722 | -0.10792  | 0.54297 | -0.065152   | 0.52597     | 0.47772   | 0.31643 |  |
|           | -0.29544        | 0.61617   | 0.31643 | 0.689193555 |             |           |         |  |
| NA        | ENSG00000254099 | 0.36591   | 0.35722 | -0.34745    | 0.63587     | 0.47772   | 0.31643 |  |
|           | 0.47772         | 0.31643   | 0.31643 | 0.689193555 |             |           |         |  |
| VWC2L-IT1 | ENSG00000224257 | -0.36841  | 0.64372 | 0.47762     | 0.31646     | -1.8456   |         |  |
|           | 0.96753         | -1.8456   | 0.96753 | 0.31646     | 0.689193555 |           |         |  |
| NA        | ENSG00000229720 | 0.47762   | 0.31646 | 0.47762     | 0.31646     | -0.27142  | 0.60697 |  |
|           | 0.47762         | 0.31646   | 0.31646 | 0.689193555 |             |           |         |  |
| RPS15AP15 | ENSG00000223739 | 0.35656   | 0.36071 | 0.47758     | 0.31647     | 0.47758   |         |  |
|           | 0.31647         | -0.47055  | 0.68102 | 0.31647     | 0.689193555 |           |         |  |
| WFIKN2    | ENSG00000173714 | 0.47744   | 0.31652 | -0.14337    | 0.557       | -0.33671  | 0.63183 |  |
|           | -0.31499        | 0.62362   | 0.31652 | 0.689193555 |             |           |         |  |
| RN7SKP268 | ENSG00000223039 | 0.17361   | 0.43109 | -0.46436    | 0.6788      | 0.47746   |         |  |
|           | 0.31652         | -1.2505   | 0.89444 | 0.31652     | 0.689193555 |           |         |  |
| NA        | ENSG00000237444 | 0.4774    | 0.31654 | 0.4774      | 0.31654     | 0.4774    | 0.31654 |  |
|           | 0.4774          | 0.31654   | 0.31654 | 0.689193555 |             |           |         |  |
| VAMP9P    | ENSG00000284516 | 0.30551   | 0.37999 | 0.4774      | 0.31654     | -0.17749  |         |  |
|           | 0.57044         | -1.2708   | 0.89809 | 0.31654     | 0.689193555 |           |         |  |
| NA        | ENSG00000264885 | 0.47734   | 0.31656 | 0.47734     | 0.31656     | 0.47734   | 0.31656 |  |
|           | 0.47734         | 0.31656   | 0.31656 | 0.689193555 |             |           |         |  |
| APLP1     | ENSG00000105290 | 0.4773    | 0.31658 | 0.4773      | 0.31658     | 0.075315  | 0.46998 |  |

|           |                 |           |         |             |             |           |         |  |
|-----------|-----------------|-----------|---------|-------------|-------------|-----------|---------|--|
|           | 0.4773          | 0.31658   | 0.31658 | 0.689193555 |             |           |         |  |
| ZBTB39    | ENSG00000166860 | 0.47721   | 0.3166  | -0.62288    | 0.73332     | -0.62288  |         |  |
|           | 0.73332         | -0.62288  | 0.73332 | 0.3166      | 0.689193555 |           |         |  |
| ATP5MC1P1 | ENSG00000230157 | -0.64716  | 0.74123 | 0.47723     | 0.3166      | -0.65001  |         |  |
|           | 0.74216         | 0.47723   | 0.3166  | 0.3166      | 0.689193555 |           |         |  |
| NA        | ENSG00000275846 | 0.47722   | 0.3166  | 0.47722     | 0.3166      | 0.47722   | 0.3166  |  |
|           | 0.47722         | 0.3166    | 0.3166  | 0.689193555 |             |           |         |  |
| APOL6     | ENSG00000221963 | -0.49476  | 0.68961 | 0.47716     | 0.31662     | -0.52513  | 0.70026 |  |
|           | -0.49476        | 0.68961   | 0.31662 | 0.689193555 |             |           |         |  |
| NA        | ENSG00000243761 | -0.78814  | 0.78469 | 0.47718     | 0.31662     | -1.0243   | 0.84714 |  |
|           | 0.22925         | 0.40934   | 0.31662 | 0.689193555 |             |           |         |  |
| THPO      | ENSG00000090534 | 0.47714   | 0.31663 | 0.47714     | 0.31663     | -0.85201  | 0.8029  |  |
|           | 0.36066         | 0.35918   | 0.31663 | 0.689193555 |             |           |         |  |
| LNX1-AS2  | ENSG00000248494 | 0.0022409 | 0.49911 | 0.0022409   | 0.49911     | 0.0022409 |         |  |
|           | 0.49911         | 0.47712   | 0.31664 | 0.31664     | 0.689193555 |           |         |  |
| TBC1D4    | ENSG00000136111 | -0.13576  | 0.554   | 0.47709     | 0.31665     | -1.1084   | 0.86616 |  |
|           | -0.43005        | 0.66642   | 0.31665 | 0.689193555 |             |           |         |  |
| MRPL34    | ENSG00000130312 | 0.47701   | 0.31668 | 0.47701     | 0.31668     | 0.47701   |         |  |
|           | 0.31668         | 0.47701   | 0.31668 | 0.31668     | 0.689195727 |           |         |  |
| IFNA20P   | ENSG00000226393 | 0.47691   | 0.31671 | 0.47691     | 0.31671     | 0.47691   |         |  |
|           | 0.31671         | 0.47691   | 0.31671 | 0.31671     | 0.689195727 |           |         |  |
| KMO       | ENSG00000117009 | 0.34728   | 0.36419 | 0.47688     | 0.31672     | 0.05462   | 0.47822 |  |
|           | -0.07319        | 0.52917   | 0.31672 | 0.689195727 |             |           |         |  |
| NA        | ENSG00000273301 | 0.47689   | 0.31672 | 0.47689     | 0.31672     | 0.47689   | 0.31672 |  |
|           | 0.47689         | 0.31672   | 0.31672 | 0.689195727 |             |           |         |  |
| KIR3DL1   | ENSG00000167633 | 0.47682   | 0.31674 | 0.33924     | 0.36721     | 0.14691   |         |  |
|           | 0.4416          | -0.20037  | 0.5794  | 0.31674     | 0.689195727 |           |         |  |
| NA        | ENSG00000277500 | 0.47684   | 0.31674 | 0.22166     | 0.41229     | 0.40424   | 0.34302 |  |
|           | 0.22166         | 0.41229   | 0.31674 | 0.689195727 |             |           |         |  |
| KRTAP20-2 | ENSG00000184032 | -0.1905   | 0.57554 | 0.47681     | 0.31675     | 0.47681   |         |  |
|           | 0.31675         | 0.47681   | 0.31675 | 0.31675     | 0.689195727 |           |         |  |
| NA        | ENSG00000250637 | 0.47675   | 0.31677 | 0.23321     | 0.4078      | -0.1905   | 0.57554 |  |
|           | -0.030753       | 0.51227   | 0.31677 | 0.68920847  |             |           |         |  |
| NA        | ENSG00000267285 | 0.47658   | 0.31683 | 0.47658     | 0.31683     | 0.47658   | 0.31683 |  |
|           | 0.47658         | 0.31683   | 0.31683 | 0.689290201 |             |           |         |  |
| AXDND1    | ENSG00000162779 | -0.70651  | 0.76007 | -0.86998    | 0.80785     | -0.51705  |         |  |
|           | 0.69744         | 0.47656   | 0.31684 | 0.31684     | 0.689290201 |           |         |  |
| RN7SL342P | ENSG00000239398 | -0.21255  | 0.58416 | -0.64605    | 0.74088     | -0.34288  |         |  |
|           | 0.63415         | 0.47652   | 0.31685 | 0.31685     | 0.689290201 |           |         |  |
| NA        | ENSG00000224014 | 0.47644   | 0.31688 | 0.47644     | 0.31688     | 0.47644   | 0.31688 |  |
|           | 0.47644         | 0.31688   | 0.31688 | 0.68929392  |             |           |         |  |
| DUX4L52   | ENSG00000258336 | 0.47643   | 0.31688 | 0.47643     | 0.31688     | 0.47643   |         |  |
|           | 0.31688         | 0.47643   | 0.31688 | 0.31688     | 0.68929392  |           |         |  |
| HIF3A     | ENSG00000124440 | 0.14091   | 0.44397 | -0.17289    | 0.56863     | 0.47633   | 0.31692 |  |
|           | -1.0818         | 0.86033   | 0.31692 | 0.689301914 |             |           |         |  |
| LINC02741 | ENSG00000255388 | 0.47621   | 0.31696 | -1.2202     | 0.8888      | -0.62552  |         |  |
|           | 0.73419         | -0.62552  | 0.73419 | 0.31696     | 0.689301914 |           |         |  |
| TNFSF13B  | ENSG00000102524 | -1.6181   | 0.94718 | -0.53106    | 0.70231     | 0.47616   |         |  |
|           | 0.31698         | -0.5515   | 0.70935 | 0.31698     | 0.689301914 |           |         |  |
| NMS       | ENSG00000204640 | -0.059449 | 0.5237  | -0.21378    | 0.58464     | -0.21378  | 0.58464 |  |
|           | 0.47606         | 0.31701   | 0.31701 | 0.689301914 |             |           |         |  |
| KRT8P36   | ENSG00000240668 | 0.47606   | 0.31701 | 0.057953    | 0.47689     | 0.47606   |         |  |
|           | 0.31701         | 0.47606   | 0.31701 | 0.31701     | 0.689301914 |           |         |  |
| NA        | ENSG00000255390 | 0.47608   | 0.31701 | 0.47608     | 0.31701     | 0.47608   | 0.31701 |  |
|           | 0.47608         | 0.31701   | 0.31701 | 0.689301914 |             |           |         |  |
| NA        | ENSG00000251643 | 0.47606   | 0.31702 | 0.060601    | 0.47584     | 0.060601  | 0.47584 |  |
|           | 0.032767        | 0.48693   | 0.31702 | 0.689301914 |             |           |         |  |
| LGR4-AS1  | ENSG00000254862 | -1.72     | 0.95728 | 0.47605     | 0.31702     | 0.40068   | 0.34433 |  |
|           | 0.40068         | 0.34433   | 0.31702 | 0.689301914 |             |           |         |  |
| RAPGEF6   | ENSG00000158987 | 0.47602   | 0.31703 | -0.30939    | 0.62149     | -0.3163   |         |  |
|           | 0.62411         | 0.34318   | 0.36573 | 0.31703     | 0.689301914 |           |         |  |
| NA        | ENSG00000224814 | 0.47601   | 0.31703 | 0.47601     | 0.31703     | 0.47601   | 0.31703 |  |

|           |                 |            |         |             |             |           |         |  |
|-----------|-----------------|------------|---------|-------------|-------------|-----------|---------|--|
|           | 0.47601         | 0.31703    | 0.31703 | 0.689301914 |             |           |         |  |
| PTPN13    | ENSG00000163629 | -0.43687   | 0.6689  | 0.47589     | 0.31708     | -0.23849  |         |  |
|           | 0.59425         | 0.21536    | 0.41474 | 0.31708     | 0.689301914 |           |         |  |
| HRNR      | ENSG00000197915 | 0.47589    | 0.31708 | -0.95794    | 0.83095     | -0.43727  | 0.66904 |  |
|           | -0.085563       | 0.53409    | 0.31708 | 0.689301914 |             |           |         |  |
| POLR1A    | ENSG00000068654 | -1.0918    | 0.86255 | 0.47584     | 0.31709     | -0.54168  |         |  |
|           | 0.70598         | -1.361     | 0.91324 | 0.31709     | 0.689301914 |           |         |  |
| NA        | ENSG00000259734 | 0.47586    | 0.31709 | 0.47586     | 0.31709     | 0.47586   | 0.31709 |  |
|           | 0.47586         | 0.31709    | 0.31709 | 0.689301914 |             |           |         |  |
| NA        | ENSG00000227585 | 0.47581    | 0.3171  | -0.28115    | 0.6107      | -0.098761 | 0.53934 |  |
|           | -0.32249        | 0.62646    | 0.3171  | 0.689301914 |             |           |         |  |
| RN7SL553P | ENSG00000241227 | 0.4758     | 0.31711 | 0.4758      | 0.31711     | 0.4758    |         |  |
|           | 0.31711         | 0.4758     | 0.31711 | 0.31711     | 0.689301914 |           |         |  |
| SPINT4    | ENSG00000149651 | -1.1217    | 0.869   | -1.1941     | 0.88378     | 0.47573   | 0.31713 |  |
|           | 0.065679        | 0.47382    | 0.31713 | 0.689314639 |             |           |         |  |
| NA        | ENSG00000270421 | 0.47554    | 0.3172  | -0.56011    | 0.7123      | 0.47554   | 0.3172  |  |
|           | 0.47554         | 0.3172     | 0.3172  | 0.689408995 |             |           |         |  |
| NA        | ENSG00000256339 | 0.47548    | 0.31722 | 0.47548     | 0.31722     | 0.47548   | 0.31722 |  |
|           | 0.47548         | 0.31722    | 0.31722 | 0.689408995 |             |           |         |  |
| NA        | ENSG00000271230 | 0.47547    | 0.31723 | 0.16778     | 0.43338     | 0.43193   | 0.33289 |  |
|           | -0.11927        | 0.54747    | 0.31723 | 0.689408995 |             |           |         |  |
| C8orf89   | ENSG00000274443 | 0.47547    | 0.31723 | 0.47547     | 0.31723     | 0.47547   |         |  |
|           | 0.31723         | -0.0075732 | 0.50302 | 0.31723     | 0.689408995 |           |         |  |
| HSF1      | ENSG00000185122 | 0.4754     | 0.31725 | 0.37763     | 0.35285     | -1.9536   | 0.97462 |  |
|           | -1.9536         | 0.97462    | 0.31725 | 0.689420108 |             |           |         |  |
| NA        | ENSG00000249052 | 0.47531    | 0.31728 | -1.7419     | 0.95923     | -1.5256   | 0.93645 |  |
|           | -1.7419         | 0.95923    | 0.31728 | 0.689420108 |             |           |         |  |
| TRAIP     | ENSG00000183763 | -1.6369    | 0.94917 | -1.3448     | 0.91065     | -0.86977  | 0.80779 |  |
|           | 0.47527         | 0.3173     | 0.3173  | 0.689420108 |             |           |         |  |
| NA        | ENSG00000197585 | -0.45128   | 0.67411 | 0.043865    | 0.48251     | 0.47525   | 0.3173  |  |
|           | 0.080684        | 0.46785    | 0.3173  | 0.689420108 |             |           |         |  |
| NA        | ENSG00000278337 | 0.47524    | 0.31731 | 0.47524     | 0.31731     | 0.47524   | 0.31731 |  |
|           | 0.47524         | 0.31731    | 0.31731 | 0.689420108 |             |           |         |  |
| PA2G4P2   | ENSG00000235698 | 0.47521    | 0.31732 | 0.47521     | 0.31732     | -1.3087   |         |  |
|           | 0.90469         | -0.69881   | 0.75766 | 0.31732     | 0.689420108 |           |         |  |
| CPLX4     | ENSG00000166569 | 0.27229    | 0.3927  | 0.47516     | 0.31734     | 0.27229   | 0.3927  |  |
|           | 0.31312         | 0.37709    | 0.31734 | 0.689432822 |             |           |         |  |
| MIR548BA  | ENSG00000212036 | 0.4751     | 0.31736 | 0.4751      | 0.31736     | 0.4751    |         |  |
|           | 0.31736         | 0.4751     | 0.31736 | 0.31736     | 0.689436524 |           |         |  |
| NA        | ENSG00000225078 | 0.38003    | 0.35196 | 0.47507     | 0.31737     | 0.16655   | 0.43386 |  |
|           | 0.16655         | 0.43386    | 0.31737 | 0.689436524 |             |           |         |  |
| NA        | ENSG00000269354 | 0.47496    | 0.31741 | 0.47496     | 0.31741     | 0.47496   | 0.31741 |  |
|           | 0.47496         | 0.31741    | 0.31741 | 0.689452935 |             |           |         |  |
| CNTLN     | ENSG00000044459 | 0.47493    | 0.31742 | -0.79422    | 0.78647     | -0.25586  | 0.60097 |  |
|           | 0.27059         | 0.39335    | 0.31742 | 0.689452935 |             |           |         |  |
| MLNR      | ENSG00000102539 | 0.47491    | 0.31742 | 0.26898     | 0.39397     | 0.47491   | 0.31742 |  |
|           | 0.47491         | 0.31742    | 0.31742 | 0.689452935 |             |           |         |  |
| NA        | ENSG00000236164 | 0.47479    | 0.31747 | -0.036216   | 0.51445     | -0.036216 | 0.51445 |  |
|           | -0.036216       | 0.51445    | 0.31747 | 0.689508351 |             |           |         |  |
| NA        | ENSG00000218472 | 0.47467    | 0.31751 | 0.47467     | 0.31751     | 0.47467   | 0.31751 |  |
|           | 0.47467         | 0.31751    | 0.31751 | 0.689508351 |             |           |         |  |
| PKMP1     | ENSG00000236480 | -0.76981   | 0.77929 | -0.76981    | 0.77929     | -0.76981  | 0.77929 |  |
|           | 0.47467         | 0.31751    | 0.31751 | 0.689508351 |             |           |         |  |
| SCPEP1    | ENSG00000121064 | -0.35572   | 0.63897 | 0.47462     | 0.31753     | 0.47462   |         |  |
|           | 0.31753         | 0.47462    | 0.31753 | 0.31753     | 0.689508351 |           |         |  |
| DESI1     | ENSG00000100418 | -0.53972   | 0.7053  | 0.47457     | 0.31755     | -1.4778   | 0.93027 |  |
|           | 0.064925        | 0.47412    | 0.31755 | 0.689508351 |             |           |         |  |
| GOLGA2P6  | ENSG00000241621 | -0.80797   | 0.79045 | -0.45141    | 0.67415     | 0.47452   |         |  |
|           | 0.31756         | 0.47452    | 0.31756 | 0.31756     | 0.689508351 |           |         |  |
| NA        | ENSG00000232334 | 0.22009    | 0.4129  | 0.47446     | 0.31759     | 0.22009   | 0.4129  |  |
|           | 0.22009         | 0.4129     | 0.31759 | 0.689508351 |             |           |         |  |
| NA        | ENSG00000187185 | -0.070368  | 0.52805 | -0.070368   | 0.52805     | -0.070368 | 0.52805 |  |

|            |                 |           |         |             |             |          |         |  |
|------------|-----------------|-----------|---------|-------------|-------------|----------|---------|--|
|            | 0.47435         | 0.31763   | 0.31763 | 0.689508351 |             |          |         |  |
| NSUN6      | ENSG00000241058 | 0.22956   | 0.40922 | 0.16721     | 0.4336      | 0.47428  | 0.31765 |  |
|            | -0.36486        | 0.64239   | 0.31765 | 0.689508351 |             |          |         |  |
| KLK15      | ENSG00000174562 | 0.47424   | 0.31766 | -0.1199     | 0.54772     | 0.47424  | 0.31766 |  |
|            | 0.47424         | 0.31766   | 0.31766 | 0.689508351 |             |          |         |  |
| NA         | ENSG00000184188 | 0.47425   | 0.31766 | 0.47425     | 0.31766     | 0.47425  | 0.31766 |  |
|            | 0.47425         | 0.31766   | 0.31766 | 0.689508351 |             |          |         |  |
| RNU6-1032P | ENSG00000206827 | -0.18614  | 0.57383 | -0.80217    | 0.78877     | 0.47422  |         |  |
|            | 0.31767         | 0.47422   | 0.31767 | 0.31767     | 0.689508351 |          |         |  |
| COL3A1     | ENSG00000168542 | -0.57939  | 0.71884 | 0.30929     | 0.37855     | 0.47416  |         |  |
|            | 0.31769         | 0.19789   | 0.42157 | 0.31769     | 0.689508351 |          |         |  |
| LINC01170  | ENSG00000253807 | 0.47416   | 0.31769 | -0.94949    | 0.82881     | 0.33916  |         |  |
|            | 0.36724         | -0.56956  | 0.71551 | 0.31769     | 0.689508351 |          |         |  |
| CBX3P1     | ENSG00000177447 | -1.0113   | 0.84407 | 0.47399     | 0.31775     | -0.47397 |         |  |
|            | 0.68224         | -0.23224  | 0.59182 | 0.31775     | 0.689508351 |          |         |  |
| RNA5SP317  | ENSG00000222108 | 0.47398   | 0.31776 | 0.47398     | 0.31776     | 0.47398  |         |  |
|            | 0.31776         | 0.47398   | 0.31776 | 0.31776     | 0.689508351 |          |         |  |
| NA         | ENSG00000222613 | -0.052208 | 0.52082 | -0.2299     | 0.59091     | 0.47396  | 0.31776 |  |
|            | -0.0087421      | 0.50349   | 0.31776 | 0.689508351 |             |          |         |  |
| NA         | ENSG00000240973 | 0.25822   | 0.39812 | 0.47396     | 0.31776     | 0.032595 | 0.487   |  |
|            | 0.032595        | 0.487     | 0.31776 | 0.689508351 |             |          |         |  |
| NA         | ENSG00000259266 | -0.52764  | 0.70112 | 0.47398     | 0.31776     | -0.52764 | 0.70112 |  |
|            | -0.52764        | 0.70112   | 0.31776 | 0.689508351 |             |          |         |  |
| FAM95C     | ENSG00000283486 | -0.10807  | 0.54303 | 0.47398     | 0.31776     | -0.96657 |         |  |
|            | 0.83312         | -0.96657  | 0.83312 | 0.31776     | 0.689508351 |          |         |  |
| SAP30      | ENSG00000164105 | 0.47396   | 0.31777 | 0.47396     | 0.31777     | 0.47396  | 0.31777 |  |
|            | 0.47396         | 0.31777   | 0.31777 | 0.689508351 |             |          |         |  |
| SAP30-DT   | ENSG00000272870 | 0.27706   | 0.39087 | 0.21149     | 0.41625     | 0.47396  |         |  |
|            | 0.31777         | -0.21949  | 0.58687 | 0.31777     | 0.689508351 |          |         |  |
| NA         | ENSG00000249944 | 0.47387   | 0.3178  | 0.47387     | 0.3178      | 0.47387  | 0.3178  |  |
|            | 0.47387         | 0.3178    | 0.3178  | 0.689508351 |             |          |         |  |
| DPY19L2P4  | ENSG00000235436 | -0.90652  | 0.81767 | -0.58753    | 0.72158     | 0.47382  |         |  |
|            | 0.31781         | 0.45166   | 0.32576 | 0.31781     | 0.689508351 |          |         |  |
| LINC02389  | ENSG00000255693 | -0.096173 | 0.53831 | 0.4738      | 0.31782     | -0.7482  |         |  |
|            | 0.77283         | 0.4738    | 0.31782 | 0.31782     | 0.689508351 |          |         |  |
| RPL13P12   | ENSG00000215030 | 0.47374   | 0.31784 | 0.47374     | 0.31784     | 0.47374  |         |  |
|            | 0.31784         | 0.47374   | 0.31784 | 0.31784     | 0.689508351 |          |         |  |
| NA         | ENSG00000248921 | 0.47375   | 0.31784 | 0.47375     | 0.31784     | 0.47375  | 0.31784 |  |
|            | -0.96224        | 0.83203   | 0.31784 | 0.689508351 |             |          |         |  |
| MIR4305    | ENSG00000264171 | 0.2812    | 0.38928 | 0.47371     | 0.31785     | 0.2812   |         |  |
|            | 0.38928         | 0.2812    | 0.38928 | 0.31785     | 0.689508351 |          |         |  |
| RNU6-1042P | ENSG00000206931 | 0.47367   | 0.31787 | 0.47367     | 0.31787     | 0.47367  |         |  |
|            | 0.31787         | 0.47367   | 0.31787 | 0.31787     | 0.689508351 |          |         |  |
| RNA5SP82   | ENSG00000252516 | 0.47366   | 0.31787 | 0.47366     | 0.31787     | 0.47366  |         |  |
|            | 0.31787         | 0.47366   | 0.31787 | 0.31787     | 0.689508351 |          |         |  |
| CFDP1      | ENSG00000153774 | 0.4735    | 0.31793 | 0.4735      | 0.31793     | 0.4735   | 0.31793 |  |
|            | 0.30274         | 0.38104   | 0.31793 | 0.689580791 |             |          |         |  |
| C20orf27   | ENSG00000101220 | 0.47347   | 0.31794 | -0.74423    | 0.77163     | 0.20408  |         |  |
|            | 0.41915         | -0.40421  | 0.65697 | 0.31794     | 0.689580791 |          |         |  |
| NA         | ENSG00000258711 | 0.47345   | 0.31795 | -0.59325    | 0.72349     | 0.46115  | 0.32235 |  |
|            | -0.44006        | 0.67005   | 0.31795 | 0.689580791 |             |          |         |  |
| NA         | ENSG00000279454 | 0.4734    | 0.31796 | 0.4734      | 0.31796     | 0.4734   | 0.31796 |  |
|            | 0.4734          | 0.31796   | 0.31796 | 0.689580791 |             |          |         |  |
| SLC9B1P4   | ENSG00000227367 | -0.13605  | 0.55411 | 0.47321     | 0.31803     | -0.7676  |         |  |
|            | 0.77864         | -0.67913  | 0.75147 | 0.31803     | 0.689662211 |          |         |  |
| A2ML1      | ENSG00000166535 | -0.31742  | 0.62454 | 0.4732      | 0.31804     | -0.60242 | 0.72655 |  |
|            | -0.47706        | 0.68334   | 0.31804 | 0.689662211 |             |          |         |  |
| EP300-AS1  | ENSG00000231993 | 0.47319   | 0.31804 | 0.47319     | 0.31804     | -0.49047 |         |  |
|            | 0.6881          | -0.28179  | 0.61095 | 0.31804     | 0.689662211 |          |         |  |
| NEDD1      | ENSG00000139350 | -0.43711  | 0.66898 | 0.47299     | 0.31811     | 0.47299  | 0.31811 |  |
|            | 0.23802         | 0.40593   | 0.31811 | 0.689752616 |             |          |         |  |
| NA         | ENSG00000203434 | 0.47298   | 0.31811 | 0.47298     | 0.31811     | 0.47298  | 0.31811 |  |

|           |                 |           |         |             |             |           |         |  |
|-----------|-----------------|-----------|---------|-------------|-------------|-----------|---------|--|
|           | 0.47298         | 0.31811   | 0.31811 | 0.689752616 |             |           |         |  |
| FAM182A   | ENSG00000125804 | 0.17685   | 0.42981 | 0.049259    | 0.48036     | 0.4729    |         |  |
|           | 0.31814         | -0.57592  | 0.71767 | 0.31814     | 0.689756282 |           |         |  |
| NA        | ENSG00000235797 | 0.47292   | 0.31814 | 0.47292     | 0.31814     | 0.47292   | 0.31814 |  |
|           | -0.62434        | 0.7338    | 0.31814 | 0.689756282 |             |           |         |  |
| AK1       | ENSG00000106992 | -1.0219   | 0.84659 | 0.14739     | 0.44141     | 0.47276   | 0.31819 |  |
|           | -0.64938        | 0.74195   | 0.31819 | 0.689794297 |             |           |         |  |
| CYCSP10   | ENSG00000232901 | 0.47275   | 0.3182  | 0.18179     | 0.42787     | 0.18179   |         |  |
|           | 0.42787         | 0.18179   | 0.42787 | 0.3182      | 0.689794297 |           |         |  |
| LINC02080 | ENSG00000267065 | -0.41746  | 0.66183 | -0.54681    | 0.70774     | -0.46146  |         |  |
|           | 0.67777         | 0.47275   | 0.3182  | 0.3182      | 0.689794297 |           |         |  |
| NA        | ENSG00000238326 | 0.47268   | 0.31822 | 0.47268     | 0.31822     | 0.47268   | 0.31822 |  |
|           | 0.47268         | 0.31822   | 0.31822 | 0.689806966 |             |           |         |  |
| NHP2P1    | ENSG00000105988 | -0.29922  | 0.61761 | -0.29922    | 0.61761     | 0.47263   |         |  |
|           | 0.31824         | -0.29922  | 0.61761 | 0.31824     | 0.689819634 |           |         |  |
| NA        | ENSG00000272714 | -0.017246 | 0.50688 | 0.42913     | 0.33391     | -0.98978  | 0.83886 |  |
|           | 0.47257         | 0.31826   | 0.31826 | 0.689832301 |             |           |         |  |
| RNY3P10   | ENSG00000207495 | 0.47236   | 0.31833 | 0.47236     | 0.31833     | 0.47236   |         |  |
|           | 0.31833         | 0.47236   | 0.31833 | 0.31833     | 0.689864941 |           |         |  |
| NA        | ENSG00000283240 | 0.46023   | 0.32267 | -0.32068    | 0.62577     | 0.47238   | 0.31833 |  |
|           | 0.072322        | 0.47117   | 0.31833 | 0.689864941 |             |           |         |  |
| RNU6-812P | ENSG00000200048 | 0.47235   | 0.31834 | 0.47235     | 0.31834     | 0.47235   |         |  |
|           | 0.31834         | 0.47235   | 0.31834 | 0.31834     | 0.689864941 |           |         |  |
| RNU6-827P | ENSG00000202423 | 0.47235   | 0.31834 | -1.1255     | 0.86981     | 0.47235   |         |  |
|           | 0.31834         | 0.47235   | 0.31834 | 0.31834     | 0.689864941 |           |         |  |
| NA        | ENSG00000198277 | 0.28082   | 0.38942 | 0.47231     | 0.31835     | 0.47231   | 0.31835 |  |
|           | 0.47231         | 0.31835   | 0.31835 | 0.689864941 |             |           |         |  |
| EIF2S2P4  | ENSG00000128692 | 0.47228   | 0.31836 | 0.47228     | 0.31836     | 0.47228   |         |  |
|           | 0.31836         | 0.47228   | 0.31836 | 0.31836     | 0.689864941 |           |         |  |
| ZNF221    | ENSG00000159905 | 0.15275   | 0.4393  | 0.47224     | 0.31838     | -0.57359  |         |  |
|           | 0.71688         | -0.57359  | 0.71688 | 0.31838     | 0.689877602 |           |         |  |
| LINC01747 | ENSG00000230400 | -0.6275   | 0.73483 | 0.47201     | 0.31846     | -0.50175  |         |  |
|           | 0.69208         | -0.081408 | 0.53244 | 0.31846     | 0.689968319 |           |         |  |
| NA        | ENSG00000260614 | 0.47201   | 0.31846 | -0.43293    | 0.66747     | -0.1784   | 0.57079 |  |
|           | -0.1784         | 0.57079   | 0.31846 | 0.689968319 |             |           |         |  |
| KRTAP12-1 | ENSG00000187175 | -1.7102   | 0.95638 | -1.7102     | 0.95638     | -1.2162   |         |  |
|           | 0.88804         | 0.47195   | 0.31848 | 0.31848     | 0.689968319 |           |         |  |
| EFCC1     | ENSG00000114654 | -0.3334   | 0.63058 | 0.47189     | 0.3185      | 0.14337   | 0.443   |  |
|           | -0.7721         | 0.77997   | 0.3185  | 0.689968319 |             |           |         |  |
| NA        | ENSG00000223911 | -0.3089   | 0.6213  | 0.47173     | 0.31856     | -0.081229 | 0.53237 |  |
|           | 0.080147        | 0.46806   | 0.31856 | 0.689968319 |             |           |         |  |
| MIR3646   | ENSG00000266151 | 0.4717    | 0.31857 | 0.4717      | 0.31857     | 0.4717    |         |  |
|           | 0.31857         | 0.4717    | 0.31857 | 0.31857     | 0.689968319 |           |         |  |
| NA        | ENSG00000258928 | 0.47165   | 0.31859 | 0.47165     | 0.31859     | 0.47165   | 0.31859 |  |
|           | 0.47165         | 0.31859   | 0.31859 | 0.689968319 |             |           |         |  |
| CPLANE2   | ENSG00000132881 | -0.046585 | 0.51858 | -0.40649    | 0.65781     | 0.47161   |         |  |
|           | 0.3186          | -0.40649  | 0.65781 | 0.3186      | 0.689968319 |           |         |  |
| HEPACAM   | ENSG00000165478 | 0.47163   | 0.3186  | -0.96287    | 0.83219     | 0.29193   |         |  |
|           | 0.38517         | -0.4227   | 0.66374 | 0.3186      | 0.689968319 |           |         |  |
| NA        | ENSG00000259042 | 0.47158   | 0.31861 | 0.41078     | 0.34062     | 0.47158   | 0.31861 |  |
|           | 0.47158         | 0.31861   | 0.31861 | 0.689968319 |             |           |         |  |
| NA        | ENSG00000232930 | -0.03789  | 0.51511 | -1.2334     | 0.89129     | 0.36108   | 0.35902 |  |
|           | 0.47157         | 0.31862   | 0.31862 | 0.689968319 |             |           |         |  |
| NA        | ENSG00000261416 | 0.47149   | 0.31864 | 0.47149     | 0.31864     | 0.47149   | 0.31864 |  |
|           | 0.47149         | 0.31864   | 0.31864 | 0.689968319 |             |           |         |  |
| IGKV2-18  | ENSG00000254157 | -0.17658  | 0.57008 | -1.3649     | 0.91386     | 0.47149   |         |  |
|           | 0.31865         | -0.25844  | 0.60196 | 0.31865     | 0.689968319 |           |         |  |
| TRIM25    | ENSG00000121060 | 0.47143   | 0.31867 | 0.47143     | 0.31867     | -0.3543   |         |  |
|           | 0.63844         | -0.26346  | 0.6039  | 0.31867     | 0.689968319 |           |         |  |
| CCDC186   | ENSG00000165813 | 0.44393   | 0.32855 | 0.18059     | 0.42834     | 0.47141   |         |  |
|           | 0.31867         | 0.3555    | 0.36111 | 0.31867     | 0.689968319 |           |         |  |
| GEMIN8P4  | ENSG00000228175 | 0.47138   | 0.31869 | 0.47138     | 0.31869     | 0.070207  |         |  |

|                           |                 |             |          |             |             |             |         |         |       |
|---------------------------|-----------------|-------------|----------|-------------|-------------|-------------|---------|---------|-------|
|                           | 0.47201         | -0.018576   | 0.50741  | 0.31869     | 0.689968319 |             |         |         |       |
| SPRED3                    | ENSG00000188766 | 0.47134     | 0.3187   | 0.47134     | 0.3187      | -0.01125    |         |         |       |
|                           | 0.50449         | 0.31997     | 0.3745   | 0.3187      | 0.689968319 |             |         |         |       |
| NA                        | ENSG00000280005 | 0.47133     | 0.3187   | 0.47133     | 0.3187      | 0.47133     | 0.3187  |         |       |
|                           | 0.47133         | 0.3187      | 0.3187   | 0.689968319 |             |             |         |         |       |
| LINC01173                 | ENSG00000280744 | 0.25938     | 0.39767  | -0.57914    | 0.71875     | 0.47132     |         |         |       |
|                           | 0.31871         | -0.73459    | 0.76871  | 0.31871     | 0.689968319 |             |         |         |       |
| NA                        | ENSG00000274859 | 0.47129     | 0.31872  | 0.47129     | 0.31872     | 0.47129     | 0.31872 |         |       |
|                           | 0.47129         | 0.31872     | 0.31872  | 0.689968319 |             |             |         |         |       |
| ARHGAP27P1-BPTFP1-KPNA2P3 | ENSG00000215769 | 0.47122     | 0.31874  | -1.4631     | 0.92829     |             |         |         |       |
|                           | 0.47122         | 0.31874     | -0.78877 | 0.78488     | 0.31874     | 0.689968319 |         |         |       |
| USP15                     | ENSG00000135655 | -0.064042   | 0.52553  | -1.1538     | 0.87572     | -1.0235     | 0.84696 |         |       |
|                           | 0.47117         | 0.31876     | 0.31876  | 0.689968319 |             |             |         |         |       |
| NA                        | ENSG00000263237 | -1.8503     | 0.96787  | -1.0098     | 0.84369     | -1.0098     | 0.84369 |         |       |
|                           | 0.47117         | 0.31876     | 0.31876  | 0.689968319 |             |             |         |         |       |
| RN7SKP178                 | ENSG00000201875 | 0.47116     | 0.31877  | 0.013866    | 0.49447     | 0.13957     |         |         |       |
|                           | 0.4445          | 0.47116     | 0.31877  | 0.31877     | 0.689968319 |             |         |         |       |
| NA                        | ENSG00000267408 | -0.76693    | 0.77844  | -0.45308    | 0.67476     | 0.47111     | 0.31878 |         |       |
|                           | -0.37943        | 0.64782     | 0.31878  | 0.689968319 |             |             |         |         |       |
| NA                        | ENSG00000238081 | 0.22687     | 0.41026  | 0.47109     | 0.31879     | 0.22687     | 0.41026 |         |       |
|                           | 0.22687         | 0.41026     | 0.31879  | 0.689968319 |             |             |         |         |       |
| ONECUT3                   | ENSG00000205922 | -0.52404    | 0.69988  | -0.55945    | 0.71207     | 0.47103     |         |         |       |
|                           | 0.31881         | -0.38178    | 0.64869  | 0.31881     | 0.68998096  |             |         |         |       |
| HEPFL1                    | ENSG00000181333 | 0.13278     | 0.44719  | 0.248       | 0.40207     | 0.47085     | 0.31887 |         |       |
|                           | -0.45546        | 0.67561     | 0.31887  | 0.69004952  |             |             |         |         |       |
| MIR3159                   | ENSG00000264603 | 0.47085     | 0.31887  | 0.47085     | 0.31887     | 0.47085     |         |         |       |
|                           | 0.31887         | 0.47085     | 0.31887  | 0.31887     | 0.69004952  |             |         |         |       |
| LINC02248                 | ENSG00000235160 | 0.47079     | 0.31889  | 0.47079     | 0.31889     | 0.47079     |         |         |       |
|                           | 0.31889         | 0.47079     | 0.31889  | 0.31889     | 0.690053153 |             |         |         |       |
| TMPRSS13                  | ENSG00000137747 | 0.2067      | 0.41812  | -0.96517    | 0.83277     | -0.10378    |         |         |       |
|                           | 0.54133         | 0.47077     | 0.3189   | 0.3189      | 0.690053153 |             |         |         |       |
| NA                        | ENSG00000279118 | 0.47049     | 0.319    | 0.47049     | 0.319       | 0.47049     | 0.319   | 0.47049 | 0.319 |
|                           | 0.319           | 0.690114684 |          |             |             |             |         |         |       |
| RNA5SP377                 | ENSG00000212154 | 0.47045     | 0.31902  | 0.31877     | 0.37495     | -0.9935     |         |         |       |
|                           | 0.83977         | 0.41742     | 0.33819  | 0.31902     | 0.690114684 |             |         |         |       |
| NA                        | ENSG00000242463 | -0.46152    | 0.67779  | 0.47045     | 0.31902     | -0.89       | 0.81327 |         |       |
|                           | 0.47045         | 0.31902     | 0.31902  | 0.690114684 |             |             |         |         |       |
| LINC02176                 | ENSG00000260340 | 0.37217     | 0.35488  | -0.8809     | 0.81081     | 0.47036     |         |         |       |
|                           | 0.31905         | -0.57929    | 0.7188   | 0.31905     | 0.690114684 |             |         |         |       |
| TRBV7-1                   | ENSG00000211707 | 0.47026     | 0.31908  | 0.47026     | 0.31908     | 0.25914     |         |         |       |
|                           | 0.39776         | 0.25914     | 0.39776  | 0.31908     | 0.690114684 |             |         |         |       |
| NA                        | ENSG00000260848 | 0.47025     | 0.31909  | -0.86087    | 0.80534     | -0.76673    | 0.77838 |         |       |
|                           | -1.0397         | 0.85077     | 0.31909  | 0.690114684 |             |             |         |         |       |
| RNA5SP441                 | ENSG00000252618 | 0.47021     | 0.3191   | -0.43763    | 0.66917     | -0.43763    |         |         |       |
|                           | 0.66917         | -0.62465    | 0.7339   | 0.3191      | 0.690114684 |             |         |         |       |
| TMTC4                     | ENSG00000125247 | -0.5832     | 0.72012  | -0.37394    | 0.64578     | 0.47016     | 0.31912 |         |       |
|                           | -1.2065         | 0.88618     | 0.31912  | 0.690114684 |             |             |         |         |       |
| NA                        | ENSG00000254044 | 0.053271    | 0.47876  | 0.47015     | 0.31912     | 0.053271    | 0.47876 |         |       |
|                           | -0.96527        | 0.8328      | 0.31912  | 0.690114684 |             |             |         |         |       |
| NA                        | ENSG00000212082 | 0.47015     | 0.31912  | 0.47015     | 0.31912     | 0.47015     | 0.31912 |         |       |
|                           | 0.47015         | 0.31912     | 0.31912  | 0.690114684 |             |             |         |         |       |
| ZNF563                    | ENSG00000188868 | 0.12871     | 0.44879  | 0.46182     | 0.32211     | -0.65064    |         |         |       |
|                           | 0.74236         | 0.47008     | 0.31915  | 0.31915     | 0.690114684 |             |         |         |       |
| GAPDHP28                  | ENSG00000213449 | 0.47006     | 0.31916  | 0.47006     | 0.31916     | 0.47006     |         |         |       |
|                           | 0.31916         | 0.47006     | 0.31916  | 0.31916     | 0.690114684 |             |         |         |       |
| MLF2                      | ENSG00000089693 | 0.47001     | 0.31917  | 0.47001     | 0.31917     | -0.33373    | 0.63071 |         |       |
|                           | 0.062037        | 0.47527     | 0.31917  | 0.690114684 |             |             |         |         |       |
| NA                        | ENSG00000219088 | 0.46997     | 0.31919  | 0.42137     | 0.33674     | 0.38007     | 0.35195 |         |       |
|                           | 0.38007         | 0.35195     | 0.31919  | 0.690114684 |             |             |         |         |       |
| MIR4307                   | ENSG00000265165 | 0.4699      | 0.31921  | -0.45383    | 0.67502     | -1.3826     |         |         |       |
|                           | 0.91661         | -1.3826     | 0.91661  | 0.31921     | 0.690114684 |             |         |         |       |
| PYCR3                     | ENSG00000104524 | -0.14689    | 0.55839  | 0.46987     | 0.31922     | 0.053304    | 0.47874 |         |       |

|             |                 |           |         |             |             |           |         |         |
|-------------|-----------------|-----------|---------|-------------|-------------|-----------|---------|---------|
|             | -0.18984        | 0.57528   | 0.31922 | 0.690114684 |             |           |         |         |
| UBE2SP2     | ENSG00000224126 | -0.45515  | 0.6755  | -0.31279    | 0.62278     | 0.46987   |         |         |
|             | 0.31922         | 0.40589   | 0.34241 | 0.31922     | 0.690114684 |           |         |         |
| NA          | ENSG00000248824 | -0.82798  | 0.79616 | 0.46987     | 0.31922     | 0.088369  | 0.46479 |         |
|             | -0.12816        | 0.55099   | 0.31922 | 0.690114684 |             |           |         |         |
| ADPRM       | ENSG00000170222 | 0.46985   | 0.31923 | 0.46985     | 0.31923     | 0.46985   | 0.31923 |         |
|             | 0.46985         | 0.31923   | 0.31923 | 0.690114684 |             |           |         |         |
| GAB4        | ENSG00000215568 | 0.13501   | 0.4463  | 0.46985     | 0.31923     | -0.16524  | 0.56562 |         |
|             | -0.20625        | 0.5817    | 0.31923 | 0.690114684 |             |           |         |         |
| NA          | ENSG00000163486 | -0.53872  | 0.70496 | 0.46984     | 0.31923     | 0.37916   | 0.35229 |         |
|             | -0.49269        | 0.68888   | 0.31923 | 0.690114684 |             |           |         |         |
| ZNF252P-AS1 | ENSG00000255559 | 0.46983   | 0.31924 | 0.46983     | 0.31924     | 0.46983   | 0.31924 | 0.46983 |
|             | 0.31924         | 0.46983   | 0.31924 | 0.31924     | 0.690114684 |           |         |         |
| XRCC5       | ENSG00000079246 | -0.50532  | 0.69333 | -1.4885     | 0.93169     | -1.7327   | 0.95843 |         |
|             | 0.46969         | 0.31929   | 0.31929 | 0.690165156 |             |           |         |         |
| FAM161A     | ENSG00000170264 | 0.46962   | 0.31931 | 0.30563     | 0.37995     | 0.092404  |         |         |
|             | 0.46319         | -0.93053  | 0.82395 | 0.31931     | 0.690165156 |           |         |         |
| NA          | ENSG00000201466 | -0.82948  | 0.79658 | -0.78626    | 0.78414     | 0.46961   | 0.31932 |         |
|             | -1.1028         | 0.86494   | 0.31932 | 0.690165156 |             |           |         |         |
| RN7SL474P   | ENSG00000264092 | 0.4696    | 0.31932 | 0.036852    | 0.4853      | 0.2518    |         |         |
|             | 0.4006          | 0.2518    | 0.4006  | 0.31932     | 0.690165156 |           |         |         |
| ATP5F1E     | ENSG00000124172 | 0.46956   | 0.31934 | 0.46956     | 0.31934     | 0.46956   |         |         |
|             | 0.31934         | 0.46956   | 0.31934 | 0.31934     | 0.690170809 |           |         |         |
| NA          | ENSG00000273389 | -0.4022   | 0.65623 | 0.46947     | 0.31937     | 0.46947   | 0.31937 |         |
|             | 0.46947         | 0.31937   | 0.31937 | 0.690170809 |             |           |         |         |
| NA          | ENSG00000213669 | 0.46944   | 0.31938 | 0.46944     | 0.31938     | 0.46944   | 0.31938 |         |
|             | 0.46944         | 0.31938   | 0.31938 | 0.690170809 |             |           |         |         |
| NA          | ENSG00000269942 | 0.46926   | 0.31944 | 0.46926     | 0.31944     | 0.46926   | 0.31944 |         |
|             | 0.46926         | 0.31944   | 0.31944 | 0.690170809 |             |           |         |         |
| RNU6-563P   | ENSG00000201742 | 0.28864   | 0.38643 | -0.088861   | 0.5354      | 0.28864   |         |         |
|             | 0.38643         | 0.46925   | 0.31945 | 0.31945     | 0.690170809 |           |         |         |
| NA          | ENSG00000269839 | -0.72516  | 0.76582 | -0.18788    | 0.57451     | 0.46924   | 0.31945 |         |
|             | -0.21835        | 0.58642   | 0.31945 | 0.690170809 |             |           |         |         |
| NA          | ENSG00000202388 | 0.46921   | 0.31946 | 0.46921     | 0.31946     | 0.46921   | 0.31946 |         |
|             | 0.46921         | 0.31946   | 0.31946 | 0.690170809 |             |           |         |         |
| LINC01566   | ENSG00000259841 | 0.46922   | 0.31946 | 0.28278     | 0.38867     | 0.28278   |         |         |
|             | 0.38867         | 0.28278   | 0.38867 | 0.31946     | 0.690170809 |           |         |         |
| ATAD2       | ENSG00000156802 | -2.2795   | 0.98868 | -1.2658     | 0.89721     | -1.3938   | 0.9183  |         |
|             | 0.46909         | 0.3195    | 0.3195  | 0.690170809 |             |           |         |         |
| MRPS6P2     | ENSG00000237130 | -0.44108  | 0.67042 | 0.46898     | 0.31954     | 0.46898   |         |         |
|             | 0.31954         | 0.46898   | 0.31954 | 0.31954     | 0.690170809 |           |         |         |
| FCGR3A      | ENSG00000203747 | -0.054842 | 0.52187 | -0.057266   | 0.52283     | -0.4647   |         |         |
|             | 0.67893         | 0.46894   | 0.31956 | 0.31956     | 0.690170809 |           |         |         |
| NA          | ENSG00000244346 | 0.46882   | 0.3196  | 0.46882     | 0.3196      | 0.46882   | 0.3196  |         |
|             | 0.46882         | 0.3196    | 0.3196  | 0.690170809 |             |           |         |         |
| RNU6-807P   | ENSG00000252614 | 0.46882   | 0.3196  | 0.46882     | 0.3196      | 0.46882   |         |         |
|             | 0.3196          | 0.46882   | 0.3196  | 0.3196      | 0.690170809 |           |         |         |
| MMADHC      | ENSG00000168288 | 0.46873   | 0.31963 | -0.27625    | 0.60882     | -0.074598 |         |         |
|             | 0.52973         | -0.68208  | 0.75241 | 0.31963     | 0.690170809 |           |         |         |
| MIR103A1    | ENSG00000199035 | 0.46872   | 0.31964 | 0.46872     | 0.31964     | 0.46872   |         |         |
|             | 0.31964         | 0.46872   | 0.31964 | 0.31964     | 0.690170809 |           |         |         |
| BMP7        | ENSG00000101144 | -0.34317  | 0.63427 | 0.20033     | 0.42061     | 0.46867   | 0.31965 |         |
|             | -0.83728        | 0.79878   | 0.31965 | 0.690170809 |             |           |         |         |
| OOSP2       | ENSG00000149507 | 0.46865   | 0.31966 | -0.28496    | 0.61216     | -0.28496  | 0.61216 |         |
|             | -0.28496        | 0.61216   | 0.31966 | 0.690170809 |             |           |         |         |
| CHN1        | ENSG00000128656 | -0.39046  | 0.6519  | 0.46862     | 0.31967     | -0.0937   | 0.53733 |         |
|             | -0.8454         | 0.80106   | 0.31967 | 0.690170809 |             |           |         |         |
| SDHC        | ENSG00000143252 | 0.13219   | 0.44742 | 0.46863     | 0.31967     | 0.42629   | 0.33495 |         |
|             | 0.24239         | 0.40424   | 0.31967 | 0.690170809 |             |           |         |         |
| NA          | ENSG00000225111 | 0.46863   | 0.31967 | 0.46863     | 0.31967     | 0.46863   | 0.31967 |         |
|             | 0.46863         | 0.31967   | 0.31967 | 0.690170809 |             |           |         |         |
| NA          | ENSG00000259561 | 0.46863   | 0.31967 | 0.46863     | 0.31967     | 0.46863   | 0.31967 |         |



|            |                 |           |         |             |         |           |         |  |
|------------|-----------------|-----------|---------|-------------|---------|-----------|---------|--|
|            | 0.46863         | 0.31967   | 0.31967 | 0.690170809 |         |           |         |  |
| UBAC1      | ENSG00000130560 | -0.046175 | 0.51841 | -0.5351     | 0.70371 | 0.19846   | 0.42134 |  |
|            | 0.46854         | 0.3197    | 0.3197  | 0.690170809 |         |           |         |  |
| SSBP3P1    | ENSG00000233225 | 0.46852   | 0.31971 | 0.46852     | 0.31971 | 0.46852   |         |  |
|            | 0.31971         | 0.46852   | 0.31971 | 0.690170809 |         |           |         |  |
| RNA5SP331  | ENSG00000201856 | 0.46849   | 0.31972 | -0.26861    | 0.60589 | -0.26861  |         |  |
|            | 0.60589         | -0.26861  | 0.60589 | 0.690170809 |         |           |         |  |
| MIR129-2   | ENSG00000199077 | 0.46846   | 0.31973 | 0.46846     | 0.31973 | 0.46846   |         |  |
|            | 0.31973         | 0.46846   | 0.31973 | 0.690170809 |         |           |         |  |
| NA         | ENSG00000254771 | -0.25839  | 0.60195 | -1.2886     | 0.90124 | 0.2678    | 0.39442 |  |
|            | 0.46846         | 0.31973   | 0.31973 | 0.690170809 |         |           |         |  |
| H2AZP6     | ENSG00000233733 | 0.46839   | 0.31975 | 0.46839     | 0.31975 | 0.46839   |         |  |
|            | 0.31975         | 0.46839   | 0.31975 | 0.690170809 |         |           |         |  |
| NA         | ENSG00000279518 | 0.4684    | 0.31975 | 0.4684      | 0.31975 | 0.4684    | 0.31975 |  |
|            | 0.4684          | 0.31975   | 0.31975 | 0.690170809 |         |           |         |  |
| LINC02755  | ENSG00000254530 | -0.83367  | 0.79777 | -0.35381    | 0.63826 | -0.24265  |         |  |
|            | 0.59586         | 0.46837   | 0.31976 | 0.690170809 |         |           |         |  |
| ADAM28     | ENSG00000042980 | 0.4683    | 0.31979 | -0.35305    | 0.63797 | 0.31258   |         |  |
|            | 0.3773          | 0.32399   | 0.37297 | 0.690170809 |         |           |         |  |
| RFX6       | ENSG00000185002 | -0.27827  | 0.6096  | 0.46828     | 0.31979 | -0.27827  | 0.6096  |  |
|            | -0.13297        | 0.55289   | 0.31979 | 0.690170809 |         |           |         |  |
| NA         | ENSG00000224477 | -0.62277  | 0.73328 | -1.4762     | 0.93006 | 0.46829   | 0.31979 |  |
|            | 0.032762        | 0.48693   | 0.31979 | 0.690170809 |         |           |         |  |
| RPL9P33    | ENSG00000244071 | 0.46828   | 0.31979 | 0.46828     | 0.31979 | 0.46828   |         |  |
|            | 0.31979         | 0.46828   | 0.31979 | 0.690170809 |         |           |         |  |
| RFPL1S     | ENSG00000225465 | 0.46817   | 0.31983 | 0.46817     | 0.31983 | 0.46817   |         |  |
|            | 0.31983         | 0.46817   | 0.31983 | 0.690226568 |         |           |         |  |
| NELFCD     | ENSG00000101158 | -0.54316  | 0.70649 | -0.54316    | 0.70649 | -0.54316  |         |  |
|            | 0.70649         | 0.46813   | 0.31985 | 0.690237386 |         |           |         |  |
| ZNF429     | ENSG00000197013 | 0.0039721 | 0.49842 | -0.18677    | 0.57408 | 0.46804   |         |  |
|            | 0.31988         | 0.35513   | 0.36125 | 0.690237386 |         |           |         |  |
| NA         | ENSG00000261537 | 0.46798   | 0.3199  | 0.46798     | 0.3199  | 0.46798   | 0.3199  |  |
|            | 0.23791         | 0.40597   | 0.3199  | 0.690237386 |         |           |         |  |
| LINC00879  | ENSG00000239589 | 0.46796   | 0.31991 | -0.15381    | 0.56112 | -0.45208  |         |  |
|            | 0.67439         | -1.0454   | 0.85207 | 0.690237386 |         |           |         |  |
| NA         | ENSG00000281920 | -0.80439  | 0.78941 | 0.46795     | 0.31991 | -0.64458  | 0.7404  |  |
|            | 0.46795         | 0.31991   | 0.31991 | 0.690237386 |         |           |         |  |
| IL5RA      | ENSG00000091181 | 0.46794   | 0.31992 | -0.33285    | 0.63038 | -0.084577 | 0.5337  |  |
|            | -0.10009        | 0.53986   | 0.31992 | 0.690237386 |         |           |         |  |
| TNIP2      | ENSG00000168884 | 0.46785   | 0.31995 | 0.28024     | 0.38965 | 0.46785   | 0.31995 |  |
|            | 0.46785         | 0.31995   | 0.31995 | 0.69027155  |         |           |         |  |
| MCM3AP-AS1 | ENSG00000215424 | 0.46772   | 0.31999 | 0.13273     | 0.4472  | 0.39743   |         |  |
|            | 0.34552         | 0.39743   | 0.34552 | 0.690327284 |         |           |         |  |
| RNASE2     | ENSG00000169385 | -0.51198  | 0.69567 | -0.51198    | 0.69567 | 0.46764   |         |  |
|            | 0.32002         | -0.51198  | 0.69567 | 0.690329086 |         |           |         |  |
| LINC00944  | ENSG00000256128 | 0.46759   | 0.32004 | -0.98517    | 0.83773 | 0.46759   |         |  |
|            | 0.32004         | 0.46759   | 0.32004 | 0.690329086 |         |           |         |  |
| NA         | ENSG00000259546 | 0.46751   | 0.32007 | 0.46751     | 0.32007 | 0.46751   | 0.32007 |  |
|            | 0.46751         | 0.32007   | 0.32007 | 0.690329086 |         |           |         |  |
| NA         | ENSG00000274508 | 0.4675    | 0.32007 | -0.17769    | 0.57052 | 0.4675    | 0.32007 |  |
|            | 0.4675          | 0.32007   | 0.32007 | 0.690329086 |         |           |         |  |
| NA         | ENSG00000196472 | 0.46746   | 0.32009 | -1.1637     | 0.87773 | -0.16545  | 0.5657  |  |
|            | -0.48923        | 0.68766   | 0.32009 | 0.690329086 |         |           |         |  |
| RNU6-809P  | ENSG00000207190 | 0.46744   | 0.32009 | 0.46744     | 0.32009 | 0.46744   |         |  |
|            | 0.32009         | 0.46744   | 0.32009 | 0.690329086 |         |           |         |  |
| NA         | ENSG00000270028 | 0.46745   | 0.32009 | 0.46745     | 0.32009 | 0.46745   | 0.32009 |  |
|            | 0.46745         | 0.32009   | 0.32009 | 0.690329086 |         |           |         |  |
| LLGL1      | ENSG00000131899 | -0.65074  | 0.74239 | 0.46732     | 0.32014 | -1.161    | 0.87718 |  |
|            | -0.27257        | 0.60741   | 0.32014 | 0.690375811 |         |           |         |  |
| NA         | ENSG00000177596 | 0.22623   | 0.41051 | -0.19752    | 0.57829 | -0.2196   | 0.58691 |  |
|            | 0.4673          | 0.32014   | 0.32014 | 0.690375811 |         |           |         |  |
| MED28P6    | ENSG00000259183 | 0.46722   | 0.32017 | 0.46722     | 0.32017 | 0.46722   |         |  |

|             |                 |           |         |             |             |          |         |
|-------------|-----------------|-----------|---------|-------------|-------------|----------|---------|
|             | 0.32017         | 0.46722   | 0.32017 | 0.32017     | 0.690388364 |          |         |
| FAM66B      | ENSG00000215374 | -0.3525   | 0.63777 | -0.3525     | 0.63777     | 0.44744  |         |
|             | 0.32728         | 0.46719   | 0.32018 | 0.32018     | 0.690388364 |          |         |
| NA          | ENSG00000267036 | 0.46717   | 0.32019 | 0.46717     | 0.32019     | 0.46717  | 0.32019 |
|             | 0.46717         | 0.32019   | 0.32019 | 0.690388364 |             |          |         |
| NA          | ENSG00000265421 | 0.19442   | 0.42292 | -0.82599    | 0.79559     | 0.46708  | 0.32022 |
|             | 0.46708         | 0.32022   | 0.32022 | 0.690388364 |             |          |         |
| NA          | ENSG00000270992 | 0.020942  | 0.49165 | -0.93371    | 0.82477     | 0.4671   | 0.32022 |
|             | -0.050293       | 0.52006   | 0.32022 | 0.690388364 |             |          |         |
| LINC01986   | ENSG00000223587 | -0.62838  | 0.73512 | -0.72719    | 0.76645     | 0.46697  |         |
|             | 0.32026         | -0.69986  | 0.75799 | 0.32026     | 0.690388364 |          |         |
| NA          | ENSG00000276900 | 0.46692   | 0.32028 | 0.46692     | 0.32028     | 0.46692  | 0.32028 |
|             | 0.46692         | 0.32028   | 0.32028 | 0.690388364 |             |          |         |
| HMGB1P48    | ENSG00000234379 | -0.73552  | 0.76899 | -0.10164    | 0.54048     | 0.46686  |         |
|             | 0.3203          | 0.46686   | 0.3203  | 0.3203      | 0.690388364 |          |         |
| LINC01936   | ENSG00000235997 | 0.46686   | 0.3203  | 0.46686     | 0.3203      | 0.46686  |         |
|             | 0.3203          | 0.46686   | 0.3203  | 0.3203      | 0.690388364 |          |         |
| NA          | ENSG00000264289 | -0.054343 | 0.52167 | 0.46687     | 0.3203      | -0.83306 | 0.7976  |
|             | -0.39227        | 0.65257   | 0.3203  | 0.690388364 |             |          |         |
| EIF3H       | ENSG00000147677 | 0.46679   | 0.32032 | 0.15792     | 0.43726     | 0.46679  | 0.32032 |
|             | 0.24434         | 0.40349   | 0.32032 | 0.690388364 |             |          |         |
| MTCYBP36    | ENSG00000216853 | 0.46681   | 0.32032 | 0.46681     | 0.32032     | 0.46681  |         |
|             | 0.32032         | 0.46681   | 0.32032 | 0.32032     | 0.690388364 |          |         |
| NA          | ENSG00000274758 | 0.46677   | 0.32033 | 0.46677     | 0.32033     | 0.46677  | 0.32033 |
|             | 0.46677         | 0.32033   | 0.32033 | 0.690388364 |             |          |         |
| ZNF700      | ENSG00000196757 | -0.24544  | 0.59694 | 0.4666      | 0.32039     | -0.29258 |         |
|             | 0.61508         | 0.063368  | 0.47474 | 0.32039     | 0.690487139 |          |         |
| RPL23AP32   | ENSG00000237887 | 0.46642   | 0.32046 | 0.46642     | 0.32046     | 0.46642  |         |
|             | 0.32046         | 0.46642   | 0.32046 | 0.32046     | 0.690567927 |          |         |
| RABAC1      | ENSG00000105404 | 0.46639   | 0.32047 | -0.32014    | 0.62557     | -0.32014 |         |
|             | 0.62557         | -0.32014  | 0.62557 | 0.32047     | 0.690567927 |          |         |
| NA          | ENSG00000215346 | 0.46638   | 0.32047 | 0.46638     | 0.32047     | -0.07542 | 0.53006 |
|             | -1.0287         | 0.84819   | 0.32047 | 0.690567927 |             |          |         |
| ZNF160      | ENSG00000170949 | -0.44005  | 0.67005 | 0.18378     | 0.42709     | 0.46633  |         |
|             | 0.32049         | -0.44005  | 0.67005 | 0.32049     | 0.690580486 |          |         |
| NA          | ENSG00000253884 | -0.24034  | 0.59497 | 0.46613     | 0.32056     | -0.29654 | 0.61659 |
|             | -0.29654        | 0.61659   | 0.32056 | 0.690700588 |             |          |         |
| CD300A      | ENSG00000167851 | 0.46608   | 0.32058 | -0.10607    | 0.54224     | -0.37616 |         |
|             | 0.6466          | 0.014497  | 0.49422 | 0.32058     | 0.690700588 |          |         |
| RASGRP3-AS1 | ENSG00000237133 | -1.8992   | 0.97123 | -1.5628     | 0.94095     | 0.46587  |         |
|             | 0.32066         | -0.80906  | 0.79076 | 0.32066     | 0.690700588 |          |         |
| NA          | ENSG00000254235 | -0.54363  | 0.70665 | -1.278      | 0.89938     | 0.46586  | 0.32066 |
|             | -1.0372         | 0.85019   | 0.32066 | 0.690700588 |             |          |         |
| MRPS9       | ENSG00000135972 | 0.11419   | 0.45454 | 0.4658      | 0.32068     | 0.4658   | 0.32068 |
|             | -0.75239        | 0.77409   | 0.32068 | 0.690700588 |             |          |         |
| LINC00428   | ENSG00000229546 | -0.096627 | 0.53849 | -1.039      | 0.85059     | 0.46579  |         |
|             | 0.32068         | 0.46579   | 0.32068 | 0.32068     | 0.690700588 |          |         |
| MTCO1P21    | ENSG00000226960 | 0.46578   | 0.32069 | 0.46578     | 0.32069     | -0.38079 |         |
|             | 0.64832         | 0.46578   | 0.32069 | 0.32069     | 0.690700588 |          |         |
| ACTR8       | ENSG00000113812 | 0.46576   | 0.3207  | 0.32543     | 0.37243     | 0.46576  | 0.3207  |
|             | 0.46576         | 0.3207    | 0.3207  | 0.690700588 |             |          |         |
| TP73-AS2    | ENSG00000235131 | 0.46573   | 0.32071 | 0.40333     | 0.34335     | 0.40333  |         |
|             | 0.34335         | 0.40333   | 0.34335 | 0.32071     | 0.690700588 |          |         |
| MECOM       | ENSG00000085276 | 0.37722   | 0.35301 | -0.14421    | 0.55733     | 0.46565  | 0.32073 |
|             | 0.019699        | 0.49214   | 0.32073 | 0.690700588 |             |          |         |
| EIF4EBP2    | ENSG00000148730 | 0.16229   | 0.43554 | 0.42644     | 0.33489     | -0.40777 |         |
|             | 0.65828         | 0.46566   | 0.32073 | 0.32073     | 0.690700588 |          |         |
| H3-4        | ENSG00000168148 | 0.46566   | 0.32073 | -0.22759    | 0.59002     | 0.46566  | 0.32073 |
|             | 0.46566         | 0.32073   | 0.32073 | 0.690700588 |             |          |         |
| NA          | ENSG00000261260 | 0.46565   | 0.32073 | 0.46565     | 0.32073     | 0.46565  | 0.32073 |
|             | 0.4188          | 0.33768   | 0.32073 | 0.690700588 |             |          |         |
| LINC02544   | ENSG00000261039 | -1.9323   | 0.97334 | -0.35607    | 0.63911     | 0.46555  |         |

|           |                 |          |         |             |             |          |         |  |
|-----------|-----------------|----------|---------|-------------|-------------|----------|---------|--|
|           | 0.32077         | -0.29095 | 0.61445 | 0.32077     | 0.690723799 |          |         |  |
| TATDN2    | ENSG00000157014 | 0.099939 | 0.4602  | 0.46553     | 0.32078     | 0.099939 |         |  |
|           | 0.4602          | 0.21302  | 0.41565 | 0.32078     | 0.690723799 |          |         |  |
| LINC02010 | ENSG00000242671 | 0.4655   | 0.32079 | 0.4655      | 0.32079     | 0.4655   |         |  |
|           | 0.32079         | 0.4655   | 0.32079 | 0.32079     | 0.690723799 |          |         |  |
| LINC01834 | ENSG00000261316 | -0.20883 | 0.58271 | 0.46547     | 0.3208      | -0.20883 |         |  |
|           | 0.58271         | -0.20883 | 0.58271 | 0.3208      | 0.690723799 |          |         |  |
| HAL       | ENSG00000084110 | -0.66844 | 0.74808 | 0.46538     | 0.32083     | -0.66844 | 0.74808 |  |
|           | -0.66844        | 0.74808  | 0.32083 | 0.690723799 |             |          |         |  |
| MTHFSD    | ENSG00000103248 | -0.49494 | 0.68968 | -1.0803     | 0.86        | -0.85262 | 0.80306 |  |
|           | 0.46534         | 0.32084  | 0.32084 | 0.690723799 |             |          |         |  |
| SMIM2     | ENSG00000139656 | 0.46535  | 0.32084 | 0.46535     | 0.32084     | 0.41442  | 0.33928 |  |
|           | -0.47929        | 0.68413  | 0.32084 | 0.690723799 |             |          |         |  |
| ACD       | ENSG00000102977 | 0.46528  | 0.32087 | 0.46528     | 0.32087     | 0.46528  | 0.32087 |  |
|           | -0.4598         | 0.67717  | 0.32087 | 0.690727353 |             |          |         |  |
| GFI1B     | ENSG00000165702 | -2.1146  | 0.98277 | -1.9542     | 0.97466     | 0.46527  | 0.32087 |  |
|           | -0.184          | 0.57299  | 0.32087 | 0.690727353 |             |          |         |  |
| E2F3      | ENSG00000112242 | -0.70092 | 0.75832 | -0.4617     | 0.67785     | 0.46518  | 0.3209  |  |
|           | 0.46518         | 0.3209   | 0.3209  | 0.690761419 |             |          |         |  |
| PYURF     | ENSG00000145337 | -0.17378 | 0.56898 | 0.46513     | 0.32092     | -0.41696 | 0.66164 |  |
|           | -0.18589        | 0.57374  | 0.32092 | 0.690766406 |             |          |         |  |
| OR2J2     | ENSG00000204700 | -0.75411 | 0.77461 | 0.46509     | 0.32094     | -2.0581  | 0.98021 |  |
|           | -1.612          | 0.94652  | 0.32094 | 0.690766406 |             |          |         |  |
| SLC30A4   | ENSG00000104154 | 0.42558  | 0.33521 | 0.42558     | 0.33521     | 0.42558  |         |  |
|           | 0.33521         | 0.46498  | 0.32097 | 0.32097     | 0.690766406 |          |         |  |
| MIR155HG  | ENSG00000234883 | -1.4635  | 0.92833 | -0.80896    | 0.79073     | -0.49028 |         |  |
|           | 0.68803         | 0.46497  | 0.32098 | 0.32098     | 0.690766406 |          |         |  |
| NA        | ENSG00000173867 | 0.46492  | 0.32099 | 0.46492     | 0.32099     | 0.46492  | 0.32099 |  |
|           | 0.46492         | 0.32099  | 0.32099 | 0.690766406 |             |          |         |  |
| NA        | ENSG00000256723 | 0.46492  | 0.32099 | 0.46492     | 0.32099     | 0.46492  | 0.32099 |  |
|           | 0.46492         | 0.32099  | 0.32099 | 0.690766406 |             |          |         |  |
| NA        | ENSG00000229425 | 0.46481  | 0.32103 | 0.38796     | 0.34902     | -0.90703 | 0.8178  |  |
|           | 0.084007        | 0.46653  | 0.32103 | 0.690766406 |             |          |         |  |
| ZNF134    | ENSG00000213762 | 0.46479  | 0.32104 | -1.1559     | 0.87614     | -1.1559  |         |  |
|           | 0.87614         | -1.1559  | 0.87614 | 0.32104     | 0.690766406 |          |         |  |
| DNMT1     | ENSG00000130816 | -0.26689 | 0.60522 | -0.57215    | 0.71639     | -0.50879 | 0.69455 |  |
|           | 0.46475         | 0.32106  | 0.32106 | 0.690766406 |             |          |         |  |
| OR10W1    | ENSG00000172772 | -1.9074  | 0.97176 | -0.45601    | 0.67581     | 0.46466  |         |  |
|           | 0.32109         | -0.45601 | 0.67581 | 0.32109     | 0.690766406 |          |         |  |
| SERINC1   | ENSG00000111897 | 0.46462  | 0.3211  | 0.46462     | 0.3211      | 0.46462  |         |  |
|           | 0.3211          | 0.46462  | 0.3211  | 0.3211      | 0.690766406 |          |         |  |
| PARVB     | ENSG00000188677 | -1.0263  | 0.84762 | -0.31167    | 0.62235     | 0.46463  | 0.3211  |  |
|           | -0.14074        | 0.55596  | 0.3211  | 0.690766406 |             |          |         |  |
| NA        | ENSG00000265453 | 0.46464  | 0.3211  | 0.46464     | 0.3211      | 0.46464  | 0.3211  |  |
|           | 0.46464         | 0.3211   | 0.3211  | 0.690766406 |             |          |         |  |
| NA        | ENSG00000254249 | 0.46461  | 0.32111 | 0.46461     | 0.32111     | 0.46461  | 0.32111 |  |
|           | 0.46461         | 0.32111  | 0.32111 | 0.690766406 |             |          |         |  |
| NA        | ENSG00000236182 | -0.30004 | 0.61793 | -0.30004    | 0.61793     | 0.46455  | 0.32113 |  |
|           | 0.2899          | 0.38595  | 0.32113 | 0.690766406 |             |          |         |  |
| NA        | ENSG00000215586 | -0.35874 | 0.64011 | 0.46449     | 0.32115     | 0.4401   | 0.32993 |  |
|           | 0.34882         | 0.36361  | 0.32115 | 0.690766406 |             |          |         |  |
| LINC00479 | ENSG00000236384 | 0.46446  | 0.32116 | 0.46446     | 0.32116     | 0.46446  |         |  |
|           | 0.32116         | 0.46446  | 0.32116 | 0.32116     | 0.690766406 |          |         |  |
| PRSS44P   | ENSG00000226074 | -0.25331 | 0.59999 | -0.26596    | 0.60486     | 0.46442  |         |  |
|           | 0.32117         | 0.46442  | 0.32117 | 0.32117     | 0.690766406 |          |         |  |
| NA        | ENSG00000229382 | -0.81287 | 0.79185 | 0.46439     | 0.32118     | 0.19052  | 0.42445 |  |
|           | 0.19052         | 0.42445  | 0.32118 | 0.690766406 |             |          |         |  |
| TTC6      | ENSG00000139865 | -0.76316 | 0.77732 | -1.1467     | 0.87425     | -0.82888 | 0.79642 |  |
|           | 0.46433         | 0.3212   | 0.3212  | 0.690766406 |             |          |         |  |
| RNU4-27P  | ENSG00000222821 | -1.3007  | 0.90331 | -1.3007     | 0.90331     | -1.3007  |         |  |
|           | 0.90331         | 0.46435  | 0.3212  | 0.3212      | 0.690766406 |          |         |  |
| TBC1D5    | ENSG00000131374 | 0.068144 | 0.47284 | 0.46424     | 0.32124     | 0.13573  |         |  |

|           |                 |           |         |             |             |            |         |
|-----------|-----------------|-----------|---------|-------------|-------------|------------|---------|
|           | 0.44602         | -0.11707  | 0.5466  | 0.32124     | 0.690821942 |            |         |
| PET117    | ENSG00000232838 | -0.2739   | 0.60792 | 0.46408     | 0.32129     | 0.46408    |         |
|           | 0.32129         | 0.46408   | 0.32129 | 0.32129     | 0.690898976 |            |         |
| MYO1F     | ENSG00000142347 | 0.16126   | 0.43595 | 0.40945     | 0.3411      | 0.46402    | 0.32132 |
|           | 0.40945         | 0.3411    | 0.32132 | 0.690902511 |             |            |         |
| NA        | ENSG00000207086 | 0.13249   | 0.4473  | 0.46402     | 0.32132     | -0.065375  | 0.52606 |
|           | 0.3014          | 0.38156   | 0.32132 | 0.690902511 |             |            |         |
| NA        | ENSG00000254898 | 0.4639    | 0.32136 | 0.39096     | 0.34791     | 0.4639     | 0.32136 |
|           | 0.4639          | 0.32136   | 0.32136 | 0.69091311  |             |            |         |
| OLFM3     | ENSG00000118733 | -0.051497 | 0.52054 | -0.98635    | 0.83802     | 0.46382    | 0.32139 |
|           | 0.46382         | 0.32139   | 0.32139 | 0.69091311  |             |            |         |
| NA        | ENSG00000214132 | -0.47796  | 0.68366 | 0.46381     | 0.32139     | 0.31812    | 0.3752  |
|           | 0.41573         | 0.3388    | 0.32139 | 0.69091311  |             |            |         |
| OR7E111P  | ENSG00000231667 | -1.5755   | 0.94244 | 0.46378     | 0.3214      | -0.94922   |         |
|           | 0.82875         | -0.85006  | 0.80235 | 0.3214      | 0.69091311  |            |         |
| OR11H4    | ENSG00000176198 | 0.45394   | 0.32494 | -1.1053     | 0.86548     | 0.46377    |         |
|           | 0.32141         | -1.3433   | 0.91041 | 0.32141     | 0.69091311  |            |         |
| NA        | ENSG00000251777 | 0.46376   | 0.32141 | 0.46376     | 0.32141     | 0.46376    | 0.32141 |
|           | 0.46376         | 0.32141   | 0.32141 | 0.69091311  |             |            |         |
| BORCS7    | ENSG00000166275 | 0.46358   | 0.32148 | 0.46358     | 0.32148     | -0.050812  |         |
|           | 0.52026         | 0.20634   | 0.41826 | 0.32148     | 0.691033101 |            |         |
| NA        | ENSG00000271251 | 0.46343   | 0.32153 | 0.46343     | 0.32153     | 0.46343    | 0.32153 |
|           | 0.46343         | 0.32153   | 0.32153 | 0.69108039  |             |            |         |
| NANS      | ENSG00000095380 | -0.5545   | 0.71038 | 0.46337     | 0.32155     | -1.8614    | 0.96866 |
|           | -0.44832        | 0.67304   | 0.32155 | 0.69108039  |             |            |         |
| MBD3L1    | ENSG00000170948 | 0.46333   | 0.32157 | 0.46333     | 0.32157     | 0.46333    |         |
|           | 0.32157         | 0.46333   | 0.32157 | 0.32157     | 0.69108039  |            |         |
| NA        | ENSG00000224012 | -0.91044  | 0.8187  | 0.46327     | 0.32158     | -0.49258   | 0.68885 |
|           | 0.46327         | 0.32158   | 0.32158 | 0.69108039  |             |            |         |
| NA        | ENSG00000279045 | 0.45593   | 0.32422 | 0.46326     | 0.32159     | 0.077716   | 0.46903 |
|           | 0.077716        | 0.46903   | 0.32159 | 0.69108039  |             |            |         |
| NA        | ENSG00000260823 | 0.46315   | 0.32163 | 0.46315     | 0.32163     | 0.46315    | 0.32163 |
|           | 0.46315         | 0.32163   | 0.32163 | 0.69108039  |             |            |         |
| CEACAMP11 | ENSG00000236123 | 0.13498   | 0.44631 | -0.78254    | 0.78305     | 0.38046    |         |
|           | 0.3518          | 0.46311   | 0.32164 | 0.32164     | 0.69108039  |            |         |
| NA        | ENSG00000255456 | 0.46312   | 0.32164 | 0.46312     | 0.32164     | 0.46312    | 0.32164 |
|           | 0.46312         | 0.32164   | 0.32164 | 0.69108039  |             |            |         |
| NA        | ENSG00000237236 | 0.46302   | 0.32168 | 0.46302     | 0.32168     | 0.46302    | 0.32168 |
|           | 0.46302         | 0.32168   | 0.32168 | 0.69108039  |             |            |         |
| UBTD2     | ENSG00000168246 | 0.46296   | 0.32169 | -0.0013396  | 0.50053     | -0.0013396 | 0.50053 |
|           | -1.3227         | 0.90703   | 0.32169 | 0.69108039  |             |            |         |
| NA        | ENSG00000232328 | 0.33577   | 0.36852 | -0.74783    | 0.77272     | -1.191     | 0.88317 |
|           | 0.46294         | 0.3217    | 0.3217  | 0.69108039  |             |            |         |
| FCER2     | ENSG00000104921 | 0.46291   | 0.32171 | 0.46291     | 0.32171     | 0.46291    | 0.32171 |
|           | 0.46291         | 0.32171   | 0.32171 | 0.69108039  |             |            |         |
| PSPH      | ENSG00000146733 | -0.13847  | 0.55506 | 0.46291     | 0.32172     | -0.11831   | 0.54709 |
|           | 0.047678        | 0.48099   | 0.32172 | 0.69108039  |             |            |         |
| CNN2P6    | ENSG00000213854 | 0.46285   | 0.32174 | 0.46285     | 0.32174     | 0.46285    |         |
|           | 0.32174         | 0.46285   | 0.32174 | 0.32174     | 0.69108039  |            |         |
| RNU6-312P | ENSG00000201499 | 0.46277   | 0.32176 | 0.46277     | 0.32176     | 0.33332    |         |
|           | 0.36945         | -0.67042  | 0.74871 | 0.32176     | 0.69108039  |            |         |
| NA        | ENSG00000235027 | 0.46278   | 0.32176 | 0.46278     | 0.32176     | 0.46278    | 0.32176 |
|           | 0.46278         | 0.32176   | 0.32176 | 0.69108039  |             |            |         |
| H3P34     | ENSG00000255295 | 0.46273   | 0.32178 | 0.46273     | 0.32178     | 0.46273    | 0.32178 |
|           | 0.46273         | 0.32178   | 0.32178 | 0.69108039  |             |            |         |
| NA        | ENSG00000243415 | -1.3346   | 0.909   | -0.19816    | 0.57854     | 0.46263    | 0.32181 |
|           | 0.46263         | 0.32181   | 0.32181 | 0.69108039  |             |            |         |
| COL1A2    | ENSG00000164692 | 0.16788   | 0.43334 | 0.076181    | 0.46964     | 0.12047    |         |
|           | 0.45206         | 0.46262   | 0.32182 | 0.32182     | 0.69108039  |            |         |
| CCL28     | ENSG00000151882 | 0.061956  | 0.4753  | 0.35442     | 0.36151     | -0.14102   | 0.55607 |
|           | 0.46259         | 0.32183   | 0.32183 | 0.69108039  |             |            |         |
| PFKP      | ENSG00000067057 | 0.46255   | 0.32184 | 0.16411     | 0.43482     | 0.46255    | 0.32184 |

|            |                 |           |         |             |             |            |         |         |
|------------|-----------------|-----------|---------|-------------|-------------|------------|---------|---------|
|            | 0.42707         | 0.33466   | 0.32184 | 0.69108039  |             |            |         |         |
| MIR331     | ENSG00000199172 | 0.46255   | 0.32184 | 0.46255     | 0.32184     | 0.46255    | 0.32184 | 0.46255 |
|            | 0.32184         | 0.46255   | 0.32184 | 0.32184     | 0.69108039  |            |         |         |
| SBK2       | ENSG00000187550 | -0.49713  | 0.69045 | -0.49713    | 0.69045     | 0.46248    | 0.32187 | 0.32187 |
|            | -0.49713        | 0.69045   | 0.32187 | 0.69108039  |             |            |         |         |
| NANOS1     | ENSG00000188613 | -0.2673   | 0.60538 | 0.46247     | 0.32187     | 0.093278   |         |         |
|            | 0.46284         | 0.093278  | 0.46284 | 0.32187     | 0.69108039  |            |         |         |
| RNU5A-6P   | ENSG00000206863 | 0.46246   | 0.32188 | 0.46246     | 0.32188     | 0.46246    |         |         |
|            | 0.32188         | 0.46246   | 0.32188 | 0.32188     | 0.69108039  |            |         |         |
| ALG9-IT1   | ENSG00000254450 | 0.46241   | 0.32189 | 0.46241     | 0.32189     | 0.46241    |         |         |
|            | 0.32189         | 0.46241   | 0.32189 | 0.32189     | 0.69108039  |            |         |         |
| RNU6-842P  | ENSG00000206996 | 0.32768   | 0.37158 | 0.46239     | 0.3219      | -0.0040899 |         |         |
|            | 0.50163         | 0.45098   | 0.326   | 0.3219      | 0.69108039  |            |         |         |
| SNX31      | ENSG00000174226 | -0.20905  | 0.5828  | -0.005119   | 0.50204     | -0.20894   | 0.58275 |         |
|            | 0.46238         | 0.32191   | 0.32191 | 0.69108039  |             |            |         |         |
| MVB12A     | ENSG00000141971 | 0.46235   | 0.32192 | -0.45985    | 0.67719     | -0.64811   |         |         |
|            | 0.74154         | -0.089109 | 0.5355  | 0.32192     | 0.69108039  |            |         |         |
| TPD52L3    | ENSG00000170777 | -0.23878  | 0.59436 | -0.48183    | 0.68504     | -1.707     |         |         |
|            | 0.95609         | 0.4623    | 0.32193 | 0.32193     | 0.69108039  |            |         |         |
| CACNB3     | ENSG00000167535 | -0.32834  | 0.62867 | 0.46224     | 0.32196     | -0.49389   |         |         |
|            | 0.68931         | -0.2247   | 0.58889 | 0.32196     | 0.69108039  |            |         |         |
| NA         | ENSG00000272735 | 0.46221   | 0.32196 | 0.46221     | 0.32196     | 0.46221    | 0.32196 |         |
|            | 0.46221         | 0.32196   | 0.32196 | 0.69108039  |             |            |         |         |
| KLF12      | ENSG00000118922 | 0.24924   | 0.40159 | -0.055367   | 0.52208     | 0.24291    | 0.40404 |         |
|            | 0.4622          | 0.32197   | 0.32197 | 0.69108039  |             |            |         |         |
| RARA       | ENSG00000131759 | -0.42855  | 0.66588 | 0.46196     | 0.32205     | 0.4362     | 0.33134 |         |
|            | 0.46196         | 0.32205   | 0.32205 | 0.691174786 |             |            |         |         |
| MAN1A1     | ENSG00000111885 | -0.4358   | 0.66851 | -0.4358     | 0.66851     | 0.46191    |         |         |
|            | 0.32207         | -0.98882  | 0.83862 | 0.32207     | 0.691174786 |            |         |         |
| NA         | ENSG00000238150 | 0.46188   | 0.32208 | 0.46188     | 0.32208     | 0.46188    | 0.32208 |         |
|            | 0.46188         | 0.32208   | 0.32208 | 0.691174786 |             |            |         |         |
| ZNF528     | ENSG00000167555 | 0.46188   | 0.32209 | -0.2768     | 0.60903     | -0.32771   |         |         |
|            | 0.62844         | -0.86652  | 0.8069  | 0.32209     | 0.691174786 |            |         |         |
| IKZF4      | ENSG00000123411 | -0.16957  | 0.56732 | -0.23836    | 0.5942      | 0.46178    | 0.32212 |         |
|            | -0.64359        | 0.74008   | 0.32212 | 0.691174786 |             |            |         |         |
| RN7SKP127  | ENSG00000222375 | 0.46175   | 0.32213 | -0.20861    | 0.58262     | 0.46175    |         |         |
|            | 0.32213         | 0.18662   | 0.42598 | 0.32213     | 0.691174786 |            |         |         |
| NA         | ENSG00000267038 | 0.39043   | 0.34811 | 0.39043     | 0.34811     | 0.39043    | 0.34811 |         |
|            | 0.46176         | 0.32213   | 0.32213 | 0.691174786 |             |            |         |         |
| RNU6-1188P | ENSG00000200665 | 0.46174   | 0.32214 | 0.46174     | 0.32214     | 0.46174    |         |         |
|            | 0.32214         | 0.46174   | 0.32214 | 0.32214     | 0.691174786 |            |         |         |
| RNA5SP130  | ENSG00000201301 | 0.46167   | 0.32216 | 0.46167     | 0.32216     | 0.46167    |         |         |
|            | 0.32216         | 0.46167   | 0.32216 | 0.32216     | 0.691174786 |            |         |         |
| SMPD1      | ENSG00000166311 | 0.46165   | 0.32217 | -0.13273    | 0.55279     | -0.63875   | 0.73851 |         |
|            | -0.7959         | 0.78695   | 0.32217 | 0.691174786 |             |            |         |         |
| LRRC37A7P  | ENSG00000265158 | -0.71091  | 0.76143 | 0.46163     | 0.32217     | -0.14884   |         |         |
|            | 0.55916         | -0.14884  | 0.55916 | 0.32217     | 0.691174786 |            |         |         |
| FAM151A    | ENSG00000162391 | 0.46157   | 0.3222  | -0.13369    | 0.55318     | 0.46157    |         |         |
|            | 0.3222          | 0.46157   | 0.3222  | 0.3222      | 0.691208717 |            |         |         |
| HDAC1P2    | ENSG00000233012 | 0.46142   | 0.32225 | -1.5732     | 0.94216     | -1.5732    |         |         |
|            | 0.94216         | -1.5732   | 0.94216 | 0.32225     | 0.691285548 |            |         |         |
| NA         | ENSG00000249282 | -1.3574   | 0.91268 | 0.46133     | 0.32228     | -0.32547   | 0.62759 |         |
|            | -0.32547        | 0.62759   | 0.32228 | 0.69131947  |             |            |         |         |
| ABHD11-AS1 | ENSG00000225969 | 0.090992  | 0.46375 | 0.46109     | 0.32237     | 0.090992   |         |         |
|            | 0.46375         | -0.12034  | 0.54789 | 0.32237     | 0.691417171 |            |         |         |
| WDR73      | ENSG00000177082 | 0.46103   | 0.32239 | 0.46103     | 0.32239     | 0.46103    | 0.32239 |         |
|            | 0.46103         | 0.32239   | 0.32239 | 0.691417171 |             |            |         |         |
| NA         | ENSG00000257475 | 0.46102   | 0.32239 | 0.46102     | 0.32239     | 0.46102    | 0.32239 |         |
|            | 0.46102         | 0.32239   | 0.32239 | 0.691417171 |             |            |         |         |
| MIR4453HG  | ENSG00000268471 | -0.17634  | 0.56999 | 0.46103     | 0.32239     | -0.24203   |         |         |
|            | 0.59562         | 0.12345   | 0.45088 | 0.32239     | 0.691417171 |            |         |         |
| DICER1     | ENSG00000100697 | 0.28367   | 0.38833 | -0.44652    | 0.67239     | 0.461      | 0.3224  |         |

|           |                 |          |         |             |             |            |         |  |
|-----------|-----------------|----------|---------|-------------|-------------|------------|---------|--|
|           | -1.0139         | 0.8447   | 0.3224  | 0.691417171 |             |            |         |  |
| NA        | ENSG00000248349 | 0.46092  | 0.32243 | 0.46092     | 0.32243     | 0.46092    | 0.32243 |  |
|           | -0.54223        | 0.70617  | 0.32243 | 0.691417171 |             |            |         |  |
| NA        | ENSG00000256258 | 0.06047  | 0.47589 | 0.06047     | 0.47589     | 0.06047    | 0.47589 |  |
|           | 0.46093         | 0.32243  | 0.32243 | 0.691417171 |             |            |         |  |
| RILPL1    | ENSG00000188026 | 0.21978  | 0.41302 | 0.051889    | 0.47931     | 0.025223   |         |  |
|           | 0.48994         | 0.4609   | 0.32244 | 0.32244     | 0.691417171 |            |         |  |
| RNU1-30P  | ENSG00000272020 | -0.24352 | 0.5962  | 0.46083     | 0.32246     | -0.24352   |         |  |
|           | 0.5962          | -0.24352 | 0.5962  | 0.32246     | 0.691417171 |            |         |  |
| RNU6-503P | ENSG00000252338 | 0.46075  | 0.32249 | 0.46075     | 0.32249     | 0.46075    |         |  |
|           | 0.32249         | 0.46075  | 0.32249 | 0.32249     | 0.691417171 |            |         |  |
| EDDM3B    | ENSG00000181552 | 0.46071  | 0.3225  | -0.3993     | 0.65517     | -0.64607   |         |  |
|           | 0.74088         | 0.35356  | 0.36184 | 0.3225      | 0.691417171 |            |         |  |
| RAD51     | ENSG00000051180 | 0.46068  | 0.32251 | 0.29236     | 0.38501     | -0.0017571 | 0.5007  |  |
|           | 0.099052        | 0.46055  | 0.32251 | 0.691417171 |             |            |         |  |
| NA        | ENSG00000260000 | 0.4607   | 0.32251 | 0.4607      | 0.32251     | 0.4607     | 0.32251 |  |
|           | 0.4607          | 0.32251  | 0.32251 | 0.691417171 |             |            |         |  |
| RPL13AP25 | ENSG00000136149 | -0.2933  | 0.61535 | -0.2933     | 0.61535     | -0.2933    |         |  |
|           | 0.61535         | 0.46047  | 0.32259 | 0.32259     | 0.691540285 |            |         |  |
| ATP1B3P1  | ENSG00000271707 | -0.50919 | 0.69469 | 0.46045     | 0.3226      | -0.50597   |         |  |
|           | 0.69356         | 0.46045  | 0.3226  | 0.3226      | 0.691540285 |            |         |  |
| NA        | ENSG00000233437 | 0.46041  | 0.32261 | 0.46041     | 0.32261     | 0.46041    | 0.32261 |  |
|           | 0.43186         | 0.33292  | 0.32261 | 0.691540285 |             |            |         |  |
| NA        | ENSG00000256654 | 0.46031  | 0.32265 | -0.057301   | 0.52285     | 0.11306    | 0.45499 |  |
|           | 0.42166         | 0.33664  | 0.32265 | 0.691581098 |             |            |         |  |
| HMGB1P27  | ENSG00000230611 | 0.46023  | 0.32268 | 0.34564     | 0.36481     | -0.30417   |         |  |
|           | 0.6195          | 0.074064 | 0.47048 | 0.32268     | 0.691581098 |            |         |  |
| RNU6-638P | ENSG00000252391 | 0.46022  | 0.32268 | 0.46022     | 0.32268     | 0.46022    |         |  |
|           | 0.32268         | 0.46022  | 0.32268 | 0.32268     | 0.691581098 |            |         |  |
| NA        | ENSG00000270605 | 0.46019  | 0.32269 | 0.46019     | 0.32269     | 0.46019    | 0.32269 |  |
|           | 0.46019         | 0.32269  | 0.32269 | 0.691581098 |             |            |         |  |
| TYW3      | ENSG00000162623 | -1.051   | 0.85336 | -0.10116    | 0.54029     | -0.62908   | 0.73535 |  |
|           | 0.46015         | 0.3227   | 0.3227  | 0.691581098 |             |            |         |  |
| PTPN9     | ENSG00000169410 | 0.087955 | 0.46496 | 0.43929     | 0.33023     | 0.46009    | 0.32272 |  |
|           | -0.18961        | 0.57519  | 0.32272 | 0.691593544 |             |            |         |  |
| NA        | ENSG00000238350 | -2.0576  | 0.98019 | -1.7973     | 0.96386     | -0.56235   | 0.71306 |  |
|           | 0.46004         | 0.32274  | 0.32274 | 0.691597005 |             |            |         |  |
| NA        | ENSG00000243440 | -0.40446 | 0.65706 | 0.27681     | 0.39096     | 0.46002    | 0.32275 |  |
|           | 0.26669         | 0.39485  | 0.32275 | 0.691597005 |             |            |         |  |
| MAP3K7    | ENSG00000135341 | -0.88788 | 0.8127  | 0.067674    | 0.47302     | -1.1978    |         |  |
|           | 0.88449         | 0.4599   | 0.32279 | 0.32279     | 0.691598404 |            |         |  |
| FAM118B   | ENSG00000197798 | -1.2805  | 0.89982 | 0.30492     | 0.38022     | 0.30492    |         |  |
|           | 0.38022         | 0.45985  | 0.32281 | 0.32281     | 0.691598404 |            |         |  |
| TSPAN16   | ENSG00000130167 | -0.40119 | 0.65586 | -1.2495     | 0.89426     | -0.57732   |         |  |
|           | 0.71814         | 0.45982  | 0.32282 | 0.32282     | 0.691598404 |            |         |  |
| HMOX2     | ENSG00000103415 | 0.4598   | 0.32283 | 0.26799     | 0.39435     | -0.19156   | 0.57596 |  |
|           | -0.30093        | 0.61827  | 0.32283 | 0.691598404 |             |            |         |  |
| NA        | ENSG00000223419 | -0.75946 | 0.77621 | 0.4598      | 0.32283     | 0.4598     | 0.32283 |  |
|           | -0.63956        | 0.73877  | 0.32283 | 0.691598404 |             |            |         |  |
| ARHGAP31  | ENSG00000031081 | 0.45978  | 0.32284 | -0.35727    | 0.63955     | 0.45978    |         |  |
|           | 0.32284         | -0.96351 | 0.83235 | 0.32284     | 0.691598404 |            |         |  |
| NA        | ENSG00000272592 | 0.45976  | 0.32285 | 0.45976     | 0.32285     | 0.45976    | 0.32285 |  |
|           | 0.45976         | 0.32285  | 0.32285 | 0.691598404 |             |            |         |  |
| NA        | ENSG00000250230 | 0.2914   | 0.38537 | -0.58327    | 0.72014     | 0.45969    | 0.32287 |  |
|           | -1.2679         | 0.89759  | 0.32287 | 0.691601864 |             |            |         |  |
| NA        | ENSG00000272181 | 0.45965  | 0.32288 | 0.45965     | 0.32288     | 0.45965    | 0.32288 |  |
|           | 0.45965         | 0.32288  | 0.32288 | 0.691601864 |             |            |         |  |
| NA        | ENSG00000258520 | -1.0783  | 0.85955 | 0.45959     | 0.32291     | 0.45959    | 0.32291 |  |
|           | 0.45959         | 0.32291  | 0.32291 | 0.69161776  |             |            |         |  |
| JMJD4     | ENSG00000081692 | 0.31329  | 0.37703 | 0.31329     | 0.37703     | -0.41497   | 0.66092 |  |
|           | 0.45953         | 0.32293  | 0.32293 | 0.69161776  |             |            |         |  |
| LINC00474 | ENSG00000204148 | 0.34162  | 0.36632 | 0.15385     | 0.43886     | 0.45952    |         |  |

|           |                 |           |         |             |             |          |         |  |
|-----------|-----------------|-----------|---------|-------------|-------------|----------|---------|--|
|           | 0.32293         | 0.11947   | 0.45245 | 0.32293     | 0.69161776  |          |         |  |
| NA        | ENSG00000264726 | 0.45939   | 0.32298 | -1.0819     | 0.86034     | 0.42488  | 0.33546 |  |
|           | -0.84065        | 0.79973   | 0.32298 | 0.691657826 |             |          |         |  |
| CCDC32    | ENSG00000128891 | 0.45934   | 0.323   | 0.45934     | 0.323       | 0.10901  | 0.4566  |  |
|           | 0.1157          | 0.45394   | 0.323   | 0.691657826 |             |          |         |  |
| RALGAP1   | ENSG00000174373 | -0.025383 | 0.51013 | -0.64755    | 0.74136     | 0.45929  |         |  |
|           | 0.32301         | -0.15349  | 0.56099 | 0.32301     | 0.691657826 |          |         |  |
| NA        | ENSG00000260953 | 0.45925   | 0.32303 | -0.56322    | 0.71336     | -0.61196 | 0.72972 |  |
|           | -0.79541        | 0.78681   | 0.32303 | 0.691657826 |             |          |         |  |
| CLEC6A    | ENSG00000205846 | -0.013438 | 0.50536 | 0.027711    | 0.48895     | 0.45916  |         |  |
|           | 0.32306         | 0.45916   | 0.32306 | 0.32306     | 0.691657826 |          |         |  |
| LCE5A     | ENSG00000186207 | 0.4591    | 0.32308 | 0.44504     | 0.32814     | -1.5665  | 0.94139 |  |
|           | -1.5665         | 0.94139   | 0.32308 | 0.691657826 |             |          |         |  |
| NA        | ENSG00000251567 | -0.19797  | 0.57847 | -0.19797    | 0.57847     | -0.19797 | 0.57847 |  |
|           | 0.45911         | 0.32308   | 0.32308 | 0.691657826 |             |          |         |  |
| SRGNP1    | ENSG00000271386 | -0.074505 | 0.5297  | 0.45907     | 0.32309     | -0.25534 |         |  |
|           | 0.60077         | -0.40512  | 0.6573  | 0.32309     | 0.691657826 |          |         |  |
| SSU72P2   | ENSG00000284306 | 0.45906   | 0.32309 | -0.69842    | 0.75754     | -0.14859 |         |  |
|           | 0.55906         | -1.3531   | 0.91198 | 0.32309     | 0.691657826 |          |         |  |
| SRSF1     | ENSG00000136450 | 0.45901   | 0.32311 | 0.45901     | 0.32311     | 0.45901  | 0.32311 |  |
|           | 0.18316         | 0.42734   | 0.32311 | 0.691657826 |             |          |         |  |
| PPP6R3    | ENSG00000110075 | -0.04034  | 0.51609 | 0.11884     | 0.4527      | 0.45896  |         |  |
|           | 0.32313         | -0.54582  | 0.7074  | 0.32313     | 0.691657826 |          |         |  |
| ZHX2      | ENSG00000178764 | 0.45894   | 0.32314 | -0.1155     | 0.54598     | -1.6124  | 0.94657 |  |
|           | -0.3612         | 0.64102   | 0.32314 | 0.691657826 |             |          |         |  |
| NA        | ENSG00000273015 | 0.45892   | 0.32314 | 0.078248    | 0.46882     | 0.43178  | 0.33295 |  |
|           | -0.41159        | 0.65968   | 0.32314 | 0.691657826 |             |          |         |  |
| TET2-AS1  | ENSG00000251586 | 0.45886   | 0.32317 | 0.45886     | 0.32317     | 0.45886  |         |  |
|           | 0.32317         | -0.066831 | 0.52664 | 0.32317     | 0.691657826 |          |         |  |
| PTGIR     | ENSG00000160013 | 0.45883   | 0.32318 | 0.45883     | 0.32318     | 0.45883  | 0.32318 |  |
|           | 0.45883         | 0.32318   | 0.32318 | 0.691657826 |             |          |         |  |
| NA        | ENSG00000225931 | -0.41198  | 0.65982 | 0.34856     | 0.36371     | 0.45883  | 0.32318 |  |
|           | 0.10074         | 0.45988   | 0.32318 | 0.691657826 |             |          |         |  |
| MXD3      | ENSG00000213347 | 0.4588    | 0.32319 | 0.4588      | 0.32319     | 0.4588   | 0.32319 |  |
|           | 0.4588          | 0.32319   | 0.32319 | 0.691657826 |             |          |         |  |
| SIGLEC10  | ENSG00000142512 | -0.24037  | 0.59498 | 0.45849     | 0.3233      | -0.24037 |         |  |
|           | 0.59498         | -0.24037  | 0.59498 | 0.3233      | 0.691711608 |          |         |  |
| LINC02700 | ENSG00000255666 | 0.45846   | 0.32331 | 0.45846     | 0.32331     | 0.45846  |         |  |
|           | 0.32331         | 0.45846   | 0.32331 | 0.32331     | 0.691711608 |          |         |  |
| UBR2      | ENSG00000024048 | -1.864    | 0.96884 | -1.6542     | 0.95095     | -0.36138 | 0.64109 |  |
|           | 0.45842         | 0.32332   | 0.32332 | 0.691711608 |             |          |         |  |
| NA        | ENSG00000254755 | 0.18945   | 0.42487 | 0.45839     | 0.32334     | 0.18945  | 0.42487 |  |
|           | 0.18945         | 0.42487   | 0.32334 | 0.691711608 |             |          |         |  |
| OR1G1     | ENSG00000183024 | 0.45836   | 0.32335 | -2.3361     | 0.99026     | -2.3361  | 0.99026 |  |
|           | -2.3361         | 0.99026   | 0.32335 | 0.691711608 |             |          |         |  |
| RPL23AP39 | ENSG00000214074 | 0.45834   | 0.32335 | -0.69554    | 0.75664     | -0.69554 |         |  |
|           | 0.75664         | -0.69554  | 0.75664 | 0.32335     | 0.691711608 |          |         |  |
| NA        | ENSG00000255542 | -0.20839  | 0.58254 | -0.2983     | 0.61726     | 0.45826  | 0.32338 |  |
|           | -0.43098        | 0.66676   | 0.32338 | 0.691711608 |             |          |         |  |
| NA        | ENSG00000258553 | 0.45822   | 0.3234  | 0.26393     | 0.39592     | 0.45822  | 0.3234  |  |
|           | 0.45822         | 0.3234    | 0.3234  | 0.691711608 |             |          |         |  |
| NA        | ENSG00000228707 | 0.45814   | 0.32342 | 0.45814     | 0.32342     | 0.45814  | 0.32342 |  |
|           | 0.45814         | 0.32342   | 0.32342 | 0.691711608 |             |          |         |  |
| UNC13D    | ENSG00000092929 | 0.45813   | 0.32343 | -0.22872    | 0.59046     | -0.22872 |         |  |
|           | 0.59046         | 0.24917   | 0.40161 | 0.32343     | 0.691711608 |          |         |  |
| C4orf51   | ENSG00000237136 | 0.4581    | 0.32344 | -0.65726    | 0.74449     | -1.1421  |         |  |
|           | 0.8733          | -0.75496  | 0.77486 | 0.32344     | 0.691711608 |          |         |  |
| G6PC3     | ENSG00000141349 | 0.45809   | 0.32345 | 0.45809     | 0.32345     | 0.45809  | 0.32345 |  |
|           | -0.24475        | 0.59668   | 0.32345 | 0.691711608 |             |          |         |  |
| NA        | ENSG00000207420 | 0.45807   | 0.32345 | -0.80718    | 0.79022     | -1.1181  | 0.86823 |  |
|           | -0.11588        | 0.54613   | 0.32345 | 0.691711608 |             |          |         |  |
| PPP4R1    | ENSG00000154845 | 0.45793   | 0.3235  | 0.25308     | 0.4001      | -0.22987 |         |  |

|           |                 |           |         |             |             |          |         |  |
|-----------|-----------------|-----------|---------|-------------|-------------|----------|---------|--|
|           | 0.5909          | 0.24098   | 0.40479 | 0.3235      | 0.691711608 |          |         |  |
| DYRK3-AS1 | ENSG00000237605 | -0.21055  | 0.58338 | 0.45791     | 0.32351     | 0.45791  |         |  |
|           | 0.32351         | 0.45791   | 0.32351 | 0.32351     | 0.691711608 |          |         |  |
| MIR4527   | ENSG00000266582 | 0.45787   | 0.32352 | 0.45787     | 0.32352     | 0.45787  |         |  |
|           | 0.32352         | 0.45787   | 0.32352 | 0.32352     | 0.691711608 |          |         |  |
| TEAD2     | ENSG00000074219 | 0.45731   | 0.32372 | 0.45786     | 0.32353     | 0.45786  | 0.32353 |  |
|           | 0.45786         | 0.32353   | 0.32353 | 0.691711608 |             |          |         |  |
| DKKL1     | ENSG00000104901 | 0.45786   | 0.32353 | 0.45786     | 0.32353     | 0.45786  | 0.32353 |  |
|           | 0.45786         | 0.32353   | 0.32353 | 0.691711608 |             |          |         |  |
| NA        | ENSG00000167912 | -0.11365  | 0.54524 | 0.2282      | 0.40975     | 0.45785  | 0.32353 |  |
|           | 0.43017         | 0.33353   | 0.32353 | 0.691711608 |             |          |         |  |
| ITGA3     | ENSG00000005884 | -1.1668   | 0.87836 | 0.45782     | 0.32354     | -0.41628 | 0.6614  |  |
|           | -0.27951        | 0.61007   | 0.32354 | 0.691711608 |             |          |         |  |
| NA        | ENSG00000237532 | 0.088601  | 0.4647  | -0.62463    | 0.73389     | 0.088601 | 0.4647  |  |
|           | 0.45783         | 0.32354   | 0.32354 | 0.691711608 |             |          |         |  |
| NA        | ENSG00000251294 | 0.45781   | 0.32355 | 0.45781     | 0.32355     | 0.45781  | 0.32355 |  |
|           | 0.45781         | 0.32355   | 0.32355 | 0.691711608 |             |          |         |  |
| CUL5      | ENSG00000166266 | 0.35137   | 0.36266 | 0.35137     | 0.36266     | 0.45776  | 0.32356 |  |
|           | 0.1912          | 0.42418   | 0.32356 | 0.691711608 |             |          |         |  |
| HMG1P38   | ENSG00000253954 | -0.023814 | 0.5095  | 0.08744     | 0.46516     | 0.45777  |         |  |
|           | 0.32356         | 0.24044   | 0.40499 | 0.32356     | 0.691711608 |          |         |  |
| RNA5SP255 | ENSG00000252179 | 0.083946  | 0.46655 | 0.083946    | 0.46655     | 0.45774  |         |  |
|           | 0.32357         | 0.083946  | 0.46655 | 0.32357     | 0.691711608 |          |         |  |
| NA        | ENSG00000279069 | 0.45768   | 0.32359 | 0.45768     | 0.32359     | 0.45768  | 0.32359 |  |
|           | 0.45768         | 0.32359   | 0.32359 | 0.69171505  |             |          |         |  |
| RNU1-16P  | ENSG00000202347 | 0.45766   | 0.3236  | 0.45766     | 0.3236      | 0.45766  |         |  |
|           | 0.3236          | 0.45766   | 0.3236  | 0.3236      | 0.69171505  |          |         |  |
| NLK       | ENSG00000087095 | 0.45757   | 0.32363 | 0.45757     | 0.32363     | -0.10881 | 0.54332 |  |
|           | -0.18842        | 0.57473   | 0.32363 | 0.691748833 |             |          |         |  |
| BTF3L4P2  | ENSG00000213189 | 0.45748   | 0.32366 | 0.45748     | 0.32366     | 0.45748  |         |  |
|           | 0.32366         | 0.45748   | 0.32366 | 0.32366     | 0.69175571  |          |         |  |
| MYL5      | ENSG00000215375 | -0.83749  | 0.79884 | 0.45745     | 0.32367     | -0.68571 | 0.75355 |  |
|           | -0.68571        | 0.75355   | 0.32367 | 0.69175571  |             |          |         |  |
| NA        | ENSG00000233265 | 0.068703  | 0.47261 | 0.45743     | 0.32368     | 0.31959  | 0.37464 |  |
|           | 0.30029         | 0.38198   | 0.32368 | 0.69175571  |             |          |         |  |
| SLC6A13   | ENSG00000010379 | 0.017735  | 0.49293 | -1.0446     | 0.85189     | -0.18364 |         |  |
|           | 0.57285         | 0.45742   | 0.32369 | 0.32369     | 0.69175571  |          |         |  |
| PPP2R5B   | ENSG00000068971 | 0.02555   | 0.48981 | 0.45732     | 0.32372     | -0.44062 |         |  |
|           | 0.67026         | -0.52331  | 0.69962 | 0.32372     | 0.691762584 |          |         |  |
| PHKB      | ENSG00000102893 | 0.45731   | 0.32373 | 0.34496     | 0.36506     | -0.16782 | 0.56664 |  |
|           | 0.057391        | 0.47712   | 0.32373 | 0.691762584 |             |          |         |  |
| KRT127P   | ENSG00000257125 | -1.4156   | 0.92155 | -1.4156     | 0.92155     | -1.4156  |         |  |
|           | 0.92155         | 0.45727   | 0.32374 | 0.32374     | 0.691762584 |          |         |  |
| SLC25A47  | ENSG00000140107 | -0.70326  | 0.75905 | 0.45723     | 0.32375     | -0.70326 |         |  |
|           | 0.75905         | 0.32445   | 0.3728  | 0.32375     | 0.691762584 |          |         |  |
| NA        | ENSG00000229762 | 0.45719   | 0.32377 | 0.45719     | 0.32377     | 0.45719  | 0.32377 |  |
|           | 0.45719         | 0.32377   | 0.32377 | 0.691774986 |             |          |         |  |
| NA        | ENSG00000253825 | -1.6059   | 0.94585 | -2.0424     | 0.97945     | 0.45712  | 0.32379 |  |
|           | -2.3205         | 0.98984   | 0.32379 | 0.691787386 |             |          |         |  |
| RNASE8    | ENSG00000173431 | -0.050357 | 0.52008 | 0.45706     | 0.32381     | -0.34769 |         |  |
|           | 0.63596         | -0.50609  | 0.6936  | 0.32381     | 0.69179082  |          |         |  |
| LINC00229 | ENSG00000234300 | -0.7955   | 0.78684 | -0.48591    | 0.68648     | -0.50169 |         |  |
|           | 0.69206         | 0.45705   | 0.32382 | 0.32382     | 0.69179082  |          |         |  |
| NA        | ENSG00000276487 | -0.42921  | 0.66612 | -0.44435    | 0.6716      | 0.45694  | 0.32386 |  |
|           | 0.45694         | 0.32386   | 0.32386 | 0.691845943 |             |          |         |  |
| CORIN     | ENSG00000145244 | -0.069668 | 0.52777 | 0.3649      | 0.35759     | 0.45672  | 0.32394 |  |
|           | 0.34084         | 0.36661   | 0.32394 | 0.691936104 |             |          |         |  |
| SNORD36A  | ENSG00000199744 | 0.4567    | 0.32394 | 0.4567      | 0.32394     | 0.4567   |         |  |
|           | 0.32394         | 0.4567    | 0.32394 | 0.32394     | 0.691936104 |          |         |  |
| CDC25B    | ENSG00000101224 | -0.58188  | 0.71968 | 0.45664     | 0.32396     | -0.35426 |         |  |
|           | 0.63843         | 0.052958  | 0.47888 | 0.32396     | 0.691936104 |          |         |  |
| NA        | ENSG00000264435 | -0.37713  | 0.64696 | -0.37713    | 0.64696     | 0.45661  | 0.32398 |  |



|              |                 |           |             |             |             |          |         |  |
|--------------|-----------------|-----------|-------------|-------------|-------------|----------|---------|--|
|              | -0.37713        | 0.64696   | 0.32398     | 0.691936104 |             |          |         |  |
| NA           | ENSG00000256149 | 0.45657   | 0.32399     | -1.1869     | 0.88237     | -0.1977  | 0.57836 |  |
|              | 0.21428         | 0.41516   | 0.32399     | 0.691936104 |             |          |         |  |
| NFKBIA       | ENSG00000100906 | 0.34234   | 0.36605     | -0.17616    | 0.56992     | 0.10422  |         |  |
|              | 0.4585          | 0.45655   | 0.3240324   | 0.691936104 |             |          |         |  |
| XPNPEP3      | ENSG00000196236 | -0.36177  | 0.64124     | -0.13102    | 0.55212     | -0.4622  |         |  |
|              | 0.67803         | 0.45647   | 0.32402     | 0.32402     | 0.691936104 |          |         |  |
| VIL1         | ENSG00000127831 | -0.45778  | 0.67644     | -0.67946    | 0.75158     | -0.44803 | 0.67293 |  |
|              | 0.45647         | 0.32403   | 0.32403     | 0.691936104 |             |          |         |  |
| ZBED3        | ENSG00000132846 | 0.45645   | 0.32403     | -0.34217    | 0.63389     | -0.51647 | 0.69724 |  |
|              | -0.55146        | 0.70934   | 0.32403     | 0.691936104 |             |          |         |  |
| NA           | ENSG00000270114 | 0.45641   | 0.32405     | 0.41843     | 0.33782     | -1.5191  | 0.93563 |  |
|              | -0.25148        | 0.59928   | 0.32405     | 0.69194849  |             |          |         |  |
| B3GNT8       | ENSG00000177191 | 0.45634   | 0.32407     | 0.45634     | 0.32407     | 0.45634  |         |  |
|              | 0.32407         | 0.45634   | 0.32407     | 0.32407     | 0.691951908 |          |         |  |
| NA           | ENSG00000278972 | 0.45631   | 0.32408     | 0.45631     | 0.32408     | 0.45631  | 0.32408 |  |
|              | 0.45631         | 0.32408   | 0.32408     | 0.691951908 |             |          |         |  |
| SUMO3        | ENSG00000184900 | -1.2723   | 0.89837     | -1.2723     | 0.89837     | 0.45624  | 0.32411 |  |
|              | -0.10057        | 0.54006   | 0.32411     | 0.691955325 |             |          |         |  |
| NA           | ENSG00000253116 | 0.45622   | 0.32411     | -1.5931     | 0.94443     | -1.5931  | 0.94443 |  |
|              | -1.5931         | 0.94443   | 0.32411     | 0.691955325 |             |          |         |  |
| TCAF1        | ENSG00000198420 | 0.45618   | 0.32413     | -0.21755    | 0.58611     | 0.15498  | 0.43842 |  |
|              | -0.92348        | 0.82212   | 0.32413     | 0.691958742 |             |          |         |  |
| PAX8         | ENSG00000125618 | 0.39316   | 0.3471      | -0.05999    | 0.52392     | 0.45615  | 0.32414 |  |
|              | -0.12386        | 0.54929   | 0.32414     | 0.691958742 |             |          |         |  |
| FNDC9        | ENSG00000172568 | 0.45586   | 0.32424     | 0.32843     | 0.37129     | 0.45586  | 0.32424 |  |
|              | 0.45586         | 0.32424   | 0.32424     | 0.692111577 |             |          |         |  |
| OR51N1P      | ENSG00000176951 | -0.003797 | 0.50151     | -0.003797   | 0.50151     | 0.45587  |         |  |
|              | 0.32424         | -0.003797 | 0.50151     | 0.32424     | 0.692111577 |          |         |  |
| NA           | ENSG00000267112 | 0.4558    | 0.32427     | 0.4558      | 0.32427     | 0.4558   | 0.32427 |  |
|              | 0.4558          | 0.32427   | 0.32427     | 0.692127352 |             |          |         |  |
| GSTM3        | ENSG00000134202 | 0.45576   | 0.32428     | 0.45576     | 0.32428     | 0.16457  | 0.43464 |  |
|              | 0.395034642     | 0.32428   | 0.692127352 |             |             |          |         |  |
| LINC02752    | ENSG00000254401 | 0.45573   | 0.32429     | 0.15323     | 0.43911     | -0.12154 |         |  |
|              | 0.54837         | -1.0702   | 0.85774     | 0.32429     | 0.692127352 |          |         |  |
| LINC02246    | ENSG00000281903 | 0.45566   | 0.32432     | -0.56085    | 0.71255     | -0.1264  |         |  |
|              | 0.55029         | -0.080778 | 0.53219     | 0.32432     | 0.692152093 |          |         |  |
| CSRNP1       | ENSG00000144655 | -0.28348  | 0.61159     | -0.28348    | 0.61159     | -0.4401  |         |  |
|              | 0.67007         | 0.45562   | 0.32433     | 0.32433     | 0.692152093 |          |         |  |
| ACTG1P22     | ENSG00000271615 | 0.45554   | 0.32436     | -0.63164    | 0.73619     | -1.672   |         |  |
|              | 0.95274         | 0.063964  | 0.4745      | 0.32436     | 0.69217683  |          |         |  |
| RPL12P40     | ENSG00000243516 | 0.45551   | 0.32437     | 0.45551     | 0.32437     | 0.45551  |         |  |
|              | 0.32437         | 0.45551   | 0.32437     | 0.32437     | 0.69217683  |          |         |  |
| NA           | ENSG00000279656 | 0.075326  | 0.46998     | 0.4554      | 0.32441     | 0.075326 | 0.46998 |  |
|              | 0.075326        | 0.46998   | 0.32441     | 0.692231874 |             |          |         |  |
| ARHGAP24     | ENSG00000138639 | 0.45528   | 0.32446     | -0.20388    | 0.58078     | 0.11324  |         |  |
|              | 0.45492         | 0.22919   | 0.40936     | 0.32446     | 0.692252584 |          |         |  |
| RNU6-1075P   | ENSG00000201260 | 0.19254   | 0.42366     | 0.19254     | 0.42366     | 0.45518  |         |  |
|              | 0.32449         | 0.028651  | 0.48857     | 0.32449     | 0.692252584 |          |         |  |
| ZNF735       | ENSG00000223614 | -0.073516 | 0.5293      | 0.45506     | 0.32453     | -0.87981 |         |  |
|              | 0.81052         | -0.064304 | 0.52564     | 0.32453     | 0.692252584 |          |         |  |
| RABGAP1L-IT1 | ENSG00000223525 | 0.45502   | 0.32455     | 0.45502     | 0.32455     | 0.45502  |         |  |
|              | 0.32455         | 0.45502   | 0.32455     | 0.32455     | 0.692252584 |          |         |  |
| NA           | ENSG00000270659 | 0.45481   | 0.32462     | 0.45481     | 0.32462     | 0.45481  | 0.32462 |  |
|              | 0.45481         | 0.32462   | 0.32462     | 0.692252584 |             |          |         |  |
| HNRNP        | ENSG00000138668 | 0.45479   | 0.32463     | -0.23288    | 0.59207     | -1.091   |         |  |
|              | 0.86237         | -1.341    | 0.91004     | 0.32463     | 0.692252584 |          |         |  |
| NA           | ENSG00000255246 | -0.62525  | 0.7341      | 0.45474     | 0.32465     | 0.45474  | 0.32465 |  |
|              | -0.31481        | 0.62355   | 0.32465     | 0.692252584 |             |          |         |  |
| NA           | ENSG00000260948 | 0.45473   | 0.32465     | 0.45473     | 0.32465     | 0.45473  | 0.32465 |  |
|              | 0.45473         | 0.32465   | 0.32465     | 0.692252584 |             |          |         |  |
| TRBV2        | ENSG00000226660 | 0.45471   | 0.32466     | -0.13249    | 0.5527      | 0.45471  | 0.32466 |  |

|           |                 |             |         |             |             |           |         |
|-----------|-----------------|-------------|---------|-------------|-------------|-----------|---------|
|           | 0.45471         | 0.32466     | 0.32466 | 0.692252584 |             |           |         |
| EIF2S2P2  | ENSG00000229704 | -1.5462     | 0.93897 | 0.45462     | 0.32469     | 0.45462   |         |
|           | 0.32469         | 0.45462     | 0.32469 | 0.32469     | 0.692252584 |           |         |
| SPTLC1P4  | ENSG00000232678 | 0.45464     | 0.32469 | 0.33338     | 0.36942     | 0.33338   |         |
|           | 0.36942         | 0.33338     | 0.36942 | 0.32469     | 0.692252584 |           |         |
| NA        | ENSG00000278831 | 0.45453     | 0.32472 | 0.45453     | 0.32472     | 0.45453   | 0.32472 |
|           | 0.45453         | 0.32472     | 0.32472 | 0.692252584 |             |           |         |
| RPS7P2    | ENSG00000231837 | -1.0989     | 0.86408 | -0.29321    | 0.61532     | 0.4545    |         |
|           | 0.32473         | -1.0989     | 0.86408 | 0.32473     | 0.692252584 |           |         |
| CLPX      | ENSG00000166855 | 0.11776     | 0.45313 | 0.21885     | 0.41338     | 0.45446   | 0.32475 |
|           | -0.20437        | 0.58097     | 0.32475 | 0.692252584 |             |           |         |
| YPEL5P1   | ENSG00000232096 | 0.4544      | 0.32477 | 0.4544      | 0.32477     | 0.4544    |         |
|           | 0.32477         | 0.4544      | 0.32477 | 0.32477     | 0.692252584 |           |         |
| CACNG3    | ENSG00000006116 | -2.0383     | 0.97924 | -2.0383     | 0.97924     | 0.45437   |         |
|           | 0.32478         | -0.87824    | 0.81009 | 0.32478     | 0.692252584 |           |         |
| NA        | ENSG00000232194 | 0.45437     | 0.32478 | -0.25592    | 0.60099     | 0.45437   | 0.32478 |
|           | 0.45437         | 0.32478     | 0.32478 | 0.692252584 |             |           |         |
| DTX3L     | ENSG00000163840 | 0.45435     | 0.32479 | 0.45435     | 0.32479     | 0.45435   | 0.32479 |
|           | 0.45435         | 0.32479     | 0.32479 | 0.692252584 |             |           |         |
| MIR302E   | ENSG00000221703 | -0.69813    | 0.75745 | -0.69813    | 0.75745     | -0.69813  |         |
|           | 0.75745         | 0.45429     | 0.32481 | 0.32481     | 0.692252584 |           |         |
| HHIP-AS1  | ENSG00000248890 | 0.22914     | 0.40938 | 0.45428     | 0.32481     | 0.22914   |         |
|           | 0.40938         | 0.22914     | 0.40938 | 0.32481     | 0.692252584 |           |         |
| NA        | ENSG00000260628 | -0.030278   | 0.51208 | 0.026717    | 0.48934     | 0.19222   | 0.42378 |
|           | 0.45423         | 0.32483     | 0.32483 | 0.692252584 |             |           |         |
| RNU6-810P | ENSG00000200871 | 0.45422     | 0.32484 | 0.45422     | 0.32484     | 0.45422   |         |
|           | 0.32484         | 0.45422     | 0.32484 | 0.32484     | 0.692252584 |           |         |
| TNNT1     | ENSG00000105048 | -0.031828   | 0.5127  | -0.23712    | 0.59372     | 0.45416   | 0.32486 |
|           | 0.27395         | 0.39206     | 0.32486 | 0.692252584 |             |           |         |
| MYOT      | ENSG00000120729 | 0.45416     | 0.32486 | -0.72154    | 0.76471     | -0.72154  | 0.76471 |
|           | 0.18636         | 0.42608     | 0.32486 | 0.692252584 |             |           |         |
| GFOD1     | ENSG00000145990 | -0.40909    | 0.65876 | -0.24798    | 0.59793     | 0.45416   | 0.32486 |
|           | -0.33465        | 0.63106     | 0.32486 | 0.692252584 |             |           |         |
| ZNF341    | ENSG00000131061 | -0.61451    | 0.73056 | -0.058316   | 0.52325     | -0.41742  |         |
|           | 0.66182         | 0.45404     | 0.3249  | 0.3249      | 0.692252584 |           |         |
| UCN2      | ENSG00000145040 | 0.45403     | 0.3249  | 0.45403     | 0.3249      | -0.088643 | 0.53532 |
|           | -0.088643       | 0.53532     | 0.3249  | 0.692252584 |             |           |         |
| TMSB4XP2  | ENSG00000188765 | 0.45402     | 0.32491 | 0.45402     | 0.32491     | 0.45402   |         |
|           | 0.32491         | 0.45402     | 0.32491 | 0.32491     | 0.692252584 |           |         |
| MARK2P15  | ENSG00000234931 | -0.43859    | 0.66952 | 0.454       | 0.32491     | -1.459    | 0.92771 |
|           | -1.459          | 0.92771     | 0.32491 | 0.692252584 |             |           |         |
| NA        | ENSG00000267006 | 0.454       | 0.32491 | 0.454       | 0.32491     | 0.454     | 0.32491 |
|           | 0.32491         | 0.692252584 |         |             |             |           |         |
| SNORD14E  | ENSG00000200879 | 0.45398     | 0.32492 | 0.45398     | 0.32492     | 0.45398   |         |
|           | 0.32492         | 0.45398     | 0.32492 | 0.32492     | 0.692252584 |           |         |
| NA        | ENSG00000259194 | 0.45396     | 0.32493 | -0.75488    | 0.77484     | -2.101    | 0.98218 |
|           | -0.13664        | 0.55434     | 0.32493 | 0.692252584 |             |           |         |
| MIR921    | ENSG00000215952 | 0.45393     | 0.32494 | 0.45393     | 0.32494     | 0.45393   |         |
|           | 0.32494         | 0.45393     | 0.32494 | 0.32494     | 0.692252584 |           |         |
| PRR13P1   | ENSG00000232824 | 0.45393     | 0.32494 | 0.45393     | 0.32494     | 0.45393   |         |
|           | 0.32494         | 0.45393     | 0.32494 | 0.32494     | 0.692252584 |           |         |
| ABT1P1    | ENSG00000250496 | 0.45389     | 0.32495 | 0.45389     | 0.32495     | 0.45389   |         |
|           | 0.32495         | -0.28598    | 0.61255 | 0.32495     | 0.692252584 |           |         |
| CSF2RBP1  | ENSG00000232254 | -0.27397    | 0.60795 | 0.45388     | 0.32496     | -0.27397  |         |
|           | 0.60795         | -0.27397    | 0.60795 | 0.32496     | 0.692252584 |           |         |
| ACAP3     | ENSG00000131584 | 0.45381     | 0.32498 | 0.45381     | 0.32498     | 0.45381   | 0.32498 |
|           | -0.76152        | 0.77683     | 0.32498 | 0.692252584 |             |           |         |
| C17orf64  | ENSG00000141371 | 0.41522     | 0.33899 | 0.41522     | 0.33899     | -1.0836   |         |
|           | 0.86074         | 0.4538      | 0.32499 | 0.32499     | 0.692252584 |           |         |
| NA        | ENSG00000263189 | -1.5682     | 0.94158 | -1.5682     | 0.94158     | 0.45374   | 0.32501 |
|           | -1.5682         | 0.94158     | 0.32501 | 0.692252584 |             |           |         |
| MIR4529   | ENSG00000264571 | 0.4536      | 0.32506 | 0.4536      | 0.32506     | 0.1282    | 0.449   |

|           |                 |          |         |             |             |           |         |  |
|-----------|-----------------|----------|---------|-------------|-------------|-----------|---------|--|
|           | -0.34424        | 0.63467  | 0.32506 | 0.692252584 |             |           |         |  |
| LINC02605 | ENSG00000261618 | 0.45358  | 0.32507 | -1.8121     | 0.96501     | -1.2785   |         |  |
|           | 0.89946         | 0.45358  | 0.32507 | 0.32507     | 0.692252584 |           |         |  |
| KRTAP26-1 | ENSG00000197683 | 0.45355  | 0.32508 | 0.45355     | 0.32508     | -0.19661  |         |  |
|           | 0.57793         | 0.45355  | 0.32508 | 0.32508     | 0.692252584 |           |         |  |
| NA        | ENSG00000231877 | -0.53741 | 0.70451 | 0.45353     | 0.32508     | 0.45353   | 0.32508 |  |
|           | 0.45353         | 0.32508  | 0.32508 | 0.692252584 |             |           |         |  |
| ELOCP31   | ENSG00000256021 | 0.45353  | 0.32508 | 0.17416     | 0.43087     | 0.45353   |         |  |
|           | 0.32508         | 0.45353  | 0.32508 | 0.32508     | 0.692252584 |           |         |  |
| LINC00294 | ENSG00000280798 | -0.28534 | 0.61231 | 0.4535      | 0.32509     | 0.4535    |         |  |
|           | 0.32509         | 0.4535   | 0.32509 | 0.32509     | 0.692252584 |           |         |  |
| PREX1     | ENSG00000124126 | 0.40095  | 0.34423 | 0.42526     | 0.33533     | 0.30957   | 0.37844 |  |
|           | 0.45349         | 0.3251   | 0.3251  | 0.692252584 |             |           |         |  |
| NA        | ENSG00000272758 | -0.35828 | 0.63993 | -0.60676    | 0.72799     | 0.45347   | 0.3251  |  |
|           | 0.45347         | 0.3251   | 0.3251  | 0.692252584 |             |           |         |  |
| TBC1D3P3  | ENSG00000235203 | 0.45347  | 0.32511 | -1.9484     | 0.97432     | -0.076222 |         |  |
|           | 0.53038         | -0.70067 | 0.75825 | 0.32511     | 0.692252584 |           |         |  |
| NA        | ENSG00000231681 | 0.042604 | 0.48301 | 0.45343     | 0.32512     | 0.42517   | 0.33536 |  |
|           | -0.62559        | 0.73421  | 0.32512 | 0.692252584 |             |           |         |  |
| PAN3-AS1  | ENSG00000261485 | -0.15363 | 0.56105 | 0.45339     | 0.32513     | -0.15363  |         |  |
|           | 0.56105         | -0.15363 | 0.56105 | 0.32513     | 0.692252584 |           |         |  |
| NA        | ENSG00000259309 | 0.45322  | 0.32519 | 0.45322     | 0.32519     | 0.45322   | 0.32519 |  |
|           | 0.45322         | 0.32519  | 0.32519 | 0.692331124 |             |           |         |  |
| OR10A3    | ENSG00000170683 | 0.45315  | 0.32522 | -0.55196    | 0.70951     | -0.55196  |         |  |
|           | 0.70951         | -0.55196 | 0.70951 | 0.32522     | 0.692331124 |           |         |  |
| SMOX      | ENSG00000088826 | 0.35243  | 0.36226 | -0.31936    | 0.62527     | -0.038602 | 0.5154  |  |
|           | 0.45313         | 0.32523  | 0.32523 | 0.692331124 |             |           |         |  |
| CASKIN2   | ENSG00000177303 | 0.45313  | 0.32523 | -0.024169   | 0.50964     | -0.22657  |         |  |
|           | 0.58962         | 0.38242  | 0.35108 | 0.32523     | 0.692331124 |           |         |  |
| NA        | ENSG00000233908 | 0.45306  | 0.32525 | 0.45306     | 0.32525     | 0.45306   | 0.32525 |  |
|           | 0.45306         | 0.32525  | 0.32525 | 0.692331124 |             |           |         |  |
| NA        | ENSG00000271543 | 0.45305  | 0.32526 | 0.45305     | 0.32526     | 0.45305   | 0.32526 |  |
|           | 0.45305         | 0.32526  | 0.32526 | 0.692331124 |             |           |         |  |
| TXNRD3    | ENSG00000197763 | -0.39773 | 0.65459 | 0.33912     | 0.36726     | 0.45295   |         |  |
|           | 0.32529         | -0.37041 | 0.64446 | 0.32529     | 0.692331124 |           |         |  |
| NA        | ENSG00000233735 | 0.45287  | 0.32532 | 0.30599     | 0.3798      | 0.45287   | 0.32532 |  |
|           | 0.45287         | 0.32532  | 0.32532 | 0.692331124 |             |           |         |  |
| LINC02365 | ENSG00000254233 | -0.62757 | 0.73486 | 0.45288     | 0.32532     | -0.68593  |         |  |
|           | 0.75362         | -0.2272  | 0.58987 | 0.32532     | 0.692331124 |           |         |  |
| CPQ       | ENSG00000104324 | 0.27246  | 0.39263 | -0.85258    | 0.80305     | -0.052075 | 0.52077 |  |
|           | 0.45281         | 0.32534  | 0.32534 | 0.692331124 |             |           |         |  |
| NA        | ENSG00000283031 | 0.4528   | 0.32535 | 0.4528      | 0.32535     | 0.088847  | 0.4646  |  |
|           | 0.4528          | 0.32535  | 0.32535 | 0.692331124 |             |           |         |  |
| COP1      | ENSG00000143207 | -0.45644 | 0.67596 | 0.45273     | 0.32537     | 0.21174   | 0.41615 |  |
|           | -0.062901       | 0.52508  | 0.32537 | 0.692331124 |             |           |         |  |
| CROCCP5   | ENSG00000186543 | 0.45275  | 0.32537 | 0.40589     | 0.34241     | 0.45275   |         |  |
|           | 0.32537         | 0.45275  | 0.32537 | 0.32537     | 0.692331124 |           |         |  |
| NA        | ENSG00000234877 | 0.45274  | 0.32537 | 0.054509    | 0.47826     | 0.45274   | 0.32537 |  |
|           | -0.81345        | 0.79202  | 0.32537 | 0.692331124 |             |           |         |  |
| TCP1      | ENSG00000120438 | 0.4527   | 0.32538 | -1.0246     | 0.84722     | -0.77242  | 0.78007 |  |
|           | -0.77242        | 0.78007  | 0.32538 | 0.692331124 |             |           |         |  |
| NA        | ENSG00000269125 | 0.45266  | 0.3254  | 0.45266     | 0.3254      | 0.45266   | 0.3254  |  |
|           | 0.45266         | 0.3254   | 0.3254  | 0.692332289 |             |           |         |  |
| LINC02432 | ENSG00000248810 | 0.45258  | 0.32542 | 0.33688     | 0.3681      | 0.1159    |         |  |
|           | 0.45387         | -2.0169  | 0.97815 | 0.32542     | 0.692332289 |           |         |  |
| NA        | ENSG00000271544 | -1.4038  | 0.91981 | 0.45257     | 0.32543     | -1.4038   | 0.91981 |  |
|           | -0.74533        | 0.77196  | 0.32543 | 0.692332289 |             |           |         |  |
| ZNF266    | ENSG00000174652 | 0.45252  | 0.32545 | 0.45252     | 0.32545     | 0.45252   |         |  |
|           | 0.32545         | 0.45252  | 0.32545 | 0.32545     | 0.692332289 |           |         |  |
| NA        | ENSG00000242816 | 0.45248  | 0.32546 | 0.17853     | 0.42915     | 0.45248   | 0.32546 |  |
|           | 0.45248         | 0.32546  | 0.32546 | 0.692332289 |             |           |         |  |
| B4GALT3   | ENSG00000158850 | 0.45243  | 0.32548 | 0.45243     | 0.32548     | 0.45243   |         |  |

|             |                 |            |         |             |             |           |         |  |
|-------------|-----------------|------------|---------|-------------|-------------|-----------|---------|--|
|             | 0.32548         | 0.45243    | 0.32548 | 0.32548     | 0.692332289 |           |         |  |
| NA          | ENSG00000234255 | -0.1563    | 0.5621  | 0.45244     | 0.32548     | -0.1563   | 0.5621  |  |
|             | -0.085156       | 0.53393    | 0.32548 | 0.692332289 |             |           |         |  |
| NA          | ENSG00000244251 | 0.45235    | 0.32551 | -0.32445    | 0.6272      | 0.44122   | 0.32953 |  |
|             | 0.45235         | 0.32551    | 0.32551 | 0.69236588  |             |           |         |  |
| FAM86C2P    | ENSG00000160172 | -1.4688    | 0.92906 | -1.9811     | 0.97621     | -0.71176  |         |  |
|             | 0.76169         | 0.45229    | 0.32553 | 0.32553     | 0.692367033 |           |         |  |
| LINC02742   | ENSG00000249867 | 0.28936    | 0.38615 | 0.1417      | 0.44366     | 0.049969  |         |  |
|             | 0.48007         | 0.45219    | 0.32557 | 0.32557     | 0.692367033 |           |         |  |
| TTC9C       | ENSG00000162222 | -0.11302   | 0.54499 | -0.16961    | 0.56734     | 0.069212  | 0.47241 |  |
|             | 0.4521          | 0.3256     | 0.3256  | 0.692367033 |             |           |         |  |
| ZNF841      | ENSG00000197608 | 0.42601    | 0.33505 | 0.45209     | 0.3256      | 0.32265   |         |  |
|             | 0.37348         | 0.030871   | 0.48769 | 0.3256      | 0.692367033 |           |         |  |
| NA          | ENSG00000251055 | -0.5057    | 0.69347 | 0.4521      | 0.3256      | 0.41218   | 0.34011 |  |
|             | 0.41218         | 0.34011    | 0.3256  | 0.692367033 |             |           |         |  |
| CDRT8       | ENSG00000265163 | 0.39742    | 0.34553 | -0.4677     | 0.68        | 0.12835   | 0.44894 |  |
|             | 0.45208         | 0.3256     | 0.3256  | 0.692367033 |             |           |         |  |
| NA          | ENSG00000260332 | 0.45206    | 0.32561 | 0.45206     | 0.32561     | 0.45206   | 0.32561 |  |
|             | 0.45206         | 0.32561    | 0.32561 | 0.692367033 |             |           |         |  |
| SREBF1      | ENSG00000072310 | 0.45193    | 0.32566 | -0.75858    | 0.77595     | -1.9591   |         |  |
|             | 0.97495         | -0.42042   | 0.66291 | 0.32566     | 0.692434186 |           |         |  |
| COL18A1-AS2 | ENSG00000224574 | 0.45191    | 0.32567 | 0.45191     | 0.32567     | 0.45191   |         |  |
|             | 0.32567         | 0.45191    | 0.32567 | 0.32567     | 0.692434186 |           |         |  |
| RPL31P14    | ENSG00000237930 | -1.7721    | 0.96181 | 0.45179     | 0.32571     | -0.71117  |         |  |
|             | 0.76151         | -0.71117   | 0.76151 | 0.32571     | 0.692489018 |           |         |  |
| NA          | ENSG00000279004 | 0.45172    | 0.32573 | -0.50358    | 0.69272     | 0.45172   | 0.32573 |  |
|             | 0.45172         | 0.32573    | 0.32573 | 0.692492374 |             |           |         |  |
| NA          | ENSG00000265494 | -0.62087   | 0.73266 | 0.45171     | 0.32574     | -0.62087  | 0.73266 |  |
|             | -2.211          | 0.98648    | 0.32574 | 0.692492374 |             |           |         |  |
| NA          | ENSG00000264526 | -1.0253    | 0.8474  | 0.45162     | 0.32577     | 0.38367   | 0.35061 |  |
|             | 0.28454         | 0.388      | 0.32577 | 0.692525939 |             |           |         |  |
| ANAPC13     | ENSG00000129055 | 0.45157    | 0.32579 | -1.8207     | 0.96567     | -0.78236  | 0.783   |  |
|             | -0.48576        | 0.68643    | 0.32579 | 0.692538244 |             |           |         |  |
| NA          | ENSG00000212928 | 0.45141    | 0.32585 | 0.45141     | 0.32585     | 0.45141   | 0.32585 |  |
|             | 0.45141         | 0.32585    | 0.32585 | 0.692635573 |             |           |         |  |
| POP7        | ENSG00000172336 | 0.11536    | 0.45408 | 0.45135     | 0.32587     | -1.8432   | 0.96735 |  |
|             | -0.6292         | 0.73539    | 0.32587 | 0.692647871 |             |           |         |  |
| AHCYP2      | ENSG00000238181 | -0.13236   | 0.55265 | 0.45125     | 0.32591     | 0.45125   |         |  |
|             | 0.32591         | 0.42604    | 0.33504 | 0.32591     | 0.692684762 |           |         |  |
| IGKV2-19    | ENSG00000253732 | 0.14612    | 0.44191 | 0.43642     | 0.33127     | -0.36456  |         |  |
|             | 0.64228         | 0.45122    | 0.32592 | 0.32592     | 0.692684762 |           |         |  |
| NA          | ENSG00000226871 | 0.45117    | 0.32593 | 0.45117     | 0.32593     | 0.45117   | 0.32593 |  |
|             | 0.45117         | 0.32593    | 0.32593 | 0.692684762 |             |           |         |  |
| NA          | ENSG00000238273 | 0.45113    | 0.32595 | 0.45113     | 0.32595     | 0.45113   | 0.32595 |  |
|             | 0.45113         | 0.32595    | 0.32595 | 0.692697056 |             |           |         |  |
| NA          | ENSG00000248234 | 0.45089    | 0.32603 | -0.069637   | 0.52776     | -0.069637 | 0.52776 |  |
|             | -0.069637       | 0.52776    | 0.32603 | 0.692752886 |             |           |         |  |
| NA          | ENSG00000276403 | 0.45087    | 0.32604 | 0.45087     | 0.32604     | 0.45087   | 0.32604 |  |
|             | 0.45087         | 0.32604    | 0.32604 | 0.692752886 |             |           |         |  |
| ZNF724      | ENSG00000196081 | -0.11348   | 0.54518 | 0.45085     | 0.32605     | -0.72669  |         |  |
|             | 0.76629         | -1.3384    | 0.90963 | 0.32605     | 0.692752886 |           |         |  |
| NA          | ENSG00000263567 | 0.45083    | 0.32605 | 0.22148     | 0.41236     | 0.31467   | 0.37651 |  |
|             | -0.22766        | 0.59004    | 0.32605 | 0.692752886 |             |           |         |  |
| NA          | ENSG00000283072 | -0.038962  | 0.51554 | 0.38594     | 0.34977     | -0.75502  | 0.77488 |  |
|             | 0.45081         | 0.32606    | 0.32606 | 0.692752886 |             |           |         |  |
| HOOK2       | ENSG00000095066 | -0.35882   | 0.64013 | 0.45079     | 0.32607     | -0.10517  | 0.54188 |  |
|             | -0.63625        | 0.73769    | 0.32607 | 0.692752886 |             |           |         |  |
| SLC35F6     | ENSG00000213699 | 0.00041332 | 0.49984 | 0.3934      | 0.34701     | 0.45074   |         |  |
|             | 0.32609         | -0.83287   | 0.79754 | 0.32609     | 0.692752886 |           |         |  |
| NA          | ENSG00000249006 | 0.45072    | 0.32609 | 0.19548     | 0.42251     | 0.19548   | 0.42251 |  |
|             | 0.19548         | 0.42251    | 0.32609 | 0.692752886 |             |           |         |  |
| MANSC4      | ENSG00000205693 | -0.14625   | 0.55814 | 0.45067     | 0.32611     | -0.14625  |         |  |

|            |                 |          |         |             |             |           |         |
|------------|-----------------|----------|---------|-------------|-------------|-----------|---------|
|            | 0.55814         | -0.14625 | 0.55814 | 0.32611     | 0.692762875 |           |         |
| KRT20      | ENSG00000171431 | -0.68512 | 0.75336 | -0.94883    | 0.82865     | -0.65822  | 0.7448  |
|            | 0.4506          | 0.32614  | 0.32614 | 0.692762875 |             |           |         |
| NA         | ENSG00000261314 | 0.45059  | 0.32614 | 0.45059     | 0.32614     | 0.45059   | 0.32614 |
|            | 0.45059         | 0.32614  | 0.32614 | 0.692762875 |             |           |         |
| NA         | ENSG00000271128 | 0.23959  | 0.40532 | 0.23959     | 0.40532     | 0.45053   | 0.32616 |
|            | -0.64594        | 0.74084  | 0.32616 | 0.692762875 |             |           |         |
| DSG3       | ENSG00000134757 | 0.26625  | 0.39502 | 0.26625     | 0.39502     | 0.26625   | 0.39502 |
|            | 0.45051         | 0.32617  | 0.32617 | 0.692762875 |             |           |         |
| NA         | ENSG00000238232 | 0.4505   | 0.32618 | 0.4505      | 0.32618     | 0.4505    | 0.32618 |
|            | 0.4505          | 0.32618  | 0.32618 | 0.692762875 |             |           |         |
| NA         | ENSG00000231189 | -0.45537 | 0.67558 | 0.45018     | 0.32629     | 0.45018   | 0.32629 |
|            | 0.10571         | 0.45791  | 0.32629 | 0.692881675 |             |           |         |
| DEDD       | ENSG00000158796 | 0.45014  | 0.3263  | 0.0064328   | 0.49743     | 0.0064328 | 0.49743 |
|            | 0.0064328       | 0.49743  | 0.3263  | 0.692881675 |             |           |         |
| CLEC17A    | ENSG00000187912 | -0.67488 | 0.75012 | 0.076315    | 0.46958     | 0.45005   |         |
|            | 0.32634         | 0.32267  | 0.37347 | 0.32634     | 0.692881675 |           |         |
| RNA5SP296  | ENSG00000222455 | 0.45005  | 0.32634 | 0.45005     | 0.32634     | 0.45005   |         |
|            | 0.32634         | 0.45005  | 0.32634 | 0.32634     | 0.692881675 |           |         |
| RNU7-35P   | ENSG00000252983 | -0.33292 | 0.6304  | 0.45004     | 0.32634     | 0.45004   |         |
|            | 0.32634         | 0.45004  | 0.32634 | 0.32634     | 0.692881675 |           |         |
| ZNF722P    | ENSG00000241149 | -1.1219  | 0.86906 | 0.28724     | 0.38696     | 0.44999   |         |
|            | 0.32636         | -0.13677 | 0.5544  | 0.32636     | 0.692881675 |           |         |
| NA         | ENSG00000279805 | 0.44994  | 0.32638 | 0.44994     | 0.32638     | 0.44994   | 0.32638 |
|            | 0.44994         | 0.32638  | 0.32638 | 0.692881675 |             |           |         |
| NA         | ENSG00000230790 | 0.44985  | 0.32641 | 0.44985     | 0.32641     | 0.44985   | 0.32641 |
|            | 0.44985         | 0.32641  | 0.32641 | 0.692881675 |             |           |         |
| PRR13P4    | ENSG00000264971 | 0.44984  | 0.32641 | 0.081422    | 0.46755     | 0.28608   |         |
|            | 0.38741         | -0.59603 | 0.72442 | 0.32641     | 0.692881675 |           |         |
| FRAT2      | ENSG00000181274 | -0.40592 | 0.6576  | -0.40592    | 0.6576      | 0.4498    | 0.32643 |
|            | -0.40592        | 0.6576   | 0.32643 | 0.692881675 |             |           |         |
| RPS29      | ENSG00000213741 | 0.44981  | 0.32643 | 0.44981     | 0.32643     | 0.44981   | 0.32643 |
|            | 0.35577         | 0.36101  | 0.32643 | 0.692881675 |             |           |         |
| NA         | ENSG00000272400 | -1.1287  | 0.87048 | -1.2603     | 0.89621     | -1.1256   | 0.86983 |
|            | 0.44976         | 0.32644  | 0.32644 | 0.692881675 |             |           |         |
| NA         | ENSG00000261166 | 0.44965  | 0.32648 | 0.44965     | 0.32648     | 0.44965   | 0.32648 |
|            | -0.49359        | 0.6892   | 0.32648 | 0.692881675 |             |           |         |
| MRPL37P1   | ENSG00000266946 | -0.13883 | 0.55521 | -0.13883    | 0.55521     | 0.44963   |         |
|            | 0.32649         | 0.30095  | 0.38173 | 0.32649     | 0.692881675 |           |         |
| RNU6-1045P | ENSG00000252130 | 0.44951  | 0.32653 | 0.44951     | 0.32653     | 0.44951   |         |
|            | 0.32653         | 0.44951  | 0.32653 | 0.32653     | 0.692881675 |           |         |
| PLAC8      | ENSG00000145287 | 0.086638 | 0.46548 | 0.26586     | 0.39517     | -0.44876  | 0.6732  |
|            | 0.44949         | 0.32654  | 0.32654 | 0.692881675 |             |           |         |
| NDUFB1     | ENSG00000183648 | -0.46733 | 0.67987 | 0.44946     | 0.32655     | 0.248     | 0.40207 |
|            | 0.248           | 0.40207  | 0.32655 | 0.692881675 |             |           |         |
| OR6B3      | ENSG00000178586 | 0.44934  | 0.32659 | -1.1475     | 0.87441     | 0.44934   | 0.32659 |
|            | -0.43201        | 0.66713  | 0.32659 | 0.692881675 |             |           |         |
| POLR1D     | ENSG00000186184 | 0.44934  | 0.32659 | 0.020276    | 0.49191     | -0.14328  |         |
|            | 0.55697         | 0.36545  | 0.35739 | 0.32659     | 0.692881675 |           |         |
| RNU6-1328P | ENSG00000222870 | 0.44936  | 0.32659 | 0.082748    | 0.46703     | 0.44936   |         |
|            | 0.32659         | 0.44936  | 0.32659 | 0.32659     | 0.692881675 |           |         |
| NA         | ENSG00000270612 | 0.30216  | 0.38127 | 0.44935     | 0.32659     | -0.088388 | 0.53522 |
|            | -0.037968       | 0.51514  | 0.32659 | 0.692881675 |             |           |         |
| RN7SL819P  | ENSG00000264251 | 0.44931  | 0.3266  | 0.44931     | 0.3266      | 0.44931   |         |
|            | 0.3266          | 0.44931  | 0.3266  | 0.3266      | 0.692881675 |           |         |
| OTP        | ENSG00000171540 | 0.4493   | 0.32661 | -0.71627    | 0.76309     | 0.096061  | 0.46174 |
|            | 0.16479         | 0.43455  | 0.32661 | 0.692881675 |             |           |         |
| NA         | ENSG00000260756 | 0.44913  | 0.32667 | 0.44913     | 0.32667     | 0.44913   | 0.32667 |
|            | -1.1269         | 0.8701   | 0.32667 | 0.692881675 |             |           |         |
| NA         | ENSG00000266614 | 0.44913  | 0.32667 | 0.44913     | 0.32667     | 0.44913   | 0.32667 |
|            | 0.44913         | 0.32667  | 0.32667 | 0.692881675 |             |           |         |
| ETFB       | ENSG00000105379 | 0.44908  | 0.32669 | 0.44908     | 0.32669     | 0.44908   | 0.32669 |

|           |                 |          |         |             |             |           |         |  |
|-----------|-----------------|----------|---------|-------------|-------------|-----------|---------|--|
|           | 0.44908         | 0.32669  | 0.32669 | 0.692881675 |             |           |         |  |
| PAOX      | ENSG00000148832 | 0.44907  | 0.32669 | 0.44907     | 0.32669     | 0.44907   | 0.32669 |  |
|           | 0.44907         | 0.32669  | 0.32669 | 0.692881675 |             |           |         |  |
| NA        | ENSG00000249890 | 0.44903  | 0.3267  | 0.44903     | 0.3267      | 0.098091  | 0.46093 |  |
|           | 0.44903         | 0.3267   | 0.3267  | 0.692881675 |             |           |         |  |
| ZBTB8OSP1 | ENSG00000183432 | 0.44898  | 0.32672 | 0.44898     | 0.32672     | 0.44898   |         |  |
|           | 0.32672         | 0.44898  | 0.32672 | 0.32672     | 0.692881675 |           |         |  |
| LINC01525 | ENSG00000235202 | 0.44895  | 0.32673 | 0.44895     | 0.32673     | 0.44895   |         |  |
|           | 0.32673         | -0.30038 | 0.61806 | 0.32673     | 0.692881675 |           |         |  |
| NA        | ENSG00000253445 | 0.26422  | 0.39581 | 0.32038     | 0.37434     | -0.20946  | 0.58295 |  |
|           | 0.44897         | 0.32673  | 0.32673 | 0.692881675 |             |           |         |  |
| CYP4F9P   | ENSG00000267392 | -0.66858 | 0.74812 | -0.73004    | 0.76732     | 0.44893   |         |  |
|           | 0.32674         | 0.28897  | 0.3863  | 0.32674     | 0.692881675 |           |         |  |
| NA        | ENSG00000250592 | 0.44887  | 0.32676 | 0.44887     | 0.32676     | 0.44887   | 0.32676 |  |
|           | 0.44887         | 0.32676  | 0.32676 | 0.692881675 |             |           |         |  |
| NA        | ENSG00000213315 | -1.1443  | 0.87375 | 0.44886     | 0.32677     | -0.34588  | 0.63528 |  |
|           | -0.10381        | 0.54134  | 0.32677 | 0.692881675 |             |           |         |  |
| KRT18P13  | ENSG00000214417 | -0.53646 | 0.70418 | -1.5472     | 0.93909     | 0.052167  |         |  |
|           | 0.4792          | 0.44876  | 0.3268  | 0.3268      | 0.692881675 |           |         |  |
| AMBP      | ENSG00000106927 | 0.041665 | 0.48338 | 0.44867     | 0.32683     | -0.33001  | 0.6293  |  |
|           | -0.13746        | 0.55467  | 0.32683 | 0.692881675 |             |           |         |  |
| ZNF853    | ENSG00000236609 | -1.4989  | 0.93305 | -1.7663     | 0.96132     | -1.7663   |         |  |
|           | 0.96132         | 0.44869  | 0.32683 | 0.32683     | 0.692881675 |           |         |  |
| NA        | ENSG00000237568 | 0.44865  | 0.32684 | 0.44865     | 0.32684     | 0.44865   | 0.32684 |  |
|           | 0.44865         | 0.32684  | 0.32684 | 0.692881675 |             |           |         |  |
| GLYATL1P1 | ENSG00000255189 | -0.31876 | 0.62505 | -1.0883     | 0.86176     | -0.84363  |         |  |
|           | 0.80056         | 0.44866  | 0.32684 | 0.32684     | 0.692881675 |           |         |  |
| NA        | ENSG00000255627 | 0.12095  | 0.45186 | 0.44857     | 0.32687     | -0.16576  | 0.56583 |  |
|           | -0.15278        | 0.56071  | 0.32687 | 0.692881675 |             |           |         |  |
| NA        | ENSG00000272682 | 0.44857  | 0.32687 | 0.44857     | 0.32687     | 0.44857   | 0.32687 |  |
|           | 0.44857         | 0.32687  | 0.32687 | 0.692881675 |             |           |         |  |
| NA        | ENSG00000283057 | 0.44857  | 0.32687 | 0.44857     | 0.32687     | 0.44857   | 0.32687 |  |
|           | 0.44857         | 0.32687  | 0.32687 | 0.692881675 |             |           |         |  |
| CCN3      | ENSG00000136999 | 0.44856  | 0.32688 | 0.2384      | 0.40579     | 0.34286   | 0.36585 |  |
|           | 0.2384          | 0.40579  | 0.32688 | 0.692881675 |             |           |         |  |
| LINC02472 | ENSG00000248338 | -0.83814 | 0.79902 | 0.15265     | 0.43934     | 0.44854   |         |  |
|           | 0.32688         | -0.34038 | 0.63321 | 0.32688     | 0.692881675 |           |         |  |
| MTATP6P26 | ENSG00000236878 | 0.44852  | 0.32689 | 0.44852     | 0.32689     | 0.44852   |         |  |
|           | 0.32689         | 0.44852  | 0.32689 | 0.32689     | 0.692881675 |           |         |  |
| NA        | ENSG00000261285 | 0.44851  | 0.32689 | 0.11645     | 0.45365     | -0.015731 | 0.50628 |  |
|           | -0.015731       | 0.50628  | 0.32689 | 0.692881675 |             |           |         |  |
| MANEALP1  | ENSG00000214070 | 0.44845  | 0.32691 | -0.22222    | 0.58793     | -0.015373 |         |  |
|           | 0.50613         | 0.24502  | 0.40322 | 0.32691     | 0.692884986 |           |         |  |
| RIMS4     | ENSG00000101098 | -1.2984  | 0.90293 | 0.14969     | 0.4405      | 0.44843   | 0.32692 |  |
|           | -0.63276        | 0.73656  | 0.32692 | 0.692884986 |             |           |         |  |
| NA        | ENSG00000230440 | -0.25978 | 0.60248 | -0.55561    | 0.71076     | 0.44825   | 0.32699 |  |
|           | 0.44825         | 0.32699  | 0.32699 | 0.693003205 |             |           |         |  |
| PLCG1-AS1 | ENSG00000226648 | 0.15401  | 0.4388  | 0.44819     | 0.32701     | 0.44819   |         |  |
|           | 0.32701         | 0.44819  | 0.32701 | 0.32701     | 0.693015452 |           |         |  |
| NA        | ENSG00000228553 | 0.44799  | 0.32708 | 0.44799     | 0.32708     | 0.44799   | 0.32708 |  |
|           | 0.44799         | 0.32708  | 0.32708 | 0.693102073 |             |           |         |  |
| TTL1      | ENSG00000100271 | -0.97586 | 0.83543 | -0.31931    | 0.62525     | -0.95954  | 0.83136 |  |
|           | 0.44795         | 0.32709  | 0.32709 | 0.693102073 |             |           |         |  |
| PDCD6     | ENSG00000249915 | 0.29134  | 0.3854  | 0.44789     | 0.32712     | 0.29134   | 0.3854  |  |
|           | 0.19389         | 0.42313  | 0.32712 | 0.693102073 |             |           |         |  |
| NA        | ENSG00000219375 | 0.44786  | 0.32713 | 0.44786     | 0.32713     | 0.44786   | 0.32713 |  |
|           | 0.44786         | 0.32713  | 0.32713 | 0.693102073 |             |           |         |  |
| NA        | ENSG00000248710 | 0.44786  | 0.32713 | 0.44786     | 0.32713     | 0.44786   | 0.32713 |  |
|           | 0.44786         | 0.32713  | 0.32713 | 0.693102073 |             |           |         |  |
| PRSS37    | ENSG00000165076 | -0.29907 | 0.61756 | 0.44773     | 0.32717     | -0.19154  |         |  |
|           | 0.57595         | -0.19154 | 0.57595 | 0.32717     | 0.693102073 |           |         |  |
| NEMP1     | ENSG00000166881 | 0.44765  | 0.3272  | 0.43907     | 0.33031     | 0.2577    | 0.39832 |  |

|           |                 |           |         |             |             |          |         |  |
|-----------|-----------------|-----------|---------|-------------|-------------|----------|---------|--|
|           | -0.1886         | 0.5748    | 0.3272  | 0.693102073 |             |          |         |  |
| OR51E1    | ENSG00000180785 | -0.025566 | 0.5102  | 0.00061543  | 0.49975     | -0.67626 |         |  |
|           | 0.75056         | 0.44766   | 0.3272  | 0.3272      | 0.693102073 |          |         |  |
| SNF8P1    | ENSG00000203387 | 0.44762   | 0.32721 | -0.052565   | 0.52096     | 0.44762  |         |  |
|           | 0.32721         | 0.44762   | 0.32721 | 0.32721     | 0.693102073 |          |         |  |
| LINC01980 | ENSG00000225548 | 0.040874  | 0.4837  | 0.44764     | 0.32721     | -0.83658 |         |  |
|           | 0.79859         | -1.7285   | 0.95805 | 0.32721     | 0.693102073 |          |         |  |
| TEX36-AS1 | ENSG00000237675 | 0.44754   | 0.32724 | 0.44754     | 0.32724     | 0.44754  |         |  |
|           | 0.32724         | 0.44754   | 0.32724 | 0.32724     | 0.693102073 |          |         |  |
| AADA4L4   | ENSG00000204518 | 0.44753   | 0.32725 | 0.096387    | 0.46161     | 0.085399 |         |  |
|           | 0.46597         | 0.12714   | 0.44941 | 0.32725     | 0.693102073 |          |         |  |
| MIR4300HG | ENSG00000245832 | 0.17058   | 0.43228 | 0.02309     | 0.49079     | 0.41391  |         |  |
|           | 0.33947         | 0.44751   | 0.32725 | 0.32725     | 0.693102073 |          |         |  |
| NA        | ENSG00000272518 | 0.41598   | 0.33871 | 0.44752     | 0.32725     | 0.41487  | 0.33912 |  |
|           | 0.41487         | 0.33912   | 0.32725 | 0.693102073 |             |          |         |  |
| NA        | ENSG00000235858 | 0.44739   | 0.3273  | 0.44739     | 0.3273      | 0.44739  | 0.3273  |  |
|           | 0.44739         | 0.3273    | 0.3273  | 0.693177843 |             |          |         |  |
| ACCSL     | ENSG00000205126 | 0.25501   | 0.39936 | -0.41943    | 0.66255     | 0.029729 | 0.48814 |  |
|           | 0.44726         | 0.32734   | 0.32734 | 0.693230037 |             |          |         |  |
| NA        | ENSG00000260747 | 0.44715   | 0.32738 | -0.78107    | 0.78262     | -2.2561  | 0.98797 |  |
|           | -2.2561         | 0.98797   | 0.32738 | 0.693230037 |             |          |         |  |
| GSTA8P    | ENSG00000220377 | 0.44713   | 0.32739 | -1.1092     | 0.86633     | -0.32014 |         |  |
|           | 0.62557         | -0.32014  | 0.62557 | 0.32739     | 0.693230037 |          |         |  |
| CFL1P8    | ENSG00000234239 | 0.44709   | 0.3274  | 0.44709     | 0.3274      | 0.44709  |         |  |
|           | 0.3274          | 0.44709   | 0.3274  | 0.3274      | 0.693230037 |          |         |  |
| NA        | ENSG00000183748 | 0.44709   | 0.3274  | -0.60664    | 0.72795     | -0.92313 | 0.82203 |  |
|           | -1.3508         | 0.91163   | 0.3274  | 0.693230037 |             |          |         |  |
| NA        | ENSG00000278929 | 0.44708   | 0.32741 | 0.44708     | 0.32741     | 0.44708  | 0.32741 |  |
|           | 0.44708         | 0.32741   | 0.32741 | 0.693230037 |             |          |         |  |
| BACE2     | ENSG00000182240 | -0.65306  | 0.74314 | 0.44698     | 0.32744     | -0.44597 | 0.67219 |  |
|           | -0.067368       | 0.52686   | 0.32744 | 0.693233315 |             |          |         |  |
| NA        | ENSG00000236387 | 0.15191   | 0.43963 | 0.15191     | 0.43963     | 0.44699  | 0.32744 |  |
|           | 0.12056         | 0.45202   | 0.32744 | 0.693233315 |             |          |         |  |
| ZNF251    | ENSG00000198169 | 0.4469    | 0.32747 | -0.7605     | 0.77652     | -0.7605  |         |  |
|           | 0.77652         | -0.7605   | 0.77652 | 0.32747     | 0.693266709 |          |         |  |
| RN7SL646P | ENSG00000242341 | -0.27293  | 0.60755 | -0.97924    | 0.83627     | 0.44679  |         |  |
|           | 0.32751         | -0.017953 | 0.50716 | 0.32751     | 0.693321269 |          |         |  |
| RPL12P3   | ENSG00000233106 | 0.44664   | 0.32757 | 0.44664     | 0.32757     | -0.30778 |         |  |
|           | 0.62088         | 0.44664   | 0.32757 | 0.32757     | 0.69335889  |          |         |  |
| HSPE1P6   | ENSG00000232917 | 0.4244    | 0.33564 | 0.38265     | 0.35099     | 0.44656  |         |  |
|           | 0.3276          | 0.38265   | 0.35099 | 0.3276      | 0.69335889  |          |         |  |
| NA        | ENSG00000270484 | 0.44644   | 0.32764 | 0.44644     | 0.32764     | 0.44644  | 0.32764 |  |
|           | 0.44644         | 0.32764   | 0.32764 | 0.69335889  |             |          |         |  |
| NA        | ENSG00000262999 | 0.44641   | 0.32765 | 0.44641     | 0.32765     | 0.44641  | 0.32765 |  |
|           | 0.44641         | 0.32765   | 0.32765 | 0.69335889  |             |          |         |  |
| TUBA3D    | ENSG00000075886 | -1.1495   | 0.87483 | -1.4244     | 0.92283     | -1.3565  |         |  |
|           | 0.91253         | 0.44638   | 0.32766 | 0.32766     | 0.69335889  |          |         |  |
| NA        | ENSG00000243243 | -0.85345  | 0.80329 | 0.44638     | 0.32766     | -1.3582  | 0.9128  |  |
|           | -1.3582         | 0.9128    | 0.32766 | 0.69335889  |             |          |         |  |
| NA        | ENSG00000235949 | 0.44637   | 0.32766 | -0.73282    | 0.76816     | -0.73282 | 0.76816 |  |
|           | -0.73282        | 0.76816   | 0.32766 | 0.69335889  |             |          |         |  |
| NA        | ENSG00000266715 | 0.44636   | 0.32767 | 0.44636     | 0.32767     | 0.44636  | 0.32767 |  |
|           | 0.44636         | 0.32767   | 0.32767 | 0.69335889  |             |          |         |  |
| SPTBN5    | ENSG00000137877 | -0.095208 | 0.53793 | 0.4463      | 0.32769     | -0.12934 |         |  |
|           | 0.55146         | -0.3879   | 0.65096 | 0.32769     | 0.69335889  |          |         |  |
| MTCO3P43  | ENSG00000227788 | 0.44624   | 0.32771 | 0.44624     | 0.32771     | 0.44624  |         |  |
|           | 0.32771         | -0.53261  | 0.70285 | 0.32771     | 0.69335889  |          |         |  |
| ALMS1-IT1 | ENSG00000230002 | 0.44624   | 0.32771 | 0.44624     | 0.32771     | 0.44624  |         |  |
|           | 0.32771         | 0.44624   | 0.32771 | 0.32771     | 0.69335889  |          |         |  |
| NA        | ENSG00000253660 | 0.20135   | 0.42021 | 0.44625     | 0.32771     | 0.20135  | 0.42021 |  |
|           | 0.20135         | 0.42021   | 0.32771 | 0.69335889  |             |          |         |  |
| MTCO3P35  | ENSG00000242836 | 0.44616   | 0.32774 | 0.44616     | 0.32774     | 0.44616  |         |  |

|           |                 |          |         |             |             |            |         |  |
|-----------|-----------------|----------|---------|-------------|-------------|------------|---------|--|
|           | 0.32774         | 0.44616  | 0.32774 | 0.32774     | 0.69335889  |            |         |  |
| RMDN1     | ENSG00000176623 | 0.29802  | 0.38284 | 0.29802     | 0.38284     | 0.29802    | 0.38284 |  |
|           | 0.44611         | 0.32776  | 0.32776 | 0.69335889  |             |            |         |  |
| NA        | ENSG00000253233 | -0.62009 | 0.7324  | 0.44607     | 0.32777     | -0.33302   | 0.63044 |  |
|           | -0.13265        | 0.55277  | 0.32777 | 0.69335889  |             |            |         |  |
| NA        | ENSG00000279322 | 0.44604  | 0.32778 | 0.44604     | 0.32778     | 0.44604    | 0.32778 |  |
|           | 0.44604         | 0.32778  | 0.32778 | 0.69335889  |             |            |         |  |
| COA6      | ENSG00000168275 | 0.44603  | 0.32779 | 0.44603     | 0.32779     | 0.44603    | 0.32779 |  |
|           | -0.30949        | 0.62152  | 0.32779 | 0.69335889  |             |            |         |  |
| NA        | ENSG00000200742 | 0.44603  | 0.32779 | 0.44603     | 0.32779     | 0.44603    | 0.32779 |  |
|           | 0.44603         | 0.32779  | 0.32779 | 0.69335889  |             |            |         |  |
| CLMP      | ENSG00000166250 | 0.315    | 0.37638 | 0.44594     | 0.32782     | 0.31052    | 0.37808 |  |
|           | 0.20501         | 0.41878  | 0.32782 | 0.69335889  |             |            |         |  |
| LINC01387 | ENSG00000265944 | -0.2047  | 0.5811  | -0.60849    | 0.72857     | -0.32343   |         |  |
|           | 0.62681         | 0.44594  | 0.32782 | 0.32782     | 0.69335889  |            |         |  |
| NA        | ENSG00000227252 | 0.44579  | 0.32787 | -0.38426    | 0.64961     | -0.38426   | 0.64961 |  |
|           | -0.38426        | 0.64961  | 0.32787 | 0.69335889  |             |            |         |  |
| NA        | ENSG00000224675 | 0.44574  | 0.32789 | 0.25146     | 0.40073     | 0.00066121 | 0.49974 |  |
|           | 0.00066121      | 0.49974  | 0.32789 | 0.69335889  |             |            |         |  |
| TMEM135   | ENSG00000166575 | -0.13314 | 0.55296 | -0.14218    | 0.55653     | 0.44571    |         |  |
|           | 0.3279          | -0.10533 | 0.54194 | 0.3279      | 0.69335889  |            |         |  |
| NA        | ENSG00000265289 | 0.44569  | 0.32791 | -0.59629    | 0.72451     | -0.61738   | 0.73151 |  |
|           | -0.59629        | 0.72451  | 0.32791 | 0.69335889  |             |            |         |  |
| NA        | ENSG00000261584 | 0.44561  | 0.32794 | 0.084192    | 0.46645     | -0.54726   | 0.7079  |  |
|           | -0.89752        | 0.81528  | 0.32794 | 0.69335889  |             |            |         |  |
| PPP1R1A   | ENSG00000135447 | -1.2013  | 0.88519 | -0.46236    | 0.67809     | 0.44558    |         |  |
|           | 0.32795         | -0.5405  | 0.70557 | 0.32795     | 0.69335889  |            |         |  |
| KDELR2    | ENSG00000136240 | -1.8036  | 0.96435 | -1.7238     | 0.95763     | -1.9564    |         |  |
|           | 0.97479         | 0.44559  | 0.32795 | 0.32795     | 0.69335889  |            |         |  |
| UPK3B     | ENSG00000243566 | -0.4021  | 0.6562  | -0.19149    | 0.57593     | 0.36347    | 0.35813 |  |
|           | 0.44558         | 0.32795  | 0.32795 | 0.69335889  |             |            |         |  |
| TYMP      | ENSG00000025708 | 0.44555  | 0.32796 | 0.24544     | 0.40306     | 0.24544    | 0.40306 |  |
|           | -0.8581         | 0.80458  | 0.32796 | 0.69335889  |             |            |         |  |
| NA        | ENSG00000266997 | 0.44552  | 0.32797 | 0.44552     | 0.32797     | 0.44552    | 0.32797 |  |
|           | 0.44552         | 0.32797  | 0.32797 | 0.69335889  |             |            |         |  |
| LPIN1     | ENSG00000134324 | 0.44538  | 0.32802 | 0.39919     | 0.34488     | 0.1094     | 0.45644 |  |
|           | 0.10542         | 0.45802  | 0.32802 | 0.69335889  |             |            |         |  |
| RNU6-481P | ENSG00000206921 | 0.44537  | 0.32803 | -0.70524    | 0.75967     | 0.07081    |         |  |
|           | 0.47177         | 0.07081  | 0.47177 | 0.32803     | 0.69335889  |            |         |  |
| NA        | ENSG00000259536 | 0.44536  | 0.32803 | 0.44536     | 0.32803     | 0.12577    | 0.44996 |  |
|           | -0.49201        | 0.68864  | 0.32803 | 0.69335889  |             |            |         |  |
| KLRC4     | ENSG00000183542 | -0.20412 | 0.58087 | 0.44534     | 0.32804     | -0.041358  | 0.51649 |  |
|           | 0.057512        | 0.47707  | 0.32804 | 0.69335889  |             |            |         |  |
| NA        | ENSG00000279453 | 0.44533  | 0.32804 | 0.44533     | 0.32804     | 0.44533    | 0.32804 |  |
|           | 0.44533         | 0.32804  | 0.32804 | 0.69335889  |             |            |         |  |
| NA        | ENSG00000239170 | 0.44535  | 0.32804 | 0.33452     | 0.36899     | 0.44535    | 0.32804 |  |
|           | 0.44535         | 0.32804  | 0.32804 | 0.69335889  |             |            |         |  |
| BAP1      | ENSG00000163930 | 0.44522  | 0.32808 | 0.44522     | 0.32808     | 0.44522    | 0.32808 |  |
|           | 0.44522         | 0.32808  | 0.32808 | 0.693404419 |             |            |         |  |
| NA        | ENSG00000232698 | 0.44518  | 0.32809 | 0.44518     | 0.32809     | 0.44518    | 0.32809 |  |
|           | 0.44518         | 0.32809  | 0.32809 | 0.693404419 |             |            |         |  |
| NA        | ENSG00000225175 | 0.44511  | 0.32812 | -0.25847    | 0.60198     | -0.45869   | 0.67677 |  |
|           | 0.0002157       | 0.49991  | 0.32812 | 0.693407676 |             |            |         |  |
| NA        | ENSG00000248863 | 0.4451   | 0.32812 | 0.4451      | 0.32812     | 0.4451     | 0.32812 |  |
|           | 0.4451          | 0.32812  | 0.32812 | 0.693407676 |             |            |         |  |
| MIR1208   | ENSG00000221261 | -0.108   | 0.543   | 0.14478     | 0.44244     | 0.44501    | 0.32815 |  |
|           | 0.44501         | 0.32815  | 0.32815 | 0.693432063 |             |            |         |  |
| PPP1R37   | ENSG00000104866 | 0.44501  | 0.32816 | 0.44501     | 0.32816     | 0.44501    |         |  |
|           | 0.32816         | 0.44501  | 0.32816 | 0.32816     | 0.693432063 |            |         |  |
| PAM       | ENSG00000145730 | 0.23408  | 0.40746 | -0.25083    | 0.59903     | -0.22545   | 0.58919 |  |
|           | 0.44489         | 0.3282   | 0.3282  | 0.693479999 |             |            |         |  |
| TLE1      | ENSG00000196781 | 0.39604  | 0.34604 | -0.28705    | 0.61296     | 0.005895   | 0.49765 |  |



|           |                 |           |         |             |             |           |         |  |
|-----------|-----------------|-----------|---------|-------------|-------------|-----------|---------|--|
|           | 0.44483         | 0.32822   | 0.32822 | 0.693479999 |             |           |         |  |
| KLF2P4    | ENSG00000236516 | 0.44473   | 0.32826 | 0.44473     | 0.32826     | 0.44473   |         |  |
|           | 0.32826         | 0.44473   | 0.32826 | 0.32826     | 0.693479999 |           |         |  |
| NA        | ENSG00000236942 | 0.44469   | 0.32827 | 0.44469     | 0.32827     | 0.44469   | 0.32827 |  |
|           | 0.44469         | 0.32827   | 0.32827 | 0.693479999 |             |           |         |  |
| NA        | ENSG00000270598 | -1.6878   | 0.95428 | 0.44467     | 0.32828     | 0.44467   | 0.32828 |  |
|           | -0.66597        | 0.74728   | 0.32828 | 0.693479999 |             |           |         |  |
| LAPTM4BP2 | ENSG00000271266 | 0.44458   | 0.32831 | 0.44458     | 0.32831     | 0.44458   |         |  |
|           | 0.32831         | 0.44458   | 0.32831 | 0.32831     | 0.693479999 |           |         |  |
| RN7SKP99  | ENSG00000252837 | -0.8893   | 0.81308 | 0.44456     | 0.32832     | 0.44456   |         |  |
|           | 0.32832         | 0.44456   | 0.32832 | 0.32832     | 0.693479999 |           |         |  |
| PURPL     | ENSG00000250337 | -0.79598  | 0.78698 | -0.9789     | 0.83619     | 0.44453   | 0.32833 |  |
|           | 0.39796         | 0.34533   | 0.32833 | 0.693479999 |             |           |         |  |
| CEP41     | ENSG00000106477 | -0.34965  | 0.6367  | 0.25716     | 0.39853     | 0.44438   | 0.32838 |  |
|           | 0.12017         | 0.45218   | 0.32838 | 0.693479999 |             |           |         |  |
| EVPLL     | ENSG00000214860 | -1.1919   | 0.88334 | 0.44434     | 0.3284      | -1.1072   | 0.86589 |  |
|           | -2.0692         | 0.98073   | 0.3284  | 0.693479999 |             |           |         |  |
| OR5D3P    | ENSG00000186886 | 0.44431   | 0.32841 | 0.44431     | 0.32841     | 0.44431   |         |  |
|           | 0.32841         | 0.44431   | 0.32841 | 0.32841     | 0.693479999 |           |         |  |
| NA        | ENSG00000250761 | 0.44431   | 0.32841 | 0.44431     | 0.32841     | 0.44431   | 0.32841 |  |
|           | 0.44431         | 0.32841   | 0.32841 | 0.693479999 |             |           |         |  |
| OR8T1P    | ENSG00000226413 | 0.072529  | 0.47109 | 0.44427     | 0.32842     | -0.61079  |         |  |
|           | 0.72933         | 0.44427   | 0.32842 | 0.32842     | 0.693479999 |           |         |  |
| NA        | ENSG00000277549 | 0.44427   | 0.32842 | 0.44427     | 0.32842     | 0.44427   | 0.32842 |  |
|           | 0.44427         | 0.32842   | 0.32842 | 0.693479999 |             |           |         |  |
| NA        | ENSG00000265430 | 0.44429   | 0.32842 | 0.44429     | 0.32842     | -0.54231  | 0.7062  |  |
|           | 0.44429         | 0.32842   | 0.32842 | 0.693479999 |             |           |         |  |
| KRT18P43  | ENSG00000240128 | 0.44424   | 0.32844 | 0.44424     | 0.32844     | 0.44424   |         |  |
|           | 0.32844         | 0.44424   | 0.32844 | 0.32844     | 0.693479999 |           |         |  |
| LINC02435 | ENSG00000251526 | 0.44424   | 0.32844 | 0.36654     | 0.35698     | -0.049582 |         |  |
|           | 0.51977         | -0.049582 | 0.51977 | 0.32844     | 0.693479999 |           |         |  |
| NA        | ENSG00000257543 | 0.44422   | 0.32844 | 0.44422     | 0.32844     | 0.44422   | 0.32844 |  |
|           | 0.44422         | 0.32844   | 0.32844 | 0.693479999 |             |           |         |  |
| SNORD63B  | ENSG00000222937 | 0.44418   | 0.32846 | 0.44418     | 0.32846     | 0.44418   |         |  |
|           | 0.32846         | 0.44418   | 0.32846 | 0.32846     | 0.693479999 |           |         |  |
| MFSD13A   | ENSG00000138111 | 0.03946   | 0.48426 | 0.44415     | 0.32847     | 0.44415   |         |  |
|           | 0.32847         | 0.44415   | 0.32847 | 0.32847     | 0.693479999 |           |         |  |
| LINC02040 | ENSG00000243149 | 0.44406   | 0.3285  | -0.60185    | 0.72636     | 0.097983  |         |  |
|           | 0.46097         | -0.58134  | 0.71949 | 0.3285      | 0.693479999 |           |         |  |
| NA        | ENSG00000187812 | 0.31425   | 0.37667 | 0.44404     | 0.32851     | -0.67545  | 0.75031 |  |
|           | -0.31114        | 0.62215   | 0.32851 | 0.693479999 |             |           |         |  |
| RPL3P13   | ENSG00000258013 | -0.026928 | 0.51074 | -0.52484    | 0.70015     | 0.44404   |         |  |
|           | 0.32851         | -0.24183  | 0.59555 | 0.32851     | 0.693479999 |           |         |  |
| NA        | ENSG00000228423 | -0.1386   | 0.55512 | -0.2012     | 0.57973     | -0.2012   | 0.57973 |  |
|           | 0.44394         | 0.32854   | 0.32854 | 0.693489736 |             |           |         |  |
| NA        | ENSG00000280392 | 0.44391   | 0.32855 | 0.44391     | 0.32855     | 0.44391   | 0.32855 |  |
|           | 0.44391         | 0.32855   | 0.32855 | 0.693489736 |             |           |         |  |
| CCM2      | ENSG00000136280 | 0.44387   | 0.32857 | 0.026101    | 0.48959     | -0.57835  | 0.71848 |  |
|           | -0.42823        | 0.66576   | 0.32857 | 0.693489736 |             |           |         |  |
| BRPF1     | ENSG00000156983 | -0.65824  | 0.74481 | 0.44383     | 0.32858     | -0.55632  | 0.711   |  |
|           | -0.29596        | 0.61637   | 0.32858 | 0.693489736 |             |           |         |  |
| LARP1B    | ENSG00000138709 | 0.44379   | 0.3286  | -1.2355     | 0.89167     | -0.40614  |         |  |
|           | 0.65768         | -0.60982  | 0.72901 | 0.3286      | 0.693489736 |           |         |  |
| MIR3137   | ENSG00000265333 | 0.22175   | 0.41225 | -0.88422    | 0.81171     | 0.39867   |         |  |
|           | 0.34507         | 0.44378   | 0.3286  | 0.3286      | 0.693489736 |           |         |  |
| RNA5SP338 | ENSG00000222427 | 0.44371   | 0.32863 | 0.44371     | 0.32863     | 0.44371   |         |  |
|           | 0.32863         | 0.44371   | 0.32863 | 0.32863     | 0.693523013 |           |         |  |
| NA        | ENSG00000230328 | 0.11875   | 0.45274 | 0.44359     | 0.32867     | 0.44359   | 0.32867 |  |
|           | 0.44359         | 0.32867   | 0.32867 | 0.69357739  |             |           |         |  |
| NA        | ENSG00000261799 | 0.44345   | 0.32872 | 0.19497     | 0.42271     | 0.44345   | 0.32872 |  |
|           | 0.44345         | 0.32872   | 0.32872 | 0.69359603  |             |           |         |  |
| NA        | ENSG00000248187 | 0.44341   | 0.32873 | 0.44341     | 0.32873     | 0.44341   | 0.32873 |  |

|            |                 |             |         |             |             |          |         |         |
|------------|-----------------|-------------|---------|-------------|-------------|----------|---------|---------|
|            | 0.24083         | 0.40484     | 0.32873 | 0.69359603  |             |          |         |         |
| RN7SL274P  | ENSG00000242430 | 0.4434      | 0.32874 | 0.4434      | 0.32874     | 0.4434   | 0.32874 | 0.4434  |
|            | 0.32874         | 0.4434      | 0.32874 | 0.32874     | 0.69359603  |          |         |         |
| PAICSP4    | ENSG00000254244 | 0.44339     | 0.32874 | 0.32874     | 0.44339     | 0.32874  | 0.32874 | 0.44339 |
|            | 0.32874         | 0.44339     | 0.32874 | 0.32874     | 0.69359603  |          |         |         |
| LINC01505  | ENSG00000234323 | -0.37266    | 0.6453  | -0.48753    | 0.68706     | -0.98259 |         |         |
|            | 0.8371          | 0.44338     | 0.32875 | 0.32875     | 0.69359603  |          |         |         |
| PSG5       | ENSG00000204941 | 0.18724     | 0.42574 | -0.17763    | 0.57049     | 0.18532  | 0.42649 |         |
|            | 0.44327         | 0.32879     | 0.32879 | 0.69362036  |             |          |         |         |
| MIR194-2HG | ENSG00000229719 | 0.44326     | 0.32879 | -0.53492    | 0.70365     | -0.23482 |         |         |
|            | 0.59283         | -0.23482    | 0.59283 | 0.32879     | 0.69362036  |          |         |         |
| NA         | ENSG00000276486 | -0.89459    | 0.8145  | 0.44318     | 0.32882     | 0.44318  | 0.32882 |         |
|            | -0.83309        | 0.7976      | 0.32882 | 0.693653619 |             |          |         |         |
| NA         | ENSG00000202255 | 0.44309     | 0.32885 | 0.44309     | 0.32885     | 0.44309  | 0.32885 |         |
|            | 0.44309         | 0.32885     | 0.32885 | 0.693686875 |             |          |         |         |
| LILRA2     | ENSG00000239998 | 0.44299     | 0.32889 | -0.063545   | 0.52533     | 0.17098  |         |         |
|            | 0.43212         | 0.30404     | 0.38055 | 0.32889     | 0.693723061 |          |         |         |
| NA         | ENSG00000200377 | 0.44281     | 0.32895 | -0.39723    | 0.6544      | -0.20226 | 0.58014 |         |
|            | 0.44281         | 0.32895     | 0.32895 | 0.693723061 |             |          |         |         |
| RPL23AP20  | ENSG00000235990 | -2.2165     | 0.98667 | -0.20064    | 0.57951     | -0.43251 |         |         |
|            | 0.66731         | 0.44278     | 0.32896 | 0.32896     | 0.693723061 |          |         |         |
| DM1-AS     | ENSG00000267395 | 0.44273     | 0.32898 | 0.44273     | 0.32898     | 0.44273  |         |         |
|            | 0.32898         | 0.44273     | 0.32898 | 0.32898     | 0.693723061 |          |         |         |
| NA         | ENSG00000212254 | 0.44269     | 0.329   | 0.44269     | 0.329       | 0.44269  | 0.329   | 0.329   |
|            | 0.329           | 0.693723061 |         |             |             |          |         |         |
| NANP       | ENSG00000170191 | 0.078824    | 0.46859 | 0.078824    | 0.46859     | 0.44266  | 0.32901 |         |
|            | -1.3495         | 0.91141     | 0.32901 | 0.693723061 |             |          |         |         |
| MIR5007    | ENSG00000264387 | 0.44259     | 0.32903 | 0.44259     | 0.32903     | 0.44259  |         |         |
|            | 0.32903         | 0.44259     | 0.32903 | 0.32903     | 0.693723061 |          |         |         |
| NA         | ENSG00000270132 | 0.44259     | 0.32903 | 0.44259     | 0.32903     | 0.44259  | 0.32903 |         |
|            | 0.44259         | 0.32903     | 0.32903 | 0.693723061 |             |          |         |         |
| ARHGEF34P  | ENSG00000204959 | -0.65582    | 0.74403 | -1.0868     | 0.86143     | 0.44249  |         |         |
|            | 0.32907         | -1.0756     | 0.85896 | 0.32907     | 0.693723061 |          |         |         |
| SAMD5      | ENSG00000203727 | -0.1092     | 0.54348 | 0.44246     | 0.32908     | 0.2246   | 0.41115 |         |
|            | -0.21741        | 0.58606     | 0.32908 | 0.693723061 |             |          |         |         |
| LINC02270  | ENSG00000251210 | 0.44241     | 0.3291  | -0.59572    | 0.72432     | -0.51412 |         |         |
|            | 0.69641         | -0.11481    | 0.5457  | 0.3291      | 0.693723061 |          |         |         |
| NA         | ENSG00000224297 | 0.44235     | 0.32912 | 0.44235     | 0.32912     | 0.44235  | 0.32912 |         |
|            | 0.44235         | 0.32912     | 0.32912 | 0.693723061 |             |          |         |         |
| TXNL1P1    | ENSG00000231879 | 0.44233     | 0.32913 | -0.20503    | 0.58123     | -0.5218  |         |         |
|            | 0.69909         | 0.44233     | 0.32913 | 0.32913     | 0.693723061 |          |         |         |
| NA         | ENSG00000259955 | 0.4423      | 0.32914 | 0.4423      | 0.32914     | 0.4423   | 0.32914 |         |
|            | 0.4423          | 0.32914     | 0.32914 | 0.693723061 |             |          |         |         |
| PLA2R1     | ENSG00000153246 | -0.90887    | 0.81829 | -0.6439     | 0.74018     | 0.44226  |         |         |
|            | 0.32915         | -1.0061     | 0.84282 | 0.32915     | 0.693723061 |          |         |         |
| OR8K5      | ENSG00000181752 | 0.44225     | 0.32915 | 0.44225     | 0.32915     | 0.44225  | 0.32915 |         |
|            | 0.44225         | 0.32915     | 0.32915 | 0.693723061 |             |          |         |         |
| NA         | ENSG00000229949 | 0.44226     | 0.32915 | 0.44226     | 0.32915     | 0.44226  | 0.32915 |         |
|            | 0.44226         | 0.32915     | 0.32915 | 0.693723061 |             |          |         |         |
| RN7SL149P  | ENSG00000241834 | -0.032443   | 0.51294 | -0.10678    | 0.54252     | 0.44227  |         |         |
|            | 0.32915         | 0.04        | 0.48405 | 0.32915     | 0.693723061 |          |         |         |
| MIR548X    | ENSG00000265841 | 0.44226     | 0.32915 | 0.44226     | 0.32915     | 0.44226  |         |         |
|            | 0.32915         | 0.44226     | 0.32915 | 0.32915     | 0.693723061 |          |         |         |
| KRTAP4-1   | ENSG00000198443 | 0.44223     | 0.32916 | 0.44223     | 0.32916     | 0.44223  |         |         |
|            | 0.32916         | 0.44223     | 0.32916 | 0.32916     | 0.693723061 |          |         |         |
| LNCsRLR    | ENSG00000240032 | 0.44212     | 0.3292  | 0.44212     | 0.3292      | 0.44212  |         |         |
|            | 0.3292          | 0.44212     | 0.3292  | 0.3292      | 0.693723061 |          |         |         |
| NA         | ENSG00000278905 | 0.44207     | 0.32922 | 0.44207     | 0.32922     | 0.44207  | 0.32922 |         |
|            | 0.44207         | 0.32922     | 0.32922 | 0.693723061 |             |          |         |         |
| NA         | ENSG00000238646 | 0.44207     | 0.32922 | 0.44207     | 0.32922     | 0.44207  | 0.32922 |         |
|            | 0.44207         | 0.32922     | 0.32922 | 0.693723061 |             |          |         |         |
| ZNF676     | ENSG00000196109 | 0.44202     | 0.32924 | -1.1501     | 0.87496     | 0.064136 |         |         |

|           |                 |          |             |             |             |          |         |
|-----------|-----------------|----------|-------------|-------------|-------------|----------|---------|
|           | 0.47443         | -0.18799 | 0.57456     | 0.32924     | 0.693723061 |          |         |
| NA        | ENSG00000263388 | 0.44201  | 0.32924     | 0.44201     | 0.32924     | 0.44201  | 0.32924 |
|           | 0.44201         | 0.32924  | 0.32924     | 0.693723061 |             |          |         |
| SPN       | ENSG00000197471 | -0.27777 | 0.60941     | 0.22177     | 0.41224     | 0.028948 | 0.48845 |
|           | 0.44197         | 0.32926  | 0.32926     | 0.693723061 |             |          |         |
| NA        | ENSG00000279433 | 0.44194  | 0.32927     | 0.27978     | 0.38982     | 0.44194  | 0.32927 |
|           | 0.44194         | 0.32927  | 0.32927     | 0.693723061 |             |          |         |
| RPSAP65   | ENSG00000223683 | 0.4419   | 0.32928     | 0.4419      | 0.32928     | 0.4419   |         |
|           | 0.32928         | 0.4419   | 0.32928     | 0.32928     | 0.693723061 |          |         |
| NA        | ENSG00000221696 | 0.4419   | 0.32928     | 0.4419      | 0.32928     | -1.7551  | 0.96038 |
|           | 0.4419          | 0.32928  | 0.32928     | 0.693723061 |             |          |         |
| ST7L      | ENSG00000007341 | -0.82789 | 0.79613     | 0.44185     | 0.3293      | -0.82789 | 0.79613 |
|           | -0.82789        | 0.79613  | 0.3293      | 0.693735204 |             |          |         |
| OTUD6B    | ENSG00000155100 | 0.44174  | 0.32934     | 0.26033     | 0.3973      | 0.30389  |         |
|           | 0.3806          | 0.025038 | 0.49001     | 0.32934     | 0.693759486 |          |         |
| NA        | ENSG00000257408 | -0.4719  | 0.6815      | 0.44174     | 0.32934     | -1.4615  | 0.92807 |
|           | -1.0062         | 0.84283  | 0.32934     | 0.693759486 |             |          |         |
| KIRREL2   | ENSG00000126259 | 0.44169  | 0.32936     | 0.44169     | 0.32936     | 0.44169  |         |
|           | 0.32936         | 0.44169  | 0.32936     | 0.32936     | 0.693771626 |          |         |
| MIR4310   | ENSG00000264850 | 0.44164  | 0.32938     | 0.44164     | 0.32938     | 0.44164  |         |
|           | 0.32938         | 0.44164  | 0.32938     | 0.32938     | 0.693779483 |          |         |
| NA        | ENSG00000263887 | -0.49202 | 0.68865     | -0.72749    | 0.76654     | 0.44146  | 0.32944 |
|           | -1.4773         | 0.9302   | 0.32944     | 0.693779483 |             |          |         |
| NA        | ENSG00000225704 | 0.44143  | 0.32945     | 0.44143     | 0.32945     | 0.44143  | 0.32945 |
|           | 0.44143         | 0.32945  | 0.32945     | 0.693779483 |             |          |         |
| RNF148    | ENSG00000235631 | 0.44139  | 0.32946     | 0.44139     | 0.32946     | 0.44139  |         |
|           | 0.32946         | 0.44139  | 0.32946     | 0.32946     | 0.693779483 |          |         |
| TNNT3     | ENSG00000130595 | -0.13896 | 0.55526     | -0.25377    | 0.60016     | -0.70795 | 0.76051 |
|           | 0.44134         | 0.32948  | 0.32948     | 0.693779483 |             |          |         |
| BAAT      | ENSG00000136881 | -0.9361  | 0.82539     | 0.44133     | 0.32949     | -0.23049 | 0.59114 |
|           | 0.44133         | 0.32949  | 0.32949     | 0.693779483 |             |          |         |
| NA        | ENSG00000255104 | 0.44133  | 0.32949     | 0.44133     | 0.32949     | 0.44133  | 0.32949 |
|           | 0.44133         | 0.32949  | 0.32949     | 0.693779483 |             |          |         |
| RNA5SP37  | ENSG00000252816 | 0.44125  | 0.32952     | 0.44125     | 0.32952     | 0.44125  |         |
|           | 0.32952         | 0.44125  | 0.32952     | 0.32952     | 0.693779483 |          |         |
| NA        | ENSG00000271149 | 0.44123  | 0.32952     | 0.44123     | 0.32952     | 0.44123  | 0.32952 |
|           | 0.44123         | 0.32952  | 0.32952     | 0.693779483 |             |          |         |
| TGFA      | ENSG00000163235 | 0.056575 | 0.47744     | -0.78572    | 0.78398     | -0.59682 | 0.72469 |
|           | 0.44115         | 0.32955  | 0.32955     | 0.693779483 |             |          |         |
| ABCC6P2   | ENSG00000255277 | 0.44112  | 0.32956     | -1.4298     | 0.92361     | -0.19909 |         |
|           | 0.57891         | 0.29717  | 0.38317     | 0.32956     | 0.693779483 |          |         |
| NA        | ENSG00000276691 | 0.44113  | 0.32956     | 0.44113     | 0.32956     | 0.44113  | 0.32956 |
|           | 0.44113         | 0.32956  | 0.32956     | 0.693779483 |             |          |         |
| TPM4      | ENSG00000167460 | -1.1518  | 0.8753      | -1.0705     | 0.85781     | -0.38036 | 0.64816 |
|           | 0.4411          | 0.32957  | 0.32957     | 0.693779483 |             |          |         |
| ALDH1A1   | ENSG00000165092 | -0.0341  | 0.5136      | 0.44104     | 0.32959     | -0.51632 |         |
|           | 0.69719         | 0.44104  | 0.32959     | 0.32959     | 0.693779483 |          |         |
| RPS23P10  | ENSG00000224203 | 0.44103  | 0.32959     | -0.23843    | 0.59423     | -0.69368 |         |
|           | 0.75606         | -0.23843 | 0.59423     | 0.32959     | 0.693779483 |          |         |
| RPL34P34  | ENSG00000236312 | 0.44101  | 0.3296      | -0.12516    | 0.5498      | -0.30273 |         |
|           | 0.61895         | -0.12516 | 0.5498      | 0.3296      | 0.693779483 |          |         |
| IGSF8     | ENSG00000162729 | -1.1793  | 0.88087     | 0.44098     | 0.32961     | -0.17211 | 0.56833 |
|           | -1.4755         | 0.92996  | 0.32961     | 0.693779483 |             |          |         |
| ATP5MC1P5 | ENSG00000227590 | 0.44097  | 0.32962     | 0.44097     | 0.32962     | 0.44097  |         |
|           | 0.32962         | 0.44097  | 0.32962     | 0.32962     | 0.693779483 |          |         |
| GMNN      | ENSG00000112312 | 0.407    | 0.342       | -0.12698    | 0.55052     | -0.30215 | 0.61873 |
|           | 0.32968         | 0.32968  | 0.693816092 |             |             |          |         |
| NA        | ENSG00000228874 | 0.38586  | 0.3498      | 0.40175     | 0.34394     | 0.44078  | 0.32968 |
|           | 0.44078         | 0.32968  | 0.32968     | 0.693816092 |             |          |         |
| IL21R-AS1 | ENSG00000259954 | 0.44071  | 0.32971     | 0.44071     | 0.32971     | 0.44071  |         |
|           | 0.32971         | 0.44071  | 0.32971     | 0.32971     | 0.693816092 |          |         |
| OOEP      | ENSG00000203907 | 0.44065  | 0.32973     | 0.44065     | 0.32973     | 0.44065  | 0.32973 |

|          |                 |          |         |             |             |          |         |  |
|----------|-----------------|----------|---------|-------------|-------------|----------|---------|--|
|          | 0.44065         | 0.32973  | 0.32973 | 0.693816092 |             |          |         |  |
| PPIP5K2  | ENSG00000145725 | 0.20723  | 0.41791 | 0.38256     | 0.35102     | 0.44059  |         |  |
|          | 0.32975         | 0.20723  | 0.41791 | 0.32975     | 0.693816092 |          |         |  |
| PDE9A    | ENSG00000160191 | -0.1437  | 0.55713 | -0.22191    | 0.58781     | 0.44059  | 0.32976 |  |
|          | -0.86651        | 0.8069   | 0.32976 | 0.693816092 |             |          |         |  |
| NA       | ENSG00000235888 | -0.4913  | 0.68839 | -1.4423     | 0.9254      | 0.44059  | 0.32976 |  |
|          | -1.2868         | 0.90092  | 0.32976 | 0.693816092 |             |          |         |  |
| EXOC6B   | ENSG00000144036 | 0.44052  | 0.32978 | -0.4362     | 0.66865     | -0.23189 |         |  |
|          | 0.59169         | -0.11524 | 0.54587 | 0.32978     | 0.693816092 |          |         |  |
| PRIM1    | ENSG00000198056 | -0.42697 | 0.6653  | -0.92194    | 0.82172     | 0.44046  | 0.3298  |  |
|          | -0.37442        | 0.64595  | 0.3298  | 0.693816092 |             |          |         |  |
| NA       | ENSG00000250532 | -0.44275 | 0.67103 | 0.44042     | 0.32982     | -0.10092 | 0.54019 |  |
|          | -0.053312       | 0.52126  | 0.32982 | 0.693816092 |             |          |         |  |
| NA       | ENSG00000226334 | 0.13081  | 0.44796 | -0.43635    | 0.66871     | 0.44037  | 0.32984 |  |
|          | -0.43635        | 0.66871  | 0.32984 | 0.693816092 |             |          |         |  |
| NA       | ENSG00000255271 | -0.43949 | 0.66985 | -0.93647    | 0.82549     | 0.44033  | 0.32985 |  |
|          | -0.30507        | 0.61984  | 0.32985 | 0.693816092 |             |          |         |  |
| ACTR6    | ENSG00000075089 | -0.87489 | 0.80918 | -0.51897    | 0.69811     | -0.87489 | 0.80918 |  |
|          | 0.44027         | 0.32987  | 0.32987 | 0.693816092 |             |          |         |  |
| COX7C    | ENSG00000127184 | 0.44022  | 0.32989 | 0.44022     | 0.32989     | 0.44022  | 0.32989 |  |
|          | 0.44022         | 0.32989  | 0.32989 | 0.693816092 |             |          |         |  |
| NA       | ENSG00000263847 | 0.44019  | 0.3299  | 0.44019     | 0.3299      | 0.44019  | 0.3299  |  |
|          | 0.44019         | 0.3299   | 0.3299  | 0.693816092 |             |          |         |  |
| NA       | ENSG00000260375 | 0.44016  | 0.32991 | 0.44016     | 0.32991     | 0.44016  | 0.32991 |  |
|          | 0.44016         | 0.32991  | 0.32991 | 0.693816092 |             |          |         |  |
| NA       | ENSG00000266122 | 0.44016  | 0.32991 | 0.44016     | 0.32991     | 0.44016  | 0.32991 |  |
|          | 0.44016         | 0.32991  | 0.32991 | 0.693816092 |             |          |         |  |
| PDE12    | ENSG00000174840 | 0.44012  | 0.32992 | 0.10792     | 0.45703     | -0.19605 | 0.57771 |  |
|          | -0.011126       | 0.50444  | 0.32992 | 0.693816092 |             |          |         |  |
| NA       | ENSG00000255028 | 0.44012  | 0.32993 | -0.53752    | 0.70455     | -0.98846 | 0.83854 |  |
|          | -0.61986        | 0.73233  | 0.32993 | 0.693816092 |             |          |         |  |
| KHK      | ENSG00000138030 | 0.44004  | 0.32995 | 0.009087    | 0.49637     | -0.19237 | 0.57628 |  |
|          | -0.19599        | 0.57769  | 0.32995 | 0.693816092 |             |          |         |  |
| CRYZL1   | ENSG00000205758 | -0.55144 | 0.70933 | 0.2447      | 0.40334     | 0.43991  | 0.33    |  |
|          | -0.082733       | 0.53297  | 0.33    | 0.693816092 |             |          |         |  |
| CNN1     | ENSG00000130176 | -0.19784 | 0.57842 | -0.19784    | 0.57842     | -0.23945 | 0.59462 |  |
|          | 0.43986         | 0.33002  | 0.33002 | 0.693816092 |             |          |         |  |
| TDRP     | ENSG00000180190 | -1.1723  | 0.87947 | -0.70523    | 0.75967     | 0.43983  | 0.33003 |  |
|          | -0.84105        | 0.79984  | 0.33003 | 0.693816092 |             |          |         |  |
| MSANTD4  | ENSG00000170903 | 0.43974  | 0.33006 | 0.43974     | 0.33006     | 0.43974  |         |  |
|          | 0.33006         | 0.43974  | 0.33006 | 0.33006     | 0.693816092 |          |         |  |
| HCCAT5   | ENSG00000260880 | -0.40976 | 0.65901 | -0.40976    | 0.65901     | -1.3869  |         |  |
|          | 0.91726         | 0.43966  | 0.33009 | 0.33009     | 0.693816092 |          |         |  |
| NA       | ENSG00000259290 | 0.43958  | 0.33012 | -0.28674    | 0.61284     | 0.14654  | 0.44175 |  |
|          | -1.7046         | 0.95586  | 0.33012 | 0.693816092 |             |          |         |  |
| SEC22A   | ENSG00000121542 | 0.43956  | 0.33013 | -0.36921    | 0.64401     | -0.19818 |         |  |
|          | 0.57855         | -0.43296 | 0.66748 | 0.33013     | 0.693816092 |          |         |  |
| ADGRV1   | ENSG00000164199 | -0.61036 | 0.72919 | 0.43949     | 0.33015     | 0.28052  |         |  |
|          | 0.38954         | -0.66562 | 0.74717 | 0.33015     | 0.693816092 |          |         |  |
| NA       | ENSG00000215993 | -0.9268  | 0.82299 | -1.862      | 0.9687      | 0.43946  | 0.33016 |  |
|          | -1.3884         | 0.9175   | 0.33016 | 0.693816092 |             |          |         |  |
| NA       | ENSG00000264811 | 0.43944  | 0.33017 | 0.43944     | 0.33017     | 0.43944  | 0.33017 |  |
|          | 0.43944         | 0.33017  | 0.33017 | 0.693816092 |             |          |         |  |
| SLC25A31 | ENSG00000151475 | -0.73599 | 0.76913 | 0.43941     | 0.33018     | -1.1646  |         |  |
|          | 0.87791         | -0.57453 | 0.7172  | 0.33018     | 0.693816092 |          |         |  |
| NA       | ENSG00000202368 | 0.43938  | 0.33019 | -2.2731     | 0.98849     | -1.0057  | 0.84271 |  |
|          | -1.6074         | 0.94601  | 0.33019 | 0.693816092 |             |          |         |  |
| GLB1     | ENSG00000170266 | -1.2131  | 0.88745 | 0.093666    | 0.46269     | -0.45059 | 0.67386 |  |
|          | 0.43932         | 0.33021  | 0.33021 | 0.693816092 |             |          |         |  |
| NANOGP3  | ENSG00000271373 | 0.4393   | 0.33022 | 0.4393      | 0.33022     | 0.4393   |         |  |
|          | 0.33022         | 0.4393   | 0.33022 | 0.33022     | 0.693816092 |          |         |  |
| AREL1    | ENSG00000119682 | -1.1843  | 0.88185 | -0.61016    | 0.72912     | -0.61016 | 0.72912 |  |

|           |                 |           |         |             |             |           |         |         |
|-----------|-----------------|-----------|---------|-------------|-------------|-----------|---------|---------|
|           | 0.43923         | 0.33025   | 0.33025 | 0.693816092 |             |           |         |         |
| MORN2     | ENSG00000188010 | 0.43923   | 0.33025 | 0.33025     | 0.43923     | 0.33025   | 0.43923 | 0.33025 |
|           | 0.43923         | 0.33025   | 0.33025 | 0.693816092 |             |           |         |         |
| LKAAEAR1  | ENSG00000171695 | 0.43919   | 0.33026 | 0.33026     | 0.43919     | 0.33026   | 0.43919 |         |
|           | 0.33026         | 0.43919   | 0.33026 | 0.33026     | 0.693816092 |           |         |         |
| NA        | ENSG00000232359 | 0.43921   | 0.33026 | 0.33026     | 0.34201     | 0.36617   | 0.43921 | 0.33026 |
|           | 0.43921         | 0.33026   | 0.33026 | 0.693816092 |             |           |         |         |
| MIR548F1  | ENSG00000221594 | 0.43916   | 0.33027 | 0.33027     | 0.43916     | 0.33027   | 0.43916 |         |
|           | 0.33027         | 0.43916   | 0.33027 | 0.33027     | 0.693816092 |           |         |         |
| ENPP6     | ENSG00000164303 | 0.43914   | 0.33028 | 0.33028     | 0.091104    | 0.4637    | -1.4412 | 0.92524 |
|           | -0.52718        | 0.70097   | 0.33028 | 0.693816092 |             |           |         |         |
| NA        | ENSG00000222395 | 0.43915   | 0.33028 | 0.33028     | -0.71164    | 0.76166   | 0.43915 | 0.33028 |
|           | 0.43915         | 0.33028   | 0.33028 | 0.693816092 |             |           |         |         |
| NA        | ENSG00000212626 | -0.55853  | 0.71176 | 0.43901     | 0.33033     | -0.55853  | 0.71176 |         |
|           | -0.55853        | 0.71176   | 0.33033 | 0.693816092 |             |           |         |         |
| TMEM98    | ENSG00000006042 | 0.43895   | 0.33035 | -0.052415   | 0.5209      | 0.15759   |         |         |
|           | 0.43739         | 0.15759   | 0.43739 | 0.33035     | 0.693816092 |           |         |         |
| LINC01614 | ENSG00000230838 | 0.43892   | 0.33036 | 0.43892     | 0.33036     | 0.43892   |         |         |
|           | 0.33036         | 0.43892   | 0.33036 | 0.33036     | 0.693816092 |           |         |         |
| NA        | ENSG00000227169 | -0.5912   | 0.72281 | 0.43885     | 0.33038     | 0.26813   | 0.3943  |         |
|           | -1.1173         | 0.86807   | 0.33038 | 0.693816092 |             |           |         |         |
| KIZ       | ENSG00000088970 | -0.24579  | 0.59708 | -1.3622     | 0.91343     | -0.10015  | 0.53989 |         |
|           | 0.43882         | 0.3304    | 0.3304  | 0.693816092 |             |           |         |         |
| ATXN1L    | ENSG00000224470 | 0.43875   | 0.33042 | 0.43875     | 0.33042     | 0.43875   |         |         |
|           | 0.33042         | 0.43875   | 0.33042 | 0.33042     | 0.693816092 |           |         |         |
| NDUFS5P4  | ENSG00000251437 | -0.77993  | 0.78228 | 0.43874     | 0.33042     | -0.11673  |         |         |
|           | 0.54646         | -0.15959  | 0.5634  | 0.33042     | 0.693816092 |           |         |         |
| CAPG      | ENSG00000042493 | -0.21435  | 0.58486 | 0.19815     | 0.42146     | 0.43873   | 0.33043 |         |
|           | 0.11411         | 0.45457   | 0.33043 | 0.693816092 |             |           |         |         |
| NA        | ENSG00000231251 | 0.43867   | 0.33045 | -1.6128     | 0.9466      | -1.7377   | 0.95887 |         |
|           | -0.91314        | 0.81942   | 0.33045 | 0.693816092 |             |           |         |         |
| CARS2     | ENSG00000134905 | -0.47303  | 0.6819  | 0.4386      | 0.33047     | -0.77861  | 0.7819  |         |
|           | -0.54986        | 0.70879   | 0.33047 | 0.693816092 |             |           |         |         |
| UGT1A7    | ENSG00000244122 | -0.29056  | 0.61431 | 0.43861     | 0.33047     | -0.29677  |         |         |
|           | 0.61668         | -0.076444 | 0.53047 | 0.33047     | 0.693816092 |           |         |         |
| NA        | ENSG00000270679 | 0.43862   | 0.33047 | 0.43862     | 0.33047     | 0.43862   | 0.33047 |         |
|           | 0.43862         | 0.33047   | 0.33047 | 0.693816092 |             |           |         |         |
| NA        | ENSG00000228719 | 0.39129   | 0.34779 | 0.43853     | 0.3305      | -1.0464   | 0.85232 |         |
|           | -0.27827        | 0.6096    | 0.3305  | 0.693816092 |             |           |         |         |
| ELL2P3    | ENSG00000234765 | 0.43855   | 0.3305  | 0.43855     | 0.3305      | 0.43855   |         |         |
|           | 0.3305          | 0.43855   | 0.3305  | 0.3305      | 0.693816092 |           |         |         |
| PHKG1     | ENSG00000164776 | 0.15016   | 0.44032 | -0.26699    | 0.60526     | -0.21571  | 0.58539 |         |
|           | 0.43848         | 0.33052   | 0.33052 | 0.693816092 |             |           |         |         |
| NA        | ENSG00000232993 | 0.43835   | 0.33057 | 0.43835     | 0.33057     | 0.43835   | 0.33057 |         |
|           | 0.43835         | 0.33057   | 0.33057 | 0.693816092 |             |           |         |         |
| NA        | ENSG00000234648 | 0.43834   | 0.33057 | 0.43834     | 0.33057     | 0.43834   | 0.33057 |         |
|           | 0.43834         | 0.33057   | 0.33057 | 0.693816092 |             |           |         |         |
| RBBP9     | ENSG00000089050 | 0.4383    | 0.33058 | 0.4383      | 0.33058     | 0.4383    | 0.33058 |         |
|           | 0.4383          | 0.33058   | 0.33058 | 0.693816092 |             |           |         |         |
| RN7SL828P | ENSG00000272075 | -0.76422  | 0.77763 | 0.43832     | 0.33058     | -1.0464   |         |         |
|           | 0.85231         | 0.43832   | 0.33058 | 0.33058     | 0.693816092 |           |         |         |
| HES2      | ENSG00000069812 | 0.43828   | 0.33059 | 0.43828     | 0.33059     | 0.43828   | 0.33059 |         |
|           | 0.068118        | 0.47285   | 0.33059 | 0.693816092 |             |           |         |         |
| CCDC15    | ENSG00000149548 | 0.0080419 | 0.49679 | 0.4383      | 0.33059     | -0.032193 |         |         |
|           | 0.51284         | -0.14769  | 0.55871 | 0.33059     | 0.693816092 |           |         |         |
| ATE1-AS1  | ENSG00000226864 | 0.2199    | 0.41297 | 0.2199      | 0.41297     | 0.074392  |         |         |
|           | 0.47035         | 0.43828   | 0.33059 | 0.33059     | 0.693816092 |           |         |         |
| ENO3      | ENSG00000108515 | 0.43825   | 0.3306  | 0.43825     | 0.3306      | 0.43825   | 0.3306  |         |
|           | -1.0635         | 0.85622   | 0.3306  | 0.693816092 |             |           |         |         |
| MCEMP1    | ENSG00000183019 | 0.43817   | 0.33063 | 0.43817     | 0.33063     | 0.43817   |         |         |
|           | 0.33063         | 0.43817   | 0.33063 | 0.33063     | 0.693816092 |           |         |         |
| SPATA8    | ENSG00000185594 | 0.43812   | 0.33065 | 0.43812     | 0.33065     | 0.43812   |         |         |

|           |                 |             |         |             |             |           |         |  |
|-----------|-----------------|-------------|---------|-------------|-------------|-----------|---------|--|
|           | 0.33065         | 0.43812     | 0.33065 | 0.33065     | 0.693816092 |           |         |  |
| RAB11FIP1 | ENSG00000156675 | -1.0227     | 0.84677 | -0.25429    | 0.60036     | -0.14935  |         |  |
|           | 0.55936         | 0.43808     | 0.33066 | 0.33066     | 0.693816092 |           |         |  |
| NA        | ENSG00000266385 | 0.43809     | 0.33066 | 0.43809     | 0.33066     | 0.43809   | 0.33066 |  |
|           | 0.43809         | 0.33066     | 0.33066 | 0.693816092 |             |           |         |  |
| ITGBL1    | ENSG00000198542 | 0.14778     | 0.44126 | 0.43801     | 0.33069     | 0.14778   |         |  |
|           | 0.44126         | -0.42489    | 0.66454 | 0.33069     | 0.693816092 |           |         |  |
| NA        | ENSG00000230617 | 0.43803     | 0.33069 | 0.43803     | 0.33069     | 0.43803   | 0.33069 |  |
|           | 0.33069         | 0.693816092 |         |             |             |           |         |  |
| NA        | ENSG00000230298 | 0.32898     | 0.37108 | 0.43792     | 0.33072     | -1.0332   | 0.84925 |  |
|           | 0.43792         | 0.33072     | 0.33072 | 0.693816092 |             |           |         |  |
| NA        | ENSG00000258460 | -0.12444    | 0.54952 | -0.47202    | 0.68155     | 0.43791   | 0.33073 |  |
|           | -0.76686        | 0.77842     | 0.33073 | 0.693816092 |             |           |         |  |
| SF3B1     | ENSG00000115524 | 0.068234    | 0.4728  | 0.17677     | 0.42984     | 0.43783   | 0.33075 |  |
|           | -0.72532        | 0.76587     | 0.33075 | 0.693816092 |             |           |         |  |
| TAF1D     | ENSG00000166012 | 0.43785     | 0.33075 | 0.16853     | 0.43308     | 0.12905   | 0.44866 |  |
|           | 0.16853         | 0.43308     | 0.33075 | 0.693816092 |             |           |         |  |
| LYG1      | ENSG00000144214 | -0.52281    | 0.69945 | -0.18981    | 0.57527     | 0.43077   | 0.33332 |  |
|           | 0.43781         | 0.33076     | 0.33076 | 0.693816092 |             |           |         |  |
| NA        | ENSG00000280284 | 0.43781     | 0.33076 | 0.43781     | 0.33076     | 0.43781   | 0.33076 |  |
|           | -0.41644        | 0.66145     | 0.33076 | 0.693816092 |             |           |         |  |
| PPARD     | ENSG00000112033 | 0.12196     | 0.45146 | 0.43756     | 0.33085     | 0.20165   | 0.4201  |  |
|           | 0.060305        | 0.47596     | 0.33085 | 0.693816092 |             |           |         |  |
| CLDN16    | ENSG00000113946 | -0.30751    | 0.62077 | -0.78066    | 0.7825      | 0.43648   |         |  |
|           | 0.33124         | 0.43758     | 0.33085 | 0.33085     | 0.693816092 |           |         |  |
| TSPAN13   | ENSG00000106537 | -0.72183    | 0.7648  | 0.43751     | 0.33087     | 0.43751   |         |  |
|           | 0.33087         | 0.43751     | 0.33087 | 0.33087     | 0.693816092 |           |         |  |
| RN7SL659P | ENSG00000244104 | 0.43752     | 0.33087 | 0.43752     | 0.33087     | 0.43752   |         |  |
|           | 0.33087         | 0.43752     | 0.33087 | 0.33087     | 0.693816092 |           |         |  |
| RCC1      | ENSG00000180198 | 0.43749     | 0.33088 | 0.43749     | 0.33088     | 0.41326   | 0.33971 |  |
|           | 0.43749         | 0.33088     | 0.33088 | 0.693816092 |             |           |         |  |
| NDN       | ENSG00000182636 | -0.75713    | 0.77552 | -0.32902    | 0.62893     | -0.43577  | 0.6685  |  |
|           | 0.43749         | 0.33088     | 0.33088 | 0.693816092 |             |           |         |  |
| NA        | ENSG00000245975 | 0.22751     | 0.41001 | 0.43749     | 0.33088     | 0.22751   | 0.41001 |  |
|           | 0.22751         | 0.41001     | 0.33088 | 0.693816092 |             |           |         |  |
| OR4D6     | ENSG00000166884 | 0.43743     | 0.3309  | 0.43743     | 0.3309      | 0.43743   | 0.3309  |  |
|           | 0.43743         | 0.3309      | 0.3309  | 0.693816092 |             |           |         |  |
| DDX43     | ENSG00000080007 | -0.11751    | 0.54677 | -0.11751    | 0.54677     | 0.4374    | 0.33091 |  |
|           | 0.086727        | 0.46544     | 0.33091 | 0.693816092 |             |           |         |  |
| CCNHP1    | ENSG00000251433 | -0.30723    | 0.62067 | -0.30723    | 0.62067     | -0.30723  |         |  |
|           | 0.62067         | 0.43738     | 0.33092 | 0.33092     | 0.693816092 |           |         |  |
| PACRG-AS2 | ENSG00000225437 | 0.20525     | 0.41869 | 0.20525     | 0.41869     | 0.43734   |         |  |
|           | 0.33093         | -0.083647   | 0.53333 | 0.33093     | 0.693816092 |           |         |  |
| DEFA6     | ENSG00000164822 | 0.43733     | 0.33094 | -0.60093    | 0.72606     | 0.39623   | 0.34597 |  |
|           | -1.1416         | 0.87319     | 0.33094 | 0.693816092 |             |           |         |  |
| NA        | ENSG00000229109 | -0.41682    | 0.66159 | -0.58634    | 0.72118     | 0.43731   | 0.33094 |  |
|           | -0.1306         | 0.55195     | 0.33094 | 0.693816092 |             |           |         |  |
| SNORD36C  | ENSG00000252542 | 0.43732     | 0.33094 | 0.43732     | 0.33094     | 0.43732   |         |  |
|           | 0.33094         | 0.43732     | 0.33094 | 0.33094     | 0.693816092 |           |         |  |
| C17orf77  | ENSG00000182352 | 0.1338      | 0.44678 | 0.2964      | 0.38346     | 0.1338    |         |  |
|           | 0.44678         | 0.43727     | 0.33096 | 0.33096     | 0.693816092 |           |         |  |
| CRYGD     | ENSG00000118231 | -0.4865     | 0.6867  | 0.4372      | 0.33098     | -0.092369 | 0.5368  |  |
|           | 0.4372          | 0.33098     | 0.33098 | 0.693816092 |             |           |         |  |
| RPL23AP85 | ENSG00000224980 | -0.50986    | 0.69493 | 0.4372      | 0.33098     | -0.50986  |         |  |
|           | 0.69493         | -0.50986    | 0.69493 | 0.33098     | 0.693816092 |           |         |  |
| NA        | ENSG00000229886 | -0.073323   | 0.52923 | -0.25967    | 0.60244     | 0.43718   | 0.33099 |  |
|           | -0.43213        | 0.66718     | 0.33099 | 0.693816092 |             |           |         |  |
| NA        | ENSG00000250608 | 0.43718     | 0.33099 | 0.034882    | 0.48609     | 0.42505   | 0.3354  |  |
|           | 0.18778         | 0.42553     | 0.33099 | 0.693816092 |             |           |         |  |
| MIR670    | ENSG00000211568 | 0.43697     | 0.33107 | -0.78825    | 0.78473     | -0.78825  |         |  |
|           | 0.78473         | -0.78825    | 0.78473 | 0.33107     | 0.693945709 |           |         |  |
| BDNF-AS   | ENSG00000245573 | 0.43686     | 0.33111 | -0.83355    | 0.79773     | -0.089883 |         |  |

|           |                 |           |         |             |             |           |         |         |
|-----------|-----------------|-----------|---------|-------------|-------------|-----------|---------|---------|
|           | 0.53581         | 0.010055  | 0.49599 | 0.33111     | 0.693945709 |           |         |         |
| RN7SL633P | ENSG00000240186 | 0.43678   | 0.33114 | 0.43678     | 0.33114     | 0.43678   | 0.33114 | 0.43678 |
|           | 0.33114         | 0.43678   | 0.33114 | 0.33114     | 0.693945709 |           |         |         |
| SLC35B3   | ENSG00000124786 | 0.43671   | 0.33116 | 0.43671     | 0.33116     | 0.43671   | 0.33116 | 0.43671 |
|           | 0.33116         | 0.43671   | 0.33116 | 0.33116     | 0.693945709 |           |         |         |
| NA        | ENSG00000250118 | -0.64     | 0.73891 | 0.43673     | 0.33116     | -0.7819   | 0.78286 |         |
|           | -0.7819         | 0.78286   | 0.33116 | 0.693945709 |             |           |         |         |
| NA        | ENSG00000212302 | 0.43668   | 0.33117 | 0.43668     | 0.33117     | -0.1381   | 0.55492 |         |
|           | -0.22885        | 0.59051   | 0.33117 | 0.693945709 |             |           |         |         |
| NA        | ENSG00000230990 | 0.37203   | 0.35494 | 0.42231     | 0.3364      | 0.43668   | 0.33117 |         |
|           | 0.36505         | 0.35754   | 0.33117 | 0.693945709 |             |           |         |         |
| NA        | ENSG00000234967 | -0.11636  | 0.54632 | -2.176      | 0.98522     | -0.11636  | 0.54632 |         |
|           | 0.4367          | 0.33117   | 0.33117 | 0.693945709 |             |           |         |         |
| RN7SKP5   | ENSG00000252854 | 0.43666   | 0.33118 | 0.43666     | 0.33118     | 0.43666   | 0.43666 |         |
|           | 0.33118         | 0.43666   | 0.33118 | 0.33118     | 0.693945709 |           |         |         |
| MAST4     | ENSG00000069020 | 0.43649   | 0.33124 | 0.25532     | 0.39924     | -0.14353  | 0.55707 |         |
|           | -0.4102         | 0.65917   | 0.33124 | 0.693993972 |             |           |         |         |
| LNX1-AS1  | ENSG00000250930 | -1.5223   | 0.93603 | -0.79944    | 0.78798     | -1.2892   |         |         |
|           | 0.90134         | 0.4365    | 0.33124 | 0.33124     | 0.693993972 |           |         |         |
| TYW1      | ENSG00000198874 | -0.53364  | 0.70321 | -0.43127    | 0.66686     | -0.66113  | 0.74573 |         |
|           | 0.43643         | 0.33126   | 0.33126 | 0.693993972 |             |           |         |         |
| NA        | ENSG00000243179 | 0.43645   | 0.33126 | 0.088323    | 0.46481     | 0.43645   | 0.33126 |         |
|           | 0.43645         | 0.33126   | 0.33126 | 0.693993972 |             |           |         |         |
| SGPP2     | ENSG00000163082 | 0.12797   | 0.44908 | 0.13188     | 0.44754     | 0.43637   | 0.33129 |         |
|           | -0.69843        | 0.75755   | 0.33129 | 0.694018098 |             |           |         |         |
| NA        | ENSG00000226465 | -0.061206 | 0.5244  | -1.2164     | 0.88808     | 0.43632   | 0.3313  |         |
|           | 0.15609         | 0.43798   | 0.3313  | 0.694018098 |             |           |         |         |
| SCRG1     | ENSG00000164106 | -0.098424 | 0.5392  | 0.43618     | 0.33135     | -0.037383 | 0.51491 |         |
|           | -0.48834        | 0.68734   | 0.33135 | 0.694084113 |             |           |         |         |
| OLIG3     | ENSG00000177468 | 0.43617   | 0.33136 | 0.43617     | 0.33136     | 0.43617   | 0.33136 |         |
|           | 0.43617         | 0.33136   | 0.33136 | 0.694084113 |             |           |         |         |
| RPL7AP8   | ENSG00000230507 | 0.41203   | 0.34016 | 0.43611     | 0.33138     | -0.099733 |         |         |
|           | 0.53972         | -0.36429  | 0.64218 | 0.33138     | 0.69409617  |           |         |         |
| CNGB3     | ENSG00000170289 | -0.83931  | 0.79935 | 0.43598     | 0.33142     | -0.27512  | 0.60839 |         |
|           | -0.032039       | 0.51278   | 0.33142 | 0.694096786 |             |           |         |         |
| NA        | ENSG00000223502 | 0.13738   | 0.44537 | 0.43598     | 0.33143     | 0.064684  | 0.47421 |         |
|           | -0.20262        | 0.58028   | 0.33143 | 0.694096786 |             |           |         |         |
| NA        | ENSG00000267268 | -0.71299  | 0.76207 | 0.43595     | 0.33144     | -0.67354  | 0.7497  |         |
|           | -0.46921        | 0.68054   | 0.33144 | 0.694096786 |             |           |         |         |
| RN7SKP294 | ENSG00000199640 | 0.43592   | 0.33145 | 0.43592     | 0.33145     | 0.43592   | 0.43592 |         |
|           | 0.33145         | 0.43592   | 0.33145 | 0.33145     | 0.694096786 |           |         |         |
| TEX37     | ENSG00000172073 | 0.43586   | 0.33147 | -0.40162    | 0.65602     | 0.43586   | 0.33147 |         |
|           | 0.43586         | 0.33147   | 0.33147 | 0.694096786 |             |           |         |         |
| LINC02403 | ENSG00000257541 | 0.22899   | 0.40944 | 0.22899     | 0.40944     | 0.22899   | 0.22899 |         |
|           | 0.40944         | 0.43586   | 0.33147 | 0.33147     | 0.694096786 |           |         |         |
| MMP14     | ENSG00000157227 | -1.0336   | 0.84935 | -0.036091   | 0.5144      | -1.0336   | 0.84935 |         |
|           | 0.43583         | 0.33148   | 0.33148 | 0.694096786 |             |           |         |         |
| OR7E4P    | ENSG00000255261 | -0.42629  | 0.66505 | -0.76264    | 0.77716     | 0.036164  |         |         |
|           | 0.48558         | 0.43571   | 0.33152 | 0.33152     | 0.69412089  |           |         |         |
| LINC01899 | ENSG00000265352 | 0.43573   | 0.33152 | -0.070234   | 0.528       | -0.15074  | 0.55991 |         |
|           | -0.29748        | 0.61695   | 0.33152 | 0.69412089  |             |           |         |         |
| RPL23AP93 | ENSG00000232873 | 0.25534   | 0.39923 | 0.43565     | 0.33155     | 0.38096   |         |         |
|           | 0.35162         | 0.16926   | 0.4328  | 0.33155     | 0.694153878 |           |         |         |
| CCDC146   | ENSG00000135205 | -0.50678  | 0.69384 | 0.43549     | 0.3316      | -0.079058 |         |         |
|           | 0.53151         | -0.091361 | 0.5364  | 0.3316      | 0.694211535 |           |         |         |
| TLK1P1    | ENSG00000226783 | 0.43545   | 0.33162 | -1.5736     | 0.94221     | -2.3216   |         |         |
|           | 0.98987         | -2.1475   | 0.98412 | 0.33162     | 0.694211535 |           |         |         |
| NA        | ENSG00000259398 | 0.40754   | 0.3418  | 0.43542     | 0.33163     | 0.40754   | 0.3418  |         |
|           | 0.40754         | 0.3418    | 0.33163 | 0.694211535 |             |           |         |         |
| NA        | ENSG00000282564 | 0.43538   | 0.33164 | 0.43538     | 0.33164     | 0.43538   | 0.33164 |         |
|           | 0.4097          | 0.34101   | 0.33164 | 0.694211535 |             |           |         |         |
| RPS26P48  | ENSG00000239438 | 0.43536   | 0.33165 | 0.43536     | 0.33165     | 0.43536   | 0.43536 |         |

|            |                 |           |         |             |             |            |         |  |
|------------|-----------------|-----------|---------|-------------|-------------|------------|---------|--|
|            | 0.33165         | 0.43536   | 0.33165 | 0.33165     | 0.694211535 |            |         |  |
| NA         | ENSG00000264131 | 0.43525   | 0.33169 | 0.43525     | 0.33169     | 0.43525    | 0.33169 |  |
|            | -0.049625       | 0.51979   | 0.33169 | 0.694211535 |             |            |         |  |
| LINC02634  | ENSG00000233200 | 0.037995  | 0.48485 | 0.037995    | 0.48485     | -1.009     |         |  |
|            | 0.84351         | 0.43521   | 0.3317  | 0.3317      | 0.694211535 |            |         |  |
| NA         | ENSG00000258539 | 0.43522   | 0.3317  | 0.43522     | 0.3317      | 0.43522    | 0.3317  |  |
|            | 0.43522         | 0.3317    | 0.3317  | 0.694211535 |             |            |         |  |
| CTNNA2     | ENSG00000066032 | -0.84294  | 0.80037 | -1.0806     | 0.86007     | -0.7157    |         |  |
|            | 0.76291         | 0.4352    | 0.33171 | 0.33171     | 0.694211535 |            |         |  |
| LINC02292  | ENSG00000258630 | -0.66822  | 0.748   | 0.43516     | 0.33172     | -0.66822   | 0.748   |  |
|            | -0.66822        | 0.748     | 0.33172 | 0.694211535 |             |            |         |  |
| CENPH      | ENSG00000153044 | 0.43495   | 0.3318  | 0.43495     | 0.3318      | 0.43495    | 0.3318  |  |
|            | -0.50107        | 0.69184   | 0.3318  | 0.694278029 |             |            |         |  |
| MIR431     | ENSG00000208001 | 0.43496   | 0.3318  | 0.43496     | 0.3318      | 0.43496    |         |  |
|            | 0.3318          | 0.43496   | 0.3318  | 0.3318      | 0.694278029 |            |         |  |
| NA         | ENSG00000273293 | 0.43494   | 0.3318  | 0.43494     | 0.3318      | 0.43494    | 0.3318  |  |
|            | 0.43494         | 0.3318    | 0.3318  | 0.694278029 |             |            |         |  |
| BABAM1     | ENSG00000105393 | 0.43486   | 0.33183 | -0.035827   | 0.51429     | 0.43486    |         |  |
|            | 0.33183         | 0.43486   | 0.33183 | 0.33183     | 0.694278029 |            |         |  |
| MASTL      | ENSG00000120539 | -0.78581  | 0.78401 | -1.0188     | 0.84585     | 0.43487    | 0.33183 |  |
|            | -0.12408        | 0.54937   | 0.33183 | 0.694278029 |             |            |         |  |
| NA         | ENSG00000258705 | 0.43478   | 0.33186 | 0.43478     | 0.33186     | 0.43478    | 0.33186 |  |
|            | 0.19329         | 0.42337   | 0.33186 | 0.694278029 |             |            |         |  |
| RNU2-36P   | ENSG00000222293 | -1.5416   | 0.93842 | -1.6731     | 0.95285     | -0.80457   |         |  |
|            | 0.78947         | 0.43477   | 0.33187 | 0.33187     | 0.694278029 |            |         |  |
| NA         | ENSG00000264296 | -0.046554 | 0.51857 | -0.2838     | 0.61172     | 0.0097149  | 0.49612 |  |
|            | 0.43475         | 0.33187   | 0.33187 | 0.694278029 |             |            |         |  |
| NA         | ENSG00000280321 | 0.43472   | 0.33188 | 0.43472     | 0.33188     | -0.0034275 | 0.50137 |  |
|            | 0.43472         | 0.33188   | 0.33188 | 0.694278029 |             |            |         |  |
| ABCC9      | ENSG00000069431 | -0.71924  | 0.764   | 0.43462     | 0.33192     | -0.3049    | 0.61978 |  |
|            | -1.248          | 0.89399   | 0.33192 | 0.6943319   |             |            |         |  |
| NA         | ENSG00000253607 | -0.43438  | 0.66799 | -0.30518    | 0.61989     | 0.37509    | 0.3538  |  |
|            | 0.43449         | 0.33197   | 0.33197 | 0.694406684 |             |            |         |  |
| RFXANK     | ENSG00000064490 | 0.43413   | 0.3321  | 0.43413     | 0.3321      | 0.43413    |         |  |
|            | 0.3321          | 0.43413   | 0.3321  | 0.3321      | 0.694639896 |            |         |  |
| NA         | ENSG00000212580 | 0.091001  | 0.46375 | -0.7403     | 0.77044     | 0.4341     | 0.33211 |  |
|            | 0.091001        | 0.46375   | 0.33211 | 0.694639896 |             |            |         |  |
| HNRNPA1P68 | ENSG00000230946 | -0.62897  | 0.73532 | 0.43404     | 0.33213     | -0.62897   |         |  |
|            | 0.73532         | -0.62897  | 0.73532 | 0.33213     | 0.694651912 |            |         |  |
| LINC01726  | ENSG00000280350 | 0.43398   | 0.33215 | 0.30149     | 0.38152     | 0.43398    |         |  |
|            | 0.33215         | 0.43398   | 0.33215 | 0.33215     | 0.694662147 |            |         |  |
| DMAP1      | ENSG00000178028 | 0.2892    | 0.38621 | -0.17714    | 0.5703      | 0.17137    | 0.43197 |  |
|            | 0.43391         | 0.33218   | 0.33218 | 0.694662147 |             |            |         |  |
| NA         | ENSG00000275431 | 0.4339    | 0.33218 | 0.4339      | 0.33218     | 0.4339     | 0.33218 |  |
|            | 0.4339          | 0.33218   | 0.33218 | 0.694662147 |             |            |         |  |
| CCL27      | ENSG00000213927 | 0.43381   | 0.33221 | 0.43381     | 0.33221     | 0.43381    | 0.33221 |  |
|            | 0.43381         | 0.33221   | 0.33221 | 0.694662147 |             |            |         |  |
| NA         | ENSG00000250250 | -0.83389  | 0.79783 | -0.83389    | 0.79783     | 0.43383    | 0.33221 |  |
|            | 0.37698         | 0.35309   | 0.33221 | 0.694662147 |             |            |         |  |
| NA         | ENSG00000219384 | 0.43375   | 0.33223 | 0.43375     | 0.33223     | 0.43375    | 0.33223 |  |
|            | 0.43375         | 0.33223   | 0.33223 | 0.694662147 |             |            |         |  |
| AK4P4      | ENSG00000223621 | 0.057197  | 0.47719 | 0.22182     | 0.41223     | 0.43371    | 0.33225 |  |
|            | 0.22182         | 0.41223   | 0.33225 | 0.694662147 |             |            |         |  |
| LINC01270  | ENSG00000203999 | 0.12689   | 0.44951 | 0.43369     | 0.33226     | -0.57807   |         |  |
|            | 0.71839         | -0.94208  | 0.82693 | 0.33226     | 0.694662147 |            |         |  |
| NA         | ENSG00000259591 | 0.43364   | 0.33228 | 0.43364     | 0.33228     | 0.43364    | 0.33228 |  |
|            | 0.43364         | 0.33228   | 0.33228 | 0.694662147 |             |            |         |  |
| NA         | ENSG00000269375 | 0.43357   | 0.3323  | 0.37939     | 0.3522      | -0.087422  | 0.53483 |  |
|            | -0.087422       | 0.53483   | 0.3323  | 0.694662147 |             |            |         |  |
| NA         | ENSG00000243378 | -0.54038  | 0.70553 | 0.43353     | 0.33232     | -0.014462  | 0.50577 |  |
|            | -0.54038        | 0.70553   | 0.33232 | 0.694662147 |             |            |         |  |
| SLC25A34   | ENSG00000162461 | 0.43345   | 0.33234 | 0.43345     | 0.33234     | 0.43345    |         |  |



|            |                 |           |         |             |             |           |         |  |
|------------|-----------------|-----------|---------|-------------|-------------|-----------|---------|--|
|            | 0.33234         | 0.43345   | 0.33234 | 0.33234     | 0.694662147 |           |         |  |
| MAPKAPK5P1 | ENSG00000224498 | 0.43346   | 0.33234 | -0.6821     | 0.75241     | -0.46424  |         |  |
|            | 0.67876         | -0.46424  | 0.67876 | 0.33234     | 0.694662147 |           |         |  |
| OR10H1     | ENSG00000186723 | -0.52297  | 0.6995  | 0.43343     | 0.33235     | -0.52297  |         |  |
|            | 0.6995          | -0.52297  | 0.6995  | 0.33235     | 0.694662147 |           |         |  |
| RNA5SP146  | ENSG00000222675 | -0.20771  | 0.58227 | -0.29413    | 0.61567     | 0.43338   |         |  |
|            | 0.33237         | -0.29413  | 0.61567 | 0.33237     | 0.694662147 |           |         |  |
| NA         | ENSG00000199867 | 0.43334   | 0.33238 | 0.43334     | 0.33238     | 0.43334   | 0.33238 |  |
|            | 0.43334         | 0.33238   | 0.33238 | 0.694662147 |             |           |         |  |
| USP20      | ENSG00000136878 | 0.088723  | 0.46465 | 0.14069     | 0.44406     | 0.43329   | 0.3324  |  |
|            | -0.3798         | 0.64795   | 0.3324  | 0.694662147 |             |           |         |  |
| SGO1P1     | ENSG00000270615 | 0.4333    | 0.3324  | 0.4333      | 0.3324      | 0.4333    |         |  |
|            | 0.3324          | 0.4333    | 0.3324  | 0.3324      | 0.694662147 |           |         |  |
| MIR1305    | ENSG00000221227 | -1.2699   | 0.89793 | 0.43325     | 0.33241     | -1.2699   |         |  |
|            | 0.89793         | -0.94377  | 0.82736 | 0.33241     | 0.694662147 |           |         |  |
| EML4-AS1   | ENSG00000224875 | 0.43325   | 0.33242 | -1.5595     | 0.94056     | 0.43325   |         |  |
|            | 0.33242         | 0.43325   | 0.33242 | 0.33242     | 0.694662147 |           |         |  |
| RN7SKP146  | ENSG00000222174 | 0.43312   | 0.33246 | 0.43312     | 0.33246     | 0.43312   |         |  |
|            | 0.33246         | 0.43312   | 0.33246 | 0.33246     | 0.694715943 |           |         |  |
| MAP3K1     | ENSG00000095015 | 0.43309   | 0.33248 | -0.9161     | 0.82019     | -1.06     | 0.85543 |  |
|            | -1.3378         | 0.90951   | 0.33248 | 0.694727945 |             |           |         |  |
| GUSB       | ENSG00000169919 | 0.43297   | 0.33252 | -0.09734    | 0.53877     | -0.2963   | 0.6165  |  |
|            | -0.5657         | 0.7142    | 0.33252 | 0.694781734 |             |           |         |  |
| NA         | ENSG00000237312 | -0.57721  | 0.7181  | -0.57721    | 0.7181      | 0.056916  | 0.47731 |  |
|            | 0.43273         | 0.33261   | 0.33261 | 0.694866078 |             |           |         |  |
| NA         | ENSG00000260167 | 0.43266   | 0.33263 | 0.43266     | 0.33263     | 0.43266   | 0.33263 |  |
|            | 0.43266         | 0.33263   | 0.33263 | 0.694866078 |             |           |         |  |
| RN7SKP89   | ENSG00000222706 | 0.43263   | 0.33264 | -1.2777     | 0.89932     | 0.43263   |         |  |
|            | 0.33264         | 0.090963  | 0.46376 | 0.33264     | 0.694866078 |           |         |  |
| ZCWPW1     | ENSG00000078487 | -0.25991  | 0.60253 | -0.25991    | 0.60253     | -0.23165  |         |  |
|            | 0.59159         | 0.43255   | 0.33267 | 0.33267     | 0.694866078 |           |         |  |
| NA         | ENSG00000251339 | -0.36925  | 0.64403 | 0.43253     | 0.33268     | -1.233    | 0.89121 |  |
|            | -0.47648        | 0.68313   | 0.33268 | 0.694866078 |             |           |         |  |
| C6orf132   | ENSG00000188112 | -0.52229  | 0.69927 | -0.1692     | 0.56718     | 0.43249   |         |  |
|            | 0.33269         | -0.28504  | 0.61219 | 0.33269     | 0.694866078 |           |         |  |
| HOXB-AS4   | ENSG00000242207 | -0.044938 | 0.51792 | -0.044938   | 0.51792     | -0.79098  |         |  |
|            | 0.78552         | 0.43244   | 0.33271 | 0.33271     | 0.694866078 |           |         |  |
| NA         | ENSG00000238491 | 0.11455   | 0.4544  | -0.16316    | 0.56481     | -0.49249  | 0.68881 |  |
|            | 0.43243         | 0.33271   | 0.33271 | 0.694866078 |             |           |         |  |
| IFNA8      | ENSG00000120242 | 0.43243   | 0.33272 | 0.43243     | 0.33272     | 0.43243   | 0.33272 |  |
|            | -0.12815        | 0.55098   | 0.33272 | 0.694866078 |             |           |         |  |
| NA         | ENSG00000225458 | 0.43241   | 0.33272 | -1.2006     | 0.88505     | 0.0080614 | 0.49678 |  |
|            | 0.0080614       | 0.49678   | 0.33272 | 0.694866078 |             |           |         |  |
| PHF11      | ENSG00000136147 | -0.86936  | 0.80768 | -0.56811    | 0.71502     | -0.56811  | 0.71502 |  |
|            | 0.43236         | 0.33274   | 0.33274 | 0.694866078 |             |           |         |  |
| TPRX1P1    | ENSG00000259021 | -1.2481   | 0.894   | -1.2481     | 0.894       | 0.15944   | 0.43666 |  |
|            | 0.43235         | 0.33274   | 0.33274 | 0.694866078 |             |           |         |  |
| GSTP1      | ENSG00000084207 | -0.29472  | 0.6159  | 0.43231     | 0.33276     | 0.17605   | 0.43013 |  |
|            | -0.29472        | 0.6159    | 0.33276 | 0.694866078 |             |           |         |  |
| NA         | ENSG00000237868 | -0.54893  | 0.70847 | -0.54893    | 0.70847     | -0.54893  | 0.70847 |  |
|            | 0.43231         | 0.33276   | 0.33276 | 0.694866078 |             |           |         |  |
| NA         | ENSG00000228192 | 0.43196   | 0.33289 | 0.43196     | 0.33289     | 0.43196   | 0.33289 |  |
|            | 0.43196         | 0.33289   | 0.33289 | 0.695087192 |             |           |         |  |
| URAHP      | ENSG00000222019 | 0.43187   | 0.33292 | 0.43187     | 0.33292     | 0.43187   | 0.33292 |  |
|            | 0.43187         | 0.33292   | 0.33292 | 0.695087192 |             |           |         |  |
| POTEF-AS1  | ENSG00000224087 | 0.43187   | 0.33292 | 0.43187     | 0.33292     | 0.43187   |         |  |
|            | 0.33292         | 0.43187   | 0.33292 | 0.33292     | 0.695087192 |           |         |  |
| UBR3       | ENSG00000144357 | 0.37729   | 0.35298 | -1.9271     | 0.97302     | -0.43021  | 0.66648 |  |
|            | 0.43178         | 0.33295   | 0.33295 | 0.695087192 |             |           |         |  |
| NA         | ENSG00000224050 | -1.8264   | 0.9661  | -1.4278     | 0.92333     | -1.4278   | 0.92333 |  |
|            | 0.43179         | 0.33295   | 0.33295 | 0.695087192 |             |           |         |  |
| NA         | ENSG00000223944 | 0.026441  | 0.48945 | 0.17607     | 0.43012     | -0.73009  | 0.76733 |  |

|           |                 |           |             |             |             |           |         |       |
|-----------|-----------------|-----------|-------------|-------------|-------------|-----------|---------|-------|
|           | 0.43172         | 0.33297   | 0.33297     | 0.695087192 |             |           |         |       |
| LINC00051 | ENSG00000254008 | -0.048039 | 0.51916     | -1.7888     | 0.96318     | -1.4582   |         |       |
|           | 0.92761         | 0.43172   | 0.33297     | 0.33297     | 0.695087192 |           |         |       |
| NA        | ENSG00000241354 | 0.43171   | 0.33298     | -0.10372    | 0.5413      | -0.23303  | 0.59213 |       |
|           | -0.11427        | 0.54549   | 0.33298     | 0.695087192 |             |           |         |       |
| NTAQ1     | ENSG00000156795 | -2.1796   | 0.98535     | -2.2151     | 0.98662     | 0.43157   | 0.33303 |       |
|           | -2.6598         | 0.99609   | 0.33303     | 0.695123108 |             |           |         |       |
| PSG2      | ENSG00000242221 | -0.88748  | 0.81259     | 0.075887    | 0.46975     | -0.48803  | 0.68723 |       |
|           | 0.43157         | 0.33303   | 0.33303     | 0.695123108 |             |           |         |       |
| RPL36P2   | ENSG00000231302 | 0.43153   | 0.33304     | 0.43153     | 0.33304     | 0.43153   |         |       |
|           | 0.33304         | 0.43153   | 0.33304     | 0.33304     | 0.695123108 |           |         |       |
| LINC01964 | ENSG00000260840 | 0.43147   | 0.33306     | -0.030643   | 0.51222     | 0.43147   |         |       |
|           | 0.33306         | 0.43147   | 0.33306     | 0.33306     | 0.695135078 |           |         |       |
| LINC02512 | ENSG00000251061 | -1.3094   | 0.9048      | -1.8628     | 0.96876     | 0.4313    |         |       |
|           | 0.33313         | 0.4313    | 0.33313     | 0.33313     | 0.695251398 |           |         |       |
| NCS1      | ENSG00000107130 | 0.14129   | 0.44382     | -0.33714    | 0.63199     | 0.43116   | 0.33318 |       |
|           | 0.29498         | 0.384     | 0.33318     | 0.695293648 |             |           |         |       |
| IGHV2-70D | ENSG00000211974 | 0.431     | 0.33324     | 0.431       | 0.33324     | 0.431     | 0.33324 | 0.431 |
|           | 0.33324         | 0.33324   | 0.695293648 |             |             |           |         |       |
| IGHV2-70  | ENSG00000274576 | 0.431     | 0.33324     | 0.431       | 0.33324     | 0.431     | 0.33324 | 0.431 |
|           | 0.33324         | 0.33324   | 0.695293648 |             |             |           |         |       |
| BRI3      | ENSG00000164713 | 0.43096   | 0.33325     | -0.70219    | 0.75872     | 0.32618   | 0.37214 |       |
|           | 0.32618         | 0.37214   | 0.33325     | 0.695293648 |             |           |         |       |
| RHO       | ENSG00000116574 | -0.28115  | 0.6107      | 0.037074    | 0.48521     | -0.18725  | 0.57427 |       |
|           | 0.43088         | 0.33328   | 0.33328     | 0.695293648 |             |           |         |       |
| NA        | ENSG00000233575 | 0.43088   | 0.33328     | 0.43088     | 0.33328     | -0.69036  | 0.75501 |       |
|           | -0.28002        | 0.61027   | 0.33328     | 0.695293648 |             |           |         |       |
| LINC02177 | ENSG00000261617 | -0.10505  | 0.54183     | 0.43083     | 0.33329     | 0.21538   |         |       |
|           | 0.41473         | 0.35973   | 0.35952     | 0.33329     | 0.695293648 |           |         |       |
| LSAMP-AS1 | ENSG00000240922 | -0.55294  | 0.70985     | 0.43081     | 0.3333      | 0.43081   |         |       |
|           | 0.3333          | -0.098998 | 0.53943     | 0.3333      | 0.695293648 |           |         |       |
| SNHG17    | ENSG00000196756 | -0.95793  | 0.83095     | -0.95793    | 0.83095     | -0.32142  |         |       |
|           | 0.62605         | 0.4308    | 0.33331     | 0.33331     | 0.695293648 |           |         |       |
| NA        | ENSG00000230137 | 0.43079   | 0.33331     | -1.3217     | 0.90687     | -1.3217   | 0.90687 |       |
|           | -1.3217         | 0.90687   | 0.33331     | 0.695293648 |             |           |         |       |
| FBXO10    | ENSG00000147912 | -0.75944  | 0.77621     | 0.17075     | 0.43221     | 0.022351  |         |       |
|           | 0.49108         | 0.43073   | 0.33333     | 0.33333     | 0.695293648 |           |         |       |
| HLA-DMB   | ENSG00000242574 | -0.79556  | 0.78686     | 0.15928     | 0.43672     | 0.43074   |         |       |
|           | 0.33333         | 0.43074   | 0.33333     | 0.33333     | 0.695293648 |           |         |       |
| PLEKHG7   | ENSG00000187510 | 0.24807   | 0.40204     | 0.4049      | 0.34277     | 0.24807   |         |       |
|           | 0.40204         | 0.43068   | 0.33335     | 0.33335     | 0.695293648 |           |         |       |
| LINC00349 | ENSG00000231238 | 0.43069   | 0.33335     | 0.43069     | 0.33335     | -0.039371 |         |       |
|           | 0.5157          | 0.42905   | 0.33394     | 0.33335     | 0.695293648 |           |         |       |
| GCK       | ENSG00000106633 | -0.33688  | 0.6319      | -0.33339    | 0.63058     | -0.78733  | 0.78446 |       |
|           | 0.4304          | 0.33345   | 0.33345     | 0.695472458 |             |           |         |       |
| NGRN      | ENSG00000182768 | -0.21926  | 0.58678     | -0.61258    | 0.72992     | -0.11681  | 0.5465  |       |
|           | 0.43022         | 0.33352   | 0.33352     | 0.695564972 |             |           |         |       |
| RHPN2     | ENSG00000131941 | 0.43018   | 0.33353     | -0.018466   | 0.50737     | -0.69561  | 0.75666 |       |
|           | 0.080312        | 0.46799   | 0.33353     | 0.695564972 |             |           |         |       |
| NA        | ENSG00000257270 | 0.43013   | 0.33355     | 0.43013     | 0.33355     | 0.43013   | 0.33355 |       |
|           | 0.43013         | 0.33355   | 0.33355     | 0.695564972 |             |           |         |       |
| SNRPGP12  | ENSG00000226734 | -0.62647  | 0.7345      | 0.43008     | 0.33357     | -0.62647  |         |       |
|           | 0.7345          | -0.62647  | 0.7345      | 0.33357     | 0.695564972 |           |         |       |
| SLC39A9   | ENSG00000029364 | -0.47922  | 0.68411     | -0.65768    | 0.74463     | 0.43004   |         |       |
|           | 0.33358         | -1.0108   | 0.84394     | 0.33358     | 0.695564972 |           |         |       |
| NA        | ENSG00000272667 | 0.43004   | 0.33358     | 0.43004     | 0.33358     | 0.43004   | 0.33358 |       |
|           | 0.43004         | 0.33358   | 0.33358     | 0.695564972 |             |           |         |       |
| LINC00575 | ENSG00000231782 | 0.24644   | 0.40267     | 0.24644     | 0.40267     | 0.24644   |         |       |
|           | 0.40267         | 0.42993   | 0.33362     | 0.33362     | 0.695618613 |           |         |       |
| NA        | ENSG00000213529 | 0.42984   | 0.33365     | -0.61291    | 0.73003     | -0.61291  | 0.73003 |       |
|           | -0.61291        | 0.73003   | 0.33365     | 0.695642485 |             |           |         |       |
| NA        | ENSG00000263499 | 0.42983   | 0.33366     | -0.099727   | 0.53972     | 0.29637   | 0.38347 |       |

|           |                 |           |         |             |             |           |         |  |
|-----------|-----------------|-----------|---------|-------------|-------------|-----------|---------|--|
|           | 0.42983         | 0.33366   | 0.33366 | 0.695642485 |             |           |         |  |
| NA        | ENSG00000258944 | 0.42968   | 0.33371 | 0.42968     | 0.33371     | 0.42968   | 0.33371 |  |
|           | 0.42968         | 0.33371   | 0.33371 | 0.695716963 |             |           |         |  |
| VDAC1P5   | ENSG00000270858 | 0.3636    | 0.35808 | 0.42962     | 0.33373     | 0.42265   |         |  |
|           | 0.33627         | -0.9858   | 0.83789 | 0.33373     | 0.695719978 |           |         |  |
| MIR181A1  | ENSG00000207759 | -1.173    | 0.8796  | -1.173      | 0.8796      | 0.42961   |         |  |
|           | 0.33374         | -1.173    | 0.8796  | 0.33374     | 0.695719978 |           |         |  |
| OR6C71P   | ENSG00000203408 | 0.42952   | 0.33377 | -0.4359     | 0.66854     | 0.42952   |         |  |
|           | 0.33377         | 0.42952   | 0.33377 | 0.33377     | 0.695752753 |           |         |  |
| PPEF2     | ENSG00000156194 | 0.42942   | 0.33381 | 0.42942     | 0.33381     | -0.096117 | 0.53829 |  |
|           | -0.11575        | 0.54607   | 0.33381 | 0.695752986 |             |           |         |  |
| SPAG6     | ENSG00000077327 | 0.4294    | 0.33382 | -1.3804     | 0.91627     | -0.53735  | 0.70449 |  |
|           | -1.2075         | 0.88639   | 0.33382 | 0.695752986 |             |           |         |  |
| MEIS3P1   | ENSG00000179277 | -1.2993   | 0.90308 | -0.55718    | 0.7113      | -0.20709  |         |  |
|           | 0.58203         | 0.42938   | 0.33382 | 0.33382     | 0.695752986 |           |         |  |
| NA        | ENSG00000199881 | 0.42925   | 0.33387 | 0.42925     | 0.33387     | 0.42925   | 0.33387 |  |
|           | -0.95755        | 0.83086   | 0.33387 | 0.695752986 |             |           |         |  |
| SNRPA1    | ENSG00000131876 | 0.33883   | 0.36737 | 0.42922     | 0.33388     | 0.012752  |         |  |
|           | 0.49491         | 0.21845   | 0.41354 | 0.33388     | 0.695752986 |           |         |  |
| PIM3      | ENSG00000198355 | 0.4292    | 0.33389 | 0.4292      | 0.33389     | 0.4292    | 0.33389 |  |
|           | 0.4292          | 0.33389   | 0.33389 | 0.695752986 |             |           |         |  |
| CTAGE11P  | ENSG00000214249 | -0.076965 | 0.53067 | 0.4292      | 0.33389     | -0.18004  |         |  |
|           | 0.57144         | 0.19578   | 0.42239 | 0.33389     | 0.695752986 |           |         |  |
| NA        | ENSG00000251330 | 0.4292    | 0.33389 | 0.4292      | 0.33389     | 0.4292    | 0.33389 |  |
|           | 0.4292          | 0.33389   | 0.33389 | 0.695752986 |             |           |         |  |
| PRSS8     | ENSG00000052344 | 0.42911   | 0.33392 | 0.42911     | 0.33392     | 0.42911   | 0.33392 |  |
|           | 0.42911         | 0.33392   | 0.33392 | 0.695752986 |             |           |         |  |
| LAP3      | ENSG00000002549 | -0.58757  | 0.72159 | -0.59488    | 0.72404     | -0.47097  | 0.68117 |  |
|           | 0.42908         | 0.33393   | 0.33393 | 0.695752986 |             |           |         |  |
| HSDL2     | ENSG00000119471 | 0.42905   | 0.33394 | -0.10691    | 0.54257     | 0.30007   | 0.38206 |  |
|           | -0.82104        | 0.79419   | 0.33394 | 0.695752986 |             |           |         |  |
| NA        | ENSG00000263982 | 0.42902   | 0.33396 | 0.035873    | 0.48569     | -0.42394  | 0.66419 |  |
|           | -0.42394        | 0.66419   | 0.33396 | 0.695752986 |             |           |         |  |
| ZEB2      | ENSG00000169554 | -0.038762 | 0.51546 | -0.23538    | 0.59304     | 0.42897   | 0.33397 |  |
|           | -0.72398        | 0.76546   | 0.33397 | 0.695752986 |             |           |         |  |
| MIR4773-1 | ENSG00000264684 | 0.42896   | 0.33397 | 0.42896     | 0.33397     | 0.42896   |         |  |
|           | 0.33397         | 0.42896   | 0.33397 | 0.33397     | 0.695752986 |           |         |  |
| TM6SF2    | ENSG00000213996 | 0.42884   | 0.33402 | 0.42884     | 0.33402     | 0.42884   |         |  |
|           | 0.33402         | 0.42884   | 0.33402 | 0.33402     | 0.695827403 |           |         |  |
| NA        | ENSG00000249988 | -1.2456   | 0.89355 | 0.18435     | 0.42687     | 0.4287    | 0.33407 |  |
|           | 0.016735        | 0.49332   | 0.33407 | 0.695869148 |             |           |         |  |
| LINC02817 | ENSG00000234754 | 0.3681    | 0.3564  | 0.42861     | 0.3341      | -0.081423 |         |  |
|           | 0.53245         | 0.3681    | 0.3564  | 0.3341      | 0.695869148 |           |         |  |
| SGK1      | ENSG00000118515 | -0.56409  | 0.71365 | -0.72131    | 0.76464     | -0.51024  | 0.69506 |  |
|           | 0.42855         | 0.33412   | 0.33412 | 0.695869148 |             |           |         |  |
| COMMD10   | ENSG00000145781 | 0.27093   | 0.39322 | 0.42856     | 0.33412     | 0.25229   |         |  |
|           | 0.40041         | -0.43219  | 0.6672  | 0.33412     | 0.695869148 |           |         |  |
| LDLRAP1   | ENSG00000157978 | -0.82576  | 0.79553 | 0.22444     | 0.41121     | -0.65929  |         |  |
|           | 0.74515         | 0.42852   | 0.33413 | 0.33413     | 0.695869148 |           |         |  |
| NRG1-IT1  | ENSG00000253974 | -0.81226  | 0.79168 | 0.4285      | 0.33414     | -0.60593  |         |  |
|           | 0.72772         | -0.3862   | 0.65033 | 0.33414     | 0.695869148 |           |         |  |
| NA        | ENSG00000263257 | -0.51941  | 0.69826 | -1.5258     | 0.93647     | 0.42851   | 0.33414 |  |
|           | -0.85514        | 0.80376   | 0.33414 | 0.695869148 |             |           |         |  |
| PLOD2     | ENSG00000152952 | -0.51699  | 0.69742 | 0.42839     | 0.33419     | -0.59046  | 0.72256 |  |
|           | -0.49773        | 0.69066   | 0.33419 | 0.69586923  |             |           |         |  |
| ITCH-AS1  | ENSG00000236388 | 0.42834   | 0.3342  | 0.42834     | 0.3342      | 0.42834   |         |  |
|           | 0.3342          | 0.42834   | 0.3342  | 0.3342      | 0.69586923  |           |         |  |
| RNA5SP260 | ENSG00000200719 | 0.42832   | 0.33421 | 0.42832     | 0.33421     | 0.42832   |         |  |
|           | 0.33421         | 0.42832   | 0.33421 | 0.33421     | 0.69586923  |           |         |  |
| NA        | ENSG00000262312 | 0.42828   | 0.33422 | 0.42828     | 0.33422     | 0.42828   | 0.33422 |  |
|           | 0.42828         | 0.33422   | 0.33422 | 0.69586923  |             |           |         |  |
| NA        | ENSG00000265750 | 0.42829   | 0.33422 | 0.42829     | 0.33422     | 0.42829   | 0.33422 |  |

|            |                 |          |         |             |             |          |         |
|------------|-----------------|----------|---------|-------------|-------------|----------|---------|
|            | 0.42829         | 0.33422  | 0.33422 | 0.69586923  |             |          |         |
| OR6L1P     | ENSG00000233685 | -0.9678  | 0.83343 | -0.27534    | 0.60847     | -0.51216 |         |
|            | 0.69573         | 0.42825  | 0.33424 | 0.33424     | 0.69586923  |          |         |
| NA         | ENSG00000257129 | 0.27793  | 0.39053 | -0.15017    | 0.55968     | 0.42823  | 0.33424 |
|            | 0.27793         | 0.39053  | 0.33424 | 0.69586923  |             |          |         |
| NA         | ENSG00000273124 | 0.42808  | 0.3343  | 0.42808     | 0.3343      | 0.42808  | 0.3343  |
|            | 0.42808         | 0.3343   | 0.3343  | 0.695931752 |             |          |         |
| NA         | ENSG00000231324 | 0.42805  | 0.33431 | 0.42805     | 0.33431     | 0.42805  | 0.33431 |
|            | 0.42805         | 0.33431  | 0.33431 | 0.695931752 |             |          |         |
| RNA5SP111  | ENSG00000223318 | -1.2356  | 0.8917  | 0.42793     | 0.33435     | -1.2356  |         |
|            | 0.8917          | -1.2356  | 0.8917  | 0.33435     | 0.695931752 |          |         |
| HMG2P17    | ENSG00000238249 | 0.42794  | 0.33435 | -0.54191    | 0.70606     | -0.35043 |         |
|            | 0.63699         | -0.13051 | 0.55192 | 0.33435     | 0.695931752 |          |         |
| RNU6-897P  | ENSG00000252944 | 0.42792  | 0.33435 | 0.42792     | 0.33435     | 0.42792  |         |
|            | 0.33435         | 0.42792  | 0.33435 | 0.33435     | 0.695931752 |          |         |
| AIF1L      | ENSG00000126878 | -0.4329  | 0.66746 | 0.42791     | 0.33436     | -0.40737 | 0.65813 |
|            | -1.8487         | 0.96775  | 0.33436 | 0.695931752 |             |          |         |
| IPO8P1     | ENSG00000224668 | 0.42788  | 0.33437 | 0.42788     | 0.33437     | 0.42788  |         |
|            | 0.33437         | 0.42788  | 0.33437 | 0.33437     | 0.695931752 |          |         |
| FUNDC2P4   | ENSG00000227009 | 0.42778  | 0.33441 | -0.91969    | 0.82113     | 0.42778  |         |
|            | 0.33441         | 0.42778  | 0.33441 | 0.33441     | 0.695976366 |          |         |
| NA         | ENSG00000277539 | 0.42775  | 0.33442 | 0.42775     | 0.33442     | 0.42775  | 0.33442 |
|            | 0.42775         | 0.33442  | 0.33442 | 0.695976366 |             |          |         |
| MTND4LP3   | ENSG00000239632 | 0.42765  | 0.33445 | 0.42765     | 0.33445     | 0.42765  |         |
|            | 0.33445         | 0.42765  | 0.33445 | 0.33445     | 0.696003147 |          |         |
| NA         | ENSG00000237604 | 0.34352  | 0.3656  | 0.34352     | 0.3656      | 0.42758  | 0.33448 |
|            | 0.049907        | 0.4801   | 0.33448 | 0.696003147 |             |          |         |
| RSAD2      | ENSG00000134321 | 0.42755  | 0.33449 | 0.32099     | 0.37411     | 0.20227  | 0.41985 |
|            | 0.20227         | 0.41985  | 0.33449 | 0.696003147 |             |          |         |
| RNU6-1162P | ENSG00000207172 | 0.42756  | 0.33449 | 0.42756     | 0.33449     | 0.42756  |         |
|            | 0.33449         | 0.42756  | 0.33449 | 0.33449     | 0.696003147 |          |         |
| IGLV7-43   | ENSG00000211652 | 0.42743  | 0.33453 | 0.42743     | 0.33453     | -1.2248  |         |
|            | 0.88967         | 0.42743  | 0.33453 | 0.33453     | 0.696026937 |          |         |
| ZNF579     | ENSG00000218891 | 0.42743  | 0.33453 | 0.22595     | 0.41062     | 0.11505  |         |
|            | 0.4542          | 0.42743  | 0.33453 | 0.33453     | 0.696026937 |          |         |
| SEC11C     | ENSG00000166562 | 0.42714  | 0.33464 | 0.42714     | 0.33464     | 0.42714  |         |
|            | 0.33464         | 0.42714  | 0.33464 | 0.33464     | 0.696196354 |          |         |
| SIGLEC17P  | ENSG00000171101 | 0.42714  | 0.33464 | 0.42714     | 0.33464     | 0.42714  |         |
|            | 0.33464         | 0.42714  | 0.33464 | 0.33464     | 0.696196354 |          |         |
| NA         | ENSG00000253164 | 0.42581  | 0.33512 | 0.42701     | 0.33469     | -0.17093 | 0.56786 |
|            | 0.11182         | 0.45548  | 0.33469 | 0.69627065  |             |          |         |
| POM121L2   | ENSG00000158553 | -0.49523 | 0.68978 | 0.42674     | 0.33478     | -1.4492  |         |
|            | 0.92635         | -1.9276  | 0.97305 | 0.33478     | 0.696347832 |          |         |
| LINC02760  | ENSG00000254516 | 0.18143  | 0.42801 | -0.030433   | 0.51214     | 0.42674  |         |
|            | 0.33478         | 0.36556  | 0.35735 | 0.33478     | 0.696347832 |          |         |
| RPN2       | ENSG00000118705 | -0.37218 | 0.64512 | 0.13286     | 0.44715     | 0.42667  | 0.33481 |
|            | -0.34089        | 0.63341  | 0.33481 | 0.696347832 |             |          |         |
| MTND2P16   | ENSG00000230818 | 0.42666  | 0.33481 | 0.42666     | 0.33481     | 0.42666  |         |
|            | 0.33481         | 0.42666  | 0.33481 | 0.33481     | 0.696347832 |          |         |
| MTND1P37   | ENSG00000283456 | -0.22029 | 0.58718 | 0.42666     | 0.33481     | 0.42666  |         |
|            | 0.33481         | 0.42666  | 0.33481 | 0.33481     | 0.696347832 |          |         |
| NA         | ENSG00000249607 | 0.42664  | 0.33482 | 0.42664     | 0.33482     | 0.42664  | 0.33482 |
|            | 0.42664         | 0.33482  | 0.33482 | 0.696347832 |             |          |         |
| NA         | ENSG00000258901 | 0.42659  | 0.33484 | 0.42659     | 0.33484     | 0.42659  | 0.33484 |
|            | 0.42659         | 0.33484  | 0.33484 | 0.696347832 |             |          |         |
| ARMH1      | ENSG00000198520 | -0.13242 | 0.55267 | 0.42656     | 0.33485     | 0.099323 | 0.46044 |
|            | -0.64872        | 0.74174  | 0.33485 | 0.696347832 |             |          |         |
| NA         | ENSG00000272748 | 0.048319 | 0.48073 | 0.22965     | 0.40918     | 0.42653  | 0.33486 |
|            | 0.42653         | 0.33486  | 0.33486 | 0.696347832 |             |          |         |
| MTND2P23   | ENSG00000232631 | -0.30046 | 0.61809 | -0.95089    | 0.82917     | -0.95089 |         |
|            | 0.82917         | 0.42649  | 0.33487 | 0.33487     | 0.696347832 |          |         |
| TMCC1P1    | ENSG00000253318 | 0.36523  | 0.35747 | 0.36523     | 0.35747     | 0.36523  |         |

|           |                 |           |         |             |             |          |         |  |
|-----------|-----------------|-----------|---------|-------------|-------------|----------|---------|--|
|           | 0.35747         | 0.42644   | 0.33489 | 0.33489     | 0.696359706 |          |         |  |
| GPATCH8   | ENSG00000186566 | 0.42638   | 0.33491 | -0.067043   | 0.52673     | -1.1906  |         |  |
|           | 0.88309         | -0.15751  | 0.56258 | 0.33491     | 0.696362657 |          |         |  |
| NA        | ENSG00000261592 | -1.741    | 0.95916 | 0.42636     | 0.33492     | -1.741   | 0.95916 |  |
|           | -1.741          | 0.95916   | 0.33492 | 0.696362657 |             |          |         |  |
| NA        | ENSG00000225488 | 0.42614   | 0.33507 | 0.33507     | 0.42086     | -1.1823  | 0.88146 |  |
|           | -0.37861        | 0.64751   | 0.33507 | 0.696436726 |             |          |         |  |
| SMPD2     | ENSG00000135587 | 0.42596   | 0.33507 | 0.42596     | 0.33507     | 0.42596  | 0.33507 |  |
|           | 0.42596         | 0.33507   | 0.33507 | 0.696436726 |             |          |         |  |
| NA        | ENSG00000253562 | 0.42596   | 0.33507 | 0.42596     | 0.33507     | 0.42596  | 0.33507 |  |
|           | 0.42596         | 0.33507   | 0.33507 | 0.696436726 |             |          |         |  |
| MRTFA     | ENSG00000196588 | 0.42588   | 0.33511 | -0.33826    | 0.63242     | -0.56189 | 0.71291 |  |
|           | -0.19535        | 0.57744   | 0.33511 | 0.696436726 |             |          |         |  |
| EPHX2     | ENSG00000120915 | -0.44443  | 0.67163 | 0.42586     | 0.33511     | -0.98136 | 0.83679 |  |
|           | -0.86163        | 0.80555   | 0.33511 | 0.696436726 |             |          |         |  |
| NA        | ENSG00000251682 | 0.18748   | 0.42564 | -0.048939   | 0.51952     | 0.42586  | 0.33511 |  |
|           | 0.38622         | 0.34967   | 0.33511 | 0.696436726 |             |          |         |  |
| NA        | ENSG00000255224 | 0.42582   | 0.33512 | 0.42582     | 0.33512     | 0.42582  | 0.33512 |  |
|           | 0.42582         | 0.33512   | 0.33512 | 0.696436726 |             |          |         |  |
| AHCYP5    | ENSG00000213107 | -0.494    | 0.68935 | -0.494      | 0.68935     | -0.494   |         |  |
|           | 0.68935         | 0.42579   | 0.33513 | 0.33513     | 0.696436726 |          |         |  |
| PRKCA-AS1 | ENSG00000264630 | 0.4258    | 0.33513 | 0.4258      | 0.33513     | 0.4258   |         |  |
|           | 0.33513         | 0.4258    | 0.33513 | 0.33513     | 0.696436726 |          |         |  |
| ABRAXAS2  | ENSG00000165660 | -0.58479  | 0.72066 | -0.049664   | 0.5198      | 0.42575  |         |  |
|           | 0.33514         | -0.29755  | 0.61698 | 0.33514     | 0.696436726 |          |         |  |
| NA        | ENSG00000226984 | 0.42573   | 0.33515 | 0.42573     | 0.33515     | 0.42573  | 0.33515 |  |
|           | 0.42573         | 0.33515   | 0.33515 | 0.696436726 |             |          |         |  |
| SNRPPF2   | ENSG00000229786 | 0.42574   | 0.33515 | 0.42574     | 0.33515     | 0.42574  |         |  |
|           | 0.33515         | 0.42574   | 0.33515 | 0.33515     | 0.696436726 |          |         |  |
| FAM86JP   | ENSG00000171084 | -0.89775  | 0.81534 | -1.5193     | 0.93566     | 0.42571  |         |  |
|           | 0.33516         | -0.2994   | 0.61768 | 0.33516     | 0.696436726 |          |         |  |
| RNA5SP487 | ENSG00000222118 | 0.42569   | 0.33517 | 0.4179      | 0.33801     | -0.70792 |         |  |
|           | 0.7605          | 0.19866   | 0.42126 | 0.33517     | 0.696436726 |          |         |  |
| NA        | ENSG00000254578 | 0.42569   | 0.33517 | 0.42569     | 0.33517     | 0.42569  | 0.33517 |  |
|           | 0.42569         | 0.33517   | 0.33517 | 0.696436726 |             |          |         |  |
| OR4C10P   | ENSG00000184789 | -0.32538  | 0.62755 | 0.42561     | 0.3352      | -1.2116  |         |  |
|           | 0.88717         | -0.32696  | 0.62815 | 0.3352      | 0.696439669 |          |         |  |
| RN7SKP141 | ENSG00000251976 | 0.41375   | 0.33953 | 0.41375     | 0.33953     | 0.42561  |         |  |
|           | 0.3352          | -0.056264 | 0.52243 | 0.3352      | 0.696439669 |          |         |  |
| NA        | ENSG00000226454 | 0.42555   | 0.33522 | -1.1356     | 0.87193     | 0.095358 | 0.46202 |  |
|           | 0.091337        | 0.46361   | 0.33522 | 0.696442612 |             |          |         |  |
| NA        | ENSG00000283317 | -0.507    | 0.69392 | -0.28721    | 0.61303     | 0.42553  | 0.33523 |  |
|           | -0.52158        | 0.69902   | 0.33523 | 0.696442612 |             |          |         |  |
| MPP6      | ENSG00000105926 | -0.41483  | 0.66087 | 0.42541     | 0.33527     | -0.8238  | 0.79497 |  |
|           | -0.61842        | 0.73185   | 0.33527 | 0.696496018 |             |          |         |  |
| NA        | ENSG00000253115 | 0.20773   | 0.41772 | 0.20773     | 0.41772     | 0.20773  | 0.41772 |  |
|           | 0.42524         | 0.33533   | 0.33533 | 0.696501571 |             |          |         |  |
| TRIM44    | ENSG00000166326 | 0.008021  | 0.4968  | 0.10605     | 0.45777     | 0.3087   |         |  |
|           | 0.37878         | 0.42519   | 0.33535 | 0.33535     | 0.696501571 |          |         |  |
| RN7SKP200 | ENSG00000222496 | 0.4252    | 0.33535 | 0.4252      | 0.33535     | 0.4252   |         |  |
|           | 0.33535         | 0.4252    | 0.33535 | 0.33535     | 0.696501571 |          |         |  |
| NA        | ENSG00000249293 | -0.33611  | 0.63161 | 0.42514     | 0.33537     | -1.6239  | 0.9478  |  |
|           | 0.049539        | 0.48024   | 0.33537 | 0.696501571 |             |          |         |  |
| MEGF9     | ENSG00000106780 | 0.4251    | 0.33538 | -0.82687    | 0.79584     | -0.82687 | 0.79584 |  |
|           | -0.087039       | 0.53468   | 0.33538 | 0.696501571 |             |          |         |  |
| H3P22     | ENSG00000250715 | 0.42506   | 0.3354  | 0.42506     | 0.3354      | 0.42506  | 0.3354  |  |
|           | 0.42506         | 0.3354    | 0.3354  | 0.696501571 |             |          |         |  |
| AGO2      | ENSG00000123908 | -0.27017  | 0.60648 | -0.90606    | 0.81755     | 0.39155  | 0.3477  |  |
|           | 0.42499         | 0.33542   | 0.33542 | 0.696501571 |             |          |         |  |
| TERF1P3   | ENSG00000249311 | 0.42496   | 0.33543 | 0.42496     | 0.33543     | 0.42496  |         |  |
|           | 0.33543         | 0.42496   | 0.33543 | 0.33543     | 0.696501571 |          |         |  |
| NA        | ENSG00000276853 | 0.42495   | 0.33543 | 0.42495     | 0.33543     | 0.42495  | 0.33543 |  |

|           |                 |           |         |             |             |           |         |  |
|-----------|-----------------|-----------|---------|-------------|-------------|-----------|---------|--|
|           | 0.42495         | 0.33543   | 0.33543 | 0.696501571 |             |           |         |  |
| PPP2R5E   | ENSG00000154001 | -0.28383  | 0.61173 | 0.42489     | 0.33546     | -0.26605  |         |  |
|           | 0.6049          | -0.23942  | 0.59461 | 0.33546     | 0.696501571 |           |         |  |
| NA        | ENSG00000271795 | 0.42485   | 0.33547 | 0.42485     | 0.33547     | 0.42485   | 0.33547 |  |
|           | 0.42485         | 0.33547   | 0.33547 | 0.696501571 |             |           |         |  |
| NA        | ENSG00000258088 | 0.4248    | 0.33549 | 0.4248      | 0.33549     | 0.4248    | 0.33549 |  |
|           | 0.4248          | 0.33549   | 0.33549 | 0.696501571 |             |           |         |  |
| TASBP1    | ENSG00000089123 | -0.21215  | 0.58401 | -0.60101    | 0.72608     | 0.42476   | 0.3355  |  |
|           | -0.000483       | 0.50019   | 0.3355  | 0.696501571 |             |           |         |  |
| NA        | ENSG00000273257 | 0.42477   | 0.3355  | 0.42477     | 0.3355      | 0.42477   | 0.3355  |  |
|           | 0.42477         | 0.3355    | 0.3355  | 0.696501571 |             |           |         |  |
| DCDC2B    | ENSG00000222046 | 0.42476   | 0.33551 | 0.42476     | 0.33551     | 0.42476   |         |  |
|           | 0.33551         | 0.42476   | 0.33551 | 0.33551     | 0.696501571 |           |         |  |
| NA        | ENSG00000260073 | 0.30304   | 0.38093 | 0.22664     | 0.41035     | 0.42472   | 0.33552 |  |
|           | -0.43968        | 0.66991   | 0.33552 | 0.696501571 |             |           |         |  |
| DCTN2     | ENSG00000175203 | -0.29552  | 0.6162  | -0.32101    | 0.6259      | 0.4247    | 0.33553 |  |
|           | 0.4247          | 0.33553   | 0.33553 | 0.696501571 |             |           |         |  |
| AVPR1A    | ENSG00000166148 | -1.6861   | 0.95412 | -0.75025    | 0.77345     | -1.3908   |         |  |
|           | 0.91786         | 0.4246    | 0.33556 | 0.33556     | 0.696501571 |           |         |  |
| BAK1P2    | ENSG00000236616 | 0.42462   | 0.33556 | 0.42462     | 0.33556     | 0.18481   |         |  |
|           | 0.42669         | 0.42462   | 0.33556 | 0.33556     | 0.696501571 |           |         |  |
| HS3ST3A1  | ENSG00000153976 | 0.10425   | 0.45848 | -0.24324    | 0.59609     | -0.57315  |         |  |
|           | 0.71673         | 0.4245    | 0.3356  | 0.3356      | 0.696501571 |           |         |  |
| RNA5P40   | ENSG00000252956 | -0.2262   | 0.58948 | 0.42451     | 0.3356      | -0.2262   |         |  |
|           | 0.58948         | -0.52736  | 0.70103 | 0.3356      | 0.696501571 |           |         |  |
| SNRNP40   | ENSG00000060688 | 0.036137  | 0.48559 | 0.42447     | 0.33561     | -0.36242  |         |  |
|           | 0.64148         | 0.036137  | 0.48559 | 0.33561     | 0.696501571 |           |         |  |
| NA        | ENSG00000203279 | -0.961    | 0.83172 | -0.83029    | 0.79681     | -0.83029  | 0.79681 |  |
|           | 0.42446         | 0.33561   | 0.33561 | 0.696501571 |             |           |         |  |
| NA        | ENSG00000213247 | 0.42441   | 0.33563 | -0.95369    | 0.82988     | -1.4283   | 0.9234  |  |
|           | -1.4283         | 0.9234    | 0.33563 | 0.696501571 |             |           |         |  |
| LINC01133 | ENSG00000224259 | -0.75382  | 0.77452 | 0.42443     | 0.33563     | -0.75382  |         |  |
|           | 0.77452         | 0.27939   | 0.38997 | 0.33563     | 0.696501571 |           |         |  |
| ZMYM6     | ENSG00000163867 | 0.17445   | 0.43076 | 0.42438     | 0.33565     | -0.22091  | 0.58742 |  |
|           | -0.16677        | 0.56622   | 0.33565 | 0.696509824 |             |           |         |  |
| NA        | ENSG00000259587 | 0.42429   | 0.33568 | 0.42429     | 0.33568     | 0.42429   | 0.33568 |  |
|           | 0.087992        | 0.46494   | 0.33568 | 0.696509824 |             |           |         |  |
| NA        | ENSG00000265665 | 0.42427   | 0.33569 | 0.42427     | 0.33569     | 0.42427   | 0.33569 |  |
|           | 0.42427         | 0.33569   | 0.33569 | 0.696509824 |             |           |         |  |
| CASP1P1   | ENSG00000255430 | -0.10822  | 0.54309 | -0.99615    | 0.84041     | -0.99615  |         |  |
|           | 0.84041         | 0.42424   | 0.3357  | 0.3357      | 0.696509824 |           |         |  |
| ANAPC1P1  | ENSG00000233673 | -1.2258   | 0.88986 | 0.4242      | 0.33571     | -0.097927 |         |  |
|           | 0.53901         | -0.81779  | 0.79326 | 0.33571     | 0.696509824 |           |         |  |
| SLC1A7    | ENSG00000162383 | 0.4241    | 0.33575 | 0.076124    | 0.46966     | -0.64465  |         |  |
|           | 0.74042         | -0.68056  | 0.75192 | 0.33575     | 0.696509824 |           |         |  |
| ZMIZ2     | ENSG00000122515 | -0.013843 | 0.50552 | -1.401      | 0.9194      | 0.42406   | 0.33576 |  |
|           | 0.17149         | 0.43192   | 0.33576 | 0.696509824 |             |           |         |  |
| NA        | ENSG00000227753 | -0.48176  | 0.68501 | -0.62432    | 0.73379     | -0.34861  | 0.63631 |  |
|           | 0.424           | 0.33578   | 0.33578 | 0.696509824 |             |           |         |  |
| PNPT1     | ENSG00000138035 | -0.26394  | 0.60409 | 0.18715     | 0.42577     | 0.18715   | 0.42577 |  |
|           | 0.42397         | 0.33579   | 0.33579 | 0.696509824 |             |           |         |  |
| CD53      | ENSG00000143119 | 0.42396   | 0.3358  | 0.42396     | 0.3358      | 0.42396   | 0.3358  |  |
|           | 0.42396         | 0.3358    | 0.3358  | 0.696509824 |             |           |         |  |
| NA        | ENSG00000213849 | 0.42396   | 0.3358  | 0.42396     | 0.3358      | 0.42396   | 0.3358  |  |
|           | 0.42396         | 0.3358    | 0.3358  | 0.696509824 |             |           |         |  |
| LINC01251 | ENSG00000233776 | 0.18154   | 0.42797 | -1.4034     | 0.91975     | -0.33657  |         |  |
|           | 0.63178         | 0.42375   | 0.33587 | 0.33587     | 0.696509824 |           |         |  |
| NA        | ENSG00000268403 | 0.16418   | 0.43479 | 0.42377     | 0.33587     | 0.42377   | 0.33587 |  |
|           | 0.42377         | 0.33587   | 0.33587 | 0.696509824 |             |           |         |  |
| NA        | ENSG00000220695 | 0.18241   | 0.42763 | 0.42361     | 0.33592     | -0.18791  | 0.57453 |  |
|           | -0.18791        | 0.57453   | 0.33592 | 0.696509824 |             |           |         |  |
| NA        | ENSG00000254801 | 0.42362   | 0.33592 | -1.428      | 0.92336     | -1.0417   | 0.85122 |  |

|           |                 |           |          |           |             |             |         |  |
|-----------|-----------------|-----------|----------|-----------|-------------|-------------|---------|--|
|           |                 | -0.040132 | 0.51601  | 0.33592   | 0.696509824 |             |         |  |
| GOLGA6L2  | ENSG00000174450 | -0.85517  | 0.80377  | 0.088652  | 0.46468     | -0.99777    |         |  |
|           |                 | 0.8408    | 0.4236   | 0.33593   | 0.33593     | 0.696509824 |         |  |
| RPL21P36  | ENSG00000233752 | -1.6028   | 0.94551  | 0.42356   | 0.33594     | 0.32376     |         |  |
|           |                 | 0.37306   | 0.32376  | 0.37306   | 0.33594     | 0.696509824 |         |  |
| RNU1-8P   | ENSG00000207056 | 0.42355   | 0.33595  | -1.8772   | 0.96975     | 0.014286    |         |  |
|           |                 | 0.4943    | -0.51214 | 0.69572   | 0.33595     | 0.696509824 |         |  |
| FBP2      | ENSG00000130957 | -0.73956  | 0.77022  | 0.42353   | 0.33596     | -0.59726    | 0.72483 |  |
|           |                 | -1.1482   | 0.87455  | 0.33596   | 0.696509824 |             |         |  |
| NA        | ENSG00000273489 | 0.42348   | 0.33597  | 0.42348   | 0.33597     | 0.42348     | 0.33597 |  |
|           |                 | 0.42348   | 0.33597  | 0.33597   | 0.696509824 |             |         |  |
| NA        | ENSG00000274281 | 0.42347   | 0.33597  | 0.20998   | 0.41684     | 0.20998     | 0.41684 |  |
|           |                 | 0.20998   | 0.41684  | 0.33597   | 0.696509824 |             |         |  |
| RBM18     | ENSG00000119446 | -0.67816  | 0.75117  | -1.5115   | 0.93467     | 0.2011      | 0.42031 |  |
|           |                 | 0.42345   | 0.33598  | 0.33598   | 0.696509824 |             |         |  |
| RN7SL655P | ENSG00000241963 | 0.42343   | 0.33599  | 0.42343   | 0.33599     | 0.42343     |         |  |
|           |                 | 0.33599   | 0.42343  | 0.33599   | 0.33599     | 0.696509824 |         |  |
| ANLN      | ENSG00000011426 | -0.089785 | 0.53577  | -1.5954   | 0.94469     | -0.85071    | 0.80254 |  |
|           |                 | 0.42328   | 0.33605  | 0.33605   | 0.696509824 |             |         |  |
| GUCA1B    | ENSG00000112599 | 0.42326   | 0.33605  | -0.69754  | 0.75727     | -0.59884    |         |  |
|           |                 | 0.72536   | -0.11007 | 0.54382   | 0.33605     | 0.696509824 |         |  |
| NA        | ENSG00000266470 | -0.76212  | 0.77701  | 0.42328   | 0.33605     | -0.58616    | 0.72112 |  |
|           |                 | -0.58616  | 0.72112  | 0.33605   | 0.696509824 |             |         |  |
| PTPN5     | ENSG00000110786 | 0.4232    | 0.33608  | -2.0809   | 0.98128     | -1.6493     | 0.95046 |  |
|           |                 | -1.7919   | 0.96343  | 0.33608   | 0.696509824 |             |         |  |
| DDX18P6   | ENSG00000220585 | 0.42318   | 0.33608  | 0.42318   | 0.33608     | 0.42318     |         |  |
|           |                 | 0.33608   | 0.1163   | 0.45371   | 0.33608     | 0.696509824 |         |  |
| NA        | ENSG00000234471 | 0.42318   | 0.33608  | -0.82719  | 0.79594     | 0.38384     | 0.35055 |  |
|           |                 | -0.52112  | 0.69886  | 0.33608   | 0.696509824 |             |         |  |
| NA        | ENSG00000267145 | -0.32724  | 0.62826  | 0.42315   | 0.33609     | 0.42315     | 0.33609 |  |
|           |                 | 0.42315   | 0.33609  | 0.33609   | 0.696509824 |             |         |  |
| HSPD1P15  | ENSG00000249557 | 0.42307   | 0.33612  | 0.42307   | 0.33612     | 0.42307     |         |  |
|           |                 | 0.33612   | 0.42307  | 0.33612   | 0.33612     | 0.696509824 |         |  |
| NA        | ENSG00000279519 | -0.02406  | 0.5096   | 0.42305   | 0.33613     | 0.42305     | 0.33613 |  |
|           |                 | 0.42305   | 0.33613  | 0.33613   | 0.696509824 |             |         |  |
| LINC02394 | ENSG00000258332 | -0.98484  | 0.83765  | -0.98484  | 0.83765     | 0.42303     |         |  |
|           |                 | 0.33614   | -0.98484 | 0.83765   | 0.33614     | 0.696509824 |         |  |
| HMG2P40   | ENSG00000260602 | -0.71489  | 0.76266  | 0.42302   | 0.33614     | 0.42302     |         |  |
|           |                 | 0.33614   | 0.42302  | 0.33614   | 0.33614     | 0.696509824 |         |  |
| NA        | ENSG00000259915 | 0.42295   | 0.33617  | -0.076914 | 0.53065     | -0.080573   | 0.53211 |  |
|           |                 | -0.080573 | 0.53211  | 0.33617   | 0.696509824 |             |         |  |
| IMPDH1P3  | ENSG00000214815 | 0.18842   | 0.42527  | -0.15714  | 0.56243     | 0.42292     |         |  |
|           |                 | 0.33618   | 0.061835 | 0.47535   | 0.33618     | 0.696509824 |         |  |
| KRTCAP2P1 | ENSG00000231848 | 0.4229    | 0.33618  | -0.44623  | 0.67228     | -1.5449     |         |  |
|           |                 | 0.93881   | -0.10482 | 0.54174   | 0.33618     | 0.696509824 |         |  |
| SAPCD2P4  | ENSG00000234312 | -2.6451   | 0.99592  | -1.8913   | 0.97071     | 0.42291     |         |  |
|           |                 | 0.33618   | 0.42291  | 0.33618   | 0.33618     | 0.696509824 |         |  |
| NA        | ENSG00000260003 | -0.38198  | 0.64876  | 0.42284   | 0.33621     | -1.2895     | 0.90139 |  |
|           |                 | -1.9623   | 0.97513  | 0.33621   | 0.696509824 |             |         |  |
| NA        | ENSG00000262141 | 0.42282   | 0.33621  | 0.42282   | 0.33621     | 0.42282     | 0.33621 |  |
|           |                 | 0.42282   | 0.33621  | 0.33621   | 0.696509824 |             |         |  |
| DCTN6     | ENSG00000104671 | 0.36377   | 0.35802  | 0.41361   | 0.33958     | 0.4228      | 0.33622 |  |
|           |                 | 0.23364   | 0.40763  | 0.33622   | 0.696509824 |             |         |  |
| XPNPEP1   | ENSG00000108039 | 0.42268   | 0.33627  | -0.12835  | 0.55106     | -1.1507     |         |  |
|           |                 | 0.87508   | -1.127   | 0.87012   | 0.33627     | 0.696565999 |         |  |
| NA        | ENSG00000204929 | -0.3556   | 0.63893  | -0.84404  | 0.80068     | 0.42262     | 0.33628 |  |
|           |                 | -0.23815  | 0.59412  | 0.33628   | 0.696565999 |             |         |  |
| CTBP2P2   | ENSG00000235746 | 0.42262   | 0.33629  | -0.58029  | 0.71914     | -0.8079     |         |  |
|           |                 | 0.79042   | -1.0242  | 0.84713   | 0.33629     | 0.696565999 |         |  |
| RNU6-886P | ENSG00000207046 | 0.42254   | 0.33632  | 0.42254   | 0.33632     | 0.42254     |         |  |
|           |                 | 0.33632   | 0.42254  | 0.33632   | 0.33632     | 0.696598529 |         |  |
| RPL21P11  | ENSG00000242571 | -0.29249  | 0.61504  | 0.42238   | 0.33637     | 0.18955     |         |  |

|            |                 |             |         |             |             |            |         |         |
|------------|-----------------|-------------|---------|-------------|-------------|------------|---------|---------|
|            | 0.42483         | 0.18955     | 0.42483 | 0.33637     | 0.696642871 |            |         |         |
| PPIAP49    | ENSG00000260471 | 0.4224      | 0.33637 | 0.4224      | 0.33637     | 0.4224     | 0.33637 | 0.4224  |
|            | 0.33637         | 0.4224      | 0.33637 | 0.33637     | 0.696642871 |            |         |         |
| LINC02600  | ENSG00000250986 | 0.37238     | 0.3548  | 0.42232     | 0.33639     | 0.37238    |         |         |
|            | 0.3548          | 0.37238     | 0.3548  | 0.33639     | 0.696654683 |            |         |         |
| RN7SKP271  | ENSG00000222460 | -0.12981    | 0.55164 | 0.42226     | 0.33642     | 0.13766    |         |         |
|            | 0.44525         | 0.13766     | 0.44525 | 0.33642     | 0.696687204 |            |         |         |
| NA         | ENSG00000232295 | 0.15669     | 0.43774 | 0.37344     | 0.35441     | -0.036156  | 0.51442 |         |
|            | 0.42216         | 0.33646     | 0.33646 | 0.69674043  |             |            |         |         |
| NA         | ENSG00000218483 | 0.42196     | 0.33653 | -0.15822    | 0.56286     | 0.42196    | 0.33653 |         |
|            | 0.42196         | 0.33653     | 0.33653 | 0.696829062 |             |            |         |         |
| NA         | ENSG00000264970 | -0.23722    | 0.59376 | 0.42193     | 0.33654     | 0.42193    | 0.33654 |         |
|            | 0.42193         | 0.33654     | 0.33654 | 0.696829062 |             |            |         |         |
| NA         | ENSG00000248322 | -1.3787     | 0.91601 | 0.42189     | 0.33655     | 0.42189    | 0.33655 |         |
|            | 0.42189         | 0.33655     | 0.33655 | 0.696829062 |             |            |         |         |
| ABHD4      | ENSG00000100439 | 0.41072     | 0.34064 | 0.037021    | 0.48523     | 0.42186    | 0.33656 |         |
|            | 0.10793         | 0.45703     | 0.33656 | 0.696829062 |             |            |         |         |
| FRG2GP     | ENSG00000260291 | 0.42168     | 0.33663 | 0.42168     | 0.33663     | 0.42168    |         |         |
|            | 0.33663         | 0.42168     | 0.33663 | 0.33663     | 0.696902748 |            |         |         |
| SIRT1      | ENSG00000096717 | -1.0414     | 0.85116 | 0.16891     | 0.43293     | 0.42164    | 0.33664 |         |
|            | -0.90079        | 0.81615     | 0.33664 | 0.696902748 |             |            |         |         |
| BNC1       | ENSG00000169594 | -0.3337     | 0.6307  | -0.07322    | 0.52918     | 0.42166    | 0.33664 |         |
|            | -0.011517       | 0.50459     | 0.33664 | 0.696902748 |             |            |         |         |
| PTPN4      | ENSG00000088179 | -0.072181   | 0.52877 | 0.42157     | 0.33667     | -0.033408  | 0.51333 |         |
|            | 0.017503        | 0.49302     | 0.33667 | 0.696902748 |             |            |         |         |
| PGF        | ENSG00000119630 | -0.32347    | 0.62683 | -0.25126    | 0.59919     | -0.74271   | 0.77117 |         |
|            | 0.4215          | 0.33669     | 0.33669 | 0.696902748 |             |            |         |         |
| LINC01360  | ENSG00000233973 | 0.090188    | 0.46407 | 0.27991     | 0.38978     | 0.42153    |         |         |
|            | 0.33669         | 0.088587    | 0.46471 | 0.33669     | 0.696902748 |            |         |         |
| NA         | ENSG00000235095 | -0.37063    | 0.64454 | 0.38543     | 0.34996     | 0.4215     | 0.3367  |         |
|            | -1.2433         | 0.89313     | 0.3367  | 0.696902748 |             |            |         |         |
| LIMS1      | ENSG00000169756 | 0.42145     | 0.33671 | -0.70606    | 0.75993     | -0.40059   | 0.65564 |         |
|            | -0.39815        | 0.65474     | 0.33671 | 0.696902748 |             |            |         |         |
| ENPP7P7    | ENSG00000273819 | -0.030787   | 0.51228 | 0.42138     | 0.33674     | -0.50742   |         |         |
|            | 0.69407         | -0.57836    | 0.71849 | 0.33674     | 0.696935239 |            |         |         |
| GALK2      | ENSG00000156958 | -0.18672    | 0.57406 | 0.11836     | 0.45289     | 0.42113    | 0.33683 |         |
|            | -0.20334        | 0.58056     | 0.33683 | 0.697074083 |             |            |         |         |
| NA         | ENSG00000225956 | 0.42109     | 0.33684 | 0.42109     | 0.33684     | 0.42109    | 0.33684 |         |
|            | 0.42109         | 0.33684     | 0.33684 | 0.697074083 |             |            |         |         |
| NA         | ENSG00000225191 | 0.42106     | 0.33685 | 0.067092    | 0.47325     | -0.2412    | 0.5953  |         |
|            | -0.25841        | 0.60196     | 0.33685 | 0.697074083 |             |            |         |         |
| NA         | ENSG00000255486 | 0.3034      | 0.38079 | 0.42096     | 0.33689     | -0.39314   | 0.65289 |         |
|            | -0.68322        | 0.75277     | 0.33689 | 0.697088744 |             |            |         |         |
| NA         | ENSG00000270695 | 0.42097     | 0.33689 | -1.4704     | 0.92927     | -0.22261   | 0.58808 |         |
|            | 0.41905         | 0.33759     | 0.33689 | 0.697088744 |             |            |         |         |
| NA         | ENSG00000254100 | 0.42094     | 0.3369  | 0.42094     | 0.3369      | 0.42094    | 0.3369  |         |
|            | 0.42094         | 0.3369      | 0.3369  | 0.697088744 |             |            |         |         |
| CAVIN4     | ENSG00000170681 | 0.42085     | 0.33693 | -0.6814     | 0.75219     | -0.27737   |         |         |
|            | 0.60925         | -1.0968     | 0.86363 | 0.33693     | 0.697121217 |            |         |         |
| RNU6-636P  | ENSG00000207328 | 0.066054    | 0.47367 | 0.42067     | 0.337       | -0.73109   | 0.76764 |         |
|            | -1.0402         | 0.85087     | 0.337   | 0.697164556 |             |            |         |         |
| NA         | ENSG00000256286 | 0.42065     | 0.337   | 0.42065     | 0.337       | 0.42065    | 0.337   | 0.42065 |
|            | 0.337           | 0.697164556 |         |             |             |            |         |         |
| POMP       | ENSG00000132963 | 0.4206      | 0.33702 | -0.15542    | 0.56175     | -0.68697   | 0.75395 |         |
|            | -0.030686       | 0.51224     | 0.33702 | 0.697164556 |             |            |         |         |
| LINC01871  | ENSG00000235576 | 0.056697    | 0.47739 | -0.28209    | 0.61106     | -0.27894   |         |         |
|            | 0.60985         | 0.42062     | 0.33702 | 0.33702     | 0.697164556 |            |         |         |
| RNU6-1297P | ENSG00000207144 | 0.42054     | 0.33705 | 0.42054     | 0.33705     | 0.42054    |         |         |
|            | 0.33705         | 0.061053    | 0.47566 | 0.33705     | 0.697164556 |            |         |         |
| INIP       | ENSG00000148153 | 0.34999     | 0.36317 | 0.42045     | 0.33708     | -0.0029387 | 0.50117 |         |
|            | -0.22419        | 0.5887      | 0.33708 | 0.697164556 |             |            |         |         |
| CSDC2      | ENSG00000172346 | 0.42035     | 0.33712 | -0.52353    | 0.6997      | 0.22393    | 0.41141 |         |



|            |                 |           |         |             |             |             |         |
|------------|-----------------|-----------|---------|-------------|-------------|-------------|---------|
|            | 0.42035         | 0.33712   | 0.33712 | 0.697164556 |             |             |         |
| NA         | ENSG00000230053 | 0.42033   | 0.33712 | 0.42033     | 0.33712     | 0.42033     | 0.33712 |
|            | 0.42033         | 0.33712   | 0.33712 | 0.697164556 |             |             |         |
| NA         | ENSG00000273399 | 0.42032   | 0.33713 | 0.42032     | 0.33713     | 0.42032     | 0.33713 |
|            | 0.42032         | 0.33713   | 0.33713 | 0.697164556 |             |             |         |
| MIR1266    | ENSG00000221052 | 0.42023   | 0.33716 | 0.42023     | 0.33716     | 0.42023     |         |
|            | 0.33716         | 0.42023   | 0.33716 | 0.33716     | 0.697164556 |             |         |
| NA         | ENSG00000229660 | 0.34511   | 0.365   | 0.34511     | 0.365       | -0.00068596 | 0.50027 |
|            | 0.42023         | 0.33716   | 0.33716 | 0.697164556 |             |             |         |
| LSM1       | ENSG00000175324 | 0.42019   | 0.33717 | 0.41745     | 0.33817     | 0.38843     | 0.34885 |
|            | 0.37583         | 0.35352   | 0.33717 | 0.697164556 |             |             |         |
| CRTAC1     | ENSG00000095713 | -0.67354  | 0.7497  | 0.42017     | 0.33718     | -0.64548    |         |
|            | 0.74069         | -1.597    | 0.94487 | 0.33718     | 0.697164556 |             |         |
| NA         | ENSG00000270618 | -0.90749  | 0.81793 | -0.97889    | 0.83618     | 0.42011     | 0.3372  |
|            | -0.90749        | 0.81793   | 0.3372  | 0.697164556 |             |             |         |
| NA         | ENSG00000267981 | 0.42013   | 0.3372  | 0.13378     | 0.44679     | 0.42013     | 0.3372  |
|            | 0.42013         | 0.3372    | 0.3372  | 0.697164556 |             |             |         |
| TFCP2L1    | ENSG00000115112 | 0.42009   | 0.33721 | -1.1344     | 0.87169     | 0.42009     |         |
|            | 0.33721         | 0.42009   | 0.33721 | 0.33721     | 0.697164556 |             |         |
| LINC02880  | ENSG00000175967 | 0.42003   | 0.33723 | -0.47955    | 0.68423     | 0.42003     |         |
|            | 0.33723         | 0.42003   | 0.33723 | 0.33723     | 0.697164556 |             |         |
| NUTF2P8    | ENSG00000270654 | -0.9393   | 0.82621 | 0.42004     | 0.33723     | -0.9393     |         |
|            | 0.82621         | -1.1735   | 0.8797  | 0.33723     | 0.697164556 |             |         |
| RNF141     | ENSG00000110315 | -0.99221  | 0.83945 | 0.41993     | 0.33727     | -0.19669    |         |
|            | 0.57797         | -0.95411  | 0.82999 | 0.33727     | 0.697164556 |             |         |
| LINC01475  | ENSG00000257582 | -0.015746 | 0.50628 | 0.41993     | 0.33727     | 0.41993     |         |
|            | 0.33727         | 0.41993   | 0.33727 | 0.33727     | 0.697164556 |             |         |
| TRIO       | ENSG00000038382 | 0.35786   | 0.36022 | 0.41989     | 0.33728     | 0.35282     | 0.36211 |
|            | -0.26566        | 0.60475   | 0.33728 | 0.697164556 |             |             |         |
| RNU6-1249P | ENSG00000200107 | 0.41991   | 0.33728 | -0.62313    | 0.7334      | 0.41991     |         |
|            | 0.33728         | 0.41991   | 0.33728 | 0.33728     | 0.697164556 |             |         |
| GARS1P1    | ENSG00000262135 | 0.41991   | 0.33728 | 0.41991     | 0.33728     | 0.41991     |         |
|            | 0.33728         | 0.41991   | 0.33728 | 0.33728     | 0.697164556 |             |         |
| MDFI       | ENSG00000112559 | -0.88372  | 0.81158 | -0.51047    | 0.69514     | 0.12393     | 0.45068 |
|            | 0.41982         | 0.33731   | 0.33731 | 0.697196993 |             |             |         |
| RPS3AP46   | ENSG00000226132 | 0.23911   | 0.40551 | 0.41974     | 0.33734     | -0.33961    |         |
|            | 0.63293         | -0.33961  | 0.63293 | 0.33734     | 0.697229427 |             |         |
| RHOQP2     | ENSG00000232742 | 0.41969   | 0.33736 | -0.50983    | 0.69491     | -0.070576   |         |
|            | 0.52813         | -0.50983  | 0.69491 | 0.33736     | 0.697241191 |             |         |
| NA         | ENSG00000261216 | 0.41963   | 0.33738 | 0.41963     | 0.33738     | 0.41963     | 0.33738 |
|            | 0.41963         | 0.33738   | 0.33738 | 0.697252954 |             |             |         |
| KRT8P12    | ENSG00000229320 | 0.41946   | 0.33744 | 0.41946     | 0.33744     | 0.41946     |         |
|            | 0.33744         | 0.41946   | 0.33744 | 0.33744     | 0.697347379 |             |         |
| NA         | ENSG00000231336 | 0.035762  | 0.48574 | -0.71311    | 0.76211     | -0.71311    | 0.76211 |
|            | 0.41936         | 0.33748   | 0.33748 | 0.697367681 |             |             |         |
| CALML4     | ENSG00000129007 | -0.86251  | 0.8058  | -0.51244    | 0.69583     | 0.41925     |         |
|            | 0.33752         | 0.41925   | 0.33752 | 0.33752     | 0.697367681 |             |         |
| SNORD115-5 | ENSG00000200503 | 0.41922   | 0.33753 | 0.41922     | 0.33753     | 0.41922     |         |
|            | 0.33753         | 0.41922   | 0.33753 | 0.33753     | 0.697367681 |             |         |
| RNU6-959P  | ENSG00000207402 | 0.41922   | 0.33753 | 0.41922     | 0.33753     | 0.41922     |         |
|            | 0.33753         | 0.41922   | 0.33753 | 0.33753     | 0.697367681 |             |         |
| BRD3OS     | ENSG00000235106 | 0.41919   | 0.33754 | 0.33833     | 0.36756     | 0.41919     |         |
|            | 0.33754         | 0.41919   | 0.33754 | 0.33754     | 0.697367681 |             |         |
| NA         | ENSG00000257337 | 0.4192    | 0.33754 | 0.4192      | 0.33754     | 0.4192      | 0.33754 |
|            | 0.4192          | 0.33754   | 0.33754 | 0.697367681 |             |             |         |
| NA         | ENSG00000254011 | -0.094688 | 0.53772 | 0.41917     | 0.33755     | -0.33504    | 0.6312  |
|            | 0.16091         | 0.43608   | 0.33755 | 0.697367681 |             |             |         |
| HDGF       | ENSG00000143321 | 0.41899   | 0.33761 | 0.41899     | 0.33761     | 0.41899     | 0.33761 |
|            | -0.20406        | 0.58085   | 0.33761 | 0.69739972  |             |             |         |
| SERTAD3    | ENSG00000167565 | -2.0157   | 0.97808 | -2.0157     | 0.97808     | 0.419       | 0.33761 |
|            | -2.0157         | 0.97808   | 0.33761 | 0.69739972  |             |             |         |
| NA         | ENSG00000238507 | 0.41895   | 0.33763 | 0.41895     | 0.33763     | 0.41895     | 0.33763 |

|           |                 |           |         |             |             |          |         |  |
|-----------|-----------------|-----------|---------|-------------|-------------|----------|---------|--|
|           | 0.41895         | 0.33763   | 0.33763 | 0.69739972  |             |          |         |  |
| PLEKHA5   | ENSG00000052126 | 0.41888   | 0.33765 | -0.85581    | 0.80395     | -1.3473  |         |  |
|           | 0.91107         | -0.44368  | 0.67136 | 0.33765     | 0.69739972  |          |         |  |
| ARL6      | ENSG00000113966 | -0.34199  | 0.63382 | -0.26207    | 0.60337     | 0.41887  | 0.33765 |  |
|           | 0.028301        | 0.48871   | 0.33765 | 0.69739972  |             |          |         |  |
| PLSCR2    | ENSG00000163746 | 0.14543   | 0.44219 | -0.137      | 0.55449     | 0.31628  |         |  |
|           | 0.3759          | 0.41885   | 0.33766 | 0.33766     | 0.69739972  |          |         |  |
| ZFP1      | ENSG00000184517 | -0.2115   | 0.58375 | -0.74868    | 0.77297     | -0.74868 | 0.77297 |  |
|           | 0.41883         | 0.33767   | 0.33767 | 0.69739972  |             |          |         |  |
| ADAD1     | ENSG00000164113 | -0.071139 | 0.52836 | 0.25488     | 0.39941     | -0.77483 | 0.78078 |  |
|           | 0.4188          | 0.33768   | 0.33768 | 0.69739972  |             |          |         |  |
| LIMD2     | ENSG00000136490 | 0.41859   | 0.33776 | 0.41859     | 0.33776     | 0.41859  | 0.33776 |  |
|           | 0.41859         | 0.33776   | 0.33776 | 0.697496911 |             |          |         |  |
| NA        | ENSG00000279369 | 0.41859   | 0.33776 | 0.41859     | 0.33776     | 0.41859  | 0.33776 |  |
|           | 0.41859         | 0.33776   | 0.33776 | 0.697496911 |             |          |         |  |
| NA        | ENSG00000255227 | 0.26899   | 0.39397 | -0.15525    | 0.56169     | 0.30468  | 0.38031 |  |
|           | 0.41856         | 0.33777   | 0.33777 | 0.697496911 |             |          |         |  |
| AKAP10    | ENSG00000108599 | 0.047758  | 0.48095 | -0.76623    | 0.77823     | 0.41851  |         |  |
|           | 0.33779         | -0.904    | 0.817   | 0.33779     | 0.697499343 |          |         |  |
| LRCH4     | ENSG00000077454 | -1.8724   | 0.96942 | -0.78448    | 0.78362     | -0.78028 | 0.78239 |  |
|           | 0.41843         | 0.33782   | 0.33782 | 0.697499343 |             |          |         |  |
| NA        | ENSG00000271586 | -0.36792  | 0.64353 | -0.65217    | 0.74285     | 0.31256  | 0.37731 |  |
|           | 0.41834         | 0.33785   | 0.33785 | 0.697499343 |             |          |         |  |
| NA        | ENSG00000248986 | -1.5971   | 0.94488 | -1.5971     | 0.94488     | -0.53664 | 0.70424 |  |
|           | 0.41834         | 0.33785   | 0.33785 | 0.697499343 |             |          |         |  |
| NA        | ENSG00000231125 | 0.41829   | 0.33787 | 0.41829     | 0.33787     | 0.41829  | 0.33787 |  |
|           | 0.41829         | 0.33787   | 0.33787 | 0.697499343 |             |          |         |  |
| RNA5SP346 | ENSG00000200411 | -0.28172  | 0.61092 | -0.15055    | 0.55984     | -0.28172 |         |  |
|           | 0.61092         | 0.41826   | 0.33788 | 0.33788     | 0.697499343 |          |         |  |
| NA        | ENSG00000226707 | 0.14963   | 0.44053 | 0.41822     | 0.33789     | 0.30825  | 0.37895 |  |
|           | 0.41822         | 0.33789   | 0.33789 | 0.697499343 |             |          |         |  |
| KLHL35    | ENSG00000149243 | 0.41821   | 0.3379  | -0.60856    | 0.72859     | -0.82905 |         |  |
|           | 0.79646         | -1.7482   | 0.95978 | 0.3379      | 0.697499343 |          |         |  |
| C15orf62  | ENSG00000188277 | 0.41821   | 0.3379  | 0.41821     | 0.3379      | 0.41821  |         |  |
|           | 0.3379          | 0.41821   | 0.3379  | 0.3379      | 0.697499343 |          |         |  |
| NA        | ENSG00000261775 | 0.26603   | 0.39511 | 0.41812     | 0.33793     | 0.41812  | 0.33793 |  |
|           | 0.20199         | 0.41996   | 0.33793 | 0.697531722 |             |          |         |  |
| LINC00449 | ENSG00000203441 | 0.41807   | 0.33795 | 0.41807     | 0.33795     | 0.41807  |         |  |
|           | 0.33795         | 0.41807   | 0.33795 | 0.33795     | 0.697543458 |          |         |  |
| NA        | ENSG00000185641 | 0.41783   | 0.33804 | 0.41783     | 0.33804     | 0.41783  | 0.33804 |  |
|           | 0.41783         | 0.33804   | 0.33804 | 0.69767012  |             |          |         |  |
| NA        | ENSG00000248635 | 0.41783   | 0.33804 | -0.41549    | 0.66111     | -0.41549 | 0.66111 |  |
|           | -0.41549        | 0.66111   | 0.33804 | 0.69767012  |             |          |         |  |
| CRAMP1    | ENSG00000007545 | 0.41774   | 0.33807 | -0.83552    | 0.79829     | -0.69605 |         |  |
|           | 0.7568          | -0.36349  | 0.64188 | 0.33807     | 0.697693576 |          |         |  |
| PLGRKT    | ENSG00000107020 | -0.76625  | 0.77824 | 0.4177      | 0.33808     | -0.33814 |         |  |
|           | 0.63237         | -0.17852  | 0.57084 | 0.33808     | 0.697693576 |          |         |  |
| NA        | ENSG00000242308 | 0.41763   | 0.33811 | -1.3075     | 0.90449     | -0.34132 | 0.63357 |  |
|           | -0.34132        | 0.63357   | 0.33811 | 0.697696392 |             |          |         |  |
| SHLD2P2   | ENSG00000259096 | 0.10955   | 0.45638 | 0.41762     | 0.33811     | 0.41762  |         |  |
|           | 0.33811         | 0.41762   | 0.33811 | 0.33811     | 0.697696392 |          |         |  |
| NA        | ENSG00000284095 | 0.41756   | 0.33813 | 0.27337     | 0.39229     | 0.41756  | 0.33813 |  |
|           | 0.41756         | 0.33813   | 0.33813 | 0.697708117 |             |          |         |  |
| MTCO2P6   | ENSG00000240951 | 0.41747   | 0.33817 | -0.96875    | 0.83367     | -0.96875 |         |  |
|           | 0.83367         | -0.96875  | 0.83367 | 0.33817     | 0.697761109 |          |         |  |
| ZFAND5    | ENSG00000107372 | 0.41735   | 0.33821 | -0.79062    | 0.78542     | -0.20183 |         |  |
|           | 0.57998         | -0.8839   | 0.81163 | 0.33821     | 0.697775639 |          |         |  |
| CCL1      | ENSG00000108702 | 0.41734   | 0.33822 | -0.032107   | 0.51281     | -0.78372 | 0.7834  |  |
|           | -0.49552        | 0.68988   | 0.33822 | 0.697775639 |             |          |         |  |
| LINC02460 | ENSG00000255714 | 0.41733   | 0.33822 | 0.41733     | 0.33822     | 0.41733  |         |  |
|           | 0.33822         | 0.41733   | 0.33822 | 0.33822     | 0.697775639 |          |         |  |
| NA        | ENSG00000267415 | 0.4172    | 0.33826 | 0.4172      | 0.33826     | 0.4172   | 0.33826 |  |

|            |                 |           |         |             |             |           |         |
|------------|-----------------|-----------|---------|-------------|-------------|-----------|---------|
|            | 0.4172          | 0.33826   | 0.33826 | 0.697798096 |             |           |         |
| NA         | ENSG00000255581 | 0.41712   | 0.33829 | 0.41712     | 0.33829     | 0.41712   | 0.33829 |
|            | 0.017128        | 0.49317   | 0.33829 | 0.697798096 |             |           |         |
| NA         | ENSG00000228226 | 0.05275   | 0.47897 | 0.41709     | 0.33831     | -0.88856  | 0.81288 |
|            | -1.1875         | 0.88248   | 0.33831 | 0.697798096 |             |           |         |
| GPD1L      | ENSG00000152642 | 0.067489  | 0.4731  | 0.32165     | 0.37386     | 0.41705   | 0.33832 |
|            | -0.74441        | 0.77169   | 0.33832 | 0.697798096 |             |           |         |
| RFLNA      | ENSG00000178882 | 0.02463   | 0.49018 | 0.09698     | 0.46137     | 0.41696   | 0.33835 |
|            | 0.20381         | 0.41925   | 0.33835 | 0.697798096 |             |           |         |
| CFAP221    | ENSG00000163075 | 0.41689   | 0.33838 | -0.36952    | 0.64413     | 0.063091  |         |
|            | 0.47485         | 0.064528  | 0.47427 | 0.33838     | 0.697798096 |           |         |
| INSYN2B    | ENSG00000204767 | -0.27278  | 0.60749 | 0.29832     | 0.38273     | 0.41688   |         |
|            | 0.33838         | -0.084084 | 0.53351 | 0.33838     | 0.697798096 |           |         |
| NA         | ENSG00000255135 | 0.41687   | 0.33839 | -0.22174    | 0.58774     | -0.22174  | 0.58774 |
|            | -0.22174        | 0.58774   | 0.33839 | 0.697798096 |             |           |         |
| C9orf78    | ENSG00000136819 | 0.20858   | 0.41739 | 0.23879     | 0.40563     | 0.41682   |         |
|            | 0.33841         | 0.050698  | 0.47978 | 0.33841     | 0.697798096 |           |         |
| LINC01374  | ENSG00000280560 | 0.0773    | 0.46919 | -0.33993    | 0.63305     | -1.3442   |         |
|            | 0.91056         | 0.41679   | 0.33842 | 0.33842     | 0.697798096 |           |         |
| NIPSNAP3B  | ENSG00000165028 | -1.7203   | 0.95731 | -0.070094   | 0.52794     | 0.41676   |         |
|            | 0.33843         | -0.54718  | 0.70787 | 0.33843     | 0.697798096 |           |         |
| RNU6-1252P | ENSG00000199924 | 0.41676   | 0.33843 | -0.78371    | 0.7834      | -0.61733  |         |
|            | 0.73149         | -0.24412  | 0.59643 | 0.33843     | 0.697798096 |           |         |
| NA         | ENSG00000248928 | -0.99458  | 0.84003 | -0.056055   | 0.52235     | -0.056055 | 0.52235 |
|            | 0.41674         | 0.33843   | 0.33843 | 0.697798096 |             |           |         |
| MAP3K3     | ENSG00000198909 | 0.41674   | 0.33844 | 0.41674     | 0.33844     | 0.41674   |         |
|            | 0.33844         | 0.3177    | 0.37536 | 0.33844     | 0.697798096 |           |         |
| PTGDR      | ENSG00000168229 | 0.11362   | 0.45477 | 0.35005     | 0.36315     | -0.79663  | 0.78717 |
|            | 0.41667         | 0.33846   | 0.33846 | 0.697798096 |             |           |         |
| FAM225B    | ENSG00000225684 | 0.39712   | 0.34564 | 0.41668     | 0.33846     | -0.96827  |         |
|            | 0.83354         | -0.2752   | 0.60842 | 0.33846     | 0.697798096 |           |         |
| RBX1       | ENSG00000100387 | 0.41661   | 0.33848 | -1.238      | 0.89214     | -0.1918   | 0.57605 |
|            | -1.2984         | 0.90293   | 0.33848 | 0.697800901 |             |           |         |
| MAP3K4     | ENSG00000085511 | -0.61591  | 0.73102 | -0.016159   | 0.50645     | -0.051104 |         |
|            | 0.52038         | 0.4166    | 0.33849 | 0.33849     | 0.697800901 |           |         |
| NA         | ENSG00000269570 | 0.41652   | 0.33852 | 0.41652     | 0.33852     | 0.41652   | 0.33852 |
|            | 0.41652         | 0.33852   | 0.33852 | 0.697824319 |             |           |         |
| SPATA5     | ENSG00000145375 | 0.41647   | 0.33853 | -0.73763    | 0.76963     | -0.78458  |         |
|            | 0.78365         | -0.76587  | 0.77812 | 0.33853     | 0.697824319 |           |         |
| NA         | ENSG00000267868 | -1.5345   | 0.93755 | 0.41638     | 0.33857     | -0.086235 | 0.53436 |
|            | -1.3516         | 0.91175   | 0.33857 | 0.697862237 |             |           |         |
| NRG3-AS1   | ENSG00000225738 | 0.41634   | 0.33858 | 0.41634     | 0.33858     | 0.41634   |         |
|            | 0.33858         | 0.41634   | 0.33858 | 0.33858     | 0.697862237 |           |         |
| RBM48      | ENSG00000127993 | 0.31349   | 0.37695 | 0.31349     | 0.37695     | 0.31349   | 0.37695 |
|            | 0.41627         | 0.3386    | 0.3386  | 0.697862237 |             |           |         |
| NA         | ENSG00000221849 | -0.66389  | 0.74662 | 0.41626     | 0.33861     | -0.66389  | 0.74662 |
|            | -0.53095        | 0.70227   | 0.33861 | 0.697862237 |             |           |         |
| DMRTA2     | ENSG00000142700 | -1.5488   | 0.93928 | -0.27444    | 0.60813     | 0.41624   |         |
|            | 0.33862         | -1.1003   | 0.86439 | 0.33862     | 0.697862237 |           |         |
| NA         | ENSG00000264595 | -0.055504 | 0.52213 | 0.41612     | 0.33866     | 0.16461   | 0.43463 |
|            | -0.079911       | 0.53185   | 0.33866 | 0.697902934 |             |           |         |
| NA         | ENSG00000265091 | 0.41602   | 0.3387  | -0.0064833  | 0.50259     | 0.41602   | 0.3387  |
|            | 0.41602         | 0.3387    | 0.3387  | 0.697902934 |             |           |         |
| NA         | ENSG00000272205 | -0.4114   | 0.65961 | -0.052794   | 0.52105     | 0.416     | 0.33871 |
|            | -0.4114         | 0.65961   | 0.33871 | 0.697902934 |             |           |         |
| TMPRSS6    | ENSG00000187045 | 0.41592   | 0.33873 | -1.1647     | 0.87793     | 0.41592   |         |
|            | 0.33873         | -0.71519  | 0.76275 | 0.33873     | 0.697902934 |           |         |
| RAB1AP2    | ENSG00000217272 | 0.41592   | 0.33873 | -0.24697    | 0.59753     | -0.078654 |         |
|            | 0.53135         | -1.0731   | 0.85839 | 0.33873     | 0.697902934 |           |         |
| NA         | ENSG00000227048 | 0.41593   | 0.33873 | 0.41593     | 0.33873     | 0.41593   | 0.33873 |
|            | 0.41593         | 0.33873   | 0.33873 | 0.697902934 |             |           |         |
| ANKS1B     | ENSG00000185046 | -0.46353  | 0.67851 | 0.41591     | 0.33874     | -1.0573   |         |

|           |                 |           |         |             |             |          |         |
|-----------|-----------------|-----------|---------|-------------|-------------|----------|---------|
|           | 0.85482         | -0.58677  | 0.72132 | 0.33874     | 0.697902934 |          |         |
| SH2B2     | ENSG00000160999 | -0.39534  | 0.6537  | 0.056531    | 0.47746     | -1.0369  | 0.85011 |
|           | 0.41583         | 0.33877   | 0.33877 | 0.697917425 |             |          |         |
| NA        | ENSG00000270798 | 0.41581   | 0.33878 | 0.41581     | 0.33878     | 0.41581  | 0.33878 |
|           | 0.41581         | 0.33878   | 0.33878 | 0.697917425 |             |          |         |
| HECW1-IT1 | ENSG00000181211 | -1.529    | 0.93687 | 0.41577     | 0.33879     | -1.2226  |         |
|           | 0.88927         | -1.529    | 0.93687 | 0.33879     | 0.697917425 |          |         |
| MLF1      | ENSG00000178053 | 0.41569   | 0.33882 | 0.11528     | 0.45411     | 0.28766  | 0.3868  |
|           | 0.13891         | 0.44476   | 0.33882 | 0.697931913 |             |          |         |
| RNU6-652P | ENSG00000202358 | 0.41562   | 0.33884 | 0.41562     | 0.33884     | 0.41562  |         |
|           | 0.33884         | 0.41562   | 0.33884 | 0.33884     | 0.697931913 |          |         |
| IGLV1-40  | ENSG00000211653 | -0.54404  | 0.70679 | -0.41697    | 0.66165     | -0.13589 |         |
|           | 0.55405         | 0.41564   | 0.33884 | 0.33884     | 0.697931913 |          |         |
| NA        | ENSG00000275216 | -0.53168  | 0.70253 | 0.41551     | 0.33889     | -0.73807 | 0.76976 |
|           | -0.4762         | 0.68304   | 0.33889 | 0.698005398 |             |          |         |
| NA        | ENSG00000229047 | 0.41532   | 0.33896 | 0.41532     | 0.33896     | 0.41532  | 0.33896 |
|           | 0.41532         | 0.33896   | 0.33896 | 0.698046028 |             |          |         |
| NA        | ENSG00000264562 | 0.41528   | 0.33897 | 0.41528     | 0.33897     | 0.079161 | 0.46845 |
|           | -0.074276       | 0.5296    | 0.33897 | 0.698046028 |             |          |         |
| ZNF800    | ENSG00000048405 | 0.17564   | 0.43029 | 0.41524     | 0.33898     | 0.41524  |         |
|           | 0.33898         | -0.067816 | 0.52703 | 0.33898     | 0.698046028 |          |         |
| RN7SL402P | ENSG00000243968 | 0.41526   | 0.33898 | 0.41526     | 0.33898     | 0.41526  |         |
|           | 0.33898         | 0.41526   | 0.33898 | 0.33898     | 0.698046028 |          |         |
| PEAR1     | ENSG00000187800 | 0.38333   | 0.35074 | 0.38333     | 0.35074     | 0.41519  | 0.339   |
|           | -0.048187       | 0.51922   | 0.339   | 0.698046028 |             |          |         |
| NTAN1P1   | ENSG00000270965 | 0.29983   | 0.38215 | 0.015802    | 0.4937      | 0.35427  |         |
|           | 0.36157         | 0.4152    | 0.339   | 0.339       | 0.698046028 |          |         |
| NKX6-1    | ENSG00000163623 | -0.56533  | 0.71407 | 0.41515     | 0.33901     | 0.27269  |         |
|           | 0.39255         | -0.50185  | 0.69211 | 0.33901     | 0.698046028 |          |         |
| OR2T7     | ENSG00000227152 | -0.13096  | 0.5521  | -1.1679     | 0.87857     | -0.31263 | 0.62272 |
|           | 0.41508         | 0.33904   | 0.33904 | 0.698048809 |             |          |         |
| NA        | ENSG00000280234 | 0.41509   | 0.33904 | 0.41509     | 0.33904     | 0.41509  | 0.33904 |
|           | 0.41509         | 0.33904   | 0.33904 | 0.698048809 |             |          |         |
| CITED2    | ENSG00000164442 | -0.48285  | 0.6854  | 0.41503     | 0.33906     | -0.2026  |         |
|           | 0.58028         | 0.30778   | 0.37913 | 0.33906     | 0.698057147 |          |         |
| ZNF823    | ENSG00000197933 | -0.85226  | 0.80297 | -1.1043     | 0.86526     | 0.2422   |         |
|           | 0.40431         | 0.41492   | 0.3391  | 0.3391      | 0.698057147 |          |         |
| NA        | ENSG00000254510 | -0.80912  | 0.79078 | 0.41493     | 0.3391      | -1.4144  | 0.92138 |
|           | -1.3239         | 0.90723   | 0.3391  | 0.698057147 |             |          |         |
| NA        | ENSG00000241946 | 0.41489   | 0.33911 | 0.41489     | 0.33911     | 0.41489  | 0.33911 |
|           | 0.41489         | 0.33911   | 0.33911 | 0.698057147 |             |          |         |
| KCTD21    | ENSG00000188997 | -0.85703  | 0.80429 | 0.41484     | 0.33913     | -0.85703 |         |
|           | 0.80429         | -0.85703  | 0.80429 | 0.33913     | 0.698057147 |          |         |
| DANCR     | ENSG00000226950 | 0.41483   | 0.33913 | -0.11692    | 0.54654     | -2.3601  | 0.99086 |
|           | -0.36432        | 0.64219   | 0.33913 | 0.698057147 |             |          |         |
| STK3      | ENSG00000104375 | 0.020918  | 0.49166 | 0.4147      | 0.33918     | 0.20386  | 0.41923 |
|           | 0.091634        | 0.46349   | 0.33918 | 0.698112768 |             |          |         |
| COL6A4P2  | ENSG00000228252 | 0.41468   | 0.33919 | -1.233      | 0.89121     | -1.1093  |         |
|           | 0.86634         | -0.59749  | 0.72491 | 0.33919     | 0.698112768 |          |         |
| GAPVD1    | ENSG00000165219 | -0.23266  | 0.59199 | 0.41464     | 0.3392      | -0.24486 |         |
|           | 0.59672         | 0.3907    | 0.34801 | 0.3392      | 0.698112768 |          |         |
| NA        | ENSG00000250993 | -0.98601  | 0.83794 | -0.98601    | 0.83794     | -0.17724 | 0.57034 |
|           | 0.41453         | 0.33924   | 0.33924 | 0.698126631 |             |          |         |
| NA        | ENSG00000273264 | 0.41453   | 0.33924 | 0.41453     | 0.33924     | 0.41453  | 0.33924 |
|           | 0.41453         | 0.33924   | 0.33924 | 0.698126631 |             |          |         |
| NA        | ENSG00000268379 | 0.4145    | 0.33926 | -0.25873    | 0.60208     | 0.4145   | 0.33926 |
|           | 0.4145          | 0.33926   | 0.33926 | 0.698126631 |             |          |         |
| NA        | ENSG00000237555 | -0.55726  | 0.71133 | -0.097089   | 0.53867     | 0.41445  | 0.33927 |
|           | 0.41445         | 0.33927   | 0.33927 | 0.698126631 |             |          |         |
| CDK4      | ENSG00000135446 | 0.41439   | 0.33929 | 0.41439     | 0.33929     | 0.41439  | 0.33929 |
|           | 0.41439         | 0.33929   | 0.33929 | 0.698126631 |             |          |         |
| HMGB1P37  | ENSG00000213467 | 0.10417   | 0.45852 | -0.5139     | 0.69634     | 0.41438  |         |

|            |                 |           |             |             |             |           |         |       |
|------------|-----------------|-----------|-------------|-------------|-------------|-----------|---------|-------|
|            | 0.3393          | -0.099963 | 0.53981     | 0.3393      | 0.698126631 |           |         |       |
| NA         | ENSG00000254337 | 0.41432   | 0.33932     | -1.229      | 0.89047     | 0.41432   | 0.33932 |       |
|            | -0.55839        | 0.71171   | 0.33932     | 0.698126631 |             |           |         |       |
| MIR1289-1  | ENSG00000221763 | 0.41423   | 0.33935     | -0.016895   | 0.50674     | -0.016895 |         |       |
|            | 0.50674         | -0.016895 | 0.50674     | 0.33935     | 0.698126631 |           |         |       |
| NA         | ENSG00000231525 | 0.41424   | 0.33935     | 0.41424     | 0.33935     | 0.41424   | 0.33935 |       |
|            | 0.41424         | 0.33935   | 0.33935     | 0.698126631 |             |           |         |       |
| NA         | ENSG00000266933 | 0.41424   | 0.33935     | 0.41424     | 0.33935     | 0.41424   | 0.33935 |       |
|            | 0.41424         | 0.33935   | 0.33935     | 0.698126631 |             |           |         |       |
| ADIPOR1P1  | ENSG00000232497 | 0.41128   | 0.34043     | -1.0187     | 0.84583     | 0.41416   |         |       |
|            | 0.33938         | 0.41416   | 0.33938     | 0.33938     | 0.698149973 |           |         |       |
| DNAJC21    | ENSG00000168724 | -0.53395  | 0.70331     | -0.0029115  | 0.50116     | -0.13409  |         |       |
|            | 0.55334         | 0.41412   | 0.33939     | 0.33939     | 0.698149973 |           |         |       |
| NA         | ENSG00000252870 | -0.50594  | 0.69355     | 0.414       | 0.33944     | -0.50594  | 0.69355 |       |
|            | -0.50594        | 0.69355   | 0.33944     | 0.698223352 |             |           |         |       |
| GABRB2     | ENSG00000145864 | -0.37335  | 0.64556     | -0.74702    | 0.77248     | -0.23384  |         |       |
|            | 0.59244         | 0.41388   | 0.33948     | 0.33948     | 0.698276156 |           |         |       |
| MOXD1      | ENSG00000079931 | -0.53472  | 0.70358     | 0.12513     | 0.45021     | 0.41382   | 0.3395  |       |
|            | 0.24294         | 0.40403   | 0.3395      | 0.698287819 |             |           |         |       |
| NA         | ENSG00000229492 | 0.41372   | 0.33954     | 0.41372     | 0.33954     | 0.41372   | 0.33954 |       |
|            | 0.41372         | 0.33954   | 0.33954     | 0.698340615 |             |           |         |       |
| RNU6-1248P | ENSG00000212398 | 0.41363   | 0.33957     | -0.20185    | 0.57998     | 0.40661   |         |       |
|            | 0.34215         | -0.92149  | 0.8216      | 0.33957     | 0.698343368 |           |         |       |
| RPS23P3    | ENSG00000244099 | -0.10039  | 0.53998     | -0.10039    | 0.53998     | 0.34702   |         |       |
|            | 0.36429         | 0.41363   | 0.33957     | 0.33957     | 0.698343368 |           |         |       |
| SMIM8      | ENSG00000111850 | -1.6107   | 0.94637     | -1.1589     | 0.87675     | -0.59267  | 0.7233  |       |
|            | 0.41354         | 0.3396    | 0.3396      | 0.69835097  |             |           |         |       |
| NA         | ENSG00000223946 | 0.41353   | 0.33961     | 0.41353     | 0.33961     | 0.41353   | 0.33961 |       |
|            | 0.41353         | 0.33961   | 0.33961     | 0.69835097  |             |           |         |       |
| P2RX4      | ENSG00000135124 | -0.82018  | 0.79394     | -0.82018    | 0.79394     | 0.4134    | 0.33966 |       |
|            | -0.82018        | 0.79394   | 0.33966     | 0.69835097  |             |           |         |       |
| NPM1P32    | ENSG00000213239 | 0.41339   | 0.33966     | 0.41339     | 0.33966     | -1.1177   |         |       |
|            | 0.86814         | 0.41339   | 0.33966     | 0.33966     | 0.69835097  |           |         |       |
| NA         | ENSG00000260612 | 0.38751   | 0.34919     | 0.41339     | 0.33966     | 0.41339   | 0.33966 |       |
|            | 0.41339         | 0.33966   | 0.33966     | 0.69835097  |             |           |         |       |
| CLCN6      | ENSG00000011021 | -0.87154  | 0.80827     | -1.4295     | 0.92357     | -1.4589   | 0.92771 |       |
|            | 0.41337         | 0.33967   | 0.33967     | 0.69835097  |             |           |         |       |
| ARF1       | ENSG00000143761 | -0.20082  | 0.57958     | -0.20082    | 0.57958     | -0.20082  | 0.57958 |       |
|            | 0.41332         | 0.33969   | 0.33969     | 0.69835097  |             |           |         |       |
| RNU2-3P    | ENSG00000222076 | 0.41324   | 0.33971     | 0.41324     | 0.33971     | 0.41324   |         |       |
|            | 0.33971         | 0.41324   | 0.33971     | 0.33971     | 0.69835097  |           |         |       |
| RN7SL492P  | ENSG00000240545 | 0.41321   | 0.33972     | -0.95063    | 0.8291      | 0.19293   |         |       |
|            | 0.42351         | -0.77842  | 0.78184     | 0.33972     | 0.69835097  |           |         |       |
| FCRLB      | ENSG00000162746 | 0.41318   | 0.33974     | 0.41318     | 0.33974     | 0.41318   | 0.33974 |       |
|            | 0.41318         | 0.33974   | 0.33974     | 0.69835097  |             |           |         |       |
| NA         | ENSG00000199797 | 0.4131    | 0.33976     | 0.4131      | 0.33976     | 0.4131    | 0.33976 |       |
|            | 0.4131          | 0.33976   | 0.33976     | 0.69835097  |             |           |         |       |
| NA         | ENSG00000257288 | -0.68772  | 0.75419     | 0.4131      | 0.33976     | -0.30188  | 0.61863 |       |
|            | -0.65868        | 0.74495   | 0.33976     | 0.69835097  |             |           |         |       |
| LCMT1-AS2  | ENSG00000260034 | 0.41311   | 0.33976     | 0.41311     | 0.33976     | 0.41311   |         |       |
|            | 0.33976         | 0.41311   | 0.33976     | 0.33976     | 0.69835097  |           |         |       |
| PCED1CP    | ENSG00000231254 | -0.41287  | 0.66015     | 0.413       | 0.3398      | 0.413     | 0.3398  | 0.413 |
|            | 0.3398          | 0.3398    | 0.698361312 |             |             |           |         |       |
| RNU6-1288P | ENSG00000251859 | 0.41296   | 0.33982     | -0.47282    | 0.68183     | 0.25271   |         |       |
|            | 0.40025         | -0.5304   | 0.70208     | 0.33982     | 0.698361312 |           |         |       |
| NA         | ENSG00000253072 | 0.41286   | 0.33985     | 0.41286     | 0.33985     | 0.41286   | 0.33985 |       |
|            | 0.41286         | 0.33985   | 0.33985     | 0.698361312 |             |           |         |       |
| NA         | ENSG00000258748 | -0.13749  | 0.55468     | 0.41287     | 0.33985     | -0.22411  | 0.58866 |       |
|            | -0.22411        | 0.58866   | 0.33985     | 0.698361312 |             |           |         |       |
| NA         | ENSG00000273891 | 0.41288   | 0.33985     | 0.41288     | 0.33985     | 0.41288   | 0.33985 |       |
|            | 0.41288         | 0.33985   | 0.33985     | 0.698361312 |             |           |         |       |
| C1QBP      | ENSG00000108561 | -1.0932   | 0.86284     | -0.45806    | 0.67655     | 0.41283   | 0.33986 |       |

|               |                 |           |         |             |             |          |         |  |
|---------------|-----------------|-----------|---------|-------------|-------------|----------|---------|--|
|               | -0.28531        | 0.6123    | 0.33986 | 0.698361312 |             |          |         |  |
| TAF11L12      | ENSG00000249156 | 0.32138   | 0.37396 | 0.41283     | 0.33987     | -0.94035 |         |  |
|               | 0.82648         | -0.94035  | 0.82648 | 0.33987     | 0.698361312 |          |         |  |
| TPTEP2-CSNK1E | ENSG00000283900 | 0.41278   | 0.33988 | 0.41278     | 0.33988     | 0.41278  |         |  |
|               | 0.33988         | 0.41278   | 0.33988 | 0.33988     | 0.698361312 |          |         |  |
| NA            | ENSG00000227960 | 0.41268   | 0.33992 | 0.085191    | 0.46605     | 0.085191 | 0.46605 |  |
|               | 0.085191        | 0.46605   | 0.33992 | 0.698361312 |             |          |         |  |
| RASSF9        | ENSG00000198774 | 0.41261   | 0.33994 | 0.24164     | 0.40453     | 0.41261  |         |  |
|               | 0.33994         | 0.41261   | 0.33994 | 0.33994     | 0.698361312 |          |         |  |
| H2ACP1        | ENSG00000223383 | 0.41261   | 0.33994 | -0.63078    | 0.73591     | -0.63078 |         |  |
|               | 0.73591         | -0.63078  | 0.73591 | 0.33994     | 0.698361312 |          |         |  |
| DYNC2H1       | ENSG00000187240 | -0.72034  | 0.76434 | 0.41258     | 0.33996     | 0.28118  |         |  |
|               | 0.38929         | -0.50099  | 0.69181 | 0.33996     | 0.698361312 |          |         |  |
| LRRC46        | ENSG00000141294 | 0.1982    | 0.42144 | 0.41254     | 0.33997     | -0.19492 |         |  |
|               | 0.57727         | -0.19492  | 0.57727 | 0.33997     | 0.698361312 |          |         |  |
| NA            | ENSG00000254258 | -0.18413  | 0.57305 | -1.2221     | 0.88917     | -0.8363  | 0.79851 |  |
|               | 0.41253         | 0.33997   | 0.33997 | 0.698361312 |             |          |         |  |
| IL3           | ENSG00000164399 | 0.013622  | 0.49457 | 0.013622    | 0.49457     | 0.41253  | 0.33998 |  |
|               | 0.013622        | 0.49457   | 0.33998 | 0.698361312 |             |          |         |  |
| LDLRAD2       | ENSG00000187942 | 0.042295  | 0.48313 | -0.35417    | 0.63839     | 0.41225  |         |  |
|               | 0.34008         | 0.41225   | 0.34008 | 0.34008     | 0.698490032 |          |         |  |
| WWC2-AS1      | ENSG00000251128 | 0.3641    | 0.35789 | -0.12345    | 0.54912     | 0.41223  |         |  |
|               | 0.34009         | 0.3641    | 0.35789 | 0.34009     | 0.698490032 |          |         |  |
| SLC25A35      | ENSG00000125434 | 0.41218   | 0.3401  | 0.41218     | 0.3401      | 0.41218  |         |  |
|               | 0.3401          | 0.41218   | 0.3401  | 0.3401      | 0.698490032 |          |         |  |
| KNDC1         | ENSG00000171798 | 0.12239   | 0.4513  | 0.4122      | 0.3401      | -0.31016 | 0.62178 |  |
|               | 0.0086683       | 0.49654   | 0.3401  | 0.698490032 |             |          |         |  |
| NA            | ENSG00000213238 | 0.4121    | 0.34013 | 0.4121      | 0.34013     | 0.4121   | 0.34013 |  |
|               | 0.4121          | 0.34013   | 0.34013 | 0.698522206 |             |          |         |  |
| ATG4B         | ENSG00000168397 | 0.41205   | 0.34015 | 0.41205     | 0.34015     | 0.41205  | 0.34015 |  |
|               | 0.41205         | 0.34015   | 0.34015 | 0.69853384  |             |          |         |  |
| CCNYL6        | ENSG00000269845 | 0.41177   | 0.34025 | 0.41177     | 0.34025     | 0.41177  |         |  |
|               | 0.34025         | 0.41177   | 0.34025 | 0.34025     | 0.698709756 |          |         |  |
| R3HCC1L       | ENSG00000166024 | 0.39623   | 0.34597 | 0.41161     | 0.34031     | -0.88049 |         |  |
|               | 0.8107          | -0.53891  | 0.70503 | 0.34031     | 0.69874463  |          |         |  |
| NA            | ENSG00000253561 | 0.41161   | 0.34031 | 0.41161     | 0.34031     | -0.40236 | 0.65629 |  |
|               | -0.73266        | 0.76812   | 0.34031 | 0.69874463  |             |          |         |  |
| RPL21P7       | ENSG00000258613 | 0.4116    | 0.34031 | 0.4116      | 0.34031     | 0.4116   |         |  |
|               | 0.34031         | 0.4116    | 0.34031 | 0.34031     | 0.69874463  |          |         |  |
| RASSF4        | ENSG00000107551 | -0.58678  | 0.72132 | 0.41156     | 0.34033     | -1.0563  |         |  |
|               | 0.8546          | -1.055    | 0.85428 | 0.34033     | 0.698756253 |          |         |  |
| NA            | ENSG00000224066 | 0.41139   | 0.34039 | 0.41139     | 0.34039     | 0.41139  | 0.34039 |  |
|               | 0.41139         | 0.34039   | 0.34039 | 0.698841085 |             |          |         |  |
| OR2A41P       | ENSG00000239967 | 0.41137   | 0.3404  | 0.41137     | 0.3404      | 0.41137  |         |  |
|               | 0.3404          | 0.41137   | 0.3404  | 0.3404      | 0.698841085 |          |         |  |
| RNU6-386P     | ENSG00000199520 | 0.41128   | 0.34043 | 0.41128     | 0.34043     | 0.41128  |         |  |
|               | 0.34043         | 0.41128   | 0.34043 | 0.34043     | 0.698873232 |          |         |  |
| ADAM11        | ENSG00000073670 | 0.41123   | 0.34045 | 0.090416    | 0.46398     | 0.020638 |         |  |
|               | 0.49177         | 0.26722   | 0.39465 | 0.34045     | 0.698884847 |          |         |  |
| NA            | ENSG00000185065 | 0.41109   | 0.3405  | 0.41109     | 0.3405      | 0.41109  | 0.3405  |  |
|               | 0.41109         | 0.3405    | 0.3405  | 0.698958044 |             |          |         |  |
| ZNF768        | ENSG00000169957 | 0.41076   | 0.34063 | 0.41076     | 0.34063     | 0.41076  |         |  |
|               | 0.34063         | 0.41076   | 0.34063 | 0.34063     | 0.699161537 |          |         |  |
| NA            | ENSG00000278922 | 0.41076   | 0.34063 | 0.41076     | 0.34063     | 0.41076  | 0.34063 |  |
|               | 0.41076         | 0.34063   | 0.34063 | 0.699161537 |             |          |         |  |
| PABPC1P8      | ENSG00000228755 | -0.064204 | 0.5256  | -0.064204   | 0.5256      | -1.3012  |         |  |
|               | 0.90341         | 0.41069   | 0.34065 | 0.34065     | 0.699161537 |          |         |  |
| NA            | ENSG00000274460 | 0.41054   | 0.34071 | 0.41054     | 0.34071     | 0.41054  | 0.34071 |  |
|               | 0.41054         | 0.34071   | 0.34071 | 0.699161537 |             |          |         |  |
| PDHA2         | ENSG00000163114 | 0.30018   | 0.38202 | 0.41051     | 0.34072     | 0.19472  | 0.42281 |  |
|               | 0.17284         | 0.43139   | 0.34072 | 0.699161537 |             |          |         |  |
| NA            | ENSG00000226945 | 0.41044   | 0.34074 | -0.4362     | 0.66865     | -0.4362  | 0.66865 |  |

|                |                 |           |            |            |             |             |         |         |
|----------------|-----------------|-----------|------------|------------|-------------|-------------|---------|---------|
|                |                 | -0.4362   | 0.66865    | 0.34074    | 0.699161537 |             |         |         |
| NA             | ENSG00000224972 | 0.4104    | 0.34076    | 0.4104     | 0.34076     | 0.4104      | 0.34076 | 0.34076 |
|                |                 | 0.4104    | 0.34076    | 0.34076    | 0.699161537 |             |         |         |
| NA             | ENSG00000276223 | 0.41039   | 0.34076    | 0.34076    | 0.41039     | 0.34076     | 0.41039 | 0.34076 |
|                |                 | 0.41039   | 0.34076    | 0.34076    | 0.699161537 |             |         |         |
| RN7SL58P       | ENSG00000241552 | 0.41037   | 0.34077    | -0.43354   | 0.66769     | 0.41037     |         |         |
|                |                 | 0.34077   | -1.2046    | 0.88582    | 0.34077     | 0.699161537 |         |         |
| SDHAP1         | ENSG00000185485 | 0.39126   | 0.3478     | -0.74322   | 0.77133     | 0.41033     |         |         |
|                |                 | 0.34078   | -0.35895   | 0.64018    | 0.34078     | 0.699161537 |         |         |
| NA             | ENSG00000271362 | 0.41032   | 0.34078    | -1.1558    | 0.87612     | -0.30663    | 0.62044 |         |
|                |                 | -0.30663  | 0.62044    | 0.34078    | 0.699161537 |             |         |         |
| DGKD           | ENSG00000077044 | -0.018567 | 0.50741    | 0.38507    | 0.35009     | -0.13277    | 0.55281 |         |
|                |                 | 0.4103    | 0.34079    | 0.34079    | 0.699161537 |             |         |         |
| SLIT2          | ENSG00000145147 | -0.60787  | 0.72836    | -0.029124  | 0.51162     | 0.035365    | 0.48589 |         |
|                |                 | 0.41029   | 0.3408     | 0.3408     | 0.699161537 |             |         |         |
| EIF1AXP2       | ENSG00000258980 | 0.11437   | 0.45447    | 0.34814    | 0.36387     | 0.41029     |         |         |
|                |                 | 0.3408    | -0.59302   | 0.72342    | 0.3408      | 0.699161537 |         |         |
| MTIF3          | ENSG00000122033 | 0.22524   | 0.4109     | 0.22524    | 0.4109      | 0.41022     | 0.34082 |         |
|                |                 | -0.69309  | 0.75587    | 0.34082    | 0.699173133 |             |         |         |
| COG3           | ENSG00000136152 | -0.41379  | 0.66049    | 0.41011    | 0.34086     | -0.56619    | 0.71437 |         |
|                |                 | -0.3085   | 0.62115    | 0.34086    | 0.699207913 |             |         |         |
| LRRK1          | ENSG00000154237 | -0.2269   | 0.58975    | 0.41007    | 0.34088     | -0.69182    | 0.75547 |         |
|                |                 | -0.26971  | 0.60631    | 0.34088    | 0.699207913 |             |         |         |
| NA             | ENSG00000229699 | 0.41006   | 0.34088    | -0.02096   | 0.50836     | -0.10773    | 0.54289 |         |
|                |                 | 0.25485   | 0.39942    | 0.34088    | 0.699207913 |             |         |         |
| TTC12          | ENSG00000149292 | -1.3137   | 0.90553    | 0.41002    | 0.3409      | -0.80317    | 0.78906 |         |
|                |                 | -1.2286   | 0.89039    | 0.3409     | 0.699210585 |             |         |         |
| CBL            | ENSG00000110395 | 0.40997   | 0.34091    | 0.28341    | 0.38843     | 0.26506     | 0.39548 |         |
|                |                 | 0.24414   | 0.40356    | 0.34091    | 0.699210585 |             |         |         |
| CRYL1          | ENSG00000165475 | -0.82413  | 0.79507    | 0.4099     | 0.34094     | 0.29824     | 0.38276 |         |
|                |                 | -0.27341  | 0.60773    | 0.34094    | 0.699224846 |             |         |         |
| NA             | ENSG00000272312 | -0.25418  | 0.60032    | -0.31581   | 0.62393     | -0.98299    | 0.83719 |         |
|                |                 | 0.40986   | 0.34095    | 0.34095    | 0.699224846 |             |         |         |
| STEAP2-AS1     | ENSG00000227646 | 0.40986   | 0.34096    | -0.0049909 | 0.50199     | -0.0049909  |         |         |
|                |                 | 0.50199   | -0.0049909 | 0.50199    | 0.34096     | 0.699224846 |         |         |
| PRDX6          | ENSG00000117592 | -0.23768  | 0.59394    | 0.40971    | 0.34101     | -0.10529    | 0.54193 |         |
|                |                 | 0.40971   | 0.34101    | 0.34101    | 0.699282779 |             |         |         |
| KLHDC2         | ENSG00000165516 | -0.055538 | 0.52215    | -0.38535   | 0.65001     | 0.40964     |         |         |
|                |                 | 0.34104   | -0.5549    | 0.71052    | 0.34104     | 0.699282779 |         |         |
| NA             | ENSG00000254706 | 0.40962   | 0.34104    | 0.40962    | 0.34104     | 0.40962     | 0.34104 |         |
|                |                 | 0.40962   | 0.34104    | 0.34104    | 0.699282779 |             |         |         |
| NA             | ENSG00000275927 | -0.094049 | 0.53746    | 0.11907    | 0.45261     | 0.40957     | 0.34106 |         |
|                |                 | -0.27216  | 0.60725    | 0.34106    | 0.699282779 |             |         |         |
| NA             | ENSG00000280364 | 0.29216   | 0.38508    | 0.40958    | 0.34106     | 0.40958     | 0.34106 |         |
|                |                 | 0.40958   | 0.34106    | 0.34106    | 0.699282779 |             |         |         |
| NA             | ENSG00000272979 | 0.40953   | 0.34108    | 0.40953    | 0.34108     | 0.40953     | 0.34108 |         |
|                |                 | 0.40953   | 0.34108    | 0.34108    | 0.699288107 |             |         |         |
| NA             | ENSG00000279396 | 0.40945   | 0.3411     | 0.40945    | 0.3411      | 0.40945     | 0.3411  |         |
|                |                 | 0.40945   | 0.3411     | 0.3411     | 0.699288107 |             |         |         |
| RNU6-756P      | ENSG00000206724 | 0.40944   | 0.34111    | 0.40944    | 0.34111     | 0.40944     |         |         |
|                |                 | 0.34111   | 0.40944    | 0.34111    | 0.34111     | 0.699288107 |         |         |
| AMOTL2         | ENSG00000114019 | -0.076295 | 0.53041    | -0.53108   | 0.70232     | 0.4094      |         |         |
|                |                 | 0.34112   | -0.2807    | 0.61053    | 0.34112     | 0.699288107 |         |         |
| GET4           | ENSG00000239857 | 0.40919   | 0.3412     | -0.02602   | 0.51038     | -0.29013    | 0.61414 |         |
|                |                 | -0.29013  | 0.61414    | 0.3412     | 0.699422682 |             |         |         |
| HMG2P46        | ENSG00000179362 | 0.4091    | 0.34123    | 0.087103   | 0.46529     | 0.4091      |         |         |
|                |                 | 0.34123   | 0.4091     | 0.34123    | 0.34123     | 0.699454755 |         |         |
| ZNF816-ZNF321P | ENSG00000221874 | 0.40899   | 0.34127    | 0.40899    | 0.34127     | 0.40899     |         |         |
|                |                 | 0.34127   | 0.40899    | 0.34127    | 0.34127     | 0.699507323 |         |         |
| LINC01875      | ENSG00000225942 | 0.40885   | 0.34132    | -0.30501   | 0.61982     | -0.36745    |         |         |
|                |                 | 0.64336   | -0.30501   | 0.61982    | 0.34132     | 0.699576733 |         |         |
| POP4           | ENSG00000105171 | 0.17883   | 0.42904    | 0.25274    | 0.40023     | 0.40877     | 0.34135 |         |

|            |                 |             |          |          |             |             |         |         |
|------------|-----------------|-------------|----------|----------|-------------|-------------|---------|---------|
|            |                 | -0.32442    | 0.62719  | 0.34135  | 0.699576733 |             |         |         |
| RNA5SP485  | ENSG00000201923 | 0.40876     | 0.34136  | 0.40876  | 0.34136     | 0.40876     | 0.34136 | 0.40876 |
|            |                 | 0.34136     | 0.40876  | 0.34136  | 0.34136     | 0.699576733 |         |         |
| RPS3AP39   | ENSG00000237226 | -0.49039    | 0.68807  | -0.23936 | 0.59459     | 0.40869     |         |         |
|            |                 | 0.34138     | 0.40869  | 0.34138  | 0.34138     | 0.699576733 |         |         |
| PRR13P7    | ENSG00000271202 | 0.36737     | 0.35667  | 0.4087   | 0.34138     | 0.36737     |         |         |
|            |                 | 0.35667     | 0.36737  | 0.35667  | 0.34138     | 0.699576733 |         |         |
| ZNF506     | ENSG00000081665 | 0.28288     | 0.38863  | -1.3345  | 0.90897     | -0.55643    |         |         |
|            |                 | 0.71104     | 0.40868  | 0.34139  | 0.34139     | 0.699576733 |         |         |
| FER        | ENSG00000151422 | -1.3197     | 0.90653  | -0.6588  | 0.74499     | 0.40858     | 0.34142 |         |
|            |                 | -0.46682    | 0.67968  | 0.34142  | 0.699579371 |             |         |         |
| NA         | ENSG00000271926 | -1.2407     | 0.89264  | 0.40859  | 0.34142     | -1.1947     | 0.88389 |         |
|            |                 | -1.3743     | 0.91532  | 0.34142  | 0.699579371 |             |         |         |
| EIF2S3B    | ENSG00000180574 | -0.12557    | 0.54996  | 0.40853  | 0.34144     | -0.4078     |         |         |
|            |                 | 0.65829     | -0.18766 | 0.57443  | 0.34144     | 0.699590935 |         |         |
| NA         | ENSG00000238694 | 0.40834     | 0.34151  | 0.40834  | 0.34151     | 0.40834     | 0.34151 |         |
|            |                 | 0.40834     | 0.34151  | 0.34151  | 0.699698638 |             |         |         |
| TXN2       | ENSG00000100348 | -1.166      | 0.8782   | -1.201   | 0.88513     | -1.166      | 0.8782  |         |
|            |                 | 0.4083      | 0.34153  | 0.34153  | 0.699698638 |             |         |         |
| NMNAT1P1   | ENSG00000259167 | 0.40827     | 0.34154  | 0.40827  | 0.34154     | 0.40827     |         |         |
|            |                 | 0.34154     | 0.40827  | 0.34154  | 0.34154     | 0.699698638 |         |         |
| OR7E108P   | ENSG00000270432 | -1.0636     | 0.85625  | 0.40823  | 0.34155     | -0.38926    |         |         |
|            |                 | 0.65146     | -0.28443 | 0.61196  | 0.34155     | 0.699698638 |         |         |
| PPL        | ENSG00000118898 | 0.40817     | 0.34157  | 0.40817  | 0.34157     | 0.40817     | 0.34157 |         |
|            |                 | -0.74014    | 0.77039  | 0.34157  | 0.699710194 |             |         |         |
| NA         | ENSG00000223429 | -1.5613     | 0.94077  | -1.5613  | 0.94077     | -1.5613     | 0.94077 |         |
|            |                 | 0.40808     | 0.34161  | 0.34161  | 0.699715446 |             |         |         |
| NA         | ENSG00000230960 | -0.57969    | 0.71894  | 0.40808  | 0.34161     | -0.52887    | 0.70155 |         |
|            |                 | -0.21902    | 0.58668  | 0.34161  | 0.699715446 |             |         |         |
| PSMC2P1    | ENSG00000240854 | 0.40805     | 0.34162  | -0.62299 | 0.73335     | 0.40805     |         |         |
|            |                 | 0.34162     | -1.0926  | 0.86271  | 0.34162     | 0.699715446 |         |         |
| CCDC124    | ENSG00000007080 | 0.12791     | 0.44911  | -0.23753 | 0.59388     | 0.40802     |         |         |
|            |                 | 0.34163     | -0.5852  | 0.72079  | 0.34163     | 0.699715446 |         |         |
| CCDC18-AS1 | ENSG00000223745 | 0.40778     | 0.34172  | 0.10509  | 0.45815     | 0.051169    |         |         |
|            |                 | 0.4796      | 0.237    | 0.40633  | 0.34172     | 0.69985402  |         |         |
| NA         | ENSG00000243501 | -1.7941     | 0.9636   | 0.40771  | 0.34174     | -1.7941     | 0.9636  |         |
|            |                 | -0.032792   | 0.51308  | 0.34174  | 0.69985402  |             |         |         |
| PSMG4      | ENSG00000180822 | -0.25877    | 0.60209  | -0.51599 | 0.69707     | 0.40767     | 0.34176 |         |
|            |                 | -0.16516    | 0.56559  | 0.34176  | 0.69985402  |             |         |         |
| TCEANC2    | ENSG00000116205 | -0.88956    | 0.81315  | 0.28616  | 0.38738     | -0.23568    |         |         |
|            |                 | 0.59316     | 0.40764  | 0.34177  | 0.34177     | 0.69985402  |         |         |
| LINC02455  | ENSG00000256672 | -0.85829    | 0.80463  | 0.40763  | 0.34177     | -1.1179     |         |         |
|            |                 | 0.8682      | 0.26921  | 0.39389  | 0.34177     | 0.69985402  |         |         |
| NA         | ENSG00000275527 | 0.40758     | 0.34179  | 0.40758  | 0.34179     | 0.40758     | 0.34179 |         |
|            |                 | 0.40758     | 0.34179  | 0.34179  | 0.69985402  |             |         |         |
| TPT1P1     | ENSG00000234107 | -0.46195    | 0.67794  | 0.4075   | 0.34182     | -1.3336     |         |         |
|            |                 | 0.90883     | -0.33997 | 0.63306  | 0.34182     | 0.69985402  |         |         |
| NA         | ENSG00000197813 | 0.40745     | 0.34184  | 0.40745  | 0.34184     | 0.40745     | 0.34184 |         |
|            |                 | 0.40745     | 0.34184  | 0.34184  | 0.69985402  |             |         |         |
| NA         | ENSG00000201916 | 0.13491     | 0.44634  | -0.35982 | 0.64051     | -0.35982    | 0.64051 |         |
|            |                 | 0.40742     | 0.34185  | 0.34185  | 0.69985402  |             |         |         |
| PRAME      | ENSG00000185686 | 0.40737     | 0.34187  | 0.40737  | 0.34187     | 0.31023     | 0.37819 |         |
|            |                 | -0.0091552  | 0.50365  | 0.34187  | 0.69985402  |             |         |         |
| NA         | ENSG00000275078 | -0.43967    | 0.66991  | -0.43967 | 0.66991     | 0.087734    | 0.46504 |         |
|            |                 | 0.40737     | 0.34187  | 0.34187  | 0.69985402  |             |         |         |
| NA         | ENSG00000279954 | -1.0775     | 0.85937  | 0.40736  | 0.34187     | -1.0775     | 0.85937 |         |
|            |                 | -1.0775     | 0.85937  | 0.34187  | 0.69985402  |             |         |         |
| NA         | ENSG00000201102 | -0.6741     | 0.74988  | -0.25114 | 0.59915     | 0.4073      | 0.3419  |         |
|            |                 | -0.55575    | 0.71081  | 0.3419   | 0.699886032 |             |         |         |
| NA         | ENSG00000222017 | -0.00041888 | 0.50017  | -0.11935 | 0.5475      | -0.014441   |         |         |
|            |                 | 0.50576     | 0.4072   | 0.34193  | 0.34193     | 0.699918042 |         |         |
| NA         | ENSG00000264695 | 0.40708     | 0.34197  | -0.13036 | 0.55186     | -0.275      | 0.60834 |         |



|            |                 |          |         |             |             |          |         |
|------------|-----------------|----------|---------|-------------|-------------|----------|---------|
|            | -0.21416        | 0.58479  | 0.34197 | 0.699932185 |             |          |         |
| SPATA3     | ENSG00000173699 | -0.95292 | 0.82969 | 0.40707     | 0.34198     | 0.40707  |         |
|            | 0.34198         | -0.10455 | 0.54163 | 0.34198     | 0.699932185 |          |         |
| NA         | ENSG00000224945 | 0.40706  | 0.34198 | 0.40706     | 0.34198     | 0.40706  | 0.34198 |
|            | 0.40706         | 0.34198  | 0.34198 | 0.699932185 |             |          |         |
| SAV1       | ENSG00000151748 | 0.40699  | 0.34201 | -0.24576    | 0.59707     | -0.24576 | 0.59707 |
|            | 0.14079         | 0.44402  | 0.34201 | 0.699946325 |             |          |         |
| PTGER2     | ENSG00000125384 | -0.73675 | 0.76936 | 0.40696     | 0.34202     | -0.32619 |         |
|            | 0.62786         | -0.46196 | 0.67795 | 0.34202     | 0.699946325 |          |         |
| NA         | ENSG00000260123 | 0.3296   | 0.37085 | 0.40694     | 0.34203     | 0.3296   | 0.37085 |
|            | 0.0011508       | 0.49954  | 0.34203 | 0.699946325 |             |          |         |
| DDR GK1    | ENSG00000198171 | 0.40682  | 0.34207 | -0.81359    | 0.79206     | -0.67219 |         |
|            | 0.74927         | -0.81359 | 0.79206 | 0.34207     | 0.699974595 |          |         |
| NA         | ENSG00000267575 | -0.40603 | 0.65764 | 0.40679     | 0.34208     | -0.66731 | 0.74771 |
|            | 0.2337          | 0.40761  | 0.34208 | 0.699974595 |             |          |         |
| MTCO3P29   | ENSG00000228069 | 0.40673  | 0.3421  | 0.40673     | 0.3421      | 0.40673  |         |
|            | 0.3421          | 0.40673  | 0.3421  | 0.3421      | 0.699974595 |          |         |
| CCNB1IP1P2 | ENSG00000230860 | 0.40671  | 0.34211 | 0.40671     | 0.34211     | 0.40671  |         |
|            | 0.34211         | 0.40671  | 0.34211 | 0.34211     | 0.699974595 |          |         |
| MICD       | ENSG00000229390 | -1.1501  | 0.87494 | 0.088178    | 0.46487     | 0.40664  | 0.34213 |
|            | 0.088178        | 0.46487  | 0.34213 | 0.699974595 |             |          |         |
| RPL5P7     | ENSG00000234415 | 0.40667  | 0.34213 | 0.21157     | 0.41622     | 0.21157  |         |
|            | 0.41622         | 0.21427  | 0.41517 | 0.34213     | 0.699974595 |          |         |
| NA         | ENSG00000234689 | -0.66055 | 0.74555 | -1.6875     | 0.95425     | 0.4065   | 0.34219 |
|            | 0.16125         | 0.43595  | 0.34219 | 0.700041164 |             |          |         |
| VPS26A     | ENSG00000122958 | 0.40643  | 0.34221 | -0.26603    | 0.60489     | 0.31796  |         |
|            | 0.37526         | 0.015489 | 0.49382 | 0.34221     | 0.700041164 |          |         |
| NA         | ENSG00000207410 | 0.40641  | 0.34222 | 0.40641     | 0.34222     | 0.40641  | 0.34222 |
|            | 0.40641         | 0.34222  | 0.34222 | 0.700041164 |             |          |         |
| NA         | ENSG00000214890 | 0.4064   | 0.34222 | 0.4064      | 0.34222     | 0.4064   | 0.34222 |
|            | 0.4064          | 0.34222  | 0.34222 | 0.700041164 |             |          |         |
| RPS3AP5    | ENSG00000178429 | -0.22814 | 0.59023 | 0.40634     | 0.34225     | -0.22814 |         |
|            | 0.59023         | -0.22814 | 0.59023 | 0.34225     | 0.700043758 |          |         |
| LINC01114  | ENSG00000234177 | -0.19055 | 0.57556 | -0.8873     | 0.81254     | 0.40633  |         |
|            | 0.34225         | -0.39087 | 0.65205 | 0.34225     | 0.700043758 |          |         |
| NA         | ENSG00000254442 | 0.40617  | 0.34231 | 0.40617     | 0.34231     | 0.40617  | 0.34231 |
|            | 0.40617         | 0.34231  | 0.34231 | 0.700054133 |             |          |         |
| KDF1       | ENSG00000175707 | 0.16464  | 0.43461 | 0.40614     | 0.34232     | 0.40614  | 0.34232 |
|            | 0.40614         | 0.34232  | 0.34232 | 0.700054133 |             |          |         |
| NA         | ENSG00000252122 | 0.40611  | 0.34233 | 0.40611     | 0.34233     | 0.40611  | 0.34233 |
|            | 0.40611         | 0.34233  | 0.34233 | 0.700054133 |             |          |         |
| KIAA2013   | ENSG00000116685 | 0.15365  | 0.43894 | -1.3995     | 0.91917     | 0.40608  |         |
|            | 0.34234         | -0.30636 | 0.62034 | 0.34234     | 0.700054133 |          |         |
| PRSS23     | ENSG00000150687 | 0.40607  | 0.34234 | -0.00068137 | 0.50027     | 0.11997  |         |
|            | 0.45225         | 0.023782 | 0.49051 | 0.34234     | 0.700054133 |          |         |
| PRDX3P3    | ENSG00000234701 | -0.92538 | 0.82262 | 0.40604     | 0.34236     | -0.92538 |         |
|            | 0.82262         | -0.92538 | 0.82262 | 0.34236     | 0.700054133 |          |         |
| SNHG31     | ENSG00000229267 | 0.40599  | 0.34237 | 0.40599     | 0.34237     | 0.40599  |         |
|            | 0.34237         | 0.40599  | 0.34237 | 0.34237     | 0.700054133 |          |         |
| NA         | ENSG00000270469 | -0.6554  | 0.7439  | 0.38353     | 0.35066     | 0.406    | 0.34237 |
|            | -0.38389        | 0.64947  | 0.34237 | 0.700054133 |             |          |         |
| UNC93A     | ENSG00000112494 | 0.13422  | 0.44662 | -0.41462    | 0.66079     | 0.20851  |         |
|            | 0.41742         | 0.40591  | 0.3424  | 0.3424      | 0.700056726 |          |         |
| LINC02523  | ENSG00000224506 | -1.3424  | 0.91027 | -1.314      | 0.90557     | 0.40592  |         |
|            | 0.3424          | -0.91002 | 0.81859 | 0.3424      | 0.700056726 |          |         |
| NA         | ENSG00000270209 | 0.40586  | 0.34242 | 0.40586     | 0.34242     | 0.40586  | 0.34242 |
|            | 0.31939         | 0.37471  | 0.34242 | 0.700068244 |             |          |         |
| NA         | ENSG00000264503 | 0.12522  | 0.45017 | -0.12578    | 0.55005     | 0.40582  | 0.34244 |
|            | 0.40582         | 0.34244  | 0.34244 | 0.700070835 |             |          |         |
| MIR1231    | ENSG00000221028 | 0.40577  | 0.34245 | 0.40577     | 0.34245     | 0.40577  |         |
|            | 0.34245         | 0.40577  | 0.34245 | 0.34245     | 0.700070835 |          |         |
| NA         | ENSG00000238581 | 0.40564  | 0.3425  | 0.25958     | 0.39759     | 0.40564  | 0.3425  |

|            |                 |            |         |             |             |          |         |  |
|------------|-----------------|------------|---------|-------------|-------------|----------|---------|--|
|            | 0.40564         | 0.3425     | 0.3425  | 0.7001209   |             |          |         |  |
| LINC02609  | ENSG00000233593 | -1.1164    | 0.86788 | -1.408      | 0.92044     | 0.40559  |         |  |
|            | 0.34252         | -0.17505   | 0.56948 | 0.34252     | 0.7001209   |          |         |  |
| MRPS25     | ENSG00000131368 | 0.38228    | 0.35113 | 0.38228     | 0.35113     | 0.40546  |         |  |
|            | 0.34257         | 0.18304274 | 0.34257 | 0.7001209   |             |          |         |  |
| KLRC1      | ENSG00000134545 | 0.23039    | 0.40889 | 0.23626     | 0.40662     | -0.14578 | 0.55795 |  |
|            | 0.40545         | 0.34257    | 0.34257 | 0.7001209   |             |          |         |  |
| NA         | ENSG00000270764 | 0.40542    | 0.34258 | 0.12625     | 0.44977     | -0.16466 | 0.56539 |  |
|            | -0.26377        | 0.60402    | 0.34258 | 0.7001209   |             |          |         |  |
| KRT13      | ENSG00000171401 | 0.40539    | 0.34259 | 0.37294     | 0.3546      | 0.12578  | 0.44995 |  |
|            | 0.33006         | 0.37068    | 0.34259 | 0.7001209   |             |          |         |  |
| SLC2A1     | ENSG00000117394 | 0.40529    | 0.34263 | 0.26018     | 0.39736     | 0.40529  |         |  |
|            | 0.34263         | -0.28432   | 0.61192 | 0.34263     | 0.7001209   |          |         |  |
| PCDHB14    | ENSG00000120327 | 0.40531    | 0.34263 | 0.40531     | 0.34263     | 0.40531  |         |  |
|            | 0.34263         | 0.40531    | 0.34263 | 0.34263     | 0.7001209   |          |         |  |
| C2orf76    | ENSG00000186132 | 0.40523    | 0.34265 | 0.02782     | 0.4889      | 0.15101  |         |  |
|            | 0.43998         | 0.34319    | 0.36573 | 0.34265     | 0.7001209   |          |         |  |
| NA         | ENSG00000258578 | -1.1867    | 0.88232 | 0.40525     | 0.34265     | 0.40525  | 0.34265 |  |
|            | 0.40525         | 0.34265    | 0.34265 | 0.7001209   |             |          |         |  |
| NA         | ENSG00000267205 | 0.4052     | 0.34266 | 0.4052      | 0.34266     | 0.4052   | 0.34266 |  |
|            | 0.4052          | 0.34266    | 0.34266 | 0.7001209   |             |          |         |  |
| TMEM128    | ENSG00000132406 | -1.2273    | 0.89015 | -1.3046     | 0.90399     | 0.40515  |         |  |
|            | 0.34268         | -0.96002   | 0.83148 | 0.34268     | 0.7001209   |          |         |  |
| NA         | ENSG00000233129 | 0.40513    | 0.34269 | -0.74535    | 0.77197     | -0.86743 | 0.80715 |  |
|            | -0.055684       | 0.5222     | 0.34269 | 0.7001209   |             |          |         |  |
| NA         | ENSG00000277299 | 0.40513    | 0.34269 | 0.40513     | 0.34269     | 0.40513  | 0.34269 |  |
|            | 0.40513         | 0.34269    | 0.34269 | 0.7001209   |             |          |         |  |
| NA         | ENSG00000280317 | -0.18277   | 0.57251 | -0.18277    | 0.57251     | 0.40513  | 0.34269 |  |
|            | -0.18277        | 0.57251    | 0.34269 | 0.7001209   |             |          |         |  |
| GLYATL1    | ENSG00000166840 | 0.35223    | 0.36233 | 0.06603     | 0.47368     | 0.36031  |         |  |
|            | 0.35931         | 0.40497    | 0.34275 | 0.34275     | 0.700187349 |          |         |  |
| ADARB2-AS1 | ENSG00000205696 | -0.55398   | 0.71021 | -0.341      | 0.63345     | 0.40492  |         |  |
|            | 0.34277         | -0.16594   | 0.5659  | 0.34277     | 0.700187349 |          |         |  |
| LINC01118  | ENSG00000222005 | 0.4049     | 0.34277 | 0.4049      | 0.34277     | 0.4049   |         |  |
|            | 0.34277         | 0.4049     | 0.34277 | 0.34277     | 0.700187349 |          |         |  |
| LINC02759  | ENSG00000255175 | 0.25472    | 0.39947 | -0.83731    | 0.79879     | 0.40489  |         |  |
|            | 0.34278         | 0.25472    | 0.39947 | 0.34278     | 0.700187349 |          |         |  |
| SMIM7      | ENSG00000214046 | 0.40484    | 0.3428  | -0.27677    | 0.60902     | 0.40484  | 0.3428  |  |
|            | 0.34204         | 0.36616    | 0.3428  | 0.700198851 |             |          |         |  |
| RERG       | ENSG00000134533 | -0.19521   | 0.57739 | -0.19521    | 0.57739     | -0.11802 | 0.54697 |  |
|            | 0.40465         | 0.34287    | 0.34287 | 0.700290836 |             |          |         |  |
| NA         | ENSG00000206661 | -0.10078   | 0.54014 | -0.10078    | 0.54014     | 0.40458  | 0.34289 |  |
|            | -0.10078        | 0.54014    | 0.34289 | 0.700290836 |             |          |         |  |
| UBXN10     | ENSG00000162543 | -0.48459   | 0.68602 | 0.35359     | 0.36182     | -1.2874  |         |  |
|            | 0.90102         | 0.40453    | 0.34291 | 0.34291     | 0.700290836 |          |         |  |
| TOMM22P5   | ENSG00000225155 | 0.40447    | 0.34293 | 0.40447     | 0.34293     | -0.22446 |         |  |
|            | 0.5888          | -1.0107    | 0.84391 | 0.34293     | 0.700290836 |          |         |  |
| NA         | ENSG00000273553 | 0.40441    | 0.34295 | 0.40441     | 0.34295     | 0.40441  | 0.34295 |  |
|            | 0.40441         | 0.34295    | 0.34295 | 0.700290836 |             |          |         |  |
| C8A        | ENSG00000157131 | 0.40439    | 0.34296 | -1.4872     | 0.93152     | -0.37969 | 0.64791 |  |
|            | -0.85072        | 0.80254    | 0.34296 | 0.700290836 |             |          |         |  |
| CERS6-AS1  | ENSG00000227617 | 0.40439    | 0.34296 | 0.40439     | 0.34296     | 0.40439  |         |  |
|            | 0.34296         | 0.40439    | 0.34296 | 0.34296     | 0.700290836 |          |         |  |
| NA         | ENSG00000232409 | 0.40441    | 0.34296 | -1.1592     | 0.87681     | -0.77535 | 0.78093 |  |
|            | 0.18257         | 0.42757    | 0.34296 | 0.700290836 |             |          |         |  |
| NA         | ENSG00000260179 | 0.40434    | 0.34298 | 0.40434     | 0.34298     | 0.40434  | 0.34298 |  |
|            | 0.40434         | 0.34298    | 0.34298 | 0.70030233  |             |          |         |  |
| PRR15      | ENSG00000176532 | 0.40423    | 0.34302 | 0.40423     | 0.34302     | 0.40423  | 0.34302 |  |
|            | 0.40423         | 0.34302    | 0.34302 | 0.700354657 |             |          |         |  |
| PPIAP19    | ENSG00000228169 | 0.40418    | 0.34304 | 0.13294     | 0.44712     | 0.40418  |         |  |
|            | 0.34304         | 0.40418    | 0.34304 | 0.34304     | 0.700366147 |          |         |  |
| NA         | ENSG00000236137 | 0.36967    | 0.35581 | -0.31521    | 0.6237      | 0.22687  | 0.41026 |  |

|            |                 |           |           |            |             |             |         |  |
|------------|-----------------|-----------|-----------|------------|-------------|-------------|---------|--|
| NA         | 0.40408         | 0.34308   | 0.34308   | 0.70040573 |             |             |         |  |
|            | ENSG00000261421 | -0.32891  | 0.62889   | 0.40405    | 0.34309     | -0.32891    | 0.62889 |  |
|            |                 | -0.72217  | 0.7649    | 0.34309    | 0.70040573  |             |         |  |
| RNU6-1238P | ENSG00000253024 | 0.40392   | 0.34314   | 0.40392    | 0.34314     | 0.40392     |         |  |
|            |                 | 0.34314   | 0.40392   | 0.34314    | 0.70040573  |             |         |  |
| NA         | ENSG00000206672 | 0.20543   | 0.41862   | 0.40388    | 0.34315     | 0.40388     | 0.34315 |  |
|            |                 | 0.40388   | 0.34315   | 0.70040573 |             |             |         |  |
| BAG4       | ENSG00000156735 | 0.24648   | 0.40266   | 0.0060666  | 0.49758     | 0.40386     | 0.34316 |  |
|            |                 | 0.37663   | 0.35323   | 0.34316    | 0.70040573  |             |         |  |
| NA         | ENSG00000223563 | 0.25322   | 0.40005   | -0.41222   | 0.65991     | 0.11069     | 0.45593 |  |
|            |                 | 0.40384   | 0.34316   | 0.34316    | 0.70040573  |             |         |  |
| NA         | ENSG00000256774 | 0.40386   | 0.34316   | 0.40386    | 0.34316     | 0.40386     | 0.34316 |  |
|            |                 | 0.038013  | 0.48484   | 0.34316    | 0.70040573  |             |         |  |
| NA         | ENSG00000263199 | -0.74361  | 0.77144   | 0.40377    | 0.34319     | -0.53929    | 0.70516 |  |
|            |                 | -0.53929  | 0.70516   | 0.34319    | 0.700428697 |             |         |  |
| DIPK1C     | ENSG00000187773 | -0.55859  | 0.71178   | 0.40375    | 0.3432      | -1.3635     |         |  |
|            |                 | 0.91363   | -0.57531  | 0.71746    | 0.3432      | 0.700428697 |         |  |
| MIR759     | ENSG00000211579 | 0.40369   | 0.34322   | -0.99987   | 0.84131     | -0.99987    |         |  |
|            |                 | 0.84131   | -0.27784  | 0.60943    | 0.34322     | 0.700440179 |         |  |
| NA         | ENSG00000236779 | 0.40361   | 0.34325   | 0.40361    | 0.34325     | 0.40361     | 0.34325 |  |
|            |                 | 0.40361   | 0.34325   | 0.34325    | 0.700454215 |             |         |  |
| NA         | ENSG00000272410 | 0.40358   | 0.34326   | 0.40358    | 0.34326     | 0.40358     | 0.34326 |  |
|            |                 | 0.40358   | 0.34326   | 0.34326    | 0.700454215 |             |         |  |
| ZDHHC20P2  | ENSG00000223702 | 0.40357   | 0.34327   | 0.40357    | 0.34327     | 0.11341     |         |  |
|            |                 | 0.45485   | 0.40357   | 0.34327    | 0.34327     | 0.700454215 |         |  |
| LINC00381  | ENSG00000226240 | -1.0919   | 0.86255   | 0.40348    | 0.3433      | 0.12588     |         |  |
|            |                 | 0.44991   | -0.051061 | 0.52036    | 0.3433      | 0.700477172 |         |  |
| MGME1      | ENSG00000125871 | 0.40346   | 0.34331   | 0.12534    | 0.45013     | -0.21627    | 0.58561 |  |
|            |                 | -0.21627  | 0.58561   | 0.34331    | 0.700477172 |             |         |  |
| HSPE1P22   | ENSG00000237306 | -0.67364  | 0.74973   | -1.0688    | 0.85742     | -0.67364    |         |  |
|            |                 | 0.74973   | 0.40339   | 0.34333    | 0.34333     | 0.700488649 |         |  |
| CAPZBP1    | ENSG00000231723 | 0.31157   | 0.37768   | 0.40332    | 0.34336     | -0.32554    |         |  |
|            |                 | 0.62761   | 0.31157   | 0.37768    | 0.34336     | 0.700520528 |         |  |
| CWC27      | ENSG00000153015 | 0.20412   | 0.41913   | 0.1234     | 0.4509      | 0.11751     | 0.45323 |  |
|            |                 | 0.40327   | 0.34338   | 0.34338    | 0.700523075 |             |         |  |
| LINC02069  | ENSG00000229433 | 0.40323   | 0.34339   | -0.5064    | 0.69371     | 0.40323     |         |  |
|            |                 | 0.34339   | -0.29266  | 0.61511    | 0.34339     | 0.700523075 |         |  |
| NA         | ENSG00000207411 | -0.9121   | 0.81914   | 0.40314    | 0.34342     | -0.10823    | 0.54309 |  |
|            |                 | -0.69389  | 0.75612   | 0.34342    | 0.700525623 |             |         |  |
| NA         | ENSG00000264843 | 0.40315   | 0.34342   | 0.40315    | 0.34342     | 0.40315     | 0.34342 |  |
|            |                 | 0.40315   | 0.34342   | 0.34342    | 0.700525623 |             |         |  |
| DHX16      | ENSG00000204560 | -0.53733  | 0.70448   | -0.57751   | 0.7182      | -1.3675     | 0.91427 |  |
|            |                 | 0.40305   | 0.34345   | 0.34345    | 0.700530716 |             |         |  |
| KRT4       | ENSG00000170477 | -0.87311  | 0.8087    | -0.42847   | 0.66585     | 0.09961     | 0.46033 |  |
|            |                 | 0.40302   | 0.34347   | 0.34347    | 0.700530716 |             |         |  |
| NA         | ENSG00000202273 | -0.045521 | 0.51815   | -0.6484    | 0.74164     | 0.40302     | 0.34347 |  |
|            |                 | 0.31267   | 0.37727   | 0.34347    | 0.700530716 |             |         |  |
| MSL2       | ENSG00000174579 | -2.0305   | 0.97884   | -2.0305    | 0.97884     | 0.40297     | 0.34348 |  |
|            |                 | 0.2541    | 0.39971   | 0.34348    | 0.700530716 |             |         |  |
| RNU6-697P  | ENSG00000200218 | -0.42512  | 0.66463   | 0.40273    | 0.34357     | -0.42512    |         |  |
|            |                 | 0.66463   | -0.42512  | 0.66463    | 0.34357     | 0.700684946 |         |  |
| NA         | ENSG00000201733 | 0.12174   | 0.45155   | 0.40257    | 0.34363     | 0.40257     | 0.34363 |  |
|            |                 | 0.40257   | 0.34363   | 0.34363    | 0.700777983 |             |         |  |
| LAD1       | ENSG00000159166 | 0.22026   | 0.41283   | 0.40253    | 0.34365     | 0.22026     | 0.41283 |  |
|            |                 | 0.079116  | 0.46847   | 0.34365    | 0.700780508 |             |         |  |
| SLC12A1    | ENSG00000074803 | -0.54541  | 0.70726   | 0.40249    | 0.34366     | -1.0288     |         |  |
|            |                 | 0.84821   | -0.75666  | 0.77537    | 0.34366     | 0.700780508 |         |  |
| UBE2O      | ENSG00000175931 | -1.5953   | 0.94467   | -2.0756    | 0.98104     | -0.5203     | 0.69857 |  |
|            |                 | 0.40241   | 0.34369   | 0.34369    | 0.700783033 |             |         |  |
| OGFRP1     | ENSG00000182057 | 0.40242   | 0.34369   | 0.40242    | 0.34369     | 0.40242     |         |  |
|            |                 | 0.34369   | -0.12861  | 0.55117    | 0.34369     | 0.700783033 |         |  |
| RNU6-1103P | ENSG00000206877 | 0.40228   | 0.34374   | 0.1587     | 0.43695     | -0.43104    |         |  |

|             |                 |          |         |             |             |           |         |  |
|-------------|-----------------|----------|---------|-------------|-------------|-----------|---------|--|
|             | 0.66678         | 0.1587   | 0.43695 | 0.34374     | 0.700826334 |           |         |  |
| SUMO2P6     | ENSG00000249031 | 0.40226  | 0.34374 | -1.0631     | 0.85613     | 0.40226   |         |  |
|             | 0.34374         | 0.40226  | 0.34374 | 0.34374     | 0.700826334 |           |         |  |
| SLC26A3     | ENSG00000091138 | 0.40218  | 0.34378 | 0.40218     | 0.34378     | 0.40218   |         |  |
|             | 0.34378         | 0.2788   | 0.3902  | 0.34378     | 0.700840307 |           |         |  |
| LINC00387   | ENSG00000231914 | -1.725   | 0.95774 | -0.66116    | 0.74575     | 0.40216   |         |  |
|             | 0.34378         | 0.16297  | 0.43527 | 0.34378     | 0.700840307 |           |         |  |
| SLC2A3      | ENSG00000059804 | 0.35287  | 0.36209 | 0.37962     | 0.35211     | 0.23136   |         |  |
|             | 0.40852         | 0.40213  | 0.34379 | 0.34379     | 0.700840307 |           |         |  |
| NA          | ENSG00000237160 | 0.40208  | 0.34381 | 0.40208     | 0.34381     | 0.40208   | 0.34381 |  |
|             | 0.40208         | 0.34381  | 0.34381 | 0.700842826 |             |           |         |  |
| RNF139-AS1  | ENSG00000245149 | 0.38094  | 0.35162 | 0.40205     | 0.34382     | -0.56498  |         |  |
|             | 0.71396         | 0.40205  | 0.34382 | 0.34382     | 0.700842826 |           |         |  |
| RAC1P5      | ENSG00000213522 | 0.40195  | 0.34386 | 0.073275    | 0.47079     | -0.52981  |         |  |
|             | 0.70188         | -0.54248 | 0.70626 | 0.34386     | 0.700895043 |           |         |  |
| TBC1D10B    | ENSG00000169221 | 0.40189  | 0.34388 | 0.35045     | 0.363       | 0.35045   | 0.363   |  |
|             | 0.35045         | 0.363    | 0.34388 | 0.700897557 |             |           |         |  |
| MMAA        | ENSG00000151611 | 0.050016 | 0.48005 | -0.039148   | 0.51561     | 0.28344   | 0.38842 |  |
|             | 0.40188         | 0.34389  | 0.34389 | 0.700897557 |             |           |         |  |
| NA          | ENSG00000213065 | -0.1323  | 0.55262 | -0.97771    | 0.83589     | 0.40182   | 0.34391 |  |
|             | -0.22293        | 0.5882   | 0.34391 | 0.700909005 |             |           |         |  |
| SETBP1      | ENSG00000152217 | -0.75044 | 0.7735  | 0.3542      | 0.36159     | 0.40176   |         |  |
|             | 0.34393         | -0.43098 | 0.66676 | 0.34393     | 0.700920451 |           |         |  |
| SSTR5       | ENSG00000162009 | -0.98666 | 0.8381  | 0.40159     | 0.34399     | -0.58103  | 0.71939 |  |
|             | -0.62289        | 0.73332  | 0.34399 | 0.701013412 |             |           |         |  |
| RPS26       | ENSG00000197728 | 0.40144  | 0.34405 | 0.40144     | 0.34405     | 0.40144   | 0.34405 |  |
|             | 0.40144         | 0.34405  | 0.34405 | 0.701070506 |             |           |         |  |
| MIR4710     | ENSG00000265291 | 0.40136  | 0.34408 | 0.40136     | 0.34408     | 0.40136   |         |  |
|             | 0.34408         | 0.40136  | 0.34408 | 0.34408     | 0.701070506 |           |         |  |
| CPT1A       | ENSG00000110090 | -1.1416  | 0.8732  | 0.40112     | 0.34417     | -0.28992  | 0.61406 |  |
|             | 0.0092636       | 0.4963   | 0.34417 | 0.701070506 |             |           |         |  |
| FAM120B     | ENSG00000112584 | -0.45907 | 0.67691 | 0.21411     | 0.41523     | 0.18998   |         |  |
|             | 0.42466         | 0.40108  | 0.34418 | 0.34418     | 0.701070506 |           |         |  |
| GBAP1       | ENSG00000160766 | -0.64718 | 0.74124 | -0.61565    | 0.73094     | -0.38427  | 0.64961 |  |
|             | 0.40109         | 0.34418  | 0.34418 | 0.701070506 |             |           |         |  |
| OR52K3P     | ENSG00000225101 | 0.09375  | 0.46265 | 0.40109     | 0.34418     | -0.67958  |         |  |
|             | 0.75162         | 0.09375  | 0.46265 | 0.34418     | 0.701070506 |           |         |  |
| ADRA1D      | ENSG00000171873 | 0.12834  | 0.44894 | 0.36948     | 0.35588     | -1.0244   |         |  |
|             | 0.84717         | 0.401    | 0.34421 | 0.34421     | 0.701070506 |           |         |  |
| CKAP2       | ENSG00000136108 | 0.40096  | 0.34422 | -0.059338   | 0.52366     | 0.28581   | 0.38751 |  |
|             | 0.28581         | 0.38751  | 0.34422 | 0.701070506 |             |           |         |  |
| NA          | ENSG00000272298 | -0.21089 | 0.58351 | 0.19111     | 0.42422     | -0.01833  | 0.50731 |  |
|             | 0.40095         | 0.34423  | 0.34423 | 0.701070506 |             |           |         |  |
| CYREN       | ENSG00000122783 | 0.4009   | 0.34425 | 0.4009      | 0.34425     | 0.4009    | 0.34425 |  |
|             | 0.4009          | 0.34425  | 0.34425 | 0.701070506 |             |           |         |  |
| CACNA1C-AS1 | ENSG00000246627 | 0.30725  | 0.37933 | -0.81988    | 0.79386     | 0.40085   |         |  |
|             | 0.34426         | 0.40085  | 0.34426 | 0.34426     | 0.701070506 |           |         |  |
| EPSTI1      | ENSG00000133106 | -1.7817  | 0.9626  | -1.0863     | 0.86132     | -1.9461   |         |  |
|             | 0.97418         | 0.4008   | 0.34428 | 0.34428     | 0.701070506 |           |         |  |
| NA          | ENSG00000228879 | -1.0334  | 0.84929 | -1.0334     | 0.84929     | 0.40081   | 0.34428 |  |
|             | -1.0334         | 0.84929  | 0.34428 | 0.701070506 |             |           |         |  |
| ADAMTS8     | ENSG00000134917 | 0.40079  | 0.34429 | -0.33583    | 0.6315      | -0.96257  |         |  |
|             | 0.83212         | -1.0002  | 0.8414  | 0.34429     | 0.701070506 |           |         |  |
| MIR548Z     | ENSG00000266016 | 0.40077  | 0.3443  | -0.37075    | 0.64459     | -0.18194  |         |  |
|             | 0.57219         | -1.0122  | 0.84427 | 0.3443      | 0.701070506 |           |         |  |
| CST8        | ENSG00000125815 | 0.40062  | 0.34435 | 0.40062     | 0.34435     | -0.023317 | 0.5093  |  |
|             | 0.40062         | 0.34435  | 0.34435 | 0.701070506 |             |           |         |  |
| LINC02387   | ENSG00000256232 | -1.3981  | 0.91896 | -1.8635     | 0.96881     | -1.6065   |         |  |
|             | 0.94592         | 0.40063  | 0.34435 | 0.34435     | 0.701070506 |           |         |  |
| NA          | ENSG00000276638 | 0.40062  | 0.34435 | 0.40062     | 0.34435     | 0.40062   | 0.34435 |  |
|             | 0.40062         | 0.34435  | 0.34435 | 0.701070506 |             |           |         |  |
| RNA5P48     | ENSG00000200839 | -0.60785 | 0.72836 | -0.60785    | 0.72836     | -0.60785  |         |  |

|             |                 |          |         |             |             |          |         |  |
|-------------|-----------------|----------|---------|-------------|-------------|----------|---------|--|
|             | 0.72836         | 0.40058  | 0.34437 | 0.34437     | 0.701070506 |          |         |  |
| NA          | ENSG00000259279 | 0.40057  | 0.34437 | 0.40057     | 0.34437     | 0.40057  | 0.34437 |  |
|             | 0.40057         | 0.34437  | 0.34437 | 0.701070506 |             |          |         |  |
| NA          | ENSG00000223861 | 0.40053  | 0.34438 | -1.6632     | 0.95186     | -1.2491  | 0.89418 |  |
|             | -1.6632         | 0.95186  | 0.34438 | 0.701070506 |             |          |         |  |
| LINC01255   | ENSG00000267252 | -0.68096 | 0.75205 | 0.034392    | 0.48628     | 0.23803  |         |  |
|             | 0.40593         | 0.40048  | 0.3444  | 0.3444      | 0.701070506 |          |         |  |
| MTOR        | ENSG00000198793 | -0.67401 | 0.74985 | -0.56294    | 0.71326     | 0.23589  | 0.40676 |  |
|             | 0.40045         | 0.34441  | 0.34441 | 0.701070506 |             |          |         |  |
| KRT73-AS1   | ENSG00000257495 | 0.40039  | 0.34443 | 0.40039     | 0.34443     | 0.40039  |         |  |
|             | 0.34443         | 0.40039  | 0.34443 | 0.34443     | 0.701070506 |          |         |  |
| RNF11       | ENSG00000123091 | 0.40031  | 0.34446 | 0.40031     | 0.34446     | 0.40031  | 0.34446 |  |
|             | 0.40031         | 0.34446  | 0.34446 | 0.701070506 |             |          |         |  |
| API5        | ENSG00000166181 | 0.40032  | 0.34446 | -0.65181    | 0.74274     | -0.65181 | 0.74274 |  |
|             | -0.23056        | 0.59117  | 0.34446 | 0.701070506 |             |          |         |  |
| NA          | ENSG00000254615 | 0.40033  | 0.34446 | 0.40033     | 0.34446     | 0.40033  | 0.34446 |  |
|             | 0.40033         | 0.34446  | 0.34446 | 0.701070506 |             |          |         |  |
| OLFM5P      | ENSG00000224295 | -0.66531 | 0.74708 | -0.33494    | 0.63116     | 0.40022  |         |  |
|             | 0.3445          | -0.33494 | 0.63116 | 0.3445      | 0.701070506 |          |         |  |
| FADD        | ENSG00000168040 | -0.17289 | 0.56863 | 0.40017     | 0.34452     | -0.04697 | 0.51873 |  |
|             | 0.39842         | 0.34516  | 0.34452 | 0.701070506 |             |          |         |  |
| NA          | ENSG00000213060 | -0.36074 | 0.64085 | 0.40014     | 0.34453     | 0.39511  | 0.34638 |  |
|             | 0.17228         | 0.43161  | 0.34453 | 0.701070506 |             |          |         |  |
| NDST4       | ENSG00000138653 | -0.30186 | 0.61862 | -0.53499    | 0.70367     | -0.77969 | 0.78221 |  |
|             | 0.40009         | 0.34454  | 0.34454 | 0.701070506 |             |          |         |  |
| NA          | ENSG00000203739 | -0.5755  | 0.71752 | 0.40008     | 0.34455     | -0.59635 | 0.72453 |  |
|             | -0.45605        | 0.67582  | 0.34455 | 0.701070506 |             |          |         |  |
| EPOR        | ENSG00000187266 | 0.34022  | 0.36684 | 0.40004     | 0.34456     | 0.40004  | 0.34456 |  |
|             | 0.40004         | 0.34456  | 0.34456 | 0.701070506 |             |          |         |  |
| NA          | ENSG00000271917 | 0.39998  | 0.34458 | 0.39998     | 0.34458     | 0.39998  | 0.34458 |  |
|             | 0.39998         | 0.34458  | 0.34458 | 0.701070506 |             |          |         |  |
| NA          | ENSG00000279317 | 0.39997  | 0.34459 | 0.39997     | 0.34459     | 0.39997  | 0.34459 |  |
|             | 0.39997         | 0.34459  | 0.34459 | 0.701070506 |             |          |         |  |
| ACER1       | ENSG00000167769 | 0.39995  | 0.3446  | 0.19314     | 0.42342     | 0.23174  | 0.40837 |  |
|             | 0.27566         | 0.3914   | 0.3446  | 0.701070506 |             |          |         |  |
| RPL26P19    | ENSG00000226221 | -0.98777 | 0.83837 | 0.39991     | 0.34461     | -0.98777 |         |  |
|             | 0.83837         | -0.98777 | 0.83837 | 0.34461     | 0.701070506 |          |         |  |
| HAVCR1      | ENSG00000113249 | -0.97473 | 0.83515 | -0.57512    | 0.7174      | 0.39989  |         |  |
|             | 0.34462         | -0.98791 | 0.8384  | 0.34462     | 0.701070506 |          |         |  |
| ORC5        | ENSG00000164815 | 0.3998   | 0.34465 | -0.97568    | 0.83539     | -0.36928 | 0.64404 |  |
|             | -0.16704        | 0.56633  | 0.34465 | 0.701070506 |             |          |         |  |
| RAB11AP1    | ENSG00000227995 | -2.0058  | 0.97756 | 0.39978     | 0.34466     | -1.4951  |         |  |
|             | 0.93255         | 0.39978  | 0.34466 | 0.34466     | 0.701070506 |          |         |  |
| NA          | ENSG00000249479 | 0.39979  | 0.34466 | 0.39979     | 0.34466     | 0.39979  | 0.34466 |  |
|             | -1.1747         | 0.87994  | 0.34466 | 0.701070506 |             |          |         |  |
| RN7SL753P   | ENSG00000264275 | -0.32781 | 0.62847 | -0.32781    | 0.62847     | -0.32781 |         |  |
|             | 0.62847         | 0.39978  | 0.34466 | 0.34466     | 0.701070506 |          |         |  |
| KRT76       | ENSG00000185069 | -0.45582 | 0.67574 | 0.39974     | 0.34468     | -0.40089 | 0.65575 |  |
|             | -0.2211         | 0.58749  | 0.34468 | 0.701070506 |             |          |         |  |
| COX5BP7     | ENSG00000226024 | 0.16377  | 0.43496 | 0.39972     | 0.34468     | 0.16377  |         |  |
|             | 0.43496         | -1.2417  | 0.89282 | 0.34468     | 0.701070506 |          |         |  |
| TDP1        | ENSG00000042088 | 0.35982  | 0.35949 | -0.19103    | 0.57575     | -0.13214 | 0.55256 |  |
|             | 0.39963         | 0.34471  | 0.34471 | 0.701070506 |             |          |         |  |
| RNY1P14     | ENSG00000207155 | 0.39965  | 0.34471 | 0.39965     | 0.34471     | 0.39965  |         |  |
|             | 0.34471         | 0.39965  | 0.34471 | 0.34471     | 0.701070506 |          |         |  |
| TRIM42      | ENSG00000155890 | -0.14752 | 0.55864 | -0.51389    | 0.69634     | -0.93449 |         |  |
|             | 0.82497         | 0.3996   | 0.34472 | 0.34472     | 0.701070506 |          |         |  |
| IGHVII-62-1 | ENSG00000253747 | 0.3995   | 0.34476 | 0.3995      | 0.34476     | 0.3995   |         |  |
|             | 0.34476         | 0.3995   | 0.34476 | 0.34476     | 0.701070506 |          |         |  |
| TENT4B      | ENSG00000121274 | -0.87093 | 0.8081  | 0.3994      | 0.3448      | -0.29136 |         |  |
|             | 0.61461         | -0.86367 | 0.80611 | 0.3448      | 0.701070506 |          |         |  |
| RBMX2P1     | ENSG00000226406 | -0.70535 | 0.7597  | 0.39941     | 0.3448      | 0.39941  |         |  |

|            |                 |           |         |             |             |           |         |         |
|------------|-----------------|-----------|---------|-------------|-------------|-----------|---------|---------|
|            | 0.3448          | 0.39941   | 0.3448  | 0.3448      | 0.701070506 |           |         |         |
| NA         | ENSG00000262011 | 0.39936   | 0.34481 | 0.39936     | 0.34481     | 0.39936   | 0.34481 | 0.34481 |
|            | 0.39936         | 0.34481   | 0.34481 | 0.701070506 |             |           |         |         |
| NA         | ENSG00000268316 | 0.39937   | 0.34481 | 0.39937     | 0.34481     | 0.39937   | 0.34481 | 0.34481 |
|            | 0.26374         | 0.39599   | 0.34481 | 0.701070506 |             |           |         |         |
| FMO10P     | ENSG00000234984 | 0.39932   | 0.34483 | 0.3901      | 0.34823     | 0.39932   |         |         |
|            | 0.34483         | 0.39932   | 0.34483 | 0.34483     | 0.701070506 |           |         |         |
| OR5A2      | ENSG00000172324 | 0.38956   | 0.34843 | 0.3993      | 0.34484     | -0.87586  | 0.80945 |         |
|            | -0.59162        | 0.72295   | 0.34484 | 0.701070506 |             |           |         |         |
| NA         | ENSG00000231505 | -0.25842  | 0.60196 | 0.39929     | 0.34484     | -0.34577  | 0.63524 |         |
|            | -0.34577        | 0.63524   | 0.34484 | 0.701070506 |             |           |         |         |
| NANOGB     | ENSG00000205857 | 0.3984    | 0.34517 | 0.3992      | 0.34487     | -0.53068  |         |         |
|            | 0.70218         | 0.11988   | 0.45229 | 0.34487     | 0.701070506 |           |         |         |
| MAMDC2     | ENSG00000165072 | 0.39919   | 0.34488 | 0.051411    | 0.4795      | -0.15089  |         |         |
|            | 0.55997         | -0.67006  | 0.74859 | 0.34488     | 0.701070506 |           |         |         |
| PAWRP1     | ENSG00000225533 | 0.33043   | 0.37054 | 0.33043     | 0.37054     | 0.39917   |         |         |
|            | 0.34489         | 0.33043   | 0.37054 | 0.34489     | 0.701070506 |           |         |         |
| ZNF850     | ENSG00000267041 | -0.23133  | 0.59147 | -0.17378    | 0.56898     | 0.39916   |         |         |
|            | 0.34489         | 0.39916   | 0.34489 | 0.34489     | 0.701070506 |           |         |         |
| RNASE7     | ENSG00000165799 | 0.39913   | 0.3449  | 0.39913     | 0.3449      | -0.14278  |         |         |
|            | 0.55677         | 0.39913   | 0.3449  | 0.3449      | 0.701070506 |           |         |         |
| NA         | ENSG00000255523 | 0.39914   | 0.3449  | -0.033677   | 0.51343     | 0.39914   | 0.3449  |         |
|            | 0.39914         | 0.3449    | 0.3449  | 0.701070506 |             |           |         |         |
| MCF2L      | ENSG00000126217 | -0.052648 | 0.52099 | -1.401      | 0.91939     | -0.32287  | 0.6266  |         |
|            | 0.39911         | 0.34491   | 0.34491 | 0.701070506 |             |           |         |         |
| RNU2-60P   | ENSG00000253099 | 0.39903   | 0.34494 | 0.39903     | 0.34494     | 0.39903   |         |         |
|            | 0.34494         | 0.39903   | 0.34494 | 0.34494     | 0.70110224  |           |         |         |
| ATP5MD     | ENSG00000173915 | 0.39891   | 0.34498 | 0.39891     | 0.34498     | 0.39891   |         |         |
|            | 0.34498         | 0.39891   | 0.34498 | 0.34498     | 0.701145377 |           |         |         |
| ADPGK-AS1  | ENSG00000260898 | 0.042705  | 0.48297 | 0.39889     | 0.34499     | 0.33526   |         |         |
|            | 0.36871         | -0.24075  | 0.59513 | 0.34499     | 0.701145377 |           |         |         |
| SNORD36B   | ENSG00000200831 | 0.39879   | 0.34502 | 0.39879     | 0.34502     | 0.39879   |         |         |
|            | 0.34502         | 0.39879   | 0.34502 | 0.34502     | 0.701168185 |           |         |         |
| LINC01721  | ENSG00000230133 | -1.4863   | 0.93141 | -1.3488     | 0.9113      | 0.39877   |         |         |
|            | 0.34503         | -0.85124  | 0.80268 | 0.34503     | 0.701168185 |           |         |         |
| LMLN2      | ENSG00000283654 | -0.85028  | 0.80242 | -0.72028    | 0.76432     | -0.88274  | 0.81131 |         |
|            | 0.39853         | 0.34512   | 0.34512 | 0.701321835 |             |           |         |         |
| FECH       | ENSG00000066926 | 0.25347   | 0.39995 | -1.0163     | 0.84527     | 0.39836   | 0.34518 |         |
|            | -0.71122        | 0.76153   | 0.34518 | 0.701414511 |             |           |         |         |
| PREP       | ENSG00000085377 | -0.31915  | 0.6252  | -0.31741    | 0.62453     | 0.34614   | 0.36462 |         |
|            | 0.39828         | 0.34521   | 0.34521 | 0.70141882  |             |           |         |         |
| SIGLEC27P  | ENSG00000269580 | 0.39822   | 0.34523 | 0.39822     | 0.34523     | 0.39822   |         |         |
|            | 0.34523         | 0.39822   | 0.34523 | 0.34523     | 0.70141882  |           |         |         |
| NA         | ENSG00000270411 | 0.39819   | 0.34525 | -0.99556    | 0.84027     | -1.5083   | 0.93427 |         |
|            | 0.39819         | 0.34525   | 0.34525 | 0.70141882  |             |           |         |         |
| OTUD6B-AS1 | ENSG00000253738 | 0.39802   | 0.34531 | -0.06791    | 0.52707     | 0.30442   |         |         |
|            | 0.3804          | 0.30442   | 0.3804  | 0.34531     | 0.70141882  |           |         |         |
| PDE6A      | ENSG00000132915 | 0.20676   | 0.4181  | 0.39799     | 0.34532     | -0.34813  | 0.63613 |         |
|            | 0.19961         | 0.42089   | 0.34532 | 0.70141882  |             |           |         |         |
| NA         | ENSG00000237534 | -1.4809   | 0.93068 | 0.39796     | 0.34533     | -0.043116 | 0.5172  |         |
|            | -0.98318        | 0.83724   | 0.34533 | 0.70141882  |             |           |         |         |
| NA         | ENSG00000221659 | -1.4389   | 0.92491 | 0.39794     | 0.34534     | 0.12558   | 0.45003 |         |
|            | 0.21326         | 0.41556   | 0.34534 | 0.70141882  |             |           |         |         |
| NA         | ENSG00000228272 | 0.39785   | 0.34537 | 0.032298    | 0.48712     | -0.18564  | 0.57364 |         |
|            | -0.18564        | 0.57364   | 0.34537 | 0.70141882  |             |           |         |         |
| LINC01892  | ENSG00000265514 | -0.66645  | 0.74744 | 0.39779     | 0.34539     | -0.2931   |         |         |
|            | 0.61528         | -0.2931   | 0.61528 | 0.34539     | 0.70141882  |           |         |         |
| NA         | ENSG00000253172 | -1.9165   | 0.97235 | 0.39776     | 0.3454      | -1.9165   | 0.97235 |         |
|            | -1.9165         | 0.97235   | 0.3454  | 0.70141882  |             |           |         |         |
| NA         | ENSG00000274422 | 0.22289   | 0.41181 | 0.39771     | 0.34542     | -0.29593  | 0.61636 |         |
|            | 0.27181         | 0.39288   | 0.34542 | 0.70141882  |             |           |         |         |
| MAP3K14    | ENSG00000006062 | 0.14371   | 0.44286 | -0.3466     | 0.63555     | 0.39768   |         |         |

|           |                 |           |             |             |             |           |         |
|-----------|-----------------|-----------|-------------|-------------|-------------|-----------|---------|
|           | 0.34543         | -0.22849  | 0.59037     | 0.34543     | 0.70141882  |           |         |
| PRPH      | ENSG00000135406 | -0.13468  | 0.55357     | -0.13468    | 0.55357     | 0.21462   | 0.41503 |
|           | 0.3977          | 0.34543   | 0.34543     | 0.70141882  |             |           |         |
| HSPA7     | ENSG00000225217 | -0.90755  | 0.81794     | -0.90755    | 0.81794     | -0.37506  | 0.64619 |
|           | 0.39769         | 0.34543   | 0.34543     | 0.70141882  |             |           |         |
| NA        | ENSG00000226302 | -0.79402  | 0.78641     | 0.39764     | 0.34545     | -0.60251  | 0.72658 |
|           | 0.39764         | 0.34545   | 0.34545     | 0.70141882  |             |           |         |
| NA        | ENSG00000233406 | 0.39764   | 0.34545     | 0.39764     | 0.34545     | 0.39764   | 0.34545 |
|           | 0.39764         | 0.34545   | 0.34545     | 0.70141882  |             |           |         |
| SFSWAP    | ENSG00000061936 | -1.0564   | 0.85462     | -1.6549     | 0.95103     | 0.3976    |         |
|           | 0.34546         | -1.8386   | 0.96701     | 0.34546     | 0.70141882  |           |         |
| NA        | ENSG00000260494 | -0.22906  | 0.59059     | -0.20234    | 0.58017     | 0.3976    | 0.34546 |
|           | 0.3976          | 0.34546   | 0.34546     | 0.70141882  |             |           |         |
| CACNA1H   | ENSG00000196557 | -0.16832  | 0.56683     | -0.31784    | 0.6247      | -0.79111  |         |
|           | 0.78556         | 0.39757   | 0.34547     | 0.34547     | 0.70141882  |           |         |
| NA        | ENSG00000225850 | -0.033009 | 0.51317     | -0.033009   | 0.51317     | -0.033009 | 0.51317 |
|           | 0.39759         | 0.34547   | 0.34547     | 0.70141882  |             |           |         |
| OR7C1     | ENSG00000127530 | 0.39748   | 0.34551     | -0.29492    | 0.61597     | -1.2501   | 0.89436 |
|           | -0.29492        | 0.61597   | 0.34551     | 0.701461884 |             |           |         |
| CANT1     | ENSG00000171302 | -0.41149  | 0.65964     | -0.26965    | 0.60629     | 0.39745   | 0.34552 |
|           | 0.34468         | 0.36517   | 0.34552     | 0.701461884 |             |           |         |
| OR2AG2    | ENSG00000188124 | -0.37845  | 0.64745     | -0.51688    | 0.69738     | 0.3974    |         |
|           | 0.34554         | 0.24919   | 0.40161     | 0.34554     | 0.701473263 |           |         |
| APOLD1    | ENSG00000178878 | 0.39728   | 0.34558     | 0.14513     | 0.4423      | 0.35125   |         |
|           | 0.3627          | -1.2638   | 0.89685     | 0.34558     | 0.701500925 |           |         |
| PSAT1P4   | ENSG00000224962 | 0.39725   | 0.34559     | -2.2129     | 0.98655     | -0.53147  |         |
|           | 0.70245         | -0.53147  | 0.70245     | 0.34559     | 0.701500925 |           |         |
| NA        | ENSG00000278399 | 0.39719   | 0.34561     | -0.84719    | 0.80156     | 0.30435   | 0.38043 |
|           | -0.34644        | 0.6355    | 0.34561     | 0.701500925 |             |           |         |
| LINC01830 | ENSG00000234207 | -0.9494   | 0.82879     | -0.11157    | 0.54442     | 0.39717   |         |
|           | 0.34562         | -0.17053  | 0.5677      | 0.34562     | 0.701500925 |           |         |
| DEFB108F  | ENSG00000188438 | -0.87408  | 0.80896     | 0.39712     | 0.34564     | -0.66626  |         |
|           | 0.74738         | -0.49081  | 0.68822     | 0.34564     | 0.701500925 |           |         |
| DUTP1     | ENSG00000229048 | -0.17195  | 0.56826     | -0.84002    | 0.79955     | -0.38049  | 0.64821 |
|           | 0.39712         | 0.34564   | 0.34564     | 0.701500925 |             |           |         |
| LYZL1     | ENSG00000120563 | -0.73792  | 0.76972     | -0.99984    | 0.84131     | -1.1686   | 0.87872 |
|           | 0.397           | 0.34569   | 0.34569     | 0.701560232 |             |           |         |
| ATP5MFP1  | ENSG00000224421 | 0.39693   | 0.34571     | 0.39693     | 0.34571     | 0.39693   |         |
|           | 0.34571         | 0.39693   | 0.34571     | 0.34571     | 0.701560232 |           |         |
| DNASE1L3  | ENSG00000163687 | 0.39684   | 0.34574     | -0.28501    | 0.61218     | -0.077358 |         |
|           | 0.53083         | -0.93776  | 0.82582     | 0.34574     | 0.701560232 |           |         |
| NA        | ENSG00000220949 | -1.2185   | 0.88848     | -1.2185     | 0.88848     | 0.39681   | 0.34575 |
|           | -1.2185         | 0.88848   | 0.34575     | 0.701560232 |             |           |         |
| NA        | ENSG00000229530 | -1.5406   | 0.93829     | 0.39683     | 0.34575     | -1.4907   | 0.93198 |
|           | -1.4907         | 0.93198   | 0.34575     | 0.701560232 |             |           |         |
| TGFBR1    | ENSG00000106799 | -1.2329   | 0.89119     | 0.39678     | 0.34576     | -0.51002  |         |
|           | 0.69498         | -0.35599  | 0.63908     | 0.34576     | 0.701560232 |           |         |
| MORF4L1P3 | ENSG00000255040 | -1.5218   | 0.93597     | 0.39676     | 0.34577     | 0.14776   |         |
|           | 0.44127         | 0.14776   | 0.44127     | 0.34577     | 0.701560232 |           |         |
| WDR17     | ENSG00000150627 | 0.39644   | 0.34589     | -0.23266    | 0.59199     | -0.23266  | 0.59199 |
|           | -0.5702         | 0.71573   | 0.34589     | 0.701745272 |             |           |         |
| NA        | ENSG00000271382 | 0.39645   | 0.34589     | 0.39645     | 0.34589     | 0.39645   | 0.34589 |
|           | 0.39645         | 0.34589   | 0.34589     | 0.701745272 |             |           |         |
| RN7SL33P  | ENSG00000243049 | -1.0514   | 0.85346     | -1.0514     | 0.85346     | -1.0514   |         |
|           | 0.85346         | 0.39621   | 0.34597     | 0.34597     | 0.701815841 |           |         |
| NA        | ENSG00000254625 | 0.39623   | 0.34597     | 0.39623     | 0.34597     | 0.39623   | 0.34597 |
|           | 0.39623         | 0.34597   | 0.34597     | 0.701815841 |             |           |         |
| APP       | ENSG00000142192 | -1.1512   | 0.87518     | 0.39621     | 0.34598     | -0.4656   | 0.67925 |
|           | 0.0039915       | 0.49841   | 0.34598     | 0.701815841 |             |           |         |
| RNU7-127P | ENSG00000238812 | 0.39616   | 0.346       | 0.39616     | 0.346       | 0.39616   | 0.346   |
|           | 0.346           | 0.346     | 0.701815841 |             |             |           |         |
| NA        | ENSG00000279670 | 0.39612   | 0.34601     | 0.39612     | 0.34601     | 0.39612   | 0.34601 |

|           |                 |            |         |             |             |           |         |  |
|-----------|-----------------|------------|---------|-------------|-------------|-----------|---------|--|
|           | -0.50214        | 0.69222    | 0.34601 | 0.701815841 |             |           |         |  |
| PDIK1L    | ENSG00000175087 | 0.065909   | 0.47373 | -0.87334    | 0.80876     | 0.39608   |         |  |
|           | 0.34602         | -0.49681   | 0.69034 | 0.34602     | 0.701815841 |           |         |  |
| CA3-AS1   | ENSG00000253549 | 0.39607    | 0.34603 | -0.21214    | 0.584       | 0.094208  | 0.46247 |  |
|           | 0.094208        | 0.46247    | 0.34603 | 0.701815841 |             |           |         |  |
| NTN1      | ENSG00000065320 | -0.60038   | 0.72587 | -0.075215   | 0.52998     | -0.53513  | 0.70372 |  |
|           | 0.39604         | 0.34604    | 0.34604 | 0.701815841 |             |           |         |  |
| SCUBE2    | ENSG00000175356 | -0.86471   | 0.8064  | -0.024452   | 0.50975     | 0.050767  |         |  |
|           | 0.47976         | 0.39596    | 0.34607 | 0.34607     | 0.701847474 |           |         |  |
| STK17B    | ENSG00000081320 | -0.1419    | 0.55642 | -0.3255     | 0.6276      | 0.39583   |         |  |
|           | 0.34612         | 0.39583    | 0.34612 | 0.34612     | 0.701919664 |           |         |  |
| CAHM      | ENSG00000270419 | -0.40895   | 0.65871 | -0.71347    | 0.76222     | 0.39574   | 0.34615 |  |
|           | 0.39574         | 0.34615    | 0.34615 | 0.701942358 |             |           |         |  |
| RNU6-170P | ENSG00000199702 | 0.3957     | 0.34616 | 0.3957      | 0.34616     | 0.3957    |         |  |
|           | 0.34616         | 0.3957     | 0.34616 | 0.34616     | 0.701942358 |           |         |  |
| RBM34     | ENSG00000188739 | -0.53687   | 0.70432 | 0.10733     | 0.45726     | 0.13395   | 0.44672 |  |
|           | 0.39559         | 0.3462     | 0.3462  | 0.701994258 |             |           |         |  |
| NA        | ENSG00000272402 | 0.39544    | 0.34626 | 0.39544     | 0.34626     | 0.39544   | 0.34626 |  |
|           | 0.39544         | 0.34626    | 0.34626 | 0.702077769 |             |           |         |  |
| NA        | ENSG00000242163 | 0.39541    | 0.34627 | 0.39541     | 0.34627     | 0.39541   | 0.34627 |  |
|           | 0.39541         | 0.34627    | 0.34627 | 0.702077769 |             |           |         |  |
| NA        | ENSG00000186328 | -0.0020815 | 0.50083 | -0.23526    | 0.593       | 0.39532   | 0.3463  |  |
|           | -0.53543        | 0.70383    | 0.3463  | 0.702109382 |             |           |         |  |
| USF3      | ENSG00000176542 | 0.39524    | 0.34633 | -0.21498    | 0.58511     | 0.39524   | 0.34633 |  |
|           | 0.39524         | 0.34633    | 0.34633 | 0.702140993 |             |           |         |  |
| LCN2      | ENSG00000148346 | 0.39509    | 0.34639 | -1.0235     | 0.84696     | -0.2278   | 0.5901  |  |
|           | -0.48676        | 0.68679    | 0.34639 | 0.702195266 |             |           |         |  |
| DARS-AS1  | ENSG00000231890 | 0.39509    | 0.34639 | 0.39509     | 0.34639     | 0.39509   |         |  |
|           | 0.34639         | 0.39509    | 0.34639 | 0.34639     | 0.702195266 |           |         |  |
| NA        | ENSG00000250135 | 0.39506    | 0.3464  | 0.39506     | 0.3464      | 0.39506   | 0.3464  |  |
|           | 0.39506         | 0.3464     | 0.3464  | 0.702195266 |             |           |         |  |
| YWHAE     | ENSG00000108953 | -1.1646    | 0.87792 | -0.09587    | 0.53819     | 0.39499   | 0.34642 |  |
|           | -0.12567        | 0.55001    | 0.34642 | 0.702206597 |             |           |         |  |
| PPIAP77   | ENSG00000249092 | -1.3115    | 0.90516 | 0.39494     | 0.34644     | 0.39494   |         |  |
|           | 0.34644         | 0.39494    | 0.34644 | 0.34644     | 0.702208988 |           |         |  |
| NA        | ENSG00000279404 | 0.39491    | 0.34645 | 0.39491     | 0.34645     | 0.39491   | 0.34645 |  |
|           | 0.39491         | 0.34645    | 0.34645 | 0.702208988 |             |           |         |  |
| GRM3      | ENSG00000198822 | 0.38584    | 0.34981 | -0.013252   | 0.50529     | 0.39482   | 0.34649 |  |
|           | -0.96783        | 0.83344    | 0.34649 | 0.702222707 |             |           |         |  |
| OR5D17P   | ENSG00000181837 | -0.71051   | 0.76131 | -0.74013    | 0.77039     | -0.40519  |         |  |
|           | 0.65733         | 0.39479    | 0.3465  | 0.3465      | 0.702222707 |           |         |  |
| RNU6-711P | ENSG00000253064 | 0.2565     | 0.39878 | 0.2565      | 0.39878     | 0.3948    |         |  |
|           | 0.3465          | 0.2565     | 0.39878 | 0.3465      | 0.702222707 |           |         |  |
| KDELC1P1  | ENSG00000250329 | 0.39474    | 0.34652 | 0.39474     | 0.34652     | 0.39474   |         |  |
|           | 0.34652         | 0.39474    | 0.34652 | 0.34652     | 0.702234035 |           |         |  |
| NA        | ENSG00000236911 | 0.3944     | 0.34664 | 0.3944      | 0.34664     | 0.3944    | 0.34664 |  |
|           | 0.096874        | 0.46141    | 0.34664 | 0.702349634 |             |           |         |  |
| RPEP3     | ENSG00000230833 | 0.39437    | 0.34665 | 0.39437     | 0.34665     | 0.39437   | 0.34665 |  |
|           | 0.39437         | 0.34665    | 0.34665 | 0.702349634 |             |           |         |  |
| NA        | ENSG00000260532 | 0.39438    | 0.34665 | 0.39438     | 0.34665     | 0.39438   | 0.34665 |  |
|           | -0.35795        | 0.63981    | 0.34665 | 0.702349634 |             |           |         |  |
| LINC00836 | ENSG00000280809 | -0.087394  | 0.53482 | -1.2322     | 0.89107     | -1.3588   |         |  |
|           | 0.91289         | 0.39439    | 0.34665 | 0.34665     | 0.702349634 |           |         |  |
| NA        | ENSG00000229220 | 0.39434    | 0.34666 | 0.39434     | 0.34666     | 0.39434   | 0.34666 |  |
|           | 0.39434         | 0.34666    | 0.34666 | 0.702349634 |             |           |         |  |
| NA        | ENSG00000278390 | -0.69817   | 0.75746 | 0.39432     | 0.34667     | 0.15077   | 0.44008 |  |
|           | -0.52956        | 0.70179    | 0.34667 | 0.702349634 |             |           |         |  |
| RNF216    | ENSG00000011275 | 0.16514    | 0.43442 | 0.39416     | 0.34673     | 0.0023942 |         |  |
|           | 0.49904         | -0.79196   | 0.78581 | 0.34673     | 0.702349634 |           |         |  |
| CNOT3     | ENSG00000088038 | 0.39418    | 0.34673 | -1.1098     | 0.86645     | -1.1098   | 0.86645 |  |
|           | -1.1098         | 0.86645    | 0.34673 | 0.702349634 |             |           |         |  |
| RNU6-81P  | ENSG00000202478 | 0.39414    | 0.34674 | 0.04637     | 0.48151     | -0.92636  |         |  |



|            |                 |           |         |             |             |           |         |  |
|------------|-----------------|-----------|---------|-------------|-------------|-----------|---------|--|
|            | 0.82287         | -1.3517   | 0.91176 | 0.34674     | 0.702349634 |           |         |  |
| NA         | ENSG00000248646 | -0.41206  | 0.65985 | 0.39413     | 0.34674     | -0.48505  | 0.68618 |  |
|            | -1.1576         | 0.87648   | 0.34674 | 0.702349634 |             |           |         |  |
| IQCC       | ENSG00000160051 | 0.39411   | 0.34675 | 0.39411     | 0.34675     | 0.39411   | 0.34675 |  |
|            | 0.39411         | 0.34675   | 0.34675 | 0.702349634 |             |           |         |  |
| SNAP25-AS1 | ENSG00000227906 | 0.0019269 | 0.49923 | 0.39411     | 0.34675     | 0.0061099 |         |  |
|            | 0.49756         | 0.12566   | 0.45    | 0.34675     | 0.702349634 |           |         |  |
| FAM162A    | ENSG00000114023 | -0.46243  | 0.67811 | 0.17939     | 0.42882     | -0.6116   |         |  |
|            | 0.7296          | 0.39402   | 0.34678 | 0.34678     | 0.702352012 |           |         |  |
| NA         | ENSG00000279103 | 0.39403   | 0.34678 | 0.39403     | 0.34678     | 0.39403   | 0.34678 |  |
|            | 0.39403         | 0.34678   | 0.34678 | 0.702352012 |             |           |         |  |
| MTND5P2    | ENSG00000229622 | 0.39383   | 0.34685 | 0.39383     | 0.34685     | 0.39383   |         |  |
|            | 0.34685         | 0.39383   | 0.34685 | 0.34685     | 0.702458016 |           |         |  |
| GIHCG      | ENSG00000257698 | 0.39376   | 0.34688 | -0.34394    | 0.63455     | 0.077605  | 0.46907 |  |
|            | 0.077605        | 0.46907   | 0.34688 | 0.702458016 |             |           |         |  |
| CEACAM5    | ENSG00000105388 | 0.39372   | 0.34689 | 0.39372     | 0.34689     | 0.39372   |         |  |
|            | 0.34689         | -0.79142  | 0.78565 | 0.34689     | 0.702458016 |           |         |  |
| NA         | ENSG00000267881 | 0.39372   | 0.34689 | 0.39372     | 0.34689     | 0.39372   | 0.34689 |  |
|            | 0.39372         | 0.34689   | 0.34689 | 0.702458016 |             |           |         |  |
| NA         | ENSG00000260497 | -0.21775  | 0.58619 | -0.10322    | 0.54111     | -0.23443  | 0.59267 |  |
|            | 0.39366         | 0.34692   | 0.34692 | 0.702465118 |             |           |         |  |
| RNU4-72P   | ENSG00000222686 | -0.4174   | 0.66181 | 0.39078     | 0.34798     | 0.24068   |         |  |
|            | 0.4049          | 0.39363   | 0.34693 | 0.34693     | 0.702465118 |           |         |  |
| LINC02104  | ENSG00000271334 | 0.39357   | 0.34695 | -0.9082     | 0.81811     | 0.39357   |         |  |
|            | 0.34695         | -1.0817   | 0.8603  | 0.34695     | 0.702465118 |           |         |  |
| FAM86B3P   | ENSG00000173295 | -0.16009  | 0.5636  | 0.019234    | 0.49233     | -0.45624  |         |  |
|            | 0.67589         | 0.39347   | 0.34698 | 0.34698     | 0.702465118 |           |         |  |
| LINC00322  | ENSG00000237864 | -0.99921  | 0.84115 | 0.39349     | 0.34698     | 0.36805   |         |  |
|            | 0.35642         | -0.75485  | 0.77483 | 0.34698     | 0.702465118 |           |         |  |
| NA         | ENSG00000279942 | -0.64227  | 0.73965 | 0.33294     | 0.36959     | -1.1161   | 0.86781 |  |
|            | 0.3935          | 0.34698   | 0.34698 | 0.702465118 |             |           |         |  |
| SIX3-AS1   | ENSG00000236502 | 0.3934    | 0.34701 | 0.3934      | 0.34701     | 0.3934    |         |  |
|            | 0.34701         | 0.3934    | 0.34701 | 0.34701     | 0.702467485 |           |         |  |
| RNU4-89P   | ENSG00000272359 | -0.19106  | 0.57576 | 0.0084433   | 0.49663     | 0.0084433 |         |  |
|            | 0.49663         | 0.39339   | 0.34701 | 0.34701     | 0.702467485 |           |         |  |
| NA         | ENSG00000279887 | 0.39334   | 0.34703 | 0.038545    | 0.48463     | 0.038545  | 0.48463 |  |
|            | 0.038545        | 0.48463   | 0.34703 | 0.70247879  |             |           |         |  |
| FAAP100    | ENSG00000185504 | -0.89706  | 0.81516 | -0.31387    | 0.62319     | 0.39328   |         |  |
|            | 0.34706         | 0.0863    | 0.46561 | 0.34706     | 0.702510335 |           |         |  |
| NA         | ENSG00000260958 | 0.39319   | 0.34709 | 0.39319     | 0.34709     | 0.39319   | 0.34709 |  |
|            | 0.39319         | 0.34709   | 0.34709 | 0.702541877 |             |           |         |  |
| NA         | ENSG00000279960 | 0.34325   | 0.3657  | 0.39315     | 0.34711     | 0.34325   | 0.3657  |  |
|            | 0.34325         | 0.3657    | 0.34711 | 0.702546597 |             |           |         |  |
| NA         | ENSG00000279956 | 0.22635   | 0.41047 | -1.2169     | 0.88818     | 0.39308   | 0.34713 |  |
|            | 0.39308         | 0.34713   | 0.34713 | 0.702546597 |             |           |         |  |
| NA         | ENSG00000279701 | 0.39305   | 0.34714 | 0.39305     | 0.34714     | 0.39305   | 0.34714 |  |
|            | 0.39305         | 0.34714   | 0.34714 | 0.702546597 |             |           |         |  |
| KCNIP4-IT1 | ENSG00000280650 | 0.39304   | 0.34715 | -0.64174    | 0.73948     | -0.28784  |         |  |
|            | 0.61326         | 0.27379   | 0.39212 | 0.34715     | 0.702546597 |           |         |  |
| NA         | ENSG00000265108 | 0.39292   | 0.34719 | 0.39292     | 0.34719     | 0.39292   | 0.34719 |  |
|            | 0.39292         | 0.34719   | 0.34719 | 0.702598368 |             |           |         |  |
| ADAM3B     | ENSG00000260089 | 0.39281   | 0.34723 | -1.7632     | 0.96106     | -1.7632   |         |  |
|            | 0.96106         | -1.7632   | 0.96106 | 0.34723     | 0.702632251 |           |         |  |
| NA         | ENSG00000260766 | 0.39278   | 0.34724 | 0.39278     | 0.34724     | 0.39278   | 0.34724 |  |
|            | 0.39278         | 0.34724   | 0.34724 | 0.702632251 |             |           |         |  |
| LINC02289  | ENSG00000258819 | -0.3049   | 0.61978 | -0.6075     | 0.72824     | 0.39276   |         |  |
|            | 0.34725         | 0.39276   | 0.34725 | 0.34725     | 0.702632251 |           |         |  |
| AGL        | ENSG00000162688 | 0.39271   | 0.34727 | -0.82102    | 0.79418     | -0.22264  | 0.58809 |  |
|            | 0.0098677       | 0.49606   | 0.34727 | 0.702636954 |             |           |         |  |
| NA         | ENSG00000225727 | 0.39265   | 0.34729 | 0.28961     | 0.38606     | 0.016939  | 0.49324 |  |
|            | -0.9084         | 0.81817   | 0.34729 | 0.702636954 |             |           |         |  |
| NA         | ENSG00000250124 | -0.25805  | 0.60182 | 0.010335    | 0.49588     | 0.39258   | 0.34731 |  |

|            |                 |           |         |             |             |           |           |  |
|------------|-----------------|-----------|---------|-------------|-------------|-----------|-----------|--|
|            | 0.010335        | 0.49588   | 0.34731 | 0.702636954 |             |           |           |  |
| NA         | ENSG00000277253 | -0.77748  | 0.78156 | -0.77748    | 0.78156     | -2.0058   | 0.97756   |  |
|            | 0.3926          | 0.34731   | 0.34731 | 0.702636954 |             |           |           |  |
| DYNLL1P7   | ENSG00000230614 | 0.39252   | 0.34734 | 0.39252     | 0.34734     | 0.39252   | 0.39252   |  |
|            | 0.34734         | 0.39252   | 0.34734 | 0.34734     | 0.702641655 |           |           |  |
| TMEM217    | ENSG00000172738 | -0.44218  | 0.67082 | -0.30947    | 0.62152     | -0.30947  | -0.30947  |  |
|            | 0.62152         | 0.39245   | 0.34736 | 0.34736     | 0.702641655 |           |           |  |
| LINC02526  | ENSG00000229654 | 0.39246   | 0.34736 | -1.3635     | 0.91363     | -1.3635   | -1.3635   |  |
|            | 0.91363         | -1.3635   | 0.91363 | 0.34736     | 0.702641655 |           |           |  |
| KRT42P     | ENSG00000214514 | 0.044133  | 0.4824  | 0.39244     | 0.34737     | -0.6736   | -0.6736   |  |
|            | 0.74972         | -0.038337 | 0.51529 | 0.34737     | 0.702641655 |           |           |  |
| NA         | ENSG00000202137 | 0.39229   | 0.34742 | 0.39229     | 0.34742     | 0.39229   | 0.34742   |  |
|            | 0.39229         | 0.34742   | 0.34742 | 0.702675517 |             |           |           |  |
| KAT14      | ENSG00000149474 | 0.39227   | 0.34743 | 0.39227     | 0.34743     | 0.39227   | 0.34743   |  |
|            | 0.26531         | 0.39539   | 0.34743 | 0.702675517 |             |           |           |  |
| NA         | ENSG00000256963 | -0.92912  | 0.82359 | -1.2177     | 0.88833     | -0.32306  | 0.62667   |  |
|            | 0.39227         | 0.34743   | 0.34743 | 0.702675517 |             |           |           |  |
| DUSP26     | ENSG00000133878 | -0.7126   | 0.76195 | -0.025892   | 0.51033     | -0.025892 | -0.025892 |  |
|            | 0.51033         | 0.39208   | 0.3475  | 0.3475      | 0.702787923 |           |           |  |
| NA         | ENSG00000232555 | -0.27341  | 0.60773 | -1.2624     | 0.8966      | 0.39197   | 0.34754   |  |
|            | -0.10101        | 0.54023   | 0.34754 | 0.702792597 |             |           |           |  |
| TNFSF11    | ENSG00000120659 | 0.0083802 | 0.49666 | 0.39191     | 0.34756     | 0.35391   | 0.35391   |  |
|            | 0.3617          | 0.26057   | 0.39721 | 0.34756     | 0.702792597 |           |           |  |
| RPS27AP15  | ENSG00000229753 | 0.39193   | 0.34756 | 0.39193     | 0.34756     | 0.39193   | 0.39193   |  |
|            | 0.34756         | 0.39193   | 0.34756 | 0.34756     | 0.702792597 |           |           |  |
| NA         | ENSG00000250240 | -0.34713  | 0.63575 | 0.072655    | 0.47104     | 0.094351  | 0.46242   |  |
|            | 0.39193         | 0.34756   | 0.34756 | 0.702792597 |             |           |           |  |
| DCTD       | ENSG00000129187 | -1.1738   | 0.87976 | 0.39185     | 0.34758     | -1.1738   | 0.87976   |  |
|            | -1.1738         | 0.87976   | 0.34758 | 0.702803876 |             |           |           |  |
| MTF2       | ENSG00000143033 | -0.27529  | 0.60845 | 0.39179     | 0.34761     | -0.27529  | 0.60845   |  |
|            | -1.3763         | 0.91563   | 0.34761 | 0.702835372 |             |           |           |  |
| NA         | ENSG00000224593 | -1.2496   | 0.89428 | 0.39173     | 0.34763     | -1.0755   | 0.85894   |  |
|            | -1.0755         | 0.85894   | 0.34763 | 0.702846648 |             |           |           |  |
| NA         | ENSG00000271725 | 0.39158   | 0.34768 | 0.39158     | 0.34768     | 0.39158   | 0.34768   |  |
|            | 0.39158         | 0.34768   | 0.34768 | 0.702911956 |             |           |           |  |
| RNU6-915P  | ENSG00000201813 | 0.39153   | 0.3477  | -0.18817    | 0.57463     | 0.39153   | 0.39153   |  |
|            | 0.3477          | 0.39153   | 0.3477  | 0.3477      | 0.702911956 |           |           |  |
| NA         | ENSG00000258698 | -0.17133  | 0.56802 | 0.39151     | 0.34771     | -0.1212   | 0.54823   |  |
|            | -0.37696        | 0.6469    | 0.34771 | 0.702911956 |             |           |           |  |
| TMEM100    | ENSG00000166292 | -1.4296   | 0.92359 | 0.39149     | 0.34772     | -0.62757  | -0.62757  |  |
|            | 0.73486         | -0.40312  | 0.65657 | 0.34772     | 0.702911956 |           |           |  |
| NA         | ENSG00000251364 | 0.39129   | 0.34779 | -0.35847    | 0.64001     | 0.10752   | 0.45719   |  |
|            | 0.053365        | 0.47872   | 0.34779 | 0.702997453 |             |           |           |  |
| EEF1AKNMT  | ENSG00000010165 | 0.0099113 | 0.49605 | -0.26629    | 0.60499     | -0.48072  | -0.48072  |  |
|            | 0.68464         | 0.39127   | 0.3478  | 0.3478      | 0.702997453 |           |           |  |
| NCK1       | ENSG00000158092 | -0.46009  | 0.67727 | -0.094712   | 0.53773     | 0.39124   | 0.34781   |  |
|            | -0.19116        | 0.5758    | 0.34781 | 0.702997453 |             |           |           |  |
| NA         | ENSG00000248716 | 0.39122   | 0.34782 | 0.39122     | 0.34782     | 0.39122   | 0.34782   |  |
|            | 0.39122         | 0.34782   | 0.34782 | 0.702997453 |             |           |           |  |
| NA         | ENSG00000265401 | 0.39111   | 0.34786 | 0.39111     | 0.34786     | 0.39111   | 0.34786   |  |
|            | 0.39111         | 0.34786   | 0.34786 | 0.703049139 |             |           |           |  |
| FXVD3      | ENSG00000089356 | 0.39086   | 0.34795 | 0.39086     | 0.34795     | 0.39086   | 0.34795   |  |
|            | 0.39086         | 0.34795   | 0.34795 | 0.70320187  |             |           |           |  |
| NA         | ENSG00000278920 | -0.64115  | 0.73929 | -1.0811     | 0.86018     | 0.098747  | 0.46067   |  |
|            | 0.39082         | 0.34797   | 0.34797 | 0.703204172 |             |           |           |  |
| LRRN4CL    | ENSG00000177363 | 0.39079   | 0.34798 | 0.39079     | 0.34798     | 0.39079   | 0.39079   |  |
|            | 0.34798         | 0.39079   | 0.34798 | 0.34798     | 0.703204172 |           |           |  |
| ELOCP23    | ENSG00000224686 | -0.72022  | 0.76431 | -0.25633    | 0.60115     | 0.39056   | 0.39056   |  |
|            | 0.34806         | -0.72022  | 0.76431 | 0.34806     | 0.70333667  |           |           |  |
| RNU6-1196P | ENSG00000252030 | 0.3905    | 0.34808 | 0.3905      | 0.34808     | -0.66608  | -0.66608  |  |
|            | 0.74732         | -0.66608  | 0.74732 | 0.34808     | 0.703347918 |           |           |  |
| ABHD15     | ENSG00000168792 | -0.058099 | 0.52316 | 0.39039     | 0.34812     | -0.058099 | -0.058099 |  |

|             |                 |           |         |             |             |           |         |  |
|-------------|-----------------|-----------|---------|-------------|-------------|-----------|---------|--|
|             | 0.52316         | -0.058099 | 0.52316 | 0.34812     | 0.703372699 |           |         |  |
| NA          | ENSG00000256533 | 0.39037   | 0.34813 | 0.39037     | 0.34813     | 0.39037   | 0.34813 |  |
|             | 0.39037         | 0.34813   | 0.34813 | 0.703372699 |             |           |         |  |
| SLC39A3     | ENSG00000141873 | 0.39031   | 0.34815 | -0.76589    | 0.77813     | -0.16888  |         |  |
|             | 0.56706         | -1.2168   | 0.88815 | 0.34815     | 0.703372699 |           |         |  |
| LINC02205   | ENSG00000259473 | -1.2327   | 0.89116 | -1.6308     | 0.94854     | 0.39033   |         |  |
|             | 0.34815         | -0.78365  | 0.78338 | 0.34815     | 0.703372699 |           |         |  |
| ABHD6       | ENSG00000163686 | -0.20884  | 0.58271 | 0.34968     | 0.36329     | -0.76325  | 0.77734 |  |
|             | 0.39019         | 0.3482    | 0.3482  | 0.70342663  |             |           |         |  |
| TRIM69      | ENSG00000185880 | -0.34847  | 0.63626 | 0.39015     | 0.34821     | -0.13831  | 0.555   |  |
|             | 0.048943        | 0.48048   | 0.34821 | 0.70342663  |             |           |         |  |
| KRT8P4      | ENSG00000248231 | 0.39013   | 0.34822 | 0.25549     | 0.39917     | 0.39013   |         |  |
|             | 0.34822         | 0.39013   | 0.34822 | 0.34822     | 0.70342663  |           |         |  |
| SELENOOLP   | ENSG00000227932 | 0.39005   | 0.34825 | 0.29587     | 0.38366     | -0.064576 |         |  |
|             | 0.52574         | -0.64172  | 0.73947 | 0.34825     | 0.703458071 |           |         |  |
| SLC35F4     | ENSG00000151812 | 0.015325  | 0.49389 | 0.38996     | 0.34828     | -0.74591  |         |  |
|             | 0.77214         | -0.12641  | 0.5503  | 0.34828     | 0.703489509 |           |         |  |
| LINC01903   | ENSG00000265555 | 0.19753   | 0.42171 | 0.3898      | 0.34834     | 0.19753   |         |  |
|             | 0.42171         | 0.31228   | 0.37741 | 0.34834     | 0.703543414 |           |         |  |
| NA          | ENSG00000279697 | 0.38981   | 0.34834 | 0.38981     | 0.34834     | 0.38981   | 0.34834 |  |
|             | 0.38981         | 0.34834   | 0.34834 | 0.703543414 |             |           |         |  |
| GAPDHP71    | ENSG00000213376 | 0.38977   | 0.34835 | 0.38977     | 0.34835     | 0.38977   |         |  |
|             | 0.34835         | 0.38977   | 0.34835 | 0.34835     | 0.703543414 |           |         |  |
| NA          | ENSG00000281732 | -0.38177  | 0.64868 | -1.9864     | 0.9765      | 0.38961   | 0.34841 |  |
|             | -0.28067        | 0.61052   | 0.34841 | 0.703559189 |             |           |         |  |
| RBIS        | ENSG00000176731 | 0.38959   | 0.34842 | 0.29042     | 0.38575     | 0.29042   | 0.38575 |  |
|             | -1.0192         | 0.84595   | 0.34842 | 0.703559189 |             |           |         |  |
| NA          | ENSG00000234521 | 0.38958   | 0.34842 | 0.38958     | 0.34842     | 0.38958   | 0.34842 |  |
|             | 0.38958         | 0.34842   | 0.34842 | 0.703559189 |             |           |         |  |
| NA          | ENSG00000260112 | 0.38958   | 0.34842 | -0.93058    | 0.82396     | 0.38958   | 0.34842 |  |
|             | 0.38958         | 0.34842   | 0.34842 | 0.703559189 |             |           |         |  |
| SHROOM3-AS1 | ENSG00000233860 | 0.38957   | 0.34843 | 0.38957     | 0.34843     | 0.38957   |         |  |
|             | 0.34843         | 0.38957   | 0.34843 | 0.34843     | 0.703559189 |           |         |  |
| NPAP1P4     | ENSG00000236521 | 0.3895    | 0.34845 | 0.3895      | 0.34845     | 0.3895    |         |  |
|             | 0.34845         | -0.029029 | 0.51158 | 0.34845     | 0.703570419 |           |         |  |
| CST6        | ENSG00000175315 | 0.3893    | 0.34853 | -0.58298    | 0.72005     | 0.3893    | 0.34853 |  |
|             | -0.47329        | 0.682     | 0.34853 | 0.703599988 |             |           |         |  |
| NA          | ENSG00000261879 | 0.38931   | 0.34853 | 0.38931     | 0.34853     | 0.38931   | 0.34853 |  |
|             | 0.38931         | 0.34853   | 0.34853 | 0.703599988 |             |           |         |  |
| CICP17      | ENSG00000227233 | 0.38924   | 0.34855 | -0.050038   | 0.51995     | -0.2344   |         |  |
|             | 0.59266         | -0.40925  | 0.65882 | 0.34855     | 0.703599988 |           |         |  |
| NA          | ENSG00000253532 | 0.38921   | 0.34856 | 0.0044412   | 0.49823     | 0.38921   | 0.34856 |  |
|             | 0.38921         | 0.34856   | 0.34856 | 0.703599988 |             |           |         |  |
| NA          | ENSG00000271848 | -0.52437  | 0.69999 | -0.38313    | 0.64919     | -0.81638  | 0.79286 |  |
|             | 0.38922         | 0.34856   | 0.34856 | 0.703599988 |             |           |         |  |
| NA          | ENSG00000254316 | 0.38918   | 0.34857 | -0.34506    | 0.63497     | 0.38918   | 0.34857 |  |
|             | 0.25456         | 0.39953   | 0.34857 | 0.703599988 |             |           |         |  |
| NA          | ENSG00000269422 | 0.38917   | 0.34858 | 0.38917     | 0.34858     | 0.38917   | 0.34858 |  |
|             | 0.38917         | 0.34858   | 0.34858 | 0.703599988 |             |           |         |  |
| PSMB4       | ENSG00000159377 | 0.38909   | 0.3486  | 0.33674     | 0.36816     | 0.33674   | 0.36816 |  |
|             | 0.33674         | 0.36816   | 0.3486  | 0.703599988 |             |           |         |  |
| RPL13AP7    | ENSG00000213885 | 0.38904   | 0.34862 | -0.50131    | 0.69192     | -0.50131  |         |  |
|             | 0.69192         | -0.50131  | 0.69192 | 0.34862     | 0.703599988 |           |         |  |
| SESTD1      | ENSG00000187231 | 0.1791    | 0.42893 | 0.38888     | 0.34868     | 0.24274   |         |  |
|             | 0.4041          | -0.3933   | 0.65295 | 0.34868     | 0.703599988 |           |         |  |
| NPAT        | ENSG00000149308 | 0.10535   | 0.45805 | 0.070411    | 0.47193     | -0.58579  | 0.72099 |  |
|             | 0.38873         | 0.34874   | 0.34874 | 0.703599988 |             |           |         |  |
| PKHD1       | ENSG00000170927 | -0.24524  | 0.59686 | -0.67146    | 0.74904     | 0.38873   | 0.34874 |  |
|             | -1.0117         | 0.84416   | 0.34874 | 0.703599988 |             |           |         |  |
| NAPRT       | ENSG00000147813 | 0.38871   | 0.34875 | -0.59127    | 0.72283     | 0.16489   | 0.43452 |  |
|             | -0.26755        | 0.60548   | 0.34875 | 0.703599988 |             |           |         |  |
| CDHR1       | ENSG00000148600 | -0.1578   | 0.56269 | 0.3887      | 0.34875     | -0.79847  | 0.7877  |  |

|           |                 |           |             |             |             |          |         |         |
|-----------|-----------------|-----------|-------------|-------------|-------------|----------|---------|---------|
|           | -0.1578         | 0.56269   | 0.34875     | 0.703599988 |             |          |         |         |
| MTHFD1    | ENSG00000100714 | 0.38866   | 0.34876     | -0.2798     | 0.61018     | 0.38866  |         |         |
|           | 0.34876         | 0.38866   | 0.34876     | 0.34876     | 0.703599988 |          |         |         |
| LINC02396 | ENSG00000258135 | 0.38861   | 0.34878     | 0.34878     | 0.29825     | 0.38276  | 0.38861 |         |
|           | 0.34878         | 0.38861   | 0.34878     | 0.34878     | 0.703599988 |          |         |         |
| NA        | ENSG00000280384 | -1.155    | 0.87596     | -0.15349    | 0.56099     | -1.155   | 0.87596 |         |
|           | 0.38857         | 0.3488    | 0.3488      | 0.703599988 |             |          |         |         |
| NA        | ENSG00000233844 | 0.30337   | 0.3808      | -0.43049    | 0.66658     | 0.38857  | 0.3488  |         |
|           | 0.0079669       | 0.49682   | 0.3488      | 0.703599988 |             |          |         |         |
| NA        | ENSG00000264600 | 0.38854   | 0.34881     | 0.38854     | 0.34881     | 0.38854  | 0.34881 |         |
|           | 0.38854         | 0.34881   | 0.34881     | 0.703599988 |             |          |         |         |
| NA        | ENSG00000276136 | 0.38849   | 0.34883     | 0.38849     | 0.34883     | 0.38849  | 0.34883 |         |
|           | 0.38849         | 0.34883   | 0.34883     | 0.703599988 |             |          |         |         |
| APOF      | ENSG00000175336 | 0.38846   | 0.34884     | 0.38846     | 0.34884     | 0.38846  | 0.34884 |         |
|           | 0.38846         | 0.34884   | 0.34884     | 0.703599988 |             |          |         |         |
| RNU6-836P | ENSG00000199790 | -0.11841  | 0.54713     | 0.1404      | 0.44417     | 0.1404   |         |         |
|           | 0.44417         | 0.38846   | 0.34884     | 0.34884     | 0.703599988 |          |         |         |
| NA        | ENSG00000279729 | -1.0008   | 0.84154     | -2.0423     | 0.97944     | -0.52837 | 0.70138 |         |
|           | 0.38845         | 0.34884   | 0.34884     | 0.703599988 |             |          |         |         |
| NA        | ENSG00000235878 | 0.38844   | 0.34885     | 0.38844     | 0.34885     | 0.38844  | 0.34885 |         |
|           | 0.38844         | 0.34885   | 0.34885     | 0.703599988 |             |          |         |         |
| GPS2      | ENSG00000132522 | 0.3884    | 0.34886     | 0.3884      | 0.34886     | 0.3884   | 0.34886 |         |
|           | 0.3884          | 0.34886   | 0.34886     | 0.703599988 |             |          |         |         |
| OR4K3     | ENSG00000176290 | -0.067495 | 0.52691     | 0.38841     | 0.34886     | -1.1652  | 0.87803 |         |
|           | -1.1652         | 0.87803   | 0.34886     | 0.703599988 |             |          |         |         |
| KIAA1671  | ENSG00000197077 | 0.38833   | 0.34888     | 0.057151    | 0.47721     | 0.29135  |         |         |
|           | 0.38539         | 0.093162  | 0.46289     | 0.34888     | 0.703599988 |          |         |         |
| NA        | ENSG00000202079 | 0.38832   | 0.34889     | -0.05844    | 0.5233      | -0.13539 | 0.55385 |         |
|           | -0.05844        | 0.5233    | 0.34889     | 0.703599988 |             |          |         |         |
| NA        | ENSG00000220920 | 0.38831   | 0.34889     | 0.38831     | 0.34889     | 0.38831  | 0.34889 |         |
|           | 0.38831         | 0.34889   | 0.34889     | 0.703599988 |             |          |         |         |
| NA        | ENSG00000249592 | 0.38829   | 0.3489      | 0.22299     | 0.41177     | 0.22299  | 0.41177 |         |
|           | 0.22299         | 0.41177   | 0.3489      | 0.703599988 |             |          |         |         |
| LINC01074 | ENSG00000227611 | 0.38822   | 0.34893     | 0.38822     | 0.34893     | 0.38822  |         |         |
|           | 0.34893         | 0.38822   | 0.34893     | 0.34893     | 0.703599988 |          |         |         |
| NA        | ENSG00000257640 | 0.38817   | 0.34894     | 0.38817     | 0.34894     | 0.38817  | 0.34894 |         |
|           | -0.010876       | 0.50434   | 0.34894     | 0.703599988 |             |          |         |         |
| ZNF337    | ENSG00000130684 | 0.32889   | 0.37112     | 0.32889     | 0.37112     | 0.32889  |         |         |
|           | 0.37112         | 0.38811   | 0.34897     | 0.34897     | 0.703599988 |          |         |         |
| ZFAND2A   | ENSG00000178381 | 0.38809   | 0.34897     | 0.27025     | 0.39348     | 0.38809  |         |         |
|           | 0.34897         | 0.38809   | 0.34897     | 0.34897     | 0.703599988 |          |         |         |
| KLF14     | ENSG00000266265 | 0.38811   | 0.34897     | 0.38811     | 0.34897     | 0.20484  | 0.41885 |         |
|           | 0.28044         | 0.38957   | 0.34897     | 0.703599988 |             |          |         |         |
| FBLL1     | ENSG00000188573 | 0.38802   | 0.349       | 0.38802     | 0.349       | 0.090907 | 0.46378 | 0.38802 |
|           | 0.349           | 0.349     | 0.703604513 |             |             |          |         |         |
| NA        | ENSG00000273595 | -0.71603  | 0.76301     | 0.388       | 0.34901     | 0.11715  | 0.45337 |         |
|           | 0.11715         | 0.45337   | 0.34901     | 0.703604513 |             |          |         |         |
| NA        | ENSG00000251744 | 0.38796   | 0.34902     | -0.3076     | 0.6208      | 0.045371 | 0.48191 |         |
|           | -0.3076         | 0.6208    | 0.34902     | 0.703604513 |             |          |         |         |
| NA        | ENSG00000235605 | 0.38795   | 0.34903     | -0.71785    | 0.76357     | -0.71785 | 0.76357 |         |
|           | 0.24715         | 0.4024    | 0.34903     | 0.703604513 |             |          |         |         |
| IGFLR1    | ENSG00000126246 | 0.38785   | 0.34906     | -0.98951    | 0.83879     | -0.98951 |         |         |
|           | 0.83879         | -0.98951  | 0.83879     | 0.34906     | 0.703635882 |          |         |         |
| RNF183    | ENSG00000165188 | 0.34705   | 0.36428     | 0.38781     | 0.34908     | 0.34705  |         |         |
|           | 0.36428         | 0.34705   | 0.36428     | 0.34908     | 0.703638141 |          |         |         |
| NA        | ENSG00000258519 | 0.38779   | 0.34909     | 0.38779     | 0.34909     | 0.38779  | 0.34909 |         |
|           | 0.38779         | 0.34909   | 0.34909     | 0.703638141 |             |          |         |         |
| NA        | ENSG00000201425 | -0.01433  | 0.50572     | -0.54392    | 0.70675     | -0.25607 | 0.60105 |         |
|           | 0.38769         | 0.34912   | 0.34912     | 0.703656287 |             |          |         |         |
| SNRPGP15  | ENSG00000224543 | 0.38764   | 0.34914     | 0.38764     | 0.34914     | 0.38764  |         |         |
|           | 0.34914         | 0.38764   | 0.34914     | 0.34914     | 0.703656287 |          |         |         |
| LINC02764 | ENSG00000255484 | 0.38763   | 0.34915     | 0.26281     | 0.39635     | 0.38763  |         |         |

|           |                 |          |         |             |             |           |         |  |
|-----------|-----------------|----------|---------|-------------|-------------|-----------|---------|--|
|           | 0.34915         | 0.23311  | 0.40784 | 0.34915     | 0.703656287 |           |         |  |
| LINC01331 | ENSG00000248673 | 0.38753  | 0.34918 | -1.2256     | 0.88982     | -0.59494  |         |  |
|           | 0.72406         | -0.49723 | 0.69049 | 0.34918     | 0.703656287 |           |         |  |
| NA        | ENSG00000260360 | 0.38749  | 0.3492  | -2.4027     | 0.99186     | -2.4027   | 0.99186 |  |
|           | -2.4027         | 0.99186  | 0.3492  | 0.703656287 |             |           |         |  |
| BSN-AS1   | ENSG00000235120 | 0.28675  | 0.38715 | 0.11895     | 0.45266     | 0.38741   |         |  |
|           | 0.34923         | 0.38741  | 0.34923 | 0.34923     | 0.703656287 |           |         |  |
| LINC02105 | ENSG00000250447 | -0.15056 | 0.55984 | 0.38738     | 0.34924     | -1.0496   |         |  |
|           | 0.85306         | -1.257   | 0.89562 | 0.34924     | 0.703656287 |           |         |  |
| NA        | ENSG00000262877 | 0.38737  | 0.34924 | 0.38737     | 0.34924     | 0.38737   | 0.34924 |  |
|           | -0.54072        | 0.70565  | 0.34924 | 0.703656287 |             |           |         |  |
| FREM2     | ENSG00000150893 | 0.38731  | 0.34926 | -1.4671     | 0.92883     | -0.41032  | 0.65921 |  |
|           | -0.94628        | 0.828    | 0.34926 | 0.703656287 |             |           |         |  |
| NA        | ENSG00000229747 | 0.38732  | 0.34926 | 0.38732     | 0.34926     | 0.38732   | 0.34926 |  |
|           | 0.38732         | 0.34926  | 0.34926 | 0.703656287 |             |           |         |  |
| LRRC8B    | ENSG00000197147 | -0.09922 | 0.53952 | 0.076782    | 0.4694      | 0.34599   |         |  |
|           | 0.36468         | 0.38718  | 0.34931 | 0.34931     | 0.703656287 |           |         |  |
| SLC22A10  | ENSG00000184999 | -0.79904 | 0.78787 | -1.0086     | 0.8434      | -0.73179  |         |  |
|           | 0.76785         | 0.38711  | 0.34934 | 0.34934     | 0.703656287 |           |         |  |
| YPEL5P3   | ENSG00000258251 | -1.7184  | 0.95714 | 0.38708     | 0.34935     | -1.6814   |         |  |
|           | 0.95366         | -1.5509  | 0.93954 | 0.34935     | 0.703656287 |           |         |  |
| SNORA59A  | ENSG00000239149 | 0.38705  | 0.34936 | 0.38705     | 0.34936     | 0.38705   |         |  |
|           | 0.34936         | 0.38705  | 0.34936 | 0.34936     | 0.703656287 |           |         |  |
| NA        | ENSG00000263594 | -0.73806 | 0.76976 | 0.38705     | 0.34936     | -0.73806  | 0.76976 |  |
|           | -0.2343         | 0.59262  | 0.34936 | 0.703656287 |             |           |         |  |
| SUPT4H1P2 | ENSG00000246115 | -0.13009 | 0.55175 | 0.38699     | 0.34938     | 0.38699   |         |  |
|           | 0.34938         | 0.38699  | 0.34938 | 0.34938     | 0.703656287 |           |         |  |
| BTBD9     | ENSG00000183826 | 0.38696  | 0.34939 | 0.032802    | 0.48692     | -0.4928   | 0.68892 |  |
|           | 0.19426         | 0.42299  | 0.34939 | 0.703656287 |             |           |         |  |
| RBBP4P3   | ENSG00000276290 | 0.38697  | 0.34939 | 0.32644     | 0.37205     | -0.41282  |         |  |
|           | 0.66013         | -0.78472 | 0.78369 | 0.34939     | 0.703656287 |           |         |  |
| WIZP1     | ENSG00000255293 | 0.38694  | 0.3494  | -0.62351    | 0.73353     | 0.38694   | 0.3494  |  |
|           | 0.38694         | 0.3494   | 0.3494  | 0.703656287 |             |           |         |  |
| ZBTB38    | ENSG00000177311 | -0.71681 | 0.76325 | 0.27095     | 0.39321     | 0.38691   |         |  |
|           | 0.34941         | -0.2313  | 0.59146 | 0.34941     | 0.703656287 |           |         |  |
| MIR581    | ENSG00000207627 | 0.06332  | 0.47476 | 0.38687     | 0.34943     | 0.06332   |         |  |
|           | 0.47476         | 0.06332  | 0.47476 | 0.34943     | 0.703656287 |           |         |  |
| NA        | ENSG00000267102 | 0.38682  | 0.34944 | 0.38682     | 0.34944     | 0.38682   | 0.34944 |  |
|           | 0.38682         | 0.34944  | 0.34944 | 0.703656287 |             |           |         |  |
| RNF213    | ENSG00000173821 | -0.79952 | 0.788   | 0.38682     | 0.34945     | 0.05977   | 0.47617 |  |
|           | 0.38427         | 0.35039  | 0.34945 | 0.703656287 |             |           |         |  |
| NA        | ENSG00000212067 | 0.38681  | 0.34945 | -1.4217     | 0.92244     | -0.027852 | 0.51111 |  |
|           | -0.027852       | 0.51111  | 0.34945 | 0.703656287 |             |           |         |  |
| MIR3919   | ENSG00000263634 | 0.38677  | 0.34946 | 0.38677     | 0.34946     | -0.65382  |         |  |
|           | 0.74339         | 0.38677  | 0.34946 | 0.34946     | 0.703656287 |           |         |  |
| ACO2      | ENSG00000100412 | 0.027477 | 0.48904 | 0.050119    | 0.48001     | 0.38661   | 0.34952 |  |
|           | 0.21636         | 0.41435  | 0.34952 | 0.703714503 |             |           |         |  |
| NA        | ENSG00000227514 | 0.38661  | 0.34952 | 0.38661     | 0.34952     | 0.38661   | 0.34952 |  |
|           | 0.38661         | 0.34952  | 0.34952 | 0.703714503 |             |           |         |  |
| NA        | ENSG00000255280 | -1.2196  | 0.88869 | -0.58316    | 0.72011     | 0.38657   | 0.34954 |  |
|           | -0.58316        | 0.72011  | 0.34954 | 0.703714503 |             |           |         |  |
| FAM25C    | ENSG00000276430 | 0.3865   | 0.34956 | -0.080071   | 0.53191     | -1.4019   |         |  |
|           | 0.91953         | 0.22778  | 0.40991 | 0.34956     | 0.703714503 |           |         |  |
| MAX       | ENSG00000125952 | 0.14619  | 0.44189 | -0.90749    | 0.81793     | 0.11187   | 0.45546 |  |
|           | 0.38645         | 0.34958  | 0.34958 | 0.703714503 |             |           |         |  |
| FAM117A   | ENSG00000121104 | 0.34387  | 0.36547 | 0.34387     | 0.36547     | -0.62506  |         |  |
|           | 0.73403         | 0.38643  | 0.34959 | 0.34959     | 0.703714503 |           |         |  |
| ESPN      | ENSG00000187017 | -0.73737 | 0.76955 | -0.48171    | 0.685       | 0.17484   | 0.4306  |  |
|           | 0.38643         | 0.34959  | 0.34959 | 0.703714503 |             |           |         |  |
| NA        | ENSG00000270677 | 0.24139  | 0.40463 | 0.38625     | 0.34965     | 0.24139   | 0.40463 |  |
|           | 0.24139         | 0.40463  | 0.34965 | 0.703759476 |             |           |         |  |
| ANKRD49P1 | ENSG00000228446 | 0.38619  | 0.34968 | 0.38619     | 0.34968     | 0.38619   |         |  |

|            |                 |             |         |             |             |            |         |         |      |
|------------|-----------------|-------------|---------|-------------|-------------|------------|---------|---------|------|
|            | 0.34968         | 0.38619     | 0.34968 | 0.34968     | 0.703759476 |            |         |         |      |
| CDH13      | ENSG00000140945 | 0.34252     | 0.36598 | -0.51779    | 0.6977      | 0.38616    | 0.34969 |         |      |
|            | 0.25339         | 0.39998     | 0.34969 | 0.703759476 |             |            |         |         |      |
| NA         | ENSG00000243621 | 0.38604     | 0.34973 | 0.38604     | 0.34973     | 0.38604    | 0.34973 |         |      |
|            | 0.38604         | 0.34973     | 0.34973 | 0.703759476 |             |            |         |         |      |
| NA         | ENSG00000212165 | 0.38601     | 0.34974 | 0.38601     | 0.34974     | 0.38601    | 0.34974 |         |      |
|            | 0.38601         | 0.34974     | 0.34974 | 0.703759476 |             |            |         |         |      |
| PLEKHB2    | ENSG00000115762 | -0.37167    | 0.64493 | 0.024961    | 0.49004     | 0.38597    |         |         |      |
|            | 0.34976         | -0.066975   | 0.5267  | 0.34976     | 0.703759476 |            |         |         |      |
| LINC02428  | ENSG00000248740 | -0.20884    | 0.58271 | 0.38595     | 0.34977     | -0.93279   |         |         |      |
|            | 0.82454         | -0.249      | 0.59832 | 0.34977     | 0.703759476 |            |         |         |      |
| NA         | ENSG00000272472 | 0.38588     | 0.34979 | 0.38588     | 0.34979     | 0.38588    | 0.34979 |         |      |
|            | 0.38588         | 0.34979     | 0.34979 | 0.703759476 |             |            |         |         |      |
| KRT18P40   | ENSG00000269012 | 0.14973     | 0.44049 | 0.38587     | 0.3498      | 0.38587    |         |         |      |
|            | 0.3498          | 0.38587     | 0.3498  | 0.3498      | 0.703759476 |            |         |         |      |
| KRT18P47   | ENSG00000259489 | -0.51355    | 0.69622 | 0.38578     | 0.34983     | 0.38578    |         |         |      |
|            | 0.34983         | 0.38578     | 0.34983 | 0.34983     | 0.703759476 |            |         |         |      |
| RNA5SP321  | ENSG00000199592 | -0.6924     | 0.75566 | -0.6924     | 0.75566     | 0.20597    |         |         |      |
|            | 0.41841         | 0.38569     | 0.34986 | 0.34986     | 0.703759476 |            |         |         |      |
| LINC02325  | ENSG00000246084 | -0.96726    | 0.83329 | 0.38569     | 0.34986     | -0.0055299 |         |         |      |
|            | 0.50221         | -0.39626    | 0.65404 | 0.34986     | 0.703759476 |            |         |         |      |
| TSPAN9-IT1 | ENSG00000256197 | -0.35667    | 0.63933 | 0.38568     | 0.34987     | 0.05616    |         |         |      |
|            | 0.47761         | -0.71507    | 0.76272 | 0.34987     | 0.703759476 |            |         |         |      |
| RNF139     | ENSG00000170881 | 0.38559     | 0.3499  | 0.38472     | 0.35022     | -0.62597   |         |         |      |
|            | 0.73433         | -0.14454    | 0.55746 | 0.3499      | 0.703759476 |            |         |         |      |
| NA         | ENSG00000240238 | 0.38559     | 0.3499  | 0.38559     | 0.3499      | 0.38559    | 0.3499  |         |      |
|            | 0.38559         | 0.3499      | 0.3499  | 0.703759476 |             |            |         |         |      |
| RPS26P42   | ENSG00000232437 | -0.55666    | 0.71112 | -0.1389     | 0.55524     | -0.55666   |         |         |      |
|            | 0.71112         | 0.38539     | 0.34997 | 0.34997     | 0.703759476 |            |         |         |      |
| FAM218A    | ENSG00000250486 | 0.17174     | 0.43182 | 0.244       | 0.40362     | 0.3854     | 0.34997 |         |      |
|            | 0.3854          | 0.34997     | 0.34997 | 0.703759476 |             |            |         |         |      |
| NA         | ENSG00000279692 | 0.38533     | 0.35    | 0.38533     | 0.35        | 0.38533    | 0.35    | 0.38533 | 0.35 |
|            | 0.35            | 0.703759476 |         |             |             |            |         |         |      |
| SLC10A6    | ENSG00000145283 | -0.82136    | 0.79428 | 0.23162     | 0.40842     | 0.31687    |         |         |      |
|            | 0.37567         | 0.38531     | 0.35001 | 0.35001     | 0.703759476 |            |         |         |      |
| PGLYRP1    | ENSG00000008438 | -0.79933    | 0.78795 | 0.38526     | 0.35002     | -0.50778   |         |         |      |
|            | 0.6942          | -0.16431    | 0.56526 | 0.35002     | 0.703759476 |            |         |         |      |
| NA         | ENSG00000283991 | -0.96618    | 0.83302 | 0.38525     | 0.35003     | 0.38525    | 0.35003 |         |      |
|            | 0.38525         | 0.35003     | 0.35003 | 0.703759476 |             |            |         |         |      |
| ACBD7      | ENSG00000176244 | -0.98518    | 0.83773 | -0.71692    | 0.76329     | 0.10761    | 0.45715 |         |      |
|            | 0.38521         | 0.35004     | 0.35004 | 0.703759476 |             |            |         |         |      |
| NA         | ENSG00000212073 | -1.9716     | 0.97567 | 0.38517     | 0.35005     | 0.064254   | 0.47438 |         |      |
|            | -1.8651         | 0.96892     | 0.35005 | 0.703759476 |             |            |         |         |      |
| CFAP20DC   | ENSG00000163689 | 0.38512     | 0.35007 | -1.0634     | 0.85621     | -1.4919    |         |         |      |
|            | 0.93213         | -1.3235     | 0.90716 | 0.35007     | 0.703759476 |            |         |         |      |
| NA         | ENSG00000261003 | -1.2972     | 0.90271 | 0.38511     | 0.35008     | -1.2149    | 0.8878  |         |      |
|            | -1.2149         | 0.8878      | 0.35008 | 0.703759476 |             |            |         |         |      |
| NA         | ENSG00000232719 | 0.38493     | 0.35014 | 0.38493     | 0.35014     | 0.38493    | 0.35014 |         |      |
|            | 0.38493         | 0.35014     | 0.35014 | 0.703759476 |             |            |         |         |      |
| NA         | ENSG00000276174 | 0.38495     | 0.35014 | 0.38495     | 0.35014     | 0.38495    | 0.35014 |         |      |
|            | 0.38495         | 0.35014     | 0.35014 | 0.703759476 |             |            |         |         |      |
| NA         | ENSG00000279029 | 0.38493     | 0.35015 | 0.38493     | 0.35015     | 0.38493    | 0.35015 |         |      |
|            | 0.38493         | 0.35015     | 0.35015 | 0.703759476 |             |            |         |         |      |
| NA         | ENSG00000283236 | 0.38493     | 0.35015 | 0.38493     | 0.35015     | 0.38493    | 0.35015 |         |      |
|            | 0.38493         | 0.35015     | 0.35015 | 0.703759476 |             |            |         |         |      |
| OR10N1P    | ENSG00000213181 | 0.38486     | 0.35017 | 0.38486     | 0.35017     | 0.38486    |         |         |      |
|            | 0.35017         | 0.38486     | 0.35017 | 0.35017     | 0.703759476 |            |         |         |      |
| RNU6-248P  | ENSG00000222652 | 0.38486     | 0.35017 | -0.78312    | 0.78322     | -0.37056   |         |         |      |
|            | 0.64452         | -0.14281    | 0.55678 | 0.35017     | 0.703759476 |            |         |         |      |
| NA         | ENSG00000267247 | 0.38485     | 0.35017 | 0.38487     | 0.35017     | -0.033899  | 0.51352 |         |      |
|            | -1.469          | 0.92908     | 0.35017 | 0.703759476 |             |            |         |         |      |
| NA         | ENSG00000280248 | 0.38485     | 0.35017 | 0.38485     | 0.35017     | 0.38485    | 0.35017 |         |      |

|            |                 |           |         |             |             |           |         |         |
|------------|-----------------|-----------|---------|-------------|-------------|-----------|---------|---------|
|            | 0.38485         | 0.35017   | 0.35017 | 0.703759476 |             |           |         |         |
| LINC02599  | ENSG00000233858 | 0.38484   | 0.35018 | 0.38484     | 0.35018     | 0.38484   | 0.35018 | 0.38484 |
|            | 0.35018         | 0.38484   | 0.35018 | 0.35018     | 0.703759476 |           |         |         |
| NA         | ENSG00000206995 | 0.38476   | 0.35021 | 0.38476     | 0.35021     | 0.38476   | 0.35021 | 0.38476 |
|            | 0.38476         | 0.35021   | 0.35021 | 0.703759476 |             |           |         |         |
| MIR5480    | ENSG00000221510 | 0.38473   | 0.35022 | 0.38473     | 0.35022     | 0.38473   | 0.35022 | 0.38473 |
|            | 0.35022         | 0.38473   | 0.35022 | 0.35022     | 0.703759476 |           |         |         |
| NA         | ENSG00000279811 | 0.38473   | 0.35022 | -0.14601    | 0.55804     | 0.29507   | 0.38397 |         |
|            | -0.8329         | 0.79755   | 0.35022 | 0.703759476 |             |           |         |         |
| NA         | ENSG00000271046 | -0.5711   | 0.71603 | -0.60712    | 0.72811     | 0.302     | 0.38133 |         |
|            | 0.3847          | 0.35023   | 0.35023 | 0.703759476 |             |           |         |         |
| NA         | ENSG00000204293 | -1.076    | 0.85903 | 0.38471     | 0.35023     | -0.22764  | 0.59004 |         |
|            | -0.97424        | 0.83503   | 0.35023 | 0.703759476 |             |           |         |         |
| NA         | ENSG00000228877 | -0.33291  | 0.6304  | -0.48178    | 0.68502     | 0.38464   | 0.35025 |         |
|            | -1.5562         | 0.94016   | 0.35025 | 0.703759476 |             |           |         |         |
| KRT18P58   | ENSG00000254831 | 0.215     | 0.41488 | -0.55429    | 0.71031     | 0.38458   | 0.35027 |         |
|            | 0.38458         | 0.35027   | 0.35027 | 0.703759476 |             |           |         |         |
| NA         | ENSG00000236503 | 0.38457   | 0.35028 | -0.18073    | 0.57171     | -0.18073  | 0.57171 |         |
|            | -0.18073        | 0.57171   | 0.35028 | 0.703759476 |             |           |         |         |
| GGA2       | ENSG00000103365 | 0.18825   | 0.42534 | 0.38454     | 0.35029     | -0.89218  | 0.81385 |         |
|            | -1.3412         | 0.91007   | 0.35029 | 0.703759476 |             |           |         |         |
| EIF4BP6    | ENSG00000197258 | 0.38453   | 0.35029 | 0.38453     | 0.35029     | 0.17203   |         |         |
|            | 0.43171         | 0.38453   | 0.35029 | 0.35029     | 0.703759476 |           |         |         |
| EDDM3DP    | ENSG00000258963 | 0.38454   | 0.35029 | 0.37437     | 0.35406     | 0.26648   |         |         |
|            | 0.39493         | 0.38454   | 0.35029 | 0.35029     | 0.703759476 |           |         |         |
| OR7E62P    | ENSG00000234896 | 0.3845    | 0.3503  | 0.040258    | 0.48394     | 0.3845    |         |         |
|            | 0.3503          | 0.3845    | 0.3503  | 0.3503      | 0.703759476 |           |         |         |
| MIR3926-1  | ENSG00000266206 | 0.38449   | 0.35031 | 0.38449     | 0.35031     | 0.38449   |         |         |
|            | 0.35031         | 0.38449   | 0.35031 | 0.35031     | 0.703759476 |           |         |         |
| GNB5       | ENSG00000069966 | 0.38447   | 0.35032 | 0.097197    | 0.46129     | 0.11851   | 0.45283 |         |
|            | -0.087924       | 0.53503   | 0.35032 | 0.703759476 |             |           |         |         |
| NA         | ENSG00000247853 | 0.38445   | 0.35032 | 0.38445     | 0.35032     | 0.38445   | 0.35032 |         |
|            | 0.38445         | 0.35032   | 0.35032 | 0.703759476 |             |           |         |         |
| NEIL3      | ENSG00000109674 | -0.57013  | 0.7157  | -0.22841    | 0.59034     | 0.29797   | 0.38286 |         |
|            | 0.38432         | 0.35037   | 0.35037 | 0.703801892 |             |           |         |         |
| CHMP1AP1   | ENSG00000226662 | 0.38432   | 0.35037 | 0.0073261   | 0.49708     | 0.0073261 |         |         |
|            | 0.49708         | 0.0073261 | 0.49708 | 0.35037     | 0.703801892 |           |         |         |
| NA         | ENSG00000230319 | 0.38424   | 0.3504  | 0.38424     | 0.3504      | 0.38424   | 0.3504  |         |
|            | 0.38424         | 0.3504    | 0.3504  | 0.703815291 |             |           |         |         |
| LINC01116  | ENSG00000163364 | -0.50242  | 0.69231 | 0.38418     | 0.35042     | -0.099872 |         |         |
|            | 0.53978         | 0.08333   | 0.46679 | 0.35042     | 0.703815291 |           |         |         |
| NA         | ENSG00000250332 | 0.38418   | 0.35042 | 0.38418     | 0.35042     | 0.38418   | 0.35042 |         |
|            | 0.38418         | 0.35042   | 0.35042 | 0.703815291 |             |           |         |         |
| HNRNPA1P44 | ENSG00000249271 | -0.56959  | 0.71552 | -1.7918     | 0.96342     | 0.38414   |         |         |
|            | 0.35044         | -1.3523   | 0.91187 | 0.35044     | 0.703826452 |           |         |         |
| NA         | ENSG00000221388 | -1.0513   | 0.85344 | -0.15533    | 0.56172     | -0.27219  | 0.60726 |         |
|            | 0.38387         | 0.35054   | 0.35054 | 0.70387555  |             |           |         |         |
| NA         | ENSG00000201535 | 0.32813   | 0.37141 | 0.32813     | 0.37141     | 0.38381   | 0.35056 |         |
|            | -1.7248         | 0.95771   | 0.35056 | 0.70387555  |             |           |         |         |
| NA         | ENSG00000224195 | 0.38381   | 0.35056 | 0.38381     | 0.35056     | 0.38381   | 0.35056 |         |
|            | 0.38381         | 0.35056   | 0.35056 | 0.70387555  |             |           |         |         |
| NA         | ENSG00000256189 | 0.38379   | 0.35057 | -0.048544   | 0.51936     | 0.38379   | 0.35057 |         |
|            | 0.38379         | 0.35057   | 0.35057 | 0.70387555  |             |           |         |         |
| CYLC2      | ENSG00000155833 | -1.0113   | 0.84406 | 0.38362     | 0.35063     | 0.38362   | 0.35063 |         |
|            | 0.38362         | 0.35063   | 0.35063 | 0.70387555  |             |           |         |         |
| NA         | ENSG00000267073 | 0.13282   | 0.44717 | 0.10654     | 0.45758     | 0.38362   | 0.35063 |         |
|            | -0.92525        | 0.82258   | 0.35063 | 0.70387555  |             |           |         |         |
| RN7SL800P  | ENSG00000242398 | 0.3836    | 0.35064 | 0.3836      | 0.35064     | 0.3836    |         |         |
|            | 0.35064         | 0.3836    | 0.35064 | 0.35064     | 0.70387555  |           |         |         |
| NA         | ENSG00000280176 | 0.15606   | 0.43799 | 0.21941     | 0.41317     | 0.38357   | 0.35065 |         |
|            | 0.38357         | 0.35065   | 0.35065 | 0.70387555  |             |           |         |         |
| MLXIP      | ENSG00000175727 | -0.86836  | 0.8074  | 0.012325    | 0.49508     | 0.3391    | 0.36727 |         |

|           |                 |           |         |            |            |           |         |  |
|-----------|-----------------|-----------|---------|------------|------------|-----------|---------|--|
|           | 0.3835          | 0.35067   | 0.35067 | 0.70387555 |            |           |         |  |
| RNU6-147P | ENSG00000206710 | -1.5313   | 0.93715 | 0.38342    | 0.3507     | -0.83736  |         |  |
|           | 0.79881         | -0.3981   | 0.65472 | 0.3507     | 0.70387555 |           |         |  |
| PPP1R17   | ENSG00000106341 | 0.38335   | 0.35073 | -1.1189    | 0.86841    | -0.31344  |         |  |
|           | 0.62303         | 0.38335   | 0.35073 | 0.35073    | 0.70387555 |           |         |  |
| NA        | ENSG00000248425 | -0.33534  | 0.63132 | 0.3833     | 0.35075    | -0.79196  | 0.78581 |  |
|           | -0.966          | 0.83298   | 0.35075 | 0.70387555 |            |           |         |  |
| NA        | ENSG00000243944 | -0.41498  | 0.66092 | 0.30984    | 0.37834    | 0.38326   | 0.35076 |  |
|           | 0.38326         | 0.35076   | 0.35076 | 0.70387555 |            |           |         |  |
| ACSM1     | ENSG00000166743 | -0.16687  | 0.56626 | -1.1457    | 0.87404    | 0.24285   | 0.40406 |  |
|           | 0.38325         | 0.35077   | 0.35077 | 0.70387555 |            |           |         |  |
| MIR619    | ENSG00000207622 | 0.38324   | 0.35077 | 0.38324    | 0.35077    | 0.38324   |         |  |
|           | 0.35077         | 0.38324   | 0.35077 | 0.35077    | 0.70387555 |           |         |  |
| CCR1      | ENSG00000163823 | 0.3832    | 0.35079 | -0.17856   | 0.57086    | -0.10979  | 0.54371 |  |
|           | -0.16497        | 0.56551   | 0.35079 | 0.70387555 |            |           |         |  |
| LIN9      | ENSG00000183814 | -0.079191 | 0.53156 | -0.079191  | 0.53156    | -0.079191 | 0.53156 |  |
|           | 0.3832          | 0.35079   | 0.35079 | 0.70387555 |            |           |         |  |
| NA        | ENSG00000200170 | 0.38308   | 0.35083 | 0.38308    | 0.35083    | 0.38308   | 0.35083 |  |
|           | 0.38308         | 0.35083   | 0.35083 | 0.70387555 |            |           |         |  |
| NA        | ENSG00000232578 | -1.5486   | 0.93926 | 0.38307    | 0.35083    | -0.7915   | 0.78567 |  |
|           | -0.97122        | 0.83428   | 0.35083 | 0.70387555 |            |           |         |  |
| NA        | ENSG00000232958 | 0.38301   | 0.35086 | 0.14646    | 0.44178    | 0.38301   | 0.35086 |  |
|           | -0.046599       | 0.51858   | 0.35086 | 0.70387555 |            |           |         |  |
| SYDE2     | ENSG00000097096 | -0.46508  | 0.67906 | -0.46508   | 0.67906    | 0.38291   | 0.35089 |  |
|           | -0.27079        | 0.60673   | 0.35089 | 0.70387555 |            |           |         |  |
| LINC02036 | ENSG00000225742 | -0.71555  | 0.76287 | 0.38286    | 0.35091    | -0.27345  |         |  |
|           | 0.60775         | -0.71555  | 0.76287 | 0.35091    | 0.70387555 |           |         |  |
| RAC3      | ENSG00000169750 | 0.38283   | 0.35092 | 0.38283    | 0.35092    | 0.38283   | 0.35092 |  |
|           | 0.38283         | 0.35092   | 0.35092 | 0.70387555 |            |           |         |  |
| C5orf15   | ENSG00000113583 | 0.3828    | 0.35094 | 0.18215    | 0.42773    | 0.20932   |         |  |
|           | 0.4171          | -0.55349  | 0.71004 | 0.35094    | 0.70387555 |           |         |  |
| MARK2P6   | ENSG00000242062 | 0.38274   | 0.35096 | -1.0602    | 0.85546    | -1.0602   |         |  |
|           | 0.85546         | -0.57767  | 0.71826 | 0.35096    | 0.70387555 |           |         |  |
| CFAP65    | ENSG00000181378 | 0.3827    | 0.35097 | -0.76679   | 0.7784     | -0.03361  |         |  |
|           | 0.51341         | -0.010416 | 0.50416 | 0.35097    | 0.70387555 |           |         |  |
| H3P6      | ENSG00000235655 | -0.47649  | 0.68314 | -0.72254   | 0.76502    | 0.22327   | 0.41166 |  |
|           | 0.38271         | 0.35097   | 0.35097 | 0.70387555 |            |           |         |  |
| STK25     | ENSG00000115694 | 0.38266   | 0.35098 | 0.22367    | 0.41151    | 0.38266   | 0.35098 |  |
|           | 0.38266         | 0.35098   | 0.35098 | 0.70387555 |            |           |         |  |
| TEX2      | ENSG00000136478 | -0.57682  | 0.71797 | 0.18076    | 0.42828    | -0.17748  | 0.57043 |  |
|           | 0.38268         | 0.35098   | 0.35098 | 0.70387555 |            |           |         |  |
| CABYR     | ENSG00000154040 | 0.38269   | 0.35098 | -0.17177   | 0.56819    | -1.194    | 0.88377 |  |
|           | -0.035511       | 0.51416   | 0.35098 | 0.70387555 |            |           |         |  |
| KRT24     | ENSG00000167916 | 0.0072964 | 0.49709 | -0.58867   | 0.72196    | 0.38262   | 0.351   |  |
|           | -0.3308         | 0.6296    | 0.351   | 0.70387555 |            |           |         |  |
| DSCR4-IT1 | ENSG00000223608 | -0.24267  | 0.59587 | -0.24267   | 0.59587    | 0.38257   |         |  |
|           | 0.35102         | 0.31346   | 0.37697 | 0.35102    | 0.70387555 |           |         |  |
| GRIK1-AS1 | ENSG00000174680 | -0.12041  | 0.54792 | 0.38253    | 0.35103    | -0.22776  |         |  |
|           | 0.59008         | -0.37503  | 0.64618 | 0.35103    | 0.70387555 |           |         |  |
| LINC00472 | ENSG00000233237 | -0.4227   | 0.66374 | 0.38251    | 0.35104    | 0.29729   |         |  |
|           | 0.38312         | 0.018892  | 0.49246 | 0.35104    | 0.70387555 |           |         |  |
| NA        | ENSG00000227479 | 0.38248   | 0.35105 | -0.72278   | 0.76509    | 0.33362   | 0.36933 |  |
|           | -0.017035       | 0.5068    | 0.35105 | 0.70387555 |            |           |         |  |
| TMEM132A  | ENSG00000006118 | 0.14567   | 0.44209 | -0.53069   | 0.70218    | -0.80527  |         |  |
|           | 0.78967         | 0.38245   | 0.35106 | 0.35106    | 0.70387555 |           |         |  |
| TEDDM1    | ENSG00000203730 | 0.38244   | 0.35107 | 0.38244    | 0.35107    | 0.38244   |         |  |
|           | 0.35107         | 0.38244   | 0.35107 | 0.35107    | 0.70387555 |           |         |  |
| IGLV7-46  | ENSG00000211649 | -0.30976  | 0.62163 | 0.38243    | 0.35107    | -0.30976  |         |  |
|           | 0.62163         | -0.30976  | 0.62163 | 0.35107    | 0.70387555 |           |         |  |
| LINC01098 | ENSG00000231171 | 0.38243   | 0.35107 | 0.28914    | 0.38624    | 0.38243   |         |  |
|           | 0.35107         | 0.38243   | 0.35107 | 0.35107    | 0.70387555 |           |         |  |
| RPS4XP20  | ENSG00000249987 | 0.38244   | 0.35107 | 0.38244    | 0.35107    | 0.38244   |         |  |



|            |                 |          |         |             |             |           |         |
|------------|-----------------|----------|---------|-------------|-------------|-----------|---------|
|            | 0.35107         | 0.38244  | 0.35107 | 0.35107     | 0.70387555  |           |         |
| GFER       | ENSG00000127554 | -0.98346 | 0.83731 | -0.98346    | 0.83731     | -0.75586  | 0.77513 |
|            | 0.3824          | 0.35108  | 0.35108 | 0.70387555  |             |           |         |
| NA         | ENSG00000260688 | 0.3824   | 0.35108 | -0.2323     | 0.59185     | -0.13653  | 0.5543  |
|            | -0.94089        | 0.82662  | 0.35108 | 0.70387555  |             |           |         |
| NA         | ENSG00000252975 | -0.33344 | 0.6306  | 0.38239     | 0.35109     | -0.33344  | 0.6306  |
|            | -0.33344        | 0.6306   | 0.35109 | 0.70387555  |             |           |         |
| AK4P3      | ENSG00000233381 | -0.75911 | 0.77611 | -0.75911    | 0.77611     | -0.75911  | 0.77611 |
|            | 0.38235         | 0.3511   | 0.3511  | 0.70387555  |             |           |         |
| C3orf20    | ENSG00000131379 | 0.1087   | 0.45672 | 0.38224     | 0.35114     | -0.066357 |         |
|            | 0.52645         | -0.74015 | 0.7704  | 0.35114     | 0.703926781 |           |         |
| DGCR5      | ENSG00000237517 | 0.38216  | 0.35117 | -0.54166    | 0.70597     | -0.66505  | 0.74699 |
|            | 0.2314          | 0.4085   | 0.35117 | 0.70394905  |             |           |         |
| PDLIM5     | ENSG00000163110 | 0.38213  | 0.35118 | -1.1116     | 0.86685     | -0.22197  |         |
|            | 0.58783         | -0.90941 | 0.81843 | 0.35118     | 0.70394905  |           |         |
| NDUFA5P10  | ENSG00000224927 | -0.9201  | 0.82124 | 0.33897     | 0.36732     | -0.04461  |         |
|            | 0.51779         | 0.38204  | 0.35122 | 0.35122     | 0.704000271 |           |         |
| TMEM51     | ENSG00000171729 | -0.83444 | 0.79798 | -0.063389   | 0.52527     | -0.27824  |         |
|            | 0.60958         | 0.38194  | 0.35125 | 0.35125     | 0.704015833 |           |         |
| MARVELD3   | ENSG00000140832 | 0.17154  | 0.4319  | 0.17154     | 0.4319      | 0.17154   |         |
|            | 0.4319          | 0.38185  | 0.35128 | 0.35128     | 0.704015833 |           |         |
| NA         | ENSG00000231349 | -1.0665  | 0.85691 | -0.70271    | 0.75888     | 0.38185   | 0.35129 |
|            | 0.38185         | 0.35129  | 0.35129 | 0.704015833 |             |           |         |
| NA         | ENSG00000234723 | 0.38183  | 0.35129 | 0.38183     | 0.35129     | -0.36815  | 0.64362 |
|            | 0.38183         | 0.35129  | 0.35129 | 0.704015833 |             |           |         |
| DCT        | ENSG00000080166 | 0.10807  | 0.45697 | 0.257       | 0.39859     | 0.38182   | 0.3513  |
|            | 0.36147         | 0.35887  | 0.3513  | 0.704015833 |             |           |         |
| KRTAP12-2  | ENSG00000221864 | 0.38175  | 0.35132 | -1.1592     | 0.87681     | -0.6769   |         |
|            | 0.75076         | -0.69731 | 0.7572  | 0.35132     | 0.704026961 |           |         |
| NA         | ENSG00000236928 | -0.22009 | 0.5871  | -1.2047     | 0.88584     | 0.38164   | 0.35136 |
|            | 0.38164         | 0.35136  | 0.35136 | 0.704078164 |             |           |         |
| ANAPC16    | ENSG00000166295 | -0.99694 | 0.8406  | -1.0015     | 0.8417      | 0.32729   |         |
|            | 0.37172         | 0.38131  | 0.35149 | 0.35149     | 0.704225029 |           |         |
| NA         | ENSG00000268714 | 0.38131  | 0.35149 | 0.38131     | 0.35149     | 0.38131   | 0.35149 |
|            | 0.38131         | 0.35149  | 0.35149 | 0.704225029 |             |           |         |
| SIDT2      | ENSG00000149577 | -0.24311 | 0.59604 | -0.0057163  | 0.50228     | 0.38121   | 0.35152 |
|            | -0.39442        | 0.65337  | 0.35152 | 0.704225029 |             |           |         |
| DENND6A-DT | ENSG00000241933 | 0.38121  | 0.35152 | 0.030605    | 0.48779     | 0.28511   |         |
|            | 0.38778         | 0.28511  | 0.38778 | 0.35152     | 0.704225029 |           |         |
| NA         | ENSG00000243328 | 0.38121  | 0.35152 | -0.28833    | 0.61345     | -0.28833  | 0.61345 |
|            | -0.28833        | 0.61345  | 0.35152 | 0.704225029 |             |           |         |
| NA         | ENSG00000267135 | 0.38122  | 0.35152 | 0.38122     | 0.35152     | 0.38122   | 0.35152 |
|            | 0.38122         | 0.35152  | 0.35152 | 0.704225029 |             |           |         |
| NA         | ENSG00000263637 | 0.38096  | 0.35161 | 0.039487    | 0.48425     | 0.039487  | 0.48425 |
|            | 0.039487        | 0.48425  | 0.35161 | 0.704313924 |             |           |         |
| PHETA1     | ENSG00000198324 | -0.21833 | 0.58642 | -0.79777    | 0.7875      | -0.65079  |         |
|            | 0.74241         | 0.38096  | 0.35162 | 0.35162     | 0.704313924 |           |         |
| OR2J4P     | ENSG00000224233 | -1.6938  | 0.95485 | 0.38095     | 0.35162     | -2.2537   |         |
|            | 0.98789         | -2.0456  | 0.9796  | 0.35162     | 0.704313924 |           |         |
| OR2B6      | ENSG00000124657 | 0.38092  | 0.35163 | -1.277      | 0.8992      | -0.50823  | 0.69435 |
|            | -0.50823        | 0.69435  | 0.35163 | 0.704313924 |             |           |         |
| MIR5194    | ENSG00000264653 | 0.38083  | 0.35166 | -1.759      | 0.96072     | -1.0776   |         |
|            | 0.8594          | -1.0776  | 0.8594  | 0.35166     | 0.704313924 |           |         |
| MAPK6      | ENSG00000069956 | 0.033675 | 0.48657 | 0.38082     | 0.35167     | -0.70174  | 0.75858 |
|            | -0.20226        | 0.58014  | 0.35167 | 0.704313924 |             |           |         |
| RBMS3-AS2  | ENSG00000203506 | 0.3808   | 0.35168 | -0.27638    | 0.60887     | -0.49534  |         |
|            | 0.68982         | -1.0572  | 0.8548  | 0.35168     | 0.704313924 |           |         |
| NA         | ENSG00000254607 | 0.38079  | 0.35168 | 0.38079     | 0.35168     | 0.38079   | 0.35168 |
|            | 0.38079         | 0.35168  | 0.35168 | 0.704313924 |             |           |         |
| NA         | ENSG00000273763 | -0.14623 | 0.55813 | -0.14623    | 0.55813     | -0.14623  | 0.55813 |
|            | 0.38073         | 0.3517   | 0.3517  | 0.704315951 |             |           |         |
| RPL34P29   | ENSG00000244551 | 0.04657  | 0.48143 | 0.27948     | 0.38994     | 0.19012   |         |

|           |                 |           |         |             |             |           |         |  |
|-----------|-----------------|-----------|---------|-------------|-------------|-----------|---------|--|
|           | 0.42461         | 0.38064   | 0.35174 | 0.35174     | 0.704315951 |           |         |  |
| TMTC1     | ENSG00000133687 | -0.73593  | 0.76911 | -0.8036     | 0.78918     | -0.9881   | 0.83845 |  |
|           | 0.38059         | 0.35176   | 0.35176 | 0.704315951 |             |           |         |  |
| RAMAC     | ENSG00000169612 | 0.32416   | 0.37291 | 0.38057     | 0.35176     | 0.32416   | 0.37291 |  |
|           | 0.32416         | 0.37291   | 0.35176 | 0.704315951 |             |           |         |  |
| CLDN12    | ENSG00000157224 | 0.26717   | 0.39467 | 0.38055     | 0.35177     | -0.12414  |         |  |
|           | 0.5494          | -0.12414  | 0.5494  | 0.35177     | 0.704315951 |           |         |  |
| GLG1      | ENSG00000090863 | 0.38051   | 0.35179 | -0.50452    | 0.69305     | 0.00441   | 0.49824 |  |
|           | -0.40367        | 0.65677   | 0.35179 | 0.704315951 |             |           |         |  |
| CLDN19    | ENSG00000164007 | -0.8911   | 0.81356 | 0.38049     | 0.35179     | -0.8911   |         |  |
|           | 0.81356         | -0.080161 | 0.53195 | 0.35179     | 0.704315951 |           |         |  |
| PTK7      | ENSG00000112655 | 0.043583  | 0.48262 | 0.38043     | 0.35181     | 0.1908    | 0.42434 |  |
|           | 0.30428         | 0.38046   | 0.35181 | 0.704315951 |             |           |         |  |
| NA        | ENSG00000253104 | 0.3804    | 0.35182 | -0.091277   | 0.53636     | 0.35763   | 0.36031 |  |
|           | -0.093528       | 0.53726   | 0.35182 | 0.704315951 |             |           |         |  |
| GLYATL2   | ENSG00000156689 | 0.065269  | 0.47398 | -0.30934    | 0.62147     | 0.26578   |         |  |
|           | 0.39521         | 0.38036   | 0.35184 | 0.35184     | 0.704315951 |           |         |  |
| NA        | ENSG00000269945 | 0.38035   | 0.35184 | 0.38035     | 0.35184     | 0.38035   | 0.35184 |  |
|           | 0.38035         | 0.35184   | 0.35184 | 0.704315951 |             |           |         |  |
| LINC02665 | ENSG00000223581 | -0.7628   | 0.77721 | -0.7628     | 0.77721     | -0.7628   |         |  |
|           | 0.77721         | 0.38031   | 0.35186 | 0.35186     | 0.704327054 |           |         |  |
| AHCTF1P1  | ENSG00000226121 | 0.38023   | 0.35189 | -0.2846     | 0.61203     | -0.71073  |         |  |
|           | 0.76137         | -0.62649  | 0.7345  | 0.35189     | 0.704358172 |           |         |  |
| ARFIP2    | ENSG00000132254 | 0.38017   | 0.35191 | 0.38017     | 0.35191     | 0.38017   |         |  |
|           | 0.35191         | -0.27465  | 0.60821 | 0.35191     | 0.704369272 |           |         |  |
| NA        | ENSG00000262400 | -0.41832  | 0.66214 | 0.30236     | 0.38119     | 0.38001   | 0.35197 |  |
|           | 0.05261         | 0.47902   | 0.35197 | 0.70446043  |             |           |         |  |
| PARP1     | ENSG00000143799 | 0.37992   | 0.352   | -0.023966   | 0.50956     | -0.023966 | 0.50956 |  |
|           | -0.19447        | 0.5771    | 0.352   | 0.704482619 |             |           |         |  |
| EPB41     | ENSG00000159023 | -0.052798 | 0.52105 | -0.47794    | 0.68365     | 0.3799    | 0.35201 |  |
|           | 0.010572        | 0.49578   | 0.35201 | 0.704482619 |             |           |         |  |
| NA        | ENSG00000253141 | 0.37978   | 0.35205 | -0.92018    | 0.82126     | -0.16552  | 0.56573 |  |
|           | -0.90588        | 0.8175    | 0.35205 | 0.70451349  |             |           |         |  |
| NCOA5     | ENSG00000124160 | -0.46776  | 0.68002 | 0.29351     | 0.38456     | -0.45827  | 0.67662 |  |
|           | 0.37974         | 0.35207   | 0.35207 | 0.70451349  |             |           |         |  |
| NA        | ENSG00000231827 | 0.36869   | 0.35618 | 0.3797      | 0.35208     | 0.061823  | 0.47535 |  |
|           | 0.059271        | 0.47637   | 0.35208 | 0.70451349  |             |           |         |  |
| TUBB8P4   | ENSG00000250788 | -1.361    | 0.91324 | -1.6538     | 0.95091     | 0.37967   |         |  |
|           | 0.3521          | -2.4367   | 0.99259 | 0.3521      | 0.70451349  |           |         |  |
| NPHP4     | ENSG00000131697 | 0.24061   | 0.40493 | -0.093281   | 0.53716     | -1.138    | 0.87243 |  |
|           | 0.3796          | 0.35212   | 0.35212 | 0.70451349  |             |           |         |  |
| LINC02757 | ENSG00000255363 | 0.37958   | 0.35213 | 0.30389     | 0.3806      | 0.37958   |         |  |
|           | 0.35213         | 0.27084   | 0.39326 | 0.35213     | 0.70451349  |           |         |  |
| SNTG2     | ENSG00000172554 | 0.37953   | 0.35215 | -1.1689     | 0.87877     | -0.45613  | 0.67585 |  |
|           | -0.96947        | 0.83385   | 0.35215 | 0.70451349  |             |           |         |  |
| LINC02280 | ENSG00000260792 | -0.01504  | 0.506   | 0.37952     | 0.35215     | -0.092386 | 0.5368  |  |
|           | 0.057603        | 0.47703   | 0.35215 | 0.70451349  |             |           |         |  |
| THYN1     | ENSG00000151500 | 0.3795    | 0.35216 | 0.3795      | 0.35216     | 0.3795    | 0.35216 |  |
|           | 0.3795          | 0.35216   | 0.35216 | 0.70451349  |             |           |         |  |
| PRAMEF2   | ENSG00000120952 | -1.0664   | 0.85687 | -0.36635    | 0.64295     | -2.0384   |         |  |
|           | 0.97925         | 0.37946   | 0.35217 | 0.35217     | 0.70451349  |           |         |  |
| NA        | ENSG00000250350 | 0.37931   | 0.35223 | -0.43581    | 0.66851     | -0.43581  | 0.66851 |  |
|           | -0.43581        | 0.66851   | 0.35223 | 0.704595673 |             |           |         |  |
| PSMC1P3   | ENSG00000231244 | -0.84007  | 0.79957 | 0.37928     | 0.35224     | -0.41539  |         |  |
|           | 0.66107         | -0.41539  | 0.66107 | 0.35224     | 0.704595673 |           |         |  |
| TXN       | ENSG00000136810 | 0.37914   | 0.35229 | -0.5869     | 0.72136     | -2.3926   | 0.99163 |  |
|           | -2.3926         | 0.99163   | 0.35229 | 0.704648921 |             |           |         |  |
| IGHV1-68  | ENSG00000253703 | 0.37909   | 0.35231 | 0.37909     | 0.35231     | 0.37909   |         |  |
|           | 0.35231         | 0.37909   | 0.35231 | 0.35231     | 0.704648921 |           |         |  |
| NA        | ENSG00000283571 | 0.37909   | 0.35231 | 0.37909     | 0.35231     | 0.37909   | 0.35231 |  |
|           | 0.37909         | 0.35231   | 0.35231 | 0.704648921 |             |           |         |  |
| MRPS9-AS1 | ENSG00000231851 | 0.37901   | 0.35234 | -0.45646    | 0.67597     | 0.011299  |         |  |

|               |                 |           |         |             |             |           |         |
|---------------|-----------------|-----------|---------|-------------|-------------|-----------|---------|
|               | 0.49549         | -0.14531  | 0.55777 | 0.35234     | 0.704671079 |           |         |
| KRT25         | ENSG00000204897 | -0.7638   | 0.77751 | 0.23751     | 0.40613     | 0.37898   | 0.35235 |
|               | 0.37898         | 0.35235   | 0.35235 | 0.704671079 |             |           |         |
| NA            | ENSG00000234841 | 0.37889   | 0.35238 | 0.049736    | 0.48017     | -0.089014 | 0.53546 |
|               | -0.018382       | 0.50733   | 0.35238 | 0.704702155 |             |           |         |
| SNORA15       | ENSG00000207168 | 0.37866   | 0.35247 | 0.37866     | 0.35247     | 0.37866   |         |
|               | 0.35247         | 0.37866   | 0.35247 | 0.35247     | 0.704815363 |           |         |
| NA            | ENSG00000260182 | 0.37867   | 0.35247 | 0.37867     | 0.35247     | 0.37867   | 0.35247 |
|               | 0.37867         | 0.35247   | 0.35247 | 0.704815363 |             |           |         |
| RNF144A-AS1   | ENSG00000228203 | 0.37863   | 0.35248 | -0.36529    | 0.64255     | -0.25659  |         |
|               | 0.60125         | 0.37863   | 0.35248 | 0.35248     | 0.704815363 |           |         |
| DDX43P2       | ENSG00000270763 | 0.37849   | 0.35253 | 0.37849     | 0.35253     | 0.37849   |         |
|               | 0.35253         | 0.37849   | 0.35253 | 0.35253     | 0.704886418 |           |         |
| NA            | ENSG00000262495 | -0.19158  | 0.57597 | -0.19158    | 0.57597     | -0.21849  | 0.58647 |
|               | 0.37825         | 0.35262   | 0.35262 | 0.705037445 |             |           |         |
| NA            | ENSG00000243089 | 0.37812   | 0.35267 | 0.37812     | 0.35267     | 0.37812   | 0.35267 |
|               | 0.37812         | 0.35267   | 0.35267 | 0.705079556 |             |           |         |
| NA            | ENSG00000252534 | 0.37813   | 0.35267 | 0.37813     | 0.35267     | 0.37813   | 0.35267 |
|               | 0.37813         | 0.35267   | 0.35267 | 0.705079556 |             |           |         |
| DLGAP2-AS1    | ENSG00000253267 | -1.136    | 0.87202 | 0.37796     | 0.35273     | 0.37668   |         |
|               | 0.3532          | -0.97872  | 0.83614 | 0.35273     | 0.705170581 |           |         |
| NA            | ENSG00000249706 | -0.91256  | 0.81926 | -1.9094     | 0.97189     | 0.37783   | 0.35278 |
|               | -2.0385         | 0.97925   | 0.35278 | 0.705205849 |             |           |         |
| PROX1-AS1     | ENSG00000230461 | 0.37779   | 0.35279 | -1.3381     | 0.90957     | -0.39979  |         |
|               | 0.65534         | -0.35654  | 0.63928 | 0.35279     | 0.705205849 |           |         |
| EPS8L3        | ENSG00000198758 | -0.64202  | 0.73957 | -1.2487     | 0.89411     | 0.37773   |         |
|               | 0.35282         | -0.29748  | 0.61695 | 0.35282     | 0.705205849 |           |         |
| NA            | ENSG00000228689 | 0.37771   | 0.35282 | 0.1225      | 0.45125     | 0.37771   | 0.35282 |
|               | 0.37771         | 0.35282   | 0.35282 | 0.705205849 |             |           |         |
| NA            | ENSG00000251307 | -0.020832 | 0.50831 | 0.37772     | 0.35282     | 0.37772   | 0.35282 |
|               | -0.077767       | 0.53099   | 0.35282 | 0.705205849 |             |           |         |
| DCXR          | ENSG00000169738 | 0.37764   | 0.35285 | -0.72374    | 0.76539     | -0.96323  | 0.83229 |
|               | 0.37764         | 0.35285   | 0.35285 | 0.705236885 |             |           |         |
| ADORA2BP1     | ENSG00000236136 | -0.6493   | 0.74193 | -0.6493     | 0.74193     | -0.6493   |         |
|               | 0.74193         | 0.37754   | 0.35289 | 0.35289     | 0.70525898  |           |         |
| NA            | ENSG00000240859 | -0.23304  | 0.59213 | 0.37752     | 0.35289     | -0.19582  | 0.57762 |
|               | -0.1802         | 0.5715    | 0.35289 | 0.70525898  |             |           |         |
| NFXL1         | ENSG00000170448 | -0.37709  | 0.64695 | 0.37741     | 0.35293     | -0.065989 | 0.52631 |
|               | 0.37741         | 0.35293   | 0.35293 | 0.705301054 |             |           |         |
| ZNF559-ZNF177 | ENSG00000270011 | 0.37739   | 0.35294 | 0.37739     | 0.35294     | 0.37739   |         |
|               | 0.35294         | 0.37739   | 0.35294 | 0.35294     | 0.705301054 |           |         |
| CCNL2P1       | ENSG00000248283 | 0.32833   | 0.37133 | -0.26034    | 0.6027      | -1.1558   |         |
|               | 0.87611         | 0.37735   | 0.35296 | 0.35296     | 0.705312097 |           |         |
| STX16-NPEPL1  | ENSG00000254995 | 0.24488   | 0.40327 | 0.3772      | 0.35301     | -0.041649 |         |
|               | 0.51661         | -0.041649 | 0.51661 | 0.35301     | 0.705339884 |           |         |
| ST13P19       | ENSG00000228110 | -0.77332  | 0.78033 | -0.57442    | 0.71716     | -0.57442  |         |
|               | 0.71716         | 0.37712   | 0.35304 | 0.35304     | 0.705339884 |           |         |
| NUDT13        | ENSG00000166321 | -0.7795   | 0.78216 | -1.0676     | 0.85715     | 0.37704   |         |
|               | 0.35307         | 0.18475   | 0.42671 | 0.35307     | 0.705339884 |           |         |
| HELZ          | ENSG00000198265 | -0.33635  | 0.6317  | 0.37705     | 0.35307     | 0.28267   | 0.38871 |
|               | 0.37705         | 0.35307   | 0.35307 | 0.705339884 |             |           |         |
| NA            | ENSG00000213076 | 0.37703   | 0.35308 | 0.1096      | 0.45636     | -0.61807  | 0.73174 |
|               | -0.61807        | 0.73174   | 0.35308 | 0.705339884 |             |           |         |
| NA            | ENSG00000221743 | 0.37686   | 0.35314 | 0.37686     | 0.35314     | 0.37686   | 0.35314 |
|               | 0.37686         | 0.35314   | 0.35314 | 0.705339884 |             |           |         |
| AIMP2         | ENSG00000106305 | -0.19674  | 0.57798 | 0.37681     | 0.35316     | 0.06708   | 0.47326 |
|               | -0.62682        | 0.73461   | 0.35316 | 0.705339884 |             |           |         |
| NA            | ENSG00000261818 | 0.37676   | 0.35317 | 0.37676     | 0.35317     | 0.37676   | 0.35317 |
|               | 0.37676         | 0.35317   | 0.35317 | 0.705339884 |             |           |         |
| CDON          | ENSG00000064309 | 0.20019   | 0.42066 | 0.0081098   | 0.49676     | 0.37676   | 0.35318 |
|               | 0.13926         | 0.44462   | 0.35318 | 0.705339884 |             |           |         |
| MIR16-2       | ENSG00000198987 | 0.37675   | 0.35318 | 0.37675     | 0.35318     | 0.37675   |         |

|           |                 |           |         |             |             |           |         |
|-----------|-----------------|-----------|---------|-------------|-------------|-----------|---------|
|           | 0.35318         | 0.37675   | 0.35318 | 0.35318     | 0.705339884 |           |         |
| MIR15B    | ENSG00000207779 | 0.37675   | 0.35318 | 0.35318     | 0.37675     | 0.35318   | 0.37675 |
|           | 0.35318         | 0.37675   | 0.35318 | 0.35318     | 0.705339884 |           |         |
| FOSB      | ENSG00000125740 | 0.21384   | 0.41534 | 0.33075     | 0.37042     | 0.37663   | 0.35322 |
|           | 0.15799         | 0.43723   | 0.35322 | 0.705339884 |             |           |         |
| ZFPM2     | ENSG00000169946 | 0.16926   | 0.4328  | -0.33568    | 0.63144     | -0.60314  | 0.72679 |
|           | 0.37661         | 0.35323   | 0.35323 | 0.705339884 |             |           |         |
| NA        | ENSG00000223027 | -1.3598   | 0.91306 | 0.37663     | 0.35323     | -1.3598   | 0.91306 |
|           | -1.3598         | 0.91306   | 0.35323 | 0.705339884 |             |           |         |
| NA        | ENSG00000279455 | 0.30785   | 0.3791  | -2.8063     | 0.99749     | 0.37655   | 0.35325 |
|           | 0.37655         | 0.35325   | 0.35325 | 0.705339884 |             |           |         |
| NA        | ENSG00000225554 | -0.32846  | 0.62872 | 0.37641     | 0.3533      | -0.68796  | 0.75426 |
|           | -1.1142         | 0.86741   | 0.3533  | 0.705339884 |             |           |         |
| NLRP13    | ENSG00000173572 | 0.3764    | 0.35331 | -0.12002    | 0.54777     | 0.3764    |         |
|           | 0.35331         | 0.3764    | 0.35331 | 0.35331     | 0.705339884 |           |         |
| PAPPA     | ENSG00000182752 | 0.35751   | 0.36036 | 0.24114     | 0.40472     | 0.3764    | 0.35331 |
|           | -0.040305       | 0.51607   | 0.35331 | 0.705339884 |             |           |         |
| RPL26     | ENSG00000161970 | 0.26515   | 0.39545 | 0.37629     | 0.35335     | 0.26515   | 0.39545 |
|           | 0.26515         | 0.39545   | 0.35335 | 0.705339884 |             |           |         |
| LINC00907 | ENSG00000267586 | 0.37615   | 0.3534  | -0.36568    | 0.6427      | -0.014814 |         |
|           | 0.50591         | -0.18443  | 0.57316 | 0.3534      | 0.705339884 |           |         |
| NA        | ENSG00000267002 | -0.44001  | 0.67004 | -0.57333    | 0.71679     | -0.55147  | 0.70934 |
|           | 0.37612         | 0.35341   | 0.35341 | 0.705339884 |             |           |         |
| NA        | ENSG00000267231 | 0.37614   | 0.35341 | 0.37614     | 0.35341     | 0.37614   | 0.35341 |
|           | 0.37614         | 0.35341   | 0.35341 | 0.705339884 |             |           |         |
| UBE3A     | ENSG00000114062 | 0.37607   | 0.35343 | 0.37607     | 0.35343     | 0.37607   | 0.35343 |
|           | -0.64221        | 0.73963   | 0.35343 | 0.705339884 |             |           |         |
| NA        | ENSG00000252655 | 0.37608   | 0.35343 | 0.37608     | 0.35343     | -0.30295  | 0.61904 |
|           | -0.22397        | 0.58861   | 0.35343 | 0.705339884 |             |           |         |
| RN7SL124P | ENSG00000242113 | 0.37599   | 0.35346 | 0.37599     | 0.35346     | 0.37599   |         |
|           | 0.35346         | 0.37599   | 0.35346 | 0.35346     | 0.705339884 |           |         |
| MTND5P16  | ENSG00000243658 | 0.37594   | 0.35348 | 0.37594     | 0.35348     | 0.37594   |         |
|           | 0.35348         | 0.37594   | 0.35348 | 0.35348     | 0.705339884 |           |         |
| SNRPBP1   | ENSG00000223550 | -0.6842   | 0.75307 | -0.6842     | 0.75307     | 0.37588   |         |
|           | 0.3535          | -0.6842   | 0.75307 | 0.3535      | 0.705339884 |           |         |
| LINC01836 | ENSG00000267530 | 0.37584   | 0.35352 | 0.37584     | 0.35352     | -0.079095 |         |
|           | 0.53152         | 0.37584   | 0.35352 | 0.35352     | 0.705339884 |           |         |
| BRI3P1    | ENSG00000225169 | 0.37578   | 0.35354 | 0.37578     | 0.35354     | 0.37578   |         |
|           | 0.35354         | 0.37578   | 0.35354 | 0.35354     | 0.705339884 |           |         |
| NA        | ENSG00000257954 | 0.37579   | 0.35354 | 0.37579     | 0.35354     | 0.37579   | 0.35354 |
|           | 0.37579         | 0.35354   | 0.35354 | 0.705339884 |             |           |         |
| NA        | ENSG00000257998 | 0.37577   | 0.35354 | -0.090108   | 0.5359      | -0.090108 | 0.5359  |
|           | -0.090108       | 0.5359    | 0.35354 | 0.705339884 |             |           |         |
| LINC01432 | ENSG00000234435 | 0.12639   | 0.44971 | 0.37576     | 0.35355     | 0.13106   |         |
|           | 0.44786         | 0.12639   | 0.44971 | 0.35355     | 0.705339884 |           |         |
| NA        | ENSG00000258623 | -0.042167 | 0.51682 | -0.14368    | 0.55712     | 0.37567   | 0.35358 |
|           | 0.37567         | 0.35358   | 0.35358 | 0.705339884 |             |           |         |
| NA        | ENSG00000273838 | -0.12678  | 0.55044 | -0.22116    | 0.58751     | -0.73553  | 0.76899 |
|           | 0.37567         | 0.35358   | 0.35358 | 0.705339884 |             |           |         |
| MIA3      | ENSG00000154305 | -0.10034  | 0.53996 | 0.37561     | 0.3536      | -0.36205  | 0.64134 |
|           | -0.10034        | 0.53996   | 0.3536  | 0.705339884 |             |           |         |
| NA        | ENSG00000235756 | -0.48615  | 0.68657 | 0.3756      | 0.35361     | -0.61366  | 0.73028 |
|           | -1.8375         | 0.96693   | 0.35361 | 0.705339884 |             |           |         |
| NA        | ENSG00000259488 | 0.37558   | 0.35361 | 0.16491     | 0.43451     | 0.37558   | 0.35361 |
|           | 0.37558         | 0.35361   | 0.35361 | 0.705339884 |             |           |         |
| NFIL3     | ENSG00000165030 | 0.37555   | 0.35363 | -0.56728    | 0.71474     | 0.17999   | 0.42858 |
|           | -0.96662        | 0.83313   | 0.35363 | 0.705339884 |             |           |         |
| POLR2L    | ENSG00000177700 | -0.3468   | 0.63563 | 0.2657      | 0.39524     | -0.33055  |         |
|           | 0.62951         | 0.37552   | 0.35364 | 0.35364     | 0.705339884 |           |         |
| SMARCE1P1 | ENSG00000225215 | 0.37551   | 0.35364 | -0.84337    | 0.80049     | -0.84337  |         |
|           | 0.80049         | -0.84337  | 0.80049 | 0.35364     | 0.705339884 |           |         |
| ZNF215    | ENSG00000149054 | 0.092651  | 0.46309 | -0.36862    | 0.64379     | 0.37547   |         |

|            |                 |           |             |             |             |           |         |         |
|------------|-----------------|-----------|-------------|-------------|-------------|-----------|---------|---------|
|            | 0.35365         | -0.25729  | 0.60152     | 0.35365     | 0.705339884 |           |         |         |
| TAAR6      | ENSG00000146383 | 0.11303   | 0.455       | 0.11303     | 0.455       | 0.11303   | 0.455   | 0.37546 |
|            | 0.35366         | 0.35366   | 0.705339884 |             |             |           |         |         |
| NA         | ENSG00000246130 | -0.74368  | 0.77147     | -0.70123    | 0.75842     | 0.37545   | 0.35366 |         |
|            | -0.70123        | 0.75842   | 0.35366     | 0.705339884 |             |           |         |         |
| RNU7-81P   | ENSG00000252507 | 0.37543   | 0.35367     | 0.37543     | 0.35367     | 0.37543   | 0.37543 |         |
|            | 0.35367         | 0.37543   | 0.35367     | 0.35367     | 0.705339884 |           |         |         |
| GEMIN7-AS1 | ENSG00000267348 | 0.37543   | 0.35367     | 0.37543     | 0.35367     | 0.37543   | 0.37543 |         |
|            | 0.35367         | 0.37543   | 0.35367     | 0.35367     | 0.705339884 |           |         |         |
| LRR1       | ENSG00000165501 | 0.05431   | 0.47834     | 0.05431     | 0.47834     | 0.05431   | 0.47834 |         |
|            | 0.37536         | 0.3537    | 0.3537      | 0.705339884 |             |           |         |         |
| RNA5SP362  | ENSG00000251857 | 0.37535   | 0.3537      | -0.70634    | 0.76001     | 0.28934   |         |         |
|            | 0.38616         | 0.14506   | 0.44233     | 0.3537      | 0.705339884 |           |         |         |
| RPS10P5    | ENSG00000101278 | 0.3753    | 0.35372     | -0.49255    | 0.68883     | -0.69866  |         |         |
|            | 0.75762         | 0.11653   | 0.45361     | 0.35372     | 0.705339884 |           |         |         |
| MTATP6P22  | ENSG00000249580 | 0.37531   | 0.35372     | 0.37531     | 0.35372     | 0.37531   |         |         |
|            | 0.35372         | 0.37531   | 0.35372     | 0.35372     | 0.705339884 |           |         |         |
| ZFAND1     | ENSG00000104231 | -0.76428  | 0.77765     | -0.76428    | 0.77765     | -0.76428  |         |         |
|            | 0.77765         | 0.37523   | 0.35374     | 0.35374     | 0.705339884 |           |         |         |
| NA         | ENSG00000267784 | 0.37525   | 0.35374     | 0.37525     | 0.35374     | 0.37525   | 0.35374 |         |
|            | 0.37525         | 0.35374   | 0.35374     | 0.705339884 |             |           |         |         |
| KRTAP4-3   | ENSG00000196156 | 0.37522   | 0.35375     | -2.3297     | 0.99009     | -0.012293 |         |         |
|            | 0.5049          | -0.012293 | 0.5049      | 0.35375     | 0.705339884 |           |         |         |
| AHSP       | ENSG00000169877 | 0.17586   | 0.4302      | 0.17586     | 0.4302      | 0.37518   | 0.35376 |         |
|            | 0.17586         | 0.4302    | 0.35376     | 0.705339884 |             |           |         |         |
| CASC19     | ENSG00000254166 | 0.3752    | 0.35376     | 0.3752      | 0.35376     | 0.3752    |         |         |
|            | 0.35376         | -0.96024  | 0.83153     | 0.35376     | 0.705339884 |           |         |         |
| SNRPCP9    | ENSG00000231812 | 0.13246   | 0.44731     | 0.37517     | 0.35377     | -0.16104  |         |         |
|            | 0.56397         | -0.15213  | 0.56046     | 0.35377     | 0.705339884 |           |         |         |
| NA         | ENSG00000245317 | 0.37508   | 0.3538      | 0.37508     | 0.3538      | 0.37508   | 0.3538  |         |
|            | 0.37508         | 0.3538    | 0.3538      | 0.705370837 |             |           |         |         |
| ITPR2      | ENSG00000123104 | -1.2454   | 0.8935      | 0.37493     | 0.35386     | -0.073246 | 0.52919 |         |
|            | 0.35962         | 0.35956   | 0.35386     | 0.705399137 |             |           |         |         |
| FTLP12     | ENSG00000265095 | 0.0039779 | 0.49841     | -0.95677    | 0.83066     | -0.59252  |         |         |
|            | 0.72325         | 0.37493   | 0.35386     | 0.35386     | 0.705399137 |           |         |         |
| VWA7       | ENSG00000204396 | -0.9997   | 0.84127     | 0.37491     | 0.35387     | 0.37491   | 0.35387 |         |
|            | 0.37491         | 0.35387   | 0.35387     | 0.705399137 |             |           |         |         |
| RN7SKP21   | ENSG00000252312 | 0.37481   | 0.3539      | -1.2385     | 0.89224     | -0.93261  |         |         |
|            | 0.82449         | 0.37481   | 0.3539      | 0.3539      | 0.705399137 |           |         |         |
| NA         | ENSG00000229757 | 0.3748    | 0.35391     | 0.3748      | 0.35391     | 0.3748    | 0.35391 |         |
|            | 0.3748          | 0.35391   | 0.35391     | 0.705399137 |             |           |         |         |
| NA         | ENSG00000276488 | 0.37477   | 0.35391     | 0.37477     | 0.35391     | 0.37477   | 0.35391 |         |
|            | 0.37477         | 0.35391   | 0.35391     | 0.705399137 |             |           |         |         |
| OR5D2P     | ENSG00000254457 | -0.67123  | 0.74896     | 0.37475     | 0.35392     | -0.92868  |         |         |
|            | 0.82347         | 0.37475   | 0.35392     | 0.35392     | 0.705399137 |           |         |         |
| NA         | ENSG00000250057 | 0.37474   | 0.35393     | 0.17633     | 0.43002     | 0.12654   | 0.44965 |         |
|            | 0.35675         | 0.36064   | 0.35393     | 0.705399137 |             |           |         |         |
| RPL23AP65  | ENSG00000243964 | -0.39719  | 0.65439     | 0.17608     | 0.43011     | -1.1374   |         |         |
|            | 0.87231         | 0.37467   | 0.35395     | 0.35395     | 0.705410147 |           |         |         |
| OR2W5      | ENSG00000203664 | -0.53279  | 0.70291     | 0.37452     | 0.35401     | -0.53279  | 0.70291 |         |
|            | -0.18105        | 0.57184   | 0.35401     | 0.705500871 |             |           |         |         |
| GPR1       | ENSG00000183671 | -0.018426 | 0.50735     | 0.37445     | 0.35404     | 0.37445   | 0.35404 |         |
|            | -0.027755       | 0.51107   | 0.35404     | 0.705502952 |             |           |         |         |
| NA         | ENSG00000279033 | 0.37445   | 0.35404     | 0.37445     | 0.35404     | 0.37445   | 0.35404 |         |
|            | 0.37445         | 0.35404   | 0.35404     | 0.705502952 |             |           |         |         |
| LINC02272  | ENSG00000251283 | 0.37439   | 0.35406     | 0.37439     | 0.35406     | 0.37439   |         |         |
|            | 0.35406         | 0.37439   | 0.35406     | 0.35406     | 0.705513956 |           |         |         |
| RPL23AP43  | ENSG00000227337 | -0.4173   | 0.66177     | -0.86929    | 0.80766     | 0.37424   |         |         |
|            | 0.35411         | -0.86929  | 0.80766     | 0.35411     | 0.705575811 |           |         |         |
| RAP1BP3    | ENSG00000219703 | -0.73043  | 0.76744     | -0.73043    | 0.76744     | 0.37422   |         |         |
|            | 0.35412         | -0.38844  | 0.65116     | 0.35412     | 0.705575811 |           |         |         |
| OR4N1P     | ENSG00000258564 | -1.5449   | 0.93882     | -0.97638    | 0.83556     | -0.54031  |         |         |

|           |                 |          |         |             |             |           |         |  |
|-----------|-----------------|----------|---------|-------------|-------------|-----------|---------|--|
|           | 0.70551         | 0.37416  | 0.35414 | 0.35414     | 0.70558681  |           |         |  |
| LINC02465 | ENSG00000249618 | 0.37395  | 0.35422 | 0.37395     | 0.35422     | 0.35422   | -1.1147 |  |
|           | 0.86751         | -0.20995 | 0.58315 | 0.35422     | 0.705717347 |           |         |  |
| FAAP20    | ENSG00000162585 | -0.15968 | 0.56343 | 0.010596    | 0.49577     | -0.306    |         |  |
|           | 0.6202          | 0.3739   | 0.35424 | 0.35424     | 0.705727659 |           |         |  |
| NEUROD4   | ENSG00000123307 | -1.3298  | 0.9082  | 0.37385     | 0.35426     | -1.4594   |         |  |
|           | 0.92777         | -0.16171 | 0.56423 | 0.35426     | 0.705727659 |           |         |  |
| NA        | ENSG00000230271 | 0.37381  | 0.35427 | 0.37381     | 0.35427     | 0.37381   | 0.35427 |  |
|           | 0.37381         | 0.35427  | 0.35427 | 0.705727659 |             |           |         |  |
| TTF1      | ENSG00000125482 | -0.87422 | 0.809   | -0.63026    | 0.73574     | -0.80399  | 0.7893  |  |
|           | 0.37366         | 0.35433  | 0.35433 | 0.705727659 |             |           |         |  |
| NA        | ENSG00000207368 | -0.34701 | 0.63571 | -0.42655    | 0.66515     | 0.37366   | 0.35433 |  |
|           | -0.34701        | 0.63571  | 0.35433 | 0.705727659 |             |           |         |  |
| CAMKK2    | ENSG00000110931 | 0.11413  | 0.45457 | 0.069432    | 0.47232     | -1.5316   |         |  |
|           | 0.93719         | 0.37363  | 0.35434 | 0.35434     | 0.705727659 |           |         |  |
| NA        | ENSG00000261120 | -0.28404 | 0.61181 | -0.22452    | 0.58882     | 0.3736    | 0.35435 |  |
|           | 0.3736          | 0.35435  | 0.35435 | 0.705727659 |             |           |         |  |
| RN7SL73P  | ENSG00000265882 | 0.37362  | 0.35435 | 0.37362     | 0.35435     | 0.37362   |         |  |
|           | 0.35435         | 0.37362  | 0.35435 | 0.35435     | 0.705727659 |           |         |  |
| CD300E    | ENSG00000186407 | 0.37358  | 0.35436 | -0.21859    | 0.58652     | 0.37358   |         |  |
|           | 0.35436         | 0.37358  | 0.35436 | 0.35436     | 0.705727659 |           |         |  |
| NA        | ENSG00000281460 | 0.37354  | 0.35437 | 0.37354     | 0.35437     | 0.37354   | 0.35437 |  |
|           | 0.37354         | 0.35437  | 0.35437 | 0.705727659 |             |           |         |  |
| OR4N5     | ENSG00000184394 | -0.79245 | 0.78595 | -0.79245    | 0.78595     | 0.37341   | 0.35442 |  |
|           | -0.79245        | 0.78595  | 0.35442 | 0.70573522  |             |           |         |  |
| NA        | ENSG00000239093 | 0.37343  | 0.35442 | -0.010827   | 0.50432     | -0.50168  | 0.69205 |  |
|           | -0.97267        | 0.83464  | 0.35442 | 0.70573522  |             |           |         |  |
| STAP1     | ENSG00000035720 | 0.37339  | 0.35443 | 0.21528     | 0.41477     | 0.37339   | 0.35443 |  |
|           | 0.37339         | 0.35443  | 0.35443 | 0.70573522  |             |           |         |  |
| SOCS5     | ENSG00000171150 | 0.37327  | 0.35447 | 0.16278     | 0.43535     | -0.024163 | 0.50964 |  |
|           | -0.64965        | 0.74204  | 0.35447 | 0.70573522  |             |           |         |  |
| RN7SKP111 | ENSG00000222281 | 0.33728  | 0.36795 | 0.37327     | 0.35447     | -0.068667 |         |  |
|           | 0.52737         | 0.37327  | 0.35447 | 0.35447     | 0.70573522  |           |         |  |
| NA        | ENSG00000279504 | 0.37327  | 0.35447 | 0.37327     | 0.35447     | 0.37327   | 0.35447 |  |
|           | 0.37327         | 0.35447  | 0.35447 | 0.70573522  |             |           |         |  |
| SEZ6L     | ENSG00000100095 | 0.37323  | 0.35449 | -0.64971    | 0.74206     | 0.027863  | 0.48889 |  |
|           | 0.061917        | 0.47531  | 0.35449 | 0.70573522  |             |           |         |  |
| RN7SKP277 | ENSG00000252704 | -1.1951  | 0.88398 | 0.37317     | 0.35451     | -1.1951   |         |  |
|           | 0.88398         | -1.1951  | 0.88398 | 0.35451     | 0.70573522  |           |         |  |
| NA        | ENSG00000251833 | 0.31358  | 0.37692 | 0.37318     | 0.35451     | 0.077563  | 0.46909 |  |
|           | 0.077563        | 0.46909  | 0.35451 | 0.70573522  |             |           |         |  |
| SNRPEP5   | ENSG00000225642 | 0.37305  | 0.35456 | 0.37305     | 0.35456     | 0.37305   |         |  |
|           | 0.35456         | 0.37305  | 0.35456 | 0.35456     | 0.70573522  |           |         |  |
| GMPS1     | ENSG00000250471 | 0.19807  | 0.42149 | -1.154      | 0.87575     | -1.4853   |         |  |
|           | 0.93127         | 0.37301  | 0.35457 | 0.35457     | 0.70573522  |           |         |  |
| NA        | ENSG00000230188 | 0.37297  | 0.35458 | -0.67338    | 0.74965     | 0.37297   | 0.35458 |  |
|           | 0.37297         | 0.35458  | 0.35458 | 0.70573522  |             |           |         |  |
| CDC42EP1  | ENSG00000128283 | 0.37295  | 0.35459 | 0.37295     | 0.35459     | -0.82444  |         |  |
|           | 0.79516         | 0.37295  | 0.35459 | 0.35459     | 0.70573522  |           |         |  |
| PSMC1P1   | ENSG00000241506 | 0.37289  | 0.35461 | 0.37289     | 0.35461     | 0.37289   |         |  |
|           | 0.35461         | 0.37289  | 0.35461 | 0.35461     | 0.70573522  |           |         |  |
| NA        | ENSG00000244640 | 0.37289  | 0.35461 | 0.37289     | 0.35461     | 0.37289   | 0.35461 |  |
|           | 0.37289         | 0.35461  | 0.35461 | 0.70573522  |             |           |         |  |
| RLN1      | ENSG00000107018 | 0.37289  | 0.35462 | -0.31206    | 0.6225      | -0.63536  | 0.7374  |  |
|           | -0.63536        | 0.7374   | 0.35462 | 0.70573522  |             |           |         |  |
| MAGOH     | ENSG00000162385 | -1.1141  | 0.86738 | 0.37288     | 0.35462     | 0.37288   | 0.35462 |  |
|           | 0.37288         | 0.35462  | 0.35462 | 0.70573522  |             |           |         |  |
| RNF14P1   | ENSG00000232915 | -0.81896 | 0.79359 | 0.37275     | 0.35467     | -0.5414   |         |  |
|           | 0.70589         | 0.37275  | 0.35467 | 0.35467     | 0.705805901 |           |         |  |
| EPHB4     | ENSG00000196411 | 0.36394  | 0.35795 | 0.37245     | 0.35478     | 0.36394   | 0.35795 |  |
|           | 0.36394         | 0.35795  | 0.35478 | 0.705995974 |             |           |         |  |
| CPNE1     | ENSG00000214078 | -0.38566 | 0.65013 | 0.37236     | 0.35481     | 0.28081   | 0.38943 |  |

|             |                 |           |         |             |             |          |         |  |
|-------------|-----------------|-----------|---------|-------------|-------------|----------|---------|--|
|             | 0.20428         | 0.41907   | 0.35481 | 0.705998011 |             |          |         |  |
| NA          | ENSG00000223589 | 0.37237   | 0.35481 | -0.61123    | 0.72948     | 0.18349  | 0.42721 |  |
|             | -0.19153        | 0.57595   | 0.35481 | 0.705998011 |             |          |         |  |
| VGLL2       | ENSG00000170162 | 0.12361   | 0.45081 | 0.37232     | 0.35483     | 0.12361  | 0.45081 |  |
|             | -0.22603        | 0.58941   | 0.35483 | 0.706000049 |             |          |         |  |
| NA          | ENSG00000224738 | 0.37227   | 0.35484 | 0.37227     | 0.35484     | 0.37227  | 0.35484 |  |
|             | 0.37227         | 0.35484   | 0.35484 | 0.706000049 |             |          |         |  |
| ARPC5L      | ENSG00000136950 | 0.37223   | 0.35486 | 0.050635    | 0.47981     | 0.37223  |         |  |
|             | 0.35486         | 0.20963   | 0.41698 | 0.35486     | 0.706002086 |          |         |  |
| LINC00352   | ENSG00000227893 | 0.37221   | 0.35487 | -0.67088    | 0.74885     | 0.37221  |         |  |
|             | 0.35487         | 0.19571   | 0.42242 | 0.35487     | 0.706002086 |          |         |  |
| RAI1        | ENSG00000108557 | 0.27348   | 0.39224 | -0.18095    | 0.5718      | -0.29596 | 0.61637 |  |
|             | 0.3721          | 0.35491   | 0.35491 | 0.706052839 |             |          |         |  |
| FLT3        | ENSG00000122025 | 0.37193   | 0.35497 | -0.098698   | 0.53931     | 0.33862  | 0.36745 |  |
|             | -0.47062        | 0.68104   | 0.35497 | 0.706143374 |             |          |         |  |
| NFU1        | ENSG00000169599 | 0.37187   | 0.355   | -0.54556    | 0.70731     | -0.54556 | 0.70731 |  |
|             | -0.11839        | 0.54712   | 0.355   | 0.706156357 |             |          |         |  |
| ZNF786      | ENSG00000197362 | 0.37182   | 0.35501 | -0.33913    | 0.63274     | -1.1105  |         |  |
|             | 0.86661         | -1.0693   | 0.85752 | 0.35501     | 0.706156357 |          |         |  |
| NA          | ENSG00000225475 | -0.29527  | 0.61611 | 0.37181     | 0.35502     | -0.33817 | 0.63238 |  |
|             | -0.33817        | 0.63238   | 0.35502 | 0.706156357 |             |          |         |  |
| NA          | ENSG00000253947 | 0.37171   | 0.35505 | -2.2495     | 0.98776     | -2.2495  | 0.98776 |  |
|             | -2.2495         | 0.98776   | 0.35505 | 0.706160405 |             |          |         |  |
| NA          | ENSG00000227081 | -0.063864 | 0.52546 | -0.063864   | 0.52546     | 0.089706 | 0.46426 |  |
|             | 0.37171         | 0.35506   | 0.35506 | 0.706160405 |             |          |         |  |
| NAPSB       | ENSG00000131401 | 0.33188   | 0.36999 | 0.37167     | 0.35507     | -2.7282  | 0.99682 |  |
|             | -0.048762       | 0.51945   | 0.35507 | 0.706160405 |             |          |         |  |
| PTCD2P1     | ENSG00000258456 | -0.8055   | 0.78973 | -0.8055     | 0.78973     | 0.37163  |         |  |
|             | 0.35508         | -0.59006  | 0.72243 | 0.35508     | 0.706160405 |          |         |  |
| GTSE1-DT    | ENSG00000277232 | 0.37141   | 0.35517 | 0.37141     | 0.35517     | 0.37141  |         |  |
|             | 0.35517         | 0.37141   | 0.35517 | 0.35517     | 0.706281743 |          |         |  |
| NA          | ENSG00000283164 | -2.0711   | 0.98083 | -0.90404    | 0.81701     | 0.37141  | 0.35517 |  |
|             | 0.37141         | 0.35517   | 0.35517 | 0.706281743 |             |          |         |  |
| NA          | ENSG00000254383 | -0.7617   | 0.77688 | -0.26566    | 0.60475     | -1.0539  | 0.85404 |  |
|             | 0.37131         | 0.3552    | 0.3552  | 0.706312577 |             |          |         |  |
| RPL26P35    | ENSG00000244229 | 0.37126   | 0.35522 | 0.37126     | 0.35522     | 0.37126  |         |  |
|             | 0.35522         | 0.37126   | 0.35522 | 0.35522     | 0.706323524 |          |         |  |
| MMRN2       | ENSG00000173269 | -0.66885  | 0.7482  | -0.5042     | 0.69294     | -0.66885 | 0.7482  |  |
|             | 0.37122         | 0.35524   | 0.35524 | 0.706329552 |             |          |         |  |
| LINC00538   | ENSG00000281664 | 0.37113   | 0.35527 | 0.37113     | 0.35527     | 0.37113  |         |  |
|             | 0.35527         | 0.37113   | 0.35527 | 0.35527     | 0.706329552 |          |         |  |
| HIKESHI     | ENSG00000149196 | -0.64264  | 0.73977 | -1.385      | 0.91698     | -2.1374  |         |  |
|             | 0.98372         | 0.37104   | 0.35531 | 0.35531     | 0.706329552 |          |         |  |
| NETO1       | ENSG00000166342 | -0.73658  | 0.76931 | 0.37103     | 0.35531     | -1.2177  | 0.88833 |  |
|             | -0.14124        | 0.55616   | 0.35531 | 0.706329552 |             |          |         |  |
| MPPED2-AS1  | ENSG00000254489 | 0.37103   | 0.35531 | 0.37103     | 0.35531     | 0.37103  |         |  |
|             | 0.35531         | 0.37103   | 0.35531 | 0.35531     | 0.706329552 |          |         |  |
| NA          | ENSG00000258736 | -0.32297  | 0.62664 | 0.15186     | 0.43965     | 0.15186  | 0.43965 |  |
|             | 0.37103         | 0.35531   | 0.35531 | 0.706329552 |             |          |         |  |
| ATG14       | ENSG00000126775 | 0.37097   | 0.35533 | 0.37097     | 0.35533     | 0.37097  | 0.35533 |  |
|             | 0.37097         | 0.35533   | 0.35533 | 0.706335576 |             |          |         |  |
| MIR4645     | ENSG00000266750 | 0.3709    | 0.35536 | -0.48897    | 0.68757     | -0.48897 |         |  |
|             | 0.68757         | -0.48897  | 0.68757 | 0.35536     | 0.706335576 |          |         |  |
| SNORD114-15 | ENSG00000201557 | 0.37082   | 0.35538 | 0.37082     | 0.35538     | 0.37082  | 0.35538 |  |
|             | 0.35538         | 0.37082   | 0.35538 | 0.35538     | 0.706335576 |          |         |  |
| UCHL1-AS1   | ENSG00000251173 | -0.42971  | 0.6663  | -0.47421    | 0.68233     | -1.1396  |         |  |
|             | 0.87277         | 0.37084   | 0.35538 | 0.35538     | 0.706335576 |          |         |  |
| NCOA7       | ENSG00000111912 | 0.33933   | 0.36718 | -1.2958     | 0.90247     | -1.2958  | 0.90247 |  |
|             | 0.37081         | 0.35539   | 0.35539 | 0.706335576 |             |          |         |  |
| LRP1        | ENSG00000123384 | 0.37079   | 0.3554  | 0.16522     | 0.43438     | -0.89889 | 0.81564 |  |
|             | -0.60216        | 0.72647   | 0.3554  | 0.706335576 |             |          |         |  |
| GCHFR       | ENSG00000137880 | 0.37058   | 0.35548 | 0.37058     | 0.35548     | 0.37058  | 0.35548 |  |

|            |                 |            |         |             |             |           |         |  |
|------------|-----------------|------------|---------|-------------|-------------|-----------|---------|--|
|            | 0.37058         | 0.35548    | 0.35548 | 0.706465759 |             |           |         |  |
| RP1        | ENSG00000104237 | 0.15264    | 0.43934 | -0.76664    | 0.77835     | 0.37049   | 0.35551 |  |
|            | -1.9677         | 0.97545    | 0.35551 | 0.706496566 |             |           |         |  |
| NA         | ENSG00000233941 | 0.37042    | 0.35554 | -0.051237   | 0.52043     | 0.37042   | 0.35554 |  |
|            | 0.37042         | 0.35554    | 0.35554 | 0.706524408 |             |           |         |  |
| ELMO1      | ENSG00000155849 | 0.37036    | 0.35556 | -0.0393     | 0.51567     | -0.22971  | 0.59084 |  |
|            | -0.3958         | 0.65387    | 0.35556 | 0.706524408 |             |           |         |  |
| MARCKSL1P2 | ENSG00000215878 | -1.0394    | 0.85068 | 0.37024     | 0.3556      | -1.1598   |         |  |
|            | 0.87693         | -1.1598    | 0.87693 | 0.3556      | 0.706524408 |           |         |  |
| RNY3P8     | ENSG00000223298 | 0.051654   | 0.4794  | 0.051654    | 0.4794      | 0.37023   |         |  |
|            | 0.3556          | 0.051654   | 0.4794  | 0.3556      | 0.706524408 |           |         |  |
| GAS2L3     | ENSG00000139354 | -0.63701   | 0.73794 | -0.63701    | 0.73794     | -0.58363  |         |  |
|            | 0.72027         | 0.37015    | 0.35563 | 0.35563     | 0.706524408 |           |         |  |
| PPP2R2B    | ENSG00000156475 | 0.37018    | 0.35563 | -1.6439     | 0.9499      | -0.54473  |         |  |
|            | 0.70703         | -0.67609   | 0.75051 | 0.35563     | 0.706524408 |           |         |  |
| MIR30C2    | ENSG00000199094 | -1.3531    | 0.91198 | -1.3531     | 0.91198     | -1.413    |         |  |
|            | 0.92118         | 0.37016    | 0.35563 | 0.35563     | 0.706524408 |           |         |  |
| NA         | ENSG00000264790 | 0.37014    | 0.35564 | 0.37014     | 0.35564     | 0.37014   | 0.35564 |  |
|            | 0.37014         | 0.35564    | 0.35564 | 0.706524408 |             |           |         |  |
| MED13      | ENSG00000108510 | 0.097822   | 0.46104 | 0.37001     | 0.35569     | -0.030411 | 0.51213 |  |
|            | -0.24381        | 0.59631    | 0.35569 | 0.706594933 |             |           |         |  |
| PPIB       | ENSG00000166794 | 0.096417   | 0.46159 | 0.36991     | 0.35572     | -0.39735  | 0.65444 |  |
|            | -0.2053         | 0.58133    | 0.35572 | 0.706598904 |             |           |         |  |
| C7orf57    | ENSG00000164746 | 0.36986    | 0.35574 | 0.25021     | 0.40121     | 0.36986   |         |  |
|            | 0.35574         | 0.36986    | 0.35574 | 0.35574     | 0.706598904 |           |         |  |
| TJP2       | ENSG00000119139 | 0.32338    | 0.37321 | -0.30603    | 0.62021     | 0.36984   | 0.35575 |  |
|            | 0.13955         | 0.44451    | 0.35575 | 0.706598904 |             |           |         |  |
| NA         | ENSG00000230345 | 0.36984    | 0.35575 | 0.36984     | 0.35575     | 0.36984   | 0.35575 |  |
|            | 0.36984         | 0.35575    | 0.35575 | 0.706598904 |             |           |         |  |
| KRT18P38   | ENSG00000214012 | 0.36963    | 0.35583 | 0.36963     | 0.35583     | 0.36963   |         |  |
|            | 0.35583         | 0.36963    | 0.35583 | 0.35583     | 0.70665945  |           |         |  |
| RN7SKP174  | ENSG00000200673 | 0.36961    | 0.35584 | 0.36961     | 0.35584     | 0.36961   |         |  |
|            | 0.35584         | 0.36961    | 0.35584 | 0.35584     | 0.70665945  |           |         |  |
| NA         | ENSG00000233534 | 0.3696     | 0.35584 | 0.3696      | 0.35584     | 0.3696    | 0.35584 |  |
|            | 0.3696          | 0.35584    | 0.35584 | 0.70665945  |             |           |         |  |
| USP3       | ENSG00000140455 | 0.36954    | 0.35586 | -0.088197   | 0.53514     | -0.24047  | 0.59502 |  |
|            | 0.082656        | 0.46706    | 0.35586 | 0.70665945  |             |           |         |  |
| NA         | ENSG00000253260 | 0.36947    | 0.35589 | 0.36947     | 0.35589     | 0.36947   | 0.35589 |  |
|            | 0.36947         | 0.35589    | 0.35589 | 0.70665945  |             |           |         |  |
| NA         | ENSG00000242712 | -1.3936    | 0.91828 | 0.36947     | 0.35589     | 0.36947   | 0.35589 |  |
|            | 0.36947         | 0.35589    | 0.35589 | 0.70665945  |             |           |         |  |
| P2RY2      | ENSG00000175591 | -1.0091    | 0.84354 | 0.36945     | 0.3559      | -1.0091   | 0.84354 |  |
|            | -1.0314         | 0.84882    | 0.3559  | 0.70665945  |             |           |         |  |
| SAR1AP2    | ENSG00000213170 | 0.36941    | 0.35591 | 0.36941     | 0.35591     | 0.36941   |         |  |
|            | 0.35591         | -0.97266   | 0.83464 | 0.35591     | 0.70665945  |           |         |  |
| RTP4       | ENSG00000136514 | 0.19001    | 0.42465 | 0.3694      | 0.35592     | 0.3694    | 0.35592 |  |
|            | 0.3694          | 0.35592    | 0.35592 | 0.70665945  |             |           |         |  |
| NA         | ENSG00000212211 | 0.36935    | 0.35593 | 0.36935     | 0.35593     | 0.36935   | 0.35593 |  |
|            | 0.36935         | 0.35593    | 0.35593 | 0.70665945  |             |           |         |  |
| ARHGAP5    | ENSG00000100852 | -0.37572   | 0.64644 | -0.67545    | 0.7503      | -0.78297  |         |  |
|            | 0.78318         | 0.36934    | 0.35594 | 0.35594     | 0.70665945  |           |         |  |
| NA         | ENSG00000111788 | -0.3519    | 0.63754 | 0.36921     | 0.35598     | -0.24557  | 0.59699 |  |
|            | -1.4393         | 0.92497    | 0.35598 | 0.706692195 |             |           |         |  |
| PDK1       | ENSG00000152256 | -0.16835   | 0.56685 | 0.36919     | 0.35599     | 0.26046   | 0.39726 |  |
|            | 0.090203        | 0.46406    | 0.35599 | 0.706692195 |             |           |         |  |
| RPL23AP7   | ENSG00000240356 | 0.00032173 | 0.49987 | -1.62       | 0.94738     | -0.46977  | 0.68074 |  |
|            | 0.36918         | 0.356      | 0.356   | 0.706692195 |             |           |         |  |
| NA         | ENSG00000229820 | 0.16851    | 0.43309 | 0.36902     | 0.35606     | 0.16851   | 0.43309 |  |
|            | 0.16851         | 0.43309    | 0.35606 | 0.706773568 |             |           |         |  |
| NA         | ENSG00000279917 | 0.36898    | 0.35607 | -0.076576   | 0.53052     | 0.36898   | 0.35607 |  |
|            | 0.36898         | 0.35607    | 0.35607 | 0.706773568 |             |           |         |  |
| NA         | ENSG00000229591 | 0.36892    | 0.35609 | 0.36892     | 0.35609     | 0.36892   | 0.35609 |  |



|              |                 |           |         |             |             |           |         |  |
|--------------|-----------------|-----------|---------|-------------|-------------|-----------|---------|--|
|              | 0.36892         | 0.35609   | 0.35609 | 0.706784477 |             |           |         |  |
| NA           | ENSG00000227167 | -1.6124   | 0.94656 | 0.36887     | 0.35611     | -1.0522   | 0.85365 |  |
|              | 0.2046          | 0.41894   | 0.35611 | 0.706795385 |             |           |         |  |
| MFSD14B      | ENSG00000148110 | 0.36875   | 0.35616 | -1.1899     | 0.88296     | -0.43161  |         |  |
|              | 0.66699         | -0.5778   | 0.7183  | 0.35616     | 0.706819164 |           |         |  |
| ELOC         | ENSG00000154582 | -0.68623  | 0.75372 | 0.36874     | 0.35616     | 0.0037003 | 0.49852 |  |
|              | -0.32288        | 0.62661   | 0.35616 | 0.706819164 |             |           |         |  |
| NA           | ENSG00000254170 | -0.18979  | 0.57526 | -0.18979    | 0.57526     | 0.36871   | 0.35617 |  |
|              | 0.16166         | 0.43579   | 0.35617 | 0.706819164 |             |           |         |  |
| RN7SKP123    | ENSG00000222664 | 0.36869   | 0.35618 | 0.34151     | 0.36636     | 0.36869   |         |  |
|              | 0.35618         | -0.18391  | 0.57296 | 0.35618     | 0.706819164 |           |         |  |
| C21orf62-AS1 | ENSG00000205930 | -1.3826   | 0.91661 | -1.6105     | 0.94635     | 0.36851   |         |  |
|              | 0.35625         | -1.4842   | 0.93112 | 0.35625     | 0.706900501 |           |         |  |
| NA           | ENSG00000257176 | 0.36849   | 0.35625 | 0.36849     | 0.35625     | 0.36849   | 0.35625 |  |
|              | 0.36849         | 0.35625   | 0.35625 | 0.706900501 |             |           |         |  |
| NA           | ENSG00000268947 | 0.36844   | 0.35627 | 0.36844     | 0.35627     | 0.36844   | 0.35627 |  |
|              | 0.36844         | 0.35627   | 0.35627 | 0.706911401 |             |           |         |  |
| CDKN1B       | ENSG00000111276 | -0.28246  | 0.6112  | 0.36838     | 0.3563      | 0.36838   |         |  |
|              | 0.3563          | 0.36838   | 0.3563  | 0.3563      | 0.706915316 |           |         |  |
| LINC00158    | ENSG00000185433 | 0.36831   | 0.35632 | -0.81262    | 0.79178     | 0.36831   |         |  |
|              | 0.35632         | 0.36831   | 0.35632 | 0.35632     | 0.706915316 |           |         |  |
| IKBKE        | ENSG00000263528 | -0.059521 | 0.52373 | 0.3683      | 0.35632     | 0.3683    | 0.35632 |  |
|              | -0.88783        | 0.81268   | 0.35632 | 0.706915316 |             |           |         |  |
| CRYGB        | ENSG00000182187 | 0.3683    | 0.35633 | 0.3683      | 0.35633     | 0.3683    | 0.35633 |  |
|              | -0.54453        | 0.70696   | 0.35633 | 0.706915316 |             |           |         |  |
| SNORD59A     | ENSG00000207031 | 0.36812   | 0.35639 | -0.98184    | 0.83691     | -0.98184  |         |  |
|              | 0.83691         | -0.98184  | 0.83691 | 0.35639     | 0.706976784 |           |         |  |
| PGAM1P3      | ENSG00000230274 | 0.36813   | 0.35639 | 0.36813     | 0.35639     | -1.9374   |         |  |
|              | 0.97365         | 0.10992   | 0.45624 | 0.35639     | 0.706976784 |           |         |  |
| OLFML1       | ENSG00000183801 | 0.36766   | 0.35656 | 0.36766     | 0.35656     | 0.36766   |         |  |
|              | 0.35656         | 0.36766   | 0.35656 | 0.35656     | 0.707240458 |           |         |  |
| NA           | ENSG00000267095 | 0.36764   | 0.35657 | 0.26751     | 0.39454     | 0.36764   | 0.35657 |  |
|              | 0.36764         | 0.35657   | 0.35657 | 0.707240458 |             |           |         |  |
| MYO1D        | ENSG00000176658 | 0.36758   | 0.35659 | 0.034773    | 0.48613     | 0.083351  | 0.46679 |  |
|              | 0.15835         | 0.43709   | 0.35659 | 0.707240458 |             |           |         |  |
| NA           | ENSG00000116957 | 0.202     | 0.41996 | 0.069281    | 0.47238     | 0.043174  | 0.48278 |  |
|              | 0.3676          | 0.35659   | 0.35659 | 0.707240458 |             |           |         |  |
| NA           | ENSG00000258666 | 0.36755   | 0.35661 | 0.36755     | 0.35661     | 0.36755   | 0.35661 |  |
|              | 0.36755         | 0.35661   | 0.35661 | 0.707240458 |             |           |         |  |
| AIRN         | ENSG00000268257 | 0.36753   | 0.35661 | 0.36753     | 0.35661     | 0.36753   | 0.35661 |  |
|              | -0.21239        | 0.5841    | 0.35661 | 0.707240458 |             |           |         |  |
| OPN4         | ENSG00000122375 | 0.36749   | 0.35663 | 0.36749     | 0.35663     | 0.36749   | 0.35663 |  |
|              | 0.31254         | 0.37732   | 0.35663 | 0.707242388 |             |           |         |  |
| HS3ST4       | ENSG00000182601 | -1.1217   | 0.86901 | -0.73249    | 0.76806     | -0.73249  |         |  |
|              | 0.76806         | 0.36745   | 0.35664 | 0.35664     | 0.707242388 |           |         |  |
| TRIM51JP     | ENSG00000232717 | -0.67423  | 0.74992 | 0.33536     | 0.36868     | -0.67423  |         |  |
|              | 0.74992         | 0.3673    | 0.3567  | 0.3567      | 0.707303805 |           |         |  |
| LINC02616    | ENSG00000261761 | 0.024904  | 0.49007 | 0.024904    | 0.49007     | 0.019956  |         |  |
|              | 0.49204         | 0.36729   | 0.3567  | 0.3567      | 0.707303805 |           |         |  |
| CCND1        | ENSG00000110092 | 0.018436  | 0.49265 | 0.2856      | 0.38759     | -0.14331  | 0.55698 |  |
|              | 0.36724         | 0.35672   | 0.35672 | 0.707314681 |             |           |         |  |
| POU4F3       | ENSG00000091010 | 0.36711   | 0.35677 | -1.2261     | 0.88992     | -1.2261   |         |  |
|              | 0.88992         | -1.2261   | 0.88992 | 0.35677     | 0.707327479 |           |         |  |
| CDK5         | ENSG00000164885 | 0.3671    | 0.35677 | 0.3671      | 0.35677     | 0.3671    | 0.35677 |  |
|              | 0.3671          | 0.35677   | 0.35677 | 0.707327479 |             |           |         |  |
| NIFKP4       | ENSG00000261205 | 0.3671    | 0.35677 | 0.3671      | 0.35677     | 0.3671    |         |  |
|              | 0.35677         | 0.3671    | 0.35677 | 0.35677     | 0.707327479 |           |         |  |
| NA           | ENSG00000275773 | 0.36704   | 0.3568  | 0.15484     | 0.43847     | -0.2684   | 0.6058  |  |
|              | 0.32695         | 0.37185   | 0.3568  | 0.707346685 |             |           |         |  |
| C21orf62     | ENSG00000205929 | 0.36689   | 0.35685 | 0.36689     | 0.35685     | -0.94469  |         |  |
|              | 0.82759         | -0.88737  | 0.81256 | 0.35685     | 0.707346685 |           |         |  |
| NA           | ENSG00000233817 | 0.36685   | 0.35687 | 0.36685     | 0.35687     | 0.36685   | 0.35687 |  |

|            |                 |           |             |         |             |             |          |         |
|------------|-----------------|-----------|-------------|---------|-------------|-------------|----------|---------|
|            |                 | -0.10901  | 0.5434      | 0.35687 | 0.707346685 |             |          |         |
| NA         | ENSG00000238010 | 0.36683   | 0.36683     | 0.35687 | 0.36683     | 0.35687     | 0.36683  | 0.35687 |
|            |                 | 0.36683   | 0.35687     | 0.35687 | 0.707346685 |             |          |         |
| PINK1      | ENSG00000158828 | 0.36673   | 0.36673     | 0.35691 | -0.19986    | 0.5792      | -0.46513 | 0.67908 |
|            |                 | 0.25193   | 0.40055     | 0.35691 | 0.707346685 |             |          |         |
| ZNF337-AS1 | ENSG00000213742 | 0.36664   | 0.36664     | 0.35694 | 0.013375    | 0.49466     | 0.014491 |         |
|            |                 | 0.49422   | 0.34782     | 0.36399 | 0.35694     | 0.707346685 |          |         |
| RNF6       | ENSG00000127870 | 0.3114    | 0.3114      | 0.37775 | -1.429      | 0.9235      | 0.36661  | 0.35696 |
|            |                 | -0.84915  | 0.8021      | 0.35696 | 0.707346685 |             |          |         |
| RNU2-12P   | ENSG00000253025 | 0.12805   | 0.12805     | 0.44906 | 0.12805     | 0.44906     | 0.3666   |         |
|            |                 | 0.35696   | 0.12805     | 0.44906 | 0.35696     | 0.707346685 |          |         |
| LINC02211  | ENSG00000245662 | 0.36658   | 0.36658     | 0.35697 | 0.04238     | 0.4831      | -1.4005  |         |
|            |                 | 0.91932   | -0.51449    | 0.69655 | 0.35697     | 0.707346685 |          |         |
| ELOVL4     | ENSG00000118402 | -1.0967   | -1.0967     | 0.86361 | 0.36652     | 0.35699     | -0.16327 |         |
|            |                 | 0.56485   | -0.16327    | 0.56485 | 0.35699     | 0.707346685 |          |         |
| NA         | ENSG00000201863 | 0.36645   | 0.36645     | 0.35701 | -0.18452    | 0.5732      | 0.36645  | 0.35701 |
|            |                 | 0.36645   | 0.35701     | 0.35701 | 0.707346685 |             |          |         |
| TLR9       | ENSG00000239732 | -0.051566 | -0.051566   | 0.52056 | -0.18662    | 0.57402     | 0.36646  | 0.35701 |
|            |                 | 0.36646   | 0.35701     | 0.35701 | 0.707346685 |             |          |         |
| NA         | ENSG00000266924 | -0.27395  | -0.27395    | 0.60794 | -1.7244     | 0.95769     | 0.36644  | 0.35702 |
|            |                 | -0.053791 | 0.52145     | 0.35702 | 0.707346685 |             |          |         |
| MIR548AW   | ENSG00000263816 | 0.36642   | 0.36642     | 0.35703 | 0.36642     | 0.35703     | 0.36642  |         |
|            |                 | 0.35703   | 0.36642     | 0.35703 | 0.35703     | 0.707346685 |          |         |
| SH2D3A     | ENSG00000125731 | -0.44665  | -0.44665    | 0.67243 | 0.36638     | 0.35704     | 0.36638  |         |
|            |                 | 0.35704   | 0.36638     | 0.35704 | 0.35704     | 0.707346685 |          |         |
| NA         | ENSG00000205537 | 0.36635   | 0.36635     | 0.35705 | 0.36635     | 0.35705     | 0.36635  | 0.35705 |
|            |                 | 0.36635   | 0.35705     | 0.35705 | 0.707346685 |             |          |         |
| SCARNA13   | ENSG00000252481 | 0.36634   | 0.36634     | 0.35706 | 0.36634     | 0.35706     | 0.36634  |         |
|            |                 | 0.35706   | 0.36634     | 0.35706 | 0.35706     | 0.707346685 |          |         |
| NA         | ENSG00000253206 | 0.36634   | 0.36634     | 0.35706 | -1.0158     | 0.84513     | 0.36634  | 0.35706 |
|            |                 | 0.36634   | 0.35706     | 0.35706 | 0.707346685 |             |          |         |
| NA         | ENSG00000233184 | -0.79228  | -0.79228    | 0.7859  | -0.79228    | 0.7859      | 0.3663   | 0.35707 |
|            |                 | -0.79228  | 0.7859      | 0.35707 | 0.707346685 |             |          |         |
| RHOQP1     | ENSG00000258568 | 0.36631   | 0.36631     | 0.35707 | 0.36631     | 0.35707     | 0.36631  |         |
|            |                 | 0.35707   | 0.36631     | 0.35707 | 0.35707     | 0.707346685 |          |         |
| RN7SL475P  | ENSG00000265535 | -0.81651  | -0.81651    | 0.7929  | 0.36625     | 0.35709     | -1.6828  |         |
|            |                 | 0.9538    | -0.24266    | 0.59586 | 0.35709     | 0.707357549 |          |         |
| RIMS1      | ENSG00000079841 | 0.36604   | 0.36604     | 0.35717 | -0.42616    | 0.66501     | -0.52414 | 0.69991 |
|            |                 | -0.62756  | 0.73485     | 0.35717 | 0.707444429 |             |          |         |
| NA         | ENSG00000261445 | 0.36604   | 0.36604     | 0.35718 | 0.36604     | 0.35718     | 0.36604  | 0.35718 |
|            |                 | 0.35718   | 0.707444429 |         |             |             |          |         |
| NUDC       | ENSG00000090273 | 0.054611  | 0.054611    | 0.47822 | 0.22038     | 0.41279     | 0.22038  | 0.41279 |
|            |                 | 0.36593   | 0.35721     | 0.35721 | 0.707444429 |             |          |         |
| ADAMTS2    | ENSG00000087116 | 0.33089   | 0.33089     | 0.37037 | 0.048854    | 0.48052     | 0.22998  |         |
|            |                 | 0.40905   | 0.36586     | 0.35723 | 0.35723     | 0.707444429 |          |         |
| AMY1A      | ENSG00000237763 | -0.73213  | -0.73213    | 0.76796 | -0.92716    | 0.82308     | -1.6631  | 0.95186 |
|            |                 | 0.36585   | 0.35724     | 0.35724 | 0.707444429 |             |          |         |
| IGHV1-45   | ENSG00000211961 | 0.36583   | 0.36583     | 0.35725 | 0.36583     | 0.35725     | 0.36583  |         |
|            |                 | 0.35725   | 0.36583     | 0.35725 | 0.35725     | 0.707444429 |          |         |
| HIGD1AP17  | ENSG00000258886 | 0.08867   | 0.08867     | 0.46467 | -0.91028    | 0.81866     | 0.36582  |         |
|            |                 | 0.35725   | -0.2789     | 0.60984 | 0.35725     | 0.707444429 |          |         |
| NA         | ENSG00000271681 | 0.36582   | 0.36582     | 0.35725 | 0.36535     | 0.35743     | 0.36535  | 0.35743 |
|            |                 | 0.36535   | 0.35743     | 0.35725 | 0.707444429 |             |          |         |
| NA         | ENSG00000230433 | 0.36565   | 0.36565     | 0.35731 | -0.40603    | 0.65764     | -0.54551 | 0.7073  |
|            |                 | 0.26508   | 0.39547     | 0.35731 | 0.707496794 |             |          |         |
| PIMREG     | ENSG00000129195 | 0.087353  | 0.087353    | 0.4652  | -0.62524    | 0.73409     | 0.2914   |         |
|            |                 | 0.38537   | 0.36563     | 0.35732 | 0.35732     | 0.707496794 |          |         |
| CHD2       | ENSG00000173575 | 0.36564   | 0.36564     | 0.35732 | 0.30254     | 0.38112     | 0.097323 | 0.46124 |
|            |                 | -0.30265  | 0.61892     | 0.35732 | 0.707496794 |             |          |         |
| DUSP2      | ENSG00000158050 | -0.87281  | -0.87281    | 0.80862 | -1.1713     | 0.87925     | 0.36551  | 0.35737 |
|            |                 | -0.22157  | 0.58767     | 0.35737 | 0.707498379 |             |          |         |
| NA         | ENSG00000259721 | 0.36545   | 0.36545     | 0.35739 | 0.36545     | 0.35739     | 0.36545  | 0.35739 |

|              |                 |          |         |             |             |           |         |
|--------------|-----------------|----------|---------|-------------|-------------|-----------|---------|
|              | 0.36545         | 0.35739  | 0.35739 | 0.707498379 |             |           |         |
| NBPF3        | ENSG00000142794 | 0.36534  | 0.35743 | 0.26653     | 0.39492     | 0.33137   | 0.37018 |
|              | -0.74972        | 0.77329  | 0.35743 | 0.707498379 |             |           |         |
| MIR4480      | ENSG00000263584 | -0.95019 | 0.82899 | 0.3653      | 0.35744     | -1.3529   |         |
|              | 0.91196         | -1.0959  | 0.86343 | 0.35744     | 0.707498379 |           |         |
| ZNF574       | ENSG00000105732 | -1.4169  | 0.92175 | 0.36522     | 0.35747     | 0.36522   |         |
|              | 0.35747         | 0.36522  | 0.35747 | 0.707498379 |             |           |         |
| TSSK1A       | ENSG00000231086 | 0.36521  | 0.35748 | 0.36521     | 0.35748     | 0.36521   |         |
|              | 0.35748         | 0.36521  | 0.35748 | 0.707498379 |             |           |         |
| ZNF29P       | ENSG00000108452 | -0.31773 | 0.62465 | -0.55761    | 0.71144     | 0.36518   |         |
|              | 0.35749         | -1.8747  | 0.96959 | 0.35749     | 0.707498379 |           |         |
| ADAM32       | ENSG00000197140 | 0.36513  | 0.35751 | -0.6276     | 0.73487     | -0.37606  |         |
|              | 0.64656         | 0.22617  | 0.41054 | 0.35751     | 0.707498379 |           |         |
| NA           | ENSG00000206865 | 0.20864  | 0.41737 | 0.053599    | 0.47863     | -0.6655   | 0.74713 |
|              | 0.36511         | 0.35751  | 0.35751 | 0.707498379 |             |           |         |
| BANF1P3      | ENSG00000237758 | -0.27235 | 0.60733 | -0.26698    | 0.60526     | -0.32084  |         |
|              | 0.62584         | 0.36511  | 0.35751 | 0.35751     | 0.707498379 |           |         |
| CCDC103      | ENSG00000167131 | 0.36504  | 0.35754 | 0.36504     | 0.35754     | 0.36504   |         |
|              | 0.35754         | 0.36504  | 0.35754 | 0.35754     | 0.707498379 |           |         |
| FAM187A      | ENSG00000214447 | 0.36504  | 0.35754 | 0.36504     | 0.35754     | 0.36504   |         |
|              | 0.35754         | 0.36504  | 0.35754 | 0.35754     | 0.707498379 |           |         |
| NIPAL4       | ENSG00000172548 | 0.36493  | 0.35758 | 0.12817     | 0.44901     | 0.36493   |         |
|              | 0.35758         | 0.30166  | 0.38146 | 0.35758     | 0.707498379 |           |         |
| NA           | ENSG00000283365 | -0.25766 | 0.60167 | 0.36487     | 0.3576      | -0.25766  | 0.60167 |
|              | -0.25766        | 0.60167  | 0.3576  | 0.707498379 |             |           |         |
| DCTN5        | ENSG00000166847 | 0.27796  | 0.39052 | 0.27796     | 0.39052     | 0.36486   | 0.35761 |
|              | 0.32337         | 0.37321  | 0.35761 | 0.707498379 |             |           |         |
| RN7SKP107    | ENSG00000201027 | 0.36473  | 0.35766 | 0.36473     | 0.35766     | 0.36473   |         |
|              | 0.35766         | 0.36473  | 0.35766 | 0.35766     | 0.707498379 |           |         |
| RFPL4B       | ENSG00000251258 | 0.36468  | 0.35768 | 0.36468     | 0.35768     | 0.36468   |         |
|              | 0.35768         | 0.36468  | 0.35768 | 0.35768     | 0.707498379 |           |         |
| CNNM2        | ENSG00000148842 | 0.36465  | 0.35769 | 0.22858     | 0.4096      | 0.1753    | 0.43042 |
|              | -0.19736        | 0.57823  | 0.35769 | 0.707498379 |             |           |         |
| DGCR11       | ENSG00000273311 | 0.36458  | 0.35771 | 0.36458     | 0.35771     | 0.36458   |         |
|              | 0.35771         | 0.36458  | 0.35771 | 0.35771     | 0.707498379 |           |         |
| SNORD116-3   | ENSG00000207014 | 0.36448  | 0.35775 | 0.36448     | 0.35775     | 0.36448   |         |
|              | 0.35775         | 0.36448  | 0.35775 | 0.35775     | 0.707498379 |           |         |
| NA           | ENSG00000270255 | -1.0236  | 0.84699 | -1.2811     | 0.89991     | 0.36442   | 0.35777 |
|              | -1.2811         | 0.89991  | 0.35777 | 0.707498379 |             |           |         |
| NA           | ENSG00000270947 | 0.36442  | 0.35777 | 0.36442     | 0.35777     | 0.36442   | 0.35777 |
|              | 0.36442         | 0.35777  | 0.35777 | 0.707498379 |             |           |         |
| RPL7P47      | ENSG00000228071 | -0.63278 | 0.73656 | -0.10535    | 0.54195     | 0.36437   |         |
|              | 0.35779         | -0.41754 | 0.66186 | 0.35779     | 0.707498379 |           |         |
| VAV3         | ENSG00000134215 | 0.35792  | 0.3602  | 0.31143     | 0.37774     | -0.14524  | 0.55774 |
|              | 0.36436         | 0.3578   | 0.3578  | 0.707498379 |             |           |         |
| DDR2         | ENSG00000162733 | -1.4288  | 0.92347 | -0.94517    | 0.82771     | 0.36434   | 0.3578  |
|              | -0.78156        | 0.78276  | 0.3578  | 0.707498379 |             |           |         |
| NA           | ENSG00000199801 | 0.36436  | 0.3578  | 0.36436     | 0.3578      | 0.36436   | 0.3578  |
|              | 0.36436         | 0.3578   | 0.3578  | 0.707498379 |             |           |         |
| EPB41L4A-AS1 | ENSG00000224032 | -0.79027 | 0.78532 | -1.2144     | 0.8877      | 0.36434   |         |
|              | 0.3578          | 0.36434  | 0.3578  | 0.3578      | 0.707498379 |           |         |
| TMEM129      | ENSG00000168936 | 0.3643   | 0.35782 | 0.3643      | 0.35782     | 0.3643    |         |
|              | 0.35782         | 0.3643   | 0.35782 | 0.35782     | 0.707498379 |           |         |
| C2CD4A       | ENSG00000198535 | 0.36426  | 0.35783 | 0.36426     | 0.35783     | 0.36426   |         |
|              | 0.35783         | 0.36426  | 0.35783 | 0.35783     | 0.707498379 |           |         |
| NA           | ENSG00000249239 | 0.36427  | 0.35783 | 0.36427     | 0.35783     | 0.36427   | 0.35783 |
|              | 0.36427         | 0.35783  | 0.35783 | 0.707498379 |             |           |         |
| NA           | ENSG00000205325 | -0.65446 | 0.74359 | 0.36421     | 0.35785     | 0.36421   | 0.35785 |
|              | -0.16658        | 0.56615  | 0.35785 | 0.707498379 |             |           |         |
| ASNSP3       | ENSG00000236554 | 0.3642   | 0.35785 | 0.3642      | 0.35785     | 0.3642    |         |
|              | 0.35785         | 0.3642   | 0.35785 | 0.35785     | 0.707498379 |           |         |
| EDDM3A       | ENSG00000181562 | 0.36408  | 0.3579  | 0.36408     | 0.3579      | 0.0049649 |         |

|                 |                 |           |         |             |             |          |         |  |
|-----------------|-----------------|-----------|---------|-------------|-------------|----------|---------|--|
|                 | 0.49802         | 0.36408   | 0.3579  | 0.3579      | 0.707498379 |          |         |  |
| GUSBP10         | ENSG00000224723 | -0.35044  | 0.637   | -0.35044    | 0.637       | -0.72685 | 0.76634 |  |
|                 | 0.36405         | 0.35791   | 0.35791 | 0.707498379 |             |          |         |  |
| NA              | ENSG00000235673 | 0.36404   | 0.35791 | 0.36404     | 0.35791     | 0.36404  | 0.35791 |  |
|                 | 0.36404         | 0.35791   | 0.35791 | 0.707498379 |             |          |         |  |
| RBM47           | ENSG00000163694 | -0.64941  | 0.74196 | 0.36401     | 0.35792     | -0.65444 | 0.74358 |  |
|                 | -1.4944         | 0.93247   | 0.35792 | 0.707498379 |             |          |         |  |
| CAPZB           | ENSG00000077549 | 0.31081   | 0.37797 | 0.36401     | 0.35793     | 0.060143 | 0.47602 |  |
|                 | 0.11848         | 0.45285   | 0.35793 | 0.707498379 |             |          |         |  |
| NA              | ENSG00000213045 | -1.0277   | 0.84796 | -1.0277     | 0.84796     | -0.85594 | 0.80398 |  |
|                 | 0.36398         | 0.35794   | 0.35794 | 0.707498379 |             |          |         |  |
| TSSC2           | ENSG00000223756 | 0.36398   | 0.35794 | -0.81574    | 0.79268     | -0.97288 | 0.83469 |  |
|                 | -0.28559        | 0.6124    | 0.35794 | 0.707498379 |             |          |         |  |
| FTLP8           | ENSG00000232217 | 0.36398   | 0.35794 | 0.36398     | 0.35794     | 0.36398  | 0.35794 |  |
|                 | 0.36398         | 0.35794   | 0.35794 | 0.707498379 |             |          |         |  |
| PPIL3           | ENSG00000240344 | 0.069439  | 0.47232 | 0.36397     | 0.35794     | 0.069439 | 0.47232 |  |
|                 | 0.092112        | 0.4633    | 0.35794 | 0.707498379 |             |          |         |  |
| IP6K1           | ENSG00000176095 | -0.49648  | 0.69022 | 0.058793    | 0.47656     | -0.11521 | 0.54586 |  |
|                 | 0.36392         | 0.35796   | 0.35796 | 0.707498379 |             |          |         |  |
| CYCSP39         | ENSG00000260690 | 0.36391   | 0.35796 | 0.16694     | 0.43371     | 0.16694  |         |  |
|                 | 0.43371         | 0.056288  | 0.47756 | 0.35796     | 0.707498379 |          |         |  |
| IQCJ-SCHIP1-AS1 | ENSG00000241211 | -1.6317   | 0.94863 | -1.6317     | 0.94863     | -1.6317  |         |  |
|                 | 0.94863         | 0.36387   | 0.35798 | 0.35798     | 0.707498379 |          |         |  |
| INO80-AS1       | ENSG00000259521 | 0.27407   | 0.39201 | 0.27407     | 0.39201     | 0.27407  |         |  |
|                 | 0.39201         | 0.36383   | 0.35799 | 0.35799     | 0.707498379 |          |         |  |
| NA              | ENSG00000237220 | 0.052083  | 0.47923 | 0.36372     | 0.35803     | 0.052083 | 0.47923 |  |
|                 | 0.052083        | 0.47923   | 0.35803 | 0.707498379 |             |          |         |  |
| ASRGL1          | ENSG00000162174 | -0.012458 | 0.50497 | 0.36369     | 0.35805     | -0.77041 |         |  |
|                 | 0.77947         | -0.2584   | 0.60195 | 0.35805     | 0.707498379 |          |         |  |
| PRR30           | ENSG00000186143 | -1.0097   | 0.84367 | 0.36365     | 0.35806     | -1.218   | 0.8884  |  |
|                 | -0.58689        | 0.72136   | 0.35806 | 0.707498379 |             |          |         |  |
| NA              | ENSG00000213358 | -0.69222  | 0.7556  | 0.36366     | 0.35806     | 0.22483  | 0.41105 |  |
|                 | 0.22483         | 0.41105   | 0.35806 | 0.707498379 |             |          |         |  |
| LINC02452       | ENSG00000283422 | 0.36366   | 0.35806 | 0.36366     | 0.35806     | 0.36366  |         |  |
|                 | 0.35806         | 0.36366   | 0.35806 | 0.35806     | 0.707498379 |          |         |  |
| NA              | ENSG00000234751 | -0.37815  | 0.64734 | 0.36362     | 0.35807     | 0.36362  | 0.35807 |  |
|                 | -0.59358        | 0.7236    | 0.35807 | 0.707498379 |             |          |         |  |
| RNU6-277P       | ENSG00000252081 | 0.36359   | 0.35808 | 0.36359     | 0.35808     | 0.36359  |         |  |
|                 | 0.35808         | 0.36359   | 0.35808 | 0.35808     | 0.707498379 |          |         |  |
| NCKAP1L         | ENSG00000123338 | -0.435    | 0.66822 | 0.36355     | 0.3581      | -0.28673 |         |  |
|                 | 0.61284         | 0.2009    | 0.42039 | 0.3581      | 0.707498379 |          |         |  |
| ZNF319          | ENSG00000166188 | -0.26246  | 0.60352 | 0.36351     | 0.35811     | 0.36351  |         |  |
|                 | 0.35811         | 0.36351   | 0.35811 | 0.35811     | 0.707498379 |          |         |  |
| NA              | ENSG00000225522 | 0.36334   | 0.35817 | 0.36334     | 0.35817     | 0.36334  | 0.35817 |  |
|                 | 0.36334         | 0.35817   | 0.35817 | 0.707498379 |             |          |         |  |
| NA              | ENSG00000273167 | 0.36336   | 0.35817 | 0.1449      | 0.44239     | -0.83616 | 0.79847 |  |
|                 | -0.83616        | 0.79847   | 0.35817 | 0.707498379 |             |          |         |  |
| GLB1L2          | ENSG00000149328 | -0.49825  | 0.69085 | 0.36329     | 0.35819     | -0.69833 |         |  |
|                 | 0.75751         | -0.24103  | 0.59524 | 0.35819     | 0.707498379 |          |         |  |
| NA              | ENSG00000223718 | -1.6179   | 0.94716 | 0.36322     | 0.35822     | -0.86869 | 0.80749 |  |
|                 | -0.98459        | 0.83759   | 0.35822 | 0.707498379 |             |          |         |  |
| NA              | ENSG00000259333 | 0.36321   | 0.35822 | 0.36321     | 0.35822     | 0.36321  | 0.35822 |  |
|                 | 0.36321         | 0.35822   | 0.35822 | 0.707498379 |             |          |         |  |
| NA              | ENSG00000272763 | 0.36323   | 0.35822 | 0.36323     | 0.35822     | 0.36323  | 0.35822 |  |
|                 | 0.36323         | 0.35822   | 0.35822 | 0.707498379 |             |          |         |  |
| NA              | ENSG00000267986 | 0.3632    | 0.35823 | 0.3632      | 0.35823     | 0.3632   | 0.35823 |  |
|                 | 0.3632          | 0.35823   | 0.35823 | 0.707498379 |             |          |         |  |
| AMPD2           | ENSG00000116337 | 0.0036644 | 0.49854 | -0.46043    | 0.6774      | 0.36316  | 0.35824 |  |
|                 | -0.86252        | 0.8058    | 0.35824 | 0.707498379 |             |          |         |  |
| NA              | ENSG00000266389 | 0.36316   | 0.35824 | 0.36316     | 0.35824     | 0.36316  | 0.35824 |  |
|                 | 0.36316         | 0.35824   | 0.35824 | 0.707498379 |             |          |         |  |
| NA              | ENSG00000276269 | 0.36315   | 0.35825 | 0.34707     | 0.36427     | 0.34707  | 0.36427 |  |

|             |                 |           |         |             |             |           |         |  |
|-------------|-----------------|-----------|---------|-------------|-------------|-----------|---------|--|
|             | 0.34707         | 0.36427   | 0.35825 | 0.707498379 |             |           |         |  |
| RPS3AP21    | ENSG00000214784 | 0.36294   | 0.35833 | 0.034619    | 0.48619     | 0.28674   |         |  |
|             | 0.38715         | -0.12723  | 0.55062 | 0.35833     | 0.707609835 |           |         |  |
| IFIH1       | ENSG00000115267 | -1.2607   | 0.89629 | -0.3513     | 0.63732     | 0.36287   | 0.35835 |  |
|             | -0.93971        | 0.82632   | 0.35835 | 0.707609835 |             |           |         |  |
| ZFP36L1     | ENSG00000185650 | -1.1453   | 0.87396 | -0.7076     | 0.7604      | -1.3356   |         |  |
|             | 0.90916         | 0.36288   | 0.35835 | 0.35835     | 0.707609835 |           |         |  |
| ABCB10      | ENSG00000135776 | 0.3628    | 0.35838 | -0.53122    | 0.70237     | -0.84017  |         |  |
|             | 0.79959         | -1.0823   | 0.86044 | 0.35838     | 0.707626324 |           |         |  |
| EIF4E1B     | ENSG00000175766 | -0.79945  | 0.78799 | -0.85263    | 0.80307     | 0.36266   |         |  |
|             | 0.35843         | -1.1507   | 0.87508 | 0.35843     | 0.707626324 |           |         |  |
| KRT90P      | ENSG00000257844 | 0.36263   | 0.35844 | 0.36263     | 0.35844     | 0.36263   |         |  |
|             | 0.35844         | 0.36263   | 0.35844 | 0.35844     | 0.707626324 |           |         |  |
| PRELID3B    | ENSG00000101166 | -0.29023  | 0.61418 | 0.36259     | 0.35846     | -0.29023  |         |  |
|             | 0.61418         | -0.29023  | 0.61418 | 0.35846     | 0.707626324 |           |         |  |
| AGPAT3      | ENSG00000160216 | -0.072652 | 0.52896 | 0.088535    | 0.46473     | -0.075427 |         |  |
|             | 0.53006         | 0.36259   | 0.35846 | 0.35846     | 0.707626324 |           |         |  |
| TRABD2A     | ENSG00000186854 | -0.025515 | 0.51018 | 0.061218    | 0.47559     | 0.36257   |         |  |
|             | 0.35846         | -0.040368 | 0.5161  | 0.35846     | 0.707626324 |           |         |  |
| NA          | ENSG00000266697 | 0.36258   | 0.35846 | 0.36258     | 0.35846     | 0.36258   | 0.35846 |  |
|             | 0.36258         | 0.35846   | 0.35846 | 0.707626324 |             |           |         |  |
| NA          | ENSG00000232309 | 0.36245   | 0.35851 | 0.36245     | 0.35851     | 0.36245   | 0.35851 |  |
|             | 0.36245         | 0.35851   | 0.35851 | 0.707696358 |             |           |         |  |
| C1QTNF3     | ENSG00000082196 | 0.21583   | 0.41456 | 0.36236     | 0.35854     | -0.31582  |         |  |
|             | 0.62393         | -1.2014   | 0.88521 | 0.35854     | 0.707726909 |           |         |  |
| NTS         | ENSG00000133636 | 0.36223   | 0.35859 | 0.029945    | 0.48806     | -0.14437  | 0.55739 |  |
|             | -0.16668        | 0.56619   | 0.35859 | 0.707732552 |             |           |         |  |
| DTWD2       | ENSG00000169570 | -0.04886  | 0.51948 | -0.007281   | 0.5029      | 0.08191   | 0.46736 |  |
|             | 0.3622          | 0.3586    | 0.3586  | 0.707732552 |             |           |         |  |
| PITPNA-AS1  | ENSG00000236618 | 0.36219   | 0.35861 | 0.36219     | 0.35861     | 0.36219   |         |  |
|             | 0.35861         | 0.36219   | 0.35861 | 0.35861     | 0.707732552 |           |         |  |
| MIR3115     | ENSG00000263793 | 0.046802  | 0.48134 | 0.025546    | 0.48981     | 0.36219   |         |  |
|             | 0.35861         | 0.36219   | 0.35861 | 0.35861     | 0.707732552 |           |         |  |
| SNORD116-10 | ENSG00000200661 | 0.23792   | 0.40597 | 0.23792     | 0.40597     | 0.23792   |         |  |
|             | 0.40597         | 0.36214   | 0.35862 | 0.35862     | 0.707732552 |           |         |  |
| RNU6-390P   | ENSG00000252068 | 0.36212   | 0.35863 | 0.36212     | 0.35863     | 0.36212   |         |  |
|             | 0.35863         | 0.36212   | 0.35863 | 0.35863     | 0.707732552 |           |         |  |
| NA          | ENSG00000223469 | -0.66518  | 0.74703 | -0.2624     | 0.60349     | 0.36204   | 0.35866 |  |
|             | 0.36204         | 0.35866   | 0.35866 | 0.707763092 |             |           |         |  |
| NCLN        | ENSG00000125912 | 0.3618    | 0.35875 | -0.7183     | 0.76371     | -0.84501  | 0.80095 |  |
|             | -0.7183         | 0.76371   | 0.35875 | 0.70788937  |             |           |         |  |
| CBLN2       | ENSG00000141668 | 0.36171   | 0.35878 | -0.49994    | 0.69144     | 0.36171   | 0.35878 |  |
|             | 0.36171         | 0.35878   | 0.35878 | 0.70788937  |             |           |         |  |
| RNU1-150P   | ENSG00000199361 | 0.1921    | 0.42383 | 0.36167     | 0.3588      | 0.36167   |         |  |
|             | 0.3588          | 0.36167   | 0.3588  | 0.3588      | 0.70788937  |           |         |  |
| NA          | ENSG00000229512 | 0.36163   | 0.35881 | 0.36163     | 0.35881     | 0.36163   | 0.35881 |  |
|             | 0.36163         | 0.35881   | 0.35881 | 0.70788937  |             |           |         |  |
| NA          | ENSG00000229278 | 0.36157   | 0.35884 | 0.36157     | 0.35884     | 0.36157   | 0.35884 |  |
|             | 0.36157         | 0.35884   | 0.35884 | 0.70788937  |             |           |         |  |
| ECEL1P3     | ENSG00000230122 | 0.36148   | 0.35887 | 0.12252     | 0.45124     | -0.7828   |         |  |
|             | 0.78313         | -0.12548  | 0.54993 | 0.35887     | 0.70788937  |           |         |  |
| KARS1P3     | ENSG00000262962 | 0.36147   | 0.35887 | 0.36147     | 0.35887     | 0.36147   |         |  |
|             | 0.35887         | 0.36147   | 0.35887 | 0.35887     | 0.70788937  |           |         |  |
| DDC         | ENSG00000132437 | 0.36144   | 0.35888 | -0.34274    | 0.6341      | -0.86454  | 0.80635 |  |
|             | -0.61332        | 0.73017   | 0.35888 | 0.70788937  |             |           |         |  |
| TRIM34      | ENSG00000258659 | 0.36141   | 0.35889 | 0.36141     | 0.35889     | 0.36141   |         |  |
|             | 0.35889         | 0.36141   | 0.35889 | 0.35889     | 0.70788937  |           |         |  |
| LINC01288   | ENSG00000254344 | 0.36134   | 0.35892 | 0.36134     | 0.35892     | -1.1081   |         |  |
|             | 0.86608         | 0.086284  | 0.46562 | 0.35892     | 0.70788937  |           |         |  |
| NA          | ENSG00000275923 | 0.36135   | 0.35892 | -0.26456    | 0.60433     | -0.26456  | 0.60433 |  |
|             | -0.26456        | 0.60433   | 0.35892 | 0.70788937  |             |           |         |  |
| CPA1        | ENSG00000091704 | -0.074877 | 0.52984 | -0.1647     | 0.56541     | 0.36129   | 0.35894 |  |

|           |                 |          |          |            |             |             |         |  |  |
|-----------|-----------------|----------|----------|------------|-------------|-------------|---------|--|--|
|           |                 | -0.4668  | 0.67968  | 0.35894    | 0.70788937  |             |         |  |  |
| TTL11     | ENSG00000175764 | 0.36131  | 0.35894  | 0.169      | 0.4329      | 0.074752    | 0.47021 |  |  |
|           |                 | 0.29125  | 0.38543  | 0.35894    | 0.70788937  |             |         |  |  |
| NA        | ENSG00000225407 | -0.1822  | 0.57229  | 0.36129    | 0.35894     | 0.36129     | 0.35894 |  |  |
|           |                 | 0.36129  | 0.35894  | 0.35894    | 0.70788937  |             |         |  |  |
| LINC01633 | ENSG00000260976 | -0.33908 | 0.63273  | 0.36123    | 0.35896     | 0.36123     |         |  |  |
|           |                 | 0.35896  | 0.36123  | 0.35896    | 0.35896     | 0.70788937  |         |  |  |
| MIR32     | ENSG00000207698 | 0.3612   | 0.35897  | 0.3612     | 0.35897     | 0.3612      | 0.35897 |  |  |
|           |                 | 0.3612   | 0.35897  | 0.35897    | 0.70788937  |             |         |  |  |
| NA        | ENSG00000265731 | 0.36118  | 0.35898  | 0.36118    | 0.35898     | 0.36118     | 0.35898 |  |  |
|           |                 | 0.36118  | 0.35898  | 0.35898    | 0.70788937  |             |         |  |  |
| TMPRSS5   | ENSG00000166682 | 0.016627 | 0.49337  | -1.7678    | 0.96145     | -1.2465     |         |  |  |
|           |                 | 0.89371  | 0.36116  | 0.35899    | 0.35899     | 0.70788937  |         |  |  |
| EIF3LP2   | ENSG00000233837 | -0.1268  | 0.55045  | 0.36112    | 0.359       | -0.33399    | 0.6308  |  |  |
|           |                 | -0.81815 | 0.79337  | 0.359      | 0.70788937  |             |         |  |  |
| PLPP2     | ENSG00000141934 | -0.84346 | 0.80052  | -0.44842   | 0.67308     | 0.36101     | 0.35905 |  |  |
|           |                 | 0.083773 | 0.46662  | 0.35905    | 0.707918408 |             |         |  |  |
| NA        | ENSG00000273806 | 0.36097  | 0.35906  | 0.36097    | 0.35906     | 0.36097     | 0.35906 |  |  |
|           |                 | 0.36097  | 0.35906  | 0.35906    | 0.707918408 |             |         |  |  |
| NA        | ENSG00000249000 | 0.064284 | 0.47437  | 0.24401    | 0.40361     | 0.3609      | 0.35909 |  |  |
|           |                 | -0.16348 | 0.56493  | 0.35909    | 0.707918408 |             |         |  |  |
| HNRNPA1P1 | ENSG00000218347 | 0.23573  | 0.40682  | -0.66174   | 0.74593     | 0.36081     |         |  |  |
|           |                 | 0.35912  | 0.36081  | 0.35912    | 0.35912     | 0.707918408 |         |  |  |
| TXNDC2    | ENSG00000168454 | 0.36078  | 0.35913  | 0.36078    | 0.35913     | -0.29363    |         |  |  |
|           |                 | 0.61548  | 0.037732 | 0.48495    | 0.35913     | 0.707918408 |         |  |  |
| NA        | ENSG00000236206 | 0.36075  | 0.35914  | -0.97565   | 0.83538     | -0.67838    | 0.75123 |  |  |
|           |                 | -0.46739 | 0.67989  | 0.35914    | 0.707918408 |             |         |  |  |
| MIR634    | ENSG00000207943 | 0.36073  | 0.35915  | 0.36073    | 0.35915     | 0.36073     |         |  |  |
|           |                 | 0.35915  | 0.36073  | 0.35915    | 0.35915     | 0.707918408 |         |  |  |
| IL1RL1    | ENSG00000115602 | 0.3607   | 0.35916  | -0.30677   | 0.62049     | -0.30677    |         |  |  |
|           |                 | 0.62049  | -0.30677 | 0.62049    | 0.35916     | 0.707918408 |         |  |  |
| LACTB2    | ENSG00000147592 | 0.36071  | 0.35916  | -1.0301    | 0.84852     | -0.49365    |         |  |  |
|           |                 | 0.68922  | 0.18545  | 0.42644    | 0.35916     | 0.707918408 |         |  |  |
| UBBP5     | ENSG00000228074 | 0.3607   | 0.35916  | -0.23753   | 0.59388     | 0.3607      | 0.35916 |  |  |
|           |                 | 0.3607   | 0.35916  | 0.35916    | 0.707918408 |             |         |  |  |
| PIK3C2B   | ENSG00000133056 | -0.90167 | 0.81638  | -0.39457   | 0.65342     | -1.1949     |         |  |  |
|           |                 | 0.88393  | 0.36065  | 0.35918    | 0.35918     | 0.707920271 |         |  |  |
| RPL30     | ENSG00000156482 | 0.36063  | 0.35919  | -0.46166   | 0.67784     | 0.36063     | 0.35919 |  |  |
|           |                 | -0.20099 | 0.57965  | 0.35919    | 0.707920271 |             |         |  |  |
| RNU6-551P | ENSG00000252470 | -0.33028 | 0.62941  | 0.36054    | 0.35922     | 0.36054     |         |  |  |
|           |                 | 0.35922  | 0.36054  | 0.35922    | 0.35922     | 0.707932918 |         |  |  |
| KLK8      | ENSG00000129455 | 0.36048  | 0.35924  | 0.36048    | 0.35924     | 0.36048     | 0.35924 |  |  |
|           |                 | 0.36048  | 0.35924  | 0.35924    | 0.707932918 |             |         |  |  |
| ADGRF4    | ENSG00000153294 | 0.36048  | 0.35924  | 0.36048    | 0.35924     | 0.36048     |         |  |  |
|           |                 | 0.35924  | 0.14726  | 0.44146    | 0.35924     | 0.707932918 |         |  |  |
| NA        | ENSG00000272505 | -1.0573  | 0.85481  | -0.46709   | 0.67978     | 0.36038     | 0.35928 |  |  |
|           |                 | -1.2261  | 0.88991  | 0.35928    | 0.707933304 |             |         |  |  |
| NA        | ENSG00000223665 | -1.4183  | 0.92195  | -0.0078967 | 0.50315     | -0.24025    | 0.59493 |  |  |
|           |                 | 0.36035  | 0.35929  | 0.35929    | 0.707933304 |             |         |  |  |
| CELSR1    | ENSG00000075275 | 0.24419  | 0.40354  | 0.14301    | 0.44314     | 0.36027     |         |  |  |
|           |                 | 0.35932  | 0.038634 | 0.48459    | 0.35932     | 0.707933304 |         |  |  |
| NA        | ENSG00000248637 | 0.36025  | 0.35933  | 0.36025    | 0.35933     | 0.36025     | 0.35933 |  |  |
|           |                 | 0.36025  | 0.35933  | 0.35933    | 0.707933304 |             |         |  |  |
| LINC00331 | ENSG00000225427 | -1.1179  | 0.8682   | -1.1179    | 0.8682      | -1.1179     |         |  |  |
|           |                 | 0.8682   | 0.36018  | 0.35935    | 0.35935     | 0.707933304 |         |  |  |
| ECSIT     | ENSG00000130159 | -0.61829 | 0.73181  | 0.36017    | 0.35936     | -0.74725    | 0.77254 |  |  |
|           |                 | -0.93819 | 0.82593  | 0.35936    | 0.707933304 |             |         |  |  |
| NA        | ENSG00000254136 | 0.36014  | 0.35937  | -0.059254  | 0.52362     | 0.29952     | 0.38227 |  |  |
|           |                 | 0.1481   | 0.44113  | 0.35937    | 0.707933304 |             |         |  |  |
| LINC01928 | ENSG00000267425 | -1.6954  | 0.955    | -1.6954    | 0.955       | -2.0999     | 0.98213 |  |  |
|           |                 | 0.36015  | 0.35937  | 0.35937    | 0.707933304 |             |         |  |  |
| BTF3P11   | ENSG00000118903 | 0.36007  | 0.3594   | -0.5226    | 0.69938     | -0.61498    |         |  |  |

|            |                 |          |         |             |             |          |         |  |
|------------|-----------------|----------|---------|-------------|-------------|----------|---------|--|
|            | 0.73072         | 0.037055 | 0.48522 | 0.3594      | 0.707933304 |          |         |  |
| SUPT3H     | ENSG00000196284 | 0.27407  | 0.39201 | 0.36006     | 0.3594      | 0.014344 |         |  |
|            | 0.49428         | -0.47987 | 0.68434 | 0.3594      | 0.707933304 |          |         |  |
| NA         | ENSG00000240535 | -1.9084  | 0.97183 | 0.36005     | 0.3594      | 0.23222  | 0.40818 |  |
|            | 0.23222         | 0.40818  | 0.3594  | 0.707933304 |             |          |         |  |
| ALPK2      | ENSG00000198796 | -0.2888  | 0.61363 | 0.36        | 0.35942     | -0.27147 | 0.60699 |  |
|            | 0.11327         | 0.45491  | 0.35942 | 0.707944082 |             |          |         |  |
| NA         | ENSG00000273287 | -0.5937  | 0.72364 | 0.018878    | 0.49247     | -0.5937  | 0.72364 |  |
|            | 0.35995         | 0.35944  | 0.35944 | 0.70795486  |             |          |         |  |
| NFYC       | ENSG00000066136 | 0.35989  | 0.35946 | -0.177      | 0.57024     | 0.27624  | 0.39118 |  |
|            | 0.34171         | 0.36628  | 0.35946 | 0.707965637 |             |          |         |  |
| NANOG      | ENSG00000111704 | 0.33855  | 0.36747 | 0.35969     | 0.35954     | 0.047651 | 0.481   |  |
|            | 0.14566         | 0.4421   | 0.35954 | 0.70809458  |             |          |         |  |
| LINC01511  | ENSG00000250584 | 0.20018  | 0.42067 | 0.35963     | 0.35956     | 0.20018  |         |  |
|            | 0.42067         | 0.20018  | 0.42067 | 0.35956     | 0.708105351 |          |         |  |
| IL36G      | ENSG00000136688 | -0.39514 | 0.65363 | 0.35952     | 0.3596      | 0.10726  | 0.45729 |  |
|            | -0.90902        | 0.81833  | 0.3596  | 0.708155506 |             |          |         |  |
| ALKBH1     | ENSG00000100601 | 0.3594   | 0.35965 | 0.35171     | 0.36253     | 0.35171  |         |  |
|            | 0.36253         | -0.7655  | 0.77801 | 0.35965     | 0.708189644 |          |         |  |
| NA         | ENSG00000253704 | -0.25357 | 0.60009 | -0.79346    | 0.78625     | -0.79346 | 0.78625 |  |
|            | 0.35939         | 0.35965  | 0.35965 | 0.708189644 |             |          |         |  |
| TACC3      | ENSG00000013810 | 0.3593   | 0.35968 | 0.26792     | 0.39438     | 0.052368 | 0.47912 |  |
|            | 0.13761         | 0.44528  | 0.35968 | 0.708189644 |             |          |         |  |
| FAN1       | ENSG00000198690 | 0.35931  | 0.35968 | 0.23593     | 0.40674     | -1.0107  | 0.84392 |  |
|            | -0.64069        | 0.73914  | 0.35968 | 0.708189644 |             |          |         |  |
| LUM        | ENSG00000139329 | -0.59309 | 0.72344 | 0.3593      | 0.35969     | 0.025112 | 0.48998 |  |
|            | 0.025112        | 0.48998  | 0.35969 | 0.708189644 |             |          |         |  |
| MUC19      | ENSG00000205592 | 0.072699 | 0.47102 | 0.35915     | 0.35974     | 0.31086  | 0.37795 |  |
|            | 0.28608         | 0.38741  | 0.35974 | 0.708204084 |             |          |         |  |
| MIR3187    | ENSG00000263414 | 0.35915  | 0.35974 | 0.35915     | 0.35974     | 0.35915  |         |  |
|            | 0.35974         | 0.35915  | 0.35974 | 0.35974     | 0.708204084 |          |         |  |
| GRM6       | ENSG00000113262 | -0.59968 | 0.72564 | -0.81633    | 0.79284     | -1.1027  | 0.86491 |  |
|            | 0.35913         | 0.35975  | 0.35975 | 0.708204084 |             |          |         |  |
| NA         | ENSG00000267747 | -0.34379 | 0.6345  | -0.36108    | 0.64098     | 0.3591   | 0.35976 |  |
|            | 0.087232        | 0.46524  | 0.35976 | 0.708204084 |             |          |         |  |
| FAM102B    | ENSG00000162636 | -1.6562  | 0.95116 | -1.241      | 0.89271     | 0.35907  |         |  |
|            | 0.35977         | 0.28354  | 0.38838 | 0.35977     | 0.708204084 |          |         |  |
| RPL22P1    | ENSG00000213178 | 0.35897  | 0.35981 | 0.35897     | 0.35981     | 0.35897  |         |  |
|            | 0.35981         | 0.35897  | 0.35981 | 0.35981     | 0.708254213 |          |         |  |
| SAFB       | ENSG00000160633 | -0.85869 | 0.80474 | 0.35889     | 0.35984     | 0.25331  | 0.40001 |  |
|            | 0.35889         | 0.35984  | 0.35984 | 0.708284655 |             |          |         |  |
| LINC00317  | ENSG00000238265 | 0.35883  | 0.35986 | 0.35883     | 0.35986     | 0.35883  |         |  |
|            | 0.35986         | 0.35883  | 0.35986 | 0.35986     | 0.708288544 |          |         |  |
| RNA5SP489  | ENSG00000238627 | 0.35878  | 0.35988 | 0.35878     | 0.35988     | 0.35878  |         |  |
|            | 0.35988         | 0.35878  | 0.35988 | 0.35988     | 0.708288544 |          |         |  |
| RNU6-1029P | ENSG00000206836 | 0.35875  | 0.35989 | 0.35875     | 0.35989     | 0.35875  |         |  |
|            | 0.35989         | 0.35875  | 0.35989 | 0.35989     | 0.708288544 |          |         |  |
| HS3ST3B1   | ENSG00000125430 | -0.24207 | 0.59564 | -0.86338    | 0.80604     | -0.31553 |         |  |
|            | 0.62382         | 0.35871  | 0.35991 | 0.35991     | 0.708288544 |          |         |  |
| NA         | ENSG00000237126 | 0.1073   | 0.45727 | -0.1957     | 0.57758     | 0.1132   | 0.45494 |  |
|            | 0.35862         | 0.35994  | 0.35994 | 0.708288544 |             |          |         |  |
| TRGV6      | ENSG00000226212 | -0.97968 | 0.83638 | -0.43652    | 0.66877     | 0.35854  | 0.35997 |  |
|            | 0.35854         | 0.35997  | 0.35997 | 0.708288544 |             |          |         |  |
| STK39      | ENSG00000198648 | -0.30434 | 0.61957 | 0.35848     | 0.35999     | 0.099608 | 0.46033 |  |
|            | -0.063169       | 0.52518  | 0.35999 | 0.708288544 |             |          |         |  |
| DDHD2      | ENSG00000085788 | 0.20032  | 0.42061 | 0.35845     | 0.36        | 0.32519  | 0.37252 |  |
|            | -0.050663       | 0.5202   | 0.36    | 0.708288544 |             |          |         |  |
| NUDT15     | ENSG00000136159 | -0.78157 | 0.78277 | -0.11116    | 0.54426     | 0.1105   |         |  |
|            | 0.45601         | 0.35846  | 0.36    | 0.36        | 0.708288544 |          |         |  |
| NIPA1      | ENSG00000170113 | 0.35844  | 0.36001 | -0.89485    | 0.81457     | -0.26138 | 0.6031  |  |
|            | -1.004          | 0.84232  | 0.36001 | 0.708288544 |             |          |         |  |
| NA         | ENSG00000267378 | 0.10587  | 0.45784 | 0.3584      | 0.36002     | 0.10587  | 0.45784 |  |

|           |                 |           |         |             |             |           |         |  |
|-----------|-----------------|-----------|---------|-------------|-------------|-----------|---------|--|
|           | 0.10587         | 0.45784   | 0.36002 | 0.708288544 |             |           |         |  |
| RPSAP20   | ENSG00000229871 | -1.7358   | 0.9587  | 0.35836     | 0.36004     | 0.17783   |         |  |
|           | 0.42943         | -1.9945   | 0.97695 | 0.36004     | 0.708288544 |           |         |  |
| NA        | ENSG00000265671 | -0.82623  | 0.79566 | 0.35836     | 0.36004     | -0.22106  | 0.58748 |  |
|           | -1.052          | 0.85361   | 0.36004 | 0.708288544 |             |           |         |  |
| NA        | ENSG00000235609 | 0.35831   | 0.36006 | -1.2425     | 0.89297     | -0.41281  | 0.66013 |  |
|           | -0.56453        | 0.7138    | 0.36006 | 0.708288544 |             |           |         |  |
| RN7SL303P | ENSG00000240116 | 0.35829   | 0.36006 | 0.35829     | 0.36006     | 0.35829   |         |  |
|           | 0.36006         | -0.037284 | 0.51487 | 0.36006     | 0.708288544 |           |         |  |
| SLC37A2   | ENSG00000134955 | 0.35819   | 0.3601  | -0.25153    | 0.5993      | -0.050396 |         |  |
|           | 0.5201          | 0.20705   | 0.41799 | 0.3601      | 0.708310043 |           |         |  |
| LINC02709 | ENSG00000245522 | -0.94332  | 0.82724 | -0.94332    | 0.82724     | -0.044609 |         |  |
|           | 0.51779         | 0.35819   | 0.3601  | 0.3601      | 0.708310043 |           |         |  |
| GARS1     | ENSG00000106105 | 0.35801   | 0.36017 | 0.35801     | 0.36017     | 0.35801   | 0.36017 |  |
|           | -0.077003       | 0.53069   | 0.36017 | 0.708328096 |             |           |         |  |
| CSMD1     | ENSG00000183117 | -0.2428   | 0.59592 | -1.0061     | 0.84282     | -1.4648   | 0.92852 |  |
|           | 0.35799         | 0.36017   | 0.36017 | 0.708328096 |             |           |         |  |
| CYCSP23   | ENSG00000253495 | 0.35801   | 0.36017 | -0.041636   | 0.51661     | 0.35801   |         |  |
|           | 0.36017         | 0.35801   | 0.36017 | 0.36017     | 0.708328096 |           |         |  |
| GPX1      | ENSG00000233276 | -1.6037   | 0.94561 | 0.35793     | 0.3602      | -0.32418  | 0.6271  |  |
|           | -0.32418        | 0.6271    | 0.3602  | 0.708328096 |             |           |         |  |
| ANKAR     | ENSG00000151687 | -1.275    | 0.89884 | 0.35789     | 0.36021     | -0.48937  | 0.68771 |  |
|           | -1.3029         | 0.90369   | 0.36021 | 0.708328096 |             |           |         |  |
| NA        | ENSG00000279743 | 0.3579    | 0.36021 | -0.66903    | 0.74826     | -1.1307   | 0.87092 |  |
|           | 0.3579          | 0.36021   | 0.36021 | 0.708328096 |             |           |         |  |
| NA        | ENSG00000229502 | 0.045281  | 0.48194 | 0.35781     | 0.36024     | 0.045281  | 0.48194 |  |
|           | 0.045281        | 0.48194   | 0.36024 | 0.708328096 |             |           |         |  |
| NA        | ENSG00000238366 | 0.35781   | 0.36024 | -0.88518    | 0.81197     | -0.78985  | 0.78519 |  |
|           | 0.35781         | 0.36024   | 0.36024 | 0.708328096 |             |           |         |  |
| NA        | ENSG00000279494 | 0.35783   | 0.36024 | 0.35783     | 0.36024     | 0.35783   | 0.36024 |  |
|           | 0.35783         | 0.36024   | 0.36024 | 0.708328096 |             |           |         |  |
| NA        | ENSG00000277748 | -0.43527  | 0.66832 | -0.3871     | 0.65066     | -0.43527  | 0.66832 |  |
|           | 0.3577          | 0.36029   | 0.36029 | 0.708388905 |             |           |         |  |
| NA        | ENSG00000237214 | 0.35765   | 0.3603  | 0.35765     | 0.3603      | 0.35765   | 0.3603  |  |
|           | 0.35765         | 0.3603    | 0.3603  | 0.708388905 |             |           |         |  |
| NA        | ENSG00000251161 | 0.35743   | 0.36038 | -0.54484    | 0.70707     | 0.052135  | 0.47921 |  |
|           | 0.35743         | 0.36038   | 0.36038 | 0.708481912 |             |           |         |  |
| CRELD1    | ENSG00000163703 | 0.35742   | 0.36039 | 0.35742     | 0.36039     | 0.35742   |         |  |
|           | 0.36039         | 0.22539   | 0.41084 | 0.36039     | 0.708481912 |           |         |  |
| LINC02484 | ENSG00000248685 | -0.85382  | 0.8034  | 0.35737     | 0.36041     | -0.16748  |         |  |
|           | 0.5665          | -0.41938  | 0.66253 | 0.36041     | 0.708481912 |           |         |  |
| SEZ6L2    | ENSG00000174938 | 0.35735   | 0.36042 | 0.020363    | 0.49188     | 0.35735   |         |  |
|           | 0.36042         | 0.35214   | 0.36237 | 0.36042     | 0.708481912 |           |         |  |
| ASPHD1    | ENSG00000174939 | 0.35735   | 0.36042 | 0.35735     | 0.36042     | 0.35735   |         |  |
|           | 0.36042         | 0.35735   | 0.36042 | 0.36042     | 0.708481912 |           |         |  |
| MBNL1     | ENSG00000152601 | -0.43551  | 0.6684  | -1.4171     | 0.92178     | -1.2649   | 0.89705 |  |
|           | 0.35717         | 0.36048   | 0.36048 | 0.708542691 |             |           |         |  |
| NA        | ENSG00000283406 | 0.35718   | 0.36048 | 0.35718     | 0.36048     | 0.35718   | 0.36048 |  |
|           | 0.35718         | 0.36048   | 0.36048 | 0.708542691 |             |           |         |  |
| FAM78A    | ENSG00000126882 | -0.15421  | 0.56128 | 0.35712     | 0.3605      | -0.76411  |         |  |
|           | 0.7776          | -0.50846  | 0.69444 | 0.3605      | 0.708553422 |           |         |  |
| NA        | ENSG00000212586 | 0.35696   | 0.36056 | 0.35696     | 0.36056     | 0.35696   | 0.36056 |  |
|           | 0.35696         | 0.36056   | 0.36056 | 0.708642768 |             |           |         |  |
| NA        | ENSG00000277670 | -1.9737   | 0.97579 | 0.35688     | 0.36059     | -0.92593  | 0.82276 |  |
|           | -2.2874         | 0.98891   | 0.36059 | 0.708673148 |             |           |         |  |
| PSMC6     | ENSG00000100519 | -0.21285  | 0.58428 | 0.094263    | 0.46245     | -0.21285  | 0.58428 |  |
|           | 0.35677         | 0.36063   | 0.36063 | 0.708673204 |             |           |         |  |
| GOLPH3L   | ENSG00000143457 | -0.11369  | 0.54526 | -0.5426     | 0.7063      | 0.35679   |         |  |
|           | 0.36063         | -0.11369  | 0.54526 | 0.36063     | 0.708673204 |           |         |  |
| ACADVL    | ENSG00000072778 | 0.35668   | 0.36067 | 0.35668     | 0.36067     | 0.35668   |         |  |
|           | 0.36067         | 0.35668   | 0.36067 | 0.36067     | 0.708673204 |           |         |  |
| FUT9      | ENSG00000172461 | -0.37043  | 0.64447 | 0.3566      | 0.36069     | 0.12093   | 0.45187 |  |



|            |                 |            |          |            |             |             |         |  |
|------------|-----------------|------------|----------|------------|-------------|-------------|---------|--|
|            |                 | -0.3413    | 0.63356  | 0.36069    | 0.708673204 |             |         |  |
| ZNF324     | ENSG00000083812 | -0.23751   | 0.59387  | 0.35656    | 0.36071     | 0.35656     |         |  |
|            |                 | 0.36071    | 0.35656  | 0.36071    | 0.36071     | 0.708673204 |         |  |
| XPO5       | ENSG00000124571 | -0.087027  | 0.53467  | 0.35657    | 0.36071     | -0.024168   | 0.50964 |  |
|            |                 | 0.28076    | 0.38945  | 0.36071    | 0.708673204 |             |         |  |
| SUMO2P7    | ENSG00000249838 | -0.38193   | 0.64874  | -1.2027    | 0.88545     | -0.38193    |         |  |
|            |                 | 0.64874    | 0.35656  | 0.36071    | 0.36071     | 0.708673204 |         |  |
| SETP2      | ENSG00000258893 | -0.99367   | 0.83981  | 0.35653    | 0.36072     | 0.35653     | 0.36072 |  |
|            |                 | 0.35653    | 0.36072  | 0.36072    | 0.708673204 |             |         |  |
| SNHG1      | ENSG00000255717 | 0.35651    | 0.36073  | -0.62269   | 0.73326     | -0.62269    | 0.73326 |  |
|            |                 | -0.0036479 | 0.50146  | 0.36073    | 0.708673204 |             |         |  |
| PCP4       | ENSG00000183036 | -0.41572   | 0.66119  | -0.0058702 | 0.50234     | -0.25864    | 0.60205 |  |
|            |                 | 0.35646    | 0.36075  | 0.36075    | 0.708673204 |             |         |  |
| NA         | ENSG00000225028 | 0.35645    | 0.36075  | 0.016828   | 0.49329     | 0.35645     | 0.36075 |  |
|            |                 | 0.35645    | 0.36075  | 0.36075    | 0.708673204 |             |         |  |
| OR5L1      | ENSG00000279395 | 0.35637    | 0.36078  | -0.1035    | 0.54122     | -0.25242    | 0.59964 |  |
|            |                 | 0.35637    | 0.36078  | 0.36078    | 0.708703568 |             |         |  |
| NA         | ENSG00000244441 | -1.9273    | 0.97303  | -0.99722   | 0.84067     | 0.35631     | 0.36081 |  |
|            |                 | 0.35631    | 0.36081  | 0.36081    | 0.708705361 |             |         |  |
| NA         | ENSG00000258168 | 0.3563     | 0.36081  | -0.060329  | 0.52405     | 0.2003      | 0.42062 |  |
|            |                 | -2.0948    | 0.9819   | 0.36081    | 0.708705361 |             |         |  |
| NA         | ENSG00000271119 | -0.9067    | 0.81772  | -0.02912   | 0.51162     | 0.3562      | 0.36084 |  |
|            |                 | 0.3562     | 0.36084  | 0.36084    | 0.708719662 |             |         |  |
| NA         | ENSG00000272558 | 0.35615    | 0.36087  | 0.35615    | 0.36087     | 0.35615     | 0.36087 |  |
|            |                 | 0.35615    | 0.36087  | 0.36087    | 0.708719662 |             |         |  |
| NA         | ENSG00000278058 | -1.2747    | 0.89879  | -1.2747    | 0.89879     | -1.2747     | 0.89879 |  |
|            |                 | 0.35613    | 0.36087  | 0.36087    | 0.708719662 |             |         |  |
| OR2AQ1P    | ENSG00000229724 | 0.35612    | 0.36088  | 0.35612    | 0.36088     | 0.35612     |         |  |
|            |                 | 0.36088    | 0.35612  | 0.36088    | 0.36088     | 0.708719662 |         |  |
| LINC00909  | ENSG00000264247 | 0.35609    | 0.36089  | 0.35609    | 0.36089     | 0.35609     |         |  |
|            |                 | 0.36089    | 0.35609  | 0.36089    | 0.36089     | 0.708719662 |         |  |
| NA         | ENSG00000262973 | 0.35589    | 0.36096  | 0.35589    | 0.36096     | 0.35589     | 0.36096 |  |
|            |                 | 0.35589    | 0.36096  | 0.36096    | 0.708828563 |             |         |  |
| CEACAM16   | ENSG00000213892 | -0.34549   | 0.63514  | -0.34549   | 0.63514     | -0.34549    |         |  |
|            |                 | 0.63514    | 0.35573  | 0.36102    | 0.36102     | 0.708917819 |         |  |
| HIRAP1     | ENSG00000271563 | -0.40402   | 0.6569   | 0.18245    | 0.42761     | 0.18245     |         |  |
|            |                 | 0.42761    | 0.35562  | 0.36106    | 0.36106     | 0.708967796 |         |  |
| LAMB4      | ENSG00000091128 | -0.5542    | 0.71028  | -0.36891   | 0.6439      | -0.36891    | 0.6439  |  |
|            |                 | 0.35551    | 0.3611   | 0.3611     | 0.709005208 |             |         |  |
| LINC01538  | ENSG00000266952 | 0.31224    | 0.37743  | 0.31224    | 0.37743     | 0.31224     |         |  |
|            |                 | 0.37743    | 0.35548  | 0.36112    | 0.36112     | 0.709005208 |         |  |
| NA         | ENSG00000261616 | 0.057693   | 0.477    | 0.26162    | 0.39681     | 0.35543     | 0.36113 |  |
|            |                 | -0.43324   | 0.66758  | 0.36113    | 0.709005208 |             |         |  |
| PSG3       | ENSG00000221826 | 0.35534    | 0.36117  | -0.35957   | 0.64041     | 0.16644     | 0.4339  |  |
|            |                 | -0.31844   | 0.62492  | 0.36117    | 0.709005208 |             |         |  |
| MSGN1      | ENSG00000151379 | 0.35529    | 0.36118  | 0.35529    | 0.36118     | 0.35529     | 0.36118 |  |
|            |                 | 0.35529    | 0.36118  | 0.36118    | 0.709005208 |             |         |  |
| WASH8P     | ENSG00000226210 | 0.24452    | 0.40342  | -0.48025   | 0.68447     | 0.35524     |         |  |
|            |                 | 0.3612     | -0.52215 | 0.69922    | 0.3612      | 0.709005208 |         |  |
| TMEM252-DT | ENSG00000226337 | -2.1115    | 0.98263  | 0.35524    | 0.36121     | -0.39746    |         |  |
|            |                 | 0.65449    | -0.39746 | 0.65449    | 0.36121     | 0.709005208 |         |  |
| NA         | ENSG00000234796 | -0.71044   | 0.76128  | 0.35524    | 0.36121     | -1.2712     | 0.89818 |  |
|            |                 | -0.71044   | 0.76128  | 0.36121    | 0.709005208 |             |         |  |
| LINC01643  | ENSG00000236052 | -0.15033   | 0.55975  | -0.84076   | 0.79976     | 0.35524     |         |  |
|            |                 | 0.36121    | -0.36328 | 0.6418     | 0.36121     | 0.709005208 |         |  |
| NA         | ENSG00000280430 | 0.35511    | 0.36125  | 0.35511    | 0.36125     | 0.35511     | 0.36125 |  |
|            |                 | 0.35511    | 0.36125  | 0.36125    | 0.709055162 |             |         |  |
| LINC00937  | ENSG00000226091 | 0.0086612  | 0.49654  | 0.11557    | 0.454       | 0.35495     | 0.36131 |  |
|            |                 | 0.027381   | 0.48908  | 0.36131    | 0.709081836 |             |         |  |
| LINC02529  | ENSG00000234777 | 0.35491    | 0.36133  | 0.21068    | 0.41657     | -0.12282    |         |  |
|            |                 | 0.54887    | -0.12282 | 0.54887    | 0.36133     | 0.709081836 |         |  |
| PNPO       | ENSG00000108439 | -0.067699  | 0.52699  | -0.067699  | 0.52699     | -0.067699   | 0.52699 |  |

|           |                 |          |         |             |             |          |         |  |
|-----------|-----------------|----------|---------|-------------|-------------|----------|---------|--|
|           | 0.35489         | 0.36134  | 0.36134 | 0.709081836 |             |          |         |  |
| RRBP1     | ENSG00000125844 | -0.79673 | 0.7872  | 0.35488     | 0.36134     | -0.29079 | 0.61439 |  |
|           | 0.11734         | 0.4533   | 0.36134 | 0.709081836 |             |          |         |  |
| PCGF2     | ENSG00000277258 | 0.35489  | 0.36134 | 0.35489     | 0.36134     | 0.35489  | 0.36134 |  |
|           | 0.35489         | 0.36134  | 0.36134 | 0.709081836 |             |          |         |  |
| NA        | ENSG00000234624 | 0.35481  | 0.36137 | -0.43196    | 0.66712     | -0.43196 | 0.66712 |  |
|           | -0.43196        | 0.66712  | 0.36137 | 0.709081836 |             |          |         |  |
| NA        | ENSG00000235710 | 0.35481  | 0.36137 | 0.22372     | 0.41149     | 0.35481  | 0.36137 |  |
|           | 0.35481         | 0.36137  | 0.36137 | 0.709081836 |             |          |         |  |
| APOA1-AS  | ENSG00000235910 | 0.35478  | 0.36138 | 0.35478     | 0.36138     | 0.35478  |         |  |
|           | 0.36138         | 0.35478  | 0.36138 | 0.36138     | 0.709081836 |          |         |  |
| NA        | ENSG00000267356 | 0.35472  | 0.3614  | 0.35472     | 0.3614      | 0.35472  | 0.3614  |  |
|           | 0.35472         | 0.3614   | 0.3614  | 0.709092527 |             |          |         |  |
| NA        | ENSG00000255288 | -0.48337 | 0.68558 | -0.90058    | 0.8161      | -0.67147 | 0.74904 |  |
|           | 0.35452         | 0.36147  | 0.36147 | 0.709192383 |             |          |         |  |
| NA        | ENSG00000242261 | 0.3545   | 0.36148 | 0.3545      | 0.36148     | 0.3545   | 0.36148 |  |
|           | 0.3545          | 0.36148  | 0.36148 | 0.709192383 |             |          |         |  |
| CROCC     | ENSG00000058453 | 0.15135  | 0.43985 | -0.66786    | 0.74789     | -1.6255  | 0.94798 |  |
|           | 0.35441         | 0.36152  | 0.36152 | 0.709217252 |             |          |         |  |
| ABCF2P1   | ENSG00000242159 | -1.1542  | 0.87579 | 0.35434     | 0.36154     | -1.04    | 0.85084 |  |
|           | -1.04           | 0.85084  | 0.36154 | 0.709217252 |             |          |         |  |
| SNORD63   | ENSG00000206989 | 0.35427  | 0.36157 | 0.35427     | 0.36157     | 0.35427  |         |  |
|           | 0.36157         | 0.35427  | 0.36157 | 0.36157     | 0.709217252 |          |         |  |
| NA        | ENSG00000236115 | -0.59636 | 0.72453 | -0.03433    | 0.51369     | -0.19525 | 0.5774  |  |
|           | 0.35427         | 0.36157  | 0.36157 | 0.709217252 |             |          |         |  |
| NA        | ENSG00000218872 | 0.35424  | 0.36158 | 0.35424     | 0.36158     | 0.35424  | 0.36158 |  |
|           | 0.35424         | 0.36158  | 0.36158 | 0.709217252 |             |          |         |  |
| NA        | ENSG00000268756 | -0.20861 | 0.58262 | 0.35423     | 0.36158     | -0.8313  | 0.7971  |  |
|           | -0.46491        | 0.679    | 0.36158 | 0.709217252 |             |          |         |  |
| NA        | ENSG00000254462 | 0.35419  | 0.3616  | 0.35419     | 0.3616      | 0.35419  | 0.3616  |  |
|           | 0.35419         | 0.3616   | 0.3616  | 0.709219001 |             |          |         |  |
| MRPS36P4  | ENSG00000255231 | 0.35415  | 0.36161 | 0.35415     | 0.36161     | 0.35415  |         |  |
|           | 0.36161         | 0.35415  | 0.36161 | 0.36161     | 0.709219001 |          |         |  |
| RN7SL326P | ENSG00000264582 | -0.86185 | 0.80562 | 0.28399     | 0.38821     | 0.35405  |         |  |
|           | 0.36165         | -0.57046 | 0.71582 | 0.36165     | 0.709232795 |          |         |  |
| NA        | ENSG00000260296 | 0.35394  | 0.36169 | 0.35394     | 0.36169     | 0.035692 | 0.48576 |  |
|           | 0.35394         | 0.36169  | 0.36169 | 0.709232795 |             |          |         |  |
| AGXT      | ENSG00000172482 | -0.57621 | 0.71776 | 0.12135     | 0.45171     | 0.35387  | 0.36172 |  |
|           | -0.90586        | 0.81749  | 0.36172 | 0.709232795 |             |          |         |  |
| SLC22A23  | ENSG00000137266 | -0.52558 | 0.70041 | 0.35381     | 0.36174     | -0.25836 |         |  |
|           | 0.60194         | -0.62774 | 0.73491 | 0.36174     | 0.709232795 |          |         |  |
| FABP5     | ENSG00000164687 | -1.119   | 0.86844 | -1.119      | 0.86844     | 0.35378  | 0.36175 |  |
|           | -1.119          | 0.86844  | 0.36175 | 0.709232795 |             |          |         |  |
| TMEM219   | ENSG00000149932 | 0.070554 | 0.47188 | 0.070554    | 0.47188     | 0.070554 |         |  |
|           | 0.47188         | 0.35376  | 0.36176 | 0.36176     | 0.709232795 |          |         |  |
| OR7E47P   | ENSG00000257542 | -0.58491 | 0.7207  | 0.35377     | 0.36176     | -0.51594 |         |  |
|           | 0.69705         | -0.96393 | 0.83246 | 0.36176     | 0.709232795 |          |         |  |
| LINC01925 | ENSG00000264265 | -0.345   | 0.63495 | 0.35373     | 0.36177     | 0.2661   |         |  |
|           | 0.39508         | 0.2661   | 0.39508 | 0.36177     | 0.709232795 |          |         |  |
| TEP1      | ENSG00000129566 | -0.89555 | 0.81475 | 0.35366     | 0.3618      | -0.75873 | 0.77599 |  |
|           | -1.5417         | 0.93842  | 0.3618  | 0.709232795 |             |          |         |  |
| EPPIN     | ENSG00000101448 | 0.097453 | 0.46118 | 0.097453    | 0.46118     | 0.33192  | 0.36998 |  |
|           | 0.35362         | 0.36181  | 0.36181 | 0.709232795 |             |          |         |  |
| LINC00910 | ENSG00000188825 | 0.35359  | 0.36182 | 0.32251     | 0.37353     | 0.32251  |         |  |
|           | 0.37353         | 0.14209  | 0.44351 | 0.36182     | 0.709232795 |          |         |  |
| NA        | ENSG00000227556 | -0.75601 | 0.77518 | 0.35347     | 0.36187     | 0.35347  | 0.36187 |  |
|           | 0.35347         | 0.36187  | 0.36187 | 0.709232795 |             |          |         |  |
| LCOR      | ENSG00000196233 | -0.84339 | 0.80049 | -0.28793    | 0.6133      | -0.12134 | 0.54829 |  |
|           | 0.35341         | 0.36189  | 0.36189 | 0.709232795 |             |          |         |  |
| NA        | ENSG00000250140 | 0.35335  | 0.36191 | 0.35335     | 0.36191     | 0.35335  | 0.36191 |  |
|           | 0.35335         | 0.36191  | 0.36191 | 0.709232795 |             |          |         |  |
| NA        | ENSG00000268659 | 0.35336  | 0.36191 | 0.12573     | 0.44997     | 0.35336  | 0.36191 |  |

|            |                 |           |         |             |             |           |         |  |
|------------|-----------------|-----------|---------|-------------|-------------|-----------|---------|--|
|            | 0.35336         | 0.36191   | 0.36191 | 0.709232795 |             |           |         |  |
| NOTCH4     | ENSG00000204301 | -0.057867 | 0.52307 | 0.19747     | 0.42173     | 0.35329   |         |  |
|            | 0.36193         | -0.54283  | 0.70638 | 0.36193     | 0.709232795 |           |         |  |
| MIR548AS   | ENSG00000263741 | 0.3533    | 0.36193 | 0.3533      | 0.36193     | 0.3533    |         |  |
|            | 0.36193         | 0.3533    | 0.36193 | 0.36193     | 0.709232795 |           |         |  |
| NA         | ENSG00000274177 | 0.35327   | 0.36194 | 0.35327     | 0.36194     | 0.35327   | 0.36194 |  |
|            | 0.35327         | 0.36194   | 0.36194 | 0.709232795 |             |           |         |  |
| PGPEP1     | ENSG00000130517 | -0.29139  | 0.61462 | 0.35324     | 0.36195     | 0.032724  |         |  |
|            | 0.48695         | -0.30982  | 0.62165 | 0.36195     | 0.709232795 |           |         |  |
| NA         | ENSG00000252629 | 0.35326   | 0.36195 | 0.35326     | 0.36195     | -0.51255  | 0.69587 |  |
|            | 0.35326         | 0.36195   | 0.36195 | 0.709232795 |             |           |         |  |
| OR2V2      | ENSG00000182613 | 0.35321   | 0.36196 | -0.19248    | 0.57632     | 0.35321   | 0.36196 |  |
|            | 0.35321         | 0.36196   | 0.36196 | 0.709232795 |             |           |         |  |
| NA         | ENSG00000225836 | 0.35319   | 0.36197 | 0.35319     | 0.36197     | 0.35319   | 0.36197 |  |
|            | 0.35319         | 0.36197   | 0.36197 | 0.709232795 |             |           |         |  |
| KCTD18     | ENSG00000155729 | -0.3584   | 0.63998 | 0.071483    | 0.47151     | 0.35314   |         |  |
|            | 0.36199         | -0.78273  | 0.78311 | 0.36199     | 0.709232795 |           |         |  |
| P3H4       | ENSG00000141696 | 0.12542   | 0.4501  | 0.35312     | 0.362010409 | 0.45855   |         |  |
|            | -0.94463        | 0.82758   | 0.36201 | 0.709232795 |             |           |         |  |
| TNXB       | ENSG00000168477 | 0.35311   | 0.36201 | -0.40932    | 0.65885     | -0.85202  | 0.8029  |  |
|            | -0.42349        | 0.66403   | 0.36201 | 0.709232795 |             |           |         |  |
| MAPK11     | ENSG00000185386 | 0.35309   | 0.36201 | -0.33974    | 0.63297     | -0.33974  |         |  |
|            | 0.63297         | -0.33974  | 0.63297 | 0.36201     | 0.709232795 |           |         |  |
| SINHCAPP3  | ENSG00000253488 | -0.63518  | 0.73735 | -1.2685     | 0.89769     | -0.93665  |         |  |
|            | 0.82553         | 0.35308   | 0.36201 | 0.36201     | 0.709232795 |           |         |  |
| NTAN1P2    | ENSG00000250569 | 0.35301   | 0.36204 | 0.35301     | 0.36204     | 0.35301   |         |  |
|            | 0.36204         | 0.35301   | 0.36204 | 0.36204     | 0.709234541 |           |         |  |
| ZIM2-AS1   | ENSG00000269793 | 0.16202   | 0.43565 | -0.21085    | 0.5835      | 0.35302   |         |  |
|            | 0.36204         | -0.21085  | 0.5835  | 0.36204     | 0.709234541 |           |         |  |
| NA         | ENSG00000261347 | 0.35291   | 0.36208 | 0.14814     | 0.44112     | 0.14814   | 0.44112 |  |
|            | 0.14814         | 0.44112   | 0.36208 | 0.709284387 |             |           |         |  |
| ADORA1     | ENSG00000163485 | -0.66206  | 0.74603 | 0.35254     | 0.36222     | -0.98715  |         |  |
|            | 0.83822         | -0.98715  | 0.83822 | 0.36222     | 0.709521179 |           |         |  |
| LINC01885  | ENSG00000237880 | -0.53231  | 0.70274 | -0.81337    | 0.79203525  | 0.36223   |         |  |
|            | -1.0754         | 0.8589    | 0.36223 | 0.709521179 |             |           |         |  |
| ZSWIM9     | ENSG00000185453 | 0.3524    | 0.36227 | 0.15839     | 0.43708     | -0.098375 |         |  |
|            | 0.53918         | -0.098375 | 0.53918 | 0.36227     | 0.709542488 |           |         |  |
| RN7SL442P  | ENSG00000239221 | 0.3524    | 0.36227 | 0.3524      | 0.36227     | 0.3524    |         |  |
|            | 0.36227         | 0.3524    | 0.36227 | 0.36227     | 0.709542488 |           |         |  |
| RNU6-1021P | ENSG00000200132 | 0.35214   | 0.36237 | 0.35214     | 0.36237     | 0.35214   |         |  |
|            | 0.36237         | 0.35214   | 0.36237 | 0.36237     | 0.709709823 |           |         |  |
| NA         | ENSG00000229543 | -0.18212  | 0.57226 | 0.35207     | 0.36239     | 0.32792   | 0.37149 |  |
|            | -1.5881         | 0.94386   | 0.36239 | 0.709720469 |             |           |         |  |
| GPR88      | ENSG00000181656 | -0.20346  | 0.58061 | -0.20346    | 0.58061     | 0.35194   | 0.36244 |  |
|            | -0.20346        | 0.58061   | 0.36244 | 0.709725587 |             |           |         |  |
| SLC35F2    | ENSG00000110660 | -0.41923  | 0.66247 | -0.41923    | 0.66247     | 0.35192   |         |  |
|            | 0.36245         | 0.3011    | 0.38167 | 0.36245     | 0.709725587 |           |         |  |
| NA         | ENSG00000257614 | -0.14212  | 0.55651 | 0.22463     | 0.41113     | -0.14212  | 0.55651 |  |
|            | 0.3519          | 0.36246   | 0.36246 | 0.709725587 |             |           |         |  |
| NA         | ENSG00000261025 | 0.3519    | 0.36246 | 0.3519      | 0.36246     | 0.3519    | 0.36246 |  |
|            | 0.3519          | 0.36246   | 0.36246 | 0.709725587 |             |           |         |  |
| GMCL1      | ENSG00000087338 | -1.4757   | 0.92999 | -1.4757     | 0.92999     | -0.023645 | 0.50943 |  |
|            | 0.35184         | 0.36248   | 0.36248 | 0.709725587 |             |           |         |  |
| NA         | ENSG00000141979 | 0.0056461 | 0.49775 | -0.24123    | 0.59531     | -0.52297  | 0.6995  |  |
|            | 0.35183         | 0.36248   | 0.36248 | 0.709725587 |             |           |         |  |
| RN7SL51P   | ENSG00000239958 | 0.35177   | 0.36251 | 0.35177     | 0.36251     | 0.35177   |         |  |
|            | 0.36251         | 0.35177   | 0.36251 | 0.36251     | 0.709755808 |           |         |  |
| NA         | ENSG00000270323 | -0.66888  | 0.74821 | 0.13595     | 0.44593     | 0.35157   | 0.36258 |  |
|            | -1.2082         | 0.88652   | 0.36258 | 0.7098366   |             |           |         |  |
| ADRA2A     | ENSG00000150594 | 0.35154   | 0.36259 | -0.78354    | 0.78335     | -0.34389  |         |  |
|            | 0.63453         | -0.78354  | 0.78335 | 0.36259     | 0.7098366   |           |         |  |
| PDCL3P5    | ENSG00000213089 | 0.3515    | 0.36261 | 0.3515      | 0.36261     | 0.3515    |         |  |

|            |                 |           |             |             |             |           |         |         |
|------------|-----------------|-----------|-------------|-------------|-------------|-----------|---------|---------|
|            | 0.36261         | 0.3515    | 0.36261     | 0.36261     | 0.7098366   |           |         |         |
| FCRL6      | ENSG00000181036 | 0.35146   | 0.36262     | -0.35567    | 0.63895     | -0.35726  | 0.63955 |         |
|            | -0.79368        | 0.78631   | 0.36262     | 0.7098366   |             |           |         |         |
| NA         | ENSG00000258111 | 0.35142   | 0.36264     | 0.35142     | 0.36264     | 0.35142   | 0.36264 |         |
|            | 0.35142         | 0.36264   | 0.36264     | 0.7098366   |             |           |         |         |
| UCP3       | ENSG00000175564 | -0.14263  | 0.55671     | -0.035157   | 0.51402     | 0.35138   | 0.36265 |         |
|            | -0.72324        | 0.76523   | 0.36265     | 0.7098366   |             |           |         |         |
| NA         | ENSG00000200209 | 0.35137   | 0.36266     | 0.35137     | 0.36266     | 0.35137   | 0.36266 |         |
|            | 0.35137         | 0.36266   | 0.36266     | 0.7098366   |             |           |         |         |
| HMGB3P17   | ENSG00000249400 | 0.3513    | 0.36268     | -0.37962    | 0.64789     | 0.3513    |         |         |
|            | 0.36268         | 0.3513    | 0.36268     | 0.36268     | 0.7098366   |           |         |         |
| GUSBP8     | ENSG00000227762 | -0.69101  | 0.75522     | -0.51704    | 0.69744     | 0.35129   |         |         |
|            | 0.36269         | 0.35129   | 0.36269     | 0.36269     | 0.7098366   |           |         |         |
| SCHLAP1    | ENSG00000281131 | 0.16473   | 0.43458     | -0.75728    | 0.77556     | 0.35124   |         |         |
|            | 0.3627          | -0.1082   | 0.54308     | 0.3627      | 0.7098366   |           |         |         |
| TM7SF3     | ENSG00000064115 | 0.3512    | 0.36272     | -1.1088     | 0.86624     | -0.87419  |         |         |
|            | 0.80899         | 0.046645  | 0.4814      | 0.36272     | 0.7098366   |           |         |         |
| KRTAP5-11  | ENSG00000204571 | -1.1422   | 0.87331     | -0.13136    | 0.55225     | 0.35115   |         |         |
|            | 0.36274         | 0.35115   | 0.36274     | 0.36274     | 0.7098366   |           |         |         |
| HSPD1      | ENSG00000144381 | 0.039072  | 0.48442     | 0.35109     | 0.36276     | 0.039072  | 0.48442 |         |
|            | 0.28735         | 0.38692   | 0.36276     | 0.7098366   |             |           |         |         |
| RPS29P9    | ENSG00000223433 | 0.35109   | 0.36276     | 0.35109     | 0.36276     | 0.35109   |         |         |
|            | 0.36276         | -0.29368  | 0.6155      | 0.36276     | 0.7098366   |           |         |         |
| NA         | ENSG00000250316 | 0.35106   | 0.36277     | 0.35106     | 0.36277     | -0.28414  | 0.61185 |         |
|            | 0.35106         | 0.36277   | 0.36277     | 0.7098366   |             |           |         |         |
| PSMA7      | ENSG00000101182 | -0.61771  | 0.73162     | -0.61771    | 0.73162     | 0.092796  | 0.46303 |         |
|            | 0.3509          | 0.36283   | 0.36283     | 0.7098366   |             |           |         |         |
| RNA5SP177  | ENSG00000222054 | 0.35091   | 0.36283     | -0.96432    | 0.83256     | -0.96432  |         |         |
|            | 0.83256         | -0.96432  | 0.83256     | 0.36283     | 0.7098366   |           |         |         |
| RNU6-978P  | ENSG00000201241 | 0.35087   | 0.36284     | 0.35087     | 0.36284     | 0.35087   |         |         |
|            | 0.36284         | 0.35087   | 0.36284     | 0.36284     | 0.7098366   |           |         |         |
| INTS12     | ENSG00000138785 | 0.35084   | 0.36285     | -0.32572    | 0.62768     | 0.35084   |         |         |
|            | 0.36285         | 0.35084   | 0.36285     | 0.36285     | 0.7098366   |           |         |         |
| CD200      | ENSG00000091972 | -0.35006  | 0.63685     | 0.28213     | 0.38892     | -1.3469   | 0.91099 |         |
|            | 0.35076         | 0.36288   | 0.36288     | 0.7098366   |             |           |         |         |
| ARHGAP12   | ENSG00000165322 | -0.026523 | 0.51058     | 0.35078     | 0.36288     | -0.14958  |         |         |
|            | 0.55945         | -0.40425  | 0.65699     | 0.36288     | 0.7098366   |           |         |         |
| NA         | ENSG00000259483 | -2.1228   | 0.98311     | 0.35076     | 0.36288     | -1.0611   | 0.85569 |         |
|            | -1.0611         | 0.85569   | 0.36288     | 0.7098366   |             |           |         |         |
| LANCL2     | ENSG00000132434 | -1.2079   | 0.88646     | -0.5723     | 0.71644     | -0.34995  |         |         |
|            | 0.63681         | 0.35069   | 0.36291     | 0.36291     | 0.7098366   |           |         |         |
| NA         | ENSG00000272892 | -0.28475  | 0.61208     | 0.3507      | 0.36291     | -0.043908 | 0.51751 |         |
|            | 0.30289         | 0.38099   | 0.36291     | 0.7098366   |             |           |         |         |
| NA         | ENSG00000228176 | -1.5493   | 0.93934     | 0.35063     | 0.36293     | -0.26226  | 0.60344 |         |
|            | -1.6638         | 0.95192   | 0.36293     | 0.7098366   |             |           |         |         |
| GTF3C2-AS1 | ENSG00000234945 | 0.35065   | 0.36293     | -1.042      | 0.85129     | -0.13872  |         |         |
|            | 0.55517         | -0.13872  | 0.55517     | 0.36293     | 0.7098366   |           |         |         |
| SLC22A5    | ENSG00000197375 | -0.18535  | 0.57352     | 0.35057     | 0.36295     | -1.2198   |         |         |
|            | 0.88872         | -0.12877  | 0.55123     | 0.36295     | 0.709838295 |           |         |         |
| RN7SKP234  | ENSG00000252982 | 0.22907   | 0.40941     | 0.35057     | 0.36296     | 0.051632  |         |         |
|            | 0.47941         | 0.22907   | 0.40941     | 0.36296     | 0.709838295 |           |         |         |
| IL12RB2    | ENSG00000081985 | -0.26685  | 0.60521     | 0.35049     | 0.36298     | -0.74974  |         |         |
|            | 0.7733          | -0.13849  | 0.55507     | 0.36298     | 0.709841684 |           |         |         |
| MS4A12     | ENSG00000071203 | 0.35044   | 0.363       | 0.35044     | 0.363       | 0.35044   | 0.363   | 0.35044 |
|            | 0.363           | 0.363     | 0.709841684 |             |             |           |         |         |
| LRRN4      | ENSG00000125872 | 0.35043   | 0.36301     | -0.59664    | 0.72463     | -0.59664  | 0.72463 |         |
|            | -0.59664        | 0.72463   | 0.36301     | 0.709841684 |             |           |         |         |
| COX6B1     | ENSG00000126267 | -0.42628  | 0.66505     | -0.42628    | 0.66505     | 0.3504    |         |         |
|            | 0.36302         | -0.51212  | 0.69571     | 0.36302     | 0.709841684 |           |         |         |
| RN7SL605P  | ENSG00000265566 | 0.35018   | 0.3631      | 0.35018     | 0.3631      | 0.35018   |         |         |
|            | 0.3631          | 0.35018   | 0.3631      | 0.3631      | 0.7099071   |           |         |         |
| ITGB3BP    | ENSG00000142856 | -0.68068  | 0.75196     | 0.20793     | 0.41764     | 0.10455   |         |         |

|            |                 |            |         |             |             |           |         |         |
|------------|-----------------|------------|---------|-------------|-------------|-----------|---------|---------|
|            | 0.45837         | 0.35017    | 0.36311 | 0.36311     | 0.7099071   |           |         |         |
| NA         | ENSG00000249843 | 0.35017    | 0.36311 | 0.36311     | 0.35017     | 0.36311   | 0.35017 | 0.36311 |
|            | 0.35017         | 0.36311    | 0.36311 | 0.7099071   |             |           |         |         |
| MIR624     | ENSG00000207952 | 0.22276    | 0.41186 | 0.35011     | 0.36313     | 0.22276   |         |         |
|            | 0.41186         | 0.27467    | 0.39179 | 0.36313     | 0.7099071   |           |         |         |
| RPRD1B     | ENSG00000101413 | -0.055326  | 0.52206 | 0.029854    | 0.48809     | 0.35009   |         |         |
|            | 0.36314         | 0.037571   | 0.48501 | 0.36314     | 0.7099071   |           |         |         |
| CHRAC1     | ENSG00000104472 | -0.64032   | 0.73902 | 0.34999     | 0.36317     | -0.20975  |         |         |
|            | 0.58307         | -1.4065    | 0.92021 | 0.36317     | 0.7099071   |           |         |         |
| CCDC184    | ENSG00000177875 | -1.4453    | 0.92581 | -1.4453     | 0.92581     | -1.4453   |         |         |
|            | 0.92581         | 0.35       | 0.36317 | 0.36317     | 0.7099071   |           |         |         |
| NA         | ENSG00000271913 | 0.26707    | 0.39471 | 0.35        | 0.36317     | 0.26707   | 0.39471 |         |
|            | 0.26707         | 0.39471    | 0.36317 | 0.7099071   |             |           |         |         |
| WDR37      | ENSG00000047056 | 0.34994    | 0.36319 | -1.0927     | 0.86274     | -0.30999  | 0.62172 |         |
|            | -0.30999        | 0.62172    | 0.36319 | 0.709908788 |             |           |         |         |
| RNU4-40P   | ENSG00000201221 | -0.0012494 | 0.5005  | 0.34992     | 0.3632      | -0.28591  |         |         |
|            | 0.61253         | 0.34992    | 0.3632  | 0.3632      | 0.709908788 |           |         |         |
| NA         | ENSG00000270426 | 0.34984    | 0.36323 | 0.19988     | 0.42079     | 0.19988   | 0.42079 |         |
|            | 0.19988         | 0.42079    | 0.36323 | 0.70993002  |             |           |         |         |
| CD79B      | ENSG00000007312 | 0.32364    | 0.37311 | 0.32364     | 0.37311     | 0.34982   | 0.36324 |         |
|            | 0.34982         | 0.36324    | 0.36324 | 0.70993002  |             |           |         |         |
| LINC01635  | ENSG00000228397 | 0.24365    | 0.40375 | -0.28065    | 0.61051     | 0.34972   |         |         |
|            | 0.36328         | 0.34972    | 0.36328 | 0.36328     | 0.709970792 |           |         |         |
| BHLHE41    | ENSG00000123095 | -0.1089    | 0.54336 | -0.72293    | 0.76514     | -0.24199  |         |         |
|            | 0.59561         | 0.34969    | 0.36329 | 0.36329     | 0.709970792 |           |         |         |
| CTTNBP2NL  | ENSG00000143079 | 0.31356    | 0.37693 | -0.053555   | 0.52136     | 0.24359   |         |         |
|            | 0.40378         | 0.34957    | 0.36333 | 0.36333     | 0.709992016 |           |         |         |
| NA         | ENSG00000279364 | 0.34958    | 0.36333 | 0.34958     | 0.36333     | 0.34958   | 0.36333 |         |
|            | 0.34958         | 0.36333    | 0.36333 | 0.709992016 |             |           |         |         |
| RNU6-1135P | ENSG00000223015 | 0.34949    | 0.36336 | 0.34949     | 0.36336     | 0.34949   |         |         |
|            | 0.36336         | 0.34949    | 0.36336 | 0.36336     | 0.710013236 |           |         |         |
| RNU6-643P  | ENSG00000206745 | -0.8429    | 0.80036 | 0.34946     | 0.36337     | -0.46881  |         |         |
|            | 0.6804          | -0.71343   | 0.76221 | 0.36337     | 0.710013236 |           |         |         |
| NA         | ENSG00000187951 | -0.4641    | 0.67871 | -0.49733    | 0.69052     | 0.3493    | 0.36343 |         |
|            | 0.2367          | 0.40645    | 0.36343 | 0.71002558  |             |           |         |         |
| NA         | ENSG00000269445 | 0.34925    | 0.36345 | 0.34925     | 0.36345     | 0.34925   | 0.36345 |         |
|            | 0.34925         | 0.36345    | 0.36345 | 0.71002558  |             |           |         |         |
| PRKG2      | ENSG00000138669 | -0.47939   | 0.68417 | -0.90413    | 0.81704     | 0.34923   | 0.36346 |         |
|            | 0.21558         | 0.41466    | 0.36346 | 0.71002558  |             |           |         |         |
| OR4D9      | ENSG00000172742 | -0.9748    | 0.83517 | 0.34922     | 0.36346     | 0.34922   | 0.36346 |         |
|            | 0.34922         | 0.36346    | 0.36346 | 0.71002558  |             |           |         |         |
| NA         | ENSG00000226804 | 0.34924    | 0.36346 | 0.34924     | 0.36346     | 0.34924   | 0.36346 |         |
|            | 0.34924         | 0.36346    | 0.36346 | 0.71002558  |             |           |         |         |
| RNU4-57P   | ENSG00000251789 | 0.26003    | 0.39742 | -0.67787    | 0.75107     | 0.3492    |         |         |
|            | 0.36347         | 0.3492     | 0.36347 | 0.36347     | 0.71002558  |           |         |         |
| NA         | ENSG00000225007 | 0.22879    | 0.40952 | 0.34907     | 0.36352     | 0.13838   | 0.44497 |         |
|            | 0.34907         | 0.36352    | 0.36352 | 0.71002558  |             |           |         |         |
| ZNF723     | ENSG00000268696 | -1.2228    | 0.88929 | -1.2228     | 0.88929     | 0.34907   |         |         |
|            | 0.36352         | -1.2228    | 0.88929 | 0.36352     | 0.71002558  |           |         |         |
| RNU6-322P  | ENSG00000251819 | -0.86077   | 0.80532 | -0.86077    | 0.80532     | 0.34902   |         |         |
|            | 0.36354         | -1.4209    | 0.92232 | 0.36354     | 0.71002558  |           |         |         |
| TBC1D3P4   | ENSG00000204471 | 0.34896    | 0.36356 | -0.066774   | 0.52662     | -0.26782  |         |         |
|            | 0.60558         | 0.06565    | 0.47383 | 0.36356     | 0.71002558  |           |         |         |
| NA         | ENSG00000254180 | -0.52629   | 0.70066 | -0.46972    | 0.68072     | -0.073164 | 0.52916 |         |
|            | 0.34895         | 0.36356    | 0.36356 | 0.71002558  |             |           |         |         |
| B4GALT7    | ENSG00000027847 | 0.34893    | 0.36357 | -0.63259    | 0.7365      | -0.66875  |         |         |
|            | 0.74817         | -0.01057   | 0.50422 | 0.36357     | 0.71002558  |           |         |         |
| NA         | ENSG00000267658 | 0.34888    | 0.36359 | 0.34888     | 0.36359     | 0.34888   | 0.36359 |         |
|            | 0.34888         | 0.36359    | 0.36359 | 0.71002558  |             |           |         |         |
| MAP1A      | ENSG00000166963 | 0.068995   | 0.4725  | 0.34881     | 0.36362     | 0.34881   | 0.36362 |         |
|            | -0.14523        | 0.55774    | 0.36362 | 0.71002558  |             |           |         |         |
| RNU4-86P   | ENSG00000222067 | 0.34881    | 0.36362 | 0.34881     | 0.36362     | 0.34881   |         |         |

|            |                 |             |             |             |             |             |         |  |
|------------|-----------------|-------------|-------------|-------------|-------------|-------------|---------|--|
|            | 0.36362         | 0.34881     | 0.36362     | 0.36362     | 0.71002558  |             |         |  |
| COL25A1-DT | ENSG00000246774 | 0.34875     | 0.36364     | 0.34613     | 0.36462     | 0.2223      |         |  |
|            | 0.41204         | 0.2223      | 0.41204     | 0.36364     | 0.71002558  |             |         |  |
| RAI1-AS1   | ENSG00000237328 | -0.50255    | 0.69236     | -0.50255    | 0.69236     | 0.045266    |         |  |
|            | 0.48195         | 0.34873     | 0.36365     | 0.36365     | 0.71002558  |             |         |  |
| FCRL4      | ENSG00000163518 | -0.77046    | 0.77949     | -1.1628     | 0.87754     | 0.34866     | 0.36367 |  |
|            | -1.4768         | 0.93014     | 0.36367     | 0.71002558  |             |             |         |  |
| NA         | ENSG00000254975 | 0.34863     | 0.36368     | 0.034734    | 0.48615     | 0.34863     | 0.36368 |  |
|            | 0.23955         | 0.40534     | 0.36368     | 0.71002558  |             |             |         |  |
| NA         | ENSG00000261037 | 0.3485      | 0.36373     | -0.54054    | 0.70559     | 0.056458    | 0.47749 |  |
|            | 0.3485          | 0.36373     | 0.36373     | 0.71002558  |             |             |         |  |
| LINGO1-AS2 | ENSG00000259281 | 0.34847     | 0.36374     | -0.55909    | 0.71195     | -0.71132    |         |  |
|            | 0.76156         | -0.16604    | 0.56594     | 0.36374     | 0.71002558  |             |         |  |
| NA         | ENSG00000258418 | 0.34847     | 0.36374     | -2.205      | 0.98627     | -0.97464    | 0.83513 |  |
|            | -0.95011        | 0.82897     | 0.36374     | 0.71002558  |             |             |         |  |
| NA         | ENSG00000275025 | 0.34837     | 0.36378     | 0.34837     | 0.36378     | 0.34837     | 0.36378 |  |
|            | 0.34837         | 0.36378     | 0.36378     | 0.71002558  |             |             |         |  |
| TBK1       | ENSG00000183735 | 0.34834     | 0.36379     | -0.68407    | 0.75304     | 0.34834     | 0.36379 |  |
|            | 0.34834         | 0.36379     | 0.36379     | 0.71002558  |             |             |         |  |
| NA         | ENSG00000239763 | 0.34826     | 0.36382     | 0.34826     | 0.36382     | 0.34826     | 0.36382 |  |
|            | 0.34826         | 0.36382     | 0.36382     | 0.71002558  |             |             |         |  |
| POC5       | ENSG00000152359 | -0.88365    | 0.81156     | 0.3482      | 0.36384     | -0.99645    | 0.84048 |  |
|            | -1.05085314     | 0.36384     | 0.71002558  |             |             |             |         |  |
| OR7E101P   | ENSG00000227019 | 0.34819     | 0.36385     | 0.34819     | 0.36385     | -0.67637    |         |  |
|            | 0.7506          | -0.76298    | 0.77726     | 0.36385     | 0.71002558  |             |         |  |
| NA         | ENSG00000248237 | 0.34819     | 0.36385     | 0.34819     | 0.36385     | 0.34819     | 0.36385 |  |
|            | 0.34819         | 0.36385     | 0.36385     | 0.71002558  |             |             |         |  |
| GRK3       | ENSG00000100077 | 0.11141     | 0.45564     | -0.66759    | 0.7478      | 0.090542    | 0.46393 |  |
|            | 0.34816         | 0.36386     | 0.36386     | 0.71002558  |             |             |         |  |
| GOLGA8M    | ENSG00000261480 | -0.65702    | 0.74442     | 0.34817     | 0.36386     | -0.52096    |         |  |
|            | 0.6988          | -0.9858     | 0.83788     | 0.36386     | 0.71002558  |             |         |  |
| NA         | ENSG00000262160 | 0.34814     | 0.36387     | 0.34814     | 0.36387     | 0.34814     | 0.36387 |  |
|            | 0.34814         | 0.36387     | 0.36387     | 0.71002558  |             |             |         |  |
| MKNK1      | ENSG00000079277 | -2.0685     | 0.9807      | -0.4608     | 0.67753     | -1.7026     | 0.95568 |  |
|            | 0.3481          | 0.36388     | 0.36388     | 0.71002558  |             |             |         |  |
| C1QL1P1    | ENSG00000260134 | -0.55276    | 0.70979     | 0.34808     | 0.36389     | 0.34808     |         |  |
|            | 0.36389         | 0.34808     | 0.36389     | 0.36389     | 0.71002558  |             |         |  |
| SNORD114-6 | ENSG00000201263 | 0.34805     | 0.3639      | 0.34805     | 0.3639      | 0.34805     |         |  |
|            | 0.3639          | 0.34805     | 0.3639      | 0.3639      | 0.71002558  |             |         |  |
| RNU6-500P  | ENSG00000199219 | 0.34799     | 0.36392     | -0.9406     | 0.82654     | -0.12721    |         |  |
|            | 0.55061         | 0.057684    | 0.477036392 | 0.71002558  |             |             |         |  |
| PTCHD3P2   | ENSG00000231550 | -0.018875   | 0.50753     | -0.083136   | 0.53313     | -0.018875   |         |  |
|            | 0.50753         | 0.348036392 | 0.36392     | 0.71002558  |             |             |         |  |
| NA         | ENSG00000234826 | -2.0461     | 0.97963     | -2.0461     | 0.97963     | 0.34799     | 0.36392 |  |
|            | -2.0461         | 0.97963     | 0.36392     | 0.71002558  |             |             |         |  |
| TUBBP1     | ENSG00000127589 | 0.019677    | 0.49215     | 0.21295     | 0.41568     | 0.146044196 |         |  |
|            | 0.34798         | 0.36393     | 0.36393     | 0.71002558  |             |             |         |  |
| NA         | ENSG00000271914 | 0.34781     | 0.36399     | 0.34781     | 0.36399     | 0.34781     | 0.36399 |  |
|            | 0.34781         | 0.36399     | 0.36399     | 0.710114209 |             |             |         |  |
| RNU2-10P   | ENSG00000252184 | 0.34772     | 0.36402     | 0.34772     | 0.36402     | 0.34772     |         |  |
|            | 0.36402         | 0.34772     | 0.36402     | 0.36402     | 0.710126464 |             |         |  |
| NA         | ENSG00000226398 | -1.0562     | 0.85457     | 0.34771     | 0.36403     | -0.02739    | 0.51093 |  |
|            | -0.048458       | 0.51932     | 0.36403     | 0.710126464 |             |             |         |  |
| OR10J2P    | ENSG00000248642 | 0.34769     | 0.36404     | 0.34769     | 0.36404     | 0.34769     |         |  |
|            | 0.36404         | 0.34769     | 0.36404     | 0.36404     | 0.710126464 |             |         |  |
| NA         | ENSG00000281468 | 0.34757     | 0.36408     | 0.34757     | 0.36408     | 0.34757     | 0.36408 |  |
|            | 0.34757         | 0.36408     | 0.36408     | 0.710140383 |             |             |         |  |
| MPP7-DT    | ENSG00000282996 | 0.34756     | 0.36409     | 0.34756     | 0.36409     | 0.34756     |         |  |
|            | 0.36409         | 0.34756     | 0.36409     | 0.36409     | 0.710140383 |             |         |  |
| NA         | ENSG00000265460 | -0.74252    | 0.77111     | 0.34751     | 0.3641      | -0.74252    | 0.77111 |  |
|            | -0.74252        | 0.77111     | 0.3641      | 0.710140383 |             |             |         |  |
| NFIX       | ENSG00000008441 | -0.87661    | 0.80965     | -1.4866     | 0.93143     | 0.3475      | 0.36411 |  |

|            |                 |           |         |             |             |           |         |  |
|------------|-----------------|-----------|---------|-------------|-------------|-----------|---------|--|
|            | -1.471          | 0.92936   | 0.36411 | 0.710140383 |             |           |         |  |
| SNORD116-2 | ENSG00000207001 | -0.057957 | 0.52311 | -0.057957   | 0.52311     | 0.34748   |         |  |
|            | 0.36412         | 0.34051   | 0.36673 | 0.36412     | 0.710140383 |           |         |  |
| NA         | ENSG00000222224 | 0.34735   | 0.36416 | 0.34735     | 0.36416     | 0.34735   | 0.36416 |  |
|            | 0.34735         | 0.36416   | 0.36416 | 0.710181051 |             |           |         |  |
| MTND4P29   | ENSG00000249177 | 0.34735   | 0.36417 | -1.0903     | 0.86222     | -1.0903   |         |  |
|            | 0.86222         | -1.0903   | 0.86222 | 0.36417     | 0.710181051 |           |         |  |
| CD209      | ENSG00000090659 | 0.34722   | 0.36421 | 0.34722     | 0.36421     | 0.34722   | 0.36421 |  |
|            | 0.34722         | 0.36421   | 0.36421 | 0.710230633 |             |           |         |  |
| DHX9       | ENSG00000135829 | -0.97907  | 0.83623 | 0.32559     | 0.37237     | 0.34708   | 0.36426 |  |
|            | 0.15746         | 0.43744   | 0.36426 | 0.71028352  |             |           |         |  |
| SLC17A1    | ENSG00000124568 | -0.76811  | 0.77879 | -0.76811    | 0.77879     | 0.347     | 0.3643  |  |
|            | -0.79836        | 0.78767   | 0.3643  | 0.71028352  |             |           |         |  |
| NA         | ENSG00000220349 | 0.34695   | 0.36431 | 0.34695     | 0.36431     | 0.34695   | 0.36431 |  |
|            | 0.34695         | 0.36431   | 0.36431 | 0.71028352  |             |           |         |  |
| RN7SL333P  | ENSG00000239494 | 0.34696   | 0.36431 | 0.34696     | 0.36431     | 0.34696   |         |  |
|            | 0.36431         | 0.34696   | 0.36431 | 0.36431     | 0.71028352  |           |         |  |
| CYP2U1-AS1 | ENSG00000245293 | -0.66869  | 0.74815 | 0.34697     | 0.36431     | -0.040903 |         |  |
|            | 0.51631         | -0.076679 | 0.53056 | 0.36431     | 0.71028352  |           |         |  |
| RBM23      | ENSG00000100461 | 0.035183  | 0.48597 | 0.3469      | 0.36433     | 0.3469    | 0.36433 |  |
|            | 0.3469          | 0.36433   | 0.36433 | 0.710294095 |             |           |         |  |
| MMP9       | ENSG00000100985 | 0.25861   | 0.39797 | -0.27159    | 0.60703     | -0.56003  | 0.71227 |  |
|            | 0.34686         | 0.36435   | 0.36435 | 0.710304669 |             |           |         |  |
| RNU6-822P  | ENSG00000199577 | -1.1587   | 0.87672 | -0.16502    | 0.56554     | 0.34673   |         |  |
|            | 0.3644          | -0.39771  | 0.65458 | 0.3644      | 0.710329417 |           |         |  |
| SNORA74D   | ENSG00000252213 | 0.3466    | 0.36445 | 0.3466      | 0.36445     | 0.3466    |         |  |
|            | 0.36445         | 0.3466    | 0.36445 | 0.36445     | 0.710329417 |           |         |  |
| GCNT2P1    | ENSG00000205318 | 0.34655   | 0.36446 | 0.34655     | 0.36446     | 0.34655   |         |  |
|            | 0.36446         | -1.6324   | 0.94871 | 0.36446     | 0.710329417 |           |         |  |
| CEACAMP9   | ENSG00000230529 | -1.1177   | 0.86814 | 0.34653     | 0.36447     | -0.68597  |         |  |
|            | 0.75363         | -1.2576   | 0.89573 | 0.36447     | 0.710329417 |           |         |  |
| NA         | ENSG00000261778 | -0.5855   | 0.72089 | 0.34651     | 0.36448     | 0.34651   | 0.36448 |  |
|            | 0.34651         | 0.36448   | 0.36448 | 0.710329417 |             |           |         |  |
| RPL12P4    | ENSG00000185834 | -0.93044  | 0.82393 | 0.34649     | 0.36449     | -1.3366   |         |  |
|            | 0.90933         | -0.46305  | 0.67834 | 0.36449     | 0.710329417 |           |         |  |
| OIT3       | ENSG00000138315 | 0.34645   | 0.3645  | 0.0014006   | 0.49944     | -0.21195  | 0.58393 |  |
|            | -1.0462         | 0.85226   | 0.3645  | 0.710329417 |             |           |         |  |
| ZNF90      | ENSG00000213988 | -0.15522  | 0.56168 | -0.72515    | 0.76582     | -0.6134   | 0.73019 |  |
|            | 0.34643         | 0.36451   | 0.36451 | 0.710329417 |             |           |         |  |
| FAAHP1     | ENSG00000232022 | 0.34638   | 0.36453 | 0.2699      | 0.39362     | -1.0521   |         |  |
|            | 0.85363         | -1.003    | 0.84206 | 0.36453     | 0.710329417 |           |         |  |
| RNU6-1118P | ENSG00000222314 | -0.2903   | 0.61421 | -0.2903     | 0.61421     | -0.2903   |         |  |
|            | 0.61421         | 0.34636   | 0.36454 | 0.36454     | 0.710329417 |           |         |  |
| PALMD      | ENSG00000099260 | 0.059821  | 0.47615 | -0.41199    | 0.65983     | 0.34625   | 0.36458 |  |
|            | -0.4591         | 0.67692   | 0.36458 | 0.710329417 |             |           |         |  |
| KRTAP4-11  | ENSG00000212721 | 0.34621   | 0.36459 | 0.34621     | 0.36459     | 0.34621   |         |  |
|            | 0.36459         | 0.34621   | 0.36459 | 0.36459     | 0.710329417 |           |         |  |
| NA         | ENSG00000261970 | 0.34623   | 0.36459 | -0.42032    | 0.66287     | 0.34623   | 0.36459 |  |
|            | 0.34623         | 0.36459   | 0.36459 | 0.710329417 |             |           |         |  |
| DNM1P47    | ENSG00000259660 | 0.34611   | 0.36463 | 0.20839     | 0.41746     | -0.52618  |         |  |
|            | 0.70062         | 0.066943  | 0.47331 | 0.36463     | 0.710329417 |           |         |  |
| NA         | ENSG00000267192 | 0.34604   | 0.36466 | 0.34604     | 0.36466     | 0.34604   | 0.36466 |  |
|            | 0.34604         | 0.36466   | 0.36466 | 0.710329417 |             |           |         |  |
| PARD6B     | ENSG00000124171 | 0.07001   | 0.47209 | -0.38559    | 0.6501      | 0.34601   |         |  |
|            | 0.36467         | 0.072364  | 0.47116 | 0.36467     | 0.710329417 |           |         |  |
| B2M        | ENSG00000166710 | -0.24479  | 0.59669 | 0.34601     | 0.36467     | 0.34601   | 0.36467 |  |
|            | 0.035693        | 0.48576   | 0.36467 | 0.710329417 |             |           |         |  |
| NA         | ENSG00000198923 | -0.065973 | 0.5263  | -0.065973   | 0.5263      | 0.34592   | 0.3647  |  |
|            | -0.065973       | 0.5263    | 0.3647  | 0.710329417 |             |           |         |  |
| TRBV12-2   | ENSG00000211739 | 0.34594   | 0.3647  | 0.34594     | 0.3647      | 0.34594   |         |  |
|            | 0.3647          | 0.34594   | 0.3647  | 0.3647      | 0.710329417 |           |         |  |
| EFL1P1     | ENSG00000259404 | -0.72903  | 0.76701 | -0.31659    | 0.62422     | 0.34589   |         |  |

|           |                 |           |         |             |             |           |         |
|-----------|-----------------|-----------|---------|-------------|-------------|-----------|---------|
|           | 0.36471         | -1.0532   | 0.85388 | 0.36471     | 0.710329417 |           |         |
| MIR3155A  | ENSG00000263628 | 0.34587   | 0.36472 | 0.34587     | 0.36472     | 0.34587   | 0.34587 |
|           | 0.36472         | 0.34587   | 0.36472 | 0.36472     | 0.710329417 |           |         |
| MYO3A     | ENSG00000095777 | 0.15561   | 0.43817 | 0.34584     | 0.36473     | 0.072542  | 0.47109 |
|           | -0.37629        | 0.64665   | 0.36473 | 0.710329417 |             |           |         |
| LINC01040 | ENSG00000226037 | 0.34584   | 0.36473 | 0.24707     | 0.40243     | 0.24707   |         |
|           | 0.40243         | 0.24707   | 0.40243 | 0.36473     | 0.710329417 |           |         |
| MIR4729   | ENSG00000263857 | -0.14092  | 0.55603 | -0.14092    | 0.55603     | 0.34585   |         |
|           | 0.36473         | 0.34585   | 0.36473 | 0.36473     | 0.710329417 |           |         |
| NA        | ENSG00000267172 | 0.3458    | 0.36475 | 0.3458      | 0.36475     | -0.70392  | 0.75926 |
|           | 0.3458          | 0.36475   | 0.36475 | 0.710329417 |             |           |         |
| ZFAT-AS1  | ENSG00000248492 | 0.34575   | 0.36477 | 0.34575     | 0.36477     | 0.34575   |         |
|           | 0.36477         | 0.34575   | 0.36477 | 0.36477     | 0.710329417 |           |         |
| KARS1P1   | ENSG00000229696 | -0.48846  | 0.68739 | 0.34567     | 0.36479     | -0.64411  |         |
|           | 0.74025         | -0.48846  | 0.68739 | 0.36479     | 0.710329417 |           |         |
| TGFB3-AS1 | ENSG00000258876 | 0.34567   | 0.36479 | 0.34567     | 0.36479     | 0.34567   |         |
|           | 0.36479         | 0.34567   | 0.36479 | 0.36479     | 0.710329417 |           |         |
| VSIG10L2  | ENSG00000283703 | 0.34568   | 0.36479 | 0.34568     | 0.36479     | 0.34568   |         |
|           | 0.36479         | 0.34568   | 0.36479 | 0.36479     | 0.710329417 |           |         |
| NA        | ENSG00000234891 | -0.95411  | 0.82999 | 0.34566     | 0.3648      | 0.34566   | 0.3648  |
|           | 0.34566         | 0.3648    | 0.3648  | 0.710329417 |             |           |         |
| PGAM1P1   | ENSG00000248271 | 0.34557   | 0.36483 | -0.8478     | 0.80172     | 0.34557   |         |
|           | 0.36483         | -0.40934  | 0.65885 | 0.36483     | 0.710359448 |           |         |
| SOD1P1    | ENSG00000219074 | -0.49108  | 0.68831 | 0.34539     | 0.3649      | -1.1752   |         |
|           | 0.88004         | -0.36511  | 0.64249 | 0.3649      | 0.710405893 |           |         |
| WASF3-AS1 | ENSG00000237001 | 0.13068   | 0.44801 | 0.34539     | 0.3649      | -1.5027   |         |
|           | 0.93354         | -1.3521   | 0.91183 | 0.3649      | 0.710405893 |           |         |
| TBX2      | ENSG00000121068 | 0.34533   | 0.36492 | -0.81591    | 0.79272     | -0.67057  | 0.74875 |
|           | -1.1922         | 0.88341   | 0.36492 | 0.710405893 |             |           |         |
| GTF2IP22  | ENSG00000259095 | 0.34532   | 0.36493 | 0.34532     | 0.36493     | 0.34532   |         |
|           | 0.36493         | 0.34532   | 0.36493 | 0.36493     | 0.710405893 |           |         |
| ZNRF1     | ENSG00000186187 | 0.0084502 | 0.49663 | -0.62946    | 0.73548     | -0.6116   | 0.7296  |
|           | 0.34525         | 0.36495   | 0.36495 | 0.710405893 |             |           |         |
| SQOR      | ENSG00000137767 | -0.25506  | 0.60066 | 0.33224     | 0.36986     | 0.34519   | 0.36497 |
|           | 0.34519         | 0.36497   | 0.36497 | 0.710405893 |             |           |         |
| CDH1      | ENSG00000039068 | 0.3451    | 0.36501 | -0.5869     | 0.72136     | 0.2147    | 0.415   |
|           | 0.28417         | 0.38814   | 0.36501 | 0.710405893 |             |           |         |
| GUCY1B1   | ENSG00000061918 | -0.66733  | 0.74772 | -1.3103     | 0.90495     | -0.063335 |         |
|           | 0.52525         | 0.34503   | 0.36504 | 0.36504     | 0.710405893 |           |         |
| CYP3A51P  | ENSG00000282277 | 0.345     | 0.36505 | 0.345       | 0.36505     | -0.10937  | 0.54355 |
|           | -1.2808         | 0.89987   | 0.36505 | 0.710405893 |             |           |         |
| NFX1      | ENSG00000086102 | -0.6363   | 0.73771 | 0.34489     | 0.36509     | -1.3436   | 0.91046 |
|           | -1.1685         | 0.87871   | 0.36509 | 0.710405893 |             |           |         |
| NA        | ENSG00000272745 | -0.53672  | 0.70427 | 0.34486     | 0.3651      | 0.13347   | 0.44691 |
|           | 0.34486         | 0.3651    | 0.3651  | 0.710405893 |             |           |         |
| RN7SL162P | ENSG00000266503 | 0.33593   | 0.36846 | -0.19871    | 0.57875     | -0.16225  |         |
|           | 0.56445         | 0.34483   | 0.36511 | 0.36511     | 0.710405893 |           |         |
| ZNF333    | ENSG00000160961 | -0.90932  | 0.81841 | -0.90932    | 0.81841     | 0.34482   |         |
|           | 0.36512         | -0.90932  | 0.81841 | 0.36512     | 0.710405893 |           |         |
| PIMREGP1  | ENSG00000226261 | -0.050827 | 0.52027 | -0.089372   | 0.53561     | -0.050827 |         |
|           | 0.52027         | 0.34481   | 0.36512 | 0.36512     | 0.710405893 |           |         |
| NA        | ENSG00000279565 | -0.48934  | 0.6877  | 0.34481     | 0.36512     | 0.34481   | 0.36512 |
|           | 0.34481         | 0.36512   | 0.36512 | 0.710405893 |             |           |         |
| CDC7      | ENSG00000097046 | 0.34475   | 0.36514 | 0.19795     | 0.42154     | -0.42756  | 0.66551 |
|           | 0.12292         | 0.45108   | 0.36514 | 0.710405893 |             |           |         |
| NA        | ENSG00000284512 | 0.34475   | 0.36514 | 0.34475     | 0.36514     | 0.34475   | 0.36514 |
|           | 0.34475         | 0.36514   | 0.36514 | 0.710405893 |             |           |         |
| GBA3      | ENSG00000249948 | -0.44889  | 0.67325 | -0.75149    | 0.77382     | 0.34474   | 0.36515 |
|           | -0.12433        | 0.54947   | 0.36515 | 0.710405893 |             |           |         |
| RPE65     | ENSG00000116745 | -0.26514  | 0.60455 | -0.26514    | 0.60455     | -1.0604   | 0.85551 |
|           | 0.34469         | 0.36516   | 0.36516 | 0.710405893 |             |           |         |
| SEMA3D    | ENSG00000153993 | -1.0161   | 0.84521 | -1.1319     | 0.87117     | -0.87914  |         |



|             |                 |           |         |             |             |          |         |  |
|-------------|-----------------|-----------|---------|-------------|-------------|----------|---------|--|
|             | 0.81034         | 0.34471   | 0.36516 | 0.36516     | 0.710405893 |          |         |  |
| POTEF       | ENSG00000196604 | -0.24869  | 0.5982  | 0.34469     | 0.36516     | -1.2511  | 0.89455 |  |
|             | 0.19362         | 0.42324   | 0.36516 | 0.710405893 |             |          |         |  |
| HAUS5       | ENSG00000249115 | 0.0046756 | 0.49813 | 0.17731     | 0.42963     | 0.34451  | 0.36523 |  |
|             | 0.34451         | 0.36523   | 0.36523 | 0.710431901 |             |          |         |  |
| PES1P1      | ENSG00000248191 | 0.34447   | 0.36524 | 0.34447     | 0.36524     | 0.34447  |         |  |
|             | 0.36524         | 0.34447   | 0.36524 | 0.36524     | 0.710431901 |          |         |  |
| RNU6-696P   | ENSG00000212136 | 0.34447   | 0.36525 | -0.38576    | 0.65016     | 0.14808  |         |  |
|             | 0.44114         | -1.1861   | 0.88221 | 0.36525     | 0.710431901 |          |         |  |
| HMG1P20     | ENSG00000239539 | 0.34443   | 0.36526 | 0.34443     | 0.36526     | 0.34443  |         |  |
|             | 0.36526         | 0.34443   | 0.36526 | 0.36526     | 0.710431901 |          |         |  |
| PRL         | ENSG00000172179 | 0.34442   | 0.36527 | 0.34442     | 0.36527     | 0.34442  | 0.36527 |  |
|             | 0.34442         | 0.36527   | 0.36527 | 0.710431901 |             |          |         |  |
| NA          | ENSG00000231883 | 0.34441   | 0.36527 | 0.34441     | 0.36527     | 0.34441  | 0.36527 |  |
|             | 0.34441         | 0.36527   | 0.36527 | 0.710431901 |             |          |         |  |
| ACTA2-AS1   | ENSG00000180139 | 0.34435   | 0.36529 | -0.33601    | 0.63157     | 0.17008  |         |  |
|             | 0.43247         | 0.17008   | 0.43247 | 0.36529     | 0.710431901 |          |         |  |
| PPIAP13     | ENSG00000237882 | -0.12367  | 0.54921 | 0.30894     | 0.37868     | 0.0884   |         |  |
|             | 0.46478         | 0.34435   | 0.36529 | 0.36529     | 0.710431901 |          |         |  |
| CCDC163     | ENSG00000280670 | 0.34423   | 0.36533 | 0.34423     | 0.36533     | 0.34423  |         |  |
|             | 0.36533         | 0.34423   | 0.36533 | 0.36533     | 0.710472432 |          |         |  |
| NA          | ENSG00000260702 | -0.26504  | 0.60451 | 0.34423     | 0.36534     | 0.14289  | 0.44319 |  |
|             | -0.5177         | 0.69767   | 0.36534 | 0.710472432 |             |          |         |  |
| EMC6        | ENSG00000127774 | 0.34407   | 0.3654  | 0.34407     | 0.3654      | 0.34407  | 0.3654  |  |
|             | 0.34407         | 0.3654    | 0.3654  | 0.710560757 |             |          |         |  |
| KLHDC4      | ENSG00000104731 | -0.64872  | 0.74174 | 0.34397     | 0.36543     | -1.0741  |         |  |
|             | 0.85862         | 0.12505   | 0.45024 | 0.36543     | 0.710590738 |          |         |  |
| SEPTIN1     | ENSG00000180096 | 0.3439    | 0.36546 | 0.3439      | 0.36546     | 0.3439   |         |  |
|             | 0.36546         | 0.3439    | 0.36546 | 0.36546     | 0.710602897 |          |         |  |
| EIF4A2P1    | ENSG00000267336 | 0.34384   | 0.36548 | 0.34384     | 0.36548     | 0.34384  |         |  |
|             | 0.36548         | -1.4342   | 0.92424 | 0.36548     | 0.710602897 |          |         |  |
| RUNDC3A-AS1 | ENSG00000267750 | 0.27352   | 0.39223 | 0.34385     | 0.36548     | 0.34385  |         |  |
|             | 0.36548         | 0.079548  | 0.4683  | 0.36548     | 0.710602897 |          |         |  |
| UPP2        | ENSG00000007001 | -0.18368  | 0.57287 | 0.21285     | 0.41572     | -0.20688 | 0.58195 |  |
|             | 0.34379         | 0.3655    | 0.3655  | 0.71061343  |             |          |         |  |
| SCARB2      | ENSG00000138760 | -0.24193  | 0.59558 | 0.23018     | 0.40898     | 0.041273 |         |  |
|             | 0.48354         | 0.34364   | 0.36556 | 0.36556     | 0.710692815 |          |         |  |
| NA          | ENSG00000250828 | 0.10044   | 0.46    | 0.34362     | 0.36557     | 0.34362  | 0.36557 |  |
|             | 0.34362         | 0.36557   | 0.36557 | 0.710692815 |             |          |         |  |
| RPL24P7     | ENSG00000215016 | 0.34347   | 0.36562 | 0.34347     | 0.36562     | 0.34347  |         |  |
|             | 0.36562         | 0.34347   | 0.36562 | 0.36562     | 0.710699278 |          |         |  |
| NA          | ENSG00000222042 | -0.77515  | 0.78087 | 0.34348     | 0.36562     | -0.77515 | 0.78087 |  |
|             | -0.77515        | 0.78087   | 0.36562 | 0.710699278 |             |          |         |  |
| MORC2       | ENSG00000133422 | -1.1055   | 0.86552 | 0.34345     | 0.36563     | -0.61241 | 0.72987 |  |
|             | -0.44056        | 0.67023   | 0.36563 | 0.710699278 |             |          |         |  |
| FREM3       | ENSG00000183090 | 0.34338   | 0.36566 | 0.19756     | 0.42169     | 0.026039 | 0.48961 |  |
|             | -0.43948        | 0.66984   | 0.36566 | 0.710699278 |             |          |         |  |
| NA          | ENSG00000267026 | 0.25881   | 0.39789 | 0.34336     | 0.36567     | 0.084457 | 0.46635 |  |
|             | 0.084457        | 0.46635   | 0.36567 | 0.710699278 |             |          |         |  |
| ATP6V0E2    | ENSG00000171130 | 0.34332   | 0.36568 | -0.27412    | 0.608       | 0.34332  | 0.36568 |  |
|             | 0.17541         | 0.43038   | 0.36568 | 0.710699278 |             |          |         |  |
| SNRPCP2     | ENSG00000251235 | 0.16055   | 0.43622 | 0.34328     | 0.36569     | 0.34328  |         |  |
|             | 0.36569         | 0.34328   | 0.36569 | 0.36569     | 0.710699278 |          |         |  |
| RN7SKP288   | ENSG00000252036 | 0.28994   | 0.38593 | 0.28994     | 0.38593     | 0.34328  |         |  |
|             | 0.36569         | -0.3837   | 0.6494  | 0.36569     | 0.710699278 |          |         |  |
| CSRP3       | ENSG00000129170 | 0.34319   | 0.36573 | -0.51216    | 0.69573     | 0.34319  | 0.36573 |  |
|             | 0.34319         | 0.36573   | 0.36573 | 0.710713031 |             |          |         |  |
| NA          | ENSG00000244380 | 0.34319   | 0.36573 | 0.34319     | 0.36573     | 0.34319  | 0.36573 |  |
|             | 0.34319         | 0.36573   | 0.36573 | 0.710713031 |             |          |         |  |
| RPS3AP24    | ENSG00000217684 | 0.34312   | 0.36575 | 0.34312     | 0.36575     | 0.34312  |         |  |
|             | 0.36575         | 0.34312   | 0.36575 | 0.36575     | 0.710713031 |          |         |  |
| VIM-AS1     | ENSG00000229124 | -0.11628  | 0.54629 | 0.34311     | 0.36576     | 0.023913 |         |  |

|           |                 |           |            |             |             |           |         |         |
|-----------|-----------------|-----------|------------|-------------|-------------|-----------|---------|---------|
|           | 0.49046         | -0.48814  | 0.68727    | 0.36576     | 0.710713031 |           |         |         |
| NA        | ENSG00000252138 | 0.34307   | 0.34307    | 0.36577     | 0.34307     | 0.36577   | 0.34307 | 0.36577 |
|           | 0.34307         | 0.36577   | 0.36577    | 0.710713031 |             |           |         |         |
| AGFG2     | ENSG00000106351 | -0.47057  | 0.68103    | -0.81631    | 0.79284     | -0.58808  | 0.72176 |         |
|           | 0.34301         | 0.36579   | 0.36579    | 0.710723553 |             |           |         |         |
| LINC01789 | ENSG00000229457 | 0.34294   | 0.36582    | 0.33678     | 0.36814     | 0.33678   |         |         |
|           | 0.36814         | 0.33678   | 0.36814    | 0.36582     | 0.710753503 |           |         |         |
| YBEY      | ENSG00000182362 | -0.37435  | 0.64593    | -0.9327     | 0.82451     | -0.9327   | 0.82451 |         |
|           | 0.3429          | 0.36584   | 0.36584    | 0.710764022 |             |           |         |         |
| CPVL      | ENSG00000106066 | -0.29354  | 0.61545    | 0.15472     | 0.43852     | 0.34274   | 0.3659  |         |
|           | 0.31941         | 0.37471   | 0.3659     | 0.710843338 |             |           |         |         |
| GPR39     | ENSG00000183840 | 0.13595   | 0.44593    | 0.34271     | 0.36591     | 0.34271   | 0.36591 |         |
|           | 0.34271         | 0.36591   | 0.36591    | 0.710843338 |             |           |         |         |
| RPS27AP7  | ENSG00000236549 | 0.34266   | 0.36593    | -0.49788    | 0.69071     | -0.32801  |         |         |
|           | 0.62855         | -0.32801  | 0.62855    | 0.36593     | 0.710853853 |           |         |         |
| NA        | ENSG00000255463 | -1.0452   | 0.85203    | -1.0452     | 0.85203     | -1.0452   | 0.85203 |         |
|           | 0.34259         | 0.36595   | 0.36595    | 0.710864367 |             |           |         |         |
| DAPL1     | ENSG00000163331 | -0.18523  | 0.57348    | -0.50255    | 0.69236     | 0.094971  | 0.46217 |         |
|           | 0.34254         | 0.36597   | 0.36597    | 0.710874879 |             |           |         |         |
| ACAD9     | ENSG00000177646 | -0.22082  | 0.58739    | -0.75828    | 0.77586     | -0.91841  | 0.8208  |         |
|           | 0.34248         | 0.366     | 0.366      | 0.71087648  |             |           |         |         |
| NA        | ENSG00000255753 | 0.34247   | 0.366      | 0.34247     | 0.366       | -0.098214 | 0.53912 | 0.34247 |
|           | 0.366           | 0.366     | 0.71087648 |             |             |           |         |         |
| NA        | ENSG00000255253 | 0.34232   | 0.36605    | 0.34232     | 0.36605     | 0.34232   | 0.36605 |         |
|           | 0.34232         | 0.36605   | 0.36605    | 0.710945257 |             |           |         |         |
| ABCC2     | ENSG00000023839 | 0.16298   | 0.43527    | -0.46118    | 0.67767     | -1.3503   | 0.91155 |         |
|           | 0.34222         | 0.36609   | 0.36609    | 0.710976778 |             |           |         |         |
| NA        | ENSG00000227619 | -0.51266  | 0.69591    | 0.17485     | 0.4306      | 0.3422    | 0.3661  |         |
|           | 0.3422          | 0.3661    | 0.3661     | 0.710976778 |             |           |         |         |
| RNU6-700P | ENSG00000212345 | 0.34216   | 0.36611    | 0.34216     | 0.36611     | 0.34216   |         |         |
|           | 0.36611         | 0.34216   | 0.36611    | 0.36611     | 0.710976778 |           |         |         |
| RPS4XP18  | ENSG00000239490 | -0.31145  | 0.62227    | -0.71946    | 0.76407     | -0.76666  |         |         |
|           | 0.77836         | 0.34204   | 0.36616    | 0.36616     | 0.711005736 |           |         |         |
| PCGF5     | ENSG00000180628 | 0.34198   | 0.36618    | -0.31566    | 0.62387     | 0.056926  | 0.4773  |         |
|           | 0.088094        | 0.4649    | 0.36618    | 0.711005736 |             |           |         |         |
| NA        | ENSG00000249216 | 0.34193   | 0.3662     | 0.34193     | 0.3662      | 0.34193   | 0.3662  |         |
|           | 0.34193         | 0.3662    | 0.3662     | 0.711005736 |             |           |         |         |
| NA        | ENSG00000252621 | 0.3419    | 0.36621    | -0.10556    | 0.54203     | -0.46918  | 0.68053 |         |
|           | -0.46918        | 0.68053   | 0.36621    | 0.711005736 |             |           |         |         |
| NA        | ENSG00000267328 | 0.34188   | 0.36622    | 0.34188     | 0.36622     | 0.34188   | 0.36622 |         |
|           | 0.34188         | 0.36622   | 0.36622    | 0.711005736 |             |           |         |         |
| TIGD5     | ENSG00000179886 | 0.29761   | 0.383      | 0.34184     | 0.36623     | -0.39766  | 0.65456 |         |
|           | -0.39766        | 0.65456   | 0.36623    | 0.711005736 |             |           |         |         |
| NA        | ENSG00000254579 | 0.34186   | 0.36623    | 0.056434    | 0.4775      | 0.34186   | 0.36623 |         |
|           | 0.34186         | 0.36623   | 0.36623    | 0.711005736 |             |           |         |         |
| CYP4Z2P   | ENSG00000154198 | 0.34181   | 0.36625    | -0.26321    | 0.60381     | -0.24054  |         |         |
|           | 0.59505         | -0.55442  | 0.71036    | 0.36625     | 0.711005736 |           |         |         |
| NA        | ENSG00000230175 | 0.34177   | 0.36626    | 0.34177     | 0.36626     | 0.34177   | 0.36626 |         |
|           | 0.34177         | 0.36626   | 0.36626    | 0.711005736 |             |           |         |         |
| RNPEP     | ENSG00000176393 | -1.01     | 0.84375    | -0.0073037  | 0.50291     | 0.34169   | 0.36629 |         |
|           | 0.12442         | 0.45049   | 0.36629    | 0.711005736 |             |           |         |         |
| EFCAB10   | ENSG00000185055 | 0.34167   | 0.3663     | 0.34167     | 0.3663      | 0.15279   |         |         |
|           | 0.43928         | 0.34167   | 0.3663     | 0.3663      | 0.711005736 |           |         |         |
| KRTAP4-7  | ENSG00000240871 | -0.016545 | 0.5066     | 0.20967     | 0.41696     | 0.20967   |         |         |
|           | 0.41696         | 0.34168   | 0.3663     | 0.3663      | 0.711005736 |           |         |         |
| CCDC170   | ENSG00000120262 | -0.55312  | 0.70991    | 0.34148     | 0.36637     | 0.34148   |         |         |
|           | 0.36637         | 0.34148   | 0.36637    | 0.36637     | 0.711068719 |           |         |         |
| KITLG     | ENSG00000049130 | 0.34144   | 0.36639    | 0.13994     | 0.44435     | 0.34144   | 0.36639 |         |
|           | 0.34144         | 0.36639   | 0.36639    | 0.711068719 |             |           |         |         |
| RPL3P8    | ENSG00000232199 | 0.34144   | 0.36639    | 0.34144     | 0.36639     | 0.34144   |         |         |
|           | 0.36639         | 0.34144   | 0.36639    | 0.36639     | 0.711068719 |           |         |         |
| C10orf67  | ENSG00000179133 | 0.16766   | 0.43343    | 0.34136     | 0.36642     | -1.6306   |         |         |

|             |                 |           |         |             |             |            |         |
|-------------|-----------------|-----------|---------|-------------|-------------|------------|---------|
|             | 0.94851         | 0.19578   | 0.42239 | 0.36642     | 0.711068719 |            |         |
| NA          | ENSG00000251288 | -0.36395  | 0.64205 | -0.36395    | 0.64205     | -0.36395   | 0.64205 |
|             | 0.34135         | 0.36642   | 0.36642 | 0.711068719 |             |            |         |
| NA          | ENSG00000260593 | 0.34134   | 0.36642 | 0.34134     | 0.36642     | 0.34134    | 0.36642 |
|             | 0.34134         | 0.36642   | 0.36642 | 0.711068719 |             |            |         |
| TRAV38-2DV8 | ENSG00000211817 | 0.34111   | 0.36651 | 0.34111     | 0.36651     | 0.34111    | 0.36651 |
|             | 0.36651         | 0.34111   | 0.36651 | 0.36651     | 0.711215049 |            |         |
| NA          | ENSG00000280220 | 0.34106   | 0.36653 | 0.34106     | 0.36653     | 0.34106    | 0.36653 |
|             | 0.34106         | 0.36653   | 0.36653 | 0.711225537 |             |            |         |
| NA          | ENSG00000207317 | 0.15214   | 0.43954 | 0.34093     | 0.36658     | 0.15214    | 0.43954 |
|             | 0.15214         | 0.43954   | 0.36658 | 0.711294234 |             |            |         |
| HSBP1P1     | ENSG00000258650 | 0.25805   | 0.39818 | -0.70389    | 0.75925     | 0.34082    |         |
|             | 0.36662         | 0.34082   | 0.36662 | 0.36662     | 0.711302058 |            |         |
| NA          | ENSG00000260995 | 0.24732   | 0.40233 | -0.018453   | 0.50736     | 0.24732    | 0.40233 |
|             | 0.34076         | 0.36664   | 0.36664 | 0.711302058 |             |            |         |
| CAPRIN2     | ENSG00000110888 | 0.033551  | 0.48662 | -0.36386    | 0.64202     | -0.45067   |         |
|             | 0.67389         | 0.34075   | 0.36665 | 0.36665     | 0.711302058 |            |         |
| TAS2R2P     | ENSG00000203523 | 0.34072   | 0.36666 | -0.63984    | 0.73886     | -0.12124   |         |
|             | 0.54825         | -0.345    | 0.63495 | 0.36666     | 0.711302058 |            |         |
| NA          | ENSG00000257855 | -0.19257  | 0.57635 | 0.047475    | 0.48107     | 0.047475   | 0.48107 |
|             | 0.34069         | 0.36667   | 0.36667 | 0.711302058 |             |            |         |
| NA          | ENSG00000266121 | 0.34067   | 0.36668 | 0.34067     | 0.36668     | 0.34067    | 0.36668 |
|             | 0.34067         | 0.36668   | 0.36668 | 0.711302058 |             |            |         |
| BUB1B       | ENSG00000156970 | 0.1108    | 0.45589 | -0.26231    | 0.60346     | 0.34061    | 0.3667  |
|             | -1.0712         | 0.85797   | 0.3667  | 0.711302058 |             |            |         |
| NCR3LG1     | ENSG00000188211 | -0.26435  | 0.60425 | 0.34055     | 0.36672     | -0.0096138 |         |
|             | 0.50384         | -0.070293 | 0.52802 | 0.36672     | 0.711302058 |            |         |
| NA          | ENSG00000222032 | 0.34053   | 0.36673 | -1.1896     | 0.88291     | -1.1896    | 0.88291 |
|             | -1.1896         | 0.88291   | 0.36673 | 0.711302058 |             |            |         |
| RNA5SP415   | ENSG00000253055 | 0.34053   | 0.36673 | 0.34053     | 0.36673     | 0.34053    |         |
|             | 0.36673         | 0.34053   | 0.36673 | 0.36673     | 0.711302058 |            |         |
| DKK4        | ENSG00000104371 | 0.20769   | 0.41773 | 0.34046     | 0.36676     | -0.65701   | 0.74441 |
|             | 0.34046         | 0.36676   | 0.36676 | 0.711303622 |             |            |         |
| LINC01866   | ENSG00000237670 | -0.039876 | 0.5159  | 0.34045     | 0.36676     | 0.34045    |         |
|             | 0.36676         | 0.34045   | 0.36676 | 0.36676     | 0.711303622 |            |         |
| NA          | ENSG00000254864 | -0.15175  | 0.56031 | 0.34039     | 0.36678     | -0.15175   | 0.56031 |
|             | -0.15175        | 0.56031   | 0.36678 | 0.7113141   |             |            |         |
| IGHV3-73    | ENSG00000211976 | 0.34026   | 0.36683 | 0.34026     | 0.36683     | 0.34026    |         |
|             | 0.36683         | 0.228     | 0.40982 | 0.36683     | 0.711347091 |            |         |
| NA          | ENSG00000248647 | -1.7471   | 0.95969 | -1.7471     | 0.95969     | -1.7471    | 0.95969 |
|             | 0.34022         | 0.36684   | 0.36684 | 0.711347091 |             |            |         |
| RPL5P1      | ENSG00000241061 | -0.18291  | 0.57256 | 0.3402      | 0.36685     | 0.3402     |         |
|             | 0.36685         | -0.39322  | 0.65292 | 0.36685     | 0.711347091 |            |         |
| RN7SL399P   | ENSG00000239542 | 0.34018   | 0.36686 | 0.34018     | 0.36686     | 0.34018    |         |
|             | 0.36686         | 0.34018   | 0.36686 | 0.36686     | 0.711347091 |            |         |
| SPCS2P2     | ENSG00000270623 | 0.34016   | 0.36687 | 0.34016     | 0.36687     | 0.34016    |         |
|             | 0.36687         | 0.34016   | 0.36687 | 0.36687     | 0.711347091 |            |         |
| NA          | ENSG00000279856 | 0.34008   | 0.3669  | 0.34008     | 0.3669      | 0.34008    | 0.3669  |
|             | 0.34008         | 0.3669    | 0.3669  | 0.711376955 |             |            |         |
| GCSIR       | ENSG00000232520 | -0.3455   | 0.63514 | 0.33982     | 0.367       | -0.49617   | 0.69011 |
|             | -1.217          | 0.8882    | 0.367   | 0.711542532 |             |            |         |
| NA          | ENSG00000214265 | 0.33974   | 0.36702 | 0.33974     | 0.36702     | 0.33974    | 0.36702 |
|             | 0.33974         | 0.36702   | 0.36702 | 0.711551794 |             |            |         |
| GNG3        | ENSG00000162188 | 0.33963   | 0.36707 | 0.33963     | 0.36707     | 0.33963    | 0.36707 |
|             | -0.82286        | 0.79471   | 0.36707 | 0.711551794 |             |            |         |
| NA          | ENSG00000252502 | 0.33961   | 0.36707 | 0.33961     | 0.36707     | 0.33961    | 0.36707 |
|             | 0.33961         | 0.36707   | 0.36707 | 0.711551794 |             |            |         |
| OR9Q2       | ENSG00000186513 | 0.3396    | 0.36708 | 0.3396      | 0.36708     | 0.3396     | 0.36708 |
|             | 0.3396          | 0.36708   | 0.36708 | 0.711551794 |             |            |         |
| NA          | ENSG00000249776 | -0.264    | 0.60411 | -0.63934    | 0.7387      | 0.33959    | 0.36708 |
|             | 0.33959         | 0.36708   | 0.36708 | 0.711551794 |             |            |         |
| NPM1P48     | ENSG00000231821 | -0.23087  | 0.59129 | -0.23087    | 0.59129     | -0.66665   |         |

|           |                 |           |         |             |             |           |         |  |
|-----------|-----------------|-----------|---------|-------------|-------------|-----------|---------|--|
|           | 0.7475          | 0.3395    | 0.36712 | 0.36712     | 0.711551794 |           |         |  |
| NA        | ENSG00000200191 | -0.18653  | 0.57398 | 0.33947     | 0.36713     | 0.037329  | 0.48511 |  |
|           | 0.037329        | 0.48511   | 0.36713 | 0.711551794 |             |           |         |  |
| NA        | ENSG00000223188 | 0.33943   | 0.36714 | -0.45627    | 0.6759      | 0.33943   | 0.36714 |  |
|           | 0.33943         | 0.36714   | 0.36714 | 0.711551794 |             |           |         |  |
| NA        | ENSG00000196661 | -0.33782  | 0.63225 | -1.3563     | 0.91251     | 0.33941   | 0.36715 |  |
|           | -1.3563         | 0.91251   | 0.36715 | 0.711551794 |             |           |         |  |
| NA        | ENSG00000259044 | -1.6601   | 0.95155 | -1.6601     | 0.95155     | 0.33935   | 0.36717 |  |
|           | -0.17978        | 0.57134   | 0.36717 | 0.711551794 |             |           |         |  |
| NA        | ENSG00000279907 | 0.21607   | 0.41446 | 0.0042064   | 0.49832     | 0.33935   | 0.36717 |  |
|           | 0.33696         | 0.36807   | 0.36717 | 0.711551794 |             |           |         |  |
| TRMT112P4 | ENSG00000236763 | 0.33933   | 0.36718 | 0.33933     | 0.36718     | 0.33933   |         |  |
|           | 0.36718         | 0.33933   | 0.36718 | 0.36718     | 0.711551794 |           |         |  |
| AIFM3     | ENSG00000183773 | -1.6386   | 0.94935 | -2.024      | 0.97852     | 0.33925   | 0.36721 |  |
|           | -0.33248        | 0.63024   | 0.36721 | 0.711581632 |             |           |         |  |
| NA        | ENSG00000267364 | 0.33915   | 0.36725 | -0.52143    | 0.69897     | -1.7248   | 0.95772 |  |
|           | -0.89253        | 0.81395   | 0.36725 | 0.711630845 |             |           |         |  |
| ACSM6     | ENSG00000173124 | 0.10336   | 0.45884 | 0.33897     | 0.36732     | -0.88432  | 0.81174 |  |
|           | -0.42913        | 0.66608   | 0.36732 | 0.71165636  |             |           |         |  |
| RNF122    | ENSG00000133874 | -0.1512   | 0.56009 | -0.30258    | 0.6189      | -0.1512   |         |  |
|           | 0.56009         | 0.33893   | 0.36733 | 0.36733     | 0.71165636  |           |         |  |
| HMG2P32   | ENSG00000213558 | 0.33888   | 0.36735 | 0.14134     | 0.4438      | -0.07456  |         |  |
|           | 0.52972         | -0.48701  | 0.68687 | 0.36735     | 0.71165636  |           |         |  |
| IKBKB     | ENSG00000104365 | -1.916    | 0.97232 | -0.75871    | 0.77599     | 0.33886   | 0.36736 |  |
|           | -0.3548         | 0.63863   | 0.36736 | 0.71165636  |             |           |         |  |
| LINC01014 | ENSG00000223941 | -0.8565   | 0.80414 | -0.25506    | 0.60066     | -0.10281  |         |  |
|           | 0.54094         | 0.33885   | 0.36736 | 0.36736     | 0.71165636  |           |         |  |
| VENTXP7   | ENSG00000236380 | 0.33881   | 0.36738 | 0.33881     | 0.36738     | -0.8556   |         |  |
|           | 0.80389         | -0.38497  | 0.64987 | 0.36738     | 0.71165636  |           |         |  |
| NA        | ENSG00000241187 | 0.33881   | 0.36738 | 0.33881     | 0.36738     | -0.6775   | 0.75095 |  |
|           | 0.0040066       | 0.4984    | 0.36738 | 0.71165636  |             |           |         |  |
| LINC02011 | ENSG00000260902 | 0.31819   | 0.37517 | 0.2864      | 0.38729     | 0.01294   |         |  |
|           | 0.49484         | 0.33879   | 0.36738 | 0.36738     | 0.71165636  |           |         |  |
| EIF2B3    | ENSG00000070785 | 0.33873   | 0.36741 | -1.7788     | 0.96236     | -0.89203  |         |  |
|           | 0.81381         | -0.96528  | 0.8328  | 0.36741     | 0.711669878 |           |         |  |
| ADCY1     | ENSG00000164742 | 0.04408   | 0.48242 | -0.31633    | 0.62412     | 0.33868   | 0.36743 |  |
|           | -1.1391         | 0.87267   | 0.36743 | 0.711669878 |             |           |         |  |
| NOX5      | ENSG00000255346 | -0.3833   | 0.64925 | -0.94881    | 0.82864     | 0.33864   | 0.36744 |  |
|           | -1.4359         | 0.92448   | 0.36744 | 0.711669878 |             |           |         |  |
| NA        | ENSG00000238723 | -1.5976   | 0.94494 | -0.22404    | 0.58864     | -0.33188  | 0.63001 |  |
|           | 0.33858         | 0.36746   | 0.36746 | 0.711669878 |             |           |         |  |
| RPS4XP23  | ENSG00000239253 | 0.0049017 | 0.49804 | 0.33858     | 0.36746     | 0.079903  |         |  |
|           | 0.46816         | 0.079903  | 0.46816 | 0.36746     | 0.711669878 |           |         |  |
| LINC00393 | ENSG00000224853 | -0.10772  | 0.54289 | 0.33853     | 0.36748     | -0.10248  |         |  |
|           | 0.54081         | 0.2269    | 0.41025 | 0.36748     | 0.711680327 |           |         |  |
| MKLN1-AS  | ENSG00000236753 | -0.06857  | 0.52733 | 0.33839     | 0.36753     | -0.17224  |         |  |
|           | 0.56838         | 0.059776  | 0.47617 | 0.36753     | 0.711692307 |           |         |  |
| ARPC4     | ENSG00000241553 | -0.66108  | 0.74572 | 0.33841     | 0.36753     | -1.1362   | 0.87205 |  |
|           | 0.23387         | 0.40754   | 0.36753 | 0.711692307 |             |           |         |  |
| NA        | ENSG00000265853 | 0.33839   | 0.36753 | -0.66329    | 0.74643     | 0.0053878 | 0.49785 |  |
|           | 0.0053878       | 0.49785   | 0.36753 | 0.711692307 |             |           |         |  |
| TBC1D21   | ENSG00000167139 | -0.33986  | 0.63302 | 0.33834     | 0.36755     | -0.64561  |         |  |
|           | 0.74073         | 0.10794   | 0.45702 | 0.36755     | 0.711693837 |           |         |  |
| OR52V1P   | ENSG00000249633 | 0.33833   | 0.36756 | -0.21007    | 0.58319     | -0.21007  |         |  |
|           | 0.58319         | -0.21007  | 0.58319 | 0.36756     | 0.711693837 |           |         |  |
| SLC6A9    | ENSG00000196517 | -1.1805   | 0.88109 | 0.33819     | 0.36761     | -0.89136  |         |  |
|           | 0.81363         | -0.8585   | 0.80469 | 0.36761     | 0.711725173 |           |         |  |
| PTMAP15   | ENSG00000255105 | 0.14826   | 0.44107 | 0.14826     | 0.44107     | 0.33819   |         |  |
|           | 0.36761         | 0.14826   | 0.44107 | 0.36761     | 0.711725173 |           |         |  |
| DNAH14    | ENSG00000185842 | -0.1136   | 0.54522 | 0.28419     | 0.38813     | 0.33816   |         |  |
|           | 0.36762         | -1.004    | 0.84232 | 0.36762     | 0.711725173 |           |         |  |
| NA        | ENSG00000280710 | 0.33804   | 0.36767 | 0.33804     | 0.36767     | 0.33804   | 0.36767 |  |

|           |                 |             |             |             |             |            |         |          |
|-----------|-----------------|-------------|-------------|-------------|-------------|------------|---------|----------|
|           | 0.33804         | 0.36767     | 0.36767     | 0.71175955  |             |            |         |          |
| PSCA      | ENSG00000167653 | -0.86935    | 0.80767     | 0.33794     | 0.3677      | -0.70528   | 0.75968 |          |
|           | -0.23436        | 0.59265     | 0.3677      | 0.71175955  |             |            |         |          |
| CDKL4     | ENSG00000205111 | -0.27809    | 0.60953     | -0.371      | 0.64468     | 0.33793    | 0.36771 |          |
|           | -0.26234        | 0.60347     | 0.36771     | 0.71175955  |             |            |         |          |
| C16orf90  | ENSG00000215131 | 0.33792     | 0.36771     | 0.33792     | 0.36771     | 0.33792    |         |          |
|           | 0.36771         | -0.245      | 0.59677     | 0.36771     | 0.71175955  |            |         |          |
| NA        | ENSG00000254460 | -0.38475    | 0.64979     | -0.73495    | 0.76882     | -0.064388  | 0.52567 |          |
|           | 0.33786         | 0.36773     | 0.36773     | 0.71175955  |             |            |         |          |
| LIPH      | ENSG00000163898 | 0.29401     | 0.38438     | -0.1646     | 0.56537     | 0.33785    | 0.36774 |          |
|           | 0.13706         | 0.44549     | 0.36774     | 0.71175955  |             |            |         |          |
| LINC02025 | ENSG00000242339 | 0.33784     | 0.36774     | 0.33784     | 0.36774     | 0.33784    |         |          |
|           | 0.36774         | 0.28965     | 0.38604     | 0.36774     | 0.71175955  |            |         |          |
| NA        | ENSG00000279463 | -1.1962     | 0.8842      | 0.33778     | 0.36776     | -1.1962    | 0.8842  |          |
|           | -1.1962         | 0.8842      | 0.36776     | 0.71176999  |             |            |         |          |
| NA        | ENSG00000242790 | 0.33762     | 0.36782     | 0.33762     | 0.36782     | 0.33762    | 0.36782 |          |
|           | 0.33762         | 0.36782     | 0.36782     | 0.711829571 |             |            |         |          |
| NA        | ENSG00000261051 | -1.1178     | 0.86818     | 0.33763     | 0.36782     | 0.33763    | 0.36782 |          |
|           | -0.98321        | 0.83725     | 0.36782     | 0.711829571 |             |            |         |          |
| NA        | ENSG00000227948 | 0.33756     | 0.36785     | 0.33756     | 0.36785     | 0.33756    | 0.36785 |          |
|           | 0.33756         | 0.36785     | 0.36785     | 0.71183109  |             |            |         |          |
| NA        | ENSG00000275103 | 0.33756     | 0.36785     | 0.33756     | 0.36785     | 0.33756    | 0.36785 |          |
|           | 0.33756         | 0.36785     | 0.36785     | 0.71183109  |             |            |         |          |
| NA        | ENSG00000253697 | 0.332       | 0.36994     | 0.13696     | 0.44553     | -0.6171    | 0.73142 |          |
|           | 0.33744         | 0.36789     | 0.36789     | 0.711880225 |             |            |         |          |
| LINC02189 | ENSG00000260026 | -0.63493    | 0.73726     | 0.33739     | 0.36791     | -0.63493   |         |          |
|           | 0.73726         | -0.63493    | 0.73726     | 0.36791     | 0.711890657 |            |         |          |
| RPL21P110 | ENSG00000226617 | 0.33729     | 0.36795     | 0.33729     | 0.36795     | 0.33729    |         |          |
|           | 0.36795         | 0.33729     | 0.36795     | 0.36795     | 0.711899734 |            |         |          |
| CDH24     | ENSG00000139880 | -0.43366    | 0.66773     | 0.33723     | 0.36797     | 0.079888   | 0.46816 |          |
|           | 0.27022         | 0.3935      | 0.36797     | 0.711899734 |             |            |         |          |
| MS4A1     | ENSG00000156738 | 0.33716     | 0.368       | 0.33716     | 0.368       | -0.86475   | 0.80641 | -0.48018 |
|           | 0.68445         | 0.368       | 0.711899734 |             |             |            |         |          |
| NA        | ENSG00000276521 | 0.33716     | 0.368       | 0.33716     | 0.368       | 0.33716    | 0.368   | 0.33716  |
|           | 0.368           | 0.711899734 |             |             |             |            |         |          |
| OR4D8P    | ENSG00000204989 | 0.10263     | 0.45913     | 0.33709     | 0.36802     | 0.33709    |         |          |
|           | 0.36802         | 0.33709     | 0.36802     | 0.36802     | 0.711899734 |            |         |          |
| ARL4AP3   | ENSG00000228291 | 0.3371      | 0.36802     | 0.3371      | 0.36802     | 0.3371     |         |          |
|           | 0.36802         | 0.3371      | 0.36802     | 0.36802     | 0.711899734 |            |         |          |
| ZNF697    | ENSG00000143067 | 0.33703     | 0.36805     | 0.22925     | 0.40934     | 0.33703    |         |          |
|           | 0.36805         | 0.24897     | 0.40169     | 0.36805     | 0.711899734 |            |         |          |
| LINC02714 | ENSG00000251226 | -0.76879    | 0.77899     | 0.33701     | 0.36805     | -0.48444   |         |          |
|           | 0.68596         | -0.2512     | 0.59917     | 0.36805     | 0.711899734 |            |         |          |
| CYP4F23P  | ENSG00000269516 | -0.25922    | 0.60227     | 0.33702     | 0.36805     | -0.85303   |         |          |
|           | 0.80318         | -0.25677    | 0.60132     | 0.36805     | 0.711899734 |            |         |          |
| GVINP1    | ENSG00000254838 | 0.33697     | 0.36807     | 0.33697     | 0.36807     | 0.33697    |         |          |
|           | 0.36807         | 0.33697     | 0.36807     | 0.36807     | 0.711899734 |            |         |          |
| CCNY      | ENSG00000108100 | 0.053513    | 0.47866     | -1.1681     | 0.87862     | -0.0055982 | 0.50223 |          |
|           | 0.33694         | 0.36808     | 0.36808     | 0.711899734 |             |            |         |          |
| NA        | ENSG00000257279 | 0.33692     | 0.36809     | 0.33692     | 0.36809     | 0.33692    | 0.36809 |          |
|           | 0.33692         | 0.36809     | 0.36809     | 0.711899734 |             |            |         |          |
| ALKBH3    | ENSG00000166199 | -1.5197     | 0.93571     | 0.33664     | 0.3682      | 0.12365    |         |          |
|           | 0.45079         | -1.2722     | 0.89834     | 0.3682      | 0.711947733 |            |         |          |
| ELAC2     | ENSG00000006744 | -0.67713    | 0.75084     | -0.10071    | 0.54011     | 0.33657    | 0.36822 |          |
|           | -0.45601        | 0.67581     | 0.36822     | 0.711947733 |             |            |         |          |
| DNAJC19   | ENSG00000205981 | 0.33656     | 0.36822     | 0.33656     | 0.36822     | 0.33656    |         |          |
|           | 0.36822         | 0.33656     | 0.36822     | 0.36822     | 0.711947733 |            |         |          |
| HGSNAT    | ENSG00000165102 | -0.16561    | 0.56577     | -0.70096    | 0.75833     | 0.33654    |         |          |
|           | 0.36823         | 0.28136     | 0.38922     | 0.36823     | 0.711947733 |            |         |          |
| NA        | ENSG00000201489 | 0.33653     | 0.36823     | -0.98609    | 0.83795     | -0.98609   | 0.83795 |          |
|           | -0.98609        | 0.83795     | 0.36823     | 0.711947733 |             |            |         |          |
| LINC01101 | ENSG00000280409 | -1.1461     | 0.87413     | 0.33651     | 0.36824     | -0.542     |         |          |

|           |                 |          |         |             |             |           |         |  |
|-----------|-----------------|----------|---------|-------------|-------------|-----------|---------|--|
|           | 0.70609         | -0.542   | 0.70609 | 0.36824     | 0.711947733 |           |         |  |
| OR2A25    | ENSG00000221933 | -0.3644  | 0.64222 | 0.64222     | -0.3644     | 0.64222   | 0.33647 |  |
|           | 0.36826         | -0.3644  | 0.64222 | 0.36826     | 0.711947733 |           |         |  |
| NA        | ENSG00000251615 | -0.12274 | 0.54884 | 0.33646     | 0.36826     | -1.9191   | 0.97251 |  |
|           | -1.013          | 0.84447  | 0.36826 | 0.711947733 |             |           |         |  |
| MIR587    | ENSG00000207577 | 0.33644  | 0.36827 | 0.33644     | 0.36827     | 0.33644   | 0.33644 |  |
|           | 0.36827         | 0.33644  | 0.36827 | 0.36827     | 0.711947733 |           |         |  |
| GNAZ      | ENSG00000128266 | -1.1191  | 0.86845 | -0.5407     | 0.70564     | -0.88679  | 0.8124  |  |
|           | 0.33642         | 0.36828  | 0.36828 | 0.711947733 |             |           |         |  |
| AKTIP     | ENSG00000166971 | -0.73518 | 0.76889 | -0.73518    | 0.76889     | 0.33635   | 0.3683  |  |
|           | -0.73518        | 0.76889  | 0.3683  | 0.711947733 |             |           |         |  |
| NA        | ENSG00000230894 | -0.49907 | 0.69113 | 0.33631     | 0.36832     | -0.1492   | 0.5593  |  |
|           | 0.27799         | 0.39051  | 0.36832 | 0.711947733 |             |           |         |  |
| NA        | ENSG00000249722 | -0.13227 | 0.55262 | 0.072067    | 0.47127     | 0.33631   | 0.36832 |  |
|           | -0.51299        | 0.69602  | 0.36832 | 0.711947733 |             |           |         |  |
| LINC02137 | ENSG00000260186 | 0.33626  | 0.36834 | 0.077158    | 0.46925     | -0.48107  |         |  |
|           | 0.68477         | 0.33628  | 0.36833 | 0.36833     | 0.711947733 |           |         |  |
| NA        | ENSG00000273387 | 0.33625  | 0.36834 | 0.33625     | 0.36834     | 0.33625   | 0.36834 |  |
|           | 0.33625         | 0.36834  | 0.36834 | 0.711947733 |             |           |         |  |
| RHO       | ENSG00000163914 | 0.33621  | 0.36836 | -0.15751    | 0.56258     | 0.14488   | 0.4424  |  |
|           | -0.88706        | 0.81248  | 0.36836 | 0.711947733 |             |           |         |  |
| GKAP1     | ENSG00000165113 | -0.67464 | 0.75005 | 0.33616     | 0.36838     | 0.14244   | 0.44337 |  |
|           | -0.62325        | 0.73344  | 0.36838 | 0.711947733 |             |           |         |  |
| HMGB1P30  | ENSG00000244089 | 0.33606  | 0.36841 | 0.33606     | 0.36841     | 0.33606   |         |  |
|           | 0.36841         | 0.33606  | 0.36841 | 0.36841     | 0.711947733 |           |         |  |
| OR2A2     | ENSG00000221989 | 0.33604  | 0.36842 | 0.33604     | 0.36842     | 0.33604   | 0.36842 |  |
|           | 0.33604         | 0.36842  | 0.36842 | 0.711947733 |             |           |         |  |
| IL1R2     | ENSG00000115590 | -0.80761 | 0.79034 | 0.33597     | 0.36845     | -0.88177  | 0.81105 |  |
|           | -0.34208        | 0.63385  | 0.36845 | 0.711947733 |             |           |         |  |
| LINC02190 | ENSG00000261475 | 0.33594  | 0.36846 | -0.58411    | 0.72043     | -0.58411  |         |  |
|           | 0.72043         | -0.58411 | 0.72043 | 0.36846     | 0.711947733 |           |         |  |
| RN7SKP169 | ENSG00000223056 | 0.33592  | 0.36847 | 0.33592     | 0.36847     | 0.33592   |         |  |
|           | 0.36847         | 0.33592  | 0.36847 | 0.36847     | 0.711947733 |           |         |  |
| LGR6      | ENSG00000133067 | -0.09131 | 0.53638 | 0.33585     | 0.36849     | -0.19075  | 0.57564 |  |
|           | -1.6685         | 0.95239  | 0.36849 | 0.711947733 |             |           |         |  |
| MIR548F2  | ENSG00000221782 | 0.33581  | 0.36851 | 0.33581     | 0.36851     | 0.33581   |         |  |
|           | 0.36851         | 0.33581  | 0.36851 | 0.36851     | 0.711947733 |           |         |  |
| LYRM2     | ENSG00000083099 | -0.99778 | 0.84081 | -0.78184    | 0.78285     | 0.19856   | 0.4213  |  |
|           | 0.33571         | 0.36854  | 0.36854 | 0.711947733 |             |           |         |  |
| RN7SKP243 | ENSG00000199975 | 0.13064  | 0.44803 | -0.69853    | 0.75758     | -0.59096  |         |  |
|           | 0.72273         | 0.33572  | 0.36854 | 0.36854     | 0.711947733 |           |         |  |
| MANEA     | ENSG00000172469 | -0.42998 | 0.6664  | -0.42998    | 0.6664      | 0.33569   | 0.36855 |  |
|           | -0.019978       | 0.50797  | 0.36855 | 0.711947733 |             |           |         |  |
| LINC01309 | ENSG00000234551 | 0.33569  | 0.36855 | -1.117      | 0.868       | 0.33569   | 0.36855 |  |
|           | 0.33569         | 0.36855  | 0.36855 | 0.711947733 |             |           |         |  |
| NA        | ENSG00000213385 | 0.33565  | 0.36857 | 0.33565     | 0.36857     | -1.4024   | 0.91961 |  |
|           | -0.25245        | 0.59965  | 0.36857 | 0.711947733 |             |           |         |  |
| RPL10P13  | ENSG00000258245 | 0.33564  | 0.36857 | 0.33564     | 0.36857     | 0.33564   |         |  |
|           | 0.36857         | 0.33564  | 0.36857 | 0.36857     | 0.711947733 |           |         |  |
| OR5BB1P   | ENSG00000198261 | 0.33551  | 0.36862 | -1.0539     | 0.85403     | -0.029155 |         |  |
|           | 0.51163         | 0.33551  | 0.36862 | 0.36862     | 0.711947733 |           |         |  |
| NA        | ENSG00000256361 | 0.33549  | 0.36863 | 0.33549     | 0.36863     | 0.33549   | 0.36863 |  |
|           | 0.33549         | 0.36863  | 0.36863 | 0.711947733 |             |           |         |  |
| TOMM20P3  | ENSG00000263935 | 0.33549  | 0.36863 | -1.8132     | 0.9651      | -1.8747   |         |  |
|           | 0.96959         | -1.1222  | 0.86911 | 0.36863     | 0.711947733 |           |         |  |
| CMBL      | ENSG00000164237 | -1.4984  | 0.93299 | -1.3357     | 0.90918     | 0.33545   | 0.36864 |  |
|           | -0.99383        | 0.83985  | 0.36864 | 0.711947733 |             |           |         |  |
| MIR548AV  | ENSG00000263750 | 0.039237 | 0.48435 | -0.31098    | 0.62209     | 0.33543   |         |  |
|           | 0.36865         | 0.071226 | 0.47161 | 0.36865     | 0.711947733 |           |         |  |
| RPL35AP24 | ENSG00000230166 | 0.12133  | 0.45171 | -0.11346    | 0.54517     | -1.2587   |         |  |
|           | 0.89594         | 0.33541  | 0.36866 | 0.36866     | 0.711947733 |           |         |  |
| NA        | ENSG00000243296 | 0.33541  | 0.36866 | 0.33541     | 0.36866     | -1.0459   | 0.8522  |  |

|           |                 |           |         |             |             |           |         |  |
|-----------|-----------------|-----------|---------|-------------|-------------|-----------|---------|--|
|           | -1.0459         | 0.8522    | 0.36866 | 0.711947733 |             |           |         |  |
| LYARP1    | ENSG00000229560 | 0.33537   | 0.36867 | -0.96489    | 0.8327      | 0.33537   |         |  |
|           | 0.36867         | 0.33537   | 0.36867 | 0.36867     | 0.711947733 |           |         |  |
| ZC3H12A   | ENSG00000163874 | -1.3212   | 0.90678 | -1.3212     | 0.90678     | -1.3212   |         |  |
|           | 0.90678         | 0.33529   | 0.3687  | 0.3687      | 0.711949239 |           |         |  |
| TGM2      | ENSG00000198959 | -0.37003  | 0.64432 | 0.3353      | 0.3687      | -0.37003  | 0.64432 |  |
|           | -0.0056409      | 0.50225   | 0.3687  | 0.711949239 |             |           |         |  |
| ZFP91P1   | ENSG00000274010 | -0.65713  | 0.74445 | -0.65713    | 0.74445     | 0.33522   |         |  |
|           | 0.36873         | -0.11585  | 0.54612 | 0.36873     | 0.711961151 |           |         |  |
| NA        | ENSG00000124593 | -1.0815   | 0.86026 | 0.33519     | 0.36874     | -1.3654   | 0.91394 |  |
|           | -1.2107         | 0.887     | 0.36874 | 0.711961151 |             |           |         |  |
| AMIGO3    | ENSG00000176020 | 0.33516   | 0.36875 | 0.33516     | 0.36875     | 0.33516   |         |  |
|           | 0.36875         | 0.33516   | 0.36875 | 0.36875     | 0.711961151 |           |         |  |
| PPP4R3A   | ENSG00000100796 | -0.75348  | 0.77442 | -0.46734    | 0.67987     | -0.43982  |         |  |
|           | 0.66997         | 0.3351    | 0.36878 | 0.36878     | 0.711962656 |           |         |  |
| ERCC2     | ENSG00000104884 | 0.3351    | 0.36878 | 0.04472     | 0.48217     | 0.3351    | 0.36878 |  |
|           | 0.07708         | 0.46928   | 0.36878 | 0.711962656 |             |           |         |  |
| LINC01099 | ENSG00000251504 | -0.077162 | 0.53075 | 0.33496     | 0.36883     | -0.018723 |         |  |
|           | 0.50747         | -0.018723 | 0.50747 | 0.36883     | 0.711984967 |           |         |  |
| NA        | ENSG00000259910 | 0.056413  | 0.47751 | 0.33492     | 0.36884     | 0.33492   | 0.36884 |  |
|           | 0.33492         | 0.36884   | 0.36884 | 0.711984967 |             |           |         |  |
| SNHG22    | ENSG00000267322 | 0.33494   | 0.36884 | 0.33494     | 0.36884     | 0.33494   |         |  |
|           | 0.36884         | 0.33494   | 0.36884 | 0.36884     | 0.711984967 |           |         |  |
| RN7SL817P | ENSG00000241791 | 0.33489   | 0.36885 | 0.28399     | 0.38821     | 0.28399   |         |  |
|           | 0.38821         | 0.28399   | 0.38821 | 0.36885     | 0.711984967 |           |         |  |
| HM13      | ENSG00000101294 | 0.2316    | 0.40843 | 0.088131    | 0.46489     | 0.33472   | 0.36892 |  |
|           | 0.016745        | 0.49332   | 0.36892 | 0.712056269 |             |           |         |  |
| KCNMA1    | ENSG00000156113 | -0.75138  | 0.77379 | -0.17316    | 0.56874     | 0.33472   |         |  |
|           | 0.36892         | -0.1049   | 0.54177 | 0.36892     | 0.712056269 |           |         |  |
| NA        | ENSG00000266466 | 0.33467   | 0.36894 | 0.33467     | 0.36894     | 0.33467   | 0.36894 |  |
|           | 0.33467         | 0.36894   | 0.36894 | 0.712056269 |             |           |         |  |
| NA        | ENSG00000248343 | 0.33463   | 0.36895 | -0.029684   | 0.51184     | -1.6789   | 0.95341 |  |
|           | -1.1477         | 0.87446   | 0.36895 | 0.712056269 |             |           |         |  |
| CTNNBL1   | ENSG00000132792 | 0.33462   | 0.36896 | 0.33462     | 0.36896     | -0.41964  |         |  |
|           | 0.66263         | -0.37726  | 0.64701 | 0.36896     | 0.712056269 |           |         |  |
| RYK       | ENSG00000163785 | 0.33452   | 0.36899 | -0.35216    | 0.63764     | -0.72847  | 0.76684 |  |
|           | -1.7832         | 0.96272   | 0.36899 | 0.712078558 |             |           |         |  |
| NA        | ENSG00000250377 | 0.33448   | 0.36901 | -0.82935    | 0.79655     | 0.33448   | 0.36901 |  |
|           | 0.33448         | 0.36901   | 0.36901 | 0.712078558 |             |           |         |  |
| NA        | ENSG00000259969 | 0.33445   | 0.36902 | -0.38347    | 0.64931     | 0.33445   | 0.36902 |  |
|           | 0.33445         | 0.36902   | 0.36902 | 0.712078558 |             |           |         |  |
| RPA3P2    | ENSG00000218261 | -1.2966   | 0.90262 | -1.2966     | 0.90262     | -1.2966   |         |  |
|           | 0.90262         | 0.33443   | 0.36903 | 0.36903     | 0.712078558 |           |         |  |
| FZD4-DT   | ENSG00000246523 | 0.33433   | 0.36906 | 0.33433     | 0.36906     | 0.33433   |         |  |
|           | 0.36906         | 0.33433   | 0.36906 | 0.36906     | 0.712108248 |           |         |  |
| RPL23AP23 | ENSG00000236863 | 0.26534   | 0.39537 | 0.26534     | 0.39537     | 0.26534   |         |  |
|           | 0.39537         | 0.33427   | 0.36909 | 0.36909     | 0.712129034 |           |         |  |
| NA        | ENSG00000249125 | 0.33424   | 0.3691  | -0.011019   | 0.5044      | 0.33424   | 0.3691  |  |
|           | -0.42183        | 0.66343   | 0.3691  | 0.712129034 |             |           |         |  |
| NA        | ENSG00000237756 | 0.33415   | 0.36913 | 0.33415     | 0.36913     | 0.33415   | 0.36913 |  |
|           | 0.33415         | 0.36913   | 0.36913 | 0.712158718 |             |           |         |  |
| VPS54     | ENSG00000143952 | 0.33404   | 0.36918 | 0.33404     | 0.36918     | 0.33404   | 0.36918 |  |
|           | 0.33404         | 0.36918   | 0.36918 | 0.712226984 |             |           |         |  |
| POC1B-AS1 | ENSG00000270344 | -0.13434  | 0.55343 | 0.33395     | 0.36921     | -0.10304  |         |  |
|           | 0.54104         | 0.027138  | 0.48917 | 0.36921     | 0.712256663 |           |         |  |
| RNU6-494P | ENSG00000253063 | 0.24513   | 0.40318 | 0.24513     | 0.40318     | 0.33387   |         |  |
|           | 0.36924         | 0.24513   | 0.40318 | 0.36924     | 0.712268527 |           |         |  |
| NAALADL2  | ENSG00000177694 | -0.30575  | 0.6201  | 0.33383     | 0.36925     | -0.097795 |         |  |
|           | 0.53895         | -0.69158  | 0.7554  | 0.36925     | 0.712268527 |           |         |  |
| CROCC2    | ENSG00000226321 | -0.38458  | 0.64973 | 0.33382     | 0.36926     | -0.22794  |         |  |
|           | 0.59015         | -0.45279  | 0.67465 | 0.36926     | 0.712268527 |           |         |  |
| OR4C3     | ENSG00000176547 | -1.4297   | 0.9236  | -1.396      | 0.91864     | 0.3337    | 0.3693  |  |

|          |                 |            |         |             |             |           |         |
|----------|-----------------|------------|---------|-------------|-------------|-----------|---------|
|          | 0.3337          | 0.3693     | 0.3693  | 0.712280389 |             |           |         |
| NPM1P2   | ENSG00000266227 | 0.33371    | 0.3693  | 0.33371     | 0.3693      | 0.33371   |         |
|          | 0.3693          | 0.33371    | 0.3693  | 0.3693      | 0.712280389 |           |         |
| LYRM7    | ENSG00000186687 | -0.3345    | 0.631   | -0.1073     | 0.54273     | 0.33367   | 0.36931 |
|          | 0.33153         | 0.37012    | 0.36931 | 0.712280389 |             |           |         |
| NA       | ENSG00000271711 | 0.33349    | 0.36938 | 0.33349     | 0.36938     | 0.33349   | 0.36938 |
|          | 0.33349         | 0.36938    | 0.36938 | 0.7122952   |             |           |         |
| NA       | ENSG00000275512 | 0.33349    | 0.36938 | -0.85783    | 0.80451     | -1.6248   | 0.94789 |
|          | 0.012228        | 0.49512    | 0.36938 | 0.7122952   |             |           |         |
| PPBPP2   | ENSG00000248848 | -0.30804   | 0.62097 | -1.3413     | 0.91009     | 0.33348   |         |
|          | 0.36939         | -0.48571   | 0.68641 | 0.36939     | 0.7122952   |           |         |
| TMEM256  | ENSG00000205544 | 0.33343    | 0.3694  | 0.33343     | 0.3694      | 0.33343   |         |
|          | 0.3694          | 0.33343    | 0.3694  | 0.3694      | 0.7122952   |           |         |
| ALG8     | ENSG00000159063 | -0.076905  | 0.53065 | -0.076905   | 0.53065     | -0.076905 | 0.53065 |
|          | 0.33341         | 0.36941    | 0.36941 | 0.7122952   |             |           |         |
| NA       | ENSG00000238186 | 0.33339    | 0.36942 | 0.33339     | 0.36942     | 0.33339   | 0.36942 |
|          | 0.33339         | 0.36942    | 0.36942 | 0.7122952   |             |           |         |
| NA       | ENSG00000284484 | -0.051688  | 0.52061 | 0.099359    | 0.46043     | 0.099359  | 0.46043 |
|          | 0.33338         | 0.36942    | 0.36942 | 0.7122952   |             |           |         |
| NA       | ENSG00000268262 | 0.33333    | 0.36944 | 0.33333     | 0.36944     | 0.33333   | 0.36944 |
|          | 0.33333         | 0.36944    | 0.36944 | 0.712305579 |             |           |         |
| NA       | ENSG00000275234 | 0.33328    | 0.36946 | 0.33328     | 0.36946     | 0.33328   | 0.36946 |
|          | 0.33328         | 0.36946    | 0.36946 | 0.712315956 |             |           |         |
| HSD17B8  | ENSG00000204228 | 0.33317    | 0.3695  | 0.33317     | 0.3695      | 0.33317   |         |
|          | 0.3695          | 0.33317    | 0.3695  | 0.3695      | 0.712336709 |           |         |
| NA       | ENSG00000281100 | 0.33318    | 0.3695  | 0.33318     | 0.3695      | 0.33318   | 0.3695  |
|          | 0.33318         | 0.3695     | 0.3695  | 0.712336709 |             |           |         |
| RNU7-75P | ENSG00000251880 | 0.33305    | 0.36955 | 0.33305     | 0.36955     | 0.33305   |         |
|          | 0.36955         | 0.33305    | 0.36955 | 0.36955     | 0.712388484 |           |         |
| TUBGCP6  | ENSG00000128159 | -0.94806   | 0.82845 | -0.92242    | 0.82185     | -0.7773   |         |
|          | 0.78151         | 0.33301    | 0.36956 | 0.36956     | 0.712388484 |           |         |
| KIF28P   | ENSG00000223519 | -0.66707   | 0.74764 | -0.64818    | 0.74157     | 0.33295   |         |
|          | 0.36958         | 0.33295    | 0.36958 | 0.36958     | 0.712388484 |           |         |
| CRYBA1   | ENSG00000108255 | 0.33293    | 0.36959 | 0.33293     | 0.36959     | 0.33293   |         |
|          | 0.36959         | 0.33293    | 0.36959 | 0.36959     | 0.712388484 |           |         |
| FIBP     | ENSG00000172500 | 0.3328     | 0.36964 | 0.3328      | 0.36964     | 0.3328    | 0.36964 |
|          | 0.22953         | 0.40923    | 0.36964 | 0.712388484 |             |           |         |
| NATP     | ENSG00000253937 | 0.33282    | 0.36964 | 0.33282     | 0.36964     | -0.40472  | 0.65716 |
|          | 0.33282         | 0.36964    | 0.36964 | 0.712388484 |             |           |         |
| NA       | ENSG00000213798 | 0.33279    | 0.36965 | 0.33279     | 0.36965     | 0.33279   | 0.36965 |
|          | 0.33279         | 0.36965    | 0.36965 | 0.712388484 |             |           |         |
| EXOC3    | ENSG00000180104 | -0.0040005 | 0.5016  | -1.0016     | 0.84174     | -0.55597  | 0.71089 |
|          | 0.33271         | 0.36968    | 0.36968 | 0.712388484 |             |           |         |
| NA       | ENSG00000207499 | 0.3327     | 0.36968 | -0.045522   | 0.51815     | 0.3327    | 0.36968 |
|          | 0.3327          | 0.36968    | 0.36968 | 0.712388484 |             |           |         |
| USP35    | ENSG00000118369 | -0.28463   | 0.61204 | 0.072185    | 0.47123     | 0.072185  | 0.47123 |
|          | 0.33263         | 0.36971    | 0.36971 | 0.712388484 |             |           |         |
| CASP9    | ENSG00000132906 | -2.1552    | 0.98443 | 0.3326      | 0.36972     | -1.49     | 0.93189 |
|          | -1.8547         | 0.96818    | 0.36972 | 0.712388484 |             |           |         |
| NA       | ENSG00000268818 | 0.3326     | 0.36972 | -1.1371     | 0.87224     | 0.3326    | 0.36972 |
|          | -0.40794        | 0.65834    | 0.36972 | 0.712388484 |             |           |         |
| NA       | ENSG00000213318 | 0.33257    | 0.36973 | 0.19362     | 0.42323     | 0.28772   | 0.38678 |
|          | 0.13818         | 0.44505    | 0.36973 | 0.712388484 |             |           |         |
| RHBDF2   | ENSG00000129667 | -1.2149    | 0.88781 | -0.94326    | 0.82723     | -1.2523   |         |
|          | 0.89478         | 0.33248    | 0.36976 | 0.36976     | 0.712388484 |           |         |
| NA       | ENSG00000273557 | 0.015778   | 0.49371 | 0.22445     | 0.4112      | 0.33245   | 0.36977 |
|          | 0.33245         | 0.36977    | 0.36977 | 0.712388484 |             |           |         |
| NA       | ENSG00000253484 | -1.6255    | 0.94797 | -1.6255     | 0.94797     | 0.33242   | 0.36978 |
|          | -1.6255         | 0.94797    | 0.36978 | 0.712388484 |             |           |         |
| TMEM132C | ENSG00000181234 | -0.051893  | 0.52069 | -0.45192    | 0.67434     | 0.3324    |         |
|          | 0.36979         | -0.31783   | 0.62469 | 0.36979     | 0.712388484 |           |         |
| RNU4-36P | ENSG00000201164 | 0.33242    | 0.36979 | -0.60672    | 0.72798     | -0.11859  |         |



|             |                 |           |         |             |             |           |         |         |
|-------------|-----------------|-----------|---------|-------------|-------------|-----------|---------|---------|
|             | 0.5472          | -0.17386  | 0.56901 | 0.36979     | 0.712388484 |           |         |         |
| NA          | ENSG00000265118 | 0.33233   | 0.36982 | 0.33233     | 0.36982     | 0.33233   | 0.36982 | 0.36982 |
|             | 0.33233         | 0.36982   | 0.36982 | 0.712418114 |             |           |         |         |
| INA         | ENSG00000148798 | -0.06555  | 0.52613 | 0.22114     | 0.41249     | 0.25899   | 0.39782 | 0.39782 |
|             | 0.33221         | 0.36986   | 0.36986 | 0.712459565 |             |           |         |         |
| UROS        | ENSG00000188690 | -0.54241  | 0.70623 | -0.85792    | 0.80453     | 0.33218   | 0.36988 | 0.36988 |
|             | 0.33218         | 0.36988   | 0.36988 | 0.712459565 |             |           |         |         |
| RNA5SP427   | ENSG00000202193 | 0.33211   | 0.3699  | 0.33211     | 0.3699      | 0.30934   |         |         |
|             | 0.37853         | 0.020293  | 0.4919  | 0.3699      | 0.712459565 |           |         |         |
| NA          | ENSG00000207316 | 0.33212   | 0.3699  | 0.33212     | 0.3699      | 0.33212   | 0.3699  | 0.3699  |
|             | 0.33212         | 0.3699    | 0.3699  | 0.712459565 |             |           |         |         |
| NA          | ENSG00000262533 | 0.33192   | 0.36998 | 0.33192     | 0.36998     | 0.33192   | 0.36998 | 0.36998 |
|             | 0.33192         | 0.36998   | 0.36998 | 0.7124905   |             |           |         |         |
| NA          | ENSG00000227743 | 0.33189   | 0.36999 | -0.47372    | 0.68215     | 0.092111  | 0.4633  | 0.4633  |
|             | 0.087402        | 0.46518   | 0.36999 | 0.7124905   |             |           |         |         |
| RN7SL346P   | ENSG00000240470 | 0.33177   | 0.37003 | -0.62234    | 0.73314     | 0.33177   |         |         |
|             | 0.37003         | -0.62234  | 0.73314 | 0.37003     | 0.7124905   |           |         |         |
| CZIB        | ENSG00000162384 | -0.24701  | 0.59755 | 0.33171     | 0.37005     | -0.24701  | 0.59755 | 0.59755 |
|             | -0.24701        | 0.59755   | 0.37005 | 0.7124905   |             |           |         |         |
| NA          | ENSG00000269408 | 0.33173   | 0.37005 | -0.64941    | 0.74196     | -0.52542  | 0.70036 | 0.70036 |
|             | 0.15328         | 0.43909   | 0.37005 | 0.7124905   |             |           |         |         |
| PGM5P4      | ENSG00000225398 | -0.6404   | 0.73904 | 0.019307    | 0.4923      | 0.33168   |         |         |
|             | 0.37006         | -0.66458  | 0.74684 | 0.37006     | 0.7124905   |           |         |         |
| NA          | ENSG00000248939 | -0.020327 | 0.50811 | 0.095804    | 0.46184     | 0.33165   | 0.37008 | 0.37008 |
|             | -0.28646        | 0.61274   | 0.37008 | 0.7124905   |             |           |         |         |
| IPPKP1      | ENSG00000225585 | -0.18354  | 0.57281 | 0.33156     | 0.37011     | -0.43521  |         |         |
|             | 0.6683          | -0.47066  | 0.68106 | 0.37011     | 0.7124905   |           |         |         |
| NA          | ENSG00000249998 | -0.21771  | 0.58617 | 0.33156     | 0.37011     | 0.03783   | 0.48491 | 0.48491 |
|             | -0.41513        | 0.66098   | 0.37011 | 0.7124905   |             |           |         |         |
| NA          | ENSG00000250455 | 0.33157   | 0.37011 | 0.33157     | 0.37011     | 0.33157   | 0.37011 | 0.37011 |
|             | 0.33157         | 0.37011   | 0.37011 | 0.7124905   |             |           |         |         |
| NUP58P1     | ENSG00000251436 | 0.33156   | 0.37011 | 0.33156     | 0.37011     | 0.33156   |         |         |
|             | 0.37011         | 0.33156   | 0.37011 | 0.37011     | 0.7124905   |           |         |         |
| NA          | ENSG00000263384 | 0.33153   | 0.37012 | 0.33153     | 0.37012     | 0.33153   | 0.37012 | 0.37012 |
|             | 0.33153         | 0.37012   | 0.37012 | 0.7124905   |             |           |         |         |
| RNU6-298P   | ENSG00000212190 | 0.3315    | 0.37013 | 0.3315      | 0.37013     | 0.3315    |         |         |
|             | 0.37013         | 0.3315    | 0.37013 | 0.37013     | 0.7124905   |           |         |         |
| ATP13A5-AS1 | ENSG00000236508 | 0.3315    | 0.37013 | 0.3315      | 0.37013     | 0.3315    |         |         |
|             | 0.37013         | 0.3315    | 0.37013 | 0.37013     | 0.7124905   |           |         |         |
| ADO         | ENSG00000181915 | 0.33148   | 0.37014 | -0.74104    | 0.77066     | 0.33148   | 0.37014 | 0.37014 |
|             | 0.081146        | 0.46766   | 0.37014 | 0.7124905   |             |           |         |         |
| NA          | ENSG00000219747 | -0.017479 | 0.50697 | 0.33146     | 0.37015     | -0.017479 | 0.50697 | 0.50697 |
|             | -0.017479       | 0.50697   | 0.37015 | 0.7124905   |             |           |         |         |
| LINC01981   | ENSG00000229243 | -0.38793  | 0.65097 | 0.33139     | 0.37018     | 0.33139   |         |         |
|             | 0.37018         | 0.33139   | 0.37018 | 0.37018     | 0.712520101 |           |         |         |
| CSK         | ENSG00000103653 | 0.27191   | 0.39285 | -0.31264    | 0.62272     | -0.85987  | 0.80507 | 0.80507 |
|             | 0.33122         | 0.37024   | 0.37024 | 0.712521396 |             |           |         |         |
| TNFSF12     | ENSG00000239697 | 0.33115   | 0.37026 | 0.2991      | 0.38243     | -0.087262 |         |         |
|             | 0.53477         | -0.17227  | 0.56839 | 0.37026     | 0.712521396 |           |         |         |
| NA          | ENSG00000253951 | -0.51978  | 0.69839 | 0.33118     | 0.37026     | 0.33118   | 0.37026 | 0.37026 |
|             | 0.33118         | 0.37026   | 0.37026 | 0.712521396 |             |           |         |         |
| KIR3DL2     | ENSG00000240403 | 0.33114   | 0.37027 | -0.2137     | 0.58461     | 0.33114   |         |         |
|             | 0.37027         | 0.33114   | 0.37027 | 0.37027     | 0.712521396 |           |         |         |
| NA          | ENSG00000250618 | 0.33109   | 0.37029 | 0.33109     | 0.37029     | 0.33109   | 0.37029 | 0.37029 |
|             | 0.33109         | 0.37029   | 0.37029 | 0.712521396 |             |           |         |         |
| RNU6-65P    | ENSG00000252141 | 0.33105   | 0.3703  | -0.70832    | 0.76063     | -0.76906  |         |         |
|             | 0.77907         | -0.96057  | 0.83162 | 0.3703      | 0.712521396 |           |         |         |
| DSCR9       | ENSG00000230366 | 0.22894   | 0.40946 | 0.22894     | 0.40946     | 0.22894   | 0.40946 | 0.40946 |
|             | 0.33104         | 0.37031   | 0.37031 | 0.712521396 |             |           |         |         |
| NA          | ENSG00000279571 | 0.20646   | 0.41822 | 0.33098     | 0.37033     | 0.33098   | 0.37033 | 0.37033 |
|             | 0.33098         | 0.37033   | 0.37033 | 0.712521396 |             |           |         |         |
| MTATP6P29   | ENSG00000232179 | 0.33095   | 0.37034 | 0.33095     | 0.37034     | 0.33095   |         |         |

|            |                 |           |         |             |             |           |         |  |
|------------|-----------------|-----------|---------|-------------|-------------|-----------|---------|--|
|            | 0.37034         | 0.33095   | 0.37034 | 0.37034     | 0.712521396 |           |         |  |
| NDFIP1P1   | ENSG00000255892 | 0.29024   | 0.38581 | 0.33089     | 0.37036     | 0.29024   |         |  |
|            | 0.38581         | 0.29024   | 0.38581 | 0.37036     | 0.712521396 |           |         |  |
| TMC8       | ENSG00000167895 | 0.33082   | 0.37039 | 0.33082     | 0.37039     | 0.33082   | 0.37039 |  |
|            | 0.33082         | 0.37039   | 0.37039 | 0.712521396 |             |           |         |  |
| CPEB1      | ENSG00000214575 | -0.34198  | 0.63382 | -0.39509    | 0.65361     | -0.029203 | 0.51165 |  |
|            | 0.33083         | 0.37039   | 0.37039 | 0.712521396 |             |           |         |  |
| MIR4271    | ENSG00000264633 | 0.33081   | 0.37039 | 0.33081     | 0.37039     | 0.33081   |         |  |
|            | 0.37039         | 0.33081   | 0.37039 | 0.37039     | 0.712521396 |           |         |  |
| ALAD       | ENSG00000148218 | -0.78237  | 0.783   | 0.33081     | 0.3704      | -0.12193  | 0.54852 |  |
|            | -0.62537        | 0.73414   | 0.3704  | 0.712521396 |             |           |         |  |
| NDUFAF2P1  | ENSG00000279307 | -1.0945   | 0.86312 | 0.33081     | 0.3704      | -0.72439  |         |  |
|            | 0.76559         | -0.078593 | 0.53132 | 0.3704      | 0.712521396 |           |         |  |
| NA         | ENSG00000230627 | 0.2391    | 0.40551 | 0.31028     | 0.37817     | 0.30911   | 0.37862 |  |
|            | 0.33068         | 0.37044   | 0.37044 | 0.712570213 |             |           |         |  |
| MARS1      | ENSG00000166986 | -0.45919  | 0.67695 | -0.19319    | 0.5766      | -1.187    | 0.88239 |  |
|            | 0.33063         | 0.37046   | 0.37046 | 0.712574565 |             |           |         |  |
| NPAS2-AS1  | ENSG00000230140 | 0.33056   | 0.37049 | 0.33056     | 0.37049     | 0.33056   |         |  |
|            | 0.37049         | 0.33056   | 0.37049 | 0.37049     | 0.712574565 |           |         |  |
| NA         | ENSG00000234172 | -0.12725  | 0.55063 | -0.56185    | 0.71289     | -0.12725  | 0.55063 |  |
|            | 0.33055         | 0.37049   | 0.37049 | 0.712574565 |             |           |         |  |
| NA         | ENSG00000254979 | 0.33051   | 0.37051 | 0.33051     | 0.37051     | 0.33051   | 0.37051 |  |
|            | 0.33051         | 0.37051   | 0.37051 | 0.712574565 |             |           |         |  |
| PRCC       | ENSG00000143294 | 0.33048   | 0.37052 | -0.82226    | 0.79453     | -0.25059  | 0.59894 |  |
|            | -0.30425        | 0.61953   | 0.37052 | 0.712574565 |             |           |         |  |
| NA         | ENSG00000235951 | 0.33046   | 0.37053 | 0.33046     | 0.37053     | 0.33046   | 0.37053 |  |
|            | 0.33046         | 0.37053   | 0.37053 | 0.712574565 |             |           |         |  |
| RNU6-582P  | ENSG00000199859 | -1.2501   | 0.89436 | -0.12989    | 0.55167     | 0.33038   |         |  |
|            | 0.37056         | -0.25331  | 0.59999 | 0.37056     | 0.712604136 |           |         |  |
| ARHGAP15   | ENSG00000075884 | -1.0576   | 0.85489 | -0.42052    | 0.66295     | 0.33021   |         |  |
|            | 0.37062         | -1.0576   | 0.85489 | 0.37062     | 0.712627705 |           |         |  |
| LINC01095  | ENSG00000248809 | -0.16786  | 0.56665 | -0.65387    | 0.7434      | 0.3302    |         |  |
|            | 0.37062         | 0.3302    | 0.37062 | 0.37062     | 0.712627705 |           |         |  |
| ADGRA2     | ENSG00000020181 | 0.33018   | 0.37063 | 0.13109     | 0.44785     | -1.5572   |         |  |
|            | 0.94029         | -1.3253   | 0.90746 | 0.37063     | 0.712627705 |           |         |  |
| CD8A       | ENSG00000153563 | -0.069266 | 0.52761 | -1.4636     | 0.92834     | 0.33013   | 0.37065 |  |
|            | -0.99863        | 0.84101   | 0.37065 | 0.712627705 |             |           |         |  |
| NA         | ENSG00000267370 | 0.33011   | 0.37066 | 0.33011     | 0.37066     | 0.33011   | 0.37066 |  |
|            | 0.33011         | 0.37066   | 0.37066 | 0.712627705 |             |           |         |  |
| OR1S1      | ENSG00000280204 | 0.33011   | 0.37066 | 0.034531    | 0.48623     | 0.33011   | 0.37066 |  |
|            | 0.33011         | 0.37066   | 0.37066 | 0.712627705 |             |           |         |  |
| SERPINB9P1 | ENSG00000230438 | -0.72155  | 0.76472 | -0.16113    | 0.564       | -0.31133  | 0.62222 |  |
|            | 0.33006         | 0.37068   | 0.37068 | 0.71263804  |             |           |         |  |
| LINC01431  | ENSG00000232645 | 0.33001   | 0.3707  | 0.33001     | 0.3707      | 0.33001   |         |  |
|            | 0.3707          | 0.33001   | 0.3707  | 0.3707      | 0.712648375 |           |         |  |
| RAB32      | ENSG00000118508 | 0.1702    | 0.43243 | -0.031089   | 0.5124      | -0.52811  | 0.70129 |  |
|            | 0.32994         | 0.37072   | 0.37072 | 0.712658708 |             |           |         |  |
| NA         | ENSG00000250812 | 0.32983   | 0.37076 | 0.32983     | 0.37076     | 0.32983   | 0.37076 |  |
|            | 0.32983         | 0.37076   | 0.37076 | 0.712679374 |             |           |         |  |
| NA         | ENSG00000260534 | 0.32985   | 0.37076 | 0.32985     | 0.37076     | 0.32985   | 0.37076 |  |
|            | 0.32985         | 0.37076   | 0.37076 | 0.712679374 |             |           |         |  |
| NA         | ENSG00000239044 | -1.4522   | 0.92678 | 0.32956     | 0.37086     | -1.4522   | 0.92678 |  |
|            | -1.4522         | 0.92678   | 0.37086 | 0.712712983 |             |           |         |  |
| RBM45      | ENSG00000155636 | -0.34476  | 0.63486 | 0.32955     | 0.37087     | -1.0532   | 0.85387 |  |
|            | 0.012556        | 0.49499   | 0.37087 | 0.712712983 |             |           |         |  |
| NA         | ENSG00000240033 | -0.99031  | 0.83899 | 0.32956     | 0.37087     | -1.425    | 0.92293 |  |
|            | -0.63183        | 0.73625   | 0.37087 | 0.712712983 |             |           |         |  |
| PTGER1     | ENSG00000160951 | 0.32953   | 0.37088 | 0.32953     | 0.37088     | 0.32953   |         |  |
|            | 0.37088         | 0.32953   | 0.37088 | 0.37088     | 0.712712983 |           |         |  |
| OR10J7P    | ENSG00000248442 | 0.32949   | 0.37089 | 0.32949     | 0.37089     | 0.32949   |         |  |
|            | 0.37089         | 0.32949   | 0.37089 | 0.37089     | 0.712712983 |           |         |  |
| NA         | ENSG00000223605 | -1.0859   | 0.86124 | -0.61816    | 0.73176     | 0.32947   | 0.3709  |  |

|             |                 |           |         |             |             |           |         |  |
|-------------|-----------------|-----------|---------|-------------|-------------|-----------|---------|--|
|             | -0.70512        | 0.75963   | 0.3709  | 0.712712983 |             |           |         |  |
| RPL35AP15   | ENSG00000243758 | 0.32943   | 0.37092 | 0.32943     | 0.37092     | 0.32943   |         |  |
|             | 0.37092         | 0.14283   | 0.44321 | 0.37092     | 0.712712983 |           |         |  |
| RN7SL259P   | ENSG00000241082 | -1.3387   | 0.90966 | -1.0416     | 0.85119     | 0.32937   |         |  |
|             | 0.37094         | -0.81092  | 0.79129 | 0.37094     | 0.712712983 |           |         |  |
| SNORD114-16 | ENSG00000199914 | 0.32927   | 0.37098 | 0.32927     | 0.37098     | 0.32927   |         |  |
|             | 0.37098         | -0.018882 | 0.50753 | 0.37098     | 0.712712983 |           |         |  |
| RSRC2       | ENSG00000111011 | 0.22379   | 0.41146 | -0.089282   | 0.53557     | -0.87887  | 0.81026 |  |
|             | 0.32922         | 0.37099   | 0.37099 | 0.712712983 |             |           |         |  |
| TRMT10B     | ENSG00000165275 | -0.352    | 0.63758 | -0.27726    | 0.60921     | 0.32923   |         |  |
|             | 0.37099         | -0.71155  | 0.76163 | 0.37099     | 0.712712983 |           |         |  |
| SLC12A8     | ENSG00000221955 | -1.3205   | 0.90666 | 0.068531    | 0.47268     | 0.3292    | 0.371   |  |
|             | -0.39125        | 0.65219   | 0.371   | 0.712712983 |             |           |         |  |
| DIRAS1      | ENSG00000176490 | -0.45563  | 0.67567 | -1.2934     | 0.90206     | -0.30954  |         |  |
|             | 0.62154         | 0.32917   | 0.37101 | 0.37101     | 0.712712983 |           |         |  |
| CERKL       | ENSG00000188452 | 0.32917   | 0.37101 | -0.68011    | 0.75178     | 0.16986   | 0.43256 |  |
|             | -1.0882         | 0.86174   | 0.37101 | 0.712712983 |             |           |         |  |
| VN1R3       | ENSG00000180663 | 0.32916   | 0.37102 | 0.13117     | 0.44782     | -0.44176  | 0.67067 |  |
|             | -0.56327        | 0.71338   | 0.37102 | 0.712712983 |             |           |         |  |
| OR10G3      | ENSG00000169208 | 0.32913   | 0.37103 | 0.32913     | 0.37103     | 0.32913   |         |  |
|             | 0.37103         | 0.32913   | 0.37103 | 0.37103     | 0.712712983 |           |         |  |
| PARS2       | ENSG00000162396 | -0.57776  | 0.71829 | -0.044395   | 0.51771     | -0.044395 | 0.51771 |  |
|             | 0.32908         | 0.37105   | 0.37105 | 0.712712983 |             |           |         |  |
| BEND3       | ENSG00000178409 | -0.70733  | 0.76032 | -0.40594    | 0.65761     | -0.63727  | 0.73802 |  |
|             | 0.32904         | 0.37106   | 0.37106 | 0.712712983 |             |           |         |  |
| NA          | ENSG00000259410 | -1.3263   | 0.90763 | 0.27357     | 0.39221     | 0.12187   | 0.4515  |  |
|             | 0.32906         | 0.37106   | 0.37106 | 0.712712983 |             |           |         |  |
| Clorf87     | ENSG00000162598 | -0.44844  | 0.67308 | 0.32903     | 0.37107     | -0.20783  |         |  |
|             | 0.58232         | -0.072029 | 0.52871 | 0.37107     | 0.712712983 |           |         |  |
| NDUFA5P4    | ENSG00000233659 | 0.32893   | 0.37111 | 0.32893     | 0.37111     | 0.32893   |         |  |
|             | 0.37111         | 0.32893   | 0.37111 | 0.37111     | 0.712752832 |           |         |  |
| FLNC        | ENSG00000128591 | -0.45031  | 0.67376 | -0.44629    | 0.6723      | -0.45031  | 0.67376 |  |
|             | 0.32889         | 0.37112   | 0.37112 | 0.712752832 |             |           |         |  |
| ITSN1       | ENSG00000205726 | -0.2272   | 0.58987 | -0.64629    | 0.74095     | -0.3157   | 0.62388 |  |
|             | 0.32877         | 0.37116   | 0.37116 | 0.712774902 |             |           |         |  |
| NA          | ENSG00000269972 | 0.32876   | 0.37117 | 0.32876     | 0.37117     | 0.32876   | 0.37117 |  |
|             | 0.32876         | 0.37117   | 0.37117 | 0.712774902 |             |           |         |  |
| EIF4ENIF1   | ENSG00000184708 | 0.32869   | 0.37119 | 0.32869     | 0.37119     | 0.21042   |         |  |
|             | 0.41667         | 0.25349   | 0.39994 | 0.37119     | 0.712774902 |           |         |  |
| NA          | ENSG00000259675 | -2.0252   | 0.97858 | 0.32872     | 0.37119     | -1.1171   | 0.86803 |  |
|             | -1.1171         | 0.86803   | 0.37119 | 0.712774902 |             |           |         |  |
| CUX1        | ENSG00000257923 | 0.087995  | 0.46494 | 0.0044646   | 0.49822     | -0.31132  | 0.62222 |  |
|             | 0.32856         | 0.37124   | 0.37124 | 0.712842824 |             |           |         |  |
| MORF4L1P1   | ENSG00000218283 | 0.32846   | 0.37128 | 0.038765    | 0.48454     | 0.32846   |         |  |
|             | 0.37128         | 0.32846   | 0.37128 | 0.37128     | 0.71289154  |           |         |  |
| RLN3        | ENSG00000171136 | 0.32837   | 0.37132 | -0.76272    | 0.77718     | 0.32837   | 0.37132 |  |
|             | 0.32837         | 0.37132   | 0.37132 | 0.712931362 |             |           |         |  |
| PYGM        | ENSG00000068976 | 0.32833   | 0.37133 | 0.32833     | 0.37133     | -0.10394  | 0.54139 |  |
|             | 0.32833         | 0.37133   | 0.37133 | 0.712931362 |             |           |         |  |
| NA          | ENSG00000223410 | 0.15831   | 0.4371  | -0.39741    | 0.65447     | 0.32815   | 0.3714  |  |
|             | 0.32815         | 0.3714    | 0.3714  | 0.7129829   |             |           |         |  |
| NA          | ENSG00000273328 | 0.12135   | 0.45171 | -0.07153    | 0.52851     | -0.07153  | 0.52851 |  |
|             | 0.32815         | 0.3714    | 0.3714  | 0.7129829   |             |           |         |  |
| SETP16      | ENSG00000254621 | 0.32813   | 0.37141 | 0.32813     | 0.37141     | 0.32813   |         |  |
|             | 0.37141         | 0.32813   | 0.37141 | 0.37141     | 0.7129829   |           |         |  |
| LMO4        | ENSG00000143013 | 0.32808   | 0.37142 | -0.069227   | 0.5276      | 0.2254    | 0.41084 |  |
|             | -0.0062981      | 0.50251   | 0.37142 | 0.7129829   |             |           |         |  |
| KCNIP3      | ENSG00000115041 | 0.32806   | 0.37143 | -1.6339     | 0.94886     | -1.1957   |         |  |
|             | 0.88409         | -1.3687   | 0.91446 | 0.37143     | 0.7129829   |           |         |  |
| WDR4        | ENSG00000160193 | 0.053189  | 0.47879 | -0.48742    | 0.68702     | 0.32796   | 0.37147 |  |
|             | -1.4599         | 0.92785   | 0.37147 | 0.71299462  |             |           |         |  |
| IPO7        | ENSG00000205339 | 0.058193  | 0.4768  | 0.32793     | 0.37148     | -0.42229  | 0.66359 |  |

|              |                 |            |         |             |             |           |         |  |
|--------------|-----------------|------------|---------|-------------|-------------|-----------|---------|--|
|              | 0.20814         | 0.41756    | 0.37148 | 0.71299462  |             |           |         |  |
| NA           | ENSG00000260947 | 0.32794    | 0.37148 | -0.17924    | 0.57113     | 0.022656  | 0.49096 |  |
|              | 0.12392         | 0.45069    | 0.37148 | 0.71299462  |             |           |         |  |
| LIPC         | ENSG00000166035 | 0.17153    | 0.4319  | 0.17153     | 0.4319      | 0.17153   | 0.4319  |  |
|              | 0.32773         | 0.37156    | 0.37156 | 0.713083101 |             |           |         |  |
| NA           | ENSG00000248203 | 0.32774    | 0.37156 | -0.19289    | 0.57648     | 0.32774   | 0.37156 |  |
|              | -0.091419       | 0.53642    | 0.37156 | 0.713083101 |             |           |         |  |
| CD69         | ENSG00000110848 | -0.022454  | 0.50896 | 0.038547    | 0.48463     | 0.19304   | 0.42346 |  |
|              | 0.3277          | 0.37157    | 0.37157 | 0.713083101 |             |           |         |  |
| THBS2        | ENSG00000186340 | 0.056881   | 0.47732 | 0.24867     | 0.40181     | 0.28236   | 0.38883 |  |
|              | 0.3276          | 0.37161    | 0.37161 | 0.71313178  |             |           |         |  |
| NA           | ENSG00000251730 | 0.32746    | 0.37166 | 0.32746     | 0.37166     | 0.32746   | 0.37166 |  |
|              | 0.32746         | 0.37166    | 0.37166 | 0.713199646 |             |           |         |  |
| HOXB6        | ENSG00000108511 | 0.1401     | 0.44429 | 0.28725     | 0.38696     | 0.20282   | 0.41964 |  |
|              | 0.3274          | 0.37168    | 0.37168 | 0.713209939 |             |           |         |  |
| OR5BR1P      | ENSG00000255386 | 0.32736    | 0.3717  | -0.2157     | 0.58539     | 0.32736   |         |  |
|              | 0.3717          | -0.024802  | 0.50989 | 0.3717      | 0.713220232 |           |         |  |
| NA           | ENSG00000233516 | 0.32719    | 0.37176 | -0.47023    | 0.6809      | -0.47023  | 0.6809  |  |
|              | -0.47023        | 0.6809     | 0.37176 | 0.713236103 |             |           |         |  |
| NA           | ENSG00000260892 | 0.32718    | 0.37177 | 0.32718     | 0.37177     | 0.32718   | 0.37177 |  |
|              | 0.32718         | 0.37177    | 0.37177 | 0.713236103 |             |           |         |  |
| RPL37P1      | ENSG00000227401 | 0.32715    | 0.37178 | 0.32715     | 0.37178     | 0.32715   |         |  |
|              | 0.37178         | 0.32715    | 0.37178 | 0.37178     | 0.713236103 |           |         |  |
| MAST4-IT1    | ENSG00000249057 | 0.32711    | 0.37179 | -0.57037    | 0.71579     | 0.14878   |         |  |
|              | 0.44086         | 0.14878    | 0.44086 | 0.37179     | 0.713236103 |           |         |  |
| NA           | ENSG00000280261 | 0.056945   | 0.47729 | 0.32713     | 0.37179     | 0.056945  | 0.47729 |  |
|              | 0.056945        | 0.47729    | 0.37179 | 0.713236103 |             |           |         |  |
| LINC02702    | ENSG00000237937 | 0.32705    | 0.37181 | 0.2427      | 0.40412     | 0.044059  |         |  |
|              | 0.48243         | 0.2102     | 0.41676 | 0.37181     | 0.713236103 |           |         |  |
| NA           | ENSG00000269483 | 0.32705    | 0.37182 | 0.32705     | 0.37182     | 0.32705   | 0.37182 |  |
|              | 0.32705         | 0.37182    | 0.37182 | 0.713236103 |             |           |         |  |
| TRIM49       | ENSG00000168930 | 0.32701    | 0.37183 | -1.0938     | 0.86297     | -0.79399  |         |  |
|              | 0.7864          | -1.1314    | 0.87106 | 0.37183     | 0.713236103 |           |         |  |
| RNF5P1       | ENSG00000253570 | -0.0093975 | 0.50375 | -0.53179    | 0.70256     | -0.027912 |         |  |
|              | 0.51113         | 0.32699    | 0.37184 | 0.37184     | 0.713236103 |           |         |  |
| RNA5SP263    | ENSG00000200246 | 0.3269     | 0.37187 | -0.26564    | 0.60474     | -0.58145  |         |  |
|              | 0.71953         | -0.26564   | 0.60474 | 0.37187     | 0.713237498 |           |         |  |
| ACTBP14      | ENSG00000229001 | 0.3269     | 0.37187 | -0.27742    | 0.60927     | -0.20184  |         |  |
|              | 0.57998         | 0.037621   | 0.485   | 0.37187     | 0.713237498 |           |         |  |
| SMTNL1       | ENSG00000214872 | -0.57937   | 0.71883 | 0.32683     | 0.3719      | -0.58917  |         |  |
|              | 0.72212         | -1.2054    | 0.88598 | 0.3719      | 0.713238892 |           |         |  |
| SLC25A48-AS1 | ENSG00000251045 | 0.32684    | 0.3719  | -0.014923   | 0.50595     | -0.64229  |         |  |
|              | 0.73966         | -0.47829   | 0.68378 | 0.3719      | 0.713238892 |           |         |  |
| NA           | ENSG00000256440 | 0.32664    | 0.37197 | 0.32664     | 0.37197     | 0.32664   | 0.37197 |  |
|              | 0.32664         | 0.37197    | 0.37197 | 0.713345065 |             |           |         |  |
| RPL17P46     | ENSG00000239689 | 0.32652    | 0.37202 | -0.13642    | 0.55426     | 0.32652   |         |  |
|              | 0.37202         | 0.32652    | 0.37202 | 0.37202     | 0.713345728 |           |         |  |
| BNIP3P30     | ENSG00000268079 | 0.32644    | 0.37205 | -0.14466    | 0.55751     | -0.77803  |         |  |
|              | 0.78172         | -0.8042    | 0.78936 | 0.37205     | 0.713345728 |           |         |  |
| LINC02443    | ENSG00000256115 | 0.32642    | 0.37206 | 0.32642     | 0.37206     | -0.75577  |         |  |
|              | 0.77511         | 0.32642    | 0.37206 | 0.37206     | 0.713345728 |           |         |  |
| MYL7         | ENSG00000106631 | -0.55667   | 0.71112 | 0.32638     | 0.37207     | -0.003116 | 0.50124 |  |
|              | -0.93531        | 0.82519    | 0.37207 | 0.713345728 |             |           |         |  |
| OR51A10P     | ENSG00000230484 | -0.32449   | 0.62722 | 0.32637     | 0.37207     | -0.15316  |         |  |
|              | 0.56086         | 0.036267   | 0.48553 | 0.37207     | 0.713345728 |           |         |  |
| RPL3P9       | ENSG00000240540 | -1.401     | 0.9194  | -0.8107     | 0.79123     | 0.32623   |         |  |
|              | 0.37212         | -1.401     | 0.9194  | 0.37212     | 0.713345728 |           |         |  |
| GRB10        | ENSG00000106070 | 0.16585    | 0.43414 | -0.090021   | 0.53586     | -0.083657 | 0.53334 |  |
|              | 0.32622         | 0.37213    | 0.37213 | 0.713345728 |             |           |         |  |
| NA           | ENSG00000272158 | 0.32621    | 0.37213 | 0.32621     | 0.37213     | 0.32621   | 0.37213 |  |
|              | 0.32621         | 0.37213    | 0.37213 | 0.713345728 |             |           |         |  |
| DHRS7        | ENSG00000100612 | -0.64736   | 0.7413  | 0.29438     | 0.38423     | -1.5391   | 0.93812 |  |

|           |                 |          |         |             |             |           |         |  |
|-----------|-----------------|----------|---------|-------------|-------------|-----------|---------|--|
|           | 0.32608         | 0.37218  | 0.37218 | 0.713345728 |             |           |         |  |
| NA        | ENSG00000214803 | 0.32607  | 0.37218 | 0.16884     | 0.43296     | -0.78003  | 0.78231 |  |
|           | -1.4752         | 0.92992  | 0.37218 | 0.713345728 |             |           |         |  |
| NA        | ENSG00000236740 | 0.16403  | 0.43485 | 0.32606     | 0.37219     | 0.32606   | 0.37219 |  |
|           | -0.29258        | 0.61508  | 0.37219 | 0.713345728 |             |           |         |  |
| OR5P1P    | ENSG00000166408 | -0.73222 | 0.76798 | -0.73222    | 0.76798     | -0.32104  |         |  |
|           | 0.62591         | 0.32602  | 0.3722  | 0.3722      | 0.713345728 |           |         |  |
| PTPRH     | ENSG00000080031 | 0.32597  | 0.37222 | 0.32597     | 0.37222     | -0.1911   | 0.57578 |  |
|           | 0.32597         | 0.37222  | 0.37222 | 0.713345728 |             |           |         |  |
| LINC02542 | ENSG00000226453 | -0.56771 | 0.71488 | -0.061787   | 0.52463     | 0.32596   |         |  |
|           | 0.37223         | -0.24027 | 0.59494 | 0.37223     | 0.713345728 |           |         |  |
| UGGT2     | ENSG00000102595 | 0.041712 | 0.48336 | -0.073223   | 0.52919     | 0.32588   | 0.37226 |  |
|           | -0.17176        | 0.56819  | 0.37226 | 0.713345728 |             |           |         |  |
| NA        | ENSG00000260810 | 0.32588  | 0.37226 | 0.32588     | 0.37226     | 0.32588   | 0.37226 |  |
|           | 0.32588         | 0.37226  | 0.37226 | 0.713345728 |             |           |         |  |
| NA        | ENSG00000234162 | -0.95208 | 0.82947 | -1.0174     | 0.84551     | -0.95208  | 0.82947 |  |
|           | 0.32577         | 0.3723   | 0.3723  | 0.713345728 |             |           |         |  |
| NRXN3     | ENSG00000021645 | 0.3257   | 0.37233 | -0.61546    | 0.73087     | 0.18044   | 0.4284  |  |
|           | 0.11191         | 0.45545  | 0.37233 | 0.713345728 |             |           |         |  |
| NA        | ENSG00000264587 | 0.32563  | 0.37235 | 0.32563     | 0.37235     | 0.32563   | 0.37235 |  |
|           | 0.32563         | 0.37235  | 0.37235 | 0.713345728 |             |           |         |  |
| PHTF2     | ENSG00000006576 | 0.32558  | 0.37237 | -0.46748    | 0.67992     | -0.16474  | 0.56543 |  |
|           | 0.045048        | 0.48203  | 0.37237 | 0.713345728 |             |           |         |  |
| NA        | ENSG00000255689 | -0.92799 | 0.82329 | 0.32553     | 0.37239     | 0.039781  | 0.48413 |  |
|           | 0.23918         | 0.40548  | 0.37239 | 0.713345728 |             |           |         |  |
| NAA15     | ENSG00000164134 | 0.32549  | 0.3724  | 0.091072    | 0.46372     | 0.26871   | 0.39408 |  |
|           | 0.13652         | 0.4457   | 0.3724  | 0.713345728 |             |           |         |  |
| NAP1L4P1  | ENSG00000177173 | -0.61851 | 0.73188 | 0.32544     | 0.37242     | -0.89588  |         |  |
|           | 0.81484         | -0.89588 | 0.81484 | 0.37242     | 0.713345728 |           |         |  |
| RNU6-234P | ENSG00000202099 | 0.17561  | 0.4303  | 0.3254      | 0.37244     | -1.0333   |         |  |
|           | 0.84928         | -0.32296 | 0.62664 | 0.37244     | 0.713345728 |           |         |  |
| NA        | ENSG00000266120 | 0.32532  | 0.37247 | 0.32532     | 0.37247     | 0.32532   | 0.37247 |  |
|           | 0.32532         | 0.37247  | 0.37247 | 0.713345728 |             |           |         |  |
| NA        | ENSG00000212604 | -0.58839 | 0.72187 | 0.32518     | 0.37252     | -0.58839  | 0.72187 |  |
|           | -0.58839        | 0.72187  | 0.37252 | 0.713345728 |             |           |         |  |
| RASA4CP   | ENSG00000228903 | -1.3752  | 0.91547 | 0.32512     | 0.37254     | 0.29246   |         |  |
|           | 0.38497         | -0.23513 | 0.59295 | 0.37254     | 0.713345728 |           |         |  |
| NA        | ENSG00000271587 | 0.32512  | 0.37255 | 0.32512     | 0.37255     | -0.43495  | 0.6682  |  |
|           | 0.32512         | 0.37255  | 0.37255 | 0.713345728 |             |           |         |  |
| DSCR4     | ENSG00000184029 | 0.064666 | 0.47422 | -1.4812     | 0.93073     | -0.049258 | 0.51964 |  |
|           | 0.32509         | 0.37256  | 0.37256 | 0.713345728 |             |           |         |  |
| LINC00567 | ENSG00000259831 | -0.6901  | 0.75494 | 0.32508     | 0.37256     | -1.6148   |         |  |
|           | 0.94682         | -1.6148  | 0.94682 | 0.37256     | 0.713345728 |           |         |  |
| CTSW      | ENSG00000172543 | 0.17721  | 0.42967 | 0.32506     | 0.37257     | 0.32506   | 0.37257 |  |
|           | 0.32506         | 0.37257  | 0.37257 | 0.713345728 |             |           |         |  |
| MLEC      | ENSG00000110917 | -0.2801  | 0.6103  | -0.2801     | 0.6103      | -0.2801   | 0.6103  |  |
|           | 0.32498         | 0.3726   | 0.3726  | 0.713345728 |             |           |         |  |
| ATP1B3    | ENSG00000069849 | -0.22177 | 0.58775 | 0.32495     | 0.37261     | -0.22177  |         |  |
|           | 0.58775         | -0.56562 | 0.71418 | 0.37261     | 0.713345728 |           |         |  |
| RNU6-976P | ENSG00000251895 | 0.32494  | 0.37261 | 0.32494     | 0.37261     | 0.32494   |         |  |
|           | 0.37261         | 0.32494  | 0.37261 | 0.37261     | 0.713345728 |           |         |  |
| LIPC-AS1  | ENSG00000259293 | 0.32491  | 0.37262 | -0.18413    | 0.57304     | 0.32491   |         |  |
|           | 0.37262         | 0.32491  | 0.37262 | 0.37262     | 0.713345728 |           |         |  |
| NA        | ENSG00000228031 | 0.32484  | 0.37265 | 0.32484     | 0.37265     | 0.32484   | 0.37265 |  |
|           | 0.32484         | 0.37265  | 0.37265 | 0.713345728 |             |           |         |  |
| NA        | ENSG00000261759 | 0.32485  | 0.37265 | 0.32485     | 0.37265     | 0.32485   | 0.37265 |  |
|           | 0.32485         | 0.37265  | 0.37265 | 0.713345728 |             |           |         |  |
| ARV1      | ENSG00000173409 | 0.32482  | 0.37266 | -0.15237    | 0.56055     | 0.32482   | 0.37266 |  |
|           | 0.074953        | 0.47013  | 0.37266 | 0.713345728 |             |           |         |  |
| LINC02874 | ENSG00000257137 | 0.012874 | 0.49486 | -0.16968    | 0.56737     | 0.32476   |         |  |
|           | 0.37268         | -0.55984 | 0.7122  | 0.37268     | 0.713345728 |           |         |  |
| LINC01227 | ENSG00000260737 | 0.32472  | 0.3727  | 0.32472     | 0.3727      | 0.32472   |         |  |

|           |                 |          |             |             |             |           |         |          |
|-----------|-----------------|----------|-------------|-------------|-------------|-----------|---------|----------|
|           | 0.3727          | 0.32472  | 0.3727      | 0.3727      | 0.713345728 |           |         |          |
| NA        | ENSG00000272172 | 0.2691   | 0.39393     | 0.32469     | 0.37271     | -0.12488  | 0.54969 |          |
|           | -0.12488        | 0.54969  | 0.37271     | 0.713345728 |             |           |         |          |
| NA        | ENSG00000236372 | 0.32458  | 0.37275     | 0.32458     | 0.37275     | 0.32458   | 0.37275 |          |
|           | 0.32458         | 0.37275  | 0.37275     | 0.713345728 |             |           |         |          |
| LINC02352 | ENSG00000259448 | -0.31739 | 0.62453     | 0.32457     | 0.37275     | -1.0176   |         |          |
|           | 0.84556         | -0.26431 | 0.60423     | 0.37275     | 0.713345728 |           |         |          |
| MTND3P10  | ENSG00000233286 | 0.32455  | 0.37276     | 0.32455     | 0.37276     | 0.32455   |         |          |
|           | 0.37276         | 0.32455  | 0.37276     | 0.37276     | 0.713345728 |           |         |          |
| ANKRD39   | ENSG00000213337 | -0.44877 | 0.6732      | -0.37979    | 0.64795     | 0.32452   |         |          |
|           | 0.37277         | -1.9995  | 0.97722     | 0.37277     | 0.713345728 |           |         |          |
| RPS20P9   | ENSG00000237162 | 0.32451  | 0.37278     | 0.32451     | 0.37278     | 0.32451   |         |          |
|           | 0.37278         | 0.32451  | 0.37278     | 0.37278     | 0.713345728 |           |         |          |
| MIR216B   | ENSG00000211520 | -0.23845 | 0.59423     | 0.32447     | 0.37279     | -0.037142 |         |          |
|           | 0.51481         | -0.50096 | 0.6918      | 0.37279     | 0.713345728 |           |         |          |
| NA        | ENSG00000268296 | 0.32447  | 0.37279     | -0.32192    | 0.62624     | -0.18251  | 0.57241 |          |
|           | -0.18251        | 0.57241  | 0.37279     | 0.713345728 |             |           |         |          |
| NA        | ENSG00000279594 | 0.3244   | 0.37282     | 0.3244      | 0.37282     | 0.3244    | 0.37282 |          |
|           | 0.3244          | 0.37282  | 0.37282     | 0.713345728 |             |           |         |          |
| SNHG28    | ENSG00000188004 | -0.62591 | 0.73431     | -0.62591    | 0.73431     | -0.62591  |         |          |
|           | 0.73431         | 0.32436  | 0.37283     | 0.37283     | 0.713345728 |           |         |          |
| RPS12P24  | ENSG00000230283 | -0.10772 | 0.54289     | -0.10772    | 0.54289     | 0.32436   |         |          |
|           | 0.37283         | -0.10772 | 0.54289     | 0.37283     | 0.713345728 |           |         |          |
| KHNYN     | ENSG00000100441 | 0.28892  | 0.38632     | 0.051934    | 0.47929     | 0.32433   | 0.37284 |          |
|           | 0.051934        | 0.47929  | 0.37284     | 0.713345728 |             |           |         |          |
| EEF1A1P11 | ENSG00000228502 | 0.32429  | 0.37286     | 0.32429     | 0.37286     | 0.32429   |         |          |
|           | 0.37286         | 0.32429  | 0.37286     | 0.37286     | 0.713345728 |           |         |          |
| PRKRIP1   | ENSG00000128563 | 0.32427  | 0.37287     | 0.27615     | 0.39122     | -1.1716   |         |          |
|           | 0.87931         | -0.29698 | 0.61676     | 0.37287     | 0.713345728 |           |         |          |
| NA        | ENSG00000234418 | 0.32426  | 0.37287     | 0.010185    | 0.49594     | 0.22383   | 0.41145 |          |
|           | 0.075171        | 0.47004  | 0.37287     | 0.713345728 |             |           |         |          |
| RN7SL173P | ENSG00000243373 | 0.32418  | 0.3729      | 0.32418     | 0.3729      | 0.32418   |         |          |
|           | 0.3729          | 0.32418  | 0.3729      | 0.3729      | 0.713345728 |           |         |          |
| HTR1D     | ENSG00000179546 | 0.066106 | 0.47365     | 0.066106    | 0.47365     | 0.22985   | 0.40911 |          |
|           | 0.32416         | 0.37291  | 0.37291     | 0.713345728 |             |           |         |          |
| NA        | ENSG00000234244 | -0.27139 | 0.60696     | 0.32413     | 0.37292     | 0.32413   | 0.37292 |          |
|           | 0.32413         | 0.37292  | 0.37292     | 0.713345728 |             |           |         |          |
| HBG1      | ENSG00000213934 | -0.90599 | 0.81753     | -0.52816    | 0.70131     | 0.32404   | 0.37295 |          |
|           | 0.32404         | 0.37295  | 0.37295     | 0.713345728 |             |           |         |          |
| NA        | ENSG00000258035 | -1.4549  | 0.92715     | -0.71853    | 0.76378     | 0.32404   | 0.37295 |          |
|           | 0.32404         | 0.37295  | 0.37295     | 0.713345728 |             |           |         |          |
| ITPRIP    | ENSG00000148841 | 0.21792  | 0.41375     | 0.32402     | 0.37296     | 0.0084339 |         |          |
|           | 0.49664         | -0.17605 | 0.56987     | 0.37296     | 0.713345728 |           |         |          |
| NA        | ENSG00000224375 | 0.324    | 0.37297     | -0.49769    | 0.69065     | 0.324     | 0.37297 | -0.47224 |
|           | 0.68162         | 0.37297  | 0.713345728 |             |             |           |         |          |
| NA        | ENSG00000239268 | -0.46185 | 0.67791     | 0.32398     | 0.37297     | -1.0289   | 0.84823 |          |
|           | 0.08405         | 0.46651  | 0.37297     | 0.713345728 |             |           |         |          |
| NA        | ENSG00000279289 | -1.7586  | 0.96067     | 0.32397     | 0.37298     | -2.0218   | 0.9784  |          |
|           | -2.0502         | 0.97983  | 0.37298     | 0.713345728 |             |           |         |          |
| NA        | ENSG00000242048 | -0.10284 | 0.54095     | -0.29139    | 0.61462     | 0.32392   | 0.373   |          |
|           | 0.32392         | 0.373    | 0.373       | 0.713345728 |             |           |         |          |
| BSPRY     | ENSG00000119411 | 0.32389  | 0.37301     | 0.31085     | 0.37796     | 0.31085   | 0.37796 |          |
|           | -0.24576        | 0.59707  | 0.37301     | 0.713345728 |             |           |         |          |
| NA        | ENSG00000254027 | -0.36991 | 0.64428     | -0.36102    | 0.64096     | 0.32388   | 0.37302 |          |
|           | 0.32388         | 0.37302  | 0.37302     | 0.713345728 |             |           |         |          |
| MIR642A   | ENSG00000207773 | 0.3238   | 0.37304     | 0.3238      | 0.37304     | 0.3238    |         |          |
|           | 0.37304         | 0.3238   | 0.37304     | 0.37304     | 0.713345728 |           |         |          |
| NA        | ENSG00000274654 | 0.32377  | 0.37305     | 0.32377     | 0.37305     | 0.32377   | 0.37305 |          |
|           | 0.32377         | 0.37305  | 0.37305     | 0.713345728 |             |           |         |          |
| NA        | ENSG00000272498 | 0.32375  | 0.37306     | -1.482      | 0.93083     | 0.32375   | 0.37306 |          |
|           | 0.32375         | 0.37306  | 0.37306     | 0.713345728 |             |           |         |          |
| ZNF107    | ENSG00000196247 | 0.075276 | 0.47        | -0.23988    | 0.59479     | 0.061555  | 0.47546 |          |

|            |                 |           |         |             |             |          |         |  |
|------------|-----------------|-----------|---------|-------------|-------------|----------|---------|--|
|            | 0.32374         | 0.37307   | 0.37307 | 0.713345728 |             |          |         |  |
| NA         | ENSG00000255496 | 0.3237    | 0.37308 | -0.69135    | 0.75533     | 0.3237   | 0.37308 |  |
|            | 0.3237          | 0.37308   | 0.37308 | 0.713345728 |             |          |         |  |
| NA         | ENSG00000238185 | 0.32364   | 0.3731  | 0.32364     | 0.3731      | 0.32364  | 0.3731  |  |
|            | 0.32364         | 0.3731    | 0.3731  | 0.713345728 |             |          |         |  |
| NA         | ENSG00000239374 | 0.32367   | 0.3731  | 0.32367     | 0.3731      | 0.32367  | 0.3731  |  |
|            | 0.32367         | 0.3731    | 0.3731  | 0.713345728 |             |          |         |  |
| NA         | ENSG00000277007 | 0.32364   | 0.3731  | 0.32364     | 0.3731      | 0.32364  | 0.3731  |  |
|            | 0.32364         | 0.3731    | 0.3731  | 0.713345728 |             |          |         |  |
| ASAH1      | ENSG00000104763 | 0.32359   | 0.37312 | 0.02533     | 0.4899      | -0.14383 | 0.55718 |  |
|            | -0.82066        | 0.79408   | 0.37312 | 0.713345728 |             |          |         |  |
| SH2D5      | ENSG00000189410 | 0.32359   | 0.37313 | 0.32359     | 0.37313     | 0.32359  | 0.37313 |  |
|            | 0.24508         | 0.4032    | 0.37313 | 0.713345728 |             |          |         |  |
| NA         | ENSG00000284522 | 0.32357   | 0.37313 | 0.32357     | 0.37313     | 0.32357  | 0.37313 |  |
|            | 0.32357         | 0.37313   | 0.37313 | 0.713345728 |             |          |         |  |
| C6orf201   | ENSG00000185689 | 0.058625  | 0.47663 | 0.042848    | 0.48291     | 0.32349  |         |  |
|            | 0.37316         | -0.3063   | 0.62031 | 0.37316     | 0.713345728 |          |         |  |
| NA         | ENSG00000259380 | -0.5095   | 0.6948  | 0.32351     | 0.37316     | 0.32351  | 0.37316 |  |
|            | -0.38802        | 0.651     | 0.37316 | 0.713345728 |             |          |         |  |
| OR2AI1P    | ENSG00000236791 | -0.91724  | 0.82049 | -0.75535    | 0.77498     | 0.32342  |         |  |
|            | 0.37319         | -0.33194  | 0.63003 | 0.37319     | 0.713345728 |          |         |  |
| RNU6-889P  | ENSG00000252998 | 0.32342   | 0.37319 | -0.32019    | 0.62559     | -2.0387  |         |  |
|            | 0.97926         | -1.0047   | 0.84248 | 0.37319     | 0.713345728 |          |         |  |
| OR7E53P    | ENSG00000239978 | -1.0333   | 0.84926 | -0.42493    | 0.66456     | -0.37027 |         |  |
|            | 0.64441         | 0.32338   | 0.3732  | 0.3732      | 0.713345728 |          |         |  |
| NA         | ENSG00000252868 | 0.32339   | 0.3732  | 0.32339     | 0.3732      | 0.32339  | 0.3732  |  |
|            | 0.32339         | 0.3732    | 0.3732  | 0.713345728 |             |          |         |  |
| NA         | ENSG00000259757 | 0.32324   | 0.37326 | -0.96385    | 0.83244     | 0.017707 | 0.49294 |  |
|            | 0.072848        | 0.47096   | 0.37326 | 0.713414692 |             |          |         |  |
| LINC01822  | ENSG00000229621 | -0.29983  | 0.61785 | -0.29983    | 0.61785     | -0.65153 |         |  |
|            | 0.74265         | 0.32319   | 0.37327 | 0.37327     | 0.713414692 |          |         |  |
| NA         | ENSG00000265334 | 0.32318   | 0.37328 | 0.32318     | 0.37328     | 0.32318  | 0.37328 |  |
|            | 0.32318         | 0.37328   | 0.37328 | 0.713414692 |             |          |         |  |
| NA         | ENSG00000274922 | 0.32312   | 0.3733  | -0.44644    | 0.67236     | 0.32312  | 0.3733  |  |
|            | 0.32312         | 0.3733    | 0.3733  | 0.713424935 |             |          |         |  |
| LINC01007  | ENSG00000233123 | 0.15695   | 0.43764 | 0.32303     | 0.37333     | -0.88245 |         |  |
|            | 0.81123         | -0.18928  | 0.57506 | 0.37333     | 0.713454288 |          |         |  |
| ZNF559     | ENSG00000188321 | 0.3229    | 0.37338 | 0.028306    | 0.48871     | 0.12541  |         |  |
|            | 0.4501          | 0.19718   | 0.42184 | 0.37338     | 0.713521859 |          |         |  |
| PDSS1      | ENSG00000148459 | 0.32284   | 0.37341 | 0.081081    | 0.46769     | 0.29496  | 0.38401 |  |
|            | -0.049236       | 0.51963   | 0.37341 | 0.713523226 |             |          |         |  |
| RNA5SP249  | ENSG00000251936 | 0.32284   | 0.37341 | -0.61418    | 0.73045     | -1.6814  |         |  |
|            | 0.95366         | -1.6814   | 0.95366 | 0.37341     | 0.713523226 |          |         |  |
| EXOGP1     | ENSG00000263748 | -0.24208  | 0.59564 | 0.32278     | 0.37343     | 0.12678  |         |  |
|            | 0.44956         | 0.1998    | 0.42082 | 0.37343     | 0.713533463 |          |         |  |
| BVES-AS1   | ENSG00000203808 | 0.32269   | 0.37346 | 0.038126    | 0.48479     | 0.32269  |         |  |
|            | 0.37346         | 0.32269   | 0.37346 | 0.37346     | 0.713553935 |          |         |  |
| LINC02590  | ENSG00000233978 | -0.29106  | 0.6145  | 0.32267     | 0.37347     | 0.32267  |         |  |
|            | 0.37347         | 0.32267   | 0.37347 | 0.37347     | 0.713553935 |          |         |  |
| TEPSIN     | ENSG00000167302 | 0.15887   | 0.43689 | 0.19184     | 0.42393     | 0.3226   |         |  |
|            | 0.3735          | -0.85029  | 0.80242 | 0.3735      | 0.713563478 |          |         |  |
| ZNF561-AS1 | ENSG00000267106 | -0.8331   | 0.79761 | 0.32256     | 0.37351     | -0.58021 |         |  |
|            | 0.71911         | -0.74416  | 0.77161 | 0.37351     | 0.713563478 |          |         |  |
| IGHEP1     | ENSG00000253692 | -0.14705  | 0.55845 | -0.095655   | 0.5381      | 0.32251  |         |  |
|            | 0.37353         | -0.029747 | 0.51187 | 0.37353     | 0.713563478 |          |         |  |
| ANKRD49P2  | ENSG00000225349 | 0.32249   | 0.37354 | 0.32249     | 0.37354     | 0.057172 |         |  |
|            | 0.4772          | 0.057172  | 0.4772  | 0.37354     | 0.713563478 |          |         |  |
| LMNTD1     | ENSG00000152936 | 0.32239   | 0.37358 | -0.093054   | 0.53707     | -0.57674 |         |  |
|            | 0.71794         | -0.57674  | 0.71794 | 0.37358     | 0.713563478 |          |         |  |
| LINC02291  | ENSG00000197176 | 0.27997   | 0.38975 | 0.32238     | 0.37358     | 0.27997  |         |  |
|            | 0.38975         | -0.40299  | 0.65652 | 0.37358     | 0.713563478 |          |         |  |
| LINC02185  | ENSG00000262097 | 0.32236   | 0.37359 | 0.32236     | 0.37359     | 0.32236  |         |  |

|            |                 |          |         |             |             |          |         |
|------------|-----------------|----------|---------|-------------|-------------|----------|---------|
|            | 0.37359         | 0.32236  | 0.37359 | 0.37359     | 0.713563478 |          |         |
| FDXACB1    | ENSG00000255561 | 0.32222  | 0.37364 | 0.32222     | 0.37364     | 0.32222  | 0.32222 |
|            | 0.37364         | 0.32222  | 0.37364 | 0.37364     | 0.713563478 |          |         |
| NA         | ENSG00000258529 | 0.32222  | 0.37364 | -0.43708    | 0.66897     | 0.32222  | 0.37364 |
|            | 0.32222         | 0.37364  | 0.37364 | 0.713563478 |             |          |         |
| LINC00898  | ENSG00000205634 | 0.3222   | 0.37365 | 0.24837     | 0.40192     | 0.21789  |         |
|            | 0.41376         | 0.078286 | 0.4688  | 0.37365     | 0.713563478 |          |         |
| NA         | ENSG00000259645 | 0.32221  | 0.37365 | 0.32221     | 0.37365     | 0.32221  | 0.37365 |
|            | 0.32221         | 0.37365  | 0.37365 | 0.713563478 |             |          |         |
| NA         | ENSG00000257389 | -0.26145 | 0.60313 | 0.32217     | 0.37366     | 0.32217  | 0.37366 |
|            | 0.32217         | 0.37366  | 0.37366 | 0.713563478 |             |          |         |
| NA         | ENSG00000271181 | 0.32216  | 0.37367 | 0.32216     | 0.37367     | 0.32216  | 0.37367 |
|            | 0.32216         | 0.37367  | 0.37367 | 0.713563478 |             |          |         |
| MIR138-2   | ENSG00000207649 | 0.32213  | 0.37368 | -0.33656    | 0.63178     | 0.32213  |         |
|            | 0.37368         | 0.32213  | 0.37368 | 0.37368     | 0.713563478 |          |         |
| DAPK1-IT1  | ENSG00000236709 | 0.32206  | 0.3737  | -0.17746    | 0.57043     | 0.32206  |         |
|            | 0.3737          | 0.32206  | 0.3737  | 0.3737      | 0.713573707 |          |         |
| NA         | ENSG00000277701 | 0.034407 | 0.48628 | 0.32202     | 0.37372     | -0.54368 | 0.70667 |
|            | -0.96591        | 0.83295  | 0.37372 | 0.713583935 |             |          |         |
| PWWP2AP1   | ENSG00000226683 | 0.32195  | 0.37375 | 0.32195     | 0.37375     | 0.32195  |         |
|            | 0.37375         | -0.11829 | 0.54708 | 0.37375     | 0.713613255 |          |         |
| SPECC1L    | ENSG00000100014 | 0.32185  | 0.37378 | -0.41119    | 0.65953     | -0.27845 |         |
|            | 0.60967         | 0.29814  | 0.3828  | 0.37378     | 0.713631623 |          |         |
| RNU6-445P  | ENSG00000252758 | 0.32184  | 0.37379 | 0.32184     | 0.37379     | 0.32184  |         |
|            | 0.37379         | 0.32184  | 0.37379 | 0.37379     | 0.713631623 |          |         |
| DPY19L3    | ENSG00000178904 | 0.20671  | 0.41812 | 0.3216      | 0.37388     | -1.0441  |         |
|            | 0.85177         | -0.26292 | 0.60369 | 0.37388     | 0.713631623 |          |         |
| HNRNPA1P51 | ENSG00000234491 | -0.38171 | 0.64866 | 0.32159     | 0.37388     | 0.32159  |         |
|            | 0.37388         | 0.32159  | 0.37388 | 0.37388     | 0.713631623 |          |         |
| SNORD101   | ENSG00000206754 | 0.32157  | 0.37389 | 0.32157     | 0.37389     | 0.32157  |         |
|            | 0.37389         | 0.32157  | 0.37389 | 0.37389     | 0.713631623 |          |         |
| RPL7P15    | ENSG00000240622 | 0.32154  | 0.3739  | -1.0148     | 0.84491     | -1.0148  |         |
|            | 0.84491         | -1.0148  | 0.84491 | 0.3739      | 0.713631623 |          |         |
| NA         | ENSG00000266076 | 0.32154  | 0.3739  | 0.32154     | 0.3739      | 0.32154  | 0.3739  |
|            | 0.32154         | 0.3739   | 0.3739  | 0.713631623 |             |          |         |
| GART       | ENSG00000159131 | -2.4253  | 0.99235 | -1.2917     | 0.90176     | -2.0641  | 0.9805  |
|            | 0.32148         | 0.37392  | 0.37392 | 0.713631623 |             |          |         |
| NA         | ENSG00000249966 | -0.59341 | 0.72355 | 0.3215      | 0.37392     | -0.78389 | 0.78345 |
|            | -0.78389        | 0.78345  | 0.37392 | 0.713631623 |             |          |         |
| PRSS3P1    | ENSG00000250591 | 0.32144  | 0.37394 | -1.049      | 0.85291     | 0.1906   |         |
|            | 0.42442         | 0.32144  | 0.37394 | 0.37394     | 0.713631623 |          |         |
| STOX2      | ENSG00000173320 | -0.36304 | 0.64171 | -0.57339    | 0.71681     | -0.64834 | 0.74162 |
|            | 0.3214          | 0.37395  | 0.37395 | 0.713631623 |             |          |         |
| NA         | ENSG00000239665 | -0.46244 | 0.67812 | 0.18276     | 0.42749     | 0.3214   | 0.37395 |
|            | 0.3214          | 0.37395  | 0.37395 | 0.713631623 |             |          |         |
| NA         | ENSG00000276992 | 0.32141  | 0.37395 | 0.32141     | 0.37395     | 0.32141  | 0.37395 |
|            | 0.32141         | 0.37395  | 0.37395 | 0.713631623 |             |          |         |
| LINC02519  | ENSG00000226194 | -0.22418 | 0.58869 | -0.013687   | 0.50546     | 0.32129  |         |
|            | 0.37399         | -1.3951  | 0.91851 | 0.37399     | 0.713680009 |          |         |
| NA         | ENSG00000261604 | 0.32121  | 0.37402 | 0.32121     | 0.37402     | 0.32121  | 0.37402 |
|            | 0.32121         | 0.37402  | 0.37402 | 0.713709308 |             |          |         |
| NA         | ENSG00000280269 | 0.32111  | 0.37406 | 0.32111     | 0.37406     | 0.32111  | 0.37406 |
|            | 0.32111         | 0.37406  | 0.37406 | 0.713757687 |             |          |         |
| PIK3R6     | ENSG00000276231 | 0.034094 | 0.4864  | 0.01997     | 0.49203     | 0.32097  |         |
|            | 0.37412         | 0.1749   | 0.43058 | 0.37412     | 0.713835352 |          |         |
| PDCD10     | ENSG00000114209 | -0.21185 | 0.58389 | 0.32094     | 0.37413     | 0.039339 |         |
|            | 0.48431         | -0.56776 | 0.7149  | 0.37413     | 0.713835352 |          |         |
| ZNF70P1    | ENSG00000225463 | 0.32084  | 0.37417 | 0.32084     | 0.37417     | 0.32084  |         |
|            | 0.37417         | 0.32084  | 0.37417 | 0.37417     | 0.71388372  |          |         |
| PPP1R3A    | ENSG00000154415 | -0.66825 | 0.74801 | -0.66825    | 0.74801     | -0.66825 |         |
|            | 0.74801         | 0.32069  | 0.37422 | 0.37422     | 0.71391434  |          |         |
| TCL1B      | ENSG00000213231 | 0.3207   | 0.37422 | 0.3207      | 0.37422     | 0.3207   | 0.37422 |



|            |                 |            |          |            |             |             |         |  |
|------------|-----------------|------------|----------|------------|-------------|-------------|---------|--|
| NA         | 0.3207          | 0.37422    | 0.37422  | 0.71391434 |             |             |         |  |
|            | ENSG00000240738 | 0.32067    | 0.37423  | -0.31407   | 0.62327     | 0.32067     | 0.37423 |  |
|            |                 | 0.32067    | 0.37423  | 0.37423    | 0.71391434  |             |         |  |
| TUBBP2     | ENSG00000214222 | -0.0099964 | 0.50399  | 0.32062    | 0.37425     | 0.32062     |         |  |
|            |                 | 0.37425    | -1.0484  | 0.85276    | 0.37425     | 0.713924545 |         |  |
| MIR548K    | ENSG00000221333 | -0.2743    | 0.60807  | 0.32055    | 0.37428     | -0.2743     |         |  |
|            |                 | 0.60807    | -0.2743  | 0.60807    | 0.37428     | 0.713953824 |         |  |
| NA         | ENSG00000266591 | 0.32043    | 0.37432  | 0.32043    | 0.37432     | 0.32043     | 0.37432 |  |
|            |                 | 0.32043    | 0.37432  | 0.37432    | 0.714002176 |             |         |  |
| NA         | ENSG00000275741 | 0.16449    | 0.43467  | -0.0069553 | 0.50277     | -0.23909    | 0.59448 |  |
|            |                 | 0.32028    | 0.37438  | 0.37438    | 0.714088672 |             |         |  |
| MOK        | ENSG00000080823 | -0.54647   | 0.70763  | -0.25936   | 0.60232     | 0.32017     | 0.37442 |  |
|            |                 | 0.27573    | 0.39138  | 0.37442    | 0.714100188 |             |         |  |
| FIBCD1     | ENSG00000130720 | -0.44399   | 0.67147  | -0.93668   | 0.82554     | 0.16753     |         |  |
|            |                 | 0.43348    | 0.32018  | 0.37442    | 0.37442     | 0.714100188 |         |  |
| HMGA1P3    | ENSG00000258011 | 0.32014    | 0.37443  | 0.12763    | 0.44922     | 0.32014     |         |  |
|            |                 | 0.37443    | 0.32014  | 0.37443    | 0.37443     | 0.714100188 |         |  |
| NA         | ENSG00000223761 | 0.3201     | 0.37445  | 0.3201     | 0.37445     | 0.3201      | 0.37445 |  |
|            |                 | 0.3201     | 0.37445  | 0.37445    | 0.714101507 |             |         |  |
| SNORA73B   | ENSG00000200087 | 0.32006    | 0.37446  | 0.32006    | 0.37446     | 0.32006     |         |  |
|            |                 | 0.37446    | 0.32006  | 0.37446    | 0.37446     | 0.714101507 |         |  |
| FAM210B    | ENSG00000124098 | -0.17391   | 0.56903  | -0.58761   | 0.7216      | 0.22928     |         |  |
|            |                 | 0.40933    | 0.32     | 0.37448    | 0.37448     | 0.714111701 |         |  |
| INAFM2     | ENSG00000259330 | -0.32039   | 0.62566  | 0.014998   | 0.49402     | -0.059991   |         |  |
|            |                 | 0.52392    | 0.31991  | 0.37452    | 0.37452     | 0.714151154 |         |  |
| C9orf24    | ENSG00000164972 | -0.30423   | 0.61953  | -0.30423   | 0.61953     | -0.30423    |         |  |
|            |                 | 0.61953    | 0.31987  | 0.37453    | 0.37453     | 0.714151154 |         |  |
| CEACAMP10  | ENSG00000241104 | -0.84576   | 0.80116  | 0.31983    | 0.37455     | 0.24538     |         |  |
|            |                 | 0.40308    | -0.78334 | 0.78329    | 0.37455     | 0.71415148  |         |  |
| RN7SL25P   | ENSG00000264530 | 0.31978    | 0.37457  | 0.31978    | 0.37457     | 0.31978     |         |  |
|            |                 | 0.37457    | 0.31978  | 0.37457    | 0.37457     | 0.71415148  |         |  |
| TPT1       | ENSG00000133112 | -0.10098   | 0.54022  | 0.3197     | 0.3746      | 0.3197      | 0.3746  |  |
|            |                 | -0.27172   | 0.60708  | 0.3746     | 0.71415148  |             |         |  |
| RPL35A     | ENSG00000182899 | 0.31962    | 0.37463  | -0.57259   | 0.71654     | -0.41479    |         |  |
|            |                 | 0.66085    | -0.41479 | 0.66085    | 0.37463     | 0.71415148  |         |  |
| RNU6-319P  | ENSG00000251834 | 0.31962    | 0.37463  | 0.31962    | 0.37463     | 0.31962     |         |  |
|            |                 | 0.37463    | 0.31962  | 0.37463    | 0.37463     | 0.71415148  |         |  |
| CASC23     | ENSG00000255420 | 0.31961    | 0.37463  | 0.25451    | 0.39955     | 0.31961     |         |  |
|            |                 | 0.37463    | 0.16852  | 0.43309    | 0.37463     | 0.71415148  |         |  |
| RNU6-1040P | ENSG00000206701 | -0.17509   | 0.56949  | -0.68297   | 0.75269     | -0.53604    |         |  |
|            |                 | 0.70404    | 0.31956  | 0.37465    | 0.37465     | 0.71415148  |         |  |
| NA         | ENSG00000241991 | 0.31951    | 0.37467  | -0.15091   | 0.55997     | -0.15091    | 0.55997 |  |
|            |                 | -0.15091   | 0.55997  | 0.37467    | 0.71415148  |             |         |  |
| NA         | ENSG00000280009 | -0.44254   | 0.67095  | 0.046404   | 0.48149     | 0.3195      | 0.37467 |  |
|            |                 | 0.24887    | 0.40173  | 0.37467    | 0.71415148  |             |         |  |
| MIR874     | ENSG00000216009 | 0.31946    | 0.37469  | 0.31946    | 0.37469     | 0.31946     |         |  |
|            |                 | 0.37469    | 0.31946  | 0.37469    | 0.37469     | 0.71415148  |         |  |
| ERCC6      | ENSG00000225830 | 0.12316    | 0.45099  | -1.7102    | 0.95638     | 0.31944     | 0.3747  |  |
|            |                 | -1.0772    | 0.8593   | 0.3747     | 0.71415148  |             |         |  |
| ZNF573     | ENSG00000189144 | 0.31938    | 0.37472  | 0.17271    | 0.43144     | 0.17271     |         |  |
|            |                 | 0.43144    | 0.17271  | 0.43144    | 0.37472     | 0.71415148  |         |  |
| ALKBH8     | ENSG00000137760 | -0.31392   | 0.62321  | -0.53167   | 0.70252     | 0.31932     |         |  |
|            |                 | 0.37474    | -0.11134 | 0.54433    | 0.37474     | 0.71415148  |         |  |
| NA         | ENSG00000229913 | -0.12594   | 0.55011  | 0.17294    | 0.43135     | 0.31934     | 0.37474 |  |
|            |                 | -0.12594   | 0.55011  | 0.37474    | 0.71415148  |             |         |  |
| AK8        | ENSG00000165695 | -0.22547   | 0.58919  | 0.31929    | 0.37475     | -1.4156     | 0.92155 |  |
|            |                 | -0.37985   | 0.64797  | 0.37475    | 0.71415148  |             |         |  |
| CALML5     | ENSG00000178372 | 0.31923    | 0.37478  | 0.31923    | 0.37478     | 0.31923     |         |  |
|            |                 | 0.37478    | -0.75267 | 0.77418    | 0.37478     | 0.714152794 |         |  |
| LINC00911  | ENSG00000259107 | 0.10293    | 0.45901  | -0.18003   | 0.57144     | -0.18003    |         |  |
|            |                 | 0.57144    | 0.31923  | 0.37478    | 0.37478     | 0.714152794 |         |  |
| MAGI2-AS2  | ENSG00000226978 | 0.31912    | 0.37482  | 0.31912    | 0.37482     | 0.31912     |         |  |

|              |                 |          |         |             |             |           |         |  |
|--------------|-----------------|----------|---------|-------------|-------------|-----------|---------|--|
|              | 0.37482         | 0.31912  | 0.37482 | 0.37482     | 0.714173161 |           |         |  |
| NA           | ENSG00000256863 | 0.31912  | 0.37482 | -0.44654    | 0.6724      | 0.051924  | 0.47929 |  |
|              | -0.65067        | 0.74237  | 0.37482 | 0.714173161 |             |           |         |  |
| ENTPD3       | ENSG00000168032 | 0.31906  | 0.37484 | -0.59071    | 0.72264     | 0.31906   |         |  |
|              | 0.37484         | -0.10591 | 0.54217 | 0.37484     | 0.714174473 |           |         |  |
| CDK5RAP2     | ENSG00000136861 | -0.80975 | 0.79096 | 0.20382     | 0.41925     | -0.80975  |         |  |
|              | 0.79096         | 0.31904  | 0.37485 | 0.37485     | 0.714174473 |           |         |  |
| LINC00881    | ENSG00000241135 | -0.73534 | 0.76893 | 0.31899     | 0.37487     | -0.2758   |         |  |
|              | 0.60865         | -0.17435 | 0.56921 | 0.37487     | 0.714184655 |           |         |  |
| NACAD        | ENSG00000136274 | -0.34753 | 0.63591 | 0.31885     | 0.37492     | 0.31885   | 0.37492 |  |
|              | 0.15295         | 0.43922  | 0.37492 | 0.714243116 |             |           |         |  |
| NA           | ENSG00000237176 | 0.31881  | 0.37493 | -0.83143    | 0.79713     | 0.31881   | 0.37493 |  |
|              | -0.83143        | 0.79713  | 0.37493 | 0.714243116 |             |           |         |  |
| HNF4GP1      | ENSG00000228611 | 0.31877  | 0.37495 | 0.31877     | 0.37495     | 0.31877   |         |  |
|              | 0.37495         | -0.27167 | 0.60706 | 0.37495     | 0.714244422 |           |         |  |
| OR10G5P      | ENSG00000226461 | 0.23946  | 0.40537 | 0.31876     | 0.37496     | 0.31876   |         |  |
|              | 0.37496         | 0.31876  | 0.37496 | 0.37496     | 0.714244422 |           |         |  |
| TMED7-TICAM2 | ENSG00000251201 | -0.81928 | 0.79369 | -1.2556     | 0.89537     | 0.31858   |         |  |
|              | 0.37502         | 0.31858  | 0.37502 | 0.37502     | 0.71433079  |           |         |  |
| NA           | ENSG00000230404 | -0.33647 | 0.63174 | -0.33647    | 0.63174     | -0.40322  | 0.65661 |  |
|              | 0.3185          | 0.37505  | 0.37505 | 0.714342261 |             |           |         |  |
| C2CD2        | ENSG00000157617 | -0.7688  | 0.77899 | 0.31846     | 0.37507     | -1.2015   | 0.88522 |  |
|              | -0.50803        | 0.69428  | 0.37507 | 0.714342261 |             |           |         |  |
| SPATA8-AS1   | ENSG00000259282 | 0.31845  | 0.37507 | 0.31845     | 0.37507     | 0.31845   |         |  |
|              | 0.37507         | 0.31845  | 0.37507 | 0.37507     | 0.714342261 |           |         |  |
| NA           | ENSG00000224604 | -0.58992 | 0.72238 | 0.31832     | 0.37512     | 0.31832   | 0.37512 |  |
|              | 0.31832         | 0.37512  | 0.37512 | 0.714367788 |             |           |         |  |
| NA           | ENSG00000267309 | 0.31832  | 0.37512 | 0.31832     | 0.37512     | 0.31832   | 0.37512 |  |
|              | 0.31832         | 0.37512  | 0.37512 | 0.714367788 |             |           |         |  |
| EEF1A1       | ENSG00000156508 | -0.67146 | 0.74904 | 0.15331     | 0.43908     | -0.072237 |         |  |
|              | 0.52879         | 0.31823  | 0.37515 | 0.37515     | 0.714367788 |           |         |  |
| TREM1        | ENSG00000124731 | 0.31818  | 0.37517 | 0.31818     | 0.37517     | 0.31818   | 0.37517 |  |
|              | -0.53167        | 0.70252  | 0.37517 | 0.714367788 |             |           |         |  |
| TGFBRAP1     | ENSG00000135966 | -0.37937 | 0.64779 | 0.20793     | 0.41764     | 0.31288   |         |  |
|              | 0.37719         | 0.31815  | 0.37519 | 0.37519     | 0.714367788 |           |         |  |
| HLA-DQA1     | ENSG00000196735 | 0.22831  | 0.4097  | -0.053349   | 0.52127     | -0.17549  |         |  |
|              | 0.56965         | 0.31814  | 0.37519 | 0.37519     | 0.714367788 |           |         |  |
| NEU1         | ENSG00000204386 | 0.31812  | 0.3752  | 0.31812     | 0.3752      | 0.31812   | 0.3752  |  |
|              | -1.2345         | 0.89149  | 0.3752  | 0.714367788 |             |           |         |  |
| RCN1P2       | ENSG00000214455 | 0.31809  | 0.37521 | 0.31809     | 0.37521     | 0.31809   |         |  |
|              | 0.37521         | 0.31809  | 0.37521 | 0.37521     | 0.714367788 |           |         |  |
| NA           | ENSG00000271353 | 0.31803  | 0.37523 | 0.31803     | 0.37523     | 0.31803   | 0.37523 |  |
|              | 0.31803         | 0.37523  | 0.37523 | 0.714367788 |             |           |         |  |
| NA           | ENSG00000265011 | 0.31802  | 0.37523 | 0.31802     | 0.37523     | 0.31802   | 0.37523 |  |
|              | 0.31802         | 0.37523  | 0.37523 | 0.714367788 |             |           |         |  |
| GIGYF2       | ENSG00000204120 | -0.2476  | 0.59778 | 0.31795     | 0.37526     | 0.06034   |         |  |
|              | 0.47594         | -0.16945 | 0.56728 | 0.37526     | 0.714369084 |           |         |  |
| RNU6-27P     | ENSG00000251955 | 0.31796  | 0.37526 | 0.31796     | 0.37526     | 0.31796   |         |  |
|              | 0.37526         | 0.31796  | 0.37526 | 0.37526     | 0.714369084 |           |         |  |
| NA           | ENSG00000213981 | -0.77603 | 0.78113 | -0.081048   | 0.5323      | 0.31791   | 0.37528 |  |
|              | -0.081048       | 0.5323   | 0.37528 | 0.714379249 |             |           |         |  |
| NA           | ENSG00000230112 | 0.31775  | 0.37534 | 0.31775     | 0.37534     | 0.31775   | 0.37534 |  |
|              | 0.31775         | 0.37534  | 0.37534 | 0.714428775 |             |           |         |  |
| RNU6-1247P   | ENSG00000252431 | -0.29183 | 0.61479 | -0.097623   | 0.53888     | -0.9488   |         |  |
|              | 0.82864         | 0.31775  | 0.37534 | 0.37534     | 0.714428775 |           |         |  |
| RNU7-174P    | ENSG00000252057 | -0.3224  | 0.62642 | -0.57527    | 0.71744     | -0.028427 |         |  |
|              | 0.51134         | 0.31771  | 0.37535 | 0.37535     | 0.714428775 |           |         |  |
| NA           | ENSG00000227885 | 0.3176   | 0.37539 | -0.75117    | 0.77372     | -0.036649 | 0.51462 |  |
|              | -0.54713        | 0.70785  | 0.37539 | 0.71446813  |             |           |         |  |
| APOOP5       | ENSG00000260240 | 0.25463  | 0.3995  | 0.31759     | 0.3754      | 0.31759   |         |  |
|              | 0.3754          | 0.29752  | 0.38304 | 0.3754      | 0.71446813  |           |         |  |
| NA           | ENSG00000248896 | -1.7682  | 0.96149 | -0.29729    | 0.61688     | -0.99587  | 0.84034 |  |

|            |                 |           |         |             |             |           |         |  |
|------------|-----------------|-----------|---------|-------------|-------------|-----------|---------|--|
|            | 0.31747         | 0.37544   | 0.37544 | 0.714479576 |             |           |         |  |
| PSD2-AS1   | ENSG00000249131 | 0.31745   | 0.37545 | -0.97335    | 0.83481     | -1.257    |         |  |
|            | 0.89562         | -1.257    | 0.89562 | 0.37545     | 0.714479576 |           |         |  |
| LMNTD2-AS1 | ENSG00000254815 | 0.030693  | 0.48776 | 0.31745     | 0.37545     | 0.24927   |         |  |
|            | 0.40158         | 0.24927   | 0.40158 | 0.37545     | 0.714479576 |           |         |  |
| NA         | ENSG00000237807 | 0.31738   | 0.37548 | 0.31738     | 0.37548     | 0.31738   | 0.37548 |  |
|            | 0.31738         | 0.37548   | 0.37548 | 0.714508763 |             |           |         |  |
| RNU6-418P  | ENSG00000206762 | 0.31731   | 0.3755  | 0.31731     | 0.3755      | 0.31731   |         |  |
|            | 0.3755          | 0.31731   | 0.3755  | 0.714518919 |             |           |         |  |
| HTR2A-AS1  | ENSG00000224517 | 0.31724   | 0.37553 | 0.091771    | 0.46344     | -0.062444 |         |  |
|            | 0.5249          | -0.10338  | 0.54117 | 0.37553     | 0.714548102 |           |         |  |
| ELL3       | ENSG00000128886 | 0.31718   | 0.37555 | 0.31718     | 0.37555     | 0.31718   | 0.37555 |  |
|            | 0.31718         | 0.37555   | 0.37555 | 0.714549383 |             |           |         |  |
| NA         | ENSG00000223849 | -1.6411   | 0.94962 | 0.31717     | 0.37556     | 0.31717   | 0.37556 |  |
|            | 0.31717         | 0.37556   | 0.37556 | 0.714549383 |             |           |         |  |
| NDUFS1     | ENSG00000023228 | 0.31707   | 0.37556 | -0.22068    | 0.58733     | -0.45571  |         |  |
|            | 0.6757          | -0.31815  | 0.62481 | 0.37556     | 0.714569688 |           |         |  |
| RN7SL5P    | ENSG00000265735 | 0.31705   | 0.37556 | 0.31705     | 0.37556     | 0.31705   |         |  |
|            | 0.37556         | 0.31705   | 0.37556 | 0.714569688 |             |           |         |  |
| SCCPDH     | ENSG00000143653 | -0.79051  | 0.78538 | -0.39535    | 0.65371     | 0.046203  |         |  |
|            | 0.48157         | 0.31692   | 0.37565 | 0.37565     | 0.714582396 |           |         |  |
| ZNF878     | ENSG00000257446 | 0.31686   | 0.37567 | 0.31686     | 0.37567     | 0.31686   |         |  |
|            | 0.37567         | 0.31686   | 0.37567 | 0.714582396 |             |           |         |  |
| XXYLT1-AS1 | ENSG00000233303 | -1.0294   | 0.84835 | -0.068845   | 0.52744     | 0.31686   |         |  |
|            | 0.37568         | -0.12887  | 0.55127 | 0.37568     | 0.714582396 |           |         |  |
| NA         | ENSG00000234108 | -0.79905  | 0.78787 | 0.31685     | 0.37568     | 0.31685   | 0.37568 |  |
|            | 0.31685         | 0.37568   | 0.37568 | 0.714582396 |             |           |         |  |
| ENPP7P11   | ENSG00000250942 | -0.71317  | 0.76213 | -0.15998    | 0.56355     | 0.31684   |         |  |
|            | 0.37568         | -1.5157   | 0.9352  | 0.37568     | 0.714582396 |           |         |  |
| GNG10P1    | ENSG00000234016 | 0.089649  | 0.46428 | -1.1484     | 0.8746      | -0.72072  |         |  |
|            | 0.76446         | 0.31679   | 0.3757  | 0.3757      | 0.714582469 |           |         |  |
| NA         | ENSG00000263477 | 0.067975  | 0.4729  | 0.31676     | 0.37571     | 0.31676   | 0.37571 |  |
|            | 0.31676         | 0.37571   | 0.37571 | 0.714582469 |             |           |         |  |
| NA         | ENSG00000261307 | -0.29065  | 0.61434 | -1.0141     | 0.84472     | -1.3902   | 0.91776 |  |
|            | 0.31666         | 0.37575   | 0.37575 | 0.714582469 |             |           |         |  |
| CDK5RAP3   | ENSG00000108465 | 0.17718   | 0.42968 | -0.34831    | 0.6362      | 0.31661   |         |  |
|            | 0.37577         | 0.17718   | 0.42968 | 0.37577     | 0.714582469 |           |         |  |
| RNU6-25P   | ENSG00000206600 | -1.0597   | 0.85536 | 0.31658     | 0.37578     | 0.071386  |         |  |
|            | 0.47155         | 0.071386  | 0.47155 | 0.37578     | 0.714582469 |           |         |  |
| NA         | ENSG00000262815 | 0.31659   | 0.37578 | 0.31659     | 0.37578     | 0.31659   | 0.37578 |  |
|            | 0.31659         | 0.37578   | 0.37578 | 0.714582469 |             |           |         |  |
| GAPDHP57   | ENSG00000236167 | 0.31655   | 0.37579 | 0.31655     | 0.37579     | 0.31655   |         |  |
|            | 0.37579         | 0.31655   | 0.37579 | 0.714582469 |             |           |         |  |
| NA         | ENSG00000255991 | 0.3164    | 0.37585 | -0.52589    | 0.70052     | -1.0901   | 0.86217 |  |
|            | -1.4496         | 0.92641   | 0.37585 | 0.714582469 |             |           |         |  |
| RNU6-180P  | ENSG00000252506 | -1.3131   | 0.90543 | -1.3131     | 0.90543     | -1.3131   |         |  |
|            | 0.90543         | 0.31637   | 0.37586 | 0.37586     | 0.714582469 |           |         |  |
| VAMP5      | ENSG00000168899 | 0.31634   | 0.37587 | 0.31634     | 0.37587     | 0.31634   | 0.37587 |  |
|            | 0.31634         | 0.37587   | 0.37587 | 0.714582469 |             |           |         |  |
| FNDC10     | ENSG00000228594 | 0.0050169 | 0.498   | 0.0395      | 0.48425     | 0.31635   | 0.37587 |  |
|            | 0.31635         | 0.37587   | 0.37587 | 0.714582469 |             |           |         |  |
| NA         | ENSG00000251986 | 0.31631   | 0.37588 | -1.2471     | 0.89383     | -2.2208   | 0.98682 |  |
|            | -0.52714        | 0.70095   | 0.37588 | 0.714582469 |             |           |         |  |
| NA         | ENSG00000260288 | -1.8307   | 0.96643 | 0.31631     | 0.37588     | -0.71307  | 0.7621  |  |
|            | -0.68935        | 0.7547    | 0.37588 | 0.714582469 |             |           |         |  |
| OR1D5      | ENSG00000262628 | -0.37537  | 0.64631 | -0.84164    | 0.8         | 0.3163    | 0.37589 |  |
|            | -0.32157        | 0.62611   | 0.37589 | 0.714582469 |             |           |         |  |
| NA         | ENSG00000272663 | -1.0795   | 0.85983 | -0.42373    | 0.66412     | 0.31628   | 0.3759  |  |
|            | 0.31628         | 0.3759    | 0.3759  | 0.714582469 |             |           |         |  |
| NA         | ENSG00000234597 | -0.057035 | 0.52274 | 0.31617     | 0.37594     | -0.32742  | 0.62832 |  |
|            | -0.62817        | 0.73506   | 0.37594 | 0.71463063  |             |           |         |  |
| NA         | ENSG00000237477 | 0.31606   | 0.37598 | 0.31606     | 0.37598     | 0.31606   | 0.37598 |  |

|            |                 |           |             |             |             |          |         |         |
|------------|-----------------|-----------|-------------|-------------|-------------|----------|---------|---------|
|            | 0.31606         | 0.37598   | 0.37598     | 0.714652182 |             |          |         |         |
| NA         | ENSG00000197604 | 0.31604   | 0.37599     | 0.31604     | 0.37599     | 0.31604  | 0.37599 | 0.37599 |
|            | 0.31604         | 0.37599   | 0.37599     | 0.714652182 |             |          |         |         |
| RNU6-537P  | ENSG00000253086 | 0.31601   | 0.376       | 0.31601     | 0.376       | 0.31601  | 0.376   | 0.31601 |
|            | 0.376           | 0.376     | 0.714652182 |             |             |          |         |         |
| HAVCR2     | ENSG00000135077 | -0.18954  | 0.57517     | -0.13511    | 0.55374     | -0.18954 |         |         |
|            | 0.57517         | 0.31597   | 0.37601     | 0.37601     | 0.714652182 |          |         |         |
| NA         | ENSG00000273523 | 0.31585   | 0.37606     | 0.31585     | 0.37606     | 0.31585  | 0.37606 | 0.37606 |
|            | 0.31585         | 0.37606   | 0.37606     | 0.714654724 |             |          |         |         |
| SLC25A41   | ENSG00000181240 | 0.31583   | 0.37607     | 0.31583     | 0.37607     | 0.31583  |         |         |
|            | 0.37607         | 0.31583   | 0.37607     | 0.37607     | 0.714654724 |          |         |         |
| NA         | ENSG00000232944 | 0.31581   | 0.37607     | -0.87669    | 0.80967     | -0.49303 | 0.68901 |         |
|            | -0.064078       | 0.52555   | 0.37607     | 0.714654724 |             |          |         |         |
| NA         | ENSG00000283627 | 0.091926  | 0.46338     | -0.0083662  | 0.50334     | 0.31581  | 0.37607 |         |
|            | -0.13344        | 0.55308   | 0.37607     | 0.714654724 |             |          |         |         |
| UBE2E2-AS1 | ENSG00000233153 | 0.31573   | 0.37611     | -0.28189    | 0.61099     | 0.16319  |         |         |
|            | 0.43518         | 0.16319   | 0.43518     | 0.37611     | 0.714674997 |          |         |         |
| NA         | ENSG00000254721 | 0.31573   | 0.37611     | 0.31573     | 0.37611     | 0.31573  | 0.37611 | 0.37611 |
|            | 0.31573         | 0.37611   | 0.37611     | 0.714674997 |             |          |         |         |
| HSP90AB2P  | ENSG00000205940 | -0.23798  | 0.59405     | 0.15522     | 0.43832     | 0.31556  |         |         |
|            | 0.37617         | -0.93346  | 0.82471     | 0.37617     | 0.714752267 |          |         |         |
| NA         | ENSG00000226698 | 0.31553   | 0.37618     | 0.31553     | 0.37618     | 0.31553  | 0.37618 | 0.37618 |
|            | 0.31553         | 0.37618   | 0.37618     | 0.714752267 |             |          |         |         |
| MIR5694    | ENSG00000265993 | 0.082332  | 0.46719     | 0.31548     | 0.3762      | -0.50632 |         |         |
|            | 0.69368         | -0.056974 | 0.52272     | 0.3762      | 0.71475353  |          |         |         |
| ESCO1      | ENSG00000141446 | 0.31545   | 0.37621     | -0.27866    | 0.60975     | -1.5001  | 0.93321 |         |
|            | -0.60139        | 0.72621   | 0.37621     | 0.71475353  |             |          |         |         |
| INHBA      | ENSG00000122641 | 0.2467    | 0.40257     | -0.27768    | 0.60937     | 0.31536  | 0.37624 |         |
|            | -0.4279         | 0.66564   | 0.37624     | 0.71477379  |             |          |         |         |
| LGMN       | ENSG00000100600 | -0.18913  | 0.575       | 0.31533     | 0.37625     | -1.0043  | 0.84238 |         |
|            | -1.9487         | 0.97434   | 0.37625     | 0.71477379  |             |          |         |         |
| RNU7-153P  | ENSG00000252264 | -0.9204   | 0.82132     | 0.31513     | 0.37633     | -2.4581  |         |         |
|            | 0.99302         | -2.4581   | 0.99302     | 0.37633     | 0.714813863 |          |         |         |
| MIR1238    | ENSG00000221410 | 0.31509   | 0.37635     | 0.31509     | 0.37635     | 0.31509  |         |         |
|            | 0.37635         | 0.31509   | 0.37635     | 0.37635     | 0.714813863 |          |         |         |
| RNU7-140P  | ENSG00000238364 | 0.31509   | 0.37635     | 0.31509     | 0.37635     | 0.31509  |         |         |
|            | 0.37635         | 0.31509   | 0.37635     | 0.37635     | 0.714813863 |          |         |         |
| FTCD       | ENSG00000160282 | 0.31504   | 0.37637     | -0.2279     | 0.59014     | -0.32382 | 0.62696 |         |
|            | 0.19457         | 0.42287   | 0.37637     | 0.714813863 |             |          |         |         |
| FLT1P1     | ENSG00000229515 | -1.0958   | 0.86341     | -0.63201    | 0.73631     | -0.25507 |         |         |
|            | 0.60067         | 0.31485   | 0.37644     | 0.37644     | 0.714813863 |          |         |         |
| TMPRSS11CP | ENSG00000232398 | 0.31485   | 0.37644     | 0.31485     | 0.37644     | 0.31485  |         |         |
|            | 0.37644         | 0.31485   | 0.37644     | 0.37644     | 0.714813863 |          |         |         |
| NA         | ENSG00000259584 | 0.31485   | 0.37644     | -0.40754    | 0.65819     | 0.31485  | 0.37644 | 0.37644 |
|            | -0.59828        | 0.72517   | 0.37644     | 0.714813863 |             |          |         |         |
| NA         | ENSG00000270019 | 0.31484   | 0.37644     | 0.31484     | 0.37644     | 0.31484  | 0.37644 | 0.37644 |
|            | 0.31484         | 0.37644   | 0.37644     | 0.714813863 |             |          |         |         |
| MAP2K3     | ENSG00000034152 | -0.16075  | 0.56386     | 0.11051     | 0.456       | 0.31483  | 0.37645 |         |
|            | 0.22446         | 0.4112    | 0.37645     | 0.714813863 |             |          |         |         |
| NA         | ENSG00000239719 | 0.31476   | 0.37647     | -1.813      | 0.96508     | -1.6326  | 0.94872 |         |
|            | -0.14597        | 0.55803   | 0.37647     | 0.714813863 |             |          |         |         |
| NA         | ENSG00000275040 | 0.22074   | 0.41265     | -1.0628     | 0.85607     | 0.31468  | 0.3765  |         |
|            | 0.31468         | 0.3765    | 0.3765      | 0.714813863 |             |          |         |         |
| SUSD1      | ENSG00000106868 | -0.74963  | 0.77326     | 0.31462     | 0.37653     | -0.41197 | 0.65982 |         |
|            | 0.19267         | 0.42361   | 0.37653     | 0.714813863 |             |          |         |         |
| DIRC3      | ENSG00000231672 | 0.3146    | 0.37653     | -1.3061     | 0.90424     | -0.88338 | 0.81148 |         |
|            | -0.65079        | 0.74241   | 0.37653     | 0.714813863 |             |          |         |         |
| DUX4L51    | ENSG00000250482 | -0.72121  | 0.76461     | -0.54808    | 0.70818     | -0.19217 |         |         |
|            | 0.5762          | 0.31462   | 0.37653     | 0.37653     | 0.714813863 |          |         |         |
| NA         | ENSG00000186163 | 0.31445   | 0.37659     | 0.31445     | 0.37659     | 0.31445  | 0.37659 | 0.37659 |
|            | 0.31445         | 0.37659   | 0.37659     | 0.714813863 |             |          |         |         |
| LINC01066  | ENSG00000230403 | 0.31438   | 0.37662     | -0.94926    | 0.82875     | -0.65776 |         |         |

|               |                 |          |         |             |             |          |         |
|---------------|-----------------|----------|---------|-------------|-------------|----------|---------|
|               | 0.74465         | 0.22208  | 0.41212 | 0.37662     | 0.714813863 |          |         |
| RN7SL110P     | ENSG00000241064 | 0.31432  | 0.37664 | 0.37664     | 0.31432     | 0.37664  | 0.31432 |
|               | 0.37664         | 0.31432  | 0.37664 | 0.37664     | 0.714813863 |          |         |
| FOLR3         | ENSG00000110203 | 0.31428  | 0.37665 | 0.31428     | 0.37665     | 0.31428  | 0.37665 |
|               | 0.0093914       | 0.49625  | 0.37665 | 0.714813863 |             |          |         |
| LINC01080     | ENSG00000281721 | -0.20461 | 0.58106 | 0.31427     | 0.37666     | -1.1587  |         |
|               | 0.87671         | -0.96845 | 0.83359 | 0.37666     | 0.714813863 |          |         |
| LINC00376     | ENSG00000227564 | 0.31423  | 0.37667 | 0.2414      | 0.40462     | -0.95148 |         |
|               | 0.82932         | 0.14297  | 0.44316 | 0.37667     | 0.714813863 |          |         |
| NA            | ENSG00000267905 | 0.31425  | 0.37667 | 0.31425     | 0.37667     | 0.31425  | 0.37667 |
|               | 0.31425         | 0.37667  | 0.37667 | 0.714813863 |             |          |         |
| LZTS3         | ENSG00000088899 | -0.7817  | 0.78281 | 0.31421     | 0.37668     | -0.7817  | 0.78281 |
|               | -0.90703        | 0.81781  | 0.37668 | 0.714813863 |             |          |         |
| NA            | ENSG00000255629 | 0.31421  | 0.37668 | 0.31421     | 0.37668     | 0.31421  | 0.37668 |
|               | 0.31421         | 0.37668  | 0.37668 | 0.714813863 |             |          |         |
| AFDN          | ENSG00000130396 | -1.2187  | 0.88852 | 0.044941    | 0.48208     | 0.027249 | 0.48913 |
|               | 0.31416         | 0.3767   | 0.3767  | 0.714813863 |             |          |         |
| KCTD15        | ENSG00000153885 | 0.31416  | 0.3767  | -1.0988     | 0.86407     | -1.3469  |         |
|               | 0.91099         | -0.01969 | 0.50785 | 0.3767      | 0.714813863 |          |         |
| OR4F15        | ENSG00000182854 | 0.044191 | 0.48238 | 0.044191    | 0.48238     | 0.3141   |         |
|               | 0.37672         | 0.044191 | 0.48238 | 0.37672     | 0.714813863 |          |         |
| RN7SL419P     | ENSG00000243883 | 0.31412  | 0.37672 | 0.31412     | 0.37672     | 0.20806  |         |
|               | 0.41759         | 0.31412  | 0.37672 | 0.37672     | 0.714813863 |          |         |
| NA            | ENSG00000272483 | 0.3141   | 0.37672 | 0.3141      | 0.37672     | 0.3141   | 0.37672 |
|               | 0.3141          | 0.37672  | 0.37672 | 0.714813863 |             |          |         |
| ZBTB34        | ENSG00000177125 | -1.2131  | 0.88745 | 0.31392     | 0.37679     | -1.2019  |         |
|               | 0.88531         | -0.53739 | 0.7045  | 0.37679     | 0.714813863 |          |         |
| NA            | ENSG00000237063 | 0.31391  | 0.37679 | 0.31391     | 0.37679     | 0.31391  | 0.37679 |
|               | 0.31391         | 0.37679  | 0.37679 | 0.714813863 |             |          |         |
| VSTM2L        | ENSG00000132821 | -0.24109 | 0.59526 | -0.36279    | 0.64162     | 0.31384  |         |
|               | 0.37682         | -0.50828 | 0.69437 | 0.37682     | 0.714813863 |          |         |
| NA            | ENSG00000251579 | 0.31384  | 0.37682 | 0.31384     | 0.37682     | 0.31384  | 0.37682 |
|               | 0.31384         | 0.37682  | 0.37682 | 0.714813863 |             |          |         |
| MTND2P12      | ENSG00000228725 | 0.31381  | 0.37683 | 0.31381     | 0.37683     | 0.31381  |         |
|               | 0.37683         | 0.31381  | 0.37683 | 0.37683     | 0.714813863 |          |         |
| NMTRQ-TTG12-1 | ENSG00000242752 | 0.31381  | 0.37683 | 0.31381     | 0.37683     | 0.31381  |         |
|               | 0.37683         | 0.31381  | 0.37683 | 0.37683     | 0.714813863 |          |         |
| HUNK          | ENSG00000142149 | -0.91333 | 0.81947 | -1.0805     | 0.86004     | 0.31374  | 0.37686 |
|               | -0.72517        | 0.76583  | 0.37686 | 0.714813863 |             |          |         |
| NA            | ENSG00000250615 | 0.31372  | 0.37687 | 0.31372     | 0.37687     | 0.31372  | 0.37687 |
|               | 0.31372         | 0.37687  | 0.37687 | 0.714813863 |             |          |         |
| NA            | ENSG00000267748 | 0.31372  | 0.37687 | 0.31372     | 0.37687     | 0.31372  | 0.37687 |
|               | 0.31372         | 0.37687  | 0.37687 | 0.714813863 |             |          |         |
| NA            | ENSG00000258064 | 0.31368  | 0.37688 | 0.31368     | 0.37688     | 0.31368  | 0.37688 |
|               | 0.31368         | 0.37688  | 0.37688 | 0.714813863 |             |          |         |
| TRMT12        | ENSG00000183665 | -1.3458  | 0.91082 | -0.90878    | 0.81827     | -0.8132  |         |
|               | 0.79195         | 0.31353  | 0.37694 | 0.37694     | 0.714813863 |          |         |
| SLC25A38P1    | ENSG00000229785 | 0.31346  | 0.37696 | -0.25473    | 0.60053     | 0.30658  |         |
|               | 0.37958         | 0.082894 | 0.46697 | 0.37696     | 0.714813863 |          |         |
| ANP32BP1      | ENSG00000259790 | 0.28088  | 0.3894  | 0.31348     | 0.37696     | -0.30046 |         |
|               | 0.61809         | -0.66382 | 0.7466  | 0.37696     | 0.714813863 |          |         |
| RN7SL675P     | ENSG00000239580 | 0.31345  | 0.37697 | 0.31345     | 0.37697     | 0.31345  |         |
|               | 0.37697         | 0.31345  | 0.37697 | 0.37697     | 0.714813863 |          |         |
| MIR5584       | ENSG00000263381 | 0.072842 | 0.47097 | 0.31339     | 0.37699     | -0.13641 |         |
|               | 0.55425         | -0.13641 | 0.55425 | 0.37699     | 0.714813863 |          |         |
| OR2T12        | ENSG00000177201 | 0.31324  | 0.37705 | -0.65667    | 0.7443      | -0.71485 |         |
|               | 0.76265         | -0.53352 | 0.70316 | 0.37705     | 0.714813863 |          |         |
| NA            | ENSG00000231628 | 0.31319  | 0.37707 | 0.31319     | 0.37707     | 0.31319  | 0.37707 |
|               | 0.31319         | 0.37707  | 0.37707 | 0.714813863 |             |          |         |
| EHD3          | ENSG00000013016 | 0.31306  | 0.37712 | 0.31306     | 0.37712     | 0.31306  | 0.37712 |
|               | -0.096426       | 0.53841  | 0.37712 | 0.714813863 |             |          |         |
| NA            | ENSG00000233536 | 0.31306  | 0.37712 | -1.4814     | 0.93075     | -0.84224 | 0.80017 |

|             |                 |          |             |             |             |          |         |       |
|-------------|-----------------|----------|-------------|-------------|-------------|----------|---------|-------|
|             | -0.55703        | 0.71125  | 0.37712     | 0.714813863 |             |          |         |       |
| RN7SL468P   | ENSG00000264833 | 0.313    | 0.37714     | 0.18609     | 0.42619     | 0.313    | 0.37714 | 0.313 |
|             | 0.37714         | 0.37714  | 0.714813863 |             |             |          |         |       |
| ZNF98       | ENSG00000197360 | 0.051618 | 0.47942     | -0.10955    | 0.54362     | 0.31293  | 0.37717 |       |
|             | -1.0123         | 0.84429  | 0.37717     | 0.714813863 |             |          |         |       |
| NA          | ENSG00000267269 | 0.31292  | 0.37717     | 0.31292     | 0.37717     | -0.16103 | 0.56397 |       |
|             | 0.31292         | 0.37717  | 0.37717     | 0.714813863 |             |          |         |       |
| ITPRIPL1    | ENSG00000198885 | -0.19328 | 0.57663     | 0.31289     | 0.37718     | -0.15677 |         |       |
|             | 0.56229         | -0.15677 | 0.56229     | 0.37718     | 0.714813863 |          |         |       |
| NA          | ENSG00000245281 | 0.26875  | 0.39406     | -0.22527    | 0.58911     | 0.26875  | 0.39406 |       |
|             | 0.31289         | 0.37718  | 0.37718     | 0.714813863 |             |          |         |       |
| NA          | ENSG00000260515 | -0.87458 | 0.8091      | -0.87458    | 0.8091      | 0.3129   | 0.37718 |       |
|             | -0.5049         | 0.69318  | 0.37718     | 0.714813863 |             |          |         |       |
| ING3        | ENSG00000071243 | 0.31286  | 0.37719     | -0.83055    | 0.79689     | 0.2263   | 0.41048 |       |
|             | 0.2263          | 0.41048  | 0.37719     | 0.714813863 |             |          |         |       |
| RHCE        | ENSG00000188672 | 0.31287  | 0.37719     | -0.82078    | 0.79411     | -0.93015 | 0.82385 |       |
|             | -0.45852        | 0.67671  | 0.37719     | 0.714813863 |             |          |         |       |
| NA          | ENSG00000232418 | 0.31281  | 0.37721     | -0.4812     | 0.68481     | -0.4812  | 0.68481 |       |
|             | -0.42017        | 0.66282  | 0.37721     | 0.714813863 |             |          |         |       |
| TNFSF18     | ENSG00000120337 | 0.031569 | 0.48741     | 0.31273     | 0.37724     | 0.31273  |         |       |
|             | 0.37724         | 0.31273  | 0.37724     | 0.37724     | 0.714813863 |          |         |       |
| MIR202HG    | ENSG00000166917 | 0.31273  | 0.37724     | 0.31273     | 0.37724     | 0.31273  |         |       |
|             | 0.37724         | 0.31273  | 0.37724     | 0.37724     | 0.714813863 |          |         |       |
| ST6GAL2-IT1 | ENSG00000238250 | -1.3809  | 0.91635     | -1.1185     | 0.86833     | 0.31266  |         |       |
|             | 0.37727         | 0.31266  | 0.37727     | 0.37727     | 0.714813863 |          |         |       |
| FCGR2A      | ENSG00000143226 | -0.3299  | 0.62926     | -0.11455    | 0.5456      | 0.3126   |         |       |
|             | 0.37729         | 0.19033  | 0.42453     | 0.37729     | 0.714813863 |          |         |       |
| NA          | ENSG00000234457 | 0.31257  | 0.3773      | 0.31257     | 0.3773      | 0.31257  | 0.3773  |       |
|             | 0.31257         | 0.3773   | 0.3773      | 0.714813863 |             |          |         |       |
| HDHD5       | ENSG00000069998 | 0.31256  | 0.37731     | -0.83413    | 0.7979      | -0.88904 | 0.81301 |       |
|             | -0.19816        | 0.57854  | 0.37731     | 0.714813863 |             |          |         |       |
| RNA5SP272   | ENSG00000251904 | 0.31256  | 0.37731     | 0.31256     | 0.37731     | -1.2073  |         |       |
|             | 0.88635         | 0.31256  | 0.37731     | 0.37731     | 0.714813863 |          |         |       |
| TBCAP2      | ENSG00000235829 | 0.31252  | 0.37732     | -0.13791    | 0.55484     | 0.17508  |         |       |
|             | 0.43051         | 0.31252  | 0.37732     | 0.37732     | 0.714813863 |          |         |       |
| MLECP1      | ENSG00000277899 | 0.31249  | 0.37733     | 0.31249     | 0.37733     | 0.31249  |         |       |
|             | 0.37733         | 0.31249  | 0.37733     | 0.37733     | 0.714813863 |          |         |       |
| RNU6-1194P  | ENSG00000252017 | 0.31247  | 0.37734     | -1.4241     | 0.92279     | -1.4241  |         |       |
|             | 0.92279         | -0.75501 | 0.77488     | 0.37734     | 0.714813863 |          |         |       |
| CGRRF1      | ENSG00000100532 | -1.6888  | 0.95437     | -1.3354     | 0.90912     | -2.0815  |         |       |
|             | 0.98131         | 0.31244  | 0.37735     | 0.37735     | 0.714813863 |          |         |       |
| USP41       | ENSG00000161133 | -0.28275 | 0.61132     | -1.2571     | 0.89564     | 0.31245  | 0.37735 |       |
|             | -0.73867        | 0.76995  | 0.37735     | 0.714813863 |             |          |         |       |
| EIF3KP2     | ENSG00000233544 | 0.16631  | 0.43396     | 0.31234     | 0.37739     | 0.31234  |         |       |
|             | 0.37739         | 0.31234  | 0.37739     | 0.37739     | 0.714813863 |          |         |       |
| SNTG1       | ENSG00000147481 | 0.27143  | 0.39303     | 0.31233     | 0.3774      | -0.48777 | 0.68714 |       |
|             | -0.50566        | 0.69345  | 0.3774      | 0.714813863 |             |          |         |       |
| RIMKLBP1    | ENSG00000189089 | 0.31218  | 0.37745     | 0.31218     | 0.37745     | 0.31218  |         |       |
|             | 0.37745         | 0.31218  | 0.37745     | 0.37745     | 0.714813863 |          |         |       |
| EXOC7P1     | ENSG00000250485 | 0.31214  | 0.37747     | 0.31214     | 0.37747     | 0.021761 |         |       |
|             | 0.49132         | 0.14018  | 0.44426     | 0.37747     | 0.714813863 |          |         |       |
| NA          | ENSG00000277241 | 0.2364   | 0.40656     | 0.31213     | 0.37747     | 0.21231  | 0.41593 |       |
|             | 0.31213         | 0.37747  | 0.37747     | 0.714813863 |             |          |         |       |
| STK31       | ENSG00000196335 | -0.37647 | 0.64671     | -1.2824     | 0.90014     | -0.2041  | 0.58086 |       |
|             | 0.31205         | 0.3775   | 0.3775      | 0.714813863 |             |          |         |       |
| NA          | ENSG00000280285 | -0.15332 | 0.56093     | 0.31199     | 0.37752     | -0.22436 | 0.58876 |       |
|             | -0.15332        | 0.56093  | 0.37752     | 0.714813863 |             |          |         |       |
| NA          | ENSG00000206797 | -0.29078 | 0.61439     | -0.29078    | 0.61439     | 0.31196  | 0.37753 |       |
|             | -0.29078        | 0.61439  | 0.37753     | 0.714813863 |             |          |         |       |
| THNSL1      | ENSG00000185875 | 0.31196  | 0.37754     | 0.31196     | 0.37754     | 0.31196  |         |       |
|             | 0.37754         | 0.31196  | 0.37754     | 0.37754     | 0.714813863 |          |         |       |
| MTND6P8     | ENSG00000248136 | 0.31176  | 0.37761     | -0.74185    | 0.77091     | -0.78989 |         |       |

|           |                 |           |         |             |             |           |         |  |
|-----------|-----------------|-----------|---------|-------------|-------------|-----------|---------|--|
|           | 0.7852          | -0.78989  | 0.7852  | 0.37761     | 0.714813863 |           |         |  |
| HADHA     | ENSG00000084754 | 0.31169   | 0.37764 | -0.24096    | 0.59521     | -0.054583 | 0.52176 |  |
|           | -0.20765        | 0.58225   | 0.37764 | 0.714813863 |             |           |         |  |
| RPS12P23  | ENSG00000180172 | 0.31166   | 0.37765 | -0.019765   | 0.50788     | -0.019765 |         |  |
|           | 0.50788         | -0.019765 | 0.50788 | 0.37765     | 0.714813863 |           |         |  |
| SNORD104  | ENSG00000199753 | 0.31166   | 0.37765 | 0.31166     | 0.37765     | 0.31166   |         |  |
|           | 0.37765         | 0.31166   | 0.37765 | 0.37765     | 0.714813863 |           |         |  |
| C4A       | ENSG00000244731 | -0.085415 | 0.53403 | 0.31167     | 0.37765     | -0.022868 | 0.50912 |  |
|           | -0.59966        | 0.72563   | 0.37765 | 0.714813863 |             |           |         |  |
| SNHG25    | ENSG00000266402 | 0.31166   | 0.37765 | 0.31166     | 0.37765     | 0.31166   |         |  |
|           | 0.37765         | 0.31166   | 0.37765 | 0.37765     | 0.714813863 |           |         |  |
| APOBEC2   | ENSG00000124701 | -0.61381  | 0.73033 | 0.3116      | 0.37767     | -0.61381  |         |  |
|           | 0.73033         | -0.61381  | 0.73033 | 0.37767     | 0.714813863 |           |         |  |
| NA        | ENSG00000230898 | -0.37909  | 0.64769 | 0.31161     | 0.37767     | 0.31161   | 0.37767 |  |
|           | 0.31161         | 0.37767   | 0.37767 | 0.714813863 |             |           |         |  |
| RN7SL362P | ENSG00000242707 | 0.3116    | 0.37767 | 0.3116      | 0.37767     | -0.12756  |         |  |
|           | 0.55075         | 0.3116    | 0.37767 | 0.37767     | 0.714813863 |           |         |  |
| VTI1BP3   | ENSG00000258074 | 0.31159   | 0.37768 | -0.54669    | 0.7077      | -0.35111  |         |  |
|           | 0.63725         | -0.73978  | 0.77028 | 0.37768     | 0.714813863 |           |         |  |
| MT3       | ENSG00000087250 | -0.42712  | 0.66535 | -0.42712    | 0.66535     | 0.31154   | 0.37769 |  |
|           | 0.26209         | 0.39663   | 0.37769 | 0.714813863 |             |           |         |  |
| NA        | ENSG00000260351 | -1.1446   | 0.87382 | -1.1446     | 0.87382     | -2.0188   | 0.97825 |  |
|           | 0.3115          | 0.37771   | 0.37771 | 0.714813863 |             |           |         |  |
| RPS17P7   | ENSG00000232723 | 0.018029  | 0.49281 | 0.31147     | 0.37772     | -1.0075   |         |  |
|           | 0.84315         | 0.018029  | 0.49281 | 0.37772     | 0.714813863 |           |         |  |
| NA        | ENSG00000235573 | 0.31144   | 0.37773 | 0.31144     | 0.37773     | 0.31144   | 0.37773 |  |
|           | 0.31144         | 0.37773   | 0.37773 | 0.714813863 |             |           |         |  |
| PEX1      | ENSG00000127980 | -1.0874   | 0.86157 | 0.31141     | 0.37774     | -1.0874   | 0.86157 |  |
|           | -1.5278         | 0.93672   | 0.37774 | 0.714813863 |             |           |         |  |
| NA        | ENSG00000264362 | 0.31143   | 0.37774 | 0.31143     | 0.37774     | 0.31143   | 0.37774 |  |
|           | 0.31143         | 0.37774   | 0.37774 | 0.714813863 |             |           |         |  |
| GALNT4    | ENSG00000257594 | 0.31141   | 0.37775 | 0.31141     | 0.37775     | 0.31141   |         |  |
|           | 0.37775         | 0.31141   | 0.37775 | 0.37775     | 0.714813863 |           |         |  |
| SLC26A9   | ENSG00000174502 | 0.31134   | 0.37777 | -0.93689    | 0.82559     | -0.22736  |         |  |
|           | 0.58993         | -0.79628  | 0.78706 | 0.37777     | 0.714813863 |           |         |  |
| MIR34B    | ENSG00000207811 | 0.31134   | 0.37777 | 0.31134     | 0.37777     | 0.31134   |         |  |
|           | 0.37777         | 0.31134   | 0.37777 | 0.37777     | 0.714813863 |           |         |  |
| CDKN2C    | ENSG00000123080 | 0.31128   | 0.37779 | 0.31128     | 0.37779     | 0.31128   |         |  |
|           | 0.37779         | 0.18482   | 0.42668 | 0.37779     | 0.714813863 |           |         |  |
| NA        | ENSG00000274204 | 0.3113    | 0.37779 | -0.61694    | 0.73136     | 0.3113    | 0.37779 |  |
|           | -1.0145         | 0.84482   | 0.37779 | 0.714813863 |             |           |         |  |
| UNC93B4   | ENSG00000250381 | 0.31126   | 0.3778  | 0.13155     | 0.44767     | -1.16     | 0.87697 |  |
|           | -0.55312        | 0.70991   | 0.3778  | 0.714813863 |             |           |         |  |
| NA        | ENSG00000251689 | 0.31123   | 0.37781 | 0.31123     | 0.37781     | 0.31123   | 0.37781 |  |
|           | 0.31123         | 0.37781   | 0.37781 | 0.714813863 |             |           |         |  |
| SKA2      | ENSG00000182628 | -0.07331  | 0.52922 | -0.052394   | 0.52089     | 0.31121   | 0.37782 |  |
|           | 0.31121         | 0.37782   | 0.37782 | 0.714813863 |             |           |         |  |
| TPM3P7    | ENSG00000187536 | 0.3112    | 0.37782 | 0.3112      | 0.37782     | 0.3112    |         |  |
|           | 0.37782         | -0.5568   | 0.71117 | 0.37782     | 0.714813863 |           |         |  |
| TENT4A    | ENSG00000112941 | 0.31119   | 0.37783 | -0.93929    | 0.82621     | -0.63038  |         |  |
|           | 0.73578         | -1.3448   | 0.91066 | 0.37783     | 0.714813863 |           |         |  |
| NA        | ENSG00000274970 | -1.0629   | 0.85608 | 0.31113     | 0.37785     | 0.31113   | 0.37785 |  |
|           | 0.31113         | 0.37785   | 0.37785 | 0.714813863 |             |           |         |  |
| PCTP      | ENSG00000141179 | -0.005812 | 0.50232 | 0.3111      | 0.37786     | -0.31331  | 0.62298 |  |
|           | 0.098225        | 0.46088   | 0.37786 | 0.714813863 |             |           |         |  |
| TRBV1     | ENSG00000242736 | 0.3111    | 0.37786 | 0.3111      | 0.37786     | 0.3111    | 0.37786 |  |
|           | 0.3111          | 0.37786   | 0.37786 | 0.714813863 |             |           |         |  |
| TAX1BP1   | ENSG00000106052 | 0.31108   | 0.37787 | -0.97588    | 0.83544     | -0.48724  |         |  |
|           | 0.68696         | -0.37102  | 0.64469 | 0.37787     | 0.714813863 |           |         |  |
| LINC00676 | ENSG00000234854 | 0.31109   | 0.37787 | -1.5526     | 0.93975     | -0.10747  |         |  |
|           | 0.54279         | -1.4678   | 0.92892 | 0.37787     | 0.714813863 |           |         |  |
| OR10V3P   | ENSG00000254743 | 0.31109   | 0.37787 | 0.31109     | 0.37787     | -0.48675  |         |  |

|            |                 |           |         |             |             |           |         |
|------------|-----------------|-----------|---------|-------------|-------------|-----------|---------|
|            | 0.68678         | 0.31109   | 0.37787 | 0.37787     | 0.714813863 |           |         |
| THAP11     | ENSG00000168286 | 0.11751   | 0.45323 | 0.11751     | 0.45323     | 0.11751   |         |
|            | 0.45323         | 0.31103   | 0.37789 | 0.37789     | 0.714823947 |           |         |
| SENP3      | ENSG00000161956 | 0.31094   | 0.37792 | -0.41057    | 0.65931     | -0.91014  | 0.81862 |
|            | -0.087243       | 0.53476   | 0.37792 | 0.714844114 |             |           |         |
| NA         | ENSG00000251603 | 0.31092   | 0.37793 | 0.31092     | 0.37793     | 0.31092   | 0.37793 |
|            | 0.31092         | 0.37793   | 0.37793 | 0.714844114 |             |           |         |
| DBF4       | ENSG00000006634 | 0.31084   | 0.37796 | -0.68512    | 0.75337     | -0.82543  | 0.79544 |
|            | -0.32422        | 0.62712   | 0.37796 | 0.71487311  |             |           |         |
| C19orf53   | ENSG00000104979 | 0.31076   | 0.37799 | 0.31076     | 0.37799     | 0.31076   |         |
|            | 0.37799         | 0.31076   | 0.37799 | 0.37799     | 0.714902104 |           |         |
| MCM3AP     | ENSG00000160294 | 0.1258    | 0.44995 | 0.31059     | 0.37806     | -0.75185  |         |
|            | 0.77393         | 0.079448  | 0.46834 | 0.37806     | 0.714997908 |           |         |
| RNU4-45P   | ENSG00000202339 | 0.31056   | 0.37807 | -0.25874    | 0.60208     | -0.25874  |         |
|            | 0.60208         | -0.25874  | 0.60208 | 0.37807     | 0.714997908 |           |         |
| RPS10P2    | ENSG00000213950 | 0.31045   | 0.37811 | 0.31045     | 0.37811     | 0.31045   |         |
|            | 0.37811         | 0.31045   | 0.37811 | 0.37811     | 0.715007807 |           |         |
| FAM204A    | ENSG00000165669 | -0.3428   | 0.63413 | 0.2711      | 0.39316     | 0.25719   |         |
|            | 0.39851         | 0.31043   | 0.37812 | 0.37812     | 0.715007807 |           |         |
| SUDS3      | ENSG00000111707 | 0.21919   | 0.41325 | 0.31038     | 0.37814     | -0.72318  | 0.76522 |
|            | -1.1246         | 0.86961   | 0.37814 | 0.715007807 |             |           |         |
| PRRC2B     | ENSG00000130723 | 0.22375   | 0.41148 | -0.28499    | 0.61217     | -0.1301   |         |
|            | 0.55176         | 0.31031   | 0.37816 | 0.37816     | 0.715007807 |           |         |
| NA         | ENSG00000273321 | 0.055025  | 0.47806 | 0.055025    | 0.47806     | 0.3103    | 0.37817 |
|            | -0.10472        | 0.5417    | 0.37817 | 0.715007807 |             |           |         |
| RAMP1      | ENSG00000132329 | 0.31024   | 0.37819 | -0.98083646 | -0.30343    | 0.61922   |         |
|            | -1.2815         | 0.89999   | 0.37819 | 0.715007807 |             |           |         |
| NA         | ENSG00000197445 | -0.96431  | 0.83256 | 0.31018     | 0.37821     | -0.13336  | 0.55305 |
|            | -0.13336        | 0.55305   | 0.37821 | 0.715007807 |             |           |         |
| RN7SKP108  | ENSG00000223299 | 0.31016   | 0.37822 | -0.48503    | 0.68617     | 0.31016   |         |
|            | 0.37822         | 0.31016   | 0.37822 | 0.37822     | 0.715007807 |           |         |
| MTND1P34   | ENSG00000225514 | -0.11546  | 0.54596 | -0.6053     | 0.72751     | 0.31014   |         |
|            | 0.37823         | 0.10301   | 0.45898 | 0.37823     | 0.715007807 |           |         |
| ATM        | ENSG00000149311 | -0.010755 | 0.50429 | 0.31012     | 0.37824     | -0.752    | 0.77398 |
|            | -0.56996        | 0.71565   | 0.37824 | 0.715007807 |             |           |         |
| RNF187     | ENSG00000168159 | -0.94379  | 0.82736 | -0.37518    | 0.64624     | -0.073211 |         |
|            | 0.52918         | 0.3101    | 0.37824 | 0.37824     | 0.715007807 |           |         |
| BST2       | ENSG00000130303 | 0.30997   | 0.37829 | 0.30997     | 0.37829     | 0.30997   | 0.37829 |
|            | -0.15782        | 0.5627    | 0.37829 | 0.715007807 |             |           |         |
| EVC2       | ENSG00000173040 | -0.55747  | 0.7114  | -1.1787     | 0.88075     | -0.25234  | 0.59961 |
|            | 0.30994         | 0.3783    | 0.3783  | 0.715007807 |             |           |         |
| LINC01884  | ENSG00000233587 | 0.30995   | 0.3783  | 0.30995     | 0.3783      | 0.30995   |         |
|            | 0.3783          | 0.30995   | 0.3783  | 0.3783      | 0.715007807 |           |         |
| LINC02784  | ENSG00000235741 | 0.30995   | 0.3783  | -0.94128    | 0.82672     | 0.30995   |         |
|            | 0.3783          | 0.30995   | 0.3783  | 0.3783      | 0.715007807 |           |         |
| NA         | ENSG00000251584 | 0.30993   | 0.37831 | 0.30993     | 0.37831     | 0.30993   | 0.37831 |
|            | 0.30993         | 0.37831   | 0.37831 | 0.715007807 |             |           |         |
| LIN28B-AS1 | ENSG00000203809 | 0.30978   | 0.37837 | 0.2488      | 0.40176     | 0.30978   |         |
|            | 0.37837         | 0.30978   | 0.37837 | 0.37837     | 0.715032691 |           |         |
| FTH1       | ENSG00000167996 | 0.30973   | 0.37838 | 0.30973     | 0.37838     | 0.30973   | 0.37838 |
|            | 0.30973         | 0.37838   | 0.37838 | 0.715032691 |             |           |         |
| CRLF3P1    | ENSG00000236596 | -1.4319   | 0.92392 | -1.4319     | 0.92392     | 0.076524  |         |
|            | 0.4695          | 0.30965   | 0.37841 | 0.37841     | 0.715032691 |           |         |
| GLYR1      | ENSG00000140632 | 0.30963   | 0.37842 | 0.025296    | 0.48991     | 0.22522   | 0.41091 |
|            | -0.85651        | 0.80414   | 0.37842 | 0.715032691 |             |           |         |
| SRGAP3-AS3 | ENSG00000227929 | 0.19242   | 0.42371 | -1.1044     | 0.86528     | -1.1044   |         |
|            | 0.86528         | 0.30962   | 0.37843 | 0.37843     | 0.715032691 |           |         |
| CDCA4P3    | ENSG00000226289 | 0.30953   | 0.37846 | 0.30953     | 0.37846     | 0.30953   |         |
|            | 0.37846         | 0.30953   | 0.37846 | 0.37846     | 0.715032691 |           |         |
| RN7SKP238  | ENSG00000252292 | 0.30952   | 0.37846 | -1.0006     | 0.84149     | -1.0006   |         |
|            | 0.84149         | -1.0006   | 0.84149 | 0.37846     | 0.715032691 |           |         |
| NA         | ENSG00000282907 | 0.30954   | 0.37846 | 0.30954     | 0.37846     | 0.30954   | 0.37846 |



|            |                 |           |         |             |             |           |         |          |
|------------|-----------------|-----------|---------|-------------|-------------|-----------|---------|----------|
|            | 0.30954         | 0.37846   | 0.37846 | 0.715032691 |             |           |         |          |
| PRIM2      | ENSG00000146143 | 0.0045792 | 0.49817 | 0.18341     | 0.42724     | 0.09621   | 0.46168 |          |
|            | 0.30949         | 0.37847   | 0.37847 | 0.715032691 |             |           |         |          |
| RNY4P28    | ENSG00000202151 | 0.30947   | 0.37848 | 0.30947     | 0.37848     | 0.30947   | 0.30947 |          |
|            | 0.37848         | 0.30947   | 0.37848 | 0.37848     | 0.715032691 |           |         |          |
| PRDX1      | ENSG00000117450 | -0.68041  | 0.75188 | 0.30944     | 0.37849     | 0.30944   | 0.37849 |          |
|            | -0.67467        | 0.75006   | 0.37849 | 0.715032691 |             |           |         |          |
| TMEM158    | ENSG00000249992 | -0.48168  | 0.68499 | -0.48168    | 0.68499     | 0.3094    |         |          |
|            | 0.37851         | -0.029436 | 0.51174 | 0.37851     | 0.715032691 |           |         |          |
| NA         | ENSG00000273424 | 0.30938   | 0.37852 | 0.30938     | 0.37852     | 0.30938   | 0.37852 |          |
|            | 0.30938         | 0.37852   | 0.37852 | 0.715032691 |             |           |         |          |
| NA         | ENSG00000256714 | -1.4564   | 0.92736 | 0.30933     | 0.37854     | -0.78633  | 0.78416 |          |
|            | -0.78633        | 0.78416   | 0.37854 | 0.715032691 |             |           |         |          |
| NA         | ENSG00000231029 | -0.0944   | 0.5376  | -0.0944     | 0.5376      | 0.30924   | 0.37857 |          |
|            | -0.27615        | 0.60878   | 0.37857 | 0.715032691 |             |           |         |          |
| HLA-F-AS1  | ENSG00000214922 | 0.18435   | 0.42687 | 0.039116    | 0.4844      | -0.017571 |         |          |
|            | 0.50701         | 0.30921   | 0.37858 | 0.37858     | 0.715032691 |           |         |          |
| TOX2       | ENSG00000124191 | -0.16306  | 0.56476 | 0.30917     | 0.3786      | 0.061007  | 0.47568 |          |
|            | 0.28803         | 0.38666   | 0.3786  | 0.715032691 |             |           |         |          |
| HRAS       | ENSG00000174775 | 0.30914   | 0.37861 | 0.13083     | 0.44795     | -0.48658  | 0.68672 |          |
|            | -0.48658        | 0.68672   | 0.37861 | 0.715032691 |             |           |         |          |
| DRICH1     | ENSG00000189269 | 0.30911   | 0.37862 | -1.1317     | 0.87111     | -0.031292 |         |          |
|            | 0.51248         | -0.031292 | 0.51248 | 0.37862     | 0.715032691 |           |         |          |
| NA         | ENSG00000232986 | 0.30902   | 0.37865 | 0.30902     | 0.37865     | 0.30902   | 0.37865 |          |
|            | 0.30902         | 0.37865   | 0.37865 | 0.715032691 |             |           |         |          |
| NUBP2      | ENSG00000095906 | 0.30898   | 0.37867 | 0.30898     | 0.37867     | 0.30898   | 0.37867 |          |
|            | 0.30898         | 0.37867   | 0.37867 | 0.715032691 |             |           |         |          |
| NA         | ENSG00000267110 | 0.30894   | 0.37868 | 0.30894     | 0.37868     | 0.30894   | 0.37868 |          |
|            | 0.30894         | 0.37868   | 0.37868 | 0.715032691 |             |           |         |          |
| MED6       | ENSG00000133997 | -0.42527  | 0.66468 | -0.62287    | 0.73332     | 0.30892   | 0.37869 |          |
|            | -1.026          | 0.84756   | 0.37869 | 0.715032691 |             |           |         |          |
| MRPL52     | ENSG00000172590 | -0.15241  | 0.56057 | -1.4632     | 0.9283      | 0.30893   |         |          |
|            | 0.37869         | 0.19574   | 0.42241 | 0.37869     | 0.715032691 |           |         |          |
| NA         | ENSG00000271970 | 0.19152   | 0.42406 | 0.19152     | 0.42406     | 0.30892   | 0.37869 |          |
|            | 0.30892         | 0.37869   | 0.37869 | 0.715032691 |             |           |         |          |
| HIGD1AP14  | ENSG00000248785 | -0.77243  | 0.78007 | 0.30878     | 0.37875     | -0.77243  |         |          |
|            | 0.78007         | -0.83238  | 0.7974  | 0.37875     | 0.715090566 |           |         |          |
| NA         | ENSG00000263531 | 0.30876   | 0.37875 | 0.30876     | 0.37875     | 0.30876   | 0.37875 |          |
|            | 0.30876         | 0.37875   | 0.37875 | 0.715090566 |             |           |         |          |
| ADCYAP1R1  | ENSG00000078549 | -0.35922  | 0.64028 | 0.063751    | 0.47458     | 0.16769   |         |          |
|            | 0.43341         | 0.30867   | 0.37878 | 0.37878     | 0.715119499 |           |         |          |
| NA         | ENSG00000249023 | -0.20427  | 0.58093 | 0.30849     | 0.37885     | -0.6853   | 0.75342 |          |
|            | -0.44779        | 0.67285   | 0.37885 | 0.715182247 |             |           |         |          |
| PRELID3BP4 | ENSG00000251163 | 0.30847   | 0.37886 | 0.30847     | 0.37886     | 0.30847   |         |          |
|            | 0.37886         | 0.30847   | 0.37886 | 0.37886     | 0.715182247 |           |         |          |
| TBX4       | ENSG00000121075 | 0.30845   | 0.37887 | 0.30121     | 0.38163     | -0.46371  | 0.67857 |          |
|            | -0.13638        | 0.55424   | 0.37887 | 0.715182247 |             |           |         |          |
| NA         | ENSG00000266188 | 0.3084    | 0.37889 | 0.3084      | 0.37889     | 0.3084    | 0.37889 |          |
|            | 0.3084          | 0.37889   | 0.37889 | 0.715182247 |             |           |         |          |
| LINC02369  | ENSG00000256551 | -0.50203  | 0.69218 | 0.30833     | 0.37891     | -1.6986   |         |          |
|            | 0.9553          | -0.14304  | 0.55687 | 0.37891     | 0.715182247 |           |         |          |
| KCNJ13     | ENSG00000115474 | 0.079508  | 0.46831 | -0.059258   | 0.52363     | -0.059258 |         |          |
|            | 0.52363         | 0.30832   | 0.37892 | 0.37892     | 0.715182247 |           |         |          |
| FOXD1-AS1  | ENSG00000247993 | 0.30831   | 0.37893 | 0.30831     | 0.37893     | 0.1716    |         |          |
|            | 0.43188         | 0.30831   | 0.37893 | 0.37893     | 0.715182247 |           |         |          |
| NA         | ENSG00000257376 | 0.30824   | 0.37895 | 0.20894     | 0.41725     | -0.57218  | 0.7164  |          |
|            | -0.024315       | 0.5097    | 0.37895 | 0.715182247 |             |           |         |          |
| NA         | ENSG00000258081 | -0.79616  | 0.78703 | 0.28383     | 0.38827     | -0.14224  | 0.55655 |          |
|            | 0.3082          | 0.37896   | 0.37896 | 0.715182247 |             |           |         |          |
| HEIH       | ENSG00000278970 | 0.30821   | 0.37896 | 0.30821     | 0.37896     | 0.30821   | 0.37896 |          |
|            | 0.30821         | 0.37896   | 0.37896 | 0.715182247 |             |           |         |          |
| C7orf31    | ENSG00000153790 | 0.30811   | 0.379   | 0.30811     | 0.379       | 0.30811   | 0.379   | -0.51706 |

|           |                 |             |             |             |             |           |         |  |
|-----------|-----------------|-------------|-------------|-------------|-------------|-----------|---------|--|
|           | 0.69744         | 0.379       | 0.715230036 |             |             |           |         |  |
| RETSAT    | ENSG00000042445 | 0.10275     | 0.45908     | 0.30802     | 0.37903     | -0.57202  |         |  |
|           | 0.71635         | -0.5709     | 0.71597     | 0.37903     | 0.715258951 |           |         |  |
| NA        | ENSG00000280426 | 0.30796     | 0.37906     | 0.30796     | 0.37906     | 0.30796   | 0.37906 |  |
|           | 0.30796         | 0.37906     | 0.37906     | 0.71527385  |             |           |         |  |
| SLC25A23  | ENSG00000125648 | 0.2879      | 0.38671     | 0.2879      | 0.38671     | -0.043142 |         |  |
|           | 0.51721         | 0.3079      | 0.37908     | 0.37908     | 0.71527385  |           |         |  |
| SSBP3     | ENSG00000157216 | -0.40121    | 0.65587     | 0.30779     | 0.37912     | -0.40281  | 0.65646 |  |
|           | 0.012362        | 0.49507     | 0.37912     | 0.71527385  |             |           |         |  |
| NA        | ENSG00000224097 | 0.3078      | 0.37912     | 0.3078      | 0.37912     | 0.3078    | 0.37912 |  |
|           | 0.3078          | 0.37912     | 0.37912     | 0.71527385  |             |           |         |  |
| NA        | ENSG00000272092 | -0.14263    | 0.55671     | 0.3078      | 0.37912     | -0.14263  | 0.55671 |  |
|           | -0.14263        | 0.55671     | 0.37912     | 0.71527385  |             |           |         |  |
| TEX55     | ENSG00000163424 | -0.38469    | 0.64977     | 0.30772     | 0.37915     | -0.38469  | 0.64977 |  |
|           | -0.71413        | 0.76243     | 0.37915     | 0.71527385  |             |           |         |  |
| CRYZP1    | ENSG00000233025 | 0.3077      | 0.37916     | -0.60875    | 0.72865     | 0.3077    |         |  |
|           | 0.37916         | 0.3077      | 0.37916     | 0.37916     | 0.71527385  |           |         |  |
| RPSAP76   | ENSG00000235332 | 0.3077      | 0.37916     | 0.3077      | 0.37916     | 0.3077    |         |  |
|           | 0.37916         | 0.3077      | 0.37916     | 0.37916     | 0.71527385  |           |         |  |
| NA        | ENSG00000284130 | 0.30765     | 0.37917     | 0.30765     | 0.37917     | 0.30765   | 0.37917 |  |
|           | 0.30765         | 0.37917     | 0.37917     | 0.71527385  |             |           |         |  |
| NDUFA5P9  | ENSG00000220831 | 0.30757     | 0.3792      | -1.0676     | 0.85715     | 0.20674   |         |  |
|           | 0.41811         | -1.6882     | 0.95432     | 0.3792      | 0.715293927 |           |         |  |
| NA        | ENSG00000258249 | -1.2637     | 0.89683     | -0.30119    | 0.61837     | 0.30755   | 0.37921 |  |
|           | -1.0004         | 0.84145     | 0.37921     | 0.715293927 |             |           |         |  |
| CUBN      | ENSG00000107611 | 0.19566     | 0.42244     | 0.30737     | 0.37928     | 0.29792   | 0.38288 |  |
|           | 0.013832        | 0.49448     | 0.37928     | 0.715344104 |             |           |         |  |
| SPEN      | ENSG00000065526 | -0.071614   | 0.52855     | 0.30735     | 0.37929     | 0.17746   | 0.42958 |  |
|           | 0.12568         | 0.44999     | 0.37929     | 0.715344104 |             |           |         |  |
| SLC30A2   | ENSG00000158014 | -0.82033    | 0.79398     | -0.5343     | 0.70343     | -0.82033  |         |  |
|           | 0.79398         | 0.30733     | 0.3793      | 0.3793      | 0.715344104 |           |         |  |
| ENPP7P10  | ENSG00000249767 | 0.30733     | 0.3793      | -0.62034    | 0.73248     | -0.1532   |         |  |
|           | 0.56088         | -0.39692    | 0.65429     | 0.3793      | 0.715344104 |           |         |  |
| NA        | ENSG00000279632 | -0.25805    | 0.60182     | 0.30731     | 0.37931     | 0.30731   | 0.37931 |  |
|           | 0.30731         | 0.37931     | 0.37931     | 0.715344104 |             |           |         |  |
| NA        | ENSG00000267084 | 0.30722     | 0.37934     | 0.30722     | 0.37934     | 0.30722   | 0.37934 |  |
|           | 0.30722         | 0.37934     | 0.37934     | 0.715372995 |             |           |         |  |
| RNU6-222P | ENSG00000199308 | 0.3071      | 0.37938     | 0.3071      | 0.37938     | 0.3071    |         |  |
|           | 0.37938         | 0.3071      | 0.37938     | 0.37938     | 0.715420742 |           |         |  |
| NA        | ENSG00000240338 | -0.25474    | 0.60054     | 0.30704     | 0.37941     | -0.25474  | 0.60054 |  |
|           | -0.25474        | 0.60054     | 0.37941     | 0.715449629 |             |           |         |  |
| RPL23AP64 | ENSG00000240970 | 0.30697     | 0.37943     | 0.30697     | 0.37943     | 0.30697   |         |  |
|           | 0.37943         | 0.30697     | 0.37943     | 0.37943     | 0.715459656 |           |         |  |
| PKD2L1    | ENSG00000107593 | 0.30688     | 0.37947     | 0.13193     | 0.44752     | -0.14488  |         |  |
|           | 0.5576          | -0.0088493  | 0.50353     | 0.37947     | 0.715507394 |           |         |  |
| NA        | ENSG00000260650 | 0.3068      | 0.3795      | 0.3068      | 0.3795      | 0.3068    | 0.3795  |  |
|           | 0.3068          | 0.3795      | 0.3795      | 0.715536274 |             |           |         |  |
| RPS29P12  | ENSG00000243664 | 0.30666     | 0.37955     | -0.27477    | 0.60825     | -0.15577  |         |  |
|           | 0.56189         | -0.15577    | 0.56189     | 0.37955     | 0.715577552 |           |         |  |
| WDR3      | ENSG00000065183 | 0.30664     | 0.37956     | 0.30664     | 0.37956     | 0.30664   | 0.37956 |  |
|           | 0.30664         | 0.37956     | 0.37956     | 0.715577552 |             |           |         |  |
| LINC01034 | ENSG00000224933 | -1.2663     | 0.8973      | -1.2663     | 0.8973      | -1.9552   |         |  |
|           | 0.97472         | 0.30654     | 0.3796      | 0.3796      | 0.715577552 |           |         |  |
| RBM22P5   | ENSG00000231137 | 0.30652     | 0.3796      | -1.1154     | 0.86766     | -0.79992  |         |  |
|           | 0.78812         | -0.79992    | 0.78812     | 0.3796      | 0.715577552 |           |         |  |
| LTBP3     | ENSG00000168056 | -0.016641   | 0.50664     | -0.1445     | 0.55745     | 0.3065    | 0.37961 |  |
|           | -0.016641       | 0.50664     | 0.37961     | 0.715577552 |             |           |         |  |
| LINC01100 | ENSG00000242107 | -0.2567     | 0.6013      | -0.2567     | 0.6013      | 0.11302   |         |  |
|           | 0.45501         | 0.3065      | 0.37961     | 0.37961     | 0.715577552 |           |         |  |
| LINC01630 | ENSG00000227115 | -0.00092134 | 0.50037     | -1.1719     | 0.87939     | -0.73353  |         |  |
|           | 0.76838         | 0.30644     | 0.37964     | 0.37964     | 0.715606421 |           |         |  |
| CHCHD2P4  | ENSG00000213118 | 0.30628     | 0.3797      | 0.30628     | 0.3797      | 0.30628   |         |  |

|           |                 |          |         |             |             |           |         |  |
|-----------|-----------------|----------|---------|-------------|-------------|-----------|---------|--|
|           | 0.3797          | 0.30628  | 0.3797  | 0.3797      | 0.715691835 |           |         |  |
| DNP1      | ENSG00000112667 | 0.30607  | 0.37977 | 0.30607     | 0.37977     | 0.30607   | 0.37977 |  |
|           | 0.30607         | 0.37977  | 0.37977 | 0.715779589 |             |           |         |  |
| NA        | ENSG00000239793 | 0.30604  | 0.37979 | 0.30604     | 0.37979     | -0.42614  | 0.665   |  |
|           | -0.32305        | 0.62667  | 0.37979 | 0.715779589 |             |           |         |  |
| CNIH3     | ENSG00000143786 | 0.30594  | 0.37982 | 0.30594     | 0.37982     | -0.50724  | 0.69401 |  |
|           | -0.71728        | 0.7634   | 0.37982 | 0.715779589 |             |           |         |  |
| CNIH3-AS2 | ENSG00000233384 | -0.64873 | 0.74174 | -0.56112    | 0.71264     | -0.37362  |         |  |
|           | 0.64566         | 0.30594  | 0.37982 | 0.37982     | 0.715779589 |           |         |  |
| NSA2P1    | ENSG00000236035 | 0.15534  | 0.43827 | 0.30596     | 0.37982     | -0.78009  |         |  |
|           | 0.78233         | -0.78009 | 0.78233 | 0.37982     | 0.715779589 |           |         |  |
| NA        | ENSG00000261489 | 0.072448 | 0.47112 | 0.30586     | 0.37986     | 0.072448  | 0.47112 |  |
|           | 0.072448        | 0.47112  | 0.37986 | 0.715827286 |             |           |         |  |
| H4C5      | ENSG00000276966 | 0.3058   | 0.37988 | 0.3058      | 0.37988     | 0.3058    | 0.37988 |  |
|           | 0.3058          | 0.37988  | 0.37988 | 0.715837293 |             |           |         |  |
| NCAN      | ENSG00000130287 | 0.30567  | 0.37993 | -1.4574     | 0.9275      | -0.032329 | 0.5129  |  |
|           | -0.55057        | 0.70904  | 0.37993 | 0.71585414  |             |           |         |  |
| IL17B     | ENSG00000127743 | -0.958   | 0.83097 | -0.958      | 0.83097     | -0.958    | 0.83097 |  |
|           | 0.3056          | 0.37995  | 0.37995 | 0.71585414  |             |           |         |  |
| GAPDH     | ENSG00000111640 | 0.3055   | 0.37999 | 0.3055      | 0.37999     | 0.3055    | 0.37999 |  |
|           | 0.3055          | 0.37999  | 0.37999 | 0.71585414  |             |           |         |  |
| PTPRD-AS1 | ENSG00000225706 | 0.30549  | 0.38    | 0.15192     | 0.43962     | 0.10667   | 0.45752 |  |
|           | 0.16585         | 0.43414  | 0.38    | 0.71585414  |             |           |         |  |
| LRRC8C-DT | ENSG00000231999 | 0.30542  | 0.38002 | 0.30542     | 0.38002     | 0.30542   |         |  |
|           | 0.38002         | -0.88637 | 0.81229 | 0.38002     | 0.71585414  |           |         |  |
| HSPA6     | ENSG00000173110 | -0.13522 | 0.55378 | -0.043124   | 0.5172      | -0.29089  | 0.61443 |  |
|           | 0.30538         | 0.38004  | 0.38004 | 0.71585414  |             |           |         |  |
| NA        | ENSG00000233454 | -0.97133 | 0.83431 | -0.81456    | 0.79234     | -0.4598   | 0.67717 |  |
|           | 0.30534         | 0.38005  | 0.38005 | 0.71585414  |             |           |         |  |
| RPS3AP8   | ENSG00000233562 | 0.30521  | 0.3801  | 0.30521     | 0.3801      | 0.30521   |         |  |
|           | 0.3801          | 0.30521  | 0.3801  | 0.3801      | 0.71585414  |           |         |  |
| PIK3R5    | ENSG00000141506 | 0.29227  | 0.38504 | -0.15415    | 0.56125     | 0.014668  |         |  |
|           | 0.49415         | 0.30515  | 0.38013 | 0.38013     | 0.71585414  |           |         |  |
| DPF3      | ENSG00000205683 | -0.95403 | 0.82996 | 0.30513     | 0.38013     | -0.53305  | 0.703   |  |
|           | -0.8706         | 0.80801  | 0.38013 | 0.71585414  |             |           |         |  |
| NA        | ENSG00000254758 | -1.1068  | 0.8658  | 0.30511     | 0.38014     | -1.1068   | 0.8658  |  |
|           | -1.1068         | 0.8658   | 0.38014 | 0.71585414  |             |           |         |  |
| NA        | ENSG00000271269 | 0.10227  | 0.45927 | 0.30506     | 0.38016     | 0.10227   | 0.45927 |  |
|           | 0.10227         | 0.45927  | 0.38016 | 0.71585414  |             |           |         |  |
| CDCA4     | ENSG00000170779 | 0.18471  | 0.42673 | 0.30504     | 0.38017     | -0.021488 | 0.50857 |  |
|           | 0.18894         | 0.42507  | 0.38017 | 0.71585414  |             |           |         |  |
| NA        | ENSG00000272139 | 0.30503  | 0.38017 | 0.30503     | 0.38017     | 0.30503   | 0.38017 |  |
|           | 0.30503         | 0.38017  | 0.38017 | 0.71585414  |             |           |         |  |
| SPATA42   | ENSG00000203897 | 0.30501  | 0.38018 | 0.30501     | 0.38018     | 0.30501   |         |  |
|           | 0.38018         | 0.30501  | 0.38018 | 0.38018     | 0.71585414  |           |         |  |
| NA        | ENSG00000260483 | 0.3049   | 0.38022 | 0.3049      | 0.38022     | 0.3049    | 0.38022 |  |
|           | 0.3049          | 0.38022  | 0.38022 | 0.71585414  |             |           |         |  |
| LINC01030 | ENSG00000253799 | 0.26921  | 0.39388 | 0.30488     | 0.38023     | 0.30488   |         |  |
|           | 0.38023         | 0.30488  | 0.38023 | 0.38023     | 0.71585414  |           |         |  |
| HAR1A     | ENSG00000225978 | 0.30484  | 0.38024 | 0.30484     | 0.38024     | -0.55252  | 0.7097  |  |
|           | -0.42355        | 0.66405  | 0.38024 | 0.71585414  |             |           |         |  |
| MRPS31    | ENSG00000102738 | 0.11593  | 0.45385 | 0.30479     | 0.38026     | -0.81405  |         |  |
|           | 0.79219         | -1.5876  | 0.94381 | 0.38026     | 0.71585414  |           |         |  |
| NA        | ENSG00000259002 | 0.30481  | 0.38026 | 0.30481     | 0.38026     | 0.30481   | 0.38026 |  |
|           | 0.30481         | 0.38026  | 0.38026 | 0.71585414  |             |           |         |  |
| TOP1      | ENSG00000198900 | -1.5678  | 0.94153 | 0.30478     | 0.38027     | -0.51049  | 0.69515 |  |
|           | -0.22606        | 0.58942  | 0.38027 | 0.71585414  |             |           |         |  |
| CTRB2     | ENSG00000168928 | 0.15965  | 0.43658 | 0.22914     | 0.40938     | 0.19567   | 0.42243 |  |
|           | 0.30471         | 0.38029  | 0.38029 | 0.71585414  |             |           |         |  |
| PLEC      | ENSG00000178209 | 0.30463  | 0.38032 | 0.25585     | 0.39903     | -0.15635  | 0.56212 |  |
|           | -0.4336         | 0.66771  | 0.38032 | 0.71585414  |             |           |         |  |
| RPE       | ENSG00000197713 | 0.30464  | 0.38032 | -0.78103    | 0.78261     | -0.78103  | 0.78261 |  |

|           |                 |           |         |             |             |           |         |  |
|-----------|-----------------|-----------|---------|-------------|-------------|-----------|---------|--|
|           | -0.78103        | 0.78261   | 0.38032 | 0.71585414  |             |           |         |  |
| DISP3     | ENSG00000204624 | -0.56655  | 0.71449 | 0.30464     | 0.38032     | -0.51331  | 0.69613 |  |
|           | -0.38667        | 0.6505    | 0.38032 | 0.71585414  |             |           |         |  |
| UQCRHP2   | ENSG00000237629 | 0.26575   | 0.39522 | -1.1033     | 0.86505     | 0.30462   |         |  |
|           | 0.38033         | -0.90054  | 0.81608 | 0.38033     | 0.71585414  |           |         |  |
| CYP2D7    | ENSG00000205702 | -0.18395  | 0.57297 | -0.54675    | 0.70773     | -1.0605   |         |  |
|           | 0.85553         | 0.30459   | 0.38034 | 0.38034     | 0.71585414  |           |         |  |
| BMPR1B    | ENSG00000138696 | 0.30452   | 0.38037 | -0.066504   | 0.52651     | -0.066553 |         |  |
|           | 0.52653         | -0.26961  | 0.60627 | 0.38037     | 0.71585414  |           |         |  |
| NA        | ENSG00000271141 | 0.30448   | 0.38038 | 0.30448     | 0.38038     | 0.30448   | 0.38038 |  |
|           | 0.30448         | 0.38038   | 0.38038 | 0.71585414  |             |           |         |  |
| LINC01516 | ENSG00000231422 | -0.85049  | 0.80247 | -0.68882    | 0.75453     | -0.14344  |         |  |
|           | 0.55703         | 0.30443   | 0.3804  | 0.3804      | 0.71585414  |           |         |  |
| RMDN2-AS1 | ENSG00000235848 | -0.90281  | 0.81669 | 0.30443     | 0.3804      | -0.65455  |         |  |
|           | 0.74362         | -0.94712  | 0.82821 | 0.3804      | 0.71585414  |           |         |  |
| NA        | ENSG00000259976 | 0.30441   | 0.38041 | 0.30441     | 0.38041     | 0.30441   | 0.38041 |  |
|           | 0.30441         | 0.38041   | 0.38041 | 0.71585414  |             |           |         |  |
| RPS7      | ENSG00000171863 | 0.30436   | 0.38043 | 0.30436     | 0.38043     | 0.30436   | 0.38043 |  |
|           | 0.30436         | 0.38043   | 0.38043 | 0.71585414  |             |           |         |  |
| DNALI1    | ENSG00000163879 | 0.30433   | 0.38044 | -0.31127    | 0.6222      | -0.31127  |         |  |
|           | 0.6222          | -0.31127  | 0.6222  | 0.38044     | 0.71585414  |           |         |  |
| TRIM59    | ENSG00000213186 | 0.30432   | 0.38044 | 0.30432     | 0.38044     | 0.30432   |         |  |
|           | 0.38044         | 0.30432   | 0.38044 | 0.38044     | 0.71585414  |           |         |  |
| NA        | ENSG00000241744 | -0.5747   | 0.71725 | 0.30432     | 0.38044     | 0.30432   | 0.38044 |  |
|           | 0.30432         | 0.38044   | 0.38044 | 0.71585414  |             |           |         |  |
| RNA5SP121 | ENSG00000252346 | 0.17105   | 0.43209 | 0.30429     | 0.38045     | 0.064042  |         |  |
|           | 0.47447         | -0.81988  | 0.79386 | 0.38045     | 0.71585414  |           |         |  |
| MIR563    | ENSG00000207815 | 0.30428   | 0.38046 | 0.30428     | 0.38046     | 0.30428   |         |  |
|           | 0.38046         | 0.30428   | 0.38046 | 0.38046     | 0.71585414  |           |         |  |
| LINC01757 | ENSG00000228105 | -0.28897  | 0.6137  | 0.15335     | 0.43906     | -0.24374  |         |  |
|           | 0.59628         | 0.30425   | 0.38047 | 0.38047     | 0.71585414  |           |         |  |
| MRPL35    | ENSG00000132313 | 0.1357    | 0.44603 | -0.8031     | 0.78904     | -0.36517  |         |  |
|           | 0.64251         | 0.30422   | 0.38048 | 0.38048     | 0.71585414  |           |         |  |
| LINC01541 | ENSG00000260676 | -1.1838   | 0.88176 | 0.30417     | 0.3805      | 0.25283   |         |  |
|           | 0.4002          | 0.25283   | 0.4002  | 0.3805      | 0.71585414  |           |         |  |
| NA        | ENSG00000238094 | 0.30413   | 0.38051 | 0.30413     | 0.38051     | 0.30413   | 0.38051 |  |
|           | 0.30413         | 0.38051   | 0.38051 | 0.71585414  |             |           |         |  |
| RNU7-88P  | ENSG00000239003 | 0.30408   | 0.38053 | 0.30408     | 0.38053     | 0.30408   |         |  |
|           | 0.38053         | 0.30408   | 0.38053 | 0.38053     | 0.71585414  |           |         |  |
| NA        | ENSG00000233645 | -0.26636  | 0.60502 | 0.26289     | 0.39632     | 0.30407   | 0.38054 |  |
|           | -0.44041        | 0.67018   | 0.38054 | 0.71585414  |             |           |         |  |
| RNU4-8P   | ENSG00000201806 | 0.30403   | 0.38055 | 0.30403     | 0.38055     | 0.30403   |         |  |
|           | 0.38055         | 0.30403   | 0.38055 | 0.38055     | 0.71585414  |           |         |  |
| TMEM170A  | ENSG00000166822 | 0.30397   | 0.38058 | 0.30397     | 0.38058     | 0.30397   |         |  |
|           | 0.38058         | 0.30397   | 0.38058 | 0.38058     | 0.715882938 |           |         |  |
| AKR1E2    | ENSG00000165568 | -0.045388 | 0.5181  | -0.038721   | 0.51544     | -0.36037  |         |  |
|           | 0.64072         | 0.30387   | 0.38061 | 0.38061     | 0.715898045 |           |         |  |
| FAHD2A    | ENSG00000115042 | -0.66045  | 0.74552 | -0.18575    | 0.57368     | -0.51463  |         |  |
|           | 0.6966          | 0.30379   | 0.38064 | 0.38064     | 0.715898045 |           |         |  |
| UBA52     | ENSG00000221983 | 0.3037    | 0.38068 | 0.3037      | 0.38068     | 0.3037    | 0.38068 |  |
|           | 0.3037          | 0.38068   | 0.38068 | 0.715898045 |             |           |         |  |
| DDX24     | ENSG00000089737 | 0.30366   | 0.38069 | 0.2774      | 0.39074     | -0.69679  | 0.75703 |  |
|           | -0.29094        | 0.61445   | 0.38069 | 0.715898045 |             |           |         |  |
| RNU1-132P | ENSG00000201170 | -0.21474  | 0.58501 | -0.21474    | 0.58501     | 0.30366   |         |  |
|           | 0.38069         | -0.3094   | 0.62149 | 0.38069     | 0.715898045 |           |         |  |
| MINPP1    | ENSG00000107789 | -0.019905 | 0.50794 | -1.6818     | 0.9537      | -1.5831   |         |  |
|           | 0.9433          | 0.30355   | 0.38073 | 0.38073     | 0.715898045 |           |         |  |
| NA        | ENSG00000253503 | 0.086803  | 0.46541 | -0.0068877  | 0.50275     | 0.30355   | 0.38073 |  |
|           | -0.010875       | 0.50434   | 0.38073 | 0.715898045 |             |           |         |  |
| NA        | ENSG00000260991 | -0.085983 | 0.53426 | 0.30355     | 0.38073     | -0.085983 | 0.53426 |  |
|           | -0.085983       | 0.53426   | 0.38073 | 0.715898045 |             |           |         |  |
| MIR3173   | ENSG00000264607 | 0.30353   | 0.38074 | 0.30353     | 0.38074     | 0.30353   |         |  |

|             |                 |           |         |             |             |           |         |
|-------------|-----------------|-----------|---------|-------------|-------------|-----------|---------|
|             | 0.38074         | 0.30353   | 0.38074 | 0.38074     | 0.715898045 |           |         |
| ZBTB44-DT   | ENSG00000175773 | -1.06     | 0.85544 | -1.6552     | 0.95106     | 0.30348   | 0.38076 |
|             | -0.93109        | 0.8241    | 0.38076 | 0.715898045 |             |           |         |
| LRRN3       | ENSG00000173114 | 0.02537   | 0.48988 | 0.3033      | 0.38083     | 0.2314    | 0.4085  |
|             | -0.072923       | 0.52907   | 0.38083 | 0.715898045 |             |           |         |
| USO1        | ENSG00000138768 | 0.30325   | 0.38085 | 0.17423     | 0.43084     | -0.04274  | 0.51705 |
|             | 0.23197         | 0.40828   | 0.38085 | 0.715898045 |             |           |         |
| CCDC179     | ENSG00000255359 | -0.70435  | 0.75939 | -0.70435    | 0.75939     | 0.30324   |         |
|             | 0.38085         | -0.062923 | 0.52509 | 0.38085     | 0.715898045 |           |         |
| NA          | ENSG00000245385 | 0.3032    | 0.38087 | 0.3032      | 0.38087     | 0.3032    | 0.38087 |
|             | 0.3032          | 0.38087   | 0.38087 | 0.715898045 |             |           |         |
| DEFB123     | ENSG00000180424 | -1.5434   | 0.93864 | -0.20718    | 0.58207     | -0.20718  |         |
|             | 0.58207         | 0.30318   | 0.38088 | 0.38088     | 0.715898045 |           |         |
| NA          | ENSG00000213078 | -1.0831   | 0.86062 | -1.0831     | 0.86062     | -1.0831   | 0.86062 |
|             | 0.30317         | 0.38088   | 0.38088 | 0.715898045 |             |           |         |
| RNU6ATAC27P | ENSG00000221216 | 0.30315   | 0.38089 | 0.30315     | 0.38089     | 0.30315   | 0.38089 |
|             | 0.38089         | 0.30315   | 0.38089 | 0.38089     | 0.715898045 |           |         |
| NA          | ENSG00000265907 | 0.30313   | 0.38089 | -0.61431    | 0.73049     | -0.11969  | 0.54763 |
|             | -0.11969        | 0.54763   | 0.38089 | 0.715898045 |             |           |         |
| SHCBP1      | ENSG00000171241 | -1.4108   | 0.92085 | -1.4108     | 0.92085     | -1.8745   |         |
|             | 0.96957         | 0.30312   | 0.3809  | 0.3809      | 0.715898045 |           |         |
| LINC02221   | ENSG00000250814 | 0.30309   | 0.38091 | 0.21415     | 0.41521     | 0.21415   |         |
|             | 0.41521         | 0.21415   | 0.41521 | 0.38091     | 0.715898045 |           |         |
| PHACTR2P1   | ENSG00000270300 | 0.30309   | 0.38091 | 0.30309     | 0.38091     | 0.30309   |         |
|             | 0.38091         | 0.30309   | 0.38091 | 0.38091     | 0.715898045 |           |         |
| RYR3        | ENSG00000198838 | 0.22577   | 0.41069 | 0.30304     | 0.38093     | -0.029011 | 0.51157 |
|             | 0.083437        | 0.46675   | 0.38093 | 0.715898045 |             |           |         |
| RPSAP11     | ENSG00000237433 | 0.30301   | 0.38094 | 0.30301     | 0.38094     | 0.30301   |         |
|             | 0.38094         | 0.30301   | 0.38094 | 0.38094     | 0.715898045 |           |         |
| ALDH3B2     | ENSG00000132746 | -0.090136 | 0.53591 | -0.91078    | 0.81879     | -0.69742  |         |
|             | 0.75723         | 0.30295   | 0.38096 | 0.38096     | 0.715898045 |           |         |
| LIPM        | ENSG00000173239 | -0.25633  | 0.60115 | -0.25633    | 0.60115     | 0.30296   | 0.38096 |
|             | -0.25633        | 0.60115   | 0.38096 | 0.715898045 |             |           |         |
| ZNF550      | ENSG00000251369 | 0.21027   | 0.41673 | 0.30293     | 0.38097     | 0.30293   |         |
|             | 0.38097         | 0.30293   | 0.38097 | 0.38097     | 0.715898045 |           |         |
| RNU1-52P    | ENSG00000206917 | 0.3028    | 0.38102 | 0.3028      | 0.38102     | 0.3028    |         |
|             | 0.38102         | 0.3028    | 0.38102 | 0.38102     | 0.715955576 |           |         |
| LINC02250   | ENSG00000235731 | -0.24275  | 0.5959  | -0.60075    | 0.726       | 0.026957  | 0.48925 |
|             | 0.30277         | 0.38103   | 0.38103 | 0.715955576 |             |           |         |
| RN7SKP134   | ENSG00000200830 | 0.30263   | 0.38109 | 0.30263     | 0.38109     | 0.30263   |         |
|             | 0.38109         | 0.30263   | 0.38109 | 0.38109     | 0.715983599 |           |         |
| NA          | ENSG00000243385 | 0.30261   | 0.38109 | 0.30261     | 0.38109     | 0.30261   | 0.38109 |
|             | 0.30261         | 0.38109   | 0.38109 | 0.715983599 |             |           |         |
| RPL35AP35   | ENSG00000239256 | 0.3026    | 0.3811  | -0.43659    | 0.66879     | 0.3026    |         |
|             | 0.3811          | 0.3026    | 0.3811  | 0.3811      | 0.715983599 |           |         |
| MEF2AP1     | ENSG00000224620 | 0.30252   | 0.38113 | 0.30252     | 0.38113     | 0.30252   |         |
|             | 0.38113         | 0.30252   | 0.38113 | 0.38113     | 0.715983599 |           |         |
| NA          | ENSG00000251148 | -0.388    | 0.65099 | -0.18522    | 0.57347     | 0.30249   | 0.38114 |
|             | 0.30249         | 0.38114   | 0.38114 | 0.715983599 |             |           |         |
| NPM1P12     | ENSG00000215311 | -0.26537  | 0.60464 | 0.30247     | 0.38115     | -0.33986  |         |
|             | 0.63302         | -0.91386  | 0.81961 | 0.38115     | 0.715983599 |           |         |
| NA          | ENSG00000250703 | 0.30246   | 0.38115 | 0.30246     | 0.38115     | 0.30246   | 0.38115 |
|             | 0.30246         | 0.38115   | 0.38115 | 0.715983599 |             |           |         |
| TOP3A       | ENSG00000177302 | -0.35993  | 0.64055 | -1.2176     | 0.88831     | -0.016641 | 0.50664 |
|             | 0.3024          | 0.38117   | 0.38117 | 0.715983599 |             |           |         |
| RPS2P25     | ENSG00000241965 | 0.30232   | 0.3812  | 0.30232     | 0.3812      | 0.30232   |         |
|             | 0.3812          | 0.30232   | 0.3812  | 0.3812      | 0.715983599 |           |         |
| NA          | ENSG00000273044 | 0.30233   | 0.3812  | 0.30233     | 0.3812      | 0.30233   | 0.3812  |
|             | 0.30233         | 0.3812    | 0.3812  | 0.715983599 |             |           |         |
| SNHG27      | ENSG00000251676 | -0.29547  | 0.61618 | 0.28635     | 0.3873      | -1.1271   |         |
|             | 0.87015         | 0.30221   | 0.38124 | 0.38124     | 0.715983599 |           |         |
| NA          | ENSG00000230552 | 0.30221   | 0.38125 | -0.91527    | 0.81997     | -0.67924  | 0.75151 |

|           |                 |           |         |             |             |           |         |  |
|-----------|-----------------|-----------|---------|-------------|-------------|-----------|---------|--|
|           | -0.14598        | 0.55803   | 0.38125 | 0.715983599 |             |           |         |  |
| LINC00971 | ENSG00000242641 | 0.15593   | 0.43804 | -0.58366    | 0.72028     | 0.0084183 |         |  |
|           | 0.49664         | 0.3022    | 0.38125 | 0.715983599 |             |           |         |  |
| CCDC91    | ENSG00000123106 | -1.0066   | 0.84293 | 0.30214     | 0.38127     | -1.1049   |         |  |
|           | 0.8654          | -1.1161   | 0.8678  | 0.38127     | 0.715983599 |           |         |  |
| RNU4-74P  | ENSG00000223212 | -0.73649  | 0.76929 | 0.30212     | 0.38128     | 0.30212   |         |  |
|           | 0.38128         | 0.30212   | 0.38128 | 0.715983599 |             |           |         |  |
| HMGB3P15  | ENSG00000250897 | 0.30212   | 0.38128 | 0.30212     | 0.38128     | 0.30212   |         |  |
|           | 0.38128         | 0.30212   | 0.38128 | 0.715983599 |             |           |         |  |
| UCHL3     | ENSG00000118939 | -0.090851 | 0.53619 | -0.68815    | 0.75432     | 0.30204   | 0.38131 |  |
|           | 0.13362         | 0.44685   | 0.38131 | 0.715991669 |             |           |         |  |
| GALNT7    | ENSG00000109586 | 0.30192   | 0.38136 | -0.14297    | 0.55684     | 0.21519   |         |  |
|           | 0.41481         | 0.23336   | 0.40774 | 0.38136     | 0.715991669 |           |         |  |
| RNU6-318P | ENSG00000207010 | 0.30191   | 0.38136 | 0.30191     | 0.38136     | 0.30191   |         |  |
|           | 0.38136         | 0.10584   | 0.45786 | 0.38136     | 0.715991669 |           |         |  |
| CCR6      | ENSG00000112486 | -0.086248 | 0.53437 | 0.14727     | 0.44146     | 0.30185   | 0.38138 |  |
|           | -0.21482        | 0.58505   | 0.38138 | 0.715991669 |             |           |         |  |
| LINC01597 | ENSG00000205611 | -1.006    | 0.84279 | -0.086396   | 0.53442     | 0.10399   |         |  |
|           | 0.45859         | 0.30186   | 0.38138 | 0.38138     | 0.715991669 |           |         |  |
| NA        | ENSG00000237888 | -0.29771  | 0.61704 | 0.30185     | 0.38138     | 0.20445   | 0.419   |  |
|           | -0.31858        | 0.62498   | 0.38138 | 0.715991669 |             |           |         |  |
| CENPL     | ENSG00000120334 | 0.10954   | 0.45639 | 0.3018      | 0.3814      | -0.088299 | 0.53518 |  |
|           | -0.59302        | 0.72342   | 0.3814  | 0.715991669 |             |           |         |  |
| LINC02525 | ENSG00000230269 | -0.89977  | 0.81588 | 0.30177     | 0.38141     | 0.1923    |         |  |
|           | 0.42375         | -0.89977  | 0.81588 | 0.38141     | 0.715991669 |           |         |  |
| NA        | ENSG00000267316 | 0.04156   | 0.48342 | -1.3779     | 0.91588     | 0.30175   | 0.38142 |  |
|           | 0.044201        | 0.48237   | 0.38142 | 0.715991669 |             |           |         |  |
| OR10T1P   | ENSG00000203758 | -0.72306  | 0.76518 | -0.72306    | 0.76518     | 0.30165   |         |  |
|           | 0.38146         | -1.3923   | 0.91808 | 0.38146     | 0.715991669 |           |         |  |
| NA        | ENSG00000283096 | 0.30165   | 0.38146 | 0.30165     | 0.38146     | 0.30165   | 0.38146 |  |
|           | 0.30165         | 0.38146   | 0.38146 | 0.715991669 |             |           |         |  |
| HMGNI1P14 | ENSG00000249439 | 0.30156   | 0.38149 | 0.022984    | 0.49083     | 0.30156   |         |  |
|           | 0.38149         | 0.30156   | 0.38149 | 0.38149     | 0.715991669 |           |         |  |
| NA        | ENSG00000251259 | -0.47041  | 0.68097 | 0.30156     | 0.38149     | -0.47041  | 0.68097 |  |
|           | 0.30156         | 0.38149   | 0.38149 | 0.715991669 |             |           |         |  |
| NA        | ENSG00000221130 | -0.98564  | 0.83785 | -1.3782     | 0.91593     | -0.47377  | 0.68217 |  |
|           | 0.30157         | 0.38149   | 0.38149 | 0.715991669 |             |           |         |  |
| LINC02077 | ENSG00000244461 | 0.022223  | 0.49113 | 0.3015      | 0.38152     | 0.022223  |         |  |
|           | 0.49113         | 0.022223  | 0.49113 | 0.38152     | 0.716020397 |           |         |  |
| NA        | ENSG00000267298 | 0.30133   | 0.38158 | 0.30133     | 0.38158     | 0.30133   | 0.38158 |  |
|           | 0.30133         | 0.38158   | 0.38158 | 0.716053303 |             |           |         |  |
| LINC02537 | ENSG00000283215 | 0.30128   | 0.3816  | 0.30128     | 0.3816      | 0.30128   |         |  |
|           | 0.3816          | 0.30128   | 0.3816  | 0.3816      | 0.716053303 |           |         |  |
| NA        | ENSG00000253723 | 0.070613  | 0.47185 | 0.16893     | 0.43293     | 0.30124   | 0.38162 |  |
|           | 0.16893         | 0.43293   | 0.38162 | 0.716053303 |             |           |         |  |
| BAIAP2    | ENSG00000175866 | -0.42485  | 0.66453 | 0.30112     | 0.38166     | -0.1747   |         |  |
|           | 0.56934         | 0.18573   | 0.42633 | 0.38166     | 0.716053303 |           |         |  |
| FAM71E2   | ENSG00000180043 | 0.30111   | 0.38166 | 0.30111     | 0.38166     | 0.30111   |         |  |
|           | 0.38166         | 0.30111   | 0.38166 | 0.38166     | 0.716053303 |           |         |  |
| NA        | ENSG00000274486 | 0.30112   | 0.38166 | 0.30112     | 0.38166     | 0.30112   | 0.38166 |  |
|           | 0.30112         | 0.38166   | 0.38166 | 0.716053303 |             |           |         |  |
| NA        | ENSG00000252759 | 0.30108   | 0.38168 | 0.30108     | 0.38168     | 0.30108   | 0.38168 |  |
|           | 0.30108         | 0.38168   | 0.38168 | 0.716053303 |             |           |         |  |
| KRT18P8   | ENSG00000264644 | 0.0678    | 0.47297 | 0.30104     | 0.38169     | -0.58357  |         |  |
|           | 0.72024         | -0.15248  | 0.5606  | 0.38169     | 0.716053303 |           |         |  |
| CISH      | ENSG00000114737 | -0.68821  | 0.75434 | 0.30102     | 0.3817      | -0.45068  | 0.67389 |  |
|           | -0.75289        | 0.77424   | 0.3817  | 0.716053303 |             |           |         |  |
| AMPD3     | ENSG00000133805 | -0.3473   | 0.63582 | -0.92998    | 0.82381     | 0.30093   | 0.38173 |  |
|           | -1.2346         | 0.89152   | 0.38173 | 0.716053303 |             |           |         |  |
| ST6GAL1   | ENSG00000073849 | -0.12453  | 0.54955 | -0.12453    | 0.54955     | -0.12453  |         |  |
|           | 0.54955         | 0.30082   | 0.38178 | 0.38178     | 0.716053303 |           |         |  |
| NUTM2G    | ENSG00000188152 | -0.49744  | 0.69056 | 0.30074     | 0.38181     | -0.40373  |         |  |

|           |                 |           |             |             |             |          |         |
|-----------|-----------------|-----------|-------------|-------------|-------------|----------|---------|
|           | 0.65679         | -0.63296  | 0.73662     | 0.38181     | 0.716053303 |          |         |
| NA        | ENSG00000236894 | -1.7728   | 0.96187     | 0.059891    | 0.47612     | 0.30072  | 0.38182 |
|           | 0.23243         | 0.4081    | 0.38182     | 0.716053303 |             |          |         |
| NA        | ENSG00000237316 | 0.30065   | 0.38184     | 0.30065     | 0.38184     | 0.30065  | 0.38184 |
|           | 0.30065         | 0.38184   | 0.38184     | 0.716053303 |             |          |         |
| FXYD5     | ENSG00000089327 | 0.30062   | 0.38185     | -0.27766    | 0.60936     | 0.30062  | 0.38185 |
|           | 0.30062         | 0.38185   | 0.38185     | 0.716053303 |             |          |         |
| RN7SKP56  | ENSG00000222445 | 0.30059   | 0.38186     | 0.30059     | 0.38186     | 0.30059  | 0.38186 |
|           | 0.38186         | 0.30059   | 0.38186     | 0.38186     | 0.716053303 |          |         |
| VPS26B    | ENSG00000151502 | 0.30054   | 0.38188     | -0.6656     | 0.74717     | 0.1555   |         |
|           | 0.43821         | -0.27356  | 0.60779     | 0.38188     | 0.716053303 |          |         |
| PPP4R4    | ENSG00000119698 | 0.30052   | 0.38189     | -1.2251     | 0.88972     | -0.39002 |         |
|           | 0.65174         | -0.39002  | 0.65174     | 0.38189     | 0.716053303 |          |         |
| NA        | ENSG00000272071 | -0.83874  | 0.79919     | 0.30052     | 0.38189     | -0.66588 | 0.74726 |
|           | 0.22532         | 0.41086   | 0.38189     | 0.716053303 |             |          |         |
| OXR1      | ENSG00000164830 | 0.16028   | 0.43633     | 0.23573     | 0.40682     | -0.36045 | 0.64074 |
|           | 0.30047         | 0.38191   | 0.38191     | 0.716053303 |             |          |         |
| RN7SL96P  | ENSG00000265905 | 0.30046   | 0.38191     | 0.30046     | 0.38191     | 0.30046  | 0.38191 |
|           | 0.38191         | 0.30046   | 0.38191     | 0.38191     | 0.716053303 |          |         |
| SNORA80D  | ENSG00000207217 | 0.30041   | 0.38193     | 0.30041     | 0.38193     | 0.30041  | 0.38193 |
|           | 0.38193         | 0.30041   | 0.38193     | 0.38193     | 0.716053303 |          |         |
| TRIM54    | ENSG00000138100 | -0.079676 | 0.53175     | 0.19002     | 0.42465     | 0.19002  |         |
|           | 0.42465         | 0.3004    | 0.38194     | 0.38194     | 0.716053303 |          |         |
| FAM87B    | ENSG00000177757 | 0.30038   | 0.38194     | -1.2994     | 0.90309     | -1.7503  |         |
|           | 0.95997         | -1.8822   | 0.97009     | 0.38194     | 0.716053303 |          |         |
| DSCR10    | ENSG00000233316 | 0.28758   | 0.38683     | 0.28758     | 0.38683     | 0.28758  |         |
|           | 0.38683         | 0.30037   | 0.38195     | 0.38195     | 0.716053303 |          |         |
| ZFHX2-AS1 | ENSG00000157306 | 0.11807   | 0.45301     | 0.30032     | 0.38197     | -0.25735 |         |
|           | 0.60155         | -0.46119  | 0.67767     | 0.38197     | 0.716053303 |          |         |
| RPL23AP54 | ENSG00000240486 | -0.34439  | 0.63472     | 0.30025     | 0.38199     | -0.34439 |         |
|           | 0.63472         | -0.34439  | 0.63472     | 0.38199     | 0.716053303 |          |         |
| HNRNPA1P9 | ENSG00000231956 | 0.30022   | 0.382       | 0.30022     | 0.382       | 0.30022  | 0.382   |
|           | 0.382           | 0.382     | 0.716053303 |             |             |          |         |
| CDX1      | ENSG00000113722 | -0.1485   | 0.55902     | 0.048611    | 0.48061     | 0.30013  | 0.38204 |
|           | -0.17734        | 0.57038   | 0.38204     | 0.716053303 |             |          |         |
| LINC01653 | ENSG00000232100 | 0.14201   | 0.44354     | 0.30012     | 0.38204     | 0.30012  |         |
|           | 0.38204         | 0.30012   | 0.38204     | 0.38204     | 0.716053303 |          |         |
| UBR5      | ENSG00000104517 | -1.2741   | 0.89869     | -0.75212    | 0.77401     | 0.30007  | 0.38206 |
|           | -0.75486        | 0.77483   | 0.38206     | 0.716053303 |             |          |         |
| FRMD8     | ENSG00000126391 | -0.62809  | 0.73503     | -0.038317   | 0.51528     | 0.30008  | 0.38206 |
|           | -0.3847         | 0.64977   | 0.38206     | 0.716053303 |             |          |         |
| NA        | ENSG00000229990 | -0.48329  | 0.68556     | 0.30006     | 0.38206     | -2.0013  | 0.97732 |
|           | -2.0013         | 0.97732   | 0.38206     | 0.716053303 |             |          |         |
| C11orf42  | ENSG00000180878 | 0.30006   | 0.38207     | 0.30006     | 0.38207     | 0.30006  |         |
|           | 0.38207         | 0.30006   | 0.38207     | 0.38207     | 0.716053303 |          |         |
| OR4A43P   | ENSG00000255534 | 0.14093   | 0.44396     | 0.29999     | 0.38209     | -0.79626 |         |
|           | 0.78706         | -0.3546   | 0.63856     | 0.38209     | 0.716053303 |          |         |
| NA        | ENSG00000250150 | 0.29998   | 0.3821      | -0.69487    | 0.75643     | -1.5722  | 0.94205 |
|           | 0.1735          | 0.43113   | 0.3821      | 0.716053303 |             |          |         |
| NA        | ENSG00000260145 | 0.29997   | 0.3821      | 0.29997     | 0.3821      | 0.29997  | 0.3821  |
|           | 0.29997         | 0.3821    | 0.3821      | 0.716053303 |             |          |         |
| NA        | ENSG00000254620 | -0.86095  | 0.80537     | 0.028153    | 0.48877     | 0.028153 | 0.48877 |
|           | 0.29991         | 0.38212   | 0.38212     | 0.716053303 |             |          |         |
| PI4KAP2   | ENSG00000183506 | 0.2999    | 0.38213     | -1.6727     | 0.9528      | -1.3627  |         |
|           | 0.91351         | -0.21782  | 0.58621     | 0.38213     | 0.716053303 |          |         |
| LINC02377 | ENSG00000250102 | 0.29987   | 0.38214     | 0.21706     | 0.41408     | -0.22914 |         |
|           | 0.59062         | -0.1606   | 0.5638      | 0.38214     | 0.716053303 |          |         |
| NA        | ENSG00000272102 | 0.29986   | 0.38214     | -0.5736     | 0.71688     | 0.29986  | 0.38214 |
|           | 0.29986         | 0.38214   | 0.38214     | 0.716053303 |             |          |         |
| MIR302CHG | ENSG00000249532 | 0.29969   | 0.38221     | 0.29969     | 0.38221     | 0.29969  |         |
|           | 0.38221         | 0.29969   | 0.38221     | 0.38221     | 0.716156931 |          |         |
| TRBV5-6   | ENSG00000211728 | 0.05962   | 0.47623     | 0.29964     | 0.38223     | 0.05962  |         |

|           |                 |           |         |             |             |            |         |  |
|-----------|-----------------|-----------|---------|-------------|-------------|------------|---------|--|
|           | 0.47623         | 0.05962   | 0.47623 | 0.38223     | 0.716166868 |            |         |  |
| NA        | ENSG00000259202 | 0.29957   | 0.38225 | 0.29957     | 0.38225     | 0.29957    | 0.38225 |  |
|           | 0.29957         | 0.38225   | 0.38225 | 0.716176804 |             |            |         |  |
| LINC02088 | ENSG00000227685 | -1.6484   | 0.95037 | 0.29949     | 0.38228     | -2.0166    |         |  |
|           | 0.97813         | -2.0166   | 0.97813 | 0.38228     | 0.716196674 |            |         |  |
| NA        | ENSG00000230769 | 0.29948   | 0.38229 | 0.29948     | 0.38229     | 0.29948    | 0.38229 |  |
|           | 0.29948         | 0.38229   | 0.38229 | 0.716196674 |             |            |         |  |
| EPS8L1    | ENSG00000131037 | 0.10694   | 0.45742 | 0.29926     | 0.38237     | 0.29926    |         |  |
|           | 0.38237         | 0.29926   | 0.38237 | 0.38237     | 0.716259655 |            |         |  |
| ACTN1-AS1 | ENSG00000259062 | 0.29923   | 0.38238 | -0.085556   | 0.53409     | 0.29923    |         |  |
|           | 0.38238         | 0.29923   | 0.38238 | 0.38238     | 0.716259655 |            |         |  |
| WARS1     | ENSG00000140105 | -0.25338  | 0.60001 | 0.24138     | 0.40463     | 0.29915    | 0.38241 |  |
|           | 0.27365         | 0.39218   | 0.38241 | 0.716259655 |             |            |         |  |
| HSPA8P4   | ENSG00000248610 | -1.2159   | 0.88799 | 0.29916     | 0.38241     | -0.56801   |         |  |
|           | 0.71498         | -0.56801  | 0.71498 | 0.38241     | 0.716259655 |            |         |  |
| GAU1      | ENSG00000255474 | -0.70138  | 0.75847 | -0.46449    | 0.67885     | -0.46449   | 0.67885 |  |
|           | 0.29907         | 0.38244   | 0.38244 | 0.716259655 |             |            |         |  |
| AFM       | ENSG00000079557 | 0.29902   | 0.38246 | -0.63744    | 0.73808     | -0.4863    | 0.68662 |  |
|           | -0.5232         | 0.69958   | 0.38246 | 0.716259655 |             |            |         |  |
| NA        | ENSG00000223847 | -1.3009   | 0.90336 | 0.29899     | 0.38247     | 0.29899    | 0.38247 |  |
|           | 0.29899         | 0.38247   | 0.38247 | 0.716259655 |             |            |         |  |
| ENSA      | ENSG00000143420 | -0.74526  | 0.77194 | -0.44189    | 0.67072     | -0.59613   | 0.72446 |  |
|           | 0.29896         | 0.38248   | 0.38248 | 0.716259655 |             |            |         |  |
| PDPN      | ENSG00000162493 | 0.29895   | 0.38249 | -1.0419     | 0.85127     | 0.29895    | 0.38249 |  |
|           | 0.29895         | 0.38249   | 0.38249 | 0.716259655 |             |            |         |  |
| NA        | ENSG00000274415 | 0.29896   | 0.38249 | 0.29896     | 0.38249     | 0.29896    | 0.38249 |  |
|           | 0.29896         | 0.38249   | 0.38249 | 0.716259655 |             |            |         |  |
| LBHD2     | ENSG00000283071 | -0.5325   | 0.70281 | 0.14868     | 0.4409      | 0.29894    | 0.38249 |  |
|           | 0.29894         | 0.38249   | 0.38249 | 0.716259655 |             |            |         |  |
| CTU1      | ENSG00000142544 | -0.31821  | 0.62484 | 0.29892     | 0.3825      | 0.29892    | 0.3825  |  |
|           | 0.29892         | 0.3825    | 0.3825  | 0.716259655 |             |            |         |  |
| ZFP14     | ENSG00000142065 | 0.11548   | 0.45403 | -0.80102    | 0.78844     | 0.29877    | 0.38256 |  |
|           | -0.18726        | 0.57427   | 0.38256 | 0.716308157 |             |            |         |  |
| LINC01534 | ENSG00000225975 | 0.29876   | 0.38256 | 0.29876     | 0.38256     | 0.29876    |         |  |
|           | 0.38256         | 0.29876   | 0.38256 | 0.38256     | 0.716308157 |            |         |  |
| HUNK-AS1  | ENSG00000237138 | 0.29875   | 0.38257 | 0.29875     | 0.38257     | -0.96896   |         |  |
|           | 0.83372         | 0.29875   | 0.38257 | 0.38257     | 0.716308157 |            |         |  |
| IFT46     | ENSG00000118096 | -0.59501  | 0.72408 | -0.59501    | 0.72408     | 0.29865    | 0.3826  |  |
|           | -1.0567         | 0.85468   | 0.3826  | 0.716312856 |             |            |         |  |
| NA        | ENSG00000243697 | 0.29109   | 0.38549 | 0.29109     | 0.38549     | -0.0036281 | 0.50145 |  |
|           | 0.29842         | 0.38269   | 0.38269 | 0.716312856 |             |            |         |  |
| FXN       | ENSG00000165060 | 0.29833   | 0.38272 | 0.19313     | 0.42343     | -1.3825    | 0.91659 |  |
|           | -0.010748       | 0.50429   | 0.38272 | 0.716312856 |             |            |         |  |
| NA        | ENSG00000261077 | 0.29834   | 0.38272 | 0.29834     | 0.38272     | 0.29834    | 0.38272 |  |
|           | 0.29834         | 0.38272   | 0.38272 | 0.716312856 |             |            |         |  |
| OR8G2P    | ENSG00000181214 | 0.29823   | 0.38276 | 0.29823     | 0.38276     | 0.29823    |         |  |
|           | 0.38276         | 0.29823   | 0.38276 | 0.38276     | 0.716312856 |            |         |  |
| NA        | ENSG00000266877 | -0.030886 | 0.51232 | 0.29824     | 0.38276     | -0.32214   | 0.62633 |  |
|           | -0.23768        | 0.59393   | 0.38276 | 0.716312856 |             |            |         |  |
| NA        | ENSG00000207403 | -0.14302  | 0.55686 | 0.29816     | 0.38279     | -0.15347   | 0.56099 |  |
|           | 0.23295         | 0.4079    | 0.38279 | 0.716312856 |             |            |         |  |
| NA        | ENSG00000277283 | 0.29817   | 0.38279 | 0.29817     | 0.38279     | 0.29817    | 0.38279 |  |
|           | 0.29817         | 0.38279   | 0.38279 | 0.716312856 |             |            |         |  |
| TRMT10BP1 | ENSG00000253580 | 0.23293   | 0.40791 | -1.2703     | 0.89801     | 0.23293    |         |  |
|           | 0.40791         | 0.29814   | 0.3828  | 0.3828      | 0.716312856 |            |         |  |
| ARID3A    | ENSG00000116017 | 0.29808   | 0.38282 | 0.2061      | 0.41836     | -0.095376  |         |  |
|           | 0.53799         | 0.035839  | 0.48571 | 0.38282     | 0.716312856 |            |         |  |
| ACTA2     | ENSG00000107796 | 0.29805   | 0.38283 | -0.10057    | 0.54006     | -0.10057   | 0.54006 |  |
|           | 0.082541        | 0.46711   | 0.38283 | 0.716312856 |             |            |         |  |
| NA        | ENSG00000234378 | 0.29805   | 0.38283 | -1.0147     | 0.84487     | -0.5456    | 0.70733 |  |
|           | -1.3835         | 0.91675   | 0.38283 | 0.716312856 |             |            |         |  |
| NA        | ENSG00000271992 | 0.29802   | 0.38284 | 0.29802     | 0.38284     | 0.29802    | 0.38284 |  |



|             |                 |           |         |             |             |           |         |  |
|-------------|-----------------|-----------|---------|-------------|-------------|-----------|---------|--|
|             | 0.29802         | 0.38284   | 0.38284 | 0.716312856 |             |           |         |  |
| MIR5689HG   | ENSG00000229401 | -0.56005  | 0.71228 | -0.98788    | 0.83839     | 0.29802   |         |  |
|             | 0.38285         | -0.89919  | 0.81573 | 0.38285     | 0.716312856 |           |         |  |
| FAM102A     | ENSG00000167106 | -0.17289  | 0.56863 | 0.073162    | 0.47084     | 0.29795   |         |  |
|             | 0.38287         | 0.084536  | 0.46631 | 0.38287     | 0.716312856 |           |         |  |
| TPT1-AS1    | ENSG00000170919 | 0.29795   | 0.38287 | -0.019103   | 0.50762     | 0.26176   |         |  |
|             | 0.39675         | -0.87167  | 0.80831 | 0.38287     | 0.716312856 |           |         |  |
| AKR1B1P2    | ENSG00000213452 | 0.29795   | 0.38287 | -0.94099    | 0.82665     | -0.77629  |         |  |
|             | 0.78121         | -0.93574  | 0.8253  | 0.38287     | 0.716312856 |           |         |  |
| CTNND2      | ENSG00000169862 | 0.1602    | 0.43636 | 0.29794     | 0.38288     | 0.029069  |         |  |
|             | 0.4884          | -0.99796  | 0.84085 | 0.38288     | 0.716312856 |           |         |  |
| GPR141      | ENSG00000187037 | -0.072753 | 0.529   | -0.73606    | 0.76915     | -0.072753 | 0.529   |  |
|             | 0.29791         | 0.38288   | 0.38288 | 0.716312856 |             |           |         |  |
| RIMS3       | ENSG00000117016 | 0.14998   | 0.44039 | -0.85251    | 0.80303     | -0.79433  | 0.7865  |  |
|             | 0.29791         | 0.38289   | 0.38289 | 0.716312856 |             |           |         |  |
| MAFA        | ENSG00000182759 | 0.29786   | 0.38291 | 0.00049641  | 0.4998      | 0.29786   | 0.38291 |  |
|             | 0.29786         | 0.38291   | 0.38291 | 0.716312856 |             |           |         |  |
| RPL23AP58   | ENSG00000228657 | -0.28361  | 0.61164 | -0.24974    | 0.59861     | 0.16201   |         |  |
|             | 0.43565         | 0.29779   | 0.38293 | 0.38293     | 0.716312856 |           |         |  |
| MTND4P21    | ENSG00000231777 | -0.96417  | 0.83252 | 0.2978      | 0.38293     | -0.96417  |         |  |
|             | 0.83252         | -0.96417  | 0.83252 | 0.38293     | 0.716312856 |           |         |  |
| KCNH1       | ENSG00000143473 | -0.59477  | 0.724   | -0.14326    | 0.55696     | -0.11918  | 0.54743 |  |
|             | 0.29776         | 0.38294   | 0.38294 | 0.716312856 |             |           |         |  |
| ARL4D       | ENSG00000175906 | 0.11804   | 0.45302 | 0.11804     | 0.45302     | 0.29777   | 0.38294 |  |
|             | 0.11804         | 0.45302   | 0.38294 | 0.716312856 |             |           |         |  |
| LINC01857   | ENSG00000224137 | 0.29769   | 0.38297 | 0.11943     | 0.45247     | -0.19987  |         |  |
|             | 0.57921         | 0.079714  | 0.46823 | 0.38297     | 0.716323893 |           |         |  |
| NA          | ENSG00000279330 | 0.29765   | 0.38298 | 0.29765     | 0.38298     | 0.29765   | 0.38298 |  |
|             | -0.34083        | 0.63338   | 0.38298 | 0.716323893 |             |           |         |  |
| LINC02033   | ENSG00000279727 | 0.29764   | 0.38299 | 0.29764     | 0.38299     | 0.29764   |         |  |
|             | 0.38299         | 0.29764   | 0.38299 | 0.38299     | 0.716323893 |           |         |  |
| NA          | ENSG00000256377 | -0.75045  | 0.77351 | 0.29747     | 0.38305     | -0.75045  | 0.77351 |  |
|             | -0.75045        | 0.77351   | 0.38305 | 0.716408616 |             |           |         |  |
| LRRK2       | ENSG00000188906 | -0.19077  | 0.57565 | -0.64272    | 0.7398      | 0.042964  | 0.48287 |  |
|             | 0.29734         | 0.3831    | 0.3831  | 0.716434005 |             |           |         |  |
| SMARCA5-AS1 | ENSG00000245112 | 0.29736   | 0.3831  | 0.29736     | 0.3831      | 0.29736   | 0.3831  |  |
|             | 0.3831          | 0.29736   | 0.3831  | 0.3831      | 0.716434005 |           |         |  |
| HNRNPA1P20  | ENSG00000205412 | -0.48006  | 0.68441 | 0.29729     | 0.38312     | -0.48006  |         |  |
|             | 0.68441         | -0.48006  | 0.68441 | 0.38312     | 0.716434005 |           |         |  |
| ZNF618      | ENSG00000157657 | -0.1946   | 0.57715 | 0.29723     | 0.38314     | -0.3235   |         |  |
|             | 0.62684         | 0.22707   | 0.41019 | 0.38314     | 0.716434005 |           |         |  |
| RNA5SP63    | ENSG00000212527 | -0.55927  | 0.71201 | 0.29713     | 0.38318     | -0.29842  |         |  |
|             | 0.61731         | -1.3323   | 0.90861 | 0.38318     | 0.716434005 |           |         |  |
| RPL35AP26   | ENSG00000243607 | 0.2971    | 0.38319 | 0.2971      | 0.38319     | 0.2971    |         |  |
|             | 0.38319         | 0.2971    | 0.38319 | 0.38319     | 0.716434005 |           |         |  |
| RPSAP73     | ENSG00000274319 | -0.63184  | 0.73626 | -0.40055    | 0.65563     | 0.29712   |         |  |
|             | 0.38319         | 0.29712   | 0.38319 | 0.38319     | 0.716434005 |           |         |  |
| LONP1       | ENSG00000196365 | 0.29706   | 0.38321 | 0.29706     | 0.38321     | 0.29706   | 0.38321 |  |
|             | 0.29706         | 0.38321   | 0.38321 | 0.716434005 |             |           |         |  |
| RPL13AP12   | ENSG00000236047 | 0.29706   | 0.38321 | 0.29706     | 0.38321     | 0.29706   |         |  |
|             | 0.38321         | 0.29706   | 0.38321 | 0.38321     | 0.716434005 |           |         |  |
| NA          | ENSG00000275678 | 0.29704   | 0.38322 | 0.29704     | 0.38322     | 0.29704   | 0.38322 |  |
|             | 0.29704         | 0.38322   | 0.38322 | 0.716434005 |             |           |         |  |
| NA          | ENSG00000278765 | 0.29701   | 0.38323 | 0.29701     | 0.38323     | 0.29701   | 0.38323 |  |
|             | 0.29701         | 0.38323   | 0.38323 | 0.716434005 |             |           |         |  |
| THRB        | ENSG00000151090 | -0.85474  | 0.80365 | 0.29698     | 0.38324     | -0.61677  | 0.73131 |  |
|             | -0.67047        | 0.74872   | 0.38324 | 0.716434005 |             |           |         |  |
| ZBTB16      | ENSG00000109906 | -1.002    | 0.84182 | -0.031769   | 0.51267     | 0.062379  |         |  |
|             | 0.47513         | 0.29692   | 0.38326 | 0.38326     | 0.716443908 |           |         |  |
| CAPN13      | ENSG00000162949 | -0.47612  | 0.68301 | -1.0051     | 0.84258     | 0.051023  |         |  |
|             | 0.47965         | 0.29686   | 0.38329 | 0.38329     | 0.716472504 |           |         |  |
| NA          | ENSG00000278933 | -0.18328  | 0.57271 | 0.0029281   | 0.49883     | 0.29677   | 0.38332 |  |

|          |                 |          |         |             |             |          |         |         |
|----------|-----------------|----------|---------|-------------|-------------|----------|---------|---------|
|          | -0.097135       | 0.53869  | 0.38332 | 0.716501097 |             |          |         |         |
| NA       | ENSG00000272554 | 0.29667  | 0.38336 | 0.29667     | 0.38336     | 0.29667  | 0.38336 | 0.38336 |
|          | 0.29667         | 0.38336  | 0.38336 | 0.716548379 |             |          |         |         |
| MS4A14   | ENSG00000166928 | -1.3981  | 0.91895 | -1.3981     | 0.91895     | 0.29663  |         |         |
|          | 0.38338         | -1.3981  | 0.91895 | 0.38338     | 0.716558277 |          |         |         |
| OR5B3    | ENSG00000172769 | -0.20716 | 0.58206 | 0.2965      | 0.38342     | -0.31112 | 0.62214 |         |
|          | 0.17218         | 0.43165  | 0.38342 | 0.716573745 |             |          |         |         |
| PPP1R21  | ENSG00000162869 | -0.99525 | 0.84019 | -0.79805    | 0.78758     | 0.29645  |         |         |
|          | 0.38345         | -0.59828 | 0.72517 | 0.38345     | 0.716573745 |          |         |         |
| RNU4-29P | ENSG00000251752 | 0.29641  | 0.38346 | 0.29641     | 0.38346     | 0.29641  |         |         |
|          | 0.38346         | 0.29641  | 0.38346 | 0.38346     | 0.716573745 |          |         |         |
| NA       | ENSG00000223400 | -0.91705 | 0.82044 | 0.29639     | 0.38347     | -1.1207  | 0.8688  |         |
|          | -0.22563        | 0.58926  | 0.38347 | 0.716573745 |             |          |         |         |
| SGMS2    | ENSG00000164023 | 0.010267 | 0.4959  | -0.41932    | 0.66251     | 0.29627  | 0.38351 |         |
|          | 0.072564        | 0.47108  | 0.38351 | 0.716573745 |             |          |         |         |
| RGMB-AS1 | ENSG00000246763 | 0.29611  | 0.38357 | 0.29611     | 0.38357     | 0.29611  |         |         |
|          | 0.38357         | 0.29611  | 0.38357 | 0.38357     | 0.716573745 |          |         |         |
| NA       | ENSG00000259367 | 0.29608  | 0.38358 | 0.29608     | 0.38358     | 0.29608  | 0.38358 |         |
|          | 0.29608         | 0.38358  | 0.38358 | 0.716573745 |             |          |         |         |
| NA       | ENSG00000270400 | 0.2961   | 0.38358 | 0.2961      | 0.38358     | 0.2961   | 0.38358 |         |
|          | 0.2961          | 0.38358  | 0.38358 | 0.716573745 |             |          |         |         |
| NA       | ENSG00000250863 | 0.29605  | 0.3836  | -0.42717    | 0.66537     | -1.1035  | 0.8651  |         |
|          | -1.1035         | 0.8651   | 0.3836  | 0.716573745 |             |          |         |         |
| NT5C2    | ENSG00000076685 | 0.19271  | 0.42359 | -0.062508   | 0.52492     | 0.29601  | 0.38361 |         |
|          | 0.28472         | 0.38793  | 0.38361 | 0.716573745 |             |          |         |         |
| NA       | ENSG00000270995 | 0.045311 | 0.48193 | 0.29602     | 0.38361     | 0.29602  | 0.38361 |         |
|          | 0.29602         | 0.38361  | 0.38361 | 0.716573745 |             |          |         |         |
| C19orf81 | ENSG00000235034 | 0.29599  | 0.38362 | 0.29599     | 0.38362     | 0.29599  |         |         |
|          | 0.38362         | 0.29599  | 0.38362 | 0.38362     | 0.716573745 |          |         |         |
| NA       | ENSG00000266993 | 0.29596  | 0.38363 | 0.29596     | 0.38363     | 0.29596  | 0.38363 |         |
|          | 0.29596         | 0.38363  | 0.38363 | 0.716573745 |             |          |         |         |
| NA       | ENSG00000274897 | 0.29596  | 0.38363 | 0.29596     | 0.38363     | 0.29596  | 0.38363 |         |
|          | 0.29596         | 0.38363  | 0.38363 | 0.716573745 |             |          |         |         |
| NA       | ENSG00000259130 | -0.50892 | 0.6946  | 0.2959      | 0.38365     | -0.96527 | 0.83279 |         |
|          | 0.2959          | 0.38365  | 0.38365 | 0.716573745 |             |          |         |         |
| NA       | ENSG00000264007 | 0.2959   | 0.38365 | 0.2959      | 0.38365     | 0.2959   | 0.38365 |         |
|          | 0.2959          | 0.38365  | 0.38365 | 0.716573745 |             |          |         |         |
| FBXL18   | ENSG00000155034 | -0.59841 | 0.72522 | -0.089105   | 0.5355      | 0.29587  |         |         |
|          | 0.38367         | 0.16633  | 0.43395 | 0.38367     | 0.716573745 |          |         |         |
| NA       | ENSG00000258661 | -0.18415 | 0.57305 | -0.44446    | 0.67165     | 0.29568  | 0.38374 |         |
|          | 0.00031235      | 0.49988  | 0.38374 | 0.716573745 |             |          |         |         |
| VPS37C   | ENSG00000167987 | -1.4993  | 0.9331  | -0.33646    | 0.63174     | 0.29565  |         |         |
|          | 0.38375         | -1.8827  | 0.97013 | 0.38375     | 0.716573745 |          |         |         |
| NPPB     | ENSG00000120937 | -1.4874  | 0.93155 | 0.29554     | 0.38379     | 0.29554  | 0.38379 |         |
|          | 0.29554         | 0.38379  | 0.38379 | 0.716573745 |             |          |         |         |
| NA       | ENSG00000199949 | 0.17353  | 0.43112 | -0.029226   | 0.51166     | -0.29867 | 0.6174  |         |
|          | 0.29555         | 0.38379  | 0.38379 | 0.716573745 |             |          |         |         |
| RPL5P23  | ENSG00000240395 | 0.2955   | 0.3838  | 0.2955      | 0.3838      | 0.2955   |         |         |
|          | 0.3838          | 0.2955   | 0.3838  | 0.3838      | 0.716573745 |          |         |         |
| CYB5R2   | ENSG00000166394 | 0.029576 | 0.4882  | -0.083388   | 0.53323     | 0.29548  |         |         |
|          | 0.38381         | -1.6522  | 0.95075 | 0.38381     | 0.716573745 |          |         |         |
| NA       | ENSG00000232072 | -0.53821 | 0.70478 | 0.039922    | 0.48408     | 0.29542  | 0.38384 |         |
|          | 0.035316        | 0.48591  | 0.38384 | 0.716573745 |             |          |         |         |
| NA       | ENSG00000272265 | 0.2954   | 0.38384 | 0.2954      | 0.38384     | 0.2954   | 0.38384 |         |
|          | 0.2954          | 0.38384  | 0.38384 | 0.716573745 |             |          |         |         |
| NA       | ENSG00000269279 | 0.29533  | 0.38387 | 0.29533     | 0.38387     | 0.29533  | 0.38387 |         |
|          | 0.29533         | 0.38387  | 0.38387 | 0.716573745 |             |          |         |         |
| NA       | ENSG00000252098 | 0.29532  | 0.38388 | -0.037985   | 0.51515     | -0.80025 | 0.78822 |         |
|          | -0.80025        | 0.78822  | 0.38388 | 0.716573745 |             |          |         |         |
| AKR1B1P1 | ENSG00000229991 | 0.29527  | 0.38389 | 0.29527     | 0.38389     | 0.29527  |         |         |
|          | 0.38389         | 0.29527  | 0.38389 | 0.38389     | 0.716573745 |          |         |         |
| OR55B1P  | ENSG00000231548 | 0.12755  | 0.44925 | 0.12755     | 0.44925     | 0.12755  |         |         |

|            |                 |            |         |             |             |          |         |  |
|------------|-----------------|------------|---------|-------------|-------------|----------|---------|--|
|            | 0.44925         | 0.29522    | 0.38391 | 0.38391     | 0.716573745 |          |         |  |
| MALAT1     | ENSG00000251562 | 0.29523    | 0.38391 | -0.49022    | 0.68801     | -0.49022 |         |  |
|            | 0.68801         | -0.57899   | 0.7187  | 0.38391     | 0.716573745 |          |         |  |
| IFNW1      | ENSG00000177047 | 0.2952     | 0.38392 | -0.37861    | 0.64751     | 0.2952   | 0.38392 |  |
|            | 0.2952          | 0.38392    | 0.38392 | 0.716573745 |             |          |         |  |
| NA         | ENSG00000283608 | 0.2952     | 0.38392 | 0.2575      | 0.3984      | 0.2952   | 0.38392 |  |
|            | 0.2952          | 0.38392    | 0.38392 | 0.716573745 |             |          |         |  |
| ZNF326     | ENSG00000162664 | -0.21485   | 0.58506 | 0.29516     | 0.38394     | 0.26196  |         |  |
|            | 0.39668         | 0.00061466 | 0.49975 | 0.38394     | 0.716573745 |          |         |  |
| LINC02676  | ENSG00000234752 | 0.29512    | 0.38395 | -1.5367     | 0.93782     | -0.81338 | 0.792   |  |
|            | -0.81338        | 0.792      | 0.38395 | 0.716573745 |             |          |         |  |
| NA         | ENSG00000259458 | 0.29512    | 0.38395 | 0.29512     | 0.38395     | 0.29512  | 0.38395 |  |
|            | 0.29512         | 0.38395    | 0.38395 | 0.716573745 |             |          |         |  |
| LINC00885  | ENSG00000224652 | -0.2738    | 0.60788 | -1.037      | 0.85014     | 0.29503  |         |  |
|            | 0.38398         | 0.24261    | 0.40415 | 0.38398     | 0.716573745 |          |         |  |
| RNU6-1278P | ENSG00000251939 | 0.29505    | 0.38398 | 0.29505     | 0.38398     | 0.29505  |         |  |
|            | 0.38398         | 0.29505    | 0.38398 | 0.38398     | 0.716573745 |          |         |  |
| NA         | ENSG00000254768 | -0.67486   | 0.75012 | 0.21152     | 0.41624     | -0.63884 | 0.73854 |  |
|            | 0.29501         | 0.38399    | 0.38399 | 0.716573745 |             |          |         |  |
| NA         | ENSG00000222095 | -0.19391   | 0.57688 | -0.19391    | 0.57688     | -1.0141  | 0.84474 |  |
|            | 0.29499         | 0.384      | 0.384   | 0.716573745 |             |          |         |  |
| IFT20      | ENSG00000109083 | 0.29495    | 0.38402 | -0.96829    | 0.83355     | -0.96829 | 0.83355 |  |
|            | -1.1749         | 0.87998    | 0.38402 | 0.716573745 |             |          |         |  |
| RN7SL610P  | ENSG00000243847 | -0.33327   | 0.63054 | 0.29491     | 0.38403     | 0.29491  |         |  |
|            | 0.38403         | 0.29491    | 0.38403 | 0.38403     | 0.716573745 |          |         |  |
| NA         | ENSG00000255885 | 0.2949     | 0.38403 | 0.2949      | 0.38403     | 0.2949   | 0.38403 |  |
|            | 0.2949          | 0.38403    | 0.38403 | 0.716573745 |             |          |         |  |
| GPHA2      | ENSG00000149735 | 0.29488    | 0.38404 | 0.29488     | 0.38404     | 0.29488  | 0.38404 |  |
|            | 0.29488         | 0.38404    | 0.38404 | 0.716573745 |             |          |         |  |
| NA         | ENSG00000270377 | 0.29489    | 0.38404 | 0.29489     | 0.38404     | 0.29489  | 0.38404 |  |
|            | 0.29489         | 0.38404    | 0.38404 | 0.716573745 |             |          |         |  |
| NA         | ENSG00000266527 | 0.29487    | 0.38405 | 0.29487     | 0.38405     | 0.29487  | 0.38405 |  |
|            | -0.17894        | 0.57101    | 0.38405 | 0.716573745 |             |          |         |  |
| NA         | ENSG00000240355 | -0.72031   | 0.76433 | 0.29481     | 0.38407     | -0.72031 | 0.76433 |  |
|            | -0.72031        | 0.76433    | 0.38407 | 0.716574846 |             |          |         |  |
| RNU6-698P  | ENSG00000200393 | 0.29478    | 0.38408 | 0.15622     | 0.43793     | 0.29478  |         |  |
|            | 0.38408         | 0.29478    | 0.38408 | 0.38408     | 0.716574846 |          |         |  |
| PPP1R1C    | ENSG00000150722 | 0.29467    | 0.38412 | -0.11498    | 0.54577     | -0.76969 |         |  |
|            | 0.77926         | -0.11498   | 0.54577 | 0.38412     | 0.716594602 |          |         |  |
| NA         | ENSG00000254199 | -0.096811  | 0.53856 | 0.29469     | 0.38412     | 0.29469  | 0.38412 |  |
|            | 0.29469         | 0.38412    | 0.38412 | 0.716594602 |             |          |         |  |
| NA         | ENSG00000283689 | 0.29452    | 0.38418 | 0.29452     | 0.38418     | 0.29452  | 0.38418 |  |
|            | 0.29452         | 0.38418    | 0.38418 | 0.716679098 |             |          |         |  |
| LINGO1-AS1 | ENSG00000259666 | 0.19955    | 0.42091 | 0.065209    | 0.474       | 0.027284 | 0.48912 |  |
|            | 0.29444         | 0.38421    | 0.38421 | 0.716681283 |             |          |         |  |
| NA         | ENSG00000260498 | 0.28193    | 0.389   | 0.29441     | 0.38422     | 0.2939   | 0.38442 |  |
|            | 0.15938         | 0.43668    | 0.38422 | 0.716681283 |             |          |         |  |
| NA         | ENSG00000253604 | -0.93473   | 0.82504 | 0.29435     | 0.38424     | 0.29435  | 0.38424 |  |
|            | 0.29435         | 0.38424    | 0.38424 | 0.716681283 |             |          |         |  |
| LINC00526  | ENSG00000264575 | 0.29435    | 0.38424 | 0.29435     | 0.38424     | 0.29435  |         |  |
|            | 0.38424         | 0.29435    | 0.38424 | 0.38424     | 0.716681283 |          |         |  |
| NA         | ENSG00000240739 | -0.11077   | 0.5441  | -0.15324    | 0.5609      | 0.22992  | 0.40908 |  |
|            | 0.29429         | 0.38427    | 0.38427 | 0.716709806 |             |          |         |  |
| NA         | ENSG00000228408 | 0.22087    | 0.4126  | 0.13927     | 0.44462     | 0.13927  | 0.44462 |  |
|            | 0.29418         | 0.38431    | 0.38431 | 0.716756977 |             |          |         |  |
| CNOT6LP1   | ENSG00000230183 | 0.29412    | 0.38433 | 0.29412     | 0.38433     | 0.29412  |         |  |
|            | 0.38433         | 0.29412    | 0.38433 | 0.38433     | 0.716758064 |          |         |  |
| ABCC8      | ENSG00000006071 | -1.4717    | 0.92945 | 0.29411     | 0.38434     | -0.5539  | 0.71018 |  |
|            | -0.014742       | 0.50588    | 0.38434 | 0.716758064 |             |          |         |  |
| SORL1      | ENSG00000137642 | -0.32439   | 0.62718 | -0.99937    | 0.84119     | 0.29405  | 0.38436 |  |
|            | -1.0806         | 0.86007    | 0.38436 | 0.716767931 |             |          |         |  |
| NEFL       | ENSG00000277586 | 0.29393    | 0.38441 | 0.29393     | 0.38441     | 0.29393  | 0.38441 |  |

|            |                 |           |         |             |             |           |         |
|------------|-----------------|-----------|---------|-------------|-------------|-----------|---------|
|            | 0.29393         | 0.38441   | 0.38441 | 0.71683374  |             |           |         |
| SLC25A40   | ENSG00000075303 | -0.69903  | 0.75773 | 0.29382     | 0.38445     | 0.29382   |         |
|            | 0.38445         | 0.29382   | 0.38445 | 0.38445     | 0.716880898 |           |         |
| LINC00851  | ENSG00000237282 | -0.42144  | 0.66328 | 0.29375     | 0.38447     | 0.29375   |         |
|            | 0.38447         | 0.29375   | 0.38447 | 0.38447     | 0.716890759 |           |         |
| NA         | ENSG00000261213 | 0.29357   | 0.38454 | 0.29357     | 0.38454     | 0.29357   | 0.38454 |
|            | 0.29357         | 0.38454   | 0.38454 | 0.716993847 |             |           |         |
| TDGF1P4    | ENSG00000217566 | 0.29343   | 0.3846  | -0.27656    | 0.60894     | -1.7054   |         |
|            | 0.95594         | -0.27656  | 0.60894 | 0.3846      | 0.717051911 |           |         |
| MZB1       | ENSG00000170476 | -0.77641  | 0.78125 | -0.77641    | 0.78125     | -0.94627  | 0.82799 |
|            | 0.29336         | 0.38462   | 0.38462 | 0.717051911 |             |           |         |
| NA         | ENSG00000280063 | 0.29336   | 0.38462 | 0.29336     | 0.38462     | 0.29336   | 0.38462 |
|            | 0.29336         | 0.38462   | 0.38462 | 0.717051911 |             |           |         |
| GNRHR2P1   | ENSG00000259169 | 0.29334   | 0.38463 | 0.29334     | 0.38463     | 0.29334   |         |
|            | 0.38463         | 0.29334   | 0.38463 | 0.38463     | 0.717051911 |           |         |
| RNU5F-4P   | ENSG00000252390 | 0.29323   | 0.38467 | 0.29323     | 0.38467     | 0.29323   |         |
|            | 0.38467         | 0.29323   | 0.38467 | 0.38467     | 0.717090257 |           |         |
| NA         | ENSG00000276417 | 0.29321   | 0.38468 | 0.29321     | 0.38468     | 0.29321   | 0.38468 |
|            | 0.29321         | 0.38468   | 0.38468 | 0.717090257 |             |           |         |
| UPF3A      | ENSG00000169062 | 0.29305   | 0.38474 | 0.29305     | 0.38474     | 0.29305   | 0.38474 |
|            | 0.29305         | 0.38474   | 0.38474 | 0.717147236 |             |           |         |
| NA         | ENSG00000269001 | 0.21827   | 0.41361 | 0.21334     | 0.41553     | 0.29306   | 0.38474 |
|            | 0.29306         | 0.38474   | 0.38474 | 0.717147236 |             |           |         |
| NA         | ENSG00000279638 | 0.29294   | 0.38478 | 0.29294     | 0.38478     | 0.29294   | 0.38478 |
|            | 0.29294         | 0.38478   | 0.38478 | 0.717163412 |             |           |         |
| PRELID2    | ENSG00000186314 | -1.6788   | 0.9534  | -1.4443     | 0.92568     | -1.4443   |         |
|            | 0.92568         | 0.29291   | 0.38479 | 0.38479     | 0.717163412 |           |         |
| CFAP58     | ENSG00000120051 | -0.51587  | 0.69703 | -0.51587    | 0.69703     | -0.7053   |         |
|            | 0.75969         | 0.29291   | 0.3848  | 0.3848      | 0.717163412 |           |         |
| LINC01554  | ENSG00000236882 | 0.13449   | 0.44651 | -0.045555   | 0.51817     | 0.18595   |         |
|            | 0.42624         | 0.29281   | 0.38483 | 0.38483     | 0.717163412 |           |         |
| NA         | ENSG00000227710 | 0.29276   | 0.38485 | 0.29276     | 0.38485     | 0.29276   | 0.38485 |
|            | 0.29276         | 0.38485   | 0.38485 | 0.717163412 |             |           |         |
| UCN        | ENSG00000163794 | 0.29274   | 0.38486 | 0.29274     | 0.38486     | 0.29274   | 0.38486 |
|            | 0.29274         | 0.38486   | 0.38486 | 0.717163412 |             |           |         |
| CCNQP3     | ENSG00000231184 | 0.29271   | 0.38487 | 0.29271     | 0.38487     | 0.29271   |         |
|            | 0.38487         | 0.29271   | 0.38487 | 0.38487     | 0.717163412 |           |         |
| AVPI1      | ENSG00000119986 | -1.4331   | 0.92408 | -1.4331     | 0.92408     | -0.81805  | 0.79334 |
|            | 0.29264         | 0.3849    | 0.3849  | 0.717163412 |             |           |         |
| NA         | ENSG00000269534 | 0.29265   | 0.3849  | 0.29265     | 0.3849      | 0.29265   | 0.3849  |
|            | 0.29265         | 0.3849    | 0.3849  | 0.717163412 |             |           |         |
| NA         | ENSG00000232807 | 0.29255   | 0.38493 | 0.29255     | 0.38493     | 0.29255   | 0.38493 |
|            | 0.29255         | 0.38493   | 0.38493 | 0.717163412 |             |           |         |
| NA         | ENSG00000257953 | 0.29257   | 0.38493 | 0.043607    | 0.48261     | 0.29257   | 0.38493 |
|            | 0.29257         | 0.38493   | 0.38493 | 0.717163412 |             |           |         |
| HNRNPUP1   | ENSG00000259051 | -0.57866  | 0.71859 | -1.1847     | 0.88192     | -0.57866  |         |
|            | 0.71859         | 0.29256   | 0.38493 | 0.38493     | 0.717163412 |           |         |
| MIR5186    | ENSG00000264330 | 0.29253   | 0.38494 | 0.18272     | 0.42751     | 0.29253   |         |
|            | 0.38494         | 0.29253   | 0.38494 | 0.38494     | 0.717163412 |           |         |
| RN7SKP91   | ENSG00000222784 | -0.047422 | 0.51891 | -0.047422   | 0.51891     | -0.047422 |         |
|            | 0.51891         | 0.29246   | 0.38497 | 0.38497     | 0.717174307 |           |         |
| RNU6-1036P | ENSG00000206686 | 0.2924    | 0.38499 | 0.2924      | 0.38499     | 0.2924    |         |
|            | 0.38499         | 0.2924    | 0.38499 | 0.38499     | 0.717174307 |           |         |
| NA         | ENSG00000248261 | -0.37449  | 0.64598 | 0.29239     | 0.38499     | 0.27184   | 0.39287 |
|            | -0.14941        | 0.55939   | 0.38499 | 0.717174307 |             |           |         |
| MIR548AT   | ENSG00000264314 | 0.29226   | 0.38504 | 0.29226     | 0.38504     | 0.29226   |         |
|            | 0.38504         | 0.29226   | 0.38504 | 0.38504     | 0.717195715 |           |         |
| HMMR       | ENSG00000072571 | 0.29221   | 0.38506 | 0.29221     | 0.38506     | 0.29221   | 0.38506 |
|            | -0.70717        | 0.76027   | 0.38506 | 0.717195715 |             |           |         |
| RN7SKP142  | ENSG00000223168 | 0.29218   | 0.38508 | 0.29218     | 0.38508     | 0.29218   |         |
|            | 0.38508         | 0.29218   | 0.38508 | 0.38508     | 0.717195715 |           |         |
| NA         | ENSG00000230192 | -0.65954  | 0.74522 | 0.13974     | 0.44443     | 0.13974   | 0.44443 |

|           |                 |           |         |             |             |           |         |  |
|-----------|-----------------|-----------|---------|-------------|-------------|-----------|---------|--|
|           | 0.29211         | 0.3851    | 0.3851  | 0.717195715 |             |           |         |  |
| NA        | ENSG00000249510 | 0.29208   | 0.38511 | 0.29208     | 0.38511     | 0.29208   | 0.38511 |  |
|           | 0.29208         | 0.38511   | 0.38511 | 0.717195715 |             |           |         |  |
| EMC1      | ENSG00000127463 | -0.45909  | 0.67692 | 0.27124     | 0.3931      | 0.29198   | 0.38515 |  |
|           | -0.12587        | 0.55008   | 0.38515 | 0.717195715 |             |           |         |  |
| NA        | ENSG00000201945 | 0.29198   | 0.38515 | -0.25829    | 0.60191     | -0.1874   | 0.57433 |  |
|           | -1.003          | 0.84206   | 0.38515 | 0.717195715 |             |           |         |  |
| NFIA      | ENSG00000162599 | -0.23295  | 0.5921  | -1.0107     | 0.84393     | 0.29192   | 0.38517 |  |
|           | -0.95551        | 0.83034   | 0.38517 | 0.717195715 |             |           |         |  |
| CCR9      | ENSG00000173585 | -1.6515   | 0.95068 | -0.65442    | 0.74358     | -0.81021  | 0.79109 |  |
|           | 0.29187         | 0.38519   | 0.38519 | 0.717195715 |             |           |         |  |
| LINC01766 | ENSG00000224910 | 0.29188   | 0.38519 | 0.29188     | 0.38519     | 0.29188   |         |  |
|           | 0.38519         | 0.29188   | 0.38519 | 0.38519     | 0.717195715 |           |         |  |
| RNU6-947P | ENSG00000252073 | 0.0072392 | 0.49711 | 0.29189     | 0.38519     | 0.29189   |         |  |
|           | 0.38519         | 0.0072392 | 0.49711 | 0.38519     | 0.717195715 |           |         |  |
| KRTAP2-1  | ENSG00000212725 | -0.7308   | 0.76755 | -0.41769    | 0.66191     | 0.29182   |         |  |
|           | 0.38521         | -0.41769  | 0.66191 | 0.38521     | 0.717195715 |           |         |  |
| CDNF      | ENSG00000185267 | 0.29177   | 0.38523 | -1.127      | 0.87013     | -0.070879 | 0.52825 |  |
|           | 0.23273         | 0.40799   | 0.38523 | 0.717195715 |             |           |         |  |
| HMG20A    | ENSG00000140382 | 0.02625   | 0.48953 | 0.29175     | 0.38524     | 0.15993   |         |  |
|           | 0.43647         | 0.14275   | 0.44325 | 0.38524     | 0.717195715 |           |         |  |
| NA        | ENSG00000267633 | 0.29174   | 0.38524 | 0.29174     | 0.38524     | 0.29174   | 0.38524 |  |
|           | 0.29174         | 0.38524   | 0.38524 | 0.717195715 |             |           |         |  |
| SPOCK1    | ENSG00000152377 | 0.29172   | 0.38525 | -0.1264     | 0.55029     | -0.84789  |         |  |
|           | 0.80175         | -0.68575  | 0.75357 | 0.38525     | 0.717195715 |           |         |  |
| LINC01559 | ENSG00000180861 | -0.42295  | 0.66383 | -0.2182     | 0.58636     | 0.29167   |         |  |
|           | 0.38527         | 0.010094  | 0.49597 | 0.38527     | 0.717195715 |           |         |  |
| C2orf81   | ENSG00000284308 | 0.29167   | 0.38527 | 0.29167     | 0.38527     | 0.29167   |         |  |
|           | 0.38527         | 0.29167   | 0.38527 | 0.38527     | 0.717195715 |           |         |  |
| RN7SL392P | ENSG00000242482 | 0.29159   | 0.3853  | 0.29159     | 0.3853      | 0.29159   |         |  |
|           | 0.3853          | 0.29159   | 0.3853  | 0.3853      | 0.717195715 |           |         |  |
| NA        | ENSG00000201644 | 0.29157   | 0.38531 | 0.29157     | 0.38531     | 0.29157   | 0.38531 |  |
|           | 0.29157         | 0.38531   | 0.38531 | 0.717195715 |             |           |         |  |
| SNORD24   | ENSG00000206611 | 0.29151   | 0.38533 | 0.29151     | 0.38533     | 0.29151   |         |  |
|           | 0.38533         | 0.29151   | 0.38533 | 0.38533     | 0.717195715 |           |         |  |
| TTF2      | ENSG00000116830 | -0.30027  | 0.61801 | 0.29147     | 0.38534     | -0.5303   | 0.70205 |  |
|           | -0.97003        | 0.83398   | 0.38534 | 0.717195715 |             |           |         |  |
| NIFKP7    | ENSG00000251590 | -0.98004  | 0.83647 | -0.29992    | 0.61788     | 0.29149   |         |  |
|           | 0.38534         | -1.5694   | 0.94173 | 0.38534     | 0.717195715 |           |         |  |
| JMJD7     | ENSG00000243789 | 0.29143   | 0.38536 | 0.29143     | 0.38536     | 0.29143   | 0.38536 |  |
|           | 0.29143         | 0.38536   | 0.38536 | 0.717205546 |             |           |         |  |
| NA        | ENSG00000271064 | 0.29138   | 0.38538 | 0.066529    | 0.47348     | 0.29138   | 0.38538 |  |
|           | -0.6229         | 0.73333   | 0.38538 | 0.717215376 |             |           |         |  |
| NA        | ENSG00000250402 | 0.29127   | 0.38542 | 0.29127     | 0.38542     | 0.29127   | 0.38542 |  |
|           | 0.29127         | 0.38542   | 0.38542 | 0.717262425 |             |           |         |  |
| RNU6-424P | ENSG00000207095 | -0.30182  | 0.6186  | -0.30182    | 0.6186      | 0.29123   |         |  |
|           | 0.38544         | -0.19931  | 0.57899 | 0.38544     | 0.71726347  |           |         |  |
| ARL2BPP6  | ENSG00000248355 | 0.22742   | 0.41005 | -0.96914    | 0.83376     | 0.003587  |         |  |
|           | 0.49857         | 0.2912    | 0.38545 | 0.38545     | 0.71726347  |           |         |  |
| KLK3      | ENSG00000142515 | 0.29114   | 0.38547 | 0.29114     | 0.38547     | 0.29114   | 0.38547 |  |
|           | 0.29114         | 0.38547   | 0.38547 | 0.717264516 |             |           |         |  |
| ARSA      | ENSG00000100299 | 0.29112   | 0.38548 | 0.29112     | 0.38548     | 0.23604   | 0.4067  |  |
|           | 0.29112         | 0.38548   | 0.38548 | 0.717264516 |             |           |         |  |
| GABARAPL1 | ENSG00000139112 | -0.088421 | 0.53523 | 0.15713     | 0.43757     | 0.29092   |         |  |
|           | 0.38556         | -0.12218  | 0.54862 | 0.38556     | 0.71735292  |           |         |  |
| NA        | ENSG00000279572 | 0.29084   | 0.38558 | 0.29084     | 0.38558     | 0.29084   | 0.38558 |  |
|           | 0.29084         | 0.38558   | 0.38558 | 0.71735292  |             |           |         |  |
| NA        | ENSG00000227154 | -0.55145  | 0.70934 | -0.38322    | 0.64922     | 0.18732   | 0.4257  |  |
|           | 0.2908          | 0.3856    | 0.3856  | 0.71735292  |             |           |         |  |
| SMC2      | ENSG00000136824 | 0.29075   | 0.38562 | -0.86139    | 0.80549     | 0.075944  | 0.46973 |  |
|           | -0.47844        | 0.68383   | 0.38562 | 0.71735292  |             |           |         |  |
| SERPINA11 | ENSG00000186910 | 0.28035   | 0.38961 | 0.29073     | 0.38563     | 0.28035   |         |  |

|                 |                 |           |         |             |             |           |         |
|-----------------|-----------------|-----------|---------|-------------|-------------|-----------|---------|
|                 | 0.38961         | 0.28035   | 0.38961 | 0.38563     | 0.71735292  |           |         |
| ZNF880          | ENSG00000221923 | -0.90039  | 0.81604 | 0.29074     | 0.38563     | 0.29074   |         |
|                 | 0.38563         | 0.29074   | 0.38563 | 0.38563     | 0.71735292  |           |         |
| REEP1           | ENSG00000068615 | -0.7878   | 0.78459 | 0.29069     | 0.38564     | -0.27503  | 0.60835 |
|                 | 0.025759        | 0.48972   | 0.38564 | 0.71735292  |             |           |         |
| NA              | ENSG00000234607 | 0.29065   | 0.38566 | -0.34163    | 0.63368     | -0.82488  | 0.79528 |
|                 | -0.82488        | 0.79528   | 0.38566 | 0.71735292  |             |           |         |
| NA              | ENSG00000260647 | 0.29065   | 0.38566 | 0.29065     | 0.38566     | 0.29065   | 0.38566 |
|                 | 0.29065         | 0.38566   | 0.38566 | 0.71735292  |             |           |         |
| NA              | ENSG00000258449 | 0.11903   | 0.45263 | 0.29054     | 0.3857      | 0.11903   | 0.45263 |
|                 | 0.11903         | 0.45263   | 0.3857  | 0.717399939 |             |           |         |
| NA              | ENSG00000232557 | 0.29044   | 0.38574 | 0.29044     | 0.38574     | -0.93983  | 0.82635 |
|                 | -0.93983        | 0.82635   | 0.38574 | 0.71743817  |             |           |         |
| NDUFAF1         | ENSG00000137806 | -0.95857  | 0.83111 | 0.072585    | 0.47107     | -1.9322   |         |
|                 | 0.97333         | 0.29042   | 0.38575 | 0.38575     | 0.71743817  |           |         |
| OR8B6P          | ENSG00000255225 | -1.5087   | 0.93432 | 0.2903      | 0.38579     | -0.74669  |         |
|                 | 0.77238         | 0.069692  | 0.47222 | 0.38579     | 0.717485181 |           |         |
| TMEM177         | ENSG00000144120 | -0.029116 | 0.51161 | -0.6684     | 0.74806     | 0.29026   |         |
|                 | 0.38581         | 0.12705   | 0.44945 | 0.38581     | 0.71748929  |           |         |
| RNASEK-C17orf49 | ENSG00000161939 | -0.052104 | 0.52078 | -0.052104   | 0.52078     | -0.052104 |         |
|                 | 0.52078         | 0.29017   | 0.38584 | 0.38584     | 0.71748929  |           |         |
| TBKBP1          | ENSG00000198933 | 0.1345    | 0.4465  | 0.29009     | 0.38588     | 0.1345    |         |
|                 | 0.4465          | 0.1345    | 0.4465  | 0.38588     | 0.71748929  |           |         |
| OR4F13P         | ENSG00000214344 | 0.29006   | 0.38588 | 0.29006     | 0.38588     | 0.29006   |         |
|                 | 0.38588         | 0.29006   | 0.38588 | 0.38588     | 0.71748929  |           |         |
| RN7SL863P       | ENSG00000244632 | 0.29009   | 0.38588 | 0.29009     | 0.38588     | 0.29009   |         |
|                 | 0.38588         | 0.29009   | 0.38588 | 0.38588     | 0.71748929  |           |         |
| NA              | ENSG00000199223 | 0.29003   | 0.3859  | -0.46197    | 0.67795     | -0.46909  | 0.6805  |
|                 | -0.46909        | 0.6805    | 0.3859  | 0.71748929  |             |           |         |
| NA              | ENSG00000254555 | 0.29001   | 0.3859  | 0.29001     | 0.3859      | 0.29001   | 0.3859  |
|                 | 0.29001         | 0.3859    | 0.3859  | 0.71748929  |             |           |         |
| LINC02552       | ENSG00000256422 | -0.38189  | 0.64873 | -1.5207     | 0.93583     | 0.28998   |         |
|                 | 0.38591         | -1.3757   | 0.91555 | 0.38591     | 0.71748929  |           |         |
| NA              | ENSG00000259103 | 0.28995   | 0.38593 | -0.10734    | 0.54274     | -0.65937  | 0.74517 |
|                 | 0.28995         | 0.38593   | 0.38593 | 0.717490317 |             |           |         |
| MPP3            | ENSG00000161647 | -0.76772  | 0.77867 | 0.28991     | 0.38594     | -0.33295  | 0.63042 |
|                 | -0.33295        | 0.63042   | 0.38594 | 0.717490317 |             |           |         |
| OR52H2P         | ENSG00000248553 | -1.0725   | 0.85825 | -1.0725     | 0.85825     | -1.0725   |         |
|                 | 0.85825         | 0.28983   | 0.38597 | 0.38597     | 0.717491344 |           |         |
| MIR4715         | ENSG00000266517 | 0.27746   | 0.39071 | 0.27746     | 0.39071     | 0.27746   |         |
|                 | 0.39071         | 0.28983   | 0.38597 | 0.38597     | 0.717491344 |           |         |
| CDC42EP3P1      | ENSG00000268992 | -1.2632   | 0.89674 | 0.2896      | 0.38606     | -1.5189   |         |
|                 | 0.93561         | 0.25607   | 0.39895 | 0.38606     | 0.717631272 |           |         |
| NNT             | ENSG00000112992 | -0.94841  | 0.82854 | 0.28945     | 0.38612     | -0.66184  | 0.74596 |
|                 | 0.058599        | 0.47664   | 0.38612 | 0.717644119 |             |           |         |
| SLC5A4-AS1      | ENSG00000242082 | 0.2894    | 0.38614 | -0.30899    | 0.62134     | 0.2894    |         |
|                 | 0.38614         | 0.2894    | 0.38614 | 0.38614     | 0.717644119 |           |         |
| NA              | ENSG00000259882 | 0.2445    | 0.40342 | -0.4998     | 0.69139     | 0.28936   | 0.38615 |
|                 | 0.10372         | 0.4587    | 0.38615 | 0.717644119 |             |           |         |
| NA              | ENSG00000249725 | -0.67656  | 0.75066 | -0.5309     | 0.70226     | -0.39199  | 0.65247 |
|                 | 0.28933         | 0.38616   | 0.38616 | 0.717644119 |             |           |         |
| PLA2G1B         | ENSG00000170890 | -0.67514  | 0.75021 | -0.54563    | 0.70734     | 0.2893    |         |
|                 | 0.38617         | -0.16019  | 0.56363 | 0.38617     | 0.717644119 |           |         |
| RPS27AP11       | ENSG00000218208 | 0.28931   | 0.38617 | -0.14058    | 0.5559      | 0.28931   |         |
|                 | 0.38617         | 0.28931   | 0.38617 | 0.38617     | 0.717644119 |           |         |
| NA              | ENSG00000229771 | -0.50902  | 0.69463 | -0.50902    | 0.69463     | 0.28931   | 0.38617 |
|                 | -0.50902        | 0.69463   | 0.38617 | 0.717644119 |             |           |         |
| NA              | ENSG00000254859 | -0.1626   | 0.56458 | 0.28924     | 0.3862      | 0.28924   | 0.3862  |
|                 | 0.28924         | 0.3862    | 0.3862  | 0.71766473  |             |           |         |
| DUSP28          | ENSG00000188542 | -1.1616   | 0.87731 | -0.98701    | 0.83818     | 0.2892    |         |
|                 | 0.38622         | 0.2892    | 0.38622 | 0.38622     | 0.71766473  |           |         |
| BIRC6-AS2       | ENSG00000279897 | -0.59034  | 0.72252 | 0.28915     | 0.38623     | -0.323    |         |

|            |                 |           |         |             |             |           |         |  |
|------------|-----------------|-----------|---------|-------------|-------------|-----------|---------|--|
|            | 0.62665         | -0.323    | 0.62665 | 0.38623     | 0.71766473  |           |         |  |
| NA         | ENSG00000231255 | 0.28914   | 0.38624 | 0.26671     | 0.39485     | 0.26671   | 0.39485 |  |
|            | -0.34664        | 0.63557   | 0.38624 | 0.71766473  |             |           |         |  |
| SIGLEC5    | ENSG00000105501 | 0.18069   | 0.42831 | 0.088084    | 0.4649      | 0.28902   |         |  |
|            | 0.38628         | 0.28902   | 0.38628 | 0.38628     | 0.717684322 |           |         |  |
| NA         | ENSG00000225864 | 0.28903   | 0.38628 | 0.28903     | 0.38628     | 0.28903   | 0.38628 |  |
|            | 0.28903         | 0.38628   | 0.38628 | 0.717684322 |             |           |         |  |
| OPLAH      | ENSG00000178814 | -0.042556 | 0.51697 | -0.091041   | 0.53627     | -1.3218   | 0.90688 |  |
|            | 0.28896         | 0.3863    | 0.3863  | 0.717694117 |             |           |         |  |
| DAB2       | ENSG00000153071 | -0.51317  | 0.69608 | -0.26057    | 0.60279     | -0.59242  | 0.72321 |  |
|            | 0.2889          | 0.38633   | 0.38633 | 0.71772249  |             |           |         |  |
| LINC02133  | ENSG00000261231 | -0.32374  | 0.62693 | 0.28875     | 0.38639     | 0.22493   |         |  |
|            | 0.41102         | -0.37059  | 0.64453 | 0.38639     | 0.717806591 |           |         |  |
| NA         | ENSG00000273082 | 0.28862   | 0.38643 | 0.28862     | 0.38643     | 0.28862   | 0.38643 |  |
|            | 0.28862         | 0.38643   | 0.38643 | 0.717853534 |             |           |         |  |
| VSNL1      | ENSG00000163032 | -0.57682  | 0.71797 | -0.34547    | 0.63513     | -1.1703   | 0.87906 |  |
|            | 0.28852         | 0.38648   | 0.38648 | 0.717911252 |             |           |         |  |
| LINC00645  | ENSG00000258548 | 0.28846   | 0.3865  | -0.15798    | 0.56276     | 0.28439   |         |  |
|            | 0.38806         | -0.43561  | 0.66844 | 0.3865      | 0.717911252 |           |         |  |
| NA         | ENSG00000228303 | 0.09085   | 0.46381 | -0.78724    | 0.78443     | 0.28843   | 0.38651 |  |
|            | -0.37019        | 0.64438   | 0.38651 | 0.717911252 |             |           |         |  |
| BET1L      | ENSG00000177951 | -0.28263  | 0.61127 | -0.049215   | 0.51963     | 0.28839   | 0.38652 |  |
|            | -0.51607        | 0.6971    | 0.38652 | 0.717911252 |             |           |         |  |
| SUV39H2    | ENSG00000152455 | -0.67924  | 0.75151 | 0.28835     | 0.38654     | 0.021628  |         |  |
|            | 0.49137         | -0.93434  | 0.82494 | 0.38654     | 0.717921035 |           |         |  |
| IFITM10    | ENSG00000244242 | 0.28831   | 0.38656 | 0.0093387   | 0.49627     | 0.12055   |         |  |
|            | 0.45202         | 0.12055   | 0.45202 | 0.38656     | 0.717922028 |           |         |  |
| NA         | ENSG00000274451 | 0.25077   | 0.40099 | -0.81375    | 0.79211     | 0.28826   | 0.38657 |  |
|            | 0.25077         | 0.40099   | 0.38657 | 0.717922028 |             |           |         |  |
| SLC26A8    | ENSG00000112053 | -1.84     | 0.96711 | -0.61118    | 0.72946     | -0.064506 | 0.52572 |  |
|            | 0.28819         | 0.3866    | 0.3866  | 0.717932802 |             |           |         |  |
| SGSM2      | ENSG00000141258 | 0.23012   | 0.409   | -0.35552    | 0.6389      | 0.13341   | 0.44693 |  |
|            | 0.28817         | 0.38661   | 0.38661 | 0.717932802 |             |           |         |  |
| NOTCH3     | ENSG00000074181 | -1.103    | 0.86499 | -0.36728    | 0.64329     | 0.28814   |         |  |
|            | 0.38662         | -1.1133   | 0.86722 | 0.38662     | 0.717932802 |           |         |  |
| NA         | ENSG00000277766 | 0.28803   | 0.38666 | 0.28803     | 0.38666     | 0.28803   | 0.38666 |  |
|            | 0.28803         | 0.38666   | 0.38666 | 0.71797972  |             |           |         |  |
| ATF6       | ENSG00000118217 | 0.2879    | 0.38671 | -0.62407    | 0.73371     | -0.61345  | 0.73021 |  |
|            | -0.45427        | 0.67518   | 0.38671 | 0.717989598 |             |           |         |  |
| RFTN2      | ENSG00000162944 | 0.14925   | 0.44068 | -0.64009    | 0.73894     | 0.2879    | 0.38671 |  |
|            | 0.25634         | 0.39884   | 0.38671 | 0.717989598 |             |           |         |  |
| MIR4667    | ENSG00000263892 | 0.28786   | 0.38673 | 0.28786     | 0.38673     | 0.28786   |         |  |
|            | 0.38673         | 0.28786   | 0.38673 | 0.38673     | 0.717989598 |           |         |  |
| NA         | ENSG00000253843 | -0.30018  | 0.61798 | -0.82048    | 0.79403     | 0.019106  | 0.49238 |  |
|            | 0.28776         | 0.38677   | 0.38677 | 0.717989598 |             |           |         |  |
| PTP4A1P3   | ENSG00000226254 | 0.28772   | 0.38678 | 0.16111     | 0.436       | 0.16111   | 0.436   |  |
|            | 0.16111         | 0.436     | 0.38678 | 0.717989598 |             |           |         |  |
| COX6B1P1   | ENSG00000234565 | 0.28769   | 0.38679 | 0.019385    | 0.49227     | -1.2088   |         |  |
|            | 0.88663         | 0.11931   | 0.45252 | 0.38679     | 0.717989598 |           |         |  |
| NA         | ENSG00000235499 | 0.28766   | 0.3868  | 0.28766     | 0.3868      | 0.28766   | 0.3868  |  |
|            | 0.28766         | 0.3868    | 0.3868  | 0.717989598 |             |           |         |  |
| NA         | ENSG00000270835 | 0.28758   | 0.38683 | 0.28758     | 0.38683     | 0.28758   | 0.38683 |  |
|            | 0.28758         | 0.38683   | 0.38683 | 0.717989598 |             |           |         |  |
| HNRNPA3P11 | ENSG00000260689 | 0.28756   | 0.38684 | 0.28756     | 0.38684     | 0.28756   |         |  |
|            | 0.38684         | 0.28756   | 0.38684 | 0.38684     | 0.717989598 |           |         |  |
| MTND4P26   | ENSG00000234065 | 0.2875    | 0.38687 | 0.2875      | 0.38687     | 0.2875    |         |  |
|            | 0.38687         | 0.2875    | 0.38687 | 0.38687     | 0.717989598 |           |         |  |
| Clorf146   | ENSG00000203910 | 0.28745   | 0.38688 | -0.9849     | 0.83766     | -1.0491   |         |  |
|            | 0.85293         | 0.21421   | 0.41519 | 0.38688     | 0.717989598 |           |         |  |
| CCR5       | ENSG00000160791 | 0.2874    | 0.3869  | 0.2874      | 0.3869      | -0.13215  | 0.55257 |  |
|            | -0.11609        | 0.54621   | 0.3869  | 0.717989598 |             |           |         |  |
| TBC1D26    | ENSG00000214946 | -0.85409  | 0.80347 | -1.9884     | 0.97661     | 0.28737   |         |  |

|           |                 |             |             |             |             |             |             |  |
|-----------|-----------------|-------------|-------------|-------------|-------------|-------------|-------------|--|
|           | 0.38691         | -1.9333     | 0.9734      | 0.38691     | 0.717989598 |             |             |  |
| NA        | ENSG00000259268 | -0.031538   | 0.51258     | -1.0343     | 0.8495      | -1.577      | 0.94261     |  |
|           | 0.28737         | 0.38691     | 0.38691     | 0.717989598 |             |             |             |  |
| NA        | ENSG00000260086 | 0.28738     | 0.38691     | 0.12976     | 0.44838     | -0.29085    | 0.61442     |  |
|           | -0.629          | 0.73533     | 0.38691     | 0.717989598 |             |             |             |  |
| RPS7P5    | ENSG00000217327 | 0.28727     | 0.38695     | 0.15955     | 0.43662     | 0.15955     |             |  |
|           | 0.43662         | -0.48781    | 0.68716     | 0.38695     | 0.717989598 |             |             |  |
| NA        | ENSG00000261312 | 0.28728     | 0.38695     | 0.28728     | 0.38695     | 0.28728     | 0.38695     |  |
|           | 0.28728         | 0.38695     | 0.38695     | 0.717989598 |             |             |             |  |
| NA        | ENSG00000281386 | -1.3247     | 0.90736     | -0.27074    | 0.60671     | 0.28728     | 0.38695     |  |
|           | 0.28728         | 0.38695     | 0.38695     | 0.717989598 |             |             |             |  |
| DUSP13    | ENSG00000079393 | 0.03755     | 0.48502     | -0.37712    | 0.64696     | 0.12459     |             |  |
|           | 0.45043         | 0.28726     | 0.38696     | 0.38696     | 0.717989598 |             |             |  |
| SPEM3     | ENSG00000283439 | 0.28725     | 0.38696     | 0.28725     | 0.38696     | 0.28725     | 0.38696     |  |
|           | 0.28725         | 0.38696     | 0.38696     | 0.717989598 |             |             |             |  |
| RNA5SP393 | ENSG00000200293 | 0.28715     | 0.387028715 | 0.387028715 | 0.387028715 | 0.387028715 | 0.387028715 |  |
|           | 0.387028715     | 0.717992558 |             |             |             |             |             |  |
| RN7SL275P | ENSG00000263940 | 0.28716     | 0.387028716 | 0.387028716 | 0.387028716 | 0.387028716 | 0.387028716 |  |
|           | 0.387028716     | 0.717992558 |             |             |             |             |             |  |
| NA        | ENSG00000251205 | 0.28707     | 0.38703     | 0.28707     | 0.38703     | 0.28707     | 0.38703     |  |
|           | 0.28707         | 0.38703     | 0.38703     | 0.717992558 |             |             |             |  |
| URGCP     | ENSG00000106608 | 0.28704     | 0.38704     | 0.055362    | 0.47793     | 0.28704     | 0.38704     |  |
|           | -0.22441        | 0.58878     | 0.38704     | 0.717992558 |             |             |             |  |
| GNB4      | ENSG00000114450 | 0.28701     | 0.38705     | -1.1184     | 0.86831     | -1.1949     | 0.88393     |  |
|           | -0.43172        | 0.66703     | 0.38705     | 0.717992558 |             |             |             |  |
| PSMB2     | ENSG00000126067 | 0.28702     | 0.38705     | 0.068586    | 0.47266     | -0.28031    | 0.61038     |  |
|           | -0.28031        | 0.61038     | 0.38705     | 0.717992558 |             |             |             |  |
| MTCO3P5   | ENSG00000225476 | 0.28686     | 0.38711     | 0.28686     | 0.38711     | 0.28686     |             |  |
|           | 0.38711         | 0.28686     | 0.38711     | 0.38711     | 0.718040408 |             |             |  |
| MTND3P9   | ENSG00000227557 | 0.28686     | 0.38711     | 0.28686     | 0.38711     | 0.28686     |             |  |
|           | 0.38711         | 0.28686     | 0.38711     | 0.38711     | 0.718040408 |             |             |  |
| NA        | ENSG00000259773 | 0.28683     | 0.38712     | 0.28683     | 0.38712     | 0.28683     | 0.38712     |  |
|           | 0.28683         | 0.38712     | 0.38712     | 0.718040408 |             |             |             |  |
| NA        | ENSG00000238270 | 0.28662     | 0.3872      | 0.28662     | 0.3872      | 0.28662     | 0.3872      |  |
|           | 0.28662         | 0.3872      | 0.3872      | 0.718152672 |             |             |             |  |
| NA        | ENSG00000254765 | 0.1037      | 0.4587      | 0.2866      | 0.38721     | 0.2866      | 0.38721     |  |
|           | 0.2866          | 0.38721     | 0.38721     | 0.718152672 |             |             |             |  |
| NCF2      | ENSG00000116701 | 0.14749     | 0.44137     | 0.28652     | 0.38724     | 0.28652     | 0.38724     |  |
|           | 0.12279         | 0.45114     | 0.38724     | 0.718180978 |             |             |             |  |
| LINC02661 | ENSG00000223381 | -0.77059    | 0.77952     | 0.28648     | 0.38726     | -0.48197    |             |  |
|           | 0.68509         | -0.48197    | 0.68509     | 0.38726     | 0.718190737 |             |             |  |
| THEM4     | ENSG00000159445 | -0.37991    | 0.648       | -0.0018289  | 0.50073     | 0.28641     | 0.38728     |  |
|           | -0.51226        | 0.69576     | 0.38728     | 0.718200495 |             |             |             |  |
| SCN1A-AS1 | ENSG00000236107 | -0.62059    | 0.73256     | 0.28635     | 0.3873      | 0.28635     |             |  |
|           | 0.3873          | 0.11205     | 0.45539     | 0.3873      | 0.718201465 |             |             |  |
| RPS29P14  | ENSG00000229054 | 0.28634     | 0.38731     | 0.28634     | 0.38731     | 0.28634     |             |  |
|           | 0.38731         | 0.28634     | 0.38731     | 0.38731     | 0.718201465 |             |             |  |
| NA        | ENSG00000266906 | 0.28627     | 0.38733     | -1.1544     | 0.87583     | -0.31286    | 0.62281     |  |
|           | -1.0942         | 0.86308     | 0.38733     | 0.718211221 |             |             |             |  |
| NA        | ENSG00000279935 | 0.13268     | 0.44722     | -0.2395     | 0.59464     | 0.28619     | 0.38737     |  |
|           | -0.15495        | 0.56157     | 0.38737     | 0.718215098 |             |             |             |  |
| LANCL1    | ENSG00000115365 | -0.42826    | 0.66577     | 0.28612     | 0.38739     | -0.42826    |             |  |
|           | 0.66577         | -0.42826    | 0.66577     | 0.38739     | 0.718215098 |             |             |  |
| H1-10     | ENSG00000184897 | 0.28611     | 0.3874      | -0.94842    | 0.82854     | -0.82842    | 0.79628     |  |
|           | -0.93337        | 0.82469     | 0.3874      | 0.718215098 |             |             |             |  |
| NA        | ENSG00000273734 | 0.2861      | 0.3874      | 0.2861      | 0.3874      | 0.2861      | 0.3874      |  |
|           | 0.2861          | 0.3874      | 0.3874      | 0.718215098 |             |             |             |  |
| NA        | ENSG00000223523 | 0.26739     | 0.39459     | 0.28606     | 0.38742     | 0.28606     | 0.38742     |  |
|           | 0.28606         | 0.38742     | 0.38742     | 0.718215098 |             |             |             |  |
| TCF3P1    | ENSG00000236567 | 0.286038744 | 0.286038744 | 0.286038744 | 0.286038744 | 0.286038744 | 0.286038744 |  |
|           | 0.38744         | 0.38744     | 0.718215098 |             |             |             |             |  |
| RNU6-880P | ENSG00000207256 | -0.30972    | 0.62161     | -0.30972    | 0.62161     | -0.0014961  |             |  |



|             |                 |           |         |             |             |           |          |          |
|-------------|-----------------|-----------|---------|-------------|-------------|-----------|----------|----------|
|             | 0.5006          | 0.28598   | 0.38745 | 0.38745     | 0.718215098 |           |          |          |
| NA          | ENSG00000226708 | 0.28596   | 0.38745 | 0.38745     | -0.30654    | 0.6204    | 0.28596  | 0.38745  |
|             | 0.28596         | 0.38745   | 0.38745 | 0.718215098 |             |           |          |          |
| LINC00304   | ENSG00000180422 | 0.23706   | 0.4063  | 0.28589     | 0.38748     | 0.28589   |          |          |
|             | 0.38748         | 0.28589   | 0.38748 | 0.38748     | 0.718243387 |           |          |          |
| SOD3        | ENSG00000109610 | 0.2857    | 0.38756 | 0.2857      | 0.38756     | 0.2857    | 0.38756  | 0.38756  |
|             | 0.2857          | 0.38756   | 0.38756 | 0.718351566 |             |           |          |          |
| NA          | ENSG00000220918 | 0.28559   | 0.3876  | 0.28559     | 0.3876      | 0.28559   | 0.3876   | 0.3876   |
|             | 0.28559         | 0.3876    | 0.3876  | 0.718351566 |             |           |          |          |
| ATP5MC2P3   | ENSG00000230482 | 0.28555   | 0.38761 | 0.28555     | 0.38761     | -0.13681  |          |          |
|             | 0.55441         | 0.28555   | 0.38761 | 0.38761     | 0.718351566 |           |          |          |
| NA          | ENSG00000227091 | -0.14865  | 0.55909 | 0.28553     | 0.38762     | -0.14865  | 0.55909  | 0.55909  |
|             | -0.14865        | 0.55909   | 0.38762 | 0.718351566 |             |           |          |          |
| SLC16A1-AS1 | ENSG00000226419 | -0.31805  | 0.62478 | -0.12735    | 0.55067     | 0.28547   |          |          |
|             | 0.38764         | -0.58144  | 0.71953 | 0.38764     | 0.718351566 |           |          |          |
| CCN2        | ENSG00000118523 | -0.136    | 0.55409 | -0.37683    | 0.64685     | 0.12787   | 0.44912  | 0.44912  |
|             | 0.28543         | 0.38766   | 0.38766 | 0.718351566 |             |           |          |          |
| RNU4-28P    | ENSG00000201609 | 0.081087  | 0.46769 | 0.28536     | 0.38768     | -0.53921  |          |          |
|             | 0.70513         | 0.28536   | 0.38768 | 0.38768     | 0.718351566 |           |          |          |
| LINC02533   | ENSG00000260239 | 0.28537   | 0.38768 | 0.28537     | 0.38768     | 0.28537   | 0.28537  | 0.28537  |
|             | 0.38768         | -0.15214  | 0.56046 | 0.38768     | 0.718351566 |           |          |          |
| NA          | ENSG00000213717 | -1.2988   | 0.90299 | 0.2853      | 0.38771     | -1.2988   | 0.90299  | 0.90299  |
|             | -0.030727       | 0.51226   | 0.38771 | 0.718351566 |             |           |          |          |
| RN7SL381P   | ENSG00000263968 | 0.2853    | 0.38771 | 0.2853      | 0.38771     | 0.2853    | 0.2853   | 0.2853   |
|             | 0.38771         | 0.2853    | 0.38771 | 0.38771     | 0.718351566 |           |          |          |
| CRHR1       | ENSG00000120088 | 0.22129   | 0.41244 | 0.14368     | 0.44288     | 0.23454   | 0.40728  | 0.40728  |
|             | 0.28526         | 0.38772   | 0.38772 | 0.718351566 |             |           |          |          |
| HNRNPA1P58  | ENSG00000219582 | 0.28527   | 0.38772 | 0.28527     | 0.38772     | 0.28527   | 0.28527  | 0.28527  |
|             | 0.38772         | 0.28527   | 0.38772 | 0.38772     | 0.718351566 |           |          |          |
| ACTG1P19    | ENSG00000237999 | 0.28525   | 0.38773 | -0.36771    | 0.64346     | -1.6104   |          |          |
|             | 0.94634         | -0.62665  | 0.73455 | 0.38773     | 0.718351566 |           |          |          |
| RN7SKP258   | ENSG00000252960 | -0.9406   | 0.82654 | 0.28515     | 0.38776     | 0.059972  | 0.059972 | 0.059972 |
|             | 0.47609         | 0.059972  | 0.47609 | 0.38776     | 0.718379835 |           |          |          |
| OR51A2      | ENSG00000205496 | -1.1654   | 0.87808 | 0.28511     | 0.38778     | -0.72161  |          |          |
|             | 0.76473         | 0.28511   | 0.38778 | 0.38778     | 0.718389576 |           |          |          |
| PERP        | ENSG00000112378 | 0.28501   | 0.38782 | -1.5898     | 0.94406     | -0.62486  | 0.73397  | 0.73397  |
|             | 0.021093        | 0.49159   | 0.38782 | 0.718401224 |             |           |          |          |
| RNF150      | ENSG00000170153 | 0.28497   | 0.38783 | -0.31321    | 0.62294     | 0.05386   | 0.05386  | 0.05386  |
|             | 0.47852         | -0.66664  | 0.7475  | 0.38783     | 0.718401224 |           |          |          |
| CPNE5       | ENSG00000124772 | 0.28492   | 0.38785 | -0.57606    | 0.71771     | -0.74843  | 0.7729   | 0.7729   |
|             | -1.0693         | 0.85754   | 0.38785 | 0.718401224 |             |           |          |          |
| MDH1        | ENSG00000014641 | 0.28491   | 0.38786 | 0.16182     | 0.43572     | 0.26628   | 0.39501  | 0.39501  |
|             | -0.075257       | 0.52999   | 0.38786 | 0.718401224 |             |           |          |          |
| CD163L1     | ENSG00000177675 | -0.31829  | 0.62487 | -0.58216    | 0.71977     | 0.2849    | 0.2849   | 0.2849   |
|             | 0.38786         | -0.48743  | 0.68702 | 0.38786     | 0.718401224 |           |          |          |
| NA          | ENSG00000270234 | -0.37595  | 0.64652 | -0.37595    | 0.64652     | 0.28478   | 0.38791  | 0.38791  |
|             | -0.37595        | 0.64652   | 0.38791 | 0.718423555 |             |           |          |          |
| NA          | ENSG00000258919 | 0.11644   | 0.45365 | 0.2139      | 0.41531     | -0.05637  | 0.52248  | 0.52248  |
|             | 0.28471         | 0.38793   | 0.38793 | 0.718423555 |             |           |          |          |
| PAN2        | ENSG00000135473 | -1.1802   | 0.88104 | 0.28466     | 0.38795     | -1.1802   | 0.88104  | 0.88104  |
|             | -1.1119         | 0.86691   | 0.38795 | 0.718423555 |             |           |          |          |
| SHANK2-AS1  | ENSG00000226627 | -0.43105  | 0.66678 | -0.40153    | 0.65599     | 0.28468   | 0.28468  | 0.28468  |
|             | 0.38795         | -0.96617  | 0.83302 | 0.38795     | 0.718423555 |           |          |          |
| BLNK        | ENSG00000095585 | -0.073221 | 0.52918 | -0.010104   | 0.50403     | -0.010104 | 0.50403  | 0.50403  |
|             | 0.28464         | 0.38796   | 0.38796 | 0.718423555 |             |           |          |          |
| RPL23AP10   | ENSG00000240051 | 0.28456   | 0.38799 | 0.28456     | 0.38799     | 0.28456   | 0.28456  | 0.28456  |
|             | 0.38799         | 0.28456   | 0.38799 | 0.38799     | 0.718423555 |           |          |          |
| NA          | ENSG00000261779 | 0.28457   | 0.38799 | 0.28457     | 0.38799     | 0.28457   | 0.38799  | 0.38799  |
|             | 0.28457         | 0.38799   | 0.38799 | 0.718423555 |             |           |          |          |
| NA          | ENSG00000279659 | -0.57506  | 0.71738 | 0.28457     | 0.38799     | -0.76918  | 0.77911  | 0.77911  |
|             | -0.8823         | 0.81119   | 0.38799 | 0.718423555 |             |           |          |          |
| PFDN2       | ENSG00000143256 | -0.94679  | 0.82813 | -0.82606    | 0.79561     | -0.82606  | 0.79561  | 0.79561  |

|           |                 |            |         |             |             |           |         |  |
|-----------|-----------------|------------|---------|-------------|-------------|-----------|---------|--|
|           | 0.28443         | 0.38804    | 0.38804 | 0.718488837 |             |           |         |  |
| PCIF1     | ENSG00000100982 | 0.28433    | 0.38808 | -0.75763    | 0.77566     | -0.79718  | 0.78733 |  |
|           | -1.4331         | 0.92408    | 0.38808 | 0.718521805 |             |           |         |  |
| NA        | ENSG00000272948 | 0.28424    | 0.38811 | 0.28424     | 0.38811     | 0.28424   | 0.38811 |  |
|           | -0.95873        | 0.83115    | 0.38811 | 0.718521805 |             |           |         |  |
| FASTKD2   | ENSG00000118246 | -0.17041   | 0.56766 | -0.46399    | 0.67867     | 0.28421   |         |  |
|           | 0.38812         | -0.46399   | 0.67867 | 0.38812     | 0.718521805 |           |         |  |
| OR1J1     | ENSG00000136834 | 0.28416    | 0.38815 | 0.28416     | 0.38815     | 0.28416   | 0.38815 |  |
|           | -1.9708         | 0.97563    | 0.38815 | 0.718521805 |             |           |         |  |
| NA        | ENSG00000221083 | -0.31638   | 0.62414 | -0.21106    | 0.58358     | 0.28409   | 0.38817 |  |
|           | -0.31638        | 0.62414    | 0.38817 | 0.718521805 |             |           |         |  |
| TK1       | ENSG00000167900 | -0.12193   | 0.54852 | -0.12193    | 0.54852     | -0.12193  | 0.54852 |  |
|           | 0.284           | 0.3882     | 0.3882  | 0.718521805 |             |           |         |  |
| RNF10P1   | ENSG00000230182 | 0.042711   | 0.48297 | 0.28398     | 0.38821     | -0.31226  |         |  |
|           | 0.62258         | -0.51685   | 0.69737 | 0.38821     | 0.718521805 |           |         |  |
| ZBTB24    | ENSG00000112365 | -0.31235   | 0.62261 | 0.28397     | 0.38822     | 0.28397   |         |  |
|           | 0.38822         | 0.28397    | 0.38822 | 0.38822     | 0.718521805 |           |         |  |
| DNAH6     | ENSG00000115423 | -0.0084688 | 0.50338 | -0.33435    | 0.63094     | 0.25      | 0.40129 |  |
|           | 0.28397         | 0.38822    | 0.38822 | 0.718521805 |             |           |         |  |
| SLC2A6    | ENSG00000160326 | 0.28397    | 0.38822 | 0.28397     | 0.38822     | -1.8222   |         |  |
|           | 0.96579         | 0.28397    | 0.38822 | 0.38822     | 0.718521805 |           |         |  |
| VWC2      | ENSG00000188730 | 0.28397    | 0.38822 | -0.27295    | 0.60755     | -0.2712   | 0.60688 |  |
|           | -0.46277        | 0.67823    | 0.38822 | 0.718521805 |             |           |         |  |
| ERBB3     | ENSG00000065361 | -0.060252  | 0.52402 | -0.060252   | 0.52402     | 0.28385   | 0.38826 |  |
|           | -0.73913        | 0.77009    | 0.38826 | 0.718541256 |             |           |         |  |
| RAX2      | ENSG00000173976 | 0.28386    | 0.38826 | 0.28386     | 0.38826     | 0.28386   | 0.38826 |  |
|           | 0.28386         | 0.38826    | 0.38826 | 0.718541256 |             |           |         |  |
| NA        | ENSG00000236472 | 0.28365    | 0.38834 | 0.28365     | 0.38834     | 0.28365   | 0.38834 |  |
|           | 0.28365         | 0.38834    | 0.38834 | 0.718564466 |             |           |         |  |
| TRIM5     | ENSG00000132256 | -0.42544   | 0.66474 | -0.39754    | 0.65452     | 0.28359   | 0.38836 |  |
|           | -0.020298       | 0.5081     | 0.38836 | 0.718564466 |             |           |         |  |
| KAAG1     | ENSG00000146049 | 0.28359    | 0.38836 | 0.28359     | 0.38836     | 0.28359   | 0.38836 |  |
|           | 0.28359         | 0.38836    | 0.38836 | 0.718564466 |             |           |         |  |
| LINC01895 | ENSG00000259256 | -0.18466   | 0.57325 | 0.24554     | 0.40302     | 0.28357   |         |  |
|           | 0.38837         | -0.62587   | 0.7343  | 0.38837     | 0.718564466 |           |         |  |
| MIR548AB  | ENSG00000265328 | 0.28355    | 0.38838 | -1.2659     | 0.89722     | -1.2659   |         |  |
|           | 0.89722         | -1.2659    | 0.89722 | 0.38838     | 0.718564466 |           |         |  |
| PYGO2     | ENSG00000163348 | 0.28347    | 0.38841 | 0.28347     | 0.38841     | 0.28347   | 0.38841 |  |
|           | 0.28347         | 0.38841    | 0.38841 | 0.718564466 |             |           |         |  |
| GPR35     | ENSG00000178623 | -1.203     | 0.88551 | -1.1112     | 0.86675     | -1.6335   | 0.94882 |  |
|           | 0.28347         | 0.38841    | 0.38841 | 0.718564466 |             |           |         |  |
| SCARNA20  | ENSG00000252577 | 0.28346    | 0.38841 | 0.28346     | 0.38841     | 0.28346   |         |  |
|           | 0.38841         | 0.28346    | 0.38841 | 0.38841     | 0.718564466 |           |         |  |
| NA        | ENSG00000271380 | 0.28347    | 0.38841 | 0.28347     | 0.38841     | 0.28347   | 0.38841 |  |
|           | 0.28347         | 0.38841    | 0.38841 | 0.718564466 |             |           |         |  |
| NA        | ENSG00000273295 | 0.28344    | 0.38842 | 0.28344     | 0.38842     | 0.28344   | 0.38842 |  |
|           | 0.28344         | 0.38842    | 0.38842 | 0.718564466 |             |           |         |  |
| USP22     | ENSG00000124422 | -0.10749   | 0.5428  | -0.067311   | 0.52683     | 0.28331   | 0.38847 |  |
|           | 0.22023         | 0.41284    | 0.38847 | 0.718629683 |             |           |         |  |
| DMBX1     | ENSG00000197587 | -0.26469   | 0.60437 | 0.28325     | 0.38849     | -1.1271   | 0.87016 |  |
|           | -1.2415         | 0.89278    | 0.38849 | 0.718630618 |             |           |         |  |
| NA        | ENSG00000256433 | 0.28324    | 0.3885  | 0.28324     | 0.3885      | 0.28324   | 0.3885  |  |
|           | 0.28324         | 0.3885     | 0.3885  | 0.718630618 |             |           |         |  |
| RPL23AP82 | ENSG00000184319 | -1.543     | 0.93858 | 0.28318     | 0.38852     | -0.090593 |         |  |
|           | 0.53609         | 0.0099308  | 0.49604 | 0.38852     | 0.718640334 |           |         |  |
| DNAJA1P5  | ENSG00000162699 | -0.76094   | 0.77666 | 0.28312     | 0.38854     | -0.76094  |         |  |
|           | 0.77666         | -0.76094   | 0.77666 | 0.38854     | 0.718641268 |           |         |  |
| NA        | ENSG00000253560 | -0.30977   | 0.62163 | -0.30977    | 0.62163     | -0.24973  | 0.5986  |  |
|           | 0.2831          | 0.38855    | 0.38855 | 0.718641268 |             |           |         |  |
| P3H2      | ENSG00000090530 | -0.25271   | 0.59975 | -0.64768    | 0.7414      | 0.2829    | 0.38863 |  |
|           | 0.20279         | 0.41965    | 0.38863 | 0.718717108 |             |           |         |  |
| NA        | ENSG00000250971 | -0.82384   | 0.79499 | 0.2829      | 0.38863     | -0.26059  | 0.60279 |  |

|             |                 |          |          |             |             |             |         |  |
|-------------|-----------------|----------|----------|-------------|-------------|-------------|---------|--|
|             | -0.76305        | 0.77728  | 0.38863  | 0.718717108 |             |             |         |  |
| NA          | ENSG00000280431 | -0.25054 | 0.59892  | 0.28287     | 0.38864     | -0.25054    | 0.59892 |  |
|             |                 | -0.25054 | 0.59892  | 0.38864     | 0.718717108 |             |         |  |
| OR7E102P    | ENSG00000168992 | -0.10915 | 0.54346  | -0.10915    | 0.54346     | -0.10915    |         |  |
|             |                 | 0.54346  | 0.28285  | 0.38865     | 0.718717108 |             |         |  |
| LINC01506   | ENSG00000234506 | 0.28276  | 0.38868  | 0.28276     | 0.38868     | -0.89685    |         |  |
|             |                 | 0.8151   | -0.15822 | 0.56286     | 0.38868     | 0.71874531  |         |  |
| RPS10-NUDT3 | ENSG00000270800 | 0.28268  | 0.38871  | -0.73774    | 0.76966     | -0.23895    |         |  |
|             |                 | 0.59443  | -0.1571  | 0.56242     | 0.38871     | 0.718758719 |         |  |
| MIR4798     | ENSG00000264658 | -1.204   | 0.8857   | 0.28266     | 0.38872     | -0.38118    |         |  |
|             |                 | 0.64847  | -0.82573 | 0.79552     | 0.38872     | 0.718758719 |         |  |
| RNU6-906P   | ENSG00000207431 | 0.28253  | 0.38877  | 0.28253     | 0.38877     | 0.28253     |         |  |
|             |                 | 0.38877  | 0.28253  | 0.38877     | 0.38877     | 0.718758719 |         |  |
| RN7SL45P    | ENSG00000264862 | 0.28252  | 0.38877  | 0.28252     | 0.38877     | 0.28252     |         |  |
|             |                 | 0.38877  | 0.28252  | 0.38877     | 0.38877     | 0.718758719 |         |  |
| NA          | ENSG00000272221 | 0.28248  | 0.38879  | -0.054885   | 0.52189     | -0.51079    | 0.69525 |  |
|             |                 | -0.51079 | 0.69525  | 0.38879     | 0.718758719 |             |         |  |
| EEF1A1P5    | ENSG00000196205 | -0.87489 | 0.80918  | -2.7179     | 0.99672     | 0.28244     |         |  |
|             |                 | 0.3888   | -1.0336  | 0.84933     | 0.3888      | 0.718758719 |         |  |
| OR4R1P      | ENSG00000255215 | 0.28244  | 0.3888   | 0.28068     | 0.38948     | -1.3615     |         |  |
|             |                 | 0.91333  | -1.1714  | 0.87928     | 0.3888      | 0.718758719 |         |  |
| BNIP3P19    | ENSG00000271638 | 0.28241  | 0.38882  | 0.28241     | 0.38882     | 0.28241     |         |  |
|             |                 | 0.38882  | 0.28241  | 0.38882     | 0.38882     | 0.718758719 |         |  |
| NA          | ENSG00000271776 | 0.28239  | 0.38882  | -0.52143    | 0.69897     | -0.85253    | 0.80304 |  |
|             |                 | -0.85253 | 0.80304  | 0.38882     | 0.718758719 |             |         |  |
| LOX         | ENSG00000113083 | 0.15878  | 0.43692  | 0.28226     | 0.38887     | 0.15878     | 0.43692 |  |
|             |                 | 0.15878  | 0.43692  | 0.38887     | 0.718815097 |             |         |  |
| RPL18AP8    | ENSG00000218754 | -0.29996 | 0.61789  | -0.29996    | 0.61789     | -0.41072    |         |  |
|             |                 | 0.65936  | 0.28223  | 0.38888     | 0.38888     | 0.718815097 |         |  |
| DNAJC19P3   | ENSG00000268997 | 0.28219  | 0.3889   | 0.28219     | 0.3889      | 0.28219     |         |  |
|             |                 | 0.3889   | 0.28219  | 0.3889      | 0.3889      | 0.718816017 |         |  |
| OR5M14P     | ENSG00000249081 | 0.22222  | 0.41207  | 0.22222     | 0.41207     | 0.22222     |         |  |
|             |                 | 0.41207  | 0.28215  | 0.38891     | 0.38891     | 0.718816017 |         |  |
| NA          | ENSG00000253567 | 0.28211  | 0.38893  | 0.28211     | 0.38893     | 0.28211     | 0.38893 |  |
|             |                 | 0.28211  | 0.38893  | 0.38893     | 0.718816938 |             |         |  |
| NA          | ENSG00000279687 | -0.84923 | 0.80212  | -0.62606    | 0.73436     | 0.18186     | 0.42785 |  |
|             |                 | 0.28208  | 0.38894  | 0.38894     | 0.718816938 |             |         |  |
| MIR3713     | ENSG00000266449 | -2.0777  | 0.98113  | -2.0777     | 0.98113     | 0.28203     |         |  |
|             |                 | 0.38896  | -2.0777  | 0.98113     | 0.38896     | 0.718823377 |         |  |
| OTUB2       | ENSG00000089723 | 0.28199  | 0.38898  | -0.70382    | 0.75923     | -0.89011    | 0.8133  |  |
|             |                 | -0.85533 | 0.80382  | 0.38898     | 0.718823377 |             |         |  |
| PDCD2       | ENSG00000071994 | 0.28183  | 0.38904  | -1.1531     | 0.87557     | -1.1531     | 0.87557 |  |
|             |                 | -1.1531  | 0.87557  | 0.38904     | 0.718823377 |             |         |  |
| NA          | ENSG00000254340 | 0.28166  | 0.3891   | -0.72916    | 0.76705     | 0.28166     | 0.3891  |  |
|             |                 | 0.28166  | 0.3891   | 0.3891      | 0.718823377 |             |         |  |
| CITED4      | ENSG00000179862 | -2.3507  | 0.99063  | -1.7145     | 0.95679     | -1.1559     |         |  |
|             |                 | 0.87613  | 0.28164  | 0.38911     | 0.38911     | 0.718823377 |         |  |
| RNU1-125P   | ENSG00000252561 | 0.28165  | 0.38911  | 0.28165     | 0.38911     | 0.28165     |         |  |
|             |                 | 0.38911  | 0.28165  | 0.38911     | 0.38911     | 0.718823377 |         |  |
| PDCL2P2     | ENSG00000255058 | -0.33965 | 0.63294  | -1.8533     | 0.96808     | 0.27604     |         |  |
|             |                 | 0.39126  | 0.28163  | 0.38911     | 0.38911     | 0.718823377 |         |  |
| VMAC        | ENSG00000187650 | 0.28159  | 0.38913  | 0.28159     | 0.38913     | 0.28159     | 0.38913 |  |
|             |                 | 0.28159  | 0.38913  | 0.38913     | 0.718823377 |             |         |  |
| NA          | ENSG00000254459 | 0.11577  | 0.45392  | 0.11577     | 0.45392     | 0.11577     | 0.45392 |  |
|             |                 | 0.28158  | 0.38913  | 0.38913     | 0.718823377 |             |         |  |
| NA          | ENSG00000267314 | 0.28159  | 0.38913  | 0.28159     | 0.38913     | 0.28159     | 0.38913 |  |
|             |                 | 0.28159  | 0.38913  | 0.38913     | 0.718823377 |             |         |  |
| NA          | ENSG00000276208 | 0.28158  | 0.38913  | 0.28158     | 0.38913     | 0.28158     | 0.38913 |  |
|             |                 | 0.28158  | 0.38913  | 0.38913     | 0.718823377 |             |         |  |
| NA          | ENSG00000279665 | 0.28159  | 0.38913  | 0.28159     | 0.38913     | 0.28159     | 0.38913 |  |
|             |                 | 0.28159  | 0.38913  | 0.38913     | 0.718823377 |             |         |  |
| RAB5C       | ENSG00000108774 | 0.28155  | 0.38915  | 0.28155     | 0.38915     | 0.28155     | 0.38915 |  |

|           |                 |           |          |           |             |             |         |         |
|-----------|-----------------|-----------|----------|-----------|-------------|-------------|---------|---------|
|           |                 | 0.28155   | 0.38915  | 0.38915   | 0.718823377 |             |         |         |
| NA        | ENSG00000267261 | 0.28155   | 0.38915  | 0.38915   | 0.28155     | 0.38915     | 0.28155 | 0.38915 |
|           |                 | 0.28155   | 0.38915  | 0.38915   | 0.718823377 |             |         |         |
| KIF6      | ENSG00000164627 | -1.2995   | 0.90312  | 0.28127   | 0.38925     | -0.0399     | 0.51591 |         |
|           |                 | -0.074235 | 0.52959  | 0.38925   | 0.718972058 |             |         |         |
| NA        | ENSG00000261505 | 0.1697    | 0.43262  | 0.28124   | 0.38926     | 0.28124     | 0.38926 |         |
|           |                 | 0.28124   | 0.38926  | 0.38926   | 0.718972058 |             |         |         |
| NA        | ENSG00000278842 | 0.28116   | 0.38929  | 0.28116   | 0.38929     | 0.28116     | 0.38929 |         |
|           |                 | 0.28116   | 0.38929  | 0.38929   | 0.718982654 |             |         |         |
| ATP13A2   | ENSG00000159363 | -0.029295 | 0.51169  | -0.029295 | 0.51169     | -0.53251    |         |         |
|           |                 | 0.70281   | 0.28114  | 0.3893    | 0.3893      | 0.718982654 |         |         |
| LEMD2     | ENSG00000161904 | -0.056565 | 0.52255  | 0.28112   | 0.38931     | 0.26201     | 0.39666 |         |
|           |                 | 0.21468   | 0.41501  | 0.38931   | 0.718982654 |             |         |         |
| NA        | ENSG00000258813 | 0.28098   | 0.38936  | 0.28098   | 0.38936     | 0.28098     | 0.38936 |         |
|           |                 | 0.28098   | 0.38936  | 0.38936   | 0.719047743 |             |         |         |
| NA        | ENSG00000248165 | -0.31848  | 0.62494  | 0.28063   | 0.3895      | -0.25467    | 0.60051 |         |
|           |                 | -0.22263  | 0.58809  | 0.3895    | 0.719270238 |             |         |         |
| PTP4A1P7  | ENSG00000237514 | 0.28059   | 0.38951  | 0.05496   | 0.47809     | 0.05496     |         |         |
|           |                 | 0.47809   | 0.034341 | 0.4863    | 0.38951     | 0.719270238 |         |         |
| CXCL8     | ENSG00000169429 | 0.28048   | 0.38956  | -1.1976   | 0.88446     | -1.0442     | 0.85181 |         |
|           |                 | -1.0442   | 0.85181  | 0.38956   | 0.719280797 |             |         |         |
| FAM181B   | ENSG00000182103 | -0.55712  | 0.71128  | -0.55712  | 0.71128     | 0.28046     |         |         |
|           |                 | 0.38956   | -0.46149 | 0.67778   | 0.38956     | 0.719280797 |         |         |
| RNA5SP191 | ENSG00000199455 | 0.28045   | 0.38956  | -0.22296  | 0.58822     | -0.34136    |         |         |
|           |                 | 0.63358   | -0.36297 | 0.64169   | 0.38956     | 0.719280797 |         |         |
| THSD7A    | ENSG00000005108 | -0.081129 | 0.53233  | -0.59593  | 0.72439     | -0.12728    |         |         |
|           |                 | 0.55064   | 0.28037  | 0.3896    | 0.3896      | 0.719300144 |         |         |
| NA        | ENSG00000282121 | 0.28037   | 0.3896   | 0.28037   | 0.3896      | 0.28037     | 0.3896  |         |
|           |                 | 0.28037   | 0.3896   | 0.3896    | 0.719300144 |             |         |         |
| HLA-DPA1  | ENSG00000231389 | -0.13861  | 0.55512  | 0.28031   | 0.38962     | -0.45824    |         |         |
|           |                 | 0.67661   | -0.20562 | 0.58146   | 0.38962     | 0.719309816 |         |         |
| NA        | ENSG00000251423 | 0.28008   | 0.38971  | 0.28008   | 0.38971     | 0.28008     | 0.38971 |         |
|           |                 | 0.28008   | 0.38971  | 0.38971   | 0.719429317 |             |         |         |
| GDF2      | ENSG00000263761 | -1.154    | 0.87575  | 0.28006   | 0.38972     | -0.25759    | 0.60164 |         |
|           |                 | -0.25759  | 0.60164  | 0.38972   | 0.719429317 |             |         |         |
| USP3-AS1  | ENSG00000259248 | -0.22859  | 0.59041  | -0.51269  | 0.69591     | 0.27991     |         |         |
|           |                 | 0.38977   | 0.27991  | 0.38977   | 0.38977     | 0.719429317 |         |         |
| NA        | ENSG00000272894 | 0.27992   | 0.38977  | 0.27992   | 0.38977     | 0.025766    | 0.48972 |         |
|           |                 | 0.025766  | 0.48972  | 0.38977   | 0.719429317 |             |         |         |
| NA        | ENSG00000260742 | 0.27988   | 0.38979  | -1.1965   | 0.88425     | -1.056      | 0.85451 |         |
|           |                 | -1.056    | 0.85451  | 0.38979   | 0.719429317 |             |         |         |
| NA        | ENSG00000253042 | 0.27982   | 0.38981  | -0.25626  | 0.60112     | -0.68545    | 0.75347 |         |
|           |                 | -0.54653  | 0.70765  | 0.38981   | 0.719429317 |             |         |         |
| UNGP3     | ENSG00000270343 | 0.27979   | 0.38982  | -0.11635  | 0.54631     | 0.031638    | 0.48738 |         |
|           |                 | 0.031638  | 0.48738  | 0.38982   | 0.719429317 |             |         |         |
| OSM       | ENSG00000099985 | 0.27966   | 0.38987  | -0.8669   | 0.807       | 0.27966     | 0.38987 |         |
|           |                 | 0.10041   | 0.46001  | 0.38987   | 0.719429317 |             |         |         |
| RPS10     | ENSG00000124614 | -1.0386   | 0.8505   | -0.74705  | 0.77248     | -1.3905     | 0.91782 |         |
|           |                 | 0.27965   | 0.38987  | 0.38987   | 0.719429317 |             |         |         |
| NA        | ENSG00000276842 | 0.27966   | 0.38987  | 0.27966   | 0.38987     | 0.27966     | 0.38987 |         |
|           |                 | 0.27966   | 0.38987  | 0.38987   | 0.719429317 |             |         |         |
| TIA1      | ENSG00000116001 | -0.20584  | 0.58154  | 0.27958   | 0.3899      | -0.4534     | 0.67487 |         |
|           |                 | -0.31571  | 0.62389  | 0.3899    | 0.719429317 |             |         |         |
| NA        | ENSG00000264196 | 0.27955   | 0.38991  | 0.27955   | 0.38991     | 0.27955     | 0.38991 |         |
|           |                 | 0.27955   | 0.38991  | 0.38991   | 0.719429317 |             |         |         |
| NA        | ENSG00000280379 | 0.27955   | 0.38991  | 0.27955   | 0.38991     | 0.27955     | 0.38991 |         |
|           |                 | 0.27955   | 0.38991  | 0.38991   | 0.719429317 |             |         |         |
| NRAP      | ENSG00000197893 | 0.27952   | 0.38992  | 0.27952   | 0.38992     | 0.27952     | 0.38992 |         |
|           |                 | 0.27952   | 0.38992  | 0.38992   | 0.719429317 |             |         |         |
| NONOP2    | ENSG00000237522 | 0.27952   | 0.38992  | 0.27952   | 0.38992     | 0.27952     |         |         |
|           |                 | 0.38992   | 0.27952  | 0.38992   | 0.38992     | 0.719429317 |         |         |
| NA        | ENSG00000257443 | -1.2354   | 0.89167  | 0.27947   | 0.38994     | -1.2354     | 0.89167 |         |

|              |                 |           |         |             |             |          |         |  |
|--------------|-----------------|-----------|---------|-------------|-------------|----------|---------|--|
|              | -1.2522         | 0.89475   | 0.38994 | 0.719429317 |             |          |         |  |
| OR2G6        | ENSG00000188558 | -0.27223  | 0.60728 | 0.27945     | 0.38995     | -0.69945 | 0.75786 |  |
|              | -0.39519        | 0.65365   | 0.38995 | 0.719429317 |             |          |         |  |
| RNU6-282P    | ENSG00000202227 | 0.27942   | 0.38996 | 0.27942     | 0.38996     | 0.27942  |         |  |
|              | 0.38996         | 0.27942   | 0.38996 | 0.38996     | 0.719429317 |          |         |  |
| NA           | ENSG00000255092 | 0.27939   | 0.38997 | 0.27939     | 0.38997     | 0.27939  | 0.38997 |  |
|              | 0.27939         | 0.38997   | 0.38997 | 0.719429317 |             |          |         |  |
| MIR4794      | ENSG00000264470 | 0.27937   | 0.38998 | 0.27937     | 0.38998     | 0.27937  |         |  |
|              | 0.38998         | 0.27937   | 0.38998 | 0.38998     | 0.719429317 |          |         |  |
| SLC38A1      | ENSG00000111371 | -0.3281   | 0.62858 | 0.27927     | 0.39002     | -0.89556 |         |  |
|              | 0.81476         | 0.22761   | 0.40998 | 0.39002     | 0.719475871 |          |         |  |
| RAB5IF       | ENSG00000101084 | -0.66662  | 0.74749 | -0.089578   | 0.53569     | 0.12596  |         |  |
|              | 0.44988         | 0.27922   | 0.39004 | 0.39004     | 0.719485528 |          |         |  |
| GSTT2B       | ENSG00000133433 | -1.0807   | 0.86009 | -1.0205     | 0.84626     | -0.3052  |         |  |
|              | 0.61989         | 0.27907   | 0.39009 | 0.39009     | 0.719541731 |          |         |  |
| RNU7-60P     | ENSG00000251747 | 0.27905   | 0.3901  | 0.27905     | 0.3901      | 0.27905  |         |  |
|              | 0.3901          | 0.27905   | 0.3901  | 0.3901      | 0.719541731 |          |         |  |
| RTP5         | ENSG00000188011 | 0.27894   | 0.39015 | 0.27894     | 0.39015     | 0.27894  | 0.39015 |  |
|              | 0.27894         | 0.39015   | 0.39015 | 0.719579482 |             |          |         |  |
| NA           | ENSG00000282864 | 0.27894   | 0.39015 | 0.27894     | 0.39015     | 0.27894  | 0.39015 |  |
|              | 0.27894         | 0.39015   | 0.39015 | 0.719579482 |             |          |         |  |
| MARF1        | ENSG00000166783 | -0.77123  | 0.77971 | 0.27872     | 0.39023     | -0.38787 | 0.65095 |  |
|              | -1.2091         | 0.88669   | 0.39023 | 0.71966376  |             |          |         |  |
| ATP6V0E2-AS1 | ENSG00000204934 | 0.2787    | 0.39024 | 0.2787      | 0.39024     | 0.2787   | 0.2787  |  |
|              | 0.39024         | 0.2787    | 0.39024 | 0.39024     | 0.71966376  |          |         |  |
| VN1R40P      | ENSG00000223845 | 0.2787    | 0.39024 | 0.2787      | 0.39024     | -0.30053 |         |  |
|              | 0.61811         | -1.3829   | 0.91665 | 0.39024     | 0.71966376  |          |         |  |
| WFDC8        | ENSG00000158901 | 0.27861   | 0.39027 | -0.93553    | 0.82524     | 0.27861  | 0.39027 |  |
|              | -1.1795         | 0.88091   | 0.39027 | 0.719683907 |             |          |         |  |
| MAGI2-AS1    | ENSG00000251276 | 0.0051463 | 0.49795 | 0.27855     | 0.3903      | 0.10171  |         |  |
|              | 0.45949         | -0.97662  | 0.83562 | 0.3903      | 0.719683907 |          |         |  |
| ILRUN        | ENSG00000196821 | -0.35722  | 0.63953 | -0.65691    | 0.74438     | 0.25672  | 0.3987  |  |
|              | 0.27852         | 0.39031   | 0.39031 | 0.719683907 |             |          |         |  |
| NA           | ENSG00000279204 | -0.099286 | 0.53954 | -0.82534    | 0.79541     | 0.2785   | 0.39031 |  |
|              | 0.2785          | 0.39031   | 0.39031 | 0.719683907 |             |          |         |  |
| UCK2         | ENSG00000143179 | 0.27844   | 0.39034 | -0.78377    | 0.78341     | -0.77397 | 0.78053 |  |
|              | -1.1957         | 0.8841    | 0.39034 | 0.719711991 |             |          |         |  |
| RNU6-542P    | ENSG00000252214 | 0.27839   | 0.39036 | 0.27839     | 0.39036     | 0.27839  |         |  |
|              | 0.39036         | 0.27839   | 0.39036 | 0.39036     | 0.719721635 |          |         |  |
| LINC00928    | ENSG00000259218 | -0.12725  | 0.55063 | -0.12725    | 0.55063     | -0.17235 |         |  |
|              | 0.56842         | 0.27827   | 0.3904  | 0.3904      | 0.719768151 |          |         |  |
| RPL6P8       | ENSG00000242285 | 0.27816   | 0.39044 | -0.01596    | 0.50637     | -0.01596 |         |  |
|              | 0.50637         | -0.98233  | 0.83703 | 0.39044     | 0.719789121 |          |         |  |
| GADD45A      | ENSG00000116717 | -0.63373  | 0.73687 | -1.3353     | 0.90912     | -0.63373 |         |  |
|              | 0.73687         | 0.27813   | 0.39046 | 0.39046     | 0.719789121 |          |         |  |
| NA           | ENSG00000251860 | 0.27812   | 0.39046 | 0.27812     | 0.39046     | 0.27812  | 0.39046 |  |
|              | 0.27812         | 0.39046   | 0.39046 | 0.719789121 |             |          |         |  |
| NA           | ENSG00000235736 | 0.27807   | 0.39048 | 0.27807     | 0.39048     | 0.27807  | 0.39048 |  |
|              | 0.27807         | 0.39048   | 0.39048 | 0.719789121 |             |          |         |  |
| NA           | ENSG00000274312 | -0.77089  | 0.77961 | -0.77089    | 0.77961     | 0.27805  | 0.39049 |  |
|              | -0.15258        | 0.56064   | 0.39049 | 0.719789121 |             |          |         |  |
| MYZAP        | ENSG00000263155 | 0.27801   | 0.3905  | 0.27801     | 0.3905      | 0.27801  | 0.3905  |  |
|              | 0.27801         | 0.3905    | 0.3905  | 0.719789121 |             |          |         |  |
| ITGA1        | ENSG00000213949 | -0.36217  | 0.64139 | -0.069616   | 0.52775     | 0.27797  | 0.39052 |  |
|              | -0.12713        | 0.55058   | 0.39052 | 0.719798759 |             |          |         |  |
| NA           | ENSG00000265625 | 0.2779    | 0.39054 | 0.2779      | 0.39054     | 0.2779   | 0.39054 |  |
|              | 0.2779          | 0.39054   | 0.39054 | 0.719800446 |             |          |         |  |
| BNIP3P26     | ENSG00000268705 | 0.27787   | 0.39056 | 0.27787     | 0.39056     | -0.11084 |         |  |
|              | 0.54413         | 0.27787   | 0.39056 | 0.39056     | 0.719800446 |          |         |  |
| CAAP1        | ENSG00000120159 | -0.32618  | 0.62786 | -1.108      | 0.86607     | 0.27783  | 0.39057 |  |
|              | -0.97537        | 0.83531   | 0.39057 | 0.719800446 |             |          |         |  |
| ARHGEF17     | ENSG00000110237 | 0.27779   | 0.39058 | -0.059807   | 0.52385     | -0.44099 |         |  |

|               |                 |          |             |             |             |          |         |
|---------------|-----------------|----------|-------------|-------------|-------------|----------|---------|
|               | 0.67039         | -0.52669 | 0.70079     | 0.39058     | 0.719800446 |          |         |
| NFATC2        | ENSG00000101096 | -2.4687  | 0.99322     | -0.20434    | 0.58096     | -1.1021  |         |
|               | 0.86479         | 0.27775  | 0.3906      | 0.3906      | 0.719802976 |          |         |
| KRAS          | ENSG00000133703 | -0.9011  | 0.81623     | -0.76503    | 0.77787     | 0.27769  | 0.39063 |
|               | -0.54717        | 0.70787  | 0.39063     | 0.719802976 |             |          |         |
| NA            | ENSG00000268543 | 0.24746  | 0.40228     | 0.27765     | 0.39064     | 0.27765  | 0.39064 |
|               | 0.27765         | 0.39064  | 0.39064     | 0.719802976 |             |          |         |
| NA            | ENSG00000279836 | 0.27763  | 0.39065     | 0.27763     | 0.39065     | 0.27763  | 0.39065 |
|               | 0.27763         | 0.39065  | 0.39065     | 0.719802976 |             |          |         |
| RPSAP27       | ENSG00000233869 | 0.27758  | 0.39067     | 0.27758     | 0.39067     | 0.27758  |         |
|               | 0.39067         | 0.27758  | 0.39067     | 0.39067     | 0.719802976 |          |         |
| NA            | ENSG00000250073 | 0.27756  | 0.39067     | 0.27756     | 0.39067     | 0.27756  | 0.39067 |
|               | 0.27756         | 0.39067  | 0.39067     | 0.719802976 |             |          |         |
| UST           | ENSG00000111962 | -0.29102 | 0.61448     | -0.75336    | 0.77438     | -0.46424 | 0.67876 |
|               | 0.27746         | 0.39071  | 0.39071     | 0.719822242 |             |          |         |
| CTAGE10P      | ENSG00000181358 | -1.7294  | 0.95813     | -1.7294     | 0.95813     | -1.7294  |         |
|               | 0.95813         | 0.27746  | 0.39071     | 0.39071     | 0.719822242 |          |         |
| RBX1P2        | ENSG00000251050 | -0.58841 | 0.72187     | 0.27734     | 0.39076     | 0.27734  |         |
|               | 0.39076         | 0.27734  | 0.39076     | 0.39076     | 0.719832715 |          |         |
| NA            | ENSG00000257781 | 0.035404 | 0.48588     | 0.27735     | 0.39076     | 0.035404 | 0.48588 |
|               | -1.7803         | 0.96249  | 0.39076     | 0.719832715 |             |          |         |
| NA            | ENSG00000272134 | 0.27733  | 0.39076     | -2.0312     | 0.97888     | -1.7272  | 0.95794 |
|               | 0.12024         | 0.45215  | 0.39076     | 0.719832715 |             |          |         |
| HMGB1P35      | ENSG00000251566 | 0.27729  | 0.39078     | 0.27729     | 0.39078     | 0.27729  |         |
|               | 0.39078         | 0.27729  | 0.39078     | 0.39078     | 0.719842345 |          |         |
| MTCL1         | ENSG00000168502 | -0.77036 | 0.77946     | -0.1007     | 0.54011     | -0.256   | 0.60103 |
|               | 0.27724         | 0.3908   | 0.3908      | 0.719851975 |             |          |         |
| RNU6-1339P    | ENSG00000200444 | 0.19572  | 0.42242     | 0.27712     | 0.39084     | -0.79864 |         |
|               | 0.78775         | -0.79864 | 0.78775     | 0.39084     | 0.71988086  |          |         |
| LINC02114     | ENSG00000249521 | 0.27707  | 0.39086     | -0.0087558  | 0.50349     | 0.27707  |         |
|               | 0.39086         | 0.27707  | 0.39086     | 0.39086     | 0.71988086  |          |         |
| NA            | ENSG00000279621 | 0.27709  | 0.39086     | 0.27709     | 0.39086     | 0.27709  | 0.39086 |
|               | 0.27709         | 0.39086  | 0.39086     | 0.71988086  |             |          |         |
| PGAM1P6       | ENSG00000224464 | 0.277    | 0.39089     | 0.277       | 0.39089     | 0.277    | 0.39089 |
|               | 0.39089         | 0.39089  | 0.719908904 |             |             |          |         |
| EIF4G2        | ENSG00000110321 | 0.041084 | 0.48361     | 0.27685     | 0.39095     | -0.67404 |         |
|               | 0.74986         | -1.3035  | 0.9038      | 0.39095     | 0.719983402 |          |         |
| NA            | ENSG00000267001 | 0.27681  | 0.39096     | 0.27681     | 0.39096     | 0.27681  | 0.39096 |
|               | 0.27681         | 0.39096  | 0.39096     | 0.719983402 |             |          |         |
| RNU2-37P      | ENSG00000222627 | 0.27665  | 0.39102     | 0.27665     | 0.39102     | 0.27665  |         |
|               | 0.39102         | 0.27665  | 0.39102     | 0.39102     | 0.72003233  |          |         |
| TBPL1         | ENSG00000028839 | -0.38479 | 0.6498      | 0.27659     | 0.39105     | -0.54152 | 0.70593 |
|               | -0.95932        | 0.8313   | 0.39105     | 0.72003233  |             |          |         |
| NA            | ENSG00000250555 | 0.27656  | 0.39106     | 0.27656     | 0.39106     | 0.27656  | 0.39106 |
|               | 0.27656         | 0.39106  | 0.39106     | 0.72003233  |             |          |         |
| KRT8P30       | ENSG00000224928 | 0.27651  | 0.39108     | 0.2204      | 0.41278     | 0.27651  |         |
|               | 0.39108         | 0.27651  | 0.39108     | 0.39108     | 0.72003233  |          |         |
| NA            | ENSG00000250183 | 0.27652  | 0.39108     | 0.27652     | 0.39108     | 0.27652  | 0.39108 |
|               | 0.27652         | 0.39108  | 0.39108     | 0.72003233  |             |          |         |
| TMCC1-AS1     | ENSG00000271270 | -0.8254  | 0.79543     | 0.27651     | 0.39108     | 0.20573  |         |
|               | 0.4185          | 0.20573  | 0.4185      | 0.39108     | 0.72003233  |          |         |
| ABHD17B       | ENSG00000107362 | 0.25007  | 0.40127     | -0.62825    | 0.73508     | -0.62825 |         |
|               | 0.73508         | 0.27647  | 0.39109     | 0.39109     | 0.72003233  |          |         |
| NSD3          | ENSG00000147548 | 0.1747   | 0.43066     | 0.2299      | 0.40909     | 0.27634  | 0.39114 |
|               | 0.19189         | 0.42392  | 0.39114     | 0.720069974 |             |          |         |
| NA            | ENSG00000242036 | 0.27634  | 0.39114     | 0.27634     | 0.39114     | 0.27634  | 0.39114 |
|               | 0.27634         | 0.39114  | 0.39114     | 0.720069974 |             |          |         |
| NA            | ENSG00000203446 | 0.27624  | 0.39118     | 0.27624     | 0.39118     | 0.27624  | 0.39118 |
|               | 0.27624         | 0.39118  | 0.39118     | 0.72008041  |             |          |         |
| SNX2          | ENSG00000205302 | 0.27625  | 0.39118     | 0.22451     | 0.41118     | 0.27625  | 0.39118 |
|               | 0.27625         | 0.39118  | 0.39118     | 0.72008041  |             |          |         |
| NDUFC2-KCTD14 | ENSG00000259112 | 0.27622  | 0.39119     | 0.27622     | 0.39119     | 0.27622  | 0.27622 |

|           |                 |            |         |             |             |            |         |  |
|-----------|-----------------|------------|---------|-------------|-------------|------------|---------|--|
|           | 0.39119         | 0.27622    | 0.39119 | 0.39119     | 0.72008041  |            |         |  |
| LINC00507 | ENSG00000256193 | 0.27609    | 0.39124 | -1.0621     | 0.8559      | -0.21032   |         |  |
|           | 0.58329         | -0.019426  | 0.50775 | 0.39124     | 0.720132558 |            |         |  |
| OR51AB1P  | ENSG00000229093 | -1.8947    | 0.97093 | -1.0054     | 0.84266     | 0.27607    |         |  |
|           | 0.39125         | 0.27607    | 0.39125 | 0.39125     | 0.720132558 |            |         |  |
| NA        | ENSG00000231613 | 0.27598    | 0.39128 | 0.16289     | 0.4353      | -0.037079  | 0.51479 |  |
|           | 0.11838         | 0.45288    | 0.39128 | 0.720132558 |             |            |         |  |
| LINC01978 | ENSG00000262188 | -0.41991   | 0.66272 | -0.41991    | 0.66272     | -0.41991   |         |  |
|           | 0.66272         | 0.27587    | 0.39132 | 0.39132     | 0.720132558 |            |         |  |
| NA        | ENSG00000227869 | 0.27588    | 0.39132 | -0.56417    | 0.71368     | 0.27588    | 0.39132 |  |
|           | 0.27588         | 0.39132    | 0.39132 | 0.720132558 |             |            |         |  |
| NA        | ENSG00000267299 | -1.3553    | 0.91234 | -1.0248     | 0.84727     | -0.97798   | 0.83596 |  |
|           | 0.27582         | 0.39134    | 0.39134 | 0.720132558 |             |            |         |  |
| NA        | ENSG00000278580 | 0.27574    | 0.39138 | 0.209       | 0.41722     | 0.27574    | 0.39138 |  |
|           | 0.27574         | 0.39138    | 0.39138 | 0.720132558 |             |            |         |  |
| CRHR2     | ENSG00000106113 | -0.63498   | 0.73728 | -1.2817     | 0.90002     | -0.63498   | 0.73728 |  |
|           | 0.2757          | 0.39139    | 0.39139 | 0.720132558 |             |            |         |  |
| ROCK2     | ENSG00000134318 | 0.21985    | 0.41299 | 0.16649     | 0.43389     | -0.030271  | 0.51207 |  |
|           | 0.27569         | 0.39139    | 0.39139 | 0.720132558 |             |            |         |  |
| NA        | ENSG00000233894 | 0.27571    | 0.39139 | 0.27571     | 0.39139     | 0.27571    | 0.39139 |  |
|           | 0.27571         | 0.39139    | 0.39139 | 0.720132558 |             |            |         |  |
| RPL19P13  | ENSG00000239315 | -0.23878   | 0.59436 | -0.23611    | 0.59333     | 0.27569    |         |  |
|           | 0.39139         | -0.59905   | 0.72543 | 0.39139     | 0.720132558 |            |         |  |
| NA        | ENSG00000250480 | 0.27562    | 0.39142 | -0.75166    | 0.77387     | -0.39808   | 0.65471 |  |
|           | 0.27562         | 0.39142    | 0.39142 | 0.720132558 |             |            |         |  |
| NA        | ENSG00000261356 | 0.27563    | 0.39142 | 0.27563     | 0.39142     | 0.27563    | 0.39142 |  |
|           | 0.27563         | 0.39142    | 0.39142 | 0.720132558 |             |            |         |  |
| ADORA2A   | ENSG00000128271 | -0.0052424 | 0.50209 | 0.2756      | 0.39143     | -0.0052424 |         |  |
|           | 0.50209         | -0.0052424 | 0.50209 | 0.39143     | 0.720132558 |            |         |  |
| NA        | ENSG00000222579 | -0.72501   | 0.76578 | 0.27557     | 0.39144     | -0.4725    | 0.68171 |  |
|           | -0.037478       | 0.51495    | 0.39144 | 0.720132558 |             |            |         |  |
| NA        | ENSG00000266532 | -2.0903    | 0.98171 | -0.88244    | 0.81123     | 0.27544    | 0.39149 |  |
|           | -1.881          | 0.97001    | 0.39149 | 0.72016219  |             |            |         |  |
| LINC01891 | ENSG00000231682 | -1.8261    | 0.96608 | -0.50782    | 0.69421     | 0.27538    |         |  |
|           | 0.39151         | -1.8261    | 0.96608 | 0.39151     | 0.72016219  |            |         |  |
| DGAT2L7P  | ENSG00000205267 | 0.27537    | 0.39152 | 0.27537     | 0.39152     | 0.27537    |         |  |
|           | 0.39152         | 0.27537    | 0.39152 | 0.39152     | 0.72016219  |            |         |  |
| RPSAP46   | ENSG00000213394 | 0.27537    | 0.39152 | 0.27537     | 0.39152     | 0.27537    |         |  |
|           | 0.39152         | 0.27537    | 0.39152 | 0.39152     | 0.72016219  |            |         |  |
| NA        | ENSG00000269082 | 0.27534    | 0.39153 | 0.27534     | 0.39153     | 0.27534    | 0.39153 |  |
|           | 0.27534         | 0.39153    | 0.39153 | 0.72016219  |             |            |         |  |
| DTX3      | ENSG00000178498 | 0.27526    | 0.39156 | -0.092917   | 0.53702     | 0.27526    | 0.39156 |  |
|           | 0.27526         | 0.39156    | 0.39156 | 0.720172607 |             |            |         |  |
| RN7SL616P | ENSG00000266477 | 0.27524    | 0.39157 | 0.27524     | 0.39157     | 0.27524    |         |  |
|           | 0.39157         | 0.27524    | 0.39157 | 0.39157     | 0.720172607 |            |         |  |
| NA        | ENSG00000259929 | -1.9697    | 0.97556 | -1.2323     | 0.89107     | -0.41439   | 0.6607  |  |
|           | 0.2752          | 0.39158    | 0.39158 | 0.720172607 |             |            |         |  |
| EIF4EP5   | ENSG00000214366 | -0.18216   | 0.57227 | 0.27516     | 0.3916      | 0.27516    |         |  |
|           | 0.3916          | 0.27516    | 0.3916  | 0.3916      | 0.720173421 |            |         |  |
| NA        | ENSG00000247345 | -0.19904   | 0.57888 | 0.27513     | 0.39161     | -0.38873   | 0.65126 |  |
|           | -0.38873        | 0.65126    | 0.39161 | 0.720173421 |             |            |         |  |
| CD8B2     | ENSG00000254126 | -1.1142    | 0.86741 | -0.67839    | 0.75124     | 0.12965    | 0.44842 |  |
|           | 0.27505         | 0.39164    | 0.39164 | 0.720201411 |             |            |         |  |
| ZNF815P   | ENSG00000235944 | -0.74585   | 0.77212 | -1.1462     | 0.87414     | 0.27495    |         |  |
|           | 0.39168         | 0.066539   | 0.47347 | 0.39168     | 0.720220611 |            |         |  |
| NA        | ENSG00000253509 | 0.27494    | 0.39168 | 0.27494     | 0.39168     | 0.27494    | 0.39168 |  |
|           | 0.27494         | 0.39168    | 0.39168 | 0.720220611 |             |            |         |  |
| UBL5P1    | ENSG00000248418 | -1.2282    | 0.89031 | 0.27478     | 0.39174     | 0.010039   | 0.496   |  |
|           | -0.92639        | 0.82288    | 0.39174 | 0.720303758 |             |            |         |  |
| ALDOB     | ENSG00000136872 | -0.63839   | 0.73839 | -0.48295    | 0.68543     | -0.14563   | 0.55789 |  |
|           | 0.27464         | 0.3918     | 0.3918  | 0.7203869   |             |            |         |  |
| TMEM109   | ENSG00000110108 | -0.47502   | 0.68261 | 0.18107     | 0.42816     | 0.27459    |         |  |

|           |                 |           |         |             |             |          |         |
|-----------|-----------------|-----------|---------|-------------|-------------|----------|---------|
|           | 0.39182         | -0.17853  | 0.57085 | 0.39182     | 0.720396491 |          |         |
| NA        | ENSG00000234338 | 0.27453   | 0.39184 | 0.27453     | 0.39184     | 0.27453  | 0.39184 |
|           | 0.27453         | 0.39184   | 0.39184 | 0.720406082 |             |          |         |
| GOLGA8VP  | ENSG00000259236 | -0.62163  | 0.73291 | -0.65888    | 0.74501     | -0.19315 |         |
|           | 0.57658         | 0.27442   | 0.39188 | 0.39188     | 0.720407673 |          |         |
| KRT8P18   | ENSG00000228767 | -0.17894  | 0.57101 | 0.2744      | 0.39189     | 0.2744   |         |
|           | 0.39189         | -0.46029  | 0.67735 | 0.39189     | 0.720407673 |          |         |
| NA        | ENSG00000282859 | 0.2744    | 0.39189 | 0.2744      | 0.39189     | 0.2744   | 0.39189 |
|           | 0.2744          | 0.39189   | 0.39189 | 0.720407673 |             |          |         |
| VDAC1P12  | ENSG00000227254 | 0.27438   | 0.3919  | 0.27438     | 0.3919      | 0.20175  |         |
|           | 0.42005         | 0.27438   | 0.3919  | 0.3919      | 0.720407673 |          |         |
| SRP14P4   | ENSG00000268062 | 0.2743    | 0.39193 | 0.2743      | 0.39193     | 0.2743   |         |
|           | 0.39193         | 0.2743    | 0.39193 | 0.39193     | 0.720426849 |          |         |
| RNA5SP340 | ENSG00000252941 | 0.27427   | 0.39194 | 0.27427     | 0.39194     | 0.27427  |         |
|           | 0.39194         | 0.27427   | 0.39194 | 0.39194     | 0.720426849 |          |         |
| RPL36AP39 | ENSG00000230980 | 0.27421   | 0.39196 | 0.27421     | 0.39196     | 0.27421  |         |
|           | 0.39196         | -0.39015  | 0.65179 | 0.39196     | 0.720433196 |          |         |
| HSF2      | ENSG00000025156 | -0.13392  | 0.55327 | 0.27414     | 0.39199     | 0.27414  | 0.39199 |
|           | 0.27414         | 0.39199   | 0.39199 | 0.720433196 |             |          |         |
| CA2       | ENSG00000104267 | 0.023773  | 0.49052 | 0.0089861   | 0.49642     | 0.27409  | 0.39201 |
|           | -0.43903        | 0.66968   | 0.39201 | 0.720433196 |             |          |         |
| ACAN      | ENSG00000157766 | -0.74953  | 0.77323 | -1.4136     | 0.92126     | -0.74953 | 0.77323 |
|           | 0.27403         | 0.39203   | 0.39203 | 0.720433196 |             |          |         |
| ZPR1      | ENSG00000109917 | -0.38399  | 0.64951 | 0.27395     | 0.39206     | 0.27373  | 0.39215 |
|           | -0.12119        | 0.54823   | 0.39206 | 0.720433196 |             |          |         |
| LINC00243 | ENSG00000214894 | 0.27389   | 0.39208 | -0.083215   | 0.53316     | -1.3172  |         |
|           | 0.90611         | -0.49316  | 0.68905 | 0.39208     | 0.720433196 |          |         |
| RN7SL397P | ENSG00000244139 | -0.62269  | 0.73326 | -0.73327    | 0.7683      | -0.62269 |         |
|           | 0.73326         | 0.27384   | 0.3921  | 0.3921      | 0.720433196 |          |         |
| NA        | ENSG00000260289 | 0.27385   | 0.3921  | -0.51495    | 0.6967      | -0.55243 | 0.70967 |
|           | -0.55243        | 0.70967   | 0.3921  | 0.720433196 |             |          |         |
| UHRF1     | ENSG00000276043 | 0.27385   | 0.3921  | -0.64537    | 0.74066     | 0.17232  | 0.43159 |
|           | -0.44954        | 0.67348   | 0.3921  | 0.720433196 |             |          |         |
| NA        | ENSG00000226644 | -0.83138  | 0.79712 | 0.27381     | 0.39212     | 0.27381  | 0.39212 |
|           | -1.5974         | 0.94491   | 0.39212 | 0.720433196 |             |          |         |
| OR6K4P    | ENSG00000180437 | -0.12051  | 0.54796 | 0.27375     | 0.39214     | 0.27375  |         |
|           | 0.39214         | 0.27375   | 0.39214 | 0.39214     | 0.720433196 |          |         |
| MIR3151   | ENSG00000265657 | 0.27373   | 0.39215 | -1.1931     | 0.88358     | 0.27373  |         |
|           | 0.39215         | 0.27373   | 0.39215 | 0.39215     | 0.720433196 |          |         |
| RPL5P5    | ENSG00000213051 | 0.27368   | 0.39216 | 0.27368     | 0.39216     | 0.27368  |         |
|           | 0.39216         | 0.27368   | 0.39216 | 0.39216     | 0.720433196 |          |         |
| KCNJ2-AS1 | ENSG00000267365 | 0.27369   | 0.39216 | 0.27369     | 0.39216     | 0.27369  |         |
|           | 0.39216         | 0.27369   | 0.39216 | 0.39216     | 0.720433196 |          |         |
| RAB8A     | ENSG00000167461 | -0.62809  | 0.73503 | 0.25181     | 0.4006      | -0.62809 | 0.73503 |
|           | 0.27363         | 0.39218   | 0.39218 | 0.720433196 |             |          |         |
| NA        | ENSG00000212556 | -0.11748  | 0.54676 | -0.11748    | 0.54676     | 0.27364  | 0.39218 |
|           | -0.11748        | 0.54676   | 0.39218 | 0.720433196 |             |          |         |
| LINC02791 | ENSG00000235446 | 0.27343   | 0.39226 | -0.43503    | 0.66823     | 0.27343  |         |
|           | 0.39226         | 0.27343   | 0.39226 | 0.39226     | 0.720552993 |          |         |
| NA        | ENSG00000251678 | 0.15011   | 0.44034 | 0.27335     | 0.39229     | 0.27335  | 0.39229 |
|           | 0.27335         | 0.39229   | 0.39229 | 0.720580938 |             |          |         |
| STAG3     | ENSG00000066923 | 0.096737  | 0.46147 | -0.32006    | 0.62554     | -0.61855 | 0.73189 |
|           | 0.2733          | 0.39231   | 0.39231 | 0.720590513 |             |          |         |
| TNK1      | ENSG00000174292 | -0.82646  | 0.79573 | -0.18166    | 0.57207     | -0.24935 | 0.59846 |
|           | 0.27324         | 0.39233   | 0.39233 | 0.720600087 |             |          |         |
| NA        | ENSG00000275728 | 0.27314   | 0.39237 | 0.27314     | 0.39237     | 0.27314  | 0.39237 |
|           | 0.27314         | 0.39237   | 0.39237 | 0.720628805 |             |          |         |
| TRIM14    | ENSG00000106785 | -0.031703 | 0.51265 | -0.28702    | 0.61295     | 0.27312  |         |
|           | 0.39238         | -1.1672   | 0.87844 | 0.39238     | 0.720628805 |          |         |
| NA        | ENSG00000238957 | 0.27308   | 0.39239 | -1.7497     | 0.95992     | -1.0812  | 0.8602  |
|           | -0.76062        | 0.77656   | 0.39239 | 0.720628805 |             |          |         |
| NA        | ENSG00000249766 | 0.27287   | 0.39247 | 0.27287     | 0.39247     | 0.27287  | 0.39247 |



|           |                 |           |         |             |             |          |         |  |
|-----------|-----------------|-----------|---------|-------------|-------------|----------|---------|--|
|           | 0.27287         | 0.39247   | 0.39247 | 0.720721401 |             |          |         |  |
| LINC02721 | ENSG00000255133 | 0.27289   | 0.39247 | 0.14327     | 0.44304     | 0.27289  |         |  |
|           | 0.39247         | 0.27289   | 0.39247 | 0.39247     | 0.720721401 |          |         |  |
| NA        | ENSG00000274346 | 0.27276   | 0.39252 | 0.27276     | 0.39252     | 0.27276  | 0.39252 |  |
|           | 0.27276         | 0.39252   | 0.39252 | 0.720735587 |             |          |         |  |
| NA        | ENSG00000275759 | -0.035319 | 0.51409 | 0.2727      | 0.39254     | -0.19064 | 0.5756  |  |
|           | -0.19064        | 0.5756    | 0.39254 | 0.720735587 |             |          |         |  |
| FHAD1     | ENSG00000142621 | -0.6782   | 0.75118 | -0.46539    | 0.67917     | 0.27263  | 0.39257 |  |
|           | -0.04081        | 0.51628   | 0.39257 | 0.720735587 |             |          |         |  |
| NA        | ENSG00000259171 | 0.27263   | 0.39257 | 0.27263     | 0.39257     | 0.27263  | 0.39257 |  |
|           | 0.27263         | 0.39257   | 0.39257 | 0.720735587 |             |          |         |  |
| LINC02307 | ENSG00000258969 | -0.63019  | 0.73572 | 0.094562    | 0.46233     | 0.2726   |         |  |
|           | 0.39258         | -0.40137  | 0.65593 | 0.39258     | 0.720735587 |          |         |  |
| ATP5MG    | ENSG00000167283 | 0.27256   | 0.39259 | 0.27256     | 0.39259     | 0.27256  |         |  |
|           | 0.39259         | -1.2558   | 0.89541 | 0.39259     | 0.720735587 |          |         |  |
| LINC01298 | ENSG00000253351 | -0.057435 | 0.5229  | 0.2725      | 0.39262     | 0.2725   |         |  |
|           | 0.39262         | -1.2821   | 0.9001  | 0.39262     | 0.720735587 |          |         |  |
| LINC02230 | ENSG00000251543 | -0.093815 | 0.53737 | 0.27241     | 0.39265     | 0.27241  |         |  |
|           | 0.39265         | 0.27241   | 0.39265 | 0.39265     | 0.720735587 |          |         |  |
| NA        | ENSG00000260482 | 0.27241   | 0.39265 | 0.27241     | 0.39265     | 0.27241  | 0.39265 |  |
|           | 0.27241         | 0.39265   | 0.39265 | 0.720735587 |             |          |         |  |
| NA        | ENSG00000270385 | 0.27242   | 0.39265 | 0.27242     | 0.39265     | 0.27242  | 0.39265 |  |
|           | 0.27242         | 0.39265   | 0.39265 | 0.720735587 |             |          |         |  |
| NA        | ENSG00000278083 | 0.27237   | 0.39267 | -0.95541    | 0.83031     | 0.076558 | 0.46949 |  |
|           | -0.72275        | 0.76508   | 0.39267 | 0.720735587 |             |          |         |  |
| NA        | ENSG00000279741 | 0.27237   | 0.39267 | 0.27237     | 0.39267     | 0.27237  | 0.39267 |  |
|           | 0.27237         | 0.39267   | 0.39267 | 0.720735587 |             |          |         |  |
| NA        | ENSG00000280027 | 0.27237   | 0.39267 | 0.27237     | 0.39267     | 0.27237  | 0.39267 |  |
|           | 0.27237         | 0.39267   | 0.39267 | 0.720735587 |             |          |         |  |
| NA        | ENSG00000267655 | 0.27219   | 0.39274 | 0.27219     | 0.39274     | 0.27219  | 0.39274 |  |
|           | 0.27219         | 0.39274   | 0.39274 | 0.720836919 |             |          |         |  |
| SNTA1     | ENSG00000101400 | -0.28161  | 0.61088 | -0.73348    | 0.76837     | 0.27197  | 0.39282 |  |
|           | -0.1335         | 0.5531    | 0.39282 | 0.720956597 |             |          |         |  |
| ZNF263    | ENSG00000006194 | -0.40042  | 0.65558 | 0.20986     | 0.41689     | 0.27189  |         |  |
|           | 0.39285         | 0.071864  | 0.47136 | 0.39285     | 0.720975701 |          |         |  |
| HDAC5     | ENSG00000108840 | 0.27187   | 0.39286 | -0.067778   | 0.52702     | -0.70348 | 0.75912 |  |
|           | 0.071668        | 0.47143   | 0.39286 | 0.720975701 |             |          |         |  |
| TBC1D24   | ENSG00000162065 | -1.5415   | 0.9384  | 0.27178     | 0.3929      | 0.27178  |         |  |
|           | 0.3929          | 0.27178   | 0.3929  | 0.3929      | 0.720986754 |          |         |  |
| NA        | ENSG00000230533 | 0.27171   | 0.39292 | -0.36298    | 0.64169     | -0.37007 | 0.64433 |  |
|           | -0.35544        | 0.63887   | 0.39292 | 0.720986754 |             |          |         |  |
| ZNF965P   | ENSG00000227784 | 0.27169   | 0.39293 | 0.27169     | 0.39293     | 0.27169  |         |  |
|           | 0.39293         | 0.27169   | 0.39293 | 0.39293     | 0.720986754 |          |         |  |
| NA        | ENSG00000263382 | 0.27168   | 0.39293 | 0.27168     | 0.39293     | 0.27168  | 0.39293 |  |
|           | 0.27168         | 0.39293   | 0.39293 | 0.720986754 |             |          |         |  |
| NA        | ENSG00000231855 | -1.0186   | 0.84581 | -1.4944     | 0.93247     | -1.4508  | 0.92658 |  |
|           | 0.27166         | 0.39294   | 0.39294 | 0.720986754 |             |          |         |  |
| RPL23AP2  | ENSG00000225067 | 0.27159   | 0.39297 | 0.27159     | 0.39297     | 0.27159  |         |  |
|           | 0.39297         | 0.27159   | 0.39297 | 0.39297     | 0.721007348 |          |         |  |
| WAKMAR2   | ENSG00000237499 | -0.29863  | 0.61739 | 0.27153     | 0.39299     | -0.29863 |         |  |
|           | 0.61739         | 0.20663   | 0.41815 | 0.39299     | 0.721007348 |          |         |  |
| RNF20     | ENSG00000155827 | 0.27149   | 0.39301 | 0.27149     | 0.39301     | -1.4573  | 0.92748 |  |
|           | -1.3403         | 0.90993   | 0.39301 | 0.721007348 |             |          |         |  |
| RNU1-96P  | ENSG00000201033 | 0.27146   | 0.39302 | 0.27146     | 0.39302     | 0.27146  |         |  |
|           | 0.39302         | -1.0273   | 0.84787 | 0.39302     | 0.721007348 |          |         |  |
| NA        | ENSG00000259199 | 0.27143   | 0.39303 | 0.27143     | 0.39303     | 0.27143  | 0.39303 |  |
|           | -0.86119        | 0.80543   | 0.39303 | 0.721007348 |             |          |         |  |
| PTGFR     | ENSG00000122420 | 0.27141   | 0.39304 | -1.5172     | 0.9354      | -0.45757 | 0.67637 |  |
|           | -0.81936        | 0.79371   | 0.39304 | 0.721007348 |             |          |         |  |
| PLEKHA1   | ENSG00000107679 | -0.20001  | 0.57927 | -0.6203     | 0.73247     | -0.41812 |         |  |
|           | 0.66207         | 0.27131   | 0.39308 | 0.39308     | 0.72102644  |          |         |  |
| CARS1     | ENSG00000110619 | 0.27129   | 0.39308 | -0.35611    | 0.63912     | -0.33897 | 0.63268 |  |

|            |                 |          |         |             |             |            |         |  |
|------------|-----------------|----------|---------|-------------|-------------|------------|---------|--|
|            | -0.59969        | 0.72564  | 0.39308 | 0.72102644  |             |            |         |  |
| GGTLC1     | ENSG00000149435 | -1.5048  | 0.93382 | -1.5048     | 0.93382     | -1.1535    |         |  |
|            | 0.87565         | 0.27114  | 0.39314 | 0.39314     | 0.721028681 |            |         |  |
| NA         | ENSG00000250271 | 0.27113  | 0.39314 | 0.058913    | 0.47651     | -1.3165    | 0.906   |  |
|            | 0.055278        | 0.47796  | 0.39314 | 0.721028681 |             |            |         |  |
| VN1R87P    | ENSG00000268789 | -1.4576  | 0.92752 | -1.2404     | 0.89259     | 0.27113    |         |  |
|            | 0.39314         | -1.2362  | 0.89181 | 0.39314     | 0.721028681 |            |         |  |
| ASB7       | ENSG00000183475 | -0.40634 | 0.65775 | -1.2796     | 0.89967     | 0.27113    | 0.39315 |  |
|            | -0.44048        | 0.6702   | 0.39315 | 0.721028681 |             |            |         |  |
| PDCL2      | ENSG00000163440 | 0.2711   | 0.39316 | -0.52687    | 0.70086     | -0.71606   | 0.76302 |  |
|            | -1.2106         | 0.88697  | 0.39316 | 0.721028681 |             |            |         |  |
| KEL        | ENSG00000197993 | 0.27106  | 0.39317 | -1.0576     | 0.85487     | -1.0576    | 0.85487 |  |
|            | -1.0576         | 0.85487  | 0.39317 | 0.721028681 |             |            |         |  |
| RPS29P10   | ENSG00000226884 | 0.27101  | 0.39319 | -0.086596   | 0.5345      | -1.3297    |         |  |
|            | 0.90819         | -0.44878 | 0.67321 | 0.39319     | 0.721038223 |            |         |  |
| RPL31P16   | ENSG00000233159 | 0.27093  | 0.39322 | -0.49968    | 0.69135     | 0.27093    |         |  |
|            | 0.39322         | 0.27093  | 0.39322 | 0.39322     | 0.721038969 |            |         |  |
| NA         | ENSG00000259720 | 0.27092  | 0.39322 | 0.27092     | 0.39322     | 0.27092    | 0.39322 |  |
|            | 0.27092         | 0.39322  | 0.39322 | 0.721038969 |             |            |         |  |
| NA         | ENSG00000228541 | 0.27086  | 0.39325 | -0.30991    | 0.62168     | 0.04843    | 0.48069 |  |
|            | -0.0046844      | 0.50187  | 0.39325 | 0.721039715 |             |            |         |  |
| NA         | ENSG00000261795 | 0.18519  | 0.42654 | 0.27086     | 0.39325     | -0.70017   | 0.75809 |  |
|            | 0.18467         | 0.42674  | 0.39325 | 0.721039715 |             |            |         |  |
| NA         | ENSG00000224869 | 0.27082  | 0.39327 | 0.27082     | 0.39327     | 0.27082    | 0.39327 |  |
|            | 0.27082         | 0.39327  | 0.39327 | 0.721040461 |             |            |         |  |
| CCNG2      | ENSG00000138764 | 0.27078  | 0.39328 | 0.24106     | 0.40476     | -0.049161  | 0.5196  |  |
|            | 0.19927         | 0.42103  | 0.39328 | 0.721040461 |             |            |         |  |
| COMETT     | ENSG00000231210 | -0.51577 | 0.69699 | 0.27069     | 0.39332     | -0.24818   | 0.598   |  |
|            | 0.10456         | 0.45836  | 0.39332 | 0.721069077 |             |            |         |  |
| ESRRG      | ENSG00000196482 | 0.27066  | 0.39333 | 0.12506     | 0.45024     | -0.68355   | 0.75287 |  |
|            | 0.24243         | 0.40422  | 0.39333 | 0.721069077 |             |            |         |  |
| ITFG2-AS1  | ENSG00000256150 | 0.27064  | 0.39334 | -0.049815   | 0.51987     | -0.12567   |         |  |
|            | 0.55001         | -1.1377  | 0.87237 | 0.39334     | 0.721069077 |            |         |  |
| NA         | ENSG00000228643 | -0.17749 | 0.57044 | -1.1501     | 0.87494     | -0.46793   | 0.68008 |  |
|            | 0.27048         | 0.39339  | 0.39339 | 0.721088893 |             |            |         |  |
| INTS13     | ENSG00000064102 | -1.1799  | 0.88098 | 0.27048     | 0.3934      | -1.1799    |         |  |
|            | 0.88098         | -0.39401 | 0.65321 | 0.3934      | 0.721088893 |            |         |  |
| NA         | ENSG00000262514 | 0.21117  | 0.41638 | 0.27046     | 0.3934      | 0.070407   | 0.47194 |  |
|            | -0.53392        | 0.7033   | 0.3934  | 0.721088893 |             |            |         |  |
| ZNF709     | ENSG00000242852 | 0.27045  | 0.39341 | -0.86657    | 0.80691     | -0.86657   |         |  |
|            | 0.80691         | -0.86657 | 0.80691 | 0.39341     | 0.721088893 |            |         |  |
| NA         | ENSG00000225214 | -0.52024 | 0.69855 | -0.52024    | 0.69855     | 0.27039    | 0.39343 |  |
|            | -0.52024        | 0.69855  | 0.39343 | 0.721089634 |             |            |         |  |
| MIR548XHG  | ENSG00000224141 | -0.15636 | 0.56212 | -0.19782    | 0.57841     | 0.27038    |         |  |
|            | 0.39344         | 0.27038  | 0.39344 | 0.39344     | 0.721089634 |            |         |  |
| DIRAS2     | ENSG00000165023 | -0.86848 | 0.80743 | 0.2703      | 0.39346     | -0.90771   |         |  |
|            | 0.81798         | -0.99732 | 0.84069 | 0.39346     | 0.721099169 |            |         |  |
| OR6C3      | ENSG00000205329 | 0.27023  | 0.39349 | 0.27023     | 0.39349     | -0.51168   | 0.69556 |  |
|            | -0.0088607      | 0.50353  | 0.39349 | 0.721127029 |             |            |         |  |
| HNRNPA1P31 | ENSG00000227862 | 0.27012  | 0.39353 | 0.27012     | 0.39353     | 0.27012    |         |  |
|            | 0.39353         | 0.27012  | 0.39353 | 0.39353     | 0.721146093 |            |         |  |
| CSP1       | ENSG00000228872 | 0.27013  | 0.39353 | 0.27013     | 0.39353     | 0.27013    | 0.39353 |  |
|            | 0.27013         | 0.39353  | 0.39353 | 0.721146093 |             |            |         |  |
| C12orf4    | ENSG00000047621 | 0.27     | 0.39358 | -1.1627     | 0.87753     | -1.1126    | 0.86705 |  |
|            | -0.54086        | 0.7057   | 0.39358 | 0.721184946 |             |            |         |  |
| OSBPL7     | ENSG00000006025 | 0.26994  | 0.3936  | 0.26994     | 0.3936      | 0.26994    |         |  |
|            | 0.3936          | 0.26994  | 0.3936  | 0.3936      | 0.721184946 |            |         |  |
| GSTCD      | ENSG00000138780 | -0.30722 | 0.62066 | 0.15862     | 0.43698     | -0.0060437 | 0.50241 |  |
|            | 0.26992         | 0.39361  | 0.39361 | 0.721184946 |             |            |         |  |
| NA         | ENSG00000232098 | 0.2699   | 0.39362 | 0.2699      | 0.39362     | 0.2699     | 0.39362 |  |
|            | 0.2699          | 0.39362  | 0.39362 | 0.721184946 |             |            |         |  |
| FAM162B    | ENSG00000183807 | 0.26988  | 0.39363 | 0.26988     | 0.39363     | 0.26988    |         |  |

|             |                 |           |         |             |             |           |         |
|-------------|-----------------|-----------|---------|-------------|-------------|-----------|---------|
|             | 0.39363         | 0.26988   | 0.39363 | 0.39363     | 0.721184946 |           |         |
| NA          | ENSG00000234044 | 0.26984   | 0.39364 | 0.39364     | 0.26984     | 0.39364   | 0.26984 |
|             | 0.26984         | 0.39364   | 0.39364 | 0.721184946 |             |           |         |
| IGHVIV-44-1 | ENSG00000253465 | 0.26966   | 0.39371 | 0.39371     | 0.26966     | 0.39371   | 0.26966 |
|             | 0.39371         | 0.26966   | 0.39371 | 0.39371     | 0.721286075 |           |         |
| NACAP6      | ENSG00000248403 | -0.080171 | 0.53195 | -0.080171   | 0.53195     | 0.26959   |         |
|             | 0.39374         | -0.041644 | 0.51661 | 0.39374     | 0.721313917 |           |         |
| RNA5SP320   | ENSG00000252072 | 0.26953   | 0.39376 | 0.39376     | 0.26953     | 0.39376   | 0.26953 |
|             | 0.39376         | 0.26953   | 0.39376 | 0.39376     | 0.721323439 |           |         |
| HLF         | ENSG00000108924 | 0.26931   | 0.39384 | -0.58431    | 0.72049     | -0.97825  | 0.83602 |
|             | -0.76586        | 0.77812   | 0.39384 | 0.721357769 |             |           |         |
| UBL7-AS1    | ENSG00000247240 | 0.26925   | 0.39387 | 0.26925     | 0.39387     | 0.26925   |         |
|             | 0.39387         | 0.26925   | 0.39387 | 0.39387     | 0.721357769 |           |         |
| NA          | ENSG00000276292 | 0.26922   | 0.39388 | 0.26922     | 0.39388     | 0.26922   | 0.39388 |
|             | 0.26922         | 0.39388   | 0.39388 | 0.721357769 |             |           |         |
| ZBTB20-AS5  | ENSG00000242290 | -0.27424  | 0.60805 | -0.58026    | 0.71913     | -0.27424  |         |
|             | 0.60805         | 0.2692    | 0.39389 | 0.39389     | 0.721357769 |           |         |
| NA          | ENSG00000269997 | -0.85284  | 0.80313 | 0.26919     | 0.39389     | 0.26919   | 0.39389 |
|             | 0.26919         | 0.39389   | 0.39389 | 0.721357769 |             |           |         |
| NA          | ENSG00000253888 | -0.23056  | 0.59117 | 0.26917     | 0.3939      | -0.092797 | 0.53697 |
|             | -0.12815        | 0.55098   | 0.3939  | 0.721357769 |             |           |         |
| NA          | ENSG00000257500 | 0.26912   | 0.39392 | 0.26912     | 0.39392     | 0.26912   | 0.39392 |
|             | 0.26912         | 0.39392   | 0.39392 | 0.721357769 |             |           |         |
| NA          | ENSG00000266273 | -1.152    | 0.87533 | -0.53173    | 0.70254     | 0.26909   | 0.39393 |
|             | -0.65778        | 0.74466   | 0.39393 | 0.721357769 |             |           |         |
| COMMD2      | ENSG00000114744 | 0.26904   | 0.39395 | -1.0974     | 0.86377     | -0.13535  |         |
|             | 0.55383         | -0.12395  | 0.54932 | 0.39395     | 0.721357769 |           |         |
| COL15A1     | ENSG00000204291 | 0.26903   | 0.39395 | -0.079293   | 0.5316      | -0.42137  |         |
|             | 0.66326         | -1.5049   | 0.93383 | 0.39395     | 0.721357769 |           |         |
| NA          | ENSG00000228772 | 0.26898   | 0.39397 | -0.69003    | 0.75491     | -0.37863  | 0.64752 |
|             | -0.31526        | 0.62372   | 0.39397 | 0.721357769 |             |           |         |
| TBC1D14     | ENSG00000132405 | 0.26889   | 0.39401 | -0.35973    | 0.64047     | -0.96183  |         |
|             | 0.83193         | -0.50374  | 0.69278 | 0.39401     | 0.721357769 |           |         |
| MIPEPP2     | ENSG00000224783 | 0.26885   | 0.39402 | -0.14322    | 0.55694     | -0.86037  |         |
|             | 0.80521         | -0.86037  | 0.80521 | 0.39402     | 0.721357769 |           |         |
| NA          | ENSG00000228404 | 0.26883   | 0.39403 | 0.26883     | 0.39403     | 0.26883   | 0.39403 |
|             | 0.26883         | 0.39403   | 0.39403 | 0.721357769 |             |           |         |
| MMACHC      | ENSG00000132763 | 0.2688    | 0.39404 | 0.2688      | 0.39404     | -0.34044  |         |
|             | 0.63324         | 0.2688    | 0.39404 | 0.39404     | 0.721357769 |           |         |
| NA          | ENSG00000226877 | -0.34743  | 0.63587 | 0.25394     | 0.39977     | 0.2688    | 0.39404 |
|             | -1.1326         | 0.8713    | 0.39404 | 0.721357769 |             |           |         |
| NA          | ENSG00000242329 | -1.8371   | 0.96691 | 0.26881     | 0.39404     | -0.58522  | 0.7208  |
|             | -1.8371         | 0.96691   | 0.39404 | 0.721357769 |             |           |         |
| RNA5SP99    | ENSG00000200890 | 0.26879   | 0.39405 | -0.79558    | 0.78686     | -0.79558  |         |
|             | 0.78686         | -0.79558  | 0.78686 | 0.39405     | 0.721357769 |           |         |
| NA          | ENSG00000237325 | 0.26876   | 0.39406 | 0.26876     | 0.39406     | -0.56009  | 0.71229 |
|             | 0.26876         | 0.39406   | 0.39406 | 0.721357769 |             |           |         |
| NA          | ENSG00000243635 | -0.62918  | 0.73538 | 0.26869     | 0.39408     | -0.1352   | 0.55377 |
|             | -1.1251         | 0.86973   | 0.39408 | 0.721358489 |             |           |         |
| ZZEF1       | ENSG00000074755 | -0.5845   | 0.72056 | -0.25721    | 0.60149     | -0.4624   | 0.6781  |
|             | 0.26866         | 0.39409   | 0.39409 | 0.721358489 |             |           |         |
| NA          | ENSG00000253683 | -0.59905  | 0.72543 | 0.26863     | 0.39411     | -0.59905  | 0.72543 |
|             | 0.25719         | 0.39851   | 0.39411 | 0.721368001 |             |           |         |
| NA          | ENSG00000243830 | 0.26851   | 0.39415 | 0.26851     | 0.39415     | 0.26851   | 0.39415 |
|             | 0.26851         | 0.39415   | 0.39415 | 0.721414119 |             |           |         |
| RNU6-610P   | ENSG00000206991 | 0.26843   | 0.39418 | 0.26843     | 0.39418     | 0.26843   |         |
|             | 0.39418         | 0.26843   | 0.39418 | 0.39418     | 0.721414835 |           |         |
| NA          | ENSG00000236717 | 0.26844   | 0.39418 | 0.26844     | 0.39418     | 0.26844   | 0.39418 |
|             | 0.26844         | 0.39418   | 0.39418 | 0.721414835 |             |           |         |
| HGS         | ENSG00000185359 | 0.047102  | 0.48122 | -0.55036    | 0.70896     | 0.032251  | 0.48714 |
|             | 0.2683          | 0.39423   | 0.39423 | 0.721463796 |             |           |         |
| KCTD17      | ENSG00000100379 | 0.26826   | 0.39425 | 0.26826     | 0.39425     | 0.26826   |         |

|            |                 |          |         |             |             |           |         |  |
|------------|-----------------|----------|---------|-------------|-------------|-----------|---------|--|
|            | 0.39425         | 0.26826  | 0.39425 | 0.39425     | 0.721463796 |           |         |  |
| ISCA1P2    | ENSG00000229840 | 0.26821  | 0.39427 | 0.39427     | 0.26821     | 0.39427   | 0.26821 |  |
|            | 0.39427         | 0.26821  | 0.39427 | 0.39427     | 0.721463796 |           |         |  |
| CHCHD3     | ENSG00000106554 | -0.57626 | 0.71778 | 0.26818     | 0.39428     | -0.59622  |         |  |
|            | 0.72448         | -0.52827 | 0.70134 | 0.39428     | 0.721463796 |           |         |  |
| NA         | ENSG00000258412 | 0.26807  | 0.39432 | 0.26807     | 0.39432     | 0.26807   | 0.39432 |  |
|            | 0.26807         | 0.39432  | 0.39432 | 0.721463796 |             |           |         |  |
| NA         | ENSG00000275567 | 0.26807  | 0.39432 | 0.26807     | 0.39432     | 0.26807   | 0.39432 |  |
|            | 0.26807         | 0.39432  | 0.39432 | 0.721463796 |             |           |         |  |
| ENTPD3-AS1 | ENSG00000223797 | -0.1356  | 0.55393 | -0.1356     | 0.55393     | -0.1356   |         |  |
|            | 0.55393         | 0.26805  | 0.39433 | 0.39433     | 0.721463796 |           |         |  |
| NA         | ENSG00000259627 | 0.26804  | 0.39433 | 0.26804     | 0.39433     | 0.26804   | 0.39433 |  |
|            | 0.26804         | 0.39433  | 0.39433 | 0.721463796 |             |           |         |  |
| NA         | ENSG00000222022 | 0.26803  | 0.39434 | -0.8259     | 0.79557     | -0.8259   | 0.79557 |  |
|            | -0.35311        | 0.638    | 0.39434 | 0.721463796 |             |           |         |  |
| NA         | ENSG00000259740 | 0.26788  | 0.39439 | 0.26788     | 0.39439     | 0.26788   | 0.39439 |  |
|            | 0.26788         | 0.39439  | 0.39439 | 0.721510598 |             |           |         |  |
| POM121L14P | ENSG00000218189 | -0.3387  | 0.63258 | -0.31225    | 0.62257     | 0.26788   |         |  |
|            | 0.3944          | -0.87276 | 0.8086  | 0.3944      | 0.721510598 |           |         |  |
| ZBTB12BP   | ENSG00000180610 | 0.26784  | 0.39441 | -0.17135    | 0.56803     | 0.26784   |         |  |
|            | 0.39441         | 0.26784  | 0.39441 | 0.39441     | 0.721510598 |           |         |  |
| HPSE2      | ENSG00000172987 | 0.26773  | 0.39445 | 0.13374     | 0.4468      | -0.39804  | 0.6547  |  |
|            | -0.19515        | 0.57736  | 0.39445 | 0.721556684 |             |           |         |  |
| NA         | ENSG00000277351 | -0.41428 | 0.66066 | 0.26765     | 0.39448     | 0.26765   | 0.39448 |  |
|            | 0.26765         | 0.39448  | 0.39448 | 0.721582713 |             |           |         |  |
| NA         | ENSG00000230733 | 0.26759  | 0.39451 | 0.26759     | 0.39451     | 0.26759   | 0.39451 |  |
|            | -0.2344         | 0.59266  | 0.39451 | 0.721582713 |             |           |         |  |
| PAR6G      | ENSG00000178184 | 0.16559  | 0.43424 | 0.12727     | 0.44936     | 0.26746   |         |  |
|            | 0.39456         | 0.017602 | 0.49298 | 0.39456     | 0.721582713 |           |         |  |
| ZNF396     | ENSG00000186496 | 0.26734  | 0.3946  | 0.26734     | 0.3946      | 0.26734   |         |  |
|            | 0.3946          | -0.95348 | 0.82983 | 0.3946      | 0.721582713 |           |         |  |
| RNU6-780P  | ENSG00000212332 | 0.074565 | 0.47028 | 0.26736     | 0.3946      | -0.022628 |         |  |
|            | 0.50903         | -0.33724 | 0.63203 | 0.3946      | 0.721582713 |           |         |  |
| KRTAP5-10  | ENSG00000204572 | -0.40054 | 0.65562 | 0.26727     | 0.39463     | 0.26727   |         |  |
|            | 0.39463         | 0.1864   | 0.42606 | 0.39463     | 0.721582713 |           |         |  |
| HECW2      | ENSG00000138411 | 0.26725  | 0.39464 | -0.2608     | 0.60288     | 0.018479  | 0.49263 |  |
|            | -0.469          | 0.68046  | 0.39464 | 0.721582713 |             |           |         |  |
| NA         | ENSG00000237464 | 0.26725  | 0.39464 | 0.26725     | 0.39464     | 0.26725   | 0.39464 |  |
|            | 0.26725         | 0.39464  | 0.39464 | 0.721582713 |             |           |         |  |
| TMEM200B   | ENSG00000253304 | 0.09087  | 0.4638  | 0.09087     | 0.4638      | 0.09087   |         |  |
|            | 0.4638          | 0.26724  | 0.39464 | 0.39464     | 0.721582713 |           |         |  |
| RELA       | ENSG00000173039 | 0.26721  | 0.39465 | -1.0706     | 0.85782     | 0.015159  | 0.49395 |  |
|            | -0.65985        | 0.74532  | 0.39465 | 0.721582713 |             |           |         |  |
| OR51P1P    | ENSG00000224300 | 0.26719  | 0.39466 | 0.26719     | 0.39466     | 0.26719   |         |  |
|            | 0.39466         | 0.26719  | 0.39466 | 0.39466     | 0.721582713 |           |         |  |
| NA         | ENSG00000240627 | -0.33283 | 0.63037 | -1.4463     | 0.92595     | 0.26716   | 0.39467 |  |
|            | -0.27281        | 0.6075   | 0.39467 | 0.721582713 |             |           |         |  |
| PXT1       | ENSG00000179165 | 0.26714  | 0.39468 | -0.61553    | 0.7309      | -0.39961  | 0.65528 |  |
|            | -0.95123        | 0.82926  | 0.39468 | 0.721582713 |             |           |         |  |
| NA         | ENSG00000227141 | 0.26711  | 0.39469 | 0.26711     | 0.39469     | 0.26711   | 0.39469 |  |
|            | 0.26711         | 0.39469  | 0.39469 | 0.721582713 |             |           |         |  |
| SLC27A5    | ENSG00000083807 | -0.62737 | 0.73479 | -0.62737    | 0.73479     | 0.267     | 0.39473 |  |
|            | 0.16645         | 0.4339   | 0.39473 | 0.721582713 |             |           |         |  |
| GFM2       | ENSG00000164347 | -2.1333  | 0.98355 | 0.26702     | 0.39473     | -1.2939   | 0.90214 |  |
|            | -0.56328        | 0.71338  | 0.39473 | 0.721582713 |             |           |         |  |
| RNA5SP235  | ENSG00000202281 | 0.26695  | 0.39475 | 0.26695     | 0.39475     | -0.28407  |         |  |
|            | 0.61182         | -0.28407 | 0.61182 | 0.39475     | 0.721582713 |           |         |  |
| ADAMTS16   | ENSG00000145536 | 0.26693  | 0.39476 | 0.18199     | 0.4278      | 0.25197   |         |  |
|            | 0.40053         | -0.89477 | 0.81455 | 0.39476     | 0.721582713 |           |         |  |
| RNA5SP24   | ENSG00000252287 | 0.20774  | 0.41772 | -0.82602    | 0.7956      | -0.78397  |         |  |
|            | 0.78347         | 0.26692  | 0.39476 | 0.39476     | 0.721582713 |           |         |  |
| ARHGEF10L  | ENSG00000074964 | -0.32061 | 0.62575 | -0.80128    | 0.78852     | 0.26688   |         |  |

|           |                 |             |         |             |             |          |           |
|-----------|-----------------|-------------|---------|-------------|-------------|----------|-----------|
|           | 0.39478         | 0.062383    | 0.47513 | 0.39478     | 0.721582713 |          |           |
| GPM6BP3   | ENSG00000234121 | 0.26688     | 0.26688 | 0.39478     | 0.26688     | 0.39478  | 0.26688   |
|           | 0.39478         | 0.26688     | 0.39478 | 0.39478     | 0.721582713 |          |           |
| MEF2BNBP1 | ENSG00000256844 | -1.4644     | 0.92846 | 0.92846     | -0.98675    | 0.83812  | -0.34327  |
|           | 0.6343          | 0.26685     | 0.39479 | 0.39479     | 0.721582713 |          |           |
| SHANK2    | ENSG00000162105 | -0.2735     | 0.60776 | 0.60776     | 0.064398    | 0.47433  | 0.26652   |
|           | 0.39492         | -0.63067    | 0.73587 | 0.39492     | 0.721739109 |          |           |
| NA        | ENSG00000254668 | -1.2049     | 0.88588 | 0.26653     | 0.39492     | -1.2049  | 0.88588   |
|           | -1.2049         | 0.88588     | 0.39492 | 0.721739109 |             |          |           |
| NA        | ENSG00000273075 | 0.26653     | 0.39492 | 0.26653     | 0.39492     | 0.26653  | 0.39492   |
|           | 0.26653         | 0.39492     | 0.39492 | 0.721739109 |             |          |           |
| CAMKK1    | ENSG00000004660 | -0.88927    | 0.81307 | -0.72443    | 0.7656      |          | -0.88927  |
|           | 0.81307         | 0.26633     | 0.39499 | 0.39499     | 0.721839966 |          |           |
| IL18RAP   | ENSG00000115607 | 0.26628     | 0.39501 | -1.988      | 0.97659     |          | -0.8866   |
|           | 0.81235         | -1.988      | 0.97659 | 0.39501     | 0.721849445 |          |           |
| NA        | ENSG00000283044 | 0.26624     | 0.39503 | 0.065015    | 0.47408     | -0.57368 | 0.71691   |
|           | -0.51733        | 0.69754     | 0.39503 | 0.721858923 |             |          |           |
| MTCYBP18  | ENSG00000244921 | -0.86677    | 0.80697 | 0.26617     | 0.39506     |          | 0.26617   |
|           | 0.39506         | 0.26617     | 0.39506 | 0.39506     | 0.721886673 |          |           |
| PDCD5P1   | ENSG00000255909 | 0.26606     | 0.3951  | 0.26606     | 0.3951      |          | 0.26606   |
|           | 0.3951          | 0.26606     | 0.3951  | 0.3951      | 0.721932693 |          |           |
| NA        | ENSG00000251270 | -0.59863    | 0.72529 | -0.30164    | 0.61854     | -0.3663  | 0.64293   |
|           | 0.26582         | 0.39519     | 0.39519 | 0.722055798 |             |          |           |
| BOK-AS1   | ENSG00000234235 | -0.37518    | 0.64624 | 0.26577     | 0.39521     |          | 0.26577   |
|           | 0.39521         | 0.26577     | 0.39521 | 0.39521     | 0.722055798 |          |           |
| DPEP2NB   | ENSG00000263201 | 0.26575     | 0.39522 | -0.052917   | 0.5211      |          | 0.26575   |
|           | 0.39522         | 0.26575     | 0.39522 | 0.39522     | 0.722055798 |          |           |
| TSC22D1   | ENSG00000102804 | -1.2238     | 0.88948 | -1.6414     | 0.94965     |          | 0.26568   |
|           | 0.39524         | -0.52482    | 0.70015 | 0.39524     | 0.722055798 |          |           |
| ANKRD18CP | ENSG00000159712 | -0.26354    | 0.60393 | -0.20377    | 0.58073     |          | 0.2656    |
|           | 0.39527         | 0.046436    | 0.48148 | 0.39527     | 0.722055798 |          |           |
| MTCO2P20  | ENSG00000231576 | 0.26557     | 0.39529 | 0.26557     | 0.39529     |          | 0.26557   |
|           | 0.39529         | 0.26557     | 0.39529 | 0.39529     | 0.722055798 |          |           |
| MTCO1P20  | ENSG00000233764 | 0.26557     | 0.39529 | 0.26557     | 0.39529     |          | 0.26557   |
|           | 0.39529         | 0.26557     | 0.39529 | 0.39529     | 0.722055798 |          |           |
| NA        | ENSG00000231405 | 0.26551     | 0.39531 | -0.82553    | 0.79546     | -0.89502 | 0.81461   |
|           | -0.68566        | 0.75354     | 0.39531 | 0.722055798 |             |          |           |
| NA        | ENSG00000229275 | 0.018465    | 0.49263 | -0.80756    | 0.79033     | 0.10856  | 0.45678   |
|           | 0.26545         | 0.39533     | 0.39533 | 0.722055798 |             |          |           |
| METTL16   | ENSG00000127804 | -0.31014    | 0.62177 | 0.26542     | 0.39534     |          | -0.073675 |
|           | 0.52937         | -0.10487    | 0.54176 | 0.39534     | 0.722055798 |          |           |
| HSPA1B    | ENSG00000204388 | 0.26542     | 0.39534 | 0.26542     | 0.39534     |          | 0.26542   |
|           | 0.39534         | -0.17885    | 0.57097 | 0.39534     | 0.722055798 |          |           |
| RSBN1     | ENSG00000081019 | 0.2654      | 0.39535 | 0.2654      | 0.39535     | 0.2654   | 0.39535   |
|           | -0.50899        | 0.69462     | 0.39535 | 0.722055798 |             |          |           |
| IGLV5-45  | ENSG00000211650 | -0.27598    | 0.60872 | 0.26538     | 0.39536     |          | -0.60357  |
|           | 0.72694         | -0.60357    | 0.72694 | 0.39536     | 0.722055798 |          |           |
| NA        | ENSG00000232692 | 0.2653      | 0.39539 | 0.2653      | 0.39539     | -0.661   | 0.74569   |
|           | 0.2653          | 0.39539     | 0.39539 | 0.722056465 |             |          |           |
| NA        | ENSG00000260526 | 0.2466      | 0.40261 | 0.2653      | 0.39539     | -0.80957 | 0.79091   |
|           | -0.80957        | 0.79091     | 0.39539 | 0.722056465 |             |          |           |
| MTCO3P4   | ENSG00000228851 | -1.5528     | 0.93976 | -1.5528     | 0.93976     |          | -1.3425   |
|           | 0.91028         | 0.26514     | 0.39545 | 0.39545     | 0.722130173 |          |           |
| PRRX1     | ENSG00000116132 | -1.0642     | 0.85638 | 0.26513     | 0.39546     | -1.0642  | 0.85638   |
|           | -0.39414        | 0.65326     | 0.39546 | 0.722130173 |             |          |           |
| UBC       | ENSG00000150991 | -0.85798    | 0.80455 | -0.85798    | 0.80455     | -0.85798 | 0.80455   |
|           | 0.26504         | 0.39549     | 0.39549 | 0.722131495 |             |          |           |
| NA        | ENSG00000256708 | 0.265       | 0.39551 | 0.265       | 0.39551     | 0.265    | 0.39551   |
|           | 0.39551         | 0.722131495 |         |             |             |          |           |
| C6        | ENSG00000039537 | -1.0448     | 0.85193 | 0.26496     | 0.39552     | 0.12519  | 0.45019   |
|           | -0.71812        | 0.76366     | 0.39552 | 0.722131495 |             |          |           |
| ING1      | ENSG00000153487 | -1.4926     | 0.93222 | 0.26496     | 0.39552     | -1.4042  | 0.91987   |

|           |                 |           |          |          |             |             |         |  |
|-----------|-----------------|-----------|----------|----------|-------------|-------------|---------|--|
|           |                 | -0.043676 | 0.51742  | 0.39552  | 0.722131495 |             |         |  |
| HMGB1P50  | ENSG00000271237 | -0.77849  | 0.78186  | 0.26491  | 0.39554     | -0.52503    |         |  |
|           |                 | 0.70022   | -0.23315 | 0.59218  | 0.39554     | 0.722140954 |         |  |
| NA        | ENSG00000254610 | 0.26482   | 0.39557  | -0.33414 | 0.63086     | -1.3799     | 0.91619 |  |
|           |                 | -0.38915  | 0.65142  | 0.39557  | 0.722168669 |             |         |  |
| SOX9      | ENSG00000125398 | -0.39477  | 0.65349  | 0.26472  | 0.39561     | -0.78644    | 0.7842  |  |
|           |                 | -0.56974  | 0.71557  | 0.39561  | 0.722214637 |             |         |  |
| LINC00974 | ENSG00000226629 | -0.69394  | 0.75614  | -0.24753 | 0.59775     | 0.26463     |         |  |
|           |                 | 0.39565   | -0.73754 | 0.7696   | 0.39565     | 0.722243651 |         |  |
| NA        | ENSG00000253190 | 0.26453   | 0.39568  | 0.26453  | 0.39568     | 0.26453     | 0.39568 |  |
|           |                 | 0.10182   | 0.45945  | 0.39568  | 0.722243651 |             |         |  |
| COG4      | ENSG00000103051 | 0.26453   | 0.39569  | -0.78631 | 0.78416     | -0.11978    | 0.54767 |  |
|           |                 | -1.2587   | 0.89593  | 0.39569  | 0.722243651 |             |         |  |
| NA        | ENSG00000225170 | 0.26449   | 0.3957   | 0.26449  | 0.3957      | 0.26449     | 0.3957  |  |
|           |                 | 0.26449   | 0.3957   | 0.3957   | 0.722243651 |             |         |  |
| NA        | ENSG00000254688 | 0.26449   | 0.3957   | -0.87393 | 0.80892     | -0.57816    | 0.71842 |  |
|           |                 | -0.7209   | 0.76451  | 0.3957   | 0.722243651 |             |         |  |
| NA        | ENSG00000207481 | -2.059    | 0.98025  | 0.26442  | 0.39573     | -0.29352    | 0.61544 |  |
|           |                 | 0.14471   | 0.44247  | 0.39573  | 0.722253755 |             |         |  |
| SPINT3    | ENSG00000101446 | 0.25726   | 0.39849  | 0.25726  | 0.39849     | 0.25726     |         |  |
|           |                 | 0.39849   | 0.26439  | 0.39574  | 0.39574     | 0.722253755 |         |  |
| NA        | ENSG00000248350 | 0.26437   | 0.39575  | 0.26437  | 0.39575     | 0.26437     | 0.39575 |  |
|           |                 | 0.26437   | 0.39575  | 0.39575  | 0.722253755 |             |         |  |
| LGALS7B   | ENSG00000178934 | -0.27032  | 0.60654  | -0.27032 | 0.60654     | -0.27032    |         |  |
|           |                 | 0.60654   | 0.2642   | 0.39581  | 0.39581     | 0.722336203 |         |  |
| ATP6V1B1  | ENSG00000116039 | 0.041034  | 0.48363  | 0.26412  | 0.39584     | -1.5578     |         |  |
|           |                 | 0.94036   | -0.64408 | 0.74024  | 0.39584     | 0.722337493 |         |  |
| MIR942    | ENSG00000215930 | 0.2641    | 0.39585  | 0.2641   | 0.39585     | 0.2641      |         |  |
|           |                 | 0.39585   | 0.2641   | 0.39585  | 0.39585     | 0.722337493 |         |  |
| HCLS1     | ENSG00000180353 | -0.69094  | 0.7552   | -0.69094 | 0.7552      | -0.69094    | 0.7552  |  |
|           |                 | 0.26409   | 0.39586  | 0.39586  | 0.722337493 |             |         |  |
| NA        | ENSG00000280255 | -0.010877 | 0.50434  | -0.63936 | 0.7387      | 0.26404     | 0.39587 |  |
|           |                 | -0.010877 | 0.50434  | 0.39587  | 0.722337493 |             |         |  |
| NOL7      | ENSG00000225921 | 0.2639    | 0.39593  | 0.2639   | 0.39593     | 0.2639      | 0.39593 |  |
|           |                 | 0.2639    | 0.39593  | 0.39593  | 0.722392875 |             |         |  |
| NA        | ENSG00000279691 | 0.2639    | 0.39593  | 0.2639   | 0.39593     | 0.2639      | 0.39593 |  |
|           |                 | 0.2639    | 0.39593  | 0.39593  | 0.722392875 |             |         |  |
| NA        | ENSG00000272913 | -0.47644  | 0.68312  | 0.26382  | 0.39596     | 0.26382     | 0.39596 |  |
|           |                 | 0.26382   | 0.39596  | 0.39596  | 0.722420562 |             |         |  |
| OR8C1P    | ENSG00000229254 | 0.26373   | 0.39599  | -0.20408 | 0.58086     | -0.20408    |         |  |
|           |                 | 0.58086   | -0.20408 | 0.58086  | 0.39599     | 0.722439444 |         |  |
| GPX7      | ENSG00000116157 | -0.77352  | 0.78039  | -0.77352 | 0.78039     | -0.77352    | 0.78039 |  |
|           |                 | 0.26372   | 0.396    | 0.396    | 0.722439444 |             |         |  |
| PALD1     | ENSG00000107719 | 0.10171   | 0.45949  | -0.46986 | 0.68077     | 0.26361     | 0.39604 |  |
|           |                 | -0.30953  | 0.62154  | 0.39604  | 0.72248537  |             |         |  |
| NA        | ENSG00000224090 | -0.94536  | 0.82776  | 0.26353  | 0.39607     | -0.94536    | 0.82776 |  |
|           |                 | -0.94536  | 0.82776  | 0.39607  | 0.72251305  |             |         |  |
| MTND2P19  | ENSG00000231567 | 0.2634    | 0.39612  | 0.2634   | 0.39612     | 0.2634      |         |  |
|           |                 | 0.39612   | 0.2634   | 0.39612  | 0.39612     | 0.722541357 |         |  |
| NA        | ENSG00000228107 | 0.26339   | 0.39613  | 0.26339  | 0.39613     | 0.26339     | 0.39613 |  |
|           |                 | 0.26339   | 0.39613  | 0.39613  | 0.722541357 |             |         |  |
| RN7SL240P | ENSG00000243505 | 0.26338   | 0.39613  | 0.26338  | 0.39613     | 0.26338     |         |  |
|           |                 | 0.39613   | 0.26338  | 0.39613  | 0.39613     | 0.722541357 |         |  |
| SLC45A2   | ENSG00000164175 | -0.065546 | 0.52613  | 0.26332  | 0.39615     | -0.81845    |         |  |
|           |                 | 0.79345   | -0.30287 | 0.619    | 0.39615     | 0.722550792 |         |  |
| ATF7      | ENSG00000170653 | 0.26317   | 0.39621  | 0.039662 | 0.48418     | 0.13259     | 0.44726 |  |
|           |                 | 0.17616   | 0.43008  | 0.39621  | 0.722606134 |             |         |  |
| SUMO2P18  | ENSG00000253639 | 0.17234   | 0.43158  | 0.26316  | 0.39621     | 0.17234     |         |  |
|           |                 | 0.43158   | 0.17234  | 0.43158  | 0.39621     | 0.722606134 |         |  |
| AQP10     | ENSG00000143595 | -0.11107  | 0.54422  | 0.26304  | 0.39626     | -0.11107    | 0.54422 |  |
|           |                 | -0.11107  | 0.54422  | 0.39626  | 0.722607383 |             |         |  |
| SYCE1L    | ENSG00000205078 | 0.26301   | 0.39627  | 0.26301  | 0.39627     | 0.16032     |         |  |

|             |                 |           |         |             |             |           |         |
|-------------|-----------------|-----------|---------|-------------|-------------|-----------|---------|
|             | 0.43632         | 0.2157    | 0.41461 | 0.39627     | 0.722607383 |           |         |
| GAPDHP54    | ENSG00000226769 | 0.26302   | 0.39627 | 0.26302     | 0.39627     | 0.26302   |         |
|             | 0.39627         | 0.26302   | 0.39627 | 0.39627     | 0.722607383 |           |         |
| NA          | ENSG00000253379 | -0.13926  | 0.55538 | -0.089081   | 0.53549     | 0.26302   | 0.39627 |
|             | -0.12668        | 0.5504    | 0.39627 | 0.722607383 |             |           |         |
| TPTE2       | ENSG00000132958 | -0.56849  | 0.71515 | -0.29348    | 0.61542     | 0.2629    | 0.39631 |
|             | -0.8995         | 0.81581   | 0.39631 | 0.722635669 |             |           |         |
| RNU6-62P    | ENSG00000252335 | 0.26288   | 0.39632 | 0.26288     | 0.39632     | 0.26288   |         |
|             | 0.39632         | 0.26288   | 0.39632 | 0.39632     | 0.722635669 |           |         |
| UGT1A4      | ENSG00000244474 | 0.26285   | 0.39633 | 0.26285     | 0.39633     | 0.26285   |         |
|             | 0.39633         | 0.26285   | 0.39633 | 0.39633     | 0.722635669 |           |         |
| NA          | ENSG00000255499 | 0.26282   | 0.39635 | 0.26282     | 0.39635     | 0.26282   | 0.39635 |
|             | 0.26282         | 0.39635   | 0.39635 | 0.722645097 |             |           |         |
| ZNF346      | ENSG00000113761 | -0.71117  | 0.76151 | -0.98274    | 0.83713     | 0.19965   |         |
|             | 0.42088         | 0.26271   | 0.39639 | 0.39639     | 0.722690987 |           |         |
| GID4        | ENSG00000141034 | -0.37702  | 0.64692 | 0.2626      | 0.39643     | 0.25218   | 0.40045 |
|             | -0.096712       | 0.53852   | 0.39643 | 0.722701029 |             |           |         |
| NA          | ENSG00000267315 | 0.26261   | 0.39643 | 0.26261     | 0.39643     | 0.26261   | 0.39643 |
|             | 0.26261         | 0.39643   | 0.39643 | 0.722701029 |             |           |         |
| PLPPR3      | ENSG00000129951 | 0.26257   | 0.39644 | 0.26257     | 0.39644     | 0.26257   |         |
|             | 0.39644         | 0.26257   | 0.39644 | 0.39644     | 0.722701029 |           |         |
| RNA5SP298   | ENSG00000201861 | 0.26235   | 0.39653 | 0.26235     | 0.39653     | 0.26235   |         |
|             | 0.39653         | 0.26235   | 0.39653 | 0.39653     | 0.722815276 |           |         |
| RPL21P9     | ENSG00000258618 | 0.26225   | 0.39657 | 0.26225     | 0.39657     | 0.26225   |         |
|             | 0.39657         | 0.26225   | 0.39657 | 0.39657     | 0.722815276 |           |         |
| MT1B        | ENSG00000169688 | 0.26221   | 0.39658 | 0.26221     | 0.39658     | 0.26221   | 0.39658 |
|             | 0.26221         | 0.39658   | 0.39658 | 0.722815276 |             |           |         |
| INVS        | ENSG00000119509 | 0.10963   | 0.45635 | 0.26218     | 0.39659     | -0.53355  | 0.70317 |
|             | -1.4438         | 0.9256    | 0.39659 | 0.722815276 |             |           |         |
| LINC00571   | ENSG00000223685 | -0.16071  | 0.56384 | 0.26212     | 0.39661     | 0.0098658 |         |
|             | 0.49606         | -0.72443  | 0.7656  | 0.39661     | 0.722815276 |           |         |
| NA          | ENSG00000273199 | -0.035275 | 0.51407 | 0.26208     | 0.39663     | -0.035275 | 0.51407 |
|             | -0.035275       | 0.51407   | 0.39663 | 0.722815276 |             |           |         |
| DHX33-DT    | ENSG00000262099 | 0.26205   | 0.39664 | 0.26205     | 0.39664     | 0.26205   |         |
|             | 0.39664         | 0.26205   | 0.39664 | 0.39664     | 0.722815276 |           |         |
| NA          | ENSG00000234869 | 0.262     | 0.39666 | 0.10844     | 0.45682     | 0.10844   | 0.45682 |
|             | 0.10844         | 0.45682   | 0.39666 | 0.722815276 |             |           |         |
| NA          | ENSG00000259696 | 0.26199   | 0.39666 | -0.16623    | 0.56601     | 0.26199   | 0.39666 |
|             | 0.07787         | 0.46897   | 0.39666 | 0.722815276 |             |           |         |
| KRTAP8-1    | ENSG00000183640 | -0.094475 | 0.53763 | 0.26193     | 0.39669     | 0.26193   |         |
|             | 0.39669         | 0.26193   | 0.39669 | 0.39669     | 0.722815276 |           |         |
| LOXL3       | ENSG00000115318 | -0.52492  | 0.70018 | 0.26186     | 0.39671     | -0.52492  | 0.70018 |
|             | -0.52492        | 0.70018   | 0.39671 | 0.722815276 |             |           |         |
| CTSK        | ENSG00000143387 | -0.15153  | 0.56022 | 0.26188     | 0.39671     | -1.4955   | 0.9326  |
|             | 0.19471         | 0.42281   | 0.39671 | 0.722815276 |             |           |         |
| MRO         | ENSG00000134042 | -0.50815  | 0.69433 | 0.26184     | 0.39672     | -0.30303  | 0.61907 |
|             | -0.25419        | 0.60033   | 0.39672 | 0.722815276 |             |           |         |
| TRMT112     | ENSG00000173113 | 0.26186   | 0.39672 | 0.26186     | 0.39672     | 0.26186   |         |
|             | 0.39672         | 0.26186   | 0.39672 | 0.39672     | 0.722815276 |           |         |
| LCK         | ENSG00000182866 | 0.10851   | 0.4568  | 0.26179     | 0.39674     | -0.25859  | 0.60202 |
|             | -0.81529        | 0.79255   | 0.39674 | 0.722815276 |             |           |         |
| POTEKP      | ENSG00000204434 | -0.60662  | 0.72795 | 0.2618      | 0.39674     | -1.573    |         |
|             | 0.94214         | -0.84639  | 0.80133 | 0.39674     | 0.722815276 |           |         |
| KLF15       | ENSG00000163884 | 0.26174   | 0.39676 | -1.2263     | 0.88996     | -0.090398 | 0.53601 |
|             | -0.23561        | 0.59313   | 0.39676 | 0.72282469  |             |           |         |
| OR6M1       | ENSG00000196099 | 0.26169   | 0.39678 | -1.2522     | 0.89475     | -1.2522   | 0.89475 |
|             | -0.68828        | 0.75436   | 0.39678 | 0.722834102 |             |           |         |
| KRTAP19-10P | ENSG00000235312 | 0.26152   | 0.39684 | 0.26152     | 0.39684     | 0.26152   |         |
|             | 0.39684         | 0.26152   | 0.39684 | 0.39684     | 0.72286294  |           |         |
| NA          | ENSG00000279129 | 0.26153   | 0.39684 | 0.26153     | 0.39684     | 0.26153   | 0.39684 |
|             | 0.26153         | 0.39684   | 0.39684 | 0.72286294  |             |           |         |
| TMEM138     | ENSG00000149483 | 0.26152   | 0.39685 | 0.23129     | 0.40854     | 0.26152   |         |

|            |                 |           |             |             |             |          |         |         |
|------------|-----------------|-----------|-------------|-------------|-------------|----------|---------|---------|
|            | 0.39685         | 0.26152   | 0.39685     | 0.39685     | 0.72286294  |          |         |         |
| NCKAP5-AS1 | ENSG00000233729 | 0.26149   | 0.39686     | 0.39686     | -0.85499    | 0.80372  | 0.26149 |         |
|            | 0.39686         | 0.26149   | 0.39686     | 0.39686     | 0.72286294  |          |         |         |
| NA         | ENSG00000226506 | -0.38282  | 0.64907     | -1.2056     | 0.88601     | 0.26145  | 0.39687 |         |
|            | -1.086          | 0.86126   | 0.39687     | 0.72286294  |             |          |         |         |
| NA         | ENSG00000227933 | 0.2614    | 0.39689     | 0.2614      | 0.39689     | 0.2614   | 0.39689 |         |
|            | 0.2614          | 0.39689   | 0.39689     | 0.722872349 |             |          |         |         |
| ME3        | ENSG00000151376 | 0.26131   | 0.39693     | -0.058157   | 0.52319     | -0.3834  | 0.64929 |         |
|            | -0.10821        | 0.54309   | 0.39693     | 0.722876218 |             |          |         |         |
| NETO2      | ENSG00000171208 | 0.020068  | 0.49199     | -0.086665   | 0.53453     | 0.26129  | 0.39694 |         |
|            | -0.016552       | 0.5066    | 0.39694     | 0.722876218 |             |          |         |         |
| VN1R108P   | ENSG00000230772 | -0.76175  | 0.77689     | -0.76175    | 0.77689     | 0.26124  |         |         |
|            | 0.39695         | 0.11524   | 0.45413     | 0.39695     | 0.722876218 |          |         |         |
| ESYT3      | ENSG00000158220 | 0.26116   | 0.39698     | -0.88747    | 0.81259     | -0.795   | 0.78669 |         |
|            | -0.795          | 0.78669   | 0.39698     | 0.722876218 |             |          |         |         |
| RNU4-18P   | ENSG00000252560 | 0.26112   | 0.397       | 0.26112     | 0.397       | 0.26112  | 0.397   | 0.26112 |
|            | 0.397           | 0.397     | 0.722876218 |             |             |          |         |         |
| CYP4F3     | ENSG00000186529 | -0.94022  | 0.82645     | -0.77502    | 0.78084     | -0.28645 |         |         |
|            | 0.61273         | 0.26109   | 0.39701     | 0.39701     | 0.722876218 |          |         |         |
| NA         | ENSG00000228940 | -0.16114  | 0.56401     | -0.16114    | 0.56401     | -0.16114 | 0.56401 |         |
|            | 0.26096         | 0.39706   | 0.39706     | 0.722876218 |             |          |         |         |
| NA         | ENSG00000254734 | 0.26095   | 0.39706     | 0.26095     | 0.39706     | 0.26095  | 0.39706 |         |
|            | 0.26095         | 0.39706   | 0.39706     | 0.722876218 |             |          |         |         |
| RNU6-922P  | ENSG00000252562 | -0.51078  | 0.69525     | -0.51078    | 0.69525     | -0.51078 |         |         |
|            | 0.69525         | 0.26085   | 0.3971      | 0.3971      | 0.722876218 |          |         |         |
| NA         | ENSG00000283098 | -0.90885  | 0.81828     | 0.26081     | 0.39712     | -0.2353  | 0.59301 |         |
|            | -0.2353         | 0.59301   | 0.39712     | 0.722876218 |             |          |         |         |
| FLRT1      | ENSG00000126500 | 0.069281  | 0.47238     | -0.75839    | 0.77589     | 0.26077  | 0.39714 |         |
|            | 0.26077         | 0.39714   | 0.39714     | 0.722876218 |             |          |         |         |
| ZNF584     | ENSG00000171574 | 0.26074   | 0.39715     | 0.2415      | 0.40458     | -0.29316 |         |         |
|            | 0.6153          | 0.25683   | 0.39865     | 0.39715     | 0.722876218 |          |         |         |
| ZP4        | ENSG00000116996 | -0.8055   | 0.78973     | -0.33438    | 0.63095     | -0.92188 | 0.8217  |         |
|            | 0.26065         | 0.39718   | 0.39718     | 0.722876218 |             |          |         |         |
| PTK2       | ENSG00000169398 | 0.26065   | 0.39718     | -0.17119    | 0.56796     | 0.25139  | 0.40076 |         |
|            | 0.13012         | 0.44824   | 0.39718     | 0.722876218 |             |          |         |         |
| CD151      | ENSG00000177697 | 0.26064   | 0.39718     | 0.26064     | 0.39718     | 0.26064  | 0.39718 |         |
|            | 0.26064         | 0.39718   | 0.39718     | 0.722876218 |             |          |         |         |
| TRABD2B    | ENSG00000269113 | -1.0101   | 0.84377     | 0.26065     | 0.39718     | -1.7458  |         |         |
|            | 0.95958         | -1.0101   | 0.84377     | 0.39718     | 0.722876218 |          |         |         |
| NA         | ENSG00000212279 | 0.26059   | 0.3972      | 0.26059     | 0.3972      | 0.26059  | 0.3972  |         |
|            | 0.26059         | 0.3972    | 0.3972      | 0.722876218 |             |          |         |         |
| HNRNPA1P54 | ENSG00000236539 | 0.26058   | 0.39721     | 0.26058     | 0.39721     | 0.14843  | 0.441   |         |
|            | 0.26058         | 0.39721   | 0.39721     | 0.722876218 |             |          |         |         |
| GAPDHP68   | ENSG00000233876 | 0.26049   | 0.39724     | -2.0715     | 0.98084     | -2.0715  |         |         |
|            | 0.98084         | -2.0715   | 0.98084     | 0.39724     | 0.722876218 |          |         |         |
| VN2R17P    | ENSG00000213014 | 0.26046   | 0.39725     | 0.26046     | 0.39725     | 0.26046  |         |         |
|            | 0.39725         | 0.26046   | 0.39725     | 0.39725     | 0.722876218 |          |         |         |
| IFITM3P5   | ENSG00000238168 | 0.26033   | 0.3973      | -0.21922    | 0.58676     | 0.26033  |         |         |
|            | 0.3973          | -1.5349   | 0.93759     | 0.3973      | 0.722876218 |          |         |         |
| NA         | ENSG00000248222 | -0.017355 | 0.50692     | -0.017355   | 0.50692     | 0.26032  | 0.39731 |         |
|            | -0.017355       | 0.50692   | 0.39731     | 0.722876218 |             |          |         |         |
| NA         | ENSG00000260932 | 0.2603    | 0.39731     | 0.2603      | 0.39731     | 0.2603   | 0.39731 |         |
|            | 0.2603          | 0.39731   | 0.39731     | 0.722876218 |             |          |         |         |
| ENDOV      | ENSG00000173818 | -0.69034  | 0.75501     | -0.39296    | 0.65283     | 0.23498  | 0.40711 |         |
|            | 0.26028         | 0.39732   | 0.39732     | 0.722876218 |             |          |         |         |
| NA         | ENSG00000225583 | 0.26027   | 0.39733     | 0.26027     | 0.39733     | 0.26027  | 0.39733 |         |
|            | 0.26027         | 0.39733   | 0.39733     | 0.722876218 |             |          |         |         |
| RNU6-1322P | ENSG00000201179 | -0.79098  | 0.78552     | -0.023265   | 0.50928     | 0.2602   |         |         |
|            | 0.39736         | -0.38188  | 0.64873     | 0.39736     | 0.722876218 |          |         |         |
| NA         | ENSG00000279092 | -0.42404  | 0.66423     | -0.57873    | 0.71862     | 0.26019  | 0.39736 |         |
|            | -0.21017        | 0.58323   | 0.39736     | 0.722876218 |             |          |         |         |
| NA         | ENSG00000252092 | -0.63655  | 0.73779     | 0.062346    | 0.47514     | 0.26017  | 0.39737 |         |



|            |                 |           |         |             |             |          |         |         |
|------------|-----------------|-----------|---------|-------------|-------------|----------|---------|---------|
|            | 0.047926        | 0.48089   | 0.39737 | 0.722876218 |             |          |         |         |
| RPSAP64    | ENSG00000227721 | 0.26014   | 0.39738 | 0.26014     | 0.39738     | 0.26014  | 0.39738 | 0.26014 |
|            | 0.39738         | 0.26014   | 0.39738 | 0.39738     | 0.722876218 |          |         |         |
| NA         | ENSG00000272015 | 0.26014   | 0.39738 | 0.26014     | 0.39738     | 0.26014  | 0.39738 | 0.26014 |
|            | 0.26014         | 0.39738   | 0.39738 | 0.722876218 |             |          |         |         |
| KRT84      | ENSG00000161849 | -0.92806  | 0.82331 | -1.3654     | 0.91394     | -0.92806 | 0.82331 | 0.82331 |
|            | 0.26012         | 0.39739   | 0.39739 | 0.722876218 |             |          |         |         |
| ZW10       | ENSG00000086827 | -1.2847   | 0.90054 | 0.26008     | 0.3974      | -1.0081  | 0.8433  | 0.8433  |
|            | -0.87207        | 0.80841   | 0.3974  | 0.722876218 |             |          |         |         |
| EIF4HP2    | ENSG00000237977 | 0.26005   | 0.39741 | 0.26005     | 0.39741     | 0.26005  | 0.39741 | 0.26005 |
|            | 0.39741         | 0.26005   | 0.39741 | 0.39741     | 0.722876218 |          |         |         |
| GGT7       | ENSG00000131067 | -0.2213   | 0.58757 | -0.21951    | 0.58687     | -0.21175 | 0.58385 | 0.58385 |
|            | 0.26003         | 0.39742   | 0.39742 | 0.722876218 |             |          |         |         |
| LINC00621  | ENSG00000262619 | 0.25999   | 0.39743 | -0.34794    | 0.63606     | -1.3731  |         |         |
|            | 0.91514         | -1.0719   | 0.85813 | 0.39743     | 0.722876218 |          |         |         |
| NA         | ENSG00000254822 | 0.25994   | 0.39746 | 0.25994     | 0.39746     | 0.25994  | 0.39746 | 0.39746 |
|            | 0.25994         | 0.39746   | 0.39746 | 0.722876218 |             |          |         |         |
| NA         | ENSG00000275476 | 0.25991   | 0.39747 | 0.25991     | 0.39747     | 0.25991  | 0.39747 | 0.39747 |
|            | 0.25991         | 0.39747   | 0.39747 | 0.722876218 |             |          |         |         |
| WSCD2      | ENSG00000075035 | 0.25987   | 0.39748 | -0.89889    | 0.81564     | 0.21809  | 0.41368 | 0.41368 |
|            | -0.059807       | 0.52385   | 0.39748 | 0.722876218 |             |          |         |         |
| REEP4      | ENSG00000168476 | 0.25987   | 0.39748 | -2.2052     | 0.98628     | -1.1883  | 0.88264 | 0.88264 |
|            | -1.1883         | 0.88264   | 0.39748 | 0.722876218 |             |          |         |         |
| RN7SL793P  | ENSG00000264554 | 0.25982   | 0.3975  | 0.25982     | 0.3975      | 0.25982  | 0.3975  | 0.25982 |
|            | 0.3975          | 0.25982   | 0.3975  | 0.3975      | 0.722876218 |          |         |         |
| SNORD115-6 | ENSG00000200812 | 0.25976   | 0.39752 | 0.25976     | 0.39752     | 0.25976  | 0.39752 | 0.25976 |
|            | 0.39752         | 0.25976   | 0.39752 | 0.39752     | 0.722876218 |          |         |         |
| NA         | ENSG00000214754 | -0.87332  | 0.80875 | 0.19102     | 0.42426     | 0.25974  | 0.39753 | 0.39753 |
|            | -1.5545         | 0.93996   | 0.39753 | 0.722876218 |             |          |         |         |
| RN7SL302P  | ENSG00000241246 | 0.12324   | 0.45096 | 0.13949     | 0.44453     | 0.13949  | 0.44453 | 0.13949 |
|            | 0.44453         | 0.25975   | 0.39753 | 0.39753     | 0.722876218 |          |         |         |
| ANGPTL7    | ENSG00000171819 | -0.44711  | 0.6726  | 0.254       | 0.39975     | 0.25957  | 0.3976  | 0.3976  |
|            | 0.15967         | 0.43657   | 0.3976  | 0.722958942 |             |          |         |         |
| CTSC       | ENSG00000109861 | 0.25951   | 0.39762 | -0.23235    | 0.59187     | -0.15933 | 0.5633  | 0.5633  |
|            | -0.31811        | 0.6248    | 0.39762 | 0.722958942 |             |          |         |         |
| MACIR      | ENSG00000181751 | -0.046974 | 0.51873 | -0.11759    | 0.5468      | 0.25951  | 0.39762 | 0.39762 |
|            | -0.30342        | 0.61922   | 0.39762 | 0.722958942 |             |          |         |         |
| NA         | ENSG00000256594 | 0.21514   | 0.41483 | 0.25944     | 0.39765     | 0.25944  | 0.39765 | 0.39765 |
|            | 0.25944         | 0.39765   | 0.39765 | 0.722986512 |             |          |         |         |
| NA         | ENSG00000235795 | 0.25933   | 0.39769 | 0.25933     | 0.39769     | 0.25933  | 0.39769 | 0.39769 |
|            | 0.25933         | 0.39769   | 0.39769 | 0.723014673 |             |          |         |         |
| NA         | ENSG00000259959 | 0.25931   | 0.3977  | 0.25931     | 0.3977      | 0.25931  | 0.3977  | 0.3977  |
|            | 0.25931         | 0.3977    | 0.3977  | 0.723014673 |             |          |         |         |
| FAM96AP2   | ENSG00000224566 | 0.1351    | 0.44627 | 0.1351      | 0.44627     | 0.1351   | 0.44627 | 0.1351  |
|            | 0.44627         | 0.25927   | 0.39771 | 0.39771     | 0.723014673 |          |         |         |
| MIR4779    | ENSG00000265420 | 0.25916   | 0.39776 | -1.3903     | 0.91779     | -1.3081  | 0.91779 | -1.3081 |
|            | 0.90457         | -1.3081   | 0.90457 | 0.39776     | 0.723061004 |          |         |         |
| RPS3AP12   | ENSG00000236804 | -0.34333  | 0.63433 | -0.082952   | 0.53306     | 0.25911  | 0.25911 | 0.25911 |
|            | 0.39777         | 0.25911   | 0.39777 | 0.39777     | 0.723061004 |          |         |         |
| NA         | ENSG00000263660 | 0.25909   | 0.39778 | 0.25909     | 0.39778     | 0.25909  | 0.39778 | 0.39778 |
|            | 0.25909         | 0.39778   | 0.39778 | 0.723061004 |             |          |         |         |
| NA         | ENSG00000222658 | 0.15224   | 0.4395  | -0.053255   | 0.52124     | 0.15224  | 0.4395  | 0.4395  |
|            | 0.25901         | 0.39782   | 0.39782 | 0.723104968 |             |          |         |         |
| KNSTRN     | ENSG00000128944 | 0.25887   | 0.39787 | 0.25887     | 0.39787     | 0.25887  | 0.39787 | 0.25887 |
|            | 0.39787         | -0.35886  | 0.64015 | 0.39787     | 0.723104968 |          |         |         |
| NA         | ENSG00000266795 | 0.25884   | 0.39788 | 0.25884     | 0.39788     | 0.25884  | 0.39788 | 0.39788 |
|            | 0.25884         | 0.39788   | 0.39788 | 0.723104968 |             |          |         |         |
| NA         | ENSG00000254708 | 0.2588    | 0.39789 | 0.10912     | 0.45655     | -0.33653 | 0.63176 | 0.63176 |
|            | 0.14238         | 0.44339   | 0.39789 | 0.723104968 |             |          |         |         |
| NA         | ENSG00000276122 | 0.25882   | 0.39789 | 0.25882     | 0.39789     | 0.25882  | 0.39789 | 0.39789 |
|            | 0.25882         | 0.39789   | 0.39789 | 0.723104968 |             |          |         |         |
| B3GNT7     | ENSG00000156966 | 0.25869   | 0.39794 | -1.9248     | 0.97287     | -1.8429  | 0.97287 | -1.8429 |

|            |                 |          |         |             |             |          |         |  |
|------------|-----------------|----------|---------|-------------|-------------|----------|---------|--|
|            | 0.96733         | -1.5107  | 0.93457 | 0.39794     | 0.723104968 |          |         |  |
| RPL12P38   | ENSG00000213228 | 0.25869  | 0.39794 | 0.18416     | 0.42694     | -0.27939 |         |  |
|            | 0.61003         | -0.27939 | 0.61003 | 0.39794     | 0.723104968 |          |         |  |
| ZFP36L2    | ENSG00000152518 | -1.3096  | 0.90484 | -0.39171    | 0.65236     | -0.15106 |         |  |
|            | 0.56004         | 0.25863  | 0.39796 | 0.39796     | 0.723104968 |          |         |  |
| LINC02610  | ENSG00000186235 | -1.0247  | 0.84726 | 0.25859     | 0.39798     | -0.58099 |         |  |
|            | 0.71938         | -0.58099 | 0.71938 | 0.39798     | 0.723104968 |          |         |  |
| NA         | ENSG00000253111 | -0.45028 | 0.67375 | 0.25853     | 0.398       | -0.45028 | 0.67375 |  |
|            | -0.1188         | 0.54728  | 0.398   | 0.723104968 |             |          |         |  |
| PMEPA1     | ENSG00000124225 | -0.94438 | 0.82751 | -2.33       | 0.9901      | -1.0101  | 0.84378 |  |
|            | 0.25851         | 0.39801  | 0.39801 | 0.723104968 |             |          |         |  |
| SP110      | ENSG00000135899 | -0.22492 | 0.58898 | 0.25848     | 0.39802     | -0.34946 | 0.63663 |  |
|            | 0.057668        | 0.47701  | 0.39802 | 0.723104968 |             |          |         |  |
| NA         | ENSG00000216324 | 0.25846  | 0.39802 | 0.25846     | 0.39802     | 0.25846  | 0.39802 |  |
|            | 0.25846         | 0.39802  | 0.39802 | 0.723104968 |             |          |         |  |
| MLLT10P1   | ENSG00000238151 | 0.25842  | 0.39804 | -0.95361    | 0.82986     | -0.95361 |         |  |
|            | 0.82986         | -0.95361 | 0.82986 | 0.39804     | 0.723104968 |          |         |  |
| ZNF875     | ENSG00000181666 | -0.70099 | 0.75834 | 0.25837     | 0.39806     | -1.7354  |         |  |
|            | 0.95866         | -0.38844 | 0.65115 | 0.39806     | 0.723104968 |          |         |  |
| OR5H2      | ENSG00000197938 | 0.25834  | 0.39807 | -1.8763     | 0.96969     | -1.8515  | 0.96795 |  |
|            | -1.8763         | 0.96969  | 0.39807 | 0.723104968 |             |          |         |  |
| NA         | ENSG00000254089 | 0.22721  | 0.41013 | 0.25833     | 0.39808     | 0.22721  | 0.41013 |  |
|            | 0.22721         | 0.41013  | 0.39808 | 0.723104968 |             |          |         |  |
| NA         | ENSG00000230815 | 0.25827  | 0.3981  | 0.018967    | 0.49243     | -0.45128 | 0.67411 |  |
|            | -0.84452        | 0.80081  | 0.3981  | 0.723104968 |             |          |         |  |
| AKAP11     | ENSG00000023516 | 0.25825  | 0.39811 | 0.25825     | 0.39811     | 0.25825  |         |  |
|            | 0.39811         | 0.25825  | 0.39811 | 0.39811     | 0.723104968 |          |         |  |
| NA         | ENSG00000206731 | 0.25813  | 0.39815 | 0.25813     | 0.39815     | 0.25813  | 0.39815 |  |
|            | 0.25813         | 0.39815  | 0.39815 | 0.723104968 |             |          |         |  |
| STT3B      | ENSG00000163527 | 0.23992  | 0.4052  | -0.41578    | 0.66121     | -0.76209 | 0.777   |  |
|            | 0.25809         | 0.39817  | 0.39817 | 0.723104968 |             |          |         |  |
| MLKL       | ENSG00000168404 | 0.25809  | 0.39817 | -0.65635    | 0.7442      | 0.17041  | 0.43234 |  |
|            | -0.34703        | 0.63571  | 0.39817 | 0.723104968 |             |          |         |  |
| NA         | ENSG00000215403 | 0.25809  | 0.39817 | 0.25809     | 0.39817     | 0.25809  | 0.39817 |  |
|            | 0.25809         | 0.39817  | 0.39817 | 0.723104968 |             |          |         |  |
| RPS4XP21   | ENSG00000186008 | -0.50742 | 0.69407 | 0.25804     | 0.39819     | -1.231   |         |  |
|            | 0.89083         | 0.25804  | 0.39819 | 0.39819     | 0.723104968 |          |         |  |
| NA         | ENSG00000239079 | 0.25804  | 0.39819 | 0.25804     | 0.39819     | 0.25804  | 0.39819 |  |
|            | 0.25804         | 0.39819  | 0.39819 | 0.723104968 |             |          |         |  |
| CDH18-AS1  | ENSG00000249854 | -0.53013 | 0.70199 | 0.21068     | 0.41657     | 0.25804  |         |  |
|            | 0.39819         | 0.13055  | 0.44807 | 0.39819     | 0.723104968 |          |         |  |
| MANEA-DT   | ENSG00000261366 | 0.25798  | 0.39821 | 0.054827    | 0.47814     | -0.3558  |         |  |
|            | 0.63901         | -0.3558  | 0.63901 | 0.39821     | 0.723105552 |          |         |  |
| SNORD116-1 | ENSG00000207063 | 0.25794  | 0.39822 | 0.25794     | 0.39822     | 0.25794  |         |  |
|            | 0.39822         | 0.25794  | 0.39822 | 0.39822     | 0.723105552 |          |         |  |
| NA         | ENSG00000280147 | -0.11381 | 0.54531 | 0.25765     | 0.39834     | 0.25765  | 0.39834 |  |
|            | 0.25765         | 0.39834  | 0.39834 | 0.723251967 |             |          |         |  |
| CCDC134    | ENSG00000100147 | 0.25762  | 0.39835 | 0.25762     | 0.39835     | 0.25762  |         |  |
|            | 0.39835         | -0.54535 | 0.70724 | 0.39835     | 0.723251967 |          |         |  |
| NA         | ENSG00000267366 | -0.24425 | 0.59648 | -0.064268   | 0.52562     | 0.25763  | 0.39835 |  |
|            | -0.63715        | 0.73799  | 0.39835 | 0.723251967 |             |          |         |  |
| NA         | ENSG00000279145 | -0.27238 | 0.60734 | -0.27238    | 0.60734     | 0.25759  | 0.39836 |  |
|            | -1.3061         | 0.90424  | 0.39836 | 0.723251967 |             |          |         |  |
| TMEM30A-DT | ENSG00000225793 | 0.25754  | 0.39838 | 0.25754     | 0.39838     | 0.25754  |         |  |
|            | 0.39838         | 0.25754  | 0.39838 | 0.39838     | 0.723252541 |          |         |  |
| SPCS3      | ENSG00000129128 | -0.66121 | 0.74576 | -0.46107    | 0.67763     | -1.6924  | 0.95472 |  |
|            | 0.25752         | 0.39839  | 0.39839 | 0.723252541 |             |          |         |  |
| NA         | ENSG00000274652 | 0.25745  | 0.39842 | -0.48009    | 0.68442     | 0.05253  | 0.47905 |  |
|            | 0.05253         | 0.47905  | 0.39842 | 0.723280058 |             |          |         |  |
| SDHB       | ENSG00000117118 | -0.98594 | 0.83792 | -0.89863    | 0.81558     | 0.25731  | 0.39847 |  |
|            | 0.13787         | 0.44517  | 0.39847 | 0.723343879 |             |          |         |  |
| NA         | ENSG00000253717 | 0.2572   | 0.39851 | 0.2572      | 0.39851     | 0.2572   | 0.39851 |  |

|              |                 |             |         |             |             |           |         |  |
|--------------|-----------------|-------------|---------|-------------|-------------|-----------|---------|--|
|              | 0.2572          | 0.39851     | 0.39851 | 0.723364858 |             |           |         |  |
| NA           | ENSG00000250193 | 0.25715     | 0.39853 | 0.25715     | 0.39853     | 0.25715   | 0.39853 |  |
|              | 0.25715         | 0.39853     | 0.39853 | 0.723364858 |             |           |         |  |
| NA           | ENSG00000257611 | 0.25716     | 0.39853 | 0.13593     | 0.44594     | -0.41661  | 0.66152 |  |
|              | -1.9707         | 0.97562     | 0.39853 | 0.723364858 |             |           |         |  |
| RNA5SP287    | ENSG00000252167 | 0.25707     | 0.39856 | 0.25707     | 0.39856     | 0.25707   |         |  |
|              | 0.39856         | 0.25707     | 0.39856 | 0.39856     | 0.723364858 |           |         |  |
| RNU6-225P    | ENSG00000207343 | -0.087528   | 0.53487 | -0.087528   | 0.53487     | 0.25701   |         |  |
|              | 0.39858         | -0.1049     | 0.54177 | 0.39858     | 0.723364858 |           |         |  |
| NA           | ENSG00000227050 | 0.257       | 0.39859 | 0.257       | 0.39859     | 0.257     | 0.39859 |  |
|              | 0.39859         | 0.723364858 |         |             |             |           |         |  |
| TOB2         | ENSG00000183864 | 0.11227     | 0.45531 | 0.1472      | 0.44149     | 0.25699   | 0.3986  |  |
|              | -0.06382        | 0.52544     | 0.3986  | 0.723364858 |             |           |         |  |
| CLECL1       | ENSG00000184293 | 0.25692     | 0.39862 | 0.16124     | 0.43595     | 0.16124   |         |  |
|              | 0.43595         | 0.16124     | 0.43595 | 0.39862     | 0.723364858 |           |         |  |
| NA           | ENSG00000250015 | 0.25691     | 0.39863 | 0.25691     | 0.39863     | 0.25691   | 0.39863 |  |
|              | 0.25691         | 0.39863     | 0.39863 | 0.723364858 |             |           |         |  |
| NA           | ENSG00000280202 | -0.43298    | 0.66748 | -0.53111    | 0.70233     | 0.2569    | 0.39863 |  |
|              | -0.43433        | 0.66798     | 0.39863 | 0.723364858 |             |           |         |  |
| HLA-P        | ENSG00000261548 | 0.25676     | 0.39868 | 0.1855      | 0.42642     | 0.23528   | 0.407   |  |
|              | 0.23528         | 0.407       | 0.39868 | 0.723419858 |             |           |         |  |
| SLC25A5P4    | ENSG00000234421 | 0.25673     | 0.39869 | 0.25673     | 0.39869     | 0.25673   |         |  |
|              | 0.39869         | 0.25673     | 0.39869 | 0.39869     | 0.723419858 |           |         |  |
| NR1I2        | ENSG00000144852 | 0.25664     | 0.39873 | 0.25664     | 0.39873     | 0.25664   | 0.39873 |  |
|              | 0.25664         | 0.39873     | 0.39873 | 0.723420979 |             |           |         |  |
| FAM114A1     | ENSG00000197712 | 0.25662     | 0.39873 | 0.16516     | 0.43441     | 0.081853  |         |  |
|              | 0.46738         | 0.19507     | 0.42267 | 0.39873     | 0.723420979 |           |         |  |
| RNA5SP110    | ENSG00000199508 | 0.25661     | 0.39874 | 0.25661     | 0.39874     | 0.25661   |         |  |
|              | 0.39874         | 0.25661     | 0.39874 | 0.39874     | 0.723420979 |           |         |  |
| LINC02196    | ENSG00000250974 | -0.024583   | 0.50981 | -0.71441    | 0.76251     | -0.46827  |         |  |
|              | 0.6802          | 0.25659     | 0.39875 | 0.39875     | 0.723420979 |           |         |  |
| PSAP         | ENSG00000197746 | -0.83304    | 0.79759 | 0.25633     | 0.39885     | -0.31748  | 0.62456 |  |
|              | -1.3006         | 0.9033      | 0.39885 | 0.723496878 |             |           |         |  |
| NA           | ENSG00000258416 | 0.20788     | 0.41766 | -0.16696    | 0.5663      | -0.938    | 0.82588 |  |
|              | 0.2563          | 0.39886     | 0.39886 | 0.723496878 |             |           |         |  |
| SH3BGRL2     | ENSG00000198478 | 0.25624     | 0.39888 | -1.3156     | 0.90584     | 0.25173   |         |  |
|              | 0.40063         | -0.7636     | 0.77745 | 0.39888     | 0.723496878 |           |         |  |
| NA           | ENSG00000272931 | 0.25622     | 0.39889 | 0.25622     | 0.39889     | 0.25622   | 0.39889 |  |
|              | 0.25622         | 0.39889     | 0.39889 | 0.723496878 |             |           |         |  |
| BNIP3P42     | ENSG00000223974 | 0.25618     | 0.39891 | 0.25618     | 0.39891     | 0.25618   |         |  |
|              | 0.39891         | 0.25618     | 0.39891 | 0.39891     | 0.723496878 |           |         |  |
| KRCC1        | ENSG00000172086 | 0.25608     | 0.39894 | -0.37186    | 0.645       | -1.3903   | 0.91777 |  |
|              | -0.94698        | 0.82818     | 0.39894 | 0.723496878 |             |           |         |  |
| NA           | ENSG00000267011 | 0.25608     | 0.39894 | 0.25608     | 0.39894     | 0.25608   | 0.39894 |  |
|              | 0.25608         | 0.39894     | 0.39894 | 0.723496878 |             |           |         |  |
| C11orf24     | ENSG00000171067 | -0.76609    | 0.77819 | -1.5218     | 0.93598     | 0.25607   |         |  |
|              | 0.39895         | -1.2889     | 0.90129 | 0.39895     | 0.723496878 |           |         |  |
| LINC01794    | ENSG00000233128 | -1.109      | 0.86628 | 0.25603     | 0.39896     | -1.1004   |         |  |
|              | 0.86441         | -0.63031    | 0.73575 | 0.39896     | 0.723496878 |           |         |  |
| ATAD3A       | ENSG00000197785 | 0.256       | 0.39897 | -1.7734     | 0.96192     | -1.1856   | 0.88211 |  |
|              | -0.53014        | 0.70199     | 0.39897 | 0.723496878 |             |           |         |  |
| RNU6-1168P   | ENSG00000212133 | 0.25603     | 0.39897 | -1.4374     | 0.92469     | -1.4374   |         |  |
|              | 0.92469         | -1.4374     | 0.92469 | 0.39897     | 0.723496878 |           |         |  |
| LINC01887    | ENSG00000266604 | 0.25602     | 0.39897 | -0.77963    | 0.7822      | 0.2386    |         |  |
|              | 0.40571         | 0.10732     | 0.45727 | 0.39897     | 0.723496878 |           |         |  |
| TBPL2        | ENSG00000182521 | -0.53692    | 0.70434 | -0.43806    | 0.66933     | -0.044294 | 0.51767 |  |
|              | 0.25593         | 0.399       | 0.399   | 0.723524355 |             |           |         |  |
| MFSD6L       | ENSG00000185156 | 0.2118      | 0.41613 | 0.25578     | 0.39906     | 0.19103   |         |  |
|              | 0.42425         | -0.78835    | 0.78475 | 0.39906     | 0.723570513 |           |         |  |
| MEF2D        | ENSG00000116604 | -0.45699    | 0.67616 | -0.21248    | 0.58413     | 0.25575   | 0.39907 |  |
|              | -0.1231         | 0.54899     | 0.39907 | 0.723570513 |             |           |         |  |
| SIGLEC10-AS1 | ENSG00000255441 | 0.25576     | 0.39907 | 0.25576     | 0.39907     | 0.25576   |         |  |

|             |                 |           |         |             |             |           |         |
|-------------|-----------------|-----------|---------|-------------|-------------|-----------|---------|
|             | 0.39907         | 0.25576   | 0.39907 | 0.39907     | 0.723570513 |           |         |
| HECTD1      | ENSG00000092148 | -0.2099   | 0.58313 | 0.25569     | 0.3991      | -0.12355  |         |
|             | 0.54917         | -0.26967  | 0.60629 | 0.3991      | 0.723571611 |           |         |
| OR5AC1      | ENSG00000213439 | -0.78752  | 0.78451 | -0.78752    | 0.78451     | 0.25564   |         |
|             | 0.39912         | -1.3807   | 0.91632 | 0.39912     | 0.723571611 |           |         |
| NA          | ENSG00000238061 | 0.25564   | 0.39912 | 0.25564     | 0.39912     | 0.25564   | 0.39912 |
|             | 0.25564         | 0.39912   | 0.39912 | 0.723571611 |             |           |         |
| NA          | ENSG00000270933 | 0.2556    | 0.39913 | -0.58818    | 0.72179     | -0.72554  | 0.76594 |
|             | -0.72554        | 0.76594   | 0.39913 | 0.723571611 |             |           |         |
| PSG11       | ENSG00000243130 | -1.338    | 0.90955 | -0.48133    | 0.68486     | -0.93741  | 0.82573 |
|             | 0.25548         | 0.39918   | 0.39918 | 0.723599624 |             |           |         |
| RPS3AP41    | ENSG00000239481 | -0.65676  | 0.74433 | 0.20947     | 0.41704     | 0.25544   |         |
|             | 0.39919         | -1.8436   | 0.96738 | 0.39919     | 0.723599624 |           |         |
| IGHVII-51-2 | ENSG00000253941 | 0.25543   | 0.39919 | 0.25543     | 0.39919     | 0.25543   |         |
|             | 0.39919         | 0.25543   | 0.39919 | 0.39919     | 0.723599624 |           |         |
| NA          | ENSG00000250202 | 0.2554    | 0.39921 | 0.2554      | 0.39921     | 0.2554    | 0.39921 |
|             | 0.2554          | 0.39921   | 0.39921 | 0.723608961 |             |           |         |
| ZNF32-AS3   | ENSG00000223910 | 0.25535   | 0.39923 | -0.9918     | 0.83935     | -0.065478 |         |
|             | 0.5261          | -0.66841  | 0.74806 | 0.39923     | 0.723609507 |           |         |
| UBE2Q2P1    | ENSG00000189136 | 0.25532   | 0.39924 | -0.013574   | 0.50541     | 0.14471   |         |
|             | 0.44247         | -0.64771  | 0.74141 | 0.39924     | 0.723609507 |           |         |
| NA          | ENSG00000230459 | 0.25526   | 0.39926 | 0.25526     | 0.39926     | -0.371    | 0.64468 |
|             | 0.079562        | 0.46829   | 0.39926 | 0.723618842 |             |           |         |
| RPL13AP3    | ENSG00000177350 | 0.2551    | 0.39932 | 0.2551      | 0.39932     | 0.2551    |         |
|             | 0.39932         | -0.24327  | 0.5961  | 0.39932     | 0.723648472 |           |         |
| NA          | ENSG00000279542 | 0.25509   | 0.39933 | 0.25509     | 0.39933     | 0.25509   | 0.39933 |
|             | 0.25509         | 0.39933   | 0.39933 | 0.723648472 |             |           |         |
| NA          | ENSG00000259299 | 0.25507   | 0.39934 | 0.25507     | 0.39934     | 0.25507   | 0.39934 |
|             | 0.25507         | 0.39934   | 0.39934 | 0.723648472 |             |           |         |
| LEFTY2      | ENSG00000143768 | 0.21814   | 0.41366 | 0.21814     | 0.41366     | 0.25502   |         |
|             | 0.39935         | -0.21373  | 0.58462 | 0.39935     | 0.723648472 |           |         |
| NA          | ENSG00000225591 | -0.57084  | 0.71595 | -0.57084    | 0.71595     | -0.208    | 0.58239 |
|             | 0.25497         | 0.39937   | 0.39937 | 0.723648472 |             |           |         |
| SLC5A12     | ENSG00000148942 | 0.12162   | 0.4516  | 0.12162     | 0.4516      | 0.2094    |         |
|             | 0.41707         | 0.2549    | 0.3994  | 0.3994      | 0.723648472 |           |         |
| NA          | ENSG00000255528 | -1.4451   | 0.92579 | 0.22884     | 0.4095      | 0.2549    | 0.3994  |
|             | 0.084208        | 0.46645   | 0.3994  | 0.723648472 |             |           |         |
| NA          | ENSG00000259039 | -0.9056   | 0.81743 | 0.25489     | 0.3994      | -1.557    | 0.94026 |
|             | -1.557          | 0.94026   | 0.3994  | 0.723648472 |             |           |         |
| MIR3153     | ENSG00000265112 | 0.25487   | 0.39941 | 0.25487     | 0.39941     | 0.25487   |         |
|             | 0.39941         | 0.25487   | 0.39941 | 0.39941     | 0.723648472 |           |         |
| VN1R25P     | ENSG00000224947 | 0.25479   | 0.39944 | -1.1656     | 0.8781      | -0.73566  |         |
|             | 0.76903         | 0.058319  | 0.47675 | 0.39944     | 0.723667131 |           |         |
| TBC1D9B     | ENSG00000197226 | 0.091303  | 0.46363 | 0.25477     | 0.39945     | -0.48728  |         |
|             | 0.68697         | -1.5159   | 0.93523 | 0.39945     | 0.723667131 |           |         |
| ARF5        | ENSG00000004059 | -0.10427  | 0.54152 | -1.8333     | 0.96662     | -1.2194   | 0.88865 |
|             | 0.25469         | 0.39948   | 0.39948 | 0.723694576 |             |           |         |
| KAT6B       | ENSG00000156650 | -0.086799 | 0.53458 | 0.25453     | 0.39954     | 0.21962   | 0.41308 |
|             | 0.10984         | 0.45627   | 0.39954 | 0.723776364 |             |           |         |
| RNU6-187P   | ENSG00000206866 | 0.25449   | 0.39956 | 0.25449     | 0.39956     | 0.25449   |         |
|             | 0.39956         | 0.25449   | 0.39956 | 0.39956     | 0.723785688 |           |         |
| CD5         | ENSG00000110448 | 0.25443   | 0.39958 | -0.71844    | 0.76376     | -1.3624   | 0.91346 |
|             | -0.43388        | 0.66781   | 0.39958 | 0.723786221 |             |           |         |
| NA          | ENSG00000220891 | 0.2544    | 0.39959 | 0.2544      | 0.39959     | 0.2544    | 0.39959 |
|             | 0.2544          | 0.39959   | 0.39959 | 0.723786221 |             |           |         |
| RNU2-49P    | ENSG00000222598 | 0.25434   | 0.39961 | 0.25434     | 0.39961     | 0.25434   |         |
|             | 0.39961         | 0.25434   | 0.39961 | 0.39961     | 0.723795543 |           |         |
| NA          | ENSG00000275236 | 0.25422   | 0.39966 | 0.25422     | 0.39966     | 0.25422   | 0.39966 |
|             | 0.25422         | 0.39966   | 0.39966 | 0.723806458 |             |           |         |
| TMEM170B    | ENSG00000205269 | -1.3555   | 0.91237 | 0.2542      | 0.39967     | -1.6733   |         |
|             | 0.95287         | -1.9101   | 0.97194 | 0.39967     | 0.723806458 |           |         |
| RPL7AP56    | ENSG00000242834 | -1.5842   | 0.94343 | 0.25418     | 0.39968     | -2.1818   |         |

|           |                 |           |         |             |             |           |         |  |
|-----------|-----------------|-----------|---------|-------------|-------------|-----------|---------|--|
|           | 0.98544         | -1.5842   | 0.94343 | 0.39968     | 0.723806458 |           |         |  |
| KRTAP4-6  | ENSG00000198090 | 0.25413   | 0.3997  | 0.054791    | 0.47815     | 0.054791  |         |  |
|           | 0.47815         | 0.054791  | 0.47815 | 0.3997      | 0.723806458 |           |         |  |
| NA        | ENSG00000255143 | 0.18557   | 0.42639 | 0.25413     | 0.3997      | -0.37077  | 0.6446  |  |
|           | -0.37077        | 0.6446    | 0.3997  | 0.723806458 |             |           |         |  |
| INSIG2    | ENSG00000125629 | -0.82453  | 0.79518 | -1.0299     | 0.84847     | 0.25406   |         |  |
|           | 0.39972         | 0.25406   | 0.39972 | 0.39972     | 0.723806458 |           |         |  |
| NA        | ENSG00000221511 | 0.25406   | 0.39972 | 0.25406     | 0.39972     | 0.25406   | 0.39972 |  |
|           | 0.25406         | 0.39972   | 0.39972 | 0.723806458 |             |           |         |  |
| RNA5SP327 | ENSG00000199364 | 0.25388   | 0.39979 | -0.72811    | 0.76673     | -0.72811  |         |  |
|           | 0.76673         | -0.72811  | 0.76673 | 0.39979     | 0.723906313 |           |         |  |
| ZNF747    | ENSG00000169955 | -0.47688  | 0.68328 | -0.47688    | 0.68328     | -1.2565   |         |  |
|           | 0.89554         | 0.25383   | 0.39981 | 0.39981     | 0.723906837 |           |         |  |
| MYOM2     | ENSG00000036448 | -1.2073   | 0.88634 | 0.25382     | 0.39982     | -1.92     | 0.97257 |  |
|           | -1.2452         | 0.89347   | 0.39982 | 0.723906837 |             |           |         |  |
| LOXL4     | ENSG00000138131 | 0.25375   | 0.39984 | -0.22438    | 0.58877     | -1.0528   | 0.85379 |  |
|           | -0.1982         | 0.57856   | 0.39984 | 0.723916151 |             |           |         |  |
| NA        | ENSG00000262271 | 0.25371   | 0.39986 | 0.25371     | 0.39986     | 0.25371   | 0.39986 |  |
|           | 0.25371         | 0.39986   | 0.39986 | 0.723925464 |             |           |         |  |
| LINC02300 | ENSG00000258175 | 0.25367   | 0.39988 | -0.31013    | 0.62177     | 0.25367   |         |  |
|           | 0.39988         | 0.25367   | 0.39988 | 0.39988     | 0.723925986 |           |         |  |
| NA        | ENSG00000260971 | 0.25363   | 0.39989 | -0.25674    | 0.60131     | 0.041048  | 0.48363 |  |
|           | -0.85411        | 0.80348   | 0.39989 | 0.723925986 |             |           |         |  |
| NA        | ENSG00000200646 | 0.25345   | 0.39996 | 0.25345     | 0.39996     | 0.25345   | 0.39996 |  |
|           | 0.25345         | 0.39996   | 0.39996 | 0.72399787  |             |           |         |  |
| NA        | ENSG00000204666 | -0.42472  | 0.66448 | 0.2534      | 0.39998     | -0.42472  | 0.66448 |  |
|           | -0.42472        | 0.66448   | 0.39998 | 0.72399787  |             |           |         |  |
| SEMA5B    | ENSG00000082684 | -0.18991  | 0.57531 | 0.2533      | 0.40002     | -0.094252 |         |  |
|           | 0.53755         | 0.079779  | 0.46821 | 0.40002     | 0.72399787  |           |         |  |
| MS4A3     | ENSG00000149516 | 0.25312   | 0.40009 | 0.25312     | 0.40009     | 0.25312   | 0.40009 |  |
|           | 0.25312         | 0.40009   | 0.40009 | 0.72399787  |             |           |         |  |
| NA        | ENSG00000199815 | 0.20357   | 0.41935 | 0.25312     | 0.40009     | 0.20357   | 0.41935 |  |
|           | 0.20357         | 0.41935   | 0.40009 | 0.72399787  |             |           |         |  |
| ARPC3P1   | ENSG00000226284 | 0.2531    | 0.40009 | -0.82703    | 0.79589     | -0.82703  |         |  |
|           | 0.79589         | -0.82703  | 0.79589 | 0.40009     | 0.72399787  |           |         |  |
| PTPN3     | ENSG00000070159 | -0.087801 | 0.53498 | 0.25309     | 0.4001      | 0.25309   | 0.4001  |  |
|           | -0.33032        | 0.62942   | 0.4001  | 0.72399787  |             |           |         |  |
| EZR-AS1   | ENSG00000233893 | 0.25303   | 0.40012 | -0.22641    | 0.58956     | 0.25303   |         |  |
|           | 0.40012         | 0.25303   | 0.40012 | 0.40012     | 0.72399787  |           |         |  |
| NA        | ENSG00000235912 | 0.25303   | 0.40012 | 0.25303     | 0.40012     | 0.25303   | 0.40012 |  |
|           | 0.25303         | 0.40012   | 0.40012 | 0.72399787  |             |           |         |  |
| NA        | ENSG00000258131 | -0.991    | 0.83916 | -1.0779     | 0.85945     | 0.25295   | 0.40015 |  |
|           | -1.7624         | 0.961     | 0.40015 | 0.72399787  |             |           |         |  |
| THSD1     | ENSG00000136114 | 0.12652   | 0.44966 | 0.25294     | 0.40016     | 0.10459   | 0.45835 |  |
|           | 0.10459         | 0.45835   | 0.40016 | 0.72399787  |             |           |         |  |
| NA        | ENSG00000226861 | 0.21032   | 0.41671 | -0.79787    | 0.78753     | 0.25292   | 0.40016 |  |
|           | 0.25292         | 0.40016   | 0.40016 | 0.72399787  |             |           |         |  |
| NA        | ENSG00000277210 | -0.1073   | 0.54272 | -0.1073     | 0.54272     | -0.77108  | 0.77967 |  |
|           | 0.25292         | 0.40016   | 0.40016 | 0.72399787  |             |           |         |  |
| NA        | ENSG00000254021 | -0.70154  | 0.75852 | 0.2529      | 0.40017     | -0.70154  | 0.75852 |  |
|           | -0.87883        | 0.81025   | 0.40017 | 0.72399787  |             |           |         |  |
| RBPJL     | ENSG00000124232 | 0.086101  | 0.46569 | 0.16046     | 0.43626     | 0.25288   | 0.40018 |  |
|           | 0.086101        | 0.46569   | 0.40018 | 0.72399787  |             |           |         |  |
| LINC01678 | ENSG00000225331 | 0.090373  | 0.464   | -0.66279    | 0.74627     | -0.45515  | 0.6755  |  |
|           | 0.25286         | 0.40019   | 0.40019 | 0.72399787  |             |           |         |  |
| NA        | ENSG00000238772 | -1.3851   | 0.91699 | -0.72315    | 0.76521     | -0.63014  | 0.7357  |  |
|           | 0.25279         | 0.40022   | 0.40022 | 0.72399787  |             |           |         |  |
| RNU6-140P | ENSG00000207296 | 0.25271   | 0.40024 | 0.25271     | 0.40024     | 0.25271   |         |  |
|           | 0.40024         | 0.25271   | 0.40024 | 0.40024     | 0.72399787  |           |         |  |
| NA        | ENSG00000267557 | 0.25267   | 0.40026 | 0.25267     | 0.40026     | 0.25267   | 0.40026 |  |
|           | 0.25267         | 0.40026   | 0.40026 | 0.72399787  |             |           |         |  |
| HID1-AS1  | ENSG00000263586 | 0.17273   | 0.43143 | 0.25263     | 0.40028     | 0.17273   |         |  |

|               |                 |           |         |             |             |           |           |         |
|---------------|-----------------|-----------|---------|-------------|-------------|-----------|-----------|---------|
|               | 0.43143         | 0.17273   | 0.43143 | 0.40028     | 0.72399787  |           |           |         |
| EIF3KP1       | ENSG00000175749 | 0.25254   | 0.40031 | 0.40031     | 0.25254     | 0.40031   | 0.25254   |         |
|               | 0.40031         | 0.25254   | 0.40031 | 0.40031     | 0.72399787  |           |           |         |
| C2orf27AP2    | ENSG00000239792 | 0.25253   | 0.40031 | 0.40031     | 0.25253     | 0.40031   | 0.25253   |         |
|               | 0.40031         | 0.25253   | 0.40031 | 0.40031     | 0.72399787  |           |           |         |
| RNU6-1095P    | ENSG00000251957 | 0.25255   | 0.40031 | 0.40031     | 0.25255     | 0.40031   | 0.25255   |         |
|               | 0.40031         | 0.25255   | 0.40031 | 0.40031     | 0.72399787  |           |           |         |
| PIK3C3        | ENSG00000078142 | 0.25251   | 0.40032 | 0.40032     | 0.25251     | 0.40032   | 0.25251   |         |
|               | 0.40032         | -0.39346  | 0.65301 | 0.40032     | 0.72399787  |           |           |         |
| HCG9          | ENSG00000204625 | 0.25241   | 0.40036 | 0.40036     | 0.25241     | 0.40036   | -0.059002 | 0.52352 |
|               | 0.25241         | 0.40036   | 0.40036 | 0.72399787  |             |           |           |         |
| DEFA1         | ENSG00000206047 | 0.25241   | 0.40036 | -0.32433    | 0.62716     | -1.2578   | 0.89576   |         |
|               | 0.23233         | 0.40814   | 0.40036 | 0.72399787  |             |           |           |         |
| NA            | ENSG00000233078 | 0.25238   | 0.40037 | 0.25238     | 0.40037     | 0.25238   | 0.40037   |         |
|               | 0.25238         | 0.40037   | 0.40037 | 0.72399787  |             |           |           |         |
| NA            | ENSG00000272912 | 0.2524    | 0.40037 | -0.12303    | 0.54896     | -0.013148 | 0.50525   |         |
|               | -0.013148       | 0.50525   | 0.40037 | 0.72399787  |             |           |           |         |
| CFAP61-AS1    | ENSG00000243810 | 0.25236   | 0.40038 | 0.25236     | 0.40038     | 0.25236   |           |         |
|               | 0.40038         | 0.25236   | 0.40038 | 0.40038     | 0.72399787  |           |           |         |
| NA            | ENSG00000199936 | 0.25234   | 0.40039 | -1.5038     | 0.93369     | -1.2548   | 0.89523   |         |
|               | -1.1672         | 0.87843   | 0.40039 | 0.72399787  |             |           |           |         |
| TRAK2         | ENSG00000115993 | -0.68103  | 0.75207 | 0.2523      | 0.4004      | 0.2523    | 0.4004    |         |
|               | 0.23079         | 0.40874   | 0.4004  | 0.72399787  |             |           |           |         |
| NA            | ENSG00000266306 | 0.25229   | 0.40041 | 0.25229     | 0.40041     | 0.25229   | 0.40041   |         |
|               | 0.25229         | 0.40041   | 0.40041 | 0.72399787  |             |           |           |         |
| DPPA5P4       | ENSG00000119660 | -0.096184 | 0.53831 | 0.25227     | 0.40042     | -0.20706  |           |         |
|               | 0.58202         | 0.25227   | 0.40042 | 0.40042     | 0.72399787  |           |           |         |
| LINC02670     | ENSG00000224788 | 0.25217   | 0.40045 | 0.25217     | 0.40045     | -0.03596  |           |         |
|               | 0.51434         | -0.32121  | 0.62597 | 0.40045     | 0.724007683 |           |           |         |
| NA            | ENSG00000217334 | 0.25217   | 0.40046 | 0.078546    | 0.4687      | 0.078546  | 0.4687    |         |
|               | 0.078546        | 0.4687    | 0.40046 | 0.724007683 |             |           |           |         |
| NA            | ENSG00000269927 | -0.26244  | 0.60351 | -1.2214     | 0.88904     | 0.25213   | 0.40047   |         |
|               | -1.244          | 0.89325   | 0.40047 | 0.724007683 |             |           |           |         |
| NA            | ENSG00000275088 | 0.25205   | 0.4005  | 0.25205     | 0.4005      | 0.25205   | 0.4005    |         |
|               | 0.25205         | 0.4005    | 0.4005  | 0.724009228 |             |           |           |         |
| RPS27P15      | ENSG00000218459 | 0.25194   | 0.40054 | 0.25194     | 0.40054     | 0.25194   |           |         |
|               | 0.40054         | 0.25194   | 0.40054 | 0.40054     | 0.724009228 |           |           |         |
| STON2         | ENSG00000140022 | -0.30771  | 0.62085 | 0.25193     | 0.40055     | -0.12167  | 0.54842   |         |
|               | -0.86695        | 0.80701   | 0.40055 | 0.724009228 |             |           |           |         |
| NA            | ENSG00000251661 | 0.25191   | 0.40055 | 0.25191     | 0.40055     | 0.25191   | 0.40055   |         |
|               | 0.25191         | 0.40055   | 0.40055 | 0.724009228 |             |           |           |         |
| MARK4         | ENSG00000007047 | 0.2519    | 0.40056 | -0.080404   | 0.53204     | 0.2519    | 0.40056   |         |
|               | 0.2519          | 0.40056   | 0.40056 | 0.724009228 |             |           |           |         |
| NA            | ENSG00000269446 | -1.0997   | 0.86428 | -0.4307     | 0.66666     | -1.1928   | 0.88354   |         |
|               | 0.25189         | 0.40056   | 0.40056 | 0.724009228 |             |           |           |         |
| ARFRP1        | ENSG00000101246 | 0.25168   | 0.40064 | 0.25168     | 0.40064     | 0.25168   |           |         |
|               | 0.40064         | 0.25168   | 0.40064 | 0.40064     | 0.724100111 |           |           |         |
| NA            | ENSG00000259756 | 0.25169   | 0.40064 | -0.10514    | 0.54187     | 0.25169   | 0.40064   |         |
|               | 0.25169         | 0.40064   | 0.40064 | 0.724100111 |             |           |           |         |
| KRT37         | ENSG00000108417 | -1.6913   | 0.95461 | 0.25161     | 0.40067     | -0.39721  | 0.65439   |         |
|               | -0.39721        | 0.65439   | 0.40067 | 0.724109909 |             |           |           |         |
| TIMM23B-AGAP6 | ENSG00000178440 | -1.8487   | 0.96775 | -1.1202     | 0.86868     | -0.26566  |           |         |
|               | 0.60475         | 0.25158   | 0.40068 | 0.40068     | 0.724109909 |           |           |         |
| LINC01136     | ENSG00000233791 | 0.023115  | 0.49078 | 0.023115    | 0.49078     | 0.25156   |           |         |
|               | 0.40069         | 0.023115  | 0.49078 | 0.40069     | 0.724109909 |           |           |         |
| DMRT1         | ENSG00000137090 | 0.2515    | 0.40071 | -0.24701    | 0.59755     | -0.32118  | 0.62596   |         |
|               | -0.61925        | 0.73212   | 0.40071 | 0.724110924 |             |           |           |         |
| TAP1          | ENSG00000168394 | -0.56033  | 0.71237 | -0.57601    | 0.7177      | -0.16741  | 0.56647   |         |
|               | 0.25146         | 0.40073   | 0.40073 | 0.724110924 |             |           |           |         |
| NA            | ENSG00000235994 | 0.25142   | 0.40074 | 0.18521     | 0.42653     | 0.18521   | 0.42653   |         |
|               | 0.18521         | 0.42653   | 0.40074 | 0.724110924 |             |           |           |         |
| NA            | ENSG00000225187 | 0.2514    | 0.40075 | -1.0254     | 0.84742     | 0.2514    | 0.40075   |         |

|           |                 |          |          |            |             |             |         |  |
|-----------|-----------------|----------|----------|------------|-------------|-------------|---------|--|
|           |                 | -0.55676 | 0.71116  | 0.40075    | 0.724110924 |             |         |  |
| NA        | ENSG00000254919 | 0.25132  | 0.40078  | -0.7812    | 0.78266     | -0.7812     | 0.78266 |  |
|           |                 | -0.7812  | 0.78266  | 0.40078    | 0.72413828  |             |         |  |
| KRT17P5   | ENSG00000205266 | -1.2267  | 0.89004  | 0.24584    | 0.4029      | -0.82449    |         |  |
|           |                 | 0.79517  | 0.25122  | 0.40082    | 0.72414807  |             |         |  |
| JCADP1    | ENSG00000235012 | -1.3395  | 0.9098   | 0.2512     | 0.40083     | -1.3541     |         |  |
|           |                 | 0.91215  | -1.4916  | 0.9321     | 0.40083     | 0.72414807  |         |  |
| NA        | ENSG00000250001 | 0.12997  | 0.4483   | 0.12997    | 0.4483      | 0.25119     | 0.40083 |  |
|           |                 | -0.52184 | 0.69911  | 0.40083    | 0.72414807  |             |         |  |
| MTND1P29  | ENSG00000237722 | -1.5371  | 0.93786  | 0.2511     | 0.40087     | -1.1381     |         |  |
|           |                 | 0.87246  | -1.1381  | 0.87246    | 0.40087     | 0.724193486 |         |  |
| MIR5697   | ENSG00000265521 | 0.25096  | 0.40092  | 0.25096    | 0.40092     | -0.58769    |         |  |
|           |                 | 0.72163  | -1.3212  | 0.90679    | 0.40092     | 0.724256964 |         |  |
| LINC00563 | ENSG00000261097 | 0.25088  | 0.40095  | 0.25088    | 0.40095     | 0.25088     |         |  |
|           |                 | 0.40095  | 0.25088  | 0.40095    | 0.40095     | 0.72426674  |         |  |
| NA        | ENSG00000237713 | 0.25086  | 0.40096  | 0.25086    | 0.40096     | 0.25086     | 0.40096 |  |
|           |                 | -0.37975 | 0.64793  | 0.40096    | 0.72426674  |             |         |  |
| PRB2      | ENSG00000121335 | -1.2693  | 0.89784  | -0.0054876 | 0.50219     | 0.25083     | 0.40097 |  |
|           |                 | -1.1067  | 0.86578  | 0.40097    | 0.72426674  |             |         |  |
| NA        | ENSG00000254649 | -0.40048 | 0.6556   | -0.40048   | 0.6556      | -0.40048    | 0.6556  |  |
|           |                 | 0.25078  | 0.40099  | 0.40099    | 0.724276018 |             |         |  |
| NCL       | ENSG00000115053 | -0.86794 | 0.80729  | 0.25062    | 0.40105     | -0.86794    | 0.80729 |  |
|           |                 | -0.83942 | 0.79938  | 0.40105    | 0.724321911 |             |         |  |
| NA        | ENSG00000229925 | 0.25064  | 0.40105  | 0.25064    | 0.40105     | 0.25064     | 0.40105 |  |
|           |                 | 0.25064  | 0.40105  | 0.40105    | 0.724321911 |             |         |  |
| NA        | ENSG00000253840 | 0.25059  | 0.40106  | 0.25059    | 0.40106     | 0.25059     | 0.40106 |  |
|           |                 | 0.25059  | 0.40106  | 0.40106    | 0.724321911 |             |         |  |
| GGT5      | ENSG00000099998 | 0.25043  | 0.40113  | -1.8199    | 0.96561     | -0.42273    | 0.66375 |  |
|           |                 | -0.84594 | 0.80121  | 0.40113    | 0.724421484 |             |         |  |
| CRACD     | ENSG00000109265 | -0.66096 | 0.74568  | -0.32312   | 0.6267      | 0.25031     | 0.40117 |  |
|           |                 | -0.65842 | 0.74486  | 0.40117    | 0.724458084 |             |         |  |
| FAM124A   | ENSG00000150510 | -0.05288 | 0.52109  | 0.074632   | 0.47025     | 0.13075     |         |  |
|           |                 | 0.44799  | 0.25029  | 0.40118    | 0.40118     | 0.724458084 |         |  |
| GNA13P1   | ENSG00000230237 | 0.25023  | 0.4012   | 0.25023    | 0.4012      | 0.25023     |         |  |
|           |                 | 0.4012   | 0.25023  | 0.4012     | 0.4012      | 0.724467353 |         |  |
| NA        | ENSG00000260432 | 0.25008  | 0.40126  | 0.25008    | 0.40126     | 0.25008     | 0.40126 |  |
|           |                 | 0.25008  | 0.40126  | 0.40126    | 0.724548849 |             |         |  |
| HLA-F     | ENSG00000204642 | 0.24998  | 0.4013   | -0.032786  | 0.51308     | 0.17376     | 0.43103 |  |
|           |                 | 0.18962  | 0.42481  | 0.4013     | 0.724567379 |             |         |  |
| NA        | ENSG00000270147 | 0.24998  | 0.4013   | 0.24998    | 0.4013      | 0.24998     | 0.4013  |  |
|           |                 | 0.24998  | 0.4013   | 0.4013     | 0.724567379 |             |         |  |
| IFI30     | ENSG00000216490 | 0.24994  | 0.40132  | 0.24994    | 0.40132     | 0.24994     | 0.40132 |  |
|           |                 | 0.24994  | 0.40132  | 0.40132    | 0.724567852 |             |         |  |
| ZBED4     | ENSG00000100426 | 0.090447 | 0.46397  | 0.2499     | 0.40133     | -0.64104    | 0.73925 |  |
|           |                 | -0.87458 | 0.8091   | 0.40133    | 0.724567852 |             |         |  |
| NA        | ENSG00000280189 | 0.24968  | 0.40142  | 0.24968    | 0.40142     | 0.24968     | 0.40142 |  |
|           |                 | 0.24968  | 0.40142  | 0.40142    | 0.72470349  |             |         |  |
| TNFRSF21  | ENSG00000146072 | -1.2214  | 0.88904  | -0.014217  | 0.50567     | 0.24957     |         |  |
|           |                 | 0.40146  | -0.45269 | 0.67461    | 0.40146     | 0.724733979 |         |  |
| DNAJB12P1 | ENSG00000237979 | 0.2495   | 0.40149  | 0.2495     | 0.40149     | 0.2495      |         |  |
|           |                 | 0.40149  | 0.2495   | 0.40149    | 0.40149     | 0.724733979 |         |  |
| NA        | ENSG00000279681 | 0.24949  | 0.40149  | 0.079886   | 0.46816     | -0.6407     | 0.73914 |  |
|           |                 | -0.6407  | 0.73914  | 0.40149    | 0.724733979 |             |         |  |
| NA        | ENSG00000269559 | 0.24944  | 0.40151  | -0.14229   | 0.55658     | 0.24944     | 0.40151 |  |
|           |                 | 0.24944  | 0.40151  | 0.40151    | 0.724733979 |             |         |  |
| NA        | ENSG00000227004 | 0.24942  | 0.40152  | 0.24942    | 0.40152     | -0.9331     | 0.82462 |  |
|           |                 | 0.24942  | 0.40152  | 0.40152    | 0.724733979 |             |         |  |
| BTBD2     | ENSG00000133243 | -0.87237 | 0.8085   | -0.70321   | 0.75904     | 0.24934     | 0.40155 |  |
|           |                 | 0.010891 | 0.49566  | 0.40155    | 0.724733979 |             |         |  |
| RPS2P52   | ENSG00000213726 | 0.24929  | 0.40157  | 0.24929    | 0.40157     | 0.24929     |         |  |
|           |                 | 0.40157  | 0.24929  | 0.40157    | 0.40157     | 0.724733979 |         |  |
| RPL23AP35 | ENSG00000232568 | 0.13941  | 0.44456  | 0.15148    | 0.4398      | 0.24927     |         |  |

|           |                 |          |          |             |             |          |          |  |
|-----------|-----------------|----------|----------|-------------|-------------|----------|----------|--|
|           | 0.40158         | 0.21971  | 0.41305  | 0.40158     | 0.724733979 |          |          |  |
| LINC00378 | ENSG00000225249 | 0.069416 | 0.069416 | 0.47233     | 0.24909     | 0.40165  | 0.069416 |  |
|           | 0.47233         | 0.069416 | 0.47233  | 0.40165     | 0.724733979 |          |          |  |
| NA        | ENSG00000279964 | 0.02113  | 0.49157  | 0.02113     | 0.49157     | 0.02113  | 0.49157  |  |
|           | 0.24899         | 0.40169  | 0.40169  | 0.724733979 |             |          |          |  |
| FAIM2     | ENSG00000135472 | -1.2391  | 0.89234  | -0.86183    | 0.80561     | -0.30954 | 0.62155  |  |
|           | 0.24895         | 0.4017   | 0.4017   | 0.724733979 |             |          |          |  |
| NA        | ENSG00000233970 | -1.3588  | 0.9129   | -1.1789     | 0.88079     | 0.24893  | 0.40171  |  |
|           | 0.24893         | 0.40171  | 0.40171  | 0.724733979 |             |          |          |  |
| NA        | ENSG00000250365 | -1.27    | 0.89796  | -1.5931     | 0.94443     | -1.1692  | 0.87885  |  |
|           | 0.24886         | 0.40174  | 0.40174  | 0.724733979 |             |          |          |  |
| NA        | ENSG00000269859 | 0.24886  | 0.40174  | 0.24886     | 0.40174     | 0.24886  | 0.40174  |  |
|           | 0.24886         | 0.40174  | 0.40174  | 0.724733979 |             |          |          |  |
| NA        | ENSG00000271666 | 0.24874  | 0.40178  | -0.069978   | 0.52789     | 0.24874  | 0.40178  |  |
|           | 0.24874         | 0.40178  | 0.40178  | 0.724733979 |             |          |          |  |
| NA        | ENSG00000223475 | -0.61512 | 0.73076  | 0.24869     | 0.4018      | -0.49823 | 0.69084  |  |
|           | 0.082325        | 0.46719  | 0.4018   | 0.724733979 |             |          |          |  |
| Clorf232  | ENSG00000282872 | 0.24867  | 0.40181  | 0.24867     | 0.40181     | 0.24867  |          |  |
|           | 0.40181         | 0.24867  | 0.40181  | 0.40181     | 0.724733979 |          |          |  |
| WARS1P1   | ENSG00000225802 | 0.24864  | 0.40182  | -0.74809    | 0.7728      | 0.24864  |          |  |
|           | 0.40182         | -0.41638 | 0.66143  | 0.40182     | 0.724733979 |          |          |  |
| NA        | ENSG00000233845 | 0.24861  | 0.40183  | 0.017929    | 0.49285     | 0.17035  | 0.43237  |  |
|           | -1.0047         | 0.84249  | 0.40183  | 0.724733979 |             |          |          |  |
| NA        | ENSG00000235522 | 0.12138  | 0.4517   | 0.24855     | 0.40185     | 0.24855  | 0.40185  |  |
|           | 0.24855         | 0.40185  | 0.40185  | 0.724733979 |             |          |          |  |
| RPL21P16  | ENSG00000220842 | 0.24847  | 0.40188  | 0.24847     | 0.40188     | 0.24847  |          |  |
|           | 0.40188         | 0.24847  | 0.40188  | 0.40188     | 0.724733979 |          |          |  |
| RPS4XP22  | ENSG00000239830 | 0.24848  | 0.40188  | 0.20804     | 0.4176      | 0.24848  |          |  |
|           | 0.40188         | 0.24848  | 0.40188  | 0.40188     | 0.724733979 |          |          |  |
| CBSL      | ENSG00000274276 | 0.24849  | 0.40188  | 0.24849     | 0.40188     | 0.24849  | 0.40188  |  |
|           | 0.24849         | 0.40188  | 0.40188  | 0.724733979 |             |          |          |  |
| MIR1276   | ENSG00000221634 | 0.24844  | 0.4019   | 0.24844     | 0.4019      | 0.24844  |          |  |
|           | 0.4019          | 0.24844  | 0.4019   | 0.4019      | 0.724733979 |          |          |  |
| NA        | ENSG00000259195 | 0.24844  | 0.4019   | 0.24844     | 0.4019      | 0.24844  | 0.4019   |  |
|           | 0.24844         | 0.4019   | 0.4019   | 0.724733979 |             |          |          |  |
| NA        | ENSG00000268938 | 0.24844  | 0.4019   | 0.24844     | 0.4019      | 0.24844  | 0.4019   |  |
|           | 0.24844         | 0.4019   | 0.4019   | 0.724733979 |             |          |          |  |
| NA        | ENSG00000249951 | 0.075478 | 0.46992  | 0.24837     | 0.40193     | 0.24837  | 0.40193  |  |
|           | 0.24837         | 0.40193  | 0.40193  | 0.724733979 |             |          |          |  |
| MB        | ENSG00000198125 | -0.63669 | 0.73784  | 0.24832     | 0.40194     | 0.24832  | 0.40194  |  |
|           | -0.15172        | 0.5603   | 0.40194  | 0.724733979 |             |          |          |  |
| NA        | ENSG00000264398 | 0.24833  | 0.40194  | -1.2236     | 0.88945     | -1.0239  | 0.84705  |  |
|           | -0.17554        | 0.56967  | 0.40194  | 0.724733979 |             |          |          |  |
| NA        | ENSG00000261118 | -0.15801 | 0.56277  | -0.13961    | 0.55552     | 0.24821  | 0.40199  |  |
|           | -0.10105        | 0.54025  | 0.40199  | 0.724733979 |             |          |          |  |
| PPP1R10   | ENSG00000204569 | -2.5359  | 0.99439  | 0.24818     | 0.402       | -0.43611 | 0.66862  |  |
|           | -0.70855        | 0.7607   | 0.402    | 0.724733979 |             |          |          |  |
| ATP5PDP2  | ENSG00000229184 | -0.18888 | 0.57491  | -0.18888    | 0.57491     | -0.63099 |          |  |
|           | 0.73598         | 0.24817  | 0.402    | 0.402       | 0.724733979 |          |          |  |
| IFIT1P1   | ENSG00000215515 | 0.2481   | 0.40203  | 0.2481      | 0.40203     | 0.2481   |          |  |
|           | 0.40203         | 0.2481   | 0.40203  | 0.40203     | 0.724733979 |          |          |  |
| VPS13B    | ENSG00000132549 | 0.15374  | 0.43891  | 0.10894     | 0.45662     | -0.63854 |          |  |
|           | 0.73844         | 0.24808  | 0.40204  | 0.40204     | 0.724733979 |          |          |  |
| TMA16     | ENSG00000198498 | -1.0329  | 0.84917  | -0.36828    | 0.64367     | -1.8786  | 0.96985  |  |
|           | 0.24807         | 0.40204  | 0.40204  | 0.724733979 |             |          |          |  |
| NA        | ENSG00000249645 | -0.86105 | 0.80539  | -0.64366    | 0.7401      | 0.24799  | 0.40207  |  |
|           | 0.24799         | 0.40207  | 0.40207  | 0.724733979 |             |          |          |  |
| RN7SL282P | ENSG00000243591 | 0.24797  | 0.40208  | -1.9106     | 0.97197     | 0.24797  |          |  |
|           | 0.40208         | 0.24797  | 0.40208  | 0.40208     | 0.724733979 |          |          |  |
| NA        | ENSG00000257830 | -0.41869 | 0.66228  | 0.24796     | 0.40208     | 0.24796  | 0.40208  |  |
|           | 0.24796         | 0.40208  | 0.40208  | 0.724733979 |             |          |          |  |
| NA        | ENSG00000177359 | 0.14432  | 0.44262  | 0.15352     | 0.43899     | 0.24793  | 0.40209  |  |



|             |                 |           |         |             |             |           |         |         |
|-------------|-----------------|-----------|---------|-------------|-------------|-----------|---------|---------|
|             | -1.1769         | 0.88039   | 0.40209 | 0.724733979 |             |           |         |         |
| EPPIN-WFDC6 | ENSG00000249139 | 0.24789   | 0.40211 | 0.24789     | 0.40211     | 0.24789   | 0.40211 | 0.24789 |
|             | 0.40211         | 0.24789   | 0.40211 | 0.40211     | 0.724733979 |           |         |         |
| C12orf54    | ENSG00000177627 | 0.060979  | 0.47569 | -0.5516     | 0.70939     | 0.24785   |         |         |
|             | 0.40213         | -0.62917  | 0.73538 | 0.40213     | 0.724733979 |           |         |         |
| NA          | ENSG00000268309 | 0.24779   | 0.40215 | 0.24779     | 0.40215     | 0.24779   | 0.40215 | 0.40215 |
|             | 0.24779         | 0.40215   | 0.40215 | 0.724733979 |             |           |         |         |
| NA          | ENSG00000283696 | 0.24774   | 0.40217 | 0.24774     | 0.40217     | 0.24774   | 0.40217 | 0.40217 |
|             | 0.24774         | 0.40217   | 0.40217 | 0.724733979 |             |           |         |         |
| FGFBP2      | ENSG00000137441 | 0.24768   | 0.40219 | -0.79209    | 0.78585     | -0.093159 |         |         |
|             | 0.53711         | -0.093159 | 0.53711 | 0.40219     | 0.724733979 |           |         |         |
| RIPK4       | ENSG00000183421 | -0.70228  | 0.75875 | 0.24769     | 0.40219     | -1.0064   | 0.84288 |         |
|             | -1.5058         | 0.93395   | 0.40219 | 0.724733979 |             |           |         |         |
| ZNF295-AS1  | ENSG00000237232 | -0.67739  | 0.75092 | -1.3982     | 0.91897     | -0.18019  |         |         |
|             | 0.5715          | 0.24769   | 0.40219 | 0.40219     | 0.724733979 |           |         |         |
| RN7SL69P    | ENSG00000240533 | 0.24769   | 0.40219 | 0.24769     | 0.40219     | 0.24769   |         |         |
|             | 0.40219         | 0.24769   | 0.40219 | 0.40219     | 0.724733979 |           |         |         |
| TMEM59      | ENSG00000116209 | -0.45411  | 0.67513 | 0.24766     | 0.4022      | -0.41152  |         |         |
|             | 0.65965         | -0.29511  | 0.61605 | 0.4022      | 0.724733979 |           |         |         |
| NDNF        | ENSG00000173376 | 0.11937   | 0.45249 | 0.24766     | 0.4022      | -0.29907  | 0.61756 |         |
|             | 0.17599         | 0.43015   | 0.4022  | 0.724733979 |             |           |         |         |
| LINC02558   | ENSG00000230866 | 0.24766   | 0.4022  | 0.24766     | 0.4022      | 0.24766   |         |         |
|             | 0.4022          | 0.24766   | 0.4022  | 0.4022      | 0.724733979 |           |         |         |
| TTL12       | ENSG00000100304 | -0.77582  | 0.78107 | 0.24764     | 0.40221     | 0.24764   |         |         |
|             | 0.40221         | 0.24764   | 0.40221 | 0.40221     | 0.724733979 |           |         |         |
| ST3GAL1     | ENSG00000008513 | -0.69003  | 0.75491 | 0.24758     | 0.40223     | -0.081628 |         |         |
|             | 0.53253         | -1.0294   | 0.84836 | 0.40223     | 0.724733979 |           |         |         |
| PPP1R3B     | ENSG00000173281 | 0.13486   | 0.44636 | 0.24755     | 0.40224     | 0.13486   |         |         |
|             | 0.44636         | 0.13486   | 0.44636 | 0.40224     | 0.724733979 |           |         |         |
| NA          | ENSG00000260757 | 0.24755   | 0.40224 | 0.24755     | 0.40224     | 0.24755   | 0.40224 | 0.40224 |
|             | 0.24755         | 0.40224   | 0.40224 | 0.724733979 |             |           |         |         |
| NA          | ENSG00000272157 | 0.22969   | 0.40917 | 0.22969     | 0.40917     | 0.22969   | 0.40917 | 0.40917 |
|             | 0.24747         | 0.40227   | 0.40227 | 0.724734439 |             |           |         |         |
| NA          | ENSG00000282413 | 0.24749   | 0.40227 | 0.24749     | 0.40227     | 0.24749   | 0.40227 | 0.40227 |
|             | 0.24749         | 0.40227   | 0.40227 | 0.724734439 |             |           |         |         |
| KCNS3       | ENSG00000170745 | -0.32824  | 0.62864 | 0.17839     | 0.42921     | -0.39863  | 0.65492 |         |
|             | 0.24743         | 0.40229   | 0.40229 | 0.724743676 |             |           |         |         |
| NA          | ENSG00000235707 | 0.24731   | 0.40234 | -0.53976    | 0.70532     | -0.53976  | 0.70532 | 0.70532 |
|             | -0.53976        | 0.70532   | 0.40234 | 0.724798178 |             |           |         |         |
| RNU6-108P   | ENSG00000202428 | 0.24726   | 0.40235 | 0.24726     | 0.40235     | 0.24726   |         |         |
|             | 0.40235         | 0.24726   | 0.40235 | 0.40235     | 0.724798178 |           |         |         |
| DMP1        | ENSG00000152592 | -0.38896  | 0.65135 | 0.24718     | 0.40238     | 0.24718   | 0.40238 | 0.40238 |
|             | 0.24718         | 0.40238   | 0.40238 | 0.724798632 |             |           |         |         |
| RN7SKP239   | ENSG00000201684 | 0.24718   | 0.40238 | 0.016632    | 0.49336     | 0.016632  |         |         |
|             | 0.49336         | 0.016632  | 0.49336 | 0.40238     | 0.724798632 |           |         |         |
| LRP3        | ENSG00000130881 | 0.24709   | 0.40242 | -1.1968     | 0.88431     | 0.24709   | 0.40242 | 0.40242 |
|             | 0.24709         | 0.40242   | 0.40242 | 0.724817099 |             |           |         |         |
| TRAV33      | ENSG00000258812 | 0.24708   | 0.40242 | 0.24708     | 0.40242     | 0.24708   |         |         |
|             | 0.40242         | 0.24708   | 0.40242 | 0.40242     | 0.724817099 |           |         |         |
| ZMAT4       | ENSG00000165061 | -0.57358  | 0.71688 | 0.18596     | 0.42624     | -0.62629  | 0.73444 |         |
|             | 0.24697         | 0.40247   | 0.40247 | 0.724844793 |             |           |         |         |
| IGHV3-50    | ENSG00000253241 | 0.24695   | 0.40247 | 0.24695     | 0.40247     | 0.24695   |         |         |
|             | 0.40247         | 0.24695   | 0.40247 | 0.40247     | 0.724844793 |           |         |         |
| LINC02121   | ENSG00000250529 | 0.24694   | 0.40248 | 0.24694     | 0.40248     | 0.24694   |         |         |
|             | 0.40248         | 0.24694   | 0.40248 | 0.40248     | 0.724844793 |           |         |         |
| NA          | ENSG00000260922 | 0.24681   | 0.40253 | -0.75721    | 0.77554     | -0.77572  | 0.78104 | 0.78104 |
|             | -1.2561         | 0.89546   | 0.40253 | 0.72490195  |             |           |         |         |
| B3GALT5     | ENSG00000183778 | 0.24676   | 0.40255 | 0.10955     | 0.45638     | 0.24676   |         |         |
|             | 0.40255         | 0.0111    | 0.49557 | 0.40255     | 0.72490195  |           |         |         |
| NA          | ENSG00000239091 | 0.24661   | 0.4026  | 0.24661     | 0.4026      | 0.028369  | 0.48868 | 0.48868 |
|             | 0.24661         | 0.4026    | 0.4026  | 0.72490195  |             |           |         |         |
| LINC01852   | ENSG00000236914 | 0.24653   | 0.40263 | 0.039702    | 0.48417     | -0.090935 |         |         |

|           |                 |           |             |             |             |           |         |         |
|-----------|-----------------|-----------|-------------|-------------|-------------|-----------|---------|---------|
|           | 0.53623         | 0.05795   | 0.47689     | 0.40263     | 0.72490195  |           |         |         |
| CBWD1     | ENSG00000172785 | -1.1834   | 0.88168     | 0.24651     | 0.40264     | -0.24729  | 0.59766 |         |
|           | -1.2295         | 0.89055   | 0.40264     | 0.72490195  |             |           |         |         |
| PABPC4L   | ENSG00000254535 | -0.14109  | 0.5561      | -0.12814    | 0.55098     | 0.24651   |         |         |
|           | 0.40264         | -0.8111   | 0.79135     | 0.40264     | 0.72490195  |           |         |         |
| NA        | ENSG00000252045 | -0.86624  | 0.80682     | -0.52918    | 0.70166     | -1.1263   | 0.86997 |         |
|           | 0.24649         | 0.40265   | 0.40265     | 0.72490195  |             |           |         |         |
| NA        | ENSG00000251893 | 0.24644   | 0.40267     | 0.24644     | 0.40267     | 0.24644   | 0.40267 |         |
|           | 0.24644         | 0.40267   | 0.40267     | 0.72490195  |             |           |         |         |
| RPS29P11  | ENSG00000242640 | 0.24642   | 0.40268     | 0.24642     | 0.40268     | 0.24642   |         |         |
|           | 0.40268         | 0.24642   | 0.40268     | 0.40268     | 0.72490195  |           |         |         |
| OR13F1    | ENSG00000186881 | 0.24639   | 0.40269     | 0.24639     | 0.40269     | 0.24639   |         |         |
|           | 0.40269         | 0.24639   | 0.40269     | 0.40269     | 0.72490195  |           |         |         |
| NA        | ENSG00000230825 | -0.13184  | 0.55245     | -0.14471    | 0.55753     | -0.13184  | 0.55245 |         |
|           | 0.2464          | 0.40269   | 0.40269     | 0.72490195  |             |           |         |         |
| ETV1      | ENSG00000006468 | 0.24632   | 0.40272     | -0.40488    | 0.65722     | -0.08127  | 0.53239 |         |
|           | -0.08127        | 0.53239   | 0.40272     | 0.72490195  |             |           |         |         |
| CBX3P9    | ENSG00000217241 | -0.010047 | 0.50401     | 0.24631     | 0.40272     | 0.24631   |         |         |
|           | 0.40272         | 0.24631   | 0.40272     | 0.40272     | 0.72490195  |           |         |         |
| RPL9P30   | ENSG00000240074 | -0.018437 | 0.50735     | 0.2463      | 0.40272     | 0.058559  |         |         |
|           | 0.47665         | -0.75049  | 0.77352     | 0.40272     | 0.72490195  |           |         |         |
| RPS27P14  | ENSG00000244717 | 0.24626   | 0.40274     | 0.24626     | 0.40274     | 0.24626   |         |         |
|           | 0.40274         | 0.24626   | 0.40274     | 0.40274     | 0.724911173 |           |         |         |
| TGFB1I1   | ENSG00000140682 | -1.2487   | 0.89411     | -1.2487     | 0.89411     | -1.2487   |         |         |
|           | 0.89411         | 0.24621   | 0.40276     | 0.40276     | 0.724920396 |           |         |         |
| LMNTD2    | ENSG00000185522 | 0.246     | 0.40284     | 0.246       | 0.40284     | 0.246     | 0.40284 | 0.246   |
|           | 0.40284         | 0.40284   | 0.725028826 |             |             |           |         |         |
| RN7SL340P | ENSG00000241604 | 0.20982   | 0.4169      | -0.44393    | 0.67146     | 0.24599   |         |         |
|           | 0.40285         | -0.2945   | 0.61581     | 0.40285     | 0.725028826 |           |         |         |
| NA        | ENSG00000257199 | -1.1749   | 0.87998     | 0.24587     | 0.40289     | -0.071359 | 0.52844 |         |
|           | -0.50102        | 0.69182   | 0.40289     | 0.725074037 |             |           |         |         |
| PON1      | ENSG00000005421 | -0.45516  | 0.6755      | -0.45516    | 0.6755      | -0.45516  | 0.6755  |         |
|           | 0.2458          | 0.40292   | 0.40292     | 0.725101248 |             |           |         |         |
| NA        | ENSG00000227713 | -1.1856   | 0.8821      | -1.3877     | 0.91738     | -1.5096   | 0.93442 |         |
|           | 0.24572         | 0.40295   | 0.40295     | 0.725128457 |             |           |         |         |
| NA        | ENSG00000271173 | 0.24567   | 0.40297     | -0.79013    | 0.78527     | -0.56663  | 0.71452 |         |
|           | -0.56663        | 0.71452   | 0.40297     | 0.72513767  |             |           |         |         |
| NA        | ENSG00000241764 | -0.23218  | 0.5918      | 0.24558     | 0.403       | 0.24558   | 0.403   | 0.24558 |
|           | 0.403           | 0.403     | 0.725156093 |             |             |           |         |         |
| RNU6-853P | ENSG00000201176 | -0.53193  | 0.70261     | 0.24556     | 0.40301     | 0.19236   |         |         |
|           | 0.42373         | -1.0965   | 0.86356     | 0.40301     | 0.725156093 |           |         |         |
| CLEC2B    | ENSG00000110852 | -0.22365  | 0.58848     | -0.22365    | 0.58848     | -0.22365  |         |         |
|           | 0.58848         | 0.24549   | 0.40304     | 0.40304     | 0.725174513 |           |         |         |
| GATA6     | ENSG00000141448 | -0.47921  | 0.68411     | -1.2007     | 0.88506     | 0.24545   | 0.40305 |         |
|           | -1.0085         | 0.8434    | 0.40305     | 0.725174513 |             |           |         |         |
| ME2       | ENSG00000082212 | -1.388    | 0.91744     | 0.24534     | 0.4031      | -1.1203   | 0.86871 |         |
|           | -1.5472         | 0.93909   | 0.4031      | 0.725229334 |             |           |         |         |
| STYX      | ENSG00000198252 | -0.12073  | 0.54805     | 0.24529     | 0.40312     | -0.038487 | 0.51535 |         |
|           | -0.038487       | 0.51535   | 0.40312     | 0.725229334 |             |           |         |         |
| RNU2-24P  | ENSG00000252639 | 0.24526   | 0.40313     | -1.5805     | 0.94301     | -1.5805   |         |         |
|           | 0.94301         | -1.5805   | 0.94301     | 0.40313     | 0.725229334 |           |         |         |
| NA        | ENSG00000271746 | 0.24522   | 0.40314     | 0.24522     | 0.40314     | 0.24522   | 0.40314 |         |
|           | 0.24522         | 0.40314   | 0.40314     | 0.725229334 |             |           |         |         |
| PPIAP33   | ENSG00000178654 | 0.24516   | 0.40317     | 0.11846     | 0.45285     | 0.11846   |         |         |
|           | 0.45285         | 0.11846   | 0.45285     | 0.40317     | 0.725229756 |           |         |         |
| NA        | ENSG00000252765 | 0.24514   | 0.40317     | 0.24514     | 0.40317     | 0.24514   | 0.40317 |         |
|           | 0.24514         | 0.40317   | 0.40317     | 0.725229756 |             |           |         |         |
| ALDH1L2   | ENSG00000136010 | -0.35774  | 0.63973     | 0.0093834   | 0.49626     | 0.24499   |         |         |
|           | 0.40323         | -1.1847   | 0.88193     | 0.40323     | 0.725284139 |           |         |         |
| NA        | ENSG00000254069 | 0.0096959 | 0.49613     | 0.245       | 0.40323     | -0.043506 | 0.51735 |         |
|           | -0.76832        | 0.77885   | 0.40323     | 0.725284139 |             |           |         |         |
| NA        | ENSG00000266270 | -0.61174  | 0.72964     | 0.2449      | 0.40327     | 0.2449    | 0.40327 |         |

|                 |                 |           |         |             |             |           |         |  |
|-----------------|-----------------|-----------|---------|-------------|-------------|-----------|---------|--|
|                 | 0.2449          | 0.40327   | 0.40327 | 0.725311744 |             |           |         |  |
| PARP4P2         | ENSG00000224976 | 0.24484   | 0.40329 | -0.25796    | 0.60178     | -0.83024  |         |  |
|                 | 0.7968          | -0.71142  | 0.76159 | 0.40329     | 0.725311744 |           |         |  |
| ZNF280B         | ENSG00000275004 | -0.10306  | 0.54104 | 0.22038     | 0.41279     | 0.22038   |         |  |
|                 | 0.41279         | 0.24485   | 0.40329 | 0.40329     | 0.725311744 |           |         |  |
| NA              | ENSG00000253668 | 0.2448    | 0.40331 | -1.0741     | 0.8586      | 0.2448    | 0.40331 |  |
|                 | 0.2448          | 0.40331   | 0.40331 | 0.725320944 |             |           |         |  |
| NA              | ENSG00000230555 | 0.24474   | 0.40333 | 0.24474     | 0.40333     | 0.24474   | 0.40333 |  |
|                 | 0.24474         | 0.40333   | 0.40333 | 0.725330144 |             |           |         |  |
| SCN11A          | ENSG00000168356 | -1.3868   | 0.91724 | 0.24463     | 0.40337     | -0.1434   |         |  |
|                 | 0.55701         | -1.313    | 0.90541 | 0.40337     | 0.725375308 |           |         |  |
| WDHD1           | ENSG00000198554 | -0.073994 | 0.52949 | 0.24445     | 0.40344     | 0.24445   | 0.40344 |  |
|                 | 0.24445         | 0.40344   | 0.40344 | 0.725474416 |             |           |         |  |
| OR51H2P         | ENSG00000198217 | 0.24438   | 0.40347 | 0.24438     | 0.40347     | 0.24438   |         |  |
|                 | 0.40347         | 0.24438   | 0.40347 | 0.40347     | 0.72550159  |           |         |  |
| NA              | ENSG00000256972 | -0.73141  | 0.76773 | 0.24421     | 0.40353     | 0.081388  | 0.46757 |  |
|                 | -0.48338        | 0.68559   | 0.40353 | 0.725565122 |             |           |         |  |
| NA              | ENSG00000261000 | 0.24416   | 0.40355 | 0.24416     | 0.40355     | 0.24416   | 0.40355 |  |
|                 | 0.24416         | 0.40355   | 0.40355 | 0.725565122 |             |           |         |  |
| NA              | ENSG00000274825 | 0.24417   | 0.40355 | 0.24417     | 0.40355     | 0.24417   | 0.40355 |  |
|                 | 0.24417         | 0.40355   | 0.40355 | 0.725565122 |             |           |         |  |
| RPL29P32        | ENSG00000242945 | 0.24411   | 0.40357 | 0.24411     | 0.40357     | 0.24411   |         |  |
|                 | 0.40357         | -0.19787  | 0.57843 | 0.40357     | 0.72557431  |           |         |  |
| NA              | ENSG00000252131 | 0.24402   | 0.40361 | 0.24402     | 0.40361     | 0.24402   | 0.40361 |  |
|                 | 0.24402         | 0.40361   | 0.40361 | 0.725619454 |             |           |         |  |
| LGR5            | ENSG00000139292 | 0.24397   | 0.40363 | 0.020503    | 0.49182     | 0.24397   | 0.40363 |  |
|                 | -0.28032        | 0.61039   | 0.40363 | 0.725628639 |             |           |         |  |
| ZC3H12D         | ENSG00000178199 | -1.465    | 0.92855 | -1.7037     | 0.95578     | -0.42396  |         |  |
|                 | 0.6642          | 0.24388   | 0.40366 | 0.40366     | 0.725647008 |           |         |  |
| NA              | ENSG00000235143 | -0.00616  | 0.50246 | 0.24385     | 0.40367     | -0.00616  | 0.50246 |  |
|                 | -0.00616        | 0.50246   | 0.40367 | 0.725647008 |             |           |         |  |
| TWF1P1          | ENSG00000178082 | -1.4245   | 0.92285 | -0.91226    | 0.81918     | -0.91226  |         |  |
|                 | 0.81918         | 0.2437    | 0.40373 | 0.40373     | 0.72568568  |           |         |  |
| WDR47           | ENSG00000085433 | -1.1488   | 0.87468 | 0.24365     | 0.40375     | -0.27622  | 0.60881 |  |
|                 | 0.049665        | 0.48019   | 0.40375 | 0.72568568  |             |           |         |  |
| CYP3A7-CYP3A51P | ENSG00000282301 | 0.24363   | 0.40376 | -1.0321     | 0.84898     | 0.075574  |         |  |
|                 | 0.46988         | 0.075574  | 0.46988 | 0.40376     | 0.72568568  |           |         |  |
| PPIAP88         | ENSG00000227350 | 0.11286   | 0.45507 | -0.35016    | 0.63689     | -0.064352 |         |  |
|                 | 0.52565         | 0.24354   | 0.40379 | 0.40379     | 0.72568568  |           |         |  |
| NA              | ENSG00000229043 | 0.24354   | 0.40379 | 0.24354     | 0.40379     | 0.24354   | 0.40379 |  |
|                 | 0.11064         | 0.45595   | 0.40379 | 0.72568568  |             |           |         |  |
| GPR155          | ENSG00000163328 | -1.1987   | 0.88468 | 0.24353     | 0.4038      | -1.1987   |         |  |
|                 | 0.88468         | -1.2853   | 0.90066 | 0.4038      | 0.72568568  |           |         |  |
| RNA5SP161       | ENSG00000200741 | -1.7831   | 0.96272 | -1.7831     | 0.96272     | 0.24352   |         |  |
|                 | 0.4038          | -0.86021  | 0.80516 | 0.4038      | 0.72568568  |           |         |  |
| SLC18A1         | ENSG00000036565 | 0.24348   | 0.40382 | -0.10222    | 0.54071     | -0.72016  |         |  |
|                 | 0.76429         | 0.24348   | 0.40382 | 0.40382     | 0.72568568  |           |         |  |
| PTPRN2          | ENSG00000155093 | -0.25656  | 0.60124 | 0.24343     | 0.40384     | -0.052418 |         |  |
|                 | 0.5209          | -1.5925   | 0.94436 | 0.40384     | 0.72568568  |           |         |  |
| NDUFV3          | ENSG00000160194 | -0.18165  | 0.57207 | -0.45634    | 0.67593     | 0.24332   |         |  |
|                 | 0.40388         | -1.396    | 0.91865 | 0.40388     | 0.72568568  |           |         |  |
| MIR3199-1       | ENSG00000264073 | 0.24332   | 0.40388 | 0.24332     | 0.40388     | 0.24332   |         |  |
|                 | 0.40388         | 0.24332   | 0.40388 | 0.40388     | 0.72568568  |           |         |  |
| WDR5            | ENSG00000196363 | -0.2534   | 0.60002 | -1.2786     | 0.89949     | 0.24327   | 0.4039  |  |
|                 | 0.22396         | 0.4114    | 0.4039  | 0.72568568  |             |           |         |  |
| RNU6-361P       | ENSG00000201324 | 0.24327   | 0.4039  | 0.24327     | 0.4039      | 0.24327   |         |  |
|                 | 0.4039          | 0.24327   | 0.4039  | 0.4039      | 0.72568568  |           |         |  |
| NFE2L3P1        | ENSG00000267497 | -1.2737   | 0.89861 | -0.23324    | 0.59221     | -1.223    |         |  |
|                 | 0.88933         | 0.24326   | 0.4039  | 0.4039      | 0.72568568  |           |         |  |
| MTCO3P2         | ENSG00000232102 | 0.24311   | 0.40396 | 0.24311     | 0.40396     | -0.41305  |         |  |
|                 | 0.66022         | 0.24311   | 0.40396 | 0.40396     | 0.725766722 |           |         |  |
| CNR1            | ENSG00000118432 | -0.091167 | 0.53632 | -0.50348    | 0.69268     | -1.3903   | 0.91778 |  |

|           |                 |           |             |             |             |          |         |  |
|-----------|-----------------|-----------|-------------|-------------|-------------|----------|---------|--|
|           | 0.24303         | 0.40399   | 0.40399     | 0.725785069 |             |          |         |  |
| PRMT5P1   | ENSG00000249004 | -0.041332 | 0.51648     | 0.24301     | 0.404       | 0.014058 | 0.49439 |  |
|           | -0.12481        | 0.54966   | 0.404       | 0.725785069 |             |          |         |  |
| C2CD6     | ENSG00000155754 | -0.86372  | 0.80613     | -0.67351    | 0.74969     | -1.2015  | 0.88523 |  |
|           | 0.2428          | 0.40408   | 0.40408     | 0.725902028 |             |          |         |  |
| OR10R1P   | ENSG00000227445 | 0.24272   | 0.40411     | -0.52477    | 0.70013     | -0.63089 |         |  |
|           | 0.73594         | -0.52477  | 0.70013     | 0.40411     | 0.725929159 |          |         |  |
| NA        | ENSG00000277550 | 0.17233   | 0.43159     | 0.17233     | 0.43159     | 0.2426   | 0.40416 |  |
|           | 0.2426          | 0.40416   | 0.40416     | 0.725942387 |             |          |         |  |
| MFS10     | ENSG00000109736 | 0.24258   | 0.40417     | 0.24258     | 0.40417     | 0.24258  |         |  |
|           | 0.40417         | 0.24258   | 0.40417     | 0.40417     | 0.725942387 |          |         |  |
| NA        | ENSG00000271163 | 0.24249   | 0.4042      | -0.52401    | 0.69987     | 0.24249  | 0.4042  |  |
|           | 0.24249         | 0.4042    | 0.4042      | 0.725942387 |             |          |         |  |
| LINC01586 | ENSG00000249487 | -0.33743  | 0.6321      | -1.0459     | 0.85221     | 0.14245  |         |  |
|           | 0.44336         | 0.24244   | 0.40422     | 0.40422     | 0.725942387 |          |         |  |
| SULT2B1   | ENSG00000088002 | -0.45375  | 0.67499     | 0.24242     | 0.40423     | -0.10403 |         |  |
|           | 0.54143         | 0.1725    | 0.43152     | 0.40423     | 0.725942387 |          |         |  |
| NA        | ENSG00000255478 | 0.24241   | 0.40423     | -0.018213   | 0.50727     | -1.0623  | 0.85595 |  |
|           | 0.14012         | 0.44428   | 0.40423     | 0.725942387 |             |          |         |  |
| UTP15     | ENSG00000164338 | -0.60582  | 0.72768     | 0.18759     | 0.4256      | 0.24226  | 0.40429 |  |
|           | -0.024946       | 0.50995   | 0.40429     | 0.725942387 |             |          |         |  |
| OR5R1     | ENSG00000279961 | 0.24224   | 0.4043      | 0.24224     | 0.4043      | 0.24224  | 0.4043  |  |
|           | 0.24224         | 0.4043    | 0.4043      | 0.725942387 |             |          |         |  |
| FGGY      | ENSG00000172456 | -0.34967  | 0.63671     | -1.0055     | 0.84266     | -0.32575 | 0.62769 |  |
|           | 0.24218         | 0.40432   | 0.40432     | 0.725942387 |             |          |         |  |
| ZC3HC1    | ENSG00000091732 | -0.38215  | 0.64882     | -0.39773    | 0.65459     | 0.24216  |         |  |
|           | 0.40433         | -0.27843  | 0.60966     | 0.40433     | 0.725942387 |          |         |  |
| RPS21     | ENSG00000171858 | 0.24216   | 0.40433     | 0.24216     | 0.40433     | 0.24216  | 0.40433 |  |
|           | 0.24216         | 0.40433   | 0.40433     | 0.725942387 |             |          |         |  |
| LDHAP7    | ENSG00000235847 | 0.24215   | 0.40433     | 0.24215     | 0.40433     | 0.24215  |         |  |
|           | 0.40433         | 0.24215   | 0.40433     | 0.40433     | 0.725942387 |          |         |  |
| NA        | ENSG00000258430 | 0.24216   | 0.40433     | 0.24216     | 0.40433     | 0.24216  | 0.40433 |  |
|           | 0.24216         | 0.40433   | 0.40433     | 0.725942387 |             |          |         |  |
| NA        | ENSG00000224713 | 0.067571  | 0.47306     | 0.24209     | 0.40435     | 0.067571 | 0.47306 |  |
|           | 0.067571        | 0.47306   | 0.40435     | 0.725942387 |             |          |         |  |
| AKT3-IT1  | ENSG00000228939 | 0.242     | 0.40439     | 0.242       | 0.40439     | 0.242    | 0.40439 |  |
|           | 0.40439         | 0.40439   | 0.725942387 |             |             |          |         |  |
| GABRR3    | ENSG00000183185 | -0.47186  | 0.68149     | -0.53911    | 0.7051      | 0.24194  |         |  |
|           | 0.40441         | -0.94768  | 0.82835     | 0.40441     | 0.725942387 |          |         |  |
| PCDH9-AS1 | ENSG00000234527 | 0.24194   | 0.40441     | 0.24194     | 0.40441     | 0.24194  |         |  |
|           | 0.40441         | 0.24194   | 0.40441     | 0.40441     | 0.725942387 |          |         |  |
| RN7SKP112 | ENSG00000223145 | -0.66852  | 0.7481      | -0.66852    | 0.7481      | -0.85974 |         |  |
|           | 0.80503         | 0.24192   | 0.40442     | 0.40442     | 0.725942387 |          |         |  |
| RNA5SP54  | ENSG00000252760 | 0.24192   | 0.40442     | 0.24192     | 0.40442     | 0.24192  |         |  |
|           | 0.40442         | 0.24192   | 0.40442     | 0.40442     | 0.725942387 |          |         |  |
| NA        | ENSG00000274885 | 0.24193   | 0.40442     | 0.24193     | 0.40442     | 0.24193  | 0.40442 |  |
|           | 0.24193         | 0.40442   | 0.40442     | 0.725942387 |             |          |         |  |
| NA        | ENSG00000254631 | 0.24186   | 0.40445     | 0.24186     | 0.40445     | 0.24186  | 0.40445 |  |
|           | 0.24186         | 0.40445   | 0.40445     | 0.725942387 |             |          |         |  |
| NA        | ENSG00000258938 | -0.19324  | 0.57661     | 0.24185     | 0.40445     | 0.24185  | 0.40445 |  |
|           | 0.24185         | 0.40445   | 0.40445     | 0.725942387 |             |          |         |  |
| NA        | ENSG00000231980 | 0.11869   | 0.45276     | 0.24181     | 0.40446     | 0.11869  | 0.45276 |  |
|           | 0.11869         | 0.45276   | 0.40446     | 0.725942387 |             |          |         |  |
| NA        | ENSG00000255959 | -0.073675 | 0.52937     | -0.34629    | 0.63544     | 0.24177  | 0.40448 |  |
|           | 0.24177         | 0.40448   | 0.40448     | 0.725942756 |             |          |         |  |
| NA        | ENSG00000279285 | 0.24174   | 0.40449     | -0.78657    | 0.78423     | 0.047438 | 0.48108 |  |
|           | 0.047438        | 0.48108   | 0.40449     | 0.725942756 |             |          |         |  |
| ZSCAN20   | ENSG00000121903 | 0.24157   | 0.40456     | -0.13122    | 0.5522      | 0.078817 |         |  |
|           | 0.46859         | -0.13138  | 0.55226     | 0.40456     | 0.72602515  |          |         |  |
| NA        | ENSG00000233589 | 0.24154   | 0.40457     | 0.24154     | 0.40457     | 0.24154  | 0.40457 |  |
|           | 0.24154         | 0.40457   | 0.40457     | 0.72602515  |             |          |         |  |
| MIR4802   | ENSG00000263642 | 0.24149   | 0.40459     | -0.42998    | 0.66639     | -0.68865 |         |  |

|           |                 |           |         |             |             |           |         |  |
|-----------|-----------------|-----------|---------|-------------|-------------|-----------|---------|--|
|           | 0.75448         | -0.42998  | 0.66639 | 0.40459     | 0.72602515  |           |         |  |
| NOX3      | ENSG00000074771 | 0.046785  | 0.48134 | 0.24146     | 0.4046      | 0.046785  | 0.48134 |  |
|           | 0.046785        | 0.48134   | 0.4046  | 0.72602515  |             |           |         |  |
| RN7SKP160 | ENSG00000200674 | 0.24136   | 0.40464 | -1.0092     | 0.84356     | -1.0092   |         |  |
|           | 0.84356         | -1.0092   | 0.84356 | 0.40464     | 0.72602515  |           |         |  |
| NA        | ENSG00000259813 | 0.24133   | 0.40465 | 0.24133     | 0.40465     | 0.24133   | 0.40465 |  |
|           | 0.24133         | 0.40465   | 0.40465 | 0.72602515  |             |           |         |  |
| TRIQQ     | ENSG00000205133 | 0.030036  | 0.48802 | -0.77863    | 0.7819      | 0.24129   | 0.40466 |  |
|           | -0.76377        | 0.7775    | 0.40466 | 0.72602515  |             |           |         |  |
| DCLRE1C   | ENSG00000152457 | -0.61092  | 0.72937 | -1.3001     | 0.90322     | 0.24128   |         |  |
|           | 0.40467         | -0.95255  | 0.82959 | 0.40467     | 0.72602515  |           |         |  |
| NA        | ENSG00000249444 | 0.24127   | 0.40467 | -1.0322     | 0.849       | -1.3684   | 0.91441 |  |
|           | -1.1857         | 0.88212   | 0.40467 | 0.72602515  |             |           |         |  |
| NA        | ENSG00000279815 | 0.24121   | 0.4047  | 0.24121     | 0.4047      | 0.24121   | 0.4047  |  |
|           | 0.24121         | 0.4047    | 0.4047  | 0.726052242 |             |           |         |  |
| NA        | ENSG00000259217 | 0.24102   | 0.40477 | -0.32738    | 0.62831     | 0.24102   | 0.40477 |  |
|           | 0.24102         | 0.40477   | 0.40477 | 0.726151092 |             |           |         |  |
| CCR12P    | ENSG00000238241 | -0.65221  | 0.74287 | -0.65221    | 0.74287     | -0.65221  |         |  |
|           | 0.74287         | 0.24089   | 0.40482 | 0.40482     | 0.726169735 |           |         |  |
| NA        | ENSG00000259891 | -1.0103   | 0.84382 | -0.80632    | 0.78997     | -0.32914  | 0.62897 |  |
|           | 0.24088         | 0.40482   | 0.40482 | 0.726169735 |             |           |         |  |
| LINC02312 | ENSG00000258869 | -1.5744   | 0.94231 | -1.5744     | 0.94231     | -1.5744   |         |  |
|           | 0.94231         | 0.24086   | 0.40483 | 0.40483     | 0.726169735 |           |         |  |
| NA        | ENSG00000213184 | 0.22681   | 0.41029 | 0.027839    | 0.4889      | 0.24085   | 0.40484 |  |
|           | -0.85572        | 0.80392   | 0.40484 | 0.726169735 |             |           |         |  |
| EVI2A     | ENSG00000126860 | 0.24067   | 0.40491 | 0.24067     | 0.40491     | 0.24067   | 0.40491 |  |
|           | 0.24067         | 0.40491   | 0.40491 | 0.726268562 |             |           |         |  |
| NA        | ENSG00000279206 | 0.24061   | 0.40493 | -1.2261     | 0.88991     | 0.24061   | 0.40493 |  |
|           | 0.013457        | 0.49463   | 0.40493 | 0.726268907 |             |           |         |  |
| NA        | ENSG00000246790 | -1.2683   | 0.89766 | 0.19541     | 0.42254     | 0.24057   | 0.40494 |  |
|           | -0.49014        | 0.68798   | 0.40494 | 0.726268907 |             |           |         |  |
| NA        | ENSG00000261916 | 0.24045   | 0.40499 | 0.24045     | 0.40499     | 0.24045   | 0.40499 |  |
|           | 0.24045         | 0.40499   | 0.40499 | 0.72627839  |             |           |         |  |
| NA        | ENSG00000271042 | 0.24046   | 0.40499 | 0.24046     | 0.40499     | 0.24046   | 0.40499 |  |
|           | 0.24046         | 0.40499   | 0.40499 | 0.72627839  |             |           |         |  |
| NA        | ENSG00000279749 | -0.56878  | 0.71525 | -1.2203     | 0.88882     | 0.049857  | 0.48012 |  |
|           | 0.24046         | 0.40499   | 0.40499 | 0.72627839  |             |           |         |  |
| NA        | ENSG00000250886 | 0.24035   | 0.40503 | -0.6028     | 0.72668     | 0.24035   | 0.40503 |  |
|           | 0.24035         | 0.40503   | 0.40503 | 0.726323394 |             |           |         |  |
| MIR200C   | ENSG00000207713 | 0.2402    | 0.40509 | 0.2402      | 0.40509     | 0.2402    |         |  |
|           | 0.40509         | 0.2402    | 0.40509 | 0.40509     | 0.726404258 |           |         |  |
| NA        | ENSG00000225490 | 0.23995   | 0.40519 | 0.23995     | 0.40519     | 0.23995   | 0.40519 |  |
|           | 0.23995         | 0.40519   | 0.40519 | 0.726548037 |             |           |         |  |
| FAAP24    | ENSG00000131944 | 0.23992   | 0.4052  | 0.23992     | 0.4052      | 0.23992   |         |  |
|           | 0.4052          | 0.23992   | 0.4052  | 0.4052      | 0.726548037 |           |         |  |
| NA        | ENSG00000261651 | 0.14614   | 0.4419  | -0.31761    | 0.62461     | 0.2398    | 0.40524 |  |
|           | 0.2398          | 0.40524   | 0.40524 | 0.726549332 |             |           |         |  |
| NA        | ENSG00000251864 | -1.2279   | 0.89025 | 0.23976     | 0.40526     | -0.67742  | 0.75093 |  |
|           | -0.67742        | 0.75093   | 0.40526 | 0.726549332 |             |           |         |  |
| GMDS      | ENSG00000112699 | -0.26278  | 0.60364 | 0.23973     | 0.40527     | -0.48388  | 0.68576 |  |
|           | -0.062609       | 0.52496   | 0.40527 | 0.726549332 |             |           |         |  |
| NA        | ENSG00000251501 | 0.20322   | 0.41948 | -0.12814    | 0.55098     | 0.23966   | 0.4053  |  |
|           | -0.42352        | 0.66404   | 0.4053  | 0.726549332 |             |           |         |  |
| IKZF5     | ENSG00000095574 | 0.23961   | 0.40532 | 0.23961     | 0.40532     | 0.23961   | 0.40532 |  |
|           | -0.61747        | 0.73154   | 0.40532 | 0.726549332 |             |           |         |  |
| NA        | ENSG00000137808 | -1.4089   | 0.92057 | -0.66988    | 0.74853     | -0.2712   | 0.60688 |  |
|           | 0.2396          | 0.40532   | 0.40532 | 0.726549332 |             |           |         |  |
| ZNF322P1  | ENSG00000188801 | -0.43508  | 0.66825 | 0.23959     | 0.40532     | -0.086488 |         |  |
|           | 0.53446         | -0.086488 | 0.53446 | 0.40532     | 0.726549332 |           |         |  |
| NA        | ENSG00000216676 | 0.2396    | 0.40532 | -1.4118     | 0.921       | -0.37045  | 0.64448 |  |
|           | -1.2881         | 0.90115   | 0.40532 | 0.726549332 |             |           |         |  |
| ADAMTS5   | ENSG00000154736 | 0.23952   | 0.40535 | 0.13523     | 0.44622     | -0.10898  |         |  |

|           |                 |           |         |             |             |           |         |
|-----------|-----------------|-----------|---------|-------------|-------------|-----------|---------|
|           | 0.54339         | -0.70748  | 0.76037 | 0.40535     | 0.72656758  |           |         |
| DOCK9-AS1 | ENSG00000229918 | 0.23949   | 0.40536 | 0.23949     | 0.40536     | 0.23949   | 0.23949 |
|           | 0.40536         | 0.23949   | 0.40536 | 0.40536     | 0.72656758  |           |         |
| RBM38     | ENSG00000132819 | 0.23929   | 0.40544 | -0.023549   | 0.50939     | -0.036761 | 0.51466 |
|           | -0.45941        | 0.67703   | 0.40544 | 0.726675439 |             |           |         |
| NA        | ENSG00000267669 | 0.043254  | 0.48275 | 0.23926     | 0.40545     | -0.017817 | 0.50711 |
|           | -0.11524        | 0.54587   | 0.40545 | 0.726675439 |             |           |         |
| NA        | ENSG00000224513 | 0.23915   | 0.4055  | 0.23915     | 0.4055      | 0.23915   | 0.4055  |
|           | 0.23915         | 0.4055    | 0.4055  | 0.726729517 |             |           |         |
| NCBP2     | ENSG00000114503 | 0.07329   | 0.47079 | 0.07329     | 0.47079     | 0.2391    | 0.40551 |
|           | 0.07329         | 0.47079   | 0.40551 | 0.726729517 |             |           |         |
| CSNK1G3   | ENSG00000151292 | 0.23896   | 0.40557 | -0.10997    | 0.54378     | 0.23896   |         |
|           | 0.40557         | -1.0025   | 0.84195 | 0.40557     | 0.726730138 |           |         |
| OR10J3    | ENSG00000196266 | -0.57771  | 0.71827 | -0.57771    | 0.71827     | 0.23896   |         |
|           | 0.40557         | -0.16183  | 0.56428 | 0.40557     | 0.726730138 |           |         |
| SNORD102  | ENSG00000207500 | 0.23895   | 0.40557 | 0.23895     | 0.40557     | 0.23895   |         |
|           | 0.40557         | 0.23895   | 0.40557 | 0.40557     | 0.726730138 |           |         |
| LINC01709 | ENSG00000226715 | -0.1111   | 0.54423 | -0.36871    | 0.64383     | 0.23895   |         |
|           | 0.40557         | 0.23895   | 0.40557 | 0.40557     | 0.726730138 |           |         |
| NA        | ENSG00000254189 | -0.42561  | 0.6648  | 0.2389      | 0.40559     | 0.2389    | 0.40559 |
|           | -1.2009         | 0.8851    | 0.40559 | 0.726730448 |             |           |         |
| RN7SL608P | ENSG00000239884 | 0.23888   | 0.4056  | 0.23888     | 0.4056      | 0.23888   |         |
|           | 0.4056          | 0.23888   | 0.4056  | 0.4056      | 0.726730448 |           |         |
| NA        | ENSG00000216966 | 0.23872   | 0.40566 | -0.025067   | 0.51        | -0.62453  | 0.73386 |
|           | -1.111          | 0.86672   | 0.40566 | 0.726811229 |             |           |         |
| RNY4P17   | ENSG00000201818 | 0.23865   | 0.40569 | 0.23865     | 0.40569     | 0.23865   |         |
|           | 0.40569         | 0.23865   | 0.40569 | 0.40569     | 0.726838255 |           |         |
| EFCAB12   | ENSG00000172771 | -0.68823  | 0.75434 | 0.23858     | 0.40572     | 0.075128  |         |
|           | 0.47006         | -0.1508   | 0.55993 | 0.40572     | 0.726838557 |           |         |
| NA        | ENSG00000269974 | 0.081226  | 0.46763 | -1.6464     | 0.95016     | 0.23857   | 0.40572 |
|           | 0.16044         | 0.43627   | 0.40572 | 0.726838557 |             |           |         |
| NA        | ENSG00000265024 | -0.76889  | 0.77902 | -1.2418     | 0.89285     | 0.23839   | 0.40579 |
|           | -0.73916        | 0.77009   | 0.40579 | 0.726911701 |             |           |         |
| NA        | ENSG00000249463 | -0.62102  | 0.73271 | 0.23837     | 0.4058      | 0.064368  | 0.47434 |
|           | -0.34309        | 0.63423   | 0.4058  | 0.726911701 |             |           |         |
| NA        | ENSG00000216020 | 0.23834   | 0.40581 | 0.23834     | 0.40581     | 0.23834   | 0.40581 |
|           | 0.23834         | 0.40581   | 0.40581 | 0.726911701 |             |           |         |
| NA        | ENSG00000277151 | -0.81874  | 0.79353 | 0.23828     | 0.40583     | 0.23828   | 0.40583 |
|           | -0.23164        | 0.59159   | 0.40583 | 0.726911701 |             |           |         |
| ARHGEF3   | ENSG00000163947 | 0.23822   | 0.40586 | 0.19205     | 0.42385     | 0.22111   |         |
|           | 0.4125          | -0.38708  | 0.65065 | 0.40586     | 0.726911701 |           |         |
| OR5H15    | ENSG00000233412 | 0.2382    | 0.40586 | -1.4641     | 0.92842     | -0.2277   |         |
|           | 0.59006         | -1.1669   | 0.87838 | 0.40586     | 0.726911701 |           |         |
| LINC01191 | ENSG00000234199 | -0.72747  | 0.76653 | 0.23815     | 0.40588     | 0.23815   |         |
|           | 0.40588         | 0.23815   | 0.40588 | 0.40588     | 0.726911701 |           |         |
| RPL7P34   | ENSG00000237205 | -0.048807 | 0.51946 | 0.23814     | 0.40589     | 0.23814   |         |
|           | 0.40589         | 0.08125   | 0.46762 | 0.40589     | 0.726911701 |           |         |
| PGAP1     | ENSG00000197121 | -0.32891  | 0.62889 | 0.23808     | 0.40591     | -0.69134  | 0.75533 |
|           | -0.43213        | 0.66718   | 0.40591 | 0.726911701 |             |           |         |
| NA        | ENSG00000255471 | -0.15082  | 0.55994 | 0.23808     | 0.40591     | 0.23808   | 0.40591 |
|           | 0.23808         | 0.40591   | 0.40591 | 0.726911701 |             |           |         |
| ISG20L2   | ENSG00000143319 | 0.14019   | 0.44425 | 0.23799     | 0.40594     | 0.14019   |         |
|           | 0.44425         | 0.14019   | 0.44425 | 0.40594     | 0.726938711 |           |         |
| NA        | ENSG00000280353 | 0.2379    | 0.40598 | 0.2379      | 0.40598     | 0.2379    | 0.40598 |
|           | 0.2379          | 0.40598   | 0.40598 | 0.726948106 |             |           |         |
| CERT1     | ENSG00000113163 | 0.23107   | 0.40863 | -0.032049   | 0.51278     | 0.23787   | 0.40599 |
|           | -1.9582         | 0.9749    | 0.40599 | 0.726948106 |             |           |         |
| NA        | ENSG00000230881 | 0.23786   | 0.40599 | -0.78272    | 0.7831      | 0.23786   | 0.40599 |
|           | 0.23786         | 0.40599   | 0.40599 | 0.726948106 |             |           |         |
| PARP4P3   | ENSG00000249263 | 0.23778   | 0.40603 | 0.23778     | 0.40603     | 0.23778   |         |
|           | 0.40603         | 0.23778   | 0.40603 | 0.40603     | 0.726975402 |           |         |
| MROH4P    | ENSG00000232722 | -0.12045  | 0.54794 | 0.23775     | 0.40604     | -0.11387  |         |

|             |                 |           |            |             |             |          |         |         |
|-------------|-----------------|-----------|------------|-------------|-------------|----------|---------|---------|
|             | 0.54533         | -0.76821  | 0.77882    | 0.40604     | 0.726975402 |          |         |         |
| HTR3A       | ENSG00000166736 | -2.5071   | 0.99391    | 0.23771     | 0.40605     | -1.5393  | 0.93813 |         |
|             | -1.9245         | 0.97286   | 0.40605    | 0.726975402 |             |          |         |         |
| RABL3       | ENSG00000144840 | 0.23733   | 0.4062     | -1.1231     | 0.86931     | -1.4076  | 0.92037 |         |
|             | -0.11847        | 0.54715   | 0.4062     | 0.72715639  |             |          |         |         |
| SNORD118    | ENSG00000200463 | 0.23734   | 0.4062     | 0.23734     | 0.4062      | 0.23734  |         |         |
|             | 0.4062          | 0.23734   | 0.4062     | 0.4062      | 0.72715639  |          |         |         |
| NA          | ENSG00000215237 | 0.23733   | 0.4062     | 0.066944    | 0.47331     | 0.066944 | 0.47331 |         |
|             | 0.066944        | 0.47331   | 0.4062     | 0.72715639  |             |          |         |         |
| TARDBPP2    | ENSG00000238213 | -0.80511  | 0.78962    | 0.23729     | 0.40622     | -0.80511 |         |         |
|             | 0.78962         | -0.80511  | 0.78962    | 0.40622     | 0.72715639  |          |         |         |
| PDCD1LG2    | ENSG00000197646 | -0.56691  | 0.71461    | 0.23717     | 0.40626     | 0.18314  |         |         |
|             | 0.42734         | -1.0931   | 0.86283    | 0.40626     | 0.72715639  |          |         |         |
| PCMTD2      | ENSG00000203880 | -0.41245  | 0.66       | -0.41245    | 0.66        | -0.41245 | 0.66    | 0.23719 |
|             | 0.40626         | 0.40626   | 0.72715639 |             |             |          |         |         |
| SDHCP1      | ENSG00000264444 | 0.13698   | 0.44552    | -0.6349     | 0.73725     | 0.23708  |         |         |
|             | 0.4063          | 0.13698   | 0.44552    | 0.4063      | 0.72715639  |          |         |         |
| NA          | ENSG00000236504 | -1.9375   | 0.97366    | -0.48351    | 0.68563     | 0.034117 | 0.48639 |         |
|             | 0.23704         | 0.40631   | 0.40631    | 0.72715639  |             |          |         |         |
| NA          | ENSG00000229694 | 0.086232  | 0.46564    | 0.23699     | 0.40633     | -1.1129  | 0.86713 |         |
|             | -0.2055         | 0.58141   | 0.40633    | 0.72715639  |             |          |         |         |
| ZNF684      | ENSG00000117010 | 0.23694   | 0.40635    | -0.23913    | 0.5945      | -0.04142 |         |         |
|             | 0.51652         | -0.19124  | 0.57583    | 0.40635     | 0.72715639  |          |         |         |
| MYLK3       | ENSG00000140795 | -0.45372  | 0.67498    | -0.45372    | 0.67498     | 0.23693  | 0.40636 |         |
|             | 0.21291         | 0.4157    | 0.40636    | 0.72715639  |             |          |         |         |
| GTF3AP5     | ENSG00000225816 | 0.23693   | 0.40636    | 0.23693     | 0.40636     | 0.23693  |         |         |
|             | 0.40636         | 0.23693   | 0.40636    | 0.40636     | 0.72715639  |          |         |         |
| NA          | ENSG00000249780 | 0.23692   | 0.40636    | 0.23692     | 0.40636     | -0.60307 | 0.72677 |         |
|             | 0.23692         | 0.40636   | 0.40636    | 0.72715639  |             |          |         |         |
| MTRNR2L13   | ENSG00000270394 | -0.57478  | 0.71728    | 0.23693     | 0.40636     | -0.57478 |         |         |
|             | 0.71728         | -0.57478  | 0.71728    | 0.40636     | 0.72715639  |          |         |         |
| TRAV36DV7   | ENSG00000211815 | 0.23681   | 0.4064     | 0.23681     | 0.4064      | 0.23681  |         |         |
|             | 0.4064          | 0.23681   | 0.4064     | 0.4064      | 0.727201263 |          |         |         |
| SIGLEC20P   | ENSG00000268336 | 0.23663   | 0.40647    | -0.58612    | 0.7211      | 0.23663  |         |         |
|             | 0.40647         | 0.23663   | 0.40647    | 0.40647     | 0.7272208   |          |         |         |
| NA          | ENSG00000275210 | 0.23663   | 0.40647    | 0.23663     | 0.40647     | 0.23663  | 0.40647 |         |
|             | 0.23663         | 0.40647   | 0.40647    | 0.7272208   |             |          |         |         |
| KCTD16      | ENSG00000183775 | -0.39666  | 0.65419    | -0.62697    | 0.73466     | -0.14317 |         |         |
|             | 0.55692         | 0.23658   | 0.40649    | 0.40649     | 0.7272208   |          |         |         |
| GP1BA       | ENSG00000185245 | 0.23657   | 0.40649    | 0.23657     | 0.40649     | -0.70529 | 0.75969 |         |
|             | -1.4221         | 0.92251   | 0.40649    | 0.7272208   |             |          |         |         |
| DNAH10      | ENSG00000197653 | -1.0657   | 0.85672    | -0.85063    | 0.80251     | -0.64855 |         |         |
|             | 0.74169         | 0.23659   | 0.40649    | 0.40649     | 0.7272208   |          |         |         |
| NA          | ENSG00000231272 | -0.75616  | 0.77522    | 0.23654     | 0.40651     | -0.75616 | 0.77522 |         |
|             | -1.431          | 0.92378   | 0.40651    | 0.7272208   |             |          |         |         |
| LINC00847   | ENSG00000245060 | -0.10246  | 0.54081    | 0.2365      | 0.40652     | -0.10246 |         |         |
|             | 0.54081         | -0.10246  | 0.54081    | 0.40652     | 0.7272208   |          |         |         |
| CDK14       | ENSG00000058091 | -0.044206 | 0.51763    | 0.15419     | 0.43873     | 0.10339  | 0.45882 |         |
|             | 0.23642         | 0.40655   | 0.40655    | 0.7272208   |             |          |         |         |
| CCDC180     | ENSG00000197816 | -1.2925   | 0.90191    | -0.2845     | 0.61199     | -0.37507 |         |         |
|             | 0.6462          | 0.23637   | 0.40657    | 0.40657     | 0.7272208   |          |         |         |
| NA          | ENSG00000228365 | -1.4655   | 0.92861    | -1.4655     | 0.92861     | -1.4655  | 0.92861 |         |
|             | 0.23639         | 0.40657   | 0.40657    | 0.7272208   |             |          |         |         |
| NAT9        | ENSG00000109065 | 0.23634   | 0.40658    | 0.23634     | 0.40658     | 0.23634  | 0.40658 |         |
|             | 0.10783         | 0.45706   | 0.40658    | 0.7272208   |             |          |         |         |
| RNU6-792P   | ENSG00000200360 | 0.23632   | 0.40659    | 0.23632     | 0.40659     | 0.23632  |         |         |
|             | 0.40659         | 0.23632   | 0.40659    | 0.40659     | 0.7272208   |          |         |         |
| RNU6-289P   | ENSG00000200963 | -0.23143  | 0.59151    | 0.23622     | 0.40663     | -2.3976  |         |         |
|             | 0.99175         | -2.3976   | 0.99175    | 0.40663     | 0.727238958 |          |         |         |
| CACNA1C-AS4 | ENSG00000256025 | 0.23623   | 0.40663    | -0.18718    | 0.57424     | -0.39309 |         |         |
|             | 0.65287         | -0.52075  | 0.69873    | 0.40663     | 0.727238958 |          |         |         |
| G3BP2       | ENSG00000138757 | -0.68228  | 0.75247    | -0.070313   | 0.52803     | 0.23615  | 0.40666 |         |

|            |                 |           |         |             |             |           |         |         |
|------------|-----------------|-----------|---------|-------------|-------------|-----------|---------|---------|
|            | -0.21136        | 0.5837    | 0.40666 | 0.727239231 |             |           |         |         |
| NA         | ENSG00000257494 | 0.23615   | 0.40666 | 0.23615     | 0.40666     | 0.23615   | 0.40666 | 0.40666 |
|            | 0.23615         | 0.40666   | 0.40666 | 0.727239231 |             |           |         |         |
| NA         | ENSG00000279096 | -1.0844   | 0.86091 | 0.23609     | 0.40668     | 0.092371  | 0.4632  |         |
|            | 0.059499        | 0.47628   | 0.40668 | 0.727248308 |             |           |         |         |
| NA         | ENSG00000263959 | -0.035802 | 0.51428 | -1.2222     | 0.88918     | 0.2359    | 0.40675 |         |
|            | 0.2359          | 0.40675   | 0.40675 | 0.727337986 |             |           |         |         |
| NA         | ENSG00000254907 | 0.23588   | 0.40676 | 0.23588     | 0.40676     | 0.23588   | 0.40676 |         |
|            | 0.23588         | 0.40676   | 0.40676 | 0.727337986 |             |           |         |         |
| NA         | ENSG00000242209 | -0.18707  | 0.5742  | -0.93713    | 0.82566     | 0.046858  | 0.48131 |         |
|            | 0.23574         | 0.40682   | 0.40682 | 0.727409771 |             |           |         |         |
| ROPN1L-AS1 | ENSG00000250600 | 0.2357    | 0.40683 | 0.2357      | 0.40683     | 0.2357    |         |         |
|            | 0.40683         | 0.2357    | 0.40683 | 0.40683     | 0.727409771 |           |         |         |
| OR5BA1P    | ENSG00000255303 | -0.093852 | 0.53739 | 0.09563     | 0.46191     | 0.23562   |         |         |
|            | 0.40686         | 0.23562   | 0.40686 | 0.40686     | 0.72743672  |           |         |         |
| RPL7AP58   | ENSG00000240554 | 0.23549   | 0.40691 | 0.23549     | 0.40691     | 0.23549   |         |         |
|            | 0.40691         | 0.23549   | 0.40691 | 0.40691     | 0.727463923 |           |         |         |
| NA         | ENSG00000272729 | 0.23549   | 0.40691 | 0.23549     | 0.40691     | 0.23549   | 0.40691 |         |
|            | 0.23549         | 0.40691   | 0.40691 | 0.727463923 |             |           |         |         |
| NA         | ENSG00000228680 | 0.21174   | 0.41616 | 0.23549     | 0.40692     | -0.67429  | 0.74994 |         |
|            | -0.67429        | 0.74994   | 0.40692 | 0.727463923 |             |           |         |         |
| REM2       | ENSG00000139890 | 0.23411   | 0.40745 | 0.23411     | 0.40745     | -0.54044  | 0.70555 |         |
|            | 0.23541         | 0.40694   | 0.40694 | 0.727464178 |             |           |         |         |
| PHBP12     | ENSG00000230585 | 0.13672   | 0.44562 | -0.34147    | 0.63362     | 0.13672   |         |         |
|            | 0.44562         | 0.23539   | 0.40695 | 0.40695     | 0.727464178 |           |         |         |
| RFC1       | ENSG00000035928 | -1.4474   | 0.92611 | 0.11821     | 0.45295     | -0.39786  | 0.65463 |         |
|            | 0.23526         | 0.407     | 0.407   | 0.727486374 |             |           |         |         |
| SNORA70C   | ENSG00000207268 | 0.23525   | 0.40701 | 0.23525     | 0.40701     | 0.23525   |         |         |
|            | 0.40701         | 0.23525   | 0.40701 | 0.40701     | 0.727486374 |           |         |         |
| NOP56P3    | ENSG00000257956 | -1.3683   | 0.91439 | 0.23525     | 0.40701     | -0.12503  |         |         |
|            | 0.54975         | 0.23525   | 0.40701 | 0.40701     | 0.727486374 |           |         |         |
| NA         | ENSG00000256085 | 0.23516   | 0.40704 | 0.23516     | 0.40704     | 0.23516   | 0.40704 |         |
|            | 0.23516         | 0.40704   | 0.40704 | 0.727486374 |             |           |         |         |
| NA         | ENSG00000252592 | -0.93166  | 0.82424 | -0.93166    | 0.82424     | 0.23506   | 0.40708 |         |
|            | -0.93166        | 0.82424   | 0.40708 | 0.727486374 |             |           |         |         |
| HMGB1P46   | ENSG00000254146 | -1.7753   | 0.96207 | -1.7753     | 0.96207     | -1.7753   |         |         |
|            | 0.96207         | 0.23497   | 0.40712 | 0.40712     | 0.727486374 |           |         |         |
| LINC01395  | ENSG00000281097 | 0.23497   | 0.40712 | 0.23497     | 0.40712     | 0.23497   |         |         |
|            | 0.40712         | 0.23497   | 0.40712 | 0.40712     | 0.727486374 |           |         |         |
| TMEM99     | ENSG00000167920 | -0.59554  | 0.72426 | -0.93566    | 0.82528     | 0.23489   |         |         |
|            | 0.40715         | -0.65321  | 0.74319 | 0.40715     | 0.727486374 |           |         |         |
| NA         | ENSG00000226716 | -0.49437  | 0.68948 | -0.65375    | 0.74336     | 0.17163   | 0.43187 |         |
|            | 0.23489         | 0.40715   | 0.40715 | 0.727486374 |             |           |         |         |
| ARAP3      | ENSG00000120318 | -0.36657  | 0.64303 | -0.091249   | 0.53635     | 0.23485   | 0.40716 |         |
|            | -0.23426        | 0.59261   | 0.40716 | 0.727486374 |             |           |         |         |
| NA         | ENSG00000206168 | -0.1915   | 0.57593 | 0.23482     | 0.40718     | -0.52159  | 0.69902 |         |
|            | -0.52159        | 0.69902   | 0.40718 | 0.727486374 |             |           |         |         |
| H3P35      | ENSG00000257287 | 0.23476   | 0.4072  | -0.64243    | 0.7397      | -0.64243  | 0.7397  |         |
|            | -0.64243        | 0.7397    | 0.4072  | 0.727486374 |             |           |         |         |
| GTF2F1     | ENSG00000125651 | -0.62954  | 0.7355  | -1.1179     | 0.8682      | 0.23466   |         |         |
|            | 0.40724         | -1.1077   | 0.86601 | 0.40724     | 0.727486374 |           |         |         |
| RNU6-914P  | ENSG00000252558 | 0.23462   | 0.40725 | 0.23462     | 0.40725     | 0.23462   |         |         |
|            | 0.40725         | 0.23462   | 0.40725 | 0.40725     | 0.727486374 |           |         |         |
| NA         | ENSG00000262228 | 0.23464   | 0.40725 | 0.23464     | 0.40725     | 0.23464   | 0.40725 |         |
|            | 0.23464         | 0.40725   | 0.40725 | 0.727486374 |             |           |         |         |
| NIF3L1     | ENSG00000196290 | 0.23455   | 0.40728 | -0.040228   | 0.51604     | -0.015556 |         |         |
|            | 0.50621         | -0.1197   | 0.54764 | 0.40728     | 0.727486374 |           |         |         |
| NA         | ENSG00000254744 | -0.69439  | 0.75628 | -1.5863     | 0.94366     | -0.040765 | 0.51626 |         |
|            | 0.2345          | 0.4073    | 0.4073  | 0.727486374 |             |           |         |         |
| RN7SL284P  | ENSG00000243446 | 0.23443   | 0.40732 | -1.0279     | 0.848       | -0.88287  | 0.81135 |         |
|            | 0.23443         | 0.40732   | 0.40732 | 0.727486374 |             |           |         |         |
| NA         | ENSG00000200432 | 0.23441   | 0.40733 | 0.23441     | 0.40733     | 0.23441   | 0.40733 |         |



|             |                 |           |         |             |             |           |         |  |
|-------------|-----------------|-----------|---------|-------------|-------------|-----------|---------|--|
|             | 0.23441         | 0.40733   | 0.40733 | 0.727486374 |             |           |         |  |
| DOK2        | ENSG00000147443 | 0.23435   | 0.40736 | -0.62272    | 0.73327     | -0.62272  | 0.73327 |  |
|             | -1.1985         | 0.88465   | 0.40736 | 0.727486374 |             |           |         |  |
| NA          | ENSG00000254361 | -0.95347  | 0.82982 | 0.23431     | 0.40737     | 0.23431   | 0.40737 |  |
|             | 0.23431         | 0.40737   | 0.40737 | 0.727486374 |             |           |         |  |
| OR1X1P      | ENSG00000272494 | 0.055499  | 0.47787 | 0.23432     | 0.40737     | -0.39512  |         |  |
|             | 0.65362         | -1.4172   | 0.92179 | 0.40737     | 0.727486374 |           |         |  |
| NA          | ENSG00000276738 | 0.23432   | 0.40737 | 0.042605    | 0.48301     | 0.23432   | 0.40737 |  |
|             | 0.23432         | 0.40737   | 0.40737 | 0.727486374 |             |           |         |  |
| MRAP2       | ENSG00000135324 | 0.15546   | 0.43823 | -1.031      | 0.84873     | -0.21306  | 0.58436 |  |
|             | 0.2343          | 0.40738   | 0.40738 | 0.727486374 |             |           |         |  |
| MLH3        | ENSG00000119684 | 0.091089  | 0.46371 | -1.3564     | 0.91252     | -0.76622  | 0.77823 |  |
|             | 0.23424         | 0.4074    | 0.4074  | 0.727486374 |             |           |         |  |
| UBAP1       | ENSG00000165006 | 0.23424   | 0.4074  | -0.17582    | 0.56978     | -0.40598  | 0.65762 |  |
|             | -0.60903        | 0.72875   | 0.4074  | 0.727486374 |             |           |         |  |
| NA          | ENSG00000258381 | 0.23425   | 0.4074  | 0.23425     | 0.4074      | 0.23425   | 0.4074  |  |
|             | 0.23425         | 0.4074    | 0.4074  | 0.727486374 |             |           |         |  |
| SCAF4       | ENSG00000156304 | -0.24831  | 0.59805 | 0.23421     | 0.40741     | -0.3281   | 0.62858 |  |
|             | 0.17774         | 0.42946   | 0.40741 | 0.727486374 |             |           |         |  |
| NA          | ENSG00000241870 | 0.23421   | 0.40741 | -0.062199   | 0.5248      | 0.23421   | 0.40741 |  |
|             | 0.23421         | 0.40741   | 0.40741 | 0.727486374 |             |           |         |  |
| HSD17B3-AS1 | ENSG00000232283 | 0.23413   | 0.40744 | -1.2488     | 0.89413     | 0.23413   |         |  |
|             | 0.40744         | 0.23413   | 0.40744 | 0.40744     | 0.727486374 |           |         |  |
| NA          | ENSG00000251345 | 0.23414   | 0.40744 | 0.23414     | 0.40744     | 0.23414   | 0.40744 |  |
|             | 0.23414         | 0.40744   | 0.40744 | 0.727486374 |             |           |         |  |
| C20orf85    | ENSG00000124237 | -0.95825  | 0.83103 | -1.3961     | 0.91866     | 0.23411   |         |  |
|             | 0.40745         | -0.067943 | 0.52708 | 0.40745     | 0.727486374 |           |         |  |
| NA          | ENSG00000250887 | 0.23408   | 0.40746 | 0.23408     | 0.40746     | 0.23408   | 0.40746 |  |
|             | -1.0473         | 0.85251   | 0.40746 | 0.727486374 |             |           |         |  |
| NA          | ENSG00000231113 | 0.21327   | 0.41556 | 0.21327     | 0.41556     | 0.23405   | 0.40747 |  |
|             | 0.21327         | 0.41556   | 0.40747 | 0.727486374 |             |           |         |  |
| GAPDHP26    | ENSG00000229541 | 0.23398   | 0.4075  | -0.40491    | 0.65723     | -0.40491  |         |  |
|             | 0.65723         | -0.40491  | 0.65723 | 0.4075      | 0.72749644  |           |         |  |
| GTF3C4      | ENSG00000125484 | -0.55578  | 0.71082 | 0.1848      | 0.42669     | 0.23394   |         |  |
|             | 0.40752         | 0.096042  | 0.46174 | 0.40752     | 0.72749644  |           |         |  |
| SPTAN1      | ENSG00000197694 | -0.43043  | 0.66656 | 0.23385     | 0.40755     | -0.66415  |         |  |
|             | 0.7467          | -0.19521  | 0.57739 | 0.40755     | 0.72749644  |           |         |  |
| APOA1       | ENSG00000118137 | 0.23384   | 0.40756 | 0.23384     | 0.40756     | 0.23384   | 0.40756 |  |
|             | 0.23384         | 0.40756   | 0.40756 | 0.72749644  |             |           |         |  |
| ORC3        | ENSG00000135336 | -0.49012  | 0.68797 | -0.58643    | 0.72121     | -0.58643  | 0.72121 |  |
|             | 0.23383         | 0.40756   | 0.40756 | 0.72749644  |             |           |         |  |
| RNA5SP387   | ENSG00000201096 | -0.92938  | 0.82365 | 0.23376     | 0.40759     | -0.92938  |         |  |
|             | 0.82365         | -0.92938  | 0.82365 | 0.40759     | 0.72749644  |           |         |  |
| NA          | ENSG00000253899 | 0.23375   | 0.40759 | -0.29136    | 0.61461     | -0.26045  | 0.60274 |  |
|             | -0.29136        | 0.61461   | 0.40759 | 0.72749644  |             |           |         |  |
| NA          | ENSG00000217878 | -0.18139  | 0.57197 | 0.23372     | 0.4076      | -0.84947  | 0.80219 |  |
|             | -0.18139        | 0.57197   | 0.4076  | 0.72749644  |             |           |         |  |
| LRRC74A     | ENSG00000100565 | 0.010685  | 0.49574 | 0.23371     | 0.40761     | -0.086088 |         |  |
|             | 0.5343          | 0.10597   | 0.4578  | 0.40761     | 0.72749644  |           |         |  |
| NA          | ENSG00000232969 | -0.77532  | 0.78093 | -0.13816    | 0.55494     | -0.77532  | 0.78093 |  |
|             | 0.23363         | 0.40764   | 0.40764 | 0.727496693 |             |           |         |  |
| NA          | ENSG00000280228 | 0.23362   | 0.40764 | -0.49123    | 0.68837     | 0.23362   | 0.40764 |  |
|             | 0.23362         | 0.40764   | 0.40764 | 0.727496693 |             |           |         |  |
| NA          | ENSG00000235349 | 0.23358   | 0.40766 | 0.23358     | 0.40766     | 0.23358   | 0.40766 |  |
|             | 0.23358         | 0.40766   | 0.40766 | 0.727505742 |             |           |         |  |
| EDN2        | ENSG00000127129 | -0.85329  | 0.80325 | 0.23348     | 0.4077      | -0.7037   | 0.75919 |  |
|             | -0.85329        | 0.80325   | 0.4077  | 0.727523839 |             |           |         |  |
| NA          | ENSG00000228951 | 0.23348   | 0.4077  | 0.23348     | 0.4077      | 0.23348   | 0.4077  |  |
|             | -2.0767         | 0.98108   | 0.4077  | 0.727523839 |             |           |         |  |
| NA          | ENSG00000249278 | -0.45891  | 0.67685 | 0.23341     | 0.40772     | -0.4285   | 0.66586 |  |
|             | -0.54919        | 0.70856   | 0.40772 | 0.727532887 |             |           |         |  |
| HPS1        | ENSG00000107521 | -0.52978  | 0.70187 | -1.0079     | 0.84324     | 0.08769   | 0.46506 |  |

|            |                 |          |         |             |             |           |         |
|------------|-----------------|----------|---------|-------------|-------------|-----------|---------|
|            | 0.23328         | 0.40777  | 0.40777 | 0.727568822 |             |           |         |
| RAD51-AS1  | ENSG00000245849 | 0.2333   | 0.40777 | -0.88523    | 0.81198     | 0.1816    |         |
|            | 0.42795         | -0.32686 | 0.62811 | 0.40777     | 0.727568822 |           |         |
| RPSAP39    | ENSG00000244002 | 0.23306  | 0.40786 | 0.23306     | 0.40786     | 0.23306   |         |
|            | 0.40786         | 0.23306  | 0.40786 | 0.40786     | 0.727676118 |           |         |
| NA         | ENSG00000267159 | 0.23305  | 0.40786 | 0.23305     | 0.40786     | 0.23305   | 0.40786 |
|            | 0.23305         | 0.40786  | 0.40786 | 0.727676118 |             |           |         |
| NA         | ENSG00000255535 | 0.23301  | 0.40788 | 0.23301     | 0.40788     | 0.23301   | 0.40788 |
|            | 0.23301         | 0.40788  | 0.40788 | 0.727685158 |             |           |         |
| CIB3       | ENSG00000141977 | -1.9264  | 0.97297 | 0.23285     | 0.40794     | -1.9264   | 0.97297 |
|            | -1.9264         | 0.97297  | 0.40794 | 0.72768683  |             |           |         |
| NKIRAS2    | ENSG00000168256 | 0.23282  | 0.40795 | -1.0304     | 0.84859     | 0.23282   |         |
|            | 0.40795         | -0.26535 | 0.60463 | 0.40795     | 0.72768683  |           |         |
| NA         | ENSG00000233044 | 0.23281  | 0.40795 | 0.23281     | 0.40795     | 0.23281   | 0.40795 |
|            | 0.096787        | 0.46145  | 0.40795 | 0.72768683  |             |           |         |
| RNU6-1085P | ENSG00000200446 | -1.0582  | 0.85501 | -0.79138    | 0.78564     | -0.53236  |         |
|            | 0.70276         | 0.2327   | 0.40804 | 0.72768683  |             |           |         |
| MIR5100    | ENSG00000263795 | -0.5466  | 0.70767 | 0.23266     | 0.40801     | -0.5466   |         |
|            | 0.70767         | -0.5466  | 0.70767 | 0.40801     | 0.72768683  |           |         |
| NA         | ENSG00000224667 | 0.23265  | 0.40802 | 0.23265     | 0.40802     | -1.0278   | 0.84797 |
|            | -1.4973         | 0.93284  | 0.40802 | 0.72768683  |             |           |         |
| ANKRD6     | ENSG00000135299 | 0.042125 | 0.4832  | 0.23262     | 0.40803     | -0.096505 |         |
|            | 0.53844         | 0.015823 | 0.49369 | 0.40803     | 0.72768683  |           |         |
| RN7SKP241  | ENSG00000240294 | 0.23258  | 0.40804 | 0.23258     | 0.40804     | 0.23258   |         |
|            | 0.40804         | 0.23258  | 0.40804 | 0.40804     | 0.72768683  |           |         |
| NA         | ENSG00000279819 | 0.23255  | 0.40806 | 0.23255     | 0.40806     | 0.23255   | 0.40806 |
|            | 0.23255         | 0.40806  | 0.40806 | 0.72768683  |             |           |         |
| CCSAP      | ENSG00000154429 | 0.097777 | 0.46105 | 0.097777    | 0.46105     | 0.23252   | 0.40807 |
|            | 0.12519         | 0.45019  | 0.40807 | 0.72768683  |             |           |         |
| MAPT       | ENSG00000186868 | -0.26581 | 0.60481 | 0.18729     | 0.42572     | 0.23252   | 0.40807 |
|            | 0.057443        | 0.4771   | 0.40807 | 0.72768683  |             |           |         |
| NA         | ENSG00000271652 | 0.2325   | 0.40808 | 0.2325      | 0.40808     | 0.2325    | 0.40808 |
|            | 0.2325          | 0.40808  | 0.40808 | 0.72768683  |             |           |         |
| NA         | ENSG00000206090 | -0.18943 | 0.57512 | -1.0842     | 0.86087     | 0.23247   | 0.40809 |
|            | -0.12266        | 0.54881  | 0.40809 | 0.72768683  |             |           |         |
| LINC00205  | ENSG00000223768 | 0.23247  | 0.40809 | 0.23247     | 0.40809     | 0.23247   |         |
|            | 0.40809         | 0.23247  | 0.40809 | 0.40809     | 0.72768683  |           |         |
| CCDC84     | ENSG00000186166 | -0.1263  | 0.55025 | -0.1263     | 0.55025     | 0.2324    |         |
|            | 0.40811         | -0.70713 | 0.76026 | 0.40811     | 0.727695865 |           |         |
| ASGR1      | ENSG00000141505 | 0.23233  | 0.40814 | -1.1737     | 0.87975     | -0.72451  | 0.76562 |
|            | 0.23233         | 0.40814  | 0.40814 | 0.727714406 |             |           |         |
| CGA        | ENSG00000135346 | 0.23224  | 0.40818 | 0.23224     | 0.40818     | 0.23224   | 0.40818 |
|            | 0.23224         | 0.40818  | 0.40818 | 0.727714406 |             |           |         |
| ZNF586     | ENSG00000083828 | 0.23215  | 0.40821 | 0.1964      | 0.42215     | 0.12754   |         |
|            | 0.44926         | 0.1415   | 0.44374 | 0.40821     | 0.727714406 |           |         |
| CHCHD4P4   | ENSG00000213964 | 0.059262 | 0.47637 | 0.059262    | 0.47637     | 0.23215   |         |
|            | 0.40821         | -1.0211  | 0.8464  | 0.40821     | 0.727714406 |           |         |
| NA         | ENSG00000230149 | 0.23215  | 0.40821 | 0.23215     | 0.40821     | 0.23215   | 0.40821 |
|            | 0.23215         | 0.40821  | 0.40821 | 0.727714406 |             |           |         |
| NA         | ENSG00000244491 | 0.23215  | 0.40821 | 0.23215     | 0.40821     | 0.23215   | 0.40821 |
|            | 0.23215         | 0.40821  | 0.40821 | 0.727714406 |             |           |         |
| RN7SL716P  | ENSG00000263558 | 0.23211  | 0.40823 | 0.23211     | 0.40823     | 0.23211   |         |
|            | 0.40823         | 0.23211  | 0.40823 | 0.40823     | 0.727723438 |           |         |
| ODAPH      | ENSG00000174792 | 0.23205  | 0.40825 | -0.67876    | 0.75136     | -0.072873 | 0.52905 |
|            | -0.85465        | 0.80363  | 0.40825 | 0.727732469 |             |           |         |
| SLC4A2     | ENSG00000164889 | 0.23195  | 0.40829 | -0.21947    | 0.58686     | 0.23195   |         |
|            | 0.40829         | 0.23195  | 0.40829 | 0.40829     | 0.727777149 |           |         |
| NA         | ENSG00000272465 | 0.23172  | 0.40838 | -0.1824     | 0.57236     | -0.85357  | 0.80333 |
|            | -0.85357        | 0.80333  | 0.40838 | 0.727788721 |             |           |         |
| NA         | ENSG00000231305 | -0.19165 | 0.57599 | -0.19165    | 0.57599     | -1.3549   | 0.91228 |
|            | 0.23168         | 0.40839  | 0.40839 | 0.727788721 |             |           |         |
| RNU4-12P   | ENSG00000202103 | 0.23163  | 0.40841 | -0.20137    | 0.57979     | -0.41566  |         |

|           |                 |           |         |             |             |           |         |  |
|-----------|-----------------|-----------|---------|-------------|-------------|-----------|---------|--|
|           | 0.66117         | -1.6359   | 0.94907 | 0.40841     | 0.727788721 |           |         |  |
| LINC00558 | ENSG00000261517 | -0.13824  | 0.55498 | 0.23152     | 0.40845     | -1.2993   |         |  |
|           | 0.90307         | -0.081242 | 0.53238 | 0.40845     | 0.727788721 |           |         |  |
| SLC4A10   | ENSG00000144290 | 0.043267  | 0.48274 | 0.2315      | 0.40846     | -0.19957  |         |  |
|           | 0.57909         | -0.21307  | 0.58436 | 0.40846     | 0.727788721 |           |         |  |
| NA        | ENSG00000254113 | -2.1008   | 0.98217 | -1.1186     | 0.86835     | -2.1008   | 0.98217 |  |
|           | 0.23152         | 0.40846   | 0.40846 | 0.727788721 |             |           |         |  |
| NA        | ENSG00000248113 | -0.1451   | 0.55768 | -0.1451     | 0.55768     | -0.086205 | 0.53435 |  |
|           | 0.23145         | 0.40848   | 0.40848 | 0.727788721 |             |           |         |  |
| NA        | ENSG00000259820 | 0.23143   | 0.40849 | 0.23143     | 0.40849     | 0.23143   | 0.40849 |  |
|           | 0.23143         | 0.40849   | 0.40849 | 0.727788721 |             |           |         |  |
| OR7E100P  | ENSG00000242525 | 0.23142   | 0.4085  | -1.0861     | 0.86128     | -1.0197   |         |  |
|           | 0.84607         | -1.3877   | 0.91739 | 0.4085      | 0.727788721 |           |         |  |
| ABCA17P   | ENSG00000238098 | 0.23137   | 0.40851 | -0.63539    | 0.73741     | 0.023912  |         |  |
|           | 0.49046         | -0.9578   | 0.83092 | 0.40851     | 0.727788721 |           |         |  |
| C11orf54  | ENSG00000182919 | -0.50733  | 0.69404 | 0.23136     | 0.40852     | -0.50733  |         |  |
|           | 0.69404         | -0.26911  | 0.60608 | 0.40852     | 0.727788721 |           |         |  |
| ARHGFEF25 | ENSG00000240771 | 0.23131   | 0.40854 | 0.23131     | 0.40854     | 0.23131   |         |  |
|           | 0.40854         | 0.23131   | 0.40854 | 0.40854     | 0.727788721 |           |         |  |
| ERC2      | ENSG00000187672 | -0.27734  | 0.60924 | 0.23126     | 0.40856     | -0.33199  | 0.63005 |  |
|           | -0.99863        | 0.84101   | 0.40856 | 0.727788721 |             |           |         |  |
| L3MBTL2   | ENSG00000100395 | 0.23122   | 0.40857 | 0.23122     | 0.40857     | -0.78783  |         |  |
|           | 0.7846          | 0.13137   | 0.44774 | 0.40857     | 0.727788721 |           |         |  |
| SNRPCP1   | ENSG00000238001 | 0.23121   | 0.40858 | -0.83693    | 0.79868     | 0.23121   |         |  |
|           | 0.40858         | 0.23121   | 0.40858 | 0.40858     | 0.727788721 |           |         |  |
| LPAR5     | ENSG00000184574 | -0.52384  | 0.69981 | -0.50166    | 0.69205     | 0.23114   | 0.4086  |  |
|           | -0.80671        | 0.79008   | 0.4086  | 0.727788721 |             |           |         |  |
| GEMIN6    | ENSG00000152147 | 0.23112   | 0.40861 | 0.23112     | 0.40861     | -0.45253  |         |  |
|           | 0.67456         | -0.4882   | 0.68729 | 0.40861     | 0.727788721 |           |         |  |
| RNU6-839P | ENSG00000200217 | 0.23112   | 0.40861 | 0.13721     | 0.44543     | 0.13721   |         |  |
|           | 0.44543         | 0.13721   | 0.44543 | 0.40861     | 0.727788721 |           |         |  |
| NA        | ENSG00000272853 | -0.53561  | 0.70389 | -1.2109     | 0.88704     | 0.23113   | 0.40861 |  |
|           | 0.23113         | 0.40861   | 0.40861 | 0.727788721 |             |           |         |  |
| ICAM3     | ENSG00000076662 | -0.095883 | 0.53819 | 0.0065358   | 0.49739     | 0.0065358 | 0.49739 |  |
|           | 0.23109         | 0.40862   | 0.40862 | 0.727788721 |             |           |         |  |
| RSBN1L    | ENSG00000187257 | -0.50369  | 0.69276 | -0.36775    | 0.64347     | -0.33186  | 0.63    |  |
|           | 0.23106         | 0.40863   | 0.40863 | 0.727788721 |             |           |         |  |
| SPRR2E    | ENSG00000203785 | 0.23104   | 0.40864 | -0.37162    | 0.64491     | -0.74973  |         |  |
|           | 0.77329         | -0.29368  | 0.6155  | 0.40864     | 0.727788721 |           |         |  |
| CYCSP11   | ENSG00000229217 | 0.23104   | 0.40864 | 0.23104     | 0.40864     | 0.23104   |         |  |
|           | 0.40864         | 0.23104   | 0.40864 | 0.40864     | 0.727788721 |           |         |  |
| ALOX15P2  | ENSG00000188101 | -0.201    | 0.57965 | -0.81952    | 0.79375     | -0.81952  |         |  |
|           | 0.79375         | 0.23099   | 0.40866 | 0.40866     | 0.727797741 |           |         |  |
| LINC02532 | ENSG00000235142 | -0.3862   | 0.65033 | -0.70012    | 0.75807     | 0.23093   |         |  |
|           | 0.40868         | -0.29893  | 0.6175  | 0.40868     | 0.727806761 |           |         |  |
| MYOCD     | ENSG00000141052 | 0.23085   | 0.40872 | -1.4234     | 0.9227      | -1.1278   | 0.87029 |  |
|           | -0.48008        | 0.68442   | 0.40872 | 0.727842606 |             |           |         |  |
| RPL38P1   | ENSG00000241993 | 0.23083   | 0.40873 | 0.23083     | 0.40873     | 0.23083   |         |  |
|           | 0.40873         | 0.23083   | 0.40873 | 0.40873     | 0.727842606 |           |         |  |
| RPS6P7    | ENSG00000219253 | 0.23076   | 0.40875 | 0.23076     | 0.40875     | 0.23076   |         |  |
|           | 0.40875         | 0.23076   | 0.40875 | 0.40875     | 0.727851622 |           |         |  |
| NA        | ENSG00000272027 | -0.30559  | 0.62004 | -1.8931     | 0.97083     | 0.2307    | 0.40877 |  |
|           | 0.2307          | 0.40877   | 0.40877 | 0.727851849 |             |           |         |  |
| NA        | ENSG00000233597 | 0.23069   | 0.40878 | 0.23069     | 0.40878     | 0.23069   | 0.40878 |  |
|           | 0.23069         | 0.40878   | 0.40878 | 0.727851849 |             |           |         |  |
| NA        | ENSG00000276828 | -2.2658   | 0.98827 | -0.22351    | 0.58843     | -0.71122  | 0.76152 |  |
|           | 0.23056         | 0.40883   | 0.40883 | 0.727914279 |             |           |         |  |
| NA        | ENSG00000279683 | 0.23047   | 0.40886 | 0.23047     | 0.40886     | 0.23047   | 0.40886 |  |
|           | 0.23047         | 0.40886   | 0.40886 | 0.727941096 |             |           |         |  |
| RPL7P45   | ENSG00000225823 | 0.23043   | 0.40888 | 0.23043     | 0.40888     | -1.3337   |         |  |
|           | 0.90885         | -0.68462  | 0.75321 | 0.40888     | 0.727941536 |           |         |  |
| ARL10     | ENSG00000175414 | -0.36073  | 0.64085 | -0.36073    | 0.64085     | 0.23035   | 0.40891 |  |

|             |                 |             |             |             |             |             |             |             |
|-------------|-----------------|-------------|-------------|-------------|-------------|-------------|-------------|-------------|
|             | -0.36073        | 0.64085     | 0.40891     | 0.727941536 |             |             |             |             |
| OGFRL1      | ENSG00000119900 | 0.23032     | 0.40892     | 0.23032     | 0.40892     | 0.23032     | 0.40892     | 0.23032     |
|             | 0.40892         | 0.23032     | 0.40892     | 0.40892     | 0.727941536 |             |             |             |
| SLC7A11-AS1 | ENSG00000250033 | -1.2919     | 0.9018      | 0.23032     | 0.40892     | 0.23032     | 0.40892     | -1.0835     |
|             | 0.86071         | -1.0835     | 0.86071     | 0.40892     | 0.727941536 |             |             |             |
| PIFO        | ENSG00000173947 | -0.0066591  | 0.50266     | -0.0066591  | 0.50266     | -0.0066591  | 0.50266     | 0.50266     |
|             | 0.23027         | 0.40894     | 0.40894     | 0.727950546 |             |             |             |             |
| NA          | ENSG00000240023 | -0.50391    | 0.69284     | 0.23023     | 0.40896     | -0.43395    | 0.66784     |             |
|             | -0.046611       | 0.51859     | 0.40896     | 0.727959556 |             |             |             |             |
| NA          | ENSG00000258450 | 0.23013     | 0.409023013 | 0.409023013 | 0.409023013 | 0.409023013 | 0.409023013 | 0.409023013 |
|             | 0.409023013     | 0.727995372 |             |             |             |             |             |             |
| NA          | ENSG00000248969 | 0.2301      | 0.40901     | -1.6934     | 0.95481     | -1.6934     | 0.95481     |             |
|             | -1.6934         | 0.95481     | 0.40901     | 0.727995372 |             |             |             |             |
| MIR5588     | ENSG00000264614 | 0.2299      | 0.40908     | -0.13708    | 0.55452     | 0.2299      |             |             |
|             | 0.40908         | 0.2299      | 0.40908     | 0.40908     | 0.728093371 |             |             |             |
| NA          | ENSG00000224867 | 0.22986     | 0.4091      | 0.22986     | 0.4091      | 0.22986     | 0.4091      |             |
|             | 0.22986         | 0.4091      | 0.4091      | 0.728102374 |             |             |             |             |
| NA          | ENSG00000234580 | 0.22975     | 0.40914     | -0.38744    | 0.65078     | -1.2577     | 0.89576     |             |
|             | -0.38744        | 0.65078     | 0.40914     | 0.728146971 |             |             |             |             |
| RNU6-1228P  | ENSG00000212316 | 0.1477      | 0.44129     | -0.014621   | 0.50583     | 0.22966     |             |             |
|             | 0.40918         | -0.39925    | 0.65515     | 0.40918     | 0.728165174 |             |             |             |
| NA          | ENSG00000268088 | 0.22964     | 0.40919     | 0.22964     | 0.40919     | 0.22964     | 0.40919     |             |
|             | 0.22964         | 0.40919     | 0.40919     | 0.728165174 |             |             |             |             |
| MRGBP       | ENSG00000101189 | 0.2296      | 0.4092      | 0.11241     | 0.45525     | 0.11241     | 0.45525     |             |
|             | -0.60656        | 0.72793     | 0.4092      | 0.728165174 |             |             |             |             |
| NA          | ENSG00000273162 | -0.44257    | 0.67096     | -0.13858    | 0.55511     | 0.22958     | 0.40921     |             |
|             | 0.21138         | 0.4163      | 0.40921     | 0.728165174 |             |             |             |             |
| PSMB1       | ENSG00000008018 | -1.101      | 0.86456     | 0.106       | 0.45779     | 0.22944     | 0.40926     |             |
|             | -0.80285        | 0.78897     | 0.40926     | 0.728183373 |             |             |             |             |
| LINC01853   | ENSG00000224028 | -1.4387     | 0.92488     | -0.22016    | 0.58712     | 0.22944     |             |             |
|             | 0.40927         | -0.44033    | 0.67015     | 0.40927     | 0.728183373 |             |             |             |
| ATP6V1D     | ENSG00000100554 | 0.1142      | 0.45454     | -0.69786    | 0.75737     | 0.1142      |             |             |
|             | 0.45454         | 0.22939     | 0.40928     | 0.40928     | 0.728183373 |             |             |             |
| LINC00459   | ENSG00000229307 | 0.2294      | 0.40928     | 0.2294      | 0.40928     | 0.2294      |             |             |
|             | 0.40928         | 0.2294      | 0.40928     | 0.40928     | 0.728183373 |             |             |             |
| PRICKLE1    | ENSG00000139174 | -0.0040928  | 0.50163     | 0.12383     | 0.45073     | 0.22929     |             |             |
|             | 0.40932         | 0.22248     | 0.41197     | 0.40932     | 0.728227952 |             |             |             |
| NA          | ENSG00000220992 | 0.22921     | 0.40935     | -1.5622     | 0.94088     | -1.7733     | 0.96191     |             |
|             | -1.3235         | 0.90717     | 0.40935     | 0.728254737 |             |             |             |             |
| NA          | ENSG00000237308 | 0.22903     | 0.40942     | 0.22903     | 0.40942     | 0.22903     | 0.40942     |             |
|             | 0.22903         | 0.40942     | 0.40942     | 0.72835268  |             |             |             |             |
| ZBED6CL     | ENSG00000188707 | 0.22891     | 0.40947     | 0.22891     | 0.40947     | 0.22891     |             |             |
|             | 0.40947         | 0.22891     | 0.40947     | 0.40947     | 0.728406235 |             |             |             |
| LMAN2L      | ENSG00000114988 | 0.22888     | 0.40948     | -0.82851    | 0.79631     | -0.6518     |             |             |
|             | 0.74273         | 0.03105     | 0.48761     | 0.40948     | 0.728406235 |             |             |             |
| CCAR2       | ENSG00000158941 | -0.038603   | 0.5154      | 0.10943     | 0.45643     | -0.4899     | 0.6879      |             |
|             | 0.22873         | 0.40954     | 0.40954     | 0.72845098  |             |             |             |             |
| MEMO1       | ENSG00000162959 | -0.15089    | 0.55997     | 0.22872     | 0.40954     | 0.22872     | 0.40954     |             |
|             | -0.79975        | 0.78807     | 0.40954     | 0.72845098  |             |             |             |             |
| RNU6-605P   | ENSG00000199963 | 0.22871     | 0.40955     | 0.22871     | 0.40955     | 0.22871     |             |             |
|             | 0.40955         | 0.22871     | 0.40955     | 0.40955     | 0.72845098  |             |             |             |
| LINC01347   | ENSG00000214837 | -0.44351    | 0.6713      | 0.22864     | 0.40957     | -0.43024    |             |             |
|             | 0.66649         | -0.1095     | 0.5436      | 0.40957     | 0.728459964 |             |             |             |
| OR51A8P     | ENSG00000197984 | 0.22853     | 0.40962     | 0.22853     | 0.40962     | 0.22853     |             |             |
|             | 0.40962         | 0.22853     | 0.40962     | 0.40962     | 0.728461418 |             |             |             |
| NA          | ENSG00000258444 | 0.22844     | 0.40965     | 0.22844     | 0.40965     | 0.22844     | 0.40965     |             |
|             | 0.22844         | 0.40965     | 0.40965     | 0.728461418 |             |             |             |             |
| RNA5SP383   | ENSG00000199804 | 0.22842     | 0.40966     | 0.22842     | 0.40966     | 0.22842     |             |             |
|             | 0.40966         | 0.22842     | 0.40966     | 0.40966     | 0.728461418 |             |             |             |
| LINC00588   | ENSG00000215117 | 0.22841     | 0.40966     | -1.2899     | 0.90145     | 0.22841     |             |             |
|             | 0.40966         | 0.22841     | 0.40966     | 0.40966     | 0.728461418 |             |             |             |
| EIF3I       | ENSG00000084623 | 0.21608     | 0.41446     | 0.2284      | 0.40967     | 0.2284      | 0.40967     |             |

|            |                 |           |           |           |             |             |         |  |
|------------|-----------------|-----------|-----------|-----------|-------------|-------------|---------|--|
|            |                 | -0.49049  | 0.68811   | 0.40967   | 0.728461418 |             |         |  |
| LDHA       | ENSG00000134333 | 0.22834   | 0.40969   | 0.22834   | 0.40969     | 0.22834     | 0.40969 |  |
|            |                 | -0.78955  | 0.7851    | 0.40969   | 0.728461418 |             |         |  |
| NA         | ENSG00000273923 | -0.99804  | 0.84087   | -0.99804  | 0.84087     | 0.22833     | 0.4097  |  |
|            |                 | -0.99804  | 0.84087   | 0.4097    | 0.728461418 |             |         |  |
| OR6C73P    | ENSG00000257414 | 0.22826   | 0.40972   | -0.050105 | 0.51998     | -0.050105   |         |  |
|            |                 | 0.51998   | -0.050105 | 0.51998   | 0.40972     | 0.728461418 |         |  |
| ENPP3      | ENSG00000154269 | 0.22818   | 0.40975   | -0.77359  | 0.78041     | -0.35895    | 0.64018 |  |
|            |                 | -0.73984  | 0.7703    | 0.40975   | 0.728461418 |             |         |  |
| MIR217HG   | ENSG00000226702 | -0.15052  | 0.55982   | 0.22814   | 0.40977     | 0.061012    |         |  |
|            |                 | 0.47567   | 0.22814   | 0.40977   | 0.40977     | 0.728461418 |         |  |
| NA         | ENSG00000268623 | 0.22812   | 0.40977   | 0.22812   | 0.40977     | 0.22812     | 0.40977 |  |
|            |                 | 0.22812   | 0.40977   | 0.40977   | 0.728461418 |             |         |  |
| PRCD       | ENSG00000214140 | 0.22809   | 0.40979   | 0.22809   | 0.40979     | 0.22809     | 0.40979 |  |
|            |                 | 0.22809   | 0.40979   | 0.40979   | 0.728461418 |             |         |  |
| NA         | ENSG00000251454 | 0.18147   | 0.428     | 0.22807   | 0.40979     | -0.064331   | 0.52565 |  |
|            |                 | -0.53849  | 0.70488   | 0.40979   | 0.728461418 |             |         |  |
| RNU6-1018P | ENSG00000252386 | 0.22807   | 0.4098    | 0.22807   | 0.4098      | 0.22807     |         |  |
|            |                 | 0.4098    | 0.22807   | 0.4098    | 0.4098      | 0.728461418 |         |  |
| ELOCP28    | ENSG00000105694 | 0.22803   | 0.40981   | 0.22803   | 0.40981     | 0.22803     |         |  |
|            |                 | 0.40981   | -0.50046  | 0.69162   | 0.40981     | 0.728461418 |         |  |
| NA         | ENSG00000259320 | 0.22804   | 0.40981   | 0.22804   | 0.40981     | 0.22804     | 0.40981 |  |
|            |                 | 0.22804   | 0.40981   | 0.40981   | 0.728461418 |             |         |  |
| CYCSP28    | ENSG00000255003 | -1.0799   | 0.85991   | 0.22789   | 0.40986     | -0.81888    |         |  |
|            |                 | 0.79357   | -0.81888  | 0.79357   | 0.40986     | 0.728470577 |         |  |
| NA         | ENSG00000257146 | 0.22789   | 0.40986   | 0.22789   | 0.40986     | 0.22789     | 0.40986 |  |
|            |                 | 0.22789   | 0.40986   | 0.40986   | 0.728470577 |             |         |  |
| NA         | ENSG00000270822 | -0.035795 | 0.51428   | 0.11748   | 0.45324     | 0.2279      | 0.40986 |  |
|            |                 | -0.74294  | 0.77124   | 0.40986   | 0.728470577 |             |         |  |
| FHL2       | ENSG00000115641 | -0.29339  | 0.61539   | -0.61391  | 0.73036     | 0.22773     | 0.40993 |  |
|            |                 | -0.17181  | 0.56821   | 0.40993   | 0.728541847 |             |         |  |
| OSTCP4     | ENSG00000220924 | 0.22772   | 0.40993   | 0.22772   | 0.40993     | -1.1195     |         |  |
|            |                 | 0.86854   | -0.99864  | 0.84101   | 0.40993     | 0.728541847 |         |  |
| PCDH7      | ENSG00000169851 | 0.22762   | 0.40997   | 0.053569  | 0.47864     | 0.22762     | 0.40997 |  |
|            |                 | 0.22762   | 0.40997   | 0.40997   | 0.728586364 |             |         |  |
| NA         | ENSG00000253857 | -0.46426  | 0.67877   | 0.22757   | 0.40999     | -0.46426    | 0.67877 |  |
|            |                 | -0.46426  | 0.67877   | 0.40999   | 0.728595336 |             |         |  |
| EBAG9P1    | ENSG00000233690 | 0.2274    | 0.41006   | 0.2274    | 0.41006     | 0.2274      |         |  |
|            |                 | 0.41006   | 0.2274    | 0.41006   | 0.41006     | 0.728658454 |         |  |
| NA         | ENSG00000230322 | 0.22736   | 0.41007   | 0.22736   | 0.41007     | 0.22736     | 0.41007 |  |
|            |                 | 0.22736   | 0.41007   | 0.41007   | 0.728658454 |             |         |  |
| SERPINB2   | ENSG00000197632 | 0.22726   | 0.41011   | 0.22726   | 0.41011     | 0.22726     |         |  |
|            |                 | 0.41011   | 0.22726   | 0.41011   | 0.41011     | 0.728658454 |         |  |
| NA         | ENSG00000237705 | -0.53217  | 0.7027    | -0.35102  | 0.63721     | 0.2272      | 0.41013 |  |
|            |                 | -1.0785   | 0.8596    | 0.41013   | 0.728658454 |             |         |  |
| TLR1       | ENSG00000174125 | 0.22718   | 0.41014   | -0.087332 | 0.5348      | -0.05035    | 0.52008 |  |
|            |                 | -0.33108  | 0.62971   | 0.41014   | 0.728658454 |             |         |  |
| CICP13     | ENSG00000234419 | 0.22718   | 0.41014   | -2.2933   | 0.98908     | -1.4953     |         |  |
|            |                 | 0.93258   | -1.8741   | 0.96954   | 0.41014     | 0.728658454 |         |  |
| NA         | ENSG00000263017 | -0.92597  | 0.82277   | 0.22716   | 0.41015     | -0.52931    | 0.7017  |  |
|            |                 | -0.28846  | 0.6135    | 0.41015   | 0.728658454 |             |         |  |
| LGI1       | ENSG00000108231 | 0.22709   | 0.41018   | -0.84333  | 0.80048     | 0.22709     | 0.41018 |  |
|            |                 | 0.22709   | 0.41018   | 0.41018   | 0.728658454 |             |         |  |
| GBF1       | ENSG00000107862 | -0.70926  | 0.76092   | -0.61714  | 0.73143     | -0.9529     | 0.82968 |  |
|            |                 | 0.22705   | 0.41019   | 0.41019   | 0.728658454 |             |         |  |
| TMPPE      | ENSG00000188167 | 0.22706   | 0.41019   | 0.22706   | 0.41019     | 0.22706     | 0.41019 |  |
|            |                 | 0.22706   | 0.41019   | 0.41019   | 0.728658454 |             |         |  |
| HEPACAM2   | ENSG00000188175 | 0.17622   | 0.43006   | 0.17622   | 0.43006     | 0.22705     |         |  |
|            |                 | 0.41019   | -0.011945 | 0.50477   | 0.41019     | 0.728658454 |         |  |
| NRG3       | ENSG00000185737 | -0.9897   | 0.83884   | -0.18328  | 0.57271     | -1.0519     | 0.85357 |  |
|            |                 | 0.227     | 0.41021   | 0.41021   | 0.728667419 |             |         |  |
| BTF3P5     | ENSG00000233594 | 0.16199   | 0.43566   | 0.16199   | 0.43566     | 0.16199     |         |  |

|            |                 |           |         |             |             |           |          |  |
|------------|-----------------|-----------|---------|-------------|-------------|-----------|----------|--|
|            | 0.43566         | 0.22693   | 0.41024 | 0.41024     | 0.728694146 |           |          |  |
| LINC01350  | ENSG00000228309 | 0.22687   | 0.41026 | 0.41026     | -0.48549    | 0.68633   | -0.48549 |  |
|            | 0.68633         | -0.48549  | 0.68633 | 0.41026     | 0.728703109 |           |          |  |
| NA         | ENSG00000257553 | 0.22668   | 0.41034 | 0.22668     | 0.41034     | 0.22668   | 0.41034  |  |
|            | 0.22668         | 0.41034   | 0.41034 | 0.728783907 |             |           |          |  |
| NRDE2      | ENSG00000119720 | 0.14439   | 0.4426  | 0.088778    | 0.46463     | -0.018767 | 0.50749  |  |
|            | 0.22663         | 0.41035   | 0.41035 | 0.728783907 |             |           |          |  |
| NA         | ENSG00000271918 | 0.22655   | 0.41039 | 0.22655     | 0.41039     | 0.22655   | 0.41039  |  |
|            | 0.068334        | 0.47276   | 0.41039 | 0.728783907 |             |           |          |  |
| RCL1       | ENSG00000120158 | 0.22652   | 0.4104  | -0.51804    | 0.69778     | -0.96863  | 0.83363  |  |
|            | 0.092312        | 0.46322   | 0.4104  | 0.728783907 |             |           |          |  |
| WT1-AS     | ENSG00000183242 | 0.22649   | 0.41041 | -0.199      | 0.57887     | 0.22649   |          |  |
|            | 0.41041         | 0.22649   | 0.41041 | 0.41041     | 0.728783907 |           |          |  |
| A4GALT     | ENSG00000128274 | 0.22647   | 0.41042 | -0.7564     | 0.7753      | -0.88425  |          |  |
|            | 0.81172         | -0.51858  | 0.69797 | 0.41042     | 0.728783907 |           |          |  |
| RB1-DT     | ENSG00000231473 | -0.60325  | 0.72683 | 0.083887    | 0.46657     | 0.22644   |          |  |
|            | 0.41043         | 0.22644   | 0.41043 | 0.41043     | 0.728783907 |           |          |  |
| IGLV5-48   | ENSG00000211647 | -1.2632   | 0.89674 | -1.2632     | 0.89674     | 0.22641   |          |  |
|            | 0.41044         | -1.2632   | 0.89674 | 0.41044     | 0.728783907 |           |          |  |
| NA         | ENSG00000235625 | -0.099147 | 0.53949 | -0.15912    | 0.56321     | 0.22638   | 0.41045  |  |
|            | -0.056355       | 0.52247   | 0.41045 | 0.728783907 |             |           |          |  |
| NA         | ENSG00000258672 | 0.22637   | 0.41046 | 0.22637     | 0.41046     | 0.22637   | 0.41046  |  |
|            | 0.22637         | 0.41046   | 0.41046 | 0.728783907 |             |           |          |  |
| NA         | ENSG00000273989 | -0.68282  | 0.75264 | 0.22634     | 0.41047     | -0.68282  | 0.75264  |  |
|            | -0.68282        | 0.75264   | 0.41047 | 0.728783907 |             |           |          |  |
| NA         | ENSG00000229587 | 0.22614   | 0.41054 | 0.22614     | 0.41054     | 0.22614   | 0.41054  |  |
|            | -0.78392        | 0.78346   | 0.41054 | 0.728881634 |             |           |          |  |
| MED28P3    | ENSG00000227692 | 0.22599   | 0.4106  | 0.22599     | 0.4106      | 0.22599   |          |  |
|            | 0.4106          | -0.24163  | 0.59547 | 0.4106      | 0.728943993 |           |          |  |
| NA         | ENSG00000258048 | 0.22597   | 0.41061 | -1.6427     | 0.94978     | 0.22597   | 0.41061  |  |
|            | 0.22597         | 0.41061   | 0.41061 | 0.728943993 |             |           |          |  |
| RNA5SP37   | ENSG00000202290 | 0.22595   | 0.41062 | 0.065629    | 0.47384     | -1.6665   |          |  |
|            | 0.95219         | -1.6665   | 0.95219 | 0.41062     | 0.728943993 |           |          |  |
| ARID1A     | ENSG00000117713 | 0.15808   | 0.4372  | -0.32817    | 0.62861     | 0.22579   |          |  |
|            | 0.41068         | -0.66522  | 0.74705 | 0.41068     | 0.729023948 |           |          |  |
| GSDMD      | ENSG00000104518 | -0.30044  | 0.61808 | 0.22562     | 0.41075     | -0.59332  | 0.72352  |  |
|            | -0.6667         | 0.74752   | 0.41075 | 0.729121649 |             |           |          |  |
| PRCPP1     | ENSG00000232556 | 0.2255    | 0.4108  | 0.2255      | 0.4108      | -0.42765  |          |  |
|            | 0.66555         | -0.56403  | 0.71363 | 0.4108      | 0.729140191 |           |          |  |
| KIF2A      | ENSG00000068796 | 0.1079    | 0.45704 | 0.094371    | 0.46241     | -0.057273 | 0.52284  |  |
|            | 0.22545         | 0.41081   | 0.41081 | 0.729140191 |             |           |          |  |
| RAET1E-AS1 | ENSG00000223701 | 0.22535   | 0.41086 | 0.22535     | 0.41086     | 0.22535   |          |  |
|            | 0.41086         | 0.22535   | 0.41086 | 0.41086     | 0.729140191 |           |          |  |
| GRAMD1B    | ENSG00000023171 | -1.0423   | 0.85136 | -0.62181    | 0.73297     | -0.62494  | 0.734    |  |
|            | 0.22531         | 0.41087   | 0.41087 | 0.729140191 |             |           |          |  |
| NA         | ENSG00000214243 | -0.49704  | 0.69042 | 0.2253      | 0.41087     | -0.2995   | 0.61772  |  |
|            | -0.4691         | 0.6805    | 0.41087 | 0.729140191 |             |           |          |  |
| OR2AM1P    | ENSG00000236110 | 0.2253    | 0.41087 | -0.75163    | 0.77386     | -0.56311  |          |  |
|            | 0.71332         | -0.36186  | 0.64127 | 0.41087     | 0.729140191 |           |          |  |
| EMP2P1     | ENSG00000231655 | 0.22521   | 0.41091 | 0.22521     | 0.41091     | 0.22521   |          |  |
|            | 0.41091         | 0.22521   | 0.41091 | 0.41091     | 0.729140191 |           |          |  |
| LINC01065  | ENSG00000237092 | -0.284    | 0.6118  | 0.22518     | 0.41092     | -0.78045  |          |  |
|            | 0.78244         | 0.22518   | 0.41092 | 0.41092     | 0.729140191 |           |          |  |
| CNN2P1     | ENSG00000227201 | 0.22514   | 0.41093 | 0.22514     | 0.41093     | 0.22514   |          |  |
|            | 0.41093         | 0.22514   | 0.41093 | 0.41093     | 0.729140191 |           |          |  |
| NA         | ENSG00000253557 | -0.85188  | 0.80286 | -0.29191    | 0.61482     | -0.25152  | 0.59929  |  |
|            | 0.22516         | 0.41093   | 0.41093 | 0.729140191 |             |           |          |  |
| RMST       | ENSG00000255794 | -0.042417 | 0.51692 | 0.22515     | 0.41093     | -0.87423  | 0.809    |  |
|            | -0.05162        | 0.52058   | 0.41093 | 0.729140191 |             |           |          |  |
| FER1L6-AS2 | ENSG00000253868 | 0.22512   | 0.41094 | -0.10379    | 0.54133     | -0.10379  |          |  |
|            | 0.54133         | 0.15962   | 0.43659 | 0.41094     | 0.729140191 |           |          |  |
| LINC01588  | ENSG00000214900 | -0.4018   | 0.65609 | 0.040085    | 0.48401     | -0.24201  |          |  |

|           |                 |            |         |            |            |           |         |         |       |
|-----------|-----------------|------------|---------|------------|------------|-----------|---------|---------|-------|
|           | 0.59561         | 0.22498    | 0.411   | 0.411      | 0.72916067 |           |         |         |       |
| NA        | ENSG00000255050 | 0.22497    | 0.411   | 0.22497    | 0.411      | 0.22497   | 0.411   | 0.22497 | 0.411 |
|           | 0.411           | 0.72916067 |         |            |            |           |         |         |       |
| NA        | ENSG00000271712 | 0.22492    | 0.41102 | -1.1004    | 0.86442    | -1.1761   | 0.88023 |         |       |
|           | -1.1761         | 0.88023    | 0.41102 | 0.72916067 |            |           |         |         |       |
| NA        | ENSG00000272180 | -1.9678    | 0.97546 | -1.9678    | 0.97546    | -1.0048   | 0.8425  |         |       |
|           | 0.2249          | 0.41103    | 0.41103 | 0.72916067 |            |           |         |         |       |
| NA        | ENSG00000240100 | 0.22479    | 0.41107 | 0.22479    | 0.41107    | 0.22479   | 0.41107 |         |       |
|           | 0.22479         | 0.41107    | 0.41107 | 0.72916067 |            |           |         |         |       |
| ADAM17    | ENSG00000151694 | 0.22466    | 0.41112 | -0.37076   | 0.64459    | -0.55368  |         |         |       |
|           | 0.7101          | 0.097267   | 0.46126 | 0.41112    | 0.72916067 |           |         |         |       |
| NA        | ENSG00000201542 | -0.42519   | 0.66465 | -0.42519   | 0.66465    | 0.22459   | 0.41115 |         |       |
|           | -0.42519        | 0.66465    | 0.41115 | 0.72916067 |            |           |         |         |       |
| IGHEP2    | ENSG00000254017 | 0.22456    | 0.41116 | 0.22456    | 0.41116    | 0.22456   |         |         |       |
|           | 0.41116         | 0.22456    | 0.41116 | 0.41116    | 0.72916067 |           |         |         |       |
| SMC6      | ENSG00000163029 | -1.5074    | 0.93415 | 0.22454    | 0.41117    | -0.36123  | 0.64104 |         |       |
|           | -0.63039        | 0.73578    | 0.41117 | 0.72916067 |            |           |         |         |       |
| F11       | ENSG00000088926 | 0.010697   | 0.49573 | 0.22448    | 0.41119    | 0.098161  | 0.4609  |         |       |
|           | -1.208          | 0.88648    | 0.41119 | 0.72916067 |            |           |         |         |       |
| ZNF816    | ENSG00000180257 | -0.3504    | 0.63698 | -1.0719    | 0.85811    | -0.3504   |         |         |       |
|           | 0.63698         | 0.22449    | 0.41119 | 0.41119    | 0.72916067 |           |         |         |       |
| NA        | ENSG00000225284 | 0.22447    | 0.41119 | 0.22447    | 0.41119    | 0.22447   | 0.41119 |         |       |
|           | 0.22447         | 0.41119    | 0.41119 | 0.72916067 |            |           |         |         |       |
| RPL7P11   | ENSG00000234619 | -1.3321    | 0.90858 | -0.27787   | 0.60944    | -0.27787  |         |         |       |
|           | 0.60944         | 0.22445    | 0.4112  | 0.4112     | 0.72916067 |           |         |         |       |
| PEBP4     | ENSG00000134020 | 0.22444    | 0.41121 | -0.2664    | 0.60504    | -0.067695 | 0.52699 |         |       |
|           | -1.117          | 0.86801    | 0.41121 | 0.72916067 |            |           |         |         |       |
| CEBPE     | ENSG00000092067 | -2.1461    | 0.98407 | -0.99575   | 0.84031    | -0.23277  | 0.59203 |         |       |
|           | 0.22436         | 0.41124    | 0.41124 | 0.72916067 |            |           |         |         |       |
| LOXHD1    | ENSG00000167210 | -0.26284   | 0.60366 | -0.67179   | 0.74914    | -0.59874  |         |         |       |
|           | 0.72533         | 0.22432    | 0.41125 | 0.41125    | 0.72916067 |           |         |         |       |
| RNA5SP200 | ENSG00000252169 | 0.1008     | 0.45985 | 0.22424    | 0.41128    | -0.29155  |         |         |       |
|           | 0.61468         | -0.10381   | 0.54134 | 0.41128    | 0.72916067 |           |         |         |       |
| NA        | ENSG00000267422 | 0.22421    | 0.4113  | 0.22421    | 0.4113     | 0.22421   | 0.4113  |         |       |
|           | 0.22421         | 0.4113     | 0.4113  | 0.72916067 |            |           |         |         |       |
| NA        | ENSG00000272780 | 0.22415    | 0.41132 | 0.22415    | 0.41132    | 0.22415   | 0.41132 |         |       |
|           | 0.22415         | 0.41132    | 0.41132 | 0.72916067 |            |           |         |         |       |
| ACTN4P1   | ENSG00000213493 | 0.22412    | 0.41133 | 0.22412    | 0.41133    | 0.22412   |         |         |       |
|           | 0.41133         | 0.22412    | 0.41133 | 0.41133    | 0.72916067 |           |         |         |       |
| LINC00298 | ENSG00000235665 | 0.22409    | 0.41134 | -0.75871   | 0.77599    | -0.33856  |         |         |       |
|           | 0.63253         | -0.88261   | 0.81128 | 0.41134    | 0.72916067 |           |         |         |       |
| RNA5SP457 | ENSG00000200527 | 0.22408    | 0.41135 | 0.22408    | 0.41135    | 0.22408   |         |         |       |
|           | 0.41135         | 0.22408    | 0.41135 | 0.41135    | 0.72916067 |           |         |         |       |
| SULT1C4   | ENSG00000198075 | -1.2297    | 0.8906  | -0.17873   | 0.57092    | 0.22404   |         |         |       |
|           | 0.41136         | -1.4929    | 0.93227 | 0.41136    | 0.72916067 |           |         |         |       |
| SNAPC1    | ENSG00000023608 | 0.22391    | 0.41141 | 0.22391    | 0.41141    | 0.22391   |         |         |       |
|           | 0.41141         | 0.22391    | 0.41141 | 0.41141    | 0.72916067 |           |         |         |       |
| NA        | ENSG00000282556 | 0.2239     | 0.41142 | 0.2239     | 0.41142    | 0.2239    | 0.41142 |         |       |
|           | 0.2239          | 0.41142    | 0.41142 | 0.72916067 |            |           |         |         |       |
| DPP4-DT   | ENSG00000230918 | 0.22386    | 0.41143 | 0.22386    | 0.41143    | 0.22386   |         |         |       |
|           | 0.41143         | 0.22386    | 0.41143 | 0.41143    | 0.72916067 |           |         |         |       |
| LINC00392 | ENSG00000228295 | 0.22384    | 0.41144 | 0.22384    | 0.41144    | -0.43593  |         |         |       |
|           | 0.66856         | 0.22384    | 0.41144 | 0.41144    | 0.72916067 |           |         |         |       |
| NA        | ENSG00000243276 | -0.44841   | 0.67307 | 0.22383    | 0.41144    | 0.053729  | 0.47858 |         |       |
|           | 0.0035969       | 0.49857    | 0.41144 | 0.72916067 |            |           |         |         |       |
| NA        | ENSG00000261598 | -0.19398   | 0.57691 | 0.2238     | 0.41146    | -0.71856  | 0.76379 |         |       |
|           | -0.85451        | 0.80359    | 0.41146 | 0.72916067 |            |           |         |         |       |
| NA        | ENSG00000268865 | 0.2238     | 0.41146 | 0.2238     | 0.41146    | 0.2238    | 0.41146 |         |       |
|           | 0.2238          | 0.41146    | 0.41146 | 0.72916067 |            |           |         |         |       |
| NA        | ENSG00000216813 | 0.22373    | 0.41148 | 0.22373    | 0.41148    | 0.22373   | 0.41148 |         |       |
|           | 0.22373         | 0.41148    | 0.41148 | 0.72916067 |            |           |         |         |       |
| RN7SKP11  | ENSG00000252827 | 0.22374    | 0.41148 | 0.22374    | 0.41148    | 0.22374   |         |         |       |

|            |                 |           |             |             |             |           |         |         |
|------------|-----------------|-----------|-------------|-------------|-------------|-----------|---------|---------|
|            | 0.41148         | 0.22374   | 0.41148     | 0.41148     | 0.72916067  |           |         |         |
| NA         | ENSG00000261588 | 0.22375   | 0.41148     | 0.22375     | 0.41148     | 0.22375   | 0.41148 | 0.41148 |
|            | 0.22375         | 0.41148   | 0.41148     | 0.72916067  |             |           |         |         |
| NA         | ENSG00000231392 | 0.22371   | 0.41149     | 0.22371     | 0.41149     | 0.22371   | 0.41149 | 0.41149 |
|            | 0.22371         | 0.41149   | 0.41149     | 0.72916067  |             |           |         |         |
| PRKAB1     | ENSG00000111725 | 0.22367   | 0.41151     | 0.22367     | 0.41151     | 0.22367   | 0.41151 | 0.22367 |
|            | 0.41151         | 0.21937   | 0.41318     | 0.41151     | 0.72916067  |           |         |         |
| RPL23AP36  | ENSG00000225124 | 0.22367   | 0.41151     | 0.22367     | 0.41151     | 0.22367   | 0.41151 | 0.22367 |
|            | 0.41151         | 0.22367   | 0.41151     | 0.41151     | 0.72916067  |           |         |         |
| NA         | ENSG00000250775 | 0.2236    | 0.41153     | 0.2236      | 0.41153     | 0.2236    | 0.41153 | 0.41153 |
|            | -0.80028        | 0.78822   | 0.41153     | 0.72916067  |             |           |         |         |
| FABP3      | ENSG00000121769 | 0.22357   | 0.41155     | 0.22357     | 0.41155     | -0.22893  | 0.59054 |         |
|            | 0.22357         | 0.41155   | 0.41155     | 0.72916067  |             |           |         |         |
| MIR5680    | ENSG00000266756 | 0.22351   | 0.41157     | 0.22351     | 0.41157     | 0.22351   |         |         |
|            | 0.41157         | 0.22351   | 0.41157     | 0.41157     | 0.72916067  |           |         |         |
| H2BC2P     | ENSG00000178762 | -1.2284   | 0.89036     | -1.2284     | 0.89036     | -0.063651 |         |         |
|            | 0.52538         | 0.22348   | 0.41158     | 0.41158     | 0.72916067  |           |         |         |
| CCDC30     | ENSG00000186409 | 0.22347   | 0.41158     | -0.53487    | 0.70363     | 0.0097989 |         |         |
|            | 0.49609         | -1.2634   | 0.89678     | 0.41158     | 0.72916067  |           |         |         |
| PTMAP11    | ENSG00000269907 | -1.2254   | 0.88978     | 0.22348     | 0.41158     | -0.4682   |         |         |
|            | 0.68018         | -0.94985  | 0.82891     | 0.41158     | 0.72916067  |           |         |         |
| SRP14P1    | ENSG00000224906 | 0.22344   | 0.4116      | -0.49988    | 0.69142     | 0.22344   |         |         |
|            | 0.4116          | 0.22344   | 0.4116      | 0.4116      | 0.7291608   |           |         |         |
| PLEKHA8    | ENSG00000106086 | -0.75313  | 0.77431     | 0.22341     | 0.41161     | 0.21192   |         |         |
|            | 0.41609         | -0.11484  | 0.54572     | 0.41161     | 0.7291608   |           |         |         |
| NA         | ENSG00000272519 | 0.090256  | 0.46404     | 0.22322     | 0.41168     | 0.090256  | 0.46404 |         |
|            | 0.090256        | 0.46404   | 0.41168     | 0.729205658 |             |           |         |         |
| NA         | ENSG00000256745 | 0.22314   | 0.41172     | 0.22314     | 0.41172     | 0.22314   | 0.41172 |         |
|            | 0.22314         | 0.41172   | 0.41172     | 0.729205658 |             |           |         |         |
| SNHG5      | ENSG00000203875 | 0.2231    | 0.41173     | -0.034541   | 0.51378     | -1.78     | 0.96246 |         |
|            | -0.40476        | 0.65717   | 0.41173     | 0.729205658 |             |           |         |         |
| CYP4F36P   | ENSG00000273330 | 0.22304   | 0.41175     | 0.22304     | 0.41175     | 0.22304   |         |         |
|            | 0.41175         | 0.22304   | 0.41175     | 0.41175     | 0.729205658 |           |         |         |
| ENOSF1     | ENSG00000132199 | 0.22302   | 0.41176     | 0.22302     | 0.41176     | -0.90069  |         |         |
|            | 0.81612         | -0.96815  | 0.83351     | 0.41176     | 0.729205658 |           |         |         |
| SEMA3E     | ENSG00000170381 | -0.34031  | 0.63319     | -0.37184    | 0.64499     | -0.055051 |         |         |
|            | 0.52195         | 0.22299   | 0.41177     | 0.41177     | 0.729205658 |           |         |         |
| RTRAFP2    | ENSG00000225165 | 0.223     | 0.41177     | 0.223       | 0.41177     | 0.223     | 0.41177 | 0.223   |
|            | 0.41177         | 0.41177   | 0.729205658 |             |             |           |         |         |
| PRELID1P5  | ENSG00000226986 | 0.22299   | 0.41177     | 0.22299     | 0.41177     | 0.22299   |         |         |
|            | 0.41177         | 0.19587   | 0.42235     | 0.41177     | 0.729205658 |           |         |         |
| LINC01696  | ENSG00000227940 | -0.2112   | 0.58363     | -1.3274     | 0.90781     | 0.22299   |         |         |
|            | 0.41177         | -0.34235  | 0.63396     | 0.41177     | 0.729205658 |           |         |         |
| C6orf89    | ENSG00000198663 | -0.081267 | 0.53239     | 0.19314     | 0.42343     | 0.22285   |         |         |
|            | 0.41183         | -0.016665 | 0.50665     | 0.41183     | 0.72928541  |           |         |         |
| NA         | ENSG00000228959 | 0.22279   | 0.41185     | -1.1515     | 0.87524     | 0.22279   | 0.41185 |         |
|            | 0.22279         | 0.41185   | 0.41185     | 0.729285531 |             |           |         |         |
| HIGD1AP12  | ENSG00000236012 | -0.43294  | 0.66747     | 0.22277     | 0.41186     | -0.34461  |         |         |
|            | 0.63481         | -0.34461  | 0.63481     | 0.41186     | 0.729285531 |           |         |         |
| NA         | ENSG00000203327 | 0.2227    | 0.41188     | 0.2227      | 0.41188     | 0.2227    | 0.41188 |         |
|            | 0.2227          | 0.41188   | 0.41188     | 0.729294444 |             |           |         |         |
| NA         | ENSG00000278543 | -0.23962  | 0.59469     | -0.19398    | 0.5769      | 0.22262   | 0.41192 |         |
|            | -0.15541        | 0.56175   | 0.41192     | 0.729338769 |             |           |         |         |
| NA         | ENSG00000248764 | 0.22251   | 0.41196     | 0.22251     | 0.41196     | 0.22251   | 0.41196 |         |
|            | 0.22251         | 0.41196   | 0.41196     | 0.729383091 |             |           |         |         |
| NA         | ENSG00000226810 | 0.22232   | 0.41203     | 0.22232     | 0.41203     | 0.22232   | 0.41203 |         |
|            | 0.040061        | 0.48402   | 0.41203     | 0.729480522 |             |           |         |         |
| LINC00970  | ENSG00000203601 | 0.22228   | 0.41205     | -0.26526    | 0.6046      | -0.26526  |         |         |
|            | 0.6046          | -0.28239  | 0.61118     | 0.41205     | 0.729489428 |           |         |         |
| RNU6-1237P | ENSG00000207508 | -1.8189   | 0.96554     | 0.22214     | 0.4121      | -1.8189   |         |         |
|            | 0.96554         | -1.8189   | 0.96554     | 0.4121      | 0.729551442 |           |         |         |
| PLSCR4     | ENSG00000114698 | 0.22208   | 0.41213     | -1.9591     | 0.97495     | -1.8245   |         |         |



|            |                 |           |         |             |             |           |         |  |
|------------|-----------------|-----------|---------|-------------|-------------|-----------|---------|--|
|            | 0.96596         | -2.2315   | 0.98718 | 0.41213     | 0.729569246 |           |         |  |
| RAB14      | ENSG00000119396 | -0.35458  | 0.63855 | 0.22205     | 0.41214     | -0.96757  | 0.83337 |  |
|            | -0.6075         | 0.72824   | 0.41214 | 0.729569246 |             |           |         |  |
| SNORA14B   | ENSG00000207181 | 0.22189   | 0.4122  | 0.22189     | 0.4122      | 0.22189   | 0.22189 |  |
|            | 0.4122          | 0.22189   | 0.4122  | 0.4122      | 0.729648952 |           |         |  |
| GAPDHP69   | ENSG00000223460 | 0.043517  | 0.48264 | 0.043517    | 0.48264     | -0.79703  |         |  |
|            | 0.78728         | 0.22181   | 0.41223 | 0.41223     | 0.729649047 |           |         |  |
| NA         | ENSG00000264785 | 0.22181   | 0.41223 | -0.62954    | 0.7355      | -0.62954  | 0.7355  |  |
|            | -0.62954        | 0.7355    | 0.41223 | 0.729649047 |             |           |         |  |
| TOR1B      | ENSG00000136816 | -1.0874   | 0.86157 | 0.22167     | 0.41229     | -0.64673  | 0.7411  |  |
|            | -0.29528        | 0.61611   | 0.41229 | 0.729693434 |             |           |         |  |
| RFX8       | ENSG00000196460 | -0.98624  | 0.83799 | 0.19598     | 0.42231     | -0.60485  | 0.72736 |  |
|            | 0.22165         | 0.41229   | 0.41229 | 0.729693434 |             |           |         |  |
| FAS        | ENSG00000026103 | -0.21713  | 0.58595 | 0.22163     | 0.4123      | -0.21713  | 0.58595 |  |
|            | 0.22163         | 0.4123    | 0.4123  | 0.729693434 |             |           |         |  |
| TAGLN2P1   | ENSG00000253676 | 0.22157   | 0.41233 | -1.09       | 0.86215     | -2.2276   | 0.98705 |  |
|            | -2.2276         | 0.98705   | 0.41233 | 0.729720025 |             |           |         |  |
| NPY6R      | ENSG00000226306 | 0.22139   | 0.41239 | -0.15508    | 0.56162     | 0.18769   | 0.42556 |  |
|            | -0.15508        | 0.56162   | 0.41239 | 0.729738954 |             |           |         |  |
| MTCO1P56   | ENSG00000220340 | 0.22138   | 0.4124  | 0.22138     | 0.4124      | 0.22138   |         |  |
|            | 0.4124          | 0.22138   | 0.4124  | 0.4124      | 0.729738954 |           |         |  |
| ACIN1      | ENSG00000100813 | -1.1849   | 0.88198 | -0.10898    | 0.54339     | 0.22136   | 0.41241 |  |
|            | -1.7056         | 0.95596   | 0.41241 | 0.729738954 |             |           |         |  |
| NA         | ENSG00000258313 | 0.22135   | 0.41241 | 0.22135     | 0.41241     | 0.22135   | 0.41241 |  |
|            | 0.22135         | 0.41241   | 0.41241 | 0.729738954 |             |           |         |  |
| NA         | ENSG00000270095 | 0.22128   | 0.41244 | 0.22128     | 0.41244     | 0.22128   | 0.41244 |  |
|            | 0.22128         | 0.41244   | 0.41244 | 0.729738954 |             |           |         |  |
| DET1       | ENSG00000140543 | -0.48312  | 0.68549 | 0.22121     | 0.41247     | -0.24805  | 0.59795 |  |
|            | -0.68173        | 0.75229   | 0.41247 | 0.729738954 |             |           |         |  |
| NA         | ENSG00000233379 | 0.22116   | 0.41248 | -0.32595    | 0.62777     | 0.22116   | 0.41248 |  |
|            | 0.22116         | 0.41248   | 0.41248 | 0.729738954 |             |           |         |  |
| CCND3P1    | ENSG00000224473 | -0.17423  | 0.56916 | 0.083762    | 0.46662     | 0.22112   |         |  |
|            | 0.4125          | -0.78669  | 0.78427 | 0.4125      | 0.729738954 |           |         |  |
| NA         | ENSG00000199530 | 0.2211    | 0.41251 | 0.2211      | 0.41251     | 0.2211    | 0.41251 |  |
|            | 0.2211          | 0.41251   | 0.41251 | 0.729738954 |             |           |         |  |
| UQCRFS1P3  | ENSG00000217314 | 0.22106   | 0.41252 | -0.59425    | 0.72383     | 0.0097735 |         |  |
|            | 0.4961          | -0.88986  | 0.81323 | 0.41252     | 0.729738954 |           |         |  |
| NA         | ENSG00000241097 | 0.22108   | 0.41252 | 0.22108     | 0.41252     | 0.22108   | 0.41252 |  |
|            | 0.22108         | 0.41252   | 0.41252 | 0.729738954 |             |           |         |  |
| NDUFA4     | ENSG00000189043 | 0.22101   | 0.41254 | 0.22101     | 0.41254     | 0.22101   |         |  |
|            | 0.41254         | 0.15062   | 0.44014 | 0.41254     | 0.729738954 |           |         |  |
| RNY4P14    | ENSG00000200526 | -1.0394   | 0.85068 | -0.60874    | 0.72865     | -0.10397  |         |  |
|            | 0.5414          | 0.221     | 0.41254 | 0.41254     | 0.729738954 |           |         |  |
| NA         | ENSG00000248853 | 0.22092   | 0.41258 | 0.22092     | 0.41258     | 0.22092   | 0.41258 |  |
|            | 0.22092         | 0.41258   | 0.41258 | 0.729738954 |             |           |         |  |
| ODF2-AS1   | ENSG00000225951 | -0.092174 | 0.53672 | -0.16074    | 0.56385     | 0.22088   |         |  |
|            | 0.41259         | 0.22088   | 0.41259 | 0.41259     | 0.729738954 |           |         |  |
| KLF17P1    | ENSG00000258316 | 0.22075   | 0.41264 | 0.22075     | 0.41264     | 0.22075   |         |  |
|            | 0.41264         | 0.22075   | 0.41264 | 0.41264     | 0.729738954 |           |         |  |
| NA         | ENSG00000213470 | 0.22072   | 0.41266 | 0.22072     | 0.41266     | 0.22072   | 0.41266 |  |
|            | 0.22072         | 0.41266   | 0.41266 | 0.729738954 |             |           |         |  |
| LRRTM2     | ENSG00000146006 | 0.22062   | 0.41269 | -2.1072     | 0.98245     | -0.32882  |         |  |
|            | 0.62886         | -1.1443   | 0.87376 | 0.41269     | 0.729738954 |           |         |  |
| NA         | ENSG00000280660 | 0.22064   | 0.41269 | 0.22064     | 0.41269     | 0.22064   | 0.41269 |  |
|            | 0.22064         | 0.41269   | 0.41269 | 0.729738954 |             |           |         |  |
| LINC01972  | ENSG00000230401 | 0.088363  | 0.46479 | 0.22057     | 0.41271     | 0.22057   |         |  |
|            | 0.41271         | -0.070884 | 0.52825 | 0.41271     | 0.729738954 |           |         |  |
| ZNF433-AS1 | ENSG00000219665 | 0.22052   | 0.41273 | -0.65361    | 0.74332     | -0.89106  |         |  |
|            | 0.81355         | -0.47715  | 0.68337 | 0.41273     | 0.729738954 |           |         |  |
| ZNF877P    | ENSG00000226875 | 0.22052   | 0.41273 | 0.22052     | 0.41273     | 0.22052   |         |  |
|            | 0.41273         | 0.22052   | 0.41273 | 0.41273     | 0.729738954 |           |         |  |
| NA         | ENSG00000270718 | -0.47624  | 0.68305 | 0.22051     | 0.41274     | 0.22051   | 0.41274 |  |

|            |                 |           |         |             |             |          |         |  |
|------------|-----------------|-----------|---------|-------------|-------------|----------|---------|--|
|            | 0.22051         | 0.41274   | 0.41274 | 0.729738954 |             |          |         |  |
| NA         | ENSG00000272463 | -0.38731  | 0.65074 | -0.55783    | 0.71152     | 0.2205   | 0.41274 |  |
|            | -0.45882        | 0.67682   | 0.41274 | 0.729738954 |             |          |         |  |
| NUP210     | ENSG00000132182 | -0.61765  | 0.7316  | -0.81024    | 0.7911      | 0.17969  |         |  |
|            | 0.4287          | 0.22048   | 0.41275 | 0.41275     | 0.729738954 |          |         |  |
| CA15P1     | ENSG00000241527 | -0.587    | 0.7214  | -0.26709    | 0.6053      | -1.1786  |         |  |
|            | 0.88072         | 0.22048   | 0.41275 | 0.41275     | 0.729738954 |          |         |  |
| RN7SL107P  | ENSG00000243424 | -0.31394  | 0.62322 | 0.22049     | 0.41275     | -1.5676  |         |  |
|            | 0.94151         | -0.57042  | 0.7158  | 0.41275     | 0.729738954 |          |         |  |
| PMCHL2     | ENSG00000169040 | -0.36018  | 0.64064 | 0.22045     | 0.41276     | -0.81736 |         |  |
|            | 0.79314         | -0.71925  | 0.76401 | 0.41276     | 0.729738954 |          |         |  |
| H2AC9P     | ENSG00000218281 | 0.22018   | 0.41287 | -0.51795    | 0.69775     | -0.51795 |         |  |
|            | 0.69775         | -0.51795  | 0.69775 | 0.41287     | 0.729906947 |          |         |  |
| NA         | ENSG00000273716 | -1.331    | 0.9084  | -0.2674     | 0.60542     | 0.22012  | 0.41289 |  |
|            | 0.22012         | 0.41289   | 0.41289 | 0.729907099 |             |          |         |  |
| NA         | ENSG00000229672 | -0.2326   | 0.59196 | -1.4788     | 0.9304      | -0.46424 | 0.67876 |  |
|            | 0.22003         | 0.41292   | 0.41292 | 0.729907099 |             |          |         |  |
| ZNF135     | ENSG00000176293 | -0.7647   | 0.77778 | 0.22001     | 0.41293     | -0.7647  |         |  |
|            | 0.77778         | -0.7647   | 0.77778 | 0.41293     | 0.729907099 |          |         |  |
| NA         | ENSG00000270727 | -0.65177  | 0.74272 | 0.22002     | 0.41293     | 0.22002  | 0.41293 |  |
|            | 0.22002         | 0.41293   | 0.41293 | 0.729907099 |             |          |         |  |
| NA         | ENSG00000270130 | -0.26832  | 0.60577 | 0.21994     | 0.41296     | 0.21994  | 0.41296 |  |
|            | 0.21994         | 0.41296   | 0.41296 | 0.72993365  |             |          |         |  |
| NA         | ENSG00000258562 | 0.054628  | 0.47822 | -0.3279     | 0.62851     | 0.21984  | 0.413   |  |
|            | 0.21984         | 0.413     | 0.413   | 0.729933871 |             |          |         |  |
| GJA5       | ENSG00000265107 | 0.21982   | 0.41301 | 0.21982     | 0.41301     | 0.21982  | 0.41301 |  |
|            | 0.21982         | 0.41301   | 0.41301 | 0.729933871 |             |          |         |  |
| NA         | ENSG00000207199 | 0.21975   | 0.41303 | 0.21975     | 0.41303     | 0.21975  | 0.41303 |  |
|            | 0.21975         | 0.41303   | 0.41303 | 0.729933871 |             |          |         |  |
| ADGRF5-AS1 | ENSG00000225730 | 0.21972   | 0.41304 | 0.21972     | 0.41304     | 0.21972  |         |  |
|            | 0.41304         | 0.21972   | 0.41304 | 0.41304     | 0.729933871 |          |         |  |
| RNU6-617P  | ENSG00000251956 | -0.79703  | 0.78728 | 0.21969     | 0.41305     | -0.79703 |         |  |
|            | 0.78728         | -0.79703  | 0.78728 | 0.41305     | 0.729933871 |          |         |  |
| NA         | ENSG00000264135 | -0.99637  | 0.84046 | 0.21971     | 0.41305     | -0.89396 | 0.81433 |  |
|            | 0.11587         | 0.45388   | 0.41305 | 0.729933871 |             |          |         |  |
| RNU6-161P  | ENSG00000199921 | 0.21954   | 0.41311 | -0.39487    | 0.65353     | -0.39487 |         |  |
|            | 0.65353         | -0.39487  | 0.65353 | 0.41311     | 0.730013428 |          |         |  |
| NA         | ENSG00000239129 | 0.081218  | 0.46763 | -0.3391     | 0.63273     | 0.21942  | 0.41316 |  |
|            | 0.21942         | 0.41316   | 0.41316 | 0.730031366 |             |          |         |  |
| NA         | ENSG00000280262 | 0.21934   | 0.41319 | 0.21934     | 0.41319     | 0.21934  | 0.41319 |  |
|            | 0.21934         | 0.41319   | 0.41319 | 0.730031366 |             |          |         |  |
| FBXO36     | ENSG00000153832 | 0.21928   | 0.41322 | -0.95303    | 0.82971     | 0.21928  |         |  |
|            | 0.41322         | 0.1147    | 0.45434 | 0.41322     | 0.730031366 |          |         |  |
| RIMKLA     | ENSG00000177181 | -1.5246   | 0.93632 | -1.5486     | 0.93926     | 0.21928  |         |  |
|            | 0.41322         | -0.83706  | 0.79872 | 0.41322     | 0.730031366 |          |         |  |
| ODAM       | ENSG00000109205 | 0.21925   | 0.41323 | 0.052467    | 0.47908     | -1.1967  | 0.88428 |  |
|            | 0.21925         | 0.41323   | 0.41323 | 0.730031366 |             |          |         |  |
| NA         | ENSG00000207249 | 0.21926   | 0.41323 | 0.21926     | 0.41323     | 0.21926  | 0.41323 |  |
|            | -0.6499         | 0.74212   | 0.41323 | 0.730031366 |             |          |         |  |
| NA         | ENSG00000270017 | 0.21923   | 0.41323 | 0.21923     | 0.41323     | 0.21923  | 0.41323 |  |
|            | 0.21923         | 0.41323   | 0.41323 | 0.730031366 |             |          |         |  |
| NA         | ENSG00000238192 | 0.21923   | 0.41324 | 0.21923     | 0.41324     | 0.21923  | 0.41324 |  |
|            | 0.21923         | 0.41324   | 0.41324 | 0.730031366 |             |          |         |  |
| SETSIP     | ENSG00000230667 | -0.64046  | 0.73906 | 0.21906     | 0.4133      | 0.21906  |         |  |
|            | 0.4133          | 0.21906   | 0.4133  | 0.4133      | 0.730066826 |          |         |  |
| ANKRD49    | ENSG00000168876 | 0.059781  | 0.47617 | 0.13786     | 0.44518     | 0.21904  |         |  |
|            | 0.41331         | 0.14845   | 0.441   | 0.41331     | 0.730066826 |          |         |  |
| CAMSAP2    | ENSG00000118200 | 0.21901   | 0.41332 | -0.1393     | 0.55539     | -0.12406 |         |  |
|            | 0.54937         | -0.030458 | 0.51215 | 0.41332     | 0.730066826 |          |         |  |
| EI24P2     | ENSG00000236257 | 0.21902   | 0.41332 | 0.21902     | 0.41332     | 0.11425  |         |  |
|            | 0.45452         | 0.21902   | 0.41332 | 0.41332     | 0.730066826 |          |         |  |
| MYBPHL     | ENSG00000221986 | 0.21895   | 0.41334 | 0.21895     | 0.41334     | 0.21895  |         |  |

|            |                 |          |         |             |             |          |         |  |
|------------|-----------------|----------|---------|-------------|-------------|----------|---------|--|
|            | 0.41334         | 0.21895  | 0.41334 | 0.41334     | 0.73006689  |          |         |  |
| GAPT       | ENSG00000175857 | -0.24281 | 0.59592 | 0.21894     | 0.41335     | -0.0973  | 0.53876 |  |
|            | -0.32913        | 0.62897  | 0.41335 | 0.73006689  |             |          |         |  |
| NA         | ENSG00000234862 | -0.63313 | 0.73668 | 0.19236     | 0.42373     | 0.21885  | 0.41338 |  |
|            | 0.011522        | 0.4954   | 0.41338 | 0.730093415 |             |          |         |  |
| SLIT1-AS1  | ENSG00000234855 | 0.094394 | 0.4624  | 0.085666    | 0.46587     | 0.21877  |         |  |
|            | 0.41342         | 0.094394 | 0.4624  | 0.41342     | 0.730128797 |          |         |  |
| TCF21      | ENSG00000118526 | 0.21873  | 0.41343 | 0.21873     | 0.41343     | 0.21873  | 0.41343 |  |
|            | 0.21873         | 0.41343  | 0.41343 | 0.730128797 |             |          |         |  |
| GRID2IP    | ENSG00000215045 | -0.7031  | 0.759   | 0.21865     | 0.41346     | -0.03713 | 0.51481 |  |
|            | -0.55166        | 0.70941  | 0.41346 | 0.730155316 |             |          |         |  |
| NA         | ENSG00000258303 | 0.21846  | 0.41354 | 0.21846     | 0.41354     | 0.21846  | 0.41354 |  |
|            | 0.21846         | 0.41354  | 0.41354 | 0.730199656 |             |          |         |  |
| NA         | ENSG00000269802 | -1.5805  | 0.943   | 0.21843     | 0.41355     | -1.0674  | 0.85709 |  |
|            | -0.17762        | 0.57049  | 0.41355 | 0.730199656 |             |          |         |  |
| USPL1      | ENSG00000132952 | -0.68782 | 0.75422 | -2.0776     | 0.98113     | 0.21837  | 0.41357 |  |
|            | -0.56835        | 0.7151   | 0.41357 | 0.730199656 |             |          |         |  |
| NA         | ENSG00000253092 | 0.21836  | 0.41357 | 0.21836     | 0.41357     | 0.21836  | 0.41357 |  |
|            | 0.21836         | 0.41357  | 0.41357 | 0.730199656 |             |          |         |  |
| AP1G1      | ENSG00000166747 | 0.21832  | 0.41359 | 0.21832     | 0.41359     | 0.21832  | 0.41359 |  |
|            | 0.21832         | 0.41359  | 0.41359 | 0.730199656 |             |          |         |  |
| RN7SL143P  | ENSG00000244003 | 0.21831  | 0.41359 | 0.21831     | 0.41359     | 0.21831  | 0.41359 |  |
|            | 0.41359         | 0.21831  | 0.41359 | 0.41359     | 0.730199656 |          |         |  |
| NA         | ENSG00000266505 | -0.76234 | 0.77707 | -0.6974     | 0.75722     | 0.21832  | 0.41359 |  |
|            | -0.28133        | 0.61077  | 0.41359 | 0.730199656 |             |          |         |  |
| NA         | ENSG00000260017 | 0.21815  | 0.41366 | 0.21815     | 0.41366     | 0.21815  | 0.41366 |  |
|            | 0.21815         | 0.41366  | 0.41366 | 0.730296783 |             |          |         |  |
| TMEM175    | ENSG00000127419 | -0.39548 | 0.65376 | -0.44343    | 0.67127     | 0.21801  |         |  |
|            | 0.41371         | -0.35104 | 0.63722 | 0.41371     | 0.730332137 |          |         |  |
| GAS1RR     | ENSG00000226237 | 0.056109 | 0.47763 | -0.34191    | 0.63379     | -0.8643  |         |  |
|            | 0.80629         | 0.218    | 0.41371 | 0.41371     | 0.730332137 |          |         |  |
| NA         | ENSG00000261220 | 0.21796  | 0.41373 | 0.21796     | 0.41373     | 0.21796  | 0.41373 |  |
|            | 0.21796         | 0.41373  | 0.41373 | 0.730340985 |             |          |         |  |
| ZNF207     | ENSG00000010244 | 0.21792  | 0.41375 | 0.21792     | 0.41375     | 0.21792  | 0.41375 |  |
|            | 0.41375         | 0.21792  | 0.41375 | 0.41375     | 0.730349833 |          |         |  |
| NR4A1      | ENSG00000123358 | -0.67509 | 0.75019 | -0.69501    | 0.75647     | 0.21782  | 0.41379 |  |
|            | -1.0551         | 0.8543   | 0.41379 | 0.730358766 |             |          |         |  |
| NA         | ENSG00000229013 | 0.21778  | 0.4138  | 0.21778     | 0.4138      | 0.21778  | 0.4138  |  |
|            | 0.21778         | 0.4138   | 0.4138  | 0.730358766 |             |          |         |  |
| NA         | ENSG00000246448 | -0.32381 | 0.62696 | 0.21774     | 0.41382     | -0.08907 | 0.53549 |  |
|            | -0.24152        | 0.59543  | 0.41382 | 0.730358766 |             |          |         |  |
| ERBIN      | ENSG00000112851 | 0.21771  | 0.41383 | -0.36553    | 0.64264     | -0.34602 | 0.63534 |  |
|            | -0.86151        | 0.80552  | 0.41383 | 0.730358766 |             |          |         |  |
| PML        | ENSG00000140464 | 0.21769  | 0.41383 | 0.11353     | 0.45481     | -0.57998 | 0.71903 |  |
|            | -0.7751         | 0.78086  | 0.41383 | 0.730358766 |             |          |         |  |
| HS1BP3-IT1 | ENSG00000231948 | -1.2331  | 0.89123 | 0.10244     | 0.4592      | 0.21766  |         |  |
|            | 0.41385         | -1.0668  | 0.85698 | 0.41385     | 0.730367612 |          |         |  |
| LDLRAD4    | ENSG00000168675 | 0.21761  | 0.41387 | 0.074646    | 0.47025     | 0.029416 |         |  |
|            | 0.48827         | 0.20166  | 0.42009 | 0.41387     | 0.730376457 |          |         |  |
| MPST       | ENSG00000128309 | -0.61866 | 0.73193 | -0.61866    | 0.73193     | -0.61866 | 0.73193 |  |
|            | 0.21752         | 0.4139   | 0.4139  | 0.730402948 |             |          |         |  |
| ITPRID2    | ENSG00000138434 | 0.21746  | 0.41392 | -1.0827     | 0.86054     | -1.571   |         |  |
|            | 0.9419          | -1.0718  | 0.8581  | 0.41392     | 0.730411791 |          |         |  |
| CLCNKA     | ENSG00000186510 | -0.11424 | 0.54548 | 0.21728     | 0.414       | -0.98264 | 0.83711 |  |
|            | -0.53355        | 0.70317  | 0.414   | 0.730518231 |             |          |         |  |
| NA         | ENSG00000266936 | 0.21722  | 0.41402 | 0.21722     | 0.41402     | 0.21722  | 0.41402 |  |
|            | 0.21722         | 0.41402  | 0.41402 | 0.730518231 |             |          |         |  |
| ESF1       | ENSG00000089048 | -1.1848  | 0.88194 | -0.54023    | 0.70548     | -1.4916  | 0.9321  |  |
|            | 0.21692         | 0.41413  | 0.41413 | 0.730518231 |             |          |         |  |
| NA         | ENSG00000259037 | 0.21691  | 0.41414 | 0.21691     | 0.41414     | 0.21691  | 0.41414 |  |
|            | 0.21691         | 0.41414  | 0.41414 | 0.730518231 |             |          |         |  |
| LINP1      | ENSG00000223784 | -0.88226 | 0.81118 | -1.485      | 0.93123     | -0.36553 | 0.64264 |  |

|           |                 |           |         |             |             |           |         |         |
|-----------|-----------------|-----------|---------|-------------|-------------|-----------|---------|---------|
|           | 0.21684         | 0.41417   | 0.41417 | 0.730518231 |             |           |         |         |
| RSL1D1    | ENSG00000171490 | 0.21681   | 0.41418 | 0.21681     | 0.41418     | 0.21681   | 0.41418 | 0.21681 |
|           | 0.41418         | 0.21681   | 0.41418 | 0.41418     | 0.730518231 |           |         |         |
| CRH       | ENSG00000147571 | 0.12194   | 0.45147 | 0.12194     | 0.45147     | 0.12194   | 0.45147 | 0.12194 |
|           | 0.21668         | 0.41423   | 0.41423 | 0.730518231 |             |           |         |         |
| NA        | ENSG00000234981 | 0.21666   | 0.41424 | 0.21666     | 0.41424     | 0.21666   | 0.41424 | 0.21666 |
|           | 0.21666         | 0.41424   | 0.41424 | 0.730518231 |             |           |         |         |
| NA        | ENSG00000250727 | 0.21654   | 0.41428 | 0.21654     | 0.41428     | 0.21654   | 0.41428 | 0.21654 |
|           | 0.21654         | 0.41428   | 0.41428 | 0.730518231 |             |           |         |         |
| MNT       | ENSG00000070444 | 0.21651   | 0.41429 | -0.67507    | 0.75018     | -1.2553   | 0.89531 |         |
|           | -0.50963        | 0.69484   | 0.41429 | 0.730518231 |             |           |         |         |
| RAD51AP2  | ENSG00000214842 | -1.2063   | 0.88615 | -0.71272    | 0.76199     | 0.21651   |         |         |
|           | 0.4143          | -0.71272  | 0.76199 | 0.4143      | 0.730518231 |           |         |         |
| NA        | ENSG00000240568 | 0.0096936 | 0.49613 | 0.2165      | 0.4143      | -0.30004  | 0.61792 |         |
|           | -1.137          | 0.87222   | 0.4143  | 0.730518231 |             |           |         |         |
| NA        | ENSG00000248538 | -0.29027  | 0.6142  | 0.21645     | 0.41432     | 0.21645   | 0.41432 |         |
|           | -0.67165        | 0.7491    | 0.41432 | 0.730518231 |             |           |         |         |
| RPL21P43  | ENSG00000231688 | -0.22929  | 0.59068 | -0.06978    | 0.52782     | 0.2164    |         |         |
|           | 0.41434         | 0.10844   | 0.45682 | 0.41434     | 0.730518231 |           |         |         |
| NA        | ENSG00000272832 | 0.21638   | 0.41435 | -1.1825     | 0.88149     | 0.21638   | 0.41435 |         |
|           | 0.21638         | 0.41435   | 0.41435 | 0.730518231 |             |           |         |         |
| NA        | ENSG00000231466 | 0.21635   | 0.41436 | 0.21635     | 0.41436     | 0.21635   | 0.41436 |         |
|           | 0.21635         | 0.41436   | 0.41436 | 0.730518231 |             |           |         |         |
| RNA5SP380 | ENSG00000252999 | -0.38975  | 0.65164 | 0.21635     | 0.41436     | 0.21635   |         |         |
|           | 0.41436         | -0.064742 | 0.52581 | 0.41436     | 0.730518231 |           |         |         |
| CDK2      | ENSG00000123374 | 0.21633   | 0.41437 | 0.21633     | 0.41437     | 0.21633   | 0.41437 |         |
|           | 0.21633         | 0.41437   | 0.41437 | 0.730518231 |             |           |         |         |
| PMEL      | ENSG00000185664 | 0.21633   | 0.41437 | 0.21633     | 0.41437     | 0.21633   | 0.41437 |         |
|           | 0.21633         | 0.41437   | 0.41437 | 0.730518231 |             |           |         |         |
| NA        | ENSG00000258554 | 0.21633   | 0.41437 | 0.21633     | 0.41437     | 0.21633   | 0.41437 |         |
|           | 0.21633         | 0.41437   | 0.41437 | 0.730518231 |             |           |         |         |
| NA        | ENSG00000225030 | 0.21632   | 0.41437 | 0.21632     | 0.41437     | 0.21632   | 0.41437 |         |
|           | 0.21632         | 0.41437   | 0.41437 | 0.730518231 |             |           |         |         |
| MTMR9     | ENSG00000104643 | -1.3017   | 0.90348 | -1.6808     | 0.95359     | -0.95977  | 0.83141 |         |
|           | 0.21627         | 0.41439   | 0.41439 | 0.730518231 |             |           |         |         |
| NA        | ENSG00000238026 | 0.21626   | 0.41439 | 0.21626     | 0.41439     | 0.21626   | 0.41439 |         |
|           | 0.21626         | 0.41439   | 0.41439 | 0.730518231 |             |           |         |         |
| RN7SL430P | ENSG00000243911 | 0.21628   | 0.41439 | 0.21628     | 0.41439     | 0.21628   |         |         |
|           | 0.41439         | 0.21628   | 0.41439 | 0.41439     | 0.730518231 |           |         |         |
| NA        | ENSG00000256210 | 0.21624   | 0.4144  | 0.21624     | 0.4144      | 0.21624   | 0.4144  |         |
|           | 0.21624         | 0.4144    | 0.4144  | 0.730518231 |             |           |         |         |
| DYSF      | ENSG00000135636 | 0.025051  | 0.49001 | -0.39411    | 0.65325     | -0.034298 | 0.51368 |         |
|           | 0.21622         | 0.41441   | 0.41441 | 0.730518231 |             |           |         |         |
| FEZ1      | ENSG00000149557 | -0.41231  | 0.65994 | -1.1244     | 0.86958     | -0.41403  | 0.66057 |         |
|           | 0.21621         | 0.41441   | 0.41441 | 0.730518231 |             |           |         |         |
| NA        | ENSG00000257779 | -1.0946   | 0.86314 | -0.6424     | 0.73969     | 0.21623   | 0.41441 |         |
|           | 0.21623         | 0.41441   | 0.41441 | 0.730518231 |             |           |         |         |
| AHI1      | ENSG00000135541 | 0.16375   | 0.43496 | 0.1771      | 0.42972     | -0.66867  | 0.74815 |         |
|           | 0.2162          | 0.41442   | 0.41442 | 0.730518231 |             |           |         |         |
| NA        | ENSG00000261702 | 0.1045    | 0.45839 | 0.21613     | 0.41444     | 0.1045    | 0.45839 |         |
|           | -0.46821        | 0.68018   | 0.41444 | 0.730518231 |             |           |         |         |
| ANP32C    | ENSG00000248546 | -0.75338  | 0.77439 | -0.90619    | 0.81758     | -1.8744   |         |         |
|           | 0.96956         | 0.21612   | 0.41445 | 0.41445     | 0.730518231 |           |         |         |
| NA        | ENSG00000264236 | 0.21602   | 0.41449 | -0.45547    | 0.67561     | -0.45547  | 0.67561 |         |
|           | -0.45547        | 0.67561   | 0.41449 | 0.730518231 |             |           |         |         |
| P2RX1     | ENSG00000108405 | 0.041364  | 0.4835  | 0.21596     | 0.41451     | 0.21596   | 0.41451 |         |
|           | 0.017359        | 0.49308   | 0.41451 | 0.730518231 |             |           |         |         |
| SLC26A7   | ENSG00000147606 | -0.036231 | 0.51445 | 0.21596     | 0.41451     | 0.17506   |         |         |
|           | 0.43052         | -0.27645  | 0.6089  | 0.41451     | 0.730518231 |           |         |         |
| IL18R1    | ENSG00000115604 | 0.21593   | 0.41452 | -0.78904    | 0.78496     | -0.78904  |         |         |
|           | 0.78496         | -0.78904  | 0.78496 | 0.41452     | 0.730518231 |           |         |         |
| NA        | ENSG00000268218 | 0.21593   | 0.41452 | 0.21593     | 0.41452     | 0.21593   | 0.41452 |         |

|            |                 |           |             |             |             |          |         |       |
|------------|-----------------|-----------|-------------|-------------|-------------|----------|---------|-------|
|            | 0.21593         | 0.41452   | 0.41452     | 0.730518231 |             |          |         |       |
| NA         | ENSG00000255726 | 0.16487   | 0.43452     | -0.34659    | 0.63555     | 0.21588  | 0.41454 |       |
|            | -0.29712        | 0.61681   | 0.41454     | 0.730527058 |             |          |         |       |
| NA         | ENSG00000231604 | 0.21574   | 0.41459     | 0.21574     | 0.41459     | 0.21574  | 0.41459 |       |
|            | 0.21574         | 0.41459   | 0.41459     | 0.730571155 |             |          |         |       |
| NA         | ENSG00000275479 | 0.21572   | 0.4146      | 0.21572     | 0.4146      | 0.21572  | 0.4146  |       |
|            | 0.21572         | 0.4146    | 0.4146      | 0.730571155 |             |          |         |       |
| C6orf99    | ENSG00000203711 | 0.21571   | 0.41461     | -1.0444     | 0.85186     | 0.14729  |         |       |
|            | 0.44145         | -0.88597  | 0.81218     | 0.41461     | 0.730571155 |          |         |       |
| RN7SL557P  | ENSG00000266166 | 0.21564   | 0.41463     | 0.21564     | 0.41463     | 0.21564  |         |       |
|            | 0.41463         | 0.21564   | 0.41463     | 0.41463     | 0.730579979 |          |         |       |
| KRTAP4-8   | ENSG00000204880 | -1.3337   | 0.90885     | -1.225      | 0.88972     | 0.21548  |         |       |
|            | 0.4147          | 0.21548   | 0.4147      | 0.4147      | 0.730659322 |          |         |       |
| CYP1A1     | ENSG00000140465 | 0.21545   | 0.41471     | 0.21545     | 0.41471     | -0.6194  |         |       |
|            | 0.73217         | 0.21545   | 0.41471     | 0.41471     | 0.730659322 |          |         |       |
| MAP3K13    | ENSG00000073803 | -0.23256  | 0.59195     | 0.21539     | 0.41473     | 0.17814  |         |       |
|            | 0.42931         | -0.26652  | 0.60508     | 0.41473     | 0.730659322 |          |         |       |
| RNU6-1132P | ENSG00000239108 | 0.21534   | 0.41475     | 0.21534     | 0.41475     | 0.21534  |         |       |
|            | 0.41475         | 0.21534   | 0.41475     | 0.41475     | 0.730659322 |          |         |       |
| LRRC34P2   | ENSG00000250464 | 0.21534   | 0.41475     | 0.026028    | 0.48962     | -0.75629 |         |       |
|            | 0.77526         | -0.5343   | 0.70343     | 0.41475     | 0.730659322 |          |         |       |
| SLC35C2    | ENSG00000080189 | 0.2152    | 0.41481     | 0.082008    | 0.46732     | -0.38151 |         |       |
|            | 0.64859         | 0.0042292 | 0.49831     | 0.41481     | 0.730694592 |          |         |       |
| MIR196A2   | ENSG00000207924 | 0.21519   | 0.41481     | 0.21519     | 0.41481     | 0.21519  |         |       |
|            | 0.41481         | 0.21519   | 0.41481     | 0.41481     | 0.730694592 |          |         |       |
| MAPK8IP2   | ENSG00000008735 | 0.21517   | 0.41482     | 0.20985     | 0.41689     | -0.37929 |         |       |
|            | 0.64776         | -0.99775  | 0.8408      | 0.41482     | 0.730694592 |          |         |       |
| LIN37      | ENSG00000267796 | 0.21514   | 0.41483     | 0.21514     | 0.41483     | 0.21514  | 0.41483 |       |
|            | 0.21514         | 0.41483   | 0.41483     | 0.730694592 |             |          |         |       |
| NA         | ENSG00000262492 | 0.21508   | 0.41485     | 0.21508     | 0.41485     | 0.21508  | 0.41485 |       |
|            | 0.21508         | 0.41485   | 0.41485     | 0.730703409 |             |          |         |       |
| DPYD-IT1   | ENSG00000232542 | 0.215     | 0.41488     | 0.215       | 0.41488     | 0.215    | 0.41488 | 0.215 |
|            | 0.41488         | 0.41488   | 0.730712241 |             |             |          |         |       |
| NA         | ENSG00000254024 | 0.21497   | 0.41489     | -0.74658    | 0.77234     | -0.74658 | 0.77234 |       |
|            | -0.74658        | 0.77234   | 0.41489     | 0.730712241 |             |          |         |       |
| RN7SL482P  | ENSG00000241587 | 0.15176   | 0.43969     | -0.32493    | 0.62738     | -0.83181 |         |       |
|            | 0.79724         | 0.21496   | 0.4149      | 0.4149      | 0.730712241 |          |         |       |
| NA         | ENSG00000197468 | 0.21491   | 0.41492     | -0.49815    | 0.69081     | -1.0186  | 0.8458  |       |
|            | -0.84842        | 0.8019    | 0.41492     | 0.730721055 |             |          |         |       |
| NA         | ENSG00000253657 | 0.21486   | 0.41494     | 0.21486     | 0.41494     | 0.21486  | 0.41494 |       |
|            | 0.21486         | 0.41494   | 0.41494     | 0.730729869 |             |          |         |       |
| TRGC2      | ENSG00000227191 | 0.21479   | 0.41497     | 0.21479     | 0.41497     | 0.21479  | 0.41497 |       |
|            | 0.21479         | 0.41497   | 0.41497     | 0.730756292 |             |          |         |       |
| MIR4445    | ENSG00000265956 | -0.05848  | 0.52332     | 0.21473     | 0.41499     | -0.05848 |         |       |
|            | 0.52332         | -0.84142  | 0.79994     | 0.41499     | 0.730765103 |          |         |       |
| CELF3      | ENSG00000159409 | -0.035657 | 0.51422     | 0.21454     | 0.41506     | -0.90703 | 0.8178  |       |
|            | -0.90703        | 0.8178    | 0.41506     | 0.730861957 |             |          |         |       |
| NA         | ENSG00000283130 | 0.2145    | 0.41508     | 0.2145      | 0.41508     | 0.2145   | 0.41508 |       |
|            | 0.2145          | 0.41508   | 0.41508     | 0.730870764 |             |          |         |       |
| NLRP8      | ENSG00000179709 | 0.21444   | 0.4151      | 0.21444     | 0.4151      | 0.21444  | 0.4151  |       |
|            | 0.21444         | 0.4151    | 0.4151      | 0.73087077  |             |          |         |       |
| NA         | ENSG00000231863 | 0.075043  | 0.47009     | 0.075043    | 0.47009     | 0.21442  | 0.41511 |       |
|            | -0.11194        | 0.54457   | 0.41511     | 0.73087077  |             |          |         |       |
| ID1        | ENSG00000125968 | 0.21435   | 0.41514     | 0.19586     | 0.42236     | 0.19586  | 0.42236 |       |
|            | -0.11043        | 0.54396   | 0.41514     | 0.730897182 |             |          |         |       |
| NA         | ENSG00000251185 | 0.21423   | 0.41518     | -0.56164    | 0.71282     | 0.037534 | 0.48503 |       |
|            | 0.088524        | 0.46473   | 0.41518     | 0.730941197 |             |          |         |       |
| NA         | ENSG00000258857 | 0.21418   | 0.4152      | 0.21418     | 0.4152      | 0.21418  | 0.4152  |       |
|            | 0.21418         | 0.4152    | 0.4152      | 0.73095     |             |          |         |       |
| NPM1P27    | ENSG00000249353 | -0.47603  | 0.68297     | 0.21411     | 0.41523     | -1.0499  |         |       |
|            | 0.85311         | 0.13703   | 0.4455      | 0.41523     | 0.73095     |          |         |       |
| NA         | ENSG00000241679 | 0.21403   | 0.41526     | 0.21403     | 0.41526     | -0.84376 | 0.8006  |       |

|           |                 |           |         |             |             |          |          |  |
|-----------|-----------------|-----------|---------|-------------|-------------|----------|----------|--|
|           | 0.21403         | 0.41526   | 0.41526 | 0.73095     |             |          |          |  |
| H3P27     | ENSG00000220730 | -0.38724  | 0.65071 | -0.86267    | 0.80584     | -0.86267 | 0.80584  |  |
|           | 0.21402         | 0.41527   | 0.41527 | 0.73095     |             |          |          |  |
| ADAD2     | ENSG00000140955 | -0.17563  | 0.56971 | -1.0038     | 0.84227     | 0.21396  | 0.41529  |  |
|           | -1.6099         | 0.94629   | 0.41529 | 0.73095     |             |          |          |  |
| RPS17P5   | ENSG00000060303 | -0.24166  | 0.59548 |             | 0.21394     | 0.4153   | -0.97096 |  |
|           | 0.83422         | -0.12028  | 0.54787 | 0.4153      | 0.73095     |          |          |  |
| TRAV34    | ENSG00000211813 | 0.2139    | 0.41531 | 0.2139      | 0.41531     | 0.2139   |          |  |
|           | 0.41531         | 0.2139    | 0.41531 | 0.41531     | 0.73095     |          |          |  |
| MRPS21P5  | ENSG00000226395 | 0.21384   | 0.41533 | 0.21384     | 0.41533     | 0.21384  |          |  |
|           | 0.41533         | 0.21384   | 0.41533 | 0.41533     | 0.73095     |          |          |  |
| NA        | ENSG00000236238 | -0.80391  | 0.78928 | 0.21386     | 0.41533     | -0.80391 | 0.78928  |  |
|           | -0.80391        | 0.78928   | 0.41533 | 0.73095     |             |          |          |  |
| RNA5SP429 | ENSG00000200558 | 0.21382   | 0.41534 | 0.21382     | 0.41534     | 0.21382  |          |  |
|           | 0.41534         | 0.21382   | 0.41534 | 0.41534     | 0.73095     |          |          |  |
| NA        | ENSG00000267409 | -1.6351   | 0.94899 | -1.495      | 0.93255     | -0.41572 | 0.66119  |  |
|           | 0.2138          | 0.41535   | 0.41535 | 0.73095     |             |          |          |  |
| RN7SKP90  | ENSG00000199883 | 0.21363   | 0.41542 | 0.21363     | 0.41542     | 0.21363  |          |  |
|           | 0.41542         | 0.21363   | 0.41542 | 0.41542     | 0.731020389 |          |          |  |
| NA        | ENSG00000260103 | 0.21363   | 0.41542 | 0.21363     | 0.41542     | 0.21363  | 0.41542  |  |
|           | 0.21363         | 0.41542   | 0.41542 | 0.731020389 |             |          |          |  |
| B4GALT1   | ENSG00000086062 | -0.54782  | 0.70809 | -1.0337     | 0.84937     | 0.21332  |          |  |
|           | 0.41554         | 0.1314    | 0.44773 | 0.41554     | 0.731072923 |          |          |  |
| CEP57     | ENSG00000166037 | 0.21326   | 0.41556 | 0.020225    | 0.49193     | -0.51592 | 0.69705  |  |
|           | -0.31536        | 0.62375   | 0.41556 | 0.731072923 |             |          |          |  |
| LINC02547 | ENSG00000254486 | -1.9369   | 0.97362 | 0.21324     | 0.41557     | -2.3137  |          |  |
|           | 0.98966         | -1.2921   | 0.90184 | 0.41557     | 0.731072923 |          |          |  |
| NA        | ENSG00000255835 | 0.21319   | 0.41559 | 0.21319     | 0.41559     | 0.21319  | 0.41559  |  |
|           | 0.21319         | 0.41559   | 0.41559 | 0.731072923 |             |          |          |  |
| KCNJ12    | ENSG00000184185 | -0.84079  | 0.79977 | -0.5512     | 0.70925     | -0.61131 |          |  |
|           | 0.7295          | 0.21316   | 0.4156  | 0.4156      | 0.731072923 |          |          |  |
| NA        | ENSG00000267970 | 0.21305   | 0.41564 | -0.073459   | 0.52928     | -0.45087 | 0.67396  |  |
|           | -0.45087        | 0.67396   | 0.41564 | 0.731072923 |             |          |          |  |
| LINC00691 | ENSG00000224074 | -0.033296 | 0.51328 | -1.0847     | 0.86098     | 0.213    | 0.41566  |  |
|           | -0.23953        | 0.59465   | 0.41566 | 0.731072923 |             |          |          |  |
| SEMA3B    | ENSG00000012171 | 0.21293   | 0.41569 | 0.21293     | 0.41569     | 0.21293  |          |  |
|           | 0.41569         | 0.21293   | 0.41569 | 0.41569     | 0.731072923 |          |          |  |
| NA        | ENSG00000277117 | -0.13302  | 0.55291 | 0.21293     | 0.41569     | -0.13302 | 0.55291  |  |
|           | -0.13302        | 0.55291   | 0.41569 | 0.731072923 |             |          |          |  |
| C10orf90  | ENSG00000154493 | -0.39036  | 0.65186 | -1.2728     | 0.89845     | -0.18608 |          |  |
|           | 0.57381         | 0.21291   | 0.4157  | 0.4157      | 0.731072923 |          |          |  |
| RN7SKP296 | ENSG00000223117 | 0.21291   | 0.4157  | 0.21291     | 0.4157      | 0.21291  |          |  |
|           | 0.4157          | 0.21291   | 0.4157  | 0.4157      | 0.731072923 |          |          |  |
| NA        | ENSG00000270494 | 0.2129    | 0.4157  | 0.2129      | 0.4157      | 0.2129   | 0.4157   |  |
|           | 0.2129          | 0.4157    | 0.4157  | 0.731072923 |             |          |          |  |
| CHI3L1    | ENSG00000133048 | -0.25769  | 0.60168 | -0.27294    | 0.60755     | 0.21282  |          |  |
|           | 0.41573         | 0.19154   | 0.42405 | 0.41573     | 0.731072923 |          |          |  |
| SCFD2     | ENSG00000184178 | 0.21283   | 0.41573 | -0.72649    | 0.76623     | -0.49297 | 0.68898  |  |
|           | 0.02437         | 0.49028   | 0.41573 | 0.731072923 |             |          |          |  |
| CTSD      | ENSG00000117984 | 0.21276   | 0.41576 | 0.12291     | 0.45109     | 0.21276  | 0.41576  |  |
|           | -0.19538        | 0.57745   | 0.41576 | 0.731072923 |             |          |          |  |
| WBP11P1   | ENSG00000260389 | -0.40344  | 0.65669 | -0.22857    | 0.5904      | -0.10887 |          |  |
|           | 0.54335         | 0.21275   | 0.41576 | 0.41576     | 0.731072923 |          |          |  |
| ZNF827    | ENSG00000151612 | -0.13554  | 0.55391 | 0.21259     | 0.41582     | -0.13554 |          |  |
|           | 0.55391         | -0.48937  | 0.68771 | 0.41582     | 0.731072923 |          |          |  |
| CACNA2D1  | ENSG00000153956 | 0.0036945 | 0.49853 | 0.1424      | 0.44338     | 0.21252  |          |  |
|           | 0.41585         | -0.55097  | 0.70917 | 0.41585     | 0.731072923 |          |          |  |
| RNU2-5P   | ENSG00000222465 | 0.21253   | 0.41585 | 0.21253     | 0.41585     | 0.21253  |          |  |
|           | 0.41585         | 0.21253   | 0.41585 | 0.41585     | 0.731072923 |          |          |  |
| NA        | ENSG00000261327 | 0.21253   | 0.41585 | 0.21253     | 0.41585     | 0.21253  | 0.41585  |  |
|           | 0.21253         | 0.41585   | 0.41585 | 0.731072923 |             |          |          |  |
| PRSS47    | ENSG00000276717 | 0.21252   | 0.41585 | -0.16976    | 0.5674      | 0.21252  |          |  |

|            |                 |           |         |             |             |           |         |  |
|------------|-----------------|-----------|---------|-------------|-------------|-----------|---------|--|
|            | 0.41585         | -0.51167  | 0.69556 | 0.41585     | 0.731072923 |           |         |  |
| RNH1       | ENSG00000023191 | -0.79205  | 0.78583 | -0.41344    | 0.66036     | -0.53424  | 0.70341 |  |
|            | 0.21247         | 0.41587   | 0.41587 | 0.731072923 |             |           |         |  |
| NA         | ENSG00000279295 | 0.21247   | 0.41587 | 0.0017324   | 0.49931     | 0.21247   | 0.41587 |  |
|            | 0.21247         | 0.41587   | 0.41587 | 0.731072923 |             |           |         |  |
| LINC02763  | ENSG00000254968 | 0.21239   | 0.4159  | -1.2342     | 0.89144     | -1.0153   |         |  |
|            | 0.84502         | -1.237    | 0.89195 | 0.4159      | 0.731072923 |           |         |  |
| LINC01914  | ENSG00000234362 | 0.21236   | 0.41591 | -0.45873    | 0.67679     | -0.45873  |         |  |
|            | 0.67679         | -0.45873  | 0.67679 | 0.41591     | 0.731072923 |           |         |  |
| NA         | ENSG00000254057 | 0.21237   | 0.41591 | -0.41276    | 0.66011     | 0.21237   | 0.41591 |  |
|            | -0.86634        | 0.80685   | 0.41591 | 0.731072923 |             |           |         |  |
| NA         | ENSG00000274874 | 0.21238   | 0.41591 | 0.21238     | 0.41591     | -0.53814  | 0.70476 |  |
|            | 0.18842         | 0.42527   | 0.41591 | 0.731072923 |             |           |         |  |
| NA         | ENSG00000202059 | 0.21232   | 0.41593 | 0.21232     | 0.41593     | 0.21232   | 0.41593 |  |
|            | 0.21232         | 0.41593   | 0.41593 | 0.731072923 |             |           |         |  |
| ATG101     | ENSG00000123395 | -1.6678   | 0.95232 | -1.7724     | 0.96184     | -0.41839  |         |  |
|            | 0.66217         | 0.21219   | 0.41598 | 0.41598     | 0.731072923 |           |         |  |
| NA         | ENSG00000280281 | 0.21219   | 0.41598 | -1.4287     | 0.92346     | -0.088655 | 0.53532 |  |
|            | -0.20842        | 0.58255   | 0.41598 | 0.731072923 |             |           |         |  |
| NA         | ENSG00000265119 | 0.21215   | 0.41599 | 0.21215     | 0.41599     | 0.21215   | 0.41599 |  |
|            | -0.22682        | 0.58972   | 0.41599 | 0.731072923 |             |           |         |  |
| NA         | ENSG00000227531 | 0.037058  | 0.48522 | -0.35993    | 0.64055     | -0.72122  | 0.76461 |  |
|            | 0.21213         | 0.416     | 0.416   | 0.731072923 |             |           |         |  |
| NA         | ENSG00000240096 | 0.089791  | 0.46423 | 0.2121      | 0.41601     | 0.089791  | 0.46423 |  |
|            | 0.089791        | 0.46423   | 0.41601 | 0.731072923 |             |           |         |  |
| ILRUNP1    | ENSG00000227513 | 0.21196   | 0.41607 | 0.016223    | 0.49353     | 0.21196   |         |  |
|            | 0.41607         | 0.21196   | 0.41607 | 0.41607     | 0.731072923 |           |         |  |
| NA         | ENSG00000235088 | -1.0222   | 0.84666 | -1.0222     | 0.84666     | -1.0222   | 0.84666 |  |
|            | 0.21195         | 0.41607   | 0.41607 | 0.731072923 |             |           |         |  |
| IMMT       | ENSG00000132305 | -1.381    | 0.91635 | 0.15837     | 0.43708     | -0.95461  | 0.83011 |  |
|            | 0.21193         | 0.41608   | 0.41608 | 0.731072923 |             |           |         |  |
| MIR4261    | ENSG00000265418 | -0.18974  | 0.57524 | 0.21185     | 0.41611     | -0.84055  |         |  |
|            | 0.7997          | 0.022878  | 0.49087 | 0.41611     | 0.731072923 |           |         |  |
| NA         | ENSG00000229899 | 0.21183   | 0.41612 | 0.21183     | 0.41612     | 0.21183   | 0.41612 |  |
|            | 0.21183         | 0.41612   | 0.41612 | 0.731072923 |             |           |         |  |
| NA         | ENSG00000226764 | -1.5626   | 0.94093 | -1.3643     | 0.91377     | 0.21182   | 0.41613 |  |
|            | -1.8049         | 0.96445   | 0.41613 | 0.731072923 |             |           |         |  |
| NA         | ENSG00000229770 | 0.2118    | 0.41613 | 0.2118      | 0.41613     | 0.2118    | 0.41613 |  |
|            | 0.2118          | 0.41613   | 0.41613 | 0.731072923 |             |           |         |  |
| RN7SKP216  | ENSG00000222982 | -0.4475   | 0.67274 | -0.32774    | 0.62845     | 0.21179   |         |  |
|            | 0.41614         | -0.86308  | 0.80595 | 0.41614     | 0.731072923 |           |         |  |
| NA         | ENSG00000257522 | -0.52717  | 0.70096 | 0.21177     | 0.41614     | 0.077141  | 0.46926 |  |
|            | -0.39046        | 0.6519    | 0.41614 | 0.731072923 |             |           |         |  |
| IL6        | ENSG00000136244 | -0.53134  | 0.70241 | -0.53134    | 0.70241     | -0.53134  | 0.70241 |  |
|            | 0.21175         | 0.41615   | 0.41615 | 0.731072923 |             |           |         |  |
| RN7SL698P  | ENSG00000244232 | -0.53882  | 0.70499 | 0.21175     | 0.41615     | -0.53882  |         |  |
|            | 0.70499         | -1.026    | 0.84755 | 0.41615     | 0.731072923 |           |         |  |
| NA         | ENSG00000278971 | 0.21176   | 0.41615 | -0.62652    | 0.73451     | -0.62652  | 0.73451 |  |
|            | -0.62652        | 0.73451   | 0.41615 | 0.731072923 |             |           |         |  |
| NA         | ENSG00000214147 | 0.21173   | 0.41616 | -0.82066    | 0.79408     | -0.82066  | 0.79408 |  |
|            | -0.82066        | 0.79408   | 0.41616 | 0.731072923 |             |           |         |  |
| NA         | ENSG00000235099 | 0.21166   | 0.41619 | 0.21166     | 0.41619     | 0.21166   | 0.41619 |  |
|            | 0.21166         | 0.41619   | 0.41619 | 0.731072923 |             |           |         |  |
| NA         | ENSG00000248545 | 0.0051631 | 0.49794 | 0.21159     | 0.41621     | -0.12373  | 0.54924 |  |
|            | -0.5378         | 0.70464   | 0.41621 | 0.731072923 |             |           |         |  |
| HNRNPA1P61 | ENSG00000187999 | 0.21157   | 0.41622 | -0.37773    | 0.64718     | 0.21157   |         |  |
|            | 0.41622         | 0.21157   | 0.41622 | 0.41622     | 0.731072923 |           |         |  |
| SSBP3-AS1  | ENSG00000198711 | 0.21154   | 0.41623 | 0.21154     | 0.41623     | 0.21154   |         |  |
|            | 0.41623         | 0.21154   | 0.41623 | 0.41623     | 0.731072923 |           |         |  |
| NA         | ENSG00000271180 | 0.21152   | 0.41624 | 0.21152     | 0.41624     | 0.21152   | 0.41624 |  |
|            | 0.21152         | 0.41624   | 0.41624 | 0.731072923 |             |           |         |  |
| PRPF4      | ENSG00000136875 | 0.085225  | 0.46604 | 0.085225    | 0.46604     | -0.61235  | 0.72985 |  |

|            |                 |           |         |             |             |            |         |  |
|------------|-----------------|-----------|---------|-------------|-------------|------------|---------|--|
|            | 0.21142         | 0.41628   | 0.41628 | 0.731072923 |             |            |         |  |
| PGLYRP4    | ENSG00000163218 | -0.50892  | 0.6946  | -0.52013    | 0.69851     | -0.32244   |         |  |
|            | 0.62644         | 0.2114    | 0.41629 | 0.41629     | 0.731072923 |            |         |  |
| PHYHD1     | ENSG00000175287 | 0.21137   | 0.4163  | -0.25813    | 0.60185     | -0.061798  |         |  |
|            | 0.52464         | -0.061798 | 0.52464 | 0.4163      | 0.731072923 |            |         |  |
| SLC4A5     | ENSG00000188687 | 0.21134   | 0.41631 | -0.59829    | 0.72518     | -0.26532   |         |  |
|            | 0.60462         | -0.06577  | 0.52622 | 0.41631     | 0.731072923 |            |         |  |
| UBE2L2     | ENSG00000131982 | -0.29943  | 0.61769 | 0.21131     | 0.41632     | -1.0197    |         |  |
|            | 0.84607         | 0.21131   | 0.41632 | 0.41632     | 0.731072923 |            |         |  |
| LEO1       | ENSG00000166477 | -1.582    | 0.94318 | -0.14905    | 0.55924     | 0.21131    | 0.41632 |  |
|            | 0.1428          | 0.44322   | 0.41632 | 0.731072923 |             |            |         |  |
| MIR588     | ENSG00000207632 | 0.21132   | 0.41632 | 0.21132     | 0.41632     | 0.21132    |         |  |
|            | 0.41632         | 0.21132   | 0.41632 | 0.41632     | 0.731072923 |            |         |  |
| WDR87      | ENSG00000171804 | -0.47356  | 0.68209 | 0.2112      | 0.41637     | -0.33897   | 0.63268 |  |
|            | -0.33897        | 0.63268   | 0.41637 | 0.731134377 |             |            |         |  |
| ATE1       | ENSG00000107669 | -0.064705 | 0.5258  | 0.21111     | 0.4164      | -1.0294    | 0.84835 |  |
|            | -0.13458        | 0.55353   | 0.4164  | 0.731160709 |             |            |         |  |
| ZNF219     | ENSG00000165804 | -0.45807  | 0.67655 | 0.21102     | 0.41644     | -0.26153   |         |  |
|            | 0.60316         | -0.36908  | 0.64397 | 0.41644     | 0.73119581  |            |         |  |
| NA         | ENSG00000246851 | 0.21098   | 0.41645 | 0.21098     | 0.41645     | 0.21098    | 0.41645 |  |
|            | 0.21098         | 0.41645   | 0.41645 | 0.73119581  |             |            |         |  |
| NA         | ENSG00000255551 | 0.21092   | 0.41647 | -1.3473     | 0.91106     | -0.53775   | 0.70462 |  |
|            | -0.53775        | 0.70462   | 0.41647 | 0.731204579 |             |            |         |  |
| LINC01524  | ENSG00000234948 | 0.21086   | 0.4165  | -2.0255     | 0.97859     | -0.0035537 |         |  |
|            | 0.50142         | -1.3167   | 0.90603 | 0.4165      | 0.731230885 |            |         |  |
| UQCRC2     | ENSG00000140740 | -0.40917  | 0.65879 | -1.3129     | 0.90539     | -0.40917   |         |  |
|            | 0.65879         | 0.21081   | 0.41652 | 0.41652     | 0.731230885 |            |         |  |
| CYB5D2     | ENSG00000167740 | 0.21078   | 0.41653 | -0.90141    | 0.81631     | -0.40731   |         |  |
|            | 0.65811         | -0.90141  | 0.81631 | 0.41653     | 0.731230885 |            |         |  |
| PGAM1P5    | ENSG00000257150 | 0.21065   | 0.41658 | -0.045014   | 0.51795     | 0.21065    |         |  |
|            | 0.41658         | 0.089203  | 0.46446 | 0.41658     | 0.731239007 |            |         |  |
| GALT       | ENSG00000213930 | 0.21057   | 0.41661 | -0.0033062  | 0.50132     | 0.21057    | 0.41661 |  |
|            | 0.21057         | 0.41661   | 0.41661 | 0.731239007 |             |            |         |  |
| NA         | ENSG00000258728 | 0.21057   | 0.41661 | 0.21057     | 0.41661     | 0.21057    | 0.41661 |  |
|            | 0.21057         | 0.41661   | 0.41661 | 0.731239007 |             |            |         |  |
| RNU6-1138P | ENSG00000202229 | 0.21055   | 0.41662 | 0.21055     | 0.41662     | 0.21055    |         |  |
|            | 0.41662         | 0.21055   | 0.41662 | 0.41662     | 0.731239007 |            |         |  |
| MIR4528    | ENSG00000263872 | 0.21049   | 0.41664 | 0.21049     | 0.41664     | 0.21049    |         |  |
|            | 0.41664         | 0.21049   | 0.41664 | 0.41664     | 0.731239007 |            |         |  |
| NA         | ENSG00000251298 | 0.21045   | 0.41666 | 0.21045     | 0.41666     | 0.21045    | 0.41666 |  |
|            | 0.21045         | 0.41666   | 0.41666 | 0.731239007 |             |            |         |  |
| NA         | ENSG00000273957 | -0.64008  | 0.73894 | 0.21044     | 0.41666     | -0.051209  | 0.52042 |  |
|            | -0.75931        | 0.77617   | 0.41666 | 0.731239007 |             |            |         |  |
| SNRPG      | ENSG00000143977 | -0.17054  | 0.56771 | -0.28073    | 0.61054     | 0.21034    | 0.4167  |  |
|            | 0.21034         | 0.4167    | 0.4167  | 0.731239007 |             |            |         |  |
| OR4K13     | ENSG00000176253 | -1.0682   | 0.85729 | -1.0682     | 0.85729     | 0.21033    |         |  |
|            | 0.4167          | -1.862    | 0.9687  | 0.4167      | 0.731239007 |            |         |  |
| NA         | ENSG00000266978 | 0.21035   | 0.4167  | 0.21035     | 0.4167      | 0.21035    | 0.4167  |  |
|            | 0.21035         | 0.4167    | 0.4167  | 0.731239007 |             |            |         |  |
| SERPINA15P | ENSG00000255033 | 0.21024   | 0.41674 | 0.21024     | 0.41674     | 0.21024    |         |  |
|            | 0.41674         | 0.21024   | 0.41674 | 0.41674     | 0.731239007 |            |         |  |
| NA         | ENSG00000249790 | -0.53469  | 0.70357 | -0.78718    | 0.78441     | -0.78718   | 0.78441 |  |
|            | 0.2102          | 0.41676   | 0.41676 | 0.731239007 |             |            |         |  |
| RNU1-76P   | ENSG00000199773 | -1.1346   | 0.87172 | 0.21017     | 0.41677     | -1.1346    |         |  |
|            | 0.87172         | -1.1346   | 0.87172 | 0.41677     | 0.731239007 |            |         |  |
| NA         | ENSG00000267559 | 0.2101    | 0.4168  | 0.2101      | 0.4168      | 0.2101     | 0.4168  |  |
|            | 0.2101          | 0.4168    | 0.4168  | 0.731239007 |             |            |         |  |
| CSMD3      | ENSG00000164796 | -0.66861  | 0.74813 | 0.21006     | 0.41681     | -0.21091   | 0.58352 |  |
|            | -0.053635       | 0.52139   | 0.41681 | 0.731239007 |             |            |         |  |
| SIRPB1     | ENSG00000101307 | 0.21004   | 0.41682 | -2.0072     | 0.97764     | -1.5992    |         |  |
|            | 0.94511         | -1.049    | 0.8529  | 0.41682     | 0.731239007 |            |         |  |
| NA         | ENSG00000224092 | -0.90719  | 0.81785 | 0.20997     | 0.41685     | 0.20997    | 0.41685 |  |



|             |                 |           |         |             |             |           |         |  |
|-------------|-----------------|-----------|---------|-------------|-------------|-----------|---------|--|
|             | -0.32412        | 0.62708   | 0.41685 | 0.731239007 |             |           |         |  |
| NA          | ENSG00000232358 | -0.28225  | 0.61112 | 0.0074724   | 0.49702     | -0.24851  | 0.59813 |  |
|             | 0.20992         | 0.41687   | 0.41687 | 0.731239007 |             |           |         |  |
| OTOP1       | ENSG00000163982 | -0.14773  | 0.55872 | -0.97215    | 0.83451     | 0.20975   | 0.41693 |  |
|             | -0.10464        | 0.54167   | 0.41693 | 0.731239007 |             |           |         |  |
| TNP1        | ENSG00000118245 | 0.20967   | 0.41696 | 0.20967     | 0.41696     | 0.20967   | 0.41696 |  |
|             | -0.3492         | 0.63653   | 0.41696 | 0.731239007 |             |           |         |  |
| POLR3F      | ENSG00000132664 | 0.20968   | 0.41696 | 0.20968     | 0.41696     | 0.20968   |         |  |
|             | 0.41696         | 0.20968   | 0.41696 | 0.731239007 |             |           |         |  |
| KRT18P20    | ENSG00000257758 | -1.3944   | 0.91839 | -1.4703     | 0.92925     | -1.3944   |         |  |
|             | 0.91839         | 0.20967   | 0.41696 | 0.41696     | 0.731239007 |           |         |  |
| MUC7        | ENSG00000171195 | -1.0726   | 0.85827 | -0.36427    | 0.64217     | 0.20961   | 0.41699 |  |
|             | -0.36427        | 0.64217   | 0.41699 | 0.731239007 |             |           |         |  |
| TRBV24OR9-2 | ENSG00000215206 | -0.59196  | 0.72306 | -0.30326    | 0.61916     | 0.20959   |         |  |
|             | 0.41699         | 0.13762   | 0.44527 | 0.41699     | 0.731239007 |           |         |  |
| CCDC77      | ENSG00000120647 | -0.89558  | 0.81476 | -0.98083    | 0.83666     | 0.03117   |         |  |
|             | 0.48757         | 0.20958   | 0.41704 | 0.41704     | 0.731239007 |           |         |  |
| HLA-DPA2    | ENSG00000231461 | -0.088042 | 0.53508 | 0.2095      | 0.41703     | -0.086863 |         |  |
|             | 0.53461         | 0.2095    | 0.41703 | 0.41703     | 0.731239007 |           |         |  |
| FAM177B     | ENSG00000197520 | -0.047414 | 0.51891 | -0.04633    | 0.51848     | 0.20944   |         |  |
|             | 0.41705         | -0.34425  | 0.63467 | 0.41705     | 0.731239007 |           |         |  |
| RPS26P49    | ENSG00000239365 | -0.32712  | 0.62821 | -0.32712    | 0.62821     | -0.32712  |         |  |
|             | 0.62821         | 0.20944   | 0.41705 | 0.41705     | 0.731239007 |           |         |  |
| NA          | ENSG00000280373 | 0.20941   | 0.41706 | 0.20941     | 0.41706     | 0.20941   | 0.41706 |  |
|             | 0.20941         | 0.41706   | 0.41706 | 0.731239007 |             |           |         |  |
| POLR1E      | ENSG00000137054 | -0.69155  | 0.75539 | -0.70994    | 0.76113     | 0.17266   |         |  |
|             | 0.43146         | 0.20941   | 0.41707 | 0.41707     | 0.731239007 |           |         |  |
| SAC3D1      | ENSG00000168061 | -0.21874  | 0.58657 | 0.20939     | 0.41707     | 0.20939   |         |  |
|             | 0.41707         | 0.20939   | 0.41707 | 0.41707     | 0.731239007 |           |         |  |
| SEMA4B      | ENSG00000185033 | 0.2093    | 0.41711 | -0.5651     | 0.714       | -0.58333  | 0.72017 |  |
|             | -0.0094017      | 0.50375   | 0.41711 | 0.731239007 |             |           |         |  |
| NA          | ENSG00000255980 | -0.327    | 0.62817 | 0.20926     | 0.41712     | -0.75237  | 0.77409 |  |
|             | -0.96625        | 0.83304   | 0.41712 | 0.731239007 |             |           |         |  |
| SLIT2-IT1   | ENSG00000248228 | -0.025968 | 0.51036 | -0.66637    | 0.74741     | -0.66637  |         |  |
|             | 0.74741         | 0.20918   | 0.41715 | 0.41715     | 0.731239007 |           |         |  |
| RBMXL2      | ENSG00000170748 | 0.20916   | 0.41716 | -0.44396    | 0.67146     | -0.13634  |         |  |
|             | 0.55422         | -0.75543  | 0.775   | 0.41716     | 0.731239007 |           |         |  |
| NKX3-2      | ENSG00000109705 | -0.2446   | 0.59662 | -0.81604    | 0.79276     | 0.20904   |         |  |
|             | 0.41721         | -0.22074  | 0.58735 | 0.41721     | 0.731239007 |           |         |  |
| NA          | ENSG00000254173 | 0.20901   | 0.41722 | 0.20901     | 0.41722     | 0.20901   | 0.41722 |  |
|             | 0.20901         | 0.41722   | 0.41722 | 0.731239007 |             |           |         |  |
| PPP1R3C     | ENSG00000119938 | -0.11384  | 0.54532 | 0.20895     | 0.41724     | -0.63565  |         |  |
|             | 0.7375          | -0.70475  | 0.75952 | 0.41724     | 0.731239007 |           |         |  |
| GPX6        | ENSG00000198704 | -0.14091  | 0.55603 | -0.65386    | 0.7434      | 0.20896   | 0.41724 |  |
|             | 0.20896         | 0.41724   | 0.41724 | 0.731239007 |             |           |         |  |
| NA          | ENSG00000280078 | 0.20893   | 0.41725 | 0.20893     | 0.41725     | 0.20893   | 0.41725 |  |
|             | 0.20893         | 0.41725   | 0.41725 | 0.731239007 |             |           |         |  |
| CPT2        | ENSG00000157184 | 0.20889   | 0.41727 | -0.71947    | 0.76408     | -0.71947  | 0.76408 |  |
|             | -0.71947        | 0.76408   | 0.41727 | 0.731239007 |             |           |         |  |
| EIF3KP3     | ENSG00000250442 | 0.20886   | 0.41728 | 0.20886     | 0.41728     | 0.20886   |         |  |
|             | 0.41728         | 0.20886   | 0.41728 | 0.41728     | 0.731239007 |           |         |  |
| TP53I13     | ENSG00000167543 | -0.058099 | 0.52316 | 0.20879     | 0.41731     | -0.058099 |         |  |
|             | 0.52316         | -0.058099 | 0.52316 | 0.41731     | 0.731239007 |           |         |  |
| JAG2        | ENSG00000184916 | 0.20878   | 0.41731 | -0.16467    | 0.5654      | -0.27912  | 0.60992 |  |
|             | -0.72812        | 0.76673   | 0.41731 | 0.731239007 |             |           |         |  |
| SNORD115-41 | ENSG00000200478 | 0.061614  | 0.47544 | 0.061614    | 0.47544     | 0.20872   |         |  |
|             | 0.41733         | 0.084441  | 0.46635 | 0.41733     | 0.731239007 |           |         |  |
| LRP5        | ENSG00000162337 | 0.20871   | 0.41734 | -0.65388    | 0.7434      | -0.41852  | 0.66222 |  |
|             | -0.29478        | 0.61592   | 0.41734 | 0.731239007 |             |           |         |  |
| ANXA2R      | ENSG00000177721 | -0.069078 | 0.52754 | 0.2087      | 0.41734     | -0.27506  |         |  |
|             | 0.60837         | -0.40072  | 0.65569 | 0.41734     | 0.731239007 |           |         |  |
| NA          | ENSG00000215068 | 0.2087    | 0.41734 | 0.2087      | 0.41734     | 0.2087    | 0.41734 |  |

|             |                 |          |         |             |             |           |         |         |
|-------------|-----------------|----------|---------|-------------|-------------|-----------|---------|---------|
|             | 0.2087          | 0.41734  | 0.41734 | 0.731239007 |             |           |         |         |
| NA          | ENSG00000264659 | 0.20865  | 0.41736 | 0.41736     | 0.20865     | 0.41736   | 0.20865 | 0.41736 |
|             | 0.20865         | 0.41736  | 0.41736 | 0.731239007 |             |           |         |         |
| UGT1A12P    | ENSG00000228949 | -0.11903 | 0.54737 | 0.20859     | 0.41738     | 0.0051766 |         |         |
|             | 0.49793         | -0.74487 | 0.77182 | 0.41738     | 0.731239007 |           |         |         |
| GRID1       | ENSG00000182771 | -0.50994 | 0.69495 | 0.20858     | 0.41739     | -1.3612   | 0.91328 |         |
|             | -0.73092        | 0.76759  | 0.41739 | 0.731239007 |             |           |         |         |
| C8orf88     | ENSG00000253250 | 0.16935  | 0.43276 | 0.20857     | 0.41739     | 0.16935   |         |         |
|             | 0.43276         | -1.2693  | 0.89783 | 0.41739     | 0.731239007 |           |         |         |
| NA          | ENSG00000161132 | -0.28605 | 0.61258 | -0.7538     | 0.77452     | -0.53594  | 0.704   |         |
|             | 0.20854         | 0.4174   | 0.4174  | 0.731239007 |             |           |         |         |
| SNORA30B    | ENSG00000202189 | 0.20849  | 0.41742 | 0.20849     | 0.41742     | 0.20849   |         |         |
|             | 0.41742         | 0.20849  | 0.41742 | 0.41742     | 0.731239007 |           |         |         |
| NA          | ENSG00000279410 | -1.274   | 0.89867 | 0.20851     | 0.41742     | -1.274    | 0.89867 |         |
|             | -1.274          | 0.89867  | 0.41742 | 0.731239007 |             |           |         |         |
| NA          | ENSG00000256346 | -0.5441  | 0.70681 | -0.66464    | 0.74686     | 0.19674   | 0.42202 |         |
|             | 0.20846         | 0.41744  | 0.41744 | 0.731239007 |             |           |         |         |
| POLR3E      | ENSG00000058600 | 0.20839  | 0.41746 | 0.011721    | 0.49532     | -0.79009  |         |         |
|             | 0.78526         | -0.79009 | 0.78526 | 0.41746     | 0.731239007 |           |         |         |
| CACNG5      | ENSG00000075429 | 0.20838  | 0.41746 | 0.20838     | 0.41746     | -0.88233  |         |         |
|             | 0.8112          | -0.10569 | 0.54209 | 0.41746     | 0.731239007 |           |         |         |
| U2AF1       | ENSG00000160201 | -0.31229 | 0.62259 | -0.80468    | 0.7895      | -0.61776  | 0.73163 |         |
|             | 0.20839         | 0.41746  | 0.41746 | 0.731239007 |             |           |         |         |
| RNU6-1091P  | ENSG00000200815 | -0.22583 | 0.58933 | 0.2084      | 0.41746     | -0.22583  |         |         |
|             | 0.58933         | -0.22583 | 0.58933 | 0.41746     | 0.731239007 |           |         |         |
| GBE1        | ENSG00000114480 | -0.67317 | 0.74958 | -0.67317    | 0.74958     | -0.67317  | 0.74958 |         |
|             | 0.20836         | 0.41747  | 0.41747 | 0.731239007 |             |           |         |         |
| RNPEPL1     | ENSG00000142327 | -1.2914  | 0.90172 | 0.20833     | 0.41748     | -0.074844 |         |         |
|             | 0.52983         | -0.38695 | 0.6506  | 0.41748     | 0.731239007 |           |         |         |
| RNU6-1035P  | ENSG00000207206 | -0.24456 | 0.5966  | -0.067411   | 0.52687     | 0.20834   |         |         |
|             | 0.41748         | 0.086487 | 0.46554 | 0.41748     | 0.731239007 |           |         |         |
| OR7E19P     | ENSG00000225980 | 0.2083   | 0.4175  | 0.2083      | 0.4175      | 0.2083    |         |         |
|             | 0.4175          | 0.2083   | 0.4175  | 0.4175      | 0.731247754 |           |         |         |
| NA          | ENSG00000232528 | -0.34053 | 0.63327 | 0.20823     | 0.41752     | -0.41925  | 0.66248 |         |
|             | -0.078383       | 0.53124  | 0.41752 | 0.7312565   |             |           |         |         |
| CYMP-AS1    | ENSG00000235407 | -0.15645 | 0.56216 | -0.15645    | 0.56216     | -0.15645  |         |         |
|             | 0.56216         | 0.20818  | 0.41754 | 0.41754     | 0.731265246 |           |         |         |
| RAB30-DT    | ENSG00000246067 | -2.8583  | 0.99787 | -2.8583     | 0.99787     | -2.8583   |         |         |
|             | 0.99787         | 0.2081   | 0.41758 | 0.41758     | 0.731300248 |           |         |         |
| NA          | ENSG00000259209 | -1.3729  | 0.91512 | 0.20807     | 0.41759     | 0.20807   | 0.41759 |         |
|             | 0.20807         | 0.41759  | 0.41759 | 0.731300248 |             |           |         |         |
| NA          | ENSG00000218976 | 0.20793  | 0.41764 | -0.27779    | 0.60941     | -0.27779  | 0.60941 |         |
|             | -0.27779        | 0.60941  | 0.41764 | 0.73133519  |             |           |         |         |
| NA          | ENSG00000257327 | 0.20786  | 0.41767 | 0.20786     | 0.41767     | 0.20786   | 0.41767 |         |
|             | 0.20786         | 0.41767  | 0.41767 | 0.73133519  |             |           |         |         |
| NA          | ENSG00000257609 | 0.20782  | 0.41768 | 0.20782     | 0.41768     | 0.20782   | 0.41768 |         |
|             | 0.20782         | 0.41768  | 0.41768 | 0.73133519  |             |           |         |         |
| MIR30C1     | ENSG00000207962 | 0.20781  | 0.41769 | 0.20781     | 0.41769     | 0.20781   |         |         |
|             | 0.41769         | 0.20781  | 0.41769 | 0.41769     | 0.73133519  |           |         |         |
| OR7A5       | ENSG00000188269 | 0.20779  | 0.4177  | -0.56011    | 0.7123      | 0.20779   | 0.4177  |         |
|             | 0.20779         | 0.4177   | 0.4177  | 0.73133519  |             |           |         |         |
| NA          | ENSG00000230686 | 0.20778  | 0.4177  | 0.20778     | 0.4177      | 0.20778   | 0.4177  |         |
|             | -0.31959        | 0.62536  | 0.4177  | 0.73133519  |             |           |         |         |
| KLHL30-AS1  | ENSG00000279484 | 0.20767  | 0.41774 | 0.20767     | 0.41774     | 0.20767   |         |         |
|             | 0.41774         | 0.20767  | 0.41774 | 0.41774     | 0.731343902 |           |         |         |
| NA          | ENSG00000226409 | 0.20764  | 0.41775 | -0.49204    | 0.68866     | -1.8063   | 0.96456 |         |
|             | -0.20781        | 0.58231  | 0.41775 | 0.731343902 |             |           |         |         |
| NA          | ENSG00000229664 | 0.14964  | 0.44052 | 0.14964     | 0.44052     | 0.20764   | 0.41775 |         |
|             | 0.20764         | 0.41775  | 0.41775 | 0.731343902 |             |           |         |         |
| TM4SF19-AS1 | ENSG00000235897 | 0.14749  | 0.44137 | 0.20751     | 0.4178      | 0.20751   |         |         |
|             | 0.4178          | 0.20751  | 0.4178  | 0.4178      | 0.731369724 |           |         |         |
| NA          | ENSG00000275142 | 0.20746  | 0.41782 | 0.20746     | 0.41782     | 0.20746   | 0.41782 |         |

|            |                 |           |         |             |             |           |         |  |
|------------|-----------------|-----------|---------|-------------|-------------|-----------|---------|--|
|            | 0.20746         | 0.41782   | 0.41782 | 0.731369724 |             |           |         |  |
| NA         | ENSG00000213280 | 0.15509   | 0.43837 | -0.6186     | 0.73191     | 0.20745   | 0.41783 |  |
|            | -0.46007        | 0.67727   | 0.41783 | 0.731369724 |             |           |         |  |
| TRBV3-1    | ENSG00000237702 | 0.2074    | 0.41785 | 0.2074      | 0.41785     | 0.2074    |         |  |
|            | 0.41785         | 0.2074    | 0.41785 | 0.731369724 |             |           |         |  |
| NA         | ENSG00000224671 | -1.0018   | 0.84177 | -1.0018     | 0.84177     | -0.7391   | 0.77008 |  |
|            | 0.20738         | 0.41786   | 0.41786 | 0.731369724 |             |           |         |  |
| RNU6-1316P | ENSG00000206969 | 0.20736   | 0.41787 | -1.4666     | 0.92875     | -0.016173 |         |  |
|            | 0.50645         | -0.016173 | 0.50645 | 0.41787     | 0.731369724 |           |         |  |
| TMEM178B   | ENSG00000261115 | -0.10121  | 0.54031 | -0.84986    | 0.8023      | 0.20729   |         |  |
|            | 0.41789         | -1.4057   | 0.9201  | 0.41789     | 0.731369724 |           |         |  |
| RN7SKP97   | ENSG00000222898 | 0.20727   | 0.4179  | 0.20727     | 0.4179      | 0.20727   |         |  |
|            | 0.4179          | 0.20727   | 0.4179  | 0.731369724 |             |           |         |  |
| HNRNPL     | ENSG00000104824 | -0.028412 | 0.51133 | 0.20721     | 0.41792     | 0.08133   |         |  |
|            | 0.46759         | -0.028412 | 0.51133 | 0.41792     | 0.731369724 |           |         |  |
| SNRPEP11   | ENSG00000230299 | -1.503    | 0.93358 | -0.50941    | 0.69477     | 0.20721   |         |  |
|            | 0.41792         | -1.5888   | 0.94395 | 0.41792     | 0.731369724 |           |         |  |
| COA4       | ENSG00000181924 | -0.54453  | 0.70696 | 0.20715     | 0.41795     | -0.54453  | 0.70696 |  |
|            | -0.54453        | 0.70696   | 0.41795 | 0.731369724 |             |           |         |  |
| NA         | ENSG00000278813 | 0.20714   | 0.41795 | 0.20714     | 0.41795     | 0.20714   | 0.41795 |  |
|            | 0.20714         | 0.41795   | 0.41795 | 0.731369724 |             |           |         |  |
| NA         | ENSG00000266865 | -1.0295   | 0.84838 | -0.80005    | 0.78816     | -1.2072   | 0.88632 |  |
|            | 0.20709         | 0.41797   | 0.41797 | 0.731369724 |             |           |         |  |
| NA         | ENSG00000222467 | -1.2861   | 0.90079 | -1.2674     | 0.8975      | -1.2795   | 0.89964 |  |
|            | 0.20698         | 0.41801   | 0.41801 | 0.731369724 |             |           |         |  |
| LONRF1     | ENSG00000154359 | 0.20693   | 0.41803 | 0.11055     | 0.45599     | -0.1404   |         |  |
|            | 0.55583         | -0.55599  | 0.71089 | 0.41803     | 0.731369724 |           |         |  |
| METTLL22   | ENSG00000067365 | -1.2996   | 0.90313 | -0.5081     | 0.69431     | -1.2752   |         |  |
|            | 0.89888         | 0.20692   | 0.41804 | 0.41804     | 0.731369724 |           |         |  |
| PLPP5      | ENSG00000147535 | 0.20686   | 0.41806 | 0.20686     | 0.41806     | 0.20686   | 0.41806 |  |
|            | 0.20686         | 0.41806   | 0.41806 | 0.731369724 |             |           |         |  |
| FABP5P4    | ENSG00000229287 | -0.33152  | 0.62987 | 0.20679     | 0.41809     | 0.17725   |         |  |
|            | 0.42966         | 0.20679   | 0.41809 | 0.41809     | 0.731369724 |           |         |  |
| PHYHIPL    | ENSG00000165443 | 0.1132    | 0.45494 | -0.51967    | 0.69835     | 0.20673   |         |  |
|            | 0.41811         | -0.96936  | 0.83382 | 0.41811     | 0.731369724 |           |         |  |
| NA         | ENSG00000203691 | 0.20672   | 0.41812 | 0.20672     | 0.41812     | 0.20672   | 0.41812 |  |
|            | 0.20672         | 0.41812   | 0.41812 | 0.731369724 |             |           |         |  |
| NA         | ENSG00000257464 | 0.20666   | 0.41814 | 0.20666     | 0.41814     | 0.20666   | 0.41814 |  |
|            | 0.20666         | 0.41814   | 0.41814 | 0.731369724 |             |           |         |  |
| CASP2      | ENSG00000106144 | 0.20659   | 0.41816 | 0.20659     | 0.41816     | -0.04478  | 0.51786 |  |
|            | -1.3083         | 0.90462   | 0.41816 | 0.731369724 |             |           |         |  |
| USP18      | ENSG00000184979 | -0.66107  | 0.74572 | 0.2066      | 0.41816     | -0.4793   | 0.68414 |  |
|            | -0.51646        | 0.69723   | 0.41816 | 0.731369724 |             |           |         |  |
| WDR86      | ENSG00000187260 | -0.73868  | 0.76995 | -0.37993    | 0.648       | 0.20657   | 0.41817 |  |
|            | -0.015649       | 0.50624   | 0.41817 | 0.731369724 |             |           |         |  |
| NA         | ENSG00000258649 | -0.55108  | 0.70921 | -1.1109     | 0.8667      | -1.0805   | 0.86003 |  |
|            | 0.20658         | 0.41817   | 0.41817 | 0.731369724 |             |           |         |  |
| SIX2       | ENSG00000170577 | -1.5439   | 0.93869 | 0.20656     | 0.41818     | 0.20656   | 0.41818 |  |
|            | 0.20656         | 0.41818   | 0.41818 | 0.731369724 |             |           |         |  |
| EEF1GP3    | ENSG00000226845 | -0.87659  | 0.80965 | -1.533      | 0.93736     | 0.20656   |         |  |
|            | 0.41818         | -1.1763   | 0.88027 | 0.41818     | 0.731369724 |           |         |  |
| NA         | ENSG00000270701 | 0.2065    | 0.4182  | 0.2065      | 0.4182      | 0.2065    | 0.4182  |  |
|            | 0.2065          | 0.4182    | 0.4182  | 0.731369724 |             |           |         |  |
| NA         | ENSG00000221320 | -0.96645  | 0.83309 | -0.27843    | 0.60966     | 0.20651   | 0.4182  |  |
|            | 0.20651         | 0.4182    | 0.4182  | 0.731369724 |             |           |         |  |
| H3P10      | ENSG00000229421 | -0.019405 | 0.50774 | 0.20632     | 0.41827     | -0.3779   | 0.64725 |  |
|            | -0.3779         | 0.64725   | 0.41827 | 0.731421784 |             |           |         |  |
| LINC01518  | ENSG00000233515 | -0.471    | 0.68118 | -0.73409    | 0.76855     | 0.20628   |         |  |
|            | 0.41829         | -0.13624  | 0.55418 | 0.41829     | 0.731421784 |           |         |  |
| NA         | ENSG00000241494 | -0.38673  | 0.65052 | 0.15863     | 0.43698     | 0.15863   | 0.43698 |  |
|            | 0.20624         | 0.4183    | 0.4183  | 0.731421784 |             |           |         |  |
| NA         | ENSG00000206805 | 0.20616   | 0.41833 | 0.20616     | 0.41833     | 0.20616   | 0.41833 |  |

|            |                 |           |             |             |             |          |         |       |
|------------|-----------------|-----------|-------------|-------------|-------------|----------|---------|-------|
|            | 0.20616         | 0.41833   | 0.41833     | 0.731421784 |             |          |         |       |
| EFCAB2     | ENSG00000203666 | -0.56558  | 0.71416     | 0.20615     | 0.41834     | -0.17884 |         |       |
|            | 0.57097         | -0.059468 | 0.52371     | 0.41834     | 0.731421784 |          |         |       |
| ATP5BPB7   | ENSG00000261424 | 0.20611   | 0.41835     | -0.49216    | 0.6887      | -0.49216 |         |       |
|            | 0.6887          | -0.49216  | 0.6887      | 0.41835     | 0.731421784 |          |         |       |
| NA         | ENSG00000274090 | -0.27022  | 0.6065      | 0.20611     | 0.41835     | 0.16225  | 0.43556 |       |
|            | -0.19857        | 0.5787    | 0.41835     | 0.731421784 |             |          |         |       |
| RNU6-655P  | ENSG00000199728 | -0.011408 | 0.50455     | 0.20601     | 0.41839     | -0.60648 |         |       |
|            | 0.7279          | -0.44073  | 0.6703      | 0.41839     | 0.731421784 |          |         |       |
| EPB41L5    | ENSG00000115109 | -0.36634  | 0.64294     | 0.20591     | 0.41843     | -0.38927 |         |       |
|            | 0.65146         | -0.083929 | 0.53344     | 0.41843     | 0.731421784 |          |         |       |
| FARSB      | ENSG00000116120 | -0.22918  | 0.59064     | -1.3444     | 0.91059     | -0.27623 | 0.60882 |       |
|            | 0.20589         | 0.41844   | 0.41844     | 0.731421784 |             |          |         |       |
| KRTAP10-7  | ENSG00000272804 | 0.2059    | 0.41844     | 0.2059      | 0.41844     | 0.2059   |         |       |
|            | 0.41844         | 0.2059    | 0.41844     | 0.41844     | 0.731421784 |          |         |       |
| EEF1A1P22  | ENSG00000259612 | -1.211    | 0.88705     | 0.2058      | 0.41847     | -0.89677 |         |       |
|            | 0.81508         | -1.2535   | 0.89499     | 0.41847     | 0.731421784 |          |         |       |
| NA         | ENSG00000272917 | 0.20581   | 0.41847     | 0.20581     | 0.41847     | 0.20581  | 0.41847 |       |
|            | 0.20581         | 0.41847   | 0.41847     | 0.731421784 |             |          |         |       |
| CRYBG1     | ENSG00000112297 | -0.3567   | 0.63934     | -0.27878    | 0.60979     | 0.10464  |         |       |
|            | 0.45833         | 0.20577   | 0.41848     | 0.41848     | 0.731421784 |          |         |       |
| PGA3       | ENSG00000229859 | 0.20577   | 0.41848     | -0.33977    | 0.63299     | -0.44224 | 0.67084 |       |
|            | -0.564          | 0.71362   | 0.41848     | 0.731421784 |             |          |         |       |
| ESRG       | ENSG00000265992 | -0.87128  | 0.8082      | 0.20573     | 0.4185      | -0.87128 | 0.8082  |       |
|            | -0.87128        | 0.8082    | 0.4185      | 0.731421784 |             |          |         |       |
| UTP25      | ENSG00000117597 | -0.97852  | 0.83609     | 0.20572     | 0.41851     | -0.63796 | 0.73825 |       |
|            | -0.16367        | 0.56501   | 0.41851     | 0.731421784 |             |          |         |       |
| RNA5SP365  | ENSG00000252207 | 0.20566   | 0.41853     | -0.16869    | 0.56698     | -0.16869 |         |       |
|            | 0.56698         | -0.75858  | 0.77595     | 0.41853     | 0.731421784 |          |         |       |
| ADGRF2     | ENSG00000164393 | 0.20563   | 0.41854     | 0.20563     | 0.41854     | 0.20563  |         |       |
|            | 0.41854         | 0.20563   | 0.41854     | 0.41854     | 0.731421784 |          |         |       |
| NA         | ENSG00000280032 | 0.20563   | 0.41854     | 0.20563     | 0.41854     | 0.20563  | 0.41854 |       |
|            | 0.20563         | 0.41854   | 0.41854     | 0.731421784 |             |          |         |       |
| RN7SL174P  | ENSG00000243333 | 0.20558   | 0.41856     | 0.20558     | 0.41856     | 0.20558  |         |       |
|            | 0.41856         | 0.20558   | 0.41856     | 0.41856     | 0.731421784 |          |         |       |
| NA         | ENSG00000280062 | 0.20553   | 0.41858     | 0.010975    | 0.49562     | 0.20553  | 0.41858 |       |
|            | 0.20553         | 0.41858   | 0.41858     | 0.731421784 |             |          |         |       |
| STUB1      | ENSG00000103266 | -0.6071   | 0.72811     | 0.20549     | 0.41859     | -0.3531  | 0.63799 |       |
|            | 0.20549         | 0.41859   | 0.41859     | 0.731421784 |             |          |         |       |
| LINC02867  | ENSG00000260394 | 0.20549   | 0.41859     | 0.20549     | 0.41859     | 0.20549  |         |       |
|            | 0.41859         | 0.20549   | 0.41859     | 0.41859     | 0.731421784 |          |         |       |
| NA         | ENSG00000279497 | 0.20536   | 0.41864     | 0.20536     | 0.41864     | 0.20536  | 0.41864 |       |
|            | 0.20536         | 0.41864   | 0.41864     | 0.731482922 |             |          |         |       |
| MAST3      | ENSG00000099308 | 0.17595   | 0.43017     | 0.17595     | 0.43017     | 0.17595  | 0.43017 |       |
|            | 0.20531         | 0.41867   | 0.41867     | 0.731509111 |             |          |         |       |
| OR2W3      | ENSG00000238243 | -0.29413  | 0.61567     | -0.46172    | 0.67786     | -1.1008  | 0.86451 |       |
|            | 0.20522         | 0.4187    | 0.4187      | 0.731534544 |             |          |         |       |
| NA         | ENSG00000262529 | -1.4479   | 0.92618     | 0.2051      | 0.41875     | 0.2051   | 0.41875 |       |
|            | 0.2051          | 0.41875   | 0.41875     | 0.731534544 |             |          |         |       |
| RNU6-920P  | ENSG00000222858 | 0.20506   | 0.41876     | 0.20506     | 0.41876     | 0.20506  |         |       |
|            | 0.41876         | 0.20506   | 0.41876     | 0.41876     | 0.731534544 |          |         |       |
| SNORD116-9 | ENSG00000206727 | 0.205     | 0.41879     | 0.205       | 0.41879     | 0.205    | 0.41879 | 0.205 |
|            | 0.41879         | 0.41879   | 0.731534544 |             |             |          |         |       |
| LINC01460  | ENSG00000205334 | -0.89202  | 0.81381     | -0.80334    | 0.78911     | -1.6729  |         |       |
|            | 0.95283         | 0.20488   | 0.41883     | 0.41883     | 0.731534544 |          |         |       |
| NA         | ENSG00000270753 | 0.20487   | 0.41884     | -0.21891    | 0.58664     | 0.20487  | 0.41884 |       |
|            | 0.20487         | 0.41884   | 0.41884     | 0.731534544 |             |          |         |       |
| RCBTB1     | ENSG00000136144 | 0.005974  | 0.49762     | 0.20484     | 0.41885     | 0.017619 |         |       |
|            | 0.49297         | -0.37064  | 0.64455     | 0.41885     | 0.731534544 |          |         |       |
| RPL21P90   | ENSG00000227805 | 0.15279   | 0.43928     | 0.20485     | 0.41885     | -1.8133  |         |       |
|            | 0.96511         | -1.8133   | 0.96511     | 0.41885     | 0.731534544 |          |         |       |
| NA         | ENSG00000269961 | -0.22998  | 0.59095     | -0.8119     | 0.79158     | -0.22998 | 0.59095 |       |

|           |                 |          |         |             |             |          |         |  |
|-----------|-----------------|----------|---------|-------------|-------------|----------|---------|--|
|           | 0.2048          | 0.41887  | 0.41887 | 0.731534544 |             |          |         |  |
| RPL27AP8  | ENSG00000229423 | -1.5889  | 0.94396 | -1.7329     | 0.95845     | -1.8118  |         |  |
|           | 0.96499         | 0.20468  | 0.41891 | 0.41891     | 0.731534544 |          |         |  |
| EMSLR     | ENSG00000232445 | 0.20466  | 0.41892 | 0.20466     | 0.41892     | 0.20466  | 0.41892 |  |
|           | 0.20466         | 0.41892  | 0.41892 | 0.731534544 |             |          |         |  |
| SHISA2    | ENSG00000180730 | 0.098569 | 0.46074 | -0.81988    | 0.79386     | -0.76611 |         |  |
|           | 0.77819         | 0.2046   | 0.41894 | 0.41894     | 0.731534544 |          |         |  |
| CCDC34P1  | ENSG00000250556 | 0.20451  | 0.41898 | 0.20451     | 0.41898     | 0.20451  |         |  |
|           | 0.41898         | 0.11133  | 0.45568 | 0.41898     | 0.731534544 |          |         |  |
| NA        | ENSG00000283033 | -0.74928 | 0.77315 | -0.14282    | 0.55678     | 0.20451  | 0.41898 |  |
|           | -0.71638        | 0.76312  | 0.41898 | 0.731534544 |             |          |         |  |
| RNU6-738P | ENSG00000207261 | -0.68364 | 0.7529  | -0.68364    | 0.7529      | 0.2044   |         |  |
|           | 0.41902         | -1.4005  | 0.91932 | 0.41902     | 0.731534544 |          |         |  |
| PCP4L1    | ENSG00000248485 | 0.20439  | 0.41903 | -0.25114    | 0.59915     | -0.54572 |         |  |
|           | 0.70737         | -0.42707 | 0.66534 | 0.41903     | 0.731534544 |          |         |  |
| VN1R84P   | ENSG00000268117 | 0.20432  | 0.41905 | 0.20432     | 0.41905     | 0.20432  |         |  |
|           | 0.41905         | 0.20432  | 0.41905 | 0.41905     | 0.731534544 |          |         |  |
| OR7E126P  | ENSG00000254593 | 0.15829  | 0.43711 | -0.40247    | 0.65633     | -0.2461  |         |  |
|           | 0.5972          | 0.20426  | 0.41908 | 0.41908     | 0.731534544 |          |         |  |
| TNFAIP8   | ENSG00000145779 | 0.20414  | 0.41912 | -0.16986    | 0.56744     | -0.32425 |         |  |
|           | 0.62713         | 0.10739  | 0.45724 | 0.41912     | 0.731534544 |          |         |  |
| RCN1P1    | ENSG00000215477 | 0.20414  | 0.41912 | -1.4312     | 0.92381     | 0.20414  |         |  |
|           | 0.41912         | 0.20414  | 0.41912 | 0.41912     | 0.731534544 |          |         |  |
| NA        | ENSG00000227818 | 0.031849 | 0.4873  | 0.20414     | 0.41912     | 0.15913  | 0.43679 |  |
|           | -0.32998        | 0.62929  | 0.41912 | 0.731534544 |             |          |         |  |
| NA        | ENSG00000177725 | 0.20413  | 0.41913 | 0.20413     | 0.41913     | 0.20413  | 0.41913 |  |
|           | 0.20413         | 0.41913  | 0.41913 | 0.731534544 |             |          |         |  |
| DUS2      | ENSG00000167264 | -0.40931 | 0.65884 | 0.2041      | 0.41914     | -0.35115 | 0.63726 |  |
|           | -0.40896        | 0.65871  | 0.41914 | 0.731534544 |             |          |         |  |
| KRTAP10-2 | ENSG00000205445 | 0.20408  | 0.41914 | 0.20408     | 0.41914     | 0.20408  |         |  |
|           | 0.41914         | -0.73669 | 0.76934 | 0.41914     | 0.731534544 |          |         |  |
| PATE3     | ENSG00000236027 | -0.51938 | 0.69825 | 0.037063    | 0.48522     | -0.82741 | 0.796   |  |
|           | 0.20409         | 0.41914  | 0.41914 | 0.731534544 |             |          |         |  |
| NRSN1     | ENSG00000152954 | 0.20403  | 0.41917 | 0.20403     | 0.41917     | 0.20403  | 0.41917 |  |
|           | -0.39898        | 0.65505  | 0.41917 | 0.731534544 |             |          |         |  |
| CASC15    | ENSG00000272168 | -1.0246  | 0.84723 | 0.066013    | 0.47368     | -0.57292 |         |  |
|           | 0.71665         | 0.204    | 0.41918 | 0.41918     | 0.731534544 |          |         |  |
| NA        | ENSG00000236842 | 0.20397  | 0.41919 | 0.20397     | 0.41919     | 0.20397  | 0.41919 |  |
|           | 0.20397         | 0.41919  | 0.41919 | 0.731534544 |             |          |         |  |
| GAPDHP51  | ENSG00000236973 | 0.20396  | 0.41919 | -0.86637    | 0.80686     | -0.86637 |         |  |
|           | 0.80686         | -0.86637 | 0.80686 | 0.41919     | 0.731534544 |          |         |  |
| LINC00654 | ENSG00000205181 | 0.20395  | 0.4192  | -0.0053898  | 0.50215     | 0.035035 |         |  |
|           | 0.48603         | -0.43963 | 0.6699  | 0.4192      | 0.731534544 |          |         |  |
| CLK4      | ENSG00000113240 | -1.0562  | 0.85455 | -0.75628    | 0.77526     | 0.20391  | 0.41921 |  |
|           | -1.2581         | 0.89582  | 0.41921 | 0.731534544 |             |          |         |  |
| RNU4-75P  | ENSG00000201491 | -0.93303 | 0.8246  | -0.14167    | 0.55633     | -0.68501 |         |  |
|           | 0.75333         | 0.20393  | 0.41921 | 0.41921     | 0.731534544 |          |         |  |
| NA        | ENSG00000229961 | 0.14511  | 0.44231 | -0.25142    | 0.59925     | 0.20392  | 0.41921 |  |
|           | -0.20376        | 0.58073  | 0.41921 | 0.731534544 |             |          |         |  |
| NA        | ENSG00000274670 | 0.2039   | 0.41921 | 0.2039      | 0.41921     | 0.2039   | 0.41921 |  |
|           | 0.2039          | 0.41921  | 0.41921 | 0.731534544 |             |          |         |  |
| MSNP1     | ENSG00000251593 | -0.42169 | 0.66337 | -0.30615    | 0.62025     | 0.20389  | 0.41922 |  |
|           | -1.2026         | 0.88544  | 0.41922 | 0.731534544 |             |          |         |  |
| CELF2     | ENSG00000048740 | -0.32599 | 0.62778 | 0.20384     | 0.41924     | -0.30279 | 0.61898 |  |
|           | -1.4807         | 0.93066  | 0.41924 | 0.731534544 |             |          |         |  |
| NA        | ENSG00000236005 | 0.13734  | 0.44538 | -0.42511    | 0.66462     | -1.277   | 0.8992  |  |
|           | 0.20385         | 0.41924  | 0.41924 | 0.731534544 |             |          |         |  |
| DIP2C     | ENSG00000151240 | -0.79565 | 0.78688 | 0.20371     | 0.41929     | -1.4618  | 0.9281  |  |
|           | -0.58878        | 0.72199  | 0.41929 | 0.73156922  |             |          |         |  |
| NA        | ENSG00000237566 | 0.20372  | 0.41929 | -0.41538    | 0.66107     | 0.20372  | 0.41929 |  |
|           | -0.70625        | 0.75998  | 0.41929 | 0.73156922  |             |          |         |  |
| RNU7-93P  | ENSG00000238540 | 0.20358  | 0.41934 | 0.12299     | 0.45106     | -0.39119 |         |  |

|            |                 |           |         |             |             |          |         |  |
|------------|-----------------|-----------|---------|-------------|-------------|----------|---------|--|
|            | 0.65217         | -0.65711  | 0.74445 | 0.41934     | 0.73156922  |          |         |  |
| NA         | ENSG00000234426 | 0.2035    | 0.41937 | -0.32694    | 0.62814     | -0.26342 | 0.60389 |  |
|            | -0.76878        | 0.77899   | 0.41937 | 0.73156922  |             |          |         |  |
| NA         | ENSG00000261560 | 0.20347   | 0.41938 | 0.20347     | 0.41938     | 0.20347  | 0.41938 |  |
|            | 0.20347         | 0.41938   | 0.41938 | 0.73156922  |             |          |         |  |
| AGAP2      | ENSG00000135439 | 0.20345   | 0.41939 | -0.40531    | 0.65737     | 0.080099 | 0.46808 |  |
|            | 0.080099        | 0.46808   | 0.41939 | 0.73156922  |             |          |         |  |
| KRTAP22-2  | ENSG00000206106 | 0.20346   | 0.41939 | 0.20346     | 0.41939     | 0.20346  |         |  |
|            | 0.41939         | 0.20346   | 0.41939 | 0.41939     | 0.73156922  |          |         |  |
| RN7SL231P  | ENSG00000240803 | 0.20342   | 0.4194  | 0.036098    | 0.4856      | -0.97213 |         |  |
|            | 0.83451         | -0.21351  | 0.58453 | 0.4194      | 0.73156922  |          |         |  |
| ELL2P2     | ENSG00000251051 | 0.20342   | 0.4194  | -0.85845    | 0.80468     | -0.5149  |         |  |
|            | 0.69669         | -0.87638  | 0.80959 | 0.4194      | 0.73156922  |          |         |  |
| NA         | ENSG00000227241 | -0.94845  | 0.82855 | 0.2034      | 0.41941     | -2.3258  | 0.98998 |  |
|            | -2.3258         | 0.98998   | 0.41941 | 0.73156922  |             |          |         |  |
| TRAV28     | ENSG00000258835 | -0.2533   | 0.59998 | 0.20334     | 0.41943     | -0.2533  |         |  |
|            | 0.59998         | -0.2533   | 0.59998 | 0.41943     | 0.731577919 |          |         |  |
| MRPL50     | ENSG00000136897 | 0.1321    | 0.44745 | 0.20327     | 0.41946     | 0.20327  |         |  |
|            | 0.41946         | 0.20327   | 0.41946 | 0.41946     | 0.731603591 |          |         |  |
| RN7SL822P  | ENSG00000239545 | 0.20321   | 0.41948 | 0.20321     | 0.41948     | 0.20321  |         |  |
|            | 0.41948         | 0.20321   | 0.41948 | 0.41948     | 0.731603591 |          |         |  |
| NA         | ENSG00000262966 | -0.4037   | 0.65678 | -0.4037     | 0.65678     | 0.20317  | 0.4195  |  |
|            | -0.4037         | 0.65678   | 0.4195  | 0.731603591 |             |          |         |  |
| NA         | ENSG00000258827 | -1.1378   | 0.87239 | 0.20313     | 0.41952     | -1.1378  | 0.87239 |  |
|            | -1.1378         | 0.87239   | 0.41952 | 0.731603591 |             |          |         |  |
| IER3-AS1   | ENSG00000272273 | 0.20313   | 0.41952 | 0.20313     | 0.41952     | 0.20313  |         |  |
|            | 0.41952         | 0.20313   | 0.41952 | 0.41952     | 0.731603591 |          |         |  |
| CTBP2P3    | ENSG00000267153 | 0.20303   | 0.41956 | -0.83232    | 0.79738     | -1.2304  |         |  |
|            | 0.89073         | -0.93897  | 0.82613 | 0.41956     | 0.731603591 |          |         |  |
| RNGTT      | ENSG00000111880 | -2.1568   | 0.98449 | -0.29986    | 0.61786     | 0.20304  | 0.41957 |  |
|            | -0.44027        | 0.67013   | 0.41957 | 0.731603591 |             |          |         |  |
| B4GALNT1   | ENSG00000135454 | -0.5831   | 0.72009 | 0.064734    | 0.47419     | 0.20299  |         |  |
|            | 0.41957         | 0.064734  | 0.47419 | 0.41957     | 0.731603591 |          |         |  |
| NA         | ENSG00000207293 | -0.067233 | 0.5268  | 0.20291     | 0.4196      | -0.46702 | 0.67976 |  |
|            | -0.46702        | 0.67976   | 0.4196  | 0.731603591 |             |          |         |  |
| NA         | ENSG00000258521 | 0.20285   | 0.41963 | 0.20285     | 0.41963     | 0.20285  | 0.41963 |  |
|            | 0.20285         | 0.41963   | 0.41963 | 0.731603591 |             |          |         |  |
| GLRX5      | ENSG00000182512 | -0.68885  | 0.75454 | 0.20279     | 0.41965     | -0.4529  | 0.67469 |  |
|            | -0.63901        | 0.73859   | 0.41965 | 0.731603591 |             |          |         |  |
| RPSAP5     | ENSG00000243904 | -0.10072  | 0.54011 | 0.20279     | 0.41965     | -0.10072 |         |  |
|            | 0.54011         | -0.10072  | 0.54011 | 0.41965     | 0.731603591 |          |         |  |
| OR6L2P     | ENSG00000273327 | -0.75862  | 0.77596 | 0.20275     | 0.41967     | 0.18682  |         |  |
|            | 0.4259          | -1.5911   | 0.9442  | 0.41967     | 0.731603591 |          |         |  |
| HYDIN      | ENSG00000157423 | 0.20267   | 0.4197  | -0.19052    | 0.57555     | -0.33139 | 0.62982 |  |
|            | -0.44611        | 0.67224   | 0.4197  | 0.731603591 |             |          |         |  |
| AUNIP      | ENSG00000127423 | -2.1757   | 0.98521 | -2.1757     | 0.98521     | -2.1757  | 0.98521 |  |
|            | 0.20263         | 0.41971   | 0.41971 | 0.731603591 |             |          |         |  |
| NA         | ENSG00000256234 | 0.20263   | 0.41971 | 0.20263     | 0.41971     | 0.20263  | 0.41971 |  |
|            | 0.20263         | 0.41971   | 0.41971 | 0.731603591 |             |          |         |  |
| UCHL1      | ENSG00000154277 | -0.52886  | 0.70155 | -0.71762    | 0.76351     | 0.20261  | 0.41972 |  |
|            | -0.90501        | 0.81727   | 0.41972 | 0.731603591 |             |          |         |  |
| TKTL2      | ENSG00000151005 | -0.59834  | 0.72519 | 0.079324    | 0.46839     | 0.20253  | 0.41975 |  |
|            | 0.20253         | 0.41975   | 0.41975 | 0.731603591 |             |          |         |  |
| CA12       | ENSG00000074410 | -0.69825  | 0.75749 | -0.59037    | 0.72253     | -0.32065 | 0.62576 |  |
|            | 0.20251         | 0.41976   | 0.41976 | 0.731603591 |             |          |         |  |
| C3orf49    | ENSG00000163632 | 0.20251   | 0.41976 | -2.5147     | 0.99404     | -1.4564  |         |  |
|            | 0.92736         | -0.050499 | 0.52014 | 0.41976     | 0.731603591 |          |         |  |
| NA         | ENSG00000280233 | 0.2025    | 0.41976 | 0.2025      | 0.41976     | 0.2025   | 0.41976 |  |
|            | 0.2025          | 0.41976   | 0.41976 | 0.731603591 |             |          |         |  |
| RNU6-1265P | ENSG00000252151 | -0.51189  | 0.69564 | -0.59614    | 0.72446     | -1.0455  |         |  |
|            | 0.8521          | 0.20247   | 0.41978 | 0.41978     | 0.731612282 |          |         |  |
| NA         | ENSG00000273473 | -0.30539  | 0.61997 | 0.043581    | 0.48262     | 0.20224  | 0.41986 |  |

|            |                 |             |         |             |             |           |         |         |      |
|------------|-----------------|-------------|---------|-------------|-------------|-----------|---------|---------|------|
|            | -1.231          | 0.89083     | 0.41986 | 0.731716798 |             |           |         |         |      |
| RNF223     | ENSG00000237330 | 0.20222     | 0.41987 | 0.20222     | 0.41987     | 0.20222   | 0.41987 | 0.20222 |      |
|            | 0.41987         | 0.20222     | 0.41987 | 0.41987     | 0.731716798 |           |         |         |      |
| SLC66A1    | ENSG0000040487  | -0.7736     | 0.78042 | -1.3603     | 0.91314     | 0.20216   |         |         |      |
|            | 0.41989         | -0.92847    | 0.82342 | 0.41989     | 0.731725484 |           |         |         |      |
| RN7SL127P  | ENSG00000242175 | 0.20205     | 0.41994 | 0.20205     | 0.41994     | 0.20205   | 0.41994 | 0.20205 |      |
|            | 0.41994         | 0.20205     | 0.41994 | 0.41994     | 0.731786327 |           |         |         |      |
| MYPN       | ENSG00000138347 | 0.025224    | 0.48994 | 0.17127     | 0.432       | 0.20199   | 0.41996 |         |      |
|            | 0.073844        | 0.47057     | 0.41996 | 0.731786327 |             |           |         |         |      |
| GGCT       | ENSG00000006625 | -0.51198    | 0.69567 | -0.51198    | 0.69567     | -0.51198  | 0.69567 |         |      |
|            | 0.20189         | 0.42        | 0.42    | 0.731786327 |             |           |         |         |      |
| MLXP1      | ENSG00000226539 | -0.54822    | 0.70823 | -0.11137    | 0.54434     | 0.20189   | 0.42    |         |      |
|            | -0.6625         | 0.74617     | 0.42    | 0.731786327 |             |           |         |         |      |
| NA         | ENSG00000212084 | 0.20189     | 0.42    | 0.20189     | 0.42        | 0.20189   | 0.42    | 0.20189 | 0.42 |
|            | 0.42            | 0.731786327 |         |             |             |           |         |         |      |
| NA         | ENSG00000260545 | 0.20178     | 0.42004 | 0.20178     | 0.42004     | 0.20178   | 0.42004 |         |      |
|            | 0.20178         | 0.42004     | 0.42004 | 0.73181237  |             |           |         |         |      |
| NA         | ENSG00000284294 | 0.20177     | 0.42005 | 0.20177     | 0.42005     | 0.20177   | 0.42005 |         |      |
|            | 0.20177         | 0.42005     | 0.42005 | 0.73181237  |             |           |         |         |      |
| RNU6-1336P | ENSG00000206613 | 0.20175     | 0.42006 | 0.20175     | 0.42006     | 0.20175   |         |         |      |
|            | 0.42006         | 0.20175     | 0.42006 | 0.42006     | 0.73181237  |           |         |         |      |
| NA         | ENSG00000250129 | -1.0406     | 0.85097 | -1.5389     | 0.93809     | -0.52498  | 0.7002  |         |      |
|            | 0.20165         | 0.42009     | 0.42009 | 0.731829729 |             |           |         |         |      |
| MRPS35P2   | ENSG00000250830 | -0.31028    | 0.62183 | 0.20165     | 0.4201      | -0.51835  |         |         |      |
|            | 0.69789         | -1.1405     | 0.87296 | 0.4201      | 0.731829729 |           |         |         |      |
| NA         | ENSG00000214067 | 0.16256     | 0.43543 | 0.16256     | 0.43543     | 0.16256   | 0.43543 |         |      |
|            | 0.20159         | 0.42012     | 0.42012 | 0.731838407 |             |           |         |         |      |
| ZC3H15     | ENSG00000065548 | -0.97666    | 0.83563 | 0.1627      | 0.43538     | -0.010258 |         |         |      |
|            | 0.50409         | 0.20147     | 0.42017 | 0.42017     | 0.731854921 |           |         |         |      |
| LINC02540  | ENSG00000236635 | -0.26103    | 0.60297 | -0.49885    | 0.69106     | 0.20147   |         |         |      |
|            | 0.42017         | -0.98095    | 0.83669 | 0.42017     | 0.731854921 |           |         |         |      |
| NA         | ENSG00000239628 | 0.20143     | 0.42018 | -0.50621    | 0.69365     | 0.20143   | 0.42018 |         |      |
|            | 0.20143         | 0.42018     | 0.42018 | 0.731854921 |             |           |         |         |      |
| EHHADH-AS1 | ENSG00000223358 | -0.19087    | 0.57569 | 0.16255     | 0.43544     | -0.1588   |         |         |      |
|            | 0.56308         | 0.20136     | 0.42021 | 0.42021     | 0.731854921 |           |         |         |      |
| FBXO2      | ENSG00000116661 | -0.13111    | 0.55215 | -0.27852    | 0.6097      | 0.20131   | 0.42023 |         |      |
|            | -0.40473        | 0.65716     | 0.42023 | 0.731854921 |             |           |         |         |      |
| NA         | ENSG00000272156 | 0.13752     | 0.44531 | 0.20123     | 0.42026     | 0.13933   | 0.44459 |         |      |
|            | -0.4464         | 0.67235     | 0.42026 | 0.731854921 |             |           |         |         |      |
| KCNE3      | ENSG00000175538 | 0.20118     | 0.42028 | 0.10943     | 0.45643     | -0.30779  | 0.62088 |         |      |
|            | 0.20118         | 0.42028     | 0.42028 | 0.731854921 |             |           |         |         |      |
| NA         | ENSG00000199676 | 0.20118     | 0.42028 | 0.20118     | 0.42028     | 0.20118   | 0.42028 |         |      |
|            | 0.20118         | 0.42028     | 0.42028 | 0.731854921 |             |           |         |         |      |
| NA         | ENSG00000270372 | 0.20113     | 0.4203  | 0.20113     | 0.4203      | 0.20113   | 0.4203  |         |      |
|            | 0.20113         | 0.4203      | 0.4203  | 0.731854921 |             |           |         |         |      |
| NA         | ENSG00000236471 | -0.6184     | 0.73185 | -0.047189   | 0.51882     | 0.20104   | 0.42033 |         |      |
|            | -0.36976        | 0.64422     | 0.42033 | 0.731854921 |             |           |         |         |      |
| PPP1R10P1  | ENSG00000255352 | 0.012529    | 0.495   | 0.20102     | 0.42034     | -0.59083  | 0.72268 |         |      |
|            | -0.24747        | 0.59773     | 0.42034 | 0.731854921 |             |           |         |         |      |
| ZNF92      | ENSG00000146757 | 0.13185     | 0.44755 | 0.20099     | 0.42035     | 0.13185   | 0.44755 |         |      |
|            | -0.68373        | 0.75293     | 0.42035 | 0.731854921 |             |           |         |         |      |
| NA         | ENSG00000205300 | -0.16056    | 0.56378 | -0.79338    | 0.78622     | 0.20098   | 0.42036 |         |      |
|            | 0.20098         | 0.42036     | 0.42036 | 0.731854921 |             |           |         |         |      |
| MIR379     | ENSG00000199088 | -0.57336    | 0.7168  | 0.20091     | 0.42038     | 0.20091   |         |         |      |
|            | 0.42038         | 0.20091     | 0.42038 | 0.42038     | 0.731854921 |           |         |         |      |
| TXNP3      | ENSG00000234388 | 0.2009      | 0.42039 | 0.2009      | 0.42039     | 0.2009    | 0.42039 |         |      |
|            | 0.2009          | 0.42039     | 0.42039 | 0.731854921 |             |           |         |         |      |
| RNU6-1084P | ENSG00000199368 | -0.58841    | 0.72187 | -1.1809     | 0.88117     | 0.20087   |         |         |      |
|            | 0.4204          | 0.20087     | 0.4204  | 0.4204      | 0.731854921 |           |         |         |      |
| ACTR1B     | ENSG00000115073 | -1.109      | 0.86628 | -0.053751   | 0.52143     | -0.19241  |         |         |      |
|            | 0.57629         | 0.20066     | 0.42048 | 0.42048     | 0.731854921 |           |         |         |      |
| RNA5SP329  | ENSG00000202147 | -0.37549    | 0.64635 | -0.37549    | 0.64635     | -0.37549  |         |         |      |

|           |                 |            |         |             |             |          |         |  |
|-----------|-----------------|------------|---------|-------------|-------------|----------|---------|--|
|           | 0.64635         | 0.20068    | 0.42048 | 0.42048     | 0.731854921 |          |         |  |
| RN7SL170P | ENSG00000241821 | 0.20065    | 0.42049 | 0.42049     | 0.20065     | 0.42049  | 0.20065 |  |
|           | 0.42049         | -0.26927   | 0.60614 | 0.42049     | 0.731854921 |          |         |  |
| C11orf96  | ENSG00000187479 | 0.20062    | 0.4205  | 0.4205      | 0.20062     | 0.4205   | -0.3577 |  |
|           | 0.63972         | 0.20062    | 0.4205  | 0.4205      | 0.731854921 |          |         |  |
| COX4I1P1  | ENSG00000258956 | 0.20059    | 0.42051 | 0.42051     | -0.6525     | 0.74296  | -1.0487 |  |
|           | 0.85284         | -0.48977   | 0.68785 | 0.42051     | 0.731854921 |          |         |  |
| NA        | ENSG00000283629 | -0.82522   | 0.79538 | -0.91824    | 0.82075     | -0.82522 | 0.79538 |  |
|           | 0.20059         | 0.42051    | 0.42051 | 0.731854921 |             |          |         |  |
| GLE1      | ENSG00000119392 | -0.73342   | 0.76835 | 0.20056     | 0.42052     | -0.87802 | 0.81003 |  |
|           | -1.178          | 0.8806     | 0.42052 | 0.731854921 |             |          |         |  |
| NA        | ENSG00000267281 | 0.20057    | 0.42052 | 0.20057     | 0.42052     | 0.20057  | 0.42052 |  |
|           | 0.20057         | 0.42052    | 0.42052 | 0.731854921 |             |          |         |  |
| NA        | ENSG00000270194 | -0.84397   | 0.80066 | 0.20056     | 0.42052     | -0.84397 | 0.80066 |  |
|           | -0.84397        | 0.80066    | 0.42052 | 0.731854921 |             |          |         |  |
| NA        | ENSG00000282876 | 0.20057    | 0.42052 | 0.20057     | 0.42052     | 0.20057  | 0.42052 |  |
|           | 0.20057         | 0.42052    | 0.42052 | 0.731854921 |             |          |         |  |
| NA        | ENSG00000270782 | -1.0287    | 0.8482  | 0.20052     | 0.42054     | 0.20052  | 0.42054 |  |
|           | 0.20052         | 0.42054    | 0.42054 | 0.731854921 |             |          |         |  |
| TRGV5     | ENSG00000211697 | -0.48675   | 0.68678 | -0.48675    | 0.68678     | -0.97298 | 0.83472 |  |
|           | 0.20048         | 0.42055    | 0.42055 | 0.731854921 |             |          |         |  |
| NA        | ENSG00000206659 | 0.20033    | 0.42061 | 0.20033     | 0.42061     | 0.20033  | 0.42061 |  |
|           | 0.20033         | 0.42061    | 0.42061 | 0.731898325 |             |          |         |  |
| RTEL1P1   | ENSG00000251441 | 0.20031    | 0.42062 | 0.085855    | 0.46579     | -0.23054 |         |  |
|           | 0.59116         | -0.066799  | 0.52663 | 0.42062     | 0.731898325 |          |         |  |
| NA        | ENSG00000257880 | 0.2003     | 0.42062 | 0.2003      | 0.42062     | 0.2003   | 0.42062 |  |
|           | 0.2003          | 0.42062    | 0.42062 | 0.731898325 |             |          |         |  |
| TPT1P7    | ENSG00000231328 | 0.20025    | 0.42064 | 0.20025     | 0.42064     | 0.20025  |         |  |
|           | 0.42064         | 0.20025    | 0.42064 | 0.42064     | 0.731906991 |          |         |  |
| CCDC92    | ENSG00000119242 | -0.88806   | 0.81275 | 0.20021     | 0.42066     | -1.1176  |         |  |
|           | 0.86812         | -0.21399   | 0.58472 | 0.42066     | 0.731915657 |          |         |  |
| SEPTIN11  | ENSG00000138758 | -0.0019881 | 0.50079 | -1.2501     | 0.89436     | 0.20016  |         |  |
|           | 0.42068         | 0.11647    | 0.45364 | 0.42068     | 0.731924322 |          |         |  |
| NA        | ENSG00000212610 | 0.19996    | 0.42076 | 0.19996     | 0.42076     | 0.19996  | 0.42076 |  |
|           | 0.19996         | 0.42076    | 0.42076 | 0.732019899 |             |          |         |  |
| NA        | ENSG00000205695 | 0.10999    | 0.45621 | 0.1999      | 0.42078     | -0.2169  | 0.58586 |  |
|           | -0.72814        | 0.76674    | 0.42078 | 0.732019899 |             |          |         |  |
| GAS2L1P2  | ENSG00000228376 | -1.5523    | 0.9397  | -1.2468     | 0.89377     | 0.1999   |         |  |
|           | 0.42078         | 0.1713     | 0.43199 | 0.42078     | 0.732019899 |          |         |  |
| RN7SL594P | ENSG00000242236 | -0.084401  | 0.53363 | 0.082771    | 0.46702     | 0.19983  |         |  |
|           | 0.42081         | 0.082771   | 0.46702 | 0.42081     | 0.732045955 |          |         |  |
| OR6K1P    | ENSG00000231237 | 0.19975    | 0.42084 | -0.42264    | 0.66372     | 0.19975  |         |  |
|           | 0.42084         | 0.19975    | 0.42084 | 0.42084     | 0.732054535 |          |         |  |
| POLRMT    | ENSG00000099821 | -0.16922   | 0.56719 | -0.13327    | 0.55301     | -0.82623 |         |  |
|           | 0.79566         | 0.19969    | 0.42086 | 0.42086     | 0.732054535 |          |         |  |
| NA        | ENSG00000239197 | -0.42125   | 0.66321 | -0.42125    | 0.66321     | -0.42125 | 0.66321 |  |
|           | 0.1997          | 0.42086    | 0.42086 | 0.732054535 |             |          |         |  |
| C12orf49  | ENSG00000111412 | 0.19959    | 0.4209  | -0.70518    | 0.75965     | -0.13504 |         |  |
|           | 0.55371         | -0.269     | 0.60603 | 0.4209      | 0.73209798  |          |         |  |
| TBXT      | ENSG00000164458 | 0.079156   | 0.46845 | 0.079156    | 0.46845     | -0.40815 | 0.65842 |  |
|           | 0.19953         | 0.42093    | 0.42093 | 0.732124028 |             |          |         |  |
| CREBZF    | ENSG00000137504 | 0.19939    | 0.42098 | -0.57442    | 0.71716     | 0.19939  |         |  |
|           | 0.42098         | -1.1634    | 0.87766 | 0.42098     | 0.73218486  |          |         |  |
| IGKV4-1   | ENSG00000211598 | 0.19928    | 0.42102 | 0.12724     | 0.44938     | 0.19928  |         |  |
|           | 0.42102         | 0.19928    | 0.42102 | 0.42102     | 0.732193068 |          |         |  |
| NA        | ENSG00000268583 | 0.19928    | 0.42102 | 0.19928     | 0.42102     | 0.19928  | 0.42102 |  |
|           | 0.19928         | 0.42102    | 0.42102 | 0.732193068 |             |          |         |  |
| NA        | ENSG00000263207 | 0.19917    | 0.42107 | 0.19917     | 0.42107     | 0.19917  | 0.42107 |  |
|           | 0.19917         | 0.42107    | 0.42107 | 0.732193068 |             |          |         |  |
| GALNT3    | ENSG00000115339 | -0.086477  | 0.53446 | -0.086477   | 0.53446     | 0.19909  |         |  |
|           | 0.42109         | 0.14983    | 0.44045 | 0.42109     | 0.732193068 |          |         |  |
| MROH2A    | ENSG00000185038 | -0.014868  | 0.50593 | -0.38553    | 0.65008     | 0.19906  |         |  |



|           |                 |           |         |             |             |           |         |
|-----------|-----------------|-----------|---------|-------------|-------------|-----------|---------|
|           | 0.42111         | -0.16972  | 0.56738 | 0.42111     | 0.732193068 |           |         |
| RNU6-829P | ENSG00000200570 | 0.10235   | 0.45924 | 0.19904     | 0.42112     | 0.0034322 |         |
|           | 0.49863         | 0.10235   | 0.45924 | 0.42112     | 0.732193068 |           |         |
| KERA      | ENSG00000139330 | 0.19901   | 0.42113 | 0.19901     | 0.42113     | 0.19901   | 0.42113 |
|           | 0.19901         | 0.42113   | 0.42113 | 0.732193068 |             |           |         |
| TAAR9     | ENSG00000237110 | 0.013299  | 0.49469 | 0.17585     | 0.4302      | 0.16311   | 0.43522 |
|           | 0.19899         | 0.42113   | 0.42113 | 0.732193068 |             |           |         |
| RTCA      | ENSG00000137996 | -0.50701  | 0.69392 | -0.096648   | 0.5385      | -0.059427 | 0.52369 |
|           | 0.19898         | 0.42114   | 0.42114 | 0.732193068 |             |           |         |
| SCN4B     | ENSG00000177098 | -0.91683  | 0.82039 | -0.23753    | 0.59388     | 0.19899   | 0.42114 |
|           | -0.93107        | 0.82409   | 0.42114 | 0.732193068 |             |           |         |
| STK36     | ENSG00000163482 | -0.88876  | 0.81294 | -1.0868     | 0.86143     | -0.85307  | 0.80319 |
|           | 0.19894         | 0.42115   | 0.42115 | 0.732193068 |             |           |         |
| DYTN      | ENSG00000232125 | 0.19877   | 0.42122 | 0.060895    | 0.47572     | -0.32016  | 0.62558 |
|           | 0.11624         | 0.45373   | 0.42122 | 0.732288641 |             |           |         |
| SPICE1    | ENSG00000163611 | -1.6846   | 0.95397 | -1.4979     | 0.93293     | -1.6846   |         |
|           | 0.95397         | 0.19868   | 0.42126 | 0.42126     | 0.732297093 |           |         |
| RN7SL762P | ENSG00000244308 | 0.19866   | 0.42126 | 0.023115    | 0.49078     | 0.023115  |         |
|           | 0.49078         | 0.023115  | 0.49078 | 0.42126     | 0.732297093 |           |         |
| MTND6P5   | ENSG00000227730 | 0.19861   | 0.42129 | 0.19861     | 0.42129     | 0.19861   |         |
|           | 0.42129         | 0.19861   | 0.42129 | 0.42129     | 0.732297093 |           |         |
| NA        | ENSG00000251601 | -0.08808  | 0.53509 | 0.1986      | 0.42129     | -0.26303  | 0.60373 |
|           | -0.36281        | 0.64163   | 0.42129 | 0.732297093 |             |           |         |
| PPIAP72   | ENSG00000174715 | -0.32479  | 0.62733 | -0.32479    | 0.62733     | -0.9081   |         |
|           | 0.81809         | 0.19856   | 0.4213  | 0.4213      | 0.732297093 |           |         |
| LUZP2     | ENSG00000187398 | -0.41643  | 0.66145 | -2.5122     | 0.994       | 0.19841   | 0.42136 |
|           | -0.73163        | 0.7678    | 0.42136 | 0.732363193 |             |           |         |
| NA        | ENSG00000226022 | 0.19831   | 0.4214  | 0.0047409   | 0.49811     | -0.62838  | 0.73512 |
|           | 0.076628        | 0.46946   | 0.4214  | 0.732363193 |             |           |         |
| NA        | ENSG00000245213 | -0.083194 | 0.53315 | 0.1983      | 0.42141     | -0.15372  | 0.56109 |
|           | -1.1277         | 0.87028   | 0.42141 | 0.732363193 |             |           |         |
| XXYLT1    | ENSG00000173950 | -0.51677  | 0.69734 | -0.19411    | 0.57695     | 0.19824   |         |
|           | 0.42143         | -0.10193  | 0.54059 | 0.42143     | 0.732363193 |           |         |
| NA        | ENSG00000226624 | -0.043534 | 0.51736 | 0.19814     | 0.42147     | -0.043534 | 0.51736 |
|           | -0.043534       | 0.51736   | 0.42147 | 0.732363193 |             |           |         |
| RNA5SP220 | ENSG00000252107 | 0.19812   | 0.42147 | -0.46138    | 0.67774     | -0.46138  |         |
|           | 0.67774         | -0.46138  | 0.67774 | 0.42147     | 0.732363193 |           |         |
| LRRCC1    | ENSG00000133739 | -0.11231  | 0.54471 | -0.025856   | 0.51031     | 0.1981    |         |
|           | 0.42149         | 0.089029  | 0.46453 | 0.42149     | 0.732363193 |           |         |
| BACE1     | ENSG00000186318 | -1.5397   | 0.93818 | -0.14264    | 0.55671     | 0.198     | 0.42152 |
|           | -0.84241        | 0.80022   | 0.42152 | 0.732363193 |             |           |         |
| NA        | ENSG00000258629 | 0.19802   | 0.42152 | 0.19802     | 0.42152     | 0.19802   | 0.42152 |
|           | 0.19802         | 0.42152   | 0.42152 | 0.732363193 |             |           |         |
| MIR548X2  | ENSG00000263581 | 0.19797   | 0.42153 | 0.19797     | 0.42153     | 0.19797   |         |
|           | 0.42153         | 0.17197   | 0.43173 | 0.42153     | 0.732363193 |           |         |
| NA        | ENSG00000280135 | 0.19797   | 0.42153 | -0.87744    | 0.80988     | -0.39114  | 0.65215 |
|           | 0.19797         | 0.42153   | 0.42153 | 0.732363193 |             |           |         |
| NA        | ENSG00000272597 | 0.19791   | 0.42156 | 0.19791     | 0.42156     | 0.19791   | 0.42156 |
|           | 0.19791         | 0.42156   | 0.42156 | 0.732363193 |             |           |         |
| RPL34P8   | ENSG00000237583 | -0.84217  | 0.80015 | 0.19784     | 0.42158     | -0.69504  |         |
|           | 0.75648         | -0.69504  | 0.75648 | 0.42158     | 0.732363193 |           |         |
| ITGB7     | ENSG00000139626 | -1.2579   | 0.89578 | -0.94088    | 0.82662     | 0.19781   | 0.4216  |
|           | -0.90849        | 0.81819   | 0.4216  | 0.732363193 |             |           |         |
| SMARCD1   | ENSG00000163104 | -0.46886  | 0.68042 | 0.19762     | 0.42167     | 0.19762   |         |
|           | 0.42167         | 0.11139   | 0.45565 | 0.42167     | 0.732363193 |           |         |
| NF1       | ENSG00000196712 | -0.019559 | 0.5078  | 0.19758     | 0.42169     | -1.6621   | 0.95175 |
|           | -0.041355       | 0.51649   | 0.42169 | 0.732363193 |             |           |         |
| POLR2DP1  | ENSG00000232090 | 0.10642   | 0.45763 | 0.19758     | 0.42169     | -0.14701  |         |
|           | 0.55844         | 0.19758   | 0.42169 | 0.42169     | 0.732363193 |           |         |
| ITSN2     | ENSG00000198399 | -0.67315  | 0.74957 | -0.73898    | 0.77004     | 0.012774  | 0.4949  |
|           | 0.19753         | 0.42171   | 0.42171 | 0.732363193 |             |           |         |
| SCGB2A2   | ENSG00000110484 | 0.19743   | 0.42174 | -1.3782     | 0.91594     | -0.25482  |         |

|              |                 |          |         |             |             |          |         |
|--------------|-----------------|----------|---------|-------------|-------------|----------|---------|
|              | 0.60057         | -1.5113  | 0.93464 | 0.42174     | 0.732363193 |          |         |
| SNORA53      | ENSG00000212443 | 0.19739  | 0.42176 | 0.19739     | 0.42176     | 0.19739  | 0.19739 |
|              | 0.42176         | 0.19739  | 0.42176 | 0.42176     | 0.732363193 |          |         |
| RN7SL274P    | ENSG00000263947 | 0.19727  | 0.42181 | 0.19727     | 0.42181     | 0.19727  | 0.19727 |
|              | 0.42181         | 0.19727  | 0.42181 | 0.42181     | 0.732363193 |          |         |
| NA           | ENSG00000261717 | 0.19725  | 0.42182 | 0.19725     | 0.42182     | 0.19725  | 0.42182 |
|              | 0.19725         | 0.42182  | 0.42182 | 0.732363193 |             |          |         |
| NA           | ENSG00000282160 | 0.19724  | 0.42182 | -0.16757    | 0.56654     | 0.19724  | 0.42182 |
|              | 0.19724         | 0.42182  | 0.42182 | 0.732363193 |             |          |         |
| MTMR7        | ENSG00000003987 | 0.19718  | 0.42184 | -0.76095    | 0.77666     | 0.10253  | 0.45917 |
|              | 0.040656        | 0.48379  | 0.42184 | 0.732363193 |             |          |         |
| PPP1R32      | ENSG00000162148 | -0.59353 | 0.72359 | -0.96125    | 0.83179     | 0.19719  |         |
|              | 0.42184         | -0.11847 | 0.54715 | 0.42184     | 0.732363193 |          |         |
| DOCK4        | ENSG00000128512 | -0.12336 | 0.54909 | 0.028534    | 0.48862     | 0.19712  | 0.42186 |
|              | -0.39109        | 0.65214  | 0.42186 | 0.732363193 |             |          |         |
| FCGR3B       | ENSG00000162747 | 0.029737 | 0.48814 | -1.2248     | 0.88967     | 0.19714  |         |
|              | 0.42186         | -0.31655 | 0.62421 | 0.42186     | 0.732363193 |          |         |
| RNU6-1180P   | ENSG00000201805 | 0.1971   | 0.42187 | 0.1971      | 0.42187     | -0.0164  |         |
|              | 0.50654         | 0.1971   | 0.42187 | 0.42187     | 0.732363193 |          |         |
| NA           | ENSG00000270425 | 0.1971   | 0.42187 | -2.6413     | 0.99587     | -2.6413  | 0.99587 |
|              | -2.6413         | 0.99587  | 0.42187 | 0.732363193 |             |          |         |
| IGLVIVOR22-1 | ENSG00000271138 | 0.010936 | 0.49564 | 0.19711     | 0.42187     | -0.34288 |         |
|              | 0.63416         | 0.19711  | 0.42187 | 0.42187     | 0.732363193 |          |         |
| MTIF2        | ENSG00000085760 | -0.59752 | 0.72492 | 0.19706     | 0.42189     | 0.19706  | 0.42189 |
|              | -0.91429        | 0.81972  | 0.42189 | 0.732363193 |             |          |         |
| SALL4P7      | ENSG00000258692 | 0.19695  | 0.42193 | 0.067285    | 0.47318     | 0.19695  |         |
|              | 0.42193         | 0.19695  | 0.42193 | 0.42193     | 0.732363193 |          |         |
| NA           | ENSG00000259810 | 0.19696  | 0.42193 | -0.34404    | 0.63459     | -0.14152 | 0.55627 |
|              | 0.040931        | 0.48368  | 0.42193 | 0.732363193 |             |          |         |
| RN7SL811P    | ENSG00000265439 | 0.19697  | 0.42193 | 0.19697     | 0.42193     | 0.060685 |         |
|              | 0.4758          | -0.51101 | 0.69533 | 0.42193     | 0.732363193 |          |         |
| MTERF1       | ENSG00000127989 | 0.19693  | 0.42194 | -0.52506    | 0.70023     | -1.087   |         |
|              | 0.86149         | -1.3982  | 0.91898 | 0.42194     | 0.732363193 |          |         |
| LINC02015    | ENSG00000231574 | -0.37019 | 0.64438 | -1.2511     | 0.89455     | 0.19692  |         |
|              | 0.42194         | -0.11548 | 0.54597 | 0.42194     | 0.732363193 |          |         |
| ADAMTS15     | ENSG00000166106 | 0.19686  | 0.42197 | -0.36913    | 0.64399     | -0.1787  |         |
|              | 0.57091         | -0.54221 | 0.70616 | 0.42197     | 0.732363193 |          |         |
| ATP2C1       | ENSG00000017260 | -0.34885 | 0.6364  | -0.93134    | 0.82416     | 0.1968   |         |
|              | 0.42199         | -0.26828 | 0.60576 | 0.42199     | 0.732363193 |          |         |
| NA           | ENSG00000233392 | -0.796   | 0.78698 | -0.49272    | 0.6889      | 0.1968   | 0.42199 |
|              | 0.1968          | 0.42199  | 0.42199 | 0.732363193 |             |          |         |
| SMIM20       | ENSG00000250317 | -0.16817 | 0.56678 | 0.1219      | 0.45149     | 0.19681  |         |
|              | 0.42199         | -0.31036 | 0.62186 | 0.42199     | 0.732363193 |          |         |
| NA           | ENSG00000279529 | 0.19674  | 0.42201 | 0.19674     | 0.42201     | 0.19674  | 0.42201 |
|              | 0.19674         | 0.42201  | 0.42201 | 0.732363193 |             |          |         |
| NDUFB4P12    | ENSG00000124399 | -0.45466 | 0.67532 | -0.26472    | 0.60439     | 0.19668  |         |
|              | 0.42204         | 0.097618 | 0.46112 | 0.42204     | 0.732363193 |          |         |
| AZIN1        | ENSG00000155096 | -0.48583 | 0.68646 | 0.19667     | 0.42204     | -2.1017  | 0.98221 |
|              | 0.14747         | 0.44138  | 0.42204 | 0.732363193 |             |          |         |
| LINC02021    | ENSG00000249846 | 0.018458 | 0.49264 | 0.018458    | 0.49264     | 0.19666  |         |
|              | 0.42205         | -0.47303 | 0.6819  | 0.42205     | 0.732363193 |          |         |
| MIR3130-2    | ENSG00000263468 | -0.16584 | 0.56586 | -0.65277    | 0.74305     | 0.19666  |         |
|              | 0.42205         | -0.16584 | 0.56586 | 0.42205     | 0.732363193 |          |         |
| RPL3P10      | ENSG00000243095 | 0.19662  | 0.42206 | 0.075949    | 0.46973     | 0.075949 |         |
|              | 0.46973         | 0.075949 | 0.46973 | 0.42206     | 0.732363193 |          |         |
| DMRT2        | ENSG00000173253 | -0.51519 | 0.69679 | -0.23943    | 0.59461     | -1.5746  | 0.94232 |
|              | 0.1965          | 0.42211  | 0.42211 | 0.732363193 |             |          |         |
| MYL1         | ENSG00000168530 | 0.19646  | 0.42213 | 0.19646     | 0.42213     | -0.91093 | 0.81883 |
|              | 0.19646         | 0.42213  | 0.42213 | 0.732363193 |             |          |         |
| NA           | ENSG00000265121 | 0.19646  | 0.42213 | 0.19646     | 0.42213     | 0.19646  | 0.42213 |
|              | 0.19646         | 0.42213  | 0.42213 | 0.732363193 |             |          |         |
| NA           | ENSG00000269373 | -0.25118 | 0.59916 | -1.5456     | 0.93889     | -0.63634 | 0.73772 |

|                  |                 |            |         |             |             |            |         |         |
|------------------|-----------------|------------|---------|-------------|-------------|------------|---------|---------|
|                  | 0.1964          | 0.42215    | 0.42215 | 0.732363193 |             |            |         |         |
| MAGI1-IT1        | ENSG00000272610 | 0.1964     | 0.42215 | 0.1964      | 0.42215     | 0.1964     | 0.42215 | 0.1964  |
|                  | 0.42215         | -0.54487   | 0.70708 | 0.42215     | 0.732363193 |            |         |         |
| LINC00358        | ENSG00000229578 | 0.19635    | 0.42217 | 0.19635     | 0.42217     | 0.19635    | 0.42217 | 0.19635 |
|                  | 0.42217         | 0.19635    | 0.42217 | 0.42217     | 0.732363193 |            |         |         |
| LINC00967        | ENSG00000253138 | 0.19627    | 0.4222  | 0.19627     | 0.4222      | 0.19627    | 0.4222  | 0.19627 |
|                  | 0.4222          | 0.19627    | 0.4222  | 0.4222      | 0.732363193 |            |         |         |
| NA               | ENSG00000236427 | -0.50085   | 0.69176 | -0.50085    | 0.69176     | 0.19623    | 0.42221 |         |
|                  | 0.038677        | 0.48457    | 0.42221 | 0.732363193 |             |            |         |         |
| NA               | ENSG00000239835 | -0.71873   | 0.76385 | -0.55037    | 0.70897     | -0.66733   | 0.74772 |         |
|                  | 0.19623         | 0.42221    | 0.42221 | 0.732363193 |             |            |         |         |
| NA               | ENSG00000254605 | 0.090138   | 0.46409 | 0.19624     | 0.42221     | 0.090138   | 0.46409 |         |
|                  | 0.090138        | 0.46409    | 0.42221 | 0.732363193 |             |            |         |         |
| RAB10            | ENSG00000084733 | -1.1569    | 0.87635 | -1.0493     | 0.85298     | 0.19622    | 0.42222 |         |
|                  | -1.0518         | 0.85356    | 0.42222 | 0.732363193 |             |            |         |         |
| MATN3            | ENSG00000132031 | -0.38852   | 0.65118 | 0.19613     | 0.42225     | -1.6195    | 0.94733 |         |
|                  | -0.40162        | 0.65602    | 0.42225 | 0.732363193 |             |            |         |         |
| NA               | ENSG00000236814 | 0.19614    | 0.42225 | 0.19614     | 0.42225     | -0.60342   | 0.72689 |         |
|                  | 0.19614         | 0.42225    | 0.42225 | 0.732363193 |             |            |         |         |
| CTBP2P6          | ENSG00000213697 | 0.19608    | 0.42227 | 0.19608     | 0.42227     | 0.19608    |         |         |
|                  | 0.42227         | 0.19608    | 0.42227 | 0.42227     | 0.732363193 |            |         |         |
| TBC1D3P1-DHX40P1 | ENSG00000267104 | 0.1961     | 0.42227 | 0.1961      | 0.42227     | 0.1961     |         |         |
|                  | 0.42227         | 0.1961     | 0.42227 | 0.42227     | 0.732363193 |            |         |         |
| NA               | ENSG00000275860 | 0.1961     | 0.42227 | 0.1961      | 0.42227     | 0.1961     | 0.42227 |         |
|                  | 0.1961          | 0.42227    | 0.42227 | 0.732363193 |             |            |         |         |
| PMS2CL           | ENSG00000187953 | -0.068466  | 0.52729 | 0.19601     | 0.4223      | -0.65086   |         |         |
|                  | 0.74243         | -1.0673    | 0.85709 | 0.4223      | 0.732363193 |            |         |         |
| TBX5-AS1         | ENSG00000255399 | -1.1336    | 0.87151 | 0.19602     | 0.4223      | -1.1336    |         |         |
|                  | 0.87151         | -1.1336    | 0.87151 | 0.4223      | 0.732363193 |            |         |         |
| RNU6-956P        | ENSG00000239030 | 0.1959     | 0.42234 | 0.1959      | 0.42234     | -0.011526  |         |         |
|                  | 0.5046          | 0.1959     | 0.42234 | 0.42234     | 0.732363193 |            |         |         |
| PRDM5            | ENSG00000138738 | -0.23743   | 0.59384 | 0.0038141   | 0.49848     | 0.19585    | 0.42236 |         |
|                  | -0.30086        | 0.61824    | 0.42236 | 0.732363193 |             |            |         |         |
| NA               | ENSG00000254444 | -1.0867    | 0.86141 | -1.6157     | 0.94692     | 0.19586    | 0.42236 |         |
|                  | -0.54204        | 0.7061     | 0.42236 | 0.732363193 |             |            |         |         |
| NA               | ENSG00000259650 | -1.508     | 0.93422 | 0.19585     | 0.42236     | -1.508     | 0.93422 |         |
|                  | -1.508          | 0.93422    | 0.42236 | 0.732363193 |             |            |         |         |
| NA               | ENSG00000282732 | -0.6131    | 0.73009 | 0.19577     | 0.42239     | -1.1172    | 0.86804 |         |
|                  | -0.4483         | 0.67303    | 0.42239 | 0.732389151 |             |            |         |         |
| RPEP5            | ENSG00000234732 | -0.074551  | 0.52971 | 0.19566     | 0.42244     | -0.29198   | 0.61485 |         |
|                  | 0.086298        | 0.46561    | 0.42244 | 0.732432341 |             |            |         |         |
| S100A7           | ENSG00000143556 | -0.9078    | 0.81801 | 0.19562     | 0.42245     | -0.27714   |         |         |
|                  | 0.60916         | -0.27714   | 0.60916 | 0.42245     | 0.732432341 |            |         |         |
| MSH6             | ENSG00000116062 | 0.19559    | 0.42246 | -1.6261     | 0.94804     | -0.48286   | 0.6854  |         |
|                  | -0.94146        | 0.82676    | 0.42246 | 0.732432341 |             |            |         |         |
| NA               | ENSG00000228274 | 0.19545    | 0.42252 | 0.19545     | 0.42252     | 0.19545    | 0.42252 |         |
|                  | 0.19545         | 0.42252    | 0.42252 | 0.732440532 |             |            |         |         |
| CCDC148          | ENSG00000153237 | 0.16044    | 0.43627 | -0.75814    | 0.77582     | -0.0073985 |         |         |
|                  | 0.50295         | 0.19542    | 0.42253 | 0.42253     | 0.732440532 |            |         |         |
| TXNDC8           | ENSG00000204193 | -0.21889   | 0.58663 | 0.19537     | 0.42255     | -0.89147   |         |         |
|                  | 0.81366         | -0.55502   | 0.71056 | 0.42255     | 0.732440532 |            |         |         |
| RNU6-224P        | ENSG00000206782 | -0.0078421 | 0.50313 | -0.53901    | 0.70506     | -0.1153    |         |         |
|                  | 0.5459          | 0.19532    | 0.42257 | 0.42257     | 0.732440532 |            |         |         |
| NA               | ENSG00000248837 | -0.93375   | 0.82478 | 0.19533     | 0.42257     | -0.17414   | 0.56912 |         |
|                  | 0.10752         | 0.45719    | 0.42257 | 0.732440532 |             |            |         |         |
| CASC18           | ENSG00000257859 | -0.27357   | 0.60779 | 0.19534     | 0.42257     | -1.4597    |         |         |
|                  | 0.92781         | -0.39172   | 0.65237 | 0.42257     | 0.732440532 |            |         |         |
| NA               | ENSG00000274245 | -0.45048   | 0.67382 | -0.15582    | 0.56191     | 0.19531    | 0.42258 |         |
|                  | 0.19531         | 0.42258    | 0.42258 | 0.732440532 |             |            |         |         |
| NA               | ENSG00000243230 | -0.33619   | 0.63164 | -0.23563    | 0.59314     | 0.19527    | 0.42259 |         |
|                  | 0.19527         | 0.42259    | 0.42259 | 0.732440532 |             |            |         |         |
| C15orf56         | ENSG00000176753 | 0.19524    | 0.4226  | 0.19524     | 0.4226      | 0.19524    |         |         |

|           |                 |           |         |             |             |          |         |  |
|-----------|-----------------|-----------|---------|-------------|-------------|----------|---------|--|
|           | 0.4226          | 0.19524   | 0.4226  | 0.4226      | 0.732440532 |          |         |  |
| PCNT      | ENSG00000160299 | 0.0018224 | 0.49927 | 0.10448     | 0.4584      | 0.19518  | 0.42263 |  |
|           | 0.015907        | 0.49365   | 0.42263 | 0.732457113 |             |          |         |  |
| NA        | ENSG00000262298 | 0.19512   | 0.42265 | 0.19512     | 0.42265     | 0.19512  | 0.42265 |  |
|           | 0.19512         | 0.42265   | 0.42265 | 0.732457113 |             |          |         |  |
| NA        | ENSG00000265764 | -0.69836  | 0.75752 | -0.45925    | 0.67697     | 0.1951   | 0.42266 |  |
|           | -0.56832        | 0.71509   | 0.42266 | 0.732457113 |             |          |         |  |
| NA        | ENSG00000229740 | -0.22744  | 0.58996 | 0.19508     | 0.42267     | 0.065731 | 0.4738  |  |
|           | -0.22071        | 0.58734   | 0.42267 | 0.732457113 |             |          |         |  |
| TEAD1     | ENSG00000187079 | 0.098251  | 0.46087 | -0.28847    | 0.61351     | 0.19496  | 0.42271 |  |
|           | 0.040637        | 0.48379   | 0.42271 | 0.732457113 |             |          |         |  |
| KRT18P52  | ENSG00000237007 | 0.19491   | 0.42273 | -0.15007    | 0.55965     | -0.57949 |         |  |
|           | 0.71887         | -0.15007  | 0.55965 | 0.42273     | 0.732457113 |          |         |  |
| RNU7-200P | ENSG00000251914 | 0.19487   | 0.42275 | 0.19487     | 0.42275     | 0.19487  |         |  |
|           | 0.42275         | 0.19487   | 0.42275 | 0.42275     | 0.732457113 |          |         |  |
| ZNF252P   | ENSG00000196922 | 0.19475   | 0.42279 | 0.19475     | 0.42279     | 0.19475  |         |  |
|           | 0.42279         | 0.19475   | 0.42279 | 0.42279     | 0.732457113 |          |         |  |
| RN7SKP139 | ENSG00000222343 | 0.19477   | 0.42279 | -1.0126     | 0.84437     | 0.19477  |         |  |
|           | 0.42279         | 0.19477   | 0.42279 | 0.42279     | 0.732457113 |          |         |  |
| IFIT3     | ENSG00000119917 | 0.034687  | 0.48616 | 0.19472     | 0.42281     | 0.034687 | 0.48616 |  |
|           | -0.25225        | 0.59958   | 0.42281 | 0.732457113 |             |          |         |  |
| EPC2      | ENSG00000135999 | -0.5213   | 0.69892 | -0.033899   | 0.51352     | 0.1947   | 0.42281 |  |
|           | -0.54609        | 0.7075    | 0.42281 | 0.732457113 |             |          |         |  |
| RNASET2   | ENSG00000026297 | -1.0944   | 0.86312 | -0.3746     | 0.64602     | -1.4844  |         |  |
|           | 0.93115         | 0.19467   | 0.42282 | 0.42282     | 0.732457113 |          |         |  |
| HYAL6P    | ENSG00000228211 | 0.19469   | 0.42282 | 0.19469     | 0.42282     | 0.19469  |         |  |
|           | 0.42282         | 0.19469   | 0.42282 | 0.42282     | 0.732457113 |          |         |  |
| NA        | ENSG00000259397 | 0.16958   | 0.43267 | 0.19468     | 0.42282     | 0.16958  | 0.43267 |  |
|           | 0.16958         | 0.43267   | 0.42282 | 0.732457113 |             |          |         |  |
| ALG1L8P   | ENSG00000227620 | 0.02791   | 0.48887 | -1.4691     | 0.9291      | 0.19462  |         |  |
|           | 0.42285         | 0.19462   | 0.42285 | 0.42285     | 0.732483044 |          |         |  |
| NA        | ENSG00000227962 | 0.19448   | 0.4229  | 0.19448     | 0.4229      | 0.19448  | 0.4229  |  |
|           | 0.19448         | 0.4229    | 0.4229  | 0.732534899 |             |          |         |  |
| NA        | ENSG00000250012 | -0.7948   | 0.78663 | -0.28262    | 0.61127     | -0.7948  | 0.78663 |  |
|           | 0.19445         | 0.42291   | 0.42291 | 0.732534899 |             |          |         |  |
| NA        | ENSG00000278958 | -0.34548  | 0.63513 | 0.19438     | 0.42294     | 0.19438  | 0.42294 |  |
|           | 0.19438         | 0.42294   | 0.42294 | 0.732552106 |             |          |         |  |
| NA        | ENSG00000254596 | 0.11368   | 0.45475 | 0.11368     | 0.45475     | -0.96763 | 0.83339 |  |
|           | 0.19435         | 0.42295   | 0.42295 | 0.732552106 |             |          |         |  |
| RN7SL168P | ENSG00000244296 | 0.19427   | 0.42298 | 0.19427     | 0.42298     | 0.19427  |         |  |
|           | 0.42298         | 0.19427   | 0.42298 | 0.42298     | 0.732569311 |          |         |  |
| ZNF468    | ENSG00000204604 | -0.65827  | 0.74482 | -0.049894   | 0.5199      | 0.19426  |         |  |
|           | 0.42299         | 0.054531  | 0.47826 | 0.42299     | 0.732569311 |          |         |  |
| NA        | ENSG00000260643 | 0.19418   | 0.42302 | 0.19418     | 0.42302     | 0.19418  | 0.42302 |  |
|           | 0.19418         | 0.42302   | 0.42302 | 0.732595114 |             |          |         |  |
| SNHG20    | ENSG00000234912 | 0.18572   | 0.42633 | 0.19413     | 0.42304     | -0.15872 |         |  |
|           | 0.56305         | 0.041008  | 0.48364 | 0.42304     | 0.732595114 |          |         |  |
| NA        | ENSG00000232110 | 0.19411   | 0.42305 | 0.19411     | 0.42305     | 0.19411  | 0.42305 |  |
|           | 0.19411         | 0.42305   | 0.42305 | 0.732595114 |             |          |         |  |
| LINC00678 | ENSG00000254934 | -0.45886  | 0.67683 | -1.2012     | 0.88517     | 0.194    | 0.42309 |  |
|           | 0.194           | 0.42309   | 0.42309 | 0.732620911 |             |          |         |  |
| MIR548H3  | ENSG00000221698 | 0.16234   | 0.43552 | 0.19394     | 0.42311     | 0.16234  |         |  |
|           | 0.43552         | 0.16234   | 0.43552 | 0.42311     | 0.732620911 |          |         |  |
| NA        | ENSG00000222206 | 0.19394   | 0.42311 | 0.19394     | 0.42311     | 0.19394  | 0.42311 |  |
|           | 0.19394         | 0.42311   | 0.42311 | 0.732620911 |             |          |         |  |
| MESD      | ENSG00000117899 | -0.75265  | 0.77417 | -0.35109    | 0.63724     | -0.16893 | 0.56708 |  |
|           | 0.19389         | 0.42313   | 0.42313 | 0.732629509 |             |          |         |  |
| NA        | ENSG00000272305 | 0.19383   | 0.42316 | 0.19383     | 0.42316     | 0.19383  | 0.42316 |  |
|           | 0.19383         | 0.42316   | 0.42316 | 0.73265542  |             |          |         |  |
| MIR125B2  | ENSG00000207863 | 0.1937    | 0.42321 | 0.1937      | 0.42321     | 0.1937   |         |  |
|           | 0.42321         | 0.1937    | 0.42321 | 0.42321     | 0.732681206 |          |         |  |
| NA        | ENSG00000264944 | 0.1937    | 0.42321 | 0.1937      | 0.42321     | 0.1937   | 0.42321 |  |

|           |                 |           |         |             |             |           |         |  |
|-----------|-----------------|-----------|---------|-------------|-------------|-----------|---------|--|
|           | 0.1937          | 0.42321   | 0.42321 | 0.732681206 |             |           |         |  |
| NA        | ENSG00000258561 | -0.39155  | 0.6523  | -0.93897    | 0.82613     | 0.19367   | 0.42322 |  |
|           | -0.85706        | 0.80429   | 0.42322 | 0.732681206 |             |           |         |  |
| GNA14-AS1 | ENSG00000231373 | 0.19356   | 0.42326 | 3.50E-05    | 0.49999     | -0.012256 |         |  |
|           | 0.50489         | -0.1148   | 0.5457  | 0.42326     | 0.732724424 |           |         |  |
| NA        | ENSG00000252352 | 0.19342   | 0.42331 | 0.19342     | 0.42331     | 0.19342   | 0.42331 |  |
|           | 0.19342         | 0.42331   | 0.42331 | 0.732758789 |             |           |         |  |
| NA        | ENSG00000268289 | 0.19344   | 0.42331 | 0.19344     | 0.42331     | 0.19344   | 0.42331 |  |
|           | 0.19344         | 0.42331   | 0.42331 | 0.732758789 |             |           |         |  |
| GPR141BP  | ENSG00000283444 | 0.19339   | 0.42333 | -0.26672    | 0.60516     | -0.45781  |         |  |
|           | 0.67645         | -0.26672  | 0.60516 | 0.42333     | 0.732758789 |           |         |  |
| VN1R88P   | ENSG00000268541 | 0.034483  | 0.48625 | 0.19336     | 0.42334     | -0.37957  |         |  |
|           | 0.64787         | 0.034483  | 0.48625 | 0.42334     | 0.732758789 |           |         |  |
| APBA2     | ENSG00000034053 | -0.21063  | 0.58341 | 0.1932      | 0.4234      | 0.1932    | 0.4234  |  |
|           | -0.01699        | 0.50678   | 0.4234  | 0.732836613 |             |           |         |  |
| PSG6      | ENSG00000170848 | -0.26077  | 0.60286 | 0.19301     | 0.42348     | 0.12382   | 0.45073 |  |
|           | 0.13864         | 0.44487   | 0.42348 | 0.732940322 |             |           |         |  |
| NA        | ENSG00000259354 | -0.098427 | 0.5392  | -0.098427   | 0.5392      | -0.092482 | 0.53684 |  |
|           | 0.19298         | 0.42349   | 0.42349 | 0.732940322 |             |           |         |  |
| NA        | ENSG00000244513 | 0.19289   | 0.42352 | 0.19289     | 0.42352     | 0.19289   | 0.42352 |  |
|           | 0.19289         | 0.42352   | 0.42352 | 0.732948762 |             |           |         |  |
| NA        | ENSG00000241596 | 0.19288   | 0.42353 | -0.2865     | 0.61275     | -0.40403  | 0.6569  |  |
|           | -0.40403        | 0.6569    | 0.42353 | 0.732948762 |             |           |         |  |
| HADHB     | ENSG00000138029 | 0.17026   | 0.4324  | -0.29967    | 0.61779     | 0.19285   | 0.42354 |  |
|           | 0.16709         | 0.43365   | 0.42354 | 0.732948762 |             |           |         |  |
| ATP6V1C2  | ENSG00000143882 | 0.19264   | 0.42362 | 0.19264     | 0.42362     | 0.19264   |         |  |
|           | 0.42362         | -0.30871  | 0.62123 | 0.42362     | 0.732991518 |           |         |  |
| NA        | ENSG00000249334 | -1.1752   | 0.88005 | -1.1752     | 0.88005     | 0.19264   | 0.42362 |  |
|           | -1.1752         | 0.88005   | 0.42362 | 0.732991518 |             |           |         |  |
| CARTPT    | ENSG00000164326 | 0.19261   | 0.42363 | 0.19261     | 0.42363     | 0.19261   |         |  |
|           | 0.42363         | 0.19261   | 0.42363 | 0.42363     | 0.732991518 |           |         |  |
| LINC01908 | ENSG00000265374 | 0.19258   | 0.42364 | 0.19258     | 0.42364     | 0.19258   |         |  |
|           | 0.42364         | -0.029278 | 0.51168 | 0.42364     | 0.732991518 |           |         |  |
| NA        | ENSG00000235158 | -1.0261   | 0.84758 | 0.19257     | 0.42365     | -0.58046  | 0.7192  |  |
|           | -0.56912        | 0.71536   | 0.42365 | 0.732991518 |             |           |         |  |
| GAPDHP39  | ENSG00000239207 | 0.19255   | 0.42366 | 0.19255     | 0.42366     | 0.19255   |         |  |
|           | 0.42366         | 0.17636   | 0.43    | 0.42366     | 0.732991518 |           |         |  |
| EEF1A1P27 | ENSG00000179460 | 0.19251   | 0.42367 | -0.90846    | 0.81818     | 0.044292  |         |  |
|           | 0.48234         | -0.74409  | 0.77159 | 0.42367     | 0.732991518 |           |         |  |
| KPTN      | ENSG00000118162 | 0.19247   | 0.42369 | 0.19247     | 0.42369     | -0.26804  | 0.60567 |  |
|           | -0.29128        | 0.61458   | 0.42369 | 0.733000096 |             |           |         |  |
| NA        | ENSG00000258765 | 0.19227   | 0.42376 | 0.19227     | 0.42376     | 0.19227   | 0.42376 |  |
|           | 0.19227         | 0.42376   | 0.42376 | 0.733042084 |             |           |         |  |
| RRM1-AS1  | ENSG00000255276 | 0.19225   | 0.42377 | 0.19225     | 0.42377     | 0.19225   |         |  |
|           | 0.42377         | 0.19225   | 0.42377 | 0.42377     | 0.733042084 |           |         |  |
| MAD2L1BP  | ENSG00000124688 | -0.92009  | 0.82124 | 0.1195      | 0.45244     | 0.1922    |         |  |
|           | 0.42379         | -0.43219  | 0.6672  | 0.42379     | 0.733042084 |           |         |  |
| RN7SL336P | ENSG00000264017 | 0.19212   | 0.42382 | 0.19212     | 0.42382     | 0.19212   |         |  |
|           | 0.42382         | 0.19212   | 0.42382 | 0.42382     | 0.733042084 |           |         |  |
| RNU6-801P | ENSG00000200957 | 0.19204   | 0.42385 | 0.19204     | 0.42385     | -0.41034  |         |  |
|           | 0.65922         | 0.19204   | 0.42385 | 0.42385     | 0.733042084 |           |         |  |
| NA        | ENSG00000261692 | 0.19206   | 0.42385 | 0.19206     | 0.42385     | 0.19206   | 0.42385 |  |
|           | 0.19206         | 0.42385   | 0.42385 | 0.733042084 |             |           |         |  |
| MIR4295   | ENSG00000264763 | 0.19205   | 0.42385 | 0.19205     | 0.42385     | 0.19205   |         |  |
|           | 0.42385         | 0.19205   | 0.42385 | 0.42385     | 0.733042084 |           |         |  |
| NA        | ENSG00000228143 | -0.62788  | 0.73496 | 0.19203     | 0.42386     | 0.19203   | 0.42386 |  |
|           | 0.19203         | 0.42386   | 0.42386 | 0.733042084 |             |           |         |  |
| PCAT14    | ENSG00000280623 | 0.10419   | 0.45851 | 0.192       | 0.42387     | 0.032065  | 0.48721 |  |
|           | 0.071386        | 0.47155   | 0.42387 | 0.733042084 |             |           |         |  |
| NA        | ENSG00000229964 | -0.34324  | 0.63429 | 0.19198     | 0.42388     | -0.34324  | 0.63429 |  |
|           | -0.34324        | 0.63429   | 0.42388 | 0.733042084 |             |           |         |  |
| RNA5SP448 | ENSG00000200021 | 0.1919    | 0.42391 | 0.1919      | 0.42391     | 0.1919    |         |  |

|           |                 |          |         |             |             |           |         |  |
|-----------|-----------------|----------|---------|-------------|-------------|-----------|---------|--|
|           | 0.42391         | -0.65529 | 0.74386 | 0.42391     | 0.733042084 |           |         |  |
| NA        | ENSG00000225790 | 0.19183  | 0.42394 | -0.44775    | 0.67283     | -0.44775  | 0.67283 |  |
|           | -0.44775        | 0.67283  | 0.42394 | 0.733042084 |             |           |         |  |
| MIR4274   | ENSG00000266690 | -1.2302  | 0.89068 | 0.19182     | 0.42394     | -0.44651  |         |  |
|           | 0.67239         | -0.5142  | 0.69644 | 0.42394     | 0.733042084 |           |         |  |
| NA        | ENSG00000253821 | -0.53034 | 0.70206 | 0.1918      | 0.42395     | -0.32889  | 0.62888 |  |
|           | -0.32261        | 0.62651  | 0.42395 | 0.733042084 |             |           |         |  |
| H1-1      | ENSG00000124610 | 0.18046  | 0.4284  | 0.18046     | 0.4284      | 0.19177   | 0.42396 |  |
|           | -0.17245        | 0.56846  | 0.42396 | 0.733042084 |             |           |         |  |
| CFAP410   | ENSG00000160226 | -0.54756 | 0.708   | -1.1437     | 0.87362     | -0.54756  | 0.708   |  |
|           | 0.19177         | 0.42396  | 0.42396 | 0.733042084 |             |           |         |  |
| NA        | ENSG00000227632 | -1.5495  | 0.93937 | 0.19175     | 0.42397     | -0.045176 | 0.51802 |  |
|           | -0.44335        | 0.67124  | 0.42397 | 0.733042084 |             |           |         |  |
| TRBV4-2   | ENSG00000211745 | -1.4097  | 0.92068 | -1.0598     | 0.85539     | 0.19166   | 0.424   |  |
|           | 0.12803         | 0.44906  | 0.424   | 0.733067944 |             |           |         |  |
| LINC02477 | ENSG00000249425 | 0.19158  | 0.42403 | -0.90035    | 0.81603     | -0.66576  |         |  |
|           | 0.74722         | -0.75308 | 0.7743  | 0.42403     | 0.733093802 |           |         |  |
| DMPK      | ENSG00000104936 | -0.15592 | 0.56195 | 0.19152     | 0.42406     | -0.15592  | 0.56195 |  |
|           | -0.15592        | 0.56195  | 0.42406 | 0.733119658 |             |           |         |  |
| NA        | ENSG00000202522 | 0.1914   | 0.4241  | 0.1914      | 0.4241      | -0.83185  | 0.79725 |  |
|           | 0.0055409       | 0.49779  | 0.4241  | 0.7331628   |             |           |         |  |
| TFAP2D    | ENSG00000008197 | -1.3189  | 0.90641 | 0.13914     | 0.44467     | 0.19127   |         |  |
|           | 0.42416         | -0.23382 | 0.59244 | 0.42416     | 0.73321418  |           |         |  |
| TMUB1     | ENSG00000164897 | 0.19125  | 0.42416 | -0.48414    | 0.68586     | 0.19125   | 0.42416 |  |
|           | 0.19125         | 0.42416  | 0.42416 | 0.73321418  |             |           |         |  |
| AATBC     | ENSG00000215458 | -0.88186 | 0.81107 | -0.3598     | 0.6405      | 0.19122   | 0.42418 |  |
|           | -0.31052        | 0.62192  | 0.42418 | 0.73321418  |             |           |         |  |
| NAPGP1    | ENSG00000271408 | 0.19118  | 0.42419 | 0.19118     | 0.42419     | 0.19118   |         |  |
|           | 0.42419         | 0.19118  | 0.42419 | 0.42419     | 0.73321418  |           |         |  |
| NA        | ENSG00000224244 | -1.4896  | 0.93183 | 0.19111     | 0.42422     | -1.2817   | 0.90003 |  |
|           | -1.5203         | 0.93578  | 0.42422 | 0.73321418  |             |           |         |  |
| CICP16    | ENSG00000248213 | 0.19112  | 0.42422 | 0.19112     | 0.42422     | -1.5661   |         |  |
|           | 0.94133         | -0.90175 | 0.81641 | 0.42422     | 0.73321418  |           |         |  |
| NA        | ENSG00000228161 | -0.7463  | 0.77226 | -0.077258   | 0.53079     | 0.19104   | 0.42425 |  |
|           | -0.025705       | 0.51025  | 0.42425 | 0.733239862 |             |           |         |  |
| NA        | ENSG00000272267 | -0.91225 | 0.81918 | 0.19098     | 0.42427     | 0.19098   | 0.42427 |  |
|           | 0.19098         | 0.42427  | 0.42427 | 0.733239862 |             |           |         |  |
| OR5BJ1P   | ENSG00000257792 | -0.54315 | 0.70649 | -1.1704     | 0.87907     | -0.11007  |         |  |
|           | 0.54382         | 0.19097  | 0.42428 | 0.42428     | 0.733239862 |           |         |  |
| DYRK1A    | ENSG00000157540 | -0.53941 | 0.7052  | 0.084698    | 0.46625     | -0.27749  |         |  |
|           | 0.6093          | 0.19086  | 0.42432 | 0.42432     | 0.733274261 |           |         |  |
| MRPL35P3  | ENSG00000226253 | 0.19083  | 0.42433 | 0.19083     | 0.42433     | 0.19083   |         |  |
|           | 0.42433         | 0.19083  | 0.42433 | 0.42433     | 0.733274261 |           |         |  |
| LINC01949 | ENSG00000233828 | 0.19074  | 0.42436 | 0.19074     | 0.42436     | -0.43782  |         |  |
|           | 0.66924         | 0.19074  | 0.42436 | 0.42436     | 0.733300099 |           |         |  |
| NA        | ENSG00000252405 | 0.19068  | 0.42439 | 0.0043595   | 0.49826     | 0.0043595 | 0.49826 |  |
|           | 0.0043595       | 0.49826  | 0.42439 | 0.733325261 |             |           |         |  |
| NA        | ENSG00000255503 | 0.19058  | 0.42443 | 0.19058     | 0.42443     | 0.19058   | 0.42443 |  |
|           | 0.19058         | 0.42443  | 0.42443 | 0.733325261 |             |           |         |  |
| BPNT2P    | ENSG00000270936 | -0.67339 | 0.74965 | 0.19049     | 0.42446     | 0.19049   |         |  |
|           | 0.42446         | 0.19049  | 0.42446 | 0.42446     | 0.733325261 |           |         |  |
| DLX6-AS1  | ENSG00000231764 | 0.033047 | 0.48682 | -0.85822    | 0.80461     | -1.2638   |         |  |
|           | 0.89685         | 0.19046  | 0.42447 | 0.42447     | 0.733325261 |           |         |  |
| NA        | ENSG00000239783 | 0.19046  | 0.42447 | 0.19046     | 0.42447     | 0.19046   | 0.42447 |  |
|           | 0.19046         | 0.42447  | 0.42447 | 0.733325261 |             |           |         |  |
| NA        | ENSG00000199698 | 0.19041  | 0.42449 | -0.46017    | 0.6773      | -0.72681  | 0.76633 |  |
|           | -0.7553         | 0.77496  | 0.42449 | 0.733325261 |             |           |         |  |
| IGKV1D-16 | ENSG00000241244 | 0.021692 | 0.49135 | 0.19043     | 0.42449     | 0.021692  |         |  |
|           | 0.49135         | 0.021692 | 0.49135 | 0.42449     | 0.733325261 |           |         |  |
| RNU6-656P | ENSG00000252594 | 0.19039  | 0.4245  | 0.19039     | 0.4245      | -0.64934  |         |  |
|           | 0.74194         | -0.27517 | 0.60841 | 0.4245      | 0.733325261 |           |         |  |
| CACNA1E   | ENSG00000198216 | -1.1574  | 0.87645 | -1.0951     | 0.86327     | -0.66129  |         |  |

|            |                 |           |         |             |             |           |         |
|------------|-----------------|-----------|---------|-------------|-------------|-----------|---------|
|            | 0.74579         | 0.19038   | 0.42451 | 0.42451     | 0.733325261 |           |         |
| HTR1E      | ENSG00000168830 | 0.05441   | 0.4783  | -0.84264    | 0.80029     | -0.45632  | 0.67592 |
|            | 0.19023         | 0.42457   | 0.42457 | 0.733383911 |             |           |         |
| NA         | ENSG00000231630 | -0.47701  | 0.68332 | -0.52043    | 0.69862     | -0.12291  | 0.54891 |
|            | 0.19016         | 0.42459   | 0.42459 | 0.733383911 |             |           |         |
| GPC5-AS2   | ENSG00000232885 | -0.20653  | 0.58181 | -0.20653    | 0.58181     | -0.20653  |         |
|            | 0.58181         | 0.19016   | 0.42459 | 0.42459     | 0.733383911 |           |         |
| NA         | ENSG00000260751 | 0.19001   | 0.42465 | 0.19001     | 0.42465     | 0.19001   | 0.42465 |
|            | 0.19001         | 0.42465   | 0.42465 | 0.733383911 |             |           |         |
| NA         | ENSG00000264116 | -0.42526  | 0.66468 | -0.42526    | 0.66468     | -0.42526  | 0.66468 |
|            | 0.19001         | 0.42465   | 0.42465 | 0.733383911 |             |           |         |
| RN7SKP29   | ENSG00000222889 | -0.38738  | 0.65076 | 0.18999     | 0.42466     | 0.18999   |         |
|            | 0.42466         | 0.18999   | 0.42466 | 0.42466     | 0.733383911 |           |         |
| NA         | ENSG00000213117 | -0.45437  | 0.67522 | 0.14725     | 0.44147     | -0.49856  | 0.69096 |
|            | 0.18991         | 0.42469   | 0.42469 | 0.733383911 |             |           |         |
| TRIM63     | ENSG00000158022 | -0.82604  | 0.79561 | 0.13107     | 0.44786     | 0.18988   |         |
|            | 0.4247          | -1.2044   | 0.88579 | 0.4247      | 0.733383911 |           |         |
| OR7E162P   | ENSG00000234386 | -0.073978 | 0.52949 | -0.62075    | 0.73262     | -1.4756   |         |
|            | 0.92997         | 0.1899    | 0.4247  | 0.4247      | 0.733383911 |           |         |
| LINC01349  | ENSG00000230402 | -0.22618  | 0.58947 | -0.5086     | 0.69448     | -0.22618  |         |
|            | 0.58947         | 0.18973   | 0.42476 | 0.42476     | 0.733383911 |           |         |
| VN2R9P     | ENSG00000236541 | -1.359    | 0.91293 | -0.9708     | 0.83418     | 0.18968   |         |
|            | 0.42478         | -0.9708   | 0.83418 | 0.42478     | 0.733383911 |           |         |
| NA         | ENSG00000251517 | -1.0071   | 0.84305 | -1.0071     | 0.84305     | 0.18968   | 0.42478 |
|            | -1.0071         | 0.84305   | 0.42478 | 0.733383911 |             |           |         |
| RNU6-1117P | ENSG00000207255 | 0.18963   | 0.4248  | 0.18963     | 0.4248      | 0.18963   |         |
|            | 0.4248          | 0.18963   | 0.4248  | 0.4248      | 0.733383911 |           |         |
| MIR548AD   | ENSG00000265301 | 0.18963   | 0.4248  | 0.18963     | 0.4248      | 0.18963   |         |
|            | 0.4248          | 0.18963   | 0.4248  | 0.4248      | 0.733383911 |           |         |
| TTC23      | ENSG00000103852 | -0.61016  | 0.72912 | -0.76053    | 0.77653     | -0.53107  | 0.70231 |
|            | 0.18961         | 0.42481   | 0.42481 | 0.733383911 |             |           |         |
| SF3B5      | ENSG00000169976 | -0.73475  | 0.76875 | -0.73475    | 0.76875     | -0.73475  | 0.76875 |
|            | 0.18959         | 0.42481   | 0.42481 | 0.733383911 |             |           |         |
| NA         | ENSG00000255497 | -0.36978  | 0.64423 | -0.18844    | 0.57473     | 0.18961   | 0.42481 |
|            | -0.41178        | 0.65975   | 0.42481 | 0.733383911 |             |           |         |
| DLEU1      | ENSG00000176124 | -0.21073  | 0.58345 | -0.21073    | 0.58345     | 0.18957   | 0.42482 |
|            | -1.0551         | 0.85431   | 0.42482 | 0.733383911 |             |           |         |
| ADAT1      | ENSG00000065457 | 0.1895    | 0.42485 | 0.1895      | 0.42485     | 0.14939   | 0.44062 |
|            | 0.1895          | 0.42485   | 0.42485 | 0.733383911 |             |           |         |
| KIF3C      | ENSG00000084731 | 0.18948   | 0.42486 | 0.16774     | 0.43339     | -0.80025  | 0.78822 |
|            | -0.96741        | 0.83333   | 0.42486 | 0.733383911 |             |           |         |
| RNU6-1285P | ENSG00000200350 | 0.18947   | 0.42486 | 0.18947     | 0.42486     | 0.18947   |         |
|            | 0.42486         | 0.18947   | 0.42486 | 0.42486     | 0.733383911 |           |         |
| RN7SKP156  | ENSG00000222240 | 0.028394  | 0.48867 | 0.18942     | 0.42488     | 0.028394  |         |
|            | 0.48867         | 0.028394  | 0.48867 | 0.42488     | 0.733392455 |           |         |
| FRMD3      | ENSG00000172159 | -0.87075  | 0.80805 | -1.0436     | 0.85166     | -0.99852  | 0.84099 |
|            | 0.18932         | 0.42492   | 0.42492 | 0.73343552  |             |           |         |
| NA         | ENSG00000234595 | 0.18928   | 0.42494 | -0.08014    | 0.53194     | -0.08014  | 0.53194 |
|            | -0.08014        | 0.53194   | 0.42494 | 0.733444062 |             |           |         |
| SLC10A2    | ENSG00000125255 | 0.18624   | 0.42613 | 0.18919     | 0.42497     | 0.18624   |         |
|            | 0.42613         | 0.18624   | 0.42613 | 0.42497     | 0.733469506 |           |         |
| IPP        | ENSG00000197429 | -1.3066   | 0.90432 | -0.4731     | 0.68193     | 0.18912   | 0.425   |
|            | -1.8356         | 0.96679   | 0.425   | 0.733469506 |             |           |         |
| SLC52A2    | ENSG00000185803 | 0.18909   | 0.42501 | 0.18909     | 0.42501     | 0.18909   |         |
|            | 0.42501         | 0.18909   | 0.42501 | 0.42501     | 0.733469506 |           |         |
| TAS2R60    | ENSG00000185899 | 0.18903   | 0.42503 | 0.18903     | 0.42503     | 0.18903   |         |
|            | 0.42503         | 0.18903   | 0.42503 | 0.42503     | 0.733469506 |           |         |
| CFTRP1     | ENSG00000228593 | 0.18905   | 0.42503 | 0.12752     | 0.44926     | 0.0034441 |         |
|            | 0.49863         | -0.50327  | 0.69261 | 0.42503     | 0.733469506 |           |         |
| SRRM3      | ENSG00000177679 | 0.18897   | 0.42506 | -0.52934    | 0.70172     | -0.26217  | 0.6034  |
|            | -0.81158        | 0.79148   | 0.42506 | 0.733485326 |             |           |         |
| RPL7AP3    | ENSG00000256243 | -0.050935 | 0.52031 | 0.18887     | 0.4251      | -0.050935 |         |

|            |                 |            |         |             |             |           |         |  |
|------------|-----------------|------------|---------|-------------|-------------|-----------|---------|--|
|            | 0.52031         | -0.16609   | 0.56596 | 0.4251      | 0.733485326 |           |         |  |
| LCE2B      | ENSG00000159455 | 0.18881    | 0.42512 | 0.13269     | 0.44722     | -0.12183  | 0.54848 |  |
|            | -0.66197        | 0.74601    | 0.42512 | 0.733485326 |             |           |         |  |
| RHOB       | ENSG00000143878 | 0.18874    | 0.42515 | -0.47976    | 0.6843      | -0.21103  | 0.58357 |  |
|            | -0.6462         | 0.74093    | 0.42515 | 0.733485326 |             |           |         |  |
| MDN1       | ENSG00000112159 | -0.0025526 | 0.50102 | 0.048153    | 0.4808      | 0.18863   | 0.42519 |  |
|            | -0.57605        | 0.71771    | 0.42519 | 0.733485326 |             |           |         |  |
| LINC01615  | ENSG00000223485 | -0.97462   | 0.83513 | 0.18862     | 0.42519     | -0.16594  |         |  |
|            | 0.5659          | -0.35034   | 0.63696 | 0.42519     | 0.733485326 |           |         |  |
| LINC02816  | ENSG00000225857 | 0.18865    | 0.42519 | -1.0873     | 0.86154     | 0.18865   |         |  |
|            | 0.42519         | 0.18865    | 0.42519 | 0.42519     | 0.733485326 |           |         |  |
| LINC02745  | ENSG00000255300 | 0.098392   | 0.46081 | -0.033952   | 0.51354     | 0.18862   |         |  |
|            | 0.4252          | -0.54155   | 0.70594 | 0.4252      | 0.733485326 |           |         |  |
| SNAI1      | ENSG00000124216 | -0.56707   | 0.71467 | -0.17562    | 0.5697      | 0.036899  | 0.48528 |  |
|            | 0.18857         | 0.42521    | 0.42521 | 0.733485326 |             |           |         |  |
| NA         | ENSG00000202399 | 0.18859    | 0.42521 | 0.18859     | 0.42521     | 0.18859   | 0.42521 |  |
|            | 0.18859         | 0.42521    | 0.42521 | 0.733485326 |             |           |         |  |
| RPSAP19    | ENSG00000183298 | -0.30505   | 0.61984 | -0.30505    | 0.61984     | -0.30505  |         |  |
|            | 0.61984         | 0.18855    | 0.42522 | 0.42522     | 0.733485326 |           |         |  |
| ASCL2      | ENSG00000183734 | 0.18857    | 0.42522 | -0.77498    | 0.78082     | -0.87036  | 0.80795 |  |
|            | -0.24005        | 0.59485    | 0.42522 | 0.733485326 |             |           |         |  |
| ACKR3      | ENSG00000144476 | 0.18851    | 0.42524 | -0.38369    | 0.6494      | -0.551    | 0.70918 |  |
|            | -0.063378       | 0.52527    | 0.42524 | 0.733485326 |             |           |         |  |
| NA         | ENSG00000237085 | 0.18846    | 0.42526 | 0.18846     | 0.42526     | 0.18846   | 0.42526 |  |
|            | 0.18846         | 0.42526    | 0.42526 | 0.733485326 |             |           |         |  |
| CLLU1-AS1  | ENSG00000205057 | 0.060408   | 0.47592 | 0.060408    | 0.47592     | 0.060408  |         |  |
|            | 0.47592         | 0.18839    | 0.42528 | 0.42528     | 0.733485326 |           |         |  |
| SRPK2P     | ENSG00000253431 | 0.1884     | 0.42528 | 0.1884      | 0.42528     | 0.1884    |         |  |
|            | 0.42528         | 0.1884     | 0.42528 | 0.42528     | 0.733485326 |           |         |  |
| LOXL1      | ENSG00000129038 | -0.018385  | 0.50733 | 0.18836     | 0.4253      | 0.045112  | 0.48201 |  |
|            | -0.052044       | 0.52075    | 0.4253  | 0.733493859 |             |           |         |  |
| BMP8A      | ENSG00000183682 | -1.4325    | 0.924   | -0.57755    | 0.71822     | -0.34202  | 0.63383 |  |
|            | 0.18827         | 0.42533    | 0.42533 | 0.733502212 |             |           |         |  |
| STEAP4     | ENSG00000127954 | 0.1551     | 0.43837 | -0.20252    | 0.58025     | 0.18822   |         |  |
|            | 0.42535         | 0.18822    | 0.42535 | 0.42535     | 0.733502212 |           |         |  |
| RNU4-35P   | ENSG00000199458 | 0.18823    | 0.42535 | 0.18823     | 0.42535     | 0.18823   |         |  |
|            | 0.42535         | 0.18823    | 0.42535 | 0.42535     | 0.733502212 |           |         |  |
| NA         | ENSG00000235639 | 0.18815    | 0.42538 | -0.25786    | 0.60174     | -0.25786  | 0.60174 |  |
|            | -0.25786        | 0.60174    | 0.42538 | 0.733527988 |             |           |         |  |
| PPBPP1     | ENSG00000250550 | 0.18808    | 0.42541 | 0.18808     | 0.42541     | 0.18808   |         |  |
|            | 0.42541         | 0.18808    | 0.42541 | 0.42541     | 0.733553762 |           |         |  |
| PITRM1     | ENSG00000107959 | -0.90576   | 0.81747 | -0.90576    | 0.81747     | -0.90576  |         |  |
|            | 0.81747         | 0.18796    | 0.42545 | 0.42545     | 0.733570819 |           |         |  |
| NA         | ENSG00000230987 | 0.12254    | 0.45124 | -0.78727    | 0.78444     | 0.18798   | 0.42545 |  |
|            | 0.18798         | 0.42545    | 0.42545 | 0.733570819 |             |           |         |  |
| NA         | ENSG00000275441 | 0.18778    | 0.42553 | 0.18778     | 0.42553     | 0.18778   | 0.42553 |  |
|            | 0.18778         | 0.42553    | 0.42553 | 0.733682797 |             |           |         |  |
| ZFP28      | ENSG00000196867 | 0.18757    | 0.42561 | -0.030439   | 0.51214     | -0.030439 | 0.51214 |  |
|            | -0.030439       | 0.51214    | 0.42561 | 0.733785645 |             |           |         |  |
| NA         | ENSG00000236030 | 0.030754   | 0.48773 | 0.18746     | 0.42565     | -0.84401  | 0.80067 |  |
|            | -1.7428         | 0.95932    | 0.42565 | 0.733785645 |             |           |         |  |
| COMMD6     | ENSG00000188243 | -0.64591   | 0.74083 | 0.18744     | 0.42566     | 0.13092   |         |  |
|            | 0.44792         | 0.090235   | 0.46405 | 0.42566     | 0.733785645 |           |         |  |
| HMGA1      | ENSG00000137309 | -0.41395   | 0.66054 | -0.95797    | 0.83096     | -0.1519   | 0.56037 |  |
|            | 0.18739         | 0.42568    | 0.42568 | 0.733785645 |             |           |         |  |
| RNU6-1292P | ENSG00000206583 | 0.18739    | 0.42568 | -0.65154    | 0.74265     | -0.054523 |         |  |
|            | 0.52174         | -0.33176   | 0.62997 | 0.42568     | 0.733785645 |           |         |  |
| ACTG1P3    | ENSG00000215388 | 0.18739    | 0.42568 | 0.18739     | 0.42568     | 0.18739   |         |  |
|            | 0.42568         | 0.18739    | 0.42568 | 0.42568     | 0.733785645 |           |         |  |
| NA         | ENSG00000248709 | 0.18729    | 0.42572 | 0.18729     | 0.42572     | 0.18729   | 0.42572 |  |
|            | 0.18729         | 0.42572    | 0.42572 | 0.733828638 |             |           |         |  |
| NA         | ENSG00000253539 | -0.047029  | 0.51875 | 0.18717     | 0.42576     | -0.84822  | 0.80184 |  |



|            |                 |           |         |             |             |           |         |  |
|------------|-----------------|-----------|---------|-------------|-------------|-----------|---------|--|
|            | -0.84822        | 0.80184   | 0.42576 | 0.733862701 |             |           |         |  |
| HBG2       | ENSG00000196565 | 0.077866  | 0.46897 | 0.077866    | 0.46897     | 0.077866  | 0.46897 |  |
|            | 0.18713         | 0.42578   | 0.42578 | 0.733862701 |             |           |         |  |
| LINC02541  | ENSG00000230943 | 0.020354  | 0.49188 | 0.1871      | 0.42579     | -0.73405  |         |  |
|            | 0.76854         | -0.2723   | 0.6073  | 0.42579     | 0.733862701 |           |         |  |
| AGMO       | ENSG00000187546 | 0.050494  | 0.47986 | 0.18708     | 0.4258      | -1.0113   | 0.84407 |  |
|            | -0.99401        | 0.83989   | 0.4258  | 0.733862701 |             |           |         |  |
| NA         | ENSG00000259867 | -0.59509  | 0.72411 | 0.18703     | 0.42582     | -2.3082   | 0.98951 |  |
|            | -2.3082         | 0.98951   | 0.42582 | 0.733871215 |             |           |         |  |
| NA         | ENSG00000277938 | 0.18697   | 0.42584 | -0.48716    | 0.68693     | 0.18697   | 0.42584 |  |
|            | 0.18697         | 0.42584   | 0.42584 | 0.733878693 |             |           |         |  |
| NA         | ENSG00000256351 | 0.18691   | 0.42587 | 0.18691     | 0.42587     | 0.18691   | 0.42587 |  |
|            | 0.18691         | 0.42587   | 0.42587 | 0.733878693 |             |           |         |  |
| NA         | ENSG00000254491 | 0.18687   | 0.42588 | -0.13097    | 0.5521      | -0.13097  | 0.5521  |  |
|            | -0.75677        | 0.77541   | 0.42588 | 0.733878693 |             |           |         |  |
| SMARCA2    | ENSG00000080503 | -0.41494  | 0.66091 | -0.12384    | 0.54928     | -0.66985  |         |  |
|            | 0.74852         | 0.18684   | 0.42589 | 0.42589     | 0.733878693 |           |         |  |
| NA         | ENSG00000258657 | -0.54029  | 0.7055  | 0.18675     | 0.42593     | -0.34856  | 0.63629 |  |
|            | 0.088644        | 0.46468   | 0.42593 | 0.733878693 |             |           |         |  |
| NA         | ENSG00000250376 | -1.2064   | 0.88616 | 0.18673     | 0.42594     | 0.18673   | 0.42594 |  |
|            | 0.18673         | 0.42594   | 0.42594 | 0.733878693 |             |           |         |  |
| TRIM55     | ENSG00000147573 | -0.37407  | 0.64582 | 0.18668     | 0.42595     | 0.046764  |         |  |
|            | 0.48135         | 0.046764  | 0.48135 | 0.42595     | 0.733878693 |           |         |  |
| MYL9       | ENSG00000101335 | 0.18663   | 0.42597 | -0.26369    | 0.60399     | -0.52965  | 0.70182 |  |
|            | 0.18663         | 0.42597   | 0.42597 | 0.733878693 |             |           |         |  |
| LINC02283  | ENSG00000248184 | -1.4109   | 0.92087 | -1.3883     | 0.91748     | -1.1308   |         |  |
|            | 0.87093         | 0.18665   | 0.42597 | 0.42597     | 0.733878693 |           |         |  |
| ERGIC2     | ENSG00000087502 | 0.11101   | 0.4558  | -0.34035    | 0.6332      | 0.0098067 |         |  |
|            | 0.49609         | 0.18659   | 0.42599 | 0.42599     | 0.733878693 |           |         |  |
| NA         | ENSG00000260115 | 0.1866    | 0.42599 | -1.4145     | 0.92139     | -1.4145   | 0.92139 |  |
|            | -1.4145         | 0.92139   | 0.42599 | 0.733878693 |             |           |         |  |
| RPL7A      | ENSG00000148303 | 0.18655   | 0.42601 | 0.18655     | 0.42601     | 0.18655   | 0.42601 |  |
|            | 0.18655         | 0.42601   | 0.42601 | 0.733887203 |             |           |         |  |
| CMTM1      | ENSG00000089505 | 0.18638   | 0.42608 | 0.18638     | 0.42608     | 0.18638   | 0.42608 |  |
|            | 0.18638         | 0.42608   | 0.42608 | 0.733972696 |             |           |         |  |
| RPS3AP3    | ENSG00000231241 | 0.18633   | 0.42609 | 0.18633     | 0.42609     | 0.18633   |         |  |
|            | 0.42609         | 0.18633   | 0.42609 | 0.42609     | 0.733972696 |           |         |  |
| NTRK1      | ENSG00000198400 | -0.86643  | 0.80687 | 0.025425    | 0.48986     | 0.18622   | 0.42613 |  |
|            | 0.18622         | 0.42613   | 0.42613 | 0.733972696 |             |           |         |  |
| NA         | ENSG00000275409 | 0.1862    | 0.42614 | 0.1862      | 0.42614     | -0.22032  | 0.58719 |  |
|            | 0.1862          | 0.42614   | 0.42614 | 0.733972696 |             |           |         |  |
| RNU6-606P  | ENSG00000207452 | 0.18618   | 0.42615 | 0.18618     | 0.42615     | 0.18618   |         |  |
|            | 0.42615         | 0.18618   | 0.42615 | 0.42615     | 0.733972696 |           |         |  |
| LINC02482  | ENSG00000251580 | 0.18618   | 0.42615 | -0.091959   | 0.53663     | -0.50515  |         |  |
|            | 0.69327         | -0.50515  | 0.69327 | 0.42615     | 0.733972696 |           |         |  |
| OR1AB1P    | ENSG00000267450 | 0.1861    | 0.42618 | 0.1861      | 0.42618     | 0.1861    |         |  |
|            | 0.42618         | -0.069677 | 0.52777 | 0.42618     | 0.733989705 |           |         |  |
| CCDC3      | ENSG00000151468 | 0.18609   | 0.42619 | -0.74574    | 0.77209     | -0.22109  | 0.58749 |  |
|            | -0.84529        | 0.80102   | 0.42619 | 0.733989705 |             |           |         |  |
| LINC01181  | ENSG00000250929 | -0.83661  | 0.79859 | -1.0982     | 0.86394     | 0.18591   |         |  |
|            | 0.42626         | -0.45021  | 0.67372 | 0.42626     | 0.734084316 |           |         |  |
| KNOP1P1    | ENSG00000256852 | 0.18583   | 0.42629 | 0.18583     | 0.42629     | 0.18583   |         |  |
|            | 0.42629         | 0.18583   | 0.42629 | 0.42629     | 0.734101315 |           |         |  |
| MIR181A2HG | ENSG00000224020 | 0.13005   | 0.44826 | 0.071833    | 0.47137     | 0.18581   |         |  |
|            | 0.4263          | 0.13838   | 0.44497 | 0.4263      | 0.734101315 |           |         |  |
| SELENOV    | ENSG00000186838 | 0.18565   | 0.42636 | 0.18565     | 0.42636     | 0.18565   |         |  |
|            | 0.42636         | -1.0916   | 0.86249 | 0.42636     | 0.734143801 |           |         |  |
| RN7SL201P  | ENSG00000242118 | -1.5597   | 0.94059 | 0.18563     | 0.42637     | -1.5597   |         |  |
|            | 0.94059         | -1.5597   | 0.94059 | 0.42637     | 0.734143801 |           |         |  |
| PAG1       | ENSG00000076641 | -0.36574  | 0.64272 | -0.55762    | 0.71145     | -0.22217  | 0.58791 |  |
|            | 0.18555         | 0.4264    | 0.4264  | 0.734143801 |             |           |         |  |
| NA         | ENSG00000206858 | -0.58209  | 0.71975 | -1.4995     | 0.93312     | 0.18555   | 0.4264  |  |

|           |                 |           |         |             |             |           |         |  |
|-----------|-----------------|-----------|---------|-------------|-------------|-----------|---------|--|
|           | -0.0074126      | 0.50296   | 0.4264  | 0.734143801 |             |           |         |  |
| P4HA3-AS1 | ENSG00000246211 | 0.18554   | 0.4264  | -0.025595   | 0.51021     | -0.9063   |         |  |
|           | 0.81761         | 0.071965  | 0.47131 | 0.4264      | 0.734143801 |           |         |  |
| AKNAD1    | ENSG00000162641 | 0.14786   | 0.44123 | 0.14271     | 0.44326     | 0.18539   |         |  |
|           | 0.42646         | 0.18539   | 0.42646 | 0.42646     | 0.734159884 |           |         |  |
| B3GNT2    | ENSG00000170340 | -0.33916  | 0.63276 | -1.2449     | 0.89342     | 0.18537   |         |  |
|           | 0.42647         | -1.2449   | 0.89342 | 0.42647     | 0.734159884 |           |         |  |
| RNA5SP282 | ENSG00000252164 | 0.18536   | 0.42648 | 0.18536     | 0.42648     | 0.18536   |         |  |
|           | 0.42648         | 0.14687   | 0.44162 | 0.42648     | 0.734159884 |           |         |  |
| NA        | ENSG00000272347 | 0.18528   | 0.4265  | 0.18528     | 0.4265      | 0.18528   | 0.4265  |  |
|           | 0.18528         | 0.4265    | 0.4265  | 0.734159884 |             |           |         |  |
| CCT6P3    | ENSG00000234585 | -0.48645  | 0.68667 | -0.37136    | 0.64482     | 0.099738  |         |  |
|           | 0.46028         | 0.18526   | 0.42651 | 0.42651     | 0.734159884 |           |         |  |
| NA        | ENSG00000207857 | 0.18523   | 0.42652 | 0.18523     | 0.42652     | 0.18523   | 0.42652 |  |
|           | -0.63283        | 0.73658   | 0.42652 | 0.734159884 |             |           |         |  |
| NA        | ENSG00000223905 | 0.18516   | 0.42655 | -0.82314    | 0.79478     | -0.98969  | 0.83884 |  |
|           | 0.084944        | 0.46615   | 0.42655 | 0.734159884 |             |           |         |  |
| RBL1      | ENSG00000080839 | -0.027139 | 0.51083 | -0.007903   | 0.50315     | -0.098647 | 0.53929 |  |
|           | 0.18513         | 0.42656   | 0.42656 | 0.734159884 |             |           |         |  |
| NA        | ENSG00000212319 | 0.18515   | 0.42656 | -0.97398    | 0.83497     | -0.24804  | 0.59795 |  |
|           | -0.24804        | 0.59795   | 0.42656 | 0.734159884 |             |           |         |  |
| RPL11P3   | ENSG00000213613 | 0.18515   | 0.42656 | 0.18515     | 0.42656     | 0.18515   |         |  |
|           | 0.42656         | 0.18515   | 0.42656 | 0.42656     | 0.734159884 |           |         |  |
| MUSK      | ENSG00000030304 | -0.67667  | 0.75069 | 0.18509     | 0.42658     | -1.0718   | 0.8581  |  |
|           | -1.9057         | 0.97166   | 0.42658 | 0.734168376 |             |           |         |  |
| NA        | ENSG00000244701 | 0.18497   | 0.42662 | 0.18497     | 0.42662     | 0.18497   | 0.42662 |  |
|           | 0.18497         | 0.42662   | 0.42662 | 0.734193619 |             |           |         |  |
| ISCA1P6   | ENSG00000227653 | -0.38651  | 0.65044 | -1.6116     | 0.94648     | 0.18497   |         |  |
|           | 0.42663         | 0.18497   | 0.42663 | 0.42663     | 0.734193619 |           |         |  |
| FAM3D     | ENSG00000198643 | -1.3419   | 0.91019 | -1.4059     | 0.92012     | -0.97525  | 0.83528 |  |
|           | 0.18491         | 0.42665   | 0.42665 | 0.734193619 |             |           |         |  |
| RPL7L1P1  | ENSG00000234227 | 0.18485   | 0.42667 | 0.18485     | 0.42667     | 0.18485   |         |  |
|           | 0.42667         | 0.18485   | 0.42667 | 0.42667     | 0.734193619 |           |         |  |
| NA        | ENSG00000251687 | -0.89798  | 0.8154  | -0.89798    | 0.8154      | -0.89798  | 0.8154  |  |
|           | 0.18486         | 0.42667   | 0.42667 | 0.734193619 |             |           |         |  |
| TSPAN17   | ENSG00000048140 | 0.18474   | 0.42672 | -0.025705   | 0.51025     | 0.087274  |         |  |
|           | 0.46523         | 0.14729   | 0.44145 | 0.42672     | 0.734201649 |           |         |  |
| NA        | ENSG00000243705 | -0.93361  | 0.82475 | -0.93361    | 0.82475     | -0.93361  | 0.82475 |  |
|           | 0.1847          | 0.42673   | 0.42673 | 0.734201649 |             |           |         |  |
| NA        | ENSG00000249277 | 0.18469   | 0.42674 | 0.18469     | 0.42674     | 0.18469   | 0.42674 |  |
|           | 0.18469         | 0.42674   | 0.42674 | 0.734201649 |             |           |         |  |
| SPTLC1P5  | ENSG00000227922 | 0.18466   | 0.42675 | 0.18466     | 0.42675     | 0.18466   |         |  |
|           | 0.42675         | -0.7567   | 0.77539 | 0.42675     | 0.734201649 |           |         |  |
| NA        | ENSG00000264972 | -1.1716   | 0.87931 | 0.025021    | 0.49002     | 0.18465   | 0.42675 |  |
|           | -0.40467        | 0.65714   | 0.42675 | 0.734201649 |             |           |         |  |
| BARHL1    | ENSG00000125492 | -0.81044  | 0.79116 | -1.115      | 0.86757     | 0.18444   |         |  |
|           | 0.42683         | 0.18444   | 0.42683 | 0.42683     | 0.734260812 |           |         |  |
| ECHDC2    | ENSG00000121310 | 0.1844    | 0.42685 | 0.1844      | 0.42685     | 0.1844    |         |  |
|           | 0.42685         | -0.2596   | 0.60241 | 0.42685     | 0.734260812 |           |         |  |
| NA        | ENSG00000271332 | 0.18439   | 0.42685 | 0.18439     | 0.42685     | 0.18439   | 0.42685 |  |
|           | 0.18439         | 0.42685   | 0.42685 | 0.734260812 |             |           |         |  |
| NA        | ENSG00000247796 | -0.46884  | 0.68041 | -0.46884    | 0.68041     | 0.18437   | 0.42686 |  |
|           | 0.09969         | 0.4603    | 0.42686 | 0.734260812 |             |           |         |  |
| KLF4      | ENSG00000136826 | 0.1843    | 0.42689 | -0.9718     | 0.83442     | -0.19341  | 0.57668 |  |
|           | -0.24779        | 0.59785   | 0.42689 | 0.734260812 |             |           |         |  |
| RNU6-477P | ENSG00000206614 | 0.047538  | 0.48104 | -0.10797    | 0.54299     | -0.15743  |         |  |
|           | 0.56255         | 0.18425   | 0.42691 | 0.42691     | 0.734260812 |           |         |  |
| SLC25A28  | ENSG00000155287 | 0.18423   | 0.42692 | -0.10371    | 0.5413      | -0.18404  |         |  |
|           | 0.57301         | -0.18404  | 0.57301 | 0.42692     | 0.734260812 |           |         |  |
| MIR9-1    | ENSG00000207933 | 0.18423   | 0.42692 | -0.087241   | 0.53476     | -0.8616   |         |  |
|           | 0.80555         | -0.8616   | 0.80555 | 0.42692     | 0.734260812 |           |         |  |
| RNU7-130P | ENSG00000238441 | 0.098646  | 0.46071 | 0.18421     | 0.42692     | 0.098646  |         |  |

|            |                 |           |         |             |             |           |         |
|------------|-----------------|-----------|---------|-------------|-------------|-----------|---------|
|            | 0.46071         | 0.098646  | 0.46071 | 0.42692     | 0.734260812 |           |         |
| NLGN1-AS1  | ENSG00000228213 | 0.18413   | 0.42696 | 0.18413     | 0.42696     | 0.18413   | 0.18413 |
|            | 0.42696         | 0.18413   | 0.42696 | 0.42696     | 0.734303692 |           |         |
| LRR37A4P   | ENSG00000214425 | 0.18401   | 0.427   | -0.20829    | 0.5825      | -0.17816  | 0.5707  |
|            | -0.095126       | 0.53789   | 0.427   | 0.734317325 |             |           |         |
| NA         | ENSG00000252238 | -1.7846   | 0.96284 | -1.7846     | 0.96284     | 0.18402   | 0.427   |
|            | -1.7846         | 0.96284   | 0.427   | 0.734317325 |             |           |         |
| HOXA13     | ENSG00000106031 | 0.1839    | 0.42705 | 0.1839      | 0.42705     | -0.32245  |         |
|            | 0.62644         | -0.72236  | 0.76496 | 0.42705     | 0.734317325 |           |         |
| HECA       | ENSG00000112406 | 0.18385   | 0.42706 | 0.18385     | 0.42706     | 0.18385   | 0.42706 |
|            | 0.18385         | 0.42706   | 0.42706 | 0.734317325 |             |           |         |
| NA         | ENSG00000255652 | -1.1943   | 0.88382 | 0.18385     | 0.42707     | -1.5225   | 0.93606 |
|            | -2.0495         | 0.97979   | 0.42707 | 0.734317325 |             |           |         |
| NA         | ENSG00000280433 | 0.18382   | 0.42708 | 0.18382     | 0.42708     | 0.18382   | 0.42708 |
|            | 0.18382         | 0.42708   | 0.42708 | 0.734317325 |             |           |         |
| FAM220A    | ENSG00000178397 | -0.036363 | 0.5145  | -0.030067   | 0.51199     | -0.036363 |         |
|            | 0.5145          | 0.18379   | 0.42709 | 0.42709     | 0.734317325 |           |         |
| KAT6A      | ENSG00000083168 | -0.37894  | 0.64763 | 0.061927    | 0.47531     | 0.18374   | 0.42711 |
|            | -0.3989         | 0.65502   | 0.42711 | 0.734317325 |             |           |         |
| RPSAP74    | ENSG00000253621 | 0.18375   | 0.42711 | 0.076278    | 0.4696      | -0.075648 |         |
|            | 0.53015         | -1.0992   | 0.86415 | 0.42711     | 0.734317325 |           |         |
| NA         | ENSG00000200544 | 0.18361   | 0.42716 | 0.18361     | 0.42716     | 0.18361   | 0.42716 |
|            | 0.18361         | 0.42716   | 0.42716 | 0.734317325 |             |           |         |
| MIR1278    | ENSG00000221680 | 0.18358   | 0.42717 | 0.18358     | 0.42717     | 0.18358   |         |
|            | 0.42717         | 0.18358   | 0.42717 | 0.42717     | 0.734317325 |           |         |
| NA         | ENSG00000278924 | -0.18954  | 0.57516 | 0.18353     | 0.42719     | -0.93278  | 0.82453 |
|            | -0.054954       | 0.52191   | 0.42719 | 0.734317325 |             |           |         |
| NA         | ENSG00000258184 | 0.035386  | 0.48589 | 0.035386    | 0.48589     | 0.035386  | 0.48589 |
|            | 0.18351         | 0.4272    | 0.4272  | 0.734317325 |             |           |         |
| MIR873     | ENSG00000215939 | -0.76154  | 0.77683 | -0.76154    | 0.77683     | 0.18338   |         |
|            | 0.42725         | -0.76154  | 0.77683 | 0.42725     | 0.734317325 |           |         |
| NA         | ENSG00000271697 | 0.18338   | 0.42725 | 0.18338     | 0.42725     | 0.18338   | 0.42725 |
|            | 0.18338         | 0.42725   | 0.42725 | 0.734317325 |             |           |         |
| NA         | ENSG00000273056 | 0.18339   | 0.42725 | -0.81595    | 0.79274     | -0.81595  | 0.79274 |
|            | -0.81595        | 0.79274   | 0.42725 | 0.734317325 |             |           |         |
| ANKS4B     | ENSG00000175311 | 0.18334   | 0.42727 | 0.18334     | 0.42727     | 0.18334   |         |
|            | 0.42727         | 0.18334   | 0.42727 | 0.42727     | 0.734317325 |           |         |
| NA         | ENSG00000276605 | 0.18334   | 0.42727 | 0.18334     | 0.42727     | 0.18334   | 0.42727 |
|            | 0.18334         | 0.42727   | 0.42727 | 0.734317325 |             |           |         |
| MTND4LP14  | ENSG00000243104 | 0.18328   | 0.42729 | 0.18328     | 0.42729     | 0.18328   |         |
|            | 0.42729         | 0.18328   | 0.42729 | 0.42729     | 0.734317325 |           |         |
| NA         | ENSG00000259826 | 0.18327   | 0.42729 | 0.18327     | 0.42729     | 0.18327   | 0.42729 |
|            | 0.18327         | 0.42729   | 0.42729 | 0.734317325 |             |           |         |
| ABCF2P2    | ENSG00000228769 | 0.071794  | 0.47138 | 0.18326     | 0.4273      | 0.060149  |         |
|            | 0.47602         | 0.071794  | 0.47138 | 0.4273      | 0.734317325 |           |         |
| MTND5P18   | ENSG00000227860 | 0.18318   | 0.42733 | 0.18318     | 0.42733     | 0.18318   |         |
|            | 0.42733         | 0.18318   | 0.42733 | 0.42733     | 0.734317325 |           |         |
| RPL7AP10   | ENSG00000240522 | 0.18318   | 0.42733 | -0.43281    | 0.66742     | -0.99528  |         |
|            | 0.8402          | -0.43281  | 0.66742 | 0.42733     | 0.734317325 |           |         |
| MIR4280    | ENSG00000265919 | 0.18312   | 0.42735 | 0.18312     | 0.42735     | 0.18312   |         |
|            | 0.42735         | 0.18312   | 0.42735 | 0.42735     | 0.734317325 |           |         |
| DGKH       | ENSG00000102780 | -1.0006   | 0.84148 | 0.044932    | 0.48208     | 0.18304   | 0.42738 |
|            | -0.65111        | 0.74251   | 0.42738 | 0.734317325 |             |           |         |
| NA         | ENSG00000271967 | 0.18305   | 0.42738 | 0.18305     | 0.42738     | 0.18305   | 0.42738 |
|            | 0.18305         | 0.42738   | 0.42738 | 0.734317325 |             |           |         |
| IGHV3-75   | ENSG00000254176 | 0.18302   | 0.42739 | 0.18302     | 0.42739     | 0.18302   |         |
|            | 0.42739         | 0.18302   | 0.42739 | 0.42739     | 0.734317325 |           |         |
| CYCSP8     | ENSG00000232503 | -0.70039  | 0.75816 | -0.020351   | 0.50812     | 0.06216   |         |
|            | 0.47522         | 0.18296   | 0.42741 | 0.42741     | 0.734317325 |           |         |
| ARL14EPP1  | ENSG00000224891 | 0.18295   | 0.42742 | 0.18295     | 0.42742     | 0.18295   |         |
|            | 0.42742         | 0.18295   | 0.42742 | 0.42742     | 0.734317325 |           |         |
| RAB11B-AS1 | ENSG00000269386 | -1.35     | 0.91149 | 0.18294     | 0.42742     | -0.64935  | 0.74194 |

|           |                 |            |         |             |             |            |         |  |
|-----------|-----------------|------------|---------|-------------|-------------|------------|---------|--|
|           | -0.64935        | 0.74194    | 0.42742 | 0.734317325 |             |            |         |  |
| RPL19P4   | ENSG00000226915 | -0.56851   | 0.71516 | 0.18287     | 0.42745     | -0.56851   |         |  |
|           | 0.71516         | -0.56851   | 0.71516 | 0.42745     | 0.734334266 |            |         |  |
| NA        | ENSG00000207123 | 0.10231    | 0.45926 | 0.18285     | 0.42746     | 0.10231    | 0.45926 |  |
|           | 0.10231         | 0.45926    | 0.42746 | 0.734334266 |             |            |         |  |
| NA        | ENSG00000248254 | 0.1828     | 0.42748 | 0.1828      | 0.42748     | 0.1828     | 0.42748 |  |
|           | 0.1828          | 0.42748    | 0.42748 | 0.734342736 |             |            |         |  |
| NA        | ENSG00000277228 | 0.18268    | 0.42752 | 0.18268     | 0.42752     | 0.18268    | 0.42752 |  |
|           | 0.18268         | 0.42752    | 0.42752 | 0.734359434 |             |            |         |  |
| PARM1-AS1 | ENSG00000249717 | -0.28003   | 0.61027 | 0.081322    | 0.46759     | -0.41932   |         |  |
|           | 0.66251         | 0.18263    | 0.42754 | 0.42754     | 0.734359434 |            |         |  |
| ERVH-1    | ENSG00000251292 | 0.18265    | 0.42754 | -1.4594     | 0.92777     | 0.13453    |         |  |
|           | 0.44649         | 0.092407   | 0.46319 | 0.42754     | 0.734359434 |            |         |  |
| RPL7AP26  | ENSG00000214988 | -0.3573    | 0.63957 | -0.3573     | 0.63957     | 0.13958    |         |  |
|           | 0.4445          | 0.18262    | 0.42755 | 0.42755     | 0.734359434 |            |         |  |
| YWHAB     | ENSG00000166913 | -1.2084    | 0.88656 | 0.18249     | 0.4276      | 0.18249    | 0.4276  |  |
|           | 0.080549        | 0.4679     | 0.4276  | 0.734409986 |             |            |         |  |
| COX5AP2   | ENSG00000258981 | -1.3853    | 0.91701 | -1.3853     | 0.91701     | -1.3853    |         |  |
|           | 0.91701         | 0.18245    | 0.42762 | 0.42762     | 0.734409986 |            |         |  |
| SNORD9    | ENSG00000199436 | 0.18238    | 0.42764 | 0.18238     | 0.42764     | 0.18238    |         |  |
|           | 0.42764         | 0.18238    | 0.42764 | 0.42764     | 0.734409986 |            |         |  |
| AGA       | ENSG00000038002 | -0.68188   | 0.75234 | -0.68188    | 0.75234     | 0.18237    | 0.42765 |  |
|           | 0.083844        | 0.46659    | 0.42765 | 0.734409986 |             |            |         |  |
| PIGFP2    | ENSG00000234881 | 0.18232    | 0.42767 | 0.18232     | 0.42767     | 0.18232    |         |  |
|           | 0.42767         | 0.18232    | 0.42767 | 0.42767     | 0.734409986 |            |         |  |
| NA        | ENSG00000267032 | -1.173     | 0.87961 | 0.18229     | 0.42768     | 0.00076288 | 0.4997  |  |
|           | 0.00076288      | 0.4997     | 0.42768 | 0.734409986 |             |            |         |  |
| NA        | ENSG00000256546 | 0.18226    | 0.42769 | 0.18226     | 0.42769     | 0.18226    | 0.42769 |  |
|           | 0.18226         | 0.42769    | 0.42769 | 0.734409986 |             |            |         |  |
| LVRN      | ENSG00000172901 | 0.18224    | 0.4277  | -0.52461    | 0.70007     | 0.18224    | 0.4277  |  |
|           | -0.56756        | 0.71483    | 0.4277  | 0.734409986 |             |            |         |  |
| NOL6      | ENSG00000165271 | 0.083066   | 0.4669  | 0.083066    | 0.4669      | 0.1821     | 0.42775 |  |
|           | -0.6017         | 0.72631    | 0.42775 | 0.734443344 |             |            |         |  |
| NA        | ENSG00000262869 | 0.18207    | 0.42776 | 0.18207     | 0.42776     | 0.18207    | 0.42776 |  |
|           | 0.18207         | 0.42776    | 0.42776 | 0.734443344 |             |            |         |  |
| RGL2      | ENSG00000237441 | 0.18206    | 0.42777 | 0.010926    | 0.49564     | 0.18206    | 0.42777 |  |
|           | 0.18206         | 0.42777    | 0.42777 | 0.734443344 |             |            |         |  |
| GPRC6A    | ENSG00000173612 | -0.98362   | 0.83735 | 0.18203     | 0.42778     | -0.65196   |         |  |
|           | 0.74279         | -0.33342   | 0.63059 | 0.42778     | 0.734443344 |            |         |  |
| LINC02224 | ENSG00000249203 | 0.18197    | 0.4278  | -0.16386    | 0.56508     | -0.79665   |         |  |
|           | 0.78717         | -0.23281   | 0.59204 | 0.4278      | 0.734443344 |            |         |  |
| XDH       | ENSG00000158125 | 0.18191    | 0.42783 | -0.82798    | 0.79616     | -0.20696   | 0.58198 |  |
|           | 0.081812        | 0.4674     | 0.42783 | 0.734443344 |             |            |         |  |
| RNA5SP400 | ENSG00000252964 | 0.18191    | 0.42783 | 0.18191     | 0.42783     | 0.18191    |         |  |
|           | 0.42783         | 0.18191    | 0.42783 | 0.42783     | 0.734443344 |            |         |  |
| NA        | ENSG00000254599 | 0.18188    | 0.42784 | -0.52803    | 0.70126     | 0.18188    | 0.42784 |  |
|           | -0.20998        | 0.58316    | 0.42784 | 0.734443344 |             |            |         |  |
| FHIT      | ENSG00000189283 | -0.26708   | 0.6053  | 0.18178     | 0.42788     | -0.75258   | 0.77415 |  |
|           | 0.11741         | 0.45327    | 0.42788 | 0.734460263 |             |            |         |  |
| SHANK3    | ENSG00000251322 | -1.5157    | 0.9352  | -1.2813     | 0.89995     | 0.18177    |         |  |
|           | 0.42788         | -0.58873   | 0.72198 | 0.42788     | 0.734460263 |            |         |  |
| NA        | ENSG00000271275 | 0.18172    | 0.4279  | 0.18172     | 0.4279      | 0.18172    | 0.4279  |  |
|           | 0.18172         | 0.4279     | 0.4279  | 0.734468721 |             |            |         |  |
| RN7SL558P | ENSG00000243260 | -1.0088    | 0.84346 | -0.33492    | 0.63116     | -0.69314   |         |  |
|           | 0.75589         | 0.18164    | 0.42793 | 0.42793     | 0.734494343 |            |         |  |
| NA        | ENSG00000267919 | 0.18159    | 0.42795 | 0.1704      | 0.43235     | 0.18159    | 0.42795 |  |
|           | 0.18159         | 0.42795    | 0.42795 | 0.734498051 |             |            |         |  |
| FAM122A   | ENSG00000187866 | 0.18155    | 0.42797 | 0.18155     | 0.42797     | 0.18155    |         |  |
|           | 0.42797         | 0.18155    | 0.42797 | 0.42797     | 0.734498051 |            |         |  |
| NA        | ENSG00000259620 | -9.60E-05  | 0.50004 | -1.8338     | 0.96666     | 0.18145    | 0.42801 |  |
|           | -0.47455        | 0.68244    | 0.42801 | 0.734498051 |             |            |         |  |
| GLDC      | ENSG00000178445 | -0.0011886 | 0.50047 | 0.1814      | 0.42803     | -0.070417  | 0.52807 |  |

|            |                 |           |         |             |             |           |         |  |
|------------|-----------------|-----------|---------|-------------|-------------|-----------|---------|--|
|            | -0.48426        | 0.6859    | 0.42803 | 0.734498051 |             |           |         |  |
| RPL35P3    | ENSG00000219902 | -0.032048 | 0.51278 | 0.18135     | 0.42805     | 0.18135   |         |  |
|            | 0.42805         | 0.18135   | 0.42805 | 0.42805     | 0.734498051 |           |         |  |
| NA         | ENSG00000229600 | 0.18126   | 0.42808 | 0.18126     | 0.42808     | 0.18126   | 0.42808 |  |
|            | 0.18126         | 0.42808   | 0.42808 | 0.734498051 |             |           |         |  |
| CCNO       | ENSG00000152669 | 0.18122   | 0.4281  | 0.18122     | 0.4281      | 0.18122   | 0.4281  |  |
|            | -0.9642         | 0.83253   | 0.4281  | 0.734498051 |             |           |         |  |
| EIF4EBP1P1 | ENSG00000258870 | 0.18122   | 0.4281  | 0.18122     | 0.4281      | 0.18122   |         |  |
|            | 0.4281          | 0.18122   | 0.4281  | 0.4281      | 0.734498051 |           |         |  |
| NA         | ENSG00000216169 | -0.20193  | 0.58002 | 0.18121     | 0.4281      | -0.20193  | 0.58002 |  |
|            | -0.20193        | 0.58002   | 0.4281  | 0.734498051 |             |           |         |  |
| NA         | ENSG00000221473 | -0.025662 | 0.51024 | -0.025662   | 0.51024     | -0.025662 | 0.51024 |  |
|            | 0.18111         | 0.42814   | 0.42814 | 0.734498051 |             |           |         |  |
| PRORSD1P   | ENSG00000162997 | 0.1811    | 0.42815 | 0.1811      | 0.42815     | 0.1811    |         |  |
|            | 0.42815         | -0.18637  | 0.57392 | 0.42815     | 0.734498051 |           |         |  |
| SLC41A2    | ENSG00000136052 | 0.085431  | 0.46596 | -0.40176    | 0.65607     | 0.18106   |         |  |
|            | 0.42816         | -0.75731  | 0.77557 | 0.42816     | 0.734498051 |           |         |  |
| NA         | ENSG00000250424 | 0.18107   | 0.42816 | 0.18107     | 0.42816     | 0.18107   | 0.42816 |  |
|            | 0.18107         | 0.42816   | 0.42816 | 0.734498051 |             |           |         |  |
| NA         | ENSG00000266601 | 0.18107   | 0.42816 | 0.18107     | 0.42816     | 0.18107   | 0.42816 |  |
|            | 0.18107         | 0.42816   | 0.42816 | 0.734498051 |             |           |         |  |
| NA         | ENSG00000270001 | 0.18107   | 0.42816 | 0.18107     | 0.42816     | 0.18107   | 0.42816 |  |
|            | 0.18107         | 0.42816   | 0.42816 | 0.734498051 |             |           |         |  |
| SUZ12      | ENSG00000178691 | -1.6136   | 0.94669 | -0.24265    | 0.59586     | -0.94289  | 0.82713 |  |
|            | 0.18102         | 0.42818   | 0.42818 | 0.734498051 |             |           |         |  |
| NA         | ENSG00000221638 | 0.1809    | 0.42822 | -0.4432     | 0.67119     | -0.61478  | 0.73065 |  |
|            | -1.7892         | 0.96321   | 0.42822 | 0.734498051 |             |           |         |  |
| NA         | ENSG00000258610 | 0.1808    | 0.42826 | 0.1808      | 0.42826     | 0.1808    | 0.42826 |  |
|            | 0.1808          | 0.42826   | 0.42826 | 0.734498051 |             |           |         |  |
| NA         | ENSG00000243744 | -0.82772  | 0.79608 | -0.82772    | 0.79608     | -0.82772  | 0.79608 |  |
|            | 0.18073         | 0.42829   | 0.42829 | 0.734498051 |             |           |         |  |
| NA         | ENSG00000226671 | 0.1806    | 0.42834 | 0.1806      | 0.42834     | 0.1806    | 0.42834 |  |
|            | 0.1806          | 0.42834   | 0.42834 | 0.734498051 |             |           |         |  |
| ERP27      | ENSG00000139055 | 0.13284   | 0.44716 | 0.13284     | 0.44716     | 0.18058   | 0.42835 |  |
|            | -0.42387        | 0.66417   | 0.42835 | 0.734498051 |             |           |         |  |
| FOXO1      | ENSG00000150907 | -1.3741   | 0.9153  | -1.2133     | 0.88749     | -1.0993   | 0.86419 |  |
|            | 0.18058         | 0.42835   | 0.42835 | 0.734498051 |             |           |         |  |
| LINC02053  | ENSG00000241696 | 0.18057   | 0.42835 | 0.18057     | 0.42835     | 0.18057   |         |  |
|            | 0.42835         | -0.44213  | 0.6708  | 0.42835     | 0.734498051 |           |         |  |
| NA         | ENSG00000236146 | 0.018874  | 0.49247 | -1.0034     | 0.84216     | 0.18053   | 0.42837 |  |
|            | 0.18053         | 0.42837   | 0.42837 | 0.734498051 |             |           |         |  |
| NA         | ENSG00000264713 | 0.18053   | 0.42837 | -1.6082     | 0.9461      | -0.68832  | 0.75437 |  |
|            | -0.15564        | 0.56184   | 0.42837 | 0.734498051 |             |           |         |  |
| RPS12P27   | ENSG00000240435 | 0.068721  | 0.47261 | 0.18049     | 0.42838     | 0.030423  |         |  |
|            | 0.48786         | 0.030423  | 0.48786 | 0.42838     | 0.734498051 |           |         |  |
| POTEA      | ENSG00000188877 | 0.16185   | 0.43571 | 0.13235     | 0.44735     | 0.18044   | 0.4284  |  |
|            | 0.084115        | 0.46648   | 0.4284  | 0.734498051 |             |           |         |  |
| NA         | ENSG00000250497 | -0.76821  | 0.77882 | -0.0096551  | 0.50385     | -0.74779  | 0.77271 |  |
|            | 0.18041         | 0.42841   | 0.42841 | 0.734498051 |             |           |         |  |
| NA         | ENSG00000264660 | 0.18037   | 0.42843 | 0.18037     | 0.42843     | 0.18037   | 0.42843 |  |
|            | 0.18037         | 0.42843   | 0.42843 | 0.734498051 |             |           |         |  |
| RPL18P13   | ENSG00000244485 | 0.18035   | 0.42844 | -0.31356    | 0.62307     | -0.095001 |         |  |
|            | 0.53784         | 0.18035   | 0.42844 | 0.42844     | 0.734498051 |           |         |  |
| KCNQ5      | ENSG00000185760 | -0.62249  | 0.73319 | 0.18033     | 0.42845     | 0.073067  | 0.47088 |  |
|            | -0.43354        | 0.66769   | 0.42845 | 0.734498051 |             |           |         |  |
| GLYAT      | ENSG00000149124 | -1.1098   | 0.86646 | 0.18022     | 0.42849     | -0.20582  | 0.58153 |  |
|            | -0.073045       | 0.52911   | 0.42849 | 0.734498051 |             |           |         |  |
| NA         | ENSG00000256148 | 0.05997   | 0.47609 | 0.18018     | 0.4285      | -0.062221 | 0.52481 |  |
|            | -0.062221       | 0.52481   | 0.4285  | 0.734498051 |             |           |         |  |
| PA2G4P3    | ENSG00000263405 | 0.1802    | 0.4285  | 0.1802      | 0.4285      | 0.1802    |         |  |
|            | 0.4285          | 0.1802    | 0.4285  | 0.4285      | 0.734498051 |           |         |  |
| CKLF       | ENSG00000217555 | 0.18017   | 0.42851 | 0.18017     | 0.42851     | 0.18017   | 0.42851 |  |

|            |                 |           |         |             |             |          |         |  |
|------------|-----------------|-----------|---------|-------------|-------------|----------|---------|--|
|            | -1.3285         | 0.90799   | 0.42851 | 0.734498051 |             |          |         |  |
| CYCSP51    | ENSG00000229357 | -0.2909   | 0.61444 | -0.86633    | 0.80685     | 0.18016  |         |  |
|            | 0.42851         | -0.86633  | 0.80685 | 0.42851     | 0.734498051 |          |         |  |
| ALX1       | ENSG00000180318 | 0.18014   | 0.42852 | 0.18014     | 0.42852     | 0.18014  | 0.42852 |  |
|            | 0.18014         | 0.42852   | 0.42852 | 0.734498051 |             |          |         |  |
| PDZPH1P    | ENSG00000226926 | 0.18013   | 0.42852 | 0.072443    | 0.47112     | -0.42541 |         |  |
|            | 0.66473         | -0.13931  | 0.5554  | 0.42852     | 0.734498051 |          |         |  |
| NA         | ENSG00000258603 | 0.18015   | 0.42852 | 0.18015     | 0.42852     | 0.18015  | 0.42852 |  |
|            | 0.18015         | 0.42852   | 0.42852 | 0.734498051 |             |          |         |  |
| NA         | ENSG00000222043 | 0.18008   | 0.42854 | 0.18008     | 0.42854     | 0.18008  | 0.42854 |  |
|            | 0.18008         | 0.42854   | 0.42854 | 0.734506496 |             |          |         |  |
| NA         | ENSG00000189229 | -0.09792  | 0.539   | 0.18004     | 0.42856     | -0.15038 | 0.55977 |  |
|            | -0.16598        | 0.56592   | 0.42856 | 0.73451469  |             |          |         |  |
| EIF2B4     | ENSG00000115211 | -0.011488 | 0.50458 | 0.17998     | 0.42858     | -0.57347 |         |  |
|            | 0.71684         | -1.3551   | 0.9123  | 0.42858     | 0.73451469  |          |         |  |
| MIR3128    | ENSG00000265396 | 0.17997   | 0.42859 | -0.42454    | 0.66441     | 0.17997  |         |  |
|            | 0.42859         | 0.17997   | 0.42859 | 0.42859     | 0.73451469  |          |         |  |
| CSGALNACT1 | ENSG00000147408 | -0.99105  | 0.83917 | 0.17841     | 0.4292      | 0.1798   |         |  |
|            | 0.42865         | -0.14723  | 0.55852 | 0.42865     | 0.73456585  |          |         |  |
| OR2A20P    | ENSG00000170356 | 0.17981   | 0.42865 | 0.15893     | 0.43686     | -0.41698 |         |  |
|            | 0.66165         | -0.060975 | 0.52431 | 0.42865     | 0.73456585  |          |         |  |
| NA         | ENSG00000253790 | 0.17967   | 0.42871 | 0.17967     | 0.42871     | -1.0085  | 0.8434  |  |
|            | -0.61058        | 0.72926   | 0.42871 | 0.734642316 |             |          |         |  |
| CS         | ENSG00000062485 | -1.5909   | 0.94418 | -2.0652     | 0.98055     | 0.17958  | 0.42874 |  |
|            | -1.7784         | 0.96233   | 0.42874 | 0.734642316 |             |          |         |  |
| NA         | ENSG00000272396 | 0.17957   | 0.42875 | 0.17957     | 0.42875     | 0.17957  | 0.42875 |  |
|            | 0.17957         | 0.42875   | 0.42875 | 0.734642316 |             |          |         |  |
| NA         | ENSG00000270828 | 0.024102  | 0.49039 | 0.17951     | 0.42877     | 0.024102 | 0.49039 |  |
|            | 0.024102        | 0.49039   | 0.42877 | 0.734642316 |             |          |         |  |
| NA         | ENSG00000272468 | 0.1795    | 0.42877 | -1.6998     | 0.95541     | -0.23465 | 0.59276 |  |
|            | -0.23465        | 0.59276   | 0.42877 | 0.734642316 |             |          |         |  |
| NA         | ENSG00000255389 | 0.17932   | 0.42884 | -0.88452    | 0.81179     | 0.17932  | 0.42884 |  |
|            | 0.17932         | 0.42884   | 0.42884 | 0.734736418 |             |          |         |  |
| DLL4       | ENSG00000128917 | 0.17926   | 0.42887 | -0.82175    | 0.79439     | -0.33605 | 0.63158 |  |
|            | 0.13976         | 0.44442   | 0.42887 | 0.734753284 |             |          |         |  |
| NA         | ENSG00000259807 | -0.55892  | 0.71189 | 0.028044    | 0.48881     | 0.17921  | 0.42888 |  |
|            | -0.46685        | 0.6797    | 0.42888 | 0.734753284 |             |          |         |  |
| KRT71      | ENSG00000139648 | -0.57959  | 0.7189  | 0.17904     | 0.42895     | -0.57959 | 0.7189  |  |
|            | -0.57959        | 0.7189    | 0.42895 | 0.734786199 |             |          |         |  |
| NA         | ENSG00000269085 | 0.17906   | 0.42895 | 0.17906     | 0.42895     | 0.17906  | 0.42895 |  |
|            | 0.17906         | 0.42895   | 0.42895 | 0.734786199 |             |          |         |  |
| NA         | ENSG00000252917 | -0.028256 | 0.51127 | 0.17901     | 0.42897     | -0.32953 | 0.62912 |  |
|            | -0.32953        | 0.62912   | 0.42897 | 0.734786199 |             |          |         |  |
| NA         | ENSG00000222602 | -1.7745   | 0.96201 | -1.2903     | 0.90153     | -0.425   | 0.66458 |  |
|            | 0.17898         | 0.42898   | 0.42898 | 0.734786199 |             |          |         |  |
| NA         | ENSG00000275163 | 0.17895   | 0.42899 | -0.10186    | 0.54056     | 0.17895  | 0.42899 |  |
|            | 0.17895         | 0.42899   | 0.42899 | 0.734786199 |             |          |         |  |
| NDUFA3     | ENSG00000170906 | 0.1789    | 0.42901 | -0.71721    | 0.76338     | 0.1789   |         |  |
|            | 0.42901         | 0.1789    | 0.42901 | 0.42901     | 0.734786199 |          |         |  |
| SLC26A10   | ENSG00000135502 | 0.17886   | 0.42902 | 0.17886     | 0.42902     | 0.17886  |         |  |
|            | 0.42902         | 0.17886   | 0.42902 | 0.42902     | 0.734786199 |          |         |  |
| EVI2B      | ENSG00000185862 | 0.17884   | 0.42903 | -0.11764    | 0.54682     | 0.17884  | 0.42903 |  |
|            | 0.17884         | 0.42903   | 0.42903 | 0.734786199 |             |          |         |  |
| CCT6P1     | ENSG00000228409 | -0.37944  | 0.64782 | 0.1788      | 0.42905     | -0.78719 |         |  |
|            | 0.78441         | -0.7707   | 0.77956 | 0.42905     | 0.734786199 |          |         |  |
| OR10AE1P   | ENSG00000271890 | 0.1788    | 0.42905 | 0.1788      | 0.42905     | 0.1788   |         |  |
|            | 0.42905         | 0.1788    | 0.42905 | 0.42905     | 0.734786199 |          |         |  |
| LINC01764  | ENSG00000267308 | 0.17872   | 0.42908 | 0.17872     | 0.42908     | 0.17872  |         |  |
|            | 0.42908         | 0.17872   | 0.42908 | 0.42908     | 0.73481148  |          |         |  |
| NA         | ENSG00000278969 | 0.17866   | 0.4291  | 0.17866     | 0.4291      | 0.17866  | 0.4291  |  |
|            | 0.17866         | 0.4291    | 0.4291  | 0.73481148  |             |          |         |  |
| ZNF571-AS1 | ENSG00000267470 | 0.17865   | 0.42911 | -1.1806     | 0.88112     | -1.1806  |         |  |

|            |                 |            |         |             |             |            |         |  |
|------------|-----------------|------------|---------|-------------|-------------|------------|---------|--|
|            | 0.88112         | -1.1806    | 0.88112 | 0.42911     | 0.73481148  |            |         |  |
| MUC16      | ENSG00000181143 | -1.151     | 0.87513 | -1.001      | 0.84159     | -1.8434    | 0.96736 |  |
|            | 0.1786          | 0.42913    | 0.42913 | 0.734819363 |             |            |         |  |
| LINC00502  | ENSG00000224851 | -0.20589   | 0.58156 | -0.20589    | 0.58156     | -0.70281   |         |  |
|            | 0.75891         | 0.17854    | 0.42915 | 0.42915     | 0.734819363 |            |         |  |
| NA         | ENSG00000276934 | 0.17852    | 0.42916 | 0.17852     | 0.42916     | 0.17852    | 0.42916 |  |
|            | 0.17852         | 0.42916    | 0.42916 | 0.734819363 |             |            |         |  |
| NA         | ENSG00000241720 | -0.91312   | 0.81941 | -0.27951    | 0.61007     | 0.17845    | 0.42918 |  |
|            | -0.12229        | 0.54866    | 0.42918 | 0.734819363 |             |            |         |  |
| NA         | ENSG00000212392 | 0.17844    | 0.42919 | 0.17844     | 0.42919     | 0.17844    | 0.42919 |  |
|            | 0.17844         | 0.42919    | 0.42919 | 0.734819363 |             |            |         |  |
| OXCT1      | ENSG00000083720 | -0.5857    | 0.72096 | -0.81485    | 0.79242     | -0.48595   | 0.6865  |  |
|            | 0.1783          | 0.42924    | 0.42924 | 0.734851686 |             |            |         |  |
| RPS3AP11   | ENSG00000230116 | 0.17826    | 0.42926 | 0.17826     | 0.42926     | 0.17826    |         |  |
|            | 0.42926         | 0.17826    | 0.42926 | 0.42926     | 0.734851686 |            |         |  |
| NA         | ENSG00000278424 | 0.17823    | 0.42927 | 0.17823     | 0.42927     | 0.049445   | 0.48028 |  |
|            | -0.5386         | 0.70492    | 0.42927 | 0.734851686 |             |            |         |  |
| NA         | ENSG00000264662 | 0.17817    | 0.42929 | 0.17817     | 0.42929     | 0.17817    | 0.42929 |  |
|            | 0.17817         | 0.42929    | 0.42929 | 0.734851686 |             |            |         |  |
| RNU6-153P  | ENSG00000201292 | 0.17812    | 0.42931 | -0.31221    | 0.62256     | 0.17812    |         |  |
|            | 0.42931         | 0.17812    | 0.42931 | 0.42931     | 0.734851686 |            |         |  |
| NA         | ENSG00000260721 | -0.028944  | 0.51155 | 0.17811     | 0.42932     | -0.14719   | 0.55851 |  |
|            | -0.028944       | 0.51155    | 0.42932 | 0.734851686 |             |            |         |  |
| NA         | ENSG00000269275 | 0.17809    | 0.42933 | 0.17809     | 0.42933     | 0.17809    | 0.42933 |  |
|            | 0.17809         | 0.42933    | 0.42933 | 0.734851686 |             |            |         |  |
| RNU6-874P  | ENSG00000199260 | 0.17805    | 0.42934 | 0.17805     | 0.42934     | 0.17805    |         |  |
|            | 0.42934         | 0.17805    | 0.42934 | 0.42934     | 0.734851686 |            |         |  |
| IER3IP1    | ENSG00000134049 | 0.17804    | 0.42935 | 0.17804     | 0.42935     | -0.022284  |         |  |
|            | 0.50889         | -0.43038   | 0.66654 | 0.42935     | 0.734851686 |            |         |  |
| ACTL7A     | ENSG00000187003 | 0.17799    | 0.42937 | 0.17799     | 0.42937     | 0.17799    |         |  |
|            | 0.42937         | 0.17799    | 0.42937 | 0.42937     | 0.734851686 |            |         |  |
| ACTBP8     | ENSG00000220267 | 0.17796    | 0.42938 | 0.17796     | 0.42938     | 0.17796    |         |  |
|            | 0.42938         | 0.17796    | 0.42938 | 0.42938     | 0.734851686 |            |         |  |
| TOX4       | ENSG00000092203 | -0.025347  | 0.51011 | 0.17791     | 0.4294      | -0.50623   | 0.69365 |  |
|            | -0.025347       | 0.51011    | 0.4294  | 0.734851686 |             |            |         |  |
| NA         | ENSG00000279752 | -0.39137   | 0.65224 | -0.12071    | 0.54804     | 0.17787    | 0.42941 |  |
|            | -0.39137        | 0.65224    | 0.42941 | 0.734851686 |             |            |         |  |
| NA         | ENSG00000228563 | 0.17785    | 0.42942 | 0.17785     | 0.42942     | 0.17785    | 0.42942 |  |
|            | 0.17785         | 0.42942    | 0.42942 | 0.734851686 |             |            |         |  |
| HSP90B2P   | ENSG00000259706 | -0.28729   | 0.61306 | -0.25554    | 0.60085     | -0.0028793 |         |  |
|            | 0.50115         | 0.17777    | 0.42945 | 0.42945     | 0.73485983  |            |         |  |
| EIF4EP3    | ENSG00000244199 | -0.13304   | 0.55292 | 0.17773     | 0.42947     | -1.2117    |         |  |
|            | 0.88719         | -1.2117    | 0.88719 | 0.42947     | 0.73485983  |            |         |  |
| NA         | ENSG00000254319 | 0.17772    | 0.42947 | 0.064871    | 0.47414     | -1.2757    | 0.89896 |  |
|            | -0.95229        | 0.82952    | 0.42947 | 0.73485983  |             |            |         |  |
| RNGTTP1    | ENSG00000237731 | 0.17767    | 0.42949 | 0.17767     | 0.42949     | 0.17767    |         |  |
|            | 0.42949         | 0.17767    | 0.42949 | 0.42949     | 0.734868248 |            |         |  |
| LINC01385  | ENSG00000251604 | 0.17756    | 0.42954 | 0.17756     | 0.42954     | 0.17756    |         |  |
|            | 0.42954         | 0.17756    | 0.42954 | 0.42954     | 0.734892944 |            |         |  |
| GAS6       | ENSG00000183087 | 0.17748    | 0.42957 | 0.17748     | 0.42957     | 0.17748    | 0.42957 |  |
|            | 0.17748         | 0.42957    | 0.42957 | 0.734892944 |             |            |         |  |
| NDUFAB1    | ENSG00000004779 | -0.21467   | 0.58499 | -0.57688    | 0.71799     | -0.61709   |         |  |
|            | 0.73141         | 0.17743    | 0.42958 | 0.42958     | 0.734892944 |            |         |  |
| TTC17      | ENSG00000052841 | 0.17743    | 0.42959 | 0.17743     | 0.42959     | 0.17743    | 0.42959 |  |
|            | 0.17743         | 0.42959    | 0.42959 | 0.734892944 |             |            |         |  |
| CFL1P2     | ENSG00000213478 | -0.07289   | 0.52905 | -0.07289    | 0.52905     | 0.17741    |         |  |
|            | 0.42959         | -0.07289   | 0.52905 | 0.42959     | 0.734892944 |            |         |  |
| GAPDHP31   | ENSG00000235868 | -0.53514   | 0.70372 | -0.22835    | 0.59031     | 0.1774     |         |  |
|            | 0.4296          | -0.30296   | 0.61904 | 0.4296      | 0.734892944 |            |         |  |
| TBC1D22A   | ENSG00000054611 | 0.17737    | 0.42961 | -0.7967     | 0.78719     | -0.6199    |         |  |
|            | 0.73234         | -0.0083442 | 0.50333 | 0.42961     | 0.734892944 |            |         |  |
| CKLF-CMTM1 | ENSG00000254788 | 0.17731    | 0.42963 | 0.17731     | 0.42963     | 0.17731    |         |  |

|            |                 |           |         |             |             |          |         |
|------------|-----------------|-----------|---------|-------------|-------------|----------|---------|
|            | 0.42963         | 0.17731   | 0.42963 | 0.42963     | 0.734901358 |          |         |
| KRTAP19-5  | ENSG00000186977 | -0.54361  | 0.70665 | 0.17725     | 0.42966     | -0.54361 |         |
|            | 0.70665         | -0.54361  | 0.70665 | 0.42966     | 0.734908938 |          |         |
| SNORD67    | ENSG00000212135 | 0.1772    | 0.42968 | 0.1772      | 0.42968     | 0.1772   |         |
|            | 0.42968         | 0.1772    | 0.42968 | 0.42968     | 0.734908938 |          |         |
| MYOC       | ENSG00000034971 | 0.17712   | 0.42971 | -0.82991    | 0.7967      | 0.17712  | 0.42971 |
|            | 0.17712         | 0.42971   | 0.42971 | 0.734908938 |             |          |         |
| DIS3       | ENSG00000083520 | 0.1771    | 0.42972 | -0.062721   | 0.52501     | -1.2073  | 0.88633 |
|            | -0.59975        | 0.72566   | 0.42972 | 0.734908938 |             |          |         |
| TTC8       | ENSG00000165533 | -0.7144   | 0.76251 | -0.7144     | 0.76251     | -0.7144  | 0.76251 |
|            | 0.17707         | 0.42973   | 0.42973 | 0.734908938 |             |          |         |
| CD81-AS1   | ENSG00000238184 | -0.23065  | 0.59121 | -1.682      | 0.95372     | 0.17704  |         |
|            | 0.42974         | 0.17704   | 0.42974 | 0.42974     | 0.734908938 |          |         |
| MIR3142HG  | ENSG00000253522 | -0.84621  | 0.80128 | 0.17704     | 0.42974     | 0.17704  |         |
|            | 0.42974         | -0.79513  | 0.78673 | 0.42974     | 0.734908938 |          |         |
| PSG8       | ENSG00000124467 | 0.17676   | 0.42985 | -0.69423    | 0.75623     | -0.18445 | 0.57317 |
|            | 0.082593        | 0.46709   | 0.42985 | 0.735062561 |             |          |         |
| NEGR1-IT1  | ENSG00000228853 | 0.17672   | 0.42986 | 0.17672     | 0.42986     | 0.17672  |         |
|            | 0.42986         | -0.042829 | 0.51708 | 0.42986     | 0.735062561 |          |         |
| LINC01591  | ENSG00000254083 | 0.17662   | 0.4299  | -1.2925     | 0.90191     | -1.9039  |         |
|            | 0.97154         | -1.2925   | 0.90191 | 0.4299      | 0.73509647  |          |         |
| NA         | ENSG00000272479 | 0.17661   | 0.42991 | 0.17661     | 0.42991     | 0.17661  | 0.42991 |
|            | -0.49636        | 0.69018   | 0.42991 | 0.73509647  |             |          |         |
| BRSK1      | ENSG00000160469 | -0.27109  | 0.60684 | -0.27109    | 0.60684     | -0.27109 | 0.60684 |
|            | 0.17646         | 0.42997   | 0.42997 | 0.735163509 |             |          |         |
| RN7SL801P  | ENSG00000241230 | -0.80241  | 0.78884 | 0.17642     | 0.42998     | -0.10694 |         |
|            | 0.54258         | -0.80241  | 0.78884 | 0.42998     | 0.735163509 |          |         |
| EED        | ENSG00000074266 | -0.48204  | 0.68511 | 0.17628     | 0.43004     | -2.2011  | 0.98613 |
|            | -0.82283        | 0.7947    | 0.43004 | 0.735163509 |             |          |         |
| NA         | ENSG00000259722 | 0.1266    | 0.44963 | -0.073429   | 0.52927     | 0.17626  | 0.43004 |
|            | 0.024579        | 0.4902    | 0.43004 | 0.735163509 |             |          |         |
| SHBG       | ENSG00000129214 | -0.70661  | 0.7601  | -1.0691     | 0.85748     | 0.17621  | 0.43006 |
|            | 0.14519         | 0.44228   | 0.43006 | 0.735163509 |             |          |         |
| RPL39L     | ENSG00000163923 | -1.5101   | 0.93449 | -0.097459   | 0.53882     | 0.17621  |         |
|            | 0.43006         | -0.31867  | 0.62501 | 0.43006     | 0.735163509 |          |         |
| RPL12P22   | ENSG00000253109 | -1.3887   | 0.91753 | 0.17604     | 0.43013     | -1.4821  |         |
|            | 0.93084         | -0.014271 | 0.50569 | 0.43013     | 0.735163509 |          |         |
| NA         | ENSG00000253380 | 0.17596   | 0.43016 | -0.61335    | 0.73018     | -1.4216  | 0.92242 |
|            | -0.61335        | 0.73018   | 0.43016 | 0.735163509 |             |          |         |
| TRIM29     | ENSG00000137699 | 0.074389  | 0.47035 | 0.17589     | 0.43019     | -0.26599 |         |
|            | 0.60488         | 0.048856  | 0.48052 | 0.43019     | 0.735163509 |          |         |
| NA         | ENSG00000258148 | 0.17588   | 0.4302  | 0.17588     | 0.4302      | 0.17588  | 0.4302  |
|            | 0.17588         | 0.4302    | 0.4302  | 0.735163509 |             |          |         |
| RPRD1A     | ENSG00000141425 | -0.55203  | 0.70954 | -0.32492    | 0.62738     | -0.28453 | 0.612   |
|            | 0.17583         | 0.43021   | 0.43021 | 0.735163509 |             |          |         |
| MIR520G    | ENSG00000207799 | 0.17579   | 0.43023 | 0.17579     | 0.43023     | 0.17579  |         |
|            | 0.43023         | 0.17579   | 0.43023 | 0.43023     | 0.735163509 |          |         |
| FGD5-AS1   | ENSG00000225733 | 0.17576   | 0.43024 | -0.048309   | 0.51926     | 0.17576  |         |
|            | 0.43024         | 0.17576   | 0.43024 | 0.43024     | 0.735163509 |          |         |
| NA         | ENSG00000232767 | 0.17576   | 0.43024 | 0.17576     | 0.43024     | 0.17576  | 0.43024 |
|            | 0.17576         | 0.43024   | 0.43024 | 0.735163509 |             |          |         |
| PPIL1      | ENSG00000137168 | -0.32242  | 0.62643 | -0.75651    | 0.77533     | 0.17566  | 0.43028 |
|            | -0.68427        | 0.7531    | 0.43028 | 0.735163509 |             |          |         |
| NPM1P31    | ENSG00000214807 | -0.8988   | 0.81562 | 0.17565     | 0.43028     | -0.1978  |         |
|            | 0.5784          | -0.8122   | 0.79166 | 0.43028     | 0.735163509 |          |         |
| NA         | ENSG00000200052 | 0.17564   | 0.43029 | -0.41366    | 0.66044     | -0.13916 | 0.55534 |
|            | -0.13916        | 0.55534   | 0.43029 | 0.735163509 |             |          |         |
| RNU6-1153P | ENSG00000252569 | 0.17564   | 0.43029 | 0.17564     | 0.43029     | 0.17564  |         |
|            | 0.43029         | 0.17564   | 0.43029 | 0.43029     | 0.735163509 |          |         |
| RGP1       | ENSG00000107185 | -1.3415   | 0.91011 | 0.17559     | 0.43031     | -0.70728 | 0.7603  |
|            | -0.70728        | 0.7603    | 0.43031 | 0.735163509 |             |          |         |
| NA         | ENSG00000244327 | -0.62329  | 0.73345 | 0.024567    | 0.4902      | -0.62329 | 0.73345 |



|           |                 |           |         |             |             |           |         |  |
|-----------|-----------------|-----------|---------|-------------|-------------|-----------|---------|--|
|           | 0.17555         | 0.43032   | 0.43032 | 0.735163509 |             |           |         |  |
| RNA5P358  | ENSG00000199843 | 0.17554   | 0.43033 | -0.18637    | 0.57392     | -0.053022 |         |  |
|           | 0.52114         | -1.7024   | 0.95566 | 0.43033     | 0.735163509 |           |         |  |
| RNU6-709P | ENSG00000253066 | -0.013292 | 0.5053  | -0.049597   | 0.51978     | -0.046714 |         |  |
|           | 0.51863         | 0.17551   | 0.43034 | 0.43034     | 0.735163509 |           |         |  |
| PUM1      | ENSG00000134644 | 0.17543   | 0.43037 | 0.037913    | 0.48488     | -0.011148 | 0.50445 |  |
|           | -0.44822        | 0.673     | 0.43037 | 0.735163509 |             |           |         |  |
| NA        | ENSG00000249368 | 0.17539   | 0.43039 | 0.17539     | 0.43039     | 0.17539   | 0.43039 |  |
|           | 0.17539         | 0.43039   | 0.43039 | 0.735163509 |             |           |         |  |
| NA        | ENSG00000254693 | 0.17539   | 0.43039 | 0.17539     | 0.43039     | 0.17539   | 0.43039 |  |
|           | 0.17539         | 0.43039   | 0.43039 | 0.735163509 |             |           |         |  |
| NA        | ENSG00000279939 | 0.17524   | 0.43044 | 0.17524     | 0.43044     | 0.17524   | 0.43044 |  |
|           | 0.17524         | 0.43044   | 0.43044 | 0.735163509 |             |           |         |  |
| OR10A2    | ENSG00000170790 | 0.17524   | 0.43045 | -0.26048    | 0.60275     | -1.3503   |         |  |
|           | 0.91154         | -1.2904   | 0.90155 | 0.43045     | 0.735163509 |           |         |  |
| LINC02480 | ENSG00000251040 | 0.17523   | 0.43045 | 0.17523     | 0.43045     | 0.17523   |         |  |
|           | 0.43045         | 0.17523   | 0.43045 | 0.43045     | 0.735163509 |           |         |  |
| RN7SL484P | ENSG00000241588 | 0.17517   | 0.43047 | 0.17517     | 0.43047     | 0.17517   |         |  |
|           | 0.43047         | 0.17517   | 0.43047 | 0.43047     | 0.735163509 |           |         |  |
| NA        | ENSG00000227934 | 0.17511   | 0.4305  | 0.17511     | 0.4305      | 0.17511   | 0.4305  |  |
|           | 0.17511         | 0.4305    | 0.4305  | 0.735163509 |             |           |         |  |
| CCDC13    | ENSG00000244607 | -0.35662  | 0.63931 | -0.3706     | 0.64453     | -0.39288  |         |  |
|           | 0.6528          | 0.17509   | 0.4305  | 0.4305      | 0.735163509 |           |         |  |
| METTL26   | ENSG00000130731 | 0.17508   | 0.43051 | 0.17508     | 0.43051     | 0.17508   |         |  |
|           | 0.43051         | 0.17508   | 0.43051 | 0.43051     | 0.735163509 |           |         |  |
| KATNBL1P6 | ENSG00000228283 | 0.17504   | 0.43052 | 0.17504     | 0.43052     | 0.17504   |         |  |
|           | 0.43052         | 0.17504   | 0.43052 | 0.43052     | 0.735163509 |           |         |  |
| UROD      | ENSG00000126088 | -0.31185  | 0.62242 | 0.17503     | 0.43053     | -1.9989   | 0.97719 |  |
|           | -0.89291        | 0.81405   | 0.43053 | 0.735163509 |             |           |         |  |
| PODN      | ENSG00000174348 | -0.28647  | 0.61274 | 0.17501     | 0.43053     | 0.17501   | 0.43053 |  |
|           | 0.17501         | 0.43053   | 0.43053 | 0.735163509 |             |           |         |  |
| SLC38A8   | ENSG00000166558 | 0.17501   | 0.43054 | -0.41975    | 0.66267     | -1.0103   |         |  |
|           | 0.84383         | -0.18045  | 0.5716  | 0.43054     | 0.735163509 |           |         |  |
| NA        | ENSG00000237131 | 0.17499   | 0.43054 | 0.17499     | 0.43054     | 0.17499   | 0.43054 |  |
|           | 0.17499         | 0.43054   | 0.43054 | 0.735163509 |             |           |         |  |
| NA        | ENSG00000254783 | -1.6569   | 0.95123 | -0.26098    | 0.60294     | 0.17486   | 0.43059 |  |
|           | -1.6569         | 0.95123   | 0.43059 | 0.735163509 |             |           |         |  |
| MFSD11    | ENSG00000092931 | -0.46042  | 0.67739 | 0.17477     | 0.43063     | -1.2526   |         |  |
|           | 0.89482         | -1.2526   | 0.89482 | 0.43063     | 0.735163509 |           |         |  |
| CTRC      | ENSG00000162438 | 0.17476   | 0.43063 | 0.17476     | 0.43063     | 0.17476   | 0.43063 |  |
|           | 0.17476         | 0.43063   | 0.43063 | 0.735163509 |             |           |         |  |
| SOCS2P2   | ENSG00000224465 | -1.6227   | 0.94767 | 0.17478     | 0.43063     | 0.17478   |         |  |
|           | 0.43063         | 0.17478   | 0.43063 | 0.43063     | 0.735163509 |           |         |  |
| NA        | ENSG00000230229 | 0.17476   | 0.43063 | 0.17476     | 0.43063     | -0.46328  | 0.67842 |  |
|           | 0.17476         | 0.43063   | 0.43063 | 0.735163509 |             |           |         |  |
| TSPOAP1   | ENSG00000005379 | -0.95377  | 0.8299  | 0.17475     | 0.43064     | -0.95377  |         |  |
|           | 0.8299          | -0.87655  | 0.80963 | 0.43064     | 0.735163509 |           |         |  |
| EDIL3     | ENSG00000164176 | -0.64068  | 0.73913 | 0.012198    | 0.49513     | 0.17475   | 0.43064 |  |
|           | -0.40379        | 0.65681   | 0.43064 | 0.735163509 |             |           |         |  |
| PRAMEF30P | ENSG00000231103 | 0.17473   | 0.43065 | -0.2441     | 0.59642     | -2.0828   |         |  |
|           | 0.98136         | -2.0828   | 0.98136 | 0.43065     | 0.735163509 |           |         |  |
| INSL5     | ENSG00000172410 | 0.17469   | 0.43066 | 0.17469     | 0.43066     | -0.3358   | 0.63149 |  |
|           | 0.17469         | 0.43066   | 0.43066 | 0.735163509 |             |           |         |  |
| RPL22P17  | ENSG00000235266 | -0.51183  | 0.69561 | 0.13063     | 0.44803     | -0.29518  |         |  |
|           | 0.61607         | 0.1746    | 0.4307  | 0.4307      | 0.735163509 |           |         |  |
| NA        | ENSG00000261653 | 0.17458   | 0.43071 | 0.17458     | 0.43071     | 0.17458   | 0.43071 |  |
|           | 0.17458         | 0.43071   | 0.43071 | 0.735163509 |             |           |         |  |
| LYRM1     | ENSG00000102897 | -0.55898  | 0.71191 | -0.55898    | 0.71191     | -0.55898  | 0.71191 |  |
|           | 0.17452         | 0.43073   | 0.43073 | 0.735163509 |             |           |         |  |
| APCDD1    | ENSG00000154856 | -0.24091  | 0.59519 | 0.17452     | 0.43073     | -0.2351   |         |  |
|           | 0.59294         | 0.10392   | 0.45861 | 0.43073     | 0.735163509 |           |         |  |
| LZTS1     | ENSG00000061337 | -0.015699 | 0.50626 | 0.17446     | 0.43075     | -0.2649   | 0.60446 |  |

|            |                 |           |             |             |             |           |         |          |
|------------|-----------------|-----------|-------------|-------------|-------------|-----------|---------|----------|
|            | -0.53859        | 0.70492   | 0.43075     | 0.735163509 |             |           |         |          |
| NA         | ENSG00000249476 | 0.078844  | 0.46858     | 0.17448     | 0.43075     | 0.078844  | 0.46858 |          |
|            | -0.081069       | 0.53231   | 0.43075     | 0.735163509 |             |           |         |          |
| NA         | ENSG00000255475 | 0.17436   | 0.43079     | 0.17436     | 0.43079     | 0.17436   | 0.43079 |          |
|            | 0.17436         | 0.43079   | 0.43079     | 0.735163509 |             |           |         |          |
| NA         | ENSG00000224583 | -0.71134  | 0.76156     | -0.50402    | 0.69288     | 0.17434   | 0.4308  |          |
|            | 0.17434         | 0.4308    | 0.4308      | 0.735163509 |             |           |         |          |
| GDI2P1     | ENSG00000229165 | -1.4253   | 0.92297     | -0.85345    | 0.8033      | -1.1118   |         |          |
|            | 0.86688         | 0.17434   | 0.4308      | 0.4308      | 0.735163509 |           |         |          |
| LINC02655  | ENSG00000231082 | 0.0022774 | 0.49909     | 0.0022774   | 0.49909     | 0.0022774 |         |          |
|            | 0.49909         | 0.1743    | 0.43081     | 0.43081     | 0.735163509 |           |         |          |
| NA         | ENSG00000240210 | 0.17431   | 0.43081     | 0.17431     | 0.43081     | 0.17431   | 0.43081 |          |
|            | 0.17431         | 0.43081   | 0.43081     | 0.735163509 |             |           |         |          |
| MARVELD2   | ENSG00000152939 | 0.17412   | 0.43089     | 0.058896    | 0.47652     | -0.15392  |         |          |
|            | 0.56116         | -0.76586  | 0.77812     | 0.43089     | 0.735163509 |           |         |          |
| OMA1       | ENSG00000162600 | -0.032458 | 0.51295     | -0.58688    | 0.72136     | 0.17411   | 0.43089 |          |
|            | -0.83849        | 0.79912   | 0.43089     | 0.735163509 |             |           |         |          |
| DDX6P2     | ENSG00000277914 | -0.55     | 0.70884     | -0.42143    | 0.66328     | 0.17412   | 0.43089 |          |
|            | -0.32275        | 0.62656   | 0.43089     | 0.735163509 |             |           |         |          |
| CEP162     | ENSG00000135315 | -0.1256   | 0.54998     | 0.17408     | 0.4309      | 0.057886  |         |          |
|            | 0.47692         | -0.043962 | 0.51753     | 0.4309      | 0.735163509 |           |         |          |
| DNAAF1     | ENSG00000154099 | -0.63058  | 0.73584     | -0.37133    | 0.64481     | -1.036    |         |          |
|            | 0.84991         | 0.17408   | 0.4309      | 0.4309      | 0.735163509 |           |         |          |
| NA         | ENSG00000272693 | 0.17406   | 0.43091     | -0.57801    | 0.71837     | -0.48791  | 0.68719 |          |
|            | -0.67231        | 0.74931   | 0.43091     | 0.735163509 |             |           |         |          |
| NA         | ENSG00000207484 | 0.17403   | 0.43092     | 0.17403     | 0.43092     | 0.17403   | 0.43092 |          |
|            | 0.17403         | 0.43092   | 0.43092     | 0.735163509 |             |           |         |          |
| IGLVIV-64  | ENSG00000253242 | 0.174     | 0.43093     | 0.174       | 0.43093     | 0.174     | 0.43093 | -0.71349 |
|            | 0.76223         | 0.43093   | 0.735163509 |             |             |           |         |          |
| RN7SL414P  | ENSG00000239396 | 0.17397   | 0.43095     | 0.17397     | 0.43095     | 0.17397   |         |          |
|            | 0.43095         | 0.17397   | 0.43095     | 0.43095     | 0.735163509 |           |         |          |
| LINC01415  | ENSG00000267325 | 0.17394   | 0.43096     | 0.17394     | 0.43096     | 0.17394   |         |          |
|            | 0.43096         | 0.17394   | 0.43096     | 0.43096     | 0.735163509 |           |         |          |
| RNA5SP279  | ENSG00000202383 | -0.65716  | 0.74446     | -1.0725     | 0.85825     | 0.17384   | 0.431   |          |
|            | 0.17384         | 0.431     | 0.431       | 0.73519228  |             |           |         |          |
| GJB6       | ENSG00000121742 | -1.3944   | 0.91839     | -0.14755    | 0.55865     | 0.12953   | 0.44847 |          |
|            | 0.17376         | 0.43103   | 0.43103     | 0.73519228  |             |           |         |          |
| LINC02321  | ENSG00000258884 | -0.015283 | 0.5061      | 0.17376     | 0.43103     | 0.17376   |         |          |
|            | 0.43103         | 0.17376   | 0.43103     | 0.43103     | 0.73519228  |           |         |          |
| NA         | ENSG00000225775 | 0.14386   | 0.44281     | 0.1737      | 0.43105     | -1.2216   | 0.88907 |          |
|            | -1.0043         | 0.84238   | 0.43105     | 0.73519228  |             |           |         |          |
| NA         | ENSG00000266824 | -1.0257   | 0.84748     | 0.17367     | 0.43106     | 0.17367   | 0.43106 |          |
|            | -0.012133       | 0.50484   | 0.43106     | 0.73519228  |             |           |         |          |
| NA         | ENSG00000232461 | -0.2469   | 0.59751     | -0.50406    | 0.69289     | 0.1736    | 0.43109 |          |
|            | -0.19794        | 0.57846   | 0.43109     | 0.73519228  |             |           |         |          |
| CDC6       | ENSG00000094804 | -1.1014   | 0.86463     | -0.68172    | 0.75229     | 0.1735    | 0.43113 |          |
|            | -0.26312        | 0.60377   | 0.43113     | 0.73519228  |             |           |         |          |
| NDUFA13    | ENSG00000186010 | -0.32771  | 0.62843     | -0.32771    | 0.62843     | -0.5051   |         |          |
|            | 0.69325         | 0.17343   | 0.43115     | 0.43115     | 0.73519228  |           |         |          |
| CNBD2      | ENSG00000149646 | 0.0042253 | 0.49831     | -0.18818    | 0.57463     | 0.043021  | 0.48284 |          |
|            | 0.17342         | 0.43116   | 0.43116     | 0.73519228  |             |           |         |          |
| E2F7       | ENSG00000165891 | -1.5045   | 0.93377     | -0.97613    | 0.8355      | -1.1556   | 0.87608 |          |
|            | 0.17341         | 0.43116   | 0.43116     | 0.73519228  |             |           |         |          |
| RPL21P131  | ENSG00000232429 | 0.17335   | 0.43119     | 0.17335     | 0.43119     | 0.17335   |         |          |
|            | 0.43119         | 0.17335   | 0.43119     | 0.43119     | 0.73519228  |           |         |          |
| ZNF667-AS1 | ENSG00000166770 | 0.17331   | 0.4312      | 0.17331     | 0.4312      | 0.17331   |         |          |
|            | 0.4312          | 0.17331   | 0.4312      | 0.4312      | 0.73519228  |           |         |          |
| LINC02210  | ENSG00000204650 | -0.1546   | 0.56143     | -0.77378    | 0.78047     | 0.17323   |         |          |
|            | 0.43123         | -0.10109  | 0.54026     | 0.43123     | 0.73519228  |           |         |          |
| NA         | ENSG00000226733 | -0.79131  | 0.78562     | 0.057766    | 0.47697     | 0.17324   | 0.43123 |          |
|            | -1.0454         | 0.85208   | 0.43123     | 0.73519228  |             |           |         |          |
| NA         | ENSG00000269796 | 0.17321   | 0.43124     | 0.17321     | 0.43124     | 0.17321   | 0.43124 |          |

|            |                 |            |         |             |             |            |         |  |
|------------|-----------------|------------|---------|-------------|-------------|------------|---------|--|
|            | 0.17321         | 0.43124    | 0.43124 | 0.73519228  |             |            |         |  |
| NA         | ENSG00000226169 | 0.17314    | 0.43127 | 0.12713     | 0.44942     | 0.17314    | 0.43127 |  |
|            | 0.17314         | 0.43127    | 0.43127 | 0.73519228  |             |            |         |  |
| RPL3P6     | ENSG00000213891 | 0.1731     | 0.43129 | 0.078322    | 0.46879     | 0.1731     |         |  |
|            | 0.43129         | -1.6213    | 0.94752 | 0.43129     | 0.73519228  |            |         |  |
| POLR2KP2   | ENSG00000224510 | 0.17308    | 0.4313  | 0.0072397   | 0.49711     | -0.42851   |         |  |
|            | 0.66586         | 0.11045    | 0.45603 | 0.4313      | 0.73519228  |            |         |  |
| ADCY10     | ENSG00000143199 | -0.42476   | 0.66449 | -1.0058     | 0.84274     | -2.4655    |         |  |
|            | 0.99316         | 0.17298    | 0.43133 | 0.43133     | 0.73519228  |            |         |  |
| LINC00681  | ENSG00000255494 | -0.47342   | 0.68204 | -0.64461    | 0.74041     | -0.47342   |         |  |
|            | 0.68204         | 0.17295    | 0.43134 | 0.43134     | 0.73519228  |            |         |  |
| CNOT8      | ENSG00000155508 | -0.18109   | 0.57185 | -0.18109    | 0.57185     | 0.17293    | 0.43135 |  |
|            | -0.36104        | 0.64096    | 0.43135 | 0.73519228  |             |            |         |  |
| LINC00484  | ENSG00000235641 | 0.17294    | 0.43135 | 0.092481    | 0.46316     | 0.092481   |         |  |
|            | 0.46316         | 0.092481   | 0.46316 | 0.43135     | 0.73519228  |            |         |  |
| NA         | ENSG00000271959 | 0.17294    | 0.43135 | 0.17294     | 0.43135     | 0.17294    | 0.43135 |  |
|            | 0.17294         | 0.43135    | 0.43135 | 0.73519228  |             |            |         |  |
| NA         | ENSG00000280025 | 0.1729     | 0.43136 | -0.048512   | 0.51935     | -0.40311   | 0.65657 |  |
|            | 0.084441        | 0.46635    | 0.43136 | 0.73519228  |             |            |         |  |
| RRH        | ENSG00000180245 | -0.23325   | 0.59222 | -0.44852    | 0.67311     | -0.38459   | 0.64973 |  |
|            | 0.17281         | 0.4314     | 0.4314  | 0.73519228  |             |            |         |  |
| SHISA7     | ENSG00000187902 | -0.24204   | 0.59563 | -0.034535   | 0.51377     | 0.17275    |         |  |
|            | 0.43142         | 0.097414   | 0.4612  | 0.43142     | 0.73519228  |            |         |  |
| NA         | ENSG00000250945 | -0.59211   | 0.72311 | 0.17277     | 0.43142     | -0.5745    | 0.71718 |  |
|            | -0.5745         | 0.71718    | 0.43142 | 0.73519228  |             |            |         |  |
| LINC01473  | ENSG00000237877 | 0.17272    | 0.43143 | 0.17272     | 0.43143     | 0.17272    |         |  |
|            | 0.43143         | 0.17272    | 0.43143 | 0.43143     | 0.73519228  |            |         |  |
| NA         | ENSG00000262566 | -0.58584   | 0.72101 | 0.17271     | 0.43144     | 0.17271    | 0.43144 |  |
|            | 0.17271         | 0.43144    | 0.43144 | 0.73519228  |             |            |         |  |
| NACAP2     | ENSG00000180230 | -0.56523   | 0.71404 | -0.56523    | 0.71404     | 0.17268    |         |  |
|            | 0.43145         | -0.56523   | 0.71404 | 0.43145     | 0.73519228  |            |         |  |
| RN7SKP18   | ENSG00000251814 | 0.17266    | 0.43146 | -1.519      | 0.93562     | -1.519     |         |  |
|            | 0.93562         | -1.519     | 0.93562 | 0.43146     | 0.73519228  |            |         |  |
| NA         | ENSG00000280168 | 0.17259    | 0.43149 | 0.17259     | 0.43149     | 0.17259    | 0.43149 |  |
|            | 0.17259         | 0.43149    | 0.43149 | 0.73519228  |             |            |         |  |
| RNU6-1256P | ENSG00000252348 | 0.17256    | 0.4315  | -0.79992    | 0.78812     | 0.17256    |         |  |
|            | 0.4315          | 0.17256    | 0.4315  | 0.4315      | 0.73519228  |            |         |  |
| TNKS2      | ENSG00000107854 | -0.32916   | 0.62898 | -0.59032    | 0.72251     | -0.35947   | 0.64038 |  |
|            | 0.1725          | 0.43152    | 0.43152 | 0.73519228  |             |            |         |  |
| NA         | ENSG00000261191 | 0.17251    | 0.43152 | 0.17251     | 0.43152     | 0.17251    | 0.43152 |  |
|            | 0.17251         | 0.43152    | 0.43152 | 0.73519228  |             |            |         |  |
| RN7SL49P   | ENSG00000265802 | -0.0078729 | 0.50314 | 0.17251     | 0.43152     | -0.0078729 |         |  |
|            | 0.50314         | -0.0078729 | 0.50314 | 0.43152     | 0.73519228  |            |         |  |
| MIR3183    | ENSG00000264429 | 0.17244    | 0.43155 | 0.17244     | 0.43155     | 0.17244    |         |  |
|            | 0.43155         | -0.32733   | 0.62829 | 0.43155     | 0.73520902  |            |         |  |
| NA         | ENSG00000273248 | 0.17241    | 0.43156 | 0.17241     | 0.43156     | 0.17241    | 0.43156 |  |
|            | 0.17241         | 0.43156    | 0.43156 | 0.73520902  |             |            |         |  |
| NA         | ENSG00000271111 | 0.17236    | 0.43158 | 0.17236     | 0.43158     | 0.17236    | 0.43158 |  |
|            | 0.17236         | 0.43158    | 0.43158 | 0.735217389 |             |            |         |  |
| NA         | ENSG00000262456 | 0.17215    | 0.43166 | 0.17215     | 0.43166     | 0.17215    | 0.43166 |  |
|            | 0.17215         | 0.43166    | 0.43166 | 0.735327966 |             |            |         |  |
| NA         | ENSG00000254564 | 0.17209    | 0.43169 | -0.62343    | 0.7335      | 0.17209    | 0.43169 |  |
|            | 0.17209         | 0.43169    | 0.43169 | 0.735353365 |             |            |         |  |
| TPCN2      | ENSG00000162341 | 0.17195    | 0.43174 | -1.3769     | 0.91572     | -1.1404    | 0.87293 |  |
|            | -0.49005        | 0.68795    | 0.43174 | 0.735386193 |             |            |         |  |
| NA         | ENSG00000223255 | -0.050972  | 0.52033 | -0.050972   | 0.52033     | 0.17194    | 0.43174 |  |
|            | -0.050972       | 0.52033    | 0.43174 | 0.735386193 |             |            |         |  |
| ZNHIT1P1   | ENSG00000253421 | -0.025156  | 0.51003 | 0.17189     | 0.43176     | -0.35599   |         |  |
|            | 0.63907         | -1.068     | 0.85723 | 0.43176     | 0.735386193 |            |         |  |
| CUBNP2     | ENSG00000234993 | 0.17183    | 0.43178 | -0.69873    | 0.75764     | -0.96074   |         |  |
|            | 0.83166         | -0.95408   | 0.82998 | 0.43178     | 0.735386193 |            |         |  |
| NA         | ENSG00000236716 | 0.12623    | 0.44977 | -0.047671   | 0.51901     | -0.047671  | 0.51901 |  |

|            |                 |           |          |             |             |             |         |  |
|------------|-----------------|-----------|----------|-------------|-------------|-------------|---------|--|
|            | 0.17179         | 0.4318    | 0.4318   | 0.735386193 |             |             |         |  |
| NA         | ENSG00000234241 | -0.86937  | 0.80768  | 0.17174     | 0.43182     | -0.13568    | 0.55396 |  |
|            |                 | -0.13568  | 0.55396  | 0.43182     | 0.735386193 |             |         |  |
| RPS27P12   | ENSG00000241673 | -0.076393 | 0.53045  | -0.15957    | 0.56339     | 0.17173     |         |  |
|            |                 | 0.43183   | 0.029357 | 0.48829     | 0.43183     | 0.735386193 |         |  |
| CYCSP40    | ENSG00000262870 | 0.17171   | 0.43183  | 0.17171     | 0.43183     | 0.17171     |         |  |
|            |                 | 0.43183   | 0.17171  | 0.43183     | 0.735386193 |             |         |  |
| LINC02553  | ENSG00000255039 | 0.17165   | 0.43186  | -0.53688    | 0.70432     | -0.48958    |         |  |
|            |                 | 0.68778   | -0.36227 | 0.64143     | 0.43186     | 0.735411581 |         |  |
| KIDINS220  | ENSG00000134313 | -0.074174 | 0.52956  | 0.10381     | 0.45866     | -0.092641   |         |  |
|            |                 | 0.53691   | 0.17122  | 0.43202     | 0.43202     | 0.7356066   |         |  |
| RNU6-1004P | ENSG00000252393 | 0.1617    | 0.43577  | 0.17123     | 0.43202     | -0.24621    |         |  |
|            |                 | 0.59724   | -0.20575 | 0.58151     | 0.43202     | 0.7356066   |         |  |
| NA         | ENSG00000257737 | 0.17118   | 0.43204  | 0.17118     | 0.43204     | 0.17118     | 0.43204 |  |
|            |                 | 0.17118   | 0.43204  | 0.43204     | 0.7356066   |             |         |  |
| NA         | ENSG00000275516 | 0.17119   | 0.43204  | 0.17119     | 0.43204     | 0.17119     | 0.43204 |  |
|            |                 | 0.17119   | 0.43204  | 0.43204     | 0.7356066   |             |         |  |
| CHMP4AP1   | ENSG00000231722 | -0.26056  | 0.60278  | 0.17115     | 0.43205     | -0.26056    |         |  |
|            |                 | 0.60278   | -0.26056 | 0.60278     | 0.43205     | 0.7356066   |         |  |
| UBALD1     | ENSG00000153443 | 0.17107   | 0.43208  | -0.10509    | 0.54185     | -0.10052    |         |  |
|            |                 | 0.54004   | -1.0231  | 0.84686     | 0.43208     | 0.735631975 |         |  |
| MOS        | ENSG00000172680 | 0.17104   | 0.4321   | 0.17104     | 0.4321      | 0.17104     | 0.4321  |  |
|            |                 | 0.17104   | 0.4321   | 0.4321      | 0.735640324 |             |         |  |
| CPB1       | ENSG00000153002 | 0.17095   | 0.43213  | -0.74472    | 0.77178     | 0.17095     | 0.43213 |  |
|            |                 | 0.17095   | 0.43213  | 0.43213     | 0.735665697 |             |         |  |
| RBPM5-AS1  | ENSG00000254109 | 0.1708    | 0.43219  | -0.0039616  | 0.50158     | -0.47998    |         |  |
|            |                 | 0.68438   | -0.01696 | 0.50677     | 0.43219     | 0.735687757 |         |  |
| SLC8A2     | ENSG00000118160 | 0.17078   | 0.4322   | -0.33378    | 0.63073     | -1.3855     |         |  |
|            |                 | 0.91705   | -1.6015  | 0.94537     | 0.4322      | 0.735687757 |         |  |
| DENND6B    | ENSG00000205593 | -0.34143  | 0.63361  | 0.17076     | 0.43221     | -0.29436    |         |  |
|            |                 | 0.61576   | 0.02522  | 0.48994     | 0.43221     | 0.735687757 |         |  |
| COMMD4     | ENSG00000140365 | -0.056613 | 0.52257  | -0.056613   | 0.52257     | 0.17071     |         |  |
|            |                 | 0.43222   | -0.3863  | 0.65036     | 0.43222     | 0.735687757 |         |  |
| NA         | ENSG00000237174 | 0.17068   | 0.43224  | 0.17068     | 0.43224     | -1.2686     | 0.89771 |  |
|            |                 | 0.17068   | 0.43224  | 0.43224     | 0.735687757 |             |         |  |
| ITM2B      | ENSG00000136156 | 0.12721   | 0.44939  | -0.2354     | 0.59305     | 0.16688     | 0.43373 |  |
|            |                 | 0.17062   | 0.43226  | 0.43226     | 0.735687757 |             |         |  |
| NA         | ENSG00000252187 | 0.17063   | 0.43226  | 0.17063     | 0.43226     | 0.17063     | 0.43226 |  |
|            |                 | 0.17063   | 0.43226  | 0.43226     | 0.735687757 |             |         |  |
| NA         | ENSG00000278687 | 0.0021025 | 0.49916  | -0.82789    | 0.79613     | -0.22452    | 0.58883 |  |
|            |                 | 0.17049   | 0.43231  | 0.43231     | 0.735687757 |             |         |  |
| NA         | ENSG00000268640 | 0.060478  | 0.47589  | -0.16704    | 0.56633     | 0.17046     | 0.43232 |  |
|            |                 | -0.22652  | 0.5896   | 0.43232     | 0.735687757 |             |         |  |
| NA         | ENSG00000207305 | 0.17038   | 0.43236  | -0.23792    | 0.59403     | -0.063332   | 0.52525 |  |
|            |                 | -1.2594   | 0.89606  | 0.43236     | 0.735687757 |             |         |  |
| EPB41L4B   | ENSG00000095203 | -1.7538   | 0.96027  | -1.3966     | 0.91874     | -1.7538     |         |  |
|            |                 | 0.96027   | 0.1703   | 0.43239     | 0.43239     | 0.735687757 |         |  |
| NCOR1P3    | ENSG00000233601 | -0.094358 | 0.53759  | -0.080487   | 0.53207     | -0.080487   |         |  |
|            |                 | 0.53207   | 0.17029  | 0.43239     | 0.43239     | 0.735687757 |         |  |
| CYP11B1    | ENSG00000160882 | -0.21854  | 0.5865   | 0.17026     | 0.4324      | 0.078075    |         |  |
|            |                 | 0.46888   | -0.2613  | 0.60307     | 0.4324      | 0.735687757 |         |  |
| EIF4EP1    | ENSG00000233578 | -0.025444 | 0.51015  | -0.64222    | 0.73964     | 0.17026     |         |  |
|            |                 | 0.4324    | 0.17026  | 0.4324      | 0.4324      | 0.735687757 |         |  |
| FBXO44     | ENSG00000132879 | 0.17025   | 0.43241  | -2.1285     | 0.98335     | -2.1285     |         |  |
|            |                 | 0.98335   | -2.1285  | 0.98335     | 0.43241     | 0.735687757 |         |  |
| ZNF469     | ENSG00000225614 | 0.17024   | 0.43241  | -0.18805    | 0.57458     | -0.7912     |         |  |
|            |                 | 0.78559   | 0.13772  | 0.44523     | 0.43241     | 0.735687757 |         |  |
| NA         | ENSG00000258795 | -1.9957   | 0.97702  | 0.17022     | 0.43242     | -1.9957     | 0.97702 |  |
|            |                 | -1.9957   | 0.97702  | 0.43242     | 0.735687757 |             |         |  |
| RPL23AP89  | ENSG00000227875 | -1.1117   | 0.86686  | 0.17015     | 0.43245     | 0.17015     |         |  |
|            |                 | 0.43245   | 0.17015  | 0.43245     | 0.43245     | 0.735687757 |         |  |
| NA         | ENSG00000252096 | 0.17015   | 0.43245  | 0.17015     | 0.43245     | 0.17015     | 0.43245 |  |

|             |                 |           |         |             |             |           |         |  |
|-------------|-----------------|-----------|---------|-------------|-------------|-----------|---------|--|
|             | 0.17015         | 0.43245   | 0.43245 | 0.735687757 |             |           |         |  |
| SLCO1C1     | ENSG00000139155 | -0.72903  | 0.76701 | -0.175      | 0.56946     | 0.17012   |         |  |
|             | 0.43246         | -1.1966   | 0.88426 | 0.43246     | 0.735687757 |           |         |  |
| LINC01567   | ENSG00000224310 | 0.17012   | 0.43246 | 0.17012     | 0.43246     | -0.51993  |         |  |
|             | 0.69844         | -0.95713  | 0.83075 | 0.43246     | 0.735687757 |           |         |  |
| PIGP        | ENSG00000185808 | 0.17006   | 0.43248 | -0.1632     | 0.56482     | -0.1632   | 0.56482 |  |
|             | -0.1632         | 0.56482   | 0.43248 | 0.735696097 |             |           |         |  |
| ATAD2B      | ENSG00000119778 | 0.16996   | 0.43252 | 0.12899     | 0.44868     | -1.1859   |         |  |
|             | 0.88217         | -0.084381 | 0.53362 | 0.43252     | 0.735720781 |           |         |  |
| ZNF283      | ENSG00000167637 | -0.08909  | 0.53549 | 0.16991     | 0.43254     | -0.08909  |         |  |
|             | 0.53549         | -0.08909  | 0.53549 | 0.43254     | 0.735720781 |           |         |  |
| GP2         | ENSG00000169347 | 0.05289   | 0.47891 | -0.14678    | 0.55835     | 0.1699    | 0.43255 |  |
|             | -1.1936         | 0.88368   | 0.43255 | 0.735720781 |             |           |         |  |
| BNIP3P20    | ENSG00000271704 | 0.16985   | 0.43256 | -0.7682     | 0.77882     | 0.16985   |         |  |
|             | 0.43256         | 0.16985   | 0.43256 | 0.43256     | 0.735720781 |           |         |  |
| NA          | ENSG00000237753 | -0.44442  | 0.67163 | 0.16984     | 0.43257     | -0.44442  | 0.67163 |  |
|             | -0.17547        | 0.56964   | 0.43257 | 0.735720781 |             |           |         |  |
| NA          | ENSG00000263326 | 0.16967   | 0.43263 | 0.16967     | 0.43263     | 0.16967   | 0.43263 |  |
|             | 0.16967         | 0.43263   | 0.43263 | 0.735788476 |             |           |         |  |
| CBR3        | ENSG00000159231 | -0.67583  | 0.75042 | 0.16965     | 0.43264     | 0.12656   | 0.44964 |  |
|             | -0.59045        | 0.72255   | 0.43264 | 0.735788476 |             |           |         |  |
| NA          | ENSG00000255639 | 0.16952   | 0.43269 | 0.16952     | 0.43269     | 0.16952   | 0.43269 |  |
|             | 0.16952         | 0.43269   | 0.43269 | 0.735847487 |             |           |         |  |
| ZNF274      | ENSG00000171606 | 0.11555   | 0.454   | 0.16945     | 0.43272     | 0.11555   | 0.454   |  |
|             | -0.097354       | 0.53878   | 0.43272 | 0.735847487 |             |           |         |  |
| TRBV22OR9-2 | ENSG00000234122 | 0.16946   | 0.43272 | -0.2383     | 0.59417     | 0.16946   |         |  |
|             | 0.43272         | 0.16946   | 0.43272 | 0.43272     | 0.735847487 |           |         |  |
| NA          | ENSG00000253852 | -0.065137 | 0.52597 | 0.16941     | 0.43274     | -0.065137 | 0.52597 |  |
|             | -0.065137       | 0.52597   | 0.43274 | 0.735855819 |             |           |         |  |
| PRELID3BP6  | ENSG00000249516 | -0.34698  | 0.6357  | -0.18685    | 0.57411     | 0.16933   |         |  |
|             | 0.43277         | -0.49938  | 0.69124 | 0.43277     | 0.735863807 |           |         |  |
| NA          | ENSG00000235113 | 0.16929   | 0.43278 | 0.16929     | 0.43278     | 0.16929   | 0.43278 |  |
|             | 0.16929         | 0.43278   | 0.43278 | 0.735863807 |             |           |         |  |
| NA          | ENSG00000279608 | -0.38264  | 0.64901 | 0.16928     | 0.43279     | -0.32007  | 0.62554 |  |
|             | -0.32007        | 0.62554   | 0.43279 | 0.735863807 |             |           |         |  |
| NA          | ENSG00000280412 | 0.16919   | 0.43282 | 0.16919     | 0.43282     | 0.16919   | 0.43282 |  |
|             | 0.16919         | 0.43282   | 0.43282 | 0.735889139 |             |           |         |  |
| EXOSC3      | ENSG00000107371 | 0.16907   | 0.43287 | -0.92146    | 0.82159     | -0.88198  |         |  |
|             | 0.81111         | -0.92146  | 0.82159 | 0.43287     | 0.735948472 |           |         |  |
| MARS2       | ENSG00000247626 | 0.16893   | 0.43293 | 0.16893     | 0.43293     | 0.16893   | 0.43293 |  |
|             | 0.16893         | 0.43293   | 0.43293 | 0.735973098 |             |           |         |  |
| NA          | ENSG00000268729 | 0.16892   | 0.43293 | 0.16892     | 0.43293     | 0.16892   | 0.43293 |  |
|             | 0.16892         | 0.43293   | 0.43293 | 0.735973098 |             |           |         |  |
| IFI27L2     | ENSG00000119632 | -0.57564  | 0.71757 | 0.072468    | 0.47111     | 0.07922   |         |  |
|             | 0.46843         | 0.16888   | 0.43295 | 0.43295     | 0.735973098 |           |         |  |
| LINC02538   | ENSG00000272549 | -1.4783   | 0.93033 | -0.23697    | 0.59366     | -0.88233  |         |  |
|             | 0.8112          | 0.16886   | 0.43295 | 0.43295     | 0.735973098 |           |         |  |
| ZFP82       | ENSG00000181007 | 0.16884   | 0.43296 | -0.026856   | 0.51071     | 0.16884   | 0.43296 |  |
|             | 0.16884         | 0.43296   | 0.43296 | 0.735973098 |             |           |         |  |
| KIF15       | ENSG00000163808 | -1.1972   | 0.88438 | -0.53005    | 0.70196     | 0.16873   | 0.433   |  |
|             | -1.1827         | 0.88155   | 0.433   | 0.73598072  |             |           |         |  |
| SEPHS2P1    | ENSG00000250247 | -0.49702  | 0.69041 | -0.49702    | 0.69041     | -0.76712  |         |  |
|             | 0.77849         | 0.16874   | 0.433   | 0.433       | 0.73598072  |           |         |  |
| XKR6        | ENSG00000171044 | -0.61471  | 0.73063 | 0.16867     | 0.43303     | -1.2488   | 0.89414 |  |
|             | -0.43346        | 0.66766   | 0.43303 | 0.73598072  |             |           |         |  |
| TIMP3       | ENSG00000100234 | 0.16864   | 0.43304 | -1.8558     | 0.96826     | 0.16864   | 0.43304 |  |
|             | 0.16864         | 0.43304   | 0.43304 | 0.73598072  |             |           |         |  |
| NA          | ENSG00000206853 | -0.097604 | 0.53888 | -0.072753   | 0.529       | -0.017039 | 0.5068  |  |
|             | 0.16863         | 0.43304   | 0.43304 | 0.73598072  |             |           |         |  |
| RPL36AP55   | ENSG00000226016 | -0.90714  | 0.81783 | 0.16852     | 0.43309     | -0.34735  |         |  |
|             | 0.63584         | -0.34735  | 0.63584 | 0.43309     | 0.736031352 |           |         |  |
| FAM170B     | ENSG00000172538 | 0.16849   | 0.4331  | 0.16849     | 0.4331      | 0.16849   |         |  |

|           |                 |          |         |             |             |           |         |
|-----------|-----------------|----------|---------|-------------|-------------|-----------|---------|
|           | 0.4331          | 0.16849  | 0.4331  | 0.4331      | 0.736031352 |           |         |
| NA        | ENSG00000253956 | 0.16843  | 0.43312 | -0.61856    | 0.7319      | -0.25912  | 0.60223 |
|           | -0.8775         | 0.80989  | 0.43312 | 0.736039672 |             |           |         |
| RAB3D     | ENSG00000105514 | 0.16824  | 0.4332  | 0.16824     | 0.4332      | 0.16824   | 0.4332  |
|           | 0.16824         | 0.4332   | 0.4332  | 0.736149951 |             |           |         |
| PDE10A    | ENSG00000112541 | -0.36312 | 0.64174 | -0.0097545  | 0.50389     | -0.46379  |         |
|           | 0.6786          | 0.16808  | 0.43326 | 0.43326     | 0.736191886 |           |         |
| SEMA5A    | ENSG00000112902 | -0.89886 | 0.81564 | -0.4028     | 0.65645     | 0.16808   |         |
|           | 0.43326         | -0.70032 | 0.75814 | 0.43326     | 0.736191886 |           |         |
| NUDT8     | ENSG00000167799 | 0.032725 | 0.48695 | 0.043495    | 0.48265     | 0.032725  | 0.48695 |
|           | 0.16806         | 0.43327  | 0.43327 | 0.736191886 |             |           |         |
| NA        | ENSG00000253013 | -1.5142  | 0.93502 | -1.5142     | 0.93502     | -1.5142   | 0.93502 |
|           | 0.16797         | 0.4333   | 0.4333  | 0.73621719  |             |           |         |
| SPATA16   | ENSG00000144962 | 0.16784  | 0.43336 | -0.52782    | 0.70119     | 0.16784   |         |
|           | 0.43336         | 0.16345  | 0.43508 | 0.43336     | 0.736254673 |           |         |
| HLA-DRB9  | ENSG00000196301 | -0.90144 | 0.81632 | 0.16782     | 0.43336     | -0.39161  |         |
|           | 0.65233         | -0.14651 | 0.55824 | 0.43336     | 0.736254673 |           |         |
| SRD5A2    | ENSG00000277893 | -0.67859 | 0.7513  | 0.16779     | 0.43337     | -0.52192  |         |
|           | 0.69914         | 0.16779  | 0.43337 | 0.43337     | 0.736254673 |           |         |
| CCDC106   | ENSG00000173581 | 0.16774  | 0.4334  | 0.16774     | 0.4334      | 0.16774   |         |
|           | 0.4334          | 0.16774  | 0.4334  | 0.4334      | 0.736254673 |           |         |
| ZDHHC17   | ENSG00000186908 | -0.17408 | 0.5691  | -1.6592     | 0.95146     | -1.3339   |         |
|           | 0.90889         | 0.16767  | 0.43342 | 0.43342     | 0.736254673 |           |         |
| ZNF888    | ENSG00000213793 | 0.16766  | 0.43343 | 0.16766     | 0.43343     | 0.11416   |         |
|           | 0.45456         | -0.36032 | 0.6407  | 0.43343     | 0.736254673 |           |         |
| NA        | ENSG00000265547 | 0.16747  | 0.4335  | 0.16747     | 0.4335      | 0.16747   | 0.4335  |
|           | 0.16747         | 0.4335   | 0.4335  | 0.736254673 |             |           |         |
| NA        | ENSG00000265964 | 0.16747  | 0.4335  | 0.16747     | 0.4335      | 0.16747   | 0.4335  |
|           | 0.16747         | 0.4335   | 0.4335  | 0.736254673 |             |           |         |
| PANK2     | ENSG00000125779 | -0.92518 | 0.82256 | 0.16744     | 0.43351     | -1.2587   | 0.89592 |
|           | -1.8227         | 0.96583  | 0.43351 | 0.736254673 |             |           |         |
| MTND1P7   | ENSG00000282321 | -0.44197 | 0.67075 | -0.52131    | 0.69893     | 0.16743   |         |
|           | 0.43351         | 0.16743  | 0.43351 | 0.43351     | 0.736254673 |           |         |
| ZNF737    | ENSG00000237440 | -1.1087  | 0.86621 | -0.75954    | 0.77623     | -0.094296 |         |
|           | 0.53756         | 0.16738  | 0.43354 | 0.43354     | 0.736254673 |           |         |
| TNIP3     | ENSG00000050730 | -0.27102 | 0.60681 | -0.20501    | 0.58122     | 0.16729   | 0.43357 |
|           | -0.45531        | 0.67556  | 0.43357 | 0.736254673 |             |           |         |
| ARHGAP25  | ENSG00000163219 | -0.36373 | 0.64197 | -0.090581   | 0.53609     | -0.40124  |         |
|           | 0.65588         | 0.16729  | 0.43357 | 0.43357     | 0.736254673 |           |         |
| E2F6      | ENSG00000169016 | -0.869   | 0.80758 | 0.1673      | 0.43357     | -0.032383 | 0.51292 |
|           | -0.55042        | 0.70898  | 0.43357 | 0.736254673 |             |           |         |
| BANF1P4   | ENSG00000223828 | 0.16721  | 0.4336  | 0.16721     | 0.4336      | 0.16721   |         |
|           | 0.4336          | 0.16721  | 0.4336  | 0.4336      | 0.736254673 |           |         |
| NA        | ENSG00000263015 | 0.16722  | 0.4336  | -0.24308    | 0.59603     | 0.16722   | 0.4336  |
|           | 0.16722         | 0.4336   | 0.4336  | 0.736254673 |             |           |         |
| HCFC2     | ENSG00000111727 | -2.1081  | 0.98249 | -1.0628     | 0.85606     | -1.6169   | 0.94705 |
|           | 0.1672          | 0.43361  | 0.43361 | 0.736254673 |             |           |         |
| CHID1     | ENSG00000177830 | -0.26385 | 0.60405 | -0.022813   | 0.5091      | 0.16712   | 0.43364 |
|           | -0.37548        | 0.64635  | 0.43364 | 0.736254673 |             |           |         |
| RN7SKP71  | ENSG00000201428 | 0.16712  | 0.43364 | 0.16712     | 0.43364     | 0.16712   |         |
|           | 0.43364         | 0.16712  | 0.43364 | 0.43364     | 0.736254673 |           |         |
| SEPTIN7P4 | ENSG00000240651 | 0.16709  | 0.43365 | -1.4327     | 0.92403     | -1.8578   |         |
|           | 0.9684          | -1.3813  | 0.91641 | 0.43365     | 0.736254673 |           |         |
| CUL1      | ENSG00000055130 | 0.16706  | 0.43366 | -0.78377    | 0.78341     | -0.23575  | 0.59319 |
|           | -0.11978        | 0.54767  | 0.43366 | 0.736254673 |             |           |         |
| KNOP1P3   | ENSG00000224344 | 0.16707  | 0.43366 | 0.16707     | 0.43366     | 0.16707   |         |
|           | 0.43366         | 0.16707  | 0.43366 | 0.43366     | 0.736254673 |           |         |
| FNBP1L    | ENSG00000137942 | -0.48129 | 0.68484 | -0.98124    | 0.83676     | 0.16699   |         |
|           | 0.43369         | -0.62051 | 0.73254 | 0.43369     | 0.736254673 |           |         |
| SLC35E4   | ENSG00000100036 | -0.40707 | 0.65802 | -0.98214    | 0.83698     | 0.16697   |         |
|           | 0.4337          | -1.1968  | 0.88431 | 0.4337      | 0.736254673 |           |         |
| NA        | ENSG00000273634 | -0.45359 | 0.67494 | -0.034583   | 0.51379     | 0.16692   | 0.43372 |

|             |                 |            |         |             |             |           |         |         |
|-------------|-----------------|------------|---------|-------------|-------------|-----------|---------|---------|
|             | -0.17877        | 0.57094    | 0.43372 | 0.736254673 |             |           |         |         |
| MTCYBP11    | ENSG00000224288 | 0.1669     | 0.43373 | 0.1669      | 0.43373     | 0.1669    | 0.43373 | 0.1669  |
|             | 0.43373         | 0.1669     | 0.43373 | 0.43373     | 0.736254673 |           |         |         |
| NEUROG2-AS1 | ENSG00000249509 | -0.10796   | 0.54299 | -0.55791    | 0.71155     | 0.16689   |         |         |
|             | 0.43373         | -0.10726   | 0.54271 | 0.43373     | 0.736254673 |           |         |         |
| RNU6-902P   | ENSG00000253021 | 0.16685    | 0.43375 | 0.16685     | 0.43375     | 0.16685   | 0.43375 | 0.16685 |
|             | 0.43375         | 0.16685    | 0.43375 | 0.43375     | 0.736262975 |           |         |         |
| RNU7-152P   | ENSG00000238789 | 0.16677    | 0.43378 | 0.0053341   | 0.49787     | 0.16677   |         |         |
|             | 0.43378         | 0.032802   | 0.48692 | 0.43378     | 0.736288251 |           |         |         |
| NUP35P2     | ENSG00000226285 | -1.0459    | 0.85219 | 0.16662     | 0.43383     | 0.16662   |         |         |
|             | 0.43383         | 0.16662    | 0.43383 | 0.43383     | 0.736347471 |           |         |         |
| RPL39P39    | ENSG00000231005 | 0.16656    | 0.43386 | -0.40018    | 0.65549     | -0.40018  |         |         |
|             | 0.65549         | -0.40018   | 0.65549 | 0.43386     | 0.736372742 |           |         |         |
| LINC02309   | ENSG00000258994 | -0.53984   | 0.70534 | 0.16645     | 0.4339      | 0.11228   |         |         |
|             | 0.4553          | 0.11228    | 0.4553  | 0.4339      | 0.736414983 |           |         |         |
| WASF1P1     | ENSG00000227597 | -0.42765   | 0.66555 | 0.16641     | 0.43392     | -0.55628  |         |         |
|             | 0.71099         | -0.55628   | 0.71099 | 0.43392     | 0.736423279 |           |         |         |
| NA          | ENSG00000212191 | 0.16634    | 0.43394 | 0.16634     | 0.43394     | 0.098544  | 0.46075 |         |
|             | 0.16634         | 0.43394    | 0.43394 | 0.736431573 |             |           |         |         |
| NENFP3      | ENSG00000248462 | -0.12845   | 0.55111 | 0.16615     | 0.43402     | -0.12845  |         |         |
|             | 0.55111         | -0.12845   | 0.55111 | 0.43402     | 0.736541689 |           |         |         |
| NA          | ENSG00000258776 | 0.16604    | 0.43406 | 0.16604     | 0.43406     | 0.16604   | 0.43406 |         |
|             | 0.16604         | 0.43406    | 0.43406 | 0.736583918 |             |           |         |         |
| HAND2       | ENSG00000164107 | 0.00091886 | 0.49963 | 0.097898    | 0.46101     | 0.16589   | 0.43412 |         |
|             | -0.36391        | 0.64204    | 0.43412 | 0.73662575  |             |           |         |         |
| NA          | ENSG00000259618 | 0.16591    | 0.43412 | 0.16591     | 0.43412     | 0.16591   | 0.43412 |         |
|             | 0.16591         | 0.43412    | 0.43412 | 0.73662575  |             |           |         |         |
| NA          | ENSG00000261519 | 0.16587    | 0.43413 | 0.16587     | 0.43413     | 0.16587   | 0.43413 |         |
|             | 0.16587         | 0.43413    | 0.43413 | 0.73662575  |             |           |         |         |
| CEP152      | ENSG00000103995 | -0.50543   | 0.69337 | -1.5146     | 0.93507     | -0.15044  |         |         |
|             | 0.55979         | 0.16576    | 0.43417 | 0.43417     | 0.73666797  |           |         |         |
| IDUA        | ENSG00000127415 | -0.71234   | 0.76187 | -0.12054    | 0.54797     | 0.16568   | 0.4342  |         |
|             | -1.1185         | 0.86831    | 0.4342  | 0.736683739 |             |           |         |         |
| NA          | ENSG00000224015 | 0.16564    | 0.43422 | 0.16564     | 0.43422     | 0.16564   | 0.43422 |         |
|             | 0.16564         | 0.43422    | 0.43422 | 0.736683739 |             |           |         |         |
| RN7SL314P   | ENSG00000244402 | -0.27667   | 0.60898 | 0.1656      | 0.43424     | -0.52907  |         |         |
|             | 0.70162         | -0.82554   | 0.79547 | 0.43424     | 0.736683739 |           |         |         |
| NA          | ENSG00000253664 | 0.16557    | 0.43425 | 0.16557     | 0.43425     | 0.16557   | 0.43425 |         |
|             | 0.16557         | 0.43425    | 0.43425 | 0.736683739 |             |           |         |         |
| NA          | ENSG00000232601 | 0.16555    | 0.43426 | 0.16555     | 0.43426     | 0.16555   | 0.43426 |         |
|             | 0.16555         | 0.43426    | 0.43426 | 0.736683739 |             |           |         |         |
| OR4A48P     | ENSG00000255113 | 0.16551    | 0.43427 | 0.16551     | 0.43427     | 0.16551   |         |         |
|             | 0.43427         | 0.16551    | 0.43427 | 0.43427     | 0.736683739 |           |         |         |
| NA          | ENSG00000238280 | 0.16528    | 0.43436 | 0.16528     | 0.43436     | 0.16528   | 0.43436 |         |
|             | -0.66537        | 0.74709    | 0.43436 | 0.73671566  |             |           |         |         |
| PARP4       | ENSG00000102699 | 0.10365    | 0.45872 | -0.092891   | 0.537       | 0.14927   | 0.44067 |         |
|             | 0.16527         | 0.43437    | 0.43437 | 0.73671566  |             |           |         |         |
| NOL10       | ENSG00000115761 | -0.77047   | 0.77949 | 0.16523     | 0.43438     | 0.0052029 | 0.49792 |         |
|             | -0.11815        | 0.54702    | 0.43438 | 0.73671566  |             |           |         |         |
| IGLV1-44    | ENSG00000211651 | 0.1652     | 0.43439 | 0.1652      | 0.43439     | 0.1652    |         |         |
|             | 0.43439         | 0.1652     | 0.43439 | 0.43439     | 0.73671566  |           |         |         |
| NA          | ENSG00000250403 | 0.1652     | 0.43439 | 0.1652      | 0.43439     | 0.1652    | 0.43439 |         |
|             | 0.1652          | 0.43439    | 0.43439 | 0.73671566  |             |           |         |         |
| NA          | ENSG00000270980 | 0.16519    | 0.4344  | 0.16519     | 0.4344      | 0.16519   | 0.4344  |         |
|             | -0.66255        | 0.74619    | 0.4344  | 0.73671566  |             |           |         |         |
| FGFBP1      | ENSG00000137440 | -0.82899   | 0.79645 | -0.0045949  | 0.50183     | 0.16515   |         |         |
|             | 0.43441         | -0.40758   | 0.65821 | 0.43441     | 0.73671566  |           |         |         |
| NA          | ENSG00000251922 | 0.16514    | 0.43442 | 0.16514     | 0.43442     | 0.16514   | 0.43442 |         |
|             | 0.16514         | 0.43442    | 0.43442 | 0.73671566  |             |           |         |         |
| NA          | ENSG00000242324 | 0.16511    | 0.43443 | 0.087296    | 0.46522     | -0.36709  | 0.64322 |         |
|             | -0.31298        | 0.62285    | 0.43443 | 0.73671566  |             |           |         |         |
| LIPA        | ENSG00000107798 | 0.16508    | 0.43444 | -0.24415    | 0.59644     | 0.11061   | 0.45596 |         |

|             |                 |           |         |             |             |           |         |  |
|-------------|-----------------|-----------|---------|-------------|-------------|-----------|---------|--|
|             | -0.78525        | 0.78385   | 0.43444 | 0.73671566  |             |           |         |  |
| MRPS18BP2   | ENSG00000235232 | 0.16502   | 0.43446 | -0.58634    | 0.72118     | 0.16502   |         |  |
|             | 0.43446         | 0.16502   | 0.43446 | 0.43446     | 0.736723938 |           |         |  |
| NA          | ENSG00000261204 | 0.16488   | 0.43452 | 0.16488     | 0.43452     | 0.16488   | 0.43452 |  |
|             | 0.16488         | 0.43452   | 0.43452 | 0.736739283 |             |           |         |  |
| NA          | ENSG00000201013 | 0.16486   | 0.43453 | 0.16486     | 0.43453     | 0.16486   | 0.43453 |  |
|             | 0.088442        | 0.46476   | 0.43453 | 0.736739283 |             |           |         |  |
| GPR63       | ENSG00000112218 | 0.16481   | 0.43455 | 0.16481     | 0.43455     | 0.16481   | 0.43455 |  |
|             | 0.16481         | 0.43455   | 0.43455 | 0.736739283 |             |           |         |  |
| NA          | ENSG00000217004 | -0.78757  | 0.78453 | 0.1648      | 0.43455     | -0.78757  | 0.78453 |  |
|             | -0.78757        | 0.78453   | 0.43455 | 0.736739283 |             |           |         |  |
| NA          | ENSG00000267090 | 0.16481   | 0.43455 | 0.16481     | 0.43455     | 0.16481   | 0.43455 |  |
|             | 0.16481         | 0.43455   | 0.43455 | 0.736739283 |             |           |         |  |
| SLC25A24P1  | ENSG00000241361 | 0.16474   | 0.43457 | -1.6996     | 0.95539     | -0.17999  |         |  |
|             | 0.57142         | -0.81628  | 0.79283 | 0.43457     | 0.736739283 |           |         |  |
| NA          | ENSG00000254498 | 0.16473   | 0.43458 | 0.16473     | 0.43458     | 0.16473   | 0.43458 |  |
|             | 0.16473         | 0.43458   | 0.43458 | 0.736739283 |             |           |         |  |
| YWHAQP5     | ENSG00000236564 | 0.1647    | 0.43459 | -1.1286     | 0.87046     | 0.1647    |         |  |
|             | 0.43459         | -0.52548  | 0.70038 | 0.43459     | 0.736739283 |           |         |  |
| SNRPGP4     | ENSG00000267203 | 0.16462   | 0.43462 | 0.16462     | 0.43462     | 0.16462   |         |  |
|             | 0.43462         | 0.16462   | 0.43462 | 0.43462     | 0.73676451  |           |         |  |
| NA          | ENSG00000259609 | -0.35598  | 0.63907 | -1.9377     | 0.97367     | 0.060245  | 0.47598 |  |
|             | 0.16454         | 0.43465   | 0.43465 | 0.736789735 |             |           |         |  |
| NA          | ENSG00000257955 | 0.16448   | 0.43468 | 0.16448     | 0.43468     | 0.16448   | 0.43468 |  |
|             | 0.16448         | 0.43468   | 0.43468 | 0.73681455  |             |           |         |  |
| NA          | ENSG00000216616 | -1.6393   | 0.94942 | -1.8881     | 0.9705      | 0.16439   | 0.43471 |  |
|             | 0.16439         | 0.43471   | 0.43471 | 0.73681455  |             |           |         |  |
| NA          | ENSG00000242613 | 0.16438   | 0.43471 | -1.3178     | 0.90622     | 0.16438   | 0.43471 |  |
|             | 0.16438         | 0.43471   | 0.43471 | 0.73681455  |             |           |         |  |
| SIK1B       | ENSG00000275993 | 0.16423   | 0.43478 | 0.16423     | 0.43478     | 0.16423   | 0.43478 |  |
|             | 0.16423         | 0.43478   | 0.43478 | 0.736881523 |             |           |         |  |
| NA          | ENSG00000235862 | 0.16419   | 0.43479 | 0.16419     | 0.43479     | 0.16419   | 0.43479 |  |
|             | 0.16419         | 0.43479   | 0.43479 | 0.736881523 |             |           |         |  |
| NA          | ENSG00000242953 | 0.16416   | 0.4348  | 0.16416     | 0.4348      | 0.16416   | 0.4348  |  |
|             | 0.16416         | 0.4348    | 0.4348  | 0.736881523 |             |           |         |  |
| SFR1        | ENSG00000156384 | -0.51344  | 0.69618 | -0.51344    | 0.69618     | -0.31141  | 0.62226 |  |
|             | 0.16415         | 0.43481   | 0.43481 | 0.736881523 |             |           |         |  |
| INKA2-AS1   | ENSG00000227811 | 0.16402   | 0.43486 | -0.23579    | 0.5932      | -0.23579  |         |  |
|             | 0.5932          | -0.23579  | 0.5932  | 0.43486     | 0.736906322 |           |         |  |
| NA          | ENSG00000260733 | -0.61541  | 0.73086 | -0.40498    | 0.65725     | -0.79353  | 0.78626 |  |
|             | 0.16401         | 0.43486   | 0.43486 | 0.736906322 |             |           |         |  |
| DOP1A       | ENSG00000083097 | -0.62958  | 0.73551 | -0.62524    | 0.73409     | -0.50546  | 0.69338 |  |
|             | 0.16398         | 0.43487   | 0.43487 | 0.736906322 |             |           |         |  |
| MSI2        | ENSG00000153944 | -0.089645 | 0.53572 | -0.86475    | 0.80641     | -0.38559  | 0.6501  |  |
|             | 0.16389         | 0.43491   | 0.43491 | 0.736922852 |             |           |         |  |
| RN7SL782P   | ENSG00000239708 | 0.16388   | 0.43491 | 0.16388     | 0.43491     | 0.16388   |         |  |
|             | 0.43491         | 0.16388   | 0.43491 | 0.43491     | 0.736922852 |           |         |  |
| ZNF227      | ENSG00000131115 | -0.20414  | 0.58088 | 0.16372     | 0.43498     | -0.028249 |         |  |
|             | 0.51127         | -0.79016  | 0.78528 | 0.43498     | 0.73700631  |           |         |  |
| ATOH1       | ENSG00000172238 | -0.6058   | 0.72768 | -0.6058     | 0.72768     | -0.6058   | 0.72768 |  |
|             | 0.16367         | 0.435     | 0.435   | 0.73700631  |             |           |         |  |
| IGHVII-44-2 | ENSG00000253895 | 0.16359   | 0.43502 | 0.16359     | 0.43502     | 0.16359   | 0.43502 |  |
|             | 0.43502         | 0.16359   | 0.43502 | 0.43502     | 0.73700631  |           |         |  |
| EXOSC10     | ENSG00000171824 | -0.097249 | 0.53874 | -0.33053    | 0.6295      | -0.074202 |         |  |
|             | 0.52957         | 0.16356   | 0.43504 | 0.43504     | 0.73700631  |           |         |  |
| RN7SKP229   | ENSG00000222397 | -0.20672  | 0.58189 | 0.16355     | 0.43504     | -0.33287  |         |  |
|             | 0.63038         | -0.16434  | 0.56527 | 0.43504     | 0.73700631  |           |         |  |
| DPPA2P3     | ENSG00000224403 | 0.16353   | 0.43505 | -0.82696    | 0.79587     | 0.16353   |         |  |
|             | 0.43505         | 0.16353   | 0.43505 | 0.43505     | 0.73700631  |           |         |  |
| DTX1        | ENSG00000135144 | -1.8498   | 0.96783 | -2.5668     | 0.99487     | -0.1023   | 0.54074 |  |
|             | 0.16349         | 0.43507   | 0.43507 | 0.737014569 |             |           |         |  |
| NA          | ENSG00000283952 | 0.16331   | 0.43514 | 0.16331     | 0.43514     | -0.24065  | 0.59509 |  |



|             |                 |          |         |             |             |          |         |  |
|-------------|-----------------|----------|---------|-------------|-------------|----------|---------|--|
|             | -0.24065        | 0.59509  | 0.43514 | 0.737029396 |             |          |         |  |
| MRPL23      | ENSG00000214026 | 0.16327  | 0.43515 | -1.2294     | 0.89054     | -1.0282  |         |  |
|             | 0.84806         | -0.68639 | 0.75377 | 0.43515     | 0.737029396 |          |         |  |
| CKM         | ENSG00000104879 | -0.83961 | 0.79944 | 0.16326     | 0.43516     | -0.83961 | 0.79944 |  |
|             | -0.83961        | 0.79944  | 0.43516 | 0.737029396 |             |          |         |  |
| PUM3        | ENSG00000080608 | 0.16323  | 0.43517 | -0.12642    | 0.5503      | -0.5672  | 0.71471 |  |
|             | -0.36839        | 0.64371  | 0.43517 | 0.737029396 |             |          |         |  |
| RBPM5       | ENSG00000157110 | -0.31189 | 0.62244 | 0.16321     | 0.43518     | -0.10782 | 0.54293 |  |
|             | -0.24365        | 0.59625  | 0.43518 | 0.737029396 |             |          |         |  |
| RNU6-808P   | ENSG00000212535 | 0.16321  | 0.43518 | 0.16321     | 0.43518     | 0.16321  |         |  |
|             | 0.43518         | 0.16321  | 0.43518 | 0.43518     | 0.737029396 |          |         |  |
| ZP2         | ENSG00000103310 | -0.57598 | 0.71769 | -0.43711    | 0.66898     | 0.16314  | 0.4352  |  |
|             | -0.71635        | 0.76311  | 0.4352  | 0.737029396 |             |          |         |  |
| SMIM2-IT1   | ENSG00000235285 | -0.66282 | 0.74628 | -0.60872    | 0.72864     | 0.16316  |         |  |
|             | 0.4352          | 0.16316  | 0.4352  | 0.4352      | 0.737029396 |          |         |  |
| RPL39P14    | ENSG00000224463 | 0.1631   | 0.43522 | 0.099038    | 0.46055     | 0.1631   |         |  |
|             | 0.43522         | 0.1631   | 0.43522 | 0.43522     | 0.737029396 |          |         |  |
| NA          | ENSG00000268157 | 0.16308  | 0.43523 | 0.16308     | 0.43523     | 0.16308  | 0.43523 |  |
|             | 0.16308         | 0.43523  | 0.43523 | 0.737029396 |             |          |         |  |
| RPS15AP12   | ENSG00000232134 | 0.16298  | 0.43527 | 0.16298     | 0.43527     | 0.16298  |         |  |
|             | 0.43527         | 0.16298  | 0.43527 | 0.43527     | 0.737037229 |          |         |  |
| NA          | ENSG00000252388 | 0.16297  | 0.43527 | -1.0591     | 0.85522     | 0.16297  | 0.43527 |  |
|             | 0.16297         | 0.43527  | 0.43527 | 0.737037229 |             |          |         |  |
| SNORD116-12 | ENSG00000207197 | 0.16294  | 0.43528 | 0.16294     | 0.43528     | 0.16294  |         |  |
|             | 0.43528         | 0.16294  | 0.43528 | 0.43528     | 0.737037229 |          |         |  |
| GATAD1      | ENSG00000157259 | -0.337   | 0.63194 | 0.16288     | 0.43531     | 0.16288  |         |  |
|             | 0.43531         | -0.41803 | 0.66204 | 0.43531     | 0.737052889 |          |         |  |
| MIR3945HG   | ENSG00000251230 | -1.0732  | 0.85842 | -1.2504     | 0.89442     | 0.16279  |         |  |
|             | 0.43534         | -0.48133 | 0.68486 | 0.43534     | 0.737052889 |          |         |  |
| NA          | ENSG00000278716 | -0.41311 | 0.66024 | -0.41311    | 0.66024     | 0.16281  | 0.43534 |  |
|             | -0.41311        | 0.66024  | 0.43534 | 0.737052889 |             |          |         |  |
| PCDHA1      | ENSG00000204970 | -0.56134 | 0.71272 | -0.82184    | 0.79442     | -0.20859 |         |  |
|             | 0.58261         | 0.16274  | 0.43536 | 0.43536     | 0.737052889 |          |         |  |
| PSAT1P1     | ENSG00000253810 | 0.097696 | 0.46109 | 0.16269     | 0.43538     | 0.16269  |         |  |
|             | 0.43538         | 0.16269  | 0.43538 | 0.43538     | 0.737052889 |          |         |  |
| NA          | ENSG00000255119 | 0.1627   | 0.43538 | 0.1627      | 0.43538     | 0.1627   | 0.43538 |  |
|             | 0.1627          | 0.43538  | 0.43538 | 0.737052889 |             |          |         |  |
| MIR616      | ENSG00000208028 | 0.16257  | 0.43543 | 0.16257     | 0.43543     | 0.16257  |         |  |
|             | 0.43543         | 0.16257  | 0.43543 | 0.43543     | 0.737111926 |          |         |  |
| RN7SL11P    | ENSG00000239316 | -0.31341 | 0.62301 | -0.31341    | 0.62301     | -0.31341 |         |  |
|             | 0.62301         | 0.1625   | 0.43545 | 0.43545     | 0.737120176 |          |         |  |
| MIRLET7A2   | ENSG00000198975 | -0.788   | 0.78465 | -0.788      | 0.78465     | -0.788   |         |  |
|             | 0.78465         | 0.16233  | 0.43552 | 0.43552     | 0.737213061 |          |         |  |
| NA          | ENSG00000279599 | -1.6826  | 0.95378 | 0.065078    | 0.47406     | 0.065078 | 0.47406 |  |
|             | 0.16228         | 0.43554  | 0.43554 | 0.737218259 |             |          |         |  |
| NA          | ENSG00000260884 | 0.16221  | 0.43557 | 0.16221     | 0.43557     | 0.16221  | 0.43557 |  |
|             | 0.16221         | 0.43557  | 0.43557 | 0.737218259 |             |          |         |  |
| ADAM18      | ENSG00000168619 | -0.20046 | 0.57944 | -0.83591    | 0.7984      | 0.16217  |         |  |
|             | 0.43559         | 0.16217  | 0.43559 | 0.43559     | 0.737218259 |          |         |  |
| NA          | ENSG00000225807 | -1.8772  | 0.96975 | -1.5652     | 0.94123     | -0.55618 | 0.71096 |  |
|             | 0.1621          | 0.43561  | 0.43561 | 0.737218259 |             |          |         |  |
| DUSP15      | ENSG00000149599 | -0.39749 | 0.6545  | -0.7762     | 0.78119     | 0.16207  |         |  |
|             | 0.43563         | -0.62891 | 0.7353  | 0.43563     | 0.737218259 |          |         |  |
| NA          | ENSG00000215979 | 0.16206  | 0.43563 | 0.16206     | 0.43563     | 0.16206  | 0.43563 |  |
|             | 0.16206         | 0.43563  | 0.43563 | 0.737218259 |             |          |         |  |
| NA          | ENSG00000108958 | 0.16199  | 0.43566 | 0.16199     | 0.43566     | 0.16199  | 0.43566 |  |
|             | 0.16199         | 0.43566  | 0.43566 | 0.737218259 |             |          |         |  |
| KRT18P55    | ENSG00000265480 | -0.9833  | 0.83727 | 0.16198     | 0.43566     | -0.9833  |         |  |
|             | 0.83727         | -0.9833  | 0.83727 | 0.43566     | 0.737218259 |          |         |  |
| NA          | ENSG00000279592 | 0.16194  | 0.43568 | 0.16194     | 0.43568     | 0.16194  | 0.43568 |  |
|             | 0.16194         | 0.43568  | 0.43568 | 0.737218259 |             |          |         |  |
| RAN         | ENSG00000132341 | 0.013968 | 0.49443 | 0.16185     | 0.43571     | -0.97307 | 0.83474 |  |

|           |                 |           |         |             |             |           |         |         |
|-----------|-----------------|-----------|---------|-------------|-------------|-----------|---------|---------|
|           | -2.0769         | 0.9811    | 0.43571 | 0.737218259 |             |           |         |         |
| RNA5SP248 | ENSG00000202472 | 0.16182   | 0.43572 | 0.16182     | 0.43572     | 0.16182   | 0.43572 | 0.16182 |
|           | 0.43572         | 0.16182   | 0.43572 | 0.43572     | 0.737218259 |           |         |         |
| NUDT19P4  | ENSG00000270900 | 0.027349  | 0.48909 | -0.15218    | 0.56048     | -0.29468  |         |         |
|           | 0.61588         | 0.16184   | 0.43572 | 0.43572     | 0.737218259 |           |         |         |
| LRRC53    | ENSG00000162621 | 0.1618    | 0.43573 | -0.53571    | 0.70392     | 0.1618    |         |         |
|           | 0.43573         | -0.52156  | 0.69901 | 0.43573     | 0.737218259 |           |         |         |
| PDIA2     | ENSG00000185615 | 0.16176   | 0.43575 | 0.16176     | 0.43575     | 0.16176   | 0.43575 | 0.43575 |
|           | 0.16176         | 0.43575   | 0.43575 | 0.737218259 |             |           |         |         |
| MIR4737   | ENSG00000264049 | 0.16176   | 0.43575 | 0.16176     | 0.43575     | 0.16176   |         |         |
|           | 0.43575         | 0.16176   | 0.43575 | 0.43575     | 0.737218259 |           |         |         |
| LINC00566 | ENSG00000261498 | -1.5192   | 0.93565 | 0.16166     | 0.43579     | -0.46719  |         |         |
|           | 0.67982         | -1.3291   | 0.90809 | 0.43579     | 0.737234304 |           |         |         |
| EWSR1     | ENSG00000182944 | -0.93544  | 0.82522 | -0.68608    | 0.75367     | -0.93544  | 0.82522 |         |
|           | 0.16158         | 0.43582   | 0.43582 | 0.737234304 |             |           |         |         |
| MARK2P12  | ENSG00000229708 | 0.008802  | 0.49649 | 0.16158     | 0.43582     | 0.008802  |         |         |
|           | 0.49649         | 0.008802  | 0.49649 | 0.43582     | 0.737234304 |           |         |         |
| MIR4771-2 | ENSG00000266063 | 0.16159   | 0.43582 | 0.16159     | 0.43582     | 0.16159   |         |         |
|           | 0.43582         | 0.16159   | 0.43582 | 0.43582     | 0.737234304 |           |         |         |
| MALINC1   | ENSG00000245146 | 0.1615    | 0.43585 | -0.23169    | 0.59161     | -0.53904  |         |         |
|           | 0.70507         | -0.45409  | 0.67512 | 0.43585     | 0.737259459 |           |         |         |
| NA        | ENSG00000271018 | -0.29664  | 0.61663 | -1.5685     | 0.94161     | 0.16139   | 0.43589 |         |
|           | 0.16139         | 0.43589   | 0.43589 | 0.737301527 |             |           |         |         |
| NA        | ENSG00000267654 | 0.16126   | 0.43595 | 0.14476     | 0.44245     | -0.76337  | 0.77738 |         |
|           | -0.38133        | 0.64852   | 0.43595 | 0.737317837 |             |           |         |         |
| OR4A47    | ENSG00000237388 | 0.034649  | 0.48618 | 0.16119     | 0.43597     | -0.054406 |         |         |
|           | 0.52169         | -0.91989  | 0.82118 | 0.43597     | 0.737317837 |           |         |         |
| CASP10    | ENSG00000003400 | 0.16116   | 0.43598 | -0.35044    | 0.63699     | -0.20805  |         |         |
|           | 0.5824          | -0.28534  | 0.61231 | 0.43598     | 0.737317837 |           |         |         |
| RPL21P2   | ENSG00000215063 | -0.056787 | 0.52264 | -0.018637   | 0.50743     | -0.14538  |         |         |
|           | 0.55779         | 0.16099   | 0.43605 | 0.43605     | 0.737317837 |           |         |         |
| MTCO1P44  | ENSG00000227149 | 0.16098   | 0.43606 | 0.16098     | 0.43606     | 0.16098   |         |         |
|           | 0.43606         | 0.16098   | 0.43606 | 0.43606     | 0.737317837 |           |         |         |
| NA        | ENSG00000231046 | -0.88417  | 0.8117  | 0.16092     | 0.43608     | -0.88417  | 0.8117  |         |
|           | -0.88417        | 0.8117    | 0.43608 | 0.737317837 |             |           |         |         |
| PLCZ1     | ENSG00000139151 | -0.25323  | 0.59996 | -0.63044    | 0.7358      | 0.16087   | 0.4361  |         |
|           | -0.25323        | 0.59996   | 0.4361  | 0.737317837 |             |           |         |         |
| HM13-AS1  | ENSG00000230613 | 0.16086   | 0.4361  | 0.16086     | 0.4361      | 0.16086   |         |         |
|           | 0.4361          | 0.16086   | 0.4361  | 0.4361      | 0.737317837 |           |         |         |
| MDH1B     | ENSG00000138400 | -0.63594  | 0.73759 | -0.51939    | 0.69825     | -0.46203  | 0.67797 |         |
|           | 0.16083         | 0.43611   | 0.43611 | 0.737317837 |             |           |         |         |
| DNAJC7    | ENSG00000168259 | -0.45829  | 0.67663 | 0.16085     | 0.43611     | -0.45829  |         |         |
|           | 0.67663         | -0.99432  | 0.83997 | 0.43611     | 0.737317837 |           |         |         |
| NA        | ENSG00000234938 | 0.088435  | 0.46477 | -0.028779   | 0.51148     | 0.16085   | 0.43611 |         |
|           | 0.038947        | 0.48447   | 0.43611 | 0.737317837 |             |           |         |         |
| CA5A      | ENSG00000174990 | -0.94735  | 0.82827 | 0.16074     | 0.43615     | -0.51575  | 0.69699 |         |
|           | -0.55008        | 0.70887   | 0.43615 | 0.737317837 |             |           |         |         |
| HSPD1P12  | ENSG00000255964 | 0.16056   | 0.43622 | 0.16056     | 0.43622     | 0.16056   |         |         |
|           | 0.43622         | 0.16056   | 0.43622 | 0.43622     | 0.737317837 |           |         |         |
| TPGS1     | ENSG00000141933 | 0.16047   | 0.43625 | -1.2469     | 0.89378     | -1.2469   | 0.89378 |         |
|           | -0.31586        | 0.62394   | 0.43625 | 0.737317837 |             |           |         |         |
| EMP2      | ENSG00000213853 | 0.16047   | 0.43625 | -0.039917   | 0.51592     | -0.14395  | 0.55723 |         |
|           | -0.14395        | 0.55723   | 0.43625 | 0.737317837 |             |           |         |         |
| RNU1-148P | ENSG00000207201 | 0.16045   | 0.43626 | 0.16045     | 0.43626     | -0.8764   |         |         |
|           | 0.80959         | 0.16045   | 0.43626 | 0.43626     | 0.737317837 |           |         |         |
| LRRC63    | ENSG00000173988 | -0.1605   | 0.56376 | -0.4604     | 0.67739     | 0.16042   |         |         |
|           | 0.43627         | 0.16042   | 0.43627 | 0.43627     | 0.737317837 |           |         |         |
| ACTL9     | ENSG00000181786 | -1.1387   | 0.87258 | -0.95125    | 0.82926     | -0.16627  | 0.56603 |         |
|           | 0.16039         | 0.43629   | 0.43629 | 0.737317837 |             |           |         |         |
| COPG1     | ENSG00000181789 | -0.62317  | 0.73341 | 0.16033     | 0.43631     | -0.4469   | 0.67253 |         |
|           | 0.11319         | 0.45494   | 0.43631 | 0.737317837 |             |           |         |         |
| SF3A3P1   | ENSG00000230568 | -0.41196  | 0.65981 | 0.047554    | 0.48104     | 0.16033   |         |         |

|              |                 |           |         |             |             |           |         |
|--------------|-----------------|-----------|---------|-------------|-------------|-----------|---------|
|              | 0.43631         | -0.14143  | 0.55624 | 0.43631     | 0.737317837 |           |         |
| NA           | ENSG00000231052 | -0.46933  | 0.68058 | -0.46933    | 0.68058     | 0.16028   | 0.43633 |
|              | -0.043467       | 0.51734   | 0.43633 | 0.737317837 |             |           |         |
| NA           | ENSG00000239130 | 0.16024   | 0.43634 | -0.44054    | 0.67023     | -0.28368  | 0.61167 |
|              | -1.2314         | 0.89091   | 0.43634 | 0.737317837 |             |           |         |
| TAOK1        | ENSG00000160551 | 0.14282   | 0.44322 | -0.023479   | 0.50937     | -0.088638 | 0.53532 |
|              | 0.16021         | 0.43636   | 0.43636 | 0.737317837 |             |           |         |
| IFTAP        | ENSG00000166352 | -0.087312 | 0.53479 | -0.7757     | 0.78104     | -0.7757   | 0.78104 |
|              | 0.16021         | 0.43636   | 0.43636 | 0.737317837 |             |           |         |
| VN1R4        | ENSG00000228567 | 0.16021   | 0.43636 | -0.41253    | 0.66003     | -0.41253  | 0.66003 |
|              | -0.41253        | 0.66003   | 0.43636 | 0.737317837 |             |           |         |
| PSD          | ENSG00000059915 | 0.16018   | 0.43637 | -0.41573    | 0.66119     | -0.040746 | 0.51625 |
|              | -0.60431        | 0.72718   | 0.43637 | 0.737317837 |             |           |         |
| NA           | ENSG00000249888 | -2.4678   | 0.9932  | 0.16019     | 0.43637     | -2.4678   | 0.9932  |
|              | 0.15322         | 0.43911   | 0.43637 | 0.737317837 |             |           |         |
| NA           | ENSG00000251610 | -0.63132  | 0.73608 | -1.5942     | 0.94455     | -1.0434   | 0.85162 |
|              | 0.16012         | 0.43639   | 0.43639 | 0.737317837 |             |           |         |
| MIR543       | ENSG00000212040 | 0.16008   | 0.43641 | 0.16008     | 0.43641     | 0.16008   |         |
|              | 0.43641         | 0.16008   | 0.43641 | 0.43641     | 0.737317837 |           |         |
| GSG1L2       | ENSG00000214978 | 0.16009   | 0.43641 | -0.13516    | 0.55376     | 0.16009   |         |
|              | 0.43641         | -1.0422   | 0.85135 | 0.43641     | 0.737317837 |           |         |
| PARD3-AS1    | ENSG00000226386 | 0.16002   | 0.43643 | 0.16002     | 0.43643     | 0.16002   |         |
|              | 0.43643         | 0.16002   | 0.43643 | 0.43643     | 0.737317837 |           |         |
| RNU6-838P    | ENSG00000200269 | 0.15999   | 0.43644 | 0.15999     | 0.43644     | 0.15999   |         |
|              | 0.43644         | 0.15999   | 0.43644 | 0.43644     | 0.737317837 |           |         |
| BOLL         | ENSG00000152430 | -0.82803  | 0.79617 | -0.90174    | 0.8164      | -0.16538  | 0.56568 |
|              | 0.15992         | 0.43647   | 0.43647 | 0.737317837 |             |           |         |
| RABGEF1      | ENSG00000154710 | -0.92221  | 0.82179 | -0.20027    | 0.57937     | 0.15991   |         |
|              | 0.43648         | -0.80167  | 0.78863 | 0.43648     | 0.737317837 |           |         |
| KRT18P17     | ENSG00000213943 | -0.23072  | 0.59123 | 0.1599      | 0.43648     | -0.10749  |         |
|              | 0.5428          | -0.13341  | 0.55306 | 0.43648     | 0.737317837 |           |         |
| ZNF703       | ENSG00000183779 | -1.0464   | 0.85231 | 0.14713     | 0.44151     | 0.15986   |         |
|              | 0.4365          | -0.92375  | 0.82219 | 0.4365      | 0.737317837 |           |         |
| C21orf91-OT1 | ENSG00000240770 | 0.15985   | 0.4365  | 0.15985     | 0.4365      | 0.15985   |         |
|              | 0.4365          | 0.15985   | 0.4365  | 0.4365      | 0.737317837 |           |         |
| NA           | ENSG00000248516 | 0.068751  | 0.47259 | 0.15986     | 0.4365      | 0.068751  | 0.47259 |
|              | 0.068751        | 0.47259   | 0.4365  | 0.737317837 |             |           |         |
| NA           | ENSG00000279536 | 0.15982   | 0.43651 | 0.15982     | 0.43651     | 0.15982   | 0.43651 |
|              | 0.15982         | 0.43651   | 0.43651 | 0.737317837 |             |           |         |
| SNRPC        | ENSG00000124562 | 0.0011886 | 0.49953 | 0.15979     | 0.43652     | -0.19601  | 0.5777  |
|              | -0.92071        | 0.8214    | 0.43652 | 0.737317837 |             |           |         |
| NA           | ENSG00000244561 | 0.15979   | 0.43652 | -0.99767    | 0.84078     | -1.1555   | 0.87606 |
|              | 0.15979         | 0.43652   | 0.43652 | 0.737317837 |             |           |         |
| ERLEC1       | ENSG00000068912 | -0.77706  | 0.78144 | 0.15969     | 0.43656     | 0.15969   |         |
|              | 0.43656         | 0.15969   | 0.43656 | 0.43656     | 0.737334285 |           |         |
| NA           | ENSG00000241792 | -1.382    | 0.91652 | 0.15969     | 0.43656     | -1.382    | 0.91652 |
|              | -1.3259         | 0.90757   | 0.43656 | 0.737334285 |             |           |         |
| PRKG1        | ENSG00000185532 | 0.15959   | 0.4366  | -0.73277    | 0.76815     | -0.5126   | 0.69588 |
|              | -2.1687         | 0.98495   | 0.4366  | 0.737376287 |             |           |         |
| SLITRK5      | ENSG00000165300 | 0.15948   | 0.43665 | -0.22266    | 0.5881      | -0.11327  |         |
|              | 0.54509         | -0.2176   | 0.58613 | 0.43665     | 0.737435174 |           |         |
| MTRES1       | ENSG00000130349 | 0.15935   | 0.4367  | 0.042957    | 0.48287     | -0.50291  |         |
|              | 0.69249         | -0.84057  | 0.79971 | 0.4367      | 0.73745983  |           |         |
| MX1          | ENSG00000157601 | 0.15932   | 0.43671 | -0.22316    | 0.5883      | -0.9325   | 0.82446 |
|              | -0.65783        | 0.74468   | 0.43671 | 0.73745983  |             |           |         |
| NA           | ENSG00000219470 | 0.15931   | 0.43671 | 0.15931     | 0.43671     | 0.15931   | 0.43671 |
|              | 0.15931         | 0.43671   | 0.43671 | 0.73745983  |             |           |         |
| PCBP2-OT1    | ENSG00000282977 | 0.15917   | 0.43677 | 0.15917     | 0.43677     | 0.15917   |         |
|              | 0.43677         | 0.15917   | 0.43677 | 0.43677     | 0.737535592 |           |         |
| VCPIP1       | ENSG00000175073 | 0.15903   | 0.43682 | -0.73416    | 0.76857     | -0.97141  |         |
|              | 0.83433         | -0.73416  | 0.76857 | 0.43682     | 0.737543349 |           |         |
| RNU6-892P    | ENSG00000222267 | -0.10907  | 0.54343 | -0.14236    | 0.5566      | -0.3626   |         |

|              |                 |          |         |             |             |          |         |  |
|--------------|-----------------|----------|---------|-------------|-------------|----------|---------|--|
|              | 0.64155         | 0.15902  | 0.43682 | 0.43682     | 0.737543349 |          |         |  |
| NA           | ENSG00000253975 | 0.15903  | 0.43682 | -0.56831    | 0.71509     | 0.15903  | 0.43682 |  |
|              | 0.15903         | 0.43682  | 0.43682 | 0.737543349 |             |          |         |  |
| KCNF1        | ENSG00000162975 | 0.15895  | 0.43685 | -0.8326     | 0.79746     | -1.6335  | 0.94882 |  |
|              | -0.78528        | 0.78386  | 0.43685 | 0.737554741 |             |          |         |  |
| NA           | ENSG00000257065 | 0.15893  | 0.43686 | 0.15893     | 0.43686     | 0.15893  | 0.43686 |  |
|              | 0.15893         | 0.43686  | 0.43686 | 0.737554741 |             |          |         |  |
| ZNF600       | ENSG00000189190 | -0.12527 | 0.54985 | -0.090306   | 0.53598     | 0.15888  |         |  |
|              | 0.43688         | -0.22051 | 0.58726 | 0.43688     | 0.737554741 |          |         |  |
| CSMD2-AS1    | ENSG00000231163 | 0.15871  | 0.43695 | -0.10696    | 0.54259     | -0.10696 |         |  |
|              | 0.54259         | -0.94838 | 0.82853 | 0.43695     | 0.737554741 |          |         |  |
| PMM1         | ENSG00000100417 | 0.15866  | 0.43697 | 0.077231    | 0.46922     | -1.2449  | 0.89342 |  |
|              | -0.54249        | 0.70626  | 0.43697 | 0.737554741 |             |          |         |  |
| NA           | ENSG00000248432 | 0.15866  | 0.43697 | 0.15866     | 0.43697     | 0.15866  | 0.43697 |  |
|              | 0.15866         | 0.43697  | 0.43697 | 0.737554741 |             |          |         |  |
| NA           | ENSG00000271048 | 0.15867  | 0.43697 | -0.78348    | 0.78333     | -0.64935 | 0.74194 |  |
|              | -0.64935        | 0.74194  | 0.43697 | 0.737554741 |             |          |         |  |
| NA           | ENSG00000259926 | 0.15862  | 0.43698 | 0.15862     | 0.43698     | 0.15862  | 0.43698 |  |
|              | 0.15862         | 0.43698  | 0.43698 | 0.737554741 |             |          |         |  |
| OPRM1        | ENSG00000112038 | 0.15853  | 0.43702 | -0.0065953  | 0.50263     | -0.69314 | 0.75589 |  |
|              | -0.52918        | 0.70166  | 0.43702 | 0.737554741 |             |          |         |  |
| HLA-DPB2     | ENSG00000224557 | -0.54223 | 0.70617 | -0.20075    | 0.57955     | 0.15853  |         |  |
|              | 0.43702         | 0.082341 | 0.46719 | 0.43702     | 0.737554741 |          |         |  |
| EDEM1        | ENSG00000134109 | -0.97419 | 0.83502 | 0.15848     | 0.43704     | -1.1027  | 0.86493 |  |
|              | -1.4965         | 0.93273  | 0.43704 | 0.737554741 |             |          |         |  |
| NA           | ENSG00000261320 | 0.15848  | 0.43704 | 0.15848     | 0.43704     | 0.15848  | 0.43704 |  |
|              | 0.15848         | 0.43704  | 0.43704 | 0.737554741 |             |          |         |  |
| NA           | ENSG00000271774 | -1.0964  | 0.86355 | 0.15845     | 0.43705     | -0.94815 | 0.82847 |  |
|              | -0.94815        | 0.82847  | 0.43705 | 0.737554741 |             |          |         |  |
| BAG1         | ENSG00000107262 | 0.15843  | 0.43706 | -0.44507    | 0.67187     | -0.76056 | 0.77654 |  |
|              | -0.57827        | 0.71846  | 0.43706 | 0.737554741 |             |          |         |  |
| NA           | ENSG00000224194 | -0.60773 | 0.72832 | -0.11384    | 0.54532     | -0.26019 | 0.60264 |  |
|              | 0.15837         | 0.43708  | 0.43708 | 0.737554741 |             |          |         |  |
| MIR3921      | ENSG00000264897 | -0.55277 | 0.70979 | 0.15835     | 0.43709     | 0.15835  |         |  |
|              | 0.43709         | 0.15835  | 0.43709 | 0.43709     | 0.737554741 |          |         |  |
| HLA-DPA3     | ENSG00000237398 | 0.15832  | 0.4371  | -0.17499    | 0.56946     | 0.15832  |         |  |
|              | 0.4371          | 0.15832  | 0.4371  | 0.4371      | 0.737554741 |          |         |  |
| ECM1P1       | ENSG00000270639 | -0.19435 | 0.57705 | -0.26217    | 0.6034      | -0.93669 |         |  |
|              | 0.82554         | 0.15827  | 0.43712 | 0.43712     | 0.737554741 |          |         |  |
| GJC3         | ENSG00000176402 | -0.93678 | 0.82557 | -0.34712    | 0.63575     | -0.93678 | 0.82557 |  |
|              | 0.15823         | 0.43714  | 0.43714 | 0.737554741 |             |          |         |  |
| RPL10P10     | ENSG00000216347 | 0.15821  | 0.43715 | 0.15821     | 0.43715     | 0.15821  |         |  |
|              | 0.43715         | 0.15821  | 0.43715 | 0.43715     | 0.737554741 |          |         |  |
| TARS1        | ENSG00000113407 | -0.28018 | 0.61033 | -0.61443    | 0.73054     | 0.15817  | 0.43716 |  |
|              | -1.2106         | 0.88698  | 0.43716 | 0.737554741 |             |          |         |  |
| GNAI2P1      | ENSG00000255749 | 0.15818  | 0.43716 | 0.15818     | 0.43716     | 0.15818  |         |  |
|              | 0.43716         | 0.15818  | 0.43716 | 0.43716     | 0.737554741 |          |         |  |
| UBQLNL       | ENSG00000175518 | 0.15811  | 0.43719 | 0.15811     | 0.43719     | 0.15811  |         |  |
|              | 0.43719         | 0.15811  | 0.43719 | 0.43719     | 0.737554741 |          |         |  |
| NA           | ENSG00000271040 | 0.1581   | 0.43719 | 0.1581      | 0.43719     | 0.1581   | 0.43719 |  |
|              | 0.1581          | 0.43719  | 0.43719 | 0.737554741 |             |          |         |  |
| RPS17P14     | ENSG00000243287 | 0.15802  | 0.43722 | 0.15802     | 0.43722     | 0.15802  |         |  |
|              | 0.43722         | 0.15802  | 0.43722 | 0.43722     | 0.737579817 |          |         |  |
| NA           | ENSG00000258086 | -0.88201 | 0.81112 | 0.15792     | 0.43726     | -0.88201 | 0.81112 |  |
|              | -0.88201        | 0.81112  | 0.43726 | 0.737621761 |             |          |         |  |
| STAT3        | ENSG00000168610 | -0.15085 | 0.55995 | 0.15784     | 0.43729     | -1.1291  | 0.87058 |  |
|              | -0.63413        | 0.737    | 0.43729 | 0.737646833 |             |          |         |  |
| OSR1         | ENSG00000143867 | -0.37069 | 0.64457 | -0.47417    | 0.68231     | 0.13263  | 0.44724 |  |
|              | 0.15769         | 0.43735  | 0.43735 | 0.737696504 |             |          |         |  |
| MARCHF11-AS1 | ENSG00000250981 | 0.15768  | 0.43735 | -0.47106    | 0.6812      | 0.061319 |         |  |
|              | 0.47555         | -1.2353  | 0.89164 | 0.43735     | 0.737696504 |          |         |  |
| RNU6-388P    | ENSG00000252821 | 0.15764  | 0.43737 | 0.15764     | 0.43737     | 0.15764  |         |  |

|           |                 |             |          |             |             |           |         |
|-----------|-----------------|-------------|----------|-------------|-------------|-----------|---------|
|           | 0.43737         | 0.15764     | 0.43737  | 0.43737     | 0.737696504 |           |         |
| NA        | ENSG00000255900 | 0.15761     | 0.43738  | -0.32396    | 0.62702     | 0.15761   | 0.43738 |
|           | 0.15761         | 0.43738     | 0.43738  | 0.737696504 |             |           |         |
| TATDN1    | ENSG00000147687 | 0.15752     | 0.43742  | -0.63904    | 0.7386      | -0.10393  |         |
|           | 0.54139         | -0.26396    | 0.6041   | 0.43742     | 0.737707757 |           |         |
| UBE2T     | ENSG00000077152 | -0.0071803  | 0.50286  | -0.72536    | 0.76589     | -1.1363   | 0.87208 |
|           | 0.15726         | 0.43752     | 0.43752  | 0.737707757 |             |           |         |
| UBE2V2    | ENSG00000169139 | -0.49128    | 0.68839  | 0.15724     | 0.43753     | -1.3781   |         |
|           | 0.91591         | -0.83089    | 0.79698  | 0.43753     | 0.737707757 |           |         |
| NA        | ENSG00000254239 | 0.15725     | 0.43753  | 0.15725     | 0.43753     | 0.15725   | 0.43753 |
|           | 0.15725         | 0.43753     | 0.43753  | 0.737707757 |             |           |         |
| TBATA     | ENSG00000166220 | 0.15719     | 0.43755  | -0.33274    | 0.63033     | 0.15719   | 0.43755 |
|           | -0.29043        | 0.61425     | 0.43755  | 0.737707757 |             |           |         |
| TAS1R2    | ENSG00000179002 | -0.45943    | 0.67704  | -1.2953     | 0.90239     | -0.16586  |         |
|           | 0.56587         | 0.15717     | 0.43756  | 0.43756     | 0.737707757 |           |         |
| NEK4P1    | ENSG00000225735 | 0.15717     | 0.43756  | 0.15717     | 0.43756     | 0.15717   |         |
|           | 0.43756         | 0.15717     | 0.43756  | 0.43756     | 0.737707757 |           |         |
| NA        | ENSG00000253784 | -0.09129    | 0.53637  | 0.15715     | 0.43756     | -0.65111  | 0.74251 |
|           | -1.3548         | 0.91226     | 0.43756  | 0.737707757 |             |           |         |
| WDR70     | ENSG00000082068 | 0.15707     | 0.4376   | 0.0021705   | 0.49913     | -0.73279  | 0.76816 |
|           | -0.062911       | 0.52508     | 0.4376   | 0.737707757 |             |           |         |
| RAC1      | ENSG00000136238 | -0.011849   | 0.50473  | -1.1321     | 0.87121     | 0.15704   | 0.43761 |
|           | -0.011849       | 0.50473     | 0.43761  | 0.737707757 |             |           |         |
| ST20      | ENSG00000180953 | -0.58212    | 0.71976  | -0.10617    | 0.54228     | -0.10617  | 0.54228 |
|           | 0.15702         | 0.43761     | 0.43761  | 0.737707757 |             |           |         |
| SMILR     | ENSG00000255364 | 0.15695     | 0.43764  | -0.60829    | 0.7285      | -0.65217  | 0.74285 |
|           | -0.72826        | 0.76677     | 0.43764  | 0.737707757 |             |           |         |
| MMP12     | ENSG00000262406 | 0.15694     | 0.43764  | -0.29372    | 0.61552     | 0.15694   | 0.43764 |
|           | 0.15694         | 0.43764     | 0.43764  | 0.737707757 |             |           |         |
| RPL3P4    | ENSG00000232573 | 0.15693     | 0.43765  | 0.15693     | 0.43765     | 0.15693   |         |
|           | 0.43765         | 0.15693     | 0.43765  | 0.43765     | 0.737707757 |           |         |
| ISCA1P3   | ENSG00000261965 | -0.6907549  | -0.63133 | 0.73609     | -0.90798    | 0.81806   |         |
|           | 0.15691         | 0.43766     | 0.43766  | 0.737707757 |             |           |         |
| FAM220CP  | ENSG00000213612 | -0.50043    | 0.69161  | -0.78029    | 0.78239     | -0.67859  |         |
|           | 0.7513          | 0.15684     | 0.43768  | 0.43768     | 0.737707757 |           |         |
| MIR4635   | ENSG00000263834 | 0.15684     | 0.43769  | 0.15684     | 0.43769     | 0.15684   |         |
|           | 0.43769         | 0.15684     | 0.43769  | 0.43769     | 0.737707757 |           |         |
| ART2BP    | ENSG00000237408 | -0.81653    | 0.7929   | 0.15681     | 0.4377      | -1.0419   |         |
|           | 0.85126         | -0.00065476 | 0.50026  | 0.4377      | 0.737707757 |           |         |
| ABCA7     | ENSG00000064687 | -0.51187    | 0.69563  | -0.12576    | 0.55004     | 0.15679   | 0.43771 |
|           | -0.96299        | 0.83222     | 0.43771  | 0.737707757 |             |           |         |
| NA        | ENSG00000229196 | 0.15676     | 0.43772  | 0.15676     | 0.43772     | 0.15676   | 0.43772 |
|           | 0.15676         | 0.43772     | 0.43772  | 0.737707757 |             |           |         |
| NA        | ENSG00000249276 | -0.44166    | 0.67063  | 0.15675     | 0.43772     | -1.0416   | 0.8512  |
|           | 0.15675         | 0.43772     | 0.43772  | 0.737707757 |             |           |         |
| DCLRE1B   | ENSG00000118655 | 0.15673     | 0.43773  | 0.15673     | 0.43773     | 0.15673   |         |
|           | 0.43773         | -0.33086    | 0.62963  | 0.43773     | 0.737707757 |           |         |
| NA        | ENSG00000253429 | -0.088763   | 0.53536  | -0.33748    | 0.63212     | 0.15669   | 0.43774 |
|           | 0.15669         | 0.43774     | 0.43774  | 0.737707757 |             |           |         |
| MIR607    | ENSG00000207976 | 0.15667     | 0.43775  | -0.30973    | 0.62162     | -0.26151  |         |
|           | 0.60315         | -0.33455    | 0.63102  | 0.43775     | 0.737707757 |           |         |
| KCNK10    | ENSG00000100433 | -0.63709    | 0.73797  | -0.63709    | 0.73797     | 0.15664   |         |
|           | 0.43777         | -0.44052    | 0.67022  | 0.43777     | 0.737715949 |           |         |
| LINC02386 | ENSG00000257756 | 0.13335     | 0.44696  | -0.55464    | 0.71043     | 0.15642   |         |
|           | 0.43785         | 0.044626    | 0.4822   | 0.43785     | 0.737763206 |           |         |
| CLEC7A    | ENSG00000172243 | 0.15639     | 0.43786  | -0.080298   | 0.532       | -0.65081  | 0.74241 |
|           | -0.014063       | 0.50561     | 0.43786  | 0.737763206 |             |           |         |
| NTNG1     | ENSG00000162631 | -0.36507    | 0.64247  | -1.3126     | 0.90534     | -0.067438 | 0.52688 |
|           | 0.15637         | 0.43787     | 0.43787  | 0.737763206 |             |           |         |
| RNA5SP367 | ENSG00000252366 | 0.15638     | 0.43787  | 0.15638     | 0.43787     | 0.15638   |         |
|           | 0.43787         | 0.15638     | 0.43787  | 0.43787     | 0.737763206 |           |         |
| NA        | ENSG00000240401 | 0.15631     | 0.4379   | 0.15631     | 0.4379      | 0.15631   | 0.4379  |

|            |                 |           |         |             |             |           |         |  |
|------------|-----------------|-----------|---------|-------------|-------------|-----------|---------|--|
|            | 0.15631         | 0.4379    | 0.4379  | 0.737763206 |             |           |         |  |
| RAB6A      | ENSG00000175582 | 0.15622   | 0.43793 | -0.91085    | 0.81881     | -0.32914  | 0.62897 |  |
|            | -0.07443        | 0.52967   | 0.43793 | 0.737763206 |             |           |         |  |
| ANKRD13B   | ENSG00000198720 | 0.1562    | 0.43794 | -0.73543    | 0.76896     | -0.56562  |         |  |
|            | 0.71417         | 0.1562    | 0.43794 | 0.43794     | 0.737763206 |           |         |  |
| VN1R80P    | ENSG00000268598 | 0.15613   | 0.43796 | 0.43796     | 0.15613     | 0.43796   | 0.15613 |  |
|            | 0.43796         | 0.15613   | 0.43796 | 0.43796     | 0.737763206 |           |         |  |
| EBI3       | ENSG00000105246 | 0.15612   | 0.43797 | 0.15612     | 0.43797     | 0.15612   | 0.43797 |  |
|            | 0.11875         | 0.45274   | 0.43797 | 0.737763206 |             |           |         |  |
| PRKACA     | ENSG00000072062 | -0.98683  | 0.83814 | -0.12125    | 0.54825     | -1.4891   |         |  |
|            | 0.93178         | 0.1561    | 0.43798 | 0.43798     | 0.737763206 |           |         |  |
| HNRNPA1P62 | ENSG00000259228 | -0.37507  | 0.64619 | -0.074549   | 0.52971     | 0.15606   |         |  |
|            | 0.43799         | 0.15606   | 0.43799 | 0.43799     | 0.737763206 |           |         |  |
| NA         | ENSG00000262818 | -1.603    | 0.94553 | 0.15606     | 0.43799     | -1.8327   | 0.96658 |  |
|            | -0.73087        | 0.76757   | 0.43799 | 0.737763206 |             |           |         |  |
| MMP15      | ENSG00000102996 | 0.15602   | 0.43801 | -0.88516    | 0.81196     | -0.01932  | 0.50771 |  |
|            | -0.54545        | 0.70728   | 0.43801 | 0.737763206 |             |           |         |  |
| PKIA-AS1   | ENSG00000254266 | 0.15601   | 0.43801 | 0.15601     | 0.43801     | 0.15601   |         |  |
|            | 0.43801         | 0.15601   | 0.43801 | 0.43801     | 0.737763206 |           |         |  |
| FLCN       | ENSG00000154803 | 0.1559    | 0.43805 | 0.1559      | 0.43805     | 0.1559    | 0.43805 |  |
|            | -0.029048       | 0.51159   | 0.43805 | 0.737779577 |             |           |         |  |
| LINC01748  | ENSG00000226476 | -1.0489   | 0.85288 | -0.31153    | 0.6223      | -0.39956  |         |  |
|            | 0.65526         | 0.15592   | 0.43805 | 0.43805     | 0.737779577 |           |         |  |
| NA         | ENSG00000258934 | 0.15584   | 0.43808 | 0.15584     | 0.43808     | 0.15584   | 0.43808 |  |
|            | 0.15584         | 0.43808   | 0.43808 | 0.737804604 |             |           |         |  |
| NA         | ENSG00000233654 | 0.031711  | 0.48735 | 0.031711    | 0.48735     | 0.031711  | 0.48735 |  |
|            | 0.15569         | 0.43814   | 0.43814 | 0.737862833 |             |           |         |  |
| MIR320D1   | ENSG00000211491 | 0.15567   | 0.43815 | -0.016549   | 0.5066      | -0.016549 |         |  |
|            | 0.5066          | -0.016549 | 0.5066  | 0.43815     | 0.737862833 |           |         |  |
| HNRNPABP1  | ENSG00000255734 | 0.15564   | 0.43816 | 0.15564     | 0.43816     | 0.15564   |         |  |
|            | 0.43816         | 0.15564   | 0.43816 | 0.43816     | 0.737862833 |           |         |  |
| NA         | ENSG00000260194 | 0.15549   | 0.43822 | 0.15549     | 0.43822     | -1.0696   | 0.85759 |  |
|            | 0.15549         | 0.43822   | 0.43822 | 0.737938372 |             |           |         |  |
| LINC02073  | ENSG00000267452 | -0.49986  | 0.69141 | -0.62081    | 0.73264     | 0.15511   |         |  |
|            | 0.43837         | 0.041199  | 0.48357 | 0.43837     | 0.738156786 |           |         |  |
| AURKB      | ENSG00000178999 | -0.16182  | 0.56428 | 0.15507     | 0.43838     | -0.16182  | 0.56428 |  |
|            | -1.092          | 0.86257   | 0.43838 | 0.738156786 |             |           |         |  |
| KCNK17     | ENSG00000124780 | -0.062299 | 0.52484 | 0.13385     | 0.44676     | 0.15503   |         |  |
|            | 0.4384          | -0.54893  | 0.70847 | 0.4384      | 0.738164956 |           |         |  |
| IMMP1L     | ENSG00000148950 | -0.78731  | 0.78445 | -0.78731    | 0.78445     | 0.15481   |         |  |
|            | 0.43849         | -0.78731  | 0.78445 | 0.43849     | 0.738211455 |           |         |  |
| NA         | ENSG00000271803 | 0.15479   | 0.4385  | 0.15479     | 0.4385      | 0.15479   | 0.4385  |  |
|            | 0.15479         | 0.4385    | 0.4385  | 0.738211455 |             |           |         |  |
| PSMA8      | ENSG00000154611 | -0.40159  | 0.65601 | -0.40159    | 0.65601     | 0.15472   | 0.43852 |  |
|            | -0.016676       | 0.50665   | 0.43852 | 0.738211455 |             |           |         |  |
| RNU6-958P  | ENSG00000252804 | 0.15472   | 0.43852 | -1.8605     | 0.96859     | 0.15472   |         |  |
|            | 0.43852         | 0.15472   | 0.43852 | 0.43852     | 0.738211455 |           |         |  |
| MIR4797    | ENSG00000265850 | 0.15468   | 0.43854 | -0.16402    | 0.56514     | -0.32687  |         |  |
|            | 0.62812         | -0.32687  | 0.62812 | 0.43854     | 0.738211455 |           |         |  |
| NA         | ENSG00000279499 | -0.11726  | 0.54667 | 0.15465     | 0.43855     | 0.11026   | 0.4561  |  |
|            | 0.11026         | 0.4561    | 0.43855 | 0.738211455 |             |           |         |  |
| NA         | ENSG00000270926 | 0.15456   | 0.43858 | 0.15456     | 0.43858     | 0.15456   | 0.43858 |  |
|            | 0.15456         | 0.43858   | 0.43858 | 0.738211455 |             |           |         |  |
| LINC00702  | ENSG00000233117 | -0.79021  | 0.7853  | 0.15449     | 0.43861     | -0.79021  |         |  |
|            | 0.7853          | -0.86484  | 0.80644 | 0.43861     | 0.738211455 |           |         |  |
| SAPCD2P2   | ENSG00000235368 | 0.15448   | 0.43861 | 0.15448     | 0.43861     | 0.15448   |         |  |
|            | 0.43861         | 0.15448   | 0.43861 | 0.43861     | 0.738211455 |           |         |  |
| ABCC12     | ENSG00000140798 | 0.15448   | 0.43862 | -0.57804    | 0.71838     | -0.026184 |         |  |
|            | 0.51044         | 0.11445   | 0.45444 | 0.43862     | 0.738211455 |           |         |  |
| CEP44      | ENSG00000164118 | -0.50149  | 0.69199 | 0.15447     | 0.43862     | -1.0307   | 0.84865 |  |
|            | -1.3761         | 0.9156    | 0.43862 | 0.738211455 |             |           |         |  |
| NA         | ENSG00000257083 | 0.15445   | 0.43863 | 0.15445     | 0.43863     | 0.15445   | 0.43863 |  |

|            |                 |           |         |             |             |            |         |  |
|------------|-----------------|-----------|---------|-------------|-------------|------------|---------|--|
|            | -0.79984        | 0.7881    | 0.43863 | 0.738211455 |             |            |         |  |
| RNU6-408P  | ENSG00000251719 | 0.1544    | 0.43865 | -0.19659    | 0.57792     | 0.1544     |         |  |
|            | 0.43865         | 0.1544    | 0.43865 | 0.43865     | 0.738211455 |            |         |  |
| NA         | ENSG00000262050 | 0.15439   | 0.43865 | 0.15439     | 0.43865     | 0.15439    | 0.43865 |  |
|            | 0.15439         | 0.43865   | 0.43865 | 0.738211455 |             |            |         |  |
| NA         | ENSG00000252601 | 0.15435   | 0.43867 | 0.15435     | 0.43867     | 0.15435    | 0.43867 |  |
|            | 0.15435         | 0.43867   | 0.43867 | 0.738211455 |             |            |         |  |
| NA         | ENSG00000262429 | 0.15434   | 0.43867 | 0.15434     | 0.43867     | 0.15434    | 0.43867 |  |
|            | 0.15434         | 0.43867   | 0.43867 | 0.738211455 |             |            |         |  |
| NA         | ENSG00000280036 | 0.1543    | 0.43869 | -0.0091195  | 0.50364     | 0.1543     | 0.43869 |  |
|            | 0.1543          | 0.43869   | 0.43869 | 0.738219618 |             |            |         |  |
| RNU6-1123P | ENSG00000199217 | 0.15416   | 0.43874 | 0.15416     | 0.43874     | 0.15416    |         |  |
|            | 0.43874         | -0.40435  | 0.65702 | 0.43874     | 0.738269596 |            |         |  |
| NA         | ENSG00000268217 | 0.15414   | 0.43875 | -1.3704     | 0.91472     | -0.35795   | 0.63981 |  |
|            | -0.70618        | 0.75996   | 0.43875 | 0.738269596 |             |            |         |  |
| LINC02157  | ENSG00000259763 | -0.3034   | 0.61921 | 0.15402     | 0.4388      | -0.18634   |         |  |
|            | 0.57391         | -0.85725  | 0.80435 | 0.4388      | 0.7383109   |            |         |  |
| ASAP1      | ENSG00000153317 | 0.15398   | 0.43881 | -0.73744    | 0.76957     | -0.47368   | 0.68214 |  |
|            | -1.1304         | 0.87085   | 0.43881 | 0.7383109   |             |            |         |  |
| FZD10      | ENSG00000111432 | 0.15396   | 0.43882 | 0.15396     | 0.43882     | 0.15396    | 0.43882 |  |
|            | -0.485          | 0.68616   | 0.43882 | 0.7383109   |             |            |         |  |
| NA         | ENSG00000205562 | 0.15374   | 0.43891 | 0.15374     | 0.43891     | 0.15374    | 0.43891 |  |
|            | 0.15374         | 0.43891   | 0.43891 | 0.738410819 |             |            |         |  |
| RN7SKP27   | ENSG00000222616 | 0.15372   | 0.43892 | 0.15372     | 0.43892     | 0.15372    |         |  |
|            | 0.43892         | 0.15372   | 0.43892 | 0.43892     | 0.738410819 |            |         |  |
| ITFG1      | ENSG00000129636 | -1.1203   | 0.8687  | 0.13048     | 0.44809     | 0.15366    | 0.43894 |  |
|            | 0.049799        | 0.48014   | 0.43894 | 0.738410819 |             |            |         |  |
| SCN3A      | ENSG00000153253 | 0.02236   | 0.49108 | 0.15365     | 0.43894     | -0.020441  | 0.50815 |  |
|            | 0.13323         | 0.447     | 0.43894 | 0.738410819 |             |            |         |  |
| SULT1A2    | ENSG00000197165 | 0.1536    | 0.43896 | 0.1536      | 0.43896     | 0.1536     |         |  |
|            | 0.43896         | 0.1536    | 0.43896 | 0.43896     | 0.738418973 |            |         |  |
| FAM228B    | ENSG00000219626 | -0.67544  | 0.7503  | -0.72677    | 0.76632     | 0.15355    |         |  |
|            | 0.43898         | -1.4068   | 0.92026 | 0.43898     | 0.738427126 |            |         |  |
| OR6C2      | ENSG00000179695 | 0.15341   | 0.43904 | -0.59035    | 0.72252     | -0.52373   | 0.69977 |  |
|            | -0.52373        | 0.69977   | 0.43904 | 0.738467882 |             |            |         |  |
| SHC2       | ENSG00000129946 | -1.6403   | 0.94953 | -0.20438    | 0.58097     | 0.15337    | 0.43905 |  |
|            | -1.0638         | 0.85628   | 0.43905 | 0.738467882 |             |            |         |  |
| TSGA10     | ENSG00000135951 | -1.0839   | 0.8608  | -0.2545     | 0.60045     | 0.15337    |         |  |
|            | 0.43905         | -0.42871  | 0.66593 | 0.43905     | 0.738467882 |            |         |  |
| TNFRSF10B  | ENSG00000120889 | -0.62706  | 0.73469 | -0.16407    | 0.56516     | -1.672     |         |  |
|            | 0.95274         | 0.15331   | 0.43908 | 0.43908     | 0.738467882 |            |         |  |
| B4GALT4    | ENSG00000121578 | -0.37367  | 0.64568 | -0.37367    | 0.64568     | 0.1533     |         |  |
|            | 0.43908         | -0.67111  | 0.74893 | 0.43908     | 0.738467882 |            |         |  |
| NA         | ENSG00000249021 | 0.15315   | 0.43914 | 0.15315     | 0.43914     | 0.15315    | 0.43914 |  |
|            | 0.15315         | 0.43914   | 0.43914 | 0.738543303 |             |            |         |  |
| BCAN       | ENSG00000132692 | 0.15309   | 0.43916 | -0.34083    | 0.63338     | -0.33172   | 0.62995 |  |
|            | -0.55114        | 0.70923   | 0.43916 | 0.738551449 |             |            |         |  |
| LINC00408  | ENSG00000226250 | -0.078507 | 0.53129 | -0.46309    | 0.67835     | -1.1147    |         |  |
|            | 0.8675          | 0.15302   | 0.43919 | 0.43919     | 0.738576412 |            |         |  |
| TERF1P2    | ENSG00000187589 | -0.4439   | 0.67144 | 0.15296     | 0.43922     | -0.097497  |         |  |
|            | 0.53883         | 0.15296   | 0.43922 | 0.43922     | 0.738592702 |            |         |  |
| RNU6-79P   | ENSG00000199381 | -0.24204  | 0.59563 | 0.15291     | 0.43923     | -0.0065085 |         |  |
|            | 0.5026          | -0.62632  | 0.73445 | 0.43923     | 0.738592702 |            |         |  |
| FTH1P20    | ENSG00000226564 | -0.10315  | 0.54108 | 0.15268     | 0.43933     | -1.059     |         |  |
|            | 0.85521         | 0.15268   | 0.43933 | 0.43933     | 0.738735366 |            |         |  |
| NA         | ENSG00000108516 | 0.15258   | 0.43937 | 0.15258     | 0.43937     | 0.15258    | 0.43937 |  |
|            | -0.10732        | 0.54273   | 0.43937 | 0.738742429 |             |            |         |  |
| H2AC10P    | ENSG00000218690 | -0.29198  | 0.61485 | -0.29198    | 0.61485     | 0.15251    |         |  |
|            | 0.43939         | -0.059207 | 0.52361 | 0.43939     | 0.738742429 |            |         |  |
| ZNF91      | ENSG00000167232 | -0.80856  | 0.79062 | -0.89747    | 0.81527     | 0.15249    | 0.4394  |  |
|            | -0.24602        | 0.59717   | 0.4394  | 0.738742429 |             |            |         |  |
| LINC00596  | ENSG00000259334 | -0.42528  | 0.66468 | 0.15249     | 0.4394      | -0.071284  |         |  |

|             |                 |           |         |             |             |           |         |
|-------------|-----------------|-----------|---------|-------------|-------------|-----------|---------|
|             | 0.52841         | -0.05695  | 0.52271 | 0.4394      | 0.738742429 |           |         |
| KMT5C       | ENSG00000133247 | 0.15246   | 0.43941 | -0.025891   | 0.51033     | -0.025891 | 0.51033 |
|             | -0.025891       | 0.51033   | 0.43941 | 0.738742429 |             |           |         |
| RNU6-1273P  | ENSG00000199903 | -0.82693  | 0.79586 | -0.6418     | 0.7395      | -0.82693  |         |
|             | 0.79586         | 0.1524    | 0.43944 | 0.43944     | 0.738745187 |           |         |
| RORA        | ENSG00000069667 | -0.37229  | 0.64516 | 0.1523      | 0.43947     | -0.088041 | 0.53508 |
|             | -0.1703         | 0.56761   | 0.43947 | 0.738745187 |             |           |         |
| NA          | ENSG00000201368 | 0.15232   | 0.43947 | 0.15232     | 0.43947     | 0.15232   | 0.43947 |
|             | 0.15232         | 0.43947   | 0.43947 | 0.738745187 |             |           |         |
| PTTG3P      | ENSG00000213005 | -1.3514   | 0.91172 | -1.3514     | 0.91172     | -1.3514   |         |
|             | 0.91172         | 0.15221   | 0.43951 | 0.43951     | 0.738745187 |           |         |
| FAR1-IT1    | ENSG00000254791 | 0.1522    | 0.43952 | 0.1522      | 0.43952     | 0.1522    |         |
|             | 0.43952         | 0.1522    | 0.43952 | 0.43952     | 0.738745187 |           |         |
| PPP1R9A-AS1 | ENSG00000236197 | -0.99092  | 0.83914 | -0.28745    | 0.61312     | -0.1768   |         |
|             | 0.57017         | 0.15214   | 0.43954 | 0.43954     | 0.738745187 |           |         |
| MKI67       | ENSG00000148773 | 0.15205   | 0.43957 | 0.15205     | 0.43957     | 0.15205   | 0.43957 |
|             | 0.15205         | 0.43957   | 0.43957 | 0.738745187 |             |           |         |
| NA          | ENSG00000260648 | 0.15206   | 0.43957 | -0.18488    | 0.57334     | -0.18488  | 0.57334 |
|             | -0.18488        | 0.57334   | 0.43957 | 0.738745187 |             |           |         |
| LINC02737   | ENSG00000256684 | -0.54181  | 0.70602 | 0.15204     | 0.43958     | -0.1005   |         |
|             | 0.54003         | -0.1005   | 0.54003 | 0.43958     | 0.738745187 |           |         |
| NA          | ENSG00000268839 | 0.15197   | 0.4396  | 0.15197     | 0.4396      | 0.15197   | 0.4396  |
|             | 0.15197         | 0.4396    | 0.4396  | 0.738745187 |             |           |         |
| KRTAP4-9    | ENSG00000212722 | -0.53448  | 0.70349 | -0.47407    | 0.68228     | -0.27408  |         |
|             | 0.60799         | 0.15195   | 0.43961 | 0.43961     | 0.738745187 |           |         |
| GPC6        | ENSG00000183098 | -0.26205  | 0.60336 | -0.083488   | 0.53327     | -0.10566  | 0.54208 |
|             | 0.15192         | 0.43962   | 0.43962 | 0.738745187 |             |           |         |
| OCM         | ENSG00000122543 | -0.75101  | 0.77368 | 0.025496    | 0.48983     | -1.5439   | 0.9387  |
|             | 0.15191         | 0.43963   | 0.43963 | 0.738745187 |             |           |         |
| LINC00293   | ENSG00000253314 | -0.10611  | 0.54225 | 0.0094952   | 0.49621     | -0.13302  |         |
|             | 0.55291         | 0.1519    | 0.43963 | 0.43963     | 0.738745187 |           |         |
| CPB2-AS1    | ENSG00000235903 | 0.15188   | 0.43964 | -0.49041    | 0.68808     | -0.065109 |         |
|             | 0.52596         | 0.15188   | 0.43964 | 0.43964     | 0.738745187 |           |         |
| CDC16       | ENSG00000130177 | 0.15184   | 0.43966 | 0.15184     | 0.43966     | 0.15184   | 0.43966 |
|             | 0.15184         | 0.43966   | 0.43966 | 0.738745187 |             |           |         |
| NA          | ENSG00000255108 | 0.15177   | 0.43968 | 0.15177     | 0.43968     | 0.15177   | 0.43968 |
|             | 0.15177         | 0.43968   | 0.43968 | 0.738745187 |             |           |         |
| GTF2IP14    | ENSG00000226002 | -0.30803  | 0.62097 | 0.15173     | 0.4397      | -0.43064  |         |
|             | 0.66664         | -0.82097  | 0.79417 | 0.4397      | 0.738745187 |           |         |
| NA          | ENSG00000251598 | -0.28336  | 0.61155 | 0.15171     | 0.43971     | -0.72177  | 0.76478 |
|             | -1.0641         | 0.85636   | 0.43971 | 0.738745187 |             |           |         |
| NA          | ENSG00000267773 | 0.15168   | 0.43972 | -0.86915    | 0.80762     | -0.10015  | 0.53989 |
|             | -0.1141         | 0.54542   | 0.43972 | 0.738745187 |             |           |         |
| NA          | ENSG00000225606 | -0.48251  | 0.68528 | 0.15164     | 0.43973     | 0.15164   | 0.43973 |
|             | 0.15164         | 0.43973   | 0.43973 | 0.738745187 |             |           |         |
| RNU7-185P   | ENSG00000239102 | -0.060421 | 0.52409 | 0.043952    | 0.48247     | 0.043952  |         |
|             | 0.48247         | 0.15152   | 0.43978 | 0.43978     | 0.73875768  |           |         |
| NA          | ENSG00000277852 | 0.1515    | 0.43979 | -0.48912    | 0.68762     | 0.1515    | 0.43979 |
|             | 0.1515          | 0.43979   | 0.43979 | 0.73875768  |             |           |         |
| MADCAM1     | ENSG00000099866 | 0.1514    | 0.43983 | 0.1514      | 0.43983     | 0.1514    |         |
|             | 0.43983         | 0.1514    | 0.43983 | 0.43983     | 0.73875768  |           |         |
| RNF111      | ENSG00000157450 | -1.0502   | 0.85318 | -0.96516    | 0.83277     | 0.15139   |         |
|             | 0.43983         | -0.72362  | 0.76535 | 0.43983     | 0.73875768  |           |         |
| RNU6-63P    | ENSG00000252499 | -1.5049   | 0.93383 | 0.15141     | 0.43983     | 0.15141   |         |
|             | 0.43983         | 0.15141   | 0.43983 | 0.43983     | 0.73875768  |           |         |
| PMCHL1      | ENSG00000168967 | -0.89896  | 0.81566 | 0.15126     | 0.43988     | -1.5622   |         |
|             | 0.94088         | -1.3469   | 0.91099 | 0.43988     | 0.73875768  |           |         |
| ZNF704      | ENSG00000164684 | -0.58206  | 0.71974 | 0.15123     | 0.4399      | -1.0146   |         |
|             | 0.84485         | -0.81876  | 0.79354 | 0.4399      | 0.73875768  |           |         |
| PLD4        | ENSG00000166428 | -1.0395   | 0.85071 | -0.66567    | 0.74719     | 0.15122   | 0.4399  |
|             | -0.50973        | 0.69488   | 0.4399  | 0.73875768  |             |           |         |
| NA          | ENSG00000259475 | 0.15122   | 0.4399  | 0.031802    | 0.48732     | 0.15122   | 0.4399  |



|            |                 |          |         |             |             |          |         |         |
|------------|-----------------|----------|---------|-------------|-------------|----------|---------|---------|
|            | 0.15122         | 0.4399   | 0.4399  | 0.73875768  |             |          |         |         |
| CRISP2     | ENSG00000124490 | 0.15117  | 0.43992 | 0.15117     | 0.43992     | 0.15117  | 0.43992 | 0.15117 |
|            | 0.43992         | 0.15117  | 0.43992 | 0.43992     | 0.73875768  |          |         |         |
| LINC00469  | ENSG00000177338 | 0.15115  | 0.43993 | 0.43993     | -0.85054    | 0.80249  | 0.15115 |         |
|            | 0.43993         | 0.15115  | 0.43993 | 0.43993     | 0.73875768  |          |         |         |
| NA         | ENSG00000279623 | 0.15115  | 0.43993 | -0.47087    | 0.68113     | 0.15115  | 0.43993 |         |
|            | 0.15115         | 0.43993  | 0.43993 | 0.73875768  |             |          |         |         |
| MIR217     | ENSG00000207548 | -0.08305 | 0.53309 | -0.56285    | 0.71323     | 0.15112  |         |         |
|            | 0.43994         | -1.5028  | 0.93356 | 0.43994     | 0.73875768  |          |         |         |
| TRGV11     | ENSG00000211693 | 0.15106  | 0.43997 | 0.15106     | 0.43997     | 0.15106  |         |         |
|            | 0.43997         | 0.15106  | 0.43997 | 0.43997     | 0.73875768  |          |         |         |
| XPC        | ENSG00000154767 | -0.3656  | 0.64267 | -0.3656     | 0.64267     | -0.95565 | 0.83038 |         |
|            | 0.15101         | 0.43998  | 0.43998 | 0.73875768  |             |          |         |         |
| OR2A01P    | ENSG00000240621 | -1.0158  | 0.84514 | 0.15101     | 0.43998     | 0.15101  |         |         |
|            | 0.43998         | 0.13433  | 0.44657 | 0.43998     | 0.73875768  |          |         |         |
| DENND4B    | ENSG00000198837 | -0.46255 | 0.67816 | -0.74914    | 0.77311     | 0.15097  | 0.44    |         |
|            | -1.6982         | 0.95527  | 0.44    | 0.738765806 |             |          |         |         |
| NA         | ENSG00000227150 | -1.3566  | 0.91255 | -1.56       | 0.94062     | -1.1529  | 0.87553 |         |
|            | 0.1509          | 0.44003  | 0.44003 | 0.738773393 |             |          |         |         |
| NA         | ENSG00000236858 | 0.15086  | 0.44004 | 0.15086     | 0.44004     | 0.15086  | 0.44004 |         |
|            | 0.15086         | 0.44004  | 0.44004 | 0.738773393 |             |          |         |         |
| NA         | ENSG00000239805 | 0.15085  | 0.44005 | 0.15085     | 0.44005     | 0.15085  | 0.44005 |         |
|            | 0.15085         | 0.44005  | 0.44005 | 0.738773393 |             |          |         |         |
| NA         | ENSG00000235972 | 0.15064  | 0.44013 | 0.15064     | 0.44013     | 0.15064  | 0.44013 |         |
|            | 0.15064         | 0.44013  | 0.44013 | 0.738805346 |             |          |         |         |
| SERPINA10  | ENSG00000140093 | -0.58029 | 0.71914 | -0.39483    | 0.65351     | -0.58029 |         |         |
|            | 0.71914         | 0.15062  | 0.44014 | 0.44014     | 0.738805346 |          |         |         |
| NA         | ENSG00000260022 | 0.11745  | 0.45325 | 0.11745     | 0.45325     | 0.12311  | 0.45101 |         |
|            | 0.15063         | 0.44014  | 0.44014 | 0.738805346 |             |          |         |         |
| MAEA       | ENSG00000090316 | 0.15059  | 0.44015 | -0.5563     | 0.711       | -0.91604 | 0.82018 |         |
|            | -0.87156        | 0.80828  | 0.44015 | 0.738805346 |             |          |         |         |
| TYK2       | ENSG00000105397 | -0.15607 | 0.56201 | 0.15058     | 0.44015     | -0.40711 | 0.65804 |         |
|            | -0.51834        | 0.69789  | 0.44015 | 0.738805346 |             |          |         |         |
| NA         | ENSG00000279441 | 0.15056  | 0.44016 | 0.15056     | 0.44016     | 0.15056  | 0.44016 |         |
|            | 0.15056         | 0.44016  | 0.44016 | 0.738805346 |             |          |         |         |
| NA         | ENSG00000225905 | 0.034423 | 0.48627 | 0.034423    | 0.48627     | -0.58927 | 0.72216 |         |
|            | 0.15043         | 0.44021  | 0.44021 | 0.738829166 |             |          |         |         |
| TNK2       | ENSG00000061938 | -0.92718 | 0.82308 | -0.27344    | 0.60774     | -0.54546 | 0.70728 |         |
|            | 0.15034         | 0.44025  | 0.44025 | 0.738829166 |             |          |         |         |
| CCDC28B    | ENSG00000160050 | 0.15034  | 0.44025 | -0.05991    | 0.52389     | 0.15034  |         |         |
|            | 0.44025         | 0.076378 | 0.46956 | 0.44025     | 0.738829166 |          |         |         |
| NA         | ENSG00000263745 | -1.0182  | 0.84571 | -0.56456    | 0.71381     | -0.49071 | 0.68818 |         |
|            | 0.15033         | 0.44025  | 0.44025 | 0.738829166 |             |          |         |         |
| NA         | ENSG00000270304 | 0.15033  | 0.44025 | 0.15033     | 0.44025     | 0.15033  | 0.44025 |         |
|            | 0.15033         | 0.44025  | 0.44025 | 0.738829166 |             |          |         |         |
| MARK2P9    | ENSG00000232709 | 0.15028  | 0.44027 | 0.017863    | 0.49287     | 0.10915  |         |         |
|            | 0.45654         | 0.034615 | 0.48619 | 0.44027     | 0.738837286 |          |         |         |
| AFAP1L2    | ENSG00000169129 | -0.57009 | 0.71569 | -1.8532     | 0.96808     | 0.15021  |         |         |
|            | 0.4403          | -0.87327 | 0.80874 | 0.4403      | 0.738840513 |          |         |         |
| RNU6-1230P | ENSG00000207121 | -0.24087 | 0.59517 | 0.15009     | 0.44035     | -0.24087 |         |         |
|            | 0.59517         | -0.24087 | 0.59517 | 0.44035     | 0.738840513 |          |         |         |
| EEF1DP8    | ENSG00000236607 | -0.753   | 0.77428 | 0.15007     | 0.44036     | 0.084308 |         |         |
|            | 0.46641         | 0.084308 | 0.46641 | 0.44036     | 0.738840513 |          |         |         |
| GCA        | ENSG00000115271 | -0.89191 | 0.81378 | 0.15002     | 0.44037     | -0.61    | 0.72907 |         |
|            | -1.301          | 0.90337  | 0.44037 | 0.738840513 |             |          |         |         |
| LINC02686  | ENSG00000254594 | 0.15002  | 0.44037 | -0.51413    | 0.69642     | 0.13817  |         |         |
|            | 0.44505         | -0.21568 | 0.58538 | 0.44037     | 0.738840513 |          |         |         |
| GPC1       | ENSG00000063660 | -0.44951 | 0.67347 | -0.37639    | 0.64669     | -0.63559 | 0.73748 |         |
|            | 0.14999         | 0.44039  | 0.44039 | 0.738840513 |             |          |         |         |
| ECRG4      | ENSG00000119147 | -0.21643 | 0.58567 | 0.14991     | 0.44042     | -0.63257 | 0.73649 |         |
|            | -0.82798        | 0.79616  | 0.44042 | 0.738840513 |             |          |         |         |
| NA         | ENSG00000279834 | 0.14991  | 0.44042 | 0.14991     | 0.44042     | -0.1831  | 0.57264 |         |

|           |                 |            |             |             |             |            |         |       |
|-----------|-----------------|------------|-------------|-------------|-------------|------------|---------|-------|
|           | 0.099541        | 0.46035    | 0.44042     | 0.738840513 |             |            |         |       |
| IDNK      | ENSG00000148057 | 0.14987    | 0.44043     | -0.72636    | 0.76619     | 0.14987    | 0.44043 |       |
|           | 0.14987         | 0.44043    | 0.44043     | 0.738840513 |             |            |         |       |
| NA        | ENSG00000249305 | -0.40068   | 0.65567     | -1.46       | 0.92786     | 0.14982    | 0.44045 | -1.46 |
|           | 0.92786         | 0.44045    | 0.738840513 |             |             |            |         |       |
| CFAP298   | ENSG00000159079 | -0.88104   | 0.81085     | -0.76026    | 0.77645     | 0.14977    |         |       |
|           | 0.44047         | -0.67276   | 0.74945     | 0.44047     | 0.738840513 |            |         |       |
| HTRA4     | ENSG00000169495 | -0.59531   | 0.72418     | -0.59531    | 0.72418     | -0.59531   | 0.72418 |       |
|           | 0.14971         | 0.44049    | 0.44049     | 0.738840513 |             |            |         |       |
| NA        | ENSG00000235922 | -1.0183    | 0.84572     | -1.2118     | 0.88721     | 0.14973    | 0.44049 |       |
|           | -1.0183         | 0.84572    | 0.44049     | 0.738840513 |             |            |         |       |
| APLP2     | ENSG00000084234 | -0.0077377 | 0.50309     | -0.18037    | 0.57157     | -0.13188   | 0.55246 |       |
|           | 0.1497          | 0.4405     | 0.4405      | 0.738840513 |             |            |         |       |
| NA        | ENSG00000243444 | 0.02824    | 0.48874     | 0.14967     | 0.44051     | 0.02824    | 0.48874 |       |
|           | 0.02824         | 0.48874    | 0.44051     | 0.738840513 |             |            |         |       |
| NA        | ENSG00000207021 | 0.14963    | 0.44053     | -0.11876    | 0.54727     | -0.46536   | 0.67916 |       |
|           | 0.14963         | 0.44053    | 0.44053     | 0.738840513 |             |            |         |       |
| DNAJB6P5  | ENSG00000256441 | 0.14963    | 0.44053     | -0.53485    | 0.70362     | -0.83209   |         |       |
|           | 0.79732         | -0.61972   | 0.73228     | 0.44053     | 0.738840513 |            |         |       |
| RPS15A    | ENSG00000134419 | 0.14956    | 0.44056     | -0.24614    | 0.59721     | -0.9346    | 0.825   |       |
|           | -1.1191         | 0.86845    | 0.44056     | 0.738840513 |             |            |         |       |
| LRRC28    | ENSG00000168904 | -0.9088    | 0.81827     | 0.14954     | 0.44056     | -0.30294   |         |       |
|           | 0.61903         | -0.97087   | 0.83419     | 0.44056     | 0.738840513 |            |         |       |
| RNA5SP246 | ENSG00000239021 | -1.2675    | 0.89751     | 0.14947     | 0.44059     | -1.2675    |         |       |
|           | 0.89751         | -1.2675    | 0.89751     | 0.44059     | 0.738855108 |            |         |       |
| NA        | ENSG00000201217 | 0.14937    | 0.44063     | 0.14937     | 0.44063     | 0.14937    | 0.44063 |       |
|           | 0.14937         | 0.44063    | 0.44063     | 0.738855108 |             |            |         |       |
| LINC02594 | ENSG00000267440 | 0.14929    | 0.44066     | 0.03834     | 0.48471     | -0.1216    |         |       |
|           | 0.54839         | -0.66435   | 0.74677     | 0.44066     | 0.738855108 |            |         |       |
| GADL1     | ENSG00000144644 | -0.72463   | 0.76566     | 0.14926     | 0.44067     | -0.10475   | 0.54171 |       |
|           | -0.02001        | 0.50798    | 0.44067     | 0.738855108 |             |            |         |       |
| BNIP3P13  | ENSG00000269154 | -0.13893   | 0.55525     | -0.23302    | 0.59213     | 0.14926    |         |       |
|           | 0.44067         | 0.14926    | 0.44067     | 0.44067     | 0.738855108 |            |         |       |
| SNX5      | ENSG00000089006 | 0.14926    | 0.44068     | -0.013057   | 0.50521     | -1.2822    | 0.90011 |       |
|           | -0.027245       | 0.51087    | 0.44068     | 0.738855108 |             |            |         |       |
| LINC01998 | ENSG00000243321 | 0.14926    | 0.44068     | 0.14926     | 0.44068     | 0.14926    |         |       |
|           | 0.44068         | 0.14926    | 0.44068     | 0.44068     | 0.738855108 |            |         |       |
| TRAF5     | ENSG00000082512 | -0.27047   | 0.6066      | -1.0327     | 0.84914     | 0.14921    | 0.44069 |       |
|           | 0.14921         | 0.44069    | 0.44069     | 0.738855108 |             |            |         |       |
| NA        | ENSG00000272288 | 0.14913    | 0.44072     | 0.14913     | 0.44072     | 0.14913    | 0.44072 |       |
|           | 0.14913         | 0.44072    | 0.44072     | 0.738879983 |             |            |         |       |
| UGT2B27P  | ENSG00000251685 | -0.86705   | 0.80704     | -1.5723     | 0.94206     | -0.14919   |         |       |
|           | 0.5593          | 0.14902    | 0.44077     | 0.44077     | 0.738938387 |            |         |       |
| NA        | ENSG00000258671 | 0.14893    | 0.4408      | 0.14893     | 0.4408      | -0.0038469 | 0.50153 |       |
|           | -1.5988         | 0.94507    | 0.4408      | 0.738963259 |             |            |         |       |
| PLD3      | ENSG00000105223 | -0.45118   | 0.67407     | 0.11122     | 0.45572     | 0.14885    | 0.44084 |       |
|           | 0.14885         | 0.44084    | 0.44084     | 0.738970261 |             |            |         |       |
| SNX13     | ENSG00000071189 | -0.7107    | 0.76137     | 0.14881     | 0.44085     | -0.7107    | 0.76137 |       |
|           | -0.7107         | 0.76137    | 0.44085     | 0.738970261 |             |            |         |       |
| SNORA11B  | ENSG00000221102 | 0.14878    | 0.44086     | 0.14878     | 0.44086     | 0.14878    |         |       |
|           | 0.44086         | 0.03234    | 0.4871      | 0.44086     | 0.738970261 |            |         |       |
| RPL34     | ENSG00000109475 | 0.14873    | 0.44088     | -0.18197    | 0.5722      | 0.095687   | 0.46188 |       |
|           | -0.18197        | 0.5722     | 0.44088     | 0.738970261 |             |            |         |       |
| LINC02235 | ENSG00000254689 | -0.02295   | 0.50915     | -0.02295    | 0.50915     | 0.14874    |         |       |
|           | 0.44088         | -0.65057   | 0.74234     | 0.44088     | 0.738970261 |            |         |       |
| NA        | ENSG00000253404 | 0.14851    | 0.44097     | -1.0096     | 0.84365     | -1.3929    | 0.91818 |       |
|           | -1.3929         | 0.91818    | 0.44097     | 0.739061611 |             |            |         |       |
| NA        | ENSG00000267055 | 0.14852    | 0.44097     | 0.14852     | 0.44097     | 0.14852    | 0.44097 |       |
|           | -0.05613        | 0.52238    | 0.44097     | 0.739061611 |             |            |         |       |
| SEC23IP   | ENSG00000107651 | -0.57626   | 0.71778     | 0.1485      | 0.44098     | -0.56081   |         |       |
|           | 0.71254         | -0.54937   | 0.70862     | 0.44098     | 0.739061611 |            |         |       |
| XKR9      | ENSG00000221947 | -1.5325    | 0.9373      | -1.3576     | 0.91271     | 0.14843    | 0.441   |       |

|            |                 |           |         |             |             |           |         |  |
|------------|-----------------|-----------|---------|-------------|-------------|-----------|---------|--|
|            | 0.093033        | 0.46294   | 0.4410  | 0.739069711 |             |           |         |  |
| RN7SL217P  | ENSG00000264706 | -1.2294   | 0.89053 | 0.14837     | 0.44103     | -1.2294   |         |  |
|            | 0.89053         | -1.2294   | 0.89053 | 0.44103     | 0.739085911 |           |         |  |
| NA         | ENSG00000259865 | 0.14832   | 0.44104 | -0.010148   | 0.50405     | -0.010148 | 0.50405 |  |
|            | -0.010148       | 0.50405   | 0.44104 | 0.739085911 |             |           |         |  |
| RNU6-1270P | ENSG00000252937 | -0.95439  | 0.83006 | 0.14823     | 0.44108     | 0.14823   |         |  |
|            | 0.44108         | 0.14823   | 0.44108 | 0.44108     | 0.739127524 |           |         |  |
| ZSWIM3     | ENSG00000132801 | -0.59192  | 0.72305 | 0.14817     | 0.44111     | -1.7168   |         |  |
|            | 0.95699         | -1.5302   | 0.93701 | 0.44111     | 0.739152378 |           |         |  |
| C10orf82   | ENSG00000165863 | 0.14806   | 0.44115 | 0.14806     | 0.44115     | 0.14806   |         |  |
|            | 0.44115         | 0.14806   | 0.44115 | 0.44115     | 0.739168569 |           |         |  |
| MIR520E    | ENSG00000207599 | 0.14804   | 0.44115 | -0.70454    | 0.75945     | 0.14804   |         |  |
|            | 0.44115         | 0.14804   | 0.44115 | 0.44115     | 0.739168569 |           |         |  |
| LINC02500  | ENSG00000249460 | 0.14801   | 0.44117 | 0.090795    | 0.46383     | 0.090795  |         |  |
|            | 0.46383         | 0.090795  | 0.46383 | 0.44117     | 0.739176664 |           |         |  |
| LINC02378  | ENSG00000256994 | -0.75628  | 0.77526 | 0.1479      | 0.44121     | -1.4127   |         |  |
|            | 0.92113         | -1.4127   | 0.92113 | 0.44121     | 0.739209038 |           |         |  |
| URB1       | ENSG00000142207 | -1.6932   | 0.9548  | 0.12277     | 0.45115     | -1.5876   | 0.94381 |  |
|            | 0.14785         | 0.44123   | 0.44123 | 0.739209038 |             |           |         |  |
| CCT7P2     | ENSG00000249958 | -0.27761  | 0.60934 | 0.14783     | 0.44124     | -0.27761  |         |  |
|            | 0.60934         | -0.49856  | 0.60934 | 0.44124     | 0.739209038 |           |         |  |
| H3P38      | ENSG00000259389 | 0.1478    | 0.44125 | 0.1478      | 0.44125     | 0.1478    | 0.44125 |  |
|            | 0.1478          | 0.44125   | 0.44125 | 0.739209038 |             |           |         |  |
| GAPDHP75   | ENSG00000226196 | 0.14775   | 0.44127 | 0.14775     | 0.44127     | 0.14775   |         |  |
|            | 0.44127         | 0.14775   | 0.44127 | 0.44127     | 0.73921713  |           |         |  |
| NA         | ENSG00000256811 | 0.14745   | 0.44139 | 0.14745     | 0.44139     | 0.14745   | 0.44139 |  |
|            | 0.14745         | 0.44139   | 0.44139 | 0.739392736 |             |           |         |  |
| GALNT11    | ENSG00000178234 | -0.26567  | 0.60475 | 0.14736     | 0.44142     | -0.76237  |         |  |
|            | 0.77708         | -0.86592  | 0.80673 | 0.44142     | 0.739417572 |           |         |  |
| C20orf181  | ENSG00000279610 | 0.14725   | 0.44147 | 0.14725     | 0.44147     | 0.14725   |         |  |
|            | 0.44147         | 0.14725   | 0.44147 | 0.44147     | 0.739475907 |           |         |  |
| NA         | ENSG00000268416 | -0.42997  | 0.66639 | -0.48577    | 0.68644     | -0.12194  | 0.54853 |  |
|            | 0.14712         | 0.44152   | 0.44152 | 0.739515134 |             |           |         |  |
| NA         | ENSG00000266744 | -1.4094   | 0.92064 | 0.14706     | 0.44154     | -1.4094   | 0.92064 |  |
|            | -1.4094         | 0.92064   | 0.44154 | 0.739515134 |             |           |         |  |
| DYNC1I2P1  | ENSG00000225137 | -0.4416   | 0.67061 | 0.14701     | 0.44156     | -0.84148  |         |  |
|            | 0.79996         | -0.54659  | 0.70767 | 0.44156     | 0.739515134 |           |         |  |
| NA         | ENSG00000251377 | -1.0693   | 0.85753 | 0.14698     | 0.44157     | -0.5747   | 0.71725 |  |
|            | -0.5747         | 0.71725   | 0.44157 | 0.739515134 |             |           |         |  |
| BTNL8      | ENSG00000113303 | -0.89242  | 0.81392 | 0.14685     | 0.44162     | 0.10531   | 0.45806 |  |
|            | -0.43774        | 0.66921   | 0.44162 | 0.739515134 |             |           |         |  |
| NA         | ENSG00000256616 | -0.59223  | 0.72315 | -1.5423     | 0.9385      | 0.14687   | 0.44162 |  |
|            | 0.14687         | 0.44162   | 0.44162 | 0.739515134 |             |           |         |  |
| NA         | ENSG00000272995 | 0.14687   | 0.44162 | 0.14687     | 0.44162     | 0.14687   | 0.44162 |  |
|            | 0.14687         | 0.44162   | 0.44162 | 0.739515134 |             |           |         |  |
| NA         | ENSG00000228614 | 0.14686   | 0.44162 | -0.49581    | 0.68998     | 0.14686   | 0.44162 |  |
|            | 0.14686         | 0.44162   | 0.44162 | 0.739515134 |             |           |         |  |
| PSMA5      | ENSG00000143106 | 0.14683   | 0.44163 | -0.79737    | 0.78738     | -1.015    | 0.84496 |  |
|            | 0.14683         | 0.44163   | 0.44163 | 0.739515134 |             |           |         |  |
| TERF1P6    | ENSG00000223824 | 0.14678   | 0.44165 | 0.14678     | 0.44165     | 0.14678   |         |  |
|            | 0.44165         | 0.14678   | 0.44165 | 0.44165     | 0.739523211 |           |         |  |
| KIAA0319L  | ENSG00000142687 | -0.099102 | 0.53947 | 0.14674     | 0.44167     | 0.0030419 |         |  |
|            | 0.49879         | -0.52263  | 0.69938 | 0.44167     | 0.739531289 |           |         |  |
| ACTG1P21   | ENSG00000232672 | 0.14667   | 0.4417  | 0.14667     | 0.4417      | 0.14667   |         |  |
|            | 0.4417          | -0.043929 | 0.51752 | 0.4417      | 0.739554926 |           |         |  |
| OR2M7      | ENSG00000177186 | -0.90675  | 0.81773 | 0.14657     | 0.44174     | -0.55283  | 0.70981 |  |
|            | -1.4297         | 0.9236    | 0.44174 | 0.739554926 |             |           |         |  |
| YME1L1     | ENSG00000136758 | -0.58753  | 0.72158 | 0.1465      | 0.44176     | -0.92266  |         |  |
|            | 0.82191         | -0.82152  | 0.79432 | 0.44176     | 0.739554926 |           |         |  |
| USP8       | ENSG00000138592 | -0.13009  | 0.55175 | 0.14651     | 0.44176     | -2.3411   | 0.99039 |  |
|            | -0.28605        | 0.61258   | 0.44176 | 0.739554926 |             |           |         |  |
| HLTF-AS1   | ENSG00000239718 | -0.75772  | 0.77569 | -0.18347    | 0.57278     | -0.75772  |         |  |

|           |                 |           |         |             |             |           |         |  |
|-----------|-----------------|-----------|---------|-------------|-------------|-----------|---------|--|
|           | 0.77569         | 0.1465    | 0.44176 | 0.44176     | 0.739554926 |           |         |  |
| PASK      | ENSG00000115687 | -0.23403  | 0.59252 | -0.884      | 0.81165     | 0.14636   | 0.44182 |  |
|           | -0.60513        | 0.72745   | 0.44182 | 0.739629963 |             |           |         |  |
| NA        | ENSG00000272844 | -1.0409   | 0.85104 | -1.0613     | 0.85573     | 0.14628   | 0.44185 |  |
|           | 0.14628         | 0.44185   | 0.44185 | 0.739646106 |             |           |         |  |
| PRMT1P1   | ENSG00000270706 | 0.14626   | 0.44186 | 0.14626     | 0.44186     | 0.14626   |         |  |
|           | 0.44186         | 0.14626   | 0.44186 | 0.44186     | 0.739646106 |           |         |  |
| RNU6-782P | ENSG00000252661 | 0.14618   | 0.44189 | 0.14618     | 0.44189     | 0.14618   |         |  |
|           | 0.44189         | 0.021389  | 0.49147 | 0.44189     | 0.739670916 |           |         |  |
| KCNH3     | ENSG00000135519 | -0.25158  | 0.59932 | 0.14602     | 0.44195     | 0.14602   | 0.44195 |  |
|           | 0.14602         | 0.44195   | 0.44195 | 0.739745938 |             |           |         |  |
| NA        | ENSG00000238358 | -0.64155  | 0.73942 | 0.1459      | 0.442       | -0.25844  | 0.60197 |  |
|           | -0.25844        | 0.60197   | 0.442   | 0.739795545 |             |           |         |  |
| NA        | ENSG00000262693 | 0.14588   | 0.44201 | -1.4591     | 0.92773     | -1.4591   | 0.92773 |  |
|           | -0.95937        | 0.83131   | 0.44201 | 0.739795545 |             |           |         |  |
| NA        | ENSG00000257386 | 0.14576   | 0.44206 | 0.14576     | 0.44206     | 0.14576   | 0.44206 |  |
|           | 0.14576         | 0.44206   | 0.44206 | 0.739853819 |             |           |         |  |
| ORC2      | ENSG00000115942 | 0.14571   | 0.44208 | -0.51952    | 0.6983      | -0.11179  | 0.54451 |  |
|           | -1.1506         | 0.87505   | 0.44208 | 0.739861881 |             |           |         |  |
| H2AZP3    | ENSG00000218502 | 0.14565   | 0.4421  | 0.14565     | 0.4421      | 0.14565   |         |  |
|           | 0.4421          | -0.33251  | 0.63025 | 0.4421      | 0.739868718 |           |         |  |
| NA        | ENSG00000224340 | -0.32078  | 0.62581 | 0.14559     | 0.44212     | -0.75448  | 0.77472 |  |
|           | -1.2781         | 0.89939   | 0.44212 | 0.739868718 |             |           |         |  |
| NA        | ENSG00000246582 | 0.14557   | 0.44213 | 0.053169    | 0.4788      | 0.14557   | 0.44213 |  |
|           | 0.14557         | 0.44213   | 0.44213 | 0.739868718 |             |           |         |  |
| NA        | ENSG00000253346 | -0.013386 | 0.50534 | -0.13309    | 0.55294     | 0.1455    | 0.44216 |  |
|           | 0.1455          | 0.44216   | 0.44216 | 0.739868718 |             |           |         |  |
| PAPPA-AS1 | ENSG00000256040 | 0.1455    | 0.44216 | 0.1455      | 0.44216     | 0.1455    |         |  |
|           | 0.44216         | 0.1455    | 0.44216 | 0.44216     | 0.739868718 |           |         |  |
| RN7SL230P | ENSG00000264916 | 0.1454    | 0.4422  | 0.1454      | 0.4422      | 0.1454    |         |  |
|           | 0.4422          | 0.1454    | 0.4422  | 0.4422      | 0.739886146 |           |         |  |
| NA        | ENSG00000264112 | 0.14537   | 0.44221 | 0.14537     | 0.44221     | 0.14537   | 0.44221 |  |
|           | 0.14537         | 0.44221   | 0.44221 | 0.739886146 |             |           |         |  |
| CYP3A4    | ENSG00000160868 | -0.39367  | 0.65309 | -0.13412    | 0.55334     | 0.14522   |         |  |
|           | 0.44227         | -0.63143  | 0.73612 | 0.44227     | 0.739886146 |           |         |  |
| NA        | ENSG00000283782 | 0.1452    | 0.44228 | 0.1452      | 0.44228     | 0.1452    | 0.44228 |  |
|           | 0.1452          | 0.44228   | 0.44228 | 0.739886146 |             |           |         |  |
| NA        | ENSG00000251426 | 0.14509   | 0.44232 | 0.14509     | 0.44232     | 0.14509   | 0.44232 |  |
|           | 0.14509         | 0.44232   | 0.44232 | 0.739886146 |             |           |         |  |
| PLA2G2C   | ENSG00000187980 | -0.26545  | 0.60467 | -0.72871    | 0.76691     | 0.11472   |         |  |
|           | 0.45433         | 0.14507   | 0.44233 | 0.44233     | 0.739886146 |           |         |  |
| PABPC1P11 | ENSG00000228810 | -0.07542  | 0.53006 | -0.64448    | 0.74037     | -0.21987  |         |  |
|           | 0.58701         | 0.14506   | 0.44233 | 0.44233     | 0.739886146 |           |         |  |
| LINC00992 | ENSG00000248663 | 0.14502   | 0.44235 | 0.12498     | 0.45027     | 0.076002  |         |  |
|           | 0.46971         | -0.72348  | 0.76531 | 0.44235     | 0.739886146 |           |         |  |
| RHOQ-AS1  | ENSG00000250116 | -0.1852   | 0.57346 | -0.1852     | 0.57346     | -0.1852   |         |  |
|           | 0.57346         | 0.14502   | 0.44235 | 0.44235     | 0.739886146 |           |         |  |
| CCNG2P1   | ENSG00000258112 | 0.14496   | 0.44237 | -0.066012   | 0.52632     | -0.066012 |         |  |
|           | 0.52632         | -0.066012 | 0.52632 | 0.44237     | 0.739886146 |           |         |  |
| GGA1      | ENSG00000100083 | -0.86175  | 0.80559 | 0.14493     | 0.44238     | -0.84771  | 0.8017  |  |
|           | -0.53266        | 0.70286   | 0.44238 | 0.739886146 |             |           |         |  |
| WNK1      | ENSG00000060237 | 0.14489   | 0.4424  | -0.98633    | 0.83802     | -0.084649 | 0.53373 |  |
|           | -0.80498        | 0.78959   | 0.4424  | 0.739886146 |             |           |         |  |
| CRISPLD1  | ENSG00000121005 | 0.028513  | 0.48863 | 0.14489     | 0.4424      | 0.14489   |         |  |
|           | 0.4424          | 0.14489   | 0.4424  | 0.4424      | 0.739886146 |           |         |  |
| SH3TC2    | ENSG00000169247 | 0.061824  | 0.47535 | -0.30956    | 0.62155     | 0.056431  |         |  |
|           | 0.4775          | 0.14489   | 0.4424  | 0.4424      | 0.739886146 |           |         |  |
| NA        | ENSG00000261386 | 0.14478   | 0.44244 | 0.14478     | 0.44244     | 0.14478   | 0.44244 |  |
|           | 0.14478         | 0.44244   | 0.44244 | 0.739886146 |             |           |         |  |
| NA        | ENSG00000205018 | 0.14476   | 0.44245 | 0.14476     | 0.44245     | -1.2209   | 0.88893 |  |
|           | -0.34163        | 0.63369   | 0.44245 | 0.739886146 |             |           |         |  |
| SNORA20   | ENSG00000207392 | 0.14471   | 0.44247 | 0.14471     | 0.44247     | 0.14471   |         |  |

|           |                 |           |         |             |             |           |         |  |
|-----------|-----------------|-----------|---------|-------------|-------------|-----------|---------|--|
|           | 0.44247         | 0.14471   | 0.44247 | 0.44247     | 0.739886146 |           |         |  |
| MPL       | ENSG00000117400 | -0.1085   | 0.5432  | -0.1085     | 0.5432      | 0.1447    | 0.44248 |  |
|           | -0.71951        | 0.76409   | 0.44248 | 0.739886146 |             |           |         |  |
| PRPS1P2   | ENSG00000232630 | 0.14468   | 0.44248 | 0.14468     | 0.44248     | 0.14468   |         |  |
|           | 0.44248         | 0.14468   | 0.44248 | 0.44248     | 0.739886146 |           |         |  |
| SLC39A1   | ENSG00000143570 | -0.72978  | 0.76724 | -0.72978    | 0.76724     | -0.72978  |         |  |
|           | 0.76724         | 0.14461   | 0.44251 | 0.44251     | 0.739886146 |           |         |  |
| SLC10A5P1 | ENSG00000205184 | 0.14461   | 0.44251 | 0.14461     | 0.44251     | 0.14461   |         |  |
|           | 0.44251         | 0.14461   | 0.44251 | 0.44251     | 0.739886146 |           |         |  |
| NA        | ENSG00000251413 | -2.1239   | 0.98316 | 0.14459     | 0.44252     | -2.4492   | 0.99284 |  |
|           | 0.14459         | 0.44252   | 0.44252 | 0.739886146 |             |           |         |  |
| NUCB1     | ENSG00000104805 | -0.27015  | 0.60648 | 0.14452     | 0.44254     | -0.27015  | 0.60648 |  |
|           | -0.27015        | 0.60648   | 0.44254 | 0.739886146 |             |           |         |  |
| LINC01968 | ENSG00000237222 | 0.14451   | 0.44255 | -1.0783     | 0.85955     | -0.4205   |         |  |
|           | 0.66294         | -0.40804  | 0.65838 | 0.44255     | 0.739886146 |           |         |  |
| NA        | ENSG00000278434 | 0.14451   | 0.44255 | -0.95056    | 0.82909     | 0.14451   | 0.44255 |  |
|           | 0.14451         | 0.44255   | 0.44255 | 0.739886146 |             |           |         |  |
| PPIAP16   | ENSG00000213509 | -0.37863  | 0.64752 | 0.14439     | 0.44259     | -0.37863  |         |  |
|           | 0.64752         | -0.37863  | 0.64752 | 0.44259     | 0.739910302 |           |         |  |
| DGCR6L    | ENSG00000128185 | -0.8377   | 0.7989  | -1.2227     | 0.88927     | 0.14437   |         |  |
|           | 0.4426          | -0.78046  | 0.78244 | 0.4426      | 0.739910302 |           |         |  |
| GK5       | ENSG00000175066 | 0.14434   | 0.44261 | -0.34127    | 0.63355     | 0.14434   | 0.44261 |  |
|           | 0.059211        | 0.47639   | 0.44261 | 0.739910302 |             |           |         |  |
| DNAJC8    | ENSG00000126698 | 0.0075181 | 0.497   | 0.14423     | 0.44266     | 0.11183   | 0.45548 |  |
|           | -0.15091        | 0.55998   | 0.44266 | 0.739943119 |             |           |         |  |
| NA        | ENSG00000259554 | 0.14423   | 0.44266 | 0.14423     | 0.44266     | 0.14423   | 0.44266 |  |
|           | 0.14423         | 0.44266   | 0.44266 | 0.739943119 |             |           |         |  |
| NA        | ENSG00000261978 | 0.14415   | 0.44269 | 0.14415     | 0.44269     | 0.14415   | 0.44269 |  |
|           | 0.14415         | 0.44269   | 0.44269 | 0.739959217 |             |           |         |  |
| NA        | ENSG00000238231 | 0.14412   | 0.4427  | 0.14412     | 0.4427      | 0.14412   | 0.4427  |  |
|           | 0.14412         | 0.4427    | 0.4427  | 0.739959217 |             |           |         |  |
| TDGF1P5   | ENSG00000254274 | -0.29735  | 0.6169  | -2.5583     | 0.99474     | -2.5583   |         |  |
|           | 0.99474         | 0.14405   | 0.44273 | 0.44273     | 0.739966646 |           |         |  |
| AGGF1     | ENSG00000164252 | -0.41278  | 0.66012 | -0.2831     | 0.61145     | 0.14402   | 0.44274 |  |
|           | -1.1878         | 0.88255   | 0.44274 | 0.739966646 |             |           |         |  |
| MIR489    | ENSG00000207656 | 0.14401   | 0.44275 | 0.14401     | 0.44275     | 0.14401   |         |  |
|           | 0.44275         | 0.14401   | 0.44275 | 0.44275     | 0.739966646 |           |         |  |
| NA        | ENSG00000278926 | 0.14381   | 0.44282 | 0.14381     | 0.44282     | 0.14381   | 0.44282 |  |
|           | 0.14381         | 0.44282   | 0.44282 | 0.74005763  |             |           |         |  |
| COX7A2P1  | ENSG00000258626 | 0.14377   | 0.44284 | 0.14377     | 0.44284     | 0.14377   |         |  |
|           | 0.44284         | 0.14377   | 0.44284 | 0.44284     | 0.74005763  |           |         |  |
| NA        | ENSG00000269449 | -0.39433  | 0.65333 | -1.4272     | 0.92323     | -0.39433  | 0.65333 |  |
|           | 0.14374         | 0.44285   | 0.44285 | 0.74005763  |             |           |         |  |
| NA        | ENSG00000234932 | -1.086    | 0.86125 | 0.14371     | 0.44287     | 0.14371   | 0.44287 |  |
|           | 0.14371         | 0.44287   | 0.44287 | 0.740065673 |             |           |         |  |
| NA        | ENSG00000274242 | 0.14364   | 0.44289 | -0.066865   | 0.52666     | -0.066865 | 0.52666 |  |
|           | -0.066865       | 0.52666   | 0.44289 | 0.740073716 |             |           |         |  |
| NA        | ENSG00000200538 | 0.14344   | 0.44297 | 0.14344     | 0.44297     | 0.14344   | 0.44297 |  |
|           | 0.14344         | 0.44297   | 0.44297 | 0.740182015 |             |           |         |  |
| OR7E26P   | ENSG00000228547 | 0.14337   | 0.443   | 0.074052    | 0.47048     | -0.077075 | 0.53072 |  |
|           | -0.077075       | 0.53072   | 0.443   | 0.74019809  |             |           |         |  |
| NA        | ENSG00000253011 | 0.12754   | 0.44926 | -0.39206    | 0.65249     | 0.068554  | 0.47267 |  |
|           | 0.14335         | 0.44301   | 0.44301 | 0.74019809  |             |           |         |  |
| THOC5     | ENSG00000100296 | -0.067251 | 0.52681 | -0.97407    | 0.83499     | 0.14321   | 0.44306 |  |
|           | -0.73994        | 0.77033   | 0.44306 | 0.740222199 |             |           |         |  |
| NFATC3    | ENSG00000072736 | -0.069906 | 0.52787 | 0.14319     | 0.44307     | 0.098518  |         |  |
|           | 0.46076         | -0.37026  | 0.64441 | 0.44307     | 0.740222199 |           |         |  |
| CYBC1     | ENSG00000178927 | 0.14318   | 0.44307 | 0.14318     | 0.44307     | 0.14318   | 0.44307 |  |
|           | 0.14318         | 0.44307   | 0.44307 | 0.740222199 |             |           |         |  |
| ZNF264    | ENSG00000083844 | -0.63186  | 0.73626 | -1.0679     | 0.85722     | -0.63625  |         |  |
|           | 0.73769         | 0.14296   | 0.44316 | 0.44316     | 0.740347177 |           |         |  |
| MTA3      | ENSG00000057935 | -0.71184  | 0.76172 | 0.1089      | 0.45664     | -0.83644  | 0.79855 |  |

|             |                 |           |             |             |             |           |           |           |
|-------------|-----------------|-----------|-------------|-------------|-------------|-----------|-----------|-----------|
|             | 0.14279         | 0.44323   | 0.44323     | 0.740434183 |             |           |           |           |
| ZBTB9       | ENSG00000213588 | 0.14268   | 0.44327     | 0.14268     | 0.44327     | 0.14268   | 0.44327   | 0.44327   |
|             | 0.14268         | 0.44327   | 0.44327     | 0.740434183 |             |           |           |           |
| SYNGAP1-AS1 | ENSG00000274259 | 0.14268   | 0.44327     | 0.14268     | 0.44327     | 0.44327   | 0.14268   | 0.14268   |
|             | 0.44327         | 0.14268   | 0.44327     | 0.44327     | 0.740434183 |           |           |           |
| LINC02276   | ENSG00000250141 | 0.14264   | 0.44329     | 0.14264     | 0.44329     | 0.44329   | 0.14264   | 0.14264   |
|             | 0.44329         | 0.14264   | 0.44329     | 0.44329     | 0.740434183 |           |           |           |
| PAPOLA      | ENSG00000090060 | 0.10031   | 0.46005     | 0.10031     | 0.46005     | 0.46005   | 0.14247   | 0.14247   |
|             | 0.44335         | 0.10031   | 0.46005     | 0.44335     | 0.740434183 |           |           |           |
| KPNA5       | ENSG00000196911 | -0.15799  | 0.56277     | 0.086445    | 0.46556     | -0.15536  | 0.56173   | 0.56173   |
|             | 0.14249         | 0.44335   | 0.44335     | 0.740434183 |             |           |           |           |
| OR7H1P      | ENSG00000226480 | -0.47487  | 0.68256     | 0.14248     | 0.44335     | 0.14248   | 0.14248   | 0.14248   |
|             | 0.44335         | 0.14248   | 0.44335     | 0.44335     | 0.740434183 |           |           |           |
| NA          | ENSG00000249981 | -0.62122  | 0.73277     | -0.26236    | 0.60348     | 0.14249   | 0.44335   | 0.44335   |
|             | -1.0905         | 0.86226   | 0.44335     | 0.740434183 |             |           |           |           |
| RASA1       | ENSG00000145715 | 0.14245   | 0.44336     | 0.13105     | 0.44787     | 0.06715   | 0.47323   | 0.47323   |
|             | -1.3395         | 0.90979   | 0.44336     | 0.740434183 |             |           |           |           |
| GABRR2      | ENSG00000111886 | -0.27484  | 0.60828     | -0.27484    | 0.60828     | -0.27484  | -0.27484  | -0.27484  |
|             | 0.60828         | 0.14239   | 0.44338     | 0.44338     | 0.740434183 |           |           |           |
| SLC7A5      | ENSG00000103257 | -0.31075  | 0.62201     | 0.046013    | 0.48165     | 0.1423    | 0.1423    | 0.1423    |
|             | 0.44342         | -0.56294  | 0.71326     | 0.44342     | 0.740434183 |           |           |           |
| KCNG1       | ENSG00000026559 | 0.14229   | 0.44343     | -0.91484    | 0.81986     | -0.73896  | 0.77003   | 0.77003   |
|             | -0.48899        | 0.68758   | 0.44343     | 0.740434183 |             |           |           |           |
| CHRND       | ENSG00000135902 | 0.14228   | 0.44343     | 0.14228     | 0.44343     | 0.14228   | 0.44343   | 0.44343   |
|             | 0.14228         | 0.44343   | 0.44343     | 0.740434183 |             |           |           |           |
| RNU6-31P    | ENSG00000207116 | 0.14227   | 0.44343     | 0.14227     | 0.44343     | 0.14227   | 0.14227   | 0.14227   |
|             | 0.44343         | 0.14227   | 0.44343     | 0.44343     | 0.740434183 |           |           |           |
| NA          | ENSG00000237707 | -0.51028  | 0.69507     | 0.14226     | 0.44344     | -0.10671  | 0.54249   | 0.54249   |
|             | -0.10671        | 0.54249   | 0.44344     | 0.740434183 |             |           |           |           |
| RNU6-1311P  | ENSG00000207459 | 0.056268  | 0.47756     | 0.056268    | 0.47756     | 0.14213   | 0.14213   | 0.14213   |
|             | 0.44349         | 0.056268  | 0.47756     | 0.44349     | 0.740439605 |           |           |           |
| NA          | ENSG00000235151 | 0.14207   | 0.44351     | 0.14207     | 0.44351     | 0.14207   | 0.44351   | 0.44351   |
|             | 0.14207         | 0.44351   | 0.44351     | 0.740439605 |             |           |           |           |
| NA          | ENSG00000258582 | -1.3124   | 0.9053      | 0.14203     | 0.44353     | 0.14203   | 0.44353   | 0.44353   |
|             | 0.14203         | 0.44353   | 0.44353     | 0.740439605 |             |           |           |           |
| NA          | ENSG00000199546 | 0.14201   | 0.44354     | 0.14201     | 0.44354     | 0.14201   | 0.44354   | 0.44354   |
|             | 0.14201         | 0.44354   | 0.44354     | 0.740439605 |             |           |           |           |
| SEC11B      | ENSG00000226098 | 0.142     | 0.44354     | 0.142       | 0.44354     | 0.142     | 0.44354   | 0.142     |
|             | 0.44354         | 0.44354   | 0.740439605 |             |             |           |           |           |
| GPR179      | ENSG00000277399 | -0.42314  | 0.6639      | 0.142       | 0.44354     | 0.142     | 0.44354   | 0.44354   |
|             | -0.42314        | 0.6639    | 0.44354     | 0.740439605 |             |           |           |           |
| RHD         | ENSG00000187010 | -1.1489   | 0.8747      | 0.12033     | 0.45211     | 0.14195   | 0.44356   | 0.44356   |
|             | -0.1769         | 0.5702    | 0.44356     | 0.740439605 |             |           |           |           |
| MED28P7     | ENSG00000236542 | 0.14191   | 0.44357     | -0.19778    | 0.57839     | -0.19778  | -0.19778  | -0.19778  |
|             | 0.57839         | -0.19778  | 0.57839     | 0.44357     | 0.740439605 |           |           |           |
| NA          | ENSG00000254336 | 0.1419    | 0.44358     | 0.1419      | 0.44358     | 0.1419    | 0.44358   | 0.44358   |
|             | 0.1419          | 0.44358   | 0.44358     | 0.740439605 |             |           |           |           |
| ZNF562      | ENSG00000171466 | -0.21236  | 0.58409     | -0.10446    | 0.5416      | -0.14756  | -0.14756  | -0.14756  |
|             | 0.55866         | 0.14178   | 0.44363     | 0.44363     | 0.740497702 |           |           |           |
| TIRAP       | ENSG00000150455 | 0.0066935 | 0.49733     | 0.14165     | 0.44368     | 0.0066935 | 0.49733   | 0.49733   |
|             | 0.0066935       | 0.49733   | 0.44368     | 0.740555794 |             |           |           |           |
| LINC01732   | ENSG00000237292 | -1.8923   | 0.97077     | 0.14154     | 0.44372     | -1.5389   | -1.5389   | -1.5389   |
|             | 0.93808         | -0.99902  | 0.84111     | 0.44372     | 0.740588516 |           |           |           |
| PSMD6       | ENSG00000163636 | -0.74319  | 0.77132     | 0.14151     | 0.44373     | -0.6776   | 0.75099   | 0.75099   |
|             | -0.4749         | 0.68257   | 0.44373     | 0.740588516 |             |           |           |           |
| NA          | ENSG00000225154 | -0.35507  | 0.63873     | -1.5804     | 0.94299     | 0.14148   | 0.44375   | 0.44375   |
|             | 0.14148         | 0.44375   | 0.44375     | 0.740596531 |             |           |           |           |
| C1QTNF4     | ENSG00000172247 | 0.14137   | 0.44379     | 0.14137     | 0.44379     | -0.093853 | -0.093853 | -0.093853 |
|             | 0.53739         | 0.14137   | 0.44379     | 0.44379     | 0.740603883 |           |           |           |
| NA          | ENSG00000229112 | 0.14137   | 0.44379     | 0.14137     | 0.44379     | 0.14137   | 0.44379   | 0.44379   |
|             | 0.12085         | 0.45191   | 0.44379     | 0.740603883 |             |           |           |           |
| NA          | ENSG00000225300 | 0.14133   | 0.4438      | 0.14133     | 0.4438      | 0.14133   | 0.4438    | 0.4438    |

|           |                 |             |             |             |             |             |         |  |
|-----------|-----------------|-------------|-------------|-------------|-------------|-------------|---------|--|
|           | 0.14133         | 0.4438      | 0.4438      | 0.740603883 |             |             |         |  |
| NA        | ENSG00000259569 | 0.14124     | 0.44384     | -0.14282    | 0.55678     | 0.14124     | 0.44384 |  |
|           | -0.01369        | 0.50546     | 0.44384     | 0.740610573 |             |             |         |  |
| RNU6-479P | ENSG00000252157 | 0.14118     | 0.44386     | 0.14118     | 0.44386     | 0.14118     | 0.44386 |  |
|           | 0.44386         | 0.14118     | 0.44386     | 0.44386     | 0.740610573 |             |         |  |
| TRIM2     | ENSG00000109654 | 0.14115     | 0.44388     | -0.19609    | 0.57773     | 0.051655    | 0.4794  |  |
|           | -0.33699        | 0.63194     | 0.44388     | 0.740610573 |             |             |         |  |
| RTRAFP1   | ENSG00000225496 | 0.14113     | 0.44388     | 0.14113     | 0.44388     | 0.14113     | 0.44388 |  |
|           | 0.44388         | 0.0088479   | 0.49647     | 0.44388     | 0.740610573 |             |         |  |
| FGF12-AS3 | ENSG00000226709 | 0.14114     | 0.44388     | 0.14114     | 0.44388     | 0.14114     | 0.44388 |  |
|           | 0.44388         | 0.14114     | 0.44388     | 0.44388     | 0.740610573 |             |         |  |
| NA        | ENSG00000237593 | 0.14108     | 0.44391     | 0.14108     | 0.44391     | 0.14108     | 0.44391 |  |
|           | 0.14108         | 0.44391     | 0.44391     | 0.740635269 |             |             |         |  |
| OGN       | ENSG00000106809 | 0.14108     | 0.44393     | 0.14108     | 0.44393     | 0.14108     | 0.44393 |  |
|           | 0.51026         | 0.44393     | 0.740642616 |             |             |             |         |  |
| NA        | ENSG00000269038 | 0.14096     | 0.44395     | 0.14096     | 0.44395     | 0.14096     | 0.44395 |  |
|           | 0.14096         | 0.44395     | 0.44395     | 0.740642616 |             |             |         |  |
| NA        | ENSG00000229657 | 0.14093     | 0.44396     | 0.14093     | 0.44396     | 0.14093     | 0.44396 |  |
|           | 0.14093         | 0.44396     | 0.44396     | 0.740642616 |             |             |         |  |
| LINC01735 | ENSG00000261453 | -0.37892    | 0.64763     | 0.14082     | 0.44401     | -1.445      |         |  |
|           | 0.92578         | -1.4855     | 0.9313      | 0.44401     | 0.740658665 |             |         |  |
| ZNF682    | ENSG00000197124 | -0.45369    | 0.67498     | 0.14078     | 0.44402     | -0.32382    |         |  |
|           | 0.62696         | -0.54741    | 0.70795     | 0.44402     | 0.740658665 |             |         |  |
| FBXL2     | ENSG00000153558 | -0.34135    | 0.63358     | -1.0936     | 0.86294     | -0.34135    | 0.63358 |  |
|           | 0.14076         | 0.44403     | 0.44403     | 0.740658665 |             |             |         |  |
| PGBD2     | ENSG00000185220 | 0.14071     | 0.44405     | -0.44498    | 0.67183     | -0.036145   | 0.51442 |  |
|           | -0.25238        | 0.59963     | 0.44405     | 0.740658665 |             |             |         |  |
| PHLPP2    | ENSG00000040199 | -0.11106    | 0.54422     | -0.11106    | 0.54422     | -0.11106    |         |  |
|           | 0.54422         | 0.14064     | 0.44408     | 0.44408     | 0.740658665 |             |         |  |
| NA        | ENSG00000257322 | -0.32685    | 0.62811     | 0.14058     | 0.4441      | -0.69262    | 0.75573 |  |
|           | -1.8212         | 0.96571     | 0.4441      | 0.740658665 |             |             |         |  |
| NA        | ENSG00000254182 | 0.14055     | 0.44411     | 0.14055     | 0.44411     | 0.14055     | 0.44411 |  |
|           | 0.14055         | 0.44411     | 0.44411     | 0.740658665 |             |             |         |  |
| SLC52A3   | ENSG00000101276 | -0.67171    | 0.74912     | 0.14045     | 0.44415     | -0.33423    |         |  |
|           | 0.6309          | -0.033774   | 0.51347     | 0.44415     | 0.740658665 |             |         |  |
| ATP5F1C   | ENSG00000165629 | -0.41341    | 0.66035     | 0.14046     | 0.44415     | 0.14046     |         |  |
|           | 0.44415         | 0.14046     | 0.44415     | 0.44415     | 0.740658665 |             |         |  |
| KRTAP22-1 | ENSG00000186924 | 0.14043     | 0.44416     | 0.14043     | 0.44416     | 0.14043     |         |  |
|           | 0.44416         | 0.14043     | 0.44416     | 0.44416     | 0.740658665 |             |         |  |
| NA        | ENSG00000234714 | -0.11874    | 0.54726     | 0.14038     | 0.44418     | 0.14038     | 0.44418 |  |
|           | 0.14038         | 0.44418     | 0.44418     | 0.740658665 |             |             |         |  |
| NA        | ENSG00000270588 | -1.3046     | 0.90399     | 0.14029     | 0.44422     | -0.48643    | 0.68667 |  |
|           | -1.0701         | 0.85771     | 0.44422     | 0.740658665 |             |             |         |  |
| EPDR1     | ENSG00000086289 | -0.57761    | 0.71824     | 0.14024     | 0.44423     | 0.14024     | 0.44423 |  |
|           | 0.14024         | 0.44423     | 0.44423     | 0.740658665 |             |             |         |  |
| LINC02549 | ENSG00000226497 | -0.19443    | 0.57708     | 0.14018     | 0.44426     | 0.14018     |         |  |
|           | 0.44426         | -0.54347    | 0.7066      | 0.44426     | 0.740658665 |             |         |  |
| RPL13AP2  | ENSG00000244053 | 0.058626    | 0.47663     | 0.14017     | 0.44426     | 0.14017     |         |  |
|           | 0.44426         | 0.14017     | 0.44426     | 0.44426     | 0.740658665 |             |         |  |
| GIMD1     | ENSG00000250298 | -0.50635    | 0.69369     | -1.0073     | 0.84309     | 0.14013     | 0.44428 |  |
|           | -0.94443        | 0.82753     | 0.44428     | 0.740658665 |             |             |         |  |
| LRRC56    | ENSG00000161328 | -0.064408   | 0.52568     | 0.14009     | 0.44429     | -0.785      |         |  |
|           | 0.78377         | -0.785      | 0.78377     | 0.44429     | 0.740658665 |             |         |  |
| ZNF606    | ENSG00000166704 | -0.85976    | 0.80504     | -0.85976    | 0.80504     | 0.14011     |         |  |
|           | 0.44429         | -0.85976    | 0.80504     | 0.44429     | 0.740658665 |             |         |  |
| COPB1     | ENSG00000129083 | -1.6541     | 0.95095     | -0.51241    | 0.69582     | 0.14006     | 0.44431 |  |
|           | 0.049964        | 0.48008     | 0.44431     | 0.740658665 |             |             |         |  |
| SAMSN1    | ENSG00000155307 | -1.7596     | 0.96076     | 0.14004     | 0.44431     | -1.3226     |         |  |
|           | 0.90702         | -0.79794    | 0.78755     | 0.44431     | 0.740658665 |             |         |  |
| RNU6-509P | ENSG00000200389 | 0.14006     | 0.44431     | 0.14006     | 0.44431     | 0.14006     |         |  |
|           | 0.44431         | 0.14006     | 0.44431     | 0.44431     | 0.740658665 |             |         |  |
| NA        | ENSG00000259318 | -0.00053997 | 0.50022     | 0.14005     | 0.44431     | -0.00053997 |         |  |

|             |                 |             |             |             |             |          |         |
|-------------|-----------------|-------------|-------------|-------------|-------------|----------|---------|
|             | 0.50022         | -0.00053997 | 0.50022     | 0.44431     | 0.740658665 |          |         |
| THAP8       | ENSG00000161277 | 0.14001     | 0.44432     | 0.14001     | 0.44432     | 0.14001  | 0.44432 |
|             | 0.14001         | 0.44432     | 0.44432     | 0.740658665 |             |          |         |
| CASP3       | ENSG00000164305 | 0.1271      | 0.44943     | 0.1271      | 0.44943     | 0.1271   | 0.44943 |
|             | 0.13998         | 0.44434     | 0.44434     | 0.740658665 |             |          |         |
| PUS7        | ENSG00000091127 | -0.30748    | 0.62076     | -0.074627   | 0.52974     | -0.63691 | 0.73791 |
|             | 0.13992         | 0.44436     | 0.44436     | 0.740658665 |             |          |         |
| ZNF644      | ENSG00000122482 | 0.13988     | 0.44438     | -0.60735    | 0.72819     | -2.0149  |         |
|             | 0.97804         | -0.60735    | 0.72819     | 0.44438     | 0.740658665 |          |         |
| NA          | ENSG00000261634 | 0.13987     | 0.44438     | 0.13987     | 0.44438     | 0.13987  | 0.44438 |
|             | 0.13987         | 0.44438     | 0.44438     | 0.740658665 |             |          |         |
| NA          | ENSG00000256982 | -1.2816     | 0.90002     | -0.43959    | 0.66988     | 0.13957  | 0.4445  |
|             | -1.7241         | 0.95766     | 0.4445      | 0.740833333 |             |          |         |
| NA          | ENSG00000204117 | -0.52863    | 0.70147     | 0.13946     | 0.44454     | -0.52863 | 0.70147 |
|             | -0.88818        | 0.81278     | 0.44454     | 0.740874661 |             |          |         |
| NA          | ENSG00000239636 | 0.13928     | 0.44461     | 0.13928     | 0.44461     | 0.13928  | 0.44461 |
|             | 0.13928         | 0.44461     | 0.44461     | 0.740965982 |             |          |         |
| NA          | ENSG00000229962 | 0.13921     | 0.44464     | 0.13921     | 0.44464     | 0.13921  | 0.44464 |
|             | 0.13921         | 0.44464     | 0.44464     | 0.740979903 |             |          |         |
| INHBE       | ENSG00000139269 | 0.13919     | 0.44465     | -0.44239    | 0.6709      | -0.44239 | 0.6709  |
|             | -1.4871         | 0.9315      | 0.44465     | 0.740979903 |             |          |         |
| NA          | ENSG00000231547 | -0.83215    | 0.79734     | -0.83215    | 0.79734     | 0.13909  | 0.44469 |
|             | -0.79837        | 0.78767     | 0.44469     | 0.740979903 |             |          |         |
| NA          | ENSG00000269986 | 0.13909     | 0.44469     | 0.13909     | 0.44469     | 0.13909  | 0.44469 |
|             | 0.13909         | 0.44469     | 0.44469     | 0.740979903 |             |          |         |
| NA          | ENSG00000275295 | -0.70511    | 0.75963     | 0.13907     | 0.4447      | -1.379   | 0.91605 |
|             | 0.13907         | 0.4447      | 0.4447      | 0.740979903 |             |          |         |
| NA          | ENSG00000204683 | 0.139       | 0.44472     | 0.139       | 0.44472     | 0.139    | 0.44472 |
|             | 0.54671         | 0.44472     | 0.740979903 |             |             |          |         |
| PCED1B-AS1  | ENSG00000247774 | 0.13898     | 0.44473     | -0.24613    | 0.59721     | 0.13898  |         |
|             | 0.44473         | 0.13898     | 0.44473     | 0.44473     | 0.740979903 |          |         |
| OXA1L       | ENSG00000155463 | 0.13896     | 0.44474     | 0.13896     | 0.44474     | 0.13896  | 0.44474 |
|             | -1.2147         | 0.88777     | 0.44474     | 0.740979903 |             |          |         |
| TRDJ1       | ENSG00000211825 | 0.13874     | 0.44483     | 0.13874     | 0.44483     | 0.13874  | 0.44483 |
|             | 0.13874         | 0.44483     | 0.44483     | 0.741061825 |             |          |         |
| CDKAL1      | ENSG00000145996 | -0.16765    | 0.56657     | 0.13871     | 0.44484     | -0.56385 |         |
|             | 0.71357         | -0.54737    | 0.70794     | 0.44484     | 0.741061825 |          |         |
| NA          | ENSG00000219023 | -0.97932    | 0.83629     | -0.68652    | 0.75381     | 0.13872  | 0.44484 |
|             | -0.32266        | 0.62652     | 0.44484     | 0.741061825 |             |          |         |
| EMP1        | ENSG00000134531 | 0.1387      | 0.44485     | -1.2008     | 0.88509     | -0.53578 | 0.70394 |
|             | 0.0084542       | 0.49663     | 0.44485     | 0.741061825 |             |          |         |
| ZNF706      | ENSG00000120963 | -0.4788     | 0.68396     | -0.40487    | 0.65722     | -0.39261 |         |
|             | 0.6527          | 0.13855     | 0.4449      | 0.4449      | 0.741111106 |          |         |
| NA          | ENSG00000248968 | -0.78383    | 0.78343     | 0.13854     | 0.44491     | 0.13854  | 0.44491 |
|             | 0.13854         | 0.44491     | 0.44491     | 0.741111106 |             |          |         |
| VTRNA1-2    | ENSG00000202111 | 0.1384      | 0.44496     | 0.1384      | 0.44496     | 0.1384   |         |
|             | 0.44496         | 0.1384      | 0.44496     | 0.44496     | 0.741169058 |          |         |
| MARCHF3     | ENSG00000173926 | 0.13833     | 0.44499     | -0.43921    | 0.66975     | -1.614   |         |
|             | 0.94674         | 0.13833     | 0.44499     | 0.44499     | 0.741193694 |          |         |
| USP1        | ENSG00000162607 | 0.13823     | 0.44503     | -0.82479    | 0.79526     | -1.2478  | 0.89395 |
|             | -0.63278        | 0.73656     | 0.44503     | 0.741233577 |             |          |         |
| MIR210HG    | ENSG00000247095 | 0.13814     | 0.44507     | 0.13814     | 0.44507     | 0.13814  |         |
|             | 0.44507         | 0.13814     | 0.44507     | 0.44507     | 0.741233577 |          |         |
| CIAO2A      | ENSG00000166797 | -0.47913    | 0.68408     | 0.1381      | 0.44508     | -0.45635 |         |
|             | 0.67593         | -0.43998    | 0.67002     | 0.44508     | 0.741233577 |          |         |
| CLEC19A     | ENSG00000261210 | -0.46491    | 0.679       | -0.46491    | 0.679       | 0.13809  | 0.44508 |
|             | -0.46491        | 0.679       | 0.44508     | 0.741233577 |             |          |         |
| RN7SL524P   | ENSG00000266754 | 0.13807     | 0.44509     | 0.13807     | 0.44509     | 0.13807  |         |
|             | 0.44509         | 0.13807     | 0.44509     | 0.44509     | 0.741233577 |          |         |
| NA          | ENSG00000277797 | 0.13799     | 0.44512     | -0.4006     | 0.65564     | -0.4006  | 0.65564 |
|             | -1.2312         | 0.89088     | 0.44512     | 0.741249527 |             |          |         |
| BORCS7-ASMT | ENSG00000270316 | 0.13799     | 0.44513     | 0.13799     | 0.44513     | 0.13799  | 0.44513 |



|            |                 |          |         |             |             |           |          |
|------------|-----------------|----------|---------|-------------|-------------|-----------|----------|
|            | 0.44513         | 0.13799  | 0.44513 | 0.44513     | 0.741249527 |           |          |
| OR7E99P    | ENSG00000250710 | -0.67872 | 0.75134 | 0.75134     | 0.13774     | 0.44522   | -0.67872 |
|            | 0.75134         | -0.67872 | 0.75134 | 0.44522     | 0.741373351 |           |          |
| NA         | ENSG00000230439 | 0.13769  | 0.44524 | 0.088797    | 0.46462     | 0.13769   | 0.44524  |
|            | 0.13769         | 0.44524  | 0.44524 | 0.741373351 |             |           |          |
| NA         | ENSG00000228592 | 0.13767  | 0.44525 | -0.58518    | 0.72079     | 0.13767   | 0.44525  |
|            | 0.13767         | 0.44525  | 0.44525 | 0.741373351 |             |           |          |
| NA         | ENSG00000260771 | 0.11433  | 0.45449 | -0.14646    | 0.55822     | -0.14389  | 0.55721  |
|            | 0.1376          | 0.44528  | 0.44528 | 0.74139797  |             |           |          |
| NA         | ENSG00000249782 | 0.13754  | 0.4453  | -0.47724    | 0.68341     | 0.13754   | 0.4453   |
|            | 0.13754         | 0.4453   | 0.4453  | 0.741405938 |             |           |          |
| DCAF4L2    | ENSG00000176566 | 0.13746  | 0.44534 | 0.13746     | 0.44534     | 0.13746   |          |
|            | 0.44534         | -1.1415  | 0.87316 | 0.44534     | 0.741421872 |           |          |
| NA         | ENSG00000261069 | 0.13745  | 0.44534 | 0.13745     | 0.44534     | 0.13745   | 0.44534  |
|            | 0.13745         | 0.44534  | 0.44534 | 0.741421872 |             |           |          |
| WTIP       | ENSG00000142279 | 0.079576 | 0.46829 | -1.0643     | 0.8564      | 0.13739   | 0.44536  |
|            | 0.13739         | 0.44536  | 0.44536 | 0.741428406 |             |           |          |
| RN7SL737P  | ENSG00000243015 | 0.13732  | 0.44539 | 0.13732     | 0.44539     | 0.13732   |          |
|            | 0.44539         | 0.13732  | 0.44539 | 0.44539     | 0.741428406 |           |          |
| NA         | ENSG00000254998 | -0.20894 | 0.58275 | 0.13733     | 0.44539     | -1.4637   | 0.92836  |
|            | 0.1312          | 0.44781  | 0.44539 | 0.741428406 |             |           |          |
| REC8       | ENSG00000100918 | 0.13727  | 0.44541 | 0.13727     | 0.44541     | 0.13727   | 0.44541  |
|            | 0.13727         | 0.44541  | 0.44541 | 0.741428406 |             |           |          |
| TRARG1     | ENSG00000184811 | 0.13725  | 0.44542 | -0.64759    | 0.74137     | -0.58586  |          |
|            | 0.72101         | -1.4668  | 0.92879 | 0.44542     | 0.741428406 |           |          |
| OR4D10     | ENSG00000254466 | -0.26243 | 0.60351 | 0.13717     | 0.44545     | 0.13717   |          |
|            | 0.44545         | 0.13717  | 0.44545 | 0.44545     | 0.741453016 |           |          |
| NA         | ENSG00000231100 | 0.13709  | 0.44548 | 0.13709     | 0.44548     | 0.13709   | 0.44548  |
|            | 0.13709         | 0.44548  | 0.44548 | 0.741458108 |             |           |          |
| UCKL1      | ENSG00000198276 | 0.13698  | 0.44552 | -0.6258     | 0.73428     | -0.6258   | 0.73428  |
|            | -0.6258         | 0.73428  | 0.44552 | 0.741458108 |             |           |          |
| SLCO1B1    | ENSG00000134538 | 0.13695  | 0.44553 | -0.025087   | 0.51001     | -1.0998   |          |
|            | 0.86428         | -0.14105 | 0.55608 | 0.44553     | 0.741458108 |           |          |
| NDUFA3P1   | ENSG00000267590 | 0.13697  | 0.44553 | 0.13697     | 0.44553     | 0.13697   |          |
|            | 0.44553         | 0.13697  | 0.44553 | 0.44553     | 0.741458108 |           |          |
| WFDC2      | ENSG00000101443 | 0.13693  | 0.44554 | 0.13693     | 0.44554     | 0.13693   | 0.44554  |
|            | -0.11833        | 0.5471   | 0.44554 | 0.741458108 |             |           |          |
| COL2A1     | ENSG00000139219 | 0.13685  | 0.44558 | -0.089716   | 0.53574     | 0.1131    |          |
|            | 0.45497         | -0.66332 | 0.74644 | 0.44558     | 0.741458108 |           |          |
| CNNM3      | ENSG00000168763 | 0.13683  | 0.44558 | -0.0054733  | 0.50218     | -1.3651   | 0.91389  |
|            | -0.48682        | 0.68681  | 0.44558 | 0.741458108 |             |           |          |
| DLGAP1-AS2 | ENSG00000262001 | 0.13684  | 0.44558 | 0.13684     | 0.44558     | 0.13684   |          |
|            | 0.44558         | 0.13684  | 0.44558 | 0.44558     | 0.741458108 |           |          |
| NA         | ENSG00000231198 | 0.13681  | 0.44559 | 0.13681     | 0.44559     | 0.13681   | 0.44559  |
|            | 0.13681         | 0.44559  | 0.44559 | 0.741458108 |             |           |          |
| RNU6-1137P | ENSG00000252882 | 0.13672  | 0.44563 | 0.13672     | 0.44563     | 0.13672   |          |
|            | 0.44563         | 0.13672  | 0.44563 | 0.44563     | 0.741461762 |           |          |
| NA         | ENSG00000267612 | -0.50066 | 0.69169 | -0.50066    | 0.69169     | 0.13661   | 0.44567  |
|            | 0.11364         | 0.45476  | 0.44567 | 0.741461762 |             |           |          |
| SLC25A6P1  | ENSG00000233015 | -0.30795 | 0.62094 | -0.11236    | 0.54473     | -1.387    |          |
|            | 0.91728         | 0.13657  | 0.44568 | 0.44568     | 0.741461762 |           |          |
| LINC02736  | ENSG00000279243 | 0.12124  | 0.45175 | -0.80829    | 0.79054     | -0.27156  |          |
|            | 0.60702         | 0.13653  | 0.4457  | 0.4457      | 0.741461762 |           |          |
| COLEC11    | ENSG00000118004 | -0.47245 | 0.6817  | -0.81132    | 0.79141     | -0.091598 |          |
|            | 0.53649         | 0.13652  | 0.44571 | 0.44571     | 0.741461762 |           |          |
| SGCEP1     | ENSG00000235352 | 0.13648  | 0.44572 | 0.13648     | 0.44572     | 0.13648   |          |
|            | 0.44572         | 0.13648  | 0.44572 | 0.44572     | 0.741461762 |           |          |
| IL17REL    | ENSG00000188263 | -0.26251 | 0.60353 | 0.028723    | 0.48854     | 0.13647   |          |
|            | 0.44573         | -0.8521  | 0.80292 | 0.44573     | 0.741461762 |           |          |
| NA         | ENSG00000199321 | 0.13645  | 0.44573 | -0.40018    | 0.65549     | -2.3053   | 0.98942  |
|            | -1.0168         | 0.84537  | 0.44573 | 0.741461762 |             |           |          |
| RNU6-837P  | ENSG00000212358 | 0.13644  | 0.44574 | 0.13644     | 0.44574     | 0.13644   |          |

|           |                 |           |         |             |             |           |         |
|-----------|-----------------|-----------|---------|-------------|-------------|-----------|---------|
|           | 0.44574         | 0.13644   | 0.44574 | 0.44574     | 0.741461762 |           |         |
| RNA5SP303 | ENSG00000252001 | 0.13636   | 0.44577 | -1.1159     | 0.86777     | -1.1159   |         |
|           | 0.86777         | -1.1159   | 0.86777 | 0.44577     | 0.741461762 |           |         |
| NA        | ENSG00000270902 | 0.13634   | 0.44578 | 0.13634     | 0.44578     | 0.13634   | 0.44578 |
|           | 0.13634         | 0.44578   | 0.44578 | 0.741461762 |             |           |         |
| NA        | ENSG00000272941 | 0.13633   | 0.44578 | 0.13633     | 0.44578     | 0.13633   | 0.44578 |
|           | 0.13633         | 0.44578   | 0.44578 | 0.741461762 |             |           |         |
| LINC00927 | ENSG00000259361 | -1.0674   | 0.85711 | 0.13631     | 0.44579     | -1.4043   |         |
|           | 0.91988         | -1.4043   | 0.91988 | 0.44579     | 0.741461762 |           |         |
| NA        | ENSG00000273118 | 0.1362    | 0.44583 | -1.0253     | 0.8474      | -0.39574  | 0.65385 |
|           | -1.189          | 0.88278   | 0.44583 | 0.741485632 |             |           |         |
| LINC02099 | ENSG00000253490 | -0.37025  | 0.6444  | 0.13616     | 0.44585     | 0.13616   |         |
|           | 0.44585         | 0.13616   | 0.44585 | 0.44585     | 0.741485632 |           |         |
| NA        | ENSG00000271788 | 0.13615   | 0.44585 | 0.13615     | 0.44585     | -0.13413  | 0.55335 |
|           | 0.072515        | 0.4711    | 0.44585 | 0.741485632 |             |           |         |
| INTS4P1   | ENSG00000164669 | -1.2273   | 0.89014 | 0.13594     | 0.44593     | -0.079695 |         |
|           | 0.53176         | -0.54563  | 0.70734 | 0.44593     | 0.741593369 |           |         |
| ABCA9     | ENSG00000154258 | -1.2259   | 0.88988 | -0.74851    | 0.77292     | 0.041462  | 0.48346 |
|           | 0.13586         | 0.44597   | 0.44597 | 0.74163458  |             |           |         |
| NA        | ENSG00000260369 | 0.1357    | 0.44603 | -0.57193    | 0.71632     | -0.709    | 0.76084 |
|           | -0.024759       | 0.50988   | 0.44603 | 0.741709047 |             |           |         |
| RPL7P26   | ENSG00000184612 | 0.021265  | 0.49152 | -0.24673    | 0.59744     | 0.13562   |         |
|           | 0.44606         | 0.13562   | 0.44606 | 0.44606     | 0.741733622 |           |         |
| TSC1      | ENSG00000165699 | -0.31764  | 0.62462 | -0.16958    | 0.56733     | 0.13551   | 0.44611 |
|           | -0.5688         | 0.71525   | 0.44611 | 0.741791452 |             |           |         |
| NA        | ENSG00000235243 | -0.87252  | 0.80854 | 0.13543     | 0.44614     | -0.87252  | 0.80854 |
|           | -0.87252        | 0.80854   | 0.44614 | 0.741816023 |             |           |         |
| NA        | ENSG00000265081 | 0.13532   | 0.44618 | 0.13532     | 0.44618     | 0.13532   | 0.44618 |
|           | 0.13532         | 0.44618   | 0.44618 | 0.741845561 |             |           |         |
| NEBL      | ENSG00000078114 | 0.1353    | 0.44619 | -0.54888    | 0.70846     | -0.28686  | 0.61289 |
|           | -0.39101        | 0.65211   | 0.44619 | 0.741845561 |             |           |         |
| SNRPB     | ENSG00000125835 | -0.7276   | 0.76657 | -1.7013     | 0.95556     | 0.13517   | 0.44624 |
|           | -1.4997         | 0.93315   | 0.44624 | 0.741845561 |             |           |         |
| SCNN1B    | ENSG00000168447 | -0.44971  | 0.67354 | -0.22438    | 0.58877     | 0.13516   |         |
|           | 0.44624         | -0.16402  | 0.56514 | 0.44624     | 0.741845561 |           |         |
| LINC00686 | ENSG00000237687 | -0.17582  | 0.56978 | 0.13518     | 0.44624     | -1.247    |         |
|           | 0.89381         | 0.0054541 | 0.49782 | 0.44624     | 0.741845561 |           |         |
| GDAP1     | ENSG00000104381 | 0.13505   | 0.44628 | -0.52767    | 0.70114     | -0.26787  | 0.6056  |
|           | -0.48574        | 0.68642   | 0.44628 | 0.741845561 |             |           |         |
| SARS1     | ENSG00000031698 | 0.13505   | 0.44629 | 0.057142    | 0.47722     | 0.11541   | 0.45406 |
|           | 0.034567        | 0.48621   | 0.44629 | 0.741845561 |             |           |         |
| NA        | ENSG00000212195 | 0.13498   | 0.44631 | 0.13498     | 0.44631     | 0.13498   | 0.44631 |
|           | 0.13498         | 0.44631   | 0.44631 | 0.741845561 |             |           |         |
| NA        | ENSG00000252171 | 0.13498   | 0.44631 | 0.13498     | 0.44631     | 0.13498   | 0.44631 |
|           | 0.13498         | 0.44631   | 0.44631 | 0.741845561 |             |           |         |
| RNU7-149P | ENSG00000252548 | 0.13498   | 0.44631 | -0.94914    | 0.82873     | -0.50223  |         |
|           | 0.69225         | -1.4395   | 0.925   | 0.44631     | 0.741845561 |           |         |
| GTF2E2    | ENSG00000197265 | -0.24176  | 0.59552 | 0.13473     | 0.44641     | -0.46244  |         |
|           | 0.67812         | -0.47147  | 0.68135 | 0.44641     | 0.741967593 |           |         |
| MFNG      | ENSG00000100060 | -0.55421  | 0.71028 | 0.13469     | 0.44643     | -0.68387  | 0.75297 |
|           | -0.60604        | 0.72776   | 0.44643 | 0.741967593 |             |           |         |
| CWF19L2   | ENSG00000152404 | -0.98107  | 0.83672 | -0.95995    | 0.83146     | -0.17328  |         |
|           | 0.56879         | 0.13458   | 0.44647 | 0.44647     | 0.741967593 |           |         |
| NA        | ENSG00000257252 | -0.87719  | 0.80981 | -1.8613     | 0.96865     | -0.60485  | 0.72736 |
|           | 0.13457         | 0.44647   | 0.44647 | 0.741967593 |             |           |         |
| NA        | ENSG00000201933 | -0.16464  | 0.56539 | -0.16464    | 0.56539     | 0.13454   | 0.44649 |
|           | -0.16464        | 0.56539   | 0.44649 | 0.741967593 |             |           |         |
| NA        | ENSG00000250282 | 0.13453   | 0.44649 | 0.13453     | 0.44649     | 0.13453   | 0.44649 |
|           | 0.13453         | 0.44649   | 0.44649 | 0.741967593 |             |           |         |
| NA        | ENSG00000272076 | 0.13453   | 0.44649 | 0.13453     | 0.44649     | 0.13453   | 0.44649 |
|           | 0.13453         | 0.44649   | 0.44649 | 0.741967593 |             |           |         |
| ADRB2     | ENSG00000169252 | 0.13447   | 0.44652 | -0.76325    | 0.77734     | -0.4616   | 0.67782 |

|             |                 |           |         |             |             |            |         |  |
|-------------|-----------------|-----------|---------|-------------|-------------|------------|---------|--|
|             | -0.36939        | 0.64408   | 0.44652 | 0.741982706 |             |            |         |  |
| NA          | ENSG00000257060 | 0.13439   | 0.44655 | -0.85279    | 0.80311     | -0.024784  | 0.50989 |  |
|             | -0.93026        | 0.82388   | 0.44655 | 0.741982706 |             |            |         |  |
| NA          | ENSG00000199222 | -0.93487  | 0.82507 | -0.64198    | 0.73956     | 0.13437    | 0.44656 |  |
|             | -0.93487        | 0.82507   | 0.44656 | 0.741982706 |             |            |         |  |
| NA          | ENSG00000261248 | -0.62664  | 0.73455 | -0.3095     | 0.62153     | -0.62664   | 0.73455 |  |
|             | 0.13436         | 0.44656   | 0.44656 | 0.741982706 |             |            |         |  |
| RPS27AP3    | ENSG00000226144 | 0.13424   | 0.44661 | 0.13424     | 0.44661     | 0.13424    |         |  |
|             | 0.44661         | 0.13424   | 0.44661 | 0.44661     | 0.742004237 |            |         |  |
| NA          | ENSG00000262712 | 0.13423   | 0.44661 | 0.13423     | 0.44661     | 0.13423    | 0.44661 |  |
|             | 0.13423         | 0.44661   | 0.44661 | 0.742004237 |             |            |         |  |
| NA          | ENSG00000226523 | 0.13414   | 0.44665 | 0.13414     | 0.44665     | 0.13414    | 0.44665 |  |
|             | 0.13414         | 0.44665   | 0.44665 | 0.742004237 |             |            |         |  |
| NA          | ENSG00000241358 | 0.1341    | 0.44666 | -0.69701    | 0.7571      | -0.69701   | 0.7571  |  |
|             | -1.9195         | 0.97254   | 0.44666 | 0.742004237 |             |            |         |  |
| FBXO39      | ENSG00000177294 | 0.13408   | 0.44667 | -1.9599     | 0.975       | -0.62948   | 0.73548 |  |
|             | -0.76645        | 0.7783    | 0.44667 | 0.742004237 |             |            |         |  |
| RNU4-85P    | ENSG00000201545 | -1.3767   | 0.9157  | -1.3767     | 0.9157      | 0.13402    |         |  |
|             | 0.44669         | -1.3767   | 0.9157  | 0.44669     | 0.742004237 |            |         |  |
| NA          | ENSG00000272485 | -1.0002   | 0.84139 | 0.134       | 0.4467      | -0.026871  | 0.51072 |  |
|             | -0.026871       | 0.51072   | 0.4467  | 0.742004237 |             |            |         |  |
| RAB5B       | ENSG00000111540 | -0.038948 | 0.51553 | 0.064297    | 0.47437     | 0.030985   | 0.48764 |  |
|             | 0.13397         | 0.44671   | 0.44671 | 0.742004237 |             |            |         |  |
| ACVR1       | ENSG00000115170 | -0.33475  | 0.63109 | 0.11136     | 0.45566     | 0.095523   | 0.46195 |  |
|             | 0.13397         | 0.44671   | 0.44671 | 0.742004237 |             |            |         |  |
| RN7SKP136   | ENSG00000222859 | 0.13375   | 0.4468  | 0.13375     | 0.4468      | 0.13375    |         |  |
|             | 0.4468          | 0.13375   | 0.4468  | 0.4468      | 0.742099339 |            |         |  |
| NECTIN4-AS1 | ENSG00000228917 | 0.13374   | 0.4468  | 0.13374     | 0.4468      | 0.13374    |         |  |
|             | 0.4468          | 0.13374   | 0.4468  | 0.4468      | 0.742099339 |            |         |  |
| OR7E104P    | ENSG00000219926 | 0.10465   | 0.45833 | 0.13371     | 0.44682     | -1.0236    |         |  |
|             | 0.84699         | -0.47461  | 0.68247 | 0.44682     | 0.742099339 |            |         |  |
| NA          | ENSG00000254957 | 0.13363   | 0.44685 | -0.91576    | 0.8201      | 0.13363    | 0.44685 |  |
|             | 0.13363         | 0.44685   | 0.44685 | 0.742099339 |             |            |         |  |
| UBE2WP1     | ENSG00000234422 | 0.13357   | 0.44687 | 0.13357     | 0.44687     | 0.13357    |         |  |
|             | 0.44687         | 0.13357   | 0.44687 | 0.44687     | 0.742099339 |            |         |  |
| NA          | ENSG00000272215 | 0.13357   | 0.44687 | 0.019919    | 0.49205     | -0.0044403 | 0.50177 |  |
|             | -0.0044403      | 0.50177   | 0.44687 | 0.742099339 |             |            |         |  |
| NA          | ENSG00000249869 | 0.082353  | 0.46718 | -0.41341    | 0.66035     | -1.3788    | 0.91602 |  |
|             | 0.13355         | 0.44688   | 0.44688 | 0.742099339 |             |            |         |  |
| NA          | ENSG00000282997 | 0.13344   | 0.44692 | 0.13344     | 0.44692     | 0.13344    | 0.44692 |  |
|             | 0.13344         | 0.44692   | 0.44692 | 0.742099339 |             |            |         |  |
| NA          | ENSG00000230715 | 0.13338   | 0.44694 | 0.13338     | 0.44694     | 0.13338    | 0.44694 |  |
|             | 0.13338         | 0.44694   | 0.44694 | 0.742099339 |             |            |         |  |
| RNU6-732P   | ENSG00000251842 | 0.13339   | 0.44694 | 0.13339     | 0.44694     | 0.13339    |         |  |
|             | 0.44694         | 0.13339   | 0.44694 | 0.44694     | 0.742099339 |            |         |  |
| METTL2B     | ENSG00000165055 | -0.088454 | 0.53524 | -0.36257    | 0.64154     | 0.13336    |         |  |
|             | 0.44695         | -1.0387   | 0.85053 | 0.44695     | 0.742099339 |            |         |  |
| SNORA22     | ENSG00000206634 | -1.0235   | 0.84696 | -0.73882    | 0.76999     | -0.74611   |         |  |
|             | 0.7722          | 0.13337   | 0.44695 | 0.44695     | 0.742099339 |            |         |  |
| LINC02640   | ENSG00000233590 | 0.13329   | 0.44698 | 0.13329     | 0.44698     | 0.13329    |         |  |
|             | 0.44698         | 0.13329   | 0.44698 | 0.44698     | 0.742123864 |            |         |  |
| MIR181A2    | ENSG00000207595 | 0.12245   | 0.45127 | 0.13325     | 0.447       | 0.073987   | 0.47051 |  |
|             | 0.073987        | 0.47051   | 0.447   | 0.742130261 |             |            |         |  |
| TAF13P2     | ENSG00000225658 | 0.1332    | 0.44702 | 0.1332      | 0.44702     | 0.1332     |         |  |
|             | 0.44702         | 0.1332    | 0.44702 | 0.44702     | 0.742130261 |            |         |  |
| OR7E128P    | ENSG00000228915 | 0.092338  | 0.46321 | 0.10793     | 0.45702     | 0.13317    |         |  |
|             | 0.44703         | -1.1984   | 0.88463 | 0.44703     | 0.742130261 |            |         |  |
| NA          | ENSG00000261193 | -1.4225   | 0.92255 | 0.13311     | 0.44705     | -0.78204   | 0.7829  |  |
|             | -0.78204        | 0.7829    | 0.44705 | 0.742130261 |             |            |         |  |
| RNA5SP395   | ENSG00000252376 | 0.1331    | 0.44706 | 0.1331      | 0.44706     | 0.1331     |         |  |
|             | 0.44706         | 0.1331    | 0.44706 | 0.44706     | 0.742130261 |            |         |  |
| RNU6-190P   | ENSG00000206881 | 0.13295   | 0.44712 | 0.13295     | 0.44712     | 0.13295    |         |  |

|           |                 |           |         |             |             |           |         |
|-----------|-----------------|-----------|---------|-------------|-------------|-----------|---------|
|           | 0.44712         | 0.13295   | 0.44712 | 0.44712     | 0.742179296 |           |         |
| LINC02559 | ENSG00000236464 | 0.13293   | 0.44712 | 0.44712     | 0.13293     | 0.44712   | 0.13293 |
|           | 0.44712         | 0.13293   | 0.44712 | 0.44712     | 0.742179296 |           |         |
| NA        | ENSG00000265516 | 0.13284   | 0.44716 | 0.44716     | 0.13284     | 0.44716   | 0.13284 |
|           | 0.13284         | 0.44716   | 0.44716 | 0.742203295 |             |           |         |
| LRRC8D    | ENSG00000171492 | 0.13277   | 0.44719 | 0.44719     | 0.13277     | 0.44719   | 0.13277 |
|           | 0.44719         | -0.85348  | 0.8033  | 0.44719     | 0.742203295 |           |         |
| RNA5SP163 | ENSG00000222236 | 0.13275   | 0.4472  | 0.4472      | 0.13275     | 0.4472    | 0.13275 |
|           | 0.4472          | 0.13275   | 0.4472  | 0.4472      | 0.742203295 |           |         |
| NA        | ENSG00000272724 | -1.3572   | 0.91265 | 0.13269     | 0.44722     | -2.2601   | 0.98809 |
|           | -2.2601         | 0.98809   | 0.44722 | 0.742203295 |             |           |         |
| RPS12P17  | ENSG00000233163 | -0.82593  | 0.79558 | 0.13264     | 0.44724     | -0.82593  |         |
|           | 0.79558         | -0.82593  | 0.79558 | 0.44724     | 0.742203295 |           |         |
| TMEM74    | ENSG00000164841 | -0.057957 | 0.52311 | 0.13251     | 0.44729     | -0.057957 |         |
|           | 0.52311         | -0.057957 | 0.52311 | 0.44729     | 0.742203295 |           |         |
| NA        | ENSG00000263576 | 0.1325    | 0.4473  | 0.1325      | 0.4473      | 0.1325    | 0.4473  |
|           | 0.1325          | 0.4473    | 0.4473  | 0.742203295 |             |           |         |
| DDX47     | ENSG00000213782 | -1.1472   | 0.87434 | -1.1        | 0.86433     | -1.1472   | 0.87434 |
|           | 0.13244         | 0.44732   | 0.44732 | 0.742203295 |             |           |         |
| NA        | ENSG00000267711 | -0.13887  | 0.55523 | -0.13887    | 0.55523     | -0.70728  | 0.7603  |
|           | 0.13242         | 0.44733   | 0.44733 | 0.742203295 |             |           |         |
| ABCF2     | ENSG00000033050 | 0.13238   | 0.44734 | 0.13238     | 0.44734     | 0.13238   | 0.44734 |
|           | -1.941          | 0.97387   | 0.44734 | 0.742203295 |             |           |         |
| LINC02766 | ENSG00000229484 | 0.13237   | 0.44735 | 0.13237     | 0.44735     | 0.13237   |         |
|           | 0.44735         | 0.13237   | 0.44735 | 0.44735     | 0.742203295 |           |         |
| DHRS2     | ENSG00000100867 | -1.0343   | 0.84951 | -0.14747    | 0.55862     | 0.13233   | 0.44736 |
|           | -0.040044       | 0.51597   | 0.44736 | 0.742203295 |             |           |         |
| SSR3      | ENSG00000114850 | -0.2678   | 0.60557 | -0.30312    | 0.6191      | 0.13228   | 0.44738 |
|           | -0.034537       | 0.51378   | 0.44738 | 0.742203295 |             |           |         |
| OR5M13P   | ENSG00000166693 | 0.13225   | 0.44739 | 0.13225     | 0.44739     | 0.13225   |         |
|           | 0.44739         | -1.0706   | 0.85782 | 0.44739     | 0.742203295 |           |         |
| NA        | ENSG00000235681 | 0.13226   | 0.44739 | 0.13226     | 0.44739     | 0.13226   | 0.44739 |
|           | 0.13226         | 0.44739   | 0.44739 | 0.742203295 |             |           |         |
| NIPBL     | ENSG00000164190 | -0.89796  | 0.8154  | -0.52253    | 0.69935     | 0.13223   | 0.4474  |
|           | -0.036239       | 0.51445   | 0.4474  | 0.742203295 |             |           |         |
| NA        | ENSG00000278957 | 0.13224   | 0.4474  | 0.13224     | 0.4474      | 0.13224   | 0.4474  |
|           | 0.13224         | 0.4474    | 0.4474  | 0.742203295 |             |           |         |
| RNU6-559P | ENSG00000251960 | 0.1322    | 0.44741 | 0.1322      | 0.44741     | 0.1322    |         |
|           | 0.44741         | 0.1322    | 0.44741 | 0.44741     | 0.742203295 |           |         |
| RNU6-741P | ENSG00000206616 | 0.13217   | 0.44743 | -0.53904    | 0.70507     | -1.1753   |         |
|           | 0.88006         | -0.30646  | 0.62037 | 0.44743     | 0.742203295 |           |         |
| NIN       | ENSG00000100503 | 0.094733  | 0.46226 | 0.13208     | 0.44746     | -0.25571  | 0.60091 |
|           | -1.2251         | 0.88974   | 0.44746 | 0.742203295 |             |           |         |
| MIR548U   | ENSG00000212017 | 0.066124  | 0.47364 | 0.13207     | 0.44746     | -0.4479   |         |
|           | 0.67289         | -0.111    | 0.54419 | 0.44746     | 0.742203295 |           |         |
| ATF7IP    | ENSG00000171681 | 0.132     | 0.44749 | 0.047246    | 0.48116     | -0.64519  | 0.7406  |
|           | -0.37678        | 0.64683   | 0.44749 | 0.742203295 |             |           |         |
| DDX43P3   | ENSG00000230196 | 0.13201   | 0.44749 | 0.13201     | 0.44749     | 0.13201   |         |
|           | 0.44749         | 0.13201   | 0.44749 | 0.44749     | 0.742203295 |           |         |
| NA        | ENSG00000224104 | -0.55417  | 0.71027 | -0.028939   | 0.51154     | 0.13199   | 0.4475  |
|           | -0.50869        | 0.69452   | 0.4475  | 0.742203295 |             |           |         |
| KCNMB3P1  | ENSG00000239435 | 0.13193   | 0.44752 | -1.4005     | 0.91932     | -0.63715  |         |
|           | 0.73799         | -2.0918   | 0.98177 | 0.44752     | 0.742211204 |           |         |
| SPRR5     | ENSG00000283227 | -0.82566  | 0.7955  | 0.13189     | 0.44754     | -0.42559  | 0.6648  |
|           | -0.42559        | 0.6648    | 0.44754 | 0.742219113 |             |           |         |
| RNU6-657P | ENSG00000206631 | 0.13177   | 0.44758 | 0.13177     | 0.44758     | 0.13177   |         |
|           | 0.44758         | -0.5926   | 0.72328 | 0.44758     | 0.742242837 |           |         |
| PPCS      | ENSG00000127125 | 0.13173   | 0.4476  | 0.13173     | 0.4476      | 0.13173   | 0.4476  |
|           | 0.13173         | 0.4476    | 0.4476  | 0.742242837 |             |           |         |
| BUD31P1   | ENSG00000253684 | 0.13171   | 0.4476  | 0.13171     | 0.4476      | -0.77973  |         |
|           | 0.78222         | -1.0199   | 0.84611 | 0.4476      | 0.742242837 |           |         |
| UNC80     | ENSG00000144406 | -0.71187  | 0.76173 | -0.099185   | 0.5395      | 0.13167   | 0.44762 |

|            |                 |           |            |             |             |           |         |       |
|------------|-----------------|-----------|------------|-------------|-------------|-----------|---------|-------|
|            | -0.48851        | 0.68741   | 0.44762    | 0.742250744 |             |           |         |       |
| SAP18      | ENSG00000150459 | -0.45317  | 0.67479    | -1.2621     | 0.89654     | 0.13163   | 0.44764 |       |
|            | -1.4409         | 0.9252    | 0.44764    | 0.74225865  |             |           |         |       |
| NA         | ENSG00000259616 | -0.16566  | 0.56579    | 0.13156     | 0.44767     | -0.5969   | 0.72471 |       |
|            | -1.9157         | 0.9723    | 0.44767    | 0.742265785 |             |           |         |       |
| NUDT2      | ENSG00000164978 | 0.13152   | 0.44768    | 0.091311    | 0.46362     | -1.0376   | 0.85028 |       |
|            | -0.52219        | 0.69923   | 0.44768    | 0.742265785 |             |           |         |       |
| ERICH3     | ENSG00000178965 | -0.70114  | 0.75839    | -0.53982    | 0.70534     | -0.86221  |         |       |
|            | 0.80572         | 0.13149   | 0.44769    | 0.44769     | 0.742265785 |           |         |       |
| RNA5SP374  | ENSG00000199809 | -0.76087  | 0.77663    | -0.76087    | 0.77663     | -0.76087  |         |       |
|            | 0.77663         | 0.13131   | 0.44777    | 0.44777     | 0.74231956  |           |         |       |
| KCNB2      | ENSG00000182674 | 0.052784  | 0.47895    | 0.096456    | 0.46158     | 0.13128   | 0.44778 |       |
|            | -0.054334       | 0.52167   | 0.44778    | 0.74231956  |             |           |         |       |
| YPEL4      | ENSG00000166793 | 0.13125   | 0.44779    | 0.12986     | 0.44834     | -0.071505 | 0.5285  |       |
|            | -0.71531        | 0.76279   | 0.44779    | 0.74231956  |             |           |         |       |
| RNU6-1277P | ENSG00000201431 | 0.13121   | 0.4478     | 0.13121     | 0.4478      | 0.13121   |         |       |
|            | 0.4478          | 0.13121   | 0.4478     | 0.4478      | 0.74231956  |           |         |       |
| KLK5       | ENSG00000167754 | 0.13119   | 0.44781    | 0.13119     | 0.44781     | 0.13119   | 0.44781 |       |
|            | 0.13119         | 0.44781   | 0.44781    | 0.74231956  |             |           |         |       |
| NA         | ENSG00000221085 | -0.030338 | 0.5121     | -0.001261   | 0.5005      | 0.13112   | 0.44784 |       |
|            | -0.29786        | 0.6171    | 0.44784    | 0.74231956  |             |           |         |       |
| DNAJB6P4   | ENSG00000228523 | 0.13109   | 0.44785    | 0.13109     | 0.44785     | 0.13109   |         |       |
|            | 0.44785         | 0.13109   | 0.44785    | 0.44785     | 0.74231956  |           |         |       |
| SSBP2      | ENSG00000145687 | 0.11085   | 0.45587    | -0.51585    | 0.69702     | 0.13107   | 0.44786 |       |
|            | -0.12027        | 0.54786   | 0.44786    | 0.74231956  |             |           |         |       |
| MAN1A2P1   | ENSG00000267799 | -0.015513 | 0.50619    | 0.13107     | 0.44786     | 0.014887  |         |       |
|            | 0.49406         | 0.13107   | 0.44786    | 0.44786     | 0.74231956  |           |         |       |
| NA         | ENSG00000199245 | 0.131     | 0.44789    | 0.088652    | 0.46468     | 0.131     | 0.44789 | 0.131 |
|            | 0.44789         | 0.44789   | 0.74231956 |             |             |           |         |       |
| MIR488     | ENSG00000202609 | 0.131     | 0.44789    | 0.131       | 0.44789     | 0.131     | 0.44789 | 0.131 |
|            | 0.44789         | 0.44789   | 0.74231956 |             |             |           |         |       |
| NA         | ENSG00000259684 | 0.13092   | 0.44792    | 0.13092     | 0.44792     | 0.13092   | 0.44792 |       |
|            | 0.13092         | 0.44792   | 0.44792    | 0.742344033 |             |           |         |       |
| MIR3612    | ENSG00000265635 | 0.13082   | 0.44796    | 0.13082     | 0.44796     | -0.448    |         |       |
|            | 0.67292         | -0.448    | 0.67292    | 0.44796     | 0.742367728 |           |         |       |
| TMEM253    | ENSG00000232070 | 0.11016   | 0.45614    | 0.13077     | 0.44798     | 0.13077   |         |       |
|            | 0.44798         | 0.13077   | 0.44798    | 0.44798     | 0.742367728 |           |         |       |
| NA         | ENSG00000255476 | 0.13075   | 0.44798    | -0.19743    | 0.57825     | -1.1633   | 0.87764 |       |
|            | 0.13075         | 0.44798   | 0.44798    | 0.742367728 |             |           |         |       |
| TJAP1      | ENSG00000137221 | -0.24802  | 0.59794    | 0.13064     | 0.44803     | -0.35447  | 0.63851 |       |
|            | -0.35447        | 0.63851   | 0.44803    | 0.742416662 |             |           |         |       |
| MAPK4      | ENSG00000141639 | -1.0801   | 0.85995    | 0.13062     | 0.44804     | 0.070334  | 0.47196 |       |
|            | 0.055267        | 0.47796   | 0.44804    | 0.742416662 |             |           |         |       |
| HMG1P36    | ENSG00000235734 | -1.4255   | 0.92299    | -1.2174     | 0.88827     | 0.13054   |         |       |
|            | 0.44807         | 0.13054   | 0.44807    | 0.44807     | 0.742423777 |           |         |       |
| RN7SKP22   | ENSG00000201967 | 0.13048   | 0.44809    | 0.13048     | 0.44809     | 0.13048   |         |       |
|            | 0.44809         | 0.13048   | 0.44809    | 0.44809     | 0.742423777 |           |         |       |
| NA         | ENSG00000226096 | -0.80604  | 0.78989    | 0.1305      | 0.44809     | -2.273    | 0.98849 |       |
|            | -0.33566        | 0.63143   | 0.44809    | 0.742423777 |             |           |         |       |
| RN7SL466P  | ENSG00000241347 | 0.13044   | 0.44811    | 0.13044     | 0.44811     | 0.13044   |         |       |
|            | 0.44811         | -0.73423  | 0.7686     | 0.44811     | 0.742431671 |           |         |       |
| HMG1P31    | ENSG00000267513 | -0.28201  | 0.61103    | -1.5755     | 0.94244     | 0.13027   |         |       |
|            | 0.44818         | -1.1187   | 0.86837    | 0.44818     | 0.742496373 |           |         |       |
| IGLJCOR18  | ENSG00000265243 | -1.3602   | 0.91312    | -1.3602     | 0.91312     | -1.3602   |         |       |
|            | 0.91312         | 0.13022   | 0.4482     | 0.4482      | 0.742496373 |           |         |       |
| ANAPC1P6   | ENSG00000235486 | -0.13446  | 0.55348    | -0.56676    | 0.71456     | -1.02     | 0.84614 |       |
|            | 0.13018         | 0.44821   | 0.44821    | 0.742496373 |             |           |         |       |
| NA         | ENSG00000242628 | 0.13018   | 0.44821    | 0.13018     | 0.44821     | 0.13018   | 0.44821 |       |
|            | 0.13018         | 0.44821   | 0.44821    | 0.742496373 |             |           |         |       |
| NA         | ENSG00000275012 | 0.12999   | 0.44829    | 0.12999     | 0.44829     | 0.12999   | 0.44829 |       |
|            | 0.12999         | 0.44829   | 0.44829    | 0.742603654 |             |           |         |       |
| PMM2       | ENSG00000140650 | -0.26132  | 0.60308    | 0.12993     | 0.44831     | -0.80454  | 0.78946 |       |

|            |                 |            |         |             |             |            |         |  |
|------------|-----------------|------------|---------|-------------|-------------|------------|---------|--|
|            | 0.044402        | 0.48229    | 0.44831 | 0.742611541 |             |            |         |  |
| NA         | ENSG00000238102 | -0.7131    | 0.76211 | -0.92313    | 0.82203     | 0.1297     | 0.4484  |  |
|            | -0.38966        | 0.65161    | 0.4484  | 0.742735375 |             |            |         |  |
| DCAF10     | ENSG00000122741 | -0.45157   | 0.67421 | -0.38007    | 0.64805     | -1.1351    |         |  |
|            | 0.87184         | 0.12958    | 0.44845 | 0.44845     | 0.742749533 |            |         |  |
| NA         | ENSG00000253341 | 0.12951    | 0.44848 | 0.12951     | 0.44848     | 0.12951    | 0.44848 |  |
|            | 0.12951         | 0.44848    | 0.44848 | 0.742749533 |             |            |         |  |
| TRIM61     | ENSG00000183439 | 0.12948    | 0.44849 | 0.12948     | 0.44849     | 0.12948    |         |  |
|            | 0.44849         | -0.70357   | 0.75915 | 0.44849     | 0.742749533 |            |         |  |
| CAPS       | ENSG00000105519 | 0.12944    | 0.4485  | 0.12944     | 0.4485      | 0.12944    | 0.4485  |  |
|            | 0.12944         | 0.4485     | 0.4485  | 0.742749533 |             |            |         |  |
| LINC01205  | ENSG00000228980 | 0.12945    | 0.4485  | -0.87438    | 0.80905     | -1.0422    |         |  |
|            | 0.85135         | -1.3414    | 0.91011 | 0.4485      | 0.742749533 |            |         |  |
| NA         | ENSG00000267571 | 0.12944    | 0.4485  | 0.12944     | 0.4485      | 0.12944    | 0.4485  |  |
|            | 0.12944         | 0.4485     | 0.4485  | 0.742749533 |             |            |         |  |
| NA         | ENSG00000250579 | -0.34459   | 0.6348  | 0.1294      | 0.44852     | -0.46995   | 0.68081 |  |
|            | -1.5145         | 0.93505    | 0.44852 | 0.742757412 |             |            |         |  |
| NA         | ENSG00000269679 | 0.058942   | 0.4765  | 0.058942    | 0.4765      | 0.12934    | 0.44854 |  |
|            | -0.16308        | 0.56477    | 0.44854 | 0.74276529  |             |            |         |  |
| DEFB116    | ENSG00000215545 | -0.22002   | 0.58707 | -1.6418     | 0.94969     | 0.12923    |         |  |
|            | 0.44859         | -1.7838    | 0.96277 | 0.44859     | 0.742787314 |            |         |  |
| TRNT1      | ENSG00000072756 | -0.13767   | 0.55475 | -0.13767    | 0.55475     | -0.72109   | 0.76457 |  |
|            | 0.12918         | 0.44861    | 0.44861 | 0.742787314 |             |            |         |  |
| RNF17      | ENSG00000132972 | -0.71305   | 0.76209 | 0.12911     | 0.44863     | -0.93059   | 0.82397 |  |
|            | -0.67808        | 0.75114    | 0.44863 | 0.742787314 |             |            |         |  |
| KIF19      | ENSG00000196169 | -1.4477    | 0.92615 | -0.3625     | 0.64151     | -0.1178    | 0.54689 |  |
|            | 0.12912         | 0.44863    | 0.44863 | 0.742787314 |             |            |         |  |
| RAPGEF2    | ENSG00000109756 | 0.078948   | 0.46854 | -1.965      | 0.97529     | -0.086501  |         |  |
|            | 0.53447         | 0.12908    | 0.44865 | 0.44865     | 0.742787314 |            |         |  |
| FGF11      | ENSG00000161958 | 0.12906    | 0.44866 | 0.039599    | 0.48421     | 0.12906    | 0.44866 |  |
|            | 0.12906         | 0.44866    | 0.44866 | 0.742787314 |             |            |         |  |
| NA         | ENSG00000272884 | 0.12906    | 0.44866 | 0.12906     | 0.44866     | 0.12906    | 0.44866 |  |
|            | 0.12906         | 0.44866    | 0.44866 | 0.742787314 |             |            |         |  |
| LINC01673  | ENSG00000234052 | -0.16654   | 0.56614 | -0.24308    | 0.59603     | 0.12897    |         |  |
|            | 0.44869         | -0.43766   | 0.66918 | 0.44869     | 0.742811745 |            |         |  |
| NA         | ENSG00000265069 | 0.12893    | 0.44871 | 0.12893     | 0.44871     | 0.12893    | 0.44871 |  |
|            | 0.12893         | 0.44871    | 0.44871 | 0.742819619 |             |            |         |  |
| NA         | ENSG00000275552 | 0.12882    | 0.44875 | 0.12882     | 0.44875     | 0.12882    | 0.44875 |  |
|            | 0.12882         | 0.44875    | 0.44875 | 0.742834357 |             |            |         |  |
| ACTR10     | ENSG00000131966 | -0.065829  | 0.52624 | 0.014529    | 0.4942      | 0.12874    |         |  |
|            | 0.44878         | -0.33163   | 0.62991 | 0.44878     | 0.742834357 |            |         |  |
| PRKCE-AS1  | ENSG00000228481 | 0.12869    | 0.4488  | 0.12869     | 0.4488      | -1.4266    |         |  |
|            | 0.92315         | 0.12869    | 0.4488  | 0.4488      | 0.742834357 |            |         |  |
| CRX        | ENSG00000105392 | 0.11653    | 0.45362 | 0.12867     | 0.44881     | -0.48569   | 0.68641 |  |
|            | -0.60924        | 0.72882    | 0.44881 | 0.742834357 |             |            |         |  |
| UTP20      | ENSG00000120800 | -0.34326   | 0.6343  | 0.12857     | 0.44885     | 0.050577   | 0.47983 |  |
|            | -0.23499        | 0.59289    | 0.44885 | 0.742834357 |             |            |         |  |
| ZNF812P    | ENSG00000224689 | -0.84119   | 0.79988 | 0.051969    | 0.47928     | 0.12858    |         |  |
|            | 0.44885         | 0.12858    | 0.44885 | 0.44885     | 0.742834357 |            |         |  |
| HSPE1-MOB4 | ENSG00000270757 | 0.12854    | 0.44886 | 0.12854     | 0.44886     | 0.12854    |         |  |
|            | 0.44886         | 0.12854    | 0.44886 | 0.44886     | 0.742834357 |            |         |  |
| PPIAP7     | ENSG00000173810 | -0.20795   | 0.58237 | 0.12851     | 0.44887     | -0.20548   |         |  |
|            | 0.5814          | -0.036224  | 0.51445 | 0.44887     | 0.742834357 |            |         |  |
| HSPE1P19   | ENSG00000271024 | -0.44621   | 0.67228 | 0.12852     | 0.44887     | -0.23617   |         |  |
|            | 0.59335         | -1.1801    | 0.88102 | 0.44887     | 0.742834357 |            |         |  |
| RNU6-1264P | ENSG00000206618 | -0.676     | 0.75048 | 0.12844     | 0.4489      | -0.60546   |         |  |
|            | 0.72756         | -0.60546   | 0.72756 | 0.4489      | 0.742834357 |            |         |  |
| WARS2-IT1  | ENSG00000224238 | -0.092471  | 0.53684 | 0.12841     | 0.44891     | -1.5206    |         |  |
|            | 0.93582         | -0.08601   | 0.53427 | 0.44891     | 0.742834357 |            |         |  |
| SPIN1      | ENSG00000106723 | -1.5745    | 0.94231 | -0.36834    | 0.64369     | 0.12833    | 0.44894 |  |
|            | -0.32442        | 0.62719    | 0.44894 | 0.742834357 |             |            |         |  |
| NA         | ENSG00000251527 | -0.0031469 | 0.50126 | 0.12831     | 0.44895     | -0.0031469 | 0.50126 |  |

|            |                 |             |         |             |             |           |         |        |         |
|------------|-----------------|-------------|---------|-------------|-------------|-----------|---------|--------|---------|
|            | -0.22228        | 0.58795     | 0.44895 | 0.742834357 |             |           |         |        |         |
| PFDN5      | ENSG00000123349 | -1.18       | 0.881   | -1.18       | 0.881       | 0.1283    | 0.44896 | -1.923 | 0.97276 |
|            | 0.44896         | 0.742834357 |         |             |             |           |         |        |         |
| TRIP10     | ENSG00000125733 | -1.7429     | 0.95933 | -1.095      | 0.86323     | -1.7429   |         |        |         |
|            | 0.95933         | 0.12821     | 0.44899 | 0.44899     | 0.742834357 |           |         |        |         |
| DHX15      | ENSG00000109606 | -0.81648    | 0.79289 | -0.61446    | 0.73054     | 0.12819   | 0.449   |        |         |
|            | -0.23714        | 0.59373     | 0.449   | 0.742834357 |             |           |         |        |         |
| MIR3119-2  | ENSG00000263390 | 0.12815     | 0.44901 | 0.12815     | 0.44901     | 0.12815   |         |        |         |
|            | 0.44901         | 0.12815     | 0.44901 | 0.44901     | 0.742834357 |           |         |        |         |
| NA         | ENSG00000249791 | 0.1281      | 0.44903 | 0.1281      | 0.44903     | 0.1281    | 0.44903 |        |         |
|            | 0.1281          | 0.44903     | 0.44903 | 0.742834357 |             |           |         |        |         |
| CMTM7      | ENSG00000153551 | -0.50309    | 0.69255 | -0.50309    | 0.69255     | -0.50309  | 0.69255 |        |         |
|            | 0.12807         | 0.44905     | 0.44905 | 0.742834357 |             |           |         |        |         |
| RN7SL752P  | ENSG00000239437 | 0.12805     | 0.44905 | -0.81005    | 0.79104     | -0.63292  |         |        |         |
|            | 0.73661         | -0.29517    | 0.61607 | 0.44905     | 0.742834357 |           |         |        |         |
| MTTP       | ENSG00000138823 | -0.28852    | 0.61352 | -0.73405    | 0.76854     | -0.29423  | 0.61571 |        |         |
|            | 0.12804         | 0.44906     | 0.44906 | 0.742834357 |             |           |         |        |         |
| B3GAT1     | ENSG00000109956 | 0.12801     | 0.44907 | 0.1266      | 0.44963     | -1.6338   |         |        |         |
|            | 0.94885         | -0.64332    | 0.73999 | 0.44907     | 0.742834357 |           |         |        |         |
| NA         | ENSG00000270100 | 0.12801     | 0.44907 | 0.12801     | 0.44907     | 0.12801   | 0.44907 |        |         |
|            | 0.12801         | 0.44907     | 0.44907 | 0.742834357 |             |           |         |        |         |
| ABCB4      | ENSG00000005471 | -0.2839     | 0.61176 | -0.2752     | 0.60842     | 0.12794   | 0.4491  |        |         |
|            | -0.41691        | 0.66163     | 0.4491  | 0.742834357 |             |           |         |        |         |
| PYROXD1    | ENSG00000121350 | 0.12794     | 0.4491  | 0.12794     | 0.4491      | 0.12794   |         |        |         |
|            | 0.4491          | -0.26997    | 0.60641 | 0.4491      | 0.742834357 |           |         |        |         |
| NA         | ENSG00000275902 | 0.12779     | 0.44916 | 0.12779     | 0.44916     | 0.12779   | 0.44916 |        |         |
|            | 0.12779         | 0.44916     | 0.44916 | 0.742905137 |             |           |         |        |         |
| CHKB       | ENSG00000100288 | -0.86588    | 0.80672 | -0.86588    | 0.80672     | 0.12767   | 0.44921 |        |         |
|            | -0.86588        | 0.80672     | 0.44921 | 0.742905137 |             |           |         |        |         |
| MTND6P25   | ENSG00000255316 | 0.12765     | 0.44921 | 0.12765     | 0.44921     | 0.12765   |         |        |         |
|            | 0.44921         | 0.12765     | 0.44921 | 0.44921     | 0.742905137 |           |         |        |         |
| NA         | ENSG00000281593 | -0.67814    | 0.75116 | 0.12763     | 0.44922     | -0.67814  | 0.75116 |        |         |
|            | -0.67814        | 0.75116     | 0.44922 | 0.742905137 |             |           |         |        |         |
| NA         | ENSG00000265693 | 0.12759     | 0.44924 | 0.12759     | 0.44924     | 0.12759   | 0.44924 |        |         |
|            | 0.12759         | 0.44924     | 0.44924 | 0.742905137 |             |           |         |        |         |
| NA         | ENSG00000229323 | -0.25109    | 0.59913 | -0.49236    | 0.68877     | 0.12758   | 0.44924 |        |         |
|            | -0.21965        | 0.58693     | 0.44924 | 0.742905137 |             |           |         |        |         |
| RIC8A      | ENSG00000177963 | 0.12756     | 0.44925 | 0.043534    | 0.48264     | -0.31698  | 0.62437 |        |         |
|            | -0.31698        | 0.62437     | 0.44925 | 0.742905137 |             |           |         |        |         |
| PPP1R15B   | ENSG00000158615 | -0.0010033  | 0.5004  | 0.12749     | 0.44928     | -0.6832   |         |        |         |
|            | 0.75276         | -0.0010033  | 0.5004  | 0.44928     | 0.742905137 |           |         |        |         |
| SELENOW    | ENSG00000178980 | 0.12748     | 0.44928 | 0.12748     | 0.44928     | 0.12748   |         |        |         |
|            | 0.44928         | 0.12748     | 0.44928 | 0.44928     | 0.742905137 |           |         |        |         |
| GPR83      | ENSG00000123901 | 0.1274      | 0.44931 | -0.48716    | 0.68693     | -0.95622  | 0.83052 |        |         |
|            | -0.74463        | 0.77175     | 0.44931 | 0.742929534 |             |           |         |        |         |
| NA         | ENSG00000257767 | 0.1273      | 0.44935 | 0.1273      | 0.44935     | 0.1273    | 0.44935 |        |         |
|            | 0.1273          | 0.44935     | 0.44935 | 0.742970463 |             |           |         |        |         |
| RAD9A      | ENSG00000172613 | 0.12723     | 0.44938 | -0.81733    | 0.79313     | -0.19706  | 0.57811 |        |         |
|            | -0.19706        | 0.57811     | 0.44938 | 0.742993222 |             |           |         |        |         |
| F11-AS1    | ENSG00000251165 | 0.12719     | 0.4494  | -0.027438   | 0.51094     | -0.80881  |         |        |         |
|            | 0.79069         | -0.47029    | 0.68093 | 0.4494      | 0.742993222 |           |         |        |         |
| FCGR2B     | ENSG00000072694 | -0.59506    | 0.7241  | -0.57602    | 0.7177      | 0.12716   |         |        |         |
|            | 0.44941         | -0.094797   | 0.53776 | 0.44941     | 0.742993222 |           |         |        |         |
| NA         | ENSG00000225286 | 0.1271      | 0.44943 | -0.67448    | 0.75        | 0.011052  | 0.49559 |        |         |
|            | 0.011052        | 0.49559     | 0.44943 | 0.742993222 |             |           |         |        |         |
| ONECUT1    | ENSG00000169856 | -0.064893   | 0.52587 | -0.055636   | 0.52218     | -0.072093 |         |        |         |
|            | 0.52874         | 0.12708     | 0.44944 | 0.44944     | 0.742993222 |           |         |        |         |
| FAM177A1P1 | ENSG00000214886 | -1.6555     | 0.95109 | 0.12684     | 0.44953     | 0.12684   |         |        |         |
|            | 0.44953         | 0.12684     | 0.44953 | 0.44953     | 0.743072589 |           |         |        |         |
| TEFM       | ENSG00000172171 | 0.1268      | 0.44955 | 0.1268      | 0.44955     | 0.1268    | 0.44955 |        |         |
|            | 0.1268          | 0.44955     | 0.44955 | 0.743072589 |             |           |         |        |         |
| NA         | ENSG00000277186 | 0.12679     | 0.44955 | 0.12679     | 0.44955     | 0.12679   | 0.44955 |        |         |

|            |                 |            |         |             |             |           |         |  |
|------------|-----------------|------------|---------|-------------|-------------|-----------|---------|--|
|            | 0.12679         | 0.44955    | 0.44955 | 0.743072589 |             |           |         |  |
| RNU6-1179P | ENSG00000207397 | -0.99365   | 0.8398  | -0.99365    | 0.8398      | 0.12668   |         |  |
|            | 0.4496          | -0.99365   | 0.8398  | 0.4496      | 0.743072589 |           |         |  |
| HMG1P12    | ENSG00000247911 | 0.12667    | 0.4496  | 0.12667     | 0.4496      | 0.12667   |         |  |
|            | 0.4496          | 0.12667    | 0.4496  | 0.4496      | 0.743072589 |           |         |  |
| CAV3       | ENSG00000182533 | 0.12664    | 0.44961 | -0.30406    | 0.61946     | 0.12664   | 0.44961 |  |
|            | 0.12664         | 0.44961    | 0.44961 | 0.743072589 |             |           |         |  |
| GRPEL2P3   | ENSG00000230682 | -1.1431    | 0.87349 | -0.31224    | 0.62257     | 0.12664   |         |  |
|            | 0.44961         | -0.31224   | 0.62257 | 0.44961     | 0.743072589 |           |         |  |
| PPP1R2P4   | ENSG00000241353 | 0.12664    | 0.44961 | 0.12664     | 0.44961     | 0.12664   |         |  |
|            | 0.44961         | 0.12664    | 0.44961 | 0.44961     | 0.743072589 |           |         |  |
| ANGPTL8    | ENSG00000130173 | 0.12651    | 0.44966 | 0.12651     | 0.44966     | 0.12651   |         |  |
|            | 0.44966         | 0.12651    | 0.44966 | 0.44966     | 0.743073041 |           |         |  |
| TMEM25     | ENSG00000149582 | 0.12649    | 0.44967 | 0.12649     | 0.44967     | -0.46568  |         |  |
|            | 0.67928         | -1.6964    | 0.9551  | 0.44967     | 0.743073041 |           |         |  |
| CD320      | ENSG00000167775 | 0.12649    | 0.44967 | -0.091882   | 0.5366      | -0.3511   | 0.63724 |  |
|            | 0.12649         | 0.44967    | 0.44967 | 0.743073041 |             |           |         |  |
| LGALS7     | ENSG00000205076 | 0.1264     | 0.44971 | 0.1264      | 0.44971     | 0.1264    |         |  |
|            | 0.44971         | 0.1264     | 0.44971 | 0.44971     | 0.743073041 |           |         |  |
| ZNF358     | ENSG00000198816 | 0.12637    | 0.44972 | 0.12637     | 0.44972     | 0.12637   |         |  |
|            | 0.44972         | 0.12637    | 0.44972 | 0.44972     | 0.743073041 |           |         |  |
| RASL10B    | ENSG00000270885 | -1.3088    | 0.90469 | 0.12633     | 0.44973     | 0.12633   |         |  |
|            | 0.44973         | -1.3088    | 0.90469 | 0.44973     | 0.743073041 |           |         |  |
| IGFALS     | ENSG00000099769 | 0.1262     | 0.44979 | 0.085063    | 0.46611     | 0.045234  |         |  |
|            | 0.48196         | 0.1262     | 0.44979 | 0.44979     | 0.743073041 |           |         |  |
| RN7SKP164  | ENSG00000251947 | -0.24191   | 0.59558 | -0.22145    | 0.58763     | -0.12093  |         |  |
|            | 0.54813         | 0.12616    | 0.4498  | 0.4498      | 0.743073041 |           |         |  |
| NA         | ENSG00000242180 | 0.12611    | 0.44982 | 0.12611     | 0.44982     | 0.12611   | 0.44982 |  |
|            | 0.12611         | 0.44982    | 0.44982 | 0.743073041 |             |           |         |  |
| HPN        | ENSG00000105707 | 0.12606    | 0.44984 | -0.26513    | 0.60454     | -0.875    | 0.80921 |  |
|            | 0.12606         | 0.44984    | 0.44984 | 0.743073041 |             |           |         |  |
| RPL7AP64   | ENSG00000213876 | 0.12602    | 0.44986 | 0.12602     | 0.44986     | -0.63635  |         |  |
|            | 0.73773         | -0.63635   | 0.73773 | 0.44986     | 0.743073041 |           |         |  |
| NA         | ENSG00000220614 | -0.27351   | 0.60777 | -0.27351    | 0.60777     | -0.27351  | 0.60777 |  |
|            | 0.12603         | 0.44986    | 0.44986 | 0.743073041 |             |           |         |  |
| MIR4690    | ENSG00000266041 | 0.12603    | 0.44986 | 0.12603     | 0.44986     | 0.12603   |         |  |
|            | 0.44986         | 0.12603    | 0.44986 | 0.44986     | 0.743073041 |           |         |  |
| TMTC3      | ENSG00000139324 | -0.11985   | 0.5477  | 0.12599     | 0.44987     | -0.094461 | 0.53763 |  |
|            | -0.14273        | 0.55675    | 0.44987 | 0.743073041 |             |           |         |  |
| RPL17P36   | ENSG00000236058 | 0.12599    | 0.44987 | 0.12599     | 0.44987     | 0.12599   |         |  |
|            | 0.44987         | 0.12599    | 0.44987 | 0.44987     | 0.743073041 |           |         |  |
| SCN2B      | ENSG00000149575 | -0.18017   | 0.57149 | -0.18017    | 0.57149     | -0.69591  | 0.75676 |  |
|            | 0.12596         | 0.44988    | 0.44988 | 0.743073041 |             |           |         |  |
| NA         | ENSG00000267802 | 0.12596    | 0.44988 | 0.12596     | 0.44988     | 0.12596   | 0.44988 |  |
|            | 0.12596         | 0.44988    | 0.44988 | 0.743073041 |             |           |         |  |
| MIR649     | ENSG00000207575 | 0.12595    | 0.44989 | 0.12595     | 0.44989     | 0.12595   |         |  |
|            | 0.44989         | 0.12595    | 0.44989 | 0.44989     | 0.743073041 |           |         |  |
| DNAJB6     | ENSG00000105993 | 0.12591    | 0.4499  | -0.14187    | 0.55641     | 0.1006    |         |  |
|            | 0.45993         | 0.02827    | 0.48872 | 0.4499      | 0.743073041 |           |         |  |
| THNSL2     | ENSG00000144115 | 0.12582    | 0.44994 | -0.86632    | 0.80684     | -0.93453  |         |  |
|            | 0.82499         | -0.6266    | 0.73454 | 0.44994     | 0.743088734 |           |         |  |
| BLM        | ENSG00000197299 | 0.028122   | 0.48878 | 0.12581     | 0.44994     | -0.2482   | 0.59801 |  |
|            | -0.73004        | 0.76732    | 0.44994 | 0.743088734 |             |           |         |  |
| PSMD13     | ENSG00000185627 | -0.0057726 | 0.5023  | -0.0057726  | 0.5023      | -0.056512 |         |  |
|            | 0.52253         | 0.12575    | 0.44997 | 0.44997     | 0.743097839 |           |         |  |
| LINC02767  | ENSG00000284237 | -0.060804  | 0.52424 | -0.10418    | 0.54149     | -0.011115 |         |  |
|            | 0.50443         | 0.12565    | 0.45    | 0.45        | 0.743097839 |           |         |  |
| RNA5SP486  | ENSG00000251770 | 0.12562    | 0.45002 | -0.47868    | 0.68392     | -0.26798  |         |  |
|            | 0.60564         | -1.1755    | 0.8801  | 0.45002     | 0.743097839 |           |         |  |
| FRYL       | ENSG00000075539 | -0.43559   | 0.66843 | -0.33505    | 0.6312      | 0.12557   | 0.45004 |  |
|            | -0.3216         | 0.62612    | 0.45004 | 0.743097839 |             |           |         |  |
| MPZL1      | ENSG00000197965 | 0.12548    | 0.45007 | 0.094386    | 0.4624      | -0.65744  | 0.74455 |  |



|            |                 |           |         |             |             |           |         |  |
|------------|-----------------|-----------|---------|-------------|-------------|-----------|---------|--|
|            | -0.018017       | 0.50719   | 0.45007 | 0.743097839 |             |           |         |  |
| NA         | ENSG00000279712 | 0.12544   | 0.45009 | -0.3047     | 0.6197      | 0.12544   | 0.45009 |  |
|            | 0.12544         | 0.45009   | 0.45009 | 0.743097839 |             |           |         |  |
| BRWD1P1    | ENSG00000215909 | -0.34447  | 0.63475 | -0.73915    | 0.77009     | 0.12542   |         |  |
|            | 0.4501          | 0.12542   | 0.4501  | 0.4501      | 0.743097839 |           |         |  |
| RPL21P42   | ENSG00000240068 | 0.12541   | 0.4501  | -0.083928   | 0.53344     | -0.087405 |         |  |
|            | 0.53483         | 0.12541   | 0.4501  | 0.4501      | 0.743097839 |           |         |  |
| RNU2-22P   | ENSG00000223198 | -0.95814  | 0.831   | -0.95814    | 0.831       | -1.4029   | 0.91968 |  |
|            | 0.12531         | 0.45014   | 0.45014 | 0.743097839 |             |           |         |  |
| RNU6-950P  | ENSG00000207381 | -1.8248   | 0.96598 | 0.12529     | 0.45015     | -0.51771  |         |  |
|            | 0.69767         | -0.51771  | 0.69767 | 0.45015     | 0.743097839 |           |         |  |
| ALG9       | ENSG00000086848 | 0.12526   | 0.45016 | -0.60248    | 0.72657     | -1.0924   | 0.86267 |  |
|            | -0.58323        | 0.72013   | 0.45016 | 0.743097839 |             |           |         |  |
| MIR4494    | ENSG00000264906 | -0.48335  | 0.68558 | -0.48335    | 0.68558     | -0.48335  |         |  |
|            | 0.68558         | 0.12517   | 0.45019 | 0.45019     | 0.743097839 |           |         |  |
| RIPK1      | ENSG00000137275 | 0.12516   | 0.4502  | 0.019395    | 0.49226     | -0.016878 | 0.50673 |  |
|            | -0.90063        | 0.81611   | 0.4502  | 0.743097839 |             |           |         |  |
| RNU6-1158P | ENSG00000212469 | 0.12514   | 0.4502  | 0.12514     | 0.4502      | 0.12514   |         |  |
|            | 0.4502          | 0.12514   | 0.4502  | 0.4502      | 0.743097839 |           |         |  |
| NA         | ENSG00000266957 | 0.12516   | 0.4502  | 0.12516     | 0.4502      | 0.12516   | 0.4502  |  |
|            | 0.12516         | 0.4502    | 0.4502  | 0.743097839 |             |           |         |  |
| ALKBH2     | ENSG00000189046 | -0.61039  | 0.7292  | 0.12513     | 0.45021     | 0.12513   |         |  |
|            | 0.45021         | 0.12513   | 0.45021 | 0.45021     | 0.743097839 |           |         |  |
| RNU2-71P   | ENSG00000223327 | -0.097636 | 0.53889 | 0.12513     | 0.45021     | 0.12513   |         |  |
|            | 0.45021         | -0.58192  | 0.71969 | 0.45021     | 0.743097839 |           |         |  |
| OR10A7     | ENSG00000179919 | -0.58652  | 0.72124 | -0.21363    | 0.58458     | -2.1556   |         |  |
|            | 0.98444         | 0.12511   | 0.45022 | 0.45022     | 0.743097839 |           |         |  |
| ENTPD6     | ENSG00000197586 | -0.22578  | 0.58931 | 0.12497     | 0.45027     | -0.47441  |         |  |
|            | 0.6824          | -0.17622  | 0.56994 | 0.45027     | 0.743146528 |           |         |  |
| LINC01750  | ENSG00000231437 | 0.12495   | 0.45028 | 0.12495     | 0.45028     | 0.12495   |         |  |
|            | 0.45028         | -0.32467  | 0.62729 | 0.45028     | 0.743146528 |           |         |  |
| MPV17      | ENSG00000115204 | -1.2081   | 0.88649 | -0.59958    | 0.72561     | -0.59958  | 0.72561 |  |
|            | 0.12491         | 0.4503    | 0.4503  | 0.743154367 |             |           |         |  |
| CATIP-AS2  | ENSG00000237281 | -0.92686  | 0.823   | 0.12475     | 0.45036     | 0.03545   | 0.48586 |  |
|            | 0.03545         | 0.48586   | 0.45036 | 0.743228217 |             |           |         |  |
| ERMP1      | ENSG00000099219 | -0.34986  | 0.63678 | 0.082682    | 0.46705     | 0.12455   | 0.45044 |  |
|            | 0.11235         | 0.45527   | 0.45044 | 0.743289526 |             |           |         |  |
| LINC01163  | ENSG00000280953 | -0.18918  | 0.57502 | -0.6492     | 0.7419      | 0.12449   |         |  |
|            | 0.45046         | -1.183    | 0.88159 | 0.45046     | 0.743289526 |           |         |  |
| SEC23A-AS1 | ENSG00000258651 | 0.12444   | 0.45048 | 0.12444     | 0.45048     | 0.12444   |         |  |
|            | 0.45048         | 0.12444   | 0.45048 | 0.45048     | 0.743289526 |           |         |  |
| NA         | ENSG00000269998 | 0.12446   | 0.45048 | -0.27111    | 0.60685     | -1.172    | 0.8794  |  |
|            | -1.172          | 0.8794    | 0.45048 | 0.743289526 |             |           |         |  |
| PHBP16     | ENSG00000227593 | 0.12432   | 0.45053 | 0.12432     | 0.45053     | 0.12432   |         |  |
|            | 0.45053         | 0.12432   | 0.45053 | 0.45053     | 0.743289526 |           |         |  |
| RPS25P3    | ENSG00000233416 | 0.1243    | 0.45054 | -0.36629    | 0.64292     | -1.1766   |         |  |
|            | 0.88032         | -1.1766   | 0.88032 | 0.45054     | 0.743289526 |           |         |  |
| MGAT4FP    | ENSG00000234761 | 0.12431   | 0.45054 | 0.12431     | 0.45054     | 0.12431   |         |  |
|            | 0.45054         | 0.12431   | 0.45054 | 0.45054     | 0.743289526 |           |         |  |
| MRPL12     | ENSG00000262814 | 0.12419   | 0.45058 | 0.12419     | 0.45058     | 0.12419   |         |  |
|            | 0.45058         | 0.12419   | 0.45058 | 0.45058     | 0.743289526 |           |         |  |
| ACTG1      | ENSG00000184009 | -0.44148  | 0.67057 | -0.38712    | 0.65067     | 0.12416   | 0.45059 |  |
|            | -1.0316         | 0.84888   | 0.45059 | 0.743289526 |             |           |         |  |
| MIR375     | ENSG00000198973 | -1.0327   | 0.84913 | 0.12415     | 0.4506      | -1.0327   |         |  |
|            | 0.84913         | -1.0327   | 0.84913 | 0.4506      | 0.743289526 |           |         |  |
| NA         | ENSG00000214254 | 0.12409   | 0.45062 | 0.12409     | 0.45062     | 0.12409   | 0.45062 |  |
|            | 0.12409         | 0.45062   | 0.45062 | 0.743289526 |             |           |         |  |
| NA         | ENSG00000267890 | 0.12404   | 0.45064 | 0.12404     | 0.45064     | 0.12404   | 0.45064 |  |
|            | 0.12404         | 0.45064   | 0.45064 | 0.743289526 |             |           |         |  |
| NA         | ENSG00000267629 | 0.12399   | 0.45066 | 0.12399     | 0.45066     | 0.12399   | 0.45066 |  |
|            | 0.12399         | 0.45066   | 0.45066 | 0.743289526 |             |           |         |  |
| NA         | ENSG00000257668 | 0.12396   | 0.45067 | 0.015914    | 0.49365     | 0.12396   | 0.45067 |  |

|               |                 |             |         |             |             |           |         |  |
|---------------|-----------------|-------------|---------|-------------|-------------|-----------|---------|--|
|               | 0.12396         | 0.45067     | 0.45067 | 0.743289526 |             |           |         |  |
| NA            | ENSG00000232750 | 0.12392     | 0.45069 | 0.12392     | 0.45069     | -0.82635  | 0.7957  |  |
|               | 0.12392         | 0.45069     | 0.45069 | 0.743289526 |             |           |         |  |
| INPP4B        | ENSG00000109452 | -0.56387    | 0.71358 | -0.68767    | 0.75417     | -0.79241  |         |  |
|               | 0.78594         | 0.1239      | 0.4507  | 0.4507      | 0.743289526 |           |         |  |
| BVES          | ENSG00000112276 | -0.00063282 | 0.50025 | -0.78602    | 0.78407     | 0.12389   |         |  |
|               | 0.4507          | 0.046716    | 0.48137 | 0.4507      | 0.743289526 |           |         |  |
| NA            | ENSG00000254820 | 0.12388     | 0.45071 | -0.13539    | 0.55385     | -0.13539  | 0.55385 |  |
|               | -0.13539        | 0.55385     | 0.45071 | 0.743289526 |             |           |         |  |
| TM6SF1        | ENSG00000136404 | 0.12376     | 0.45075 | -1.0431     | 0.85154     | -0.53115  |         |  |
|               | 0.70234         | -0.79396    | 0.78639 | 0.45075     | 0.743289526 |           |         |  |
| NA            | ENSG00000282943 | -0.25137    | 0.59924 | -0.86645    | 0.80688     | -0.3221   | 0.62631 |  |
|               | 0.12377         | 0.45075     | 0.45075 | 0.743289526 |             |           |         |  |
| LACC1         | ENSG00000179630 | -0.35927    | 0.6403  | -1.4315     | 0.92385     | 0.12373   | 0.45076 |  |
|               | -0.16854        | 0.56692     | 0.45076 | 0.743289526 |             |           |         |  |
| DACT3         | ENSG00000197380 | -0.45538    | 0.67558 | 0.055634    | 0.47782     | -1.4092   | 0.92061 |  |
|               | 0.12373         | 0.45077     | 0.45077 | 0.743289526 |             |           |         |  |
| OR4A44P       | ENSG00000255053 | 0.12369     | 0.45078 | -0.70845    | 0.76067     | -0.92773  |         |  |
|               | 0.82322         | -0.99764    | 0.84077 | 0.45078     | 0.743289526 |           |         |  |
| CENPBD1P1     | ENSG00000213753 | -0.057033   | 0.52274 | 0.12366     | 0.45079     | -0.077218 |         |  |
|               | 0.53077         | -0.057033   | 0.52274 | 0.45079     | 0.743289526 |           |         |  |
| BANP          | ENSG00000172530 | -0.67522    | 0.75023 | -0.8785     | 0.81016     | 0.12358   | 0.45082 |  |
|               | -0.18749        | 0.57436     | 0.45082 | 0.743289526 |             |           |         |  |
| KRT10         | ENSG00000186395 | 0.12358     | 0.45082 | 0.12358     | 0.45082     | 0.12358   | 0.45082 |  |
|               | 0.12358         | 0.45082     | 0.45082 | 0.743289526 |             |           |         |  |
| TTC31         | ENSG00000115282 | 0.12355     | 0.45084 | 0.12355     | 0.45084     | 0.12355   | 0.45084 |  |
|               | 0.12355         | 0.45084     | 0.45084 | 0.743289526 |             |           |         |  |
| CRTC1P1       | ENSG00000204993 | -0.2359     | 0.59325 | -0.2359     | 0.59325     | 0.12354   |         |  |
|               | 0.45084         | 0.12354     | 0.45084 | 0.45084     | 0.743289526 |           |         |  |
| NMNAT1        | ENSG00000173614 | -0.75597    | 0.77517 | -0.30707    | 0.62061     | 0.12352   |         |  |
|               | 0.45085         | -0.73628    | 0.76922 | 0.45085     | 0.743289526 |           |         |  |
| NA            | ENSG00000263392 | -0.13173    | 0.5524  | -0.37145    | 0.64485     | 0.12348   | 0.45086 |  |
|               | 0.072313        | 0.47118     | 0.45086 | 0.743289526 |             |           |         |  |
| LINC01140     | ENSG00000267272 | -0.17285    | 0.56862 | -0.049603   | 0.51978     | 0.12347   |         |  |
|               | 0.45087         | -0.15096    | 0.56    | 0.45087     | 0.743289526 |           |         |  |
| DNAJC25-GNG10 | ENSG00000244115 | 0.12329     | 0.45094 | 0.12329     | 0.45094     | 0.12329   | 0.12329 |  |
|               | 0.45094         | 0.12329     | 0.45094 | 0.45094     | 0.743354629 |           |         |  |
| NA            | ENSG00000257587 | 0.12329     | 0.45094 | 0.12329     | 0.45094     | 0.12329   | 0.45094 |  |
|               | -0.60302        | 0.72675     | 0.45094 | 0.743354629 |             |           |         |  |
| ZNF696        | ENSG00000185730 | -1.0425     | 0.8514  | -0.25626    | 0.60112     | -0.69277  |         |  |
|               | 0.75577         | 0.12319     | 0.45098 | 0.45098     | 0.743386757 |           |         |  |
| SNORD116-17   | ENSG00000206656 | 0.12317     | 0.45099 | 0.12317     | 0.45099     | 0.12317   | 0.12317 |  |
|               | 0.45099         | 0.12317     | 0.45099 | 0.45099     | 0.743386757 |           |         |  |
| OR52M1        | ENSG00000197790 | -0.29353    | 0.61544 | 0.10451     | 0.45838     | 0.123     | 0.45105 |  |
|               | -0.21179        | 0.58386     | 0.45105 | 0.743435363 |             |           |         |  |
| MIR3139       | ENSG00000265623 | -1.0878     | 0.86166 | -1.0878     | 0.86166     | -1.0878   |         |  |
|               | 0.86166         | 0.12301     | 0.45105 | 0.45105     | 0.743435363 |           |         |  |
| RHOT1         | ENSG00000126858 | -1.3117     | 0.90518 | -1.3117     | 0.90518     | 0.12286   | 0.45111 |  |
|               | -1.2795         | 0.89965     | 0.45111 | 0.743483962 |             |           |         |  |
| HACD4         | ENSG00000188921 | 0.12286     | 0.45111 | 0.12286     | 0.45111     | 0.12286   | 0.45111 |  |
|               | 0.12286         | 0.45111     | 0.45111 | 0.743483962 |             |           |         |  |
| NA            | ENSG00000277493 | -0.90936    | 0.81842 | -0.030914   | 0.51233     | -0.030914 | 0.51233 |  |
|               | 0.12274         | 0.45116     | 0.45116 | 0.743507581 |             |           |         |  |
| RGCC          | ENSG00000102760 | -1.6965     | 0.95511 | -2.049      | 0.97977     | 0.12249   | 0.45125 |  |
|               | -1.1381         | 0.87246     | 0.45125 | 0.743507581 |             |           |         |  |
| SMC4          | ENSG00000113810 | 0.12251     | 0.45125 | -1.5403     | 0.93826     | -0.12787  | 0.55087 |  |
|               | -0.73191        | 0.76789     | 0.45125 | 0.743507581 |             |           |         |  |
| NA            | ENSG00000213291 | -1.8903     | 0.97064 | -1.8903     | 0.97064     | 0.1225    | 0.45125 |  |
|               | -0.32216        | 0.62633     | 0.45125 | 0.743507581 |             |           |         |  |
| ZNF189        | ENSG00000136870 | 0.12248     | 0.45126 | 0.12248     | 0.45126     | 0.12248   |         |  |
|               | 0.45126         | 0.12248     | 0.45126 | 0.45126     | 0.743507581 |           |         |  |
| NA            | ENSG00000264104 | 0.12246     | 0.45127 | -0.47662    | 0.68318     | 0.12246   | 0.45127 |  |

|            |                 |           |         |             |             |           |         |  |
|------------|-----------------|-----------|---------|-------------|-------------|-----------|---------|--|
|            | -0.030173       | 0.51204   | 0.45127 | 0.743507581 |             |           |         |  |
| RN7SKP249  | ENSG00000202360 | -0.15233  | 0.56054 | -0.20663    | 0.58185     | -0.092689 |         |  |
|            | 0.53692         | 0.1224    | 0.45129 | 0.45129     | 0.743507581 |           |         |  |
| STK32A-AS1 | ENSG00000250343 | -0.6106   | 0.72927 | 0.12237     | 0.4513      | -0.43857  |         |  |
|            | 0.66951         | -1.389    | 0.91758 | 0.4513      | 0.743507581 |           |         |  |
| OR14J1     | ENSG00000204695 | -1.5096   | 0.93442 | -1.1341     | 0.87162     | 0.12235   |         |  |
|            | 0.45131         | -1.718    | 0.9571  | 0.45131     | 0.743507581 |           |         |  |
| OR2J3      | ENSG00000204701 | -0.50738  | 0.69406 | -0.24431    | 0.5965      | -0.19281  | 0.57645 |  |
|            | 0.12235         | 0.45131   | 0.45131 | 0.743507581 |             |           |         |  |
| NA         | ENSG00000253499 | 0.12234   | 0.45132 | 0.12234     | 0.45132     | 0.12234   | 0.45132 |  |
|            | -0.52577        | 0.70048   | 0.45132 | 0.743507581 |             |           |         |  |
| MOCS2      | ENSG00000164172 | 0.12227   | 0.45134 | -1.2277     | 0.89022     | 0.12227   | 0.45134 |  |
|            | -0.064822       | 0.52584   | 0.45134 | 0.743507581 |             |           |         |  |
| SNX25P1    | ENSG00000236809 | 0.12224   | 0.45135 | 0.12224     | 0.45135     | -0.43374  |         |  |
|            | 0.66776         | -0.10488  | 0.54177 | 0.45135     | 0.743507581 |           |         |  |
| C14orf177  | ENSG00000176605 | -0.85942  | 0.80495 | 0.055842    | 0.47773     | 0.12223   |         |  |
|            | 0.45136         | 0.12223   | 0.45136 | 0.45136     | 0.743507581 |           |         |  |
| PABPC1L    | ENSG00000101104 | -0.3138   | 0.62316 | 0.012321    | 0.49508     | -0.97319  |         |  |
|            | 0.83477         | 0.12215   | 0.45139 | 0.45139     | 0.743507581 |           |         |  |
| TUBBP6     | ENSG00000235207 | -0.17854  | 0.57085 | -0.50595    | 0.69355     | 0.12213   |         |  |
|            | 0.4514          | 0.0040758 | 0.49837 | 0.4514      | 0.743507581 |           |         |  |
| RPS24P18   | ENSG00000243925 | 0.12212   | 0.4514  | 0.12212     | 0.4514      | 0.12212   |         |  |
|            | 0.4514          | 0.12212   | 0.4514  | 0.4514      | 0.743507581 |           |         |  |
| NA         | ENSG00000255458 | 0.12213   | 0.4514  | -0.40402    | 0.6569      | -0.015669 | 0.50625 |  |
|            | -0.13643        | 0.55426   | 0.4514  | 0.743507581 |             |           |         |  |
| RNU6-429P  | ENSG00000207312 | 0.12208   | 0.45142 | 0.12208     | 0.45142     | 0.12208   |         |  |
|            | 0.45142         | 0.12208   | 0.45142 | 0.45142     | 0.743507581 |           |         |  |
| ANXA6      | ENSG00000197043 | 0.12201   | 0.45144 | -0.078331   | 0.53122     | -0.62276  | 0.73328 |  |
|            | -0.86932        | 0.80766   | 0.45144 | 0.743507581 |             |           |         |  |
| RN7SL67P   | ENSG00000243854 | 0.12199   | 0.45145 | 0.12199     | 0.45145     | 0.12199   |         |  |
|            | 0.45145         | -1.4198   | 0.92217 | 0.45145     | 0.743507581 |           |         |  |
| NA         | ENSG00000229413 | -0.80554  | 0.78974 | -0.80554    | 0.78974     | 0.12197   | 0.45146 |  |
|            | -0.9284         | 0.8234    | 0.45146 | 0.743507581 |             |           |         |  |
| NA         | ENSG00000230310 | 0.12182   | 0.45152 | 0.12182     | 0.45152     | 0.12182   | 0.45152 |  |
|            | 0.12182         | 0.45152   | 0.45152 | 0.743548472 |             |           |         |  |
| ZNF564     | ENSG00000249709 | -1.278    | 0.89937 | -0.18404    | 0.57301     | 0.12182   |         |  |
|            | 0.45152         | 0.12182   | 0.45152 | 0.45152     | 0.743548472 |           |         |  |
| TMC2       | ENSG00000149488 | -1.1192   | 0.86847 | 0.12166     | 0.45158     | -0.48239  | 0.68523 |  |
|            | -1.5457         | 0.93892   | 0.45158 | 0.743548472 |             |           |         |  |
| CYHR1      | ENSG00000187954 | -0.60807  | 0.72843 | -0.85845    | 0.80468     | 0.12161   | 0.4516  |  |
|            | -0.94489        | 0.82764   | 0.4516  | 0.743548472 |             |           |         |  |
| RIOK1      | ENSG00000124784 | -0.77965  | 0.7822  | -0.36395    | 0.64205     | -0.36395  | 0.64205 |  |
|            | 0.12149         | 0.45165   | 0.45165 | 0.743548472 |             |           |         |  |
| RNU6-1243P | ENSG00000200898 | -0.070065 | 0.52793 | 0.12146     | 0.45166     | -0.070065 |         |  |
|            | 0.52793         | -0.78283  | 0.78314 | 0.45166     | 0.743548472 |           |         |  |
| SNORD6     | ENSG00000202314 | 0.12147   | 0.45166 | 0.12147     | 0.45166     | 0.12147   |         |  |
|            | 0.45166         | 0.12147   | 0.45166 | 0.45166     | 0.743548472 |           |         |  |
| SNORA32    | ENSG00000206799 | 0.12147   | 0.45166 | 0.12147     | 0.45166     | 0.12147   |         |  |
|            | 0.45166         | 0.12147   | 0.45166 | 0.45166     | 0.743548472 |           |         |  |
| SNORA25    | ENSG00000207112 | 0.12147   | 0.45166 | 0.12147     | 0.45166     | 0.12147   |         |  |
|            | 0.45166         | 0.12147   | 0.45166 | 0.45166     | 0.743548472 |           |         |  |
| NA         | ENSG00000279696 | -0.17133  | 0.56802 | 0.12147     | 0.45166     | 0.12147   | 0.45166 |  |
|            | 0.12147         | 0.45166   | 0.45166 | 0.743548472 |             |           |         |  |
| SULT1C3    | ENSG00000196228 | -1.0418   | 0.85124 | 0.12144     | 0.45167     | -0.9196   |         |  |
|            | 0.82111         | -0.98205  | 0.83696 | 0.45167     | 0.743548472 |           |         |  |
| PIC SAR    | ENSG00000275874 | -1.9783   | 0.97605 | -0.050565   | 0.52016     | -1.9783   |         |  |
|            | 0.97605         | 0.12145   | 0.45167 | 0.45167     | 0.743548472 |           |         |  |
| MIR1224    | ENSG00000221120 | 0.12134   | 0.45171 | 0.12134     | 0.45171     | 0.12134   |         |  |
|            | 0.45171         | 0.12134   | 0.45171 | 0.45171     | 0.743548472 |           |         |  |
| NA         | ENSG00000200261 | -0.44418  | 0.67155 | -0.44418    | 0.67155     | -0.46949  | 0.68064 |  |
|            | 0.12126         | 0.45174   | 0.45174 | 0.743548472 |             |           |         |  |
| RNU6-137P  | ENSG00000200550 | 0.12124   | 0.45175 | 0.12124     | 0.45175     | 0.12124   |         |  |

|           |                 |            |         |             |             |             |         |  |
|-----------|-----------------|------------|---------|-------------|-------------|-------------|---------|--|
|           | 0.45175         | 0.12124    | 0.45175 | 0.45175     | 0.743548472 |             |         |  |
| NA        | ENSG00000222601 | 0.12119    | 0.45177 | 0.12119     | 0.45177     | 0.12119     | 0.45177 |  |
|           | 0.12119         | 0.45177    | 0.45177 | 0.743548472 |             |             |         |  |
| LINC02696 | ENSG00000254427 | 0.12119    | 0.45177 | -0.23824    | 0.59415     | -1.6063     |         |  |
|           | 0.9459          | -0.46066   | 0.67748 | 0.45177     | 0.743548472 |             |         |  |
| NA        | ENSG00000278973 | -0.67207   | 0.74923 | 0.12117     | 0.45178     | -0.41755    | 0.66186 |  |
|           | -0.67207        | 0.74923    | 0.45178 | 0.743548472 |             |             |         |  |
| NA        | ENSG00000233849 | 0.12115    | 0.45179 | 0.12115     | 0.45179     | 0.12115     | 0.45179 |  |
|           | 0.12115         | 0.45179    | 0.45179 | 0.743548472 |             |             |         |  |
| NA        | ENSG00000254277 | -0.0087867 | 0.50351 | 0.12113     | 0.45179     | -0.2927     | 0.61513 |  |
|           | -0.81305        | 0.79191    | 0.45179 | 0.743548472 |             |             |         |  |
| NA        | ENSG00000256185 | 0.12106    | 0.45182 | 0.12106     | 0.45182     | 0.12106     | 0.45182 |  |
|           | 0.12106         | 0.45182    | 0.45182 | 0.743572732 |             |             |         |  |
| PAAF1     | ENSG00000175575 | 0.121      | 0.45184 | -0.40533    | 0.65738     | -1.048      | 0.85268 |  |
|           | -1.6618         | 0.95172    | 0.45184 | 0.74357627  |             |             |         |  |
| ECH1      | ENSG00000104823 | -0.63955   | 0.73877 | -0.15256    | 0.56063     | 0.12094     | 0.45187 |  |
|           | -0.027004       | 0.51077    | 0.45187 | 0.74357627  |             |             |         |  |
| NA        | ENSG00000275905 | 0.12084    | 0.45191 | -1.122      | 0.86906     | -1.122      | 0.86906 |  |
|           | -1.122          | 0.86906    | 0.45191 | 0.74357627  |             |             |         |  |
| MS4A4E    | ENSG00000214787 | 0.034882   | 0.48609 | 0.12082     | 0.45192     | 0.12082     |         |  |
|           | 0.45192         | 0.12082    | 0.45192 | 0.45192     | 0.74357627  |             |         |  |
| COX7BP2   | ENSG00000234274 | 0.12081    | 0.45192 | 0.12081     | 0.45192     | 0.12081     |         |  |
|           | 0.45192         | 0.12081    | 0.45192 | 0.45192     | 0.74357627  |             |         |  |
| HNRNPA3P1 | ENSG00000226790 | -0.12391   | 0.54931 | -1.9514     | 0.97449     | -0.9961     |         |  |
|           | 0.8404          | 0.12076    | 0.45194 | 0.45194     | 0.74357627  |             |         |  |
| NA        | ENSG00000283157 | 0.12074    | 0.45195 | 0.12074     | 0.45195     | 0.12074     | 0.45195 |  |
|           | 0.12074         | 0.45195    | 0.45195 | 0.74357627  |             |             |         |  |
| NA        | ENSG00000256248 | 0.12073    | 0.45195 | -1.256      | 0.89544     | -1.256      | 0.89544 |  |
|           | -1.256          | 0.89544    | 0.45195 | 0.74357627  |             |             |         |  |
| POP1      | ENSG00000104356 | -0.29741   | 0.61692 | 0.12069     | 0.45197     | 0.0059298   | 0.49763 |  |
|           | -0.31845        | 0.62493    | 0.45197 | 0.74357627  |             |             |         |  |
| RNA5SP351 | ENSG00000238965 | 0.12066    | 0.45198 | 0.12066     | 0.45198     | 0.12066     |         |  |
|           | 0.45198         | 0.12066    | 0.45198 | 0.45198     | 0.74357627  |             |         |  |
| NA        | ENSG00000255527 | 0.12065    | 0.45199 | -0.70797    | 0.76052     | -0.23305    | 0.59214 |  |
|           | -1.8278         | 0.96621    | 0.45199 | 0.74357627  |             |             |         |  |
| NA        | ENSG00000255511 | 0.12056    | 0.45202 | 0.12056     | 0.45202     | 0.12056     | 0.45202 |  |
|           | 0.12056         | 0.45202    | 0.45202 | 0.743598812 |             |             |         |  |
| KCNU1     | ENSG00000215262 | 0.094456   | 0.46237 | -0.44268    | 0.671       | -0.19146    | 0.57592 |  |
|           | 0.12042         | 0.45207    | 0.45207 | 0.743598812 |             |             |         |  |
| MTND2P38  | ENSG00000253828 | 0.12043    | 0.45207 | 0.12043     | 0.45207     | 0.12043     |         |  |
|           | 0.45207         | 0.12043    | 0.45207 | 0.45207     | 0.743598812 |             |         |  |
| NA        | ENSG00000254263 | 0.12043    | 0.45207 | 0.12043     | 0.45207     | 0.12043     | 0.45207 |  |
|           | 0.12043         | 0.45207    | 0.45207 | 0.743598812 |             |             |         |  |
| LINC02579 | ENSG00000233694 | 0.1204     | 0.45208 | -0.31528    | 0.62372     | -0.31528    |         |  |
|           | 0.62372         | 0.048907   | 0.4805  | 0.45208     | 0.743598812 |             |         |  |
| MIR3941   | ENSG00000265442 | 0.1203     | 0.45212 | 0.1203      | 0.45212     | 0.1203      |         |  |
|           | 0.45212         | 0.1203     | 0.45212 | 0.45212     | 0.743605754 |             |         |  |
| OR5M8     | ENSG00000181371 | 0.12028    | 0.45213 | -0.036411   | 0.51452     | -0.036411   | 0.51452 |  |
|           | -0.036411       | 0.51452    | 0.45213 | 0.743605754 |             |             |         |  |
| RPL17P17  | ENSG00000223409 | -0.6705    | 0.74873 | 0.12028     | 0.45213     | -0.00029458 |         |  |
|           | 0.50012         | -0.97707   | 0.83573 | 0.45213     | 0.743605754 |             |         |  |
| LINC02372 | ENSG00000249873 | 0.12024    | 0.45215 | 0.12024     | 0.45215     | 0.12024     |         |  |
|           | 0.45215         | 0.12024    | 0.45215 | 0.45215     | 0.743611841 |             |         |  |
| MIR5000   | ENSG00000263909 | 0.12016    | 0.45218 | 0.12016     | 0.45218     | 0.12016     |         |  |
|           | 0.45218         | 0.12016    | 0.45218 | 0.45218     | 0.743611841 |             |         |  |
| RAB6C     | ENSG00000222014 | 0.12013    | 0.45219 | -1.1834     | 0.88167     | -0.76556    | 0.77803 |  |
|           | -0.44607        | 0.67223    | 0.45219 | 0.743611841 |             |             |         |  |
| RN7SKP19  | ENSG00000251825 | 0.12011    | 0.4522  | 0.12011     | 0.4522      | 0.12011     |         |  |
|           | 0.4522          | 0.12011    | 0.4522  | 0.4522      | 0.743611841 |             |         |  |
| SLC25A5P9 | ENSG00000251078 | -0.36346   | 0.64187 | -1.0392     | 0.85064     | -1.2319     | 0.891   |  |
|           | 0.12008         | 0.45221    | 0.45221 | 0.743611841 |             |             |         |  |
| NA        | ENSG00000237832 | 0.11989    | 0.45228 | 0.11989     | 0.45228     | 0.11989     | 0.45228 |  |

|                |                 |           |         |             |             |           |         |  |
|----------------|-----------------|-----------|---------|-------------|-------------|-----------|---------|--|
|                | 0.11989         | 0.45228   | 0.45228 | 0.743651665 |             |           |         |  |
| ETV3L          | ENSG00000253831 | -1.4874   | 0.93155 | -1.4874     | 0.93155     | -0.60037  | 0.72587 |  |
|                | 0.11989         | 0.45228   | 0.45228 | 0.743651665 |             |           |         |  |
| NA             | ENSG00000274184 | -0.16635  | 0.56606 | -1.2669     | 0.89741     | -0.16635  | 0.56606 |  |
|                | 0.1199          | 0.45228   | 0.45228 | 0.743651665 |             |           |         |  |
| RNU6-787P      | ENSG00000206759 | -1.4076   | 0.92038 | -0.43809    | 0.66934     | 0.1198    |         |  |
|                | 0.45232         | -0.43809  | 0.66934 | 0.45232     | 0.7436586   |           |         |  |
| DROSHA         | ENSG00000113360 | -1.0935   | 0.86291 | -0.8365     | 0.79856     | -0.8365   |         |  |
|                | 0.79856         | 0.11977   | 0.45233 | 0.45233     | 0.7436586   |           |         |  |
| HCAR3          | ENSG00000255398 | -0.77795  | 0.7817  | -0.77795    | 0.7817      | 0.11977   | 0.45233 |  |
|                | -0.59563        | 0.72429   | 0.45233 | 0.7436586   |             |           |         |  |
| NA             | ENSG00000249943 | 0.11956   | 0.45241 | -0.68863    | 0.75447     | -1.5126   | 0.93481 |  |
|                | -3.0756         | 0.99895   | 0.45241 | 0.743765032 |             |           |         |  |
| NA             | ENSG00000259942 | 0.11944   | 0.45246 | -0.45465    | 0.67532     | -0.45465  | 0.67532 |  |
|                | -0.45465        | 0.67532   | 0.45246 | 0.743810857 |             |           |         |  |
| NA             | ENSG00000271646 | 0.11924   | 0.45254 | 0.11924     | 0.45254     | 0.11924   | 0.45254 |  |
|                | 0.11924         | 0.45254   | 0.45254 | 0.743810857 |             |           |         |  |
| LSM8           | ENSG00000128534 | -0.95544  | 0.83032 | -0.75736    | 0.77558     | 0.11923   | 0.45255 |  |
|                | -0.22543        | 0.58918   | 0.45255 | 0.743810857 |             |           |         |  |
| TTL2           | ENSG00000120440 | -0.83457  | 0.79802 | 0.11916     | 0.45257     | -1.1464   | 0.87419 |  |
|                | -0.49085        | 0.68823   | 0.45257 | 0.743810857 |             |           |         |  |
| ERICH5         | ENSG00000177459 | -0.076009 | 0.53029 | -0.33233    | 0.63018     | -0.076009 |         |  |
|                | 0.53029         | 0.11917   | 0.45257 | 0.45257     | 0.743810857 |           |         |  |
| RPL21P106      | ENSG00000239201 | 0.11918   | 0.45257 | 0.11918     | 0.45257     | 0.11918   |         |  |
|                | 0.45257         | 0.11918   | 0.45257 | 0.45257     | 0.743810857 |           |         |  |
| RNU6ATAC2P     | ENSG00000210678 | -0.6216   | 0.7329  | -0.95969    | 0.83139     | 0.11897   |         |  |
|                | 0.45265         | -0.78435  | 0.78358 | 0.45265     | 0.743810857 |           |         |  |
| ADSS2          | ENSG00000035687 | 0.11893   | 0.45266 | 0.11893     | 0.45266     | 0.11893   | 0.45266 |  |
|                | -0.59769        | 0.72498   | 0.45266 | 0.743810857 |             |           |         |  |
| SLC16A14P1     | ENSG00000213708 | 0.11892   | 0.45267 | 0.11892     | 0.45267     | -1.2185   |         |  |
|                | 0.88849         | -0.15153  | 0.56022 | 0.45267     | 0.743810857 |           |         |  |
| NA             | ENSG00000272502 | 0.1188    | 0.45272 | 0.1188      | 0.45272     | 0.1188    | 0.45272 |  |
|                | 0.1188          | 0.45272   | 0.45272 | 0.743810857 |             |           |         |  |
| SCARNA8        | ENSG00000251733 | 0.11874   | 0.45274 | 0.11874     | 0.45274     | 0.11874   |         |  |
|                | 0.45274         | 0.11874   | 0.45274 | 0.45274     | 0.743810857 |           |         |  |
| NA             | ENSG00000199875 | 0.11873   | 0.45275 | 0.11873     | 0.45275     | 0.11873   | 0.45275 |  |
|                | 0.11873         | 0.45275   | 0.45275 | 0.743810857 |             |           |         |  |
| TMPOP1         | ENSG00000229068 | 0.11871   | 0.45275 | -1.1582     | 0.8766      | -0.29354  |         |  |
|                | 0.61544         | -0.29354  | 0.61544 | 0.45275     | 0.743810857 |           |         |  |
| TMEM256-PLSCR3 | ENSG00000262481 | 0.11871   | 0.45275 | 0.11871     | 0.45275     | 0.11871   | 0.45275 |  |
|                | 0.45275         | 0.11871   | 0.45275 | 0.45275     | 0.743810857 |           |         |  |
| NA             | ENSG00000278341 | 0.11872   | 0.45275 | 0.11872     | 0.45275     | 0.11872   | 0.45275 |  |
|                | 0.11872         | 0.45275   | 0.45275 | 0.743810857 |             |           |         |  |
| SPNS3          | ENSG00000182557 | -0.79298  | 0.7861  | -0.4842     | 0.68588     | -1.0077   | 0.84319 |  |
|                | 0.1187          | 0.45276   | 0.45276 | 0.743810857 |             |           |         |  |
| AKAP12         | ENSG00000131016 | -1.0276   | 0.84793 | 0.11866     | 0.45277     | -0.42948  |         |  |
|                | 0.66621         | -0.78374  | 0.7834  | 0.45277     | 0.743810857 |           |         |  |
| SHISAL2B       | ENSG00000145642 | 0.051977  | 0.47927 | 0.051977    | 0.47927     | -0.045569 |         |  |
|                | 0.51817         | 0.11864   | 0.45278 | 0.45278     | 0.743810857 |           |         |  |
| NA             | ENSG00000212624 | 0.11865   | 0.45278 | -0.09841    | 0.5392      | 0.11865   | 0.45278 |  |
|                | 0.11865         | 0.45278   | 0.45278 | 0.743810857 |             |           |         |  |
| RNU6-145P      | ENSG00000207307 | -0.099712 | 0.53971 | 0.035436    | 0.48587     | 0.11862   |         |  |
|                | 0.45279         | -0.57345  | 0.71683 | 0.45279     | 0.743810857 |           |         |  |
| NA             | ENSG00000254561 | -0.85753  | 0.80442 | 0.055486    | 0.47788     | 0.11851   | 0.45283 |  |
|                | 0.11851         | 0.45283   | 0.45283 | 0.743810857 |             |           |         |  |
| OR7E158P       | ENSG00000254948 | 0.11851   | 0.45283 | -0.43178    | 0.66705     | -0.13625  |         |  |
|                | 0.55419         | -0.48307  | 0.68548 | 0.45283     | 0.743810857 |           |         |  |
| EID2B          | ENSG00000176401 | 0.11848   | 0.45284 | 0.11848     | 0.45284     | 0.11848   | 0.45284 |  |
|                | 0.11848         | 0.45284   | 0.45284 | 0.743810857 |             |           |         |  |
| NA             | ENSG00000200421 | 0.11848   | 0.45284 | 0.11848     | 0.45284     | 0.11848   | 0.45284 |  |
|                | 0.11848         | 0.45284   | 0.45284 | 0.743810857 |             |           |         |  |
| RPL36AP41      | ENSG00000242087 | 0.11849   | 0.45284 | -0.049438   | 0.51971     | -0.94934  |         |  |

|             |                 |           |         |             |             |           |         |  |
|-------------|-----------------|-----------|---------|-------------|-------------|-----------|---------|--|
|             | 0.82878         | 0.11849   | 0.45284 | 0.45284     | 0.743810857 |           |         |  |
| TNFRSF12A   | ENSG00000006327 | 0.11847   | 0.45285 | 0.11847     | 0.45285     | -0.87493  |         |  |
|             | 0.8092          | -0.87493  | 0.8092  | 0.45285     | 0.743810857 |           |         |  |
| NA          | ENSG00000227224 | 0.11847   | 0.45285 | -1.3137     | 0.90553     | -0.061904 | 0.52468 |  |
|             | -1.01           | 0.84374   | 0.45285 | 0.743810857 |             |           |         |  |
| NA          | ENSG00000261754 | 0.11839   | 0.45288 | 0.11839     | 0.45288     | 0.11839   | 0.45288 |  |
|             | 0.11839         | 0.45288   | 0.45288 | 0.743816901 |             |           |         |  |
| CCL16       | ENSG00000275152 | -0.077546 | 0.53091 | 0.11837     | 0.45289     | -0.077546 | 0.53091 |  |
|             | -0.077546       | 0.53091   | 0.45289 | 0.743816901 |             |           |         |  |
| HOXA10      | ENSG00000253293 | 0.11835   | 0.4529  | -1.0611     | 0.85568     | -1.0611   |         |  |
|             | 0.85568         | -1.0611   | 0.85568 | 0.4529      | 0.743816901 |           |         |  |
| NA          | ENSG00000243494 | 0.11826   | 0.45293 | 0.11826     | 0.45293     | 0.11826   | 0.45293 |  |
|             | 0.11826         | 0.45293   | 0.45293 | 0.743816901 |             |           |         |  |
| MIR4514     | ENSG00000265855 | 0.11826   | 0.45293 | 0.11826     | 0.45293     | 0.11826   |         |  |
|             | 0.45293         | 0.11826   | 0.45293 | 0.45293     | 0.743816901 |           |         |  |
| NA          | ENSG00000267262 | 0.11817   | 0.45297 | -1.0984     | 0.86398     | -0.80661  | 0.79005 |  |
|             | -0.80661        | 0.79005   | 0.45297 | 0.743848876 |             |           |         |  |
| AK3P5       | ENSG00000228816 | 0.11815   | 0.45298 | -1.1539     | 0.87573     | -0.29655  | 0.6166  |  |
|             | -0.29655        | 0.6166    | 0.45298 | 0.743848876 |             |           |         |  |
| SPAST       | ENSG00000021574 | -0.49682  | 0.69034 | -1.2959     | 0.9025      | 0.11796   | 0.45305 |  |
|             | -0.87555        | 0.80936   | 0.45305 | 0.74389465  |             |           |         |  |
| SUSD6       | ENSG00000100647 | -0.79821  | 0.78762 | -1.039      | 0.85059     | -0.8685   | 0.80744 |  |
|             | 0.11793         | 0.45306   | 0.45306 | 0.74389465  |             |           |         |  |
| NA          | ENSG00000239486 | 0.048167  | 0.48079 | 0.1179      | 0.45307     | -0.21209  | 0.58398 |  |
|             | -0.21209        | 0.58398   | 0.45307 | 0.74389465  |             |           |         |  |
| RO60        | ENSG00000116747 | 0.11787   | 0.45308 | 0.078286    | 0.4688      | -0.24888  | 0.59827 |  |
|             | -0.21261        | 0.58419   | 0.45308 | 0.74389465  |             |           |         |  |
| MED17       | ENSG00000042429 | 0.058433  | 0.4767  | 0.11785     | 0.45309     | -0.34301  | 0.6342  |  |
|             | -0.16162        | 0.5642    | 0.45309 | 0.74389465  |             |           |         |  |
| POLR3H      | ENSG00000100413 | -0.22279  | 0.58815 | -0.22279    | 0.58815     | -0.22279  |         |  |
|             | 0.58815         | 0.11778   | 0.45312 | 0.45312     | 0.74389465  |           |         |  |
| NA          | ENSG00000227294 | 0.11776   | 0.45313 | 0.11776     | 0.45313     | 0.11776   | 0.45313 |  |
|             | 0.11776         | 0.45313   | 0.45313 | 0.74389465  |             |           |         |  |
| PVT1        | ENSG00000249859 | 0.11776   | 0.45313 | -0.65006    | 0.74217     | -0.49369  | 0.68924 |  |
|             | -0.077173       | 0.53076   | 0.45313 | 0.74389465  |             |           |         |  |
| NUDCD2      | ENSG00000170584 | 0.11767   | 0.45316 | 0.11767     | 0.45316     | 0.11767   |         |  |
|             | 0.45316         | 0.11767   | 0.45316 | 0.45316     | 0.743918838 |           |         |  |
| RNU7-43P    | ENSG00000252363 | 0.11761   | 0.45319 | 0.11761     | 0.45319     | 0.11761   |         |  |
|             | 0.45319         | 0.11761   | 0.45319 | 0.45319     | 0.743943025 |           |         |  |
| NA          | ENSG00000269890 | -0.84474  | 0.80087 | 0.11746     | 0.45325     | -0.84474  | 0.80087 |  |
|             | -0.84474        | 0.80087   | 0.45325 | 0.744016456 |             |           |         |  |
| ELOVL5      | ENSG00000012660 | 0.11727   | 0.45332 | -0.79481    | 0.78664     | 0.11727   |         |  |
|             | 0.45332         | -1.0733   | 0.85843 | 0.45332     | 0.744072582 |           |         |  |
| NA          | ENSG00000236469 | 0.11727   | 0.45332 | -0.5606     | 0.71246     | 0.026185  | 0.48955 |  |
|             | -0.17831        | 0.57076   | 0.45332 | 0.744072582 |             |           |         |  |
| PEG3        | ENSG00000198300 | -1.2233   | 0.88939 | -1.2233     | 0.88939     | 0.11724   | 0.45333 |  |
|             | -1.2233         | 0.88939   | 0.45333 | 0.744072582 |             |           |         |  |
| RN7SL795P   | ENSG00000239748 | 0.11715   | 0.45337 | 0.11715     | 0.45337     | 0.11715   |         |  |
|             | 0.45337         | -0.65424  | 0.74352 | 0.45337     | 0.74410098  |           |         |  |
| SORD2P      | ENSG00000259479 | 0.11707   | 0.4534  | -0.38247    | 0.64894     | -0.61666  |         |  |
|             | 0.73127         | -0.53188  | 0.70259 | 0.4534      | 0.74410098  |           |         |  |
| WFDC13      | ENSG00000168634 | 0.11704   | 0.45342 | -1.0659     | 0.85676     | -1.0659   |         |  |
|             | 0.85676         | -0.34158  | 0.63367 | 0.45342     | 0.74410098  |           |         |  |
| KDR         | ENSG00000128052 | -1.1881   | 0.88261 | -1.403      | 0.91969     | 0.11695   | 0.45345 |  |
|             | -0.16905        | 0.56712   | 0.45345 | 0.74410098  |             |           |         |  |
| SORT1       | ENSG00000134243 | -0.41797  | 0.66202 | -0.22652    | 0.5896      | 0.099128  | 0.46052 |  |
|             | 0.11694         | 0.45345   | 0.45345 | 0.74410098  |             |           |         |  |
| CLNK        | ENSG00000109684 | -0.23902  | 0.59445 | -0.2        | 0.57926     | 0.11692   | 0.45346 |  |
|             | -0.54795        | 0.70814   | 0.45346 | 0.74410098  |             |           |         |  |
| IGKV1OR10-1 | ENSG00000237592 | -0.71931  | 0.76403 | -0.69269    | 0.75575     | 0.11688   |         |  |
|             | 0.45348         | -0.97993  | 0.83644 | 0.45348     | 0.74410098  |           |         |  |
| NA          | ENSG00000254698 | 0.11687   | 0.45348 | 0.11687     | 0.45348     | 0.11687   | 0.45348 |  |

|            |                 |           |         |             |             |           |         |  |
|------------|-----------------|-----------|---------|-------------|-------------|-----------|---------|--|
|            | 0.11687         | 0.45348   | 0.45348 | 0.74410098  |             |           |         |  |
| NA         | ENSG00000266673 | 0.11686   | 0.45349 | 0.11686     | 0.45349     | 0.11686   | 0.45349 |  |
|            | 0.11686         | 0.45349   | 0.45349 | 0.74410098  |             |           |         |  |
| CLUHP3     | ENSG00000131797 | 0.11683   | 0.4535  | -0.10847    | 0.54319     | -0.10847  |         |  |
|            | 0.54319         | -0.10847  | 0.54319 | 0.4535      | 0.74410098  |           |         |  |
| NA         | ENSG00000263505 | 0.11674   | 0.45353 | -1.3084     | 0.90462     | -0.046792 | 0.51866 |  |
|            | -0.030837       | 0.5123    | 0.45353 | 0.744124261 |             |           |         |  |
| JHY        | ENSG00000109944 | 0.11671   | 0.45355 | -0.27142    | 0.60697     | -0.27142  | 0.60697 |  |
|            | -0.27142        | 0.60697   | 0.45355 | 0.744124261 |             |           |         |  |
| PRM1       | ENSG00000175646 | 0.11668   | 0.45356 | 0.11668     | 0.45356     | 0.11668   | 0.45356 |  |
|            | 0.11668         | 0.45356   | 0.45356 | 0.744124261 |             |           |         |  |
| NA         | ENSG00000271172 | -0.75585  | 0.77513 | -0.75585    | 0.77513     | -0.75585  | 0.77513 |  |
|            | 0.11657         | 0.4536    | 0.4536  | 0.744156184 |             |           |         |  |
| TMED7      | ENSG00000134970 | 0.10653   | 0.45758 | -1.2606     | 0.89627     | 0.11654   | 0.45361 |  |
|            | -1.1661         | 0.87821   | 0.45361 | 0.744156184 |             |           |         |  |
| HNRNPA1P69 | ENSG00000257332 | -0.96235  | 0.83206 | -0.57292    | 0.71665     | 0.11641   |         |  |
|            | 0.45366         | 0.11641   | 0.45366 | 0.45366     | 0.744204508 |           |         |  |
| LINC01907  | ENSG00000226125 | -0.10249  | 0.54082 | -0.16562    | 0.56577     | -0.10249  |         |  |
|            | 0.54082         | 0.1164    | 0.45367 | 0.45367     | 0.744204508 |           |         |  |
| OR51A3P    | ENSG00000227023 | -1.0639   | 0.85631 | 0.11633     | 0.4537      | 0.11633   |         |  |
|            | 0.4537          | 0.11633   | 0.4537  | 0.4537      | 0.74421137  |           |         |  |
| NA         | ENSG00000226770 | 0.042263  | 0.48314 | -0.090013   | 0.53586     | 0.11627   | 0.45372 |  |
|            | 0.042263        | 0.48314   | 0.45372 | 0.74421137  |             |           |         |  |
| LINC01890  | ENSG00000228329 | 0.11627   | 0.45372 | 0.11627     | 0.45372     | 0.11627   |         |  |
|            | 0.45372         | -0.18446  | 0.57317 | 0.45372     | 0.74421137  |           |         |  |
| NA         | ENSG00000232174 | -0.39117  | 0.65216 | -0.23116    | 0.5914      | -0.94415  | 0.82745 |  |
|            | 0.11617         | 0.45376   | 0.45376 | 0.744251929 |             |           |         |  |
| LARGE1     | ENSG00000133424 | 0.039551  | 0.48423 | -0.27652    | 0.60892     | -0.77876  |         |  |
|            | 0.78194         | 0.11608   | 0.45379 | 0.45379     | 0.744258786 |           |         |  |
| MRPL40     | ENSG00000185608 | 0.015331  | 0.49388 | 0.015331    | 0.49388     | 0.015331  |         |  |
|            | 0.49388         | 0.11607   | 0.4538  | 0.4538      | 0.744258786 |           |         |  |
| NA         | ENSG00000261020 | -0.25036  | 0.59884 | 0.11604     | 0.45381     | -0.25036  | 0.59884 |  |
|            | -0.43704        | 0.66896   | 0.45381 | 0.744258786 |             |           |         |  |
| GAB2       | ENSG00000033327 | -0.030819 | 0.51229 | 0.116       | 0.45383     | -0.20625  | 0.5817  |  |
|            | -0.039829       | 0.51589   | 0.45383 | 0.744265641 |             |           |         |  |
| RPS3AP44   | ENSG00000234031 | 0.11593   | 0.45385 | -1.1532     | 0.87559     | -1.1532   |         |  |
|            | 0.87559         | -0.59346  | 0.72356 | 0.45385     | 0.744265641 |           |         |  |
| NA         | ENSG00000264118 | 0.11591   | 0.45386 | 0.11591     | 0.45386     | 0.11591   | 0.45386 |  |
|            | 0.11591         | 0.45386   | 0.45386 | 0.744265641 |             |           |         |  |
| DENND5B    | ENSG00000170456 | -0.22465  | 0.58888 | 0.11578     | 0.45391     | -0.83017  |         |  |
|            | 0.79678         | -0.48874  | 0.68749 | 0.45391     | 0.744288893 |           |         |  |
| NA         | ENSG00000212421 | -0.67348  | 0.74968 | -0.67348    | 0.74968     | -2.169    | 0.98496 |  |
|            | 0.11576         | 0.45392   | 0.45392 | 0.744288893 |             |           |         |  |
| NA         | ENSG00000260476 | 0.11576   | 0.45392 | 0.040426    | 0.48388     | -0.75306  | 0.77429 |  |
|            | -0.94701        | 0.82818   | 0.45392 | 0.744288893 |             |           |         |  |
| NA         | ENSG00000241811 | -0.19372  | 0.5768  | -0.58947    | 0.72223     | -0.28359  | 0.61164 |  |
|            | 0.11556         | 0.454     | 0.454   | 0.744375913 |             |           |         |  |
| NA         | ENSG00000226890 | 0.11549   | 0.45403 | 0.11549     | 0.45403     | 0.11549   | 0.45403 |  |
|            | 0.11549         | 0.45403   | 0.45403 | 0.744375913 |             |           |         |  |
| KCNN2      | ENSG00000080709 | -0.23331  | 0.59224 | -0.22881    | 0.59049     | -0.44898  | 0.67328 |  |
|            | 0.11544         | 0.45405   | 0.45405 | 0.744375913 |             |           |         |  |
| NA         | ENSG00000258773 | 0.11542   | 0.45405 | 0.11542     | 0.45405     | 0.11542   | 0.45405 |  |
|            | 0.11542         | 0.45405   | 0.45405 | 0.744375913 |             |           |         |  |
| MIR573     | ENSG00000207697 | -0.2638   | 0.60403 | -0.95029    | 0.82902     | 0.11541   |         |  |
|            | 0.45406         | 0.11541   | 0.45406 | 0.45406     | 0.744375913 |           |         |  |
| DDIT3      | ENSG00000175197 | 0.11537   | 0.45408 | 0.11537     | 0.45408     | 0.11537   | 0.45408 |  |
|            | 0.11537         | 0.45408   | 0.45408 | 0.744375913 |             |           |         |  |
| RAD21L1    | ENSG00000244588 | -0.26791  | 0.60562 | 0.11535     | 0.45408     | -0.071571 |         |  |
|            | 0.52853         | -0.74362  | 0.77145 | 0.45408     | 0.744375913 |           |         |  |
| SYCE1      | ENSG00000171772 | -0.43088  | 0.66672 | -1.0293     | 0.84833     | 0.1152    | 0.45414 |  |
|            | -0.43088        | 0.66672   | 0.45414 | 0.744399146 |             |           |         |  |
| LINC01806  | ENSG00000227403 | 0.11521   | 0.45414 | 0.11521     | 0.45414     | -1.6076   |         |  |

|            |                 |          |         |             |             |           |         |  |
|------------|-----------------|----------|---------|-------------|-------------|-----------|---------|--|
|            | 0.94604         | 0.11521  | 0.45414 | 0.45414     | 0.744399146 |           |         |  |
| ATP5PO     | ENSG00000241837 | -0.30854 | 0.62116 | 0.11521     | 0.45414     | -0.30854  |         |  |
|            | 0.62116         | -0.30854 | 0.62116 | 0.45414     | 0.744399146 |           |         |  |
| NA         | ENSG00000255508 | 0.11502  | 0.45421 | 0.11502     | 0.45421     | 0.11502   | 0.45421 |  |
|            | 0.11502         | 0.45421  | 0.45421 | 0.744446504 |             |           |         |  |
| ATPSCKMT   | ENSG00000150756 | -0.50342 | 0.69267 | 0.11502     | 0.45422     | 0.11502   | 0.45422 |  |
|            | -0.39892        | 0.65502  | 0.45422 | 0.744446504 |             |           |         |  |
| KIAA1143   | ENSG00000163807 | -1.0978  | 0.86386 | -1.1        | 0.86433     | -1.8342   | 0.96669 |  |
|            | 0.11499         | 0.45423  | 0.45423 | 0.744446504 |             |           |         |  |
| NA         | ENSG00000207290 | 0.11499  | 0.45423 | 0.11499     | 0.45423     | 0.11499   | 0.45423 |  |
|            | 0.11499         | 0.45423  | 0.45423 | 0.744446504 |             |           |         |  |
| NA         | ENSG00000279426 | 0.11492  | 0.45425 | 0.11492     | 0.45425     | 0.11492   | 0.45425 |  |
|            | 0.11492         | 0.45425  | 0.45425 | 0.744454244 |             |           |         |  |
| RPL36AP40  | ENSG00000240298 | -1.1442  | 0.87373 | 0.11474     | 0.45432     | -0.44079  |         |  |
|            | 0.67032         | -0.8893  | 0.81308 | 0.45432     | 0.74453436  |           |         |  |
| KRTAP9-12P | ENSG00000248807 | 0.1147   | 0.45434 | 0.1147      | 0.45434     | 0.1147    |         |  |
|            | 0.45434         | 0.1147   | 0.45434 | 0.45434     | 0.74453436  |           |         |  |
| RNU6-761P  | ENSG00000206875 | -1.0071  | 0.84305 | -0.64701    | 0.74119     | -0.22592  |         |  |
|            | 0.58937         | 0.11466  | 0.45436 | 0.45436     | 0.74453436  |           |         |  |
| NA         | ENSG00000280166 | 0.11465  | 0.45436 | -0.47623    | 0.68305     | 0.11465   | 0.45436 |  |
|            | -0.76101        | 0.77667  | 0.45436 | 0.74453436  |             |           |         |  |
| LINC01946  | ENSG00000223647 | -1.0792  | 0.85975 | 0.11456     | 0.4544      | -0.60651  |         |  |
|            | 0.72791         | -1.1173  | 0.86806 | 0.4544      | 0.744574868 |           |         |  |
| NA         | ENSG00000249621 | 0.11442  | 0.45445 | 0.11442     | 0.45445     | -0.015776 | 0.50629 |  |
|            | -0.81806        | 0.79334  | 0.45445 | 0.744582086 |             |           |         |  |
| NA         | ENSG00000282057 | -0.51586 | 0.69702 | -1.1777     | 0.88055     | 0.11444   | 0.45445 |  |
|            | 0.11444         | 0.45445  | 0.45445 | 0.744582086 |             |           |         |  |
| TEX36      | ENSG00000175018 | 0.11441  | 0.45446 | -1.4045     | 0.91992     | -0.58152  | 0.71955 |  |
|            | -1.3825         | 0.91659  | 0.45446 | 0.744582086 |             |           |         |  |
| CTRB1      | ENSG00000168925 | 0.060029 | 0.47607 | -1.0687     | 0.85741     | -1.0687   | 0.85741 |  |
|            | 0.11427         | 0.45451  | 0.45451 | 0.744582086 |             |           |         |  |
| SNX9       | ENSG00000130340 | -0.22848 | 0.59036 | -0.036928   | 0.51473     | 0.11426   | 0.45452 |  |
|            | -0.057005       | 0.52273  | 0.45452 | 0.744582086 |             |           |         |  |
| SNORD38B   | ENSG00000207421 | 0.1142   | 0.45454 | 0.1142      | 0.45454     | 0.1142    |         |  |
|            | 0.45454         | 0.1142   | 0.45454 | 0.45454     | 0.744582086 |           |         |  |
| NA         | ENSG00000277621 | 0.11419  | 0.45454 | 0.11419     | 0.45454     | 0.11419   | 0.45454 |  |
|            | 0.11419         | 0.45454  | 0.45454 | 0.744582086 |             |           |         |  |
| HNRNPM     | ENSG00000099783 | -2.0378  | 0.97921 | 0.11415     | 0.45456     | -1.6022   |         |  |
|            | 0.94544         | -1.6022  | 0.94544 | 0.45456     | 0.744582086 |           |         |  |
| NA         | ENSG00000278313 | 0.11411  | 0.45458 | 0.11411     | 0.45458     | 0.11411   | 0.45458 |  |
|            | 0.11411         | 0.45458  | 0.45458 | 0.744582086 |             |           |         |  |
| RPS15AP27  | ENSG00000236783 | 0.11406  | 0.4546  | 0.11406     | 0.4546      | 0.11406   |         |  |
|            | 0.4546          | 0.11406  | 0.4546  | 0.4546      | 0.744582086 |           |         |  |
| ZNF615     | ENSG00000197619 | -0.3686  | 0.64379 | -0.37562    | 0.6464      | -0.3686   |         |  |
|            | 0.64379         | 0.11406  | 0.45462 | 0.45462     | 0.744582086 |           |         |  |
| NA         | ENSG00000253456 | 0.11399  | 0.45462 | 0.11399     | 0.45462     | 0.11399   | 0.45462 |  |
|            | 0.11399         | 0.45462  | 0.45462 | 0.744582086 |             |           |         |  |
| NA         | ENSG00000253976 | 0.11399  | 0.45462 | 0.11399     | 0.45462     | 0.11399   | 0.45462 |  |
|            | 0.11399         | 0.45462  | 0.45462 | 0.744582086 |             |           |         |  |
| LNX2       | ENSG00000139517 | -0.68394 | 0.75299 | -0.0034321  | 0.50137     | -0.46812  | 0.68015 |  |
|            | 0.11391         | 0.45465  | 0.45465 | 0.744582086 |             |           |         |  |
| NA         | ENSG00000252290 | 0.11393  | 0.45465 | 0.11393     | 0.45465     | 0.11393   | 0.45465 |  |
|            | 0.11393         | 0.45465  | 0.45465 | 0.744582086 |             |           |         |  |
| WVOX       | ENSG00000186153 | 0.11391  | 0.45466 | -1.3722     | 0.915       | -1.4815   | 0.93076 |  |
|            | -1.5663         | 0.94136  | 0.45466 | 0.744582086 |             |           |         |  |
| FAM107A    | ENSG00000168309 | 0.023569 | 0.4906  | -0.45195    | 0.67435     | -0.044947 |         |  |
|            | 0.51793         | 0.11384  | 0.45468 | 0.45468     | 0.744582086 |           |         |  |
| LINC00867  | ENSG00000232139 | 0.087098 | 0.4653  | -0.56253    | 0.71312     | -0.56253  |         |  |
|            | 0.71312         | 0.11383  | 0.45468 | 0.45468     | 0.744582086 |           |         |  |
| PYCR1      | ENSG00000183010 | -0.72033 | 0.76434 | 0.11377     | 0.45471     | -0.72033  | 0.76434 |  |
|            | -0.72033        | 0.76434  | 0.45471 | 0.744582086 |             |           |         |  |
| NA         | ENSG00000258844 | 0.11377  | 0.45471 | 0.11377     | 0.45471     | -0.23795  | 0.59404 |  |



|            |                 |           |         |             |             |          |         |  |
|------------|-----------------|-----------|---------|-------------|-------------|----------|---------|--|
|            | 0.11377         | 0.45471   | 0.45471 | 0.744582086 |             |          |         |  |
| NA         | ENSG00000258968 | 0.11372   | 0.45473 | 0.11372     | 0.45473     | 0.11372  | 0.45473 |  |
|            | 0.11372         | 0.45473   | 0.45473 | 0.744589815 |             |          |         |  |
| GRK6P1     | ENSG00000215571 | -0.57008  | 0.71569 | -0.058575   | 0.52335     | 0.11366  |         |  |
|            | 0.45475         | 0.11366   | 0.45475 | 0.45475     | 0.744597544 |          |         |  |
| ST13P11    | ENSG00000213368 | -1.151    | 0.87514 | -1.151      | 0.87514     | 0.11356  |         |  |
|            | 0.45479         | -1.151    | 0.87514 | 0.45479     | 0.744638018 |          |         |  |
| FBXO8      | ENSG00000164117 | 0.11342   | 0.45485 | -0.76819    | 0.77881     | -0.76819 | 0.77881 |  |
|            | -0.76819        | 0.77881   | 0.45485 | 0.744702587 |             |          |         |  |
| S100A7L2   | ENSG00000197364 | -0.66365  | 0.74654 | -0.66365    | 0.74654     | 0.1134   |         |  |
|            | 0.45486         | -1.5371   | 0.93786 | 0.45486     | 0.744702587 |          |         |  |
| SIGLEC29P  | ENSG00000268267 | 0.11329   | 0.4549  | 0.11329     | 0.4549      | 0.11329  |         |  |
|            | 0.4549          | 0.11329   | 0.4549  | 0.4549      | 0.744733479 |          |         |  |
| UEVLD      | ENSG00000151116 | -1.3993   | 0.91915 | -2.0903     | 0.9817      | -1.3168  | 0.90605 |  |
|            | 0.11326         | 0.45491   | 0.45491 | 0.744733479 |             |          |         |  |
| NA         | ENSG00000229971 | 0.11322   | 0.45493 | -0.32537    | 0.62755     | -0.49969 | 0.69135 |  |
|            | -0.82715        | 0.79592   | 0.45493 | 0.744733479 |             |          |         |  |
| CCDC39-AS1 | ENSG00000243187 | 0.11318   | 0.45494 | -0.11054    | 0.54401     | -0.11054 |         |  |
|            | 0.54401         | -0.11054  | 0.54401 | 0.45494     | 0.744733479 |          |         |  |
| SHF        | ENSG00000138606 | 0.086909  | 0.46537 | 0.11307     | 0.45499     | 0.07992  | 0.46815 |  |
|            | -0.18172        | 0.5721    | 0.45499 | 0.744790309 |             |          |         |  |
| NA         | ENSG00000254094 | -0.053928 | 0.5215  | -0.31367    | 0.62311     | 0.11298  | 0.45502 |  |
|            | 0.11298         | 0.45502   | 0.45502 | 0.744813466 |             |          |         |  |
| PWWP3A     | ENSG00000160953 | 0.11291   | 0.45505 | -1.1048     | 0.86537     | -0.27836 |         |  |
|            | 0.60963         | -0.53405  | 0.70335 | 0.45505     | 0.744813466 |          |         |  |
| NA         | ENSG00000258240 | 0.11292   | 0.45505 | -0.17623    | 0.56994     | 0.11292  | 0.45505 |  |
|            | 0.11292         | 0.45505   | 0.45505 | 0.744813466 |             |          |         |  |
| ROCR       | ENSG00000228639 | -0.8354   | 0.79825 | 0.1128      | 0.45509     | -0.66895 | 0.74824 |  |
|            | -0.8354         | 0.79825   | 0.45509 | 0.744820252 |             |          |         |  |
| LINC02009  | ENSG00000283646 | -0.67191  | 0.74918 | -0.77803    | 0.78173     | 0.11282  |         |  |
|            | 0.45509         | -0.37355  | 0.64563 | 0.45509     | 0.744820252 |          |         |  |
| NA         | ENSG00000225662 | 0.1128    | 0.4551  | 0.1128      | 0.4551      | 0.1128   | 0.4551  |  |
|            | 0.1128          | 0.4551    | 0.4551  | 0.744820252 |             |          |         |  |
| KCNAB1-AS2 | ENSG00000240596 | -0.26993  | 0.60639 | 0.11271     | 0.45513     | 0.11271  |         |  |
|            | 0.45513         | 0.11271   | 0.45513 | 0.45513     | 0.744827037 |          |         |  |
| FLVCR2     | ENSG00000119686 | 0.11268   | 0.45514 | -0.50653    | 0.69376     | -0.21523 |         |  |
|            | 0.58521         | -0.56903  | 0.71533 | 0.45514     | 0.744827037 |          |         |  |
| NA         | ENSG00000273030 | -0.70502  | 0.7596  | -1.6374     | 0.94923     | 0.11266  | 0.45515 |  |
|            | -1.5685         | 0.94162   | 0.45515 | 0.744827037 |             |          |         |  |
| NA         | ENSG00000231178 | 0.1126    | 0.45517 | 0.1126      | 0.45517     | 0.1126   | 0.45517 |  |
|            | 0.1126          | 0.45517   | 0.45517 | 0.744834753 |             |          |         |  |
| NECAP1P1   | ENSG00000178503 | 0.11253   | 0.4552  | -0.19331    | 0.57664     | 0.11253  |         |  |
|            | 0.4552          | -0.33089  | 0.62964 | 0.4552      | 0.744858831 |          |         |  |
| CMTM5      | ENSG00000166091 | 0.11234   | 0.45528 | 0.11234     | 0.45528     | 0.11234  | 0.45528 |  |
|            | 0.11234         | 0.45528   | 0.45528 | 0.744964722 |             |          |         |  |
| SMC1B      | ENSG00000077935 | -0.29891  | 0.6175  | 0.11219     | 0.45534     | 0.11219  | 0.45534 |  |
|            | 0.11219         | 0.45534   | 0.45534 | 0.745020575 |             |          |         |  |
| NA         | ENSG00000223725 | -0.38043  | 0.64819 | 0.11215     | 0.45535     | -0.86266 | 0.80584 |  |
|            | -0.064044       | 0.52553   | 0.45535 | 0.745020575 |             |          |         |  |
| NA         | ENSG00000225280 | 0.11213   | 0.45536 | 0.11213     | 0.45536     | 0.11213  | 0.45536 |  |
|            | 0.11213         | 0.45536   | 0.45536 | 0.745020575 |             |          |         |  |
| USP13      | ENSG00000058056 | -0.80208  | 0.78875 | -0.9058     | 0.81748     | -0.15476 | 0.56149 |  |
|            | 0.11196         | 0.45543   | 0.45543 | 0.745110086 |             |          |         |  |
| BFSP1      | ENSG00000125864 | 0.11189   | 0.45545 | -0.30548    | 0.62        | -0.50783 | 0.69421 |  |
|            | -0.7672         | 0.77852   | 0.45545 | 0.74511779  |             |          |         |  |
| TESPA1     | ENSG00000135426 | -0.14141  | 0.55623 | 0.11184     | 0.45547     | -0.78159 |         |  |
|            | 0.78277         | -0.82135  | 0.79428 | 0.45547     | 0.745124543 |          |         |  |
| IFNWP2     | ENSG00000237691 | 0.11177   | 0.4555  | 0.11177     | 0.4555      | 0.11177  |         |  |
|            | 0.4555          | 0.11177   | 0.4555  | 0.4555      | 0.745124543 |          |         |  |
| NA         | ENSG00000264817 | 0.11178   | 0.4555  | 0.11178     | 0.4555      | 0.11178  | 0.4555  |  |
|            | 0.11178         | 0.4555    | 0.4555  | 0.745124543 |             |          |         |  |
| ISX        | ENSG00000175329 | -1.6987   | 0.95531 | -0.90461    | 0.81716     | 0.11165  | 0.45555 |  |

|            |                 |             |         |             |             |           |         |  |
|------------|-----------------|-------------|---------|-------------|-------------|-----------|---------|--|
|            | 0.11165         | 0.45555     | 0.45555 | 0.745181319 |             |           |         |  |
| NA         | ENSG00000254129 | 0.1115      | 0.45561 | 0.1115      | 0.45561     | 0.1115    | 0.45561 |  |
|            | 0.1115          | 0.45561     | 0.45561 | 0.745237133 |             |           |         |  |
| NA         | ENSG00000261036 | 0.11149     | 0.45562 | -0.60018    | 0.72581     | -0.34024  | 0.63316 |  |
|            | -1.6122         | 0.94654     | 0.45562 | 0.745237133 |             |           |         |  |
| NA         | ENSG00000203386 | 0.11145     | 0.45563 | -1.3602     | 0.91311     | 0.0062567 | 0.4975  |  |
|            | -1.021          | 0.84637     | 0.45563 | 0.745237133 |             |           |         |  |
| CYP26C1    | ENSG00000187553 | -0.28779    | 0.61325 | -0.28779    | 0.61325     | -0.28779  |         |  |
|            | 0.61325         | 0.11127     | 0.4557  | 0.4557      | 0.745317949 |           |         |  |
| RN7SKP287  | ENSG00000252355 | 0.11125     | 0.45571 | 0.11125     | 0.45571     | 0.11125   |         |  |
|            | 0.45571         | 0.11125     | 0.45571 | 0.45571     | 0.745317949 |           |         |  |
| SVIL       | ENSG00000197321 | -1.3444     | 0.9106  | -0.28114    | 0.6107      | -0.98078  | 0.83665 |  |
|            | 0.11108         | 0.45578     | 0.45578 | 0.745407417 |             |           |         |  |
| GTF2IP7    | ENSG00000227038 | -0.159      | 0.56317 | 0.11102     | 0.4558      | 0.095395  | 0.462   |  |
|            | -0.60529        | 0.72751     | 0.4558  | 0.745414138 |             |           |         |  |
| DAP3       | ENSG00000132676 | -0.042237   | 0.51684 | -0.041257   | 0.51645     | -0.41215  | 0.65989 |  |
|            | 0.11096         | 0.45582     | 0.45582 | 0.745414138 |             |           |         |  |
| ZBTB3      | ENSG00000185670 | 0.11096     | 0.45583 | 0.11096     | 0.45583     | 0.11096   | 0.45583 |  |
|            | -0.24532        | 0.59689     | 0.45583 | 0.745414138 |             |           |         |  |
| NA         | ENSG00000225751 | -0.05855    | 0.52334 | -0.31157    | 0.62232     | 0.11088   | 0.45586 |  |
|            | -1.015          | 0.84496     | 0.45586 | 0.745438181 |             |           |         |  |
| SNRNP35    | ENSG00000184209 | -0.24354    | 0.59621 | 0.11073     | 0.45591     | -1.0993   |         |  |
|            | 0.86418         | -0.16054    | 0.56377 | 0.45591     | 0.745469911 |           |         |  |
| RNU4ATAC4P | ENSG00000252116 | 0.11075     | 0.45591 | 0.11075     | 0.45591     | 0.11075   |         |  |
|            | 0.45591         | 0.11075     | 0.45591 | 0.45591     | 0.745469911 |           |         |  |
| HPF1       | ENSG00000056050 | -1.2279     | 0.89025 | 0.11056     | 0.45598     | -0.56086  | 0.71255 |  |
|            | -0.33148        | 0.62986     | 0.45598 | 0.745559353 |             |           |         |  |
| NA         | ENSG00000243960 | 0.11052     | 0.456   | 0.11052     | 0.456       | 0.11052   | 0.456   |  |
|            | 0.456           | 0.745567038 |         |             |             |           |         |  |
| NA         | ENSG00000277174 | -1.3252     | 0.90745 | -1.1366     | 0.87215     | 0.11039   | 0.45605 |  |
|            | -0.1255         | 0.54994     | 0.45605 | 0.745623771 |             |           |         |  |
| NA         | ENSG00000258462 | 0.11032     | 0.45608 | 0.11032     | 0.45608     | 0.11032   | 0.45608 |  |
|            | 0.11032         | 0.45608     | 0.45608 | 0.745647802 |             |           |         |  |
| NA         | ENSG00000203531 | 0.11025     | 0.45611 | 0.11025     | 0.45611     | 0.11025   | 0.45611 |  |
|            | 0.11025         | 0.45611     | 0.45611 | 0.745671832 |             |           |         |  |
| POT1       | ENSG00000128513 | -1.6949     | 0.95496 | -0.23734    | 0.5938      | 0.11016   | 0.45614 |  |
|            | -2.3439         | 0.99046     | 0.45614 | 0.745687192 |             |           |         |  |
| NA         | ENSG00000253785 | -0.10411    | 0.54146 | -0.68626    | 0.75373     | 0.11014   | 0.45615 |  |
|            | -1.415          | 0.92146     | 0.45615 | 0.745687192 |             |           |         |  |
| XRRA1      | ENSG00000166435 | -0.60963    | 0.72895 | -0.99886    | 0.84107     | 0.11004   | 0.45619 |  |
|            | -1.2614         | 0.89642     | 0.45619 | 0.745702549 |             |           |         |  |
| NA         | ENSG00000261219 | 0.11005     | 0.45619 | 0.11005     | 0.45619     | 0.11005   | 0.45619 |  |
|            | 0.11005         | 0.45619     | 0.45619 | 0.745702549 |             |           |         |  |
| HNRNPA3P16 | ENSG00000267233 | 0.10986     | 0.45626 | -0.74       | 0.77035     | 0.10986   | 0.45626 |  |
|            | 0.10986         | 0.45626     | 0.45626 | 0.745765671 |             |           |         |  |
| ARHGAP27   | ENSG00000159314 | -0.13566    | 0.55395 | -0.095857   | 0.53818     | 0.10982   |         |  |
|            | 0.45628         | 0.00094951  | 0.49962 | 0.45628     | 0.745765671 |           |         |  |
| LINC02345  | ENSG00000259225 | 0.10982     | 0.45628 | -0.55747    | 0.7114      | -0.23589  |         |  |
|            | 0.59324         | -0.40416    | 0.65695 | 0.45628     | 0.745765671 |           |         |  |
| RN7SL87P   | ENSG00000239390 | -0.07726    | 0.53079 | -0.58179    | 0.71965     | -0.59266  |         |  |
|            | 0.7233          | 0.10967     | 0.45633 | 0.45633     | 0.745765671 |           |         |  |
| SURF4      | ENSG00000148248 | -0.60169    | 0.72631 | 0.10965     | 0.45634     | -0.43944  | 0.66983 |  |
|            | -0.69072        | 0.75513     | 0.45634 | 0.745765671 |             |           |         |  |
| HLTF       | ENSG00000071794 | -0.46321    | 0.67839 | 0.10963     | 0.45635     | -0.46321  | 0.67839 |  |
|            | -0.45559        | 0.67566     | 0.45635 | 0.745765671 |             |           |         |  |
| KRT85      | ENSG00000135443 | -0.25596    | 0.60101 | 0.10946     | 0.45642     | -0.25596  | 0.60101 |  |
|            | -0.35414        | 0.63838     | 0.45642 | 0.745765671 |             |           |         |  |
| SETP12     | ENSG00000251609 | -0.67246    | 0.74936 | -0.67246    | 0.74936     | 0.10943   |         |  |
|            | 0.45643         | -0.67246    | 0.74936 | 0.45643     | 0.745765671 |           |         |  |
| NA         | ENSG00000267583 | -1.755      | 0.96037 | 0.10941     | 0.45644     | -1.755    | 0.96037 |  |
|            | -1.755          | 0.96037     | 0.45644 | 0.745765671 |             |           |         |  |
| NKX1-2     | ENSG00000229544 | 0.10938     | 0.45645 | 0.10938     | 0.45645     | 0.10938   |         |  |

|             |                 |           |         |             |             |           |         |
|-------------|-----------------|-----------|---------|-------------|-------------|-----------|---------|
|             | 0.45645         | -0.095309 | 0.53797 | 0.45645     | 0.745765671 |           |         |
| SNRNP48     | ENSG00000168566 | 0.10933   | 0.45647 | -0.96932    | 0.83381     | -0.29947  |         |
|             | 0.61771         | -1.1033   | 0.86506 | 0.45647     | 0.745765671 |           |         |
| NA          | ENSG00000258960 | -0.20684  | 0.58193 | -0.52681    | 0.70084     | -1.435    | 0.92436 |
|             | 0.10934         | 0.45647   | 0.45647 | 0.745765671 |             |           |         |
| ACOT13      | ENSG00000112304 | 0.094227  | 0.46246 | -0.066649   | 0.52657     | -0.71946  |         |
|             | 0.76407         | 0.10931   | 0.45648 | 0.45648     | 0.745765671 |           |         |
| NA          | ENSG00000280153 | 0.10929   | 0.45649 | -0.18057    | 0.57165     | 0.10929   | 0.45649 |
|             | 0.10929         | 0.45649   | 0.45649 | 0.745765671 |             |           |         |
| NA          | ENSG00000253837 | -0.27226  | 0.60729 | 0.1092      | 0.45652     | -0.27226  | 0.60729 |
|             | -0.27226        | 0.60729   | 0.45652 | 0.745765671 |             |           |         |
| NA          | ENSG00000258768 | -0.38566  | 0.65012 | -0.18397    | 0.57298     | 0.10921   | 0.45652 |
|             | -0.18397        | 0.57298   | 0.45652 | 0.745765671 |             |           |         |
| NA          | ENSG00000267873 | 0.10921   | 0.45652 | 0.10921     | 0.45652     | 0.10921   | 0.45652 |
|             | 0.10921         | 0.45652   | 0.45652 | 0.745765671 |             |           |         |
| TAS2R13     | ENSG00000212128 | -0.29865  | 0.6174  | -0.29865    | 0.6174      | -0.29865  |         |
|             | 0.6174          | 0.10917   | 0.45653 | 0.45653     | 0.745765671 |           |         |
| NA          | ENSG00000279491 | 0.10917   | 0.45654 | 0.10917     | 0.45654     | 0.10917   | 0.45654 |
|             | 0.10917         | 0.45654   | 0.45654 | 0.745765671 |             |           |         |
| NA          | ENSG00000207101 | -1.0599   | 0.85539 | -1.0599     | 0.85539     | -0.85989  | 0.80508 |
|             | 0.10913         | 0.45655   | 0.45655 | 0.745765671 |             |           |         |
| NA          | ENSG00000269032 | 0.10914   | 0.45655 | 0.10914     | 0.45655     | 0.10914   | 0.45655 |
|             | 0.10914         | 0.45655   | 0.45655 | 0.745765671 |             |           |         |
| KANSL1L-AS1 | ENSG00000229127 | -0.11444  | 0.54556 | -0.11444    | 0.54556     | -0.11444  |         |
|             | 0.54556         | 0.10907   | 0.45657 | 0.45657     | 0.745771354 |           |         |
| NA          | ENSG00000235303 | -0.13354  | 0.55312 | 0.10546     | 0.45801     | -0.095455 | 0.53802 |
|             | 0.10902         | 0.45659   | 0.45659 | 0.745771354 |             |           |         |
| FANK1-AS1   | ENSG00000233409 | 0.0015403 | 0.49939 | -0.39074    | 0.652       | 0.10898   | 0.45661 |
|             | 0.10898         | 0.45661   | 0.45661 | 0.745771354 |             |           |         |
| PSMA3P      | ENSG00000258563 | -0.75626  | 0.77525 | -0.12511    | 0.54978     | -1.0101   |         |
|             | 0.84378         | 0.10892   | 0.45663 | 0.45663     | 0.745771354 |           |         |
| SH3GL1P1    | ENSG00000266777 | 0.10894   | 0.45663 | 0.10894     | 0.45663     | 0.10894   |         |
|             | 0.45663         | 0.10894   | 0.45663 | 0.45663     | 0.745771354 |           |         |
| MIR4473     | ENSG00000263790 | -0.85125  | 0.80269 | 0.10889     | 0.45665     | 0.10889   |         |
|             | 0.45665         | 0.10889   | 0.45665 | 0.45665     | 0.745779023 |           |         |
| NA          | ENSG00000255670 | 0.10873   | 0.45671 | 0.10873     | 0.45671     | 0.10873   | 0.45671 |
|             | 0.10873         | 0.45671   | 0.45671 | 0.745852016 |             |           |         |
| ASN5P4      | ENSG00000251470 | -0.94951  | 0.82882 | -0.21942    | 0.58684     | -0.34805  |         |
|             | 0.6361          | 0.10866   | 0.45674 | 0.45674     | 0.745876012 |           |         |
| CENPO       | ENSG00000138092 | -0.44443  | 0.67164 | 0.10856     | 0.45678     | -0.51424  | 0.69646 |
|             | -0.12478        | 0.54965   | 0.45678 | 0.745916337 |             |           |         |
| NA          | ENSG00000225339 | 0.10843   | 0.45683 | 0.10843     | 0.45683     | -0.1822   | 0.57229 |
|             | -0.11062        | 0.54404   | 0.45683 | 0.745921993 |             |           |         |
| MRGPRG-AS1  | ENSG00000236301 | 0.10839   | 0.45684 | 0.10839     | 0.45684     | 0.10839   |         |
|             | 0.45684         | 0.10839   | 0.45684 | 0.45684     | 0.745921993 |           |         |
| NA          | ENSG00000253096 | -0.71141  | 0.76158 | -0.19186    | 0.57607     | 0.1084    | 0.45684 |
|             | 0.1084          | 0.45684   | 0.45684 | 0.745921993 |             |           |         |
| TCN2        | ENSG00000185339 | -0.24586  | 0.5971  | -2.0983     | 0.98206     | -0.67823  | 0.75119 |
|             | 0.10836         | 0.45686   | 0.45686 | 0.745921993 |             |           |         |
| KLF3-AS1    | ENSG00000231160 | 0.098415  | 0.4608  | -0.36171    | 0.64122     | 0.10836   |         |
|             | 0.45686         | -0.74342  | 0.77139 | 0.45686     | 0.745921993 |           |         |
| MCUR1P2     | ENSG00000242326 | -1.129    | 0.87054 | 0.10824     | 0.4569      | 0.10824   |         |
|             | 0.4569          | 0.10824   | 0.4569  | 0.4569      | 0.745937316 |           |         |
| NA          | ENSG00000248551 | -0.73439  | 0.76864 | 0.10824     | 0.4569      | 0.10824   | 0.4569  |
|             | 0.10824         | 0.4569    | 0.4569  | 0.745937316 |             |           |         |
| MYCNUT      | ENSG00000223850 | -0.60469  | 0.72731 | -1.6019     | 0.94541     | -0.52427  |         |
|             | 0.69995         | 0.10818   | 0.45693 | 0.45693     | 0.745961302 |           |         |
| LCE3D       | ENSG00000163202 | -0.27995  | 0.61024 | -0.91245    | 0.81923     | -0.33302  | 0.63044 |
|             | 0.10808         | 0.45697   | 0.45697 | 0.7459869   |             |           |         |
| RPL35AP33   | ENSG00000241334 | -0.91133  | 0.81894 | -0.42284    | 0.66379     | -0.3942   |         |
|             | 0.65328         | 0.10805   | 0.45698 | 0.45698     | 0.7459869   |           |         |
| RNA5SP363   | ENSG00000201942 | 0.10788   | 0.45705 | 0.10788     | 0.45705     | 0.10788   |         |

|           |                 |           |         |             |             |           |         |
|-----------|-----------------|-----------|---------|-------------|-------------|-----------|---------|
|           | 0.45705         | 0.10788   | 0.45705 | 0.45705     | 0.7459869   |           |         |
| LBX2-AS1  | ENSG00000257702 | 0.10776   | 0.45709 | 0.10776     | 0.45709     | 0.10776   |         |
|           | 0.45709         | 0.10776   | 0.45709 | 0.45709     | 0.7459869   |           |         |
| NA        | ENSG00000272183 | 0.10776   | 0.45709 | 0.10776     | 0.45709     | 0.10776   | 0.45709 |
|           | 0.10776         | 0.45709   | 0.45709 | 0.7459869   |             |           |         |
| HSF2BP    | ENSG00000160207 | -0.41993  | 0.66273 | -0.18868    | 0.57483     | 0.10775   |         |
|           | 0.4571          | -0.31362  | 0.62309 | 0.4571      | 0.7459869   |           |         |
| SVIL-AS1  | ENSG00000224597 | 0.10773   | 0.4571  | -0.68176    | 0.7523      | -1.2617   |         |
|           | 0.89647         | -1.1928   | 0.88352 | 0.4571      | 0.7459869   |           |         |
| NA        | ENSG00000234248 | 0.10775   | 0.4571  | 0.10775     | 0.4571      | 0.10775   | 0.4571  |
|           | -0.36966        | 0.64418   | 0.4571  | 0.7459869   |             |           |         |
| SMARCC2   | ENSG00000139613 | -0.94024  | 0.82645 | -0.61073    | 0.72931     | 0.10763   |         |
|           | 0.45714         | 0.10763   | 0.45714 | 0.45714     | 0.7459869   |           |         |
| NA        | ENSG00000258199 | 0.10763   | 0.45714 | 0.10763     | 0.45714     | 0.10763   | 0.45714 |
|           | 0.10763         | 0.45714   | 0.45714 | 0.7459869   |             |           |         |
| RN7SL815P | ENSG00000243359 | -0.21034  | 0.5833  | -0.38459    | 0.64973     | 0.10761   |         |
|           | 0.45715         | -0.27232  | 0.60731 | 0.45715     | 0.7459869   |           |         |
| NA        | ENSG00000260213 | -0.32281  | 0.62658 | 0.10762     | 0.45715     | -0.35274  | 0.63786 |
|           | -0.35274        | 0.63786   | 0.45715 | 0.7459869   |             |           |         |
| FAM241B   | ENSG00000171224 | -1.2506   | 0.89445 | -0.46845    | 0.68027     | -1.3716   |         |
|           | 0.91491         | 0.10759   | 0.45716 | 0.45716     | 0.7459869   |           |         |
| RNA5SP271 | ENSG00000252509 | -1.3798   | 0.91618 | 0.1076      | 0.45716     | -0.72987  |         |
|           | 0.76726         | 0.095973  | 0.46177 | 0.45716     | 0.7459869   |           |         |
| RNA5SP74  | ENSG00000200408 | -0.3824   | 0.64892 | -0.62524    | 0.73409     | -0.13283  |         |
|           | 0.55283         | 0.1075    | 0.4572  | 0.4572      | 0.74600221  |           |         |
| NA        | ENSG00000262000 | 0.10749   | 0.4572  | 0.010723    | 0.49572     | 0.083657  | 0.46666 |
|           | -0.039512       | 0.51576   | 0.4572  | 0.74600221  |             |           |         |
| OSTCP2    | ENSG00000225294 | 0.10732   | 0.45727 | 0.10732     | 0.45727     | 0.10732   |         |
|           | 0.45727         | 0.10732   | 0.45727 | 0.45727     | 0.746091445 |           |         |
| LINC02183 | ENSG00000283304 | -0.13532  | 0.55382 | 0.10727     | 0.45729     | 0.10727   |         |
|           | 0.45729         | 0.10727   | 0.45729 | 0.45729     | 0.746099096 |           |         |
| GRB7      | ENSG00000141738 | 0.10722   | 0.45731 | -0.648      | 0.74151     | 0.10722   | 0.45731 |
|           | 0.10722         | 0.45731   | 0.45731 | 0.746106746 |             |           |         |
| HAND1     | ENSG00000113196 | -0.43047  | 0.66657 | -0.43047    | 0.66657     | 0.10712   | 0.45735 |
|           | -0.43047        | 0.66657   | 0.45735 | 0.746147025 |             |           |         |
| NA        | ENSG00000267286 | 0.10689   | 0.45744 | -0.1609     | 0.56391     | -0.089537 | 0.53567 |
|           | -0.24734        | 0.59768   | 0.45744 | 0.746268872 |             |           |         |
| RNF227    | ENSG00000179859 | 0.1066    | 0.45755 | 0.1066      | 0.45755     | 0.1066    |         |
|           | 0.45755         | 0.1066    | 0.45755 | 0.45755     | 0.746330009 |           |         |
| LGI4      | ENSG00000153902 | 0.10659   | 0.45756 | 0.10659     | 0.45756     | 0.10659   | 0.45756 |
|           | -0.84219        | 0.80016   | 0.45756 | 0.746330009 |             |           |         |
| RN7SKP9   | ENSG00000201793 | 0.10659   | 0.45756 | 0.10659     | 0.45756     | 0.10659   |         |
|           | 0.45756         | 0.10659   | 0.45756 | 0.45756     | 0.746330009 |           |         |
| MEG8      | ENSG00000225746 | -0.24449  | 0.59657 | -0.18682    | 0.5741      | -0.13345  | 0.55308 |
|           | 0.10659         | 0.45756   | 0.45756 | 0.746330009 |             |           |         |
| LIPT2     | ENSG00000175536 | 0.10656   | 0.45757 | 0.10656     | 0.45757     | 0.10656   | 0.45757 |
|           | 0.10656         | 0.45757   | 0.45757 | 0.746330009 |             |           |         |
| NA        | ENSG00000258954 | 0.10653   | 0.45758 | 0.10653     | 0.45758     | 0.10653   | 0.45758 |
|           | 0.10653         | 0.45758   | 0.45758 | 0.746330009 |             |           |         |
| RNA5SP270 | ENSG00000223293 | 0.10648   | 0.4576  | -0.47699    | 0.68332     | 0.10648   |         |
|           | 0.4576          | -0.30117  | 0.61836 | 0.4576      | 0.746330009 |           |         |
| NA        | ENSG00000229188 | 0.10648   | 0.4576  | 0.10648     | 0.4576      | 0.10648   | 0.4576  |
|           | 0.10648         | 0.4576    | 0.4576  | 0.746330009 |             |           |         |
| SNORD3J   | ENSG00000221400 | -0.19157  | 0.57596 | -0.19157    | 0.57596     | -0.19157  |         |
|           | 0.57596         | 0.10639   | 0.45763 | 0.45763     | 0.746353958 |           |         |
| NA        | ENSG00000279329 | 0.10628   | 0.45768 | 0.10628     | 0.45768     | 0.10628   | 0.45768 |
|           | 0.10628         | 0.45768   | 0.45768 | 0.746410522 |             |           |         |
| RNASE9    | ENSG00000188655 | -0.97346  | 0.83484 | 0.10621     | 0.45771     | -1.6446   |         |
|           | 0.94997         | -0.52421  | 0.69993 | 0.45771     | 0.746434467 |           |         |
| LINC01048 | ENSG00000230390 | -0.72968  | 0.76721 | -0.28372    | 0.61169     | 0.10612   |         |
|           | 0.45774         | -0.056019 | 0.52234 | 0.45774     | 0.74645841  |           |         |
| IFT57     | ENSG00000114446 | -0.58297  | 0.72004 | -0.22939    | 0.59072     | -0.58297  | 0.72004 |

|           |                 |           |         |             |             |           |         |  |
|-----------|-----------------|-----------|---------|-------------|-------------|-----------|---------|--|
|           | 0.10603         | 0.45778   | 0.45778 | 0.746480272 |             |           |         |  |
| NA        | ENSG00000227815 | 0.10599   | 0.4578  | 0.10599     | 0.4578      | 0.10599   | 0.4578  |  |
|           | 0.10599         | 0.4578    | 0.4578  | 0.746480272 |             |           |         |  |
| LCMT2     | ENSG00000168806 | 0.10596   | 0.45781 | 0.10596     | 0.45781     | 0.10596   | 0.45781 |  |
|           | -0.25897        | 0.60217   | 0.45781 | 0.746480272 |             |           |         |  |
| NA        | ENSG00000273580 | -1.0268   | 0.84773 | -0.79761    | 0.78745     | 0.10592   | 0.45782 |  |
|           | -0.15335        | 0.56094   | 0.45782 | 0.746480272 |             |           |         |  |
| NA        | ENSG00000199977 | 0.1059    | 0.45783 | 0.1059      | 0.45783     | 0.1059    | 0.45783 |  |
|           | 0.1059          | 0.45783   | 0.45783 | 0.746480272 |             |           |         |  |
| GPAT2     | ENSG00000186281 | 0.10585   | 0.45785 | -0.68726    | 0.75404     | -0.13908  | 0.5553  |  |
|           | -0.55339        | 0.71      | 0.45785 | 0.746487905 |             |           |         |  |
| ZMIZ1-AS1 | ENSG00000224596 | -0.44328  | 0.67122 | -0.84789    | 0.80175     | -0.7839   |         |  |
|           | 0.78345         | 0.10578   | 0.45788 | 0.45788     | 0.74651184  |           |         |  |
| MBLAC1    | ENSG00000214309 | 0.10551   | 0.45798 | 0.10551     | 0.45798     | 0.10551   |         |  |
|           | 0.45798         | 0.10551   | 0.45798 | 0.45798     | 0.746649896 |           |         |  |
| NA        | ENSG00000279829 | 0.10542   | 0.45802 | 0.10542     | 0.45802     | 0.10542   | 0.45802 |  |
|           | 0.10542         | 0.45802   | 0.45802 | 0.746690127 |             |           |         |  |
| ZFP62     | ENSG00000196670 | -0.38516  | 0.64994 | -0.71682    | 0.76326     | 0.10537   | 0.45804 |  |
|           | -0.15761        | 0.56262   | 0.45804 | 0.746697752 |             |           |         |  |
| NA        | ENSG00000256101 | 0.10531   | 0.45807 | -0.21818    | 0.58635     | -0.041579 | 0.51658 |  |
|           | -0.12196        | 0.54854   | 0.45807 | 0.746721677 |             |           |         |  |
| IFI44L    | ENSG00000137959 | -0.93264  | 0.8245  | -0.68607    | 0.75366     | -0.95622  |         |  |
|           | 0.83052         | 0.10517   | 0.45812 | 0.45812     | 0.746759787 |           |         |  |
| IFNA10    | ENSG00000186803 | 0.10515   | 0.45813 | 0.10515     | 0.45813     | -0.22334  |         |  |
|           | 0.58836         | -0.53367  | 0.70321 | 0.45813     | 0.746759787 |           |         |  |
| NA        | ENSG00000257378 | 0.10509   | 0.45815 | 0.10509     | 0.45815     | 0.10509   | 0.45815 |  |
|           | 0.10509         | 0.45815   | 0.45815 | 0.746759787 |             |           |         |  |
| ARPP19    | ENSG00000128989 | -0.1935   | 0.57672 | -0.41073    | 0.65936     | 0.10506   |         |  |
|           | 0.45816         | -0.069586 | 0.52774 | 0.45816     | 0.746759787 |           |         |  |
| NA        | ENSG00000220204 | 0.10504   | 0.45817 | -0.0078658  | 0.50314     | 0.10504   | 0.45817 |  |
|           | 0.10504         | 0.45817   | 0.45817 | 0.746759787 |             |           |         |  |
| UHRF1BP1  | ENSG00000065060 | 0.10488   | 0.45823 | -0.0046773  | 0.50187     | -0.21899  |         |  |
|           | 0.58667         | -0.66538  | 0.7471  | 0.45823     | 0.746773968 |           |         |  |
| TRIM17    | ENSG00000162931 | 0.10488   | 0.45823 | 0.10488     | 0.45823     | 0.10488   |         |  |
|           | 0.45823         | 0.10488   | 0.45823 | 0.45823     | 0.746773968 |           |         |  |
| PRR5      | ENSG00000186654 | 0.1049    | 0.45823 | 0.1049      | 0.45823     | -0.12904  | 0.55134 |  |
|           | 0.074507        | 0.4703    | 0.45823 | 0.746773968 |             |           |         |  |
| RNA5SP185 | ENSG00000212265 | -0.89363  | 0.81424 | -0.20272    | 0.58032     | 0.10488   |         |  |
|           | 0.45824         | -1.0482   | 0.85274 | 0.45824     | 0.746773968 |           |         |  |
| PAK1      | ENSG00000149269 | -0.42093  | 0.6631  | -0.42093    | 0.6631      | -0.44476  | 0.67175 |  |
|           | 0.10466         | 0.45832   | 0.45832 | 0.746814369 |             |           |         |  |
| TRIM60P15 | ENSG00000250857 | -0.20922  | 0.58286 | 0.10456     | 0.45836     | -0.029591 |         |  |
|           | 0.5118          | -0.28414  | 0.61185 | 0.45836     | 0.746814369 |           |         |  |
| MIR663AHG | ENSG00000227195 | -0.19043  | 0.57551 | -0.076643   | 0.53055     | 0.10454   |         |  |
|           | 0.45837         | -0.47677  | 0.68324 | 0.45837     | 0.746814369 |           |         |  |
| NA        | ENSG00000232347 | -0.31042  | 0.62188 | -0.31042    | 0.62188     | -0.31042  | 0.62188 |  |
|           | 0.10452         | 0.45838   | 0.45838 | 0.746814369 |             |           |         |  |
| NA        | ENSG00000205037 | -0.49354  | 0.68918 | -0.59621    | 0.72448     | 0.10447   | 0.4584  |  |
|           | -0.43504        | 0.66823   | 0.4584  | 0.746814369 |             |           |         |  |
| SLC25A6P4 | ENSG00000266909 | 0.10447   | 0.4584  | 0.10447     | 0.4584      | 0.10447   |         |  |
|           | 0.4584          | 0.10447   | 0.4584  | 0.4584      | 0.746814369 |           |         |  |
| CAMK2N1   | ENSG00000162545 | -0.12131  | 0.54828 | -0.75502    | 0.77488     | 0.1044    |         |  |
|           | 0.45843         | -0.51992  | 0.69844 | 0.45843     | 0.746814369 |           |         |  |
| NA        | ENSG00000280451 | 0.10438   | 0.45843 | 0.10438     | 0.45843     | 0.10438   | 0.45843 |  |
|           | 0.10438         | 0.45843   | 0.45843 | 0.746814369 |             |           |         |  |
| AIMP1     | ENSG00000164022 | 0.10436   | 0.45844 | -0.43716    | 0.669       | -0.38621  | 0.65033 |  |
|           | 0.079758        | 0.46822   | 0.45844 | 0.746814369 |             |           |         |  |
| SNORD3G   | ENSG00000199666 | 0.10435   | 0.45845 | -0.49267    | 0.68888     | -0.97395  |         |  |
|           | 0.83496         | -0.43238  | 0.66727 | 0.45845     | 0.746814369 |           |         |  |
| DKK3      | ENSG00000050165 | 0.10426   | 0.45848 | 0.10426     | 0.45848     | 0.10426   | 0.45848 |  |
|           | -0.61799        | 0.73171   | 0.45848 | 0.746814369 |             |           |         |  |
| NA        | ENSG00000236449 | -0.54011  | 0.70544 | -0.59594    | 0.72439     | 0.10426   | 0.45848 |  |

|           |                 |           |           |           |             |             |         |  |
|-----------|-----------------|-----------|-----------|-----------|-------------|-------------|---------|--|
|           |                 | -0.57851  | 0.71854   | 0.45848   | 0.746814369 |             |         |  |
| SPINK14   | ENSG00000196800 | -0.064437 | 0.52569   | 0.10425   | 0.45849     | -0.25584    |         |  |
|           |                 | 0.60096   | -0.14607  | 0.55807   | 0.45849     | 0.746814369 |         |  |
| NA        | ENSG00000218749 | -0.48135  | 0.68487   | 0.10425   | 0.45849     | -0.66083    | 0.74564 |  |
|           |                 | -0.23514  | 0.59295   | 0.45849   | 0.746814369 |             |         |  |
| NA        | ENSG00000201393 | 0.10421   | 0.4585    | -0.63555  | 0.73746     | 0.10421     | 0.4585  |  |
|           |                 | 0.10421   | 0.4585    | 0.4585    | 0.746814369 |             |         |  |
| NA        | ENSG00000232622 | 0.1042    | 0.45851   | 0.1042    | 0.45851     | 0.1042      | 0.45851 |  |
|           |                 | 0.1042    | 0.45851   | 0.45851   | 0.746814369 |             |         |  |
| PRDX2P1   | ENSG00000215049 | 0.10411   | 0.45854   | -0.085298 | 0.53399     | -0.085298   |         |  |
|           |                 | 0.53399   | -0.085298 | 0.53399   | 0.45854     | 0.74683827  |         |  |
| NA        | ENSG00000260618 | 0.10399   | 0.45859   | 0.10399   | 0.45859     | 0.10399     | 0.45859 |  |
|           |                 | 0.10399   | 0.45859   | 0.45859   | 0.746842695 |             |         |  |
| NA        | ENSG00000254963 | 0.10397   | 0.4586    | 0.10397   | 0.4586      | 0.10397     | 0.4586  |  |
|           |                 | 0.10397   | 0.4586    | 0.4586    | 0.746842695 |             |         |  |
| NA        | ENSG00000267282 | 0.10392   | 0.45862   | 0.10392   | 0.45862     | 0.10392     | 0.45862 |  |
|           |                 | 0.10392   | 0.45862   | 0.45862   | 0.746842695 |             |         |  |
| NA        | ENSG00000268080 | 0.10391   | 0.45862   | 0.10391   | 0.45862     | 0.10391     | 0.45862 |  |
|           |                 | 0.10391   | 0.45862   | 0.45862   | 0.746842695 |             |         |  |
| ANKRD49P3 | ENSG00000248616 | 0.10387   | 0.45864   | -0.78734  | 0.78446     | -1.3827     |         |  |
|           |                 | 0.91663   | -0.99606  | 0.84039   | 0.45864     | 0.746842695 |         |  |
| CCDC37-DT | ENSG00000249833 | 0.10386   | 0.45864   | 0.10386   | 0.45864     | 0.10386     |         |  |
|           |                 | 0.45864   | 0.10386   | 0.45864   | 0.45864     | 0.746842695 |         |  |
| RNU6-337P | ENSG00000212545 | -0.68341  | 0.75283   | 0.10383   | 0.45865     | 0.06836     |         |  |
|           |                 | 0.47275   | -0.3943   | 0.65332   | 0.45865     | 0.746842695 |         |  |
| NA        | ENSG00000270554 | 0.10377   | 0.45867   | 0.10377   | 0.45867     | 0.10377     | 0.45867 |  |
|           |                 | 0.10377   | 0.45867   | 0.45867   | 0.746848181 |             |         |  |
| NA        | ENSG00000224155 | 0.10375   | 0.45869   | -0.98461  | 0.83759     | -1.3949     | 0.91847 |  |
|           |                 | -1.557    | 0.94026   | 0.45869   | 0.746848181 |             |         |  |
| NA        | ENSG00000253726 | 0.10368   | 0.45871   | 0.10368   | 0.45871     | 0.10368     | 0.45871 |  |
|           |                 | 0.083158  | 0.46686   | 0.45871   | 0.746848181 |             |         |  |
| NA        | ENSG00000237378 | -1.4464   | 0.92597   | -0.51405  | 0.69639     | 0.10367     | 0.45872 |  |
|           |                 | -1.4302   | 0.92367   | 0.45872   | 0.746848181 |             |         |  |
| Clorf220  | ENSG00000213057 | 0.10363   | 0.45873   | -1.0612   | 0.85571     | -1.1657     |         |  |
|           |                 | 0.87814   | -1.0257   | 0.84749   | 0.45873     | 0.746848181 |         |  |
| TMEM179B  | ENSG00000185475 | 0.10341   | 0.45882   | 0.10341   | 0.45882     | 0.10341     |         |  |
|           |                 | 0.45882   | 0.10341   | 0.45882   | 0.45882     | 0.746927449 |         |  |
| NA        | ENSG00000269176 | 0.10341   | 0.45882   | 0.10341   | 0.45882     | 0.10341     | 0.45882 |  |
|           |                 | 0.10341   | 0.45882   | 0.45882   | 0.746927449 |             |         |  |
| PRKCZ     | ENSG00000067606 | -0.58487  | 0.72068   | -0.76652  | 0.77832     | -0.6872     | 0.75402 |  |
|           |                 | 0.10337   | 0.45883   | 0.45883   | 0.746927449 |             |         |  |
| IFNGR2    | ENSG00000159128 | -1.4904   | 0.93193   | -0.15408  | 0.56123     | -0.73389    |         |  |
|           |                 | 0.76849   | 0.10336   | 0.45884   | 0.45884     | 0.746927449 |         |  |
| NA        | ENSG00000261535 | -1.3886   | 0.91752   | 0.06119   | 0.4756      | 0.1031      | 0.45894 |  |
|           |                 | -0.28817  | 0.61339   | 0.45894   | 0.746993736 |             |         |  |
| NA        | ENSG00000274275 | 0.1031    | 0.45894   | 0.1031    | 0.45894     | 0.1031      | 0.45894 |  |
|           |                 | 0.1031    | 0.45894   | 0.45894   | 0.746993736 |             |         |  |
| MCRIP1    | ENSG00000225663 | -0.61552  | 0.7309    | 0.10305   | 0.45896     | -0.61552    |         |  |
|           |                 | 0.7309    | -0.61552  | 0.7309    | 0.45896     | 0.746993736 |         |  |
| NA        | ENSG00000280958 | 0.10299   | 0.45898   | -0.70945  | 0.76098     | 0.10299     | 0.45898 |  |
|           |                 | 0.10299   | 0.45898   | 0.45898   | 0.746993736 |             |         |  |
| NA        | ENSG00000267400 | 0.10296   | 0.459     | -1.0725   | 0.85825     | -1.0725     | 0.85825 |  |
|           |                 | -1.0725   | 0.85825   | 0.459     | 0.746993736 |             |         |  |
| NA        | ENSG00000280356 | -0.44651  | 0.67238   | 0.090617  | 0.4639      | 0.10295     | 0.459   |  |
|           |                 | -0.4198   | 0.66268   | 0.459     | 0.746993736 |             |         |  |
| MIR5692B  | ENSG00000264580 | -1.06     | 0.85543   | 0.1029    | 0.45902     | -1.06       | 0.85543 |  |
|           |                 | -1.7978   | 0.9639    | 0.45902   | 0.746993736 |             |         |  |
| RNU6-713P | ENSG00000207492 | 0.10287   | 0.45903   | 0.10287   | 0.45903     | 0.10287     |         |  |
|           |                 | 0.45903   | 0.10287   | 0.45903   | 0.45903     | 0.746993736 |         |  |
| NA        | ENSG00000252640 | 0.10285   | 0.45904   | 0.10285   | 0.45904     | 0.10285     | 0.45904 |  |
|           |                 | 0.10285   | 0.45904   | 0.45904   | 0.746993736 |             |         |  |
| RNA5SP202 | ENSG00000201185 | 0.10281   | 0.45906   | 0.10281   | 0.45906     | 0.10281     |         |  |

|           |                 |           |         |             |             |          |         |
|-----------|-----------------|-----------|---------|-------------|-------------|----------|---------|
|           | 0.45906         | 0.10281   | 0.45906 | 0.45906     | 0.746993736 |          |         |
| LINC01239 | ENSG00000234840 | -0.50085  | 0.69176 | 0.10279     | 0.45906     | 0.10279  |         |
|           | 0.45906         | 0.10279   | 0.45906 | 0.45906     | 0.746993736 |          |         |
| ATP5MGL   | ENSG00000249222 | 0.10278   | 0.45907 | 0.10278     | 0.45907     | 0.10278  |         |
|           | 0.45907         | 0.10278   | 0.45907 | 0.45907     | 0.746993736 |          |         |
| NA        | ENSG00000271670 | 0.10275   | 0.45908 | 0.0057519   | 0.49771     | 0.10275  | 0.45908 |
|           | 0.10275         | 0.45908   | 0.45908 | 0.746993736 |             |          |         |
| BEND3P2   | ENSG00000224809 | -1.2979   | 0.90284 | -0.03681    | 0.51468     | -1.4818  |         |
|           | 0.93081         | 0.10258   | 0.45915 | 0.45915     | 0.747040401 |          |         |
| NA        | ENSG00000214306 | -0.99533  | 0.84021 | 0.10255     | 0.45916     | -0.99533 | 0.84021 |
|           | -0.99533        | 0.84021   | 0.45916 | 0.747040401 |             |          |         |
| ARID4B    | ENSG00000054267 | 0.024897  | 0.49007 | -0.22245    | 0.58802     | -0.65921 |         |
|           | 0.74512         | 0.10251   | 0.45917 | 0.45917     | 0.747040401 |          |         |
| NA        | ENSG00000224540 | -0.45667  | 0.67605 | -0.41525    | 0.66102     | -0.26274 | 0.60362 |
|           | 0.10253         | 0.45917   | 0.45917 | 0.747040401 |             |          |         |
| PARK7     | ENSG00000116288 | 0.10248   | 0.45919 | -1.1811     | 0.88122     | -0.33098 | 0.62967 |
|           | -0.56915        | 0.71537   | 0.45919 | 0.747047999 |             |          |         |
| CLSTN2    | ENSG00000158258 | -1.101    | 0.86454 | -0.45914    | 0.67693     | -0.61108 |         |
|           | 0.72943         | 0.10235   | 0.45924 | 0.45924     | 0.747075153 |          |         |
| CDKL2     | ENSG00000138769 | -0.8837   | 0.81157 | -0.54214    | 0.70614     | 0.10229  | 0.45926 |
|           | -0.6112         | 0.72947   | 0.45926 | 0.747075153 |             |          |         |
| NA        | ENSG00000258101 | 0.10222   | 0.45929 | 0.10222     | 0.45929     | 0.10222  | 0.45929 |
|           | 0.10222         | 0.45929   | 0.45929 | 0.747075153 |             |          |         |
| RETNLB    | ENSG00000163515 | -0.48495  | 0.68615 | -0.98618    | 0.83798     | 0.10219  |         |
|           | 0.4593          | -0.48495  | 0.68615 | 0.4593      | 0.747075153 |          |         |
| FBXO17    | ENSG00000269190 | -0.44186  | 0.6707  | 0.10216     | 0.45931     | -0.44186 |         |
|           | 0.6707          | -0.014204 | 0.50567 | 0.45931     | 0.747075153 |          |         |
| NLRP11    | ENSG00000179873 | -0.42134  | 0.66325 | 0.10216     | 0.45932     | -0.86337 |         |
|           | 0.80603         | -0.61168  | 0.72962 | 0.45932     | 0.747075153 |          |         |
| ZNF56     | ENSG00000267419 | 0.10211   | 0.45933 | -0.42062    | 0.66298     | -0.12122 | 0.54824 |
|           | -0.12122        | 0.54824   | 0.45933 | 0.747075153 |             |          |         |
| RNA5SP61  | ENSG00000252262 | 0.1021    | 0.45934 | 0.1021      | 0.45934     | 0.1021   |         |
|           | 0.45934         | 0.1021    | 0.45934 | 0.45934     | 0.747075153 |          |         |
| NA        | ENSG00000199220 | -0.55255  | 0.70971 | -0.68852    | 0.75444     | 0.10207  | 0.45935 |
|           | -0.55255        | 0.70971   | 0.45935 | 0.747075153 |             |          |         |
| NA        | ENSG00000212989 | -0.44011  | 0.67007 | -0.44011    | 0.67007     | -0.44011 | 0.67007 |
|           | 0.10204         | 0.45936   | 0.45936 | 0.747075153 |             |          |         |
| NA        | ENSG00000242667 | 0.10196   | 0.45939 | 0.10196     | 0.45939     | 0.10196  | 0.45939 |
|           | 0.10196         | 0.45939   | 0.45939 | 0.747079516 |             |          |         |
| ZFHX3     | ENSG00000140836 | -0.011131 | 0.50444 | -1.5894     | 0.94402     | 0.10191  | 0.45941 |
|           | -0.5692         | 0.71539   | 0.45941 | 0.747079516 |             |          |         |
| GRM5-AS1  | ENSG00000255082 | -0.89613  | 0.81491 | 0.10193     | 0.45941     | -0.83268 |         |
|           | 0.79749         | -0.83268  | 0.79749 | 0.45941     | 0.747079516 |          |         |
| NA        | ENSG00000205830 | 0.10183   | 0.45945 | 0.10183     | 0.45945     | 0.10183  | 0.45945 |
|           | 0.10183         | 0.45945   | 0.45945 | 0.747079516 |             |          |         |
| LINC01976 | ENSG00000261514 | 0.10179   | 0.45946 | 0.10179     | 0.45946     | 0.10179  |         |
|           | 0.45946         | 0.10179   | 0.45946 | 0.45946     | 0.747079516 |          |         |
| RPS6P8    | ENSG00000224221 | 0.10178   | 0.45947 | 0.10178     | 0.45947     | 0.10178  |         |
|           | 0.45947         | 0.10178   | 0.45947 | 0.45947     | 0.747079516 |          |         |
| IGLV10-67 | ENSG00000253794 | 0.10177   | 0.45947 | 0.10177     | 0.45947     | 0.10177  |         |
|           | 0.45947         | 0.10177   | 0.45947 | 0.45947     | 0.747079516 |          |         |
| NA        | ENSG00000268475 | 0.10166   | 0.45951 | 0.10166     | 0.45951     | 0.10166  | 0.45951 |
|           | 0.10166         | 0.45951   | 0.45951 | 0.747119626 |             |          |         |
| ZIC5      | ENSG00000139800 | 0.10159   | 0.45954 | -0.91881    | 0.8209      | 0.05858  | 0.47664 |
|           | -0.98989        | 0.83889   | 0.45954 | 0.74712182  |             |          |         |
| TRIM60P19 | ENSG00000235737 | 0.1015    | 0.45958 | 0.1015      | 0.45958     | 0.1015   |         |
|           | 0.45958         | 0.1015    | 0.45958 | 0.45958     | 0.74712182  |          |         |
| CTBP2P7   | ENSG00000267091 | 0.10147   | 0.45959 | 0.10147     | 0.45959     | -1.0623  |         |
|           | 0.85595         | 0.10147   | 0.45959 | 0.45959     | 0.74712182  |          |         |
| ZSWIM2    | ENSG00000163012 | 0.1014    | 0.45962 | -0.77186    | 0.7799      | 0.041756 |         |
|           | 0.48335         | -0.052221 | 0.52082 | 0.45962     | 0.74712182  |          |         |
| ZNF679    | ENSG00000197123 | -0.24967  | 0.59858 | 0.10135     | 0.45963     | -1.1607  |         |

|           |                 |           |         |             |             |           |         |
|-----------|-----------------|-----------|---------|-------------|-------------|-----------|---------|
|           | 0.87712         | -0.41211  | 0.65987 | 0.45963     | 0.74712182  |           |         |
| LINC02848 | ENSG00000226581 | 0.10134   | 0.45964 | 0.10134     | 0.45964     | 0.10134   | 0.10134 |
|           | 0.45964         | 0.10134   | 0.45964 | 0.45964     | 0.74712182  |           |         |
| NA        | ENSG00000269842 | 0.10134   | 0.45964 | 0.10134     | 0.45964     | 0.10134   | 0.45964 |
|           | 0.10134         | 0.45964   | 0.45964 | 0.74712182  |             |           |         |
| CLRN1-AS1 | ENSG00000239265 | -0.014318 | 0.50571 | -0.50706    | 0.69394     | 0.10131   |         |
|           | 0.45965         | -0.15417  | 0.56126 | 0.45965     | 0.74712182  |           |         |
| NA        | ENSG00000257384 | 0.10128   | 0.45967 | 0.10128     | 0.45967     | 0.10128   | 0.45967 |
|           | 0.10128         | 0.45967   | 0.45967 | 0.74712182  |             |           |         |
| NA        | ENSG00000270506 | -0.67219  | 0.74927 | -0.19886    | 0.57881     | 0.10125   | 0.45967 |
|           | 0.10125         | 0.45967   | 0.45967 | 0.74712182  |             |           |         |
| FYB2      | ENSG00000187889 | 0.10124   | 0.45968 | 0.10124     | 0.45968     | -0.73843  | 0.76987 |
|           | -0.32476        | 0.62732   | 0.45968 | 0.74712182  |             |           |         |
| LINC01248 | ENSG00000224128 | 0.10118   | 0.4597  | 0.10118     | 0.4597      | -1.0745   |         |
|           | 0.8587          | 0.10118   | 0.4597  | 0.4597      | 0.747129407 |           |         |
| NUTF2     | ENSG00000102898 | -0.34152  | 0.63364 | 0.092572    | 0.46312     | 0.092572  | 0.46312 |
|           | 0.10097         | 0.45979   | 0.45979 | 0.747146763 |             |           |         |
| NA        | ENSG00000238301 | -0.61318  | 0.73012 | -0.25331    | 0.59999     | -0.082804 | 0.533   |
|           | 0.10097         | 0.45979   | 0.45979 | 0.747146763 |             |           |         |
| NA        | ENSG00000223023 | 0.10095   | 0.4598  | 0.10095     | 0.4598      | 0.10095   | 0.4598  |
|           | 0.10095         | 0.4598    | 0.4598  | 0.747146763 |             |           |         |
| GEMIN7    | ENSG00000142252 | 0.10092   | 0.45981 | 0.10092     | 0.45981     | -0.62653  |         |
|           | 0.73452         | -0.24862  | 0.59817 | 0.45981     | 0.747146763 |           |         |
| RNU6-817P | ENSG00000212385 | 0.10089   | 0.45982 | 0.10089     | 0.45982     | 0.10089   |         |
|           | 0.45982         | 0.10089   | 0.45982 | 0.45982     | 0.747146763 |           |         |
| NA        | ENSG00000280047 | -1.0926   | 0.86273 | -0.45713    | 0.67621     | 0.10088   | 0.45982 |
|           | -0.41072        | 0.65936   | 0.45982 | 0.747146763 |             |           |         |
| RHOH      | ENSG00000168421 | -1.468    | 0.92895 | 0.10081     | 0.45985     | -0.66713  | 0.74765 |
|           | -0.39024        | 0.65182   | 0.45985 | 0.747146763 |             |           |         |
| BCAS1     | ENSG00000064787 | -0.87373  | 0.80887 | -0.5363     | 0.70412     | 0.1008    | 0.45986 |
|           | -0.62365        | 0.73357   | 0.45986 | 0.747146763 |             |           |         |
| NA        | ENSG00000258959 | 0.012894  | 0.49486 | -0.11863    | 0.54721     | -0.5194   | 0.69826 |
|           | 0.10079         | 0.45986   | 0.45986 | 0.747146763 |             |           |         |
| MIR4780   | ENSG00000265003 | 0.0022785 | 0.49909 | -0.39191    | 0.65244     | 0.10077   |         |
|           | 0.45987         | 0.10077   | 0.45987 | 0.45987     | 0.747146763 |           |         |
| LINC01166 | ENSG00000232903 | 0.10074   | 0.45988 | 0.10074     | 0.45988     | 0.10074   |         |
|           | 0.45988         | 0.10074   | 0.45988 | 0.45988     | 0.747146763 |           |         |
| SCRIB     | ENSG00000180900 | -0.59085  | 0.72269 | 0.10066     | 0.45991     | -1.0595   | 0.85531 |
|           | -1.3361         | 0.90924   | 0.45991 | 0.747146763 |             |           |         |
| NADK2-AS1 | ENSG00000245711 | 0.10067   | 0.45991 | 0.10067     | 0.45991     | 0.10067   |         |
|           | 0.45991         | 0.10067   | 0.45991 | 0.45991     | 0.747146763 |           |         |
| RHBDL1    | ENSG00000103269 | 0.10052   | 0.45996 | 0.10052     | 0.45996     | 0.10052   |         |
|           | 0.45996         | 0.10052   | 0.45996 | 0.45996     | 0.747174927 |           |         |
| SMCO3     | ENSG00000179256 | 0.10048   | 0.45998 | -0.29417    | 0.61569     | -0.90464  | 0.81717 |
|           | 0.10048         | 0.45998   | 0.45998 | 0.747174927 |             |           |         |
| LINC00397 | ENSG00000223404 | 0.10041   | 0.46001 | 0.10041     | 0.46001     | 0.10041   |         |
|           | 0.46001         | -0.52909  | 0.70163 | 0.46001     | 0.747174927 |           |         |
| NA        | ENSG00000259094 | -1.5667   | 0.94141 | 0.10041     | 0.46001     | -0.78448  | 0.78362 |
|           | -0.78448        | 0.78362   | 0.46001 | 0.747174927 |             |           |         |
| MIR499A   | ENSG00000207635 | 0.10035   | 0.46003 | 0.10035     | 0.46003     | 0.10035   |         |
|           | 0.46003         | 0.10035   | 0.46003 | 0.46003     | 0.747174927 |           |         |
| NA        | ENSG00000254091 | 0.10033   | 0.46004 | 0.10033     | 0.46004     | -0.80828  | 0.79054 |
|           | 0.10033         | 0.46004   | 0.46004 | 0.747174927 |             |           |         |
| RBM11P1   | ENSG00000271488 | 0.10033   | 0.46004 | 0.10033     | 0.46004     | 0.10033   |         |
|           | 0.46004         | 0.10033   | 0.46004 | 0.46004     | 0.747174927 |           |         |
| NA        | ENSG00000250706 | -0.21119  | 0.58363 | -0.46675    | 0.67966     | -0.69749  | 0.75725 |
|           | 0.10031         | 0.46005   | 0.46005 | 0.747174927 |             |           |         |
| NA        | ENSG00000207002 | 0.0052343 | 0.49791 | 0.10006     | 0.46015     | 0.0052343 | 0.49791 |
|           | 0.0052343       | 0.49791   | 0.46015 | 0.747312431 |             |           |         |
| TUBB4BP4  | ENSG00000254961 | 0.099944  | 0.46019 | 0.099944    | 0.46019     | 0.099944  |         |
|           | 0.46019         | 0.099944  | 0.46019 | 0.46019     | 0.747352486 |           |         |
| NDUFAF8   | ENSG00000224877 | 0.099885  | 0.46022 | 0.099885    | 0.46022     | 0.099885  |         |



|            |                 |           |         |             |             |           |          |
|------------|-----------------|-----------|---------|-------------|-------------|-----------|----------|
|            | 0.46022         | 0.099885  | 0.46022 | 0.46022     | 0.747367632 |           |          |
| NA         | ENSG00000251199 | -0.46514  | 0.67908 | -0.14496    | 0.55763     | -0.14496  | 0.55763  |
|            | 0.099859        | 0.46023   | 0.46023 | 0.747367632 |             |           |          |
| RNU6-945P  | ENSG00000206674 | 0.099633  | 0.46032 | 0.099633    | 0.46032     | 0.099633  | 0.099633 |
|            | 0.46032         | 0.099633  | 0.46032 | 0.46032     | 0.747439059 |           |          |
| CFL1P5     | ENSG00000213830 | 0.099616  | 0.46032 | 0.099616    | 0.46032     | 0.099616  | 0.099616 |
|            | 0.46032         | 0.099616  | 0.46032 | 0.46032     | 0.747439059 |           |          |
| RAB1C      | ENSG00000233111 | 0.099617  | 0.46032 | -0.35255    | 0.63779     | -0.69492  | 0.75645  |
|            | -0.82372        | 0.79495   | 0.46032 | 0.747439059 |             |           |          |
| NA         | ENSG00000237061 | 0.099352  | 0.46043 | 0.099352    | 0.46043     | 0.099352  | 0.46043  |
|            | 0.099352        | 0.46043   | 0.46043 | 0.74759276  |             |           |          |
| SEC31A     | ENSG00000138674 | -0.43427  | 0.66796 | 0.099205    | 0.46049     | -1.155    |          |
|            | 0.87595         | -0.026576 | 0.5106  | 0.46049     | 0.747665268 |           |          |
| RN7SL219P  | ENSG00000265386 | 0.099127  | 0.46052 | -0.39604    | 0.65396     | -1.8662   |          |
|            | 0.96899         | -1.8662   | 0.96899 | 0.46052     | 0.747689065 |           |          |
| GPI        | ENSG00000105220 | -1.1542   | 0.8758  | 0.098927    | 0.4606      | -0.52288  | 0.69947  |
|            | -0.077585       | 0.53092   | 0.4606  | 0.74777668  |             |           |          |
| LGALS8-AS1 | ENSG00000223776 | 0.098895  | 0.46061 | 0.098895    | 0.46061     | 0.098895  | 0.098895 |
|            | 0.46061         | 0.098895  | 0.46061 | 0.46061     | 0.74777668  |           |          |
| NA         | ENSG00000214546 | 0.098869  | 0.46062 | 0.098869    | 0.46062     | -0.71483  | 0.76264  |
|            | -0.63168        | 0.7362    | 0.46062 | 0.74777668  |             |           |          |
| SOBP       | ENSG00000112320 | -0.53867  | 0.70494 | 0.098825    | 0.46064     | -0.49661  | 0.69027  |
|            | -0.63744        | 0.73808   | 0.46064 | 0.747784236 |             |           |          |
| NA         | ENSG00000238575 | 0.098739  | 0.46067 | 0.098739    | 0.46067     | 0.098739  | 0.46067  |
|            | 0.098739        | 0.46067   | 0.46067 | 0.747808025 |             |           |          |
| LINC00254  | ENSG00000281219 | 0.098589  | 0.46073 | 0.098589    | 0.46073     | 0.098589  | 0.098589 |
|            | 0.46073         | 0.098589  | 0.46073 | 0.46073     | 0.747813333 |           |          |
| MIR516A2   | ENSG00000207620 | 0.07532   | 0.46998 | 0.098582    | 0.46074     | -0.71099  |          |
|            | 0.76146         | 0.098582  | 0.46074 | 0.46074     | 0.747813333 |           |          |
| RNU6-1041P | ENSG00000252063 | 0.098582  | 0.46074 | 0.098582    | 0.46074     | 0.098582  | 0.098582 |
|            | 0.46074         | 0.098582  | 0.46074 | 0.46074     | 0.747813333 |           |          |
| NA         | ENSG00000259118 | 0.098544  | 0.46075 | 0.098544    | 0.46075     | 0.098544  | 0.46075  |
|            | 0.098544        | 0.46075   | 0.46075 | 0.747813333 |             |           |          |
| NA         | ENSG00000261442 | 0.098535  | 0.46075 | 0.098535    | 0.46075     | 0.098535  | 0.46075  |
|            | 0.098535        | 0.46075   | 0.46075 | 0.747813333 |             |           |          |
| NA         | ENSG00000218857 | -0.66603  | 0.7473  | -0.52519    | 0.70028     | -0.56963  | 0.71553  |
|            | 0.098373        | 0.46082   | 0.46082 | 0.747902035 |             |           |          |
| NA         | ENSG00000205596 | -0.5602   | 0.71233 | -0.74855    | 0.77294     | 0.098261  | 0.46086  |
|            | -0.47156        | 0.68138   | 0.46086 | 0.747942044 |             |           |          |
| TSPAN4     | ENSG00000214063 | -0.32564  | 0.62765 | -0.49803    | 0.69077     | 0.0083039 |          |
|            | 0.49669         | 0.09821   | 0.46088 | 0.46088     | 0.747949592 |           |          |
| C5         | ENSG00000106804 | -0.24408  | 0.59641 | 0.098158    | 0.4609      | -0.71619  | 0.76306  |
|            | -0.15592        | 0.56195   | 0.4609  | 0.74795714  |             |           |          |
| NA         | ENSG00000248911 | -0.03353  | 0.51337 | 0.098068    | 0.46094     | -0.45368  | 0.67497  |
|            | -0.53728        | 0.70446   | 0.46094 | 0.747972234 |             |           |          |
| NA         | ENSG00000255838 | 0.098065  | 0.46094 | -2.462      | 0.99309     | -1.0288   | 0.84821  |
|            | -1.0288         | 0.84821   | 0.46094 | 0.747972234 |             |           |          |
| NA         | ENSG00000215871 | 0.098015  | 0.46096 | 0.098015    | 0.46096     | 0.098015  | 0.46096  |
|            | -0.4979         | 0.69072   | 0.46096 | 0.747978647 |             |           |          |
| MED29      | ENSG00000063322 | -0.76387  | 0.77753 | -0.76387    | 0.77753     | -0.76387  | 0.77753  |
|            | 0.09797         | 0.46098   | 0.46098 | 0.747978647 |             |           |          |
| NA         | ENSG00000202233 | -0.3557   | 0.63897 | -0.16781    | 0.56663     | 0.097952  | 0.46099  |
|            | -0.69391        | 0.75613   | 0.46099 | 0.747978647 |             |           |          |
| CDKN2B-AS1 | ENSG00000240498 | 0.097858  | 0.46102 | -0.81002    | 0.79104     | -0.22016  |          |
|            | 0.58713         | -0.57314  | 0.71672 | 0.46102     | 0.748002417 |           |          |
| CLSTN2-AS1 | ENSG00000250433 | -0.1415   | 0.55626 | -1.2586     | 0.89591     | 0.097714  |          |
|            | 0.46108         | 0.097714  | 0.46108 | 0.46108     | 0.748066177 |           |          |
| IGHV3-62   | ENSG00000253132 | 0.097692  | 0.46109 | 0.097692    | 0.46109     | 0.097692  | 0.097692 |
|            | 0.46109         | 0.097692  | 0.46109 | 0.46109     | 0.748066177 |           |          |
| NA         | ENSG00000228692 | 0.09763   | 0.46111 | -0.047885   | 0.5191      | -0.034834 | 0.51389  |
|            | -0.73076        | 0.76754   | 0.46111 | 0.748073719 |             |           |          |
| NAB2       | ENSG00000166886 | 0.068648  | 0.47264 | -0.91944    | 0.82107     | -0.71425  | 0.76246  |

|            |                 |          |         |             |             |           |         |  |
|------------|-----------------|----------|---------|-------------|-------------|-----------|---------|--|
|            | 0.09744         | 0.46119  | 0.46119 | 0.748110278 |             |           |         |  |
| NA         | ENSG00000232906 | -0.10343 | 0.54119 | 0.097445    | 0.46119     | 0.097445  | 0.46119 |  |
|            | 0.097445        | 0.46119  | 0.46119 | 0.748110278 |             |           |         |  |
| CCDC58P5   | ENSG00000256681 | -0.7932  | 0.78617 | -0.7932     | 0.78617     | -0.7932   |         |  |
|            | 0.78617         | 0.097421 | 0.4612  | 0.4612      | 0.748110278 |           |         |  |
| RNU6-1107P | ENSG00000201687 | 0.097385 | 0.46121 | 0.097385    | 0.46121     | -0.49514  |         |  |
|            | 0.68975         | 0.097385 | 0.46121 | 0.46121     | 0.748110278 |           |         |  |
| NARF-IT1   | ENSG00000266236 | 0.097368 | 0.46122 | 0.097368    | 0.46122     | 0.097368  |         |  |
|            | 0.46122         | 0.097368 | 0.46122 | 0.46122     | 0.748110278 |           |         |  |
| PPIAP3     | ENSG00000235044 | 0.097333 | 0.46123 | 0.097333    | 0.46123     | 0.097333  |         |  |
|            | 0.46123         | 0.097333 | 0.46123 | 0.46123     | 0.748110278 |           |         |  |
| NA         | ENSG00000250422 | -0.20073 | 0.57955 | -0.71566    | 0.7629      | -0.28199  | 0.61103 |  |
|            | 0.097299        | 0.46124  | 0.46124 | 0.748110278 |             |           |         |  |
| DOLPP1     | ENSG00000167130 | -1.0074  | 0.84312 | -0.97271    | 0.83465     | 0.014541  |         |  |
|            | 0.4942          | 0.097151 | 0.4613  | 0.4613      | 0.748182693 |           |         |  |
| RNA5SP369  | ENSG00000223046 | -0.53647 | 0.70418 | 0.096953    | 0.46138     | -0.80764  |         |  |
|            | 0.79035         | -0.53647 | 0.70418 | 0.46138     | 0.748209386 |           |         |  |
| TXNDC15    | ENSG00000113621 | 0.096932 | 0.46139 | -0.22474    | 0.58891     | -0.20603  |         |  |
|            | 0.58162         | -0.76187 | 0.77693 | 0.46139     | 0.748209386 |           |         |  |
| NA         | ENSG00000225551 | 0.096929 | 0.46139 | -0.049891   | 0.5199      | -0.049891 | 0.5199  |  |
|            | -0.77516        | 0.78088  | 0.46139 | 0.748209386 |             |           |         |  |
| NA         | ENSG00000241434 | 0.096931 | 0.46139 | 0.096931    | 0.46139     | 0.096931  | 0.46139 |  |
|            | 0.096931        | 0.46139  | 0.46139 | 0.748209386 |             |           |         |  |
| NA         | ENSG00000232346 | 0.096866 | 0.46142 | 0.096866    | 0.46142     | 0.096866  | 0.46142 |  |
|            | 0.096866        | 0.46142  | 0.46142 | 0.748209386 |             |           |         |  |
| TAS2R38    | ENSG00000257138 | 0.096793 | 0.46145 | -1.6652     | 0.95206     | -0.07726  |         |  |
|            | 0.53079         | -0.6194  | 0.73217 | 0.46145     | 0.748209386 |           |         |  |
| ZNF184     | ENSG00000096654 | -0.61725 | 0.73147 | -0.82107    | 0.7942      | -0.95693  |         |  |
|            | 0.8307          | 0.096762 | 0.46146 | 0.46146     | 0.748209386 |           |         |  |
| SCYL1      | ENSG00000142186 | -0.1862  | 0.57385 | -0.07421    | 0.52958     | -0.14567  | 0.55791 |  |
|            | 0.09675         | 0.46146  | 0.46146 | 0.748209386 |             |           |         |  |
| DCSTAMP    | ENSG00000164935 | 0.096753 | 0.46146 | 0.096753    | 0.46146     | 0.096753  |         |  |
|            | 0.46146         | -0.92753 | 0.82318 | 0.46146     | 0.748209386 |           |         |  |
| NA         | ENSG00000265542 | 0.096732 | 0.46147 | -0.27854    | 0.6097      | -0.66715  | 0.74766 |  |
|            | 0.096732        | 0.46147  | 0.46147 | 0.748209386 |             |           |         |  |
| RNU6-407P  | ENSG00000202150 | 0.096651 | 0.4615  | 0.096651    | 0.4615      | 0.096651  |         |  |
|            | 0.4615          | 0.096651 | 0.4615  | 0.4615      | 0.748233131 |           |         |  |
| NA         | ENSG00000250410 | -0.4223  | 0.6636  | 0.09655     | 0.46154     | 0.09655   | 0.46154 |  |
|            | 0.09655         | 0.46154  | 0.46154 | 0.748263253 |             |           |         |  |
| ATRAID     | ENSG00000138085 | 0.096484 | 0.46157 | -0.97474    | 0.83516     | -0.97474  |         |  |
|            | 0.83516         | -0.97474 | 0.83516 | 0.46157     | 0.748263253 |           |         |  |
| ANKK1      | ENSG00000170209 | 0.096455 | 0.46158 | 0.096455    | 0.46158     | -0.43813  | 0.66936 |  |
|            | -0.16122        | 0.56404  | 0.46158 | 0.748263253 |             |           |         |  |
| NA         | ENSG00000258134 | -0.43414 | 0.6679  | 0.096444    | 0.46158     | -1.4131   | 0.92119 |  |
|            | 0.096444        | 0.46158  | 0.46158 | 0.748263253 |             |           |         |  |
| NYAP1      | ENSG00000166924 | -1.1832  | 0.88164 | -0.72146    | 0.76469     | -0.66441  | 0.74679 |  |
|            | 0.096321        | 0.46163  | 0.46163 | 0.748280753 |             |           |         |  |
| NPM1P24    | ENSG00000215086 | 0.096323 | 0.46163 | 0.096323    | 0.46163     | 0.096323  |         |  |
|            | 0.46163         | 0.096323 | 0.46163 | 0.46163     | 0.748280753 |           |         |  |
| RNU4-26P   | ENSG00000222202 | 0.096278 | 0.46165 | 0.096278    | 0.46165     | 0.096278  |         |  |
|            | 0.46165         | 0.096278 | 0.46165 | 0.46165     | 0.748280753 |           |         |  |
| NA         | ENSG00000261017 | 0.089189 | 0.46447 | 0.096142    | 0.4617      | 0.022448  | 0.49105 |  |
|            | -0.55319        | 0.70993  | 0.4617  | 0.748280753 |             |           |         |  |
| RPL21P8    | ENSG00000180662 | -0.16588 | 0.56587 | -0.16588    | 0.56587     | 0.096119  |         |  |
|            | 0.46171         | -0.16588 | 0.56587 | 0.46171     | 0.748280753 |           |         |  |
| NA         | ENSG00000244730 | -0.35403 | 0.63834 | 0.096058    | 0.46174     | 0.096058  | 0.46174 |  |
|            | 0.096058        | 0.46174  | 0.46174 | 0.748280753 |             |           |         |  |
| OR10V1     | ENSG00000172289 | 0.096035 | 0.46175 | 0.096035    | 0.46175     | -0.48934  |         |  |
|            | 0.6877          | -1.6477  | 0.95029 | 0.46175     | 0.748280753 |           |         |  |
| SEM1P1     | ENSG00000214857 | 0.096018 | 0.46175 | 0.096018    | 0.46175     | 0.096018  |         |  |
|            | 0.46175         | 0.096018 | 0.46175 | 0.46175     | 0.748280753 |           |         |  |
| NA         | ENSG00000226281 | -0.20094 | 0.57963 | -0.99583    | 0.84033     | -1.6891   | 0.9544  |  |

|           |                 |           |         |             |             |          |         |  |
|-----------|-----------------|-----------|---------|-------------|-------------|----------|---------|--|
|           | 0.095968        | 0.46177   | 0.46177 | 0.748280753 |             |          |         |  |
| HMGB3P1   | ENSG00000225336 | -0.32338  | 0.6268  | -0.7665     | 0.77831     | 0.095961 |         |  |
|           | 0.46178         | -1.0098   | 0.8437  | 0.46178     | 0.748280753 |          |         |  |
| MPEG1     | ENSG00000197629 | 0.095932  | 0.46179 | -0.55977    | 0.71218     | 0.095932 | 0.46179 |  |
|           | 0.095932        | 0.46179   | 0.46179 | 0.748280753 |             |          |         |  |
| RPL23AP48 | ENSG00000219135 | 0.095901  | 0.4618  | 0.095901    | 0.4618      | 0.095901 |         |  |
|           | 0.4618          | 0.095901  | 0.4618  | 0.4618      | 0.748280753 |          |         |  |
| NA        | ENSG00000251735 | -1.4921   | 0.93216 | -1.4921     | 0.93216     | -1.4921  | 0.93216 |  |
|           | 0.095744        | 0.46186   | 0.46186 | 0.748280753 |             |          |         |  |
| GTPBP8    | ENSG00000163607 | -1.4061   | 0.92015 | 0.095719    | 0.46187     | -1.1471  |         |  |
|           | 0.87432         | -1.0627   | 0.85604 | 0.46187     | 0.748280753 |          |         |  |
| NOS1AP    | ENSG00000198929 | -0.62646  | 0.73449 | 0.095558    | 0.46194     | -0.05303 |         |  |
|           | 0.52115         | -0.2337   | 0.59239 | 0.46194     | 0.748280753 |          |         |  |
| OR2T10    | ENSG00000184022 | -0.29502  | 0.61601 | -0.63018    | 0.73571     | 0.095503 |         |  |
|           | 0.46196         | -0.12479  | 0.54966 | 0.46196     | 0.748280753 |          |         |  |
| NA        | ENSG00000260475 | 0.095499  | 0.46196 | 0.095499    | 0.46196     | 0.095499 | 0.46196 |  |
|           | 0.095499        | 0.46196   | 0.46196 | 0.748280753 |             |          |         |  |
| LINC00535 | ENSG00000246662 | -1.3478   | 0.91114 | 0.095473    | 0.46197     | -1.781   |         |  |
|           | 0.96254         | -1.2928   | 0.90196 | 0.46197     | 0.748280753 |          |         |  |
| NA        | ENSG00000260337 | 0.095462  | 0.46197 | 0.095462    | 0.46197     | 0.095462 | 0.46197 |  |
|           | 0.095462        | 0.46197   | 0.46197 | 0.748280753 |             |          |         |  |
| SENPI1    | ENSG00000079387 | 0.095364  | 0.46201 | -1.5601     | 0.94064     | -1.2134  | 0.88752 |  |
|           | -0.65745        | 0.74455   | 0.46201 | 0.748280753 |             |          |         |  |
| SUMF2     | ENSG00000129103 | 0.095363  | 0.46201 | 0.095363    | 0.46201     | -0.66592 | 0.74727 |  |
|           | -0.40582        | 0.65756   | 0.46201 | 0.748280753 |             |          |         |  |
| RPL9P3    | ENSG00000240392 | -0.19617  | 0.57776 | 0.095379    | 0.46201     | -0.19617 |         |  |
|           | 0.57776         | -0.19617  | 0.57776 | 0.46201     | 0.748280753 |          |         |  |
| CYP2C8    | ENSG00000138115 | 0.095352  | 0.46202 | -0.6916     | 0.75541     | -0.9239  |         |  |
|           | 0.82223         | 0.095352  | 0.46202 | 0.46202     | 0.748280753 |          |         |  |
| LYST-AS1  | ENSG00000229463 | 0.095266  | 0.46205 | 0.095266    | 0.46205     | 0.095266 |         |  |
|           | 0.46205         | 0.095266  | 0.46205 | 0.46205     | 0.748280753 |          |         |  |
| NA        | ENSG00000263910 | 0.095278  | 0.46205 | 0.095278    | 0.46205     | 0.095278 | 0.46205 |  |
|           | 0.095278        | 0.46205   | 0.46205 | 0.748280753 |             |          |         |  |
| BBS1      | ENSG00000174483 | -0.30459  | 0.61966 | -0.60237    | 0.72654     | 0.095251 | 0.46206 |  |
|           | 0.095251        | 0.46206   | 0.46206 | 0.748280753 |             |          |         |  |
| RNU6-724P | ENSG00000212260 | 0.095219  | 0.46207 | -0.15778    | 0.56269     | -0.87904 |         |  |
|           | 0.81031         | 0.095219  | 0.46207 | 0.46207     | 0.748280753 |          |         |  |
| NA        | ENSG00000278737 | 0.095219  | 0.46207 | 0.095219    | 0.46207     | 0.095219 | 0.46207 |  |
|           | 0.095219        | 0.46207   | 0.46207 | 0.748280753 |             |          |         |  |
| NA        | ENSG00000269898 | 0.095192  | 0.46208 | 0.095192    | 0.46208     | 0.095192 | 0.46208 |  |
|           | 0.095192        | 0.46208   | 0.46208 | 0.748280753 |             |          |         |  |
| NA        | ENSG00000258377 | 0.095158  | 0.46209 | 0.095158    | 0.46209     | 0.095158 | 0.46209 |  |
|           | 0.095158        | 0.46209   | 0.46209 | 0.748280753 |             |          |         |  |
| NA        | ENSG00000270035 | 0.095153  | 0.4621  | 0.095153    | 0.4621      | 0.095153 | 0.4621  |  |
|           | -0.39858        | 0.6549    | 0.4621  | 0.748280753 |             |          |         |  |
| CCDC114   | ENSG00000105479 | 0.018424  | 0.49265 | 0.095132    | 0.46211     | -0.30048 |         |  |
|           | 0.6181          | -0.41784  | 0.66197 | 0.46211     | 0.748280753 |          |         |  |
| NA        | ENSG00000266896 | -1.5453   | 0.93887 | -1.1665     | 0.87828     | 0.094999 | 0.46216 |  |
|           | 0.094999        | 0.46216   | 0.46216 | 0.748280753 |             |          |         |  |
| NA        | ENSG00000280003 | -0.18511  | 0.57343 | 0.094995    | 0.46216     | -2.7642  | 0.99715 |  |
|           | -2.7642         | 0.99715   | 0.46216 | 0.748280753 |             |          |         |  |
| MORF4L1P7 | ENSG00000225904 | -0.65803  | 0.74474 | -0.41983    | 0.6627      | -0.65803 |         |  |
|           | 0.74474         | 0.094878  | 0.46221 | 0.46221     | 0.748280753 |          |         |  |
| NA        | ENSG00000258829 | -0.08067  | 0.53215 | 0.094876    | 0.46221     | -0.12314 | 0.549   |  |
|           | -0.074288       | 0.52961   | 0.46221 | 0.748280753 |             |          |         |  |
| JMJD1C    | ENSG00000171988 | -0.10269  | 0.54089 | 0.082722    | 0.46704     | 0.094829 |         |  |
|           | 0.46223         | -0.088965 | 0.53545 | 0.46223     | 0.748280753 |          |         |  |
| NA        | ENSG00000272982 | 0.094827  | 0.46223 | 0.094827    | 0.46223     | 0.094827 | 0.46223 |  |
|           | 0.094827        | 0.46223   | 0.46223 | 0.748280753 |             |          |         |  |
| LINC02213 | ENSG00000249160 | 0.094791  | 0.46224 | 0.094791    | 0.46224     | 0.094791 |         |  |
|           | 0.46224         | 0.094791  | 0.46224 | 0.46224     | 0.748280753 |          |         |  |
| MATR3     | ENSG00000015479 | -0.28824  | 0.61342 | -0.28824    | 0.61342     | -1.2851  | 0.90063 |  |

|            |                 |          |         |             |             |           |         |  |
|------------|-----------------|----------|---------|-------------|-------------|-----------|---------|--|
|            | 0.094772        | 0.46225  | 0.46225 | 0.748280753 |             |           |         |  |
| TELO2      | ENSG00000100726 | -0.11099 | 0.54419 | 0.094755    | 0.46225     | 0.054336  | 0.47833 |  |
|            | -0.58929        | 0.72217  | 0.46225 | 0.748280753 |             |           |         |  |
| POGLUT3    | ENSG00000178202 | 0.094779 | 0.46225 | 0.094779    | 0.46225     | 0.094779  |         |  |
|            | 0.46225         | -0.17962 | 0.57127 | 0.46225     | 0.748280753 |           |         |  |
| C1QTNF6    | ENSG00000133466 | 0.094647 | 0.4623  | -0.22441    | 0.58878     | -0.22441  |         |  |
|            | 0.58878         | -0.22441 | 0.58878 | 0.4623      | 0.748280753 |           |         |  |
| NA         | ENSG00000231918 | -0.98542 | 0.83779 | 0.04741     | 0.48109     | -0.94738  | 0.82828 |  |
|            | 0.094579        | 0.46232  | 0.46232 | 0.748280753 |             |           |         |  |
| NA         | ENSG00000249406 | 0.0946   | 0.46232 | -0.62288    | 0.73332     | -2.1329   | 0.98353 |  |
|            | -1.0846         | 0.86095  | 0.46232 | 0.748280753 |             |           |         |  |
| LINC01142  | ENSG00000224286 | 0.094572 | 0.46233 | -1.6117     | 0.94649     | 0.094572  |         |  |
|            | 0.46233         | -0.43105 | 0.66678 | 0.46233     | 0.748280753 |           |         |  |
| NA         | ENSG00000224848 | -1.2202  | 0.88881 | -1.2545     | 0.89518     | -1.1201   | 0.86866 |  |
|            | 0.094576        | 0.46233  | 0.46233 | 0.748280753 |             |           |         |  |
| GOLGA7     | ENSG00000147533 | 0.070524 | 0.47189 | -1.4161     | 0.92162     | -1.0941   |         |  |
|            | 0.86305         | 0.094506 | 0.46235 | 0.46235     | 0.748280753 |           |         |  |
| PHB        | ENSG00000167085 | 0.094511 | 0.46235 | -0.64957    | 0.74201     | -0.1136   | 0.54522 |  |
|            | -0.018857       | 0.50752  | 0.46235 | 0.748280753 |             |           |         |  |
| RD3        | ENSG00000198570 | -0.40727 | 0.65809 | -0.66368    | 0.74655     | -0.40727  | 0.65809 |  |
|            | 0.094502        | 0.46236  | 0.46236 | 0.748280753 |             |           |         |  |
| RPL14      | ENSG00000188846 | -0.30094 | 0.61827 | -0.30094    | 0.61827     | -0.44402  | 0.67148 |  |
|            | 0.094428        | 0.46238  | 0.46238 | 0.748280753 |             |           |         |  |
| FOXI3      | ENSG00000214336 | -1.2124  | 0.88732 | -1.2545     | 0.89517     | -0.42734  | 0.66543 |  |
|            | 0.094419        | 0.46239  | 0.46239 | 0.748280753 |             |           |         |  |
| CSE1L      | ENSG00000124207 | -0.13889 | 0.55523 | -0.46026    | 0.67733     | 0.094356  | 0.46241 |  |
|            | -0.12352        | 0.54915  | 0.46241 | 0.748280753 |             |           |         |  |
| AOX2P      | ENSG00000243478 | 0.094331 | 0.46242 | -1.0404     | 0.85092     | 0.094331  | 0.46242 |  |
|            | -0.64505        | 0.74055  | 0.46242 | 0.748280753 |             |           |         |  |
| NA         | ENSG00000270371 | -0.58304 | 0.72007 | -0.79061    | 0.78541     | 0.094297  | 0.46244 |  |
|            | -0.91613        | 0.8202   | 0.46244 | 0.748288268 |             |           |         |  |
| NA         | ENSG00000221032 | -1.6881  | 0.9543  | -0.9        | 0.81594     | -1.5878   | 0.94383 |  |
|            | 0.094029        | 0.46254  | 0.46254 | 0.748407889 |             |           |         |  |
| IGKV3-7    | ENSG00000243063 | -1.3089  | 0.90472 | 0.09402     | 0.46255     | -0.711    |         |  |
|            | 0.76146         | -1.6625  | 0.9518  | 0.46255     | 0.748407889 |           |         |  |
| IGHV7-34-1 | ENSG00000253325 | 0.093984 | 0.46256 | 0.093984    | 0.46256     | 0.093984  |         |  |
|            | 0.46256         | 0.093984 | 0.46256 | 0.46256     | 0.748407889 |           |         |  |
| NA         | ENSG00000224934 | 0.093815 | 0.46263 | 0.093815    | 0.46263     | 0.093815  | 0.46263 |  |
|            | 0.093815        | 0.46263  | 0.46263 | 0.748478952 |             |           |         |  |
| ZNF687     | ENSG00000143373 | 0.093796 | 0.46264 | 0.021145    | 0.49157     | -0.95536  |         |  |
|            | 0.8303          | -0.6454  | 0.74067 | 0.46264     | 0.748478952 |           |         |  |
| SLFN12L    | ENSG00000205045 | -0.33287 | 0.63038 | -0.17876    | 0.57094     | -0.096633 |         |  |
|            | 0.53849         | 0.093748 | 0.46265 | 0.46265     | 0.748478952 |           |         |  |
| NA         | ENSG00000238254 | -0.75983 | 0.77632 | 0.093614    | 0.46271     | 0.072741  | 0.47101 |  |
|            | 0.072741        | 0.47101  | 0.46271 | 0.748551169 |             |           |         |  |
| LHFPL4     | ENSG00000156959 | 0.036242 | 0.48554 | 0.093473    | 0.46276     | -0.41054  |         |  |
|            | 0.6593          | -0.10929 | 0.54351 | 0.46276     | 0.748598529 |           |         |  |
| RPS28      | ENSG00000233927 | 0.093462 | 0.46277 | 0.093462    | 0.46277     | 0.093462  | 0.46277 |  |
|            | 0.093462        | 0.46277  | 0.46277 | 0.748598529 |             |           |         |  |
| SLC30A6P1  | ENSG00000232277 | 0.093402 | 0.46279 | 0.093402    | 0.46279     | 0.093402  |         |  |
|            | 0.46279         | 0.093402 | 0.46279 | 0.46279     | 0.748606032 |           |         |  |
| RPL17P26   | ENSG00000216854 | 0.093287 | 0.46284 | 0.093287    | 0.46284     | -0.14612  |         |  |
|            | 0.55809         | 0.093287 | 0.46284 | 0.46284     | 0.748662059 |           |         |  |
| CSNK2A1    | ENSG00000101266 | -0.31912 | 0.62518 | -1.6244     | 0.94786     | -0.88131  |         |  |
|            | 0.81092         | 0.093217 | 0.46287 | 0.46287     | 0.748677058 |           |         |  |
| HSPE1P18   | ENSG00000255163 | 0.09317  | 0.46288 | 0.09317     | 0.46288     | 0.09317   |         |  |
|            | 0.46288         | 0.09317  | 0.46288 | 0.46288     | 0.748677058 |           |         |  |
| RN7SKP206  | ENSG00000222755 | -0.30216 | 0.61874 | -0.30216    | 0.61874     | 0.093097  |         |  |
|            | 0.46291         | -0.66072 | 0.7456  | 0.46291     | 0.74870073  |           |         |  |
| LINC02318  | ENSG00000258390 | -0.71723 | 0.76338 | -2.1377     | 0.98373     | 0.093041  |         |  |
|            | 0.46294         | -0.35759 | 0.63968 | 0.46294     | 0.74870587  |           |         |  |
| RPS29P15   | ENSG00000235926 | 0.092967 | 0.46296 | -0.45163    | 0.67423     | 0.065028  |         |  |

|             |                 |           |         |             |             |          |         |
|-------------|-----------------|-----------|---------|-------------|-------------|----------|---------|
|             | 0.47408         | -0.18235  | 0.57235 | 0.46296     | 0.74870587  |          |         |
| OR5D16      | ENSG00000205029 | -1.1906   | 0.88309 | -0.89888    | 0.81564     | 0.092957 |         |
|             | 0.46297         | 0.092957  | 0.46297 | 0.46297     | 0.74870587  |          |         |
| RNVU1-33    | ENSG00000200597 | -0.2586   | 0.60203 | -0.67354    | 0.7497      | -1.1467  |         |
|             | 0.87425         | 0.092903  | 0.46299 | 0.46299     | 0.74870587  |          |         |
| NA          | ENSG00000275202 | 0.092899  | 0.46299 | -0.15754    | 0.56259     | 0.092899 | 0.46299 |
|             | 0.092899        | 0.46299   | 0.46299 | 0.74870587  |             |          |         |
| RALBP1P1    | ENSG00000239880 | 0.092569  | 0.46312 | 0.092569    | 0.46312     | 0.092569 |         |
|             | 0.46312         | 0.092569  | 0.46312 | 0.46312     | 0.748823002 |          |         |
| GNPNAT1     | ENSG00000100522 | 0.092563  | 0.46313 | -0.3763     | 0.64665     | -0.60248 |         |
|             | 0.72657         | -0.025245 | 0.51007 | 0.46313     | 0.748823002 |          |         |
| NA          | ENSG00000228452 | 0.092531  | 0.46314 | 0.092531    | 0.46314     | 0.092531 | 0.46314 |
|             | 0.092531        | 0.46314   | 0.46314 | 0.748823002 |             |          |         |
| NA          | ENSG00000277978 | 0.092538  | 0.46314 | 0.092538    | 0.46314     | 0.092538 | 0.46314 |
|             | 0.092538        | 0.46314   | 0.46314 | 0.748823002 |             |          |         |
| NA          | ENSG00000237936 | 0.092504  | 0.46315 | 0.092504    | 0.46315     | 0.092504 | 0.46315 |
|             | 0.092504        | 0.46315   | 0.46315 | 0.748823002 |             |          |         |
| NLRP10      | ENSG00000182261 | 0.092486  | 0.46316 | 0.092486    | 0.46316     | -1.2451  |         |
|             | 0.89345         | 0.092486  | 0.46316 | 0.46316     | 0.748823002 |          |         |
| DLG5        | ENSG00000151208 | -0.39241  | 0.65262 | -1.1292     | 0.8706      | -1.2485  | 0.89407 |
|             | 0.092449        | 0.46317   | 0.46317 | 0.748823002 |             |          |         |
| NA          | ENSG00000255786 | 0.092257  | 0.46325 | -0.10179    | 0.54054     | 0.092257 | 0.46325 |
|             | -0.39785        | 0.65463   | 0.46325 | 0.748901456 |             |          |         |
| TRIM6       | ENSG00000121236 | 0.092191  | 0.46327 | 0.092191    | 0.46327     | 0.092191 | 0.46327 |
|             | 0.092191        | 0.46327   | 0.46327 | 0.748901456 |             |          |         |
| SPATA2      | ENSG00000158480 | 0.092205  | 0.46327 | -0.28875    | 0.61361     | -0.10125 |         |
|             | 0.54032         | -0.10284  | 0.54095 | 0.46327     | 0.748901456 |          |         |
| CYCSP30     | ENSG00000257648 | 0.092174  | 0.46328 | 0.092174    | 0.46328     | -1.3114  |         |
|             | 0.90514         | -0.30134  | 0.61842 | 0.46328     | 0.748901456 |          |         |
| CEP85L      | ENSG00000111860 | 0.092117  | 0.4633  | 0.054879    | 0.47812     | -1.3699  |         |
|             | 0.91465         | -2.3877   | 0.99152 | 0.4633      | 0.748908943 |          |         |
| NA          | ENSG00000279152 | 0.0919    | 0.46339 | 0.0919      | 0.46339     | 0.0919   | 0.46339 |
|             | 0.0919          | 0.46339   | 0.46339 | 0.749029578 |             |          |         |
| NA          | ENSG00000270935 | -1.1017   | 0.8647  | 0.091858    | 0.46341     | -1.1017  | 0.8647  |
|             | -1.1017         | 0.8647    | 0.46341 | 0.749037061 |             |          |         |
| NA          | ENSG00000249028 | 0.090291  | 0.46403 | -0.5569     | 0.7112      | 0.091703 | 0.46347 |
|             | -0.40997        | 0.65908   | 0.46347 | 0.749100511 |             |          |         |
| NA          | ENSG00000260773 | 0.09166   | 0.46348 | 0.09166     | 0.46348     | 0.09166  | 0.46348 |
|             | 0.09166         | 0.46348   | 0.46348 | 0.749100511 |             |          |         |
| NA          | ENSG00000267353 | 0.091521  | 0.46354 | 0.091521    | 0.46354     | 0.091521 | 0.46354 |
|             | 0.091521        | 0.46354   | 0.46354 | 0.749121741 |             |          |         |
| NA          | ENSG00000241014 | 0.091504  | 0.46355 | 0.091504    | 0.46355     | 0.091504 | 0.46355 |
|             | 0.091504        | 0.46355   | 0.46355 | 0.749121741 |             |          |         |
| GOLGA2P11   | ENSG00000260062 | 0.043543  | 0.48263 | 0.091486    | 0.46355     | 0.045436 |         |
|             | 0.48188         | 0.042453  | 0.48307 | 0.46355     | 0.749121741 |          |         |
| NA          | ENSG00000228613 | -0.3547   | 0.63859 | 0.091477    | 0.46356     | -1.0305  | 0.84861 |
|             | -1.3077         | 0.90451   | 0.46356 | 0.749121741 |             |          |         |
| NSA2        | ENSG00000164346 | -0.6944   | 0.75629 | 0.091433    | 0.46357     | 0.091433 | 0.46357 |
|             | 0.091433        | 0.46357   | 0.46357 | 0.749121741 |             |          |         |
| CCDC61      | ENSG00000104983 | -0.31965  | 0.62538 | -1.4547     | 0.92712     | 0.091293 |         |
|             | 0.46363         | 0.052073  | 0.47924 | 0.46363     | 0.749185171 |          |         |
| BTBD19      | ENSG00000222009 | 0.09127   | 0.46364 | 0.09127     | 0.46364     | 0.09127  |         |
|             | 0.46364         | 0.09127   | 0.46364 | 0.46364     | 0.749185171 |          |         |
| PRELID1P2   | ENSG00000217408 | 0.09119   | 0.46367 | 0.09119     | 0.46367     | 0.09119  |         |
|             | 0.46367         | 0.09119   | 0.46367 | 0.46367     | 0.749208804 |          |         |
| SNORD114-17 | ENSG00000201569 | 0.09106   | 0.46372 | 0.09106     | 0.46372     | 0.09106  |         |
|             | 0.46372         | 0.09106   | 0.46372 | 0.46372     | 0.749239907 |          |         |
| RNU6-695P   | ENSG00000212459 | -1.546    | 0.93895 | 0.091071    | 0.46372     | -0.12867 |         |
|             | 0.55119         | -0.12867  | 0.55119 | 0.46372     | 0.749239907 |          |         |
| RNA5SP134   | ENSG00000252301 | 0.090906  | 0.46378 | -0.7206     | 0.76442     | -0.7206  |         |
|             | 0.76442         | -0.7206   | 0.76442 | 0.46378     | 0.749312006 |          |         |
| RNF130      | ENSG00000113269 | -1.1437   | 0.87363 | -1.6341     | 0.94889     | -1.6275  |         |

|           |                 |           |         |             |             |           |          |
|-----------|-----------------|-----------|---------|-------------|-------------|-----------|----------|
|           | 0.94819         | 0.09077   | 0.46384 | 0.46384     | 0.749359255 |           |          |
| MRPS10P1  | ENSG00000235378 | 0.090752  | 0.46384 | 0.46384     | 0.090752    | 0.46384   | 0.090752 |
|           | 0.46384         | 0.090752  | 0.46384 | 0.46384     | 0.749359255 |           |          |
| NA        | ENSG00000254042 | 0.090681  | 0.46387 | -0.45655    | 0.676       | 0.090681  | 0.46387  |
|           | 0.090681        | 0.46387   | 0.46387 | 0.749382877 |             |           |          |
| NA        | ENSG00000259254 | 0.090633  | 0.46389 | 0.090633    | 0.46389     | 0.090633  | 0.46389  |
|           | 0.090633        | 0.46389   | 0.46389 | 0.749390343 |             |           |          |
| NA        | ENSG00000261071 | 0.090525  | 0.46394 | 0.090525    | 0.46394     | 0.090525  | 0.46394  |
|           | 0.090525        | 0.46394   | 0.46394 | 0.749412739 |             |           |          |
| NA        | ENSG00000271495 | 0.090519  | 0.46394 | 0.090519    | 0.46394     | 0.090519  | 0.46394  |
|           | 0.090519        | 0.46394   | 0.46394 | 0.749412739 |             |           |          |
| MIR1245A  | ENSG00000221502 | -1.3895   | 0.91766 | 0.090498    | 0.46395     | -1.3895   |          |
|           | 0.91766         | -1.3895   | 0.91766 | 0.46395     | 0.749412739 |           |          |
| NA        | ENSG00000265844 | -0.58743  | 0.72154 | 0.090334    | 0.46401     | -0.72211  | 0.76489  |
|           | -1.2386         | 0.89226   | 0.46401 | 0.749484812 |             |           |          |
| NA        | ENSG00000228944 | 0.090214  | 0.46406 | 0.090214    | 0.46406     | -0.15056  | 0.55984  |
|           | 0.090214        | 0.46406   | 0.46406 | 0.749532037 |             |           |          |
| OR52I1    | ENSG00000232268 | 0.090198  | 0.46407 | -0.72166    | 0.76475     | -0.72166  |          |
|           | 0.76475         | -0.72166  | 0.76475 | 0.46407     | 0.749532037 |           |          |
| UBN1      | ENSG00000118900 | -0.066475 | 0.5265  | -0.066475   | 0.5265      | -0.066475 | 0.5265   |
|           | 0.090128        | 0.46409   | 0.46409 | 0.749539497 |             |           |          |
| BACH2     | ENSG00000112182 | 0.090062  | 0.46412 | -0.36954    | 0.64414     | -0.26409  | 0.60415  |
|           | -0.16659        | 0.56616   | 0.46412 | 0.749563106 |             |           |          |
| NA        | ENSG00000228043 | 0.090007  | 0.46414 | -0.95947    | 0.83134     | -0.59223  | 0.72315  |
|           | -0.59223        | 0.72315   | 0.46414 | 0.749570564 |             |           |          |
| RNU4-67P  | ENSG00000201439 | 0.089918  | 0.46418 | -0.51       | 0.69497     | -0.77132  | 0.77974  |
|           | -1.6226         | 0.94767   | 0.46418 | 0.749609083 |             |           |          |
| CDKL1     | ENSG00000100490 | 0.089867  | 0.4642  | 0.0076203   | 0.49696     | -0.26112  | 0.603    |
|           | -0.40383        | 0.65683   | 0.4642  | 0.749609083 |             |           |          |
| RN7SL515P | ENSG00000241406 | 0.08983   | 0.46421 | 0.08983     | 0.46421     | 0.08983   |          |
|           | 0.46421         | 0.08983   | 0.46421 | 0.46421     | 0.749609083 |           |          |
| NUP37     | ENSG00000075188 | 0.08974   | 0.46425 | -0.34742    | 0.63586     | 0.08974   | 0.46425  |
|           | 0.08974         | 0.46425   | 0.46425 | 0.749648834 |             |           |          |
| NA        | ENSG00000256814 | 0.089633  | 0.46429 | 0.089633    | 0.46429     | 0.089633  | 0.46429  |
|           | 0.089633        | 0.46429   | 0.46429 | 0.749688581 |             |           |          |
| MIR3176   | ENSG00000266235 | 0.089423  | 0.46437 | -0.02019    | 0.50805     | 0.089423  |          |
|           | 0.46437         | 0.089423  | 0.46437 | 0.46437     | 0.749766822 |           |          |
| NA        | ENSG00000217231 | -0.27521  | 0.60842 | 0.089408    | 0.46438     | -0.40277  | 0.65644  |
|           | -0.27521        | 0.60842   | 0.46438 | 0.749766822 |             |           |          |
| SMLR1     | ENSG00000256162 | -0.6788   | 0.75137 | -0.71152    | 0.76162     | -0.74778  | 0.7727   |
|           | 0.089368        | 0.46439   | 0.46439 | 0.749766822 |             |           |          |
| TNFAIP8L1 | ENSG00000185361 | -0.071849 | 0.52864 | -0.89414    | 0.81438     | -0.59562  |          |
|           | 0.72429         | 0.089363  | 0.4644  | 0.4644      | 0.749766822 |           |          |
| UTS2      | ENSG00000049247 | -0.38293  | 0.64912 | -0.38293    | 0.64912     | 0.089221  | 0.46445  |
|           | -1.4324         | 0.92398   | 0.46445 | 0.749814007 |             |           |          |
| HSPE1P4   | ENSG00000258153 | 0.089204  | 0.46446 | 0.089204    | 0.46446     | 0.089204  |          |
|           | 0.46446         | 0.089204  | 0.46446 | 0.46446     | 0.749814007 |           |          |
| NA        | ENSG00000255583 | 0.089079  | 0.46451 | -0.51097    | 0.69532     | -0.21309  | 0.58437  |
|           | -1.1788         | 0.88076   | 0.46451 | 0.749869883 |             |           |          |
| PACSIN2   | ENSG00000100266 | -0.70815  | 0.76057 | -0.70297    | 0.75896     | 0.088943  |          |
|           | 0.46456         | -1.4503   | 0.92651 | 0.46456     | 0.749925756 |           |          |
| NA        | ENSG00000280383 | 0.088865  | 0.46459 | 0.088865    | 0.46459     | -0.17953  | 0.57124  |
|           | 0.088865        | 0.46459   | 0.46459 | 0.749940641 |             |           |          |
| NA        | ENSG00000241003 | -0.10518  | 0.54188 | 0.088845    | 0.4646      | -0.10518  | 0.54188  |
|           | -0.10518        | 0.54188   | 0.4646  | 0.749940641 |             |           |          |
| LCE1F     | ENSG00000240386 | -0.32957  | 0.62914 | 0.088746    | 0.46464     | -0.32957  | 0.62914  |
|           | -0.32957        | 0.62914   | 0.46464 | 0.749960445 |             |           |          |
| SEC61GP1  | ENSG00000224219 | 0.088724  | 0.46465 | 0.088724    | 0.46465     | 0.088724  |          |
|           | 0.46465         | 0.088724  | 0.46465 | 0.46465     | 0.749960445 |           |          |
| FGFR3     | ENSG00000068078 | -1.9645   | 0.97527 | 0.088605    | 0.4647      | -0.19615  | 0.57775  |
|           | -0.048333       | 0.51927   | 0.4647  | 0.749960445 |             |           |          |
| SREK1IP1  | ENSG00000153006 | -0.13376  | 0.5532  | -0.54712    | 0.70785     | 0.088588  |          |

|            |                 |           |         |             |             |           |         |
|------------|-----------------|-----------|---------|-------------|-------------|-----------|---------|
|            | 0.4647          | -0.10401  | 0.54142 | 0.4647      | 0.749960445 |           |         |
| SELENOT    | ENSG00000198843 | 0.088588  | 0.4647  | -0.098657   | 0.53929     | -0.098657 |         |
|            | 0.53929         | -0.098657 | 0.53929 | 0.4647      | 0.749960445 |           |         |
| NA         | ENSG00000271715 | -0.20172  | 0.57993 | -0.30058    | 0.61813     | 0.088574  | 0.46471 |
|            | 0.088574        | 0.46471   | 0.46471 | 0.749960445 |             |           |         |
| RPSAP48    | ENSG00000240590 | -0.8088   | 0.79068 | 0.08856     | 0.46472     | -0.8088   |         |
|            | 0.79068         | -0.8088   | 0.79068 | 0.46472     | 0.749960445 |           |         |
| OR13D3P    | ENSG00000188712 | 0.088435  | 0.46477 | -0.42621    | 0.66502     | -0.36033  |         |
|            | 0.6407          | -0.36033  | 0.6407  | 0.46477     | 0.750016296 |           |         |
| CHP2       | ENSG00000166869 | -0.12261  | 0.54879 | 0.076704    | 0.46943     | 0.08834   | 0.4648  |
|            | -0.86917        | 0.80762   | 0.4648  | 0.750038606 |             |           |         |
| PHYH       | ENSG00000107537 | -0.42131  | 0.66324 | 0.088309    | 0.46482     | -0.66578  | 0.74722 |
|            | -0.014059       | 0.50561   | 0.46482 | 0.750038606 |             |           |         |
| NA         | ENSG00000278238 | 0.088263  | 0.46483 | 0.088263    | 0.46483     | 0.088263  | 0.46483 |
|            | 0.088263        | 0.46483   | 0.46483 | 0.750038606 |             |           |         |
| NA         | ENSG00000219549 | -0.16843  | 0.56688 | -0.86977    | 0.80779     | -0.56243  | 0.71309 |
|            | 0.088223        | 0.46485   | 0.46485 | 0.750039721 |             |           |         |
| PPWD1      | ENSG00000113593 | 0.028367  | 0.48868 | 0.088141    | 0.46488     | -0.2592   | 0.60226 |
|            | -0.094285       | 0.53756   | 0.46488 | 0.750039721 |             |           |         |
| MTND5P28   | ENSG00000223549 | 0.088072  | 0.46491 | 0.088072    | 0.46491     | 0.088072  |         |
|            | 0.46491         | 0.088072  | 0.46491 | 0.46491     | 0.750039721 |           |         |
| ATP6V1A    | ENSG00000114573 | 0.08803   | 0.46493 | -0.10923    | 0.54349     | -0.055547 |         |
|            | 0.52215         | -0.70511  | 0.75963 | 0.46493     | 0.750039721 |           |         |
| NA         | ENSG00000199282 | 0.087934  | 0.46496 | 0.087934    | 0.46496     | 0.087934  | 0.46496 |
|            | 0.087934        | 0.46496   | 0.46496 | 0.750039721 |             |           |         |
| EHD1       | ENSG00000110047 | -1.1742   | 0.87984 | -1.8048     | 0.96445     | 0.087919  | 0.46497 |
|            | -1.5544         | 0.93995   | 0.46497 | 0.750039721 |             |           |         |
| NA         | ENSG00000268678 | 0.087911  | 0.46497 | 0.087911    | 0.46497     | 0.087911  | 0.46497 |
|            | 0.087911        | 0.46497   | 0.46497 | 0.750039721 |             |           |         |
| NA         | ENSG00000271874 | 0.087905  | 0.46498 | -0.14889    | 0.55918     | 0.087905  | 0.46498 |
|            | 0.087905        | 0.46498   | 0.46498 | 0.750039721 |             |           |         |
| MRPS21P6   | ENSG00000214298 | -0.57784  | 0.71831 | -0.57784    | 0.71831     | 0.087863  |         |
|            | 0.46499         | -0.57784  | 0.71831 | 0.46499     | 0.750039721 |           |         |
| PGAM1P13   | ENSG00000248838 | -1.3498   | 0.91146 | -1.6246     | 0.94787     | -1.0596   |         |
|            | 0.85533         | 0.087864  | 0.46499 | 0.46499     | 0.750039721 |           |         |
| CLEC4G     | ENSG00000182566 | 0.087856  | 0.465   | -0.059681   | 0.5238      | 0.087856  | 0.465   |
|            | 0.087856        | 0.465     | 0.465   | 0.750039721 |             |           |         |
| MYO18B-AS1 | ENSG00000231933 | 0.087683  | 0.46506 | 0.087683    | 0.46506     | 0.087683  |         |
|            | 0.46506         | 0.087683  | 0.46506 | 0.46506     | 0.750078146 |           |         |
| ADGB       | ENSG00000118492 | -0.4044   | 0.65704 | 0.08768     | 0.46507     | -0.22705  | 0.58981 |
|            | -1.2048         | 0.88587   | 0.46507 | 0.750078146 |             |           |         |
| NA         | ENSG00000233836 | -0.72507  | 0.7658  | 0.087659    | 0.46507     | 0.087659  | 0.46507 |
|            | 0.087659        | 0.46507   | 0.46507 | 0.750078146 |             |           |         |
| NA         | ENSG00000258763 | -0.64002  | 0.73892 | -0.63746    | 0.73809     | -0.24389  | 0.59634 |
|            | 0.08757         | 0.46511   | 0.46511 | 0.750117832 |             |           |         |
| MIR4665    | ENSG00000263575 | 0.087384  | 0.46518 | 0.087384    | 0.46518     | 0.087384  |         |
|            | 0.46518         | 0.087384  | 0.46518 | 0.46518     | 0.750132501 |           |         |
| NA         | ENSG00000228395 | -0.55774  | 0.71149 | 0.087348    | 0.4652      | -0.5053   | 0.69332 |
|            | -0.5053         | 0.69332   | 0.4652  | 0.750132501 |             |           |         |
| NA         | ENSG00000262302 | 0.087351  | 0.4652  | 0.087351    | 0.4652      | 0.087351  | 0.4652  |
|            | 0.087351        | 0.4652    | 0.4652  | 0.750132501 |             |           |         |
| EFCAB3     | ENSG00000172421 | -1.2914   | 0.90171 | -0.94457    | 0.82756     | -0.6598   |         |
|            | 0.74531         | 0.087302  | 0.46522 | 0.46522     | 0.750132501 |           |         |
| KCNJ6      | ENSG00000157542 | -0.39678  | 0.65424 | 0.087191    | 0.46526     | -1.3017   | 0.90349 |
|            | -1.2267         | 0.89004   | 0.46526 | 0.750132501 |             |           |         |
| RN7SL563P  | ENSG00000239211 | -1.3789   | 0.91604 | -0.17509    | 0.5695      | -0.38835  |         |
|            | 0.65112         | 0.087191  | 0.46526 | 0.46526     | 0.750132501 |           |         |
| LINC01018  | ENSG00000250056 | -0.0554   | 0.52209 | -0.0554     | 0.52209     | -0.030727 |         |
|            | 0.51226         | 0.0872    | 0.46526 | 0.46526     | 0.750132501 |           |         |
| ADAMTS6    | ENSG00000049192 | -0.80821  | 0.79052 | 0.087144    | 0.46528     | -0.62055  |         |
|            | 0.73255         | -0.31569  | 0.62388 | 0.46528     | 0.750132501 |           |         |
| NA         | ENSG00000251309 | 0.08714   | 0.46528 | 0.08714     | 0.46528     | 0.08714   | 0.46528 |

|             |                 |           |         |             |             |           |         |  |
|-------------|-----------------|-----------|---------|-------------|-------------|-----------|---------|--|
|             | 0.08714         | 0.46528   | 0.46528 | 0.750132501 |             |           |         |  |
| NA          | ENSG00000283458 | 0.087065  | 0.46531 | 0.087065    | 0.46531     | 0.087065  | 0.46531 |  |
|             | 0.087065        | 0.46531   | 0.46531 | 0.750132501 |             |           |         |  |
| RNU4-92P    | ENSG00000200653 | 0.087036  | 0.46532 | 0.087036    | 0.46532     | 0.087036  | 0.46532 |  |
|             | 0.46532         | 0.087036  | 0.46532 | 0.750132501 |             |           |         |  |
| OR5M5P      | ENSG00000185701 | 0.087003  | 0.46533 | 0.087003    | 0.46533     | 0.087003  | 0.46533 |  |
|             | 0.46533         | 0.087003  | 0.46533 | 0.750132501 |             |           |         |  |
| ZNF34       | ENSG00000196378 | -0.49006  | 0.68796 | -1.413      | 0.92117     | -0.86676  | 0.80696 |  |
|             | 0.08702         | 0.46533   | 0.46533 | 0.750132501 |             |           |         |  |
| NA          | ENSG00000219159 | 0.086999  | 0.46534 | 0.086999    | 0.46534     | 0.086999  | 0.46534 |  |
|             | 0.086999        | 0.46534   | 0.46534 | 0.750132501 |             |           |         |  |
| NA          | ENSG00000246331 | 0.061392  | 0.47552 | 0.086968    | 0.46535     | 0.086968  | 0.46535 |  |
|             | 0.086968        | 0.46535   | 0.46535 | 0.750132501 |             |           |         |  |
| SHMT1       | ENSG00000176974 | 0.086883  | 0.46538 | 0.086883    | 0.46538     | 0.086883  | 0.46538 |  |
|             | -0.12054        | 0.54797   | 0.46538 | 0.75014735  |             |           |         |  |
| HSPE1       | ENSG00000115541 | 0.086869  | 0.46539 | 0.086869    | 0.46539     | 0.086869  | 0.46539 |  |
|             | 0.038078        | 0.48481   | 0.46539 | 0.75014735  |             |           |         |  |
| NA          | ENSG00000243777 | 0.029537  | 0.48822 | 0.086806    | 0.46541     | -0.034641 | 0.51382 |  |
|             | -0.31475        | 0.62353   | 0.46541 | 0.750154775 |             |           |         |  |
| NA          | ENSG00000257285 | -0.3649   | 0.64241 | 0.086753    | 0.46543     | -0.3649   | 0.64241 |  |
|             | -0.3649         | 0.64241   | 0.46543 | 0.750162198 |             |           |         |  |
| NA          | ENSG00000253067 | 0.086687  | 0.46546 | 0.086687    | 0.46546     | 0.086687  | 0.46546 |  |
|             | 0.086687        | 0.46546   | 0.46546 | 0.750177044 |             |           |         |  |
| RNU2-8P     | ENSG00000222659 | 0.086652  | 0.46547 | 0.086652    | 0.46547     | 0.086652  | 0.46547 |  |
|             | 0.46547         | 0.086652  | 0.46547 | 0.750177044 |             |           |         |  |
| NA          | ENSG00000203462 | -0.65013  | 0.7422  | -0.96296    | 0.83222     | 0.086597  | 0.4655  |  |
|             | -0.6533         | 0.74322   | 0.4655  | 0.750191888 |             |           |         |  |
| CTNNBIP1    | ENSG00000178585 | -0.038822 | 0.51548 | 0.086551    | 0.46551     | -0.99774  |         |  |
|             | 0.8408          | -0.52692  | 0.70088 | 0.46551     | 0.750191888 |           |         |  |
| RNU5E-4P    | ENSG00000201801 | 0.086353  | 0.46559 | 0.086353    | 0.46559     | 0.086353  | 0.46559 |  |
|             | 0.46559         | 0.086353  | 0.46559 | 0.750220295 |             |           |         |  |
| TRGV4       | ENSG00000211698 | -0.44262  | 0.67098 | -0.44262    | 0.67098     | 0.077195  | 0.46923 |  |
|             | 0.086352        | 0.46559   | 0.46559 | 0.750220295 |             |           |         |  |
| RAB11FIP2   | ENSG00000107560 | -0.63466  | 0.73717 | -1.115      | 0.86758     | 0.086341  |         |  |
|             | 0.4656          | -0.65816  | 0.74478 | 0.4656      | 0.750220295 |           |         |  |
| MIR181D     | ENSG00000207585 | 0.086318  | 0.46561 | 0.086318    | 0.46561     | 0.086318  | 0.46561 |  |
|             | 0.46561         | 0.086318  | 0.46561 | 0.750220295 |             |           |         |  |
| MIR181C     | ENSG00000207613 | 0.086318  | 0.46561 | 0.086318    | 0.46561     | 0.086318  | 0.46561 |  |
|             | 0.46561         | 0.086318  | 0.46561 | 0.750220295 |             |           |         |  |
| MIR3927     | ENSG00000263861 | -0.43192  | 0.6671  | -0.96438    | 0.83257     | 0.086276  |         |  |
|             | 0.46562         | 0.086276  | 0.46562 | 0.750220295 |             |           |         |  |
| GCSHP3      | ENSG00000237580 | 0.08613   | 0.46568 | 0.08613     | 0.46568     | 0.08613   | 0.46568 |  |
|             | 0.46568         | 0.08613   | 0.46568 | 0.750292161 |             |           |         |  |
| NA          | ENSG00000256181 | 0.085897  | 0.46577 | -0.68682    | 0.7539      | -0.68682  | 0.7539  |  |
|             | -0.73863        | 0.76993   | 0.46577 | 0.750370151 |             |           |         |  |
| NA          | ENSG00000260778 | 0.08592   | 0.46577 | 0.08592     | 0.46577     | 0.08592   | 0.46577 |  |
|             | 0.08592         | 0.46577   | 0.46577 | 0.750370151 |             |           |         |  |
| DEFA4       | ENSG00000164821 | -1.0882   | 0.86174 | 0.085884    | 0.46578     | -1.0882   | 0.86174 |  |
|             | -1.0882         | 0.86174   | 0.46578 | 0.750370151 |             |           |         |  |
| CEP131      | ENSG00000141577 | -0.1369   | 0.55444 | -0.76833    | 0.77885     | -0.20688  |         |  |
|             | 0.58195         | 0.085865  | 0.46579 | 0.46579     | 0.750370151 |           |         |  |
| YBX1P4      | ENSG00000213188 | 0.085712  | 0.46585 | 0.085712    | 0.46585     | 0.085712  | 0.46585 |  |
|             | 0.46585         | 0.085712  | 0.46585 | 0.750408495 |             |           |         |  |
| BCAR3       | ENSG00000137936 | -0.13325  | 0.553   | 0.08568     | 0.46586     | -0.062952 | 0.5251  |  |
|             | -0.031755       | 0.51267   | 0.46586 | 0.750408495 |             |           |         |  |
| SLC44A3-AS1 | ENSG00000224081 | -1.5545   | 0.93997 | 0.085675    | 0.46586     | -1.2964   |         |  |
|             | 0.90257         | -1.8231   | 0.96585 | 0.46586     | 0.750408495 |           |         |  |
| CUX2        | ENSG00000111249 | -0.43028  | 0.6665  | -0.47831    | 0.68379     | -0.57145  | 0.71615 |  |
|             | 0.085603        | 0.46589   | 0.46589 | 0.750413332 |             |           |         |  |
| NA          | ENSG00000202046 | 0.085569  | 0.4659  | -0.87962    | 0.81047     | -0.83656  | 0.79858 |  |
|             | -1.3526         | 0.91191   | 0.4659  | 0.750413332 |             |           |         |  |
| NA          | ENSG00000223920 | 0.085524  | 0.46592 | -2.1027     | 0.98225     | -1.0793   | 0.85977 |  |



|          |                 |           |         |             |             |           |         |          |
|----------|-----------------|-----------|---------|-------------|-------------|-----------|---------|----------|
|          | -0.76788        | 0.77872   | 0.46592 | 0.750413332 |             |           |         |          |
| IGLV6-57 | ENSG00000211640 | 0.085506  | 0.46593 | 0.085506    | 0.46593     | 0.085506  | 0.46593 | 0.085506 |
|          | 0.46593         | 0.085506  | 0.46593 | 0.46593     | 0.750413332 |           |         |          |
| BGLT3    | ENSG00000260629 | 0.085483  | 0.46594 | 0.085483    | 0.46594     | 0.085483  | 0.46594 | 0.085483 |
|          | 0.085483        | 0.46594   | 0.46594 | 0.750413332 |             |           |         |          |
| NA       | ENSG00000241671 | 0.085426  | 0.46596 | -1.0656     | 0.8567      | -1.0562   | 0.85455 |          |
|          | -0.66084        | 0.74564   | 0.46596 | 0.750420742 |             |           |         |          |
| MTND6P24 | ENSG00000232922 | 0.085301  | 0.46601 | 0.085301    | 0.46601     | 0.085301  | 0.46601 | 0.085301 |
|          | 0.46601         | 0.085301  | 0.46601 | 0.46601     | 0.750475173 |           |         |          |
| LRRC2P1  | ENSG00000227180 | -0.47918  | 0.6841  | -0.71099    | 0.76145     | 0.085257  |         |          |
|          | 0.46603         | 0.062204  | 0.4752  | 0.46603     | 0.750475173 |           |         |          |
| HTR3B    | ENSG00000149305 | -2.5187   | 0.99411 | -1.9561     | 0.97477     | 0.085229  | 0.46604 |          |
|          | -1.7641         | 0.96114   | 0.46604 | 0.750475173 |             |           |         |          |
| MTND5P30 | ENSG00000233039 | -0.34922  | 0.63654 | -0.34922    | 0.63654     | -0.46505  |         |          |
|          | 0.67905         | 0.085158  | 0.46607 | 0.46607     | 0.750498682 |           |         |          |
| MAEL     | ENSG00000143194 | -1.4048   | 0.91996 | -1.4048     | 0.91996     | -1.4048   | 0.91996 |          |
|          | 0.085037        | 0.46612   | 0.46612 | 0.750545695 |             |           |         |          |
| NA       | ENSG00000227400 | -0.66928  | 0.74834 | 0.085013    | 0.46613     | -0.38903  | 0.65137 |          |
|          | -1.2482         | 0.89402   | 0.46613 | 0.750545695 |             |           |         |          |
| NA       | ENSG00000227709 | -1.3398   | 0.90984 | -1.6821     | 0.95372     | 0.084891  | 0.46617 |          |
|          | 0.084891        | 0.46617   | 0.46617 | 0.750566606 |             |           |         |          |
| NA       | ENSG00000201988 | 0.084823  | 0.4662  | -0.56032    | 0.71237     | 0.084823  | 0.4662  |          |
|          | 0.084823        | 0.4662    | 0.4662  | 0.750566606 |             |           |         |          |
| NA       | ENSG00000243953 | -0.041589 | 0.51659 | -0.041589   | 0.51659     | -0.041589 | 0.51659 |          |
|          | 0.084826        | 0.4662    | 0.4662  | 0.750566606 |             |           |         |          |
| SUMO2P19 | ENSG00000253328 | 0.084773  | 0.46622 | 0.084773    | 0.46622     | 0.084773  | 0.46622 |          |
|          | 0.46622         | 0.084773  | 0.46622 | 0.46622     | 0.750566606 |           |         |          |
| NA       | ENSG00000261278 | -0.50491  | 0.69319 | 0.084788    | 0.46622     | 0.084788  | 0.46622 |          |
|          | 0.084788        | 0.46622   | 0.46622 | 0.750566606 |             |           |         |          |
| NA       | ENSG00000279530 | 0.0847    | 0.46625 | 0.0847      | 0.46625     | 0.0847    | 0.46625 |          |
|          | 0.0847          | 0.46625   | 0.46625 | 0.750590106 |             |           |         |          |
| NA       | ENSG00000261449 | 0.084632  | 0.46628 | -0.058112   | 0.52317     | -0.19236  | 0.57627 |          |
|          | 0.0518          | 0.47934   | 0.46628 | 0.750596208 |             |           |         |          |
| NA       | ENSG00000223430 | -0.49683  | 0.69034 | -0.30154    | 0.6185      | 0.0846    | 0.46629 |          |
|          | -0.83646        | 0.79855   | 0.46629 | 0.750596208 |             |           |         |          |
| TCF7L1   | ENSG00000152284 | 0.084566  | 0.4663  | -0.63168    | 0.7362      | -0.7524   |         |          |
|          | 0.77409         | -1.689    | 0.95439 | 0.4663      | 0.750596208 |           |         |          |
| OGA      | ENSG00000198408 | -0.59545  | 0.72423 | 0.084408    | 0.46637     | -1.0794   | 0.85978 |          |
|          | -0.79666        | 0.78717   | 0.46637 | 0.750659293 |             |           |         |          |
| NA       | ENSG00000231515 | 0.084406  | 0.46637 | 0.084406    | 0.46637     | 0.084406  | 0.46637 |          |
|          | 0.011654        | 0.49535   | 0.46637 | 0.750659293 |             |           |         |          |
| CBX2     | ENSG00000173894 | -1.809    | 0.96477 | -2.061      | 0.98035     | -1.066    | 0.85679 |          |
|          | 0.084339        | 0.46639   | 0.46639 | 0.75066669  |             |           |         |          |
| NA       | ENSG00000273687 | 0.084257  | 0.46643 | 0.084257    | 0.46643     | 0.084257  | 0.46643 |          |
|          | 0.084257        | 0.46643   | 0.46643 | 0.750706275 |             |           |         |          |
| ZNF132   | ENSG00000131849 | 0.061718  | 0.47539 | -0.16941    | 0.56726     | -0.3499   |         |          |
|          | 0.63679         | 0.084195  | 0.46645 | 0.46645     | 0.75071367  |           |         |          |
| SLC29A4  | ENSG00000164638 | 0.083978  | 0.46654 | -0.39777    | 0.6546      | -0.20062  |         |          |
|          | 0.5795          | -0.1849   | 0.57335 | 0.46654     | 0.75076411  |           |         |          |
| DENND5A  | ENSG00000184014 | 0.083957  | 0.46655 | -0.20536    | 0.58136     | -1.5003   |         |          |
|          | 0.93324         | -0.42667  | 0.66519 | 0.46655     | 0.75076411  |           |         |          |
| NA       | ENSG00000253121 | 0.083955  | 0.46655 | 0.083955    | 0.46655     | 0.083955  | 0.46655 |          |
|          | 0.083955        | 0.46655   | 0.46655 | 0.75076411  |             |           |         |          |
| CRB3     | ENSG00000130545 | 0.083879  | 0.46658 | 0.083879    | 0.46658     | 0.083879  | 0.46658 |          |
|          | -0.056599       | 0.52257   | 0.46658 | 0.75076411  |             |           |         |          |
| GBA2     | ENSG00000070610 | 0.083857  | 0.46659 | 0.083857    | 0.46659     | 0.083857  | 0.46659 |          |
|          | 0.083857        | 0.46659   | 0.46659 | 0.75076411  |             |           |         |          |
| NA       | ENSG00000271398 | 0.083813  | 0.4666  | 0.083813    | 0.4666      | 0.083813  | 0.4666  |          |
|          | 0.083813        | 0.4666    | 0.4666  | 0.75076411  |             |           |         |          |
| STARD3NL | ENSG00000010270 | 0.083787  | 0.46661 | 0.0022751   | 0.49909     | -0.062977 |         |          |
|          | 0.52511         | -0.17336  | 0.56882 | 0.46661     | 0.75076411  |           |         |          |
| KAT7     | ENSG00000136504 | 0.083768  | 0.46662 | 0.083768    | 0.46662     | 0.083768  | 0.46662 |          |

|           |                 |           |         |             |             |          |         |          |
|-----------|-----------------|-----------|---------|-------------|-------------|----------|---------|----------|
|           | 0.083768        | 0.46662   | 0.46662 | 0.75076411  |             |          |         |          |
| RPS21P1   | ENSG00000229795 | 0.083765  | 0.46662 | 0.083765    | 0.46662     | 0.083765 | 0.46662 | 0.083765 |
|           | 0.46662         | 0.083765  | 0.46662 | 0.46662     | 0.75076411  |          |         |          |
| NA        | ENSG00000271340 | 0.083657  | 0.46666 | 0.083657    | 0.46666     | 0.083657 | 0.46666 | 0.083657 |
|           | 0.083657        | 0.46666   | 0.46666 | 0.750803678 |             |          |         |          |
| NA        | ENSG00000230472 | -1.5911   | 0.94421 | -1.5354     | 0.93765     | -1.863   | 0.96877 |          |
|           | 0.083467        | 0.46674   | 0.46674 | 0.750849317 |             |          |         |          |
| FER1L4    | ENSG00000088340 | -0.15967  | 0.56343 | -0.47106    | 0.6812      | 0.083435 |         |          |
|           | 0.46675         | -0.3157   | 0.62388 | 0.46675     | 0.750849317 |          |         |          |
| MTND4LP13 | ENSG00000235318 | 0.083432  | 0.46675 | 0.083432    | 0.46675     | 0.083432 |         |          |
|           | 0.46675         | 0.083432  | 0.46675 | 0.46675     | 0.750849317 |          |         |          |
| NA        | ENSG00000267667 | -0.65007  | 0.74218 | -0.65007    | 0.74218     | 0.083435 | 0.46675 |          |
|           | -0.61098        | 0.72939   | 0.46675 | 0.750849317 |             |          |         |          |
| SIX6      | ENSG00000184302 | 0.083386  | 0.46677 | -0.61074    | 0.72931     | -0.38684 | 0.65056 |          |
|           | -0.61074        | 0.72931   | 0.46677 | 0.750856703 |             |          |         |          |
| NA        | ENSG00000248903 | 0.083327  | 0.4668  | 0.083327    | 0.4668      | 0.083327 | 0.4668  |          |
|           | 0.083327        | 0.4668    | 0.4668  | 0.750878859 |             |          |         |          |
| NA        | ENSG00000270139 | 0.083268  | 0.46682 | -0.41276    | 0.66011     | 0.0349   | 0.48608 |          |
|           | -1.3217         | 0.90687   | 0.46682 | 0.750878859 |             |          |         |          |
| GPBP1     | ENSG00000062194 | -0.83432  | 0.79795 | -0.59946    | 0.72557     | 0.083248 | 0.46683 |          |
|           | -0.44851        | 0.67311   | 0.46683 | 0.750878859 |             |          |         |          |
| NA        | ENSG00000249950 | -0.037391 | 0.51491 | -0.067102   | 0.52675     | 0.083193 | 0.46685 |          |
|           | -0.57147        | 0.71616   | 0.46685 | 0.750886243 |             |          |         |          |
| RNA5SP28  | ENSG00000200711 | 0.08315   | 0.46687 | 0.08315     | 0.46687     | -0.81189 |         |          |
|           | 0.79157         | -0.15189  | 0.56036 | 0.46687     | 0.750893627 |          |         |          |
| OSTN-AS1  | ENSG00000233308 | -0.24957  | 0.59854 | 0.083024    | 0.46692     | -0.24957 |         |          |
|           | 0.59854         | -0.24957  | 0.59854 | 0.46692     | 0.750949259 |          |         |          |
| NA        | ENSG00000255572 | -0.15206  | 0.56043 | -0.14722    | 0.55852     | -0.20816 | 0.58245 |          |
|           | 0.082852        | 0.46698   | 0.46698 | 0.750957418 |             |          |         |          |
| SIK3      | ENSG00000160584 | -0.23148  | 0.59153 | -0.4266     | 0.66516     | -0.13817 | 0.55495 |          |
|           | 0.082725        | 0.46703   | 0.46703 | 0.750957418 |             |          |         |          |
| CGAS      | ENSG00000164430 | 0.082717  | 0.46704 | -0.77581    | 0.78107     | 0.082717 | 0.46704 |          |
|           | -0.57754        | 0.71821   | 0.46704 | 0.750957418 |             |          |         |          |
| NA        | ENSG00000258932 | -0.7202   | 0.7643  | 0.082719    | 0.46704     | -0.15122 | 0.5601  |          |
|           | -0.18165        | 0.57207   | 0.46704 | 0.750957418 |             |          |         |          |
| FLOT1     | ENSG00000137312 | -1.0724   | 0.85823 | 0.082639    | 0.46707     | -1.0861  | 0.86129 |          |
|           | 0.014529        | 0.4942    | 0.46707 | 0.750957418 |             |          |         |          |
| RN7SL361P | ENSG00000242158 | 0.082629  | 0.46707 | 0.082629    | 0.46707     | 0.082629 |         |          |
|           | 0.46707         | 0.082629  | 0.46707 | 0.46707     | 0.750957418 |          |         |          |
| REXO5     | ENSG00000005189 | -0.29243  | 0.61502 | -0.64366    | 0.7401      | -0.17877 | 0.57094 |          |
|           | 0.082622        | 0.46708   | 0.46708 | 0.750957418 |             |          |         |          |
| NA        | ENSG00000225002 | 0.082622  | 0.46708 | -0.038094   | 0.51519     | 0.082622 | 0.46708 |          |
|           | 0.082622        | 0.46708   | 0.46708 | 0.750957418 |             |          |         |          |
| NA        | ENSG00000269694 | 0.082604  | 0.46708 | 0.082604    | 0.46708     | 0.082604 | 0.46708 |          |
|           | 0.082604        | 0.46708   | 0.46708 | 0.750957418 |             |          |         |          |
| BSCL2     | ENSG00000168000 | -0.541    | 0.70575 | 0.082581    | 0.46709     | 0.082581 | 0.46709 |          |
|           | -0.27092        | 0.60677   | 0.46709 | 0.750957418 |             |          |         |          |
| NA        | ENSG00000257096 | 0.082537  | 0.46711 | 0.082537    | 0.46711     | 0.082537 | 0.46711 |          |
|           | 0.082537        | 0.46711   | 0.46711 | 0.750957418 |             |          |         |          |
| NA        | ENSG00000258205 | -0.79346  | 0.78624 | 0.082526    | 0.46711     | 0.082526 | 0.46711 |          |
|           | 0.082526        | 0.46711   | 0.46711 | 0.750957418 |             |          |         |          |
| NA        | ENSG00000260622 | 0.082432  | 0.46715 | 0.082432    | 0.46715     | 0.082432 | 0.46715 |          |
|           | 0.082432        | 0.46715   | 0.46715 | 0.750996948 |             |          |         |          |
| ACR       | ENSG00000100312 | -0.99062  | 0.83907 | 0.01452     | 0.49421     | 0.082303 | 0.4672  |          |
|           | -1.7639         | 0.96112   | 0.4672  | 0.751052552 |             |          |         |          |
| TMEM167A  | ENSG00000174695 | -1.6748   | 0.95302 | -1.4281     | 0.92337     | 0.082209 |         |          |
|           | 0.46724         | -1.6748   | 0.95302 | 0.46724     | 0.751092076 |          |         |          |
| OR51I1    | ENSG00000167359 | 0.082082  | 0.46729 | -0.30712    | 0.62062     | -0.30712 |         |          |
|           | 0.62062         | -0.30712  | 0.62062 | 0.46729     | 0.751110203 |          |         |          |
| NAA60     | ENSG00000122390 | -0.34687  | 0.63565 | -0.098555   | 0.53925     | 0.081979 | 0.46733 |          |
|           | -0.29941        | 0.61769   | 0.46733 | 0.751110203 |             |          |         |          |
| C22orf15  | ENSG00000169314 | 0.081978  | 0.46733 | 0.081978    | 0.46733     | 0.081978 |         |          |

|             |                 |           |         |             |             |           |          |  |
|-------------|-----------------|-----------|---------|-------------|-------------|-----------|----------|--|
|             | 0.46733         | 0.081978  | 0.46733 | 0.46733     | 0.751110203 |           |          |  |
| RPL22P4     | ENSG00000225483 | -0.88626  | 0.81226 | 0.081972    | 0.46733     | -1.3484   |          |  |
|             | 0.91123         | -0.96051  | 0.8316  | 0.46733     | 0.751110203 |           |          |  |
| NA          | ENSG00000242292 | -1.1154   | 0.86765 | -1.1154     | 0.86765     | -1.1154   | 0.86765  |  |
|             | 0.081955        | 0.46734   | 0.46734 | 0.751110203 |             |           |          |  |
| USB1        | ENSG00000103005 | -0.11503  | 0.54579 | -0.065807   | 0.52623     | 0.081937  | 0.46735  |  |
|             | -0.59367        | 0.72363   | 0.46735 | 0.751110203 |             |           |          |  |
| NA          | ENSG00000201850 | 0.081882  | 0.46737 | 0.081882    | 0.46737     | 0.081882  | 0.46737  |  |
|             | -0.031151       | 0.51243   | 0.46737 | 0.751110203 |             |           |          |  |
| COQ9        | ENSG00000088682 | 0.081825  | 0.46739 | -0.3119     | 0.62244     | -0.3119   | 0.62244  |  |
|             | -0.3119         | 0.62244   | 0.46739 | 0.751110203 |             |           |          |  |
| MTRF1       | ENSG00000120662 | -1.1803   | 0.88106 | -0.026255   | 0.51047     | 0.017321  | 0.49309  |  |
|             | 0.081845        | 0.46739   | 0.46739 | 0.751110203 |             |           |          |  |
| MTFR1L      | ENSG00000117640 | -0.73674  | 0.76936 | 0.081752    | 0.46742     | -1.0624   |          |  |
|             | 0.85598         | -0.28155  | 0.61086 | 0.46742     | 0.751123613 |           |          |  |
| TCF20       | ENSG00000100207 | -0.90175  | 0.8164  | -0.593      | 0.72341     | 0.081724  | 0.46743  |  |
|             | -0.31789        | 0.62472   | 0.46743 | 0.751123613 |             |           |          |  |
| LSM5        | ENSG00000106355 | -0.84039  | 0.79966 | -0.6011     | 0.72611     | 0.081657  | 0.46746  |  |
|             | 0.055943        | 0.47769   | 0.46746 | 0.751123613 |             |           |          |  |
| RNU6ATAC42P | ENSG00000221564 | 0.081667  | 0.46746 | 0.081667    | 0.46746     | 0.081667  | 0.081667 |  |
|             | 0.46746         | 0.081667  | 0.46746 | 0.46746     | 0.751123613 |           |          |  |
| NA          | ENSG00000278577 | -1.1204   | 0.86872 | 0.081531    | 0.46751     | -1.9167   | 0.97236  |  |
|             | -1.9167         | 0.97236   | 0.46751 | 0.751179184 |             |           |          |  |
| SERPINB10   | ENSG00000242550 | 0.081372  | 0.46757 | 0.081372    | 0.46757     | -1.7651   |          |  |
|             | 0.96123         | -1.0962   | 0.8635  | 0.46757     | 0.751217349 |           |          |  |
| PLEKHA7     | ENSG00000166689 | -0.031457 | 0.51255 | -0.55368    | 0.7101      | 0.056221  |          |  |
|             | 0.47758         | 0.081346  | 0.46758 | 0.46758     | 0.751217349 |           |          |  |
| RN7SKP64    | ENSG00000253015 | 0.081349  | 0.46758 | 0.081349    | 0.46758     | 0.081349  |          |  |
|             | 0.46758         | 0.081349  | 0.46758 | 0.46758     | 0.751217349 |           |          |  |
| MTCO1P31    | ENSG00000251476 | 0.081217  | 0.46763 | 0.081217    | 0.46763     | 0.081217  |          |  |
|             | 0.46763         | 0.081217  | 0.46763 | 0.46763     | 0.75126019  |           |          |  |
| TRGV2       | ENSG00000233306 | 0.08117   | 0.46765 | -1.0484     | 0.85278     | -0.97343  | 0.83483  |  |
|             | -0.97343        | 0.83483   | 0.46765 | 0.75126019  |             |           |          |  |
| NA          | ENSG00000255530 | 0.081092  | 0.46768 | 0.081092    | 0.46768     | 0.081092  | 0.46768  |  |
|             | 0.081092        | 0.46768   | 0.46768 | 0.75126019  |             |           |          |  |
| RPS27AP18   | ENSG00000249851 | 0.081034  | 0.46771 | 0.081034    | 0.46771     | 0.081034  |          |  |
|             | 0.46771         | 0.081034  | 0.46771 | 0.46771     | 0.75126019  |           |          |  |
| RDH10-AS1   | ENSG00000250295 | -0.20344  | 0.58061 | 0.081035    | 0.46771     | -0.20088  |          |  |
|             | 0.5796          | -0.1012   | 0.5403  | 0.46771     | 0.75126019  |           |          |  |
| NA          | ENSG00000271855 | 0.08101   | 0.46772 | 0.08101     | 0.46772     | 0.08101   | 0.46772  |  |
|             | 0.08101         | 0.46772   | 0.46772 | 0.75126019  |             |           |          |  |
| CYP4A22     | ENSG00000162365 | -0.56582  | 0.71424 | -0.64715    | 0.74123     | -0.026108 |          |  |
|             | 0.51041         | 0.080987  | 0.46773 | 0.46773     | 0.75126019  |           |          |  |
| LINC01323   | ENSG00000241636 | 0.080982  | 0.46773 | -1.0458     | 0.85217     | 0.080982  |          |  |
|             | 0.46773         | 0.080982  | 0.46773 | 0.46773     | 0.75126019  |           |          |  |
| NEURL1-AS1  | ENSG00000235470 | 0.080845  | 0.46778 | -0.21887    | 0.58663     | 0.080845  |          |  |
|             | 0.46778         | 0.080845  | 0.46778 | 0.46778     | 0.751280932 |           |          |  |
| LINC02459   | ENSG00000257476 | -0.23984  | 0.59477 | 0.080846    | 0.46778     | -1.3979   |          |  |
|             | 0.91893         | -1.3979   | 0.91893 | 0.46778     | 0.751280932 |           |          |  |
| NA          | ENSG00000270742 | 0.080771  | 0.46781 | 0.080771    | 0.46781     | -0.30347  | 0.61923  |  |
|             | -1.1786         | 0.88071   | 0.46781 | 0.751280932 |             |           |          |  |
| TTLL13P     | ENSG00000213471 | 0.080749  | 0.46782 | -1.2495     | 0.89426     | -1.2495   |          |  |
|             | 0.89426         | -1.2495   | 0.89426 | 0.46782     | 0.751280932 |           |          |  |
| RPS15AP29   | ENSG00000237827 | -0.061112 | 0.52436 | 0.0015537   | 0.49938     | -0.061112 |          |  |
|             | 0.52436         | 0.080755  | 0.46782 | 0.46782     | 0.751280932 |           |          |  |
| CORO6       | ENSG00000167549 | 0.080694  | 0.46784 | -0.18615    | 0.57384     | 0.080694  | 0.46784  |  |
|             | 0.080694        | 0.46784   | 0.46784 | 0.751288291 |             |           |          |  |
| RPL17P41    | ENSG00000213179 | 0.080573  | 0.46789 | 0.080573    | 0.46789     | 0.080573  |          |  |
|             | 0.46789         | -0.8      | 0.78815 | 0.46789     | 0.751341137 |           |          |  |
| RPS15AP34   | ENSG00000241808 | 0.080537  | 0.46791 | 0.080537    | 0.46791     | 0.080537  |          |  |
|             | 0.46791         | 0.080537  | 0.46791 | 0.46791     | 0.751341137 |           |          |  |
| NA          | ENSG00000273113 | 0.080491  | 0.46792 | 0.080491    | 0.46792     | 0.080491  | 0.46792  |  |

|           |                 |           |         |             |             |           |          |         |
|-----------|-----------------|-----------|---------|-------------|-------------|-----------|----------|---------|
|           | 0.080491        | 0.46792   | 0.46792 | 0.751341137 |             |           |          |         |
| NA        | ENSG00000255339 | 0.080444  | 0.46794 | 0.080444    | 0.46794     | 0.080444  | 0.46794  | 0.46794 |
|           | 0.080444        | 0.46794   | 0.46794 | 0.751341137 |             |           |          |         |
| NA        | ENSG00000199263 | 0.080421  | 0.46795 | 0.080421    | 0.46795     | 0.080421  | 0.46795  | 0.46795 |
|           | 0.080421        | 0.46795   | 0.46795 | 0.751341137 |             |           |          |         |
| PACSIN1   | ENSG00000124507 | -0.038437 | 0.51533 | 0.080305    | 0.468       | -1.3335   | 0.90882  |         |
|           | 0.064124        | 0.47444   | 0.468   | 0.751387958 |             |           |          |         |
| VENTXP5   | ENSG00000253569 | 0.08028   | 0.46801 | 0.08028     | 0.46801     | 0.08028   | 0.08028  |         |
|           | 0.46801         | -0.090114 | 0.5359  | 0.46801     | 0.751387958 |           |          |         |
| TNFRSF6B  | ENSG00000243509 | 0.08012   | 0.46807 | 0.08012     | 0.46807     | 0.08012   | 0.08012  |         |
|           | 0.46807         | 0.08012   | 0.46807 | 0.46807     | 0.751434773 |           |          |         |
| NA        | ENSG00000282863 | 0.077813  | 0.46899 | 0.080114    | 0.46807     | -0.4215   | 0.6633   |         |
|           | -0.80671        | 0.79008   | 0.46807 | 0.751434773 |             |           |          |         |
| SEC24B    | ENSG00000138802 | -0.26739  | 0.60542 | -0.82922    | 0.79651     | -0.47907  |          |         |
|           | 0.68406         | 0.080072  | 0.46809 | 0.46809     | 0.751442125 |           |          |         |
| NA        | ENSG00000271742 | 0.079969  | 0.46813 | 0.079969    | 0.46813     | -1.7536   | 0.96025  |         |
|           | 0.079969        | 0.46813   | 0.46813 | 0.751481582 |             |           |          |         |
| NA        | ENSG00000230258 | -1.8347   | 0.96673 | -1.8347     | 0.96673     | -0.73491  | 0.7688   |         |
|           | 0.079772        | 0.46821   | 0.46821 | 0.751541723 |             |           |          |         |
| DNTTIP1   | ENSG00000101457 | -0.048722 | 0.51943 | 0.079686    | 0.46824     | -0.020019 |          |         |
|           | 0.50799         | -0.56948  | 0.71548 | 0.46824     | 0.751541723 |           |          |         |
| RN7SL764P | ENSG00000240317 | -0.69405  | 0.75617 | -0.46372    | 0.67857     | 0.079707  |          |         |
|           | 0.46824         | -0.42092  | 0.66309 | 0.46824     | 0.751541723 |           |          |         |
| NA        | ENSG00000232934 | 0.079678  | 0.46825 | 0.079678    | 0.46825     | 0.079678  | 0.46825  |         |
|           | 0.079678        | 0.46825   | 0.46825 | 0.751541723 |             |           |          |         |
| NA        | ENSG00000257860 | 0.07966   | 0.46825 | 0.07966     | 0.46825     | 0.07966   | 0.46825  |         |
|           | 0.07966         | 0.46825   | 0.46825 | 0.751541723 |             |           |          |         |
| CELA2B    | ENSG00000215704 | -0.68918  | 0.75465 | -0.68216    | 0.75243     | -0.68216  |          |         |
|           | 0.75243         | 0.079644  | 0.46826 | 0.46826     | 0.751541723 |           |          |         |
| TNNI1     | ENSG00000159173 | 0.079571  | 0.46829 | -0.16507    | 0.56555     | 0.022956  | 0.49084  |         |
|           | -0.48002        | 0.68439   | 0.46829 | 0.751556415 |             |           |          |         |
| FAHD2P1   | ENSG00000257302 | 0.079555  | 0.4683  | -0.13967    | 0.55554     | -0.13967  |          |         |
|           | 0.55554         | -0.13967  | 0.55554 | 0.4683      | 0.751556415 |           |          |         |
| NA        | ENSG00000201944 | 0.079313  | 0.46839 | 0.079313    | 0.46839     | 0.079313  | 0.46839  |         |
|           | 0.079313        | 0.46839   | 0.46839 | 0.751676097 |             |           |          |         |
| NA        | ENSG00000225708 | 0.07916   | 0.46845 | 0.07916     | 0.46845     | 0.07916   | 0.46845  |         |
|           | 0.07916         | 0.46845   | 0.46845 | 0.751714166 |             |           |          |         |
| NA        | ENSG00000274379 | 0.079154  | 0.46845 | 0.079154    | 0.46845     | 0.079154  | 0.46845  |         |
|           | 0.065198        | 0.47401   | 0.46845 | 0.751714166 |             |           |          |         |
| RPLP1     | ENSG00000137818 | 0.079147  | 0.46846 | 0.079147    | 0.46846     | 0.079147  | 0.46846  |         |
|           | 0.079147        | 0.46846   | 0.46846 | 0.751714166 |             |           |          |         |
| CHST14    | ENSG00000169105 | 0.079074  | 0.46849 | 0.079074    | 0.46849     | 0.079074  | 0.079074 |         |
|           | 0.46849         | 0.079074  | 0.46849 | 0.46849     | 0.751737551 |           |          |         |
| BCDIN3D   | ENSG00000186666 | 0.07507   | 0.47008 | 0.07901     | 0.46851     | -0.54795  |          |         |
|           | 0.70814         | -0.47081  | 0.68111 | 0.46851     | 0.75174489  |           |          |         |
| ZFP41     | ENSG00000181638 | -0.1193   | 0.54748 | 0.078951    | 0.46854     | -0.7287   | 0.76691  |         |
|           | -0.1193         | 0.54748   | 0.46854 | 0.751759565 |             |           |          |         |
| NA        | ENSG00000254365 | 0.078906  | 0.46855 | 0.078906    | 0.46855     | 0.078906  | 0.46855  |         |
|           | 0.078906        | 0.46855   | 0.46855 | 0.751759565 |             |           |          |         |
| ZDHHC8    | ENSG00000099904 | -0.33578  | 0.63148 | -0.5488     | 0.70843     | -0.57298  |          |         |
|           | 0.71667         | 0.078839  | 0.46858 | 0.46858     | 0.751782945 |           |          |         |
| NA        | ENSG00000275547 | -0.56196  | 0.71293 | -0.30167    | 0.61855     | 0.078771  | 0.46861  |         |
|           | 0.078771        | 0.46861   | 0.46861 | 0.751803578 |             |           |          |         |
| LCE3A     | ENSG00000185962 | 0.078697  | 0.46864 | 0.078697    | 0.46864     | 0.078697  | 0.46864  |         |
|           | -0.15639        | 0.56214   | 0.46864 | 0.751803578 |             |           |          |         |
| NA        | ENSG00000234026 | 0.078664  | 0.46865 | 0.078664    | 0.46865     | 0.078664  | 0.46865  |         |
|           | 0.078664        | 0.46865   | 0.46865 | 0.751803578 |             |           |          |         |
| FGF19     | ENSG00000162344 | -0.25117  | 0.59916 | 0.078626    | 0.46867     | -0.26009  | 0.6026   |         |
|           | -0.6943         | 0.75625   | 0.46867 | 0.751803578 |             |           |          |         |
| RPS3AP48  | ENSG00000242278 | 0.078624  | 0.46867 | -0.11053    | 0.54401     | -0.21365  |          |         |
|           | 0.58459         | -0.22596  | 0.58938 | 0.46867     | 0.751803578 |           |          |         |
| VTA1P1    | ENSG00000224999 | -0.19704  | 0.5781  | -0.19704    | 0.5781      | 0.078438  |          |         |

|           |                 |            |         |             |             |            |          |
|-----------|-----------------|------------|---------|-------------|-------------|------------|----------|
|           | 0.46874         | -1.6171    | 0.94707 | 0.46874     | 0.75184895  |            |          |
| CIP2A     | ENSG00000163507 | -0.10451   | 0.54162 | 0.0072823   | 0.49709     | 0.0072823  | 0.49709  |
|           | 0.078385        | 0.46876    | 0.46876 | 0.75184895  |             |            |          |
| B3GNTL1P2 | ENSG00000271328 | 0.078396   | 0.46876 | 0.078396    | 0.46876     | 0.078396   | 0.078396 |
|           | 0.46876         | 0.078396   | 0.46876 | 0.46876     | 0.75184895  |            |          |
| NA        | ENSG00000274425 | 0.078397   | 0.46876 | 0.078397    | 0.46876     | 0.078397   | 0.46876  |
|           | 0.078397        | 0.46876    | 0.46876 | 0.75184895  |             |            |          |
| C16orf71  | ENSG00000166246 | 0.078337   | 0.46878 | 0.078337    | 0.46878     | -0.869     |          |
|           | 0.80758         | 0.078337   | 0.46878 | 0.46878     | 0.751856281 |            |          |
| FUZ       | ENSG00000010361 | 0.078251   | 0.46881 | 0.078251    | 0.46881     | -0.94225   | 0.82697  |
|           | -1.4031         | 0.91971    | 0.46881 | 0.751878273 |             |            |          |
| BMP6P1    | ENSG00000236323 | -0.010754  | 0.50429 | 0.078215    | 0.46883     | 0.038049   |          |
|           | 0.48482         | -0.48969   | 0.68782 | 0.46883     | 0.751878273 |            |          |
| STX8      | ENSG00000170310 | 0.078197   | 0.46884 | -0.82075    | 0.7941      | -0.49219   | 0.68871  |
|           | -0.33527        | 0.63129    | 0.46884 | 0.751878273 |             |            |          |
| NA        | ENSG00000274159 | 0.078122   | 0.46887 | 0.078122    | 0.46887     | 0.078122   | 0.46887  |
|           | 0.078122        | 0.46887    | 0.46887 | 0.751898881 |             |            |          |
| NA        | ENSG00000254687 | -0.0084571 | 0.50337 | -0.0084571  | 0.50337     | 0.078029   | 0.4689   |
|           | -0.0084571      | 0.50337    | 0.4689  | 0.751898881 |             |            |          |
| RPL31P1   | ENSG00000214326 | -0.2337    | 0.59239 | 0.077994    | 0.46892     | -0.2337    |          |
|           | 0.59239         | -1.286     | 0.90078 | 0.46892     | 0.751898881 |            |          |
| RPL5P18   | ENSG00000220744 | -1.0883    | 0.86176 | -1.0883     | 0.86176     | -1.0883    |          |
|           | 0.86176         | 0.077974   | 0.46892 | 0.46892     | 0.751898881 |            |          |
| CCR2      | ENSG00000121807 | 0.077972   | 0.46893 | 0.077972    | 0.46893     | -0.67388   | 0.74981  |
|           | -0.0052107      | 0.50208    | 0.46893 | 0.751898881 |             |            |          |
| SLC25A3   | ENSG00000075415 | -0.18384   | 0.57293 | -0.080237   | 0.53198     | -0.18384   |          |
|           | 0.57293         | 0.07782    | 0.46899 | 0.46899     | 0.751970344 |            |          |
| CA6       | ENSG00000131686 | 0.077722   | 0.46902 | -0.52908    | 0.70162     | -0.27383   | 0.60789  |
|           | -0.69494        | 0.75645    | 0.46902 | 0.751993702 |             |            |          |
| HAO2      | ENSG00000116882 | -1.6606    | 0.9516  | -0.97062    | 0.83413     | 0.077611   | 0.46907  |
|           | -0.66075        | 0.74561    | 0.46907 | 0.752039027 |             |            |          |
| PER3P1    | ENSG00000271077 | 0.077582   | 0.46908 | 0.077582    | 0.46908     | 0.077582   |          |
|           | 0.46908         | 0.077582   | 0.46908 | 0.46908     | 0.752039027 |            |          |
| SNORD53B  | ENSG00000265706 | 0.077545   | 0.4691  | 0.077545    | 0.4691      | 0.077545   |          |
|           | 0.4691          | 0.077545   | 0.4691  | 0.4691      | 0.752039027 |            |          |
| RBM8B     | ENSG00000258427 | -0.69206   | 0.75555 | -0.69206    | 0.75555     | 0.077499   | 0.46911  |
|           | -0.10637        | 0.54235    | 0.46911 | 0.752039027 |             |            |          |
| MTMR2     | ENSG00000087053 | -0.12407   | 0.54937 | -0.63428    | 0.73705     | 0.077447   | 0.46913  |
|           | -0.86801        | 0.8073     | 0.46913 | 0.752046348 |             |            |          |
| MORC1     | ENSG00000114487 | -0.63379   | 0.73689 | -0.32022    | 0.6256      | -1.2193    | 0.88864  |
|           | 0.077393        | 0.46916    | 0.46916 | 0.75206099  |             |            |          |
| RN7SL751P | ENSG00000240964 | 0.077364   | 0.46917 | 0.077364    | 0.46917     | 0.077364   |          |
|           | 0.46917         | 0.077364   | 0.46917 | 0.46917     | 0.75206099  |            |          |
| TATDN1P1  | ENSG00000234369 | -0.12921   | 0.5514  | 0.077215    | 0.46923     | -0.12921   |          |
|           | 0.5514          | -0.34633   | 0.63545 | 0.46923     | 0.752098977 |            |          |
| RNU6-420P | ENSG00000239001 | -1.3483    | 0.91122 | -0.3792     | 0.64773     | 0.077209   |          |
|           | 0.46923         | 0.036383   | 0.48549 | 0.46923     | 0.752098977 |            |          |
| RN7SL309P | ENSG00000239356 | 0.020818   | 0.4917  | -0.2069     | 0.58195     | -0.0023855 |          |
|           | 0.50095         | 0.077178   | 0.46924 | 0.46924     | 0.752098977 |            |          |
| CERS1     | ENSG00000223802 | 0.076866   | 0.46936 | 0.076866    | 0.46936     | 0.076866   | 0.46936  |
|           | 0.076866        | 0.46936    | 0.46936 | 0.752198593 |             |            |          |
| IP6K3     | ENSG00000161896 | 0.0028209  | 0.49887 | -0.44487    | 0.67179     | -0.99569   | 0.8403   |
|           | 0.076843        | 0.46937    | 0.46937 | 0.752198593 |             |            |          |
| MMEL1-AS1 | ENSG00000237058 | 0.076825   | 0.46938 | 0.076825    | 0.46938     | 0.076825   |          |
|           | 0.46938         | 0.076825   | 0.46938 | 0.46938     | 0.752198593 |            |          |
| LINC02451 | ENSG00000257164 | -0.45171   | 0.67426 | -0.5934     | 0.72354     | 0.076732   |          |
|           | 0.46942         | -0.0096656 | 0.50386 | 0.46942     | 0.752198593 |            |          |
| NA        | ENSG00000255995 | -0.22066   | 0.58732 | -0.91117    | 0.8189      | 0.076702   | 0.46943  |
|           | -0.91117        | 0.8189     | 0.46943 | 0.752198593 |             |            |          |
| LMAN1     | ENSG00000074695 | 0.076686   | 0.46944 | 0.076686    | 0.46944     | 0.076686   | 0.46944  |
|           | 0.076686        | 0.46944    | 0.46944 | 0.752198593 |             |            |          |
| PPIAP76   | ENSG00000250484 | -1.6542    | 0.95096 | -0.3331     | 0.63047     | 0.076683   |          |

|             |                 |           |         |             |             |          |          |         |
|-------------|-----------------|-----------|---------|-------------|-------------|----------|----------|---------|
|             | 0.46944         | 0.076683  | 0.46944 | 0.46944     | 0.752198593 |          |          |         |
| NA          | ENSG00000256281 | 0.076678  | 0.46944 | 0.46944     | -1.1247     | 0.86963  | -0.22804 | 0.59019 |
|             | -0.22804        | 0.59019   | 0.46944 | 0.752198593 |             |          |          |         |
| RPS3AP18    | ENSG00000243417 | 0.07662   | 0.46946 | 0.46946     | 0.07662     | 0.46946  | 0.07662  |         |
|             | 0.46946         | 0.07662   | 0.46946 | 0.752198593 |             |          |          |         |
| YES1        | ENSG00000176105 | -0.45974  | 0.67715 | -0.87941    | 0.81041     | 0.076545 | 0.46949  |         |
|             | -0.34617        | 0.63539   | 0.46949 | 0.752198593 |             |          |          |         |
| TRBV21OR9-2 | ENSG00000183938 | -0.19197  | 0.57612 | -0.19197    | 0.57612     | -0.19197 |          |         |
|             | 0.57612         | 0.076533  | 0.4695  | 0.4695      | 0.752198593 |          |          |         |
| NDUFA12     | ENSG00000184752 | -0.93733  | 0.82571 | -1.1269     | 0.87011     | -1.1269  |          |         |
|             | 0.87011         | 0.076511  | 0.46951 | 0.46951     | 0.752198593 |          |          |         |
| CES1        | ENSG00000198848 | 0.076497  | 0.46951 | -1.2885     | 0.90121     | -0.93513 | 0.82514  |         |
|             | -0.51753        | 0.69761   | 0.46951 | 0.752198593 |             |          |          |         |
| NA          | ENSG00000248458 | -0.00565  | 0.50225 | 0.076477    | 0.46952     | -0.00565 | 0.50225  |         |
|             | -0.00565        | 0.50225   | 0.46952 | 0.752198593 |             |          |          |         |
| NA          | ENSG00000229313 | -0.98461  | 0.83759 | 0.076427    | 0.46954     | 0.076427 | 0.46954  |         |
|             | 0.076427        | 0.46954   | 0.46954 | 0.752198593 |             |          |          |         |
| OR7E87P     | ENSG00000184055 | -1.4023   | 0.91958 | 0.0764      | 0.46955     | -0.1568  |          |         |
|             | 0.5623          | -1.0253   | 0.8474  | 0.46955     | 0.752198593 |          |          |         |
| PABPC3      | ENSG00000151846 | 0.076359  | 0.46957 | 0.076359    | 0.46957     | -0.87567 |          |         |
|             | 0.8094          | -0.56927  | 0.71541 | 0.46957     | 0.752198593 |          |          |         |
| NA          | ENSG00000277229 | -2.0418   | 0.97942 | 0.076338    | 0.46958     | -2.0418  | 0.97942  |         |
|             | -2.0418         | 0.97942   | 0.46958 | 0.752198593 |             |          |          |         |
| NA          | ENSG00000266455 | 0.076271  | 0.4696  | 0.076271    | 0.4696      | 0.076271 | 0.4696   |         |
|             | 0.076271        | 0.4696    | 0.4696  | 0.752205904 |             |          |          |         |
| PLEKHF2     | ENSG00000175895 | 0.076229  | 0.46962 | 0.076229    | 0.46962     | -0.52131 |          |         |
|             | 0.69892         | 0.076229  | 0.46962 | 0.46962     | 0.752213214 |          |          |         |
| CCZ1        | ENSG00000122674 | 0.076106  | 0.46967 | -0.40546    | 0.65743     | -0.69264 | 0.75573  |         |
|             | -0.13478        | 0.55361   | 0.46967 | 0.752249757 |             |          |          |         |
| AFMID       | ENSG00000183077 | 0.076062  | 0.46968 | -0.0028341  | 0.50113     | -0.27851 | 0.60969  |         |
|             | -0.27851        | 0.60969   | 0.46968 | 0.752249757 |             |          |          |         |
| LINC02502   | ENSG00000250392 | 0.076041  | 0.46969 | 0.076041    | 0.46969     | 0.076041 |          |         |
|             | 0.46969         | 0.076041  | 0.46969 | 0.46969     | 0.752249757 |          |          |         |
| RRP7BP      | ENSG00000182841 | -0.7455   | 0.77202 | 0.075996    | 0.46971     | -0.65837 |          |         |
|             | 0.74485         | -0.43939  | 0.66981 | 0.46971     | 0.752249757 |          |          |         |
| NA          | ENSG00000250596 | 0.075964  | 0.46972 | 0.075964    | 0.46972     | 0.075964 | 0.46972  |         |
|             | 0.075964        | 0.46972   | 0.46972 | 0.752249757 |             |          |          |         |
| NA          | ENSG00000244998 | -0.32724  | 0.62826 | -1.1885     | 0.88268     | 0.075826 | 0.46978  |         |
|             | 0.075826        | 0.46978   | 0.46978 | 0.752257369 |             |          |          |         |
| DNAJC17     | ENSG00000104129 | -0.34289  | 0.63416 | 0.0758      | 0.46979     | -0.36236 |          |         |
|             | 0.64146         | -1.1551   | 0.87598 | 0.46979     | 0.752257369 |          |          |         |
| DNAJC25     | ENSG00000059769 | 0.075779  | 0.4698  | 0.075779    | 0.4698      | -0.26945 |          |         |
|             | 0.60621         | -0.72746  | 0.76653 | 0.4698      | 0.752257369 |          |          |         |
| NA          | ENSG00000264588 | 0.07577   | 0.4698  | 0.07577     | 0.4698      | 0.07577  | 0.4698   |         |
|             | 0.07577         | 0.4698    | 0.4698  | 0.752257369 |             |          |          |         |
| NA          | ENSG00000248645 | 0.012285  | 0.4951  | 0.075756    | 0.46981     | 0.075756 | 0.46981  |         |
|             | 0.075756        | 0.46981   | 0.46981 | 0.752257369 |             |          |          |         |
| RNU6-744P   | ENSG00000202427 | 0.07573   | 0.46982 | 0.07573     | 0.46982     | 0.07573  |          |         |
|             | 0.46982         | 0.07573   | 0.46982 | 0.46982     | 0.752257369 |          |          |         |
| MON1B       | ENSG00000103111 | 0.075627  | 0.46986 | -0.13224    | 0.5526      | -0.08157 | 0.53251  |         |
|             | -0.096333       | 0.53837   | 0.46986 | 0.752257369 |             |          |          |         |
| FMNL3       | ENSG00000161791 | -0.032462 | 0.51295 | 0.075591    | 0.46987     | -0.19717 | 0.57815  |         |
|             | -0.18623        | 0.57387   | 0.46987 | 0.752257369 |             |          |          |         |
| AMACR       | ENSG00000242110 | -0.20127  | 0.57976 | -0.23187    | 0.59168     | 0.075563 | 0.46988  |         |
|             | 0.044017        | 0.48245   | 0.46988 | 0.752257369 |             |          |          |         |
| NA          | ENSG00000262140 | 0.075517  | 0.4699  | 0.075517    | 0.4699      | 0.075517 | 0.4699   |         |
|             | 0.075517        | 0.4699    | 0.4699  | 0.752257369 |             |          |          |         |
| CHIA        | ENSG00000134216 | 0.075487  | 0.46991 | -0.24576    | 0.59706     | 0.075487 | 0.46991  |         |
|             | 0.075487        | 0.46991   | 0.46991 | 0.752257369 |             |          |          |         |
| NUDT3       | ENSG00000272325 | -0.65554  | 0.74394 | -0.73127    | 0.76769     | -0.32006 | 0.62554  |         |
|             | 0.075484        | 0.46991   | 0.46991 | 0.752257369 |             |          |          |         |
| CHTF18      | ENSG00000127586 | -1.7779   | 0.96229 | 0.075453    | 0.46993     | 0.051935 |          |         |

|                 |                 |           |         |             |             |           |          |
|-----------------|-----------------|-----------|---------|-------------|-------------|-----------|----------|
|                 | 0.47929         | -0.40218  | 0.65622 | 0.46993     | 0.752264673 |           |          |
| FAM13C          | ENSG00000148541 | -0.43226  | 0.66722 | -0.43226    | 0.66722     | 0.075286  |          |
|                 | 0.46999         | -0.88303  | 0.81139 | 0.46999     | 0.752334601 |           |          |
| NA              | ENSG00000207370 | 0.075234  | 0.47001 | -1.2313     | 0.8909      | -1.2313   | 0.8909   |
|                 | -1.2313         | 0.8909    | 0.47001 | 0.752334601 |             |           |          |
| CTC1            | ENSG00000178971 | 0.075213  | 0.47002 | 0.075213    | 0.47002     | 0.075213  | 0.47002  |
|                 | 0.075213        | 0.47002   | 0.47002 | 0.752334601 |             |           |          |
| CETN1           | ENSG00000177143 | -0.94632  | 0.82801 | -2.1676     | 0.98491     | 0.075108  | 0.47006  |
|                 | -0.9911         | 0.83918   | 0.47006 | 0.752367937 |             |           |          |
| RNU6-1017P      | ENSG00000200483 | -0.20043  | 0.57943 | -1.049      | 0.85291     | 0.074994  |          |
|                 | 0.47011         | -0.0313   | 0.51249 | 0.47011     | 0.752367937 |           |          |
| H3P5            | ENSG00000231712 | 0.074974  | 0.47012 | -1.6961     | 0.95506     | -0.44667  | 0.67244  |
|                 | -0.26908        | 0.60607   | 0.47012 | 0.752367937 |             |           |          |
| NA              | ENSG00000258789 | 0.074944  | 0.47013 | 0.074944    | 0.47013     | 0.074944  | 0.47013  |
|                 | 0.074944        | 0.47013   | 0.47013 | 0.752367937 |             |           |          |
| NA              | ENSG00000280120 | 0.074783  | 0.47019 | -1.0529     | 0.8538      | -1.0529   | 0.8538   |
|                 | -1.0529         | 0.8538    | 0.47019 | 0.752367937 |             |           |          |
| IFITM3P4        | ENSG00000230191 | -0.90143  | 0.81632 | -0.02085    | 0.50832     | -1.0091   |          |
|                 | 0.84354         | 0.074736  | 0.47021 | 0.47021     | 0.752367937 |           |          |
| NA              | ENSG00000271456 | -1.5526   | 0.93974 | -1.4728     | 0.9296      | -1.2266   | 0.89002  |
|                 | 0.07464         | 0.47025   | 0.47025 | 0.752367937 |             |           |          |
| DUPD1           | ENSG00000188716 | -0.20172  | 0.57993 | -0.10316    | 0.54108     | -0.098215 | 0.53912  |
|                 | 0.074621        | 0.47026   | 0.47026 | 0.752367937 |             |           |          |
| SS18L2P1        | ENSG00000232525 | 0.074622  | 0.47026 | 0.074622    | 0.47026     | 0.074622  |          |
|                 | 0.47026         | 0.074622  | 0.47026 | 0.47026     | 0.752367937 |           |          |
| NA              | ENSG00000222511 | 0.074584  | 0.47027 | 0.074584    | 0.47027     | 0.074584  | 0.47027  |
|                 | 0.074584        | 0.47027   | 0.47027 | 0.752367937 |             |           |          |
| PROKR2          | ENSG00000101292 | -0.079859 | 0.53183 | 0.074488    | 0.47031     | -0.23659  |          |
|                 | 0.59351         | -0.57106  | 0.71602 | 0.47031     | 0.752367937 |           |          |
| NA              | ENSG00000254246 | 0.074495  | 0.47031 | 0.074495    | 0.47031     | 0.074495  | 0.47031  |
|                 | 0.074495        | 0.47031   | 0.47031 | 0.752367937 |             |           |          |
| BAALC-AS1       | ENSG00000247081 | -1.0848   | 0.86099 | -0.21204    | 0.58396     | -1.6659   |          |
|                 | 0.95214         | 0.074411  | 0.47034 | 0.47034     | 0.752367937 |           |          |
| BEST3           | ENSG00000127325 | -0.060704 | 0.5242  | 0.074365    | 0.47036     | 0.074365  | 0.47036  |
|                 | -0.45779        | 0.67645   | 0.47036 | 0.752367937 |             |           |          |
| IL22RA2         | ENSG00000164485 | -0.26968  | 0.6063  | -0.20065    | 0.57951     | -1.6257   |          |
|                 | 0.94799         | 0.074298  | 0.47039 | 0.47039     | 0.752367937 |           |          |
| NA              | ENSG00000279543 | 0.074252  | 0.47041 | 0.074252    | 0.47041     | 0.074252  | 0.47041  |
|                 | -0.84599        | 0.80122   | 0.47041 | 0.752367937 |             |           |          |
| NA              | ENSG00000271560 | 0.074178  | 0.47043 | -0.39802    | 0.65469     | -0.49204  | 0.68865  |
|                 | -0.45868        | 0.67677   | 0.47043 | 0.752367937 |             |           |          |
| RPS8P4          | ENSG00000227437 | 0.074106  | 0.47046 | 0.074106    | 0.47046     | 0.074106  |          |
|                 | 0.47046         | 0.074106  | 0.47046 | 0.47046     | 0.752367937 |           |          |
| KIFAP3          | ENSG00000075945 | 0.074082  | 0.47047 | -0.18946    | 0.57513     | -0.93584  |          |
|                 | 0.82532         | -0.2935   | 0.61543 | 0.47047     | 0.752367937 |           |          |
| OR4B1           | ENSG00000175619 | -0.84008  | 0.79957 | -0.94416    | 0.82746     | -0.44471  | 0.67173  |
|                 | 0.074082        | 0.47047   | 0.47047 | 0.752367937 |             |           |          |
| PTPDC1          | ENSG00000158079 | 0.074061  | 0.47048 | -0.069278   | 0.52762     | -1.8216   |          |
|                 | 0.96574         | -0.053181 | 0.52121 | 0.47048     | 0.752367937 |           |          |
| NA              | ENSG00000227777 | 0.074004  | 0.4705  | 0.074004    | 0.4705      | 0.074004  | 0.4705   |
|                 | 0.074004        | 0.4705    | 0.4705  | 0.752367937 |             |           |          |
| PHBP8           | ENSG00000240471 | 0.073998  | 0.47051 | 0.073998    | 0.47051     | 0.073998  | 0.47051  |
|                 | 0.073998        | 0.47051   | 0.47051 | 0.752367937 |             |           |          |
| ADGRD1          | ENSG00000111452 | -0.69934  | 0.75783 | -1.011      | 0.84398     | 0.073955  |          |
|                 | 0.47052         | -1.0937   | 0.86296 | 0.47052     | 0.752367937 |           |          |
| SIN3B           | ENSG00000127511 | 0.020872  | 0.49167 | 0.073965    | 0.47052     | -0.63236  | 0.73642  |
|                 | -1.5191         | 0.93563   | 0.47052 | 0.752367937 |             |           |          |
| TNFSF12-TNFSF13 | ENSG00000248871 | 0.073958  | 0.47052 | 0.073958    | 0.47052     | 0.073958  | 0.073958 |
|                 | 0.47052         | 0.073958  | 0.47052 | 0.47052     | 0.752367937 |           |          |
| NA              | ENSG00000239969 | 0.073923  | 0.47054 | 0.073923    | 0.47054     | 0.073923  | 0.47054  |
|                 | 0.073923        | 0.47054   | 0.47054 | 0.752367937 |             |           |          |
| WBP2            | ENSG00000132471 | 0.032092  | 0.4872  | 0.032092    | 0.4872      | 0.073824  | 0.47058  |

|           |                 |          |         |             |             |          |         |  |
|-----------|-----------------|----------|---------|-------------|-------------|----------|---------|--|
|           | 0.032092        | 0.4872   | 0.47058 | 0.752367937 |             |          |         |  |
| NA        | ENSG00000223393 | -1.1903  | 0.88304 | 0.073819    | 0.47058     | -1.1903  | 0.88304 |  |
|           | 0.073819        | 0.47058  | 0.47058 | 0.752367937 |             |          |         |  |
| NA        | ENSG00000238522 | -1.4444  | 0.92569 | -0.12658    | 0.55036     | -0.74533 | 0.77196 |  |
|           | 0.073805        | 0.47058  | 0.47058 | 0.752367937 |             |          |         |  |
| NA        | ENSG00000270728 | 0.073776 | 0.47059 | 0.073776    | 0.47059     | -1.0599  | 0.8554  |  |
|           | -0.33102        | 0.62968  | 0.47059 | 0.752367937 |             |          |         |  |
| NA        | ENSG00000254363 | -0.68448 | 0.75316 | -0.0072078  | 0.50288     | 0.073744 | 0.47061 |  |
|           | -0.29311        | 0.61528  | 0.47061 | 0.752367937 |             |          |         |  |
| RPL7AP30  | ENSG00000241741 | -1.5235  | 0.93619 | 0.073672    | 0.47064     | -1.5235  |         |  |
|           | 0.93619         | -1.6336  | 0.94883 | 0.47064     | 0.752367937 |          |         |  |
| NA        | ENSG00000260879 | 0.073651 | 0.47064 | 0.073651    | 0.47064     | 0.073651 | 0.47064 |  |
|           | 0.073651        | 0.47064  | 0.47064 | 0.752367937 |             |          |         |  |
| MIR654    | ENSG00000207934 | 0.073641 | 0.47065 | 0.073641    | 0.47065     | 0.073641 |         |  |
|           | 0.47065         | 0.073641 | 0.47065 | 0.47065     | 0.752367937 |          |         |  |
| LINC00457 | ENSG00000225179 | -1.1068  | 0.8658  | -0.20743    | 0.58216     | -0.71938 |         |  |
|           | 0.76405         | 0.07362  | 0.47066 | 0.47066     | 0.752367937 |          |         |  |
| MRPS35P3  | ENSG00000270192 | 0.073616 | 0.47066 | 0.073616    | 0.47066     | 0.073616 |         |  |
|           | 0.47066         | 0.073616 | 0.47066 | 0.47066     | 0.752367937 |          |         |  |
| NA        | ENSG00000273416 | 0.073563 | 0.47068 | 0.073563    | 0.47068     | 0.073563 | 0.47068 |  |
|           | 0.073563        | 0.47068  | 0.47068 | 0.752367937 |             |          |         |  |
| PRDM15    | ENSG00000141956 | -0.57457 | 0.71721 | -0.79693    | 0.78725     | 0.073519 |         |  |
|           | 0.4707          | -1.1299  | 0.87074 | 0.4707      | 0.752367937 |          |         |  |
| ZNF764    | ENSG00000169951 | 0.07349  | 0.47071 | 0.07349     | 0.47071     | 0.07349  |         |  |
|           | 0.47071         | 0.07349  | 0.47071 | 0.47071     | 0.752367937 |          |         |  |
| NA        | ENSG00000260869 | 0.07349  | 0.47071 | 0.07349     | 0.47071     | 0.07349  | 0.47071 |  |
|           | 0.07349         | 0.47071  | 0.47071 | 0.752367937 |             |          |         |  |
| NA        | ENSG00000256064 | 0.073472 | 0.47072 | 0.073472    | 0.47072     | 0.073472 | 0.47072 |  |
|           | 0.073472        | 0.47072  | 0.47072 | 0.752367937 |             |          |         |  |
| GML       | ENSG00000104499 | -0.30802 | 0.62097 | 0.073446    | 0.47073     | -0.21281 | 0.58426 |  |
|           | -0.65451        | 0.74361  | 0.47073 | 0.752367937 |             |          |         |  |
| Clorf210  | ENSG00000253313 | 0.073348 | 0.47076 | -0.31432    | 0.62336     | 0.073348 |         |  |
|           | 0.47076         | -0.17631 | 0.56998 | 0.47076     | 0.752367937 |          |         |  |
| SLC25A1P5 | ENSG00000267323 | 0.073348 | 0.47076 | 0.073348    | 0.47076     | 0.073348 |         |  |
|           | 0.47076         | 0.073348 | 0.47076 | 0.47076     | 0.752367937 |          |         |  |
| NOP2      | ENSG00000111641 | -0.16132 | 0.56408 | -0.32754    | 0.62837     | -0.32709 | 0.6282  |  |
|           | 0.073345        | 0.47077  | 0.47077 | 0.752367937 |             |          |         |  |
| LRFN1     | ENSG00000128011 | -0.20578 | 0.58152 | -0.37167    | 0.64493     | -0.25958 | 0.60241 |  |
|           | 0.073302        | 0.47078  | 0.47078 | 0.752367937 |             |          |         |  |
| FAM71B    | ENSG00000170613 | -0.75518 | 0.77493 | -0.75518    | 0.77493     | 0.073176 |         |  |
|           | 0.47083         | -1.072   | 0.85814 | 0.47083     | 0.752367937 |          |         |  |
| NA        | ENSG00000236775 | -0.88937 | 0.8131  | -1.0554     | 0.85438     | 0.073186 | 0.47083 |  |
|           | -1.1619         | 0.87736  | 0.47083 | 0.752367937 |             |          |         |  |
| SMIM35    | ENSG00000255274 | 0.073177 | 0.47083 | 0.073177    | 0.47083     | 0.073177 |         |  |
|           | 0.47083         | 0.073177 | 0.47083 | 0.47083     | 0.752367937 |          |         |  |
| NCKAP5    | ENSG00000176771 | -1.5851  | 0.94352 | 0.073127    | 0.47085     | -0.95152 |         |  |
|           | 0.82933         | -0.41955 | 0.66259 | 0.47085     | 0.752367937 |          |         |  |
| PPIAP85   | ENSG00000254103 | 0.073114 | 0.47086 | 0.073114    | 0.47086     | 0.073114 |         |  |
|           | 0.47086         | 0.073114 | 0.47086 | 0.47086     | 0.752367937 |          |         |  |
| NA        | ENSG00000273343 | 0.073075 | 0.47087 | 0.073075    | 0.47087     | 0.073075 | 0.47087 |  |
|           | 0.073075        | 0.47087  | 0.47087 | 0.752367937 |             |          |         |  |
| RNY4P10   | ENSG00000202441 | 0.073059 | 0.47088 | 0.073059    | 0.47088     | 0.073059 |         |  |
|           | 0.47088         | 0.073059 | 0.47088 | 0.47088     | 0.752367937 |          |         |  |
| RERE      | ENSG00000142599 | 0.073034 | 0.47089 | 0.061743    | 0.47538     | -0.10656 | 0.54243 |  |
|           | -0.044055       | 0.51757  | 0.47089 | 0.752367937 |             |          |         |  |
| RAB27B    | ENSG00000041353 | 0.07286  | 0.47096 | -1.0177     | 0.84558     | 0.07286  |         |  |
|           | 0.47096         | -1.0531  | 0.85385 | 0.47096     | 0.75237408  |          |         |  |
| NA        | ENSG00000258445 | 0.072857 | 0.47096 | 0.072857    | 0.47096     | 0.072857 | 0.47096 |  |
|           | -0.45818        | 0.67659  | 0.47096 | 0.75237408  |             |          |         |  |
| NA        | ENSG00000275601 | 0.072836 | 0.47097 | 0.072836    | 0.47097     | 0.072836 | 0.47097 |  |
|           | 0.072836        | 0.47097  | 0.47097 | 0.75237408  |             |          |         |  |
| HNRNPDL   | ENSG00000152795 | -0.65976 | 0.7453  | -0.70729    | 0.76031     | -0.98722 |         |  |



|            |                 |            |         |           |             |           |         |
|------------|-----------------|------------|---------|-----------|-------------|-----------|---------|
|            | 0.83823         | 0.072771   | 0.47099 | 0.47099   | 0.75237408  |           |         |
| LUCAT1     | ENSG00000248323 | -0.64936   | 0.74195 | -0.64936  | 0.74195     | 0.072707  |         |
|            | 0.47102         | -0.64936   | 0.74195 | 0.47102   | 0.75237408  |           |         |
| NA         | ENSG00000249495 | 0.072698   | 0.47102 | -0.19543  | 0.57747     | -0.15477  | 0.5615  |
|            | -0.39214        | 0.65252    | 0.47102 |           | 0.75237408  |           |         |
| CRB2       | ENSG00000148204 | -0.10922   | 0.54349 | -0.53635  | 0.70414     | 0.072685  | 0.47103 |
|            | -0.23936        | 0.59459    | 0.47103 |           | 0.75237408  |           |         |
| LINC02308  | ENSG00000258675 | 0.072582   | 0.47107 | -1.271    | 0.89814     | -0.12992  |         |
|            | 0.55169         | -0.36488   | 0.6424  | 0.47107   | 0.75237408  |           |         |
| CFAP126    | ENSG00000188931 | 0.072545   | 0.47108 | 0.072545  | 0.47108     | 0.072545  |         |
|            | 0.47108         | 0.072545   | 0.47108 | 0.47108   | 0.75237408  |           |         |
| BNIP3P10   | ENSG00000270270 | 0.072554   | 0.47108 | 0.072554  | 0.47108     | 0.072554  |         |
|            | 0.47108         | 0.072554   | 0.47108 | 0.47108   | 0.75237408  |           |         |
| NA         | ENSG00000253627 | -2.1398    | 0.98381 | -2.1398   | 0.98381     | 0.072528  | 0.47109 |
|            | -2.1024         | 0.98224    | 0.47109 |           | 0.75237408  |           |         |
| HMGB1P23   | ENSG00000253770 | -0.0079872 | 0.50319 | -0.56094  | 0.71258     | 0.072495  |         |
|            | 0.4711          | 0.072495   | 0.4711  | 0.4711    | 0.75237408  |           |         |
| NA         | ENSG00000206958 | 0.072492   | 0.47111 | 0.072492  | 0.47111     | -1.4576   | 0.92753 |
|            | -0.01102        | 0.5044     | 0.47111 |           | 0.75237408  |           |         |
| NA         | ENSG00000250306 | 0.072492   | 0.47111 | 0.072492  | 0.47111     | 0.072492  | 0.47111 |
|            | 0.072492        | 0.47111    | 0.47111 |           | 0.75237408  |           |         |
| CTBS       | ENSG00000117151 | 0.072366   | 0.47116 | 0.072366  | 0.47116     | 0.072366  | 0.47116 |
|            | -0.27436        | 0.6081     | 0.47116 |           | 0.752379958 |           |         |
| TAMM41     | ENSG00000144559 | -1.2275    | 0.89019 | -1.1111   | 0.86673     | -0.74551  |         |
|            | 0.77202         | 0.072349   | 0.47116 | 0.47116   | 0.752379958 |           |         |
| DUTP5      | ENSG00000216439 | 0.072354   | 0.47116 | 0.072354  | 0.47116     | 0.072354  | 0.47116 |
|            | 0.072354        | 0.47116    | 0.47116 |           | 0.752379958 |           |         |
| NA         | ENSG00000259314 | 0.072111   | 0.47126 | 0.072111  | 0.47126     | 0.072111  | 0.47126 |
|            | 0.072111        | 0.47126    | 0.47126 |           | 0.752514985 |           |         |
| RN7SKP211  | ENSG00000200198 | -0.077455  | 0.53087 | -0.077455 | 0.53087     | 0.071971  |         |
|            | 0.47131         | -0.077455  | 0.53087 | 0.47131   | 0.752545506 |           |         |
| NA         | ENSG00000229689 | 0.071988   | 0.47131 | 0.071988  | 0.47131     | 0.071988  | 0.47131 |
|            | 0.044784        | 0.48214    | 0.47131 |           | 0.752545506 |           |         |
| NA         | ENSG00000232327 | 0.071843   | 0.47136 | -0.38428  | 0.64962     | -1.7406   | 0.95913 |
|            | -0.096156       | 0.5383     | 0.47136 |           | 0.752584901 |           |         |
| MED27      | ENSG00000160563 | 0.037883   | 0.48489 | 0.071828  | 0.47137     | -1.2253   | 0.88976 |
|            | -0.5533         | 0.70997    | 0.47137 |           | 0.752584901 |           |         |
| CRACR2B    | ENSG00000177685 | -0.037673  | 0.51503 | -0.046085 | 0.51838     | -0.037673 |         |
|            | 0.51503         | 0.071753   | 0.4714  | 0.4714    | 0.752584901 |           |         |
| NA         | ENSG00000222339 | 0.071754   | 0.4714  | 0.071754  | 0.4714      | 0.071754  | 0.4714  |
|            | 0.071754        | 0.4714     | 0.4714  |           | 0.752584901 |           |         |
| NA         | ENSG00000273262 | 0.07164    | 0.47144 | 0.07164   | 0.47144     | 0.07164   | 0.47144 |
|            | 0.07164         | 0.47144    | 0.47144 |           | 0.752584901 |           |         |
| SYNPR-AS1  | ENSG00000241359 | -0.43953   | 0.66986 | -1.3559   | 0.91244     | 0.071629  |         |
|            | 0.47145         | -2.0471    | 0.97968 | 0.47145   | 0.752584901 |           |         |
| NA         | ENSG00000273096 | 0.071622   | 0.47145 | 0.071622  | 0.47145     | 0.071622  | 0.47145 |
|            | 0.071622        | 0.47145    | 0.47145 |           | 0.752584901 |           |         |
| CHURC1     | ENSG00000258289 | 0.071593   | 0.47146 | 0.071593  | 0.47146     | 0.071593  |         |
|            | 0.47146         | 0.071593   | 0.47146 | 0.47146   | 0.752584901 |           |         |
| IFT88      | ENSG00000032742 | -0.28802   | 0.61333 | -0.028294 | 0.51129     | 0.07151   | 0.4715  |
|            | -0.28238        | 0.61117    | 0.4715  |           | 0.752584901 |           |         |
| NA         | ENSG00000233492 | -1.0645    | 0.85644 | 0.0715    | 0.4715      | -1.0645   | 0.85644 |
|            | -1.0645         | 0.85644    | 0.4715  |           | 0.752584901 |           |         |
| SPINK1     | ENSG00000164266 | -0.43589   | 0.66854 | -0.02954  | 0.51178     | 0.071451  |         |
|            | 0.47152         | -0.011858  | 0.50473 | 0.47152   | 0.752584901 |           |         |
| IL21-AS1   | ENSG00000227145 | 0.071458   | 0.47152 | -0.23396  | 0.59249     | -0.014263 |         |
|            | 0.50569         | -0.014263  | 0.50569 | 0.47152   | 0.752584901 |           |         |
| SGIP1      | ENSG00000118473 | -0.65874   | 0.74497 | -1.1408   | 0.87302     | -0.21601  | 0.58551 |
|            | 0.071339        | 0.47156    | 0.47156 |           | 0.752590755 |           |         |
| NA         | ENSG00000223440 | 0.071329   | 0.47157 | 0.071329  | 0.47157     | 0.071329  | 0.47157 |
|            | 0.071329        | 0.47157    | 0.47157 |           | 0.752590755 |           |         |
| ISY1-RAB43 | ENSG00000261796 | 0.071324   | 0.47157 | 0.071324  | 0.47157     | 0.071324  |         |

|            |                 |           |             |             |             |           |         |
|------------|-----------------|-----------|-------------|-------------|-------------|-----------|---------|
|            | 0.47157         | 0.071324  | 0.47157     | 0.47157     | 0.752590755 |           |         |
| NA         | ENSG00000274156 | 0.07125   | 0.4716      | 0.07125     | 0.4716      | 0.07125   | 0.4716  |
|            | 0.07125         | 0.4716    | 0.4716      | 0.752605295 |             |           |         |
| NA         | ENSG00000255125 | -0.70003  | 0.75804     | -1.4341     | 0.92422     | 0.071228  | 0.47161 |
|            | 0.071228        | 0.47161   | 0.47161     | 0.752605295 |             |           |         |
| GEMIN2     | ENSG00000092208 | -0.34108  | 0.63348     | -0.52584    | 0.7005      | -0.34108  |         |
|            | 0.63348         | 0.071134  | 0.47165     | 0.47165     | 0.75264448  |           |         |
| NA         | ENSG00000271410 | 0.071045  | 0.47168     | -0.81363    | 0.79207     | 0.071045  | 0.47168 |
|            | 0.071045        | 0.47168   | 0.47168     | 0.752650327 |             |           |         |
| SH3GL3     | ENSG00000140600 | 0.071004  | 0.4717      | -0.068742   | 0.5274      | -0.9798   |         |
|            | 0.83641         | -1.1849   | 0.88198     | 0.4717      | 0.752650327 |           |         |
| ZNF367     | ENSG00000165244 | -0.3352   | 0.63126     | 0.070997    | 0.4717      | -0.79887  |         |
|            | 0.78782         | -0.1729   | 0.56863     | 0.4717      | 0.752650327 |           |         |
| CYP46A4P   | ENSG00000237180 | 0.070937  | 0.47172     | 0.070937    | 0.47172     | 0.070937  |         |
|            | 0.47172         | 0.070937  | 0.47172     | 0.47172     | 0.752657595 |           |         |
| NA         | ENSG00000283001 | -0.31895  | 0.62512     | 0.070712    | 0.47181     | 0.070712  | 0.47181 |
|            | 0.070712        | 0.47181   | 0.47181     | 0.752776547 |             |           |         |
| VCAM1      | ENSG00000162692 | 0.070475  | 0.47191     | 0.070475    | 0.47191     | 0.070475  | 0.47191 |
|            | 0.070475        | 0.47191   | 0.47191     | 0.752886796 |             |           |         |
| MTND6P18   | ENSG00000227714 | -0.38252  | 0.64896     | -0.38252    | 0.64896     | -0.38252  |         |
|            | 0.64896         | 0.070471  | 0.47191     | 0.47191     | 0.752886796 |           |         |
| NT5C3AP1   | ENSG00000213492 | 0.070257  | 0.47199     | 0.070257    | 0.47199     | 0.070257  |         |
|            | 0.47199         | 0.0046381 | 0.49815     | 0.47199     | 0.752960801 |           |         |
| RNU6-175P  | ENSG00000252705 | 0.070236  | 0.472       | 0.070236    | 0.472       | 0.070236  | 0.472   |
|            | 0.70294         | 0.472     | 0.752960801 |             |             |           |         |
| NA         | ENSG00000267980 | 0.070201  | 0.47202     | 0.070201    | 0.47202     | 0.070201  | 0.47202 |
|            | 0.070201        | 0.47202   | 0.47202     | 0.752960801 |             |           |         |
| BTBD6P1    | ENSG00000229106 | 0.070125  | 0.47205     | 0.070125    | 0.47205     | 0.070125  |         |
|            | 0.47205         | 0.070125  | 0.47205     | 0.47205     | 0.752960801 |           |         |
| SYCE2      | ENSG00000161860 | -1.0443   | 0.85184     | -1.0443     | 0.85184     | 0.070068  | 0.47207 |
|            | -1.0443         | 0.85184   | 0.47207     | 0.752960801 |             |           |         |
| PTPRS      | ENSG00000105426 | -1.2432   | 0.89309     | 0.07004     | 0.47208     | -1.4284   | 0.92341 |
|            | -0.35157        | 0.63742   | 0.47208     | 0.752960801 |             |           |         |
| NA         | ENSG00000223461 | 0.070054  | 0.47208     | 0.070054    | 0.47208     | 0.070054  | 0.47208 |
|            | 0.070054        | 0.47208   | 0.47208     | 0.752960801 |             |           |         |
| NA         | ENSG00000227667 | 0.070043  | 0.47208     | 0.070043    | 0.47208     | 0.070043  | 0.47208 |
|            | 0.070043        | 0.47208   | 0.47208     | 0.752960801 |             |           |         |
| RPL7P14    | ENSG00000232994 | 0.069972  | 0.47211     | 0.069972    | 0.47211     | 0.069972  |         |
|            | 0.47211         | 0.069972  | 0.47211     | 0.47211     | 0.752965173 |           |         |
| NA         | ENSG00000279456 | 0.069924  | 0.47213     | -0.70235    | 0.75877     | -2.0029   | 0.97741 |
|            | -0.67193        | 0.74919   | 0.47213     | 0.752965173 |             |           |         |
| CAVIN2-AS1 | ENSG00000233766 | 0.069864  | 0.47215     | 0.069864    | 0.47215     | 0.069864  |         |
|            | 0.47215         | 0.069864  | 0.47215     | 0.47215     | 0.752965173 |           |         |
| GTF2IP13   | ENSG00000272556 | -1.2505   | 0.89445     | 0.069877    | 0.47215     | -0.70079  |         |
|            | 0.75828         | -0.69389  | 0.75612     | 0.47215     | 0.752965173 |           |         |
| NRIR       | ENSG00000225964 | -0.68221  | 0.75245     | 0.069831    | 0.47216     | -0.7181   | 0.76365 |
|            | -0.25737        | 0.60155   | 0.47216     | 0.752965173 |             |           |         |
| RNA5SP113  | ENSG00000222418 | 0.069739  | 0.4722      | 0.069739    | 0.4722      | 0.069739  |         |
|            | 0.4722          | 0.069739  | 0.4722      | 0.4722      | 0.75300432  |           |         |
| LINC02158  | ENSG00000225611 | -0.48215  | 0.68515     | 0.069512    | 0.47229     | -0.014767 |         |
|            | 0.50589         | -0.22984  | 0.59089     | 0.47229     | 0.75309855  |           |         |
| NA         | ENSG00000254900 | 0.069523  | 0.47229     | -0.8055     | 0.78973     | 0.069523  | 0.47229 |
|            | 0.069523        | 0.47229   | 0.47229     | 0.75309855  |             |           |         |
| NA         | ENSG00000233967 | -1.5989   | 0.94508     | 0.069439    | 0.47232     | -0.91463  | 0.81981 |
|            | -0.91463        | 0.81981   | 0.47232     | 0.753121743 |             |           |         |
| PTPRU      | ENSG00000060656 | -1.2634   | 0.89678     | -1.7374     | 0.95884     | 0.069335  | 0.47236 |
|            | -0.53614        | 0.70407   | 0.47236     | 0.75316088  |             |           |         |
| NAA25      | ENSG00000111300 | -0.64766  | 0.7414      | 0.069161    | 0.47243     | -0.90072  | 0.81613 |
|            | -0.86036        | 0.8052    | 0.47243     | 0.7532145   |             |           |         |
| LMF1       | ENSG00000103227 | -0.11724  | 0.54667     | -0.062795   | 0.52504     | -0.29384  | 0.61556 |
|            | 0.069136        | 0.47244   | 0.47244     | 0.7532145   |             |           |         |
| NA         | ENSG00000259442 | 0.069146  | 0.47244     | 0.069146    | 0.47244     | 0.069146  | 0.47244 |

|             |                 |           |         |             |             |           |         |
|-------------|-----------------|-----------|---------|-------------|-------------|-----------|---------|
|             | 0.069146        | 0.47244   | 0.47244 | 0.7532145   |             |           |         |
| RPS12P3     | ENSG00000232713 | 0.068968  | 0.47251 | 0.068968    | 0.47251     | 0.068968  |         |
|             | 0.47251         | 0.068968  | 0.47251 | 0.47251     | 0.753301456 |           |         |
| RBM12       | ENSG00000244462 | -0.21671  | 0.58578 | 0.068905    | 0.47253     | 0.068905  | 0.47253 |
|             | 0.068905        | 0.47253   | 0.47253 | 0.753308696 |             |           |         |
| LYVE1       | ENSG00000133800 | 0.068816  | 0.47257 | 0.068816    | 0.47257     | 0.068816  | 0.47257 |
|             | 0.068816        | 0.47257   | 0.47257 | 0.753314472 |             |           |         |
| HADH        | ENSG00000138796 | -0.15345  | 0.56098 | 0.068798    | 0.47258     | -0.3328   | 0.63036 |
|             | -0.63852        | 0.73843   | 0.47258 | 0.753314472 |             |           |         |
| NA          | ENSG00000276980 | 0.068788  | 0.47258 | 0.068788    | 0.47258     | 0.068788  | 0.47258 |
|             | 0.068788        | 0.47258   | 0.47258 | 0.753314472 |             |           |         |
| NANOGP7     | ENSG00000258774 | -0.28531  | 0.6123  | 0.068737    | 0.4726      | 0.068737  |         |
|             | 0.4726          | 0.068737  | 0.4726  | 0.4726      | 0.75332171  |           |         |
| NA          | ENSG00000251342 | 0.068605  | 0.47265 | 0.068605    | 0.47265     | 0.068605  | 0.47265 |
|             | 0.068605        | 0.47265   | 0.47265 | 0.753375299 |             |           |         |
| IL22        | ENSG00000127318 | 0.068523  | 0.47268 | 0.068523    | 0.47268     | 0.068523  | 0.47268 |
|             | 0.068523        | 0.47268   | 0.47268 | 0.753375299 |             |           |         |
| NA          | ENSG00000217631 | -1.4021   | 0.91956 | -1.5249     | 0.93636     | 0.068538  | 0.47268 |
|             | -0.038251       | 0.51526   | 0.47268 | 0.753375299 |             |           |         |
| ANO7        | ENSG00000146205 | -1.1654   | 0.87806 | 0.06835     | 0.47275     | -0.55968  | 0.71215 |
|             | -1.0262         | 0.8476    | 0.47275 | 0.753417236 |             |           |         |
| NA          | ENSG00000250020 | -0.60746  | 0.72823 | -0.67275    | 0.74945     | -0.055939 | 0.5223  |
|             | 0.068246        | 0.47279   | 0.47279 | 0.753417236 |             |           |         |
| SAMD9L      | ENSG00000177409 | -0.3562   | 0.63915 | -0.041083   | 0.51639     | -1.0695   |         |
|             | 0.85757         | 0.068221  | 0.4728  | 0.4728      | 0.753417236 |           |         |
| LINC00433   | ENSG00000229443 | 0.068223  | 0.4728  | 0.068223    | 0.4728      | 0.068223  |         |
|             | 0.4728          | 0.068223  | 0.4728  | 0.4728      | 0.753417236 |           |         |
| MIR1915     | ENSG00000222071 | 0.068171  | 0.47282 | 0.068171    | 0.47282     | 0.068171  |         |
|             | 0.47282         | 0.068171  | 0.47282 | 0.47282     | 0.753417236 |           |         |
| RNU4ATAC17P | ENSG00000253081 | 0.068174  | 0.47282 | 0.068174    | 0.47282     | 0.068174  |         |
|             | 0.47282         | 0.068174  | 0.47282 | 0.47282     | 0.753417236 |           |         |
| PARP8       | ENSG00000151883 | -0.032406 | 0.51293 | 0.068148    | 0.47283     | -0.13224  | 0.5526  |
|             | -0.050305       | 0.52006   | 0.47283 | 0.753417236 |             |           |         |
| NA          | ENSG00000233478 | -1.897    | 0.97108 | 0.068161    | 0.47283     | 0.017496  | 0.49302 |
|             | -1.897          | 0.97108   | 0.47283 | 0.753417236 |             |           |         |
| NA          | ENSG00000249169 | -0.21843  | 0.58645 | -0.23077    | 0.59125     | 0.06791   | 0.47293 |
|             | -0.16212        | 0.5644    | 0.47293 | 0.753493958 |             |           |         |
| TUBA3FP     | ENSG00000161149 | 0.067877  | 0.47294 | 0.067877    | 0.47294     | 0.067877  |         |
|             | 0.47294         | 0.067877  | 0.47294 | 0.47294     | 0.753493958 |           |         |
| ELP5        | ENSG00000170291 | -0.77164  | 0.77984 | 0.06788     | 0.47294     | -0.049793 | 0.51986 |
|             | -0.83526        | 0.79821   | 0.47294 | 0.753493958 |             |           |         |
| NA          | ENSG00000246792 | -0.57667  | 0.71792 | -0.57667    | 0.71792     | -0.40393  | 0.65687 |
|             | 0.067887        | 0.47294   | 0.47294 | 0.753493958 |             |           |         |
| PIGFP1      | ENSG00000253869 | 0.067703  | 0.47301 | 0.067703    | 0.47301     | 0.067703  |         |
|             | 0.47301         | 0.067703  | 0.47301 | 0.47301     | 0.753579365 |           |         |
| SLC01A2     | ENSG00000084453 | -1.2384   | 0.89222 | 0.067655    | 0.47303     | -0.25052  |         |
|             | 0.59891         | -0.072625 | 0.52895 | 0.47303     | 0.753579365 |           |         |
| PTENP1-AS   | ENSG00000281128 | 0.067628  | 0.47304 | -0.55476    | 0.71047     | 0.067628  |         |
|             | 0.47304         | -0.28612  | 0.61261 | 0.47304     | 0.753579365 |           |         |
| METTL6      | ENSG00000206562 | -0.45174  | 0.67427 | 0.067546    | 0.47307     | 0.0040496 |         |
|             | 0.49838         | -0.32428  | 0.62714 | 0.47307     | 0.753601039 |           |         |
| SLC30A6     | ENSG00000152683 | 0.067509  | 0.47309 | 0.067509    | 0.47309     | 0.067509  |         |
|             | 0.47309         | -0.77239  | 0.78006 | 0.47309     | 0.753601039 |           |         |
| NA          | ENSG00000225148 | 0.067476  | 0.4731  | 0.067476    | 0.4731      | 0.067476  | 0.4731  |
|             | -0.57306        | 0.7167    | 0.4731  | 0.753601039 |             |           |         |
| TMEM245     | ENSG00000106771 | -0.033367 | 0.51331 | -0.097694   | 0.53891     | -0.097694 |         |
|             | 0.53891         | 0.067341  | 0.47315 | 0.47315     | 0.753645075 |           |         |
| BAIAP2-DT   | ENSG00000226137 | 0.067313  | 0.47317 | 0.067313    | 0.47317     | 0.067313  |         |
|             | 0.47317         | 0.067313  | 0.47317 | 0.47317     | 0.753645075 |           |         |
| NA          | ENSG00000199762 | -0.61896  | 0.73203 | -0.61896    | 0.73203     | -0.61896  | 0.73203 |
|             | 0.06725         | 0.47319   | 0.47319 | 0.753645075 |             |           |         |
| RPL12P27    | ENSG00000237169 | -0.6605   | 0.74553 | -0.6605     | 0.74553     | -0.6605   |         |

|            |                 |           |         |             |             |          |         |  |
|------------|-----------------|-----------|---------|-------------|-------------|----------|---------|--|
|            | 0.74553         | 0.067206  | 0.47321 | 0.47321     | 0.753645075 |          |         |  |
| PTX4       | ENSG00000251692 | -0.036208 | 0.51444 | 0.067171    | 0.47322     | -0.53942 | 0.7052  |  |
|            | -0.9193         | 0.82103   | 0.47322 | 0.753645075 |             |          |         |  |
| KTI12      | ENSG00000198841 | 0.067086  | 0.47326 | 0.067086    | 0.47326     | 0.067086 | 0.47326 |  |
|            | 0.067086        | 0.47326   | 0.47326 | 0.753645075 |             |          |         |  |
| RBSN       | ENSG00000131381 | 0.067037  | 0.47328 | -0.22209    | 0.58788     | -1.4474  | 0.92611 |  |
|            | -1.2477         | 0.89393   | 0.47328 | 0.753645075 |             |          |         |  |
| UBE2E3     | ENSG00000170035 | -0.15541  | 0.56175 | 0.067017    | 0.47328     | -0.78375 |         |  |
|            | 0.78341         | -0.4995   | 0.69129 | 0.47328     | 0.753645075 |          |         |  |
| RPL27A     | ENSG00000166441 | -0.95044  | 0.82906 | -1.1469     | 0.87428     | -0.95044 |         |  |
|            | 0.82906         | 0.06688   | 0.47334 | 0.47334     | 0.753645075 |          |         |  |
| NA         | ENSG00000280438 | -1.2124   | 0.88733 | -0.38321    | 0.64922     | -0.22013 | 0.58712 |  |
|            | 0.066778        | 0.47338   | 0.47338 | 0.753645075 |             |          |         |  |
| GAS2L1P1   | ENSG00000229511 | -0.68544  | 0.75347 | -0.84604    | 0.80124     | -1.2559  |         |  |
|            | 0.89542         | 0.066757  | 0.47339 | 0.47339     | 0.753645075 |          |         |  |
| NA         | ENSG00000267882 | 0.066657  | 0.47343 | 0.066657    | 0.47343     | 0.066657 | 0.47343 |  |
|            | 0.066657        | 0.47343   | 0.47343 | 0.753645075 |             |          |         |  |
| NA         | ENSG00000274554 | 0.066654  | 0.47343 | 0.066654    | 0.47343     | 0.066654 | 0.47343 |  |
|            | 0.066654        | 0.47343   | 0.47343 | 0.753645075 |             |          |         |  |
| NA         | ENSG00000258337 | -0.32643  | 0.62795 | 0.066599    | 0.47345     | 0.066599 | 0.47345 |  |
|            | 0.066599        | 0.47345   | 0.47345 | 0.753645075 |             |          |         |  |
| RNF26      | ENSG00000173456 | -1.5194   | 0.93567 | -0.045712   | 0.51823     | 0.066573 | 0.47346 |  |
|            | -1.8224         | 0.96581   | 0.47346 | 0.753645075 |             |          |         |  |
| KRTAP10-4  | ENSG00000215454 | 0.066575  | 0.47346 | -1.6857     | 0.95408     | -0.31874 |         |  |
|            | 0.62504         | -0.64664  | 0.74107 | 0.47346     | 0.753645075 |          |         |  |
| SNORD116-7 | ENSG00000207133 | 0.066469  | 0.4735  | 0.066469    | 0.4735      | 0.066469 |         |  |
|            | 0.4735          | 0.066469  | 0.4735  | 0.4735      | 0.753645075 |          |         |  |
| BMPR1B-DT  | ENSG00000249599 | -0.38246  | 0.64894 | -0.76202    | 0.77697     | 0.066469 |         |  |
|            | 0.4735          | -0.42503  | 0.66459 | 0.4735      | 0.753645075 |          |         |  |
| HEXD       | ENSG00000169660 | 0.066448  | 0.47351 | -0.63117    | 0.73603     | -0.67703 | 0.75081 |  |
|            | -0.77581        | 0.78107   | 0.47351 | 0.753645075 |             |          |         |  |
| NA         | ENSG00000238015 | -0.47353  | 0.68208 | 0.06645     | 0.47351     | 0.06645  | 0.47351 |  |
|            | -0.91515        | 0.81994   | 0.47351 | 0.753645075 |             |          |         |  |
| NA         | ENSG00000280076 | 0.066445  | 0.47351 | 0.066445    | 0.47351     | 0.066445 | 0.47351 |  |
|            | 0.066445        | 0.47351   | 0.47351 | 0.753645075 |             |          |         |  |
| AVL9       | ENSG00000105778 | -0.1314   | 0.55227 | -0.24241    | 0.59577     | -0.25855 | 0.60201 |  |
|            | 0.066424        | 0.47352   | 0.47352 | 0.753645075 |             |          |         |  |
| EFS        | ENSG00000100842 | -0.11202  | 0.54459 | 0.0012411   | 0.4995      | 0.06639  | 0.47353 |  |
|            | -0.68695        | 0.75394   | 0.47353 | 0.753645075 |             |          |         |  |
| NA         | ENSG00000263772 | 0.066407  | 0.47353 | 0.066407    | 0.47353     | -0.27893 | 0.60985 |  |
|            | -1.1193         | 0.8685    | 0.47353 | 0.753645075 |             |          |         |  |
| NA         | ENSG00000272606 | -0.62861  | 0.7352  | -0.62861    | 0.7352      | -0.62861 | 0.7352  |  |
|            | 0.066355        | 0.47355   | 0.47355 | 0.753645075 |             |          |         |  |
| OR8A1      | ENSG00000196119 | -1.7013   | 0.95555 | -0.80572    | 0.7898      | 0.066327 | 0.47356 |  |
|            | -0.48491        | 0.68613   | 0.47356 | 0.753645075 |             |          |         |  |
| NA         | ENSG00000270195 | 0.066253  | 0.47359 | 0.066253    | 0.47359     | 0.066253 | 0.47359 |  |
|            | 0.066253        | 0.47359   | 0.47359 | 0.753645075 |             |          |         |  |
| MTUS2-AS2  | ENSG00000236758 | 0.066207  | 0.47361 | -0.61866    | 0.73193     | -1.1576  |         |  |
|            | 0.87648         | -0.33712  | 0.63199 | 0.47361     | 0.753645075 |          |         |  |
| NA         | ENSG00000258343 | 0.066182  | 0.47362 | -0.7505     | 0.77352     | -0.4352  | 0.66829 |  |
|            | -0.7505         | 0.77352   | 0.47362 | 0.753645075 |             |          |         |  |
| NA         | ENSG00000270184 | -0.14279  | 0.55677 | 0.066166    | 0.47362     | 0.066166 | 0.47362 |  |
|            | 0.066166        | 0.47362   | 0.47362 | 0.753645075 |             |          |         |  |
| MIR802     | ENSG00000211590 | 0.066139  | 0.47363 | 0.066139    | 0.47363     | -0.19684 |         |  |
|            | 0.57802         | 0.066139  | 0.47363 | 0.47363     | 0.753645075 |          |         |  |
| SRPRA      | ENSG00000182934 | 0.066102  | 0.47365 | 0.066102    | 0.47365     | 0.066102 | 0.47365 |  |
|            | 0.066102        | 0.47365   | 0.47365 | 0.753645075 |             |          |         |  |
| ZNF426     | ENSG00000130818 | 0.025295  | 0.48991 | 0.065991    | 0.47369     | -0.13309 |         |  |
|            | 0.55294         | -0.59842  | 0.72522 | 0.47369     | 0.753645075 |          |         |  |
| GRAMD1C    | ENSG00000178075 | 0.065892  | 0.47373 | -0.08394    | 0.53345     | -0.97536 |         |  |
|            | 0.83531         | -0.071582 | 0.52853 | 0.47373     | 0.753645075 |          |         |  |
| NA         | ENSG00000234871 | 0.065897  | 0.47373 | 0.065897    | 0.47373     | 0.065897 | 0.47373 |  |

|            |                 |             |         |             |             |           |         |           |
|------------|-----------------|-------------|---------|-------------|-------------|-----------|---------|-----------|
|            | 0.065897        | 0.47373     | 0.47373 | 0.753645075 |             |           |         |           |
| SNRPB2     | ENSG00000125870 | 0.065816    | 0.47376 | 0.065816    | 0.47376     | 0.065816  | 0.47376 | 0.065816  |
|            | 0.47376         | 0.065816    | 0.47376 | 0.47376     | 0.753645075 |           |         |           |
| NA         | ENSG00000265544 | 0.01479     | 0.4941  | 0.065819    | 0.47376     | 0.01479   | 0.4941  | 0.4941    |
|            | 0.01479         | 0.4941      | 0.47376 | 0.753645075 |             |           |         |           |
| LINC02543  | ENSG00000232947 | 0.019933    | 0.49205 | 0.065745    | 0.47379     | 0.019933  | 0.47379 | 0.019933  |
|            | 0.49205         | 0.019933    | 0.49205 | 0.47379     | 0.753645075 |           |         |           |
| NA         | ENSG00000251942 | 0.065754    | 0.47379 | 0.065754    | 0.47379     | 0.065754  | 0.47379 | 0.47379   |
|            | 0.065754        | 0.47379     | 0.47379 | 0.753645075 |             |           |         |           |
| IGFN1      | ENSG00000163395 | -0.75338    | 0.77439 | -1.5583     | 0.94042     | -1.4838   | 0.93108 | 0.93108   |
|            | 0.065715        | 0.4738      | 0.4738  | 0.753645075 |             |           |         |           |
| NA         | ENSG00000225032 | -0.60384    | 0.72703 | -0.13128    | 0.55222     | 0.065724  | 0.4738  | 0.4738    |
|            | 0.065724        | 0.4738      | 0.4738  | 0.753645075 |             |           |         |           |
| NA         | ENSG00000271462 | 0.065688    | 0.47381 | -0.92536    | 0.82261     | 0.065688  | 0.47381 | 0.47381   |
|            | 0.065688        | 0.47381     | 0.47381 | 0.753645075 |             |           |         |           |
| OAZ2       | ENSG00000180304 | -1.2218     | 0.88911 | -1.2218     | 0.88911     | 0.065683  | 0.47382 | 0.47382   |
|            | -1.3957         | 0.91859     | 0.47382 | 0.753645075 |             |           |         |           |
| NPY5R      | ENSG00000164129 | -1.531      | 0.93712 | -1.0264     | 0.84766     | -1.0264   | 0.84766 | 0.84766   |
|            | 0.065648        | 0.47383     | 0.47383 | 0.753645075 |             |           |         |           |
| MIR598     | ENSG00000207600 | -0.58428    | 0.72048 | 0.065583    | 0.47385     | -1.2741   | 0.47385 | -1.2741   |
|            | 0.89868         | -0.24399    | 0.59638 | 0.47385     | 0.753645075 |           |         |           |
| IL10RB-DT  | ENSG00000223799 | 0.065573    | 0.47386 | 0.065573    | 0.47386     | 0.065573  | 0.47386 | 0.065573  |
|            | 0.47386         | 0.065573    | 0.47386 | 0.47386     | 0.753645075 |           |         |           |
| ZDHHC4P1   | ENSG00000238025 | 0.065583    | 0.47386 | 0.065583    | 0.47386     | 0.065583  | 0.47386 | 0.065583  |
|            | 0.47386         | 0.065583    | 0.47386 | 0.47386     | 0.753645075 |           |         |           |
| NA         | ENSG00000234007 | -0.20943    | 0.58294 | -0.39677    | 0.65423     | 0.065542  | 0.47387 | 0.47387   |
|            | -1.0398         | 0.85079     | 0.47387 | 0.753645075 |             |           |         |           |
| OR5B1P     | ENSG00000233499 | 0.065478    | 0.4739  | -0.0088839  | 0.50354     | -0.092229 | 0.4739  | -0.092229 |
|            | 0.53674         | 0.065478    | 0.4739  | 0.4739      | 0.75366819  |           |         |           |
| NA         | ENSG00000229618 | 0.0654      | 0.47393 | -0.70195    | 0.75864     | 0.015218  | 0.49393 | 0.49393   |
|            | -1.3802         | 0.91624     | 0.47393 | 0.753673917 |             |           |         |           |
| KCNIP1-OT1 | ENSG00000253647 | -0.89918    | 0.81572 | -1.0289     | 0.84824     | 0.065359  | 0.47394 | 0.065359  |
|            | 0.47394         | -0.6981     | 0.75744 | 0.47394     | 0.753673917 |           |         |           |
| NA         | ENSG00000227164 | 0.065344    | 0.47395 | 0.065344    | 0.47395     | 0.065344  | 0.47395 | 0.47395   |
|            | 0.065344        | 0.47395     | 0.47395 | 0.753673917 |             |           |         |           |
| NA         | ENSG00000225399 | 0.065217    | 0.474   | 0.065217    | 0.474       | 0.065217  | 0.474   | 0.065217  |
|            | 0.474           | 0.753695543 |         |             |             |           |         |           |
| SHB        | ENSG00000107338 | -1.4258     | 0.92304 | -0.44362    | 0.67134     | 0.0652    | 0.47401 | 0.47401   |
|            | -0.18382        | 0.57292     | 0.47401 | 0.753695543 |             |           |         |           |
| NUS1P3     | ENSG00000234627 | -0.096406   | 0.5384  | -1.2101     | 0.88688     | -1.3607   | 0.47401 | -1.3607   |
|            | 0.9132          | 0.065191    | 0.47401 | 0.47401     | 0.753695543 |           |         |           |
| CCDC181    | ENSG00000117477 | 0.065113    | 0.47404 | -0.87328    | 0.80874     | -1.1064   | 0.47404 | -1.1064   |
|            | 0.86572         | -0.53457    | 0.70353 | 0.47404     | 0.75371865  |           |         |           |
| SLC35E1    | ENSG00000127526 | 0.065034    | 0.47407 | 0.065034    | 0.47407     | -1.4573   | 0.47407 | -1.4573   |
|            | 0.92748         | -0.084261   | 0.53358 | 0.47407     | 0.753741757 |           |         |           |
| PRKCQ-AS1  | ENSG00000237943 | -0.71998    | 0.76423 | 0.064863    | 0.47414     | 0.064863  | 0.47414 | 0.064863  |
|            | 0.47414         | -1.5552     | 0.94005 | 0.47414     | 0.753784985 |           |         |           |
| EXD2       | ENSG00000081177 | 0.064848    | 0.47415 | -0.7204     | 0.76436     | -0.38296  | 0.47415 | 0.64913   |
|            | -0.96652        | 0.83311     | 0.47415 | 0.753784985 |             |           |         |           |
| NA         | ENSG00000237921 | 0.064805    | 0.47416 | 0.064805    | 0.47416     | 0.064805  | 0.47416 | 0.47416   |
|            | 0.064805        | 0.47416     | 0.47416 | 0.753784985 |             |           |         |           |
| NA         | ENSG00000269091 | 0.064803    | 0.47417 | 0.064803    | 0.47417     | 0.064803  | 0.47417 | 0.47417   |
|            | 0.064803        | 0.47417     | 0.47417 | 0.753784985 |             |           |         |           |
| OR7A18P    | ENSG00000269678 | 0.064776    | 0.47418 | 0.064776    | 0.47418     | 0.064776  | 0.47418 | 0.064776  |
|            | 0.47418         | 0.064776    | 0.47418 | 0.47418     | 0.753784985 |           |         |           |
| CXCR2      | ENSG00000180871 | -0.12084    | 0.54809 | -0.12084    | 0.54809     | 0.06473   | 0.47419 | 0.47419   |
|            | 0.06473         | 0.47419     | 0.47419 | 0.753784985 |             |           |         |           |
| ASB13      | ENSG00000196372 | -0.52267    | 0.6994  | -0.52267    | 0.6994      | -0.52267  | 0.6994  | 0.6994    |
|            | 0.064667        | 0.47422     | 0.47422 | 0.753808083 |             |           |         |           |
| KRTAP9-10P | ENSG00000237183 | 0.064618    | 0.47424 | 0.064618    | 0.47424     | 0.064618  | 0.47424 | 0.064618  |
|            | 0.47424         | 0.064618    | 0.47424 | 0.47424     | 0.753815285 |           |         |           |
| PTENP1     | ENSG00000237984 | -0.37128    | 0.64478 | -0.23216    | 0.59179     | 0.0011546 | 0.64478 | 0.0011546 |

|            |                 |          |         |             |             |           |         |
|------------|-----------------|----------|---------|-------------|-------------|-----------|---------|
|            | 0.49954         | 0.06457  | 0.47426 | 0.47426     | 0.753819503 |           |         |
| RFXAP      | ENSG00000133111 | -1.266   | 0.89724 | -0.31591    | 0.62396     | 0.06449   | 0.47429 |
|            | 0.034945        | 0.48606  | 0.47429 | 0.753819503 |             |           |         |
| NA         | ENSG00000238594 | 0.064478 | 0.47429 | 0.064478    | 0.47429     | 0.064478  | 0.47429 |
|            | 0.064478        | 0.47429  | 0.47429 | 0.753819503 |             |           |         |
| DPP6       | ENSG00000130226 | -1.3706  | 0.91475 | -1.1336     | 0.87151     | -1.0087   | 0.84345 |
|            | 0.064425        | 0.47432  | 0.47432 | 0.753819503 |             |           |         |
| NA         | ENSG00000228430 | -1.1641  | 0.87781 | -0.54515    | 0.70717     | 0.064416  | 0.47432 |
|            | -0.61805        | 0.73173  | 0.47432 | 0.753819503 |             |           |         |
| SUFU       | ENSG00000107882 | 0.064262 | 0.47438 | -0.26441    | 0.60427     | -0.55486  | 0.71051 |
|            | -0.97543        | 0.83533  | 0.47438 | 0.7538684   |             |           |         |
| FAM83B     | ENSG00000168143 | -0.63313 | 0.73668 | -0.63313    | 0.73668     | 0.064194  |         |
|            | 0.47441         | -0.63313 | 0.73668 | 0.47441     | 0.7538684   |           |         |
| SRSF3P2    | ENSG00000254079 | 0.064104 | 0.47444 | 0.064104    | 0.47444     | 0.064104  |         |
|            | 0.47444         | 0.064104 | 0.47444 | 0.47444     | 0.7538684   |           |         |
| NA         | ENSG00000264973 | -0.67973 | 0.75166 | -1.1874     | 0.88247     | -1.1874   | 0.88247 |
|            | 0.064115        | 0.47444  | 0.47444 | 0.7538684   |             |           |         |
| LINC01247  | ENSG00000227007 | -0.14063 | 0.55592 | -0.14063    | 0.55592     | 0.06406   |         |
|            | 0.47446         | -0.14063 | 0.55592 | 0.47446     | 0.7538684   |           |         |
| NA         | ENSG00000267510 | 0.064057 | 0.47446 | 0.064057    | 0.47446     | 0.064057  | 0.47446 |
|            | 0.064057        | 0.47446  | 0.47446 | 0.7538684   |             |           |         |
| LINC02085  | ENSG00000214407 | 0.064026 | 0.47447 | 0.064026    | 0.47447     | 0.064026  |         |
|            | 0.47447         | -0.40228 | 0.65626 | 0.47447     | 0.7538684   |           |         |
| LINC02826  | ENSG00000275212 | -0.66016 | 0.74542 | -1.4828     | 0.93094     | -0.66016  |         |
|            | 0.74542         | 0.064014 | 0.47448 | 0.47448     | 0.7538684   |           |         |
| NA         | ENSG00000260316 | 0.063984 | 0.47449 | -0.44677    | 0.67248     | -0.032205 | 0.51285 |
|            | -0.28695        | 0.61293  | 0.47449 | 0.7538684   |             |           |         |
| ACTR3      | ENSG00000115091 | -0.62176 | 0.73295 | -0.13527    | 0.5538      | 0.063859  | 0.47454 |
|            | 0.063859        | 0.47454  | 0.47454 | 0.75389868  |             |           |         |
| NA         | ENSG00000250984 | 0.063854 | 0.47454 | 0.063854    | 0.47454     | 0.063854  | 0.47454 |
|            | 0.063854        | 0.47454  | 0.47454 | 0.75389868  |             |           |         |
| SPTSSA     | ENSG00000165389 | -0.93108 | 0.82409 | -0.93108    | 0.82409     | -0.93108  |         |
|            | 0.82409         | 0.06369  | 0.47461 | 0.47461     | 0.753976613 |           |         |
| PHF2       | ENSG00000197724 | -0.42568 | 0.66483 | 0.063669    | 0.47462     | -0.45084  | 0.67395 |
|            | -0.89933        | 0.81576  | 0.47462 | 0.753976613 |             |           |         |
| PDE6H      | ENSG00000139053 | 0.044717 | 0.48217 | -0.098201   | 0.53911     | 0.063599  | 0.47464 |
|            | -0.076356       | 0.53043  | 0.47464 | 0.753983805 |             |           |         |
| SUPT7L     | ENSG00000119760 | -1.1411  | 0.87308 | -0.61459    | 0.73059     | 0.063458  |         |
|            | 0.4747          | -1.1411  | 0.87308 | 0.4747      | 0.754029956 |           |         |
| NA         | ENSG00000240311 | 0.063448 | 0.4747  | 0.063448    | 0.4747      | 0.063448  | 0.4747  |
|            | 0.063448        | 0.4747   | 0.4747  | 0.754029956 |             |           |         |
| MTND2P20   | ENSG00000229701 | 0.063325 | 0.47475 | 0.063325    | 0.47475     | 0.063325  |         |
|            | 0.47475         | 0.063325 | 0.47475 | 0.47475     | 0.754050018 |           |         |
| ITPRIPL2   | ENSG00000205730 | 0.0633   | 0.47476 | 0.0633      | 0.47476     | 0.0633    |         |
|            | 0.47476         | -0.32217 | 0.62634 | 0.47476     | 0.754050018 |           |         |
| NA         | ENSG00000254938 | 0.063253 | 0.47478 | -0.37632    | 0.64666     | 0.063253  | 0.47478 |
|            | 0.063253        | 0.47478  | 0.47478 | 0.754050018 |             |           |         |
| NA         | ENSG00000242970 | 0.063243 | 0.47479 | 0.063243    | 0.47479     | 0.063243  | 0.47479 |
|            | 0.063243        | 0.47479  | 0.47479 | 0.754050018 |             |           |         |
| NA         | ENSG00000260590 | 0.063226 | 0.47479 | 0.063226    | 0.47479     | 0.063226  | 0.47479 |
|            | 0.063226        | 0.47479  | 0.47479 | 0.754050018 |             |           |         |
| NODAL      | ENSG00000156574 | 0.012815 | 0.49489 | -0.2081     | 0.58243     | 0.063155  | 0.47482 |
|            | 0.063155        | 0.47482  | 0.47482 | 0.754073087 |             |           |         |
| RNU6-1283P | ENSG00000202184 | 0.06304  | 0.47487 | 0.06304     | 0.47487     | 0.06304   |         |
|            | 0.47487         | 0.06304  | 0.47487 | 0.47487     | 0.754090564 |           |         |
| RPL27AP4   | ENSG00000233939 | 0.063041 | 0.47487 | -0.48857    | 0.68743     | 0.063041  |         |
|            | 0.47487         | 0.063041 | 0.47487 | 0.47487     | 0.754090564 |           |         |
| OR5AK4P    | ENSG00000283307 | 0.062876 | 0.47493 | 0.062876    | 0.47493     | 0.062876  |         |
|            | 0.47493         | 0.062876 | 0.47493 | 0.47493     | 0.754090564 |           |         |
| REST       | ENSG00000084093 | 0.062857 | 0.47494 | -0.11941    | 0.54753     | -0.87243  | 0.80851 |
|            | -0.13613        | 0.55414  | 0.47494 | 0.754090564 |             |           |         |
| NA         | ENSG00000278834 | 0.062825 | 0.47495 | 0.062825    | 0.47495     | 0.062825  | 0.47495 |

|            |                 |           |         |             |         |          |         |  |
|------------|-----------------|-----------|---------|-------------|---------|----------|---------|--|
|            | 0.062825        | 0.47495   | 0.47495 | 0.754090564 |         |          |         |  |
| CD226      | ENSG00000150637 | -0.91327  | 0.81945 | 0.062796    | 0.47496 | -0.5495  | 0.70867 |  |
|            | -0.14476        | 0.55755   | 0.47496 | 0.754090564 |         |          |         |  |
| ATP6V0D2   | ENSG00000147614 | 0.062698  | 0.475   | 0.062698    | 0.475   | -0.8131  | 0.79192 |  |
|            | -0.28603        | 0.61257   | 0.475   | 0.754090564 |         |          |         |  |
| VPS18      | ENSG00000104142 | -0.75593  | 0.77515 | -1.4277     | 0.92331 | -0.94397 | 0.82741 |  |
|            | 0.062685        | 0.47501   | 0.47501 | 0.754090564 |         |          |         |  |
| NA         | ENSG00000282917 | 0.062579  | 0.47505 | 0.062579    | 0.47505 | 0.062579 | 0.47505 |  |
|            | 0.062579        | 0.47505   | 0.47505 | 0.754090564 |         |          |         |  |
| SMIM18     | ENSG00000253457 | 0.062556  | 0.47506 | 0.062556    | 0.47506 | 0.062556 |         |  |
|            | 0.47506         | 0.062556  | 0.47506 | 0.754090564 |         |          |         |  |
| PUM2       | ENSG00000055917 | -1.4637   | 0.92836 | -0.29717    | 0.61683 | 0.062541 | 0.47507 |  |
|            | -0.47026        | 0.68092   | 0.47507 | 0.754090564 |         |          |         |  |
| EEF1DP5    | ENSG00000213130 | -0.3089   | 0.6213  | 0.062497    | 0.47508 | -0.3089  |         |  |
|            | 0.6213          | -0.3089   | 0.6213  | 0.754090564 |         |          |         |  |
| NA         | ENSG00000254404 | 0.062495  | 0.47508 | 0.062495    | 0.47508 | -0.70677 | 0.76014 |  |
|            | 0.062495        | 0.47508   | 0.47508 | 0.754090564 |         |          |         |  |
| NA         | ENSG00000227006 | 0.062484  | 0.47509 | 0.062484    | 0.47509 | 0.062484 | 0.47509 |  |
|            | 0.062484        | 0.47509   | 0.47509 | 0.754090564 |         |          |         |  |
| NA         | ENSG00000214109 | 0.062398  | 0.47512 | 0.062398    | 0.47512 | 0.062398 | 0.47512 |  |
|            | 0.062398        | 0.47512   | 0.47512 | 0.754090564 |         |          |         |  |
| IFNWP18    | ENSG00000223684 | 0.062309  | 0.47516 | 0.062309    | 0.47516 | 0.062309 |         |  |
|            | 0.47516         | 0.062309  | 0.47516 | 0.754090564 |         |          |         |  |
| PSMB8      | ENSG00000204264 | 0.062256  | 0.47518 | 0.062256    | 0.47518 | 0.062256 | 0.47518 |  |
|            | 0.017698        | 0.49294   | 0.47518 | 0.754090564 |         |          |         |  |
| NA         | ENSG00000233455 | -1.5435   | 0.93865 | -0.78734    | 0.78446 | 0.062172 | 0.47521 |  |
|            | -0.69623        | 0.75686   | 0.47521 | 0.754090564 |         |          |         |  |
| C8orf33    | ENSG00000182307 | 0.062104  | 0.47524 | 0.062104    | 0.47524 | 0.062104 |         |  |
|            | 0.47524         | 0.062104  | 0.47524 | 0.754090564 |         |          |         |  |
| NA         | ENSG00000263401 | -0.028326 | 0.5113  | -0.024803   | 0.50989 | -0.95356 | 0.82985 |  |
|            | 0.062098        | 0.47524   | 0.47524 | 0.754090564 |         |          |         |  |
| NA         | ENSG00000207177 | 0.06205   | 0.47526 | -2.3873     | 0.99151 | -2.4593  | 0.99304 |  |
|            | -2.4593         | 0.99304   | 0.47526 | 0.754090564 |         |          |         |  |
| NA         | ENSG00000253550 | 0.062037  | 0.47527 | -0.31742    | 0.62454 | 0.062037 | 0.47527 |  |
|            | 0.062037        | 0.47527   | 0.47527 | 0.754090564 |         |          |         |  |
| NA         | ENSG00000234139 | 0.062002  | 0.47528 | -0.25189    | 0.59944 | -0.13219 | 0.55258 |  |
|            | -0.13219        | 0.55258   | 0.47528 | 0.754090564 |         |          |         |  |
| MS4A7      | ENSG00000166927 | -1.4636   | 0.92835 | -0.61769    | 0.73161 | 0.061967 | 0.47529 |  |
|            | -1.1985         | 0.88464   | 0.47529 | 0.754090564 |         |          |         |  |
| YBX1P6     | ENSG00000213539 | 0.061915  | 0.47532 | 0.061915    | 0.47532 | 0.061915 |         |  |
|            | 0.47532         | 0.061915  | 0.47532 | 0.754090564 |         |          |         |  |
| NA         | ENSG00000218520 | -1.3814   | 0.91642 | -0.017532   | 0.50699 | -0.58739 | 0.72153 |  |
|            | 0.061887        | 0.47533   | 0.47533 | 0.754090564 |         |          |         |  |
| NA         | ENSG00000256944 | -0.056567 | 0.52255 | 0.061865    | 0.47534 | -0.10164 | 0.54048 |  |
|            | -0.10164        | 0.54048   | 0.47534 | 0.754090564 |         |          |         |  |
| NA         | ENSG00000267271 | 0.061864  | 0.47534 | 0.061864    | 0.47534 | 0.061864 | 0.47534 |  |
|            | 0.061864        | 0.47534   | 0.47534 | 0.754090564 |         |          |         |  |
| NA         | ENSG00000234175 | 0.061835  | 0.47535 | 0.061835    | 0.47535 | 0.061835 | 0.47535 |  |
|            | 0.061835        | 0.47535   | 0.47535 | 0.754090564 |         |          |         |  |
| IGLC7      | ENSG00000211685 | 0.061798  | 0.47536 | 0.061798    | 0.47536 | 0.061798 | 0.47536 |  |
|            | 0.061798        | 0.47536   | 0.47536 | 0.754090564 |         |          |         |  |
| NPM1P28    | ENSG00000240804 | -0.48081  | 0.68467 | -0.8482     | 0.80184 | 0.0618   |         |  |
|            | 0.47536         | 0.0618    | 0.47536 | 0.754090564 |         |          |         |  |
| LINC00556  | ENSG00000260131 | 0.061775  | 0.47537 | 0.061775    | 0.47537 | 0.061775 |         |  |
|            | 0.47537         | 0.061775  | 0.47537 | 0.754090564 |         |          |         |  |
| RNU6-1313P | ENSG00000199492 | 0.061763  | 0.47538 | 0.061763    | 0.47538 | 0.061763 |         |  |
|            | 0.47538         | 0.061763  | 0.47538 | 0.754090564 |         |          |         |  |
| KMT5AP3    | ENSG00000242583 | -0.82997  | 0.79672 | -0.82997    | 0.79672 | -0.82997 |         |  |
|            | 0.79672         | 0.061742  | 0.47538 | 0.754090564 |         |          |         |  |
| NA         | ENSG00000248749 | 0.0617    | 0.4754  | -1.3989     | 0.91907 | -0.35234 | 0.63771 |  |
|            | -1.3989         | 0.91907   | 0.4754  | 0.754090564 |         |          |         |  |
| SIPA1      | ENSG00000213445 | 0.061682  | 0.47541 | -0.010133   | 0.50404 | -0.82014 | 0.79393 |  |

|            |                 |             |         |             |             |           |         |  |
|------------|-----------------|-------------|---------|-------------|-------------|-----------|---------|--|
|            | -0.82014        | 0.79393     | 0.47541 | 0.754090564 |             |           |         |  |
| IGLJ7      | ENSG00000211684 | 0.061617    | 0.47543 | 0.061617    | 0.47543     | 0.061617  | 0.47543 |  |
|            | 0.061617        | 0.47543     | 0.47543 | 0.754090564 |             |           |         |  |
| RCC2       | ENSG00000179051 | -1.0186     | 0.8458  | -0.19888    | 0.57882     | 0.061569  | 0.47545 |  |
|            | -0.57579        | 0.71762     | 0.47545 | 0.754090564 |             |           |         |  |
| RNU6-1083P | ENSG00000206749 | 0.061574    | 0.47545 | 0.061574    | 0.47545     | 0.061574  |         |  |
|            | 0.47545         | 0.061574    | 0.47545 | 0.47545     | 0.754090564 |           |         |  |
| VENTXP2    | ENSG00000215037 | 0.061585    | 0.47545 | -0.78881    | 0.78489     | -0.16898  |         |  |
|            | 0.56709         | -0.87649    | 0.80962 | 0.47545     | 0.754090564 |           |         |  |
| RNU7-124P  | ENSG00000251745 | 0.061506    | 0.47548 | -0.85735    | 0.80437     | 0.047913  |         |  |
|            | 0.48089         | -0.84025    | 0.79961 | 0.47548     | 0.754113601 |           |         |  |
| MCEE       | ENSG00000124370 | -0.16347    | 0.56493 | -0.16347    | 0.56493     | -0.16347  | 0.56493 |  |
|            | 0.061309        | 0.47556     | 0.47556 | 0.754215934 |             |           |         |  |
| KIAA1143P2 | ENSG00000232766 | 0.061181    | 0.47561 | -0.26593    | 0.60485     | -1.4989   |         |  |
|            | 0.93305         | -0.26772    | 0.60554 | 0.47561     | 0.754270684 |           |         |  |
| NA         | ENSG00000255477 | 0.061065    | 0.47565 | -0.078655   | 0.53135     | -0.078655 | 0.53135 |  |
|            | -0.37924        | 0.64774     | 0.47565 | 0.754309571 |             |           |         |  |
| NARS1      | ENSG00000134440 | -1.2207     | 0.8889  | -0.69675    | 0.75702     | -0.69675  | 0.75702 |  |
|            | 0.060964        | 0.47569     | 0.47569 | 0.754339766 |             |           |         |  |
| KRBA1      | ENSG00000133619 | -0.10711    | 0.54265 | -0.20256    | 0.58026     | 0.060944  | 0.4757  |  |
|            | -1.0675         | 0.85712     | 0.4757  | 0.754339766 |             |           |         |  |
| NA         | ENSG00000243733 | 0.060845    | 0.47574 | -0.28857    | 0.61355     | -1.2526   | 0.89482 |  |
|            | -2.1173         | 0.98288     | 0.47574 | 0.754378647 |             |           |         |  |
| NA         | ENSG00000232115 | 0.060757    | 0.47578 | 0.060757    | 0.47578     | 0.060757  | 0.47578 |  |
|            | 0.060757        | 0.47578     | 0.47578 | 0.754395566 |             |           |         |  |
| MIR4513    | ENSG00000264386 | 0.060707    | 0.4758  | 0.060707    | 0.4758      | 0.060707  |         |  |
|            | 0.4758          | 0.060707    | 0.4758  | 0.4758      | 0.754395566 |           |         |  |
| SATB2      | ENSG00000119042 | -0.10572    | 0.5421  | 0.060644    | 0.47582     | -1.3538   | 0.9121  |  |
|            | -1.0657         | 0.85673     | 0.47582 | 0.754395566 |             |           |         |  |
| RNU6-670P  | ENSG00000201182 | 0.060625    | 0.47583 | 0.060625    | 0.47583     | 0.060625  |         |  |
|            | 0.47583         | 0.060625    | 0.47583 | 0.47583     | 0.754395566 |           |         |  |
| NA         | ENSG00000235845 | 0.060607    | 0.47584 | -2.2892     | 0.98897     | -0.28735  | 0.61308 |  |
|            | -0.28735        | 0.61308     | 0.47584 | 0.754395566 |             |           |         |  |
| PHLDB3     | ENSG00000176531 | -0.020613   | 0.50822 | 0.060575    | 0.47585     | -0.020613 |         |  |
|            | 0.50822         | -0.10491    | 0.54178 | 0.47585     | 0.754395566 |           |         |  |
| MIR4704    | ENSG00000263561 | 0.060553    | 0.47586 | 0.013999    | 0.49442     | 0.060553  |         |  |
|            | 0.47586         | 0.060553    | 0.47586 | 0.47586     | 0.754395566 |           |         |  |
| CIBAR2     | ENSG00000153789 | -0.26618    | 0.60495 | 0.060468    | 0.47589     | -1.3262   |         |  |
|            | 0.90761         | -0.48949    | 0.68775 | 0.47589     | 0.754395566 |           |         |  |
| RNF152P1   | ENSG00000214190 | -0.18071    | 0.5717  | -0.18071    | 0.5717      | -0.18071  |         |  |
|            | 0.5717          | 0.06047     | 0.47589 | 0.47589     | 0.754395566 |           |         |  |
| IRF9       | ENSG00000213928 | 0.060416    | 0.47591 | 0.060416    | 0.47591     | 0.060416  | 0.47591 |  |
|            | 0.060416        | 0.47591     | 0.47591 | 0.754402729 |             |           |         |  |
| FABP12     | ENSG00000197416 | 0.06036     | 0.47593 | 0.06036     | 0.47593     | -1.0007   |         |  |
|            | 0.84151         | -1.4656     | 0.92862 | 0.47593     | 0.754409892 |           |         |  |
| ACOT7      | ENSG00000097021 | 0.060254    | 0.47598 | -0.054942   | 0.52191     | -0.38006  | 0.64805 |  |
|            | -0.16146        | 0.56413     | 0.47598 | 0.754438538 |             |           |         |  |
| RXRG       | ENSG00000143171 | -0.19732    | 0.57821 | 0.060208    | 0.47599     | 0.026873  | 0.48928 |  |
|            | -0.031048       | 0.51238     | 0.47599 | 0.754438538 |             |           |         |  |
| NA         | ENSG00000270574 | 0.060195    | 0.476   | 0.060195    | 0.476       | 0.060195  | 0.476   |  |
|            | 0.476           | 0.754438538 |         |             |             |           |         |  |
| NA         | ENSG00000280828 | 0.060175    | 0.47601 | 0.060175    | 0.47601     | 0.060175  | 0.47601 |  |
|            | 0.060175        | 0.47601     | 0.47601 | 0.754438538 |             |           |         |  |
| LINC02782  | ENSG00000231510 | -1.4618     | 0.9281  | -0.42639    | 0.66509     | -0.68813  |         |  |
|            | 0.75431         | 0.060075    | 0.47605 | 0.47605     | 0.754477396 |           |         |  |
| AK3P4      | ENSG00000248722 | -0.71595    | 0.76299 | -0.28717    | 0.61301     | 0.059859  | 0.47613 |  |
|            | -0.71595        | 0.76299     | 0.47613 | 0.754543344 |             |           |         |  |
| MARK2P14   | ENSG00000231897 | 0.059836    | 0.47614 | 0.059836    | 0.47614     | 0.059836  |         |  |
|            | 0.47614         | 0.059836    | 0.47614 | 0.47614     | 0.754543344 |           |         |  |
| NA         | ENSG00000224746 | 0.059815    | 0.47615 | 0.059815    | 0.47615     | 0.019026  | 0.49241 |  |
|            | 0.059815        | 0.47615     | 0.47615 | 0.754543344 |             |           |         |  |
| RPL23AP1   | ENSG00000239257 | 0.05976     | 0.47617 | 0.05976     | 0.47617     | 0.05976   |         |  |



|            |                 |           |         |             |             |           |         |
|------------|-----------------|-----------|---------|-------------|-------------|-----------|---------|
|            | 0.47617         | 0.05976   | 0.47617 | 0.47617     | 0.754543344 |           |         |
| NA         | ENSG00000283413 | 0.059776  | 0.47617 | 0.059776    | 0.47617     | 0.059776  | 0.47617 |
|            | 0.059776        | 0.47617   | 0.47617 | 0.754543344 |             |           |         |
| GEMIN5     | ENSG00000082516 | -0.02813  | 0.51122 | -0.70455    | 0.75946     | -0.37627  |         |
|            | 0.64664         | 0.059716  | 0.47619 | 0.47619     | 0.754543344 |           |         |
| LINC01078  | ENSG00000223880 | 0.059696  | 0.4762  | -0.55429    | 0.71031     | 0.059696  |         |
|            | 0.4762          | 0.059696  | 0.4762  | 0.4762      | 0.754543344 |           |         |
| MIR1249    | ENSG00000221598 | 0.059557  | 0.47625 | 0.059557    | 0.47625     | 0.059557  |         |
|            | 0.47625         | 0.059557  | 0.47625 | 0.47625     | 0.754598033 |           |         |
| TUBBP11    | ENSG00000243195 | 0.059271  | 0.47637 | -0.32169    | 0.62616     | 0.059271  |         |
|            | 0.47637         | 0.059271  | 0.47637 | 0.47637     | 0.754754931 |           |         |
| NA         | ENSG00000231902 | 0.059241  | 0.47638 | 0.059241    | 0.47638     | 0.059241  | 0.47638 |
|            | 0.059241        | 0.47638   | 0.47638 | 0.754754931 |             |           |         |
| PRDX4P1    | ENSG00000248987 | 0.059166  | 0.47641 | -1.562      | 0.94085     | -1.8692   |         |
|            | 0.9692          | -1.562    | 0.94085 | 0.47641     | 0.754758982 |           |         |
| EIF4E3     | ENSG00000163412 | -0.62763  | 0.73488 | -0.58485    | 0.72068     | 0.059076  |         |
|            | 0.47645         | -0.63907  | 0.73861 | 0.47645     | 0.754758982 |           |         |
| RNA5SP168  | ENSG00000252451 | 0.059078  | 0.47645 | 0.059078    | 0.47645     | 0.059078  |         |
|            | 0.47645         | 0.059078  | 0.47645 | 0.47645     | 0.754758982 |           |         |
| NA         | ENSG00000266844 | -0.86067  | 0.80529 | 0.059063    | 0.47645     | 0.040145  | 0.48399 |
|            | 0.040145        | 0.48399   | 0.47645 | 0.754758982 |             |           |         |
| MTCO2P1    | ENSG00000229690 | -1.1152   | 0.86762 | 0.059052    | 0.47646     | 0.059052  |         |
|            | 0.47646         | 0.059052  | 0.47646 | 0.47646     | 0.754758982 |           |         |
| TTC4       | ENSG00000243725 | -0.047589 | 0.51898 | -0.013198   | 0.50526     | -0.047589 | 0.51898 |
|            | 0.058977        | 0.47649   | 0.47649 | 0.754773274 |             |           |         |
| LRRC37A16P | ENSG00000267023 | -0.40917  | 0.65879 | -0.71806    | 0.76364     | 0.058947  |         |
|            | 0.4765          | -1.3038   | 0.90385 | 0.4765      | 0.754773274 |           |         |
| SLC35D3    | ENSG00000182747 | 0.058837  | 0.47654 | 0.058837    | 0.47654     | 0.058837  |         |
|            | 0.47654         | 0.058837  | 0.47654 | 0.47654     | 0.754812098 |           |         |
| NA         | ENSG00000232436 | -0.94196  | 0.82689 | 0.058798    | 0.47656     | -0.49886  | 0.69106 |
|            | -0.39272        | 0.65274   | 0.47656 | 0.754819242 |             |           |         |
| ATP2C2-AS1 | ENSG00000261286 | -0.12351  | 0.54915 | -0.59542    | 0.72422     | 0.058697  |         |
|            | 0.4766          | 0.058697  | 0.4766  | 0.4766      | 0.754839118 |           |         |
| PXDNL      | ENSG00000147485 | -0.20196  | 0.58003 | -0.43884    | 0.66961     | 0.05866   | 0.47661 |
|            | -0.32722        | 0.62825   | 0.47661 | 0.754839118 |             |           |         |
| MARCHF6    | ENSG00000145495 | -0.81618  | 0.7928  | 0.058647    | 0.47662     | -1.3124   |         |
|            | 0.90531         | -1.0311   | 0.84875 | 0.47662     | 0.754839118 |           |         |
| GNAI2P2    | ENSG00000231957 | -0.85948  | 0.80496 | -1.7844     | 0.96282     | -2.1454   |         |
|            | 0.98404         | 0.058594  | 0.47664 | 0.47664     | 0.754839118 |           |         |
| OR5G4P     | ENSG00000255485 | 0.058564  | 0.47665 | -0.99675    | 0.84056     | 0.058564  |         |
|            | 0.47665         | -0.99675  | 0.84056 | 0.47665     | 0.754839118 |           |         |
| KIAA0319   | ENSG00000137261 | 0.058492  | 0.47668 | -0.30263    | 0.61891     | -0.76632  |         |
|            | 0.77826         | -0.88769  | 0.81265 | 0.47668     | 0.754862095 |           |         |
| NA         | ENSG00000260252 | 0.058414  | 0.47671 | 0.058414    | 0.47671     | 0.058414  | 0.47671 |
|            | 0.058414        | 0.47671   | 0.47671 | 0.754863019 |             |           |         |
| ZNF496     | ENSG00000162714 | -1.555    | 0.94003 | -1.0565     | 0.85464     | 0.058363  |         |
|            | 0.47673         | 0.058363  | 0.47673 | 0.47673     | 0.754863019 |           |         |
| NA         | ENSG00000201810 | -0.51464  | 0.6966  | -0.61381    | 0.73033     | -0.056328 | 0.52246 |
|            | 0.058361        | 0.47673   | 0.47673 | 0.754863019 |             |           |         |
| RNU6-627P  | ENSG00000200902 | 0.05828   | 0.47676 | -0.22597    | 0.58939     | -1.3103   |         |
|            | 0.90495         | -1.2293   | 0.89053 | 0.47676     | 0.754863019 |           |         |
| LINC01763  | ENSG00000225446 | 0.058282  | 0.47676 | -0.021208   | 0.50846     | -0.53333  |         |
|            | 0.7031          | -0.16514  | 0.56558 | 0.47676     | 0.754863019 |           |         |
| NA         | ENSG00000279884 | 0.041766  | 0.48334 | 0.058222    | 0.47679     | 0.041766  | 0.48334 |
|            | 0.041766        | 0.48334   | 0.47679 | 0.754863019 |             |           |         |
| NA         | ENSG00000238054 | 0.058185  | 0.4768  | 0.058185    | 0.4768      | 0.058185  | 0.4768  |
|            | 0.058185        | 0.4768    | 0.4768  | 0.754863019 |             |           |         |
| RNU6-142P  | ENSG00000206746 | -0.88964  | 0.81317 | -0.23715    | 0.59373     | 0.058157  |         |
|            | 0.47681         | -1.0895   | 0.86204 | 0.47681     | 0.754863019 |           |         |
| NA         | ENSG00000254926 | 0.058143  | 0.47682 | -0.88978    | 0.81321     | -1.0255   | 0.84743 |
|            | -0.38342        | 0.6493    | 0.47682 | 0.754863019 |             |           |         |
| NA         | ENSG00000232897 | -0.29821  | 0.61723 | 0.058027    | 0.47686     | 0.058027  | 0.47686 |

|            |                 |           |         |             |             |           |         |         |
|------------|-----------------|-----------|---------|-------------|-------------|-----------|---------|---------|
|            | 0.058027        | 0.47686   | 0.47686 | 0.754884433 |             |           |         |         |
| BCRP9      | ENSG00000271287 | 0.058004  | 0.47687 | 0.058004    | 0.47687     | 0.058004  | 0.47687 | 0.47687 |
|            | 0.058004        | 0.47687   | 0.47687 | 0.754884433 |             |           |         |         |
| OR6U2P     | ENSG00000272937 | -0.45659  | 0.67602 | -0.33528    | 0.63129     | 0.057993  |         |         |
|            | 0.47688         | -0.30806  | 0.62098 | 0.47688     | 0.754884433 |           |         |         |
| STX10      | ENSG00000104915 | 0.057884  | 0.47692 | -1.3022     | 0.90358     | -0.37353  | 0.64562 |         |
|            | 0.057884        | 0.47692   | 0.47692 | 0.754914536 |             |           |         |         |
| RN7SL391P  | ENSG00000265388 | 0.057863  | 0.47693 | 0.057863    | 0.47693     | 0.057863  |         |         |
|            | 0.47693         | 0.057863  | 0.47693 | 0.47693     | 0.754914536 |           |         |         |
| C2orf69P2  | ENSG00000260341 | 0.057797  | 0.47696 | 0.057797    | 0.47696     | 0.057797  |         |         |
|            | 0.47696         | 0.057797  | 0.47696 | 0.47696     | 0.754935941 |           |         |         |
| NA         | ENSG00000176320 | 0.057731  | 0.47698 | -1.2975     | 0.90277     | -0.80805  | 0.79047 |         |
|            | -0.45987        | 0.6772    | 0.47698 | 0.754935941 |             |           |         |         |
| E2F2       | ENSG00000007968 | 0.026935  | 0.48926 | -0.39297    | 0.65283     | 0.057704  | 0.47699 |         |
|            | -0.55503        | 0.71056   | 0.47699 | 0.754935941 |             |           |         |         |
| FBXO36-IT1 | ENSG00000231534 | 0.057458  | 0.47709 | 0.057458    | 0.47709     | 0.057458  |         |         |
|            | 0.47709         | -0.097531 | 0.53885 | 0.47709     | 0.754946013 |           |         |         |
| NA         | ENSG00000260472 | 0.057463  | 0.47709 | -0.58737    | 0.72152     | 0.057463  | 0.47709 |         |
|            | 0.057463        | 0.47709   | 0.47709 | 0.754946013 |             |           |         |         |
| CADM4      | ENSG00000105767 | 0.057386  | 0.47712 | -0.77716    | 0.78147     | -0.77716  | 0.78147 |         |
|            | -0.77716        | 0.78147   | 0.47712 | 0.754946013 |             |           |         |         |
| SNORA71A   | ENSG00000225091 | 0.057255  | 0.47717 | 0.057255    | 0.47717     | 0.057255  |         |         |
|            | 0.47717         | 0.057255  | 0.47717 | 0.47717     | 0.754946013 |           |         |         |
| NA         | ENSG00000228330 | 0.057222  | 0.47718 | 0.057222    | 0.47718     | 0.057222  | 0.47718 |         |
|            | 0.057222        | 0.47718   | 0.47718 | 0.754946013 |             |           |         |         |
| TLN2       | ENSG00000171914 | 0.057204  | 0.47719 | -0.42506    | 0.6646      | -0.69633  | 0.75689 |         |
|            | -0.72381        | 0.76541   | 0.47719 | 0.754946013 |             |           |         |         |
| MTHFD2     | ENSG00000065911 | -0.92733  | 0.82312 | -0.92733    | 0.82312     | -0.92733  |         |         |
|            | 0.82312         | 0.05718   | 0.4772  | 0.4772      | 0.754946013 |           |         |         |
| MIR4515    | ENSG00000263643 | 0.057139  | 0.47722 | 0.057139    | 0.47722     | 0.057139  |         |         |
|            | 0.47722         | 0.057139  | 0.47722 | 0.47722     | 0.754946013 |           |         |         |
| SDAD1      | ENSG00000198301 | 0.057076  | 0.47724 | -0.49476    | 0.68962     | -0.54699  | 0.70781 |         |
|            | -0.54881        | 0.70843   | 0.47724 | 0.754946013 |             |           |         |         |
| FTLP5      | ENSG00000266989 | 0.057084  | 0.47724 | 0.057084    | 0.47724     | 0.057084  | 0.47724 |         |
|            | 0.057084        | 0.47724   | 0.47724 | 0.754946013 |             |           |         |         |
| FSD2       | ENSG00000186628 | -0.85582  | 0.80395 | -0.23068    | 0.59122     | -0.2576   | 0.60164 |         |
|            | 0.057047        | 0.47725   | 0.47725 | 0.754946013 |             |           |         |         |
| ABCG4      | ENSG00000172350 | 0.056998  | 0.47727 | -1.4288     | 0.92347     | -1.4763   | 0.93007 |         |
|            | -0.47045        | 0.68098   | 0.47727 | 0.754946013 |             |           |         |         |
| RPL41P1    | ENSG00000227063 | -0.076804 | 0.53061 | 0.056884    | 0.47732     | -0.063156 |         |         |
|            | 0.52518         | 0.056884  | 0.47732 | 0.47732     | 0.754946013 |           |         |         |
| MRPL48     | ENSG00000175581 | -0.083253 | 0.53317 | -0.17713    | 0.5703      | 0.056802  |         |         |
|            | 0.47735         | -0.48268  | 0.68534 | 0.47735     | 0.754946013 |           |         |         |
| NA         | ENSG00000241592 | 0.056768  | 0.47736 | -0.61694    | 0.73136     | 0.056768  | 0.47736 |         |
|            | 0.056768        | 0.47736   | 0.47736 | 0.754946013 |             |           |         |         |
| NA         | ENSG00000249061 | 0.056771  | 0.47736 | 0.056771    | 0.47736     | 0.056771  | 0.47736 |         |
|            | 0.056771        | 0.47736   | 0.47736 | 0.754946013 |             |           |         |         |
| THAP3      | ENSG00000041988 | 0.056662  | 0.47741 | 0.056662    | 0.47741     | 0.056662  | 0.47741 |         |
|            | -0.14203        | 0.55647   | 0.47741 | 0.754946013 |             |           |         |         |
| NA         | ENSG00000205044 | 0.056643  | 0.47741 | -1.9288     | 0.97312     | -1.7935   | 0.96356 |         |
|            | -1.4908         | 0.93199   | 0.47741 | 0.754946013 |             |           |         |         |
| SOWAHC     | ENSG00000198142 | 0.056637  | 0.47742 | 0.056637    | 0.47742     | 0.056637  |         |         |
|            | 0.47742         | 0.056637  | 0.47742 | 0.47742     | 0.754946013 |           |         |         |
| NA         | ENSG00000252112 | 0.056621  | 0.47742 | 0.056621    | 0.47742     | 0.056621  | 0.47742 |         |
|            | 0.056621        | 0.47742   | 0.47742 | 0.754946013 |             |           |         |         |
| SLC35E2B   | ENSG00000189339 | -0.18836  | 0.5747  | -0.47612    | 0.683       | -0.36485  | 0.64239 |         |
|            | 0.056612        | 0.47743   | 0.47743 | 0.754946013 |             |           |         |         |
| GM2A       | ENSG00000196743 | 0.056602  | 0.47743 | 0.056602    | 0.47743     | 0.056602  | 0.47743 |         |
|            | -1.0714         | 0.85801   | 0.47743 | 0.754946013 |             |           |         |         |
| RNU7-20P   | ENSG00000251712 | 0.056614  | 0.47743 | 0.056614    | 0.47743     | 0.056614  |         |         |
|            | 0.47743         | 0.056614  | 0.47743 | 0.47743     | 0.754946013 |           |         |         |
| NA         | ENSG00000267385 | 0.056596  | 0.47743 | 0.056596    | 0.47743     | 0.056596  | 0.47743 |         |

|            |                 |            |         |             |             |          |         |  |
|------------|-----------------|------------|---------|-------------|-------------|----------|---------|--|
|            | 0.056596        | 0.47743    | 0.47743 | 0.754946013 |             |          |         |  |
| NA         | ENSG00000275157 | 0.056565   | 0.47745 | -1.7783     | 0.96232     | 0.037648 | 0.48498 |  |
|            | -1.0617         | 0.85582    | 0.47745 | 0.754946013 |             |          |         |  |
| GLP1R      | ENSG00000112164 | -0.59457   | 0.72393 | -0.84204    | 0.80012     | 0.056446 | 0.47749 |  |
|            | -1.4685         | 0.92902    | 0.47749 | 0.754946013 |             |          |         |  |
| ZBTB46-AS1 | ENSG00000231208 | -0.0044289 | 0.50177 | -0.35227    | 0.63768     | 0.056444 |         |  |
|            | 0.47749         | 0.056444   | 0.47749 | 0.47749     | 0.754946013 |          |         |  |
| FAM136A    | ENSG00000035141 | -0.64558   | 0.74072 | 0.056414    | 0.47751     | 0.053015 |         |  |
|            | 0.47886         | -0.85602   | 0.80401 | 0.47751     | 0.754946013 |          |         |  |
| RNU7-85P   | ENSG00000238884 | 0.056377   | 0.47752 | 0.056377    | 0.47752     | 0.056377 |         |  |
|            | 0.47752         | 0.056377   | 0.47752 | 0.47752     | 0.754946013 |          |         |  |
| USP54      | ENSG00000166348 | -0.020914  | 0.50834 | 0.02694     | 0.48925     | 0.056336 | 0.47754 |  |
|            | -0.10972        | 0.54368    | 0.47754 | 0.754946013 |             |          |         |  |
| LINC01749  | ENSG00000272259 | -1.1965    | 0.88425 | -0.21532    | 0.58524     | -0.51251 |         |  |
|            | 0.69585         | 0.056326   | 0.47754 | 0.47754     | 0.754946013 |          |         |  |
| NA         | ENSG00000278867 | 0.05631    | 0.47755 | 0.05631     | 0.47755     | 0.05631  | 0.47755 |  |
|            | 0.05631         | 0.47755    | 0.47755 | 0.754946013 |             |          |         |  |
| NA         | ENSG00000249077 | 0.056274   | 0.47756 | 0.056274    | 0.47756     | 0.056274 | 0.47756 |  |
|            | 0.056274        | 0.47756    | 0.47756 | 0.754946013 |             |          |         |  |
| SEC23A     | ENSG00000100934 | 0.056167   | 0.4776  | -1.3501     | 0.91151     | -0.51883 |         |  |
|            | 0.69806         | -1.452     | 0.92675 | 0.4776      | 0.754946013 |          |         |  |
| NA         | ENSG00000220694 | 0.056147   | 0.47761 | 0.056147    | 0.47761     | 0.056147 | 0.47761 |  |
|            | -0.2553         | 0.60075    | 0.47761 | 0.754946013 |             |          |         |  |
| NA         | ENSG00000280187 | 0.056119   | 0.47762 | 0.056119    | 0.47762     | 0.056119 | 0.47762 |  |
|            | 0.056119        | 0.47762    | 0.47762 | 0.754946013 |             |          |         |  |
| KRT8P40    | ENSG00000213069 | 0.056096   | 0.47763 | -0.66512    | 0.74701     | 0.056096 |         |  |
|            | 0.47763         | -0.24199   | 0.59561 | 0.47763     | 0.754946013 |          |         |  |
| ACOD1      | ENSG00000102794 | -0.38955   | 0.65156 | -0.083619   | 0.53332     | 0.056052 | 0.47765 |  |
|            | -0.38955        | 0.65156    | 0.47765 | 0.754946013 |             |          |         |  |
| NA         | ENSG00000270898 | 0.056029   | 0.47766 | 0.056029    | 0.47766     | 0.056029 | 0.47766 |  |
|            | 0.056029        | 0.47766    | 0.47766 | 0.754946013 |             |          |         |  |
| PILRA      | ENSG00000085514 | -0.62377   | 0.73361 | -0.62377    | 0.73361     | -0.62377 | 0.73361 |  |
|            | 0.056009        | 0.47767    | 0.47767 | 0.754946013 |             |          |         |  |
| RPS28P5    | ENSG00000224646 | 0.056004   | 0.47767 | -1.1759     | 0.88018     | -1.1759  |         |  |
|            | 0.88018         | -1.1759    | 0.88018 | 0.47767     | 0.754946013 |          |         |  |
| RNF14P2    | ENSG00000250594 | -0.66336   | 0.74645 | -0.66336    | 0.74645     | -0.11575 |         |  |
|            | 0.54607         | 0.056008   | 0.47767 | 0.47767     | 0.754946013 |          |         |  |
| NA         | ENSG00000272275 | 0.056014   | 0.47767 | -0.91705    | 0.82044     | 0.056014 | 0.47767 |  |
|            | 0.056014        | 0.47767    | 0.47767 | 0.754946013 |             |          |         |  |
| ZNF302     | ENSG00000089335 | 0.055858   | 0.47773 | 0.055858    | 0.47773     | 0.055858 |         |  |
|            | 0.47773         | 0.055858   | 0.47773 | 0.47773     | 0.754946013 |          |         |  |
| NA         | ENSG00000233002 | 0.055842   | 0.47773 | 0.055842    | 0.47773     | 0.055842 | 0.47773 |  |
|            | 0.055842        | 0.47773    | 0.47773 | 0.754946013 |             |          |         |  |
| NA         | ENSG00000267227 | 0.055842   | 0.47773 | 0.055842    | 0.47773     | 0.055842 | 0.47773 |  |
|            | 0.055842        | 0.47773    | 0.47773 | 0.754946013 |             |          |         |  |
| NA         | ENSG00000274354 | 0.055854   | 0.47773 | 0.055854    | 0.47773     | 0.055854 | 0.47773 |  |
|            | 0.055854        | 0.47773    | 0.47773 | 0.754946013 |             |          |         |  |
| ITPR1      | ENSG00000150995 | 0.034543   | 0.48622 | 0.055837    | 0.47774     | -0.43852 | 0.66949 |  |
|            | -0.13989        | 0.55563    | 0.47774 | 0.754946013 |             |          |         |  |
| NA         | ENSG00000233055 | 0.055693   | 0.47779 | 0.055693    | 0.47779     | 0.055693 | 0.47779 |  |
|            | 0.055693        | 0.47779    | 0.47779 | 0.755000542 |             |          |         |  |
| RNA5SP160  | ENSG00000201736 | -0.92967   | 0.82373 | -0.97895    | 0.8362      | 0.055624 |         |  |
|            | 0.47782         | -0.58195   | 0.7197  | 0.47782     | 0.755023464 |          |         |  |
| NA         | ENSG00000277945 | 0.055551   | 0.47785 | 0.055551    | 0.47785     | 0.055551 | 0.47785 |  |
|            | 0.055551        | 0.47785    | 0.47785 | 0.755046385 |             |          |         |  |
| NA         | ENSG00000250122 | -0.26625   | 0.60498 | 0.055483    | 0.47788     | -0.26212 | 0.60339 |  |
|            | -0.33994        | 0.63305    | 0.47788 | 0.755069304 |             |          |         |  |
| NA         | ENSG00000271414 | 0.055309   | 0.47795 | 0.055309    | 0.47795     | 0.055309 | 0.47795 |  |
|            | 0.055309        | 0.47795    | 0.47795 | 0.755104174 |             |          |         |  |
| CBX3P7     | ENSG00000197692 | -0.52381   | 0.6998  | -1.962      | 0.97512     | 0.055249 |         |  |
|            | 0.47797         | 0.055249   | 0.47797 | 0.47797     | 0.755104174 |          |         |  |
| TRIM37     | ENSG00000108395 | -0.37483   | 0.64611 | -0.3143     | 0.62336     | -0.32296 |         |  |

|           |                 |           |         |             |             |          |          |
|-----------|-----------------|-----------|---------|-------------|-------------|----------|----------|
|           | 0.62664         | 0.055235  | 0.47798 | 0.47798     | 0.755104174 |          |          |
| RN7SKP187 | ENSG00000202406 | 0.055206  | 0.47799 | 0.47799     | 0.055206    | 0.47799  | 0.055206 |
|           | 0.47799         | 0.055206  | 0.47799 | 0.47799     | 0.755104174 |          |          |
| ACER2P1   | ENSG00000180105 | 0.053988  | 0.47847 | 0.47847     | -1.6236     | 0.94777  | 0.055112 |
|           | 0.47802         | -0.8128   | 0.79183 | 0.47802     | 0.755104174 |          |          |
| RMC1      | ENSG00000141452 | -1.1486   | 0.87464 | 0.055091    | 0.47803     | -1.1371  | 0.87226  |
|           | -0.012706       | 0.50507   | 0.47803 | 0.755104174 |             |          |          |
| NA        | ENSG00000223901 | 0.055061  | 0.47804 | 0.47804     | -0.64429    | 0.74031  | 0.055061 |
|           | 0.055061        | 0.47804   | 0.47804 | 0.755104174 |             |          |          |
| NA        | ENSG00000254756 | 0.05508   | 0.47804 | 0.47804     | 0.05508     | 0.47804  | 0.05508  |
|           | 0.05508         | 0.47804   | 0.47804 | 0.755104174 |             |          |          |
| LINC01911 | ENSG00000231040 | 0.05492   | 0.4781  | 0.05492     | 0.4781      | 0.05492  |          |
|           | 0.4781          | 0.05492   | 0.4781  | 0.4781      | 0.755104174 |          |          |
| NA        | ENSG00000239683 | -1.0687   | 0.85739 | 0.054931    | 0.4781      | -1.0806  | 0.86007  |
|           | -0.74328        | 0.77134   | 0.4781  | 0.755104174 |             |          |          |
| NA        | ENSG00000272383 | 0.054919  | 0.4781  | 0.054919    | 0.4781      | 0.054919 | 0.4781   |
|           | 0.054919        | 0.4781    | 0.4781  | 0.755104174 |             |          |          |
| ADGRF3    | ENSG00000173567 | -1.0375   | 0.85024 | 0.0549      | 0.47811     | -0.12383 |          |
|           | 0.54928         | -0.22336  | 0.58837 | 0.47811     | 0.755104174 |          |          |
| SLC47A1P2 | ENSG00000231625 | 0.05484   | 0.47813 | 0.05484     | 0.47813     | -1.0815  |          |
|           | 0.86026         | 0.05484   | 0.47813 | 0.47813     | 0.755104174 |          |          |
| LINC02113 | ENSG00000249515 | 0.054848  | 0.47813 | -0.79016    | 0.78528     | -1.9143  |          |
|           | 0.97221         | -0.85039  | 0.80245 | 0.47813     | 0.755104174 |          |          |
| TMCO6     | ENSG00000113119 | 0.054818  | 0.47814 | 0.054818    | 0.47814     | -0.16175 | 0.56425  |
|           | -0.83432        | 0.79795   | 0.47814 | 0.755104174 |             |          |          |
| NA        | ENSG00000259631 | 0.054808  | 0.47815 | 0.054808    | 0.47815     | 0.054808 | 0.47815  |
|           | -0.32381        | 0.62696   | 0.47815 | 0.755104174 |             |          |          |
| HIGD1AP2  | ENSG00000237148 | 0.054676  | 0.4782  | 0.054676    | 0.4782      | 0.054676 |          |
|           | 0.4782          | 0.054676  | 0.4782  | 0.4782      | 0.75510659  |          |          |
| RNA5SP229 | ENSG00000222741 | 0.054647  | 0.47821 | 0.054647    | 0.47821     | 0.054647 |          |
|           | 0.47821         | 0.054647  | 0.47821 | 0.47821     | 0.75510659  |          |          |
| LINC02003 | ENSG00000264026 | -2.0229   | 0.97846 | -2.0229     | 0.97846     | -0.44435 |          |
|           | 0.67161         | 0.054645  | 0.47821 | 0.47821     | 0.75510659  |          |          |
| H3P40     | ENSG00000258570 | -0.47257  | 0.68174 | -0.55278    | 0.70979     | 0.054622 | 0.47822  |
|           | -1.3968         | 0.91876   | 0.47822 | 0.75510659  |             |          |          |
| TSPAN3    | ENSG00000140391 | 0.036788  | 0.48533 | 0.054538    | 0.47825     | -0.47738 |          |
|           | 0.68345         | -0.7717   | 0.77985 | 0.47825     | 0.75510659  |          |          |
| NA        | ENSG00000200162 | 0.054512  | 0.47826 | 0.054512    | 0.47826     | 0.054512 | 0.47826  |
|           | -1.1605         | 0.87708   | 0.47826 | 0.75510659  |             |          |          |
| NA        | ENSG00000275764 | -1.2894   | 0.90137 | -0.97861    | 0.83611     | -1.2894  | 0.90137  |
|           | 0.054531        | 0.47826   | 0.47826 | 0.75510659  |             |          |          |
| HSPA2     | ENSG00000126803 | -0.81105  | 0.79133 | -0.81105    | 0.79133     | -0.81105 | 0.79133  |
|           | 0.054472        | 0.47828   | 0.47828 | 0.755113702 |             |          |          |
| NA        | ENSG00000232514 | 0.054364  | 0.47832 | 0.054364    | 0.47832     | 0.054364 | 0.47832  |
|           | 0.054364        | 0.47832   | 0.47832 | 0.755152388 |             |          |          |
| NA        | ENSG00000254577 | 0.054332  | 0.47834 | 0.054332    | 0.47834     | 0.054332 | 0.47834  |
|           | 0.054332        | 0.47834   | 0.47834 | 0.755159497 |             |          |          |
| NA        | ENSG00000253392 | 0.05425   | 0.47837 | 0.05425     | 0.47837     | 0.05425  | 0.47837  |
|           | 0.05425         | 0.47837   | 0.47837 | 0.755182393 |             |          |          |
| RNA5SP318 | ENSG00000252161 | 0.054162  | 0.4784  | 0.054162    | 0.4784      | 0.054162 |          |
|           | 0.4784          | 0.054162  | 0.4784  | 0.4784      | 0.755196608 |          |          |
| ERBB4     | ENSG00000178568 | -0.58697  | 0.72139 | -0.51014    | 0.69502     | 0.054153 | 0.47841  |
|           | -0.23225        | 0.59183   | 0.47841 | 0.755196608 |             |          |          |
| IL17A     | ENSG00000112115 | -0.67102  | 0.7489  | 0.054033    | 0.47845     | 0.054033 | 0.47845  |
|           | -0.95397        | 0.82995   | 0.47845 | 0.755210822 |             |          |          |
| LINC02261 | ENSG00000249699 | 0.054039  | 0.47845 | -0.10772    | 0.54289     | -0.10772 |          |
|           | 0.54289         | -0.10772  | 0.54289 | 0.47845     | 0.755210822 |          |          |
| ADGRF5P2  | ENSG00000204818 | 0.053974  | 0.47848 | 0.053974    | 0.47848     | 0.053974 |          |
|           | 0.47848         | -0.21318  | 0.5844  | 0.47848     | 0.755233712 |          |          |
| GJC2      | ENSG00000198835 | -0.4268   | 0.66524 | -0.4268     | 0.66524     | 0.053763 | 0.47856  |
|           | -0.47895        | 0.68401   | 0.47856 | 0.755335519 |             |          |          |
| TTC3      | ENSG00000182670 | -0.051404 | 0.5205  | 0.02743     | 0.48906     | -0.13999 | 0.55567  |

|            |                 |          |             |             |             |           |         |          |
|------------|-----------------|----------|-------------|-------------|-------------|-----------|---------|----------|
|            | 0.053693        | 0.47859  | 0.47859     | 0.755337881 |             |           |         |          |
| PCDHB1     | ENSG00000171815 | 0.053637 | 0.47861     | 0.053637    | 0.47861     | 0.053637  |         |          |
|            | 0.47861         | 0.053637 | 0.47861     | 0.47861     | 0.755337881 |           |         |          |
| NA         | ENSG00000236039 | -0.64476 | 0.74046     | 0.053615    | 0.47862     | -0.23316  | 0.59218 |          |
|            | 0.041969        | 0.48326  | 0.47862     | 0.755337881 |             |           |         |          |
| NA         | ENSG00000234252 | -1.3394  | 0.90978     | -1.4879     | 0.93161     | 0.053583  | 0.47863 |          |
|            | -0.38268        | 0.64902  | 0.47863     | 0.755337881 |             |           |         |          |
| LINC02180  | ENSG00000261749 | 0.05352  | 0.47866     | 0.05352     | 0.47866     | 0.05352   |         |          |
|            | 0.47866         | 0.05352  | 0.47866     | 0.47866     | 0.755337881 |           |         |          |
| NA         | ENSG00000269199 | -0.25709 | 0.60145     | -1.3345     | 0.90897     | 0.053509  | 0.47866 |          |
|            | -0.99832        | 0.84094  | 0.47866     | 0.755337881 |             |           |         |          |
| NA         | ENSG00000279500 | 0.053496 | 0.47867     | 0.053496    | 0.47867     | 0.053496  | 0.47867 |          |
|            | 0.053496        | 0.47867  | 0.47867     | 0.755337881 |             |           |         |          |
| NA         | ENSG00000242439 | 0.053452 | 0.47869     | 0.053452    | 0.47869     | 0.053452  | 0.47869 |          |
|            | 0.053452        | 0.47869  | 0.47869     | 0.755344981 |             |           |         |          |
| NA         | ENSG00000267349 | 0.053223 | 0.47878     | 0.053223    | 0.47878     | 0.053223  | 0.47878 |          |
|            | 0.053223        | 0.47878  | 0.47878     | 0.75534812  |             |           |         |          |
| DDX59      | ENSG00000118197 | -0.85963 | 0.805       | -0.58912    | 0.72211     | 0.05316   | 0.4788  |          |
|            | -0.26618        | 0.60495  | 0.4788      | 0.75534812  |             |           |         |          |
| IMPDH1P5   | ENSG00000213513 | -0.16646 | 0.5661      | 0.053116    | 0.47882     | -0.49387  |         |          |
|            | 0.6893          | 0.053116 | 0.47882     | 0.47882     | 0.75534812  |           |         |          |
| DIS3L      | ENSG00000166938 | -1.0334  | 0.8493      | -0.057647   | 0.52298     | -0.86324  | 0.806   |          |
|            | 0.053037        | 0.47885  | 0.47885     | 0.75534812  |             |           |         |          |
| KRT18P60   | ENSG00000215208 | 0.053042 | 0.47885     | 0.053042    | 0.47885     | 0.053042  |         |          |
|            | 0.47885         | -0.36985 | 0.64425     | 0.47885     | 0.75534812  |           |         |          |
| NA         | ENSG00000271843 | 0.053045 | 0.47885     | 0.053045    | 0.47885     | 0.053045  | 0.47885 |          |
|            | 0.053045        | 0.47885  | 0.47885     | 0.75534812  |             |           |         |          |
| ZNF569     | ENSG00000196437 | 0.053005 | 0.47886     | 0.019582    | 0.49219     | -1.0272   |         |          |
|            | 0.84784         | -1.0272  | 0.84784     | 0.47886     | 0.75534812  |           |         |          |
| RNA5SP455  | ENSG00000202060 | 0.053    | 0.47887     | 0.053       | 0.47887     | -0.035621 | 0.51421 | 0.053    |
|            | 0.47887         | 0.47887  | 0.75534812  |             |             |           |         |          |
| NA         | ENSG00000248286 | 0.052985 | 0.47887     | -1.2648     | 0.89703     | -0.18646  | 0.57396 |          |
|            | -0.88408        | 0.81167  | 0.47887     | 0.75534812  |             |           |         |          |
| EEF1A1P26  | ENSG00000233167 | 0.05291  | 0.4789      | 0.05291     | 0.4789      | 0.05291   |         |          |
|            | 0.4789          | 0.05291  | 0.4789      | 0.4789      | 0.75534812  |           |         |          |
| MAPK13     | ENSG00000156711 | 0.052885 | 0.47891     | -1.0625     | 0.856       | -0.74106  | 0.77067 |          |
|            | -1.4445         | 0.92571  | 0.47891     | 0.75534812  |             |           |         |          |
| NA         | ENSG00000270378 | 0.052859 | 0.47892     | 0.052859    | 0.47892     | 0.052859  | 0.47892 |          |
|            | 0.052859        | 0.47892  | 0.47892     | 0.75534812  |             |           |         |          |
| ZNF519P4   | ENSG00000249025 | 0.052827 | 0.47893     | 0.052827    | 0.47893     | -0.70762  |         |          |
|            | 0.76041         | 0.052827 | 0.47893     | 0.47893     | 0.75534812  |           |         |          |
| NA         | ENSG00000252230 | -1.2127  | 0.88739     | -0.33806    | 0.63234     | 0.052842  | 0.47893 |          |
|            | -1.2127         | 0.88739  | 0.47893     | 0.75534812  |             |           |         |          |
| ZNF763     | ENSG00000197054 | -0.34409 | 0.63461     | -0.84591    | 0.8012      | 0.052816  |         |          |
|            | 0.47894         | -0.24594 | 0.59714     | 0.47894     | 0.75534812  |           |         |          |
| RPL9P2     | ENSG00000234324 | 0.052817 | 0.47894     | 0.052817    | 0.47894     | 0.052817  |         |          |
|            | 0.47894         | -0.57067 | 0.71589     | 0.47894     | 0.75534812  |           |         |          |
| RPL32      | ENSG00000144713 | -0.19465 | 0.57717     | -3.60E-06   | 0.5         | 0.05269   | 0.47899 |          |
|            | -0.050489       | 0.52013  | 0.47899     | 0.755393851 |             |           |         |          |
| CTDNEP1    | ENSG00000175826 | 0.052656 | 0.479       | 0.052656    | 0.479       | 0.052656  | 0.479   | 0.052656 |
|            | 0.479           | 0.479    | 0.755393851 |             |             |           |         |          |
| RNU6-1048P | ENSG00000200924 | 0.052615 | 0.47902     | 0.052615    | 0.47902     | 0.052615  |         |          |
|            | 0.47902         | 0.052615 | 0.47902     | 0.47902     | 0.755400945 |           |         |          |
| RNA5SP173  | ENSG00000201727 | 0.052462 | 0.47908     | 0.042046    | 0.48323     | 0.042046  |         |          |
|            | 0.48323         | -1.1258  | 0.86989     | 0.47908     | 0.755471115 |           |         |          |
| LINC01778  | ENSG00000223382 | 0.052272 | 0.47916     | -0.45112    | 0.67405     | 0.052272  |         |          |
|            | 0.47916         | 0.052272 | 0.47916     | 0.47916     | 0.755564137 |           |         |          |
| NA         | ENSG00000252919 | 0.052248 | 0.47917     | 0.052248    | 0.47917     | 0.052248  | 0.47917 |          |
|            | 0.052248        | 0.47917  | 0.47917     | 0.755564137 |             |           |         |          |
| RN7SKP38   | ENSG00000222714 | 0.052056 | 0.47924     | 0.052056    | 0.47924     | 0.052056  |         |          |
|            | 0.47924         | 0.052056 | 0.47924     | 0.47924     | 0.75564138  |           |         |          |
| GGCTP3     | ENSG00000225842 | 0.052046 | 0.47925     | 0.052046    | 0.47925     | 0.052046  |         |          |

|            |                 |            |         |             |             |           |         |
|------------|-----------------|------------|---------|-------------|-------------|-----------|---------|
|            | 0.47925         | 0.052046   | 0.47925 | 0.47925     | 0.75564138  |           |         |
| UBL4B      | ENSG00000186150 | 0.051973   | 0.47928 | 0.051973    | 0.47928     | 0.051973  | 0.47928 |
|            | -0.93988        | 0.82636    | 0.47928 | 0.755664231 |             |           |         |
| ODF3       | ENSG00000177947 | 0.051826   | 0.47933 | -0.16206    | 0.56437     | -0.53986  | 0.70535 |
|            | -0.078795       | 0.5314     | 0.47933 | 0.755718613 |             |           |         |
| NA         | ENSG00000266009 | 0.051768   | 0.47936 | 0.051768    | 0.47936     | 0.051768  | 0.47936 |
|            | 0.051768        | 0.47936    | 0.47936 | 0.755734232 |             |           |         |
| NA         | ENSG00000254739 | -0.086914  | 0.53463 | -0.51389    | 0.69633     | -0.45197  | 0.67435 |
|            | 0.051689        | 0.47939    | 0.47939 | 0.755734232 |             |           |         |
| PARD6G-AS1 | ENSG00000267270 | -0.17712   | 0.57029 | -0.35586    | 0.63903     | 0.051593  |         |
|            | 0.47943         | -0.40447   | 0.65707 | 0.47943     | 0.755734232 |           |         |
| NA         | ENSG00000227542 | -0.27763   | 0.60935 | 0.05156     | 0.47944     | -0.82886  | 0.79641 |
|            | -0.64205        | 0.73958    | 0.47944 | 0.755734232 |             |           |         |
| PKN1       | ENSG00000123143 | -0.96586   | 0.83294 | -1.0897     | 0.86207     | 0.051495  | 0.47947 |
|            | 0.051495        | 0.47947    | 0.47947 | 0.755734232 |             |           |         |
| NA         | ENSG00000229116 | 0.051435   | 0.47949 | -0.12164    | 0.54841     | -1.1571   | 0.87638 |
|            | -0.10488        | 0.54176    | 0.47949 | 0.755734232 |             |           |         |
| NA         | ENSG00000243016 | -0.77657   | 0.78129 | -1.9568     | 0.97481     | 0.051417  | 0.4795  |
|            | -0.88052        | 0.81071    | 0.4795  | 0.755734232 |             |           |         |
| KRT8P20    | ENSG00000227404 | 0.051381   | 0.47951 | -0.6612     | 0.74576     | 0.051381  |         |
|            | 0.47951         | -0.36367   | 0.64195 | 0.47951     | 0.755734232 |           |         |
| KLRB1      | ENSG00000111796 | 0.051303   | 0.47954 | -0.17572    | 0.56974     | -0.17572  | 0.56974 |
|            | -0.17572        | 0.56974    | 0.47954 | 0.755734232 |             |           |         |
| MTO1       | ENSG00000135297 | 0.051202   | 0.47958 | -0.18299    | 0.5726      | -0.81926  | 0.79368 |
|            | -0.12827        | 0.55103    | 0.47958 | 0.755734232 |             |           |         |
| RN7SL89P   | ENSG00000243383 | 0.051206   | 0.47958 | 0.026324    | 0.4895      | 0.051206  |         |
|            | 0.47958         | 0.051206   | 0.47958 | 0.47958     | 0.755734232 |           |         |
| NA         | ENSG00000270989 | -0.0023644 | 0.50094 | -0.49023    | 0.68802     | 0.05119   | 0.47959 |
|            | -0.94738        | 0.82828    | 0.47959 | 0.755734232 |             |           |         |
| NA         | ENSG00000222941 | 0.0086605  | 0.49655 | 0.00055787  | 0.49978     | 0.0090279 | 0.4964  |
|            | 0.051132        | 0.47961    | 0.47961 | 0.755734232 |             |           |         |
| LINC00528  | ENSG00000269220 | -1.5651    | 0.94122 | -0.50847    | 0.69444     | -0.50847  |         |
|            | 0.69444         | 0.050997   | 0.47966 | 0.47966     | 0.755734232 |           |         |
| ZNHIT3     | ENSG00000273611 | 0.050964   | 0.47968 | -0.79209    | 0.78585     | -1.1384   |         |
|            | 0.87252         | 0.050964   | 0.47968 | 0.47968     | 0.755734232 |           |         |
| PRDM16     | ENSG00000142611 | 0.050931   | 0.47969 | -0.67709    | 0.75083     | -0.53587  |         |
|            | 0.70398         | -0.22071   | 0.58734 | 0.47969     | 0.755734232 |           |         |
| NA         | ENSG00000226601 | 0.050913   | 0.4797  | 0.050913    | 0.4797      | 0.050913  | 0.4797  |
|            | 0.050913        | 0.4797     | 0.4797  | 0.755734232 |             |           |         |
| FBXW8      | ENSG00000174989 | -0.53011   | 0.70198 | -0.86979    | 0.80779     | -0.32503  | 0.62742 |
|            | 0.050856        | 0.47972    | 0.47972 | 0.755734232 |             |           |         |
| NA         | ENSG00000228355 | -0.28672   | 0.61284 | -0.28672    | 0.61284     | -0.20586  | 0.58155 |
|            | 0.050864        | 0.47972    | 0.47972 | 0.755734232 |             |           |         |
| NA         | ENSG00000269289 | -0.28095   | 0.61063 | 0.050861    | 0.47972     | -0.73024  | 0.76738 |
|            | -0.28876        | 0.61362    | 0.47972 | 0.755734232 |             |           |         |
| NA         | ENSG00000267053 | -0.86032   | 0.80519 | -0.86032    | 0.80519     | 0.050835  | 0.47973 |
|            | -0.3539         | 0.63829    | 0.47973 | 0.755734232 |             |           |         |
| NA         | ENSG00000236145 | -0.17815   | 0.5707  | 0.050784    | 0.47975     | -0.17815  | 0.5707  |
|            | -0.17815        | 0.5707     | 0.47975 | 0.755734232 |             |           |         |
| VDAC2P5    | ENSG00000172974 | 0.050761   | 0.47976 | 0.050761    | 0.47976     | 0.050761  |         |
|            | 0.47976         | 0.050761   | 0.47976 | 0.47976     | 0.755734232 |           |         |
| OR2AL1P    | ENSG00000254767 | 0.050718   | 0.47978 | 0.050718    | 0.47978     | 0.050718  |         |
|            | 0.47978         | 0.050718   | 0.47978 | 0.47978     | 0.755734232 |           |         |
| NA         | ENSG00000238943 | 0.050664   | 0.4798  | -0.016679   | 0.50665     | 0.050664  | 0.4798  |
|            | 0.050664        | 0.4798     | 0.4798  | 0.755734232 |             |           |         |
| RPL23AP90  | ENSG00000271415 | 0.05058    | 0.47983 | 0.05058     | 0.47983     | 0.05058   |         |
|            | 0.47983         | 0.05058    | 0.47983 | 0.47983     | 0.755734232 |           |         |
| HNRNPA1P66 | ENSG00000229221 | 0.050546   | 0.47984 | 0.050546    | 0.47984     | 0.050546  |         |
|            | 0.47984         | 0.050546   | 0.47984 | 0.47984     | 0.755734232 |           |         |
| NA         | ENSG00000264347 | 0.050557   | 0.47984 | 0.050557    | 0.47984     | 0.050557  | 0.47984 |
|            | 0.050557        | 0.47984    | 0.47984 | 0.755734232 |             |           |         |
| NA         | ENSG00000284461 | 0.05048    | 0.47987 | 0.05048     | 0.47987     | 0.05048   | 0.47987 |

|                 |                 |             |         |             |             |          |         |          |      |
|-----------------|-----------------|-------------|---------|-------------|-------------|----------|---------|----------|------|
|                 | 0.05048         | 0.47987     | 0.47987 | 0.755734232 |             |          |         |          |      |
| RNU6-166P       | ENSG00000207099 | -0.77073    | 0.77957 | -0.77073    | 0.77957     | -0.52632 |         |          |      |
|                 | 0.70067         | 0.050459    | 0.47988 | 0.47988     | 0.755734232 |          |         |          |      |
| NA              | ENSG00000256917 | 0.050458    | 0.47988 | 0.050458    | 0.47988     | 0.050458 | 0.47988 |          |      |
|                 | 0.050458        | 0.47988     | 0.47988 | 0.755734232 |             |          |         |          |      |
| EPM2A           | ENSG00000112425 | 0.050393    | 0.4799  | -0.37422    | 0.64588     | -0.26841 | 0.60581 |          |      |
|                 | -0.73589        | 0.7691      | 0.4799  | 0.755734232 |             |          |         |          |      |
| GRIK2           | ENSG00000164418 | -0.96017    | 0.83151 | -1.2154     | 0.88789     | -0.72263 | 0.76505 |          |      |
|                 | 0.050318        | 0.47993     | 0.47993 | 0.755734232 |             |          |         |          |      |
| COQ5            | ENSG00000110871 | -0.6367     | 0.73784 | -0.92271    | 0.82192     | -0.49215 | 0.68869 |          |      |
|                 | 0.050296        | 0.47994     | 0.47994 | 0.755734232 |             |          |         |          |      |
| USP37           | ENSG00000135913 | -0.43514    | 0.66827 | -0.50276    | 0.69243     | -0.63303 | 0.73664 |          |      |
|                 | 0.050298        | 0.47994     | 0.47994 | 0.755734232 |             |          |         |          |      |
| NA              | ENSG00000265415 | 0.05024     | 0.47997 | 0.05024     | 0.47997     | 0.05024  | 0.47997 |          |      |
|                 | 0.05024         | 0.47997     | 0.47997 | 0.755734232 |             |          |         |          |      |
| JUNB            | ENSG00000171223 | 0.050144    | 0.48    | 0.050144    | 0.48        | 0.050144 | 0.48    | 0.050144 | 0.48 |
|                 | 0.48            | 0.755734232 |         |             |             |          |         |          |      |
| NA              | ENSG00000255167 | 0.050145    | 0.48    | -0.89985    | 0.8159      | -0.98926 | 0.83873 |          |      |
|                 | -0.78057        | 0.78247     | 0.48    | 0.755734232 |             |          |         |          |      |
| NA              | ENSG00000258802 | -1.121      | 0.86886 | -0.55489    | 0.71051     | -0.47713 | 0.68337 |          |      |
|                 | 0.050098        | 0.48002     | 0.48002 | 0.755734232 |             |          |         |          |      |
| LINC01177       | ENSG00000261397 | 0.050096    | 0.48002 | 0.050096    | 0.48002     | 0.050096 |         |          |      |
|                 | 0.48002         | 0.050096    | 0.48002 | 0.48002     | 0.755734232 |          |         |          |      |
| NA              | ENSG00000266903 | 0.050085    | 0.48003 | 0.050085    | 0.48003     | 0.050085 | 0.48003 |          |      |
|                 | 0.050085        | 0.48003     | 0.48003 | 0.755734232 |             |          |         |          |      |
| CENPP           | ENSG00000188312 | 0.0041677   | 0.49834 | -0.36228    | 0.64143     | 0.050063 | 0.48004 |          |      |
|                 | -0.13569        | 0.55397     | 0.48004 | 0.755734232 |             |          |         |          |      |
| NA              | ENSG00000207161 | 0.050059    | 0.48004 | 0.050059    | 0.48004     | 0.050059 | 0.48004 |          |      |
|                 | 0.050059        | 0.48004     | 0.48004 | 0.755734232 |             |          |         |          |      |
| NA              | ENSG00000261826 | -0.054381   | 0.52168 | -1.1558     | 0.87612     | -0.25148 | 0.59928 |          |      |
|                 | 0.050056        | 0.48004     | 0.48004 | 0.755734232 |             |          |         |          |      |
| NA              | ENSG00000270620 | 0.049962    | 0.48008 | 0.049962    | 0.48008     | 0.049962 | 0.48008 |          |      |
|                 | 0.049962        | 0.48008     | 0.48008 | 0.755734232 |             |          |         |          |      |
| SUGT1P4-STRA6LP | ENSG00000254876 | 0.049908    | 0.4801  | -0.83383    | 0.79781     | -1.3693  |         |          |      |
|                 | 0.91455         | -0.75846    | 0.77591 | 0.4801      | 0.755734232 |          |         |          |      |
| GCLM            | ENSG00000023909 | -0.65675    | 0.74433 | -1.4148     | 0.92144     | -0.10694 | 0.54258 |          |      |
|                 | 0.049839        | 0.48013     | 0.48013 | 0.755734232 |             |          |         |          |      |
| NA              | ENSG00000279266 | -0.067393   | 0.52687 | 0.049831    | 0.48013     | -0.61168 | 0.72962 |          |      |
|                 | -1.1058         | 0.8656      | 0.48013 | 0.755734232 |             |          |         |          |      |
| RNU6-879P       | ENSG00000201198 | -0.72748    | 0.76653 | -0.79713    | 0.78731     | 0.049754 |         |          |      |
|                 | 0.48016         | 0.049754    | 0.48016 | 0.48016     | 0.755734232 |          |         |          |      |
| NA              | ENSG00000242405 | 0.049645    | 0.4802  | 0.049645    | 0.4802      | 0.049645 | 0.4802  |          |      |
|                 | 0.049645        | 0.4802      | 0.4802  | 0.755734232 |             |          |         |          |      |
| RPLP1P10        | ENSG00000226888 | -1.4658     | 0.92865 | 0.049638    | 0.48021     | -1.4658  |         |          |      |
|                 | 0.92865         | -0.89343    | 0.81419 | 0.48021     | 0.755734232 |          |         |          |      |
| NA              | ENSG00000267547 | 0.049627    | 0.48021 | 0.049627    | 0.48021     | 0.049627 | 0.48021 |          |      |
|                 | 0.049627        | 0.48021     | 0.48021 | 0.755734232 |             |          |         |          |      |
| NA              | ENSG00000217130 | -0.4036     | 0.65675 | -0.42328    | 0.66396     | 0.049601 | 0.48022 |          |      |
|                 | -1.0829         | 0.86058     | 0.48022 | 0.755734232 |             |          |         |          |      |
| NA              | ENSG00000267069 | 0.049515    | 0.48025 | 0.049515    | 0.48025     | 0.049515 | 0.48025 |          |      |
|                 | 0.049515        | 0.48025     | 0.48025 | 0.755734232 |             |          |         |          |      |
| PROK1           | ENSG00000143125 | -0.98706    | 0.83819 | 0.049358    | 0.48032     | -0.98706 | 0.83819 |          |      |
|                 | -0.98706        | 0.83819     | 0.48032 | 0.755734232 |             |          |         |          |      |
| RNU6-666P       | ENSG00000200369 | -0.37314    | 0.64548 | -0.37314    | 0.64548     | 0.049357 |         |          |      |
|                 | 0.48032         | -0.37314    | 0.64548 | 0.48032     | 0.755734232 |          |         |          |      |
| NA              | ENSG00000272411 | -0.26577    | 0.60479 | 0.049326    | 0.48033     | -0.10748 | 0.5428  |          |      |
|                 | -0.15694        | 0.56235     | 0.48033 | 0.755734232 |             |          |         |          |      |
| NA              | ENSG00000259755 | -1.0828     | 0.86054 | -1.0828     | 0.86054     | -1.0828  | 0.86054 |          |      |
|                 | 0.049308        | 0.48034     | 0.48034 | 0.755734232 |             |          |         |          |      |
| OR52E3P         | ENSG00000226157 | -0.21185    | 0.58389 | -1.3773     | 0.91579     | 0.04928  |         |          |      |
|                 | 0.48035         | 0.04928     | 0.48035 | 0.48035     | 0.755734232 |          |         |          |      |
| NA              | ENSG00000227687 | 0.049275    | 0.48035 | 0.049275    | 0.48035     | 0.049275 | 0.48035 |          |      |

|             |                 |           |         |             |             |          |         |
|-------------|-----------------|-----------|---------|-------------|-------------|----------|---------|
|             | 0.049275        | 0.48035   | 0.48035 | 0.755734232 |             |          |         |
| CIAPIN1P    | ENSG00000263846 | -3.4056   | 0.99967 | 0.049279    | 0.48035     | -3.4056  |         |
|             | 0.99967         | -3.4056   | 0.99967 | 0.48035     | 0.755734232 |          |         |
| NA          | ENSG00000248223 | 0.04925   | 0.48036 | 0.04925     | 0.48036     | 0.04925  | 0.48036 |
|             | 0.04925         | 0.48036   | 0.48036 | 0.755734232 |             |          |         |
| RUVBL1-AS1  | ENSG00000239608 | 0.049193  | 0.48038 | 0.049193    | 0.48038     | 0.049193 |         |
|             | 0.48038         | 0.049193  | 0.48038 | 0.48038     | 0.755734232 |          |         |
| MYLK        | ENSG00000065534 | -7.45E-05 | 0.50003 | 0.049183    | 0.48039     | -0.66052 | 0.74554 |
|             | -0.27341        | 0.60773   | 0.48039 | 0.755734232 |             |          |         |
| PHACTR2-AS1 | ENSG00000235740 | -0.35578  | 0.639   | -0.01788    | 0.50713     | 0.049166 |         |
|             | 0.48039         | -0.84452  | 0.80081 | 0.48039     | 0.755734232 |          |         |
| NA          | ENSG00000200733 | 0.049157  | 0.4804  | 0.049157    | 0.4804      | 0.049157 | 0.4804  |
|             | 0.049157        | 0.4804    | 0.4804  | 0.755734232 |             |          |         |
| ZNF672      | ENSG00000171161 | 0.049125  | 0.48041 | -0.60746    | 0.72823     | -0.31918 |         |
|             | 0.6252          | -0.60746  | 0.72823 | 0.48041     | 0.755734232 |          |         |
| ZACNP1      | ENSG00000278589 | 0.049119  | 0.48041 | 0.049119    | 0.48041     | 0.049119 |         |
|             | 0.48041         | 0.049119  | 0.48041 | 0.48041     | 0.755734232 |          |         |
| NA          | ENSG00000230971 | 0.049127  | 0.48041 | -0.70868    | 0.76074     | -1.0561  | 0.85453 |
|             | 0.049127        | 0.48041   | 0.48041 | 0.755734232 |             |          |         |
| PPIAP93     | ENSG00000227847 | -1.6351   | 0.94899 | -1.6351     | 0.94899     | 0.049074 |         |
|             | 0.48043         | -0.89604  | 0.81488 | 0.48043     | 0.755741297 |          |         |
| NA          | ENSG00000253480 | -0.40962  | 0.65896 | -1.2169     | 0.88818     | -1.2169  | 0.88818 |
|             | 0.048994        | 0.48046   | 0.48046 | 0.755764092 |             |          |         |
| NA          | ENSG00000273302 | 0.048925  | 0.48049 | 0.048925    | 0.48049     | 0.048925 | 0.48049 |
|             | 0.048925        | 0.48049   | 0.48049 | 0.755778219 |             |          |         |
| RPL21P30    | ENSG00000235937 | 0.048908  | 0.4805  | -0.0012432  | 0.5005      | 0.048908 |         |
|             | 0.4805          | 0.048908  | 0.4805  | 0.4805      | 0.755778219 |          |         |
| NA          | ENSG00000259923 | 0.048786  | 0.48054 | 0.048786    | 0.48054     | 0.048786 | 0.48054 |
|             | 0.048786        | 0.48054   | 0.48054 | 0.755794595 |             |          |         |
| GTF2IRD2B   | ENSG00000174428 | -0.4416   | 0.67061 | 0.048759    | 0.48056     | -0.31899 |         |
|             | 0.62513         | -1.2714   | 0.8982  | 0.48056     | 0.755794595 |          |         |
| CFAP157     | ENSG00000160401 | -1.0915   | 0.86246 | -0.65764    | 0.74461     | 0.048672 |         |
|             | 0.48059         | -0.89404  | 0.81435 | 0.48059     | 0.755794595 |          |         |
| SRRM1P2     | ENSG00000242195 | 0.048646  | 0.4806  | 0.048646    | 0.4806      | 0.048646 |         |
|             | 0.4806          | 0.048646  | 0.4806  | 0.4806      | 0.755794595 |          |         |
| NA          | ENSG00000250189 | 0.048658  | 0.4806  | -0.028587   | 0.5114      | -0.33808 | 0.63235 |
|             | -0.33808        | 0.63235   | 0.4806  | 0.755794595 |             |          |         |
| PLA2G2A     | ENSG00000188257 | 0.04856   | 0.48063 | -0.0077409  | 0.50309     | 0.04856  |         |
|             | 0.48063         | 0.04856   | 0.48063 | 0.48063     | 0.755794595 |          |         |
| NA          | ENSG00000264050 | 0.048579  | 0.48063 | 0.048579    | 0.48063     | 0.048579 | 0.48063 |
|             | 0.048579        | 0.48063   | 0.48063 | 0.755794595 |             |          |         |
| NA          | ENSG00000271162 | -0.04409  | 0.51758 | -0.37048    | 0.64449     | 0.048544 | 0.48064 |
|             | 0.048544        | 0.48064   | 0.48064 | 0.755794595 |             |          |         |
| HSPB8       | ENSG00000152137 | -1.1664   | 0.87826 | -1.1664     | 0.87826     | -0.79072 | 0.78545 |
|             | 0.048528        | 0.48065   | 0.48065 | 0.755794595 |             |          |         |
| RNU6-996P   | ENSG00000202308 | 0.048451  | 0.48068 | -1.7553     | 0.96039     | -1.5072  |         |
|             | 0.93412         | -1.5072   | 0.93412 | 0.48068     | 0.755812566 |          |         |
| NA          | ENSG00000267703 | 0.048407  | 0.4807  | 0.048407    | 0.4807      | 0.048407 | 0.4807  |
|             | 0.048407        | 0.4807    | 0.4807  | 0.755812566 |             |          |         |
| POLR2E      | ENSG00000099817 | -0.14711  | 0.55848 | -0.55121    | 0.70926     | 0.048358 |         |
|             | 0.48072         | 0.048358  | 0.48072 | 0.48072     | 0.755812566 |          |         |
| RNU6-274P   | ENSG00000239075 | -0.69889  | 0.75769 | -0.57032    | 0.71577     | 0.048217 |         |
|             | 0.48077         | 0.048217  | 0.48077 | 0.48077     | 0.755812566 |          |         |
| RNU4ATAC8P  | ENSG00000252005 | 0.048211  | 0.48077 | -0.64891    | 0.7418      | -0.71431 |         |
|             | 0.76248         | -0.71431  | 0.76248 | 0.48077     | 0.755812566 |          |         |
| OR52E1      | ENSG00000273085 | 0.048229  | 0.48077 | 0.048229    | 0.48077     | 0.048229 |         |
|             | 0.48077         | 0.048229  | 0.48077 | 0.48077     | 0.755812566 |          |         |
| NA          | ENSG00000273381 | 0.04821   | 0.48077 | 0.04821     | 0.48077     | -0.46769 | 0.68    |
|             | -0.46769        | 0.68      | 0.48077 | 0.755812566 |             |          |         |
| ANKUB1      | ENSG00000206199 | -0.7866   | 0.78424 | -0.037834   | 0.51509     | -0.65669 |         |
|             | 0.74431         | 0.048029  | 0.48085 | 0.48085     | 0.755812886 |          |         |
| ZFHX4       | ENSG00000091656 | 0.047989  | 0.48086 | -0.54618    | 0.70753     | -0.59829 | 0.72518 |



|           |                 |            |         |             |             |           |         |  |
|-----------|-----------------|------------|---------|-------------|-------------|-----------|---------|--|
|           | -0.84492        | 0.80092    | 0.48086 | 0.755812886 |             |           |         |  |
| PSMG2     | ENSG00000128789 | 0.047994   | 0.48086 | -0.09298    | 0.53704     | -0.24768  | 0.59781 |  |
|           | -0.10298        | 0.54101    | 0.48086 | 0.755812886 |             |           |         |  |
| ADAMTS4   | ENSG00000158859 | -0.0089609 | 0.50357 | 0.048005    | 0.48086     | 0.017645  |         |  |
|           | 0.49296         | 0.017645   | 0.49296 | 0.48086     | 0.755812886 |           |         |  |
| H3P14     | ENSG00000250966 | 0.047986   | 0.48086 | 0.047986    | 0.48086     | 0.047986  | 0.48086 |  |
|           | 0.047986        | 0.48086    | 0.48086 | 0.755812886 |             |           |         |  |
| MINDY4    | ENSG00000106125 | 0.047969   | 0.48087 | -0.68975    | 0.75482     | -0.59323  |         |  |
|           | 0.72349         | -0.73003   | 0.76731 | 0.48087     | 0.755812886 |           |         |  |
| USP21P2   | ENSG00000271356 | 0.047911   | 0.48089 | 0.047911    | 0.48089     | 0.047911  |         |  |
|           | 0.48089         | 0.047911   | 0.48089 | 0.48089     | 0.755812886 |           |         |  |
| RPL21P119 | ENSG00000220793 | -0.44335   | 0.67125 | -0.91192    | 0.81909     | -0.23066  |         |  |
|           | 0.59121         | 0.047832   | 0.48092 | 0.48092     | 0.755812886 |           |         |  |
| NA        | ENSG00000212181 | 0.047791   | 0.48094 | 0.047791    | 0.48094     | 0.047791  | 0.48094 |  |
|           | 0.047791        | 0.48094    | 0.48094 | 0.755812886 |             |           |         |  |
| LINC01327 | ENSG00000241669 | -1.0669    | 0.85699 | -1.8342     | 0.96669     | 0.047776  |         |  |
|           | 0.48095         | -0.84911   | 0.80209 | 0.48095     | 0.755812886 |           |         |  |
| NA        | ENSG00000278035 | 0.047739   | 0.48096 | 0.047739    | 0.48096     | 0.047739  | 0.48096 |  |
|           | 0.047739        | 0.48096    | 0.48096 | 0.755812886 |             |           |         |  |
| MTND5P24  | ENSG00000224852 | 0.047727   | 0.48097 | 0.047727    | 0.48097     | 0.047727  |         |  |
|           | 0.48097         | 0.047727   | 0.48097 | 0.48097     | 0.755812886 |           |         |  |
| NA        | ENSG00000228171 | 0.047693   | 0.48098 | 0.047693    | 0.48098     | 0.047693  | 0.48098 |  |
|           | 0.047693        | 0.48098    | 0.48098 | 0.755812886 |             |           |         |  |
| RUFY2     | ENSG00000204130 | -0.077574  | 0.53092 | -0.3842     | 0.64958     | 0.047654  | 0.481   |  |
|           | -1.0264         | 0.84765    | 0.481   | 0.755812886 |             |           |         |  |
| NA        | ENSG00000225979 | 0.047577   | 0.48103 | 0.047577    | 0.48103     | 0.047577  | 0.48103 |  |
|           | 0.047577        | 0.48103    | 0.48103 | 0.755812886 |             |           |         |  |
| NPHP3-AS1 | ENSG00000248724 | 0.047581   | 0.48103 | -0.48323    | 0.68553     | -0.56795  |         |  |
|           | 0.71497         | -0.74919   | 0.77313 | 0.48103     | 0.755812886 |           |         |  |
| SPATA31D3 | ENSG00000186788 | -1.0246    | 0.84721 | -0.61558    | 0.73091     | -0.68008  |         |  |
|           | 0.75177         | 0.047547   | 0.48104 | 0.48104     | 0.755812886 |           |         |  |
| CATSPERZ  | ENSG00000219435 | -0.18204   | 0.57223 | 0.047516    | 0.48105     | -0.18204  |         |  |
|           | 0.57223         | -0.18204   | 0.57223 | 0.48105     | 0.755812886 |           |         |  |
| NA        | ENSG00000229312 | 0.031115   | 0.48759 | 0.047373    | 0.48111     | 0.031115  | 0.48759 |  |
|           | 0.031115        | 0.48759    | 0.48111 | 0.755812886 |             |           |         |  |
| NA        | ENSG00000242136 | -0.78928   | 0.78503 | -0.39028    | 0.65184     | 0.047355  | 0.48112 |  |
|           | -1.0493         | 0.85297    | 0.48112 | 0.755812886 |             |           |         |  |
| BCLAF1P1  | ENSG00000248966 | 0.047349   | 0.48112 | 0.047349    | 0.48112     | -1.2398   |         |  |
|           | 0.89248         | 0.047349   | 0.48112 | 0.48112     | 0.755812886 |           |         |  |
| CPS1      | ENSG00000021826 | 0.047287   | 0.48114 | -0.91894    | 0.82094     | 0.0052383 | 0.49791 |  |
|           | -0.43726        | 0.66904    | 0.48114 | 0.755812886 |             |           |         |  |
| NA        | ENSG00000206739 | 0.047285   | 0.48114 | 0.047285    | 0.48114     | 0.047285  | 0.48114 |  |
|           | 0.047285        | 0.48114    | 0.48114 | 0.755812886 |             |           |         |  |
| NA        | ENSG00000207108 | 0.047222   | 0.48117 | 0.047222    | 0.48117     | 0.047222  | 0.48117 |  |
|           | 0.047222        | 0.48117    | 0.48117 | 0.755812886 |             |           |         |  |
| NA        | ENSG00000263276 | -0.029138  | 0.51162 | 0.025509    | 0.48982     | 0.047201  | 0.48118 |  |
|           | 0.047201        | 0.48118    | 0.48118 | 0.755812886 |             |           |         |  |
| PIN1P1    | ENSG00000229359 | 0.047164   | 0.48119 | 0.047164    | 0.48119     | 0.047164  |         |  |
|           | 0.48119         | 0.047164   | 0.48119 | 0.48119     | 0.755812886 |           |         |  |
| RNU6-310P | ENSG00000207385 | -1.6021    | 0.94543 | 0.047147    | 0.4812      | 0.047147  |         |  |
|           | 0.4812          | 0.047147   | 0.4812  | 0.4812      | 0.755812886 |           |         |  |
| NA        | ENSG00000179577 | -0.47304   | 0.68191 | -0.65056    | 0.74233     | 0.047095  | 0.48122 |  |
|           | 0.047095        | 0.48122    | 0.48122 | 0.755812886 |             |           |         |  |
| MIER1     | ENSG00000198160 | -1.3105    | 0.90499 | -0.74389    | 0.77153     | -0.70731  | 0.76031 |  |
|           | 0.047097        | 0.48122    | 0.48122 | 0.755812886 |             |           |         |  |
| NA        | ENSG00000238791 | -0.49632   | 0.69017 | 0.046999    | 0.48126     | -0.87516  | 0.80926 |  |
|           | -0.83613        | 0.79846    | 0.48126 | 0.755849744 |             |           |         |  |
| EIF3A     | ENSG00000107581 | -0.59211   | 0.72311 | 0.032754    | 0.48694     | -0.65268  | 0.74302 |  |
|           | 0.046909        | 0.48129    | 0.48129 | 0.755849744 |             |           |         |  |
| BTF3P14   | ENSG00000262609 | -0.068954  | 0.52749 | -0.0016735  | 0.50067     | 0.046909  |         |  |
|           | 0.48129         | -1.1627    | 0.87752 | 0.48129     | 0.755849744 |           |         |  |
| TRDV3     | ENSG00000256590 | 0.046803   | 0.48134 | 0.046803    | 0.48134     | 0.046803  | 0.48134 |  |

|             |                 |            |         |             |             |           |         |  |
|-------------|-----------------|------------|---------|-------------|-------------|-----------|---------|--|
|             | 0.046803        | 0.48134    | 0.48134 | 0.755903906 |             |           |         |  |
| HBZP1       | ENSG00000206178 | -0.43544   | 0.66838 | -0.40224    | 0.65625     | 0.046675  | 0.48139 |  |
|             | 0.046675        | 0.48139    | 0.48139 | 0.755949407 |             |           |         |  |
| NA          | ENSG00000248374 | -1.4636    | 0.92835 | 0.046643    | 0.4814      | -1.0604   | 0.85551 |  |
|             | -0.60341        | 0.72688    | 0.4814  | 0.755949407 |             |           |         |  |
| NA          | ENSG00000238585 | 0.046589   | 0.48142 | 0.046589    | 0.48142     | 0.046589  | 0.48142 |  |
|             | 0.046589        | 0.48142    | 0.48142 | 0.755956453 |             |           |         |  |
| SHLD1       | ENSG00000171984 | -0.61558   | 0.73092 | -0.12907    | 0.55135     | 0.046482  | 0.48146 |  |
|             | -0.14068        | 0.55594    | 0.48146 | 0.755994902 |             |           |         |  |
| OR5B17      | ENSG00000197786 | 0.046315   | 0.48153 | 0.046315    | 0.48153     | 0.046315  |         |  |
|             | 0.48153         | 0.046315   | 0.48153 | 0.48153     | 0.756080454 |           |         |  |
| NA          | ENSG00000201584 | -0.60378   | 0.72701 | -0.66919    | 0.74831     | -0.66919  | 0.74831 |  |
|             | 0.046178        | 0.48158    | 0.48158 | 0.756134599 |             |           |         |  |
| DENND6A     | ENSG00000174839 | -0.3929    | 0.6528  | -0.10049    | 0.54002     | -0.043838 |         |  |
|             | 0.51748         | 0.046007   | 0.48165 | 0.48165     | 0.75622014  |           |         |  |
| MIR129-1    | ENSG00000207705 | -1.2761    | 0.89904 | -0.88074    | 0.81077     | -0.7258   |         |  |
|             | 0.76602         | 0.04583    | 0.48172 | 0.48172     | 0.756242279 |           |         |  |
| NA          | ENSG00000273068 | 0.045814   | 0.48173 | -0.68597    | 0.75363     | -0.68597  | 0.75363 |  |
|             | -0.68597        | 0.75363    | 0.48173 | 0.756242279 |             |           |         |  |
| NA          | ENSG00000233342 | -0.078514  | 0.53129 | -0.078514   | 0.53129     | -0.078514 | 0.53129 |  |
|             | 0.045788        | 0.48174    | 0.48174 | 0.756242279 |             |           |         |  |
| NA          | ENSG00000253777 | 0.045729   | 0.48176 | 0.045729    | 0.48176     | 0.045729  | 0.48176 |  |
|             | 0.045729        | 0.48176    | 0.48176 | 0.756242279 |             |           |         |  |
| GTF2H3      | ENSG00000111358 | 0.045629   | 0.4818  | 0.045629    | 0.4818      | 0.045629  |         |  |
|             | 0.4818          | 0.045629   | 0.4818  | 0.4818      | 0.756242279 |           |         |  |
| PLEKHM1P1   | ENSG00000214176 | -1.1995    | 0.88484 | -0.2346     | 0.59274     | -0.19097  |         |  |
|             | 0.57573         | 0.045635   | 0.4818  | 0.4818      | 0.756242279 |           |         |  |
| NA          | ENSG00000261411 | -0.057772  | 0.52303 | 0.045646    | 0.4818      | -0.057772 | 0.52303 |  |
|             | -0.057772       | 0.52303    | 0.4818  | 0.756242279 |             |           |         |  |
| MEMO1P5     | ENSG00000271492 | 0.045634   | 0.4818  | -0.2757     | 0.60861     | -0.32761  |         |  |
|             | 0.6284          | -0.33863   | 0.63256 | 0.4818      | 0.756242279 |           |         |  |
| XKR4        | ENSG00000206579 | -0.75375   | 0.7745  | -0.3367     | 0.63183     | 0.045598  | 0.48182 |  |
|             | -0.12763        | 0.55078    | 0.48182 | 0.756242279 |             |           |         |  |
| MIR497HG    | ENSG00000267532 | 0.045549   | 0.48183 | 0.045549    | 0.48183     | 0.045549  |         |  |
|             | 0.48183         | 0.045549   | 0.48183 | 0.48183     | 0.756242279 |           |         |  |
| SPECC1P2    | ENSG00000244456 | 0.045531   | 0.48184 | 0.045531    | 0.48184     | 0.045531  |         |  |
|             | 0.48184         | 0.045531   | 0.48184 | 0.48184     | 0.756242279 |           |         |  |
| NA          | ENSG00000207281 | 0.045476   | 0.48186 | 0.045476    | 0.48186     | 0.045476  | 0.48186 |  |
|             | 0.045476        | 0.48186    | 0.48186 | 0.756242279 |             |           |         |  |
| NA          | ENSG00000233903 | 0.045458   | 0.48187 | 0.045458    | 0.48187     | 0.045458  | 0.48187 |  |
|             | 0.045458        | 0.48187    | 0.48187 | 0.756242279 |             |           |         |  |
| HSD11B1-AS1 | ENSG00000227591 | 0.045377   | 0.4819  | 0.045377    | 0.4819      | 0.045377  |         |  |
|             | 0.4819          | 0.045377   | 0.4819  | 0.4819      | 0.756242279 |           |         |  |
| NA          | ENSG00000248779 | -0.28733   | 0.61307 | 0.045353    | 0.48191     | -1.1942   | 0.8838  |  |
|             | -0.66079        | 0.74563    | 0.48191 | 0.756242279 |             |           |         |  |
| RN7SL704P   | ENSG00000241693 | 0.045287   | 0.48194 | 0.045287    | 0.48194     | 0.045287  |         |  |
|             | 0.48194         | 0.045287   | 0.48194 | 0.48194     | 0.756242279 |           |         |  |
| NA          | ENSG00000278601 | 0.045291   | 0.48194 | 0.045291    | 0.48194     | 0.045291  | 0.48194 |  |
|             | 0.045291        | 0.48194    | 0.48194 | 0.756242279 |             |           |         |  |
| MTRR        | ENSG00000124275 | -0.0012311 | 0.50049 | -0.23112    | 0.59139     | 0.045263  | 0.48195 |  |
|             | -0.0012311      | 0.50049    | 0.48195 | 0.756242279 |             |           |         |  |
| ONECUT2     | ENSG00000119547 | -0.57336   | 0.7168  | -0.89804    | 0.81542     | -0.78079  |         |  |
|             | 0.78254         | 0.045215   | 0.48197 | 0.48197     | 0.756242279 |           |         |  |
| SLC36A2     | ENSG00000186335 | 0.045149   | 0.48199 | -1.0801     | 0.85994     | -0.99616  |         |  |
|             | 0.84041         | -1.0801    | 0.85994 | 0.48199     | 0.756242279 |           |         |  |
| NA          | ENSG00000261570 | -0.59669   | 0.72464 | -0.58894    | 0.72205     | -0.69775  | 0.75733 |  |
|             | 0.045149        | 0.48199    | 0.48199 | 0.756242279 |             |           |         |  |
| NA          | ENSG00000248625 | -0.93155   | 0.82422 | 0.045081    | 0.48202     | 0.045081  | 0.48202 |  |
|             | -0.042929       | 0.51712    | 0.48202 | 0.756256245 |             |           |         |  |
| NA          | ENSG00000267371 | 0.045066   | 0.48203 | -0.124      | 0.54934     | -0.17597  | 0.56984 |  |
|             | 0.025498        | 0.48983    | 0.48203 | 0.756256245 |             |           |         |  |
| NA          | ENSG00000280423 | 0.04502    | 0.48205 | -0.027805   | 0.51109     | 0.04502   | 0.48205 |  |

|           |                 |           |         |             |             |          |         |  |
|-----------|-----------------|-----------|---------|-------------|-------------|----------|---------|--|
|           | 0.04502         | 0.48205   | 0.48205 | 0.756256245 |             |          |         |  |
| OR8D4     | ENSG00000181518 | 0.044911  | 0.48209 | 0.044911    | 0.48209     | 0.044911 | 0.48209 |  |
|           | 0.044911        | 0.48209   | 0.48209 | 0.756256245 |             |          |         |  |
| SUCLG2P2  | ENSG00000236349 | 0.044887  | 0.4821  | -3.154      | 0.99919     | 0.044887 |         |  |
|           | 0.4821          | -0.76224  | 0.77704 | 0.4821      | 0.756256245 |          |         |  |
| TBC1D3P5  | ENSG00000266433 | 0.044793  | 0.48214 | -0.875      | 0.80921     | -0.63911 |         |  |
|           | 0.73862         | -0.2127   | 0.58422 | 0.48214     | 0.756256245 |          |         |  |
| GJA8      | ENSG00000121634 | 0.044766  | 0.48215 | 0.044766    | 0.48215     | 0.044766 | 0.48215 |  |
|           | 0.044766        | 0.48215   | 0.48215 | 0.756256245 |             |          |         |  |
| PRPF40B   | ENSG00000110844 | -0.36803  | 0.64358 | -0.025174   | 0.51004     | 0.044691 |         |  |
|           | 0.48218         | -0.18382  | 0.57292 | 0.48218     | 0.756256245 |          |         |  |
| NA        | ENSG00000273010 | 0.044578  | 0.48222 | 0.044578    | 0.48222     | 0.044578 | 0.48222 |  |
|           | 0.044578        | 0.48222   | 0.48222 | 0.756256245 |             |          |         |  |
| NA        | ENSG00000261731 | 0.044538  | 0.48224 | 0.044538    | 0.48224     | 0.044538 | 0.48224 |  |
|           | 0.044538        | 0.48224   | 0.48224 | 0.756256245 |             |          |         |  |
| RPL14P3   | ENSG00000241923 | 0.044497  | 0.48225 | 0.044497    | 0.48225     | 0.044497 |         |  |
|           | 0.48225         | 0.044497  | 0.48225 | 0.48225     | 0.756256245 |          |         |  |
| PRR22     | ENSG00000212123 | 0.044476  | 0.48226 | 0.044476    | 0.48226     | 0.044476 | 0.48226 |  |
|           | 0.044476        | 0.48226   | 0.48226 | 0.756256245 |             |          |         |  |
| MIP       | ENSG00000135517 | -1.044    | 0.85175 | 0.044461    | 0.48227     | -0.83896 | 0.79925 |  |
|           | 0.044461        | 0.48227   | 0.48227 | 0.756256245 |             |          |         |  |
| BCRP8     | ENSG00000236794 | 0.0444    | 0.48229 | 0.0444      | 0.48229     | 0.0444   | 0.48229 |  |
|           | 0.0444          | 0.48229   | 0.48229 | 0.756256245 |             |          |         |  |
| NA        | ENSG00000252727 | 0.044383  | 0.4823  | -1.1499     | 0.87492     | 0.044383 | 0.4823  |  |
|           | 0.044383        | 0.4823    | 0.4823  | 0.756256245 |             |          |         |  |
| RAD9B     | ENSG00000151164 | -0.21695  | 0.58588 | -0.21695    | 0.58588     | 0.044357 | 0.48231 |  |
|           | -0.84104        | 0.79984   | 0.48231 | 0.756256245 |             |          |         |  |
| CLDN11    | ENSG00000013297 | -0.59576  | 0.72433 | 0.039451    | 0.48427     | 0.044323 |         |  |
|           | 0.48232         | -0.29576  | 0.61629 | 0.48232     | 0.756256245 |          |         |  |
| RPL7L1    | ENSG00000146223 | -1.2227   | 0.88929 | -1.2227     | 0.88929     | -1.069   |         |  |
|           | 0.85746         | 0.044332  | 0.48232 | 0.48232     | 0.756256245 |          |         |  |
| CREB3L4   | ENSG00000143578 | 0.044224  | 0.48236 | 0.044224    | 0.48236     | 0.044224 |         |  |
|           | 0.48236         | 0.044224  | 0.48236 | 0.48236     | 0.756256245 |          |         |  |
| TTC34     | ENSG00000215912 | 0.044217  | 0.48237 | -0.53552    | 0.70385     | -1.0004  | 0.84144 |  |
|           | -0.012143       | 0.50484   | 0.48237 | 0.756256245 |             |          |         |  |
| NA        | ENSG00000270453 | 0.044185  | 0.48238 | -0.3875     | 0.65081     | 0.044185 | 0.48238 |  |
|           | 0.044185        | 0.48238   | 0.48238 | 0.756256245 |             |          |         |  |
| SLAIN1    | ENSG00000139737 | -0.90385  | 0.81696 | -0.2478     | 0.59786     | 0.044155 |         |  |
|           | 0.48239         | -0.015731 | 0.50628 | 0.48239     | 0.756256245 |          |         |  |
| NA        | ENSG00000167774 | 0.044102  | 0.48241 | 0.044102    | 0.48241     | 0.044102 | 0.48241 |  |
|           | 0.044102        | 0.48241   | 0.48241 | 0.756256245 |             |          |         |  |
| RNU6-527P | ENSG00000200295 | 0.044097  | 0.48241 | 0.044097    | 0.48241     | 0.044097 |         |  |
|           | 0.48241         | 0.044097  | 0.48241 | 0.48241     | 0.756256245 |          |         |  |
| NA        | ENSG00000261655 | -0.049191 | 0.51962 | 0.044083    | 0.48242     | -1.8276  | 0.9662  |  |
|           | -1.8276         | 0.9662    | 0.48242 | 0.756256245 |             |          |         |  |
| NA        | ENSG00000200521 | -1.5928   | 0.9444  | 0.044019    | 0.48244     | 0.044019 | 0.48244 |  |
|           | 0.044019        | 0.48244   | 0.48244 | 0.756256245 |             |          |         |  |
| KLHL40    | ENSG00000157119 | 0.044011  | 0.48245 | -0.86853    | 0.80745     | -0.86853 |         |  |
|           | 0.80745         | -2.224    | 0.98693 | 0.48245     | 0.756256245 |          |         |  |
| LINC01004 | ENSG00000228393 | 0.043978  | 0.48246 | -0.27145    | 0.60698     | -0.41992 |         |  |
|           | 0.66273         | -0.15791  | 0.56274 | 0.48246     | 0.756256245 |          |         |  |
| PDE4A     | ENSG00000065989 | -0.95732  | 0.8308  | -1.0068     | 0.84299     | -0.44311 | 0.67116 |  |
|           | 0.043963        | 0.48247   | 0.48247 | 0.756256245 |             |          |         |  |
| TTLL8     | ENSG00000138892 | 0.032723  | 0.48695 | -0.59965    | 0.72563     | -0.21212 | 0.584   |  |
|           | 0.043966        | 0.48247   | 0.48247 | 0.756256245 |             |          |         |  |
| BEST2     | ENSG00000039987 | 0.043935  | 0.48248 | 0.043935    | 0.48248     | -0.52179 | 0.69909 |  |
|           | 0.043935        | 0.48248   | 0.48248 | 0.756256245 |             |          |         |  |
| RN7SL612P | ENSG00000266160 | 0.043694  | 0.48257 | 0.043694    | 0.48257     | 0.043694 |         |  |
|           | 0.48257         | 0.043694  | 0.48257 | 0.48257     | 0.756313405 |          |         |  |
| ANGPT1    | ENSG00000154188 | 0.043657  | 0.48259 | -0.0055025  | 0.5022      | 0.033058 |         |  |
|           | 0.48681         | -0.55036  | 0.70896 | 0.48259     | 0.756313405 |          |         |  |
| RN7SKP10  | ENSG00000201161 | -0.61171  | 0.72964 | -1.6121     | 0.94653     | 0.043597 |         |  |

|             |                 |           |         |             |             |           |          |
|-------------|-----------------|-----------|---------|-------------|-------------|-----------|----------|
|             | 0.48261         | -0.35715  | 0.63951 | 0.48261     | 0.756313405 |           |          |
| NA          | ENSG00000261353 | 0.043588  | 0.48262 | 0.043588    | 0.48262     | 0.043588  | 0.48262  |
|             | 0.043588        | 0.48262   | 0.48262 | 0.756313405 |             |           |          |
| LINC02706   | ENSG00000255344 | 0.043557  | 0.48263 | 0.043557    | 0.48263     | -0.76071  |          |
|             | 0.77658         | 0.043557  | 0.48263 | 0.48263     | 0.756313405 |           |          |
| PROM2       | ENSG00000155066 | -0.91176  | 0.81905 | 0.043518    | 0.48264     | -1.2509   | 0.89451  |
|             | -0.57815        | 0.71842   | 0.48264 | 0.756313405 |             |           |          |
| SPATA17-AS1 | ENSG00000234070 | 0.043535  | 0.48264 | 0.043535    | 0.48264     | 0.043535  | 0.043535 |
|             | 0.48264         | 0.043535  | 0.48264 | 0.48264     | 0.756313405 |           |          |
| TMEM218     | ENSG00000150433 | -1.309    | 0.90474 | 0.043467    | 0.48266     | -1.3959   |          |
|             | 0.91863         | -0.021805 | 0.5087  | 0.48266     | 0.756313405 |           |          |
| NA          | ENSG00000248632 | -0.34653  | 0.63553 | 0.043475    | 0.48266     | 0.036371  | 0.48549  |
|             | -0.35994        | 0.64055   | 0.48266 | 0.756313405 |             |           |          |
| WASF1       | ENSG00000112290 | -0.77979  | 0.78224 | -0.30677    | 0.62049     | 0.043421  | 0.48268  |
|             | -1.211          | 0.88706   | 0.48268 | 0.756313405 |             |           |          |
| NA          | ENSG00000227549 | 0.043269  | 0.48274 | 0.043269    | 0.48274     | 0.043269  | 0.48274  |
|             | 0.043269        | 0.48274   | 0.48274 | 0.756313405 |             |           |          |
| NA          | ENSG00000213620 | 0.043263  | 0.48275 | -0.51696    | 0.69741     | -0.51696  | 0.69741  |
|             | -0.51696        | 0.69741   | 0.48275 | 0.756313405 |             |           |          |
| SNRPGP11    | ENSG00000229906 | -1.5387   | 0.93807 | -1.5387     | 0.93807     | 0.043197  |          |
|             | 0.48277         | -1.5387   | 0.93807 | 0.48277     | 0.756313405 |           |          |
| PART1       | ENSG00000152931 | -0.34361  | 0.63443 | -0.062837   | 0.52505     | 0.043098  | 0.48281  |
|             | -0.24325        | 0.59609   | 0.48281 | 0.756313405 |             |           |          |
| ACTN4       | ENSG00000130402 | 0.043075  | 0.48282 | -0.51947    | 0.69828     | -0.22105  | 0.58747  |
|             | -0.070003       | 0.5279    | 0.48282 | 0.756313405 |             |           |          |
| ZNF701      | ENSG00000167562 | -0.39134  | 0.65223 | -0.44533    | 0.67196     | 0.043087  |          |
|             | 0.48282         | -0.62163  | 0.73291 | 0.48282     | 0.756313405 |           |          |
| BDNF        | ENSG00000176697 | -0.35338  | 0.6381  | -0.8659     | 0.80673     | -0.25933  | 0.60231  |
|             | 0.043079        | 0.48282   | 0.48282 | 0.756313405 |             |           |          |
| DPPA5P1     | ENSG00000269776 | 0.043019  | 0.48284 | 0.043019    | 0.48284     | 0.043019  |          |
|             | 0.48284         | 0.043019  | 0.48284 | 0.48284     | 0.756313405 |           |          |
| NA          | ENSG00000231188 | -0.54913  | 0.70854 | 0.043005    | 0.48285     | -0.96491  | 0.8327   |
|             | -0.96491        | 0.8327    | 0.48285 | 0.756313405 |             |           |          |
| C14orf93    | ENSG00000100802 | -0.42895  | 0.66602 | -0.42895    | 0.66602     | -0.42895  |          |
|             | 0.66602         | 0.042926  | 0.48288 | 0.48288     | 0.756313405 |           |          |
| HOXD8       | ENSG00000175879 | 0.042918  | 0.48288 | -0.59345    | 0.72356     | -0.057469 | 0.52291  |
|             | -0.90504        | 0.81728   | 0.48288 | 0.756313405 |             |           |          |
| RNU4-47P    | ENSG00000222808 | 0.042926  | 0.48288 | 0.042926    | 0.48288     | 0.042926  |          |
|             | 0.48288         | 0.042926  | 0.48288 | 0.48288     | 0.756313405 |           |          |
| MIR3158-1   | ENSG00000263436 | 0.042839  | 0.48291 | 0.042839    | 0.48291     | 0.042839  |          |
|             | 0.48291         | 0.042839  | 0.48291 | 0.48291     | 0.756313405 |           |          |
| NA          | ENSG00000279264 | 0.042851  | 0.48291 | -1.5883     | 0.94389     | -1.2784   | 0.89944  |
|             | -1.2784         | 0.89944   | 0.48291 | 0.756313405 |             |           |          |
| NDUFB2      | ENSG00000090266 | -0.68214  | 0.75242 | 0.042821    | 0.48292     | -0.44016  |          |
|             | 0.67009         | -1.3623   | 0.91344 | 0.48292     | 0.756313405 |           |          |
| NA          | ENSG00000260217 | 0.042819  | 0.48292 | 0.025637    | 0.48977     | 0.042819  | 0.48292  |
|             | 0.042819        | 0.48292   | 0.48292 | 0.756313405 |             |           |          |
| FH          | ENSG00000091483 | -0.41331  | 0.66031 | -0.27736    | 0.60925     | -0.10779  | 0.54292  |
|             | 0.042699        | 0.48297   | 0.48297 | 0.756343095 |             |           |          |
| LINC00664   | ENSG00000268658 | 0.0427    | 0.48297 | -0.35673    | 0.63935     | -0.17136  |          |
|             | 0.56803         | -0.076626 | 0.53054 | 0.48297     | 0.756343095 |           |          |
| FRRS1       | ENSG00000156869 | 0.042614  | 0.483   | -0.13195    | 0.55249     | -1.0995   | 0.86422  |
|             | -0.18942        | 0.57512   | 0.483   | 0.756348477 |             |           |          |
| SPINK2      | ENSG00000128040 | -0.22074  | 0.58735 | -0.22074    | 0.58735     | -0.49524  |          |
|             | 0.68978         | 0.042601  | 0.48301 | 0.48301     | 0.756348477 |           |          |
| RNU6-516P   | ENSG00000223313 | 0.042571  | 0.48302 | 0.042571    | 0.48302     | 0.042571  |          |
|             | 0.48302         | 0.042571  | 0.48302 | 0.48302     | 0.756348477 |           |          |
| NA          | ENSG00000224988 | 0.042529  | 0.48304 | 0.042529    | 0.48304     | 0.042529  | 0.48304  |
|             | 0.042529        | 0.48304   | 0.48304 | 0.75635549  |             |           |          |
| NA          | ENSG00000239922 | -0.92613  | 0.82281 | 0.042432    | 0.48308     | -0.5113   | 0.69543  |
|             | -0.5113         | 0.69543   | 0.48308 | 0.756393818 |             |           |          |
| LINC01561   | ENSG00000177234 | 0.042309  | 0.48313 | -0.4096     | 0.65895     | -0.4096   |          |

|           |                 |            |         |             |             |           |         |
|-----------|-----------------|------------|---------|-------------|-------------|-----------|---------|
|           | 0.65895         | -0.4096    | 0.65895 | 0.48313     | 0.75641485  |           |         |
| RNY1P1    | ENSG00000201242 | 0.042289   | 0.48313 | -0.32768    | 0.62842     | -0.01564  |         |
|           | 0.50624         | -0.57063   | 0.71587 | 0.48313     | 0.75641485  |           |         |
| NA        | ENSG00000228265 | 0.04228    | 0.48314 | -0.26879    | 0.60595     | -0.26879  | 0.60595 |
|           | -0.26879        | 0.60595    | 0.48314 | 0.75641485  |             |           |         |
| ZNF16     | ENSG00000170631 | -0.84609   | 0.80125 | 0.042128    | 0.4832      | -0.84609  | 0.80125 |
|           | -0.84609        | 0.80125    | 0.4832  | 0.756484482 |             |           |         |
| MTRF1LP1  | ENSG00000256091 | -0.4559    | 0.67577 | -0.4559     | 0.67577     | 0.042061  |         |
|           | 0.48322         | -0.0065363 | 0.50261 | 0.48322     | 0.75649149  |           |         |
| RNU6-440P | ENSG00000212184 | 0.041939   | 0.48327 | -0.80516    | 0.78964     | -0.68105  |         |
|           | 0.75208         | -0.68105   | 0.75208 | 0.48327     | 0.756521157 |           |         |
| NA        | ENSG00000238440 | 0.041946   | 0.48327 | 0.041946    | 0.48327     | 0.041946  | 0.48327 |
|           | 0.041946        | 0.48327    | 0.48327 | 0.756521157 |             |           |         |
| NA        | ENSG00000232702 | -0.47388   | 0.68221 | -0.47388    | 0.68221     | -0.47388  | 0.68221 |
|           | 0.041873        | 0.4833     | 0.4833  | 0.756535168 |             |           |         |
| CHORDC1P4 | ENSG00000263606 | 0.041848   | 0.48331 | 0.041848    | 0.48331     | 0.041848  |         |
|           | 0.48331         | 0.041848   | 0.48331 | 0.48331     | 0.756535168 |           |         |
| MIR1228   | ENSG00000221365 | 0.041683   | 0.48338 | 0.041683    | 0.48338     | 0.041683  |         |
|           | 0.48338         | 0.041683   | 0.48338 | 0.48338     | 0.756613841 |           |         |
| AP4S1     | ENSG00000100478 | 0.015926   | 0.49365 | -0.39553    | 0.65378     | 0.041619  | 0.4834  |
|           | -0.16257        | 0.56457    | 0.4834  | 0.756613841 |             |           |         |
| LST1      | ENSG00000204482 | 0.041606   | 0.48341 | 0.041606    | 0.48341     | 0.041606  | 0.48341 |
|           | 0.041606        | 0.48341    | 0.48341 | 0.756613841 |             |           |         |
| CCT2      | ENSG00000166226 | 0.041484   | 0.48346 | -1.9052     | 0.97162     | -1.4216   | 0.92243 |
|           | -1.5282         | 0.93677    | 0.48346 | 0.756613841 |             |           |         |
| ZNF324B   | ENSG00000249471 | 0.041474   | 0.48346 | 0.041474    | 0.48346     | 0.041474  |         |
|           | 0.48346         | 0.041474   | 0.48346 | 0.48346     | 0.756613841 |           |         |
| TIGD6     | ENSG00000164296 | 0.041428   | 0.48348 | 0.041428    | 0.48348     | 0.041428  | 0.48348 |
|           | 0.041428        | 0.48348    | 0.48348 | 0.756613841 |             |           |         |
| CARD8-AS1 | ENSG00000268001 | 0.041392   | 0.48349 | -0.13223    | 0.5526      | -0.42678  |         |
|           | 0.66523         | -0.12744   | 0.55071 | 0.48349     | 0.756613841 |           |         |
| MZF1      | ENSG00000099326 | 0.041368   | 0.4835  | 0.041368    | 0.4835      | 0.041368  | 0.4835  |
|           | 0.041368        | 0.4835     | 0.4835  | 0.756613841 |             |           |         |
| RNU6-632P | ENSG00000251711 | 0.041372   | 0.4835  | 0.041372    | 0.4835      | 0.041372  |         |
|           | 0.4835          | 0.041372   | 0.4835  | 0.4835      | 0.756613841 |           |         |
| PCDH15    | ENSG00000150275 | -1.1174    | 0.86808 | 0.041238    | 0.48355     | -0.2608   |         |
|           | 0.60288         | -1.2956    | 0.90245 | 0.48355     | 0.756641838 |           |         |
| NA        | ENSG00000263611 | 0.041212   | 0.48356 | 0.041212    | 0.48356     | 0.041212  | 0.48356 |
|           | 0.041212        | 0.48356    | 0.48356 | 0.756641838 |             |           |         |
| NA        | ENSG00000279754 | 0.041195   | 0.48357 | 0.041195    | 0.48357     | 0.041195  | 0.48357 |
|           | 0.041195        | 0.48357    | 0.48357 | 0.756641838 |             |           |         |
| DNM1P46   | ENSG00000182397 | -1.2697    | 0.8979  | 0.041164    | 0.48358     | -0.12161  |         |
|           | 0.5484          | -0.10655   | 0.54243 | 0.48358     | 0.756641838 |           |         |
| ELOBP2    | ENSG00000255262 | -0.85041   | 0.80245 | -0.85041    | 0.80245     | 0.041104  |         |
|           | 0.48361         | -0.85041   | 0.80245 | 0.48361     | 0.756664482 |           |         |
| RPL19P11  | ENSG00000241668 | 0.040993   | 0.48365 | 0.040993    | 0.48365     | 0.040993  |         |
|           | 0.48365         | 0.040993   | 0.48365 | 0.48365     | 0.756694121 |           |         |
| CCDC144B  | ENSG00000154874 | -1.392     | 0.91804 | -2.1874     | 0.98564     | -0.047295 |         |
|           | 0.51886         | 0.040968   | 0.48366 | 0.48366     | 0.756694121 |           |         |
| RN7SL55P  | ENSG00000243227 | 0.040875   | 0.4837  | 0.040875    | 0.4837      | 0.040875  |         |
|           | 0.4837          | 0.040875   | 0.4837  | 0.4837      | 0.756722102 |           |         |
| NA        | ENSG00000242659 | 0.040808   | 0.48372 | 0.040808    | 0.48372     | 0.040808  | 0.48372 |
|           | 0.040808        | 0.48372    | 0.48372 | 0.756722102 |             |           |         |
| ADAM29    | ENSG00000168594 | 0.040767   | 0.48374 | -0.19547    | 0.57749     | -0.87376  |         |
|           | 0.80888         | -0.87376   | 0.80888 | 0.48374     | 0.756722102 |           |         |
| NA        | ENSG00000267838 | 0.040764   | 0.48374 | 0.040764    | 0.48374     | 0.040764  | 0.48374 |
|           | 0.040764        | 0.48374    | 0.48374 | 0.756722102 |             |           |         |
| NIPA2     | ENSG00000140157 | -0.22389   | 0.58858 | -1.3113     | 0.90513     | 0.040662  | 0.48378 |
|           | -0.017136       | 0.50684    | 0.48378 | 0.756760381 |             |           |         |
| PSPHP1    | ENSG00000226278 | -1.304     | 0.90389 | -0.31285    | 0.6228      | 0.040597  |         |
|           | 0.48381         | -0.81849   | 0.79346 | 0.48381     | 0.756783016 |           |         |
| HDAC3     | ENSG00000171720 | -0.94456   | 0.82756 | 0.040526    | 0.48384     | -0.94456  | 0.82756 |

|            |                 |            |         |             |             |           |         |  |
|------------|-----------------|------------|---------|-------------|-------------|-----------|---------|--|
|            | -1.7072         | 0.9561     | 0.48384 | 0.756805649 |             |           |         |  |
| VENTXP6    | ENSG00000254105 | -0.72144   | 0.76468 | -0.13211    | 0.55255     | 0.040395  |         |  |
|            | 0.48389         | 0.040395   | 0.48389 | 0.48389     | 0.756850912 |           |         |  |
| NA         | ENSG00000277879 | 0.040357   | 0.4839  | 0.040357    | 0.4839      | 0.040357  | 0.4839  |  |
|            | 0.040357        | 0.4839     | 0.4839  | 0.756850912 |             |           |         |  |
| CHCHD3P2   | ENSG00000257723 | 0.040236   | 0.48395 | 0.040236    | 0.48395     | 0.040236  | 0.48395 |  |
|            | 0.48395         | 0.040236   | 0.48395 | 0.48395     | 0.756878864 |           |         |  |
| NA         | ENSG00000275426 | -0.24876   | 0.59823 | 0.040238    | 0.48395     | -0.2675   | 0.60546 |  |
|            | -1.0384         | 0.85047    | 0.48395 | 0.756878864 |             |           |         |  |
| RTN4IP1    | ENSG00000130347 | 0.040174   | 0.48398 | -0.37031    | 0.64442     | -1.4668   |         |  |
|            | 0.92878         | -0.0036139 | 0.50144 | 0.48398     | 0.756878864 |           |         |  |
| PWAR5      | ENSG00000279192 | 0.040161   | 0.48398 | 0.040161    | 0.48398     | 0.040161  | 0.48398 |  |
|            | 0.040161        | 0.48398    | 0.48398 | 0.756878864 |             |           |         |  |
| NA         | ENSG00000258727 | -0.80575   | 0.78981 | 0.039999    | 0.48405     | 0.039999  | 0.48405 |  |
|            | 0.039999        | 0.48405    | 0.48405 | 0.756899131 |             |           |         |  |
| GGN        | ENSG00000179168 | 0.039846   | 0.48411 | 0.039846    | 0.48411     | 0.039846  | 0.48411 |  |
|            | 0.039846        | 0.48411    | 0.48411 | 0.756899131 |             |           |         |  |
| YWHAQ      | ENSG00000134308 | -0.38991   | 0.6517  | -0.0060893  | 0.50243     | 0.039818  | 0.48412 |  |
|            | -0.68777        | 0.7542     | 0.48412 | 0.756899131 |             |           |         |  |
| NA         | ENSG00000244559 | 0.03982    | 0.48412 | 0.03982     | 0.48412     | 0.03982   | 0.48412 |  |
|            | 0.03982         | 0.48412    | 0.48412 | 0.756899131 |             |           |         |  |
| NA         | ENSG00000259761 | 0.039823   | 0.48412 | -1.2765     | 0.89911     | -0.48715  | 0.68692 |  |
|            | -1.0363         | 0.84997    | 0.48412 | 0.756899131 |             |           |         |  |
| ZNF423     | ENSG00000102935 | 0.039803   | 0.48413 | -0.86312    | 0.80596     | 0.0137    |         |  |
|            | 0.49453         | -0.5641    | 0.71366 | 0.48413     | 0.756899131 |           |         |  |
| GLCE       | ENSG00000138604 | 0.039801   | 0.48413 | -0.19609    | 0.57773     | -0.95957  | 0.83137 |  |
|            | -0.16686        | 0.56626    | 0.48413 | 0.756899131 |             |           |         |  |
| NA         | ENSG00000261090 | -0.49028   | 0.68803 | 0.039772    | 0.48414     | -0.49028  | 0.68803 |  |
|            | -0.74713        | 0.77251    | 0.48414 | 0.756899131 |             |           |         |  |
| KRTAP19-7  | ENSG00000244362 | 0.039679   | 0.48417 | 0.039679    | 0.48417     | -0.022497 |         |  |
|            | 0.50897         | 0.039679   | 0.48417 | 0.48417     | 0.756899131 |           |         |  |
| NA         | ENSG00000272795 | -0.10041   | 0.53999 | 0.039683    | 0.48417     | 0.039683  | 0.48417 |  |
|            | 0.039683        | 0.48417    | 0.48417 | 0.756899131 |             |           |         |  |
| SORCS3     | ENSG00000156395 | -1.1809    | 0.88117 | -0.85704    | 0.80429     | -0.99094  |         |  |
|            | 0.83914         | 0.039513   | 0.48424 | 0.48424     | 0.756899131 |           |         |  |
| CENPE      | ENSG00000138778 | -0.44637   | 0.67233 | 0.0045714   | 0.49818     | -0.24787  | 0.59788 |  |
|            | 0.039488        | 0.48425    | 0.48425 | 0.756899131 |             |           |         |  |
| HNRNPA1P71 | ENSG00000259686 | 0.039494   | 0.48425 | 0.039494    | 0.48425     | 0.039494  |         |  |
|            | 0.48425         | 0.039494   | 0.48425 | 0.48425     | 0.756899131 |           |         |  |
| GZMH       | ENSG00000100450 | -0.013063  | 0.50521 | -0.43371    | 0.66775     | 0.039458  | 0.48426 |  |
|            | 0.039458        | 0.48426    | 0.48426 | 0.756899131 |             |           |         |  |
| TPH1       | ENSG00000129167 | 0.039437   | 0.48427 | -1.1694     | 0.87888     | -0.71521  | 0.76276 |  |
|            | -0.91772        | 0.82062    | 0.48427 | 0.756899131 |             |           |         |  |
| RASSF3     | ENSG00000153179 | 0.03945    | 0.48427 | -1.3543     | 0.91217     | -0.86661  |         |  |
|            | 0.80692         | -0.44808   | 0.67295 | 0.48427     | 0.756899131 |           |         |  |
| STOM       | ENSG00000148175 | -0.29909   | 0.61756 | -0.29909    | 0.61756     | -0.29909  | 0.61756 |  |
|            | 0.039407        | 0.48428    | 0.48428 | 0.756899131 |             |           |         |  |
| ANKRD53    | ENSG00000144031 | -1.0633    | 0.85617 | -1.0633     | 0.85617     | 0.039317  |         |  |
|            | 0.48432         | -1.0633    | 0.85617 | 0.48432     | 0.756899131 |           |         |  |
| CARD11-AS1 | ENSG00000237286 | 0.039307   | 0.48432 | 0.039307    | 0.48432     | 0.039307  |         |  |
|            | 0.48432         | 0.039307   | 0.48432 | 0.48432     | 0.756899131 |           |         |  |
| MESTIT1    | ENSG00000272701 | 0.039296   | 0.48433 | -0.62535    | 0.73413     | -1.9157   |         |  |
|            | 0.9723          | -1.9157    | 0.9723  | 0.48433     | 0.756899131 |           |         |  |
| GABBR2     | ENSG00000136928 | 0.039272   | 0.48434 | -0.079556   | 0.5317      | -0.010278 |         |  |
|            | 0.5041          | -1.3627    | 0.91351 | 0.48434     | 0.756899131 |           |         |  |
| MAPT-IT1   | ENSG00000279685 | 0.039269   | 0.48434 | 0.039269    | 0.48434     | 0.039269  |         |  |
|            | 0.48434         | 0.039269   | 0.48434 | 0.48434     | 0.756899131 |           |         |  |
| NA         | ENSG00000232946 | 0.039205   | 0.48436 | 0.039205    | 0.48436     | 0.039205  | 0.48436 |  |
|            | 0.039205        | 0.48436    | 0.48436 | 0.756899131 |             |           |         |  |
| SINHCAP1   | ENSG00000263829 | 0.039093   | 0.48441 | 0.039093    | 0.48441     | 0.039093  |         |  |
|            | 0.48441         | 0.039093   | 0.48441 | 0.48441     | 0.756899131 |           |         |  |
| NA         | ENSG00000260430 | 0.039025   | 0.48444 | 0.039025    | 0.48444     | 0.039025  | 0.48444 |  |

|            |                 |          |         |             |             |          |         |  |
|------------|-----------------|----------|---------|-------------|-------------|----------|---------|--|
|            | -1.7219         | 0.95746  | 0.48444 | 0.756899131 |             |          |         |  |
| SLC47A2    | ENSG00000180638 | -0.21699 | 0.58589 | 0.038981    | 0.48445     | -0.63156 |         |  |
|            | 0.73616         | -1.0793  | 0.85977 | 0.48445     | 0.756899131 |          |         |  |
| AP5B1      | ENSG00000254470 | -0.26837 | 0.60579 | -0.26837    | 0.60579     | 0.038989 | 0.48445 |  |
|            | -0.26837        | 0.60579  | 0.48445 | 0.756899131 |             |          |         |  |
| CSGALNACT2 | ENSG00000169826 | -0.97595 | 0.83546 | -0.97595    | 0.83546     | -0.23209 |         |  |
|            | 0.59177         | 0.038941 | 0.48447 | 0.48447     | 0.756899131 |          |         |  |
| NA         | ENSG00000272431 | 0.038943 | 0.48447 | 0.038943    | 0.48447     | 0.038943 | 0.48447 |  |
|            | 0.038943        | 0.48447  | 0.48447 | 0.756899131 |             |          |         |  |
| BMP2       | ENSG00000125845 | -1.1884  | 0.88267 | 0.038891    | 0.48449     | -1.24    | 0.8925  |  |
|            | -0.48555        | 0.68636  | 0.48449 | 0.756899131 |             |          |         |  |
| MYCBP2-AS1 | ENSG00000236051 | 0.038878 | 0.48449 | 0.038878    | 0.48449     | 0.038878 |         |  |
|            | 0.48449         | 0.038878 | 0.48449 | 0.48449     | 0.756899131 |          |         |  |
| LINC01582  | ENSG00000259611 | 0.038892 | 0.48449 | -1.1775     | 0.88049     | -0.22799 |         |  |
|            | 0.59017         | -0.19554 | 0.57751 | 0.48449     | 0.756899131 |          |         |  |
| NA         | ENSG00000264668 | 0.038744 | 0.48455 | 0.038744    | 0.48455     | 0.038744 | 0.48455 |  |
|            | 0.038744        | 0.48455  | 0.48455 | 0.756966931 |             |          |         |  |
| RNU6-462P  | ENSG00000199529 | 0.038694 | 0.48457 | 0.038694    | 0.48457     | 0.038694 |         |  |
|            | 0.48457         | 0.038694 | 0.48457 | 0.48457     | 0.756966931 |          |         |  |
| RNA5SP459  | ENSG00000252437 | 0.038652 | 0.48458 | 0.038652    | 0.48458     | 0.038652 |         |  |
|            | 0.48458         | 0.038652 | 0.48458 | 0.48458     | 0.756966931 |          |         |  |
| NA         | ENSG00000278890 | 0.038603 | 0.4846  | -0.71166    | 0.76166     | 0.038603 | 0.4846  |  |
|            | 0.038603        | 0.4846   | 0.4846  | 0.756973907 |             |          |         |  |
| OR52J1P    | ENSG00000203560 | 0.038562 | 0.48462 | -0.5593     | 0.71202     | 0.038562 |         |  |
|            | 0.48462         | 0.038562 | 0.48462 | 0.48462     | 0.756977546 |          |         |  |
| GFPT1      | ENSG00000198380 | -0.54292 | 0.70641 | -0.28947    | 0.61389     | -1.1028  | 0.86494 |  |
|            | 0.038485        | 0.48465  | 0.48465 | 0.756977546 |             |          |         |  |
| KDM2B      | ENSG00000089094 | -0.35278 | 0.63787 | 0.03847     | 0.48466     | -0.49995 | 0.69144 |  |
|            | -0.47868        | 0.68392  | 0.48466 | 0.756977546 |             |          |         |  |
| FZD7       | ENSG00000155760 | -0.26837 | 0.60579 | -0.26837    | 0.60579     | -0.58541 | 0.72086 |  |
|            | 0.038418        | 0.48468  | 0.48468 | 0.756977546 |             |          |         |  |
| RN7SKP140  | ENSG00000223128 | 0.038402 | 0.48468 | 0.038402    | 0.48468     | -0.96053 |         |  |
|            | 0.83161         | 0.038402 | 0.48468 | 0.48468     | 0.756977546 |          |         |  |
| NA         | ENSG00000254813 | -0.13236 | 0.55265 | 0.038199    | 0.48476     | -0.54061 | 0.70561 |  |
|            | -0.43663        | 0.66881  | 0.48476 | 0.757053963 |             |          |         |  |
| NA         | ENSG00000275315 | 0.03822  | 0.48476 | 0.03822     | 0.48476     | 0.03822  | 0.48476 |  |
|            | 0.03822         | 0.48476  | 0.48476 | 0.757053963 |             |          |         |  |
| RASSF2     | ENSG00000101265 | 0.03564  | 0.48578 | 0.038087    | 0.48481     | -1.2222  |         |  |
|            | 0.88918         | -0.55959 | 0.71212 | 0.48481     | 0.757083522 |          |         |  |
| NA         | ENSG00000224239 | 0.038086 | 0.48481 | -0.48308    | 0.68548     | -1.4937  | 0.93238 |  |
|            | -0.60607        | 0.72776  | 0.48481 | 0.757083522 |             |          |         |  |
| NA         | ENSG00000271958 | -1.05    | 0.85315 | -0.21625    | 0.5856      | 0.037976 | 0.48485 |  |
|            | 0.037976        | 0.48485  | 0.48485 | 0.757121723 |             |          |         |  |
| NA         | ENSG00000273958 | 0.037906 | 0.48488 | 0.037906    | 0.48488     | 0.037906 | 0.48488 |  |
|            | 0.037906        | 0.48488  | 0.48488 | 0.757144307 |             |          |         |  |
| RWDD2B     | ENSG00000156253 | 0.037746 | 0.48495 | -0.43214    | 0.66718     | 0.037746 |         |  |
|            | 0.48495         | -0.38807 | 0.65102 | 0.48495     | 0.75720172  |          |         |  |
| USP50      | ENSG00000170236 | 0.037723 | 0.48495 | 0.037723    | 0.48495     | 0.037723 | 0.48495 |  |
|            | 0.037723        | 0.48495  | 0.48495 | 0.75720172  |             |          |         |  |
| REG1B      | ENSG00000172023 | 0.037695 | 0.48497 | 0.037695    | 0.48497     | 0.037695 | 0.48497 |  |
|            | 0.037695        | 0.48497  | 0.48497 | 0.75720172  |             |          |         |  |
| TIMM10B    | ENSG00000132286 | 0.037631 | 0.48499 | 0.037631    | 0.48499     | 0.037631 |         |  |
|            | 0.48499         | 0.037631 | 0.48499 | 0.48499     | 0.75720172  |          |         |  |
| RAD23BP1   | ENSG00000236570 | 0.037595 | 0.48501 | 0.037595    | 0.48501     | 0.037595 |         |  |
|            | 0.48501         | 0.037595 | 0.48501 | 0.48501     | 0.75720172  |          |         |  |
| NA         | ENSG00000267626 | 0.037577 | 0.48501 | 0.037577    | 0.48501     | 0.037577 | 0.48501 |  |
|            | 0.037577        | 0.48501  | 0.48501 | 0.75720172  |             |          |         |  |
| QRSL1P3    | ENSG00000257957 | 0.037488 | 0.48505 | 0.037488    | 0.48505     | 0.037488 |         |  |
|            | 0.48505         | 0.037488 | 0.48505 | 0.48505     | 0.75721565  |          |         |  |
| NA         | ENSG00000234229 | -0.45837 | 0.67666 | 0.037482    | 0.48505     | -0.50458 | 0.69307 |  |
|            | -0.79982        | 0.78809  | 0.48505 | 0.75721565  |             |          |         |  |
| NCEH1      | ENSG00000144959 | 0.0374   | 0.48508 | -0.74577    | 0.7721      | -0.74577 | 0.7721  |  |

|             |                 |           |          |          |             |             |          |          |  |
|-------------|-----------------|-----------|----------|----------|-------------|-------------|----------|----------|--|
|             |                 | -0.74577  | 0.7721   | 0.48508  | 0.757238224 |             |          |          |  |
| RPL10P4     | ENSG00000238003 | 0.037282  | 0.48513  | 0.037282 | 0.48513     | 0.037282    | 0.48513  | 0.037282 |  |
|             |                 | 0.48513   | 0.037282 | 0.48513  | 0.48513     | 0.757290541 |          |          |  |
| PIK3R1      | ENSG00000145675 | -0.24629  | 0.59727  | 0.037233 | 0.48515     | -0.76701    |          |          |  |
|             |                 | 0.77846   | -1.0389  | 0.85057  | 0.48515     | 0.757290541 |          |          |  |
| CHMP4B      | ENSG00000101421 | -0.38557  | 0.65009  | -0.72831 | 0.76679     | 0.037112    |          |          |  |
|             |                 | 0.4852    | -0.56652 | 0.71448  | 0.4852      | 0.757290541 |          |          |  |
| ZNF341-AS1  | ENSG00000230753 | 0.037112  | 0.4852   | 0.037112 | 0.4852      | 0.037112    | 0.4852   | 0.037112 |  |
|             |                 | 0.4852    | 0.037112 | 0.4852   | 0.4852      | 0.757290541 |          |          |  |
| NA          | ENSG00000204990 | -1.3894   | 0.91764  | -1.3894  | 0.91764     | -1.3894     | 0.91764  |          |  |
|             |                 | 0.037018  | 0.48524  | 0.48524  | 0.757290541 |             |          |          |  |
| MRPL10      | ENSG00000159111 | 0.036991  | 0.48525  | 0.036991 | 0.48525     | 0.036991    |          |          |  |
|             |                 | 0.48525   | 0.036991 | 0.48525  | 0.48525     | 0.757290541 |          |          |  |
| CCL13       | ENSG00000181374 | 0.036927  | 0.48527  | 0.036927 | 0.48527     | 0.036927    | 0.48527  | 0.036927 |  |
|             |                 | 0.036927  | 0.48527  | 0.48527  | 0.757290541 |             |          |          |  |
| CIDEC1      | ENSG00000186162 | -0.36079  | 0.64087  | 0.036872 | 0.48529     | 0.036872    |          |          |  |
|             |                 | 0.48529   | 0.013148 | 0.49475  | 0.48529     | 0.757290541 |          |          |  |
| LARS2-AS1   | ENSG00000232455 | 0.013045  | 0.4948   | 0.036879 | 0.48529     | -1.9592     |          |          |  |
|             |                 | 0.97496   | -1.9592  | 0.97496  | 0.48529     | 0.757290541 |          |          |  |
| MED24       | ENSG00000008838 | 0.036854  | 0.4853   | -0.92193 | 0.82172     | -0.28879    | 0.61363  |          |  |
|             |                 | -1.2684   | 0.89768  | 0.4853   | 0.757290541 |             |          |          |  |
| SPTBN2      | ENSG00000173898 | -1.5549   | 0.94001  | 0.036851 | 0.4853      | -1.0002     |          |          |  |
|             |                 | 0.8414    | -0.30454 | 0.61964  | 0.4853      | 0.757290541 |          |          |  |
| NA          | ENSG00000258440 | 0.036865  | 0.4853   | -0.32341 | 0.62681     | -0.6029     | 0.72671  |          |  |
|             |                 | -0.6029   | 0.72671  | 0.4853   | 0.757290541 |             |          |          |  |
| IGLVVI-25-1 | ENSG00000253779 | 0.036763  | 0.48534  | 0.036763 | 0.48534     | 0.036763    | 0.036763 |          |  |
|             |                 | 0.48534   | 0.036763 | 0.48534  | 0.48534     | 0.757320061 |          |          |  |
| LINC01508   | ENSG00000231107 | -0.19371  | 0.5768   | 0.036729 | 0.48535     | 0.036729    |          |          |  |
|             |                 | 0.48535   | 0.036729 | 0.48535  | 0.48535     | 0.757320061 |          |          |  |
| ATG3        | ENSG00000144848 | 0.03653   | 0.48543  | -0.58169 | 0.71961     | -0.11614    | 0.54623  |          |  |
|             |                 | -0.056003 | 0.52233  | 0.48543  | 0.757376078 |             |          |          |  |
| RNY1P3      | ENSG00000223158 | -0.98534  | 0.83777  | 0.036406 | 0.48548     | -1.2594     |          |          |  |
|             |                 | 0.89606   | 0.028031 | 0.48882  | 0.48548     | 0.757376078 |          |          |  |
| NA          | ENSG00000271474 | 0.036414  | 0.48548  | 0.036414 | 0.48548     | 0.036414    | 0.48548  |          |  |
|             |                 | 0.036414  | 0.48548  | 0.48548  | 0.757376078 |             |          |          |  |
| CYP19A1     | ENSG00000137869 | -0.30035  | 0.61805  | 0.03639  | 0.48549     | -1.1996     |          |          |  |
|             |                 | 0.88486   | -1.2922  | 0.90186  | 0.48549     | 0.757376078 |          |          |  |
| CLN6        | ENSG00000128973 | -1.0093   | 0.8436   | -0.19432 | 0.57704     | -0.81893    | 0.79359  |          |  |
|             |                 | 0.036358  | 0.4855   | 0.4855   | 0.757376078 |             |          |          |  |
| NA          | ENSG00000253134 | 0.036295  | 0.48552  | 0.036295 | 0.48552     | 0.036295    | 0.48552  |          |  |
|             |                 | 0.036295  | 0.48552  | 0.48552  | 0.757376078 |             |          |          |  |
| RN7SL233P   | ENSG00000242971 | 0.036166  | 0.48558  | 0.036166 | 0.48558     | 0.036166    |          |          |  |
|             |                 | 0.48558   | 0.036166 | 0.48558  | 0.48558     | 0.757376078 |          |          |  |
| LINC02030   | ENSG00000240708 | -0.69985  | 0.75799  | 0.036048 | 0.48562     | -0.39567    |          |          |  |
|             |                 | 0.65382   | -0.39567 | 0.65382  | 0.48562     | 0.757376078 |          |          |  |
| SUGT1-DT    | ENSG00000273723 | -0.65358  | 0.74331  | 0.036049 | 0.48562     | 0.036049    |          |          |  |
|             |                 | 0.48562   | 0.036049 | 0.48562  | 0.48562     | 0.757376078 |          |          |  |
| TNFSF10     | ENSG00000121858 | 0.036006  | 0.48564  | -0.18103 | 0.57183     | 0.036006    |          |          |  |
|             |                 | 0.48564   | -0.49077 | 0.6882   | 0.48564     | 0.757376078 |          |          |  |
| MIR4293     | ENSG00000266321 | 0.035895  | 0.48568  | 0.035895 | 0.48568     | 0.035895    |          |          |  |
|             |                 | 0.48568   | 0.035895 | 0.48568  | 0.48568     | 0.757376078 |          |          |  |
| MIR34AHG    | ENSG00000228526 | -0.96092  | 0.8317   | 0.035855 | 0.4857      | -0.18518    |          |          |  |
|             |                 | 0.57346   | -0.78062 | 0.78249  | 0.4857      | 0.757376078 |          |          |  |
| GSN         | ENSG00000148180 | -0.25074  | 0.59899  | -0.77543 | 0.78096     | -0.86986    | 0.80781  |          |  |
|             |                 | 0.035839  | 0.48571  | 0.48571  | 0.757376078 |             |          |          |  |
| NA          | ENSG00000230725 | -0.73378  | 0.76846  | 0.035816 | 0.48571     | -0.34568    | 0.63521  |          |  |
|             |                 | 0.0063419 | 0.49747  | 0.48571  | 0.757376078 |             |          |          |  |
| NA          | ENSG00000259018 | 0.035751  | 0.48574  | 0.035751 | 0.48574     | 0.035751    | 0.48574  |          |  |
|             |                 | 0.035751  | 0.48574  | 0.48574  | 0.757376078 |             |          |          |  |
| MMP26       | ENSG00000167346 | -1.6893   | 0.95442  | -0.36669 | 0.64308     | 0.035738    | 0.48575  |          |  |
|             |                 | -0.33007  | 0.62933  | 0.48575  | 0.757376078 |             |          |          |  |
| NA          | ENSG00000213683 | 0.035726  | 0.48575  | 0.035726 | 0.48575     | 0.035726    | 0.48575  |          |  |



|            |                 |           |         |             |             |           |         |
|------------|-----------------|-----------|---------|-------------|-------------|-----------|---------|
|            | 0.035726        | 0.48575   | 0.48575 | 0.757376078 |             |           |         |
| ATP5MC1P6  | ENSG00000214318 | 0.035715  | 0.48575 | 0.035715    | 0.48575     | 0.035715  |         |
|            | 0.48575         | 0.035715  | 0.48575 | 0.48575     | 0.757376078 |           |         |
| IFIT6P     | ENSG00000224289 | -1.2816   | 0.9     | -0.29098    | 0.61447     | 0.035719  | 0.48575 |
|            | -1.2816         | 0.9       | 0.48575 | 0.757376078 |             |           |         |
| SLC12A4    | ENSG00000124067 | -0.18139  | 0.57197 | 0.035665    | 0.48577     | 0.0020908 |         |
|            | 0.49917         | -0.02673  | 0.51066 | 0.48577     | 0.757376078 |           |         |
| NA         | ENSG00000248571 | 0.035676  | 0.48577 | 0.035676    | 0.48577     | 0.035676  | 0.48577 |
|            | 0.035676        | 0.48577   | 0.48577 | 0.757376078 |             |           |         |
| MIR4668    | ENSG00000266315 | 0.035676  | 0.48577 | 0.035676    | 0.48577     | 0.035676  |         |
|            | 0.48577         | 0.035676  | 0.48577 | 0.48577     | 0.757376078 |           |         |
| SHMT2      | ENSG00000182199 | -0.10797  | 0.54299 | -0.10797    | 0.54299     | 0.035648  | 0.48578 |
|            | -0.02093        | 0.50835   | 0.48578 | 0.757376078 |             |           |         |
| LINC02620  | ENSG00000225768 | 0.035649  | 0.48578 | 0.035649    | 0.48578     | 0.035649  |         |
|            | 0.48578         | -0.80623  | 0.78994 | 0.48578     | 0.757376078 |           |         |
| NA         | ENSG00000278370 | -0.47527  | 0.6827  | 0.035648    | 0.48578     | -0.22363  | 0.58848 |
|            | -0.0459         | 0.51831   | 0.48578 | 0.757376078 |             |           |         |
| NA         | ENSG00000277782 | 0.035634  | 0.48579 | 0.035634    | 0.48579     | 0.035634  | 0.48579 |
|            | 0.035634        | 0.48579   | 0.48579 | 0.757376078 |             |           |         |
| ZBTB44     | ENSG00000196323 | -0.68708  | 0.75398 | -0.39938    | 0.65519     | -0.68708  |         |
|            | 0.75398         | 0.035382  | 0.48589 | 0.48589     | 0.757499104 |           |         |
| NA         | ENSG00000256350 | -0.73992  | 0.77033 | -0.84772    | 0.8017      | 0.035357  | 0.4859  |
|            | -0.41059        | 0.65931   | 0.4859  | 0.757499104 |             |           |         |
| RNU6-384P  | ENSG00000201770 | 0.035263  | 0.48594 | 0.035263    | 0.48594     | 0.035263  |         |
|            | 0.48594         | -0.21557  | 0.58534 | 0.48594     | 0.75750435  |           |         |
| NA         | ENSG00000278276 | 0.035263  | 0.48594 | 0.035263    | 0.48594     | 0.035263  | 0.48594 |
|            | 0.035263        | 0.48594   | 0.48594 | 0.75750435  |             |           |         |
| NA         | ENSG00000251388 | -0.12554  | 0.54995 | -0.59958    | 0.72561     | -0.60624  | 0.72782 |
|            | 0.035234        | 0.48595   | 0.48595 | 0.75750435  |             |           |         |
| PELP1      | ENSG00000141456 | -1.5601   | 0.94063 | -1.7587     | 0.96068     | 0.034991  | 0.48604 |
|            | -2.6003         | 0.99534   | 0.48604 | 0.757511442 |             |           |         |
| NA         | ENSG00000226143 | 0.03499   | 0.48604 | 0.03499     | 0.48604     | 0.03499   | 0.48604 |
|            | 0.03499         | 0.48604   | 0.48604 | 0.757511442 |             |           |         |
| IGHV1-69   | ENSG00000211973 | -0.059361 | 0.52367 | -0.059361   | 0.52367     | -0.059361 |         |
|            | 0.52367         | 0.034941  | 0.48606 | 0.48606     | 0.757511442 |           |         |
| NA         | ENSG00000259138 | 0.034959  | 0.48606 | 0.034959    | 0.48606     | 0.034959  | 0.48606 |
|            | 0.034959        | 0.48606   | 0.48606 | 0.757511442 |             |           |         |
| RN7SL134P  | ENSG00000263360 | 0.034953  | 0.48606 | 0.034953    | 0.48606     | 0.034953  |         |
|            | 0.48606         | 0.034953  | 0.48606 | 0.48606     | 0.757511442 |           |         |
| NA         | ENSG00000279605 | 0.034941  | 0.48606 | 0.034941    | 0.48606     | 0.034941  | 0.48606 |
|            | 0.034941        | 0.48606   | 0.48606 | 0.757511442 |             |           |         |
| RNU6-1152P | ENSG00000207306 | -0.073785 | 0.52941 | -0.39608    | 0.65398     | 0.034936  |         |
|            | 0.48607         | -0.073785 | 0.52941 | 0.48607     | 0.757511442 |           |         |
| KLK10      | ENSG00000129451 | 0.024975  | 0.49004 | 0.024975    | 0.49004     | 0.024975  | 0.49004 |
|            | 0.034886        | 0.48609   | 0.48609 | 0.757511442 |             |           |         |
| NA         | ENSG00000200391 | 0.034827  | 0.48611 | 0.034827    | 0.48611     | 0.034827  | 0.48611 |
|            | 0.034827        | 0.48611   | 0.48611 | 0.757511442 |             |           |         |
| MRPL23-AS1 | ENSG00000226416 | -0.4981   | 0.69079 | -0.20622    | 0.58169     | 0.034829  |         |
|            | 0.48611         | 0.034829  | 0.48611 | 0.48611     | 0.757511442 |           |         |
| SNORA1     | ENSG00000206834 | 0.034656  | 0.48618 | 0.034656    | 0.48618     | 0.034656  |         |
|            | 0.48618         | 0.034656  | 0.48618 | 0.48618     | 0.757554788 |           |         |
| SNORA8     | ENSG00000207304 | 0.034656  | 0.48618 | 0.034656    | 0.48618     | 0.034656  |         |
|            | 0.48618         | 0.034656  | 0.48618 | 0.48618     | 0.757554788 |           |         |
| RPP38      | ENSG00000152464 | 0.034614  | 0.48619 | -0.7961     | 0.78701     | -0.7961   | 0.78701 |
|            | -0.7961         | 0.78701   | 0.48619 | 0.757554788 |             |           |         |
| CCDC62     | ENSG00000130783 | -0.20582  | 0.58153 | -0.15116    | 0.56007     | -0.34127  |         |
|            | 0.63355         | 0.034611  | 0.4862  | 0.4862      | 0.757554788 |           |         |
| LZTS1-AS1  | ENSG00000253733 | -0.033507 | 0.51336 | -0.13391    | 0.55326     | -0.024059 |         |
|            | 0.5096          | 0.034497  | 0.48624 | 0.48624     | 0.757592889 |           |         |
| SNORA5A    | ENSG00000206838 | 0.034448  | 0.48626 | 0.034448    | 0.48626     | 0.034448  |         |
|            | 0.48626         | 0.034448  | 0.48626 | 0.48626     | 0.757599827 |           |         |
| GCNT4      | ENSG00000176928 | 0.027483  | 0.48904 | 0.034371    | 0.48629     | 0.027483  | 0.48904 |

|              |                 |           |         |             |             |           |         |  |
|--------------|-----------------|-----------|---------|-------------|-------------|-----------|---------|--|
|              | 0.027483        | 0.48904   | 0.48629 | 0.757605061 |             |           |         |  |
| CPNE3        | ENSG00000085719 | -0.026331 | 0.5105  | -0.026331   | 0.5105      | -0.026331 | 0.5105  |  |
|              | 0.034313        | 0.48631   | 0.48631 | 0.757605061 |             |           |         |  |
| RHCG         | ENSG00000140519 | -1.2399   | 0.89249 | -0.41495    | 0.66091     | 0.034324  | 0.48631 |  |
|              | -1.266          | 0.89724   | 0.48631 | 0.757605061 |             |           |         |  |
| NA           | ENSG00000260371 | 0.034267  | 0.48633 | 0.034267    | 0.48633     | 0.034267  | 0.48633 |  |
|              | 0.034267        | 0.48633   | 0.48633 | 0.757611998 |             |           |         |  |
| NA           | ENSG00000267745 | 0.034191  | 0.48636 | 0.034191    | 0.48636     | 0.034191  | 0.48636 |  |
|              | 0.034191        | 0.48636   | 0.48636 | 0.757634512 |             |           |         |  |
| NA           | ENSG00000255060 | 0.034157  | 0.48638 | 0.034157    | 0.48638     | 0.034157  | 0.48638 |  |
|              | 0.034157        | 0.48638   | 0.48638 | 0.757641447 |             |           |         |  |
| HPRT1P2      | ENSG00000250587 | 0.034027  | 0.48643 | 0.034027    | 0.48643     | 0.034027  |         |  |
|              | 0.48643         | 0.034027  | 0.48643 | 0.48643     | 0.757677827 |           |         |  |
| RPL22P11     | ENSG00000233707 | 0.033999  | 0.48644 | 0.033999    | 0.48644     | 0.033999  |         |  |
|              | 0.48644         | 0.033999  | 0.48644 | 0.48644     | 0.757677827 |           |         |  |
| RNU6-171P    | ENSG00000207082 | -0.12183  | 0.54848 | 0.033984    | 0.48645     | 0.033984  |         |  |
|              | 0.48645         | 0.033984  | 0.48645 | 0.48645     | 0.757677827 |           |         |  |
| C17orf97     | ENSG00000187624 | -0.3776   | 0.64713 | -0.70758    | 0.7604      | 0.033534  |         |  |
|              | 0.48662         | 0.0081089 | 0.49677 | 0.48662     | 0.757806239 |           |         |  |
| NA           | ENSG00000230773 | -0.88616  | 0.81223 | 0.033531    | 0.48663     | -1.3518   | 0.91178 |  |
|              | -1.1032         | 0.86502   | 0.48663 | 0.757806239 |             |           |         |  |
| NA           | ENSG00000238845 | 0.033461  | 0.48665 | 0.033461    | 0.48665     | -1.1552   | 0.876   |  |
|              | -0.52383        | 0.6998    | 0.48665 | 0.757806239 |             |           |         |  |
| KCNAB1       | ENSG00000169282 | -0.66586  | 0.74725 | -0.87172    | 0.80832     | -0.2531   |         |  |
|              | 0.5999          | 0.033437  | 0.48666 | 0.48666     | 0.757806239 |           |         |  |
| RNA5SP32     | ENSG00000212365 | -1.1568   | 0.87632 | -2.028      | 0.97872     | 0.033337  |         |  |
|              | 0.4867          | -1.5303   | 0.93703 | 0.4867      | 0.757806239 |           |         |  |
| GAR1         | ENSG00000109534 | 0.033308  | 0.48671 | 0.033308    | 0.48671     | 0.033308  | 0.48671 |  |
|              | 0.033308        | 0.48671   | 0.48671 | 0.757806239 |             |           |         |  |
| PSMD14P1     | ENSG00000227738 | 0.033254  | 0.48674 | 0.033254    | 0.48674     | 0.033254  |         |  |
|              | 0.48674         | 0.033254  | 0.48674 | 0.48674     | 0.757806239 |           |         |  |
| ARHGAP31-AS1 | ENSG00000241155 | 0.03316   | 0.48677 | 0.03316     | 0.48677     | 0.03316   |         |  |
|              | 0.48677         | 0.03316   | 0.48677 | 0.48677     | 0.757806239 |           |         |  |
| NECTIN3-AS1  | ENSG00000242242 | 0.033129  | 0.48679 | -0.15024    | 0.55971     | -1.0843   |         |  |
|              | 0.86089         | -0.17158  | 0.56812 | 0.48679     | 0.757806239 |           |         |  |
| PPP1R7       | ENSG00000115685 | -0.51087  | 0.69528 | -0.023388   | 0.50933     | -0.83835  |         |  |
|              | 0.79908         | 0.033034  | 0.48682 | 0.48682     | 0.757806239 |           |         |  |
| NA           | ENSG00000260464 | 0.033015  | 0.48683 | 0.033015    | 0.48683     | 0.033015  | 0.48683 |  |
|              | 0.033015        | 0.48683   | 0.48683 | 0.757806239 |             |           |         |  |
| IL12RB1      | ENSG00000096996 | -0.33933  | 0.63282 | -0.86527    | 0.80655     | -0.11997  |         |  |
|              | 0.54775         | 0.032988  | 0.48684 | 0.48684     | 0.757806239 |           |         |  |
| THSD4        | ENSG00000187720 | -0.89218  | 0.81385 | -0.80537    | 0.7897      | -1.0294   | 0.84836 |  |
|              | 0.032942        | 0.48686   | 0.48686 | 0.757806239 |             |           |         |  |
| NA           | ENSG00000253632 | -0.4337   | 0.66775 | -0.8642     | 0.80626     | -0.4337   | 0.66775 |  |
|              | 0.032914        | 0.48687   | 0.48687 | 0.757806239 |             |           |         |  |
| TEDC1        | ENSG00000185347 | -0.16115  | 0.56401 | 0.032884    | 0.48688     | 0.032884  | 0.48688 |  |
|              | 0.032884        | 0.48688   | 0.48688 | 0.757806239 |             |           |         |  |
| TRBV23OR9-2  | ENSG00000229063 | -0.084099 | 0.53351 | -0.084099   | 0.53351     | 0.032883  |         |  |
|              | 0.48688         | -0.084099 | 0.53351 | 0.48688     | 0.757806239 |           |         |  |
| PBX3         | ENSG00000167081 | 0.032843  | 0.4869  | 0.03041     | 0.48787     | -0.38636  | 0.65039 |  |
|              | -0.28405        | 0.61181   | 0.4869  | 0.757806239 |             |           |         |  |
| NA           | ENSG00000271741 | 0.032806  | 0.48691 | 0.032806    | 0.48691     | 0.032806  | 0.48691 |  |
|              | 0.032806        | 0.48691   | 0.48691 | 0.757806239 |             |           |         |  |
| PTPN12       | ENSG00000127947 | 0.032786  | 0.48692 | 0.032786    | 0.48692     | 0.032786  |         |  |
|              | 0.48692         | -0.11215  | 0.54465 | 0.48692     | 0.757806239 |           |         |  |
| ASB15        | ENSG00000146809 | 0.032785  | 0.48692 | -0.54509    | 0.70715     | 0.032785  | 0.48692 |  |
|              | -0.44353        | 0.67131   | 0.48692 | 0.757806239 |             |           |         |  |
| NA           | ENSG00000250242 | 0.032798  | 0.48692 | 0.032798    | 0.48692     | 0.032798  | 0.48692 |  |
|              | 0.032798        | 0.48692   | 0.48692 | 0.757806239 |             |           |         |  |
| NA           | ENSG00000260671 | -1.3572   | 0.91264 | 0.032778    | 0.48693     | -1.215    | 0.88782 |  |
|              | -1.5844         | 0.94345   | 0.48693 | 0.757806239 |             |           |         |  |
| ATP1A1       | ENSG00000163399 | -0.44991  | 0.67361 | -0.47214    | 0.68159     | 0.032696  |         |  |

|            |                 |             |         |             |             |           |          |
|------------|-----------------|-------------|---------|-------------|-------------|-----------|----------|
|            | 0.48696         | -0.58011    | 0.71908 | 0.48696     | 0.757806239 |           |          |
| SYNE1-AS1  | ENSG00000234577 | 0.032619    | 0.48699 | 0.032619    | 0.48699     | 0.032619  | 0.032619 |
|            | 0.48699         | 0.032619    | 0.48699 | 0.48699     | 0.757806239 |           |          |
| PSMD1      | ENSG00000173692 | 0.032581    | 0.487   | -0.60851    | 0.72857     | -0.6995   | 0.75788  |
|            | -0.93884        | 0.82609     | 0.487   | 0.757806239 |             |           |          |
| NA         | ENSG00000200969 | 0.032592    | 0.487   | 0.032592    | 0.487       | 0.032592  | 0.487    |
|            | 0.487           | 0.757806239 |         |             |             |           |          |
| FAM3D-AS1  | ENSG00000244383 | -0.049483   | 0.51973 | -0.049483   | 0.51973     | -0.049483 |          |
|            | 0.51973         | 0.032565    | 0.48701 | 0.48701     | 0.757806239 |           |          |
| PPIAP4     | ENSG00000258591 | 0.032531    | 0.48702 | 0.032531    | 0.48702     | 0.032531  |          |
|            | 0.48702         | 0.032531    | 0.48702 | 0.48702     | 0.757806239 |           |          |
| NA         | ENSG00000255232 | 0.032526    | 0.48703 | 0.032526    | 0.48703     | 0.032526  | 0.48703  |
|            | 0.032526        | 0.48703     | 0.48703 | 0.757806239 |             |           |          |
| NA         | ENSG00000201756 | 0.032468    | 0.48705 | 0.032468    | 0.48705     | 0.032468  | 0.48705  |
|            | 0.032468        | 0.48705     | 0.48705 | 0.757806239 |             |           |          |
| DNAJB11    | ENSG00000090520 | -0.18709    | 0.57421 | -0.53216    | 0.70269     | 0.032435  |          |
|            | 0.48706         | 0.011252    | 0.49551 | 0.48706     | 0.757806239 |           |          |
| ZNF430     | ENSG00000118620 | 0.032451    | 0.48706 | -1.4456     | 0.92586     | -0.25234  |          |
|            | 0.59961         | -0.12452    | 0.54955 | 0.48706     | 0.757806239 |           |          |
| NA         | ENSG00000273674 | 0.0033909   | 0.49865 | -0.19639    | 0.57785     | -0.038374 | 0.51531  |
|            | 0.032228        | 0.48714     | 0.48714 | 0.757806239 |             |           |          |
| NA         | ENSG00000279355 | 0.032249    | 0.48714 | 0.032249    | 0.48714     | 0.032249  | 0.48714  |
|            | 0.032249        | 0.48714     | 0.48714 | 0.757806239 |             |           |          |
| ATP5ME     | ENSG00000169020 | 0.03217     | 0.48717 | 0.03217     | 0.48717     | 0.03217   |          |
|            | 0.48717         | 0.03217     | 0.48717 | 0.48717     | 0.757806239 |           |          |
| FAM186A    | ENSG00000185958 | 0.032148    | 0.48718 | -0.24036    | 0.59498     | 0.032148  |          |
|            | 0.48718         | -0.73294    | 0.7682  | 0.48718     | 0.757806239 |           |          |
| IGLV1-36   | ENSG00000211655 | 0.032115    | 0.48719 | 0.032115    | 0.48719     | 0.032115  |          |
|            | 0.48719         | 0.032115    | 0.48719 | 0.48719     | 0.757806239 |           |          |
| RNA5SP221  | ENSG00000223203 | 0.032098    | 0.4872  | -1.3508     | 0.91162     | 0.032098  |          |
|            | 0.4872          | 0.032098    | 0.4872  | 0.4872      | 0.757806239 |           |          |
| LINC02884  | ENSG00000231246 | 0.032088    | 0.4872  | -1.49       | 0.93189     | -0.5987   | 0.72531  |
|            | -0.6464         | 0.74099     | 0.4872  | 0.757806239 |             |           |          |
| RN7SKP98   | ENSG00000252879 | 0.032057    | 0.48721 | 0.032057    | 0.48721     | 0.032057  |          |
|            | 0.48721         | 0.032057    | 0.48721 | 0.48721     | 0.757806239 |           |          |
| HNRNPA1P10 | ENSG00000214223 | 0.032044    | 0.48722 | -1.2851     | 0.90062     | -0.47281  |          |
|            | 0.68183         | -1.386      | 0.91713 | 0.48722     | 0.757806239 |           |          |
| MAP2K1P1   | ENSG00000254013 | -0.62971    | 0.73556 | -0.54512    | 0.70717     | 0.032017  |          |
|            | 0.48723         | -0.13539    | 0.55385 | 0.48723     | 0.757806239 |           |          |
| NA         | ENSG00000272293 | 0.032001    | 0.48724 | 0.032001    | 0.48724     | 0.032001  | 0.48724  |
|            | 0.032001        | 0.48724     | 0.48724 | 0.757806239 |             |           |          |
| NA         | ENSG00000235837 | -0.25803    | 0.60181 | 0.031952    | 0.48725     | 0.031952  | 0.48725  |
|            | -0.068289       | 0.52722     | 0.48725 | 0.757806239 |             |           |          |
| NA         | ENSG00000263307 | 0.031962    | 0.48725 | 0.031962    | 0.48725     | 0.031962  | 0.48725  |
|            | 0.031962        | 0.48725     | 0.48725 | 0.757806239 |             |           |          |
| NA         | ENSG00000258496 | 0.031917    | 0.48727 | 0.031917    | 0.48727     | 0.031917  | 0.48727  |
|            | -0.13648        | 0.55428     | 0.48727 | 0.757806239 |             |           |          |
| GLI4       | ENSG00000250571 | -0.45113    | 0.67405 | -0.31023    | 0.62181     | 0.03184   | 0.4873   |
|            | -0.28477        | 0.61209     | 0.4873  | 0.757806239 |             |           |          |
| NA         | ENSG00000268485 | 0.031832    | 0.4873  | 0.031832    | 0.4873      | 0.031832  | 0.4873   |
|            | 0.031832        | 0.4873      | 0.4873  | 0.757806239 |             |           |          |
| SLC2A11    | ENSG00000133460 | -0.77213    | 0.77998 | -0.77213    | 0.77998     | -0.77213  |          |
|            | 0.77998         | 0.031822    | 0.48731 | 0.48731     | 0.757806239 |           |          |
| SPA17P1    | ENSG00000236797 | -0.67979    | 0.75168 | -0.59785    | 0.72503     | -0.34795  |          |
|            | 0.63606         | 0.031814    | 0.48731 | 0.48731     | 0.757806239 |           |          |
| LACRT      | ENSG00000135413 | 0.031572    | 0.48741 | -0.67179    | 0.74914     | -1.001    | 0.84158  |
|            | -1.001          | 0.84158     | 0.48741 | 0.757904739 |             |           |          |
| ZNF513     | ENSG00000163795 | 0.031571    | 0.48741 | 0.031571    | 0.48741     | 0.031571  |          |
|            | 0.48741         | 0.031571    | 0.48741 | 0.48741     | 0.757904739 |           |          |
| SLC7A2     | ENSG00000003989 | 0.031551    | 0.48742 | -0.27431    | 0.60808     | -0.36007  |          |
|            | 0.6406          | -0.60728    | 0.72817 | 0.48742     | 0.757904739 |           |          |
| EMILIN1    | ENSG00000138080 | -0.31792    | 0.62473 | 0.031408    | 0.48747     | -0.97251  |          |

|              |                 |             |         |             |             |           |          |  |
|--------------|-----------------|-------------|---------|-------------|-------------|-----------|----------|--|
|              | 0.8346          | -0.97251    | 0.8346  | 0.48747     | 0.757949663 |           |          |  |
| SLITRK1      | ENSG00000178235 | -0.74952    | 0.77323 | -0.74952    | 0.77323     | 0.031395  |          |  |
|              | 0.48748         | -1.2133     | 0.88749 | 0.48748     | 0.757949663 |           |          |  |
| MYADML2      | ENSG00000185105 | -0.61735    | 0.7315  | 0.7315      | 0.031342    | 0.4875    | -0.61735 |  |
|              | 0.7315          | -0.61735    | 0.7315  | 0.4875      | 0.757956576 |           |          |  |
| IFNL1        | ENSG00000182393 | -0.35654    | 0.63928 | -0.52041    | 0.69861     | 0.031212  | 0.48755  |  |
|              | -0.58822        | 0.72181     | 0.48755 | 0.757985946 |             |           |          |  |
| NA           | ENSG00000250815 | -1.5052     | 0.93386 | 0.031207    | 0.48755     | -1.9657   | 0.97533  |  |
|              | 0.031207        | 0.48755     | 0.48755 | 0.757985946 |             |           |          |  |
| NA           | ENSG00000269765 | 0.031088    | 0.4876  | -0.8941     | 0.81437     | -0.69485  | 0.75643  |  |
|              | -0.69485        | 0.75643     | 0.4876  | 0.758039496 |             |           |          |  |
| NA           | ENSG00000230953 | 0.030888    | 0.48768 | 0.030888    | 0.48768     | 0.030888  | 0.48768  |  |
|              | 0.030888        | 0.48768     | 0.48768 | 0.75813968  |             |           |          |  |
| SIX3         | ENSG00000138083 | -1.0545     | 0.85417 | -0.28515    | 0.61224     | -0.55334  | 0.70998  |  |
|              | 0.030772        | 0.48773     | 0.48773 | 0.758193221 |             |           |          |  |
| MIR5702      | ENSG00000263363 | -0.8429     | 0.80036 | 0.030581    | 0.4878      | -0.4461   |          |  |
|              | 0.67224         | -0.56354    | 0.71346 | 0.4878      | 0.758222514 |           |          |  |
| NA           | ENSG00000236153 | -0.618      | 0.73171 | 0.030561    | 0.48781     | -0.24344  | 0.59617  |  |
|              | -0.24344        | 0.59617     | 0.48781 | 0.758222514 |             |           |          |  |
| LINC01943    | ENSG00000280721 | -0.84271    | 0.8003  | -0.03305    | 0.51318     | 0.030501  |          |  |
|              | 0.48783         | -1.5021     | 0.93347 | 0.48783     | 0.758222514 |           |          |  |
| LYPD6        | ENSG00000187123 | -0.14564    | 0.5579  | 0.030497    | 0.48784     | -0.52356  | 0.69971  |  |
|              | 0.030497        | 0.48784     | 0.48784 | 0.758222514 |             |           |          |  |
| LINC01153    | ENSG00000227143 | -0.14075    | 0.55597 | -0.73915    | 0.77009     | 0.030492  |          |  |
|              | 0.48784         | -1.4002     | 0.91927 | 0.48784     | 0.758222514 |           |          |  |
| EIF2B2       | ENSG00000119718 | -1.2758     | 0.89898 | -0.26779    | 0.60557     | -0.1925   |          |  |
|              | 0.57632         | 0.030432    | 0.48786 | 0.48786     | 0.758222514 |           |          |  |
| NA           | ENSG00000252537 | -0.38379    | 0.64943 | -0.79003    | 0.78524     | -0.12797  | 0.55091  |  |
|              | 0.030402        | 0.48787     | 0.48787 | 0.758222514 |             |           |          |  |
| TMPRSS11GP   | ENSG00000229009 | -0.62697    | 0.73466 | -1.3957     | 0.9186      | -0.62697  |          |  |
|              | 0.73466         | 0.030384    | 0.48788 | 0.48788     | 0.758222514 |           |          |  |
| PGBD4P4      | ENSG00000248877 | -0.52605    | 0.70057 | -0.52605    | 0.70057     | -0.11324  |          |  |
|              | 0.54508         | 0.030308    | 0.48791 | 0.48791     | 0.758222514 |           |          |  |
| GSK3B        | ENSG00000082701 | 0.030274    | 0.48792 | -0.4447     | 0.67173     | -0.89683  | 0.8151   |  |
|              | -0.94632        | 0.82801     | 0.48792 | 0.758222514 |             |           |          |  |
| NA           | ENSG00000226249 | 0.030275    | 0.48792 | 0.030275    | 0.48792     | 0.030275  | 0.48792  |  |
|              | 0.030275        | 0.48792     | 0.48792 | 0.758222514 |             |           |          |  |
| SNORA13      | ENSG00000238363 | 0.030206    | 0.48795 | 0.030206    | 0.48795     | 0.030206  |          |  |
|              | 0.48795         | 0.030206    | 0.48795 | 0.48795     | 0.758244954 |           |          |  |
| DVL2         | ENSG00000004975 | -0.00041668 | 0.50017 | -0.19325    | 0.57662     | 0.03009   | 0.488    |  |
|              | -0.00041668     | 0.50017     | 0.488   | 0.758298469 |             |           |          |  |
| ZNF699       | ENSG00000196110 | -0.69591    | 0.75676 | 0.030037    | 0.48802     | -0.083226 |          |  |
|              | 0.53316         | -0.048244   | 0.51924 | 0.48802     | 0.758305285 |           |          |  |
| GLT1D1       | ENSG00000151948 | -0.90651    | 0.81767 | -0.60929    | 0.72883     | -2.6255   |          |  |
|              | 0.99567         | 0.029974    | 0.48804 | 0.48804     | 0.758305285 |           |          |  |
| ABCA3        | ENSG00000167972 | -0.24095    | 0.5952  | 0.029936    | 0.48806     | -0.51673  | 0.69733  |  |
|              | -0.67168        | 0.74911     | 0.48806 | 0.758305285 |             |           |          |  |
| CYP4F34P     | ENSG00000244155 | 0.029825    | 0.4881  | 0.029825    | 0.4881      | 0.0052431 |          |  |
|              | 0.49791         | -0.92709    | 0.82306 | 0.4881      | 0.758305285 |           |          |  |
| MTCO2P30     | ENSG00000250808 | 0.029845    | 0.4881  | 0.029845    | 0.4881      | 0.029845  |          |  |
|              | 0.4881          | 0.029845    | 0.4881  | 0.4881      | 0.758305285 |           |          |  |
| SUMO2P13     | ENSG00000218359 | -0.96228    | 0.83205 | -0.88489    | 0.81189     | -0.53743  |          |  |
|              | 0.70452         | 0.029815    | 0.48811 | 0.48811     | 0.758305285 |           |          |  |
| LINC02068    | ENSG00000223387 | -1.3982     | 0.91897 | -0.59613    | 0.72445     | -0.7692   |          |  |
|              | 0.77911         | 0.029791    | 0.48812 | 0.48812     | 0.758305285 |           |          |  |
| LINC02580    | ENSG00000230587 | 0.029747    | 0.48813 | -0.13958    | 0.55551     | -0.18646  |          |  |
|              | 0.57396         | -0.37393    | 0.64577 | 0.48813     | 0.758305285 |           |          |  |
| CASP4LP      | ENSG00000235505 | -0.77365    | 0.78043 | -1.9467     | 0.97422     | -0.88475  |          |  |
|              | 0.81186         | 0.029685    | 0.48816 | 0.48816     | 0.758305285 |           |          |  |
| SH3PXD2A-AS1 | ENSG00000280693 | 0.029674    | 0.48816 | -0.21632    | 0.58563     | -0.21632  |          |  |
|              | 0.58563         | -0.039976   | 0.51594 | 0.48816     | 0.758305285 |           |          |  |
| GCSHP5       | ENSG00000224837 | 0.029588    | 0.4882  | 0.029588    | 0.4882      | 0.029588  |          |  |

|           |                 |             |         |             |             |           |         |
|-----------|-----------------|-------------|---------|-------------|-------------|-----------|---------|
|           | 0.4882          | 0.029588    | 0.4882  | 0.4882      | 0.758322392 |           |         |
| IBA57-DT  | ENSG00000203684 | 0.029559    | 0.48821 | -0.76008    | 0.7764      | 0.029559  |         |
|           | 0.48821         | 0.029559    | 0.48821 | 0.48821     | 0.758322392 |           |         |
| NA        | ENSG00000234688 | 0.029532    | 0.48822 | 0.029532    | 0.48822     | 0.029532  | 0.48822 |
|           | 0.029532        | 0.48822     | 0.48822 | 0.758322392 |             |           |         |
| NA        | ENSG00000259016 | 0.029482    | 0.48824 | 0.029482    | 0.48824     | 0.029482  | 0.48824 |
|           | 0.029482        | 0.48824     | 0.48824 | 0.758322392 |             |           |         |
| LINC01222 | ENSG00000233410 | -1.5519     | 0.93966 | -1.5519     | 0.93966     | -1.5519   |         |
|           | 0.93966         | 0.029469    | 0.48825 | 0.48825     | 0.758322392 |           |         |
| NDUFB7    | ENSG00000099795 | 0.029411    | 0.48827 | 0.029411    | 0.48827     | 0.029411  |         |
|           | 0.48827         | 0.029411    | 0.48827 | 0.48827     | 0.758322392 |           |         |
| NA        | ENSG00000259543 | -0.39307    | 0.65287 | 0.029367    | 0.48829     | -1.5396   | 0.93817 |
|           | -0.77244        | 0.78007     | 0.48829 | 0.758322392 |             |           |         |
| NA        | ENSG00000253772 | 0.029342    | 0.4883  | 0.029342    | 0.4883      | 0.029342  | 0.4883  |
|           | 0.029342        | 0.4883      | 0.4883  | 0.758322392 |             |           |         |
| NA        | ENSG00000239027 | 0.029252    | 0.48833 | -0.8793     | 0.81038     | -0.70455  | 0.75946 |
|           | -0.70455        | 0.75946     | 0.48833 | 0.758322392 |             |           |         |
| TBRG4     | ENSG00000136270 | -1.4473     | 0.92609 | 0.029241    | 0.48834     | -0.27342  | 0.60773 |
|           | -0.15721        | 0.56246     | 0.48834 | 0.758322392 |             |           |         |
| MKS1      | ENSG00000011143 | 0.029215    | 0.48835 | 0.029215    | 0.48835     | 0.029215  | 0.48835 |
|           | 0.029215        | 0.48835     | 0.48835 | 0.758322392 |             |           |         |
| NA        | ENSG00000279340 | -1.1614     | 0.87727 | -1.1614     | 0.87727     | 0.029135  | 0.48838 |
|           | -0.37465        | 0.64604     | 0.48838 | 0.758322392 |             |           |         |
| OR1E1     | ENSG00000180016 | 0.029102    | 0.48839 | -0.37674    | 0.64682     | -0.36012  | 0.64062 |
|           | 0.029102        | 0.48839     | 0.48839 | 0.758322392 |             |           |         |
| GSN-AS1   | ENSG00000235865 | 0.029056    | 0.48841 | 0.029056    | 0.48841     | 0.029056  |         |
|           | 0.48841         | 0.029056    | 0.48841 | 0.48841     | 0.758322392 |           |         |
| MME-AS1   | ENSG00000240666 | 0.029065    | 0.48841 | 0.029065    | 0.48841     | 0.029065  |         |
|           | 0.48841         | 0.029065    | 0.48841 | 0.48841     | 0.758322392 |           |         |
| NA        | ENSG00000234819 | 0.02902     | 0.48842 | -0.89264    | 0.81398     | 0.02902   | 0.48842 |
|           | 0.02902         | 0.48842     | 0.48842 | 0.758322392 |             |           |         |
| IGLC4     | ENSG00000254029 | 0.028888    | 0.48848 | 0.028888    | 0.48848     | 0.028888  | 0.48848 |
|           | 0.028888        | 0.48848     | 0.48848 | 0.758391385 |             |           |         |
| NA        | ENSG00000250238 | 0.028783    | 0.48852 | -0.90368    | 0.81692     | -0.11925  | 0.54746 |
|           | -0.081149       | 0.53234     | 0.48852 | 0.758420686 |             |           |         |
| GOLGA2P1  | ENSG00000205333 | 0.028754    | 0.48853 | 0.028754    | 0.48853     | 0.028754  |         |
|           | 0.48853         | 0.028754    | 0.48853 | 0.48853     | 0.758420686 |           |         |
| RELT      | ENSG00000054967 | -0.29003    | 0.6141  | -0.25086    | 0.59904     | -0.070887 | 0.52826 |
|           | 0.028542        | 0.48861     | 0.48861 | 0.758520717 |             |           |         |
| OR5H3P    | ENSG00000249975 | 0.028503    | 0.48863 | -1.195      | 0.88396     | 0.028503  |         |
|           | 0.48863         | 0.028503    | 0.48863 | 0.48863     | 0.7585276   |           |         |
| NA        | ENSG00000267723 | -0.3011     | 0.61833 | 0.02843     | 0.48866     | -1.4155   | 0.92154 |
|           | -0.82961        | 0.79662     | 0.48866 | 0.758529067 |             |           |         |
| PKP4-AS1  | ENSG00000204380 | -0.45959    | 0.67709 | -0.02903    | 0.51158     | 0.028377  |         |
|           | 0.48868         | -0.21687    | 0.58584 | 0.48868     | 0.758529067 |           |         |
| SOGA1     | ENSG00000149639 | -0.87057    | 0.80801 | -1.2021     | 0.88533     | -0.69725  | 0.75718 |
|           | 0.028167        | 0.48876     | 0.48876 | 0.758529067 |             |           |         |
| SCTR      | ENSG00000080293 | -0.011948   | 0.50477 | -0.41618    | 0.66136     | -0.54639  | 0.7076  |
|           | 0.028155        | 0.48877     | 0.48877 | 0.758529067 |             |           |         |
| LINC02713 | ENSG00000255502 | -0.90758    | 0.81795 | -0.4703     | 0.68093     | 0.028156  |         |
|           | 0.48877         | -0.15849    | 0.56297 | 0.48877     | 0.758529067 |           |         |
| CLDN4     | ENSG00000189143 | -0.13639    | 0.55424 | -0.089085   | 0.53549     | 0.028123  | 0.48878 |
|           | 0.028123        | 0.48878     | 0.48878 | 0.758529067 |             |           |         |
| SEC14L6   | ENSG00000214491 | -1.6557     | 0.9511  | -1.6557     | 0.9511      | 0.028113  |         |
|           | 0.48879         | -1.104      | 0.8652  | 0.48879     | 0.758529067 |           |         |
| LINC02660 | ENSG00000226005 | -0.68799    | 0.75427 | -0.68799    | 0.75427     | 0.028107  |         |
|           | 0.48879         | -0.68799    | 0.75427 | 0.48879     | 0.758529067 |           |         |
| SNX14     | ENSG00000135317 | 0.028054    | 0.48881 | -0.092315   | 0.53678     | -0.57733  | 0.71814 |
|           | -0.24848        | 0.59812     | 0.48881 | 0.758529067 |             |           |         |
| D2HGDH    | ENSG00000180902 | -1.2293     | 0.89052 | -0.50614    | 0.69362     | 0.02802   |         |
|           | 0.48882         | -1.31090491 | 0.48882 | 0.758529067 |             |           |         |
| ZNF793    | ENSG00000188227 | 0.027995    | 0.48883 | -1.0559     | 0.85449     | -1.7704   |         |

|           |                 |          |         |             |             |           |         |  |
|-----------|-----------------|----------|---------|-------------|-------------|-----------|---------|--|
|           | 0.96167         | -1.3843  | 0.91687 | 0.48883     | 0.758529067 |           |         |  |
| TP63      | ENSG00000073282 | -0.45454 | 0.67528 | -1.9036     | 0.97152     | 0.027949  | 0.48885 |  |
|           | -0.45089        | 0.67396  | 0.48885 | 0.758529067 |             |           |         |  |
| UPK1A-AS1 | ENSG00000226510 | 0.027946 | 0.48885 | 0.027946    | 0.48885     | 0.027946  |         |  |
|           | 0.48885         | 0.027946 | 0.48885 | 0.48885     | 0.758529067 |           |         |  |
| NA        | ENSG00000260007 | 0.027923 | 0.48886 | 0.027923    | 0.48886     | 0.027923  | 0.48886 |  |
|           | 0.027923        | 0.48886  | 0.48886 | 0.758529067 |             |           |         |  |
| NA        | ENSG00000278492 | 0.027902 | 0.48887 | 0.027902    | 0.48887     | 0.027902  | 0.48887 |  |
|           | 0.027902        | 0.48887  | 0.48887 | 0.758529067 |             |           |         |  |
| NA        | ENSG00000279205 | 0.027887 | 0.48888 | 0.027887    | 0.48888     | 0.027887  | 0.48888 |  |
|           | 0.027887        | 0.48888  | 0.48888 | 0.758529067 |             |           |         |  |
| UBE2S     | ENSG00000108106 | 0.027721 | 0.48894 | 0.027721    | 0.48894     | -0.32713  | 0.62822 |  |
|           | 0.027721        | 0.48894  | 0.48894 | 0.758578973 |             |           |         |  |
| ZNF804B   | ENSG00000182348 | -0.76532 | 0.77796 | 0.027671    | 0.48896     | -1.1464   |         |  |
|           | 0.87418         | -0.68387 | 0.75297 | 0.48896     | 0.758578973 |           |         |  |
| NA        | ENSG00000257519 | 0.027686 | 0.48896 | -1.1748     | 0.87997     | 0.027686  | 0.48896 |  |
|           | 0.027686        | 0.48896  | 0.48896 | 0.758578973 |             |           |         |  |
| RALB      | ENSG00000144118 | -0.3627  | 0.64158 | -0.25374    | 0.60015     | 0.027613  | 0.48899 |  |
|           | 0.027613        | 0.48899  | 0.48899 | 0.758578973 |             |           |         |  |
| MAF       | ENSG00000178573 | -1.3544  | 0.9122  | 0.027609    | 0.48899     | -0.29659  | 0.61661 |  |
|           | -0.67439        | 0.74997  | 0.48899 | 0.758578973 |             |           |         |  |
| NA        | ENSG00000275710 | 0.027503 | 0.48903 | 0.027503    | 0.48903     | 0.027503  | 0.48903 |  |
|           | 0.027503        | 0.48903  | 0.48903 | 0.758589044 |             |           |         |  |
| NA        | ENSG00000238644 | -0.61717 | 0.73144 | -1.1296     | 0.87068     | -1.8247   | 0.96598 |  |
|           | 0.027508        | 0.48903  | 0.48903 | 0.758589044 |             |           |         |  |
| MIR490    | ENSG00000207597 | 0.027416 | 0.48906 | 0.027416    | 0.48906     | 0.027416  |         |  |
|           | 0.48906         | 0.027416 | 0.48906 | 0.48906     | 0.758589044 |           |         |  |
| NA        | ENSG00000283809 | 0.027353 | 0.48909 | 0.027353    | 0.48909     | 0.027353  | 0.48909 |  |
|           | 0.027353        | 0.48909  | 0.48909 | 0.758589044 |             |           |         |  |
| SNHG3     | ENSG00000242125 | 0.027324 | 0.4891  | 0.027324    | 0.4891      | 0.027324  | 0.4891  |  |
|           | 0.027324        | 0.4891   | 0.4891  | 0.758589044 |             |           |         |  |
| TESK1     | ENSG00000107140 | -0.28348 | 0.6116  | -0.38605    | 0.65027     | 0.027226  | 0.48914 |  |
|           | -0.84258        | 0.80027  | 0.48914 | 0.758589044 |             |           |         |  |
| GNAL      | ENSG00000141404 | -0.16087 | 0.5639  | -0.37364    | 0.64566     | 0.027145  | 0.48917 |  |
|           | -0.18533        | 0.57352  | 0.48917 | 0.758589044 |             |           |         |  |
| EI24P3    | ENSG00000214825 | -1.3307  | 0.90836 | -1.3307     | 0.90836     | -1.3307   |         |  |
|           | 0.90836         | 0.027158 | 0.48917 | 0.48917     | 0.758589044 |           |         |  |
| CERK      | ENSG00000100422 | -0.20407 | 0.58085 | -0.20407    | 0.58085     | -0.98566  | 0.83785 |  |
|           | 0.027082        | 0.4892   | 0.4892  | 0.758589044 |             |           |         |  |
| NA        | ENSG00000278989 | 0.027076 | 0.4892  | 0.027076    | 0.4892      | 0.027076  | 0.4892  |  |
|           | 0.027076        | 0.4892   | 0.4892  | 0.758589044 |             |           |         |  |
| ST8SIA2   | ENSG00000140557 | -0.56299 | 0.71328 | 0.027043    | 0.48921     | -0.85079  |         |  |
|           | 0.80256         | -0.56299 | 0.71328 | 0.48921     | 0.758589044 |           |         |  |
| NDUFB4    | ENSG00000065518 | -0.81663 | 0.79293 | -1.4457     | 0.92586     | 0.027029  |         |  |
|           | 0.48922         | -0.67404 | 0.74986 | 0.48922     | 0.758589044 |           |         |  |
| RNU6-618P | ENSG00000200388 | 0.027019 | 0.48922 | 0.027019    | 0.48922     | 0.027019  |         |  |
|           | 0.48922         | 0.027019 | 0.48922 | 0.48922     | 0.758589044 |           |         |  |
| NA        | ENSG00000233519 | 0.02702  | 0.48922 | 0.02702     | 0.48922     | 0.02702   | 0.48922 |  |
|           | 0.02702         | 0.48922  | 0.48922 | 0.758589044 |             |           |         |  |
| GAPDHP70  | ENSG00000249489 | 0.026989 | 0.48923 | -0.99449    | 0.84001     | 0.026989  |         |  |
|           | 0.48923         | 0.026989 | 0.48923 | 0.48923     | 0.758589044 |           |         |  |
| NA        | ENSG00000259152 | 0.02692  | 0.48926 | -1.2538     | 0.89504     | -0.40608  | 0.65766 |  |
|           | -1.712          | 0.95655  | 0.48926 | 0.75860279  |             |           |         |  |
| LYPD5     | ENSG00000159871 | 0.026888 | 0.48927 | 0.026888    | 0.48927     | 0.026888  | 0.48927 |  |
|           | 0.026888        | 0.48927  | 0.48927 | 0.75860279  |             |           |         |  |
| KBTBD6    | ENSG00000165572 | 0.026764 | 0.48932 | 0.026764    | 0.48932     | 0.026764  |         |  |
|           | 0.48932         | 0.026764 | 0.48932 | 0.48932     | 0.758614774 |           |         |  |
| NA        | ENSG00000232252 | -0.37558 | 0.64638 | 0.026764    | 0.48932     | -0.020835 | 0.50831 |  |
|           | -0.29859        | 0.61738  | 0.48932 | 0.758614774 |             |           |         |  |
| NA        | ENSG00000267334 | 0.026756 | 0.48933 | 0.026756    | 0.48933     | 0.026756  | 0.48933 |  |
|           | 0.026756        | 0.48933  | 0.48933 | 0.758614774 |             |           |         |  |
| NA        | ENSG00000267187 | -0.88995 | 0.81325 | -0.93682    | 0.82557     | -0.45524  | 0.67553 |  |

|            |                 |           |         |             |             |          |         |         |
|------------|-----------------|-----------|---------|-------------|-------------|----------|---------|---------|
|            | 0.026728        | 0.48934   | 0.48934 | 0.758614774 |             |          |         |         |
| NA         | ENSG00000220540 | 0.026466  | 0.48944 | 0.026466    | 0.48944     | 0.026466 | 0.48944 | 0.48944 |
|            | 0.026466        | 0.48944   | 0.48944 | 0.758745664 |             |          |         |         |
| MED15      | ENSG00000099917 | -0.13177  | 0.55242 | 0.026395    | 0.48947     | -0.91643 | 0.82028 |         |
|            | -1.4953         | 0.93258   | 0.48947 | 0.758768032 |             |          |         |         |
| MCTP2      | ENSG00000140563 | 0.026331  | 0.4895  | -0.12324    | 0.54904     | 0.026331 | 0.4895  |         |
|            | -0.70519        | 0.75966   | 0.4895  | 0.7587904   |             |          |         |         |
| KIAA1549   | ENSG00000122778 | 0.02617   | 0.48956 | -0.26029    | 0.60268     | 0.02617  |         |         |
|            | 0.48956         | -0.39624  | 0.65403 | 0.48956     | 0.758859268 |          |         |         |
| LINC01249  | ENSG00000231532 | 0.025933  | 0.48966 | -0.4067     | 0.65789     | -0.49783 |         |         |
|            | 0.6907          | -0.99115  | 0.83919 | 0.48966     | 0.758990133 |          |         |         |
| RNU6-1047P | ENSG00000201288 | 0.025845  | 0.48969 | -0.085027   | 0.53388     | -0.37553 |         |         |
|            | 0.64637         | -0.65375  | 0.74336 | 0.48969     | 0.759012491 |          |         |         |
| NA         | ENSG00000267457 | 0.025798  | 0.48971 | 0.025798    | 0.48971     | 0.025798 | 0.48971 |         |
|            | 0.025798        | 0.48971   | 0.48971 | 0.759014925 |             |          |         |         |
| NA         | ENSG00000255440 | 0.025723  | 0.48974 | 0.025723    | 0.48974     | 0.025723 | 0.48974 |         |
|            | 0.025723        | 0.48974   | 0.48974 | 0.759014925 |             |          |         |         |
| FBXO27     | ENSG00000161243 | -0.055152 | 0.52199 | 0.025667    | 0.48976     | 0.025667 |         |         |
|            | 0.48976         | 0.025667  | 0.48976 | 0.48976     | 0.759014925 |          |         |         |
| RNU7-148P  | ENSG00000238357 | 0.025644  | 0.48977 | -0.49453    | 0.68953     | -0.25912 |         |         |
|            | 0.60223         | -0.49453  | 0.68953 | 0.48977     | 0.759014925 |          |         |         |
| NA         | ENSG00000232494 | 0.025608  | 0.48979 | -0.20975    | 0.58307     | 0.025608 | 0.48979 |         |
|            | 0.025608        | 0.48979   | 0.48979 | 0.759014925 |             |          |         |         |
| CYP46A1    | ENSG00000036530 | 0.025511  | 0.48982 | -0.39212    | 0.65251     | -0.52999 |         |         |
|            | 0.70194         | -0.31452  | 0.62344 | 0.48982     | 0.759014925 |          |         |         |
| GUCY1A1    | ENSG00000164116 | -0.73361  | 0.76841 | 0.025513    | 0.48982     | -0.41246 | 0.66    |         |
|            | -0.9526         | 0.8296    | 0.48982 | 0.759014925 |             |          |         |         |
| RNU6-6P    | ENSG00000272055 | 0.025519  | 0.48982 | 0.025519    | 0.48982     | 0.025519 |         |         |
|            | 0.48982         | 0.025519  | 0.48982 | 0.48982     | 0.759014925 |          |         |         |
| NIPA2P4    | ENSG00000254151 | 0.025402  | 0.48987 | 0.025402    | 0.48987     | 0.025402 |         |         |
|            | 0.48987         | 0.025402  | 0.48987 | 0.48987     | 0.759014925 |          |         |         |
| ATAD1      | ENSG00000138138 | -0.025103 | 0.51001 | -1.0226     | 0.84675     | -1.3583  | 0.91281 |         |
|            | 0.025365        | 0.48988   | 0.48988 | 0.759014925 |             |          |         |         |
| NHLRC3     | ENSG00000188811 | 0.025359  | 0.48988 | -0.203      | 0.58043     | -0.57696 |         |         |
|            | 0.71802         | -0.42291  | 0.66382 | 0.48988     | 0.759014925 |          |         |         |
| TRIML1     | ENSG00000184108 | -0.171    | 0.56789 | 0.025353    | 0.48989     | -0.60821 |         |         |
|            | 0.72848         | -0.31585  | 0.62394 | 0.48989     | 0.759014925 |          |         |         |
| NA         | ENSG00000256664 | 0.025258  | 0.48992 | 0.025258    | 0.48992     | 0.025258 | 0.48992 |         |
|            | 0.025258        | 0.48992   | 0.48992 | 0.759014925 |             |          |         |         |
| NA         | ENSG00000256670 | 0.025265  | 0.48992 | 0.025265    | 0.48992     | 0.025265 | 0.48992 |         |
|            | 0.025265        | 0.48992   | 0.48992 | 0.759014925 |             |          |         |         |
| MAGOHB     | ENSG00000111196 | -0.78914  | 0.78498 | -0.42028    | 0.66286     | -0.42028 |         |         |
|            | 0.66286         | 0.02525   | 0.48993 | 0.48993     | 0.759014925 |          |         |         |
| NA         | ENSG00000277984 | -0.98017  | 0.8365  | -0.56658    | 0.7145      | -0.75842 | 0.7759  |         |
|            | 0.025106        | 0.48999   | 0.48999 | 0.759014925 |             |          |         |         |
| NA         | ENSG00000259582 | 0.025039  | 0.49001 | -1.6577     | 0.95131     | 0.025039 | 0.49001 |         |
|            | -0.83586        | 0.79838   | 0.49001 | 0.759014925 |             |          |         |         |
| NA         | ENSG00000234677 | 0.02501   | 0.49002 | 0.02501     | 0.49002     | -0.753   | 0.77428 |         |
|            | -0.5861         | 0.72109   | 0.49002 | 0.759014925 |             |          |         |         |
| MIR3973    | ENSG00000263389 | 0.024976  | 0.49004 | 0.024976    | 0.49004     | 0.024976 |         |         |
|            | 0.49004         | -1.4801   | 0.93057 | 0.49004     | 0.759014925 |          |         |         |
| NA         | ENSG00000268739 | 0.024975  | 0.49004 | 0.024975    | 0.49004     | 0.024975 | 0.49004 |         |
|            | 0.024975        | 0.49004   | 0.49004 | 0.759014925 |             |          |         |         |
| PRR5L      | ENSG00000135362 | -0.87783  | 0.80998 | -0.56726    | 0.71473     | -0.34386 | 0.63452 |         |
|            | 0.024936        | 0.49005   | 0.49005 | 0.759014925 |             |          |         |         |
| ZNF561     | ENSG00000171469 | -0.032062 | 0.51279 | -0.77845    | 0.78185     | -0.19243 |         |         |
|            | 0.5763          | 0.024937  | 0.49005 | 0.49005     | 0.759014925 |          |         |         |
| SLC35E3    | ENSG00000175782 | -1.9065   | 0.97171 | 0.024919    | 0.49006     | -1.1433  |         |         |
|            | 0.87354         | -0.59626  | 0.7245  | 0.49006     | 0.759014925 |          |         |         |
| PSPC1P1    | ENSG00000227879 | -1.8807   | 0.96999 | -1.4417     | 0.9253      | 0.024778 |         |         |
|            | 0.49012         | -0.56647  | 0.71446 | 0.49012     | 0.759014925 |          |         |         |
| NA         | ENSG00000260706 | -0.09555  | 0.53806 | 0.024762    | 0.49012     | -0.09555 | 0.53806 |         |

|            |                 |          |           |           |             |             |          |         |
|------------|-----------------|----------|-----------|-----------|-------------|-------------|----------|---------|
|            |                 | -0.09555 | 0.53806   | 0.49012   | 0.759014925 |             |          |         |
| NA         | ENSG00000272741 | 0.024776 | 0.49012   | 0.49012   | 0.024776    | 0.49012     | 0.024776 | 0.49012 |
|            |                 | 0.024776 | 0.49012   | 0.49012   | 0.759014925 |             |          |         |
| PLIN5      | ENSG00000214456 | -0.33712 | 0.63199   | -0.033503 | 0.51336     | -0.033503   | 0.51336  |         |
|            |                 | 0.024754 | 0.49013   | 0.49013   | 0.759014925 |             |          |         |
| NA         | ENSG00000260673 | 0.02474  | 0.49013   | 0.49013   | 0.02474     | 0.49013     | 0.02474  | 0.49013 |
|            |                 | 0.02474  | 0.49013   | 0.49013   | 0.759014925 |             |          |         |
| NA         | ENSG00000221204 | 0.024693 | 0.49015   | 0.49015   | 0.024693    | 0.49015     | 0.024693 | 0.49015 |
|            |                 | -0.59655 | 0.7246    | 0.49015   | 0.759014925 |             |          |         |
| NA         | ENSG00000255750 | -0.42807 | 0.6657    | -0.85845  | 0.80468     | -1.638      | 0.94929  |         |
|            |                 | 0.024651 | 0.49017   | 0.49017   | 0.759014925 |             |          |         |
| RAPGEFL1   | ENSG00000108352 | -0.70212 | 0.7587    | -0.75259  | 0.77415     | 0.024601    |          |         |
|            |                 | 0.49019  | -0.92181  | 0.82169   | 0.49019     | 0.759014925 |          |         |
| NA         | ENSG00000199200 | -0.63563 | 0.73749   | 0.024583  | 0.49019     | -0.63563    | 0.73749  |         |
|            |                 | -0.63563 | 0.73749   | 0.49019   | 0.759014925 |             |          |         |
| CDC14A     | ENSG00000079335 | -0.49461 | 0.68956   | 0.024497  | 0.49023     | -0.22686    |          |         |
|            |                 | 0.58973  | -1.6507   | 0.9506    | 0.49023     | 0.759018208 |          |         |
| IFNA13     | ENSG00000233816 | -0.38081 | 0.64833   | 0.0245    | 0.49023     | 0.0245      |          |         |
|            |                 | 0.49023  | 0.0245    | 0.49023   | 0.49023     | 0.759018208 |          |         |
| NA         | ENSG00000200953 | 0.024438 | 0.49025   | -0.75431  | 0.77467     | 0.024438    | 0.49025  |         |
|            |                 | 0.024438 | 0.49025   | 0.49025   | 0.759018208 |             |          |         |
| RSPH9      | ENSG00000172426 | -1.0776  | 0.8594    | -0.6962   | 0.75685     | -0.011534   | 0.5046   |         |
|            |                 | 0.024404 | 0.49027   | 0.49027   | 0.759018208 |             |          |         |
| RNU7-11P   | ENSG00000252796 | 0.024404 | 0.49027   | 0.024404  | 0.49027     | 0.024404    |          |         |
|            |                 | 0.49027  | -0.39922  | 0.65514   | 0.49027     | 0.759018208 |          |         |
| UFL1       | ENSG00000014123 | -1.0304  | 0.84859   | 0.02429   | 0.49031     | -0.6226     | 0.73323  |         |
|            |                 | -0.75921 | 0.77614   | 0.49031   | 0.759054233 |             |          |         |
| COLCA1     | ENSG00000196167 | -0.19941 | 0.57903   | -0.58644  | 0.72121     | 0.02423     |          |         |
|            |                 | 0.49033  | -1.131    | 0.87097   | 0.49033     | 0.759054233 |          |         |
| NA         | ENSG00000229399 | -0.12386 | 0.54929   | 0.024215  | 0.49034     | 0.024215    | 0.49034  |         |
|            |                 | 0.024215 | 0.49034   | 0.49034   | 0.759054233 |             |          |         |
| RNU6-923P  | ENSG00000201623 | 0.023943 | 0.49045   | 0.023943  | 0.49045     | 0.023943    |          |         |
|            |                 | 0.49045  | 0.023943  | 0.49045   | 0.49045     | 0.759093215 |          |         |
| PRPF19     | ENSG00000110107 | -0.18994 | 0.57532   | -0.049233 | 0.51963     | -0.28122    |          |         |
|            |                 | 0.61073  | 0.0239    | 0.49047   | 0.49047     | 0.759093215 |          |         |
| RIPPLY3    | ENSG00000183145 | -0.29021 | 0.61417   | 0.023864  | 0.49048     | -0.89454    |          |         |
|            |                 | 0.81448  | -0.30289  | 0.61901   | 0.49048     | 0.759093215 |          |         |
| SNX33      | ENSG00000173548 | -0.22878 | 0.59048   | -0.22878  | 0.59048     | -0.22878    | 0.59048  |         |
|            |                 | 0.023835 | 0.49049   | 0.49049   | 0.759093215 |             |          |         |
| NA         | ENSG00000202382 | 0.023805 | 0.4905    | 0.023805  | 0.4905      | 0.023805    | 0.4905   |         |
|            |                 | 0.023805 | 0.4905    | 0.4905    | 0.759093215 |             |          |         |
| KRT18P16   | ENSG00000235275 | -0.07328 | 0.52921   | -0.07328  | 0.52921     | 0.023725    |          |         |
|            |                 | 0.49054  | 0.023725  | 0.49054   | 0.49054     | 0.759093215 |          |         |
| RNU6-1329P | ENSG00000202534 | 0.023682 | 0.49055   | -0.096639 | 0.53849     | -0.096639   |          |         |
|            |                 | 0.53849  | -0.096639 | 0.53849   | 0.49055     | 0.759093215 |          |         |
| NA         | ENSG00000279586 | -0.88707 | 0.81248   | 0.023687  | 0.49055     | -0.52417    | 0.69992  |         |
|            |                 | 0.023687 | 0.49055   | 0.49055   | 0.759093215 |             |          |         |
| EEF1AKMT2  | ENSG00000203791 | -1.2348  | 0.89156   | -0.55342  | 0.71001     | -0.7677     |          |         |
|            |                 | 0.77867  | 0.023663  | 0.49056   | 0.49056     | 0.759093215 |          |         |
| NA         | ENSG00000253170 | -0.91806 | 0.82071   | 0.023641  | 0.49057     | -0.056014   | 0.52233  |         |
|            |                 | -1.0542  | 0.85411   | 0.49057   | 0.759093215 |             |          |         |
| NA         | ENSG00000253706 | -0.13321 | 0.55299   | -1.2251   | 0.88973     | -0.0712     | 0.52838  |         |
|            |                 | 0.023648 | 0.49057   | 0.49057   | 0.759093215 |             |          |         |
| NA         | ENSG00000203635 | 0.023611 | 0.49058   | 0.023611  | 0.49058     | -1.314      | 0.90558  |         |
|            |                 | 0.023611 | 0.49058   | 0.49058   | 0.759093215 |             |          |         |
| DNAJA1P6   | ENSG00000228045 | 0.023575 | 0.4906    | 0.023575  | 0.4906      | 0.023575    |          |         |
|            |                 | 0.4906   | 0.023575  | 0.4906    | 0.4906      | 0.759093215 |          |         |
| EPHA3      | ENSG00000044524 | -0.98622 | 0.83799   | -0.88224  | 0.81118     | -0.60134    | 0.72619  |         |
|            |                 | 0.023511 | 0.49062   | 0.49062   | 0.759093215 |             |          |         |
| PTMAP3     | ENSG00000218902 | 0.023517 | 0.49062   | -0.20191  | 0.58001     | -0.24337    |          |         |
|            |                 | 0.59614  | -0.24337  | 0.59614   | 0.49062     | 0.759093215 |          |         |
| MRPS5      | ENSG00000144029 | -0.68612 | 0.75368   | 0.023495  | 0.49063     | -0.78082    | 0.78254  |         |



|            |                 |            |          |           |             |             |          |        |
|------------|-----------------|------------|----------|-----------|-------------|-------------|----------|--------|
|            |                 | -0.82326   | 0.79482  | 0.49063   | 0.759093215 |             |          |        |
| HIGD1AP3   | ENSG00000248929 | -0.4221    | 0.66352  | -0.72909  | 0.76703     | 0.023483    |          |        |
|            |                 | 0.49063    | -0.41717 | 0.66172   | 0.49063     | 0.759093215 |          |        |
| PSME3      | ENSG00000131467 | -0.61695   | 0.73137  | -0.61695  | 0.73137     | -0.41947    | 0.66256  |        |
|            |                 | 0.023406   | 0.49066  | 0.49066   | 0.759115528 |             |          |        |
| NA         | ENSG00000259705 | 0.023319   | 0.4907   | 0.4907    | 0.023319    | 0.4907      | 0.023319 | 0.4907 |
|            |                 | 0.023319   | 0.4907   | 0.4907    | 0.759142891 |             |          |        |
| SEC23B     | ENSG00000101310 | -0.41362   | 0.66042  | -0.69604  | 0.7568      | 0.023252    |          |        |
|            |                 | 0.49072    | -0.14894 | 0.5592    | 0.49072     | 0.759142891 |          |        |
| ZMPSTE24   | ENSG00000084073 | 0.023251   | 0.49073  | -0.83515  | 0.79818     | -0.67456    |          |        |
|            |                 | 0.75002    | -0.90644 | 0.81765   | 0.49073     | 0.759142891 |          |        |
| PRKG1-AS1  | ENSG00000236671 | -0.0018206 | 0.50073  | 0.023206  | 0.49074     | -0.58352    |          |        |
|            |                 | 0.72023    | -0.13446 | 0.55348   | 0.49074     | 0.759142891 |          |        |
| NA         | ENSG00000253422 | 0.023107   | 0.49078  | -0.37459  | 0.64602     | -1.414      | 0.92132  |        |
|            |                 | -0.92089   | 0.82145  | 0.49078   | 0.759180668 |             |          |        |
| RPL38P4    | ENSG00000250562 | 0.023001   | 0.49082  | 0.023001  | 0.49082     | 0.023001    |          |        |
|            |                 | 0.49082    | 0.023001 | 0.49082   | 0.49082     | 0.759185713 |          |        |
| FAM53B-AS1 | ENSG00000233334 | -0.47766   | 0.68356  | 0.022987  | 0.49083     | -0.4153     |          |        |
|            |                 | 0.66104    | -0.11815 | 0.54703   | 0.49083     | 0.759185713 |          |        |
| NA         | ENSG00000253262 | 0.022996   | 0.49083  | -0.056405 | 0.52249     | -1.2143     | 0.88769  |        |
|            |                 | 0.022996   | 0.49083  | 0.49083   | 0.759185713 |             |          |        |
| ABHD3      | ENSG00000158201 | -0.40535   | 0.65739  | -0.45472  | 0.67535     | 0.022943    | 0.49085  |        |
|            |                 | -0.10153   | 0.54043  | 0.49085   | 0.759192551 |             |          |        |
| NA         | ENSG00000226172 | 0.022838   | 0.49089  | -0.55426  | 0.7103      | -0.58353    | 0.72023  |        |
|            |                 | -0.25163   | 0.59934  | 0.49089   | 0.75923032  |             |          |        |
| MTCO1P4    | ENSG00000253556 | -0.98526   | 0.83775  | -0.58644  | 0.72121     | 0.022733    |          |        |
|            |                 | 0.49093    | -0.18866 | 0.57482   | 0.49093     | 0.759262696 |          |        |
| DDX18P4    | ENSG00000251553 | -0.42852   | 0.66586  | -0.20082  | 0.57958     | 0.022651    |          |        |
|            |                 | 0.49096    | -0.87307 | 0.80869   | 0.49096     | 0.759262696 |          |        |
| OR51J1     | ENSG00000184321 | -0.68611   | 0.75368  | 0.022611  | 0.49098     | 0.022611    |          |        |
|            |                 | 0.49098    | 0.022611 | 0.49098   | 0.49098     | 0.759262696 |          |        |
| RNA5SP426  | ENSG00000199771 | -0.69964   | 0.75792  | -0.056669 | 0.5226      | 0.022541    |          |        |
|            |                 | 0.49101    | -0.69964 | 0.75792   | 0.49101     | 0.759262696 |          |        |
| OR7E89P    | ENSG00000243792 | -0.96591   | 0.83296  | -0.54018  | 0.70546     | 0.022536    |          |        |
|            |                 | 0.49101    | 0.022536 | 0.49101   | 0.49101     | 0.759262696 |          |        |
| NA         | ENSG00000272831 | 0.022545   | 0.49101  | -0.71513  | 0.76273     | 0.022545    | 0.49101  |        |
|            |                 | 0.022545   | 0.49101  | 0.49101   | 0.759262696 |             |          |        |
| NA         | ENSG00000257228 | 0.022522   | 0.49102  | 0.022522  | 0.49102     | 0.022522    | 0.49102  |        |
|            |                 | 0.022522   | 0.49102  | 0.49102   | 0.759262696 |             |          |        |
| MTND5P34   | ENSG00000260147 | 0.022423   | 0.49106  | 0.022423  | 0.49106     | 0.022423    |          |        |
|            |                 | 0.49106    | 0.022423 | 0.49106   | 0.49106     | 0.759276361 |          |        |
| PPIAP75    | ENSG00000271131 | -0.1141    | 0.54542  | -0.28882  | 0.61364     | -1.2143     |          |        |
|            |                 | 0.88769    | 0.022401 | 0.49106   | 0.49106     | 0.759276361 |          |        |
| KRT8P50    | ENSG00000260799 | 0.022291   | 0.49111  | 0.022291  | 0.49111     | 0.022291    |          |        |
|            |                 | 0.49111    | 0.022291 | 0.49111   | 0.49111     | 0.759325976 |          |        |
| NA         | ENSG00000221496 | 0.022194   | 0.49115  | 0.022194  | 0.49115     | 0.022194    | 0.49115  |        |
|            |                 | 0.022194   | 0.49115  | 0.49115   | 0.759325976 |             |          |        |
| LYPD8      | ENSG00000259823 | 0.022198   | 0.49115  | -0.24742  | 0.59771     | -0.51867    | 0.698    |        |
|            |                 | -0.51867   | 0.698    | 0.49115   | 0.759325976 |             |          |        |
| GAPDHP53   | ENSG00000234069 | 0.022161   | 0.49116  | -1.1606   | 0.87711     | 0.022161    |          |        |
|            |                 | 0.49116    | 0.022161 | 0.49116   | 0.49116     | 0.759325976 |          |        |
| RBBP6      | ENSG00000122257 | -0.58461   | 0.7206   | 0.022133  | 0.49117     | -0.081236   | 0.53237  |        |
|            |                 | -0.31531   | 0.62374  | 0.49117   | 0.759325976 |             |          |        |
| NA         | ENSG00000251569 | 0.022081   | 0.49119  | 0.022081  | 0.49119     | 0.022081    | 0.49119  |        |
|            |                 | 0.022081   | 0.49119  | 0.49119   | 0.759332806 |             |          |        |
| WBP11      | ENSG00000084463 | 0.022042   | 0.49121  | -0.3389   | 0.63266     | 0.022042    | 0.49121  |        |
|            |                 | 0.022042   | 0.49121  | 0.49121   | 0.759339635 |             |          |        |
| NA         | ENSG00000236938 | -0.47913   | 0.68408  | 0.021997  | 0.49123     | 0.021997    | 0.49123  |        |
|            |                 | 0.021997   | 0.49123  | 0.49123   | 0.759346463 |             |          |        |
| MIGA2      | ENSG00000148343 | -0.9831    | 0.83722  | -0.92207  | 0.82175     | -1.7666     | 0.96135  |        |
|            |                 | 0.021852   | 0.49128  | 0.49128   | 0.759366946 |             |          |        |
| HSBP1P2    | ENSG00000166530 | 0.021861   | 0.49128  | 0.021861  | 0.49128     | 0.021861    |          |        |

|              |                 |            |         |             |             |          |          |
|--------------|-----------------|------------|---------|-------------|-------------|----------|----------|
|              | 0.49128         | -0.22677   | 0.5897  | 0.49128     | 0.759366946 |          |          |
| ZNRD1ASP     | ENSG00000204623 | -0.33308   | 0.63046 | -0.50202    | 0.69217     | 0.02184  |          |
|              | 0.49129         | -0.54827   | 0.70825 | 0.49129     | 0.759366946 |          |          |
| RNA5SP385    | ENSG00000251756 | 0.021737   | 0.49133 | 0.021737    | 0.49133     | 0.021737 |          |
|              | 0.49133         | 0.021737   | 0.49133 | 0.49133     | 0.759387035 |          |          |
| NA           | ENSG00000255426 | 0.021704   | 0.49134 | -0.19067    | 0.57561     | 0.021704 | 0.49134  |
|              | 0.021704        | 0.49134    | 0.49134 | 0.759387035 |             |          |          |
| NA           | ENSG00000230991 | 0.021677   | 0.49135 | 0.021677    | 0.49135     | 0.021677 | 0.49135  |
|              | 0.021677        | 0.49135    | 0.49135 | 0.759387035 |             |          |          |
| NA           | ENSG00000255546 | -0.98083   | 0.83666 | 0.021562    | 0.4914      | -0.68014 | 0.75179  |
|              | -0.26609        | 0.60491    | 0.4914  | 0.759387035 |             |          |          |
| OXCT2        | ENSG00000198754 | 0.021534   | 0.49141 | 0.021534    | 0.49141     | 0.021534 | 0.49141  |
|              | 0.021534        | 0.49141    | 0.49141 | 0.759387035 |             |          |          |
| NA           | ENSG00000232058 | -0.76364   | 0.77746 | -1.4497     | 0.92643     | -0.9619  | 0.83195  |
|              | 0.021517        | 0.49142    | 0.49142 | 0.759387035 |             |          |          |
| NA           | ENSG00000280287 | -0.86439   | 0.80631 | -0.86439    | 0.80631     | -0.48865 | 0.68746  |
|              | 0.021489        | 0.49143    | 0.49143 | 0.759387035 |             |          |          |
| RNU6-205P    | ENSG00000212160 | 0.021449   | 0.49144 | 0.021449    | 0.49144     | 0.021449 |          |
|              | 0.49144         | 0.021449   | 0.49144 | 0.49144     | 0.759387035 |          |          |
| RFC5         | ENSG00000111445 | 0.021391   | 0.49147 | 0.021391    | 0.49147     | 0.021391 | 0.49147  |
|              | -0.77702        | 0.78143    | 0.49147 | 0.759387035 |             |          |          |
| BCAS3        | ENSG00000141376 | -0.94156   | 0.82679 | -0.0002947  | 0.50012     | 0.021355 | 0.49148  |
|              | -0.75652        | 0.77533    | 0.49148 | 0.759387035 |             |          |          |
| TVP23C       | ENSG00000175106 | -1.3647    | 0.91382 | 0.021336    | 0.49149     | -2.5305  |          |
|              | 0.99431         | -1.1435    | 0.87359 | 0.49149     | 0.759387035 |          |          |
| RNA5SP95     | ENSG00000222251 | 0.021344   | 0.49149 | -0.53077    | 0.70221     | -0.13004 |          |
|              | 0.55173         | -0.0034581 | 0.50138 | 0.49149     | 0.759387035 |          |          |
| NA           | ENSG00000260317 | 0.021244   | 0.49153 | 0.021244    | 0.49153     | 0.021244 | 0.49153  |
|              | 0.021244        | 0.49153    | 0.49153 | 0.759424759 |             |          |          |
| NA           | ENSG00000279432 | 0.021148   | 0.49156 | 0.021148    | 0.49156     | 0.021148 | 0.49156  |
|              | 0.021148        | 0.49156    | 0.49156 | 0.759447031 |             |          |          |
| TTL5         | ENSG00000119685 | -1.3269    | 0.90773 | -0.27469    | 0.60822     | 0.021048 | 0.4916   |
|              | -0.61626        | 0.73114    | 0.4916  | 0.759457058 |             |          |          |
| NA           | ENSG00000266969 | 0.021066   | 0.4916  | -0.7371     | 0.76947     | -1.3059  | 0.90421  |
|              | -1.3059         | 0.90421    | 0.4916  | 0.759457058 |             |          |          |
| IFFO1        | ENSG00000010295 | -0.34263   | 0.63406 | -0.038475   | 0.51535     | 0.021012 | 0.49162  |
|              | -0.062923       | 0.52509    | 0.49162 | 0.759457058 |             |          |          |
| NA           | ENSG00000259688 | -1.0397    | 0.85075 | 0.020933    | 0.49165     | 0.020933 | 0.49165  |
|              | 0.020933        | 0.49165    | 0.49165 | 0.759457058 |             |          |          |
| CACUL1       | ENSG00000151893 | -0.31239   | 0.62263 | -0.65959    | 0.74524     | -0.36138 |          |
|              | 0.64109         | 0.020919   | 0.49166 | 0.49166     | 0.759457058 |          |          |
| LINC02004    | ENSG00000240006 | -1.0379    | 0.85034 | 0.020918    | 0.49166     | -0.13742 |          |
|              | 0.55465         | -0.64132   | 0.73934 | 0.49166     | 0.759457058 |          |          |
| PABPC1       | ENSG00000070756 | 0.020804   | 0.4917  | -1.2385     | 0.89223     | 0.020804 |          |
|              | 0.4917          | 0.020804   | 0.4917  | 0.4917      | 0.759458455 |          |          |
| CLEC20A      | ENSG00000188585 | -0.52623   | 0.70064 | -0.25491    | 0.60061     | 0.020786 |          |
|              | 0.49171         | 0.020786   | 0.49171 | 0.49171     | 0.759458455 |          |          |
| PPOX         | ENSG00000143224 | -0.1811    | 0.57185 | -0.1811     | 0.57185     | 0.020738 | 0.49173  |
|              | 0.020738        | 0.49173    | 0.49173 | 0.759458455 |             |          |          |
| IGHVIII-67-3 | ENSG00000253635 | 0.020739   | 0.49173 | 0.020739    | 0.49173     | 0.020739 | 0.020739 |
|              | 0.49173         | 0.020739   | 0.49173 | 0.49173     | 0.759458455 |          |          |
| ISL1         | ENSG00000016082 | -0.93899   | 0.82613 | -0.93899    | 0.82613     | 0.020689 | 0.49175  |
|              | -0.54383        | 0.70672    | 0.49175 | 0.759458455 |             |          |          |
| LINC02022    | ENSG00000232746 | -0.27547   | 0.60852 | -0.27377    | 0.60787     | -0.23553 |          |
|              | 0.5931          | 0.020638   | 0.49177 | 0.49177     | 0.759458455 |          |          |
| LINC01192    | ENSG00000241369 | -0.69315   | 0.75589 | -1.421      | 0.92234     | -0.30668 |          |
|              | 0.62046         | 0.020631   | 0.49177 | 0.49177     | 0.759458455 |          |          |
| CHST8        | ENSG00000124302 | -0.39069   | 0.65199 | 0.020486    | 0.49183     | -0.38617 | 0.65032  |
|              | -0.65991        | 0.74534    | 0.49183 | 0.759527045 |             |          |          |
| NA           | ENSG00000263657 | -0.32469   | 0.62729 | -0.49291    | 0.68896     | -0.12247 | 0.54874  |
|              | 0.020399        | 0.49186    | 0.49186 | 0.759549303 |             |          |          |
| TUBAP5       | ENSG00000214796 | -1.5425    | 0.93853 | -0.95037    | 0.82904     | -1.5425  |          |

|             |                 |           |         |             |             |           |                      |
|-------------|-----------------|-----------|---------|-------------|-------------|-----------|----------------------|
|             | 0.93853         | 0.020319  | 0.49189 | 0.49189     | 0.759554305 |           |                      |
| NA          | ENSG00000267363 | 0.020305  | 0.4919  | 0.4919      | 0.020305    | 0.4919    | 0.020305 0.4919      |
|             | 0.020305        | 0.4919    | 0.4919  | 0.759554305 |             |           |                      |
| RNU6-930P   | ENSG00000212240 | -0.87081  | 0.80807 | 0.020283    | 0.49191     | 0.020283  |                      |
|             | 0.49191         | 0.020283  | 0.49191 | 0.49191     | 0.759554305 |           |                      |
| SIGLEC1     | ENSG00000088827 | -0.10518  | 0.54188 | -0.32059    | 0.62574     | 0.020119  |                      |
|             | 0.49197         | -0.5355   | 0.70385 | 0.49197     | 0.7595603   |           |                      |
| TUSC1       | ENSG00000198680 | -0.23889  | 0.5944  | 0.016472    | 0.49343     | 0.020067  | 0.49199              |
|             | 0.020067        | 0.49199   | 0.49199 | 0.7595603   |             |           |                      |
| NA          | ENSG00000273240 | 0.020063  | 0.492   | 0.020063    | 0.492       | 0.020063  | 0.492 0.020063 0.492 |
|             | 0.492           | 0.7595603 |         |             |             |           |                      |
| PTPRC       | ENSG00000081237 | -0.97167  | 0.83439 | 0.019981    | 0.49203     | -0.35462  | 0.63856              |
|             | -1.3833         | 0.91671   | 0.49203 | 0.7595603   |             |           |                      |
| PBX2P1      | ENSG00000244171 | 0.019901  | 0.49206 | -0.42171    | 0.66338     | 0.019901  |                      |
|             | 0.49206         | 0.019901  | 0.49206 | 0.49206     | 0.7595603   |           |                      |
| PGAM1P4     | ENSG00000214041 | 0.019807  | 0.4921  | -0.84586    | 0.80119     | 0.019807  |                      |
|             | 0.4921          | 0.019807  | 0.4921  | 0.4921      | 0.7595603   |           |                      |
| NA          | ENSG00000257303 | 0.019816  | 0.4921  | 0.019816    | 0.4921      | 0.019816  | 0.4921               |
|             | 0.019816        | 0.4921    | 0.4921  | 0.7595603   |             |           |                      |
| NA          | ENSG00000244459 | -0.54641  | 0.70761 | -0.12946    | 0.5515      | -0.091056 | 0.53628              |
|             | 0.019759        | 0.49212   | 0.49212 | 0.7595603   |             |           |                      |
| NA          | ENSG00000271780 | 0.019753  | 0.49212 | 0.019753    | 0.49212     | -0.43766  | 0.66919              |
|             | -0.5025         | 0.69234   | 0.49212 | 0.7595603   |             |           |                      |
| NA          | ENSG00000277662 | 0.019734  | 0.49213 | 0.019734    | 0.49213     | 0.019734  | 0.49213              |
|             | 0.019734        | 0.49213   | 0.49213 | 0.7595603   |             |           |                      |
| ZNF474      | ENSG00000164185 | 0.019701  | 0.49214 | 0.019701    | 0.49214     | 0.019701  |                      |
|             | 0.49214         | 0.019701  | 0.49214 | 0.49214     | 0.7595603   |           |                      |
| NA          | ENSG00000228421 | -0.39063  | 0.65197 | -0.39063    | 0.65197     | -0.08841  | 0.53522              |
|             | 0.019702        | 0.49214   | 0.49214 | 0.7595603   |             |           |                      |
| KLRC4-KLRK1 | ENSG00000255819 | 0.019673  | 0.49215 | 0.019673    | 0.49215     | 0.019673  |                      |
|             | 0.49215         | 0.019673  | 0.49215 | 0.49215     | 0.7595603   |           |                      |
| CR1         | ENSG00000203710 | -0.38848  | 0.65117 | -0.61149    | 0.72956     | 0.019516  | 0.49221              |
|             | -0.071209       | 0.52838   | 0.49221 | 0.7595603   |             |           |                      |
| TMEM39A     | ENSG00000176142 | -1.0268   | 0.84775 | 0.019504    | 0.49222     | 0.019504  |                      |
|             | 0.49222         | -0.15581  | 0.56191 | 0.49222     | 0.7595603   |           |                      |
| FOS         | ENSG00000170345 | 0.019438  | 0.49225 | 0.019438    | 0.49225     | -0.1855   | 0.57358              |
|             | -0.64057        | 0.7391    | 0.49225 | 0.7595603   |             |           |                      |
| NA          | ENSG00000248891 | -1.135    | 0.87181 | -1.6105     | 0.94635     | 0.019419  | 0.49225              |
|             | -1.135          | 0.87181   | 0.49225 | 0.7595603   |             |           |                      |
| NA          | ENSG00000207034 | 0.019395  | 0.49226 | 0.019395    | 0.49226     | 0.019395  | 0.49226              |
|             | 0.019395        | 0.49226   | 0.49226 | 0.7595603   |             |           |                      |
| DYNC1LI2    | ENSG00000135720 | 0.019386  | 0.49227 | -0.1018     | 0.54054     | 0.019386  |                      |
|             | 0.49227         | -0.54367  | 0.70667 | 0.49227     | 0.7595603   |           |                      |
| IL36B       | ENSG00000136696 | 0.019364  | 0.49228 | -0.13954    | 0.55549     | -0.18745  | 0.57435              |
|             | -0.18745        | 0.57435   | 0.49228 | 0.7595603   |             |           |                      |
| EFCAB1      | ENSG00000034239 | -0.74023  | 0.77042 | -1.0964     | 0.86354     | 0.019245  |                      |
|             | 0.49232         | -0.36049  | 0.64076 | 0.49232     | 0.7595603   |           |                      |
| PLPP1       | ENSG00000067113 | -0.33286  | 0.63038 | -0.3518     | 0.63751     | -0.33286  | 0.63038              |
|             | 0.019239        | 0.49233   | 0.49233 | 0.7595603   |             |           |                      |
| MYO1B       | ENSG00000128641 | -0.48841  | 0.68737 | 0.019092    | 0.49238     | -0.27472  | 0.60824              |
|             | -0.24112        | 0.59527   | 0.49238 | 0.7595603   |             |           |                      |
| NA          | ENSG00000271437 | 0.019107  | 0.49238 | -0.38072    | 0.64829     | -1.9805   | 0.97618              |
|             | -1.298          | 0.90285   | 0.49238 | 0.7595603   |             |           |                      |
| GAPDHP73    | ENSG00000226540 | 0.019086  | 0.49239 | -0.23661    | 0.59352     | -0.23661  |                      |
|             | 0.59352         | -0.23661  | 0.59352 | 0.49239     | 0.7595603   |           |                      |
| ARL2BPP7    | ENSG00000230418 | -0.83366  | 0.79776 | 0.019051    | 0.4924      | -0.30612  |                      |
|             | 0.62024         | -0.1733   | 0.56879 | 0.4924      | 0.7595603   |           |                      |
| RPS18P1     | ENSG00000225831 | -0.025677 | 0.51024 | 0.018966    | 0.49243     | -0.69494  |                      |
|             | 0.75645         | -0.37772  | 0.64718 | 0.49243     | 0.7595603   |           |                      |
| C2orf68     | ENSG00000168887 | -0.42879  | 0.66596 | 0.018822    | 0.49249     | 0.018822  |                      |
|             | 0.49249         | 0.018822  | 0.49249 | 0.49249     | 0.7595603   |           |                      |
| COL5A3      | ENSG00000080573 | -0.25121  | 0.59917 | 0.01881     | 0.4925      | -0.56746  |                      |

|           |                 |           |         |             |             |           |         |
|-----------|-----------------|-----------|---------|-------------|-------------|-----------|---------|
|           | 0.7148          | -0.25121  | 0.59917 | 0.4925      | 0.7595603   |           |         |
| GPNMB     | ENSG00000136235 | -1.5755   | 0.94243 | -1.1974     | 0.88442     | -2.1826   | 0.98547 |
|           | 0.01879         | 0.4925    | 0.4925  | 0.7595603   |             |           |         |
| NA        | ENSG00000271009 | 0.018786  | 0.49251 | 0.018786    | 0.49251     | 0.018786  | 0.49251 |
|           | 0.018786        | 0.49251   | 0.49251 | 0.7595603   |             |           |         |
| NA        | ENSG00000272250 | 0.018786  | 0.49251 | 0.018786    | 0.49251     | 0.018786  | 0.49251 |
|           | 0.018786        | 0.49251   | 0.49251 | 0.7595603   |             |           |         |
| AEN       | ENSG00000181026 | -0.42141  | 0.66327 | 0.018701    | 0.49254     | -0.21202  | 0.58396 |
|           | 0.018701        | 0.49254   | 0.49254 | 0.7595603   |             |           |         |
| RN7SL335P | ENSG00000241037 | -0.503    | 0.69252 | 0.018689    | 0.49254     | 0.018689  |         |
|           | 0.49254         | 0.018689  | 0.49254 | 0.49254     | 0.7595603   |           |         |
| NA        | ENSG00000272387 | 0.018703  | 0.49254 | 0.018703    | 0.49254     | 0.018703  | 0.49254 |
|           | 0.018703        | 0.49254   | 0.49254 | 0.7595603   |             |           |         |
| OR6W1P    | ENSG00000179420 | 0.01868   | 0.49255 | 0.01868     | 0.49255     | 0.01868   |         |
|           | 0.49255         | 0.01868   | 0.49255 | 0.49255     | 0.7595603   |           |         |
| GLRX2     | ENSG00000023572 | 0.018643  | 0.49256 | 0.018643    | 0.49256     | 0.018643  | 0.49256 |
|           | -0.3857         | 0.65014   | 0.49256 | 0.7595603   |             |           |         |
| NA        | ENSG00000258065 | 0.018653  | 0.49256 | 0.018653    | 0.49256     | -0.40008  | 0.65545 |
|           | 0.018653        | 0.49256   | 0.49256 | 0.7595603   |             |           |         |
| LINC01961 | ENSG00000234148 | -0.28745  | 0.61312 | 0.018616    | 0.49257     | -0.86318  |         |
|           | 0.80598         | -0.85717  | 0.80432 | 0.49257     | 0.7595603   |           |         |
| HEXIM2    | ENSG00000168517 | -0.55082  | 0.70912 | -0.55082    | 0.70912     | 0.018583  |         |
|           | 0.49259         | -1.9666   | 0.97538 | 0.49259     | 0.7595603   |           |         |
| RPS23P6   | ENSG00000241641 | 0.01854   | 0.4926  | 0.01854     | 0.4926      | 0.01854   |         |
|           | 0.4926          | 0.01854   | 0.4926  | 0.4926      | 0.7595603   |           |         |
| OR5AM1P   | ENSG00000255172 | 0.018489  | 0.49262 | 0.018489    | 0.49262     | 0.018489  |         |
|           | 0.49262         | 0.018489  | 0.49262 | 0.49262     | 0.7595603   |           |         |
| NA        | ENSG00000216639 | 0.01845   | 0.49264 | -0.42389    | 0.66418     | 0.01845   | 0.49264 |
|           | 0.01845         | 0.49264   | 0.49264 | 0.7595603   |             |           |         |
| SMAD7     | ENSG00000101665 | -0.78629  | 0.78415 | -0.38299    | 0.64914     | -0.34077  | 0.63336 |
|           | 0.018415        | 0.49265   | 0.49265 | 0.7595603   |             |           |         |
| RTCA-AS1  | ENSG00000224616 | -0.10947  | 0.54359 | 0.018385    | 0.49267     | -0.52332  |         |
|           | 0.69963         | -0.52332  | 0.69963 | 0.49267     | 0.7595603   |           |         |
| RTP1      | ENSG00000175077 | 0.018362  | 0.49268 | 0.018362    | 0.49268     | -0.15163  | 0.56026 |
|           | 0.018362        | 0.49268   | 0.49268 | 0.7595603   |             |           |         |
| NA        | ENSG00000261763 | 0.018284  | 0.49271 | -0.033491   | 0.51336     | -0.033491 | 0.51336 |
|           | -0.033491       | 0.51336   | 0.49271 | 0.7595603   |             |           |         |
| NA        | ENSG00000265179 | -0.23454  | 0.59272 | 0.018276    | 0.49271     | 0.018276  | 0.49271 |
|           | 0.018276        | 0.49271   | 0.49271 | 0.7595603   |             |           |         |
| MAPK6P2   | ENSG00000223488 | 0.018238  | 0.49272 | 0.018238    | 0.49272     | 0.018238  |         |
|           | 0.49272         | 0.018238  | 0.49272 | 0.49272     | 0.7595603   |           |         |
| HNRNPCP1  | ENSG00000258900 | -2.045    | 0.97957 | -1.444      | 0.92563     | 0.018256  |         |
|           | 0.49272         | -0.5527   | 0.70976 | 0.49272     | 0.7595603   |           |         |
| NA        | ENSG00000260933 | -0.090098 | 0.5359  | 0.018239    | 0.49272     | 0.012781  | 0.4949  |
|           | 0.012781        | 0.4949    | 0.49272 | 0.7595603   |             |           |         |
| MTND1P27  | ENSG00000223921 | 0.018204  | 0.49274 | 0.018204    | 0.49274     | 0.018204  |         |
|           | 0.49274         | 0.018204  | 0.49274 | 0.49274     | 0.7595603   |           |         |
| FCGR2C    | ENSG00000244682 | -0.998    | 0.84086 | -0.27326    | 0.60767     | -0.61194  |         |
|           | 0.72971         | 0.018211  | 0.49274 | 0.49274     | 0.7595603   |           |         |
| NA        | ENSG00000265936 | -1.0943   | 0.86308 | 0.017884    | 0.49287     | -0.35271  | 0.63785 |
|           | 0.017884        | 0.49287   | 0.49287 | 0.759736662 |             |           |         |
| EEA1      | ENSG00000102189 | -1.0398   | 0.85078 | -0.57279    | 0.71661     | -0.72402  | 0.76547 |
|           | 0.017781        | 0.49291   | 0.49291 | 0.759741637 |             |           |         |
| NA        | ENSG00000206957 | -0.6455   | 0.7407  | -0.46822    | 0.68019     | 0.017774  | 0.49291 |
|           | -0.014626       | 0.50583   | 0.49291 | 0.759741637 |             |           |         |
| NA        | ENSG00000197670 | -0.78618  | 0.78412 | 0.017755    | 0.49292     | -2.215    | 0.98662 |
|           | -0.13535        | 0.55383   | 0.49292 | 0.759741637 |             |           |         |
| NA        | ENSG00000282865 | -0.48613  | 0.68656 | -0.48613    | 0.68656     | 0.017676  | 0.49295 |
|           | -0.35191        | 0.63755   | 0.49295 | 0.759763845 |             |           |         |
| RNU1-33P  | ENSG00000201119 | -1.0065   | 0.84292 | 0.017521    | 0.49301     | -1.0344   |         |
|           | 0.84952         | 0.017521  | 0.49301 | 0.49301     | 0.759820308 |           |         |
| CYP11B2   | ENSG00000179142 | -0.17963  | 0.57128 | -0.29463    | 0.61586     | -0.29463  |         |

|              |                 |           |         |             |             |          |          |
|--------------|-----------------|-----------|---------|-------------|-------------|----------|----------|
|              | 0.61586         | 0.017506  | 0.49302 | 0.49302     | 0.759820308 |          |          |
| PTPRB        | ENSG00000127329 | -0.29033  | 0.61422 | -1.4001     | 0.91926     | 0.017264 | 0.49311  |
|              | -0.38465        | 0.64975   | 0.49311 | 0.759820308 |             |          |          |
| SSTR1        | ENSG00000139874 | 0.017235  | 0.49312 | 0.017235    | 0.49312     | 0.017235 | 0.49312  |
|              | -0.067596       | 0.52695   | 0.49312 | 0.759820308 |             |          |          |
| TPH2         | ENSG00000139287 | 0.017192  | 0.49314 | -0.66681    | 0.74755     | -0.66681 | 0.74755  |
|              | -0.66681        | 0.74755   | 0.49314 | 0.759820308 |             |          |          |
| LINC02128    | ENSG00000261241 | -1.5535   | 0.93985 | 0.017161    | 0.49315     | -0.64758 |          |
|              | 0.74137         | -0.29463  | 0.61586 | 0.49315     | 0.759820308 |          |          |
| NA           | ENSG00000206776 | 0.017116  | 0.49317 | -0.65645    | 0.74423     | -0.48846 | 0.68739  |
|              | -1.182          | 0.88139   | 0.49317 | 0.759820308 |             |          |          |
| RNF212B      | ENSG00000215277 | -0.20563  | 0.58146 | -0.708      | 0.76053     | 0.017116 |          |
|              | 0.49317         | -0.24786  | 0.59788 | 0.49317     | 0.759820308 |          |          |
| NA           | ENSG00000251803 | 0.01709   | 0.49318 | 0.01709     | 0.49318     | 0.01709  | 0.49318  |
|              | 0.01709         | 0.49318   | 0.49318 | 0.759820308 |             |          |          |
| E2F8         | ENSG00000129173 | -0.68221  | 0.75245 | 0.017038    | 0.4932      | 0.017038 | 0.4932   |
|              | 0.017038        | 0.4932    | 0.4932  | 0.759820308 |             |          |          |
| KRT8P31      | ENSG00000250148 | -0.73067  | 0.76751 | -0.73067    | 0.76751     | 0.017014 |          |
|              | 0.49321         | -1.0705   | 0.8578  | 0.49321     | 0.759820308 |          |          |
| NA           | ENSG00000253317 | 0.016991  | 0.49322 | -1.7163     | 0.95694     | -1.091   | 0.86237  |
|              | -0.99093        | 0.83914   | 0.49322 | 0.759820308 |             |          |          |
| WFDC10A      | ENSG00000180305 | 0.016908  | 0.49325 | 0.016908    | 0.49325     | 0.016908 |          |
|              | 0.49325         | 0.016908  | 0.49325 | 0.49325     | 0.759820308 |          |          |
| KATNB1P4     | ENSG00000249270 | -0.34053  | 0.63327 | -0.38919    | 0.65143     | -0.35887 |          |
|              | 0.64015         | 0.016916  | 0.49325 | 0.49325     | 0.759820308 |          |          |
| NUP210P3     | ENSG00000248916 | -1.1114   | 0.8668  | 0.016889    | 0.49326     | -1.1114  |          |
|              | 0.8668          | -1.1114   | 0.8668  | 0.49326     | 0.759820308 |          |          |
| HMGB3P32     | ENSG00000260828 | -0.075441 | 0.53007 | -0.075441   | 0.53007     | -0.77938 |          |
|              | 0.78212         | 0.016907  | 0.49326 | 0.49326     | 0.759820308 |          |          |
| NA           | ENSG00000252923 | 0.016784  | 0.4933  | -0.11349    | 0.54518     | -0.11349 | 0.54518  |
|              | -0.11349        | 0.54518   | 0.4933  | 0.759820308 |             |          |          |
| ERH          | ENSG00000100632 | 0.016747  | 0.49332 | 0.016747    | 0.49332     | 0.016747 | 0.49332  |
|              | 0.016747        | 0.49332   | 0.49332 | 0.759820308 |             |          |          |
| NA           | ENSG00000233977 | -0.30912  | 0.62138 | 0.016663    | 0.49335     | -0.60492 | 0.72738  |
|              | -0.60492        | 0.72738   | 0.49335 | 0.759820308 |             |          |          |
| NA           | ENSG00000257159 | 0.016638  | 0.49336 | -0.45227    | 0.67446     | 0.016638 | 0.49336  |
|              | 0.016638        | 0.49336   | 0.49336 | 0.759820308 |             |          |          |
| ETV4         | ENSG00000175832 | -0.010215 | 0.50408 | -0.010215   | 0.50408     | 0.016593 | 0.49338  |
|              | -0.95867        | 0.83114   | 0.49338 | 0.759820308 |             |          |          |
| NA           | ENSG00000225755 | -1.0753   | 0.85888 | 0.016586    | 0.49338     | -0.21683 | 0.58583  |
|              | 0.016586        | 0.49338   | 0.49338 | 0.759820308 |             |          |          |
| SMARCD2      | ENSG00000108604 | -0.30246  | 0.61885 | -0.30677    | 0.62049     | 0.016544 |          |
|              | 0.4934          | -0.28086  | 0.61059 | 0.4934      | 0.759820308 |          |          |
| RPS26P40     | ENSG00000231366 | -0.27083  | 0.60674 | -0.28073    | 0.61054     | 0.016504 |          |
|              | 0.49342         | -1.8639   | 0.96883 | 0.49342     | 0.759820308 |          |          |
| NA           | ENSG00000259453 | 0.01649   | 0.49342 | 0.01649     | 0.49342     | 0.01649  | 0.49342  |
|              | 0.01649         | 0.49342   | 0.49342 | 0.759820308 |             |          |          |
| C3orf56      | ENSG00000214324 | -0.55087  | 0.70914 | -0.55087    | 0.70914     | 0.016482 |          |
|              | 0.49343         | -0.55087  | 0.70914 | 0.49343     | 0.759820308 |          |          |
| NA           | ENSG00000259053 | 0.016475  | 0.49343 | 0.016475    | 0.49343     | 0.016475 | 0.49343  |
|              | 0.016475        | 0.49343   | 0.49343 | 0.759820308 |             |          |          |
| NA           | ENSG00000259294 | 0.01642   | 0.49345 | -0.39671    | 0.65421     | -0.53062 | 0.70216  |
|              | -0.53062        | 0.70216   | 0.49345 | 0.759820308 |             |          |          |
| RBM17P4      | ENSG00000259585 | 0.016407  | 0.49345 | 0.016407    | 0.49345     | 0.016407 |          |
|              | 0.49345         | 0.016407  | 0.49345 | 0.49345     | 0.759820308 |          |          |
| KIAA2012-AS1 | ENSG00000222035 | 0.016399  | 0.49346 | 0.016399    | 0.49346     | 0.016399 | 0.016399 |
|              | 0.49346         | 0.016399  | 0.49346 | 0.49346     | 0.759820308 |          |          |
| NA           | ENSG00000251206 | -0.54476  | 0.70704 | 0.016363    | 0.49347     | -0.3811  | 0.64844  |
|              | -0.9735         | 0.83485   | 0.49347 | 0.759820308 |             |          |          |
| RDM1P5       | ENSG00000263818 | 0.016267  | 0.49351 | 0.016267    | 0.49351     | 0.016267 |          |
|              | 0.49351         | 0.016267  | 0.49351 | 0.49351     | 0.759852409 |          |          |
| NA           | ENSG00000223813 | 0.016135  | 0.49356 | 0.016135    | 0.49356     | 0.016135 | 0.49356  |

|            |                 |           |         |             |             |            |         |
|------------|-----------------|-----------|---------|-------------|-------------|------------|---------|
|            | 0.016135        | 0.49356   | 0.49356 | 0.759852409 |             |            |         |
| NDUFB10P1  | ENSG00000260870 | -0.2024   | 0.5802  | -0.36884    | 0.64388     | -0.26879   |         |
|            | 0.60595         | 0.01614   | 0.49356 | 0.49356     | 0.759852409 |            |         |
| MTND3P13   | ENSG00000263196 | 0.016135  | 0.49356 | 0.016135    | 0.49356     | 0.016135   |         |
|            | 0.49356         | 0.016135  | 0.49356 | 0.49356     | 0.759852409 |            |         |
| NA         | ENSG00000252380 | -0.20737  | 0.58214 | 0.016085    | 0.49358     | -0.25748   | 0.6016  |
|            | -0.29765        | 0.61701   | 0.49358 | 0.759852409 |             |            |         |
| KPNA4      | ENSG00000186432 | -0.6221   | 0.73306 | -0.06232    | 0.52485     | 0.016032   | 0.4936  |
|            | 0.016032        | 0.4936    | 0.4936  | 0.759852409 |             |            |         |
| RNU5D-2P   | ENSG00000252521 | -0.054421 | 0.5217  | 0.016036    | 0.4936      | -0.98437   |         |
|            | 0.83753         | -0.11049  | 0.54399 | 0.4936      | 0.759852409 |            |         |
| EEF1A1P3   | ENSG00000232587 | 0.015926  | 0.49365 | -0.41867    | 0.66227     | -0.28175   |         |
|            | 0.61093         | -0.28175  | 0.61093 | 0.49365     | 0.759905373 |            |         |
| NA         | ENSG00000250027 | -0.604    | 0.72708 | -0.68507    | 0.75335     | -0.16583   | 0.56585 |
|            | 0.015813        | 0.49369   | 0.49369 | 0.759938734 |             |            |         |
| FTSJ3      | ENSG00000108592 | 0.015778  | 0.49371 | -0.16814    | 0.56676     | -0.16814   | 0.56676 |
|            | -0.16814        | 0.56676   | 0.49371 | 0.759938734 |             |            |         |
| NA         | ENSG00000263089 | 0.015716  | 0.49373 | 0.015716    | 0.49373     | 0.015716   | 0.49373 |
|            | 0.015716        | 0.49373   | 0.49373 | 0.759938734 |             |            |         |
| NA         | ENSG00000201957 | 0.01568   | 0.49374 | -0.60508    | 0.72744     | -0.72292   | 0.76513 |
|            | -0.72292        | 0.76513   | 0.49374 | 0.759938734 |             |            |         |
| PREB       | ENSG00000138073 | 0.015642  | 0.49376 | 0.015642    | 0.49376     | -1.1715    | 0.87931 |
|            | -1.3065         | 0.90431   | 0.49376 | 0.759938734 |             |            |         |
| NA         | ENSG00000279715 | 0.015614  | 0.49377 | 0.015614    | 0.49377     | 0.015614   | 0.49377 |
|            | 0.015614        | 0.49377   | 0.49377 | 0.759938734 |             |            |         |
| ARHGAP39   | ENSG00000147799 | 0.015547  | 0.4938  | -0.10667    | 0.54247     | -0.64311   |         |
|            | 0.73992         | -0.64311  | 0.73992 | 0.4938      | 0.759938734 |            |         |
| NA         | ENSG00000224600 | -0.44676  | 0.67248 | 0.015517    | 0.49381     | 0.015517   | 0.49381 |
|            | 0.015517        | 0.49381   | 0.49381 | 0.759938734 |             |            |         |
| PCAT5      | ENSG00000280719 | -0.39925  | 0.65515 | 0.015405    | 0.49385     | -0.86044   | 0.80523 |
|            | -0.52923        | 0.70168   | 0.49385 | 0.759938734 |             |            |         |
| NA         | ENSG00000274818 | 0.015368  | 0.49387 | -0.21572    | 0.5854      | 0.015368   | 0.49387 |
|            | 0.015368        | 0.49387   | 0.49387 | 0.759938734 |             |            |         |
| TNFRSF13B  | ENSG00000240505 | -0.014552 | 0.50581 | 0.015338    | 0.49388     | 0.015338   |         |
|            | 0.49388         | 0.015338  | 0.49388 | 0.49388     | 0.759938734 |            |         |
| BNIP3P37   | ENSG00000270479 | 0.015334  | 0.49388 | 0.015334    | 0.49388     | 0.015334   |         |
|            | 0.49388         | 0.015334  | 0.49388 | 0.49388     | 0.759938734 |            |         |
| NA         | ENSG00000279059 | 0.015349  | 0.49388 | 0.015349    | 0.49388     | 0.015349   | 0.49388 |
|            | 0.015349        | 0.49388   | 0.49388 | 0.759938734 |             |            |         |
| NA         | ENSG00000266746 | 0.015316  | 0.49389 | 0.015316    | 0.49389     | 0.015316   | 0.49389 |
|            | 0.015316        | 0.49389   | 0.49389 | 0.759938734 |             |            |         |
| CALU       | ENSG00000128595 | -0.66543  | 0.74711 | -0.55111    | 0.70922     | -0.55111   | 0.70922 |
|            | 0.015171        | 0.49395   | 0.49395 | 0.759998447 |             |            |         |
| PCDHA11    | ENSG00000249158 | -0.39629  | 0.65405 | -0.39629    | 0.65405     | -0.96336   |         |
|            | 0.83232         | 0.015149  | 0.49396 | 0.49396     | 0.759998447 |            |         |
| CDH6       | ENSG00000113361 | 0.015092  | 0.49398 | -0.58042    | 0.71918     | -0.21941   | 0.58684 |
|            | -0.66846        | 0.74808   | 0.49398 | 0.760001553 |             |            |         |
| SLC2A1-AS1 | ENSG00000227533 | 0.015029  | 0.494   | 0.015029    | 0.494       | -0.1837    | 0.57288 |
|            | 0.015029        | 0.494     | 0.494   | 0.760001553 |             |            |         |
| FCRL5      | ENSG00000143297 | -2.0364   | 0.97914 | 0.015004    | 0.49401     | -0.0037554 | 0.5015  |
|            | -1.1725         | 0.87951   | 0.49401 | 0.760001553 |             |            |         |
| SNORD114-3 | ENSG00000201839 | 0.014972  | 0.49403 | 0.014972    | 0.49403     | 0.014972   |         |
|            | 0.49403         | 0.014972  | 0.49403 | 0.49403     | 0.760001553 |            |         |
| SLCO6A1    | ENSG00000205359 | -0.47323  | 0.68197 | 0.014936    | 0.49404     | -0.47323   |         |
|            | 0.68197         | -0.017464 | 0.50697 | 0.49404     | 0.760001553 |            |         |
| ACTL6B     | ENSG00000077080 | -0.065377 | 0.52606 | -1.2607     | 0.89629     | -0.065377  |         |
|            | 0.52606         | 0.014807  | 0.49409 | 0.49409     | 0.760054476 |            |         |
| CYCSP5     | ENSG00000227735 | 0.014698  | 0.49414 | -0.47582    | 0.6829      | -1.3679    |         |
|            | 0.91433         | -1.3679   | 0.91433 | 0.49414     | 0.760088334 |            |         |
| IGKV1D-27  | ENSG00000224607 | 0.014647  | 0.49416 | -1.5239     | 0.93624     | -1.5239    |         |
|            | 0.93624         | -1.5239   | 0.93624 | 0.49416     | 0.760088334 |            |         |
| ITFG2-AS1  | ENSG00000258325 | 0.014615  | 0.49417 | 0.014615    | 0.49417     | 0.014615   |         |

|             |                 |           |         |             |             |           |          |
|-------------|-----------------|-----------|---------|-------------|-------------|-----------|----------|
|             | 0.49417         | 0.014615  | 0.49417 | 0.49417     | 0.760088334 |           |          |
| MTMR9LP     | ENSG00000220785 | 0.014595  | 0.49418 | 0.49418     | 0.014595    | 0.49418   | 0.014595 |
|             | 0.49418         | 0.014595  | 0.49418 | 0.49418     | 0.760088334 |           |          |
| NA          | ENSG00000261632 | 0.014566  | 0.49419 | -0.59897    | 0.7254      | -0.59897  | 0.7254   |
|             | -0.59897        | 0.7254    | 0.49419 | 0.760088334 |             |           |          |
| SNRK-AS1    | ENSG00000234617 | 0.014476  | 0.49423 | 0.014476    | 0.49423     | 0.014476  | 0.014476 |
|             | 0.49423         | 0.014476  | 0.49423 | 0.49423     | 0.760125865 |           |          |
| LINC00662   | ENSG00000261824 | -0.97915  | 0.83625 | -0.44116    | 0.67045     | -0.97173  |          |
|             | 0.83441         | 0.014403  | 0.49425 | 0.49425     | 0.760132634 |           |          |
| NA          | ENSG00000240056 | 0.014238  | 0.49432 | 0.014238    | 0.49432     | 0.014238  | 0.49432  |
|             | 0.014238        | 0.49432   | 0.49432 | 0.760199072 |             |           |          |
| NA          | ENSG00000280011 | -0.45863  | 0.67675 | 0.014208    | 0.49433     | -0.24704  | 0.59756  |
|             | -0.24704        | 0.59756   | 0.49433 | 0.760199072 |             |           |          |
| RNA5SP179   | ENSG00000253093 | -1.116    | 0.86779 | -0.58917    | 0.72213     | 0.014188  |          |
|             | 0.49434         | -0.58917  | 0.72213 | 0.49434     | 0.760199072 |           |          |
| NA          | ENSG00000282218 | 0.01396   | 0.49443 | 0.01396     | 0.49443     | 0.01396   | 0.49443  |
|             | 0.01396         | 0.49443   | 0.49443 | 0.760313481 |             |           |          |
| RPS15AP36   | ENSG00000213013 | 0.013893  | 0.49446 | 0.013893    | 0.49446     | 0.013893  | 0.013893 |
|             | 0.49446         | 0.013893  | 0.49446 | 0.49446     | 0.76033562  |           |          |
| POLR1C      | ENSG00000171453 | 0.013804  | 0.49449 | 0.013804    | 0.49449     | 0.013804  | 0.013804 |
|             | 0.49449         | 0.013804  | 0.49449 | 0.49449     | 0.760357758 |           |          |
| DEFB110     | ENSG00000203970 | 0.013722  | 0.49453 | -0.54856    | 0.70835     | -0.54856  |          |
|             | 0.70835         | -0.54856  | 0.70835 | 0.49453     | 0.760371278 |           |          |
| NA          | ENSG00000259067 | -0.26907  | 0.60606 | 0.013719    | 0.49453     | 0.013719  | 0.49453  |
|             | 0.013719        | 0.49453   | 0.49453 | 0.760371278 |             |           |          |
| DDO         | ENSG00000203797 | 0.013673  | 0.49455 | -0.024104   | 0.50962     | -0.32046  | 0.62569  |
|             | -1.3273         | 0.90779   | 0.49455 | 0.760378037 |             |           |          |
| HIRA        | ENSG00000100084 | -0.061448 | 0.5245  | -0.38757    | 0.65083     | -0.059719 | 0.52381  |
|             | 0.013598        | 0.49458   | 0.49458 | 0.760391554 |             |           |          |
| GIPC3       | ENSG00000179855 | 0.013572  | 0.49459 | 0.013572    | 0.49459     | 0.013572  | 0.49459  |
|             | 0.013572        | 0.49459   | 0.49459 | 0.760391554 |             |           |          |
| NA          | ENSG00000279658 | 0.013434  | 0.49464 | -1.3645     | 0.9138      | -0.78066  | 0.7825   |
|             | -0.78066        | 0.7825    | 0.49464 | 0.760411827 |             |           |          |
| GUCY2C      | ENSG00000070019 | -0.11196  | 0.54457 | 0.013421    | 0.49465     | -0.49104  |          |
|             | 0.6883          | -0.85495  | 0.80371 | 0.49465     | 0.760411827 |           |          |
| NA          | ENSG00000259346 | 0.013411  | 0.49465 | 0.013411    | 0.49465     | 0.013411  | 0.49465  |
|             | 0.013411        | 0.49465   | 0.49465 | 0.760411827 |             |           |          |
| SCAMP5      | ENSG00000198794 | -0.38769  | 0.65088 | -0.36537    | 0.64258     | 0.013312  |          |
|             | 0.49469         | -0.27903  | 0.60989 | 0.49469     | 0.760447467 |           |          |
| SART1       | ENSG00000175467 | 0.013225  | 0.49472 | 0.013225    | 0.49472     | 0.013225  | 0.49472  |
|             | -0.5274         | 0.70104   | 0.49472 | 0.760447467 |             |           |          |
| NA          | ENSG00000203335 | 0.01324   | 0.49472 | 0.01324     | 0.49472     | 0.01324   | 0.49472  |
|             | 0.01324         | 0.49472   | 0.49472 | 0.760447467 |             |           |          |
| AQR         | ENSG00000021776 | 0.013084  | 0.49478 | -0.56477    | 0.71389     | -0.057374 | 0.52288  |
|             | -0.31157        | 0.62232   | 0.49478 | 0.760489854 |             |           |          |
| MRPL57      | ENSG00000173141 | 0.013046  | 0.4948  | 0.013046    | 0.4948      | 0.013046  | 0.013046 |
|             | 0.4948          | 0.013046  | 0.4948  | 0.4948      | 0.760489854 |           |          |
| NA          | ENSG00000258376 | 0.013044  | 0.4948  | 0.013044    | 0.4948      | 0.013044  | 0.4948   |
|             | 0.013044        | 0.4948    | 0.4948  | 0.760489854 |             |           |          |
| NA          | ENSG00000280211 | 0.013005  | 0.49481 | 0.013005    | 0.49481     | 0.013005  | 0.49481  |
|             | 0.013005        | 0.49481   | 0.49481 | 0.760489854 |             |           |          |
| NA          | ENSG00000235152 | 0.012778  | 0.4949  | 0.012778    | 0.4949      | 0.012778  | 0.4949   |
|             | 0.012778        | 0.4949    | 0.4949  | 0.760600448 |             |           |          |
| TMEM212-IT1 | ENSG00000235943 | 0.012722  | 0.49492 | -0.2071     | 0.58203     | 0.012722  |          |
|             | 0.49492         | 0.012722  | 0.49492 | 0.49492     | 0.760600448 |           |          |
| NACA        | ENSG00000196531 | -0.49631  | 0.69016 | 0.012705    | 0.49493     | -0.89417  | 0.81439  |
|             | -0.79294        | 0.78609   | 0.49493 | 0.760600448 |             |           |          |
| HNRNPA3P12  | ENSG00000219102 | -0.72571  | 0.76599 | -1.3493     | 0.91138     | -1.2483   |          |
|             | 0.89405         | 0.012642  | 0.49496 | 0.49496     | 0.760600448 |           |          |
| NA          | ENSG00000279434 | 0.012622  | 0.49496 | 0.012622    | 0.49496     | 0.012622  | 0.49496  |
|             | 0.012622        | 0.49496   | 0.49496 | 0.760600448 |             |           |          |
| NA          | ENSG00000234160 | 0.012594  | 0.49498 | -0.21682    | 0.58583     | -0.21682  | 0.58583  |

|            |                 |           |             |             |             |           |         |          |
|------------|-----------------|-----------|-------------|-------------|-------------|-----------|---------|----------|
|            | -0.21682        | 0.58583   | 0.49498     | 0.760607196 |             |           |         |          |
| NA         | ENSG00000220506 | 0.012533  | 0.495       | 0.012533    | 0.495       | -0.27064  | 0.60667 | -0.26562 |
|            | 0.60473         | 0.495     | 0.760613944 |             |             |           |         |          |
| NA         | ENSG00000258001 | 0.01244   | 0.49504     | 0.01244     | 0.49504     | 0.01244   | 0.49504 | 0.49504  |
|            | 0.01244         | 0.49504   | 0.49504     | 0.760651422 |             |           |         |          |
| NA         | ENSG00000279128 | 0.012391  | 0.49506     | -0.83962    | 0.79944     | -0.77102  | 0.77965 | 0.77965  |
|            | -0.77102        | 0.77965   | 0.49506     | 0.760658168 |             |           |         |          |
| RN7SL408P  | ENSG00000266875 | 0.01212   | 0.49516     | -0.2294     | 0.59072     | -0.23107  |         |          |
|            | 0.59137         | -0.50935  | 0.69475     | 0.49516     | 0.760770585 |           |         |          |
| POM121L10P | ENSG00000224124 | -0.6962   | 0.75685     | -0.67548    | 0.75032     | -0.59542  |         |          |
|            | 0.72422         | 0.012106  | 0.49517     | 0.49517     | 0.760770585 |           |         |          |
| FKBP8      | ENSG00000105701 | -0.602    | 0.72641     | -0.602      | 0.72641     | 0.012076  | 0.49518 | 0.49518  |
|            | -0.61081        | 0.72934   | 0.49518     | 0.760770585 |             |           |         |          |
| PLAGL1     | ENSG00000118495 | -0.44343  | 0.67127     | 0.011912    | 0.49525     | -0.52369  |         |          |
|            | 0.69975         | -0.25506  | 0.60066     | 0.49525     | 0.760790022 |           |         |          |
| NA         | ENSG00000260205 | -0.80361  | 0.78919     | -0.34749    | 0.63589     | -0.34749  | 0.63589 | 0.63589  |
|            | 0.011834        | 0.49528   | 0.49528     | 0.760790022 |             |           |         |          |
| OS9        | ENSG00000135506 | 0.011753  | 0.49531     | -0.25552    | 0.60084     | -0.090495 | 0.53605 | 0.53605  |
|            | -0.51486        | 0.69668   | 0.49531     | 0.760790022 |             |           |         |          |
| RNU6-463P  | ENSG00000207068 | 0.011732  | 0.49532     | 0.011732    | 0.49532     | 0.011732  |         |          |
|            | 0.49532         | -0.63309  | 0.73666     | 0.49532     | 0.760790022 |           |         |          |
| NA         | ENSG00000266489 | 0.011735  | 0.49532     | -0.014087   | 0.50562     | 0.011735  | 0.49532 | 0.49532  |
|            | 0.011735        | 0.49532   | 0.49532     | 0.760790022 |             |           |         |          |
| ADAP2      | ENSG00000184060 | -0.015209 | 0.50607     | 0.01168     | 0.49534     | -0.77618  | 0.78118 | 0.78118  |
|            | -0.59826        | 0.72517   | 0.49534     | 0.760790022 |             |           |         |          |
| COX6A2     | ENSG00000156885 | 0.011658  | 0.49535     | 0.011658    | 0.49535     | 0.011658  |         |          |
|            | 0.49535         | 0.011658  | 0.49535     | 0.49535     | 0.760790022 |           |         |          |
| XIRP1      | ENSG00000168334 | 0.011644  | 0.49535     | -0.42198    | 0.66348     | -0.65098  | 0.74247 | 0.74247  |
|            | -0.74243        | 0.77109   | 0.49535     | 0.760790022 |             |           |         |          |
| RABGAP1    | ENSG00000011454 | -0.028889 | 0.51152     | -0.18385    | 0.57294     | -0.14684  |         |          |
|            | 0.55837         | 0.011622  | 0.49536     | 0.49536     | 0.760790022 |           |         |          |
| NA         | ENSG00000226824 | -1.1967   | 0.88428     | 0.011626    | 0.49536     | -0.84566  | 0.80113 | 0.80113  |
|            | -0.59426        | 0.72383   | 0.49536     | 0.760790022 |             |           |         |          |
| ADAMTS19   | ENSG00000145808 | -0.9037   | 0.81692     | -0.39714    | 0.65437     | 0.011617  |         |          |
|            | 0.49537         | -1.3362   | 0.90926     | 0.49537     | 0.760790022 |           |         |          |
| MTND4P34   | ENSG00000262322 | 0.011572  | 0.49538     | 0.011572    | 0.49538     | 0.011572  |         |          |
|            | 0.49538         | 0.011572  | 0.49538     | 0.49538     | 0.760790022 |           |         |          |
| TRABD      | ENSG00000170638 | -0.21403  | 0.58474     | 0.01152     | 0.4954      | -0.21403  | 0.58474 | 0.58474  |
|            | -0.63398        | 0.73695   | 0.4954      | 0.76079676  |             |           |         |          |
| KRT8P11    | ENSG00000255815 | -1.4505   | 0.92655     | -0.64867    | 0.74172     | 0.011405  |         |          |
|            | 0.49545         | -0.64173  | 0.73947     | 0.49545     | 0.760826679 |           |         |          |
| KCNN4      | ENSG00000104783 | 0.011351  | 0.49547     | 0.011351    | 0.49547     | 0.011351  | 0.49547 | 0.49547  |
|            | 0.011351        | 0.49547   | 0.49547     | 0.760826679 |             |           |         |          |
| NA         | ENSG00000230922 | 0.011288  | 0.4955      | -0.80974    | 0.79096     | 0.011288  | 0.4955  | 0.4955   |
|            | 0.011288        | 0.4955    | 0.4955      | 0.760826679 |             |           |         |          |
| DRAVIN     | ENSG00000162490 | -0.27182  | 0.60712     | 0.011222    | 0.49552     | -0.27182  |         |          |
|            | 0.60712         | -0.17533  | 0.56959     | 0.49552     | 0.760826679 |           |         |          |
| NA         | ENSG00000234083 | -0.45834  | 0.67665     | -1.6296     | 0.94841     | -0.34751  | 0.63589 | 0.63589  |
|            | 0.011168        | 0.49554   | 0.49554     | 0.760826679 |             |           |         |          |
| EIF4E2     | ENSG00000135930 | -0.67638  | 0.7506      | -0.31091    | 0.62207     | -0.31437  |         |          |
|            | 0.62338         | 0.011162  | 0.49555     | 0.49555     | 0.760826679 |           |         |          |
| OR9P1P     | ENSG00000239293 | 0.01115   | 0.49555     | 0.01115     | 0.49555     | 0.01115   |         |          |
|            | 0.49555         | 0.01115   | 0.49555     | 0.49555     | 0.760826679 |           |         |          |
| ZDHHC23    | ENSG00000184307 | 0.01112   | 0.49556     | 0.01112     | 0.49556     | 0.01112   |         |          |
|            | 0.49556         | 0.01112   | 0.49556     | 0.49556     | 0.760826679 |           |         |          |
| NA         | ENSG00000237987 | -0.81574  | 0.79268     | -2.0967     | 0.98199     | 0.011142  | 0.49556 | 0.49556  |
|            | -0.81574        | 0.79268   | 0.49556     | 0.760826679 |             |           |         |          |
| MTND4LP24  | ENSG00000262259 | 0.010998  | 0.49561     | 0.010998    | 0.49561     | 0.010998  |         |          |
|            | 0.49561         | 0.010998  | 0.49561     | 0.49561     | 0.760835585 |           |         |          |
| NA         | ENSG00000242299 | 0.010928  | 0.49564     | 0.010928    | 0.49564     | 0.010928  | 0.49564 | 0.49564  |
|            | 0.010928        | 0.49564   | 0.49564     | 0.760835585 |             |           |         |          |
| NA         | ENSG00000253966 | -0.90136  | 0.8163      | 0.010917    | 0.49564     | 0.010917  | 0.49564 | 0.49564  |



|           |                 |           |         |             |             |           |         |  |
|-----------|-----------------|-----------|---------|-------------|-------------|-----------|---------|--|
|           | 0.010917        | 0.49564   | 0.49564 | 0.760835585 |             |           |         |  |
| LINC02123 | ENSG00000250668 | -0.77801  | 0.78172 | 0.010881    | 0.49566     | -0.67742  |         |  |
|           | 0.75093         | 0.010881  | 0.49566 | 0.49566     | 0.760835585 |           |         |  |
| HNF4G     | ENSG00000164749 | 0.010826  | 0.49568 | -0.43208    | 0.66716     | -1.0272   | 0.84785 |  |
|           | -0.43208        | 0.66716   | 0.49568 | 0.760835585 |             |           |         |  |
| APBB2     | ENSG00000163697 | -0.5501   | 0.70887 | 0.010765    | 0.49571     | -0.77066  | 0.77954 |  |
|           | -0.6869         | 0.75393   | 0.49571 | 0.760835585 |             |           |         |  |
| NA        | ENSG00000237993 | 0.010761  | 0.49571 | 0.010761    | 0.49571     | 0.010761  | 0.49571 |  |
|           | 0.010761        | 0.49571   | 0.49571 | 0.760835585 |             |           |         |  |
| NA        | ENSG00000267812 | 0.010718  | 0.49572 | 0.0045535   | 0.49818     | -0.023346 | 0.50931 |  |
|           | -1.1392         | 0.8727    | 0.49572 | 0.760835585 |             |           |         |  |
| RNU5E-6P  | ENSG00000202444 | 0.0107    | 0.49573 | 0.0107      | 0.49573     | 0.0107    |         |  |
|           | 0.49573         | 0.0107    | 0.49573 | 0.49573     | 0.760835585 |           |         |  |
| KIF1C     | ENSG00000129250 | -0.86422  | 0.80627 | 0.010646    | 0.49575     | -0.57236  | 0.71646 |  |
|           | 0.010646        | 0.49575   | 0.49575 | 0.760835585 |             |           |         |  |
| NA        | ENSG00000234181 | 0.010656  | 0.49575 | 0.010656    | 0.49575     | 0.010656  | 0.49575 |  |
|           | 0.010656        | 0.49575   | 0.49575 | 0.760835585 |             |           |         |  |
| KIAA1191  | ENSG00000122203 | -0.76488  | 0.77783 | -0.76488    | 0.77783     | 0.010603  |         |  |
|           | 0.49577         | -0.87275  | 0.8086  | 0.49577     | 0.760835585 |           |         |  |
| RN7SL734P | ENSG00000243420 | -0.26809  | 0.60569 | 0.010591    | 0.49577     | -0.26809  |         |  |
|           | 0.60569         | -0.26809  | 0.60569 | 0.49577     | 0.760835585 |           |         |  |
| ESRP1     | ENSG00000104413 | 0.010559  | 0.49579 | -0.24321    | 0.59608     | 0.010559  | 0.49579 |  |
|           | -1.7064         | 0.95603   | 0.49579 | 0.760835585 |             |           |         |  |
| PSMB6     | ENSG00000142507 | 0.010523  | 0.4958  | -0.68522    | 0.7534      | 0.010523  | 0.4958  |  |
|           | -0.68522        | 0.7534    | 0.4958  | 0.760835585 |             |           |         |  |
| MIR496    | ENSG00000207961 | 0.010321  | 0.49588 | 0.010321    | 0.49588     | 0.010321  |         |  |
|           | 0.49588         | 0.010321  | 0.49588 | 0.49588     | 0.760901811 |           |         |  |
| NA        | ENSG00000240775 | 0.010335  | 0.49588 | 0.010335    | 0.49588     | 0.010335  | 0.49588 |  |
|           | 0.010335        | 0.49588   | 0.49588 | 0.760901811 |             |           |         |  |
| PITPNM3   | ENSG00000091622 | 0.010307  | 0.49589 | -0.10721    | 0.54269     | 0.010307  |         |  |
|           | 0.49589         | -0.07131  | 0.52842 | 0.49589     | 0.760901811 |           |         |  |
| SDK1      | ENSG00000146555 | -0.18849  | 0.57475 | -0.38333    | 0.64926     | -0.54737  | 0.70794 |  |
|           | 0.010095        | 0.49597   | 0.49597 | 0.760911494 |             |           |         |  |
| STOX1     | ENSG00000165730 | -0.027138 | 0.51083 | 0.010094    | 0.49597     | -0.097824 | 0.53896 |  |
|           | -1.0684         | 0.85733   | 0.49597 | 0.760911494 |             |           |         |  |
| SUMO2P8   | ENSG00000228976 | -0.61844  | 0.73186 | 0.010095    | 0.49597     | -0.61844  |         |  |
|           | 0.73186         | -0.71259  | 0.76195 | 0.49597     | 0.760911494 |           |         |  |
| NA        | ENSG00000254437 | -1.1618   | 0.87735 | -1.1618     | 0.87735     | 0.010071  | 0.49598 |  |
|           | -1.1618         | 0.87735   | 0.49598 | 0.760911494 |             |           |         |  |
| GRP       | ENSG00000134443 | -0.72269  | 0.76507 | -0.72269    | 0.76507     | -0.72269  | 0.76507 |  |
|           | 0.010054        | 0.49599   | 0.49599 | 0.760911494 |             |           |         |  |
| NA        | ENSG00000249301 | 0.01004   | 0.49599 | -0.34856    | 0.63629     | -0.34856  | 0.63629 |  |
|           | -0.34856        | 0.63629   | 0.49599 | 0.760911494 |             |           |         |  |
| NA        | ENSG00000266036 | 0.0099515 | 0.49603 | 0.0099515   | 0.49603     | 0.0099515 | 0.49603 |  |
|           | 0.0099515       | 0.49603   | 0.49603 | 0.760948903 |             |           |         |  |
| SORBS2    | ENSG00000154556 | -0.20567  | 0.58148 | -0.45362    | 0.67495     | -1.2411   |         |  |
|           | 0.89272         | 0.0098046 | 0.49609 | 0.49609     | 0.76101699  |           |         |  |
| SUB1P3    | ENSG00000261612 | -0.37471  | 0.64606 | -0.37471    | 0.64606     | -0.54398  |         |  |
|           | 0.70677         | 0.0096451 | 0.49615 | 0.49615     | 0.761061115 |           |         |  |
| NA        | ENSG00000267627 | -0.99062  | 0.83906 | -0.26075    | 0.60286     | 0.0096386 | 0.49615 |  |
|           | -0.48747        | 0.68704   | 0.49615 | 0.761061115 |             |           |         |  |
| PSD3      | ENSG00000156011 | -1.0791   | 0.85973 | 0.0095706   | 0.49618     | -1.8261   | 0.96609 |  |
|           | -1.4375         | 0.92471   | 0.49618 | 0.761073693 |             |           |         |  |
| NA        | ENSG00000220446 | 0.0095327 | 0.4962  | 0.0095327   | 0.4962      | 0.0095327 | 0.4962  |  |
|           | 0.0095327       | 0.4962    | 0.4962  | 0.761073693 |             |           |         |  |
| NA        | ENSG00000280026 | 0.0094921 | 0.49621 | 0.0094921   | 0.49621     | 0.0094921 | 0.49621 |  |
|           | 0.0094921       | 0.49621   | 0.49621 | 0.761073693 |             |           |         |  |
| NA        | ENSG00000228368 | 0.0093923 | 0.49625 | 0.0093923   | 0.49625     | 0.0093923 | 0.49625 |  |
|           | 0.0093923       | 0.49625   | 0.49625 | 0.761073693 |             |           |         |  |
| NA        | ENSG00000239809 | 0.0093799 | 0.49626 | 0.0093799   | 0.49626     | 0.0093799 | 0.49626 |  |
|           | 0.0093799       | 0.49626   | 0.49626 | 0.761073693 |             |           |         |  |
| HPGDS     | ENSG00000163106 | -0.50957  | 0.69482 | 0.0093596   | 0.49627     | -0.73108  | 0.76764 |  |

|            |                 |           |         |             |             |           |         |           |
|------------|-----------------|-----------|---------|-------------|-------------|-----------|---------|-----------|
|            | -1.173          | 0.8796    | 0.49627 | 0.761073693 |             |           |         |           |
| PHOX2A     | ENSG00000165462 | 0.0092692 | 0.4963  | 0.0092692   | 0.4963      | 0.0092692 | 0.4963  | 0.0092692 |
|            | 0.4963          | 0.0092692 | 0.4963  | 0.4963      | 0.761073693 |           |         |           |
| BATF       | ENSG00000156127 | 0.0092407 | 0.49631 | -1.0648     | 0.85651     | 0.0092407 | 0.49631 |           |
|            | -0.57218        | 0.7164    | 0.49631 | 0.761073693 |             |           |         |           |
| RN7SKP79   | ENSG00000200243 | -0.26409  | 0.60415 | -0.10113    | 0.54028     | 0.0091939 |         |           |
|            | 0.49633         | -0.24657  | 0.59738 | 0.49633     | 0.761073693 |           |         |           |
| NA         | ENSG00000259648 | 0.0091969 | 0.49633 | 0.0091969   | 0.49633     | 0.0091969 | 0.49633 |           |
|            | 0.0091969       | 0.49633   | 0.49633 | 0.761073693 |             |           |         |           |
| NDUFA7     | ENSG00000267855 | 0.0091874 | 0.49633 | 0.0091874   | 0.49633     | 0.0091874 |         |           |
|            | 0.49633         | 0.0091874 | 0.49633 | 0.49633     | 0.761073693 |           |         |           |
| GMPPB      | ENSG00000173540 | 0.0091521 | 0.49635 | -0.27736    | 0.60925     | -0.72324  | 0.76523 |           |
|            | -0.43924        | 0.66976   | 0.49635 | 0.761080412 |             |           |         |           |
| DOHH       | ENSG00000129932 | 0.0090874 | 0.49637 | -0.29602    | 0.61639     | 0.0090874 | 0.49637 |           |
|            | -1.1005         | 0.86443   | 0.49637 | 0.761087131 |             |           |         |           |
| BAZ2A      | ENSG00000076108 | -1.2795   | 0.89964 | -1.4424     | 0.9254      | -0.72168  | 0.76476 |           |
|            | 0.0089393       | 0.49643   | 0.49643 | 0.761116045 |             |           |         |           |
| NA         | ENSG00000238276 | -0.49755  | 0.6906  | -0.34012    | 0.63312     | -0.81007  | 0.79105 |           |
|            | 0.0089447       | 0.49643   | 0.49643 | 0.761116045 |             |           |         |           |
| ASH1L-IT1  | ENSG00000227773 | 0.0089172 | 0.49644 | 0.0089172   | 0.49644     | 0.0089172 |         |           |
|            | 0.49644         | 0.0089172 | 0.49644 | 0.49644     | 0.761116045 |           |         |           |
| APOD       | ENSG00000189058 | 0.0087908 | 0.49649 | -1.2661     | 0.89726     | -1.1871   | 0.88241 |           |
|            | -0.61697        | 0.73137   | 0.49649 | 0.761116045 |             |           |         |           |
| SMG1P6     | ENSG00000254634 | 0.008768  | 0.4965  | -0.47035    | 0.68095     | -0.16169  |         |           |
|            | 0.56422         | -0.20735  | 0.58213 | 0.4965      | 0.761116045 |           |         |           |
| SP2        | ENSG00000167182 | 0.0087554 | 0.49651 | 0.0087554   | 0.49651     | 0.0087554 | 0.49651 |           |
|            | 0.0038784       | 0.49845   | 0.49651 | 0.761116045 |             |           |         |           |
| TMEM44-AS1 | ENSG00000231770 | 0.008586  | 0.49657 | -1.3927     | 0.91815     | -1.614    |         |           |
|            | 0.94673         | -1.614    | 0.94673 | 0.49657     | 0.761116045 |           |         |           |
| NUP54      | ENSG00000138750 | -0.38607  | 0.65028 | -0.33083    | 0.62961     | -0.090039 | 0.53587 |           |
|            | 0.0085634       | 0.49658   | 0.49658 | 0.761116045 |             |           |         |           |
| NA         | ENSG00000240975 | 0.0085306 | 0.4966  | -0.88415    | 0.81169     | 0.0085306 | 0.4966  |           |
|            | 0.0085306       | 0.4966    | 0.4966  | 0.761116045 |             |           |         |           |
| SYTL2      | ENSG00000137501 | -1.3328   | 0.9087  | -0.13746    | 0.55467     | 0.0084656 | 0.49662 |           |
|            | -1.4918         | 0.93213   | 0.49662 | 0.761116045 |             |           |         |           |
| ASIC5      | ENSG00000256394 | 0.0084809 | 0.49662 | -0.084836   | 0.5338      | -0.084836 | 0.5338  |           |
|            | -0.084836       | 0.5338    | 0.49662 | 0.761116045 |             |           |         |           |
| NA         | ENSG00000265901 | 0.0084727 | 0.49662 | -1.2475     | 0.8939      | -0.12246  | 0.54873 |           |
|            | -0.12246        | 0.54873   | 0.49662 | 0.761116045 |             |           |         |           |
| NA         | ENSG00000280369 | 0.0084474 | 0.49663 | 0.0084474   | 0.49663     | -1.3435   | 0.91045 |           |
|            | -1.8308         | 0.96643   | 0.49663 | 0.761116045 |             |           |         |           |
| ATP5F1BP1  | ENSG00000231635 | 0.0084132 | 0.49664 | -0.16392    | 0.5651      | -1.349    |         |           |
|            | 0.91134         | -1.349    | 0.91134 | 0.49664     | 0.761116045 |           |         |           |
| NA         | ENSG00000249153 | -0.7782   | 0.78177 | 0.0084324   | 0.49664     | 0.0084324 | 0.49664 |           |
|            | 0.0084324       | 0.49664   | 0.49664 | 0.761116045 |             |           |         |           |
| NA         | ENSG00000255093 | -0.036594 | 0.5146  | 0.0084139   | 0.49664     | -0.28942  | 0.61387 |           |
|            | -0.67735        | 0.75091   | 0.49664 | 0.761116045 |             |           |         |           |
| PRLHR      | ENSG00000119973 | 0.0083819 | 0.49666 | -0.39956    | 0.65526     | -0.20399  | 0.58082 |           |
|            | -0.29852        | 0.61735   | 0.49666 | 0.761116045 |             |           |         |           |
| NA         | ENSG00000250264 | 0.008336  | 0.49667 | 0.008336    | 0.49667     | 0.008336  | 0.49667 |           |
|            | 0.008336        | 0.49667   | 0.49667 | 0.761116045 |             |           |         |           |
| THSD8      | ENSG00000284491 | 0.0082492 | 0.49671 | 0.0082492   | 0.49671     | 0.0082492 | 0.49671 |           |
|            | 0.0082492       | 0.49671   | 0.49671 | 0.761153406 |             |           |         |           |
| RNA5SP319  | ENSG00000199638 | 0.0081559 | 0.49675 | -0.82554    | 0.79547     | -0.82554  |         |           |
|            | 0.79547         | -0.82554  | 0.79547 | 0.49675     | 0.761158218 |           |         |           |
| KIF16B     | ENSG00000089177 | -0.15199  | 0.5604  | -0.97277    | 0.83467     | 0.0081272 |         |           |
|            | 0.49676         | -0.47323  | 0.68198 | 0.49676     | 0.761158218 |           |         |           |
| NA         | ENSG00000271151 | 0.0081257 | 0.49676 | 0.0081257   | 0.49676     | 0.0081257 | 0.49676 |           |
|            | 0.0081257       | 0.49676   | 0.49676 | 0.761158218 |             |           |         |           |
| NA         | ENSG00000239415 | 0.0079751 | 0.49682 | 0.0079751   | 0.49682     | 0.0079751 | 0.49682 |           |
|            | 0.0079751       | 0.49682   | 0.49682 | 0.761217604 |             |           |         |           |
| NA         | ENSG00000259834 | 0.0079574 | 0.49683 | 0.0079574   | 0.49683     | 0.0079574 | 0.49683 |           |

|            |                 |           |         |             |             |           |           |           |
|------------|-----------------|-----------|---------|-------------|-------------|-----------|-----------|-----------|
|            | -1.7058         | 0.95598   | 0.49683 | 0.761217604 |             |           |           |           |
| PXMP4      | ENSG00000101417 | 0.007732  | 0.49692 | 0.007732    | 0.49692     | 0.007732  | 0.49692   |           |
|            | -0.0075334      | 0.50301   | 0.49692 | 0.761259757 |             |           |           |           |
| FAM172BP   | ENSG00000175841 | 0.0077268 | 0.49692 | 0.0077268   | 0.49692     | 0.0077268 | 0.49692   | 0.0077268 |
|            | 0.49692         | 0.0077268 | 0.49692 | 0.49692     | 0.761259757 |           |           |           |
| CAMK1D     | ENSG00000183049 | -1.095    | 0.86325 | 0.0077126   | 0.49692     | 0.49692   | -1.4466   |           |
|            | 0.92599         | -1.1892   | 0.88283 | 0.49692     | 0.761259757 |           |           |           |
| NA         | ENSG00000277245 | 0.0077185 | 0.49692 | 0.0077185   | 0.49692     | 0.0077185 | 0.49692   | 0.49692   |
|            | 0.0077185       | 0.49692   | 0.49692 | 0.761259757 |             |           |           |           |
| MIR618     | ENSG00000208022 | 0.0075928 | 0.49697 | 0.0075928   | 0.49697     | 0.0075928 | 0.49697   | 0.0075928 |
|            | 0.49697         | 0.0075928 | 0.49697 | 0.49697     | 0.761276062 |           |           |           |
| RAB40B     | ENSG00000141542 | -0.41132  | 0.65958 | -0.55669    | 0.71113     | -0.76432  |           |           |
|            | 0.77766         | 0.0075478 | 0.49699 | 0.49699     | 0.761276062 |           |           |           |
| TMEM80     | ENSG00000177042 | 0.0074826 | 0.49701 | 0.0074826   | 0.49701     | 0.0074826 | 0.49701   | 0.0074826 |
|            | 0.49701         | 0.0074826 | 0.49701 | 0.49701     | 0.761276062 |           |           |           |
| LINC02531  | ENSG00000220908 | 0.0075053 | 0.49701 | -0.6709     | 0.74886     | -1.0188   |           |           |
|            | 0.84585         | -1.0188   | 0.84585 | 0.49701     | 0.761276062 |           |           |           |
| NBPF21P    | ENSG00000231382 | 0.0075018 | 0.49701 | -0.84234    | 0.8002      | -1.1858   |           |           |
|            | 0.88214         | -0.54551  | 0.7073  | 0.49701     | 0.761276062 |           |           |           |
| KLK7       | ENSG00000169035 | 0.0074448 | 0.49703 | 0.0074448   | 0.49703     | 0.0074448 | 0.49703   | 0.49703   |
|            | -0.07017        | 0.52797   | 0.49703 | 0.761276062 |             |           |           |           |
| STIL       | ENSG00000123473 | 0.0074286 | 0.49704 | -0.39509    | 0.65361     | -0.39509  | 0.65361   | 0.65361   |
|            | -0.52294        | 0.69949   | 0.49704 | 0.761276062 |             |           |           |           |
| PLAUR      | ENSG00000011422 | 0.0073238 | 0.49708 | -0.52115    | 0.69887     | -0.94546  | 0.82779   | 0.82779   |
|            | -0.94546        | 0.82779   | 0.49708 | 0.76128086  |             |           |           |           |
| LINC02485  | ENSG00000248456 | -0.14245  | 0.55664 | -0.14245    | 0.55664     | 0.0073253 |           |           |
|            | 0.49708         | -0.14245  | 0.55664 | 0.49708     | 0.76128086  |           |           |           |
| NA         | ENSG00000228984 | 0.0072871 | 0.49709 | -0.428      | 0.66567     | -0.069952 | 0.52788   | 0.52788   |
|            | -0.7988         | 0.7878    | 0.49709 | 0.76128086  |             |           |           |           |
| NA         | ENSG00000271698 | 0.007169  | 0.49714 | 0.007169    | 0.49714     | 0.007169  | 0.49714   | 0.49714   |
|            | 0.007169        | 0.49714   | 0.49714 | 0.761324896 |             |           |           |           |
| NA         | ENSG00000223220 | -0.21774  | 0.58619 | -0.119      | 0.54736     | 0.0071315 | 0.49715   | 0.49715   |
|            | -0.078168       | 0.53115   | 0.49715 | 0.761324896 |             |           |           |           |
| NA         | ENSG00000237115 | 0.007086  | 0.49717 | 0.007086    | 0.49717     | 0.007086  | 0.49717   | 0.49717   |
|            | 0.007086        | 0.49717   | 0.49717 | 0.761331598 |             |           |           |           |
| PAEPP1     | ENSG00000224045 | 0.0069919 | 0.49721 | -0.37259    | 0.64527     | -1.051    |           |           |
|            | 0.85336         | -0.77885  | 0.78197 | 0.49721     | 0.761345001 |           |           |           |
| NA         | ENSG00000230051 | -0.33757  | 0.63216 | -0.4521     | 0.6744      | 0.0018802 | 0.49925   | 0.49925   |
|            | 0.0069815       | 0.49721   | 0.49721 | 0.761345001 |             |           |           |           |
| OR9G3P     | ENSG00000181325 | 0.0069293 | 0.49724 | 0.0069293   | 0.49724     | 0.0069293 | 0.0069293 | 0.0069293 |
|            | 0.49724         | -1.1322   | 0.87123 | 0.49724     | 0.761358402 |           |           |           |
| TVP23CP2   | ENSG00000262470 | 0.0068958 | 0.49725 | 0.0068958   | 0.49725     | 0.0068958 | 0.49725   | 0.0068958 |
|            | 0.49725         | 0.0068958 | 0.49725 | 0.49725     | 0.761358402 |           |           |           |
| CD46P1     | ENSG00000244703 | 0.0067718 | 0.4973  | -0.51503    | 0.69673     | -0.51503  |           |           |
|            | 0.69673         | -0.51503  | 0.69673 | 0.4973      | 0.761411035 |           |           |           |
| GADD45GIP1 | ENSG00000179271 | 0.0066148 | 0.49736 | 0.0066148   | 0.49736     | 0.0066148 | 0.49736   | 0.0066148 |
|            | 0.49736         | 0.0066148 | 0.49736 | 0.49736     | 0.76145505  |           |           |           |
| NA         | ENSG00000279377 | 0.0066288 | 0.49736 | -1.6559     | 0.95112     | -1.2108   | 0.88701   | 0.88701   |
|            | -0.48904        | 0.68759   | 0.49736 | 0.76145505  |             |           |           |           |
| RN7SL401P  | ENSG00000241866 | 0.0064537 | 0.49743 | 0.0064537   | 0.49743     | 0.0064537 | 0.0064537 | 0.0064537 |
|            | 0.49743         | 0.0064537 | 0.49743 | 0.49743     | 0.761538294 |           |           |           |
| RN7SL731P  | ENSG00000264501 | 0.0063157 | 0.49748 | 0.0063157   | 0.49748     | 0.0063157 | 0.49748   | 0.0063157 |
|            | 0.49748         | 0.0063157 | 0.49748 | 0.49748     | 0.761582298 |           |           |           |
| NA         | ENSG00000244268 | -0.10418  | 0.54149 | -0.1345     | 0.55349     | -0.091063 | 0.53628   | 0.53628   |
|            | 0.0063          | 0.49749   | 0.49749 | 0.761582298 |             |           |           |           |
| SCN10A     | ENSG00000185313 | -1.2764   | 0.89909 | -0.97163    | 0.83438     | -0.32925  |           |           |
|            | 0.62902         | 0.0062392 | 0.49751 | 0.49751     | 0.761588989 |           |           |           |
| CADM2      | ENSG00000175161 | -0.4125   | 0.66001 | -0.4125     | 0.66001     | -0.4125   | 0.66001   | 0.66001   |
|            | 0.0060179       | 0.4976    | 0.4976  | 0.76159751  |             |           |           |           |
| SMPD4P2    | ENSG00000229147 | -0.25681  | 0.60134 | -0.79889    | 0.78782     | -0.25681  |           |           |
|            | 0.60134         | 0.0060284 | 0.4976  | 0.4976      | 0.76159751  |           |           |           |
| RNA5SP199  | ENSG00000200275 | 0.005998  | 0.49761 | -0.63491    | 0.73726     | 0.005998  |           |           |

|           |                 |            |         |             |             |           |         |
|-----------|-----------------|------------|---------|-------------|-------------|-----------|---------|
|           | 0.49761         | 0.005998   | 0.49761 | 0.49761     | 0.76159751  |           |         |
| IL10RB    | ENSG00000243646 | -1.4704    | 0.92927 | -2.5894     | 0.99519     | -1.5417   |         |
|           | 0.93842         | 0.0059411  | 0.49763 | 0.49763     | 0.76159751  |           |         |
| NA        | ENSG00000279361 | -0.97342   | 0.83483 | -0.97342    | 0.83483     | 0.0059132 | 0.49764 |
|           | -0.97342        | 0.83483    | 0.49764 | 0.76159751  |             |           |         |
| SCGB1D1   | ENSG00000168515 | -0.08308   | 0.53311 | 0.0058803   | 0.49765     | -0.45469  |         |
|           | 0.67533         | -1.6869    | 0.95418 | 0.49765     | 0.76159751  |           |         |
| GAS2      | ENSG00000148935 | -0.29477   | 0.61592 | -1.0983     | 0.86396     | 0.0058375 | 0.49767 |
|           | -1.0983         | 0.86396    | 0.49767 | 0.76159751  |             |           |         |
| SLC35A1   | ENSG00000164414 | 0.0057603  | 0.4977  | -0.69161    | 0.75541     | 0.0057603 |         |
|           | 0.4977          | -0.79852   | 0.78771 | 0.4977      | 0.76159751  |           |         |
| UBE2E1    | ENSG00000170142 | -0.9899    | 0.83889 | 0.0057657   | 0.4977      | -0.83724  |         |
|           | 0.79877         | -0.10203   | 0.54063 | 0.4977      | 0.76159751  |           |         |
| MAP4K2    | ENSG00000168067 | -0.62101   | 0.73271 | -0.15745    | 0.56255     | 0.0057156 |         |
|           | 0.49772         | -0.71636   | 0.76311 | 0.49772     | 0.76159751  |           |         |
| SNORA7A   | ENSG00000207496 | 0.0056973  | 0.49773 | 0.0056973   | 0.49773     | 0.0056973 |         |
|           | 0.49773         | 0.0056973  | 0.49773 | 0.49773     | 0.76159751  |           |         |
| LINC00640 | ENSG00000258479 | 0.0056797  | 0.49773 | -0.21485    | 0.58506     | -0.21485  |         |
|           | 0.58506         | -0.21485   | 0.58506 | 0.49773     | 0.76159751  |           |         |
| NA        | ENSG00000273420 | 0.0056807  | 0.49773 | 0.0056807   | 0.49773     | 0.0056807 | 0.49773 |
|           | 0.0056807       | 0.49773    | 0.49773 | 0.76159751  |             |           |         |
| AUH       | ENSG00000148090 | -1.1748    | 0.87997 | -1.0063     | 0.84287     | 0.0056448 | 0.49775 |
|           | -0.088343       | 0.5352     | 0.49775 | 0.76159751  |             |           |         |
| RNU6-851P | ENSG00000207295 | -0.0048006 | 0.50192 | -0.0048006  | 0.50192     | 0.0056505 |         |
|           | 0.49775         | -0.0048006 | 0.50192 | 0.49775     | 0.76159751  |           |         |
| NA        | ENSG00000260850 | 0.0055659  | 0.49778 | 0.0055659   | 0.49778     | 0.0055659 | 0.49778 |
|           | 0.0055659       | 0.49778    | 0.49778 | 0.761610885 |             |           |         |
| NA        | ENSG00000253155 | 0.0055372  | 0.49779 | -0.15167    | 0.56028     | -0.54385  | 0.70673 |
|           | -0.82268        | 0.79466    | 0.49779 | 0.761610885 |             |           |         |
| NA        | ENSG00000207329 | 0.0054469  | 0.49783 | 0.0054469   | 0.49783     | 0.0054469 | 0.49783 |
|           | 0.0054469       | 0.49783    | 0.49783 | 0.761615647 |             |           |         |
| NA        | ENSG00000224635 | -0.24441   | 0.59654 | -0.24441    | 0.59654     | 0.0054449 | 0.49783 |
|           | -1.0538         | 0.85402    | 0.49783 | 0.761615647 |             |           |         |
| SPDYA     | ENSG00000163806 | -0.16056   | 0.56378 | -0.72865    | 0.76689     | -0.17927  | 0.57114 |
|           | 0.0054257       | 0.49784    | 0.49784 | 0.761615647 |             |           |         |
| NA        | ENSG00000229288 | 0.0053643  | 0.49786 | 0.0053643   | 0.49786     | 0.0053643 | 0.49786 |
|           | -0.090703       | 0.53614    | 0.49786 | 0.761622333 |             |           |         |
| NA        | ENSG00000253530 | -0.50065   | 0.69169 | -1.6442     | 0.94993     | 0.0053065 | 0.49788 |
|           | -1.1923         | 0.88343    | 0.49788 | 0.761629019 |             |           |         |
| NA        | ENSG00000183470 | -1.3551    | 0.9123  | 0.0050506   | 0.49799     | -0.47479  | 0.68253 |
|           | -0.35825        | 0.63992    | 0.49799 | 0.761767573 |             |           |         |
| NA        | ENSG00000255216 | 0.004941   | 0.49803 | -0.72435    | 0.76557     | -0.91393  | 0.81962 |
|           | -0.78061        | 0.78248    | 0.49803 | 0.761767573 |             |           |         |
| MIR5700   | ENSG00000266099 | -0.41572   | 0.66119 | -0.41572    | 0.66119     | -0.41572  |         |
|           | 0.66119         | 0.0049142  | 0.49804 | 0.49804     | 0.761767573 |           |         |
| NA        | ENSG00000276030 | -0.87095   | 0.80811 | 0.004863    | 0.49806     | -1.3095   | 0.90482 |
|           | -1.3095         | 0.90482    | 0.49806 | 0.761767573 |             |           |         |
| EEPDI     | ENSG00000122547 | 0.0048295  | 0.49807 | -0.022554   | 0.509       | -0.30287  | 0.61901 |
|           | -0.52293        | 0.69949    | 0.49807 | 0.761767573 |             |           |         |
| APELA     | ENSG00000248329 | 0.0048353  | 0.49807 | -0.54546    | 0.70728     | 0.0048353 | 0.49807 |
|           | -0.30978        | 0.62164    | 0.49807 | 0.761767573 |             |           |         |
| TMEM223   | ENSG00000168569 | 0.0048123  | 0.49808 | 0.0048123   | 0.49808     | 0.0048123 |         |
|           | 0.49808         | 0.0048123  | 0.49808 | 0.49808     | 0.761767573 |           |         |
| NA        | ENSG00000231024 | -2.3165    | 0.98974 | -1.0853     | 0.8611      | -1.5653   | 0.94124 |
|           | 0.0047361       | 0.49811    | 0.49811 | 0.761789546 |             |           |         |
| ADGRE2    | ENSG00000127507 | 0.0012285  | 0.49951 | 0.0046999   | 0.49813     | -1.4149   |         |
|           | 0.92146         | -1.369     | 0.9145  | 0.49813     | 0.761794289 |           |         |
| NA        | ENSG00000234156 | -0.37061   | 0.64453 | -0.52469    | 0.7001      | 0.0046255 | 0.49815 |
|           | -0.52469        | 0.7001     | 0.49815 | 0.761794289 |             |           |         |
| NA        | ENSG00000269543 | 0.0046176  | 0.49816 | 0.0046176   | 0.49816     | 0.0046176 | 0.49816 |
|           | 0.0046176       | 0.49816    | 0.49816 | 0.761794289 |             |           |         |
| NA        | ENSG00000244039 | 0.0045525  | 0.49818 | -0.23749    | 0.59386     | -0.23749  | 0.59386 |

|                 |                 |           |         |             |             |           |           |  |
|-----------------|-----------------|-----------|---------|-------------|-------------|-----------|-----------|--|
|                 | -0.23749        | 0.59386   | 0.49818 | 0.761800967 |             |           |           |  |
| NA              | ENSG00000240861 | -0.29178  | 0.61477 | 0.0044444   | 0.49823     | -1.141    | 0.87307   |  |
|                 | -0.048585       | 0.51937   | 0.49823 | 0.761829612 |             |           |           |  |
| NA              | ENSG00000249743 | 0.00443   | 0.49823 | -0.47091    | 0.68115     | -0.70137  | 0.75846   |  |
|                 | -0.92025        | 0.82128   | 0.49823 | 0.761829612 |             |           |           |  |
| NA              | ENSG00000260646 | 0.0043718 | 0.49826 | 0.0043718   | 0.49826     | 0.0043718 | 0.49826   |  |
|                 | 0.0043718       | 0.49826   | 0.49826 | 0.761850497 |             |           |           |  |
| NA              | ENSG00000249540 | 0.0042499 | 0.4983  | -0.37959    | 0.64788     | -0.63449  | 0.73712   |  |
|                 | -0.70062        | 0.75823   | 0.4983  | 0.761850497 |             |           |           |  |
| NA              | ENSG00000201207 | 0.0042187 | 0.49832 | 0.0042187   | 0.49832     | 0.0042187 | 0.49832   |  |
|                 | 0.0042187       | 0.49832   | 0.49832 | 0.761850497 |             |           |           |  |
| C6orf47         | ENSG00000204439 | 0.0042187 | 0.49832 | 0.0042187   | 0.49832     | 0.0042187 |           |  |
|                 | 0.49832         | 0.0042187 | 0.49832 | 0.49832     | 0.761850497 |           |           |  |
| LINC02210-CRHR1 | ENSG00000263715 | 0.0041451 | 0.49835 | 0.0041451   | 0.49835     | 0.49835   | 0.0041451 |  |
|                 | 0.49835         | 0.0041451 | 0.49835 | 0.49835     | 0.761850497 |           |           |  |
| NA              | ENSG00000226535 | 0.0041027 | 0.49836 | -0.73453    | 0.76869     | 0.0041027 | 0.49836   |  |
|                 | 0.0041027       | 0.49836   | 0.49836 | 0.761850497 |             |           |           |  |
| NA              | ENSG00000258745 | -0.020574 | 0.50821 | 0.0041229   | 0.49836     | -0.020574 | 0.50821   |  |
|                 | -0.020574       | 0.50821   | 0.49836 | 0.761850497 |             |           |           |  |
| G0S2            | ENSG00000123689 | -0.64533  | 0.74064 | -0.64533    | 0.74064     | 0.0040502 | 0.49838   |  |
|                 | -0.64533        | 0.74064   | 0.49838 | 0.761850497 |             |           |           |  |
| FN1             | ENSG00000115414 | 0.0040439 | 0.49839 | -0.44873    | 0.67319     | -0.44455  | 0.67168   |  |
|                 | -0.23993        | 0.59481   | 0.49839 | 0.761850497 |             |           |           |  |
| OR6V1           | ENSG00000225781 | -0.40424  | 0.65698 | 0.0040176   | 0.4984      | 0.0040176 | 0.4984    |  |
|                 | 0.0040176       | 0.4984    | 0.4984  | 0.761850497 |             |           |           |  |
| LMNB1           | ENSG00000113368 | 0.0039072 | 0.49844 | -1.0878     | 0.86165     | -1.1685   | 0.8787    |  |
|                 | -0.75879        | 0.77601   | 0.49844 | 0.761868345 |             |           |           |  |
| OR9I1           | ENSG00000172377 | 0.0038497 | 0.49846 | -0.82497    | 0.79531     | -0.58504  | 0.72074   |  |
|                 | 0.0038497       | 0.49846   | 0.49846 | 0.761868345 |             |           |           |  |
| NA              | ENSG00000251142 | -0.55052  | 0.70902 | -1.2578     | 0.89577     | 0.003731  | 0.49851   |  |
|                 | 0.003731        | 0.49851   | 0.49851 | 0.761868345 |             |           |           |  |
| ATCAY           | ENSG00000167654 | -0.058751 | 0.52342 | -0.08851    | 0.53526     | 0.003721  | 0.49852   |  |
|                 | -0.08851        | 0.53526   | 0.49852 | 0.761868345 |             |           |           |  |
| NA              | ENSG00000213431 | 0.0036371 | 0.49855 | -1.69       | 0.95449     | -0.844    | 0.80066   |  |
|                 | -0.844          | 0.80066   | 0.49855 | 0.761868345 |             |           |           |  |
| NA              | ENSG00000226754 | 0.0036313 | 0.49855 | 0.0036313   | 0.49855     | 0.0036313 | 0.49855   |  |
|                 | 0.0036313       | 0.49855   | 0.49855 | 0.761868345 |             |           |           |  |
| ARL14           | ENSG00000179674 | -0.27421  | 0.60804 | -0.49923    | 0.69119     | 0.0035909 | 0.49857   |  |
|                 | 0.0035909       | 0.49857   | 0.49857 | 0.761868345 |             |           |           |  |
| IMPDH1P8        | ENSG00000224728 | -1.4893   | 0.93179 | -0.93431    | 0.82493     | 0.0035499 |           |  |
|                 | 0.49858         | 0.0035499 | 0.49858 | 0.49858     | 0.761868345 |           |           |  |
| NA              | ENSG00000229721 | -1.186    | 0.88218 | -0.27317    | 0.60764     | 0.0035193 | 0.4986    |  |
|                 | -0.40488        | 0.65722   | 0.4986  | 0.761868345 |             |           |           |  |
| NA              | ENSG00000260306 | -1.1595   | 0.87687 | -0.026597   | 0.51061     | 0.0034968 | 0.49861   |  |
|                 | 0.0034968       | 0.49861   | 0.49861 | 0.761868345 |             |           |           |  |
| NA              | ENSG00000280278 | -0.89524  | 0.81467 | -0.8429     | 0.80036     | 0.0034714 | 0.49862   |  |
|                 | 0.0034714       | 0.49862   | 0.49862 | 0.761868345 |             |           |           |  |
| NA              | ENSG00000264598 | 0.003444  | 0.49863 | -0.17687    | 0.57019     | -1.617    | 0.94706   |  |
|                 | -1.617          | 0.94706   | 0.49863 | 0.761868345 |             |           |           |  |
| RNU6-471P       | ENSG00000206671 | -1.9521   | 0.97454 | 0.0033138   | 0.49868     | -1.9521   |           |  |
|                 | 0.97454         | -1.9521   | 0.97454 | 0.49868     | 0.761868345 |           |           |  |
| NA              | ENSG00000233376 | 0.0033012 | 0.49868 | 0.0033012   | 0.49868     | 0.0033012 | 0.49868   |  |
|                 | 0.0033012       | 0.49868   | 0.49868 | 0.761868345 |             |           |           |  |
| NA              | ENSG00000255130 | 0.0032478 | 0.4987  | 0.0032478   | 0.4987      | 0.0032478 | 0.4987    |  |
|                 | 0.0032478       | 0.4987    | 0.4987  | 0.761868345 |             |           |           |  |
| PTGES3P3        | ENSG00000229204 | -0.30605  | 0.62022 | -0.30605    | 0.62022     | -0.95865  |           |  |
|                 | 0.83113         | 0.0032457 | 0.49871 | 0.49871     | 0.761868345 |           |           |  |
| NA              | ENSG00000281008 | 0.0032423 | 0.49871 | 0.0032423   | 0.49871     | 0.0032423 | 0.49871   |  |
|                 | 0.0032423       | 0.49871   | 0.49871 | 0.761868345 |             |           |           |  |
| NA              | ENSG00000248493 | 0.0032149 | 0.49872 | 0.0032149   | 0.49872     | 0.0032149 | 0.49872   |  |
|                 | 0.0032149       | 0.49872   | 0.49872 | 0.761868345 |             |           |           |  |
| NA              | ENSG00000283156 | -0.18095  | 0.5718  | -1.2403     | 0.89256     | 0.0032209 | 0.49872   |  |

|          |                 |           |           |           |             |             |         |  |
|----------|-----------------|-----------|-----------|-----------|-------------|-------------|---------|--|
|          |                 | -0.015796 | 0.5063    | 0.49872   | 0.761868345 |             |         |  |
| NA       | ENSG00000240652 | -0.28167  | 0.6109    | -0.28167  | 0.6109      | -0.44536    | 0.67197 |  |
|          |                 | 0.0031481 | 0.49874   | 0.49874   | 0.761868345 |             |         |  |
| ZBTB8B   | ENSG00000273274 | 0.0031696 | 0.49874   | -1.3727   | 0.91508     | -1.3727     |         |  |
|          |                 | 0.91508   | -1.3727   | 0.91508   | 0.49874     | 0.761868345 |         |  |
| NA       | ENSG00000261837 | 0.0028241 | 0.49887   | 0.0028241 | 0.49887     | 0.0028241   | 0.49887 |  |
|          |                 | 0.0028241 | 0.49887   | 0.49887   | 0.762002758 |             |         |  |
| NA       | ENSG00000273876 | -0.000565 | 0.50023   | 0.0028114 | 0.49888     | 0.0028114   | 0.49888 |  |
|          |                 | 0.0028114 | 0.49888   | 0.49888   | 0.762002758 |             |         |  |
| NA       | ENSG00000227544 | 0.0027948 | 0.49889   | -1.1283   | 0.8704      | -0.0046651  | 0.50186 |  |
|          |                 | -0.40068  | 0.65567   | 0.49889   | 0.762002758 |             |         |  |
| ARPC5    | ENSG00000162704 | -0.92897  | 0.82355   | -0.84795  | 0.80177     | 0.0026895   | 0.49893 |  |
|          |                 | -0.69225  | 0.75561   | 0.49893   | 0.762002758 |             |         |  |
| HYMAI    | ENSG00000283122 | -0.50358  | 0.69272   | -0.43671  | 0.66884     | 0.002647    | 0.49894 |  |
|          |                 | 0.002647  | 0.49894   | 0.49894   | 0.762002758 |             |         |  |
| ZCCHC14  | ENSG00000140948 | -0.11431  | 0.5455    | -0.42873  | 0.66594     | 0.0026325   |         |  |
|          |                 | 0.49895   | -0.46089  | 0.67756   | 0.49895     | 0.762002758 |         |  |
| FNDC8    | ENSG00000073598 | -0.8717   | 0.80832   | 0.0026065 | 0.49896     | -1.1525     | 0.87544 |  |
|          |                 | -0.60603  | 0.72775   | 0.49896   | 0.762002758 |             |         |  |
| NA       | ENSG00000227269 | 0.0025953 | 0.49896   | -0.56022  | 0.71233     | -0.5208     | 0.69875 |  |
|          |                 | -0.32684  | 0.62811   | 0.49896   | 0.762002758 |             |         |  |
| IGHV3-71 | ENSG00000254056 | 0.0025676 | 0.49898   | 0.0025676 | 0.49898     | 0.0025676   |         |  |
|          |                 | 0.49898   | 0.0025676 | 0.49898   | 0.49898     | 0.762002758 |         |  |
| NA       | ENSG00000266156 | 0.0025367 | 0.49899   | 0.0025367 | 0.49899     | 0.0025367   | 0.49899 |  |
|          |                 | 0.0025367 | 0.49899   | 0.49899   | 0.762002758 |             |         |  |
| CERS2    | ENSG00000143418 | 0.0025155 | 0.499     | -0.57996  | 0.71903     | -0.57996    | 0.71903 |  |
|          |                 | -0.57996  | 0.71903   | 0.499     | 0.762002758 |             |         |  |
| NA       | ENSG00000254207 | -0.51401  | 0.69638   | -0.89947  | 0.8158      | -0.89947    | 0.8158  |  |
|          |                 | 0.0024533 | 0.49902   | 0.49902   | 0.76200942  |             |         |  |
| NA       | ENSG00000230221 | -0.026234 | 0.51046   | 0.0022683 | 0.4991      | -0.12246    | 0.54873 |  |
|          |                 | -0.026234 | 0.51046   | 0.4991    | 0.762083479 |             |         |  |
| CSNK2A3  | ENSG00000254598 | -2.0812   | 0.98129   | -2.0812   | 0.98129     | -2.0812     |         |  |
|          |                 | 0.98129   | 0.0022416 | 0.49911   | 0.49911     | 0.762083479 |         |  |
| NA       | ENSG00000253680 | -1.1095   | 0.86639   | 0.0020778 | 0.49917     | -0.37361    | 0.64565 |  |
|          |                 | -2.3376   | 0.9903    | 0.49917   | 0.762083479 |             |         |  |
| NA       | ENSG00000239254 | 0.0020134 | 0.4992    | 0.0020134 | 0.4992      | 0.0020134   | 0.4992  |  |
|          |                 | 0.0020134 | 0.4992    | 0.4992    | 0.762083479 |             |         |  |
| NA       | ENSG00000256006 | 0.0020096 | 0.4992    | 0.0020096 | 0.4992      | 0.0020096   | 0.4992  |  |
|          |                 | 0.0020096 | 0.4992    | 0.4992    | 0.762083479 |             |         |  |
| NA       | ENSG00000268896 | 0.0019778 | 0.49921   | -1.7582   | 0.96065     | -1.7582     | 0.96065 |  |
|          |                 | -1.7582   | 0.96065   | 0.49921   | 0.762083479 |             |         |  |
| COBL     | ENSG00000106078 | -0.221    | 0.58745   | 0.001949  | 0.49922     | -0.62839    | 0.73513 |  |
|          |                 | -0.72015  | 0.76428   | 0.49922   | 0.762083479 |             |         |  |
| HSFY1P1  | ENSG00000229027 | -0.58664  | 0.72128   | -0.52554  | 0.7004      | 0.0019342   |         |  |
|          |                 | 0.49923   | 0.0019342 | 0.49923   | 0.49923     | 0.762083479 |         |  |
| PUS1     | ENSG00000177192 | -0.39141  | 0.65225   | 0.0017783 | 0.49929     | -1.5465     | 0.939   |  |
|          |                 | -0.63616  | 0.73766   | 0.49929   | 0.762083479 |             |         |  |
| CTDSP1   | ENSG00000144579 | -0.25001  | 0.59871   | 0.0017441 | 0.4993      | -0.69097    |         |  |
|          |                 | 0.75521   | -0.66904  | 0.74827   | 0.4993      | 0.762083479 |         |  |
| ARL5B    | ENSG00000165997 | -0.60941  | 0.72887   | 0.0017581 | 0.4993      | 0.0017581   | 0.4993  |  |
|          |                 | 0.0017581 | 0.4993    | 0.4993    | 0.762083479 |             |         |  |
| MOCS1P1  | ENSG00000260347 | 0.0017558 | 0.4993    | 0.0017558 | 0.4993      | 0.0017558   |         |  |
|          |                 | 0.4993    | -0.88333  | 0.81147   | 0.4993      | 0.762083479 |         |  |
| NA       | ENSG00000253477 | 0.0017281 | 0.49931   | -0.2495   | 0.59851     | -0.088002   | 0.53506 |  |
|          |                 | -0.088002 | 0.53506   | 0.49931   | 0.762083479 |             |         |  |
| NA       | ENSG00000227170 | -0.2947   | 0.61589   | 0.0016702 | 0.49933     | 0.0016702   | 0.49933 |  |
|          |                 | 0.0016702 | 0.49933   | 0.49933   | 0.762083479 |             |         |  |
| MTHFD2P7 | ENSG00000181260 | 0.0016299 | 0.49935   | -0.45303  | 0.67474     | -1.1312     |         |  |
|          |                 | 0.87101   | -1.1312   | 0.87101   | 0.49935     | 0.762083479 |         |  |
| NA       | ENSG00000265206 | 0.0016373 | 0.49935   | 0.0016373 | 0.49935     | 0.0016373   | 0.49935 |  |
|          |                 | 0.0016373 | 0.49935   | 0.49935   | 0.762083479 |             |         |  |
| NA       | ENSG00000267062 | 0.0016269 | 0.49935   | 0.0016269 | 0.49935     | 0.0016269   | 0.49935 |  |

|           |                 |             |             |             |             |            |         |           |
|-----------|-----------------|-------------|-------------|-------------|-------------|------------|---------|-----------|
|           | 0.0016269       | 0.49935     | 0.49935     | 0.762083479 |             |            |         |           |
| NA        | ENSG00000268467 | 0.0016283   | 0.49935     | 0.0016283   | 0.49935     | 0.0016283  | 0.49935 |           |
|           | 0.0016283       | 0.49935     | 0.49935     | 0.762083479 |             |            |         |           |
| OLR1      | ENSG00000173391 | 0.001562    | 0.49938     | -0.47113    | 0.68123     | 0.001562   | 0.49938 |           |
|           | 0.001562        | 0.49938     | 0.49938     | 0.762105396 |             |            |         |           |
| NA        | ENSG00000261976 | 0.0013946   | 0.49944     | 0.0013946   | 0.49944     | 0.0013946  | 0.49944 |           |
|           | 0.0013946       | 0.49944     | 0.49944     | 0.762173093 |             |            |         |           |
| NA        | ENSG00000238425 | 0.001341    | 0.49946     | 0.001341    | 0.49946     | 0.001341   | 0.49946 |           |
|           | 0.001341        | 0.49946     | 0.49946     | 0.762175834 |             |            |         |           |
| NA        | ENSG00000226423 | -1.8331     | 0.96661     | 0.0012508   | 0.4995      | -1.8331    | 0.96661 |           |
|           | 0.0012508       | 0.4995      | 0.4995      | 0.762175834 |             |            |         |           |
| ZC3H13    | ENSG00000123200 | -0.75018    | 0.77343     | -0.33325    | 0.63053     | -0.80096   |         |           |
|           | 0.78842         | 0.0012332   | 0.49951     | 0.49951     | 0.762175834 |            |         |           |
| FGF7P2    | ENSG00000185390 | -0.053058   | 0.52116     | -0.58764    | 0.72161     | -0.1494    |         |           |
|           | 0.55938         | 0.0012038   | 0.49952     | 0.49952     | 0.762175834 |            |         |           |
| SNRPEP2   | ENSG00000256968 | -0.72965    | 0.7672      | -0.72965    | 0.7672      | -0.72965   |         |           |
|           | 0.7672          | 0.0011944   | 0.49952     | 0.49952     | 0.762175834 |            |         |           |
| NA        | ENSG00000256075 | 0.0011525   | 0.49954     | 0.0011525   | 0.49954     | 0.0011525  | 0.49954 |           |
|           | 0.0011525       | 0.49954     | 0.49954     | 0.762182485 |             |            |         |           |
| NA        | ENSG00000277543 | 0.0010996   | 0.49956     | 0.0010996   | 0.49956     | 0.0010996  | 0.49956 |           |
|           | 0.0010996       | 0.49956     | 0.49956     | 0.762187179 |             |            |         |           |
| NACA2     | ENSG00000253506 | -0.23225    | 0.59183     | 0.0010607   | 0.49958     | -1.4414    | 0.92527 |           |
|           | -0.30786        | 0.62091     | 0.49958     | 0.762187179 |             |            |         |           |
| LINC01081 | ENSG00000268754 | -0.56682    | 0.71458     | -0.56682    | 0.71458     | -0.56682   |         |           |
|           | 0.71458         | 0.001031    | 0.49959     | 0.49959     | 0.762187179 |            |         |           |
| RRM2      | ENSG00000171848 | -1.0612     | 0.8557      | -0.89996    | 0.81593     | 0.00086592 | 0.49965 |           |
|           | -1.4814         | 0.93076     | 0.49965     | 0.762254853 |             |            |         |           |
| NA        | ENSG00000253389 | 0.00063973  | 0.49974     | 0.00063973  | 0.49974     | 0.00063973 | 0.49974 |           |
|           | 0.00063973      | 0.49974     | 0.49974     | 0.762301377 |             |            |         |           |
| ARL16     | ENSG00000214087 | 0.00062469  | 0.49975     | 0.00062469  | 0.49975     | 0.00062469 | 0.49975 |           |
|           | 0.00062469      | 0.49975     | 0.49975     | 0.762301377 |             |            |         |           |
| NUSAP1    | ENSG00000137804 | -1.5271     | 0.93663     | -0.88283    | 0.81134     | -0.78084   |         |           |
|           | 0.78255         | 0.0005966   | 0.49976     | 0.49976     | 0.762301377 |            |         |           |
| KCTD9P4   | ENSG00000214264 | 0.00060889  | 0.49976     | 0.00060889  | 0.49976     | 0.00060889 |         |           |
|           | 0.49976         | 0.00060889  | 0.49976     | 0.49976     | 0.762301377 |            |         |           |
| NA        | ENSG00000233472 | 0.00058198  | 0.49977     | 0.00058198  | 0.49977     | 0.00058198 | 0.49977 |           |
|           | 0.00058198      | 0.49977     | 0.49977     | 0.762301377 |             |            |         |           |
| AK6P2     | ENSG00000257173 | -0.61236    | 0.72985     | 0.00054057  | 0.49978     | -0.50355   | 0.69271 |           |
|           | -0.29777        | 0.61706     | 0.49978     | 0.762301377 |             |            |         |           |
| ZNF629    | ENSG00000102870 | 0.0005366   | 0.49979     | -0.31491    | 0.62358     | -0.31491   |         |           |
|           | 0.62358         | 0.0005366   | 0.49979     | 0.49979     | 0.762301377 |            |         |           |
| MTDHP5    | ENSG00000269575 | 0.00048659  | 0.49981     | 0.00048659  | 0.49981     | 0.00048659 |         |           |
|           | 0.49981         | 0.00048659  | 0.49981     | 0.49981     | 0.762308022 |            |         |           |
| PARP11    | ENSG00000111224 | -0.598      | 0.72508     | 0.00037316  | 0.49985     | -1.4838    |         |           |
|           | 0.93107         | -1.3778     | 0.91586     | 0.49985     | 0.762312703 |            |         |           |
| NA        | ENSG00000230680 | -1.2504     | 0.89443     | 0.00038707  | 0.49985     | -1.2504    | 0.89443 |           |
|           | -1.2504         | 0.89443     | 0.49985     | 0.762312703 |             |            |         |           |
| ZNF865    | ENSG00000261221 | 0.00034591  | 0.49986     | 0.00034591  | 0.49986     | 0.00034591 |         |           |
|           | 0.49986         | 0.00034591  | 0.49986     | 0.49986     | 0.762312703 |            |         |           |
| ODF2      | ENSG00000136811 | 0.00023781  | 0.49991     | -0.39671    | 0.65421     | -0.22608   | 0.58943 |           |
|           | -0.17052        | 0.5677      | 0.49991     | 0.762341239 |             |            |         |           |
| LINC02240 | ENSG00000260192 | -0.25527    | 0.60074     | -0.66443    | 0.74679     | 0.0002222  |         |           |
|           | 0.49991         | 0.0002222   | 0.49991     | 0.49991     | 0.762341239 |            |         |           |
| DDX50P1   | ENSG00000229816 | 0.00012482  | 0.49995     | 0.00012482  | 0.49995     | 0.00012482 |         |           |
|           | 0.49995         | 0.00012482  | 0.49995     | 0.49995     | 0.76237838  |            |         |           |
| SELENOI   | ENSG00000138018 | -0.47336    | 0.68202     | -0.52317    | 0.69957     | -0.065285  |         |           |
|           | 0.52603         | 2.36E-05    | 0.49999     | 0.49999     | 0.762383053 |            |         |           |
| GDAP1L1   | ENSG00000124194 | 5.30E-06    | 0.5         | 5.30E-06    | 0.5         | 5.30E-06   | 0.5     | -0.093521 |
|           | 0.53726         | 0.5         | 0.762383053 |             |             |            |         |           |
| NA        | ENSG00000249351 | -7.79E-06   | 0.5         | -7.79E-06   | 0.5         | -7.79E-06  | 0.5     | -7.79E-06 |
|           | 0.5             | 0.762383053 |             |             |             |            |         |           |
| NA        | ENSG00000256757 | -0.00012521 | 0.50005     | -0.00012521 | 0.50005     |            |         |           |

|           |                 |             |              |             |             |                    |
|-----------|-----------------|-------------|--------------|-------------|-------------|--------------------|
|           | -0.00012521     | 0.50005     | -0.00012521  | 0.50005     | 0.50005     | 0.762435435        |
| BRPF3     | ENSG00000096070 | -1.808      | 0.9647       | -1.3637     | 0.91366     | -1.02 0.84614      |
|           | -0.00019181     | 0.50008     | 0.50008      | 0.762448711 |             |                    |
| TMEM212   | ENSG00000186329 | -1.1689     | 0.87878      | -0.041596   | 0.51659     | -1.1689            |
|           | 0.87878         | -0.00021729 | 0.50009      | 0.50009     | 0.762448711 |                    |
| NA        | ENSG00000254026 | -0.00046122 | 0.50018      | -0.00046122 | 0.50018     |                    |
|           | -0.00046122     | 0.50018     | -0.00046122  | 0.50018     | 0.50018     | 0.762479921        |
| LPIN3     | ENSG00000132793 | -0.068825   | 0.52744      | -0.13685    | 0.55442     | -0.00046451        |
|           | 0.50019         | -0.27933    | 0.61 0.50019 | 0.762479921 |             |                    |
| NCAPG2    | ENSG00000146918 | -2.4374     | 0.9926       | -1.0061     | 0.84282     | -1.8063            |
|           | 0.96456         | -0.00046387 | 0.50019      | 0.50019     | 0.762479921 |                    |
| RNFT1P2   | ENSG00000233333 | -0.00050897 | 0.5002       | -0.4925     | 0.68882     | -0.63597           |
|           | 0.7376          | -0.25409    | 0.60029      | 0.5002      | 0.762479921 |                    |
| NA        | ENSG00000253287 | -0.05461    | 0.52178      | -0.11575    | 0.54607     | -0.11974 0.54766   |
|           | -0.00052689     | 0.50021     | 0.50021      | 0.762479921 |             |                    |
| NA        | ENSG00000223254 | -0.00056119 | 0.50022      | -0.00056119 | 0.50022     |                    |
|           | -0.00056119     | 0.50022     | -0.00056119  | 0.50022     | 0.50022     | 0.762479921        |
| RNA5SP148 | ENSG00000252336 | -0.1701     | 0.56754      | -0.22747    | 0.58997     | -0.00054191        |
|           | 0.50022         | -0.24364    | 0.59625      | 0.50022     | 0.762479921 |                    |
| RNA5SP189 | ENSG00000201790 | -0.54179    | 0.70602      | -0.54179    | 0.70602     | -0.36432           |
|           | 0.64219         | -0.00067645 | 0.50027      | 0.50027     | 0.762499825 |                    |
| NA        | ENSG00000257918 | -0.00068093 | 0.50027      | -0.00068093 | 0.50027     |                    |
|           | -0.00068093     | 0.50027     | -0.00068093  | 0.50027     | 0.50027     | 0.762499825        |
| BCHE      | ENSG00000114200 | -1.2056     | 0.88601      | -0.0006932  | 0.50028     | -1.1583 0.87663    |
|           | -1.1583         | 0.87663     | 0.50028      | 0.762499825 |             |                    |
| TMX3      | ENSG00000166479 | -0.00074568 | 0.5003       | -0.77239    | 0.78006     | -0.2362            |
|           | 0.59336         | -0.082151   | 0.53274      | 0.5003      | 0.762506459 |                    |
| RHNO1     | ENSG00000171792 | -0.00080089 | 0.50032      | -0.00080089 | 0.50032     |                    |
|           | -0.00080089     | 0.50032     | -0.00080089  | 0.50032     | 0.50032     | 0.762511118        |
| CNOT7P2   | ENSG00000232185 | -0.00088704 | 0.50035      | -0.00088704 | 0.50035     |                    |
|           | -0.00088704     | 0.50035     | -0.00088704  | 0.50035     | 0.50035     | 0.762511118        |
| NA        | ENSG00000243225 | -1.5773     | 0.94264      | -1.5773     | 0.94264     | -0.00087911        |
|           | 0.50035         | -0.81891    | 0.79358      | 0.50035     | 0.762511118 |                    |
| NA        | ENSG00000258744 | -0.00093458 | 0.50037      | -0.18055    | 0.57164     | -0.18055           |
|           | 0.57164         | -0.18055    | 0.57164      | 0.50037     | 0.76251775  |                    |
| HMGB3P16  | ENSG00000248430 | -2.1976     | 0.98601      | -0.41781    | 0.66196     | -0.0010532         |
|           | 0.50042         | -1.8744     | 0.96956      | 0.50042     | 0.762570098 |                    |
| CTBP1-DT  | ENSG00000196810 | -1.2579     | 0.89578      | -1.2579     | 0.89578     | -1.0774            |
|           | 0.85935         | -0.0011364  | 0.50045      | 0.50045     | 0.762591967 |                    |
| PAX4      | ENSG00000106331 | -0.62311    | 0.73339      | -0.0012682  | 0.50051     | -0.35708 0.63949   |
|           | -0.70184        | 0.75861     | 0.50051      | 0.762633718 |             |                    |
| ARGFXP2   | ENSG00000265293 | -0.0012857  | 0.50051      | -0.0012857  | 0.50051     | -0.0012857         |
|           | 0.50051         | -0.0012857  | 0.50051      | 0.50051     | 0.762633718 |                    |
| NA        | ENSG00000267706 | -0.0013345  | 0.50053      | -0.0013345  | 0.50053     | -0.0013345 0.50053 |
|           | -0.0013345      | 0.50053     | 0.50053      | 0.762633718 |             |                    |
| GCSH      | ENSG00000140905 | -0.039002   | 0.51556      | -0.039002   | 0.51556     | -0.0013424 0.50054 |
|           | -0.44324        | 0.6712      | 0.50054      | 0.762633718 |             |                    |
| SLC18A3   | ENSG00000187714 | -0.44877    | 0.6732       | -0.001418   | 0.50057     | -0.036192          |
|           | 0.51444         | -0.036192   | 0.51444      | 0.50057     | 0.76264369  |                    |
| PIBF1     | ENSG00000083535 | -0.5631     | 0.71332      | -0.82733    | 0.79598     | -0.001443 0.50058  |
|           | -0.39949        | 0.65523     | 0.50058      | 0.76264369  |             |                    |
| NA        | ENSG00000269460 | -0.0015586  | 0.50062      | -0.0015586  | 0.50062     | -0.0015586 0.50062 |
|           | -0.0015586      | 0.50062     | 0.50062      | 0.76264369  |             |                    |
| NA        | ENSG00000212939 | -0.0015887  | 0.50063      | -0.86812    | 0.80733     | -0.72929 0.76709   |
|           | -0.72929        | 0.76709     | 0.50063      | 0.76264369  |             |                    |
| NA        | ENSG00000270578 | -1.0687     | 0.85739      | -1.0687     | 0.85739     | -0.85591 0.80398   |
|           | -0.0016414      | 0.50065     | 0.50065      | 0.76264369  |             |                    |
| ESD       | ENSG00000139684 | -0.0016516  | 0.50066      | -0.74153    | 0.77081     | -0.69655 0.75696   |
|           | -0.76105        | 0.77669     | 0.50066      | 0.76264369  |             |                    |
| MRPL50P1  | ENSG00000234587 | -0.033996   | 0.51356      | -0.0016768  | 0.50067     | -0.0016768         |
|           | 0.50067         | -0.0016768  | 0.50067      | 0.50067     | 0.76264369  |                    |
| LPAR6     | ENSG00000139679 | -0.0017819  | 0.50071      | -0.61864    | 0.73192     | -0.0017819 0.50071 |



|             |                 |            |         |             |             |            |         |  |
|-------------|-----------------|------------|---------|-------------|-------------|------------|---------|--|
|             | -0.42576        | 0.66486    | 0.50071 | 0.76264369  |             |            |         |  |
| RAB6D       | ENSG00000233087 | -0.0017843 | 0.50071 | -0.50863    | 0.6945      | -0.061755  | 0.52462 |  |
|             | -0.061755       | 0.52462    | 0.50071 | 0.76264369  |             |            |         |  |
| NA          | ENSG00000279581 | -0.0017966 | 0.50072 | -0.0017966  | 0.50072     | -0.0017966 | 0.50072 |  |
|             | -0.0017966      | 0.50072    | 0.50072 | 0.76264369  |             |            |         |  |
| NA          | ENSG00000226432 | -0.0018463 | 0.50074 | -0.0018463  | 0.50074     | -0.0018463 | 0.50074 |  |
|             | -0.0018463      | 0.50074    | 0.50074 | 0.76264369  |             |            |         |  |
| NA          | ENSG00000263624 | -0.0018739 | 0.50075 | -0.0018739  | 0.50075     | -0.0018739 | 0.50075 |  |
|             | -0.0018739      | 0.50075    | 0.50075 | 0.76264369  |             |            |         |  |
| NA          | ENSG00000277047 | -0.0018684 | 0.50075 | -2.3561     | 0.99077     | -0.89808   | 0.81543 |  |
|             | -0.89808        | 0.81543    | 0.50075 | 0.76264369  |             |            |         |  |
| SNORD113-4  | ENSG00000201672 | -0.0019491 | 0.50078 | -0.0019491  | 0.50078     | -0.0019491 |         |  |
|             | 0.50078         | -0.0019491 | 0.50078 | 0.50078     | 0.762665544 |            |         |  |
| ACOX2       | ENSG00000168306 | -0.0020713 | 0.50083 | -0.0020713  | 0.50083     | -0.041088  | 0.51639 |  |
|             | -0.72085        | 0.7645     | 0.50083 | 0.762694019 |             |            |         |  |
| NA          | ENSG00000239774 | -0.040147  | 0.51601 | -0.41343    | 0.66035     | -0.5816    | 0.71958 |  |
|             | -0.0020902      | 0.50083    | 0.50083 | 0.762694019 |             |            |         |  |
| NA          | ENSG00000277959 | -0.0022556 | 0.5009  | -0.0022556  | 0.5009      | -0.0022556 | 0.5009  |  |
|             | -0.0022556      | 0.5009     | 0.5009  | 0.762768173 |             |            |         |  |
| FBXO32      | ENSG00000156804 | -1.1117    | 0.86686 | -1.3898     | 0.91771     | -0.0022869 |         |  |
|             | 0.50091         | -0.13487   | 0.55364 | 0.50091     | 0.762768173 |            |         |  |
| NA          | ENSG00000232386 | -0.22779   | 0.59009 | -0.87033    | 0.80794     | -0.0023849 | 0.50095 |  |
|             | -0.59421        | 0.72381    | 0.50095 | 0.762781411 |             |            |         |  |
| RNU4ATAC6P  | ENSG00000252401 | -1.1562    | 0.87621 | -0.47738    | 0.68346     | -0.0023783 |         |  |
|             | 0.50095         | -0.46749   | 0.67993 | 0.50095     | 0.762781411 |            |         |  |
| DDX46       | ENSG00000145833 | -0.0024598 | 0.50098 | -0.069314   | 0.52763     | -0.24437   | 0.59653 |  |
|             | -0.38032        | 0.64815    | 0.50098 | 0.762803256 |             |            |         |  |
| SLC6A17     | ENSG00000197106 | -0.45128   | 0.67411 | -0.53998    | 0.7054      | -0.0026799 |         |  |
|             | 0.50107         | -0.9212    | 0.82153 | 0.50107     | 0.762866787 |            |         |  |
| RNU4ATAC14P | ENSG00000252013 | -0.0027072 | 0.50108 | -0.6349     | 0.73725     | -0.0027072 |         |  |
|             | 0.50108         | -0.2967    | 0.61665 | 0.50108     | 0.762866787 |            |         |  |
| NDUFA5P2    | ENSG00000253454 | -0.0027008 | 0.50108 | -0.0027008  | 0.50108     | -0.0027008 |         |  |
|             | 0.50108         | -0.0027008 | 0.50108 | 0.50108     | 0.762866787 |            |         |  |
| EML6        | ENSG00000214595 | -1.1426    | 0.8734  | -0.197      | 0.57809     | -0.0027588 | 0.5011  |  |
|             | -0.20958        | 0.583      | 0.5011  | 0.762866787 |             |            |         |  |
| NA          | ENSG00000271208 | -0.0027449 | 0.5011  | -0.0027449  | 0.5011      | -0.0027449 | 0.5011  |  |
|             | -0.0027449      | 0.5011     | 0.5011  | 0.762866787 |             |            |         |  |
| NA          | ENSG00000268713 | -0.0028516 | 0.50114 | -0.0028516  | 0.50114     | -0.0028516 | 0.50114 |  |
|             | -0.0028516      | 0.50114    | 0.50114 | 0.762903849 |             |            |         |  |
| CBLL1       | ENSG00000105879 | -1.1826    | 0.88151 | -0.0029125  | 0.50116     | -0.0029125 | 0.50116 |  |
|             | -1.0219         | 0.84659    | 0.50116 | 0.762910462 |             |            |         |  |
| TUBB8P2     | ENSG00000218896 | -0.0030606 | 0.50122 | -0.0030606  | 0.50122     | -0.0030606 |         |  |
|             | 0.50122         | -0.0030606 | 0.50122 | 0.50122     | 0.762973963 |            |         |  |
| RNU6-226P   | ENSG00000200648 | -0.0031027 | 0.50124 | -1.2564     | 0.89552     | -0.63033   |         |  |
|             | 0.73576         | -0.63033   | 0.73576 | 0.50124     | 0.762973963 |            |         |  |
| SIRT4       | ENSG00000089163 | -0.81055   | 0.79119 | -0.75815    | 0.77582     | -0.89306   | 0.81409 |  |
|             | -0.0031542      | 0.50126    | 0.50126 | 0.762973963 |             |            |         |  |
| PKDCC       | ENSG00000162878 | -0.43701   | 0.66895 | -0.41472    | 0.66082     | -0.0032137 | 0.50128 |  |
|             | -0.2522         | 0.59956    | 0.50128 | 0.762973963 |             |            |         |  |
| MARCHF10-DT | ENSG00000265000 | -0.0032085 | 0.50128 | -0.0032085  | 0.50128     | -0.0032085 |         |  |
|             | 0.50128         | -0.0032085 | 0.50128 | 0.50128     | 0.762973963 |            |         |  |
| POU5F1P7    | ENSG00000248365 | -1.5603    | 0.94065 | -0.0032667  | 0.5013      | -1.6793    |         |  |
|             | 0.95345         | -0.97859   | 0.83611 | 0.5013      | 0.762980573 |            |         |  |
| GORAB-AS1   | ENSG00000231407 | -0.47182   | 0.68147 | -0.003364   | 0.50134     | -0.16721   |         |  |
|             | 0.5664          | -0.31607   | 0.62402 | 0.50134     | 0.763015618 |            |         |  |
| LINC01033   | ENSG00000249069 | -0.26142   | 0.60311 | -1.3501     | 0.91151     | -0.0034278 |         |  |
|             | 0.50137         | -0.083186  | 0.53315 | 0.50137     | 0.763015618 |            |         |  |
| NA          | ENSG00000256314 | -0.0034364 | 0.50137 | -0.0034364  | 0.50137     | -0.0034364 | 0.50137 |  |
|             | -0.0034364      | 0.50137    | 0.50137 | 0.763015618 |             |            |         |  |
| NA          | ENSG00000272021 | -0.91253   | 0.81926 | -0.71338    | 0.76219     | -0.0035103 | 0.5014  |  |
|             | -0.0035103      | 0.5014     | 0.5014  | 0.763022824 |             |            |         |  |
| MALT1       | ENSG00000172175 | -0.71766   | 0.76352 | -0.0035547  | 0.50142     | -0.23301   | 0.59212 |  |

|           |                 |            |         |             |             |            |         |
|-----------|-----------------|------------|---------|-------------|-------------|------------|---------|
|           | -0.019464       | 0.50776    | 0.50142 | 0.763022824 |             |            |         |
| MEDAG     | ENSG00000102802 | -0.0035762 | 0.50143 | -0.28517    | 0.61224     | -0.0035762 | 0.50143 |
|           | -0.37906        | 0.64768    | 0.50143 | 0.763022824 |             |            |         |
| CCL25     | ENSG00000131142 | -0.0036002 | 0.50144 | -0.0036002  | 0.50144     | -0.0036002 | 0.50144 |
|           | -0.057767       | 0.52303    | 0.50144 | 0.763022824 |             |            |         |
| SMPD4BP   | ENSG00000152117 | -0.69532   | 0.75657 | -0.16815    | 0.56677     | -1.0774    |         |
|           | 0.85935         | -0.0036899 | 0.50147 | 0.50147     | 0.763022824 |            |         |
| RANBP2    | ENSG00000153201 | -0.0036751 | 0.50147 | -0.59241    | 0.72321     | -0.40856   |         |
|           | 0.65857         | -0.57801   | 0.71837 | 0.50147     | 0.763022824 |            |         |
| FAM160B1  | ENSG00000151553 | -0.0037475 | 0.5015  | -0.017899   | 0.50714     | -1.6552    |         |
|           | 0.95106         | -1.6552    | 0.95106 | 0.5015      | 0.763022824 |            |         |
| LINC02828 | ENSG00000224164 | -0.0037506 | 0.5015  | -0.015738   | 0.50628     | -0.015738  |         |
|           | 0.50628         | -0.015738  | 0.50628 | 0.5015      | 0.763022824 |            |         |
| NA        | ENSG00000223977 | -0.0038725 | 0.50154 | -0.0038725  | 0.50154     | -0.0038725 | 0.50154 |
|           | -0.0038725      | 0.50154    | 0.50154 | 0.763051249 |             |            |         |
| PCDHA13   | ENSG00000239389 | -0.0038891 | 0.50155 | -0.0038891  | 0.50155     | -0.43178   |         |
|           | 0.66705         | -0.0038891 | 0.50155 | 0.50155     | 0.763051249 |            |         |
| TPT1P6    | ENSG00000214460 | -0.0040303 | 0.50161 | -0.0040303  | 0.50161     | -0.0040303 |         |
|           | 0.50161         | -0.0040303 | 0.50161 | 0.50161     | 0.763118707 |            |         |
| NA        | ENSG00000255983 | -0.37694   | 0.64689 | -0.68723    | 0.75403     | -0.0042072 | 0.50168 |
|           | -0.68723        | 0.75403    | 0.50168 | 0.763201374 |             |            |         |
| NGFR      | ENSG00000064300 | -1.0992    | 0.86417 | -0.0043102  | 0.50172     | -0.70822   | 0.7606  |
|           | -0.70822        | 0.7606     | 0.50172 | 0.763238398 |             |            |         |
| NA        | ENSG00000251434 | -0.52355   | 0.6997  | -0.0044212  | 0.50176     | -0.0044212 | 0.50176 |
|           | -0.0044212      | 0.50176    | 0.50176 | 0.763249577 |             |            |         |
| NA        | ENSG00000262768 | -0.0044418 | 0.50177 | -0.0044418  | 0.50177     | -0.0044418 | 0.50177 |
|           | -0.0044418      | 0.50177    | 0.50177 | 0.763249577 |             |            |         |
| NA        | ENSG00000258853 | -0.0044663 | 0.50178 | -0.0044663  | 0.50178     | -0.0044663 | 0.50178 |
|           | -0.0044663      | 0.50178    | 0.50178 | 0.763249577 |             |            |         |
| PSMD4P1   | ENSG00000223741 | -0.0044813 | 0.50179 | -0.0044813  | 0.50179     | -0.0044813 |         |
|           | 0.50179         | -0.0044813 | 0.50179 | 0.50179     | 0.763249577 |            |         |
| MIR371A   | ENSG00000199031 | -0.0046984 | 0.50187 | -0.0046984  | 0.50187     | -0.0046984 |         |
|           | 0.50187         | -0.0046984 | 0.50187 | 0.50187     | 0.763250125 |            |         |
| MIR372    | ENSG00000199095 | -0.0046984 | 0.50187 | -0.0046984  | 0.50187     | -0.0046984 |         |
|           | 0.50187         | -0.0046984 | 0.50187 | 0.50187     | 0.763250125 |            |         |
| MIR373    | ENSG00000199143 | -0.0046984 | 0.50187 | -0.0046984  | 0.50187     | -0.0046984 |         |
|           | 0.50187         | -0.0046984 | 0.50187 | 0.50187     | 0.763250125 |            |         |
| NA        | ENSG00000269564 | -0.0046984 | 0.50187 | -0.0046984  | 0.50187     | -0.0046984 | 0.50187 |
|           | -0.0046984      | 0.50187    | 0.50187 | 0.763250125 |             |            |         |
| IL27      | ENSG00000197272 | -0.0047304 | 0.50189 | -0.0047304  | 0.50189     | -0.0047304 | 0.50189 |
|           | -0.0047304      | 0.50189    | 0.50189 | 0.763250125 |             |            |         |
| PFAS      | ENSG00000178921 | -0.14782   | 0.55876 | -1.154      | 0.87574     | -0.14782   | 0.55876 |
|           | -0.0047739      | 0.5019     | 0.5019  | 0.763250125 |             |            |         |
| NA        | ENSG00000227311 | -0.14533   | 0.55778 | -0.0047604  | 0.5019      | -0.059135  | 0.52358 |
|           | -0.06558        | 0.52614    | 0.5019  | 0.763250125 |             |            |         |
| NA        | ENSG00000269145 | -0.0048214 | 0.50192 | -0.0048214  | 0.50192     | -0.0048214 | 0.50192 |
|           | -0.0048214      | 0.50192    | 0.50192 | 0.76325672  |             |            |         |
| TRIM16    | ENSG00000221926 | -0.0049185 | 0.50196 | -0.12588    | 0.55009     | -0.9662    |         |
|           | 0.83303         | -0.093972  | 0.53743 | 0.50196     | 0.763259282 |            |         |
| NA        | ENSG00000227131 | -0.59308   | 0.72344 | -0.004927   | 0.50197     | -0.63832   | 0.73837 |
|           | -0.99099        | 0.83915    | 0.50197 | 0.763259282 |             |            |         |
| ADGRE5    | ENSG00000123146 | -0.39234   | 0.6526  | -0.45991    | 0.67721     | -0.14089   |         |
|           | 0.55602         | -0.0049646 | 0.50198 | 0.50198     | 0.763259282 |            |         |
| C2orf78   | ENSG00000187833 | -0.0049983 | 0.50199 | -0.95376    | 0.8299      | -0.33603   |         |
|           | 0.63158         | -0.20833   | 0.58251 | 0.50199     | 0.763259282 |            |         |
| NA        | ENSG00000235880 | -0.0050088 | 0.502   | -0.54141    | 0.70589     | -1.1785    | 0.8807  |
|           | -1.5406         | 0.93829    | 0.502   | 0.763259282 |             |            |         |
| NA        | ENSG00000267518 | -0.0051461 | 0.50205 | -0.0051461  | 0.50205     | -0.0051461 | 0.50205 |
|           | -0.0051461      | 0.50205    | 0.50205 | 0.763311488 |             |            |         |
| KLHL31    | ENSG00000124743 | -0.0052524 | 0.5021  | -0.0052524  | 0.5021      | -0.20389   |         |
|           | 0.58078         | -0.52847   | 0.70141 | 0.5021      | 0.763322652 |            |         |
| DEFB118   | ENSG00000131068 | -0.005313  | 0.50212 | -0.005313   | 0.50212     | -0.005313  |         |

|            |                 |            |         |             |             |            |         |
|------------|-----------------|------------|---------|-------------|-------------|------------|---------|
|            | 0.50212         | -1.5757    | 0.94246 | 0.50212     | 0.763322652 |            |         |
| SNORA22C   | ENSG00000207344 | -0.1995    | 0.57906 | -0.1995     | 0.57906     | -0.11383   |         |
|            | 0.54531         | -0.0053092 | 0.50212 | 0.50212     | 0.763322652 |            |         |
| AMZ2P2     | ENSG00000219249 | -0.0053159 | 0.50212 | -0.0053159  | 0.50212     | -0.0053159 |         |
|            | 0.50212         | -0.0053159 | 0.50212 | 0.50212     | 0.763322652 |            |         |
| HEXA       | ENSG00000213614 | -0.31664   | 0.62424 | -0.56084    | 0.71255     | -0.0053881 | 0.50215 |
|            | -0.56084        | 0.71255    | 0.50215 | 0.763327223 |             |            |         |
| NA         | ENSG00000235861 | -0.0054337 | 0.50217 | -0.0054337  | 0.50217     | -0.0054337 | 0.50217 |
|            | -0.0054337      | 0.50217    | 0.50217 | 0.763327223 |             |            |         |
| NA         | ENSG00000243423 | -0.0054469 | 0.50217 | -0.0054469  | 0.50217     | -0.0054469 | 0.50217 |
|            | -0.0054469      | 0.50217    | 0.50217 | 0.763327223 |             |            |         |
| SLC27A6    | ENSG00000113396 | -0.64671   | 0.74109 | -0.0054987  | 0.50219     | -0.49033   |         |
|            | 0.68805         | -0.65315   | 0.74317 | 0.50219     | 0.763333813 |            |         |
| NA         | ENSG00000232546 | -0.0055885 | 0.50223 | -0.0055885  | 0.50223     | -0.060265  | 0.52403 |
|            | -0.35631        | 0.6392     | 0.50223 | 0.763362191 |             |            |         |
| NRTN       | ENSG00000171119 | -0.59691   | 0.72472 | -0.042394   | 0.51691     | -0.57435   | 0.71713 |
|            | -0.0056199      | 0.50224    | 0.50224 | 0.763362191 |             |            |         |
| ERICH6B    | ENSG00000165837 | -0.0057815 | 0.50231 | -0.78814    | 0.78469     | -0.21427   |         |
|            | 0.58483         | -1.0818    | 0.86033 | 0.50231     | 0.763412862 |            |         |
| SNHG4      | ENSG00000281398 | -0.005818  | 0.50232 | -1.1523     | 0.87539     | -0.11664   | 0.54643 |
|            | -0.11664        | 0.54643    | 0.50232 | 0.763412862 |             |            |         |
| C5orf58    | ENSG00000234511 | -0.56741   | 0.71478 | -1.3503     | 0.91154     | -0.73908   |         |
|            | 0.77007         | -0.0058709 | 0.50234 | 0.50234     | 0.763412862 |            |         |
| NA         | ENSG00000228150 | -1.2711    | 0.89815 | -1.4294     | 0.92356     | -0.0059402 | 0.50237 |
|            | -0.29918        | 0.6176     | 0.50237 | 0.763412862 |             |            |         |
| TRIM60P14  | ENSG00000250227 | -0.28481   | 0.6121  | -0.28471    | 0.61207     | -0.0059743 |         |
|            | 0.50238         | -0.8209    | 0.79415 | 0.50238     | 0.763412862 |            |         |
| ACAD11     | ENSG00000240303 | -0.83953   | 0.79941 | -0.0059959  | 0.50239     | -0.34109   |         |
|            | 0.63348         | -0.6129    | 0.73003 | 0.50239     | 0.763412862 |            |         |
| NA         | ENSG00000271578 | -0.6675    | 0.74777 | -0.6675     | 0.74777     | -0.0060534 | 0.50241 |
|            | -0.6675         | 0.74777    | 0.50241 | 0.763412862 |             |            |         |
| POU2F2     | ENSG00000028277 | -0.26924   | 0.60613 | -0.93683    | 0.82558     | -0.0060865 |         |
|            | 0.50243         | -0.51481   | 0.69666 | 0.50243     | 0.763412862 |            |         |
| TRPC6      | ENSG00000137672 | -0.0061035 | 0.50243 | -0.80918    | 0.79079     | -0.59054   | 0.72259 |
|            | -0.87588        | 0.80945    | 0.50243 | 0.763412862 |             |            |         |
| GSTA3      | ENSG00000174156 | -1.1854    | 0.88207 | -0.0060946  | 0.50243     | -0.0060946 | 0.50243 |
|            | -0.35276        | 0.63787    | 0.50243 | 0.763412862 |             |            |         |
| SNORD13P1  | ENSG00000238498 | -0.0061367 | 0.50245 | -0.0061367  | 0.50245     | -0.0061367 |         |
|            | 0.50245         | -0.0061367 | 0.50245 | 0.50245     | 0.763417422 |            |         |
| LINC00895  | ENSG00000281548 | -0.015379  | 0.50614 | -0.015379   | 0.50614     | -0.015379  |         |
|            | 0.50614         | -0.0062024 | 0.50247 | 0.50247     | 0.763417422 |            |         |
| RPS5       | ENSG00000083845 | -0.0062274 | 0.50248 | -0.0062274  | 0.50248     | -0.0062274 | 0.50248 |
|            | -0.0062274      | 0.50248    | 0.50248 | 0.763417422 |             |            |         |
| NA         | ENSG00000248821 | -0.0063043 | 0.50252 | -0.0063043  | 0.50252     | -0.0063043 | 0.50252 |
|            | -0.0063043      | 0.50252    | 0.50252 | 0.763454391 |             |            |         |
| NA         | ENSG00000275703 | -0.0065034 | 0.50259 | -0.0065034  | 0.50259     | -0.0065034 | 0.50259 |
|            | -0.21276        | 0.58424    | 0.50259 | 0.763536934 |             |            |         |
| NUFIP1     | ENSG00000083635 | -0.39617   | 0.65401 | -0.0067202  | 0.50268     | -0.80696   |         |
|            | 0.79015         | -0.44393   | 0.67145 | 0.50268     | 0.763554049 |            |         |
| C3orf85    | ENSG00000241224 | -0.0067393 | 0.50269 | -0.0067393  | 0.50269     | -0.0067393 |         |
|            | 0.50269         | -0.0067393 | 0.50269 | 0.50269     | 0.763554049 |            |         |
| MIR208B    | ENSG00000215991 | -0.0067613 | 0.5027  | -0.0067613  | 0.5027      | -0.0067613 |         |
|            | 0.5027          | -0.0067613 | 0.5027  | 0.5027      | 0.763554049 |            |         |
| OSBPL5     | ENSG00000021762 | -0.25333   | 0.59999 | -0.18673    | 0.57406     | -0.0067941 |         |
|            | 0.50271         | -0.46593   | 0.67937 | 0.50271     | 0.763554049 |            |         |
| NA         | ENSG00000238342 | -0.0068356 | 0.50273 | -0.0068356  | 0.50273     | -0.0068356 | 0.50273 |
|            | -0.0068356      | 0.50273    | 0.50273 | 0.763554049 |             |            |         |
| PRELID3BP8 | ENSG00000270741 | -0.97572   | 0.8354  | -0.0068589  | 0.50274     | -0.0068589 |         |
|            | 0.50274         | -0.0068589 | 0.50274 | 0.50274     | 0.763554049 |            |         |
| MARCKSL1P1 | ENSG00000213277 | -0.0069149 | 0.50276 | -0.0069149  | 0.50276     | -0.0069149 |         |
|            | 0.50276         | -0.0069149 | 0.50276 | 0.50276     | 0.763554049 |            |         |
| DYNC1I1    | ENSG00000158560 | -1.1909    | 0.88315 | -0.45157    | 0.67421     | -0.0069906 |         |

|            |                 |            |         |             |             |            |         |
|------------|-----------------|------------|---------|-------------|-------------|------------|---------|
|            | 0.50279         | -0.41136   | 0.6596  | 0.50279     | 0.763554049 |            |         |
| ADGRB1     | ENSG00000181790 | -0.52867   | 0.70148 | -0.0070235  | 0.5028      | -0.35268   |         |
|            | 0.63784         | -0.74106   | 0.77067 | 0.5028      | 0.763554049 |            |         |
| MYADM-AS1  | ENSG00000228323 | -0.0071049 | 0.50283 | -0.54207    | 0.70612     | -0.54207   |         |
|            | 0.70612         | -0.54207   | 0.70612 | 0.50283     | 0.763554049 |            |         |
| RNU6-1101P | ENSG00000252053 | -0.0070843 | 0.50283 | -0.097174   | 0.53871     | -0.0070843 |         |
|            | 0.50283         | -0.0070843 | 0.50283 | 0.50283     | 0.763554049 |            |         |
| CEP83-DT   | ENSG00000278916 | -0.0071853 | 0.50287 | -0.0071853  | 0.50287     | -0.0071853 |         |
|            | 0.50287         | -0.0071853 | 0.50287 | 0.50287     | 0.763554049 |            |         |
| NA         | ENSG00000230172 | -0.0072186 | 0.50288 | -0.0072186  | 0.50288     | -0.0072186 | 0.50288 |
|            | -0.0072186      | 0.50288    | 0.50288 | 0.763554049 |             |            |         |
| PPM1F      | ENSG00000100034 | -0.0072365 | 0.50289 | -0.90191    | 0.81645     | -0.74755   | 0.77263 |
|            | -0.75331        | 0.77437    | 0.50289 | 0.763554049 |             |            |         |
| LINC01489  | ENSG00000255727 | -0.67994   | 0.75173 | -0.041174   | 0.51642     | -0.8614    |         |
|            | 0.80549         | -0.007254  | 0.50289 | 0.50289     | 0.763554049 |            |         |
| PSMA3-AS1  | ENSG00000257621 | -0.0072399 | 0.50289 | -0.0072399  | 0.50289     | -0.0072399 |         |
|            | 0.50289         | -0.0072399 | 0.50289 | 0.50289     | 0.763554049 |            |         |
| ACSM5      | ENSG00000183549 | -0.64086   | 0.73919 | -0.3274     | 0.62832     | -1.5767    | 0.94257 |
|            | -0.0072617      | 0.5029     | 0.5029  | 0.763554049 |             |            |         |
| LINC02421  | ENSG00000255970 | -0.26587   | 0.60483 | -0.74467    | 0.77176     | -0.26587   |         |
|            | 0.60483         | -0.0072859 | 0.50291 | 0.50291     | 0.763554049 |            |         |
| NA         | ENSG00000235121 | -0.0073296 | 0.50292 | -0.71034    | 0.76125     | -0.71034   | 0.76125 |
|            | -0.71034        | 0.76125    | 0.50292 | 0.763554049 |             |            |         |
| NA         | ENSG00000205595 | -0.75025   | 0.77345 | -0.6439     | 0.74018     | -0.97801   | 0.83597 |
|            | -0.0073786      | 0.50294    | 0.50294 | 0.763554049 |             |            |         |
| SMG9       | ENSG00000105771 | -0.0074054 | 0.50295 | -0.0074054  | 0.50295     | -0.0074054 | 0.50295 |
|            | -0.0074054      | 0.50295    | 0.50295 | 0.763554049 |             |            |         |
| SLC13A3    | ENSG00000158296 | -1.1127    | 0.86709 | -0.98252    | 0.83708     | -0.0073906 |         |
|            | 0.50295         | -0.50046   | 0.69163 | 0.50295     | 0.763554049 |            |         |
| RMI1       | ENSG00000178966 | -0.0075001 | 0.50299 | -0.0075001  | 0.50299     | -0.0075001 | 0.50299 |
|            | -0.0075001      | 0.50299    | 0.50299 | 0.763554049 |             |            |         |
| C11orf65   | ENSG00000166323 | -0.0075392 | 0.50301 | -0.0075392  | 0.50301     | -0.0075392 |         |
|            | 0.50301         | -0.21415   | 0.58478 | 0.50301     | 0.763554049 |            |         |
| NA         | ENSG00000248293 | -0.0075787 | 0.50302 | -0.0075787  | 0.50302     | -0.022813  | 0.5091  |
|            | -1.732          | 0.95836    | 0.50302 | 0.763554049 |             |            |         |
| SIGLEC9    | ENSG00000129450 | -0.0075889 | 0.50303 | -0.0075889  | 0.50303     | -0.0075889 |         |
|            | 0.50303         | -0.0075889 | 0.50303 | 0.50303     | 0.763554049 |            |         |
| NA         | ENSG00000265519 | -0.0076116 | 0.50304 | -0.0076116  | 0.50304     | -0.0076116 | 0.50304 |
|            | -0.0076116      | 0.50304    | 0.50304 | 0.763554049 |             |            |         |
| NA         | ENSG00000276855 | -0.0076116 | 0.50304 | -0.0076116  | 0.50304     | -0.0076116 | 0.50304 |
|            | -0.0076116      | 0.50304    | 0.50304 | 0.763554049 |             |            |         |
| RASGEF1A   | ENSG00000198915 | -0.51219   | 0.69574 | -0.51219    | 0.69574     | -0.007694  |         |
|            | 0.50307         | -0.16665   | 0.56618 | 0.50307     | 0.763575801 |            |         |
| NA         | ENSG00000224029 | -0.0078966 | 0.50315 | -0.0078966  | 0.50315     | -0.0078966 | 0.50315 |
|            | -0.0078966      | 0.50315    | 0.50315 | 0.763629299 |             |            |         |
| PPP1R2P6   | ENSG00000241661 | -0.0079144 | 0.50316 | -0.0079144  | 0.50316     | -0.0079144 |         |
|            | 0.50316         | -0.0079144 | 0.50316 | 0.50316     | 0.763629299 |            |         |
| HLA-T      | ENSG00000231130 | -0.28922   | 0.61379 | -0.28922    | 0.61379     | -0.0079682 | 0.50318 |
|            | -0.16664        | 0.56617    | 0.50318 | 0.763629299 |             |            |         |
| RNU2-7P    | ENSG00000222726 | -0.0080407 | 0.50321 | -0.0080407  | 0.50321     | -0.0080407 |         |
|            | 0.50321         | -0.0080407 | 0.50321 | 0.50321     | 0.763629299 |            |         |
| PPP3CB     | ENSG00000107758 | -1.3845    | 0.9169  | -1.6218     | 0.94757     | -1.7737    |         |
|            | 0.96194         | -0.0081336 | 0.50324 | 0.50324     | 0.763629299 |            |         |
| NA         | ENSG00000236713 | -0.71424   | 0.76246 | -0.0081712  | 0.50326     | -0.67211   | 0.74924 |
|            | -0.10071        | 0.54011    | 0.50326 | 0.763629299 |             |            |         |
| PPP1R13L   | ENSG00000104881 | -0.0083309 | 0.50332 | -0.0083309  | 0.50332     | -0.96567   |         |
|            | 0.8329          | -0.11048   | 0.54398 | 0.50332     | 0.763629299 |            |         |
| TFDP2      | ENSG00000114126 | -0.51757   | 0.69762 | -0.0083377  | 0.50333     | -0.1437    | 0.55713 |
|            | -0.95377        | 0.8299     | 0.50333 | 0.763629299 |             |            |         |
| VAMP3      | ENSG00000049245 | -0.0083613 | 0.50334 | -0.0083613  | 0.50334     | -0.0083613 | 0.50334 |
|            | -0.088852       | 0.5354     | 0.50334 | 0.763629299 |             |            |         |
| NA         | ENSG00000266111 | -1.0188    | 0.84584 | -1.1123     | 0.867       | -0.0083713 | 0.50334 |

|              |                 |            |         |             |             |            |         |  |
|--------------|-----------------|------------|---------|-------------|-------------|------------|---------|--|
|              | -0.42509        | 0.66462    | 0.50334 | 0.763629299 |             |            |         |  |
| CBLN1        | ENSG00000102924 | -0.0084328 | 0.50336 | -0.52948    | 0.70176     | -0.15131   | 0.56013 |  |
|              | -0.52425        | 0.69995    | 0.50336 | 0.763629299 |             |            |         |  |
| NFKBIZ       | ENSG00000144802 | -0.0084182 | 0.50336 | -0.0084182  | 0.50336     | -0.62735   |         |  |
|              | 0.73478         | -1.2373    | 0.89201 | 0.50336     | 0.763629299 |            |         |  |
| URAD         | ENSG00000183463 | -1.4533    | 0.92694 | -0.7718     | 0.77988     | -0.00852   | 0.5034  |  |
|              | -1.7022         | 0.95565    | 0.5034  | 0.763629299 |             |            |         |  |
| RN7SL272P    | ENSG00000242360 | -0.00852   | 0.5034  | -0.00852    | 0.5034      | -0.00852   |         |  |
|              | 0.5034          | -0.00852   | 0.5034  | 0.5034      | 0.763629299 |            |         |  |
| NA           | ENSG00000267471 | -0.0085219 | 0.5034  | -0.0085219  | 0.5034      | -0.0085219 | 0.5034  |  |
|              | -0.090009       | 0.53586    | 0.5034  | 0.763629299 |             |            |         |  |
| ARHGEF26     | ENSG00000114790 | -0.67223   | 0.74928 | -0.0085483  | 0.50341     | -0.33044   |         |  |
|              | 0.62947         | -0.38093   | 0.64837 | 0.50341     | 0.763629299 |            |         |  |
| ANKRD11P1    | ENSG00000234429 | -1.8745    | 0.96957 | -0.0085747  | 0.50342     | -0.57621   |         |  |
|              | 0.71776         | -0.57621   | 0.71776 | 0.50342     | 0.763629299 |            |         |  |
| NA           | ENSG00000249624 | -0.008588  | 0.50343 | -0.008588   | 0.50343     | -0.008588  | 0.50343 |  |
|              | -0.008588       | 0.50343    | 0.50343 | 0.763629299 |             |            |         |  |
| EPS8         | ENSG00000151491 | -0.25834   | 0.60193 | -0.69069    | 0.75512     | -0.0086576 | 0.50345 |  |
|              | -0.22738        | 0.58993    | 0.50345 | 0.763629299 |             |            |         |  |
| SCTR-AS1     | ENSG00000231013 | -1.1547    | 0.87589 | -0.0086561  | 0.50345     | -1.1547    |         |  |
|              | 0.87589         | -0.35821   | 0.63991 | 0.50345     | 0.763629299 |            |         |  |
| NA           | ENSG00000257283 | -0.0086528 | 0.50345 | -0.0086528  | 0.50345     | -0.0086528 | 0.50345 |  |
|              | -0.65777        | 0.74466    | 0.50345 | 0.763629299 |             |            |         |  |
| NA           | ENSG00000280362 | -0.0086378 | 0.50345 | -0.082996   | 0.53307     | -0.73686   | 0.76939 |  |
|              | -0.73686        | 0.76939    | 0.50345 | 0.763629299 |             |            |         |  |
| MAP1LC3B2    | ENSG00000258102 | -0.56384   | 0.71357 | -1.0869     | 0.86146     | -0.47971   |         |  |
|              | 0.68428         | -0.0087558 | 0.50349 | 0.50349     | 0.763649457 |            |         |  |
| SUB1P1       | ENSG00000227203 | -0.0088688 | 0.50354 | -0.0088688  | 0.50354     | -0.0088688 |         |  |
|              | 0.50354         | -0.0088688 | 0.50354 | 0.50354     | 0.763649457 |            |         |  |
| XKR3         | ENSG00000172967 | -0.32295   | 0.62663 | -0.49287    | 0.68895     | -0.26388   | 0.60406 |  |
|              | -0.0089835      | 0.50358    | 0.50358 | 0.763649457 |             |            |         |  |
| NA           | ENSG00000262670 | -1.5622    | 0.94088 | -0.0089773  | 0.50358     | -1.0669    | 0.857   |  |
|              | -1.7795         | 0.96242    | 0.50358 | 0.763649457 |             |            |         |  |
| NA           | ENSG00000224256 | -0.064999  | 0.52591 | -0.0090103  | 0.50359     | -0.064999  | 0.52591 |  |
|              | -0.064999       | 0.52591    | 0.50359 | 0.763649457 |             |            |         |  |
| APOBEC3B-AS1 | ENSG00000249310 | -0.0089976 | 0.50359 | -0.38815    | 0.65105     | -0.97472   |         |  |
|              | 0.83515         | -0.35953   | 0.6404  | 0.50359     | 0.763649457 |            |         |  |
| NA           | ENSG00000263723 | -0.009029  | 0.5036  | -0.18756    | 0.57439     | -0.50054   | 0.69165 |  |
|              | -0.51521        | 0.6968     | 0.5036  | 0.763649457 |             |            |         |  |
| RUSF1        | ENSG00000140688 | -0.24607   | 0.59719 | -0.0090673  | 0.50362     | -0.0090673 | 0.50362 |  |
|              | -0.0090673      | 0.50362    | 0.50362 | 0.763649457 |             |            |         |  |
| MTND4P10     | ENSG00000226663 | -1.6928    | 0.95476 | -1.6928     | 0.95476     | -1.6928    |         |  |
|              | 0.95476         | -0.0090787 | 0.50362 | 0.50362     | 0.763649457 |            |         |  |
| NA           | ENSG00000261848 | -0.49879   | 0.69104 | -0.0090646  | 0.50362     | -1.556     | 0.94014 |  |
|              | -0.1189         | 0.54732    | 0.50362 | 0.763649457 |             |            |         |  |
| TMEM107      | ENSG00000179029 | -0.0091807 | 0.50366 | -0.0091807  | 0.50366     | -0.0091807 |         |  |
|              | 0.50366         | -0.0091807 | 0.50366 | 0.50366     | 0.763668022 |            |         |  |
| NA           | ENSG00000256013 | -0.0092161 | 0.50368 | -0.0092161  | 0.50368     | -0.0092161 | 0.50368 |  |
|              | -0.0092161      | 0.50368    | 0.50368 | 0.763668022 |             |            |         |  |
| DEFB131E     | ENSG00000254507 | -1.1527    | 0.87548 | -1.0843     | 0.86089     | -0.0093938 |         |  |
|              | 0.50375         | -1.5245    | 0.93631 | 0.50375     | 0.763668022 |            |         |  |
| TH2LCRR      | ENSG00000223442 | -0.042613  | 0.51699 | -0.0094595  | 0.50377     | -0.042613  |         |  |
|              | 0.51699         | -0.042613  | 0.51699 | 0.50377     | 0.763668022 |            |         |  |
| GSTA1        | ENSG00000243955 | -2.1574    | 0.98451 | -0.61411    | 0.73043     | -0.0094535 | 0.50377 |  |
|              | -0.068164       | 0.52717    | 0.50377 | 0.763668022 |             |            |         |  |
| MTCYBP37     | ENSG00000248765 | -0.39949   | 0.65523 | -0.39949    | 0.65523     | -0.39949   |         |  |
|              | 0.65523         | -0.0094552 | 0.50377 | 0.50377     | 0.763668022 |            |         |  |
| NA           | ENSG00000268205 | -0.0094527 | 0.50377 | -0.0094527  | 0.50377     | -0.0094527 | 0.50377 |  |
|              | -0.0094527      | 0.50377    | 0.50377 | 0.763668022 |             |            |         |  |
| NA           | ENSG00000258601 | -0.0094896 | 0.50379 | -0.0094896  | 0.50379     | -0.0094896 | 0.50379 |  |
|              | -0.0094896      | 0.50379    | 0.50379 | 0.763668022 |             |            |         |  |
| IL9RP4       | ENSG00000262081 | -0.40721   | 0.65807 | -1.4136     | 0.92126     | -0.38506   |         |  |

|            |                 |            |         |             |             |         |            |
|------------|-----------------|------------|---------|-------------|-------------|---------|------------|
|            | 0.6499          | -0.0095174 | 0.5038  | 0.5038      | 0.763668022 |         |            |
| KRTAP20-1  | ENSG00000244624 | -0.0095812 | 0.50382 | 0.50382     | -0.0095812  | 0.50382 | -0.0095812 |
|            | 0.50382         | -0.0095812 | 0.50382 | 0.50382     | 0.763668022 |         |            |
| NA         | ENSG00000280276 | -0.0096168 | 0.50384 | 0.50384     | -0.0096168  | 0.50384 | -0.0096168 |
|            | -0.0096168      | 0.50384    | 0.50384 | 0.763668022 |             |         |            |
| UBE2Q1-AS1 | ENSG00000229780 | -0.0096507 | 0.50385 | 0.50385     | -0.0096507  | 0.50385 | -0.0096507 |
|            | 0.50385         | -0.0096507 | 0.50385 | 0.50385     | 0.763668022 |         |            |
| NA         | ENSG00000220556 | -0.0097083 | 0.50387 | 0.50387     | -0.0097083  | 0.50387 | -0.0097083 |
|            | -0.0097083      | 0.50387    | 0.50387 | 0.763668022 |             |         |            |
| NA         | ENSG00000250692 | -0.0097083 | 0.50387 | 0.50387     | -0.0097083  | 0.50387 | -0.0097083 |
|            | -0.0097083      | 0.50387    | 0.50387 | 0.763668022 |             |         |            |
| NA         | ENSG00000159239 | -0.51193   | 0.69565 | 0.69565     | -0.51193    | 0.69565 | -0.51193   |
|            | -0.0097459      | 0.50389    | 0.50389 | 0.763668022 |             |         |            |
| NA         | ENSG00000224685 | -0.0097762 | 0.5039  | 0.5039      | -0.0097762  | 0.5039  | -0.0097762 |
|            | -0.0097762      | 0.5039     | 0.5039  | 0.763668022 |             |         |            |
| ADM        | ENSG00000148926 | -0.0098487 | 0.50393 | 0.50393     | -0.0098487  | 0.50393 | -0.053027  |
|            | -0.50432        | 0.69298    | 0.50393 | 0.763668022 |             |         | 0.52114    |
| NA         | ENSG00000217447 | -0.0098635 | 0.50393 | 0.50393     | -0.0098635  | 0.50393 | -0.0098635 |
|            | -0.1695         | 0.5673     | 0.50393 | 0.763668022 |             |         | 0.50393    |
| NA         | ENSG00000235052 | -0.79341   | 0.78623 | 0.78623     | -0.52788    | 0.70121 | -1.0194    |
|            | -0.0098588      | 0.50393    | 0.50393 | 0.763668022 |             |         | 0.84599    |
| NA         | ENSG00000259507 | -0.0099654 | 0.50398 | 0.50398     | -0.92758    | 0.82319 | -1.6914    |
|            | -0.54635        | 0.70759    | 0.50398 | 0.763720042 |             |         | 0.95462    |
| RNU6-600P  | ENSG00000199394 | -0.010081  | 0.50402 | 0.50402     | -0.097869   | 0.53898 | -0.097869  |
|            | 0.53898         | -0.011011  | 0.50439 | 0.50402     | 0.763739714 |         |            |
| LINC00398  | ENSG00000237879 | -0.7709    | 0.77962 | 0.77962     | -0.31568    | 0.62388 | -0.010093  |
|            | 0.50403         | -0.32812   | 0.62859 | 0.50403     | 0.763739714 |         |            |
| TMEM165    | ENSG00000134851 | -1.5258    | 0.93647 | 0.93647     | -0.88412    | 0.81169 | -0.95484   |
|            | 0.83017         | -0.010138  | 0.50404 | 0.50404     | 0.763739714 |         |            |
| ENO4       | ENSG00000188316 | -0.76216   | 0.77702 | 0.77702     | -0.46091    | 0.67757 | -0.86756   |
|            | -0.010256       | 0.50409    | 0.50409 | 0.76376637  |             |         | 0.80718    |
| P3H2-AS1   | ENSG00000225764 | -0.010261  | 0.50409 | 0.50409     | -0.6712     | 0.74895 | -0.6712    |
|            | 0.74895         | -0.6712    | 0.74895 | 0.50409     | 0.76376637  |         |            |
| NA         | ENSG00000264091 | -0.010375  | 0.50414 | 0.50414     | -0.010375   | 0.50414 | -0.010375  |
|            | -0.010375       | 0.50414    | 0.50414 | 0.76376637  |             |         | 0.50414    |
| SGSM1      | ENSG00000167037 | -0.010401  | 0.50415 | 0.50415     | -0.11159    | 0.54443 | -0.39938   |
|            | -0.11345        | 0.54516    | 0.50415 | 0.76376637  |             |         | 0.65519    |
| CD3D       | ENSG00000167286 | -1.1351    | 0.87184 | 0.87184     | -0.010401   | 0.50415 | -1.1156    |
|            | -1.8421         | 0.96727    | 0.50415 | 0.76376637  |             |         | 0.8677     |
| RIPOR3     | ENSG00000042062 | -0.78427   | 0.78356 | 0.78356     | -0.01043    | 0.50416 | -0.15083   |
|            | 0.55995         | -0.58849   | 0.7219  | 0.50416     | 0.76376637  |         |            |
| ISCA1P1    | ENSG00000217416 | -0.35714   | 0.63951 | 0.63951     | -0.42597    | 0.66493 | -0.010444  |
|            | 0.50417         | -0.31948   | 0.62532 | 0.50417     | 0.76376637  |         |            |
| RNA5SP143  | ENSG00000252745 | -1.135     | 0.87181 | 0.87181     | -0.010516   | 0.5042  | -0.6878    |
|            | 0.75421         | -0.6878    | 0.75421 | 0.5042      | 0.76376637  |         |            |
| CHRM3      | ENSG00000133019 | -0.010586  | 0.50422 | 0.50422     | -0.97517    | 0.83526 | -0.010586  |
|            | -0.060395       | 0.52408    | 0.50422 | 0.76376637  |             |         | 0.50422    |
| NA         | ENSG00000234750 | -0.48827   | 0.68732 | 0.68732     | -0.010613   | 0.50423 | -0.48827   |
|            | -0.14817        | 0.5589     | 0.50423 | 0.76376637  |             |         | 0.68732    |
| NA         | ENSG00000251591 | -0.12092   | 0.54812 | 0.54812     | -0.12092    | 0.54812 | -0.12092   |
|            | -0.010608       | 0.50423    | 0.50423 | 0.76376637  |             |         | 0.54812    |
| NA         | ENSG00000221751 | -0.010804  | 0.50431 | 0.50431     | -0.010804   | 0.50431 | -1.1906    |
|            | -0.010804       | 0.50431    | 0.50431 | 0.763863804 |             |         | 0.88309    |
| NA         | ENSG00000213174 | -0.092638  | 0.5369  | 0.5369      | -0.092638   | 0.5369  | -0.092638  |
|            | -0.011012       | 0.50439    | 0.50439 | 0.763950581 |             |         | 0.5369     |
| MIR3123    | ENSG00000265831 | -0.011044  | 0.50441 | 0.50441     | -0.011044   | 0.50441 | -0.011044  |
|            | 0.50441         | -0.011044  | 0.50441 | 0.50441     | 0.763950581 |         |            |
| NIM1K      | ENSG00000177453 | -0.011108  | 0.50443 | 0.50443     | -0.9595     | 0.83135 | -1.2343    |
|            | -1.5373         | 0.93789    | 0.50443 | 0.763950581 |             |         | 0.89145    |
| POLR2A     | ENSG00000181222 | -0.011103  | 0.50443 | 0.50443     | -0.011103   | 0.50443 | -0.55945   |
|            | 0.71207         | -0.03877   | 0.51546 | 0.50443     | 0.763950581 |         |            |
| RN7SKP65   | ENSG00000222210 | -0.011258  | 0.50449 | 0.50449     | -0.035308   | 0.51408 | -0.011258  |

|           |                 |             |         |             |             |           |         |
|-----------|-----------------|-------------|---------|-------------|-------------|-----------|---------|
|           | 0.50449         | -0.011258   | 0.50449 | 0.50449     | 0.764017705 |           |         |
| OR7E83P   | ENSG00000249866 | -0.011457   | 0.50457 | -1.0127     | 0.8444      | -1.691    |         |
|           | 0.95458         | -1.1926     | 0.88349 | 0.50457     | 0.764083494 |           |         |
| LINC01445 | ENSG00000231427 | -0.011481   | 0.50458 | -0.18483    | 0.57332     | -0.18483  |         |
|           | 0.57332         | -0.18483    | 0.57332 | 0.50458     | 0.764083494 |           |         |
| NA        | ENSG00000279611 | -0.011508   | 0.50459 | -0.011508   | 0.50459     | -0.011508 | 0.50459 |
|           | -0.011508       | 0.50459     | 0.50459 | 0.764083494 |             |           |         |
| NA        | ENSG00000225521 | -0.011527   | 0.5046  | -0.24177    | 0.59552     | -0.85532  | 0.80381 |
|           | -0.94488        | 0.82764     | 0.5046  | 0.764083494 |             |           |         |
| LINC01075 | ENSG00000230142 | -0.011602   | 0.50463 | -0.011602   | 0.50463     | -0.011602 |         |
|           | 0.50463         | -0.011602   | 0.50463 | 0.50463     | 0.764083494 |           |         |
| RBL2      | ENSG00000103479 | -0.062268   | 0.52483 | -0.44421    | 0.67156     | -0.011665 | 0.50465 |
|           | -0.011665       | 0.50465     | 0.50465 | 0.764083494 |             |           |         |
| LSP1P2    | ENSG00000240665 | -0.011683   | 0.50466 | -0.011683   | 0.50466     | -0.8678   |         |
|           | 0.80725         | -0.8963     | 0.81495 | 0.50466     | 0.764083494 |           |         |
| AUP1      | ENSG00000115307 | -0.2028     | 0.58035 | -0.2028     | 0.58035     | -0.011862 | 0.50473 |
|           | -0.2028         | 0.58035     | 0.50473 | 0.764083494 |             |           |         |
| NA        | ENSG00000283511 | -0.59467    | 0.72397 | -1.0028     | 0.84202     | -0.011869 | 0.50473 |
|           | -0.011869       | 0.50473     | 0.50473 | 0.764083494 |             |           |         |
| JKAMP     | ENSG00000050130 | -1.6482     | 0.95035 | -0.96493    | 0.83271     | -0.89643  | 0.81499 |
|           | -0.011897       | 0.50475     | 0.50475 | 0.764083494 |             |           |         |
| LIFR      | ENSG00000113594 | -0.14277    | 0.55676 | -0.43113    | 0.66681     | -0.5299   | 0.70191 |
|           | -0.011907       | 0.50475     | 0.50475 | 0.764083494 |             |           |         |
| OR6D1P    | ENSG00000224402 | -0.47503    | 0.68262 | -0.011907   | 0.50475     | -0.011907 |         |
|           | 0.50475         | -0.47101    | 0.68118 | 0.50475     | 0.764083494 |           |         |
| NA        | ENSG00000227463 | -0.43472    | 0.66812 | -0.43472    | 0.66812     | -0.43472  | 0.66812 |
|           | -0.011899       | 0.50475     | 0.50475 | 0.764083494 |             |           |         |
| LINC02630 | ENSG00000227313 | -0.011957   | 0.50477 | -0.011957   | 0.50477     | -0.011957 |         |
|           | 0.50477         | -0.011957   | 0.50477 | 0.50477     | 0.764083494 |           |         |
| DIO3OS    | ENSG00000258498 | -0.011977   | 0.50478 | -0.1539     | 0.56116     | -0.64147  |         |
|           | 0.73939         | -0.068522   | 0.52732 | 0.50478     | 0.764083494 |           |         |
| OR6C74    | ENSG00000197706 | -0.012008   | 0.50479 | -0.13512    | 0.55374     | -0.75906  |         |
|           | 0.77609         | -0.75906    | 0.77609 | 0.50479     | 0.764083494 |           |         |
| TCIRG1    | ENSG00000110719 | -0.012036   | 0.5048  | -0.012036   | 0.5048      | -0.012036 |         |
|           | 0.5048          | -0.54724    | 0.70789 | 0.5048      | 0.764083494 |           |         |
| HMG2P6    | ENSG00000257179 | -0.012222   | 0.50488 | -0.012222   | 0.50488     | -0.012222 |         |
|           | 0.50488         | -0.091482   | 0.53645 | 0.50488     | 0.764172248 |           |         |
| ZNF432    | ENSG00000256087 | -0.35145    | 0.63737 | -0.012262   | 0.50489     | -0.012262 |         |
|           | 0.50489         | -0.012262   | 0.50489 | 0.50489     | 0.764172248 |           |         |
| NA        | ENSG00000223812 | -0.30621    | 0.62028 | -0.01231    | 0.50491     | -0.52123  | 0.6989  |
|           | -0.78204        | 0.78291     | 0.50491 | 0.764178784 |             |           |         |
| ZNF114P1  | ENSG00000234538 | -0.012389   | 0.50494 | -0.012389   | 0.50494     | -0.012389 |         |
|           | 0.50494         | -0.012389   | 0.50494 | 0.50494     | 0.764200453 |           |         |
| FAM230G   | ENSG00000188280 | -0.012523   | 0.505   | -0.012523   | 0.505       | -1.799    | 0.96399 |
|           | -0.99178        | 0.83935     | 0.505   | 0.764226588 |             |           |         |
| NA        | ENSG00000253793 | -0.012536   | 0.505   | -0.012536   | 0.505       | -0.012536 | 0.505   |
|           | 0.505           | 0.764226588 |         |             |             |           |         |
| ALDH3A1   | ENSG00000108602 | -2.256      | 0.98796 | -1.0534     | 0.85391     | -1.0534   |         |
|           | 0.85391         | -0.012554   | 0.50501 | 0.50501     | 0.764226588 |           |         |
| RNA5SP456 | ENSG00000200872 | -0.012578   | 0.50502 | -0.012578   | 0.50502     | -0.55185  |         |
|           | 0.70947         | -0.54821    | 0.70823 | 0.50502     | 0.764226588 |           |         |
| GXYLT1P1  | ENSG00000230931 | -0.012657   | 0.50505 | -0.012657   | 0.50505     | -1.4151   |         |
|           | 0.92148         | -0.12789    | 0.55088 | 0.50505     | 0.764248253 |           |         |
| MIR122HG  | ENSG00000267391 | -0.9077     | 0.81798 | -0.012964   | 0.50517     | -1.8396   |         |
|           | 0.96709         | -1.8396     | 0.96709 | 0.50517     | 0.764404024 |           |         |
| NA        | ENSG00000272914 | -0.53591    | 0.70399 | -0.79323    | 0.78618     | -0.013001 | 0.50519 |
|           | -0.081957       | 0.53266     | 0.50519 | 0.764404024 |             |           |         |
| RNU4-33P  | ENSG00000201186 | -1.0036     | 0.84221 | -2.1867     | 0.98562     | -0.013034 |         |
|           | 0.5052          | -0.013034   | 0.5052  | 0.5052      | 0.764404024 |           |         |
| EMB       | ENSG00000170571 | -0.23659    | 0.59351 | -0.37413    | 0.64585     | -0.061402 | 0.52448 |
|           | -0.013105       | 0.50523     | 0.50523 | 0.764408473 |             |           |         |
| CLCA4-AS1 | ENSG00000236915 | -0.013125   | 0.50524 | -0.62172    | 0.73294     | -0.56548  |         |

|            |                 |           |             |             |             |           |         |
|------------|-----------------|-----------|-------------|-------------|-------------|-----------|---------|
|            | 0.71413         | -0.51264  | 0.6959      | 0.50524     | 0.764408473 |           |         |
| CLCA4      | ENSG00000016602 | -1.0758   | 0.85899     | -1.0758     | 0.85899     | -1.0758   | 0.85899 |
|            | -0.01315        | 0.50525   | 0.50525     | 0.764408473 |             |           |         |
| SLC39A5    | ENSG00000139540 | -0.77666  | 0.78132     | -0.53259    | 0.70284     | -0.65174  |         |
|            | 0.74271         | -0.013206 | 0.50527     | 0.50527     | 0.764414998 |           |         |
| NA         | ENSG00000250041 | -0.24896  | 0.59831     | -0.14762    | 0.55868     | -0.57167  | 0.71623 |
|            | -0.013296       | 0.5053    | 0.5053      | 0.764436652 |             |           |         |
| CCDC141    | ENSG00000163492 | -0.50148  | 0.69198     | -1.1927     | 0.88351     | -0.013426 |         |
|            | 0.50536         | -1.9182   | 0.97246     | 0.50536     | 0.764503688 |           |         |
| TRAV19     | ENSG00000211799 | -0.013511 | 0.50539     | -0.013511   | 0.50539     | -0.013511 |         |
|            | 0.50539         | -0.013511 | 0.50539     | 0.50539     | 0.764525338 |           |         |
| SLC25A20P1 | ENSG00000218363 | -0.013604 | 0.50543     | -0.013604   | 0.50543     | -0.013604 |         |
|            | 0.50543         | -0.68274  | 0.75262     | 0.50543     | 0.76455142  |           |         |
| NUFIP2     | ENSG00000108256 | -0.013716 | 0.50547     | -0.013716   | 0.50547     | -0.013716 |         |
|            | 0.50547         | -0.69857  | 0.75759     | 0.50547     | 0.76455142  |           |         |
| LRRC14     | ENSG00000160959 | -0.013707 | 0.50547     | -0.75396    | 0.77456     | -0.61874  |         |
|            | 0.73196         | -0.61874  | 0.73196     | 0.50547     | 0.76455142  |           |         |
| NA         | ENSG00000267686 | -0.013709 | 0.50547     | -0.013709   | 0.50547     | -0.013709 | 0.50547 |
|            | -0.013709       | 0.50547   | 0.50547     | 0.76455142  |             |           |         |
| TMEM248    | ENSG00000106609 | -0.14252  | 0.55666     | -0.14252    | 0.55666     | -0.14252  |         |
|            | 0.55666         | -0.013791 | 0.5055      | 0.5055      | 0.764570978 |           |         |
| SNORD28B   | ENSG00000212295 | -0.013867 | 0.50553     | -0.64318    | 0.73995     | -0.013867 |         |
|            | 0.50553         | -0.013867 | 0.50553     | 0.50553     | 0.764570978 |           |         |
| MIR3650    | ENSG00000265304 | -0.013866 | 0.50553     | -0.013866   | 0.50553     | -0.013866 |         |
|            | 0.50553         | -0.013866 | 0.50553     | 0.50553     | 0.764570978 |           |         |
| NA         | ENSG00000199895 | -0.014045 | 0.5056      | -0.014045   | 0.5056      | -0.014045 | 0.5056  |
|            | -0.014045       | 0.5056    | 0.5056      | 0.764629384 |             |           |         |
| NA         | ENSG00000201371 | -0.014042 | 0.5056      | -0.014042   | 0.5056      | -0.014042 | 0.5056  |
|            | -0.014042       | 0.5056    | 0.5056      | 0.764629384 |             |           |         |
| NA         | ENSG00000224414 | -1.609    | 0.94619     | -0.014287   | 0.5057      | -0.74743  | 0.7726  |
|            | -0.62212        | 0.73307   | 0.5057      | 0.764756882 |             |           |         |
| TAAR4P     | ENSG00000237449 | -0.014373 | 0.50573     | -0.014373   | 0.50573     | -0.014373 |         |
|            | 0.50573         | -0.014373 | 0.50573     | 0.50573     | 0.764778516 |           |         |
| NA         | ENSG00000233689 | -0.40589  | 0.65759     | -0.014402   | 0.50575     | -0.40589  | 0.65759 |
|            | -0.40589        | 0.65759   | 0.50575     | 0.764785027 |             |           |         |
| NA         | ENSG00000280184 | -0.014601 | 0.50582     | -0.014601   | 0.50582     | -0.014601 | 0.50582 |
|            | -0.014601       | 0.50582   | 0.50582     | 0.764858532 |             |           |         |
| PPIAP87    | ENSG00000219149 | -0.014602 | 0.50583     | -0.014602   | 0.50583     | -0.014602 |         |
|            | 0.50583         | -0.014602 | 0.50583     | 0.50583     | 0.764858532 |           |         |
| DSCR8      | ENSG00000198054 | -0.014705 | 0.50587     | -0.29214    | 0.61491     | -0.014705 | 0.50587 |
|            | -0.014705       | 0.50587   | 0.50587     | 0.764886667 |             |           |         |
| HMGB1P18   | ENSG00000236407 | -0.12446  | 0.54952     | -0.014741   | 0.50588     | -0.12446  |         |
|            | 0.54952         | -0.12446  | 0.54952     | 0.50588     | 0.764886667 |           |         |
| NA         | ENSG00000267554 | -0.2679   | 0.60561     | -0.21763    | 0.58614     | -0.2679   | 0.60561 |
|            | -0.014821       | 0.50591   | 0.50591     | 0.764901973 |             |           |         |
| NA         | ENSG00000236162 | -0.014854 | 0.50593     | -0.035032   | 0.51397     | -0.014854 | 0.50593 |
|            | -0.014854       | 0.50593   | 0.50593     | 0.764901973 |             |           |         |
| NA         | ENSG00000260509 | -0.014901 | 0.50594     | -1.1992     | 0.88477     | -1.1992   | 0.88477 |
|            | -1.1992         | 0.88477   | 0.50594     | 0.764901973 |             |           |         |
| TRIM15     | ENSG00000204610 | -0.014982 | 0.50598     | -1.2268     | 0.89004     | -0.014982 |         |
|            | 0.50598         | -0.075939 | 0.53027     | 0.50598     | 0.764901973 |           |         |
| MTCL1P1    | ENSG00000226554 | -0.015006 | 0.50599     | -0.015006   | 0.50599     | -0.015006 |         |
|            | 0.50599         | -0.015006 | 0.50599     | 0.50599     | 0.764901973 |           |         |
| ZFR        | ENSG00000056097 | -0.44507  | 0.67186     | -1.4227     | 0.92258     | -0.01504  | 0.506   |
|            | -0.26627        | 0.60499   | 0.506       | 0.764901973 |             |           |         |
| YTHDF2P1   | ENSG00000270503 | -0.015037 | 0.506       | -0.015037   | 0.506       | -0.015037 | 0.506   |
|            | 0.506           | 0.506     | 0.764901973 |             |             |           |         |
| NA         | ENSG00000271717 | -0.49172  | 0.68854     | -0.01518    | 0.50606     | -0.49172  | 0.68854 |
|            | -0.49172        | 0.68854   | 0.50606     | 0.76495822  |             |           |         |
| TAP2       | ENSG00000204267 | -0.015235 | 0.50608     | -0.042044   | 0.51677     | -0.042044 | 0.51677 |
|            | -0.042044       | 0.51677   | 0.50608     | 0.76495822  |             |           |         |
| NA         | ENSG00000255621 | -0.60799  | 0.7284      | -1.187      | 0.88239     | -0.60799  | 0.7284  |



|            |                 |           |           |         |             |             |           |         |
|------------|-----------------|-----------|-----------|---------|-------------|-------------|-----------|---------|
|            |                 | -0.015276 | 0.50609   | 0.50609 | 0.76495822  |             |           |         |
| NA         | ENSG00000249713 | -0.015281 | 0.5061    | 0.5061  | -0.015281   | 0.5061      | -0.015281 | 0.5061  |
|            |                 | -0.015281 | 0.5061    | 0.5061  | 0.76495822  |             |           |         |
| NA         | ENSG00000279450 | -0.6471   | 0.74122   | 0.74122 | -0.52243    | 0.69932     | -0.6471   | 0.74122 |
|            |                 | -0.015455 | 0.50617   | 0.50617 | 0.765040293 |             |           |         |
| NA         | ENSG00000251195 | -0.015607 | 0.50623   | 0.50623 | -0.015607   | 0.50623     | -1.6114   | 0.94646 |
|            |                 | -0.12348  | 0.54914   | 0.50623 | 0.765049062 |             |           |         |
| LINC00534  | ENSG00000253394 | -0.23819  | 0.59413   | 0.59413 | -1.1555     | 0.87605     | -0.57323  |         |
|            |                 | 0.71675   | -0.01569  | 0.50626 | 0.50626     | 0.765049062 |           |         |
| NA         | ENSG00000262020 | -0.015681 | 0.50626   | 0.50626 | -0.91818    | 0.82074     | -0.015681 | 0.50626 |
|            |                 | -0.015681 | 0.50626   | 0.50626 | 0.765049062 |             |           |         |
| B4GALNT2   | ENSG00000167080 | -0.015723 | 0.50627   | 0.50627 | -0.059881   | 0.52387     | -0.015723 |         |
|            |                 | 0.50627   | -0.015723 | 0.50627 | 0.50627     | 0.765049062 |           |         |
| SIVA1      | ENSG00000184990 | -1.4322   | 0.92396   | 0.92396 | -1.5459     | 0.93894     | -0.015717 | 0.50627 |
|            |                 | -1.8667   | 0.96903   | 0.50627 | 0.765049062 |             |           |         |
| REXO1L8P   | ENSG00000270971 | -0.53465  | 0.70355   | 0.70355 | -0.84578    | 0.80116     | -0.015716 |         |
|            |                 | 0.50627   | -1.1303   | 0.87083 | 0.50627     | 0.765049062 |           |         |
| GPHB5      | ENSG00000179600 | -0.015808 | 0.50631   | 0.50631 | -0.015808   | 0.50631     | -0.015808 | 0.50631 |
|            |                 | -0.015808 | 0.50631   | 0.50631 | 0.765053445 |             |           |         |
| CYP2C19    | ENSG00000165841 | -0.34658  | 0.63555   | 0.63555 | -1.0705     | 0.8578      | -1.286    |         |
|            |                 | 0.90078   | -0.015854 | 0.50632 | 0.50632     | 0.765053445 |           |         |
| LINC02578  | ENSG00000235201 | -0.16551  | 0.56573   | 0.56573 | -0.01585    | 0.50632     | -0.16551  |         |
|            |                 | 0.56573   | -0.16551  | 0.56573 | 0.50632     | 0.765053445 |           |         |
| OSTF1      | ENSG00000134996 | -1.3477   | 0.91112   | 0.91112 | -1.7465     | 0.95964     | -1.7465   | 0.95964 |
|            |                 | -0.016266 | 0.50649   | 0.50649 | 0.76520679  |             |           |         |
| RNU6-647P  | ENSG00000201113 | -0.016271 | 0.50649   | 0.50649 | -0.016271   | 0.50649     | -0.016271 |         |
|            |                 | 0.50649   | -0.016271 | 0.50649 | 0.50649     | 0.76520679  |           |         |
| NA         | ENSG00000272476 | -0.016261 | 0.50649   | 0.50649 | -0.016261   | 0.50649     | -1.1712   | 0.87924 |
|            |                 | -0.48525  | 0.68625   | 0.50649 | 0.76520679  |             |           |         |
| BNIP3P24   | ENSG00000269040 | -0.15881  | 0.56309   | 0.56309 | -0.50322    | 0.69259     | -1.2118   |         |
|            |                 | 0.88721   | -0.0163   | 0.5065  | 0.5065      | 0.76520679  |           |         |
| EIF2S2P7   | ENSG00000271115 | -0.6773   | 0.75089   | 0.75089 | -0.074291   | 0.52961     | -0.01629  |         |
|            |                 | 0.5065    | -0.074291 | 0.52961 | 0.5065      | 0.76520679  |           |         |
| TNFRSF1B   | ENSG00000028137 | -1.2887   | 0.90126   | 0.90126 | -1.7764     | 0.96216     | -0.016513 |         |
|            |                 | 0.50659   | -1.7333   | 0.95848 | 0.50659     | 0.765301795 |           |         |
| WAPL       | ENSG00000062650 | -0.10245  | 0.5408    | 0.5408  | -0.016557   | 0.5066      | -0.29469  | 0.61588 |
|            |                 | -0.97284  | 0.83468   | 0.5066  | 0.765301795 |             |           |         |
| NA         | ENSG00000264379 | -0.016578 | 0.50661   | 0.50661 | -0.016578   | 0.50661     | -0.016578 | 0.50661 |
|            |                 | -0.016578 | 0.50661   | 0.50661 | 0.765301795 |             |           |         |
| NA         | ENSG00000279283 | -0.016702 | 0.50666   | 0.50666 | -0.016702   | 0.50666     | -0.016702 | 0.50666 |
|            |                 | -0.016702 | 0.50666   | 0.50666 | 0.765313218 |             |           |         |
| HDAC1P1    | ENSG00000234724 | -0.01674  | 0.50668   | 0.50668 | -0.01674    | 0.50668     | -0.01674  |         |
|            |                 | 0.50668   | -0.01674  | 0.50668 | 0.50668     | 0.765313218 |           |         |
| NA         | ENSG00000280247 | -0.016778 | 0.50669   | 0.50669 | -0.016778   | 0.50669     | -0.016778 | 0.50669 |
|            |                 | -0.016778 | 0.50669   | 0.50669 | 0.765313218 |             |           |         |
| ATP2B2-IT1 | ENSG00000236999 | -0.15983  | 0.56349   | 0.56349 | -1.1044     | 0.86529     | -0.016798 |         |
|            |                 | 0.5067    | -0.8188   | 0.79355 | 0.5067      | 0.765313218 |           |         |
| NA         | ENSG00000213216 | -0.016877 | 0.50673   | 0.50673 | -0.016877   | 0.50673     | -0.016877 | 0.50673 |
|            |                 | -0.016877 | 0.50673   | 0.50673 | 0.765313218 |             |           |         |
| RPL7P22    | ENSG00000226544 | -0.016888 | 0.50674   | 0.50674 | -1.6682     | 0.95236     | -0.50629  |         |
|            |                 | 0.69367   | -0.34976  | 0.63674 | 0.50674     | 0.765313218 |           |         |
| RN7SKP26   | ENSG00000222179 | -0.016916 | 0.50675   | 0.50675 | -0.016916   | 0.50675     | -0.016916 |         |
|            |                 | 0.50675   | -0.016916 | 0.50675 | 0.50675     | 0.765313218 |           |         |
| CMKLR1     | ENSG00000174600 | -0.016976 | 0.50677   | 0.50677 | -1.066      | 0.85679     | -0.016976 |         |
|            |                 | 0.50677   | -0.31389  | 0.6232  | 0.50677     | 0.765313218 |           |         |
| CUL4A      | ENSG00000139842 | -0.34861  | 0.63631   | 0.63631 | -0.01699    | 0.50678     | -1.3804   | 0.91627 |
|            |                 | -1.6171   | 0.94707   | 0.50678 | 0.765313218 |             |           |         |
| NA         | ENSG00000259697 | -0.91125  | 0.81892   | 0.81892 | -0.017028   | 0.50679     | -0.91125  | 0.81892 |
|            |                 | -0.91125  | 0.81892   | 0.50679 | 0.765313218 |             |           |         |
| TRAF1      | ENSG00000056558 | -0.017077 | 0.50681   | 0.50681 | -0.33813    | 0.63237     | -0.47459  | 0.68246 |
|            |                 | -0.42072  | 0.66302   | 0.50681 | 0.765313218 |             |           |         |
| MTND2P29   | ENSG00000233595 | -0.017119 | 0.50683   | 0.50683 | -0.017119   | 0.50683     | -0.017119 |         |

|             |                 |           |             |             |             |          |           |           |
|-------------|-----------------|-----------|-------------|-------------|-------------|----------|-----------|-----------|
|             | 0.50683         | -0.017119 | 0.50683     | 0.50683     | 0.765313218 |          |           |           |
| RBMS1P1     | ENSG00000225422 | -0.017196 | 0.50686     | 0.50686     | -0.017196   | 0.50686  | -0.017196 |           |
|             | 0.50686         | -0.017196 | 0.50686     | 0.50686     | 0.765313218 |          |           |           |
| SLC6A5      | ENSG00000165970 | -0.51811  | 0.69781     | 0.69781     | -1.6748     | 0.95301  | -0.017339 |           |
|             | 0.50692         | -0.55992  | 0.71223     | 0.50692     | 0.765313218 |          |           |           |
| RNU1-119P   | ENSG00000212424 | -1.0832   | 0.86063     | 0.86063     | -1.0832     | 0.86063  | -0.52395  |           |
|             | 0.69984         | -0.017372 | 0.50693     | 0.50693     | 0.765313218 |          |           |           |
| NA          | ENSG00000213994 | -0.017418 | 0.50695     | 0.50695     | -0.64788    | 0.74147  | -0.017418 | 0.50695   |
|             | -0.017418       | 0.50695   | 0.50695     | 0.765313218 |             |          |           |           |
| NA          | ENSG00000229673 | -0.017417 | 0.50695     | 0.50695     | -1.0596     | 0.85533  | -0.017417 | 0.50695   |
|             | -0.11262        | 0.54484   | 0.50695     | 0.765313218 |             |          |           |           |
| NA          | ENSG00000232529 | -0.22772  | 0.59007     | 0.59007     | -1.1341     | 0.87161  | -0.22772  | 0.59007   |
|             | -0.017428       | 0.50695   | 0.50695     | 0.765313218 |             |          |           |           |
| KIAA0930    | ENSG00000100364 | -0.13831  | 0.555       | -2.5281     | 0.99427     | -0.69707 | 0.75712   |           |
|             | -0.017448       | 0.50696   | 0.50696     | 0.765313218 |             |          |           |           |
| TNP2        | ENSG00000178279 | -0.017483 | 0.50697     | 0.50697     | -0.017483   | 0.50697  | -0.017483 | 0.50697   |
|             | -0.017483       | 0.50697   | 0.50697     | 0.765313218 |             |          |           |           |
| EPAS1       | ENSG00000116016 | -1.3845   | 0.9169      | 0.9169      | -0.75897    | 0.77606  | -0.026638 | 0.51063   |
|             | -0.017494       | 0.50698   | 0.50698     | 0.765313218 |             |          |           |           |
| NUCB1-AS1   | ENSG00000235191 | -0.017517 | 0.50699     | 0.50699     | -0.017517   | 0.50699  | -0.017517 |           |
|             | 0.50699         | -0.017517 | 0.50699     | 0.50699     | 0.765313218 |          |           |           |
| ALG1L9P     | ENSG00000254978 | -0.01759  | 0.50702     | 0.50702     | -0.01759    | 0.50702  | -0.01759  |           |
|             | 0.50702         | -0.01759  | 0.50702     | 0.50702     | 0.765313218 |          |           |           |
| NA          | ENSG00000280173 | -1.5032   | 0.9336      | 0.9336      | -1.5032     | 0.9336   | -0.017637 | 0.50704   |
|             | -1.5752         | 0.94239   | 0.50704     | 0.765313218 |             |          |           |           |
| NA          | ENSG00000251647 | -0.017688 | 0.50706     | 0.50706     | -0.34082    | 0.63338  | -0.017688 | 0.50706   |
|             | -0.017688       | 0.50706   | 0.50706     | 0.765313218 |             |          |           |           |
| MYH11       | ENSG00000133392 | -0.017796 | 0.5071      | 0.5071      | -0.39864    | 0.65492  | -0.86639  | 0.80686   |
|             | -0.88012        | 0.8106    | 0.5071      | 0.765313218 |             |          |           |           |
| RBBP4P5     | ENSG00000256737 | -0.017848 | 0.50712     | 0.50712     | -0.7439     | 0.77153  | -1.1875   |           |
|             | 0.88249         | -1.3884   | 0.9175      | 0.50712     | 0.765313218 |          |           |           |
| ANKRD20A10P | ENSG00000226695 | -0.01793  | 0.50715     | 0.50715     | -0.01793    | 0.50715  | -0.01793  |           |
|             | 0.50715         | -0.01793  | 0.50715     | 0.50715     | 0.765313218 |          |           |           |
| SLC25A47P1  | ENSG00000254799 | -0.33083  | 0.62961     | 0.62961     | -0.017953   | 0.50716  | -0.017953 |           |
|             | 0.50716         | -0.017953 | 0.50716     | 0.50716     | 0.765313218 |          |           |           |
| NA          | ENSG00000270513 | -0.88674  | 0.81239     | 0.81239     | -1.8904     | 0.97065  | -1.4164   | 0.92168   |
|             | -0.017954       | 0.50716   | 0.50716     | 0.765313218 |             |          |           |           |
| NAAA        | ENSG00000138744 | -0.50766  | 0.69415     | 0.69415     | -0.017997   | 0.50718  | -0.15257  | 0.56063   |
|             | -0.80192        | 0.7887    | 0.50718     | 0.765313218 |             |          |           |           |
| MIR4759     | ENSG00000266133 | -0.070868 | 0.52825     | 0.52825     | -0.018006   | 0.50718  | -0.15766  |           |
|             | 0.56264         | -0.15766  | 0.56264     | 0.50718     | 0.765313218 |          |           |           |
| MRM2        | ENSG00000122687 | -0.018028 | 0.50719     | 0.50719     | -0.84716    | 0.80155  | -0.84716  | 0.80155   |
|             | -0.84716        | 0.80155   | 0.50719     | 0.765313218 |             |          |           |           |
| CDA         | ENSG00000158825 | -0.018036 | 0.50719     | 0.50719     | -0.91358    | 0.81953  | -0.87478  | 0.80915   |
|             | -0.41609        | 0.66133   | 0.50719     | 0.765313218 |             |          |           |           |
| GOLT1B      | ENSG00000111711 | -1.0581   | 0.855       | -1.0581     | 0.855       | -1.0581  | 0.855     | -0.018127 |
|             | 0.50723         | 0.50723   | 0.765313218 |             |             |          |           |           |
| UBE2SP1     | ENSG00000233966 | -0.018148 | 0.50724     | 0.50724     | -0.018148   | 0.50724  | -0.018148 |           |
|             | 0.50724         | -0.018148 | 0.50724     | 0.50724     | 0.765313218 |          |           |           |
| ABHD17AP5   | ENSG00000263366 | -0.077021 | 0.5307      | 0.5307      | -0.71077    | 0.76139  | -0.018189 |           |
|             | 0.50726         | -0.018189 | 0.50726     | 0.50726     | 0.765313218 |          |           |           |
| DSG4        | ENSG00000175065 | -0.10718  | 0.54268     | 0.54268     | -0.018218   | 0.50727  | -0.069313 | 0.52763   |
|             | -0.069313       | 0.52763   | 0.50727     | 0.765313218 |             |          |           |           |
| SEPTIN14P4  | ENSG00000251155 | -0.018242 | 0.50728     | 0.50728     | -0.38086    | 0.64835  | -1.0446   |           |
|             | 0.85191         | -0.66707  | 0.74764     | 0.50728     | 0.765313218 |          |           |           |
| NA          | ENSG00000253997 | -0.018257 | 0.50728     | 0.50728     | -0.018257   | 0.50728  | -0.018257 | 0.50728   |
|             | -0.31906        | 0.62516   | 0.50728     | 0.765313218 |             |          |           |           |
| FAM167A-AS1 | ENSG00000184608 | -0.5971   | 0.72478     | 0.72478     | -0.018336   | 0.50731  | -0.45972  |           |
|             | 0.67714         | -0.25627  | 0.60113     | 0.50731     | 0.765313218 |          |           |           |
| SMG8        | ENSG00000167447 | -0.018357 | 0.50732     | 0.50732     | -0.018357   | 0.50732  | -0.018357 | 0.50732   |
|             | -0.018357       | 0.50732   | 0.50732     | 0.765313218 |             |          |           |           |
| IFITM3P2    | ENSG00000223722 | -0.025181 | 0.51004     | 0.51004     | -0.025181   | 0.51004  | -0.018349 |           |

|           |                 |           |         |             |             |           |         |
|-----------|-----------------|-----------|---------|-------------|-------------|-----------|---------|
|           | 0.50732         | -0.29867  | 0.6174  | 0.50732     | 0.765313218 |           |         |
| CACNG1    | ENSG00000108878 | -0.018381 | 0.50733 | -0.018381   | 0.50733     | -0.018381 |         |
|           | 0.50733         | -0.52357  | 0.69971 | 0.50733     | 0.765313218 |           |         |
| NA        | ENSG00000274128 | -0.018399 | 0.50734 | -0.60776    | 0.72833     | -1.619    | 0.94728 |
|           | -1.619          | 0.94728   | 0.50734 | 0.765313218 |             |           |         |
| NA        | ENSG00000212768 | -0.018391 | 0.50734 | -0.018391   | 0.50734     | -0.018391 | 0.50734 |
|           | -0.018391       | 0.50734   | 0.50734 | 0.765313218 |             |           |         |
| NA        | ENSG00000282793 | -0.072915 | 0.52906 | -0.018497   | 0.50738     | -0.072915 | 0.52906 |
|           | -0.072915       | 0.52906   | 0.50738 | 0.76534809  |             |           |         |
| BAALC-AS2 | ENSG00000236939 | -0.018593 | 0.50742 | -0.018593   | 0.50742     | -0.018593 |         |
|           | 0.50742         | -1.1052   | 0.86546 | 0.50742     | 0.76534809  |           |         |
| DNAJB7    | ENSG00000172404 | -0.018626 | 0.50743 | -0.018626   | 0.50743     | -0.018626 |         |
|           | 0.50743         | -0.018626 | 0.50743 | 0.50743     | 0.76534809  |           |         |
| PTPN1     | ENSG00000196396 | -1.1278   | 0.8703  | -1.6914     | 0.95462     | -1.5899   | 0.94408 |
|           | -0.018621       | 0.50743   | 0.50743 | 0.76534809  |             |           |         |
| MIR378H   | ENSG00000263361 | -0.01873  | 0.50747 | -0.01873    | 0.50747     | -0.01873  |         |
|           | 0.50747         | -0.01873  | 0.50747 | 0.50747     | 0.76534809  |           |         |
| CD24P1    | ENSG00000236500 | -0.17643  | 0.57002 | -0.018744   | 0.50748     | -0.018744 |         |
|           | 0.50748         | -0.018744 | 0.50748 | 0.50748     | 0.76534809  |           |         |
| NA        | ENSG00000266048 | -0.018803 | 0.5075  | -0.018803   | 0.5075      | -0.018803 | 0.5075  |
|           | -0.018803       | 0.5075    | 0.5075  | 0.76534809  |             |           |         |
| NA        | ENSG00000272841 | -0.39099  | 0.6521  | -0.018806   | 0.5075      | -0.39099  | 0.6521  |
|           | -0.39099        | 0.6521    | 0.5075  | 0.76534809  |             |           |         |
| UNGP1     | ENSG00000260818 | -0.018857 | 0.50752 | -0.018857   | 0.50752     | -0.018857 | 0.50752 |
|           | -0.018857       | 0.50752   | 0.50752 | 0.76534809  |             |           |         |
| NA        | ENSG00000253782 | -0.018934 | 0.50755 | -0.018934   | 0.50755     | -0.018934 | 0.50755 |
|           | -0.018934       | 0.50755   | 0.50755 | 0.76534809  |             |           |         |
| PDF       | ENSG00000258429 | -0.018928 | 0.50755 | -0.018928   | 0.50755     | -0.018928 | 0.50755 |
|           | -0.018928       | 0.50755   | 0.50755 | 0.76534809  |             |           |         |
| RAB3IL1   | ENSG00000167994 | -1.5119   | 0.93472 | -0.018965   | 0.50757     | -0.2187   |         |
|           | 0.58656         | -1.4628   | 0.92823 | 0.50757     | 0.76534809  |           |         |
| NA        | ENSG00000206976 | -0.018984 | 0.50757 | -0.21785    | 0.58623     | -0.018984 | 0.50757 |
|           | -0.72661        | 0.76627   | 0.50757 | 0.76534809  |             |           |         |
| RN7SKP227 | ENSG00000201315 | -0.31373  | 0.62314 | -0.30612    | 0.62024     | -0.033291 |         |
|           | 0.51328         | -0.019125 | 0.50763 | 0.50763     | 0.76534809  |           |         |
| HCN1      | ENSG00000164588 | -0.66252  | 0.74618 | -0.24689    | 0.5975      | -0.65236  | 0.74292 |
|           | -0.019212       | 0.50766   | 0.50766 | 0.76534809  |             |           |         |
| NA        | ENSG00000250677 | -0.019197 | 0.50766 | -0.019197   | 0.50766     | -0.019197 | 0.50766 |
|           | -0.019197       | 0.50766   | 0.50766 | 0.76534809  |             |           |         |
| MFSD6     | ENSG00000151690 | -0.019268 | 0.50769 | -0.3179     | 0.62472     | -0.63525  | 0.73737 |
|           | -0.5831         | 0.72009   | 0.50769 | 0.76534809  |             |           |         |
| NA        | ENSG00000276997 | -0.78322  | 0.78325 | -0.01927    | 0.50769     | -1.0478   | 0.85262 |
|           | -1.038          | 0.85037   | 0.50769 | 0.76534809  |             |           |         |
| RNU6-520P | ENSG00000207448 | -0.019301 | 0.5077  | -0.019301   | 0.5077      | -0.019301 |         |
|           | 0.5077          | -0.019301 | 0.5077  | 0.5077      | 0.76534809  |           |         |
| CAMK4     | ENSG00000152495 | -0.1345   | 0.5535  | -0.24565    | 0.59702     | -0.019341 | 0.50772 |
|           | -0.38034        | 0.64815   | 0.50772 | 0.76534809  |             |           |         |
| NA        | ENSG00000269400 | -0.019394 | 0.50774 | -0.019394   | 0.50774     | -0.019394 | 0.50774 |
|           | -0.019394       | 0.50774   | 0.50774 | 0.76534809  |             |           |         |
| NA        | ENSG00000255243 | -0.019411 | 0.50774 | -0.83414    | 0.7979      | -0.83414  | 0.7979  |
|           | -0.83414        | 0.7979    | 0.50774 | 0.76534809  |             |           |         |
| NA        | ENSG00000254236 | -1.8254   | 0.96603 | -0.019458   | 0.50776     | -0.019458 | 0.50776 |
|           | -0.019458       | 0.50776   | 0.50776 | 0.76534809  |             |           |         |
| NBAT1     | ENSG00000260455 | -0.61182  | 0.72967 | -0.61182    | 0.72967     | -0.01947  | 0.50777 |
|           | -0.61182        | 0.72967   | 0.50777 | 0.76534809  |             |           |         |
| ZNF24     | ENSG00000172466 | -0.23153  | 0.59155 | -0.1691     | 0.56714     | -0.019557 | 0.5078  |
|           | -1.7855         | 0.96291   | 0.5078  | 0.76534809  |             |           |         |
| RNU6-249P | ENSG00000199886 | -0.019595 | 0.50782 | -0.67664    | 0.75068     | -0.67664  |         |
|           | 0.75068         | -0.67664  | 0.75068 | 0.50782     | 0.76534809  |           |         |
| NA        | ENSG00000258185 | -0.80962  | 0.79092 | -0.019598   | 0.50782     | -1.4583   | 0.92762 |
|           | -1.4583         | 0.92762   | 0.50782 | 0.76534809  |             |           |         |
| NA        | ENSG00000252317 | -0.019657 | 0.50784 | -0.019657   | 0.50784     | -0.019657 | 0.50784 |

|           |                 |           |         |             |             |           |         |  |
|-----------|-----------------|-----------|---------|-------------|-------------|-----------|---------|--|
|           | -0.019657       | 0.50784   | 0.50784 | 0.76534809  |             |           |         |  |
| IL21R     | ENSG00000103522 | -0.019673 | 0.50785 | -0.019673   | 0.50785     | -0.019673 | 0.50785 |  |
|           | -0.019673       | 0.50785   | 0.50785 | 0.76534809  |             |           |         |  |
| PODXL2    | ENSG00000114631 | -0.019673 | 0.50785 | -0.33479    | 0.63111     | -0.19626  |         |  |
|           | 0.5778          | -0.026399 | 0.51053 | 0.50785     | 0.76534809  |           |         |  |
| NA        | ENSG00000251446 | -0.019684 | 0.50785 | -0.2212     | 0.58753     | -0.2212   | 0.58753 |  |
|           | -0.2212         | 0.58753   | 0.50785 | 0.76534809  |             |           |         |  |
| SPATA21   | ENSG00000187144 | -1.7654   | 0.96125 | -0.01975    | 0.50788     | -1.5942   |         |  |
|           | 0.94455         | -1.6632   | 0.95186 | 0.50788     | 0.765369631 |           |         |  |
| NA        | ENSG00000250934 | -0.019882 | 0.50793 | -0.50292    | 0.69249     | -0.019882 | 0.50793 |  |
|           | -0.019882       | 0.50793   | 0.50793 | 0.765410578 |             |           |         |  |
| HNRNPA3P9 | ENSG00000270903 | -0.019937 | 0.50795 | -0.019937   | 0.50795     | -0.019937 |         |  |
|           | 0.50795         | -0.019937 | 0.50795 | 0.50795     | 0.765410578 |           |         |  |
| SPINDOC   | ENSG00000168005 | -0.019986 | 0.50797 | -1.0976     | 0.8638      | -0.57067  |         |  |
|           | 0.71589         | -0.87327  | 0.80874 | 0.50797     | 0.765410578 |           |         |  |
| MTCO1P23  | ENSG00000235524 | -0.019987 | 0.50797 | -0.019987   | 0.50797     | -0.019987 |         |  |
|           | 0.50797         | -0.019987 | 0.50797 | 0.50797     | 0.765410578 |           |         |  |
| NA        | ENSG00000279365 | -0.02003  | 0.50799 | -0.02003    | 0.50799     | -0.02003  | 0.50799 |  |
|           | -0.02003        | 0.50799   | 0.50799 | 0.765417046 |             |           |         |  |
| NA        | ENSG00000228559 | -0.44273  | 0.67102 | -1.0939     | 0.863       | -0.020316 | 0.5081  |  |
|           | -0.9311         | 0.8241    | 0.5081  | 0.765449448 |             |           |         |  |
| NA        | ENSG00000250712 | -0.020306 | 0.5081  | -0.020306   | 0.5081      | -0.020306 | 0.5081  |  |
|           | -0.020306       | 0.5081    | 0.5081  | 0.765449448 |             |           |         |  |
| GTF2IP3   | ENSG00000187721 | -0.96183  | 0.83193 | -1.2183     | 0.88844     | -0.020358 |         |  |
|           | 0.50812         | -0.29933  | 0.61765 | 0.50812     | 0.765449448 |           |         |  |
| RNU4-73P  | ENSG00000200034 | -1.1184   | 0.86829 | -0.23474    | 0.5928      | -1.1184   |         |  |
|           | 0.86829         | -0.020352 | 0.50812 | 0.50812     | 0.765449448 |           |         |  |
| RNU1-55P  | ENSG00000202380 | -0.21073  | 0.58345 | -0.72758    | 0.76657     | -0.020377 |         |  |
|           | 0.50813         | -0.020377 | 0.50813 | 0.50813     | 0.765449448 |           |         |  |
| NA        | ENSG00000238841 | -0.020384 | 0.50813 | -0.75393    | 0.77455     | -0.75393  | 0.77455 |  |
|           | -0.75393        | 0.77455   | 0.50813 | 0.765449448 |             |           |         |  |
| NA        | ENSG00000214210 | -0.45081  | 0.67394 | -0.77873    | 0.78193     | -0.52249  | 0.69933 |  |
|           | -0.020418       | 0.50815   | 0.50815 | 0.765449448 |             |           |         |  |
| STRN      | ENSG00000115808 | -0.62942  | 0.73546 | -0.020445   | 0.50816     | -0.31199  | 0.62248 |  |
|           | -0.68266        | 0.75259   | 0.50816 | 0.765449448 |             |           |         |  |
| AHSA2P    | ENSG00000173209 | -0.020481 | 0.50817 | -0.90083    | 0.81616     | -0.12093  |         |  |
|           | 0.54813         | -0.61911  | 0.73208 | 0.50817     | 0.765449448 |           |         |  |
| ORMDL1    | ENSG00000128699 | -0.020551 | 0.5082  | -0.49343    | 0.68915     | -0.020551 |         |  |
|           | 0.5082          | -0.020551 | 0.5082  | 0.5082      | 0.765449448 |           |         |  |
| NA        | ENSG00000206721 | -0.020548 | 0.5082  | -0.020548   | 0.5082      | -0.020548 | 0.5082  |  |
|           | -0.020548       | 0.5082    | 0.5082  | 0.765449448 |             |           |         |  |
| NA        | ENSG00000213598 | -0.67586  | 0.75044 | -0.67586    | 0.75044     | -0.020553 | 0.5082  |  |
|           | -0.67586        | 0.75044   | 0.5082  | 0.765449448 |             |           |         |  |
| NA        | ENSG00000227089 | -0.020659 | 0.50824 | -0.020659   | 0.50824     | -0.020659 | 0.50824 |  |
|           | -0.020659       | 0.50824   | 0.50824 | 0.765486036 |             |           |         |  |
| NA        | ENSG00000225282 | -0.91774  | 0.82062 | -1.1154     | 0.86766     | -0.26223  | 0.60343 |  |
|           | -0.020765       | 0.50828   | 0.50828 | 0.765522621 |             |           |         |  |
| IGHV1-18  | ENSG00000211945 | -0.020869 | 0.50833 | -0.020869   | 0.50833     | -0.020869 |         |  |
|           | 0.50833         | -0.020869 | 0.50833 | 0.50833     | 0.765557065 |           |         |  |
| SMR3B     | ENSG00000171201 | -1.6012   | 0.94533 | -1.6012     | 0.94533     | -1.6012   | 0.94533 |  |
|           | -0.020918       | 0.50834   | 0.50834 | 0.765557065 |             |           |         |  |
| NA        | ENSG00000271806 | -0.020931 | 0.50835 | -0.6672     | 0.74768     | -0.020931 | 0.50835 |  |
|           | -0.020931       | 0.50835   | 0.50835 | 0.765557065 |             |           |         |  |
| NA        | ENSG00000248367 | -0.021127 | 0.50843 | -0.57251    | 0.71651     | -0.064928 | 0.52588 |  |
|           | -0.064928       | 0.52588   | 0.50843 | 0.76565388  |             |           |         |  |
| NA        | ENSG00000279056 | -2.4245   | 0.99234 | -1.4441     | 0.92565     | -0.72676  | 0.76631 |  |
|           | -0.021183       | 0.50845   | 0.50845 | 0.765660337 |             |           |         |  |
| NA        | ENSG00000231961 | -0.021439 | 0.50855 | -0.021439   | 0.50855     | -0.021439 | 0.50855 |  |
|           | -0.021439       | 0.50855   | 0.50855 | 0.765754992 |             |           |         |  |
| LINC01813 | ENSG00000229805 | -0.30783  | 0.6209  | -0.021457   | 0.50856     | -0.14074  |         |  |
|           | 0.55596         | -0.07344  | 0.52927 | 0.50856     | 0.765754992 |           |         |  |
| NA        | ENSG00000278484 | -0.021446 | 0.50856 | -0.021446   | 0.50856     | -0.021446 | 0.50856 |  |

|            |                 |           |           |           |             |             |         |  |  |
|------------|-----------------|-----------|-----------|-----------|-------------|-------------|---------|--|--|
|            |                 | -0.021446 | 0.50856   | 0.50856   | 0.765754992 |             |         |  |  |
| NA         | ENSG00000264930 | -0.50735  | 0.69405   | -0.021609 | 0.50862     | -0.021609   | 0.50862 |  |  |
|            |                 | -0.021609 | 0.50862   | 0.50862   | 0.765780801 |             |         |  |  |
| ZFP69      | ENSG00000187815 | -0.25568  | 0.6009    | -0.021643 | 0.50863     | -0.9617     | 0.8319  |  |  |
|            |                 | -0.9617   | 0.8319    | 0.50863   | 0.765780801 |             |         |  |  |
| CYP26B1    | ENSG00000003137 | -0.14867  | 0.55909   | -0.02167  | 0.50864     | -0.46859    |         |  |  |
|            |                 | 0.68032   | -1.3549   | 0.91228   | 0.50864     | 0.765780801 |         |  |  |
| LINC02267  | ENSG00000248510 | -0.38327  | 0.64924   | -0.021667 | 0.50864     | -0.69486    |         |  |  |
|            |                 | 0.75643   | -0.74539  | 0.77198   | 0.50864     | 0.765780801 |         |  |  |
| NA         | ENSG00000250955 | -0.046377 | 0.5185    | -0.021725 | 0.50867     | -0.046377   | 0.5185  |  |  |
|            |                 | -0.046377 | 0.5185    | 0.50867   | 0.765793704 |             |         |  |  |
| RN7SL778P  | ENSG00000272412 | -0.021748 | 0.50868   | -0.021748 | 0.50868     | -0.021748   |         |  |  |
|            |                 | 0.50868   | -0.021748 | 0.50868   | 0.50868     | 0.765793704 |         |  |  |
| CELF2-AS1  | ENSG00000181800 | -0.022088 | 0.50881   | -0.022088 | 0.50881     | -0.022088   |         |  |  |
|            |                 | 0.50881   | -0.022088 | 0.50881   | 0.50881     | 0.765957141 |         |  |  |
| WARS2      | ENSG00000116874 | -0.80958  | 0.79091   | -0.45448  | 0.67526     | -0.84647    | 0.80135 |  |  |
|            |                 | -0.022115 | 0.50882   | 0.50882   | 0.765957141 |             |         |  |  |
| LINC01531  | ENSG00000205786 | -0.022317 | 0.5089    | -0.022317 | 0.5089      | -0.022317   |         |  |  |
|            |                 | 0.5089    | -0.58657  | 0.72126   | 0.5089      | 0.766053905 |         |  |  |
| PHF19      | ENSG00000119403 | -0.77297  | 0.78023   | -0.25911  | 0.60223     | -0.022388   | 0.50893 |  |  |
|            |                 | -0.82828  | 0.79624   | 0.50893   | 0.766075399 |             |         |  |  |
| LINC01792  | ENSG00000237166 | -0.070098 | 0.52794   | -0.070098 | 0.52794     | -0.070098   |         |  |  |
|            |                 | 0.52794   | -0.022493 | 0.50897   | 0.50897     | 0.766103333 |         |  |  |
| PPRC1      | ENSG00000148840 | -1.4855   | 0.93129   | -0.022522 | 0.50898     | -0.15851    | 0.56297 |  |  |
|            |                 | -0.78541  | 0.78389   | 0.50898   | 0.766103333 |             |         |  |  |
| NA         | ENSG00000213486 | -0.25555  | 0.60085   | -0.022617 | 0.50902     | -0.27526    | 0.60844 |  |  |
|            |                 | -0.13543  | 0.55386   | 0.50902   | 0.766105429 |             |         |  |  |
| IFI27      | ENSG00000165949 | -0.29609  | 0.61642   | -0.022698 | 0.50905     | -0.37042    | 0.64447 |  |  |
|            |                 | -0.53833  | 0.70483   | 0.50905   | 0.766105429 |             |         |  |  |
| CFAP73     | ENSG00000186710 | -0.3256   | 0.62764   | -0.022682 | 0.50905     | -0.83216    |         |  |  |
|            |                 | 0.79734   | -0.51444  | 0.69653   | 0.50905     | 0.766105429 |         |  |  |
| FBXO16     | ENSG00000214050 | -1.1859   | 0.88216   | -0.022707 | 0.50906     | -0.98619    |         |  |  |
|            |                 | 0.83798   | -0.30063  | 0.61815   | 0.50906     | 0.766105429 |         |  |  |
| RNU6-1046P | ENSG00000252347 | -0.022706 | 0.50906   | -0.022706 | 0.50906     | -0.022706   |         |  |  |
|            |                 | 0.50906   | -0.022706 | 0.50906   | 0.50906     | 0.766105429 |         |  |  |
| ZNF667     | ENSG00000198046 | -0.82773  | 0.79609   | -0.62939  | 0.73545     | -0.022932   |         |  |  |
|            |                 | 0.50915   | -0.022932 | 0.50915   | 0.50915     | 0.766156842 |         |  |  |
| MIR3683    | ENSG00000266287 | -0.022937 | 0.50915   | -0.022937 | 0.50915     | -0.022937   |         |  |  |
|            |                 | 0.50915   | -0.022937 | 0.50915   | 0.50915     | 0.766156842 |         |  |  |
| NA         | ENSG00000283669 | -0.023182 | 0.50925   | -1.4539   | 0.92702     | -1.1906     | 0.88309 |  |  |
|            |                 | -0.36858  | 0.64378   | 0.50925   | 0.766156842 |             |         |  |  |
| TMCO5B     | ENSG00000215296 | -0.20829  | 0.5825    | -0.061431 | 0.52449     | -0.34512    | 0.635   |  |  |
|            |                 | -0.023217 | 0.50926   | 0.50926   | 0.766156842 |             |         |  |  |
| RPS12P4    | ENSG00000236533 | -0.023231 | 0.50927   | -0.35243  | 0.63774     | -0.35273    |         |  |  |
|            |                 | 0.63785   | -0.023231 | 0.50927   | 0.50927     | 0.766156842 |         |  |  |
| NA         | ENSG00000276064 | -0.023241 | 0.50927   | -0.088483 | 0.53525     | -0.088483   | 0.53525 |  |  |
|            |                 | -0.88092  | 0.81082   | 0.50927   | 0.766156842 |             |         |  |  |
| MMP2       | ENSG00000087245 | -1.1879   | 0.88255   | -0.090311 | 0.53598     | -0.02331    | 0.5093  |  |  |
|            |                 | -0.70961  | 0.76103   | 0.5093    | 0.766156842 |             |         |  |  |
| NA         | ENSG00000213605 | -0.58161  | 0.71959   | -0.58161  | 0.71959     | -0.17387    | 0.56902 |  |  |
|            |                 | -0.023342 | 0.50931   | 0.50931   | 0.766156842 |             |         |  |  |
| RPS29P6    | ENSG00000230451 | -0.023344 | 0.50931   | -0.023344 | 0.50931     | -0.023344   |         |  |  |
|            |                 | 0.50931   | -0.023344 | 0.50931   | 0.50931     | 0.766156842 |         |  |  |
| FGF10-AS1  | ENSG00000248464 | -0.23883  | 0.59438   | -0.19002  | 0.57535     | -0.023336   |         |  |  |
|            |                 | 0.50931   | -0.23883  | 0.59438   | 0.50931     | 0.766156842 |         |  |  |
| RALGPS2    | ENSG00000116191 | -0.2911   | 0.61451   | -0.17857  | 0.57086     | -0.023354   |         |  |  |
|            |                 | 0.50932   | -0.62107  | 0.73272   | 0.50932     | 0.766156842 |         |  |  |
| NA         | ENSG00000279570 | -0.023361 | 0.50932   | -0.023361 | 0.50932     | -0.023361   | 0.50932 |  |  |
|            |                 | -0.023361 | 0.50932   | 0.50932   | 0.766156842 |             |         |  |  |
| ZKSCAN2    | ENSG00000155592 | -0.023381 | 0.50933   | -0.023381 | 0.50933     | -0.023381   |         |  |  |
|            |                 | 0.50933   | -0.023381 | 0.50933   | 0.50933     | 0.766156842 |         |  |  |
| TTL10      | ENSG00000162571 | -0.85564  | 0.8039    | -0.85564  | 0.8039      | -1.6766     |         |  |  |

|            |                 |           |         |             |             |           |         |
|------------|-----------------|-----------|---------|-------------|-------------|-----------|---------|
|            | 0.95319         | -0.023396 | 0.50933 | 0.50933     | 0.766156842 |           |         |
| NA         | ENSG00000279957 | -0.42658  | 0.66516 | -0.023379   | 0.50933     | -0.42658  | 0.66516 |
|            | -0.42658        | 0.66516   | 0.50933 | 0.766156842 |             |           |         |
| NA         | ENSG00000280040 | -0.023491 | 0.50937 | -0.023491   | 0.50937     | -0.023491 | 0.50937 |
|            | -0.023491       | 0.50937   | 0.50937 | 0.766184752 |             |           |         |
| OR3A3      | ENSG00000159961 | -0.023511 | 0.50938 | -0.023511   | 0.50938     | -1.9474   | 0.97426 |
|            | -1.0049         | 0.84252   | 0.50938 | 0.766184752 |             |           |         |
| NA         | ENSG00000257453 | -0.02365  | 0.50943 | -0.02365    | 0.50943     | -0.02365  | 0.50943 |
|            | -0.02365        | 0.50943   | 0.50943 | 0.766236308 |             |           |         |
| SUMO2P14   | ENSG00000271096 | -0.17856  | 0.57086 | -0.023693   | 0.50945     | -0.91097  |         |
|            | 0.81885         | -0.063969 | 0.5255  | 0.50945     | 0.766242739 |           |         |
| KCNIP1-AS1 | ENSG00000253591 | -0.0238   | 0.50949 | -0.26182    | 0.60327     | -1.0021   |         |
|            | 0.84186         | -0.31327  | 0.62296 | 0.50949     | 0.766244812 |           |         |
| LARP1      | ENSG00000155506 | -0.97178  | 0.83442 | -0.023817   | 0.5095      | -0.60693  | 0.72805 |
|            | -0.11649        | 0.54637   | 0.5095  | 0.766244812 |             |           |         |
| NA         | ENSG00000270159 | -0.023841 | 0.50951 | -0.023841   | 0.50951     | -0.023841 | 0.50951 |
|            | -0.023841       | 0.50951   | 0.50951 | 0.766244812 |             |           |         |
| RANGAP1    | ENSG00000100401 | -0.51913  | 0.69816 | -1.394      | 0.91834     | -0.023879 |         |
|            | 0.50953         | -0.14072  | 0.55595 | 0.50953     | 0.766244812 |           |         |
| PSPC1      | ENSG00000121390 | -1.2518   | 0.89468 | -0.25713    | 0.60146     | -0.9506   | 0.8291  |
|            | -0.023892       | 0.50953   | 0.50953 | 0.766244812 |             |           |         |
| NA         | ENSG00000227627 | -0.023969 | 0.50956 | -0.023969   | 0.50956     | -0.023969 | 0.50956 |
|            | -0.023969       | 0.50956   | 0.50956 | 0.76626628  |             |           |         |
| NA         | ENSG00000279883 | -0.024159 | 0.50964 | -0.26028    | 0.60268     | -0.024159 | 0.50964 |
|            | -0.024159       | 0.50964   | 0.50964 | 0.766336225 |             |           |         |
| KRT1       | ENSG00000167768 | -0.024249 | 0.50967 | -0.024249   | 0.50967     | -0.024249 | 0.50967 |
|            | -0.024249       | 0.50967   | 0.50967 | 0.766336225 |             |           |         |
| NA         | ENSG00000236248 | -0.024248 | 0.50967 | -0.024248   | 0.50967     | -0.05504  | 0.52195 |
|            | -0.05504        | 0.52195   | 0.50967 | 0.766336225 |             |           |         |
| PGS1       | ENSG00000087157 | -0.024262 | 0.50968 | -0.91222    | 0.81917     | -0.11723  | 0.54666 |
|            | -1.1895         | 0.88287   | 0.50968 | 0.766336225 |             |           |         |
| NA         | ENSG00000267077 | -0.024376 | 0.50972 | -0.024376   | 0.50972     | -0.024376 | 0.50972 |
|            | -0.024376       | 0.50972   | 0.50972 | 0.766336225 |             |           |         |
| LINC01656  | ENSG00000232655 | -0.024507 | 0.50978 | -0.024507   | 0.50978     | -0.024507 |         |
|            | 0.50978         | -0.024507 | 0.50978 | 0.50978     | 0.766336225 |           |         |
| CDK8       | ENSG00000132964 | -0.91549  | 0.82003 | -0.024563   | 0.5098      | -0.079486 | 0.53168 |
|            | -0.51716        | 0.69748   | 0.5098  | 0.766336225 |             |           |         |
| NA         | ENSG00000231401 | -0.024629 | 0.50982 | -0.024629   | 0.50982     | -0.024629 | 0.50982 |
|            | -0.024629       | 0.50982   | 0.50982 | 0.766336225 |             |           |         |
| THRB-AS1   | ENSG00000228791 | -0.8279   | 0.79614 | -0.024648   | 0.50983     | -0.35444  |         |
|            | 0.63849         | -1.4377   | 0.92474 | 0.50983     | 0.766336225 |           |         |
| MIR4489    | ENSG00000265874 | -0.0247   | 0.50985 | -0.0247     | 0.50985     | -0.0247   |         |
|            | 0.50985         | -0.0247   | 0.50985 | 0.50985     | 0.766336225 |           |         |
| NCBP2-AS1  | ENSG00000225578 | -0.024714 | 0.50986 | -0.024714   | 0.50986     | -0.024714 |         |
|            | 0.50986         | -0.024714 | 0.50986 | 0.50986     | 0.766336225 |           |         |
| RPL23AP61  | ENSG00000280012 | -0.024787 | 0.50989 | -0.024787   | 0.50989     | -0.14208  |         |
|            | 0.55649         | -0.024787 | 0.50989 | 0.50989     | 0.766336225 |           |         |
| ARMS2      | ENSG00000254636 | -0.024825 | 0.5099  | -0.024825   | 0.5099      | -0.41248  | 0.66001 |
|            | -0.8471         | 0.80153   | 0.5099  | 0.766336225 |             |           |         |
| NA         | ENSG00000259363 | -1.6672   | 0.95227 | -0.024809   | 0.5099      | -0.14519  | 0.55772 |
|            | -0.56243        | 0.71309   | 0.5099  | 0.766336225 |             |           |         |
| NA         | ENSG00000227206 | -1.0174   | 0.84552 | -0.024871   | 0.50992     | -1.8765   | 0.96971 |
|            | -0.024871       | 0.50992   | 0.50992 | 0.766336225 |             |           |         |
| RPS2P1     | ENSG00000225246 | -0.069738 | 0.5278  | -0.024924   | 0.50994     | -0.30219  |         |
|            | 0.61874         | -0.38019  | 0.6481  | 0.50994     | 0.766336225 |           |         |
| NA         | ENSG00000227554 | -0.024913 | 0.50994 | -0.024913   | 0.50994     | -0.024913 | 0.50994 |
|            | -0.024913       | 0.50994   | 0.50994 | 0.766336225 |             |           |         |
| NA         | ENSG00000274954 | -0.024936 | 0.50995 | -0.024936   | 0.50995     | -0.024936 | 0.50995 |
|            | -0.024936       | 0.50995   | 0.50995 | 0.766336225 |             |           |         |
| NA         | ENSG00000283536 | -1.6104   | 0.94634 | -1.6104     | 0.94634     | -0.02497  | 0.50996 |
|            | -1.6104         | 0.94634   | 0.50996 | 0.766336225 |             |           |         |
| RNU6-1306P | ENSG00000202089 | -1.0434   | 0.85162 | -0.94269    | 0.82708     | -0.025006 |         |

|            |                 |           |         |             |             |           |           |
|------------|-----------------|-----------|---------|-------------|-------------|-----------|-----------|
|            | 0.50997         | -0.025006 | 0.50997 | 0.50997     | 0.766336225 |           |           |
| MIR2116    | ENSG00000253030 | -0.025005 | 0.50997 | 0.50997     | -0.025005   | 0.50997   | -0.025005 |
|            | 0.50997         | -0.025005 | 0.50997 | 0.50997     | 0.766336225 |           |           |
| HNRNPA1P38 | ENSG00000253605 | -0.043056 | 0.51717 | 0.51717     | -0.025005   | 0.50997   | -0.4414   |
|            | 0.67054         | -0.91481  | 0.81985 | 0.50997     | 0.766336225 |           |           |
| WDR11-AS1  | ENSG00000227165 | -0.23245  | 0.59191 | 0.59191     | -0.025052   | 0.50999   | -0.60457  |
|            | 0.72727         | -0.37809  | 0.64732 | 0.50999     | 0.766336225 |           |           |
| SNORA5C    | ENSG00000201772 | -0.025131 | 0.51002 | 0.51002     | -0.025131   | 0.51002   | -0.025131 |
|            | 0.51002         | -0.025131 | 0.51002 | 0.51002     | 0.766336225 |           |           |
| CHSY3      | ENSG00000198108 | -0.34932  | 0.63658 | -0.61179    | 0.72966     | -0.077061 | 0.53071   |
|            | -0.025328       | 0.5101    | 0.5101  | 0.766336225 |             |           |           |
| TUB        | ENSG00000166402 | -0.025355 | 0.51011 | -0.20153    | 0.57986     | -0.49938  | 0.69124   |
|            | -0.42042        | 0.66291   | 0.51011 | 0.766336225 |             |           |           |
| NA         | ENSG00000277369 | -0.025382 | 0.51012 | -0.025382   | 0.51012     | -0.025382 | 0.51012   |
|            | -0.025382       | 0.51012   | 0.51012 | 0.766336225 |             |           |           |
| SEPTIN12   | ENSG00000140623 | -0.17315  | 0.56873 | -0.025418   | 0.51014     | -0.055663 |           |
|            | 0.52219         | -0.29914  | 0.61758 | 0.51014     | 0.766336225 |           |           |
| GGT6       | ENSG00000167741 | -0.02542  | 0.51014 | -0.12363    | 0.5492      | -0.12363  | 0.5492    |
|            | -0.11244        | 0.54476   | 0.51014 | 0.766336225 |             |           |           |
| FAR2P3     | ENSG00000240253 | -1.474    | 0.92975 | -1.848      | 0.9677      | -0.025433 |           |
|            | 0.51015         | -0.58252  | 0.71989 | 0.51015     | 0.766336225 |           |           |
| MICE       | ENSG00000273340 | -0.025476 | 0.51016 | -0.025476   | 0.51016     | -0.025476 | 0.51016   |
|            | -0.025476       | 0.51016   | 0.51016 | 0.766336225 |             |           |           |
| NFILZ      | ENSG00000268480 | -0.88235  | 0.81121 | -1.2188     | 0.88854     | -0.025535 | 0.51019   |
|            | -0.39112        | 0.65215   | 0.51019 | 0.766336225 |             |           |           |
| NA         | ENSG00000200287 | -0.91035  | 0.81868 | -0.91035    | 0.81868     | -0.91035  | 0.81868   |
|            | -0.025581       | 0.5102    | 0.5102  | 0.766336225 |             |           |           |
| MIR3074    | ENSG00000207617 | -0.025598 | 0.51021 | -0.41744    | 0.66182     | -0.41744  |           |
|            | 0.66182         | -2.0328   | 0.97896 | 0.51021     | 0.766336225 |           |           |
| DPY19L2P3  | ENSG00000227855 | -0.042249 | 0.51685 | -0.37264    | 0.64529     | -0.68064  |           |
|            | 0.75195         | -0.025615 | 0.51022 | 0.51022     | 0.766336225 |           |           |
| HCRT       | ENSG00000161610 | -0.025636 | 0.51023 | -0.025636   | 0.51023     | -0.025636 | 0.51023   |
|            | -0.025636       | 0.51023   | 0.51023 | 0.766336225 |             |           |           |
| NA         | ENSG00000220685 | -0.71337  | 0.76219 | -0.71337    | 0.76219     | -0.71337  | 0.76219   |
|            | -0.025652       | 0.51023   | 0.51023 | 0.766336225 |             |           |           |
| NA         | ENSG00000228032 | -0.69542  | 0.7566  | -0.69542    | 0.7566      | -0.025674 | 0.51024   |
|            | -1.0505         | 0.85326   | 0.51024 | 0.766336225 |             |           |           |
| PER1       | ENSG00000179094 | -0.46534  | 0.67916 | -0.46534    | 0.67916     | -0.46534  | 0.67916   |
|            | -0.025716       | 0.51026   | 0.51026 | 0.766336225 |             |           |           |
| TOR2A      | ENSG00000160404 | -0.025779 | 0.51028 | -0.025779   | 0.51028     | -0.085995 | 0.53426   |
|            | -0.6483         | 0.7416    | 0.51028 | 0.766336225 |             |           |           |
| GPRC5B     | ENSG00000167191 | -0.88552  | 0.81206 | -0.20742    | 0.58216     | -0.11216  |           |
|            | 0.54465         | -0.025822 | 0.5103  | 0.5103      | 0.766336225 |           |           |
| GSDME      | ENSG00000105928 | -0.922    | 0.82174 | -0.23753    | 0.59388     | -0.025842 | 0.51031   |
|            | -1.1024         | 0.86486   | 0.51031 | 0.766336225 |             |           |           |
| RPL5P35    | ENSG00000214727 | -0.074471 | 0.52968 | -0.025865   | 0.51032     | -0.025865 |           |
|            | 0.51032         | -0.025865 | 0.51032 | 0.51032     | 0.766336225 |           |           |
| RNF11P2    | ENSG00000227563 | -0.58916  | 0.72212 | -0.58916    | 0.72212     | -0.025928 |           |
|            | 0.51034         | -0.58916  | 0.72212 | 0.51034     | 0.766336225 |           |           |
| NA         | ENSG00000259615 | -0.025932 | 0.51034 | -0.025932   | 0.51034     | -0.025932 | 0.51034   |
|            | -0.025932       | 0.51034   | 0.51034 | 0.766336225 |             |           |           |
| NA         | ENSG00000283417 | -1.0559   | 0.8545  | -0.9784     | 0.83606     | -0.24081  | 0.59515   |
|            | -0.025975       | 0.51036   | 0.51036 | 0.766336225 |             |           |           |
| RNU6-119P  | ENSG00000201752 | -2.1163   | 0.98284 | -0.025997   | 0.51037     | -0.79558  |           |
|            | 0.78686         | -0.79558  | 0.78686 | 0.51037     | 0.766336225 |           |           |
| NA         | ENSG00000258836 | -0.026021 | 0.51038 | -0.026021   | 0.51038     | -0.026021 | 0.51038   |
|            | -0.026021       | 0.51038   | 0.51038 | 0.766336225 |             |           |           |
| MAPRE1     | ENSG00000101367 | -1.0151   | 0.84497 | -1.0151     | 0.84497     | -0.026074 |           |
|            | 0.5104          | -1.0151   | 0.84497 | 0.5104      | 0.766336225 |           |           |
| NA         | ENSG00000267397 | -0.026083 | 0.5104  | -0.026083   | 0.5104      | -0.026083 | 0.5104    |
|            | -0.026083       | 0.5104    | 0.5104  | 0.766336225 |             |           |           |
| FAM182B    | ENSG00000175170 | -0.24055  | 0.59505 | -0.026157   | 0.51043     | -0.4656   |           |

|           |                 |             |         |             |             |           |         |           |
|-----------|-----------------|-------------|---------|-------------|-------------|-----------|---------|-----------|
|           | 0.67925         | -0.091491   | 0.53645 | 0.51043     | 0.766336225 |           |         |           |
| PIK3C2G   | ENSG00000139144 | -1.0283     | 0.8481  | -0.89298    | 0.81407     | -0.77858  |         |           |
|           | 0.78189         | -0.026178   | 0.51044 | 0.51044     | 0.766336225 |           |         |           |
| PDHB      | ENSG00000168291 | -0.026177   | 0.51044 | -0.026177   | 0.51044     | -0.026177 | 0.51044 |           |
|           | -0.026177       | 0.51044     | 0.51044 | 0.766336225 |             |           |         |           |
| NA        | ENSG00000255099 | -0.080384   | 0.53203 | -0.95648    | 0.83058     | -1.6199   | 0.94737 |           |
|           | -0.026237       | 0.51047     | 0.51047 | 0.766357654 |             |           |         |           |
| LGI3      | ENSG00000168481 | -0.026376   | 0.51052 | -0.026376   | 0.51052     | -0.026376 | 0.51052 |           |
|           | -0.54473        | 0.70703     | 0.51052 | 0.766409107 |             |           |         |           |
| NA        | ENSG00000267157 | -0.026468   | 0.51056 | -0.026468   | 0.51056     | -0.026468 | 0.51056 |           |
|           | -0.026468       | 0.51056     | 0.51056 | 0.766445544 |             |           |         |           |
| CALCP     | ENSG00000253179 | -0.026731   | 0.51066 | -0.026731   | 0.51066     | -0.026731 | 0.51066 |           |
|           | -0.026731       | 0.51066     | 0.51066 | 0.766546241 |             |           |         |           |
| RNA5SP357 | ENSG00000272435 | -0.026742   | 0.51067 | -0.026742   | 0.51067     | -0.026742 |         |           |
|           | 0.51067         | -0.026742   | 0.51067 | 0.51067     | 0.766546241 |           |         |           |
| NA        | ENSG00000216368 | -0.026778   | 0.51068 | -0.026778   | 0.51068     | -0.026778 | 0.51068 |           |
|           | -0.026778       | 0.51068     | 0.51068 | 0.766546241 |             |           |         |           |
| DSTNP1    | ENSG00000230982 | -0.026787   | 0.51069 | -0.026787   | 0.51069     | -0.026787 |         |           |
|           | 0.51069         | -0.026787   | 0.51069 | 0.51069     | 0.766546241 |           |         |           |
| NA        | ENSG00000279714 | -0.026864   | 0.51072 | -0.026864   | 0.51072     | -0.026864 | 0.51072 |           |
|           | -0.026864       | 0.51072     | 0.51072 | 0.766567658 |             |           |         |           |
| NA        | ENSG00000251132 | -0.10871    | 0.54329 | -0.031576   | 0.5126      | -0.026934 | 0.51074 |           |
|           | -0.026934       | 0.51074     | 0.51074 | 0.76657389  |             |           |         |           |
| BATF2     | ENSG00000168062 | -0.4124     | 0.65998 | -0.026989   | 0.51077     | -0.19119  | 0.57581 |           |
|           | -0.29805        | 0.61717     | 0.51077 | 0.76657389  |             |           |         |           |
| LRPPRC    | ENSG00000138095 | -0.9602     | 0.83152 | -0.41422    | 0.66064     | -0.47169  |         |           |
|           | 0.68142         | -0.027034   | 0.51078 | 0.51078     | 0.76657389  |           |         |           |
| RTL6      | ENSG00000188636 | -0.18663    | 0.57403 | -0.027147   | 0.51083     | -0.398    | 0.65468 |           |
|           | -0.60726        | 0.72816     | 0.51083 | 0.76657389  |             |           |         |           |
| NA        | ENSG00000230287 | -0.027167   | 0.51084 | -0.027167   | 0.51084     | -0.027167 | 0.51084 |           |
|           | -0.027167       | 0.51084     | 0.51084 | 0.76657389  |             |           |         |           |
| KCTD6     | ENSG00000168301 | -0.027207   | 0.51085 | -0.027207   | 0.51085     | -0.77137  | 0.77976 |           |
|           | -0.39508        | 0.65361     | 0.51085 | 0.76657389  |             |           |         |           |
| XPOTP1    | ENSG00000214185 | -0.73781    | 0.76969 | -0.73781    | 0.76969     | -0.73781  |         |           |
|           | 0.76969         | -0.0272     | 0.51085 | 0.51085     | 0.76657389  |           |         |           |
| NUTF2P4   | ENSG00000234790 | -0.24415    | 0.59644 | -0.27001    | 0.60642     | -0.22421  |         |           |
|           | 0.5887          | -0.02721    | 0.51085 | 0.51085     | 0.76657389  |           |         |           |
| CXCL12    | ENSG00000107562 | -1.4256     | 0.92301 | -1.5395     | 0.93816     | -0.027266 |         |           |
|           | 0.51088         | -1.7018     | 0.9556  | 0.51088     | 0.766575555 |           |         |           |
| PKD1L2    | ENSG00000166473 | -0.53808    | 0.70474 | -0.80538    | 0.7897      | -0.027293 |         |           |
|           | 0.51089         | -0.70199    | 0.75866 | 0.51089     | 0.766575555 |           |         |           |
| HMGB1P14  | ENSG00000180189 | -0.098502   | 0.53923 | -0.027431   | 0.51094     | -0.098502 |         |           |
|           | 0.53923         | -0.098502   | 0.53923 | 0.51094     | 0.766575555 |           |         |           |
| NA        | ENSG00000221281 | -0.027444   | 0.51095 | -0.027444   | 0.51095     | -0.027444 | 0.51095 |           |
|           | -0.027444       | 0.51095     | 0.51095 | 0.766575555 |             |           |         |           |
| NA        | ENSG00000255367 | -0.38602    | 0.65026 | -0.30234    | 0.6188      | -0.16623  | 0.56601 |           |
|           | -0.027559       | 0.51099     | 0.51099 | 0.766575555 |             |           |         |           |
| NA        | ENSG00000271434 | -0.027573   | 0.511   | -0.027573   | 0.511       | -0.027573 | 0.511   | -0.027573 |
|           | 0.511           | 0.766575555 |         |             |             |           |         |           |
| RPS24P16  | ENSG00000242634 | -0.027604   | 0.51101 | -0.027604   | 0.51101     | -0.027604 |         |           |
|           | 0.51101         | -0.027604   | 0.51101 | 0.51101     | 0.766575555 |           |         |           |
| TMEM134   | ENSG00000172663 | -0.027638   | 0.51102 | -0.027638   | 0.51102     | -0.60105  |         |           |
|           | 0.7261          | -0.027638   | 0.51102 | 0.51102     | 0.766575555 |           |         |           |
| NA        | ENSG00000227307 | -0.027617   | 0.51102 | -0.20984    | 0.5831      | -0.72738  | 0.7665  |           |
|           | -0.66104        | 0.74571     | 0.51102 | 0.766575555 |             |           |         |           |
| NA        | ENSG00000221486 | -0.027629   | 0.51102 | -0.027629   | 0.51102     | -0.027629 | 0.51102 |           |
|           | -0.027629       | 0.51102     | 0.51102 | 0.766575555 |             |           |         |           |
| TSPAN31   | ENSG00000135452 | -0.027647   | 0.51103 | -0.027647   | 0.51103     | -0.027647 |         |           |
|           | 0.51103         | -0.027647   | 0.51103 | 0.51103     | 0.766575555 |           |         |           |
| NANOGP8   | ENSG00000255192 | -0.47792    | 0.68365 | -0.47792    | 0.68365     | -0.45353  |         |           |
|           | 0.67492         | -0.027696   | 0.51105 | 0.51105     | 0.766575555 |           |         |           |
| NA        | ENSG00000232874 | -1.3134     | 0.90548 | -2.2205     | 0.98681     | -0.027767 | 0.51108 |           |



|             |                 |           |           |           |             |             |           |  |
|-------------|-----------------|-----------|-----------|-----------|-------------|-------------|-----------|--|
|             |                 | -0.38417  | 0.64957   | 0.51108   | 0.766575555 |             |           |  |
| MYO7B       | ENSG00000169994 | -0.5963   | 0.72451   | -0.11968  | 0.54763     | -0.027849   | 0.51111   |  |
|             |                 | -1.6873   | 0.95423   | 0.51111   | 0.766575555 |             |           |  |
| NA          | ENSG00000251154 | -0.59404  | 0.72376   | -0.51706  | 0.69744     | -0.027852   | 0.51111   |  |
|             |                 | -0.54949  | 0.70867   | 0.51111   | 0.766575555 |             |           |  |
| RN7SL305P   | ENSG00000240647 | -0.027906 | 0.51113   | -0.69195  | 0.75552     | -0.69195    |           |  |
|             |                 | 0.75552   | -0.69195  | 0.75552   | 0.51113     | 0.766575555 |           |  |
| SNORD114-14 | ENSG00000199593 | -0.027953 | 0.51115   | -0.027953 | 0.51115     | 0.51115     | -0.027953 |  |
|             |                 | 0.51115   | -0.027953 | 0.51115   | 0.51115     | 0.766575555 |           |  |
| SYF2P1      | ENSG00000258350 | -0.027944 | 0.51115   | -0.027944 | 0.51115     | -0.027944   |           |  |
|             |                 | 0.51115   | -0.027944 | 0.51115   | 0.51115     | 0.766575555 |           |  |
| NA          | ENSG00000264884 | -0.38343  | 0.6493    | -1.1671   | 0.87842     | -0.02795    | 0.51115   |  |
|             |                 | -0.48676  | 0.68678   | 0.51115   | 0.766575555 |             |           |  |
| NA          | ENSG00000224365 | -0.096949 | 0.53862   | -0.028046 | 0.51119     | -0.91588    | 0.82014   |  |
|             |                 | -0.19377  | 0.57682   | 0.51119   | 0.766590372 |             |           |  |
| ZNF653      | ENSG00000161914 | -0.69918  | 0.75778   | -0.61564  | 0.73093     | -0.69918    |           |  |
|             |                 | 0.75778   | -0.028087 | 0.5112    | 0.5112      | 0.766590372 |           |  |
| COL9A2      | ENSG00000049089 | -0.47637  | 0.6831    | -0.028151 | 0.51123     | -0.71738    |           |  |
|             |                 | 0.76343   | -0.14802  | 0.55884   | 0.51123     | 0.766590372 |           |  |
| PHF5GP      | ENSG00000238259 | -1.1741   | 0.87982   | -0.028187 | 0.51124     | -2.1717     |           |  |
|             |                 | 0.98506   | -2.1717   | 0.98506   | 0.51124     | 0.766590372 |           |  |
| NA          | ENSG00000279040 | -0.028209 | 0.51125   | -0.028209 | 0.51125     | -0.028209   | 0.51125   |  |
|             |                 | -0.028209 | 0.51125   | 0.51125   | 0.766590372 |             |           |  |
| CCR4        | ENSG00000183813 | -0.95961  | 0.83137   | -0.028236 | 0.51126     | -1.0491     | 0.85294   |  |
|             |                 | -1.024    | 0.84707   | 0.51126   | 0.766590372 |             |           |  |
| PRKN        | ENSG00000185345 | -1.6255   | 0.94797   | -1.8151   | 0.96525     | -1.0895     | 0.86203   |  |
|             |                 | -0.028246 | 0.51127   | 0.51127   | 0.766590372 |             |           |  |
| MTX1        | ENSG00000173171 | -0.028295 | 0.51129   | -0.32979  | 0.62922     | -0.86469    | 0.8064    |  |
|             |                 | -0.86469  | 0.8064    | 0.51129   | 0.766594579 |             |           |  |
| DNM1L       | ENSG00000087470 | -0.98204  | 0.83696   | -1.8298   | 0.96636     | -0.028381   | 0.51132   |  |
|             |                 | -1.4759   | 0.93001   | 0.51132   | 0.766594579 |             |           |  |
| RNY4P6      | ENSG00000200537 | -0.063508 | 0.52532   | -0.063508 | 0.52532     | -0.063508   |           |  |
|             |                 | 0.52532   | -0.02837  | 0.51132   | 0.51132     | 0.766594579 |           |  |
| NA          | ENSG00000261420 | -0.028562 | 0.51139   | -0.028562 | 0.51139     | -0.028562   | 0.51139   |  |
|             |                 | -0.028562 | 0.51139   | 0.51139   | 0.766667343 |             |           |  |
| NA          | ENSG00000238865 | -1.0142   | 0.84476   | -0.63903  | 0.7386      | -0.45753    | 0.67636   |  |
|             |                 | -0.028582 | 0.5114    | 0.5114    | 0.766667343 |             |           |  |
| SLC6A19     | ENSG00000174358 | -0.12885  | 0.55126   | -0.028638 | 0.51142     | -0.34935    |           |  |
|             |                 | 0.63659   | -0.56525  | 0.71405   | 0.51142     | 0.766673543 |           |  |
| LINC01650   | ENSG00000230434 | -0.028741 | 0.51146   | -0.028741 | 0.51146     | -0.65938    |           |  |
|             |                 | 0.74517   | -0.028741 | 0.51146   | 0.51146     | 0.766673543 |           |  |
| NA          | ENSG00000242611 | -1.1191   | 0.86846   | -1.3158   | 0.90588     | -0.37342    | 0.64558   |  |
|             |                 | -0.02875  | 0.51147   | 0.51147   | 0.766673543 |             |           |  |
| PEAK3       | ENSG00000188305 | -0.028815 | 0.51149   | -0.028815 | 0.51149     | -0.028815   | 0.51149   |  |
|             |                 | -0.27837  | 0.60964   | 0.51149   | 0.766673543 |             |           |  |
| LDLR        | ENSG00000130164 | -1.2663   | 0.8973    | -1.6064   | 0.9459      | -0.02884    | 0.5115    |  |
|             |                 | -1.131    | 0.87098   | 0.5115    | 0.766673543 |             |           |  |
| PIGCP1      | ENSG00000213713 | -0.028841 | 0.5115    | -0.028841 | 0.5115      | -0.028841   |           |  |
|             |                 | 0.5115    | -0.028841 | 0.5115    | 0.5115      | 0.766673543 |           |  |
| LINC02087   | ENSG00000237057 | -0.02891  | 0.51153   | -0.071333 | 0.52843     | -0.21079    |           |  |
|             |                 | 0.58347   | -0.47288  | 0.68185   | 0.51153     | 0.766673543 |           |  |
| NA          | ENSG00000268601 | -0.028913 | 0.51153   | -0.028913 | 0.51153     | -0.028913   | 0.51153   |  |
|             |                 | -0.028913 | 0.51153   | 0.51153   | 0.766673543 |             |           |  |
| TBC1D10A    | ENSG00000099992 | -0.029013 | 0.51157   | -1.7303   | 0.95821     | -1.7303     |           |  |
|             |                 | 0.95821   | -1.5321   | 0.93725   | 0.51157     | 0.766690528 |           |  |
| NA          | ENSG00000267872 | -0.60693  | 0.72805   | -1.2285   | 0.89037     | -0.02904    | 0.51158   |  |
|             |                 | -0.32008  | 0.62554   | 0.51158   | 0.766690528 |             |           |  |
| SH3GL1P2    | ENSG00000264943 | -0.029054 | 0.51159   | -0.029054 | 0.51159     | -0.029054   |           |  |
|             |                 | 0.51159   | -0.029054 | 0.51159   | 0.51159     | 0.766690528 |           |  |
| SFXN1       | ENSG00000164466 | -0.3605   | 0.64076   | -0.029135 | 0.51162     | -0.96918    | 0.83377   |  |
|             |                 | -0.67882  | 0.75137   | 0.51162   | 0.766690528 |             |           |  |
| FREM2-AS1   | ENSG00000225350 | -0.87756  | 0.80991   | -0.87756  | 0.80991     | -0.029123   |           |  |

|             |                 |           |         |             |             |           |         |
|-------------|-----------------|-----------|---------|-------------|-------------|-----------|---------|
|             | 0.51162         | -0.87756  | 0.80991 | 0.51162     | 0.766690528 |           |         |
| RNU6-492P   | ENSG00000199905 | -0.029212 | 0.51165 | -0.63723    | 0.73801     | -0.43875  |         |
|             | 0.66958         | -1.0189   | 0.84588 | 0.51165     | 0.766711907 |           |         |
| KRTAP10-11  | ENSG00000243489 | -0.80171  | 0.78864 | -0.029245   | 0.51167     | -1.8346   |         |
|             | 0.96672         | -0.91995  | 0.8212  | 0.51167     | 0.7667183   |           |         |
| ZCCHC2      | ENSG00000141664 | -0.84307  | 0.80041 | -0.43154    | 0.66696     | -0.02945  |         |
|             | 0.51175         | -0.21217  | 0.58401 | 0.51175     | 0.766765239 |           |         |
| NA          | ENSG00000283633 | -0.029457 | 0.51175 | -0.029457   | 0.51175     | -0.029457 | 0.51175 |
|             | -0.029457       | 0.51175   | 0.51175 | 0.766765239 |             |           |         |
| MTND1P18    | ENSG00000225276 | -0.029474 | 0.51176 | -0.90037    | 0.81604     | -0.55648  |         |
|             | 0.71106         | -0.12773  | 0.55082 | 0.51176     | 0.766765239 |           |         |
| OR5L2       | ENSG00000205030 | -0.029498 | 0.51177 | -0.26677    | 0.60518     | -0.029498 | 0.51177 |
|             | -0.029498       | 0.51177   | 0.51177 | 0.766765239 |             |           |         |
| NA          | ENSG00000277790 | -0.029523 | 0.51178 | -0.029523   | 0.51178     | -0.029523 | 0.51178 |
|             | -0.029523       | 0.51178   | 0.51178 | 0.766765239 |             |           |         |
| PROSER1     | ENSG00000120685 | -0.44092  | 0.67036 | -0.054176   | 0.5216      | -0.20415  |         |
|             | 0.58088         | -0.029613 | 0.51181 | 0.51181     | 0.766777799 |           |         |
| LINC01500   | ENSG00000258583 | -0.029647 | 0.51183 | -0.22297    | 0.58822     | -0.22045  |         |
|             | 0.58724         | -0.083493 | 0.53327 | 0.51183     | 0.766777799 |           |         |
| TMEM212-AS1 | ENSG00000234717 | -0.029717 | 0.51185 | -1.2262     | 0.88994     | -0.029717 |         |
|             | 0.51185         | -0.029717 | 0.51185 | 0.51185     | 0.766777799 |           |         |
| NA          | ENSG00000258918 | -0.029725 | 0.51186 | -0.029725   | 0.51186     | -0.89044  | 0.81338 |
|             | -0.15846        | 0.56295   | 0.51186 | 0.766777799 |             |           |         |
| MARCKS      | ENSG00000277443 | -0.66504  | 0.74699 | -0.56188    | 0.7129      | -0.44155  |         |
|             | 0.67059         | -0.029802 | 0.51189 | 0.51189     | 0.766777799 |           |         |
| CYP27A1     | ENSG00000135929 | -1.5997   | 0.94517 | -0.82874    | 0.79637     | -0.08576  |         |
|             | 0.53417         | -0.029831 | 0.5119  | 0.5119      | 0.766777799 |           |         |
| GCNAP1      | ENSG00000256912 | -0.029896 | 0.51192 | -0.029896   | 0.51192     | -0.029896 |         |
|             | 0.51192         | -0.029896 | 0.51192 | 0.51192     | 0.766777799 |           |         |
| NA          | ENSG00000279024 | -0.69911  | 0.75776 | -1.6798     | 0.9535      | -1.6798   | 0.9535  |
|             | -0.029913       | 0.51193   | 0.51193 | 0.766777799 |             |           |         |
| NA          | ENSG00000269468 | -0.02992  | 0.51193 | -0.02992    | 0.51193     | -0.02992  | 0.51193 |
|             | -0.02992        | 0.51193   | 0.51193 | 0.766777799 |             |           |         |
| IGHD3-9     | ENSG00000211924 | -0.030099 | 0.51201 | -0.030099   | 0.51201     | -0.030099 |         |
|             | 0.51201         | -0.030099 | 0.51201 | 0.51201     | 0.766848276 |           |         |
| SLC25A6P6   | ENSG00000218870 | -0.23681  | 0.5936  | -0.030133   | 0.51202     | -0.030133 |         |
|             | 0.51202         | -0.030133 | 0.51202 | 0.51202     | 0.766848276 |           |         |
| TH          | ENSG00000180176 | -0.046437 | 0.51852 | -0.030167   | 0.51203     | -0.046437 | 0.51852 |
|             | -0.046437       | 0.51852   | 0.51203 | 0.766848276 |             |           |         |
| LINC01357   | ENSG00000224167 | -0.66934  | 0.74836 | -0.84496    | 0.80093     | -0.66934  |         |
|             | 0.74836         | -0.030181 | 0.51204 | 0.51204     | 0.766848276 |           |         |
| CACYBPP3    | ENSG00000219188 | -0.030246 | 0.51206 | -0.030246   | 0.51206     | -0.030246 |         |
|             | 0.51206         | -0.030246 | 0.51206 | 0.51206     | 0.766854661 |           |         |
| NA          | ENSG00000283183 | -1.1241   | 0.86951 | -0.030459   | 0.51215     | -1.1241   | 0.86951 |
|             | -1.1241         | 0.86951   | 0.51215 | 0.766898851 |             |           |         |
| LINC00310   | ENSG00000227456 | -0.34079  | 0.63337 | -1.7802     | 0.96248     | -0.030495 |         |
|             | 0.51216         | -0.36664  | 0.64306 | 0.51216     | 0.766898851 |           |         |
| PPP2R5C     | ENSG00000078304 | -0.81728  | 0.79311 | -1.1165     | 0.8679      | -0.50567  |         |
|             | 0.69346         | -0.030562 | 0.51219 | 0.51219     | 0.766898851 |           |         |
| PRPS1P1     | ENSG00000226847 | -0.030573 | 0.5122  | -1.1392     | 0.8727      | -0.78962  |         |
|             | 0.78512         | -0.030573 | 0.5122  | 0.5122      | 0.766898851 |           |         |
| MIR3622B    | ENSG00000265075 | -0.030629 | 0.51222 | -0.030629   | 0.51222     | -0.030629 |         |
|             | 0.51222         | -0.030629 | 0.51222 | 0.51222     | 0.766898851 |           |         |
| LINC02078   | ENSG00000267719 | -0.030669 | 0.51223 | -1.5929     | 0.94441     | -1.0233   |         |
|             | 0.84693         | -0.235    | 0.5929  | 0.51223     | 0.766898851 |           |         |
| NA          | ENSG00000259036 | -0.73947  | 0.77019 | -0.62565    | 0.73423     | -0.030764 | 0.51227 |
|             | -0.16494        | 0.5655    | 0.51227 | 0.766898851 |             |           |         |
| NA          | ENSG00000268987 | -0.030793 | 0.51228 | -0.030793   | 0.51228     | -0.030793 | 0.51228 |
|             | -0.030793       | 0.51228   | 0.51228 | 0.766898851 |             |           |         |
| SLC17A5     | ENSG00000119899 | -0.28492  | 0.61215 | -0.195      | 0.5773      | -0.0308   |         |
|             | 0.51229         | -0.55701  | 0.71124 | 0.51229     | 0.766898851 |           |         |
| HTR1A       | ENSG00000178394 | -0.030814 | 0.51229 | -0.030814   | 0.51229     | -2.1336   | 0.98356 |

|              |                 |           |         |             |             |           |         |  |
|--------------|-----------------|-----------|---------|-------------|-------------|-----------|---------|--|
|              | -1.6235         | 0.94776   | 0.51229 | 0.766898851 |             |           |         |  |
| MYCN         | ENSG00000134323 | -0.030881 | 0.51232 | -0.030881   | 0.51232     | -0.754    | 0.77458 |  |
|              | -0.41337        | 0.66033   | 0.51232 | 0.766898851 |             |           |         |  |
| STMN1P1      | ENSG00000276058 | -0.030934 | 0.51234 | -0.030934   | 0.51234     | -0.030934 |         |  |
|              | 0.51234         | -0.030934 | 0.51234 | 0.766898851 |             |           |         |  |
| ARLNC1       | ENSG00000260896 | -1.0393   | 0.85066 | -1.1825     | 0.8815      | -1.1825   |         |  |
|              | 0.8815          | -0.030972 | 0.51235 | 0.766898851 |             |           |         |  |
| LINC02723    | ENSG00000231680 | -0.034676 | 0.51383 | -0.034676   | 0.51383     | -0.034676 |         |  |
|              | 0.51383         | -0.030979 | 0.51236 | 0.766898851 |             |           |         |  |
| NA           | ENSG00000222000 | -0.031018 | 0.51237 | -0.81837    | 0.79343     | -0.84493  | 0.80092 |  |
|              | -0.81837        | 0.79343   | 0.51237 | 0.766898851 |             |           |         |  |
| NA           | ENSG00000249752 | -0.74098  | 0.77065 | -0.03102    | 0.51237     | -1.3856   | 0.91707 |  |
|              | -0.80795        | 0.79044   | 0.51237 | 0.766898851 |             |           |         |  |
| HCG20        | ENSG00000228022 | -0.031026 | 0.51238 | -0.14296    | 0.55684     | -0.65325  | 0.7432  |  |
|              | -1.258          | 0.8958    | 0.51238 | 0.766898851 |             |           |         |  |
| NXNL1        | ENSG00000171773 | -0.7779   | 0.78169 | -0.031052   | 0.51239     | -1.1695   | 0.87891 |  |
|              | -1.2632         | 0.89673   | 0.51239 | 0.766898851 |             |           |         |  |
| RNU6-1064P   | ENSG00000222558 | -1.0568   | 0.85469 | -0.031094   | 0.5124      | -1.0568   |         |  |
|              | 0.85469         | -0.29461  | 0.61586 | 0.5124      | 0.766898851 |           |         |  |
| NA           | ENSG00000226323 | -0.031105 | 0.51241 | -0.031105   | 0.51241     | -0.031105 | 0.51241 |  |
|              | -0.031105       | 0.51241   | 0.51241 | 0.766898851 |             |           |         |  |
| ARHGFE35-AS1 | ENSG00000244198 | -0.77032  | 0.77944 | -1.0065     | 0.84291     | -0.64734  |         |  |
|              | 0.74129         | -0.031146 | 0.51242 | 0.51242     | 0.766898851 |           |         |  |
| BRD7P2       | ENSG00000184100 | -1.0404   | 0.85092 | -1.0404     | 0.85092     | -0.031276 |         |  |
|              | 0.51248         | -1.0404   | 0.85092 | 0.51248     | 0.766922155 |           |         |  |
| NA           | ENSG00000283757 | -0.031293 | 0.51248 | -0.031293   | 0.51248     | -0.031293 | 0.51248 |  |
|              | -0.031293       | 0.51248   | 0.51248 | 0.766922155 |             |           |         |  |
| NA           | ENSG00000257550 | -0.031348 | 0.5125  | -0.031348   | 0.5125      | -0.031348 | 0.5125  |  |
|              | -0.031348       | 0.5125    | 0.5125  | 0.766922155 |             |           |         |  |
| ZSCAN29      | ENSG00000140265 | -0.48826  | 0.68732 | -0.031383   | 0.51252     | -0.34709  |         |  |
|              | 0.63574         | -0.34709  | 0.63574 | 0.51252     | 0.766922155 |           |         |  |
| NA           | ENSG00000253988 | -0.77872  | 0.78193 | -0.031385   | 0.51252     | -1.7703   | 0.96166 |  |
|              | -1.7703         | 0.96166   | 0.51252 | 0.766922155 |             |           |         |  |
| RPL39P18     | ENSG00000229468 | -0.031424 | 0.51253 | -0.031424   | 0.51253     | -0.031424 |         |  |
|              | 0.51253         | -0.031424 | 0.51253 | 0.51253     | 0.766922155 |           |         |  |
| SNORD116-29  | ENSG00000207245 | -0.26374  | 0.60401 | -0.26374    | 0.60401     | -0.26374  |         |  |
|              | 0.60401         | -0.031515 | 0.51257 | 0.51257     | 0.766958458 |           |         |  |
| RPL36AP15    | ENSG00000235369 | -0.031566 | 0.51259 | -0.031566   | 0.51259     | -0.031566 |         |  |
|              | 0.51259         | -0.031566 | 0.51259 | 0.51259     | 0.766964834 |           |         |  |
| MIR933       | ENSG00000215973 | -0.031711 | 0.51265 | -0.47419    | 0.68232     | -0.47419  |         |  |
|              | 0.68232         | -0.47419  | 0.68232 | 0.51265     | 0.767022469 |           |         |  |
| NTSR1        | ENSG00000101188 | -0.22786  | 0.59012 | -0.53786    | 0.70466     | -0.031734 | 0.51266 |  |
|              | -0.44162        | 0.67062   | 0.51266 | 0.767022469 |             |           |         |  |
| NA           | ENSG00000217120 | -1.4948   | 0.93252 | -0.03179    | 0.51268     | -0.63341  | 0.73677 |  |
|              | -0.63341        | 0.73677   | 0.51268 | 0.767028842 |             |           |         |  |
| NA           | ENSG00000199231 | -0.031974 | 0.51275 | -2.1678     | 0.98491     | -2.4828   | 0.99348 |  |
|              | -1.7829         | 0.9627    | 0.51275 | 0.767084249 |             |           |         |  |
| NA           | ENSG00000248835 | -0.031958 | 0.51275 | -0.031958   | 0.51275     | -0.031958 | 0.51275 |  |
|              | -0.031958       | 0.51275   | 0.51275 | 0.767084249 |             |           |         |  |
| EIF2D        | ENSG00000143486 | -0.72794  | 0.76667 | -0.42373    | 0.66412     | -0.24166  | 0.59548 |  |
|              | -0.032042       | 0.51278   | 0.51278 | 0.767084249 |             |           |         |  |
| NA           | ENSG00000250006 | -0.28739  | 0.61309 | -0.03204    | 0.51278     | -0.28739  | 0.61309 |  |
|              | -0.28739        | 0.61309   | 0.51278 | 0.767084249 |             |           |         |  |
| LINC00167    | ENSG00000233220 | -0.032087 | 0.5128  | -0.032087   | 0.5128      | -0.032087 |         |  |
|              | 0.5128          | -0.032087 | 0.5128  | 0.5128      | 0.767090619 |           |         |  |
| COX11        | ENSG00000166260 | -0.032222 | 0.51285 | -0.032222   | 0.51285     | -0.032222 | 0.51285 |  |
|              | -0.032222       | 0.51285   | 0.51285 | 0.767141269 |             |           |         |  |
| SNORD116-6   | ENSG00000207442 | -0.032353 | 0.5129  | -0.032353   | 0.5129      | -0.032353 |         |  |
|              | 0.5129          | -0.032353 | 0.5129  | 0.5129      | 0.767141269 |           |         |  |
| NA           | ENSG00000243150 | -0.03234  | 0.5129  | -0.03234    | 0.5129      | -0.03234  | 0.5129  |  |
|              | -0.03234        | 0.5129    | 0.5129  | 0.767141269 |             |           |         |  |
| NA           | ENSG00000263707 | -0.032395 | 0.51292 | -0.032395   | 0.51292     | -0.032395 | 0.51292 |  |

|             |                 |           |         |             |             |           |         |  |
|-------------|-----------------|-----------|---------|-------------|-------------|-----------|---------|--|
|             | -0.032395       | 0.51292   | 0.51292 | 0.767141269 |             |           |         |  |
| KIF2C       | ENSG00000142945 | -0.032425 | 0.51293 | -0.73909    | 0.77007     | -0.1998   | 0.57918 |  |
|             | -0.45294        | 0.6747    | 0.51293 | 0.767141269 |             |           |         |  |
| CLPTM1L     | ENSG00000049656 | -0.81622  | 0.79281 | -0.26077    | 0.60286     | -1.2901   |         |  |
|             | 0.90149         | -0.032465 | 0.51295 | 0.51295     | 0.767141269 |           |         |  |
| PSMD3       | ENSG00000108344 | -0.12804  | 0.55094 | -0.12804    | 0.55094     | -0.032618 | 0.51301 |  |
|             | -1.3293         | 0.90812   | 0.51301 | 0.767141269 |             |           |         |  |
| RNU6-1327P  | ENSG00000202172 | -0.032636 | 0.51302 | -0.032636   | 0.51302     | -0.032636 |         |  |
|             | 0.51302         | -0.032636 | 0.51302 | 0.51302     | 0.767141269 |           |         |  |
| FBXL22      | ENSG00000197361 | -0.032669 | 0.51303 | -0.46836    | 0.68024     | -0.48326  |         |  |
|             | 0.68554         | -0.7108   | 0.76139 | 0.51303     | 0.767141269 |           |         |  |
| ATP1A1-AS1  | ENSG00000203865 | -0.032662 | 0.51303 | -0.14553    | 0.55785     | -0.5154   |         |  |
|             | 0.69686         | -0.40737  | 0.65813 | 0.51303     | 0.767141269 |           |         |  |
| STRC        | ENSG00000242866 | -0.84902  | 0.80207 | -0.76196    | 0.77696     | -0.73686  | 0.7694  |  |
|             | -0.032661       | 0.51303   | 0.51303 | 0.767141269 |             |           |         |  |
| RPL22P10    | ENSG00000213295 | -0.032702 | 0.51304 | -0.22334    | 0.58837     | -0.15658  |         |  |
|             | 0.56221         | -0.40893  | 0.6587  | 0.51304     | 0.767141269 |           |         |  |
| RNVU1-22    | ENSG00000199879 | -0.92799  | 0.82329 | -0.03272    | 0.51305     | -0.90586  |         |  |
|             | 0.8175          | -0.82415  | 0.79507 | 0.51305     | 0.767141269 |           |         |  |
| UPF3AP3     | ENSG00000234709 | -0.032732 | 0.51306 | -0.84856    | 0.80194     | -0.27838  |         |  |
|             | 0.60964         | -0.27838  | 0.60964 | 0.51306     | 0.767141269 |           |         |  |
| TTI1        | ENSG00000101407 | -0.032758 | 0.51307 | -0.88639    | 0.8123      | -0.81591  | 0.79273 |  |
|             | -0.16215        | 0.56441   | 0.51307 | 0.767141269 |             |           |         |  |
| EXTL1       | ENSG00000158008 | -0.18433  | 0.57312 | -0.13997    | 0.55566     | -0.13997  | 0.55566 |  |
|             | -0.03286        | 0.51311   | 0.51311 | 0.767177537 |             |           |         |  |
| NA          | ENSG00000238628 | -0.38045  | 0.64819 | -0.032991   | 0.51316     | -1.4639   | 0.92839 |  |
|             | -0.73841        | 0.76987   | 0.51316 | 0.767228755 |             |           |         |  |
| OBSCN-AS1   | ENSG00000162913 | -0.033059 | 0.51319 | -0.55166    | 0.70941     | -0.55166  |         |  |
|             | 0.70941         | -0.55166  | 0.70941 | 0.51319     | 0.767250067 |           |         |  |
| NA          | ENSG00000203395 | -0.033133 | 0.51322 | -0.033133   | 0.51322     | -0.37388  | 0.64575 |  |
|             | -0.15571        | 0.56187   | 0.51322 | 0.767269151 |             |           |         |  |
| RNU6-78P    | ENSG00000199767 | -0.97961  | 0.83636 | -0.033217   | 0.51325     | -0.53406  |         |  |
|             | 0.70335         | -0.53219  | 0.7027  | 0.51325     | 0.767269151 |           |         |  |
| NA          | ENSG00000273721 | -0.033221 | 0.51325 | -0.033221   | 0.51325     | -0.033221 | 0.51325 |  |
|             | -0.033221       | 0.51325   | 0.51325 | 0.767269151 |             |           |         |  |
| NA          | ENSG00000251585 | -0.033356 | 0.5133  | -0.033356   | 0.5133      | -0.033356 | 0.5133  |  |
|             | -0.033356       | 0.5133    | 0.5133  | 0.767277413 |             |           |         |  |
| NA          | ENSG00000239166 | -0.56278  | 0.71321 | -1.0441     | 0.85178     | -0.85189  | 0.80286 |  |
|             | -0.033342       | 0.5133    | 0.5133  | 0.767277413 |             |           |         |  |
| LINC02058   | ENSG00000248528 | -1.1641   | 0.87782 | -1.1002     | 0.86437     | -0.78723  |         |  |
|             | 0.78443         | -0.033385 | 0.51332 | 0.51332     | 0.767277413 |           |         |  |
| LINC00520   | ENSG00000258791 | -0.033398 | 0.51332 | -0.993      | 0.83965     | -0.11295  |         |  |
|             | 0.54496         | -0.11295  | 0.54496 | 0.51332     | 0.767277413 |           |         |  |
| LINC01739   | ENSG00000229537 | -0.033439 | 0.51334 | -0.033439   | 0.51334     | -0.033439 |         |  |
|             | 0.51334         | -0.033439 | 0.51334 | 0.51334     | 0.767277413 |           |         |  |
| HMGB1P4     | ENSG00000214821 | -0.90523  | 0.81733 | -0.033468   | 0.51335     | -0.033468 |         |  |
|             | 0.51335         | -0.033468 | 0.51335 | 0.51335     | 0.767277413 |           |         |  |
| EPB41L4A-DT | ENSG00000278921 | -0.03365  | 0.51342 | -0.03365    | 0.51342     | -0.03365  |         |  |
|             | 0.51342         | -0.03365  | 0.51342 | 0.51342     | 0.767349913 |           |         |  |
| TRIM39      | ENSG00000204599 | -0.37254  | 0.64526 | -0.37254    | 0.64526     | -1.2307   |         |  |
|             | 0.89079         | -0.03368  | 0.51343 | 0.51343     | 0.767349913 |           |         |  |
| OLFML2B     | ENSG00000162745 | -0.30578  | 0.62011 | -0.033795   | 0.51348     | -0.331    |         |  |
|             | 0.62968         | -0.75404  | 0.77459 | 0.51348     | 0.767401104 |           |         |  |
| NA          | ENSG00000277837 | -0.3804   | 0.64818 | -0.90407    | 0.81702     | -0.034049 | 0.51358 |  |
|             | -0.71576        | 0.76293   | 0.51358 | 0.767527016 |             |           |         |  |
| MTCO1P39    | ENSG00000224254 | -0.91063  | 0.81876 | -0.034142   | 0.51362     | -0.034142 |         |  |
|             | 0.51362         | -0.034142 | 0.51362 | 0.51362     | 0.76755466  |           |         |  |
| MARVELD1    | ENSG00000155254 | -0.034179 | 0.51363 | -0.034179   | 0.51363     | -0.034179 |         |  |
|             | 0.51363         | -0.85957  | 0.80499 | 0.51363     | 0.76755466  |           |         |  |
| LRRC37A5P   | ENSG00000204173 | -0.034296 | 0.51368 | -0.034296   | 0.51368     | -0.034296 |         |  |
|             | 0.51368         | -0.034296 | 0.51368 | 0.51368     | 0.767605839 |           |         |  |
| RN7SL101P   | ENSG00000243548 | -0.034374 | 0.51371 | -0.034374   | 0.51371     | -0.034374 |         |  |

|            |                 |           |         |             |             |           |         |  |
|------------|-----------------|-----------|---------|-------------|-------------|-----------|---------|--|
|            | 0.51371         | -0.034374 | 0.51371 | 0.51371     | 0.76760769  |           |         |  |
| NA         | ENSG00000249017 | -0.034408 | 0.51372 | -1.0065     | 0.84292     | -1.0065   | 0.84292 |  |
|            | -1.0065         | 0.84292   | 0.51372 | 0.76760769  |             |           |         |  |
| UBE2QL1    | ENSG00000215218 | -1.1086   | 0.86621 | -0.034421   | 0.51373     | -0.71522  |         |  |
|            | 0.76276         | -0.70552  | 0.75976 | 0.51373     | 0.76760769  |           |         |  |
| RN7SKP8    | ENSG00000222969 | -0.21641  | 0.58566 | -1.0267     | 0.84773     | -0.21641  |         |  |
|            | 0.58566         | -0.034483 | 0.51375 | 0.51375     | 0.76760769  |           |         |  |
| NAA30      | ENSG00000139977 | -0.034504 | 0.51376 | -0.76119    | 0.77673     | -0.76119  | 0.77673 |  |
|            | -0.76119        | 0.77673   | 0.51376 | 0.76760769  |             |           |         |  |
| NA         | ENSG00000230864 | -0.53275  | 0.7029  | -0.22643    | 0.58957     | -0.87252  | 0.80854 |  |
|            | -0.034709       | 0.51384   | 0.51384 | 0.767680142 |             |           |         |  |
| TUBB8P5    | ENSG00000254381 | -0.034709 | 0.51384 | -0.87118    | 0.80817     | -0.79154  |         |  |
|            | 0.78568         | -1.0089   | 0.84348 | 0.51384     | 0.767680142 |           |         |  |
| SNORD116-8 | ENSG00000207093 | -0.034879 | 0.51391 | -0.034879   | 0.51391     | -0.034879 |         |  |
|            | 0.51391         | -0.034879 | 0.51391 | 0.51391     | 0.767752586 |           |         |  |
| NA         | ENSG00000277509 | -0.73352  | 0.76838 | -1.6007     | 0.94528     | -0.73352  | 0.76838 |  |
|            | -0.034907       | 0.51392   | 0.51392 | 0.767752586 |             |           |         |  |
| C3orf80    | ENSG00000180044 | -0.034949 | 0.51394 | -0.034949   | 0.51394     | -0.034949 |         |  |
|            | 0.51394         | -0.034949 | 0.51394 | 0.51394     | 0.767758927 |           |         |  |
| RNU6-484P  | ENSG00000206743 | -0.035054 | 0.51398 | -0.21254    | 0.58416     | -0.21254  |         |  |
|            | 0.58416         | -0.21254  | 0.58416 | 0.51398     | 0.767771608 |           |         |  |
| NA         | ENSG00000269924 | -1.5222   | 0.93603 | -0.03505    | 0.51398     | -0.44142  | 0.67055 |  |
|            | -0.2504         | 0.59886   | 0.51398 | 0.767771608 |             |           |         |  |
| NA         | ENSG00000228242 | -0.035257 | 0.51406 | -0.035257   | 0.51406     | -0.035257 | 0.51406 |  |
|            | -0.035257       | 0.51406   | 0.51406 | 0.767820546 |             |           |         |  |
| RNU6-944P  | ENSG00000200893 | -0.035275 | 0.51407 | -0.035275   | 0.51407     | -0.035275 |         |  |
|            | 0.51407         | -0.035275 | 0.51407 | 0.51407     | 0.767820546 |           |         |  |
| RNA5SP242  | ENSG00000201041 | -0.035305 | 0.51408 | -0.035305   | 0.51408     | -0.035305 |         |  |
|            | 0.51408         | -0.035305 | 0.51408 | 0.51408     | 0.767820546 |           |         |  |
| TAMALIN    | ENSG00000161835 | -0.37147  | 0.64485 | -0.66277    | 0.74626     | -0.37147  |         |  |
|            | 0.64485         | -0.035407 | 0.51412 | 0.51412     | 0.767820546 |           |         |  |
| IGHD3-10   | ENSG00000211923 | -0.035437 | 0.51413 | -1.045      | 0.852       | -0.089415 | 0.53562 |  |
|            | -0.18365        | 0.57286   | 0.51413 | 0.767820546 |             |           |         |  |
| RANP8      | ENSG00000233524 | -0.03548  | 0.51415 | -0.03548    | 0.51415     | -1.2872   | 0.90099 |  |
|            | -0.41335        | 0.66032   | 0.51415 | 0.767820546 |             |           |         |  |
| KLHL38     | ENSG00000175946 | -0.035534 | 0.51417 | -0.035534   | 0.51417     | -0.035534 |         |  |
|            | 0.51417         | -0.96825  | 0.83354 | 0.51417     | 0.767820546 |           |         |  |
| NA         | ENSG00000257991 | -0.035539 | 0.51417 | -0.035539   | 0.51417     | -0.035539 | 0.51417 |  |
|            | -0.035539       | 0.51417   | 0.51417 | 0.767820546 |             |           |         |  |
| SGTB       | ENSG00000197860 | -0.03565  | 0.51422 | -0.54835    | 0.70827     | -0.38355  | 0.64934 |  |
|            | -0.67196        | 0.7492    | 0.51422 | 0.767820546 |             |           |         |  |
| TM7SF2     | ENSG00000149809 | -0.035694 | 0.51424 | -0.51239    | 0.69581     | -0.83849  |         |  |
|            | 0.79912         | -1.5532   | 0.93981 | 0.51424     | 0.767820546 |           |         |  |
| PRSS45P    | ENSG00000188086 | -1.0957   | 0.8634  | -0.035761   | 0.51426     | -0.035761 |         |  |
|            | 0.51426         | -0.035761 | 0.51426 | 0.51426     | 0.767820546 |           |         |  |
| OR52K2     | ENSG00000181963 | -0.48336  | 0.68558 | -0.53415    | 0.70338     | -0.035788 |         |  |
|            | 0.51427         | -0.035788 | 0.51427 | 0.51427     | 0.767820546 |           |         |  |
| SNORA28    | ENSG00000272533 | -0.03577  | 0.51427 | -0.03577    | 0.51427     | -0.03577  |         |  |
|            | 0.51427         | -0.03577  | 0.51427 | 0.51427     | 0.767820546 |           |         |  |
| WHAMM      | ENSG00000156232 | -0.84122  | 0.79989 | -0.81377    | 0.79211     | -0.12914  | 0.55138 |  |
|            | -0.035825       | 0.51429   | 0.51429 | 0.767820546 |             |           |         |  |
| SNORA74A   | ENSG00000200959 | -0.035855 | 0.5143  | -0.035855   | 0.5143      | -0.035855 |         |  |
|            | 0.5143          | -0.035855 | 0.5143  | 0.5143      | 0.767820546 |           |         |  |
| EDC4       | ENSG00000038358 | -0.035875 | 0.51431 | -0.035875   | 0.51431     | -0.035875 | 0.51431 |  |
|            | -0.30567        | 0.62007   | 0.51431 | 0.767820546 |             |           |         |  |
| NPC1L1     | ENSG00000015520 | -0.050798 | 0.52026 | -0.035945   | 0.51434     | -0.589    |         |  |
|            | 0.72207         | -0.050798 | 0.52026 | 0.51434     | 0.767820546 |           |         |  |
| NA         | ENSG00000279748 | -0.036    | 0.51436 | -0.036      | 0.51436     | -0.036    | 0.51436 |  |
|            | -0.036          | 0.51436   | 0.51436 | 0.767820546 |             |           |         |  |
| MIR153-2   | ENSG00000207960 | -0.036017 | 0.51437 | -0.036017   | 0.51437     | -0.036017 |         |  |
|            | 0.51437         | -0.036017 | 0.51437 | 0.51437     | 0.767820546 |           |         |  |
| BRCC3P1    | ENSG00000251667 | -0.036064 | 0.51438 | -0.036064   | 0.51438     | -0.036064 |         |  |

|            |                 |           |         |             |             |           |         |
|------------|-----------------|-----------|---------|-------------|-------------|-----------|---------|
|            | 0.51438         | -0.45118  | 0.67407 | 0.51438     | 0.767820546 |           |         |
| RNA5SP359  | ENSG00000201708 | -0.036079 | 0.51439 | -0.036079   | 0.51439     | -0.036079 | 0.51439 |
|            | 0.51439         | -0.036079 | 0.51439 | 0.51439     | 0.767820546 |           |         |
| RARRES2    | ENSG00000106538 | -0.036167 | 0.51443 | -0.036167   | 0.51443     | -0.036167 | 0.51443 |
|            | 0.51443         | -0.036167 | 0.51443 | 0.51443     | 0.767820546 |           |         |
| NA         | ENSG00000201216 | -0.036168 | 0.51443 | -0.036168   | 0.51443     | -0.036168 | 0.51443 |
|            | -1.4463         | 0.92595   | 0.51443 | 0.767820546 |             |           |         |
| NA         | ENSG00000261305 | -0.036167 | 0.51443 | -0.036167   | 0.51443     | -0.036167 | 0.51443 |
|            | -0.036167       | 0.51443   | 0.51443 | 0.767820546 |             |           |         |
| NA         | ENSG00000232296 | -0.65281  | 0.74306 | -0.03623    | 0.51445     | -0.65281  | 0.74306 |
|            | -0.65281        | 0.74306   | 0.51445 | 0.767820546 |             |           |         |
| MTCO2P24   | ENSG00000249990 | -0.036232 | 0.51445 | -0.036232   | 0.51445     | -0.036232 |         |
|            | 0.51445         | -0.036232 | 0.51445 | 0.51445     | 0.767820546 |           |         |
| NA         | ENSG00000258676 | -0.68787  | 0.75423 | -0.036251   | 0.51446     | -0.68787  | 0.75423 |
|            | -0.68787        | 0.75423   | 0.51446 | 0.767820546 |             |           |         |
| CATSPER1   | ENSG00000175294 | -0.48773  | 0.68713 | -0.48773    | 0.68713     | -0.48773  |         |
|            | 0.68713         | -0.036341 | 0.51449 | 0.51449     | 0.767820546 |           |         |
| CASC16     | ENSG00000249231 | -0.44848  | 0.6731  | -0.036373   | 0.51451     | -1.555    |         |
|            | 0.94003         | -0.58873  | 0.72198 | 0.51451     | 0.767820546 |           |         |
| NA         | ENSG00000251577 | -0.616    | 0.73105 | -0.20884    | 0.58271     | -0.3837   | 0.6494  |
|            | -0.03641        | 0.51452   | 0.51452 | 0.767820546 |             |           |         |
| NA         | ENSG00000280455 | -0.036414 | 0.51452 | -0.036414   | 0.51452     | -0.036414 | 0.51452 |
|            | -0.036414       | 0.51452   | 0.51452 | 0.767820546 |             |           |         |
| NA         | ENSG00000257607 | -0.036491 | 0.51455 | -0.036491   | 0.51455     | -0.036491 | 0.51455 |
|            | -0.036491       | 0.51455   | 0.51455 | 0.767820546 |             |           |         |
| CYP4F12    | ENSG00000186204 | -0.79017  | 0.78529 | -0.036521   | 0.51457     | -0.19714  |         |
|            | 0.57814         | -1.5499   | 0.93942 | 0.51457     | 0.767820546 |           |         |
| NA         | ENSG00000199550 | -1.2977   | 0.9028  | -0.036534   | 0.51457     | -0.036534 | 0.51457 |
|            | -0.036534       | 0.51457   | 0.51457 | 0.767820546 |             |           |         |
| LINC02216  | ENSG00000249551 | -0.036526 | 0.51457 | -0.036526   | 0.51457     | -0.036526 |         |
|            | 0.51457         | -0.036526 | 0.51457 | 0.51457     | 0.767820546 |           |         |
| MRPS17P5   | ENSG00000274493 | -0.036567 | 0.51458 | -1.0703     | 0.85777     | -0.036567 |         |
|            | 0.51458         | -0.036567 | 0.51458 | 0.51458     | 0.767820546 |           |         |
| LINC01185  | ENSG00000228414 | -0.11387  | 0.54533 | -0.11387    | 0.54533     | -0.11387  |         |
|            | 0.54533         | -0.036659 | 0.51462 | 0.51462     | 0.767856719 |           |         |
| PLEKHA3    | ENSG00000116095 | -2.0078   | 0.97767 | -0.036735   | 0.51465     | -0.5551   |         |
|            | 0.71059         | -0.5551   | 0.71059 | 0.51465     | 0.767860789 |           |         |
| NA         | ENSG00000226874 | -0.036772 | 0.51467 | -0.73998    | 0.77034     | -0.73998  | 0.77034 |
|            | -0.73998        | 0.77034   | 0.51467 | 0.767860789 |             |           |         |
| NA         | ENSG00000284592 | -1.5028   | 0.93355 | -0.036792   | 0.51467     | -1.5028   | 0.93355 |
|            | -2.291          | 0.98902   | 0.51467 | 0.767860789 |             |           |         |
| SLC27A4    | ENSG00000167114 | -0.44429  | 0.67158 | -1.0955     | 0.86335     | -0.036964 |         |
|            | 0.51474         | -0.37127  | 0.64478 | 0.51474     | 0.767881582 |           |         |
| NA         | ENSG00000225018 | -0.036974 | 0.51475 | -0.036974   | 0.51475     | -0.7892   | 0.785   |
|            | -0.31082        | 0.62203   | 0.51475 | 0.767881582 |             |           |         |
| NA         | ENSG00000227499 | -0.036974 | 0.51475 | -0.036974   | 0.51475     | -0.036974 | 0.51475 |
|            | -0.036974       | 0.51475   | 0.51475 | 0.767881582 |             |           |         |
| NA         | ENSG00000249600 | -0.059204 | 0.52361 | -0.037056   | 0.51478     | -0.037056 | 0.51478 |
|            | -0.037056       | 0.51478   | 0.51478 | 0.767881582 |             |           |         |
| CA13       | ENSG00000185015 | -1.406    | 0.92013 | -0.8813     | 0.81092     | -1.2423   | 0.89294 |
|            | -0.0371         | 0.5148    | 0.5148  | 0.767881582 |             |           |         |
| NA         | ENSG00000200419 | -0.037103 | 0.5148  | -0.037103   | 0.5148      | -0.037103 | 0.5148  |
|            | -0.037103       | 0.5148    | 0.5148  | 0.767881582 |             |           |         |
| RNU6-26P   | ENSG00000206712 | -0.037111 | 0.5148  | -0.037111   | 0.5148      | -0.037111 |         |
|            | 0.5148          | -0.037111 | 0.5148  | 0.5148      | 0.767881582 |           |         |
| RNU6-1122P | ENSG00000207178 | -0.037139 | 0.51481 | -0.037139   | 0.51481     | -0.037139 |         |
|            | 0.51481         | -0.037139 | 0.51481 | 0.51481     | 0.767881582 |           |         |
| NA         | ENSG00000248317 | -1.0348   | 0.84962 | -0.74708    | 0.77249     | -0.55036  | 0.70896 |
|            | -0.037186       | 0.51483   | 0.51483 | 0.76788791  |             |           |         |
| NA         | ENSG00000282386 | -0.037271 | 0.51487 | -0.037271   | 0.51487     | -0.037271 | 0.51487 |
|            | -0.037271       | 0.51487   | 0.51487 | 0.767898728 |             |           |         |
| NA         | ENSG00000250379 | -0.03733  | 0.51489 | -0.03733    | 0.51489     | -0.03733  | 0.51489 |

|            |                 |           |         |             |             |           |         |  |
|------------|-----------------|-----------|---------|-------------|-------------|-----------|---------|--|
|            | -0.03733        | 0.51489   | 0.51489 | 0.767898728 |             |           |         |  |
| LINC01641  | ENSG00000234277 | -0.98804  | 0.83843 | -0.41146    | 0.65963     | -0.037349 |         |  |
|            | 0.5149          | -0.082783 | 0.53299 | 0.5149      | 0.767898728 |           |         |  |
| C2CD4D-AS1 | ENSG00000234614 | -0.037493 | 0.51495 | -0.037493   | 0.51495     | -0.037493 |         |  |
|            | 0.51495         | -0.037493 | 0.51495 | 0.51495     | 0.767898728 |           |         |  |
| BLK        | ENSG00000136573 | -0.037504 | 0.51496 | -0.41296    | 0.66018     | -1.027    | 0.84779 |  |
|            | -0.554          | 0.71021   | 0.51496 | 0.767898728 |             |           |         |  |
| UMOD       | ENSG00000169344 | -0.72392  | 0.76544 | -0.037637   | 0.51501     | -0.43843  | 0.66946 |  |
|            | -0.25754        | 0.60162   | 0.51501 | 0.767898728 |             |           |         |  |
| NA         | ENSG00000275733 | -0.037623 | 0.51501 | -0.9047     | 0.81719     | -0.037623 | 0.51501 |  |
|            | -0.037623       | 0.51501   | 0.51501 | 0.767898728 |             |           |         |  |
| CSN2       | ENSG00000135222 | -0.037662 | 0.51502 | -0.037662   | 0.51502     | -0.037662 | 0.51502 |  |
|            | -0.037662       | 0.51502   | 0.51502 | 0.767898728 |             |           |         |  |
| NA         | ENSG00000235427 | -0.39694  | 0.65429 | -0.037685   | 0.51503     | -0.037685 | 0.51503 |  |
|            | -0.037685       | 0.51503   | 0.51503 | 0.767898728 |             |           |         |  |
| NA         | ENSG00000249675 | -1.1402   | 0.8729  | -0.9047     | 0.81719     | -0.037687 | 0.51503 |  |
|            | -1.2774         | 0.89927   | 0.51503 | 0.767898728 |             |           |         |  |
| DGLUCY     | ENSG00000133943 | -0.74116  | 0.7707  | -0.68235    | 0.75249     | -0.23649  |         |  |
|            | 0.59348         | -0.037703 | 0.51504 | 0.51504     | 0.767898728 |           |         |  |
| MFN1       | ENSG00000171109 | -0.037797 | 0.51508 | -0.34254    | 0.63403     | -0.12764  | 0.55078 |  |
|            | -0.44063        | 0.67026   | 0.51508 | 0.767898728 |             |           |         |  |
| SPAG1      | ENSG00000104450 | -1.2302   | 0.89069 | -0.64381    | 0.74015     | -0.037834 | 0.51509 |  |
|            | -0.80923        | 0.79081   | 0.51509 | 0.767898728 |             |           |         |  |
| PSMD8      | ENSG00000099341 | -0.037985 | 0.51515 | -0.037985   | 0.51515     | -0.4774   | 0.68346 |  |
|            | -0.037985       | 0.51515   | 0.51515 | 0.767898728 |             |           |         |  |
| RXFP2      | ENSG00000133105 | -0.30312  | 0.6191  | -0.038018   | 0.51516     | -0.35095  | 0.63719 |  |
|            | -0.40176        | 0.65607   | 0.51516 | 0.767898728 |             |           |         |  |
| VN1R54P    | ENSG00000232109 | -0.93993  | 0.82637 | -0.64052    | 0.73908     | -0.038014 |         |  |
|            | 0.51516         | -0.038014 | 0.51516 | 0.51516     | 0.767898728 |           |         |  |
| SNORA5B    | ENSG00000200656 | -0.038118 | 0.5152  | -0.038118   | 0.5152      | -0.038118 |         |  |
|            | 0.5152          | -0.038118 | 0.5152  | 0.5152      | 0.767898728 |           |         |  |
| NA         | ENSG00000224000 | -0.0381   | 0.5152  | -0.0381     | 0.5152      | -0.0381   | 0.5152  |  |
|            | -0.35341        | 0.63811   | 0.5152  | 0.767898728 |             |           |         |  |
| ANKRD36BP1 | ENSG00000214262 | -0.038148 | 0.51522 | -0.038148   | 0.51522     | -0.038148 |         |  |
|            | 0.51522         | -0.038148 | 0.51522 | 0.51522     | 0.767898728 |           |         |  |
| RANP5      | ENSG00000228054 | -0.21299  | 0.58433 | -0.21299    | 0.58433     | -0.038152 | 0.51522 |  |
|            | -0.56226        | 0.71303   | 0.51522 | 0.767898728 |             |           |         |  |
| NA         | ENSG00000202182 | -0.038184 | 0.51523 | -0.038184   | 0.51523     | -0.038184 | 0.51523 |  |
|            | -0.038184       | 0.51523   | 0.51523 | 0.767898728 |             |           |         |  |
| FAM166B    | ENSG00000215187 | -0.038185 | 0.51523 | -0.038185   | 0.51523     | -0.038185 |         |  |
|            | 0.51523         | -0.038185 | 0.51523 | 0.51523     | 0.767898728 |           |         |  |
| NA         | ENSG00000262660 | -0.038214 | 0.51524 | -0.038214   | 0.51524     | -0.038214 | 0.51524 |  |
|            | -0.038214       | 0.51524   | 0.51524 | 0.767898728 |             |           |         |  |
| RPS23P7    | ENSG00000239527 | -0.03824  | 0.51525 | -0.03824    | 0.51525     | -0.03824  |         |  |
|            | 0.51525         | -0.03824  | 0.51525 | 0.51525     | 0.767898728 |           |         |  |
| NA         | ENSG00000252762 | -0.038272 | 0.51526 | -0.41133    | 0.65959     | -0.36975  | 0.64422 |  |
|            | -0.36975        | 0.64422   | 0.51526 | 0.767898728 |             |           |         |  |
| NA         | ENSG00000248629 | -0.038301 | 0.51528 | -1.2242     | 0.88957     | -0.038301 | 0.51528 |  |
|            | -0.038301       | 0.51528   | 0.51528 | 0.767898728 |             |           |         |  |
| MARCHF1    | ENSG00000145416 | -0.83195  | 0.79728 | -0.10169    | 0.5405      | -0.063312 |         |  |
|            | 0.52524         | -0.038365 | 0.5153  | 0.5153      | 0.767898728 |           |         |  |
| ZNF831     | ENSG00000124203 | -0.45846  | 0.67669 | -0.038381   | 0.51531     | -0.42868  |         |  |
|            | 0.66592         | -0.29563  | 0.61624 | 0.51531     | 0.767898728 |           |         |  |
| SYNPO      | ENSG00000171992 | -0.95996  | 0.83146 | -0.96256    | 0.83212     | -0.038376 | 0.51531 |  |
|            | -0.38724        | 0.65071   | 0.51531 | 0.767898728 |             |           |         |  |
| NA         | ENSG00000234450 | -0.038382 | 0.51531 | -0.038382   | 0.51531     | -0.038382 | 0.51531 |  |
|            | -0.038382       | 0.51531   | 0.51531 | 0.767898728 |             |           |         |  |
| NA         | ENSG00000268030 | -0.038506 | 0.51536 | -0.038506   | 0.51536     | -0.038506 | 0.51536 |  |
|            | -0.038506       | 0.51536   | 0.51536 | 0.767949752 |             |           |         |  |
| PLEKHG4B   | ENSG00000153404 | -0.03859  | 0.51539 | -0.21003    | 0.58318     | -0.33223  |         |  |
|            | 0.63014         | -0.44358  | 0.67133 | 0.51539     | 0.767970972 |           |         |  |
| AIPL1      | ENSG00000129221 | -0.13368  | 0.55317 | -0.038782   | 0.51547     | -0.35666  | 0.63933 |  |

|           |                 |           |         |             |             |           |         |  |
|-----------|-----------------|-----------|---------|-------------|-------------|-----------|---------|--|
|           | -0.12085        | 0.5481    | 0.51547 | 0.768066692 |             |           |         |  |
| RPL23AP81 | ENSG00000242748 | -0.038839 | 0.51549 | -0.038839   | 0.51549     | -1.0009   |         |  |
|           | 0.84156         | -0.038839 | 0.51549 | 0.51549     | 0.768073007 |           |         |  |
| MAPRE3    | ENSG0000084764  | -0.82077  | 0.79411 | -0.89788    | 0.81538     | -0.039035 |         |  |
|           | 0.51557         | -0.54106  | 0.70577 | 0.51557     | 0.768119474 |           |         |  |
| NA        | ENSG00000255671 | -0.039067 | 0.51558 | -0.039067   | 0.51558     | -0.039067 | 0.51558 |  |
|           | -0.039067       | 0.51558   | 0.51558 | 0.768119474 |             |           |         |  |
| NA        | ENSG00000264497 | -0.039078 | 0.51559 | -0.039078   | 0.51559     | -0.039078 | 0.51559 |  |
|           | -0.039078       | 0.51559   | 0.51559 | 0.768119474 |             |           |         |  |
| GPR153    | ENSG00000158292 | -0.039124 | 0.51556 | -0.12214    | 0.54861     | -0.61237  |         |  |
|           | 0.72985         | -0.42759  | 0.66553 | 0.51556     | 0.768119474 |           |         |  |
| NA        | ENSG00000263494 | -2.0345   | 0.97905 | -2.3992     | 0.99179     | -0.039108 | 0.51556 |  |
|           | -2.0345         | 0.97905   | 0.51556 | 0.768119474 |             |           |         |  |
| PIK3CB    | ENSG00000051382 | -0.31629  | 0.62411 | -0.039261   | 0.51566     | -1.2881   |         |  |
|           | 0.90115         | -0.24932  | 0.59844 | 0.51566     | 0.768142447 |           |         |  |
| HNRNPMP2  | ENSG00000269576 | -0.039309 | 0.51568 | -0.039309   | 0.51568     | -0.039309 |         |  |
|           | 0.51568         | -0.039309 | 0.51568 | 0.51568     | 0.768142447 |           |         |  |
| NA        | ENSG00000275862 | -0.039309 | 0.51568 | -0.039309   | 0.51568     | -0.039309 | 0.51568 |  |
|           | -0.039309       | 0.51568   | 0.51568 | 0.768142447 |             |           |         |  |
| CLUHP6    | ENSG00000265279 | -0.039331 | 0.51569 | -0.039331   | 0.51569     | -0.039331 |         |  |
|           | 0.51569         | -0.039331 | 0.51569 | 0.51569     | 0.768142447 |           |         |  |
| STRAP     | ENSG00000023734 | -0.039374 | 0.51557 | -0.297      | 0.61677     | -0.297    | 0.61677 |  |
|           | -0.50987        | 0.69493   | 0.51557 | 0.768142447 |             |           |         |  |
| LINC01814 | ENSG00000236008 | -0.16178  | 0.56426 | -0.49441    | 0.68949     | -1.7883   |         |  |
|           | 0.96314         | -0.039401 | 0.51571 | 0.51571     | 0.768142447 |           |         |  |
| SPRY2     | ENSG00000136158 | -0.039637 | 0.51581 | -1.6581     | 0.95135     | -0.96112  | 0.83175 |  |
|           | -1.1751         | 0.88003   | 0.51581 | 0.768235845 |             |           |         |  |
| NA        | ENSG00000256783 | -0.03963  | 0.51581 | -1.2077     | 0.88642     | -0.66743  | 0.74775 |  |
|           | -0.32365        | 0.6269    | 0.51581 | 0.768235845 |             |           |         |  |
| ISOC2     | ENSG00000063241 | -1.3947   | 0.91845 | -1.6089     | 0.94618     | -1.6089   | 0.94618 |  |
|           | -0.039657       | 0.51582   | 0.51582 | 0.768235845 |             |           |         |  |
| NA        | ENSG00000253675 | -0.03976  | 0.51586 | -0.03976    | 0.51586     | -0.03976  | 0.51586 |  |
|           | -0.03976        | 0.51586   | 0.51586 | 0.768251417 |             |           |         |  |
| RPS2P36   | ENSG00000227032 | -0.03983  | 0.51589 | -0.03983    | 0.51589     | -0.03983  |         |  |
|           | 0.51589         | -0.03983  | 0.51589 | 0.51589     | 0.768251417 |           |         |  |
| NA        | ENSG00000223559 | -0.67139  | 0.74901 | -0.75714    | 0.77552     | -0.92734  | 0.82312 |  |
|           | -0.039887       | 0.51591   | 0.51591 | 0.768251417 |             |           |         |  |
| SF1       | ENSG00000168066 | -0.32401  | 0.62703 | -0.20626    | 0.58171     | -0.039958 | 0.51594 |  |
|           | -0.28949        | 0.6139    | 0.51594 | 0.768251417 |             |           |         |  |
| MIR3189   | ENSG00000264175 | -0.039961 | 0.51594 | -0.039961   | 0.51594     | -0.039961 |         |  |
|           | 0.51594         | -0.039961 | 0.51594 | 0.51594     | 0.768251417 |           |         |  |
| DIAPH3    | ENSG00000139734 | -1.628    | 0.94824 | -1.5358     | 0.93771     | -1.0814   |         |  |
|           | 0.86024         | -0.040035 | 0.51597 | 0.51597     | 0.768251417 |           |         |  |
| ERICH6    | ENSG00000163645 | -1.2166   | 0.88811 | -0.040051   | 0.51597     | -0.77319  |         |  |
|           | 0.7803          | -0.25511  | 0.60068 | 0.51597     | 0.768251417 |           |         |  |
| NA        | ENSG00000279273 | -0.040069 | 0.51598 | -0.59472    | 0.72399     | -0.32191  | 0.62624 |  |
|           | -0.51383        | 0.69632   | 0.51598 | 0.768251417 |             |           |         |  |
| PRSS48    | ENSG00000189099 | -0.040082 | 0.51599 | -0.87066    | 0.80803     | -0.74799  |         |  |
|           | 0.77277         | -0.47112  | 0.68122 | 0.51599     | 0.768251417 |           |         |  |
| NA        | ENSG00000225886 | -0.040155 | 0.51602 | -0.040155   | 0.51602     | -0.040155 | 0.51602 |  |
|           | -0.040155       | 0.51602   | 0.51602 | 0.768251417 |             |           |         |  |
| NA        | ENSG00000256081 | -0.77177  | 0.77987 | -0.040224   | 0.51604     | -0.040224 | 0.51604 |  |
|           | -0.094904       | 0.5378    | 0.51604 | 0.768251417 |             |           |         |  |
| ASCL3     | ENSG00000176009 | -1.2349   | 0.89157 | -1.2349     | 0.89157     | -0.04024  | 0.51605 |  |
|           | -1.2349         | 0.89157   | 0.51605 | 0.768251417 |             |           |         |  |
| ESR1      | ENSG00000091831 | -0.1439   | 0.55721 | -0.066344   | 0.52645     | -0.69228  | 0.75562 |  |
|           | -0.040255       | 0.51606   | 0.51606 | 0.768251417 |             |           |         |  |
| NA        | ENSG00000272371 | -0.040305 | 0.51607 | -0.040305   | 0.51607     | -0.040305 | 0.51607 |  |
|           | -1.1439         | 0.87367   | 0.51607 | 0.768251417 |             |           |         |  |
| GPR176    | ENSG00000166073 | -0.040322 | 0.51608 | -0.59696    | 0.72473     | -0.99609  |         |  |
|           | 0.8404          | -0.4436   | 0.67134 | 0.51608     | 0.768251417 |           |         |  |
| NA        | ENSG00000283515 | -0.04039  | 0.51611 | -0.04039    | 0.51611     | -0.04039  | 0.51611 |  |



|              |                 |           |         |             |             |           |         |  |
|--------------|-----------------|-----------|---------|-------------|-------------|-----------|---------|--|
|              | -0.04039        | 0.51611   | 0.51611 | 0.768251417 |             |           |         |  |
| UTS2R        | ENSG00000181408 | -0.04043  | 0.51612 | -0.63085    | 0.73593     | -0.10218  | 0.54069 |  |
|              | -0.63085        | 0.73593   | 0.51612 | 0.768251417 |             |           |         |  |
| NACAP7       | ENSG00000218965 | -0.21347  | 0.58452 | -0.040423   | 0.51612     | -0.23026  |         |  |
|              | 0.59105         | -0.42197  | 0.66348 | 0.51612     | 0.768251417 |           |         |  |
| KIAA1614-AS1 | ENSG00000232586 | -0.040445 | 0.51613 | -0.040445   | 0.51613     | -0.040445 |         |  |
|              | 0.51613         | -0.040445 | 0.51613 | 0.51613     | 0.768251417 |           |         |  |
| CFTRP3       | ENSG00000204555 | -0.040484 | 0.51615 | -0.75453    | 0.77474     | -0.73861  |         |  |
|              | 0.76993         | -1.3188   | 0.90639 | 0.51615     | 0.768255441 |           |         |  |
| IGLV7-35     | ENSG00000253631 | -0.040565 | 0.51618 | -0.040565   | 0.51618     | -0.040565 |         |  |
|              | 0.51618         | -0.040565 | 0.51618 | 0.51618     | 0.768255441 |           |         |  |
| NA           | ENSG00000278964 | -0.040575 | 0.51618 | -0.040575   | 0.51618     | -0.040575 | 0.51618 |  |
|              | -0.040575       | 0.51618   | 0.51618 | 0.768255441 |             |           |         |  |
| NOTCH2P1     | ENSG00000226446 | -0.89544  | 0.81472 | -0.45756    | 0.67637     | -1.6213   |         |  |
|              | 0.94752         | -0.040789 | 0.51627 | 0.51627     | 0.768365925 |           |         |  |
| FGD5         | ENSG00000154783 | -0.040851 | 0.51629 | -0.29106    | 0.6145      | -0.24153  | 0.59543 |  |
|              | -0.055251       | 0.52203   | 0.51629 | 0.768372223 |             |           |         |  |
| RAP1BP2      | ENSG00000214405 | -0.040889 | 0.51631 | -0.040889   | 0.51631     | -0.040889 |         |  |
|              | 0.51631         | -0.040889 | 0.51631 | 0.51631     | 0.76837395  |           |         |  |
| TONSL        | ENSG00000160949 | -0.32596  | 0.62777 | -0.041027   | 0.51636     | -0.041027 | 0.51636 |  |
|              | -0.041027       | 0.51636   | 0.51636 | 0.76837395  |             |           |         |  |
| SDCCAG8      | ENSG00000054282 | -0.064709 | 0.5258  | -0.65726    | 0.74449     | -0.041036 |         |  |
|              | 0.51637         | -0.31176  | 0.62239 | 0.51637     | 0.76837395  |           |         |  |
| CPB2         | ENSG00000080618 | -0.1639   | 0.5651  | -1.364      | 0.91371     | -0.041035 | 0.51637 |  |
|              | -0.87962        | 0.81047   | 0.51637 | 0.76837395  |             |           |         |  |
| MIR1296      | ENSG00000221063 | -0.041043 | 0.51637 | -0.041043   | 0.51637     | -0.041043 |         |  |
|              | 0.51637         | -0.041043 | 0.51637 | 0.51637     | 0.76837395  |           |         |  |
| NA           | ENSG00000234730 | -0.79745  | 0.78741 | -0.041154   | 0.51641     | -0.041154 | 0.51641 |  |
|              | -0.56352        | 0.71346   | 0.51641 | 0.768410006 |             |           |         |  |
| MIR206       | ENSG00000207604 | -1.557    | 0.94027 | -0.041229   | 0.51644     | -0.041229 |         |  |
|              | 0.51644         | -0.041229 | 0.51644 | 0.51644     | 0.768414014 |           |         |  |
| ATP13A5      | ENSG00000187527 | -0.35065  | 0.63707 | -1.0698     | 0.85764     | -0.61334  |         |  |
|              | 0.73017         | -0.041273 | 0.51646 | 0.51646     | 0.768414014 |           |         |  |
| RN7SL423P    | ENSG00000244372 | -0.04128  | 0.51646 | -0.04128    | 0.51646     | -0.04128  |         |  |
|              | 0.51646         | -0.62508  | 0.73404 | 0.51646     | 0.768414014 |           |         |  |
| LINC01953    | ENSG00000236193 | -0.041399 | 0.51651 | -0.57739    | 0.71816     | -0.041399 |         |  |
|              | 0.51651         | -0.23902  | 0.59445 | 0.51651     | 0.768424316 |           |         |  |
| CLEC4D       | ENSG00000166527 | -0.041433 | 0.51652 | -0.041433   | 0.51652     | -0.50126  |         |  |
|              | 0.69191         | -0.25958  | 0.60241 | 0.51652     | 0.768424316 |           |         |  |
| NA           | ENSG00000270880 | -0.041409 | 0.51652 | -0.041409   | 0.51652     | -0.041409 | 0.51652 |  |
|              | -0.041409       | 0.51652   | 0.51652 | 0.768424316 |             |           |         |  |
| NA           | ENSG00000272950 | -0.82477  | 0.79525 | -0.041458   | 0.51653     | -0.82477  | 0.79525 |  |
|              | -0.82477        | 0.79525   | 0.51653 | 0.768424316 |             |           |         |  |
| DEFB112      | ENSG00000180872 | -0.041547 | 0.51657 | -0.041547   | 0.51657     | -0.041547 |         |  |
|              | 0.51657         | -1.0034   | 0.84218 | 0.51657     | 0.768436331 |           |         |  |
| RNU6-1205P   | ENSG00000200495 | -0.041582 | 0.51658 | -0.041582   | 0.51658     | -0.041582 |         |  |
|              | 0.51658         | -0.041582 | 0.51658 | 0.51658     | 0.768436331 |           |         |  |
| SPG11        | ENSG00000104133 | -0.41244  | 0.65999 | -0.04514    | 0.518       | -0.37749  | 0.64709 |  |
|              | -0.041592       | 0.51659   | 0.51659 | 0.768436331 |             |           |         |  |
| ITPKB-IT1    | ENSG00000228382 | -2.0737   | 0.98095 | -2.0737     | 0.98095     | -2.0737   |         |  |
|              | 0.98095         | -0.041669 | 0.51662 | 0.51662     | 0.768436331 |           |         |  |
| SOX5P1       | ENSG00000254376 | -0.16851  | 0.56691 | -0.041665   | 0.51662     | -0.64065  |         |  |
|              | 0.73913         | -0.15788  | 0.56273 | 0.51662     | 0.768436331 |           |         |  |
| NA           | ENSG00000261226 | -0.12014  | 0.54781 | -0.041765   | 0.51666     | -0.21345  | 0.58451 |  |
|              | -0.21345        | 0.58451   | 0.51666 | 0.768436331 |             |           |         |  |
| NUCKS1P1     | ENSG00000232864 | -1.4389   | 0.92491 | -0.041809   | 0.51667     | -0.94251  |         |  |
|              | 0.82704         | -0.41651  | 0.66148 | 0.51667     | 0.768436331 |           |         |  |
| RNU4ATAC13P  | ENSG00000251741 | -0.31429  | 0.62335 | -0.31429    | 0.62335     | -0.041832 |         |  |
|              | 0.51668         | -1.0832   | 0.86065 | 0.51668     | 0.768436331 |           |         |  |
| NA           | ENSG00000276261 | -0.041828 | 0.51668 | -0.041828   | 0.51668     | -0.041828 | 0.51668 |  |
|              | -0.041828       | 0.51668   | 0.51668 | 0.768436331 |             |           |         |  |
| GABRG1       | ENSG00000163285 | -0.23092  | 0.59131 | -0.041912   | 0.51672     | -0.40675  |         |  |

|            |                 |           |         |             |             |           |         |
|------------|-----------------|-----------|---------|-------------|-------------|-----------|---------|
|            | 0.6579          | -0.54953  | 0.70868 | 0.51672     | 0.768463787 |           |         |
| GCFC2      | ENSG00000005436 | -1.4851   | 0.93124 | -1.4851     | 0.93124     | -1.4851   | 0.93124 |
|            | -0.041958       | 0.51673   | 0.51673 | 0.768463787 |             |           |         |
| NA         | ENSG00000226405 | -0.97218  | 0.83452 | -0.33557    | 0.6314      | -0.39168  | 0.65235 |
|            | -0.042022       | 0.51676   | 0.51676 | 0.768484949 |             |           |         |
| RNU7-38P   | ENSG00000238446 | -0.042205 | 0.51683 | -0.042205   | 0.51683     | -0.042205 |         |
|            | 0.51683         | -0.042205 | 0.51683 | 0.51683     | 0.768565592 |           |         |
| NA         | ENSG00000216642 | -0.31435  | 0.62337 | -0.31435    | 0.62337     | -0.042301 | 0.51687 |
|            | -1.3009         | 0.90335   | 0.51687 | 0.768568983 |             |           |         |
| NA         | ENSG00000260588 | -0.25445  | 0.60043 | -0.10315    | 0.54108     | -0.042311 | 0.51687 |
|            | -0.16821        | 0.56679   | 0.51687 | 0.768568983 |             |           |         |
| AVIL       | ENSG00000135407 | -1.0338   | 0.84938 | -1.0338     | 0.84938     | -0.04237  | 0.5169  |
|            | -0.04237        | 0.5169    | 0.5169  | 0.768568983 |             |           |         |
| NA         | ENSG00000224715 | -1.6099   | 0.94629 | -0.92396    | 0.82225     | -0.04242  | 0.51692 |
|            | -1.2085         | 0.88656   | 0.51692 | 0.768568983 |             |           |         |
| NA         | ENSG00000236536 | -0.042464 | 0.51694 | -0.52168    | 0.69905     | -1.5927   | 0.94439 |
|            | -0.76575        | 0.77809   | 0.51694 | 0.768568983 |             |           |         |
| NA         | ENSG00000268960 | -0.042478 | 0.51694 | -0.43354    | 0.66769     | -0.43354  | 0.66769 |
|            | -0.43354        | 0.66769   | 0.51694 | 0.768568983 |             |           |         |
| LINC01164  | ENSG00000189275 | -0.13804  | 0.55489 | -0.042587   | 0.51698     | -0.5427   |         |
|            | 0.70633         | -0.37329  | 0.64553 | 0.51698     | 0.768568983 |           |         |
| NA         | ENSG00000272971 | -0.48281  | 0.68539 | -0.042573   | 0.51698     | -0.48281  | 0.68539 |
|            | -0.48281        | 0.68539   | 0.51698 | 0.768568983 |             |           |         |
| NA         | ENSG00000242477 | -0.042596 | 0.51699 | -0.042596   | 0.51699     | -0.042596 | 0.51699 |
|            | -0.042596       | 0.51699   | 0.51699 | 0.768568983 |             |           |         |
| NA         | ENSG00000263098 | -0.042604 | 0.51699 | -0.042604   | 0.51699     | -0.042604 | 0.51699 |
|            | -0.042604       | 0.51699   | 0.51699 | 0.768568983 |             |           |         |
| NA         | ENSG00000226772 | -0.042815 | 0.51708 | -0.042815   | 0.51708     | -0.042815 | 0.51708 |
|            | -0.042815       | 0.51708   | 0.51708 | 0.768662162 |             |           |         |
| NA         | ENSG00000242199 | -0.042868 | 0.5171  | -0.042868   | 0.5171      | -0.042868 | 0.5171  |
|            | -0.042868       | 0.5171    | 0.5171  | 0.768662162 |             |           |         |
| NA         | ENSG00000250371 | -0.042872 | 0.5171  | -0.49943    | 0.69126     | -0.77289  | 0.78021 |
|            | -0.4925         | 0.68882   | 0.5171  | 0.768662162 |             |           |         |
| NA         | ENSG00000255811 | -0.043006 | 0.51715 | -0.043006   | 0.51715     | -0.043006 | 0.51715 |
|            | -0.043006       | 0.51715   | 0.51715 | 0.768713037 |             |           |         |
| NA         | ENSG00000235978 | -0.043043 | 0.51717 | -0.043043   | 0.51717     | -0.043043 | 0.51717 |
|            | -0.50499        | 0.69322   | 0.51717 | 0.768719317 |             |           |         |
| GTPBP2     | ENSG00000172432 | -0.043121 | 0.5172  | -0.043121   | 0.5172      | -0.043121 |         |
|            | 0.5172          | -0.043121 | 0.5172  | 0.5172      | 0.768720989 |           |         |
| NA         | ENSG00000225119 | -0.043201 | 0.51723 | -0.30899    | 0.62134     | -0.30899  | 0.62134 |
|            | -0.32587        | 0.62774   | 0.51723 | 0.768720989 |             |           |         |
| LINGO2     | ENSG00000174482 | -0.043221 | 0.51724 | -1.1492     | 0.87476     | -1.9699   |         |
|            | 0.97558         | -1.9699   | 0.97558 | 0.51724     | 0.768720989 |           |         |
| RPS15AP24  | ENSG00000241511 | -0.70221  | 0.75873 | -0.70221    | 0.75873     | -0.43824  |         |
|            | 0.66939         | -0.043228 | 0.51724 | 0.51724     | 0.768720989 |           |         |
| TSLP       | ENSG00000145777 | -0.87192  | 0.80838 | -1.1364     | 0.8721      | -0.043242 | 0.51725 |
|            | -0.043242       | 0.51725   | 0.51725 | 0.768720989 |             |           |         |
| RNU1-65P   | ENSG00000200789 | -0.043416 | 0.51732 | -0.043416   | 0.51732     | -0.043416 |         |
|            | 0.51732         | -0.043416 | 0.51732 | 0.51732     | 0.768774533 |           |         |
| SERPINH1P1 | ENSG00000229207 | -0.043616 | 0.51739 | -0.043616   | 0.51739     | -0.043616 |         |
|            | 0.51739         | -0.043616 | 0.51739 | 0.51739     | 0.768774533 |           |         |
| NA         | ENSG00000267089 | -0.043592 | 0.51739 | -0.043592   | 0.51739     | -0.043592 | 0.51739 |
|            | -0.043592       | 0.51739   | 0.51739 | 0.768774533 |             |           |         |
| NA         | ENSG00000268520 | -0.043615 | 0.51739 | -0.043615   | 0.51739     | -0.043615 | 0.51739 |
|            | -0.043615       | 0.51739   | 0.51739 | 0.768774533 |             |           |         |
| ZNF649-AS1 | ENSG00000268095 | -0.043641 | 0.5174  | -0.043641   | 0.5174      | -0.043641 |         |
|            | 0.5174          | -0.043641 | 0.5174  | 0.5174      | 0.768774533 |           |         |
| RNU6-964P  | ENSG00000252333 | -0.04367  | 0.51742 | -1.1144     | 0.86745     | -1.9006   |         |
|            | 0.97132         | -1.9006   | 0.97132 | 0.51742     | 0.768774533 |           |         |
| NA         | ENSG00000271482 | -0.0437   | 0.51743 | -0.0437     | 0.51743     | -0.0437   | 0.51743 |
|            | -0.0437         | 0.51743   | 0.51743 | 0.768774533 |             |           |         |
| PRRG4      | ENSG00000135378 | -1.513    | 0.93487 | -1.513      | 0.93487     | -0.043771 | 0.51746 |

|           |                 |           |         |             |             |           |         |  |
|-----------|-----------------|-----------|---------|-------------|-------------|-----------|---------|--|
|           | -1.513          | 0.93487   | 0.51746 | 0.768774533 |             |           |         |  |
| KRTAP9-4  | ENSG00000241595 | -0.22757  | 0.59001 | -0.25766    | 0.60166     | -1.3989   |         |  |
|           | 0.91907         | -0.043798 | 0.51747 | 0.51747     | 0.768774533 |           |         |  |
| PPIAP80   | ENSG00000174495 | -0.6434   | 0.74002 | -0.6434     | 0.74002     | -0.043905 |         |  |
|           | 0.51751         | -0.6434   | 0.74002 | 0.51751     | 0.768774533 |           |         |  |
| TRAV13-2  | ENSG00000211791 | -0.043917 | 0.51751 | -0.043917   | 0.51751     | -1.0252   |         |  |
|           | 0.84737         | -0.043917 | 0.51751 | 0.51751     | 0.768774533 |           |         |  |
| NA        | ENSG00000264937 | -0.043908 | 0.51751 | -0.043908   | 0.51751     | -0.043908 | 0.51751 |  |
|           | -0.043908       | 0.51751   | 0.51751 | 0.768774533 |             |           |         |  |
| RNU6-788P | ENSG00000212269 | -0.13429  | 0.55341 | -0.13429    | 0.55341     | -0.13429  |         |  |
|           | 0.55341         | -0.043945 | 0.51753 | 0.51753     | 0.768774533 |           |         |  |
| RPAP3     | ENSG00000005175 | -0.17139  | 0.56804 | -0.4855     | 0.68634     | -0.043972 | 0.51754 |  |
|           | -0.21981        | 0.58699   | 0.51754 | 0.768774533 |             |           |         |  |
| NA        | ENSG00000263218 | -0.043999 | 0.51755 | -0.043999   | 0.51755     | -0.043999 | 0.51755 |  |
|           | -0.043999       | 0.51755   | 0.51755 | 0.768774533 |             |           |         |  |
| ISM1      | ENSG00000101230 | -1.9763   | 0.97594 | -0.04404    | 0.51756     | -1.9763   | 0.97594 |  |
|           | -1.9763         | 0.97594   | 0.51756 | 0.768774533 |             |           |         |  |
| NA        | ENSG00000231868 | -0.044048 | 0.51757 | -0.044048   | 0.51757     | -0.044048 | 0.51757 |  |
|           | -0.044048       | 0.51757   | 0.51757 | 0.768774533 |             |           |         |  |
| LINC02032 | ENSG00000241131 | -0.16824  | 0.5668  | -0.044059   | 0.51757     | -1.4852   |         |  |
|           | 0.93126         | -1.4852   | 0.93126 | 0.51757     | 0.768774533 |           |         |  |
| NA        | ENSG00000233191 | -0.65279  | 0.74305 | -0.044163   | 0.51761     | -0.68352  | 0.75286 |  |
|           | -0.1486         | 0.55907   | 0.51761 | 0.768807554 |             |           |         |  |
| NA        | ENSG00000226527 | -0.044233 | 0.51764 | -0.63728    | 0.73803     | -0.27509  | 0.60837 |  |
|           | -0.75765        | 0.77567   | 0.51764 | 0.768807554 |             |           |         |  |
| SUMO2P2   | ENSG00000227607 | -0.044269 | 0.51766 | -0.044269   | 0.51766     | -0.044269 |         |  |
|           | 0.51766         | -0.044269 | 0.51766 | 0.51766     | 0.768807554 |           |         |  |
| ADGRL1    | ENSG00000072071 | -0.57408  | 0.71704 | -0.10276    | 0.54092     | -0.044336 |         |  |
|           | 0.51768         | -0.30885  | 0.62128 | 0.51768     | 0.768807554 |           |         |  |
| DGKZP1    | ENSG00000179611 | -1.0684   | 0.85733 | -0.46359    | 0.67853     | -0.044321 |         |  |
|           | 0.51768         | -0.38597  | 0.65024 | 0.51768     | 0.768807554 |           |         |  |
| LEF1      | ENSG00000138795 | -0.78667  | 0.78426 | -0.044414   | 0.51771     | -0.26634  | 0.60501 |  |
|           | -0.55265        | 0.70975   | 0.51771 | 0.768807554 |             |           |         |  |
| MARCF11   | ENSG00000183654 | -0.044457 | 0.51773 | -0.47662    | 0.68318     | -0.050674 |         |  |
|           | 0.52021         | -1.6894   | 0.95443 | 0.51773     | 0.768807554 |           |         |  |
| RNU4-7P   | ENSG00000201628 | -0.11931  | 0.54748 | -0.5195     | 0.69829     | -0.044483 |         |  |
|           | 0.51774         | -0.23601  | 0.59329 | 0.51774     | 0.768807554 |           |         |  |
| RPH3A     | ENSG00000089169 | -1.0663   | 0.85686 | -0.38067    | 0.64828     | -0.044515 | 0.51775 |  |
|           | -0.58207        | 0.71974   | 0.51775 | 0.768807554 |             |           |         |  |
| NA        | ENSG00000251489 | -0.04452  | 0.51775 | -0.29234    | 0.61499     | -0.40942  | 0.65888 |  |
|           | -0.64887        | 0.74179   | 0.51775 | 0.768807554 |             |           |         |  |
| HNRNPA1P7 | ENSG00000215492 | -0.59938  | 0.72554 | -0.59938    | 0.72554     | -0.044576 |         |  |
|           | 0.51778         | -1.1165   | 0.86789 | 0.51778     | 0.768828673 |           |         |  |
| C16orf46  | ENSG00000166455 | -0.04463  | 0.5178  | -0.04463    | 0.5178      | -0.10152  |         |  |
|           | 0.54043         | -0.70516  | 0.75964 | 0.5178      | 0.768834943 |           |         |  |
| E2F3P2    | ENSG00000203435 | -0.044738 | 0.51784 | -0.044738   | 0.51784     | -0.044738 |         |  |
|           | 0.51784         | -0.044738 | 0.51784 | 0.51784     | 0.768842864 |           |         |  |
| OR1E2     | ENSG00000127780 | -1.6112   | 0.94643 | -0.044816   | 0.51787     | -0.044816 | 0.51787 |  |
|           | -0.044816       | 0.51787   | 0.51787 | 0.768842864 |             |           |         |  |
| ZNF534    | ENSG00000198633 | -1.0307   | 0.84866 | -0.044797   | 0.51787     | -0.044797 |         |  |
|           | 0.51787         | -0.044797 | 0.51787 | 0.51787     | 0.768842864 |           |         |  |
| MIR4279   | ENSG00000266243 | -0.42523  | 0.66467 | -0.42523    | 0.66467     | -0.42523  |         |  |
|           | 0.66467         | -0.044824 | 0.51788 | 0.51788     | 0.768842864 |           |         |  |
| ABHD17AP4 | ENSG00000229107 | -0.88726  | 0.81253 | -0.15791    | 0.56273     | -0.88726  |         |  |
|           | 0.81253         | -0.044865 | 0.51789 | 0.51789     | 0.768842864 |           |         |  |
| STPG4     | ENSG00000239605 | -1.4921   | 0.93217 | -0.04489    | 0.5179      | -0.79778  | 0.7875  |  |
|           | -1.1893         | 0.88285   | 0.5179  | 0.768842864 |             |           |         |  |
| PCK2      | ENSG00000100889 | -0.044948 | 0.51793 | -0.044948   | 0.51793     | -0.044948 | 0.51793 |  |
|           | -0.044948       | 0.51793   | 0.51793 | 0.768854739 |             |           |         |  |
| NA        | ENSG00000227278 | -0.045068 | 0.51797 | -0.045068   | 0.51797     | -0.045068 | 0.51797 |  |
|           | -0.045068       | 0.51797   | 0.51797 | 0.768854739 |             |           |         |  |
| VPS28     | ENSG00000160948 | -0.045087 | 0.51798 | -1.1327     | 0.87133     | -0.045087 | 0.51798 |  |

|            |                 |           |         |             |             |           |         |  |
|------------|-----------------|-----------|---------|-------------|-------------|-----------|---------|--|
|            | -0.75992        | 0.77635   | 0.51798 | 0.768854739 |             |           |         |  |
| EPHA1      | ENSG00000146904 | -1.0094   | 0.84361 | -1.0094     | 0.84361     | -0.3316   | 0.6299  |  |
|            | -0.045104       | 0.51799   | 0.51799 | 0.768854739 |             |           |         |  |
| NA         | ENSG00000253670 | -0.3256   | 0.62764 | -0.045185   | 0.51802     | -0.42934  | 0.66616 |  |
|            | -0.62154        | 0.73288   | 0.51802 | 0.768854739 |             |           |         |  |
| NA         | ENSG00000280051 | -0.045197 | 0.51802 | -0.045197   | 0.51802     | -0.48763  | 0.68709 |  |
|            | -0.045197       | 0.51802   | 0.51802 | 0.768854739 |             |           |         |  |
| SCN1B      | ENSG00000105711 | -0.045235 | 0.51804 | -0.045235   | 0.51804     | -0.045235 | 0.51804 |  |
|            | -0.045235       | 0.51804   | 0.51804 | 0.768854739 |             |           |         |  |
| ODF3L2     | ENSG00000181781 | -0.045254 | 0.51805 | -0.057858   | 0.52307     | -0.88424  |         |  |
|            | 0.81172         | -0.045254 | 0.51805 | 0.51805     | 0.768854739 |           |         |  |
| RN7SL383P  | ENSG00000263556 | -0.045272 | 0.51805 | -0.76314    | 0.77731     | -0.50533  |         |  |
|            | 0.69334         | -0.50533  | 0.69334 | 0.51805     | 0.768854739 |           |         |  |
| LMX1B      | ENSG00000136944 | -0.89983  | 0.81589 | -0.045305   | 0.51807     | -0.3577   | 0.63972 |  |
|            | -0.22482        | 0.58894   | 0.51807 | 0.768861005 |             |           |         |  |
| BACE1-AS   | ENSG00000278768 | -0.045395 | 0.5181  | -0.045395   | 0.5181      | -0.045395 |         |  |
|            | 0.5181          | -0.045395 | 0.5181  | 0.5181      | 0.768882111 |           |         |  |
| NA         | ENSG00000235078 | -0.045564 | 0.51817 | -0.045564   | 0.51817     | -0.045564 | 0.51817 |  |
|            | -0.045564       | 0.51817   | 0.51817 | 0.768900234 |             |           |         |  |
| RNU6-1012P | ENSG00000252415 | -0.04563  | 0.5182  | -0.04563    | 0.5182      | -0.04563  |         |  |
|            | 0.5182          | -0.04563  | 0.5182  | 0.5182      | 0.768900234 |           |         |  |
| NA         | ENSG00000257729 | -0.21043  | 0.58333 | -0.045662   | 0.51821     | -0.21043  | 0.58333 |  |
|            | -0.85662        | 0.80417   | 0.51821 | 0.768900234 |             |           |         |  |
| MIR4686    | ENSG00000265258 | -0.045685 | 0.51822 | -0.045685   | 0.51822     | -0.045685 |         |  |
|            | 0.51822         | -0.045685 | 0.51822 | 0.51822     | 0.768900234 |           |         |  |
| NA         | ENSG00000207009 | -0.25498  | 0.60063 | -0.045746   | 0.51824     | -0.25498  | 0.60063 |  |
|            | -0.25498        | 0.60063   | 0.51824 | 0.768900234 |             |           |         |  |
| DEF6       | ENSG00000023892 | -0.25658  | 0.60125 | -0.045772   | 0.51825     | -0.22165  | 0.58771 |  |
|            | -0.19984        | 0.5792    | 0.51825 | 0.768900234 |             |           |         |  |
| NA         | ENSG00000249664 | -0.20558  | 0.58144 | -0.30114    | 0.61834     | -0.045767 | 0.51825 |  |
|            | -0.045767       | 0.51825   | 0.51825 | 0.768900234 |             |           |         |  |
| MEMO1P3    | ENSG00000239238 | -0.045775 | 0.51826 | -0.045775   | 0.51826     | -0.045775 |         |  |
|            | 0.51826         | -0.045775 | 0.51826 | 0.51826     | 0.768900234 |           |         |  |
| NA         | ENSG00000271758 | -0.045795 | 0.51826 | -0.045795   | 0.51826     | -0.045795 | 0.51826 |  |
|            | -0.045795       | 0.51826   | 0.51826 | 0.768900234 |             |           |         |  |
| ATP5PDP1   | ENSG00000261679 | -0.95551  | 0.83034 | -0.045803   | 0.51827     | -0.55113  |         |  |
|            | 0.70923         | -0.55113  | 0.70923 | 0.51827     | 0.768900234 |           |         |  |
| SLC39A4    | ENSG00000147804 | -0.19175  | 0.57603 | -1.8021     | 0.96424     | -0.045922 |         |  |
|            | 0.51831         | -1.2776   | 0.8993  | 0.51831     | 0.768936168 |           |         |  |
| GALNTL5    | ENSG00000106648 | -0.61886  | 0.732   | -0.92286    | 0.82196     | -0.71907  | 0.76395 |  |
|            | -0.046117       | 0.51839   | 0.51839 | 0.768982302 |             |           |         |  |
| OCIAD1-AS1 | ENSG00000248256 | -0.046108 | 0.51839 | -0.4964     | 0.6902      | -1.4251   |         |  |
|            | 0.92293         | -1.4251   | 0.92293 | 0.51839     | 0.768982302 |           |         |  |
| SLC39A7    | ENSG00000112473 | -0.046136 | 0.5184  | -0.046136   | 0.5184      | -0.046136 |         |  |
|            | 0.5184          | -0.046136 | 0.5184  | 0.5184      | 0.768982302 |           |         |  |
| AK3P2      | ENSG00000250115 | -0.046161 | 0.51841 | -0.046161   | 0.51841     | -0.046161 | 0.51841 |  |
|            | -0.046161       | 0.51841   | 0.51841 | 0.768982302 |             |           |         |  |
| THADA      | ENSG00000115970 | -0.046188 | 0.51842 | -1.4485     | 0.92627     | -0.58222  | 0.71979 |  |
|            | -1.1068         | 0.86581   | 0.51842 | 0.768982302 |             |           |         |  |
| DOK3       | ENSG00000146094 | -0.046258 | 0.51845 | -0.15316    | 0.56087     | -0.85922  | 0.80489 |  |
|            | -0.66512        | 0.74701   | 0.51845 | 0.769003394 |             |           |         |  |
| NA         | ENSG00000218586 | -1.0919   | 0.86256 | -0.046392   | 0.5185      | -0.41249  | 0.66001 |  |
|            | -0.72893        | 0.76698   | 0.5185  | 0.769032362 |             |           |         |  |
| NA         | ENSG00000279940 | -0.62994  | 0.73563 | -1.1567     | 0.8763      | -1.1567   | 0.8763  |  |
|            | -0.046406       | 0.51851   | 0.51851 | 0.769032362 |             |           |         |  |
| NA         | ENSG00000256116 | -0.046437 | 0.51852 | -0.046437   | 0.51852     | -0.046437 | 0.51852 |  |
|            | -0.046437       | 0.51852   | 0.51852 | 0.769032362 |             |           |         |  |
| RNU4ATAC5P | ENSG00000253035 | -0.046531 | 0.51856 | -0.046531   | 0.51856     | -0.046531 |         |  |
|            | 0.51856         | -0.046531 | 0.51856 | 0.51856     | 0.769032362 |           |         |  |
| CKS1BP1    | ENSG00000258788 | -0.046552 | 0.51856 | -0.046552   | 0.51856     | -0.046552 |         |  |
|            | 0.51856         | -0.046552 | 0.51856 | 0.51856     | 0.769032362 |           |         |  |
| GPR26      | ENSG00000154478 | -0.69211  | 0.75557 | -0.15076    | 0.55992     | -0.046582 | 0.51858 |  |

|           |                 |           |         |             |             |           |         |           |
|-----------|-----------------|-----------|---------|-------------|-------------|-----------|---------|-----------|
|           | -1.3432         | 0.9104    | 0.51858 | 0.769032362 |             |           |         |           |
| LINC01782 | ENSG00000267204 | -0.046596 | 0.51858 | -0.046596   | 0.51858     | -0.046596 | 0.51858 | -0.046596 |
|           | 0.51858         | -0.046596 | 0.51858 | 0.51858     | 0.769032362 |           |         |           |
| NA        | ENSG00000267007 | -0.046655 | 0.51861 | -0.046655   | 0.51861     | -0.046655 | 0.51861 | -0.046655 |
|           | -0.046655       | 0.51861   | 0.51861 | 0.76904649  |             |           |         |           |
| STOML2    | ENSG00000165283 | -0.046725 | 0.51863 | -0.21907    | 0.5867      | -0.20361  |         |           |
|           | 0.58067         | -0.20361  | 0.58067 | 0.51863     | 0.76904649  |           |         |           |
| NA        | ENSG00000259972 | -0.046737 | 0.51864 | -0.046737   | 0.51864     | -0.046737 | 0.51864 | -0.046737 |
|           | -0.046737       | 0.51864   | 0.51864 | 0.76904649  |             |           |         |           |
| NA        | ENSG00000267749 | -0.046802 | 0.51866 | -0.046802   | 0.51866     | -0.046802 | 0.51866 | -0.046802 |
|           | -0.046802       | 0.51866   | 0.51866 | 0.76904649  |             |           |         |           |
| NA        | ENSG00000257438 | -1.4576   | 0.92753 | -0.046809   | 0.51867     | -1.1738   | 0.87977 |           |
|           | -0.046809       | 0.51867   | 0.51867 | 0.76904649  |             |           |         |           |
| ABI3BP    | ENSG00000154175 | -1.2941   | 0.90219 | -1.8983     | 0.97117     | -1.6376   |         |           |
|           | 0.94925         | -0.046886 | 0.5187  | 0.5187      | 0.76904649  |           |         |           |
| NA        | ENSG00000237525 | -0.046885 | 0.5187  | -0.046885   | 0.5187      | -0.046885 | 0.5187  | -0.046885 |
|           | -0.52566        | 0.70044   | 0.5187  | 0.76904649  |             |           |         |           |
| RNU6-197P | ENSG00000252489 | -0.046935 | 0.51872 | -0.082783   | 0.53299     | -0.92868  |         |           |
|           | 0.82347         | -1.1264   | 0.87    | 0.51872     | 0.769052744 |           |         |           |
| MOB3C     | ENSG00000142961 | -1.1851   | 0.88201 | -0.046986   | 0.51874     | -1.1851   | 0.88201 |           |
|           | -1.1851         | 0.88201   | 0.51874 | 0.769058998 |             |           |         |           |
| RPL7L1P4  | ENSG00000249582 | -0.72776  | 0.76662 | -0.38915    | 0.65142     | -0.72776  |         |           |
|           | 0.76662         | -0.047072 | 0.51877 | 0.51877     | 0.769080076 |           |         |           |
| NA        | ENSG00000270443 | -0.65085  | 0.74243 | -0.047132   | 0.5188      | -0.65085  | 0.74243 | -0.65085  |
|           | -0.65085        | 0.74243   | 0.5188  | 0.769101153 |             |           |         |           |
| MYL6P2    | ENSG00000235808 | -0.29703  | 0.61678 | -0.047337   | 0.51888     | -0.096911 |         |           |
|           | 0.5386          | -0.096911 | 0.5386  | 0.51888     | 0.769152032 |           |         |           |
| IKZF2     | ENSG00000030419 | -0.047366 | 0.51889 | -0.23758    | 0.59389     | -0.093314 | 0.53717 |           |
|           | -0.4272         | 0.66538   | 0.51889 | 0.769152032 |             |           |         |           |
| NA        | ENSG00000265618 | -0.047361 | 0.51889 | -0.047361   | 0.51889     | -0.047361 | 0.51889 | -0.047361 |
|           | -0.047361       | 0.51889   | 0.51889 | 0.769152032 |             |           |         |           |
| RNA5SP123 | ENSG00000200114 | -0.047443 | 0.51892 | -0.047443   | 0.51892     | -0.047443 |         |           |
|           | 0.51892         | -0.047443 | 0.51892 | 0.51892     | 0.769152032 |           |         |           |
| GACAT1    | ENSG00000232991 | -0.59305  | 0.72343 | -0.047455   | 0.51892     | -0.095254 |         |           |
|           | 0.53794         | -0.42392  | 0.66419 | 0.51892     | 0.769152032 |           |         |           |
| RNU2-33P  | ENSG00000222276 | -0.047505 | 0.51894 | -0.047505   | 0.51894     | -0.047505 |         |           |
|           | 0.51894         | -0.047505 | 0.51894 | 0.51894     | 0.769152032 |           |         |           |
| TNFRSF11B | ENSG00000164761 | -2.2523   | 0.98785 | -2.2523     | 0.98785     | -0.047587 |         |           |
|           | 0.51898         | -2.2523   | 0.98785 | 0.51898     | 0.769152032 |           |         |           |
| NA        | ENSG00000254644 | -0.04762  | 0.51899 | -0.04762    | 0.51899     | -0.04762  | 0.51899 | -0.04762  |
|           | -0.04762        | 0.51899   | 0.51899 | 0.769152032 |             |           |         |           |
| NA        | ENSG00000201316 | -1.3182   | 0.90627 | -1.3182     | 0.90627     | -1.4468   | 0.92603 |           |
|           | -0.047632       | 0.519     | 0.519   | 0.769152032 |             |           |         |           |
| HBS1L     | ENSG00000112339 | -0.42441  | 0.66437 | -0.047679   | 0.51901     | -0.55918  | 0.71198 |           |
|           | -0.21666        | 0.58576   | 0.51901 | 0.769152032 |             |           |         |           |
| NA        | ENSG00000270698 | -0.047753 | 0.51904 | -0.047753   | 0.51904     | -0.047753 | 0.51904 | -0.047753 |
|           | -0.047753       | 0.51904   | 0.51904 | 0.769152032 |             |           |         |           |
| CD1C      | ENSG00000158481 | -0.8654   | 0.80659 | -1.5649     | 0.94119     | -0.86633  | 0.80685 |           |
|           | -0.047819       | 0.51907   | 0.51907 | 0.769152032 |             |           |         |           |
| MSLN      | ENSG00000102854 | -1.4894   | 0.93181 | -1.2113     | 0.88711     | -1.6208   | 0.94747 |           |
|           | -0.04784        | 0.51908   | 0.51908 | 0.769152032 |             |           |         |           |
| TPT1P3    | ENSG00000241899 | -0.047841 | 0.51908 | -0.047841   | 0.51908     | -0.61525  |         |           |
|           | 0.7308          | -0.047841 | 0.51908 | 0.51908     | 0.769152032 |           |         |           |
| KNOP1P4   | ENSG00000232422 | -1.4557   | 0.92727 | -0.047886   | 0.5191      | -0.047886 |         |           |
|           | 0.5191          | -0.047886 | 0.5191  | 0.5191      | 0.769152032 |           |         |           |
| KIF25-AS1 | ENSG00000229921 | -0.82476  | 0.79525 | -0.04793    | 0.51911     | -0.04793  |         |           |
|           | 0.51911         | -0.04793  | 0.51911 | 0.51911     | 0.769152032 |           |         |           |
| HEMK1     | ENSG00000114735 | -0.047957 | 0.51912 | -0.44431    | 0.67159     | -0.61012  | 0.72911 |           |
|           | -0.69747        | 0.75724   | 0.51912 | 0.769152032 |             |           |         |           |
| NA        | ENSG00000250597 | -1.0987   | 0.86405 | -0.048002   | 0.51914     | -0.098566 | 0.53926 |           |
|           | -0.098566       | 0.53926   | 0.51914 | 0.769152032 |             |           |         |           |
| NA        | ENSG00000223777 | -0.048031 | 0.51915 | -0.048031   | 0.51915     | -0.048031 | 0.51915 | -0.048031 |

|            |                 |           |           |         |             |             |           |         |
|------------|-----------------|-----------|-----------|---------|-------------|-------------|-----------|---------|
|            |                 | -0.048031 | 0.51915   | 0.51915 | 0.769152032 |             |           |         |
| NA         | ENSG00000240459 | -0.048012 | 0.51915   | 0.51915 | -0.46432    | 0.67879     | -0.85722  | 0.80434 |
|            |                 | -0.54904  | 0.70851   | 0.51915 | 0.769152032 |             |           |         |
| RN7SL554P  | ENSG00000240936 | -0.048063 | 0.51917   | 0.51917 | -0.048063   | 0.51917     | -0.048063 |         |
|            |                 | 0.51917   | -0.29799  | 0.61715 | 0.51917     | 0.769158279 |           |         |
| IK         | ENSG00000113141 | -0.04818  | 0.51921   | 0.51921 | -0.35296    | 0.63794     | -0.54812  | 0.70819 |
|            |                 | -0.48691  | 0.68684   | 0.51921 | 0.76917077  |             |           |         |
| LRP8       | ENSG00000157193 | -0.048169 | 0.51921   | 0.51921 | -0.32352    | 0.62685     | -0.39817  | 0.65475 |
|            |                 | -1.2345   | 0.89149   | 0.51921 | 0.76917077  |             |           |         |
| NA         | ENSG00000222145 | -0.04821  | 0.51923   | 0.51923 | -0.23265    | 0.59198     | -0.04821  | 0.51923 |
|            |                 | -0.04821  | 0.51923   | 0.51923 | 0.769177015 |             |           |         |
| NA         | ENSG00000267184 | -0.048352 | 0.51928   | 0.51928 | -0.048352   | 0.51928     | -0.048352 | 0.51928 |
|            |                 | -0.048352 | 0.51928   | 0.51928 | 0.769227699 |             |           |         |
| CTDP1      | ENSG00000060069 | -1.4586   | 0.92767   | 0.92767 | -0.61085    | 0.72935     | -0.47306  | 0.68191 |
|            |                 | -0.048406 | 0.5193    | 0.5193  | 0.769233942 |             |           |         |
| NA         | ENSG00000230882 | -0.98114  | 0.83674   | 0.83674 | -0.98114    | 0.83674     | -0.45909  | 0.67692 |
|            |                 | -0.048439 | 0.51932   | 0.51932 | 0.769240185 |             |           |         |
| NA         | ENSG00000279981 | -0.41248  | 0.66001   | 0.66001 | -0.10261    | 0.54086     | -0.048519 | 0.51935 |
|            |                 | -0.29238  | 0.615     | 0.51935 | 0.769261239 |             |           |         |
| NA         | ENSG00000248719 | -0.048561 | 0.51937   | 0.51937 | -0.080449   | 0.53206     | -0.080449 | 0.53206 |
|            |                 | -0.080449 | 0.53206   | 0.51937 | 0.76926748  |             |           |         |
| RNF213-AS1 | ENSG00000263069 | -0.048676 | 0.51941   | 0.51941 | -0.048676   | 0.51941     | -0.048676 |         |
|            |                 | 0.51941   | -0.048676 | 0.51941 | 0.51941     | 0.769274554 |           |         |
| AXIN2      | ENSG00000168646 | -0.93619  | 0.82541   | 0.82541 | -0.048709   | 0.51942     | -0.67336  | 0.74964 |
|            |                 | -1.2244   | 0.8896    | 0.51942 | 0.769274554 |             |           |         |
| NA         | ENSG00000259529 | -0.048739 | 0.51944   | 0.51944 | -1.8003     | 0.96409     | -0.048739 | 0.51944 |
|            |                 | -0.048739 | 0.51944   | 0.51944 | 0.769274554 |             |           |         |
| RN7SL357P  | ENSG00000265894 | -0.66643  | 0.74743   | 0.74743 | -0.04875    | 0.51944     | -0.52919  |         |
|            |                 | 0.70166   | -0.52919  | 0.70166 | 0.51944     | 0.769274554 |           |         |
| MAPK12     | ENSG00000188130 | -1.4087   | 0.92054   | 0.92054 | -0.048794   | 0.51946     | -1.5588   |         |
|            |                 | 0.94048   | -0.56049  | 0.71243 | 0.51946     | 0.769274554 |           |         |
| NA         | ENSG00000273139 | -0.048883 | 0.51949   | 0.51949 | -0.048883   | 0.51949     | -0.048883 | 0.51949 |
|            |                 | -0.048883 | 0.51949   | 0.51949 | 0.769274554 |             |           |         |
| MTCO2P21   | ENSG00000236689 | -0.048914 | 0.51951   | 0.51951 | -0.048914   | 0.51951     | -0.048914 |         |
|            |                 | 0.51951   | -0.048914 | 0.51951 | 0.51951     | 0.769274554 |           |         |
| TCAM1P     | ENSG00000240280 | -0.057691 | 0.523     | 0.523   | -0.058489   | 0.52332     | -0.048928 | 0.51951 |
|            |                 | -0.24549  | 0.59696   | 0.51951 | 0.769274554 |             |           |         |
| NA         | ENSG00000256389 | -0.63772  | 0.73817   | 0.73817 | -0.25193    | 0.59945     | -0.048991 | 0.51954 |
|            |                 | -0.43643  | 0.66874   | 0.51954 | 0.769274554 |             |           |         |
| BTNL9      | ENSG00000165810 | -1.1304   | 0.87086   | 0.87086 | -1.0187     | 0.84582     | -0.77608  | 0.78115 |
|            |                 | -0.049055 | 0.51956   | 0.51956 | 0.769274554 |             |           |         |
| DEFB130C   | ENSG00000255157 | -1.8883   | 0.9705    | 0.9705  | -0.23485    | 0.59284     | -0.04904  |         |
|            |                 | 0.51956   | -0.64473  | 0.74045 | 0.51956     | 0.769274554 |           |         |
| NA         | ENSG00000264997 | -0.049066 | 0.51957   | 0.51957 | -0.049066   | 0.51957     | -0.049066 | 0.51957 |
|            |                 | -0.049066 | 0.51957   | 0.51957 | 0.769274554 |             |           |         |
| EMC3-AS1   | ENSG00000180385 | -0.049098 | 0.51958   | 0.51958 | -0.15506    | 0.56161     | -0.43946  |         |
|            |                 | 0.66984   | -0.18882  | 0.57488 | 0.51958     | 0.769274554 |           |         |
| ARL8A      | ENSG00000143862 | -1.2213   | 0.88901   | 0.88901 | -0.049238   | 0.51964     | -0.21739  | 0.58605 |
|            |                 | -0.60347  | 0.7269    | 0.51964 | 0.769340013 |             |           |         |
| OR5B15P    | ENSG00000273408 | -1.0679   | 0.85721   | 0.85721 | -0.049322   | 0.51967     | -0.21736  |         |
|            |                 | 0.58604   | -0.21736  | 0.58604 | 0.51967     | 0.769361054 |           |         |
| NA         | ENSG00000269271 | -0.049465 | 0.51973   | 0.51973 | -0.049465   | 0.51973     | -0.049465 | 0.51973 |
|            |                 | -0.049465 | 0.51973   | 0.51973 | 0.769417936 |             |           |         |
| NA         | ENSG00000214888 | -0.04951  | 0.51974   | 0.51974 | -0.32786    | 0.62849     | -0.32786  | 0.62849 |
|            |                 | -0.32786  | 0.62849   | 0.51974 | 0.769417936 |             |           |         |
| TPM3P4     | ENSG00000214869 | -0.049574 | 0.51977   | 0.51977 | -0.049574   | 0.51977     | -0.39865  |         |
|            |                 | 0.65493   | -0.049574 | 0.51977 | 0.51977     | 0.769428064 |           |         |
| NA         | ENSG00000250764 | -1.6575   | 0.95129   | 0.95129 | -0.049614   | 0.51979     | -1.6575   | 0.95129 |
|            |                 | -1.6575   | 0.95129   | 0.51979 | 0.769428064 |             |           |         |
| NA         | ENSG00000200332 | -0.049659 | 0.5198    | 0.5198  | -0.049659   | 0.5198      | -0.049659 | 0.5198  |
|            |                 | -0.049659 | 0.5198    | 0.5198  | 0.769428064 |             |           |         |
| NA         | ENSG00000231858 | -0.049673 | 0.51981   | 0.51981 | -0.049673   | 0.51981     | -0.049673 | 0.51981 |

|           |                 |           |         |             |             |           |         |  |
|-----------|-----------------|-----------|---------|-------------|-------------|-----------|---------|--|
|           | -0.049673       | 0.51981   | 0.51981 | 0.769428064 |             |           |         |  |
| CTXN3     | ENSG00000205279 | -0.049752 | 0.51984 | -0.049752   | 0.51984     | -0.049752 | 0.51984 |  |
|           | -0.049752       | 0.51984   | 0.51984 | 0.769449098 |             |           |         |  |
| NA        | ENSG00000248434 | -0.17922  | 0.57112 | -0.049876   | 0.51989     | -0.049876 | 0.51989 |  |
|           | -0.049876       | 0.51989   | 0.51989 | 0.769452205 |             |           |         |  |
| WDR11     | ENSG00000120008 | -0.049928 | 0.51991 | -1.0666     | 0.85693     | -0.18735  | 0.57431 |  |
|           | -0.34728        | 0.63581   | 0.51991 | 0.769452205 |             |           |         |  |
| AASS      | ENSG00000008311 | -0.049943 | 0.51992 | -0.18341    | 0.57276     | -0.09927  | 0.53954 |  |
|           | -0.049943       | 0.51992   | 0.51992 | 0.769452205 |             |           |         |  |
| NA        | ENSG00000257341 | -0.049985 | 0.51993 | -0.049985   | 0.51993     | -0.049985 | 0.51993 |  |
|           | -0.049985       | 0.51993   | 0.51993 | 0.769452205 |             |           |         |  |
| PEX14     | ENSG00000142655 | -0.29896  | 0.61751 | -0.70079    | 0.75828     | -0.73087  | 0.76757 |  |
|           | -0.049998       | 0.51994   | 0.51994 | 0.769452205 |             |           |         |  |
| HRG       | ENSG00000113905 | -0.05006  | 0.51996 | -0.05006    | 0.51996     | -0.05006  | 0.51996 |  |
|           | -1.5951         | 0.94466   | 0.51996 | 0.769452205 |             |           |         |  |
| OR51C1P   | ENSG00000197674 | -0.050067 | 0.51997 | -0.050067   | 0.51997     | -0.050067 |         |  |
|           | 0.51997         | -0.050067 | 0.51997 | 0.51997     | 0.769452205 |           |         |  |
| NA        | ENSG00000253383 | -0.050096 | 0.51998 | -0.050096   | 0.51998     | -0.050096 | 0.51998 |  |
|           | -0.050096       | 0.51998   | 0.51998 | 0.769452205 |             |           |         |  |
| TDRD1     | ENSG00000095627 | -0.050117 | 0.51999 | -0.84617    | 0.80127     | -0.26381  | 0.60404 |  |
|           | -0.84617        | 0.80127   | 0.51999 | 0.769452205 |             |           |         |  |
| TMEM14DP  | ENSG00000214881 | -0.050157 | 0.52    | -1.5665     | 0.94139     | -0.093986 | 0.53744 |  |
|           | -1.8707         | 0.96931   | 0.52    | 0.769452205 |             |           |         |  |
| LINC00689 | ENSG00000231419 | -0.20215  | 0.5801  | -0.050253   | 0.52004     | -0.1611   |         |  |
|           | 0.56399         | -0.20215  | 0.5801  | 0.52004     | 0.769464663 |           |         |  |
| POLR2M    | ENSG00000255529 | -0.050256 | 0.52004 | -0.050256   | 0.52004     | -0.050256 |         |  |
|           | 0.52004         | -0.050256 | 0.52004 | 0.52004     | 0.769464663 |           |         |  |
| PATL2     | ENSG00000229474 | -0.65654  | 0.74426 | -0.42816    | 0.66573     | -0.2781   | 0.60953 |  |
|           | -0.050391       | 0.52009   | 0.52009 | 0.769515279 |             |           |         |  |
| SLC7A8    | ENSG00000092068 | -0.050442 | 0.52011 | -0.18283    | 0.57253     | -0.45768  |         |  |
|           | 0.67641         | -0.79504  | 0.7867  | 0.52011     | 0.769521505 |           |         |  |
| ZNF746    | ENSG00000181220 | -0.23425  | 0.5926  | -1.4307     | 0.92375     | -0.050536 |         |  |
|           | 0.52015         | -0.64     | 0.73891 | 0.52015     | 0.769554977 |           |         |  |
| PSMA1     | ENSG00000129084 | -1.285    | 0.9006  | -0.19724    | 0.57818     | -0.050599 | 0.52018 |  |
|           | -0.58691        | 0.72137   | 0.52018 | 0.769554977 |             |           |         |  |
| TRAT1     | ENSG00000163519 | -0.10306  | 0.54104 | -0.10306    | 0.54104     | -0.21954  | 0.58689 |  |
|           | -0.050605       | 0.52018   | 0.52018 | 0.769554977 |             |           |         |  |
| NA        | ENSG00000275185 | -0.05067  | 0.52021 | -0.05067    | 0.52021     | -0.05067  | 0.52021 |  |
|           | -0.05067        | 0.52021   | 0.52021 | 0.769575996 |             |           |         |  |
| METTL21A  | ENSG00000144401 | -0.0508   | 0.52026 | -0.80357    | 0.78918     | -0.070357 |         |  |
|           | 0.52805         | -0.668    | 0.74793 | 0.52026     | 0.769607112 |           |         |  |
| DNAJC19P1 | ENSG00000237141 | -0.050872 | 0.52029 | -0.050872   | 0.52029     | -0.050872 |         |  |
|           | 0.52029         | -0.050872 | 0.52029 | 0.52029     | 0.769607112 |           |         |  |
| LINC00485 | ENSG00000258169 | -0.050913 | 0.5203  | -0.36076    | 0.64086     | -0.6502   |         |  |
|           | 0.74222         | -0.28758  | 0.61317 | 0.5203      | 0.769607112 |           |         |  |
| IGKV2D-19 | ENSG00000253765 | -0.050927 | 0.52031 | -0.050927   | 0.52031     | -0.050927 |         |  |
|           | 0.52031         | -0.050927 | 0.52031 | 0.52031     | 0.769607112 |           |         |  |
| NA        | ENSG00000260578 | -0.050927 | 0.52031 | -0.17249    | 0.56847     | -0.050927 | 0.52031 |  |
|           | -1.3257         | 0.90754   | 0.52031 | 0.769607112 |             |           |         |  |
| C9orf40   | ENSG00000135045 | -0.050992 | 0.52033 | -0.050992   | 0.52033     | -0.050992 |         |  |
|           | 0.52033         | -0.050992 | 0.52033 | 0.52033     | 0.769613334 |           |         |  |
| FGF21     | ENSG00000105550 | -0.31685  | 0.62432 | -0.31685    | 0.62432     | -0.31685  | 0.62432 |  |
|           | -0.051078       | 0.52037   | 0.52037 | 0.769649136 |             |           |         |  |
| SH2B3     | ENSG00000111252 | -0.051216 | 0.52042 | -0.29569    | 0.61627     | -0.051216 | 0.52042 |  |
|           | -0.86853        | 0.80745   | 0.52042 | 0.769699727 |             |           |         |  |
| NA        | ENSG00000243107 | -0.051293 | 0.52045 | -0.051293   | 0.52045     | -0.051293 | 0.52045 |  |
|           | -0.051293       | 0.52045   | 0.52045 | 0.769720735 |             |           |         |  |
| RPS3AP13  | ENSG00000230783 | -0.051376 | 0.52049 | -0.70542    | 0.75973     | -0.70542  |         |  |
|           | 0.75973         | -0.70542  | 0.75973 | 0.52049     | 0.769756531 |           |         |  |
| CCDC189   | ENSG00000196118 | -0.051457 | 0.52052 | -0.051457   | 0.52052     | -0.051457 |         |  |
|           | 0.52052         | -0.051457 | 0.52052 | 0.52052     | 0.769777536 |           |         |  |
| NA        | ENSG00000274015 | -0.051612 | 0.52058 | -0.051612   | 0.52058     | -0.051612 | 0.52058 |  |

|             |                 |           |         |             |             |           |         |  |
|-------------|-----------------|-----------|---------|-------------|-------------|-----------|---------|--|
|             | -0.051612       | 0.52058   | 0.52058 | 0.769817184 |             |           |         |  |
| NA          | ENSG00000259878 | -0.051634 | 0.52059 | -0.051634   | 0.52059     | -0.051634 | 0.52059 |  |
|             | -0.051634       | 0.52059   | 0.52059 | 0.769817184 |             |           |         |  |
| NA          | ENSG00000256349 | -0.051648 | 0.5206  | -0.051648   | 0.5206      | -0.051648 | 0.5206  |  |
|             | -0.051648       | 0.5206    | 0.5206  | 0.769817184 |             |           |         |  |
| NA          | ENSG00000255206 | -0.051679 | 0.52061 | -0.051679   | 0.52061     | -0.051679 | 0.52061 |  |
|             | -0.051679       | 0.52061   | 0.52061 | 0.769817184 |             |           |         |  |
| NA          | ENSG00000278158 | -0.051755 | 0.52064 | -0.051755   | 0.52064     | -0.051755 | 0.52064 |  |
|             | -0.051755       | 0.52064   | 0.52064 | 0.769838184 |             |           |         |  |
| MIR548S     | ENSG00000265056 | -0.051833 | 0.52067 | -0.051833   | 0.52067     | -0.051833 |         |  |
|             | 0.52067         | -0.051833 | 0.52067 | 0.52067     | 0.769859183 |           |         |  |
| NA          | ENSG00000282834 | -0.052023 | 0.52075 | -0.052023   | 0.52075     | -0.052023 | 0.52075 |  |
|             | -0.052023       | 0.52075   | 0.52075 | 0.769928382 |             |           |         |  |
| RLIMP1      | ENSG00000229456 | -0.20365  | 0.58069 | -0.10845    | 0.54318     | -0.052078 |         |  |
|             | 0.52077         | -1.1177   | 0.86814 | 0.52077     | 0.769928382 |           |         |  |
| UGDH        | ENSG00000109814 | -0.052117 | 0.52078 | -0.5053     | 0.69333     | -1.26     | 0.89616 |  |
|             | -1.0751         | 0.85884   | 0.52078 | 0.769928382 |             |           |         |  |
| LINC01684   | ENSG00000237484 | -1.6101   | 0.94631 | -0.80977    | 0.79096     | -0.25638  |         |  |
|             | 0.60117         | -0.052101 | 0.52078 | 0.52078     | 0.769928382 |           |         |  |
| NA          | ENSG00000279663 | -0.052289 | 0.52085 | -0.55093    | 0.70916     | -0.1656   | 0.56577 |  |
|             | -0.22941        | 0.59072   | 0.52085 | 0.769948485 |             |           |         |  |
| ICE2P1      | ENSG00000248880 | -0.052303 | 0.52086 | -1.8896     | 0.9706      | -1.4217   |         |  |
|             | 0.92244         | -0.056895 | 0.52269 | 0.52086     | 0.769948485 |           |         |  |
| SLC12A5     | ENSG00000124140 | -0.19105  | 0.57576 | -0.05739    | 0.52288     | -0.052352 |         |  |
|             | 0.52088         | -0.24143  | 0.59539 | 0.52088     | 0.769948485 |           |         |  |
| LINC01937   | ENSG00000234279 | -0.052356 | 0.52088 | -0.52352    | 0.69969     | -0.71541  |         |  |
|             | 0.76282         | -0.71541  | 0.76282 | 0.52088     | 0.769948485 |           |         |  |
| NA          | ENSG00000241929 | -0.67294  | 0.74951 | -0.052353   | 0.52088     | -0.36558  | 0.64266 |  |
|             | -0.36558        | 0.64266   | 0.52088 | 0.769948485 |             |           |         |  |
| NA          | ENSG00000270024 | -1.1698   | 0.87895 | -0.16917    | 0.56717     | -1.1698   | 0.87895 |  |
|             | -0.05239        | 0.52089   | 0.52089 | 0.769948485 |             |           |         |  |
| TOR1AIP2    | ENSG00000169905 | -0.052469 | 0.52092 | -0.45787    | 0.67648     | -0.19785  |         |  |
|             | 0.57842         | -0.86407  | 0.80623 | 0.52092     | 0.769948485 |           |         |  |
| NA          | ENSG00000215838 | -0.052451 | 0.52092 | -0.79172    | 0.78574     | -1.9122   | 0.97208 |  |
|             | -0.99507        | 0.84015   | 0.52092 | 0.769948485 |             |           |         |  |
| FBXW7-AS1   | ENSG00000270751 | -0.052545 | 0.52095 | -0.052545   | 0.52095     | -0.052545 |         |  |
|             | 0.52095         | -0.052545 | 0.52095 | 0.52095     | 0.769966212 |           |         |  |
| NA          | ENSG00000256928 | -0.052646 | 0.52099 | -0.052646   | 0.52099     | -0.052646 | 0.52099 |  |
|             | -0.052646       | 0.52099   | 0.52099 | 0.769966212 |             |           |         |  |
| RN7SL849P   | ENSG00000243115 | -0.052687 | 0.52101 | -0.052687   | 0.52101     | -0.052687 |         |  |
|             | 0.52101         | -0.052687 | 0.52101 | 0.52101     | 0.769966212 |           |         |  |
| GPR25       | ENSG00000170128 | -0.052701 | 0.52102 | -0.052701   | 0.52102     | -0.052701 | 0.52102 |  |
|             | -0.052701       | 0.52102   | 0.52102 | 0.769966212 |             |           |         |  |
| RNU6-577P   | ENSG00000252756 | -0.052722 | 0.52102 | -0.052722   | 0.52102     | -0.052722 |         |  |
|             | 0.52102         | -0.052722 | 0.52102 | 0.52102     | 0.769966212 |           |         |  |
| TRBV25OR9-2 | ENSG00000240215 | -0.83684  | 0.79866 | -0.91463    | 0.81981     | -0.32477  |         |  |
|             | 0.62732         | -0.052805 | 0.52106 | 0.52106     | 0.769966212 |           |         |  |
| SRP9P1      | ENSG00000180581 | -0.052835 | 0.52107 | -0.50096    | 0.6918      | -0.052835 |         |  |
|             | 0.52107         | -0.26359  | 0.60395 | 0.52107     | 0.769966212 |           |         |  |
| NA          | ENSG00000242431 | -0.32101  | 0.6259  | -0.052839   | 0.52107     | -0.052839 | 0.52107 |  |
|             | -0.052839       | 0.52107   | 0.52107 | 0.769966212 |             |           |         |  |
| MIR548F3    | ENSG00000221436 | -0.052857 | 0.52108 | -0.052857   | 0.52108     | -0.052857 |         |  |
|             | 0.52108         | -1.9179   | 0.97244 | 0.52108     | 0.769966212 |           |         |  |
| BMERB1      | ENSG00000166780 | -0.23407  | 0.59253 | -0.38126    | 0.6485      | -0.052877 |         |  |
|             | 0.52109         | -1.0472   | 0.85251 | 0.52109     | 0.769966212 |           |         |  |
| MPO         | ENSG00000005381 | -0.82602  | 0.7956  | -0.70873    | 0.76075     | -0.70873  | 0.76075 |  |
|             | -0.052973       | 0.52112   | 0.52112 | 0.769987192 |             |           |         |  |
| PIMREGP4    | ENSG00000248340 | -0.73437  | 0.76864 | -0.73437    | 0.76864     | -1.316    |         |  |
|             | 0.90592         | -0.05302  | 0.52114 | 0.52114     | 0.769993396 |           |         |  |
| NA          | ENSG00000262482 | -0.053109 | 0.52118 | -0.053109   | 0.52118     | -0.053109 | 0.52118 |  |
|             | -0.053109       | 0.52118   | 0.52118 | 0.7700226   |             |           |         |  |
| CCDC88A     | ENSG00000115355 | -0.46357  | 0.67852 | -0.05319    | 0.52121     | -0.59578  |         |  |



|           |                 |           |         |             |             |           |         |
|-----------|-----------------|-----------|---------|-------------|-------------|-----------|---------|
|           | 0.72434         | -0.32643  | 0.62795 | 0.52121     | 0.7700226   |           |         |
| RNU6-389P | ENSG00000252857 | -0.053184 | 0.52121 | -0.053184   | 0.52121     | -0.053184 |         |
|           | 0.52121         | -0.053184 | 0.52121 | 0.52121     | 0.7700226   |           |         |
| SYN3      | ENSG00000185666 | -1.2316   | 0.89094 | -0.053327   | 0.52126     | -1.3465   | 0.91093 |
|           | -0.47982        | 0.68432   | 0.52126 | 0.7700226   |             |           |         |
| UPK2      | ENSG00000110375 | -0.053354 | 0.52127 | -0.21685    | 0.58584     | -0.46724  | 0.67984 |
|           | -1.2282         | 0.89032   | 0.52127 | 0.7700226   |             |           |         |
| RHOT1P1   | ENSG00000266145 | -0.053368 | 0.52128 | -0.053368   | 0.52128     | -0.053368 |         |
|           | 0.52128         | -0.053368 | 0.52128 | 0.52128     | 0.7700226   |           |         |
| NA        | ENSG00000258685 | -0.33345  | 0.6306  | -0.053501   | 0.52133     | -0.33345  | 0.6306  |
|           | -0.98259        | 0.83709   | 0.52133 | 0.7700226   |             |           |         |
| SLIT3     | ENSG00000184347 | -0.90734  | 0.81789 | -0.053549   | 0.52135     | -0.82247  | 0.79459 |
|           | -0.88194        | 0.8111    | 0.52135 | 0.7700226   |             |           |         |
| NA        | ENSG00000283849 | -0.053552 | 0.52135 | -0.053552   | 0.52135     | -0.053552 | 0.52135 |
|           | -0.053552       | 0.52135   | 0.52135 | 0.7700226   |             |           |         |
| SLC35E2A  | ENSG00000215790 | -1.4322   | 0.92395 | -0.053624   | 0.52138     | -0.25767  |         |
|           | 0.60167         | -0.61535  | 0.73084 | 0.52138     | 0.7700226   |           |         |
| DUTP8     | ENSG00000214904 | -0.37441  | 0.64595 | -0.37441    | 0.64595     | -0.37441  | 0.64595 |
|           | -0.053642       | 0.52139   | 0.52139 | 0.7700226   |             |           |         |
| RNU5B-6P  | ENSG00000252574 | -0.053647 | 0.52139 | -0.053647   | 0.52139     | -0.053647 |         |
|           | 0.52139         | -0.45659  | 0.67602 | 0.52139     | 0.7700226   |           |         |
| IGLVI-56  | ENSG00000253126 | -0.053672 | 0.5214  | -0.053672   | 0.5214      | -0.053672 |         |
|           | 0.5214          | -0.053672 | 0.5214  | 0.5214      | 0.7700226   |           |         |
| RPL26L1   | ENSG00000037241 | -0.20813  | 0.58244 | -0.20813    | 0.58244     | -0.053746 |         |
|           | 0.52143         | -0.63166  | 0.7362  | 0.52143     | 0.7700226   |           |         |
| RN7SKP43  | ENSG00000251982 | -0.053737 | 0.52143 | -0.98222    | 0.83701     | -0.053737 |         |
|           | 0.52143         | -0.053737 | 0.52143 | 0.52143     | 0.7700226   |           |         |
| CATSPER3  | ENSG00000152705 | -0.3729   | 0.64539 | -0.053787   | 0.52145     | -0.43653  |         |
|           | 0.66877         | -0.53876  | 0.70498 | 0.52145     | 0.7700226   |           |         |
| ZNF492    | ENSG00000229676 | -0.34577  | 0.63524 | -0.13242    | 0.55267     | -0.053795 |         |
|           | 0.52145         | -0.15836  | 0.56291 | 0.52145     | 0.7700226   |           |         |
| NA        | ENSG00000240669 | -0.053823 | 0.52146 | -0.3578     | 0.63975     | -0.3578   | 0.63975 |
|           | -0.3578         | 0.63975   | 0.52146 | 0.7700226   |             |           |         |
| MIR5690   | ENSG00000265527 | -0.18903  | 0.57496 | -0.16242    | 0.56451     | -0.053829 |         |
|           | 0.52146         | -0.11521  | 0.54586 | 0.52146     | 0.7700226   |           |         |
| RNU2-64P  | ENSG00000223247 | -0.053883 | 0.52149 | -2.2607     | 0.98811     | -1.3242   |         |
|           | 0.90728         | -2.0878   | 0.98159 | 0.52149     | 0.770043565 |           |         |
| GTF3AP2   | ENSG00000258966 | -1.4632   | 0.92829 | -0.91525    | 0.81997     | -0.054006 |         |
|           | 0.52153         | -0.054006 | 0.52153 | 0.52153     | 0.770079295 |           |         |
| NA        | ENSG00000229255 | -0.67355  | 0.7497  | -0.24968    | 0.59858     | -0.054048 | 0.52155 |
|           | -0.15763        | 0.56262   | 0.52155 | 0.770085492 |             |           |         |
| MIR548P   | ENSG00000221263 | -0.054103 | 0.52157 | -0.054103   | 0.52157     | -0.054103 |         |
|           | 0.52157         | -0.054103 | 0.52157 | 0.52157     | 0.770091689 |           |         |
| PRX       | ENSG00000105227 | -0.054448 | 0.52171 | -0.054448   | 0.52171     | -0.054448 | 0.52171 |
|           | -0.97203        | 0.83448   | 0.52171 | 0.770197916 |             |           |         |
| NA        | ENSG00000250767 | -0.054473 | 0.52172 | -0.054473   | 0.52172     | -0.054473 | 0.52172 |
|           | -0.054473       | 0.52172   | 0.52172 | 0.770197916 |             |           |         |
| ZNF613    | ENSG00000176024 | -0.16265  | 0.5646  | -0.054492   | 0.52173     | -0.054492 |         |
|           | 0.52173         | -0.054492 | 0.52173 | 0.52173     | 0.770197916 |           |         |
| NA        | ENSG00000257368 | -0.054524 | 0.52174 | -0.054524   | 0.52174     | -0.054524 | 0.52174 |
|           | -0.054524       | 0.52174   | 0.52174 | 0.770197916 |             |           |         |
| NA        | ENSG00000235008 | -0.054546 | 0.52175 | -0.97963    | 0.83636     | -0.054546 | 0.52175 |
|           | -2.0391         | 0.97928   | 0.52175 | 0.770197916 |             |           |         |
| NPM1P4    | ENSG00000226703 | -0.27895  | 0.60986 | -0.27895    | 0.60986     | -0.19976  |         |
|           | 0.57916         | -0.054629 | 0.52178 | 0.52178     | 0.770197916 |           |         |
| NA        | ENSG00000228521 | -0.054628 | 0.52178 | -0.054628   | 0.52178     | -0.054628 | 0.52178 |
|           | -0.054628       | 0.52178   | 0.52178 | 0.770197916 |             |           |         |
| CTBP2P4   | ENSG00000251102 | -0.078862 | 0.53143 | -0.078862   | 0.53143     | -0.054624 |         |
|           | 0.52178         | -0.83828  | 0.79906 | 0.52178     | 0.770197916 |           |         |
| NA        | ENSG00000278999 | -0.054654 | 0.52179 | -0.054654   | 0.52179     | -0.054654 | 0.52179 |
|           | -0.054654       | 0.52179   | 0.52179 | 0.770197916 |             |           |         |
| NA        | ENSG00000272855 | -0.054682 | 0.5218  | -0.054682   | 0.5218      | -0.054682 | 0.5218  |

|           |                 |           |         |             |             |           |         |  |
|-----------|-----------------|-----------|---------|-------------|-------------|-----------|---------|--|
|           | -0.054682       | 0.5218    | 0.5218  | 0.770197916 |             |           |         |  |
| CPLX3     | ENSG00000213578 | -0.92099  | 0.82147 | -0.054734   | 0.52182     | -0.054734 | 0.52182 |  |
|           | -0.054734       | 0.52182   | 0.52182 | 0.770204107 |             |           |         |  |
| NA        | ENSG00000256206 | -0.05476  | 0.52184 | -0.05476    | 0.52184     | -0.05476  | 0.52184 |  |
|           | -0.05476        | 0.52184   | 0.52184 | 0.770210298 |             |           |         |  |
| NA        | ENSG00000241280 | -0.054912 | 0.5219  | -0.91314    | 0.81941     | -0.91314  | 0.81941 |  |
|           | -1.0214         | 0.84647   | 0.5219  | 0.770215543 |             |           |         |  |
| DNAJA1P2  | ENSG00000236917 | -1.2808   | 0.89987 | -0.055009   | 0.52193     | -0.055009 | 0.52193 |  |
|           | 0.79063         | -0.27796  | 0.60948 | 0.52193     | 0.770215543 |           |         |  |
| RN7SL456P | ENSG00000242266 | -0.68444  | 0.75315 | -0.68444    | 0.75315     | -0.68444  | 0.75315 |  |
|           | 0.52193         | -0.68444  | 0.75315 | 0.52193     | 0.770215543 |           |         |  |
| RNA5SP364 | ENSG00000252747 | -0.055013 | 0.52194 | -0.055013   | 0.52194     | -0.055013 | 0.52194 |  |
|           | 0.52194         | -0.055013 | 0.52194 | 0.52194     | 0.770215543 |           |         |  |
| TRDJ3     | ENSG00000211828 | -0.055048 | 0.52195 | -0.055048   | 0.52195     | -0.055048 | 0.52195 |  |
|           | -0.055048       | 0.52195   | 0.52195 | 0.770215543 |             |           |         |  |
| CLEC9A    | ENSG00000197992 | -0.055062 | 0.52196 | -0.073322   | 0.52923     | -0.073322 | 0.52923 |  |
|           | 0.52923         | -0.073322 | 0.52923 | 0.52196     | 0.770215543 |           |         |  |
| MRPS26    | ENSG00000125901 | -0.055096 | 0.52197 | -0.055096   | 0.52197     | -0.055096 | 0.52197 |  |
|           | 0.52197         | -0.055096 | 0.52197 | 0.52197     | 0.770215543 |           |         |  |
| NA        | ENSG00000255272 | -0.055105 | 0.52197 | -0.055105   | 0.52197     | -0.055105 | 0.52197 |  |
|           | -0.055105       | 0.52197   | 0.52197 | 0.770215543 |             |           |         |  |
| NA        | ENSG00000263050 | -0.055233 | 0.52202 | -0.055233   | 0.52202     | -0.055233 | 0.52202 |  |
|           | -0.055233       | 0.52202   | 0.52202 | 0.770229369 |             |           |         |  |
| TMEM52    | ENSG00000178821 | -0.57545  | 0.7175  | -0.49146    | 0.68845     | -0.49146  | 0.68845 |  |
|           | 0.52204         | -0.055278 | 0.52204 | 0.52204     | 0.770229369 |           |         |  |
| PIGPP4    | ENSG00000265564 | -0.055274 | 0.52204 | -0.055274   | 0.52204     | -0.055274 | 0.52204 |  |
|           | 0.52204         | -0.055274 | 0.52204 | 0.52204     | 0.770229369 |           |         |  |
| NA        | ENSG00000271313 | -0.20643  | 0.58177 | -0.692      | 0.75553     | -0.692    | 0.75553 |  |
|           | -0.055331       | 0.52206   | 0.52206 | 0.770229369 |             |           |         |  |
| ADPRH     | ENSG00000144843 | -0.13083  | 0.55205 | -0.13083    | 0.55205     | -0.13083  | 0.55205 |  |
|           | -0.055514       | 0.52214   | 0.52214 | 0.770229369 |             |           |         |  |
| NA        | ENSG00000279534 | -0.055602 | 0.52217 | -0.055602   | 0.52217     | -0.055602 | 0.52217 |  |
|           | -0.055602       | 0.52217   | 0.52217 | 0.770229369 |             |           |         |  |
| GPR22     | ENSG00000172209 | -1.7464   | 0.95963 | -0.055654   | 0.52219     | -0.055654 | 0.52219 |  |
|           | -1.3507         | 0.91161   | 0.52219 | 0.770229369 |             |           |         |  |
| NA        | ENSG00000249689 | -0.16943  | 0.56727 | -0.055687   | 0.5222      | -0.055687 | 0.5222  |  |
|           | -0.055687       | 0.5222    | 0.5222  | 0.770229369 |             |           |         |  |
| TESC-AS1  | ENSG00000258285 | -0.055679 | 0.5222  | -0.43608    | 0.66861     | -0.43608  | 0.66861 |  |
|           | 0.66861         | -0.43608  | 0.66861 | 0.5222      | 0.770229369 |           |         |  |
| MIR210    | ENSG00000199038 | -0.055774 | 0.52224 | -0.055774   | 0.52224     | -0.055774 | 0.52224 |  |
|           | 0.52224         | -0.055774 | 0.52224 | 0.52224     | 0.770229369 |           |         |  |
| SNX2P2    | ENSG00000236460 | -0.074239 | 0.52959 | -0.055779   | 0.52224     | -0.055779 | 0.52224 |  |
|           | 0.52224         | -0.055779 | 0.52224 | 0.52224     | 0.770229369 |           |         |  |
| NA        | ENSG00000261842 | -0.055795 | 0.52225 | -0.055795   | 0.52225     | -0.055795 | 0.52225 |  |
|           | -1.158          | 0.87657   | 0.52225 | 0.770229369 |             |           |         |  |
| KRT83     | ENSG00000170523 | -0.076505 | 0.53049 | -0.076505   | 0.53049     | -0.076505 | 0.53049 |  |
|           | -0.055854       | 0.52227   | 0.52227 | 0.770229369 |             |           |         |  |
| CPSF1P1   | ENSG00000214076 | -0.055839 | 0.52227 | -0.055839   | 0.52227     | -0.055839 | 0.52227 |  |
|           | 0.52227         | -0.055839 | 0.52227 | 0.52227     | 0.770229369 |           |         |  |
| IGHV3-37  | ENSG00000253359 | -0.055844 | 0.52227 | -0.055844   | 0.52227     | -0.055844 | 0.52227 |  |
|           | 0.52227         | -0.055844 | 0.52227 | 0.52227     | 0.770229369 |           |         |  |
| NA        | ENSG00000282980 | -0.05585  | 0.52227 | -0.05585    | 0.52227     | -0.05585  | 0.52227 |  |
|           | -0.05585        | 0.52227   | 0.52227 | 0.770229369 |             |           |         |  |
| NA        | ENSG00000253071 | -0.05585  | 0.52227 | -0.05585    | 0.52227     | -0.05585  | 0.52227 |  |
|           | -0.05585        | 0.52227   | 0.52227 | 0.770229369 |             |           |         |  |
| NA        | ENSG00000275919 | -0.055915 | 0.5223  | -0.055915   | 0.5223      | -0.055915 | 0.5223  |  |
|           | -0.055915       | 0.5223    | 0.5223  | 0.770229369 |             |           |         |  |
| CYCSP24   | ENSG00000227666 | -1.3092   | 0.90476 | -1.0874     | 0.86157     | -1.0874   | 0.86157 |  |
|           | 0.90476         | -0.055956 | 0.52231 | 0.52231     | 0.770229369 |           |         |  |
| MMUT      | ENSG00000146085 | -0.055998 | 0.52233 | -0.90912    | 0.81836     | -0.90912  | 0.81836 |  |
|           | -0.90912        | 0.81836   | 0.52233 | 0.770229369 |             |           |         |  |
| NA        | ENSG00000238687 | -0.86209  | 0.80568 | -0.056      | 0.52233     | -0.056    | 0.52233 |  |

|           |                 |           |         |             |             |           |         |  |
|-----------|-----------------|-----------|---------|-------------|-------------|-----------|---------|--|
|           | -0.056          | 0.52233   | 0.52233 | 0.770229369 |             |           |         |  |
| NA        | ENSG00000248236 | -1.2532   | 0.89493 | -0.056055   | 0.52235     | -0.056055 | 0.52235 |  |
|           | -0.72887        | 0.76696   | 0.52235 | 0.770229369 |             |           |         |  |
| COL23A1   | ENSG0000050767  | -1.0342   | 0.84948 | -1.0293     | 0.84834     | -1.0742   |         |  |
|           | 0.85863         | -0.056074 | 0.52236 | 0.52236     | 0.770229369 |           |         |  |
| PDS5A     | ENSG00000121892 | -0.37647  | 0.64672 | -0.4388     | 0.6696      | -0.056093 | 0.52237 |  |
|           | -0.31608        | 0.62403   | 0.52237 | 0.770229369 |             |           |         |  |
| FLACC1    | ENSG00000155749 | -0.50293  | 0.69249 | -0.9494     | 0.82879     | -0.056215 |         |  |
|           | 0.52241         | -0.056215 | 0.52241 | 0.52241     | 0.770229369 |           |         |  |
| TPI1P1    | ENSG00000226415 | -0.063481 | 0.52531 | -0.063481   | 0.52531     | -0.49337  |         |  |
|           | 0.68913         | -0.056199 | 0.52241 | 0.52241     | 0.770229369 |           |         |  |
| NA        | ENSG00000251471 | -0.13046  | 0.5519  | -0.56531    | 0.71407     | -0.056263 | 0.52243 |  |
|           | -0.056263       | 0.52243   | 0.52243 | 0.770229369 |             |           |         |  |
| NA        | ENSG00000270682 | -0.056247 | 0.52243 | -0.056247   | 0.52243     | -1.245    | 0.89343 |  |
|           | -0.063464       | 0.5253    | 0.52243 | 0.770229369 |             |           |         |  |
| LINC02060 | ENSG00000250156 | -0.31718  | 0.62445 | -1.6263     | 0.94806     | -0.056362 |         |  |
|           | 0.52247         | -0.056362 | 0.52247 | 0.52247     | 0.770229369 |           |         |  |
| NA        | ENSG00000260070 | -0.66464  | 0.74686 | -0.056394   | 0.52249     | -0.66464  | 0.74686 |  |
|           | -0.66464        | 0.74686   | 0.52249 | 0.770229369 |             |           |         |  |
| NA        | ENSG00000262769 | -0.056428 | 0.5225  | -0.056428   | 0.5225      | -0.056428 | 0.5225  |  |
|           | -0.056428       | 0.5225    | 0.5225  | 0.770229369 |             |           |         |  |
| NA        | ENSG00000266579 | -0.056437 | 0.5225  | -0.44723    | 0.67265     | -0.47422  | 0.68233 |  |
|           | -0.77699        | 0.78142   | 0.5225  | 0.770229369 |             |           |         |  |
| LINC01783 | ENSG00000233421 | -0.43575  | 0.66849 | -0.056476   | 0.52252     | -1.1693   |         |  |
|           | 0.87887         | -0.26293  | 0.6037  | 0.52252     | 0.770229369 |           |         |  |
| NA        | ENSG00000277743 | -0.056552 | 0.52255 | -0.056552   | 0.52255     | -0.056552 | 0.52255 |  |
|           | -0.056552       | 0.52255   | 0.52255 | 0.770229369 |             |           |         |  |
| EML3      | ENSG00000149499 | -0.05658  | 0.52256 | -0.28821    | 0.61341     | -0.05658  | 0.52256 |  |
|           | -0.05658        | 0.52256   | 0.52256 | 0.770229369 |             |           |         |  |
| UBE2D3P3  | ENSG00000224690 | -0.056577 | 0.52256 | -0.056577   | 0.52256     | -0.056577 |         |  |
|           | 0.52256         | -0.056577 | 0.52256 | 0.52256     | 0.770229369 |           |         |  |
| IL33      | ENSG00000137033 | -1.0442   | 0.8518  | -0.056592   | 0.52257     | -0.8618   | 0.8056  |  |
|           | -0.11008        | 0.54383   | 0.52257 | 0.770229369 |             |           |         |  |
| NA        | ENSG00000280207 | -0.056639 | 0.52258 | -0.056639   | 0.52258     | -0.056639 | 0.52258 |  |
|           | -0.056639       | 0.52258   | 0.52258 | 0.770229369 |             |           |         |  |
| RNU7-9P   | ENSG00000238782 | -0.67003  | 0.74858 | -0.67003    | 0.74858     | -0.67003  |         |  |
|           | 0.74858         | -0.056737 | 0.52262 | 0.52262     | 0.770236978 |           |         |  |
| TARDBP    | ENSG00000120948 | -0.47044  | 0.68098 | -0.056748   | 0.52263     | -0.81916  |         |  |
|           | 0.79365         | -0.72036  | 0.76435 | 0.52263     | 0.770236978 |           |         |  |
| NA        | ENSG00000251448 | -0.056805 | 0.52265 | -0.056805   | 0.52265     | -0.056805 | 0.52265 |  |
|           | -0.056805       | 0.52265   | 0.52265 | 0.770236978 |             |           |         |  |
| ABHD5     | ENSG00000011198 | -0.056829 | 0.52266 | -0.2106     | 0.5834      | -0.15561  | 0.56183 |  |
|           | -0.51273        | 0.69593   | 0.52266 | 0.770236978 |             |           |         |  |
| ACSS1     | ENSG00000154930 | -0.14938  | 0.55937 | -1.0879     | 0.86168     | -0.056881 | 0.52268 |  |
|           | -0.59016        | 0.72246   | 0.52268 | 0.770236978 |             |           |         |  |
| NA        | ENSG00000254905 | -0.056892 | 0.52268 | -0.056892   | 0.52268     | -0.056892 | 0.52268 |  |
|           | -0.056892       | 0.52268   | 0.52268 | 0.770236978 |             |           |         |  |
| PIGHP1    | ENSG00000259657 | -0.056982 | 0.52272 | -0.056982   | 0.52272     | -0.056982 |         |  |
|           | 0.52272         | -0.056982 | 0.52272 | 0.52272     | 0.77027263  |           |         |  |
| NA        | ENSG00000231227 | -0.05705  | 0.52275 | -0.05705    | 0.52275     | -0.05705  | 0.52275 |  |
|           | -0.05705        | 0.52275   | 0.52275 | 0.770291165 |             |           |         |  |
| NA        | ENSG00000254367 | -0.057112 | 0.52277 | -0.92139    | 0.82158     | -0.57576  | 0.71761 |  |
|           | -0.41361        | 0.66042   | 0.52277 | 0.770291165 |             |           |         |  |
| OGFOD3    | ENSG00000181396 | -0.30079  | 0.61821 | -0.21266    | 0.58421     | -0.057121 |         |  |
|           | 0.52278         | -0.59914  | 0.72546 | 0.52278     | 0.770291165 |           |         |  |
| RNF32-AS1 | ENSG00000224903 | -0.05733  | 0.52286 | -1.1195     | 0.86853     | -0.05733  |         |  |
|           | 0.52286         | -0.05733  | 0.52286 | 0.52286     | 0.770385747 |           |         |  |
| OSCAR     | ENSG00000170909 | -0.057543 | 0.52294 | -0.057543   | 0.52294     | -0.057543 | 0.52294 |  |
|           | -0.057543       | 0.52294   | 0.52294 | 0.770437926 |             |           |         |  |
| RHOT2     | ENSG00000140983 | -0.78848  | 0.78479 | -0.85917    | 0.80488     | -0.057563 | 0.52295 |  |
|           | -0.59577        | 0.72433   | 0.52295 | 0.770437926 |             |           |         |  |
| HMG2P35   | ENSG00000232875 | -0.17007  | 0.56752 | -0.05756    | 0.52295     | -0.05756  |         |  |

|           |                 |           |         |             |             |           |         |
|-----------|-----------------|-----------|---------|-------------|-------------|-----------|---------|
|           | 0.52295         | -0.56689  | 0.71461 | 0.52295     | 0.770437926 |           |         |
| NA        | ENSG00000199755 | -0.057577 | 0.52296 | -0.057577   | 0.52296     | -0.057577 | 0.52296 |
|           | -0.057577       | 0.52296   | 0.52296 | 0.770437926 |             |           |         |
| NA        | ENSG00000252662 | -0.057644 | 0.52298 | -0.7076     | 0.7604      | -0.55036  | 0.70896 |
|           | -0.1975         | 0.57828   | 0.52298 | 0.770437926 |             |           |         |
| ZNF702P   | ENSG00000242779 | -0.05769  | 0.523   | -1.2338     | 0.89136     | -1.0821   | 0.8604  |
|           | -0.88961        | 0.81316   | 0.523   | 0.770437926 |             |           |         |
| RNA5SP484 | ENSG00000238908 | -0.083567 | 0.5333  | -0.057928   | 0.5231      | -0.083567 |         |
|           | 0.5333          | -0.083567 | 0.5333  | 0.5231      | 0.770437926 |           |         |
| NA        | ENSG00000251818 | -0.05795  | 0.52311 | -0.05795    | 0.52311     | -0.05795  | 0.52311 |
|           | -0.05795        | 0.52311   | 0.52311 | 0.770437926 |             |           |         |
| CDK15     | ENSG00000138395 | -0.057997 | 0.52312 | -0.55977    | 0.71218     | -0.30211  | 0.61872 |
|           | -0.26651        | 0.60508   | 0.52312 | 0.770437926 |             |           |         |
| NA        | ENSG00000262708 | -0.90665  | 0.8177  | -0.057993   | 0.52312     | -0.68721  | 0.75402 |
|           | -0.90665        | 0.8177    | 0.52312 | 0.770437926 |             |           |         |
| NA        | ENSG00000263952 | -0.20973  | 0.58306 | -0.058021   | 0.52313     | -0.20973  | 0.58306 |
|           | -0.20973        | 0.58306   | 0.52313 | 0.770437926 |             |           |         |
| NA        | ENSG00000249863 | -0.058039 | 0.52314 | -0.058039   | 0.52314     | -0.058039 | 0.52314 |
|           | -0.058039       | 0.52314   | 0.52314 | 0.770437926 |             |           |         |
| NA        | ENSG00000279386 | -0.058039 | 0.52314 | -0.058039   | 0.52314     | -0.058039 | 0.52314 |
|           | -0.058039       | 0.52314   | 0.52314 | 0.770437926 |             |           |         |
| NA        | ENSG00000251041 | -0.058035 | 0.52314 | -0.058035   | 0.52314     | -0.058035 | 0.52314 |
|           | -0.058035       | 0.52314   | 0.52314 | 0.770437926 |             |           |         |
| WDR82P2   | ENSG00000241318 | -0.058059 | 0.52315 | -0.058059   | 0.52315     | -0.058059 |         |
|           | 0.52315         | -0.058059 | 0.52315 | 0.52315     | 0.770437926 |           |         |
| NA        | ENSG00000227240 | -0.29989  | 0.61787 | -0.058099   | 0.52316     | -0.35055  | 0.63704 |
|           | -0.35055        | 0.63704   | 0.52316 | 0.770437926 |             |           |         |
| ATP8A2    | ENSG00000132932 | -0.78348  | 0.78333 | -0.70574    | 0.75982     | -0.75163  |         |
|           | 0.77386         | -0.058103 | 0.52317 | 0.52317     | 0.770437926 |           |         |
| NA        | ENSG00000254202 | -0.7561   | 0.7752  | -1.786      | 0.96295     | -0.058127 | 0.52318 |
|           | -0.7561         | 0.7752    | 0.52318 | 0.770437926 |             |           |         |
| IGHD5-12  | ENSG00000211921 | -0.058276 | 0.52324 | -0.058276   | 0.52324     | -0.058276 |         |
|           | 0.52324         | -0.058276 | 0.52324 | 0.52324     | 0.770479715 |           |         |
| IGHD4-11  | ENSG00000232543 | -0.058276 | 0.52324 | -0.058276   | 0.52324     | -0.058276 |         |
|           | 0.52324         | -0.058276 | 0.52324 | 0.52324     | 0.770479715 |           |         |
| NA        | ENSG00000218813 | -0.058381 | 0.52328 | -0.058381   | 0.52328     | -0.058381 | 0.52328 |
|           | -0.058381       | 0.52328   | 0.52328 | 0.770515332 |             |           |         |
| NA        | ENSG00000268595 | -0.05848  | 0.52332 | -0.05848    | 0.52332     | -0.05848  | 0.52332 |
|           | -0.05848        | 0.52332   | 0.52332 | 0.77052942  |             |           |         |
| MIR646HG  | ENSG00000228340 | -0.058512 | 0.52333 | -0.059561   | 0.52375     | -0.56661  |         |
|           | 0.71451         | -0.85623  | 0.80406 | 0.52333     | 0.77052942  |           |         |
| NA        | ENSG00000272906 | -0.058603 | 0.52337 | -0.058603   | 0.52337     | -0.058603 | 0.52337 |
|           | -0.058603       | 0.52337   | 0.52337 | 0.77052942  |             |           |         |
| NA        | ENSG00000250220 | -1.2554   | 0.89533 | -0.96946    | 0.83384     | -0.058641 | 0.52338 |
|           | -0.79128        | 0.78561   | 0.52338 | 0.77052942  |             |           |         |
| SMIM33    | ENSG00000283288 | -0.27628  | 0.60883 | -0.058699   | 0.5234      | -0.27628  |         |
|           | 0.60883         | -0.27628  | 0.60883 | 0.5234      | 0.77052942  |           |         |
| DLEU7     | ENSG00000186047 | -0.34326  | 0.6343  | -0.54088    | 0.7057      | -0.78595  | 0.78405 |
|           | -0.058719       | 0.52341   | 0.52341 | 0.77052942  |             |           |         |
| C5orf51   | ENSG00000205765 | -1.1848   | 0.88194 | -0.058721   | 0.52341     | -1.0548   |         |
|           | 0.85423         | -0.8525   | 0.80303 | 0.52341     | 0.77052942  |           |         |
| NA        | ENSG00000179131 | -0.058839 | 0.52346 | -0.058839   | 0.52346     | -0.058839 | 0.52346 |
|           | -0.058839       | 0.52346   | 0.52346 | 0.77052942  |             |           |         |
| RNU6-12P  | ENSG00000207334 | -1.2659   | 0.89722 | -0.058954   | 0.52351     | -1.2659   |         |
|           | 0.89722         | -1.0479   | 0.85265 | 0.52351     | 0.77052942  |           |         |
| RPTN      | ENSG00000215853 | -0.82955  | 0.7966  | -0.82955    | 0.7966      | -0.059    | 0.52352 |
|           | -0.82955        | 0.7966    | 0.52352 | 0.77052942  |             |           |         |
| NA        | ENSG00000259528 | -0.058994 | 0.52352 | -0.058994   | 0.52352     | -0.058994 | 0.52352 |
|           | -0.058994       | 0.52352   | 0.52352 | 0.77052942  |             |           |         |
| RPL10AP3  | ENSG00000215264 | -0.059016 | 0.52353 | -0.059016   | 0.52353     | -0.059016 |         |
|           | 0.52353         | -0.059016 | 0.52353 | 0.52353     | 0.77052942  |           |         |
| NA        | ENSG00000218521 | -0.059031 | 0.52354 | -0.30506    | 0.61984     | -0.68824  | 0.75435 |

|            |                 |           |         |             |             |           |         |           |
|------------|-----------------|-----------|---------|-------------|-------------|-----------|---------|-----------|
|            | -0.55285        | 0.70982   | 0.52354 | 0.77052942  |             |           |         |           |
| RN7SKP198  | ENSG00000238324 | -0.059037 | 0.52354 | -0.059037   | 0.52354     | -0.059037 | 0.52354 | -0.059037 |
|            | 0.52354         | -0.059037 | 0.52354 | 0.52354     | 0.77052942  |           |         |           |
| RNU6-565P  | ENSG00000222869 | -0.059058 | 0.52355 | -0.44017    | 0.67009     | -0.31493  |         |           |
|            | 0.62359         | -0.31493  | 0.62359 | 0.52355     | 0.77052942  |           |         |           |
| NA         | ENSG00000271315 | -0.059103 | 0.52356 | -1.4494     | 0.92639     | -1.1114   | 0.86681 |           |
|            | -1.7604         | 0.96083   | 0.52356 | 0.77052942  |             |           |         |           |
| NA         | ENSG00000272115 | -0.05912  | 0.52357 | -0.05912    | 0.52357     | -0.05912  | 0.52357 |           |
|            | -0.05912        | 0.52357   | 0.52357 | 0.77052942  |             |           |         |           |
| MTHFD2L    | ENSG00000163738 | -0.49814  | 0.69081 | -0.60678    | 0.728       | -1.9346   | 0.97348 |           |
|            | -0.059139       | 0.52358   | 0.52358 | 0.77052942  |             |           |         |           |
| NA         | ENSG00000201741 | -0.059166 | 0.52359 | -0.75445    | 0.77471     | -0.059166 | 0.52359 |           |
|            | -0.059166       | 0.52359   | 0.52359 | 0.77052942  |             |           |         |           |
| IGHV1-69D  | ENSG00000280411 | -0.059361 | 0.52367 | -0.059361   | 0.52367     | -0.059361 |         |           |
|            | 0.52367         | -0.059361 | 0.52367 | 0.52367     | 0.770606767 |           |         |           |
| GHITM      | ENSG00000165678 | -0.059424 | 0.52369 | -0.059424   | 0.52369     | -0.073049 | 0.52912 |           |
|            | -0.17624        | 0.56995   | 0.52369 | 0.770606767 |             |           |         |           |
| ACTG1P4    | ENSG00000236085 | -0.35719  | 0.63953 | -0.059411   | 0.52369     | -0.35719  |         |           |
|            | 0.63953         | -0.35719  | 0.63953 | 0.52369     | 0.770606767 |           |         |           |
| NA         | ENSG00000269360 | -0.5548   | 0.71048 | -0.27747    | 0.60929     | -0.33251  | 0.63025 |           |
|            | -0.059456       | 0.52371   | 0.52371 | 0.770612927 |             |           |         |           |
| NA         | ENSG00000253283 | -0.70423  | 0.75935 | -0.6016     | 0.72628     | -0.059834 | 0.52386 |           |
|            | -0.059834       | 0.52386   | 0.52386 | 0.770803149 |             |           |         |           |
| NA         | ENSG00000223356 | -0.060025 | 0.52393 | -0.50191    | 0.69213     | -0.060025 | 0.52393 |           |
|            | -0.060025       | 0.52393   | 0.52393 | 0.770803149 |             |           |         |           |
| ELF5       | ENSG00000135374 | -0.77522  | 0.7809  | -0.06005    | 0.52394     | -0.77522  | 0.7809  |           |
|            | -0.77522        | 0.7809    | 0.52394 | 0.770803149 |             |           |         |           |
| NA         | ENSG00000275016 | -2.0962   | 0.98197 | -0.060051   | 0.52394     | -1.5566   | 0.94021 |           |
|            | -0.46905        | 0.68048   | 0.52394 | 0.770803149 |             |           |         |           |
| MACROH2A2  | ENSG00000099284 | -0.060071 | 0.52395 | -0.060071   | 0.52395     | -0.060071 |         |           |
|            | 0.52395         | -0.32204  | 0.62629 | 0.52395     | 0.770803149 |           |         |           |
| CBR1       | ENSG00000159228 | -0.66071  | 0.7456  | -0.66071    | 0.7456      | -0.66071  | 0.7456  |           |
|            | -0.060075       | 0.52395   | 0.52395 | 0.770803149 |             |           |         |           |
| CCT5P2     | ENSG00000230584 | -0.83654  | 0.79857 | -0.060074   | 0.52395     | -1.5316   |         |           |
|            | 0.93719         | -0.83654  | 0.79857 | 0.52395     | 0.770803149 |           |         |           |
| NR2C2      | ENSG00000177463 | -0.060122 | 0.52397 | -0.099338   | 0.53957     | -0.28998  | 0.61408 |           |
|            | -0.51195        | 0.69566   | 0.52397 | 0.770809301 |             |           |         |           |
| GSTA6P     | ENSG00000223622 | -0.060257 | 0.52402 | -0.54766    | 0.70804     | -0.10813  |         |           |
|            | 0.54305         | -0.10813  | 0.54305 | 0.52402     | 0.770836315 |           |         |           |
| PRSS58     | ENSG00000258223 | -0.06025  | 0.52402 | -0.06025    | 0.52402     | -0.4427   |         |           |
|            | 0.67101         | -0.06025  | 0.52402 | 0.52402     | 0.770836315 |           |         |           |
| NA         | ENSG00000166104 | -0.060581 | 0.52415 | -0.25532    | 0.60076     | -0.25849  | 0.60199 |           |
|            | -0.2            | 0.57926   | 0.52415 | 0.770922622 |             |           |         |           |
| MUC1       | ENSG00000185499 | -0.80292  | 0.78899 | -0.060565   | 0.52415     | -0.50887  | 0.69458 |           |
|            | -0.50887        | 0.69458   | 0.52415 | 0.770922622 |             |           |         |           |
| NA         | ENSG00000261566 | -0.060585 | 0.52416 | -0.060585   | 0.52416     | -0.060585 | 0.52416 |           |
|            | -0.060585       | 0.52416   | 0.52416 | 0.770922622 |             |           |         |           |
| NLRP5      | ENSG00000171487 | -0.15403  | 0.56121 | -0.060611   | 0.52417     | -0.1984   | 0.57863 |           |
|            | -0.15403        | 0.56121   | 0.52417 | 0.770922622 |             |           |         |           |
| RNU6-1300P | ENSG00000212348 | -0.060657 | 0.52418 | -0.060657   | 0.52418     | -1.6294   |         |           |
|            | 0.94838         | -1.0171   | 0.84545 | 0.52418     | 0.770922622 |           |         |           |
| FAM43A     | ENSG00000185112 | -1.0382   | 0.85042 | -0.060725   | 0.52421     | -0.9488   |         |           |
|            | 0.82864         | -1.3995   | 0.91916 | 0.52421     | 0.770922622 |           |         |           |
| ZNF560     | ENSG00000198028 | -0.060747 | 0.52422 | -0.060747   | 0.52422     | -0.81547  |         |           |
|            | 0.7926          | -0.060747 | 0.52422 | 0.52422     | 0.770922622 |           |         |           |
| WNK2       | ENSG00000165238 | -0.74933  | 0.77317 | -0.76737    | 0.77857     | -0.060797 | 0.52424 |           |
|            | -0.42864        | 0.66591   | 0.52424 | 0.770922622 |             |           |         |           |
| EIF1P3     | ENSG00000231684 | -0.060828 | 0.52425 | -0.060828   | 0.52425     | -0.060828 |         |           |
|            | 0.52425         | -0.060828 | 0.52425 | 0.52425     | 0.770922622 |           |         |           |
| EMILIN2    | ENSG00000132205 | -0.060838 | 0.52426 | -0.31106    | 0.62212     | -1.5774   |         |           |
|            | 0.94265         | -0.83682  | 0.79865 | 0.52426     | 0.770922622 |           |         |           |
| SH3GL2     | ENSG00000107295 | -0.16713  | 0.56637 | -0.73837    | 0.76986     | -0.06106  |         |           |

|           |                 |           |         |             |             |           |         |
|-----------|-----------------|-----------|---------|-------------|-------------|-----------|---------|
|           | 0.52434         | -0.47142  | 0.68133 | 0.52434     | 0.770922622 |           |         |
| ALKAL1    | ENSG00000196711 | -0.061109 | 0.52436 | -1.3641     | 0.91374     | -0.12413  |         |
|           | 0.54939         | -0.82352  | 0.79489 | 0.52436     | 0.770922622 |           |         |
| SNRPD1    | ENSG00000167088 | -0.22784  | 0.59012 | -0.389      | 0.65136     | -0.38677  |         |
|           | 0.65054         | -0.061131 | 0.52437 | 0.52437     | 0.770922622 |           |         |
| NA        | ENSG00000254037 | -0.061115 | 0.52437 | -0.061115   | 0.52437     | -0.061115 | 0.52437 |
|           | -0.34584        | 0.63527   | 0.52437 | 0.770922622 |             |           |         |
| NA        | ENSG00000254287 | -0.06113  | 0.52437 | -0.06113    | 0.52437     | -0.06113  | 0.52437 |
|           | -0.06113        | 0.52437   | 0.52437 | 0.770922622 |             |           |         |
| PRKCZ-AS1 | ENSG00000182873 | -0.41447  | 0.66073 | -0.061172   | 0.52439     | -0.41447  |         |
|           | 0.66073         | -0.41447  | 0.66073 | 0.52439     | 0.770922622 |           |         |
| NA        | ENSG00000276411 | -0.06121  | 0.5244  | -0.06121    | 0.5244      | -0.06121  | 0.5244  |
|           | -0.06121        | 0.5244    | 0.5244  | 0.770922622 |             |           |         |
| KRT18P37  | ENSG00000253943 | -0.06123  | 0.52441 | -0.26648    | 0.60506     | -0.06123  |         |
|           | 0.52441         | -1.7294   | 0.95814 | 0.52441     | 0.770922622 |           |         |
| SNX25     | ENSG00000109762 | -0.29831  | 0.61727 | -0.061321   | 0.52445     | -0.52386  | 0.69981 |
|           | -0.17954        | 0.57124   | 0.52445 | 0.770922622 |             |           |         |
| NA        | ENSG00000264985 | -0.0806   | 0.53212 | -0.061332   | 0.52445     | -0.30899  | 0.62134 |
|           | -0.34014        | 0.63313   | 0.52445 | 0.770922622 |             |           |         |
| ZNF229    | ENSG00000278318 | -0.061314 | 0.52445 | -0.061314   | 0.52445     | -0.061314 |         |
|           | 0.52445         | -0.061314 | 0.52445 | 0.52445     | 0.770922622 |           |         |
| TEX12     | ENSG00000150783 | -0.06135  | 0.52446 | -0.98291    | 0.83718     | -0.06135  | 0.52446 |
|           | -0.31762        | 0.62461   | 0.52446 | 0.770922622 |             |           |         |
| LINC01944 | ENSG00000254299 | -0.33554  | 0.63139 | -0.33554    | 0.63139     | -0.33554  |         |
|           | 0.63139         | -0.061357 | 0.52446 | 0.52446     | 0.770922622 |           |         |
| MIR193BHG | ENSG00000262454 | -0.83428  | 0.79794 | -0.06136    | 0.52446     | -0.43961  |         |
|           | 0.66989         | -0.43961  | 0.66989 | 0.52446     | 0.770922622 |           |         |
| NA        | ENSG00000254691 | -0.061403 | 0.52448 | -0.061403   | 0.52448     | -0.061403 | 0.52448 |
|           | -0.061403       | 0.52448   | 0.52448 | 0.770922622 |             |           |         |
| NA        | ENSG00000250847 | -0.061423 | 0.52449 | -0.061423   | 0.52449     | -0.061423 | 0.52449 |
|           | -0.061423       | 0.52449   | 0.52449 | 0.770922622 |             |           |         |
| NA        | ENSG00000225205 | -0.061604 | 0.52456 | -0.061604   | 0.52456     | -0.061604 | 0.52456 |
|           | -0.061604       | 0.52456   | 0.52456 | 0.770993699 |             |           |         |
| PDLIM1P4  | ENSG00000249274 | -1.1364   | 0.8721  | -1.1364     | 0.8721      | -0.061633 |         |
|           | 0.52457         | -0.061633 | 0.52457 | 0.52457     | 0.770993699 |           |         |
| OR5M11    | ENSG00000255223 | -0.65144  | 0.74262 | -0.061762   | 0.52462     | -0.061762 |         |
|           | 0.52462         | -0.061762 | 0.52462 | 0.52462     | 0.77103426  |           |         |
| CTIF      | ENSG00000134030 | -0.33808  | 0.63235 | -0.061772   | 0.52463     | -0.3177   | 0.62464 |
|           | -0.27444        | 0.60813   | 0.52463 | 0.77103426  |             |           |         |
| PIP4P2    | ENSG00000155099 | -0.061896 | 0.52468 | -0.061896   | 0.52468     | -0.061896 |         |
|           | 0.52468         | -0.081689 | 0.53255 | 0.52468     | 0.77103426  |           |         |
| NA        | ENSG00000266965 | -0.061942 | 0.5247  | -0.39036    | 0.65186     | -0.39036  | 0.65186 |
|           | -0.39036        | 0.65186   | 0.5247  | 0.77103426  |             |           |         |
| NT5C3A    | ENSG00000122643 | -0.25867  | 0.60206 | -0.18445    | 0.57317     | -0.74557  |         |
|           | 0.77204         | -0.06197  | 0.52471 | 0.52471     | 0.77103426  |           |         |
| RPL23AP76 | ENSG00000226156 | -0.72311  | 0.76519 | -0.062013   | 0.52472     | -0.062013 |         |
|           | 0.52472         | -0.062013 | 0.52472 | 0.52472     | 0.77103426  |           |         |
| RBMS3     | ENSG00000144642 | -0.78157  | 0.78277 | -0.062033   | 0.52473     | -0.93517  | 0.82515 |
|           | -0.32995        | 0.62928   | 0.52473 | 0.77103426  |             |           |         |
| ZNF253    | ENSG00000256771 | -0.11278  | 0.5449  | -0.44116    | 0.67045     | -1.0403   |         |
|           | 0.8509          | -0.062032 | 0.52473 | 0.52473     | 0.77103426  |           |         |
| CDR2      | ENSG00000140743 | -0.65352  | 0.74329 | -0.65352    | 0.74329     | -0.65352  | 0.74329 |
|           | -0.062045       | 0.52474   | 0.52474 | 0.77103426  |             |           |         |
| NA        | ENSG00000254135 | -0.22523  | 0.5891  | -0.062214   | 0.5248      | -0.095065 | 0.53787 |
|           | -1.3472         | 0.91104   | 0.5248  | 0.771099171 |             |           |         |
| C2CD4D    | ENSG00000225556 | -0.06232  | 0.52485 | -0.69334    | 0.75595     | -0.06232  |         |
|           | 0.52485         | -0.06232  | 0.52485 | 0.52485     | 0.771149385 |           |         |
| ZNF680P1  | ENSG00000228014 | -0.67507  | 0.75018 | -0.062408   | 0.52488     | -0.71132  |         |
|           | 0.76156         | -0.58132  | 0.71949 | 0.52488     | 0.771170211 |           |         |
| NA        | ENSG00000238143 | -0.67927  | 0.75152 | -1.2246     | 0.88963     | -0.35439  | 0.63848 |
|           | -0.062504       | 0.52492   | 0.52492 | 0.771205728 |             |           |         |
| LINC02534 | ENSG00000228777 | -0.062704 | 0.525   | -0.062704   | 0.525       | -0.062704 | 0.525   |
|           |                 |           |         |             |             |           |         |

0.525 0.525 0.771276756

RN7SL202P ENSG00000266627 -0.062704 0.525 -0.062704 0.525 -0.062704 0.525 -0.062704  
0.525 0.525 0.771276756

NA ENSG00000235100 -0.062803 0.52504 -0.062803 0.52504 -0.062803 0.52504  
-0.062803 0.52504 0.52504 0.77129884

NA ENSG00000200764 -1.4486 0.92628 -1.4486 0.92628 -1.4486 0.92628  
-0.062887 0.52507 0.52507 0.77129884

NINJ2-AS1 ENSG00000177406 -0.062928 0.52509 -0.19645 0.57787 -0.25819  
0.60187 -0.21911 0.58672 0.52509 0.77129884

NA ENSG00000279236 -0.062939 0.52509 -0.062939 0.52509 -0.062939 0.52509  
-0.062939 0.52509 0.52509 0.77129884

MIR25 ENSG00000207547 -0.062977 0.52511 -0.062977 0.52511 -0.062977 0.52511  
-0.062977 0.52511 0.52511 0.77129884

MIR93 ENSG00000207757 -0.062977 0.52511 -0.062977 0.52511 -0.062977 0.52511  
-0.062977 0.52511 0.52511 0.77129884

C1QTNF9-AS1 ENSG00000240868 -0.90658 0.81769 -1.0629 0.85609 -0.063111  
0.52516 -0.063111 0.52516 0.52516 0.771314789

TPR ENSG00000047410 -2.1346 0.98361 -0.06315 0.52518 -0.2773 0.60923  
-0.29219 0.61493 0.52518 0.771314789

WNT7A ENSG00000154764 -0.063193 0.52519 -0.84025 0.79962 -0.35229 0.63769  
-0.11717 0.54664 0.52519 0.771314789

MTCYBP15 ENSG00000232154 -0.54138 0.70588 -0.1523 0.56053 -0.063176  
0.52519 -0.063176 0.52519 0.52519 0.771314789

RNF207 ENSG00000158286 -0.063201 0.5252 -0.45179 0.67429 -0.45179  
0.67429 -0.58403 0.7204 0.5252 0.771314789

ZNF18 ENSG00000154957 -0.34947 0.63663 -0.93656 0.82551 -0.063277 0.52523  
-0.063277 0.52523 0.52523 0.771322174

UBXN2A ENSG00000173960 -0.24625 0.59726 -0.14005 0.55569 -0.063303  
0.52524 -0.073943 0.52947 0.52524 0.771322174

CLC ENSG00000105205 -0.063356 0.52526 -0.063356 0.52526 -0.063356 0.52526  
-0.063356 0.52526 0.52526 0.771322174

MIR3146 ENSG00000265932 -0.063385 0.52527 -0.063385 0.52527 -0.063385  
0.52527 -0.063385 0.52527 0.52527 0.771322174

NA ENSG00000246889 -0.3505 0.63702 -0.063427 0.52529 -0.79159 0.7857  
-0.79159 0.7857 0.52529 0.771322174

POTED ENSG00000166351 -0.35152 0.6374 -0.21142 0.58372 -0.063457 0.5253  
-1.1421 0.87329 0.5253 0.771322174

RPL12P23 ENSG00000218716 -0.063707 0.5254 -0.337 0.63194 -0.39507  
0.6536 -0.5593 0.71202 0.5254 0.771413959

PITPNM2 ENSG00000090975 -0.063743 0.52541 -0.38718 0.65069 -0.7872  
0.78442 -0.76331 0.77736 0.52541 0.771413959

CGN ENSG00000143375 -0.063728 0.52541 -0.063728 0.52541 -0.063728 0.52541  
-1.1835 0.88169 0.52541 0.771413959

NA ENSG00000255118 -0.063891 0.52547 -0.063891 0.52547 -0.063891 0.52547  
-0.063891 0.52547 0.52547 0.771467804

OGFOD1 ENSG00000087263 -0.063902 0.52548 -0.88385 0.81161 -0.88385  
0.81161 -0.88385 0.81161 0.52548 0.771467804

WIF1 ENSG00000156076 -1.4845 0.93116 -0.063994 0.52551 -0.96257 0.83212  
-0.46332 0.67843 0.52551 0.771467804

RNU6-1183P ENSG00000252863 -1.1101 0.86652 -0.06398 0.52551 -0.76346  
0.77741 -0.8569 0.80425 0.52551 0.771467804

SHROOM3 ENSG00000138771 -0.06406 0.52554 -0.76594 0.77814 -1.0961  
0.86348 -1.1131 0.86718 0.52554 0.771488604

NA ENSG00000246777 -0.064205 0.5256 -0.064205 0.5256 -0.064205 0.5256  
-0.064205 0.5256 0.5256 0.771536315

RN7SKP281 ENSG00000222404 -0.064235 0.52561 -0.064235 0.52561 -0.064235  
0.52561 -0.064235 0.52561 0.52561 0.771536315

H3C12 ENSG00000197153 -0.064269 0.52562 -0.90126 0.81628 -0.90126 0.81628  
-0.90126 0.81628 0.52562 0.771536315

TRBV22-1 ENSG00000240578 -0.51361 0.69624 -0.51361 0.69624 -0.36615  
0.64287 -0.064511 0.52572 0.52572 0.771659857

GP9 ENSG00000169704 -0.24029 0.59495 -0.24029 0.59495 -0.064624 0.52576

|             |                 |           |           |           |             |             |         |  |
|-------------|-----------------|-----------|-----------|-----------|-------------|-------------|---------|--|
|             |                 | -0.24029  | 0.59495   | 0.52576   | 0.771695325 |             |         |  |
| DEFA11P     | ENSG00000234178 | -0.60297  | 0.72674   | -0.064657 | 0.52578     | -0.60297    |         |  |
|             |                 | 0.72674   | -0.60297  | 0.72674   | 0.52578     | 0.771701437 |         |  |
| NA          | ENSG00000199781 | -0.46391  | 0.67864   | -0.32919  | 0.62899     | -0.064711   | 0.5258  |  |
|             |                 | -0.064711 | 0.5258    | 0.5258    | 0.771707548 |             |         |  |
| TNNT2       | ENSG00000118194 | -0.26799  | 0.60565   | -0.3194   | 0.62529     | -0.47146    | 0.68134 |  |
|             |                 | -0.064795 | 0.52583   | 0.52583   | 0.771728335 |             |         |  |
| NA          | ENSG00000232463 | -0.064922 | 0.52588   | -0.064922 | 0.52588     | -0.064922   | 0.52588 |  |
|             |                 | -0.064922 | 0.52588   | 0.52588   | 0.771778472 |             |         |  |
| NA          | ENSG00000226952 | -0.065009 | 0.52592   | -0.065009 | 0.52592     | -0.065009   | 0.52592 |  |
|             |                 | -0.065009 | 0.52592   | 0.52592   | 0.771813932 |             |         |  |
| RN7SKP161   | ENSG00000223042 | -0.065248 | 0.52601   | -0.065248 | 0.52601     | -0.065248   |         |  |
|             |                 | 0.52601   | -0.065248 | 0.52601   | 0.52601     | 0.771922764 |         |  |
| MTCO1P29    | ENSG00000240452 | -0.89509  | 0.81463   | -0.065339 | 0.52605     | -0.065339   |         |  |
|             |                 | 0.52605   | -0.065339 | 0.52605   | 0.52605     | 0.771949645 |         |  |
| DBIL5P      | ENSG00000231784 | -0.065366 | 0.52606   | -0.065366 | 0.52606     | -0.065366   |         |  |
|             |                 | 0.52606   | -0.065366 | 0.52606   | 0.52606     | 0.771949645 |         |  |
| SUMF1       | ENSG00000144455 | -0.85275  | 0.8031    | -0.33923  | 0.63278     | -0.065494   | 0.52611 |  |
|             |                 | -0.1569   | 0.56234   | 0.52611   | 0.771999768 |             |         |  |
| NA          | ENSG00000185839 | -0.07081  | 0.52823   | -0.065544 | 0.52613     | -0.07081    | 0.52823 |  |
|             |                 | -0.07081  | 0.52823   | 0.52613   | 0.772003396 |             |         |  |
| NA          | ENSG00000258140 | -0.065594 | 0.52615   | -0.46277  | 0.67824     | -0.46277    | 0.67824 |  |
|             |                 | -0.46277  | 0.67824   | 0.52615   | 0.772003396 |             |         |  |
| NA          | ENSG00000239498 | -0.065617 | 0.52616   | -0.87362  | 0.80884     | -0.25492    | 0.60061 |  |
|             |                 | -0.25492  | 0.60061   | 0.52616   | 0.772003396 |             |         |  |
| IGHVII-15-1 | ENSG00000253458 | -0.69275  | 0.75577   | -0.065683 | 0.52619     | -0.79416    |         |  |
|             |                 | 0.78645   | -0.79416  | 0.78645   | 0.52619     | 0.772024168 |         |  |
| KBTBD13     | ENSG00000234438 | -0.47476  | 0.68252   | -0.065824 | 0.52624     | -1.0159     |         |  |
|             |                 | 0.84516   | -0.44101  | 0.6704    | 0.52624     | 0.772031248 |         |  |
| SNORD114-10 | ENSG00000200279 | -0.065963 | 0.5263    | -0.065963 | 0.5263      | -0.065963   |         |  |
|             |                 | 0.5263    | -0.065963 | 0.5263    | 0.5263      | 0.772031248 |         |  |
| RNA5SP419   | ENSG00000251717 | -0.065962 | 0.5263    | -0.065962 | 0.5263      | -0.065962   |         |  |
|             |                 | 0.5263    | -0.065962 | 0.5263    | 0.5263      | 0.772031248 |         |  |
| RNA5SP421   | ENSG00000252673 | -0.065962 | 0.5263    | -0.065962 | 0.5263      | -0.065962   |         |  |
|             |                 | 0.5263    | -0.065962 | 0.5263    | 0.5263      | 0.772031248 |         |  |
| RNA5SP420   | ENSG00000252806 | -0.065962 | 0.5263    | -0.065962 | 0.5263      | -0.065962   |         |  |
|             |                 | 0.5263    | -0.065962 | 0.5263    | 0.5263      | 0.772031248 |         |  |
| NA          | ENSG00000272578 | -0.06605  | 0.52633   | -0.06605  | 0.52633     | -0.06605    | 0.52633 |  |
|             |                 | -0.06605  | 0.52633   | 0.52633   | 0.772031248 |             |         |  |
| NA          | ENSG00000256028 | -0.0661   | 0.52635   | -0.0661   | 0.52635     | -0.0661     | 0.52635 |  |
|             |                 | -0.0661   | 0.52635   | 0.52635   | 0.772031248 |             |         |  |
| NA          | ENSG00000264149 | -0.40441  | 0.65704   | -0.066182 | 0.52638     | -0.76059    | 0.77655 |  |
|             |                 | -0.45569  | 0.6757    | 0.52638   | 0.772031248 |             |         |  |
| NA          | ENSG00000283994 | -0.066175 | 0.52638   | -0.066175 | 0.52638     | -0.066175   | 0.52638 |  |
|             |                 | -0.066175 | 0.52638   | 0.52638   | 0.772031248 |             |         |  |
| EDN3        | ENSG00000124205 | -0.066219 | 0.5264    | -0.066219 | 0.5264      | -0.066219   | 0.5264  |  |
|             |                 | -0.066219 | 0.5264    | 0.5264    | 0.772031248 |             |         |  |
| OR4B2P      | ENSG00000255514 | -0.92508  | 0.82254   | -1.0637   | 0.85627     | -1.0895     |         |  |
|             |                 | 0.86203   | -0.066252 | 0.52641   | 0.52641     | 0.772031248 |         |  |
| NA          | ENSG00000219150 | -1.2902   | 0.90151   | -1.2902   | 0.90151     | -1.2902     | 0.90151 |  |
|             |                 | -0.06632  | 0.52644   | 0.52644   | 0.772031248 |             |         |  |
| DDX25       | ENSG00000109832 | -1.3411   | 0.91005   | -1.2015   | 0.88523     | -0.066357   | 0.52645 |  |
|             |                 | -1.0687   | 0.8574    | 0.52645   | 0.772031248 |             |         |  |
| NA          | ENSG00000212306 | -0.066344 | 0.52645   | -0.066344 | 0.52645     | -0.066344   | 0.52645 |  |
|             |                 | -0.066344 | 0.52645   | 0.52645   | 0.772031248 |             |         |  |
| OR51R1P     | ENSG00000237272 | -0.24298  | 0.59599   | -0.86992  | 0.80783     | -0.58884    |         |  |
|             |                 | 0.72202   | -0.06636  | 0.52645   | 0.52645     | 0.772031248 |         |  |
| NA          | ENSG00000260806 | -0.066372 | 0.52646   | -0.066372 | 0.52646     | -0.066372   | 0.52646 |  |
|             |                 | -0.066372 | 0.52646   | 0.52646   | 0.772031248 |             |         |  |
| USP42       | ENSG00000106346 | -0.45284  | 0.67467   | -0.79765  | 0.78746     | -0.72409    | 0.76549 |  |
|             |                 | -0.066437 | 0.52648   | 0.52648   | 0.772031248 |             |         |  |
| LANCL1-AS1  | ENSG00000234281 | -0.7124   | 0.76189   | -0.7124   | 0.76189     | -0.7124     |         |  |



|             |                 |           |         |             |             |           |         |
|-------------|-----------------|-----------|---------|-------------|-------------|-----------|---------|
|             | 0.76189         | -0.06642  | 0.52648 | 0.52648     | 0.772031248 |           |         |
| PDIA3       | ENSG00000167004 | -0.74185  | 0.77091 | -0.84244    | 0.80023     | -0.066561 | 0.52653 |
|             | -0.13891        | 0.55524   | 0.52653 | 0.772076384 |             |           |         |
| RNU7-171P   | ENSG00000238406 | -0.066683 | 0.52658 | -0.066683   | 0.52658     | -0.066683 |         |
|             | 0.52658         | -0.066683 | 0.52658 | 0.772076384 |             |           |         |
| UBA52P3     | ENSG00000243023 | -0.066682 | 0.52658 | -0.066682   | 0.52658     | -0.066682 |         |
|             | 0.52658         | -0.066682 | 0.52658 | 0.772076384 |             |           |         |
| RBKS        | ENSG00000171174 | -0.066693 | 0.52659 | -1.6382     | 0.94932     | -1.9252   | 0.9729  |
|             | -1.7006         | 0.95549   | 0.52659 | 0.772076384 |             |           |         |
| NA          | ENSG00000254238 | -0.066696 | 0.52659 | -0.066696   | 0.52659     | -0.066696 | 0.52659 |
|             | -0.066696       | 0.52659   | 0.52659 | 0.772076384 |             |           |         |
| NA          | ENSG00000269814 | -0.066851 | 0.52665 | -0.066851   | 0.52665     | -0.066851 | 0.52665 |
|             | -0.066851       | 0.52665   | 0.52665 | 0.772115214 |             |           |         |
| NA          | ENSG00000278986 | -0.066978 | 0.5267  | -0.066978   | 0.5267      | -0.066978 | 0.5267  |
|             | -0.066978       | 0.5267    | 0.5267  | 0.772115214 |             |           |         |
| NA          | ENSG00000223999 | -1.4458   | 0.92589 | -1.2733     | 0.89854     | -1.4458   | 0.92589 |
|             | -0.067019       | 0.52672   | 0.52672 | 0.772115214 |             |           |         |
| ZNF385D-AS1 | ENSG00000225542 | -0.067033 | 0.52672 | -0.39037    | 0.65187     | -0.54808  |         |
|             | 0.70818         | -0.54808  | 0.70818 | 0.52672     | 0.772115214 |           |         |
| NA          | ENSG00000232448 | -0.067073 | 0.52674 | -0.067073   | 0.52674     | -0.067073 | 0.52674 |
|             | -0.067073       | 0.52674   | 0.52674 | 0.772115214 |             |           |         |
| KLF11       | ENSG00000172059 | -0.98934  | 0.83875 | -0.5013     | 0.69192     | -0.66564  | 0.74718 |
|             | -0.06713        | 0.52676   | 0.52676 | 0.772115214 |             |           |         |
| RNU6-453P   | ENSG00000252628 | -0.067125 | 0.52676 | -0.067125   | 0.52676     | -0.067125 |         |
|             | 0.52676         | -0.067125 | 0.52676 | 0.52676     | 0.772115214 |           |         |
| NA          | ENSG00000267175 | -0.8651   | 0.80651 | -1.4983     | 0.93297     | -0.12532  | 0.54986 |
|             | -0.067213       | 0.52679   | 0.52679 | 0.772115214 |             |           |         |
| RTN2        | ENSG00000125744 | -1.2898   | 0.90145 | -1.2898     | 0.90145     | -1.2898   | 0.90145 |
|             | -0.067232       | 0.5268    | 0.5268  | 0.772115214 |             |           |         |
| SCN3B       | ENSG00000166257 | -0.75889  | 0.77604 | -0.75889    | 0.77604     | -0.49995  | 0.69144 |
|             | -0.067265       | 0.52681   | 0.52681 | 0.772115214 |             |           |         |
| RRM2P2      | ENSG00000236484 | -0.067275 | 0.52682 | -0.067275   | 0.52682     | -0.16544  |         |
|             | 0.5657          | -0.067275 | 0.52682 | 0.52682     | 0.772115214 |           |         |
| LYZL6       | ENSG00000275722 | -0.72538  | 0.76589 | -1.1415     | 0.87318     | -0.067268 | 0.52682 |
|             | -1.036          | 0.8499    | 0.52682 | 0.772115214 |             |           |         |
| NA          | ENSG00000238296 | -0.16828  | 0.56682 | -0.06735    | 0.52685     | -0.12842  | 0.55109 |
|             | -0.098236       | 0.53913   | 0.52685 | 0.772115214 |             |           |         |
| MIR4326     | ENSG00000266104 | -0.067367 | 0.52686 | -0.067367   | 0.52686     | -0.067367 |         |
|             | 0.52686         | -0.067367 | 0.52686 | 0.52686     | 0.772115214 |           |         |
| MIR4703     | ENSG00000266611 | -0.067368 | 0.52686 | -0.067368   | 0.52686     | -0.067368 |         |
|             | 0.52686         | -0.067368 | 0.52686 | 0.52686     | 0.772115214 |           |         |
| LRIG2-DT    | ENSG00000238198 | -0.78586  | 0.78402 | -0.29911    | 0.61757     | -1.1263   |         |
|             | 0.86999         | -0.067416 | 0.52687 | 0.52687     | 0.772115214 |           |         |
| NA          | ENSG00000227399 | -0.067517 | 0.52692 | -0.067517   | 0.52692     | -0.31495  | 0.6236  |
|             | -0.31495        | 0.6236    | 0.52692 | 0.772165266 |             |           |         |
| LACTBL1     | ENSG00000215906 | -0.13056  | 0.55194 | -0.1723     | 0.5684      | -0.13056  |         |
|             | 0.55194         | -0.067674 | 0.52698 | 0.52698     | 0.772229969 |           |         |
| NA          | ENSG00000267521 | -1.385    | 0.91697 | -1.385      | 0.91697     | -1.385    | 0.91697 |
|             | -0.06785        | 0.52705   | 0.52705 | 0.772300752 |             |           |         |
| GAS2L2      | ENSG00000270765 | -1.4616   | 0.92808 | -1.6376     | 0.94925     | -0.067892 |         |
|             | 0.52706         | -0.067892 | 0.52706 | 0.52706     | 0.772300752 |           |         |
| RPL5P15     | ENSG00000240412 | -0.58401  | 0.72039 | -0.58401    | 0.72039     | -0.067951 |         |
|             | 0.52709         | -0.58401  | 0.72039 | 0.52709     | 0.772321487 |           |         |
| DSE         | ENSG00000111817 | -0.34378  | 0.63449 | -0.34378    | 0.63449     | -0.34378  | 0.63449 |
|             | -0.068124       | 0.52716   | 0.52716 | 0.772389766 |             |           |         |
| AGGF1P5     | ENSG00000260680 | -0.068193 | 0.52718 | -0.18486    | 0.57333     | -0.18486  |         |
|             | 0.57333         | -0.18486  | 0.57333 | 0.52718     | 0.772389766 |           |         |
| SAXO1       | ENSG00000155875 | -0.39437  | 0.65335 | -0.91611    | 0.8202      | -0.068232 | 0.5272  |
|             | -0.45633        | 0.67592   | 0.5272  | 0.772389766 |             |           |         |
| NA          | ENSG00000216548 | -0.068226 | 0.5272  | -0.25934    | 0.60231     | -0.068226 | 0.5272  |
|             | -0.068226       | 0.5272    | 0.5272  | 0.772389766 |             |           |         |
| NA          | ENSG00000268292 | -0.068321 | 0.52724 | -0.068321   | 0.52724     | -0.068321 | 0.52724 |

|              |                 |           |         |             |             |           |         |
|--------------|-----------------|-----------|---------|-------------|-------------|-----------|---------|
|              | -0.068321       | 0.52724   | 0.52724 | 0.772416574 |             |           |         |
| MIR548A2     | ENSG00000207689 | -0.068369 | 0.52725 | -0.068369   | 0.52725     | -0.068369 |         |
|              | 0.52725         | -0.068369 | 0.52725 | 0.52725     | 0.772416574 |           |         |
| GAS6-AS1     | ENSG00000233695 | -0.068441 | 0.52728 | -0.068441   | 0.52728     | -0.068441 |         |
|              | 0.52728         | -0.068441 | 0.52728 | 0.52728     | 0.772437302 |           |         |
| CCDC74BP1    | ENSG00000250261 | -0.068517 | 0.52731 | -0.068517   | 0.52731     | -0.068517 |         |
|              | 0.52731         | -0.068517 | 0.52731 | 0.52731     | 0.772458028 |           |         |
| POC1B-GALNT4 | ENSG00000259075 | -0.06866  | 0.52737 | -0.06866    | 0.52737     | -0.06866  |         |
|              | 0.52737         | -0.06866  | 0.52737 | 0.52737     | 0.77250663  |           |         |
| NA           | ENSG00000275046 | -0.93832  | 0.82596 | -0.3308     | 0.6296      | -0.068728 | 0.5274  |
|              | -0.23341        | 0.59228   | 0.5274  | 0.77250663  |             |           |         |
| OR11I1P      | ENSG00000232791 | -0.371    | 0.64468 | -0.371      | 0.64468     | -0.371    |         |
|              | 0.64468         | -0.068815 | 0.52743 | 0.52743     | 0.77250663  |           |         |
| SLCO1B7      | ENSG00000205754 | -0.11366  | 0.54525 | -0.15409    | 0.56123     | -0.068836 |         |
|              | 0.52744         | -1.1154   | 0.86765 | 0.52744     | 0.77250663  |           |         |
| NA           | ENSG00000240063 | -0.10257  | 0.54085 | -0.10257    | 0.54085     | -0.10257  | 0.54085 |
|              | -0.06884        | 0.52744   | 0.52744 | 0.77250663  |             |           |         |
| C5orf47      | ENSG00000185056 | -0.63384  | 0.73691 | -0.22914    | 0.59062     | -0.068865 |         |
|              | 0.52745         | -0.14874  | 0.55912 | 0.52745     | 0.77250663  |           |         |
| RAC1P1       | ENSG00000266520 | -0.068882 | 0.52746 | -0.068882   | 0.52746     | -0.068882 |         |
|              | 0.52746         | -0.068882 | 0.52746 | 0.52746     | 0.77250663  |           |         |
| LURAP1L-AS1  | ENSG00000235448 | -0.91239  | 0.81922 | -0.068899   | 0.52747     | -0.91239  |         |
|              | 0.81922         | -0.91239  | 0.81922 | 0.52747     | 0.77250663  |           |         |
| SLC25A36P1   | ENSG00000267781 | -0.068967 | 0.52749 | -0.068967   | 0.52749     | -0.068967 |         |
|              | 0.52749         | -0.068967 | 0.52749 | 0.52749     | 0.772512704 |           |         |
| NA           | ENSG00000259358 | -1.2028   | 0.88548 | -0.62661    | 0.73454     | -2.009    | 0.97773 |
|              | -0.06903        | 0.52752   | 0.52752 | 0.772516279 |             |           |         |
| NA           | ENSG00000279248 | -0.069069 | 0.52753 | -0.069069   | 0.52753     | -0.069069 | 0.52753 |
|              | -0.069069       | 0.52753   | 0.52753 | 0.772516279 |             |           |         |
| NA           | ENSG00000226852 | -0.069082 | 0.52754 | -0.069082   | 0.52754     | -0.069082 | 0.52754 |
|              | -0.069082       | 0.52754   | 0.52754 | 0.772516279 |             |           |         |
| MIRLET7A1HG  | ENSG00000269929 | -0.069164 | 0.52757 | -1.7877     | 0.96309     | -0.61165  |         |
|              | 0.72962         | -0.61165  | 0.72962 | 0.52757     | 0.772528423 |           |         |
| TEAD4        | ENSG00000197905 | -0.53836  | 0.70483 | -0.069193   | 0.52758     | -0.26236  | 0.60348 |
|              | -0.36498        | 0.64244   | 0.52758 | 0.772528423 |             |           |         |
| LINC01258    | ENSG00000249534 | -1.3284   | 0.90797 | -0.069251   | 0.52761     | -0.19071  |         |
|              | 0.57562         | -0.8657   | 0.80667 | 0.52761     | 0.772540567 |           |         |
| NA           | ENSG00000268461 | -0.069291 | 0.52762 | -0.069291   | 0.52762     | -0.069291 | 0.52762 |
|              | -0.069291       | 0.52762   | 0.52762 | 0.772540567 |             |           |         |
| SBNO1-AS1    | ENSG00000256092 | -0.10336  | 0.54116 | -0.069459   | 0.52769     | -0.41104  |         |
|              | 0.65948         | -0.34787  | 0.63603 | 0.52769     | 0.772594129 |           |         |
| WDR7         | ENSG00000091157 | -0.64622  | 0.74093 | -0.31529    | 0.62373     | -0.34339  | 0.63435 |
|              | -0.069526       | 0.52771   | 0.52771 | 0.772594129 |             |           |         |
| POP5         | ENSG00000167272 | -0.59922  | 0.72549 | -0.069507   | 0.52771     | -0.59922  | 0.72549 |
|              | -0.59922        | 0.72549   | 0.52771 | 0.772594129 |             |           |         |
| ZNF728       | ENSG00000269067 | -0.30526  | 0.61992 | -0.38373    | 0.64941     | -0.069535 |         |
|              | 0.52772         | -1.0923   | 0.86265 | 0.52772     | 0.772594129 |           |         |
| PLEKHS1      | ENSG00000148735 | -0.57864  | 0.71858 | -0.069578   | 0.52774     | -0.57864  |         |
|              | 0.71858         | -0.57864  | 0.71858 | 0.52774     | 0.772600198 |           |         |
| NA           | ENSG00000276334 | -0.069697 | 0.52778 | -0.069697   | 0.52778     | -0.069697 | 0.52778 |
|              | -0.069697       | 0.52778   | 0.52778 | 0.772618402 |             |           |         |
| NA           | ENSG00000261628 | -1.2221   | 0.88917 | -0.069716   | 0.52779     | -0.069716 | 0.52779 |
|              | -0.069716       | 0.52779   | 0.52779 | 0.772618402 |             |           |         |
| NA           | ENSG00000272304 | -0.62619  | 0.7344  | -0.62619    | 0.7344      | -0.069737 | 0.5278  |
|              | -0.62619        | 0.7344    | 0.5278  | 0.772618402 |             |           |         |
| KIAA0895L    | ENSG00000196123 | -0.86446  | 0.80633 | -0.069968   | 0.52789     | -1.7682   |         |
|              | 0.96148         | -1.7682   | 0.96148 | 0.52789     | 0.772703725 |           |         |
| OR52N3P      | ENSG00000236965 | -0.069965 | 0.52789 | -0.87047    | 0.80798     | -1.6484   |         |
|              | 0.95036         | -1.5637   | 0.94105 | 0.52789     | 0.772703725 |           |         |
| PPP1R12B     | ENSG00000077157 | -0.37431  | 0.64591 | -0.8091     | 0.79077     | -0.44372  |         |
|              | 0.67138         | -0.070383 | 0.52806 | 0.52806     | 0.772874338 |           |         |
| SHLD3        | ENSG00000253251 | -0.070399 | 0.52806 | -0.070399   | 0.52806     | -0.070399 | 0.52806 |

|            |                 |           |         |             |             |           |         |  |
|------------|-----------------|-----------|---------|-------------|-------------|-----------|---------|--|
|            | -0.070399       | 0.52806   | 0.52806 | 0.772874338 |             |           |         |  |
| THOP1      | ENSG00000172009 | -0.070426 | 0.52807 | -0.48801    | 0.68723     | -1.2885   | 0.90121 |  |
|            | -1.2885         | 0.90121   | 0.52807 | 0.772874338 |             |           |         |  |
| PKNOX2-AS1 | ENSG00000254880 | -0.54417  | 0.70684 | -0.43958    | 0.66988     | -0.090073 |         |  |
|            | 0.53589         | -0.070422 | 0.52807 | 0.52807     | 0.772874338 |           |         |  |
| NA         | ENSG00000269887 | -0.070459 | 0.52809 | -0.070459   | 0.52809     | -0.30206  | 0.6187  |  |
|            | -0.070459       | 0.52809   | 0.52809 | 0.772880397 |             |           |         |  |
| LINC00661  | ENSG00000205396 | -0.2331   | 0.59216 | -0.070512   | 0.52811     | -0.070512 |         |  |
|            | 0.52811         | -0.070512 | 0.52811 | 0.52811     | 0.772886455 |           |         |  |
| PHYKPL     | ENSG00000175309 | -2.1992   | 0.98607 | -1.8188     | 0.96553     | -0.67928  |         |  |
|            | 0.75152         | -0.070777 | 0.52821 | 0.52821     | 0.772986865 |           |         |  |
| NA         | ENSG00000260934 | -0.070879 | 0.52825 | -0.070879   | 0.52825     | -0.070879 | 0.52825 |  |
|            | -0.070879       | 0.52825   | 0.52825 | 0.772986865 |             |           |         |  |
| NA         | ENSG00000227824 | -0.6644   | 0.74678 | -0.070885   | 0.52826     | -0.6644   | 0.74678 |  |
|            | -0.6644         | 0.74678   | 0.52826 | 0.772986865 |             |           |         |  |
| NA         | ENSG00000237323 | -0.070965 | 0.52829 | -0.070965   | 0.52829     | -0.070965 | 0.52829 |  |
|            | -0.070965       | 0.52829   | 0.52829 | 0.772986865 |             |           |         |  |
| NA         | ENSG00000256417 | -0.33205  | 0.63007 | -0.4471     | 0.6726      | -0.070988 | 0.5283  |  |
|            | -1.0251         | 0.84735   | 0.5283  | 0.772986865 |             |           |         |  |
| NA         | ENSG00000260162 | -0.071077 | 0.52833 | -0.21101    | 0.58356     | -0.86125  | 0.80545 |  |
|            | -0.38764        | 0.65086   | 0.52833 | 0.772986865 |             |           |         |  |
| CD3E       | ENSG00000198851 | -0.59524  | 0.72416 | -0.071107   | 0.52834     | -0.071107 | 0.52834 |  |
|            | -0.071107       | 0.52834   | 0.52834 | 0.772986865 |             |           |         |  |
| DEFA10P    | ENSG00000233531 | -0.071144 | 0.52836 | -0.07431    | 0.52962     | -0.17419  |         |  |
|            | 0.56914         | -0.071144 | 0.52836 | 0.52836     | 0.772986865 |           |         |  |
| RN7SL706P  | ENSG00000244677 | -0.76328  | 0.77735 | -1.0921     | 0.86261     | -0.071165 |         |  |
|            | 0.52837         | -0.76328  | 0.77735 | 0.52837     | 0.772986865 |           |         |  |
| TMEM150B   | ENSG00000180061 | -0.071196 | 0.52838 | -0.071196   | 0.52838     | -0.071196 |         |  |
|            | 0.52838         | -0.071196 | 0.52838 | 0.52838     | 0.772986865 |           |         |  |
| DAAM2-AS1  | ENSG00000235033 | -0.28779  | 0.61325 | -0.46497    | 0.67902     | -0.07119  |         |  |
|            | 0.52838         | -0.07119  | 0.52838 | 0.52838     | 0.772986865 |           |         |  |
| NA         | ENSG00000239246 | -0.071309 | 0.52842 | -0.071309   | 0.52842     | -0.071309 | 0.52842 |  |
|            | -0.071309       | 0.52842   | 0.52842 | 0.772986865 |             |           |         |  |
| NA         | ENSG00000223522 | -1.1992   | 0.88477 | -1.1952     | 0.884       | -0.071319 | 0.52843 |  |
|            | -0.071319       | 0.52843   | 0.52843 | 0.772986865 |             |           |         |  |
| NA         | ENSG00000257431 | -0.071346 | 0.52844 | -0.071346   | 0.52844     | -0.071346 | 0.52844 |  |
|            | -0.071346       | 0.52844   | 0.52844 | 0.772986865 |             |           |         |  |
| MIR3193    | ENSG00000264395 | -0.071351 | 0.52844 | -0.071351   | 0.52844     | -0.071351 |         |  |
|            | 0.52844         | -0.071351 | 0.52844 | 0.52844     | 0.772986865 |           |         |  |
| MIR548W    | ENSG00000265005 | -1.6442   | 0.94993 | -0.071363   | 0.52845     | -1.6442   |         |  |
|            | 0.94993         | -1.5708   | 0.94188 | 0.52845     | 0.772986865 |           |         |  |
| LINC00670  | ENSG00000179136 | -0.071405 | 0.52846 | -0.071405   | 0.52846     | -0.88318  |         |  |
|            | 0.81143         | -0.071405 | 0.52846 | 0.52846     | 0.772986865 |           |         |  |
| NOA1       | ENSG00000084092 | -0.90489  | 0.81724 | -0.07143    | 0.52847     | -0.40125  | 0.65588 |  |
|            | -0.71987        | 0.7642    | 0.52847 | 0.772986865 |             |           |         |  |
| NOVA1      | ENSG00000139910 | -0.071459 | 0.52848 | -1.3229     | 0.90707     | -1.3229   | 0.90707 |  |
|            | -1.3172         | 0.90611   | 0.52848 | 0.772986865 |             |           |         |  |
| SNORD108   | ENSG00000239014 | -0.071536 | 0.52851 | -0.071536   | 0.52851     | -0.071536 |         |  |
|            | 0.52851         | -0.071536 | 0.52851 | 0.52851     | 0.772998968 |           |         |  |
| SLC35F5    | ENSG00000115084 | -0.78831  | 0.78474 | -0.45285    | 0.67467     | -0.49303  |         |  |
|            | 0.68901         | -0.071561 | 0.52852 | 0.52852     | 0.772998968 |           |         |  |
| RPL23AP15  | ENSG00000230841 | -0.071654 | 0.52856 | -0.071654   | 0.52856     | -0.62297  |         |  |
|            | 0.73335         | -0.071654 | 0.52856 | 0.52856     | 0.773034269 |           |         |  |
| NA         | ENSG00000225884 | -1.5046   | 0.93378 | -0.10503    | 0.54182     | -0.071754 | 0.5286  |  |
|            | -0.14842        | 0.55899   | 0.5286  | 0.773060992 |             |           |         |  |
| TFF3       | ENSG00000160180 | -0.21086  | 0.5835  | -0.21086    | 0.5835      | -0.071764 | 0.52861 |  |
|            | -0.21086        | 0.5835    | 0.52861 | 0.773060992 |             |           |         |  |
| COX5B      | ENSG00000135940 | -0.63995  | 0.7389  | -0.27834    | 0.60962     | -0.071937 | 0.52867 |  |
|            | -1.1313         | 0.87104   | 0.52867 | 0.773125536 |             |           |         |  |
| KRT73      | ENSG00000186049 | -0.41728  | 0.66176 | -0.072011   | 0.5287      | -0.072011 | 0.5287  |  |
|            | -0.072011       | 0.5287    | 0.5287  | 0.773146205 |             |           |         |  |
| NA         | ENSG00000227758 | -0.072048 | 0.52872 | -0.072048   | 0.52872     | -0.072048 | 0.52872 |  |

|           |                 |           |           |           |             |             |         |  |
|-----------|-----------------|-----------|-----------|-----------|-------------|-------------|---------|--|
|           |                 | -0.072048 | 0.52872   | 0.52872   | 0.773152251 |             |         |  |
| C15orf54  | ENSG00000175746 | -0.11628  | 0.54628   | -0.56265  | 0.71316     | -0.072103   |         |  |
|           |                 | 0.52874   | -0.53633  | 0.70414   | 0.52874     | 0.773158296 |         |  |
| NA        | ENSG00000270704 | -0.072161 | 0.52876   | -0.072161 | 0.52876     | -0.072161   | 0.52876 |  |
|           |                 | -0.072161 | 0.52876   | 0.52876   | 0.77316434  |             |         |  |
| NA        | ENSG00000251391 | -0.60249  | 0.72658   | -0.072343 | 0.52884     | -1.2184     | 0.88846 |  |
|           |                 | -1.3867   | 0.91724   | 0.52884   | 0.773258115 |             |         |  |
| NA        | ENSG00000228292 | -1.349    | 0.91134   | -0.072447 | 0.52888     | -0.072447   | 0.52888 |  |
|           |                 | -0.072447 | 0.52888   | 0.52888   | 0.773293399 |             |         |  |
| RPL26P20  | ENSG00000219722 | -0.072556 | 0.52892   | -0.90515  | 0.81731     | -1.0825     |         |  |
|           |                 | 0.8605    | -1.1553   | 0.87601   | 0.52892     | 0.773328681 |         |  |
| RNU7-192P | ENSG00000252275 | -0.072672 | 0.52897   | -0.072672 | 0.52897     | -0.072672   |         |  |
|           |                 | 0.52897   | -0.91333  | 0.81946   | 0.52897     | 0.773346796 |         |  |
| PM20D1    | ENSG00000162877 | -0.0727   | 0.52898   | -1.5002   | 0.93322     | -1.9935     |         |  |
|           |                 | 0.9769    | -1.9501   | 0.97442   | 0.52898     | 0.773346796 |         |  |
| NA        | ENSG00000253264 | -0.072709 | 0.52898   | -0.072709 | 0.52898     | -0.072709   | 0.52898 |  |
|           |                 | -0.072709 | 0.52898   | 0.52898   | 0.773346796 |             |         |  |
| NA        | ENSG00000228112 | -0.072802 | 0.52902   | -0.072802 | 0.52902     | -0.072802   | 0.52902 |  |
|           |                 | -0.072802 | 0.52902   | 0.52902   | 0.773382072 |             |         |  |
| NA        | ENSG00000225598 | -0.072909 | 0.52906   | -0.072909 | 0.52906     | -0.072909   | 0.52906 |  |
|           |                 | -0.38218  | 0.64884   | 0.52906   | 0.773406215 |             |         |  |
| TMEM190   | ENSG00000160472 | -0.072924 | 0.52907   | -0.072924 | 0.52907     | -0.072924   |         |  |
|           |                 | 0.52907   | -0.072924 | 0.52907   | 0.52907     | 0.773406215 |         |  |
| RN7SKP262 | ENSG00000222950 | -1.6519   | 0.95072   | -1.6519   | 0.95072     | -0.072981   |         |  |
|           |                 | 0.52909   | -1.6519   | 0.95072   | 0.52909     | 0.773406215 |         |  |
| NA        | ENSG00000199716 | -1.0997   | 0.86427   | -0.073012 | 0.5291      | -0.21232    | 0.58407 |  |
|           |                 | -1.0997   | 0.86427   | 0.5291    | 0.773406215 |             |         |  |
| NA        | ENSG00000275011 | -0.073057 | 0.52912   | -0.073057 | 0.52912     | -0.073057   | 0.52912 |  |
|           |                 | -0.073057 | 0.52912   | 0.52912   | 0.77341225  |             |         |  |
| NA        | ENSG00000260171 | -1.0007   | 0.84151   | -1.0007   | 0.84151     | -0.073258   | 0.5292  |  |
|           |                 | -1.0007   | 0.84151   | 0.5292    | 0.773486264 |             |         |  |
| NA        | ENSG00000280134 | -0.073302 | 0.52922   | -0.073302 | 0.52922     | -0.073302   | 0.52922 |  |
|           |                 | -0.073302 | 0.52922   | 0.52922   | 0.773486264 |             |         |  |
| NA        | ENSG00000229064 | -0.59013  | 0.72245   | -0.073348 | 0.52924     | -0.59013    | 0.72245 |  |
|           |                 | -0.59013  | 0.72245   | 0.52924   | 0.773486264 |             |         |  |
| VWA8-AS1  | ENSG00000278338 | -0.073352 | 0.52924   | -0.29319  | 0.61531     | -0.073352   |         |  |
|           |                 | 0.52924   | -0.086674 | 0.53453   | 0.52924     | 0.773486264 |         |  |
| CDC42EP2  | ENSG00000149798 | -0.98453  | 0.83757   | -2.6512   | 0.99599     | -0.073377   |         |  |
|           |                 | 0.52925   | -0.61873  | 0.73195   | 0.52925     | 0.773486264 |         |  |
| ZCCHC10   | ENSG00000155329 | -0.30403  | 0.61945   | -0.1212   | 0.54823     | -0.22625    |         |  |
|           |                 | 0.58949   | -0.073509 | 0.5293    | 0.5293      | 0.773513865 |         |  |
| NA        | ENSG00000237590 | -0.07357  | 0.52932   | -0.44834  | 0.67305     | -1.1912     | 0.88321 |  |
|           |                 | -0.28901  | 0.61371   | 0.52932   | 0.773513865 |             |         |  |
| OSR2      | ENSG00000164920 | -0.10605  | 0.54223   | -0.073593 | 0.52933     | -0.10605    | 0.54223 |  |
|           |                 | -0.79977  | 0.78808   | 0.52933   | 0.773513865 |             |         |  |
| NA        | ENSG00000259509 | -0.073636 | 0.52935   | -0.30351  | 0.61925     | -0.073636   | 0.52935 |  |
|           |                 | -0.073636 | 0.52935   | 0.52935   | 0.773513865 |             |         |  |
| DMKN      | ENSG00000161249 | -0.56797  | 0.71497   | -0.073688 | 0.52937     | -0.56797    | 0.71497 |  |
|           |                 | -0.72285  | 0.76511   | 0.52937   | 0.773513865 |             |         |  |
| MT1E      | ENSG00000169715 | -0.07371  | 0.52938   | -0.07371  | 0.52938     | -0.07371    | 0.52938 |  |
|           |                 | -0.1296   | 0.55156   | 0.52938   | 0.773513865 |             |         |  |
| RNU6-733P | ENSG00000222691 | -0.073721 | 0.52938   | -0.073721 | 0.52938     | -0.073721   |         |  |
|           |                 | 0.52938   | -0.073721 | 0.52938   | 0.52938     | 0.773513865 |         |  |
| CALD1     | ENSG00000122786 | -0.18282  | 0.57253   | -0.073841 | 0.52943     | -0.30878    | 0.62126 |  |
|           |                 | -0.13098  | 0.5521    | 0.52943   | 0.773563728 |             |         |  |
| LINC02697 | ENSG00000255327 | -0.073986 | 0.52949   | -0.83832  | 0.79907     | -1.3631     |         |  |
|           |                 | 0.91358   | -0.52764  | 0.70112   | 0.52949     | 0.773628199 |         |  |
| LINC00489 | ENSG00000225759 | -1.1105   | 0.8666    | -0.074088 | 0.52953     | -0.50273    |         |  |
|           |                 | 0.69242   | -0.2601   | 0.60261   | 0.52953     | 0.773643715 |         |  |
| NA        | ENSG00000218125 | -0.074129 | 0.52955   | -0.074129 | 0.52955     | -0.074129   | 0.52955 |  |
|           |                 | -0.074129 | 0.52955   | 0.52955   | 0.773643715 |             |         |  |
| LINC01055 | ENSG00000235366 | -0.18043  | 0.57159   | -0.074172 | 0.52956     | -0.62727    |         |  |

|            |                 |           |         |             |             |           |         |
|------------|-----------------|-----------|---------|-------------|-------------|-----------|---------|
|            | 0.73476         | -0.62727  | 0.73476 | 0.52956     | 0.773643715 |           |         |
| RPTOR      | ENSG00000141564 | -0.80395  | 0.78929 | -1.8548     | 0.96819     | -0.62153  | 0.73288 |
|            | -0.07418        | 0.52957   | 0.52957 | 0.773643715 |             |           |         |
| NA         | ENSG00000280282 | -0.074203 | 0.52958 | -0.074203   | 0.52958     | -0.074203 | 0.52958 |
|            | -0.074203       | 0.52958   | 0.52958 | 0.773643715 |             |           |         |
| NA         | ENSG00000277749 | -0.27029  | 0.60653 | -0.64077    | 0.73916     | -0.074309 | 0.52962 |
|            | -0.6165         | 0.73122   | 0.52962 | 0.773678956 |             |           |         |
| ASS1P12    | ENSG00000237437 | -0.074402 | 0.52965 | -0.86269    | 0.80585     | -0.4341   |         |
|            | 0.66789         | -0.92311  | 0.82203 | 0.52965     | 0.773699586 |           |         |
| NA         | ENSG00000265204 | -0.084145 | 0.53353 | -1.6385     | 0.94934     | -0.07452  | 0.5297  |
|            | -2.5036         | 0.99385   | 0.5297  | 0.77374943  |             |           |         |
| NA         | ENSG00000273784 | -0.34767  | 0.63596 | -0.074599   | 0.52973     | -0.28079  | 0.61057 |
|            | -0.28079        | 0.61057   | 0.52973 | 0.773758905 |             |           |         |
| FTH1P24    | ENSG00000249302 | -0.074631 | 0.52975 | -0.074631   | 0.52975     | -0.074631 |         |
|            | 0.52975         | -0.074631 | 0.52975 | 0.52975     | 0.773758905 |           |         |
| ZNF541     | ENSG00000118156 | -1.3306   | 0.90833 | -1.489      | 0.93176     | -0.074679 |         |
|            | 0.52976         | -0.27723  | 0.6092  | 0.52976     | 0.773758905 |           |         |
| KMT5A      | ENSG00000183955 | -0.84399  | 0.80066 | -0.074687   | 0.52977     | -0.92349  | 0.82213 |
|            | -1.3126         | 0.90535   | 0.52977 | 0.773758905 |             |           |         |
| NA         | ENSG00000250345 | -0.074816 | 0.52982 | -0.074816   | 0.52982     | -0.074816 | 0.52982 |
|            | -0.074816       | 0.52982   | 0.52982 | 0.773763245 |             |           |         |
| NA         | ENSG00000261055 | -0.63942  | 0.73872 | -0.44614    | 0.67225     | -0.074834 | 0.52983 |
|            | -0.074834       | 0.52983   | 0.52983 | 0.773763245 |             |           |         |
| PRKCI      | ENSG00000163558 | -0.074859 | 0.52984 | -0.60243    | 0.72656     | -0.47259  | 0.68175 |
|            | -0.53968        | 0.70529   | 0.52984 | 0.773763245 |             |           |         |
| NA         | ENSG00000257769 | -0.074912 | 0.52986 | -0.074912   | 0.52986     | -0.074912 | 0.52986 |
|            | -0.074912       | 0.52986   | 0.52986 | 0.773763245 |             |           |         |
| KRT36      | ENSG00000126337 | -0.074939 | 0.52987 | -1.5734     | 0.94218     | -1.5734   | 0.94218 |
|            | -1.5734         | 0.94218   | 0.52987 | 0.773763245 |             |           |         |
| PSMC2P2    | ENSG00000253137 | -1.5597   | 0.94059 | -0.074978   | 0.52988     | -0.49145  |         |
|            | 0.68845         | -1.0022   | 0.84187 | 0.52988     | 0.773763245 |           |         |
| CERS3-AS1  | ENSG00000259430 | -1.3477   | 0.91112 | -0.07501    | 0.5299      | -1.5779   |         |
|            | 0.94271         | -0.79561  | 0.78687 | 0.5299      | 0.773763245 |           |         |
| CASC22     | ENSG00000260887 | -0.075015 | 0.5299  | -0.075015   | 0.5299      | -0.075015 |         |
|            | 0.5299          | -0.075015 | 0.5299  | 0.5299      | 0.773763245 |           |         |
| PDSS1P1    | ENSG00000182347 | -0.075178 | 0.52996 | -0.075178   | 0.52996     | -0.075178 |         |
|            | 0.52996         | -0.075178 | 0.52996 | 0.52996     | 0.773804483 |           |         |
| MIR33B     | ENSG00000207839 | -0.075164 | 0.52996 | -0.075164   | 0.52996     | -0.075164 |         |
|            | 0.52996         | -0.075164 | 0.52996 | 0.52996     | 0.773804483 |           |         |
| NA         | ENSG00000250144 | -0.075208 | 0.52998 | -0.17854    | 0.57085     | -0.17854  | 0.57085 |
|            | -0.17854        | 0.57085   | 0.52998 | 0.77380881  |             |           |         |
| FTO        | ENSG00000140718 | -0.27982  | 0.61019 | -0.73467    | 0.76873     | -0.075348 | 0.53003 |
|            | -1.0832         | 0.86064   | 0.53003 | 0.77380881  |             |           |         |
| LDHAL6FP   | ENSG00000217783 | -0.17035  | 0.56763 | -0.075354   | 0.53003     | -0.075354 |         |
|            | 0.53003         | -0.075354 | 0.53003 | 0.53003     | 0.77380881  |           |         |
| VPS51      | ENSG00000149823 | -0.075421 | 0.53006 | -0.78506    | 0.78379     | -0.78506  | 0.78379 |
|            | -0.24915        | 0.59838   | 0.53006 | 0.77380881  |             |           |         |
| NA         | ENSG00000253715 | -1.4163   | 0.92165 | -1.9602     | 0.97501     | -0.075476 | 0.53008 |
|            | -0.5432         | 0.70651   | 0.53008 | 0.77380881  |             |           |         |
| NA         | ENSG00000254760 | -0.075481 | 0.53008 | -0.075481   | 0.53008     | -0.075481 | 0.53008 |
|            | -0.075481       | 0.53008   | 0.53008 | 0.77380881  |             |           |         |
| TMEM249    | ENSG00000261587 | -0.075505 | 0.53009 | -0.075505   | 0.53009     | -0.075505 |         |
|            | 0.53009         | -0.075505 | 0.53009 | 0.53009     | 0.77380881  |           |         |
| NA         | ENSG00000277211 | -0.075496 | 0.53009 | -0.51073    | 0.69523     | -0.075496 | 0.53009 |
|            | -0.17318        | 0.56875   | 0.53009 | 0.77380881  |             |           |         |
| RPS28P7    | ENSG00000227097 | -0.075579 | 0.53012 | -0.075579   | 0.53012     | -0.58152  |         |
|            | 0.71956         | -1.611    | 0.94641 | 0.53012     | 0.773812257 |           |         |
| RNU6-76P   | ENSG00000206787 | -1.6948   | 0.95495 | -1.1523     | 0.8754      | -0.075633 |         |
|            | 0.53014         | -2.3208   | 0.98985 | 0.53014     | 0.773812257 |           |         |
| NKX2-2-AS1 | ENSG00000258197 | -0.075612 | 0.53014 | -0.075612   | 0.53014     | -0.075612 |         |
|            | 0.53014         | -0.075612 | 0.53014 | 0.53014     | 0.773812257 |           |         |
| FCGRT      | ENSG00000104870 | -0.082097 | 0.53272 | -0.075718   | 0.53018     | -0.082097 | 0.53272 |

|            |                 |           |         |             |             |           |         |
|------------|-----------------|-----------|---------|-------------|-------------|-----------|---------|
|            | -0.082097       | 0.53272   | 0.53018 | 0.773824285 |             |           |         |
| RNU6-229P  | ENSG00000252423 | -0.10021  | 0.53991 | -0.10021    | 0.53991     | -0.075723 |         |
|            | 0.53018         | -0.075723 | 0.53018 | 0.53018     | 0.773824285 |           |         |
| OR6C4      | ENSG00000179626 | -0.28733  | 0.61307 | -0.075762   | 0.5302      | -0.83006  | 0.79675 |
|            | -0.075762       | 0.5302    | 0.5302  | 0.773830298 |             |           |         |
| SRP14      | ENSG00000140319 | -0.5059   | 0.69354 | -0.58233    | 0.71983     | -1.4418   | 0.92532 |
|            | -0.075838       | 0.53023   | 0.53023 | 0.773839755 |             |           |         |
| OR10AB1P   | ENSG00000176716 | -0.095134 | 0.5379  | -0.075926   | 0.53026     | -0.075926 |         |
|            | 0.53026         | -0.4804   | 0.68453 | 0.53026     | 0.773839755 |           |         |
| MRPL14     | ENSG00000180992 | -0.2036   | 0.58067 | -0.07593    | 0.53026     | -0.4695   |         |
|            | 0.68065         | -0.07593  | 0.53026 | 0.53026     | 0.773839755 |           |         |
| NA         | ENSG00000252128 | -0.52231  | 0.69927 | -0.075952   | 0.53027     | -0.53129  | 0.70239 |
|            | -0.53129        | 0.70239   | 0.53027 | 0.773839755 |             |           |         |
| IGHV8-51-1 | ENSG00000254167 | -0.076196 | 0.53037 | -0.076196   | 0.53037     | -0.076196 |         |
|            | 0.53037         | -0.076196 | 0.53037 | 0.53037     | 0.773925603 |           |         |
| CTSB       | ENSG00000164733 | -0.38255  | 0.64897 | -0.1315     | 0.55231     | -0.076261 | 0.53039 |
|            | -0.076261       | 0.53039   | 0.53039 | 0.773925603 |             |           |         |
| NA         | ENSG00000264734 | -1.1353   | 0.87187 | -1.4963     | 0.93271     | -0.076279 | 0.5304  |
|            | -1.1914         | 0.88325   | 0.5304  | 0.773925603 |             |           |         |
| NA         | ENSG00000273214 | -0.076284 | 0.5304  | -1.0733     | 0.85843     | -1.0733   | 0.85843 |
|            | -1.0733         | 0.85843   | 0.5304  | 0.773925603 |             |           |         |
| NA         | ENSG00000207258 | -0.076337 | 0.53042 | -1.1832     | 0.88164     | -0.62388  | 0.73365 |
|            | -0.62388        | 0.73365   | 0.53042 | 0.773925603 |             |           |         |
| NA         | ENSG00000252904 | -0.076363 | 0.53043 | -0.82281    | 0.79469     | -0.076363 | 0.53043 |
|            | -0.076363       | 0.53043   | 0.53043 | 0.773925603 |             |           |         |
| BICRA      | ENSG00000063169 | -1.1807   | 0.88114 | -1.819      | 0.96555     | -0.70229  | 0.75875 |
|            | -0.076386       | 0.53044   | 0.53044 | 0.773925603 |             |           |         |
| NA         | ENSG00000206951 | -0.69625  | 0.75686 | -1.3939     | 0.91832     | -0.69625  | 0.75686 |
|            | -0.076484       | 0.53048   | 0.53048 | 0.773941052 |             |           |         |
| RASL12     | ENSG00000103710 | -0.47804  | 0.68369 | -0.076501   | 0.53049     | -0.47804  |         |
|            | 0.68369         | -0.56191  | 0.71291 | 0.53049     | 0.773941052 |           |         |
| RPL35P2    | ENSG00000220583 | -0.26744  | 0.60543 | -0.076556   | 0.53051     | -0.62009  |         |
|            | 0.7324          | -0.10047  | 0.54001 | 0.53051     | 0.773941052 |           |         |
| CLOCK      | ENSG00000134852 | -0.2053   | 0.58133 | -0.082247   | 0.53277     | -0.07659  | 0.53053 |
|            | -0.12904        | 0.55134   | 0.53053 | 0.773941052 |             |           |         |
| NA         | ENSG00000247121 | -0.076611 | 0.53053 | -0.076611   | 0.53053     | -0.076611 | 0.53053 |
|            | -0.16479        | 0.56545   | 0.53053 | 0.773941052 |             |           |         |
| ZEB1       | ENSG00000148516 | -0.076671 | 0.53056 | -0.95305    | 0.82972     | -0.65098  | 0.74247 |
|            | -0.56387        | 0.71358   | 0.53056 | 0.773961646 |             |           |         |
| NA         | ENSG00000206840 | -0.076727 | 0.53058 | -0.076727   | 0.53058     | -0.34353  | 0.6344  |
|            | -0.095023       | 0.53785   | 0.53058 | 0.773967653 |             |           |         |
| RNU6-760P  | ENSG00000251887 | -0.23678  | 0.59359 | -0.23678    | 0.59359     | -0.12506  |         |
|            | 0.54976         | -0.076935 | 0.53066 | 0.53066     | 0.773985649 |           |         |
| NA         | ENSG00000241881 | -0.077069 | 0.53072 | -0.077069   | 0.53072     | -0.077069 | 0.53072 |
|            | -0.077069       | 0.53072   | 0.53072 | 0.773985649 |             |           |         |
| NA         | ENSG00000261302 | -0.077095 | 0.53073 | -0.2591     | 0.60222     | -0.32418  | 0.6271  |
|            | -0.096113       | 0.53828   | 0.53073 | 0.773985649 |             |           |         |
| NA         | ENSG00000252083 | -0.077163 | 0.53075 | -0.62419    | 0.73375     | -0.077163 | 0.53075 |
|            | -0.077163       | 0.53075   | 0.53075 | 0.773985649 |             |           |         |
| NA         | ENSG00000263902 | -0.43431  | 0.66797 | -0.43431    | 0.66797     | -0.077168 | 0.53075 |
|            | -0.43431        | 0.66797   | 0.53075 | 0.773985649 |             |           |         |
| NA         | ENSG00000279996 | -0.28447  | 0.61197 | -0.21109    | 0.58359     | -0.077206 | 0.53077 |
|            | -0.2986         | 0.61738   | 0.53077 | 0.773985649 |             |           |         |
| KRTAP19-1  | ENSG00000184351 | -0.077241 | 0.53078 | -0.077241   | 0.53078     | -0.077241 |         |
|            | 0.53078         | -0.077241 | 0.53078 | 0.53078     | 0.773985649 |           |         |
| NA         | ENSG00000231780 | -0.077303 | 0.53081 | -0.077303   | 0.53081     | -0.077303 | 0.53081 |
|            | -0.077303       | 0.53081   | 0.53081 | 0.773985649 |             |           |         |
| NT5E       | ENSG00000135318 | -0.57181  | 0.71627 | -0.54149    | 0.70591     | -0.077358 | 0.53083 |
|            | -0.62554        | 0.73419   | 0.53083 | 0.773985649 |             |           |         |
| KRTAP16-1  | ENSG00000212657 | -1.1665   | 0.87829 | -0.17796    | 0.57062     | -0.077356 |         |
|            | 0.53083         | -1.1665   | 0.87829 | 0.53083     | 0.773985649 |           |         |
| PIKFYVE    | ENSG00000115020 | -1.4289   | 0.92348 | -0.077386   | 0.53084     | -1.1716   |         |

|            |                 |           |         |             |             |         |                   |
|------------|-----------------|-----------|---------|-------------|-------------|---------|-------------------|
|            | 0.87932         | -0.74471  | 0.77178 | 0.53084     | 0.773985649 |         |                   |
| NA         | ENSG00000233912 | -0.077392 | 0.53084 | 0.53084     | -0.077392   | 0.53084 | -0.077392 0.53084 |
|            | -0.077392       | 0.53084   | 0.53084 | 0.773985649 |             |         |                   |
| NA         | ENSG00000270367 | -0.07739  | 0.53084 | 0.53084     | -0.07739    | 0.53084 | -0.07739 0.53084  |
|            | -0.07739        | 0.53084   | 0.53084 | 0.773985649 |             |         |                   |
| NA         | ENSG00000237349 | -0.07743  | 0.53086 | 0.53086     | -0.07743    | 0.53086 | -0.07743 0.53086  |
|            | -0.07743        | 0.53086   | 0.53086 | 0.773985649 |             |         |                   |
| RNA5SP102  | ENSG00000252674 | -0.18601  | 0.53086 | 0.53086     | -1.2571     | 0.89564 | -0.18601          |
|            | 0.57378         | -0.077425 | 0.53086 | 0.53086     | 0.773985649 |         |                   |
| H3Y1       | ENSG00000269466 | -0.07744  | 0.53086 | 0.53086     | -0.07744    | 0.53086 | -0.07744 0.53086  |
|            | -0.07744        | 0.53086   | 0.53086 | 0.773985649 |             |         |                   |
| NA         | ENSG00000283647 | -0.077524 | 0.5309  | 0.5309      | -0.077524   | 0.5309  | -0.077524 0.5309  |
|            | -0.077524       | 0.5309    | 0.5309  | 0.773985649 |             |         |                   |
| TXNP1      | ENSG00000232823 | -0.077559 | 0.53091 | 0.53091     | -0.1556     | 0.56183 | -0.38266 0.64901  |
|            | -0.23915        | 0.59451   | 0.53091 | 0.773985649 |             |         |                   |
| NA         | ENSG00000251002 | -0.69491  | 0.75645 | 0.53091     | -0.077569   | 0.53091 | -0.70176 0.75858  |
|            | -0.76149        | 0.77682   | 0.53091 | 0.773985649 |             |         |                   |
| NA         | ENSG00000279493 | -0.077556 | 0.53091 | 0.53091     | -0.077556   | 0.53091 | -0.077556 0.53091 |
|            | -0.077556       | 0.53091   | 0.53091 | 0.773985649 |             |         |                   |
| NA         | ENSG00000249868 | -0.4727   | 0.68179 | 0.53094     | -0.88419    | 0.8117  | -0.077626 0.53094 |
|            | -0.84935        | 0.80216   | 0.53094 | 0.773989075 |             |         |                   |
| RNA5SP324  | ENSG00000202047 | -0.077658 | 0.53095 | 0.53095     | -0.077658   | 0.53095 | -0.077658         |
|            | 0.53095         | -0.077658 | 0.53095 | 0.53095     | 0.773989075 |         |                   |
| RNU6-1050P | ENSG00000222320 | -0.077696 | 0.53096 | 0.53096     | -0.077696   | 0.53096 | -0.077696         |
|            | 0.53096         | -0.077696 | 0.53096 | 0.53096     | 0.773989075 |         |                   |
| ACTA1      | ENSG00000143632 | -0.077838 | 0.53102 | 0.53102     | -0.077838   | 0.53102 | -0.077838 0.53102 |
|            | -0.077838       | 0.53102   | 0.53102 | 0.774053383 |             |         |                   |
| PPP1R14D   | ENSG00000166143 | -0.60684  | 0.72802 | 0.53108     | -0.70698    | 0.76021 | -0.077988         |
|            | 0.53108         | -0.60684  | 0.72802 | 0.53108     | 0.774109108 |         |                   |
| C4BPA      | ENSG00000123838 | -0.078001 | 0.53109 | 0.53109     | -0.50942    | 0.69477 | -0.84013 0.79958  |
|            | -0.14462        | 0.55749   | 0.53109 | 0.774109108 |             |         |                   |
| HMBOX1     | ENSG00000147421 | -0.078095 | 0.53112 | 0.53112     | -0.77214    | 0.77998 | -1.6814           |
|            | 0.95366         | -0.50995  | 0.69496 | 0.53112     | 0.77412968  |         |                   |
| SNORA70H   | ENSG00000206637 | -1.2057   | 0.88604 | 0.53121     | -0.078304   | 0.53121 | -0.078304         |
|            | 0.53121         | -0.68702  | 0.75396 | 0.53121     | 0.774205569 |         |                   |
| NA         | ENSG00000280378 | -0.77402  | 0.78054 | 0.53126     | -0.078428   | 0.53126 | -0.32051 0.62571  |
|            | -0.32051        | 0.62571   | 0.53126 | 0.774205569 |             |         |                   |
| NA         | ENSG00000249441 | -0.085024 | 0.53388 | 0.53388     | -0.085024   | 0.53388 | -0.078549 0.5313  |
|            | -0.4421         | 0.67079   | 0.5313  | 0.774205569 |             |         |                   |
| SH3BP5L    | ENSG00000175137 | -0.078568 | 0.53131 | 0.53131     | -0.53364    | 0.7032  | -0.078568         |
|            | 0.53131         | -0.6132   | 0.73013 | 0.53131     | 0.774205569 |         |                   |
| MTND6P33   | ENSG00000262107 | -0.078601 | 0.53132 | 0.53132     | -0.078601   | 0.53132 | -0.078601         |
|            | 0.53132         | -0.078601 | 0.53132 | 0.53132     | 0.774205569 |         |                   |
| NA         | ENSG00000237481 | -0.078663 | 0.53135 | 0.53135     | -0.078663   | 0.53135 | -0.078663 0.53135 |
|            | -0.078663       | 0.53135   | 0.53135 | 0.774205569 |             |         |                   |
| CCNB1      | ENSG00000134057 | -0.11496  | 0.54576 | 0.53136     | -0.11496    | 0.54576 | -0.078701 0.53136 |
|            | -0.90344        | 0.81685   | 0.53136 | 0.774205569 |             |         |                   |
| ATP6V1B2   | ENSG00000147416 | -0.14956  | 0.55944 | 0.53137     | -0.07871    | 0.53137 | -0.16753          |
|            | 0.56652         | -0.23194  | 0.59171 | 0.53137     | 0.774205569 |         |                   |
| MAP1LC3BP1 | ENSG00000231909 | -0.13224  | 0.5526  | 0.53141     | -0.13224    | 0.5526  | -0.078806         |
|            | 0.53141         | -1.5091   | 0.93436 | 0.53141     | 0.774205569 |         |                   |
| KLF8P1     | ENSG00000260726 | -0.41915  | 0.66245 | 0.53141     | -1.0159     | 0.84516 | -0.66596          |
|            | 0.74728         | -0.078811 | 0.53141 | 0.53141     | 0.774205569 |         |                   |
| TRBV10-2   | ENSG00000229769 | -0.078874 | 0.53143 | 0.53143     | -0.23683    | 0.59361 | -0.23683          |
|            | 0.59361         | -0.23683  | 0.59361 | 0.53143     | 0.774205569 |         |                   |
| RNU6-9     | ENSG00000207507 | -0.078888 | 0.53144 | 0.53144     | -0.078888   | 0.53144 | -0.078888         |
|            | 0.53144         | -0.078888 | 0.53144 | 0.53144     | 0.774205569 |         |                   |
| KSR1       | ENSG00000141068 | -0.25407  | 0.60028 | 0.53146     | -1.201      | 0.88513 | -0.078937 0.53146 |
|            | -0.28387        | 0.61174   | 0.53146 | 0.774205569 |             |         |                   |
| SMIM1      | ENSG00000235169 | -0.078996 | 0.53148 | 0.53148     | -0.078996   | 0.53148 | -0.078996 0.53148 |
|            | -0.078996       | 0.53148   | 0.53148 | 0.774205569 |             |         |                   |
| HMG1P17    | ENSG00000250787 | -0.2963   | 0.6165  | 0.53148     | -0.88286    | 0.81134 | -0.079118         |

|            |                 |           |         |             |             |           |         |
|------------|-----------------|-----------|---------|-------------|-------------|-----------|---------|
|            | 0.53153         | -0.82991  | 0.79671 | 0.53153     | 0.774205569 |           |         |
| RAB3IP     | ENSG00000127328 | -1.768    | 0.96147 | -0.079166   | 0.53155     | -0.6434   |         |
|            | 0.74002         | -0.81798  | 0.79332 | 0.53155     | 0.774205569 |           |         |
| ZNF860     | ENSG00000197385 | -0.86852  | 0.80744 | -0.079181   | 0.53156     | -0.079181 |         |
|            | 0.53156         | -0.079181 | 0.53156 | 0.53156     | 0.774205569 |           |         |
| NA         | ENSG00000253059 | -0.079214 | 0.53157 | -0.079214   | 0.53157     | -0.079214 | 0.53157 |
|            | -0.079214       | 0.53157   | 0.53157 | 0.774205569 |             |           |         |
| CABCOC01   | ENSG00000183346 | -0.51187  | 0.69563 | -0.65813    | 0.74477     | -0.079255 |         |
|            | 0.53159         | -0.079255 | 0.53159 | 0.53159     | 0.774205569 |           |         |
| GGPS1      | ENSG00000152904 | -0.12646  | 0.55032 | -0.13699    | 0.55448     | -0.12646  | 0.55032 |
|            | -0.079304       | 0.5316    | 0.5316  | 0.774205569 |             |           |         |
| NA         | ENSG00000270321 | -0.079284 | 0.5316  | -0.079284   | 0.5316      | -0.079284 | 0.5316  |
|            | -0.079284       | 0.5316    | 0.5316  | 0.774205569 |             |           |         |
| NA         | ENSG00000237640 | -0.07932  | 0.53161 | -0.47231    | 0.68165     | -0.07932  | 0.53161 |
|            | -0.07932        | 0.53161   | 0.53161 | 0.774205569 |             |           |         |
| UPK3A      | ENSG00000100373 | -0.079487 | 0.53168 | -0.75555    | 0.77504     | -0.20029  | 0.57937 |
|            | -0.2431         | 0.59604   | 0.53168 | 0.774205569 |             |           |         |
| PDIA3P2    | ENSG00000224677 | -0.07955  | 0.5317  | -0.07955    | 0.5317      | -0.07955  |         |
|            | 0.5317          | -0.07955  | 0.5317  | 0.5317      | 0.774205569 |           |         |
| NFE2L1     | ENSG00000082641 | -0.86855  | 0.80745 | -0.079608   | 0.53173     | -0.86855  |         |
|            | 0.80745         | -0.86855  | 0.80745 | 0.53173     | 0.774205569 |           |         |
| ROM1       | ENSG00000149489 | -0.17655  | 0.57007 | -0.17655    | 0.57007     | -0.4779   | 0.68364 |
|            | -0.079618       | 0.53173   | 0.53173 | 0.774205569 |             |           |         |
| NA         | ENSG00000255331 | -0.079623 | 0.53173 | -1.154      | 0.87576     | -0.77139  | 0.77976 |
|            | -0.691          | 0.75522   | 0.53173 | 0.774205569 |             |           |         |
| RN7SL644P  | ENSG00000264313 | -0.079632 | 0.53173 | -0.079632   | 0.53173     | -0.079632 |         |
|            | 0.53173         | -0.079632 | 0.53173 | 0.53173     | 0.774205569 |           |         |
| RPS19P1    | ENSG00000214612 | -0.079683 | 0.53176 | -0.079683   | 0.53176     | -0.079683 |         |
|            | 0.53176         | -0.079683 | 0.53176 | 0.53176     | 0.774205569 |           |         |
| MAPK6P4    | ENSG00000215179 | -0.72061  | 0.76443 | -0.29956    | 0.61774     | -0.099216 |         |
|            | 0.53952         | -0.079693 | 0.53176 | 0.53176     | 0.774205569 |           |         |
| NA         | ENSG00000250646 | -0.07969  | 0.53176 | -0.07969    | 0.53176     | -0.19349  | 0.57671 |
|            | -0.5424         | 0.70623   | 0.53176 | 0.774205569 |             |           |         |
| IQCJ       | ENSG00000214216 | -0.49816  | 0.69081 | -0.07971    | 0.53177     | -0.26259  | 0.60357 |
|            | -0.088975       | 0.53545   | 0.53177 | 0.774205569 |             |           |         |
| RPL23AP34  | ENSG00000225991 | -0.079716 | 0.53177 | -0.079716   | 0.53177     | -0.079716 |         |
|            | 0.53177         | -0.079716 | 0.53177 | 0.53177     | 0.774205569 |           |         |
| RPL23AP78  | ENSG00000269244 | -1.6348   | 0.94896 | -0.079781   | 0.53179     | -1.6348   |         |
|            | 0.94896         | -1.6348   | 0.94896 | 0.53179     | 0.774205569 |           |         |
| PDZRN4     | ENSG00000165966 | -0.079789 | 0.5318  | -0.61445    | 0.73054     | -0.5917   |         |
|            | 0.72298         | -0.71337  | 0.76219 | 0.5318      | 0.774205569 |           |         |
| DYNLL1P5   | ENSG00000242151 | -0.079825 | 0.53181 | -0.079825   | 0.53181     | -0.079825 |         |
|            | 0.53181         | -0.079825 | 0.53181 | 0.53181     | 0.774205569 |           |         |
| STK17A     | ENSG00000164543 | -0.44286  | 0.67107 | -0.63267    | 0.73653     | -0.70108  |         |
|            | 0.75837         | -0.079842 | 0.53182 | 0.53182     | 0.774205569 |           |         |
| NA         | ENSG00000250130 | -0.079871 | 0.53183 | -0.33929    | 0.6328      | -0.91473  | 0.81983 |
|            | -2.2625         | 0.98817   | 0.53183 | 0.774205569 |             |           |         |
| RN7SKP269  | ENSG00000202415 | -0.07991  | 0.53185 | -0.07991    | 0.53185     | -0.07991  |         |
|            | 0.53185         | -0.07991  | 0.53185 | 0.53185     | 0.774205569 |           |         |
| HEG1       | ENSG00000173706 | -0.080034 | 0.5319  | -1.0849     | 0.86101     | -0.47965  | 0.68426 |
|            | -0.8879         | 0.8127    | 0.5319  | 0.774205569 |             |           |         |
| WRAP53     | ENSG00000141499 | -0.080085 | 0.53192 | -0.32209    | 0.62631     | -0.74308  |         |
|            | 0.77128         | -1.2791   | 0.89957 | 0.53192     | 0.774205569 |           |         |
| NA         | ENSG00000265149 | -0.080125 | 0.53193 | -0.080125   | 0.53193     | -0.080125 | 0.53193 |
|            | -0.080125       | 0.53193   | 0.53193 | 0.774205569 |             |           |         |
| NA         | ENSG00000283576 | -0.080143 | 0.53194 | -0.080143   | 0.53194     | -0.080143 | 0.53194 |
|            | -0.080143       | 0.53194   | 0.53194 | 0.774205569 |             |           |         |
| KCNS2      | ENSG00000156486 | -0.080199 | 0.53196 | -0.080199   | 0.53196     | -0.080199 | 0.53196 |
|            | -0.87753        | 0.8099    | 0.53196 | 0.774205569 |             |           |         |
| ZNF528-AS1 | ENSG00000269834 | -0.080203 | 0.53196 | -0.080203   | 0.53196     | -0.55147  |         |
|            | 0.70934         | -0.080203 | 0.53196 | 0.53196     | 0.774205569 |           |         |
| NA         | ENSG00000206781 | -0.080225 | 0.53197 | -0.080225   | 0.53197     | -0.080225 | 0.53197 |



|           |                 |           |         |             |             |           |         |
|-----------|-----------------|-----------|---------|-------------|-------------|-----------|---------|
|           | -0.080225       | 0.53197   | 0.53197 | 0.774205569 |             |           |         |
| RAD52P1   | ENSG00000237964 | -0.080214 | 0.53197 | -0.77687    | 0.78138     | -0.080214 |         |
|           | 0.53197         | -0.080214 | 0.53197 | 0.53197     | 0.774205569 |           |         |
| PCAT1     | ENSG00000253438 | -0.080279 | 0.53199 | -1.26       | 0.89616     | -0.73014  | 0.76735 |
|           | -0.32282        | 0.62659   | 0.53199 | 0.774205569 |             |           |         |
| INPP5F    | ENSG00000198825 | -0.14977  | 0.55953 | -0.72915    | 0.76704     | -0.10239  |         |
|           | 0.54078         | -0.080289 | 0.532   | 0.532       | 0.774205569 |           |         |
| MTCO1P48  | ENSG00000237055 | -0.080317 | 0.53201 | -0.26504    | 0.60451     | -1.4098   |         |
|           | 0.92071         | -1.4098   | 0.92071 | 0.53201     | 0.774205569 |           |         |
| CSF1R     | ENSG00000182578 | -0.56266  | 0.71317 | -1.0522     | 0.85366     | -0.080358 | 0.53202 |
|           | -0.47998        | 0.68438   | 0.53202 | 0.774205569 |             |           |         |
| S1PR3     | ENSG00000213694 | -0.080375 | 0.53203 | -0.080375   | 0.53203     | -0.080375 | 0.53203 |
|           | -0.080375       | 0.53203   | 0.53203 | 0.774205569 |             |           |         |
| OR7H2P    | ENSG00000251261 | -0.080363 | 0.53203 | -0.080363   | 0.53203     | -0.080363 |         |
|           | 0.53203         | -0.080363 | 0.53203 | 0.53203     | 0.774205569 |           |         |
| OR11G1P   | ENSG00000258468 | -0.080364 | 0.53203 | -0.080364   | 0.53203     | -0.87701  |         |
|           | 0.80976         | -0.080364 | 0.53203 | 0.53203     | 0.774205569 |           |         |
| LINC01333 | ENSG00000249343 | -0.080467 | 0.53207 | -0.080467   | 0.53207     | -0.080467 |         |
|           | 0.53207         | -0.080467 | 0.53207 | 0.53207     | 0.774240656 |           |         |
| NA        | ENSG00000234640 | -0.080729 | 0.53217 | -0.25515    | 0.6007      | -0.25515  | 0.6007  |
|           | -0.25515        | 0.6007    | 0.53217 | 0.774314215 |             |           |         |
| PENK      | ENSG00000181195 | -1.1684   | 0.87868 | -1.2188     | 0.88855     | -0.080749 | 0.53218 |
|           | -1.7228         | 0.95754   | 0.53218 | 0.774314215 |             |           |         |
| NA        | ENSG00000254660 | -1.0851   | 0.86106 | -0.49481    | 0.68963     | -0.080748 | 0.53218 |
|           | -0.080748       | 0.53218   | 0.53218 | 0.774314215 |             |           |         |
| LINC02662 | ENSG00000231326 | -1.1112   | 0.86676 | -0.46615    | 0.67945     | -0.46615  |         |
|           | 0.67945         | -0.080804 | 0.5322  | 0.5322      | 0.774314215 |           |         |
| ZBED5-AS1 | ENSG00000247271 | -0.22071  | 0.58734 | -0.080812   | 0.5322      | -0.25017  |         |
|           | 0.59877         | -0.32273  | 0.62655 | 0.5322      | 0.774314215 |           |         |
| LINC00448 | ENSG00000228669 | -0.60356  | 0.72693 | -0.080869   | 0.53223     | -0.60356  |         |
|           | 0.72693         | -0.60356  | 0.72693 | 0.53223     | 0.774334744 |           |         |
| EEF1A1P34 | ENSG00000233324 | -0.08095  | 0.53226 | -0.16556    | 0.56575     | -0.08095  |         |
|           | 0.53226         | -0.08095  | 0.53226 | 0.53226     | 0.774346701 |           |         |
| LINC02360 | ENSG00000248300 | -0.25051  | 0.5989  | -0.08098    | 0.53227     | -0.26751  |         |
|           | 0.60546         | -1.1438   | 0.87365 | 0.53227     | 0.774346701 |           |         |
| NA        | ENSG00000232710 | -0.08103  | 0.53229 | -0.08103    | 0.53229     | -0.08103  | 0.53229 |
|           | -0.08103        | 0.53229   | 0.53229 | 0.774352679 |             |           |         |
| NA        | ENSG00000241493 | -0.081093 | 0.53232 | -0.081093   | 0.53232     | -0.25364  | 0.60011 |
|           | -0.10972        | 0.54368   | 0.53232 | 0.774373204 |             |           |         |
| LINC00552 | ENSG00000279770 | -1.3242   | 0.90728 | -0.081196   | 0.53236     | -0.081196 |         |
|           | 0.53236         | -1.3482   | 0.9112  | 0.53236     | 0.774408275 |           |         |
| NA        | ENSG00000259364 | -1.7955   | 0.96371 | -1.1821     | 0.88142     | -0.081292 | 0.5324  |
|           | -1.7955         | 0.96371   | 0.5324  | 0.774423606 |             |           |         |
| NA        | ENSG00000237283 | -0.081346 | 0.53242 | -0.081346   | 0.53242     | -0.081346 | 0.53242 |
|           | -0.081346       | 0.53242   | 0.53242 | 0.774423606 |             |           |         |
| NA        | ENSG00000243945 | -0.36986  | 0.64426 | -0.36986    | 0.64426     | -0.36986  | 0.64426 |
|           | -0.081348       | 0.53242   | 0.53242 | 0.774423606 |             |           |         |
| LINC00475 | ENSG00000225511 | -0.40643  | 0.65779 | -0.081412   | 0.53244     | -0.59842  |         |
|           | 0.72522         | -0.28416  | 0.61186 | 0.53244     | 0.774423606 |           |         |
| NA        | ENSG00000248885 | -0.08143  | 0.53245 | -0.08143    | 0.53245     | -0.08143  | 0.53245 |
|           | -0.08143        | 0.53245   | 0.53245 | 0.774423606 |             |           |         |
| NA        | ENSG00000277077 | -0.08148  | 0.53247 | -0.08148    | 0.53247     | -0.08148  | 0.53247 |
|           | -0.08148        | 0.53247   | 0.53247 | 0.774429581 |             |           |         |
| MYO6      | ENSG00000196586 | -0.10531  | 0.54193 | -0.64278    | 0.73982     | -0.081526 | 0.53249 |
|           | -0.35317        | 0.63802   | 0.53249 | 0.774435555 |             |           |         |
| RBBP4P4   | ENSG00000214561 | -0.081589 | 0.53251 | -0.84664    | 0.8014      | -0.72184  |         |
|           | 0.7648          | -0.66458  | 0.74684 | 0.53251     | 0.774438933 |           |         |
| RN7SL837P | ENSG00000240502 | -0.081622 | 0.53253 | -0.081622   | 0.53253     | -0.081622 |         |
|           | 0.53253         | -0.081622 | 0.53253 | 0.53253     | 0.774438933 |           |         |
| NA        | ENSG00000258454 | -0.081667 | 0.53254 | -0.081667   | 0.53254     | -0.081667 | 0.53254 |
|           | -0.081667       | 0.53254   | 0.53254 | 0.774438933 |             |           |         |
| LINC02093 | ENSG00000234634 | -0.85391  | 0.80342 | -0.081717   | 0.53256     | -0.99459  |         |

|           |                 |           |         |             |             |           |         |
|-----------|-----------------|-----------|---------|-------------|-------------|-----------|---------|
|           | 0.84003         | -0.99459  | 0.84003 | 0.53256     | 0.774444906 |           |         |
| NA        | ENSG00000226664 | -0.23916  | 0.59451 | -0.23916    | 0.59451     | -0.081859 | 0.53262 |
|           | -0.13463        | 0.55355   | 0.53262 | 0.774472169 |             |           |         |
| NA        | ENSG00000200553 | -0.081886 | 0.53263 | -0.081886   | 0.53263     | -0.54911  | 0.70853 |
|           | -1.279          | 0.89956   | 0.53263 | 0.774472169 |             |           |         |
| NA        | ENSG00000266682 | -0.081873 | 0.53263 | -1.7719     | 0.9618      | -1.9443   | 0.97407 |
|           | -1.9443         | 0.97407   | 0.53263 | 0.774472169 |             |           |         |
| OR52P1P   | ENSG00000181109 | -0.081953 | 0.53266 | -0.081953   | 0.53266     | -0.09659  |         |
|           | 0.53847         | -0.081953 | 0.53266 | 0.53266     | 0.774472169 |           |         |
| GLRXP2    | ENSG00000258544 | -0.081995 | 0.53267 | -0.081995   | 0.53267     | -0.081995 |         |
|           | 0.53267         | -0.081995 | 0.53267 | 0.53267     | 0.774472169 |           |         |
| MTCYBP24  | ENSG00000236232 | -0.081996 | 0.53268 | -0.081996   | 0.53268     | -0.081996 |         |
|           | 0.53268         | -0.081996 | 0.53268 | 0.53268     | 0.774472169 |           |         |
| NA        | ENSG00000252992 | -0.4324   | 0.66728 | -0.4324     | 0.66728     | -0.48378  | 0.68573 |
|           | -0.082032       | 0.53269   | 0.53269 | 0.774472169 |             |           |         |
| RNU6-362P | ENSG00000252545 | -0.082219 | 0.53276 | -0.082219   | 0.53276     | -0.082219 |         |
|           | 0.53276         | -0.082219 | 0.53276 | 0.53276     | 0.774519925 |           |         |
| NA        | ENSG00000280200 | -0.082327 | 0.53281 | -1.5011     | 0.93333     | -0.082327 | 0.53281 |
|           | -0.082327       | 0.53281   | 0.53281 | 0.774519925 |             |           |         |
| PRAMEF12  | ENSG00000116726 | -0.082351 | 0.53282 | -0.082351   | 0.53282     | -0.082351 |         |
|           | 0.53282         | -0.082351 | 0.53282 | 0.53282     | 0.774519925 |           |         |
| CCDC194   | ENSG00000269720 | -0.082393 | 0.53283 | -0.78945    | 0.78507     | -0.082393 |         |
|           | 0.53283         | -0.81983  | 0.79384 | 0.53283     | 0.774519925 |           |         |
| NA        | ENSG00000268211 | -0.28552  | 0.61238 | -0.082376   | 0.53283     | -0.28552  | 0.61238 |
|           | -0.28552        | 0.61238   | 0.53283 | 0.774519925 |             |           |         |
| SEC14L1P1 | ENSG00000213693 | -0.08241  | 0.53284 | -1.1993     | 0.8848      | -0.08241  |         |
|           | 0.53284         | -0.08241  | 0.53284 | 0.53284     | 0.774519925 |           |         |
| NA        | ENSG00000248229 | -0.082414 | 0.53284 | -0.30114    | 0.61835     | -0.30114  | 0.61835 |
|           | -0.30114        | 0.61835   | 0.53284 | 0.774519925 |             |           |         |
| NA        | ENSG00000256947 | -0.85256  | 0.80305 | -0.18973    | 0.57524     | -1.5768   | 0.94258 |
|           | -0.082434       | 0.53285   | 0.53285 | 0.774519925 |             |           |         |
| NA        | ENSG00000229970 | -0.08252  | 0.53288 | -0.08252    | 0.53288     | -0.08252  | 0.53288 |
|           | -0.08252        | 0.53288   | 0.53288 | 0.774540428 |             |           |         |
| NA        | ENSG00000227364 | -0.63211  | 0.73634 | -0.90542    | 0.81738     | -0.082559 | 0.5329  |
|           | -0.25818        | 0.60187   | 0.5329  | 0.774546395 |             |           |         |
| RNU11-6P  | ENSG00000212429 | -0.082717 | 0.53296 | -0.082717   | 0.53296     | -0.082717 |         |
|           | 0.53296         | -0.082717 | 0.53296 | 0.53296     | 0.774610499 |           |         |
| TAF1A-AS1 | ENSG00000225265 | -0.082797 | 0.53299 | -0.082797   | 0.53299     | -0.082797 |         |
|           | 0.53299         | -0.082797 | 0.53299 | 0.53299     | 0.774628392 |           |         |
| NA        | ENSG00000279021 | -0.2436   | 0.59623 | -0.082855   | 0.53302     | -0.51657  | 0.69727 |
|           | -0.46456        | 0.67888   | 0.53302 | 0.774628392 |             |           |         |
| NA        | ENSG00000261521 | -0.082861 | 0.53302 | -0.082861   | 0.53302     | -0.082861 | 0.53302 |
|           | -0.082861       | 0.53302   | 0.53302 | 0.774628392 |             |           |         |
| HSD17B7   | ENSG00000132196 | -0.097492 | 0.53883 | -0.63363    | 0.73684     | -0.86953  |         |
|           | 0.80772         | -0.082903 | 0.53304 | 0.53304     | 0.774634355 |           |         |
| RN7SKP46  | ENSG00000251751 | -0.08297  | 0.53306 | -0.08297    | 0.53306     | -0.08297  |         |
|           | 0.53306         | -0.08297  | 0.53306 | 0.53306     | 0.774640318 |           |         |
| NA        | ENSG00000267239 | -0.19635  | 0.57783 | -0.77919    | 0.78207     | -0.44562  | 0.67207 |
|           | -0.083114       | 0.53312   | 0.53312 | 0.774672737 |             |           |         |
| NA        | ENSG00000265267 | -0.083108 | 0.53312 | -0.083108   | 0.53312     | -0.083108 | 0.53312 |
|           | -0.083108       | 0.53312   | 0.53312 | 0.774672737 |             |           |         |
| GRSF1     | ENSG00000132463 | -0.63364  | 0.73684 | -0.37059    | 0.64453     | -0.083141 | 0.53313 |
|           | -0.49296        | 0.68898   | 0.53313 | 0.774672737 |             |           |         |
| RPL34P31  | ENSG00000239223 | -0.083229 | 0.53317 | -0.083229   | 0.53317     | -0.083229 |         |
|           | 0.53317         | -0.083229 | 0.53317 | 0.53317     | 0.774707759 |           |         |
| NA        | ENSG00000205794 | -0.53135  | 0.70241 | -0.083371   | 0.53322     | -0.49569  | 0.68994 |
|           | -1.3378         | 0.90951   | 0.53322 | 0.774757308 |             |           |         |
| NA        | ENSG00000227992 | -0.083427 | 0.53324 | -0.18367    | 0.57286     | -0.083427 | 0.53324 |
|           | -0.083427       | 0.53324   | 0.53324 | 0.774763267 |             |           |         |
| CNN2P12   | ENSG00000204718 | -0.083481 | 0.53327 | -0.27353    | 0.60778     | -0.6312   |         |
|           | 0.73604         | -1.8662   | 0.96899 | 0.53327     | 0.774783754 |           |         |
| PLCD1     | ENSG00000187091 | -0.083589 | 0.53331 | -0.083589   | 0.53331     | -0.31587  | 0.62395 |

|           |                 |             |         |             |             |           |         |  |
|-----------|-----------------|-------------|---------|-------------|-------------|-----------|---------|--|
|           | -0.083589       | 0.53331     | 0.53331 | 0.774795668 |             |           |         |  |
| NA        | ENSG00000207130 | -0.58253    | 0.7199  | -0.083583   | 0.53331     | -1.3086   | 0.90467 |  |
|           | -0.55319        | 0.70993     | 0.53331 | 0.774795668 |             |           |         |  |
| NA        | ENSG00000256646 | -0.083775   | 0.53338 | -0.083775   | 0.53338     | -0.083775 | 0.53338 |  |
|           | -0.083775       | 0.53338     | 0.53338 | 0.774874263 |             |           |         |  |
| NA        | ENSG00000257761 | -0.083938   | 0.53345 | -0.083938   | 0.53345     | -0.083938 | 0.53345 |  |
|           | -0.083938       | 0.53345     | 0.53345 | 0.774880932 |             |           |         |  |
| NA        | ENSG00000278153 | -0.083957   | 0.53345 | -0.28174    | 0.61093     | -0.28174  | 0.61093 |  |
|           | -0.28174        | 0.61093     | 0.53345 | 0.774880932 |             |           |         |  |
| NA        | ENSG00000228165 | -0.083968   | 0.53346 | -0.083968   | 0.53346     | -0.083968 | 0.53346 |  |
|           | -0.083968       | 0.53346     | 0.53346 | 0.774880932 |             |           |         |  |
| ZNF572    | ENSG00000180938 | -0.084015   | 0.53348 | -0.084015   | 0.53348     | -0.10815  |         |  |
|           | 0.54306         | -0.084015   | 0.53348 | 0.53348     | 0.774880932 |           |         |  |
| NA        | ENSG00000207032 | -0.084025   | 0.53348 | -0.46422    | 0.67875     | -0.084025 | 0.53348 |  |
|           | -0.084025       | 0.53348     | 0.53348 | 0.774880932 |             |           |         |  |
| NA        | ENSG00000271122 | -0.084027   | 0.53348 | -0.084027   | 0.53348     | -0.084027 | 0.53348 |  |
|           | -0.084027       | 0.53348     | 0.53348 | 0.774880932 |             |           |         |  |
| CD101     | ENSG00000134256 | -0.084103   | 0.53351 | -0.42449    | 0.6644      | -0.47677  | 0.68324 |  |
|           | -0.28957        | 0.61393     | 0.53351 | 0.77490141  |             |           |         |  |
| BLACAT1   | ENSG00000281406 | -0.23472    | 0.59279 | -0.9613     | 0.8318      | -0.0842   |         |  |
|           | 0.53355         | -1.4746     | 0.92984 | 0.53355     | 0.77493641  |           |         |  |
| CMTM4     | ENSG00000183723 | -0.39453    | 0.6534  | -0.33543    | 0.63135     | -0.084313 | 0.5336  |  |
|           | -2.3013         | 0.98931     | 0.5336  | 0.774985932 |             |           |         |  |
| JAML      | ENSG00000160593 | -0.09016    | 0.53592 | -1.696      | 0.95506     | -0.63033  | 0.73576 |  |
|           | -0.084439       | 0.53365     | 0.53365 | 0.775035451 |             |           |         |  |
| NA        | ENSG00000260352 | -0.084527   | 0.53368 | -0.084527   | 0.53368     | -0.084527 | 0.53368 |  |
|           | -0.084527       | 0.53368     | 0.53368 | 0.775036143 |             |           |         |  |
| PSMC1P10  | ENSG00000236348 | -0.084634   | 0.53372 | -0.78035    | 0.78241     | -1.1882   |         |  |
|           | 0.88262         | -1.1882     | 0.88262 | 0.53372     | 0.775036143 |           |         |  |
| RNU6-778P | ENSG00000200139 | -1.7023     | 0.95565 | -0.084655   | 0.53373     | -1.1957   |         |  |
|           | 0.88409         | -0.59719    | 0.72481 | 0.53373     | 0.775036143 |           |         |  |
| IGHV3-36  | ENSG00000253240 | -0.084637   | 0.53373 | -0.084637   | 0.53373     | -0.084637 |         |  |
|           | 0.53373         | -0.084637   | 0.53373 | 0.53373     | 0.775036143 |           |         |  |
| NA        | ENSG00000268105 | -0.084644   | 0.53373 | -0.084644   | 0.53373     | -0.084644 | 0.53373 |  |
|           | -0.084644       | 0.53373     | 0.53373 | 0.775036143 |             |           |         |  |
| PARG      | ENSG00000227345 | -0.084768   | 0.53378 | -0.6888     | 0.75452     | -0.43887  | 0.66962 |  |
|           | -0.14704        | 0.55845     | 0.53378 | 0.775062557 |             |           |         |  |
| NA        | ENSG00000251830 | -0.084763   | 0.53378 | -0.084763   | 0.53378     | -0.084763 | 0.53378 |  |
|           | -0.084763       | 0.53378     | 0.53378 | 0.775062557 |             |           |         |  |
| NA        | ENSG00000229831 | -0.085064   | 0.53389 | -0.56499    | 0.71396     | -0.085064 | 0.53389 |  |
|           | -0.49553        | 0.68989     | 0.53389 | 0.775191271 |             |           |         |  |
| CATSPERE  | ENSG00000179397 | -0.085103   | 0.53391 | -0.39923    | 0.65514     | -0.53838  |         |  |
|           | 0.70484         | -0.12568    | 0.55001 | 0.53391     | 0.775191271 |           |         |  |
| SNORD123  | ENSG00000239112 | -0.085115   | 0.53392 | -0.085115   | 0.53392     | -0.085115 |         |  |
|           | 0.53392         | -0.085115   | 0.53392 | 0.53392     | 0.775191271 |           |         |  |
| NA        | ENSG00000231435 | -1.3965     | 0.91871 | -1.3965     | 0.91871     | -0.085175 | 0.53394 |  |
|           | -1.3965         | 0.91871     | 0.53394 | 0.775191271 |             |           |         |  |
| NA        | ENSG00000268166 | -0.085218   | 0.53396 | -0.085218   | 0.53396     | -0.085218 | 0.53396 |  |
|           | -0.085218       | 0.53396     | 0.53396 | 0.775191271 |             |           |         |  |
| NA        | ENSG00000267293 | -0.085256   | 0.53397 | -0.085256   | 0.53397     | -0.085256 | 0.53397 |  |
|           | -0.085256       | 0.53397     | 0.53397 | 0.775191271 |             |           |         |  |
| VPS26AP1  | ENSG00000240375 | -0.085275   | 0.53398 | -0.085275   | 0.53398     | -0.085275 |         |  |
|           | 0.53398         | -0.085275   | 0.53398 | 0.53398     | 0.775191271 |           |         |  |
| NA        | ENSG00000271793 | -0.085334   | 0.534   | -0.085334   | 0.534       | -0.085334 | 0.534   |  |
|           | 0.534           | 0.775197212 |         |             |             |           |         |  |
| LENG8     | ENSG00000167615 | -0.39709    | 0.65435 | -0.39709    | 0.65435     | -0.085471 | 0.53406 |  |
|           | -0.39709        | 0.65435     | 0.53406 | 0.775252639 |             |           |         |  |
| ZNF316    | ENSG00000205903 | -2.1437     | 0.98397 | -1.4952     | 0.93257     | -0.085515 |         |  |
|           | 0.53407         | -1.043      | 0.85152 | 0.53407     | 0.775252639 |           |         |  |
| GPC6-AS2  | ENSG00000224394 | -0.29581    | 0.61631 | -0.085582   | 0.5341      | -0.085582 |         |  |
|           | 0.5341          | -0.085582   | 0.5341  | 0.5341      | 0.775273093 |           |         |  |
| SNORD23   | ENSG00000221803 | -0.085699   | 0.53415 | -0.085699   | 0.53415     | -0.085699 |         |  |

|              |                 |           |         |             |             |           |         |
|--------------|-----------------|-----------|---------|-------------|-------------|-----------|---------|
|              | 0.53415         | -0.085699 | 0.53415 | 0.53415     | 0.775322575 |           |         |
| NA           | ENSG00000256678 | -0.085748 | 0.53417 | -0.085748   | 0.53417     | -0.085748 | 0.53417 |
|              | -0.085748       | 0.53417   | 0.53417 | 0.775328511 |             |           |         |
| NA           | ENSG00000260011 | -0.085982 | 0.53426 | -0.085982   | 0.53426     | -0.085982 | 0.53426 |
|              | -0.085982       | 0.53426   | 0.53426 | 0.775436046 |             |           |         |
| NA           | ENSG00000225846 | -0.086048 | 0.53429 | -0.086048   | 0.53429     | -0.086048 | 0.53429 |
|              | -0.086048       | 0.53429   | 0.53429 | 0.775439328 |             |           |         |
| ATP6V1B1-AS1 | ENSG00000239322 | -0.086086 | 0.5343  | -0.086086   | 0.5343      | -0.086086 | 0.5343  |
|              | 0.5343          | -0.086086 | 0.5343  | 0.5343      | 0.775439328 |           |         |
| RN7SL452P    | ENSG00000243103 | -0.086106 | 0.53431 | -0.086106   | 0.53431     | -0.086106 | 0.53431 |
|              | 0.53431         | -0.086106 | 0.53431 | 0.53431     | 0.775439328 |           |         |
| ASIC3        | ENSG00000213199 | -0.08622  | 0.53435 | -0.08622    | 0.53435     | -0.08622  | 0.53435 |
|              | -0.08622        | 0.53435   | 0.53435 | 0.77544059  |             |           |         |
| NA           | ENSG00000249531 | -0.086331 | 0.5344  | -0.086331   | 0.5344      | -0.086331 | 0.5344  |
|              | -0.086331       | 0.5344    | 0.5344  | 0.77544059  |             |           |         |
| CSNK2A2      | ENSG00000070770 | -1.5351   | 0.93762 | -1.5351     | 0.93762     | -1.5351   | 0.93762 |
|              | 0.93762         | -0.086357 | 0.53441 | 0.53441     | 0.77544059  |           |         |
| NA           | ENSG00000213361 | -0.7429   | 0.77123 | -0.23663    | 0.59353     | -0.7429   | 0.77123 |
|              | -0.086359       | 0.53441   | 0.53441 | 0.77544059  |             |           |         |
| NA           | ENSG00000272562 | -0.086371 | 0.53441 | -0.086371   | 0.53441     | -0.086371 | 0.53441 |
|              | -0.086371       | 0.53441   | 0.53441 | 0.77544059  |             |           |         |
| ZDHHC3       | ENSG00000163812 | -0.62254  | 0.73321 | -0.18289    | 0.57256     | -0.62254  | 0.73321 |
|              | 0.8061          | -0.086381 | 0.53442 | 0.53442     | 0.77544059  |           |         |
| RNU6-1186P   | ENSG00000222361 | -0.086435 | 0.53444 | -0.086435   | 0.53444     | -0.086435 | 0.53444 |
|              | 0.53444         | -0.086435 | 0.53444 | 0.53444     | 0.77544059  |           |         |
| NA           | ENSG00000226380 | -1.0573   | 0.85482 | -0.22784    | 0.59011     | -0.086452 | 0.53445 |
|              | -1.1463         | 0.87417   | 0.53445 | 0.77544059  |             |           |         |
| SLC22A25     | ENSG00000196600 | -0.69579  | 0.75672 | -0.69247    | 0.75568     | -1.4997   | 0.75672 |
|              | 0.93316         | -0.086497 | 0.53446 | 0.53446     | 0.77544059  |           |         |
| NA           | ENSG00000253614 | -0.47693  | 0.68329 | -0.25524    | 0.60073     | -0.08652  | 0.53447 |
|              | -0.48187        | 0.68505   | 0.53447 | 0.77544059  |             |           |         |
| NA           | ENSG00000259805 | -1.0298   | 0.84845 | -0.08673    | 0.53456     | -1.0298   | 0.84845 |
|              | -1.0298         | 0.84845   | 0.53456 | 0.775506416 |             |           |         |
| DGCR6        | ENSG00000183628 | -0.086803 | 0.53459 | -0.57688    | 0.71799     | -0.21081  | 0.58348 |
|              | -0.21081        | 0.58348   | 0.53459 | 0.775506416 |             |           |         |
| NA           | ENSG00000279953 | -0.086806 | 0.53459 | -0.086806   | 0.53459     | -0.086806 | 0.53459 |
|              | -0.086806       | 0.53459   | 0.53459 | 0.775506416 |             |           |         |
| MCIDAS       | ENSG00000234602 | -0.94968  | 0.82886 | -0.22552    | 0.58921     | -0.63389  | 0.82886 |
|              | 0.73692         | -0.08684  | 0.5346  | 0.5346      | 0.775506416 |           |         |
| NA           | ENSG00000234296 | -0.45764  | 0.6764  | -0.086893   | 0.53462     | -0.45764  | 0.6764  |
|              | -0.45764        | 0.6764    | 0.53462 | 0.775506416 |             |           |         |
| KLRC3        | ENSG00000205810 | -1.492    | 0.93215 | -0.7127     | 0.76198     | -0.086909 | 0.53463 |
|              | -0.20482        | 0.58114   | 0.53463 | 0.775506416 |             |           |         |
| NA           | ENSG00000258021 | -0.58455  | 0.72058 | -0.58455    | 0.72058     | -0.087041 | 0.53468 |
|              | -0.58455        | 0.72058   | 0.53468 | 0.775506416 |             |           |         |
| PSRC1        | ENSG00000134222 | -0.71915  | 0.76398 | -0.087056   | 0.53469     | -0.23141  | 0.5915  |
|              | -0.97558        | 0.83536   | 0.53469 | 0.775506416 |             |           |         |
| NA           | ENSG00000253047 | -0.28735  | 0.61308 | -0.38197    | 0.64876     | -0.087068 | 0.53469 |
|              | -0.087068       | 0.53469   | 0.53469 | 0.775506416 |             |           |         |
| PSMB8-AS1    | ENSG00000204261 | -0.087156 | 0.53473 | -0.087156   | 0.53473     | -0.087156 | 0.53473 |
|              | 0.53473         | -0.087156 | 0.53473 | 0.53473     | 0.775506416 |           |         |
| NA           | ENSG00000224789 | -0.087186 | 0.53474 | -0.087186   | 0.53474     | -0.087186 | 0.53474 |
|              | -0.087186       | 0.53474   | 0.53474 | 0.775506416 |             |           |         |
| NA           | ENSG00000274492 | -0.087203 | 0.53474 | -0.087203   | 0.53474     | -0.087203 | 0.53474 |
|              | -0.087203       | 0.53474   | 0.53474 | 0.775506416 |             |           |         |
| DSG1-AS1     | ENSG00000266729 | -1.3298   | 0.90821 | -0.41298    | 0.66019     | -1.3298   | 0.90821 |
|              | 0.90821         | -0.087252 | 0.53476 | 0.53476     | 0.775506416 |           |         |
| CASP1        | ENSG00000137752 | -0.64158  | 0.73943 | -0.11041    | 0.54396     | -0.087256 | 0.53477 |
|              | -0.11041        | 0.54396   | 0.53477 | 0.775506416 |             |           |         |
| NA           | ENSG00000250453 | -0.60536  | 0.72753 | -0.087274   | 0.53477     | -0.60536  | 0.72753 |
|              | -0.84001        | 0.79955   | 0.53477 | 0.775506416 |             |           |         |
| NA           | ENSG00000267125 | -0.087267 | 0.53477 | -0.087267   | 0.53477     | -0.087267 | 0.53477 |

|           |                 |           |             |           |             |             |           |           |
|-----------|-----------------|-----------|-------------|-----------|-------------|-------------|-----------|-----------|
|           |                 | -0.087267 | 0.53477     | 0.53477   | 0.775506416 |             |           |           |
| NA        | ENSG00000275515 | -0.087384 | 0.53482     | 0.53482   | -0.087384   | 0.53482     | -0.087384 | 0.53482   |
|           |                 | -0.087384 | 0.53482     | 0.53482   | 0.775544613 |             |           |           |
| ITIH4-AS1 | ENSG00000239799 | -0.08749  | 0.53486     | 0.53486   | -0.08749    | 0.53486     | -0.08749  |           |
|           |                 | 0.53486   | -0.08749    | 0.53486   | 0.53486     | 0.775544613 |           |           |
| NA        | ENSG00000270495 | -0.087486 | 0.53486     | 0.53486   | -1.0712     | 0.85795     | -0.60536  | 0.72753   |
|           |                 | -0.60536  | 0.72753     | 0.53486   | 0.775544613 |             |           |           |
| NA        | ENSG00000279357 | -0.4175   | 0.66185     | 0.66185   | -0.087482   | 0.53486     | -0.48969  | 0.68782   |
|           |                 | -1.3753   | 0.91548     | 0.53486   | 0.775544613 |             |           |           |
| HSPE1P12  | ENSG00000235930 | -0.087644 | 0.53492     | 0.53492   | -0.087644   | 0.53492     | -0.62961  |           |
|           |                 | 0.73553   | -0.83924    | 0.79933   | 0.53492     | 0.775608534 |           |           |
| IL11      | ENSG00000095752 | -0.087852 | 0.535       | -0.087852 | 0.535       | -0.087852   | 0.535     | -0.087852 |
|           |                 | 0.535     | 0.775696124 |           |             |             |           |           |
| CACYBPP1  | ENSG00000225928 | -0.087917 | 0.53503     | 0.53503   | -0.087917   | 0.53503     | -0.087917 |           |
|           |                 | 0.53503   | -0.52651    | 0.70073   | 0.53503     | 0.775696124 |           |           |
| NA        | ENSG00000229066 | -1.3144   | 0.90564     | 0.90564   | -0.73691    | 0.76941     | -0.87025  | 0.80792   |
|           |                 | -0.08792  | 0.53503     | 0.53503   | 0.775696124 |             |           |           |
| MAPRE1P1  | ENSG00000253915 | -0.088001 | 0.53506     | 0.53506   | -0.088001   | 0.53506     | -0.088001 |           |
|           |                 | 0.53506   | -0.088001   | 0.53506   | 0.53506     | 0.775696124 |           |           |
| NA        | ENSG00000270492 | -0.088015 | 0.53507     | 0.53507   | -0.088005   | 0.53506     | -1.1235   | 0.86939   |
|           |                 | -0.89895  | 0.81566     | 0.53506   | 0.775696124 |             |           |           |
| RPL21P108 | ENSG00000232701 | -0.088034 | 0.53508     | 0.53508   | -0.088034   | 0.53508     | -0.088034 |           |
|           |                 | 0.53508   | -0.088034   | 0.53508   | 0.53508     | 0.775702041 |           |           |
| DOCK2     | ENSG00000134516 | -0.9309   | 0.82405     | 0.82405   | -1.2434     | 0.89314     | -1.371    | 0.91482   |
|           |                 | -0.088192 | 0.53514     | 0.53514   | 0.775707658 |             |           |           |
| RNF41     | ENSG00000181852 | -0.9913   | 0.83923     | 0.83923   | -0.96801    | 0.83348     | -0.088187 | 0.53514   |
|           |                 | -2.046    | 0.97962     | 0.53514   | 0.775707658 |             |           |           |
| SLC6A20   | ENSG00000163817 | -0.088243 | 0.53516     | 0.53516   | -0.62256    | 0.73321     | -0.29297  |           |
|           |                 | 0.61523   | -0.093434   | 0.53722   | 0.53516     | 0.775707658 |           |           |
| CCRL2     | ENSG00000121797 | -0.35263  | 0.63782     | 0.63782   | -0.35263    | 0.63782     | -0.088349 | 0.5352    |
|           |                 | -1.5939   | 0.94452     | 0.5352    | 0.775707658 |             |           |           |
| RPL4P7    | ENSG00000224442 | -0.088341 | 0.5352      | 0.5352    | -0.088341   | 0.5352      | -0.088341 |           |
|           |                 | 0.5352    | -0.088341   | 0.5352    | 0.5352      | 0.775707658 |           |           |
| NA        | ENSG00000253760 | -0.088344 | 0.5352      | 0.5352    | -0.088344   | 0.5352      | -0.10379  | 0.54133   |
|           |                 | -0.088344 | 0.5352      | 0.5352    | 0.775707658 |             |           |           |
| NA        | ENSG00000237186 | -0.088454 | 0.53524     | 0.53524   | -0.088454   | 0.53524     | -0.088454 | 0.53524   |
|           |                 | -0.088454 | 0.53524     | 0.53524   | 0.775707658 |             |           |           |
| NA        | ENSG00000269700 | -0.088528 | 0.53527     | 0.53527   | -0.088528   | 0.53527     | -0.088528 | 0.53527   |
|           |                 | -0.088528 | 0.53527     | 0.53527   | 0.775707658 |             |           |           |
| NA        | ENSG00000227854 | -0.088548 | 0.53528     | 0.53528   | -0.088548   | 0.53528     | -0.088548 | 0.53528   |
|           |                 | -0.088548 | 0.53528     | 0.53528   | 0.775707658 |             |           |           |
| LINC02287 | ENSG00000258499 | -0.73418  | 0.76858     | 0.76858   | -0.088628   | 0.53531     | -0.72957  |           |
|           |                 | 0.76717   | -0.38329    | 0.64925   | 0.53531     | 0.775707658 |           |           |
| C9orf50   | ENSG00000179058 | -0.42572  | 0.66484     | 0.66484   | -0.088657   | 0.53532     | -0.088657 |           |
|           |                 | 0.53532   | -0.088657   | 0.53532   | 0.53532     | 0.775707658 |           |           |
| WNT10B    | ENSG00000169884 | -0.76365  | 0.77746     | 0.77746   | -0.088713   | 0.53534     | -0.088713 |           |
|           |                 | 0.53534   | -0.088713   | 0.53534   | 0.53534     | 0.775707658 |           |           |
| ZMAT3     | ENSG00000172667 | -1.0869   | 0.86145     | 0.86145   | -1.2259     | 0.88988     | -0.55097  | 0.70917   |
|           |                 | -0.088713 | 0.53535     | 0.53535   | 0.775707658 |             |           |           |
| NA        | ENSG00000250623 | -0.69188  | 0.75549     | 0.75549   | -0.69188    | 0.75549     | -0.69188  | 0.75549   |
|           |                 | -0.088721 | 0.53535     | 0.53535   | 0.775707658 |             |           |           |
| RPS6P14   | ENSG00000225482 | -0.088748 | 0.53536     | 0.53536   | -0.34479    | 0.63487     | -0.34479  |           |
|           |                 | 0.63487   | -0.34479    | 0.63487   | 0.53536     | 0.775707658 |           |           |
| PGAM1P10  | ENSG00000220515 | -0.088787 | 0.53537     | 0.53537   | -0.85849    | 0.80469     | -0.088787 |           |
|           |                 | 0.53537   | -0.088787   | 0.53537   | 0.53537     | 0.775707658 |           |           |
| BRD7P1    | ENSG00000259043 | -0.088799 | 0.53538     | 0.53538   | -0.088799   | 0.53538     | -0.27444  |           |
|           |                 | 0.60813   | -0.33219    | 0.63013   | 0.53538     | 0.775707658 |           |           |
| NA        | ENSG00000267244 | -0.088807 | 0.53538     | 0.53538   | -0.088807   | 0.53538     | -0.088807 | 0.53538   |
|           |                 | -0.088807 | 0.53538     | 0.53538   | 0.775707658 |             |           |           |
| NA        | ENSG00000257191 | -0.8059   | 0.78985     | 0.78985   | -0.088835   | 0.53539     | -0.13375  | 0.5532    |
|           |                 | -0.13375  | 0.5532      | 0.53539   | 0.775707658 |             |           |           |
| SCARNA9   | ENSG00000254911 | -0.088876 | 0.53541     | 0.53541   | -0.088876   | 0.53541     | -0.088876 |           |

|           |                 |           |             |             |             |           |         |
|-----------|-----------------|-----------|-------------|-------------|-------------|-----------|---------|
|           | 0.53541         | -0.088876 | 0.53541     | 0.53541     | 0.775707658 |           |         |
| MCM5      | ENSG00000100297 | -0.088891 | 0.53542     | -0.093459   | 0.53723     | -1.2125   | 0.88733 |
|           | -2.1969         | 0.98599   | 0.53542     | 0.775707658 |             |           |         |
| FBXL6     | ENSG00000182325 | -0.94289  | 0.82713     | -0.088948   | 0.53544     | -0.088948 | 0.53544 |
|           | -0.088948       | 0.53544   | 0.53544     | 0.775707658 |             |           |         |
| CD81      | ENSG00000110651 | -0.088971 | 0.53545     | -0.65967    | 0.74527     | -1.403    | 0.91969 |
|           | -0.92707        | 0.82305   | 0.53545     | 0.775707658 |             |           |         |
| DNAI1     | ENSG00000122735 | -0.25014  | 0.59876     | -0.089096   | 0.5355      | -0.47757  | 0.68352 |
|           | -0.11415        | 0.54544   | 0.5355      | 0.775757031 |             |           |         |
| NA        | ENSG00000199357 | -0.089247 | 0.53556     | -0.089247   | 0.53556     | -0.089247 | 0.53556 |
|           | -0.089247       | 0.53556   | 0.53556     | 0.775778588 |             |           |         |
| TMEM244   | ENSG00000203756 | -0.089259 | 0.53556     | -0.089259   | 0.53556     | -0.089259 |         |
|           | 0.53556         | -0.089259 | 0.53556     | 0.53556     | 0.775778588 |           |         |
| TIE1      | ENSG00000066056 | -0.45094  | 0.67398     | -0.42352    | 0.66404     | -1.0483   | 0.85274 |
|           | -0.089288       | 0.53557   | 0.53557     | 0.775778588 |             |           |         |
| OTOG      | ENSG00000188162 | -1.7823   | 0.96265     | -0.089386   | 0.53561     | -0.9543   | 0.83003 |
|           | -1.1887         | 0.88272   | 0.53561     | 0.775778588 |             |           |         |
| CSN1S1    | ENSG00000126545 | -0.71658  | 0.76318     | -0.089404   | 0.53562     | -1.102    |         |
|           | 0.86477         | -0.089404 | 0.53562     | 0.53562     | 0.775778588 |           |         |
| SGO2      | ENSG00000163535 | -0.089457 | 0.53564     | -0.40602    | 0.65764     | -0.089457 | 0.53564 |
|           | -0.089457       | 0.53564   | 0.53564     | 0.775778588 |             |           |         |
| SLC4A8    | ENSG00000050438 | -1.4169   | 0.92174     | -0.089469   | 0.53565     | -1.1159   |         |
|           | 0.86777         | -0.97844  | 0.83607     | 0.53565     | 0.775778588 |           |         |
| PRSS50    | ENSG00000283706 | -0.089512 | 0.53566     | -0.089512   | 0.53566     | -0.089512 |         |
|           | 0.53566         | -0.089512 | 0.53566     | 0.53566     | 0.775778588 |           |         |
| GAPDHP45  | ENSG00000228312 | -0.08959  | 0.53569     | -0.08959    | 0.53569     | -0.08959  |         |
|           | 0.53569         | -0.08959  | 0.53569     | 0.53569     | 0.775778588 |           |         |
| LINC02209 | ENSG00000253279 | -0.55524  | 0.71063     | -0.89936    | 0.81577     | -1.6391   |         |
|           | 0.9494          | -0.089578 | 0.53569     | 0.53569     | 0.775778588 |           |         |
| NA        | ENSG00000276519 | -0.13483  | 0.55362     | -0.6363     | 0.73771     | -0.63621  | 0.73768 |
|           | -0.089575       | 0.53569   | 0.53569     | 0.775778588 |             |           |         |
| TMEM63C   | ENSG00000165548 | -0.089694 | 0.53573     | -0.85545    | 0.80385     | -0.78938  |         |
|           | 0.78506         | -0.14324  | 0.55695     | 0.53573     | 0.775804885 |           |         |
| TLR10     | ENSG00000174123 | -0.61656  | 0.73124     | -0.089711   | 0.53574     | -0.73107  | 0.76763 |
|           | -0.507          | 0.69392   | 0.53574     | 0.775804885 |             |           |         |
| NA        | ENSG00000281608 | -0.089757 | 0.53576     | -0.12066    | 0.54802     | -0.12066  | 0.54802 |
|           | -0.12066        | 0.54802   | 0.53576     | 0.775810793 |             |           |         |
| FHOD3     | ENSG00000134775 | -0.52455  | 0.70005     | -0.33838    | 0.63246     | -0.089866 | 0.5358  |
|           | -0.70684        | 0.76017   | 0.5358      | 0.775817274 |             |           |         |
| NA        | ENSG00000226694 | -0.45816  | 0.67658     | -1.2284     | 0.89035     | -0.089916 | 0.53582 |
|           | -0.45816        | 0.67658   | 0.53582     | 0.775817274 |             |           |         |
| NA        | ENSG00000266757 | -1.5589   | 0.94049     | -0.089944   | 0.53583     | -1.5589   | 0.94049 |
|           | -1.5589         | 0.94049   | 0.53583     | 0.775817274 |             |           |         |
| RNU6-212P | ENSG00000199512 | -0.61877  | 0.73196     | -0.58061    | 0.71925     | -0.090003 |         |
|           | 0.53586         | -0.61877  | 0.73196     | 0.53586     | 0.775817274 |           |         |
| NA        | ENSG00000228095 | -0.6183   | 0.73181     | -0.089998   | 0.53586     | -0.4169   | 0.66162 |
|           | -0.4169         | 0.66162   | 0.53586     | 0.775817274 |             |           |         |
| NA        | ENSG00000235127 | -0.090008 | 0.53586     | -0.29548    | 0.61619     | -0.090008 | 0.53586 |
|           | -0.090008       | 0.53586   | 0.53586     | 0.775817274 |             |           |         |
| PACRGL    | ENSG00000163138 | -0.771    | 0.77965     | -0.090195   | 0.53593     | -0.33039  |         |
|           | 0.62945         | -0.65483  | 0.74371     | 0.53593     | 0.775881654 |           |         |
| SS18L2P2  | ENSG00000266201 | -2.1512   | 0.98427     | -0.090229   | 0.53595     | -2.1512   |         |
|           | 0.98427         | -2.1512   | 0.98427     | 0.53595     | 0.775881654 |           |         |
| RNASEH2A  | ENSG00000104889 | -0.090291 | 0.53597     | -0.090291   | 0.53597     | -0.090291 |         |
|           | 0.53597         | -0.96327  | 0.83229     | 0.53597     | 0.775881654 |           |         |
| APMAP     | ENSG00000101474 | -0.090365 | 0.536       | -0.73837    | 0.76985     | -1.0672   | 0.85705 |
|           | -0.91864        | 0.82086   | 0.536       | 0.775881654 |             |           |         |
| SPATA17   | ENSG00000162814 | -0.52332  | 0.69962     | -1.1006     | 0.86446     | -0.090369 | 0.536   |
|           | -0.090369       | 0.536     | 0.536       | 0.775881654 |             |           |         |
| FANCD2OS  | ENSG00000163705 | -0.090349 | 0.536       | -0.090349   | 0.536       | -0.090349 | 0.536   |
|           | 0.536           | 0.536     | 0.775881654 |             |             |           |         |
| NA        | ENSG00000250131 | -0.090403 | 0.53602     | -0.42056    | 0.66296     | -0.090403 | 0.53602 |

|             |                 |           |         |             |             |           |         |  |
|-------------|-----------------|-----------|---------|-------------|-------------|-----------|---------|--|
|             | -0.090403       | 0.53602   | 0.53602 | 0.775887557 |             |           |         |  |
| P2RX7       | ENSG00000089041 | -0.68681  | 0.7539  | -1.0124     | 0.84432     | -0.090477 | 0.53605 |  |
|             | -0.54707        | 0.70784   | 0.53605 | 0.775890789 |             |           |         |  |
| NA          | ENSG00000248977 | -0.09052  | 0.53606 | -0.26989    | 0.60638     | -0.26989  | 0.60638 |  |
|             | -0.26989        | 0.60638   | 0.53606 | 0.775890789 |             |           |         |  |
| NA          | ENSG00000271392 | -0.090537 | 0.53607 | -0.090537   | 0.53607     | -0.090537 | 0.53607 |  |
|             | -0.090537       | 0.53607   | 0.53607 | 0.775890789 |             |           |         |  |
| NA          | ENSG00000239985 | -0.090673 | 0.53612 | -0.090673   | 0.53612     | -0.090673 | 0.53612 |  |
|             | -0.090673       | 0.53612   | 0.53612 | 0.775894022 |             |           |         |  |
| SDCBPP2     | ENSG00000247570 | -0.83945  | 0.79939 | -0.83945    | 0.79939     | -0.090665 |         |  |
|             | 0.53612         | -0.71932  | 0.76403 | 0.53612     | 0.775894022 |           |         |  |
| RNA5SP342   | ENSG00000252902 | -0.090674 | 0.53612 | -1.3014     | 0.90343     | -0.16833  |         |  |
|             | 0.56684         | -0.090674 | 0.53612 | 0.53612     | 0.775894022 |           |         |  |
| IQGAP1      | ENSG00000140575 | -0.52015  | 0.69852 | -0.19541    | 0.57746     | -0.090715 |         |  |
|             | 0.53614         | -0.23601  | 0.59329 | 0.53614     | 0.775899923 |           |         |  |
| GTF3C3      | ENSG00000119041 | -0.090767 | 0.53616 | -0.46044    | 0.6774      | -1.5021   |         |  |
|             | 0.93347         | -0.72592  | 0.76606 | 0.53616     | 0.775905824 |           |         |  |
| NA          | ENSG00000216523 | -0.65466  | 0.74366 | -0.61388    | 0.73035     | -0.27104  | 0.60682 |  |
|             | -0.090946       | 0.53623   | 0.53623 | 0.775975507 |             |           |         |  |
| NA          | ENSG00000213252 | -0.86121  | 0.80544 | -0.86121    | 0.80544     | -0.090974 | 0.53624 |  |
|             | -0.86121        | 0.80544   | 0.53624 | 0.775975507 |             |           |         |  |
| PRR23B      | ENSG00000184814 | -0.091093 | 0.53629 | -0.091093   | 0.53629     | -0.68862  |         |  |
|             | 0.75447         | -1.101    | 0.86456 | 0.53629     | 0.77600663  |           |         |  |
| OR2AJ1      | ENSG00000177275 | -0.091151 | 0.53631 | -0.091151   | 0.53631     | -0.091151 |         |  |
|             | 0.53631         | -0.091151 | 0.53631 | 0.53631     | 0.77600663  |           |         |  |
| RPS27AP5    | ENSG00000231767 | -0.091258 | 0.53636 | -0.091258   | 0.53636     | -0.091258 |         |  |
|             | 0.53636         | -0.091258 | 0.53636 | 0.53636     | 0.77600663  |           |         |  |
| NA          | ENSG00000269944 | -0.091286 | 0.53637 | -0.091286   | 0.53637     | -0.091286 | 0.53637 |  |
|             | -0.091286       | 0.53637   | 0.53637 | 0.77600663  |             |           |         |  |
| SNORD116-15 | ENSG00000207174 | -0.091368 | 0.5364  | -0.091368   | 0.5364      | -0.091368 |         |  |
|             | 0.5364          | -0.091368 | 0.5364  | 0.5364      | 0.77600663  |           |         |  |
| NA          | ENSG00000251144 | -0.386    | 0.65025 | -0.09136    | 0.5364      | -0.44851  | 0.67311 |  |
|             | -0.09136        | 0.5364    | 0.5364  | 0.77600663  |             |           |         |  |
| RNA5SP186   | ENSG00000252833 | -0.091368 | 0.5364  | -0.091368   | 0.5364      | -0.091368 |         |  |
|             | 0.5364          | -0.091368 | 0.5364  | 0.5364      | 0.77600663  |           |         |  |
| FAM153B     | ENSG00000182230 | -1.3341   | 0.90892 | -1.071      | 0.85792     | -1.8783   |         |  |
|             | 0.96983         | -0.091405 | 0.53641 | 0.53641     | 0.77600663  |           |         |  |
| KCNA4       | ENSG00000182255 | -0.091512 | 0.53646 | -0.091512   | 0.53646     | -0.091512 | 0.53646 |  |
|             | -0.091512       | 0.53646   | 0.53646 | 0.77600663  |             |           |         |  |
| NA          | ENSG00000233494 | -0.60458  | 0.72727 | -1.8478     | 0.96768     | -0.32628  | 0.62789 |  |
|             | -0.091511       | 0.53646   | 0.53646 | 0.77600663  |             |           |         |  |
| MAPRE2      | ENSG00000166974 | -1.3616   | 0.91334 | -0.091632   | 0.5365      | -0.42717  |         |  |
|             | 0.66537         | -0.58815  | 0.72178 | 0.5365      | 0.77600663  |           |         |  |
| NKX1-1      | ENSG00000235608 | -0.091619 | 0.5365  | -0.091619   | 0.5365      | -0.091619 |         |  |
|             | 0.5365          | -0.091619 | 0.5365  | 0.5365      | 0.77600663  |           |         |  |
| OR9A1P      | ENSG00000237621 | -0.091625 | 0.5365  | -0.091625   | 0.5365      | -1.1136   |         |  |
|             | 0.86727         | -0.091625 | 0.5365  | 0.5365      | 0.77600663  |           |         |  |
| LINC01035   | ENSG00000226486 | -0.91187  | 0.81908 | -0.09165    | 0.53651     | -0.09165  |         |  |
|             | 0.53651         | -0.09165  | 0.53651 | 0.53651     | 0.77600663  |           |         |  |
| NA          | ENSG00000251211 | -0.096942 | 0.53861 | -0.091689   | 0.53653     | -0.091689 | 0.53653 |  |
|             | -0.091689       | 0.53653   | 0.53653 | 0.77600663  |             |           |         |  |
| HSPE1P2     | ENSG00000258645 | -0.091691 | 0.53653 | -0.091691   | 0.53653     | -0.091691 |         |  |
|             | 0.53653         | -0.091691 | 0.53653 | 0.53653     | 0.77600663  |           |         |  |
| SNORA54     | ENSG00000207008 | -0.091756 | 0.53655 | -0.091756   | 0.53655     | -0.091756 |         |  |
|             | 0.53655         | -0.091756 | 0.53655 | 0.53655     | 0.77600663  |           |         |  |
| RPSAP43     | ENSG00000216471 | -0.091829 | 0.53658 | -0.091829   | 0.53658     | -0.091829 |         |  |
|             | 0.53658         | -0.091829 | 0.53658 | 0.53658     | 0.77600663  |           |         |  |
| NA          | ENSG00000241449 | -0.56179  | 0.71287 | -0.091824   | 0.53658     | -0.2534   | 0.60002 |  |
|             | -1.2764         | 0.89909   | 0.53658 | 0.77600663  |             |           |         |  |
| NA          | ENSG00000274038 | -0.091829 | 0.53658 | -0.091829   | 0.53658     | -0.091829 | 0.53658 |  |
|             | -0.091829       | 0.53658   | 0.53658 | 0.77600663  |             |           |         |  |
| RRNAD1      | ENSG00000143303 | -1.0283   | 0.84808 | -0.091877   | 0.5366      | -1.0283   |         |  |

|             |                 |           |         |             |             |           |         |
|-------------|-----------------|-----------|---------|-------------|-------------|-----------|---------|
|             | 0.84808         | -0.17682  | 0.57018 | 0.5366      | 0.776012524 |           |         |
| SMNDC1      | ENSG00000119953 | -0.21177  | 0.58385 | -0.43637    | 0.66872     | -0.092024 |         |
|             | 0.53666         | -0.17197  | 0.56827 | 0.53666     | 0.776013068 |           |         |
| NA          | ENSG00000272524 | -0.092017 | 0.53666 | -0.58124    | 0.71946     | -0.72375  | 0.76539 |
|             | -0.72375        | 0.76539   | 0.53666 | 0.776013068 |             |           |         |
| NBR1        | ENSG00000188554 | -0.68898  | 0.75458 | -0.74919    | 0.77313     | -0.092041 | 0.53667 |
|             | -1.312          | 0.90524   | 0.53667 | 0.776013068 |             |           |         |
| LINCMD1     | ENSG00000225613 | -0.092056 | 0.53667 | -1.2695     | 0.89786     | -0.092056 |         |
|             | 0.53667         | -0.092056 | 0.53667 | 0.53667     | 0.776013068 |           |         |
| GNG5        | ENSG00000174021 | -0.092085 | 0.53668 | -0.092085   | 0.53668     | -0.092085 | 0.53668 |
|             | -0.092085       | 0.53668   | 0.53668 | 0.776013068 |             |           |         |
| PDE6B-AS1   | ENSG00000242686 | -0.13219  | 0.55258 | -0.092186   | 0.53672     | -0.40573  |         |
|             | 0.65753         | -0.40573  | 0.65753 | 0.53672     | 0.776047878 |           |         |
| NA          | ENSG00000261360 | -0.092301 | 0.53677 | -0.91238    | 0.81921     | -0.092301 | 0.53677 |
|             | -0.092301       | 0.53677   | 0.53677 | 0.776074119 |             |           |         |
| LINC02127   | ENSG00000261637 | -1.8993   | 0.97124 | -0.092298   | 0.53677     | -1.6502   |         |
|             | 0.95055         | -1.1725   | 0.8795  | 0.53677     | 0.776074119 |           |         |
| NA          | ENSG00000279344 | -0.092425 | 0.53682 | -0.092425   | 0.53682     | -0.092425 | 0.53682 |
|             | -0.092425       | 0.53682   | 0.53682 | 0.776083221 |             |           |         |
| NA          | ENSG00000280347 | -0.092416 | 0.53682 | -0.092416   | 0.53682     | -0.092416 | 0.53682 |
|             | -0.092416       | 0.53682   | 0.53682 | 0.776083221 |             |           |         |
| COX7A1      | ENSG00000161281 | -0.092476 | 0.53684 | -0.092476   | 0.53684     | -0.092476 |         |
|             | 0.53684         | -0.092476 | 0.53684 | 0.53684     | 0.776083221 |           |         |
| NA          | ENSG00000269417 | -0.092483 | 0.53684 | -0.70618    | 0.75996     | -0.43219  | 0.6672  |
|             | -0.62054        | 0.73255   | 0.53684 | 0.776083221 |             |           |         |
| GCDH        | ENSG00000105607 | -0.79428  | 0.78648 | -0.79428    | 0.78648     | -0.09255  | 0.53687 |
|             | -0.79428        | 0.78648   | 0.53687 | 0.776083754 |             |           |         |
| NA          | ENSG00000230386 | -0.87157  | 0.80828 | -0.63521    | 0.73735     | -0.092576 | 0.53688 |
|             | -0.80539        | 0.7897    | 0.53688 | 0.776083754 |             |           |         |
| PLSCR1      | ENSG00000188313 | -0.61413  | 0.73043 | -2.4564     | 0.99298     | -2.4564   |         |
|             | 0.99298         | -0.092627 | 0.5369  | 0.5369      | 0.776083754 |           |         |
| NA          | ENSG00000231418 | -0.092651 | 0.53691 | -1.2115     | 0.88715     | -0.83097  | 0.79701 |
|             | -1.1263         | 0.86999   | 0.53691 | 0.776083754 |             |           |         |
| TMEM214     | ENSG00000119777 | -0.092684 | 0.53692 | -1.1892     | 0.88282     | -1.1892   |         |
|             | 0.88282         | -0.32541  | 0.62757 | 0.53692     | 0.776083754 |           |         |
| ADAL        | ENSG00000168803 | -0.25518  | 0.60071 | -0.25518    | 0.60071     | -0.25518  | 0.60071 |
|             | -0.092745       | 0.53695   | 0.53695 | 0.776104096 |             |           |         |
| OR14A2      | ENSG00000241128 | -0.092829 | 0.53698 | -0.092829   | 0.53698     | -0.092829 |         |
|             | 0.53698         | -0.092829 | 0.53698 | 0.53698     | 0.776124437 |           |         |
| NA          | ENSG00000207497 | -0.25724  | 0.6015  | -0.092978   | 0.53704     | -0.25724  | 0.6015  |
|             | -0.80227        | 0.7888    | 0.53704 | 0.776134056 |             |           |         |
| NA          | ENSG00000202438 | -0.09303  | 0.53706 | -0.09303    | 0.53706     | -0.09303  | 0.53706 |
|             | -0.09303        | 0.53706   | 0.53706 | 0.776134056 |             |           |         |
| WASL-DT     | ENSG00000272686 | -0.093027 | 0.53706 | -0.093027   | 0.53706     | -0.093027 |         |
|             | 0.53706         | -0.093027 | 0.53706 | 0.53706     | 0.776134056 |           |         |
| ZNF385D-AS2 | ENSG00000223351 | -0.29091  | 0.61444 | -0.31578    | 0.62391     | -0.093067 |         |
|             | 0.53707         | -0.093067 | 0.53707 | 0.53707     | 0.776134056 |           |         |
| ZNF99       | ENSG00000213973 | -0.093142 | 0.5371  | -0.42728    | 0.66541     | -0.985    | 0.83769 |
|             | -0.83135        | 0.79711   | 0.5371  | 0.776134056 |             |           |         |
| GLYATL1P2   | ENSG00000254717 | -0.093137 | 0.5371  | -0.45399    | 0.67508     | -0.89735  |         |
|             | 0.81523         | -0.093897 | 0.5374  | 0.5371      | 0.776134056 |           |         |
| LUC7L3      | ENSG00000108848 | -0.093198 | 0.53713 | -0.093198   | 0.53713     | -0.093198 |         |
|             | 0.53713         | -2.0681   | 0.98069 | 0.53713     | 0.776134056 |           |         |
| MGMT        | ENSG00000170430 | -0.65821  | 0.7448  | -0.093202   | 0.53713     | -0.77746  | 0.78156 |
|             | -0.39493        | 0.65355   | 0.53713 | 0.776134056 |             |           |         |
| NA          | ENSG00000277358 | -0.0932   | 0.53713 | -0.098359   | 0.53918     | -0.098359 | 0.53918 |
|             | -0.098359       | 0.53918   | 0.53713 | 0.776134056 |             |           |         |
| FMNL2       | ENSG00000157827 | -0.093249 | 0.53715 | -0.17703    | 0.57026     | -0.12728  | 0.55064 |
|             | -0.18931        | 0.57508   | 0.53715 | 0.776139941 |             |           |         |
| FABP5P3     | ENSG00000241735 | -0.093374 | 0.5372  | -0.25336    | 0.6         | -2.3339   | 0.9902  |
|             | -2.3339         | 0.9902    | 0.5372  | 0.776186489 |             |           |         |
| NA          | ENSG00000231731 | -2.0929   | 0.98182 | -2.2377     | 0.98738     | -0.86974  | 0.80778 |



|           |                 |           |           |             |             |             |         |           |
|-----------|-----------------|-----------|-----------|-------------|-------------|-------------|---------|-----------|
|           |                 | -0.093444 | 0.53722   | 0.53722     | 0.776186489 |             |         |           |
| NA        | ENSG00000250207 | -1.5198   | 0.93572   | -0.09345    | 0.53723     | -1.5153     | 0.93515 |           |
|           |                 | -1.5153   | 0.93515   | 0.53723     | 0.776186489 |             |         |           |
| ZRANB3    | ENSG00000121988 | -0.79917  | 0.7879    | -0.74883    | 0.77302     | -0.093559   |         |           |
|           |                 | 0.53727   | -0.38508  | 0.64991     | 0.53727     | 0.776198254 |         |           |
| NA        | ENSG00000259999 | -0.093557 | 0.53727   | -0.094089   | 0.53748     | -0.31628    | 0.62411 |           |
|           |                 | 0.53727   | 0.53727   | 0.776198254 |             |             |         |           |
| RBMS3-AS3 | ENSG00000235904 | -0.093657 | 0.53731   | -0.50646    | 0.69373     | -0.10813    |         |           |
|           |                 | 0.54305   | -0.10813  | 0.54305     | 0.53731     | 0.776233029 |         |           |
| MTMR14    | ENSG00000163719 | -0.093884 | 0.5374    | -0.93442    | 0.82496     | -0.47044    |         |           |
|           |                 | 0.68098   | -0.24997  | 0.5987      | 0.5374      | 0.776340033 |         |           |
| RPL23AP53 | ENSG00000223508 | -0.09399  | 0.53744   | -0.67303    | 0.74954     | -0.91856    |         |           |
|           |                 | 0.82084   | -0.12745  | 0.55071     | 0.53744     | 0.776351788 |         |           |
| NA        | ENSG00000282686 | -0.093991 | 0.53744   | -0.093991   | 0.53744     | -0.093991   | 0.53744 |           |
|           |                 | -0.093991 | 0.53744   | 0.53744     | 0.776351788 |             |         |           |
| OR8K2P    | ENSG00000255134 | -0.094144 | 0.5375    | -0.094144   | 0.5375      | -0.094144   |         |           |
|           |                 | 0.5375    | -0.094144 | 0.5375      | 0.5375      | 0.776369907 |         |           |
| NA        | ENSG00000201297 | -0.094169 | 0.53751   | -0.094169   | 0.53751     | -0.094169   | 0.53751 |           |
|           |                 | -0.094169 | 0.53751   | 0.53751     | 0.776369907 |             |         |           |
| NA        | ENSG00000262730 | -0.094206 | 0.53753   | -0.094206   | 0.53753     | -0.094206   | 0.53753 |           |
|           |                 | -0.094206 | 0.53753   | 0.53753     | 0.776369907 |             |         |           |
| KRT7      | ENSG00000135480 | -0.094229 | 0.53754   | -0.094229   | 0.53754     | -0.25463    | 0.60049 |           |
|           |                 | -0.85373  | 0.80337   | 0.53754     | 0.776369907 |             |         |           |
| NA        | ENSG00000253118 | -0.25723  | 0.6015    | -0.25723    | 0.6015      | -0.13663    | 0.55434 |           |
|           |                 | -0.094291 | 0.53756   | 0.53756     | 0.776369907 |             |         |           |
| NA        | ENSG00000256159 | -0.094294 | 0.53756   | -0.36539    | 0.64259     | -0.094294   | 0.53756 |           |
|           |                 | -0.36248  | 0.6415    | 0.53756     | 0.776369907 |             |         |           |
| C9orf131  | ENSG00000174038 | -0.09435  | 0.53758   | -0.09435    | 0.53758     | -0.09435    |         |           |
|           |                 | 0.53758   | -0.09435  | 0.53758     | 0.53758     | 0.776369907 |         |           |
| RPL13AP20 | ENSG00000234498 | -0.55684  | 0.71118   | -2.4191     | 0.99222     | -0.55684    |         |           |
|           |                 | 0.71118   | -0.094329 | 0.53758     | 0.53758     | 0.776369907 |         |           |
| NA        | ENSG00000188078 | -0.69629  | 0.75688   | -0.38536    | 0.65001     | -0.09445    | 0.53762 |           |
|           |                 | -0.42005  | 0.66277   | 0.53762     | 0.776384837 |             |         |           |
| NA        | ENSG00000244125 | -0.09446  | 0.53763   | -0.09446    | 0.53763     | -0.09446    | 0.53763 |           |
|           |                 | -0.09446  | 0.53763   | 0.53763     | 0.776384837 |             |         |           |
| RELB      | ENSG00000104856 | -2.2067   | 0.98633   | -0.094518   | 0.53765     | -1.0609     | 0.85564 |           |
|           |                 | -1.3299   | 0.90822   | 0.53765     | 0.776384837 |             |         |           |
| MKLN1     | ENSG00000128585 | -0.20246  | 0.58022   | -0.094576   | 0.53767     | -0.095042   | 0.53786 |           |
|           |                 | -0.61184  | 0.72968   | 0.53767     | 0.776384837 |             |         |           |
| SOCS2-AS1 | ENSG00000246985 | -0.85214  | 0.80293   | -0.16758    | 0.56654     | -0.55494    |         |           |
|           |                 | 0.71053   | -0.094567 | 0.53767     | 0.53767     | 0.776384837 |         |           |
| UFC1      | ENSG00000143222 | -0.86815  | 0.80734   | -1.4065     | 0.92021     | -0.86815    | 0.80734 |           |
|           |                 | -0.094813 | 0.53777   | 0.53777     | 0.776497656 |             |         |           |
| NA        | ENSG00000248864 | -0.094845 | 0.53778   | -0.094845   | 0.53778     | -0.094845   | 0.53778 |           |
|           |                 | -0.16473  | 0.56542   | 0.53778     | 0.776497656 |             |         |           |
| SPECC1P1  | ENSG00000227790 | -2.8008   | 0.99745   | -0.46229    | 0.67806     | -1.7952     |         |           |
|           |                 | 0.96369   | -0.094927 | 0.53781     | 0.53781     | 0.776517964 |         |           |
| FLRT2     | ENSG00000185070 | -0.095019 | 0.53785   | -0.095019   | 0.53785     | -0.58749    | 0.72156 |           |
|           |                 | -0.1471   | 0.55847   | 0.53785     | 0.77655271  |             |         |           |
| NA        | ENSG00000224409 | -0.65749  | 0.74457   | -1.4985     | 0.933       | -1.4985     | 0.933   | -0.095545 |
|           |                 | 0.53806   | 0.53806   | 0.776832893 |             |             |         |           |
| DGKI      | ENSG00000157680 | -1.0111   | 0.84402   | -0.095634   | 0.53809     | -0.29586    | 0.61633 |           |
|           |                 | -0.49872  | 0.69101   | 0.53809     | 0.776853189 |             |         |           |
| ITGA8     | ENSG00000077943 | -0.12758  | 0.55076   | -0.32408    | 0.62706     | -0.095739   | 0.53814 |           |
|           |                 | -1.6226   | 0.94766   | 0.53814     | 0.776893779 |             |         |           |
| UTP3      | ENSG00000132467 | -0.095774 | 0.53815   | -0.095774   | 0.53815     | -0.095774   | 0.53815 |           |
|           |                 | -0.13193  | 0.55248   | 0.53815     | 0.776893779 |             |         |           |
| NA        | ENSG00000236800 | -1.583    | 0.94329   | -0.096276   | 0.53835     | -2.1044     | 0.98233 |           |
|           |                 | -0.74033  | 0.77045   | 0.53835     | 0.77711929  |             |         |           |
| NA        | ENSG00000258566 | -0.52529  | 0.70031   | -0.09629    | 0.53835     | -0.09629    | 0.53835 |           |
|           |                 | -0.09629  | 0.53835   | 0.53835     | 0.77711929  |             |         |           |
| NA        | ENSG00000230104 | -0.096303 | 0.53836   | -0.096303   | 0.53836     | -0.096303   | 0.53836 |           |

|           |                 |           |           |           |             |             |         |  |
|-----------|-----------------|-----------|-----------|-----------|-------------|-------------|---------|--|
|           |                 | -0.096303 | 0.53836   | 0.53836   | 0.77711929  |             |         |  |
| NPS       | ENSG00000214285 | -0.33692  | 0.63191   | -0.33692  | 0.63191     | -0.99234    | 0.83948 |  |
|           |                 | -0.096323 | 0.53837   | 0.53837   | 0.77711929  |             |         |  |
| WDFY1     | ENSG00000085449 | -0.096483 | 0.53843   | -0.60739  | 0.7282      | -0.096483   | 0.53843 |  |
|           |                 | -0.54597  | 0.70746   | 0.53843   | 0.777145798 |             |         |  |
| NA        | ENSG00000260366 | -0.09653  | 0.53845   | -0.09653  | 0.53845     | -0.09653    | 0.53845 |  |
|           |                 | -0.09653  | 0.53845   | 0.53845   | 0.777145798 |             |         |  |
| NA        | ENSG00000267937 | -0.096519 | 0.53845   | -0.096519 | 0.53845     | -0.096519   | 0.53845 |  |
|           |                 | -0.096519 | 0.53845   | 0.53845   | 0.777145798 |             |         |  |
| CAMKMT    | ENSG00000143919 | -0.7899   | 0.78521   | -1.4299   | 0.92363     | -0.096551   |         |  |
|           |                 | 0.53846   | -0.89524  | 0.81467   | 0.53846     | 0.777145798 |         |  |
| SLC16A9   | ENSG00000165449 | -0.096569 | 0.53847   | -0.096569 | 0.53847     | -0.69008    |         |  |
|           |                 | 0.75493   | -1.4194   | 0.92211   | 0.53847     | 0.777145798 |         |  |
| NA        | ENSG00000248752 | -1.3032   | 0.90375   | -1.3032   | 0.90375     | -0.096639   | 0.53849 |  |
|           |                 | -1.3032   | 0.90375   | 0.53849   | 0.777145798 |             |         |  |
| DUXA      | ENSG00000258873 | -0.19305  | 0.57654   | -0.096659 | 0.5385      | -1.2897     | 0.90142 |  |
|           |                 | -0.096659 | 0.5385    | 0.5385    | 0.777145798 |             |         |  |
| NA        | ENSG00000227371 | -0.096949 | 0.53862   | -0.096949 | 0.53862     | -0.096949   | 0.53862 |  |
|           |                 | -0.40298  | 0.65652   | 0.53862   | 0.777295958 |             |         |  |
| MIR4306   | ENSG00000263615 | -1.5448   | 0.9388    | -0.097108 | 0.53868     | -1.2079     |         |  |
|           |                 | 0.88645   | -0.94281  | 0.82711   | 0.53868     | 0.777359524 |         |  |
| RNU6-581P | ENSG00000252023 | -0.097203 | 0.53872   | -0.097203 | 0.53872     | -0.097203   |         |  |
|           |                 | 0.53872   | -0.097203 | 0.53872   | 0.777374296 |             |         |  |
| NA        | ENSG00000217825 | -0.95137  | 0.82929   | -0.23298  | 0.59211     | -0.23298    | 0.59211 |  |
|           |                 | -0.097266 | 0.53874   | 0.53874   | 0.777374296 |             |         |  |
| SCARNA5   | ENSG00000252010 | -0.097296 | 0.53875   | -0.097296 | 0.53875     | -0.097296   |         |  |
|           |                 | 0.53875   | -0.097296 | 0.53875   | 0.777374296 |             |         |  |
| MRPL49    | ENSG00000149792 | -1.0598   | 0.85539   | -0.42874  | 0.66595     | -1.0598     |         |  |
|           |                 | 0.85539   | -0.09734  | 0.53877   | 0.53877     | 0.777374296 |         |  |
| NA        | ENSG00000279281 | -0.097325 | 0.53877   | -0.097325 | 0.53877     | -0.097325   | 0.53877 |  |
|           |                 | -0.097325 | 0.53877   | 0.53877   | 0.777374296 |             |         |  |
| NA        | ENSG00000279072 | -0.097544 | 0.53885   | -0.54753  | 0.70799     | -0.88311    | 0.81141 |  |
|           |                 | -0.79461  | 0.78658   | 0.53885   | 0.777466705 |             |         |  |
| NA        | ENSG00000244278 | -0.097673 | 0.5389    | -0.097673 | 0.5389      | -0.097673   | 0.5389  |  |
|           |                 | -0.097673 | 0.5389    | 0.5389    | 0.777515825 |             |         |  |
| HDHD5-AS1 | ENSG00000185837 | -0.097748 | 0.53893   | -0.097748 | 0.53893     | -0.097748   |         |  |
|           |                 | 0.53893   | -0.097748 | 0.53893   | 0.777536088 |             |         |  |
| STX6      | ENSG00000135823 | -0.097806 | 0.53896   | -0.097806 | 0.53896     | -0.097806   | 0.53896 |  |
|           |                 | -1.9021   | 0.97142   | 0.53896   | 0.777547756 |             |         |  |
| NA        | ENSG00000269288 | -0.09783  | 0.53897   | -0.09783  | 0.53897     | -0.09783    | 0.53897 |  |
|           |                 | -0.09783  | 0.53897   | 0.53897   | 0.777547756 |             |         |  |
| KRIT1     | ENSG00000001631 | -0.87333  | 0.80876   | -0.58477  | 0.72065     | -0.87333    | 0.80876 |  |
|           |                 | -0.098018 | 0.53904   | 0.53904   | 0.77757692  |             |         |  |
| NA        | ENSG00000207380 | -0.098026 | 0.53904   | -0.098026 | 0.53904     | -0.098026   | 0.53904 |  |
|           |                 | -0.098026 | 0.53904   | 0.53904   | 0.77757692  |             |         |  |
| SNORD8    | ENSG00000200785 | -0.098059 | 0.53906   | -0.098059 | 0.53906     | -0.098059   |         |  |
|           |                 | 0.53906   | -0.098059 | 0.53906   | 0.77757692  |             |         |  |
| RBMXP1    | ENSG00000216835 | -0.098068 | 0.53906   | -0.23112  | 0.59139     | -0.098068   |         |  |
|           |                 | 0.53906   | -0.098068 | 0.53906   | 0.77757692  |             |         |  |
| LINC02646 | ENSG00000236303 | -0.098101 | 0.53907   | -0.72183  | 0.7648      | -0.48116    |         |  |
|           |                 | 0.6848    | -0.48116  | 0.6848    | 0.53907     | 0.77757692  |         |  |
| B3GALNT1  | ENSG00000169255 | -0.098158 | 0.5391    | -0.33914  | 0.63275     | -0.098158   |         |  |
|           |                 | 0.5391    | -0.098158 | 0.5391    | 0.777588584 |             |         |  |
| MAP3K20   | ENSG00000091436 | -0.49635  | 0.69018   | -0.73034  | 0.76741     | -0.098199   |         |  |
|           |                 | 0.53911   | -0.34908  | 0.63648   | 0.53911     | 0.777588584 |         |  |
| KRTAP12-4 | ENSG00000212933 | -0.098305 | 0.53915   | -1.2662   | 0.89727     | -1.2662     |         |  |
|           |                 | 0.89727   | -1.2662   | 0.89727   | 0.53915     | 0.777623261 |         |  |
| CCDC196   | ENSG00000196553 | -0.20457  | 0.58105   | -0.57823  | 0.71844     | -0.098402   |         |  |
|           |                 | 0.53919   | -0.47566  | 0.68284   | 0.53919     | 0.777657936 |         |  |
| NA        | ENSG00000262296 | -0.098474 | 0.53922   | -0.098474 | 0.53922     | -0.098474   | 0.53922 |  |
|           |                 | -0.098474 | 0.53922   | 0.53922   | 0.777665256 |             |         |  |
| LINC01324 | ENSG00000241767 | -2.1297   | 0.9834    | -0.098499 | 0.53923     | -0.33123    |         |  |

|           |                 |           |         |             |             |           |         |  |
|-----------|-----------------|-----------|---------|-------------|-------------|-----------|---------|--|
|           | 0.62976         | -1.7507   | 0.96    | 0.53923     | 0.777665256 |           |         |  |
| CD200R1L  | ENSG00000206531 | -0.52614  | 0.70061 | -0.098623   | 0.53928     | -0.098623 |         |  |
|           | 0.53928         | -0.098623 | 0.53928 | 0.53928     | 0.777665256 |           |         |  |
| PCDHB13   | ENSG00000187372 | -0.098691 | 0.53931 | -0.098691   | 0.53931     | -0.098691 |         |  |
|           | 0.53931         | -0.098691 | 0.53931 | 0.53931     | 0.777665256 |           |         |  |
| VDAC1P9   | ENSG00000232366 | -0.20713  | 0.58205 | -0.098751   | 0.53933     | -0.098751 |         |  |
|           | 0.53933         | -0.098751 | 0.53933 | 0.53933     | 0.777665256 |           |         |  |
| MBIP      | ENSG00000151332 | -0.46405  | 0.67869 | -0.098762   | 0.53934     | -0.098762 | 0.53934 |  |
|           | -0.098762       | 0.53934   | 0.53934 | 0.777665256 |             |           |         |  |
| NA        | ENSG00000226468 | -0.31704  | 0.62439 | -0.098765   | 0.53934     | -0.30026  | 0.61801 |  |
|           | -0.098765       | 0.53934   | 0.53934 | 0.777665256 |             |           |         |  |
| NA        | ENSG00000234579 | -0.098774 | 0.53934 | -0.55076    | 0.7091      | -0.92745  | 0.82315 |  |
|           | -0.098774       | 0.53934   | 0.53934 | 0.777665256 |             |           |         |  |
| MARCHF2   | ENSG00000099785 | -0.22035  | 0.5872  | -0.80233    | 0.78882     | -0.22035  |         |  |
|           | 0.5872          | -0.098905 | 0.53939 | 0.53939     | 0.777665256 |           |         |  |
| RN7SL41P  | ENSG00000241550 | -0.45834  | 0.67665 | -1.1646     | 0.87791     | -0.098923 |         |  |
|           | 0.5394          | -0.13676  | 0.55439 | 0.5394      | 0.777665256 |           |         |  |
| NA        | ENSG00000259712 | -0.098946 | 0.53941 | -0.098946   | 0.53941     | -0.098946 | 0.53941 |  |
|           | -0.37139        | 0.64483   | 0.53941 | 0.777665256 |             |           |         |  |
| NA        | ENSG00000224356 | -0.26669  | 0.60515 | -0.098963   | 0.53942     | -0.7244   | 0.76559 |  |
|           | -0.37561        | 0.6464    | 0.53942 | 0.777665256 |             |           |         |  |
| NA        | ENSG00000250441 | -0.099018 | 0.53944 | -0.099018   | 0.53944     | -0.099018 | 0.53944 |  |
|           | -0.099018       | 0.53944   | 0.53944 | 0.777665256 |             |           |         |  |
| NA        | ENSG00000267640 | -0.099027 | 0.53944 | -0.099027   | 0.53944     | -0.099027 | 0.53944 |  |
|           | -0.099027       | 0.53944   | 0.53944 | 0.777665256 |             |           |         |  |
| NA        | ENSG00000259048 | -0.099047 | 0.53945 | -0.099047   | 0.53945     | -0.97988  | 0.83643 |  |
|           | -1.2743         | 0.89873   | 0.53945 | 0.777665256 |             |           |         |  |
| NA        | ENSG00000203643 | -0.099075 | 0.53946 | -0.099075   | 0.53946     | -0.099075 | 0.53946 |  |
|           | -0.099075       | 0.53946   | 0.53946 | 0.777665256 |             |           |         |  |
| RPS3AP22  | ENSG00000240083 | -0.50139  | 0.69195 | -0.09919    | 0.53951     | -0.09919  |         |  |
|           | 0.53951         | -0.09919  | 0.53951 | 0.53951     | 0.777665256 |           |         |  |
| NA        | ENSG00000274414 | -0.34663  | 0.63556 | -0.099216   | 0.53952     | -0.28124  | 0.61074 |  |
|           | -0.87527        | 0.80929   | 0.53952 | 0.777665256 |             |           |         |  |
| RORB-AS1  | ENSG00000224825 | -0.099244 | 0.53953 | -0.099244   | 0.53953     | -0.099244 |         |  |
|           | 0.53953         | -0.099244 | 0.53953 | 0.53953     | 0.777665256 |           |         |  |
| ZNF66     | ENSG00000160229 | -1.3871   | 0.91729 | -0.51753    | 0.69761     | -0.099282 | 0.53954 |  |
|           | -0.82834        | 0.79626   | 0.53954 | 0.777665256 |             |           |         |  |
| FAM71E1   | ENSG00000142530 | -0.099289 | 0.53955 | -0.099289   | 0.53955     | -0.099289 |         |  |
|           | 0.53955         | -0.48017  | 0.68445 | 0.53955     | 0.777665256 |           |         |  |
| LIPF      | ENSG00000182333 | -0.099321 | 0.53956 | -0.099321   | 0.53956     | -0.099321 | 0.53956 |  |
|           | -0.099321       | 0.53956   | 0.53956 | 0.777665256 |             |           |         |  |
| MRPL17    | ENSG00000158042 | -0.3798   | 0.64795 | -0.47389    | 0.68221     | -0.81217  |         |  |
|           | 0.79165         | -0.099355 | 0.53957 | 0.53957     | 0.777665256 |           |         |  |
| NA        | ENSG00000259711 | -0.0994   | 0.53959 | -1.3061     | 0.90424     | -1.3061   | 0.90424 |  |
|           | -1.3061         | 0.90424   | 0.53959 | 0.777665256 |             |           |         |  |
| TMEM234   | ENSG00000160055 | -0.099414 | 0.5396  | -0.099414   | 0.5396      | -0.099414 |         |  |
|           | 0.5396          | -0.099414 | 0.5396  | 0.5396      | 0.777665256 |           |         |  |
| NA        | ENSG00000251536 | -0.71541  | 0.76282 | -0.54117    | 0.7058      | -1.6714   | 0.95268 |  |
|           | -0.099441       | 0.53961   | 0.53961 | 0.777665256 |             |           |         |  |
| NA        | ENSG00000255065 | -0.32285  | 0.62659 | -1.55       | 0.93943     | -0.099526 | 0.53964 |  |
|           | -0.5489         | 0.70846   | 0.53964 | 0.777676904 |             |           |         |  |
| OR10D4P   | ENSG00000186268 | -0.099557 | 0.53965 | -0.94596    | 0.82792     | -0.94596  |         |  |
|           | 0.82792         | -0.94596  | 0.82792 | 0.53965     | 0.777676904 |           |         |  |
| LINC02568 | ENSG00000259459 | -0.09965  | 0.53969 | -0.30265    | 0.61892     | -0.68766  |         |  |
|           | 0.75417         | -0.41846  | 0.66219 | 0.53969     | 0.777700195 |           |         |  |
| RBFADN    | ENSG00000261126 | -0.099694 | 0.53971 | -0.47965    | 0.68426     | -0.21689  |         |  |
|           | 0.58585         | -0.29842  | 0.61731 | 0.53971     | 0.777700195 |           |         |  |
| RNU7-53P  | ENSG00000252514 | -0.099719 | 0.53972 | -0.5788     | 0.71864     | -0.099719 |         |  |
|           | 0.53972         | -0.099719 | 0.53972 | 0.53972     | 0.777700195 |           |         |  |
| RNA5SP488 | ENSG00000201812 | -0.09976  | 0.53973 | -0.09976    | 0.53973     | -0.09976  |         |  |
|           | 0.53973         | -0.09976  | 0.53973 | 0.53973     | 0.777700195 |           |         |  |
| NA        | ENSG00000254991 | -0.099888 | 0.53978 | -0.95138    | 0.8293      | -0.099888 | 0.53978 |  |

|            |                 |          |         |             |             |          |         |  |
|------------|-----------------|----------|---------|-------------|-------------|----------|---------|--|
|            | -0.099888       | 0.53978  | 0.53978 | 0.777749243 |             |          |         |  |
| NA         | ENSG00000276754 | -0.09993 | 0.5398  | -0.09993    | 0.5398      | -0.09993 | 0.5398  |  |
|            | -0.09993        | 0.5398   | 0.5398  | 0.777755063 |             |          |         |  |
| ZZZ3       | ENSG00000036549 | -0.3526  | 0.6378  | -0.10001    | 0.53983     | -0.87158 | 0.80828 |  |
|            | -0.74247        | 0.7711   | 0.53983 | 0.777775291 |             |          |         |  |
| RPL23AP14  | ENSG00000224438 | -0.10016 | 0.53989 | -0.10016    | 0.53989     | -0.10016 |         |  |
|            | 0.53989         | -0.10016 | 0.53989 | 0.53989     | 0.77783015  |          |         |  |
| NDFIP2-AS1 | ENSG00000232132 | -0.10017 | 0.5399  | -0.10017    | 0.5399      | -0.10017 |         |  |
|            | 0.5399          | -0.10017 | 0.5399  | 0.5399      | 0.77783015  |          |         |  |
| RPSAP52    | ENSG00000241749 | -0.10023 | 0.53992 | -0.10023    | 0.53992     | -0.10023 |         |  |
|            | 0.53992         | -0.25466 | 0.60051 | 0.53992     | 0.777835967 |          |         |  |
| NA         | ENSG00000276867 | -0.10045 | 0.54001 | -0.10045    | 0.54001     | -0.10045 | 0.54001 |  |
|            | -0.10045        | 0.54001  | 0.54001 | 0.777888837 |             |          |         |  |
| PPIAP62    | ENSG00000226473 | -0.1005  | 0.54003 | -0.1005     | 0.54003     | -0.1005  |         |  |
|            | 0.54003         | -0.1005  | 0.54003 | 0.54003     | 0.777888837 |          |         |  |
| CHMP2B     | ENSG00000083937 | -0.10056 | 0.54005 | -1.0545     | 0.85417     | -0.19191 |         |  |
|            | 0.5761          | -1.3868  | 0.91725 | 0.54005     | 0.777888837 |          |         |  |
| OR2M2      | ENSG00000198601 | -0.10055 | 0.54005 | -0.10055    | 0.54005     | -0.10055 | 0.54005 |  |
|            | -0.72073        | 0.76446  | 0.54005 | 0.777888837 |             |          |         |  |
| ADGRG3     | ENSG00000182885 | -0.30429 | 0.61955 | -0.10061    | 0.54007     | -0.10061 |         |  |
|            | 0.54007         | -0.10061 | 0.54007 | 0.54007     | 0.777888837 |          |         |  |
| TMEM60     | ENSG00000135211 | -0.10071 | 0.54011 | -0.10071    | 0.54011     | -0.10071 |         |  |
|            | 0.54011         | -0.10071 | 0.54011 | 0.54011     | 0.777888837 |          |         |  |
| KLK13      | ENSG00000167759 | -0.10072 | 0.54011 | -0.10072    | 0.54011     | -0.10072 | 0.54011 |  |
|            | -0.10072        | 0.54011  | 0.54011 | 0.777888837 |             |          |         |  |
| OR13C3     | ENSG00000204246 | -0.10072 | 0.54011 | -0.24583    | 0.59709     | -0.24583 |         |  |
|            | 0.59709         | -0.24583 | 0.59709 | 0.54011     | 0.777888837 |          |         |  |
| NA         | ENSG00000280058 | -0.47708 | 0.68335 | -0.10073    | 0.54012     | -0.6613  | 0.74579 |  |
|            | -0.6613         | 0.74579  | 0.54012 | 0.777888837 |             |          |         |  |
| NA         | ENSG00000255960 | -0.10079 | 0.54014 | -0.10079    | 0.54014     | -0.10079 | 0.54014 |  |
|            | -0.10079        | 0.54014  | 0.54014 | 0.777888837 |             |          |         |  |
| NAA50      | ENSG00000121579 | -0.10082 | 0.54015 | -0.10082    | 0.54015     | -0.10082 | 0.54015 |  |
|            | -0.10082        | 0.54015  | 0.54015 | 0.777888837 |             |          |         |  |
| RPS26P39   | ENSG00000227586 | -0.10085 | 0.54016 | -0.10085    | 0.54016     | -0.10085 |         |  |
|            | 0.54016         | -0.10085 | 0.54016 | 0.54016     | 0.777888837 |          |         |  |
| PWRN4      | ENSG00000260232 | -1.2421  | 0.8929  | -0.68972    | 0.75482     | -0.58703 | 0.72141 |  |
|            | -0.10088        | 0.54018  | 0.54018 | 0.777888837 |             |          |         |  |
| VN1R37P    | ENSG00000213643 | -1.2309  | 0.89082 | -0.10098    | 0.54022     | -1.4424  |         |  |
|            | 0.92541         | -1.4131  | 0.92119 | 0.54022     | 0.777888837 |          |         |  |
| RPL12P11   | ENSG00000232493 | -0.10101 | 0.54023 | -0.10101    | 0.54023     | -0.10101 |         |  |
|            | 0.54023         | -0.10101 | 0.54023 | 0.54023     | 0.777888837 |          |         |  |
| NA         | ENSG00000219604 | -0.10105 | 0.54025 | -0.10105    | 0.54025     | -0.10105 | 0.54025 |  |
|            | -0.10105        | 0.54025  | 0.54025 | 0.777888837 |             |          |         |  |
| NA         | ENSG00000251455 | -0.10109 | 0.54026 | -0.10109    | 0.54026     | -0.10109 | 0.54026 |  |
|            | -0.10109        | 0.54026  | 0.54026 | 0.777888837 |             |          |         |  |
| OR7E1P     | ENSG00000255554 | -0.48618 | 0.68658 | -0.2232     | 0.58831     | -0.1011  |         |  |
|            | 0.54026         | -1.4415  | 0.92528 | 0.54026     | 0.777888837 |          |         |  |
| NA         | ENSG00000261595 | -0.65152 | 0.74264 | -0.30381    | 0.61937     | -0.1011  | 0.54026 |  |
|            | -0.1011         | 0.54026  | 0.54026 | 0.777888837 |             |          |         |  |
| DIMT1      | ENSG00000086189 | -0.10117 | 0.54029 | -0.10117    | 0.54029     | -0.10117 | 0.54029 |  |
|            | -0.10117        | 0.54029  | 0.54029 | 0.777900461 |             |          |         |  |
| NA         | ENSG00000258431 | -0.1012  | 0.5403  | -0.1012     | 0.5403      | -0.1012  | 0.5403  |  |
|            | -0.1012         | 0.5403   | 0.5403  | 0.777900461 |             |          |         |  |
| HOXC12     | ENSG00000123407 | -0.10136 | 0.54037 | -0.10136    | 0.54037     | -0.10136 |         |  |
|            | 0.54037         | -0.10136 | 0.54037 | 0.54037     | 0.777949719 |          |         |  |
| OR56A4     | ENSG00000183389 | -0.10138 | 0.54037 | -0.32963    | 0.62916     | -0.10138 |         |  |
|            | 0.54037         | -0.10138 | 0.54037 | 0.54037     | 0.777949719 |          |         |  |
| PPIA       | ENSG00000196262 | -0.10142 | 0.54039 | -2.1107     | 0.9826      | -1.2323  | 0.89108 |  |
|            | -1.6497         | 0.9505   | 0.54039 | 0.777949719 |             |          |         |  |
| AP5S1      | ENSG00000125843 | -0.10148 | 0.54042 | -0.10148    | 0.54042     | -0.10148 | 0.54042 |  |
|            | -0.10148        | 0.54042  | 0.54042 | 0.777949719 |             |          |         |  |
| RNU105B    | ENSG00000201348 | -0.10153 | 0.54043 | -0.10153    | 0.54043     | -0.10153 |         |  |

|           |                 |          |         |             |             |          |         |
|-----------|-----------------|----------|---------|-------------|-------------|----------|---------|
|           | 0.54043         | -0.60402 | 0.72708 | 0.54043     | 0.777949719 |          |         |
| NA        | ENSG00000249259 | -0.78181 | 0.78284 | -0.10151    | 0.54043     | -0.10151 | 0.54043 |
|           | -0.10151        | 0.54043  | 0.54043 | 0.777949719 |             |          |         |
| RN7SL483P | ENSG00000244091 | -0.10176 | 0.54053 | -0.88854    | 0.81288     | -0.26382 |         |
|           | 0.60404         | -0.10176 | 0.54053 | 0.54053     | 0.778070685 |          |         |
| SUCNR1    | ENSG00000198829 | -0.58907 | 0.72209 | -0.10181    | 0.54055     | -0.10181 |         |
|           | 0.54055         | -0.10181 | 0.54055 | 0.54055     | 0.77807649  |          |         |
| NA        | ENSG00000274598 | -0.10192 | 0.54059 | -0.10192    | 0.54059     | -0.10192 | 0.54059 |
|           | -0.10192        | 0.54059  | 0.54059 | 0.778111083 |             |          |         |
| LINC01705 | ENSG00000232679 | -0.10213 | 0.54067 | -1.1209     | 0.86883     | -0.79108 |         |
|           | 0.78555         | -1.1767  | 0.88035 | 0.54067     | 0.778154489 |          |         |
| RN7SL580P | ENSG00000240641 | -0.10212 | 0.54067 | -1.3173     | 0.90614     | -0.19088 |         |
|           | 0.57569         | -1.3173  | 0.90614 | 0.54067     | 0.778154489 |          |         |
| UPK1A     | ENSG00000105668 | -0.10216 | 0.54069 | -0.10216    | 0.54069     | -0.10216 | 0.54069 |
|           | -0.10216        | 0.54069  | 0.54069 | 0.778154489 |             |          |         |
| LPL       | ENSG00000175445 | -0.4658  | 0.67932 | -0.15031    | 0.55974     | -0.69428 | 0.75625 |
|           | -0.10217        | 0.54069  | 0.54069 | 0.778154489 |             |          |         |
| NBPF18P   | ENSG00000240667 | -0.1022  | 0.5407  | -0.1022     | 0.5407      | -0.1022  |         |
|           | 0.5407          | -0.1022  | 0.5407  | 0.5407      | 0.778154489 |          |         |
| NA        | ENSG00000279549 | -0.1023  | 0.54074 | -0.1023     | 0.54074     | -0.1023  | 0.54074 |
|           | -0.1023         | 0.54074  | 0.54074 | 0.778189073 |             |          |         |
| CCDC65    | ENSG00000139537 | -0.10242 | 0.54079 | -0.25182    | 0.59941     | -0.72707 |         |
|           | 0.76641         | -1.5058  | 0.93394 | 0.54079     | 0.778207125 |          |         |
| PSMB9     | ENSG00000240065 | -0.10252 | 0.54083 | -0.10252    | 0.54083     | -0.10252 | 0.54083 |
|           | -0.10252        | 0.54083  | 0.54083 | 0.778207125 |             |          |         |
| MIR1283-1 | ENSG00000221421 | -0.10257 | 0.54085 | -0.10257    | 0.54085     | -0.10257 |         |
|           | 0.54085         | -0.10257 | 0.54085 | 0.54085     | 0.778207125 |          |         |
| NA        | ENSG00000276957 | -0.10264 | 0.54087 | -0.10264    | 0.54087     | -0.10264 | 0.54087 |
|           | -0.10264        | 0.54087  | 0.54087 | 0.778207125 |             |          |         |
| NBAS      | ENSG00000151779 | -0.21559 | 0.58534 | -0.10264    | 0.54088     | -0.24849 | 0.59812 |
|           | -0.67563        | 0.75036  | 0.54088 | 0.778207125 |             |          |         |
| DDX23     | ENSG00000174243 | -0.10265 | 0.54088 | -0.766      | 0.77816     | -0.55259 | 0.70973 |
|           | -0.65014        | 0.7422   | 0.54088 | 0.778207125 |             |          |         |
| NA        | ENSG00000225323 | -0.10264 | 0.54088 | -0.10264    | 0.54088     | -0.10264 | 0.54088 |
|           | -0.10264        | 0.54088  | 0.54088 | 0.778207125 |             |          |         |
| RN7SKP39  | ENSG00000222705 | -0.10274 | 0.54092 | -0.10274    | 0.54092     | -0.10274 |         |
|           | 0.54092         | -0.10274 | 0.54092 | 0.54092     | 0.778207125 |          |         |
| HORMAD1   | ENSG00000143452 | -0.13852 | 0.55509 | -0.16842    | 0.56687     | -0.81579 |         |
|           | 0.79269         | -0.10277 | 0.54093 | 0.54093     | 0.778207125 |          |         |
| NA        | ENSG00000254190 | -0.10278 | 0.54093 | -0.17513    | 0.56951     | -0.10278 | 0.54093 |
|           | -0.10278        | 0.54093  | 0.54093 | 0.778207125 |             |          |         |
| NA        | ENSG00000225408 | -0.7445  | 0.77171 | -0.10282    | 0.54095     | -0.10282 | 0.54095 |
|           | -0.10282        | 0.54095  | 0.54095 | 0.778207125 |             |          |         |
| CYBRD1    | ENSG00000071967 | -0.40571 | 0.65752 | -0.52092    | 0.69879     | -0.52092 |         |
|           | 0.69879         | -0.10285 | 0.54096 | 0.54096     | 0.778207125 |          |         |
| NA        | ENSG00000227355 | -0.71645 | 0.76314 | -0.30826    | 0.62106     | -0.10292 | 0.54099 |
|           | -0.51703        | 0.69743  | 0.54099 | 0.778207125 |             |          |         |
| FST       | ENSG00000134363 | -1.2427  | 0.89302 | -0.63975    | 0.73883     | -0.18486 | 0.57333 |
|           | -0.10297        | 0.54101  | 0.54101 | 0.778207125 |             |          |         |
| SIGLEC6   | ENSG00000105492 | -1.6706  | 0.9526  | -0.103      | 0.54102     | -1.1133  |         |
|           | 0.86722         | -1.1133  | 0.86722 | 0.54102     | 0.778207125 |          |         |
| NA        | ENSG00000232618 | -0.58205 | 0.71973 | -0.58205    | 0.71973     | -0.10306 | 0.54104 |
|           | -0.41945        | 0.66256  | 0.54104 | 0.778207125 |             |          |         |
| RNU6-885P | ENSG00000252416 | -0.10305 | 0.54104 | -0.10305    | 0.54104     | -0.10305 |         |
|           | 0.54104         | -0.10305 | 0.54104 | 0.54104     | 0.778207125 |          |         |
| NA        | ENSG00000266501 | -0.10306 | 0.54104 | -0.10306    | 0.54104     | -0.10306 | 0.54104 |
|           | -0.10306        | 0.54104  | 0.54104 | 0.778207125 |             |          |         |
| NA        | ENSG00000260244 | -0.10312 | 0.54107 | -0.10312    | 0.54107     | -0.10312 | 0.54107 |
|           | -0.10312        | 0.54107  | 0.54107 | 0.778207777 |             |          |         |
| CMA1      | ENSG00000092009 | -0.10323 | 0.54111 | -0.10323    | 0.54111     | -0.10323 | 0.54111 |
|           | -0.10323        | 0.54111  | 0.54111 | 0.778207777 |             |          |         |
| NLRP9P1   | ENSG00000256581 | -0.21159 | 0.58379 | -0.66199    | 0.74601     | -0.34044 |         |

|               |                 |          |         |             |             |          |         |
|---------------|-----------------|----------|---------|-------------|-------------|----------|---------|
|               | 0.63324         | -0.10325 | 0.54112 | 0.54112     | 0.778207777 |          |         |
| STON1-GTF2A1L | ENSG00000068781 | -0.10329 | 0.54113 | -0.65982    | 0.74532     | -0.1197  |         |
|               | 0.54764         | -1.0892  | 0.86197 | 0.54113     | 0.778207777 |          |         |
| LINC01611     | ENSG00000231776 | -1.0074  | 0.84312 | -0.6336     | 0.73683     | -0.10332 |         |
|               | 0.54115         | -0.62643 | 0.73448 | 0.54115     | 0.778207777 |          |         |
| RNU6ATAC28P   | ENSG00000238561 | -0.10334 | 0.54115 | -0.10334    | 0.54115     | -0.10334 |         |
|               | 0.54115         | -0.10334 | 0.54115 | 0.54115     | 0.778207777 |          |         |
| HMGA1P5       | ENSG00000233313 | -0.10336 | 0.54116 | -0.10336    | 0.54116     | -0.10336 |         |
|               | 0.54116         | -0.10336 | 0.54116 | 0.54116     | 0.778207777 |          |         |
| MASP2         | ENSG0000009724  | -0.75153 | 0.77383 | -0.10339    | 0.54118     | -0.60488 | 0.72737 |
|               | -0.79171        | 0.78573  | 0.54118 | 0.778207777 |             |          |         |
| NA            | ENSG00000248540 | -1.048   | 0.85267 | -0.442      | 0.67076     | -0.10343 | 0.54119 |
|               | -0.45333        | 0.67485  | 0.54119 | 0.778207777 |             |          |         |
| NA            | ENSG00000264276 | -0.10354 | 0.54123 | -0.10354    | 0.54123     | -0.10354 | 0.54123 |
|               | -0.10354        | 0.54123  | 0.54123 | 0.778207777 |             |          |         |
| NA            | ENSG00000268129 | -0.10357 | 0.54125 | -1.312      | 0.90525     | -1.312   | 0.90525 |
|               | -1.312          | 0.90525  | 0.54125 | 0.778207777 |             |          |         |
| CTLA4         | ENSG00000163599 | -0.10362 | 0.54126 | -0.10362    | 0.54126     | -0.10362 | 0.54126 |
|               | -0.10362        | 0.54126  | 0.54126 | 0.778207777 |             |          |         |
| DPP3P1        | ENSG00000250768 | -0.10361 | 0.54126 | -0.10361    | 0.54126     | -0.10361 |         |
|               | 0.54126         | -0.10361 | 0.54126 | 0.54126     | 0.778207777 |          |         |
| EEF1A1P16     | ENSG00000213235 | -0.47719 | 0.68339 | -0.47719    | 0.68339     | -0.35164 |         |
|               | 0.63745         | -0.10363 | 0.54127 | 0.54127     | 0.778207777 |          |         |
| NA            | ENSG00000230087 | -0.10365 | 0.54128 | -0.10365    | 0.54128     | -0.10365 | 0.54128 |
|               | -0.10365        | 0.54128  | 0.54128 | 0.778207777 |             |          |         |
| SRPK2         | ENSG00000135250 | -0.10377 | 0.54132 | -0.16744    | 0.56649     | -0.913   | 0.81938 |
|               | -0.13591        | 0.55406  | 0.54132 | 0.778242325 |             |          |         |
| DNAJC1        | ENSG00000136770 | -0.85279 | 0.80311 | -0.56414    | 0.71367     | -0.10386 |         |
|               | 0.54136         | -0.21835 | 0.58642 | 0.54136     | 0.778268286 |          |         |
| RNU6-499P     | ENSG00000202485 | -1.6705  | 0.95259 | -0.77057    | 0.77952     | -1.7894  |         |
|               | 0.96323         | -0.10388 | 0.54137 | 0.54137     | 0.778268286 |          |         |
| BNIP3P39      | ENSG00000269662 | -0.10395 | 0.54139 | -0.10395    | 0.54139     | -0.10395 |         |
|               | 0.54139         | -0.10395 | 0.54139 | 0.54139     | 0.778274078 |          |         |
| TBX10         | ENSG00000167800 | -0.10401 | 0.54142 | -0.73375    | 0.76845     | -0.10401 | 0.54142 |
|               | -0.58411        | 0.72043  | 0.54142 | 0.778285661 |             |          |         |
| CXCR4         | ENSG00000121966 | -0.45182 | 0.6743  | -0.45182    | 0.6743      | -0.10403 | 0.54143 |
|               | -0.10403        | 0.54143  | 0.54143 | 0.778285661 |             |          |         |
| BTBD10        | ENSG00000148925 | -0.56586 | 0.71425 | -0.43983    | 0.66997     | -0.10409 |         |
|               | 0.54145         | -0.10409 | 0.54145 | 0.54145     | 0.778291452 |          |         |
| NA            | ENSG00000270412 | -0.10416 | 0.54148 | -0.10416    | 0.54148     | -0.10416 | 0.54148 |
|               | -0.10416        | 0.54148  | 0.54148 | 0.778311616 |             |          |         |
| MIR5684       | ENSG00000263800 | -0.10426 | 0.54152 | -0.10426    | 0.54152     | -0.60297 |         |
|               | 0.72673         | -0.51961 | 0.69833 | 0.54152     | 0.778328984 |          |         |
| PRLH          | ENSG00000071677 | -0.10432 | 0.54154 | -0.10432    | 0.54154     | -0.10432 | 0.54154 |
|               | -1.4334         | 0.92412  | 0.54154 | 0.778328984 |             |          |         |
| MIR4277       | ENSG00000263746 | -0.75023 | 0.77344 | -1.6417     | 0.94968     | -0.10431 |         |
|               | 0.54154         | -0.16526 | 0.56563 | 0.54154     | 0.778328984 |          |         |
| NA            | ENSG00000259244 | -0.10445 | 0.54159 | -0.58606    | 0.72108     | -0.20072 | 0.57954 |
|               | -0.20072        | 0.57954  | 0.54159 | 0.778377889 |             |          |         |
| RPL21P89      | ENSG00000229870 | -0.18214 | 0.57226 | -0.10449    | 0.54161     | -0.10449 |         |
|               | 0.54161         | -0.10449 | 0.54161 | 0.54161     | 0.778383676 |          |         |
| AVEN          | ENSG00000169857 | -0.10469 | 0.54169 | -0.83496    | 0.79813     | -0.10469 | 0.54169 |
|               | -0.19125        | 0.57584  | 0.54169 | 0.778464301 |             |          |         |
| METAP2        | ENSG00000111142 | -0.8275  | 0.79602 | -0.8275     | 0.79602     | -0.64304 |         |
|               | 0.7399          | -0.10476 | 0.54172 | 0.54172     | 0.778464301 |          |         |
| NA            | ENSG00000248671 | -0.73695 | 0.76942 | -1.5947     | 0.94461     | -0.10479 | 0.54173 |
|               | -0.10479        | 0.54173  | 0.54173 | 0.778464301 |             |          |         |
| NA            | ENSG00000260624 | -0.1048  | 0.54173 | -0.1048     | 0.54173     | -0.1048  | 0.54173 |
|               | -0.1048         | 0.54173  | 0.54173 | 0.778464301 |             |          |         |
| RNU4-91P      | ENSG00000201648 | -0.10491 | 0.54178 | -0.10491    | 0.54178     | -0.10491 |         |
|               | 0.54178         | -0.10491 | 0.54178 | 0.54178     | 0.778513193 |          |         |
| NA            | ENSG00000254741 | -0.10513 | 0.54186 | -0.10513    | 0.54186     | -0.10513 | 0.54186 |

|           |                 |          |          |         |             |             |          |         |
|-----------|-----------------|----------|----------|---------|-------------|-------------|----------|---------|
|           |                 | -0.10513 | 0.54186  | 0.54186 | 0.778545074 |             |          |         |
| NA        | ENSG00000283228 | -0.10516 | 0.54187  | 0.54187 | -0.10516    | 0.54187     | -0.10516 | 0.54187 |
|           |                 | -0.10516 | 0.54187  | 0.54187 | 0.778545074 |             |          |         |
| NA        | ENSG00000258142 | -0.10523 | 0.5419   | 0.5419  | -0.10523    | 0.5419      | -0.10523 | 0.5419  |
|           |                 | -0.10523 | 0.5419   | 0.5419  | 0.778545074 |             |          |         |
| NA        | ENSG00000264845 | -0.17303 | 0.56869  | 0.56869 | -0.17303    | 0.56869     | -0.10522 | 0.5419  |
|           |                 | -0.17303 | 0.56869  | 0.5419  | 0.778545074 |             |          |         |
| NA        | ENSG00000268922 | -0.29503 | 0.61602  | 0.61602 | -1.0948     | 0.86319     | -0.10522 | 0.5419  |
|           |                 | -0.95323 | 0.82976  | 0.5419  | 0.778545074 |             |          |         |
| LINC02111 | ENSG00000250822 | -0.48041 | 0.68453  | 0.68453 | -0.10523    | 0.54191     | -0.42898 |         |
|           |                 | 0.66603  | -0.48041 | 0.68453 | 0.54191     | 0.778545074 |          |         |
| MFHAS1    | ENSG00000147324 | -0.10529 | 0.54193  | 0.54193 | -0.33787    | 0.63227     | -0.19028 |         |
|           |                 | 0.57546  | -0.68264 | 0.75258 | 0.54193     | 0.778545074 |          |         |
| NA        | ENSG00000276759 | -0.10529 | 0.54193  | 0.54193 | -0.10529    | 0.54193     | -0.10529 | 0.54193 |
|           |                 | -1.2876  | 0.90106  | 0.54193 | 0.778545074 |             |          |         |
| MTSS1     | ENSG00000170873 | -1.8826  | 0.97012  | 0.97012 | -0.98989    | 0.83889     | -0.1245  | 0.54954 |
|           |                 | -0.10546 | 0.54199  | 0.54199 | 0.778585363 |             |          |         |
| NA        | ENSG00000227895 | -0.57867 | 0.71859  | 0.71859 | -0.10544    | 0.54199     | -0.48754 | 0.68706 |
|           |                 | -0.20685 | 0.58194  | 0.54199 | 0.778585363 |             |          |         |
| NA        | ENSG00000259478 | -0.10558 | 0.54204  | 0.54204 | -0.10558    | 0.54204     | -0.10558 | 0.54204 |
|           |                 | -0.10558 | 0.54204  | 0.54204 | 0.778634236 |             |          |         |
| ATP2C2    | ENSG00000064270 | -0.72581 | 0.76602  | 0.76602 | -0.42881    | 0.66597     | -0.49482 |         |
|           |                 | 0.68964  | -0.10565 | 0.54207 | 0.54207     | 0.778648753 |          |         |
| SEC14L4   | ENSG00000133488 | -1.2346  | 0.8915   | 0.8915  | -1.1805     | 0.8811      | -0.16757 |         |
|           |                 | 0.56654  | -0.10574 | 0.5421  | 0.5421      | 0.778648753 |          |         |
| NA        | ENSG00000271943 | -0.10574 | 0.54211  | 0.54211 | -0.10574    | 0.54211     | -0.10574 | 0.54211 |
|           |                 | -0.10574 | 0.54211  | 0.54211 | 0.778648753 |             |          |         |
| HMGB3P9   | ENSG00000229992 | -0.10578 | 0.54212  | 0.54212 | -1.0013     | 0.84167     | -0.10578 |         |
|           |                 | 0.54212  | -0.78359 | 0.78336 | 0.54212     | 0.778648753 |          |         |
| PDLIM1P3  | ENSG00000264172 | -0.60867 | 0.72863  | 0.72863 | -0.1058     | 0.54213     | -0.88327 |         |
|           |                 | 0.81146  | -1.4114  | 0.92094 | 0.54213     | 0.778648753 |          |         |
| METTL7B   | ENSG00000170439 | -0.85459 | 0.80361  | 0.80361 | -0.10589    | 0.54217     | -0.10589 |         |
|           |                 | 0.54217  | -0.10589 | 0.54217 | 0.54217     | 0.778674665 |          |         |
| NA        | ENSG00000248816 | -1.2256  | 0.88982  | 0.88982 | -0.10594    | 0.54218     | -1.2256  | 0.88982 |
|           |                 | -1.2256  | 0.88982  | 0.54218 | 0.778674665 |             |          |         |
| NA        | ENSG00000271930 | -0.10605 | 0.54223  | 0.54223 | -0.10605    | 0.54223     | -0.10605 | 0.54223 |
|           |                 | -0.10605 | 0.54223  | 0.54223 | 0.778703533 |             |          |         |
| CCM2L     | ENSG00000101331 | -0.92543 | 0.82263  | 0.82263 | -0.8076     | 0.79034     | -0.10612 | 0.54225 |
|           |                 | -0.8076  | 0.79034  | 0.54225 | 0.778703533 |             |          |         |
| NA        | ENSG00000257053 | -0.60281 | 0.72668  | 0.72668 | -0.337      | 0.63194     | -0.337   | 0.63194 |
|           |                 | -0.1061  | 0.54225  | 0.54225 | 0.778703533 |             |          |         |
| PPIC-AS1  | ENSG00000249996 | -0.10616 | 0.54227  | 0.54227 | -0.10616    | 0.54227     | -0.10616 |         |
|           |                 | 0.54227  | -0.10616 | 0.54227 | 0.54227     | 0.778703533 |          |         |
| NA        | ENSG00000227230 | -0.10618 | 0.54228  | 0.54228 | -0.10618    | 0.54228     | -0.10618 | 0.54228 |
|           |                 | -0.10618 | 0.54228  | 0.54228 | 0.778703533 |             |          |         |
| MTND4P9   | ENSG00000250050 | -1.0567  | 0.85466  | 0.85466 | -0.22472    | 0.5889      | -0.10624 |         |
|           |                 | 0.5423   | -1.6117  | 0.94648 | 0.5423      | 0.778709306 |          |         |
| RNA5SP198 | ENSG00000222308 | -0.1063  | 0.54233  | 0.54233 | -0.70742    | 0.76035     | -0.70742 |         |
|           |                 | 0.76035  | -0.70742 | 0.76035 | 0.54233     | 0.778729437 |          |         |
| ZNF257    | ENSG00000197134 | -0.1817  | 0.57209  | 0.57209 | -1.0573     | 0.85481     | -0.64639 |         |
|           |                 | 0.74099  | -0.10639 | 0.54237 | 0.54237     | 0.778740979 |          |         |
| LINC01733 | ENSG00000226203 | -0.70417 | 0.75934  | 0.75934 | -0.1064     | 0.54237     | -0.29525 |         |
|           |                 | 0.6161   | -0.61234 | 0.72984 | 0.54237     | 0.778740979 |          |         |
| UNC93B5   | ENSG00000184795 | -0.98304 | 0.83721  | 0.83721 | -1.3617     | 0.91336     | -1.6105  |         |
|           |                 | 0.94636  | -0.10647 | 0.5424  | 0.5424      | 0.778761108 |          |         |
| ADAT2     | ENSG00000189007 | -1.3585  | 0.91285  | 0.91285 | -0.10667    | 0.54247     | -0.80696 | 0.79016 |
|           |                 | -0.23808 | 0.59409  | 0.54247 | 0.778838664 |             |          |         |
| NA        | ENSG00000270761 | -0.1067  | 0.54249  | 0.54249 | -0.1067     | 0.54249     | -0.1067  | 0.54249 |
|           |                 | -0.1067  | 0.54249  | 0.54249 | 0.778844432 |             |          |         |
| NA        | ENSG00000257346 | -0.1068  | 0.54253  | 0.54253 | -0.1068     | 0.54253     | -0.1068  | 0.54253 |
|           |                 | -0.1068  | 0.54253  | 0.54253 | 0.778878912 |             |          |         |
| SPAG17    | ENSG00000155761 | -0.69908 | 0.75775  | 0.75775 | -0.26349    | 0.60391     | -0.1069  |         |

|            |                 |          |         |             |             |          |         |
|------------|-----------------|----------|---------|-------------|-------------|----------|---------|
|            | 0.54257         | -0.71745 | 0.76345 | 0.54257     | 0.77891339  |          |         |
| NA         | ENSG00000277504 | -0.10697 | 0.5426  | -0.10697    | 0.5426      | -0.10697 | 0.5426  |
|            | -0.10697        | 0.5426   | 0.5426  | 0.77893351  |             |          |         |
| RXFP1      | ENSG00000171509 | -0.10706 | 0.54263 | -0.3578     | 0.63975     | -1.6652  | 0.95206 |
|            | -1.8412         | 0.9672   | 0.54263 | 0.778936556 |             |          |         |
| SEPTIN10P1 | ENSG00000253541 | -1.0821  | 0.8604  | -0.10712    | 0.54265     | -1.0169  |         |
|            | 0.8454          | -1.8502  | 0.96786 | 0.54265     | 0.778936556 |          |         |
| MIR521-2   | ENSG00000207549 | -0.10714 | 0.54266 | -0.10714    | 0.54266     | -0.10714 |         |
|            | 0.54266         | -0.10714 | 0.54266 | 0.54266     | 0.778936556 |          |         |
| ETFDH      | ENSG00000171503 | -0.10717 | 0.54267 | -0.15326    | 0.5609      | -1.0935  | 0.86292 |
|            | -1.2771         | 0.89922  | 0.54267 | 0.778936556 |             |          |         |
| EFEMP1     | ENSG00000115380 | -0.26764 | 0.60551 | -0.10727    | 0.54271     | -0.10727 |         |
|            | 0.54271         | -0.10727 | 0.54271 | 0.54271     | 0.778936556 |          |         |
| RNU6-1092P | ENSG00000252764 | -0.10725 | 0.54271 | -0.10725    | 0.54271     | -0.10725 |         |
|            | 0.54271         | -0.10725 | 0.54271 | 0.54271     | 0.778936556 |          |         |
| NA         | ENSG00000200427 | -0.37985 | 0.64797 | -0.37985    | 0.64797     | -0.1073  | 0.54273 |
|            | -0.37985        | 0.64797  | 0.54273 | 0.778936556 |             |          |         |
| HNRNPA3P5  | ENSG00000236565 | -0.10732 | 0.54273 | -0.10732    | 0.54273     | -0.10732 |         |
|            | 0.54273         | -0.10732 | 0.54273 | 0.54273     | 0.778936556 |          |         |
| NA         | ENSG00000281205 | -0.10745 | 0.54278 | -0.83205    | 0.79731     | -0.10745 | 0.54278 |
|            | -0.10745        | 0.54278  | 0.54278 | 0.778985374 |             |          |         |
| MIR3939    | ENSG00000265828 | -0.10763 | 0.54286 | -0.44763    | 0.67279     | -0.44763 |         |
|            | 0.67279         | -0.44763 | 0.67279 | 0.54286     | 0.779017202 |          |         |
| COG6       | ENSG00000133103 | -0.69636 | 0.7569  | -0.10768    | 0.54287     | -1.0266  | 0.8477  |
|            | -0.22792        | 0.59015  | 0.54287 | 0.779017202 |             |          |         |
| NA         | ENSG00000260797 | -1.0875  | 0.8616  | -0.1077     | 0.54288     | -1.0875  | 0.8616  |
|            | -1.0875         | 0.8616   | 0.54288 | 0.779017202 |             |          |         |
| RNU6-828P  | ENSG00000201746 | -0.10772 | 0.54289 | -0.10772    | 0.54289     | -0.10772 |         |
|            | 0.54289         | -0.10772 | 0.54289 | 0.54289     | 0.779017202 |          |         |
| NA         | ENSG00000262262 | -0.10774 | 0.5429  | -0.10774    | 0.5429      | -0.10774 | 0.5429  |
|            | -0.10774        | 0.5429   | 0.5429  | 0.779017202 |             |          |         |
| TMEFF1     | ENSG00000241697 | -0.55109 | 0.70921 | -0.76755    | 0.77862     | -0.10782 |         |
|            | 0.54293         | -1.1541  | 0.87577 | 0.54293     | 0.779017202 |          |         |
| RN7SKP228  | ENSG00000222974 | -0.24512 | 0.59682 | -0.10787    | 0.54295     | -0.10787 |         |
|            | 0.54295         | -0.10787 | 0.54295 | 0.54295     | 0.779017202 |          |         |
| RPL6P24    | ENSG00000227474 | -0.10792 | 0.54297 | -0.44558    | 0.67205     | -0.44558 |         |
|            | 0.67205         | -0.44558 | 0.67205 | 0.54297     | 0.779017202 |          |         |
| NA         | ENSG00000237810 | -0.69741 | 0.75723 | -0.10791    | 0.54297     | -2.157   | 0.9845  |
|            | -1.5221         | 0.936    | 0.54297 | 0.779017202 |             |          |         |
| NA         | ENSG00000213642 | -0.53853 | 0.7049  | -0.10794    | 0.54298     | -0.83285 | 0.79754 |
|            | -1.8378         | 0.96696  | 0.54298 | 0.779017202 |             |          |         |
| NA         | ENSG00000276727 | -0.10797 | 0.54299 | -0.10797    | 0.54299     | -0.10797 | 0.54299 |
|            | -0.10797        | 0.54299  | 0.54299 | 0.779017202 |             |          |         |
| NA         | ENSG00000226025 | -0.108   | 0.543   | -0.25624    | 0.60112     | -0.72537 | 0.76589 |
|            | -0.72537        | 0.76589  | 0.543   | 0.779017202 |             |          |         |
| CAPN10     | ENSG00000142330 | -1.399   | 0.91909 | -1.0495     | 0.85303     | -0.10801 |         |
|            | 0.54301         | -1.1157  | 0.86772 | 0.54301     | 0.779017202 |          |         |
| NA         | ENSG00000249942 | -0.6085  | 0.72857 | -0.17473    | 0.56935     | -0.10806 | 0.54303 |
|            | -0.7735         | 0.78039  | 0.54303 | 0.77902296  |             |          |         |
| NA         | ENSG00000232337 | -0.71138 | 0.76157 | -0.10816    | 0.54307     | -1.5217  | 0.93596 |
|            | -0.96552        | 0.83286  | 0.54307 | 0.779040231 |             |          |         |
| NA         | ENSG00000253427 | -0.1082  | 0.54308 | -0.1082     | 0.54308     | -0.1082  | 0.54308 |
|            | -0.1082         | 0.54308  | 0.54308 | 0.779040231 |             |          |         |
| NA         | ENSG00000259298 | -0.10823 | 0.54309 | -0.10823    | 0.54309     | -0.10823 | 0.54309 |
|            | -0.10823        | 0.54309  | 0.54309 | 0.779040231 |             |          |         |
| NA         | ENSG00000222305 | -0.10832 | 0.54313 | -0.10832    | 0.54313     | -0.10832 | 0.54313 |
|            | -0.10832        | 0.54313  | 0.54313 | 0.779074676 |             |          |         |
| NA         | ENSG00000269976 | -1.0436  | 0.85167 | -0.99722    | 0.84067     | -0.69818 | 0.75747 |
|            | -0.1084         | 0.54316  | 0.54316 | 0.77908052  |             |          |         |
| NA         | ENSG00000237359 | -1.6878  | 0.95427 | -0.10848    | 0.54319     | -1.6878  | 0.95427 |
|            | -1.6878         | 0.95427  | 0.54319 | 0.77908052  |             |          |         |
| NA         | ENSG00000269300 | -0.1085  | 0.5432  | -0.1085     | 0.5432      | -0.1085  | 0.5432  |



|           |                 |          |         |             |             |          |         |
|-----------|-----------------|----------|---------|-------------|-------------|----------|---------|
|           | -0.1085         | 0.5432   | 0.5432  | 0.77908052  |             |          |         |
| LINC01775 | ENSG00000267201 | -0.76145 | 0.77681 | -0.10856    | 0.54322     | -0.89622 |         |
|           | 0.81493         | -0.89622 | 0.81493 | 0.54322     | 0.77908052  |          |         |
| NA        | ENSG00000266521 | -0.20848 | 0.58257 | -0.10857    | 0.54323     | -0.10857 | 0.54323 |
|           | -0.10857        | 0.54323  | 0.54323 | 0.77908052  |             |          |         |
| NA        | ENSG00000278600 | -0.10856 | 0.54323 | -0.10856    | 0.54323     | -0.10856 | 0.54323 |
|           | -0.10856        | 0.54323  | 0.54323 | 0.77908052  |             |          |         |
| JOSD2     | ENSG00000161677 | -0.10865 | 0.54326 | -0.10865    | 0.54326     | -0.10865 | 0.54326 |
|           | -0.10865        | 0.54326  | 0.54326 | 0.779092028 |             |          |         |
| NA        | ENSG00000200174 | -0.10867 | 0.54327 | -0.10867    | 0.54327     | -0.10867 | 0.54327 |
|           | -0.10867        | 0.54327  | 0.54327 | 0.779092028 |             |          |         |
| MIR1271   | ENSG00000221464 | -0.10878 | 0.54331 | -0.10878    | 0.54331     | -0.10878 |         |
|           | 0.54331         | -0.10878 | 0.54331 | 0.54331     | 0.779120792 |          |         |
| FAM168A   | ENSG00000054965 | -0.10883 | 0.54333 | -0.31631    | 0.62412     | -0.27058 |         |
|           | 0.60664         | -0.41657 | 0.6615  | 0.54333     | 0.779120792 |          |         |
| NA        | ENSG00000236897 | -0.1089  | 0.54336 | -1.0315     | 0.84884     | -0.1089  | 0.54336 |
|           | -0.1089         | 0.54336  | 0.54336 | 0.779120792 |             |          |         |
| NA        | ENSG00000206532 | -0.26682 | 0.6052  | -0.1089     | 0.54336     | -0.1089  | 0.54336 |
|           | -0.1089         | 0.54336  | 0.54336 | 0.779120792 |             |          |         |
| P4HA2-AS1 | ENSG00000237714 | -0.10894 | 0.54337 | -0.10894    | 0.54337     | -0.10894 |         |
|           | 0.54337         | -0.10894 | 0.54337 | 0.54337     | 0.779120792 |          |         |
| NA        | ENSG00000251974 | -1.0734  | 0.85845 | -0.10898    | 0.54339     | -0.78044 | 0.78243 |
|           | -1.3128         | 0.90537  | 0.54339 | 0.779121285 |             |          |         |
| NA        | ENSG00000231181 | -0.10911 | 0.54344 | -0.10911    | 0.54344     | -0.10911 | 0.54344 |
|           | -0.10911        | 0.54344  | 0.54344 | 0.779121285 |             |          |         |
| SNTB2     | ENSG00000168807 | -0.41705 | 0.66168 | -0.30233    | 0.6188      | -0.39551 | 0.65377 |
|           | -0.10912        | 0.54345  | 0.54345 | 0.779121285 |             |          |         |
| NA        | ENSG00000233037 | -0.10915 | 0.54346 | -0.10915    | 0.54346     | -0.10915 | 0.54346 |
|           | -1.0603         | 0.85549  | 0.54346 | 0.779121285 |             |          |         |
| RN7SL20P  | ENSG00000242251 | -0.10917 | 0.54347 | -0.10917    | 0.54347     | -0.10917 |         |
|           | 0.54347         | -0.10917 | 0.54347 | 0.54347     | 0.779121285 |          |         |
| NA        | ENSG00000273233 | -0.16487 | 0.56548 | -0.10921    | 0.54348     | -0.16487 | 0.56548 |
|           | -0.16487        | 0.56548  | 0.54348 | 0.779121285 |             |          |         |
| PRELID3A  | ENSG00000141391 | -0.82722 | 0.79594 | -0.6851     | 0.75336     | -0.32866 |         |
|           | 0.62879         | -0.10925 | 0.5435  | 0.5435      | 0.779121285 |          |         |
| NA        | ENSG00000278914 | -0.1093  | 0.54352 | -0.1093     | 0.54352     | -0.1093  | 0.54352 |
|           | -0.1093         | 0.54352  | 0.54352 | 0.779121285 |             |          |         |
| TMED10P2  | ENSG00000239405 | -0.80399 | 0.7893  | -0.80399    | 0.7893      | -0.80399 |         |
|           | 0.7893          | -0.10935 | 0.54354 | 0.54354     | 0.779121285 |          |         |
| RBCK1     | ENSG00000125826 | -0.29719 | 0.61684 | -1.6585     | 0.95139     | -1.6585  | 0.95139 |
|           | -0.10942        | 0.54357  | 0.54357 | 0.779121285 |             |          |         |
| SERTAD1   | ENSG00000197019 | -0.10945 | 0.54358 | -0.10945    | 0.54358     | -0.10945 |         |
|           | 0.54358         | -0.10945 | 0.54358 | 0.54358     | 0.779121285 |          |         |
| OR2J1     | ENSG00000204702 | -0.84248 | 0.80024 | -0.58967    | 0.72229     | -0.10958 | 0.54363 |
|           | -0.57942        | 0.71885  | 0.54363 | 0.779121285 |             |          |         |
| EP300     | ENSG00000100393 | -0.55666 | 0.71112 | -0.69557    | 0.75665     | -0.10962 | 0.54364 |
|           | -0.57511        | 0.71739  | 0.54364 | 0.779121285 |             |          |         |
| ADAM24P   | ENSG00000214607 | -0.10962 | 0.54365 | -0.10962    | 0.54365     | -0.10962 |         |
|           | 0.54365         | -0.10962 | 0.54365 | 0.54365     | 0.779121285 |          |         |
| DEFB113   | ENSG00000214642 | -0.10965 | 0.54366 | -0.10965    | 0.54366     | -0.10965 |         |
|           | 0.54366         | -0.10965 | 0.54366 | 0.54366     | 0.779121285 |          |         |
| RN7SKP196 | ENSG00000252076 | -1.8194  | 0.96557 | -0.68556    | 0.7535      | -0.10968 |         |
|           | 0.54367         | -0.11557 | 0.546   | 0.54367     | 0.779121285 |          |         |
| CGREF1    | ENSG00000138028 | -0.10977 | 0.5437  | -0.81178    | 0.79154     | -1.0497  |         |
|           | 0.85306         | -0.47649 | 0.68314 | 0.5437      | 0.779121285 |          |         |
| NA        | ENSG00000256341 | -0.10976 | 0.5437  | -0.10976    | 0.5437      | -0.10976 | 0.5437  |
|           | -0.10976        | 0.5437   | 0.5437  | 0.779121285 |             |          |         |
| NA        | ENSG00000271716 | -0.10987 | 0.54374 | -0.10987    | 0.54374     | -0.10987 | 0.54374 |
|           | -0.9981         | 0.84088  | 0.54374 | 0.779121285 |             |          |         |
| KLK6      | ENSG00000167755 | -0.41547 | 0.6611  | -0.1099     | 0.54376     | -0.86537 | 0.80658 |
|           | -0.41547        | 0.6611   | 0.54376 | 0.779121285 |             |          |         |
| GSKIP     | ENSG00000100744 | -0.16348 | 0.56493 | -0.16348    | 0.56493     | -0.16348 | 0.56493 |

|           |                 |          |         |             |             |          |         |
|-----------|-----------------|----------|---------|-------------|-------------|----------|---------|
|           | -0.10994        | 0.54377  | 0.54377 | 0.779121285 |             |          |         |
| ZNF444    | ENSG00000167685 | -0.10995 | 0.54378 | -0.10995    | 0.54378     | -0.10995 |         |
|           | 0.54378         | -0.10995 | 0.54378 | 0.54378     | 0.779121285 |          |         |
| TM4SF1    | ENSG00000169908 | -0.10996 | 0.54378 | -0.65212    | 0.74284     | -0.10996 |         |
|           | 0.54378         | -0.10996 | 0.54378 | 0.54378     | 0.779121285 |          |         |
| PRR23A    | ENSG00000206260 | -0.10999 | 0.54379 | -1.3364     | 0.90928     | -1.3364  |         |
|           | 0.90928         | -1.3364  | 0.90928 | 0.54379     | 0.779121285 |          |         |
| OMD       | ENSG00000127083 | -0.57522 | 0.71743 | -0.11008    | 0.54383     | -0.11008 | 0.54383 |
|           | -0.11008        | 0.54383  | 0.54383 | 0.779121285 |             |          |         |
| YWHAZP2   | ENSG00000213236 | -0.1101  | 0.54383 | -0.1101     | 0.54383     | -1.6501  |         |
|           | 0.95054         | -0.74596 | 0.77215 | 0.54383     | 0.779121285 |          |         |
| NA        | ENSG00000278011 | -0.11009 | 0.54383 | -0.11009    | 0.54383     | -0.11009 | 0.54383 |
|           | -0.11009        | 0.54383  | 0.54383 | 0.779121285 |             |          |         |
| DPH5      | ENSG00000117543 | -0.11011 | 0.54384 | -0.11011    | 0.54384     | -0.11011 | 0.54384 |
|           | -0.11011        | 0.54384  | 0.54384 | 0.779121285 |             |          |         |
| NA        | ENSG00000232738 | -0.11012 | 0.54384 | -0.11012    | 0.54384     | -0.11012 | 0.54384 |
|           | -0.11012        | 0.54384  | 0.54384 | 0.779121285 |             |          |         |
| SPATA46   | ENSG00000171722 | -0.11014 | 0.54385 | -0.11014    | 0.54385     | -0.11014 |         |
|           | 0.54385         | -0.11014 | 0.54385 | 0.54385     | 0.779121285 |          |         |
| NPM1P1    | ENSG00000267652 | -0.11022 | 0.54388 | -0.11022    | 0.54388     | -0.11022 |         |
|           | 0.54388         | -0.25407 | 0.60028 | 0.54388     | 0.779132778 |          |         |
| RNU6V     | ENSG00000206832 | -0.11025 | 0.54389 | -0.11025    | 0.54389     | -0.11025 | 0.54389 |
|           | -0.11025        | 0.54389  | 0.54389 | 0.779132778 |             |          |         |
| NA        | ENSG00000258428 | -0.11031 | 0.54392 | -0.65125    | 0.74256     | -1.1069  | 0.86582 |
|           | -1.1069         | 0.86582  | 0.54392 | 0.779135691 |             |          |         |
| RNA5SP391 | ENSG00000200326 | -0.11037 | 0.54394 | -0.95976    | 0.83141     | -0.79249 |         |
|           | 0.78596         | -0.61869 | 0.73194 | 0.54394     | 0.779135691 |          |         |
| NA        | ENSG00000229299 | -0.11037 | 0.54394 | -0.11037    | 0.54394     | -0.11037 | 0.54394 |
|           | -0.11037        | 0.54394  | 0.54394 | 0.779135691 |             |          |         |
| C21orf91  | ENSG00000154642 | -0.11047 | 0.54398 | -0.11047    | 0.54398     | -0.11047 |         |
|           | 0.54398         | -0.22526 | 0.58911 | 0.54398     | 0.779147181 |          |         |
| CHST1     | ENSG00000175264 | -0.69991 | 0.75801 | -0.48137    | 0.68487     | -0.11046 | 0.54398 |
|           | -0.35431        | 0.63845  | 0.54398 | 0.779147181 |             |          |         |
| OSGEPL1   | ENSG00000128694 | -0.85191 | 0.80287 | -0.59551    | 0.72425     | -0.72984 |         |
|           | 0.76726         | -0.11058 | 0.54402 | 0.54402     | 0.77915867  |          |         |
| CYYR1-AS1 | ENSG00000197934 | -0.37764 | 0.64715 | -0.11488    | 0.54573     | -0.11056 |         |
|           | 0.54402         | -0.74461 | 0.77175 | 0.54402     | 0.77915867  |          |         |
| TF        | ENSG00000091513 | -0.72207 | 0.76487 | -0.60894    | 0.72872     | -0.11068 | 0.54407 |
|           | -0.92937        | 0.82365  | 0.54407 | 0.779161581 |             |          |         |
| CRP       | ENSG00000132693 | -0.1107  | 0.54407 | -0.1107     | 0.54407     | -0.1107  | 0.54407 |
|           | -0.1107         | 0.54407  | 0.54407 | 0.779161581 |             |          |         |
| PDLIM3    | ENSG00000154553 | -1.2211  | 0.88897 | -0.59815    | 0.72513     | -0.55699 |         |
|           | 0.71123         | -0.1107  | 0.54407 | 0.54407     | 0.779161581 |          |         |
| NA        | ENSG00000273025 | -0.11074 | 0.54409 | -0.11074    | 0.54409     | -0.11074 | 0.54409 |
|           | -0.11074        | 0.54409  | 0.54409 | 0.779167324 |             |          |         |
| RN7SL846P | ENSG00000242818 | -0.95318 | 0.82975 | -0.95318    | 0.82975     | -0.95318 |         |
|           | 0.82975         | -0.11105 | 0.54421 | 0.54421     | 0.779270528 |          |         |
| TPRG1L    | ENSG00000158109 | -0.11111 | 0.54424 | -0.11111    | 0.54424     | -0.11111 |         |
|           | 0.54424         | -0.11111 | 0.54424 | 0.54424     | 0.779270528 |          |         |
| LINC01029 | ENSG00000265843 | -0.11112 | 0.54424 | -0.35248    | 0.63776     | -0.17889 |         |
|           | 0.57099         | -1.5544  | 0.93995 | 0.54424     | 0.779270528 |          |         |
| NA        | ENSG00000279415 | -0.11115 | 0.54425 | -0.11115    | 0.54425     | -0.63404 | 0.73697 |
|           | -0.11115        | 0.54425  | 0.54425 | 0.779270528 |             |          |         |
| NA        | ENSG00000271624 | -0.11118 | 0.54426 | -0.11118    | 0.54426     | -0.11118 | 0.54426 |
|           | -0.11118        | 0.54426  | 0.54426 | 0.779270528 |             |          |         |
| KCNMB3    | ENSG00000171121 | -0.23225 | 0.59183 | -0.1112     | 0.54427     | -0.67226 |         |
|           | 0.74929         | -1.0133  | 0.84455 | 0.54427     | 0.779270528 |          |         |
| NA        | ENSG00000275799 | -0.11123 | 0.54428 | -0.11123    | 0.54428     | -0.11123 | 0.54428 |
|           | -0.11123        | 0.54428  | 0.54428 | 0.779270528 |             |          |         |
| CCDC125   | ENSG00000183323 | -1.111   | 0.86671 | -1.9008     | 0.97133     | -0.83389 |         |
|           | 0.79783         | -0.11125 | 0.54429 | 0.54429     | 0.779270528 |          |         |
| NA        | ENSG00000276454 | -1.6507  | 0.9506  | -0.11144    | 0.54437     | -1.6507  | 0.9506  |

|           |                 |          |         |             |             |          |         |  |
|-----------|-----------------|----------|---------|-------------|-------------|----------|---------|--|
|           | -1.6507         | 0.9506   | 0.54437 | 0.779353587 |             |          |         |  |
| MYO1A     | ENSG00000166866 | -1.3347  | 0.90901 | -1.5796     | 0.9429      | -0.11148 | 0.54438 |  |
|           | -1.2916         | 0.90174  | 0.54438 | 0.779353587 |             |          |         |  |
| SLC41A3   | ENSG00000114544 | -0.30617 | 0.62026 | -0.33637    | 0.6317      | -0.11155 |         |  |
|           | 0.54441         | -0.14812 | 0.55888 | 0.54441     | 0.779373639 |          |         |  |
| NA        | ENSG00000251837 | -0.1116  | 0.54443 | -0.1116     | 0.54443     | -0.1116  | 0.54443 |  |
|           | -0.1116         | 0.54443  | 0.54443 | 0.779379374 |             |          |         |  |
| NA        | ENSG00000244331 | -1.4988  | 0.93303 | -0.11164    | 0.54445     | -1.7161  | 0.95692 |  |
|           | -2.0327         | 0.97896  | 0.54445 | 0.779385109 |             |          |         |  |
| PANK2-AS1 | ENSG00000229539 | -0.11177 | 0.5445  | -0.11177    | 0.5445      | -0.11177 |         |  |
|           | 0.5445          | -0.11177 | 0.5445  | 0.5445      | 0.779422359 |          |         |  |
| ECHDC1    | ENSG00000093144 | -0.43056 | 0.66661 | -0.1118     | 0.54451     | -1.4179  |         |  |
|           | 0.92189         | -0.43056 | 0.66661 | 0.54451     | 0.779422359 |          |         |  |
| NA        | ENSG00000188512 | -0.31629 | 0.62411 | -0.8649     | 0.80645     | -0.59722 | 0.72482 |  |
|           | -0.11188        | 0.54454  | 0.54454 | 0.779422359 |             |          |         |  |
| NA        | ENSG00000254350 | -0.68192 | 0.75236 | -0.71874    | 0.76385     | -0.71874 | 0.76385 |  |
|           | -0.11187        | 0.54454  | 0.54454 | 0.779422359 |             |          |         |  |
| ARL14EPL  | ENSG00000268223 | -0.11194 | 0.54456 | -0.34784    | 0.63602     | -0.34784 |         |  |
|           | 0.63602         | -0.8585  | 0.80469 | 0.54456     | 0.779428091 |          |         |  |
| NA        | ENSG00000241462 | -0.11199 | 0.54459 | -0.11199    | 0.54459     | -0.11199 | 0.54459 |  |
|           | -0.411          | 0.65946  | 0.54459 | 0.779448136 |             |          |         |  |
| RPL12P18  | ENSG00000213400 | -0.11206 | 0.54461 | -1.7448     | 0.95949     | -1.7448  |         |  |
|           | 0.95949         | -1.7448  | 0.95949 | 0.54461     | 0.779453868 |          |         |  |
| FRS3      | ENSG00000137218 | -1.1989  | 0.88471 | -0.18325    | 0.5727      | -0.4186  | 0.66225 |  |
|           | -0.11214        | 0.54464  | 0.54464 | 0.779473911 |             |          |         |  |
| NA        | ENSG00000261342 | -0.11229 | 0.5447  | -0.11229    | 0.5447      | -0.11229 | 0.5447  |  |
|           | -0.11229        | 0.5447   | 0.5447  | 0.779528305 |             |          |         |  |
| PXK       | ENSG00000168297 | -0.33792 | 0.63229 | -0.25457    | 0.60047     | -0.20447 | 0.58101 |  |
|           | -0.11231        | 0.54471  | 0.54471 | 0.779528305 |             |          |         |  |
| RGPD3     | ENSG00000153165 | -0.12617 | 0.5502  | -0.80976    | 0.79096     | -0.11246 | 0.54477 |  |
|           | -0.23301        | 0.59212  | 0.54477 | 0.779551217 |             |          |         |  |
| NA        | ENSG00000262115 | -0.11245 | 0.54477 | -0.11245    | 0.54477     | -0.11245 | 0.54477 |  |
|           | -0.11245        | 0.54477  | 0.54477 | 0.779551217 |             |          |         |  |
| DHFRP3    | ENSG00000168129 | -0.501   | 0.69182 | -0.11249    | 0.54478     | -0.11249 |         |  |
|           | 0.54478         | -0.11249 | 0.54478 | 0.54478     | 0.779551217 |          |         |  |
| NA        | ENSG00000275329 | -0.11252 | 0.54479 | -0.11252    | 0.54479     | -0.11252 | 0.54479 |  |
|           | -0.11252        | 0.54479  | 0.54479 | 0.779551217 |             |          |         |  |
| ZNF652    | ENSG00000198740 | -0.60388 | 0.72704 | -0.60388    | 0.72704     | -0.62988 |         |  |
|           | 0.73561         | -0.11271 | 0.54487 | 0.54487     | 0.779642797 |          |         |  |
| RNY4P9    | ENSG00000200064 | -0.1128  | 0.54491 | -0.81311    | 0.79192     | -0.37445 |         |  |
|           | 0.64596         | -0.37445 | 0.64596 | 0.54491     | 0.779668554 |          |         |  |
| ADARB2    | ENSG00000185736 | -1.202   | 0.88531 | -0.11284    | 0.54492     | -1.0157  |         |  |
|           | 0.84511         | -0.29254 | 0.61506 | 0.54492     | 0.779668554 |          |         |  |
| NA        | ENSG00000202345 | -0.11298 | 0.54498 | -0.11298    | 0.54498     | -0.11298 | 0.54498 |  |
|           | -0.11298        | 0.54498  | 0.54498 | 0.779731507 |             |          |         |  |
| NA        | ENSG00000274979 | -0.11307 | 0.54501 | -0.11307    | 0.54501     | -0.11307 | 0.54501 |  |
|           | -0.11307        | 0.54501  | 0.54501 | 0.779740076 |             |          |         |  |
| PINK1-AS  | ENSG00000117242 | -0.11313 | 0.54503 | -0.11313    | 0.54503     | -0.57282 |         |  |
|           | 0.71662         | -0.1862  | 0.57385 | 0.54503     | 0.779740076 |          |         |  |
| HORMAD2   | ENSG00000176635 | -0.1132  | 0.54506 | -0.51587    | 0.69703     | -0.98041 |         |  |
|           | 0.83656         | -0.98312 | 0.83723 | 0.54506     | 0.779740076 |          |         |  |
| NA        | ENSG00000221184 | -0.11326 | 0.54509 | -0.11326    | 0.54509     | -0.11326 | 0.54509 |  |
|           | -0.11326        | 0.54509  | 0.54509 | 0.779740076 |             |          |         |  |
| DLG2-AS2  | ENSG00000255311 | -0.27611 | 0.60877 | -0.11325    | 0.54509     | -1.2537  |         |  |
|           | 0.89503         | -0.49248 | 0.68881 | 0.54509     | 0.779740076 |          |         |  |
| EPS15     | ENSG00000085832 | -0.11329 | 0.5451  | -1.7902     | 0.96329     | -1.7902  | 0.96329 |  |
|           | -0.43631        | 0.66869  | 0.5451  | 0.779740076 |             |          |         |  |
| AGAP2-AS1 | ENSG00000255737 | -0.11328 | 0.5451  | -0.11328    | 0.5451      | -0.11328 |         |  |
|           | 0.5451          | -0.11328 | 0.5451  | 0.5451      | 0.779740076 |          |         |  |
| MTNR1A    | ENSG00000168412 | -0.11337 | 0.54513 | -1.0647     | 0.8565      | -0.19273 |         |  |
|           | 0.57642         | -1.69    | 0.95448 | 0.54513     | 0.779740076 |          |         |  |
| SDHAF3    | ENSG00000196636 | -0.1564  | 0.56214 | -0.11336    | 0.54513     | -0.83371 |         |  |

|            |                 |          |         |             |             |          |         |
|------------|-----------------|----------|---------|-------------|-------------|----------|---------|
|            | 0.79778         | -0.69499 | 0.75647 | 0.54513     | 0.779740076 |          |         |
| LINC01900  | ENSG00000265758 | -0.11354 | 0.5452  | -1.2148     | 0.88778     | -0.99651 |         |
|            | 0.8405          | -1.4126  | 0.92111 | 0.5452      | 0.779808726 |          |         |
| ARID3B     | ENSG00000179361 | -0.18682 | 0.5741  | -0.11358    | 0.54521     | -0.23655 |         |
|            | 0.5935          | -0.11599 | 0.54617 | 0.54521     | 0.779808726 |          |         |
| RBM15-AS1  | ENSG00000227963 | -0.32949 | 0.62911 | -0.11362    | 0.54523     | -0.25044 |         |
|            | 0.59887         | -0.68789 | 0.75424 | 0.54523     | 0.779814443 |          |         |
| NA         | ENSG00000227718 | -0.15424 | 0.56129 | -0.1137     | 0.54526     | -0.48142 | 0.68489 |
|            | -0.48142        | 0.68489  | 0.54526 | 0.779825877 |             |          |         |
| KIF5A      | ENSG00000155980 | -0.49289 | 0.68895 | -0.11372    | 0.54527     | -0.43893 | 0.66964 |
|            | -0.3064         | 0.62035  | 0.54527 | 0.779825877 |             |          |         |
| SPINT1-AS1 | ENSG00000261183 | -0.11377 | 0.54529 | -0.11377    | 0.54529     | -0.11377 |         |
|            | 0.54529         | -0.11377 | 0.54529 | 0.54529     | 0.779831593 |          |         |
| TPM3       | ENSG00000143549 | -0.11397 | 0.54537 | -0.49655    | 0.69025     | -0.28457 | 0.61201 |
|            | -0.97386        | 0.83494  | 0.54537 | 0.779854429 |             |          |         |
| NA         | ENSG00000253745 | -0.114   | 0.54538 | -0.46551    | 0.67922     | -1.3342  | 0.90894 |
|            | -1.0233         | 0.84692  | 0.54538 | 0.779854429 |             |          |         |
| MS4A4A     | ENSG00000110079 | -0.11402 | 0.54539 | -1.0223     | 0.84668     | -0.9827  |         |
|            | 0.83712         | -0.9827  | 0.83712 | 0.54539     | 0.779854429 |          |         |
| LINC01700  | ENSG00000232837 | -0.19276 | 0.57643 | -0.11403    | 0.54539     | -0.19276 |         |
|            | 0.57643         | -1.336   | 0.90922 | 0.54539     | 0.779854429 |          |         |
| SNTN       | ENSG00000188817 | -0.89118 | 0.81358 | -0.86672    | 0.80695     | -0.47678 | 0.68324 |
|            | -0.1141         | 0.54542  | 0.54542 | 0.779854429 |             |          |         |
| NA         | ENSG00000267439 | -0.11413 | 0.54543 | -0.11413    | 0.54543     | -0.11413 | 0.54543 |
|            | -0.11413        | 0.54543  | 0.54543 | 0.779854429 |             |          |         |
| LINC01238  | ENSG00000237940 | -1.4144  | 0.92137 | -0.11414    | 0.54544     | -0.11414 |         |
|            | 0.54544         | -0.11414 | 0.54544 | 0.54544     | 0.779854429 |          |         |
| NA         | ENSG00000259899 | -0.11416 | 0.54544 | -0.98853    | 0.83855     | -0.98853 | 0.83855 |
|            | -0.98853        | 0.83855  | 0.54544 | 0.779854429 |             |          |         |
| DGKB       | ENSG00000136267 | -0.11417 | 0.54545 | -0.13545    | 0.55387     | -0.168   | 0.56671 |
|            | -0.29496        | 0.61599  | 0.54545 | 0.779854429 |             |          |         |
| NA         | ENSG00000215298 | -0.11438 | 0.54553 | -0.11438    | 0.54553     | -0.11438 | 0.54553 |
|            | -0.11438        | 0.54553  | 0.54553 | 0.779897289 |             |          |         |
| NA         | ENSG00000253125 | -0.78026 | 0.78238 | -0.63976    | 0.73884     | -1.199   | 0.88474 |
|            | -0.11441        | 0.54554  | 0.54554 | 0.779897289 |             |          |         |
| NA         | ENSG00000254707 | -0.53885 | 0.70501 | -0.1144     | 0.54554     | -0.56748 | 0.71481 |
|            | -0.1144         | 0.54554  | 0.54554 | 0.779897289 |             |          |         |
| CCNDBP1    | ENSG00000166946 | -0.11443 | 0.54555 | -0.62559    | 0.73421     | -0.62559 |         |
|            | 0.73421         | -0.81551 | 0.79261 | 0.54555     | 0.779897289 |          |         |
| NA         | ENSG00000273585 | -0.69808 | 0.75744 | -1.0304     | 0.84859     | -0.11446 | 0.54556 |
|            | -1.3102         | 0.90493  | 0.54556 | 0.779897289 |             |          |         |
| NA         | ENSG00000260465 | -0.11451 | 0.54558 | -0.11451    | 0.54558     | -0.11451 | 0.54558 |
|            | -0.11451        | 0.54558  | 0.54558 | 0.779903001 |             |          |         |
| NA         | ENSG00000264385 | -0.11465 | 0.54564 | -0.11465    | 0.54564     | -0.11465 | 0.54564 |
|            | -0.11465        | 0.54564  | 0.54564 | 0.77996589  |             |          |         |
| CCDC158    | ENSG00000163749 | -1.0642  | 0.85637 | -0.15432    | 0.56132     | -0.19388 |         |
|            | 0.57686         | -0.11476 | 0.54568 | 0.54568     | 0.779968724 |          |         |
| NA         | ENSG00000237342 | -0.11475 | 0.54568 | -0.58843    | 0.72188     | -1.2213  | 0.88901 |
|            | -1.2213         | 0.88901  | 0.54568 | 0.779968724 |             |          |         |
| POLH-AS1   | ENSG00000203362 | -0.11477 | 0.54569 | -0.11477    | 0.54569     | -0.11477 |         |
|            | 0.54569         | -0.11477 | 0.54569 | 0.54569     | 0.779968724 |          |         |
| NA         | ENSG00000223536 | -1.028   | 0.84802 | -0.5237     | 0.69976     | -0.11483 | 0.54571 |
|            | -0.82904        | 0.79646  | 0.54571 | 0.779974432 |             |          |         |
| RNA5SP98   | ENSG00000200028 | -0.36932 | 0.64406 | -0.89451    | 0.81447     | -0.11494 |         |
|            | 0.54575         | -0.89451 | 0.81447 | 0.54575     | 0.780008726 |          |         |
| NA         | ENSG00000250568 | -0.30945 | 0.62151 | -0.11504    | 0.54579     | -0.69108 | 0.75524 |
|            | -0.69108        | 0.75524  | 0.54579 | 0.780040137 |             |          |         |
| DRG1P1     | ENSG00000235411 | -0.50963 | 0.69485 | -0.78839    | 0.78477     | -0.11512 |         |
|            | 0.54582         | -0.11512 | 0.54582 | 0.54582     | 0.780040137 |          |         |
| NA         | ENSG00000273209 | -0.56938 | 0.71545 | -1.3617     | 0.91335     | -0.11512 | 0.54582 |
|            | -0.11512        | 0.54582  | 0.54582 | 0.780040137 |             |          |         |
| SFTPD-AS1  | ENSG00000273372 | -0.54721 | 0.70788 | -0.42619    | 0.66501     | -0.44522 |         |

|            |                 |          |         |             |             |          |         |
|------------|-----------------|----------|---------|-------------|-------------|----------|---------|
|            | 0.67192         | -0.1152  | 0.54586 | 0.54586     | 0.780057253 |          |         |
| TRAPPC4    | ENSG00000196655 | -0.54497 | 0.70711 | -0.11523    | 0.54587     | -0.11523 |         |
|            | 0.54587         | -0.11523 | 0.54587 | 0.54587     | 0.780057253 |          |         |
| HYLS1      | ENSG00000198331 | -0.55515 | 0.71061 | -0.3757     | 0.64643     | -0.64371 | 0.74012 |
|            | -0.11526        | 0.54588  | 0.54588 | 0.780057253 |             |          |         |
| NA         | ENSG00000252543 | -1.2746  | 0.89878 | -0.24558    | 0.597       | -0.11532 | 0.5459  |
|            | -0.73374        | 0.76845  | 0.5459  | 0.780062958 |             |          |         |
| GOT2P3     | ENSG00000233719 | -0.11542 | 0.54594 | -0.11638    | 0.54632     | -0.11542 |         |
|            | 0.54594         | -0.11542 | 0.54594 | 0.54594     | 0.780097241 |          |         |
| NA         | ENSG00000269908 | -0.11548 | 0.54597 | -0.11548    | 0.54597     | -0.11548 | 0.54597 |
|            | -0.11548        | 0.54597  | 0.54597 | 0.780117233 |             |          |         |
| NA         | ENSG00000259447 | -0.1156  | 0.54602 | -0.1156     | 0.54602     | -0.1156  | 0.54602 |
|            | -0.1156         | 0.54602  | 0.54602 | 0.7801658   |             |          |         |
| ASB1       | ENSG00000065802 | -0.36004 | 0.64059 | -0.11567    | 0.54604     | -0.12281 | 0.54887 |
|            | -0.26015        | 0.60263  | 0.54604 | 0.780171501 |             |          |         |
| SNORD114-9 | ENSG00000201240 | -0.11575 | 0.54607 | -0.11575    | 0.54607     | -0.11575 |         |
|            | 0.54607         | -0.11575 | 0.54607 | 0.54607     | 0.780191489 |          |         |
| LHX2       | ENSG00000106689 | -1.1933  | 0.88363 | -1.8404     | 0.96714     | -0.59917 | 0.72547 |
|            | -0.1159         | 0.54613  | 0.54613 | 0.780222873 |             |          |         |
| NA         | ENSG00000212594 | -0.1159  | 0.54613 | -0.1159     | 0.54613     | -0.1159  | 0.54613 |
|            | -0.1159         | 0.54613  | 0.54613 | 0.780222873 |             |          |         |
| DOCK8-AS1  | ENSG00000183784 | -2.7251  | 0.99679 | -0.1159     | 0.54614     | -1.2437  |         |
|            | 0.89319         | -1.2437  | 0.89319 | 0.54614     | 0.780222873 |          |         |
| LINC00200  | ENSG00000229205 | -0.11601 | 0.54618 | -0.20197    | 0.58003     | -0.20197 |         |
|            | 0.58003         | -0.20197 | 0.58003 | 0.54618     | 0.780257143 |          |         |
| NA         | ENSG00000249525 | -1.5766  | 0.94255 | -0.11608    | 0.54621     | -0.64842 | 0.74164 |
|            | -0.64842        | 0.74164  | 0.54621 | 0.780259949 |             |          |         |
| MACORIS    | ENSG00000237797 | -0.7543  | 0.77466 | -0.58401    | 0.72039     | -1.426   |         |
|            | 0.92306         | -0.11611 | 0.54622 | 0.54622     | 0.780259949 |          |         |
| NA         | ENSG00000230751 | -0.33274 | 0.63033 | -0.11614    | 0.54623     | -0.11614 | 0.54623 |
|            | -0.11614        | 0.54623  | 0.54623 | 0.780259949 |             |          |         |
| NA         | ENSG00000264339 | -0.11623 | 0.54627 | -0.11623    | 0.54627     | -0.11623 | 0.54627 |
|            | -0.11623        | 0.54627  | 0.54627 | 0.780294214 |             |          |         |
| NA         | ENSG00000259663 | -0.35619 | 0.63915 | -0.63444    | 0.7371      | -0.11628 | 0.54629 |
|            | -0.93298        | 0.82458  | 0.54629 | 0.780299909 |             |          |         |
| NA         | ENSG00000220412 | -0.11633 | 0.54631 | -0.11633    | 0.54631     | -0.13037 | 0.55186 |
|            | -0.9951         | 0.84016  | 0.54631 | 0.780305604 |             |          |         |
| KRT17P8    | ENSG00000256937 | -0.11647 | 0.54636 | -0.11647    | 0.54636     | -0.11647 |         |
|            | 0.54636         | -0.11647 | 0.54636 | 0.54636     | 0.780339768 |          |         |
| GLIS3-AS1  | ENSG00000237009 | -1.062   | 0.85588 | -0.11658    | 0.5464      | -0.49738 |         |
|            | 0.69054         | -0.49738 | 0.69054 | 0.5464      | 0.780339768 |          |         |
| NA         | ENSG00000224794 | -0.11661 | 0.54642 | -0.66869    | 0.74815     | -0.46938 | 0.6806  |
|            | -0.88388        | 0.81162  | 0.54642 | 0.780339768 |             |          |         |
| C12orf66   | ENSG00000174206 | -0.11666 | 0.54643 | -0.43712    | 0.66899     | -0.67309 |         |
|            | 0.74956         | -0.11666 | 0.54643 | 0.54643     | 0.780339768 |          |         |
| NA         | ENSG00000253642 | -0.67825 | 0.75119 | -0.95201    | 0.82945     | -0.56945 | 0.71547 |
|            | -0.11666        | 0.54643  | 0.54643 | 0.780339768 |             |          |         |
| DUXAP11    | ENSG00000270222 | -1.51    | 0.93448 | -0.66538    | 0.7471      | -0.11665 | 0.54643 |
|            | -0.11665        | 0.54643  | 0.54643 | 0.780339768 |             |          |         |
| HNRNPA1P43 | ENSG00000214204 | -0.15306 | 0.56082 | -0.11686    | 0.54651     | -0.15306 |         |
|            | 0.56082         | -0.15306 | 0.56082 | 0.54651     | 0.780425234 |          |         |
| NA         | ENSG00000269978 | -0.11693 | 0.54654 | -0.11693    | 0.54654     | -0.11693 | 0.54654 |
|            | -0.54869        | 0.70839  | 0.54654 | 0.780425234 |             |          |         |
| RNF170     | ENSG00000120925 | -0.85009 | 0.80236 | -0.79282    | 0.78606     | -1.4706  |         |
|            | 0.92931         | -0.11696 | 0.54656 | 0.54656     | 0.780425234 |          |         |
| RPL34P33   | ENSG00000241282 | -1.0449  | 0.85197 | -0.11699    | 0.54657     | -1.1187  |         |
|            | 0.86838         | -1.1187  | 0.86838 | 0.54657     | 0.780425234 |          |         |
| NA         | ENSG00000222966 | -0.11704 | 0.54659 | -0.11704    | 0.54659     | -0.11704 | 0.54659 |
|            | -0.11704        | 0.54659  | 0.54659 | 0.780425234 |             |          |         |
| NA         | ENSG00000260412 | -0.11705 | 0.54659 | -0.29164    | 0.61472     | -0.29164 | 0.61472 |
|            | -0.29164        | 0.61472  | 0.54659 | 0.780425234 |             |          |         |
| NA         | ENSG00000261462 | -0.11711 | 0.54662 | -0.9296     | 0.82371     | -0.11711 | 0.54662 |

|          |                 |          |         |             |             |          |         |
|----------|-----------------|----------|---------|-------------|-------------|----------|---------|
|          | -0.77592        | 0.7811   | 0.54662 | 0.780425234 |             |          |         |
| POLR3GP2 | ENSG00000266984 | -0.11713 | 0.54662 | -0.11713    | 0.54662     | -0.11713 |         |
|          | 0.54662         | -0.11713 | 0.54662 | 0.54662     | 0.780425234 |          |         |
| CYB5A    | ENSG00000166347 | -0.78691 | 0.78433 | -0.52036    | 0.69859     | -0.52036 | 0.69859 |
|          | -0.1172         | 0.54665  | 0.54665 | 0.780425234 |             |          |         |
| NA       | ENSG00000261659 | -0.7952  | 0.78675 | -0.1172     | 0.54665     | -0.50328 | 0.69262 |
|          | -0.50328        | 0.69262  | 0.54665 | 0.780425234 |             |          |         |
| NA       | ENSG00000272382 | -0.11729 | 0.54669 | -0.11729    | 0.54669     | -0.11729 | 0.54669 |
|          | -0.11729        | 0.54669  | 0.54669 | 0.780459474 |             |          |         |
| NA       | ENSG00000256725 | -1.8984  | 0.97118 | -0.66639    | 0.74742     | -0.73701 | 0.76944 |
|          | -0.11752        | 0.54678  | 0.54678 | 0.780559278 |             |          |         |
| OR9H1P   | ENSG00000228336 | -0.60479 | 0.72734 | -0.67637    | 0.7506      | -0.11759 |         |
|          | 0.5468          | -0.34524 | 0.63504 | 0.5468      | 0.780559278 |          |         |
| NA       | ENSG00000265316 | -0.64425 | 0.74029 | -0.64425    | 0.74029     | -0.11763 | 0.54682 |
|          | -0.64425        | 0.74029  | 0.54682 | 0.780559278 |             |          |         |
| ABCD1P2  | ENSG00000215151 | -0.99336 | 0.83973 | -0.70224    | 0.75874     | -0.7104  |         |
|          | 0.76127         | -0.11765 | 0.54683 | 0.54683     | 0.780559278 |          |         |
| NA       | ENSG00000281883 | -0.11769 | 0.54684 | -0.17073    | 0.56778     | -0.84198 | 0.8001  |
|          | -0.84198        | 0.8001   | 0.54684 | 0.780559278 |             |          |         |
| SUPT4H1  | ENSG00000213246 | -0.11776 | 0.54687 | -0.11776    | 0.54687     | -0.11776 |         |
|          | 0.54687         | -0.11776 | 0.54687 | 0.54687     | 0.780570645 |          |         |
| NA       | ENSG00000257308 | -0.11778 | 0.54688 | -1.1688     | 0.87875     | -1.1688  | 0.87875 |
|          | -1.1688         | 0.87875  | 0.54688 | 0.780570645 |             |          |         |
| MIR4499  | ENSG00000263978 | -0.11788 | 0.54692 | -0.11788    | 0.54692     | -0.11788 |         |
|          | 0.54692         | -0.11788 | 0.54692 | 0.54692     | 0.780604874 |          |         |
| NA       | ENSG00000268070 | -0.11804 | 0.54698 | -0.11804    | 0.54698     | -0.11804 | 0.54698 |
|          | -0.11804        | 0.54698  | 0.54698 | 0.78063619  |             |          |         |
| TRAF3IP2 | ENSG00000056972 | -0.11806 | 0.54699 | -0.57822    | 0.71844     | -0.12668 |         |
|          | 0.5504          | -0.44978 | 0.67357 | 0.54699     | 0.78063619  |          |         |
| RNU6-24P | ENSG00000207169 | -0.11807 | 0.54699 | -0.11807    | 0.54699     | -0.11807 |         |
|          | 0.54699         | -0.11807 | 0.54699 | 0.54699     | 0.78063619  |          |         |
| SULT6B1  | ENSG00000138068 | -0.21705 | 0.58591 | -0.11817    | 0.54703     | -0.51309 |         |
|          | 0.69606         | -0.63624 | 0.73769 | 0.54703     | 0.780670412 |          |         |
| NA       | ENSG00000271477 | -0.11826 | 0.54707 | -0.11826    | 0.54707     | -0.11826 | 0.54707 |
|          | -0.11826        | 0.54707  | 0.54707 | 0.780696041 |             |          |         |
| NA       | ENSG00000251125 | -0.11828 | 0.54708 | -0.52698    | 0.7009      | -0.11828 | 0.54708 |
|          | -1.0557         | 0.85444  | 0.54708 | 0.780696041 |             |          |         |
| PHKG1P1  | ENSG00000226075 | -0.11864 | 0.54722 | -1.6915     | 0.95463     | -1.3156  |         |
|          | 0.90584         | -1.1808  | 0.88115 | 0.54722     | 0.780872957 |          |         |
| OR4D5    | ENSG00000171014 | -0.11869 | 0.54724 | -0.11869    | 0.54724     | -0.19545 | 0.57748 |
|          | -0.11869        | 0.54724  | 0.54724 | 0.780875706 |             |          |         |
| IGHV3-52 | ENSG00000253545 | -0.11875 | 0.54726 | -0.11875    | 0.54726     | -0.11875 |         |
|          | 0.54726         | -0.11875 | 0.54726 | 0.54726     | 0.780875706 |          |         |
| MIR600HG | ENSG00000236901 | -0.11876 | 0.54727 | -0.13812    | 0.55493     | -0.41821 |         |
|          | 0.6621          | -0.36239 | 0.64147 | 0.54727     | 0.780875706 |          |         |
| LRRC39   | ENSG00000122477 | -0.19001 | 0.57535 | -0.19001    | 0.57535     | -0.11884 |         |
|          | 0.5473          | -0.19001 | 0.57535 | 0.5473      | 0.780895646 |          |         |
| NA       | ENSG00000234522 | -0.11896 | 0.54734 | -1.2161     | 0.88803     | -0.17968 | 0.5713  |
|          | -1.2161         | 0.88803  | 0.54734 | 0.780898393 |             |          |         |
| NA       | ENSG00000236364 | -0.11898 | 0.54735 | -0.11898    | 0.54735     | -0.11898 | 0.54735 |
|          | -0.11898        | 0.54735  | 0.54735 | 0.780898393 |             |          |         |
| NA       | ENSG00000241556 | -0.11896 | 0.54735 | -0.11896    | 0.54735     | -0.11896 | 0.54735 |
|          | -0.11896        | 0.54735  | 0.54735 | 0.780898393 |             |          |         |
| CFAP44   | ENSG00000206530 | -1.488   | 0.93163 | -1.3976     | 0.91889     | -1.3976  |         |
|          | 0.91889         | -0.11902 | 0.54737 | 0.54737     | 0.780904064 |          |         |
| CIAPIN1  | ENSG00000005194 | -0.61078 | 0.72933 | -0.91064    | 0.81876     | -0.91064 |         |
|          | 0.81876         | -0.11915 | 0.54742 | 0.54742     | 0.780952532 |          |         |
| RPL7AP51 | ENSG00000226448 | -0.11924 | 0.54746 | -0.34654    | 0.63553     | -0.34654 |         |
|          | 0.63553         | -0.34654 | 0.63553 | 0.54746     | 0.78096387  |          |         |
| NA       | ENSG00000267179 | -0.11925 | 0.54746 | -0.11925    | 0.54746     | -0.11925 | 0.54746 |
|          | -0.11925        | 0.54746  | 0.54746 | 0.78096387  |             |          |         |
| MINAR2   | ENSG00000186367 | -0.11941 | 0.54753 | -0.68792    | 0.75425     | -0.53137 |         |

|           |                 |          |         |             |             |          |         |
|-----------|-----------------|----------|---------|-------------|-------------|----------|---------|
|           | 0.70242         | -0.5515  | 0.70936 | 0.54753     | 0.781032264 |          |         |
| OR5H4P    | ENSG00000248507 | -0.11945 | 0.54754 | -0.11945    | 0.54754     | -0.11945 |         |
|           | 0.54754         | -0.67919 | 0.75149 | 0.54754     | 0.781032264 |          |         |
| SNORA21   | ENSG00000199293 | -0.11973 | 0.54765 | -0.11973    | 0.54765     | -0.11973 |         |
|           | 0.54765         | -0.11973 | 0.54765 | 0.54765     | 0.781120366 |          |         |
| RN7SKP254 | ENSG00000222617 | -1.0346  | 0.84958 | -0.95203    | 0.82946     | -0.11976 |         |
|           | 0.54766         | -0.95203 | 0.82946 | 0.54766     | 0.781120366 |          |         |
| PLCB1     | ENSG00000182621 | -0.38349 | 0.64932 | -0.43648    | 0.66876     | -0.11984 | 0.54769 |
|           | -0.27624        | 0.60882  | 0.54769 | 0.781120366 |             |          |         |
| LINC01722 | ENSG00000233048 | -0.11985 | 0.5477  | -0.22377    | 0.58853     | -0.29847 |         |
|           | 0.61733         | -0.34709 | 0.63574 | 0.5477      | 0.781120366 |          |         |
| NA        | ENSG00000236958 | -0.11985 | 0.5477  | -2.1053     | 0.98237     | -2.1053  | 0.98237 |
|           | -2.1053         | 0.98237  | 0.5477  | 0.781120366 |             |          |         |
| OR2A12    | ENSG00000221858 | -0.11991 | 0.54772 | -0.11991    | 0.54772     | -0.11991 |         |
|           | 0.54772         | -0.11991 | 0.54772 | 0.54772     | 0.781120366 |          |         |
| NA        | ENSG00000259862 | -1.7857  | 0.96293 | -0.7333     | 0.76831     | -0.7333  | 0.76831 |
|           | -0.1199         | 0.54772  | 0.54772 | 0.781120366 |             |          |         |
| CD1B      | ENSG00000158485 | -1.0908  | 0.86231 | -0.11992    | 0.54773     | -1.0133  | 0.84453 |
|           | -0.46424        | 0.67876  | 0.54773 | 0.781120366 |             |          |         |
| BDKRB2    | ENSG00000168398 | -0.12003 | 0.54777 | -0.8804     | 0.81068     | -1.1162  |         |
|           | 0.86784         | -0.14727 | 0.55854 | 0.54777     | 0.78114595  |          |         |
| NA        | ENSG00000237387 | -0.12004 | 0.54778 | -0.12004    | 0.54778     | -0.12004 | 0.54778 |
|           | -0.12004        | 0.54778  | 0.54778 | 0.78114595  |             |          |         |
| LINC02397 | ENSG00000205056 | -0.1201  | 0.5478  | -0.40451    | 0.65708     | -0.50092 |         |
|           | 0.69179         | -0.1201  | 0.5478  | 0.5478      | 0.781151611 |          |         |
| NA        | ENSG00000268584 | -0.12017 | 0.54783 | -0.12017    | 0.54783     | -0.12017 | 0.54783 |
|           | -0.12017        | 0.54783  | 0.54783 | 0.781171531 |             |          |         |
| NA        | ENSG00000211683 | -0.12031 | 0.54788 | -0.12031    | 0.54788     | -0.12031 | 0.54788 |
|           | -0.12031        | 0.54788  | 0.54788 | 0.781193726 |             |          |         |
| HIP1R     | ENSG00000130787 | -0.68087 | 0.75202 | -0.1204     | 0.54792     | -0.3464  | 0.63548 |
|           | -0.94661        | 0.82808  | 0.54792 | 0.781193726 |             |          |         |
| NINL      | ENSG00000101004 | -1.557   | 0.94027 | -0.61259    | 0.72993     | -0.12046 | 0.54794 |
|           | -0.1357         | 0.55397  | 0.54794 | 0.781193726 |             |          |         |
| NA        | ENSG00000251490 | -0.50767 | 0.69416 | -0.12163    | 0.5484      | -0.12055 | 0.54798 |
|           | -0.12163        | 0.5484   | 0.54798 | 0.781193726 |             |          |         |
| NA        | ENSG00000267904 | -0.12055 | 0.54798 | -0.12055    | 0.54798     | -0.12055 | 0.54798 |
|           | -0.12055        | 0.54798  | 0.54798 | 0.781193726 |             |          |         |
| ZNF112    | ENSG00000062370 | -0.12062 | 0.548   | -1.084      | 0.86082     | -0.55648 | 0.71106 |
|           | -0.55648        | 0.71106  | 0.548   | 0.781193726 |             |          |         |
| NA        | ENSG00000244676 | -0.12063 | 0.54801 | -0.12063    | 0.54801     | -0.20927 | 0.58288 |
|           | -0.32913        | 0.62897  | 0.54801 | 0.781193726 |             |          |         |
| NA        | ENSG00000218418 | -1.252   | 0.89471 | -0.1207     | 0.54803     | -1.252   | 0.89471 |
|           | -1.0287         | 0.84818  | 0.54803 | 0.781193726 |             |          |         |
| NA        | ENSG00000251467 | -2.1878  | 0.98566 | -0.12068    | 0.54803     | -2.1878  | 0.98566 |
|           | -2.1878         | 0.98566  | 0.54803 | 0.781193726 |             |          |         |
| HNF4A     | ENSG00000101076 | -0.58607 | 0.72109 | -1.3757     | 0.91554     | -0.28015 | 0.61032 |
|           | -0.12071        | 0.54804  | 0.54804 | 0.781193726 |             |          |         |
| NA        | ENSG00000237015 | -0.12071 | 0.54804 | -0.12071    | 0.54804     | -0.12071 | 0.54804 |
|           | -0.12071        | 0.54804  | 0.54804 | 0.781193726 |             |          |         |
| NA        | ENSG00000257603 | -0.12073 | 0.54805 | -0.41651    | 0.66148     | -0.41651 | 0.66148 |
|           | -0.41651        | 0.66148  | 0.54805 | 0.781193726 |             |          |         |
| TAT-AS1   | ENSG00000260886 | -0.12077 | 0.54806 | -0.12077    | 0.54806     | -0.12077 |         |
|           | 0.54806         | -0.12077 | 0.54806 | 0.54806     | 0.781193726 |          |         |
| NA        | ENSG00000261673 | -0.1208  | 0.54807 | -0.1208     | 0.54807     | -0.1208  | 0.54807 |
|           | -0.1208         | 0.54807  | 0.54807 | 0.781193726 |             |          |         |
| NA        | ENSG00000257526 | -0.12083 | 0.54809 | -0.12083    | 0.54809     | -0.6103  | 0.72917 |
|           | -0.58823        | 0.72181  | 0.54809 | 0.781199161 |             |          |         |
| HYPK      | ENSG00000242028 | -1.3672  | 0.91422 | -1.3044     | 0.90395     | -0.12088 | 0.54811 |
|           | -0.12088        | 0.54811  | 0.54811 | 0.781199161 |             |          |         |
| ZNF671    | ENSG00000083814 | -0.121   | 0.54815 | -0.121      | 0.54815     | -0.121   |         |
|           | 0.54815         | -0.121   | 0.54815 | 0.54815     | 0.781199161 |          |         |
| C5orf46   | ENSG00000178776 | -0.121   | 0.54816 | -0.121      | 0.54816     | -0.121   |         |

|            |                 |          |         |             |             |          |         |
|------------|-----------------|----------|---------|-------------|-------------|----------|---------|
|            | 0.54816         | -0.121   | 0.54816 | 0.54816     | 0.781199161 |          |         |
| NA         | ENSG00000220537 | -0.21886 | 0.58662 | -0.54417    | 0.70684     | -0.80021 | 0.78821 |
|            | -0.12101        | 0.54816  | 0.54816 | 0.781199161 |             |          |         |
| NA         | ENSG00000271761 | -0.39681 | 0.65425 | -0.39681    | 0.65425     | -0.52245 | 0.69932 |
|            | -0.12103        | 0.54817  | 0.54817 | 0.781199161 |             |          |         |
| FGG        | ENSG00000171557 | -0.12113 | 0.5482  | -1.1203     | 0.8687      | -0.12113 | 0.5482  |
|            | -1.1203         | 0.8687   | 0.5482  | 0.781219067 |             |          |         |
| RPL29P12   | ENSG00000224993 | -0.69527 | 0.75656 | -0.4898     | 0.68786     | -0.12115 |         |
|            | 0.54822         | -0.65212 | 0.74284 | 0.54822     | 0.781221782 |          |         |
| SNORA29    | ENSG00000206910 | -0.12123 | 0.54825 | -0.12123    | 0.54825     | -0.12123 |         |
|            | 0.54825         | -0.12123 | 0.54825 | 0.781221782 |             |          |         |
| SNRPCP16   | ENSG00000250342 | -0.70485 | 0.75955 | -0.12124    | 0.54825     | -0.71208 |         |
|            | 0.76179         | -1.1754  | 0.88008 | 0.54825     | 0.781221782 |          |         |
| TRAPPC1    | ENSG00000170043 | -0.12129 | 0.54827 | -0.12129    | 0.54827     | -0.12129 |         |
|            | 0.54827         | -0.12129 | 0.54827 | 0.781227436 |             |          |         |
| GCC2       | ENSG00000135968 | -0.60851 | 0.72858 | -0.12139    | 0.54831     | -1.6395  | 0.94945 |
|            | -0.36776        | 0.64347  | 0.54831 | 0.781261588 |             |          |         |
| COL1A1     | ENSG00000108821 | -1.816   | 0.96531 | -0.88192    | 0.81109     | -0.23003 |         |
|            | 0.59097         | -0.12157 | 0.54838 | 0.54838     | 0.781329884 |          |         |
| VN1R10P    | ENSG00000220758 | -0.1216  | 0.54839 | -0.26001    | 0.60257     | -0.26001 |         |
|            | 0.60257         | -1.1209  | 0.86884 | 0.54839     | 0.781329884 |          |         |
| NA         | ENSG00000255088 | -0.12168 | 0.54842 | -0.12168    | 0.54842     | -0.12168 | 0.54842 |
|            | -0.12168        | 0.54842  | 0.54842 | 0.781338239 |             |          |         |
| CDC26      | ENSG00000176386 | -0.12175 | 0.54845 | -0.12175    | 0.54845     | -0.12175 | 0.54845 |
|            | -0.12175        | 0.54845  | 0.54845 | 0.781338239 |             |          |         |
| NA         | ENSG00000224842 | -0.36558 | 0.64266 | -0.12174    | 0.54845     | -1.1813  | 0.88126 |
|            | -0.44081        | 0.67032  | 0.54845 | 0.781338239 |             |          |         |
| NEIL2      | ENSG00000154328 | -0.44863 | 0.67315 | -0.45137    | 0.67414     | -0.12177 | 0.54846 |
|            | -0.51581        | 0.69701  | 0.54846 | 0.781338239 |             |          |         |
| OR6C65     | ENSG00000205328 | -0.12183 | 0.54848 | -0.12183    | 0.54848     | -0.12183 |         |
|            | 0.54848         | -0.12183 | 0.54848 | 0.781343889 |             |          |         |
| NA         | ENSG00000272457 | -0.56331 | 0.71339 | -0.12187    | 0.5485      | -0.56331 | 0.71339 |
|            | -1.515          | 0.93511  | 0.5485  | 0.781349538 |             |          |         |
| NA         | ENSG00000278642 | -0.12193 | 0.54852 | -0.12193    | 0.54852     | -0.12193 | 0.54852 |
|            | -0.12193        | 0.54852  | 0.54852 | 0.781355187 |             |          |         |
| VIPR1      | ENSG00000114812 | -0.8589  | 0.8048  | -0.12208    | 0.54858     | -0.22203 | 0.58786 |
|            | -2.032          | 0.97892  | 0.54858 | 0.781360099 |             |          |         |
| ATF1P1     | ENSG00000219387 | -0.12214 | 0.54861 | -0.12214    | 0.54861     | -0.12214 |         |
|            | 0.54861         | -0.12214 | 0.54861 | 0.781360099 |             |          |         |
| PIMREGP3   | ENSG00000217653 | -0.12224 | 0.54864 | -0.12224    | 0.54864     | -0.12224 |         |
|            | 0.54864         | -0.12224 | 0.54864 | 0.781360099 |             |          |         |
| GTF2IRD1P1 | ENSG00000230583 | -0.48414 | 0.68586 | -0.48414    | 0.68586     | -0.34386 |         |
|            | 0.63452         | -0.12222 | 0.54864 | 0.54864     | 0.781360099 |          |         |
| SOX8       | ENSG00000005513 | -0.12226 | 0.54865 | -0.12226    | 0.54865     | -0.12226 | 0.54865 |
|            | -0.12226        | 0.54865  | 0.54865 | 0.781360099 |             |          |         |
| GNA11      | ENSG00000088256 | -0.74609 | 0.77219 | -0.12227    | 0.54866     | -0.74609 | 0.77219 |
|            | -0.36906        | 0.64396  | 0.54866 | 0.781360099 |             |          |         |
| SDR42E2    | ENSG00000183921 | -1.4468  | 0.92602 | -1.4468     | 0.92602     | -1.4468  |         |
|            | 0.92602         | -0.12228 | 0.54866 | 0.54866     | 0.781360099 |          |         |
| CYCSP26    | ENSG00000254601 | -0.81241 | 0.79172 | -1.7648     | 0.9612      | -0.12231 |         |
|            | 0.54867         | -0.5756  | 0.71756 | 0.54867     | 0.781360099 |          |         |
| LINC01039  | ENSG00000234168 | -0.54505 | 0.70714 | -0.36917    | 0.644       | -0.12233 | 0.54868 |
|            | -0.50726        | 0.69401  | 0.54868 | 0.781360099 |             |          |         |
| MED15P9    | ENSG00000223760 | -1.5579  | 0.94037 | -0.12235    | 0.54869     | -1.1066  |         |
|            | 0.86576         | -1.1066  | 0.86576 | 0.54869     | 0.781360099 |          |         |
| NA         | ENSG00000241409 | -0.12246 | 0.54873 | -0.12246    | 0.54873     | -0.12246 | 0.54873 |
|            | -0.12246        | 0.54873  | 0.54873 | 0.781360099 |             |          |         |
| RPL18P10   | ENSG00000214359 | -0.47992 | 0.68436 | -0.13575    | 0.55399     | -0.12248 |         |
|            | 0.54874         | -0.12248 | 0.54874 | 0.54874     | 0.781360099 |          |         |
| AKR1B1P4   | ENSG00000237876 | -1.4726  | 0.92957 | -1.4726     | 0.92957     | -0.13073 | 0.552   |
|            | -0.12247        | 0.54874  | 0.54874 | 0.781360099 |             |          |         |
| EIF4EBP2P1 | ENSG00000233711 | -0.12253 | 0.54876 | -0.12253    | 0.54876     | -0.12253 |         |



|           |                 |          |             |             |             |          |         |          |
|-----------|-----------------|----------|-------------|-------------|-------------|----------|---------|----------|
|           | 0.54876         | -0.12253 | 0.54876     | 0.54876     | 0.781360099 |          |         |          |
| ABCA12    | ENSG00000144452 | -0.22074 | 0.58735     | -1.2716     | 0.89824     | -0.12256 |         |          |
|           | 0.54877         | -2.3252  | 0.98997     | 0.54877     | 0.781360099 |          |         |          |
| UBE2D3P1  | ENSG00000225022 | -0.12259 | 0.54878     | -0.12259    | 0.54878     | -0.12259 |         |          |
|           | 0.54878         | -0.12259 | 0.54878     | 0.54878     | 0.781360099 |          |         |          |
| RPSAP55   | ENSG00000214896 | -0.12273 | 0.54884     | -0.12273    | 0.54884     | -0.12273 |         |          |
|           | 0.54884         | -0.12273 | 0.54884     | 0.54884     | 0.781422696 |          |         |          |
| C5orf66   | ENSG00000224186 | -1.151   | 0.87513     | -1.0675     | 0.85712     | -0.52377 |         |          |
|           | 0.69978         | -0.12288 | 0.5489      | 0.5489      | 0.781459246 |          |         |          |
| THUMPD3   | ENSG00000134077 | -0.23963 | 0.59469     | -0.61603    | 0.73106     | -0.51837 |         |          |
|           | 0.6979          | -0.12292 | 0.54892     | 0.54892     | 0.781459246 |          |         |          |
| NA        | ENSG00000264431 | -0.12293 | 0.54892     | -0.12293    | 0.54892     | -0.12293 | 0.54892 |          |
|           | -0.12293        | 0.54892  | 0.54892     | 0.781459246 |             |          |         |          |
| SCIN      | ENSG00000006747 | -0.60762 | 0.72828     | -0.42806    | 0.6657      | -0.43711 | 0.66898 |          |
|           | -0.12299        | 0.54894  | 0.54894     | 0.781459246 |             |          |         |          |
| NIPSNAP3A | ENSG00000136783 | -0.88607 | 0.81221     | -1.156      | 0.87615     | -1.156   |         |          |
|           | 0.87615         | -0.12307 | 0.54897     | 0.54897     | 0.781459246 |          |         |          |
| RN7SL505P | ENSG00000241420 | -0.12314 | 0.549       | -0.12314    | 0.549       | -0.12314 | 0.549   | -0.12314 |
|           | 0.549           | 0.549    | 0.781459246 |             |             |          |         |          |
| IFITM4P   | ENSG00000235821 | -0.12316 | 0.54901     | -0.12316    | 0.54901     | -0.12316 |         |          |
|           | 0.54901         | -0.12316 | 0.54901     | 0.54901     | 0.781459246 |          |         |          |
| NA        | ENSG00000237774 | -0.94644 | 0.82804     | -0.86151    | 0.80552     | -1.11    | 0.8665  |          |
|           | -0.12316        | 0.54901  | 0.54901     | 0.781459246 |             |          |         |          |
| USP12P1   | ENSG00000253213 | -0.12316 | 0.54901     | -0.52203    | 0.69918     | -0.52203 |         |          |
|           | 0.69918         | -0.52203 | 0.69918     | 0.54901     | 0.781459246 |          |         |          |
| NA        | ENSG00000253270 | -0.12325 | 0.54905     | -0.12325    | 0.54905     | -0.12325 | 0.54905 |          |
|           | -0.12325        | 0.54905  | 0.54905     | 0.781493355 |             |          |         |          |
| NA        | ENSG00000255057 | -0.12335 | 0.54909     | -0.12335    | 0.54909     | -0.12335 | 0.54909 |          |
|           | -0.12335        | 0.54909  | 0.54909     | 0.781518868 |             |          |         |          |
| NA        | ENSG00000207176 | -0.12338 | 0.5491      | -0.92067    | 0.82139     | -0.12338 | 0.5491  |          |
|           | -0.12338        | 0.5491   | 0.5491      | 0.781518868 |             |          |         |          |
| ACOT4     | ENSG00000177465 | -1.4044  | 0.9199      | -0.12361    | 0.54919     | -0.73281 | 0.76816 |          |
|           | -0.85522        | 0.80379  | 0.54919     | 0.78159455  |             |          |         |          |
| RN7SKP125 | ENSG00000222413 | -0.12375 | 0.54924     | -0.12375    | 0.54924     | -0.12375 |         |          |
|           | 0.54924         | -0.12375 | 0.54924     | 0.54924     | 0.78159455  |          |         |          |
| RNU6-428P | ENSG00000199812 | -1.0038  | 0.84226     | -0.12392    | 0.54931     | -1.0038  |         |          |
|           | 0.84226         | -0.13598 | 0.55408     | 0.54931     | 0.78159455  |          |         |          |
| NA        | ENSG00000225370 | -0.12393 | 0.54931     | -0.12393    | 0.54931     | -0.12393 | 0.54931 |          |
|           | -0.12393        | 0.54931  | 0.54931     | 0.78159455  |             |          |         |          |
| OR5H14    | ENSG00000236032 | -1.4163  | 0.92165     | -1.4163     | 0.92165     | -1.2903  |         |          |
|           | 0.90152         | -0.12392 | 0.54931     | 0.54931     | 0.78159455  |          |         |          |
| NA        | ENSG00000253783 | -0.12391 | 0.54931     | -0.12391    | 0.54931     | -0.12391 | 0.54931 |          |
|           | -0.12391        | 0.54931  | 0.54931     | 0.78159455  |             |          |         |          |
| NA        | ENSG00000213421 | -0.70242 | 0.75879     | -0.73743    | 0.76957     | -0.12399 | 0.54934 |          |
|           | -0.12399        | 0.54934  | 0.54934     | 0.78159455  |             |          |         |          |
| IGSF10    | ENSG00000152580 | -0.58174 | 0.71963     | -0.12405    | 0.54936     | -0.44971 |         |          |
|           | 0.67354         | -1.0565  | 0.85464     | 0.54936     | 0.78159455  |          |         |          |
| SNX7      | ENSG00000162627 | -0.85956 | 0.80498     | -1.2405     | 0.8926      | -0.12411 | 0.54938 |          |
|           | -1.4788         | 0.9304   | 0.54938     | 0.78159455  |             |          |         |          |
| CFAP57    | ENSG00000243710 | -0.40377 | 0.65681     | -0.1241     | 0.54938     | -0.54673 |         |          |
|           | 0.70772         | -0.91822 | 0.82075     | 0.54938     | 0.78159455  |          |         |          |
| RN7SL81P  | ENSG00000244218 | -0.12414 | 0.5494      | -0.12414    | 0.5494      | -0.12414 |         |          |
|           | 0.5494          | -0.12414 | 0.5494      | 0.5494      | 0.78159455  |          |         |          |
| NUDT19P5  | ENSG00000251073 | -0.12414 | 0.5494      | -0.12414    | 0.5494      | -0.12414 |         |          |
|           | 0.5494          | -0.12414 | 0.5494      | 0.5494      | 0.78159455  |          |         |          |
| NA        | ENSG00000272865 | -0.46532 | 0.67915     | -0.76667    | 0.77836     | -0.35993 | 0.64055 |          |
|           | -0.12415        | 0.5494   | 0.5494      | 0.78159455  |             |          |         |          |
| CCDC175   | ENSG00000151838 | -0.446   | 0.6722      | -0.12417    | 0.54941     | -0.37226 |         |          |
|           | 0.64515         | -0.2107  | 0.58344     | 0.54941     | 0.78159455  |          |         |          |
| PPP1R12C  | ENSG00000125503 | -0.1242  | 0.54942     | -0.18201    | 0.57221     | -0.16319 |         |          |
|           | 0.56481         | -0.16319 | 0.56481     | 0.54942     | 0.78159455  |          |         |          |
| LINC01672 | ENSG00000228750 | -0.40139 | 0.65593     | -0.17817    | 0.57071     | -0.12419 |         |          |

|             |                 |          |         |             |             |          |         |
|-------------|-----------------|----------|---------|-------------|-------------|----------|---------|
|             | 0.54942         | -1.1431  | 0.87351 | 0.54942     | 0.78159455  |          |         |
| TGFB2-AS1   | ENSG00000232480 | -0.12423 | 0.54944 | -0.12423    | 0.54944     | -0.12423 | 0.54944 |
|             | 0.54944         | -0.12423 | 0.54944 | 0.54944     | 0.78159455  |          |         |
| PILRB       | ENSG00000121716 | -0.3418  | 0.63375 | -0.3418     | 0.63375     | -0.3418  | 0.63375 |
|             | -0.12426        | 0.54945  | 0.54945 | 0.78159455  |             |          |         |
| NA          | ENSG00000227981 | -0.12433 | 0.54947 | -0.12433    | 0.54947     | -0.12433 | 0.54947 |
|             | -0.12433        | 0.54947  | 0.54947 | 0.78159455  |             |          |         |
| TRAPPC2L    | ENSG00000167515 | -0.12438 | 0.54949 | -0.12438    | 0.54949     | -0.12438 |         |
|             | 0.54949         | -0.12438 | 0.54949 | 0.54949     | 0.78159455  |          |         |
| NA          | ENSG00000207189 | -0.12437 | 0.54949 | -0.12437    | 0.54949     | -0.12437 | 0.54949 |
|             | -0.12437        | 0.54949  | 0.54949 | 0.78159455  |             |          |         |
| IQUB        | ENSG00000164675 | -0.1245  | 0.54954 | -0.39629    | 0.65405     | -0.39629 | 0.65405 |
|             | -0.50746        | 0.69409  | 0.54954 | 0.78162004  |             |          |         |
| NA          | ENSG00000227413 | -0.12451 | 0.54954 | -0.12451    | 0.54954     | -0.12451 | 0.54954 |
|             | -0.12451        | 0.54954  | 0.54954 | 0.78162004  |             |          |         |
| NA          | ENSG00000224250 | -1.7705  | 0.96168 | -1.7769     | 0.96221     | -0.12459 | 0.54958 |
|             | -0.12459        | 0.54958  | 0.54958 | 0.781654118 |             |          |         |
| SLC35B1     | ENSG00000121073 | -0.12496 | 0.54972 | -0.2059     | 0.58156     | -0.41548 |         |
|             | 0.66111         | -0.24082 | 0.59515 | 0.54972     | 0.781724635 |          |         |
| SNRPGP18    | ENSG00000257979 | -0.12494 | 0.54972 | -0.12494    | 0.54972     | -0.44989 |         |
|             | 0.67361         | -0.12494 | 0.54972 | 0.54972     | 0.781724635 |          |         |
| AEBP2       | ENSG00000139154 | -0.59012 | 0.72245 | -0.59012    | 0.72245     | -0.59012 | 0.72245 |
|             | -0.12497        | 0.54973  | 0.54973 | 0.781724635 |             |          |         |
| HMGB1P20    | ENSG00000219163 | -0.12497 | 0.54973 | -0.12497    | 0.54973     | -0.12497 |         |
|             | 0.54973         | -0.95249 | 0.82958 | 0.54973     | 0.781724635 |          |         |
| RAB9BP1     | ENSG00000232159 | -0.12498 | 0.54973 | -0.12498    | 0.54973     | -0.12498 |         |
|             | 0.54973         | -0.12498 | 0.54973 | 0.54973     | 0.781724635 |          |         |
| PRELID3BP10 | ENSG00000236105 | -0.12505 | 0.54976 | -0.12505    | 0.54976     | -0.12505 |         |
|             | 0.54976         | -0.12505 | 0.54976 | 0.54976     | 0.781724635 |          |         |
| NA          | ENSG00000241130 | -0.12505 | 0.54976 | -0.12505    | 0.54976     | -0.12505 | 0.54976 |
|             | -0.12505        | 0.54976  | 0.54976 | 0.781724635 |             |          |         |
| PGGT1BP1    | ENSG00000213667 | -1.5352  | 0.93763 | -0.12511    | 0.54978     | -0.57582 |         |
|             | 0.71763         | -0.57582 | 0.71763 | 0.54978     | 0.781724635 |          |         |
| KRTAP5-9    | ENSG00000254997 | -0.1251  | 0.54978 | -0.78234    | 0.78299     | -0.26116 |         |
|             | 0.60302         | -0.33271 | 0.63032 | 0.54978     | 0.781724635 |          |         |
| GALNT14     | ENSG00000158089 | -0.12514 | 0.54979 | -0.71631    | 0.7631      | -0.85416 |         |
|             | 0.80349         | -1.0814  | 0.86025 | 0.54979     | 0.781724635 |          |         |
| OR5H8       | ENSG00000232535 | -0.1253  | 0.54986 | -0.2454     | 0.59693     | -0.1253  | 0.54986 |
|             | -0.1253         | 0.54986  | 0.54986 | 0.781780284 |             |          |         |
| SPINT1      | ENSG00000166145 | -0.2862  | 0.61264 | -0.749      | 0.77307     | -0.81989 |         |
|             | 0.79386         | -0.12532 | 0.54987 | 0.54987     | 0.781780284 |          |         |
| NA          | ENSG00000242828 | -1.1437  | 0.87363 | -0.12542    | 0.5499      | -1.1437  | 0.87363 |
|             | -1.1437         | 0.87363  | 0.5499  | 0.781780284 |             |          |         |
| NA          | ENSG00000248634 | -0.12543 | 0.54991 | -0.12543    | 0.54991     | -0.12543 | 0.54991 |
|             | -0.12543        | 0.54991  | 0.54991 | 0.781780284 |             |          |         |
| CCDC86      | ENSG00000110104 | -0.12554 | 0.54995 | -0.12554    | 0.54995     | -0.14896 |         |
|             | 0.55921         | -0.21504 | 0.58513 | 0.54995     | 0.781780284 |          |         |
| THAP12P5    | ENSG00000218020 | -0.12563 | 0.54999 | -0.86872    | 0.8075      | -0.37019 |         |
|             | 0.64438         | -0.37019 | 0.64438 | 0.54999     | 0.781780284 |          |         |
| STAU1       | ENSG00000124214 | -0.58888 | 0.72203 | -0.12566    | 0.55        | -0.23869 | 0.59433 |
|             | -0.29782        | 0.61708  | 0.55    | 0.781780284 |             |          |         |
| NA          | ENSG00000248588 | -0.12565 | 0.55    | -0.96804    | 0.83349     | -0.39141 | 0.65225 |
|             | -0.74302        | 0.77127  | 0.55    | 0.781780284 |             |          |         |
| NA          | ENSG00000271117 | -0.12574 | 0.55003 | -0.12574    | 0.55003     | -0.12574 | 0.55003 |
|             | -0.12574        | 0.55003  | 0.55003 | 0.781780284 |             |          |         |
| NA          | ENSG00000255159 | -0.33311 | 0.63048 | -0.2746     | 0.60819     | -0.12577 | 0.55004 |
|             | -0.33592        | 0.63153  | 0.55004 | 0.781780284 |             |          |         |
| NA          | ENSG00000253280 | -0.33286 | 0.63038 | -1.684      | 0.95391     | -0.12582 | 0.55006 |
|             | -0.33286        | 0.63038  | 0.55006 | 0.781780284 |             |          |         |
| SLC25A5P7   | ENSG00000218180 | -0.12585 | 0.55007 | -0.12585    | 0.55007     | -0.79681 |         |
|             | 0.78722         | -1.6124  | 0.94656 | 0.55007     | 0.781780284 |          |         |
| NA          | ENSG00000219409 | -0.12585 | 0.55007 | -0.22422    | 0.58871     | -0.12585 | 0.55007 |

|                |                 |          |          |         |             |             |          |         |
|----------------|-----------------|----------|----------|---------|-------------|-------------|----------|---------|
|                |                 | -0.12585 | 0.55007  | 0.55007 | 0.781780284 |             |          |         |
| NA             | ENSG00000272447 | -0.12592 | 0.5501   | 0.5501  | -0.12592    | 0.5501      | -0.12592 | 0.5501  |
|                |                 | -0.12592 | 0.5501   | 0.5501  | 0.781780284 |             |          |         |
| ZNF552         | ENSG00000178935 | -0.12595 | 0.55012  | 0.55012 | -0.12595    | 0.55012     | -0.12595 | 0.55012 |
|                |                 | 0.55012  | -0.12595 | 0.55012 | 0.55012     | 0.781780284 |          |         |
| SNORD89        | ENSG00000212283 | -0.12596 | 0.55012  | 0.55012 | -0.12596    | 0.55012     | -0.12596 | 0.55012 |
|                |                 | 0.55012  | -0.12596 | 0.55012 | 0.55012     | 0.781780284 |          |         |
| NA             | ENSG00000261329 | -0.12597 | 0.55012  | 0.55012 | -0.2144     | 0.58488     | -0.12597 | 0.55012 |
|                |                 | -0.12597 | 0.55012  | 0.55012 | 0.781780284 |             |          |         |
| LINC02375      | ENSG00000256362 | -0.126   | 0.55013  | 0.55013 | -0.126      | 0.55013     | -0.126   | 0.55013 |
|                |                 | 0.55013  | -0.126   | 0.55013 | 0.55013     | 0.781780284 |          |         |
| LDHC           | ENSG00000166796 | -0.16989 | 0.56745  | 0.56745 | -0.16989    | 0.56745     | -0.16989 | 0.56745 |
|                |                 | -0.12604 | 0.55015  | 0.55015 | 0.781780284 |             |          |         |
| NA             | ENSG00000274892 | -0.12605 | 0.55015  | 0.55015 | -0.12605    | 0.55015     | -0.12605 | 0.55015 |
|                |                 | -0.12605 | 0.55015  | 0.55015 | 0.781780284 |             |          |         |
| MAL2           | ENSG00000147676 | -0.33286 | 0.63038  | 0.63038 | -1.8453     | 0.9675      | -1.6121  | 0.94653 |
|                |                 | -0.12615 | 0.55019  | 0.55019 | 0.781791529 |             |          |         |
| ZNF8           | ENSG00000278129 | -0.12614 | 0.55019  | 0.55019 | -0.12614    | 0.55019     | -0.12614 | 0.55019 |
|                |                 | -0.12614 | 0.55019  | 0.55019 | 0.781791529 |             |          |         |
| DNTTIP2        | ENSG00000067334 | -1.2034  | 0.88558  | 0.88558 | -0.12621    | 0.55022     | -0.64287 | 0.55022 |
|                |                 | 0.73985  | -0.77845 | 0.78185 | 0.55022     | 0.781794186 |          |         |
| NA             | ENSG00000269103 | -0.12627 | 0.55024  | 0.55024 | -0.12627    | 0.55024     | -0.12627 | 0.55024 |
|                |                 | -0.12627 | 0.55024  | 0.55024 | 0.781794186 |             |          |         |
| NA             | ENSG00000267824 | -0.31283 | 0.6228   | 0.6228  | -0.67693    | 0.75077     | -0.12626 | 0.55024 |
|                |                 | -0.39756 | 0.65452  | 0.55024 | 0.781794186 |             |          |         |
| AICDA          | ENSG00000111732 | -1.577   | 0.9426   | 0.9426  | -1.577      | 0.9426      | -1.2359  | 0.89176 |
|                |                 | -0.12633 | 0.55026  | 0.55026 | 0.781799808 |             |          |         |
| GVQW3          | ENSG00000179240 | -0.12655 | 0.55035  | 0.55035 | -0.12655    | 0.55035     | -0.12655 | 0.55035 |
|                |                 | -0.41912 | 0.66244  | 0.55035 | 0.781879115 |             |          |         |
| NA             | ENSG00000256448 | -0.12655 | 0.55035  | 0.55035 | -0.12655    | 0.55035     | -0.12655 | 0.55035 |
|                |                 | -0.12655 | 0.55035  | 0.55035 | 0.781879115 |             |          |         |
| NA             | ENSG00000228251 | -0.12659 | 0.55037  | 0.55037 | -0.12659    | 0.55037     | -0.12659 | 0.55037 |
|                |                 | -0.12659 | 0.55037  | 0.55037 | 0.781879115 |             |          |         |
| TMEM189-UBE2V1 | ENSG00000124208 | -0.12662 | 0.55038  | 0.55038 | -0.42581    | 0.66488     | -0.25684 | 0.55038 |
|                |                 | 0.60135  | -0.70574 | 0.75982 | 0.55038     | 0.781879115 |          |         |
| RNU6-293P      | ENSG00000223191 | -0.12679 | 0.55045  | 0.55045 | -0.12679    | 0.55045     | -0.12679 | 0.55045 |
|                |                 | 0.55045  | -0.12679 | 0.55045 | 0.55045     | 0.781899645 |          |         |
| RNU4-71P       | ENSG00000252067 | -1.6341  | 0.94888  | 0.94888 | -1.6341     | 0.94888     | -1.6341  | 0.94888 |
|                |                 | 0.94888  | -0.12695 | 0.55051 | 0.55051     | 0.781899645 |          |         |
| LACTB          | ENSG00000103642 | -0.80592 | 0.78986  | 0.78986 | -1.1561     | 0.87617     | -0.28059 | 0.61049 |
|                |                 | -0.12704 | 0.55054  | 0.55054 | 0.781899645 |             |          |         |
| MPP4           | ENSG00000082126 | -0.63033 | 0.73576  | 0.73576 | -0.12705    | 0.55055     | -0.63033 | 0.73576 |
|                |                 | -0.39878 | 0.65497  | 0.55055 | 0.781899645 |             |          |         |
| EDN1           | ENSG00000078401 | -1.0859  | 0.86124  | 0.86124 | -0.26149    | 0.60314     | -1.1921  | 0.8834  |
|                |                 | -0.12711 | 0.55057  | 0.55057 | 0.781899645 |             |          |         |
| NA             | ENSG00000272927 | -0.12713 | 0.55058  | 0.55058 | -0.12713    | 0.55058     | -0.12713 | 0.55058 |
|                |                 | -0.12713 | 0.55058  | 0.55058 | 0.781899645 |             |          |         |
| CCDC191        | ENSG00000163617 | -0.19733 | 0.57821  | 0.57821 | -0.23283    | 0.59205     | -0.12716 | 0.57821 |
|                |                 | 0.55059  | -0.19733 | 0.57821 | 0.55059     | 0.781899645 |          |         |
| NA             | ENSG00000253413 | -0.517   | 0.69742  | 0.69742 | -0.517      | 0.69742     | -0.1272  | 0.55061 |
|                |                 | -0.517   | 0.69742  | 0.55061 | 0.781899645 |             |          |         |
| NCOA4          | ENSG00000266412 | -0.1272  | 0.55061  | 0.55061 | -0.1272     | 0.55061     | -0.1272  | 0.55061 |
|                |                 | -0.1272  | 0.55061  | 0.55061 | 0.781899645 |             |          |         |
| FTH1P22        | ENSG00000225079 | -0.12724 | 0.55062  | 0.55062 | -0.12724    | 0.55062     | -0.12724 | 0.55062 |
|                |                 | 0.55062  | -0.12724 | 0.55062 | 0.55062     | 0.781899645 |          |         |
| NA             | ENSG00000253444 | -0.36464 | 0.64231  | 0.64231 | -0.12735    | 0.55067     | -0.97137 | 0.83432 |
|                |                 | -0.42633 | 0.66507  | 0.55067 | 0.781899645 |             |          |         |
| NA             | ENSG00000280156 | -0.12736 | 0.55067  | 0.55067 | -0.1843     | 0.57311     | -0.12736 | 0.55067 |
|                |                 | -0.12736 | 0.55067  | 0.55067 | 0.781899645 |             |          |         |
| FBXO5          | ENSG00000112029 | -0.12737 | 0.55068  | 0.55068 | -0.12737    | 0.55068     | -0.12737 | 0.55068 |
|                |                 | -0.12737 | 0.55068  | 0.55068 | 0.781899645 |             |          |         |
| KCNMA1-AS1     | ENSG00000236467 | -0.33426 | 0.63091  | 0.63091 | -0.47137    | 0.68131     | -0.12741 | 0.63091 |

|            |                 |          |         |             |             |          |         |
|------------|-----------------|----------|---------|-------------|-------------|----------|---------|
|            | 0.55069         | -0.75163 | 0.77386 | 0.55069     | 0.781899645 |          |         |
| IWS1       | ENSG00000163166 | -0.12744 | 0.55071 | -0.19604    | 0.57771     | -2.0949  | 0.98191 |
|            | -1.6732         | 0.95286  | 0.55071 | 0.781899645 |             |          |         |
| TET1P1     | ENSG00000232204 | -1.5213  | 0.93591 | -1.5213     | 0.93591     | -0.12746 |         |
|            | 0.55071         | -1.5213  | 0.93591 | 0.55071     | 0.781899645 |          |         |
| NA         | ENSG00000270333 | -0.12746 | 0.55071 | -0.12746    | 0.55071     | -1.0951  | 0.86326 |
|            | -0.77818        | 0.78177  | 0.55071 | 0.781899645 |             |          |         |
| NA         | ENSG00000267260 | -0.12752 | 0.55073 | -0.12752    | 0.55073     | -0.12752 | 0.55073 |
|            | -0.12752        | 0.55073  | 0.55073 | 0.781899645 |             |          |         |
| NA         | ENSG00000179979 | -0.12753 | 0.55074 | -0.12753    | 0.55074     | -0.12753 | 0.55074 |
|            | -0.12753        | 0.55074  | 0.55074 | 0.781899645 |             |          |         |
| CHMP5      | ENSG00000086065 | -0.39645 | 0.65411 | -0.26186    | 0.60328     | -0.12762 | 0.55077 |
|            | -0.9997         | 0.84127  | 0.55077 | 0.781899645 |             |          |         |
| APOA2      | ENSG00000158874 | -0.12771 | 0.55081 | -0.12771    | 0.55081     | -0.12771 | 0.55081 |
|            | -0.12771        | 0.55081  | 0.55081 | 0.781899645 |             |          |         |
| TOMM40L    | ENSG00000158882 | -0.49442 | 0.6895  | -0.12771    | 0.55081     | -0.12771 |         |
|            | 0.55081         | -0.12771 | 0.55081 | 0.55081     | 0.781899645 |          |         |
| NA         | ENSG00000257674 | -0.48725 | 0.68696 | -0.74592    | 0.77214     | -0.12775 | 0.55083 |
|            | -0.74592        | 0.77214  | 0.55083 | 0.781899645 |             |          |         |
| BSNDP2     | ENSG00000274973 | -0.12777 | 0.55083 | -0.31752    | 0.62458     | -0.45558 |         |
|            | 0.67566         | -0.45558 | 0.67566 | 0.55083     | 0.781899645 |          |         |
| ACTR1A     | ENSG00000138107 | -0.48196 | 0.68508 | -0.72342    | 0.76529     | -0.12781 |         |
|            | 0.55085         | -0.45029 | 0.67375 | 0.55085     | 0.781899645 |          |         |
| NA         | ENSG00000237974 | -0.12781 | 0.55085 | -0.12781    | 0.55085     | -0.12781 | 0.55085 |
|            | -0.12781        | 0.55085  | 0.55085 | 0.781899645 |             |          |         |
| KCTD21-AS1 | ENSG00000246174 | -0.12781 | 0.55085 | -0.12781    | 0.55085     | -0.12781 |         |
|            | 0.55085         | -0.12781 | 0.55085 | 0.55085     | 0.781899645 |          |         |
| TMEM44     | ENSG00000145014 | -0.96221 | 0.83203 | -0.95543    | 0.83032     | -0.12784 |         |
|            | 0.55086         | -0.24711 | 0.59759 | 0.55086     | 0.781899645 |          |         |
| ZC2HC1C    | ENSG00000119703 | -1.5402  | 0.93825 | -1.7026     | 0.95568     | -0.1279  |         |
|            | 0.55088         | -0.1279  | 0.55088 | 0.55088     | 0.781899645 |          |         |
| NA         | ENSG00000254288 | -0.12788 | 0.55088 | -0.17796    | 0.57062     | -0.12788 | 0.55088 |
|            | -0.12788        | 0.55088  | 0.55088 | 0.781899645 |             |          |         |
| RN7SKP105  | ENSG00000253001 | -0.51584 | 0.69702 | -0.47402    | 0.68226     | -0.128   |         |
|            | 0.55092         | -0.70699 | 0.76021 | 0.55092     | 0.781899645 |          |         |
| PMS1       | ENSG00000064933 | -1.6896  | 0.95444 | -0.128      | 0.55093     | -0.62733 | 0.73478 |
|            | -0.76078        | 0.77661  | 0.55093 | 0.781899645 |             |          |         |
| NA         | ENSG00000259296 | -0.12801 | 0.55093 | -0.12801    | 0.55093     | -0.12801 | 0.55093 |
|            | -0.12801        | 0.55093  | 0.55093 | 0.781899645 |             |          |         |
| NXT1       | ENSG00000132661 | -0.12805 | 0.55094 | -0.12805    | 0.55094     | -0.76834 | 0.77886 |
|            | -0.76834        | 0.77886  | 0.55094 | 0.781899645 |             |          |         |
| NA         | ENSG00000170089 | -0.12815 | 0.55098 | -0.73254    | 0.76808     | -0.4288  | 0.66597 |
|            | -1.2987         | 0.90297  | 0.55098 | 0.781933312 |             |          |         |
| FPGS       | ENSG00000136877 | -0.54103 | 0.70576 | -0.12824    | 0.55102     | -0.61318 | 0.73012 |
|            | -0.83385        | 0.79782  | 0.55102 | 0.781933312 |             |          |         |
| RNF121     | ENSG00000137522 | -0.3412  | 0.63352 | -0.12831    | 0.55105     | -0.27582 |         |
|            | 0.60866         | -0.41915 | 0.66245 | 0.55105     | 0.781933312 |          |         |
| NA         | ENSG00000223751 | -0.12831 | 0.55105 | -0.12831    | 0.55105     | -2.0746  | 0.98099 |
|            | -0.40513        | 0.65731  | 0.55105 | 0.781933312 |             |          |         |
| LINC01579  | ENSG00000258754 | -1.1467  | 0.87424 | -0.12833    | 0.55105     | -0.98691 |         |
|            | 0.83816         | -0.84293 | 0.80037 | 0.55105     | 0.781933312 |          |         |
| NA         | ENSG00000220725 | -0.87929 | 0.81038 | -0.12833    | 0.55106     | -1.2335  | 0.8913  |
|            | -1.3547         | 0.91225  | 0.55106 | 0.781933312 |             |          |         |
| RNU6-273P  | ENSG00000252746 | -0.12839 | 0.55108 | -0.26133    | 0.60308     | -0.59599 |         |
|            | 0.72441         | -0.59599 | 0.72441 | 0.55108     | 0.781938922 |          |         |
| NA         | ENSG00000270067 | -0.12846 | 0.55111 | -0.12846    | 0.55111     | -0.12846 | 0.55111 |
|            | -0.12846        | 0.55111  | 0.55111 | 0.78195575  |             |          |         |
| NA         | ENSG00000250037 | -0.12854 | 0.55114 | -0.12854    | 0.55114     | -0.12854 | 0.55114 |
|            | -0.12854        | 0.55114  | 0.55114 | 0.78195575  |             |          |         |
| MIR3914-1  | ENSG00000265878 | -0.12855 | 0.55114 | -0.12855    | 0.55114     | -0.75156 |         |
|            | 0.77384         | -0.12855 | 0.55114 | 0.55114     | 0.78195575  |          |         |
| NA         | ENSG00000200288 | -0.12862 | 0.55117 | -0.12862    | 0.55117     | -0.12862 | 0.55117 |

|           |                 |          |             |          |             |             |         |  |
|-----------|-----------------|----------|-------------|----------|-------------|-------------|---------|--|
|           |                 | -0.12862 | 0.55117     | 0.55117  | 0.781975547 |             |         |  |
| NA        | ENSG00000273747 | -0.12866 | 0.55119     | -0.12866 | 0.55119     | -0.12866    | 0.55119 |  |
|           |                 | -0.12866 | 0.55119     | 0.55119  | 0.781981155 |             |         |  |
| C12orf75  | ENSG00000235162 | -1.3399  | 0.90987     | -1.1162  | 0.86784     | -0.12878    |         |  |
|           |                 | 0.55123  | -1.0577     | 0.85491  | 0.55123     | 0.782006556 |         |  |
| CPSF3     | ENSG00000119203 | -1.1211  | 0.86888     | -2.0172  | 0.97816     | -0.12881    | 0.55124 |  |
|           |                 | -0.97438 | 0.83507     | 0.55124  | 0.782006556 |             |         |  |
| NA        | ENSG00000230010 | -0.1289  | 0.55128     | -0.1289  | 0.55128     | -0.1289     | 0.55128 |  |
|           |                 | -0.8218  | 0.7944      | 0.55128  | 0.78200919  |             |         |  |
| NA        | ENSG00000261670 | -0.1289  | 0.55128     | -0.1289  | 0.55128     | -0.1289     | 0.55128 |  |
|           |                 | -0.1289  | 0.55128     | 0.55128  | 0.78200919  |             |         |  |
| NA        | ENSG00000283517 | -0.99815 | 0.8409      | -0.12893 | 0.55129     | -0.53215    | 0.70269 |  |
|           |                 | -0.6727  | 0.74943     | 0.55129  | 0.78200919  |             |         |  |
| ANKRD18EP | ENSG00000217165 | -0.129   | 0.55132     | -0.129   | 0.55132     | -0.129      |         |  |
|           |                 | 0.55132  | -0.129      | 0.55132  | 0.55132     | 0.782028981 |         |  |
| KRT32     | ENSG00000108759 | -0.91405 | 0.81965     | -0.12913 | 0.55137     | -1.6386     | 0.94935 |  |
|           |                 | -0.58638 | 0.72119     | 0.55137  | 0.782051055 |             |         |  |
| CTTNBP2   | ENSG00000077063 | -0.63762 | 0.73814     | -0.12918 | 0.55139     | -0.95398    |         |  |
|           |                 | 0.82995  | -0.57041    | 0.7158   | 0.55139     | 0.782051055 |         |  |
| LINC02488 | ENSG00000249362 | -0.12933 | 0.55145     | -0.12933 | 0.55145     | -0.81181    |         |  |
|           |                 | 0.79155  | -0.12933    | 0.55145  | 0.55145     | 0.782051055 |         |  |
| NA        | ENSG00000277977 | -0.12932 | 0.55145     | -0.12932 | 0.55145     | -0.12932    | 0.55145 |  |
|           |                 | -0.12932 | 0.55145     | 0.55145  | 0.782051055 |             |         |  |
| PDCD6IP   | ENSG00000170248 | -0.12936 | 0.55146     | -0.61752 | 0.73155     | -0.70946    |         |  |
|           |                 | 0.76098  | -0.49165    | 0.68852  | 0.55146     | 0.782051055 |         |  |
| BNIP3P27  | ENSG00000268438 | -0.12936 | 0.55146     | -0.12936 | 0.55146     | -0.12936    |         |  |
|           |                 | 0.55146  | -0.12936    | 0.55146  | 0.55146     | 0.782051055 |         |  |
| NA        | ENSG00000207282 | -0.50508 | 0.69325     | -0.83686 | 0.79866     | -0.50508    | 0.69325 |  |
|           |                 | -0.12939 | 0.55147     | 0.55147  | 0.782051055 |             |         |  |
| ARMC2-AS1 | ENSG00000230290 | -0.12939 | 0.55147     | -0.12939 | 0.55147     | -0.12939    |         |  |
|           |                 | 0.55147  | -0.12939    | 0.55147  | 0.55147     | 0.782051055 |         |  |
| NA        | ENSG00000252465 | -0.12941 | 0.55148     | -0.12941 | 0.55148     | -0.12941    | 0.55148 |  |
|           |                 | -0.12941 | 0.55148     | 0.55148  | 0.782051055 |             |         |  |
| NA        | ENSG00000230381 | -0.12949 | 0.55152     | -0.12949 | 0.55152     | -0.12949    | 0.55152 |  |
|           |                 | -0.12949 | 0.55152     | 0.55152  | 0.782085019 |             |         |  |
| ZNF665    | ENSG00000197497 | -2.1394  | 0.9838      | -0.81636 | 0.79285     | -0.80388    |         |  |
|           |                 | 0.78927  | -0.1296     | 0.55156  | 0.55156     | 0.782107426 |         |  |
| NA        | ENSG00000271440 | -0.56771 | 0.71488     | -0.56771 | 0.71488     | -0.12967    | 0.55159 |  |
|           |                 | -0.56771 | 0.71488     | 0.55159  | 0.782107426 |             |         |  |
| FAM110A   | ENSG00000125898 | -1.3324  | 0.90863     | -0.53872 | 0.70496     | -0.89251    |         |  |
|           |                 | 0.81394  | -0.1297     | 0.5516   | 0.5516      | 0.782107426 |         |  |
| IGHV1-58  | ENSG00000211968 | -0.12971 | 0.5516      | -0.12971 | 0.5516      | -0.12971    |         |  |
|           |                 | 0.5516   | -0.12971    | 0.5516   | 0.5516      | 0.782107426 |         |  |
| NA        | ENSG00000280049 | -0.20557 | 0.58144     | -0.20557 | 0.58144     | -0.12977    | 0.55163 |  |
|           |                 | -0.57709 | 0.71806     | 0.55163  | 0.782124227 |             |         |  |
| NA        | ENSG00000278769 | -0.12984 | 0.55165     | -0.12984 | 0.55165     | -0.12984    | 0.55165 |  |
|           |                 | -0.12984 | 0.55165     | 0.55165  | 0.782124227 |             |         |  |
| EPS15P1   | ENSG00000242948 | -0.12986 | 0.55166     | -0.12986 | 0.55166     | -0.12986    |         |  |
|           |                 | 0.55166  | -0.12986    | 0.55166  | 0.55166     | 0.782124227 |         |  |
| LRRC8C    | ENSG00000171488 | -0.25512 | 0.60068     | -0.25512 | 0.60068     | -0.25512    |         |  |
|           |                 | 0.60068  | -0.13055172 | 0.55172  | 0.782186536 |             |         |  |
| CDC40     | ENSG00000168438 | -0.13008 | 0.55175     | -1.8209  | 0.96569     | -0.29254    | 0.61506 |  |
|           |                 | -0.68318 | 0.75275     | 0.55175  | 0.78220631  |             |         |  |
| SUMO2P15  | ENSG00000271236 | -0.32678 | 0.62808     | -0.13022 | 0.55181     | -0.32678    |         |  |
|           |                 | 0.62808  | -0.32678    | 0.62808  | 0.55181     | 0.782248467 |         |  |
| FBXO11    | ENSG00000138081 | -0.30471 | 0.61971     | -0.93632 | 0.82545     | -0.13027    |         |  |
|           |                 | 0.55182  | -0.65307    | 0.74314  | 0.55182     | 0.782248467 |         |  |
| NA        | ENSG00000259744 | -0.13029 | 0.55183     | -0.13029 | 0.55183     | -0.13029    | 0.55183 |  |
|           |                 | -0.13029 | 0.55183     | 0.55183  | 0.782248467 |             |         |  |
| MIR324    | ENSG00000199053 | -0.13037 | 0.55186     | -0.13037 | 0.55186     | -0.13037    |         |  |
|           |                 | 0.55186  | -0.13037    | 0.55186  | 0.55186     | 0.782248467 |         |  |
| NA        | ENSG00000278009 | -0.13036 | 0.55186     | -0.13036 | 0.55186     | -0.13036    | 0.55186 |  |

|            |                 |          |             |          |             |             |         |          |       |
|------------|-----------------|----------|-------------|----------|-------------|-------------|---------|----------|-------|
|            |                 | -0.13036 | 0.55186     | 0.55186  | 0.782248467 |             |         |          |       |
| NA         | ENSG00000276063 | -0.13044 | 0.55189     | -0.13044 | 0.55189     | -0.6916     | 0.75541 |          |       |
|            |                 | -0.57953 | 0.71888     | 0.55189  | 0.782256672 |             |         |          |       |
| RNY1       | ENSG00000201098 | -0.1305  | 0.55192     | -0.1305  | 0.55192     | -0.1305     | 0.55192 |          |       |
|            |                 | -0.1305  | 0.55192     | 0.55192  | 0.782256672 |             |         |          |       |
| NA         | ENSG00000254048 | -0.37433 | 0.64592     | -0.13051 | 0.55192     | -0.37433    | 0.64592 |          |       |
|            |                 | -0.37433 | 0.64592     | 0.55192  | 0.782256672 |             |         |          |       |
| IL6ST      | ENSG00000134352 | -0.28628 | 0.61267     | -0.70695 | 0.7602      | -0.70104    | 0.75836 |          |       |
|            |                 | -0.13053 | 0.55193     | 0.55193  | 0.782256672 |             |         |          |       |
| RN7SL229P  | ENSG00000242811 | -0.14133 | 0.55619     | -0.14133 | 0.55619     | -0.13069    |         |          |       |
|            |                 | 0.55199  | -0.14133    | 0.55619  | 0.55199     | 0.782275684 |         |          |       |
| PMF1-BGLAP | ENSG00000260238 | -0.13069 | 0.55199     | -0.13069 | 0.55199     | -0.13069    |         |          |       |
|            |                 | 0.55199  | -0.13069    | 0.55199  | 0.55199     | 0.782275684 |         |          |       |
| NA         | ENSG00000184566 | -0.13073 | 0.552       | -0.13073 | 0.552       | -0.13073    | 0.552   | -0.13073 | 0.552 |
|            |                 | 0.552    | 0.782275684 |          |             |             |         |          |       |
| NA         | ENSG00000256953 | -0.86033 | 0.8052      | -0.16489 | 0.56549     | -0.24412    | 0.59643 |          |       |
|            |                 | -0.1309  | 0.55207     | 0.55207  | 0.782275684 |             |         |          |       |
| NA         | ENSG00000227033 | -1.0052  | 0.84261     | -0.80126 | 0.78851     | -0.70257    | 0.75884 |          |       |
|            |                 | -0.13092 | 0.55208     | 0.55208  | 0.782275684 |             |         |          |       |
| SFPQ       | ENSG00000116560 | -0.56893 | 0.7153      | -0.3449  | 0.63491     | -0.86076    | 0.80531 |          |       |
|            |                 | -0.13095 | 0.55209     | 0.55209  | 0.782275684 |             |         |          |       |
| HNRNPK     | ENSG00000165119 | -0.18417 | 0.57306     | -0.13097 | 0.5521      | -0.13607    |         |          |       |
|            |                 | 0.55412  | -0.18417    | 0.57306  | 0.5521      | 0.782275684 |         |          |       |
| ARL2BPP5   | ENSG00000254351 | -0.13097 | 0.5521      | -0.13097 | 0.5521      | -0.13097    |         |          |       |
|            |                 | 0.5521   | -0.13097    | 0.5521   | 0.5521      | 0.782275684 |         |          |       |
| SNORD115-9 | ENSG00000199782 | -0.13103 | 0.55212     | -0.13103 | 0.55212     | -0.13103    |         |          |       |
|            |                 | 0.55212  | -0.13103    | 0.55212  | 0.55212     | 0.782275684 |         |          |       |
| SNORD115-8 | ENSG00000200726 | -0.13103 | 0.55212     | -0.13103 | 0.55212     | -0.13103    |         |          |       |
|            |                 | 0.55212  | -0.13103    | 0.55212  | 0.55212     | 0.782275684 |         |          |       |
| POLG2      | ENSG00000256525 | -0.13101 | 0.55212     | -0.13101 | 0.55212     | -0.13101    | 0.55212 |          |       |
|            |                 | -0.13101 | 0.55212     | 0.55212  | 0.782275684 |             |         |          |       |
| NA         | ENSG00000248973 | -1.1467  | 0.87425     | -0.13119 | 0.55219     | -1.1341     | 0.87163 |          |       |
|            |                 | -0.29217 | 0.61492     | 0.55219  | 0.782328985 |             |         |          |       |
| WDR18      | ENSG00000065268 | -0.38614 | 0.6503      | -0.13125 | 0.55221     | -0.34828    | 0.63618 |          |       |
|            |                 | -0.34828 | 0.63618     | 0.55221  | 0.782328985 |             |         |          |       |
| SETP3      | ENSG00000266648 | -0.1313  | 0.55223     | -0.1313  | 0.55223     | -0.1313     | 0.55223 |          |       |
|            |                 | -0.1313  | 0.55223     | 0.55223  | 0.782328985 |             |         |          |       |
| PEX26      | ENSG00000215193 | -0.81853 | 0.79347     | -0.7812  | 0.78266     | -0.13136    | 0.55225 |          |       |
|            |                 | -1.3468  | 0.91098     | 0.55225  | 0.782328985 |             |         |          |       |
| KIAA0513   | ENSG00000135709 | -0.13137 | 0.55226     | -1.6936  | 0.95483     | -1.0752     |         |          |       |
|            |                 | 0.85886  | -0.14484    | 0.55758  | 0.55226     | 0.782328985 |         |          |       |
| ZNF3       | ENSG00000166526 | -0.41184 | 0.65977     | -0.41184 | 0.65977     | -0.1314     | 0.55227 |          |       |
|            |                 | -1.0174  | 0.84552     | 0.55227  | 0.782328985 |             |         |          |       |
| CCDC13-AS1 | ENSG00000173811 | -0.4147  | 0.66082     | -0.4147  | 0.66082     | -0.30569    |         |          |       |
|            |                 | 0.62008  | -0.13139    | 0.55227  | 0.55227     | 0.782328985 |         |          |       |
| LINC00498  | ENSG00000248397 | -0.2048  | 0.58114     | -0.2048  | 0.58114     | -0.2048     |         |          |       |
|            |                 | 0.58114  | -0.13153    | 0.55232  | 0.55232     | 0.78237707  |         |          |       |
| RXYLT1-AS1 | ENSG00000255850 | -1.9525  | 0.97456     | -0.13179 | 0.55242     | -1.9525     |         |          |       |
|            |                 | 0.97456  | -1.9525     | 0.97456  | 0.55242     | 0.782495977 |         |          |       |
| GYG1       | ENSG00000163754 | -0.13188 | 0.55246     | -0.13188 | 0.55246     | -0.13188    | 0.55246 |          |       |
|            |                 | -0.13188 | 0.55246     | 0.55246  | 0.78252989  |             |         |          |       |
| RNU6-786P  | ENSG00000252658 | -0.13199 | 0.5525      | -0.13199 | 0.5525      | -0.13199    |         |          |       |
|            |                 | 0.5525   | -0.13199    | 0.5525   | 0.5525      | 0.782535058 |         |          |       |
| TONSL-AS1  | ENSG00000232600 | -0.13205 | 0.55253     | -0.13205 | 0.55253     | -0.13205    |         |          |       |
|            |                 | 0.55253  | -0.13205    | 0.55253  | 0.55253     | 0.782535058 |         |          |       |
| RING1      | ENSG00000204227 | -1.1033  | 0.86504     | -1.1033  | 0.86504     | -0.13207    | 0.55254 |          |       |
|            |                 | -1.1033  | 0.86504     | 0.55254  | 0.782535058 |             |         |          |       |
| NA         | ENSG00000239705 | -0.13212 | 0.55255     | -0.1895  | 0.57515     | -0.1895     | 0.57515 |          |       |
|            |                 | -0.1895  | 0.57515     | 0.55255  | 0.782535058 |             |         |          |       |
| TMEM192    | ENSG00000170088 | -1.6117  | 0.94649     | -0.61748 | 0.73154     | -0.13212    |         |          |       |
|            |                 | 0.55256  | -2.0102     | 0.97779  | 0.55256     | 0.782535058 |         |          |       |
| LINC02772  | ENSG00000271736 | -1.1042  | 0.86525     | -0.13213 | 0.55256     | -0.13213    |         |          |       |

|            |                 |          |         |             |             |          |         |
|------------|-----------------|----------|---------|-------------|-------------|----------|---------|
|            | 0.55256         | -0.13213 | 0.55256 | 0.55256     | 0.782535058 |          |         |
| TRIAPI1    | ENSG00000170855 | -0.9293  | 0.82363 | 0.82363     | -0.13231    | 0.55263  | -0.9293 |
|            | 0.82363         | -0.9293  | 0.82363 | 0.55263     | 0.782611447 |          |         |
| NA         | ENSG00000241307 | -0.13241 | 0.55267 | -0.13241    | 0.55267     | -0.13241 | 0.55267 |
|            | -0.13241        | 0.55267  | 0.55267 | 0.782645349 |             |          |         |
| NA         | ENSG00000272945 | -0.13256 | 0.55273 | -0.13256    | 0.55273     | -0.13256 | 0.55273 |
|            | -0.13256        | 0.55273  | 0.55273 | 0.782690402 |             |          |         |
| FAM167A    | ENSG00000154319 | -0.3737  | 0.64568 | -0.13261    | 0.55275     | -0.64744 |         |
|            | 0.74133         | -0.72609 | 0.76611 | 0.55275     | 0.782690402 |          |         |
| LINC01979  | ENSG00000262585 | -0.19411 | 0.57695 | -0.1326     | 0.55275     | -0.19411 |         |
|            | 0.57695         | -0.1326  | 0.55275 | 0.55275     | 0.782690402 |          |         |
| NA         | ENSG00000249159 | -1.1945  | 0.88385 | -0.13267    | 0.55277     | -0.52776 | 0.70117 |
|            | -0.43155        | 0.66697  | 0.55277 | 0.782695978 |             |          |         |
| RNU6-1258P | ENSG00000252720 | -0.1328  | 0.55282 | -0.1328     | 0.55282     | -0.1328  |         |
|            | 0.55282         | -0.21745 | 0.58607 | 0.55282     | 0.782744032 |          |         |
| SMG1P3     | ENSG00000180747 | -1.0861  | 0.86127 | -0.13298    | 0.5529      | -0.75527 |         |
|            | 0.77496         | -0.23948 | 0.59463 | 0.5529      | 0.782785607 |          |         |
| NA         | ENSG00000169253 | -0.13303 | 0.55291 | -2.4103     | 0.99203     | -2.1657  | 0.98483 |
|            | -2.1657         | 0.98483  | 0.55291 | 0.782785607 |             |          |         |
| ZFAND3     | ENSG00000156639 | -1.9485  | 0.97432 | -0.13311    | 0.55295     | -1.4916  |         |
|            | 0.93209         | -1.3056  | 0.90416 | 0.55295     | 0.782785607 |          |         |
| NA         | ENSG00000236662 | -0.13311 | 0.55295 | -0.13311    | 0.55295     | -0.13311 | 0.55295 |
|            | -0.13311        | 0.55295  | 0.55295 | 0.782785607 |             |          |         |
| MRTFA-AS1  | ENSG00000232564 | -0.26979 | 0.60634 | -0.26979    | 0.60634     | -0.26979 |         |
|            | 0.60634         | -0.13316 | 0.55296 | 0.55296     | 0.782785607 |          |         |
| CCDC92B    | ENSG00000261963 | -1.9137  | 0.97217 | -0.79072    | 0.78545     | -1.9766  |         |
|            | 0.97596         | -0.13314 | 0.55296 | 0.55296     | 0.782785607 |          |         |
| FABP3P2    | ENSG00000233259 | -1.4181  | 0.92192 | -0.13318    | 0.55297     | -1.4181  |         |
|            | 0.92192         | -0.50771 | 0.69417 | 0.55297     | 0.782785607 |          |         |
| CLEC12A    | ENSG00000172322 | -0.92505 | 0.82253 | -0.33516    | 0.63125     | -0.6063  |         |
|            | 0.72784         | -0.13326 | 0.55301 | 0.55301     | 0.782785607 |          |         |
| NA         | ENSG00000235251 | -0.13326 | 0.55301 | -0.13326    | 0.55301     | -0.13326 | 0.55301 |
|            | -0.13326        | 0.55301  | 0.55301 | 0.782785607 |             |          |         |
| NA         | ENSG00000265455 | -0.13327 | 0.55301 | -0.13327    | 0.55301     | -0.13327 | 0.55301 |
|            | -0.13327        | 0.55301  | 0.55301 | 0.782785607 |             |          |         |
| NA         | ENSG00000254400 | -0.1334  | 0.55306 | -0.1334     | 0.55306     | -0.1334  | 0.55306 |
|            | -0.1334         | 0.55306  | 0.55306 | 0.782825058 |             |          |         |
| PRG3       | ENSG00000156575 | -0.16063 | 0.56381 | -0.13341    | 0.55307     | -0.16063 | 0.56381 |
|            | -1.1235         | 0.86938  | 0.55307 | 0.782825058 |             |          |         |
| MIR4650-1  | ENSG00000266525 | -0.1335  | 0.5531  | -0.1335     | 0.5531      | -0.1335  |         |
|            | 0.5531          | -0.1335  | 0.5531  | 0.5531      | 0.782833184 |          |         |
| CFAP20     | ENSG00000070761 | -0.1336  | 0.55314 | -0.46097    | 0.67759     | -0.43886 |         |
|            | 0.66962         | -0.1336  | 0.55314 | 0.55314     | 0.782833184 |          |         |
| HNRNPA1P64 | ENSG00000213559 | -0.1336  | 0.55314 | -0.76285    | 0.77722     | -0.22733 |         |
|            | 0.58992         | -0.1336  | 0.55314 | 0.55314     | 0.782833184 |          |         |
| NA         | ENSG00000249364 | -0.36122 | 0.64103 | -1.0705     | 0.8578      | -0.1423  | 0.55658 |
|            | -0.13361        | 0.55314  | 0.55314 | 0.782833184 |             |          |         |
| RN7SL735P  | ENSG00000244044 | -0.13364 | 0.55316 | -0.13364    | 0.55316     | -0.13364 |         |
|            | 0.55316         | -0.13364 | 0.55316 | 0.55316     | 0.782838754 |          |         |
| HFM1       | ENSG00000162669 | -0.44414 | 0.67153 | -0.13369    | 0.55318     | -0.24615 | 0.59722 |
|            | -0.60014        | 0.72579  | 0.55318 | 0.782844322 |             |          |         |
| TBX18-AS1  | ENSG00000228290 | -0.73003 | 0.76731 | -0.23137    | 0.59149     | -1.1375  |         |
|            | 0.87233         | -0.13375 | 0.5532  | 0.5532      | 0.782848511 |          |         |
| COLQ       | ENSG00000206561 | -1.0057  | 0.84273 | -1.2606     | 0.89627     | -0.13381 | 0.55323 |
|            | -0.15792        | 0.56274  | 0.55323 | 0.782848511 |             |          |         |
| NA         | ENSG00000254469 | -0.29837 | 0.61729 | -0.37999    | 0.64802     | -0.13384 | 0.55324 |
|            | -0.13384        | 0.55324  | 0.55324 | 0.782848511 |             |          |         |
| NA         | ENSG00000283663 | -0.1339  | 0.55326 | -0.1339     | 0.55326     | -0.1339  | 0.55326 |
|            | -0.1339         | 0.55326  | 0.55326 | 0.782848511 |             |          |         |
| GPR84      | ENSG00000139572 | -0.13409 | 0.55333 | -1.3292     | 0.9081      | -1.3292  | 0.9081  |
|            | -1.3292         | 0.9081   | 0.55333 | 0.782848511 |             |          |         |
| NA         | ENSG00000227158 | -0.13407 | 0.55333 | -0.13407    | 0.55333     | -0.6431  | 0.73992 |

|           |                 |          |          |          |             |             |         |  |
|-----------|-----------------|----------|----------|----------|-------------|-------------|---------|--|
|           |                 | -0.13407 | 0.55333  | 0.55333  | 0.782848511 |             |         |  |
| ICE1      | ENSG00000164151 | -1.3767  | 0.91569  | -1.799   | 0.96399     | -1.7047     | 0.95587 |  |
|           |                 | -0.13414 | 0.55335  | 0.55335  | 0.782848511 |             |         |  |
| SEC61B    | ENSG00000106803 | -0.13415 | 0.55336  | -0.43333 | 0.66761     | -0.38601    |         |  |
|           |                 | 0.65026  | -0.48507 | 0.68619  | 0.55336     | 0.782848511 |         |  |
| NA        | ENSG00000179743 | -0.3552  | 0.63878  | -0.13417 | 0.55337     | -0.64361    | 0.74008 |  |
|           |                 | -0.71565 | 0.7629   | 0.55337  | 0.782848511 |             |         |  |
| NA        | ENSG00000255210 | -0.48634 | 0.68664  | -0.70012 | 0.75807     | -0.48634    | 0.68664 |  |
|           |                 | -0.13418 | 0.55337  | 0.55337  | 0.782848511 |             |         |  |
| CTSG      | ENSG00000100448 | -0.45305 | 0.67474  | -0.99129 | 0.83923     | -0.99129    | 0.83923 |  |
|           |                 | -0.1343  | 0.55342  | 0.55342  | 0.782848511 |             |         |  |
| NA        | ENSG00000231434 | -0.1343  | 0.55342  | -0.1343  | 0.55342     | -0.1343     | 0.55342 |  |
|           |                 | -0.1343  | 0.55342  | 0.55342  | 0.782848511 |             |         |  |
| NA        | ENSG00000253879 | -0.13431 | 0.55342  | -0.13431 | 0.55342     | -0.13431    | 0.55342 |  |
|           |                 | -0.13431 | 0.55342  | 0.55342  | 0.782848511 |             |         |  |
| MIR548Y   | ENSG00000263945 | -0.13434 | 0.55343  | -0.27244 | 0.60736     | -0.13434    |         |  |
|           |                 | 0.55343  | -0.13434 | 0.55343  | 0.55343     | 0.782848511 |         |  |
| YIPF2     | ENSG00000130733 | -1.3336  | 0.90884  | -0.87972 | 0.81049     | -0.1575     | 0.56257 |  |
|           |                 | -0.13435 | 0.55344  | 0.55344  | 0.782848511 |             |         |  |
| RAD1P2    | ENSG00000233473 | -0.13435 | 0.55344  | -0.5543  | 0.71031     | -0.13435    |         |  |
|           |                 | 0.55344  | -0.13435 | 0.55344  | 0.55344     | 0.782848511 |         |  |
| BANF1P5   | ENSG00000225935 | -0.13447 | 0.55348  | -0.13447 | 0.55348     | -1.0033     |         |  |
|           |                 | 0.84214  | -0.13447 | 0.55348  | 0.55348     | 0.782879352 |         |  |
| NA        | ENSG00000258162 | -0.2923  | 0.61497  | -0.2923  | 0.61497     | -0.53455    | 0.70352 |  |
|           |                 | -0.13452 | 0.5535   | 0.5535   | 0.782879352 |             |         |  |
| RN7SKP30  | ENSG00000223305 | -0.13454 | 0.55351  | -0.22327 | 0.58834     | -0.13454    |         |  |
|           |                 | 0.55351  | -0.13454 | 0.55351  | 0.55351     | 0.782879352 |         |  |
| NA        | ENSG00000274719 | -0.13461 | 0.55354  | -0.6626  | 0.74621     | -0.13461    | 0.55354 |  |
|           |                 | -0.13461 | 0.55354  | 0.55354  | 0.78289048  |             |         |  |
| NA        | ENSG00000248607 | -0.13464 | 0.55355  | -0.13464 | 0.55355     | -0.13464    | 0.55355 |  |
|           |                 | -0.13464 | 0.55355  | 0.55355  | 0.78289048  |             |         |  |
| CCDC74B   | ENSG00000152076 | -1.7365  | 0.95876  | -0.1703  | 0.56761     | -0.23535    |         |  |
|           |                 | 0.59303  | -0.13479 | 0.55361  | 0.55361     | 0.782952615 |         |  |
| EIF4BP4   | ENSG00000229572 | -0.81075 | 0.79124  | -0.13493 | 0.55367     | -0.47653    |         |  |
|           |                 | 0.68315  | -1.5584  | 0.94044  | 0.55367     | 0.783014746 |         |  |
| NA        | ENSG00000280085 | -0.39837 | 0.65482  | -1.4368  | 0.92461     | -0.90585    | 0.81749 |  |
|           |                 | -0.13515 | 0.55375  | 0.55375  | 0.783054724 |             |         |  |
| NA        | ENSG00000249225 | -0.13519 | 0.55377  | -1.4593  | 0.92776     | -1.5899     | 0.94407 |  |
|           |                 | -1.5899  | 0.94407  | 0.55377  | 0.783054724 |             |         |  |
| DNAAF3    | ENSG00000167646 | -0.26411 | 0.60415  | -0.13526 | 0.5538      | -0.26411    |         |  |
|           |                 | 0.60415  | -0.26411 | 0.60415  | 0.5538      | 0.783054724 |         |  |
| COL24A1   | ENSG00000171502 | -0.52215 | 0.69922  | -0.13533 | 0.55382     | -1.2462     |         |  |
|           |                 | 0.89365  | -0.54721 | 0.70788  | 0.55382     | 0.783054724 |         |  |
| NA        | ENSG00000199370 | -0.13533 | 0.55382  | -0.13533 | 0.55382     | -0.13533    | 0.55382 |  |
|           |                 | -0.13533 | 0.55382  | 0.55382  | 0.783054724 |             |         |  |
| NA        | ENSG00000200494 | -0.13532 | 0.55382  | -1.188   | 0.88259     | -0.13532    | 0.55382 |  |
|           |                 | -0.13532 | 0.55382  | 0.55382  | 0.783054724 |             |         |  |
| NA        | ENSG00000201343 | -0.19817 | 0.57854  | -0.13533 | 0.55382     | -0.19817    | 0.57854 |  |
|           |                 | -0.19817 | 0.57854  | 0.55382  | 0.783054724 |             |         |  |
| NA        | ENSG00000251555 | -0.86831 | 0.80739  | -0.20147 | 0.57983     | -0.13539    | 0.55385 |  |
|           |                 | -0.15459 | 0.56143  | 0.55385  | 0.783054724 |             |         |  |
| RN7SKP242 | ENSG00000251776 | -1.0275  | 0.84791  | -0.13542 | 0.55386     | -1.1219     |         |  |
|           |                 | 0.86904  | -0.97025 | 0.83404  | 0.55386     | 0.783054724 |         |  |
| DDTP1     | ENSG00000230683 | -1.9598  | 0.97499  | -0.13556 | 0.55392     | -0.79865    | 0.78775 |  |
|           |                 | -0.89541 | 0.81472  | 0.55392  | 0.783054724 |             |         |  |
| NA        | ENSG00000250678 | -0.13559 | 0.55393  | -0.13559 | 0.55393     | -0.13559    | 0.55393 |  |
|           |                 | -0.13559 | 0.55393  | 0.55393  | 0.783054724 |             |         |  |
| MLH1      | ENSG00000076242 | -0.74192 | 0.77093  | -1.0647  | 0.8565      | -0.13568    | 0.55396 |  |
|           |                 | -1.3177  | 0.90619  | 0.55396  | 0.783054724 |             |         |  |
| PPP3R2    | ENSG00000188386 | -0.13567 | 0.55396  | -0.13567 | 0.55396     | -0.13567    |         |  |
|           |                 | 0.55396  | -0.13567 | 0.55396  | 0.55396     | 0.783054724 |         |  |
| NA        | ENSG00000244630 | -0.13567 | 0.55396  | -0.13567 | 0.55396     | -0.13567    | 0.55396 |  |



|            |                 |          |          |         |             |             |         |                  |
|------------|-----------------|----------|----------|---------|-------------|-------------|---------|------------------|
|            |                 | -0.13567 | 0.55396  | 0.55396 | 0.783054724 |             |         |                  |
| NA         | ENSG00000253336 | -1.3302  | 0.90828  | 0.55401 | 0.783054724 | -0.50179    | 0.69209 | -0.13578 0.554   |
|            |                 | -1.3302  | 0.90828  | 0.55401 | 0.783054724 |             |         |                  |
| CDHR3      | ENSG00000128536 | -1.0915  | 0.86247  | 0.55401 | 0.783054724 | -0.13581    | 0.55401 | -0.28641 0.61272 |
|            |                 | -1.1583  | 0.87664  | 0.55401 | 0.783054724 |             |         |                  |
| GSTM5P1    | ENSG00000236062 | -0.36472 | 0.64234  | 0.55401 | 0.783054724 | -0.32272    | 0.62655 | -0.13581         |
|            |                 | 0.55401  | -0.32272 | 0.62655 | 0.55401     | 0.783054724 |         |                  |
| EAF1-AS1   | ENSG00000249786 | -0.13581 | 0.55401  | 0.55401 | 0.783054724 | -0.21874    | 0.58657 | -0.13581         |
|            |                 | 0.55401  | -0.13581 | 0.55401 | 0.55401     | 0.783054724 |         |                  |
| CORO2A     | ENSG00000106789 | -0.13582 | 0.55402  | 0.55402 | 0.783054724 | -0.17676    | 0.57015 | -0.73564         |
|            |                 | 0.76902  | -0.88382 | 0.8116  | 0.55402     | 0.783054724 |         |                  |
| NA         | ENSG00000226070 | -0.50971 | 0.69487  | 0.55402 | 0.783054724 | -0.13582    | 0.55402 | -0.50971 0.69487 |
|            |                 | -0.20449 | 0.58101  | 0.55402 | 0.783054724 |             |         |                  |
| METTL14    | ENSG00000145388 | -0.81742 | 0.79315  | 0.55406 | 0.783054724 | -0.13593    | 0.55406 | -0.87145         |
|            |                 | 0.80824  | -0.65528 | 0.74386 | 0.55406     | 0.783054724 |         |                  |
| NA         | ENSG00000240095 | -0.13594 | 0.55407  | 0.55407 | 0.783054724 | -0.88752    | 0.8126  | -0.13594 0.55407 |
|            |                 | -0.13594 | 0.55407  | 0.55407 | 0.783054724 |             |         |                  |
| NA         | ENSG00000258121 | -0.13595 | 0.55407  | 0.55407 | 0.783054724 | -0.13595    | 0.55407 | -0.13595 0.55407 |
|            |                 | -0.13595 | 0.55407  | 0.55407 | 0.783054724 |             |         |                  |
| MTND6P20   | ENSG00000254156 | -0.13601 | 0.55409  | 0.55409 | 0.783054724 | -0.13601    | 0.55409 | -0.13601         |
|            |                 | 0.55409  | -0.13601 | 0.55409 | 0.55409     | 0.783054724 |         |                  |
| PACRG      | ENSG00000112530 | -0.13602 | 0.5541   | 0.5541  | 0.783054724 | -0.91206    | 0.81913 | -0.91206 0.81913 |
|            |                 | -0.35987 | 0.64053  | 0.5541  | 0.783054724 |             |         |                  |
| LINC00303  | ENSG00000176754 | -0.18412 | 0.57304  | 0.55418 | 0.783145069 | -0.13623    | 0.55418 | -0.23217         |
|            |                 | 0.5918   | -0.16943 | 0.56727 | 0.55418     | 0.783145069 |         |                  |
| MTCYBP35   | ENSG00000251340 | -0.1364  | 0.55425  | 0.55425 | 0.783189984 | -0.1364     | 0.55425 | -0.26144         |
|            |                 | 0.60312  | -0.1364  | 0.55425 | 0.55425     | 0.783189984 |         |                  |
| NA         | ENSG00000283405 | -0.1364  | 0.55425  | 0.55425 | 0.783189984 | -0.1364     | 0.55425 | -0.1364 0.55425  |
|            |                 | -0.1364  | 0.55425  | 0.55425 | 0.783189984 |             |         |                  |
| ZNF211     | ENSG00000121417 | -0.13644 | 0.55426  | 0.55426 | 0.783189984 | -0.67215    | 0.74925 | -0.27278         |
|            |                 | 0.60749  | -0.13644 | 0.55426 | 0.55426     | 0.783189984 |         |                  |
| TCP10L3    | ENSG00000203690 | -0.13667 | 0.55435  | 0.55435 | 0.783194515 | -1.6657     | 0.95212 | -1.6509          |
|            |                 | 0.95062  | -1.0131  | 0.8445  | 0.55435     | 0.783194515 |         |                  |
| RUNX1      | ENSG00000159216 | -1.2829  | 0.90024  | 0.55436 | 0.783194515 | -0.33722    | 0.63202 | -0.32356 0.62686 |
|            |                 | -0.13668 | 0.55436  | 0.55436 | 0.783194515 |             |         |                  |
| LINC02388  | ENSG00000257259 | -0.13668 | 0.55436  | 0.55436 | 0.783194515 | -0.13668    | 0.55436 | -0.88713         |
|            |                 | 0.8125   | -0.81169 | 0.79151 | 0.55436     | 0.783194515 |         |                  |
| NA         | ENSG00000255089 | -0.13671 | 0.55437  | 0.55437 | 0.783194515 | -0.13671    | 0.55437 | -0.13671 0.55437 |
|            |                 | -0.13671 | 0.55437  | 0.55437 | 0.783194515 |             |         |                  |
| NA         | ENSG00000249892 | -0.27799 | 0.60949  | 0.55438 | 0.783194515 | -0.13674    | 0.55438 | -0.54028 0.7055  |
|            |                 | -0.54028 | 0.7055   | 0.55438 | 0.783194515 |             |         |                  |
| IFIT1      | ENSG00000185745 | -0.13676 | 0.55439  | 0.55439 | 0.783194515 | -0.78534    | 0.78387 | -0.78534 0.78387 |
|            |                 | -0.78534 | 0.78387  | 0.55439 | 0.783194515 |             |         |                  |
| OR7E109P   | ENSG00000236316 | -0.27651 | 0.60892  | 0.55439 | 0.783194515 | -1.0654     | 0.85664 | -0.1482          |
|            |                 | 0.55891  | -0.13676 | 0.55439 | 0.55439     | 0.783194515 |         |                  |
| GPAA1      | ENSG00000197858 | -0.15223 | 0.5605   | 0.55443 | 0.783194515 | -0.13685    | 0.55443 | -0.13685 0.55443 |
|            |                 | -0.13685 | 0.55443  | 0.55443 | 0.783194515 |             |         |                  |
| WASHC5-AS1 | ENSG00000253167 | -0.13687 | 0.55443  | 0.55443 | 0.783194515 | -0.13687    | 0.55443 | -0.13687         |
|            |                 | 0.55443  | -0.13687 | 0.55443 | 0.55443     | 0.783194515 |         |                  |
| HEATR5A    | ENSG00000129493 | -0.97978 | 0.8364   | 0.55444 | 0.783194515 | -0.26347    | 0.60391 | -0.84514         |
|            |                 | 0.80098  | -0.13689 | 0.55444 | 0.55444     | 0.783194515 |         |                  |
| PTMAP2     | ENSG00000197744 | -1.2139  | 0.88761  | 0.55444 | 0.783194515 | -0.13688    | 0.55444 | -0.27162         |
|            |                 | 0.60704  | -0.4248  | 0.66451 | 0.55444     | 0.783194515 |         |                  |
| NA         | ENSG00000280357 | -0.13708 | 0.55451  | 0.55451 | 0.783270691 | -0.13708    | 0.55451 | -0.13708 0.55451 |
|            |                 | -0.13708 | 0.55451  | 0.55451 | 0.783270691 |             |         |                  |
| MTHFR      | ENSG00000177000 | -0.13724 | 0.55458  | 0.55458 | 0.783346862 | -0.13724    | 0.55458 | -0.13724 0.55458 |
|            |                 | -0.24093 | 0.5952   | 0.55458 | 0.783346862 |             |         |                  |
| MYC        | ENSG00000136997 | -0.15263 | 0.56065  | 0.55458 | 0.783352406 | -1.0711     | 0.85795 | -0.1373 0.5546   |
|            |                 | -0.91514 | 0.81994  | 0.5546  | 0.783352406 |             |         |                  |
| STAT1      | ENSG00000115415 | -0.74015 | 0.7704   | 0.55463 | 0.783354911 | -0.74015    | 0.7704  | -0.13738 0.55463 |
|            |                 | -0.13738 | 0.55463  | 0.55463 | 0.783354911 |             |         |                  |
| NA         | ENSG00000266711 | -1.3728  | 0.91509  | 0.55464 | 0.783354911 | -0.13741    | 0.55464 | -0.45973 0.67714 |

|            |                 |          |         |             |             |          |         |  |
|------------|-----------------|----------|---------|-------------|-------------|----------|---------|--|
|            | -1.2107         | 0.88699  | 0.55464 | 0.783354911 |             |          |         |  |
| OR51Q1     | ENSG00000167360 | -0.4738  | 0.68218 | -0.13742    | 0.55465     | -0.13742 |         |  |
|            | 0.55465         | -0.13742 | 0.55465 | 0.55465     | 0.783354911 |          |         |  |
| NEUROD1    | ENSG00000162992 | -1.5639  | 0.94108 | -1.5639     | 0.94108     | -0.13755 |         |  |
|            | 0.5547          | -1.5639  | 0.94108 | 0.5547      | 0.783402823 |          |         |  |
| LINC01509  | ENSG00000226825 | -0.46549 | 0.67921 | -0.1377     | 0.55476     | -1.026   |         |  |
|            | 0.84755         | -0.37106 | 0.6447  | 0.55476     | 0.783456271 |          |         |  |
| NA         | ENSG00000255557 | -0.90703 | 0.81781 | -1.5324     | 0.93729     | -1.4982  | 0.93296 |  |
|            | -0.13773        | 0.55477  | 0.55477 | 0.783456271 |             |          |         |  |
| OR5V1      | ENSG00000243729 | -1.791   | 0.96335 | -1.791      | 0.96335     | -1.0561  | 0.85455 |  |
|            | -0.1379         | 0.55484  | 0.55484 | 0.783506668 |             |          |         |  |
| XRN2       | ENSG00000088930 | -1.213   | 0.88744 | -1.213      | 0.88744     | -0.13794 | 0.55486 |  |
|            | -1.213          | 0.88744  | 0.55486 | 0.783506668 |             |          |         |  |
| DAPK1      | ENSG00000196730 | -0.13798 | 0.55487 | -0.18926    | 0.57506     | -0.99591 | 0.84035 |  |
|            | -1.0281         | 0.84804  | 0.55487 | 0.783506668 |             |          |         |  |
| NA         | ENSG00000257900 | -0.13799 | 0.55487 | -0.13799    | 0.55487     | -0.13799 | 0.55487 |  |
|            | -0.13799        | 0.55487  | 0.55487 | 0.783506668 |             |          |         |  |
| PSMD11     | ENSG00000108671 | -0.48158 | 0.68495 | -0.13805    | 0.5549      | -0.6247  |         |  |
|            | 0.73392         | -0.2905  | 0.61428 | 0.5549      | 0.783526325 |          |         |  |
| LSM12P1    | ENSG00000232024 | -0.13821 | 0.55496 | -0.52575    | 0.70047     | -0.47957 |         |  |
|            | 0.68423         | -1.5389  | 0.93808 | 0.55496     | 0.783539327 |          |         |  |
| MTND1P24   | ENSG00000257858 | -0.13834 | 0.55501 | -0.13834    | 0.55501     | -0.13834 |         |  |
|            | 0.55501         | -0.33146 | 0.62985 | 0.55501     | 0.783539327 |          |         |  |
| DDX10P2    | ENSG00000230360 | -0.18925 | 0.57505 | -0.13836    | 0.55502     | -0.18925 |         |  |
|            | 0.57505         | -0.91446 | 0.81976 | 0.55502     | 0.783539327 |          |         |  |
| NA         | ENSG00000263345 | -0.13834 | 0.55502 | -0.13834    | 0.55502     | -0.13834 | 0.55502 |  |
|            | -0.13834        | 0.55502  | 0.55502 | 0.783539327 |             |          |         |  |
| NA         | ENSG00000278981 | -0.13835 | 0.55502 | -0.13835    | 0.55502     | -0.13835 | 0.55502 |  |
|            | -0.13835        | 0.55502  | 0.55502 | 0.783539327 |             |          |         |  |
| HMG2P18    | ENSG00000223452 | -0.90028 | 0.81601 | -1.2268     | 0.89006     | -0.13837 |         |  |
|            | 0.55503         | -1.2268  | 0.89006 | 0.55503     | 0.783539327 |          |         |  |
| DNM1P17    | ENSG00000250833 | -0.13838 | 0.55503 | -0.13838    | 0.55503     | -0.13838 |         |  |
|            | 0.55503         | -0.37822 | 0.64737 | 0.55503     | 0.783539327 |          |         |  |
| PTP4A1P6   | ENSG00000254727 | -0.13847 | 0.55506 | -0.13847    | 0.55506     | -0.13847 |         |  |
|            | 0.55506         | -0.13847 | 0.55506 | 0.55506     | 0.783539327 |          |         |  |
| NA         | ENSG00000253447 | -1.5378  | 0.93796 | -0.13848    | 0.55507     | -0.85108 | 0.80264 |  |
|            | -0.30461        | 0.61967  | 0.55507 | 0.783539327 |             |          |         |  |
| NA         | ENSG00000280186 | -0.13848 | 0.55507 | -0.13848    | 0.55507     | -0.13848 | 0.55507 |  |
|            | -0.13848        | 0.55507  | 0.55507 | 0.783539327 |             |          |         |  |
| NA         | ENSG00000236324 | -0.46616 | 0.67945 | -0.3265     | 0.62798     | -0.46616 | 0.67945 |  |
|            | -0.13856        | 0.5551   | 0.5551  | 0.783550395 |             |          |         |  |
| MTCO2P23   | ENSG00000235803 | -0.13858 | 0.55511 | -0.13858    | 0.55511     | -0.13858 |         |  |
|            | 0.55511         | -0.13858 | 0.55511 | 0.55511     | 0.783550395 |          |         |  |
| LINC01639  | ENSG00000236117 | -0.63679 | 0.73787 | -0.13868    | 0.55515     | -0.98436 |         |  |
|            | 0.83753         | -0.13868 | 0.55515 | 0.55515     | 0.783584159 |          |         |  |
| RN7SL832P  | ENSG00000243819 | -0.13893 | 0.55525 | -0.13893    | 0.55525     | -0.13893 |         |  |
|            | 0.55525         | -0.13893 | 0.55525 | 0.55525     | 0.783702607 |          |         |  |
| NA         | ENSG00000253154 | -0.56382 | 0.71356 | -0.76326    | 0.77735     | -0.13905 | 0.55529 |  |
|            | -0.47251        | 0.68172  | 0.55529 | 0.783732719 |             |          |         |  |
| LINC01366  | ENSG00000235172 | -0.13909 | 0.55531 | -0.13909    | 0.55531     | -0.13909 |         |  |
|            | 0.55531         | -0.6905  | 0.75506 | 0.55531     | 0.783732719 |          |         |  |
| IGFBP11    | ENSG00000137142 | -1.3736  | 0.91522 | -0.13914    | 0.55533     | -0.39315 |         |  |
|            | 0.6529          | -0.93582 | 0.82532 | 0.55533     | 0.783732719 |          |         |  |
| NA         | ENSG00000255100 | -0.13916 | 0.55534 | -0.13916    | 0.55534     | -0.13916 | 0.55534 |  |
|            | -0.13916        | 0.55534  | 0.55534 | 0.783732719 |             |          |         |  |
| RNU6-1262P | ENSG00000252026 | -0.6658  | 0.74723 | -0.6658     | 0.74723     | -0.6658  |         |  |
|            | 0.74723         | -0.13921 | 0.55536 | 0.55536     | 0.783732719 |          |         |  |
| NA         | ENSG00000224719 | -0.13926 | 0.55538 | -0.13926    | 0.55538     | -0.84061 | 0.79972 |  |
|            | -0.87033        | 0.80794  | 0.55538 | 0.783732719 |             |          |         |  |
| MIR569     | ENSG00000207963 | -0.1393  | 0.55539 | -0.33957    | 0.63291     | -0.33957 |         |  |
|            | 0.63291         | -0.33957 | 0.63291 | 0.55539     | 0.783732719 |          |         |  |
| CCDC60     | ENSG00000183273 | -1.291   | 0.90165 | -1.1411     | 0.87309     | -0.97316 |         |  |

|           |                 |          |             |             |             |          |         |          |
|-----------|-----------------|----------|-------------|-------------|-------------|----------|---------|----------|
|           | 0.83476         | -0.13932 | 0.5554      | 0.5554      | 0.783732719 |          |         |          |
| NA        | ENSG00000267423 | -0.13937 | 0.55542     | -0.35848    | 0.64001     | -0.13937 | 0.55542 |          |
|           | -0.13937        | 0.55542  | 0.55542     | 0.783737072 |             |          |         |          |
| LDB2      | ENSG00000169744 | -0.92791 | 0.82327     | -1.5618     | 0.94083     | -0.31602 | 0.62401 |          |
|           | -0.13949        | 0.55547  | 0.55547     | 0.783737072 |             |          |         |          |
| C1DP2     | ENSG00000236217 | -0.13955 | 0.55549     | -0.17477    | 0.56937     | -0.17477 | 0.56937 |          |
|           | -0.17477        | 0.56937  | 0.55549     | 0.783737072 |             |          |         |          |
| PDE4B-AS1 | ENSG00000227466 | -0.13961 | 0.55551     | -0.13961    | 0.55551     | -0.13961 |         |          |
|           | 0.55551         | -0.13961 | 0.55551     | 0.55551     | 0.783737072 |          |         |          |
| LINC02604 | ENSG00000273142 | -0.47708 | 0.68335     | -0.81912    | 0.79364     | -0.1396  |         |          |
|           | 0.55551         | -0.94314 | 0.8272      | 0.55551     | 0.783737072 |          |         |          |
| NA        | ENSG00000242729 | -0.13963 | 0.55552     | -0.53775    | 0.70462     | -1.1075  | 0.86595 |          |
|           | -1.1181         | 0.86825  | 0.55552     | 0.783737072 |             |          |         |          |
| SNX24     | ENSG00000064652 | -0.13967 | 0.55554     | -0.57103    | 0.71601     | -0.64258 | 0.73975 |          |
|           | -0.70292        | 0.75895  | 0.55554     | 0.783737072 |             |          |         |          |
| NA        | ENSG00000279629 | -0.61379 | 0.73032     | -0.73458    | 0.7687      | -0.13967 | 0.55554 |          |
|           | -1.113          | 0.86715  | 0.55554     | 0.783737072 |             |          |         |          |
| RPL12P37  | ENSG00000240270 | -0.72705 | 0.7664      | -0.93732    | 0.8257      | -0.28796 |         |          |
|           | 0.61331         | -0.13973 | 0.55556     | 0.55556     | 0.783737072 |          |         |          |
| NA        | ENSG00000268745 | -0.13975 | 0.55557     | -0.13975    | 0.55557     | -0.13975 | 0.55557 |          |
|           | -0.13975        | 0.55557  | 0.55557     | 0.783737072 |             |          |         |          |
| SNORA40C  | ENSG00000212587 | -0.13978 | 0.55558     | -0.13978    | 0.55558     | -0.13978 |         |          |
|           | 0.55558         | -1.1856  | 0.8821      | 0.55558     | 0.783737072 |          |         |          |
| PTCHD3P3  | ENSG00000219700 | -0.13987 | 0.55562     | -0.68844    | 0.75441     | -0.13987 |         |          |
|           | 0.55562         | -0.13987 | 0.55562     | 0.55562     | 0.78375917  |          |         |          |
| OR8B1P    | ENSG00000227737 | -0.13993 | 0.55564     | -0.13993    | 0.55564     | -0.13993 |         |          |
|           | 0.55564         | -0.13993 | 0.55564     | 0.55564     | 0.78375917  |          |         |          |
| PIP5K1P1  | ENSG00000219294 | -0.51083 | 0.69527     | -0.31144    | 0.62227     | -1.018   |         |          |
|           | 0.84567         | -0.13999 | 0.55566     | 0.55566     | 0.78375917  |          |         |          |
| NA        | ENSG00000283635 | -0.13998 | 0.55566     | -0.13998    | 0.55566     | -0.13998 | 0.55566 |          |
|           | -0.13998        | 0.55566  | 0.55566     | 0.78375917  |             |          |         |          |
| CDRT1     | ENSG00000241322 | -0.69668 | 0.757       | -0.14008    | 0.5557      | -1.01    | 0.84376 | -0.67213 |
|           | 0.74925         | 0.5557   | 0.78377574  |             |             |          |         |          |
| LINC00402 | ENSG00000235532 | -0.46973 | 0.68073     | -0.51477    | 0.69664     | -0.46973 |         |          |
|           | 0.68073         | -0.1401  | 0.55571     | 0.55571     | 0.78377574  |          |         |          |
| CHCHD2P2  | ENSG00000215006 | -0.97062 | 0.83413     | -0.97062    | 0.83413     | -0.26898 |         |          |
|           | 0.60603         | -0.14013 | 0.55572     | 0.55572     | 0.78377574  |          |         |          |
| NA        | ENSG00000213736 | -0.1402  | 0.55575     | -0.71394    | 0.76237     | -0.1402  | 0.55575 |          |
|           | -0.43346        | 0.66766  | 0.55575     | 0.783795366 |             |          |         |          |
| DDHD1     | ENSG00000100523 | -0.49195 | 0.68862     | -0.1403     | 0.55579     | -0.59739 | 0.72488 |          |
|           | -0.25057        | 0.59893  | 0.55579     | 0.783829094 |             |          |         |          |
| NA        | ENSG00000268313 | -0.1405  | 0.55587     | -0.1405     | 0.55587     | -0.1405  | 0.55587 |          |
|           | -0.1405         | 0.55587  | 0.55587     | 0.783829753 |             |          |         |          |
| ABCB9     | ENSG00000150967 | -0.53894 | 0.70504     | -0.14053    | 0.55588     | -0.21009 | 0.5832  |          |
|           | -0.38949        | 0.65154  | 0.55588     | 0.783829753 |             |          |         |          |
| NA        | ENSG00000276831 | -0.14061 | 0.55591     | -0.14061    | 0.55591     | -0.14061 | 0.55591 |          |
|           | -0.14061        | 0.55591  | 0.55591     | 0.783829753 |             |          |         |          |
| NA        | ENSG00000225116 | -0.14062 | 0.55592     | -0.14062    | 0.55592     | -0.52849 | 0.70142 |          |
|           | -0.99397        | 0.83988  | 0.55592     | 0.783829753 |             |          |         |          |
| NA        | ENSG00000231173 | -0.14066 | 0.55593     | -0.14066    | 0.55593     | -0.14066 | 0.55593 |          |
|           | -0.14066        | 0.55593  | 0.55593     | 0.783829753 |             |          |         |          |
| EIF1P7    | ENSG00000213772 | -0.14067 | 0.55594     | -0.14067    | 0.55594     | -0.14067 |         |          |
|           | 0.55594         | -0.14067 | 0.55594     | 0.55594     | 0.783829753 |          |         |          |
| RN7SL223P | ENSG00000240202 | -0.93662 | 0.82552     | -0.14079    | 0.55598     | -0.93662 |         |          |
|           | 0.82552         | -0.93662 | 0.82552     | 0.55598     | 0.783829753 |          |         |          |
| NA        | ENSG00000279325 | -0.91461 | 0.8198      | -0.14084    | 0.556       | -1.45    | 0.92647 | -0.5428  |
|           | 0.70637         | 0.556    | 0.783829753 |             |             |          |         |          |
| GCM2      | ENSG00000124827 | -0.14086 | 0.55601     | -1.1878     | 0.88254     | -0.14086 | 0.55601 |          |
|           | -1.6152         | 0.94687  | 0.55601     | 0.783829753 |             |          |         |          |
| STXBP4    | ENSG00000166263 | -0.86422 | 0.80627     | -0.14086    | 0.55601     | -0.29824 |         |          |
|           | 0.61724         | -0.6594  | 0.74518     | 0.55601     | 0.783829753 |          |         |          |
| DHCR24    | ENSG00000116133 | -2.1991  | 0.98606     | -1.6408     | 0.94958     | -1.8051  |         |          |

|             |                 |          |         |             |             |          |         |
|-------------|-----------------|----------|---------|-------------|-------------|----------|---------|
|             | 0.96447         | -0.14089 | 0.55602 | 0.55602     | 0.783829753 |          |         |
| NA          | ENSG00000236529 | -0.31316 | 0.62292 | -0.70315    | 0.75902     | -0.1409  | 0.55603 |
|             | -0.84958        | 0.80222  | 0.55603 | 0.783829753 |             |          |         |
| DCAKD       | ENSG00000172992 | -0.63488 | 0.73725 | -0.14094    | 0.55604     | -0.54792 | 0.70813 |
|             | -0.99184        | 0.83936  | 0.55604 | 0.783829753 |             |          |         |
| SNORD114-18 | ENSG00000202142 | -0.14093 | 0.55604 | -0.14093    | 0.55604     | -0.14093 | 0.55604 |
|             | 0.55604         | -0.14093 | 0.55604 | 0.55604     | 0.783829753 |          |         |
| LINC01412   | ENSG00000232606 | -0.14094 | 0.55604 | -0.14094    | 0.55604     | -0.14094 |         |
|             | 0.55604         | -0.14094 | 0.55604 | 0.55604     | 0.783829753 |          |         |
| UBR1        | ENSG00000159459 | -1.1599  | 0.87695 | -0.14096    | 0.55605     | -0.63143 | 0.73612 |
|             | -0.71226        | 0.76185  | 0.55605 | 0.783829753 |             |          |         |
| NA          | ENSG00000188223 | -0.14104 | 0.55608 | -0.14104    | 0.55608     | -0.14104 | 0.55608 |
|             | -0.14104        | 0.55608  | 0.55608 | 0.783829753 |             |          |         |
| NA          | ENSG00000271724 | -0.14103 | 0.55608 | -0.14103    | 0.55608     | -0.14103 | 0.55608 |
|             | -0.14103        | 0.55608  | 0.55608 | 0.783829753 |             |          |         |
| RPS20P24    | ENSG00000236862 | -0.63985 | 0.73886 | -0.63985    | 0.73886     | -0.14114 |         |
|             | 0.55612         | -0.63985 | 0.73886 | 0.55612     | 0.783863462 |          |         |
| NA          | ENSG00000248775 | -0.46114 | 0.67765 | -0.44767    | 0.6728      | -0.14123 | 0.55616 |
|             | -0.14123        | 0.55616  | 0.55616 | 0.783897168 |             |          |         |
| NA          | ENSG00000221073 | -0.19099 | 0.57573 | -0.48639    | 0.68665     | -0.14129 | 0.55618 |
|             | -0.55897        | 0.71191  | 0.55618 | 0.783899621 |             |          |         |
| RNU2-39P    | ENSG00000222536 | -0.14134 | 0.5562  | -0.14134    | 0.5562      | -0.14134 |         |
|             | 0.5562          | -0.14134 | 0.5562  | 0.5562      | 0.783899621 |          |         |
| MTCYBP45    | ENSG00000224338 | -0.14136 | 0.55621 | -1.134      | 0.8716      | -0.78458 |         |
|             | 0.78365         | -1.134   | 0.8716  | 0.55621     | 0.783899621 |          |         |
| EXOC1       | ENSG00000090989 | -0.1415  | 0.55626 | -0.23157    | 0.59156     | -0.25341 | 0.60003 |
|             | -1.7485         | 0.95981  | 0.55626 | 0.783935157 |             |          |         |
| FAAH        | ENSG00000117480 | -1.2337  | 0.89135 | -0.1416     | 0.5563      | -0.76081 | 0.77662 |
|             | -1.5631         | 0.94098  | 0.5563  | 0.783935157 |             |          |         |
| ZNF593      | ENSG00000142684 | -0.14161 | 0.5563  | -0.14161    | 0.5563      | -0.14161 |         |
|             | 0.5563          | -0.96065 | 0.83164 | 0.5563      | 0.783935157 |          |         |
| C18orf21    | ENSG00000141428 | -0.26391 | 0.60408 | -0.14168    | 0.55633     | -0.14168 |         |
|             | 0.55633         | -0.45648 | 0.67598 | 0.55633     | 0.783935157 |          |         |
| RPL10P3     | ENSG00000230734 | -0.14172 | 0.55635 | -0.14172    | 0.55635     | -0.14172 |         |
|             | 0.55635         | -0.14172 | 0.55635 | 0.55635     | 0.783935157 |          |         |
| NA          | ENSG00000272922 | -0.14177 | 0.55637 | -0.14177    | 0.55637     | -0.20418 | 0.58089 |
|             | -0.14177        | 0.55637  | 0.55637 | 0.783935157 |             |          |         |
| NA          | ENSG00000273403 | -0.14177 | 0.55637 | -0.14177    | 0.55637     | -0.14177 | 0.55637 |
|             | -0.14177        | 0.55637  | 0.55637 | 0.783935157 |             |          |         |
| RPF1        | ENSG00000117133 | -1.2002  | 0.88497 | -1.2002     | 0.88497     | -0.1418  | 0.55638 |
|             | -1.2002         | 0.88497  | 0.55638 | 0.783935157 |             |          |         |
| POR         | ENSG00000127948 | -0.68018 | 0.7518  | -0.1418     | 0.55638     | -0.77039 | 0.77947 |
|             | -1.1742         | 0.87983  | 0.55638 | 0.783935157 |             |          |         |
| MIR3907     | ENSG00000265810 | -0.14202 | 0.55647 | -1.3372     | 0.90941     | -0.7083  |         |
|             | 0.76062         | -0.7083  | 0.76062 | 0.55647     | 0.784039296 |          |         |
| PIGS        | ENSG00000087111 | -0.31183 | 0.62241 | -0.31183    | 0.62241     | -0.14207 | 0.55649 |
|             | -0.74597        | 0.77216  | 0.55649 | 0.784044806 |             |          |         |
| IFT74       | ENSG00000096872 | -0.69424 | 0.75623 | -0.24471    | 0.59666     | -0.14226 | 0.55656 |
|             | -0.53369        | 0.70322  | 0.55656 | 0.784112177 |             |          |         |
| KRT19P2     | ENSG00000216306 | -0.14227 | 0.55657 | -0.14227    | 0.55657     | -0.14227 |         |
|             | 0.55657         | -0.14227 | 0.55657 | 0.55657     | 0.784112177 |          |         |
| NA          | ENSG00000227994 | -0.14238 | 0.55661 | -0.14238    | 0.55661     | -0.14238 | 0.55661 |
|             | -0.14238        | 0.55661  | 0.55661 | 0.784128697 |             |          |         |
| NA          | ENSG00000234694 | -0.33857 | 0.63253 | -0.1424     | 0.55662     | -0.61202 | 0.72974 |
|             | -0.61202        | 0.72974  | 0.55662 | 0.784128697 |             |          |         |
| ABCA13      | ENSG00000179869 | -0.60506 | 0.72743 | -0.56357    | 0.71348     | -1.0968  |         |
|             | 0.86363         | -0.14242 | 0.55663 | 0.55663     | 0.784128697 |          |         |
| NA          | ENSG00000237017 | -0.14253 | 0.55667 | -0.14253    | 0.55667     | -0.14253 | 0.55667 |
|             | -0.14253        | 0.55667  | 0.55667 | 0.78415072  |             |          |         |
| DIAPH1      | ENSG00000131504 | -0.28338 | 0.61156 | -1.4253     | 0.92296     | -0.60445 |         |
|             | 0.72723         | -0.14255 | 0.55668 | 0.55668     | 0.78415072  |          |         |
| NA          | ENSG00000232806 | -1.0786  | 0.85963 | -0.1426     | 0.5567      | -1.0786  | 0.85963 |

|              |                 |          |         |             |             |          |         |  |
|--------------|-----------------|----------|---------|-------------|-------------|----------|---------|--|
|              | -1.0786         | 0.85963  | 0.5567  | 0.78415072  |             |          |         |  |
| CCDC81       | ENSG00000149201 | -0.42228 | 0.66359 | -1.1079     | 0.86605     | -0.42228 |         |  |
|              | 0.66359         | -0.14263 | 0.55671 | 0.55671     | 0.78415072  |          |         |  |
| RNA5SP247    | ENSG00000223113 | -0.14272 | 0.55674 | -0.14272    | 0.55674     | -0.43199 |         |  |
|              | 0.66713         | -0.14272 | 0.55674 | 0.55674     | 0.784161081 |          |         |  |
| APPBP2       | ENSG00000062725 | -0.18863 | 0.57481 | -0.14282    | 0.55678     | -0.14282 |         |  |
|              | 0.55678         | -1.7896  | 0.96324 | 0.55678     | 0.784161081 |          |         |  |
| SLC25A52     | ENSG00000141437 | -0.14928 | 0.55934 | -0.55928    | 0.71201     | -0.14285 |         |  |
|              | 0.5568          | -0.14285 | 0.5568  | 0.5568      | 0.784161081 |          |         |  |
| NA           | ENSG00000266955 | -0.14285 | 0.5568  | -1.1101     | 0.86652     | -0.14285 | 0.5568  |  |
|              | -0.14285        | 0.5568   | 0.5568  | 0.784161081 |             |          |         |  |
| TRIM53CP     | ENSG00000254764 | -2.1753  | 0.98519 | -0.14289    | 0.55681     | -2.0532  |         |  |
|              | 0.97997         | -2.272   | 0.98846 | 0.55681     | 0.784161081 |          |         |  |
| ACCS         | ENSG00000110455 | -0.67726 | 0.75088 | -0.14291    | 0.55682     | -0.98523 | 0.83775 |  |
|              | -0.67726        | 0.75088  | 0.55682 | 0.784161081 |             |          |         |  |
| RNU6-242P    | ENSG00000207087 | -1.4295  | 0.92356 | -1.4295     | 0.92356     | -1.4295  |         |  |
|              | 0.92356         | -0.14294 | 0.55683 | 0.55683     | 0.784161081 |          |         |  |
| RPL17P44     | ENSG00000241088 | -0.14302 | 0.55686 | -0.2394     | 0.5946      | -0.14302 |         |  |
|              | 0.55686         | -0.14302 | 0.55686 | 0.55686     | 0.784174515 |          |         |  |
| MARK2P13     | ENSG00000228815 | -0.86513 | 0.80652 | -0.14305    | 0.55688     | -0.98861 |         |  |
|              | 0.83857         | -0.98861 | 0.83857 | 0.55688     | 0.784174515 |          |         |  |
| RNU2-30P     | ENSG00000252018 | -0.1431  | 0.5569  | -0.1431     | 0.5569      | -0.1431  |         |  |
|              | 0.5569          | -0.397   | 0.65431 | 0.5569      | 0.784174515 |          |         |  |
| MAP1LC3P     | ENSG00000267647 | -0.70425 | 0.75936 | -1.1407     | 0.873       | -0.14313 | 0.55691 |  |
|              | -0.14313        | 0.55691  | 0.55691 | 0.784174515 |             |          |         |  |
| URGCP-MRPS24 | ENSG00000270617 | -0.14318 | 0.55692 | -0.14318    | 0.55692     | -0.14318 |         |  |
|              | 0.55692         | -0.14318 | 0.55692 | 0.55692     | 0.784174515 |          |         |  |
| NA           | ENSG00000213461 | -0.14322 | 0.55694 | -0.14322    | 0.55694     | -0.14322 | 0.55694 |  |
|              | -0.14322        | 0.55694  | 0.55694 | 0.784180017 |             |          |         |  |
| TENT5A       | ENSG00000112773 | -0.14339 | 0.55701 | -0.22494    | 0.58899     | -0.14339 |         |  |
|              | 0.55701         | -0.97626 | 0.83553 | 0.55701     | 0.784244258 |          |         |  |
| LRRC74B      | ENSG00000187905 | -0.95521 | 0.83026 | -1.5164     | 0.93529     | -0.14341 |         |  |
|              | 0.55702         | -1.548   | 0.93919 | 0.55702     | 0.784244258 |          |         |  |
| NA           | ENSG00000244146 | -0.14348 | 0.55705 | -0.85651    | 0.80414     | -0.14348 | 0.55705 |  |
|              | -0.81076        | 0.79125  | 0.55705 | 0.784244258 |             |          |         |  |
| NA           | ENSG00000279923 | -0.14349 | 0.55705 | -0.14349    | 0.55705     | -0.14349 | 0.55705 |  |
|              | -0.14349        | 0.55705  | 0.55705 | 0.784244258 |             |          |         |  |
| ALG12        | ENSG00000182858 | -0.14373 | 0.55714 | -1.277      | 0.8992      | -0.24105 | 0.59524 |  |
|              | -0.182          | 0.57221  | 0.55714 | 0.784348304 |             |          |         |  |
| NA           | ENSG00000255126 | -0.14377 | 0.55716 | -0.14377    | 0.55716     | -0.14377 | 0.55716 |  |
|              | -0.14377        | 0.55716  | 0.55716 | 0.784350715 |             |          |         |  |
| NA           | ENSG00000251184 | -0.14381 | 0.55718 | -0.14381    | 0.55718     | -0.14381 | 0.55718 |  |
|              | -0.14381        | 0.55718  | 0.55718 | 0.784350715 |             |          |         |  |
| NA           | ENSG00000278861 | -0.14385 | 0.55719 | -1.5114     | 0.93465     | -1.5114  | 0.93465 |  |
|              | -1.5114         | 0.93465  | 0.55719 | 0.784350715 |             |          |         |  |
| MIR193A      | ENSG00000207614 | -0.14391 | 0.55721 | -0.14391    | 0.55721     | -0.14391 |         |  |
|              | 0.55721         | -0.39966 | 0.6553  | 0.55721     | 0.784356211 |          |         |  |
| SNORA46      | ENSG00000207493 | -0.14402 | 0.55726 | -0.14402    | 0.55726     | -0.14402 |         |  |
|              | 0.55726         | -0.14402 | 0.55726 | 0.55726     | 0.784386771 |          |         |  |
| OR4F14P      | ENSG00000232459 | -0.43379 | 0.66778 | -0.43379    | 0.66778     | -0.43379 |         |  |
|              | 0.66778         | -0.14405 | 0.55727 | 0.55727     | 0.784386771 |          |         |  |
| S100A11      | ENSG00000163191 | -1.115   | 0.86758 | -1.2014     | 0.8852      | -0.14408 |         |  |
|              | 0.55728         | -1.2014  | 0.8852  | 0.55728     | 0.784386771 |          |         |  |
| NUDT4        | ENSG00000173598 | -1.7377  | 0.95887 | -0.14413    | 0.5573      | -1.3396  | 0.90982 |  |
|              | -0.79442        | 0.78652  | 0.5573  | 0.784392265 |             |          |         |  |
| RMDN2        | ENSG00000115841 | -0.5757  | 0.71759 | -1.1793     | 0.88087     | -1.6732  | 0.95286 |  |
|              | -0.14429        | 0.55737  | 0.55737 | 0.784468131 |             |          |         |  |
| ROCK1P1      | ENSG00000263006 | -0.24156 | 0.59544 | -0.79733    | 0.78737     | -0.14436 |         |  |
|              | 0.55739         | -1.5193  | 0.93565 | 0.55739     | 0.784470531 |          |         |  |
| NA           | ENSG00000199290 | -0.14444 | 0.55742 | -0.14444    | 0.55742     | -0.14444 | 0.55742 |  |
|              | -0.14444        | 0.55742  | 0.55742 | 0.784470531 |             |          |         |  |
| NA           | ENSG00000253326 | -0.14444 | 0.55742 | -0.14444    | 0.55742     | -0.14444 | 0.55742 |  |

|            |                 |          |          |         |             |             |          |         |
|------------|-----------------|----------|----------|---------|-------------|-------------|----------|---------|
|            |                 | -0.14444 | 0.55742  | 0.55742 | 0.784470531 |             |          |         |
| NA         | ENSG00000262663 | -0.14455 | 0.55747  | 0.55747 | -0.14455    | 0.55747     | -0.14455 | 0.55747 |
|            |                 | -0.14455 | 0.55747  | 0.55747 | 0.784472561 |             |          |         |
| NA         | ENSG00000283197 | -0.14455 | 0.55747  | 0.55747 | -0.14455    | 0.55747     | -0.14455 | 0.55747 |
|            |                 | -0.14455 | 0.55747  | 0.55747 | 0.784472561 |             |          |         |
| CSF3       | ENSG00000108342 | -0.1446  | 0.55749  | 0.55749 | -0.1446     | 0.55749     | -0.1446  | 0.55749 |
|            |                 | -0.1446  | 0.55749  | 0.55749 | 0.784472561 |             |          |         |
| HNRNP1P13  | ENSG00000213568 | -0.14461 | 0.55749  | 0.55749 | -0.16038    | 0.56371     | -0.14461 |         |
|            |                 | 0.55749  | -1.0719  | 0.85811 | 0.55749     | 0.784472561 |          |         |
| TDO2       | ENSG00000151790 | -0.14472 | 0.55753  | 0.55753 | -0.73316    | 0.76827     | -0.73316 | 0.76827 |
|            |                 | -0.73316 | 0.76827  | 0.55753 | 0.784472561 |             |          |         |
| NA         | ENSG00000204814 | -0.19665 | 0.57795  | 0.57795 | -0.14476    | 0.55755     | -0.14476 | 0.55755 |
|            |                 | -0.14476 | 0.55755  | 0.55755 | 0.784472561 |             |          |         |
| NA         | ENSG00000267555 | -0.14476 | 0.55755  | 0.55755 | -0.14476    | 0.55755     | -0.14476 | 0.55755 |
|            |                 | -0.14476 | 0.55755  | 0.55755 | 0.784472561 |             |          |         |
| NA         | ENSG00000279734 | -1.2097  | 0.88681  | 0.88681 | -0.14479    | 0.55756     | -1.2097  | 0.88681 |
|            |                 | -1.2097  | 0.88681  | 0.55756 | 0.784472561 |             |          |         |
| NA         | ENSG00000256282 | -0.14486 | 0.55759  | 0.55759 | -0.14486    | 0.55759     | -0.14486 | 0.55759 |
|            |                 | -0.14486 | 0.55759  | 0.55759 | 0.784472561 |             |          |         |
| EIF4EBP2P2 | ENSG00000260282 | -0.14486 | 0.55759  | 0.55759 | -0.43406    | 0.66788     | -0.14486 |         |
|            |                 | 0.55759  | -0.14486 | 0.55759 | 0.55759     | 0.784472561 |          |         |
| RNY3       | ENSG00000202354 | -0.14488 | 0.5576   | 0.5576  | -0.16439    | 0.56529     | -0.34051 | 0.63326 |
|            |                 | -0.14488 | 0.5576   | 0.5576  | 0.784472561 |             |          |         |
| ABLIM2     | ENSG00000163995 | -0.52939 | 0.70173  | 0.70173 | -1.5471     | 0.93909     | -0.14497 |         |
|            |                 | 0.55763  | -2.0535  | 0.97999 | 0.55763     | 0.784472561 |          |         |
| SLC49A4    | ENSG00000138463 | -0.44883 | 0.67322  | 0.67322 | -0.14501    | 0.55765     | -0.21004 |         |
|            |                 | 0.58318  | -0.74721 | 0.77253 | 0.55765     | 0.784472561 |          |         |
| DDX42      | ENSG00000198231 | -0.2168  | 0.58582  | 0.58582 | -0.14878    | 0.55914     | -0.14509 | 0.55768 |
|            |                 | -0.14509 | 0.55768  | 0.55768 | 0.784472561 |             |          |         |
| LINC02229  | ENSG00000250313 | -0.14508 | 0.55768  | 0.55768 | -0.14508    | 0.55768     | -0.14508 |         |
|            |                 | 0.55768  | -0.14508 | 0.55768 | 0.55768     | 0.784472561 |          |         |
| CLEC2A     | ENSG00000188393 | -0.61494 | 0.7307   | 0.7307  | -0.14514    | 0.5577      | -0.14514 |         |
|            |                 | 0.5577   | -0.50038 | 0.6916  | 0.5577      | 0.784472561 |          |         |
| NA         | ENSG00000242791 | -0.14513 | 0.5577   | 0.5577  | -0.14513    | 0.5577      | -0.14513 | 0.5577  |
|            |                 | -0.14513 | 0.5577   | 0.5577  | 0.784472561 |             |          |         |
| GNE        | ENSG00000159921 | -0.40829 | 0.65847  | 0.65847 | -0.14518    | 0.55772     | -0.38822 | 0.65107 |
|            |                 | -0.31905 | 0.62516  | 0.55772 | 0.784472561 |             |          |         |
| LINC01827  | ENSG00000234919 | -0.14531 | 0.55777  | 0.55777 | -0.14531    | 0.55777     | -0.14531 |         |
|            |                 | 0.55777  | -0.14531 | 0.55777 | 0.55777     | 0.784472561 |          |         |
| ELF2P4     | ENSG00000225406 | -0.14535 | 0.55778  | 0.55778 | -0.26662    | 0.60512     | -1.5265  |         |
|            |                 | 0.93656  | -0.36158 | 0.64117 | 0.55778     | 0.784472561 |          |         |
| VEZT       | ENSG00000028203 | -0.57139 | 0.71613  | 0.71613 | -0.14537    | 0.55779     | -0.18868 | 0.57483 |
|            |                 | -0.2153  | 0.58523  | 0.55779 | 0.784472561 |             |          |         |
| NA         | ENSG00000278862 | -1.7276  | 0.95797  | 0.95797 | -0.14543    | 0.55782     | -1.107   | 0.86584 |
|            |                 | -1.1714  | 0.87929  | 0.55782 | 0.784472561 |             |          |         |
| NA         | ENSG00000251709 | -0.43621 | 0.66866  | 0.66866 | -0.37679    | 0.64684     | -0.37679 | 0.64684 |
|            |                 | -0.14543 | 0.55782  | 0.55782 | 0.784472561 |             |          |         |
| SYNC       | ENSG00000162520 | -0.65258 | 0.74299  | 0.74299 | -0.65258    | 0.74299     | -0.65258 | 0.74299 |
|            |                 | -0.14551 | 0.55784  | 0.55784 | 0.784472561 |             |          |         |
| MIR4725    | ENSG00000265976 | -0.1455  | 0.55784  | 0.55784 | -0.1455     | 0.55784     | -0.1455  |         |
|            |                 | 0.55784  | -0.1455  | 0.55784 | 0.55784     | 0.784472561 |          |         |
| LINC02034  | ENSG00000282975 | -0.14551 | 0.55784  | 0.55784 | -0.14551    | 0.55784     | -0.14551 |         |
|            |                 | 0.55784  | -0.14551 | 0.55784 | 0.55784     | 0.784472561 |          |         |
| GNG5P1     | ENSG00000213536 | -0.1456  | 0.55788  | 0.55788 | -0.1456     | 0.55788     | -0.1456  |         |
|            |                 | 0.55788  | -0.1456  | 0.55788 | 0.55788     | 0.784506173 |          |         |
| PCNX3      | ENSG00000197136 | -0.52236 | 0.69929  | 0.69929 | -0.44233    | 0.67088     | -0.14564 | 0.5579  |
|            |                 | -0.48068 | 0.68463  | 0.5579  | 0.784511658 |             |          |         |
| NA         | ENSG00000253584 | -1.4009  | 0.91937  | 0.91937 | -0.27207    | 0.60721     | -0.14569 | 0.55792 |
|            |                 | -0.14569 | 0.55792  | 0.55792 | 0.784514052 |             |          |         |
| DPY19L1P2  | ENSG00000231952 | -0.14578 | 0.55795  | 0.55795 | -1.4916     | 0.9321      | -0.21693 |         |
|            |                 | 0.58587  | -0.393   | 0.65284 | 0.55795     | 0.784514052 |          |         |
| NA         | ENSG00000253200 | -0.14577 | 0.55795  | 0.55795 | -0.14577    | 0.55795     | -0.14577 | 0.55795 |

|          |                 |          |         |             |             |          |         |
|----------|-----------------|----------|---------|-------------|-------------|----------|---------|
|          | -0.14577        | 0.55795  | 0.55795 | 0.784514052 |             |          |         |
| NA       | ENSG00000213985 | -0.22679 | 0.58971 | -0.14584    | 0.55797     | -0.29718 | 0.61683 |
|          | -0.26449        | 0.6043   | 0.55797 | 0.784519537 |             |          |         |
| NA       | ENSG00000259047 | -0.53154 | 0.70248 | -0.14608    | 0.55807     | -0.53154 | 0.70248 |
|          | -1.637          | 0.94919  | 0.55807 | 0.7846375   |             |          |         |
| RAB37    | ENSG00000172794 | -0.14626 | 0.55814 | -0.14626    | 0.55814     | -0.14626 | 0.55814 |
|          | -0.14626        | 0.55814  | 0.55814 | 0.784701595 |             |          |         |
| RNF43    | ENSG00000108375 | -0.74241 | 0.77108 | -1.513      | 0.93486     | -0.74241 | 0.77108 |
|          | -0.14631        | 0.55816  | 0.55816 | 0.784701595 |             |          |         |
| NA       | ENSG00000233110 | -0.9641  | 0.8325  | -0.14635    | 0.55818     | -0.9641  | 0.8325  |
|          | -0.9641         | 0.8325   | 0.55818 | 0.784701595 |             |          |         |
| NA       | ENSG00000280273 | -0.14636 | 0.55818 | -0.14636    | 0.55818     | -0.14636 | 0.55818 |
|          | -0.14636        | 0.55818  | 0.55818 | 0.784701595 |             |          |         |
| NA       | ENSG00000260242 | -1.0997  | 0.86426 | -0.34154    | 0.63365     | -0.90681 | 0.81775 |
|          | -0.14646        | 0.55822  | 0.55822 | 0.784735189 |             |          |         |
| ZNF576   | ENSG00000124444 | -0.14665 | 0.55829 | -0.14665    | 0.55829     | -0.14665 |         |
|          | 0.55829         | -0.14665 | 0.55829 | 0.55829     | 0.784802371 |          |         |
| NA       | ENSG00000279489 | -0.14666 | 0.5583  | -0.14666    | 0.5583      | -0.14666 | 0.5583  |
|          | -0.14666        | 0.5583   | 0.5583  | 0.784802371 |             |          |         |
| NA       | ENSG00000276707 | -0.14673 | 0.55833 | -0.14673    | 0.55833     | -0.14673 | 0.55833 |
|          | -0.14673        | 0.55833  | 0.55833 | 0.784813321 |             |          |         |
| TRBV6-8  | ENSG00000253534 | -0.14677 | 0.55834 | -0.14677    | 0.55834     | -0.14677 |         |
|          | 0.55834         | -0.14677 | 0.55834 | 0.55834     | 0.784813321 |          |         |
| NA       | ENSG00000268093 | -0.14681 | 0.55836 | -0.14681    | 0.55836     | -0.14681 | 0.55836 |
|          | -0.14681        | 0.55836  | 0.55836 | 0.784818795 |             |          |         |
| BOK      | ENSG00000176720 | -0.6835  | 0.75286 | -0.14696    | 0.55842     | -0.17996 | 0.57141 |
|          | -0.17996        | 0.57141  | 0.55842 | 0.784871907 |             |          |         |
| NA       | ENSG00000276931 | -0.16784 | 0.56665 | -0.14699    | 0.55843     | -0.38819 | 0.65106 |
|          | -0.48563        | 0.68638  | 0.55843 | 0.784871907 |             |          |         |
| EIPR1    | ENSG00000032389 | -0.96765 | 0.83339 | -1.8358     | 0.96681     | -0.44274 | 0.67102 |
|          | -0.14713        | 0.55848  | 0.55848 | 0.784909451 |             |          |         |
| KRTAP1-1 | ENSG00000188581 | -0.14718 | 0.5585  | -0.14718    | 0.5585      | -0.14718 |         |
|          | 0.5585          | -0.14718 | 0.5585  | 0.5585      | 0.784909451 |          |         |
| MIR4296  | ENSG00000264572 | -0.7207  | 0.76445 | -0.24655    | 0.59737     | -0.14721 |         |
|          | 0.55852         | -0.14721 | 0.55852 | 0.55852     | 0.784909451 |          |         |
| DPF1     | ENSG00000011332 | -0.14725 | 0.55853 | -0.55113    | 0.70923     | -0.14725 | 0.55853 |
|          | -0.30966        | 0.62159  | 0.55853 | 0.784909451 |             |          |         |
| SDE2     | ENSG00000143751 | -0.14736 | 0.55858 | -0.94064    | 0.82656     | -0.54311 | 0.70647 |
|          | -0.2439         | 0.59634  | 0.55858 | 0.784909451 |             |          |         |
| TXNL4AP1 | ENSG00000213126 | -0.14739 | 0.55859 | -0.14739    | 0.55859     | -0.14739 |         |
|          | 0.55859         | -0.43701 | 0.66895 | 0.55859     | 0.784909451 |          |         |
| MIR5687  | ENSG00000265135 | -0.14742 | 0.5586  | -0.14742    | 0.5586      | -0.14742 |         |
|          | 0.5586          | -0.14742 | 0.5586  | 0.5586      | 0.784909451 |          |         |
| OR6C6    | ENSG00000188324 | -0.1475  | 0.55863 | -0.16632    | 0.56605     | -0.91804 | 0.8207  |
|          | -0.91804        | 0.8207   | 0.55863 | 0.784909451 |             |          |         |
| NA       | ENSG00000261141 | -0.1475  | 0.55863 | -0.1475     | 0.55863     | -0.1475  | 0.55863 |
|          | -0.1475         | 0.55863  | 0.55863 | 0.784909451 |             |          |         |
| NA       | ENSG00000200135 | -0.14752 | 0.55864 | -0.14752    | 0.55864     | -0.14752 | 0.55864 |
|          | -0.14752        | 0.55864  | 0.55864 | 0.784909451 |             |          |         |
| IGHV3-6  | ENSG00000253763 | -0.14753 | 0.55864 | -0.14753    | 0.55864     | -0.14753 |         |
|          | 0.55864         | -0.14753 | 0.55864 | 0.55864     | 0.784909451 |          |         |
| EIF5AP2  | ENSG00000267679 | -0.14754 | 0.55865 | -0.14754    | 0.55865     | -0.14754 |         |
|          | 0.55865         | -0.14754 | 0.55865 | 0.55865     | 0.784909451 |          |         |
| BRK1P2   | ENSG00000227983 | -1.8814  | 0.97004 | -1.8814     | 0.97004     | -0.14774 |         |
|          | 0.55872         | -1.8814  | 0.97004 | 0.55872     | 0.784933681 |          |         |
| NA       | ENSG00000284376 | -0.14773 | 0.55872 | -0.14773    | 0.55872     | -0.14773 | 0.55872 |
|          | -0.14773        | 0.55872  | 0.55872 | 0.784933681 |             |          |         |
| NA       | ENSG00000224609 | -0.14777 | 0.55874 | -1.1406     | 0.87299     | -1.1406  | 0.87299 |
|          | -0.90472        | 0.81719  | 0.55874 | 0.784933681 |             |          |         |
| NA       | ENSG00000249174 | -0.1478  | 0.55875 | -0.1478     | 0.55875     | -0.1478  | 0.55875 |
|          | -0.1478         | 0.55875  | 0.55875 | 0.784933681 |             |          |         |
| PRKAA2   | ENSG00000162409 | -0.14786 | 0.55877 | -1.3897     | 0.91769     | -1.3897  |         |

|           |                 |          |             |             |             |          |         |
|-----------|-----------------|----------|-------------|-------------|-------------|----------|---------|
|           | 0.91769         | -1.3897  | 0.91769     | 0.55877     | 0.784933681 |          |         |
| RNU7-181P | ENSG00000253043 | -1.0984  | 0.86399     | -1.0984     | 0.86399     | -0.14785 |         |
|           | 0.55877         | -1.5766  | 0.94255     | 0.55877     | 0.784933681 |          |         |
| NA        | ENSG00000265799 | -0.14787 | 0.55878     | -0.14787    | 0.55878     | -1.0276  | 0.84792 |
|           | -0.14787        | 0.55878  | 0.55878     | 0.784933681 |             |          |         |
| SNRPN     | ENSG00000128739 | -0.5453  | 0.70723     | -0.148      | 0.55883     | -0.65898 | 0.74505 |
|           | -0.17437        | 0.56921  | 0.55883     | 0.784938391 |             |          |         |
| RNU6-192P | ENSG00000212555 | -0.14802 | 0.55884     | -0.33013    | 0.62935     | -0.62992 |         |
|           | 0.73563         | -0.33617 | 0.63163     | 0.55884     | 0.784938391 |          |         |
| FAM86FP   | ENSG00000164845 | -0.93444 | 0.82496     | -0.93444    | 0.82496     | -0.14807 |         |
|           | 0.55885         | -0.70379 | 0.75922     | 0.55885     | 0.784938391 |          |         |
| MTCO2P29  | ENSG00000243257 | -0.14807 | 0.55886     | -0.14807    | 0.55886     | -0.14807 |         |
|           | 0.55886         | -0.14807 | 0.55886     | 0.55886     | 0.784938391 |          |         |
| GIMAP8    | ENSG00000171115 | -1.0183  | 0.84572     | -0.42721    | 0.66539     | -0.94475 |         |
|           | 0.82761         | -0.1481  | 0.55887     | 0.55887     | 0.784938391 |          |         |
| LDLRAD1   | ENSG00000203985 | -0.31536 | 0.62376     | -0.18623    | 0.57387     | -0.33651 |         |
|           | 0.63176         | -0.14812 | 0.55888     | 0.55888     | 0.784938391 |          |         |
| LINC02562 | ENSG00000260265 | -0.74375 | 0.77149     | -0.86819    | 0.80735     | -0.14825 |         |
|           | 0.55893         | -0.71102 | 0.76146     | 0.55893     | 0.78498599  |          |         |
| KRT72     | ENSG00000170486 | -0.1483  | 0.55895     | -0.53582    | 0.70396     | -0.1483  | 0.55895 |
|           | -0.1483         | 0.55895  | 0.55895     | 0.784991455 |             |          |         |
| NA        | ENSG00000278192 | -0.42007 | 0.66278     | -0.14835    | 0.55897     | -0.20807 | 0.58241 |
|           | -0.20807        | 0.58241  | 0.55897     | 0.784996153 |             |          |         |
| PSMF1     | ENSG00000125818 | -0.14844 | 0.559       | -0.14844    | 0.559       | -0.14844 | 0.559   |
|           | 0.68519         | 0.559    | 0.784996153 |             |             |          |         |
| PAQR4     | ENSG00000162073 | -0.14849 | 0.55902     | -0.14849    | 0.55902     | -0.14849 | 0.55902 |
|           | -0.14849        | 0.55902  | 0.55902     | 0.784996153 |             |          |         |
| MIR4711   | ENSG00000266150 | -0.32824 | 0.62863     | -0.23431    | 0.59263     | -0.14848 |         |
|           | 0.55902         | -0.94246 | 0.82702     | 0.55902     | 0.784996153 |          |         |
| SOX17     | ENSG00000164736 | -0.14857 | 0.55905     | -0.36005    | 0.64059     | -0.14857 | 0.55905 |
|           | -0.14857        | 0.55905  | 0.55905     | 0.784996153 |             |          |         |
| SFT2D2    | ENSG00000213064 | -0.14856 | 0.55905     | -0.14856    | 0.55905     | -0.14856 |         |
|           | 0.55905         | -0.14856 | 0.55905     | 0.55905     | 0.784996153 |          |         |
| NA        | ENSG00000272420 | -0.14861 | 0.55907     | -0.14861    | 0.55907     | -0.14861 | 0.55907 |
|           | -0.14861        | 0.55907  | 0.55907     | 0.784998502 |             |          |         |
| YAP1      | ENSG00000137693 | -0.21449 | 0.58492     | -0.48281    | 0.68539     | -0.48281 | 0.68539 |
|           | -0.14869        | 0.5591   | 0.5591      | 0.784998502 |             |          |         |
| NA        | ENSG00000233668 | -0.14868 | 0.5591      | -0.14868    | 0.5591      | -0.14868 | 0.5591  |
|           | -0.14868        | 0.5591   | 0.5591      | 0.784998502 |             |          |         |
| LINC01933 | ENSG00000254226 | -1.2962  | 0.90254     | -1.3476     | 0.91111     | -1.5845  |         |
|           | 0.94346         | -0.14886 | 0.55917     | 0.55917     | 0.785048428 |          |         |
| NA        | ENSG00000278272 | -0.14886 | 0.55917     | -0.14886    | 0.55917     | -0.14886 | 0.55917 |
|           | -0.14886        | 0.55917  | 0.55917     | 0.785048428 |             |          |         |
| NA        | ENSG00000251300 | -0.14892 | 0.55919     | -0.64251    | 0.73973     | -0.14892 | 0.55919 |
|           | -0.14892        | 0.55919  | 0.55919     | 0.785048428 |             |          |         |
| ZNF639    | ENSG00000121864 | -1.2065  | 0.88619     | -0.14895    | 0.5592      | -0.33543 |         |
|           | 0.63135         | -0.44393 | 0.67145     | 0.5592      | 0.785048428 |          |         |
| CLPP      | ENSG00000125656 | -0.14906 | 0.55925     | -0.88408    | 0.81167     | -0.14906 | 0.55925 |
|           | -0.14906        | 0.55925  | 0.55925     | 0.785092885 |             |          |         |
| GNG5P3    | ENSG00000254949 | -0.14911 | 0.55927     | -0.14911    | 0.55927     | -0.14911 |         |
|           | 0.55927         | -0.14911 | 0.55927     | 0.55927     | 0.785092885 |          |         |
| NA        | ENSG00000272248 | -0.14913 | 0.55928     | -1.3884     | 0.91749     | -0.14913 | 0.55928 |
|           | -0.14913        | 0.55928  | 0.55928     | 0.785092885 |             |          |         |
| NA        | ENSG00000259162 | -0.14919 | 0.5593      | -0.14919    | 0.5593      | -0.14919 | 0.5593  |
|           | -0.14919        | 0.5593   | 0.5593      | 0.785098344 |             |          |         |
| NA        | ENSG00000227245 | -0.14928 | 0.55933     | -0.14928    | 0.55933     | -0.14928 | 0.55933 |
|           | -0.14928        | 0.55933  | 0.55933     | 0.785117839 |             |          |         |
| PLEKHB1   | ENSG00000021300 | -0.48276 | 0.68537     | -0.62367    | 0.73358     | -0.14936 |         |
|           | 0.55937         | -0.98959 | 0.83881     | 0.55937     | 0.78515137  |          |         |
| RPL18AP2  | ENSG00000225043 | -0.14952 | 0.55943     | -1.0257     | 0.84748     | -0.56625 |         |
|           | 0.71439         | -0.56625 | 0.71439     | 0.55943     | 0.78521297  |          |         |
| NA        | ENSG00000259821 | -0.14963 | 0.55947     | -0.54323    | 0.70652     | -0.40974 | 0.659   |



|             |                 |          |          |             |             |             |          |         |
|-------------|-----------------|----------|----------|-------------|-------------|-------------|----------|---------|
|             |                 | -0.28966 | 0.61396  | 0.55947     | 0.785246496 |             |          |         |
| NA          | ENSG00000268784 | -0.14973 | 0.55951  | 0.55951     | -0.14973    | 0.55951     | -0.14973 | 0.55951 |
|             |                 | -0.14973 | 0.55951  | 0.55951     | 0.785271438 |             |          |         |
| MIR610      | ENSG00000207874 | -0.14976 | 0.55952  | 0.55952     | -0.14976    | 0.55952     | -0.14976 |         |
|             |                 | 0.55952  | -0.14976 | 0.55952     | 0.55952     | 0.785271438 |          |         |
| NA          | ENSG00000254419 | -0.1499  | 0.55958  | 0.55958     | -0.1499     | 0.55958     | -0.1499  | 0.55958 |
|             |                 | -0.1499  | 0.55958  | 0.55958     | 0.785295568 |             |          |         |
| ICA1        | ENSG00000003147 | -2.0614  | 0.98037  | 0.98037     | -1.1737     | 0.87974     | -0.14996 | 0.5596  |
|             |                 | -0.44519 | 0.67191  | 0.5596      | 0.785295568 |             |          |         |
| NA          | ENSG00000245059 | -0.14998 | 0.55961  | 0.55961     | -0.14998    | 0.55961     | -0.14998 | 0.55961 |
|             |                 | -0.14998 | 0.55961  | 0.55961     | 0.785295568 |             |          |         |
| RNU4-16P    | ENSG00000201607 | -0.15001 | 0.55962  | 0.55962     | -0.15001    | 0.55962     | -0.15001 |         |
|             |                 | 0.55962  | -0.15001 | 0.55962     | 0.55962     | 0.785295568 |          |         |
| LINC00221   | ENSG00000270816 | -0.15001 | 0.55962  | 0.55962     | -0.15001    | 0.55962     | -0.15001 |         |
|             |                 | 0.55962  | -0.15001 | 0.55962     | 0.55962     | 0.785295568 |          |         |
| NA          | ENSG00000270638 | -0.15007 | 0.55964  | 0.55964     | -0.15007    | 0.55964     | -0.15007 | 0.55964 |
|             |                 | -0.15007 | 0.55964  | 0.55964     | 0.785295568 |             |          |         |
| AK2P2       | ENSG00000242272 | -0.15007 | 0.55965  | 0.55965     | -0.15007    | 0.55965     | -0.15007 | 0.55965 |
|             |                 | -0.15007 | 0.55965  | 0.55965     | 0.785295568 |             |          |         |
| SNORA15B-1  | ENSG00000207062 | -0.15019 | 0.55969  | 0.55969     | -0.15019    | 0.55969     | -0.5291  |         |
|             |                 | 0.70163  | -0.16602 | 0.56593     | 0.55969     | 0.785320501 |          |         |
| CRCP        | ENSG00000241258 | -0.9486  | 0.82859  | 0.82859     | -0.69617    | 0.75684     | -0.1502  | 0.5597  |
|             |                 | -0.24032 | 0.59496  | 0.5597      | 0.785320501 |             |          |         |
| CCL24       | ENSG00000106178 | -0.46642 | 0.67954  | 0.67954     | -0.15032    | 0.55974     | -0.71324 | 0.76215 |
|             |                 | -1.1009  | 0.86454  | 0.55974     | 0.785345431 |             |          |         |
| ZNF117      | ENSG00000152926 | -0.35712 | 0.6395   | 0.6395      | -0.2894     | 0.61386     | -0.15034 |         |
|             |                 | 0.55975  | -0.42669 | 0.6652      | 0.55975     | 0.785345431 |          |         |
| ATP6V0E1P2  | ENSG00000223513 | -0.88164 | 0.81101  | 0.81101     | -1.4407     | 0.92517     | -0.17659 |         |
|             |                 | 0.57008  | -0.15042 | 0.55979     | 0.55979     | 0.785365587 |          |         |
| PSMB3       | ENSG00000277791 | -0.15048 | 0.55981  | 0.55981     | -0.15048    | 0.55981     | -0.15048 | 0.55981 |
|             |                 | -0.15048 | 0.55981  | 0.55981     | 0.785365587 |             |          |         |
| WDR7-OT1    | ENSG00000267225 | -0.15056 | 0.55984  | 0.55984     | -0.15056    | 0.55984     | -0.15056 |         |
|             |                 | 0.55984  | -0.15056 | 0.55984     | 0.55984     | 0.785365587 |          |         |
| SNORD116-16 | ENSG00000207263 | -0.15068 | 0.55988  | 0.55988     | -0.15068    | 0.55988     | -0.15068 |         |
|             |                 | 0.55988  | -0.15068 | 0.55988     | 0.55988     | 0.785365587 |          |         |
| CKS1BP7     | ENSG00000254331 | -0.15069 | 0.55989  | 0.55989     | -0.15069    | 0.55989     | -0.15069 |         |
|             |                 | 0.55989  | -0.15069 | 0.55989     | 0.55989     | 0.785365587 |          |         |
| ANKRD30A    | ENSG00000148513 | -1.0962  | 0.8635   | 0.8635      | -0.545      | 0.70712     | -0.83548 |         |
|             |                 | 0.79828  | -0.15081 | 0.55994     | 0.55994     | 0.785365587 |          |         |
| NA          | ENSG00000266279 | -0.15083 | 0.55994  | 0.55994     | -0.15083    | 0.55994     | -0.15083 | 0.55994 |
|             |                 | -0.15083 | 0.55994  | 0.55994     | 0.785365587 |             |          |         |
| TBX2-AS1    | ENSG00000267280 | -0.15085 | 0.55995  | 0.55995     | -0.15085    | 0.55995     | -0.15085 |         |
|             |                 | 0.55995  | -0.15085 | 0.55995     | 0.55995     | 0.785365587 |          |         |
| INO80C      | ENSG00000153391 | -0.87096 | 0.80811  | 0.80811     | -1.0402     | 0.85087     | -2.413   |         |
|             |                 | 0.99209  | -0.15088 | 0.55996     | 0.55996     | 0.785365587 |          |         |
| NA          | ENSG00000249012 | -1.0714  | 0.858    | 0.858       | -1.0714     | 0.858       | -1.0714  | 0.858   |
|             |                 | 0.55996  | 0.55996  | 0.785365587 |             |             |          |         |
| FTH1P21     | ENSG00000249013 | -0.15087 | 0.55996  | 0.55996     | -1.3277     | 0.90787     | -1.3277  |         |
|             |                 | 0.90787  | -1.3277  | 0.90787     | 0.55996     | 0.785365587 |          |         |
| NA          | ENSG00000250829 | -0.15089 | 0.55997  | 0.55997     | -0.50566    | 0.69345     | -0.15089 | 0.55997 |
|             |                 | -0.5933  | 0.72351  | 0.55997     | 0.785365587 |             |          |         |
| NEK10       | ENSG00000163491 | -0.15091 | 0.55998  | 0.55998     | -1.5404     | 0.93826     | -1.474   | 0.92976 |
|             |                 | -1.3096  | 0.90484  | 0.55998     | 0.785365587 |             |          |         |
| SLC25A51    | ENSG00000122696 | -0.9527  | 0.82963  | 0.82963     | -0.15095    | 0.55999     | -0.52866 |         |
|             |                 | 0.70148  | -1.3383  | 0.90959     | 0.55999     | 0.785365587 |          |         |
| USP16       | ENSG00000156256 | -0.15099 | 0.56001  | 0.56001     | -0.15099    | 0.56001     | -0.15099 | 0.56001 |
|             |                 | -0.15099 | 0.56001  | 0.56001     | 0.78537089  |             |          |         |
| RN7SL479P   | ENSG00000239560 | -0.15107 | 0.56004  | 0.56004     | -0.15107    | 0.56004     | -0.15107 |         |
|             |                 | 0.56004  | -0.15107 | 0.56004     | 0.56004     | 0.78537089  |          |         |
| NA          | ENSG00000258831 | -0.15108 | 0.56005  | 0.56005     | -0.15108    | 0.56005     | -0.15108 | 0.56005 |
|             |                 | -0.15108 | 0.56005  | 0.56005     | 0.78537089  |             |          |         |
| UBE2R2-AS1  | ENSG00000235481 | -1.1318  | 0.87115  | 0.87115     | -0.15124    | 0.56011     | -2.2156  |         |

|            |                 |          |         |             |             |          |         |
|------------|-----------------|----------|---------|-------------|-------------|----------|---------|
|            | 0.98664         | -2.2156  | 0.98664 | 0.56011     | 0.78537089  |          |         |
| NA         | ENSG00000259992 | -0.15129 | 0.56013 | -0.15129    | 0.56013     | -0.15129 | 0.56013 |
|            | -0.15129        | 0.56013  | 0.56013 | 0.78537089  |             |          |         |
| ITPR3      | ENSG00000096433 | -0.51982 | 0.6984  | -0.19068    | 0.57561     | -0.15132 | 0.56014 |
|            | -1.3569         | 0.91259  | 0.56014 | 0.78537089  |             |          |         |
| TP53       | ENSG00000141510 | -0.15131 | 0.56014 | -0.15131    | 0.56014     | -0.15131 | 0.56014 |
|            | -0.36651        | 0.64301  | 0.56014 | 0.78537089  |             |          |         |
| NFAM1      | ENSG00000235568 | -0.31875 | 0.62504 | -0.15137    | 0.56016     | -0.38293 | 0.64911 |
|            | -0.43253        | 0.66732  | 0.56016 | 0.78537089  |             |          |         |
| PLXND1     | ENSG00000004399 | -0.52622 | 0.70063 | -1.1696     | 0.87891     | -0.38616 |         |
|            | 0.65031         | -0.15144 | 0.56018 | 0.56018     | 0.78537089  |          |         |
| CRKL       | ENSG00000099942 | -1.1098  | 0.86646 | -0.15145    | 0.56019     | -1.1098  | 0.86646 |
|            | -1.1098         | 0.86646  | 0.56019 | 0.78537089  |             |          |         |
| GMFB       | ENSG00000197045 | -0.49429 | 0.68945 | -1.7311     | 0.95829     | -0.25026 | 0.59881 |
|            | -0.15144        | 0.56019  | 0.56019 | 0.78537089  |             |          |         |
| YBX3       | ENSG00000060138 | -0.15151 | 0.56021 | -0.59506    | 0.7241      | -1.0916  | 0.86249 |
|            | -0.59506        | 0.7241   | 0.56021 | 0.78537089  |             |          |         |
| PSORS1C2   | ENSG00000204538 | -1.1846  | 0.8819  | -0.15153    | 0.56022     | -0.6134  |         |
|            | 0.73019         | -0.51646 | 0.69723 | 0.56022     | 0.78537089  |          |         |
| MICOS10P3  | ENSG00000224237 | -0.15156 | 0.56023 | -0.15156    | 0.56023     | -0.15156 |         |
|            | 0.56023         | -0.15156 | 0.56023 | 0.56023     | 0.78537089  |          |         |
| COL4A2-AS2 | ENSG00000224821 | -0.15164 | 0.56026 | -1.7496     | 0.95991     | -0.83205 |         |
|            | 0.79731         | -0.83205 | 0.79731 | 0.56026     | 0.78537089  |          |         |
| NA         | ENSG00000248296 | -1.3686  | 0.91444 | -0.51006    | 0.69499     | -1.0583  | 0.85504 |
|            | -0.15168        | 0.56028  | 0.56028 | 0.78537089  |             |          |         |
| MIR548AL   | ENSG00000264402 | -0.15168 | 0.56028 | -0.15168    | 0.56028     | -0.15168 |         |
|            | 0.56028         | -0.15168 | 0.56028 | 0.56028     | 0.78537089  |          |         |
| NA         | ENSG00000274898 | -0.1517  | 0.56029 | -0.1517     | 0.56029     | -0.1517  | 0.56029 |
|            | -0.1517         | 0.56029  | 0.56029 | 0.78537089  |             |          |         |
| FDFT1      | ENSG00000079459 | -0.62594 | 0.73432 | -0.49876    | 0.69103     | -0.15172 | 0.5603  |
|            | -0.50361        | 0.69273  | 0.5603  | 0.78537089  |             |          |         |
| NA         | ENSG00000260927 | -0.1518  | 0.56033 | -0.1518     | 0.56033     | -0.1518  | 0.56033 |
|            | -0.1518         | 0.56033  | 0.56033 | 0.78539035  |             |          |         |
| GJB4       | ENSG00000189433 | -0.15187 | 0.56036 | -0.15187    | 0.56036     | -0.15187 | 0.56036 |
|            | -0.15187        | 0.56036  | 0.56036 | 0.785409808 |             |          |         |
| NA         | ENSG00000267589 | -0.15199 | 0.5604  | -0.15199    | 0.5604      | -0.15199 | 0.5604  |
|            | -0.15199        | 0.5604   | 0.5604  | 0.785443281 |             |          |         |
| NA         | ENSG00000236385 | -1.0091  | 0.84354 | -0.15211    | 0.56045     | -1.0091  | 0.84354 |
|            | -1.0091         | 0.84354  | 0.56045 | 0.785490768 |             |          |         |
| FTH1P1     | ENSG00000232273 | -0.15217 | 0.56047 | -0.15217    | 0.56047     | -0.15217 |         |
|            | 0.56047         | -0.15217 | 0.56047 | 0.56047     | 0.785496206 |          |         |
| MIR5191    | ENSG00000264802 | -0.15234 | 0.56054 | -0.15234    | 0.56054     | -0.15234 |         |
|            | 0.56054         | -0.15234 | 0.56054 | 0.56054     | 0.785571718 |          |         |
| VN1R5      | ENSG00000197617 | -0.95926 | 0.83129 | -0.5269     | 0.70087     | -0.15248 | 0.5606  |
|            | -0.5269         | 0.70087  | 0.5606  | 0.785624631 |             |          |         |
| NA         | ENSG00000261374 | -0.15253 | 0.56061 | -0.15253    | 0.56061     | -0.15253 | 0.56061 |
|            | -0.15253        | 0.56061  | 0.56061 | 0.785624631 |             |          |         |
| LINC02436  | ENSG00000250754 | -0.45673 | 0.67607 | -0.25232    | 0.5996      | -0.16821 |         |
|            | 0.56679         | -0.15257 | 0.56063 | 0.56063     | 0.785630066 |          |         |
| LINC00880  | ENSG00000243629 | -0.15271 | 0.56069 | -0.32239    | 0.62642     | -1.4668  |         |
|            | 0.92879         | -0.46169 | 0.67785 | 0.56069     | 0.785671244 |          |         |
| CDC42BPG   | ENSG00000171219 | -0.87171 | 0.80832 | -1.4577     | 0.92754     | -0.27815 |         |
|            | 0.60955         | -0.15278 | 0.56071 | 0.56071     | 0.785671244 |          |         |
| TLK2P2     | ENSG00000228828 | -0.54212 | 0.70613 | -0.15276    | 0.56071     | -0.41293 |         |
|            | 0.66017         | -0.56805 | 0.715   | 0.56071     | 0.785671244 |          |         |
| NA         | ENSG00000253321 | -0.15281 | 0.56073 | -0.15281    | 0.56073     | -0.15281 | 0.56073 |
|            | -0.27629        | 0.60884  | 0.56073 | 0.785671244 |             |          |         |
| STK4-AS1   | ENSG00000227477 | -0.59117 | 0.7228  | -0.15284    | 0.56074     | -0.15284 |         |
|            | 0.56074         | -0.15284 | 0.56074 | 0.56074     | 0.785671244 |          |         |
| HINFP      | ENSG00000172273 | -0.74602 | 0.77217 | -1.0785     | 0.8596      | -0.15297 | 0.56079 |
|            | -0.90708        | 0.81782  | 0.56079 | 0.785718709 |             |          |         |
| MTND6P3    | ENSG00000254132 | -0.15304 | 0.56082 | -0.15304    | 0.56082     | -0.15304 |         |

|           |                 |          |         |             |             |          |         |
|-----------|-----------------|----------|---------|-------------|-------------|----------|---------|
|           | 0.56082         | -0.15304 | 0.56082 | 0.56082     | 0.7857287   |          |         |
| FAM243A   | ENSG00000222018 | -0.15309 | 0.56084 | -0.15309    | 0.56084     | -0.15309 |         |
|           | 0.56084         | -0.15309 | 0.56084 | 0.56084     | 0.7857287   |          |         |
| LINC01779 | ENSG00000235933 | -1.3351  | 0.90908 | -0.28221    | 0.61111     | -0.45321 |         |
|           | 0.6748          | -0.1532  | 0.56088 | 0.56088     | 0.7857287   |          |         |
| PEX5L     | ENSG00000114757 | -0.15322 | 0.56089 | -0.53687    | 0.70432     | -0.16778 | 0.56662 |
|           | -0.4034         | 0.65667  | 0.56089 | 0.7857287   |             |          |         |
| LINC02868 | ENSG00000203864 | -1.3934  | 0.91826 | -0.15323    | 0.56089     | -1.6392  |         |
|           | 0.94942         | -1.3934  | 0.91826 | 0.56089     | 0.7857287   |          |         |
| NA        | ENSG00000231762 | -0.2471  | 0.59759 | -0.99913    | 0.84113     | -0.77489 | 0.7808  |
|           | -0.15324        | 0.5609   | 0.5609  | 0.7857287   |             |          |         |
| LINC01991 | ENSG00000224187 | -1.1579  | 0.87655 | -0.85242    | 0.80301     | -0.15327 |         |
|           | 0.56091         | -0.29867 | 0.6174  | 0.56091     | 0.7857287   |          |         |
| MIR370    | ENSG00000199005 | -0.15332 | 0.56093 | -0.15332    | 0.56093     | -0.15332 |         |
|           | 0.56093         | -0.15332 | 0.56093 | 0.56093     | 0.78573413  |          |         |
| CCDC150   | ENSG00000144395 | -1.4445  | 0.92571 | -0.58466    | 0.72061     | -0.15349 |         |
|           | 0.56099         | -0.49313 | 0.68904 | 0.56099     | 0.785792435 |          |         |
| NA        | ENSG00000271752 | -0.53532 | 0.70379 | -0.15353    | 0.56101     | -0.72372 | 0.76538 |
|           | -0.45543        | 0.6756   | 0.56101 | 0.785792435 |             |          |         |
| NA        | ENSG00000264125 | -0.15356 | 0.56102 | -0.15356    | 0.56102     | -0.15356 | 0.56102 |
|           | -0.15356        | 0.56102  | 0.56102 | 0.785792435 |             |          |         |
| GAMTP2    | ENSG00000231910 | -0.1536  | 0.56104 | -1.891      | 0.97069     | -0.1536  |         |
|           | 0.56104         | -0.1536  | 0.56104 | 0.56104     | 0.785797862 |          |         |
| NA        | ENSG00000253016 | -0.89294 | 0.81406 | -0.90657    | 0.81768     | -0.44523 | 0.67192 |
|           | -0.15373        | 0.56109  | 0.56109 | 0.78583357  |             |          |         |
| RPL39P15  | ENSG00000231414 | -0.15382 | 0.56112 | -0.15382    | 0.56112     | -0.15382 |         |
|           | 0.56112         | -0.15382 | 0.56112 | 0.56112     | 0.78583357  |          |         |
| RN7SL869P | ENSG00000244392 | -0.15382 | 0.56113 | -0.15382    | 0.56113     | -0.15382 |         |
|           | 0.56113         | -0.15382 | 0.56113 | 0.56113     | 0.78583357  |          |         |
| NA        | ENSG00000265199 | -0.15383 | 0.56113 | -1.3124     | 0.9053      | -1.3124  | 0.9053  |
|           | -1.3124         | 0.9053   | 0.56113 | 0.78583357  |             |          |         |
| NA        | ENSG00000264373 | -0.33193 | 0.63003 | -0.33193    | 0.63003     | -0.1539  | 0.56116 |
|           | -0.33193        | 0.63003  | 0.56116 | 0.785852112 |             |          |         |
| NA        | ENSG00000253398 | -0.46084 | 0.67754 | -0.36029    | 0.64068     | -0.15396 | 0.56118 |
|           | -1.031          | 0.84873  | 0.56118 | 0.785852112 |             |          |         |
| LGALSL-DT | ENSG00000223935 | -0.154   | 0.5612  | -0.154      | 0.5612      | -0.154   |         |
|           | 0.5612          | -0.154   | 0.5612  | 0.5612      | 0.785852112 |          |         |
| S100P     | ENSG00000163993 | -1.1266  | 0.87004 | -1.1266     | 0.87004     | -0.15408 | 0.56123 |
|           | -1.1266         | 0.87004  | 0.56123 | 0.785852112 |             |          |         |
| NTRK3-AS1 | ENSG00000260305 | -1.6388  | 0.94938 | -0.15412    | 0.56124     | -1.6388  |         |
|           | 0.94938         | -1.6388  | 0.94938 | 0.56124     | 0.785852112 |          |         |
| NA        | ENSG00000270287 | -0.15412 | 0.56124 | -0.15412    | 0.56124     | -0.1774  | 0.5704  |
|           | -0.15412        | 0.56124  | 0.56124 | 0.785852112 |             |          |         |
| MIR4660   | ENSG00000263407 | -0.42722 | 0.66539 | -0.15428    | 0.56131     | -1.4716  |         |
|           | 0.92944         | -0.19044 | 0.57552 | 0.56131     | 0.785923488 |          |         |
| NA        | ENSG00000240271 | -0.15445 | 0.56137 | -0.15445    | 0.56137     | -0.15445 | 0.56137 |
|           | -0.15445        | 0.56137  | 0.56137 | 0.785923488 |             |          |         |
| NA        | ENSG00000270589 | -0.15445 | 0.56137 | -0.15445    | 0.56137     | -0.15445 | 0.56137 |
|           | -0.15445        | 0.56137  | 0.56137 | 0.785923488 |             |          |         |
| NA        | ENSG00000280339 | -0.15447 | 0.56138 | -0.15447    | 0.56138     | -0.15447 | 0.56138 |
|           | -0.15447        | 0.56138  | 0.56138 | 0.785923488 |             |          |         |
| ARL4AP5   | ENSG00000218996 | -0.15453 | 0.5614  | -0.53244    | 0.70279     | -0.15453 |         |
|           | 0.5614          | -0.15453 | 0.5614  | 0.5614      | 0.785923488 |          |         |
| NA        | ENSG00000267567 | -0.15455 | 0.56141 | -0.15455    | 0.56141     | -0.15455 | 0.56141 |
|           | -0.15455        | 0.56141  | 0.56141 | 0.785923488 |             |          |         |
| NA        | ENSG00000270381 | -0.35598 | 0.63907 | -0.65961    | 0.74525     | -1.0149  | 0.84492 |
|           | -0.15454        | 0.56141  | 0.56141 | 0.785923488 |             |          |         |
| SCP2D1    | ENSG00000132631 | -0.15457 | 0.56142 | -0.15457    | 0.56142     | -0.15457 |         |
|           | 0.56142         | -0.15457 | 0.56142 | 0.56142     | 0.785923488 |          |         |
| LIMS2     | ENSG00000072163 | -0.94125 | 0.82671 | -1.1931     | 0.88359     | -0.15466 | 0.56146 |
|           | -1.1129         | 0.86713  | 0.56146 | 0.785939747 |             |          |         |
| NA        | ENSG00000258170 | -0.1547  | 0.56147 | -0.26961    | 0.60627     | -0.1547  | 0.56147 |

|            |                 |          |         |             |             |          |         |
|------------|-----------------|----------|---------|-------------|-------------|----------|---------|
|            | -0.1547         | 0.56147  | 0.56147 | 0.785939747 |             |          |         |
| DNAJC19P6  | ENSG00000220871 | -0.15472 | 0.56148 | -0.15472    | 0.56148     | -0.15472 |         |
|            | 0.56148         | -0.15472 | 0.56148 | 0.56148     | 0.785939747 |          |         |
| LINC02163  | ENSG00000251026 | -0.1548  | 0.56151 | -0.42164    | 0.66336     | -0.1548  |         |
|            | 0.56151         | -0.1548  | 0.56151 | 0.56151     | 0.785959163 |          |         |
| RPS15P5    | ENSG00000229806 | -0.58256 | 0.7199  | -0.1549     | 0.56155     | -0.58256 |         |
|            | 0.7199          | -0.58256 | 0.7199  | 0.56155     | 0.785969999 |          |         |
| ZNF436-AS1 | ENSG00000249087 | -0.15491 | 0.56155 | -0.15491    | 0.56155     | -0.15491 |         |
|            | 0.56155         | -0.15491 | 0.56155 | 0.56155     | 0.785969999 |          |         |
| LIPT1      | ENSG00000144182 | -0.15506 | 0.56161 | -0.15506    | 0.56161     | -0.15506 | 0.56161 |
|            | -0.15506        | 0.56161  | 0.56161 | 0.785996178 |             |          |         |
| C19orf71   | ENSG00000183397 | -0.15519 | 0.56167 | -0.15519    | 0.56167     | -0.15519 |         |
|            | 0.56167         | -0.15519 | 0.56167 | 0.56167     | 0.785996178 |          |         |
| OVCH1-AS1  | ENSG00000257599 | -1.1966  | 0.88426 | -0.15521    | 0.56167     | -1.391   |         |
|            | 0.91788         | -0.6662  | 0.74736 | 0.56167     | 0.785996178 |          |         |
| NA         | ENSG00000271329 | -0.85294 | 0.80315 | -0.1552     | 0.56167     | -0.1552  | 0.56167 |
|            | -0.1552         | 0.56167  | 0.56167 | 0.785996178 |             |          |         |
| NA         | ENSG00000279265 | -0.15524 | 0.56168 | -0.54718    | 0.70787     | -0.54718 | 0.70787 |
|            | -0.54718        | 0.70787  | 0.56168 | 0.785996178 |             |          |         |
| CFAP92     | ENSG00000114656 | -0.18682 | 0.5741  | -0.34397    | 0.63456     | -0.15528 |         |
|            | 0.5617          | -0.3927  | 0.65273 | 0.5617      | 0.785996178 |          |         |
| CYP24A1    | ENSG00000019186 | -0.1553  | 0.56171 | -0.1553     | 0.56171     | -0.1553  |         |
|            | 0.56171         | -0.1553  | 0.56171 | 0.56171     | 0.785996178 |          |         |
| ZNF774     | ENSG00000196391 | -0.53991 | 0.70537 | -0.31628    | 0.6241      | -0.53991 |         |
|            | 0.70537         | -0.15533 | 0.56172 | 0.56172     | 0.785996178 |          |         |
| NA         | ENSG00000213058 | -0.15533 | 0.56172 | -0.15533    | 0.56172     | -0.15533 | 0.56172 |
|            | -0.15533        | 0.56172  | 0.56172 | 0.785996178 |             |          |         |
| RNF216-IT1 | ENSG00000237738 | -0.15536 | 0.56173 | -0.15536    | 0.56173     | -0.15536 |         |
|            | 0.56173         | -0.15536 | 0.56173 | 0.56173     | 0.785996178 |          |         |
| NA         | ENSG00000255086 | -0.1554  | 0.56175 | -0.1554     | 0.56175     | -0.1554  | 0.56175 |
|            | -0.1554         | 0.56175  | 0.56175 | 0.786001594 |             |          |         |
| KRT80      | ENSG00000167767 | -0.44194 | 0.67073 | -0.70555    | 0.75977     | -0.15553 | 0.5618  |
|            | -0.44907        | 0.67331  | 0.5618  | 0.786048984 |             |          |         |
| GLMP       | ENSG00000198715 | -0.15558 | 0.56182 | -0.15558    | 0.56182     | -0.15558 | 0.56182 |
|            | -0.15558        | 0.56182  | 0.56182 | 0.786054397 |             |          |         |
| NA         | ENSG00000240036 | -0.15584 | 0.56192 | -0.15584    | 0.56192     | -0.15584 | 0.56192 |
|            | -0.15584        | 0.56192  | 0.56192 | 0.786154576 |             |          |         |
| ALG2       | ENSG00000119523 | -0.55238 | 0.70966 | -0.22822    | 0.59026     | -0.53841 | 0.70485 |
|            | -0.1559         | 0.56194  | 0.56194 | 0.786154576 |             |          |         |
| RNU6-748P  | ENSG00000207378 | -0.54929 | 0.7086  | -0.15589    | 0.56194     | -0.54929 |         |
|            | 0.7086          | -1.0756  | 0.85894 | 0.56194     | 0.786154576 |          |         |
| LINC02596  | ENSG00000233431 | -0.15596 | 0.56197 | -0.15596    | 0.56197     | -0.15596 |         |
|            | 0.56197         | -0.15596 | 0.56197 | 0.56197     | 0.786162226 |          |         |
| PRDM11     | ENSG00000019485 | -0.87828 | 0.8101  | -0.35492    | 0.63868     | -0.156   |         |
|            | 0.56198         | -0.20629 | 0.58172 | 0.56198     | 0.786162226 |          |         |
| FYCO1      | ENSG00000163820 | -1.5124  | 0.93478 | -0.15608    | 0.56201     | -1.2232  | 0.88937 |
|            | -0.70301        | 0.75898  | 0.56201 | 0.786162226 |             |          |         |
| TRIM8      | ENSG00000171206 | -0.15608 | 0.56201 | -0.40489    | 0.65722     | -0.80946 | 0.79087 |
|            | -0.44389        | 0.67144  | 0.56201 | 0.786162226 |             |          |         |
| SLC39A12   | ENSG00000148482 | -0.15627 | 0.56209 | -0.69778    | 0.75734     | -1.0951  |         |
|            | 0.86327         | -0.48933 | 0.6877  | 0.56209     | 0.78620549  |          |         |
| UGT3A2     | ENSG00000168671 | -0.15633 | 0.56211 | -1.5049     | 0.93383     | -0.15633 |         |
|            | 0.56211         | -0.15633 | 0.56211 | 0.56211     | 0.78620549  |          |         |
| RNU6-1028P | ENSG00000252973 | -0.15633 | 0.56211 | -0.15633    | 0.56211     | -0.15633 |         |
|            | 0.56211         | -0.15633 | 0.56211 | 0.56211     | 0.78620549  |          |         |
| RNU7-120P  | ENSG00000238302 | -0.15635 | 0.56212 | -0.21785    | 0.58623     | -0.15635 |         |
|            | 0.56212         | -0.15635 | 0.56212 | 0.56212     | 0.78620549  |          |         |
| UMAD1      | ENSG00000219545 | -0.44158 | 0.6706  | -0.44158    | 0.6706      | -0.1564  | 0.56214 |
|            | -0.28496        | 0.61216  | 0.56214 | 0.78620549  |             |          |         |
| CNST       | ENSG00000162852 | -1.1586  | 0.87669 | -0.15647    | 0.56217     | -1.52    | 0.93574 |
|            | -0.49039        | 0.68807  | 0.56217 | 0.78620549  |             |          |         |
| NA         | ENSG00000228540 | -0.15648 | 0.56217 | -0.15648    | 0.56217     | -0.15648 | 0.56217 |

|           |                 |          |          |          |             |             |         |  |
|-----------|-----------------|----------|----------|----------|-------------|-------------|---------|--|
|           |                 | -0.15648 | 0.56217  | 0.56217  | 0.78620549  |             |         |  |
| MTDHP4    | ENSG00000268535 | -0.90197 | 0.81646  | -0.53633 | 0.70414     | -0.30114    |         |  |
|           |                 | 0.61835  | -0.15647 | 0.56217  | 0.56217     | 0.78620549  |         |  |
| NA        | ENSG00000259624 | -0.70691 | 0.76019  | -0.32474 | 0.62731     | -0.32474    | 0.62731 |  |
|           |                 | -0.15656 | 0.56222  | 0.56222  | 0.786224882 |             |         |  |
| DNAJA1    | ENSG00000086061 | -0.17622 | 0.56994  | -0.54037 | 0.70553     | -0.34075    |         |  |
|           |                 | 0.63335  | -0.15662 | 0.56223  | 0.56223     | 0.786244272 |         |  |
| TK2       | ENSG00000166548 | -0.15673 | 0.56227  | -0.15673 | 0.56227     | -0.15673    | 0.56227 |  |
|           |                 | -0.60395 | 0.72706  | 0.56227  | 0.786269066 |             |         |  |
| NA        | ENSG00000221639 | -0.15676 | 0.56228  | -0.15676 | 0.56228     | -0.15676    | 0.56228 |  |
|           |                 | -0.15676 | 0.56228  | 0.56228  | 0.786269066 |             |         |  |
| NA        | ENSG00000273413 | -0.15691 | 0.56234  | -0.15691 | 0.56234     | -0.15691    | 0.56234 |  |
|           |                 | -0.15691 | 0.56234  | 0.56234  | 0.786330403 |             |         |  |
| NA        | ENSG00000272542 | -0.15701 | 0.56238  | -0.19384 | 0.57685     | -0.19384    | 0.57685 |  |
|           |                 | -0.19384 | 0.57685  | 0.56238  | 0.78636377  |             |         |  |
| SSU72P8   | ENSG00000230268 | -0.15713 | 0.56243  | -0.15713 | 0.56243     | -0.15713    |         |  |
|           |                 | 0.56243  | -1.0208  | 0.84632  | 0.56243     | 0.786411119 |         |  |
| ACAT2     | ENSG00000120437 | -0.41788 | 0.66198  | -0.15726 | 0.56248     | -0.21809    | 0.58632 |  |
|           |                 | -0.15726 | 0.56248  | 0.56248  | 0.786421233 |             |         |  |
| NA        | ENSG00000224301 | -0.15727 | 0.56248  | -0.46642 | 0.67954     | -0.15727    | 0.56248 |  |
|           |                 | -0.93114 | 0.82411  | 0.56248  | 0.786421233 |             |         |  |
| MIR3682   | ENSG00000265452 | -0.15743 | 0.56255  | -0.15743 | 0.56255     | -0.15743    |         |  |
|           |                 | 0.56255  | -0.15743 | 0.56255  | 0.56255     | 0.786421233 |         |  |
| RAP1GDS1  | ENSG00000138698 | -1.4754  | 0.92994  | -1.1551  | 0.87598     | -1.0878     |         |  |
|           |                 | 0.86167  | -0.15752 | 0.56258  | 0.56258     | 0.786421233 |         |  |
| FABP2     | ENSG00000145384 | -0.9628  | 0.83218  | -1.1583  | 0.87663     | -0.15753    | 0.56259 |  |
|           |                 | -0.57276 | 0.7166   | 0.56259  | 0.786421233 |             |         |  |
| INTS9     | ENSG00000104299 | -0.20484 | 0.58115  | -0.15763 | 0.56263     | -0.58401    | 0.72039 |  |
|           |                 | -0.50191 | 0.69213  | 0.56263  | 0.786421233 |             |         |  |
| NA        | ENSG00000277223 | -0.15763 | 0.56263  | -0.15763 | 0.56263     | -0.15763    | 0.56263 |  |
|           |                 | -0.15763 | 0.56263  | 0.56263  | 0.786421233 |             |         |  |
| NA        | ENSG00000226433 | -0.15769 | 0.56265  | -0.70666 | 0.76011     | -0.68143    | 0.7522  |  |
|           |                 | -1.1494  | 0.87481  | 0.56265  | 0.786421233 |             |         |  |
| MEF2A     | ENSG00000068305 | -0.34995 | 0.63681  | -0.15772 | 0.56266     | -0.25067    | 0.59896 |  |
|           |                 | -0.43832 | 0.66942  | 0.56266  | 0.786421233 |             |         |  |
| HUS1      | ENSG00000136273 | -1.2868  | 0.90092  | -0.15771 | 0.56266     | -0.24459    | 0.59661 |  |
|           |                 | -0.55945 | 0.71207  | 0.56266  | 0.786421233 |             |         |  |
| NA        | ENSG00000278346 | -0.15775 | 0.56267  | -0.15775 | 0.56267     | -0.15775    | 0.56267 |  |
|           |                 | -0.15775 | 0.56267  | 0.56267  | 0.786421233 |             |         |  |
| RNU6-759P | ENSG00000252549 | -0.15777 | 0.56268  | -0.15777 | 0.56268     | -0.15777    |         |  |
|           |                 | 0.56268  | -0.15777 | 0.56268  | 0.56268     | 0.786421233 |         |  |
| NA        | ENSG00000269696 | -0.15777 | 0.56268  | -0.15777 | 0.56268     | -0.15777    | 0.56268 |  |
|           |                 | -0.15777 | 0.56268  | 0.56268  | 0.786421233 |             |         |  |
| PHACTR2   | ENSG00000112419 | -0.5308  | 0.70222  | -0.29488 | 0.61596     | -0.1578     |         |  |
|           |                 | 0.56269  | -0.50464 | 0.6931   | 0.56269     | 0.786421233 |         |  |
| NA        | ENSG00000242103 | -0.15778 | 0.56269  | -0.15778 | 0.56269     | -0.96247    | 0.83209 |  |
|           |                 | -1.4304  | 0.9237   | 0.56269  | 0.786421233 |             |         |  |
| LINC02651 | ENSG00000235645 | -0.94891 | 0.82867  | -1.3209  | 0.90674     | -0.15788    |         |  |
|           |                 | 0.56272  | -0.94891 | 0.82867  | 0.56272     | 0.786421233 |         |  |
| ZNF772    | ENSG00000197128 | -0.39352 | 0.65303  | -0.28522 | 0.61226     | -0.15789    |         |  |
|           |                 | 0.56273  | -0.25892 | 0.60215  | 0.56273     | 0.786421233 |         |  |
| ANKH      | ENSG00000154122 | -0.15795 | 0.56275  | -0.89011 | 0.8133      | -1.39       | 0.91774 |  |
|           |                 | -0.92481 | 0.82247  | 0.56275  | 0.786421233 |             |         |  |
| NA        | ENSG00000248443 | -0.15795 | 0.56275  | -0.15795 | 0.56275     | -0.15795    | 0.56275 |  |
|           |                 | -0.15795 | 0.56275  | 0.56275  | 0.786421233 |             |         |  |
| KRT31     | ENSG00000094796 | -0.15796 | 0.56276  | -2.1162  | 0.98284     | -1.1772     | 0.88045 |  |
|           |                 | -1.2269  | 0.89007  | 0.56276  | 0.786421233 |             |         |  |
| NA        | ENSG00000253836 | -1.0129  | 0.84446  | -0.71669 | 0.76322     | -1.8579     | 0.96841 |  |
|           |                 | -0.15802 | 0.56278  | 0.56278  | 0.786426629 |             |         |  |
| DNAJC15   | ENSG00000120675 | -1.1715  | 0.8793   | -1.2471  | 0.89382     | -0.15806    |         |  |
|           |                 | 0.5628   | -0.77697 | 0.78141  | 0.5628      | 0.786432025 |         |  |
| NA        | ENSG00000217139 | -0.15835 | 0.56291  | -0.15835 | 0.56291     | -0.15835    | 0.56291 |  |

|           |                 |          |         |             |             |          |         |  |
|-----------|-----------------|----------|---------|-------------|-------------|----------|---------|--|
|           | -0.15835        | 0.56291  | 0.56291 | 0.786517092 |             |          |         |  |
| SNORA6    | ENSG00000206760 | -0.15837 | 0.56292 | -0.64082    | 0.73918     | -0.78148 |         |  |
|           | 0.78274         | -0.78148 | 0.78274 | 0.56292     | 0.786517092 |          |         |  |
| CDK5R1    | ENSG00000176749 | -0.1584  | 0.56293 | -0.1584     | 0.56293     | -0.1584  |         |  |
|           | 0.56293         | -0.1584  | 0.56293 | 0.56293     | 0.786517092 |          |         |  |
| OR7E35P   | ENSG00000250425 | -0.67863 | 0.75131 | -0.15848    | 0.56296     | -1.5334  |         |  |
|           | 0.93741         | -1.2784  | 0.89945 | 0.56296     | 0.786517092 |          |         |  |
| NA        | ENSG00000278877 | -0.6444  | 0.74034 | -0.15851    | 0.56297     | -0.39068 | 0.65198 |  |
|           | -0.31717        | 0.62444  | 0.56297 | 0.786517092 |             |          |         |  |
| ITPA      | ENSG00000125877 | -0.15853 | 0.56298 | -1.3393     | 0.90977     | -0.78366 | 0.78338 |  |
|           | -1.3524         | 0.91188  | 0.56298 | 0.786517092 |             |          |         |  |
| CC2D1A    | ENSG00000132024 | -0.15855 | 0.56299 | -0.15855    | 0.56299     | -0.15855 |         |  |
|           | 0.56299         | -0.15855 | 0.56299 | 0.56299     | 0.786517092 |          |         |  |
| NA        | ENSG00000249416 | -0.36621 | 0.64289 | -0.36621    | 0.64289     | -0.84296 | 0.80038 |  |
|           | -0.15856        | 0.56299  | 0.56299 | 0.786517092 |             |          |         |  |
| RNU1-70P  | ENSG00000199488 | -0.1586  | 0.56301 | -0.84702    | 0.80151     | -0.1586  |         |  |
|           | 0.56301         | -0.1586  | 0.56301 | 0.56301     | 0.786522484 |          |         |  |
| NA        | ENSG00000228222 | -0.52833 | 0.70137 | -0.37562    | 0.6464      | -0.15866 | 0.56303 |  |
|           | -1.3038         | 0.90385  | 0.56303 | 0.786527876 |             |          |         |  |
| MBOAT2    | ENSG00000143797 | -0.15873 | 0.56306 | -0.91347    | 0.8195      | -0.81639 |         |  |
|           | 0.79286         | -1.0896  | 0.86205 | 0.56306     | 0.786538658 |          |         |  |
| FLNB-AS1  | ENSG00000244161 | -0.8236  | 0.79492 | -0.15876    | 0.56307     | -0.15876 |         |  |
|           | 0.56307         | -0.15876 | 0.56307 | 0.56307     | 0.786538658 |          |         |  |
| RSL24D1P5 | ENSG00000257664 | -0.38269 | 0.64903 | -0.15891    | 0.56313     | -0.15891 |         |  |
|           | 0.56313         | -0.71593 | 0.76298 | 0.56313     | 0.786599923 |          |         |  |
| NA        | ENSG00000228367 | -0.15913 | 0.56322 | -0.15913    | 0.56322     | -0.15913 | 0.56322 |  |
|           | -0.15913        | 0.56322  | 0.56322 | 0.786663376 |             |          |         |  |
| NA        | ENSG00000278983 | -0.59835 | 0.7252  | -0.15913    | 0.56322     | -0.67339 | 0.74965 |  |
|           | -0.82324        | 0.79481  | 0.56322 | 0.786663376 |             |          |         |  |
| COX7A2L   | ENSG00000115944 | -1.621   | 0.94749 | -1.621      | 0.94749     | -1.1429  |         |  |
|           | 0.87345         | -0.15918 | 0.56324 | 0.56324     | 0.786663376 |          |         |  |
| NA        | ENSG00000221766 | -0.8974  | 0.81525 | -1.7943     | 0.96362     | -0.15919 | 0.56324 |  |
|           | -0.15919        | 0.56324  | 0.56324 | 0.786663376 |             |          |         |  |
| SMC4P1    | ENSG00000229568 | -0.15928 | 0.56328 | -0.15928    | 0.56328     | -0.15928 |         |  |
|           | 0.56328         | -0.15928 | 0.56328 | 0.56328     | 0.786679535 |          |         |  |
| REXO2     | ENSG00000076043 | -0.15931 | 0.56329 | -0.15931    | 0.56329     | -0.15931 | 0.56329 |  |
|           | -0.15931        | 0.56329  | 0.56329 | 0.786679535 |             |          |         |  |
| NA        | ENSG00000233553 | -0.26451 | 0.60431 | -1.6841     | 0.95392     | -0.15933 | 0.5633  |  |
|           | -0.15933        | 0.5633   | 0.5633  | 0.786679535 |             |          |         |  |
| NA        | ENSG00000235386 | -0.15941 | 0.56333 | -0.15941    | 0.56333     | -0.15941 | 0.56333 |  |
|           | -0.15941        | 0.56333  | 0.56333 | 0.786698885 |             |          |         |  |
| PSG7      | ENSG00000221878 | -0.62643 | 0.73448 | -0.57358    | 0.71687     | -1.0399  | 0.8508  |  |
|           | -0.15951        | 0.56337  | 0.56337 | 0.786711843 |             |          |         |  |
| OR7E97P   | ENSG00000179170 | -0.93857 | 0.82602 | -0.69485    | 0.75642     | -0.33879 |         |  |
|           | 0.63262         | -0.15954 | 0.56338 | 0.56338     | 0.786711843 |          |         |  |
| ZCCHC4    | ENSG00000168228 | -0.295   | 0.616   | -0.15956    | 0.56339     | -1.0225  | 0.84672 |  |
|           | -0.33605        | 0.63158  | 0.56339 | 0.786711843 |             |          |         |  |
| NA        | ENSG00000255455 | -0.15963 | 0.56341 | -0.30826    | 0.62106     | -0.15963 | 0.56341 |  |
|           | -0.15963        | 0.56341  | 0.56341 | 0.786711843 |             |          |         |  |
| NA        | ENSG00000234983 | -0.15964 | 0.56342 | -0.15964    | 0.56342     | -0.15964 | 0.56342 |  |
|           | -0.15964        | 0.56342  | 0.56342 | 0.786711843 |             |          |         |  |
| RN7SKP284 | ENSG00000222934 | -0.15977 | 0.56347 | -0.15977    | 0.56347     | -0.15977 |         |  |
|           | 0.56347         | -0.15977 | 0.56347 | 0.56347     | 0.786736572 |          |         |  |
| LINC00592 | ENSG00000258279 | -0.98997 | 0.8389  | -0.15979    | 0.56347     | -0.46602 |         |  |
|           | 0.6794          | -0.64509 | 0.74057 | 0.56347     | 0.786736572 |          |         |  |
| CHRNA1    | ENSG00000138435 | -0.25299 | 0.59986 | -0.52078    | 0.69874     | -0.15984 |         |  |
|           | 0.56349         | -0.67814 | 0.75116 | 0.56349     | 0.786741955 |          |         |  |
| NA        | ENSG00000237310 | -1.4751  | 0.92991 | -0.15998    | 0.56355     | -0.97581 | 0.83542 |  |
|           | -0.97581        | 0.83542  | 0.56355 | 0.786798963 |             |          |         |  |
| EFL1P2    | ENSG00000248998 | -0.16004 | 0.56357 | -0.16004    | 0.56357     | -0.16004 |         |  |
|           | 0.56357         | -0.16004 | 0.56357 | 0.56357     | 0.786798963 |          |         |  |
| ANKS1A    | ENSG00000064999 | -0.53054 | 0.70213 | -0.78021    | 0.78237     | -0.38299 |         |  |

|            |                 |          |         |             |             |          |         |
|------------|-----------------|----------|---------|-------------|-------------|----------|---------|
|            | 0.64913         | -0.16021 | 0.56364 | 0.56364     | 0.786798963 |          |         |
| AP4B1-AS1  | ENSG00000226167 | -0.16019 | 0.56364 | -0.93785    | 0.82584     | -0.93785 |         |
|            | 0.82584         | -0.93785 | 0.82584 | 0.56364     | 0.786798963 |          |         |
| SGCA       | ENSG00000108823 | -1.4714  | 0.9294  | -0.79917    | 0.7879      | -1.4014  | 0.91945 |
|            | -0.16024        | 0.56365  | 0.56365 | 0.786798963 |             |          |         |
| ANXA1      | ENSG00000135046 | -0.16024 | 0.56365 | -0.71029    | 0.76124     | -0.16024 | 0.56365 |
|            | -0.25559        | 0.60087  | 0.56365 | 0.786798963 |             |          |         |
| NA         | ENSG00000248138 | -0.49555 | 0.68989 | -0.16022    | 0.56365     | -0.34384 | 0.63452 |
|            | -0.97985        | 0.83642  | 0.56365 | 0.786798963 |             |          |         |
| LINC01883  | ENSG00000235009 | -2.5042  | 0.99386 | -2.5042     | 0.99386     | -2.5042  |         |
|            | 0.99386         | -0.16025 | 0.56366 | 0.56366     | 0.786798963 |          |         |
| RBM4       | ENSG00000173933 | -0.45315 | 0.67478 | -1.1817     | 0.88134     | -0.59946 | 0.72557 |
|            | -0.16034        | 0.56369  | 0.56369 | 0.786801143 |             |          |         |
| CLLU1      | ENSG00000257127 | -0.16035 | 0.5637  | -0.16035    | 0.5637      | -0.16035 | 0.5637  |
|            | -0.16035        | 0.5637   | 0.5637  | 0.786801143 |             |          |         |
| KLHL7      | ENSG00000122550 | -0.16037 | 0.56371 | -1.4856     | 0.9313      | -1.4856  | 0.9313  |
|            | -1.4856         | 0.9313   | 0.56371 | 0.786801143 |             |          |         |
| RNU6-1081P | ENSG00000207267 | -0.16045 | 0.56374 | -0.21254    | 0.58416     | -0.21254 |         |
|            | 0.58416         | -0.21254 | 0.58416 | 0.56374     | 0.786820479 |          |         |
| NA         | ENSG00000260137 | -0.62981 | 0.73559 | -1.3284     | 0.90798     | -0.16055 | 0.56378 |
|            | -0.16055        | 0.56378  | 0.56378 | 0.786853771 |             |          |         |
| LARGE-IT1  | ENSG00000232081 | -0.1607  | 0.56383 | -0.1607     | 0.56383     | -0.1607  |         |
|            | 0.56383         | -0.1607  | 0.56383 | 0.56383     | 0.78687745  |          |         |
| COX6CP3    | ENSG00000266251 | -0.16073 | 0.56385 | -0.16073    | 0.56385     | -0.16073 |         |
|            | 0.56385         | -0.16073 | 0.56385 | 0.56385     | 0.78687745  |          |         |
| NA         | ENSG00000202459 | -0.16079 | 0.56387 | -0.29031    | 0.61421     | -0.28041 | 0.61042 |
|            | -0.28041        | 0.61042  | 0.56387 | 0.78687745  |             |          |         |
| NA         | ENSG00000276960 | -0.16082 | 0.56388 | -0.16082    | 0.56388     | -0.16082 | 0.56388 |
|            | -0.16082        | 0.56388  | 0.56388 | 0.78687745  |             |          |         |
| METTL18    | ENSG00000171806 | -0.16085 | 0.56389 | -0.16085    | 0.56389     | -0.16085 |         |
|            | 0.56389         | -0.16085 | 0.56389 | 0.56389     | 0.78687745  |          |         |
| PTPA       | ENSG00000119383 | -0.19472 | 0.57719 | -1.8162     | 0.96533     | -0.16088 | 0.5639  |
|            | -0.86569        | 0.80667  | 0.5639  | 0.78687745  |             |          |         |
| NA         | ENSG00000257289 | -0.16089 | 0.56391 | -0.16089    | 0.56391     | -0.16089 | 0.56391 |
|            | -0.16089        | 0.56391  | 0.56391 | 0.78687745  |             |          |         |
| METTL5     | ENSG00000138382 | -0.99923 | 0.84116 | -0.47391    | 0.68222     | -0.99923 |         |
|            | 0.84116         | -0.16102 | 0.56396 | 0.56396     | 0.786902153 |          |         |
| RN7SL292P  | ENSG00000242650 | -0.16102 | 0.56396 | -0.16102    | 0.56396     | -0.16102 |         |
|            | 0.56396         | -0.16102 | 0.56396 | 0.56396     | 0.786902153 |          |         |
| NA         | ENSG00000276623 | -0.16107 | 0.56398 | -0.16107    | 0.56398     | -0.16107 | 0.56398 |
|            | -0.16107        | 0.56398  | 0.56398 | 0.786904323 |             |          |         |
| NA         | ENSG00000260972 | -0.67159 | 0.74908 | -0.44211    | 0.67079     | -0.33244 | 0.63022 |
|            | -0.16112        | 0.564    | 0.564   | 0.786904323 |             |          |         |
| RN7SL570P  | ENSG00000241174 | -1.474   | 0.92976 | -0.85146    | 0.80274     | -0.16115 |         |
|            | 0.56401         | -0.3716  | 0.64491 | 0.56401     | 0.786904323 |          |         |
| TNKS2-AS1  | ENSG00000228701 | -0.16138 | 0.5641  | -0.71094    | 0.76144     | -0.16138 |         |
|            | 0.5641          | -0.16138 | 0.5641  | 0.5641      | 0.786977366 |          |         |
| NA         | ENSG00000250507 | -0.16138 | 0.5641  | -0.16138    | 0.5641      | -0.16138 | 0.5641  |
|            | -0.16138        | 0.5641   | 0.5641  | 0.786977366 |             |          |         |
| ALG1L13P   | ENSG00000253981 | -1.3026  | 0.90365 | -0.16155    | 0.56417     | -0.39174 |         |
|            | 0.65238         | -0.39174 | 0.65238 | 0.56417     | 0.786977366 |          |         |
| PAX7       | ENSG00000009709 | -1.5906  | 0.94416 | -0.16156    | 0.56418     | -0.18006 | 0.57145 |
|            | -1.2187         | 0.88852  | 0.56418 | 0.786977366 |             |          |         |
| ADRM1      | ENSG00000130706 | -0.16162 | 0.5642  | -0.16162    | 0.5642      | -0.16162 | 0.5642  |
|            | -0.16162        | 0.5642   | 0.5642  | 0.786977366 |             |          |         |
| FAM86GP    | ENSG00000166492 | -1.0822  | 0.86042 | -0.16162    | 0.5642      | -1.4217  |         |
|            | 0.92244         | -0.31643 | 0.62416 | 0.5642      | 0.786977366 |          |         |
| NA         | ENSG00000239920 | -0.16162 | 0.5642  | -0.16162    | 0.5642      | -0.16162 | 0.5642  |
|            | -0.16162        | 0.5642   | 0.5642  | 0.786977366 |             |          |         |
| NPPA       | ENSG00000175206 | -0.16168 | 0.56422 | -0.16168    | 0.56422     | -0.16168 | 0.56422 |
|            | -0.16168        | 0.56422  | 0.56422 | 0.786977366 |             |          |         |
| LINC01801  | ENSG00000267767 | -0.16167 | 0.56422 | -0.16167    | 0.56422     | -0.16167 |         |

|            |                 |          |         |             |             |          |         |
|------------|-----------------|----------|---------|-------------|-------------|----------|---------|
|            | 0.56422         | -0.16167 | 0.56422 | 0.56422     | 0.786977366 |          |         |
| NDUFB4P7   | ENSG00000225428 | -0.711   | 0.76146 | -0.16172    | 0.56424     | -0.70753 |         |
|            | 0.76038         | -0.29041 | 0.61425 | 0.56424     | 0.786977366 |          |         |
| NA         | ENSG00000261019 | -1.0667  | 0.85695 | -0.70453    | 0.75945     | -0.16174 | 0.56424 |
|            | -0.16174        | 0.56424  | 0.56424 | 0.786977366 |             |          |         |
| NR2E3      | ENSG00000278570 | -0.16181 | 0.56427 | -0.21315    | 0.58439     | -0.99969 | 0.84127 |
|            | -0.5712         | 0.71607  | 0.56427 | 0.786993475 |             |          |         |
| PCDHB12    | ENSG00000120328 | -0.16185 | 0.56429 | -0.16185    | 0.56429     | -0.16185 |         |
|            | 0.56429         | -0.16185 | 0.56429 | 0.56429     | 0.786993475 |          |         |
| NA         | ENSG00000252193 | -0.16188 | 0.5643  | -0.16188    | 0.5643      | -0.16188 | 0.5643  |
|            | -0.16188        | 0.5643   | 0.5643  | 0.786993475 |             |          |         |
| B4GALT6    | ENSG00000118276 | -1.4081  | 0.92044 | -1.4081     | 0.92044     | -1.4081  |         |
|            | 0.92044         | -0.16219 | 0.56442 | 0.56442     | 0.787078248 |          |         |
| NA         | ENSG00000259146 | -1.1252  | 0.86975 | -0.16222    | 0.56443     | -0.84556 | 0.8011  |
|            | -0.744          | 0.77156  | 0.56443 | 0.787078248 |             |          |         |
| NA         | ENSG00000270352 | -0.16224 | 0.56444 | -0.16224    | 0.56444     | -0.16224 | 0.56444 |
|            | -0.16224        | 0.56444  | 0.56444 | 0.787078248 |             |          |         |
| MAPK6P3    | ENSG00000237263 | -0.16226 | 0.56445 | -1.355      | 0.91229     | -0.43177 |         |
|            | 0.66704         | -1.8172  | 0.96541 | 0.56445     | 0.787078248 |          |         |
| RPLPOP6    | ENSG00000213553 | -0.16228 | 0.56446 | -0.86588    | 0.80672     | -0.16228 |         |
|            | 0.56446         | -0.16228 | 0.56446 | 0.56446     | 0.787078248 |          |         |
| CENPF      | ENSG00000117724 | -0.5798  | 0.71898 | -0.17928    | 0.57114     | -0.16232 | 0.56447 |
|            | -0.30204        | 0.61869  | 0.56447 | 0.787078248 |             |          |         |
| SAR1B      | ENSG00000152700 | -1.0379  | 0.85033 | -0.40824    | 0.65845     | -1.0174  | 0.84552 |
|            | -0.16233        | 0.56448  | 0.56448 | 0.787078248 |             |          |         |
| NA         | ENSG00000227061 | -0.21054 | 0.58338 | -0.16236    | 0.56449     | -0.47884 | 0.68398 |
|            | -0.16236        | 0.56449  | 0.56449 | 0.787078248 |             |          |         |
| MIR548Q    | ENSG00000221331 | -0.25787 | 0.60175 | -1.5648     | 0.94118     | -1.1422  |         |
|            | 0.87331         | -0.16251 | 0.56455 | 0.56455     | 0.787135103 |          |         |
| H19        | ENSG00000130600 | -0.70188 | 0.75862 | -0.70188    | 0.75862     | -0.16258 | 0.56457 |
|            | -0.29658        | 0.61661  | 0.56457 | 0.787135103 |             |          |         |
| NA         | ENSG00000235538 | -0.16266 | 0.56461 | -0.16266    | 0.56461     | -0.16266 | 0.56461 |
|            | -0.19369        | 0.57679  | 0.56461 | 0.787135103 |             |          |         |
| RNU7-45P   | ENSG00000238829 | -0.16273 | 0.56464 | -0.16273    | 0.56464     | -0.16273 |         |
|            | 0.56464         | -0.16273 | 0.56464 | 0.56464     | 0.787135103 |          |         |
| NA         | ENSG00000272349 | -0.16273 | 0.56464 | -0.16273    | 0.56464     | -0.16273 | 0.56464 |
|            | -0.16273        | 0.56464  | 0.56464 | 0.787135103 |             |          |         |
| HEXB       | ENSG00000049860 | -0.77602 | 0.78113 | -0.47871    | 0.68393     | -0.90842 | 0.81817 |
|            | -0.1628         | 0.56466  | 0.56466 | 0.787135103 |             |          |         |
| ADGRL4     | ENSG00000162618 | -2.8152  | 0.99756 | -0.16281    | 0.56466     | -0.16281 |         |
|            | 0.56466         | -0.16281 | 0.56466 | 0.56466     | 0.787135103 |          |         |
| NA         | ENSG00000281974 | -0.1628  | 0.56466 | -0.1628     | 0.56466     | -0.1628  | 0.56466 |
|            | -0.1628         | 0.56466  | 0.56466 | 0.787135103 |             |          |         |
| SNORD115-2 | ENSG00000199712 | -0.16303 | 0.56475 | -0.16303    | 0.56475     | -0.16303 |         |
|            | 0.56475         | -0.16303 | 0.56475 | 0.56475     | 0.787234823 |          |         |
| NA         | ENSG00000273137 | -0.16307 | 0.56477 | -0.16307    | 0.56477     | -0.16307 | 0.56477 |
|            | -0.16307        | 0.56477  | 0.56477 | 0.787234823 |             |          |         |
| MTND4P28   | ENSG00000233709 | -0.20011 | 0.5793  | -0.16309    | 0.56478     | -0.21456 |         |
|            | 0.58494         | -0.21456 | 0.58494 | 0.56478     | 0.787234823 |          |         |
| RPL6P4     | ENSG00000226080 | -0.16314 | 0.5648  | -0.81269    | 0.7918      | -0.16314 |         |
|            | 0.5648          | -0.16314 | 0.5648  | 0.5648      | 0.787240182 |          |         |
| SLC66A1L   | ENSG00000174899 | -0.31917 | 0.6252  | -0.16322    | 0.56483     | -0.2811  |         |
|            | 0.61068         | -0.44593 | 0.67218 | 0.56483     | 0.787259479 |          |         |
| SYNPO2L    | ENSG00000166317 | -0.16327 | 0.56485 | -0.35613    | 0.63913     | -1.1347  |         |
|            | 0.87176         | -0.88413 | 0.81169 | 0.56485     | 0.787264837 |          |         |
| SOX15      | ENSG00000129194 | -0.16335 | 0.56488 | -0.16335    | 0.56488     | -0.16335 | 0.56488 |
|            | -0.16335        | 0.56488  | 0.56488 | 0.787284132 |             |          |         |
| C7orf77    | ENSG00000275356 | -1.2269  | 0.89006 | -0.16345    | 0.56492     | -1.53    | 0.93699 |
|            | -0.77351        | 0.78039  | 0.56492 | 0.787308783 |             |          |         |
| SMCHD1     | ENSG00000101596 | -0.26328 | 0.60383 | -0.20792    | 0.58235     | -0.16348 |         |
|            | 0.56493         | -0.21375 | 0.58463 | 0.56493     | 0.787308783 |          |         |
| ANAPC1P4   | ENSG00000234231 | -0.51679 | 0.69735 | -0.16362    | 0.56498     | -0.49774 |         |



|           |                 |          |         |             |             |          |         |
|-----------|-----------------|----------|---------|-------------|-------------|----------|---------|
|           | 0.69067         | -0.56639 | 0.71443 | 0.56498     | 0.787355947 |          |         |
| NA        | ENSG00000233288 | -0.37959 | 0.64787 | -0.16365    | 0.565       | -0.37959 | 0.64787 |
|           | -0.60638        | 0.72787  | 0.565   | 0.787361302 |             |          |         |
| NA        | ENSG00000214670 | -0.16381 | 0.56506 | -0.16381    | 0.56506     | -0.16381 | 0.56506 |
|           | -0.16381        | 0.56506  | 0.56506 | 0.787396652 |             |          |         |
| NA        | ENSG00000267047 | -0.16386 | 0.56508 | -0.16386    | 0.56508     | -0.16386 | 0.56508 |
|           | -0.16386        | 0.56508  | 0.56508 | 0.787396652 |             |          |         |
| HSPE1P26  | ENSG00000220867 | -0.16389 | 0.56509 | -0.16389    | 0.56509     | -0.16389 |         |
|           | 0.56509         | -0.16389 | 0.56509 | 0.56509     | 0.787396652 |          |         |
| LINC01117 | ENSG00000224577 | -0.20295 | 0.58041 | -0.20295    | 0.58041     | -0.16389 |         |
|           | 0.56509         | -0.20295 | 0.58041 | 0.56509     | 0.787396652 |          |         |
| MIR4684   | ENSG00000265422 | -1.3063  | 0.90427 | -0.7855     | 0.78392     | -0.96032 |         |
|           | 0.83155         | -0.16414 | 0.56519 | 0.56519     | 0.787513473 |          |         |
| NA        | ENSG00000250191 | -0.16429 | 0.56525 | -0.61171    | 0.72964     | -0.71621 | 0.76307 |
|           | -0.61171        | 0.72964  | 0.56525 | 0.787540217 |             |          |         |
| PCDHAC2   | ENSG00000243232 | -0.28664 | 0.61281 | -0.28664    | 0.61281     | -0.28664 |         |
|           | 0.61281         | -0.16436 | 0.56528 | 0.56528     | 0.787540217 |          |         |
| NA        | ENSG00000256632 | -0.16437 | 0.56528 | -0.16437    | 0.56528     | -0.16437 | 0.56528 |
|           | -0.16437        | 0.56528  | 0.56528 | 0.787540217 |             |          |         |
| DPY19L1P1 | ENSG00000229358 | -0.16441 | 0.56529 | -0.50374    | 0.69278     | -0.28604 |         |
|           | 0.61257         | -0.60029 | 0.72584 | 0.56529     | 0.787540217 |          |         |
| LINC02215 | ENSG00000249128 | -0.24622 | 0.59724 | -0.52036    | 0.69859     | -0.16441 |         |
|           | 0.56529         | -0.19688 | 0.57804 | 0.56529     | 0.787540217 |          |         |
| SLC4A7    | ENSG00000033867 | -1.3637  | 0.91367 | -1.1931     | 0.88358     | -0.16451 |         |
|           | 0.56533         | -0.95493 | 0.83019 | 0.56533     | 0.787550912 |          |         |
| BNIP3     | ENSG00000176171 | -0.16449 | 0.56533 | -1.029      | 0.84826     | -0.31593 | 0.62397 |
|           | -0.22361        | 0.58847  | 0.56533 | 0.787550912 |             |          |         |
| MTND6P19  | ENSG00000254384 | -0.16458 | 0.56536 | -0.16458    | 0.56536     | -0.16458 |         |
|           | 0.56536         | -0.16458 | 0.56536 | 0.56536     | 0.787566953 |          |         |
| NA        | ENSG00000245719 | -0.56134 | 0.71272 | -0.16463    | 0.56538     | -0.30995 | 0.6217  |
|           | -0.30995        | 0.6217   | 0.56538 | 0.787566953 |             |          |         |
| OR1J4     | ENSG00000239590 | -1.3823  | 0.91656 | -0.16464    | 0.56539     | -0.16464 | 0.56539 |
|           | -0.16464        | 0.56539  | 0.56539 | 0.787566953 |             |          |         |
| NA        | ENSG00000267743 | -0.98749 | 0.8383  | -0.98749    | 0.8383      | -0.16483 | 0.56546 |
|           | -0.98749        | 0.8383   | 0.56546 | 0.787602264 |             |          |         |
| IRAG2     | ENSG00000118308 | -0.16484 | 0.56547 | -0.16484    | 0.56547     | -0.16484 | 0.56547 |
|           | -0.89192        | 0.81378  | 0.56547 | 0.787602264 |             |          |         |
| KIF18B    | ENSG00000186185 | -0.57884 | 0.71865 | -0.16484    | 0.56547     | -0.5646  |         |
|           | 0.71383         | -1.3526  | 0.9119  | 0.56547     | 0.787602264 |          |         |
| HSPE1P3   | ENSG00000259746 | -0.16488 | 0.56548 | -0.16488    | 0.56548     | -0.16488 |         |
|           | 0.56548         | -0.16488 | 0.56548 | 0.56548     | 0.787602264 |          |         |
| ARID4A    | ENSG00000032219 | -0.38286 | 0.64909 | -0.34963    | 0.63669     | -0.34963 |         |
|           | 0.63669         | -0.16493 | 0.5655  | 0.5655      | 0.787607608 |          |         |
| NA        | ENSG00000270490 | -0.16504 | 0.56554 | -0.20167    | 0.57991     | -0.20167 | 0.57991 |
|           | -0.20167        | 0.57991  | 0.56554 | 0.78762364  |             |          |         |
| ARHGAP45  | ENSG00000180448 | -0.16506 | 0.56555 | -0.16506    | 0.56555     | -0.17841 |         |
|           | 0.5708          | -0.73859 | 0.76992 | 0.56555     | 0.78762364  |          |         |
| NA        | ENSG00000257009 | -0.36519 | 0.64252 | -0.36519    | 0.64252     | -1.4417  | 0.92531 |
|           | -0.16507        | 0.56556  | 0.56556 | 0.78762364  |             |          |         |
| NA        | ENSG00000278472 | -0.16515 | 0.56559 | -0.16515    | 0.56559     | -0.16515 | 0.56559 |
|           | -0.16515        | 0.56559  | 0.56559 | 0.78764291  |             |          |         |
| NA        | ENSG00000272269 | -0.16532 | 0.56566 | -0.16532    | 0.56566     | -0.16532 | 0.56566 |
|           | -0.16532        | 0.56566  | 0.56566 | 0.787717881 |             |          |         |
| NMNAT1P5  | ENSG00000259573 | -0.16544 | 0.5657  | -0.16544    | 0.5657      | -0.16544 |         |
|           | 0.5657          | -0.16544 | 0.5657  | 0.5657      | 0.787742486 |          |         |
| JMY       | ENSG00000152409 | -1.6638  | 0.95193 | -1.7782     | 0.96231     | -0.16545 | 0.56571 |
|           | -1.3282         | 0.90794  | 0.56571 | 0.787742486 |             |          |         |
| SLC20A1P1 | ENSG00000223506 | -0.16552 | 0.56573 | -0.16552    | 0.56573     | -0.16552 |         |
|           | 0.56573         | -0.16552 | 0.56573 | 0.56573     | 0.787747825 |          |         |
| MIR3619   | ENSG00000266533 | -0.16566 | 0.56579 | -0.16566    | 0.56579     | -0.16566 |         |
|           | 0.56579         | -0.16566 | 0.56579 | 0.56579     | 0.787808861 |          |         |
| DRC1      | ENSG00000157856 | -0.5775  | 0.7182  | -0.24213    | 0.59566     | -1.0596  | 0.85534 |

|              |                 |          |          |         |             |             |          |         |
|--------------|-----------------|----------|----------|---------|-------------|-------------|----------|---------|
|              |                 | -0.16577 | 0.56583  | 0.56583 | 0.787810949 |             |          |         |
| NA           | ENSG00000225299 | -0.16577 | 0.56583  | 0.56583 | -0.16577    | 0.56583     | -0.16577 | 0.56583 |
|              |                 | -0.16577 | 0.56583  | 0.56583 | 0.787810949 |             |          |         |
| GNG10        | ENSG00000242616 | -0.79852 | 0.78771  | 0.78771 | -0.1658     | 0.56584     | -0.79852 | 0.78771 |
|              |                 | -0.79852 | 0.78771  | 0.56584 | 0.787810949 |             |          |         |
| RHOBTB1      | ENSG00000072422 | -0.16584 | 0.56586  | 0.56586 | -1.1051     | 0.86544     | -1.3972  |         |
|              |                 | 0.91882  | -1.1377  | 0.87237 | 0.56586     | 0.787816285 |          |         |
| ADSL         | ENSG00000239900 | -0.61983 | 0.73231  | 0.73231 | -0.61983    | 0.73231     | -0.61983 | 0.73231 |
|              |                 | -0.16588 | 0.56588  | 0.56588 | 0.787821622 |             |          |         |
| NA           | ENSG00000271582 | -1.4273  | 0.92325  | 0.92325 | -0.16597    | 0.56591     | -0.16597 | 0.56591 |
|              |                 | -1.1357  | 0.87197  | 0.56591 | 0.787840879 |             |          |         |
| HMG1P30      | ENSG00000235028 | -0.16602 | 0.56593  | 0.56593 | -0.16602    | 0.56593     | -0.17454 |         |
|              |                 | 0.56928  | -0.16602 | 0.56593 | 0.56593     | 0.787846215 |          |         |
| AAK1         | ENSG00000115977 | -0.20283 | 0.58037  | 0.58037 | -0.2696     | 0.60627     | -0.3597  | 0.64046 |
|              |                 | -0.16621 | 0.566    | 0.566   | 0.787921154 |             |          |         |
| MTCO1P9      | ENSG00000251223 | -0.16634 | 0.56605  | 0.56605 | -0.16634    | 0.56605     | -0.16634 |         |
|              |                 | 0.56605  | -0.16634 | 0.56605 | 0.56605     | 0.787968248 |          |         |
| KCNAB1-AS1   | ENSG00000242370 | -0.41883 | 0.66233  | 0.66233 | -0.16664    | 0.56617     | -1.3398  |         |
|              |                 | 0.90984  | -0.35423 | 0.63842 | 0.56617     | 0.78811278  |          |         |
| CACTIN       | ENSG00000105298 | -0.51837 | 0.6979   | 0.6979  | -0.16674    | 0.56621     | -0.51837 |         |
|              |                 | 0.6979   | -0.51837 | 0.6979  | 0.56621     | 0.788137353 |          |         |
| ATP8B1       | ENSG00000081923 | -1.2248  | 0.88968  | 0.88968 | -1.1168     | 0.86796     | -0.51546 |         |
|              |                 | 0.69688  | -0.16676 | 0.56622 | 0.56622     | 0.788137353 |          |         |
| VDR          | ENSG00000111424 | -0.7405  | 0.7705   | 0.7705  | -0.7405     | 0.7705      | -0.16683 | 0.56625 |
|              |                 | -0.78355 | 0.78335  | 0.56625 | 0.78815333  |             |          |         |
| NMNAT3       | ENSG00000163864 | -0.16692 | 0.56628  | 0.56628 | -0.73278    | 0.76815     | -0.34694 |         |
|              |                 | 0.63568  | -0.56805 | 0.715   | 0.56628     | 0.78815333  |          |         |
| NA           | ENSG00000259301 | -0.16691 | 0.56628  | 0.56628 | -0.16691    | 0.56628     | -0.16691 | 0.56628 |
|              |                 | -0.16691 | 0.56628  | 0.56628 | 0.78815333  |             |          |         |
| EFHC1        | ENSG00000096093 | -1.6503  | 0.95056  | 0.95056 | -0.58129    | 0.71948     | -0.167   | 0.56632 |
|              |                 | -1.019   | 0.84589  | 0.56632 | 0.788177897 |             |          |         |
| MIR760       | ENSG00000211575 | -0.16705 | 0.56633  | 0.56633 | -0.16705    | 0.56633     | -0.16705 |         |
|              |                 | 0.56633  | -0.16705 | 0.56633 | 0.56633     | 0.788177897 |          |         |
| SLC2A12      | ENSG00000146411 | -0.37306 | 0.64545  | 0.64545 | -0.1671     | 0.56636     | -0.17626 |         |
|              |                 | 0.56996  | -0.20401 | 0.58083 | 0.56636     | 0.788197138 |          |         |
| TSEN34       | ENSG00000170892 | -0.16717 | 0.56638  | 0.56638 | -0.16717    | 0.56638     | -0.16717 |         |
|              |                 | 0.56638  | -0.16717 | 0.56638 | 0.56638     | 0.788202462 |          |         |
| NA           | ENSG00000258906 | -0.31028 | 0.62182  | 0.62182 | -0.31028    | 0.62182     | -0.35703 | 0.63946 |
|              |                 | -0.16724 | 0.56641  | 0.56641 | 0.788221701 |             |          |         |
| NA           | ENSG00000206549 | -0.16737 | 0.56646  | 0.56646 | -0.26219    | 0.60341     | -0.58108 | 0.71941 |
|              |                 | -0.52332 | 0.69962  | 0.56646 | 0.78826877  |             |          |         |
| TIMM17A      | ENSG00000134375 | -0.16761 | 0.56655  | 0.56655 | -1.4764     | 0.93008     | -1.3287  |         |
|              |                 | 0.90802  | -1.5364  | 0.93778 | 0.56655     | 0.788345708 |          |         |
| NA           | ENSG00000265953 | -1.6564  | 0.95118  | 0.95118 | -0.16764    | 0.56657     | -1.5163  | 0.93528 |
|              |                 | -1.5163  | 0.93528  | 0.56657 | 0.788345708 |             |          |         |
| NA           | ENSG00000255155 | -0.16768 | 0.56658  | 0.56658 | -0.30737    | 0.62072     | -0.16768 | 0.56658 |
|              |                 | -0.16768 | 0.56658  | 0.56658 | 0.788345708 |             |          |         |
| NA           | ENSG00000256538 | -0.16767 | 0.56658  | 0.56658 | -0.78728    | 0.78444     | -1.9707  | 0.97562 |
|              |                 | -0.6607  | 0.7456   | 0.56658 | 0.788345708 |             |          |         |
| FAM242A      | ENSG00000231934 | -0.45993 | 0.67722  | 0.67722 | -0.68406    | 0.75303     | -0.58436 |         |
|              |                 | 0.72051  | -0.16806 | 0.56673 | 0.56673     | 0.788531905 |          |         |
| NA           | ENSG00000238538 | -0.16817 | 0.56677  | 0.56677 | -0.16817    | 0.56677     | -0.16817 | 0.56677 |
|              |                 | -0.16817 | 0.56677  | 0.56677 | 0.788553153 |             |          |         |
| KBTBD12      | ENSG00000187715 | -0.53573 | 0.70393  | 0.70393 | -1.3247     | 0.90737     | -0.16822 |         |
|              |                 | 0.5668   | -0.866   | 0.80676 | 0.5668      | 0.788553153 |          |         |
| IGKV1OR2-108 | ENSG00000231292 | -1.0413  | 0.85112  | 0.85112 | -0.83594    | 0.79841     | -0.16825 |         |
|              |                 | 0.56681  | -0.69929 | 0.75781 | 0.56681     | 0.788553153 |          |         |
| NA           | ENSG00000250137 | -0.16825 | 0.56681  | 0.56681 | -0.61921    | 0.73211     | -0.21927 | 0.58678 |
|              |                 | -0.3849  | 0.64984  | 0.56681 | 0.788553153 |             |          |         |
| NA           | ENSG00000257392 | -0.22788 | 0.59013  | 0.59013 | -0.1683     | 0.56683     | -0.22788 | 0.59013 |
|              |                 | -0.22788 | 0.59013  | 0.56683 | 0.788558465 |             |          |         |
| NA           | ENSG00000271490 | -0.16838 | 0.56686  | 0.56686 | -1.3334     | 0.90879     | -0.28562 | 0.61241 |

|             |                 |          |         |             |             |          |         |  |
|-------------|-----------------|----------|---------|-------------|-------------|----------|---------|--|
|             | -0.16838        | 0.56686  | 0.56686 | 0.788577687 |             |          |         |  |
| ZNF500      | ENSG00000103199 | -0.68065 | 0.75195 | -0.68065    | 0.75195     | -0.16853 |         |  |
|             | 0.56691         | -0.29421 | 0.6157  | 0.56691     | 0.788593617 |          |         |  |
| NA          | ENSG00000255296 | -0.49149 | 0.68846 | -0.19516    | 0.57737     | -0.16853 | 0.56692 |  |
|             | -0.23274        | 0.59202  | 0.56692 | 0.788593617 |             |          |         |  |
| NA          | ENSG00000283270 | -0.24684 | 0.59748 | -0.16853    | 0.56692     | -0.24684 | 0.59748 |  |
|             | -0.24684        | 0.59748  | 0.56692 | 0.788593617 |             |          |         |  |
| EIF3D       | ENSG00000100353 | -0.1686  | 0.56694 | -0.20414    | 0.58088     | -0.1686  | 0.56694 |  |
|             | -0.1686         | 0.56694  | 0.56694 | 0.788598927 |             |          |         |  |
| RN7SL810P   | ENSG00000243035 | -0.16868 | 0.56698 | -0.16868    | 0.56698     | -0.16868 |         |  |
|             | 0.56698         | -0.16868 | 0.56698 | 0.56698     | 0.788608271 |          |         |  |
| PPIAP74     | ENSG00000220343 | -0.16881 | 0.56703 | -0.16881    | 0.56703     | -0.16881 |         |  |
|             | 0.56703         | -0.16881 | 0.56703 | 0.56703     | 0.788608271 |          |         |  |
| NA          | ENSG00000215464 | -0.16885 | 0.56704 | -0.16885    | 0.56704     | -0.16885 | 0.56704 |  |
|             | -0.16885        | 0.56704  | 0.56704 | 0.788608271 |             |          |         |  |
| STK4        | ENSG00000101109 | -1.0864  | 0.86134 | -0.50039    | 0.6916      | -0.16887 | 0.56705 |  |
|             | -0.70262        | 0.75885  | 0.56705 | 0.788608271 |             |          |         |  |
| SNORD114-1  | ENSG00000199575 | -0.16887 | 0.56705 | -0.16887    | 0.56705     | -0.16887 |         |  |
|             | 0.56705         | -0.25571 | 0.60091 | 0.56705     | 0.788608271 |          |         |  |
| LZIC        | ENSG00000162441 | -1.0018  | 0.84178 | -0.16889    | 0.56706     | -0.89009 | 0.81329 |  |
|             | -0.81797        | 0.79331  | 0.56706 | 0.788608271 |             |          |         |  |
| NA          | ENSG00000271364 | -0.41015 | 0.65915 | -0.1689     | 0.56706     | -0.1689  | 0.56706 |  |
|             | -0.18044        | 0.5716   | 0.56706 | 0.788608271 |             |          |         |  |
| NA          | ENSG00000250076 | -0.16898 | 0.5671  | -1.0465     | 0.85233     | -0.16898 | 0.5671  |  |
|             | -1.097          | 0.86368  | 0.5671  | 0.788622381 |             |          |         |  |
| CYP4A22-AS1 | ENSG00000225506 | -0.1704  | 0.56765 | -0.16908    | 0.56713     | -0.16908 | 0.56713 |  |
|             | 0.56713         | -0.16908 | 0.56713 | 0.56713     | 0.788622381 |          |         |  |
| NA          | ENSG00000264243 | -0.16918 | 0.56717 | -0.16918    | 0.56717     | -0.16918 | 0.56717 |  |
|             | -0.16918        | 0.56717  | 0.56717 | 0.788622381 |             |          |         |  |
| RNU6-144P   | ENSG00000206678 | -0.1693  | 0.56722 | -0.1693     | 0.56722     | -0.1693  |         |  |
|             | 0.56722         | -0.24777 | 0.59784 | 0.56722     | 0.788622381 |          |         |  |
| RPL31P2     | ENSG00000230837 | -0.16931 | 0.56722 | -0.16931    | 0.56722     | -0.16931 |         |  |
|             | 0.56722         | -0.16931 | 0.56722 | 0.56722     | 0.788622381 |          |         |  |
| LINC02330   | ENSG00000258770 | -0.42126 | 0.66322 | -0.20476    | 0.58112     | -0.33744 |         |  |
|             | 0.63211         | -0.16933 | 0.56723 | 0.56723     | 0.788622381 |          |         |  |
| NA          | ENSG00000228438 | -0.16934 | 0.56724 | -0.16934    | 0.56724     | -0.16934 | 0.56724 |  |
|             | -0.43199        | 0.66713  | 0.56724 | 0.788622381 |             |          |         |  |
| MGRN1       | ENSG00000102858 | -0.29971 | 0.6178  | -0.9787     | 0.83614     | -0.16941 | 0.56726 |  |
|             | -0.32281        | 0.62658  | 0.56726 | 0.788622381 |             |          |         |  |
| NA          | ENSG00000225011 | -0.1694  | 0.56726 | -1.6608     | 0.95162     | -1.2132  | 0.88747 |  |
|             | -0.49454        | 0.68954  | 0.56726 | 0.788622381 |             |          |         |  |
| TTC26       | ENSG00000105948 | -0.16949 | 0.5673  | -0.16949    | 0.5673      | -0.16949 | 0.5673  |  |
|             | -0.16949        | 0.5673   | 0.5673  | 0.788622381 |             |          |         |  |
| SLC12A6     | ENSG00000140199 | -0.17243 | 0.56845 | -0.16954    | 0.56731     | -0.17969 |         |  |
|             | 0.5713          | -0.1755  | 0.56966 | 0.56731     | 0.788622381 |          |         |  |
| KIRREL3-AS3 | ENSG00000218109 | -0.16959 | 0.56733 | -0.16959    | 0.56733     | -0.16959 | 0.56733 |  |
|             | 0.56733         | -0.16959 | 0.56733 | 0.56733     | 0.788622381 |          |         |  |
| NA          | ENSG00000256211 | -1.1442  | 0.87373 | -0.50806    | 0.69429     | -0.16967 | 0.56736 |  |
|             | -0.16967        | 0.56736  | 0.56736 | 0.788622381 |             |          |         |  |
| C11orf72    | ENSG00000184224 | -0.94438 | 0.82751 | -0.54326    | 0.70652     | -0.16971 |         |  |
|             | 0.56738         | -0.16971 | 0.56738 | 0.56738     | 0.788622381 |          |         |  |
| RNU6-615P   | ENSG00000251874 | -0.16972 | 0.56738 | -0.16972    | 0.56738     | -0.16972 |         |  |
|             | 0.56738         | -0.47961 | 0.68425 | 0.56738     | 0.788622381 |          |         |  |
| NA          | ENSG00000261722 | -0.16972 | 0.56738 | -0.16972    | 0.56738     | -0.16972 | 0.56738 |  |
|             | -0.16972        | 0.56738  | 0.56738 | 0.788622381 |             |          |         |  |
| NA          | ENSG00000236574 | -1.0396  | 0.85073 | -0.78306    | 0.7832      | -0.50272 | 0.69242 |  |
|             | -0.16975        | 0.5674   | 0.5674  | 0.788622381 |             |          |         |  |
| ELOVL1      | ENSG00000066322 | -0.56233 | 0.71306 | -0.28533    | 0.61231     | -0.16979 |         |  |
|             | 0.56741         | -0.28533 | 0.61231 | 0.56741     | 0.788622381 |          |         |  |
| CLDN5       | ENSG00000184113 | -0.37524 | 0.64626 | -0.1698     | 0.56741     | -0.1698  | 0.56741 |  |
|             | -0.1698         | 0.56741  | 0.56741 | 0.788622381 |             |          |         |  |
| NA          | ENSG00000235018 | -0.41196 | 0.65981 | -0.16979    | 0.56741     | -0.16979 | 0.56741 |  |

|            |                 |          |         |             |             |          |         |
|------------|-----------------|----------|---------|-------------|-------------|----------|---------|
|            | -0.43676        | 0.66886  | 0.56741 | 0.788622381 |             |          |         |
| LINC02614  | ENSG00000241288 | -0.89098 | 0.81353 | -0.54841    | 0.70829     | -0.16979 |         |
|            | 0.56741         | -0.51308 | 0.69605 | 0.56741     | 0.788622381 |          |         |
| PHF20      | ENSG0000025293  | -0.17237 | 0.56843 | -0.24216    | 0.59567     | -0.24377 | 0.5963  |
|            | -0.16991        | 0.56746  | 0.56746 | 0.78866938  |             |          |         |
| LGSN       | ENSG00000146166 | -0.95078 | 0.82914 | -1.7481     | 0.95978     | -0.16997 | 0.56748 |
|            | -0.42736        | 0.66544  | 0.56748 | 0.788674683 |             |          |         |
| NA         | ENSG00000248467 | -0.17004 | 0.56751 | -0.17004    | 0.56751     | -0.17004 | 0.56751 |
|            | -0.17004        | 0.56751  | 0.56751 | 0.788693883 |             |          |         |
| RPS3AP9    | ENSG00000231022 | -0.17009 | 0.56753 | -0.17009    | 0.56753     | -0.17009 |         |
|            | 0.56753         | -0.17009 | 0.56753 | 0.56753     | 0.788699184 |          |         |
| SNHG14     | ENSG00000224078 | -0.60463 | 0.72729 | -0.61458    | 0.73058     | -0.18712 |         |
|            | 0.57422         | -0.17026 | 0.5676  | 0.5676      | 0.788732993 |          |         |
| COPS8      | ENSG00000198612 | -1.764   | 0.96114 | -0.79946    | 0.78799     | -0.17031 | 0.56762 |
|            | -0.6734         | 0.74965  | 0.56762 | 0.788732993 |             |          |         |
| ABCF1      | ENSG00000204574 | -0.17036 | 0.56764 | -0.17036    | 0.56764     | -0.42897 | 0.66603 |
|            | -0.55028        | 0.70894  | 0.56764 | 0.788732993 |             |          |         |
| PRR3       | ENSG00000204576 | -0.48397 | 0.6858  | -0.64485    | 0.74049     | -0.17036 | 0.56764 |
|            | -0.92232        | 0.82182  | 0.56764 | 0.788732993 |             |          |         |
| GNAI3      | ENSG00000065135 | -0.92221 | 0.82179 | -0.17042    | 0.56766     | -1.0413  | 0.85113 |
|            | -0.32047        | 0.62569  | 0.56766 | 0.788732993 |             |          |         |
| SLC9A2     | ENSG00000115616 | -0.17043 | 0.56766 | -0.85685    | 0.80424     | -1.3842  |         |
|            | 0.91685         | -0.17043 | 0.56766 | 0.56766     | 0.788732993 |          |         |
| NA         | ENSG00000225402 | -0.44197 | 0.67075 | -0.53537    | 0.7038      | -0.17046 | 0.56768 |
|            | -0.32002        | 0.62552  | 0.56768 | 0.788732993 |             |          |         |
| LINC01427  | ENSG00000225321 | -0.57249 | 0.71651 | -0.20742    | 0.58216     | -0.20593 |         |
|            | 0.58158         | -0.1705  | 0.56769 | 0.56769     | 0.788732993 |          |         |
| NA         | ENSG00000279225 | -0.68127 | 0.75215 | -1.4581     | 0.9276      | -1.4581  | 0.9276  |
|            | -0.17052        | 0.5677   | 0.5677  | 0.788732993 |             |          |         |
| NA         | ENSG00000199378 | -0.2003  | 0.57938 | -0.724      | 0.76547     | -0.17081 | 0.56781 |
|            | -0.68766        | 0.75417  | 0.56781 | 0.78884084  |             |          |         |
| NA         | ENSG00000235501 | -0.1708  | 0.56781 | -0.1708     | 0.56781     | -0.1708  | 0.56781 |
|            | -0.1708         | 0.56781  | 0.56781 | 0.78884084  |             |          |         |
| NA         | ENSG00000276772 | -0.17097 | 0.56787 | -0.17097    | 0.56787     | -0.17097 | 0.56787 |
|            | -0.17097        | 0.56787  | 0.56787 | 0.788850124 |             |          |         |
| MIR548A1   | ENSG00000207775 | -0.17097 | 0.56788 | -0.17097    | 0.56788     | -0.17097 |         |
|            | 0.56788         | -0.17097 | 0.56788 | 0.56788     | 0.788850124 |          |         |
| AQP7       | ENSG00000165269 | -0.34871 | 0.63635 | -0.47224    | 0.68162     | -0.17103 | 0.5679  |
|            | -1.2943         | 0.90223  | 0.5679  | 0.788850124 |             |          |         |
| NA         | ENSG00000236425 | -0.17103 | 0.5679  | -0.17103    | 0.5679      | -1.3229  | 0.90706 |
|            | -0.34941        | 0.63661  | 0.5679  | 0.788850124 |             |          |         |
| SDC1       | ENSG00000115884 | -1.2677  | 0.89755 | -0.17107    | 0.56792     | -0.32064 | 0.62576 |
|            | -0.1891         | 0.57499  | 0.56792 | 0.788850124 |             |          |         |
| LINC01872  | ENSG00000268318 | -0.17109 | 0.56792 | -0.17109    | 0.56792     | -0.17109 |         |
|            | 0.56792         | -0.17109 | 0.56792 | 0.56792     | 0.788850124 |          |         |
| SCUBE1     | ENSG00000159307 | -0.17111 | 0.56793 | -0.3035     | 0.61924     | -0.41449 |         |
|            | 0.66074         | -0.51723 | 0.6975  | 0.56793     | 0.788850124 |          |         |
| NEUROG2    | ENSG00000178403 | -0.51226 | 0.69576 | -0.26151    | 0.60315     | -0.76458 |         |
|            | 0.77774         | -0.17124 | 0.56798 | 0.56798     | 0.788897087 |          |         |
| FAM149B1P1 | ENSG00000214424 | -0.17135 | 0.56803 | -0.17135    | 0.56803     | -0.17135 |         |
|            | 0.56803         | -0.17135 | 0.56803 | 0.56803     | 0.788921561 |          |         |
| FABP5P1    | ENSG00000236972 | -0.17135 | 0.56803 | -0.17135    | 0.56803     | -1.1869  |         |
|            | 0.88237         | -0.17135 | 0.56803 | 0.56803     | 0.788921561 |          |         |
| ZNF790-AS1 | ENSG00000267254 | -0.43063 | 0.66663 | -1.1913     | 0.88324     | -0.94337 |         |
|            | 0.82725         | -0.17145 | 0.56807 | 0.56807     | 0.78895463  |          |         |
| NA         | ENSG00000236514 | -0.17154 | 0.5681  | -0.17154    | 0.5681      | -0.17154 | 0.5681  |
|            | -0.17154        | 0.5681   | 0.5681  | 0.788973809 |             |          |         |
| NA         | ENSG00000230615 | -0.45948 | 0.67706 | -0.17159    | 0.56812     | -0.22045 | 0.58724 |
|            | -0.24487        | 0.59672  | 0.56812 | 0.788979099 |             |          |         |
| RNU6-969P  | ENSG00000206627 | -0.75601 | 0.77518 | -0.17168    | 0.56815     | -0.17168 |         |
|            | 0.56815         | -0.17168 | 0.56815 | 0.56815     | 0.788998276 |          |         |
| LENG9      | ENSG00000275183 | -0.17174 | 0.56818 | -0.17174    | 0.56818     | -0.17174 | 0.56818 |

|           |                 |          |         |             |             |          |         |
|-----------|-----------------|----------|---------|-------------|-------------|----------|---------|
|           | -0.17174        | 0.56818  | 0.56818 | 0.789008854 |             |          |         |
| CHRD2     | ENSG00000054938 | -0.56737 | 0.71477 | -0.70084    | 0.7583      | -0.17176 |         |
|           | 0.56819         | -0.91425 | 0.81971 | 0.56819     | 0.789008854 |          |         |
| NA        | ENSG00000259157 | -0.17186 | 0.56823 | -0.17186    | 0.56823     | -0.17186 | 0.56823 |
|           | -0.17186        | 0.56823  | 0.56823 | 0.789041914 |             |          |         |
| OR51B6    | ENSG00000176239 | -0.17221 | 0.56836 | -0.28424    | 0.61189     | -0.46363 |         |
|           | 0.67854         | -0.17221 | 0.56836 | 0.56836     | 0.789138389 |          |         |
| RNU6-766P | ENSG00000199348 | -0.17224 | 0.56837 | -0.17224    | 0.56837     | -1.5668  |         |
|           | 0.94142         | -1.3445  | 0.9106  | 0.56837     | 0.789138389 |          |         |
| NA        | ENSG00000212325 | -1.1843  | 0.88185 | -0.46254    | 0.67815     | -0.46254 | 0.67815 |
|           | -0.17227        | 0.56839  | 0.56839 | 0.789138389 |             |          |         |
| NA        | ENSG00000226472 | -0.63655 | 0.73779 | -0.8152     | 0.79252     | -0.17228 | 0.56839 |
|           | -0.17228        | 0.56839  | 0.56839 | 0.789138389 |             |          |         |
| ZNF727    | ENSG00000214652 | -0.82474 | 0.79524 | -0.1723     | 0.5684      | -0.75888 |         |
|           | 0.77604         | -1.7771  | 0.96222 | 0.5684      | 0.789138389 |          |         |
| NA        | ENSG00000240813 | -0.17237 | 0.56843 | -0.17237    | 0.56843     | -0.17237 | 0.56843 |
|           | -0.38928        | 0.65147  | 0.56843 | 0.789138389 |             |          |         |
| HTR4      | ENSG00000164270 | -0.17245 | 0.56846 | -1.5144     | 0.93503     | -0.8644  | 0.80632 |
|           | -0.71373        | 0.7623   | 0.56846 | 0.789138389 |             |          |         |
| NA        | ENSG00000207147 | -0.17248 | 0.56847 | -0.17248    | 0.56847     | -0.23132 | 0.59147 |
|           | -0.50513        | 0.69327  | 0.56847 | 0.789138389 |             |          |         |
| ZMYND12   | ENSG00000066185 | -0.1725  | 0.56848 | -0.1725     | 0.56848     | -0.1725  |         |
|           | 0.56848         | -0.59622 | 0.72449 | 0.56848     | 0.789138389 |          |         |
| TULP1     | ENSG00000112041 | -0.64754 | 0.74136 | -1.2519     | 0.89469     | -1.9007  | 0.97133 |
|           | -0.17254        | 0.56849  | 0.56849 | 0.789138389 |             |          |         |
| PSMC5     | ENSG00000087191 | -0.17255 | 0.5685  | -0.17255    | 0.5685      | -0.17898 | 0.57102 |
|           | -0.17255        | 0.5685   | 0.5685  | 0.789138389 |             |          |         |
| SNORA26   | ENSG00000212588 | -1.7343  | 0.95857 | -1.7343     | 0.95857     | -0.17255 |         |
|           | 0.5685          | -1.0262  | 0.84759 | 0.5685      | 0.789138389 |          |         |
| RPS4XP1   | ENSG00000214203 | -0.17258 | 0.56851 | -0.17258    | 0.56851     | -0.17258 |         |
|           | 0.56851         | -0.17258 | 0.56851 | 0.56851     | 0.789138389 |          |         |
| NA        | ENSG00000254396 | -0.17266 | 0.56854 | -0.17266    | 0.56854     | -0.17266 | 0.56854 |
|           | -0.17266        | 0.56854  | 0.56854 | 0.789148955 |             |          |         |
| NABP2     | ENSG00000139579 | -1.369   | 0.9145  | -0.98215    | 0.83699     | -0.17268 | 0.56855 |
|           | -1.2618         | 0.89648  | 0.56855 | 0.789148955 |             |          |         |
| DHX29     | ENSG00000067248 | -1.1343  | 0.87168 | -0.17275    | 0.56858     | -1.0625  | 0.85601 |
|           | -0.54002        | 0.70541  | 0.56858 | 0.789168116 |             |          |         |
| SPSB4     | ENSG00000175093 | -0.31105 | 0.62212 | -0.17284    | 0.56861     | -0.87668 | 0.80967 |
|           | -0.76995        | 0.77934  | 0.56861 | 0.789187277 |             |          |         |
| LINC01076 | ENSG00000225105 | -0.58278 | 0.71998 | -0.58278    | 0.71998     | -0.17292 |         |
|           | 0.56864         | -0.51743 | 0.69757 | 0.56864     | 0.789206437 |          |         |
| NA        | ENSG00000267216 | -0.1731  | 0.56871 | -0.1731     | 0.56871     | -0.1731  | 0.56871 |
|           | -0.17675        | 0.57015  | 0.56871 | 0.789271143 |             |          |         |
| NA        | ENSG00000225258 | -0.31881 | 0.62506 | -0.31881    | 0.62506     | -0.25165 | 0.59934 |
|           | -0.17319        | 0.56875  | 0.56875 | 0.789271143 |             |          |         |
| NA        | ENSG00000253886 | -0.17319 | 0.56875 | -0.17319    | 0.56875     | -0.17319 | 0.56875 |
|           | -0.17319        | 0.56875  | 0.56875 | 0.789271143 |             |          |         |
| NA        | ENSG00000263688 | -0.88432 | 0.81174 | -0.17324    | 0.56877     | -0.17324 | 0.56877 |
|           | -0.17324        | 0.56877  | 0.56877 | 0.789271143 |             |          |         |
| COX7CP1   | ENSG00000235957 | -0.17329 | 0.56879 | -0.17329    | 0.56879     | -0.17329 |         |
|           | 0.56879         | -0.17329 | 0.56879 | 0.56879     | 0.789271143 |          |         |
| CLEC1A    | ENSG00000150048 | -0.17333 | 0.5688  | -0.17333    | 0.5688      | -0.17333 |         |
|           | 0.5688          | -0.17333 | 0.5688  | 0.5688      | 0.789271143 |          |         |
| RPL30P11  | ENSG00000244573 | -0.17332 | 0.5688  | -1.0018     | 0.84178     | -0.17332 |         |
|           | 0.5688          | -0.8495  | 0.8022  | 0.5688      | 0.789271143 |          |         |
| MIR515-1  | ENSG00000207616 | -0.17343 | 0.56884 | -0.17343    | 0.56884     | -0.17343 |         |
|           | 0.56884         | -0.17343 | 0.56884 | 0.56884     | 0.789304172 |          |         |
| RNU6-375P | ENSG00000252859 | -0.17351 | 0.56887 | -0.17351    | 0.56887     | -0.17351 |         |
|           | 0.56887         | -0.17351 | 0.56887 | 0.56887     | 0.789306124 |          |         |
| SRGAP3    | ENSG00000196220 | -0.17353 | 0.56888 | -0.26926    | 0.60613     | -0.64481 |         |
|           | 0.74048         | -0.68795 | 0.75426 | 0.56888     | 0.789306124 |          |         |
| NA        | ENSG00000201723 | -0.17355 | 0.56889 | -0.35573    | 0.63898     | -0.17355 | 0.56889 |

|             |                 |          |          |         |             |             |          |         |
|-------------|-----------------|----------|----------|---------|-------------|-------------|----------|---------|
|             |                 | -0.17355 | 0.56889  | 0.56889 | 0.789306124 |             |          |         |
| NA          | ENSG00000272601 | -0.17373 | 0.56896  | 0.56896 | -0.17373    | 0.56896     | -0.17373 | 0.56896 |
|             |                 | -0.17373 | 0.56896  | 0.56896 | 0.78938077  |             |          |         |
| KCNA3       | ENSG00000177272 | -0.17389 | 0.56902  | 0.56902 | -0.17389    | 0.56902     | -0.17389 | 0.56902 |
|             |                 | -0.27521 | 0.60842  | 0.56902 | 0.789438208 |             |          |         |
| OXCT1-AS1   | ENSG00000248668 | -0.18859 | 0.57479  | 0.57479 | -0.81969    | 0.7938      | -0.17392 |         |
|             |                 | 0.56904  | -0.17392 | 0.56904 | 0.56904     | 0.789438208 |          |         |
| SNX18P27    | ENSG00000253418 | -0.17397 | 0.56905  | 0.56905 | -0.17397    | 0.56905     | -0.17397 |         |
|             |                 | 0.56905  | -0.17397 | 0.56905 | 0.56905     | 0.789438208 |          |         |
| PPID        | ENSG00000171497 | -0.61335 | 0.73018  | 0.73018 | -1.0947     | 0.86318     | -0.17401 | 0.56907 |
|             |                 | -0.65335 | 0.74324  | 0.56907 | 0.789443479 |             |          |         |
| RNU4ATAC16P | ENSG00000221439 | -0.18516 | 0.57345  | 0.57345 | -0.18516    | 0.57345     | -0.44924 |         |
|             |                 | 0.67337  | -0.17418 | 0.56914 | 0.56914     | 0.789500905 |          |         |
| CACNG6      | ENSG00000130433 | -0.1742  | 0.56915  | 0.56915 | -1.7915     | 0.96339     | -0.2471  |         |
|             |                 | 0.59759  | -1.168   | 0.8786  | 0.56915     | 0.789500905 |          |         |
| NA          | ENSG00000236656 | -1.0857  | 0.8612   | 0.8612  | -0.17424    | 0.56916     | -0.17424 | 0.56916 |
|             |                 | -0.17424 | 0.56916  | 0.56916 | 0.789500905 |             |          |         |
| NA          | ENSG00000259071 | -0.17434 | 0.5692   | 0.5692  | -0.17434    | 0.5692      | -0.17434 | 0.5692  |
|             |                 | -0.17434 | 0.5692   | 0.5692  | 0.789533916 |             |          |         |
| SNORD82     | ENSG00000202400 | -0.17458 | 0.56929  | 0.56929 | -0.17458    | 0.56929     | -0.17458 |         |
|             |                 | 0.56929  | -0.17458 | 0.56929 | 0.56929     | 0.789612388 |          |         |
| KRTAP2-4    | ENSG00000213417 | -0.17468 | 0.56933  | 0.56933 | -0.17468    | 0.56933     | -0.17468 |         |
|             |                 | 0.56933  | -0.17468 | 0.56933 | 0.56933     | 0.789612388 |          |         |
| RNU4-63P    | ENSG00000223245 | -0.60237 | 0.72654  | 0.72654 | -1.1036     | 0.86512     | -0.17472 |         |
|             |                 | 0.56935  | -0.5407  | 0.70564 | 0.56935     | 0.789612388 |          |         |
| NA          | ENSG00000239255 | -0.90271 | 0.81666  | 0.81666 | -0.90271    | 0.81666     | -0.17472 | 0.56935 |
|             |                 | -0.7033  | 0.75907  | 0.56935 | 0.789612388 |             |          |         |
| RPS25       | ENSG00000118181 | -0.17475 | 0.56936  | 0.56936 | -0.17475    | 0.56936     | -0.17475 | 0.56936 |
|             |                 | -1.2674  | 0.89749  | 0.56936 | 0.789612388 |             |          |         |
| ACER2       | ENSG00000177076 | -0.17476 | 0.56937  | 0.56937 | -1.452      | 0.92675     | -1.6123  | 0.94655 |
|             |                 | -1.65    | 0.95053  | 0.56937 | 0.789612388 |             |          |         |
| NA          | ENSG00000235246 | -0.17478 | 0.56937  | 0.56937 | -0.17478    | 0.56937     | -0.17478 | 0.56937 |
|             |                 | -0.17478 | 0.56937  | 0.56937 | 0.789612388 |             |          |         |
| RNF169      | ENSG00000166439 | -0.17485 | 0.5694   | 0.5694  | -0.84267    | 0.80029     | -0.46225 |         |
|             |                 | 0.67805  | -0.46225 | 0.67805 | 0.5694      | 0.789622917 |          |         |
| GRM8-AS1    | ENSG00000236340 | -0.69211 | 0.75557  | 0.75557 | -0.69211    | 0.75557     | -0.69211 |         |
|             |                 | 0.75557  | -0.17486 | 0.56941 | 0.56941     | 0.789622917 |          |         |
| RNU6-1330P  | ENSG00000199645 | -0.17498 | 0.56945  | 0.56945 | -0.17498    | 0.56945     | -0.17498 |         |
|             |                 | 0.56945  | -0.17498 | 0.56945 | 0.56945     | 0.789647311 |          |         |
| LINC00884   | ENSG00000233058 | -0.175   | 0.56946  | 0.56946 | -0.35774    | 0.63973     | -1.2034  |         |
|             |                 | 0.88559  | -0.83687 | 0.79867 | 0.56946     | 0.789647311 |          |         |
| NLN         | ENSG00000123213 | -0.76851 | 0.77891  | 0.77891 | -0.36495    | 0.64243     | -0.17513 | 0.56951 |
|             |                 | -1.1956  | 0.88407  | 0.56951 | 0.789671702 |             |          |         |
| BRK1        | ENSG00000254999 | -0.86106 | 0.8054   | 0.8054  | -0.86106    | 0.8054      | -0.86106 | 0.8054  |
|             |                 | -0.17514 | 0.56951  | 0.56951 | 0.789671702 |             |          |         |
| MIR4495     | ENSG00000265861 | -0.17526 | 0.56956  | 0.56956 | -0.17526    | 0.56956     | -0.17526 |         |
|             |                 | 0.56956  | -0.17526 | 0.56956 | 0.56956     | 0.789692748 |          |         |
| NA          | ENSG00000264635 | -0.17529 | 0.56957  | 0.56957 | -0.17529    | 0.56957     | -0.17529 | 0.56957 |
|             |                 | -0.17529 | 0.56957  | 0.56957 | 0.789692748 |             |          |         |
| PCNX4       | ENSG00000126773 | -0.60535 | 0.72753  | 0.72753 | -0.17532    | 0.56959     | -0.45557 | 0.67565 |
|             |                 | -0.55166 | 0.70941  | 0.56959 | 0.789692748 |             |          |         |
| NA          | ENSG00000233674 | -0.45851 | 0.67671  | 0.67671 | -0.37152    | 0.64487     | -0.17533 | 0.56959 |
|             |                 | -0.17533 | 0.56959  | 0.56959 | 0.789692748 |             |          |         |
| SPOPL       | ENSG00000144228 | -1.0677  | 0.85718  | 0.85718 | -1.0605     | 0.85553     | -0.88741 | 0.81257 |
|             |                 | -0.17548 | 0.56965  | 0.56965 | 0.789731966 |             |          |         |
| KCNK7       | ENSG00000173338 | -0.17555 | 0.56968  | 0.56968 | -0.17555    | 0.56968     | -0.17555 | 0.56968 |
|             |                 | -0.17555 | 0.56968  | 0.56968 | 0.789731966 |             |          |         |
| RPL24       | ENSG00000114391 | -1.5921  | 0.94432  | 0.94432 | -1.5921     | 0.94432     | -1.5921  | 0.94432 |
|             |                 | -0.17561 | 0.5697   | 0.5697  | 0.789731966 |             |          |         |
| NA          | ENSG00000257404 | -0.17563 | 0.56971  | 0.56971 | -0.17563    | 0.56971     | -0.17563 | 0.56971 |
|             |                 | -0.17563 | 0.56971  | 0.56971 | 0.789731966 |             |          |         |
| NA          | ENSG00000275055 | -0.17564 | 0.56971  | 0.56971 | -0.17564    | 0.56971     | -0.17564 | 0.56971 |

|           |                 |          |          |          |             |             |         |  |
|-----------|-----------------|----------|----------|----------|-------------|-------------|---------|--|
|           |                 | -0.17564 | 0.56971  | 0.56971  | 0.789731966 |             |         |  |
| KYAT1     | ENSG00000171097 | -0.79749 | 0.78742  | -0.17577 | 0.56976     | -0.34757    | 0.63592 |  |
|           |                 | -0.52876 | 0.70151  | 0.56976  | 0.789731966 |             |         |  |
| LRRFIP2   | ENSG00000093167 | -0.17578 | 0.56977  | -1.2773  | 0.89925     | -1.053      |         |  |
|           |                 | 0.85382  | -0.73313 | 0.76826  | 0.56977     | 0.789731966 |         |  |
| RAD51B    | ENSG00000182185 | -0.17588 | 0.56981  | -1.5442  | 0.93873     | -0.4895     |         |  |
|           |                 | 0.68776  | -0.48716 | 0.68693  | 0.56981     | 0.789731966 |         |  |
| LINC01649 | ENSG00000228127 | -0.1759  | 0.56981  | -0.45816 | 0.67658     | -0.1759     |         |  |
|           |                 | 0.56981  | -0.1759  | 0.56981  | 0.56981     | 0.789731966 |         |  |
| NA        | ENSG00000284057 | -0.17589 | 0.56981  | -0.17589 | 0.56981     | -0.17589    | 0.56981 |  |
|           |                 | -0.17589 | 0.56981  | 0.56981  | 0.789731966 |             |         |  |
| MMP11     | ENSG00000099953 | -1.1196  | 0.86855  | -0.17595 | 0.56983     | -1.1196     | 0.86855 |  |
|           |                 | -0.51042 | 0.69512  | 0.56983  | 0.789731966 |             |         |  |
| LINC01752 | ENSG00000224961 | -0.17594 | 0.56983  | -0.79286 | 0.78607     | -0.17594    |         |  |
|           |                 | 0.56983  | -0.17594 | 0.56983  | 0.56983     | 0.789731966 |         |  |
| NA        | ENSG00000259981 | -0.46616 | 0.67945  | -1.4258  | 0.92304     | -0.52888    | 0.70156 |  |
|           |                 | -0.17606 | 0.56988  | 0.56988  | 0.789731966 |             |         |  |
| WASL      | ENSG00000106299 | -0.17612 | 0.5699   | -0.17612 | 0.5699      | -0.78941    | 0.78506 |  |
|           |                 | -0.17612 | 0.5699   | 0.5699   | 0.789731966 |             |         |  |
| NA        | ENSG00000219492 | -0.59071 | 0.72264  | -0.17612 | 0.5699      | -1.6279     | 0.94823 |  |
|           |                 | -0.77854 | 0.78187  | 0.5699   | 0.789731966 |             |         |  |
| C1orf50   | ENSG00000164008 | -0.68404 | 0.75303  | -1.9612  | 0.97507     | -0.17615    |         |  |
|           |                 | 0.56991  | -1.2371  | 0.89197  | 0.56991     | 0.789731966 |         |  |
| BPESC1    | ENSG00000232416 | -0.17613 | 0.56991  | -0.17613 | 0.56991     | -0.17613    |         |  |
|           |                 | 0.56991  | -0.17613 | 0.56991  | 0.56991     | 0.789731966 |         |  |
| NA        | ENSG00000283580 | -0.17615 | 0.56991  | -0.17615 | 0.56991     | -0.17615    | 0.56991 |  |
|           |                 | -0.17615 | 0.56991  | 0.56991  | 0.789731966 |             |         |  |
| OR7E117P  | ENSG00000238161 | -0.34765 | 0.63595  | -0.17618 | 0.56993     | -0.34765    |         |  |
|           |                 | 0.63595  | -0.34765 | 0.63595  | 0.56993     | 0.789737222 |         |  |
| REV3L     | ENSG00000009413 | -0.36354 | 0.6419   | -0.17637 | 0.57        | -0.93021    | 0.82387 |  |
|           |                 | -1.5257  | 0.93646  | 0.57     | 0.789763978 |             |         |  |
| C8orf49   | ENSG00000255394 | -0.17642 | 0.57002  | -1.0119  | 0.84421     | -0.17642    |         |  |
|           |                 | 0.57002  | -0.17642 | 0.57002  | 0.57002     | 0.789763978 |         |  |
| PTGER3    | ENSG00000050628 | -0.78113 | 0.78264  | -0.25283 | 0.5998      | -0.48747    |         |  |
|           |                 | 0.68704  | -0.17647 | 0.57004  | 0.57004     | 0.789763978 |         |  |
| PLVAP     | ENSG00000130300 | -0.73024 | 0.76738  | -1.5592  | 0.94052     | -0.73024    | 0.76738 |  |
|           |                 | -0.17649 | 0.57004  | 0.57004  | 0.789763978 |             |         |  |
| LINC01616 | ENSG00000261340 | -0.17668 | 0.57012  | -0.17668 | 0.57012     | -0.17668    |         |  |
|           |                 | 0.57012  | -0.17668 | 0.57012  | 0.57012     | 0.789763978 |         |  |
| ISM2      | ENSG00000100593 | -1.3232  | 0.90712  | -1.5078  | 0.9342      | -0.69455    | 0.75633 |  |
|           |                 | -0.17672 | 0.57013  | 0.57013  | 0.789763978 |             |         |  |
| ADORA3    | ENSG00000282608 | -0.26613 | 0.60493  | -0.1767  | 0.57013     | -0.26613    |         |  |
|           |                 | 0.60493  | -0.26613 | 0.60493  | 0.57013     | 0.789763978 |         |  |
| MUL1      | ENSG00000090432 | -1.4268  | 0.92317  | -1.0322  | 0.84901     | -1.7433     | 0.95936 |  |
|           |                 | -0.17672 | 0.57014  | 0.57014  | 0.789763978 |             |         |  |
| FRGCA     | ENSG00000236663 | -0.91055 | 0.81873  | -0.54497 | 0.70711     | -1.0939     | 0.863   |  |
|           |                 | -0.17674 | 0.57014  | 0.57014  | 0.789763978 |             |         |  |
| NA        | ENSG00000225203 | -0.88781 | 0.81268  | -0.17675 | 0.57015     | -0.8722     | 0.80845 |  |
|           |                 | -0.37249 | 0.64524  | 0.57015  | 0.789763978 |             |         |  |
| NA        | ENSG00000200241 | -0.17677 | 0.57016  | -0.17677 | 0.57016     | -0.17677    | 0.57016 |  |
|           |                 | -0.17677 | 0.57016  | 0.57016  | 0.789763978 |             |         |  |
| ASNS      | ENSG00000070669 | -0.17685 | 0.57019  | -0.62857 | 0.73519     | -0.34665    | 0.63557 |  |
|           |                 | -0.61356 | 0.73025  | 0.57019  | 0.789763978 |             |         |  |
| CDHR5     | ENSG00000099834 | -0.17697 | 0.57023  | -0.471   | 0.68118     | -0.471      | 0.68118 |  |
|           |                 | -0.471   | 0.68118  | 0.57023  | 0.789763978 |             |         |  |
| LYSMD4    | ENSG00000183060 | -1.0375  | 0.85026  | -0.17695 | 0.57023     | -0.57539    |         |  |
|           |                 | 0.71749  | -0.57539 | 0.71749  | 0.57023     | 0.789763978 |         |  |
| LINC02145 | ENSG00000250490 | -0.27563 | 0.60858  | -1.0709  | 0.85788     | -0.177      |         |  |
|           |                 | 0.57024  | -0.94772 | 0.82836  | 0.57024     | 0.789763978 |         |  |
| TANK      | ENSG00000136560 | -0.17706 | 0.57027  | -0.96658 | 0.83312     | -0.97379    | 0.83492 |  |
|           |                 | -1.3027  | 0.90366  | 0.57027  | 0.789763978 |             |         |  |
| NA        | ENSG00000217483 | -0.17707 | 0.57027  | -0.17707 | 0.57027     | -0.17707    | 0.57027 |  |

|            |                 |          |         |             |             |          |         |  |
|------------|-----------------|----------|---------|-------------|-------------|----------|---------|--|
|            | -0.17707        | 0.57027  | 0.57027 | 0.789763978 |             |          |         |  |
| IGHV1-46   | ENSG00000211962 | -0.1771  | 0.57028 | -0.1771     | 0.57028     | -0.1771  |         |  |
|            | 0.57028         | -0.1771  | 0.57028 | 0.57028     | 0.789763978 |          |         |  |
| MIR106B    | ENSG00000208036 | -0.17714 | 0.5703  | -0.17714    | 0.5703      | -0.17714 |         |  |
|            | 0.5703          | -0.17714 | 0.5703  | 0.5703      | 0.789763978 |          |         |  |
| TP53BP1    | ENSG00000067369 | -0.17722 | 0.57033 | -0.24738    | 0.59769     | -0.21959 |         |  |
|            | 0.58691         | -0.32363 | 0.62689 | 0.57033     | 0.789763978 |          |         |  |
| BTBD18     | ENSG00000233436 | -0.17721 | 0.57033 | -0.17721    | 0.57033     | -0.17721 |         |  |
|            | 0.57033         | -0.17721 | 0.57033 | 0.57033     | 0.789763978 |          |         |  |
| RNU6-433P  | ENSG00000200086 | -0.17729 | 0.57036 | -1.4123     | 0.92107     | -1.8904  |         |  |
|            | 0.97065         | -1.5259  | 0.93648 | 0.57036     | 0.789763978 |          |         |  |
| NA         | ENSG00000260404 | -1.2193  | 0.88863 | -0.62973    | 0.73556     | -0.89943 | 0.81579 |  |
|            | -0.17728        | 0.57036  | 0.57036 | 0.789763978 |             |          |         |  |
| CDC123     | ENSG00000151465 | -0.7054  | 0.75972 | -0.96141    | 0.83183     | -0.73884 | 0.77    |  |
|            | -0.17738        | 0.57039  | 0.57039 | 0.789763978 |             |          |         |  |
| NA         | ENSG00000254150 | -0.17744 | 0.57042 | -0.18628    | 0.57389     | -0.18628 | 0.57389 |  |
|            | -0.18628        | 0.57389  | 0.57042 | 0.789763978 |             |          |         |  |
| CSTL1      | ENSG00000125823 | -0.60061 | 0.72595 | -0.83557    | 0.7983      | -0.17746 | 0.57043 |  |
|            | -1.0269         | 0.84777  | 0.57043 | 0.789763978 |             |          |         |  |
| PGM5P4-AS1 | ENSG00000231943 | -0.80716 | 0.79021 | -0.69545    | 0.75661     | -0.60327 |         |  |
|            | 0.72684         | -0.17747 | 0.57043 | 0.57043     | 0.789763978 |          |         |  |
| MRPL4      | ENSG00000105364 | -0.61723 | 0.73146 | -0.63412    | 0.737       | -0.17749 | 0.57044 |  |
|            | -0.70838        | 0.76065  | 0.57044 | 0.789763978 |             |          |         |  |
| RPS21P2    | ENSG00000230353 | -0.17755 | 0.57046 | -1.8956     | 0.971       | -0.17755 | 0.57046 |  |
|            | -0.17755        | 0.57046  | 0.57046 | 0.789763978 |             |          |         |  |
| RN7SL472P  | ENSG00000240457 | -0.87708 | 0.80978 | -0.1776     | 0.57048     | -0.26301 |         |  |
|            | 0.60373         | -0.26301 | 0.60373 | 0.57048     | 0.789763978 |          |         |  |
| THUMPD1    | ENSG00000066654 | -0.17767 | 0.57051 | -0.17767    | 0.57051     | -0.17767 |         |  |
|            | 0.57051         | -0.17767 | 0.57051 | 0.57051     | 0.789763978 |          |         |  |
| PHF14      | ENSG00000106443 | -0.98842 | 0.83853 | -0.17771    | 0.57053     | -0.17771 | 0.57053 |  |
|            | -0.67161        | 0.74909  | 0.57053 | 0.789763978 |             |          |         |  |
| HSPA8P15   | ENSG00000219395 | -0.79192 | 0.7858  | -1.1654     | 0.87808     | -0.1778  |         |  |
|            | 0.57056         | -0.1778  | 0.57056 | 0.57056     | 0.789763978 |          |         |  |
| UCMA       | ENSG00000165623 | -1.8874  | 0.97044 | -0.3375     | 0.63213     | -0.17783 | 0.57057 |  |
|            | -0.17783        | 0.57057  | 0.57057 | 0.789763978 |             |          |         |  |
| RNU6-693P  | ENSG00000251943 | -0.17782 | 0.57057 | -0.17782    | 0.57057     | -0.17782 |         |  |
|            | 0.57057         | -0.17782 | 0.57057 | 0.57057     | 0.789763978 |          |         |  |
| SCGB1C1    | ENSG00000188076 | -0.17788 | 0.57059 | -0.17788    | 0.57059     | -0.17788 |         |  |
|            | 0.57059         | -0.17788 | 0.57059 | 0.57059     | 0.789763978 |          |         |  |
| SCGB1C2    | ENSG00000268320 | -0.42257 | 0.6637  | -1.0841     | 0.86085     | -0.17788 |         |  |
|            | 0.57059         | -0.17788 | 0.57059 | 0.57059     | 0.789763978 |          |         |  |
| LINC01625  | ENSG00000238099 | -0.6818  | 0.75232 | -0.17789    | 0.5706      | -0.6818  |         |  |
|            | 0.75232         | -0.17789 | 0.5706  | 0.5706      | 0.789763978 |          |         |  |
| ZMAT2      | ENSG00000146007 | -0.17792 | 0.57061 | -0.30738    | 0.62072     | -0.67549 | 0.75032 |  |
|            | -0.32629        | 0.6279   | 0.57061 | 0.789763978 |             |          |         |  |
| RNA5SP22   | ENSG00000202263 | -0.17792 | 0.57061 | -0.17792    | 0.57061     | -0.17792 |         |  |
|            | 0.57061         | -0.17792 | 0.57061 | 0.57061     | 0.789763978 |          |         |  |
| BIRC6-AS1  | ENSG00000230046 | -0.17798 | 0.57063 | -0.17798    | 0.57063     | -0.17798 |         |  |
|            | 0.57063         | -0.17798 | 0.57063 | 0.57063     | 0.789763978 |          |         |  |
| NA         | ENSG00000270627 | -0.17798 | 0.57063 | -0.17798    | 0.57063     | -0.17798 | 0.57063 |  |
|            | -0.17798        | 0.57063  | 0.57063 | 0.789763978 |             |          |         |  |
| ATF5       | ENSG00000169136 | -0.17803 | 0.57065 | -0.35522    | 0.63879     | -0.35522 | 0.63879 |  |
|            | -0.35522        | 0.63879  | 0.57065 | 0.789769227 |             |          |         |  |
| C2orf69    | ENSG00000178074 | -1.8111  | 0.96493 | -0.1781     | 0.57068     | -1.4102  |         |  |
|            | 0.92076         | -1.4102  | 0.92076 | 0.57068     | 0.789788316 |          |         |  |
| ZNF599     | ENSG00000153896 | -0.17821 | 0.57072 | -0.17821    | 0.57072     | -0.17821 |         |  |
|            | 0.57072         | -0.17821 | 0.57072 | 0.57072     | 0.789798813 |          |         |  |
| NA         | ENSG00000207092 | -0.17821 | 0.57072 | -0.52684    | 0.70085     | -0.17821 | 0.57072 |  |
|            | -0.17821        | 0.57072  | 0.57072 | 0.789798813 |             |          |         |  |
| NA         | ENSG00000244167 | -1.4     | 0.91924 | -0.17825    | 0.57074     | -0.17825 | 0.57074 |  |
|            | -0.17825        | 0.57074  | 0.57074 | 0.789804061 |             |          |         |  |
| MAT2B      | ENSG00000038274 | -0.89206 | 0.81382 | -0.89206    | 0.81382     | -0.89206 | 0.81382 |  |



|           |                 |          |         |             |             |          |         |  |
|-----------|-----------------|----------|---------|-------------|-------------|----------|---------|--|
|           | -0.1784         | 0.5708   | 0.5708  | 0.789856068 |             |          |         |  |
| C6orf223  | ENSG00000181577 | -0.31007 | 0.62174 | -0.35603    | 0.63909     | -0.35603 |         |  |
|           | 0.63909         | -0.17843 | 0.57081 | 0.57081     | 0.789856068 |          |         |  |
| TRIM64C   | ENSG00000214891 | -0.98474 | 0.83762 | -0.3116     | 0.62233     | -1.3322  |         |  |
|           | 0.9086          | -0.17868 | 0.5709  | 0.5709      | 0.789904722 |          |         |  |
| NA        | ENSG00000273088 | -0.17867 | 0.5709  | -0.17867    | 0.5709      | -0.17867 | 0.5709  |  |
|           | -0.17867        | 0.5709   | 0.5709  | 0.789904722 |             |          |         |  |
| NA        | ENSG00000247131 | -0.65717 | 0.74446 | -0.45328    | 0.67483     | -0.17869 | 0.57091 |  |
|           | -0.17869        | 0.57091  | 0.57091 | 0.789904722 |             |          |         |  |
| MRPS33P3  | ENSG00000251308 | -0.1787  | 0.57091 | -0.21763    | 0.58614     | -1.0169  |         |  |
|           | 0.84539         | -1.0169  | 0.84539 | 0.57091     | 0.789904722 |          |         |  |
| CDX2      | ENSG00000165556 | -0.77145 | 0.77978 | -0.17875    | 0.57093     | -1.0141  | 0.84474 |  |
|           | -1.0141         | 0.84474  | 0.57093 | 0.789909966 |             |          |         |  |
| TEAD3     | ENSG00000007866 | -0.17881 | 0.57096 | -0.76236    | 0.77708     | -1.8356  | 0.96679 |  |
|           | -0.49357        | 0.6892   | 0.57096 | 0.789929044 |             |          |         |  |
| AKR7A2P1  | ENSG00000229020 | -0.17888 | 0.57098 | -0.17888    | 0.57098     | -0.17888 |         |  |
|           | 0.57098         | -0.17888 | 0.57098 | 0.57098     | 0.789934287 |          |         |  |
| NA        | ENSG00000225893 | -0.17894 | 0.57101 | -0.17894    | 0.57101     | -0.17894 | 0.57101 |  |
|           | -0.17894        | 0.57101  | 0.57101 | 0.789936181 |             |          |         |  |
| CSRP2     | ENSG00000175183 | -0.17898 | 0.57103 | -0.17898    | 0.57103     | -0.27672 | 0.609   |  |
|           | -0.17898        | 0.57103  | 0.57103 | 0.789936181 |             |          |         |  |
| NA        | ENSG00000270767 | -0.17899 | 0.57103 | -1.0614     | 0.85576     | -0.89468 | 0.81452 |  |
|           | -0.89468        | 0.81452  | 0.57103 | 0.789936181 |             |          |         |  |
| NA        | ENSG00000278734 | -0.22728 | 0.5899  | -0.17911    | 0.57108     | -0.9454  | 0.82777 |  |
|           | -0.9454         | 0.82777  | 0.57108 | 0.789970979 |             |          |         |  |
| RN7SKP261 | ENSG00000222880 | -0.17915 | 0.57109 | -0.17915    | 0.57109     | -0.17915 |         |  |
|           | 0.57109         | -0.17915 | 0.57109 | 0.57109     | 0.789970979 |          |         |  |
| PLRG1     | ENSG00000171566 | -0.1792  | 0.57111 | -1.1629     | 0.87756     | -1.6455  | 0.95006 |  |
|           | -1.2833         | 0.9003   | 0.57111 | 0.789970979 |             |          |         |  |
| RNU6-233P | ENSG00000222777 | -0.6033  | 0.72684 | -0.6033     | 0.72684     | -0.47104 |         |  |
|           | 0.68119         | -0.17922 | 0.57112 | 0.57112     | 0.789970979 |          |         |  |
| SMIM11B   | ENSG00000273590 | -0.17939 | 0.57118 | -0.17939    | 0.57118     | -0.17939 |         |  |
|           | 0.57118         | -0.17939 | 0.57118 | 0.57118     | 0.789983349 |          |         |  |
| ZNRF2P1   | ENSG00000237004 | -0.17941 | 0.57119 | -0.17941    | 0.57119     | -0.17941 |         |  |
|           | 0.57119         | -0.17941 | 0.57119 | 0.57119     | 0.789983349 |          |         |  |
| NA        | ENSG00000278942 | -0.1794  | 0.57119 | -0.1794     | 0.57119     | -0.1794  | 0.57119 |  |
|           | -0.1794         | 0.57119  | 0.57119 | 0.789983349 |             |          |         |  |
| NA        | ENSG00000257642 | -0.17944 | 0.5712  | -1.7642     | 0.96115     | -1.0134  | 0.84456 |  |
|           | -1.4292         | 0.92353  | 0.5712  | 0.789983349 |             |          |         |  |
| OR13D1    | ENSG00000179055 | -0.88803 | 0.81274 | -0.17947    | 0.57121     | -0.88803 |         |  |
|           | 0.81274         | -0.88803 | 0.81274 | 0.57121     | 0.789983349 |          |         |  |
| NA        | ENSG00000259877 | -0.17979 | 0.57134 | -0.17979    | 0.57134     | -0.17979 | 0.57134 |  |
|           | -0.17979        | 0.57134  | 0.57134 | 0.790101104 |             |          |         |  |
| DEFB129   | ENSG00000125903 | -0.17981 | 0.57135 | -1.0245     | 0.84719     | -1.0426  |         |  |
|           | 0.85144         | -0.57317 | 0.71674 | 0.57135     | 0.790101104 |          |         |  |
| NA        | ENSG00000230782 | -0.27373 | 0.60786 | -0.17983    | 0.57136     | -0.27373 | 0.60786 |  |
|           | -0.27373        | 0.60786  | 0.57136 | 0.790101104 |             |          |         |  |
| RDM1P3    | ENSG00000267708 | -1.1254  | 0.86979 | -0.17984    | 0.57136     | -0.38019 |         |  |
|           | 0.6481          | -1.1254  | 0.86979 | 0.57136     | 0.790101104 |          |         |  |
| NA        | ENSG00000259502 | -1.3297  | 0.90819 | -0.17989    | 0.57138     | -1.3297  | 0.90819 |  |
|           | -0.34574        | 0.63523  | 0.57138 | 0.790106339 |             |          |         |  |
| KLHL26    | ENSG00000167487 | -0.28622 | 0.61264 | -0.25197    | 0.59947     | -0.18004 |         |  |
|           | 0.57144         | -1.0625  | 0.856   | 0.57144     | 0.790118686 |          |         |  |
| ERG28     | ENSG00000133935 | -0.18008 | 0.57145 | -0.69225    | 0.75561     | -0.69225 | 0.75561 |  |
|           | -0.69225        | 0.75561  | 0.57145 | 0.790118686 |             |          |         |  |
| OR6C72P   | ENSG00000205331 | -0.18008 | 0.57145 | -0.18008    | 0.57145     | -0.18008 |         |  |
|           | 0.57145         | -0.18008 | 0.57145 | 0.57145     | 0.790118686 |          |         |  |
| MEN1      | ENSG00000133895 | -0.18013 | 0.57147 | -0.18013    | 0.57147     | -2.0846  | 0.98145 |  |
|           | -0.70497        | 0.75958  | 0.57147 | 0.790118686 |             |          |         |  |
| KIAA0825  | ENSG00000185261 | -1.3654  | 0.91393 | -0.18012    | 0.57147     | -1.1921  |         |  |
|           | 0.88338         | -0.6754  | 0.75029 | 0.57147     | 0.790118686 |          |         |  |
| NA        | ENSG00000269444 | -0.18026 | 0.57152 | -0.18026    | 0.57152     | -0.18026 | 0.57152 |  |

|           |                 |          |         |             |             |          |         |
|-----------|-----------------|----------|---------|-------------|-------------|----------|---------|
|           | -0.18026        | 0.57152  | 0.57152 | 0.790165397 |             |          |         |
| RPL23AP30 | ENSG00000226658 | -0.18035 | 0.57156 | -0.74142    | 0.77078     | -0.18035 |         |
|           | 0.57156         | -0.18035 | 0.57156 | 0.57156     | 0.790175862 |          |         |
| NA        | ENSG00000277368 | -0.18035 | 0.57156 | -0.18035    | 0.57156     | -0.18035 | 0.57156 |
|           | -0.18035        | 0.57156  | 0.57156 | 0.790175862 |             |          |         |
| ATRNL1    | ENSG00000107518 | -0.1804  | 0.57158 | -1.2851     | 0.90062     | -1.5079  |         |
|           | 0.93421         | -0.4633  | 0.67843 | 0.57158     | 0.790181094 |          |         |
| NA        | ENSG00000226680 | -0.18046 | 0.57161 | -0.18046    | 0.57161     | -0.18046 | 0.57161 |
|           | -0.55752        | 0.71141  | 0.57161 | 0.790190067 |             |          |         |
| CA1       | ENSG00000133742 | -0.18059 | 0.57166 | -0.74393    | 0.77154     | -0.3876  | 0.65085 |
|           | -0.48875        | 0.68749  | 0.57166 | 0.790190067 |             |          |         |
| RIN3      | ENSG00000100599 | -0.44168 | 0.67064 | -0.18063    | 0.57167     | -0.55365 | 0.71009 |
|           | -0.85351        | 0.80331  | 0.57167 | 0.790190067 |             |          |         |
| NA        | ENSG00000275173 | -0.3216  | 0.62612 | -0.18063    | 0.57167     | -0.18063 | 0.57167 |
|           | -0.18063        | 0.57167  | 0.57167 | 0.790190067 |             |          |         |
| NA        | ENSG00000276841 | -0.62418 | 0.73374 | -0.18064    | 0.57167     | -0.44208 | 0.67078 |
|           | -0.19631        | 0.57781  | 0.57167 | 0.790190067 |             |          |         |
| HDAC10    | ENSG00000100429 | -0.49976 | 0.69138 | -0.1807     | 0.5717      | -0.55298 |         |
|           | 0.70986         | -0.55298 | 0.70986 | 0.5717      | 0.790190067 |          |         |
| PGAM4P2   | ENSG00000248488 | -0.68371 | 0.75292 | -0.18071    | 0.5717      | -0.68371 |         |
|           | 0.75292         | -0.68371 | 0.75292 | 0.5717      | 0.790190067 |          |         |
| NA        | ENSG00000231720 | -0.18075 | 0.57172 | -0.18075    | 0.57172     | -0.18075 | 0.57172 |
|           | -0.18075        | 0.57172  | 0.57172 | 0.790195297 |             |          |         |
| CARNMT1   | ENSG00000156017 | -0.18091 | 0.57178 | -0.18091    | 0.57178     | -0.94646 |         |
|           | 0.82804         | -0.85295 | 0.80316 | 0.57178     | 0.790255811 |          |         |
| NA        | ENSG00000201811 | -0.18113 | 0.57187 | -0.18113    | 0.57187     | -0.18113 | 0.57187 |
|           | -0.18113        | 0.57187  | 0.57187 | 0.790357784 |             |          |         |
| MIR1283-2 | ENSG00000221548 | -0.18135 | 0.57196 | -0.18135    | 0.57196     | -0.18135 |         |
|           | 0.57196         | -0.18135 | 0.57196 | 0.57196     | 0.79045975  |          |         |
| RBM14     | ENSG00000239306 | -0.48297 | 0.68544 | -0.94193    | 0.82689     | -0.18144 | 0.57199 |
|           | -0.49577        | 0.68997  | 0.57199 | 0.790470195 |             |          |         |
| SNORA50B  | ENSG00000253007 | -0.47579 | 0.68289 | -0.18148    | 0.572       | -0.18148 | 0.572   |
|           | -0.18148        | 0.572    | 0.572   | 0.790470195 |             |          |         |
| PEX3      | ENSG00000034693 | -0.95247 | 0.82957 | -1.4804     | 0.93061     | -0.1818  | 0.57213 |
|           | -0.94099        | 0.82664  | 0.57213 | 0.790605005 |             |          |         |
| RNU4-25P  | ENSG00000222501 | -0.1818  | 0.57213 | -0.1818     | 0.57213     | -0.1818  |         |
|           | 0.57213         | -0.1818  | 0.57213 | 0.57213     | 0.790605005 |          |         |
| NA        | ENSG00000228560 | -0.18192 | 0.57218 | -0.26945    | 0.60621     | -0.82214 | 0.7945  |
|           | -0.26945        | 0.60621  | 0.57218 | 0.790651677 |             |          |         |
| LINC01592 | ENSG00000253658 | -1.1824  | 0.88148 | -0.18203    | 0.57222     | -1.0466  |         |
|           | 0.85237         | -1.0264  | 0.84766 | 0.57222     | 0.790668408 |          |         |
| NA        | ENSG00000217769 | -0.92761 | 0.82319 | -0.18206    | 0.57223     | -0.66514 | 0.74702 |
|           | -0.57799        | 0.71836  | 0.57223 | 0.790668408 |             |          |         |
| NA        | ENSG00000262049 | -0.18211 | 0.57225 | -0.18211    | 0.57225     | -0.18211 | 0.57225 |
|           | -0.18211        | 0.57225  | 0.57225 | 0.790668408 |             |          |         |
| ZNF209P   | ENSG00000269138 | -0.70752 | 0.76038 | -1.2088     | 0.88663     | -0.32275 |         |
|           | 0.62656         | -0.18213 | 0.57226 | 0.57226     | 0.790668408 |          |         |
| ASH2LP1   | ENSG00000224144 | -0.37491 | 0.64614 | -0.18221    | 0.57229     | -0.18221 |         |
|           | 0.57229         | -0.18221 | 0.57229 | 0.57229     | 0.790668408 |          |         |
| NA        | ENSG00000271002 | -0.1822  | 0.57229 | -0.1822     | 0.57229     | -0.1822  | 0.57229 |
|           | -0.1822         | 0.57229  | 0.57229 | 0.790668408 |             |          |         |
| NA        | ENSG00000269246 | -0.18239 | 0.57236 | -0.18239    | 0.57236     | -0.18239 | 0.57236 |
|           | -0.18239        | 0.57236  | 0.57236 | 0.790668408 |             |          |         |
| TNFRSF8   | ENSG00000120949 | -1.9907  | 0.97674 | -2.2111     | 0.98648     | -0.18243 |         |
|           | 0.57238         | -1.5399  | 0.9382  | 0.57238     | 0.790668408 |          |         |
| RNA5SP481 | ENSG00000252623 | -0.18244 | 0.57238 | -0.18244    | 0.57238     | -0.18244 |         |
|           | 0.57238         | -0.18244 | 0.57238 | 0.57238     | 0.790668408 |          |         |
| SCML4     | ENSG00000146285 | -0.68661 | 0.75384 | -1.4362     | 0.92452     | -0.68661 | 0.75384 |
|           | -0.18245        | 0.57239  | 0.57239 | 0.790668408 |             |          |         |
| ASNSP1    | ENSG00000248498 | -0.18245 | 0.57239 | -0.35488    | 0.63866     | -0.2685  |         |
|           | 0.60584         | -0.44932 | 0.6734  | 0.57239     | 0.790668408 |          |         |
| SDHCP2    | ENSG00000214549 | -0.18248 | 0.5724  | -0.18248    | 0.5724      | -0.18248 |         |

|            |                 |          |         |             |             |          |         |
|------------|-----------------|----------|---------|-------------|-------------|----------|---------|
|            | 0.5724          | -0.18248 | 0.5724  | 0.5724      | 0.790668408 |          |         |
| OR13C8     | ENSG00000186943 | -0.18266 | 0.57247 | -0.45524    | 0.67553     | -0.18266 |         |
|            | 0.57247         | -0.18266 | 0.57247 | 0.57247     | 0.790668408 |          |         |
| NA         | ENSG00000228968 | -0.18269 | 0.57248 | -0.31708    | 0.62441     | -0.6724  | 0.74934 |
|            | -0.6724         | 0.74934  | 0.57248 | 0.790668408 |             |          |         |
| OVOL1      | ENSG00000172818 | -1.3545  | 0.91222 | -0.33684    | 0.63188     | -0.18273 | 0.57249 |
|            | -0.18273        | 0.57249  | 0.57249 | 0.790668408 |             |          |         |
| NA         | ENSG00000251642 | -0.45091 | 0.67397 | -0.18278    | 0.57251     | -0.18278 | 0.57251 |
|            | -0.18278        | 0.57251  | 0.57251 | 0.790668408 |             |          |         |
| NA         | ENSG00000260641 | -0.46523 | 0.67912 | -1.9827     | 0.9763      | -1.0313  | 0.8488  |
|            | -0.18278        | 0.57251  | 0.57251 | 0.790668408 |             |          |         |
| NA         | ENSG00000271379 | -1.1627  | 0.87753 | -0.18277    | 0.57251     | -1.2774  | 0.89928 |
|            | -0.55267        | 0.70975  | 0.57251 | 0.790668408 |             |          |         |
| MIR1-1     | ENSG00000199017 | -0.1828  | 0.57252 | -0.1828     | 0.57252     | -0.1828  |         |
|            | 0.57252         | -0.1828  | 0.57252 | 0.57252     | 0.790668408 |          |         |
| OR5W1P     | ENSG00000227806 | -0.1829  | 0.57256 | -0.87723    | 0.80982     | -1.2808  |         |
|            | 0.89987         | -1.2808  | 0.89987 | 0.57256     | 0.790668408 |          |         |
| NA         | ENSG00000216352 | -0.18296 | 0.57259 | -0.18296    | 0.57259     | -0.18296 | 0.57259 |
|            | -0.18296        | 0.57259  | 0.57259 | 0.790668408 |             |          |         |
| NA         | ENSG00000226045 | -2.1409  | 0.98386 | -0.18297    | 0.57259     | -2.1409  | 0.98386 |
|            | -2.1409         | 0.98386  | 0.57259 | 0.790668408 |             |          |         |
| TRPC4      | ENSG00000133107 | -0.24318 | 0.59607 | -0.18302    | 0.57261     | -0.7096  | 0.76102 |
|            | -0.73882        | 0.76999  | 0.57261 | 0.790668408 |             |          |         |
| NA         | ENSG00000257128 | -0.18301 | 0.57261 | -0.18301    | 0.57261     | -0.18301 | 0.57261 |
|            | -0.18301        | 0.57261  | 0.57261 | 0.790668408 |             |          |         |
| GCNT3      | ENSG00000140297 | -0.18305 | 0.57262 | -0.28841    | 0.61348     | -0.28841 | 0.61348 |
|            | -0.28841        | 0.61348  | 0.57262 | 0.790668408 |             |          |         |
| FAM155A    | ENSG00000204442 | -0.18311 | 0.57265 | -0.24082    | 0.59515     | -0.19875 |         |
|            | 0.57877         | -2.1328  | 0.98353 | 0.57265     | 0.790668408 |          |         |
| NA         | ENSG00000244675 | -0.98649 | 0.83805 | -0.18313    | 0.57265     | -0.98649 | 0.83805 |
|            | -1.99           | 0.97671  | 0.57265 | 0.790668408 |             |          |         |
| NF1P4      | ENSG00000258027 | -1.418   | 0.9219  | -0.18314    | 0.57266     | -1.0963  | 0.86353 |
|            | -0.56099        | 0.7126   | 0.57266 | 0.790668408 |             |          |         |
| TTC39A-AS1 | ENSG00000261664 | -0.852   | 0.80289 | -0.852      | 0.80289     | -0.852   |         |
|            | 0.80289         | -0.18321 | 0.57268 | 0.57268     | 0.790668408 |          |         |
| SUMO4      | ENSG00000177688 | -0.18331 | 0.57272 | -0.18331    | 0.57272     | -0.18331 | 0.57272 |
|            | -0.18331        | 0.57272  | 0.57272 | 0.790668408 |             |          |         |
| LPAL2      | ENSG00000213071 | -1.1208  | 0.86882 | -1.4924     | 0.9322      | -0.18331 | 0.57272 |
|            | -1.6003         | 0.94524  | 0.57272 | 0.790668408 |             |          |         |
| NA         | ENSG00000256204 | -0.18332 | 0.57273 | -0.18332    | 0.57273     | -0.18332 | 0.57273 |
|            | -0.18332        | 0.57273  | 0.57273 | 0.790668408 |             |          |         |
| NA         | ENSG00000263779 | -0.18335 | 0.57274 | -0.18335    | 0.57274     | -0.18335 | 0.57274 |
|            | -0.18335        | 0.57274  | 0.57274 | 0.790668408 |             |          |         |
| PNOC       | ENSG00000168081 | -1.6262  | 0.94804 | -1.1855     | 0.88209     | -0.18337 | 0.57275 |
|            | -1.562          | 0.94086  | 0.57275 | 0.790668408 |             |          |         |
| LINC02438  | ENSG00000248238 | -0.1834  | 0.57276 | -0.51153    | 0.69551     | -0.71656 |         |
|            | 0.76318         | -0.82304 | 0.79476 | 0.57276     | 0.790668408 |          |         |
| NA         | ENSG00000280345 | -0.18348 | 0.57279 | -0.18348    | 0.57279     | -0.18348 | 0.57279 |
|            | -0.18348        | 0.57279  | 0.57279 | 0.790678828 |             |          |         |
| RAB1AP1    | ENSG00000229023 | -0.18352 | 0.5728  | -0.18352    | 0.5728      | -0.18352 |         |
|            | 0.5728          | -0.18352 | 0.5728  | 0.5728      | 0.790678828 |          |         |
| NA         | ENSG00000252319 | -0.70317 | 0.75903 | -0.45745    | 0.67633     | -0.18372 | 0.57288 |
|            | -0.18372        | 0.57288  | 0.57288 | 0.79072727  |             |          |         |
| ZNF594     | ENSG00000180626 | -0.6567  | 0.74431 | -0.6567     | 0.74431     | -0.6567  |         |
|            | 0.74431         | -0.18375 | 0.57289 | 0.57289     | 0.79072727  |          |         |
| DNMBP      | ENSG00000107554 | -0.31114 | 0.62215 | -0.89541    | 0.81472     | -0.18377 | 0.5729  |
|            | -0.69207        | 0.75555  | 0.5729  | 0.79072727  |             |          |         |
| LINC01888  | ENSG00000237576 | -0.18376 | 0.5729  | -0.18376    | 0.5729      | -0.18376 |         |
|            | 0.5729          | -0.18376 | 0.5729  | 0.5729      | 0.79072727  |          |         |
| NA         | ENSG00000230979 | -1.2514  | 0.8946  | -1.3803     | 0.91626     | -0.18384 | 0.57293 |
|            | -1.2514         | 0.8946   | 0.57293 | 0.79074628  |             |          |         |
| NA         | ENSG00000219553 | -0.81471 | 0.79238 | -0.18403    | 0.573       | -0.81471 | 0.79238 |

|           |                 |          |          |          |             |             |         |  |
|-----------|-----------------|----------|----------|----------|-------------|-------------|---------|--|
|           |                 | -0.18838 | 0.57471  | 0.573    | 0.790820494 |             |         |  |
| IGLV8-61  | ENSG00000211638 | -0.68765 | 0.75416  | -0.18409 | 0.57303     | -0.68765    |         |  |
|           |                 | 0.75416  | -0.68765 | 0.75416  | 0.57303     | 0.7908395   |         |  |
| NA        | ENSG00000228216 | -0.18419 | 0.57307  | -0.89088 | 0.8135      | -0.7925     | 0.78596 |  |
|           |                 | -1.1005  | 0.86444  | 0.57307  | 0.790872305 |             |         |  |
| NA        | ENSG00000256221 | -0.43053 | 0.6666   | -0.18429 | 0.57311     | -0.18429    | 0.57311 |  |
|           |                 | -0.18429 | 0.57311  | 0.57311  | 0.790874114 |             |         |  |
| NA        | ENSG00000260173 | -0.25001 | 0.59871  | -0.26095 | 0.60293     | -1.0305     | 0.84862 |  |
|           |                 | -0.18429 | 0.57311  | 0.57311  | 0.790874114 |             |         |  |
| NA        | ENSG00000259715 | -0.18431 | 0.57312  | -0.18431 | 0.57312     | -0.18431    | 0.57312 |  |
|           |                 | -0.18431 | 0.57312  | 0.57312  | 0.790874114 |             |         |  |
| DDX3P3    | ENSG00000251571 | -0.18436 | 0.57314  | -0.18436 | 0.57314     | -0.18436    |         |  |
|           |                 | 0.57314  | -0.6377  | 0.73816  | 0.57314     | 0.790879317 |         |  |
| LINC02265 | ENSG00000249241 | -0.48387 | 0.68576  | -0.5649  | 0.71393     | -0.18446    |         |  |
|           |                 | 0.57317  | -1.213   | 0.88744  | 0.57317     | 0.790898318 |         |  |
| RNA5SP434 | ENSG00000252456 | -0.18453 | 0.5732   | -0.18453 | 0.5732      | -0.18453    |         |  |
|           |                 | 0.5732   | -0.18453 | 0.5732   | 0.5732      | 0.790908721 |         |  |
| TMEM86A   | ENSG00000151117 | -0.18455 | 0.57321  | -0.18455 | 0.57321     | -0.18455    |         |  |
|           |                 | 0.57321  | -0.18455 | 0.57321  | 0.57321     | 0.790908721 |         |  |
| ATPAF1    | ENSG00000123472 | -0.44871 | 0.67318  | -0.42151 | 0.66331     | -0.18461    |         |  |
|           |                 | 0.57323  | -0.74623 | 0.77224  | 0.57323     | 0.790913922 |         |  |
| RNA5SP153 | ENSG00000252307 | -1.2962  | 0.90254  | -1.1128  | 0.8671      | -0.86707    |         |  |
|           |                 | 0.80705  | -0.18481 | 0.57331  | 0.57331     | 0.790970912 |         |  |
| IGHV3-48  | ENSG00000211964 | -0.18483 | 0.57332  | -0.18483 | 0.57332     | -0.18483    |         |  |
|           |                 | 0.57332  | -0.18483 | 0.57332  | 0.57332     | 0.790970912 |         |  |
| NA        | ENSG00000259370 | -0.18484 | 0.57332  | -0.24709 | 0.59758     | -0.24709    | 0.59758 |  |
|           |                 | -0.24206 | 0.59563  | 0.57332  | 0.790970912 |             |         |  |
| RPS10P28  | ENSG00000243167 | -0.18492 | 0.57336  | -0.18492 | 0.57336     | -0.18492    |         |  |
|           |                 | 0.57336  | -0.18492 | 0.57336  | 0.57336     | 0.791003703 |         |  |
| ASNSD1    | ENSG00000138381 | -1.0142  | 0.84476  | -0.18505 | 0.5734      | -1.0142     |         |  |
|           |                 | 0.84476  | -0.7378  | 0.76968  | 0.5734      | 0.791036492 |         |  |
| NA        | ENSG00000262003 | -0.44437 | 0.67161  | -1.5423  | 0.9385      | -0.18515    | 0.57344 |  |
|           |                 | -0.18515 | 0.57344  | 0.57344  | 0.791057276 |             |         |  |
| AIG1P1    | ENSG00000249089 | -0.18521 | 0.57347  | -0.18521 | 0.57347     | -0.18521    |         |  |
|           |                 | 0.57347  | -0.18521 | 0.57347  | 0.57347     | 0.791057276 |         |  |
| LDAH      | ENSG00000118961 | -0.18524 | 0.57348  | -0.27081 | 0.60673     | -0.49142    | 0.68843 |  |
|           |                 | -1.214   | 0.88763  | 0.57348  | 0.791057276 |             |         |  |
| NA        | ENSG00000256705 | -0.18524 | 0.57348  | -0.18524 | 0.57348     | -0.18524    | 0.57348 |  |
|           |                 | -0.18524 | 0.57348  | 0.57348  | 0.791057276 |             |         |  |
| NA        | ENSG00000263435 | -0.18531 | 0.57351  | -0.18531 | 0.57351     | -0.18531    | 0.57351 |  |
|           |                 | -0.18531 | 0.57351  | 0.57351  | 0.791061042 |             |         |  |
| NA        | ENSG00000257272 | -0.18534 | 0.57352  | -0.18534 | 0.57352     | -0.18534    | 0.57352 |  |
|           |                 | -0.18534 | 0.57352  | 0.57352  | 0.791061042 |             |         |  |
| SDHCP4    | ENSG00000255035 | -0.18538 | 0.57354  | -0.18538 | 0.57354     | -0.18538    |         |  |
|           |                 | 0.57354  | -0.18538 | 0.57354  | 0.57354     | 0.791061042 |         |  |
| FOXA1     | ENSG00000129514 | -2.4464  | 0.99278  | -0.18545 | 0.57356     | -1.2517     | 0.89466 |  |
|           |                 | -2.4464  | 0.99278  | 0.57356  | 0.791061042 |             |         |  |
| SLC39A2   | ENSG00000165794 | -0.90828 | 0.81814  | -0.18553 | 0.57359     | -0.90828    |         |  |
|           |                 | 0.81814  | -1.0152  | 0.845    | 0.57359     | 0.791061042 |         |  |
| TMSB4XP1  | ENSG00000236876 | -0.18554 | 0.5736   | -0.18554 | 0.5736      | -0.18554    |         |  |
|           |                 | 0.5736   | -0.18554 | 0.5736   | 0.5736      | 0.791061042 |         |  |
| BRDT      | ENSG00000137948 | -0.94315 | 0.8272   | -0.18559 | 0.57361     | -1.1203     | 0.8687  |  |
|           |                 | -1.1949  | 0.88393  | 0.57361  | 0.791061042 |             |         |  |
| NA        | ENSG00000278655 | -0.87989 | 0.81054  | -0.87989 | 0.81054     | -0.28164    | 0.61089 |  |
|           |                 | -0.18559 | 0.57362  | 0.57362  | 0.791061042 |             |         |  |
| OIP5-AS1  | ENSG00000247556 | -1.0925  | 0.86269  | -0.41268 | 0.66008     | -0.18561    |         |  |
|           |                 | 0.57363  | -0.18561 | 0.57363  | 0.57363     | 0.791061042 |         |  |
| ABCB8     | ENSG00000197150 | -0.98325 | 0.83726  | -0.98325 | 0.83726     | -0.98325    | 0.83726 |  |
|           |                 | -0.1857  | 0.57366  | 0.57366  | 0.791061042 |             |         |  |
| TP73      | ENSG00000078900 | -0.31636 | 0.62414  | -0.70339 | 0.75909     | -0.31636    | 0.62414 |  |
|           |                 | -0.18576 | 0.57368  | 0.57368  | 0.791061042 |             |         |  |
| NA        | ENSG00000212553 | -0.99821 | 0.84091  | -0.99821 | 0.84091     | -0.18581    | 0.5737  |  |

|            |                 |          |         |             |             |          |         |
|------------|-----------------|----------|---------|-------------|-------------|----------|---------|
|            | -1.1345         | 0.87171  | 0.5737  | 0.791061042 |             |          |         |
| RNA5SP431  | ENSG00000222244 | -0.1858  | 0.5737  | -1.3268     | 0.90771     | -0.1858  |         |
|            | 0.5737          | -0.1858  | 0.5737  | 0.5737      | 0.791061042 |          |         |
| NA         | ENSG00000283686 | -0.62305 | 0.73338 | -0.18584    | 0.57371     | -0.32133 | 0.62602 |
|            | -0.51556        | 0.69692  | 0.57371 | 0.791061042 |             |          |         |
| PKP2       | ENSG00000057294 | -0.92558 | 0.82267 | -0.18596    | 0.57376     | -1.2953  | 0.90239 |
|            | -1.8284         | 0.96625  | 0.57376 | 0.791085216 |             |          |         |
| POLR3GP1   | ENSG00000268295 | -0.18597 | 0.57376 | -1.3141     | 0.9056      | -1.3141  |         |
|            | 0.9056          | -2.5885  | 0.99518 | 0.57376     | 0.791085216 |          |         |
| SIRPG-AS1  | ENSG00000237914 | -0.43614 | 0.66863 | -0.42229    | 0.66359     | -0.18611 |         |
|            | 0.57382         | -0.18611 | 0.57382 | 0.57382     | 0.791133556 |          |         |
| NA         | ENSG00000280152 | -0.36064 | 0.64082 | -0.51328    | 0.69612     | -0.18613 | 0.57383 |
|            | -0.18613        | 0.57383  | 0.57383 | 0.791133556 |             |          |         |
| NA         | ENSG00000277639 | -0.18617 | 0.57385 | -0.53778    | 0.70464     | -0.26848 | 0.60584 |
|            | -0.53778        | 0.70464  | 0.57385 | 0.791133556 |             |          |         |
| NA         | ENSG00000219575 | -1.1196  | 0.86857 | -0.91097    | 0.81884     | -0.18622 | 0.57386 |
|            | -0.75694        | 0.77546  | 0.57386 | 0.791133556 |             |          |         |
| FAM118A    | ENSG00000100376 | -0.1863  | 0.5739  | -0.1863     | 0.5739      | -0.1863  |         |
|            | 0.5739          | -0.85232 | 0.80298 | 0.5739      | 0.791166318 |          |         |
| NA         | ENSG00000227076 | -0.18646 | 0.57396 | -0.18646    | 0.57396     | -0.18646 | 0.57396 |
|            | -0.18646        | 0.57396  | 0.57396 | 0.791195669 |             |          |         |
| NA         | ENSG00000262202 | -1.1802  | 0.88104 | -1.2553     | 0.89532     | -0.19294 | 0.5765  |
|            | -0.18646        | 0.57396  | 0.57396 | 0.791195669 |             |          |         |
| CFTR       | ENSG00000001626 | -0.18649 | 0.57397 | -1.2748     | 0.89881     | -1.2748  | 0.89881 |
|            | -0.54943        | 0.70864  | 0.57397 | 0.791195669 |             |          |         |
| APCDD1L-DT | ENSG00000231290 | -0.24825 | 0.59803 | -0.24825    | 0.59803     | -0.24825 |         |
|            | 0.59803         | -0.18662 | 0.57402 | 0.57402     | 0.79124221  |          |         |
| NA         | ENSG00000218732 | -0.18672 | 0.57406 | -0.18672    | 0.57406     | -0.18672 | 0.57406 |
|            | -0.18672        | 0.57406  | 0.57406 | 0.791274964 |             |          |         |
| NA         | ENSG00000236098 | -0.38281 | 0.64907 | -0.73352    | 0.76838     | -0.18681 | 0.57409 |
|            | -0.98845        | 0.83853  | 0.57409 | 0.791293933 |             |          |         |
| NA         | ENSG00000237666 | -0.18685 | 0.57411 | -1.7139     | 0.95673     | -0.65662 | 0.74429 |
|            | -1.1893         | 0.88283  | 0.57411 | 0.791299118 |             |          |         |
| OR52J2P    | ENSG00000230261 | -0.18703 | 0.57418 | -0.18703    | 0.57418     | -0.18703 |         |
|            | 0.57418         | -0.18703 | 0.57418 | 0.57418     | 0.791333755 |          |         |
| NA         | ENSG00000223462 | -0.18718 | 0.57424 | -0.18718    | 0.57424     | -0.18718 | 0.57424 |
|            | -0.18718        | 0.57424  | 0.57424 | 0.791333755 |             |          |         |
| HMG2P47    | ENSG00000259246 | -0.18723 | 0.57426 | -0.18723    | 0.57426     | -0.18723 |         |
|            | 0.57426         | -0.18723 | 0.57426 | 0.57426     | 0.791333755 |          |         |
| NA         | ENSG00000263640 | -0.18723 | 0.57426 | -0.18723    | 0.57426     | -0.18723 | 0.57426 |
|            | -0.18723        | 0.57426  | 0.57426 | 0.791333755 |             |          |         |
| NSFL1C     | ENSG00000088833 | -0.79651 | 0.78713 | -0.73129    | 0.7677      | -0.83953 |         |
|            | 0.79941         | -0.18729 | 0.57428 | 0.57428     | 0.791333755 |          |         |
| NA         | ENSG00000271491 | -0.18729 | 0.57428 | -1.3583     | 0.91282     | -0.18729 | 0.57428 |
|            | -0.18729        | 0.57428  | 0.57428 | 0.791333755 |             |          |         |
| IL7R       | ENSG00000168685 | -0.18731 | 0.57429 | -0.67367    | 0.74974     | -0.57247 | 0.7165  |
|            | -1.1194         | 0.86851  | 0.57429 | 0.791333755 |             |          |         |
| NA         | ENSG00000274315 | -0.1873  | 0.57429 | -0.1873     | 0.57429     | -0.1873  | 0.57429 |
|            | -0.1873         | 0.57429  | 0.57429 | 0.791333755 |             |          |         |
| CFLAR-AS1  | ENSG00000226312 | -0.24423 | 0.59647 | -0.23366    | 0.59238     | -0.18735 |         |
|            | 0.57431         | -0.18735 | 0.57431 | 0.57431     | 0.791333755 |          |         |
| UBE2CP2    | ENSG00000265939 | -1.1063  | 0.8657  | -0.18737    | 0.57431     | -1.6296  |         |
|            | 0.94841         | -0.37206 | 0.64508 | 0.57431     | 0.791333755 |          |         |
| HIGD1AP13  | ENSG00000251019 | -0.18737 | 0.57432 | -0.18737    | 0.57432     | -0.18737 |         |
|            | 0.57432         | -0.50491 | 0.69319 | 0.57432     | 0.791333755 |          |         |
| AKAP9      | ENSG00000127914 | -0.47991 | 0.68435 | -0.88877    | 0.81294     | -0.1874  | 0.57433 |
|            | -1.0418         | 0.85126  | 0.57433 | 0.791333755 |             |          |         |
| NA         | ENSG00000279862 | -0.18745 | 0.57435 | -0.84269    | 0.8003      | -0.18745 | 0.57435 |
|            | -0.18745        | 0.57435  | 0.57435 | 0.791338936 |             |          |         |
| OR5M12P    | ENSG00000197866 | -0.18757 | 0.57439 | -0.18757    | 0.57439     | -0.18757 |         |
|            | 0.57439         | -0.18757 | 0.57439 | 0.57439     | 0.79135966  |          |         |
| NA         | ENSG00000170846 | -0.39202 | 0.65248 | -0.39202    | 0.65248     | -0.18759 | 0.5744  |

|            |                 |          |         |             |             |          |         |         |
|------------|-----------------|----------|---------|-------------|-------------|----------|---------|---------|
|            | -0.31585        | 0.62394  | 0.5744  | 0.79135966  |             |          |         |         |
| NA         | ENSG00000274541 | -0.18763 | 0.57442 | -0.18763    | 0.57442     | -0.18763 | 0.57442 | 0.57442 |
|            | -0.18763        | 0.57442  | 0.57442 | 0.79135966  |             |          |         |         |
| TMTC2      | ENSG00000179104 | -0.79713 | 0.78731 | -1.017      | 0.84543     | -0.77901 | 0.78201 | 0.78201 |
|            | -0.18768        | 0.57443  | 0.57443 | 0.79135966  |             |          |         |         |
| GDE1       | ENSG0000006007  | -0.57107 | 0.71602 | -0.18778    | 0.57448     | -0.66968 | 0.74847 | 0.74847 |
|            | -0.18778        | 0.57448  | 0.57448 | 0.791406169 |             |          |         |         |
| UBE2G1     | ENSG00000132388 | -0.95186 | 0.82942 | -0.95773    | 0.8309      | -0.96385 |         |         |
|            | 0.83244         | -0.18796 | 0.57455 | 0.57455     | 0.791471627 |          |         |         |
| NA         | ENSG00000249764 | -0.18799 | 0.57456 | -0.67428    | 0.74993     | -0.18799 | 0.57456 | 0.57456 |
|            | -1.4039         | 0.91982  | 0.57456 | 0.791471627 |             |          |         |         |
| RPL12P17   | ENSG00000224839 | -0.18814 | 0.57462 | -1.5645     | 0.94115     | -1.5645  |         |         |
|            | 0.94115         | -1.5645  | 0.94115 | 0.57462     | 0.791476891 |          |         |         |
| NA         | ENSG00000267725 | -0.18818 | 0.57463 | -0.18818    | 0.57463     | -0.18818 | 0.57463 | 0.57463 |
|            | -0.18818        | 0.57463  | 0.57463 | 0.791476891 |             |          |         |         |
| SNORD114-7 | ENSG00000199390 | -0.18826 | 0.57466 | -0.18826    | 0.57466     | -0.18826 |         |         |
|            | 0.57466         | -0.18826 | 0.57466 | 0.57466     | 0.791476891 |          |         |         |
| NA         | ENSG00000200769 | -0.18826 | 0.57466 | -0.18826    | 0.57466     | -0.18826 | 0.57466 | 0.57466 |
|            | -0.18826        | 0.57466  | 0.57466 | 0.791476891 |             |          |         |         |
| MIR1285-1  | ENSG00000221520 | -0.18826 | 0.57466 | -0.18826    | 0.57466     | -0.18826 |         |         |
|            | 0.57466         | -0.18826 | 0.57466 | 0.57466     | 0.791476891 |          |         |         |
| NA         | ENSG00000260185 | -0.18826 | 0.57467 | -0.18826    | 0.57467     | -0.18826 | 0.57467 | 0.57467 |
|            | -0.18826        | 0.57467  | 0.57467 | 0.791476891 |             |          |         |         |
| NUFIP1P1   | ENSG00000218890 | -0.78239 | 0.78301 | -0.31097    | 0.62209     | -0.18836 |         |         |
|            | 0.5747          | -0.76259 | 0.77715 | 0.5747      | 0.791476891 |          |         |         |
| NA         | ENSG00000252894 | -0.93548 | 0.82523 | -0.18834    | 0.5747      | -0.18834 | 0.5747  | 0.5747  |
|            | -0.18834        | 0.5747   | 0.5747  | 0.791476891 |             |          |         |         |
| COLCA2     | ENSG00000214290 | -0.18837 | 0.57471 | -1.0542     | 0.8541      | -1.0542  |         |         |
|            | 0.8541          | -1.0542  | 0.8541  | 0.57471     | 0.791476891 |          |         |         |
| MIR556     | ENSG00000207729 | -0.18857 | 0.57479 | -0.56177    | 0.71286     | -0.56177 |         |         |
|            | 0.71286         | -0.56177 | 0.71286 | 0.57479     | 0.791547498 |          |         |         |
| RPL26P27   | ENSG00000226493 | -0.18861 | 0.5748  | -0.18861    | 0.5748      | -0.18861 |         |         |
|            | 0.5748          | -0.18861 | 0.5748  | 0.5748      | 0.791547498 |          |         |         |
| NA         | ENSG00000266951 | -0.18864 | 0.57481 | -0.18864    | 0.57481     | -0.18864 | 0.57481 | 0.57481 |
|            | -0.18864        | 0.57481  | 0.57481 | 0.791547498 |             |          |         |         |
| CCNH       | ENSG00000134480 | -0.45498 | 0.67544 | -0.42536    | 0.66471     | -0.49269 | 0.68888 | 0.68888 |
|            | -0.18881        | 0.57488  | 0.57488 | 0.791599152 |             |          |         |         |
| NA         | ENSG00000200788 | -0.18881 | 0.57488 | -0.18881    | 0.57488     | -0.18881 | 0.57488 | 0.57488 |
|            | -0.18881        | 0.57488  | 0.57488 | 0.791599152 |             |          |         |         |
| GTF3C6     | ENSG00000155115 | -0.18886 | 0.5749  | -0.23009    | 0.59099     | -0.63249 |         |         |
|            | 0.73647         | -0.26264 | 0.60359 | 0.5749      | 0.791604323 |          |         |         |
| NA         | ENSG00000200842 | -0.18891 | 0.57492 | -0.18891    | 0.57492     | -0.18891 | 0.57492 | 0.57492 |
|            | -0.18891        | 0.57492  | 0.57492 | 0.791609494 |             |          |         |         |
| RN7SL146P  | ENSG00000240106 | -0.18896 | 0.57494 | -0.18896    | 0.57494     | -0.18896 |         |         |
|            | 0.57494         | -0.18896 | 0.57494 | 0.57494     | 0.791614664 |          |         |         |
| OR13C9     | ENSG00000136839 | -0.18902 | 0.57496 | -1.0575     | 0.85486     | -1.2175  |         |         |
|            | 0.8883          | -1.2175  | 0.8883  | 0.57496     | 0.791619834 |          |         |         |
| NA         | ENSG00000236605 | -1.1922  | 0.88341 | -0.18906    | 0.57498     | -1.1922  | 0.88341 | 0.88341 |
|            | -1.1922         | 0.88341  | 0.57498 | 0.791625004 |             |          |         |         |
| NA         | ENSG00000271185 | -0.18917 | 0.57502 | -0.18917    | 0.57502     | -0.18917 | 0.57502 | 0.57502 |
|            | -0.18917        | 0.57502  | 0.57502 | 0.791657709 |             |          |         |         |
| LINC02384  | ENSG00000251301 | -0.61146 | 0.72955 | -0.1893     | 0.57507     | -0.55116 |         |         |
|            | 0.70924         | -0.74672 | 0.77238 | 0.57507     | 0.791688715 |          |         |         |
| ST6GALNAC3 | ENSG00000184005 | -0.43553 | 0.66841 | -0.72243    | 0.76498     | -1.0549  |         |         |
|            | 0.85427         | -0.18937 | 0.5751  | 0.5751      | 0.791688715 |          |         |         |
| APOBEC1    | ENSG00000111701 | -0.82396 | 0.79502 | -0.1894     | 0.57511     | -0.83215 |         |         |
|            | 0.79734         | -1.3949  | 0.91848 | 0.57511     | 0.791688715 |          |         |         |
| NA         | ENSG00000269473 | -0.18943 | 0.57512 | -0.18943    | 0.57512     | -0.18943 | 0.57512 | 0.57512 |
|            | -0.18943        | 0.57512  | 0.57512 | 0.791688715 |             |          |         |         |
| CDK19      | ENSG00000155111 | -0.18946 | 0.57513 | -1.0117     | 0.84416     | -1.0019  | 0.8418  | 0.8418  |
|            | -0.79165        | 0.78572  | 0.57513 | 0.791688715 |             |          |         |         |
| LINC02202  | ENSG00000245812 | -0.18949 | 0.57514 | -0.79602    | 0.78699     | -0.80263 |         |         |

|           |                 |          |         |             |             |          |          |
|-----------|-----------------|----------|---------|-------------|-------------|----------|----------|
|           | 0.78891         | -0.76343 | 0.7774  | 0.57514     | 0.791688715 |          |          |
| MIR1285-2 | ENSG00000221238 | -0.18952 | 0.57516 | 0.57516     | -0.18952    | 0.57516  | -0.18952 |
|           | 0.57516         | -0.18952 | 0.57516 | 0.57516     | 0.791688754 |          |          |
| NA        | ENSG00000277246 | -1.1364  | 0.87211 | -0.18966    | 0.57521     | -0.18966 | 0.57521  |
|           | -0.18966        | 0.57521  | 0.57521 | 0.791688754 |             |          |          |
| VPS13C    | ENSG00000129003 | -0.23605 | 0.5933  | -0.57419    | 0.71708     | -0.80118 |          |
|           | 0.78849         | -0.18968 | 0.57522 | 0.57522     | 0.791688754 |          |          |
| NA        | ENSG00000273270 | -0.18969 | 0.57522 | -0.92611    | 0.82281     | -0.64946 | 0.74198  |
|           | -1.5489         | 0.9393   | 0.57522 | 0.791688754 |             |          |          |
| VN1R79P   | ENSG00000269885 | -0.65593 | 0.74406 | -0.1897     | 0.57523     | -0.1897  |          |
|           | 0.57523         | -1.0486  | 0.85282 | 0.57523     | 0.791688754 |          |          |
| APLNR     | ENSG00000134817 | -1.636   | 0.94908 | -0.18981    | 0.57527     | -0.51211 | 0.69571  |
|           | -1.0407         | 0.85099  | 0.57527 | 0.791688754 |             |          |          |
| IRGQ      | ENSG00000167378 | -0.26316 | 0.60379 | -0.26316    | 0.60379     | -0.26316 | 0.60379  |
|           | -0.18981        | 0.57527  | 0.57527 | 0.791688754 |             |          |          |
| RNU6-373P | ENSG00000223179 | -0.31184 | 0.62242 | -0.31184    | 0.62242     | -0.31184 |          |
|           | 0.62242         | -0.1898  | 0.57527 | 0.57527     | 0.791688754 |          |          |
| TMEM64    | ENSG00000180694 | -0.18987 | 0.57529 | -0.18987    | 0.57529     | -0.18987 |          |
|           | 0.57529         | -0.79998 | 0.78814 | 0.57529     | 0.79169392  |          |          |
| SEPHS1P1  | ENSG00000182722 | -0.70195 | 0.75865 | -0.38171    | 0.64866     | -0.19008 |          |
|           | 0.57538         | -0.19008 | 0.57538 | 0.57538     | 0.791733503 |          |          |
| NA        | ENSG00000232454 | -0.66775 | 0.74785 | -0.66775    | 0.74785     | -0.54986 | 0.70879  |
|           | -0.19012        | 0.57539  | 0.57539 | 0.791733503 |             |          |          |
| NA        | ENSG00000235635 | -0.19012 | 0.57539 | -0.19012    | 0.57539     | -0.19012 | 0.57539  |
|           | -0.19012        | 0.57539  | 0.57539 | 0.791733503 |             |          |          |
| BICRAL    | ENSG00000112624 | -0.7428  | 0.7712  | -0.74929    | 0.77316     | -0.97297 |          |
|           | 0.83472         | -0.19013 | 0.5754  | 0.5754      | 0.791733503 |          |          |
| MIR3685   | ENSG00000265917 | -0.19015 | 0.5754  | -0.19015    | 0.5754      | -0.19015 |          |
|           | 0.5754          | -0.19015 | 0.5754  | 0.5754      | 0.791733503 |          |          |
| NA        | ENSG00000267066 | -0.5088  | 0.69455 | -0.19023    | 0.57544     | -0.54348 | 0.7066   |
|           | -0.54348        | 0.7066   | 0.57544 | 0.791735233 |             |          |          |
| RPSAP23   | ENSG00000230391 | -0.19026 | 0.57545 | -0.19026    | 0.57545     | -0.19026 |          |
|           | 0.57545         | -0.19026 | 0.57545 | 0.57545     | 0.791735233 |          |          |
| NA        | ENSG00000237899 | -0.7166  | 0.76319 | -0.19027    | 0.57545     | -0.19027 | 0.57545  |
|           | -0.19027        | 0.57545  | 0.57545 | 0.791735233 |             |          |          |
| SUMO2P20  | ENSG00000253721 | -0.32841 | 0.6287  | -0.68126    | 0.75215     | -0.32841 |          |
|           | 0.6287          | -0.19045 | 0.57552 | 0.57552     | 0.791779981 |          |          |
| NA        | ENSG00000268162 | -0.19044 | 0.57552 | -0.19044    | 0.57552     | -0.19044 | 0.57552  |
|           | -0.19044        | 0.57552  | 0.57552 | 0.791779981 |             |          |          |
| RAB6C-AS1 | ENSG00000225449 | -0.19062 | 0.57559 | -1.7099     | 0.95636     | -0.61155 |          |
|           | 0.72958         | -1.1178  | 0.86818 | 0.57559     | 0.791779981 |          |          |
| NA        | ENSG00000250025 | -0.69684 | 0.75705 | -0.734      | 0.76852     | -0.8863  | 0.81227  |
|           | -0.19064        | 0.5756   | 0.5756  | 0.791779981 |             |          |          |
| NA        | ENSG00000213872 | -0.19069 | 0.57562 | -0.19069    | 0.57562     | -0.19069 | 0.57562  |
|           | -0.19069        | 0.57562  | 0.57562 | 0.791779981 |             |          |          |
| RNA5SP101 | ENSG00000252845 | -0.19071 | 0.57562 | -0.49091    | 0.68826     | -0.19071 |          |
|           | 0.57562         | -0.19071 | 0.57562 | 0.57562     | 0.791779981 |          |          |
| NA        | ENSG00000279927 | -0.19071 | 0.57562 | -0.19071    | 0.57562     | -0.19071 | 0.57562  |
|           | -0.19071        | 0.57562  | 0.57562 | 0.791779981 |             |          |          |
| OR5D14    | ENSG00000186113 | -1.9398  | 0.9738  | -0.19078    | 0.57565     | -0.64247 |          |
|           | 0.73972         | -0.64247 | 0.73972 | 0.57565     | 0.791779981 |          |          |
| FSIP2-AS2 | ENSG00000226747 | -0.19077 | 0.57565 | -0.19077    | 0.57565     | -0.19077 |          |
|           | 0.57565         | -0.19077 | 0.57565 | 0.57565     | 0.791779981 |          |          |
| ZNF530    | ENSG00000183647 | -0.19083 | 0.57567 | -0.19083    | 0.57567     | -0.19083 |          |
|           | 0.57567         | -0.19083 | 0.57567 | 0.57567     | 0.791779981 |          |          |
| NA        | ENSG00000283538 | -0.67808 | 0.75114 | -0.19086    | 0.57568     | -0.67808 | 0.75114  |
|           | -0.67808        | 0.75114  | 0.57568 | 0.791779981 |             |          |          |
| NA        | ENSG00000274092 | -0.19088 | 0.57569 | -0.19088    | 0.57569     | -0.19088 | 0.57569  |
|           | -0.19088        | 0.57569  | 0.57569 | 0.791779981 |             |          |          |
| NA        | ENSG00000242968 | -1.0971  | 0.86369 | -1.0971     | 0.86369     | -1.0971  | 0.86369  |
|           | -0.19093        | 0.57571  | 0.57571 | 0.791779981 |             |          |          |
| NA        | ENSG00000277544 | -0.19094 | 0.57571 | -1.5861     | 0.94364     | -1.5861  | 0.94364  |

|           |                 |          |         |             |             |          |         |
|-----------|-----------------|----------|---------|-------------|-------------|----------|---------|
|           | -1.5861         | 0.94364  | 0.57571 | 0.791779981 |             |          |         |
| CYB5R1    | ENSG00000159348 | -0.19105 | 0.57576 | -0.19105    | 0.57576     | -0.19105 |         |
|           | 0.57576         | -0.19105 | 0.57576 | 0.57576     | 0.791804053 |          |         |
| NA        | ENSG00000256403 | -0.19105 | 0.57576 | -0.19105    | 0.57576     | -0.6165  | 0.73122 |
|           | -0.19105        | 0.57576  | 0.57576 | 0.791804053 |             |          |         |
| CD1D      | ENSG00000158473 | -0.6632  | 0.7464  | -0.4661     | 0.67943     | -0.19112 | 0.57579 |
|           | -1.4141         | 0.92134  | 0.57579 | 0.791819528 |             |          |         |
| SSXP10    | ENSG00000217330 | -0.19121 | 0.57582 | -1.9094     | 0.97189     | -2.4195  |         |
|           | 0.99223         | -2.4195  | 0.99223 | 0.57582     | 0.791819528 |          |         |
| NA        | ENSG00000254865 | -0.19122 | 0.57582 | -0.19122    | 0.57582     | -0.39885 | 0.655   |
|           | -1.1383         | 0.87251  | 0.57582 | 0.791819528 |             |          |         |
| NA        | ENSG00000268442 | -0.53621 | 0.70409 | -0.19126    | 0.57584     | -0.53621 | 0.70409 |
|           | -0.53621        | 0.70409  | 0.57584 | 0.791824685 |             |          |         |
| COX17P1   | ENSG00000205105 | -0.19141 | 0.5759  | -0.19141    | 0.5759      | -1.718   |         |
|           | 0.9571          | -2.2283  | 0.98707 | 0.5759      | 0.791853906 |          |         |
| NA        | ENSG00000266934 | -0.19145 | 0.57591 | -0.19145    | 0.57591     | -0.19145 | 0.57591 |
|           | -0.19145        | 0.57591  | 0.57591 | 0.791853906 |             |          |         |
| NA        | ENSG00000273196 | -0.19145 | 0.57591 | -0.19145    | 0.57591     | -0.19145 | 0.57591 |
|           | -0.19145        | 0.57591  | 0.57591 | 0.791853906 |             |          |         |
| CLPSL1    | ENSG00000204140 | -1.331   | 0.90841 | -0.19152    | 0.57594     | -0.82281 |         |
|           | 0.79469         | -1.331   | 0.90841 | 0.57594     | 0.791855626 |          |         |
| NA        | ENSG00000228974 | -0.19156 | 0.57595 | -1.1167     | 0.86794     | -1.1167  | 0.86794 |
|           | -1.1167         | 0.86794  | 0.57595 | 0.791855626 |             |          |         |
| SNRPA1P1  | ENSG00000144158 | -0.20515 | 0.58127 | -1.7831     | 0.96271     | -0.77549 |         |
|           | 0.78097         | -0.19158 | 0.57596 | 0.57596     | 0.791855626 |          |         |
| NAGPA     | ENSG00000103174 | -0.19165 | 0.57599 | -0.19165    | 0.57599     | -0.19165 | 0.57599 |
|           | -0.19165        | 0.57599  | 0.57599 | 0.791871092 |             |          |         |
| MRPL22    | ENSG00000082515 | -0.19168 | 0.57601 | -0.19168    | 0.57601     | -0.19168 |         |
|           | 0.57601         | -0.46525 | 0.67912 | 0.57601     | 0.791871092 |          |         |
| OR7E161P  | ENSG00000206014 | -0.73183 | 0.76786 | -0.19173    | 0.57602     | -0.92438 |         |
|           | 0.82236         | -0.37319 | 0.64549 | 0.57602     | 0.791871092 |          |         |
| LINC01882 | ENSG00000260302 | -1.3302  | 0.90828 | -1.4779     | 0.93028     | -1.4779  |         |
|           | 0.93028         | -0.19183 | 0.57606 | 0.57606     | 0.791903741 |          |         |
| NA        | ENSG00000260687 | -0.19201 | 0.57613 | -0.68181    | 0.75232     | -0.19201 | 0.57613 |
|           | -0.19201        | 0.57613  | 0.57613 | 0.791977627 |             |          |         |
| YRDCP1    | ENSG00000278486 | -0.19208 | 0.57616 | -0.19208    | 0.57616     | -0.19208 |         |
|           | 0.57616         | -0.19208 | 0.57616 | 0.57616     | 0.791996525 |          |         |
| GRIA2     | ENSG00000120251 | -0.19215 | 0.57619 | -0.76074    | 0.77659     | -1.2201  | 0.88879 |
|           | -0.98193        | 0.83693  | 0.57619 | 0.792015421 |             |          |         |
| ELAVL3    | ENSG00000196361 | -0.19224 | 0.57622 | -1.5181     | 0.93551     | -1.5181  |         |
|           | 0.93551         | -1.6751  | 0.95305 | 0.57622     | 0.792034317 |          |         |
| NA        | ENSG00000272836 | -0.19233 | 0.57626 | -0.19233    | 0.57626     | -0.19233 | 0.57626 |
|           | -0.19233        | 0.57626  | 0.57626 | 0.79203602  |             |          |         |
| NA        | ENSG00000272908 | -0.19233 | 0.57626 | -0.19233    | 0.57626     | -0.19233 | 0.57626 |
|           | -0.19233        | 0.57626  | 0.57626 | 0.79203602  |             |          |         |
| TOM1L1    | ENSG00000141198 | -1.978   | 0.97604 | -0.8209     | 0.79415     | -0.19236 |         |
|           | 0.57627         | -0.8209  | 0.79415 | 0.57627     | 0.79203602  |          |         |
| CYCSP4    | ENSG00000229120 | -0.73397 | 0.76852 | -0.24829    | 0.59805     | -0.19263 |         |
|           | 0.57637         | -1.7378  | 0.95887 | 0.57637     | 0.792106439 |          |         |
| LINC02131 | ENSG00000261154 | -0.89507 | 0.81462 | -1.2039     | 0.88569     | -0.19262 |         |
|           | 0.57637         | -0.62359 | 0.73355 | 0.57637     | 0.792106439 |          |         |
| NA        | ENSG00000276337 | -0.19262 | 0.57637 | -0.19262    | 0.57637     | -0.19262 | 0.57637 |
|           | -0.19262        | 0.57637  | 0.57637 | 0.792106439 |             |          |         |
| NA        | ENSG00000217078 | -0.19266 | 0.57639 | -0.19266    | 0.57639     | -0.19266 | 0.57639 |
|           | -0.19266        | 0.57639  | 0.57639 | 0.792111585 |             |          |         |
| TRGV8     | ENSG00000211696 | -0.19282 | 0.57645 | -0.19282    | 0.57645     | -0.19282 | 0.57645 |
|           | -0.19282        | 0.57645  | 0.57645 | 0.792154506 |             |          |         |
| FAM172A   | ENSG00000113391 | -0.66101 | 0.7457  | -0.19285    | 0.57646     | -0.59577 |         |
|           | 0.72434         | -0.77369 | 0.78044 | 0.57646     | 0.792154506 |          |         |
| ELMO2     | ENSG00000062598 | -0.23888 | 0.5944  | -0.66716    | 0.74767     | -0.19287 | 0.57647 |
|           | -0.46199        | 0.67796  | 0.57647 | 0.792154506 |             |          |         |
| MAT1A     | ENSG00000151224 | -0.19298 | 0.57651 | -0.19298    | 0.57651     | -0.19298 | 0.57651 |



|            |                 |          |             |             |             |             |         |          |
|------------|-----------------|----------|-------------|-------------|-------------|-------------|---------|----------|
|            |                 | -0.19298 | 0.57651     | 0.57651     | 0.792187133 |             |         |          |
| NA         | ENSG00000259768 | -0.19315 | 0.57658     | -0.19315    | 0.57658     | -0.19315    | 0.57658 | 0.57658  |
|            |                 | -0.19315 | 0.57658     | 0.57658     | 0.79226098  |             |         |          |
| NA         | ENSG00000278784 | -0.19335 | 0.57666     | -0.7543     | 0.77467     | -0.19335    | 0.57666 | 0.57666  |
|            |                 | -0.19335 | 0.57666     | 0.57666     | 0.792341639 |             |         |          |
| POM121L12  | ENSG00000221900 | -0.19343 | 0.57669     | -1.0865     | 0.86136     | -0.19343    |         |          |
|            |                 | 0.57669  | -0.19343    | 0.57669     | 0.792341639 |             |         |          |
| NEUROD6    | ENSG00000164600 | -0.19347 | 0.5767      | -0.19347    | 0.5767      | -0.60774    |         |          |
|            |                 | 0.72832  | -0.19347    | 0.5767      | 0.792341639 |             |         |          |
| OLMALINC   | ENSG00000235823 | -0.1935  | 0.57672     | -0.85494    | 0.80371     | -1.0883     |         |          |
|            |                 | 0.86177  | -0.7853     | 0.78386     | 0.57672     | 0.792341639 |         |          |
| NA         | ENSG00000236376 | -0.69027 | 0.75499     | -1.3451     | 0.9107      | -0.1935     | 0.57672 | 0.57672  |
|            |                 | -1.2718  | 0.89829     | 0.57672     | 0.792341639 |             |         |          |
| MIR603     | ENSG00000207930 | -0.19359 | 0.57675     | -0.19359    | 0.57675     | -0.19359    |         |          |
|            |                 | 0.57675  | -0.19359    | 0.57675     | 0.792360516 |             |         |          |
| NA         | ENSG00000255046 | -0.40316 | 0.65659     | -0.30017    | 0.61798     | -0.19377    | 0.57682 | 0.57682  |
|            |                 | -0.19377 | 0.57682     | 0.57682     | 0.792420354 |             |         |          |
| NA         | ENSG00000260558 | -0.19383 | 0.57685     | -0.19383    | 0.57685     | -0.19383    | 0.57685 | 0.57685  |
|            |                 | -0.19383 | 0.57685     | 0.57685     | 0.792420354 |             |         |          |
| SMIM27     | ENSG00000235453 | -0.19392 | 0.57688     | -0.19392    | 0.57688     | -0.19392    |         |          |
|            |                 | 0.57688  | -0.19392    | 0.57688     | 0.792420354 |             |         |          |
| RPSAP13    | ENSG00000233924 | -0.19411 | 0.57695     | -0.88788    | 0.8127      | -0.88788    |         |          |
|            |                 | 0.8127   | -0.88788    | 0.8127      | 0.792420354 |             |         |          |
| RN7SKP4    | ENSG00000271818 | -0.19412 | 0.57696     | -0.19412    | 0.57696     | -0.19412    |         |          |
|            |                 | 0.57696  | -0.19412    | 0.57696     | 0.792420354 |             |         |          |
| NA         | ENSG00000227623 | -1.5867  | 0.94371     | -1.3283     | 0.90796     | -0.19414    | 0.57697 | 0.57697  |
|            |                 | -1.3283  | 0.90796     | 0.57697     | 0.792420354 |             |         |          |
| KRT18P27   | ENSG00000224419 | -0.19417 | 0.57698     | -0.19417    | 0.57698     | -0.19417    |         |          |
|            |                 | 0.57698  | -0.19417    | 0.57698     | 0.792420354 |             |         |          |
| NA         | ENSG00000234223 | -0.19422 | 0.577       | -0.19422    | 0.577       | -1.0023     | 0.8419  | -0.19422 |
|            |                 | 0.577    | 0.577       | 0.792420354 |             |             |         |          |
| NA         | ENSG00000273786 | -0.19423 | 0.577       | -0.19423    | 0.577       | -0.19423    | 0.577   | -0.19423 |
|            |                 | 0.577    | 0.792420354 |             |             |             |         |          |
| POLDIP2    | ENSG00000004142 | -0.91749 | 0.82056     | -0.91749    | 0.82056     | -0.91749    |         |          |
|            |                 | 0.82056  | -0.19424    | 0.57701     | 0.57701     | 0.792420354 |         |          |
| NA         | ENSG00000232884 | -0.41456 | 0.66077     | -0.41285    | 0.66014     | -0.19424    | 0.57701 | 0.57701  |
|            |                 | -0.35322 | 0.63804     | 0.57701     | 0.792420354 |             |         |          |
| NA         | ENSG00000238592 | -0.19424 | 0.57701     | -0.19424    | 0.57701     | -0.19424    | 0.57701 | 0.57701  |
|            |                 | -0.19424 | 0.57701     | 0.57701     | 0.792420354 |             |         |          |
| NA         | ENSG00000227397 | -0.72577 | 0.76601     | -0.41193    | 0.6598      | -0.19429    | 0.57703 | 0.57703  |
|            |                 | -0.89641 | 0.81498     | 0.57703     | 0.792420354 |             |         |          |
| RNU6-1318P | ENSG00000202259 | -0.19433 | 0.57704     | -0.19433    | 0.57704     | -0.19433    |         |          |
|            |                 | 0.57704  | -0.19433    | 0.57704     | 0.792420354 |             |         |          |
| NA         | ENSG00000260511 | -0.19438 | 0.57706     | -0.19438    | 0.57706     | -0.19438    | 0.57706 | 0.57706  |
|            |                 | -0.19438 | 0.57706     | 0.57706     | 0.792420354 |             |         |          |
| RBM8A      | ENSG00000265241 | -0.19441 | 0.57707     | -0.19441    | 0.57707     | -0.19441    | 0.57707 | 0.57707  |
|            |                 | -0.19441 | 0.57707     | 0.57707     | 0.792420354 |             |         |          |
| NA         | ENSG00000280778 | -0.19441 | 0.57707     | -0.19441    | 0.57707     | -0.19441    | 0.57707 | 0.57707  |
|            |                 | -0.19441 | 0.57707     | 0.57707     | 0.792420354 |             |         |          |
| GALNT9     | ENSG00000182870 | -1.0413  | 0.85114     | -0.70352    | 0.75913     | -0.19447    |         |          |
|            |                 | 0.57709  | -2.6318     | 0.99575     | 0.57709     | 0.792425487 |         |          |
| RNU6-601P  | ENSG00000207270 | -0.28202 | 0.61103     | -0.69195    | 0.75551     | -0.19456    |         |          |
|            |                 | 0.57713  | -0.9789     | 0.83618     | 0.57713     | 0.792440886 |         |          |
| ALKBH3-AS1 | ENSG00000244926 | -0.19462 | 0.57715     | -0.19462    | 0.57715     | -0.19462    |         |          |
|            |                 | 0.57715  | -0.19462    | 0.57715     | 0.792440886 |             |         |          |
| NA         | ENSG00000258254 | -1.1676  | 0.87853     | -1.0464     | 0.8523      | -0.1946     | 0.57715 | 0.57715  |
|            |                 | -1.5155  | 0.93518     | 0.57715     | 0.792440886 |             |         |          |
| NA         | ENSG00000230709 | -0.45718 | 0.67623     | -0.45718    | 0.67623     | -0.45718    | 0.67623 | 0.67623  |
|            |                 | -0.1947  | 0.57719     | 0.57719     | 0.792451151 |             |         |          |
| NA         | ENSG00000237377 | -0.19471 | 0.57719     | -0.31382    | 0.62317     | -0.8756     | 0.80938 | 0.80938  |
|            |                 | -1.1157  | 0.86773     | 0.57719     | 0.792451151 |             |         |          |
| LINC01741  | ENSG00000236720 | -0.47277 | 0.68181     | -0.19477    | 0.57721     | -1.1619     |         |          |

|             |                 |          |         |             |             |         |          |
|-------------|-----------------|----------|---------|-------------|-------------|---------|----------|
|             | 0.87737         | -0.39042 | 0.65189 | 0.57721     | 0.792456283 |         |          |
| PPP1R1B     | ENSG00000131771 | -0.28645 | 0.61273 | 0.61273     | -0.19482    | 0.57723 | -0.28645 |
|             | 0.61273         | -0.28645 | 0.61273 | 0.57723     | 0.792461414 |         |          |
| ERBB2       | ENSG00000141736 | -0.22018 | 0.58713 | 0.58713     | -0.53982    | 0.70534 | -0.22018 |
|             | -0.19507        | 0.57733  | 0.57733 | 0.792548761 |             |         | 0.58713  |
| SMPD4       | ENSG00000136699 | -0.19509 | 0.57734 | 0.57734     | -0.3313     | 0.62979 | -1.2538  |
|             | -1.2617         | 0.89647  | 0.57734 | 0.792548761 |             |         | 0.89504  |
| NA          | ENSG00000220986 | -0.19514 | 0.57736 | 0.57736     | -0.19514    | 0.57736 | -0.19514 |
|             | -0.19514        | 0.57736  | 0.57736 | 0.792548761 |             |         | 0.57736  |
| RPL30P6     | ENSG00000242936 | -0.47995 | 0.68437 | 0.68437     | -0.19522    | 0.57739 | -0.46477 |
|             | 0.67895         | -0.46477 | 0.67895 | 0.57739     | 0.792548761 |         |          |
| EIF2S1      | ENSG00000134001 | -0.19531 | 0.57743 | 0.57743     | -0.19531    | 0.57743 | -0.19531 |
|             | 0.57743         | -0.19531 | 0.57743 | 0.57743     | 0.792548761 |         |          |
| FCHSD2      | ENSG00000137478 | -0.75167 | 0.77388 | 0.77388     | -0.44623    | 0.67229 | -0.5506  |
|             | 0.70905         | -0.19532 | 0.57743 | 0.57743     | 0.792548761 |         |          |
| TSPYL6      | ENSG00000178021 | -0.19534 | 0.57744 | 0.57744     | -0.423      | 0.66385 | -0.19534 |
|             | 0.57744         | -0.19534 | 0.57744 | 0.57744     | 0.792548761 |         |          |
| KLHL33      | ENSG00000185271 | -0.19535 | 0.57744 | 0.57744     | -0.19535    | 0.57744 | -1.5854  |
|             | 0.94356         | -0.19535 | 0.57744 | 0.57744     | 0.792548761 |         |          |
| NA          | ENSG00000226329 | -1.5916  | 0.94426 | 0.94426     | -1.5916     | 0.94426 | -0.19536 |
|             | -1.5916         | 0.94426  | 0.57744 | 0.792548761 |             |         | 0.57744  |
| SHH         | ENSG00000164690 | -0.45461 | 0.6753  | 0.6753      | -0.28491    | 0.61214 | -0.46469 |
|             | -0.1954         | 0.57746  | 0.57746 | 0.792553888 |             |         | 0.67892  |
| SNORD115-28 | ENSG00000200801 | -0.19585 | 0.57764 | 0.57764     | -0.19585    | 0.57764 | -0.19585 |
|             | 0.57764         | -0.19585 | 0.57764 | 0.57764     | 0.792770003 |         |          |
| SPEF1       | ENSG00000101222 | -0.60995 | 0.72905 | 0.72905     | -0.8151     | 0.79249 | -0.19587 |
|             | -1.2626         | 0.89664  | 0.57765 | 0.792770003 |             |         | 0.57765  |
| NA          | ENSG00000269968 | -0.196   | 0.57769 | 0.57769     | -0.196      | 0.57769 | -0.196   |
|             | -0.196          | 0.57769  | 0.57769 | 0.792793968 |             |         | 0.57769  |
| NA          | ENSG00000255539 | -0.19601 | 0.5777  | 0.5777      | -0.19601    | 0.5777  | -0.19601 |
|             | -0.19601        | 0.5777   | 0.5777  | 0.792793968 |             |         | 0.5777   |
| NPM1P23     | ENSG00000242109 | -0.1961  | 0.57774 | 0.57774     | -0.1961     | 0.57774 | -0.1961  |
|             | 0.57774         | -0.1961  | 0.57774 | 0.57774     | 0.792823049 |         |          |
| PPAT        | ENSG00000128059 | -0.19619 | 0.57777 | 0.57777     | -0.30899    | 0.62133 | -0.19619 |
|             | -0.60865        | 0.72862  | 0.57777 | 0.792823049 |             |         | 0.57777  |
| LINC01271   | ENSG00000233077 | -0.74847 | 0.77291 | 0.77291     | -0.1962     | 0.57777 | -1.9017  |
|             | 0.9714          | -1.9017  | 0.9714  | 0.57777     | 0.792823049 |         |          |
| RNU6-740P   | ENSG00000201604 | -0.19629 | 0.57781 | 0.57781     | -0.19629    | 0.57781 | -0.19629 |
|             | 0.57781         | -0.19629 | 0.57781 | 0.57781     | 0.792855611 |         |          |
| RN7SL679P   | ENSG00000243905 | -0.42699 | 0.6653  | 0.6653      | -0.19646    | 0.57788 | -0.54665 |
|             | 0.70769         | -0.22113 | 0.58751 | 0.57788     | 0.792907008 |         |          |
| MIR3613     | ENSG00000264864 | -0.81173 | 0.79153 | 0.79153     | -0.19648    | 0.57788 | -0.87377 |
|             | 0.80888         | -0.87377 | 0.80888 | 0.57788     | 0.792907008 |         |          |
| NA          | ENSG00000242349 | -0.19664 | 0.57794 | 0.57794     | -0.19664    | 0.57794 | -0.19664 |
|             | -0.19664        | 0.57794  | 0.57794 | 0.792911651 |             |         | 0.57794  |
| SMARCA4     | ENSG00000127616 | -0.19668 | 0.57796 | 0.57796     | -0.26324    | 0.60382 | -1.7099  |
|             | 0.95636         | -1.5603  | 0.94066 | 0.57796     | 0.792911651 |         |          |
| NA          | ENSG00000255000 | -0.19667 | 0.57796 | 0.57796     | -0.19667    | 0.57796 | -0.19667 |
|             | -0.19667        | 0.57796  | 0.57796 | 0.792911651 |             |         | 0.57796  |
| NA          | ENSG00000261472 | -0.77043 | 0.77948 | 0.77948     | -0.19677    | 0.57799 | -0.77043 |
|             | -0.77043        | 0.77948  | 0.57799 | 0.792911651 |             |         | 0.77948  |
| UGT2B28     | ENSG00000135226 | -0.53069 | 0.70218 | 0.70218     | -0.77823    | 0.78178 | -0.19678 |
|             | -1.2046         | 0.88582  | 0.578   | 0.792911651 |             |         | 0.578    |
| NA          | ENSG00000242737 | -0.19687 | 0.57803 | 0.57803     | -0.19687    | 0.57803 | -0.19687 |
|             | -0.19687        | 0.57803  | 0.57803 | 0.792911651 |             |         | 0.57803  |
| TMEM35B     | ENSG00000243749 | -0.19694 | 0.57806 | 0.57806     | -0.19694    | 0.57806 | -0.19694 |
|             | 0.57806         | -0.19694 | 0.57806 | 0.57806     | 0.792911651 |         |          |
| NA          | ENSG00000265639 | -2.1325  | 0.98352 | 0.98352     | -0.4322     | 0.6672  | -0.19695 |
|             | -0.4322         | 0.6672   | 0.57806 | 0.792911651 |             |         | 0.57806  |
| NA          | ENSG00000273890 | -0.19697 | 0.57807 | 0.57807     | -0.19697    | 0.57807 | -0.19697 |
|             | -0.19697        | 0.57807  | 0.57807 | 0.792911651 |             |         | 0.57807  |
| NA          | ENSG00000254619 | -0.19698 | 0.57808 | 0.57808     | -0.86749    | 0.80716 | -0.59072 |
|             |                 |          |         |             |             |         | 0.72265  |

|             |                 |          |         |             |             |          |         |  |
|-------------|-----------------|----------|---------|-------------|-------------|----------|---------|--|
|             | -0.19698        | 0.57808  | 0.57808 | 0.792911651 |             |          |         |  |
| NA          | ENSG00000216112 | -0.19701 | 0.57809 | -0.19701    | 0.57809     | -0.19701 | 0.57809 |  |
|             | -0.19701        | 0.57809  | 0.57809 | 0.792911651 |             |          |         |  |
| NA          | ENSG00000213953 | -0.19704 | 0.5781  | -0.19704    | 0.5781      | -0.19704 | 0.5781  |  |
|             | -0.19704        | 0.5781   | 0.5781  | 0.792911651 |             |          |         |  |
| CTNNA3      | ENSG00000183230 | -0.85909 | 0.80485 | -1.3509     | 0.91164     | -0.31491 |         |  |
|             | 0.62359         | -0.19712 | 0.57814 | 0.57814     | 0.792911651 |          |         |  |
| MIR4457     | ENSG00000263670 | -0.19714 | 0.57814 | -0.19714    | 0.57814     | -0.19714 |         |  |
|             | 0.57814         | -0.19714 | 0.57814 | 0.57814     | 0.792911651 |          |         |  |
| SNX18       | ENSG00000178996 | -0.42793 | 0.66565 | -0.22239    | 0.58799     | -0.68804 | 0.75429 |  |
|             | -0.19716        | 0.57815  | 0.57815 | 0.792911651 |             |          |         |  |
| NA          | ENSG00000229628 | -0.59855 | 0.72526 | -0.19715    | 0.57815     | -0.59855 | 0.72526 |  |
|             | -0.59855        | 0.72526  | 0.57815 | 0.792911651 |             |          |         |  |
| TSNAX-DISC1 | ENSG00000270106 | -0.19718 | 0.57816 | -0.19718    | 0.57816     | -0.19718 |         |  |
|             | 0.57816         | -0.19718 | 0.57816 | 0.57816     | 0.792911651 |          |         |  |
| RNU6-238P   | ENSG00000200183 | -0.1974  | 0.57824 | -0.1974     | 0.57824     | -0.1974  |         |  |
|             | 0.57824         | -0.1974  | 0.57824 | 0.57824     | 0.792976732 |          |         |  |
| TAS2R15P    | ENSG00000212125 | -0.74015 | 0.77039 | -0.1974     | 0.57824     | -0.1974  |         |  |
|             | 0.57824         | -0.1974  | 0.57824 | 0.57824     | 0.792976732 |          |         |  |
| GABPAP      | ENSG00000235720 | -0.4668  | 0.67968 | -0.4668     | 0.67968     | -0.19776 |         |  |
|             | 0.57838         | -0.7061  | 0.75994 | 0.57838     | 0.793146402 |          |         |  |
| CALM2P3     | ENSG00000215482 | -0.3326  | 0.63028 | -0.3326     | 0.63028     | -0.19796 |         |  |
|             | 0.57846         | -0.3326  | 0.63028 | 0.57846     | 0.793233785 |          |         |  |
| ACSM2B      | ENSG00000066813 | -0.63527 | 0.73738 | -0.57026    | 0.71575     | -0.19803 |         |  |
|             | 0.57849         | -0.31927 | 0.62524 | 0.57849     | 0.793252602 |          |         |  |
| ETAA1       | ENSG00000143971 | -0.63645 | 0.73776 | -0.19809    | 0.57851     | -0.63645 | 0.73776 |  |
|             | -0.63645        | 0.73776  | 0.57851 | 0.793257704 |             |          |         |  |
| RPS3AP50    | ENSG00000243864 | -0.19821 | 0.57856 | -0.19821    | 0.57856     | -0.19821 |         |  |
|             | 0.57856         | -0.19821 | 0.57856 | 0.57856     | 0.793281621 |          |         |  |
| NA          | ENSG00000265070 | -0.19821 | 0.57856 | -0.22145    | 0.58763     | -0.79755 | 0.78743 |  |
|             | -0.22145        | 0.58763  | 0.57856 | 0.793281621 |             |          |         |  |
| NA          | ENSG00000232013 | -0.1983  | 0.57859 | -0.1983     | 0.57859     | -0.1983  | 0.57859 |  |
|             | -0.1983         | 0.57859  | 0.57859 | 0.793288316 |             |          |         |  |
| YARS2       | ENSG00000139131 | -0.51441 | 0.69652 | -0.19836    | 0.57862     | -0.43633 | 0.6687  |  |
|             | -0.51441        | 0.69652  | 0.57862 | 0.793288316 |             |          |         |  |
| NA          | ENSG00000279009 | -0.19837 | 0.57862 | -0.19837    | 0.57862     | -0.19837 | 0.57862 |  |
|             | -0.19837        | 0.57862  | 0.57862 | 0.793288316 |             |          |         |  |
| RN7SL393P   | ENSG00000243723 | -0.23779 | 0.59398 | -0.23779    | 0.59398     | -0.19839 |         |  |
|             | 0.57863         | -0.23779 | 0.59398 | 0.57863     | 0.793288316 |          |         |  |
| NA          | ENSG00000272880 | -0.19844 | 0.57865 | -0.19844    | 0.57865     | -0.19844 | 0.57865 |  |
|             | -0.19844        | 0.57865  | 0.57865 | 0.793293417 |             |          |         |  |
| MIR4693     | ENSG00000264200 | -0.19851 | 0.57868 | -0.19851    | 0.57868     | -0.53204 |         |  |
|             | 0.70265         | -0.19851 | 0.57868 | 0.57868     | 0.793312226 |          |         |  |
| NA          | ENSG00000214526 | -0.19858 | 0.57871 | -0.19858    | 0.57871     | -0.19858 | 0.57871 |  |
|             | -0.19858        | 0.57871  | 0.57871 | 0.793331035 |             |          |         |  |
| RASA2-IT1   | ENSG00000250170 | -0.19871 | 0.57876 | -0.19871    | 0.57876     | -0.19871 |         |  |
|             | 0.57876         | -0.19871 | 0.57876 | 0.57876     | 0.793368649 |          |         |  |
| NA          | ENSG00000259327 | -0.19875 | 0.57877 | -0.19875    | 0.57877     | -0.19875 | 0.57877 |  |
|             | -0.19875        | 0.57877  | 0.57877 | 0.793368649 |             |          |         |  |
| CHST3       | ENSG00000122863 | -0.19896 | 0.57885 | -0.29833    | 0.61727     | -0.40518 | 0.65733 |  |
|             | -0.38008        | 0.64806  | 0.57885 | 0.793455992 |             |          |         |  |
| NA          | ENSG00000250694 | -0.19905 | 0.57889 | -0.19905    | 0.57889     | -0.95365 | 0.82987 |  |
|             | -0.19905        | 0.57889  | 0.57889 | 0.793479889 |             |          |         |  |
| NA          | ENSG00000254556 | -1.113   | 0.86715 | -0.19908    | 0.5789      | -0.42256 | 0.66369 |  |
|             | -0.3998         | 0.65535  | 0.5789  | 0.793479889 |             |          |         |  |
| TET3        | ENSG00000187605 | -0.91413 | 0.81968 | -0.73723    | 0.76951     | -1.2404  | 0.89259 |  |
|             | -0.19918        | 0.57894  | 0.57894 | 0.793495171 |             |          |         |  |
| LINC00663   | ENSG00000266904 | -0.5973  | 0.72485 | -0.4332     | 0.66756     | -0.1992  |         |  |
|             | 0.57895         | -0.1992  | 0.57895 | 0.57895     | 0.793495171 |          |         |  |
| NA          | ENSG00000270711 | -0.19923 | 0.57896 | -0.19923    | 0.57896     | -0.19923 | 0.57896 |  |
|             | -0.19923        | 0.57896  | 0.57896 | 0.793495171 |             |          |         |  |
| KIRREL3-AS2 | ENSG00000254960 | -0.19939 | 0.57902 | -0.19939    | 0.57902     | -0.19939 |         |  |

|            |                 |          |         |             |             |         |          |
|------------|-----------------|----------|---------|-------------|-------------|---------|----------|
|            | 0.57902         | -0.19939 | 0.57902 | 0.57902     | 0.793546472 |         |          |
| Clorf189   | ENSG00000163263 | -0.1994  | 0.57903 | 0.57903     | -0.1994     | 0.57903 | -0.1994  |
|            | 0.57903         | -0.1994  | 0.57903 | 0.57903     | 0.793546472 |         |          |
| KDM5B      | ENSG00000117139 | -0.19947 | 0.57905 | 0.57905     | -0.86496    | 0.80647 | -1.0708  |
|            | -0.87785        | 0.80999  | 0.57905 | 0.793551564 |             |         | 0.85787  |
| CHCHD4     | ENSG00000163528 | -0.49231 | 0.68875 | 0.68875     | -0.29234    | 0.61499 | -0.19954 |
|            | 0.57908         | -0.24105 | 0.59524 | 0.57908     | 0.793570359 |         |          |
| NA         | ENSG00000249284 | -0.19974 | 0.57916 | 0.57916     | -1.0105     | 0.84386 | -0.58624 |
|            | -0.58624        | 0.72114  | 0.57916 | 0.793657672 |             |         | 0.72114  |
| SKA1       | ENSG00000154839 | -0.95981 | 0.83143 | 0.83143     | -0.19982    | 0.57919 | -1.6339  |
|            | -2.0794         | 0.98121  | 0.57919 | 0.793676463 |             |         | 0.94886  |
| NA         | ENSG00000253178 | -0.19993 | 0.57923 | 0.57923     | -0.23511    | 0.59294 | -0.45467 |
|            | -0.44228        | 0.67086  | 0.57923 | 0.79370034  |             |         | 0.67533  |
| RNU6-813P  | ENSG00000207422 | -0.19995 | 0.57924 | 0.57924     | -0.19995    | 0.57924 | -0.19995 |
|            | 0.57924         | -0.19995 | 0.57924 | 0.79370034  |             |         |          |
| UCKL1-AS1  | ENSG00000280213 | -0.20008 | 0.57929 | 0.57929     | -0.20008    | 0.57929 | -0.20008 |
|            | 0.57929         | -0.20008 | 0.57929 | 0.793734386 |             |         |          |
| RPL21P3    | ENSG00000225419 | -0.20015 | 0.57932 | 0.57932     | -0.20015    | 0.57932 | -0.20015 |
|            | 0.57932         | -0.20015 | 0.57932 | 0.793734386 |             |         |          |
| NA         | ENSG00000261586 | -0.20015 | 0.57932 | 0.57932     | -0.20015    | 0.57932 | -0.20015 |
|            | -0.20015        | 0.57932  | 0.57932 | 0.793734386 |             |         | 0.57932  |
| LINC00173  | ENSG00000196668 | -0.34009 | 0.63311 | 0.63311     | -0.34009    | 0.63311 | -0.34009 |
|            | 0.63311         | -0.20019 | 0.57933 | 0.57933     | 0.793734386 |         |          |
| NA         | ENSG00000222481 | -0.20023 | 0.57935 | 0.57935     | -0.20023    | 0.57935 | -0.20023 |
|            | -0.20023        | 0.57935  | 0.57935 | 0.793739471 |             |         | 0.57935  |
| RNU6-1005P | ENSG00000207248 | -0.20037 | 0.5794  | 0.5794      | -0.20037    | 0.5794  | -0.20037 |
|            | 0.5794          | -0.20037 | 0.5794  | 0.79376334  |             |         |          |
| NA         | ENSG00000255186 | -0.20037 | 0.5794  | 0.5794      | -0.20037    | 0.5794  | -0.20037 |
|            | -0.20037        | 0.5794   | 0.5794  | 0.79376334  |             |         | 0.5794   |
| HTR2B      | ENSG00000135914 | -0.20059 | 0.57949 | 0.57949     | -0.64176    | 0.73948 | -0.78734 |
|            | -1.4178         | 0.92187  | 0.57949 | 0.793787458 |             |         | 0.78446  |
| ARHGEF11   | ENSG00000132694 | -0.20062 | 0.5795  | 0.5795      | -0.20062    | 0.5795  | -0.20062 |
|            | 0.5795          | -0.44364 | 0.67135 | 0.5795      | 0.793787458 |         |          |
| GLULP4     | ENSG00000178723 | -1.2447  | 0.89338 | 0.89338     | -1.7408     | 0.95914 | -0.20065 |
|            | 0.57951         | -1.5055  | 0.9339  | 0.57951     | 0.793787458 |         |          |
| TSSK6      | ENSG00000178093 | -0.20074 | 0.57955 | 0.57955     | -0.20074    | 0.57955 | -0.20074 |
|            | -0.25805        | 0.60182  | 0.57955 | 0.793787458 |             |         | 0.57955  |
| NA         | ENSG00000236327 | -0.40571 | 0.65752 | 0.65752     | -0.22761    | 0.59002 | -0.40571 |
|            | -0.20074        | 0.57955  | 0.57955 | 0.793787458 |             |         | 0.65752  |
| RNU6-1218P | ENSG00000239175 | -0.20079 | 0.57957 | 0.57957     | -1.0551     | 0.85431 | -0.74026 |
|            | 0.77043         | -1.148   | 0.87452 | 0.57957     | 0.793787458 |         |          |
| RNU6-540P  | ENSG00000207352 | -0.20082 | 0.57958 | 0.57958     | -0.20082    | 0.57958 | -0.20082 |
|            | 0.57958         | -0.20082 | 0.57958 | 0.793787458 |             |         |          |
| LINC02039  | ENSG00000248107 | -0.20085 | 0.57959 | 0.57959     | -0.20085    | 0.57959 | -0.20085 |
|            | 0.57959         | -0.20085 | 0.57959 | 0.793787458 |             |         |          |
| RPS19P6    | ENSG00000234637 | -0.201   | 0.57965 | 0.57965     | -0.201      | 0.57965 | -0.201   |
|            | 0.57965         | -0.201   | 0.57965 | 0.793787458 |             |         |          |
| RNU6-360P  | ENSG00000212246 | -0.20104 | 0.57967 | 0.57967     | -0.8578     | 0.8045  | -0.20748 |
|            | 0.58218         | -0.73532 | 0.76893 | 0.57967     | 0.793787458 |         |          |
| NA         | ENSG00000279235 | -0.20106 | 0.57967 | 0.57967     | -0.20106    | 0.57967 | -0.20106 |
|            | -0.20106        | 0.57967  | 0.57967 | 0.793787458 |             |         | 0.57967  |
| LINC01303  | ENSG00000250548 | -0.20107 | 0.57968 | 0.57968     | -0.2674     | 0.60542 | -0.20107 |
|            | 0.57968         | -0.20107 | 0.57968 | 0.793787458 |             |         |          |
| NA         | ENSG00000261427 | -0.20119 | 0.57972 | 0.57972     | -0.20119    | 0.57972 | -0.20119 |
|            | -0.20119        | 0.57972  | 0.57972 | 0.793787458 |             |         | 0.57972  |
| H4C7       | ENSG00000275663 | -0.2012  | 0.57973 | 0.57973     | -0.2012     | 0.57973 | -0.2012  |
|            | -0.2012         | 0.57973  | 0.57973 | 0.793787458 |             |         | 0.57973  |
| CPNE9      | ENSG00000144550 | -0.20126 | 0.57975 | 0.57975     | -1.1057     | 0.86557 | -1.0245  |
|            | -0.77888        | 0.78197  | 0.57975 | 0.793787458 |             |         | 0.84721  |
| RN7SL551P  | ENSG00000243856 | -0.20126 | 0.57975 | 0.57975     | -0.20126    | 0.57975 | -0.20126 |
|            | 0.57975         | -0.20126 | 0.57975 | 0.793787458 |             |         |          |
| NA         | ENSG00000183653 | -0.20127 | 0.57975 | 0.57975     | -0.20127    | 0.57975 | -0.20127 |
|            |                 |          |         |             |             |         | 0.57975  |

|            |                 |          |          |          |             |             |         |  |
|------------|-----------------|----------|----------|----------|-------------|-------------|---------|--|
|            |                 | -0.20127 | 0.57975  | 0.57975  | 0.793787458 |             |         |  |
| RNU6-624P  | ENSG00000200281 | -0.28724 | 0.61304  | -0.20128 | 0.57976     | -0.25287    |         |  |
|            |                 | 0.59982  | -0.25287 | 0.59982  | 0.793787458 |             |         |  |
| LINC02734  | ENSG00000255382 | -1.2749  | 0.89882  | -1.2749  | 0.89882     | -1.2749     |         |  |
|            |                 | 0.89882  | -0.2013  | 0.57977  | 0.793787458 |             |         |  |
| NA         | ENSG00000255992 | -0.20135 | 0.57979  | -0.20135 | 0.57979     | -0.20135    | 0.57979 |  |
|            |                 | -0.20135 | 0.57979  | 0.57979  | 0.793787458 |             |         |  |
| HTN1       | ENSG00000126550 | -0.98585 | 0.8379   | -0.53119 | 0.70235     | -0.20138    | 0.5798  |  |
|            |                 | -0.98585 | 0.8379   | 0.5798   | 0.793787458 |             |         |  |
| MEI1       | ENSG00000167077 | -1.1324  | 0.87126  | -1.55    | 0.93943     | -2.7887     | 0.99735 |  |
|            |                 | -0.20149 | 0.57984  | 0.57984  | 0.793787458 |             |         |  |
| DMWD       | ENSG00000185800 | -0.20154 | 0.57986  | -0.20154 | 0.57986     | -0.20154    | 0.57986 |  |
|            |                 | -0.20154 | 0.57986  | 0.57986  | 0.793787458 |             |         |  |
| IER5L      | ENSG00000188483 | -0.70645 | 0.76005  | -0.20154 | 0.57986     | -1.1123     | 0.867   |  |
|            |                 | -1.1547  | 0.8759   | 0.57986  | 0.793787458 |             |         |  |
| NA         | ENSG00000274507 | -0.64848 | 0.74166  | -0.4264  | 0.66509     | -0.20154    | 0.57986 |  |
|            |                 | -0.20154 | 0.57986  | 0.57986  | 0.793787458 |             |         |  |
| NA         | ENSG00000253358 | -0.20156 | 0.57987  | -0.20156 | 0.57987     | -0.20156    | 0.57987 |  |
|            |                 | -0.20156 | 0.57987  | 0.57987  | 0.793787458 |             |         |  |
| NA         | ENSG00000268750 | -0.20155 | 0.57987  | -0.20155 | 0.57987     | -0.20155    | 0.57987 |  |
|            |                 | -0.20155 | 0.57987  | 0.57987  | 0.793787458 |             |         |  |
| NA         | ENSG00000283235 | -0.20159 | 0.57988  | -1.1977  | 0.88449     | -0.96189    | 0.83195 |  |
|            |                 | -0.96189 | 0.83195  | 0.57988  | 0.793787458 |             |         |  |
| TSPO       | ENSG00000100300 | -0.20162 | 0.57989  | -0.20162 | 0.57989     | -0.20162    | 0.57989 |  |
|            |                 | -0.46357 | 0.67852  | 0.57989  | 0.793787458 |             |         |  |
| CLMAT3     | ENSG00000249035 | -0.20182 | 0.57997  | -0.93174 | 0.82426     | -0.53949    |         |  |
|            |                 | 0.70522  | -0.86649 | 0.80689  | 0.57997     | 0.793857443 |         |  |
| RNU6-15P   | ENSG00000207264 | -0.20185 | 0.57998  | -0.20185 | 0.57998     | -0.20185    |         |  |
|            |                 | 0.57998  | -0.20185 | 0.57998  | 0.793857443 |             |         |  |
| CHEK2P3    | ENSG00000234898 | -0.20186 | 0.57999  | -0.20186 | 0.57999     | -0.20186    |         |  |
|            |                 | 0.57999  | -0.20186 | 0.57999  | 0.793857443 |             |         |  |
| RNU6-64P   | ENSG00000252928 | -0.20193 | 0.58002  | -0.20193 | 0.58002     | -0.20193    |         |  |
|            |                 | 0.58002  | -0.20193 | 0.58002  | 0.793867596 |             |         |  |
| NA         | ENSG00000239617 | -0.23317 | 0.59218  | -0.20198 | 0.58003     | -0.23317    | 0.59218 |  |
|            |                 | -0.23317 | 0.59218  | 0.58003  | 0.793867596 |             |         |  |
| MROH9      | ENSG00000117501 | -0.20201 | 0.58005  | -1.1266  | 0.87004     | -0.56576    | 0.71422 |  |
|            |                 | -1.1081  | 0.8661   | 0.58005  | 0.793872672 |             |         |  |
| DNAJC19P4  | ENSG00000225310 | -0.40847 | 0.65854  | -0.20212 | 0.58009     | -0.40847    |         |  |
|            |                 | 0.65854  | -1.3303  | 0.9083   | 0.58009     | 0.79390512  |         |  |
| CD300LG    | ENSG00000161649 | -0.61824 | 0.73179  | -0.61824 | 0.73179     | -0.61824    |         |  |
|            |                 | 0.73179  | -0.20227 | 0.58015  | 0.58015     | 0.793942639 |         |  |
| NA         | ENSG00000244657 | -0.20228 | 0.58015  | -0.20228 | 0.58015     | -0.20228    | 0.58015 |  |
|            |                 | -0.20228 | 0.58015  | 0.58015  | 0.793942639 |             |         |  |
| RNU6-42P   | ENSG00000206892 | -0.20238 | 0.58019  | -0.62654 | 0.73452     | -0.62654    |         |  |
|            |                 | 0.73452  | -0.62654 | 0.73452  | 0.58019     | 0.793944175 |         |  |
| CNOT9      | ENSG00000144580 | -0.2471  | 0.59758  | -0.31303 | 0.62287     | -0.22886    | 0.59051 |  |
|            |                 | -0.20241 | 0.5802   | 0.5802   | 0.793944175 |             |         |  |
| NA         | ENSG00000267279 | -0.2024  | 0.5802   | -0.21621 | 0.58559     | -1.2806     | 0.89984 |  |
|            |                 | -0.2024  | 0.5802   | 0.5802   | 0.793944175 |             |         |  |
| POLR2I     | ENSG00000105258 | -0.20255 | 0.58026  | -0.20255 | 0.58026     | -0.20255    |         |  |
|            |                 | 0.58026  | -0.20255 | 0.58026  | 0.58026     | 0.793950909 |         |  |
| ST20-MTHFS | ENSG00000259332 | -0.20256 | 0.58026  | -0.20256 | 0.58026     | -0.20256    |         |  |
|            |                 | 0.58026  | -0.20256 | 0.58026  | 0.58026     | 0.793950909 |         |  |
| ZGLP1      | ENSG00000220201 | -0.20265 | 0.58029  | -0.20265 | 0.58029     | -0.20265    | 0.58029 |  |
|            |                 | -0.20265 | 0.58029  | 0.58029  | 0.793950909 |             |         |  |
| NA         | ENSG00000272342 | -0.20262 | 0.58029  | -0.20262 | 0.58029     | -0.20262    | 0.58029 |  |
|            |                 | -0.20262 | 0.58029  | 0.58029  | 0.793950909 |             |         |  |
| NA         | ENSG00000265769 | -0.33435 | 0.63094  | -0.20273 | 0.58033     | -0.66289    | 0.7463  |  |
|            |                 | -0.37023 | 0.6444   | 0.58033  | 0.793950909 |             |         |  |
| SLC4A3     | ENSG00000114923 | -0.8652  | 0.80654  | -0.20276 | 0.58034     | -0.97832    |         |  |
|            |                 | 0.83604  | -0.33647 | 0.63174  | 0.58034     | 0.793950909 |         |  |
| MIR103A2   | ENSG00000199024 | -0.20277 | 0.58034  | -0.20277 | 0.58034     | -0.20277    |         |  |

|            |                 |          |         |             |             |          |          |
|------------|-----------------|----------|---------|-------------|-------------|----------|----------|
|            | 0.58034         | -0.20277 | 0.58034 | 0.58034     | 0.793950909 |          |          |
| RNU6-59P   | ENSG00000207518 | -1.8508  | -1.8508 | 0.9679      | -0.49417    | 0.68941  | -0.20286 |
|            | 0.58038         | -1.8508  | 0.9679  | 0.58038     | 0.793950909 |          |          |
| SYT11      | ENSG00000132718 | -0.20292 | 0.5804  | -0.83468    | 0.79805     | -0.8547  | 0.80364  |
|            | -0.8547         | 0.80364  | 0.5804  | 0.793950909 |             |          |          |
| C2orf73    | ENSG00000177994 | -0.20292 | 0.5804  | -0.8639     | 0.80618     | -0.36192 |          |
|            | 0.64129         | -0.6757  | 0.75039 | 0.5804      | 0.793950909 |          |          |
| GPX3       | ENSG00000211445 | -1.5589  | 0.94048 | -1.5589     | 0.94048     | -1.5589  | 0.94048  |
|            | -0.20301        | 0.58043  | 0.58043 | 0.793950909 |             |          |          |
| FAM21EP    | ENSG00000235618 | -1.1746  | 0.87993 | -1.0497     | 0.85307     | -0.20309 |          |
|            | 0.58047         | -0.50185 | 0.69211 | 0.58047     | 0.793950909 |          |          |
| NA         | ENSG00000255209 | -0.2437  | 0.59627 | -0.20309    | 0.58047     | -0.2437  | 0.59627  |
|            | -0.2437         | 0.59627  | 0.58047 | 0.793950909 |             |          |          |
| NA         | ENSG00000266102 | -0.20311 | 0.58048 | -0.20311    | 0.58048     | -0.20311 | 0.58048  |
|            | -0.20311        | 0.58048  | 0.58048 | 0.793950909 |             |          |          |
| CREB1      | ENSG00000118260 | -0.21269 | 0.58421 | -0.65935    | 0.74516     | -0.20321 | 0.58052  |
|            | -0.44674        | 0.67247  | 0.58052 | 0.793950909 |             |          |          |
| HSF5       | ENSG00000176160 | -0.20323 | 0.58052 | -1.485      | 0.93122     | -0.20323 | 0.58052  |
|            | -0.37655        | 0.64675  | 0.58052 | 0.793950909 |             |          |          |
| NA         | ENSG00000231295 | -0.20325 | 0.58053 | -0.20325    | 0.58053     | -0.20325 | 0.58053  |
|            | -0.20325        | 0.58053  | 0.58053 | 0.793950909 |             |          |          |
| BIRC8      | ENSG00000163098 | -0.20327 | 0.58054 | -0.20327    | 0.58054     | -0.20327 | 0.58054  |
|            | -0.20327        | 0.58054  | 0.58054 | 0.793950909 |             |          |          |
| NA         | ENSG00000262248 | -0.20329 | 0.58054 | -0.20329    | 0.58054     | -0.20329 | 0.58054  |
|            | -0.20329        | 0.58054  | 0.58054 | 0.793950909 |             |          |          |
| RN7SL371P  | ENSG00000266210 | -0.20328 | 0.58054 | -0.20328    | 0.58054     | -0.20328 |          |
|            | 0.58054         | -0.20328 | 0.58054 | 0.58054     | 0.793950909 |          |          |
| GPR45      | ENSG00000135973 | -1.546   | 0.93894 | -2.4426     | 0.99271     | -2.4353  | 0.99256  |
|            | -0.20336        | 0.58057  | 0.58057 | 0.793950909 |             |          |          |
| SPATA13    | ENSG00000182957 | -1.6959  | 0.95505 | -0.20335    | 0.58057     | -1.0917  |          |
|            | 0.86252         | -0.36119 | 0.64102 | 0.58057     | 0.793950909 |          |          |
| NA         | ENSG00000248514 | -0.20348 | 0.58062 | -0.20348    | 0.58062     | -0.20348 | 0.58062  |
|            | -0.20348        | 0.58062  | 0.58062 | 0.793950909 |             |          |          |
| LINC02002  | ENSG00000263609 | -0.20352 | 0.58064 | -0.65036    | 0.74227     | -0.3676  |          |
|            | 0.64341         | -0.38087 | 0.64835 | 0.58064     | 0.793950909 |          |          |
| TBC1D12    | ENSG00000108239 | -1.1312  | 0.87101 | -1.1005     | 0.86444     | -0.20356 |          |
|            | 0.58065         | -1.2407  | 0.89264 | 0.58065     | 0.793950909 |          |          |
| LINC02801  | ENSG00000284240 | -0.64561 | 0.74073 | -0.26902    | 0.60604     | -0.20356 |          |
|            | 0.58065         | -0.20356 | 0.58065 | 0.58065     | 0.793950909 |          |          |
| NA         | ENSG00000267212 | -0.2036  | 0.58067 | -0.2036     | 0.58067     | -0.2036  | 0.58067  |
|            | -0.2036         | 0.58067  | 0.58067 | 0.793950909 |             |          |          |
| NA         | ENSG00000228721 | -0.20364 | 0.58068 | -0.55125    | 0.70927     | -0.20364 | 0.58068  |
|            | -0.20364        | 0.58068  | 0.58068 | 0.793950909 |             |          |          |
| RPS29P27   | ENSG00000240320 | -0.20365 | 0.58069 | -0.20365    | 0.58069     | -0.20365 |          |
|            | 0.58069         | -0.20365 | 0.58069 | 0.58069     | 0.793950909 |          |          |
| ST8SIA3    | ENSG00000177511 | -1.0429  | 0.8515  | -0.20372    | 0.58071     | -0.68186 |          |
|            | 0.75234         | -0.24552 | 0.59697 | 0.58071     | 0.793950909 |          |          |
| DICER1-AS1 | ENSG00000235706 | -0.20372 | 0.58071 | -0.20372    | 0.58071     | -0.20372 |          |
|            | 0.58071         | -0.20372 | 0.58071 | 0.58071     | 0.793950909 |          |          |
| NA         | ENSG00000254436 | -0.20375 | 0.58073 | -0.20375    | 0.58073     | -1.1214  | 0.86894  |
|            | -0.20375        | 0.58073  | 0.58073 | 0.793955977 |             |          |          |
| NA         | ENSG00000261737 | -0.20385 | 0.58076 | -0.88726    | 0.81253     | -0.20385 | 0.58076  |
|            | -0.20385        | 0.58076  | 0.58076 | 0.793962577 |             |          |          |
| TRAV15     | ENSG00000258482 | -0.68514 | 0.75337 | -0.20388    | 0.58078     | -0.68514 |          |
|            | 0.75337         | -0.68514 | 0.75337 | 0.58078     | 0.793962577 |          |          |
| AGTR1      | ENSG00000144891 | -0.6271  | 0.7347  | -0.78573    | 0.78399     | -0.20394 | 0.5808   |
|            | -0.20394        | 0.5808   | 0.5808  | 0.793962577 |             |          |          |
| NA         | ENSG00000280987 | -1.0147  | 0.84489 | -0.47838    | 0.68381     | -0.20395 | 0.5808   |
|            | -0.94848        | 0.82856  | 0.5808  | 0.793962577 |             |          |          |
| SULT6B2P   | ENSG00000283582 | -1.0121  | 0.84426 | -1.5988     | 0.94506     | -0.20415 |          |
|            | 0.58088         | -1.0329  | 0.84918 | 0.58088     | 0.794049663 |          |          |
| NA         | ENSG00000232498 | -0.20419 | 0.5809  | -0.32094    | 0.62587     | -0.32094 | 0.62587  |

|             |                 |          |         |             |             |          |         |
|-------------|-----------------|----------|---------|-------------|-------------|----------|---------|
|             | -0.32094        | 0.62587  | 0.5809  | 0.794054728 |             |          |         |
| LINC01069   | ENSG00000236133 | -0.20426 | 0.58093 | -0.20426    | 0.58093     | -0.20426 |         |
|             | 0.58093         | -0.20426 | 0.58093 | 0.58093     | 0.794062839 |          |         |
| NA          | ENSG00000280394 | -0.20435 | 0.58096 | -0.20435    | 0.58096     | -0.20435 | 0.58096 |
|             | -0.20435        | 0.58096  | 0.58096 | 0.794062839 |             |          |         |
| HLA-B       | ENSG00000234745 | -0.30125 | 0.61839 | -0.36953    | 0.64413     | -0.20437 | 0.58097 |
|             | -0.2496         | 0.59855  | 0.58097 | 0.794062839 |             |          |         |
| RNU6-401P   | ENSG00000212374 | -1.4695  | 0.92915 | -1.4695     | 0.92915     | -1.4695  |         |
|             | 0.92915         | -0.20442 | 0.58099 | 0.58099     | 0.794062839 |          |         |
| EIF5AP4     | ENSG00000234743 | -0.20449 | 0.58101 | -0.20449    | 0.58101     | -0.20449 |         |
|             | 0.58101         | -0.20449 | 0.58101 | 0.58101     | 0.794062839 |          |         |
| CTSZ        | ENSG00000101160 | -0.20451 | 0.58102 | -0.20451    | 0.58102     | -0.20451 | 0.58102 |
|             | -0.20451        | 0.58102  | 0.58102 | 0.794062839 |             |          |         |
| NA          | ENSG00000233179 | -0.2045  | 0.58102 | -1.2845     | 0.90052     | -0.69556 | 0.75665 |
|             | -0.69556        | 0.75665  | 0.58102 | 0.794062839 |             |          |         |
| TMEM236     | ENSG00000148483 | -0.48425 | 0.6859  | -0.29733    | 0.61689     | -0.2047  |         |
|             | 0.5811          | -0.34519 | 0.63502 | 0.5811      | 0.794103337 |          |         |
| VPS11       | ENSG00000160695 | -0.87047 | 0.80798 | -0.87047    | 0.80798     | -1.9255  | 0.97292 |
|             | -0.20473        | 0.58111  | 0.58111 | 0.794103337 |             |          |         |
| NA          | ENSG00000254883 | -0.58519 | 0.72079 | -2.177      | 0.98526     | -1.5466  | 0.93902 |
|             | -0.20477        | 0.58113  | 0.58113 | 0.794103337 |             |          |         |
| RNU5B-3P    | ENSG00000252410 | -0.20482 | 0.58114 | -0.20482    | 0.58114     | -0.20482 |         |
|             | 0.58114         | -0.20482 | 0.58114 | 0.58114     | 0.794103337 |          |         |
| TMEM252     | ENSG00000181778 | -0.75756 | 0.77564 | -0.20484    | 0.58115     | -0.20484 |         |
|             | 0.58115         | -1.4511  | 0.92662 | 0.58115     | 0.794103337 |          |         |
| CASP14      | ENSG00000105141 | -0.20487 | 0.58116 | -0.55417    | 0.71027     | -0.67428 |         |
|             | 0.74993         | -0.66175 | 0.74593 | 0.58116     | 0.794103337 |          |         |
| APEX1       | ENSG00000100823 | -0.20491 | 0.58118 | -0.20491    | 0.58118     | -0.20491 | 0.58118 |
|             | -0.20491        | 0.58118  | 0.58118 | 0.794103337 |             |          |         |
| RAB6B       | ENSG00000154917 | -0.2049  | 0.58118 | -0.65701    | 0.74441     | -0.65701 | 0.74441 |
|             | -0.37555        | 0.64637  | 0.58118 | 0.794103337 |             |          |         |
| NA          | ENSG00000267526 | -0.20507 | 0.58124 | -0.20507    | 0.58124     | -0.20507 | 0.58124 |
|             | -0.20507        | 0.58124  | 0.58124 | 0.794163051 |             |          |         |
| TMIGD1      | ENSG00000182271 | -1.2056  | 0.88601 | -1.2056     | 0.88601     | -0.20514 |         |
|             | 0.58127         | -2.0041  | 0.97747 | 0.58127     | 0.794173168 |          |         |
| SEPTIN4-AS1 | ENSG00000264672 | -0.20516 | 0.58128 | -0.20516    | 0.58128     | -0.20516 |         |
|             | 0.58128         | -0.20516 | 0.58128 | 0.58128     | 0.794173168 |          |         |
| LINC00351   | ENSG00000226317 | -0.20526 | 0.58131 | -1.2823     | 0.90014     | -0.20526 |         |
|             | 0.58131         | -0.20526 | 0.58131 | 0.58131     | 0.794174682 |          |         |
| LINC02370   | ENSG00000230294 | -1.277   | 0.8992  | -0.34588    | 0.63528     | -0.85936 |         |
|             | 0.80493         | -0.20528 | 0.58132 | 0.58132     | 0.794174682 |          |         |
| RNU6-80P    | ENSG00000206922 | -0.2053  | 0.58133 | -0.2053     | 0.58133     | -0.2053  |         |
|             | 0.58133         | -0.2053  | 0.58133 | 0.58133     | 0.794174682 |          |         |
| ELOVL6      | ENSG00000170522 | -0.20536 | 0.58136 | -1.2665     | 0.89734     | -1.0355  |         |
|             | 0.84977         | -0.64944 | 0.74197 | 0.58136     | 0.794193401 |          |         |
| NA          | ENSG00000260521 | -0.20542 | 0.58138 | -0.20542    | 0.58138     | -0.20542 | 0.58138 |
|             | -0.20542        | 0.58138  | 0.58138 | 0.794198458 |             |          |         |
| NA          | ENSG00000278275 | -0.20556 | 0.58143 | -0.20556    | 0.58143     | -0.20556 | 0.58143 |
|             | -0.20556        | 0.58143  | 0.58143 | 0.794223741 |             |          |         |
| SNORD116-5  | ENSG00000207191 | -0.20559 | 0.58145 | -0.20559    | 0.58145     | -0.20559 |         |
|             | 0.58145         | -0.20559 | 0.58145 | 0.58145     | 0.794223741 |          |         |
| NA          | ENSG00000249180 | -0.20566 | 0.58147 | -0.20566    | 0.58147     | -0.20566 | 0.58147 |
|             | -0.20566        | 0.58147  | 0.58147 | 0.794223741 |             |          |         |
| NAT16       | ENSG00000167011 | -0.20567 | 0.58148 | -0.20567    | 0.58148     | -0.20567 | 0.58148 |
|             | -0.27656        | 0.60894  | 0.58148 | 0.794223741 |             |          |         |
| NA          | ENSG00000258119 | -0.86077 | 0.80532 | -0.20568    | 0.58148     | -1.5084  | 0.93427 |
|             | -1.1986         | 0.88466  | 0.58148 | 0.794223741 |             |          |         |
| MFSD4B      | ENSG00000173214 | -1.2814  | 0.89997 | -1.2814     | 0.89997     | -0.80864 |         |
|             | 0.79064         | -0.20589 | 0.58156 | 0.58156     | 0.794310746 |          |         |
| NA          | ENSG00000279419 | -0.43984 | 0.66997 | -0.20599    | 0.5816      | -0.20599 | 0.5816  |
|             | -0.20599        | 0.5816   | 0.5816  | 0.794311698 |             |          |         |
| NA          | ENSG00000220996 | -0.93979 | 0.82634 | -1.4561     | 0.92732     | -0.206   | 0.58161 |

|            |                 |          |             |             |             |          |         |          |
|------------|-----------------|----------|-------------|-------------|-------------|----------|---------|----------|
|            | -0.206          | 0.58161  | 0.58161     | 0.794311698 |             |          |         |          |
| RPS4XP8    | ENSG00000219146 | -0.20604 | 0.58162     | -0.20604    | 0.58162     | -0.20604 | 0.58162 | -0.20604 |
|            | 0.58162         | -0.20604 | 0.58162     | 0.58162     | 0.794311698 |          |         |          |
| NA         | ENSG00000274685 | -0.20611 | 0.58165     | -0.20611    | 0.58165     | -0.20611 | 0.58165 | -0.20611 |
|            | -0.20611        | 0.58165  | 0.58165     | 0.794311698 |             |          |         |          |
| CD300C     | ENSG00000167850 | -0.30231 | 0.61879     | -0.20618    | 0.58167     | -0.20618 | 0.58167 | -0.30231 |
|            | 0.61879         | -0.84034 | 0.79964     | 0.58167     | 0.794311698 |          |         |          |
| NA         | ENSG00000273077 | -0.2062  | 0.58168     | -1.5386     | 0.93804     | -0.53854 | 0.7049  | -0.53854 |
|            | -0.53854        | 0.7049   | 0.58168     | 0.794311698 |             |          |         |          |
| SBK3       | ENSG00000231274 | -0.62338 | 0.73348     | -0.20622    | 0.58169     | -0.62338 | 0.73348 | -0.62338 |
|            | -0.62338        | 0.73348  | 0.58169     | 0.794311698 |             |          |         |          |
| NA         | ENSG00000233514 | -0.20625 | 0.5817      | -0.20625    | 0.5817      | -0.20625 | 0.5817  | -0.20625 |
|            | -0.20625        | 0.5817   | 0.5817      | 0.794311698 |             |          |         |          |
| NA         | ENSG00000279522 | -1.2298  | 0.89062     | -0.2063     | 0.58172     | -0.2063  | 0.58172 | -0.2063  |
|            | -0.2063         | 0.58172  | 0.58172     | 0.794311698 |             |          |         |          |
| NA         | ENSG00000257875 | -2.0527  | 0.97995     | -2.0527     | 0.97995     | -2.0527  | 0.97995 | -2.0527  |
|            | -0.20633        | 0.58173  | 0.58173     | 0.794311698 |             |          |         |          |
| EXT2       | ENSG00000151348 | -0.33591 | 0.63153     | -0.90459    | 0.81716     | -0.20636 | 0.58174 | -0.96273 |
|            | -0.96273        | 0.83216  | 0.58174     | 0.794311698 |             |          |         |          |
| ABCA9-AS1  | ENSG00000231749 | -0.20649 | 0.5818      | -0.20649    | 0.5818      | -0.20649 | 0.5818  | -0.20649 |
|            | 0.5818          | -0.20649 | 0.5818      | 0.5818      | 0.7943162   |          |         |          |
| ARRDC3-AS1 | ENSG00000281357 | -1.3949  | 0.91848     | -0.4043     | 0.657       | -0.8913  | 0.81362 | -0.20649 |
|            | -0.20649        | 0.5818   | 0.5818      | 0.7943162   |             |          |         |          |
| NA         | ENSG00000253737 | -0.20663 | 0.58185     | -0.20663    | 0.58185     | -0.20663 | 0.58185 | -0.20663 |
|            | -0.20663        | 0.58185  | 0.58185     | 0.7943162   |             |          |         |          |
| COA6-AS1   | ENSG00000231663 | -0.20666 | 0.58186     | -0.20666    | 0.58186     | -0.20666 | 0.58186 | -0.20666 |
|            | 0.58186         | -0.20666 | 0.58186     | 0.58186     | 0.7943162   |          |         |          |
| NA         | ENSG00000243304 | -0.20664 | 0.58186     | -1.5517     | 0.93964     | -1.5517  | 0.93964 | -1.5517  |
|            | -1.5517         | 0.93964  | 0.58186     | 0.7943162   |             |          |         |          |
| A1BG-AS1   | ENSG00000268895 | -0.20667 | 0.58187     | -0.20667    | 0.58187     | -0.20667 | 0.58187 | -0.20667 |
|            | 0.58187         | -0.20667 | 0.58187     | 0.58187     | 0.7943162   |          |         |          |
| GAP43      | ENSG00000172020 | -0.34466 | 0.63483     | -0.20671    | 0.58188     | -0.28547 | 0.61236 | -1.6557  |
|            | -1.6557         | 0.95111  | 0.58188     | 0.7943162   |             |          |         |          |
| NOP56P2    | ENSG00000226626 | -0.20671 | 0.58188     | -0.20671    | 0.58188     | -0.20671 | 0.58188 | -0.20671 |
|            | 0.58188         | -0.20671 | 0.58188     | 0.58188     | 0.7943162   |          |         |          |
| DSTN       | ENSG00000125868 | -1.8166  | 0.96536     | -0.20673    | 0.58189     | -1.8166  | 0.96536 | -1.0538  |
|            | -1.0538         | 0.85401  | 0.58189     | 0.7943162   |             |          |         |          |
| SNORD96A   | ENSG00000272296 | -0.20702 | 0.582       | -0.20702    | 0.582       | -0.20702 | 0.582   | -0.20702 |
|            | 0.582           | 0.582    | 0.794426896 |             |             |          |         |          |
| NA         | ENSG00000249518 | -0.20705 | 0.58201     | -0.46831    | 0.68022     | -0.51053 | 0.69516 | -1.0025  |
|            | -1.0025         | 0.84195  | 0.58201     | 0.794426896 |             |          |         |          |
| NA         | ENSG00000258820 | -0.24599 | 0.59715     | -0.20708    | 0.58202     | -0.34104 | 0.63346 | -0.21108 |
|            | -0.21108        | 0.58359  | 0.58202     | 0.794426896 |             |          |         |          |
| ATXN2      | ENSG00000204842 | -0.66591 | 0.74727     | -0.2072     | 0.58207     | -1.171   | 0.8792  | -1.2857  |
|            | -1.2857         | 0.90072  | 0.58207     | 0.794472889 |             |          |         |          |
| MIR1302-7  | ENSG00000221768 | -0.2073  | 0.58211     | -0.2073     | 0.58211     | -0.2073  | 0.58211 | -0.57119 |
|            | 0.58211         | -0.57119 | 0.71606     | 0.58211     | 0.794474376 |          |         |          |
| NA         | ENSG00000236102 | -0.2073  | 0.58211     | -1.0703     | 0.85776     | -1.8021  | 0.96424 | -1.0703  |
|            | -1.0703         | 0.85776  | 0.58211     | 0.794474376 |             |          |         |          |
| RPL5P3     | ENSG00000242276 | -0.20732 | 0.58212     | -0.20732    | 0.58212     | -0.20732 | 0.58212 | -0.20732 |
|            | 0.58212         | -0.20732 | 0.58212     | 0.58212     | 0.794474376 |          |         |          |
| KLF3P1     | ENSG00000253218 | -0.20737 | 0.58214     | -0.20737    | 0.58214     | -0.20737 | 0.58214 | -0.20737 |
|            | 0.58214         | -0.20737 | 0.58214     | 0.58214     | 0.794479421 |          |         |          |
| MRE11      | ENSG00000020922 | -0.49687 | 0.69036     | -0.42822    | 0.66575     | -0.57076 | 0.71592 | -0.2075  |
|            | -0.2075         | 0.58219  | 0.58219     | 0.794503156 |             |          |         |          |
| NA         | ENSG00000256364 | -0.20749 | 0.58219     | -0.20749    | 0.58219     | -0.20749 | 0.58219 | -0.20749 |
|            | -0.20749        | 0.58219  | 0.58219     | 0.794503156 |             |          |         |          |
| NA         | ENSG00000221040 | -0.74857 | 0.77294     | -0.2078     | 0.58231     | -0.2078  | 0.58231 | -0.2078  |
|            | -0.2078         | 0.58231  | 0.58231     | 0.794595983 |             |          |         |          |
| RPS3AP17   | ENSG00000244031 | -0.20787 | 0.58233     | -0.20787    | 0.58233     | -0.20787 | 0.58233 | -0.20787 |
|            | 0.58233         | -0.20787 | 0.58233     | 0.58233     | 0.794595983 |          |         |          |
| PSMA3      | ENSG00000100567 | -0.93157 | 0.82422     | -0.20789    | 0.58234     | -0.67933 | 0.75154 | -0.20789 |



|           |                 |          |          |         |             |             |          |         |
|-----------|-----------------|----------|----------|---------|-------------|-------------|----------|---------|
|           |                 | -0.67933 | 0.75154  | 0.58234 | 0.794595983 |             |          |         |
| NA        | ENSG00000229953 | -0.20792 | 0.58235  | 0.58235 | -0.20792    | 0.58235     | -0.20792 | 0.58235 |
|           |                 | -0.20792 | 0.58235  | 0.58235 | 0.794595983 |             |          |         |
| PAICSP1   | ENSG00000226055 | -0.20797 | 0.58237  | 0.58237 | -0.24265    | 0.59586     | -0.24265 |         |
|           |                 | 0.59586  | -0.24265 | 0.59586 | 0.58237     | 0.794595983 |          |         |
| RNU6-646P | ENSG00000201441 | -0.20803 | 0.5824   | 0.5824  | -0.20803    | 0.5824      | -0.20803 |         |
|           |                 | 0.5824   | -0.20803 | 0.5824  | 0.5824      | 0.794595983 |          |         |
| MTND6P2   | ENSG00000250389 | -0.20807 | 0.58241  | 0.58241 | -0.20807    | 0.58241     | -0.20807 |         |
|           |                 | 0.58241  | -0.20807 | 0.58241 | 0.58241     | 0.794595983 |          |         |
| KIRREL3   | ENSG00000149571 | -0.72623 | 0.76615  | 0.76615 | -0.6712     | 0.74895     | -0.85116 |         |
|           |                 | 0.80266  | -0.20809 | 0.58242 | 0.58242     | 0.794595983 |          |         |
| OPA1-AS1  | ENSG00000224855 | -0.20812 | 0.58243  | 0.58243 | -0.20812    | 0.58243     | -0.20812 |         |
|           |                 | 0.58243  | -0.20812 | 0.58243 | 0.58243     | 0.794595983 |          |         |
| NA        | ENSG00000279490 | -1.2325  | 0.89111  | 0.89111 | -0.20812    | 0.58243     | -1.2325  | 0.89111 |
|           |                 | -0.47303 | 0.6819   | 0.58243 | 0.794595983 |             |          |         |
| CCDC12    | ENSG00000160799 | -0.66278 | 0.74626  | 0.74626 | -0.31496    | 0.6236      | -1.1143  |         |
|           |                 | 0.86743  | -0.20815 | 0.58244 | 0.58244     | 0.794595983 |          |         |
| NA        | ENSG00000280424 | -0.20819 | 0.58246  | 0.58246 | -0.20819    | 0.58246     | -0.20819 | 0.58246 |
|           |                 | -0.20819 | 0.58246  | 0.58246 | 0.794595983 |             |          |         |
| HNRNPA3P4 | ENSG00000226068 | -0.20821 | 0.58247  | 0.58247 | -0.80438    | 0.78941     | -0.20821 |         |
|           |                 | 0.58247  | -0.20821 | 0.58247 | 0.58247     | 0.794595983 |          |         |
| NA        | ENSG00000248773 | -0.20826 | 0.58249  | 0.58249 | -0.20826    | 0.58249     | -0.20826 | 0.58249 |
|           |                 | -0.20826 | 0.58249  | 0.58249 | 0.794601022 |             |          |         |
| MYRF-AS1  | ENSG00000124915 | -0.20843 | 0.58255  | 0.58255 | -0.20843    | 0.58255     | -0.42021 |         |
|           |                 | 0.66284  | -0.46286 | 0.67827 | 0.58255     | 0.794652021 |          |         |
| DOK5      | ENSG00000101134 | -0.43525 | 0.66831  | 0.66831 | -1.1658     | 0.87815     | -0.57099 | 0.716   |
|           |                 | -0.20844 | 0.58256  | 0.58256 | 0.794652021 |             |          |         |
| NA        | ENSG00000260798 | -0.20853 | 0.58259  | 0.58259 | -0.20853    | 0.58259     | -0.20853 | 0.58259 |
|           |                 | -0.20853 | 0.58259  | 0.58259 | 0.794670698 |             |          |         |
| PPP5C     | ENSG00000011485 | -0.20857 | 0.58261  | 0.58261 | -0.9054     | 0.81737     | -0.4185  | 0.66221 |
|           |                 | -0.54072 | 0.70565  | 0.58261 | 0.794675735 |             |          |         |
| CX3CR1    | ENSG00000168329 | -0.20867 | 0.58265  | 0.58265 | -0.43991    | 0.67        | -1.21    | 0.88686 |
|           |                 | -1.2884  | 0.90119  | 0.58265 | 0.794699446 |             |          |         |
| MTCO1P47  | ENSG00000254241 | -0.2087  | 0.58266  | 0.58266 | -0.2087     | 0.58266     | -0.2087  |         |
|           |                 | 0.58266  | -0.2087  | 0.58266 | 0.58266     | 0.794699446 |          |         |
| MIR4705   | ENSG00000264482 | -0.61896 | 0.73203  | 0.73203 | -0.20883    | 0.58271     | -0.20883 |         |
|           |                 | 0.58271  | -0.20883 | 0.58271 | 0.58271     | 0.794728188 |          |         |
| KRTAP10-3 | ENSG00000212935 | -0.20886 | 0.58272  | 0.58272 | -0.20886    | 0.58272     | -0.20886 |         |
|           |                 | 0.58272  | -0.20886 | 0.58272 | 0.58272     | 0.794728188 |          |         |
| RPL23AP96 | ENSG00000250752 | -0.20888 | 0.58273  | 0.58273 | -0.53705    | 0.70438     | -0.20888 |         |
|           |                 | 0.58273  | -0.20888 | 0.58273 | 0.58273     | 0.794728188 |          |         |
| PPIAP51   | ENSG00000260229 | -1.4189  | 0.92204  | 0.92204 | -0.31646    | 0.62417     | -0.20903 |         |
|           |                 | 0.58279  | -0.31646 | 0.62417 | 0.58279     | 0.794753355 |          |         |
| NA        | ENSG00000249019 | -0.20906 | 0.5828   | 0.5828  | -0.20906    | 0.5828      | -0.20906 | 0.5828  |
|           |                 | -0.20906 | 0.5828   | 0.5828  | 0.794753355 |             |          |         |
| NA        | ENSG00000271892 | -0.54122 | 0.70582  | 0.70582 | -1.5144     | 0.93504     | -0.87366 | 0.80885 |
|           |                 | -0.20907 | 0.5828   | 0.5828  | 0.794753355 |             |          |         |
| TRIM77BP  | ENSG00000254993 | -1.2191  | 0.88859  | 0.88859 | -0.99359    | 0.83979     | -0.20912 |         |
|           |                 | 0.58282  | -1.2178  | 0.88835 | 0.58282     | 0.794753355 |          |         |
| NA        | ENSG00000267388 | -0.20913 | 0.58283  | 0.58283 | -0.20913    | 0.58283     | -0.20913 | 0.58283 |
|           |                 | -0.20913 | 0.58283  | 0.58283 | 0.794753355 |             |          |         |
| NA        | ENSG00000219928 | -0.45628 | 0.67591  | 0.67591 | -0.20935    | 0.58291     | -0.20935 | 0.58291 |
|           |                 | -0.20935 | 0.58291  | 0.58291 | 0.794767801 |             |          |         |
| NA        | ENSG00000279075 | -0.20933 | 0.58291  | 0.58291 | -0.20933    | 0.58291     | -0.20933 | 0.58291 |
|           |                 | -0.20933 | 0.58291  | 0.58291 | 0.794767801 |             |          |         |
| CLUH      | ENSG00000132361 | -1.8861  | 0.97036  | 0.97036 | -0.88418    | 0.8117      | -0.20938 | 0.58292 |
|           |                 | -0.78864 | 0.78484  | 0.58292 | 0.794767801 |             |          |         |
| MZT1P2    | ENSG00000271404 | -0.20938 | 0.58292  | 0.58292 | -0.20938    | 0.58292     | -0.20938 |         |
|           |                 | 0.58292  | -0.20938 | 0.58292 | 0.58292     | 0.794767801 |          |         |
| SLC22A4   | ENSG00000197208 | -0.2094  | 0.58293  | 0.58293 | -1.3123     | 0.90528     | -0.2094  |         |
|           |                 | 0.58293  | -1.0976  | 0.8638  | 0.58293     | 0.794767801 |          |         |
| UBE2K     | ENSG00000078140 | -0.20947 | 0.58296  | 0.58296 | -0.2841     | 0.61183     | -0.8999  | 0.81591 |

|           |                 |          |         |             |             |          |         |  |
|-----------|-----------------|----------|---------|-------------|-------------|----------|---------|--|
|           | -1.2264         | 0.88997  | 0.58296 | 0.794767801 |             |          |         |  |
| PDSS1P2   | ENSG00000224637 | -0.20949 | 0.58297 | -0.49344    | 0.68915     | -0.20949 |         |  |
|           | 0.58297         | -0.20949 | 0.58297 | 0.58297     | 0.794767801 |          |         |  |
| RNASE13   | ENSG00000206150 | -0.20951 | 0.58298 | -0.20951    | 0.58298     | -0.20951 |         |  |
|           | 0.58298         | -0.20951 | 0.58298 | 0.58298     | 0.794767801 |          |         |  |
| DDX51     | ENSG00000185163 | -1.6607  | 0.95161 | -1.6568     | 0.95122     | -0.20958 | 0.583   |  |
|           | -0.20958        | 0.583    | 0.583   | 0.794767801 |             |          |         |  |
| NA        | ENSG00000237938 | -0.20961 | 0.58301 | -0.20961    | 0.58301     | -0.20961 | 0.58301 |  |
|           | -0.20961        | 0.58301  | 0.58301 | 0.794767801 |             |          |         |  |
| HTRA1     | ENSG00000166033 | -0.20963 | 0.58302 | -0.20963    | 0.58302     | -0.68145 | 0.75221 |  |
|           | -0.20963        | 0.58302  | 0.58302 | 0.794767801 |             |          |         |  |
| DPF2      | ENSG00000133884 | -0.29924 | 0.61762 | -0.34074    | 0.63335     | -0.83779 | 0.79893 |  |
|           | -0.20973        | 0.58306  | 0.58306 | 0.794782892 |             |          |         |  |
| NA        | ENSG00000259149 | -0.20975 | 0.58307 | -0.55429    | 0.71031     | -0.98489 | 0.83766 |  |
|           | -1.9831         | 0.97632  | 0.58307 | 0.794782892 |             |          |         |  |
| NA        | ENSG00000248542 | -0.20977 | 0.58308 | -0.20977    | 0.58308     | -0.20977 | 0.58308 |  |
|           | -0.20977        | 0.58308  | 0.58308 | 0.794782892 |             |          |         |  |
| COQ10A    | ENSG00000135469 | -0.62478 | 0.73394 | -0.34626    | 0.63543     | -0.20989 |         |  |
|           | 0.58312         | -0.20989 | 0.58312 | 0.58312     | 0.794815183 |          |         |  |
| NA        | ENSG00000255944 | -0.20999 | 0.58316 | -0.74035    | 0.77046     | -0.46923 | 0.68055 |  |
|           | -1.1953         | 0.88402  | 0.58316 | 0.794847471 |             |          |         |  |
| L1TD1     | ENSG00000240563 | -0.21012 | 0.58321 | -0.71471    | 0.76261     | -0.21012 | 0.58321 |  |
|           | -0.21012        | 0.58321  | 0.58321 | 0.794853952 |             |          |         |  |
| LINC00377 | ENSG00000229246 | -0.54887 | 0.70845 | -0.21014    | 0.58322     | -0.54887 |         |  |
|           | 0.70845         | -0.64987 | 0.74211 | 0.58322     | 0.794853952 |          |         |  |
| DUSP8     | ENSG00000184545 | -0.94803 | 0.82844 | -0.21016    | 0.58323     | -0.84148 | 0.79996 |  |
|           | -1.0084         | 0.84337  | 0.58323 | 0.794853952 |             |          |         |  |
| LINC02017 | ENSG00000243572 | -0.21017 | 0.58323 | -1.8995     | 0.97125     | -1.1576  |         |  |
|           | 0.87648         | -1.2659  | 0.89722 | 0.58323     | 0.794853952 |          |         |  |
| MTA3P1    | ENSG00000228937 | -0.85942 | 0.80495 | -0.21034    | 0.5833      | -0.21034 |         |  |
|           | 0.5833          | -0.42033 | 0.66288 | 0.5833      | 0.794918516 |          |         |  |
| RNU6-620P | ENSG00000206744 | -0.60178 | 0.72634 | -0.21036    | 0.58331     | -0.60178 |         |  |
|           | 0.72634         | -0.2195  | 0.58687 | 0.58331     | 0.794918516 |          |         |  |
| RN7SKP83  | ENSG00000252321 | -0.21045 | 0.58334 | -0.21045    | 0.58334     | -0.21045 |         |  |
|           | 0.58334         | -0.21045 | 0.58334 | 0.58334     | 0.794937168 |          |         |  |
| BUD13     | ENSG00000137656 | -0.43028 | 0.6665  | -0.28612    | 0.61261     | -0.92726 | 0.8231  |  |
|           | -0.21055        | 0.58338  | 0.58338 | 0.794960843 |             |          |         |  |
| NA        | ENSG00000260084 | -0.21057 | 0.58339 | -0.43093    | 0.66674     | -0.87652 | 0.80963 |  |
|           | -0.50491        | 0.69319  | 0.58339 | 0.794960843 |             |          |         |  |
| NAV2-AS5  | ENSG00000255043 | -0.21064 | 0.58342 | -0.21064    | 0.58342     | -0.21064 |         |  |
|           | 0.58342         | -0.21064 | 0.58342 | 0.58342     | 0.794962286 |          |         |  |
| RPL27     | ENSG00000131469 | -0.21067 | 0.58343 | -0.21067    | 0.58343     | -0.21067 | 0.58343 |  |
|           | -0.21067        | 0.58343  | 0.58343 | 0.794962286 |             |          |         |  |
| ZNF169    | ENSG00000175787 | -0.74667 | 0.77237 | -0.59904    | 0.72543     | -0.21071 |         |  |
|           | 0.58344         | -2.2386  | 0.98741 | 0.58344     | 0.794962286 |          |         |  |
| RNU6-651P | ENSG00000222972 | -0.21083 | 0.58349 | -0.21083    | 0.58349     | -0.21083 |         |  |
|           | 0.58349         | -0.21083 | 0.58349 | 0.58349     | 0.795008184 |          |         |  |
| ZSCAN1    | ENSG00000152467 | -0.39021 | 0.65181 | -0.211      | 0.58356     | -0.39021 |         |  |
|           | 0.65181         | -0.39021 | 0.65181 | 0.58356     | 0.795047634 |          |         |  |
| GADD45G   | ENSG00000130222 | -0.50109 | 0.69185 | -0.62834    | 0.73511     | -0.75636 |         |  |
|           | 0.77528         | -0.21107 | 0.58358 | 0.58358     | 0.795047634 |          |         |  |
| NA        | ENSG00000213846 | -2.1035  | 0.98229 | -1.1207     | 0.8688      | -2.533   | 0.99434 |  |
|           | -0.21106        | 0.58358  | 0.58358 | 0.795047634 |             |          |         |  |
| MIR3126   | ENSG00000266649 | -0.2112  | 0.58363 | -0.2112     | 0.58363     | -0.2112  |         |  |
|           | 0.58363         | -0.2112  | 0.58363 | 0.58363     | 0.795047634 |          |         |  |
| NA        | ENSG00000229821 | -0.21128 | 0.58367 | -0.21128    | 0.58367     | -0.21128 | 0.58367 |  |
|           | -0.21128        | 0.58367  | 0.58367 | 0.795047634 |             |          |         |  |
| TUBB4BP2  | ENSG00000224802 | -0.21135 | 0.58369 | -0.21135    | 0.58369     | -0.21135 |         |  |
|           | 0.58369         | -0.21135 | 0.58369 | 0.58369     | 0.795047634 |          |         |  |
| ANKRD34A  | ENSG00000272031 | -0.21135 | 0.58369 | -0.21135    | 0.58369     | -0.21135 |         |  |
|           | 0.58369         | -0.21135 | 0.58369 | 0.58369     | 0.795047634 |          |         |  |
| NA        | ENSG00000278431 | -0.21135 | 0.58369 | -0.21135    | 0.58369     | -0.21135 | 0.58369 |  |

|                 |                 |          |         |             |             |          |         |
|-----------------|-----------------|----------|---------|-------------|-------------|----------|---------|
|                 | -0.21135        | 0.58369  | 0.58369 | 0.795047634 |             |          |         |
| PSPC1-AS2       | ENSG00000226352 | -0.21136 | 0.5837  | -0.21136    | 0.5837      | -0.21136 |         |
|                 | 0.5837          | -0.42371 | 0.66411 | 0.5837      | 0.795047634 |          |         |
| NA              | ENSG00000265603 | -0.71686 | 0.76327 | -1.0255     | 0.84745     | -0.21138 | 0.5837  |
|                 | -0.53833        | 0.70483  | 0.5837  | 0.795047634 |             |          |         |
| DDX12P          | ENSG00000214826 | -0.2114  | 0.58371 | -0.84827    | 0.80186     | -1.0126  |         |
|                 | 0.84439         | -0.62746 | 0.73482 | 0.58371     | 0.795047634 |          |         |
| MTND4P13        | ENSG00000216713 | -0.21144 | 0.58373 | -0.21144    | 0.58373     | -0.21144 |         |
|                 | 0.58373         | -0.21144 | 0.58373 | 0.58373     | 0.795047634 |          |         |
| NA              | ENSG00000253851 | -0.21149 | 0.58375 | -0.21149    | 0.58375     | -0.21149 | 0.58375 |
|                 | -0.21149        | 0.58375  | 0.58375 | 0.795047634 |             |          |         |
| RPS26P21        | ENSG00000242829 | -0.21153 | 0.58376 | -0.21153    | 0.58376     | -0.21153 |         |
|                 | 0.58376         | -0.21153 | 0.58376 | 0.58376     | 0.795047634 |          |         |
| CST5            | ENSG00000170367 | -1.2851  | 0.90062 | -1.1649     | 0.87797     | -0.21156 | 0.58377 |
|                 | -0.9255         | 0.82265  | 0.58377 | 0.795047634 |             |          |         |
| RARA-AS1        | ENSG00000265666 | -0.21158 | 0.58378 | -0.21158    | 0.58378     | -0.21158 |         |
|                 | 0.58378         | -0.21158 | 0.58378 | 0.58378     | 0.795047634 |          |         |
| RNA5SP491       | ENSG00000199806 | -0.94628 | 0.828   | -0.21165    | 0.58381     | -0.94225 | 0.82697 |
|                 | -1.0029         | 0.84204  | 0.58381 | 0.795066271 |             |          |         |
| ADH5P5          | ENSG00000234865 | -0.21174 | 0.58384 | -0.21174    | 0.58384     | -0.21174 |         |
|                 | 0.58384         | -0.86833 | 0.80739 | 0.58384     | 0.795081322 |          |         |
| ADRA2C          | ENSG00000184160 | -0.2118  | 0.58387 | -0.88193    | 0.81109     | -0.2118  |         |
|                 | 0.58387         | -0.54413 | 0.70682 | 0.58387     | 0.795081322 |          |         |
| LINC01370       | ENSG00000237767 | -0.21179 | 0.58387 | -0.54921    | 0.70857     | -0.21179 |         |
|                 | 0.58387         | -0.2641  | 0.60415 | 0.58387     | 0.795081322 |          |         |
| NA              | ENSG00000240241 | -0.26949 | 0.60622 | -0.21186    | 0.58389     | -0.26949 | 0.60622 |
|                 | -1.4393         | 0.92497  | 0.58389 | 0.795086338 |             |          |         |
| NA              | ENSG00000257022 | -0.21194 | 0.58392 | -0.21194    | 0.58392     | -0.21194 | 0.58392 |
|                 | -0.21194        | 0.58392  | 0.58392 | 0.79509637  |             |          |         |
| NA              | ENSG00000230623 | -0.97205 | 0.83449 | -0.5361     | 0.70406     | -1.3404  | 0.90994 |
|                 | -0.21196        | 0.58393  | 0.58393 | 0.79509637  |             |          |         |
| RN7SL220P       | ENSG00000266467 | -0.21205 | 0.58397 | -0.21205    | 0.58397     | -0.21205 |         |
|                 | 0.58397         | -0.21205 | 0.58397 | 0.58397     | 0.795128618 |          |         |
| NA              | ENSG00000230177 | -1.3652  | 0.9139  | -0.21217    | 0.58401     | -0.47709 | 0.68335 |
|                 | -0.47709        | 0.68335  | 0.58401 | 0.795160863 |             |          |         |
| TMEM204         | ENSG00000131634 | -0.21223 | 0.58404 | -0.21223    | 0.58404     | -0.21223 |         |
|                 | 0.58404         | -0.21302 | 0.58434 | 0.58404     | 0.795179492 |          |         |
| TCF7            | ENSG00000081059 | -0.37253 | 0.64525 | -0.21235    | 0.58408     | -0.72689 | 0.76635 |
|                 | -0.94067        | 0.82656  | 0.58408 | 0.795193785 |             |          |         |
| FANCE           | ENSG00000112039 | -0.21247 | 0.58413 | -0.59998    | 0.72574     | -0.83737 | 0.79881 |
|                 | -1.4548         | 0.92714  | 0.58413 | 0.795193785 |             |          |         |
| RN7SKP74        | ENSG00000199719 | -0.21248 | 0.58413 | -0.21248    | 0.58413     | -0.21248 |         |
|                 | 0.58413         | -0.21248 | 0.58413 | 0.58413     | 0.795193785 |          |         |
| IGHM            | ENSG00000211899 | -1.4598  | 0.92782 | -1.5287     | 0.93683     | -0.21252 | 0.58415 |
|                 | -1.487          | 0.9315   | 0.58415 | 0.795193785 |             |          |         |
| SPECC1L-ADORA2A | ENSG00000258555 | -0.21252 | 0.58415 | -0.21252    | 0.58415     | -0.21252 |         |
|                 | 0.58415         | -0.21252 | 0.58415 | 0.58415     | 0.795193785 |          |         |
| NA              | ENSG00000254047 | -1.069   | 0.85746 | -0.21257    | 0.58417     | -0.29048 | 0.61427 |
|                 | -0.4822         | 0.68517  | 0.58417 | 0.795193785 |             |          |         |
| USP47           | ENSG00000170242 | -0.21259 | 0.58418 | -1.4753     | 0.92994     | -0.55228 | 0.70962 |
|                 | -0.26136        | 0.60309  | 0.58418 | 0.795193785 |             |          |         |
| TMIGD3          | ENSG00000121933 | -0.47431 | 0.68236 | -0.31263    | 0.62272     | -0.21262 |         |
|                 | 0.58419         | -0.23964 | 0.5947  | 0.58419     | 0.795193785 |          |         |
| NA              | ENSG00000263253 | -0.21265 | 0.5842  | -0.21265    | 0.5842      | -0.21265 | 0.5842  |
|                 | -0.21265        | 0.5842   | 0.5842  | 0.795193785 |             |          |         |
| TUBAP2          | ENSG00000214391 | -1.4339  | 0.9242  | -1.5465     | 0.93901     | -0.21273 |         |
|                 | 0.58423         | -1.5465  | 0.93901 | 0.58423     | 0.795193785 |          |         |
| LINC02129       | ENSG00000261045 | -0.21272 | 0.58423 | -0.21272    | 0.58423     | -0.88721 |         |
|                 | 0.81252         | -0.88721 | 0.81252 | 0.58423     | 0.795193785 |          |         |
| NA              | ENSG00000250411 | -0.21305 | 0.58435 | -0.21305    | 0.58435     | -0.21305 | 0.58435 |
|                 | -0.21305        | 0.58435  | 0.58435 | 0.795317696 |             |          |         |
| ANKHD1          | ENSG00000131503 | -0.65894 | 0.74503 | -0.87715    | 0.8098      | -0.21306 |         |

|            |                 |          |         |             |             |          |         |
|------------|-----------------|----------|---------|-------------|-------------|----------|---------|
|            | 0.58436         | -0.5463  | 0.70757 | 0.58436     | 0.795317696 |          |         |
| NA         | ENSG00000251679 | -0.21308 | 0.58437 | -0.21308    | 0.58437     | -0.21308 | 0.58437 |
|            | -0.21308        | 0.58437  | 0.58437 | 0.795317696 |             |          |         |
| RNA5SP366  | ENSG00000202324 | -0.21323 | 0.58443 | -0.83981    | 0.79949     | -0.21323 |         |
|            | 0.58443         | -0.21323 | 0.58443 | 0.58443     | 0.795354928 |          |         |
| NA         | ENSG00000238322 | -0.21323 | 0.58443 | -1.2586     | 0.89591     | -1.2586  | 0.89591 |
|            | -1.2586         | 0.89591  | 0.58443 | 0.795354928 |             |          |         |
| RNU6-97P   | ENSG00000200257 | -0.21329 | 0.58445 | -0.21329    | 0.58445     | -0.21329 |         |
|            | 0.58445         | -0.21329 | 0.58445 | 0.58445     | 0.795359934 |          |         |
| PLCG2      | ENSG00000197943 | -0.68289 | 0.75266 | -0.21343    | 0.5845      | -0.22135 | 0.58759 |
|            | -0.34618        | 0.6354   | 0.5845  | 0.795383552 |             |          |         |
| NA         | ENSG00000213036 | -0.21343 | 0.5845  | -0.37775    | 0.64719     | -0.37775 | 0.64719 |
|            | -0.37775        | 0.64719  | 0.5845  | 0.795383552 |             |          |         |
| WDR35      | ENSG00000118965 | -0.86783 | 0.80726 | -0.3554     | 0.63885     | -0.21354 | 0.58455 |
|            | -0.49993        | 0.69144  | 0.58455 | 0.795387769 |             |          |         |
| LINC01878  | ENSG00000234308 | -0.34719 | 0.63578 | -1.6001     | 0.94521     | -0.38393 |         |
|            | 0.64949         | -0.21356 | 0.58456 | 0.58456     | 0.795387769 |          |         |
| RNA5SP403  | ENSG00000200468 | -1.5817  | 0.94315 | -1.5817     | 0.94315     | -0.21363 |         |
|            | 0.58458         | -1.1554  | 0.87604 | 0.58458     | 0.795387769 |          |         |
| NA         | ENSG00000266171 | -0.21366 | 0.58459 | -0.21366    | 0.58459     | -0.21366 | 0.58459 |
|            | -0.21366        | 0.58459  | 0.58459 | 0.795387769 |             |          |         |
| NR2C2AP    | ENSG00000184162 | -0.2137  | 0.58461 | -0.2137     | 0.58461     | -0.2137  |         |
|            | 0.58461         | -0.2137  | 0.58461 | 0.58461     | 0.795387769 |          |         |
| MIR4458HG  | ENSG00000247516 | -0.21369 | 0.58461 | -0.21369    | 0.58461     | -0.21369 |         |
|            | 0.58461         | -0.21369 | 0.58461 | 0.58461     | 0.795387769 |          |         |
| PXMP2      | ENSG00000176894 | -1.3697  | 0.91461 | -0.21378    | 0.58464     | -1.7567  | 0.96052 |
|            | -0.79655        | 0.78714  | 0.58464 | 0.795387769 |             |          |         |
| NA         | ENSG00000226545 | -0.21379 | 0.58465 | -0.21379    | 0.58465     | -0.21379 | 0.58465 |
|            | -0.21379        | 0.58465  | 0.58465 | 0.795387769 |             |          |         |
| HNRNPA1P46 | ENSG00000228020 | -0.21381 | 0.58465 | -0.21381    | 0.58465     | -0.21381 |         |
|            | 0.58465         | -0.21381 | 0.58465 | 0.58465     | 0.795387769 |          |         |
| HCG18      | ENSG00000231074 | -1.0392  | 0.85064 | -0.91049    | 0.81872     | -0.21394 | 0.5847  |
|            | -1.5133         | 0.9349   | 0.5847  | 0.795424983 |             |          |         |
| PHC1P1     | ENSG00000179899 | -0.72248 | 0.765   | -0.23788    | 0.59401     | -0.21396 | 0.58471 |
|            | -0.36827        | 0.64366  | 0.58471 | 0.795424983 |             |          |         |
| RNU6-1131P | ENSG00000201825 | -0.98411 | 0.83747 | -0.21406    | 0.58475     | -1.2431  |         |
|            | 0.89308         | -0.21406 | 0.58475 | 0.58475     | 0.795432787 |          |         |
| NA         | ENSG00000234718 | -0.33894 | 0.63267 | -0.21406    | 0.58475     | -0.21406 | 0.58475 |
|            | -0.21406        | 0.58475  | 0.58475 | 0.795432787 |             |          |         |
| ZNF598     | ENSG00000167962 | -0.21419 | 0.5848  | -1.6446     | 0.94998     | -0.93988 |         |
|            | 0.82636         | -1.9055  | 0.97165 | 0.5848      | 0.795432787 |          |         |
| NA         | ENSG00000249563 | -0.50816 | 0.69433 | -2.0337     | 0.97901     | -1.4232  | 0.92266 |
|            | -0.21418        | 0.5848   | 0.5848  | 0.795432787 |             |          |         |
| FABP1      | ENSG00000163586 | -0.21425 | 0.58482 | -0.21425    | 0.58482     | -0.21425 | 0.58482 |
|            | -0.64682        | 0.74113  | 0.58482 | 0.795432787 |             |          |         |
| NA         | ENSG00000259922 | -0.21424 | 0.58482 | -0.21424    | 0.58482     | -0.21424 | 0.58482 |
|            | -0.90546        | 0.81739  | 0.58482 | 0.795432787 |             |          |         |
| NA         | ENSG00000203258 | -0.21426 | 0.58483 | -0.21426    | 0.58483     | -0.21426 | 0.58483 |
|            | -0.21426        | 0.58483  | 0.58483 | 0.795432787 |             |          |         |
| GTPBP3     | ENSG00000130299 | -0.84687 | 0.80147 | -0.84687    | 0.80147     | -0.84687 |         |
|            | 0.80147         | -0.21444 | 0.5849  | 0.5849      | 0.795484986 |          |         |
| NA         | ENSG00000273174 | -0.21452 | 0.58493 | -0.21452    | 0.58493     | -0.21452 | 0.58493 |
|            | -0.21452        | 0.58493  | 0.58493 | 0.795484986 |             |          |         |
| CCDC122    | ENSG00000151773 | -1.0279  | 0.84801 | -0.21457    | 0.58495     | -1.4076  |         |
|            | 0.92038         | -0.21495 | 0.5851  | 0.58495     | 0.795484986 |          |         |
| SLC35G6    | ENSG00000259224 | -0.21457 | 0.58495 | -0.21457    | 0.58495     | -0.21457 |         |
|            | 0.58495         | -0.21457 | 0.58495 | 0.58495     | 0.795484986 |          |         |
| NA         | ENSG00000279544 | -1.0141  | 0.84474 | -0.56881    | 0.71526     | -0.21457 | 0.58495 |
|            | -0.28142        | 0.6108   | 0.58495 | 0.795484986 |             |          |         |
| OR4A15     | ENSG00000181958 | -0.91084 | 0.81881 | -0.21465    | 0.58498     | -0.21465 |         |
|            | 0.58498         | -0.21465 | 0.58498 | 0.58498     | 0.795503583 |          |         |
| TYRO3P     | ENSG00000259581 | -1.2867  | 0.9009  | -0.62789    | 0.73496     | -0.21477 |         |

|            |                 |          |         |             |             |          |         |
|------------|-----------------|----------|---------|-------------|-------------|----------|---------|
|            | 0.58503         | -0.82328 | 0.79482 | 0.58503     | 0.795549376 |          |         |
| MIR5586    | ENSG00000263629 | -0.48098 | 0.68473 | -1.1003     | 0.86441     | -1.1003  |         |
|            | 0.86441         | -0.21483 | 0.58505 | 0.58505     | 0.795554373 |          |         |
| UVSSA      | ENSG00000163945 | -1.0717  | 0.85808 | -1.0286     | 0.84816     | -0.21509 | 0.58515 |
|            | -0.41656        | 0.6615   | 0.58515 | 0.795655935 |             |          |         |
| OVOL2      | ENSG00000125850 | -0.21512 | 0.58516 | -0.21512    | 0.58516     | -0.21512 | 0.58516 |
|            | -0.21512        | 0.58516  | 0.58516 | 0.795655935 |             |          |         |
| NA         | ENSG00000227459 | -0.54379 | 0.70671 | -1.6394     | 0.94944     | -0.68972 | 0.75482 |
|            | -0.21516        | 0.58518  | 0.58518 | 0.795655935 |             |          |         |
| NA         | ENSG00000279148 | -0.2152  | 0.58519 | -0.35235    | 0.63771     | -0.35235 | 0.63771 |
|            | -0.2152         | 0.58519  | 0.58519 | 0.795655935 |             |          |         |
| NA         | ENSG00000212579 | -0.21523 | 0.58521 | -0.62217    | 0.73308     | -0.62217 | 0.73308 |
|            | -0.62217        | 0.73308  | 0.58521 | 0.795660613 |             |          |         |
| GMCL1P2    | ENSG00000271070 | -0.61133 | 0.72951 | -0.21532    | 0.58524     | -0.61133 |         |
|            | 0.72951         | -0.61133 | 0.72951 | 0.58524     | 0.795660613 |          |         |
| NA         | ENSG00000250725 | -0.61212 | 0.72977 | -0.21542    | 0.58528     | -0.57107 | 0.71602 |
|            | -0.61212        | 0.72977  | 0.58528 | 0.795660613 |             |          |         |
| NA         | ENSG00000269071 | -0.21548 | 0.5853  | -0.21548    | 0.5853      | -0.21548 | 0.5853  |
|            | -0.21548        | 0.5853   | 0.5853  | 0.795660613 |             |          |         |
| YJEFN3     | ENSG00000250067 | -0.21565 | 0.58537 | -0.21565    | 0.58537     | -0.21565 |         |
|            | 0.58537         | -0.21565 | 0.58537 | 0.58537     | 0.795660613 |          |         |
| SF3A2      | ENSG00000104897 | -0.21577 | 0.58542 | -0.22429    | 0.58873     | -1.1669  | 0.87837 |
|            | -1.1669         | 0.87837  | 0.58542 | 0.795660613 |             |          |         |
| ZBTB41     | ENSG00000177888 | -0.21577 | 0.58542 | -0.21577    | 0.58542     | -0.50001 |         |
|            | 0.69147         | -1.397   | 0.91879 | 0.58542     | 0.795660613 |          |         |
| RNU6-102P  | ENSG00000207214 | -0.21578 | 0.58542 | -0.21578    | 0.58542     | -0.21578 |         |
|            | 0.58542         | -0.21578 | 0.58542 | 0.58542     | 0.795660613 |          |         |
| ZBTB8OS    | ENSG00000176261 | -0.21584 | 0.58544 | -1.0183     | 0.84574     | -0.3982  |         |
|            | 0.65476         | -0.21584 | 0.58544 | 0.58544     | 0.795660613 |          |         |
| SZRDR1     | ENSG00000055070 | -0.21584 | 0.58545 | -0.22569    | 0.58928     | -0.38474 | 0.64979 |
|            | -0.98397        | 0.83743  | 0.58545 | 0.795660613 |             |          |         |
| ZNF12      | ENSG00000164631 | -1.6106  | 0.94636 | -1.3426     | 0.9103      | -1.4948  | 0.93252 |
|            | -0.21593        | 0.58548  | 0.58548 | 0.795660613 |             |          |         |
| ZRSR2P1    | ENSG00000212643 | -0.21593 | 0.58548 | -0.21593    | 0.58548     | -0.21593 |         |
|            | 0.58548         | -0.21593 | 0.58548 | 0.58548     | 0.795660613 |          |         |
| MTND4LP20  | ENSG00000220514 | -0.21593 | 0.58548 | -0.21593    | 0.58548     | -0.21593 |         |
|            | 0.58548         | -0.21593 | 0.58548 | 0.58548     | 0.795660613 |          |         |
| MTND3P20   | ENSG00000220733 | -0.21593 | 0.58548 | -0.21593    | 0.58548     | -0.21593 |         |
|            | 0.58548         | -0.21593 | 0.58548 | 0.58548     | 0.795660613 |          |         |
| NA         | ENSG00000228957 | -0.21592 | 0.58548 | -0.21592    | 0.58548     | -0.21592 | 0.58548 |
|            | -0.21592        | 0.58548  | 0.58548 | 0.795660613 |             |          |         |
| ATP6V1G1P7 | ENSG00000230474 | -0.21594 | 0.58548 | -0.21594    | 0.58548     | -0.21594 |         |
|            | 0.58548         | -0.21594 | 0.58548 | 0.58548     | 0.795660613 |          |         |
| GPC5-AS1   | ENSG00000235984 | -0.21593 | 0.58548 | -0.56717    | 0.7147      | -0.21593 |         |
|            | 0.58548         | -0.21593 | 0.58548 | 0.58548     | 0.795660613 |          |         |
| NA         | ENSG00000251131 | -0.47232 | 0.68165 | -0.80202    | 0.78873     | -0.47232 | 0.68165 |
|            | -0.21596        | 0.58549  | 0.58549 | 0.795660613 |             |          |         |
| NA         | ENSG00000233459 | -0.21602 | 0.58551 | -0.21602    | 0.58551     | -0.21602 | 0.58551 |
|            | -0.21602        | 0.58551  | 0.58551 | 0.795660613 |             |          |         |
| SCAF8      | ENSG00000213079 | -1.6182  | 0.94719 | -1.6513     | 0.95066     | -0.21605 | 0.58552 |
|            | -1.6439         | 0.9499   | 0.58552 | 0.795660613 |             |          |         |
| NA         | ENSG00000200883 | -0.21611 | 0.58555 | -0.48166    | 0.68498     | -0.43708 | 0.66897 |
|            | -0.21611        | 0.58555  | 0.58555 | 0.795679192 |             |          |         |
| NA         | ENSG00000260093 | -0.40693 | 0.65797 | -1.0175     | 0.84554     | -0.4701  | 0.68086 |
|            | -0.21619        | 0.58558  | 0.58558 | 0.79568917  |             |          |         |
| FAM243B    | ENSG00000277277 | -0.71459 | 0.76257 | -0.21622    | 0.58559     | -0.21622 |         |
|            | 0.58559         | -0.21622 | 0.58559 | 0.58559     | 0.79568917  |          |         |
| WDR74      | ENSG00000133316 | -0.21628 | 0.58561 | -0.21628    | 0.58561     | -0.21628 | 0.58561 |
|            | -0.21628        | 0.58561  | 0.58561 | 0.795694158 |             |          |         |
| NA         | ENSG00000206592 | -0.21637 | 0.58565 | -0.21637    | 0.58565     | -0.21637 | 0.58565 |
|            | -0.48875        | 0.68749  | 0.58565 | 0.795717722 |             |          |         |
| NEBL-AS1   | ENSG00000231920 | -0.21639 | 0.58566 | -0.21639    | 0.58566     | -0.21639 |         |

|            |                 |          |         |             |             |          |         |
|------------|-----------------|----------|---------|-------------|-------------|----------|---------|
|            | 0.58566         | -0.21639 | 0.58566 | 0.58566     | 0.795717722 |          |         |
| HYAL4      | ENSG00000106302 | -1.3718  | 0.91494 | -0.88246    | 0.81124     | -0.21651 | 0.5857  |
|            | -0.76213        | 0.77701  | 0.5857  | 0.795749882 |             |          |         |
| CRNDE      | ENSG00000245694 | -0.55496 | 0.71054 | -0.69684    | 0.75705     | -0.21675 | 0.5858  |
|            | -2.208          | 0.98638  | 0.5858  | 0.795785275 |             |          |         |
| TMEM14A    | ENSG00000096092 | -1.1172  | 0.86806 | -0.21688    | 0.58585     | -0.21688 |         |
|            | 0.58585         | -1.6327  | 0.94873 | 0.58585     | 0.795785275 |          |         |
| RNU6-130P  | ENSG00000223044 | -0.40197 | 0.65615 | -0.21689    | 0.58585     | -1.5118  |         |
|            | 0.93471         | -1.5118  | 0.93471 | 0.58585     | 0.795785275 |          |         |
| KAT5       | ENSG00000172977 | -0.80933 | 0.79084 | -0.94569    | 0.82785     | -0.21692 | 0.58586 |
|            | -1.2343         | 0.89146  | 0.58586 | 0.795785275 |             |          |         |
| C3orf38    | ENSG00000179021 | -0.21701 | 0.5859  | -0.21701    | 0.5859      | -0.21701 |         |
|            | 0.5859          | -0.21701 | 0.5859  | 0.795785275 |             |          |         |
| NA         | ENSG00000255519 | -0.21701 | 0.5859  | -0.21701    | 0.5859      | -0.21701 | 0.5859  |
|            | -0.21701        | 0.5859   | 0.5859  | 0.795785275 |             |          |         |
| PPP1R18    | ENSG00000146112 | -0.6473  | 0.74128 | -0.6473     | 0.74128     | -1.1599  |         |
|            | 0.87696         | -0.21705 | 0.58591 | 0.58591     | 0.795785275 |          |         |
| NA         | ENSG00000258461 | -0.21703 | 0.58591 | -0.21703    | 0.58591     | -0.21703 | 0.58591 |
|            | -0.21703        | 0.58591  | 0.58591 | 0.795785275 |             |          |         |
| CEP63      | ENSG00000182923 | -1.204   | 0.88571 | -0.21708    | 0.58593     | -0.43623 | 0.66866 |
|            | -0.2721         | 0.60723  | 0.58593 | 0.795785275 |             |          |         |
| RNU6-318P  | ENSG00000207477 | -0.21714 | 0.58595 | -0.21714    | 0.58595     | -0.21714 |         |
|            | 0.58595         | -0.21714 | 0.58595 | 0.58595     | 0.795785275 |          |         |
| NA         | ENSG00000224278 | -0.21714 | 0.58595 | -0.21714    | 0.58595     | -0.21714 | 0.58595 |
|            | -0.21714        | 0.58595  | 0.58595 | 0.795785275 |             |          |         |
| LINC00332  | ENSG00000230710 | -1.7268  | 0.95789 | -0.48141    | 0.68489     | -1.516   |         |
|            | 0.93524         | -0.21714 | 0.58595 | 0.58595     | 0.795785275 |          |         |
| NA         | ENSG00000230952 | -0.4641  | 0.67871 | -0.4641     | 0.67871     | -0.4641  | 0.67871 |
|            | -0.21714        | 0.58595  | 0.58595 | 0.795785275 |             |          |         |
| LINC02419  | ENSG00000256906 | -0.21716 | 0.58596 | -0.21716    | 0.58596     | -1.2516  |         |
|            | 0.89464         | -2.0559  | 0.9801  | 0.58596     | 0.795785275 |          |         |
| NA         | ENSG00000276075 | -1.1446  | 0.8738  | -0.21723    | 0.58598     | -1.1446  | 0.8738  |
|            | -0.76307        | 0.77729  | 0.58598 | 0.795785275 |             |          |         |
| SCUBE1-AS2 | ENSG00000236272 | -0.21724 | 0.58599 | -0.21724    | 0.58599     | -0.21724 |         |
|            | 0.58599         | -0.21724 | 0.58599 | 0.58599     | 0.795785275 |          |         |
| GFAP       | ENSG00000131095 | -0.65217 | 0.74285 | -0.63304    | 0.73665     | -0.2173  | 0.58601 |
|            | -0.60236        | 0.72653  | 0.58601 | 0.795785275 |             |          |         |
| KRT43P     | ENSG00000236473 | -0.21732 | 0.58602 | -0.21732    | 0.58602     | -0.21732 |         |
|            | 0.58602         | -0.21732 | 0.58602 | 0.58602     | 0.795785275 |          |         |
| LINC02462  | ENSG00000251291 | -0.6446  | 0.74041 | -0.6446     | 0.74041     | -0.6446  |         |
|            | 0.74041         | -0.21741 | 0.58606 | 0.58606     | 0.795796609 |          |         |
| GCOM2      | ENSG00000227725 | -1.5317  | 0.9372  | -1.5317     | 0.9372      | -1.1519  | 0.87532 |
|            | -0.2175         | 0.58609  | 0.58609 | 0.795796609 |             |          |         |
| NA         | ENSG00000262920 | -0.2175  | 0.58609 | -0.2175     | 0.58609     | -0.2175  | 0.58609 |
|            | -0.2175         | 0.58609  | 0.58609 | 0.795796609 |             |          |         |
| NA         | ENSG00000242327 | -0.21753 | 0.5861  | -0.21753    | 0.5861      | -0.21753 | 0.5861  |
|            | -0.21753        | 0.5861   | 0.5861  | 0.795796609 |             |          |         |
| RNA5SP79   | ENSG00000202063 | -0.21755 | 0.58611 | -0.21755    | 0.58611     | -0.21755 |         |
|            | 0.58611         | -0.21755 | 0.58611 | 0.58611     | 0.795796609 |          |         |
| ADAM20P3   | ENSG00000249162 | -0.54473 | 0.70703 | -0.54473    | 0.70703     | -0.54473 |         |
|            | 0.70703         | -0.21762 | 0.58614 | 0.58614     | 0.795802081 |          |         |
| SLC37A1    | ENSG00000160190 | -0.21769 | 0.58616 | -0.3027     | 0.61894     | -0.68901 |         |
|            | 0.75459         | -0.34255 | 0.63403 | 0.58616     | 0.795802081 |          |         |
| TRAV5      | ENSG00000211779 | -0.21777 | 0.58619 | -0.49483    | 0.68964     | -1.47    | 0.92922 |
|            | -0.8063         | 0.78997  | 0.58619 | 0.795802081 |             |          |         |
| NA         | ENSG00000213296 | -0.21776 | 0.58619 | -0.21776    | 0.58619     | -0.21776 | 0.58619 |
|            | -0.21776        | 0.58619  | 0.58619 | 0.795802081 |             |          |         |
| ZNF782     | ENSG00000196597 | -0.6084  | 0.72854 | -1.1964     | 0.88424     | -0.21779 |         |
|            | 0.5862          | -0.68848 | 0.75442 | 0.5862      | 0.795802081 |          |         |
| LINC02199  | ENSG00000250198 | -0.21785 | 0.58623 | -0.21785    | 0.58623     | -0.75187 |         |
|            | 0.77394         | -0.21785 | 0.58623 | 0.58623     | 0.795802081 |          |         |
| MIR1200    | ENSG00000221325 | -0.21788 | 0.58624 | -0.21788    | 0.58624     | -0.21788 |         |

|             |                 |          |         |             |             |          |          |  |
|-------------|-----------------|----------|---------|-------------|-------------|----------|----------|--|
|             | 0.58624         | -0.21788 | 0.58624 | 0.58624     | 0.795802081 |          |          |  |
| NA          | ENSG00000260577 | -0.9045  | 0.81714 | -0.21796    | 0.58627     | -0.9045  | 0.81714  |  |
|             | -0.9045         | 0.81714  | 0.58627 | 0.795802081 |             |          |          |  |
| SPCS2       | ENSG00000118363 | -0.96834 | 0.83356 | -0.96834    | 0.83356     | -0.21798 | 0.58628  |  |
|             | -1.2891         | 0.90132  | 0.58628 | 0.795802081 |             |          |          |  |
| RNU6ATAC36P | ENSG00000252684 | -0.21803 | 0.5863  | -0.21803    | 0.5863      | 0.5863   | -0.21803 |  |
|             | 0.5863          | -0.21803 | 0.5863  | 0.5863      | 0.795802081 |          |          |  |
| FKBP3       | ENSG00000100442 | -0.21807 | 0.58631 | -0.90321    | 0.81679     | -0.21807 | 0.58631  |  |
|             | -0.88022        | 0.81063  | 0.58631 | 0.795802081 |             |          |          |  |
| NA          | ENSG00000232306 | -0.45103 | 0.67401 | -0.27205    | 0.60721     | -0.23877 | 0.59436  |  |
|             | -0.21806        | 0.58631  | 0.58631 | 0.795802081 |             |          |          |  |
| MPZL2       | ENSG00000149573 | -0.29836 | 0.61729 | -0.21814    | 0.58634     | -0.21814 | 0.58634  |  |
|             | -0.65689        | 0.74438  | 0.58634 | 0.79581702  |             |          |          |  |
| C1D         | ENSG00000197223 | -1.4583  | 0.92763 | -0.82922    | 0.79651     | -0.21821 | 0.58637  |  |
|             | -0.51694        | 0.6974   | 0.58637 | 0.79581702  |             |          |          |  |
| NA          | ENSG00000283148 | -1.103   | 0.86498 | -0.82602    | 0.7956      | -0.21821 | 0.58637  |  |
|             | -1.2531         | 0.89492  | 0.58637 | 0.79581702  |             |          |          |  |
| KCNIP4      | ENSG00000185774 | -0.21832 | 0.58641 | -0.59481    | 0.72402     | -0.29597 |          |  |
|             | 0.61637         | -1.0736  | 0.85851 | 0.58641     | 0.795849142 |          |          |  |
| HOXC6       | ENSG00000197757 | -0.2779  | 0.60946 | -0.21853    | 0.58649     | -0.21853 | 0.58649  |  |
|             | -0.59827        | 0.72517  | 0.58649 | 0.795904787 |             |          |          |  |
| NA          | ENSG00000267681 | -0.21853 | 0.58649 | -0.21853    | 0.58649     | -0.21853 | 0.58649  |  |
|             | -0.21853        | 0.58649  | 0.58649 | 0.795904787 |             |          |          |  |
| NA          | ENSG00000223633 | -0.87943 | 0.81041 | -0.30547    | 0.62        | -0.21854 | 0.5865   |  |
|             | -0.36061        | 0.6408   | 0.5865  | 0.795904787 |             |          |          |  |
| NA          | ENSG00000253596 | -0.21861 | 0.58652 | -1.0133     | 0.84455     | -0.22598 | 0.58939  |  |
|             | -1.0594         | 0.85529  | 0.58652 | 0.795909763 |             |          |          |  |
| RNU1-82P    | ENSG00000212153 | -0.21874 | 0.58657 | -0.21874    | 0.58657     | -0.21874 |          |  |
|             | 0.58657         | -0.21874 | 0.58657 | 0.58657     | 0.795926047 |          |          |  |
| LINC02464   | ENSG00000257677 | -0.21875 | 0.58658 | -0.21875    | 0.58658     | -0.21875 |          |  |
|             | 0.58658         | -0.21875 | 0.58658 | 0.58658     | 0.795926047 |          |          |  |
| NA          | ENSG00000260912 | -0.21884 | 0.58661 | -0.21884    | 0.58661     | -0.21884 | 0.58661  |  |
|             | -0.21884        | 0.58661  | 0.58661 | 0.795926047 |             |          |          |  |
| DEAF1       | ENSG00000177030 | -0.32495 | 0.62739 | -0.21889    | 0.58663     | -1.2294  | 0.89054  |  |
|             | -0.51104        | 0.69534  | 0.58663 | 0.795926047 |             |          |          |  |
| RNU4-20P    | ENSG00000202471 | -0.48593 | 0.68649 | -0.2189     | 0.58663     | -0.48593 |          |  |
|             | 0.68649         | -0.48593 | 0.68649 | 0.58663     | 0.795926047 |          |          |  |
| NA          | ENSG00000225450 | -0.21888 | 0.58663 | -0.21888    | 0.58663     | -0.21888 | 0.58663  |  |
|             | -0.21888        | 0.58663  | 0.58663 | 0.795926047 |             |          |          |  |
| SRSF1P1     | ENSG00000224640 | -0.21896 | 0.58666 | -0.21896    | 0.58666     | -0.21896 |          |  |
|             | 0.58666         | -0.21896 | 0.58666 | 0.58666     | 0.795944589 |          |          |  |
| TBCK        | ENSG00000145348 | -0.5559  | 0.71086 | -0.21903    | 0.58669     | -0.98752 | 0.83831  |  |
|             | -0.70344        | 0.75911  | 0.58669 | 0.79596313  |             |          |          |  |
| NA          | ENSG00000253728 | -1.7708  | 0.9617  | -1.0429     | 0.85151     | -0.21922 | 0.58676  |  |
|             | -0.21922        | 0.58676  | 0.58676 | 0.796002909 |             |          |          |  |
| RN7SL280P   | ENSG00000244671 | -0.6175  | 0.73155 | -0.21927    | 0.58678     | -0.41893 |          |  |
|             | 0.66237         | -0.40035 | 0.65555 | 0.58678     | 0.796002909 |          |          |  |
| OR10K1      | ENSG00000173285 | -0.21931 | 0.5868  | -0.48961    | 0.68779     | -1.2294  |          |  |
|             | 0.89053         | -1.2324  | 0.89111 | 0.5868      | 0.796002909 |          |          |  |
| NA          | ENSG00000212335 | -1.0937  | 0.86295 | -0.21934    | 0.58681     | -0.21934 | 0.58681  |  |
|             | -0.75415        | 0.77462  | 0.58681 | 0.796002909 |             |          |          |  |
| NA          | ENSG00000253778 | -0.51227 | 0.69577 | -0.7977     | 0.78748     | -0.63981 | 0.73885  |  |
|             | -0.21935        | 0.58681  | 0.58681 | 0.796002909 |             |          |          |  |
| MAP2        | ENSG00000078018 | -0.5336  | 0.70319 | -0.21944    | 0.58685     | -0.84037 | 0.79965  |  |
|             | -1.1445         | 0.87379  | 0.58685 | 0.796002909 |             |          |          |  |
| TEX10       | ENSG00000136891 | -0.77731 | 0.78151 | -1.3094     | 0.90479     | -0.21944 | 0.58685  |  |
|             | -1.3232         | 0.90711  | 0.58685 | 0.796002909 |             |          |          |  |
| NA          | ENSG00000204429 | -0.21945 | 0.58685 | -0.21945    | 0.58685     | -0.21945 | 0.58685  |  |
|             | -0.21945        | 0.58685  | 0.58685 | 0.796002909 |             |          |          |  |
| RXYLT1      | ENSG00000118600 | -1.8226  | 0.96582 | -1.4599     | 0.92784     | -0.21961 |          |  |
|             | 0.58691         | -0.87317 | 0.80872 | 0.58691     | 0.796039977 |          |          |  |
| NA          | ENSG00000234726 | -1.4424  | 0.92541 | -1.7797     | 0.96243     | -1.3293  | 0.90813  |  |

|             |                 |          |         |             |             |          |         |
|-------------|-----------------|----------|---------|-------------|-------------|----------|---------|
|             | -0.2196         | 0.58691  | 0.58691 | 0.796039977 |             |          |         |
| SNORD115-30 | ENSG00000200987 | -0.21986 | 0.58701 | -0.21986    | 0.58701     | -0.21986 | 0.58701 |
|             | 0.58701         | -0.21986 | 0.58701 | 0.58701     | 0.796143901 |          |         |
| PKHD1L1     | ENSG00000205038 | -0.49964 | 0.69134 | -0.21987    | 0.58702     | -0.49964 |         |
|             | 0.69134         | -0.21987 | 0.58702 | 0.58702     | 0.796143901 |          |         |
| CNGB1       | ENSG00000070729 | -0.24094 | 0.5952  | -0.21999    | 0.58706     | -0.24566 | 0.59703 |
|             | -0.9129         | 0.81935  | 0.58706 | 0.796143901 |             |          |         |
| ART3        | ENSG00000156219 | -0.22001 | 0.58707 | -0.63148    | 0.73614     | -0.39258 | 0.65268 |
|             | -0.40606        | 0.65765  | 0.58707 | 0.796143901 |             |          |         |
| NA          | ENSG00000259654 | -0.22006 | 0.58709 | -0.22006    | 0.58709     | -0.22006 | 0.58709 |
|             | -0.22006        | 0.58709  | 0.58709 | 0.796143901 |             |          |         |
| YBX2P1      | ENSG00000213438 | -0.2201  | 0.5871  | -1.5737     | 0.94222     | -0.85588 |         |
|             | 0.80397         | -1.2866  | 0.90088 | 0.5871      | 0.796143901 |          |         |
| MIR527      | ENSG00000207979 | -0.22011 | 0.58711 | -0.22011    | 0.58711     | -0.22011 |         |
|             | 0.58711         | -0.22011 | 0.58711 | 0.58711     | 0.796143901 |          |         |
| NA          | ENSG00000228627 | -0.22017 | 0.58713 | -0.42731    | 0.66542     | -0.43589 | 0.66854 |
|             | -0.43589        | 0.66854  | 0.58713 | 0.796143901 |             |          |         |
| NA          | ENSG00000266213 | -0.22022 | 0.58715 | -0.7793     | 0.7821      | -1.8287  | 0.96628 |
|             | -1.95           | 0.97441  | 0.58715 | 0.796143901 |             |          |         |
| NA          | ENSG00000270994 | -0.22021 | 0.58715 | -0.22021    | 0.58715     | -0.22021 | 0.58715 |
|             | -0.22021        | 0.58715  | 0.58715 | 0.796143901 |             |          |         |
| HNRNPDL4    | ENSG00000270837 | -0.22037 | 0.58721 | -0.22037    | 0.58721     | -0.22037 |         |
|             | 0.58721         | -0.22037 | 0.58721 | 0.58721     | 0.796194508 |          |         |
| RPS4XP13    | ENSG00000240371 | -0.2204  | 0.58722 | -0.2204     | 0.58722     | -0.2204  |         |
|             | 0.58722         | -0.2204  | 0.58722 | 0.58722     | 0.796194508 |          |         |
| NA          | ENSG00000251771 | -0.4496  | 0.6735  | -0.4496     | 0.6735      | -0.22045 | 0.58724 |
|             | -0.4496         | 0.6735   | 0.58724 | 0.796199471 |             |          |         |
| RN7SL304P   | ENSG00000242688 | -0.2207  | 0.58734 | -1.563      | 0.94098     | -0.2207  |         |
|             | 0.58734         | -0.2207  | 0.58734 | 0.58734     | 0.796266283 |          |         |
| ZNF287      | ENSG00000141040 | -2.0491  | 0.97978 | -2.0491     | 0.97978     | -2.0491  |         |
|             | 0.97978         | -0.22076 | 0.58736 | 0.58736     | 0.796266283 |          |         |
| NA          | ENSG00000213655 | -1.2094  | 0.88675 | -1.6463     | 0.95014     | -1.0343  | 0.84951 |
|             | -0.22084        | 0.58739  | 0.58739 | 0.796266283 |             |          |         |
| GPC5        | ENSG00000179399 | -0.63978 | 0.73884 | -0.2209     | 0.58741     | -1.1216  | 0.86899 |
|             | -0.81169        | 0.79151  | 0.58741 | 0.796266283 |             |          |         |
| NA          | ENSG00000228010 | -1.7026  | 0.95568 | -1.7026     | 0.95568     | -1.3804  | 0.91627 |
|             | -0.22088        | 0.58741  | 0.58741 | 0.796266283 |             |          |         |
| NA          | ENSG00000253551 | -0.2209  | 0.58742 | -0.2209     | 0.58742     | -0.2209  | 0.58742 |
|             | -0.2209         | 0.58742  | 0.58742 | 0.796266283 |             |          |         |
| NA          | ENSG00000254837 | -0.22092 | 0.58742 | -0.22092    | 0.58742     | -0.22092 | 0.58742 |
|             | -0.22092        | 0.58742  | 0.58742 | 0.796266283 |             |          |         |
| NA          | ENSG00000268912 | -0.22092 | 0.58742 | -0.22092    | 0.58742     | -0.22092 | 0.58742 |
|             | -0.22092        | 0.58742  | 0.58742 | 0.796266283 |             |          |         |
| NA          | ENSG00000248347 | -0.39737 | 0.65445 | -0.50067    | 0.6917      | -0.22107 | 0.58748 |
|             | -0.99753        | 0.84075  | 0.58748 | 0.796316867 |             |          |         |
| RNU6-1151P  | ENSG00000207415 | -0.8091  | 0.79077 | -1.0233     | 0.84692     | -0.27285 |         |
|             | 0.60752         | -0.2211  | 0.58749 | 0.58749     | 0.796316867 |          |         |
| NA          | ENSG00000257062 | -1.0694  | 0.85755 | -0.22115    | 0.58751     | -0.45974 | 0.67715 |
|             | -0.52569        | 0.70045  | 0.58751 | 0.796321826 |             |          |         |
| SIT1        | ENSG00000137078 | -0.5985  | 0.72525 | -0.80922    | 0.79081     | -1.0666  | 0.85692 |
|             | -0.22131        | 0.58757  | 0.58757 | 0.796381    |             |          |         |
| LRRC3C      | ENSG00000204913 | -0.22139 | 0.58761 | -0.22139    | 0.58761     | -0.22139 |         |
|             | 0.58761         | -0.22139 | 0.58761 | 0.58761     | 0.796413064 |          |         |
| SMC5-AS1    | ENSG00000268364 | -0.22148 | 0.58764 | -0.22148    | 0.58764     | -0.22148 |         |
|             | 0.58764         | -0.22148 | 0.58764 | 0.58764     | 0.796419334 |          |         |
| NA          | ENSG00000237163 | -0.22153 | 0.58766 | -0.22153    | 0.58766     | -0.22153 | 0.58766 |
|             | -0.22153        | 0.58766  | 0.58766 | 0.796419334 |             |          |         |
| FAM234B     | ENSG00000084444 | -0.26157 | 0.60317 | -0.22156    | 0.58767     | -0.2805  |         |
|             | 0.61045         | -0.44479 | 0.67177 | 0.58767     | 0.796419334 |          |         |
| OR6N2       | ENSG00000188340 | -1.1356  | 0.87194 | -0.53288    | 0.70294     | -0.22157 | 0.58768 |
|             | -0.22157        | 0.58768  | 0.58768 | 0.796419334 |             |          |         |
| L3MBTL3     | ENSG00000198945 | -0.41425 | 0.66066 | -0.59427    | 0.72384     | -1.4736  |         |



|              |                 |          |         |             |             |          |         |
|--------------|-----------------|----------|---------|-------------|-------------|----------|---------|
|              | 0.92971         | -0.22172 | 0.58773 | 0.58773     | 0.796433181 |          |         |
| NA           | ENSG00000273212 | -0.22172 | 0.58773 | -0.22172    | 0.58773     | -0.22172 | 0.58773 |
|              | -0.22172        | 0.58773  | 0.58773 | 0.796433181 |             |          |         |
| LINC01864    | ENSG00000267522 | -0.22175 | 0.58775 | -0.57385    | 0.71696     | -1.3214  |         |
|              | 0.90681         | -1.3214  | 0.90681 | 0.58775     | 0.796433181 |          |         |
| MTCO3P31     | ENSG00000217044 | -0.22183 | 0.58778 | -0.22183    | 0.58778     | -0.22183 |         |
|              | 0.58778         | -0.22183 | 0.58778 | 0.58778     | 0.796433181 |          |         |
| SLC16A12-AS1 | ENSG00000234452 | -0.22187 | 0.58779 | -0.22187    | 0.58779     | -0.22187 | 0.58779 |
|              | 0.58779         | -0.22187 | 0.58779 | 0.58779     | 0.796433181 |          |         |
| NA           | ENSG00000259007 | -0.22187 | 0.58779 | -0.22187    | 0.58779     | -0.22187 | 0.58779 |
|              | -0.22187        | 0.58779  | 0.58779 | 0.796433181 |             |          |         |
| C12orf45     | ENSG00000151131 | -0.22193 | 0.58781 | -0.68314    | 0.75274     | -0.99324 |         |
|              | 0.8397          | -0.54785 | 0.7081  | 0.58781     | 0.796433181 |          |         |
| RPL21P5      | ENSG00000258640 | -0.22196 | 0.58783 | -0.22196    | 0.58783     | -0.22196 |         |
|              | 0.58783         | -0.22196 | 0.58783 | 0.58783     | 0.796433181 |          |         |
| SNHG15       | ENSG00000232956 | -0.48478 | 0.68608 | -0.30955    | 0.62155     | -0.22204 |         |
|              | 0.58786         | -0.48478 | 0.68608 | 0.58786     | 0.796433181 |          |         |
| NA           | ENSG00000230383 | -0.22208 | 0.58787 | -0.64645    | 0.74101     | -1.034   | 0.84943 |
|              | -1.034          | 0.84943  | 0.58787 | 0.796433181 |             |          |         |
| NA           | ENSG00000267174 | -0.22206 | 0.58787 | -0.22206    | 0.58787     | -0.22206 | 0.58787 |
|              | -0.22206        | 0.58787  | 0.58787 | 0.796433181 |             |          |         |
| TLR2         | ENSG00000137462 | -0.22225 | 0.58794 | -0.22225    | 0.58794     | -0.22225 | 0.58794 |
|              | -0.22225        | 0.58794  | 0.58794 | 0.796483729 |             |          |         |
| RN7SL766P    | ENSG00000244197 | -0.91126 | 0.81892 | -0.22226    | 0.58794     | -0.35731 |         |
|              | 0.63957         | -0.8523  | 0.80298 | 0.58794     | 0.796483729 |          |         |
| NPTX2        | ENSG00000106236 | -0.22235 | 0.58798 | -0.22235    | 0.58798     | -1.6679  | 0.95233 |
|              | -0.27641        | 0.60888  | 0.58798 | 0.796515773 |             |          |         |
| IGLV3-27     | ENSG00000211658 | -0.22239 | 0.588   | -0.62998    | 0.73565     | -0.2568  | 0.60133 |
|              | -0.53407        | 0.70335  | 0.588   | 0.796520724 |             |          |         |
| RN7SL181P    | ENSG00000243738 | -0.22246 | 0.58802 | -0.22246    | 0.58802     | -0.22246 |         |
|              | 0.58802         | -0.22246 | 0.58802 | 0.58802     | 0.796525674 |          |         |
| NA           | ENSG00000277669 | -0.22265 | 0.5881  | -0.22265    | 0.5881      | -0.22265 | 0.5881  |
|              | -0.22265        | 0.5881   | 0.5881  | 0.796603299 |             |          |         |
| ZNF330       | ENSG00000109445 | -0.2227  | 0.58811 | -0.38615    | 0.65031     | -0.38615 |         |
|              | 0.65031         | -0.38615 | 0.65031 | 0.58811     | 0.796603299 |          |         |
| ATP6V0CP4    | ENSG00000284138 | -0.22289 | 0.58819 | -0.22289    | 0.58819     | -0.22289 |         |
|              | 0.58819         | -0.22289 | 0.58819 | 0.58819     | 0.796678554 |          |         |
| NA           | ENSG00000269881 | -0.22291 | 0.5882  | -0.87694    | 0.80974     | -0.87694 | 0.80974 |
|              | -0.87694        | 0.80974  | 0.5882  | 0.796678554 |             |          |         |
| NA           | ENSG00000224431 | -0.22305 | 0.58825 | -0.22305    | 0.58825     | -0.22305 | 0.58825 |
|              | -0.22305        | 0.58825  | 0.58825 | 0.796678554 |             |          |         |
| PPIAP32      | ENSG00000233319 | -0.28239 | 0.61118 | -0.22307    | 0.58826     | -0.28239 |         |
|              | 0.61118         | -0.28239 | 0.61118 | 0.58826     | 0.796678554 |          |         |
| MIR23B       | ENSG00000207563 | -0.22312 | 0.58828 | -0.22312    | 0.58828     | -0.22312 |         |
|              | 0.58828         | -0.22312 | 0.58828 | 0.58828     | 0.796678554 |          |         |
| MTND4LP22    | ENSG00000248133 | -2.1933  | 0.98586 | -2.1933     | 0.98586     | -0.71168 |         |
|              | 0.76167         | -0.22313 | 0.58828 | 0.58828     | 0.796678554 |          |         |
| NA           | ENSG00000259119 | -0.22312 | 0.58828 | -0.22312    | 0.58828     | -0.22312 | 0.58828 |
|              | -0.22312        | 0.58828  | 0.58828 | 0.796678554 |             |          |         |
| NA           | ENSG00000255129 | -1.4123  | 0.92106 | -1.038      | 0.85036     | -0.22327 | 0.58834 |
|              | -1.4438         | 0.9256   | 0.58834 | 0.796737667 |             |          |         |
| XRCC2        | ENSG00000196584 | -0.22336 | 0.58837 | -0.93773    | 0.82581     | -0.53805 | 0.70473 |
|              | -1.0087         | 0.84343  | 0.58837 | 0.796756151 |             |          |         |
| OR1R1P       | ENSG00000180042 | -0.22357 | 0.58845 | -0.33028    | 0.62941     | -1.7591  |         |
|              | 0.96072         | -1.7591  | 0.96072 | 0.58845     | 0.79683868  |          |         |
| RN7SKP272    | ENSG00000252797 | -0.22365 | 0.58848 | -0.32018    | 0.62559     | -0.69779 |         |
|              | 0.75735         | -0.69779 | 0.75735 | 0.58848     | 0.79683868  |          |         |
| LINC02684    | ENSG00000255512 | -0.92911 | 0.82358 | -1.2267     | 0.89003     | -0.57096 |         |
|              | 0.71599         | -0.22363 | 0.58848 | 0.58848     | 0.79683868  |          |         |
| NEMP2        | ENSG00000189362 | -0.22371 | 0.58851 | -0.22371    | 0.58851     | -0.22371 | 0.58851 |
|              | -2.241          | 0.98749  | 0.58851 | 0.796857159 |             |          |         |
| HSPA8P13     | ENSG00000253425 | -0.63367 | 0.73685 | -0.56146    | 0.71276     | -0.2239  |         |

|           |                 |             |         |             |             |          |         |
|-----------|-----------------|-------------|---------|-------------|-------------|----------|---------|
|           | 0.58858         | -0.57922    | 0.71878 | 0.58858     | 0.796899053 |          |         |
| ARHGEF10  | ENSG00000104728 | -0.78317    | 0.78324 | -0.22392    | 0.58859     | -1.0357  |         |
|           | 0.84983         | -0.42839    | 0.66582 | 0.58859     | 0.796899053 |          |         |
| CCNYL1    | ENSG00000163249 | -0.26317    | 0.60379 | -0.22392    | 0.58859     | -0.35287 |         |
|           | 0.63791         | -0.3205     | 0.62571 | 0.58859     | 0.796899053 |          |         |
| RPLP1P5   | ENSG00000214657 | -0.22407    | 0.58865 | -0.22407    | 0.58865     | -0.22407 |         |
|           | 0.58865         | -0.41077    | 0.65938 | 0.58865     | 0.796937273 |          |         |
| RNASE6    | ENSG00000169413 | -0.22416    | 0.58869 | -0.50819    | 0.69434     | -0.50819 |         |
|           | 0.69434         | -0.50819    | 0.69434 | 0.58869     | 0.796937273 |          |         |
| ARF3      | ENSG00000134287 | -0.57287    | 0.71663 | -0.22421    | 0.5887      | -0.22421 | 0.5887  |
|           | -0.49834        | 0.69088     | 0.5887  | 0.796937273 |             |          |         |
| OR52S1P   | ENSG00000237354 | -0.2242     | 0.5887  | -0.2242     | 0.5887      | -0.2242  |         |
|           | 0.5887          | -0.2242     | 0.5887  | 0.5887      | 0.796937273 |          |         |
| NA        | ENSG00000240915 | -0.61895    | 0.73203 | -1.2261     | 0.88993     | -0.22419 | 0.5887  |
|           | -0.22419        | 0.5887      | 0.5887  | 0.796937273 |             |          |         |
| NA        | ENSG00000269148 | -0.22429    | 0.58873 | -0.22429    | 0.58873     | -0.22429 | 0.58873 |
|           | -0.22429        | 0.58873     | 0.58873 | 0.796955745 |             |          |         |
| RBMS1     | ENSG00000153250 | -0.44955    | 0.67348 | -0.41331    | 0.66031     | -1.3335  | 0.90881 |
|           | -0.22439        | 0.58877     | 0.58877 | 0.796987752 |             |          |         |
| NA        | ENSG00000260855 | -0.22451    | 0.58882 | -0.22451    | 0.58882     | -0.22451 | 0.58882 |
|           | -0.22451        | 0.58882     | 0.58882 | 0.797017467 |             |          |         |
| MAN2A1    | ENSG00000112893 | -2.8279     | 0.99766 | -2.5236     | 0.99419     | -2.1468  |         |
|           | 0.9841          | -0.22462    | 0.58886 | 0.58886     | 0.797017467 |          |         |
| DUSP4     | ENSG00000120875 | -0.22465    | 0.58887 | -0.32574    | 0.62769     | -0.98757 | 0.83832 |
|           | -1.1204         | 0.86873     | 0.58887 | 0.797017467 |             |          |         |
| RPS26P28  | ENSG00000243538 | -0.84741    | 0.80162 | -0.84741    | 0.80162     | -0.22467 |         |
|           | 0.58888         | -0.84741    | 0.80162 | 0.58888     | 0.797017467 |          |         |
| ELF2P3    | ENSG00000232743 | -0.22482    | 0.58894 | -0.22482    | 0.58894     | -0.22482 |         |
|           | 0.58894         | -0.22482    | 0.58894 | 0.58894     | 0.797017467 |          |         |
| NA        | ENSG00000274559 | -0.22482    | 0.58894 | -0.22482    | 0.58894     | -0.22482 | 0.58894 |
|           | -0.22482        | 0.58894     | 0.58894 | 0.797017467 |             |          |         |
| RNU6-270P | ENSG00000201001 | -0.22487    | 0.58896 | -0.22487    | 0.58896     | -0.22487 |         |
|           | 0.58896         | -0.47929    | 0.68413 | 0.58896     | 0.797017467 |          |         |
| SIM2      | ENSG00000159263 | -1.6363     | 0.94911 | -1.3447     | 0.91065     | -0.2249  | 0.58897 |
|           | -0.3457         | 0.63522     | 0.58897 | 0.797017467 |             |          |         |
| C2orf16   | ENSG00000221843 | -0.62111    | 0.73274 | -0.80032    | 0.78824     | -0.66813 |         |
|           | 0.74797         | -0.22495    | 0.58899 | 0.58899     | 0.797017467 |          |         |
| BISPR     | ENSG00000282851 | -0.22498    | 0.589   | -0.22498    | 0.589       | -0.22498 | 0.589   |
|           | 0.589           | 0.797017467 |         |             |             |          |         |
| NA        | ENSG00000240291 | -0.22502    | 0.58902 | -0.24808    | 0.59796     | -0.22502 | 0.58902 |
|           | -0.22502        | 0.58902     | 0.58902 | 0.797017467 |             |          |         |
| KLF18     | ENSG00000283039 | -0.22504    | 0.58902 | -0.22504    | 0.58902     | -0.22504 | 0.58902 |
|           | -0.22504        | 0.58902     | 0.58902 | 0.797017467 |             |          |         |
| RNU1-108P | ENSG00000199426 | -0.22509    | 0.58904 | -0.27055    | 0.60663     | -0.22509 |         |
|           | 0.58904         | -0.22509    | 0.58904 | 0.58904     | 0.797017467 |          |         |
| RPSAP29   | ENSG00000244722 | -0.22511    | 0.58905 | -0.73887    | 0.77001     | -0.32155 |         |
|           | 0.6261          | -0.22511    | 0.58905 | 0.58905     | 0.797017467 |          |         |
| NA        | ENSG00000267490 | -0.22511    | 0.58905 | -0.31537    | 0.62376     | -0.23136 | 0.59148 |
|           | -0.23136        | 0.59148     | 0.58905 | 0.797017467 |             |          |         |
| KIAA2012  | ENSG00000182329 | -0.26342    | 0.60389 | -0.29186    | 0.61481     | -0.22512 |         |
|           | 0.58906         | -0.91429    | 0.81972 | 0.58906     | 0.797017467 |          |         |
| RN7SKP40  | ENSG00000253020 | -0.22514    | 0.58907 | -0.22514    | 0.58907     | -0.22514 |         |
|           | 0.58907         | -0.22514    | 0.58907 | 0.58907     | 0.797017467 |          |         |
| NA        | ENSG00000279604 | -1.2728     | 0.89845 | -0.69256    | 0.75571     | -0.49497 | 0.68969 |
|           | -0.2252         | 0.58909     | 0.58909 | 0.797018729 |             |          |         |
| SNRPEP3   | ENSG00000227624 | -0.22524    | 0.58911 | -2.0877     | 0.98159     | -2.0877  |         |
|           | 0.98159         | -2.0877     | 0.98159 | 0.58911     | 0.797018729 |          |         |
| NA        | ENSG00000232512 | -0.22529    | 0.58912 | -1.4102     | 0.92075     | -0.83751 | 0.79885 |
|           | -0.83751        | 0.79885     | 0.58912 | 0.797018729 |             |          |         |
| NA        | ENSG00000266002 | -0.2254     | 0.58917 | -0.2254     | 0.58917     | -0.2254  | 0.58917 |
|           | -0.2254         | 0.58917     | 0.58917 | 0.797051975 |             |          |         |
| FJX1      | ENSG00000179431 | -0.694      | 0.75616 | -1.4632     | 0.9283      | -0.22543 | 0.58918 |

|             |                 |          |         |             |             |          |         |  |
|-------------|-----------------|----------|---------|-------------|-------------|----------|---------|--|
|             | -1.0807         | 0.8601   | 0.58918 | 0.797051975 |             |          |         |  |
| HACD2       | ENSG00000206527 | -0.95767 | 0.83089 | -0.82731    | 0.79597     | -0.2255  | 0.58921 |  |
|             | -0.80786        | 0.79041  | 0.58921 | 0.797051975 |             |          |         |  |
| RN7SL591P   | ENSG00000240940 | -0.2255  | 0.58921 | -0.2255     | 0.58921     | -0.2255  |         |  |
|             | 0.58921         | -0.68646 | 0.75379 | 0.58921     | 0.797051975 |          |         |  |
| NA          | ENSG00000265839 | -1.1564  | 0.87625 | -0.22568    | 0.58928     | -0.37191 | 0.64502 |  |
|             | -1.2402         | 0.89254  | 0.58928 | 0.797085214 |             |          |         |  |
| RIPOR1      | ENSG00000039523 | -0.28723 | 0.61303 | -0.45253    | 0.67456     | -0.22571 |         |  |
|             | 0.58929         | -0.32228 | 0.62638 | 0.58929     | 0.797085214 |          |         |  |
| OR10R3P     | ENSG00000198703 | -0.22571 | 0.58929 | -0.22571    | 0.58929     | -0.22571 |         |  |
|             | 0.58929         | -0.22571 | 0.58929 | 0.58929     | 0.797085214 |          |         |  |
| ALPL        | ENSG00000162551 | -0.22574 | 0.5893  | -1.266      | 0.89724     | -0.49257 | 0.68884 |  |
|             | -1.1008         | 0.86451  | 0.5893  | 0.797085214 |             |          |         |  |
| NA          | ENSG00000264012 | -0.2258  | 0.58932 | -0.2258     | 0.58932     | -0.2258  | 0.58932 |  |
|             | -0.2258         | 0.58932  | 0.58932 | 0.797090141 |             |          |         |  |
| NA          | ENSG00000259432 | -0.22589 | 0.58935 | -0.22589    | 0.58935     | -0.22589 | 0.58935 |  |
|             | -0.22589        | 0.58935  | 0.58935 | 0.797101249 |             |          |         |  |
| IGHV3-49    | ENSG00000211965 | -0.22597 | 0.58939 | -0.22597    | 0.58939     | -0.22597 |         |  |
|             | 0.58939         | -0.22597 | 0.58939 | 0.58939     | 0.797101249 |          |         |  |
| POLR2CP1    | ENSG00000228600 | -1.3139  | 0.90557 | -0.226      | 0.5894      | -0.35912 |         |  |
|             | 0.64025         | -0.226   | 0.5894  | 0.5894      | 0.797101249 |          |         |  |
| NA          | ENSG00000202008 | -0.22603 | 0.58941 | -0.22603    | 0.58941     | -0.22603 | 0.58941 |  |
|             | -0.22603        | 0.58941  | 0.58941 | 0.797101249 |             |          |         |  |
| NA          | ENSG00000235021 | -0.22603 | 0.58941 | -0.70426    | 0.75936     | -0.22603 | 0.58941 |  |
|             | -0.70426        | 0.75936  | 0.58941 | 0.797101249 |             |          |         |  |
| CATIP-AS1   | ENSG00000225062 | -0.22635 | 0.58953 | -0.58021    | 0.71911     | -0.58021 |         |  |
|             | 0.71911         | -0.58021 | 0.71911 | 0.58953     | 0.797241408 |          |         |  |
| NA          | ENSG00000242317 | -0.73223 | 0.76799 | -1.2978     | 0.90282     | -0.46826 | 0.6802  |  |
|             | -0.2264         | 0.58956  | 0.58956 | 0.797251252 |             |          |         |  |
| NA          | ENSG00000269946 | -0.22643 | 0.58957 | -0.88513    | 0.81196     | -0.22643 | 0.58957 |  |
|             | -1.4345         | 0.92429  | 0.58957 | 0.797251252 |             |          |         |  |
| CACNA1C-IT3 | ENSG00000256721 | -1.0891  | 0.86194 | -0.58068    | 0.71927     | -0.57853 |         |  |
|             | 0.71855         | -0.22655 | 0.58961 | 0.58961     | 0.797274616 |          |         |  |
| RNA5SP278   | ENSG00000252864 | -0.35288 | 0.63791 | -0.3229     | 0.62661     | -0.22656 |         |  |
|             | 0.58962         | -0.3229  | 0.62661 | 0.58962     | 0.797274616 |          |         |  |
| SDCBP2      | ENSG00000125775 | -0.67706 | 0.75082 | -0.22669    | 0.58967     | -0.58298 |         |  |
|             | 0.72005         | -0.41326 | 0.66029 | 0.58967     | 0.797302897 |          |         |  |
| NA          | ENSG00000125695 | -0.22675 | 0.58969 | -0.22675    | 0.58969     | -0.22675 | 0.58969 |  |
|             | -0.22675        | 0.58969  | 0.58969 | 0.797302897 |             |          |         |  |
| NA          | ENSG00000270324 | -1.4831  | 0.93098 | -1.0741     | 0.85861     | -1.4831  | 0.93098 |  |
|             | -0.22674        | 0.58969  | 0.58969 | 0.797302897 |             |          |         |  |
| NA          | ENSG00000256125 | -0.22689 | 0.58975 | -0.22689    | 0.58975     | -0.22689 | 0.58975 |  |
|             | -0.22689        | 0.58975  | 0.58975 | 0.797339775 |             |          |         |  |
| NA          | ENSG00000279240 | -0.27736 | 0.60925 | -0.27736    | 0.60925     | -0.22691 | 0.58975 |  |
|             | -0.27736        | 0.60925  | 0.58975 | 0.797339775 |             |          |         |  |
| NA          | ENSG00000250092 | -0.22696 | 0.58977 | -0.22696    | 0.58977     | -0.22696 | 0.58977 |  |
|             | -0.22696        | 0.58977  | 0.58977 | 0.797344693 |             |          |         |  |
| CREG2       | ENSG00000175874 | -0.22707 | 0.58981 | -1.0706     | 0.85783     | -0.26507 | 0.60452 |  |
|             | -0.69746        | 0.75724  | 0.58981 | 0.797376649 |             |          |         |  |
| OR5AK2      | ENSG00000181273 | -0.22714 | 0.58984 | -0.5505     | 0.70901     | -0.22714 |         |  |
|             | 0.58984         | -0.22714 | 0.58984 | 0.58984     | 0.797395084 |          |         |  |
| WDR26       | ENSG00000162923 | -0.43243 | 0.66728 | -0.22737    | 0.58993     | -1.6146  | 0.9468  |  |
|             | -1.6146         | 0.9468   | 0.58993 | 0.797443006 |             |          |         |  |
| KRASP1      | ENSG00000220635 | -1.765   | 0.96122 | -0.22741    | 0.58995     | -0.22741 |         |  |
|             | 0.58995         | -0.22741 | 0.58995 | 0.58995     | 0.797443006 |          |         |  |
| MT1CP       | ENSG00000205360 | -0.22744 | 0.58996 | -0.22744    | 0.58996     | -0.22744 | 0.58996 |  |
|             | -0.22744        | 0.58996  | 0.58996 | 0.797443006 |             |          |         |  |
| MRAP-AS1    | ENSG00000232623 | -0.83946 | 0.79939 | -0.77482    | 0.78078     | -0.22747 |         |  |
|             | 0.58997         | -0.22747 | 0.58997 | 0.58997     | 0.797443006 |          |         |  |
| TRIM46      | ENSG00000163462 | -1.5518  | 0.93965 | -1.7414     | 0.9592      | -0.37391 |         |  |
|             | 0.64576         | -0.22749 | 0.58998 | 0.58998     | 0.797443006 |          |         |  |
| RPS3AP2     | ENSG00000219027 | -0.2275  | 0.58998 | -0.2275     | 0.58998     | -0.2275  |         |  |

|             |                 |          |         |             |             |          |          |  |
|-------------|-----------------|----------|---------|-------------|-------------|----------|----------|--|
|             | 0.58998         | -0.2275  | 0.58998 | 0.58998     | 0.797443006 |          |          |  |
| ULK1        | ENSG00000177169 | -0.49697 | 0.69039 | -0.22752    | 0.58999     | -1.7299  | 0.95817  |  |
|             | -1.4215         | 0.92241  | 0.58999 | 0.797443006 |             |          |          |  |
| NA          | ENSG00000240673 | -0.43156 | 0.66697 | -0.22774    | 0.59008     | -0.43156 | 0.66697  |  |
|             | -0.43156        | 0.66697  | 0.59008 | 0.797525322 |             |          |          |  |
| DHX33       | ENSG00000005100 | -0.22778 | 0.59009 | -0.79637    | 0.78709     | -1.1812  | 0.88124  |  |
|             | -0.48817        | 0.68729  | 0.59009 | 0.797525322 |             |          |          |  |
| MTMR10      | ENSG00000166912 | -0.2278  | 0.5901  | -1.0997     | 0.86426     | -0.39542 |          |  |
|             | 0.65373         | -1.1505  | 0.87503 | 0.5901      | 0.797525322 |          |          |  |
| PER3        | ENSG00000049246 | -0.22791 | 0.59014 | -1.2708     | 0.89811     | -1.1521  | 0.87535  |  |
|             | -1.1182         | 0.86826  | 0.59014 | 0.797528858 |             |          |          |  |
| NA          | ENSG00000274198 | -0.22799 | 0.59017 | -0.22799    | 0.59017     | -0.22799 | 0.59017  |  |
|             | -0.44471        | 0.67174  | 0.59017 | 0.797528858 |             |          |          |  |
| SEPTIN14P17 | ENSG00000274886 | -0.22813 | 0.59023 | -0.22813    | 0.59023     | -0.22813 | -0.22813 |  |
|             | 0.59023         | -0.22813 | 0.59023 | 0.59023     | 0.797528858 |          |          |  |
| EFCAB5      | ENSG00000176927 | -0.87481 | 0.80916 | -0.22823    | 0.59026     | -0.78105 |          |  |
|             | 0.78261         | -1.2759  | 0.89901 | 0.59026     | 0.797528858 |          |          |  |
| NELL1       | ENSG00000165973 | -0.22825 | 0.59027 | -0.25641    | 0.60118     | -1.7445  | 0.95947  |  |
|             | -0.5042         | 0.69294  | 0.59027 | 0.797528858 |             |          |          |  |
| NA          | ENSG00000265113 | -0.6207  | 0.7326  | -0.22832    | 0.5903      | -0.6207  | 0.7326   |  |
|             | -0.6207         | 0.7326   | 0.5903  | 0.797528858 |             |          |          |  |
| NA          | ENSG00000236352 | -0.22838 | 0.59032 | -0.52174    | 0.69907     | -0.52174 | 0.69907  |  |
|             | -1.0803         | 0.85999  | 0.59032 | 0.797528858 |             |          |          |  |
| NA          | ENSG00000266718 | -0.22843 | 0.59035 | -0.22843    | 0.59035     | -0.22843 | 0.59035  |  |
|             | -0.22843        | 0.59035  | 0.59035 | 0.797528858 |             |          |          |  |
| CD82        | ENSG00000085117 | -0.22848 | 0.59036 | -0.50155    | 0.69201     | -0.63872 | 0.7385   |  |
|             | -0.71324        | 0.76215  | 0.59036 | 0.797528858 |             |          |          |  |
| NA          | ENSG00000265748 | -0.71687 | 0.76327 | -0.71757    | 0.76349     | -0.95508 | 0.83023  |  |
|             | -0.2285         | 0.59037  | 0.59037 | 0.797528858 |             |          |          |  |
| GMFG        | ENSG00000130755 | -1.1223  | 0.86914 | -0.5424     | 0.70623     | -0.38493 | 0.64985  |  |
|             | -0.22863        | 0.59042  | 0.59042 | 0.797528858 |             |          |          |  |
| NA          | ENSG00000227407 | -0.22862 | 0.59042 | -0.22862    | 0.59042     | -0.22862 | 0.59042  |  |
|             | -0.22862        | 0.59042  | 0.59042 | 0.797528858 |             |          |          |  |
| SEMA6B      | ENSG00000167680 | -2.0767  | 0.98108 | -2.8865     | 0.99805     | -0.32007 |          |  |
|             | 0.62554         | -0.22865 | 0.59043 | 0.59043     | 0.797528858 |          |          |  |
| H3P30       | ENSG00000227443 | -0.22872 | 0.59046 | -0.22872    | 0.59046     | -1.0797  | 0.85986  |  |
|             | -0.22872        | 0.59046  | 0.59046 | 0.797528858 |             |          |          |  |
| GALP        | ENSG00000197487 | -0.22875 | 0.59047 | -0.82806    | 0.79618     | -0.22875 | 0.59047  |  |
|             | -0.22875        | 0.59047  | 0.59047 | 0.797528858 |             |          |          |  |
| SUB1P4      | ENSG00000260247 | -0.22877 | 0.59048 | -0.22877    | 0.59048     | -0.22877 |          |  |
|             | 0.59048         | -0.22877 | 0.59048 | 0.59048     | 0.797528858 |          |          |  |
| OR56A7P     | ENSG00000255481 | -0.22883 | 0.5905  | -0.22883    | 0.5905      | -0.22883 |          |  |
|             | 0.5905          | -0.22883 | 0.5905  | 0.5905      | 0.797528858 |          |          |  |
| PHGDH       | ENSG00000092621 | -0.57444 | 0.71717 | -0.56042    | 0.7124      | -0.2289  | 0.59052  |  |
|             | -0.2289         | 0.59052  | 0.59052 | 0.797528858 |             |          |          |  |
| LINC02812   | ENSG00000230138 | -0.33056 | 0.62951 | -0.2289     | 0.59053     | -0.31234 |          |  |
|             | 0.62261         | -1.1154  | 0.86766 | 0.59053     | 0.797528858 |          |          |  |
| NA          | ENSG00000250746 | -0.33941 | 0.63285 | -0.33941    | 0.63285     | -0.33941 | 0.63285  |  |
|             | -0.22902        | 0.59057  | 0.59057 | 0.797528858 |             |          |          |  |
| RBM20       | ENSG00000203867 | -0.81272 | 0.79181 | -0.69567    | 0.75668     | -0.39635 | 0.65408  |  |
|             | -0.22909        | 0.5906   | 0.5906  | 0.797528858 |             |          |          |  |
| NA          | ENSG00000223514 | -0.53526 | 0.70377 | -0.22909    | 0.5906      | -0.53526 | 0.70377  |  |
|             | -0.53526        | 0.70377  | 0.5906  | 0.797528858 |             |          |          |  |
| NA          | ENSG00000253653 | -0.22912 | 0.59061 | -0.22912    | 0.59061     | -0.22912 | 0.59061  |  |
|             | -0.22912        | 0.59061  | 0.59061 | 0.797528858 |             |          |          |  |
| CLDN23      | ENSG00000253958 | -1.0012  | 0.84163 | -0.22912    | 0.59061     | -0.82489 |          |  |
|             | 0.79528         | -0.62302 | 0.73336 | 0.59061     | 0.797528858 |          |          |  |
| NA          | ENSG00000267544 | -0.22917 | 0.59063 | -0.22917    | 0.59063     | -0.22917 | 0.59063  |  |
|             | -0.22917        | 0.59063  | 0.59063 | 0.797528858 |             |          |          |  |
| NA          | ENSG00000283352 | -0.22919 | 0.59064 | -0.22919    | 0.59064     | -0.22919 | 0.59064  |  |
|             | -0.22919        | 0.59064  | 0.59064 | 0.797528858 |             |          |          |  |
| NA          | ENSG00000201080 | -0.2292  | 0.59064 | -0.2292     | 0.59064     | -0.2292  | 0.59064  |  |

|           |                 |          |         |             |             |          |         |  |
|-----------|-----------------|----------|---------|-------------|-------------|----------|---------|--|
|           | -0.2292         | 0.59064  | 0.59064 | 0.797528858 |             |          |         |  |
| CNBD1     | ENSG00000176571 | -0.95075 | 0.82914 | -0.50021    | 0.69154     | -0.22921 | 0.59065 |  |
|           | -1.3518         | 0.91178  | 0.59065 | 0.797528858 |             |          |         |  |
| TRDJ2     | ENSG00000211827 | -0.22921 | 0.59065 | -0.22921    | 0.59065     | -0.22921 | 0.59065 |  |
|           | -0.22921        | 0.59065  | 0.59065 | 0.797528858 |             |          |         |  |
| NA        | ENSG00000238072 | -0.22925 | 0.59066 | -0.22925    | 0.59066     | -0.22925 | 0.59066 |  |
|           | -0.22925        | 0.59066  | 0.59066 | 0.797528858 |             |          |         |  |
| AQP8      | ENSG00000103375 | -0.22926 | 0.59067 | -0.22926    | 0.59067     | -0.22926 | 0.59067 |  |
|           | -0.22926        | 0.59067  | 0.59067 | 0.797528858 |             |          |         |  |
| S1PR5     | ENSG00000180739 | -0.22929 | 0.59068 | -0.22929    | 0.59068     | -0.22929 | 0.59068 |  |
|           | -0.22929        | 0.59068  | 0.59068 | 0.797528858 |             |          |         |  |
| TBC1D3P7  | ENSG00000233014 | -0.86846 | 0.80743 | -0.22931    | 0.59068     | -1.2006  |         |  |
|           | 0.88504         | -1.2095  | 0.88676 | 0.59068     | 0.797528858 |          |         |  |
| NA        | ENSG00000279919 | -0.22935 | 0.5907  | -0.92365    | 0.82216     | -0.94042 | 0.8265  |  |
|           | -0.92656        | 0.82292  | 0.5907  | 0.797528858 |             |          |         |  |
| MIR625    | ENSG00000207781 | -0.22942 | 0.59073 | -0.22942    | 0.59073     | -0.22942 |         |  |
|           | 0.59073         | -0.22942 | 0.59073 | 0.59073     | 0.797528858 |          |         |  |
| NA        | ENSG00000267709 | -0.22946 | 0.59074 | -0.22946    | 0.59074     | -0.22946 | 0.59074 |  |
|           | -0.22946        | 0.59074  | 0.59074 | 0.797528858 |             |          |         |  |
| NA        | ENSG00000271455 | -0.59507 | 0.7241  | -0.55353    | 0.71005     | -0.22944 | 0.59074 |  |
|           | -0.2732         | 0.60765  | 0.59074 | 0.797528858 |             |          |         |  |
| SPAG7     | ENSG00000091640 | -0.22946 | 0.59075 | -0.22946    | 0.59075     | -0.22946 | 0.59075 |  |
|           | -0.22946        | 0.59075  | 0.59075 | 0.797528858 |             |          |         |  |
| RNU5E-7P  | ENSG00000202160 | -0.74333 | 0.77136 | -0.22952    | 0.59077     | -0.22952 |         |  |
|           | 0.59077         | -0.22952 | 0.59077 | 0.59077     | 0.797528858 |          |         |  |
| RNU6-426P | ENSG00000252273 | -0.22956 | 0.59078 | -0.22956    | 0.59078     | -0.22956 |         |  |
|           | 0.59078         | -0.22956 | 0.59078 | 0.59078     | 0.797528858 |          |         |  |
| NA        | ENSG00000235901 | -0.22958 | 0.59079 | -1.4672     | 0.92884     | -1.4672  | 0.92884 |  |
|           | -1.4672         | 0.92884  | 0.59079 | 0.797528858 |             |          |         |  |
| PRNCR1    | ENSG00000282961 | -0.22957 | 0.59079 | -0.22957    | 0.59079     | -0.22957 |         |  |
|           | 0.59079         | -0.22957 | 0.59079 | 0.59079     | 0.797528858 |          |         |  |
| NA        | ENSG00000229588 | -0.35839 | 0.63997 | -2.093      | 0.98183     | -0.22972 | 0.59085 |  |
|           | -0.22972        | 0.59085  | 0.59085 | 0.797579163 |             |          |         |  |
| CDR2L     | ENSG00000109089 | -0.22976 | 0.59086 | -1.0237     | 0.84702     | -1.0237  | 0.84702 |  |
|           | -1.0237         | 0.84702  | 0.59086 | 0.797579163 |             |          |         |  |
| NA        | ENSG00000253354 | -0.22987 | 0.5909  | -0.22987    | 0.5909      | -0.22987 | 0.5909  |  |
|           | -0.43407        | 0.66788  | 0.5909  | 0.797602468 |             |          |         |  |
| TMBIM1    | ENSG00000135926 | -1.0427  | 0.85145 | -0.22988    | 0.59091     | -0.48977 |         |  |
|           | 0.68785         | -0.95433 | 0.83004 | 0.59091     | 0.797602468 |          |         |  |
| RNU6-933P | ENSG00000207153 | -0.23001 | 0.59096 | -0.23001    | 0.59096     | -0.23001 |         |  |
|           | 0.59096         | -0.23001 | 0.59096 | 0.59096     | 0.797647863 |          |         |  |
| IQSEC3    | ENSG00000120645 | -0.90633 | 0.81762 | -0.23012    | 0.591       | -0.94392 | 0.82739 |  |
|           | -0.27668        | 0.60899  | 0.591   | 0.797679758 |             |          |         |  |
| EPHA1-AS1 | ENSG00000229153 | -0.56709 | 0.71467 | -0.23019    | 0.59103     | -0.41526 |         |  |
|           | 0.66103         | -0.34369 | 0.63446 | 0.59103     | 0.797698155 |          |         |  |
| NA        | ENSG00000266901 | -1.5428  | 0.93856 | -0.23027    | 0.59106     | -1.3692  | 0.91454 |  |
|           | -1.3692         | 0.91454  | 0.59106 | 0.797700559 |             |          |         |  |
| USP7      | ENSG00000187555 | -1.5588  | 0.94047 | -1.5588     | 0.94047     | -1.5588  | 0.94047 |  |
|           | -0.23029        | 0.59107  | 0.59107 | 0.797700559 |             |          |         |  |
| PEG10     | ENSG00000242265 | -0.23035 | 0.59109 | -0.23035    | 0.59109     | -0.23035 | 0.59109 |  |
|           | -0.23035        | 0.59109  | 0.59109 | 0.797700559 |             |          |         |  |
| CEP83     | ENSG00000173588 | -0.72882 | 0.76694 | -0.23041    | 0.59111     | -0.84864 | 0.80196 |  |
|           | -0.57146        | 0.71615  | 0.59111 | 0.797700559 |             |          |         |  |
| RNU6-43P  | ENSG00000207029 | -0.31713 | 0.62443 | -0.23042    | 0.59112     | -0.31713 |         |  |
|           | 0.62443         | -0.31713 | 0.62443 | 0.59112     | 0.797700559 |          |         |  |
| DDX6P1    | ENSG00000230056 | -0.55947 | 0.71208 | -0.23046    | 0.59113     | -1.0606  |         |  |
|           | 0.85556         | -1.3055  | 0.90414 | 0.59113     | 0.797700559 |          |         |  |
| RPL8      | ENSG00000161016 | -0.23058 | 0.59118 | -0.23058    | 0.59118     | -0.23058 | 0.59118 |  |
|           | -1.4223         | 0.92253  | 0.59118 | 0.79774594  |             |          |         |  |
| NA        | ENSG00000269365 | -0.23072 | 0.59123 | -1.3324     | 0.90864     | -1.3324  | 0.90864 |  |
|           | -1.3324         | 0.90864  | 0.59123 | 0.797770424 |             |          |         |  |
| MXD4      | ENSG00000123933 | -0.26855 | 0.60586 | -0.23075    | 0.59124     | -0.44014 | 0.67008 |  |

|           |                 |          |             |             |             |          |         |          |
|-----------|-----------------|----------|-------------|-------------|-------------|----------|---------|----------|
|           | -0.27016        | 0.60648  | 0.59124     | 0.797770424 |             |          |         |          |
| LINC01917 | ENSG00000260433 | -0.2308  | 0.59126     | -0.2308     | 0.59126     | -0.2308  | 0.59126 | -0.2308  |
|           | 0.59126         | -0.2308  | 0.59126     | 0.59126     | 0.797770424 |          |         |          |
| NA        | ENSG00000218274 | -0.23084 | 0.59128     | -0.23084    | 0.59128     | -0.23084 | 0.59128 | 0.59128  |
|           | -0.23084        | 0.59128  | 0.59128     | 0.797770424 |             |          |         |          |
| NA        | ENSG00000250241 | -0.55699 | 0.71123     | -0.8889     | 0.81297     | -0.23084 | 0.59128 | 0.59128  |
|           | -1.1634         | 0.87766  | 0.59128     | 0.797770424 |             |          |         |          |
| INPP1     | ENSG00000151689 | -0.23094 | 0.59132     | -0.23094    | 0.59132     | -0.99081 | 0.83911 | 0.83911  |
|           | -1.2337         | 0.89133  | 0.59132     | 0.797802304 |             |          |         |          |
| CFLAR     | ENSG00000003402 | -0.25398 | 0.60025     | -0.23109    | 0.59138     | -0.50044 | 0.69162 | 0.69162  |
|           | -0.72936        | 0.76711  | 0.59138     | 0.797861164 |             |          |         |          |
| PALM      | ENSG00000099864 | -0.23128 | 0.59145     | -0.23117    | 0.59141     | -1.3858  | 0.91709 | 0.91709  |
|           | -0.58164        | 0.71959  | 0.59141     | 0.797879549 |             |          |         |          |
| CELA1     | ENSG00000139610 | -1.4671  | 0.92882     | -0.23127    | 0.59145     | -1.3484  | 0.91124 | 0.91124  |
|           | -0.80477        | 0.78952  | 0.59145     | 0.797911423 |             |          |         |          |
| SDHAF1    | ENSG00000205138 | -0.23133 | 0.59147     | -0.23133    | 0.59147     | -0.23133 | 0.59147 | -0.23133 |
|           | 0.59147         | -0.23133 | 0.59147     | 0.59147     | 0.797916314 |          |         |          |
| RNU7-137P | ENSG00000252597 | -0.2315  | 0.59154     | -0.2315     | 0.59154     | -0.2315  | 0.59154 | -0.2315  |
|           | 0.59154         | -0.2315  | 0.59154     | 0.59154     | 0.797988655 |          |         |          |
| NA        | ENSG00000254261 | -0.23156 | 0.59156     | -0.37401    | 0.6458      | -0.23156 | 0.59156 | 0.59156  |
|           | -0.23156        | 0.59156  | 0.59156     | 0.797993364 |             |          |         |          |
| NA        | ENSG00000230015 | -0.83166 | 0.7972      | -0.75553    | 0.77503     | -0.23161 | 0.59158 | 0.59158  |
|           | -0.72763        | 0.76658  | 0.59158     | 0.797993364 |             |          |         |          |
| TMEM186   | ENSG00000184857 | -0.23173 | 0.59162     | -0.23173    | 0.59162     | -0.23173 | 0.59162 | -0.23173 |
|           | 0.59162         | -0.23173 | 0.59162     | 0.59162     | 0.797993364 |          |         |          |
| ELP2      | ENSG00000134759 | -0.23174 | 0.59163     | -0.54529    | 0.70722     | -0.8115  | 0.79146 | 0.79146  |
|           | -1.5729         | 0.94213  | 0.59163     | 0.797993364 |             |          |         |          |
| FURIN     | ENSG00000140564 | -0.41826 | 0.66212     | -0.35945    | 0.64037     | -0.23173 | 0.59163 | 0.59163  |
|           | -0.53777        | 0.70463  | 0.59163     | 0.797993364 |             |          |         |          |
| NPB       | ENSG00000183979 | -0.23181 | 0.59166     | -0.23181    | 0.59166     | -0.23181 | 0.59166 | 0.59166  |
|           | -0.23181        | 0.59166  | 0.59166     | 0.797993364 |             |          |         |          |
| PCYT2     | ENSG00000185813 | -0.23181 | 0.59166     | -0.23181    | 0.59166     | -0.23181 | 0.59166 | 0.59166  |
|           | -0.23181        | 0.59166  | 0.59166     | 0.797993364 |             |          |         |          |
| VN1R71P   | ENSG00000264837 | -0.40102 | 0.6558      | -0.2319     | 0.59169     | -0.44953 | 0.59169 | -0.44953 |
|           | 0.67348         | -1.4663  | 0.92872     | 0.59169     | 0.797993364 |          |         |          |
| SLC35D1   | ENSG00000116704 | -0.23196 | 0.59171     | -0.85316    | 0.80321     | -0.23196 | 0.59171 | -0.23196 |
|           | 0.59171         | -0.286   | 0.61256     | 0.59171     | 0.797993364 |          |         |          |
| NA        | ENSG00000257501 | -1.278   | 0.89937     | -1.041      | 0.85105     | -0.56414 | 0.71367 | 0.71367  |
|           | -0.23196        | 0.59172  | 0.59172     | 0.797993364 |             |          |         |          |
| NA        | ENSG00000228191 | -0.35899 | 0.6402      | -0.23201    | 0.59173     | -0.23201 | 0.59173 | 0.59173  |
|           | -0.92999        | 0.82381  | 0.59173     | 0.797993364 |             |          |         |          |
| NA        | ENSG00000239280 | -0.23202 | 0.59174     | -0.23202    | 0.59174     | -0.23202 | 0.59174 | 0.59174  |
|           | -0.23202        | 0.59174  | 0.59174     | 0.797993364 |             |          |         |          |
| RN7SL294P | ENSG00000242638 | -0.33958 | 0.63291     | -0.2321     | 0.59177     | -1.0134  | 0.59177 | -1.0134  |
|           | 0.84457         | -1.0134  | 0.84457     | 0.59177     | 0.798011736 |          |         |          |
| ABAT      | ENSG00000183044 | -0.23247 | 0.59191     | -0.61172    | 0.72964     | -0.9704  | 0.83408 | 0.83408  |
|           | -1.1713         | 0.87925  | 0.59191     | 0.798136597 |             |          |         |          |
| NA        | ENSG00000242814 | -0.23249 | 0.59192     | -0.23249    | 0.59192     | -0.23249 | 0.59192 | 0.59192  |
|           | -0.25327        | 0.59997  | 0.59192     | 0.798136597 |             |          |         |          |
| NA        | ENSG00000271099 | -0.23255 | 0.59195     | -0.23255    | 0.59195     | -0.23255 | 0.59195 | 0.59195  |
|           | -0.23255        | 0.59195  | 0.59195     | 0.798136597 |             |          |         |          |
| AGMAT     | ENSG00000116771 | -1.4116  | 0.92097     | -0.23261    | 0.59197     | -1.3553  | 0.91233 | 0.91233  |
|           | -0.54784        | 0.7081   | 0.59197     | 0.798136597 |             |          |         |          |
| NA        | ENSG00000225102 | -0.23265 | 0.59198     | -0.41529    | 0.66103     | -0.23265 | 0.59198 | 0.59198  |
|           | -0.25752        | 0.60161  | 0.59198     | 0.798136597 |             |          |         |          |
| NA        | ENSG00000230485 | -0.23264 | 0.59198     | -1.8796     | 0.96992     | -1.1624  | 0.87746 | 0.87746  |
|           | -1.2496         | 0.89428  | 0.59198     | 0.798136597 |             |          |         |          |
| CD14      | ENSG00000170458 | -0.23268 | 0.592       | -0.23608    | 0.59331     | -0.23268 | 0.592   | -0.23268 |
|           | 0.592           | 0.592    | 0.798136597 |             |             |          |         |          |
| OR5AL2P   | ENSG00000255466 | -1.0185  | 0.84579     | -0.23268    | 0.592       | -0.23268 | 0.592   | 0.592    |
|           | -0.23268        | 0.592    | 0.592       | 0.798136597 |             |          |         |          |
| BIN2P2    | ENSG00000248684 | -0.23272 | 0.59201     | -0.23272    | 0.59201     | -0.23272 | 0.59201 | -0.23272 |

|              |                 |          |         |             |             |          |         |
|--------------|-----------------|----------|---------|-------------|-------------|----------|---------|
|              | 0.59201         | -0.23272 | 0.59201 | 0.59201     | 0.798136597 |          |         |
| GPR146       | ENSG00000164849 | -0.43807 | 0.66933 | -0.23286    | 0.59206     | -0.23286 |         |
|              | 0.59206         | -0.26396 | 0.6041  | 0.59206     | 0.798137537 |          |         |
| NA           | ENSG00000224500 | -0.27896 | 0.60986 | -0.23293    | 0.59209     | -0.23293 | 0.59209 |
|              | -0.23293        | 0.59209  | 0.59209 | 0.798137537 |             |          |         |
| IQSEC3P1     | ENSG00000256902 | -1.6108  | 0.94639 | -0.23296    | 0.5921      | -1.6108  |         |
|              | 0.94639         | -1.4926  | 0.93223 | 0.5921      | 0.798137537 |          |         |
| CCDC40       | ENSG00000141519 | -0.23297 | 0.59211 | -1.2442     | 0.89329     | -0.28978 |         |
|              | 0.61401         | -0.96374 | 0.83241 | 0.59211     | 0.798137537 |          |         |
| NA           | ENSG00000240027 | -0.23306 | 0.59214 | -0.23306    | 0.59214     | -0.23306 | 0.59214 |
|              | -0.23306        | 0.59214  | 0.59214 | 0.798137537 |             |          |         |
| NA           | ENSG00000262873 | -0.23317 | 0.59218 | -0.23317    | 0.59218     | -0.23317 | 0.59218 |
|              | -0.23317        | 0.59218  | 0.59218 | 0.798137537 |             |          |         |
| MIR300       | ENSG00000215957 | -0.23322 | 0.5922  | -0.23322    | 0.5922      | -0.23322 |         |
|              | 0.5922          | -0.23322 | 0.5922  | 0.5922      | 0.798137537 |          |         |
| MIR1185-1    | ENSG00000221525 | -0.23322 | 0.5922  | -0.23322    | 0.5922      | -0.23322 |         |
|              | 0.5922          | -0.23322 | 0.5922  | 0.5922      | 0.798137537 |          |         |
| SLC25A25-AS1 | ENSG00000234771 | -0.2332  | 0.5922  | -0.87895    | 0.81028     | -0.2332  |         |
|              | 0.5922          | -0.2332  | 0.5922  | 0.5922      | 0.798137537 |          |         |
| NA           | ENSG00000212581 | -0.23326 | 0.59222 | -0.23326    | 0.59222     | -0.23326 | 0.59222 |
|              | -0.23326        | 0.59222  | 0.59222 | 0.798137537 |             |          |         |
| NA           | ENSG00000258572 | -1.1638  | 0.87775 | -0.23327    | 0.59222     | -0.85848 | 0.80469 |
|              | -1.0849         | 0.86101  | 0.59222 | 0.798137537 |             |          |         |
| MYCBP2-AS2   | ENSG00000229521 | -0.23332 | 0.59224 | -0.23332    | 0.59224     | -0.23332 |         |
|              | 0.59224         | -0.23332 | 0.59224 | 0.59224     | 0.798137537 |          |         |
| NA           | ENSG00000269896 | -0.30861 | 0.62119 | -0.23332    | 0.59224     | -0.30861 | 0.62119 |
|              | -0.30861        | 0.62119  | 0.59224 | 0.798137537 |             |          |         |
| NA           | ENSG00000280087 | -0.23332 | 0.59224 | -0.23332    | 0.59224     | -0.23332 | 0.59224 |
|              | -0.23332        | 0.59224  | 0.59224 | 0.798137537 |             |          |         |
| KREMEN2      | ENSG00000131650 | -0.58738 | 0.72153 | -0.23339    | 0.59227     | -0.23339 |         |
|              | 0.59227         | -0.23339 | 0.59227 | 0.59227     | 0.798140803 |          |         |
| NA           | ENSG00000267056 | -0.23342 | 0.59228 | -0.23342    | 0.59228     | -0.23342 | 0.59228 |
|              | -0.23342        | 0.59228  | 0.59228 | 0.798140803 |             |          |         |
| FRRS1L       | ENSG00000260230 | -0.23354 | 0.59233 | -0.23354    | 0.59233     | -0.23354 |         |
|              | 0.59233         | -0.23354 | 0.59233 | 0.59233     | 0.798140803 |          |         |
| PJA2         | ENSG00000198961 | -0.57625 | 0.71778 | -0.60836    | 0.72853     | -0.2337  | 0.59239 |
|              | -0.52145        | 0.69897  | 0.59239 | 0.798140803 |             |          |         |
| NA           | ENSG00000256804 | -1.546   | 0.93895 | -2.5232     | 0.99419     | -2.3203  | 0.98984 |
|              | -0.2337         | 0.59239  | 0.59239 | 0.798140803 |             |          |         |
| NA           | ENSG00000268873 | -0.94538 | 0.82777 | -0.23372    | 0.5924      | -0.23372 | 0.5924  |
|              | -0.23372        | 0.5924   | 0.5924  | 0.798140803 |             |          |         |
| NA           | ENSG00000275162 | -0.23372 | 0.5924  | -0.76234    | 0.77707     | -0.92496 | 0.82251 |
|              | -0.23372        | 0.5924   | 0.5924  | 0.798140803 |             |          |         |
| BDH1         | ENSG00000161267 | -1.3839  | 0.9168  | -1.2358     | 0.89173     | -0.86925 | 0.80765 |
|              | -0.23381        | 0.59243  | 0.59243 | 0.798140803 |             |          |         |
| PPIAP38      | ENSG00000233477 | -1.5347  | 0.93757 | -0.23381    | 0.59244     | -1.5347  |         |
|              | 0.93757         | -1.5347  | 0.93757 | 0.59244     | 0.798140803 |          |         |
| RRAGA        | ENSG00000155876 | -0.23396 | 0.59249 | -0.23396    | 0.59249     | -0.23396 | 0.59249 |
|              | -0.23396        | 0.59249  | 0.59249 | 0.798140803 |             |          |         |
| RNU4-4P      | ENSG00000201458 | -0.23397 | 0.5925  | -0.70004    | 0.75805     | -0.23397 |         |
|              | 0.5925          | -0.23397 | 0.5925  | 0.5925      | 0.798140803 |          |         |
| KALRN        | ENSG00000160145 | -0.59181 | 0.72301 | -0.78269    | 0.7831      | -0.23403 | 0.59252 |
|              | -0.92111        | 0.8215   | 0.59252 | 0.798140803 |             |          |         |
| ODF2L        | ENSG00000122417 | -0.45608 | 0.67583 | -0.23406    | 0.59253     | -0.84943 | 0.80218 |
|              | -1.2839         | 0.9004   | 0.59253 | 0.798140803 |             |          |         |
| OR7A8P       | ENSG00000269552 | -0.23405 | 0.59253 | -0.23405    | 0.59253     | -0.35699 |         |
|              | 0.63945         | -0.23405 | 0.59253 | 0.59253     | 0.798140803 |          |         |
| LINC01220    | ENSG00000259687 | -0.48119 | 0.68481 | -0.23411    | 0.59255     | -0.23411 |         |
|              | 0.59255         | -0.48119 | 0.68481 | 0.59255     | 0.798140803 |          |         |
| PPP4R3B      | ENSG00000275052 | -0.23411 | 0.59255 | -1.6926     | 0.95473     | -0.5817  |         |
|              | 0.71962         | -0.27783 | 0.60943 | 0.59255     | 0.798140803 |          |         |
| HSPE1P16     | ENSG00000237140 | -0.26917 | 0.6061  | -0.23414    | 0.59256     | -0.86019 |         |

|           |                 |          |             |             |             |          |         |
|-----------|-----------------|----------|-------------|-------------|-------------|----------|---------|
|           | 0.80516         | -0.86019 | 0.80516     | 0.59256     | 0.798140803 |          |         |
| NA        | ENSG00000260530 | -0.53928 | 0.70515     | -2.5044     | 0.99387     | -0.53928 | 0.70515 |
|           | -0.23413        | 0.59256  | 0.59256     | 0.798140803 |             |          |         |
| RN7SKP181 | ENSG00000223120 | -0.23416 | 0.59257     | -0.23416    | 0.59257     | -0.23416 |         |
|           | 0.59257         | -0.23416 | 0.59257     | 0.59257     | 0.798140803 |          |         |
| NA        | ENSG00000248423 | -0.23417 | 0.59257     | -0.23417    | 0.59257     | -0.23417 | 0.59257 |
|           | -0.23417        | 0.59257  | 0.59257     | 0.798140803 |             |          |         |
| TOR1AIP1  | ENSG00000143337 | -0.2343  | 0.59262     | -0.2343     | 0.59262     | -0.2343  |         |
|           | 0.59262         | -0.2343  | 0.59262     | 0.59262     | 0.798186086 |          |         |
| RESF1     | ENSG00000174718 | -0.38203 | 0.64878     | -0.83168    | 0.79721     | -0.38203 | 0.64878 |
|           | -0.23441        | 0.59267  | 0.59267     | 0.798200713 |             |          |         |
| CYYR1     | ENSG00000166265 | -0.23444 | 0.59268     | -0.23444    | 0.59268     | -0.23444 | 0.59268 |
|           | -0.23444        | 0.59268  | 0.59268     | 0.798200713 |             |          |         |
| NA        | ENSG00000275432 | -0.23445 | 0.59268     | -0.23445    | 0.59268     | -0.23445 | 0.59268 |
|           | -0.23445        | 0.59268  | 0.59268     | 0.798200713 |             |          |         |
| BRD7P6    | ENSG00000235289 | -0.23455 | 0.59272     | -0.77093    | 0.77963     | -2.359   |         |
|           | 0.99084         | -0.39464 | 0.65345     | 0.59272     | 0.79822393  |          |         |
| PLG       | ENSG00000122194 | -0.23456 | 0.59273     | -1.2916     | 0.90176     | -0.52064 | 0.69869 |
|           | -0.9934         | 0.83974  | 0.59273     | 0.79822393  |             |          |         |
| TBCCD1    | ENSG00000113838 | -0.25404 | 0.60027     | -0.25404    | 0.60027     | -0.48987 |         |
|           | 0.68789         | -0.2349  | 0.59286     | 0.59286     | 0.798313049 |          |         |
| NA        | ENSG00000218682 | -1.1711  | 0.87922     | -1.5567     | 0.94023     | -0.23491 | 0.59286 |
|           | -1.2649         | 0.89705  | 0.59286     | 0.798313049 |             |          |         |
| NA        | ENSG00000226578 | -0.23499 | 0.59289     | -0.73873    | 0.76997     | -0.61231 | 0.72983 |
|           | -0.87555        | 0.80936  | 0.59289     | 0.798313049 |             |          |         |
| ZNF622    | ENSG00000173545 | -0.50461 | 0.69308     | -0.34201    | 0.63383     | -0.50461 |         |
|           | 0.69308         | -0.23503 | 0.59291     | 0.59291     | 0.798313049 |          |         |
| TRAV32    | ENSG00000258905 | -0.23504 | 0.59291     | -0.23504    | 0.59291     | -0.23504 |         |
|           | 0.59291         | -0.23504 | 0.59291     | 0.59291     | 0.798313049 |          |         |
| PRDX2     | ENSG00000167815 | -0.23506 | 0.59292     | -0.23506    | 0.59292     | -0.23506 | 0.59292 |
|           | -0.23506        | 0.59292  | 0.59292     | 0.798313049 |             |          |         |
| SNORD41   | ENSG00000209702 | -0.23507 | 0.59292     | -0.23507    | 0.59292     | -0.23507 |         |
|           | 0.59292         | -0.23507 | 0.59292     | 0.59292     | 0.798313049 |          |         |
| CARD8     | ENSG00000105483 | -0.23508 | 0.59293     | -0.30512    | 0.61986     | -0.35656 | 0.63929 |
|           | -0.41399        | 0.66056  | 0.59293     | 0.798313049 |             |          |         |
| IGHV3-60  | ENSG00000253742 | -0.23514 | 0.59295     | -0.23514    | 0.59295     | -0.23514 |         |
|           | 0.59295         | -0.23514 | 0.59295     | 0.59295     | 0.798313049 |          |         |
| MIR1261   | ENSG00000221586 | -0.23517 | 0.59296     | -0.23517    | 0.59296     | -0.23517 |         |
|           | 0.59296         | -0.23517 | 0.59296     | 0.59296     | 0.798313049 |          |         |
| LINC02251 | ENSG00000258483 | -0.23526 | 0.593       | -0.23526    | 0.593       | -0.23526 | 0.593   |
|           | 0.77664         | 0.593    | 0.798336252 |             |             |          |         |
| TMOD3     | ENSG00000138594 | -0.40386 | 0.65684     | -0.40386    | 0.65684     | -1.1825  | 0.8815  |
|           | -0.23529        | 0.59301  | 0.59301     | 0.798336252 |             |          |         |
| ANKRD40   | ENSG00000154945 | -0.83711 | 0.79874     | -0.23534    | 0.59303     | -1.3914  |         |
|           | 0.91796         | -1.4581  | 0.92759     | 0.59303     | 0.798337398 |          |         |
| NA        | ENSG00000248794 | -0.23539 | 0.59305     | -0.23539    | 0.59305     | -0.23539 | 0.59305 |
|           | -0.23539        | 0.59305  | 0.59305     | 0.798337398 |             |          |         |
| SLF1      | ENSG00000133302 | -1.4016  | 0.91948     | -0.23541    | 0.59306     | -1.0062  | 0.84284 |
|           | -1.0531         | 0.85386  | 0.59306     | 0.798337398 |             |          |         |
| RNU7-99P  | ENSG00000252080 | -2.6387  | 0.99584     | -2.6387     | 0.99584     | -2.6387  |         |
|           | 0.99584         | -0.23547 | 0.59308     | 0.59308     | 0.798342267 |          |         |
| NA        | ENSG00000223063 | -0.23553 | 0.5931      | -0.48137    | 0.68487     | -1.8851  | 0.97029 |
|           | -0.37331        | 0.64554  | 0.5931      | 0.798347136 |             |          |         |
| CHIAP1    | ENSG00000236040 | -0.23564 | 0.59314     | -0.23564    | 0.59314     | -0.23564 |         |
|           | 0.59314         | -1.0286  | 0.84815     | 0.59314     | 0.798356872 |          |         |
| NA        | ENSG00000254731 | -0.23562 | 0.59314     | -0.23562    | 0.59314     | -0.23562 | 0.59314 |
|           | -0.23562        | 0.59314  | 0.59314     | 0.798356872 |             |          |         |
| OR1C1     | ENSG00000221888 | -0.33023 | 0.62939     | -0.23571    | 0.59317     | -0.48737 | 0.687   |
|           | -0.33023        | 0.62939  | 0.59317     | 0.798358016 |             |          |         |
| KRT18P56  | ENSG00000249668 | -0.23574 | 0.59318     | -0.23574    | 0.59318     | -0.50755 |         |
|           | 0.69411         | -0.23574 | 0.59318     | 0.59318     | 0.798358016 |          |         |
| MIS18BP1  | ENSG00000129534 | -1.1435  | 0.87358     | -0.23576    | 0.59319     | -0.73208 |         |



|            |                 |          |         |             |             |          |         |
|------------|-----------------|----------|---------|-------------|-------------|----------|---------|
|            | 0.76794         | -1.1382  | 0.87249 | 0.59319     | 0.798358016 |          |         |
| WSB2       | ENSG00000176871 | -0.23594 | 0.59326 | -0.23594    | 0.59326     | -0.23594 | 0.59326 |
|            | -1.1473         | 0.87437  | 0.59326 | 0.798399533 |             |          |         |
| RPIA       | ENSG00000153574 | -0.71505 | 0.76271 | -0.67168    | 0.7491      | -0.33122 | 0.62976 |
|            | -0.23595        | 0.59327  | 0.59327 | 0.798399533 |             |          |         |
| NA         | ENSG00000265489 | -0.23595 | 0.59327 | -0.23595    | 0.59327     | -0.23595 | 0.59327 |
|            | -0.23595        | 0.59327  | 0.59327 | 0.798399533 |             |          |         |
| NA         | ENSG00000261838 | -0.23602 | 0.59329 | -0.26943    | 0.6062      | -0.23602 | 0.59329 |
|            | -0.23602        | 0.59329  | 0.59329 | 0.798404399 |             |          |         |
| CYTH2      | ENSG00000105443 | -0.61415 | 0.73044 | -0.95585    | 0.83043     | -0.23614 | 0.59334 |
|            | -0.95585        | 0.83043  | 0.59334 | 0.798437316 |             |          |         |
| RNU6-1143P | ENSG00000251934 | -0.23616 | 0.59335 | -0.23616    | 0.59335     | -0.23616 |         |
|            | 0.59335         | -0.23616 | 0.59335 | 0.59335     | 0.798437316 |          |         |
| FCF1P7     | ENSG00000224727 | -0.46312 | 0.67836 | -0.23622    | 0.59337     | -0.46312 |         |
|            | 0.67836         | -0.46312 | 0.67836 | 0.59337     | 0.798437316 |          |         |
| BDP1P      | ENSG00000264736 | -0.23624 | 0.59338 | -0.67718    | 0.75085     | -0.62299 | 0.73335 |
|            | -0.67718        | 0.75085  | 0.59338 | 0.798437316 |             |          |         |
| NA         | ENSG00000235126 | -0.23634 | 0.59342 | -0.79363    | 0.78629     | -1.347   | 0.91101 |
|            | -1.347          | 0.91101  | 0.59342 | 0.798447044 |             |          |         |
| CEACAM20   | ENSG00000273777 | -1.0754  | 0.8589  | -0.23636    | 0.59342     | -0.70442 |         |
|            | 0.75942         | -0.70442 | 0.75942 | 0.59342     | 0.798447044 |          |         |
| NA         | ENSG00000280185 | -0.23642 | 0.59345 | -0.23642    | 0.59345     | -0.23642 | 0.59345 |
|            | -0.23642        | 0.59345  | 0.59345 | 0.798465363 |             |          |         |
| RNU4-21P   | ENSG00000199672 | -1.8952  | 0.97097 | -0.71133    | 0.76156     | -0.23651 |         |
|            | 0.59348         | -0.23651 | 0.59348 | 0.59348     | 0.79848368  |          |         |
| MTAPP1     | ENSG00000243025 | -0.2366  | 0.59352 | -0.34893    | 0.63643     | -0.2366  |         |
|            | 0.59352         | -0.2366  | 0.59352 | 0.59352     | 0.798506858 |          |         |
| NDFIP1     | ENSG00000131507 | -0.23664 | 0.59353 | -0.74404    | 0.77157     | -1.6432  |         |
|            | 0.94983         | -0.49578 | 0.68997 | 0.59353     | 0.798506858 |          |         |
| NA         | ENSG00000263970 | -0.2368  | 0.59359 | -0.2368     | 0.59359     | -0.2368  | 0.59359 |
|            | -0.2368         | 0.59359  | 0.59359 | 0.798556939 |             |          |         |
| LRRC23     | ENSG00000010626 | -0.23681 | 0.5936  | -0.23681    | 0.5936      | -0.35557 |         |
|            | 0.63892         | -0.3769  | 0.64688 | 0.5936      | 0.798556939 |          |         |
| SLC5A7     | ENSG00000115665 | -0.23692 | 0.59364 | -0.72042    | 0.76437     | -0.91201 |         |
|            | 0.81912         | -0.32686 | 0.62811 | 0.59364     | 0.79858011  |          |         |
| SERPINE4P  | ENSG00000258624 | -0.23696 | 0.59365 | -0.23696    | 0.59365     | -0.23696 |         |
|            | 0.59365         | -0.23696 | 0.59365 | 0.59365     | 0.79858011  |          |         |
| HSD11B2    | ENSG00000176387 | -0.29398 | 0.61561 | -0.29398    | 0.61561     | -0.29398 |         |
|            | 0.61561         | -0.23714 | 0.59372 | 0.59372     | 0.798649609 |          |         |
| RFWD3      | ENSG00000168411 | -1.6199  | 0.94738 | -0.23717    | 0.59374     | -1.626   | 0.94803 |
|            | -0.74396        | 0.77155  | 0.59374 | 0.798649609 |             |          |         |
| RNU1-100P  | ENSG00000202125 | -0.23725 | 0.59377 | -0.23725    | 0.59377     | -0.23725 |         |
|            | 0.59377         | -0.23725 | 0.59377 | 0.59377     | 0.798649609 |          |         |
| NA         | ENSG00000229458 | -0.6659  | 0.74726 | -0.23725    | 0.59377     | -0.6659  | 0.74726 |
|            | -0.6659         | 0.74726  | 0.59377 | 0.798649609 |             |          |         |
| NA         | ENSG00000184084 | -0.23732 | 0.59379 | -0.23732    | 0.59379     | -0.23732 | 0.59379 |
|            | -0.23732        | 0.59379  | 0.59379 | 0.798649609 |             |          |         |
| NA         | ENSG00000275392 | -0.23734 | 0.5938  | -0.23734    | 0.5938      | -0.23734 | 0.5938  |
|            | -0.23734        | 0.5938   | 0.5938  | 0.798649609 |             |          |         |
| NUP35      | ENSG00000163002 | -0.23739 | 0.59382 | -1.0867     | 0.86142     | -0.92764 | 0.8232  |
|            | -0.92764        | 0.8232   | 0.59382 | 0.798654466 |             |          |         |
| HOXB13     | ENSG00000159184 | -0.35373 | 0.63823 | -0.23751    | 0.59387     | -0.35373 |         |
|            | 0.63823         | -0.35373 | 0.63823 | 0.59387     | 0.798699669 |          |         |
| NA         | ENSG00000260583 | -0.23758 | 0.5939  | -0.23758    | 0.5939      | -0.23758 | 0.5939  |
|            | -0.23758        | 0.5939   | 0.5939  | 0.798717972 |             |          |         |
| NA         | ENSG00000232983 | -1.674   | 0.95293 | -1.674      | 0.95293     | -1.674   | 0.95293 |
|            | -0.23779        | 0.59398  | 0.59398 | 0.798803516 |             |          |         |
| NA         | ENSG00000241111 | -1.1729  | 0.87958 | -0.23785    | 0.594       | -0.8634  | 0.80604 |
|            | -0.8634         | 0.80604  | 0.594   | 0.798808367 |             |          |         |
| GABRA1     | ENSG00000022355 | -0.52245 | 0.69932 | -0.8847     | 0.81184     | -0.24629 |         |
|            | 0.59727         | -0.23813 | 0.59411 | 0.59411     | 0.798890154 |          |         |
| TEDDM2P    | ENSG00000233537 | -0.82024 | 0.79396 | -0.23812    | 0.59411     | -0.82024 |         |

|           |                 |          |         |             |             |          |         |
|-----------|-----------------|----------|---------|-------------|-------------|----------|---------|
|           | 0.79396         | -0.82024 | 0.79396 | 0.59411     | 0.798890154 |          |         |
| NA        | ENSG00000266184 | -0.23813 | 0.59411 | -0.23813    | 0.59411     | -0.23813 | 0.59411 |
|           | -0.24518        | 0.59684  | 0.59411 | 0.798890154 |             |          |         |
| NA        | ENSG00000231421 | -0.23822 | 0.59415 | -0.23822    | 0.59415     | -0.23822 | 0.59415 |
|           | -0.23822        | 0.59415  | 0.59415 | 0.798909547 |             |          |         |
| NA        | ENSG00000257643 | -0.23829 | 0.59417 | -0.23829    | 0.59417     | -0.23829 | 0.59417 |
|           | -0.25206        | 0.5995   | 0.59417 | 0.798909547 |             |          |         |
| SCNN1G    | ENSG00000166828 | -0.23834 | 0.59419 | -0.44827    | 0.67302     | -1.3855  |         |
|           | 0.91705         | -0.70923 | 0.76091 | 0.59419     | 0.798909547 |          |         |
| NA        | ENSG00000272933 | -0.23833 | 0.59419 | -0.53833    | 0.70483     | -0.23833 | 0.59419 |
|           | -0.23833        | 0.59419  | 0.59419 | 0.798909547 |             |          |         |
| NA        | ENSG00000230027 | -0.23842 | 0.59422 | -0.9355     | 0.82523     | -0.5448  | 0.70706 |
|           | -0.5448         | 0.70706  | 0.59422 | 0.798927839 |             |          |         |
| ZNF619    | ENSG00000177873 | -0.23847 | 0.59424 | -0.23847    | 0.59424     | -0.23847 |         |
|           | 0.59424         | -0.98059 | 0.8366  | 0.59424     | 0.798932686 |          |         |
| NA        | ENSG00000250494 | -0.38451 | 0.6497  | -0.23856    | 0.59427     | -0.23856 | 0.59427 |
|           | -0.23856        | 0.59427  | 0.59427 | 0.798950977 |             |          |         |
| XYLT1     | ENSG00000103489 | -0.23866 | 0.59431 | -1.315      | 0.90574     | -1.4852  | 0.93126 |
|           | -0.72788        | 0.76666  | 0.59431 | 0.79898271  |             |          |         |
| RNU6-917P | ENSG00000252103 | -0.23875 | 0.59435 | -0.23875    | 0.59435     | -0.23875 |         |
|           | 0.59435         | -0.23875 | 0.59435 | 0.59435     | 0.799005843 |          |         |
| JAK3      | ENSG00000105639 | -0.70294 | 0.75895 | -0.23877    | 0.59436     | -0.70294 | 0.75895 |
|           | -0.70294        | 0.75895  | 0.59436 | 0.799005843 |             |          |         |
| MT1XP1    | ENSG00000233929 | -0.23896 | 0.59443 | -0.23896    | 0.59443     | -0.23896 |         |
|           | 0.59443         | -0.23896 | 0.59443 | 0.59443     | 0.799026305 |          |         |
| SNORD110  | ENSG00000221116 | -0.23897 | 0.59444 | -0.23897    | 0.59444     | -0.23897 |         |
|           | 0.59444         | -0.23897 | 0.59444 | 0.59444     | 0.799026305 |          |         |
| NA        | ENSG00000227880 | -0.23901 | 0.59445 | -0.23901    | 0.59445     | -0.23901 | 0.59445 |
|           | -0.23901        | 0.59445  | 0.59445 | 0.799026305 |             |          |         |
| NA        | ENSG00000255566 | -0.23901 | 0.59445 | -0.23901    | 0.59445     | -0.23901 | 0.59445 |
|           | -0.23901        | 0.59445  | 0.59445 | 0.799026305 |             |          |         |
| RNA5SP406 | ENSG00000251915 | -3.6259  | 0.99986 | -0.23906    | 0.59447     | -3.6259  |         |
|           | 0.99986         | -3.6259  | 0.99986 | 0.59447     | 0.799026305 |          |         |
| RN7SKP225 | ENSG00000222337 | -1.0649  | 0.85654 | -1.0735     | 0.85847     | -0.73742 |         |
|           | 0.76957         | -0.23909 | 0.59448 | 0.59448     | 0.799026305 |          |         |
| NA        | ENSG00000234112 | -0.23912 | 0.59449 | -0.71321    | 0.76214     | -0.71321 | 0.76214 |
|           | -0.71321        | 0.76214  | 0.59449 | 0.799026305 |             |          |         |
| SMTNL2    | ENSG00000188176 | -0.79494 | 0.78668 | -0.23921    | 0.59453     | -1.3973  |         |
|           | 0.91883         | -0.45305 | 0.67474 | 0.59453     | 0.799040831 |          |         |
| NA        | ENSG00000241035 | -0.23923 | 0.59454 | -0.23923    | 0.59454     | -0.23923 | 0.59454 |
|           | -0.23923        | 0.59454  | 0.59454 | 0.799040831 |             |          |         |
| OR7C2     | ENSG00000127529 | -0.23926 | 0.59455 | -1.2405     | 0.89261     | -0.41075 | 0.65937 |
|           | -0.63325        | 0.73672  | 0.59455 | 0.799040831 |             |          |         |
| NAF1      | ENSG00000145414 | -1.0166  | 0.84532 | -1.0166     | 0.84532     | -0.23939 | 0.5946  |
|           | -0.43375        | 0.66777  | 0.5946  | 0.79908599  |             |          |         |
| RCE1      | ENSG00000173653 | -0.23948 | 0.59463 | -0.23948    | 0.59463     | -0.23948 | 0.59463 |
|           | -0.23948        | 0.59463  | 0.59463 | 0.79909567  |             |          |         |
| HAGLROS   | ENSG00000226363 | -0.23949 | 0.59464 | -0.23949    | 0.59464     | -0.23949 |         |
|           | 0.59464         | -0.23949 | 0.59464 | 0.59464     | 0.79909567  |          |         |
| HROB      | ENSG00000125319 | -0.23956 | 0.59466 | -0.93013    | 0.82385     | -0.76047 | 0.77651 |
|           | -0.4664         | 0.67954  | 0.59466 | 0.79910051  |             |          |         |
| NA        | ENSG00000236606 | -0.23962 | 0.59469 | -1.5613     | 0.94078     | -1.5613  | 0.94078 |
|           | -1.5613         | 0.94078  | 0.59469 | 0.799118787 |             |          |         |
| NA        | ENSG00000201701 | -0.23971 | 0.59472 | -0.23971    | 0.59472     | -0.23971 | 0.59472 |
|           | -0.46315        | 0.67837  | 0.59472 | 0.799137063 |             |          |         |
| AK9       | ENSG00000155085 | -0.23978 | 0.59475 | -0.47349    | 0.68207     | -0.66426 | 0.74674 |
|           | -0.58517        | 0.72078  | 0.59475 | 0.799151577 |             |          |         |
| NA        | ENSG00000271754 | -0.23982 | 0.59477 | -0.23982    | 0.59477     | -0.23982 | 0.59477 |
|           | -0.23982        | 0.59477  | 0.59477 | 0.799151577 |             |          |         |
| OR9G2P    | ENSG00000254825 | -0.55678 | 0.71116 | -0.55678    | 0.71116     | -0.23987 |         |
|           | 0.59478         | -0.55678 | 0.71116 | 0.59478     | 0.799151577 |          |         |
| RPL7P13   | ENSG00000234253 | -0.23992 | 0.5948  | -0.23992    | 0.5948      | -0.23992 |         |

|           |                 |          |         |             |             |          |         |
|-----------|-----------------|----------|---------|-------------|-------------|----------|---------|
|           | 0.5948          | -0.23992 | 0.5948  | 0.5948      | 0.799156415 |          |         |
| SNX19P3   | ENSG00000264570 | -0.90996 | 0.81858 | -0.24004    | 0.59485     | -0.24004 |         |
|           | 0.59485         | -0.24004 | 0.59485 | 0.59485     | 0.79918436  |          |         |
| PCMTD1P3  | ENSG00000234800 | -0.24006 | 0.59486 | -1.4913     | 0.93206     | -1.4913  |         |
|           | 0.93206         | -1.4913  | 0.93206 | 0.59486     | 0.79918436  |          |         |
| H4C1      | ENSG00000278637 | -0.24008 | 0.59487 | -0.24008    | 0.59487     | -0.24008 | 0.59487 |
|           | -0.24008        | 0.59487  | 0.59487 | 0.79918436  |             |          |         |
| NA        | ENSG00000266365 | -0.40597 | 0.65762 | -1.4167     | 0.92172     | -0.24018 | 0.59491 |
|           | -0.964          | 0.83248  | 0.59491 | 0.799216064 |             |          |         |
| NA        | ENSG00000217702 | -1.1084  | 0.86616 | -1.4712     | 0.92938     | -0.24031 | 0.59496 |
|           | -2.1702         | 0.985    | 0.59496 | 0.799261201 |             |          |         |
| NA        | ENSG00000249502 | -0.24037 | 0.59498 | -1.0455     | 0.8521      | -1.0455  | 0.8521  |
|           | -1.0455         | 0.8521   | 0.59498 | 0.799266034 |             |          |         |
| FBXO40    | ENSG00000163833 | -0.85112 | 0.80265 | -0.85112    | 0.80265     | -0.24051 |         |
|           | 0.59503         | -0.62865 | 0.73521 | 0.59503     | 0.799285366 |          |         |
| IGF2      | ENSG00000167244 | -0.45658 | 0.67601 | -1.2413     | 0.89276     | -1.4555  | 0.92724 |
|           | -0.24056        | 0.59505  | 0.59505 | 0.799285366 |             |          |         |
| NA        | ENSG00000239137 | -0.24055 | 0.59505 | -0.24055    | 0.59505     | -0.24055 | 0.59505 |
|           | -0.24055        | 0.59505  | 0.59505 | 0.799285366 |             |          |         |
| NA        | ENSG00000259665 | -0.24058 | 0.59506 | -0.55739    | 0.71137     | -0.24058 | 0.59506 |
|           | -0.24058        | 0.59506  | 0.59506 | 0.799285366 |             |          |         |
| FOXL2     | ENSG00000183770 | -0.2407  | 0.59511 | -0.2407     | 0.59511     | -0.2407  | 0.59511 |
|           | -0.2407         | 0.59511  | 0.59511 | 0.799286431 |             |          |         |
| BET1-AS1  | ENSG00000236861 | -0.24072 | 0.59511 | -0.24072    | 0.59511     | -0.24072 |         |
|           | 0.59511         | -1.0621  | 0.85591 | 0.59511     | 0.799286431 |          |         |
| UBR5-AS1  | ENSG00000246263 | -0.3964  | 0.6541  | -0.24071    | 0.59511     | -0.3964  |         |
|           | 0.6541          | -0.3964  | 0.6541  | 0.59511     | 0.799286431 |          |         |
| FTOP1     | ENSG00000226491 | -0.8216  | 0.79435 | -0.49599    | 0.69005     | -0.24082 | 0.59515 |
|           | -0.34043        | 0.63323  | 0.59515 | 0.799318124 |             |          |         |
| NA        | ENSG00000261687 | -0.241   | 0.59522 | -0.241      | 0.59522     | -0.241   | 0.59522 |
|           | -0.241          | 0.59522  | 0.59522 | 0.799390106 |             |          |         |
| NA        | ENSG00000248994 | -0.24107 | 0.59525 | -1.1354     | 0.8719      | -1.3408  | 0.91001 |
|           | -0.68129        | 0.75216  | 0.59525 | 0.799408364 |             |          |         |
| OR51B5    | ENSG00000167355 | -0.24111 | 0.59527 | -0.24111    | 0.59527     | -0.24111 |         |
|           | 0.59527         | -0.24111 | 0.59527 | 0.59527     | 0.79940881  |          |         |
| KCNJ15    | ENSG00000157551 | -0.24504 | 0.59679 | -0.24131    | 0.59534     | -0.36295 |         |
|           | 0.64168         | -0.30806 | 0.62098 | 0.59534     | 0.79940881  |          |         |
| MIR193B   | ENSG00000207639 | -0.2413  | 0.59534 | -0.2413     | 0.59534     | -0.2413  |         |
|           | 0.59534         | -0.30444 | 0.6196  | 0.59534     | 0.79940881  |          |         |
| HSP90AA1  | ENSG00000080824 | -0.45966 | 0.67712 | -0.24133    | 0.59535     | -0.46481 |         |
|           | 0.67897         | -0.29168 | 0.61474 | 0.59535     | 0.79940881  |          |         |
| NA        | ENSG00000266490 | -0.24138 | 0.59537 | -0.24138    | 0.59537     | -0.24138 | 0.59537 |
|           | -0.24138        | 0.59537  | 0.59537 | 0.79940881  |             |          |         |
| SYNGR1    | ENSG00000100321 | -0.24145 | 0.5954  | -0.24145    | 0.5954      | -0.24145 |         |
|           | 0.5954          | -0.24145 | 0.5954  | 0.5954      | 0.79940881  |          |         |
| RNU1-72P  | ENSG00000199846 | -0.24153 | 0.59543 | -0.24153    | 0.59543     | -0.24153 |         |
|           | 0.59543         | -0.24153 | 0.59543 | 0.59543     | 0.79940881  |          |         |
| ZNF558    | ENSG00000167785 | -0.24156 | 0.59544 | -0.39574    | 0.65385     | -0.44354 |         |
|           | 0.67131         | -0.60314 | 0.72679 | 0.59544     | 0.79940881  |          |         |
| NA        | ENSG00000249837 | -0.33018 | 0.62937 | -0.24157    | 0.59544     | -0.32266 | 0.62653 |
|           | -0.32266        | 0.62653  | 0.59544 | 0.79940881  |             |          |         |
| RNF138P1  | ENSG00000250853 | -0.24155 | 0.59544 | -0.2883     | 0.61344     | -0.24155 |         |
|           | 0.59544         | -0.25063 | 0.59895 | 0.59544     | 0.79940881  |          |         |
| DOLK      | ENSG00000175283 | -0.2416  | 0.59545 | -0.2416     | 0.59545     | -0.2416  | 0.59545 |
|           | -0.2416         | 0.59545  | 0.59545 | 0.79940881  |             |          |         |
| RNU6-888P | ENSG00000199880 | -0.24162 | 0.59546 | -0.24162    | 0.59546     | -0.24162 |         |
|           | 0.59546         | -0.24162 | 0.59546 | 0.59546     | 0.79940881  |          |         |
| HAPLN4    | ENSG00000187664 | -0.24167 | 0.59548 | -0.24167    | 0.59548     | -0.30195 |         |
|           | 0.61865         | -0.30195 | 0.61865 | 0.59548     | 0.79940881  |          |         |
| SLC22A31  | ENSG00000259803 | -0.24166 | 0.59548 | -1.112      | 0.86693     | -1.112   |         |
|           | 0.86693         | -1.112   | 0.86693 | 0.59548     | 0.79940881  |          |         |
| NA        | ENSG00000223967 | -0.24183 | 0.59554 | -0.24183    | 0.59554     | -0.24183 | 0.59554 |

|           |                 |          |          |          |             |             |         |  |
|-----------|-----------------|----------|----------|----------|-------------|-------------|---------|--|
|           |                 | -0.24183 | 0.59554  | 0.59554  | 0.799441537 |             |         |  |
| DYNLL1P4  | ENSG00000257231 | -1.0468  | 0.8524   | -1.0468  | 0.8524      | -0.24184    |         |  |
|           |                 | 0.59555  | -1.0468  | 0.8524   | 0.59555     | 0.799441537 |         |  |
| NA        | ENSG00000249036 | -0.59944 | 0.72556  | -0.55426 | 0.7103      | -0.24187    | 0.59556 |  |
|           |                 | -0.53375 | 0.70324  | 0.59556  | 0.799441537 |             |         |  |
| OR13E1P   | ENSG00000236083 | -0.2419  | 0.59557  | -0.2419  | 0.59557     | -0.2419     |         |  |
|           |                 | 0.59557  | -0.2419  | 0.59557  | 0.799441537 |             |         |  |
| NA        | ENSG00000218617 | -0.24199 | 0.5956   | -0.24199 | 0.5956      | -0.24199    | 0.5956  |  |
|           |                 | -0.24199 | 0.5956   | 0.5956   | 0.799459784 |             |         |  |
| RNU6-329P | ENSG00000238882 | -1.2187  | 0.88852  | -0.24209 | 0.59564     | -0.24209    |         |  |
|           |                 | 0.59564  | -0.24209 | 0.59564  | 0.799474256 |             |         |  |
| SLC40A1   | ENSG00000138449 | -0.5222  | 0.69923  | -0.5222  | 0.69923     | -0.5222     |         |  |
|           |                 | 0.69923  | -0.24213 | 0.59566  | 0.799474256 |             |         |  |
| ZBTB8A    | ENSG00000160062 | -0.24213 | 0.59566  | -0.24213 | 0.59566     | -0.89536    |         |  |
|           |                 | 0.8147   | -0.82033 | 0.79399  | 0.59566     | 0.799474256 |         |  |
| RN7SL57P  | ENSG00000242256 | -0.24229 | 0.59572  | -0.24229 | 0.59572     | -0.24229    |         |  |
|           |                 | 0.59572  | -0.24229 | 0.59572  | 0.799503192 |             |         |  |
| SEMA3A    | ENSG00000075213 | -0.40141 | 0.65594  | -0.97748 | 0.83583     | -1.0494     |         |  |
|           |                 | 0.85299  | -0.24233 | 0.59574  | 0.799503192 |             |         |  |
| RNU6-415P | ENSG00000252061 | -0.24235 | 0.59574  | -0.24235 | 0.59574     | -0.24235    |         |  |
|           |                 | 0.59574  | -0.24235 | 0.59574  | 0.799503192 |             |         |  |
| NA        | ENSG00000279137 | -0.2424  | 0.59576  | -0.2424  | 0.59576     | -0.2424     | 0.59576 |  |
|           |                 | -0.2424  | 0.59576  | 0.59576  | 0.799503192 |             |         |  |
| NA        | ENSG00000280397 | -0.24242 | 0.59577  | -0.24242 | 0.59577     | -0.24242    | 0.59577 |  |
|           |                 | -0.24242 | 0.59577  | 0.59577  | 0.799503192 |             |         |  |
| NA        | ENSG00000241815 | -0.24245 | 0.59578  | -0.24245 | 0.59578     | -0.24245    | 0.59578 |  |
|           |                 | -0.24245 | 0.59578  | 0.59578  | 0.799503192 |             |         |  |
| NA        | ENSG00000232482 | -0.24261 | 0.59584  | -0.24261 | 0.59584     | -0.24261    | 0.59584 |  |
|           |                 | -0.24261 | 0.59584  | 0.59584  | 0.799553091 |             |         |  |
| SIRPB2    | ENSG00000196209 | -0.67373 | 0.74976  | -0.24261 | 0.59585     | -2.8083     |         |  |
|           |                 | 0.99751  | -0.57909 | 0.71874  | 0.59585     | 0.799553091 |         |  |
| GFOD1-AS1 | ENSG00000237786 | -0.24268 | 0.59587  | -0.24268 | 0.59587     | -0.24268    |         |  |
|           |                 | 0.59587  | -0.24268 | 0.59587  | 0.799557911 |             |         |  |
| MIR31HG   | ENSG00000171889 | -0.24279 | 0.59592  | -1.2781  | 0.89939     | -1.2781     |         |  |
|           |                 | 0.89939  | -1.2781  | 0.89939  | 0.59592     | 0.799558953 |         |  |
| FTH1P2    | ENSG00000234975 | -0.24279 | 0.59592  | -1.0638  | 0.85628     | -0.71546    |         |  |
|           |                 | 0.76284  | -2.0148  | 0.97804  | 0.59592     | 0.799558953 |         |  |
| OR10G4    | ENSG00000254737 | -0.2428  | 0.59592  | -0.2428  | 0.59592     | -0.2428     |         |  |
|           |                 | 0.59592  | -0.2428  | 0.59592  | 0.799558953 |             |         |  |
| BANF1     | ENSG00000175334 | -0.77255 | 0.7801   | -0.24286 | 0.59594     | -0.24286    | 0.59594 |  |
|           |                 | -0.24286 | 0.59594  | 0.59594  | 0.799563772 |             |         |  |
| NA        | ENSG00000235253 | -0.86672 | 0.80695  | -0.24294 | 0.59597     | -0.86672    | 0.80695 |  |
|           |                 | -0.86672 | 0.80695  | 0.59597  | 0.79957341  |             |         |  |
| NA        | ENSG00000235965 | -0.24297 | 0.59598  | -0.24297 | 0.59598     | -0.24297    | 0.59598 |  |
|           |                 | -0.24297 | 0.59598  | 0.59598  | 0.79957341  |             |         |  |
| NA        | ENSG00000267456 | -0.42564 | 0.66481  | -0.42564 | 0.66481     | -0.24301    | 0.596   |  |
|           |                 | -0.42564 | 0.66481  | 0.596    | 0.799578229 |             |         |  |
| NA        | ENSG00000255858 | -0.24312 | 0.59604  | -0.76225 | 0.77704     | -0.38795    | 0.65098 |  |
|           |                 | -1.5833  | 0.94332  | 0.59604  | 0.799587865 |             |         |  |
| NA        | ENSG00000213029 | -0.24311 | 0.59604  | -0.24311 | 0.59604     | -0.24311    | 0.59604 |  |
|           |                 | -0.24311 | 0.59604  | 0.59604  | 0.799587865 |             |         |  |
| RAB3GAP1  | ENSG00000115839 | -0.59534 | 0.72419  | -1.3885  | 0.91751     | -0.73775    |         |  |
|           |                 | 0.76967  | -0.24319 | 0.59607  | 0.59607     | 0.799606098 |         |  |
| NA        | ENSG00000225889 | -0.46531 | 0.67915  | -0.70658 | 0.76008     | -0.24326    | 0.5961  |  |
|           |                 | -0.68247 | 0.75253  | 0.5961   | 0.799624329 |             |         |  |
| NA        | ENSG00000253252 | -0.24341 | 0.59615  | -0.24341 | 0.59615     | -1.0675     | 0.85713 |  |
|           |                 | -1.7341  | 0.95855  | 0.59615  | 0.7996264   |             |         |  |
| SPECC1    | ENSG00000128487 | -0.24342 | 0.59616  | -1.4347  | 0.92431     | -1.1456     |         |  |
|           |                 | 0.87402  | -2.0431  | 0.97948  | 0.59616     | 0.7996264   |         |  |
| NPLP1     | ENSG00000232114 | -0.24344 | 0.59617  | -0.24344 | 0.59617     | -0.24344    | 0.59617 |  |
|           |                 | -0.24344 | 0.59617  | 0.59617  | 0.7996264   |             |         |  |
| TAF5      | ENSG00000148835 | -0.29503 | 0.61601  | -0.29503 | 0.61601     | -0.29503    | 0.61601 |  |

|              |                 |          |          |          |             |             |          |          |
|--------------|-----------------|----------|----------|----------|-------------|-------------|----------|----------|
|              |                 | -0.24347 | 0.59618  | 0.59618  | 0.7996264   |             |          |          |
| PLEKHG2      | ENSG00000090924 | -0.56318 | 0.71334  | -0.56318 | 0.71334     | -0.56318    | 0.71334  | -0.56318 |
|              |                 | 0.71334  | -0.2435  | 0.59619  | 0.59619     | 0.7996264   |          |          |
| NA           | ENSG00000226180 | -0.24352 | 0.5962   | 0.5962   | -0.24352    | 0.5962      | -0.24352 | 0.5962   |
|              |                 | -0.24352 | 0.5962   | 0.5962   | 0.7996264   |             |          |          |
| NA           | ENSG00000253300 | -0.24373 | 0.59628  | 0.59628  | -1.0032     | 0.84211     | -0.3474  | 0.63586  |
|              |                 | -1.0473  | 0.85251  | 0.59628  | 0.799711686 |             |          |          |
| OASL2P       | ENSG00000283542 | -0.95314 | 0.82974  | -0.95314 | 0.82974     | -0.95314    |          |          |
|              |                 | 0.82974  | -0.24404 | 0.5964   | 0.5964      | 0.799850612 |          |          |
| GLDN         | ENSG00000186417 | -1.2785  | 0.89947  | -1.3066  | 0.90433     | -1.3953     | 0.91853  |          |
|              |                 | -0.24413 | 0.59644  | 0.59644  | 0.799869848 |             |          |          |
| RNU4-87P     | ENSG00000200974 | -1.9747  | 0.97585  | -2.1683  | 0.98493     | -0.24417    |          |          |
|              |                 | 0.59645  | -0.45482 | 0.67538  | 0.59645     | 0.799869848 |          |          |
| DAPK2        | ENSG00000035664 | -0.24423 | 0.59647  | -0.48251 | 0.68528     | -0.56272    | 0.71319  |          |
|              |                 | -0.29324 | 0.61533  | 0.59647  | 0.799869848 |             |          |          |
| NA           | ENSG00000253698 | -0.25681 | 0.60134  | -0.25681 | 0.60134     | -0.2493     | 0.59843  |          |
|              |                 | -0.24424 | 0.59648  | 0.59648  | 0.799869848 |             |          |          |
| NA           | ENSG00000279525 | -0.24437 | 0.59653  | -0.24437 | 0.59653     | -0.24437    | 0.59653  |          |
|              |                 | -0.24437 | 0.59653  | 0.59653  | 0.799898693 |             |          |          |
| C17orf50     | ENSG00000270806 | -0.24449 | 0.59657  | -0.65921 | 0.74512     | -0.48494    |          |          |
|              |                 | 0.68614  | -0.48494 | 0.68614  | 0.59657     | 0.799898693 |          |          |
| NA           | ENSG00000231859 | -0.24452 | 0.59659  | -0.24452 | 0.59659     | -0.24452    | 0.59659  |          |
|              |                 | -0.24452 | 0.59659  | 0.59659  | 0.799898693 |             |          |          |
| NA           | ENSG00000232032 | -0.24452 | 0.59659  | -0.24452 | 0.59659     | -0.24452    | 0.59659  |          |
|              |                 | -0.24452 | 0.59659  | 0.59659  | 0.799898693 |             |          |          |
| DNAAF4-CCPG1 | ENSG00000261771 | -0.24452 | 0.59659  | -0.24452 | 0.59659     | -0.24452    | 0.59659  | -0.24452 |
|              |                 | 0.59659  | -0.24452 | 0.59659  | 0.59659     | 0.799898693 |          |          |
| NA           | ENSG00000258871 | -0.24456 | 0.5966   | -0.24456 | 0.5966      | -0.24456    | 0.5966   |          |
|              |                 | -0.24456 | 0.5966   | 0.5966   | 0.799898693 |             |          |          |
| NA           | ENSG00000241912 | -0.2447  | 0.59665  | -0.2447  | 0.59665     | -0.2447     | 0.59665  |          |
|              |                 | -0.2447  | 0.59665  | 0.59665  | 0.799943721 |             |          |          |
| LINC02471    | ENSG00000223914 | -0.48981 | 0.68787  | -0.24473 | 0.59667     | -0.83929    |          |          |
|              |                 | 0.79935  | -0.83929 | 0.79935  | 0.59667     | 0.799948527 |          |          |
| PPIAP5       | ENSG00000258996 | -0.24481 | 0.5967   | -0.4629  | 0.67828     | -0.24481    |          |          |
|              |                 | 0.5967   | -0.24481 | 0.5967   | 0.5967      | 0.799966738 |          |          |
| NA           | ENSG00000272801 | -0.24493 | 0.59674  | -0.24493 | 0.59674     | -0.24493    | 0.59674  |          |
|              |                 | -0.24493 | 0.59674  | 0.59674  | 0.799973555 |             |          |          |
| RNU6-805P    | ENSG00000202513 | -0.62923 | 0.7354   | -1.1978  | 0.88451     | -0.24499    |          |          |
|              |                 | 0.59677  | -0.71993 | 0.76422  | 0.59677     | 0.799973555 |          |          |
| NA           | ENSG00000272579 | -0.24502 | 0.59678  | -0.24502 | 0.59678     | -0.24502    | 0.59678  |          |
|              |                 | -0.24502 | 0.59678  | 0.59678  | 0.799973555 |             |          |          |
| FFAR3        | ENSG00000185897 | -1.7133  | 0.95668  | -1.7133  | 0.95668     | -0.24506    | 0.59679  |          |
|              |                 | -1.7133  | 0.95668  | 0.59679  | 0.799973555 |             |          |          |
| NA           | ENSG00000197254 | -0.24505 | 0.59679  | -0.24505 | 0.59679     | -0.24505    | 0.59679  |          |
|              |                 | -0.24505 | 0.59679  | 0.59679  | 0.799973555 |             |          |          |
| NPM1P41      | ENSG00000248543 | -0.2451  | 0.59681  | -0.2451  | 0.59681     | -0.79297    |          |          |
|              |                 | 0.7861   | -0.2451  | 0.59681  | 0.59681     | 0.799973555 |          |          |
| RPL36P4      | ENSG00000224497 | -0.24514 | 0.59682  | -0.24514 | 0.59682     | -0.24514    |          |          |
|              |                 | 0.59682  | -0.24514 | 0.59682  | 0.59682     | 0.799973555 |          |          |
| VAMP8        | ENSG00000118640 | -0.24535 | 0.59691  | -0.24535 | 0.59691     | -0.24535    | 0.59691  |          |
|              |                 | -0.71645 | 0.76314  | 0.59691  | 0.800021576 |             |          |          |
| ZBTB45       | ENSG00000119574 | -0.66904 | 0.74827  | -0.24538 | 0.59692     | -0.66904    |          |          |
|              |                 | 0.74827  | -0.66904 | 0.74827  | 0.59692     | 0.800021576 |          |          |
| NA           | ENSG00000231714 | -1.1885  | 0.88267  | -0.24547 | 0.59695     | -1.1885     | 0.88267  |          |
|              |                 | -1.1885  | 0.88267  | 0.59695  | 0.800021576 |             |          |          |
| NA           | ENSG00000236550 | -0.2455  | 0.59696  | -0.2455  | 0.59696     | -0.2455     | 0.59696  |          |
|              |                 | -0.2455  | 0.59696  | 0.59696  | 0.800021576 |             |          |          |
| TOP3BP1      | ENSG00000228050 | -0.24552 | 0.59697  | -0.78052 | 0.78246     | -0.78052    |          |          |
|              |                 | 0.78246  | -1.9171  | 0.97239  | 0.59697     | 0.800021576 |          |          |
| NA           | ENSG00000271075 | -0.24551 | 0.59697  | -0.24551 | 0.59697     | -0.24551    | 0.59697  |          |
|              |                 | -0.24551 | 0.59697  | 0.59697  | 0.800021576 |             |          |          |
| RNASEH2B     | ENSG00000136104 | -0.44645 | 0.67236  | -0.44719 | 0.67263     | -0.93439    |          |          |

|            |                 |          |         |             |             |          |         |  |
|------------|-----------------|----------|---------|-------------|-------------|----------|---------|--|
|            | 0.82495         | -0.24555 | 0.59699 | 0.59699     | 0.800021576 |          |         |  |
| NA         | ENSG00000271667 | -1.0082  | 0.84332 | -0.24556    | 0.59699     | -0.24556 | 0.59699 |  |
|            | -0.24556        | 0.59699  | 0.59699 | 0.800021576 |             |          |         |  |
| ZNF320     | ENSG00000182986 | -0.29706 | 0.61679 | -0.24563    | 0.59702     | -0.42215 |         |  |
|            | 0.66354         | -0.27434 | 0.60809 | 0.59702     | 0.800021576 |          |         |  |
| HNRNPA3P15 | ENSG00000225636 | -0.24563 | 0.59702 | -0.24563    | 0.59702     | -0.24563 |         |  |
|            | 0.59702         | -0.24563 | 0.59702 | 0.59702     | 0.800021576 |          |         |  |
| NA         | ENSG00000263080 | -0.24568 | 0.59704 | -1.549      | 0.93931     | -1.549   | 0.93931 |  |
|            | -1.549          | 0.93931  | 0.59704 | 0.800026376 |             |          |         |  |
| NA         | ENSG00000229766 | -0.24586 | 0.5971  | -0.78739    | 0.78447     | -0.49791 | 0.69073 |  |
|            | -1.154          | 0.87575  | 0.5971  | 0.800058974 |             |          |         |  |
| NKIRAS1    | ENSG00000197885 | -0.24587 | 0.59711 | -0.81996    | 0.79388     | -0.24587 |         |  |
|            | 0.59711         | -0.24587 | 0.59711 | 0.59711     | 0.800058974 |          |         |  |
| C8B        | ENSG00000021852 | -1.3453  | 0.91074 | -0.24592    | 0.59713     | -1.3453  | 0.91074 |  |
|            | -1.3453         | 0.91074  | 0.59713 | 0.800058974 |             |          |         |  |
| LINC01714  | ENSG00000227634 | -0.25949 | 0.60237 | -0.24593    | 0.59713     | -1.5319  |         |  |
|            | 0.93723         | -1.5319  | 0.93723 | 0.59713     | 0.800058974 |          |         |  |
| NA         | ENSG00000275480 | -0.24602 | 0.59717 | -0.24602    | 0.59717     | -0.24602 | 0.59717 |  |
|            | -0.5371         | 0.7044   | 0.59717 | 0.800064772 |             |          |         |  |
| NA         | ENSG00000254039 | -0.24604 | 0.59718 | -1.2985     | 0.90294     | -1.3674  | 0.91425 |  |
|            | -1.3674         | 0.91425  | 0.59718 | 0.800064772 |             |          |         |  |
| TRBV5-3    | ENSG00000211715 | -0.24608 | 0.59719 | -0.24608    | 0.59719     | -0.24608 |         |  |
|            | 0.59719         | -0.24608 | 0.59719 | 0.59719     | 0.800064772 |          |         |  |
| DNAH11     | ENSG00000105877 | -0.47614 | 0.68301 | -0.2461     | 0.5972      | -0.98324 |         |  |
|            | 0.83725         | -0.34624 | 0.63542 | 0.5972      | 0.800064772 |          |         |  |
| LNCARSR    | ENSG00000233086 | -0.55387 | 0.71017 | -0.74407    | 0.77158     | -0.24619 |         |  |
|            | 0.59723         | -0.24619 | 0.59723 | 0.59723     | 0.800067765 |          |         |  |
| RPL35P4    | ENSG00000213783 | -0.93275 | 0.82452 | -1.276      | 0.89901     | -0.24622 |         |  |
|            | 0.59724         | -1.276   | 0.89901 | 0.59724     | 0.800067765 |          |         |  |
| TCERG1L    | ENSG00000176769 | -0.63939 | 0.73871 | -1.0721     | 0.85816     | -0.2463  |         |  |
|            | 0.59728         | -0.62379 | 0.73362 | 0.59728     | 0.800067765 |          |         |  |
| RNU6-136P  | ENSG00000207393 | -0.24633 | 0.59729 | -0.24633    | 0.59729     | -0.24633 |         |  |
|            | 0.59729         | -0.24633 | 0.59729 | 0.59729     | 0.800067765 |          |         |  |
| PPP1R27    | ENSG00000182676 | -0.24639 | 0.59731 | -0.6187     | 0.73194     | -0.6187  |         |  |
|            | 0.73194         | -0.6187  | 0.73194 | 0.59731     | 0.800067765 |          |         |  |
| NA         | ENSG00000225505 | -0.24642 | 0.59732 | -0.24642    | 0.59732     | -0.24642 | 0.59732 |  |
|            | -0.24642        | 0.59732  | 0.59732 | 0.800067765 |             |          |         |  |
| KHDC1P1    | ENSG00000251360 | -1.0416  | 0.8512  | -0.24641    | 0.59732     | -1.0416  |         |  |
|            | 0.8512          | -1.0416  | 0.8512  | 0.59732     | 0.800067765 |          |         |  |
| NA         | ENSG00000235533 | -1.7186  | 0.95716 | -0.2465     | 0.59735     | -1.7186  | 0.95716 |  |
|            | -1.7186         | 0.95716  | 0.59735 | 0.800067765 |             |          |         |  |
| NAPA-AS1   | ENSG00000268061 | -0.2465  | 0.59735 | -0.2465     | 0.59735     | -0.2465  |         |  |
|            | 0.59735         | -0.2465  | 0.59735 | 0.59735     | 0.800067765 |          |         |  |
| MIR548I2   | ENSG00000221275 | -0.24666 | 0.59741 | -0.24666    | 0.59741     | -1.6056  |         |  |
|            | 0.94582         | -0.84055 | 0.7997  | 0.59741     | 0.800126135 |          |         |  |
| RNU5E-5P   | ENSG00000202249 | -0.9857  | 0.83786 | -0.9857     | 0.83786     | -0.9857  |         |  |
|            | 0.83786         | -0.2468  | 0.59747 | 0.59747     | 0.800184502 |          |         |  |
| LINC02413  | ENSG00000257345 | -1.4719  | 0.92948 | -0.57654    | 0.71787     | -0.24695 |         |  |
|            | 0.59753         | -0.7379  | 0.76971 | 0.59753     | 0.800234265 |          |         |  |
| MS4A6E     | ENSG00000166926 | -0.76008 | 0.7764  | -0.31941    | 0.62529     | -0.36438 |         |  |
|            | 0.64221         | -0.24698 | 0.59754 | 0.59754     | 0.800234265 |          |         |  |
| CAMTA1     | ENSG00000171735 | -0.24705 | 0.59756 | -0.72993    | 0.76728     | -1.4538  | 0.927   |  |
|            | -0.74016        | 0.7704   | 0.59756 | 0.800239057 |             |          |         |  |
| GPRC5A     | ENSG00000013588 | -0.92628 | 0.82285 | -0.24717    | 0.59761     | -0.33094 |         |  |
|            | 0.62966         | -0.93966 | 0.8263  | 0.59761     | 0.800284023 |          |         |  |
| COX6CP1    | ENSG00000260318 | -0.24722 | 0.59763 | -0.24722    | 0.59763     | -0.24722 |         |  |
|            | 0.59763         | -0.24722 | 0.59763 | 0.59763     | 0.800288813 |          |         |  |
| MTATP6P31  | ENSG00000218776 | -0.24743 | 0.59771 | -0.24743    | 0.59771     | -0.24743 |         |  |
|            | 0.59771         | -0.24743 | 0.59771 | 0.59771     | 0.80033475  |          |         |  |
| ANKFY1     | ENSG00000185722 | -1.2879  | 0.90111 | -1.8898     | 0.97061     | -1.1173  |         |  |
|            | 0.86807         | -0.24745 | 0.59772 | 0.59772     | 0.80033475  |          |         |  |
| FAM221A    | ENSG00000188732 | -0.44356 | 0.67132 | -1.9379     | 0.97368     | -1.0504  |         |  |

|           |                 |          |         |             |             |          |         |
|-----------|-----------------|----------|---------|-------------|-------------|----------|---------|
|           | 0.85322         | -0.24746 | 0.59772 | 0.59772     | 0.80033475  |          |         |
| FAM20A    | ENSG00000108950 | -0.93436 | 0.82494 | -0.93436    | 0.82494     | -0.93436 |         |
|           | 0.82494         | -0.24746 | 0.59773 | 0.59773     | 0.80033475  |          |         |
| NA        | ENSG00000231353 | -0.26779 | 0.60557 | -0.40449    | 0.65707     | -0.24761 | 0.59778 |
|           | -0.24761        | 0.59778  | 0.59778 | 0.800373048 |             |          |         |
| NA        | ENSG00000255825 | -0.24772 | 0.59782 | -1.1114     | 0.8668      | -0.76053 | 0.77653 |
|           | -1.1114         | 0.8668   | 0.59782 | 0.800373048 |             |          |         |
| IGSF23    | ENSG00000216588 | -0.24773 | 0.59783 | -0.24773    | 0.59783     | -0.24773 |         |
|           | 0.59783         | -0.24773 | 0.59783 | 0.59783     | 0.800373048 |          |         |
| NA        | ENSG00000254671 | -0.85879 | 0.80477 | -0.24782    | 0.59786     | -0.24782 | 0.59786 |
|           | -0.24782        | 0.59786  | 0.59786 | 0.800373048 |             |          |         |
| RNU6-480P | ENSG00000207060 | -0.49602 | 0.69006 | -1.0429     | 0.85149     | -0.24786 |         |
|           | 0.59788         | -1.8817  | 0.97006 | 0.59788     | 0.800373048 |          |         |
| NA        | ENSG00000244144 | -0.24787 | 0.59788 | -0.24787    | 0.59788     | -0.24787 | 0.59788 |
|           | -0.24787        | 0.59788  | 0.59788 | 0.800373048 |             |          |         |
| NA        | ENSG00000269794 | -0.24786 | 0.59788 | -0.24786    | 0.59788     | -0.24786 | 0.59788 |
|           | -0.24786        | 0.59788  | 0.59788 | 0.800373048 |             |          |         |
| OR52L2P   | ENSG00000262980 | -0.2479  | 0.59789 | -0.2479     | 0.59789     | -0.2479  |         |
|           | 0.59789         | -0.2479  | 0.59789 | 0.59789     | 0.800373048 |          |         |
| HIF1AP1   | ENSG00000258978 | -0.24795 | 0.59791 | -0.24795    | 0.59791     | -0.24795 |         |
|           | 0.59791         | -0.24795 | 0.59791 | 0.59791     | 0.800377834 |          |         |
| GUCA1C    | ENSG00000138472 | -0.39811 | 0.65472 | -0.24813    | 0.59798     | -0.29253 |         |
|           | 0.61506         | -0.41271 | 0.66009 | 0.59798     | 0.800445731 |          |         |
| CD38      | ENSG00000004468 | -1.413   | 0.92118 | -0.24818    | 0.598       | -1.4972  | 0.93283 |
|           | -1.1261         | 0.86994  | 0.598   | 0.800445731 |             |          |         |
| NA        | ENSG00000275155 | -1.0407  | 0.85099 | -0.24819    | 0.59801     | -0.24819 | 0.59801 |
|           | -0.24819        | 0.59801  | 0.59801 | 0.800445731 |             |          |         |
| NA        | ENSG00000246250 | -0.40654 | 0.65783 | -0.2483     | 0.59805     | -1.5298  | 0.93697 |
|           | -0.42408        | 0.66424  | 0.59805 | 0.800455298 |             |          |         |
| MIOXP1    | ENSG00000253292 | -0.2483  | 0.59805 | -0.2483     | 0.59805     | -0.26567 |         |
|           | 0.60475         | -0.2483  | 0.59805 | 0.59805     | 0.800455298 |          |         |
| MIR3156-3 | ENSG00000266211 | -0.24847 | 0.59812 | -0.24847    | 0.59812     | -0.24847 |         |
|           | 0.59812         | -0.24847 | 0.59812 | 0.59812     | 0.800514578 |          |         |
| MST1R     | ENSG00000164078 | -0.24852 | 0.59814 | -0.26364    | 0.60397     | -1.5874  | 0.94378 |
|           | -2.2752         | 0.98855  | 0.59814 | 0.800514578 |             |          |         |
| ATP13A3   | ENSG00000133657 | -0.24857 | 0.59815 | -0.67778    | 0.75104     | -0.9508  |         |
|           | 0.82915         | -1.1101  | 0.86653 | 0.59815     | 0.800514578 |          |         |
| NA        | ENSG00000199459 | -1.2477  | 0.89394 | -0.24859    | 0.59816     | -1.2477  | 0.89394 |
|           | -1.2477         | 0.89394  | 0.59816 | 0.800514578 |             |          |         |
| NPM1P11   | ENSG00000226827 | -0.24866 | 0.59819 | -0.24866    | 0.59819     | -0.24866 |         |
|           | 0.59819         | -0.24866 | 0.59819 | 0.59819     | 0.800532741 |          |         |
| PELATON   | ENSG00000224397 | -0.90174 | 0.8164  | -0.95922    | 0.83128     | -0.24872 |         |
|           | 0.59821         | -0.84761 | 0.80167 | 0.59821     | 0.800537521 |          |         |
| LINC02513 | ENSG00000248227 | -0.72055 | 0.76441 | -1.3566     | 0.91255     | -1.1708  |         |
|           | 0.87915         | -0.24886 | 0.59827 | 0.59827     | 0.800539437 |          |         |
| NA        | ENSG00000254443 | -0.82779 | 0.7961  | -0.82779    | 0.7961      | -0.24888 | 0.59827 |
|           | -0.34111        | 0.63349  | 0.59827 | 0.800539437 |             |          |         |
| FASN      | ENSG00000169710 | -1.6881  | 0.95431 | -0.24892    | 0.59829     | -1.217   | 0.8882  |
|           | -1.0125         | 0.84436  | 0.59829 | 0.800539437 |             |          |         |
| NA        | ENSG00000228648 | -0.63705 | 0.73795 | -0.63705    | 0.73795     | -0.24891 | 0.59829 |
|           | -0.63705        | 0.73795  | 0.59829 | 0.800539437 |             |          |         |
| ZNF776    | ENSG00000152443 | -0.24897 | 0.59831 | -0.32736    | 0.6283      | -0.32736 |         |
|           | 0.6283          | -0.32736 | 0.6283  | 0.59831     | 0.800539437 |          |         |
| TRAV1-1   | ENSG00000255569 | -0.45105 | 0.67402 | -0.45105    | 0.67402     | -0.45105 |         |
|           | 0.67402         | -0.24897 | 0.59831 | 0.59831     | 0.800539437 |          |         |
| NA        | ENSG00000232335 | -0.24911 | 0.59836 | -0.24911    | 0.59836     | -0.24911 | 0.59836 |
|           | -0.24911        | 0.59836  | 0.59836 | 0.800549952 |             |          |         |
| NA        | ENSG00000255038 | -0.24911 | 0.59836 | -0.24911    | 0.59836     | -0.24911 | 0.59836 |
|           | -0.24911        | 0.59836  | 0.59836 | 0.800549952 |             |          |         |
| NA        | ENSG00000249365 | -0.24916 | 0.59838 | -0.24916    | 0.59838     | -0.24916 | 0.59838 |
|           | -0.24916        | 0.59838  | 0.59838 | 0.800549952 |             |          |         |
| NA        | ENSG00000273797 | -0.24917 | 0.59839 | -0.89899    | 0.81567     | -0.99888 | 0.84107 |

|              |                 |          |         |             |             |          |         |  |
|--------------|-----------------|----------|---------|-------------|-------------|----------|---------|--|
|              | -0.8933         | 0.81415  | 0.59839 | 0.800549952 |             |          |         |  |
| NA           | ENSG00000266561 | -0.24922 | 0.5984  | -0.24922    | 0.5984      | -0.24922 | 0.5984  |  |
|              | -0.24922        | 0.5984   | 0.5984  | 0.800549952 |             |          |         |  |
| EXOG         | ENSG00000157036 | -0.77342 | 0.78036 | -0.7062     | 0.75997     | -1.394   | 0.91833 |  |
|              | -0.24934        | 0.59845  | 0.59845 | 0.800564286 |             |          |         |  |
| RPL31P35     | ENSG00000232612 | -0.24937 | 0.59846 | -0.73526    | 0.76891     | -0.24937 |         |  |
|              | 0.59846         | -0.24937 | 0.59846 | 0.59846     | 0.800564286 |          |         |  |
| LINC01311    | ENSG00000260924 | -0.24937 | 0.59846 | -0.24937    | 0.59846     | -0.24937 |         |  |
|              | 0.59846         | -1.3119  | 0.90522 | 0.59846     | 0.800564286 |          |         |  |
| IFITM3P8     | ENSG00000271377 | -0.24945 | 0.59849 | -0.24945    | 0.59849     | -0.24945 |         |  |
|              | 0.59849         | -0.24945 | 0.59849 | 0.59849     | 0.800565241 |          |         |  |
| FAM107B      | ENSG00000065809 | -0.71033 | 0.76125 | -1.0494     | 0.85299     | -0.24948 |         |  |
|              | 0.5985          | -0.27409 | 0.60799 | 0.5985      | 0.800565241 |          |         |  |
| NA           | ENSG00000242575 | -0.24948 | 0.59851 | -0.24948    | 0.59851     | -0.24948 | 0.59851 |  |
|              | -0.24948        | 0.59851  | 0.59851 | 0.800565241 |             |          |         |  |
| RNU6-173P    | ENSG00000201085 | -0.73182 | 0.76786 | -0.24965    | 0.59857     | -0.73182 |         |  |
|              | 0.76786         | -0.73182 | 0.76786 | 0.59857     | 0.800584347 |          |         |  |
| NA           | ENSG00000232939 | -0.24966 | 0.59858 | -0.24966    | 0.59858     | -0.24966 | 0.59858 |  |
|              | -0.24966        | 0.59858  | 0.59858 | 0.800584347 |             |          |         |  |
| NA           | ENSG00000243303 | -0.24967 | 0.59858 | -0.24967    | 0.59858     | -0.24967 | 0.59858 |  |
|              | -0.24967        | 0.59858  | 0.59858 | 0.800584347 |             |          |         |  |
| SNRPD3       | ENSG00000100028 | -0.24971 | 0.59859 | -0.33484    | 0.63113     | -0.32424 |         |  |
|              | 0.62712         | -0.32424 | 0.62712 | 0.59859     | 0.800584347 |          |         |  |
| TBX18        | ENSG00000112837 | -1.1432  | 0.87352 | -0.24976    | 0.59861     | -0.62162 | 0.73291 |  |
|              | -0.67646        | 0.75063  | 0.59861 | 0.800589123 |             |          |         |  |
| CHPT1        | ENSG00000111666 | -0.69301 | 0.75585 | -0.24982    | 0.59864     | -1.1204  | 0.86873 |  |
|              | -0.90421        | 0.81706  | 0.59864 | 0.800607273 |             |          |         |  |
| NA           | ENSG00000260160 | -0.24991 | 0.59867 | -0.24991    | 0.59867     | -0.24991 | 0.59867 |  |
|              | -0.24991        | 0.59867  | 0.59867 | 0.800625421 |             |          |         |  |
| NA           | ENSG00000283016 | -0.25013 | 0.59875 | -0.25013    | 0.59875     | -0.25013 | 0.59875 |  |
|              | -0.25013        | 0.59875  | 0.59875 | 0.800696066 |             |          |         |  |
| NA           | ENSG00000224163 | -0.25015 | 0.59876 | -0.25015    | 0.59876     | -0.25015 | 0.59876 |  |
|              | -0.25015        | 0.59876  | 0.59876 | 0.800696066 |             |          |         |  |
| NA           | ENSG00000275106 | -0.2502  | 0.59878 | -0.2502     | 0.59878     | -0.2502  | 0.59878 |  |
|              | -0.2502         | 0.59878  | 0.59878 | 0.800696066 |             |          |         |  |
| NA           | ENSG00000280181 | -0.72508 | 0.7658  | -0.25034    | 0.59884     | -0.72508 | 0.7658  |  |
|              | -0.72508        | 0.7658   | 0.59884 | 0.800696066 |             |          |         |  |
| F2R          | ENSG00000181104 | -0.25045 | 0.59888 | -0.25045    | 0.59888     | -0.2907  | 0.61436 |  |
|              | -0.25045        | 0.59888  | 0.59888 | 0.800696066 |             |          |         |  |
| NA           | ENSG00000272791 | -0.43259 | 0.66734 | -0.25044    | 0.59888     | -0.25044 | 0.59888 |  |
|              | -0.25044        | 0.59888  | 0.59888 | 0.800696066 |             |          |         |  |
| CCDC144CP    | ENSG00000154898 | -1.8844  | 0.97024 | -0.52974    | 0.70186     | -1.1779  |         |  |
|              | 0.88059         | -0.25047 | 0.59889 | 0.59889     | 0.800696066 |          |         |  |
| TTC16        | ENSG00000167094 | -0.25047 | 0.59889 | -1.0929     | 0.86279     | -0.4451  | 0.67187 |  |
|              | -0.72507        | 0.7658   | 0.59889 | 0.800696066 |             |          |         |  |
| PLA2G4F      | ENSG00000168907 | -0.25048 | 0.59889 | -0.9878     | 0.83837     | -0.88228 |         |  |
|              | 0.81119         | -0.42481 | 0.66451 | 0.59889     | 0.800696066 |          |         |  |
| ANPEP        | ENSG00000166825 | -0.31044 | 0.62189 | -0.31044    | 0.62189     | -0.25057 | 0.59892 |  |
|              | -0.31044        | 0.62189  | 0.59892 | 0.800696066 |             |          |         |  |
| MAPKAPK5-AS1 | ENSG00000234608 | -0.38641 | 0.6504  | -0.25054    | 0.59892     | -0.25054 |         |  |
|              | 0.59892         | -0.25054 | 0.59892 | 0.59892     | 0.800696066 |          |         |  |
| NA           | ENSG00000278256 | -1.3677  | 0.9143  | -0.25056    | 0.59892     | -1.3677  | 0.9143  |  |
|              | -1.3677         | 0.9143   | 0.59892 | 0.800696066 |             |          |         |  |
| NA           | ENSG00000230121 | -0.25063 | 0.59895 | -0.87282    | 0.80862     | -0.87282 | 0.80862 |  |
|              | -0.26614        | 0.60493  | 0.59895 | 0.800714205 |             |          |         |  |
| NA           | ENSG00000239480 | -0.25083 | 0.59903 | -0.25083    | 0.59903     | -0.25083 | 0.59903 |  |
|              | -0.25083        | 0.59903  | 0.59903 | 0.800795353 |             |          |         |  |
| NA           | ENSG00000266003 | -0.25088 | 0.59905 | -0.25088    | 0.59905     | -0.25088 | 0.59905 |  |
|              | -1.1449         | 0.87387  | 0.59905 | 0.800795353 |             |          |         |  |
| HMBX1-IT1    | ENSG00000259196 | -0.34771 | 0.63597 | -0.25092    | 0.59906     | -0.34616 |         |  |
|              | 0.63539         | -0.79613 | 0.78702 | 0.59906     | 0.800795353 |          |         |  |
| SFT2D3       | ENSG00000173349 | -0.25111 | 0.59913 | -0.25111    | 0.59913     | -0.25111 |         |  |



|             |                 |          |         |             |             |          |         |
|-------------|-----------------|----------|---------|-------------|-------------|----------|---------|
|             | 0.59913         | -0.25111 | 0.59913 | 0.59913     | 0.800855451 |          |         |
| BCL9P1      | ENSG00000249238 | -0.25114 | 0.59915 | -0.25114    | 0.59915     | -0.25114 |         |
|             | 0.59915         | -0.34681 | 0.63563 | 0.59915     | 0.800855451 |          |         |
| ADORA2A-AS1 | ENSG00000178803 | -0.25122 | 0.59918 | -0.25122    | 0.59918     | -0.38916 |         |
|             | 0.65142         | -0.25122 | 0.59918 | 0.59918     | 0.800855451 |          |         |
| KIF13B      | ENSG00000197892 | -1.3475  | 0.9111  | -0.48823    | 0.68731     | -0.90414 |         |
|             | 0.81704         | -0.25124 | 0.59918 | 0.59918     | 0.800855451 |          |         |
| PRR18       | ENSG00000176381 | -0.25129 | 0.5992  | -1.2661     | 0.89726     | -0.74029 | 0.77044 |
|             | -0.74029        | 0.77044  | 0.5992  | 0.800855451 |             |          |         |
| PMS2P11     | ENSG00000241350 | -1.0752  | 0.85887 | -0.25133    | 0.59922     | -1.0752  |         |
|             | 0.85887         | -1.0752  | 0.85887 | 0.59922     | 0.800855451 |          |         |
| NA          | ENSG00000272990 | -0.42165 | 0.66336 | -0.25133    | 0.59922     | -0.25133 | 0.59922 |
|             | -0.25133        | 0.59922  | 0.59922 | 0.800855451 |             |          |         |
| NA          | ENSG00000200085 | -0.45873 | 0.67679 | -0.55608    | 0.71092     | -0.35734 | 0.63958 |
|             | -0.25149        | 0.59928  | 0.59928 | 0.800913675 |             |          |         |
| ANGPTL1     | ENSG00000116194 | -0.25161 | 0.59933 | -0.45843    | 0.67668     | -0.45843 |         |
|             | 0.67668         | -0.71844 | 0.76376 | 0.59933     | 0.800951774 |          |         |
| RN7SL497P   | ENSG00000240847 | -0.25168 | 0.59935 | -0.25168    | 0.59935     | -0.25168 |         |
|             | 0.59935         | -0.25168 | 0.59935 | 0.59935     | 0.800951774 |          |         |
| PCDHA7      | ENSG00000204963 | -0.25174 | 0.59938 | -0.25174    | 0.59938     | -0.25174 |         |
|             | 0.59938         | -0.25174 | 0.59938 | 0.59938     | 0.800951774 |          |         |
| TRBV8-2     | ENSG00000239944 | -0.25176 | 0.59939 | -0.25176    | 0.59939     | -0.25176 |         |
|             | 0.59939         | -0.25176 | 0.59939 | 0.59939     | 0.800951774 |          |         |
| MTND2P26    | ENSG00000254565 | -0.25182 | 0.59941 | -0.25182    | 0.59941     | -0.25182 |         |
|             | 0.59941         | -0.25182 | 0.59941 | 0.59941     | 0.800951774 |          |         |
| NA          | ENSG00000267149 | -0.25185 | 0.59942 | -0.25185    | 0.59942     | -0.25185 | 0.59942 |
|             | -0.25185        | 0.59942  | 0.59942 | 0.800951774 |             |          |         |
| EMC4        | ENSG00000128463 | -0.87241 | 0.80851 | -0.25188    | 0.59943     | -0.28564 | 0.61242 |
|             | -1.4479         | 0.92617  | 0.59943 | 0.800951774 |             |          |         |
| ZNF627      | ENSG00000198551 | -0.28651 | 0.61275 | -0.25189    | 0.59944     | -0.25189 |         |
|             | 0.59944         | -0.45108 | 0.67404 | 0.59944     | 0.800951774 |          |         |
| NA          | ENSG00000279785 | -1.2061  | 0.88612 | -0.25204    | 0.59949     | -1.2061  | 0.88612 |
|             | -1.2061         | 0.88612  | 0.59949 | 0.800996619 |             |          |         |
| NA          | ENSG00000260581 | -0.55142 | 0.70933 | -0.2521     | 0.59952     | -1.3731  | 0.91514 |
|             | -1.8332         | 0.96661  | 0.59952 | 0.80101474  |             |          |         |
| FMO1        | ENSG00000010932 | -0.2523  | 0.59959 | -0.2523     | 0.59959     | -0.2523  | 0.59959 |
|             | -0.39769        | 0.65457  | 0.59959 | 0.801042377 |             |          |         |
| YWHABP1     | ENSG00000237557 | -0.25228 | 0.59959 | -0.25228    | 0.59959     | -0.75773 |         |
|             | 0.77569         | -0.25228 | 0.59959 | 0.59959     | 0.801042377 |          |         |
| NA          | ENSG00000272854 | -0.25227 | 0.59959 | -0.25227    | 0.59959     | -0.25227 | 0.59959 |
|             | -0.25227        | 0.59959  | 0.59959 | 0.801042377 |             |          |         |
| MAVS        | ENSG00000088888 | -1.3102  | 0.90494 | -1.8477     | 0.96768     | -0.25253 | 0.59968 |
|             | -1.1842         | 0.88183  | 0.59968 | 0.801114841 |             |          |         |
| ACBD6       | ENSG00000230124 | -1.1386  | 0.87256 | -0.25256    | 0.59969     | -1.1726  | 0.87951 |
|             | -0.27474        | 0.60824  | 0.59969 | 0.801114841 |             |          |         |
| CDK12       | ENSG00000167258 | -0.48484 | 0.68611 | -0.48484    | 0.68611     | -0.25259 | 0.59971 |
|             | -0.78809        | 0.78468  | 0.59971 | 0.801114841 |             |          |         |
| NA          | ENSG00000253399 | -0.25259 | 0.59971 | -0.25259    | 0.59971     | -0.25259 | 0.59971 |
|             | -0.25259        | 0.59971  | 0.59971 | 0.801114841 |             |          |         |
| NA          | ENSG00000279994 | -2.3153  | 0.9897  | -1.5692     | 0.9417      | -2.2494  | 0.98776 |
|             | -0.25266        | 0.59973  | 0.59973 | 0.80111575  |             |          |         |
| NA          | ENSG00000274561 | -0.25269 | 0.59975 | -0.25269    | 0.59975     | -0.25269 | 0.59975 |
|             | -0.25269        | 0.59975  | 0.59975 | 0.80111575  |             |          |         |
| NA          | ENSG00000224016 | -1.6118  | 0.94649 | -0.25272    | 0.59976     | -2.0665  | 0.98061 |
|             | -0.92815        | 0.82333  | 0.59976 | 0.80111575  |             |          |         |
| CICP14      | ENSG00000281490 | -0.253   | 0.59987 | -0.253      | 0.59987     | -0.253   |         |
|             | 0.59987         | -0.253   | 0.59987 | 0.59987     | 0.801202372 |          |         |
| NA          | ENSG00000231465 | -0.95767 | 0.83089 | -0.25303    | 0.59988     | -0.25303 | 0.59988 |
|             | -0.25303        | 0.59988  | 0.59988 | 0.801202372 |             |          |         |
| ODF4        | ENSG00000184650 | -0.25307 | 0.59989 | -0.25307    | 0.59989     | -0.25307 | 0.59989 |
|             | -0.25307        | 0.59989  | 0.59989 | 0.801202372 |             |          |         |
| NA          | ENSG00000279881 | -1.3884  | 0.91749 | -0.2531     | 0.5999      | -0.2531  | 0.5999  |

|           |                 |          |         |             |             |          |         |
|-----------|-----------------|----------|---------|-------------|-------------|----------|---------|
|           | -0.35338        | 0.6381   | 0.5999  | 0.801202372 |             |          |         |
| LINC01495 | ENSG00000255323 | -0.82261 | 0.79464 | -0.82261    | 0.79464     | -0.25313 |         |
|           | 0.59992         | -1.2738  | 0.89862 | 0.59992     | 0.801202372 |          |         |
| CBX1      | ENSG00000108468 | -0.97365 | 0.83488 | -0.25322    | 0.59995     | -0.25322 | 0.59995 |
|           | -0.26658        | 0.60511  | 0.59995 | 0.801202372 |             |          |         |
| LGALS13   | ENSG00000105198 | -1.4326  | 0.92401 | -0.25325    | 0.59996     | -1.4326  |         |
|           | 0.92401         | -1.4326  | 0.92401 | 0.59996     | 0.801202372 |          |         |
| NA        | ENSG00000283103 | -0.25338 | 0.60001 | -0.25338    | 0.60001     | -0.25338 | 0.60001 |
|           | -0.25338        | 0.60001  | 0.60001 | 0.801202372 |             |          |         |
| ANO8      | ENSG00000074855 | -0.25343 | 0.60003 | -0.80685    | 0.79012     | -0.80685 | 0.79012 |
|           | -0.80685        | 0.79012  | 0.60003 | 0.801202372 |             |          |         |
| MTCO1P55  | ENSG00000241926 | -0.96465 | 0.83264 | -0.25343    | 0.60003     | -0.96465 |         |
|           | 0.83264         | -0.96465 | 0.83264 | 0.60003     | 0.801202372 |          |         |
| LINC02054 | ENSG00000224153 | -1.0276  | 0.84794 | -0.25348    | 0.60005     | -0.7976  |         |
|           | 0.78745         | -0.35348 | 0.63813 | 0.60005     | 0.801202372 |          |         |
| NA        | ENSG00000268175 | -0.39289 | 0.6528  | -0.25354    | 0.60007     | -0.25354 | 0.60007 |
|           | -0.25354        | 0.60007  | 0.60007 | 0.801202372 |             |          |         |
| IQCH      | ENSG00000103599 | -1.0899  | 0.86213 | -0.25357    | 0.60008     | -1.0957  | 0.86339 |
|           | -0.32745        | 0.62834  | 0.60008 | 0.801202372 |             |          |         |
| FAM219B   | ENSG00000178761 | -0.25365 | 0.60012 | -0.25365    | 0.60012     | -0.25365 |         |
|           | 0.60012         | -0.25365 | 0.60012 | 0.60012     | 0.801202372 |          |         |
| NA        | ENSG00000267429 | -0.25365 | 0.60012 | -0.25365    | 0.60012     | -0.25365 | 0.60012 |
|           | -0.25365        | 0.60012  | 0.60012 | 0.801202372 |             |          |         |
| NA        | ENSG00000272235 | -0.76963 | 0.77924 | -0.74971    | 0.77329     | -0.7837  | 0.78339 |
|           | -0.2538         | 0.60017  | 0.60017 | 0.801202372 |             |          |         |
| EMC7      | ENSG00000134153 | -0.7613  | 0.77676 | -0.51968    | 0.69836     | -0.25384 | 0.60019 |
|           | -0.69889        | 0.75769  | 0.60019 | 0.801202372 |             |          |         |
| NA        | ENSG00000227987 | -0.2539  | 0.60021 | -0.2539     | 0.60021     | -0.2539  | 0.60021 |
|           | -0.2539         | 0.60021  | 0.60021 | 0.801202372 |             |          |         |
| IGHV1-67  | ENSG00000253274 | -0.2539  | 0.60021 | -0.2539     | 0.60021     | -0.2539  |         |
|           | 0.60021         | -0.2539  | 0.60021 | 0.60021     | 0.801202372 |          |         |
| NA        | ENSG00000228085 | -0.25391 | 0.60022 | -0.25391    | 0.60022     | -0.25391 | 0.60022 |
|           | -0.25391        | 0.60022  | 0.60022 | 0.801202372 |             |          |         |
| FZD5      | ENSG00000163251 | -1.7367  | 0.95878 | -0.60246    | 0.72657     | -1.7367  | 0.95878 |
|           | -0.25398        | 0.60024  | 0.60024 | 0.801202372 |             |          |         |
| RN7SKP82  | ENSG00000252595 | -0.81492 | 0.79244 | -0.25396    | 0.60024     | -0.81492 |         |
|           | 0.79244         | -0.81492 | 0.79244 | 0.60024     | 0.801202372 |          |         |
| NA        | ENSG00000267375 | -0.25397 | 0.60024 | -0.44822    | 0.673       | -0.39778 | 0.6546  |
|           | -0.69655        | 0.75696  | 0.60024 | 0.801202372 |             |          |         |
| KLRA1P    | ENSG00000256667 | -1.0808  | 0.86011 | -0.25398    | 0.60025     | -1.1554  |         |
|           | 0.87603         | -2.4278  | 0.9924  | 0.60025     | 0.801202372 |          |         |
| RN7SKP24  | ENSG00000251697 | -0.35025 | 0.63692 | -0.35025    | 0.63692     | -0.35025 |         |
|           | 0.63692         | -0.25405 | 0.60027 | 0.60027     | 0.801202372 |          |         |
| GGTA1P    | ENSG00000204136 | -1.0765  | 0.85915 | -0.25406    | 0.60028     | -1.0458  |         |
|           | 0.85217         | -0.41723 | 0.66174 | 0.60028     | 0.801202372 |          |         |
| NA        | ENSG00000236732 | -0.4218  | 0.66341 | -0.25407    | 0.60028     | -0.4218  | 0.66341 |
|           | -0.4218         | 0.66341  | 0.60028 | 0.801202372 |             |          |         |
| RPL15P14  | ENSG00000226701 | -0.25416 | 0.60031 | -0.25416    | 0.60031     | -0.25416 |         |
|           | 0.60031         | -0.25416 | 0.60031 | 0.60031     | 0.801202372 |          |         |
| OSMR      | ENSG00000145623 | -0.25419 | 0.60033 | -1.393      | 0.91819     | -1.6444  | 0.94996 |
|           | -1.8315         | 0.96648  | 0.60033 | 0.801202372 |             |          |         |
| LAMTOR5P1 | ENSG00000236646 | -0.25423 | 0.60034 | -0.25423    | 0.60034     | -0.25423 |         |
|           | 0.60034         | -0.25423 | 0.60034 | 0.60034     | 0.801202372 |          |         |
| KHDRBS2   | ENSG00000112232 | -1.3537  | 0.91208 | -0.89402    | 0.81435     | -0.25428 |         |
|           | 0.60036         | -0.57693 | 0.71801 | 0.60036     | 0.801202372 |          |         |
| LINC02551 | ENSG00000254842 | -1.2157  | 0.88794 | -1.4493     | 0.92637     | -1.0568  |         |
|           | 0.8547          | -0.25436 | 0.60039 | 0.60039     | 0.801202372 |          |         |
| NA        | ENSG00000273155 | -0.25436 | 0.60039 | -0.25436    | 0.60039     | -0.25436 | 0.60039 |
|           | -0.25436        | 0.60039  | 0.60039 | 0.801202372 |             |          |         |
| MINCR     | ENSG00000253716 | -0.25442 | 0.60042 | -0.36829    | 0.64367     | -0.36829 | 0.64367 |
|           | -0.36829        | 0.64367  | 0.60042 | 0.801202372 |             |          |         |
| NA        | ENSG00000268673 | -0.25456 | 0.60047 | -0.7223     | 0.76495     | -0.7223  | 0.76495 |

|             |                 |          |          |          |             |             |          |         |
|-------------|-----------------|----------|----------|----------|-------------|-------------|----------|---------|
|             |                 | -0.7223  | 0.76495  | 0.60047  | 0.801202372 |             |          |         |
| NA          | ENSG00000272360 | -0.25459 | 0.60048  | 0.60048  | -0.25459    | 0.60048     | -0.25459 | 0.60048 |
|             |                 | -0.25459 | 0.60048  | 0.60048  | 0.801202372 |             |          |         |
| MIR4754     | ENSG00000266640 | -0.25462 | 0.60049  | 0.60049  | -0.25462    | 0.60049     | -0.25462 |         |
|             |                 | 0.60049  | -0.25462 | 0.60049  | 0.60049     | 0.801202372 |          |         |
| MCC         | ENSG00000171444 | -2.2749  | 0.98855  | -0.25467 | 0.60051     | -1.6489     | 0.95041  |         |
|             |                 | -1.2042  | 0.88574  | 0.60051  | 0.801202372 |             |          |         |
| NA          | ENSG00000227971 | -0.25466 | 0.60051  | 0.60051  | -0.88048    | 0.8107      | -0.25466 | 0.60051 |
|             |                 | -0.25466 | 0.60051  | 0.60051  | 0.801202372 |             |          |         |
| NA          | ENSG00000272617 | -0.25471 | 0.60053  | 0.60053  | -0.25471    | 0.60053     | -0.25471 | 0.60053 |
|             |                 | -0.25471 | 0.60053  | 0.60053  | 0.801202372 |             |          |         |
| RNU7-82P    | ENSG00000238924 | -0.25478 | 0.60055  | -0.25478 | 0.60055     | -0.25478    |          |         |
|             |                 | 0.60055  | -0.25478 | 0.60055  | 0.60055     | 0.801202372 |          |         |
| NA          | ENSG00000261513 | -0.25476 | 0.60055  | -0.25476 | 0.60055     | -0.25476    | 0.60055  |         |
|             |                 | -0.25476 | 0.60055  | 0.60055  | 0.801202372 |             |          |         |
| STX5        | ENSG00000162236 | -0.25495 | 0.60062  | -0.47374 | 0.68216     | -0.52159    | 0.69902  |         |
|             |                 | -0.52159 | 0.69902  | 0.60062  | 0.801202372 |             |          |         |
| DTNB-AS1    | ENSG00000224220 | -0.25496 | 0.60062  | -0.25496 | 0.60062     | -0.25496    |          |         |
|             |                 | 0.60062  | -0.25496 | 0.60062  | 0.60062     | 0.801202372 |          |         |
| NA          | ENSG00000249114 | -0.25494 | 0.60062  | -0.25494 | 0.60062     | -0.25494    | 0.60062  |         |
|             |                 | -0.74022 | 0.77042  | 0.60062  | 0.801202372 |             |          |         |
| ARL9        | ENSG00000196503 | -0.73807 | 0.76976  | -0.87565 | 0.80939     | -0.25504    | 0.60065  |         |
|             |                 | -1.2319  | 0.89101  | 0.60065  | 0.801202372 |             |          |         |
| RN7SL180P   | ENSG00000242860 | -0.33393 | 0.63078  | -0.99585 | 0.84034     | -0.33393    |          |         |
|             |                 | 0.63078  | -0.25515 | 0.60069  | 0.60069     | 0.801202372 |          |         |
| NA          | ENSG00000260698 | -1.0157  | 0.84512  | -1.0157  | 0.84512     | -0.25515    | 0.60069  |         |
|             |                 | -1.0157  | 0.84512  | 0.60069  | 0.801202372 |             |          |         |
| MARCO       | ENSG00000019169 | -0.71432 | 0.76248  | -0.88722 | 0.81252     | -0.25516    | 0.6007   |         |
|             |                 | -0.42413 | 0.66426  | 0.6007   | 0.801202372 |             |          |         |
| DDX10       | ENSG00000178105 | -1.228   | 0.89028  | -1.0548  | 0.85425     | -0.67179    | 0.74914  |         |
|             |                 | -0.25517 | 0.6007   | 0.6007   | 0.801202372 |             |          |         |
| PFKFB2      | ENSG00000123836 | -0.90568 | 0.81745  | -0.44993 | 0.67362     | -0.27134    |          |         |
|             |                 | 0.60694  | -0.25524 | 0.60073  | 0.60073     | 0.801202372 |          |         |
| FNTA        | ENSG00000168522 | -0.42686 | 0.66526  | -0.25538 | 0.60078     | -0.41593    | 0.66127  |         |
|             |                 | -0.53118 | 0.70235  | 0.60078  | 0.801202372 |             |          |         |
| SEPTIN14P24 | ENSG00000231299 | -1.2005  | 0.88504  | -0.67699 | 0.75079     | -0.2554     |          |         |
|             |                 | 0.60079  | -1.5025  | 0.93351  | 0.60079     | 0.801202372 |          |         |
| NA          | ENSG00000233703 | -2.1779  | 0.98529  | -0.25538 | 0.60079     | -2.3962     | 0.99172  |         |
|             |                 | -2.3962  | 0.99172  | 0.60079  | 0.801202372 |             |          |         |
| NA          | ENSG00000253673 | -0.99707 | 0.84063  | -0.99707 | 0.84063     | -0.25539    | 0.60079  |         |
|             |                 | -0.90874 | 0.81826  | 0.60079  | 0.801202372 |             |          |         |
| NA          | ENSG00000268516 | -0.25547 | 0.60082  | -0.25547 | 0.60082     | -0.25547    | 0.60082  |         |
|             |                 | -0.25547 | 0.60082  | 0.60082  | 0.801202372 |             |          |         |
| HINT2       | ENSG00000137133 | -0.25553 | 0.60084  | -0.25553 | 0.60084     | -0.25553    | 0.60084  |         |
|             |                 | -0.25553 | 0.60084  | 0.60084  | 0.801202372 |             |          |         |
| DEFB130D    | ENSG00000232773 | -0.25552 | 0.60084  | -1.1614  | 0.87726     | -0.51418    |          |         |
|             |                 | 0.69644  | -0.66769 | 0.74783  | 0.60084     | 0.801202372 |          |         |
| NA          | ENSG00000225330 | -0.36221 | 0.6414   | -0.25556 | 0.60085     | -1.4352     | 0.92438  |         |
|             |                 | -1.7392  | 0.959    | 0.60085  | 0.801202372 |             |          |         |
| GPCPD1      | ENSG00000125772 | -1.4166  | 0.9217   | -0.25558 | 0.60086     | -0.51856    |          |         |
|             |                 | 0.69796  | -0.65571 | 0.74399  | 0.60086     | 0.801202372 |          |         |
| OR51L1      | ENSG00000176798 | -1.2144  | 0.8877   | -0.84971 | 0.80226     | -0.25557    |          |         |
|             |                 | 0.60086  | -1.9591  | 0.97495  | 0.60086     | 0.801202372 |          |         |
| LRRC37A6P   | ENSG00000230445 | -0.69438 | 0.75628  | -0.25563 | 0.60088     | -0.69438    |          |         |
|             |                 | 0.75628  | -0.69438 | 0.75628  | 0.60088     | 0.801202372 |          |         |
| AKT1S1      | ENSG00000204673 | -0.25564 | 0.60089  | -0.25564 | 0.60089     | -0.25564    |          |         |
|             |                 | 0.60089  | -0.25564 | 0.60089  | 0.60089     | 0.801202372 |          |         |
| NA          | ENSG00000216105 | -0.25568 | 0.6009   | -0.25568 | 0.6009      | -0.25568    | 0.6009   |         |
|             |                 | -0.25568 | 0.6009   | 0.6009   | 0.801202372 |             |          |         |
| NA          | ENSG00000260760 | -0.25569 | 0.6009   | -0.86818 | 0.80735     | -0.39221    | 0.65255  |         |
|             |                 | -0.75766 | 0.77567  | 0.6009   | 0.801202372 |             |          |         |
| NA          | ENSG00000258850 | -0.85824 | 0.80462  | -0.89187 | 0.81377     | -0.25571    | 0.60091  |         |

|           |                 |          |             |             |             |          |         |       |
|-----------|-----------------|----------|-------------|-------------|-------------|----------|---------|-------|
|           | -0.25571        | 0.60091  | 0.60091     | 0.801202372 |             |          |         |       |
| RPL23AP42 | ENSG00000234851 | -0.41498 | 0.66092     | -0.41498    | 0.66092     | -1.1627  |         |       |
|           | 0.87752         | -0.25585 | 0.60097     | 0.60097     | 0.801241216 |          |         |       |
| NA        | ENSG00000274666 | -1.3576  | 0.91271     | -0.25589    | 0.60098     | -1.3576  | 0.91271 |       |
|           | -1.3576         | 0.91271  | 0.60098     | 0.801241216 |             |          |         |       |
| ATP5MC1P8 | ENSG00000224948 | -0.25598 | 0.60102     | -0.25598    | 0.60102     | -0.25598 |         |       |
|           | 0.60102         | -0.25598 | 0.60102     | 0.60102     | 0.801241216 |          |         |       |
| NA        | ENSG00000252888 | -0.57403 | 0.71703     | -0.25598    | 0.60102     | -0.25598 | 0.60102 |       |
|           | -0.25598        | 0.60102  | 0.60102     | 0.801241216 |             |          |         |       |
| NA        | ENSG00000276294 | -0.25605 | 0.60104     | -0.92588    | 0.82275     | -0.36265 | 0.64157 |       |
|           | -0.36265        | 0.64157  | 0.60104     | 0.801241216 |             |          |         |       |
| RNA5-8SP7 | ENSG00000200313 | -0.25608 | 0.60106     | -0.25608    | 0.60106     | -0.25608 |         |       |
|           | 0.60106         | -0.25608 | 0.60106     | 0.60106     | 0.801241216 |          |         |       |
| SARAF     | ENSG00000133872 | -0.66964 | 0.74846     | -0.25611    | 0.60107     | -1.22    | 0.88877 | -1.22 |
|           | 0.88877         | 0.60107  | 0.801241216 |             |             |          |         |       |
| MIR520A   | ENSG00000207594 | -0.25617 | 0.60109     | -0.25617    | 0.60109     | -0.25617 |         |       |
|           | 0.60109         | -0.25617 | 0.60109     | 0.60109     | 0.801241216 |          |         |       |
| OR9G4     | ENSG00000172457 | -0.2562  | 0.6011      | -0.78629    | 0.78415     | -0.42798 | 0.66567 |       |
|           | -0.2562         | 0.6011   | 0.6011      | 0.801241216 |             |          |         |       |
| TCAF2     | ENSG00000170379 | -1.3777  | 0.91585     | -1.9245     | 0.97285     | -0.25623 | 0.60111 |       |
|           | -1.2169         | 0.88818  | 0.60111     | 0.801241216 |             |          |         |       |
| LINC02064 | ENSG00000248391 | -0.25624 | 0.60112     | -0.95298    | 0.8297      | -0.41875 |         |       |
|           | 0.6623          | -0.41875 | 0.6623      | 0.60112     | 0.801241216 |          |         |       |
| NA        | ENSG00000280232 | -0.25633 | 0.60115     | -0.25633    | 0.60115     | -0.25633 | 0.60115 |       |
|           | -0.25633        | 0.60115  | 0.60115     | 0.801259286 |             |          |         |       |
| NA        | ENSG00000257883 | -0.45871 | 0.67678     | -0.58684    | 0.72134     | -0.25643 | 0.60119 |       |
|           | -0.99339        | 0.83974  | 0.60119     | 0.801283882 |             |          |         |       |
| OR7E90P   | ENSG00000188668 | -0.25654 | 0.60123     | -0.32284    | 0.62659     | -0.95957 |         |       |
|           | 0.83137         | -0.40743 | 0.65815     | 0.60123     | 0.801283882 |          |         |       |
| NA        | ENSG00000207240 | -0.71693 | 0.76329     | -0.25659    | 0.60125     | -0.25659 | 0.60125 |       |
|           | -0.25659        | 0.60125  | 0.60125     | 0.801283882 |             |          |         |       |
| EDRF1-DT  | ENSG00000224023 | -1.1065  | 0.86574     | -0.25659    | 0.60125     | -0.46655 |         |       |
|           | 0.67959         | -1.53    | 0.93699     | 0.60125     | 0.801283882 |          |         |       |
| NRSN2-AS1 | ENSG00000225377 | -0.25663 | 0.60127     | -1.1216     | 0.86899     | -1.1216  |         |       |
|           | 0.86899         | -1.1216  | 0.86899     | 0.60127     | 0.801283882 |          |         |       |
| MT1JP     | ENSG00000255986 | -0.25665 | 0.60128     | -0.43578    | 0.6685      | -0.25665 | 0.60128 |       |
|           | -0.25665        | 0.60128  | 0.60128     | 0.801283882 |             |          |         |       |
| LINC02779 | ENSG00000231529 | -1.4113  | 0.92092     | -1.4113     | 0.92092     | -0.2567  |         |       |
|           | 0.60129         | -1.4113  | 0.92092     | 0.60129     | 0.801283882 |          |         |       |
| OR2T33    | ENSG00000177212 | -0.2567  | 0.6013      | -1.2893     | 0.90135     | -2.1724  |         |       |
|           | 0.98509         | -2.1724  | 0.98509     | 0.6013      | 0.801283882 |          |         |       |
| NA        | ENSG00000259941 | -0.2568  | 0.60133     | -0.2568     | 0.60133     | -0.2568  | 0.60133 |       |
|           | -0.2568         | 0.60133  | 0.60133     | 0.8012981   |             |          |         |       |
| NA        | ENSG00000178636 | -0.60167 | 0.7263      | -0.7058     | 0.75984     | -0.60167 | 0.7263  |       |
|           | -0.25688        | 0.60136  | 0.60136     | 0.8012981   |             |          |         |       |
| FRG2KP    | ENSG00000261741 | -0.30423 | 0.61952     | -0.25687    | 0.60136     | -0.25687 |         |       |
|           | 0.60136         | -0.25687 | 0.60136     | 0.60136     | 0.8012981   |          |         |       |
| CENPC     | ENSG00000145241 | -0.45251 | 0.67455     | -0.25695    | 0.60139     | -0.36577 | 0.64273 |       |
|           | -1.1253         | 0.86977  | 0.60139     | 0.801312315 |             |          |         |       |
| NA        | ENSG00000212290 | -0.55641 | 0.71103     | -0.25699    | 0.60141     | -0.25699 | 0.60141 |       |
|           | -0.25699        | 0.60141  | 0.60141     | 0.801312315 |             |          |         |       |
| AMIGO2    | ENSG00000139211 | -0.28703 | 0.61295     | -0.46758    | 0.67996     | -0.25702 |         |       |
|           | 0.60142         | -0.48096 | 0.68473     | 0.60142     | 0.801312315 |          |         |       |
| PF4       | ENSG00000163737 | -0.25709 | 0.60145     | -0.25709    | 0.60145     | -0.25709 | 0.60145 |       |
|           | -0.25709        | 0.60145  | 0.60145     | 0.801314095 |             |          |         |       |
| ZBED5     | ENSG00000236287 | -0.68787 | 0.75423     | -0.28663    | 0.6128      | -0.68787 | 0.75423 |       |
|           | -0.25716        | 0.60147  | 0.60147     | 0.801314095 |             |          |         |       |
| NA        | ENSG00000260951 | -1.2445  | 0.89333     | -0.29368    | 0.6155      | -0.82626 | 0.79567 |       |
|           | -0.25717        | 0.60148  | 0.60148     | 0.801314095 |             |          |         |       |
| RNU6-497P | ENSG00000202186 | -1.9521  | 0.97454     | -1.7502     | 0.95995     | -0.61891 |         |       |
|           | 0.73201         | -0.25726 | 0.60151     | 0.60151     | 0.801314095 |          |         |       |
| NA        | ENSG00000258317 | -0.25725 | 0.60151     | -0.25725    | 0.60151     | -0.25725 | 0.60151 |       |

|             |                 |          |         |             |             |          |         |  |
|-------------|-----------------|----------|---------|-------------|-------------|----------|---------|--|
|             | -0.25725        | 0.60151  | 0.60151 | 0.801314095 |             |          |         |  |
| ZNF519P1    | ENSG00000232950 | -0.25729 | 0.60152 | -0.36439    | 0.64222     | -0.36439 |         |  |
|             | 0.64222         | -0.36439 | 0.64222 | 0.60152     | 0.801314095 |          |         |  |
| NA          | ENSG00000237719 | -0.25743 | 0.60158 | -0.65514    | 0.74381     | -0.51158 | 0.69553 |  |
|             | -0.42372        | 0.66411  | 0.60158 | 0.801372117 |             |          |         |  |
| MIR3944     | ENSG00000265395 | -0.25756 | 0.60163 | -0.25756    | 0.60163     | -0.25756 |         |  |
|             | 0.60163         | -0.25756 | 0.60163 | 0.60163     | 0.801416814 |          |         |  |
| MIR4318     | ENSG00000266530 | -0.25767 | 0.60167 | -0.25767    | 0.60167     | -0.25767 |         |  |
|             | 0.60167         | -0.25767 | 0.60167 | 0.60167     | 0.801448189 |          |         |  |
| NA          | ENSG00000252250 | -0.25781 | 0.60172 | -0.25781    | 0.60172     | -0.25781 | 0.60172 |  |
|             | -0.25781        | 0.60172  | 0.60172 | 0.801470974 |             |          |         |  |
| RNA5SP468   | ENSG00000252591 | -0.25779 | 0.60172 | -0.25779    | 0.60172     | -0.25779 |         |  |
|             | 0.60172         | -0.25779 | 0.60172 | 0.60172     | 0.801470974 |          |         |  |
| RN7SL672P   | ENSG00000239742 | -0.25785 | 0.60174 | -0.81643    | 0.79287     | -0.25785 |         |  |
|             | 0.60174         | -0.25785 | 0.60174 | 0.60174     | 0.801475707 |          |         |  |
| NA          | ENSG00000282787 | -0.25791 | 0.60176 | -0.25791    | 0.60176     | -0.25791 | 0.60176 |  |
|             | -0.25791        | 0.60176  | 0.60176 | 0.801480438 |             |          |         |  |
| CAPN14      | ENSG00000214711 | -1.2561  | 0.89546 | -1.3416     | 0.91013     | -0.25799 |         |  |
|             | 0.60179         | -0.27832 | 0.60962 | 0.60179     | 0.801498489 |          |         |  |
| RNU4-34P    | ENSG00000222363 | -0.25808 | 0.60183 | -0.25808    | 0.60183     | -0.25808 |         |  |
|             | 0.60183         | -0.25808 | 0.60183 | 0.60183     | 0.801529856 |          |         |  |
| ZDHHC13     | ENSG00000177054 | -0.69243 | 0.75566 | -0.25822    | 0.60188     | -0.25822 |         |  |
|             | 0.60188         | -0.32451 | 0.62723 | 0.60188     | 0.801557362 |          |         |  |
| IL17F       | ENSG00000112116 | -0.39518 | 0.65365 | -0.25827    | 0.6019      | -0.25827 | 0.6019  |  |
|             | -0.25827        | 0.6019   | 0.6019  | 0.801557362 |             |          |         |  |
| RN7SL457P   | ENSG00000263794 | -0.25828 | 0.6019  | -0.25828    | 0.6019      | -0.25828 |         |  |
|             | 0.6019          | -0.25828 | 0.6019  | 0.6019      | 0.801557362 |          |         |  |
| KLHL36      | ENSG00000135686 | -0.76326 | 0.77735 | -0.25836    | 0.60194     | -0.76326 |         |  |
|             | 0.77735         | -0.76326 | 0.77735 | 0.60194     | 0.80156084  |          |         |  |
| PSMC1P7     | ENSG00000243838 | -0.25844 | 0.60197 | -0.25844    | 0.60197     | -0.25844 |         |  |
|             | 0.60197         | -0.25844 | 0.60197 | 0.60197     | 0.80156084  |          |         |  |
| CBX3P8      | ENSG00000254496 | -0.25846 | 0.60197 | -0.25846    | 0.60197     | -0.25846 |         |  |
|             | 0.60197         | -0.25846 | 0.60197 | 0.60197     | 0.80156084  |          |         |  |
| NA          | ENSG00000228741 | -0.90119 | 0.81626 | -1.3781     | 0.91591     | -1.2695  | 0.89788 |  |
|             | -0.25853        | 0.602    | 0.602   | 0.80156084  |             |          |         |  |
| NA          | ENSG00000258214 | -0.25859 | 0.60202 | -0.52654    | 0.70074     | -0.9327  | 0.82451 |  |
|             | -0.41443        | 0.66072  | 0.60202 | 0.80156084  |             |          |         |  |
| ADD3        | ENSG00000148700 | -1.0669  | 0.85698 | -1.0425     | 0.85141     | -0.38246 | 0.64894 |  |
|             | -0.2586         | 0.60203  | 0.60203 | 0.80156084  |             |          |         |  |
| RN7SKP168   | ENSG00000222842 | -0.25869 | 0.60206 | -0.25869    | 0.60206     | -0.78614 |         |  |
|             | 0.78411         | -0.25869 | 0.60206 | 0.60206     | 0.80156084  |          |         |  |
| NA          | ENSG00000248160 | -0.25867 | 0.60206 | -0.25867    | 0.60206     | -0.25867 | 0.60206 |  |
|             | -0.57688        | 0.71799  | 0.60206 | 0.80156084  |             |          |         |  |
| NA          | ENSG00000280143 | -0.25869 | 0.60206 | -0.25869    | 0.60206     | -0.25869 | 0.60206 |  |
|             | -0.25869        | 0.60206  | 0.60206 | 0.80156084  |             |          |         |  |
| IGKV1OR22-1 | ENSG00000253481 | -1.8896  | 0.9706  | -0.25874    | 0.60208     | -1.8896  |         |  |
|             | 0.9706          | -1.638   | 0.94929 | 0.60208     | 0.80156084  |          |         |  |
| SEC14L3     | ENSG00000100012 | -0.66278 | 0.74627 | -0.66278    | 0.74627     | -1.5931  |         |  |
|             | 0.94444         | -0.25878 | 0.6021  | 0.6021      | 0.80156084  |          |         |  |
| NADSYN1     | ENSG00000172890 | -0.33656 | 0.63177 | -0.35624    | 0.63917     | -0.25879 |         |  |
|             | 0.6021          | -1.4529  | 0.92687 | 0.6021      | 0.80156084  |          |         |  |
| NA          | ENSG00000269957 | -0.93973 | 0.82632 | -0.93973    | 0.82632     | -0.25895 | 0.60216 |  |
|             | -0.93973        | 0.82632  | 0.60216 | 0.801618817 |             |          |         |  |
| RNU7-28P    | ENSG00000252568 | -0.25904 | 0.6022  | -0.25904    | 0.6022      | -0.25904 |         |  |
|             | 0.6022          | -0.25904 | 0.6022  | 0.6022      | 0.801646304 |          |         |  |
| RNU1-20P    | ENSG00000200184 | -0.25909 | 0.60222 | -0.25909    | 0.60222     | -0.25909 |         |  |
|             | 0.60222         | -0.25909 | 0.60222 | 0.60222     | 0.801646304 |          |         |  |
| CMIP        | ENSG00000153815 | -0.42175 | 0.6634  | -0.50437    | 0.693       | -0.25911 | 0.60223 |  |
|             | -0.53116        | 0.70234  | 0.60223 | 0.801646304 |             |          |         |  |
| NA          | ENSG00000259185 | -0.25924 | 0.60227 | -0.25924    | 0.60227     | -0.25924 | 0.60227 |  |
|             | -0.25924        | 0.60227  | 0.60227 | 0.801659197 |             |          |         |  |
| ZCCHC9      | ENSG00000131732 | -0.28728 | 0.61305 | -0.25926    | 0.60228     | -0.40647 |         |  |

|             |                 |          |         |             |             |          |         |
|-------------|-----------------|----------|---------|-------------|-------------|----------|---------|
|             | 0.6578          | -0.28728 | 0.61305 | 0.60228     | 0.801659197 |          |         |
| NA          | ENSG00000267136 | -0.25992 | 0.60254 | -1.492      | 0.93215     | -0.62642 | 0.73448 |
|             | -0.25939        | 0.60233  | 0.60233 | 0.801659197 |             |          |         |
| RPL10AP2    | ENSG00000188873 | -0.2594  | 0.60234 | -0.45238    | 0.6745      | -1.3451  |         |
|             | 0.91071         | -1.5207  | 0.93584 | 0.60234     | 0.801659197 |          |         |
| RPL21       | ENSG00000122026 | -1.5661  | 0.94134 | -0.87326    | 0.80874     | -0.87326 | 0.80874 |
|             | -0.25947        | 0.60236  | 0.60236 | 0.801659197 |             |          |         |
| GLULP6      | ENSG00000215043 | -0.36356 | 0.64191 | -1.6129     | 0.94661     | -0.8673  |         |
|             | 0.80711         | -0.25955 | 0.60239 | 0.60239     | 0.801659197 |          |         |
| DLST        | ENSG00000119689 | -0.25956 | 0.6024  | -0.70454    | 0.75945     | -1.3284  | 0.90798 |
|             | -1.1331         | 0.87142  | 0.6024  | 0.801659197 |             |          |         |
| IGHV4-61    | ENSG00000211970 | -0.25955 | 0.6024  | -0.25955    | 0.6024      | -0.25955 |         |
|             | 0.6024          | -0.25955 | 0.6024  | 0.6024      | 0.801659197 |          |         |
| AFG3L2P1    | ENSG00000253606 | -0.54106 | 0.70577 | -0.52304    | 0.69953     | -0.25959 |         |
|             | 0.60241         | -0.26883 | 0.60597 | 0.60241     | 0.801659197 |          |         |
| NA          | ENSG00000275854 | -1.3563  | 0.9125  | -0.25958    | 0.60241     | -1.3563  | 0.9125  |
|             | -1.3563         | 0.9125   | 0.60241 | 0.801659197 |             |          |         |
| RNU6-790P   | ENSG00000207208 | -1.9123  | 0.97208 | -1.9123     | 0.97208     | -1.4369  |         |
|             | 0.92463         | -0.25966 | 0.60244 | 0.60244     | 0.801659197 |          |         |
| NA          | ENSG00000239323 | -0.72396 | 0.76546 | -0.88386    | 0.81161     | -0.25968 | 0.60245 |
|             | -2.1879         | 0.98566  | 0.60245 | 0.801659197 |             |          |         |
| TUBAP4      | ENSG00000261665 | -0.42985 | 0.66635 | -0.25971    | 0.60246     | -0.42985 |         |
|             | 0.66635         | -0.42985 | 0.66635 | 0.60246     | 0.801659197 |          |         |
| NA          | ENSG00000278107 | -0.25975 | 0.60247 | -0.25975    | 0.60247     | -0.25975 | 0.60247 |
|             | -0.25975        | 0.60247  | 0.60247 | 0.801659197 |             |          |         |
| SNORD114-31 | ENSG00000200089 | -0.25989 | 0.60253 | -0.25989    | 0.60253     | -0.25989 |         |
|             | 0.60253         | -0.25989 | 0.60253 | 0.60253     | 0.801708557 |          |         |
| GOT2P2      | ENSG00000230849 | -0.99141 | 0.83926 | -0.25993    | 0.60254     | -0.99141 |         |
|             | 0.83926         | -0.99141 | 0.83926 | 0.60254     | 0.801708557 |          |         |
| BCL10       | ENSG00000142867 | -0.26    | 0.60257 | -1.0386     | 0.8505      | -1.0895  | 0.86203 |
|             | -1.0386         | 0.8505   | 0.60257 | 0.801726583 |             |          |         |
| ST13P6      | ENSG00000225259 | -0.51163 | 0.69555 | -1.3806     | 0.9163      | -0.26013 |         |
|             | 0.60262         | -0.92313 | 0.82203 | 0.60262     | 0.801745461 |          |         |
| NA          | ENSG00000240960 | -0.26016 | 0.60263 | -0.26016    | 0.60263     | -0.26016 | 0.60263 |
|             | -0.26016        | 0.60263  | 0.60263 | 0.801745461 |             |          |         |
| RNU6ATAC25P | ENSG00000221725 | -0.2602  | 0.60264 | -0.2602     | 0.60264     | -0.2602  |         |
|             | 0.60264         | -0.2602  | 0.60264 | 0.60264     | 0.801745461 |          |         |
| NA          | ENSG00000204876 | -0.26021 | 0.60265 | -1.0953     | 0.86331     | -1.3065  | 0.90432 |
|             | -1.3065         | 0.90432  | 0.60265 | 0.801745461 |             |          |         |
| ZCWPW2      | ENSG00000206559 | -0.84574 | 0.80115 | -0.26034    | 0.6027      | -0.57928 |         |
|             | 0.7188          | -1.267   | 0.89741 | 0.6027      | 0.801768202 |          |         |
| NA          | ENSG00000248600 | -0.26034 | 0.6027  | -0.26034    | 0.6027      | -0.28927 | 0.61381 |
|             | -0.90728        | 0.81787  | 0.6027  | 0.801768202 |             |          |         |
| F2RL1       | ENSG00000164251 | -0.26064 | 0.60281 | -0.26064    | 0.60281     | -0.26064 | 0.60281 |
|             | -0.26064        | 0.60281  | 0.60281 | 0.801833385 |             |          |         |
| NA          | ENSG00000261104 | -0.26062 | 0.60281 | -0.26062    | 0.60281     | -0.26062 | 0.60281 |
|             | -0.26062        | 0.60281  | 0.60281 | 0.801833385 |             |          |         |
| VN1R107P    | ENSG00000268545 | -0.26063 | 0.60281 | -0.26063    | 0.60281     | -0.26063 |         |
|             | 0.60281         | -0.26063 | 0.60281 | 0.60281     | 0.801833385 |          |         |
| NA          | ENSG00000241352 | -0.26064 | 0.60282 | -0.26064    | 0.60282     | -0.26064 | 0.60282 |
|             | -0.26064        | 0.60282  | 0.60282 | 0.801833385 |             |          |         |
| NT5C3AP2    | ENSG00000244720 | -1.0176  | 0.84557 | -0.26074    | 0.60285     | -0.26074 |         |
|             | 0.60285         | -0.26074 | 0.60285 | 0.60285     | 0.801833385 |          |         |
| NA          | ENSG00000232926 | -0.26078 | 0.60287 | -0.26078    | 0.60287     | -0.26078 | 0.60287 |
|             | -0.26078        | 0.60287  | 0.60287 | 0.801833385 |             |          |         |
| NA          | ENSG00000255403 | -0.26082 | 0.60288 | -0.26082    | 0.60288     | -0.26082 | 0.60288 |
|             | -0.98219        | 0.837    | 0.60288 | 0.801833385 |             |          |         |
| HLA-DOA     | ENSG00000204252 | -1.1306  | 0.87089 | -0.26092    | 0.60292     | -0.99172 |         |
|             | 0.83933         | -1.3676  | 0.91428 | 0.60292     | 0.801833385 |          |         |
| MFF-DT      | ENSG00000236432 | -0.41778 | 0.66195 | -0.35277    | 0.63787     | -0.26091 |         |
|             | 0.60292         | -0.26091 | 0.60292 | 0.60292     | 0.801833385 |          |         |
| NA          | ENSG00000260832 | -0.26092 | 0.60292 | -0.26092    | 0.60292     | -0.26092 | 0.60292 |

|             |                 |          |         |             |             |          |         |
|-------------|-----------------|----------|---------|-------------|-------------|----------|---------|
|             | -0.26092        | 0.60292  | 0.60292 | 0.801833385 |             |          |         |
| SNORD114-5  | ENSG00000199798 | -0.26094 | 0.60293 | -0.26094    | 0.60293     | -0.26094 | 0.60293 |
|             | 0.60293         | -0.26094 | 0.60293 | 0.60293     | 0.801833385 |          |         |
| KIAA1755    | ENSG00000149633 | -0.7457  | 0.77207 | -0.31117    | 0.62216     | -1.4722  |         |
|             | 0.92952         | -0.26114 | 0.60301 | 0.60301     | 0.801914018 |          |         |
| POLA2       | ENSG00000014138 | -0.26122 | 0.60304 | -0.49556    | 0.6899      | -0.72508 | 0.7658  |
|             | -0.58414        | 0.72044  | 0.60304 | 0.801914018 |             |          |         |
| NA          | ENSG00000227863 | -0.34351 | 0.63439 | -0.26123    | 0.60304     | -0.75903 | 0.77608 |
|             | -0.30859        | 0.62118  | 0.60304 | 0.801914018 |             |          |         |
| H3P32       | ENSG00000233814 | -0.74679 | 0.7724  | -0.74679    | 0.7724      | -0.26156 | 0.60317 |
|             | -0.74679        | 0.7724   | 0.60317 | 0.802030649 |             |          |         |
| RPL5P30     | ENSG00000243431 | -0.26156 | 0.60317 | -0.26156    | 0.60317     | -0.26156 |         |
|             | 0.60317         | -0.26156 | 0.60317 | 0.60317     | 0.802030649 |          |         |
| RNU6-566P   | ENSG00000252599 | -0.26158 | 0.60318 | -0.26158    | 0.60318     | -0.26158 |         |
|             | 0.60318         | -0.56957 | 0.71551 | 0.60318     | 0.802030649 |          |         |
| RN7SL586P   | ENSG00000241487 | -0.26167 | 0.60321 | -0.77276    | 0.78017     | -0.26167 |         |
|             | 0.60321         | -1.1449  | 0.87388 | 0.60321     | 0.802030649 |          |         |
| NA          | ENSG00000267476 | -0.26165 | 0.60321 | -0.26165    | 0.60321     | -0.26165 | 0.60321 |
|             | -0.26165        | 0.60321  | 0.60321 | 0.802030649 |             |          |         |
| RPL7AP11    | ENSG00000242445 | -0.26181 | 0.60327 | -0.26181    | 0.60327     | -0.26181 |         |
|             | 0.60327         | -0.26181 | 0.60327 | 0.60327     | 0.802046431 |          |         |
| TSPOAP1-AS1 | ENSG00000265148 | -0.26183 | 0.60327 | -0.26183    | 0.60327     | -0.26183 |         |
|             | 0.60327         | -0.26183 | 0.60327 | 0.60327     | 0.802046431 |          |         |
| NA          | ENSG00000255919 | -0.26185 | 0.60328 | -0.26185    | 0.60328     | -0.26185 | 0.60328 |
|             | -0.26185        | 0.60328  | 0.60328 | 0.802046431 |             |          |         |
| NA          | ENSG00000271443 | -0.26186 | 0.60329 | -1.1525     | 0.87545     | -1.1525  | 0.87545 |
|             | -1.1916         | 0.88329  | 0.60329 | 0.802046431 |             |          |         |
| NA          | ENSG00000240801 | -0.26198 | 0.60333 | -0.26198    | 0.60333     | -0.26198 | 0.60333 |
|             | -0.26198        | 0.60333  | 0.60333 | 0.802046431 |             |          |         |
| NA          | ENSG00000273828 | -0.262   | 0.60334 | -0.262      | 0.60334     | -0.262   | 0.60334 |
|             | -0.262          | 0.60334  | 0.60334 | 0.802046431 |             |          |         |
| TMEM121B    | ENSG00000183307 | -0.32407 | 0.62706 | -0.31052    | 0.62192     | -0.31052 |         |
|             | 0.62192         | -0.26206 | 0.60336 | 0.60336     | 0.802046431 |          |         |
| NA          | ENSG00000240776 | -0.26207 | 0.60337 | -0.26207    | 0.60337     | -0.26207 | 0.60337 |
|             | -0.26207        | 0.60337  | 0.60337 | 0.802046431 |             |          |         |
| RPL23AP94   | ENSG00000248439 | -0.26207 | 0.60337 | -0.46163    | 0.67783     | -0.46163 |         |
|             | 0.67783         | -0.46163 | 0.67783 | 0.60337     | 0.802046431 |          |         |
| COPS9       | ENSG00000172428 | -1.003   | 0.84208 | -0.26214    | 0.60339     | -1.2125  | 0.88735 |
|             | -0.85529        | 0.80381  | 0.60339 | 0.802051137 |             |          |         |
| KCNK6       | ENSG00000099337 | -0.46081 | 0.67753 | -0.68628    | 0.75373     | -1.2864  | 0.90085 |
|             | -0.26224        | 0.60343  | 0.60343 | 0.802077145 |             |          |         |
| CASC8       | ENSG00000246228 | -0.26231 | 0.60346 | -0.38744    | 0.65078     | -0.38744 | 0.65078 |
|             | -1.1059         | 0.86562  | 0.60346 | 0.802077145 |             |          |         |
| MTND2P17    | ENSG00000258239 | -0.2623  | 0.60346 | -0.2623     | 0.60346     | -0.2623  |         |
|             | 0.60346         | -0.2623  | 0.60346 | 0.60346     | 0.802077145 |          |         |
| NA          | ENSG00000271737 | -0.26247 | 0.60352 | -0.26247    | 0.60352     | -0.26247 | 0.60352 |
|             | -0.26247        | 0.60352  | 0.60352 | 0.802077145 |             |          |         |
| NA          | ENSG00000265749 | -0.2625  | 0.60353 | -0.2625     | 0.60353     | -0.2625  | 0.60353 |
|             | -0.2625         | 0.60353  | 0.60353 | 0.802077145 |             |          |         |
| SRRM5       | ENSG00000226763 | -0.26252 | 0.60354 | -0.26252    | 0.60354     | -0.26252 | 0.60354 |
|             | -0.26252        | 0.60354  | 0.60354 | 0.802077145 |             |          |         |
| FOSL2       | ENSG00000075426 | -1.2841  | 0.90045 | -0.26264    | 0.60358     | -1.0839  | 0.86079 |
|             | -1.1902         | 0.88302  | 0.60358 | 0.802077145 |             |          |         |
| SCHIP1      | ENSG00000151967 | -0.85568 | 0.80391 | -0.69769    | 0.75732     | -0.26264 |         |
|             | 0.60358         | -0.93845 | 0.82599 | 0.60358     | 0.802077145 |          |         |
| NA          | ENSG00000239600 | -0.56586 | 0.71426 | -0.56586    | 0.71426     | -0.56586 | 0.71426 |
|             | -0.26265        | 0.60359  | 0.60359 | 0.802077145 |             |          |         |
| PPP3CB-AS1  | ENSG00000221817 | -1.1809  | 0.88118 | -0.26269    | 0.60361     | -1.1809  |         |
|             | 0.88118         | -1.1809  | 0.88118 | 0.60361     | 0.802077145 |          |         |
| RNA5SP50    | ENSG00000200601 | -0.26274 | 0.60362 | -0.26274    | 0.60362     | -0.26274 |         |
|             | 0.60362         | -0.26274 | 0.60362 | 0.60362     | 0.802077145 |          |         |
| COX6CP7     | ENSG00000268681 | -0.26274 | 0.60362 | -0.26274    | 0.60362     | -0.26274 |         |

|            |                 |          |         |             |             |         |                  |
|------------|-----------------|----------|---------|-------------|-------------|---------|------------------|
|            | 0.60362         | -0.26274 | 0.60362 | 0.60362     | 0.802077145 |         |                  |
| NA         | ENSG00000234578 | -0.26278 | 0.60364 | 0.60364     | -0.26278    | 0.60364 | -0.26278 0.60364 |
|            | -0.26278        | 0.60364  | 0.60364 | 0.802077145 |             |         |                  |
| NA         | ENSG00000259709 | -0.26277 | 0.60364 | 0.60364     | -1.0368     | 0.85008 | -0.26277 0.60364 |
|            | -0.26277        | 0.60364  | 0.60364 | 0.802077145 |             |         |                  |
| RNU6-682P  | ENSG00000200713 | -0.2629  | 0.60369 | 0.60369     | -0.2629     | 0.60369 | -0.2629          |
|            | 0.60369         | -0.2629  | 0.60369 | 0.60369     | 0.802112535 |         |                  |
| MIR4730    | ENSG00000264961 | -0.26295 | 0.60371 | 0.60371     | -0.26295    | 0.60371 | -0.26295         |
|            | 0.60371         | -0.26295 | 0.60371 | 0.60371     | 0.802112535 |         |                  |
| MIR4291    | ENSG00000265347 | -0.26304 | 0.60374 | 0.60374     | -0.88727    | 0.81253 | -0.58968         |
|            | 0.7223          | -1.2823  | 0.90014 | 0.60374     | 0.802112535 |         |                  |
| NA         | ENSG00000279467 | -0.26309 | 0.60376 | 0.60376     | -0.26309    | 0.60376 | -0.26309 0.60376 |
|            | -0.26309        | 0.60376  | 0.60376 | 0.802112535 |             |         |                  |
| RNU6-1140P | ENSG00000222449 | -0.26313 | 0.60378 | 0.60378     | -0.26313    | 0.60378 | -0.26313         |
|            | 0.60378         | -0.26313 | 0.60378 | 0.60378     | 0.802112535 |         |                  |
| SDCBP2P1   | ENSG00000223389 | -0.26319 | 0.6038  | 0.6038      | -0.26319    | 0.6038  | -0.26319         |
|            | 0.6038          | -0.26319 | 0.6038  | 0.6038      | 0.802112535 |         |                  |
| NA         | ENSG00000235237 | -0.26321 | 0.6038  | 0.6038      | -0.26321    | 0.6038  | -1.2991 0.90305  |
|            | -0.26321        | 0.6038   | 0.6038  | 0.802112535 |             |         |                  |
| NA         | ENSG00000232989 | -0.26324 | 0.60382 | 0.60382     | -0.90669    | 0.81772 | -0.26324 0.60382 |
|            | -0.26324        | 0.60382  | 0.60382 | 0.802112535 |             |         |                  |
| HNRNPDP2   | ENSG00000217811 | -0.26327 | 0.60383 | 0.60383     | -0.57813    | 0.71841 | -0.57813         |
|            | 0.71841         | -0.31531 | 0.62374 | 0.60383     | 0.802112535 |         |                  |
| RN7SL827P  | ENSG00000271986 | -0.26338 | 0.60387 | 0.60387     | -0.26338    | 0.60387 | -0.26338         |
|            | 0.60387         | -0.26338 | 0.60387 | 0.60387     | 0.802112535 |         |                  |
| COL4A3     | ENSG00000169031 | -0.86017 | 0.80515 | 0.80515     | -0.86017    | 0.80515 | -0.26341         |
|            | 0.60388         | -0.73018 | 0.76736 | 0.60388     | 0.802112535 |         |                  |
| MAPT-AS1   | ENSG00000264589 | -0.28639 | 0.61271 | 0.61271     | -0.28639    | 0.61271 | -0.28639         |
|            | 0.61271         | -0.26345 | 0.6039  | 0.6039      | 0.802112535 |         |                  |
| MINAR1     | ENSG00000169330 | -0.34735 | 0.63584 | 0.63584     | -0.87047    | 0.80798 | -0.2635          |
|            | 0.60392         | -0.67705 | 0.75081 | 0.60392     | 0.802112535 |         |                  |
| EIF4A1P4   | ENSG00000257790 | -1.6327  | 0.94873 | 0.94873     | -1.6327     | 0.94873 | -1.6274          |
|            | 0.94818         | -0.2635  | 0.60392 | 0.60392     | 0.802112535 |         |                  |
| NA         | ENSG00000278954 | -1.2332  | 0.89124 | 0.89124     | -1.2332     | 0.89124 | -1.5324 0.93729  |
|            | -0.26352        | 0.60392  | 0.60392 | 0.802112535 |             |         |                  |
| LZTFL1     | ENSG00000163818 | -0.26355 | 0.60393 | 0.60393     | -0.68834    | 0.75438 | -0.66585         |
|            | 0.74725         | -0.98756 | 0.83832 | 0.60393     | 0.802112535 |         |                  |
| ATXN7      | ENSG00000163635 | -0.26372 | 0.604   | 0.604       | -0.83553    | 0.79829 | -0.39065 0.65197 |
|            | -0.89162        | 0.8137   | 0.604   | 0.802115    |             |         |                  |
| RNA5SP350  | ENSG00000200168 | -1.6803  | 0.95355 | 0.95355     | -1.6803     | 0.95355 | -0.26374         |
|            | 0.60401         | -1.6803  | 0.95355 | 0.60401     | 0.802115    |         |                  |
| NA         | ENSG00000241921 | -0.48584 | 0.68646 | 0.68646     | -0.26378    | 0.60403 | -0.40937 0.65887 |
|            | -0.40937        | 0.65887  | 0.60403 | 0.802115    |             |         |                  |
| NA         | ENSG00000264578 | -0.26383 | 0.60404 | 0.60404     | -0.26383    | 0.60404 | -0.26383 0.60404 |
|            | -0.26383        | 0.60404  | 0.60404 | 0.802115    |             |         |                  |
| HRH1       | ENSG00000196639 | -0.26385 | 0.60405 | 0.60405     | -1.6364     | 0.94913 | -1.3766 0.91568  |
|            | -1.284          | 0.90043  | 0.60405 | 0.802115    |             |         |                  |
| NA         | ENSG00000278915 | -0.26384 | 0.60405 | 0.60405     | -0.26384    | 0.60405 | -0.26384 0.60405 |
|            | -0.26384        | 0.60405  | 0.60405 | 0.802115    |             |         |                  |
| THAP4      | ENSG00000176946 | -0.65275 | 0.74304 | 0.74304     | -0.26387    | 0.60406 | -0.65275 0.74304 |
|            | -0.65275        | 0.74304  | 0.60406 | 0.802115    |             |         |                  |
| NA         | ENSG00000269025 | -0.2639  | 0.60407 | 0.60407     | -0.2639     | 0.60407 | -0.2639 0.60407  |
|            | -0.2639         | 0.60407  | 0.60407 | 0.802115    |             |         |                  |
| MFSD14C    | ENSG00000196312 | -0.26391 | 0.60408 | 0.60408     | -0.50431    | 0.69298 | -0.57178         |
|            | 0.71627         | -2.0085  | 0.97771 | 0.60408     | 0.802115    |         |                  |
| KRTAP19-9P | ENSG00000237841 | -0.264   | 0.60411 | 0.60411     | -0.264      | 0.60411 | -0.264           |
|            | 0.60411         | -0.264   | 0.60411 | 0.60411     | 0.8021244   |         |                  |
| RDH12      | ENSG00000139988 | -0.26403 | 0.60412 | 0.60412     | -0.26403    | 0.60412 | -0.26403 0.60412 |
|            | -0.26403        | 0.60412  | 0.60412 | 0.8021244   |             |         |                  |
| SPACA1     | ENSG00000118434 | -0.58197 | 0.71971 | 0.71971     | -1.9369     | 0.97362 | -0.61117         |
|            | 0.72946         | -0.26409 | 0.60414 | 0.60414     | 0.802129099 |         |                  |
| RNU6-1337P | ENSG00000252334 | -0.26422 | 0.60419 | 0.60419     | -0.26422    | 0.60419 | -0.26422         |



|           |                 |          |         |             |             |          |         |
|-----------|-----------------|----------|---------|-------------|-------------|----------|---------|
|           | 0.60419         | -0.26422 | 0.60419 | 0.60419     | 0.802165868 |          |         |
| OR5AZ1P   | ENSG00000180714 | -0.97956 | 0.83635 | -0.26434    | 0.60424     | -0.83457 |         |
|           | 0.79802         | -1.8122  | 0.96502 | 0.60424     | 0.802165868 |          |         |
| IGLVI-70  | ENSG00000253239 | -0.26433 | 0.60424 | -0.26433    | 0.60424     | -0.26433 |         |
|           | 0.60424         | -0.26433 | 0.60424 | 0.60424     | 0.802165868 |          |         |
| NA        | ENSG00000269256 | -0.35113 | 0.63725 | -0.35113    | 0.63725     | -0.35113 | 0.63725 |
|           | -0.26433        | 0.60424  | 0.60424 | 0.802165868 |             |          |         |
| NA        | ENSG00000270981 | -0.26438 | 0.60425 | -0.26438    | 0.60425     | -0.26438 | 0.60425 |
|           | -0.26438        | 0.60425  | 0.60425 | 0.802165868 |             |          |         |
| DLG1-AS1  | ENSG00000227375 | -0.26447 | 0.60429 | -0.35499    | 0.6387      | -0.36997 |         |
|           | 0.6443          | -1.2794  | 0.89963 | 0.60429     | 0.802197115 |          |         |
| LINC01608 | ENSG00000253877 | -1.3258  | 0.90755 | -0.85419    | 0.8035      | -0.26455 |         |
|           | 0.60432         | -0.26455 | 0.60432 | 0.60432     | 0.802210576 |          |         |
| MIR3677   | ENSG00000266643 | -0.26462 | 0.60435 | -0.28265    | 0.61128     | -0.26462 |         |
|           | 0.60435         | -0.26462 | 0.60435 | 0.60435     | 0.802210576 |          |         |
| NA        | ENSG00000275038 | -0.26463 | 0.60435 | -0.56907    | 0.71534     | -0.56907 | 0.71534 |
|           | -0.56907        | 0.71534  | 0.60435 | 0.802210576 |             |          |         |
| CRYBG3    | ENSG00000080200 | -0.77794 | 0.7817  | -0.55323    | 0.70995     | -0.26468 |         |
|           | 0.60437         | -0.61909 | 0.73207 | 0.60437     | 0.802210576 |          |         |
| SFT2D1    | ENSG00000198818 | -0.45234 | 0.67449 | -0.26475    | 0.6044      | -0.64759 |         |
|           | 0.74138         | -1.3584  | 0.91284 | 0.6044      | 0.802210576 |          |         |
| NA        | ENSG00000272374 | -0.26477 | 0.60441 | -0.26477    | 0.60441     | -0.26477 | 0.60441 |
|           | -0.26477        | 0.60441  | 0.60441 | 0.802210576 |             |          |         |
| IRAG1-AS1 | ENSG00000177112 | -0.2649  | 0.60446 | -0.2649     | 0.60446     | -0.2649  |         |
|           | 0.60446         | -0.2649  | 0.60446 | 0.60446     | 0.802210576 |          |         |
| RNA5SP35  | ENSG00000212559 | -0.26492 | 0.60446 | -0.26492    | 0.60446     | -0.26492 |         |
|           | 0.60446         | -0.26492 | 0.60446 | 0.60446     | 0.802210576 |          |         |
| SGSM3     | ENSG00000100359 | -0.33122 | 0.62976 | -0.32012    | 0.62556     | -0.35125 | 0.6373  |
|           | -0.26497        | 0.60448  | 0.60448 | 0.802210576 |             |          |         |
| NA        | ENSG00000253162 | -0.265   | 0.60449 | -0.30724    | 0.62067     | -0.265   | 0.60449 |
|           | -0.265          | 0.60449  | 0.60449 | 0.802210576 |             |          |         |
| IPO13     | ENSG00000117408 | -0.26508 | 0.60453 | -1.0891     | 0.86195     | -0.26508 | 0.60453 |
|           | -1.2545         | 0.89518  | 0.60453 | 0.802210576 |             |          |         |
| MIR5688   | ENSG00000264084 | -0.26509 | 0.60453 | -0.26509    | 0.60453     | -0.72046 |         |
|           | 0.76438         | -0.26509 | 0.60453 | 0.60453     | 0.802210576 |          |         |
| BRCA1     | ENSG00000012048 | -0.50396 | 0.69286 | -0.60409    | 0.72711     | -0.26511 | 0.60454 |
|           | -0.55492        | 0.71053  | 0.60454 | 0.802210576 |             |          |         |
| ORM1      | ENSG00000229314 | -1.0153  | 0.84502 | -1.0153     | 0.84502     | -1.0153  | 0.84502 |
|           | -0.26514        | 0.60455  | 0.60455 | 0.802210576 |             |          |         |
| NA        | ENSG00000268173 | -0.26519 | 0.60457 | -0.26519    | 0.60457     | -0.26519 | 0.60457 |
|           | -0.26519        | 0.60457  | 0.60457 | 0.802210576 |             |          |         |
| RNU6-95P  | ENSG00000207428 | -0.26522 | 0.60458 | -0.26522    | 0.60458     | -0.26522 |         |
|           | 0.60458         | -0.26522 | 0.60458 | 0.60458     | 0.802210576 |          |         |
| NA        | ENSG00000228503 | -1.1722  | 0.87945 | -1.1722     | 0.87945     | -1.1722  | 0.87945 |
|           | -0.26521        | 0.60458  | 0.60458 | 0.802210576 |             |          |         |
| OCIAD2    | ENSG00000145247 | -1.1462  | 0.87415 | -1.1462     | 0.87415     | -0.83012 |         |
|           | 0.79676         | -0.2655  | 0.60469 | 0.60469     | 0.802279343 |          |         |
| NA        | ENSG00000253982 | -0.54677 | 0.70773 | -0.26553    | 0.6047      | -0.54677 | 0.70773 |
|           | -0.54677        | 0.70773  | 0.6047  | 0.802279343 |             |          |         |
| PYGB      | ENSG00000100994 | -0.60682 | 0.72801 | -0.37118    | 0.64475     | -0.67576 | 0.7504  |
|           | -0.26558        | 0.60472  | 0.60472 | 0.802279343 |             |          |         |
| NA        | ENSG00000225720 | -0.26557 | 0.60472 | -0.88316    | 0.81142     | -0.88316 | 0.81142 |
|           | -1.4377         | 0.92474  | 0.60472 | 0.802279343 |             |          |         |
| CDK8P1    | ENSG00000230044 | -0.26559 | 0.60472 | -0.26559    | 0.60472     | -0.26559 |         |
|           | 0.60472         | -0.26559 | 0.60472 | 0.60472     | 0.802279343 |          |         |
| MAFB      | ENSG00000204103 | -1.0447  | 0.85192 | -1.0447     | 0.85192     | -2.4709  | 0.99326 |
|           | -0.26571        | 0.60477  | 0.60477 | 0.802279343 |             |          |         |
| NA        | ENSG00000280418 | -0.60795 | 0.72839 | -0.86405    | 0.80622     | -0.32905 | 0.62894 |
|           | -0.26572        | 0.60477  | 0.60477 | 0.802279343 |             |          |         |
| RNU6-449P | ENSG00000206641 | -0.26573 | 0.60478 | -0.26573    | 0.60478     | -0.26573 |         |
|           | 0.60478         | -0.26573 | 0.60478 | 0.60478     | 0.802279343 |          |         |
| NA        | ENSG00000274937 | -0.26575 | 0.60478 | -0.26575    | 0.60478     | -0.26575 | 0.60478 |

|            |                 |          |             |             |             |          |         |       |
|------------|-----------------|----------|-------------|-------------|-------------|----------|---------|-------|
|            | -0.26575        | 0.60478  | 0.60478     | 0.802279343 |             |          |         |       |
| NA         | ENSG00000268279 | -0.2658  | 0.6048      | -0.2658     | 0.6048      | -0.2658  | 0.6048  |       |
|            | -0.2658         | 0.6048   | 0.6048      | 0.802284034 |             |          |         |       |
| MUC13      | ENSG00000173702 | -0.27829 | 0.6096      | -1.2349     | 0.89157     | -0.26591 | 0.60484 |       |
|            | -0.72435        | 0.76557  | 0.60484     | 0.802293415 |             |          |         |       |
| CACTIN-AS1 | ENSG00000226800 | -0.26589 | 0.60484     | -0.26589    | 0.60484     | -0.26589 |         |       |
|            | 0.60484         | -0.26589 | 0.60484     | 0.802293415 |             |          |         |       |
| MAP1LC3B   | ENSG00000140941 | -1.4823  | 0.93087     | -1.4823     | 0.93087     | -1.0943  |         |       |
|            | 0.86309         | -0.26607 | 0.60491     | 0.60491     | 0.802334012 |          |         |       |
| CDO1       | ENSG00000129596 | -0.59794 | 0.72506     | -0.56013    | 0.7123      | -0.61569 | 0.73095 |       |
|            | -0.2661         | 0.60492  | 0.60492     | 0.802334012 |             |          |         |       |
| NA         | ENSG00000228686 | -0.26611 | 0.60492     | -0.26611    | 0.60492     | -0.39718 | 0.65438 |       |
|            | -0.26611        | 0.60492  | 0.60492     | 0.802334012 |             |          |         |       |
| NA         | ENSG00000269349 | -0.26627 | 0.60498     | -0.26627    | 0.60498     | -0.26627 | 0.60498 |       |
|            | -0.26627        | 0.60498  | 0.60498     | 0.802367627 |             |          |         |       |
| KIF1C-AS1  | ENSG00000227495 | -0.26634 | 0.60501     | -0.26634    | 0.60501     | -0.26634 |         |       |
|            | 0.60501         | -0.26634 | 0.60501     | 0.60501     | 0.802367627 |          |         |       |
| NA         | ENSG00000238013 | -1.8333  | 0.96662     | -1.2302     | 0.8907      | -0.26639 | 0.60503 |       |
|            | -0.44264        | 0.67099  | 0.60503     | 0.802367627 |             |          |         |       |
| NA         | ENSG00000279046 | -0.26639 | 0.60503     | -0.26639    | 0.60503     | -0.26639 | 0.60503 |       |
|            | -0.26639        | 0.60503  | 0.60503     | 0.802367627 |             |          |         |       |
| SNORA63C   | ENSG00000201448 | -0.26645 | 0.60505     | -0.26645    | 0.60505     | -0.26645 |         |       |
|            | 0.60505         | -0.26645 | 0.60505     | 0.60505     | 0.802367627 |          |         |       |
| RN7SL366P  | ENSG00000266128 | -0.26653 | 0.60508     | -0.26653    | 0.60508     | -0.26653 |         |       |
|            | 0.60508         | -0.26653 | 0.60508     | 0.60508     | 0.802367627 |          |         |       |
| NA         | ENSG00000240477 | -0.26654 | 0.60509     | -0.26654    | 0.60509     | -0.26654 | 0.60509 |       |
|            | -0.26654        | 0.60509  | 0.60509     | 0.802367627 |             |          |         |       |
| SNAP23     | ENSG00000092531 | -0.45579 | 0.67573     | -0.26656    | 0.6051      | -0.45579 |         |       |
|            | 0.67573         | -0.45579 | 0.67573     | 0.6051      | 0.802367627 |          |         |       |
| FAM214BP1  | ENSG00000240487 | -0.26658 | 0.6051      | -0.26658    | 0.6051      | -0.26658 |         |       |
|            | 0.6051          | -0.26658 | 0.6051      | 0.6051      | 0.802367627 |          |         |       |
| NA         | ENSG00000259153 | -0.72652 | 0.76624     | -0.72652    | 0.76624     | -0.2666  | 0.60511 |       |
|            | -0.93309        | 0.82461  | 0.60511     | 0.802367627 |             |          |         |       |
| NA         | ENSG00000280069 | -0.26666 | 0.60513     | -0.26666    | 0.60513     | -0.26666 | 0.60513 |       |
|            | -0.26666        | 0.60513  | 0.60513     | 0.802372314 |             |          |         |       |
| STAU2-AS1  | ENSG00000253302 | -0.26686 | 0.60521     | -0.26686    | 0.60521     | -0.26686 |         |       |
|            | 0.60521         | -0.26686 | 0.60521     | 0.60521     | 0.802431626 |          |         |       |
| MPC1       | ENSG00000060762 | -0.69592 | 0.75676     | -0.73023    | 0.76738     | -0.26689 | 0.60522 |       |
|            | -0.93792        | 0.82586  | 0.60522     | 0.802431626 |             |          |         |       |
| NA         | ENSG00000200164 | -0.26695 | 0.60525     | -0.26695    | 0.60525     | -0.26695 | 0.60525 |       |
|            | -0.26695        | 0.60525  | 0.60525     | 0.802431626 |             |          |         |       |
| NA         | ENSG00000207467 | -0.26699 | 0.60526     | -0.26699    | 0.60526     | -0.26699 | 0.60526 |       |
|            | -0.26699        | 0.60526  | 0.60526     | 0.802431626 |             |          |         |       |
| NA         | ENSG00000261783 | -0.30422 | 0.61952     | -0.85784    | 0.80451     | -0.82684 | 0.79584 |       |
|            | -0.26699        | 0.60526  | 0.60526     | 0.802431626 |             |          |         |       |
| RNA5SP259  | ENSG00000202411 | -0.26704 | 0.60528     | -0.26704    | 0.60528     | -0.26704 |         |       |
|            | 0.60528         | -0.26704 | 0.60528     | 0.60528     | 0.802431626 |          |         |       |
| NA         | ENSG00000262652 | -0.26706 | 0.60529     | -0.50502    | 0.69323     | -0.50502 | 0.69323 |       |
|            | -0.50502        | 0.69323  | 0.60529     | 0.802431626 |             |          |         |       |
| NA         | ENSG00000259306 | -1.35    | 0.9115      | -1.35       | 0.9115      | -0.2672  | 0.60534 | -1.35 |
|            | 0.9115          | 0.60534  | 0.802458932 |             |             |          |         |       |
| CYCSP6     | ENSG00000214429 | -0.26724 | 0.60536     | -0.26724    | 0.60536     | -0.26724 |         |       |
|            | 0.60536         | -0.26724 | 0.60536     | 0.60536     | 0.802458932 |          |         |       |
| NA         | ENSG00000268434 | -0.26725 | 0.60536     | -0.26725    | 0.60536     | -0.26725 | 0.60536 |       |
|            | -0.26725        | 0.60536  | 0.60536     | 0.802458932 |             |          |         |       |
| CAPN3      | ENSG00000092529 | -0.2674  | 0.60542     | -0.74091    | 0.77063     | -0.82361 | 0.79492 |       |
|            | -0.80353        | 0.78917  | 0.60542     | 0.802516637 |             |          |         |       |
| RNU2-58P   | ENSG00000252212 | -0.26754 | 0.60547     | -0.26754    | 0.60547     | -0.26754 |         |       |
|            | 0.60547         | -0.26754 | 0.60547     | 0.60547     | 0.802523678 |          |         |       |
| EIF4A1P12  | ENSG00000257662 | -0.26761 | 0.6055      | -0.26761    | 0.6055      | -0.26761 |         |       |
|            | 0.6055          | -0.26761 | 0.6055      | 0.6055      | 0.802523678 |          |         |       |
| RNU7-111P  | ENSG00000252645 | -0.2677  | 0.60553     | -0.2677     | 0.60553     | -0.2677  |         |       |

|               |                 |             |         |             |             |          |         |  |
|---------------|-----------------|-------------|---------|-------------|-------------|----------|---------|--|
|               | 0.60553         | -0.2677     | 0.60553 | 0.60553     | 0.802523678 |          |         |  |
| NA            | ENSG00000183308 | -0.26772    | 0.60554 | -0.26772    | 0.60554     | -0.26772 | 0.60554 |  |
|               | -0.26772        | 0.60554     | 0.60554 | 0.802523678 |             |          |         |  |
| NA            | ENSG00000243822 | -1.1937     | 0.8837  | -0.26771    | 0.60554     | -1.1937  | 0.8837  |  |
|               | -1.1937         | 0.8837      | 0.60554 | 0.802523678 |             |          |         |  |
| NA            | ENSG00000255921 | -0.45314    | 0.67478 | -0.32183    | 0.62621     | -0.45314 | 0.67478 |  |
|               | -0.26772        | 0.60554     | 0.60554 | 0.802523678 |             |          |         |  |
| NA            | ENSG00000236841 | -0.26774    | 0.60555 | -0.91961    | 0.82111     | -0.26774 | 0.60555 |  |
|               | -0.26774        | 0.60555     | 0.60555 | 0.802523678 |             |          |         |  |
| NA            | ENSG00000277744 | -0.26779    | 0.60557 | -0.26779    | 0.60557     | -0.26779 | 0.60557 |  |
|               | -0.26779        | 0.60557     | 0.60557 | 0.802523678 |             |          |         |  |
| NA            | ENSG00000278987 | -0.26782    | 0.60558 | -0.65012    | 0.74219     | -0.57954 | 0.71889 |  |
|               | -0.57954        | 0.71889     | 0.60558 | 0.802523678 |             |          |         |  |
| NA            | ENSG00000221611 | -0.26786    | 0.60559 | -0.26786    | 0.60559     | -0.26786 | 0.60559 |  |
|               | -0.26786        | 0.60559     | 0.60559 | 0.802523678 |             |          |         |  |
| BACH1-AS1     | ENSG00000232118 | -0.32238    | 0.62642 | -0.32238    | 0.62642     | -0.26792 |         |  |
|               | 0.60562         | -0.32238    | 0.62642 | 0.60562     | 0.802541609 |          |         |  |
| NA            | ENSG00000248613 | -0.26802    | 0.60566 | -0.90176    | 0.81641     | -0.26802 | 0.60566 |  |
|               | -0.26802        | 0.60566     | 0.60566 | 0.802555645 |             |          |         |  |
| C2orf72       | ENSG00000204128 | -0.26807    | 0.60568 | -0.26807    | 0.60568     | -0.26807 |         |  |
|               | 0.60568         | -0.9705     | 0.8341  | 0.60568     | 0.802555645 |          |         |  |
| NA            | ENSG00000257411 | -0.26807    | 0.60568 | -0.26807    | 0.60568     | -0.26807 | 0.60568 |  |
|               | -0.26807        | 0.60568     | 0.60568 | 0.802555645 |             |          |         |  |
| NA            | ENSG00000268081 | -0.4469     | 0.67253 | -0.26821    | 0.60573     | -0.41893 | 0.66237 |  |
|               | -0.41893        | 0.66237     | 0.60573 | 0.802579033 |             |          |         |  |
| POLD4         | ENSG00000175482 | -0.27796    | 0.60948 | -0.43852    | 0.6695      | -0.26823 | 0.60574 |  |
|               | -1.3432         | 0.9104      | 0.60574 | 0.802579033 |             |          |         |  |
| PPIAP41       | ENSG00000254463 | -0.44669    | 0.67245 | -0.2683     | 0.60577     | -0.2683  |         |  |
|               | 0.60577         | -0.2683     | 0.60577 | 0.60577     | 0.802579033 |          |         |  |
| FDPSP4        | ENSG00000254793 | -0.26835    | 0.60578 | -0.26835    | 0.60578     | -0.26835 |         |  |
|               | 0.60578         | -0.26835    | 0.60578 | 0.60578     | 0.802579033 |          |         |  |
| NA            | ENSG00000272091 | -0.26833    | 0.60578 | -0.26833    | 0.60578     | -0.26833 | 0.60578 |  |
|               | -0.26833        | 0.60578     | 0.60578 | 0.802579033 |             |          |         |  |
| RNU4-37P      | ENSG00000222146 | -0.26839    | 0.6058  | -0.26839    | 0.6058      | -0.26839 |         |  |
|               | 0.6058          | -0.26839    | 0.6058  | 0.6058      | 0.802583709 |          |         |  |
| NA            | ENSG00000283932 | -0.26863    | 0.60589 | -0.26863    | 0.60589     | -0.26863 | 0.60589 |  |
|               | -0.26863        | 0.60589     | 0.60589 | 0.802639811 |             |          |         |  |
| NA            | ENSG00000236046 | -0.26871    | 0.60592 | -0.26871    | 0.60592     | -0.74579 | 0.7721  |  |
|               | -0.77701        | 0.78142     | 0.60592 | 0.802639811 |             |          |         |  |
| LTA4H         | ENSG00000111144 | -1.3924     | 0.9181  | -1.881      | 0.97001     | -1.1957  | 0.8841  |  |
|               | -0.26874        | 0.60593     | 0.60593 | 0.802639811 |             |          |         |  |
| SYNJ2BP-COX16 | ENSG00000258644 | -0.26872    | 0.60593 | -0.26872    | 0.60593     | -0.26872 |         |  |
|               | 0.60593         | -0.26872    | 0.60593 | 0.60593     | 0.802639811 |          |         |  |
| NA            | ENSG00000275959 | -0.33272    | 0.63033 | -0.26875    | 0.60594     | -1.0049  | 0.84253 |  |
|               | -0.52049        | 0.69864     | 0.60594 | 0.802639811 |             |          |         |  |
| RNU1-43P      | ENSG00000201922 | -0.2688     | 0.60596 | -0.2688     | 0.60596     | -0.2688  |         |  |
|               | 0.60596         | -0.57681    | 0.71796 | 0.60596     | 0.802639811 |          |         |  |
| KRTAP5-8      | ENSG00000241233 | -0.76016    | 0.77642 | -0.61353    | 0.73024     | -1.1653  |         |  |
|               | 0.87806         | -0.26881    | 0.60596 | 0.60596     | 0.802639811 |          |         |  |
| TDRD15        | ENSG00000218819 | -1.2354     | 0.89165 | -1.5646     | 0.94116     | -0.26886 |         |  |
|               | 0.60598         | -1.5646     | 0.94116 | 0.60598     | 0.802639811 |          |         |  |
| NA            | ENSG00000255710 | -0.26891    | 0.606   | -0.26891    | 0.606       | -0.26891 | 0.606   |  |
|               | 0.606           | 0.802639811 |         |             |             |          |         |  |
| NA            | ENSG00000267152 | -0.26898    | 0.60603 | -0.26898    | 0.60603     | -0.26898 | 0.60603 |  |
|               | -0.26898        | 0.60603     | 0.60603 | 0.802639811 |             |          |         |  |
| NA            | ENSG00000279173 | -0.26897    | 0.60603 | -1.3776     | 0.91583     | -2.0274  | 0.97869 |  |
|               | -0.60958        | 0.72893     | 0.60603 | 0.802639811 |             |          |         |  |
| CLCN1         | ENSG00000188037 | -0.26902    | 0.60604 | -0.26902    | 0.60604     | -0.26902 | 0.60604 |  |
|               | -1.2365         | 0.89187     | 0.60604 | 0.802639811 |             |          |         |  |
| NA            | ENSG00000278419 | -0.26907    | 0.60606 | -0.26907    | 0.60606     | -0.26907 | 0.60606 |  |
|               | -0.26907        | 0.60606     | 0.60606 | 0.802644484 |             |          |         |  |
| NA            | ENSG00000277423 | -0.38518    | 0.64995 | -0.2692     | 0.60611     | -0.2692  | 0.60611 |  |

|             |                 |          |         |             |             |          |         |
|-------------|-----------------|----------|---------|-------------|-------------|----------|---------|
|             | -0.2692         | 0.60611  | 0.60611 | 0.802660053 |             |          |         |
| RNU6-769P   | ENSG00000207136 | -0.75458 | 0.77475 | -0.53256    | 0.70283     | -0.26925 |         |
|             | 0.60613         | -0.42679 | 0.66523 | 0.60613     | 0.802660053 |          |         |
| CCDC84-DT   | ENSG00000255121 | -0.26932 | 0.60616 | -0.26932    | 0.60616     | -0.26932 |         |
|             | 0.60616         | -0.26932 | 0.60616 | 0.60616     | 0.802660053 |          |         |
| GLCCI1      | ENSG00000106415 | -0.26935 | 0.60617 | -0.52133    | 0.69893     | -0.52133 |         |
|             | 0.69893         | -0.57017 | 0.71572 | 0.60617     | 0.802660053 |          |         |
| UBFD1       | ENSG00000103353 | -0.36128 | 0.64105 | -0.32691    | 0.62813     | -0.26937 | 0.60618 |
|             | -1.0333         | 0.84926  | 0.60618 | 0.802660053 |             |          |         |
| NA          | ENSG00000243314 | -1.7868  | 0.96301 | -1.2011     | 0.88515     | -0.26938 | 0.60618 |
|             | -1.5728         | 0.94212  | 0.60618 | 0.802660053 |             |          |         |
| RC3H2       | ENSG00000056586 | -1.1307  | 0.87091 | -0.69667    | 0.757       | -0.5123  | 0.69578 |
|             | -0.26939        | 0.60619  | 0.60619 | 0.802660053 |             |          |         |
| MRPS17      | ENSG00000239789 | -0.76023 | 0.77644 | -0.5558     | 0.71082     | -0.26947 |         |
|             | 0.60622         | -0.64482 | 0.74048 | 0.60622     | 0.802660053 |          |         |
| IGKV3-25    | ENSG00000253202 | -1.4105  | 0.92081 | -1.3002     | 0.90323     | -0.26947 |         |
|             | 0.60622         | -0.8293  | 0.79653 | 0.60622     | 0.802660053 |          |         |
| TMEM269     | ENSG00000274386 | -0.26959 | 0.60626 | -0.52329    | 0.69962     | -0.52329 |         |
|             | 0.69962         | -1.3459  | 0.91084 | 0.60626     | 0.802691205 |          |         |
| TAF1A       | ENSG00000143498 | -0.73157 | 0.76778 | -0.73157    | 0.76778     | -0.73157 | 0.76778 |
|             | -0.26968        | 0.6063   | 0.6063  | 0.802700546 |             |          |         |
| JPH3        | ENSG00000154118 | -0.40067 | 0.65567 | -0.8385     | 0.79913     | -0.98003 | 0.83646 |
|             | -0.26969        | 0.6063   | 0.6063  | 0.802700546 |             |          |         |
| UQCRHL      | ENSG00000233954 | -0.26982 | 0.60635 | -0.76329    | 0.77735     | -0.68552 |         |
|             | 0.75349         | -0.87907 | 0.81032 | 0.60635     | 0.802744933 |          |         |
| DDC-AS1     | ENSG00000226122 | -0.26986 | 0.60637 | -0.65845    | 0.74488     | -0.65845 |         |
|             | 0.74488         | -0.65845 | 0.74488 | 0.60637     | 0.802749602 |          |         |
| NA          | ENSG00000242246 | -0.26994 | 0.6064  | -0.26994    | 0.6064      | -0.26994 | 0.6064  |
|             | -0.26994        | 0.6064   | 0.6064  | 0.802767509 |             |          |         |
| RNY3P1      | ENSG00000201955 | -0.77255 | 0.78011 | -0.26999    | 0.60642     | -1.1011  |         |
|             | 0.86458         | -1.1011  | 0.86458 | 0.60642     | 0.802772177 |          |         |
| USP32P3     | ENSG00000189423 | -1.3782  | 0.91592 | -0.27007    | 0.60645     | -0.816   |         |
|             | 0.79275         | -1.6148  | 0.94683 | 0.60645     | 0.802786179 |          |         |
| ZNF646P1    | ENSG00000274316 | -0.27014 | 0.60647 | -0.27014    | 0.60647     | -0.27014 |         |
|             | 0.60647         | -0.27014 | 0.60647 | 0.60647     | 0.802786179 |          |         |
| NA          | ENSG00000251296 | -1.8194  | 0.96558 | -1.0994     | 0.8642      | -0.27017 | 0.60648 |
|             | -0.29716        | 0.61683  | 0.60648 | 0.802786179 |             |          |         |
| RN7SL299P   | ENSG00000242794 | -0.27035 | 0.60655 | -0.27035    | 0.60655     | -0.27035 |         |
|             | 0.60655         | -0.27035 | 0.60655 | 0.60655     | 0.802835221 |          |         |
| NA          | ENSG00000284299 | -0.27033 | 0.60655 | -0.27033    | 0.60655     | -0.27033 | 0.60655 |
|             | -0.27033        | 0.60655  | 0.60655 | 0.802835221 |             |          |         |
| PRMT9       | ENSG00000164169 | -0.35308 | 0.63799 | -1.068      | 0.85723     | -0.35308 | 0.63799 |
|             | -0.27041        | 0.60658  | 0.60658 | 0.802853122 |             |          |         |
| SSPN        | ENSG00000123096 | -0.27046 | 0.6066  | -1.0387     | 0.85054     | -1.0979  | 0.86387 |
|             | -0.7546         | 0.77476  | 0.6066  | 0.802857787 |             |          |         |
| TXNDC17     | ENSG00000129235 | -0.27054 | 0.60663 | -0.27054    | 0.60663     | -0.27054 |         |
|             | 0.60663         | -0.27054 | 0.60663 | 0.60663     | 0.802875686 |          |         |
| NA          | ENSG00000253373 | -0.27071 | 0.60669 | -1.6905     | 0.95454     | -1.6905  | 0.95454 |
|             | -1.6905         | 0.95454  | 0.60669 | 0.802933289 |             |          |         |
| ST3GAL6-AS1 | ENSG00000239445 | -1.3114  | 0.90515 | -1.3114     | 0.90515     | -1.3114  |         |
|             | 0.90515         | -0.27078 | 0.60672 | 0.60672     | 0.802942613 |          |         |
| RPL7P21     | ENSG00000231579 | -0.60956 | 0.72892 | -0.2708     | 0.60673     | -0.6324  |         |
|             | 0.73644         | -0.2708  | 0.60673 | 0.60673     | 0.802942613 |          |         |
| MIR199A1    | ENSG00000207752 | -0.27114 | 0.60686 | -0.27114    | 0.60686     | -0.27114 |         |
|             | 0.60686         | -0.27114 | 0.60686 | 0.60686     | 0.803067118 |          |         |
| SSR4P1      | ENSG00000235374 | -0.2712  | 0.60688 | -1.4357     | 0.92445     | -0.2712  |         |
|             | 0.60688         | -0.2712  | 0.60688 | 0.60688     | 0.803067118 |          |         |
| LINC02718   | ENSG00000255418 | -0.8177  | 0.79323 | -0.77637    | 0.78123     | -0.27119 |         |
|             | 0.60688         | -0.51327 | 0.69612 | 0.60688     | 0.803067118 |          |         |
| NA          | ENSG00000258983 | -0.27121 | 0.60689 | -0.27121    | 0.60689     | -0.27121 | 0.60689 |
|             | -0.27121        | 0.60689  | 0.60689 | 0.803067118 |             |          |         |
| PSPN        | ENSG00000125650 | -0.27145 | 0.60698 | -0.27145    | 0.60698     | -0.27145 | 0.60698 |

|             |                 |          |         |             |             |          |         |  |
|-------------|-----------------|----------|---------|-------------|-------------|----------|---------|--|
|             | -0.27145        | 0.60698  | 0.60698 | 0.803164401 |             |          |         |  |
| ARL2        | ENSG00000213465 | -0.66644 | 0.74744 | -0.45839    | 0.67666     | -0.27162 | 0.60704 |  |
|             | -0.88024        | 0.81064  | 0.60704 | 0.803221983 |             |          |         |  |
| SND1        | ENSG00000197157 | -0.43706 | 0.66897 | -0.35543    | 0.63887     | -0.61345 | 0.73021 |  |
|             | -0.27172        | 0.60708  | 0.60708 | 0.803253099 |             |          |         |  |
| RNU6-82P    | ENSG00000200840 | -0.27185 | 0.60713 | -0.27185    | 0.60713     | -0.27185 |         |  |
|             | 0.60713         | -0.27185 | 0.60713 | 0.60713     | 0.803267056 |          |         |  |
| LINC-ROR    | ENSG00000258609 | -0.71898 | 0.76392 | -1.0376     | 0.85027     | -0.27185 |         |  |
|             | 0.60713         | -0.27185 | 0.60713 | 0.60713     | 0.803267056 |          |         |  |
| LINC02140   | ENSG00000261803 | -0.27188 | 0.60714 | -0.27188    | 0.60714     | -0.27188 |         |  |
|             | 0.60714         | -0.27188 | 0.60714 | 0.60714     | 0.803267056 |          |         |  |
| RIPOR3-AS1  | ENSG00000234693 | -0.27208 | 0.60722 | -0.33946    | 0.63287     | -0.33946 |         |  |
|             | 0.63287         | -0.53062 | 0.70216 | 0.60722     | 0.803334646 |          |         |  |
| RNU6-417P   | ENSG00000207443 | -1.0823  | 0.86044 | -1.8141     | 0.96517     | -1.0769  |         |  |
|             | 0.85924         | -0.27215 | 0.60725 | 0.60725     | 0.803334646 |          |         |  |
| VN1R1       | ENSG00000178201 | -0.27222 | 0.60727 | -0.70356    | 0.75915     | -0.27222 | 0.60727 |  |
|             | -0.27222        | 0.60727  | 0.60727 | 0.803334646 |             |          |         |  |
| MIR4736     | ENSG00000264399 | -0.27224 | 0.60728 | -0.27224    | 0.60728     | -0.27224 |         |  |
|             | 0.60728         | -0.27224 | 0.60728 | 0.60728     | 0.803334646 |          |         |  |
| ARPC3P5     | ENSG00000214027 | -0.27226 | 0.60729 | -0.27226    | 0.60729     | -0.27226 |         |  |
|             | 0.60729         | -0.27226 | 0.60729 | 0.60729     | 0.803334646 |          |         |  |
| RPL21P135   | ENSG00000235482 | -0.40651 | 0.65782 | -0.27227    | 0.60729     | -0.27227 |         |  |
|             | 0.60729         | -0.27227 | 0.60729 | 0.60729     | 0.803334646 |          |         |  |
| CCNF        | ENSG00000162063 | -0.27244 | 0.60736 | -0.96231    | 0.83205     | -0.96231 | 0.83205 |  |
|             | -0.96231        | 0.83205  | 0.60736 | 0.803357889 |             |          |         |  |
| TRIM71      | ENSG00000206557 | -1.7879  | 0.9631  | -0.27245    | 0.60736     | -1.7879  |         |  |
|             | 0.9631          | -0.34788 | 0.63604 | 0.60736     | 0.803357889 |          |         |  |
| NA          | ENSG00000220154 | -0.51594 | 0.69705 | -0.51594    | 0.69705     | -0.27246 | 0.60737 |  |
|             | -0.2953         | 0.61612  | 0.60737 | 0.803357889 |             |          |         |  |
| OR9A2       | ENSG00000179468 | -0.5947  | 0.72398 | -0.83708    | 0.79872     | -0.83708 | 0.79872 |  |
|             | -0.27251        | 0.60738  | 0.60738 | 0.803357889 |             |          |         |  |
| PRKCSH      | ENSG00000130175 | -1.7745  | 0.96201 | -0.27252    | 0.60739     | -1.9148  |         |  |
|             | 0.97224         | -0.70417 | 0.75934 | 0.60739     | 0.803357889 |          |         |  |
| MIR26A2     | ENSG00000207789 | -0.27258 | 0.60741 | -0.27258    | 0.60741     | -0.27258 |         |  |
|             | 0.60741         | -0.27258 | 0.60741 | 0.60741     | 0.803362537 |          |         |  |
| MIR146B     | ENSG00000202569 | -0.27265 | 0.60744 | -0.27265    | 0.60744     | -0.27265 |         |  |
|             | 0.60744         | -0.27265 | 0.60744 | 0.60744     | 0.80338041  |          |         |  |
| SNORD115-29 | ENSG00000199704 | -0.27271 | 0.60746 | -0.27271    | 0.60746     | -0.27271 |         |  |
|             | 0.60746         | -0.27271 | 0.60746 | 0.60746     | 0.803385057 |          |         |  |
| TCP10L2     | ENSG00000166984 | -0.9142  | 0.81969 | -0.27284    | 0.60751     | -0.69912 |         |  |
|             | 0.75776         | -1.3589  | 0.91291 | 0.60751     | 0.803395064 |          |         |  |
| NA          | ENSG00000259076 | -0.27285 | 0.60752 | -0.40426    | 0.65699     | -0.27285 | 0.60752 |  |
|             | -0.27285        | 0.60752  | 0.60752 | 0.803395064 |             |          |         |  |
| JAM2        | ENSG00000154721 | -0.33307 | 0.63046 | -0.7332     | 0.76828     | -0.71712 | 0.76335 |  |
|             | -0.2729         | 0.60754  | 0.60754 | 0.803395064 |             |          |         |  |
| EIF2S2P3    | ENSG00000236493 | -0.31827 | 0.62486 | -0.31827    | 0.62486     | -0.31827 |         |  |
|             | 0.62486         | -0.27292 | 0.60754 | 0.60754     | 0.803395064 |          |         |  |
| NA          | ENSG00000249820 | -0.48439 | 0.68594 | -0.27294    | 0.60755     | -1.232   | 0.89102 |  |
|             | -0.85437        | 0.80355  | 0.60755 | 0.803395064 |             |          |         |  |
| RNU6-439P   | ENSG00000206915 | -0.27303 | 0.60758 | -0.27303    | 0.60758     | -0.27303 |         |  |
|             | 0.60758         | -0.27303 | 0.60758 | 0.60758     | 0.803412933 |          |         |  |
| NA          | ENSG00000231606 | -0.27307 | 0.6076  | -0.79335    | 0.78621     | -0.27307 | 0.6076  |  |
|             | -0.27307        | 0.6076   | 0.6076  | 0.803417578 |             |          |         |  |
| NA          | ENSG00000270336 | -0.27312 | 0.60762 | -0.34703    | 0.63572     | -0.34703 | 0.63572 |  |
|             | -0.34703        | 0.63572  | 0.60762 | 0.80341829  |             |          |         |  |
| SLC25A17    | ENSG00000100372 | -0.89903 | 0.81568 | -0.27319    | 0.60765     | -0.27319 |         |  |
|             | 0.60765         | -0.27319 | 0.60765 | 0.60765     | 0.80341829  |          |         |  |
| TIFA        | ENSG00000145365 | -0.83535 | 0.79824 | -0.83535    | 0.79824     | -0.27321 | 0.60765 |  |
|             | -0.83535        | 0.79824  | 0.60765 | 0.80341829  |             |          |         |  |
| RPSAP72     | ENSG00000219361 | -2.4633  | 0.99312 | -2.4633     | 0.99312     | -2.4633  |         |  |
|             | 0.99312         | -0.27325 | 0.60767 | 0.60767     | 0.803419714 |          |         |  |
| NA          | ENSG00000275964 | -0.27331 | 0.60769 | -0.27331    | 0.60769     | -0.27331 | 0.60769 |  |

|             |                 |          |          |         |             |             |          |         |
|-------------|-----------------|----------|----------|---------|-------------|-------------|----------|---------|
|             |                 | -0.27331 | 0.60769  | 0.60769 | 0.803419714 |             |          |         |
| NA          | ENSG00000220984 | -0.27337 | 0.60772  | 0.60772 | -0.27337    | 0.60772     | -0.27337 | 0.60772 |
|             |                 | -0.27337 | 0.60772  | 0.60772 | 0.803419714 |             |          |         |
| GFRA4       | ENSG00000125861 | -0.27343 | 0.60774  | 0.60774 | -0.27343    | 0.60774     | -1.3842  | 0.91685 |
|             |                 | -0.39403 | 0.65322  | 0.60774 | 0.803419714 |             |          |         |
| NA          | ENSG00000239096 | -0.27344 | 0.60774  | 0.60774 | -0.33647    | 0.63174     | -0.33647 | 0.63174 |
|             |                 | -0.33647 | 0.63174  | 0.60774 | 0.803419714 |             |          |         |
| NA          | ENSG00000275636 | -0.27345 | 0.60775  | 0.60775 | -0.27345    | 0.60775     | -0.27345 | 0.60775 |
|             |                 | -0.27345 | 0.60775  | 0.60775 | 0.803419714 |             |          |         |
| OR8H2       | ENSG00000181767 | -0.2737  | 0.60784  | 0.60784 | -0.2737     | 0.60784     | -0.2737  | 0.60784 |
|             |                 | -0.2737  | 0.60784  | 0.60784 | 0.803516892 |             |          |         |
| KRTAP19-4   | ENSG00000186967 | -0.27387 | 0.60791  | 0.60791 | -0.27387    | 0.60791     | -0.27387 |         |
|             |                 | 0.60791  | -0.27387 | 0.60791 | 0.60791     | 0.803587627 |          |         |
| TESK2       | ENSG00000070759 | -0.27398 | 0.60795  | 0.60795 | -0.35985    | 0.64052     | -1.4563  | 0.92735 |
|             |                 | -1.2981  | 0.90287  | 0.60795 | 0.803618703 |             |          |         |
| RBP5        | ENSG00000139194 | -0.42099 | 0.66312  | 0.66312 | -0.42099    | 0.66312     | -0.42099 | 0.66312 |
|             |                 | -0.27405 | 0.60798  | 0.60798 | 0.803620094 |             |          |         |
| NA          | ENSG00000254251 | -0.27413 | 0.60801  | 0.60801 | -0.27413    | 0.60801     | -0.27413 | 0.60801 |
|             |                 | -0.27413 | 0.60801  | 0.60801 | 0.803620094 |             |          |         |
| NA          | ENSG00000232470 | -0.62632 | 0.73445  | 0.60803 | -0.27418    | 0.60803     | -0.62632 | 0.73445 |
|             |                 | -0.62632 | 0.73445  | 0.60803 | 0.803620094 |             |          |         |
| NA          | ENSG00000236244 | -0.27419 | 0.60803  | 0.60803 | -0.27419    | 0.60803     | -0.27419 | 0.60803 |
|             |                 | -0.27419 | 0.60803  | 0.60803 | 0.803620094 |             |          |         |
| NA          | ENSG00000282602 | -0.76523 | 0.77793  | 0.77793 | -0.76523    | 0.77793     | -0.27422 | 0.60804 |
|             |                 | -0.37954 | 0.64786  | 0.60804 | 0.803620094 |             |          |         |
| ASL         | ENSG00000126522 | -1.315   | 0.90574  | 0.60805 | -0.27423    | 0.60805     | -0.77446 | 0.78067 |
|             |                 | -0.96403 | 0.83248  | 0.60805 | 0.803620094 |             |          |         |
| ST8SIA6-AS1 | ENSG00000204832 | -0.83719 | 0.79876  | 0.60814 | -0.27446    | 0.60814     | -0.37908 |         |
|             |                 | 0.64769  | -0.27446 | 0.60814 | 0.60814     | 0.803717243 |          |         |
| MIRLET7D    | ENSG00000199133 | -0.27462 | 0.6082   | 0.6082  | -0.27462    | 0.6082      | -0.27462 |         |
|             |                 | 0.6082   | -0.27462 | 0.6082  | 0.6082      | 0.803753627 |          |         |
| NA          | ENSG00000242222 | -0.87582 | 0.80944  | 0.60822 | -0.855      | 0.80373     | -0.27467 | 0.60822 |
|             |                 | -0.90649 | 0.81766  | 0.60822 | 0.803753627 |             |          |         |
| SUMO2P10    | ENSG00000235424 | -0.27472 | 0.60823  | 0.60823 | -0.27472    | 0.60823     | -0.27472 |         |
|             |                 | 0.60823  | -0.27472 | 0.60823 | 0.60823     | 0.803753627 |          |         |
| IGHVII-60-1 | ENSG00000254329 | -0.27475 | 0.60824  | 0.60824 | -0.27475    | 0.60824     | -0.27475 |         |
|             |                 | 0.60824  | -0.27475 | 0.60824 | 0.60824     | 0.803753627 |          |         |
| RPS6KA5     | ENSG00000100784 | -1.3803  | 0.91625  | 0.60825 | -0.46863    | 0.68033     | -0.27477 |         |
|             |                 | 0.60825  | -0.38832 | 0.65111 | 0.60825     | 0.803753627 |          |         |
| PLA2G2F     | ENSG00000158786 | -0.27489 | 0.6083   | 0.6083  | -1.4452     | 0.9258      | -0.67686 |         |
|             |                 | 0.75075  | -1.5074  | 0.93415 | 0.6083      | 0.803776106 |          |         |
| NA          | ENSG00000201529 | -0.27489 | 0.6083   | 0.6083  | -0.27489    | 0.6083      | -0.27489 | 0.6083  |
|             |                 | -0.27489 | 0.6083   | 0.6083  | 0.803776106 |             |          |         |
| SNHG21      | ENSG00000250988 | -0.27506 | 0.60836  | 0.60836 | -0.27506    | 0.60836     | -0.27506 |         |
|             |                 | 0.60836  | -0.27506 | 0.60836 | 0.60836     | 0.80383359  |          |         |
| CNBP        | ENSG00000169714 | -0.47287 | 0.68185  | 0.60841 | -0.27518    | 0.60841     | -0.66219 | 0.74608 |
|             |                 | -0.59198 | 0.72307  | 0.60841 | 0.803877859 |             |          |         |
| UBE2Q2P10   | ENSG00000233915 | -0.27526 | 0.60844  | 0.60844 | -0.27526    | 0.60844     | -0.27526 |         |
|             |                 | 0.60844  | -0.27526 | 0.60844 | 0.60844     | 0.803887116 |          |         |
| LMCD1-AS1   | ENSG00000227110 | -0.27528 | 0.60845  | 0.60845 | -1.2519     | 0.8947      | -2.2126  |         |
|             |                 | 0.98654  | -1.9668  | 0.9754  | 0.60845     | 0.803887116 |          |         |
| BLZF1       | ENSG00000117475 | -0.27545 | 0.60851  | 0.60851 | -1.1327     | 0.87132     | -0.40261 | 0.65638 |
|             |                 | -0.50597 | 0.69356  | 0.60851 | 0.803914211 |             |          |         |
| CCNYL7      | ENSG00000261528 | -0.27544 | 0.60851  | 0.60851 | -0.27544    | 0.60851     | -0.27544 |         |
|             |                 | 0.60851  | -0.27544 | 0.60851 | 0.60851     | 0.803914211 |          |         |
| OR10U1P     | ENSG00000227423 | -0.27545 | 0.60852  | 0.60852 | -1.2563     | 0.8955      | -1.3923  |         |
|             |                 | 0.91808  | -1.1926  | 0.88348 | 0.60852     | 0.803914211 |          |         |
| RPL19P16    | ENSG00000236762 | -0.4252  | 0.66465  | 0.60861 | -0.4252     | 0.66465     | -0.2757  |         |
|             |                 | 0.60861  | -0.4252  | 0.66465 | 0.60861     | 0.80397897  |          |         |
| NA          | ENSG00000248601 | -0.37822 | 0.64737  | 0.60863 | -0.59461    | 0.72395     | -0.37822 | 0.64737 |
|             |                 | -0.27576 | 0.60863  | 0.60863 | 0.80397897  |             |          |         |
| MIR4422     | ENSG00000265822 | -0.27576 | 0.60863  | 0.60863 | -0.27576    | 0.60863     | -0.27576 |         |

|           |                 |          |                |             |             |          |          |
|-----------|-----------------|----------|----------------|-------------|-------------|----------|----------|
|           | 0.60863         | -0.27576 | 0.60863        | 0.60863     | 0.80397897  |          |          |
| RNF11P1   | ENSG00000213110 | -0.2758  | 0.60865        | 0.60865     | -0.2758     | 0.60865  | -0.2758  |
|           | 0.60865         | -0.2758  | 0.60865        | 0.60865     | 0.80397897  |          |          |
| MTRF1LP2  | ENSG00000224110 | -0.27582 | 0.60866        | 0.60866     | -0.27582    | 0.60866  | -0.27582 |
|           | 0.60866         | -0.27582 | 0.60866        | 0.60866     | 0.80397897  |          |          |
| NA        | ENSG00000226843 | -0.61986 | 0.73232        | -0.68093    | 0.75204     | -1.2644  | 0.89696  |
|           | -0.27594        | 0.6087   | 0.6087         | 0.80397897  |             |          |          |
| HADHAP2   | ENSG00000255967 | -0.27599 | 0.60872        | -0.27599    | 0.60872     | -0.27599 |          |
|           | 0.60872         | -0.27599 | 0.60872        | 0.60872     | 0.80397897  |          |          |
| NA        | ENSG00000279690 | -0.27604 | 0.60874        | -0.27604    | 0.60874     | -0.27604 | 0.60874  |
|           | -0.27604        | 0.60874  | 0.60874        | 0.80397897  |             |          |          |
| NDUFA5P12 | ENSG00000248531 | -0.52389 | 0.69982        | -0.93154    | 0.82421     | -0.27606 |          |
|           | 0.60875         | -1.0793  | 0.85977        | 0.60875     | 0.80397897  |          |          |
| NA        | ENSG00000273765 | -0.27606 | 0.60875        | -0.27606    | 0.60875     | -0.27606 | 0.60875  |
|           | -0.27606        | 0.60875  | 0.60875        | 0.80397897  |             |          |          |
| MB21D2    | ENSG00000180611 | -0.61837 | 0.73184        | -0.27611    | 0.60877     | -1.1986  |          |
|           | 0.88466         | -0.57717 | 0.71809        | 0.60877     | 0.80397897  |          |          |
| TMEM119   | ENSG00000183160 | -1.1177  | 0.86815        | -0.27615    | 0.60878     | -0.86853 |          |
|           | 0.80745         | -1.1559  | 0.87613        | 0.60878     | 0.80397897  |          |          |
| NEIL1     | ENSG00000140398 | -0.3349  | 0.63115        | -0.40366    | 0.65677     | -0.3349  | 0.63115  |
|           | -0.27618        | 0.6088   | 0.6088         | 0.80397897  |             |          |          |
| NA        | ENSG00000280171 | -1.5957  | 0.94472        | -0.53622    | 0.7041      | -0.27618 | 0.6088   |
|           | -0.27618        | 0.6088   | 0.6088         | 0.80397897  |             |          |          |
| CEP290    | ENSG00000198707 | -0.55256 | 0.70972        | -0.60789    | 0.72837     | -0.34066 |          |
|           | 0.63332         | -0.27633 | 0.60885        | 0.60885     | 0.803980301 |          |          |
| NA        | ENSG00000254080 | -1.1791  | 0.88082        | -0.27638    | 0.60887     | -1.1716  | 0.87932  |
|           | -0.27638        | 0.60887  | 0.60887        | 0.803980301 |             |          |          |
| EEF1GP2   | ENSG00000250346 | -0.2764  | 0.60888        | -2.4357     | 0.99257     | -2.0723  |          |
|           | 0.98088         | -2.0723  | 0.98088        | 0.60888     | 0.803980301 |          |          |
| MTCO2P31  | ENSG00000217160 | -0.27643 | 0.60889        | -0.89427    | 0.81441     | -0.27643 |          |
|           | 0.60889         | -0.27643 | 0.60889        | 0.60889     | 0.803980301 |          |          |
| LMF2      | ENSG00000100258 | -0.27646 | 0.6089         | -0.27646    | 0.6089      | -0.27646 | 0.6089   |
|           | -0.27646        | 0.6089   | 0.6089         | 0.803980301 |             |          |          |
| CFI       | ENSG00000205403 | -0.46328 | 0.67842        | -0.27646    | 0.6089      | -0.592   | 0.72307  |
|           | -0.46328        | 0.67842  | 0.6089         | 0.803980301 |             |          |          |
| VN1R90P   | ENSG00000268794 | -0.27661 | 0.60896        | -0.27661    | 0.60896     | -0.30271 |          |
|           | 0.61895         | -0.27661 | 0.60896        | 0.60896     | 0.804037738 |          |          |
| PAX9      | ENSG00000198807 | -0.41427 | 0.66066        | -0.97363    | 0.83488     | -0.27671 | 0.609    |
|           | -0.45744        | 0.67632  | 0.609080406612 |             |             |          |          |
| SIGIRR    | ENSG00000185187 | -0.27683 | 0.60904        | -0.70783    | 0.76047     | -0.6329  |          |
|           | 0.7366          | -0.6329  | 0.7366         | 0.60904     | 0.80406612  |          |          |
| FBXO42    | ENSG00000037637 | -0.31631 | 0.62411        | -0.27683    | 0.60905     | -0.3076  |          |
|           | 0.62081         | -1.3918  | 0.91801        | 0.60905     | 0.80406612  |          |          |
| NA        | ENSG00000271065 | -0.8508  | 0.80256        | -1.5195     | 0.93568     | -1.2887  | 0.90124  |
|           | -0.27686        | 0.60905  | 0.60905        | 0.80406612  |             |          |          |
| NA        | ENSG00000232450 | -0.27692 | 0.60908        | -0.27692    | 0.60908     | -0.27692 | 0.60908  |
|           | -0.27692        | 0.60908  | 0.60908        | 0.80406612  |             |          |          |
| NA        | ENSG00000279675 | -0.44883 | 0.67322        | -0.27694    | 0.60909     | -0.27694 | 0.60909  |
|           | -0.27694        | 0.60909  | 0.60909        | 0.80406612  |             |          |          |
| KIF9      | ENSG00000088727 | -0.78855 | 0.78481        | -0.8584     | 0.80466     | -0.35159 | 0.63743  |
|           | -0.27701        | 0.60911  | 0.60911        | 0.80406612  |             |          |          |
| VIT       | ENSG00000205221 | -0.352   | 0.63758        | -0.93232    | 0.82441     | -0.27703 | 0.60912  |
|           | -1.1281         | 0.87037  | 0.60912        | 0.80406612  |             |          |          |
| NA        | ENSG00000279488 | -0.27704 | 0.60913        | -0.27704    | 0.60913     | -0.27704 | 0.60913  |
|           | -0.27704        | 0.60913  | 0.60913        | 0.80406612  |             |          |          |
| NA        | ENSG00000267287 | -0.27716 | 0.60917        | -0.57698    | 0.71802     | -0.86734 | 0.80712  |
|           | -0.91332        | 0.81946  | 0.60917        | 0.804079978 |             |          |          |
| GRXCR2    | ENSG00000204928 | -0.99151 | 0.83928        | -0.27721    | 0.60919     | -1.0245  |          |
|           | 0.84721         | -1.0245  | 0.84721        | 0.60919     | 0.804079978 |          |          |
| NA        | ENSG00000226621 | -1.0915  | 0.86248        | -1.0915     | 0.86248     | -1.0915  | 0.86248  |
|           | -0.27721        | 0.60919  | 0.60919        | 0.804079978 |             |          |          |
| LINC01843 | ENSG00000251169 | -1.3233  | 0.90713        | -1.4905     | 0.93195     | -0.65388 |          |

|             |                 |          |         |             |             |          |         |
|-------------|-----------------|----------|---------|-------------|-------------|----------|---------|
|             | 0.74341         | -0.27729 | 0.60922 | 0.60922     | 0.804089215 |          |         |
| ADHFE1      | ENSG00000147576 | -0.37145 | 0.64485 | -0.2773     | 0.60923     | -0.70645 |         |
|             | 0.76005         | -0.74403 | 0.77157 | 0.60923     | 0.804089215 |          |         |
| RPL7AP2     | ENSG00000241984 | -0.27756 | 0.60933 | -0.27756    | 0.60933     | -0.27756 |         |
|             | 0.60933         | -0.27756 | 0.60933 | 0.60933     | 0.804173671 |          |         |
| PUDPP2      | ENSG00000233792 | -0.27759 | 0.60934 | -0.27759    | 0.60934     | -0.78118 |         |
|             | 0.78265         | -0.58537 | 0.72085 | 0.60934     | 0.804173671 |          |         |
| IGFBP7      | ENSG00000163453 | -0.42932 | 0.66616 | -0.27763    | 0.60935     | -0.42932 |         |
|             | 0.66616         | -1.689   | 0.95439 | 0.60935     | 0.804173671 |          |         |
| NA          | ENSG00000229912 | -0.27765 | 0.60936 | -0.90266    | 0.81665     | -1.3946  | 0.91844 |
|             | -1.3382         | 0.90958  | 0.60936 | 0.804173671 |             |          |         |
| NA          | ENSG00000236540 | -0.27775 | 0.6094  | -0.27775    | 0.6094      | -0.27775 | 0.6094  |
|             | -0.27775        | 0.6094   | 0.6094  | 0.80417432  |             |          |         |
| LINC01922   | ENSG00000259779 | -0.27776 | 0.6094  | -0.27776    | 0.6094      | -0.27776 |         |
|             | 0.6094          | -0.94931 | 0.82877 | 0.6094      | 0.80417432  |          |         |
| PIWIL2      | ENSG00000197181 | -1.022   | 0.84661 | -0.27778    | 0.60941     | -0.45311 |         |
|             | 0.67476         | -1.2737  | 0.89862 | 0.60941     | 0.80417432  |          |         |
| NA          | ENSG00000260917 | -0.27797 | 0.60948 | -0.27797    | 0.60948     | -0.27797 | 0.60948 |
|             | -1.1526         | 0.87546  | 0.60948 | 0.804244913 |             |          |         |
| RPL31P52    | ENSG00000219355 | -0.27801 | 0.6095  | -0.27801    | 0.6095      | -0.27801 |         |
|             | 0.6095          | -0.27801 | 0.6095  | 0.6095      | 0.804249526 |          |         |
| MDS2        | ENSG00000197880 | -1.0206  | 0.84629 | -1.1677     | 0.87853     | -0.27807 | 0.60952 |
|             | -1.4149         | 0.92145  | 0.60952 | 0.804254139 |             |          |         |
| RIOK3       | ENSG00000101782 | -1.8891  | 0.97056 | -0.27811    | 0.60954     | -0.38016 | 0.64809 |
|             | -0.58213        | 0.71976  | 0.60954 | 0.804258751 |             |          |         |
| NA          | ENSG00000263450 | -0.27828 | 0.6096  | -0.27828    | 0.6096      | -0.27828 | 0.6096  |
|             | -0.27828        | 0.6096   | 0.6096  | 0.80431614  |             |          |         |
| FAM90A28P   | ENSG00000269118 | -1.1761  | 0.88023 | -0.73328    | 0.76831     | -0.27846 |         |
|             | 0.60967         | -0.27846 | 0.60967 | 0.60967     | 0.804366208 |          |         |
| OR5K3       | ENSG00000206536 | -0.27852 | 0.60969 | -0.27852    | 0.60969     | -0.27852 | 0.60969 |
|             | -0.27852        | 0.60969  | 0.60969 | 0.804366208 |             |          |         |
| RNU6ATAC21P | ENSG00000221583 | -1.4204  | 0.92225 | -1.4204     | 0.92225     | -1.112   |         |
|             | 0.86694         | -0.27861 | 0.60973 | 0.60973     | 0.804366208 |          |         |
| MIR4290     | ENSG00000263967 | -0.27861 | 0.60973 | -0.27861    | 0.60973     | -0.27861 |         |
|             | 0.60973         | -0.27861 | 0.60973 | 0.60973     | 0.804366208 |          |         |
| NA          | ENSG00000248440 | -0.27868 | 0.60975 | -0.64017    | 0.73897     | -0.27868 | 0.60975 |
|             | -0.27868        | 0.60975  | 0.60975 | 0.804366208 |             |          |         |
| ACP4        | ENSG00000142513 | -1.4446  | 0.92571 | -0.76496    | 0.77785     | -0.27869 | 0.60976 |
|             | -1.3608         | 0.91321  | 0.60976 | 0.804366208 |             |          |         |
| ODC1        | ENSG00000115758 | -0.64011 | 0.73895 | -0.27872    | 0.60977     | -1.6712  | 0.95266 |
|             | -0.86152        | 0.80552  | 0.60977 | 0.804366208 |             |          |         |
| GOLGA8S     | ENSG00000261739 | -0.52187 | 0.69912 | -0.27871    | 0.60977     | -0.47365 |         |
|             | 0.68212         | -0.91368 | 0.81956 | 0.60977     | 0.804366208 |          |         |
| NA          | ENSG00000270830 | -0.29782 | 0.61708 | -0.27876    | 0.60979     | -0.27876 | 0.60979 |
|             | -0.27876        | 0.60979  | 0.60979 | 0.804370816 |             |          |         |
| COL12A1     | ENSG00000111799 | -0.3513  | 0.63732 | -0.28734    | 0.61307     | -0.27884 |         |
|             | 0.60982         | -0.28809 | 0.61336 | 0.60982     | 0.804380032 |          |         |
| RNU6-678P   | ENSG00000252641 | -0.27886 | 0.60983 | -0.27886    | 0.60983     | -0.27886 |         |
|             | 0.60983         | -0.27886 | 0.60983 | 0.60983     | 0.804380032 |          |         |
| TNPO1       | ENSG00000083312 | -0.70232 | 0.75876 | -1.0008     | 0.84154     | -0.28671 | 0.61283 |
|             | -0.27919        | 0.60995  | 0.60995 | 0.804472988 |             |          |         |
| SPATA12     | ENSG00000186451 | -0.27918 | 0.60995 | -0.47995    | 0.68437     | -0.60148 |         |
|             | 0.72624         | -0.82174 | 0.79439 | 0.60995     | 0.804472988 |          |         |
| FAT1P1      | ENSG00000217809 | -0.27919 | 0.60995 | -0.27919    | 0.60995     | -0.27919 |         |
|             | 0.60995         | -0.27919 | 0.60995 | 0.60995     | 0.804472988 |          |         |
| BNIP3P35    | ENSG00000271655 | -0.27926 | 0.60998 | -0.90513    | 0.8173      | -0.6068  |         |
|             | 0.72801         | -0.27926 | 0.60998 | 0.60998     | 0.804482197 |          |         |
| NA          | ENSG00000224099 | -0.2793  | 0.60999 | -0.2793     | 0.60999     | -0.2793  | 0.60999 |
|             | -0.72989        | 0.76727  | 0.60999 | 0.804482197 |             |          |         |
| RNU4-53P    | ENSG00000222760 | -0.33046 | 0.62947 | -0.33046    | 0.62947     | -0.33046 |         |
|             | 0.62947         | -0.27938 | 0.61002 | 0.61002     | 0.804499989 |          |         |
| NA          | ENSG00000253284 | -1.2058  | 0.88605 | -1.1028     | 0.86494     | -0.66971 | 0.74848 |



|             |                 |          |         |             |             |          |         |
|-------------|-----------------|----------|---------|-------------|-------------|----------|---------|
|             | -0.27962        | 0.61011  | 0.61011 | 0.804596907 |             |          |         |
| RN7SL566P   | ENSG00000241983 | -0.27966 | 0.61013 | -0.27966    | 0.61013     | -0.27966 | 0.61013 |
|             | 0.61013         | -0.27966 | 0.61013 | 0.61013     | 0.804601507 |          |         |
| NA          | ENSG00000256571 | -0.27978 | 0.61018 | -1.6017     | 0.94539     | -0.72193 | 0.76483 |
|             | -1.6017         | 0.94539  | 0.61018 | 0.804645669 |             |          |         |
| CEROX1      | ENSG00000260807 | -0.27985 | 0.6102  | -0.27985    | 0.6102      | -0.27985 |         |
|             | 0.6102          | -0.27985 | 0.6102  | 0.6102      | 0.804650268 |          |         |
| OR7E39P     | ENSG00000273252 | -2.3161  | 0.98972 | -1.4578     | 0.92755     | -1.4001  |         |
|             | 0.91926         | -0.27991 | 0.61023 | 0.61023     | 0.804658801 |          |         |
| ANKRD1      | ENSG00000148677 | -0.61729 | 0.73148 | -1.438      | 0.92478     | -0.68771 |         |
|             | 0.75418         | -0.28006 | 0.61028 | 0.61028     | 0.804658801 |          |         |
| KEAP1       | ENSG00000079999 | -0.97766 | 0.83588 | -0.42611    | 0.66499     | -0.8613  | 0.80546 |
|             | -0.28008        | 0.61029  | 0.61029 | 0.804658801 |             |          |         |
| NA          | ENSG00000234520 | -0.5817  | 0.71961 | -1.5101     | 0.93449     | -0.28014 | 0.61032 |
|             | -1.5101         | 0.93449  | 0.61032 | 0.804658801 |             |          |         |
| FIBIN       | ENSG00000176971 | -0.28017 | 0.61033 | -0.28017    | 0.61033     | -0.28017 | 0.61033 |
|             | -0.28017        | 0.61033  | 0.61033 | 0.804658801 |             |          |         |
| YIPF3       | ENSG00000137207 | -0.2802  | 0.61034 | -0.2802     | 0.61034     | -0.2802  | 0.61034 |
|             | -0.2802         | 0.61034  | 0.61034 | 0.804658801 |             |          |         |
| SESN3       | ENSG00000149212 | -0.60652 | 0.72792 | -1.0835     | 0.86071     | -0.28025 | 0.61036 |
|             | -0.81623        | 0.79282  | 0.61036 | 0.804658801 |             |          |         |
| NA          | ENSG00000280385 | -0.28219 | 0.6111  | -0.28047    | 0.61044     | -0.28047 | 0.61044 |
|             | -0.28047        | 0.61044  | 0.61044 | 0.804658801 |             |          |         |
| BLOC1S6     | ENSG00000104164 | -0.33292 | 0.6304  | -0.28049    | 0.61045     | -0.33292 |         |
|             | 0.6304          | -0.58049 | 0.71921 | 0.61045     | 0.804658801 |          |         |
| RPL7P4      | ENSG00000230449 | -0.75409 | 0.7746  | -0.28049    | 0.61045     | -0.75409 |         |
|             | 0.7746          | -0.75409 | 0.7746  | 0.61045     | 0.804658801 |          |         |
| NA          | ENSG00000237493 | -0.28051 | 0.61046 | -0.28051    | 0.61046     | -0.28051 | 0.61046 |
|             | -0.28051        | 0.61046  | 0.61046 | 0.804658801 |             |          |         |
| NA          | ENSG00000259437 | -0.28052 | 0.61046 | -1.9522     | 0.97454     | -1.2332  | 0.89126 |
|             | -1.3814         | 0.91643  | 0.61046 | 0.804658801 |             |          |         |
| NA          | ENSG00000225705 | -0.57683 | 0.71797 | -1.3531     | 0.91199     | -0.40018 | 0.65549 |
|             | -0.28062        | 0.6105   | 0.6105  | 0.804658801 |             |          |         |
| OR10B1P     | ENSG00000267961 | -0.28063 | 0.6105  | -0.28063    | 0.6105      | -0.28063 |         |
|             | 0.6105          | -0.28063 | 0.6105  | 0.6105      | 0.804658801 |          |         |
| NA          | ENSG00000239288 | -0.93213 | 0.82437 | -0.28068    | 0.61052     | -0.28068 | 0.61052 |
|             | -0.28068        | 0.61052  | 0.61052 | 0.804658801 |             |          |         |
| FHOD1       | ENSG00000135723 | -0.64469 | 0.74044 | -0.64469    | 0.74044     | -0.64469 | 0.74044 |
|             | -0.28069        | 0.61053  | 0.61053 | 0.804658801 |             |          |         |
| NA          | ENSG00000276507 | -0.2807  | 0.61053 | -0.2807     | 0.61053     | -0.2807  | 0.61053 |
|             | -0.2807         | 0.61053  | 0.61053 | 0.804658801 |             |          |         |
| NEDD4L      | ENSG00000049759 | -0.28082 | 0.61057 | -1.2371     | 0.89197     | -0.82289 |         |
|             | 0.79471         | -0.98829 | 0.8385  | 0.61057     | 0.804658801 |          |         |
| REEP3       | ENSG00000165476 | -0.28514 | 0.61223 | -0.32792    | 0.62852     | -0.54646 | 0.70762 |
|             | -0.28081        | 0.61057  | 0.61057 | 0.804658801 |             |          |         |
| NA          | ENSG00000279476 | -0.28091 | 0.61061 | -0.28091    | 0.61061     | -1.5062  | 0.93399 |
|             | -0.28091        | 0.61061  | 0.61061 | 0.804658801 |             |          |         |
| NA          | ENSG00000207024 | -0.28094 | 0.61062 | -0.28094    | 0.61062     | -0.28094 | 0.61062 |
|             | -0.28094        | 0.61062  | 0.61062 | 0.804658801 |             |          |         |
| SNORD114-19 | ENSG00000199942 | -0.281   | 0.61064 | -0.281      | 0.61064     | -0.281   |         |
|             | 0.61064         | -0.281   | 0.61064 | 0.61064     | 0.804658801 |          |         |
| NA          | ENSG00000206567 | -0.28102 | 0.61065 | -0.5875     | 0.72157     | -0.67861 | 0.75131 |
|             | -0.67861        | 0.75131  | 0.61065 | 0.804658801 |             |          |         |
| RNU4-69P    | ENSG00000222609 | -0.28105 | 0.61066 | -0.28105    | 0.61066     | -0.28105 |         |
|             | 0.61066         | -0.28105 | 0.61066 | 0.61066     | 0.804658801 |          |         |
| NA          | ENSG00000277099 | -0.28105 | 0.61067 | -0.28105    | 0.61067     | -0.28105 | 0.61067 |
|             | -0.28105        | 0.61067  | 0.61067 | 0.804658801 |             |          |         |
| SLC25A16    | ENSG00000122912 | -0.28122 | 0.61073 | -0.71921    | 0.76399     | -1.5965  |         |
|             | 0.94481         | -0.80454 | 0.78946 | 0.61073     | 0.804658801 |          |         |
| HBBP1       | ENSG00000229988 | -0.59552 | 0.72425 | -0.28128    | 0.61075     | -0.28128 | 0.61075 |
|             | -0.28128        | 0.61075  | 0.61075 | 0.804658801 |             |          |         |
| NA          | ENSG00000230831 | -0.2813  | 0.61076 | -0.2813     | 0.61076     | -0.2813  | 0.61076 |

|           |                 |          |         |             |             |          |         |          |
|-----------|-----------------|----------|---------|-------------|-------------|----------|---------|----------|
|           | -0.66401        | 0.74666  | 0.61076 | 0.804658801 |             |          |         |          |
| RNA5SP458 | ENSG00000251997 | -0.90722 | 0.81786 | -0.90722    | 0.81786     | -0.90722 | 0.81786 | -0.90722 |
|           | 0.81786         | -0.28131 | 0.61076 | 0.61076     | 0.804658801 |          |         |          |
| DHCR7     | ENSG00000172893 | -0.28135 | 0.61078 | -0.96175    | 0.83191     | -0.28135 | 0.61078 |          |
|           | -0.30375        | 0.61934  | 0.61078 | 0.804658801 |             |          |         |          |
| RNU6-611P | ENSG00000207003 | -0.28137 | 0.61079 | -0.28137    | 0.61079     | -0.28137 | 0.61079 | -0.28137 |
|           | 0.61079         | -0.28137 | 0.61079 | 0.61079     | 0.804658801 |          |         |          |
| NA        | ENSG00000234353 | -0.28138 | 0.61079 | -0.28138    | 0.61079     | -0.28138 | 0.61079 | -0.28138 |
|           | -0.28138        | 0.61079  | 0.61079 | 0.804658801 |             |          |         |          |
| SERHL     | ENSG00000172250 | -0.38789 | 0.65095 | -0.3219     | 0.62624     | -0.28142 | 0.61081 |          |
|           | -1.8033         | 0.96433  | 0.61081 | 0.804658801 |             |          |         |          |
| RABL2A    | ENSG00000144134 | -1.3295  | 0.90816 | -1.0508     | 0.85333     | -1.33    | 0.90824 |          |
|           | -0.28145        | 0.61082  | 0.61082 | 0.804658801 |             |          |         |          |
| CA3       | ENSG00000164879 | -0.28145 | 0.61082 | -0.76218    | 0.77702     | -0.64691 | 0.74115 |          |
|           | -0.6955         | 0.75663  | 0.61082 | 0.804658801 |             |          |         |          |
| RPL30P3   | ENSG00000223640 | -0.95008 | 0.82897 | -0.28157    | 0.61086     | -1.4646  |         |          |
|           | 0.92849         | -0.28157 | 0.61086 | 0.61086     | 0.804658801 |          |         |          |
| RPL17P11  | ENSG00000233445 | -0.38609 | 0.65028 | -0.57644    | 0.71784     | -0.38609 |         |          |
|           | 0.65028         | -0.28155 | 0.61086 | 0.61086     | 0.804658801 |          |         |          |
| CBY2      | ENSG00000174015 | -1.2333  | 0.89126 | -0.28159    | 0.61087     | -1.3351  | 0.90907 |          |
|           | -1.1506         | 0.87505  | 0.61087 | 0.804658801 |             |          |         |          |
| IL4I1     | ENSG00000104951 | -0.28162 | 0.61088 | -0.28162    | 0.61088     | -0.28162 | 0.61088 |          |
|           | -0.28162        | 0.61088  | 0.61088 | 0.804658801 |             |          |         |          |
| SEPTIN14  | ENSG00000154997 | -1.3299  | 0.90823 | -0.67233    | 0.74931     | -0.28163 |         |          |
|           | 0.61089         | -0.70602 | 0.75991 | 0.61089     | 0.804658801 |          |         |          |
| NA        | ENSG00000258646 | -0.28164 | 0.61089 | -0.28164    | 0.61089     | -0.28164 | 0.61089 |          |
|           | -0.28164        | 0.61089  | 0.61089 | 0.804658801 |             |          |         |          |
| NA        | ENSG00000257865 | -0.2858  | 0.61248 | -0.28165    | 0.6109      | -0.28165 | 0.6109  |          |
|           | -0.28165        | 0.6109   | 0.6109  | 0.804658801 |             |          |         |          |
| TRAV7     | ENSG00000211781 | -0.94798 | 0.82843 | -0.28196    | 0.61101     | -0.28196 | 0.61101 |          |
|           | -0.28196        | 0.61101  | 0.61101 | 0.804764775 |             |          |         |          |
| ELANE     | ENSG00000197561 | -0.28198 | 0.61102 | -0.356      | 0.63908     | -0.28198 | 0.61102 |          |
|           | -0.28198        | 0.61102  | 0.61102 | 0.804764775 |             |          |         |          |
| C1QL1     | ENSG00000131094 | -0.28199 | 0.61103 | -0.46603    | 0.6794      | -1.1005  | 0.86443 |          |
|           | -1.1005         | 0.86443  | 0.61103 | 0.804764775 |             |          |         |          |
| GSTA2     | ENSG00000244067 | -1.0248  | 0.84727 | -0.28212    | 0.61107     | -1.4525  | 0.92681 |          |
|           | -1.3276         | 0.90784  | 0.61107 | 0.804795705 |             |          |         |          |
| MYOZ1     | ENSG00000177791 | -0.28235 | 0.61116 | -1.1824     | 0.88147     | -0.28235 | 0.61116 |          |
|           | -0.28235        | 0.61116  | 0.61116 | 0.804836405 |             |          |         |          |
| LINC01359 | ENSG00000226891 | -0.28235 | 0.61116 | -0.28235    | 0.61116     | -0.28235 |         |          |
|           | 0.61116         | -0.28235 | 0.61116 | 0.61116     | 0.804836405 |          |         |          |
| NA        | ENSG00000230807 | -0.28234 | 0.61116 | -0.28234    | 0.61116     | -0.28234 | 0.61116 |          |
|           | -0.28234        | 0.61116  | 0.61116 | 0.804836405 |             |          |         |          |
| GIN54     | ENSG00000147536 | -1.0859  | 0.86124 | -0.7699     | 0.77932     | -0.28243 | 0.61119 |          |
|           | -0.72333        | 0.76526  | 0.61119 | 0.804836405 |             |          |         |          |
| NA        | ENSG00000240281 | -0.28243 | 0.61119 | -1.4023     | 0.91959     | -1.3999  | 0.91922 |          |
|           | -1.3999         | 0.91922  | 0.61119 | 0.804836405 |             |          |         |          |
| NA        | ENSG00000272237 | -0.28246 | 0.6112  | -0.28246    | 0.6112      | -0.28246 | 0.6112  |          |
|           | -0.28246        | 0.6112   | 0.6112  | 0.804836405 |             |          |         |          |
| CLCA2     | ENSG00000137975 | -0.82579 | 0.79554 | -1.0914     | 0.86244     | -0.28262 | 0.61127 |          |
|           | -0.28262        | 0.61127  | 0.61127 | 0.804847359 |             |          |         |          |
| LINC00900 | ENSG00000246100 | -0.28262 | 0.61127 | -0.28262    | 0.61127     | -0.28262 |         |          |
|           | 0.61127         | -0.28262 | 0.61127 | 0.61127     | 0.804847359 |          |         |          |
| CABS1     | ENSG00000145309 | -2.4519  | 0.99289 | -0.87898    | 0.81029     | -2.4519  | 0.99289 |          |
|           | -0.28274        | 0.61131  | 0.61131 | 0.804847359 |             |          |         |          |
| NA        | ENSG00000272525 | -0.28275 | 0.61132 | -1.3649     | 0.91386     | -1.3649  | 0.91386 |          |
|           | -1.3649         | 0.91386  | 0.61132 | 0.804847359 |             |          |         |          |
| NAV3      | ENSG00000067798 | -1.1795  | 0.8809  | -0.91687    | 0.82039     | -0.96923 | 0.83378 |          |
|           | -0.28284        | 0.61135  | 0.61135 | 0.804847359 |             |          |         |          |
| LINC01563 | ENSG00000236819 | -0.6249  | 0.73398 | -0.35812    | 0.63988     | -0.56683 |         |          |
|           | 0.71459         | -0.28284 | 0.61135 | 0.61135     | 0.804847359 |          |         |          |
| KIF18BP1  | ENSG00000260746 | -0.28283 | 0.61135 | -0.28283    | 0.61135     | -0.28283 |         |          |

|           |                 |          |             |             |             |          |         |  |
|-----------|-----------------|----------|-------------|-------------|-------------|----------|---------|--|
|           | 0.61135         | -0.28283 | 0.61135     | 0.61135     | 0.804847359 |          |         |  |
| ANKS3     | ENSG00000168096 | -0.28288 | 0.61137     | -0.28288    | 0.61137     | -0.29249 | 0.61504 |  |
|           | -0.55546        | 0.71071  | 0.61137     | 0.804847359 |             |          |         |  |
| ZNF79     | ENSG00000196152 | -0.81754 | 0.79319     | -0.28292    | 0.61138     | -1.2348  | 0.89155 |  |
|           | -1.4383         | 0.92483  | 0.61138     | 0.804847359 |             |          |         |  |
| NA        | ENSG00000249456 | -0.87656 | 0.80964     | -0.55048    | 0.70901     | -0.28295 | 0.61139 |  |
|           | -0.55048        | 0.70901  | 0.61139     | 0.804847359 |             |          |         |  |
| NA        | ENSG00000254932 | -0.28295 | 0.61139     | -0.53796    | 0.7047      | -0.496   | 0.69005 |  |
|           | -0.53796        | 0.7047   | 0.61139     | 0.804847359 |             |          |         |  |
| GDF15     | ENSG00000130513 | -0.28305 | 0.61143     | -0.28305    | 0.61143     | -0.28305 | 0.61143 |  |
|           | -0.28305        | 0.61143  | 0.61143     | 0.804878273 |             |          |         |  |
| ANKRD36   | ENSG00000135976 | -0.2832  | 0.61149     | -0.58345    | 0.7202      | -0.33859 |         |  |
|           | 0.63254         | -0.56374 | 0.71353     | 0.61149     | 0.804905189 |          |         |  |
| NA        | ENSG00000222939 | -0.28321 | 0.61149     | -1.6179     | 0.94716     | -1.0864  | 0.86134 |  |
|           | -2.2196         | 0.98678  | 0.61149     | 0.804905189 |             |          |         |  |
| TEKT3     | ENSG00000125409 | -1.4672  | 0.92884     | -1.6401     | 0.94951     | -0.28322 | 0.6115  |  |
|           | -1.0512         | 0.85342  | 0.6115      | 0.804905189 |             |          |         |  |
| NA        | ENSG00000256898 | -0.28335 | 0.61155     | -0.28335    | 0.61155     | -0.28335 | 0.61155 |  |
|           | -0.28335        | 0.61155  | 0.61155     | 0.80494926  |             |          |         |  |
| GSG1L     | ENSG00000169181 | -1.255   | 0.89526     | -1.2167     | 0.88815     | -0.2836  | 0.61164 |  |
|           | -0.79288        | 0.78608  | 0.61164     | 0.805007071 |             |          |         |  |
| NA        | ENSG00000269657 | -0.28358 | 0.61164     | -0.28358    | 0.61164     | -0.28358 | 0.61164 |  |
|           | -0.28358        | 0.61164  | 0.61164     | 0.805007071 |             |          |         |  |
| DNAH8-AS1 | ENSG00000231150 | -0.65352 | 0.74329     | -0.36552    | 0.64264     | -0.28363 |         |  |
|           | 0.61165         | -0.36552 | 0.64264     | 0.61165     | 0.805007071 |          |         |  |
| PPIP5K1   | ENSG00000168781 | -1.5562  | 0.94017     | -0.28366    | 0.61166     | -0.66927 |         |  |
|           | 0.74834         | -0.41218 | 0.65989     | 0.61166     | 0.805007071 |          |         |  |
| CRNN      | ENSG00000143536 | -0.28404 | 0.61181     | -0.28404    | 0.61181     | -0.28404 | 0.61181 |  |
|           | -0.28404        | 0.61181  | 0.61181     | 0.805113502 |             |          |         |  |
| NA        | ENSG00000223634 | -0.28403 | 0.61181     | -0.96627    | 0.83305     | -0.98202 | 0.83695 |  |
|           | -0.62981        | 0.73559  | 0.61181     | 0.805113502 |             |          |         |  |
| NA        | ENSG00000224282 | -0.29471 | 0.61589     | -0.29471    | 0.61589     | -0.28404 | 0.61181 |  |
|           | -1.02084614     | 0.61181  | 0.805113502 |             |             |          |         |  |
| HIGD1AP9  | ENSG00000258104 | -0.28409 | 0.61183     | -0.28409    | 0.61183     | -0.28409 |         |  |
|           | 0.61183         | -0.28409 | 0.61183     | 0.61183     | 0.805113502 |          |         |  |
| RANBP1    | ENSG00000099901 | -0.51125 | 0.69541     | -0.85963    | 0.805       | -0.52851 | 0.70143 |  |
|           | -0.28411        | 0.61184  | 0.61184     | 0.805113502 |             |          |         |  |
| NA        | ENSG00000252969 | -0.28412 | 0.61184     | -0.28412    | 0.61184     | -0.28412 | 0.61184 |  |
|           | -0.28412        | 0.61184  | 0.61184     | 0.805113502 |             |          |         |  |
| STAC      | ENSG00000144681 | -0.67974 | 0.75166     | -0.28437    | 0.61194     | -0.92525 | 0.82258 |  |
|           | -0.53299        | 0.70298  | 0.61194     | 0.805201604 |             |          |         |  |
| NA        | ENSG00000226756 | -0.79014 | 0.78528     | -0.5256     | 0.70042     | -0.52731 | 0.70101 |  |
|           | -0.28438        | 0.61194  | 0.61194     | 0.805201604 |             |          |         |  |
| MTATP6P23 | ENSG00000230755 | -0.28448 | 0.61198     | -1.0799     | 0.8599      | -0.28448 |         |  |
|           | 0.61198         | -0.28448 | 0.61198     | 0.61198     | 0.805232494 |          |         |  |
| PHLDB1    | ENSG00000019144 | -1.2932  | 0.90202     | -0.96648    | 0.8331      | -1.6668  |         |  |
|           | 0.95223         | -0.28461 | 0.61203     | 0.61203     | 0.805233055 |          |         |  |
| NA        | ENSG00000227878 | -0.28461 | 0.61203     | -0.28461    | 0.61203     | -0.28461 | 0.61203 |  |
|           | -0.28461        | 0.61203  | 0.61203     | 0.805233055 |             |          |         |  |
| NA        | ENSG00000236960 | -0.28462 | 0.61203     | -0.28462    | 0.61203     | -0.28462 | 0.61203 |  |
|           | -0.28462        | 0.61203  | 0.61203     | 0.805233055 |             |          |         |  |
| RNU6-658P | ENSG00000207336 | -1.4294  | 0.92356     | -0.28466    | 0.61205     | -0.28466 |         |  |
|           | 0.61205         | -0.28466 | 0.61205     | 0.61205     | 0.805237628 |          |         |  |
| RND2      | ENSG00000108830 | -1.2621  | 0.89654     | -0.28483    | 0.61211     | -1.2621  | 0.89654 |  |
|           | -1.2621         | 0.89654  | 0.61211     | 0.805251904 |             |          |         |  |
| KATNB1    | ENSG00000134152 | -0.57464 | 0.71723     | -0.6266     | 0.73454     | -0.3474  |         |  |
|           | 0.63585         | -0.28484 | 0.61212     | 0.61212     | 0.805251904 |          |         |  |
| SNORA77B  | ENSG00000264346 | -0.28486 | 0.61212     | -0.28486    | 0.61212     | -0.28486 |         |  |
|           | 0.61212         | -0.28486 | 0.61212     | 0.61212     | 0.805251904 |          |         |  |
| SETD2     | ENSG00000181555 | -0.87678 | 0.8097      | -0.72059    | 0.76442     | -0.96512 | 0.83276 |  |
|           | -0.28492        | 0.61215  | 0.61215     | 0.805251904 |             |          |         |  |
| AIFM1P1   | ENSG00000225509 | -0.28492 | 0.61215     | -0.28492    | 0.61215     | -0.28492 |         |  |

|            |                 |          |         |             |             |          |          |
|------------|-----------------|----------|---------|-------------|-------------|----------|----------|
|            | 0.61215         | -0.28492 | 0.61215 | 0.61215     | 0.805251904 |          |          |
| XIAPP2     | ENSG00000254843 | -0.28496 | 0.61216 | 0.61216     | -0.28496    | 0.61216  | -0.28496 |
|            | 0.61216         | -0.28496 | 0.61216 | 0.61216     | 0.805251904 |          |          |
| TAPT1      | ENSG00000169762 | -0.78491 | 0.78375 | -0.91819    | 0.82074     | -0.2851  | 0.61221  |
|            | -0.79215        | 0.78586  | 0.61221 | 0.8052742   |             |          |          |
| LINC02842  | ENSG00000254119 | -1.4457  | 0.92587 | -1.4436     | 0.92558     | -1.2247  |          |
|            | 0.88966         | -0.28508 | 0.61221 | 0.61221     | 0.8052742   |          |          |
| MRPL57P1   | ENSG00000273698 | -0.28514 | 0.61223 | -0.42657    | 0.66515     | -0.65818 |          |
|            | 0.74479         | -0.28514 | 0.61223 | 0.61223     | 0.805278771 |          |          |
| CCR8       | ENSG00000179934 | -1.0321  | 0.84898 | -0.93945    | 0.82625     | -1.2502  | 0.89438  |
|            | -0.28537        | 0.61232  | 0.61232 | 0.805375411 |             |          |          |
| SMIM29     | ENSG00000186577 | -0.28543 | 0.61234 | -0.28543    | 0.61234     | -0.28543 |          |
|            | 0.61234         | -0.28543 | 0.61234 | 0.61234     | 0.805379978 |          |          |
| NA         | ENSG00000262880 | -0.28551 | 0.61237 | -0.28551    | 0.61237     | -0.28551 | 0.61237  |
|            | -0.28551        | 0.61237  | 0.61237 | 0.805397698 |             |          |          |
| NA         | ENSG00000253286 | -0.61714 | 0.73143 | -0.28569    | 0.61244     | -0.34899 | 0.63645  |
|            | -0.59159        | 0.72294  | 0.61244 | 0.805437699 |             |          |          |
| INPP4A     | ENSG00000040933 | -1.0987  | 0.86405 | -0.2857     | 0.61245     | -0.79776 |          |
|            | 0.78749         | -0.48061 | 0.6846  | 0.61245     | 0.805437699 |          |          |
| KRT8P10    | ENSG00000231203 | -0.2857  | 0.61245 | -0.2857     | 0.61245     | -0.2857  |          |
|            | 0.61245         | -0.2857  | 0.61245 | 0.61245     | 0.805437699 |          |          |
| NA         | ENSG00000222767 | -0.28581 | 0.61249 | -0.28581    | 0.61249     | -0.28581 | 0.61249  |
|            | -0.28581        | 0.61249  | 0.61249 | 0.805442809 |             |          |          |
| CDV3       | ENSG00000091527 | -0.63274 | 0.73655 | -0.43706    | 0.66897     | -0.28583 | 0.6125   |
|            | -0.38694        | 0.6506   | 0.6125  | 0.805442809 |             |          |          |
| LINC00543  | ENSG00000260704 | -1.7759  | 0.96212 | -0.51513    | 0.69677     | -1.7759  |          |
|            | 0.96212         | -0.28586 | 0.61251 | 0.61251     | 0.805442809 |          |          |
| RNU6-1079P | ENSG00000199731 | -0.2859  | 0.61252 | -0.2859     | 0.61252     | -0.2859  |          |
|            | 0.61252         | -0.2859  | 0.61252 | 0.61252     | 0.805442809 |          |          |
| STT3A      | ENSG00000134910 | -1.1026  | 0.86489 | -1.057      | 0.85473     | -1.0917  | 0.86251  |
|            | -0.28597        | 0.61255  | 0.61255 | 0.805460522 |             |          |          |
| SS18L1     | ENSG00000184402 | -0.61856 | 0.7319  | -1.0622     | 0.85594     | -0.28612 |          |
|            | 0.61261         | -1.0622  | 0.85594 | 0.61261     | 0.805486043 |          |          |
| ACBD4      | ENSG00000181513 | -0.77274 | 0.78016 | -0.30531    | 0.61993     | -0.77274 | 0.78016  |
|            | -0.28615        | 0.61262  | 0.61262 | 0.805486043 |             |          |          |
| KANK2      | ENSG00000197256 | -2.172   | 0.98507 | -1.884      | 0.97022     | -1.3963  | 0.91869  |
|            | -0.28614        | 0.61262  | 0.61262 | 0.805486043 |             |          |          |
| PSAPL1     | ENSG00000178597 | -1.6075  | 0.94603 | -0.71851    | 0.76378     | -0.28621 |          |
|            | 0.61264         | -0.74341 | 0.77138 | 0.61264     | 0.805486043 |          |          |
| NA         | ENSG00000259198 | -0.2863  | 0.61268 | -0.2863     | 0.61268     | -0.2863  | 0.61268  |
|            | -0.2863         | 0.61268  | 0.61268 | 0.805486043 |             |          |          |
| NA         | ENSG00000274664 | -0.28632 | 0.61268 | -0.28632    | 0.61268     | -0.28632 | 0.61268  |
|            | -0.28632        | 0.61268  | 0.61268 | 0.805486043 |             |          |          |
| MAP1S      | ENSG00000130479 | -0.64379 | 0.74015 | -0.64379    | 0.74015     | -0.64379 | 0.74015  |
|            | -0.28636        | 0.6127   | 0.6127  | 0.805486043 |             |          |          |
| LINC00840  | ENSG00000226808 | -0.54647 | 0.70763 | -1.6852     | 0.95402     | -0.53    | 0.70194  |
|            | -0.28646        | 0.61274  | 0.61274 | 0.805486043 |             |          |          |
| CPEB4      | ENSG00000113742 | -0.28652 | 0.61276 | -0.6669     | 0.74758     | -0.43923 | 0.66975  |
|            | -0.62177        | 0.73295  | 0.61276 | 0.805486043 |             |          |          |
| MMP10      | ENSG00000166670 | -0.28662 | 0.6128  | -0.28662    | 0.6128      | -0.28662 | 0.6128   |
|            | -0.28662        | 0.6128   | 0.6128  | 0.805486043 |             |          |          |
| NA         | ENSG00000229405 | -0.28665 | 0.61281 | -0.28665    | 0.61281     | -0.8992  | 0.81573  |
|            | -0.69982        | 0.75798  | 0.61281 | 0.805486043 |             |          |          |
| BTF3P6     | ENSG00000233956 | -0.28667 | 0.61282 | -0.8136     | 0.79206     | -0.8136  |          |
|            | 0.79206         | -0.8136  | 0.79206 | 0.61282     | 0.805486043 |          |          |
| PLCD4      | ENSG00000115556 | -0.50679 | 0.69385 | -0.49109    | 0.68832     | -0.42681 | 0.66524  |
|            | -0.28669        | 0.61283  | 0.61283 | 0.805486043 |             |          |          |
| HABP4      | ENSG00000130956 | -0.28677 | 0.61286 | -0.29888    | 0.61749     | -0.6491  | 0.74186  |
|            | -0.8087         | 0.79066  | 0.61286 | 0.805486043 |             |          |          |
| VSTM2A     | ENSG00000170419 | -0.28681 | 0.61287 | -0.6303     | 0.73575     | -0.46417 |          |
|            | 0.67874         | -0.46417 | 0.67874 | 0.61287     | 0.805486043 |          |          |
| NA         | ENSG00000263756 | -0.28682 | 0.61288 | -0.28682    | 0.61288     | -0.28682 | 0.61288  |

|           |                 |             |         |             |             |          |         |       |
|-----------|-----------------|-------------|---------|-------------|-------------|----------|---------|-------|
|           | -0.28682        | 0.61288     | 0.61288 | 0.805486043 |             |          |         |       |
| HBZ       | ENSG00000130656 | -1.0424     | 0.8514  | -0.28686    | 0.61289     | -0.38638 | 0.65039 |       |
|           | -0.43919        | 0.66974     | 0.61289 | 0.805486043 |             |          |         |       |
| RN7SKP203 | ENSG00000200488 | -0.28686    | 0.61289 | -0.28686    | 0.61289     | -0.91617 |         |       |
|           | 0.82021         | -0.28686    | 0.61289 | 0.61289     | 0.805486043 |          |         |       |
| RPL21P35  | ENSG00000231494 | -1.5744     | 0.9423  | -1.7314     | 0.95831     | -1.1086  |         |       |
|           | 0.8662          | -0.28686    | 0.61289 | 0.61289     | 0.805486043 |          |         |       |
| FTH1P11   | ENSG00000237264 | -0.28689    | 0.6129  | -0.28689    | 0.6129      | -0.28689 |         |       |
|           | 0.6129          | -0.28689    | 0.6129  | 0.6129      | 0.805486043 |          |         |       |
| ACBD3-AS1 | ENSG00000234478 | -0.28696    | 0.61293 | -0.28696    | 0.61293     | -0.28696 |         |       |
|           | 0.61293         | -0.28696    | 0.61293 | 0.61293     | 0.805486584 |          |         |       |
| SUCLG2    | ENSG00000172340 | -1.7889     | 0.96319 | -0.90256    | 0.81662     | -0.28701 |         |       |
|           | 0.61295         | -0.55419    | 0.71028 | 0.61295     | 0.805486584 |          |         |       |
| NA        | ENSG00000233875 | -0.28701    | 0.61295 | -0.28701    | 0.61295     | -0.28701 | 0.61295 |       |
|           | -0.28701        | 0.61295     | 0.61295 | 0.805486584 |             |          |         |       |
| VKORC1L1  | ENSG00000196715 | -0.41903    | 0.6624  | -0.28713    | 0.61299     | -0.75505 |         |       |
|           | 0.77489         | -0.38514    | 0.64993 | 0.61299     | 0.805508845 |          |         |       |
| NA        | ENSG00000222719 | -0.28714    | 0.613   | -0.28714    | 0.613       | -0.28714 | 0.613   | 0.613 |
|           | 0.613           | 0.805508845 |         |             |             |          |         |       |
| FTCDNL1   | ENSG00000226124 | -0.8707     | 0.80804 | -1.0296     | 0.8484      | -0.28727 |         |       |
|           | 0.61305         | -0.51186    | 0.69562 | 0.61305     | 0.805552825 |          |         |       |
| H3P7      | ENSG00000237178 | -0.28733    | 0.61307 | -0.28733    | 0.61307     | -0.28733 | 0.61307 |       |
|           | -0.28733        | 0.61307     | 0.61307 | 0.805557383 |             |          |         |       |
| NA        | ENSG00000272236 | -0.28739    | 0.61309 | -0.28739    | 0.61309     | -0.28739 | 0.61309 |       |
|           | -0.28739        | 0.61309     | 0.61309 | 0.805561941 |             |          |         |       |
| BTAF1     | ENSG00000095564 | -0.59184    | 0.72302 | -0.55708    | 0.71126     | -0.2875  | 0.61313 |       |
|           | -0.54233        | 0.70621     | 0.61313 | 0.805575613 |             |          |         |       |
| CLVS1     | ENSG00000177182 | -0.28752    | 0.61314 | -0.28752    | 0.61314     | -0.28752 | 0.61314 |       |
|           | -0.37804        | 0.6473      | 0.61314 | 0.805575613 |             |          |         |       |
| MED28     | ENSG00000118579 | -1.2661     | 0.89726 | -0.83951    | 0.79941     | -0.77697 | 0.78141 |       |
|           | -0.28754        | 0.61315     | 0.61315 | 0.805575613 |             |          |         |       |
| SHISA8    | ENSG00000234965 | -0.28764    | 0.61319 | -0.28764    | 0.61319     | -0.28764 |         |       |
|           | 0.61319         | -0.28764    | 0.61319 | 0.61319     | 0.805606446 |          |         |       |
| FOLR2     | ENSG00000165457 | -0.28791    | 0.61329 | -0.28791    | 0.61329     | -0.28791 | 0.61329 |       |
|           | -0.28791        | 0.61329     | 0.61329 | 0.805677215 |             |          |         |       |
| CDYL-AS1  | ENSG00000236336 | -0.28789    | 0.61329 | -0.28789    | 0.61329     | -0.28789 |         |       |
|           | 0.61329         | -0.28789    | 0.61329 | 0.61329     | 0.805677215 |          |         |       |
| ZNF680    | ENSG00000173041 | -0.51903    | 0.69813 | -0.76485    | 0.77782     | -0.97246 |         |       |
|           | 0.83459         | -0.28797    | 0.61331 | 0.61331     | 0.805677215 |          |         |       |
| NA        | ENSG00000271475 | -0.28797    | 0.61331 | -0.28797    | 0.61331     | -0.29084 | 0.61441 |       |
|           | -0.29084        | 0.61441     | 0.61331 | 0.805677215 |             |          |         |       |
| DNAJB5    | ENSG00000137094 | -1.1393     | 0.8727  | -0.28813    | 0.61338     | -1.1393  |         |       |
|           | 0.8727          | -1.1393     | 0.8727  | 0.61338     | 0.80574745  |          |         |       |
| BCL2L12P1 | ENSG00000248530 | -0.28832    | 0.61345 | -0.28832    | 0.61345     | -0.28832 |         |       |
|           | 0.61345         | -0.28832    | 0.61345 | 0.61345     | 0.805813645 |          |         |       |
| NA        | ENSG00000254160 | -1.5862     | 0.94365 | -0.28841    | 0.61348     | -0.30272 | 0.61895 |       |
|           | -0.87336        | 0.80877     | 0.61348 | 0.805813645 |             |          |         |       |
| NA        | ENSG00000279302 | -0.29822    | 0.61723 | -0.30864    | 0.6212      | -0.2884  | 0.61348 |       |
|           | -0.29822        | 0.61723     | 0.61348 | 0.805813645 |             |          |         |       |
| TBC1D17   | ENSG00000104946 | -0.95853    | 0.8311  | -0.28854    | 0.61353     | -0.28854 |         |       |
|           | 0.61353         | -0.28854    | 0.61353 | 0.61353     | 0.805857598 |          |         |       |
| NA        | ENSG00000269755 | -0.28858    | 0.61355 | -0.28858    | 0.61355     | -0.28858 | 0.61355 |       |
|           | -0.28858        | 0.61355     | 0.61355 | 0.805862147 |             |          |         |       |
| LRRK2-DT  | ENSG00000225342 | -1.0989     | 0.86409 | -0.28866    | 0.61358     | -0.28866 |         |       |
|           | 0.61358         | -0.28866    | 0.61358 | 0.61358     | 0.805862656 |          |         |       |
| NA        | ENSG00000252240 | -0.28869    | 0.61359 | -0.28869    | 0.61359     | -0.28869 | 0.61359 |       |
|           | -0.28869        | 0.61359     | 0.61359 | 0.805862656 |             |          |         |       |
| RPSAP2    | ENSG00000237425 | -0.95118    | 0.82924 | -0.28871    | 0.6136      | -1.0727  |         |       |
|           | 0.85829         | -0.28871    | 0.6136  | 0.6136      | 0.805862656 |          |         |       |
| NA        | ENSG00000257588 | -0.28877    | 0.61362 | -0.28877    | 0.61362     | -0.28877 | 0.61362 |       |
|           | -0.28877        | 0.61362     | 0.61362 | 0.805867204 |             |          |         |       |
| CCN4      | ENSG00000104415 | -0.33696    | 0.63193 | -0.28882    | 0.61364     | -0.48398 | 0.6858  |       |

|              |                 |          |         |             |             |          |         |
|--------------|-----------------|----------|---------|-------------|-------------|----------|---------|
|              | -0.56547        | 0.71412  | 0.61364 | 0.805871751 |             |          |         |
| ZNF407       | ENSG00000215421 | -0.2889  | 0.61367 | -0.83144    | 0.79714     | -0.33963 |         |
|              | 0.63293         | -1.0563  | 0.85459 | 0.61367     | 0.805889431 |          |         |
| NA           | ENSG00000265084 | -0.28894 | 0.61369 | -0.28894    | 0.61369     | -0.28894 | 0.61369 |
|              | -0.28894        | 0.61369  | 0.61369 | 0.805893977 |             |          |         |
| PRSS54       | ENSG00000103023 | -0.28912 | 0.61375 | -0.28912    | 0.61375     | -0.28912 |         |
|              | 0.61375         | -0.28912 | 0.61375 | 0.61375     | 0.80595105  |          |         |
| NA           | ENSG00000275393 | -1.0939  | 0.86301 | -1.0939     | 0.86301     | -0.28918 | 0.61378 |
|              | -0.59514        | 0.72412  | 0.61378 | 0.805968725 |             |          |         |
| RPL12P19     | ENSG00000226972 | -0.28928 | 0.61382 | -0.60503    | 0.72742     | -0.28928 |         |
|              | 0.61382         | -0.82659 | 0.79577 | 0.61382     | 0.805977813 |          |         |
| RPS26P4      | ENSG00000228349 | -0.28929 | 0.61382 | -0.28929    | 0.61382     | -0.59027 |         |
|              | 0.7225          | -0.28929 | 0.61382 | 0.61382     | 0.805977813 |          |         |
| OR5M10       | ENSG00000254834 | -1.6206  | 0.94745 | -0.42406    | 0.66424     | -0.2894  |         |
|              | 0.61386         | -0.2894  | 0.61386 | 0.61386     | 0.806003517 |          |         |
| NA           | ENSG00000262560 | -0.28944 | 0.61388 | -0.28944    | 0.61388     | -0.28944 | 0.61388 |
|              | -0.28944        | 0.61388  | 0.61388 | 0.806003517 |             |          |         |
| NA           | ENSG00000250790 | -0.98202 | 0.83695 | -0.89311    | 0.8141      | -0.82307 | 0.79477 |
|              | -0.28956        | 0.61392  | 0.61392 | 0.806003517 |             |          |         |
| TSPAN10      | ENSG00000182612 | -0.28969 | 0.61397 | -0.66835    | 0.74804     | -0.28969 |         |
|              | 0.61397         | -0.28969 | 0.61397 | 0.61397     | 0.806003517 |          |         |
| ANKRD33B-AS1 | ENSG00000250106 | -0.38188 | 0.64872 | -0.28969    | 0.61398     | -1.5877  |         |
|              | 0.94382         | -0.38188 | 0.64872 | 0.61398     | 0.806003517 |          |         |
| HNRNPAL12    | ENSG00000139675 | -0.28973 | 0.61399 | -0.28973    | 0.61399     | -0.28973 |         |
|              | 0.61399         | -0.28973 | 0.61399 | 0.61399     | 0.806003517 |          |         |
| RNA5SP106    | ENSG00000253083 | -0.53957 | 0.70525 | -0.2898     | 0.61401     | -0.53957 |         |
|              | 0.70525         | -0.53957 | 0.70525 | 0.61401     | 0.806003517 |          |         |
| IGHV3-72     | ENSG00000225698 | -0.2898  | 0.61402 | -0.2898     | 0.61402     | -0.2898  |         |
|              | 0.61402         | -0.2898  | 0.61402 | 0.61402     | 0.806003517 |          |         |
| GDF5-AS1     | ENSG00000204183 | -0.53814 | 0.70476 | -0.47914    | 0.68408     | -0.28995 |         |
|              | 0.61407         | -0.38198 | 0.64876 | 0.61407     | 0.806003517 |          |         |
| NA           | ENSG00000220522 | -0.84892 | 0.80204 | -1.2742     | 0.8987      | -0.84892 | 0.80204 |
|              | -0.29003        | 0.6141   | 0.6141  | 0.806003517 |             |          |         |
| ARPP21-AS1   | ENSG00000230830 | -0.29003 | 0.6141  | -0.29003    | 0.6141      | -0.29003 |         |
|              | 0.6141          | -0.29003 | 0.6141  | 0.6141      | 0.806003517 |          |         |
| KRT18P34     | ENSG00000244515 | -0.86327 | 0.80601 | -0.29002    | 0.6141      | -0.86327 |         |
|              | 0.80601         | -0.86327 | 0.80601 | 0.6141      | 0.806003517 |          |         |
| NA           | ENSG00000268499 | -0.29009 | 0.61412 | -0.29009    | 0.61412     | -0.29009 | 0.61412 |
|              | -0.29009        | 0.61412  | 0.61412 | 0.806003517 |             |          |         |
| TGFB3        | ENSG00000119699 | -0.81215 | 0.79165 | -1.1105     | 0.8666      | -0.90625 | 0.8176  |
|              | -0.29011        | 0.61413  | 0.61413 | 0.806003517 |             |          |         |
| NUP188       | ENSG00000095319 | -0.66894 | 0.74823 | -0.68347    | 0.75284     | -1.329   |         |
|              | 0.90808         | -0.29016 | 0.61415 | 0.61415     | 0.806003517 |          |         |
| GTPBP10      | ENSG00000105793 | -0.76739 | 0.77857 | -0.84175    | 0.80004     | -0.29014 |         |
|              | 0.61415         | -0.76739 | 0.77857 | 0.61415     | 0.806003517 |          |         |
| FAM53B       | ENSG00000189319 | -0.49851 | 0.69094 | -0.29017    | 0.61416     | -0.5109  |         |
|              | 0.69529         | -0.38954 | 0.65156 | 0.61416     | 0.806003517 |          |         |
| NA           | ENSG00000244743 | -0.29018 | 0.61416 | -1.374      | 0.91528     | -0.29018 | 0.61416 |
|              | -0.29018        | 0.61416  | 0.61416 | 0.806003517 |             |          |         |
| NA           | ENSG00000229239 | -0.29028 | 0.6142  | -0.88228    | 0.81119     | -0.29028 | 0.6142  |
|              | -0.29028        | 0.6142   | 0.6142  | 0.806003517 |             |          |         |
| SLURP1       | ENSG00000126233 | -0.64163 | 0.73944 | -0.44655    | 0.6724      | -0.2903  |         |
|              | 0.61421         | -1.5372  | 0.93788 | 0.61421     | 0.806003517 |          |         |
| CCND2P1      | ENSG00000256847 | -0.29032 | 0.61421 | -0.61439    | 0.73052     | -0.29032 |         |
|              | 0.61421         | -0.29032 | 0.61421 | 0.61421     | 0.806003517 |          |         |
| NA           | ENSG00000207494 | -1.1944  | 0.88384 | -0.29034    | 0.61422     | -0.29034 | 0.61422 |
|              | -0.29034        | 0.61422  | 0.61422 | 0.806003517 |             |          |         |
| MIR4422HG    | ENSG00000231090 | -0.29034 | 0.61422 | -0.29034    | 0.61422     | -0.29034 |         |
|              | 0.61422         | -0.29034 | 0.61422 | 0.61422     | 0.806003517 |          |         |
| NA           | ENSG00000272911 | -0.29049 | 0.61428 | -0.29049    | 0.61428     | -0.29049 | 0.61428 |
|              | -0.29049        | 0.61428  | 0.61428 | 0.806043379 |             |          |         |
| MYG1P1       | ENSG00000270846 | -0.73283 | 0.76817 | -1.1505     | 0.87504     | -0.86681 |         |

|           |                 |          |         |             |             |          |         |
|-----------|-----------------|----------|---------|-------------|-------------|----------|---------|
|           | 0.80698         | -0.29052 | 0.61429 | 0.61429     | 0.806043379 |          |         |
| CSH2      | ENSG00000213218 | -0.80988 | 0.79099 | -0.63273    | 0.73654     | -0.29054 | 0.6143  |
|           | -2.1125         | 0.98268  | 0.6143  | 0.806043379 |             |          |         |
| LCN10     | ENSG00000187922 | -0.29062 | 0.61433 | -0.29062    | 0.61433     | -0.29062 | 0.61433 |
|           | -0.29062        | 0.61433  | 0.61433 | 0.806052456 |             |          |         |
| LINC01580 | ENSG00000258785 | -2.0374  | 0.97919 | -0.29066    | 0.61434     | -0.93085 |         |
|           | 0.82404         | -1.0945  | 0.86312 | 0.61434     | 0.806052456 |          |         |
| NA        | ENSG00000272869 | -0.29075 | 0.61438 | -0.29075    | 0.61438     | -0.29075 | 0.61438 |
|           | -0.29075        | 0.61438  | 0.61438 | 0.806083234 |             |          |         |
| NA        | ENSG00000250920 | -0.51961 | 0.69833 | -0.29084    | 0.61441     | -0.29084 | 0.61441 |
|           | -0.64138        | 0.73936  | 0.61441 | 0.80608361  |             |          |         |
| NA        | ENSG00000251778 | -0.48318 | 0.68552 | -0.29088    | 0.61443     | -0.48318 | 0.68552 |
|           | -0.48318        | 0.68552  | 0.61443 | 0.80608361  |             |          |         |
| NA        | ENSG00000252690 | -0.291   | 0.61447 | -0.291      | 0.61447     | -0.291   | 0.61447 |
|           | -0.291          | 0.61447  | 0.61447 | 0.80608361  |             |          |         |
| NA        | ENSG00000261642 | -0.29105 | 0.61449 | -0.29105    | 0.61449     | -0.29105 | 0.61449 |
|           | -0.29105        | 0.61449  | 0.61449 | 0.80608361  |             |          |         |
| NA        | ENSG00000236941 | -0.67098 | 0.74888 | -0.29114    | 0.61453     | -0.29114 | 0.61453 |
|           | -0.29114        | 0.61453  | 0.61453 | 0.80608361  |             |          |         |
| GPR137    | ENSG00000173264 | -0.29118 | 0.61454 | -0.29118    | 0.61454     | -0.29118 |         |
|           | 0.61454         | -0.29118 | 0.61454 | 0.61454     | 0.80608361  |          |         |
| MAML2     | ENSG00000184384 | -1.0268  | 0.84773 | -0.29128    | 0.61458     | -0.48991 | 0.6879  |
|           | -0.45485        | 0.67539  | 0.61458 | 0.80608361  |             |          |         |
| RPS12P5   | ENSG00000226216 | -0.29127 | 0.61458 | -0.29127    | 0.61458     | -0.29127 |         |
|           | 0.61458         | -0.29127 | 0.61458 | 0.61458     | 0.80608361  |          |         |
| UGT2B10   | ENSG00000109181 | -0.29131 | 0.61459 | -1.7972     | 0.96384     | -0.82295 |         |
|           | 0.79473         | -1.4497  | 0.92643 | 0.61459     | 0.80608361  |          |         |
| RPL7P46   | ENSG00000229917 | -0.80523 | 0.78966 | -0.29129    | 0.61459     | -0.80523 |         |
|           | 0.78966         | -0.80523 | 0.78966 | 0.61459     | 0.80608361  |          |         |
| NA        | ENSG00000266651 | -0.29132 | 0.6146  | -0.29132    | 0.6146      | -0.29132 | 0.6146  |
|           | -0.29132        | 0.6146   | 0.6146  | 0.80608361  |             |          |         |
| VTI1A     | ENSG00000151532 | -1.1644  | 0.87787 | -0.87586    | 0.80945     | -0.84486 | 0.80091 |
|           | -0.2914         | 0.61463  | 0.61463 | 0.80608361  |             |          |         |
| PPARGC1B  | ENSG00000155846 | -0.6619  | 0.74598 | -0.29147    | 0.61465     | -0.66392 |         |
|           | 0.74663         | -0.63776 | 0.73819 | 0.61465     | 0.80608361  |          |         |
| PLXNA2    | ENSG00000076356 | -1.3602  | 0.91312 | -1.3819     | 0.9165      | -0.67985 |         |
|           | 0.7517          | -0.29154 | 0.61468 | 0.61468     | 0.80608361  |          |         |
| FBXL17    | ENSG00000145743 | -0.29161 | 0.61471 | -0.29161    | 0.61471     | -0.29161 |         |
|           | 0.61471         | -1.0786  | 0.85961 | 0.61471     | 0.80608361  |          |         |
| NA        | ENSG00000231243 | -0.29163 | 0.61472 | -0.29163    | 0.61472     | -0.6662  | 0.74736 |
|           | -0.29163        | 0.61472  | 0.61472 | 0.80608361  |             |          |         |
| NA        | ENSG00000226012 | -0.29167 | 0.61473 | -1.7207     | 0.95735     | -0.29167 | 0.61473 |
|           | -0.29167        | 0.61473  | 0.61473 | 0.80608361  |             |          |         |
| NA        | ENSG00000225527 | -0.97662 | 0.83562 | -0.29169    | 0.61474     | -0.97662 | 0.83562 |
|           | -0.97662        | 0.83562  | 0.61474 | 0.80608361  |             |          |         |
| NA        | ENSG00000273363 | -0.29172 | 0.61475 | -0.29172    | 0.61475     | -0.29172 | 0.61475 |
|           | -0.29172        | 0.61475  | 0.61475 | 0.80608361  |             |          |         |
| NA        | ENSG00000207142 | -0.29174 | 0.61476 | -0.29174    | 0.61476     | -0.29174 | 0.61476 |
|           | -0.29174        | 0.61476  | 0.61476 | 0.80608361  |             |          |         |
| NA        | ENSG00000260170 | -0.29178 | 0.61477 | -0.29178    | 0.61477     | -0.29178 | 0.61477 |
|           | -0.29178        | 0.61477  | 0.61477 | 0.80608361  |             |          |         |
| NA        | ENSG00000275709 | -0.29178 | 0.61477 | -0.29178    | 0.61477     | -0.29178 | 0.61477 |
|           | -0.29178        | 0.61477  | 0.61477 | 0.80608361  |             |          |         |
| TPP1      | ENSG00000166340 | -0.29179 | 0.61478 | -0.29179    | 0.61478     | -0.29179 | 0.61478 |
|           | -0.29179        | 0.61478  | 0.61478 | 0.80608361  |             |          |         |
| LINC00692 | ENSG00000230891 | -0.29186 | 0.6148  | -0.82195    | 0.79445     | -0.46587 |         |
|           | 0.67935         | -0.60525 | 0.72749 | 0.6148      | 0.80608361  |          |         |
| IL23A     | ENSG00000110944 | -0.83202 | 0.7973  | -0.80707    | 0.79019     | -0.83202 | 0.7973  |
|           | -0.29187        | 0.61481  | 0.61481 | 0.80608361  |             |          |         |
| NFYC-AS1  | ENSG00000272145 | -0.29193 | 0.61483 | -0.29193    | 0.61483     | -0.29193 |         |
|           | 0.61483         | -0.29193 | 0.61483 | 0.61483     | 0.80608361  |          |         |
| NA        | ENSG00000265068 | -0.29199 | 0.61485 | -0.29199    | 0.61485     | -0.29199 | 0.61485 |

|            |                 |          |         |             |             |          |         |
|------------|-----------------|----------|---------|-------------|-------------|----------|---------|
|            | -0.29199        | 0.61485  | 0.61485 | 0.80608361  |             |          |         |
| SNORA72    | ENSG00000207067 | -0.29201 | 0.61486 | -0.29201    | 0.61486     | -0.29201 |         |
|            | 0.61486         | -0.29201 | 0.61486 | 0.61486     | 0.80608361  |          |         |
| NA         | ENSG00000262198 | -0.29201 | 0.61486 | -0.29201    | 0.61486     | -0.29201 | 0.61486 |
|            | -0.29201        | 0.61486  | 0.61486 | 0.80608361  |             |          |         |
| NA         | ENSG00000251236 | -1.3384  | 0.90961 | -1.139      | 0.87266     | -0.29205 | 0.61488 |
|            | -0.29205        | 0.61488  | 0.61488 | 0.806088144 |             |          |         |
| NA         | ENSG00000237021 | -0.29228 | 0.61496 | -0.29228    | 0.61496     | -0.29228 | 0.61496 |
|            | -0.29228        | 0.61496  | 0.61496 | 0.806171333 |             |          |         |
| NA         | ENSG00000131152 | -0.7394  | 0.77017 | -0.7394     | 0.77017     | -0.29232 | 0.61498 |
|            | -0.3262         | 0.62786  | 0.61498 | 0.806175864 |             |          |         |
| LRRC37B    | ENSG00000185158 | -0.52618 | 0.70062 | -1.1428     | 0.87345     | -0.29238 | 0.615   |
|            | -1.5068         | 0.93406  | 0.615   | 0.806180395 |             |          |         |
| NA         | ENSG00000264098 | -0.29255 | 0.61507 | -0.29255    | 0.61507     | -0.29255 | 0.61507 |
|            | -0.29255        | 0.61507  | 0.61507 | 0.806211898 |             |          |         |
| CEP19      | ENSG00000174007 | -1.2976  | 0.90278 | -0.57087    | 0.71596     | -0.29261 | 0.61509 |
|            | -0.29261        | 0.61509  | 0.61509 | 0.806211898 |             |          |         |
| ARC        | ENSG00000198576 | -0.81325 | 0.79196 | -0.29271    | 0.61513     | -1.0749  | 0.8588  |
|            | -0.6431         | 0.73992  | 0.61513 | 0.806211898 |             |          |         |
| MIR517C    | ENSG00000207838 | -0.2929  | 0.6152  | -0.2929     | 0.6152      | -0.2929  |         |
|            | 0.6152          | -0.2929  | 0.6152  | 0.6152      | 0.806211898 |          |         |
| RNA5SP322  | ENSG00000200487 | -0.29298 | 0.61523 | -0.29298    | 0.61523     | -0.29298 |         |
|            | 0.61523         | -0.29298 | 0.61523 | 0.61523     | 0.806211898 |          |         |
| JMJD1C-AS1 | ENSG00000272767 | -0.57129 | 0.7161  | -0.29298    | 0.61523     | -0.29298 |         |
|            | 0.61523         | -0.29298 | 0.61523 | 0.61523     | 0.806211898 |          |         |
| NA         | ENSG00000277576 | -0.293   | 0.61524 | -0.293      | 0.61524     | -0.293   | 0.61524 |
|            | -0.45896        | 0.67687  | 0.61524 | 0.806211898 |             |          |         |
| NA         | ENSG00000213443 | -0.29306 | 0.61526 | -0.29306    | 0.61526     | -0.29306 | 0.61526 |
|            | -0.29306        | 0.61526  | 0.61526 | 0.806211898 |             |          |         |
| NT5M       | ENSG00000205309 | -0.51637 | 0.6972  | -0.43467    | 0.6681      | -0.2931  | 0.61528 |
|            | -0.37495        | 0.64615  | 0.61528 | 0.806211898 |             |          |         |
| RPL17P34   | ENSG00000213432 | -0.4395  | 0.66985 | -0.2931     | 0.61528     | -0.52858 |         |
|            | 0.70145         | -0.36262 | 0.64156 | 0.61528     | 0.806211898 |          |         |
| LINC02120  | ENSG00000248279 | -1.2495  | 0.89426 | -0.2931     | 0.61528     | -1.2554  |         |
|            | 0.89534         | -1.2554  | 0.89534 | 0.61528     | 0.806211898 |          |         |
| NA         | ENSG00000248777 | -0.93759 | 0.82577 | -0.29312    | 0.61528     | -0.37457 | 0.64601 |
|            | -0.55092        | 0.70916  | 0.61528 | 0.806211898 |             |          |         |
| ZNF284     | ENSG00000186026 | -0.29317 | 0.6153  | -0.29317    | 0.6153      | -0.29317 |         |
|            | 0.6153          | -0.29317 | 0.6153  | 0.6153      | 0.806211898 |          |         |
| SNORD113-2 | ENSG00000212384 | -0.29315 | 0.6153  | -0.29315    | 0.6153      | -0.29315 |         |
|            | 0.6153          | -0.29315 | 0.6153  | 0.6153      | 0.806211898 |          |         |
| RRS1       | ENSG00000179041 | -0.2932  | 0.61532 | -0.2932     | 0.61532     | -0.2932  | 0.61532 |
|            | -0.2932         | 0.61532  | 0.61532 | 0.806211898 |             |          |         |
| AOAH-IT1   | ENSG00000230539 | -0.29322 | 0.61532 | -0.29322    | 0.61532     | -0.29322 |         |
|            | 0.61532         | -0.29322 | 0.61532 | 0.61532     | 0.806211898 |          |         |
| TTC5       | ENSG00000136319 | -1.2185  | 0.88849 | -0.29324    | 0.61533     | -0.47419 | 0.68232 |
|            | -0.74174        | 0.77088  | 0.61533 | 0.806211898 |             |          |         |
| NAP1L5     | ENSG00000177432 | -0.57059 | 0.71586 | -0.2933     | 0.61535     | -0.7115  |         |
|            | 0.76161         | -1.2199  | 0.88875 | 0.61535     | 0.806211898 |          |         |
| NA         | ENSG00000259457 | -0.29337 | 0.61538 | -0.29337    | 0.61538     | -0.29337 | 0.61538 |
|            | -0.29337        | 0.61538  | 0.61538 | 0.806211898 |             |          |         |
| H2AC11     | ENSG00000196787 | -0.29341 | 0.6154  | -0.29341    | 0.6154      | -0.29341 |         |
|            | 0.6154          | -0.29341 | 0.6154  | 0.6154      | 0.806211898 |          |         |
| RPS29P13   | ENSG00000217089 | -0.52107 | 0.69884 | -0.29348    | 0.61542     | -0.52107 |         |
|            | 0.69884         | -1.3683  | 0.9144  | 0.61542     | 0.806211898 |          |         |
| NA         | ENSG00000249650 | -0.30955 | 0.62155 | -0.40367    | 0.65677     | -0.29347 | 0.61542 |
|            | -0.29347        | 0.61542  | 0.61542 | 0.806211898 |             |          |         |
| NA         | ENSG00000259452 | -0.29355 | 0.61545 | -0.29355    | 0.61545     | -0.29355 | 0.61545 |
|            | -0.29355        | 0.61545  | 0.61545 | 0.806211898 |             |          |         |
| LINC01154  | ENSG00000257477 | -0.29358 | 0.61546 | -0.29358    | 0.61546     | -0.93639 |         |
|            | 0.82546         | -0.52655 | 0.70075 | 0.61546     | 0.806211898 |          |         |
| PLIN3      | ENSG00000105355 | -1.4323  | 0.92397 | -1.2043     | 0.88576     | -1.9016  | 0.97139 |



|             |                 |          |         |             |             |          |         |  |
|-------------|-----------------|----------|---------|-------------|-------------|----------|---------|--|
|             | -0.29363        | 0.61548  | 0.61548 | 0.806211898 |             |          |         |  |
| USF2        | ENSG00000105698 | -0.29367 | 0.61549 | -0.52925    | 0.70168     | -0.29367 | 0.61549 |  |
|             | -0.29367        | 0.61549  | 0.61549 | 0.806211898 |             |          |         |  |
| NA          | ENSG00000234979 | -0.29366 | 0.61549 | -0.29366    | 0.61549     | -0.29366 | 0.61549 |  |
|             | -0.29366        | 0.61549  | 0.61549 | 0.806211898 |             |          |         |  |
| KIF5B       | ENSG00000170759 | -0.60683 | 0.72802 | -0.29369    | 0.6155      | -0.39117 | 0.65216 |  |
|             | -0.88894        | 0.81298  | 0.6155  | 0.806211898 |             |          |         |  |
| NA          | ENSG00000234818 | -0.29372 | 0.61551 | -0.29372    | 0.61551     | -0.29372 | 0.61551 |  |
|             | -0.29372        | 0.61551  | 0.61551 | 0.806211898 |             |          |         |  |
| HMG2P38     | ENSG00000231726 | -0.30964 | 0.62158 | -0.3958     | 0.65387     | -0.29379 |         |  |
|             | 0.61554         | -0.36495 | 0.64243 | 0.61554     | 0.806211898 |          |         |  |
| CLK1        | ENSG00000013441 | -0.29386 | 0.61557 | -0.29386    | 0.61557     | -0.29386 | 0.61557 |  |
|             | -0.41786        | 0.66197  | 0.61557 | 0.806211898 |             |          |         |  |
| RPL13P5     | ENSG00000240370 | -0.29388 | 0.61557 | -0.29388    | 0.61557     | -0.29388 |         |  |
|             | 0.61557         | -0.29388 | 0.61557 | 0.61557     | 0.806211898 |          |         |  |
| CKS1BP3     | ENSG00000268942 | -0.29387 | 0.61557 | -0.29387    | 0.61557     | -0.29387 |         |  |
|             | 0.61557         | -0.29387 | 0.61557 | 0.61557     | 0.806211898 |          |         |  |
| ZFAT        | ENSG00000066827 | -0.29403 | 0.61563 | -0.31445    | 0.62341     | -1.0152  | 0.84499 |  |
|             | -1.1379         | 0.87241  | 0.61563 | 0.806264762 |             |          |         |  |
| NA          | ENSG00000272081 | -0.29407 | 0.61565 | -0.29407    | 0.61565     | -0.29407 | 0.61565 |  |
|             | -0.29407        | 0.61565  | 0.61565 | 0.806264762 |             |          |         |  |
| RNA5SP469   | ENSG00000201035 | -0.2941  | 0.61566 | -0.2941     | 0.61566     | -0.2941  |         |  |
|             | 0.61566         | -0.2941  | 0.61566 | 0.61566     | 0.806264762 |          |         |  |
| NA          | ENSG00000261054 | -1.4015  | 0.91947 | -0.65136    | 0.74259     | -0.29415 | 0.61568 |  |
|             | -0.29415        | 0.61568  | 0.61568 | 0.806269286 |             |          |         |  |
| NA          | ENSG00000267675 | -0.29426 | 0.61572 | -1.4715     | 0.92942     | -0.29426 | 0.61572 |  |
|             | -0.29426        | 0.61572  | 0.61572 | 0.80629595  |             |          |         |  |
| LINC01703   | ENSG00000225518 | -0.29432 | 0.61574 | -0.29432    | 0.61574     | -0.29432 |         |  |
|             | 0.61574         | -0.29432 | 0.61574 | 0.61574     | 0.80629595  |          |         |  |
| RNU6-571P   | ENSG00000206855 | -0.29433 | 0.61575 | -0.29433    | 0.61575     | -0.29433 |         |  |
|             | 0.61575         | -0.29433 | 0.61575 | 0.61575     | 0.80629595  |          |         |  |
| MIR578      | ENSG00000207559 | -0.29441 | 0.61578 | -0.29441    | 0.61578     | -0.29441 |         |  |
|             | 0.61578         | -0.29441 | 0.61578 | 0.61578     | 0.806304995 |          |         |  |
| NA          | ENSG00000224612 | -0.64811 | 0.74154 | -1.9052     | 0.97162     | -1.9052  | 0.97162 |  |
|             | -0.29444        | 0.61579  | 0.61579 | 0.806304995 |             |          |         |  |
| RPL35P5     | ENSG00000225573 | -1.1687  | 0.87873 | -0.29453    | 0.61582     | -1.1687  |         |  |
|             | 0.87873         | -0.69809 | 0.75744 | 0.61582     | 0.806322611 |          |         |  |
| ZGRF1       | ENSG00000138658 | -0.29457 | 0.61584 | -1.0782     | 0.85952     | -0.64331 | 0.73999 |  |
|             | -0.77736        | 0.78153  | 0.61584 | 0.806327132 |             |          |         |  |
| NA          | ENSG00000259077 | -0.29467 | 0.61588 | -0.29467    | 0.61588     | -0.29467 | 0.61588 |  |
|             | -0.29467        | 0.61588  | 0.61588 | 0.806327603 |             |          |         |  |
| NA          | ENSG00000244436 | -0.2947  | 0.61589 | -0.2947     | 0.61589     | -0.2947  | 0.61589 |  |
|             | -0.2947         | 0.61589  | 0.61589 | 0.806327603 |             |          |         |  |
| MIR4264     | ENSG00000266436 | -0.29471 | 0.61589 | -0.29471    | 0.61589     | -0.29471 |         |  |
|             | 0.61589         | -0.29471 | 0.61589 | 0.61589     | 0.806327603 |          |         |  |
| MACROD2-IT1 | ENSG00000227927 | -0.43285 | 0.66744 | -0.43285    | 0.66744     | -0.29479 |         |  |
|             | 0.61592         | -0.43285 | 0.66744 | 0.61592     | 0.806345215 |          |         |  |
| NA          | ENSG00000233264 | -0.89137 | 0.81364 | -1.1321     | 0.87121     | -1.154   | 0.87574 |  |
|             | -0.29483        | 0.61594  | 0.61594 | 0.806349735 |             |          |         |  |
| PIK3IP1     | ENSG00000100100 | -0.29496 | 0.61599 | -0.29496    | 0.61599     | -0.29496 |         |  |
|             | 0.61599         | -0.29496 | 0.61599 | 0.61599     | 0.806389475 |          |         |  |
| CALHM2      | ENSG00000138172 | -0.29505 | 0.61602 | -0.29505    | 0.61602     | -1.1256  |         |  |
|             | 0.86983         | -0.29505 | 0.61602 | 0.61602     | 0.806389475 |          |         |  |
| NA          | ENSG00000248468 | -1.2521  | 0.89472 | -0.35497    | 0.63869     | -3.4572  | 0.99973 |  |
|             | -0.29504        | 0.61602  | 0.61602 | 0.806389475 |             |          |         |  |
| CLEC14A     | ENSG00000176435 | -0.51714 | 0.69747 | -0.29534    | 0.61613     | -0.29534 |         |  |
|             | 0.61613         | -0.29534 | 0.61613 | 0.61613     | 0.806464419 |          |         |  |
| BCAR1       | ENSG00000050820 | -0.38414 | 0.64956 | -0.30039    | 0.61806     | -0.29535 | 0.61614 |  |
|             | -0.45514        | 0.6755   | 0.61614 | 0.806464419 |             |          |         |  |
| NA          | ENSG00000234918 | -0.29536 | 0.61614 | -0.29536    | 0.61614     | -0.98495 | 0.83768 |  |
|             | -0.54762        | 0.70803  | 0.61614 | 0.806464419 |             |          |         |  |
| PLA2G2E     | ENSG00000188784 | -1.59    | 0.94408 | -0.78909    | 0.78497     | -1.5089  | 0.93434 |  |

|           |                 |          |         |             |             |          |         |
|-----------|-----------------|----------|---------|-------------|-------------|----------|---------|
|           | -0.2954         | 0.61616  | 0.61616 | 0.806464419 |             |          |         |
| C19orf73  | ENSG00000221916 | -0.2954  | 0.61616 | -0.2954     | 0.61616     | -0.2954  |         |
|           | 0.61616         | -0.2954  | 0.61616 | 0.61616     | 0.806464419 |          |         |
| MPZ       | ENSG00000158887 | -1.5685  | 0.94162 | -0.2956     | 0.61623     | -0.33079 | 0.6296  |
|           | -0.44003        | 0.67004  | 0.61623 | 0.806478883 |             |          |         |
| NA        | ENSG00000278455 | -0.29566 | 0.61626 | -0.29566    | 0.61626     | -0.29566 | 0.61626 |
|           | -0.29566        | 0.61626  | 0.61626 | 0.806478883 |             |          |         |
| NUP107    | ENSG00000111581 | -1.5478  | 0.93916 | -0.2957     | 0.61627     | -1.5478  |         |
|           | 0.93916         | -1.7478  | 0.95975 | 0.61627     | 0.806478883 |          |         |
| TBC1D15   | ENSG00000121749 | -0.43426 | 0.66795 | -0.29574    | 0.61629     | -0.29574 |         |
|           | 0.61629         | -0.29574 | 0.61629 | 0.61629     | 0.806478883 |          |         |
| NA        | ENSG00000213956 | -0.62893 | 0.7353  | -0.29576    | 0.61629     | -0.47618 | 0.68303 |
|           | -0.81197        | 0.7916   | 0.61629 | 0.806478883 |             |          |         |
| NA        | ENSG00000252901 | -0.71725 | 0.76339 | -0.29581    | 0.61631     | -0.58499 | 0.72072 |
|           | -0.86671        | 0.80695  | 0.61631 | 0.806478883 |             |          |         |
| TUBA8     | ENSG00000183785 | -0.29583 | 0.61632 | -1.1003     | 0.8644      | -0.83213 | 0.79733 |
|           | -0.83213        | 0.79733  | 0.61632 | 0.806478883 |             |          |         |
| NA        | ENSG00000227716 | -0.91962 | 0.82111 | -0.29582    | 0.61632     | -0.76087 | 0.77663 |
|           | -0.76087        | 0.77663  | 0.61632 | 0.806478883 |             |          |         |
| NA        | ENSG00000279397 | -0.77918 | 0.78206 | -0.29584    | 0.61632     | -0.34105 | 0.63347 |
|           | -0.34105        | 0.63347  | 0.61632 | 0.806478883 |             |          |         |
| UXS1      | ENSG00000115652 | -0.47466 | 0.68248 | -1.9145     | 0.97222     | -0.29595 | 0.61637 |
|           | -0.98641        | 0.83803  | 0.61637 | 0.806488826 |             |          |         |
| NA        | ENSG00000271547 | -0.29595 | 0.61637 | -0.57234    | 0.71646     | -0.29595 | 0.61637 |
|           | -1.0528         | 0.85379  | 0.61637 | 0.806488826 |             |          |         |
| MIR4527HG | ENSG00000267761 | -1.0115  | 0.8441  | -1.2046     | 0.88582     | -0.29599 |         |
|           | 0.61638         | -2.1273  | 0.9833  | 0.61638     | 0.806488826 |          |         |
| MMD       | ENSG00000108960 | -0.29604 | 0.6164  | -0.36059    | 0.6408      | -0.51847 | 0.69793 |
|           | -0.36059        | 0.6408   | 0.6164  | 0.806488826 |             |          |         |
| NA        | ENSG00000207438 | -0.29614 | 0.61644 | -1.1652     | 0.87803     | -0.29614 | 0.61644 |
|           | -0.29614        | 0.61644  | 0.61644 | 0.806488826 |             |          |         |
| NA        | ENSG00000234073 | -0.29614 | 0.61644 | -0.29614    | 0.61644     | -0.29614 | 0.61644 |
|           | -0.29614        | 0.61644  | 0.61644 | 0.806488826 |             |          |         |
| KCNA2     | ENSG00000177301 | -0.4941  | 0.68938 | -1.218      | 0.88838     | -0.2962  | 0.61646 |
|           | -0.3628         | 0.64162  | 0.61646 | 0.806488826 |             |          |         |
| LINC01929 | ENSG00000267013 | -0.90607 | 0.81755 | -0.36488    | 0.6424      | -0.29619 |         |
|           | 0.61646         | -0.72813 | 0.76673 | 0.61646     | 0.806488826 |          |         |
| FTLP14    | ENSG00000260459 | -0.2963  | 0.6165  | -0.2963     | 0.6165      | -0.2963  |         |
|           | 0.6165          | -0.2963  | 0.6165  | 0.6165      | 0.806519504 |          |         |
| STMP1     | ENSG00000243317 | -0.97512 | 0.83525 | -0.29651    | 0.61658     | -0.29651 | 0.61658 |
|           | -0.29651        | 0.61658  | 0.61658 | 0.806572283 |             |          |         |
| ELAVL2    | ENSG00000107105 | -1.6269  | 0.94812 | -0.29653    | 0.61659     | -1.2949  |         |
|           | 0.90232         | -1.2129  | 0.88742 | 0.61659     | 0.806572283 |          |         |
| RN7SL449P | ENSG00000242889 | -0.29654 | 0.61659 | -0.29654    | 0.61659     | -0.29654 |         |
|           | 0.61659         | -0.29654 | 0.61659 | 0.61659     | 0.806572283 |          |         |
| LINC00656 | ENSG00000233746 | -0.30964 | 0.62158 | -1.3363     | 0.90928     | -0.72496 |         |
|           | 0.76576         | -0.29672 | 0.61666 | 0.61666     | 0.806634962 |          |         |
| RPL41     | ENSG00000229117 | -0.29678 | 0.61668 | -1.4443     | 0.92568     | -0.29678 | 0.61668 |
|           | -0.29678        | 0.61668  | 0.61668 | 0.806634962 |             |          |         |
| NA        | ENSG00000240980 | -1.4187  | 0.922   | -0.4696     | 0.68068     | -0.29688 | 0.61672 |
|           | -0.67334        | 0.74963  | 0.61672 | 0.806634962 |             |          |         |
| ATP5PF    | ENSG00000154723 | -0.29689 | 0.61673 | -0.5787     | 0.7186      | -0.90514 |         |
|           | 0.8173          | -0.5787  | 0.7186  | 0.61673     | 0.806634962 |          |         |
| POM121L9P | ENSG00000128262 | -0.29694 | 0.61674 | -0.75903    | 0.77608     | -0.75816 |         |
|           | 0.77582         | -0.8937  | 0.81426 | 0.61674     | 0.806634962 |          |         |
| NA        | ENSG00000256450 | -0.29697 | 0.61675 | -0.29697    | 0.61675     | -0.29697 | 0.61675 |
|           | -0.29697        | 0.61675  | 0.61675 | 0.806634962 |             |          |         |
| NA        | ENSG00000259540 | -0.29701 | 0.61677 | -0.807      | 0.79017     | -0.29701 | 0.61677 |
|           | -0.29701        | 0.61677  | 0.61677 | 0.806634962 |             |          |         |
| NA        | ENSG00000230910 | -0.29706 | 0.61679 | -0.8789     | 0.81027     | -0.29706 | 0.61679 |
|           | -0.29706        | 0.61679  | 0.61679 | 0.806634962 |             |          |         |
| NUP98     | ENSG00000110713 | -0.98383 | 0.8374  | -1.0363     | 0.84998     | -0.2971  | 0.61681 |

|           |                 |          |         |             |             |          |         |
|-----------|-----------------|----------|---------|-------------|-------------|----------|---------|
|           | -1.0345         | 0.84955  | 0.61681 | 0.806634962 |             |          |         |
| GDF9      | ENSG00000164404 | -0.2971  | 0.61681 | -0.44482    | 0.67178     | -0.44482 | 0.67178 |
|           | -0.44482        | 0.67178  | 0.61681 | 0.806634962 |             |          |         |
| TNFAIP3   | ENSG00000118503 | -0.29714 | 0.61682 | -0.60171    | 0.72632     | -0.29714 |         |
|           | 0.61682         | -0.39609 | 0.65398 | 0.61682     | 0.806634962 |          |         |
| RPL10P2   | ENSG00000174572 | -1.1083  | 0.86614 | -0.29749    | 0.61695     | -1.4469  |         |
|           | 0.92604         | -1.6639  | 0.95193 | 0.61695     | 0.806761666 |          |         |
| NA        | ENSG00000227161 | -0.29748 | 0.61695 | -0.29748    | 0.61695     | -0.29748 | 0.61695 |
|           | -0.29748        | 0.61695  | 0.61695 | 0.806761666 |             |          |         |
| ZBTB14    | ENSG00000198081 | -0.30185 | 0.61862 | -0.88752    | 0.8126      | -0.73947 |         |
|           | 0.77019         | -0.29757 | 0.61698 | 0.61698     | 0.806770674 |          |         |
| RN7SL405P | ENSG00000264540 | -0.29758 | 0.61699 | -0.29758    | 0.61699     | -0.29758 |         |
|           | 0.61699         | -0.29758 | 0.61699 | 0.61699     | 0.806770674 |          |         |
| OSBPL3    | ENSG00000070882 | -1.3184  | 0.90632 | -0.76837    | 0.77887     | -0.29798 |         |
|           | 0.61714         | -1.1388  | 0.8726  | 0.61714     | 0.806920275 |          |         |
| NA        | ENSG00000268496 | -0.29798 | 0.61714 | -0.29798    | 0.61714     | -0.29798 | 0.61714 |
|           | -0.29798        | 0.61714  | 0.61714 | 0.806920275 |             |          |         |
| NA        | ENSG00000257069 | -0.29802 | 0.61716 | -0.29802    | 0.61716     | -0.29802 | 0.61716 |
|           | -0.29802        | 0.61716  | 0.61716 | 0.806920275 |             |          |         |
| NA        | ENSG00000266709 | -0.29812 | 0.6172  | -0.29812    | 0.6172      | -0.29812 | 0.6172  |
|           | -0.29812        | 0.6172   | 0.6172  | 0.806920275 |             |          |         |
| NA        | ENSG00000282855 | -0.29814 | 0.6172  | -0.29814    | 0.6172      | -0.29814 | 0.6172  |
|           | -0.29814        | 0.6172   | 0.6172  | 0.806920275 |             |          |         |
| PTMAP10   | ENSG00000213237 | -0.29823 | 0.61723 | -0.29823    | 0.61723     | -0.29823 |         |
|           | 0.61723         | -0.29823 | 0.61723 | 0.61723     | 0.806920275 |          |         |
| OR5BC1P   | ENSG00000255218 | -0.29821 | 0.61723 | -0.29821    | 0.61723     | -0.29821 |         |
|           | 0.61723         | -0.29821 | 0.61723 | 0.61723     | 0.806920275 |          |         |
| SMIM22    | ENSG00000267795 | -0.29825 | 0.61724 | -0.29825    | 0.61724     | -0.29825 |         |
|           | 0.61724         | -0.29825 | 0.61724 | 0.61724     | 0.806920275 |          |         |
| RPL23AP29 | ENSG00000214024 | -0.51868 | 0.69801 | -0.51868    | 0.69801     | -0.29829 |         |
|           | 0.61726         | -0.51868 | 0.69801 | 0.61726     | 0.806920275 |          |         |
| MED13L    | ENSG00000123066 | -0.86805 | 0.80732 | -0.29832    | 0.61727     | -0.72522 |         |
|           | 0.76584         | -0.36971 | 0.6442  | 0.61727     | 0.806920275 |          |         |
| LINC01704 | ENSG00000231666 | -1.4437  | 0.92558 | -0.52005    | 0.69849     | -1.2029  |         |
|           | 0.88549         | -0.29845 | 0.61732 | 0.61732     | 0.806955415 |          |         |
| NA        | ENSG00000231903 | -0.29846 | 0.61733 | -0.32567    | 0.62766     | -0.34912 | 0.6365  |
|           | -0.34912        | 0.6365   | 0.61733 | 0.806955415 |             |          |         |
| NA        | ENSG00000277247 | -0.29853 | 0.61735 | -0.29853    | 0.61735     | -0.29853 | 0.61735 |
|           | -0.29853        | 0.61735  | 0.61735 | 0.806959911 |             |          |         |
| CRAT      | ENSG00000095321 | -0.42745 | 0.66547 | -0.29865    | 0.6174      | -0.61647 | 0.73121 |
|           | -0.89606        | 0.81489  | 0.6174  | 0.80696033  |             |          |         |
| RNU6-73P  | ENSG00000207330 | -1.1525  | 0.87545 | -0.29866    | 0.6174      | -0.60637 |         |
|           | 0.72787         | -0.82258 | 0.79463 | 0.6174      | 0.80696033  |          |         |
| ECM1P2    | ENSG00000249995 | -1.0476  | 0.85259 | -1.6887     | 0.95437     | -0.62189 |         |
|           | 0.73299         | -0.29867 | 0.6174  | 0.6174      | 0.80696033  |          |         |
| NA        | ENSG00000220139 | -1.8667  | 0.96903 | -0.29875    | 0.61743     | -1.8667  | 0.96903 |
|           | -0.48669        | 0.68676  | 0.61743 | 0.806977897 |             |          |         |
| DBNDD2    | ENSG00000244274 | -0.29881 | 0.61746 | -0.29881    | 0.61746     | -0.84852 |         |
|           | 0.80193         | -0.85269 | 0.80308 | 0.61746     | 0.806995462 |          |         |
| NA        | ENSG00000242162 | -0.29891 | 0.6175  | -0.29891    | 0.6175      | -0.29891 | 0.6175  |
|           | -0.29891        | 0.6175   | 0.6175  | 0.807026096 |             |          |         |
| RPL22L1   | ENSG00000163584 | -0.54268 | 0.70632 | -0.73486    | 0.76879     | -1.4512  |         |
|           | 0.92663         | -0.29903 | 0.61754 | 0.61754     | 0.807039577 |          |         |
| KRTAP8-3P | ENSG00000227840 | -1.7625  | 0.96101 | -1.7625     | 0.96101     | -0.29908 |         |
|           | 0.61756         | -1.5663  | 0.94136 | 0.61756     | 0.807039577 |          |         |
| NA        | ENSG00000275980 | -0.29909 | 0.61756 | -0.85748    | 0.80441     | -0.85748 | 0.80441 |
|           | -0.85748        | 0.80441  | 0.61756 | 0.807039577 |             |          |         |
| NA        | ENSG00000236634 | -0.29912 | 0.61758 | -0.29912    | 0.61758     | -0.29912 | 0.61758 |
|           | -0.29912        | 0.61758  | 0.61758 | 0.807044071 |             |          |         |
| FAM83C    | ENSG00000125998 | -0.53278 | 0.70291 | -0.62563    | 0.73422     | -0.53278 |         |
|           | 0.70291         | -0.2992  | 0.6176  | 0.6176      | 0.807048564 |          |         |
| EPHX4     | ENSG00000172031 | -0.29927 | 0.61763 | -0.36742    | 0.64335     | -1.4387  | 0.92488 |

|            |                 |          |         |             |             |          |         |  |
|------------|-----------------|----------|---------|-------------|-------------|----------|---------|--|
|            | -1.2351         | 0.8916   | 0.61763 | 0.807066124 |             |          |         |  |
| NA         | ENSG00000253474 | -0.5854  | 0.72086 | -0.29946    | 0.6177      | -0.29946 | 0.6177  |  |
|            | -0.29946        | 0.6177   | 0.6177  | 0.807120828 |             |          |         |  |
| OR5H6      | ENSG00000230301 | -1.0267  | 0.84771 | -0.29947    | 0.61771     | -1.5626  | 0.94093 |  |
|            | -1.5626         | 0.94093  | 0.61771 | 0.807120828 |             |          |         |  |
| MLIP-IT1   | ENSG00000236996 | -1.622   | 0.9476  | -0.29953    | 0.61773     | -1.622   |         |  |
|            | 0.9476          | -1.622   | 0.9476  | 0.61773     | 0.807120828 |          |         |  |
| RAB27A     | ENSG00000069974 | -0.2996  | 0.61776 | -1.4659     | 0.92866     | -1.2582  |         |  |
|            | 0.89584         | -1.5841  | 0.94342 | 0.61776     | 0.807120828 |          |         |  |
| HNRNPA1P56 | ENSG00000248640 | -1.1995  | 0.88483 | -0.94902    | 0.82869     | -0.97222 |         |  |
|            | 0.83453         | -0.29964 | 0.61777 | 0.61777     | 0.807120828 |          |         |  |
| LINC02440  | ENSG00000255618 | -1.3512  | 0.91168 | -1.3512     | 0.91168     | -0.2997  |         |  |
|            | 0.6178          | -1.3512  | 0.91168 | 0.6178      | 0.807120828 |          |         |  |
| NA         | ENSG00000225779 | -0.29977 | 0.61782 | -1.0507     | 0.85331     | -1.0507  | 0.85331 |  |
|            | -1.0507         | 0.85331  | 0.61782 | 0.807120828 |             |          |         |  |
| SYT2       | ENSG00000143858 | -0.89929 | 0.81575 | -1.334      | 0.9089      | -0.84036 | 0.79965 |  |
|            | -0.29983        | 0.61785  | 0.61785 | 0.807120828 |             |          |         |  |
| NA         | ENSG00000239467 | -0.29985 | 0.61785 | -0.53796    | 0.7047      | -0.64036 | 0.73903 |  |
|            | -0.64036        | 0.73903  | 0.61785 | 0.807120828 |             |          |         |  |
| LINC00671  | ENSG00000213373 | -0.79454 | 0.78656 | -0.29987    | 0.61786     | -0.34082 |         |  |
|            | 0.63338         | -0.88984 | 0.81322 | 0.61786     | 0.807120828 |          |         |  |
| NA         | ENSG00000267648 | -0.29992 | 0.61788 | -0.29992    | 0.61788     | -0.29992 | 0.61788 |  |
|            | -0.29992        | 0.61788  | 0.61788 | 0.807120828 |             |          |         |  |
| TMEM75     | ENSG00000280055 | -0.29999 | 0.61791 | -0.31174    | 0.62238     | -0.29999 |         |  |
|            | 0.61791         | -0.29999 | 0.61791 | 0.61791     | 0.807120828 |          |         |  |
| S100A10    | ENSG00000197747 | -0.39831 | 0.6548  | -0.56811    | 0.71502     | -0.54214 |         |  |
|            | 0.70614         | -0.30002 | 0.61792 | 0.61792     | 0.807120828 |          |         |  |
| WFDC9      | ENSG00000180205 | -0.30004 | 0.61793 | -0.30004    | 0.61793     | -0.30004 | 0.61793 |  |
|            | -0.30004        | 0.61793  | 0.61793 | 0.807120828 |             |          |         |  |
| ZNF2       | ENSG00000275111 | -0.30004 | 0.61793 | -1.2237     | 0.88947     | -0.95587 | 0.83043 |  |
|            | -1.1363         | 0.87209  | 0.61793 | 0.807120828 |             |          |         |  |
| NA         | ENSG00000272297 | -0.3001  | 0.61795 | -0.3001     | 0.61795     | -0.3001  | 0.61795 |  |
|            | -0.3001         | 0.61795  | 0.61795 | 0.807120828 |             |          |         |  |
| CA7        | ENSG00000168748 | -0.85926 | 0.8049  | -0.30015    | 0.61797     | -0.9179  | 0.82067 |  |
|            | -0.30015        | 0.61797  | 0.61797 | 0.807120828 |             |          |         |  |
| SETP11     | ENSG00000239570 | -0.96846 | 0.83359 | -0.30015    | 0.61797     | -0.96846 |         |  |
|            | 0.83359         | -0.96846 | 0.83359 | 0.61797     | 0.807120828 |          |         |  |
| NA         | ENSG00000251872 | -0.63808 | 0.73829 | -0.94492    | 0.82765     | -0.30027 | 0.61801 |  |
|            | -0.9259         | 0.82275  | 0.61801 | 0.807151438 |             |          |         |  |
| NA         | ENSG00000223821 | -0.30031 | 0.61803 | -0.77971    | 0.78222     | -0.30031 | 0.61803 |  |
|            | -0.30031        | 0.61803  | 0.61803 | 0.807155926 |             |          |         |  |
| RBPM52P1   | ENSG00000234025 | -1.2106  | 0.88697 | -1.1581     | 0.87659     | -0.30041 |         |  |
|            | 0.61807         | -2.3589  | 0.99084 | 0.61807     | 0.807186533 |          |         |  |
| NA         | ENSG00000184909 | -0.87156 | 0.80828 | -0.87156    | 0.80828     | -0.87156 | 0.80828 |  |
|            | -0.30046        | 0.61809  | 0.61809 | 0.807191019 |             |          |         |  |
| IGBP1P4    | ENSG00000250325 | -0.30052 | 0.61811 | -0.30052    | 0.61811     | -0.30052 |         |  |
|            | 0.61811         | -0.30052 | 0.61811 | 0.61811     | 0.807195506 |          |         |  |
| LINC00208  | ENSG00000170983 | -0.60038 | 0.72587 | -0.46194    | 0.67794     | -0.89387 |         |  |
|            | 0.8143          | -0.30065 | 0.61816 | 0.61816     | 0.807239168 |          |         |  |
| COL19A1    | ENSG00000082293 | -0.30109 | 0.61833 | -0.94828    | 0.82851     | -0.47891 | 0.684   |  |
|            | -0.30077        | 0.6182   | 0.6182  | 0.807248138 |             |          |         |  |
| COX6B1P5   | ENSG00000249047 | -0.30076 | 0.6182  | -0.30076    | 0.6182      | -0.30076 |         |  |
|            | 0.6182          | -0.30076 | 0.6182  | 0.6182      | 0.807248138 |          |         |  |
| NA         | ENSG00000233491 | -0.30084 | 0.61823 | -0.61938    | 0.73217     | -0.58144 | 0.71953 |  |
|            | -0.62079        | 0.73263  | 0.61823 | 0.807259079 |             |          |         |  |
| NA         | ENSG00000277825 | -0.30089 | 0.61825 | -0.30089    | 0.61825     | -0.30089 | 0.61825 |  |
|            | -0.30089        | 0.61825  | 0.61825 | 0.807259079 |             |          |         |  |
| NA         | ENSG00000244260 | -0.30093 | 0.61827 | -1.6494     | 0.95046     | -0.34521 | 0.63503 |  |
|            | -0.51942        | 0.69827  | 0.61827 | 0.807259079 |             |          |         |  |
| NTAN1      | ENSG00000157045 | -0.31876 | 0.62505 | -0.48453    | 0.68599     | -0.301   | 0.61829 |  |
|            | -0.301          | 0.61829  | 0.61829 | 0.807259079 |             |          |         |  |
| NA         | ENSG00000241593 | -0.30102 | 0.6183  | -1.2864     | 0.90084     | -1.2864  | 0.90084 |  |

|               |                 |          |         |             |             |          |         |  |
|---------------|-----------------|----------|---------|-------------|-------------|----------|---------|--|
|               | -1.2864         | 0.90084  | 0.6183  | 0.807259079 |             |          |         |  |
| MIR526A1      | ENSG00000207629 | -1.248   | 0.89398 | -0.80742    | 0.79029     | -0.30103 |         |  |
|               | 0.61831         | -0.80742 | 0.79029 | 0.61831     | 0.807259079 |          |         |  |
| RNA5SP92      | ENSG00000252246 | -0.30114 | 0.61834 | -0.30114    | 0.61834     | -0.95723 |         |  |
|               | 0.83077         | -0.30114 | 0.61834 | 0.61834     | 0.807259079 |          |         |  |
| ARHGFE16      | ENSG00000130762 | -0.9587  | 0.83115 | -0.30115    | 0.61835     | -0.56543 |         |  |
|               | 0.71411         | -1.5314  | 0.93716 | 0.61835     | 0.807259079 |          |         |  |
| GABARAPL3     | ENSG00000238244 | -0.30121 | 0.61837 | -0.3251     | 0.62745     | -0.3251  |         |  |
|               | 0.62745         | -0.3251  | 0.62745 | 0.61837     | 0.807259079 |          |         |  |
| NA            | ENSG00000234185 | -0.30128 | 0.6184  | -1.1652     | 0.87803     | -0.44042 | 0.67018 |  |
|               | -0.71128        | 0.76154  | 0.6184  | 0.807259079 |             |          |         |  |
| CYCSP33       | ENSG00000233545 | -0.30131 | 0.61841 | -1.8345     | 0.96671     | -2.1732  |         |  |
|               | 0.98512         | -0.90819 | 0.81811 | 0.61841     | 0.807259079 |          |         |  |
| RPS17P8       | ENSG00000226242 | -0.30142 | 0.61845 | -0.30142    | 0.61845     | -0.30142 |         |  |
|               | 0.61845         | -0.30142 | 0.61845 | 0.61845     | 0.807259079 |          |         |  |
| NA            | ENSG00000265927 | -0.30145 | 0.61846 | -0.30145    | 0.61846     | -0.30145 | 0.61846 |  |
|               | -0.30145        | 0.61846  | 0.61846 | 0.807259079 |             |          |         |  |
| LY6G6F        | ENSG00000204424 | -0.30147 | 0.61847 | -0.30147    | 0.61847     | -0.30147 |         |  |
|               | 0.61847         | -0.30147 | 0.61847 | 0.61847     | 0.807259079 |          |         |  |
| LY6G6F-LY6G6D | ENSG00000250641 | -0.30147 | 0.61847 | -0.30147    | 0.61847     | -0.30147 |         |  |
|               | 0.61847         | -0.30147 | 0.61847 | 0.61847     | 0.807259079 |          |         |  |
| ZMYM4-AS1     | ENSG00000227409 | -0.30148 | 0.61848 | -0.77075    | 0.77957     | -0.77075 |         |  |
|               | 0.77957         | -0.77075 | 0.77957 | 0.61848     | 0.807259079 |          |         |  |
| GEMIN2P2      | ENSG00000235339 | -0.30152 | 0.61849 | -0.30152    | 0.61849     | -0.30152 |         |  |
|               | 0.61849         | -0.34223 | 0.63391 | 0.61849     | 0.807259079 |          |         |  |
| CSF3R         | ENSG00000119535 | -0.3016  | 0.61852 | -1.5023     | 0.93349     | -0.61783 | 0.73166 |  |
|               | -0.94129        | 0.82672  | 0.61852 | 0.807276612 |             |          |         |  |
| H3P13         | ENSG00000243977 | -0.30171 | 0.61856 | -0.34341    | 0.63436     | -0.53629 | 0.70412 |  |
|               | -0.34341        | 0.63436  | 0.61856 | 0.807277005 |             |          |         |  |
| MT1DP         | ENSG00000205361 | -0.30173 | 0.61857 | -0.30173    | 0.61857     | -0.30173 | 0.61857 |  |
|               | -0.30173        | 0.61857  | 0.61857 | 0.807277005 |             |          |         |  |
| NA            | ENSG00000279732 | -0.30172 | 0.61857 | -0.30172    | 0.61857     | -0.30172 | 0.61857 |  |
|               | -0.30172        | 0.61857  | 0.61857 | 0.807277005 |             |          |         |  |
| RNA5SP176     | ENSG00000212258 | -0.30178 | 0.61859 | -0.30178    | 0.61859     | -0.30178 |         |  |
|               | 0.61859         | -0.77102 | 0.77965 | 0.61859     | 0.807281486 |          |         |  |
| LINC01623     | ENSG00000225595 | -1.2969  | 0.90266 | -0.30185    | 0.61862     | -0.9755  |         |  |
|               | 0.83534         | -1.2396  | 0.89244 | 0.61862     | 0.807299017 |          |         |  |
| NA            | ENSG00000237749 | -0.30198 | 0.61867 | -0.43777    | 0.66922     | -0.30198 | 0.61867 |  |
|               | -0.30198        | 0.61867  | 0.61867 | 0.807308368 |             |          |         |  |
| ZNF331        | ENSG00000130844 | -0.41451 | 0.66075 | -0.30201    | 0.61868     | -0.6477  |         |  |
|               | 0.74141         | -0.41451 | 0.66075 | 0.61868     | 0.807308368 |          |         |  |
| NUDT16        | ENSG00000198585 | -0.30205 | 0.61869 | -0.30205    | 0.61869     | -0.30205 |         |  |
|               | 0.61869         | -0.98408 | 0.83746 | 0.61869     | 0.807308368 |          |         |  |
| NA            | ENSG00000224493 | -1.144   | 0.87368 | -0.30211    | 0.61871     | -0.85737 | 0.80438 |  |
|               | -0.30211        | 0.61871  | 0.61871 | 0.807308368 |             |          |         |  |
| NA            | ENSG00000274294 | -0.30211 | 0.61871 | -0.30211    | 0.61871     | -1.0376  | 0.85028 |  |
|               | -0.30211        | 0.61871  | 0.61871 | 0.807308368 |             |          |         |  |
| KRT18P4       | ENSG00000229222 | -0.30224 | 0.61877 | -0.30224    | 0.61877     | -0.30224 |         |  |
|               | 0.61877         | -0.30224 | 0.61877 | 0.61877     | 0.807365039 |          |         |  |
| OR4F6         | ENSG00000184140 | -0.30236 | 0.61881 | -0.30236    | 0.61881     | -0.30236 | 0.61881 |  |
|               | -0.30236        | 0.61881  | 0.61881 | 0.807395612 |             |          |         |  |
| NA            | ENSG00000263424 | -0.30252 | 0.61887 | -0.30252    | 0.61887     | -0.30252 | 0.61887 |  |
|               | -0.30252        | 0.61887  | 0.61887 | 0.807439989 |             |          |         |  |
| RP9P          | ENSG00000205763 | -0.30255 | 0.61888 | -0.77153    | 0.7798      | -0.30255 | 0.61888 |  |
|               | -0.34949        | 0.63664  | 0.61888 | 0.807439989 |             |          |         |  |
| SZT2          | ENSG00000198198 | -1.0799  | 0.8599  | -0.31501    | 0.62362     | -0.3026  | 0.6189  |  |
|               | -0.31501        | 0.62362  | 0.6189  | 0.807439989 |             |          |         |  |
| VSIG10        | ENSG00000176834 | -0.30269 | 0.61894 | -0.3592     | 0.64028     | -1.0836  |         |  |
|               | 0.86073         | -0.81055 | 0.79119 | 0.61894     | 0.807439989 |          |         |  |
| NA            | ENSG00000207252 | -1.0614  | 0.85575 | -0.3027     | 0.61894     | -0.3027  | 0.61894 |  |
|               | -0.3027         | 0.61894  | 0.61894 | 0.807439989 |             |          |         |  |
| NA            | ENSG00000282860 | -0.30271 | 0.61895 | -0.42566    | 0.66482     | -0.42566 | 0.66482 |  |

|           |                 |          |         |             |             |          |         |
|-----------|-----------------|----------|---------|-------------|-------------|----------|---------|
|           | -0.42566        | 0.66482  | 0.61895 | 0.807439989 |             |          |         |
| TUBGCP4   | ENSG00000137822 | -0.30275 | 0.61896 | -0.60481    | 0.72735     | -0.54743 |         |
|           | 0.70796         | -0.60481 | 0.72735 | 0.61896     | 0.807439989 |          |         |
| NA        | ENSG00000261207 | -0.68489 | 0.75329 | -0.30282    | 0.61899     | -0.30282 | 0.61899 |
|           | -0.30282        | 0.61899  | 0.61899 | 0.807457509 |             |          |         |
| SDR16C5   | ENSG00000170786 | -0.96441 | 0.83258 | -0.84968    | 0.80225     | -1.1732  |         |
|           | 0.87964         | -0.3029  | 0.61902 | 0.61902     | 0.807475027 |          |         |
| RFESD     | ENSG00000175449 | -0.91962 | 0.82112 | -0.30304    | 0.61907     | -0.66907 | 0.74827 |
|           | -1.0377         | 0.85029  | 0.61907 | 0.807506338 |             |          |         |
| RPL4P1    | ENSG00000240954 | -0.30312 | 0.6191  | -0.30312    | 0.6191      | -0.30312 |         |
|           | 0.6191          | -0.30312 | 0.6191  | 0.6191      | 0.807506338 |          |         |
| NA        | ENSG00000270575 | -1.1929  | 0.88355 | -1.1929     | 0.88355     | -1.1929  | 0.88355 |
|           | -0.30313        | 0.61911  | 0.61911 | 0.807506338 |             |          |         |
| NA        | ENSG00000254942 | -0.30318 | 0.61912 | -0.30318    | 0.61912     | -0.30318 | 0.61912 |
|           | -0.30318        | 0.61912  | 0.61912 | 0.807506338 |             |          |         |
| NA        | ENSG00000276250 | -0.30319 | 0.61913 | -0.30319    | 0.61913     | -0.30319 | 0.61913 |
|           | -0.30319        | 0.61913  | 0.61913 | 0.807506338 |             |          |         |
| RNU6-74P  | ENSG00000206962 | -0.30326 | 0.61915 | -0.30326    | 0.61915     | -0.30326 |         |
|           | 0.61915         | -0.30326 | 0.61915 | 0.61915     | 0.807506338 |          |         |
| PDE2A     | ENSG00000186642 | -0.30328 | 0.61916 | -2.3101     | 0.98956     | -1.2023  | 0.88538 |
|           | -0.99357        | 0.83978  | 0.61916 | 0.807506338 |             |          |         |
| UGT2B4    | ENSG00000156096 | -1.7458  | 0.95958 | -1.7458     | 0.95958     | -1.7458  |         |
|           | 0.95958         | -0.30342 | 0.61921 | 0.61921     | 0.807532794 |          |         |
| GATAD2B   | ENSG00000143614 | -0.56263 | 0.71316 | -0.50706    | 0.69394     | -0.30347 |         |
|           | 0.61923         | -0.60666 | 0.72796 | 0.61923     | 0.807532794 |          |         |
| NA        | ENSG00000201239 | -0.30346 | 0.61923 | -0.30346    | 0.61923     | -0.30346 | 0.61923 |
|           | -0.30346        | 0.61923  | 0.61923 | 0.807532794 |             |          |         |
| ELOAP1    | ENSG00000235640 | -1.1888  | 0.88273 | -0.30365    | 0.6193      | -1.1888  |         |
|           | 0.88273         | -1.1888  | 0.88273 | 0.6193      | 0.807602467 |          |         |
| RPF2P2    | ENSG00000250693 | -0.46315 | 0.67837 | -0.33932    | 0.63281     | -0.32633 |         |
|           | 0.62791         | -0.30376 | 0.61934 | 0.61934     | 0.807628913 |          |         |
| SYCE3     | ENSG00000217442 | -0.30383 | 0.61937 | -0.30383    | 0.61937     | -0.30383 | 0.61937 |
|           | -0.52893        | 0.70157  | 0.61937 | 0.807628913 |             |          |         |
| TRBV8-1   | ENSG00000243889 | -0.30381 | 0.61937 | -1.4422     | 0.92537     | -0.30381 |         |
|           | 0.61937         | -1.1344  | 0.87168 | 0.61937     | 0.807628913 |          |         |
| BLMH      | ENSG00000108578 | -0.3041  | 0.61947 | -0.73721    | 0.7695      | -0.71833 | 0.76372 |
|           | -0.32899        | 0.62892  | 0.61947 | 0.807716438 |             |          |         |
| NA        | ENSG00000273485 | -0.30415 | 0.61949 | -0.30415    | 0.61949     | -0.30415 | 0.61949 |
|           | -0.30415        | 0.61949  | 0.61949 | 0.807716438 |             |          |         |
| OIP5      | ENSG00000104147 | -0.30419 | 0.61951 | -0.30419    | 0.61951     | -0.70691 | 0.76019 |
|           | -0.30419        | 0.61951  | 0.61951 | 0.807716438 |             |          |         |
| ARFGAP3   | ENSG00000242247 | -0.70602 | 0.75991 | -0.3042     | 0.61951     | -0.77363 |         |
|           | 0.78043         | -1.2449  | 0.89342 | 0.61951     | 0.807716438 |          |         |
| NA        | ENSG00000267114 | -0.30421 | 0.61952 | -0.30421    | 0.61952     | -0.30421 | 0.61952 |
|           | -0.30421        | 0.61952  | 0.61952 | 0.807716438 |             |          |         |
| WIPI2     | ENSG00000157954 | -1.2654  | 0.89714 | -0.30444    | 0.6196      | -0.69763 | 0.75729 |
|           | -1.8875         | 0.97046  | 0.6196  | 0.807768942 |             |          |         |
| LINC02089 | ENSG00000226364 | -1.4185  | 0.92197 | -0.30442    | 0.6196      | -1.2819  |         |
|           | 0.90006         | -1.0493  | 0.85298 | 0.6196      | 0.807768942 |          |         |
| NA        | ENSG00000223975 | -0.30445 | 0.61961 | -0.30445    | 0.61961     | -0.30445 | 0.61961 |
|           | -0.30445        | 0.61961  | 0.61961 | 0.807768942 |             |          |         |
| EMC8      | ENSG00000131148 | -0.50098 | 0.69181 | -0.30464    | 0.61968     | -0.30464 | 0.61968 |
|           | -0.30464        | 0.61968  | 0.61968 | 0.807786793 |             |          |         |
| FTLP15    | ENSG00000233952 | -0.30463 | 0.61968 | -0.30463    | 0.61968     | -0.30463 |         |
|           | 0.61968         | -0.30463 | 0.61968 | 0.61968     | 0.807786793 |          |         |
| MIR516B1  | ENSG00000207946 | -0.30465 | 0.61969 | -0.30465    | 0.61969     | -0.30465 |         |
|           | 0.61969         | -0.30465 | 0.61969 | 0.61969     | 0.807786793 |          |         |
| NA        | ENSG00000267940 | -0.30466 | 0.61969 | -0.30466    | 0.61969     | -0.30466 | 0.61969 |
|           | -0.30466        | 0.61969  | 0.61969 | 0.807786793 |             |          |         |
| NF1P12    | ENSG00000258360 | -0.30472 | 0.61971 | -2.0223     | 0.97843     | -0.83132 |         |
|           | 0.7971          | -0.89961 | 0.81583 | 0.61971     | 0.807791256 |          |         |
| C19orf38  | ENSG00000214212 | -0.38962 | 0.65159 | -0.38962    | 0.65159     | -1.6227  |         |

|             |                 |          |         |             |             |         |                  |
|-------------|-----------------|----------|---------|-------------|-------------|---------|------------------|
|             | 0.94767         | -0.30492 | 0.61979 | 0.61979     | 0.807813563 |         |                  |
| NA          | ENSG00000258167 | -0.30494 | 0.61979 | 0.61979     | -0.30494    | 0.61979 | -0.30494 0.61979 |
|             | -0.30494        | 0.61979  | 0.61979 | 0.807813563 |             |         |                  |
| NA          | ENSG00000256391 | -0.30493 | 0.61979 | 0.61979     | -0.38924    | 0.65145 | -0.80861 0.79063 |
|             | -0.53107        | 0.70231  | 0.61979 | 0.807813563 |             |         |                  |
| RPL5P6      | ENSG00000232393 | -0.30497 | 0.6198  | 0.6198      | -0.30497    | 0.6198  | -0.30497         |
|             | 0.6198          | -0.30497 | 0.6198  | 0.6198      | 0.807813563 |         |                  |
| RNU7-180P   | ENSG00000238374 | -0.30498 | 0.61981 | 0.61981     | -0.30498    | 0.61981 | -0.30498         |
|             | 0.61981         | -0.30498 | 0.61981 | 0.61981     | 0.807813563 |         |                  |
| NA          | ENSG00000254162 | -0.30505 | 0.61984 | 0.61984     | -0.30505    | 0.61984 | -0.30505 0.61984 |
|             | -0.30505        | 0.61984  | 0.61984 | 0.807831056 |             |         |                  |
| NA          | ENSG00000244266 | -0.30516 | 0.61988 | 0.61988     | -0.30516    | 0.61988 | -0.30516 0.61988 |
|             | -0.30516        | 0.61988  | 0.61988 | 0.807836211 |             |         |                  |
| BRAP        | ENSG00000089234 | -1.7055  | 0.95595 | 0.95595     | -0.30522    | 0.6199  | -1.182 0.8814    |
|             | -0.94242        | 0.82701  | 0.6199  | 0.807836211 |             |         |                  |
| NA          | ENSG00000259283 | -0.53217 | 0.70269 | 0.70269     | -0.30529    | 0.61993 | -0.53217 0.70269 |
|             | -0.53217        | 0.70269  | 0.61993 | 0.807836211 |             |         |                  |
| PRELID1     | ENSG00000169230 | -0.30536 | 0.61995 | 0.61995     | -0.30536    | 0.61995 | -0.30536         |
|             | 0.61995         | -0.30536 | 0.61995 | 0.61995     | 0.807836211 |         |                  |
| SHOX2       | ENSG00000168779 | -1.2131  | 0.88746 | 0.88746     | -1.0335     | 0.84932 | -1.2131 0.88746  |
|             | -0.30537        | 0.61996  | 0.61996 | 0.807836211 |             |         |                  |
| NA          | ENSG00000207235 | -0.30536 | 0.61996 | 0.61996     | -0.30536    | 0.61996 | -0.30536 0.61996 |
|             | -0.30536        | 0.61996  | 0.61996 | 0.807836211 |             |         |                  |
| NA          | ENSG00000237734 | -1.3031  | 0.90373 | 0.90373     | -0.33555    | 0.6314  | -1.2981 0.90288  |
|             | -0.30538        | 0.61996  | 0.61996 | 0.807836211 |             |         |                  |
| CHRNA10     | ENSG00000129749 | -0.75302 | 0.77428 | 0.77428     | -1.4809     | 0.93068 | -0.30546         |
|             | 0.61999         | -0.30546 | 0.61999 | 0.61999     | 0.807853701 |         |                  |
| HNRNPAB     | ENSG00000197451 | -0.30553 | 0.62002 | 0.62002     | -1.6374     | 0.94923 | -0.41163         |
|             | 0.6597          | -0.41163 | 0.6597  | 0.62002     | 0.807871189 |         |                  |
| NA          | ENSG00000250347 | -0.40285 | 0.65647 | 0.65647     | -0.63691    | 0.73791 | -0.30562 0.62005 |
|             | -0.552          | 0.70953  | 0.62005 | 0.807888676 |             |         |                  |
| RNU6-342P   | ENSG00000207251 | -1.3903  | 0.91778 | 0.91778     | -0.30567    | 0.62007 | -1.3903          |
|             | 0.91778         | -1.3903  | 0.91778 | 0.62007     | 0.807893134 |         |                  |
| NA          | ENSG00000215796 | -0.30573 | 0.6201  | 0.6201      | -0.30573    | 0.6201  | -0.30573 0.6201  |
|             | -0.40202        | 0.65617  | 0.6201  | 0.807893477 |             |         |                  |
| NIFKP9      | ENSG00000237630 | -0.96589 | 0.83295 | 0.83295     | -0.3058     | 0.62012 | -0.96589         |
|             | 0.83295         | -0.96589 | 0.83295 | 0.62012     | 0.807893477 |         |                  |
| RAC1P9      | ENSG00000271306 | -0.3058  | 0.62012 | 0.62012     | -0.3058     | 0.62012 | -0.3058          |
|             | 0.62012         | -0.3058  | 0.62012 | 0.62012     | 0.807893477 |         |                  |
| NA          | ENSG00000242474 | -0.88686 | 0.81242 | 0.81242     | -0.30593    | 0.62017 | -0.74564 0.77206 |
|             | -0.6958         | 0.75672  | 0.62017 | 0.807937016 |             |         |                  |
| NA          | ENSG00000203971 | -0.30607 | 0.62022 | 0.62022     | -0.30607    | 0.62022 | -0.30607 0.62022 |
|             | -0.64443        | 0.74035  | 0.62022 | 0.807980554 |             |         |                  |
| FLT3LG      | ENSG00000090554 | -0.30619 | 0.62027 | 0.62027     | -0.30619    | 0.62027 | -0.30619         |
|             | 0.62027         | -0.30619 | 0.62027 | 0.62027     | 0.808007276 |         |                  |
| AP1S3       | ENSG00000152056 | -0.81053 | 0.79118 | 0.79118     | -1.0555     | 0.85439 | -0.30627 0.6203  |
|             | -1.066          | 0.85679  | 0.6203  | 0.808007276 |             |         |                  |
| NA          | ENSG00000238533 | -0.52456 | 0.70006 | 0.70006     | -0.52456    | 0.70006 | -0.3063 0.62031  |
|             | -0.52456        | 0.70006  | 0.62031 | 0.808007276 |             |         |                  |
| NA          | ENSG00000259251 | -0.30631 | 0.62032 | 0.62032     | -0.30631    | 0.62032 | -0.30631 0.62032 |
|             | -0.30631        | 0.62032  | 0.62032 | 0.808007276 |             |         |                  |
| OGFOD2      | ENSG00000111325 | -0.82316 | 0.79479 | 0.79479     | -0.57798    | 0.71836 | -0.30638         |
|             | 0.62034         | -0.35597 | 0.63907 | 0.62034     | 0.808007276 |         |                  |
| DSG2-AS1    | ENSG00000264859 | -0.30638 | 0.62034 | 0.62034     | -1.7468     | 0.95966 | -0.86803         |
|             | 0.80731         | -0.56377 | 0.71354 | 0.62034     | 0.808007276 |         |                  |
| RPP40P2     | ENSG00000271190 | -0.30656 | 0.62041 | 0.62041     | -0.84303    | 0.80039 | -0.64093         |
|             | 0.73921         | -0.30656 | 0.62041 | 0.62041     | 0.808034652 |         |                  |
| CNTNAP2-AS1 | ENSG00000236795 | -2.4424  | 0.9927  | 0.9927      | -0.3066     | 0.62043 | -2.1854          |
|             | 0.98557         | -1.2427  | 0.89301 | 0.62043     | 0.808034652 |         |                  |
| TMED10P1    | ENSG00000254618 | -0.30663 | 0.62044 | 0.62044     | -0.30663    | 0.62044 | -0.30663         |
|             | 0.62044         | -0.30663 | 0.62044 | 0.62044     | 0.808034652 |         |                  |
| LRIG2       | ENSG00000198799 | -0.61735 | 0.7315  | 0.7315      | -0.65938    | 0.74517 | -0.38993 0.65171 |

|            |                 |          |             |             |             |          |         |  |
|------------|-----------------|----------|-------------|-------------|-------------|----------|---------|--|
|            | -0.3067         | 0.62046  | 0.62046     | 0.808034652 |             |          |         |  |
| BLACE      | ENSG00000204960 | -0.3068  | 0.6205      | -0.95805    | 0.83098     | -0.62125 | 0.73278 |  |
|            | -0.80002        | 0.78815  | 0.6205      | 0.808034652 |             |          |         |  |
| NA         | ENSG00000254936 | -0.30682 | 0.62051     | -0.30682    | 0.62051     | -0.30682 | 0.62051 |  |
|            | -0.30682        | 0.62051  | 0.62051     | 0.808034652 |             |          |         |  |
| BIRC6      | ENSG00000115760 | -1.8094  | 0.96481     | -0.30684    | 0.62052     | -1.799   | 0.96399 |  |
|            | -1.4626         | 0.92821  | 0.62052     | 0.808034652 |             |          |         |  |
| OR2A1      | ENSG00000221970 | -0.30685 | 0.62052     | -1.01084376 | -0.66161    | 0.74589  |         |  |
|            | -1.003          | 0.84206  | 0.62052     | 0.808034652 |             |          |         |  |
| NA         | ENSG00000271598 | -0.30685 | 0.62052     | -0.30685    | 0.62052     | -0.30685 | 0.62052 |  |
|            | -0.30685        | 0.62052  | 0.62052     | 0.808034652 |             |          |         |  |
| GFRAL      | ENSG00000187871 | -0.82335 | 0.79484     | -0.30689    | 0.62054     | -1.5999  | 0.94519 |  |
|            | -0.81602        | 0.79276  | 0.62054     | 0.808034652 |             |          |         |  |
| RNU6-1332P | ENSG00000252475 | -0.30693 | 0.62055     | -0.30693    | 0.62055     | -0.30693 |         |  |
|            | 0.62055         | -0.30693 | 0.62055     | 0.62055     | 0.808034652 |          |         |  |
| NAA16      | ENSG00000172766 | -0.49545 | 0.68986     | -0.6189     | 0.73201     | -0.30696 | 0.62056 |  |
|            | -0.30697        | 0.62057  | 0.62056     | 0.808034652 |             |          |         |  |
| NA         | ENSG00000248249 | -0.99144 | 0.83926     | -0.99144    | 0.83926     | -0.30703 | 0.62059 |  |
|            | -0.99144        | 0.83926  | 0.62059     | 0.808052123 |             |          |         |  |
| NA         | ENSG00000272866 | -0.30712 | 0.62062     | -0.4695     | 0.68064     | -0.4695  | 0.68064 |  |
|            | -0.4695         | 0.68064  | 0.62062     | 0.808069593 |             |          |         |  |
| NA         | ENSG00000248452 | -0.40595 | 0.65761     | -0.30719    | 0.62065     | -0.40595 | 0.65761 |  |
|            | -0.40595        | 0.65761  | 0.62065     | 0.808087063 |             |          |         |  |
| NA         | ENSG00000236326 | -0.30737 | 0.62072     | -0.30737    | 0.62072     | -0.30737 | 0.62072 |  |
|            | -0.30737        | 0.62072  | 0.62072     | 0.808105182 |             |          |         |  |
| NA         | ENSG00000271222 | -0.30737 | 0.62072     | -0.30737    | 0.62072     | -0.30737 | 0.62072 |  |
|            | -0.30737        | 0.62072  | 0.62072     | 0.808105182 |             |          |         |  |
| NA         | ENSG00000223390 | -0.3074  | 0.62073     | -0.3074     | 0.62073     | -0.3074  | 0.62073 |  |
|            | -0.3074         | 0.62073  | 0.62073     | 0.808105182 |             |          |         |  |
| MIR548AE2  | ENSG00000265699 | -0.30742 | 0.62074     | -0.30742    | 0.62074     | -0.30742 |         |  |
|            | 0.62074         | -0.30742 | 0.62074     | 0.62074     | 0.808105182 |          |         |  |
| NA         | ENSG00000254861 | -0.43066 | 0.66664     | -1.357      | 0.91261     | -0.30748 | 0.62076 |  |
|            | -0.43066        | 0.66664  | 0.62076     | 0.808105182 |             |          |         |  |
| NA         | ENSG00000268107 | -0.3075  | 0.62077     | -0.3075     | 0.62077     | -0.3075  | 0.62077 |  |
|            | -0.3075         | 0.62077  | 0.62077     | 0.808105182 |             |          |         |  |
| NA         | ENSG00000259117 | -0.30752 | 0.62078     | -0.30752    | 0.62078     | -0.30752 | 0.62078 |  |
|            | -0.30752        | 0.62078  | 0.62078     | 0.808105182 |             |          |         |  |
| MYO1E      | ENSG00000157483 | -0.88555 | 0.81207     | -0.30764    | 0.62082     | -1.3997  | 0.91919 |  |
|            | -1.53093699     | 0.62082  | 0.808122971 |             |             |          |         |  |
| NA         | ENSG00000239622 | -0.30766 | 0.62083     | -0.34015    | 0.63313     | -0.80183 | 0.78867 |  |
|            | -0.34015        | 0.63313  | 0.62083     | 0.808122971 |             |          |         |  |
| RNU6-797P  | ENSG00000199971 | -0.78274 | 0.78311     | -0.30773    | 0.62086     | -0.78274 |         |  |
|            | 0.78311         | -0.78274 | 0.78311     | 0.62086     | 0.808122971 |          |         |  |
| NA         | ENSG00000228935 | -0.30775 | 0.62086     | -0.7953     | 0.78678     | -0.7953  | 0.78678 |  |
|            | -0.7953         | 0.78678  | 0.62086     | 0.808122971 |             |          |         |  |
| MIR548B    | ENSG00000207982 | -0.30779 | 0.62088     | -0.30779    | 0.62088     | -0.30779 |         |  |
|            | 0.62088         | -0.30779 | 0.62088     | 0.62088     | 0.808127418 |          |         |  |
| P3H3       | ENSG00000110811 | -0.30792 | 0.62093     | -0.30792    | 0.62093     | -0.30792 | 0.62093 |  |
|            | -1.2948         | 0.90231  | 0.62093     | 0.808170911 |             |          |         |  |
| ELOCP30    | ENSG00000223746 | -1.147   | 0.87431     | -0.30809    | 0.62099     | -1.0006  |         |  |
|            | 0.8415          | -1.5031  | 0.93359     | 0.62099     | 0.808227416 |          |         |  |
| NA         | ENSG00000226812 | -0.30822 | 0.62104     | -0.66424    | 0.74673     | -1.5649  | 0.9412  |  |
|            | -1.5649         | 0.9412   | 0.62104     | 0.808270904 |             |          |         |  |
| STEAP2     | ENSG00000157214 | -0.30832 | 0.62108     | -0.30832    | 0.62108     | -0.30832 |         |  |
|            | 0.62108         | -0.30832 | 0.62108     | 0.62108     | 0.808297244 |          |         |  |
| LRRC4      | ENSG00000128594 | -0.52442 | 0.70001     | -0.50041    | 0.69161     | -0.30838 | 0.6211  |  |
|            | -0.78699        | 0.78436  | 0.6211      | 0.808297244 |             |          |         |  |
| TNNI3      | ENSG00000129991 | -0.30839 | 0.62111     | -0.30839    | 0.62111     | -0.30839 | 0.62111 |  |
|            | -0.30839        | 0.62111  | 0.62111     | 0.808297244 |             |          |         |  |
| NA         | ENSG00000203437 | -0.3085  | 0.62115     | -0.3085     | 0.62115     | -0.3085  | 0.62115 |  |
|            | -0.3085         | 0.62115  | 0.62115     | 0.808327712 |             |          |         |  |
| NA         | ENSG00000250243 | -0.30859 | 0.62118     | -0.71037    | 0.76126     | -0.71037 | 0.76126 |  |



|            |                 |          |          |          |             |             |         |  |  |
|------------|-----------------|----------|----------|----------|-------------|-------------|---------|--|--|
|            |                 | -0.71037 | 0.76126  | 0.62118  | 0.808345165 |             |         |  |  |
| NA         | ENSG00000267695 | -0.40201 | 0.65616  | -0.30885 | 0.62128     | -0.30885    | 0.62128 |  |  |
|            |                 | -0.41481 | 0.66086  | 0.62128  | 0.808419706 |             |         |  |  |
| TTR        | ENSG00000118271 | -0.93063 | 0.82398  | -0.30888 | 0.62129     | -0.93063    | 0.82398 |  |  |
|            |                 | -0.93063 | 0.82398  | 0.62129  | 0.808419706 |             |         |  |  |
| DBN1       | ENSG00000113758 | -0.63063 | 0.73586  | -0.50282 | 0.69245     | -1.4726     | 0.92958 |  |  |
|            |                 | -0.3089  | 0.6213   | 0.6213   | 0.808419706 |             |         |  |  |
| NA         | ENSG00000279908 | -0.30897 | 0.62133  | -0.30897 | 0.62133     | -0.30897    | 0.62133 |  |  |
|            |                 | -0.30897 | 0.62133  | 0.62133  | 0.808419706 |             |         |  |  |
| NA         | ENSG00000250034 | -0.30901 | 0.62134  | -0.30901 | 0.62134     | -0.30901    | 0.62134 |  |  |
|            |                 | -1.1124  | 0.86703  | 0.62134  | 0.808419706 |             |         |  |  |
| NA         | ENSG00000271245 | -1.301   | 0.90336  | -0.37237 | 0.64519     | -0.309      | 0.62134 |  |  |
|            |                 | -0.88862 | 0.8129   | 0.62134  | 0.808419706 |             |         |  |  |
| IGKV1D-43  | ENSG00000242580 | -0.77812 | 0.78175  | -0.30907 | 0.62136     | -0.77812    |         |  |  |
|            |                 | 0.78175  | -0.77812 | 0.78175  | 0.62136     | 0.808419706 |         |  |  |
| UBE2V1P4   | ENSG00000233909 | -0.30908 | 0.62137  | -1.5697  | 0.94176     | -0.30908    |         |  |  |
|            |                 | 0.62137  | -0.30908 | 0.62137  | 0.62137     | 0.808419706 |         |  |  |
| SLC30A1    | ENSG00000170385 | -0.30916 | 0.6214   | -0.30916 | 0.6214      | -0.30916    |         |  |  |
|            |                 | 0.6214   | -0.90479 | 0.81721  | 0.6214      | 0.808437153 |         |  |  |
| SPATA1     | ENSG00000122432 | -0.37183 | 0.64499  | -0.37183 | 0.64499     | -0.37183    |         |  |  |
|            |                 | 0.64499  | -0.30925 | 0.62144  | 0.62144     | 0.808446025 |         |  |  |
| SLC25A39P1 | ENSG00000226148 | -0.30927 | 0.62144  | -1.3459  | 0.91083     | -0.66821    | 0.748   |  |  |
|            |                 | -1.3459  | 0.91083  | 0.62144  | 0.808446025 |             |         |  |  |
| SMARCE1P2  | ENSG00000226309 | -0.30935 | 0.62147  | -0.40429 | 0.657       | -0.3665     | 0.64301 |  |  |
|            |                 | -0.70999 | 0.76114  | 0.62147  | 0.808463469 |             |         |  |  |
| PHF3       | ENSG00000118482 | -0.30939 | 0.62149  | -1.74    | 0.95907     | -1.0264     | 0.84765 |  |  |
|            |                 | -0.97311 | 0.83475  | 0.62149  | 0.808467904 |             |         |  |  |
| MIR576     | ENSG00000207988 | -0.30956 | 0.62155  | -0.30956 | 0.62155     | -0.30956    |         |  |  |
|            |                 | 0.62155  | -0.30956 | 0.62155  | 0.62155     | 0.808472931 |         |  |  |
| NA         | ENSG00000201279 | -0.30959 | 0.62156  | -0.30959 | 0.62156     | -0.30959    | 0.62156 |  |  |
|            |                 | -0.30959 | 0.62156  | 0.62156  | 0.808472931 |             |         |  |  |
| GNAQP1     | ENSG00000214077 | -1.3531  | 0.91199  | -0.6184  | 0.73184     | -1.6394     |         |  |  |
|            |                 | 0.94943  | -0.30967 | 0.62159  | 0.62159     | 0.808472931 |         |  |  |
| RNA5SP170  | ENSG00000252959 | -0.30966 | 0.62159  | -0.44715 | 0.67262     | -0.44715    |         |  |  |
|            |                 | 0.67262  | -0.44715 | 0.67262  | 0.62159     | 0.808472931 |         |  |  |
| NA         | ENSG00000267228 | -0.30966 | 0.62159  | -0.30966 | 0.62159     | -0.30966    | 0.62159 |  |  |
|            |                 | -0.30966 | 0.62159  | 0.62159  | 0.808472931 |             |         |  |  |
| FKBP11     | ENSG00000134285 | -0.3097  | 0.62161  | -0.3097  | 0.62161     | -0.3097     |         |  |  |
|            |                 | 0.62161  | -0.3097  | 0.62161  | 0.62161     | 0.808472931 |         |  |  |
| IGHV7-40   | ENSG00000253467 | -0.30971 | 0.62161  | -0.30971 | 0.62161     | -0.30971    |         |  |  |
|            |                 | 0.62161  | -0.30971 | 0.62161  | 0.62161     | 0.808472931 |         |  |  |
| NA         | ENSG00000256894 | -0.30989 | 0.62168  | -0.30989 | 0.62168     | -0.30989    | 0.62168 |  |  |
|            |                 | -0.30989 | 0.62168  | 0.62168  | 0.808512242 |             |         |  |  |
| MRPS21P8   | ENSG00000259978 | -0.30993 | 0.62169  | -0.30993 | 0.62169     | -0.60455    |         |  |  |
|            |                 | 0.72726  | -0.30993 | 0.62169  | 0.62169     | 0.808512242 |         |  |  |
| NA         | ENSG00000270820 | -0.41679 | 0.66158  | -0.30991 | 0.62169     | -0.41679    | 0.66158 |  |  |
|            |                 | -0.41679 | 0.66158  | 0.62169  | 0.808512242 |             |         |  |  |
| YIPF5      | ENSG00000145817 | -0.31003 | 0.62173  | -1.3038  | 0.90385     | -0.57129    | 0.7161  |  |  |
|            |                 | -1.1964  | 0.88423  | 0.62173  | 0.808512534 |             |         |  |  |
| DBF4P2     | ENSG00000271635 | -0.31002 | 0.62173  | -0.68269 | 0.7526      | -0.62404    |         |  |  |
|            |                 | 0.7337   | -0.62404 | 0.7337   | 0.62173     | 0.808512534 |         |  |  |
| UTRN       | ENSG00000152818 | -0.632   | 0.73631  | -0.94724 | 0.82824     | -0.98871    | 0.8386  |  |  |
|            |                 | -0.31005 | 0.62174  | 0.62174  | 0.808512534 |             |         |  |  |
| NA         | ENSG00000256835 | -0.78002 | 0.78231  | -0.31019 | 0.62179     | -1.4143     | 0.92136 |  |  |
|            |                 | -0.31019 | 0.62179  | 0.62179  | 0.80852583  |             |         |  |  |
| NA         | ENSG00000267770 | -0.31022 | 0.6218   | -0.31022 | 0.6218      | -0.31022    | 0.6218  |  |  |
|            |                 | -0.31022 | 0.6218   | 0.6218   | 0.80852583  |             |         |  |  |
| NA         | ENSG00000277597 | -0.3102  | 0.6218   | -0.3102  | 0.6218      | -0.3102     | 0.6218  |  |  |
|            |                 | -0.3102  | 0.6218   | 0.6218   | 0.80852583  |             |         |  |  |
| NA         | ENSG00000200118 | -0.3103  | 0.62183  | -0.3103  | 0.62183     | -0.3103     | 0.62183 |  |  |
|            |                 | -0.3103  | 0.62183  | 0.62183  | 0.808539123 |             |         |  |  |
| PGAM1P11   | ENSG00000233623 | -0.31036 | 0.62186  | -0.31036 | 0.62186     | -0.31036    |         |  |  |

|           |                 |          |         |             |             |          |         |  |
|-----------|-----------------|----------|---------|-------------|-------------|----------|---------|--|
|           | 0.62186         | -0.31036 | 0.62186 | 0.62186     | 0.808539123 |          |         |  |
| NA        | ENSG00000265454 | -0.31036 | 0.62186 | -1.7288     | 0.95807     | -1.5497  | 0.9394  |  |
|           | -1.3998         | 0.91921  | 0.62186 | 0.808539123 |             |          |         |  |
| NA        | ENSG00000254431 | -0.54819 | 0.70822 | -0.31044    | 0.62189     | -0.31044 | 0.62189 |  |
|           | -0.31044        | 0.62189  | 0.62189 | 0.808556555 |             |          |         |  |
| N4BP2     | ENSG00000078177 | -1.2582  | 0.89584 | -0.47103    | 0.68119     | -0.75816 | 0.77582 |  |
|           | -0.31061        | 0.62195  | 0.62195 | 0.808582846 |             |          |         |  |
| MIR1227   | ENSG00000221411 | -0.31064 | 0.62196 | -0.31064    | 0.62196     | -0.31064 |         |  |
|           | 0.62196         | -0.31064 | 0.62196 | 0.62196     | 0.808582846 |          |         |  |
| NA        | ENSG00000262979 | -0.31065 | 0.62196 | -0.31065    | 0.62196     | -0.31065 | 0.62196 |  |
|           | -0.31065        | 0.62196  | 0.62196 | 0.808582846 |             |          |         |  |
| CYP27C1   | ENSG00000186684 | -0.9974  | 0.84071 | -0.67961    | 0.75162     | -0.38525 |         |  |
|           | 0.64997         | -0.31072 | 0.62199 | 0.62199     | 0.808600275 |          |         |  |
| ABCA4     | ENSG00000198691 | -0.51798 | 0.69776 | -0.31079    | 0.62202     | -0.4842  | 0.68588 |  |
|           | -0.85731        | 0.80436  | 0.62202 | 0.808601131 |             |          |         |  |
| NA        | ENSG00000230161 | -0.31086 | 0.62205 | -0.31086    | 0.62205     | -0.31086 | 0.62205 |  |
|           | -0.31086        | 0.62205  | 0.62205 | 0.808601131 |             |          |         |  |
| ARL6IP1P3 | ENSG00000255014 | -1.5241  | 0.93626 | -0.31089    | 0.62206     | -1.5256  |         |  |
|           | 0.93644         | -1.5256  | 0.93644 | 0.62206     | 0.808601131 |          |         |  |
| TAOK2     | ENSG00000149930 | -0.31097 | 0.62209 | -1.0946     | 0.86315     | -0.99744 | 0.84072 |  |
|           | -1.0934         | 0.86289  | 0.62209 | 0.808601131 |             |          |         |  |
| NA        | ENSG00000261369 | -0.311   | 0.6221  | -0.311      | 0.6221      | -0.311   | 0.6221  |  |
|           | -0.311          | 0.6221   | 0.6221  | 0.808601131 |             |          |         |  |
| HSPE1P28  | ENSG00000230081 | -0.80453 | 0.78945 | -0.80453    | 0.78945     | -0.54825 |         |  |
|           | 0.70824         | -0.31102 | 0.62211 | 0.62211     | 0.808601131 |          |         |  |
| NA        | ENSG00000230352 | -0.31107 | 0.62213 | -0.31107    | 0.62213     | -0.31107 | 0.62213 |  |
|           | -0.31107        | 0.62213  | 0.62213 | 0.808601131 |             |          |         |  |
| NA        | ENSG00000261823 | -0.31108 | 0.62213 | -0.31108    | 0.62213     | -0.31108 | 0.62213 |  |
|           | -0.31108        | 0.62213  | 0.62213 | 0.808601131 |             |          |         |  |
| GTF2IP9   | ENSG00000251451 | -0.31111 | 0.62214 | -0.62824    | 0.73508     | -0.62824 |         |  |
|           | 0.73508         | -0.62824 | 0.73508 | 0.62214     | 0.808601131 |          |         |  |
| API5P2    | ENSG00000213962 | -0.4495  | 0.67346 | -0.31127    | 0.6222      | -0.31127 |         |  |
|           | 0.6222          | -0.31127 | 0.6222  | 0.6222      | 0.808627408 |          |         |  |
| NA        | ENSG00000267954 | -0.31127 | 0.6222  | -0.31127    | 0.6222      | -0.31127 | 0.6222  |  |
|           | -0.31127        | 0.6222   | 0.6222  | 0.808627408 |             |          |         |  |
| MCM3      | ENSG00000112118 | -0.31128 | 0.62221 | -0.74676    | 0.77239     | -0.40419 | 0.65696 |  |
|           | -0.95752        | 0.83085  | 0.62221 | 0.808627408 |             |          |         |  |
| RPS15AP17 | ENSG00000225405 | -0.31141 | 0.62226 | -0.31141    | 0.62226     | -0.31141 |         |  |
|           | 0.62226         | -0.31141 | 0.62226 | 0.62226     | 0.808670822 |          |         |  |
| OR4R2P    | ENSG00000255560 | -0.31156 | 0.62231 | -1.0917     | 0.86252     | -0.9618  |         |  |
|           | 0.83193         | -0.31156 | 0.62231 | 0.62231     | 0.808714233 |          |         |  |
| NA        | ENSG00000265168 | -0.31183 | 0.62241 | -0.31183    | 0.62241     | -0.31183 | 0.62241 |  |
|           | -0.31183        | 0.62241  | 0.62241 | 0.808822617 |             |          |         |  |
| NA        | ENSG00000279277 | -0.31189 | 0.62244 | -0.31189    | 0.62244     | -0.31189 | 0.62244 |  |
|           | -0.31189        | 0.62244  | 0.62244 | 0.808835878 |             |          |         |  |
| NA        | ENSG00000272023 | -0.31195 | 0.62246 | -0.31195    | 0.62246     | -0.31195 | 0.62246 |  |
|           | -0.50055        | 0.69166  | 0.62246 | 0.808835878 |             |          |         |  |
| NA        | ENSG00000274461 | -0.56189 | 0.71291 | -0.4476     | 0.67278     | -0.31196 | 0.62247 |  |
|           | -0.31196        | 0.62247  | 0.62247 | 0.808835878 |             |          |         |  |
| SNHG32    | ENSG00000204387 | -0.31203 | 0.62249 | -0.31203    | 0.62249     | -0.31203 |         |  |
|           | 0.62249         | -0.31203 | 0.62249 | 0.62249     | 0.808840298 |          |         |  |
| NA        | ENSG00000256407 | -0.59792 | 0.72505 | -0.31227    | 0.62258     | -0.31227 | 0.62258 |  |
|           | -0.31227        | 0.62258  | 0.62258 | 0.808901632 |             |          |         |  |
| DND1      | ENSG00000256453 | -0.31232 | 0.6226  | -0.31232    | 0.6226      | -0.31232 | 0.6226  |  |
|           | -0.31232        | 0.6226   | 0.6226  | 0.808901632 |             |          |         |  |
| RPS27P23  | ENSG00000239413 | -0.31238 | 0.62262 | -0.31238    | 0.62262     | -0.62034 |         |  |
|           | 0.73248         | -1.0578  | 0.85492 | 0.62262     | 0.808901632 |          |         |  |
| ZNF516    | ENSG00000101493 | -1.1734  | 0.87967 | -1.1032     | 0.86502     | -0.34409 |         |  |
|           | 0.63461         | -0.31248 | 0.62266 | 0.62266     | 0.808901632 |          |         |  |
| HAUS8     | ENSG00000131351 | -0.93894 | 0.82612 | -1.2292     | 0.89049     | -0.31248 | 0.62266 |  |
|           | -0.60145        | 0.72623  | 0.62266 | 0.808901632 |             |          |         |  |
| RPL18AP17 | ENSG00000227952 | -0.3125  | 0.62267 | -0.3125     | 0.62267     | -0.3125  |         |  |

|              |                 |          |          |          |             |             |         |
|--------------|-----------------|----------|----------|----------|-------------|-------------|---------|
|              | 0.62267         | -0.3125  | 0.62267  | 0.62267  | 0.808901632 |             |         |
| NA           | ENSG00000249697 | -0.80273 | 0.78893  | -0.84978 | 0.80227     | -0.3125     | 0.62267 |
|              |                 | -0.80273 | 0.78893  | 0.62267  | 0.808901632 |             |         |
| NA           | ENSG00000251715 | -0.3125  | 0.62267  | -0.3125  | 0.62267     | -0.3125     | 0.62267 |
|              |                 | -0.3125  | 0.62267  | 0.62267  | 0.808901632 |             |         |
| RNASEK       | ENSG00000219200 | -0.31258 | 0.6227   | -0.31258 | 0.6227      | -0.31258    |         |
|              |                 | 0.6227   | -0.31258 | 0.6227   | 0.808919039 |             |         |
| TRUB1        | ENSG00000165832 | -0.68091 | 0.75204  | -0.68091 | 0.75204     | -0.31264    | 0.62272 |
|              |                 | -0.48622 | 0.68659  | 0.62272  | 0.808923456 |             |         |
| RN7SL745P    | ENSG00000242182 | -0.31297 | 0.62285  | -0.31297 | 0.62285     | -0.31297    |         |
|              |                 | 0.62285  | -0.31297 | 0.62285  | 0.809015143 |             |         |
| KDM7A        | ENSG00000006459 | -0.31303 | 0.62287  | -0.6775  | 0.75096     | -1.0929     | 0.86279 |
|              |                 | -0.83198 | 0.79729  | 0.62287  | 0.809015143 |             |         |
| NA           | ENSG00000280215 | -1.0963  | 0.86352  | -0.31304 | 0.62287     | -0.40621    | 0.65771 |
|              |                 | -0.60712 | 0.72811  | 0.62287  | 0.809015143 |             |         |
| NA           | ENSG00000226889 | -0.47388 | 0.68221  | -0.31309 | 0.62289     | -0.47388    | 0.68221 |
|              |                 | -0.47388 | 0.68221  | 0.62289  | 0.809015143 |             |         |
| IGHVII-65-1  | ENSG00000253169 | -0.31312 | 0.6229   | -0.31312 | 0.6229      | -0.31312    |         |
|              |                 | 0.6229   | -0.31312 | 0.6229   | 0.809015143 |             |         |
| FAM167B      | ENSG00000183615 | -0.36236 | 0.64146  | -0.31314 | 0.62291     | -0.38046    |         |
|              |                 | 0.6482   | -0.38046 | 0.6482   | 0.62291     | 0.809015143 |         |
| NA           | ENSG00000231128 | -0.60445 | 0.72723  | -0.48673 | 0.68677     | -0.31322    | 0.62294 |
|              |                 | -0.31322 | 0.62294  | 0.62294  | 0.809015143 |             |         |
| ITPR1-DT     | ENSG00000231249 | -0.3132  | 0.62294  | -0.3132  | 0.62294     | -0.3132     |         |
|              |                 | 0.62294  | -0.3132  | 0.62294  | 0.62294     | 0.809015143 |         |
| AQP1         | ENSG00000240583 | -0.44805 | 0.67294  | -0.44805 | 0.67294     | -0.3132     | 0.62294 |
|              |                 | -0.7897  | 0.78515  | 0.62294  | 0.809015143 |             |         |
| FAM110B      | ENSG00000169122 | -0.3136  | 0.62309  | -0.36695 | 0.64317     | -1.0041     |         |
|              |                 | 0.84233  | -0.50847 | 0.69444  | 0.62309     | 0.809188383 |         |
| FAM47E-STBD1 | ENSG00000272414 | -0.31368 | 0.62312  | -0.31368 | 0.62312     | -0.31368    |         |
|              |                 | 0.62312  | -0.31368 | 0.62312  | 0.62312     | 0.809189811 |         |
| NA           | ENSG00000237422 | -0.31373 | 0.62314  | -0.31373 | 0.62314     | -0.31373    | 0.62314 |
|              |                 | -0.31373 | 0.62314  | 0.62314  | 0.809189811 |             |         |
| NA           | ENSG00000237371 | -0.31378 | 0.62315  | -0.31378 | 0.62315     | -0.31378    | 0.62315 |
|              |                 | -0.31378 | 0.62315  | 0.62315  | 0.809189811 |             |         |
| OR8K4P       | ENSG00000254947 | -0.31389 | 0.6232   | -0.31389 | 0.6232      | -0.31389    |         |
|              |                 | 0.6232   | -0.95069 | 0.82912  | 0.6232      | 0.809189811 |         |
| NA           | ENSG00000265361 | -0.31392 | 0.62321  | -1.4163  | 0.92165     | -0.31831    | 0.62487 |
|              |                 | -0.79445 | 0.78653  | 0.62321  | 0.809189811 |             |         |
| NA           | ENSG00000202379 | -0.31406 | 0.62326  | -0.31406 | 0.62326     | -0.31406    | 0.62326 |
|              |                 | -0.31406 | 0.62326  | 0.62326  | 0.809189811 |             |         |
| NA           | ENSG00000276763 | -0.31406 | 0.62326  | -0.31406 | 0.62326     | -0.31406    | 0.62326 |
|              |                 | -0.31406 | 0.62326  | 0.62326  | 0.809189811 |             |         |
| GARNL3       | ENSG00000136895 | -0.31419 | 0.62331  | -0.93365 | 0.82476     | -1.2241     |         |
|              |                 | 0.88954  | -1.152   | 0.87534  | 0.62331     | 0.809189811 |         |
| NA           | ENSG00000231344 | -0.3142  | 0.62331  | -0.3142  | 0.62331     | -0.3142     | 0.62331 |
|              |                 | -0.3142  | 0.62331  | 0.62331  | 0.809189811 |             |         |
| CLEC4E       | ENSG00000166523 | -0.54929 | 0.7086   | -0.31428 | 0.62335     | -0.67973    |         |
|              |                 | 0.75166  | -0.67973 | 0.75166  | 0.62335     | 0.809189811 |         |
| RDH5         | ENSG00000135437 | -0.31435 | 0.62337  | -0.31435 | 0.62337     | -0.31435    | 0.62337 |
|              |                 | -0.31435 | 0.62337  | 0.62337  | 0.809189811 |             |         |
| NA           | ENSG00000242593 | -1.5145  | 0.93505  | -1.2298  | 0.89062     | -0.6346     | 0.73715 |
|              |                 | -0.31434 | 0.62337  | 0.62337  | 0.809189811 |             |         |
| NA           | ENSG00000258311 | -0.31435 | 0.62337  | -0.31435 | 0.62337     | -0.31435    | 0.62337 |
|              |                 | -0.31435 | 0.62337  | 0.62337  | 0.809189811 |             |         |
| PLA2G4D      | ENSG00000159337 | -0.31436 | 0.62338  | -1.5597  | 0.94058     | -0.65528    |         |
|              |                 | 0.74385  | -0.81127 | 0.7914   | 0.62338     | 0.809189811 |         |
| RN7SKP87     | ENSG00000200966 | -0.3144  | 0.62339  | -0.3144  | 0.62339     | -0.3144     |         |
|              |                 | 0.62339  | -0.3144  | 0.62339  | 0.62339     | 0.809189811 |         |
| ANKRD20A7P   | ENSG00000236816 | -0.3144  | 0.62339  | -0.67444 | 0.74998     | -0.48673    |         |
|              |                 | 0.68677  | -0.51478 | 0.69665  | 0.62339     | 0.809189811 |         |
| PI4KA        | ENSG00000241973 | -0.3144  | 0.62339  | -0.60021 | 0.72582     | -0.5916     | 0.72294 |

|            |                 |             |         |             |             |          |         |       |
|------------|-----------------|-------------|---------|-------------|-------------|----------|---------|-------|
|            | -0.87641        | 0.8096      | 0.62339 | 0.809189811 |             |          |         |       |
| NA         | ENSG00000259192 | -0.3144     | 0.62339 | -0.3144     | 0.62339     | -0.3144  | 0.62339 |       |
|            | -0.3144         | 0.62339     | 0.62339 | 0.809189811 |             |          |         |       |
| ARAP1-AS1  | ENSG00000256007 | -0.31454    | 0.62344 | -0.31454    | 0.62344     | -0.31454 | 0.62344 |       |
|            | 0.62344         | -0.31454    | 0.62344 | 0.62344     | 0.809233158 |          |         |       |
| SLC7A13    | ENSG00000164893 | -0.41277    | 0.66011 | -0.41277    | 0.66011     | -0.41277 | 0.66011 |       |
|            | 0.66011         | -0.31463    | 0.62348 | 0.62348     | 0.809263522 |          |         |       |
| NKX2-4     | ENSG00000125816 | -0.3147     | 0.62351 | -0.3147     | 0.62351     | -0.3147  | 0.62351 |       |
|            | 0.62351         | -0.3147     | 0.62351 | 0.62351     | 0.809280905 |          |         |       |
| TMBIM6     | ENSG00000139644 | -0.64419    | 0.74027 | -0.58073    | 0.71929     | -0.31477 |         |       |
|            | 0.62353         | -0.31477    | 0.62353 | 0.62353     | 0.809285308 |          |         |       |
| NA         | ENSG00000237861 | -0.31481    | 0.62355 | -0.31481    | 0.62355     | -0.31481 | 0.62355 |       |
|            | -0.92286        | 0.82196     | 0.62355 | 0.809289711 |             |          |         |       |
| ACVRL1     | ENSG00000139567 | -1.1756     | 0.88013 | -0.31489    | 0.62358     | -0.45629 |         |       |
|            | 0.67591         | -1.9671     | 0.97541 | 0.62358     | 0.809298517 |          |         |       |
| MIR944     | ENSG00000216058 | -0.31493    | 0.62359 | -1.3922     | 0.91806     | -0.4406  |         |       |
|            | 0.67025         | -0.4406     | 0.67025 | 0.62359     | 0.809298517 |          |         |       |
| EPCAM      | ENSG00000119888 | -0.31498    | 0.62361 | -0.45076    | 0.67392     | -1.4227  | 0.92259 |       |
|            | -0.38199        | 0.64877     | 0.62361 | 0.809301264 |             |          |         |       |
| OR2A4      | ENSG00000180658 | -1.2005     | 0.88503 | -1.1863     | 0.88224     | -0.31502 | 0.62363 |       |
|            | -0.90364        | 0.81691     | 0.62363 | 0.809301264 |             |          |         |       |
| IRF5       | ENSG00000128604 | -0.31523    | 0.62371 | -0.31523    | 0.62371     | -0.31523 | 0.62371 |       |
|            | -0.31523        | 0.62371     | 0.62371 | 0.809301264 |             |          |         |       |
| NA         | ENSG00000248285 | -1.0101     | 0.84377 | -0.76739    | 0.77857     | -0.5058  | 0.6935  |       |
|            | -0.31525        | 0.62371     | 0.62371 | 0.809301264 |             |          |         |       |
| TCTN3      | ENSG00000119977 | -0.46393    | 0.67865 | -0.31531    | 0.62374     | -0.98864 | 0.83858 |       |
|            | -0.64369        | 0.74011     | 0.62374 | 0.809301264 |             |          |         |       |
| AKAIN1     | ENSG00000231824 | -0.36733    | 0.64331 | -0.31541    | 0.62378     | -0.41539 |         |       |
|            | 0.66107         | -0.41539    | 0.66107 | 0.62378     | 0.809301264 |          |         |       |
| NA         | ENSG00000276667 | -0.50651    | 0.69375 | -0.3155     | 0.62381     | -0.59032 | 0.72251 |       |
|            | -0.3155         | 0.62381     | 0.62381 | 0.809301264 |             |          |         |       |
| RPL7P7     | ENSG00000224315 | -0.41833    | 0.66215 | -0.87016    | 0.80789     | -0.31557 |         |       |
|            | 0.62383         | -0.87016    | 0.80789 | 0.62383     | 0.809301264 |          |         |       |
| C7orf25    | ENSG00000136197 | -0.46911    | 0.6805  | -0.31558    | 0.62384     | -0.31558 |         |       |
|            | 0.62384         | -0.31558    | 0.62384 | 0.62384     | 0.809301264 |          |         |       |
| H2BC10     | ENSG00000278588 | -0.31566    | 0.62387 | -0.31566    | 0.62387     | -0.31566 |         |       |
|            | 0.62387         | -0.31566    | 0.62387 | 0.62387     | 0.809301264 |          |         |       |
| KRTAP10-10 | ENSG00000221859 | -0.77167    | 0.77985 | -0.31573    | 0.6239      | -0.45952 |         |       |
|            | 0.67707         | -0.45952    | 0.67707 | 0.6239      | 0.809301264 |          |         |       |
| LINC02402  | ENSG00000257510 | -0.73527    | 0.76891 | -0.73527    | 0.76891     | -0.31574 |         |       |
|            | 0.6239          | -0.73527    | 0.76891 | 0.6239      | 0.809301264 |          |         |       |
| OSBPL1A    | ENSG00000141447 | -0.77623    | 0.78119 | -0.3158     | 0.62392     | -1.2356  |         |       |
|            | 0.8917          | -0.42856    | 0.66588 | 0.62392     | 0.809301264 |          |         |       |
| P2RX2      | ENSG00000187848 | -0.31579    | 0.62392 | -0.84356    | 0.80054     | -0.9361  | 0.82539 |       |
|            | -0.84356        | 0.80054     | 0.62392 | 0.809301264 |             |          |         |       |
| NA         | ENSG00000227845 | -0.31583    | 0.62393 | -0.31583    | 0.62393     | -0.37487 | 0.64612 |       |
|            | -0.31583        | 0.62393     | 0.62393 | 0.809301264 |             |          |         |       |
| RN7SL183P  | ENSG00000240997 | -1.5333     | 0.9374  | -1.3316     | 0.9085      | -0.31584 |         |       |
|            | 0.62394         | -0.31584    | 0.62394 | 0.62394     | 0.809301264 |          |         |       |
| CENPK      | ENSG00000123219 | -1.2359     | 0.89175 | -1.0695     | 0.85758     | -0.31587 | 0.62395 |       |
|            | -1.0888         | 0.86189     | 0.62395 | 0.809301264 |             |          |         |       |
| MTND4P22   | ENSG00000232772 | -0.31588    | 0.62395 | -0.31588    | 0.62395     | -0.31588 |         |       |
|            | 0.62395         | -0.31588    | 0.62395 | 0.62395     | 0.809301264 |          |         |       |
| MTND4LP12  | ENSG00000236300 | -0.31588    | 0.62395 | -0.31588    | 0.62395     | -0.31588 |         |       |
|            | 0.62395         | -0.31588    | 0.62395 | 0.62395     | 0.809301264 |          |         |       |
| OR51K1P    | ENSG00000248424 | -0.31588    | 0.62395 | -0.31588    | 0.62395     | -0.31588 |         |       |
|            | 0.62395         | -0.70055    | 0.75821 | 0.62395     | 0.809301264 |          |         |       |
| NA         | ENSG00000234115 | -1.662      | 0.95174 | -0.31591    | 0.62397     | -1.2785  | 0.89947 |       |
|            | -1.2009         | 0.8851      | 0.62397 | 0.809301264 |             |          |         |       |
| NA         | ENSG00000236489 | -0.31599    | 0.624   | -0.31599    | 0.624       | -0.31599 | 0.624   | 0.624 |
|            | 0.624           | 0.809301264 |         |             |             |          |         |       |
| WDR82P1    | ENSG00000234629 | -0.3161     | 0.62404 | -0.3161     | 0.62404     | -0.3161  |         |       |

|            |                 |          |         |             |             |          |         |
|------------|-----------------|----------|---------|-------------|-------------|----------|---------|
|            | 0.62404         | -0.3161  | 0.62404 | 0.62404     | 0.809301264 |          |         |
| RFLNB      | ENSG00000183688 | -0.83731 | 0.79879 | -0.31613    | 0.62405     | -0.49448 | 0.68952 |
|            | -0.82553        | 0.79546  | 0.62405 | 0.809301264 |             |          |         |
| NA         | ENSG00000228997 | -1.5152  | 0.93514 | -1.5152     | 0.93514     | -0.31613 | 0.62405 |
|            | -1.2648         | 0.89702  | 0.62405 | 0.809301264 |             |          |         |
| NA         | ENSG00000271053 | -0.31617 | 0.62407 | -0.31617    | 0.62407     | -0.31617 | 0.62407 |
|            | -0.31617        | 0.62407  | 0.62407 | 0.809301264 |             |          |         |
| NA         | ENSG00000252607 | -0.3162  | 0.62408 | -0.3162     | 0.62408     | -0.3162  | 0.62408 |
|            | -0.3162         | 0.62408  | 0.62408 | 0.809301264 |             |          |         |
| NA         | ENSG00000282390 | -0.31628 | 0.62411 | -0.31628    | 0.62411     | -1.0422  | 0.85135 |
|            | -0.31628        | 0.62411  | 0.62411 | 0.809301264 |             |          |         |
| NA         | ENSG00000207132 | -0.31635 | 0.62413 | -0.79862    | 0.78775     | -0.79862 | 0.78775 |
|            | -0.79862        | 0.78775  | 0.62413 | 0.809301264 |             |          |         |
| NA         | ENSG00000265254 | -0.31635 | 0.62413 | -0.31635    | 0.62413     | -0.31635 | 0.62413 |
|            | -0.31635        | 0.62413  | 0.62413 | 0.809301264 |             |          |         |
| SMIM36     | ENSG00000261873 | -0.74894 | 0.77305 | -1.9149     | 0.97225     | -0.66482 |         |
|            | 0.74692         | -0.31636 | 0.62414 | 0.62414     | 0.809301264 |          |         |
| NA         | ENSG00000278546 | -0.31638 | 0.62414 | -0.31638    | 0.62414     | -0.31638 | 0.62414 |
|            | -0.31638        | 0.62414  | 0.62414 | 0.809301264 |             |          |         |
| OR6K5P     | ENSG00000226949 | -0.31644 | 0.62416 | -0.47341    | 0.68204     | -0.47341 |         |
|            | 0.68204         | -0.47341 | 0.68204 | 0.62416     | 0.809301264 |          |         |
| NA         | ENSG00000252677 | -2.298   | 0.98922 | -2.298      | 0.98922     | -0.66358 | 0.74652 |
|            | -0.31645        | 0.62417  | 0.62417 | 0.809301264 |             |          |         |
| RNU6-824P  | ENSG00000200594 | -0.31647 | 0.62418 | -0.31647    | 0.62418     | -0.31647 |         |
|            | 0.62418         | -0.31647 | 0.62418 | 0.62418     | 0.809301264 |          |         |
| RAC1P8     | ENSG00000234033 | -0.88111 | 0.81087 | -0.3165     | 0.62419     | -0.31852 |         |
|            | 0.62495         | -0.3165  | 0.62419 | 0.62419     | 0.809301264 |          |         |
| CLEC4F     | ENSG00000152672 | -0.31663 | 0.62424 | -0.31663    | 0.62424     | -0.31663 |         |
|            | 0.62424         | -0.31663 | 0.62424 | 0.62424     | 0.809331819 |          |         |
| NA         | ENSG00000213109 | -0.31669 | 0.62426 | -0.31669    | 0.62426     | -0.31669 | 0.62426 |
|            | -0.31669        | 0.62426  | 0.62426 | 0.809331819 |             |          |         |
| NA         | ENSG00000267707 | -0.31671 | 0.62427 | -0.31671    | 0.62427     | -0.31671 | 0.62427 |
|            | -0.31671        | 0.62427  | 0.62427 | 0.809331819 |             |          |         |
| NA         | ENSG00000226036 | -1.5365  | 0.93779 | -0.31675    | 0.62428     | -0.31675 | 0.62428 |
|            | -0.31675        | 0.62428  | 0.62428 | 0.809331819 |             |          |         |
| OR6C66P    | ENSG00000233606 | -0.31683 | 0.62431 | -0.31683    | 0.62431     | -0.31683 |         |
|            | 0.62431         | -0.31683 | 0.62431 | 0.62431     | 0.809349179 |          |         |
| IGHG1      | ENSG00000211896 | -0.91534 | 0.81999 | -0.42014    | 0.66281     | -0.31694 | 0.62436 |
|            | -0.42014        | 0.66281  | 0.62436 | 0.809375553 |             |          |         |
| HNRNPA1P14 | ENSG00000227638 | -0.93748 | 0.82575 | -0.31707    | 0.6244      | -1.3589  |         |
|            | 0.91291         | -1.3589  | 0.91291 | 0.6244      | 0.809375553 |          |         |
| RNU6-984P  | ENSG00000200106 | -0.31708 | 0.62441 | -0.31708    | 0.62441     | -0.31708 |         |
|            | 0.62441         | -0.31708 | 0.62441 | 0.62441     | 0.809375553 |          |         |
| NA         | ENSG00000234017 | -0.3171  | 0.62441 | -0.88111    | 0.81087     | -1.3755  | 0.91552 |
|            | -0.45825        | 0.67661  | 0.62441 | 0.809375553 |             |          |         |
| LMNB2      | ENSG00000176619 | -0.37417 | 0.64586 | -0.70471    | 0.7595      | -0.31711 | 0.62442 |
|            | -1.2232         | 0.88938  | 0.62442 | 0.809375553 |             |          |         |
| NA         | ENSG00000257458 | -1.0443  | 0.85183 | -0.98142    | 0.83681     | -0.51307 | 0.69605 |
|            | -0.31714        | 0.62443  | 0.62443 | 0.809375553 |             |          |         |
| CCNYL4     | ENSG00000224761 | -0.83842 | 0.7991  | -0.31723    | 0.62446     | -0.9722  |         |
|            | 0.83452         | -1.3501  | 0.91151 | 0.62446     | 0.809375775 |          |         |
| SERBP1P6   | ENSG00000248873 | -0.98319 | 0.83724 | -0.91566    | 0.82008     | -0.56782 |         |
|            | 0.71492         | -0.31726 | 0.62448 | 0.62448     | 0.809375775 |          |         |
| OR2AT1P    | ENSG00000254475 | -0.31727 | 0.62448 | -0.93275    | 0.82453     | -0.84358 |         |
|            | 0.80055         | -0.93275 | 0.82453 | 0.62448     | 0.809375775 |          |         |
| RNA5SP149  | ENSG00000201822 | -0.80076 | 0.78836 | -0.80076    | 0.78836     | -0.80076 |         |
|            | 0.78836         | -0.31735 | 0.62451 | 0.62451     | 0.80939313  |          |         |
| CDHR2      | ENSG00000074276 | -0.9573  | 0.83079 | -0.90388    | 0.81697     | -0.46724 | 0.67983 |
|            | -0.31743        | 0.62454  | 0.62454 | 0.809397745 |             |          |         |
| CHP1       | ENSG00000187446 | -0.36158 | 0.64117 | -0.31749    | 0.62456     | -1.1098  | 0.86645 |
|            | -2.4456         | 0.99277  | 0.62456 | 0.809397745 |             |          |         |
| NA         | ENSG00000248790 | -0.3175  | 0.62457 | -0.3175     | 0.62457     | -0.3175  | 0.62457 |

|           |                 |          |         |             |             |          |         |
|-----------|-----------------|----------|---------|-------------|-------------|----------|---------|
|           | -0.3175         | 0.62457  | 0.62457 | 0.809397745 |             |          |         |
| ZNF385B   | ENSG00000144331 | -0.64634 | 0.74097 | -0.31753    | 0.62458     | -1.2153  |         |
|           | 0.88788         | -1.1585  | 0.87667 | 0.62458     | 0.809397745 |          |         |
| LINC01828 | ENSG00000235885 | -0.31757 | 0.6246  | -0.64756    | 0.74137     | -1.0167  |         |
|           | 0.84535         | -1.0652  | 0.85662 | 0.6246      | 0.809402138 |          |         |
| TMEM259   | ENSG00000182087 | -0.31777 | 0.62467 | -0.31777    | 0.62467     | -0.48265 |         |
|           | 0.68533         | -0.31777 | 0.62467 | 0.62467     | 0.809428492 |          |         |
| OGDH      | ENSG00000105953 | -2.13    | 0.98341 | -1.991      | 0.97676     | -0.87818 | 0.81008 |
|           | -0.31781        | 0.62468  | 0.62468 | 0.809428492 |             |          |         |
| GALNT6    | ENSG00000139629 | -0.86932 | 0.80766 | -0.31785    | 0.6247      | -0.86932 |         |
|           | 0.80766         | -0.86932 | 0.80766 | 0.6247      | 0.809428492 |          |         |
| TRPT1     | ENSG00000149743 | -0.31787 | 0.62471 | -0.31787    | 0.62471     | -0.31787 | 0.62471 |
|           | -0.31787        | 0.62471  | 0.62471 | 0.809428492 |             |          |         |
| NUDT22    | ENSG00000149761 | -0.31787 | 0.62471 | -0.31787    | 0.62471     | -0.31787 |         |
|           | 0.62471         | -0.31787 | 0.62471 | 0.62471     | 0.809428492 |          |         |
| NA        | ENSG00000260391 | -0.3179  | 0.62472 | -0.3179     | 0.62472     | -0.3179  | 0.62472 |
|           | -0.3179         | 0.62472  | 0.62472 | 0.809428492 |             |          |         |
| TNKS      | ENSG00000173273 | -0.34723 | 0.63579 | -0.47066    | 0.68106     | -0.95542 | 0.83032 |
|           | -0.31799        | 0.62476  | 0.62476 | 0.809433102 |             |          |         |
| NA        | ENSG00000259463 | -0.31801 | 0.62476 | -0.73561    | 0.76902     | -2.4064  | 0.99194 |
|           | -2.4064         | 0.99194  | 0.62476 | 0.809433102 |             |          |         |
| RNU4-84P  | ENSG00000201070 | -0.89328 | 0.81415 | -0.89328    | 0.81415     | -0.89328 |         |
|           | 0.81415         | -0.31807 | 0.62478 | 0.62478     | 0.809433102 |          |         |
| C7        | ENSG00000112936 | -0.85582 | 0.80395 | -0.95384    | 0.82992     | -0.47425 | 0.68234 |
|           | -0.31807        | 0.62479  | 0.62479 | 0.809433102 |             |          |         |
| ABHD12B   | ENSG00000131969 | -0.55322 | 0.70994 | -0.31821    | 0.62484     | -0.78797 |         |
|           | 0.78464         | -0.55322 | 0.70994 | 0.62484     | 0.809476358 |          |         |
| NA        | ENSG00000247287 | -0.5044  | 0.69301 | -1.0381     | 0.85038     | -0.83354 | 0.79773 |
|           | -0.31852        | 0.62496  | 0.62496 | 0.809610293 |             |          |         |
| IGKV3-20  | ENSG00000239951 | -1.0615  | 0.85576 | -0.67377    | 0.74977     | -0.69742 |         |
|           | 0.75723         | -0.31867 | 0.62501 | 0.62501     | 0.809653542 |          |         |
| NA        | ENSG00000261178 | -0.31871 | 0.62503 | -0.70457    | 0.75946     | -0.70457 | 0.75946 |
|           | -0.70457        | 0.75946  | 0.62503 | 0.809657927 |             |          |         |
| NA        | ENSG00000280054 | -0.31881 | 0.62506 | -0.31881    | 0.62506     | -0.31881 | 0.62506 |
|           | -0.31881        | 0.62506  | 0.62506 | 0.809675265 |             |          |         |
| NA        | ENSG00000269399 | -0.31898 | 0.62513 | -0.31898    | 0.62513     | -0.31898 | 0.62513 |
|           | -0.31898        | 0.62513  | 0.62513 | 0.80973185  |             |          |         |
| CDH7      | ENSG00000081138 | -0.38994 | 0.65171 | -0.31903    | 0.62515     | -1.3415  | 0.91011 |
|           | -2.4154         | 0.99214  | 0.62515 | 0.80973185  |             |          |         |
| GXYLT1    | ENSG00000151233 | -0.88409 | 0.81168 | -0.8833     | 0.81146     | -0.95758 |         |
|           | 0.83086         | -0.31906 | 0.62516 | 0.62516     | 0.80973185  |          |         |
| SYNGR4    | ENSG00000105467 | -0.31917 | 0.6252  | -0.31917    | 0.6252      | -0.31917 |         |
|           | 0.6252          | -0.31917 | 0.6252  | 0.6252      | 0.80973185  |          |         |
| SIAH2     | ENSG00000181788 | -0.31916 | 0.6252  | -0.31916    | 0.6252      | -1.2156  | 0.88793 |
|           | -0.96854        | 0.83361  | 0.6252  | 0.80973185  |             |          |         |
| PF4V1     | ENSG00000109272 | -0.31919 | 0.62521 | -0.31919    | 0.62521     | -0.31919 | 0.62521 |
|           | -0.31919        | 0.62521  | 0.62521 | 0.80973185  |             |          |         |
| TMEM106A  | ENSG00000184988 | -0.72231 | 0.76495 | -0.72231    | 0.76495     | -0.72231 |         |
|           | 0.76495         | -0.31922 | 0.62522 | 0.62522     | 0.80973185  |          |         |
| NA        | ENSG00000274001 | -1.1898  | 0.88295 | -0.3193     | 0.62525     | -1.5345  | 0.93755 |
|           | -1.5345         | 0.93755  | 0.62525 | 0.809740807 |             |          |         |
| TOX       | ENSG00000198846 | -0.32213 | 0.62632 | -0.31941    | 0.62529     | -0.65465 | 0.74365 |
|           | -0.51581        | 0.69701  | 0.62529 | 0.809740807 |             |          |         |
| NA        | ENSG00000273284 | -0.31941 | 0.62529 | -1.0642     | 0.85639     | -0.40665 | 0.65787 |
|           | -0.40665        | 0.65787  | 0.62529 | 0.809740807 |             |          |         |
| NA        | ENSG00000233367 | -0.71217 | 0.76182 | -0.73663    | 0.76933     | -0.3277  | 0.62843 |
|           | -0.31943        | 0.6253   | 0.6253  | 0.809740807 |             |          |         |
| NA        | ENSG00000271324 | -0.31947 | 0.62531 | -0.67888    | 0.75139     | -0.31947 | 0.62531 |
|           | -0.31947        | 0.62531  | 0.62531 | 0.809740807 |             |          |         |
| RNU1-14P  | ENSG00000199629 | -0.46155 | 0.6778  | -0.3196     | 0.62536     | -0.46155 |         |
|           | 0.6778          | -0.46155 | 0.6778  | 0.62536     | 0.809784035 |          |         |
| NA        | ENSG00000255098 | -0.61492 | 0.7307  | -0.31967    | 0.62539     | -0.47752 | 0.6835  |

|           |                 |          |             |             |             |          |         |          |
|-----------|-----------------|----------|-------------|-------------|-------------|----------|---------|----------|
|           | -1.3208         | 0.90671  | 0.62539     | 0.809792794 |             |          |         |          |
| ANK2-AS1  | ENSG00000248152 | -0.83345 | 0.79771     | -0.85234    | 0.80299     | -0.31969 |         |          |
|           | 0.6254          | -1.0948  | 0.86319     | 0.6254      | 0.809792794 |          |         |          |
| UGT1A10   | ENSG00000242515 | -2.067   | 0.98063     | -2.067      | 0.98063     | -0.3198  |         |          |
|           | 0.62544         | -0.50416 | 0.69293     | 0.62544     | 0.809823069 |          |         |          |
| DNAJC28   | ENSG00000177692 | -0.31994 | 0.62549     | -0.51862    | 0.69799     | -0.31994 |         |          |
|           | 0.62549         | -0.54787 | 0.70811     | 0.62549     | 0.80986629  |          |         |          |
| NA        | ENSG00000278946 | -0.32004 | 0.62553     | -0.32004    | 0.62553     | -0.32004 | 0.62553 |          |
|           | -0.32004        | 0.62553  | 0.62553     | 0.809879603 |             |          |         |          |
| COMT      | ENSG00000093010 | -0.99026 | 0.83898     | -0.55036    | 0.70896     | -0.32006 | 0.62554 |          |
|           | -0.64097        | 0.73923  | 0.62554     | 0.809879603 |             |          |         |          |
| NA        | ENSG00000215022 | -0.63271 | 0.73654     | -0.32018    | 0.62558     | -0.61082 | 0.72934 |          |
|           | -0.61082        | 0.72934  | 0.62558     | 0.809879603 |             |          |         |          |
| NA        | ENSG00000274478 | -0.32016 | 0.62558     | -0.32016    | 0.62558     | -0.32016 | 0.62558 |          |
|           | -0.32016        | 0.62558  | 0.62558     | 0.809879603 |             |          |         |          |
| RNA5SP201 | ENSG00000222248 | -1.1694  | 0.87889     | -1.6075     | 0.94603     | -0.32019 |         |          |
|           | 0.62559         | -1.1694  | 0.87889     | 0.62559     | 0.809879603 |          |         |          |
| NA        | ENSG00000254302 | -1.58    | 0.94294     | -1.58       | 0.94294     | -0.5992  | 0.72548 | -0.32023 |
|           | 0.6256          | 0.6256   | 0.809879603 |             |             |          |         |          |
| C1orf174  | ENSG00000198912 | -0.32044 | 0.62568     | -0.32044    | 0.62568     | -0.32853 |         |          |
|           | 0.62874         | -0.56725 | 0.71473     | 0.62568     | 0.80996165  |          |         |          |
| NA        | ENSG00000276533 | -0.85939 | 0.80494     | -1.0343     | 0.84951     | -0.32051 | 0.62571 |          |
|           | -0.32051        | 0.62571  | 0.62571     | 0.80997512  |             |          |         |          |
| TSBP1     | ENSG00000204296 | -0.33409 | 0.63084     | -0.711      | 0.76146     | -0.3206  | 0.62574 |          |
|           | -1.3704         | 0.91472  | 0.62574     | 0.80997512  |             |          |         |          |
| E2F4P1    | ENSG00000231276 | -0.32066 | 0.62576     | -0.32066    | 0.62576     | -0.32066 |         |          |
|           | 0.62576         | -0.32066 | 0.62576     | 0.62576     | 0.80997512  |          |         |          |
| NA        | ENSG00000253555 | -1.1849  | 0.88196     | -1.1614     | 0.87726     | -0.32066 | 0.62577 |          |
|           | -1.1849         | 0.88196  | 0.62577     | 0.80997512  |             |          |         |          |
| ARFGEF2   | ENSG00000124198 | -1.4761  | 0.93004     | -0.62006    | 0.73239     | -0.32074 |         |          |
|           | 0.6258          | -0.49822 | 0.69084     | 0.6258      | 0.80997512  |          |         |          |
| CPNE8     | ENSG00000139117 | -0.96916 | 0.83377     | -0.74956    | 0.77324     | -0.90436 | 0.8171  |          |
|           | -0.32074        | 0.6258   | 0.6258      | 0.80997512  |             |          |         |          |
| MRPS21P7  | ENSG00000260024 | -0.32077 | 0.62581     | -1.4081     | 0.92045     | -0.78062 |         |          |
|           | 0.78249         | -0.78062 | 0.78249     | 0.62581     | 0.80997512  |          |         |          |
| ULK3      | ENSG00000140474 | -0.76655 | 0.77833     | -0.51319    | 0.69609     | -0.32086 | 0.62584 |          |
|           | -0.7635         | 0.77742  | 0.62584     | 0.80997512  |             |          |         |          |
| NA        | ENSG00000265072 | -0.32085 | 0.62584     | -0.32085    | 0.62584     | -0.32085 | 0.62584 |          |
|           | -0.32085        | 0.62584  | 0.62584     | 0.80997512  |             |          |         |          |
| OR7E43P   | ENSG00000249844 | -1.4328  | 0.92404     | -1.6009     | 0.9453      | -0.98251 |         |          |
|           | 0.83708         | -0.32107 | 0.62592     | 0.62592     | 0.810048571 |          |         |          |
| EXTL2P1   | ENSG00000223976 | -0.3211  | 0.62593     | -0.3211     | 0.62593     | -0.3211  |         |          |
|           | 0.62593         | -0.3211  | 0.62593     | 0.62593     | 0.810048571 |          |         |          |
| MIR4699   | ENSG00000265227 | -0.32126 | 0.62599     | -0.32126    | 0.62599     | -0.32126 |         |          |
|           | 0.62599         | -0.32126 | 0.62599     | 0.62599     | 0.810066719 |          |         |          |
| MIR5704   | ENSG00000265859 | -0.6169  | 0.73135     | -0.32133    | 0.62602     | -0.36086 |         |          |
|           | 0.6409          | -0.33088 | 0.62963     | 0.62602     | 0.810066719 |          |         |          |
| MED20     | ENSG00000124641 | -1.2176  | 0.88832     | -1.0964     | 0.86355     | -0.67694 | 0.75078 |          |
|           | -0.32143        | 0.62606  | 0.62606     | 0.810066719 |             |          |         |          |
| ARRDC3    | ENSG00000113369 | -0.32149 | 0.62608     | -0.52213    | 0.69921     | -0.91812 |         |          |
|           | 0.82072         | -1.543   | 0.93858     | 0.62608     | 0.810066719 |          |         |          |
| VN2R10P   | ENSG00000226348 | -1.5549  | 0.94002     | -0.79017    | 0.78529     | -1.0345  |         |          |
|           | 0.84954         | -0.32153 | 0.62609     | 0.62609     | 0.810066719 |          |         |          |
| NA        | ENSG00000206977 | -0.81588 | 0.79272     | -1.0814     | 0.86024     | -0.735   | 0.76883 |          |
|           | -0.32161        | 0.62612  | 0.62612     | 0.810066719 |             |          |         |          |
| AK4P6     | ENSG00000235606 | -0.3216  | 0.62612     | -0.3216     | 0.62612     | -0.3216  | 0.62612 |          |
|           | -1.0188         | 0.84585  | 0.62612     | 0.810066719 |             |          |         |          |
| NA        | ENSG00000256093 | -0.3216  | 0.62612     | -0.3216     | 0.62612     | -0.3216  | 0.62612 |          |
|           | -0.3216         | 0.62612  | 0.62612     | 0.810066719 |             |          |         |          |
| NA        | ENSG00000259257 | -0.32165 | 0.62614     | -0.32165    | 0.62614     | -0.32165 | 0.62614 |          |
|           | -0.32165        | 0.62614  | 0.62614     | 0.810066719 |             |          |         |          |
| NA        | ENSG00000279343 | -0.32167 | 0.62615     | -0.32167    | 0.62615     | -0.32167 | 0.62615 |          |

|              |                 |          |         |             |             |          |         |  |
|--------------|-----------------|----------|---------|-------------|-------------|----------|---------|--|
|              | -0.32167        | 0.62615  | 0.62615 | 0.810066719 |             |          |         |  |
| HMGB1P47     | ENSG00000249338 | -0.32171 | 0.62616 | -1.1912     | 0.88321     | -0.70472 |         |  |
|              | 0.75951         | -0.32171 | 0.62616 | 0.62616     | 0.810066719 |          |         |  |
| RPS27        | ENSG00000177954 | -0.32173 | 0.62617 | -1.3964     | 0.91871     | -1.3964  | 0.91871 |  |
|              | -1.3964         | 0.91871  | 0.62617 | 0.810066719 |             |          |         |  |
| RNU2-32P     | ENSG00000223125 | -0.3218  | 0.6262  | -0.3218     | 0.6262      | -0.3218  |         |  |
|              | 0.6262          | -0.3218  | 0.6262  | 0.6262      | 0.810066719 |          |         |  |
| NA           | ENSG00000275286 | -0.82593 | 0.79558 | -0.82593    | 0.79558     | -0.32181 | 0.6262  |  |
|              | -0.82593        | 0.79558  | 0.6262  | 0.810066719 |             |          |         |  |
| NA           | ENSG00000279080 | -0.32179 | 0.6262  | -0.32179    | 0.6262      | -0.32179 | 0.6262  |  |
|              | -0.32179        | 0.6262   | 0.6262  | 0.810066719 |             |          |         |  |
| NA           | ENSG00000219559 | -0.32216 | 0.62633 | -0.32183    | 0.62621     | -1.0741  | 0.8586  |  |
|              | -0.74186        | 0.77091  | 0.62621 | 0.810066719 |             |          |         |  |
| NA           | ENSG00000206751 | -0.3219  | 0.62624 | -1.2577     | 0.89576     | -0.95353 | 0.82984 |  |
|              | -0.72468        | 0.76568  | 0.62624 | 0.810066886 |             |          |         |  |
| TPST1        | ENSG00000169902 | -0.9364  | 0.82547 | -0.77815    | 0.78176     | -0.32195 | 0.62625 |  |
|              | -0.80622        | 0.78994  | 0.62625 | 0.810066886 |             |          |         |  |
| TMEM62       | ENSG00000137842 | -0.89612 | 0.81491 | -0.32195    | 0.62626     | -0.49825 |         |  |
|              | 0.69085         | -0.61995 | 0.73235 | 0.62626     | 0.810066886 |          |         |  |
| H2BS1        | ENSG00000234289 | -0.32224 | 0.62637 | -0.44352    | 0.6713      | -1.2591  | 0.896   |  |
|              | -0.65492        | 0.74374  | 0.62637 | 0.810187665 |             |          |         |  |
| LINC00523    | ENSG00000196273 | -0.32233 | 0.6264  | -0.56805    | 0.715       | -0.50954 | 0.69481 |  |
|              | -0.51639        | 0.69721  | 0.6264  | 0.810204964 |             |          |         |  |
| DPRXP4       | ENSG00000264743 | -0.32245 | 0.62644 | -0.32245    | 0.62644     | -0.32245 |         |  |
|              | 0.62644         | -0.32245 | 0.62644 | 0.62644     | 0.810213846 |          |         |  |
| NA           | ENSG00000237614 | -0.3225  | 0.62646 | -0.3225     | 0.62646     | -1.0556  | 0.85442 |  |
|              | -0.3225         | 0.62646  | 0.62646 | 0.810213846 |             |          |         |  |
| HLA-DRB1     | ENSG00000196126 | -0.32256 | 0.62648 | -0.53901    | 0.70506     | -0.37183 |         |  |
|              | 0.64499         | -0.53901 | 0.70506 | 0.62648     | 0.810213846 |          |         |  |
| LINC02643    | ENSG00000230109 | -0.68204 | 0.75239 | -0.68204    | 0.75239     | -0.68204 |         |  |
|              | 0.75239         | -0.32255 | 0.62648 | 0.62648     | 0.810213846 |          |         |  |
| ADAMTSL4-AS2 | ENSG00000237781 | -0.32258 | 0.62649 | -0.32258    | 0.62649     | -0.32258 |         |  |
|              | 0.62649         | -0.32258 | 0.62649 | 0.62649     | 0.810213846 |          |         |  |
| RNU6-358P    | ENSG00000252373 | -0.37283 | 0.64536 | -0.84188    | 0.80007     | -0.32271 |         |  |
|              | 0.62654         | -0.32271 | 0.62654 | 0.62654     | 0.810214156 |          |         |  |
| NA           | ENSG00000229682 | -1.2727  | 0.89843 | -0.32273    | 0.62655     | -1.2727  | 0.89843 |  |
|              | -1.2727         | 0.89843  | 0.62655 | 0.810214156 |             |          |         |  |
| NA           | ENSG00000203546 | -2.2513  | 0.98782 | -2.2513     | 0.98782     | -0.38424 | 0.6496  |  |
|              | -0.32276        | 0.62656  | 0.62656 | 0.810214156 |             |          |         |  |
| DUXB         | ENSG00000282757 | -0.32275 | 0.62656 | -0.32275    | 0.62656     | -0.32275 | 0.62656 |  |
|              | -0.32275        | 0.62656  | 0.62656 | 0.810214156 |             |          |         |  |
| LYPD9P       | ENSG00000229703 | -0.32281 | 0.62658 | -0.60212    | 0.72645     | -0.32281 |         |  |
|              | 0.62658         | -0.32281 | 0.62658 | 0.62658     | 0.810214156 |          |         |  |
| NA           | ENSG00000220643 | -0.71622 | 0.76307 | -0.71622    | 0.76307     | -0.71622 | 0.76307 |  |
|              | -0.32284        | 0.62659  | 0.62659 | 0.810214156 |             |          |         |  |
| NA           | ENSG00000263667 | -0.50352 | 0.6927  | -0.32298    | 0.62664     | -0.92217 | 0.82178 |  |
|              | -0.50517        | 0.69328  | 0.62664 | 0.81024874  |             |          |         |  |
| POU1F1       | ENSG00000064835 | -0.83142 | 0.79713 | -1.286      | 0.90078     | -0.62707 |         |  |
|              | 0.73469         | -0.32298 | 0.62665 | 0.62665     | 0.81024874  |          |         |  |
| BCKDHA       | ENSG00000248098 | -0.32308 | 0.62668 | -0.32308    | 0.62668     | -0.32308 |         |  |
|              | 0.62668         | -0.32308 | 0.62668 | 0.62668     | 0.81026603  |          |         |  |
| NA           | ENSG00000279764 | -1.0281  | 0.84805 | -0.70505    | 0.75961     | -1.1229  | 0.86926 |  |
|              | -0.32318        | 0.62672  | 0.62672 | 0.810296248 |             |          |         |  |
| NA           | ENSG00000256146 | -1.1146  | 0.86748 | -1.3418     | 0.91016     | -1.1146  | 0.86748 |  |
|              | -0.32333        | 0.62678  | 0.62678 | 0.810335182 |             |          |         |  |
| NA           | ENSG00000223672 | -0.32338 | 0.6268  | -0.32338    | 0.6268      | -0.32338 | 0.6268  |  |
|              | -0.32338        | 0.6268   | 0.6268  | 0.810335182 |             |          |         |  |
| NA           | ENSG00000253520 | -0.32339 | 0.6268  | -0.32339    | 0.6268      | -0.32339 | 0.6268  |  |
|              | -0.32339        | 0.6268   | 0.6268  | 0.810335182 |             |          |         |  |
| STXBP5L      | ENSG00000145087 | -1.0511  | 0.8534  | -0.8092     | 0.7908      | -0.90276 |         |  |
|              | 0.81667         | -0.32355 | 0.62686 | 0.62686     | 0.810382679 |          |         |  |
| NA           | ENSG00000223421 | -0.32359 | 0.62687 | -0.54832    | 0.70826     | -0.32359 | 0.62687 |  |



|            |                 |          |          |             |             |             |          |          |
|------------|-----------------|----------|----------|-------------|-------------|-------------|----------|----------|
|            |                 | -0.32359 | 0.62687  | 0.62687     | 0.810382679 |             |          |          |
| TMEM37     | ENSG00000171227 | -0.32365 | 0.6269   | 0.6269      | -0.32365    | 0.6269      | -0.35122 |          |
|            |                 | 0.63729  | -0.35122 | 0.63729     | 0.6269      | 0.810399963 |          |          |
| MYBBP1A    | ENSG00000132382 | -0.32382 | 0.62696  | 0.62696     | -0.94541    | 0.82777     | -1.3559  |          |
|            |                 | 0.91243  | -0.98157 | 0.83685     | 0.62696     | 0.810434665 |          |          |
| CLCN3      | ENSG00000109572 | -0.46118 | 0.67767  | -0.54889    | 0.70846     | -0.32387    | 0.62698  |          |
|            |                 | -0.482   | 0.6851   | 0.62698     | 0.810434665 |             |          |          |
| ERCC4      | ENSG00000175595 | -0.62064 | 0.73258  | -0.45752    | 0.67635     | -1.0152     | 0.845    |          |
|            |                 | -0.3239  | 0.62699  | 0.62699     | 0.810434665 |             |          |          |
| RPS10P16   | ENSG00000239917 | -0.32391 | 0.627    | -0.32391    | 0.627       | -0.32391    | 0.627    | -0.32391 |
|            |                 | 0.627    | 0.627    | 0.810434665 |             |             |          |          |
| NDUFB11P1  | ENSG00000235547 | -0.32395 | 0.62701  | -0.32395    | 0.62701     | -0.32395    |          |          |
|            |                 | 0.62701  | -0.32395 | 0.62701     | 0.62701     | 0.810434665 |          |          |
| NA         | ENSG00000248967 | -0.32401 | 0.62704  | -0.32401    | 0.62704     | -0.32401    | 0.62704  |          |
|            |                 | -0.32401 | 0.62704  | 0.62704     | 0.810443373 |             |          |          |
| INTS5      | ENSG00000185085 | -0.32404 | 0.62705  | -0.32404    | 0.62705     | -0.32404    | 0.62705  |          |
|            |                 | -0.32404 | 0.62705  | 0.62705     | 0.810443373 |             |          |          |
| MED26      | ENSG00000105085 | -0.79655 | 0.78714  | -0.79655    | 0.78714     | -0.79655    | 0.78714  |          |
|            |                 | -0.3242  | 0.62711  | 0.62711     | 0.810469358 |             |          |          |
| OPN5       | ENSG00000124818 | -0.32423 | 0.62712  | -1.1578     | 0.87653     | -1.8106     | 0.9649   |          |
|            |                 | -2.1863  | 0.9856   | 0.62712     | 0.810469358 |             |          |          |
| GPR135     | ENSG00000181619 | -0.32424 | 0.62712  | -1.3594     | 0.91298     | -0.92925    |          |          |
|            |                 | 0.82362  | -1.6579  | 0.95133     | 0.62712     | 0.810469358 |          |          |
| CCT4       | ENSG00000115484 | -0.93474 | 0.82504  | -0.32439    | 0.62718     | -0.45036    | 0.67377  |          |
|            |                 | -0.79116 | 0.78557  | 0.62718     | 0.810503909 |             |          |          |
| NA         | ENSG00000242080 | -0.49492 | 0.68967  | -0.73913    | 0.77009     | -0.3244     | 0.62718  |          |
|            |                 | -1.2792  | 0.89958  | 0.62718     | 0.810503909 |             |          |          |
| PPIAP47    | ENSG00000260815 | -0.64798 | 0.7415   | -0.32454    | 0.62723     | -2.8407     |          |          |
|            |                 | 0.99775  | -2.8407  | 0.99775     | 0.62723     | 0.810542807 |          |          |
| NA         | ENSG00000280257 | -0.32457 | 0.62725  | -0.32457    | 0.62725     | -0.39118    | 0.65217  |          |
|            |                 | -0.32457 | 0.62725  | 0.62725     | 0.810542807 |             |          |          |
| HNRNPA1P49 | ENSG00000233231 | -0.32462 | 0.62726  | -0.32462    | 0.62726     | -0.32462    |          |          |
|            |                 | 0.62726  | -0.32462 | 0.62726     | 0.62726     | 0.810542807 |          |          |
| NA         | ENSG00000250292 | -1.109   | 0.86629  | -0.32472    | 0.6273      | -1.109      | 0.86629  |          |
|            |                 | -1.0687  | 0.8574   | 0.6273      | 0.810564429 |             |          |          |
| IL12A-AS1  | ENSG00000244040 | -0.46858 | 0.68031  | -0.63248    | 0.73646     | -0.32475    |          |          |
|            |                 | 0.62731  | -1.2576  | 0.89573     | 0.62731     | 0.810564429 |          |          |
| NA         | ENSG00000268280 | -1.0825  | 0.86048  | -1.0156     | 0.84508     | -0.91066    | 0.81876  |          |
|            |                 | -0.32482 | 0.62734  | 0.62734     | 0.810581699 |             |          |          |
| NA         | ENSG00000262890 | -0.32498 | 0.6274   | -0.32498    | 0.6274      | -0.32498    | 0.6274   |          |
|            |                 | -0.32498 | 0.6274   | 0.6274      | 0.810620585 |             |          |          |
| H2AJ       | ENSG00000246705 | -0.32499 | 0.62741  | -0.32499    | 0.62741     | -0.32499    | 0.62741  |          |
|            |                 | -0.32499 | 0.62741  | 0.62741     | 0.810620585 |             |          |          |
| SDR39U1    | ENSG00000100445 | -0.32502 | 0.62742  | -0.32502    | 0.62742     | -0.32502    |          |          |
|            |                 | 0.62742  | -0.32502 | 0.62742     | 0.62742     | 0.810620585 |          |          |
| IDH1-AS1   | ENSG00000231908 | -0.53823 | 0.70479  | -0.53823    | 0.70479     | -0.32516    |          |          |
|            |                 | 0.62747  | -0.53823 | 0.70479     | 0.62747     | 0.810625055 |          |          |
| OCIAD1     | ENSG00000109180 | -0.63799 | 0.73826  | -0.38029    | 0.64813     | -0.32522    |          |          |
|            |                 | 0.62749  | -0.47192 | 0.68151     | 0.62749     | 0.810625055 |          |          |
| COL10A1    | ENSG00000123500 | -0.32521 | 0.62749  | -0.7677     | 0.77867     | -0.7677     |          |          |
|            |                 | 0.77867  | -0.7677  | 0.77867     | 0.62749     | 0.810625055 |          |          |
| PCNPP1     | ENSG00000258359 | -0.32522 | 0.62749  | -0.32522    | 0.62749     | -0.32522    |          |          |
|            |                 | 0.62749  | -0.32522 | 0.62749     | 0.62749     | 0.810625055 |          |          |
| LINC01647  | ENSG00000235643 | -0.32525 | 0.62751  | -0.68514    | 0.75337     | -0.34368    |          |          |
|            |                 | 0.63446  | -0.47978 | 0.68431     | 0.62751     | 0.810629402 |          |          |
| CCDC6      | ENSG00000108091 | -0.3254  | 0.62756  | -0.3254     | 0.62756     | -0.3254     | 0.62756  |          |
|            |                 | -0.48497 | 0.68615  | 0.62756     | 0.810672502 |             |          |          |
| OR4A40P    | ENSG00000254832 | -0.32555 | 0.62762  | -1.0234     | 0.84695     | -0.55989    |          |          |
|            |                 | 0.71222  | -0.60706 | 0.72809     | 0.62762     | 0.810711371 |          |          |
| NA         | ENSG00000212615 | -0.32558 | 0.62763  | -0.32558    | 0.62763     | -0.32558    | 0.62763  |          |
|            |                 | -0.32558 | 0.62763  | 0.62763     | 0.810711371 |             |          |          |
| NA         | ENSG00000268965 | -0.32561 | 0.62764  | -0.32561    | 0.62764     | -0.32561    | 0.62764  |          |

|             |                 |             |             |           |             |             |          |  |
|-------------|-----------------|-------------|-------------|-----------|-------------|-------------|----------|--|
|             |                 | -0.32561    | 0.62764     | 0.62764   | 0.810711371 |             |          |  |
| NA          | ENSG00000254237 | -0.62984    | 0.7356      | -0.3259   | 0.62775     | -1.0497     | 0.85308  |  |
|             |                 | -1.8242     | 0.96594     | 0.62775   | 0.810831964 |             |          |  |
| NA          | ENSG00000225974 | -0.32608    | 0.62782     | -0.32608  | 0.62782     | -0.32608    | 0.62782  |  |
|             |                 | -0.32608    | 0.62782     | 0.62782   | 0.810900885 |             |          |  |
| BACH1-IT2   | ENSG00000228817 | -0.32622    | 0.62787     | -0.32622  | 0.62787     | -0.32622    |          |  |
|             |                 | 0.62787     | -0.94763    | 0.82834   | 0.62787     | 0.810922478 |          |  |
| NA          | ENSG00000249875 | -1.2495     | 0.89426     | -0.58301  | 0.72006     | -0.32621    | 0.62787  |  |
|             |                 | -0.32621    | 0.62787     | 0.62787   | 0.810922478 |             |          |  |
| NA          | ENSG00000270889 | -0.32626    | 0.62789     | -0.75622  | 0.77524     | -0.32626    | 0.62789  |  |
|             |                 | -0.32626    | 0.62789     | 0.62789   | 0.810926816 |             |          |  |
| SNORD116-18 | ENSG00000206688 | -0.32639    | 0.62794     | -0.32639  | 0.62794     | 0.62794     | -0.32639 |  |
|             |                 | 0.62794     | -0.32639    | 0.62794   | 0.62794     | 0.810944166 |          |  |
| NA          | ENSG00000238858 | -0.3264     | 0.62794     | -0.3264   | 0.62794     | -0.3264     | 0.62794  |  |
|             |                 | -0.3264     | 0.62794     | 0.62794   | 0.810944166 |             |          |  |
| NA          | ENSG00000255653 | -0.32645    | 0.62796     | -1.612    | 0.94652     | -0.32645    | 0.62796  |  |
|             |                 | -0.32645    | 0.62796     | 0.62796   | 0.810944166 |             |          |  |
| PRR7-AS1    | ENSG00000246334 | -0.47321    | 0.68197     | -0.32648  | 0.62797     | -0.32648    |          |  |
|             |                 | 0.62797     | -0.32648    | 0.62797   | 0.62797     | 0.810944166 |          |  |
| RNU6-942P   | ENSG00000199872 | -1.8279     | 0.96622     | -1.8279   | 0.96622     | -1.8279     |          |  |
|             |                 | 0.96622     | -0.32655    | 0.6280628 | 0.810961416 |             |          |  |
| RWDD4P1     | ENSG00000244490 | -0.33623    | 0.63165     | -0.32678  | 0.62808     | -0.32678    |          |  |
|             |                 | 0.62808     | -0.32678    | 0.62808   | 0.62808     | 0.811013161 |          |  |
| NA          | ENSG00000279794 | -0.32676    | 0.62808     | -0.32676  | 0.62808     | -0.32676    | 0.62808  |  |
|             |                 | -0.32676    | 0.62808     | 0.62808   | 0.811013161 |             |          |  |
| NA          | ENSG00000269563 | -0.82179    | 0.7944      | -1.1039   | 0.86518     | -1.1039     | 0.86518  |  |
|             |                 | -0.32679    | 0.62809     | 0.62809   | 0.811013161 |             |          |  |
| SETD4-AS1   | ENSG00000236677 | -0.32692    | 0.62814     | -0.32692  | 0.62814     | -0.32692    |          |  |
|             |                 | 0.62814     | -0.32692    | 0.62814   | 0.62814     | 0.811034742 |          |  |
| NA          | ENSG00000271277 | -0.32694    | 0.62814     | -0.32694  | 0.62814     | -0.32694    | 0.62814  |  |
|             |                 | -0.32694    | 0.62814     | 0.62814   | 0.811034742 |             |          |  |
| ZC3HAV1     | ENSG00000105939 | -0.73224    | 0.76799     | -1.8417   | 0.96724     | -1.4786     |          |  |
|             |                 | 0.93038     | -0.32711    | 0.62821   | 0.62821     | 0.811103633 |          |  |
| NA          | ENSG00000278231 | -0.32719    | 0.62824     | -0.40789  | 0.65832     | -0.6926     | 0.75572  |  |
|             |                 | -0.65686    | 0.74437     | 0.62824   | 0.811120875 |             |          |  |
| SETD5       | ENSG00000168137 | -0.61546    | 0.73088     | -1.2385   | 0.89223     | -0.75304    | 0.77429  |  |
|             |                 | -0.32728    | 0.62827     | 0.62827   | 0.811138117 |             |          |  |
| NA          | ENSG00000212228 | -0.32734    | 0.6283      | -0.32734  | 0.6283      | -0.32734    | 0.6283   |  |
|             |                 | -0.32734    | 0.6283      | 0.6283    | 0.811138281 |             |          |  |
| SNRPGP5     | ENSG00000235763 | -0.32739    | 0.62831     | -0.32739  | 0.62831     | -0.32739    |          |  |
|             |                 | 0.62831     | -0.32739    | 0.62831   | 0.62831     | 0.811138281 |          |  |
| TBCD        | ENSG00000141556 | -0.32744    | 0.62833     | -0.62178  | 0.73296     | -0.93052    | 0.82395  |  |
|             |                 | -1.227      | 0.89008     | 0.62833   | 0.811138281 |             |          |  |
| NA          | ENSG00000261606 | -0.32745    | 0.62834     | -0.32745  | 0.62834     | -0.32745    | 0.62834  |  |
|             |                 | -0.32745    | 0.62834     | 0.62834   | 0.811138281 |             |          |  |
| MEAK7       | ENSG00000140950 | -1.1002     | 0.86437     | -1.2697   | 0.8979      | -0.52327    | 0.69961  |  |
|             |                 | -0.32753    | 0.62837     | 0.62837   | 0.811138281 |             |          |  |
| OR5A1       | ENSG00000172320 | -0.32755    | 0.62837     | -0.32755  | 0.62837     | -0.53408    | 0.70336  |  |
|             |                 | -0.32755    | 0.62837     | 0.62837   | 0.811138281 |             |          |  |
| LRRC41      | ENSG00000132128 | -0.32766    | 0.62841     | -0.61258  | 0.72992     | -0.32766    |          |  |
|             |                 | 0.62841     | -0.756      | 0.77518   | 0.62841     | 0.811168427 |          |  |
| NA          | ENSG00000202014 | -0.32776    | 0.62845     | -0.32776  | 0.62845     | -0.32776    | 0.62845  |  |
|             |                 | -0.32776    | 0.62845     | 0.62845   | 0.811177085 |             |          |  |
| NA          | ENSG00000268810 | -0.32776    | 0.62845     | -0.32776  | 0.62845     | -0.32776    | 0.62845  |  |
|             |                 | -0.32776    | 0.62845     | 0.62845   | 0.811177085 |             |          |  |
| NA          | ENSG00000261621 | -0.98763    | 0.83833     | -1.2105   | 0.88696     | -1.0283     | 0.8481   |  |
|             |                 | -0.32789    | 0.6285      | 0.6285    | 0.811220136 |             |          |  |
| LINC01318   | ENSG00000237790 | -0.32796    | 0.62853     | -0.35026  | 0.63693     | -0.49112    |          |  |
|             |                 | 0.68833     | -0.32796    | 0.62853   | 0.62853     | 0.81123737  |          |  |
| RN7SKP298   | ENSG00000251759 | -1.08085993 | -1.08085993 | -0.83077  | 0.79695     |             |          |  |
|             |                 | -0.32802    | 0.62855     | 0.62855   | 0.811241697 |             |          |  |
| NA          | ENSG00000242539 | -0.32809    | 0.62858     | -0.32809  | 0.62858     | -0.32809    | 0.62858  |  |

|            |                 |          |          |         |             |             |          |         |
|------------|-----------------|----------|----------|---------|-------------|-------------|----------|---------|
|            |                 | -0.32809 | 0.62858  | 0.62858 | 0.811258929 |             |          |         |
| MRPL3P1    | ENSG00000215349 | -0.32821 | 0.62862  | 0.62862 | -0.32821    | 0.62862     | -0.32821 |         |
|            |                 | 0.62862  | -0.32821 | 0.62862 | 0.62862     | 0.811284882 |          |         |
| GAPDHP15   | ENSG00000214563 | -1.2057  | 0.88604  | 0.88604 | -1.2057     | 0.88604     | -1.1791  |         |
|            |                 | 0.88082  | -0.3283  | 0.62866 | 0.62866     | 0.811284882 |          |         |
| KCNJ3      | ENSG00000162989 | -0.71544 | 0.76283  | 0.76283 | -0.71544    | 0.76283     | -0.32836 | 0.62868 |
|            |                 | -0.71544 | 0.76283  | 0.62868 | 0.811284882 |             |          |         |
| NA         | ENSG00000267430 | -0.32836 | 0.62868  | 0.62868 | -0.32836    | 0.62868     | -0.32836 | 0.62868 |
|            |                 | -0.32836 | 0.62868  | 0.62868 | 0.811284882 |             |          |         |
| NCK1-DT    | ENSG00000239213 | -0.32838 | 0.62869  | 0.62869 | -0.32838    | 0.62869     | -0.32838 |         |
|            |                 | 0.62869  | -1.511   | 0.93461 | 0.62869     | 0.811284882 |          |         |
| GPAT4      | ENSG00000158669 | -0.89016 | 0.81331  | 0.81331 | -0.32842    | 0.6287      | -1.2044  | 0.88577 |
|            |                 | -0.60117 | 0.72614  | 0.6287  | 0.811284882 |             |          |         |
| INTU       | ENSG00000164066 | -0.32848 | 0.62873  | 0.62873 | -1.1818     | 0.88136     | -1.031   | 0.84874 |
|            |                 | -0.89747 | 0.81526  | 0.62873 | 0.81130211  |             |          |         |
| LINC02613  | ENSG00000231367 | -0.36912 | 0.64398  | 0.64398 | -0.32858    | 0.62876     | -0.61243 |         |
|            |                 | 0.72987  | -0.74927 | 0.77315 | 0.62876     | 0.811319338 |          |         |
| RPL6P5     | ENSG00000214064 | -0.32869 | 0.62881  | 0.62881 | -0.32869    | 0.62881     | -0.32869 |         |
|            |                 | 0.62881  | -0.69597 | 0.75678 | 0.62881     | 0.811358113 |          |         |
| CYCSP29    | ENSG00000255379 | -0.32875 | 0.62883  | 0.62883 | -0.32875    | 0.62883     | -0.32875 |         |
|            |                 | 0.62883  | -0.32875 | 0.62883 | 0.62883     | 0.811358113 |          |         |
| TMEM251P1  | ENSG00000249514 | -0.43863 | 0.66953  | 0.66953 | -0.32877    | 0.62884     | -0.43863 |         |
|            |                 | 0.66953  | -0.43863 | 0.66953 | 0.62884     | 0.811358113 |          |         |
| NA         | ENSG00000277310 | -0.32886 | 0.62887  | 0.62887 | -0.32886    | 0.62887     | -0.32886 | 0.62887 |
|            |                 | -0.32886 | 0.62887  | 0.62887 | 0.811358177 |             |          |         |
| NA         | ENSG00000224412 | -0.32888 | 0.62888  | 0.62888 | -0.32888    | 0.62888     | -0.32888 | 0.62888 |
|            |                 | -0.32888 | 0.62888  | 0.62888 | 0.811358177 |             |          |         |
| ENPP1      | ENSG00000197594 | -0.43428 | 0.66796  | 0.66796 | -1.3876     | 0.91738     | -0.32891 | 0.62889 |
|            |                 | -0.72038 | 0.76435  | 0.62889 | 0.811358177 |             |          |         |
| CNOT10-AS1 | ENSG00000251224 | -1.791   | 0.96335  | 0.96335 | -2.6017     | 0.99536     | -1.7298  |         |
|            |                 | 0.95817  | -0.32901 | 0.62893 | 0.62893     | 0.811388301 |          |         |
| HBEGF      | ENSG00000113070 | -0.84733 | 0.80159  | 0.80159 | -0.37065    | 0.64455     | -0.58244 | 0.71986 |
|            |                 | -0.32908 | 0.62895  | 0.62895 | 0.811388363 |             |          |         |
| NA         | ENSG00000253018 | -0.85743 | 0.8044   | 0.8044  | -0.32912    | 0.62897     | -0.85743 | 0.8044  |
|            |                 | -0.85743 | 0.8044   | 0.62897 | 0.811388363 |             |          |         |
| NA         | ENSG00000267139 | -0.32915 | 0.62898  | 0.62898 | -0.32915    | 0.62898     | -0.32915 | 0.62898 |
|            |                 | -0.32915 | 0.62898  | 0.62898 | 0.811388363 |             |          |         |
| NA         | ENSG00000223538 | -0.32936 | 0.62906  | 0.62906 | -0.32936    | 0.62906     | -0.32936 | 0.62906 |
|            |                 | -0.32936 | 0.62906  | 0.62906 | 0.811427122 |             |          |         |
| RPL10P11   | ENSG00000230853 | -0.51595 | 0.69705  | 0.69705 | -1.1107     | 0.86664     | -0.32937 |         |
|            |                 | 0.62906  | -1.2432  | 0.89311 | 0.62906     | 0.811427122 |          |         |
| RNU6-1236P | ENSG00000252889 | -0.32937 | 0.62906  | 0.62906 | -0.32937    | 0.62906     | -0.32937 |         |
|            |                 | 0.62906  | -0.32937 | 0.62906 | 0.62906     | 0.811427122 |          |         |
| NA         | ENSG00000229131 | -0.32945 | 0.62909  | 0.62909 | -0.32945    | 0.62909     | -0.32945 | 0.62909 |
|            |                 | -0.32945 | 0.62909  | 0.62909 | 0.811444339 |             |          |         |
| SNX1       | ENSG00000028528 | -0.32952 | 0.62912  | 0.62912 | -0.60195    | 0.72639     | -0.3838  | 0.64944 |
|            |                 | -0.41783 | 0.66196  | 0.62912 | 0.811461556 |             |          |         |
| ATP5MFP4   | ENSG00000256826 | -0.32967 | 0.62917  | 0.62917 | -0.32967    | 0.62917     | -0.32967 |         |
|            |                 | 0.62917  | -0.32967 | 0.62917 | 0.62917     | 0.811495988 |          |         |
| KBTBD2     | ENSG00000170852 | -0.32969 | 0.62918  | 0.62918 | -0.49494    | 0.68968     | -0.79879 |         |
|            |                 | 0.78779  | -0.49494 | 0.68968 | 0.62918     | 0.811495988 |          |         |
| NA         | ENSG00000259939 | -0.32977 | 0.62921  | 0.62921 | -0.32977    | 0.62921     | -0.32977 | 0.62921 |
|            |                 | -0.32977 | 0.62921  | 0.62921 | 0.811513202 |             |          |         |
| CCT5P1     | ENSG00000250444 | -1.4538  | 0.927    | 0.927   | -0.32983    | 0.62924     | -0.32983 | 0.62924 |
|            |                 | -0.49748 | 0.69058  | 0.62924 | 0.811530415 |             |          |         |
| NA         | ENSG00000213857 | -0.72862 | 0.76688  | 0.76688 | -0.63733    | 0.73804     | -0.68998 | 0.7549  |
|            |                 | -0.32997 | 0.62929  | 0.62929 | 0.811573421 |             |          |         |
| E2F5       | ENSG00000133740 | -0.45507 | 0.67547  | 0.67547 | -0.33007    | 0.62933     | -0.56597 | 0.71429 |
|            |                 | -0.6055  | 0.72758  | 0.62933 | 0.811603528 |             |          |         |
| RN7SKP80   | ENSG00000202058 | -0.33018 | 0.62937  | 0.62937 | -0.33018    | 0.62937     | -0.33018 |         |
|            |                 | 0.62937  | -0.33018 | 0.62937 | 0.62937     | 0.811633633 |          |         |
| DNAJB6P1   | ENSG00000254612 | -0.33033 | 0.62942  | 0.62942 | -0.99945    | 0.84121     | -0.99232 |         |

|           |                 |          |         |             |             |          |         |
|-----------|-----------------|----------|---------|-------------|-------------|----------|---------|
|           | 0.83948         | -0.99232 | 0.83948 | 0.62942     | 0.811637988 |          |         |
| NA        | ENSG00000223653 | -0.33033 | 0.62943 | -0.33033    | 0.62943     | -0.33033 | 0.62943 |
|           | -0.33033        | 0.62943  | 0.62943 | 0.811637988 |             |          |         |
| S100Z     | ENSG00000171643 | -1.3041  | 0.90391 | -0.35124    | 0.6373      | -1.3041  | 0.90391 |
|           | -0.33037        | 0.62944  | 0.62944 | 0.811637988 |             |          |         |
| NA        | ENSG00000207073 | -0.33038 | 0.62944 | -0.33038    | 0.62944     | -0.38307 | 0.64917 |
|           | -0.33038        | 0.62944  | 0.62944 | 0.811637988 |             |          |         |
| LINC01521 | ENSG00000213888 | -0.33043 | 0.62946 | -0.33043    | 0.62946     | -0.33043 |         |
|           | 0.62946         | -0.33043 | 0.62946 | 0.62946     | 0.8116423   |          |         |
| NA        | ENSG00000265984 | -0.3305  | 0.62949 | -0.48695    | 0.68685     | -1.7909  | 0.96334 |
|           | -1.7909         | 0.96334  | 0.62949 | 0.811659506 |             |          |         |
| AAMP      | ENSG00000127837 | -0.33056 | 0.62951 | -0.56529    | 0.71406     | -0.76732 | 0.77855 |
|           | -0.75227        | 0.77405  | 0.62951 | 0.811663817 |             |          |         |
| NA        | ENSG00000268886 | -0.33061 | 0.62953 | -0.33061    | 0.62953     | -0.33061 | 0.62953 |
|           | -0.33061        | 0.62953  | 0.62953 | 0.811668128 |             |          |         |
| TXNDC16   | ENSG00000087301 | -0.3355  | 0.63138 | -0.43024    | 0.66649     | -0.33067 |         |
|           | 0.62955         | -0.52161 | 0.69903 | 0.62955     | 0.811672439 |          |         |
| HAMP      | ENSG00000105697 | -0.33073 | 0.62957 | -0.33073    | 0.62957     | -0.33073 | 0.62957 |
|           | -0.33073        | 0.62957  | 0.62957 | 0.811676749 |             |          |         |
| NA        | ENSG00000235679 | -0.33094 | 0.62966 | -1.1274     | 0.87021     | -0.63165 | 0.73619 |
|           | -0.51654        | 0.69726  | 0.62966 | 0.811771305 |             |          |         |
| RNU6-990P | ENSG00000201255 | -1.4316  | 0.92388 | -1.0845     | 0.86093     | -1.2755  |         |
|           | 0.89893         | -0.33102 | 0.62969 | 0.62969     | 0.811775644 |          |         |
| FAM24A    | ENSG00000203795 | -0.93881 | 0.82609 | -0.93881    | 0.82609     | -0.33106 |         |
|           | 0.6297          | -0.76877 | 0.77898 | 0.6297      | 0.811775644 |          |         |
| BTG1P1    | ENSG00000256720 | -0.33112 | 0.62972 | -0.33112    | 0.62972     | -0.33112 |         |
|           | 0.62972         | -0.33112 | 0.62972 | 0.62972     | 0.811775644 |          |         |
| IMP3P2    | ENSG00000239722 | -0.33114 | 0.62973 | -0.33114    | 0.62973     | -0.33114 |         |
|           | 0.62973         | -0.33114 | 0.62973 | 0.62973     | 0.811775644 |          |         |
| FKBP7     | ENSG00000079150 | -0.33131 | 0.62979 | -0.33131    | 0.62979     | -0.33131 | 0.62979 |
|           | -0.40926        | 0.65883  | 0.62979 | 0.811810039 |             |          |         |
| MMP1      | ENSG00000196611 | -0.72999 | 0.7673  | -0.72999    | 0.7673      | -0.72999 | 0.7673  |
|           | -0.33129        | 0.62979  | 0.62979 | 0.811810039 |             |          |         |
| RN7SL163P | ENSG00000266195 | -0.33152 | 0.62987 | -0.33152    | 0.62987     | -0.33152 |         |
|           | 0.62987         | -0.33152 | 0.62987 | 0.62987     | 0.811853039 |          |         |
| TMEM101   | ENSG00000091947 | -0.5601  | 0.71229 | -0.33154    | 0.62988     | -0.5601  |         |
|           | 0.71229         | -0.57945 | 0.71886 | 0.62988     | 0.811853039 |          |         |
| PLN       | ENSG00000198523 | -0.33154 | 0.62988 | -1.5388     | 0.93808     | -2.2009  | 0.98613 |
|           | -0.46157        | 0.67781  | 0.62988 | 0.811853039 |             |          |         |
| RN7SKP28  | ENSG00000201640 | -0.40652 | 0.65782 | -1.34       | 0.90988     | -0.33157 | 0.62989 |
|           | -0.33157        | 0.62989  | 0.62989 | 0.811853039 |             |          |         |
| NA        | ENSG00000270607 | -0.73645 | 0.76927 | -0.33164    | 0.62992     | -0.33164 | 0.62992 |
|           | -0.33164        | 0.62992  | 0.62992 | 0.811870232 |             |          |         |
| SMIM11P1  | ENSG00000198738 | -0.33171 | 0.62994 | -0.33171    | 0.62994     | -0.33171 |         |
|           | 0.62994         | -0.33171 | 0.62994 | 0.62994     | 0.811874536 |          |         |
| LINC00700 | ENSG00000234962 | -0.3366  | 0.63179 | -0.60582    | 0.72768     | -0.33175 |         |
|           | 0.62996         | -0.3366  | 0.63179 | 0.62996     | 0.811878839 |          |         |
| UQCRHP1   | ENSG00000230622 | -0.9063  | 0.81761 | -0.33183    | 0.62999     | -0.99783 |         |
|           | 0.84082         | -1.072   | 0.85814 | 0.62999     | 0.81189603  |          |         |
| WDR90     | ENSG00000161996 | -0.79991 | 0.78812 | -0.99963    | 0.84126     | -0.82627 | 0.79567 |
|           | -0.33215        | 0.63011  | 0.63011 | 0.811990557 |             |          |         |
| AGAP5     | ENSG00000172650 | -0.87786 | 0.80999 | -0.33217    | 0.63012     | -0.77979 | 0.78224 |
|           | -0.3345         | 0.631    | 0.63012 | 0.811990557 |             |          |         |
| RNU1-61P  | ENSG00000251916 | -0.33217 | 0.63012 | -0.33217    | 0.63012     | -1.017   |         |
|           | 0.84543         | -0.33217 | 0.63012 | 0.63012     | 0.811990557 |          |         |
| NA        | ENSG00000283940 | -0.3322  | 0.63013 | -0.3322     | 0.63013     | -0.3322  | 0.63013 |
|           | -0.3322         | 0.63013  | 0.63013 | 0.811990557 |             |          |         |
| HECTD4    | ENSG00000173064 | -0.86063 | 0.80528 | -0.80636    | 0.78998     | -0.70239 |         |
|           | 0.75878         | -0.33232 | 0.63018 | 0.63018     | 0.812020651 |          |         |
| NA        | ENSG00000267088 | -0.49948 | 0.69128 | -0.33237    | 0.63019     | -0.49948 | 0.69128 |
|           | -0.49948        | 0.69128  | 0.63019 | 0.812020651 |             |          |         |
| NA        | ENSG00000263331 | -0.33241 | 0.63021 | -0.33241    | 0.63021     | -0.33241 | 0.63021 |

|             |                 |          |         |             |             |          |         |  |
|-------------|-----------------|----------|---------|-------------|-------------|----------|---------|--|
|             | -0.33241        | 0.63021  | 0.63021 | 0.812020651 |             |          |         |  |
| NA          | ENSG00000282327 | -0.62927 | 0.73541 | -1.6257     | 0.948       | -0.49024 | 0.68802 |  |
|             | -0.33247        | 0.63023  | 0.63023 | 0.812020651 |             |          |         |  |
| ESPNL       | ENSG00000144488 | -0.68705 | 0.75398 | -0.52386    | 0.69981     | -0.33251 | 0.63025 |  |
|             | -0.56249        | 0.71311  | 0.63025 | 0.812020651 |             |          |         |  |
| OR51S1      | ENSG00000176922 | -1.0638  | 0.85628 | -0.59333    | 0.72352     | -1.8079  |         |  |
|             | 0.96469         | -0.33258 | 0.63027 | 0.63027     | 0.812020651 |          |         |  |
| NA          | ENSG00000236668 | -0.94502 | 0.82767 | -0.33258    | 0.63027     | -1.7237  | 0.95762 |  |
|             | -1.7364         | 0.95875  | 0.63027 | 0.812020651 |             |          |         |  |
| NA          | ENSG00000275248 | -1.6453  | 0.95005 | -0.33574    | 0.63147     | -0.33272 | 0.63033 |  |
|             | -1.3157         | 0.90587  | 0.63033 | 0.812076483 |             |          |         |  |
| HCG21       | ENSG00000233529 | -0.33277 | 0.63035 | -1.7846     | 0.96284     | -0.84425 | 0.80073 |  |
|             | -0.84425        | 0.80073  | 0.63035 | 0.81208078  |             |          |         |  |
| LETMD1      | ENSG00000050426 | -1.0307  | 0.84867 | -1.0307     | 0.84867     | -0.75435 |         |  |
|             | 0.77468         | -0.33284 | 0.63037 | 0.63037     | 0.812080794 |          |         |  |
| NA          | ENSG00000279882 | -0.33294 | 0.63041 | -0.33294    | 0.63041     | -0.33294 | 0.63041 |  |
|             | -0.33294        | 0.63041  | 0.63041 | 0.812080794 |             |          |         |  |
| CYP21A2     | ENSG00000231852 | -0.33298 | 0.63043 | -0.33298    | 0.63043     | -0.33298 |         |  |
|             | 0.63043         | -0.33298 | 0.63043 | 0.63043     | 0.812080794 |          |         |  |
| NA          | ENSG00000248521 | -0.33299 | 0.63043 | -0.33299    | 0.63043     | -0.33299 | 0.63043 |  |
|             | -0.33299        | 0.63043  | 0.63043 | 0.812080794 |             |          |         |  |
| OR1Q1       | ENSG00000165202 | -0.33306 | 0.63045 | -0.33306    | 0.63045     | -0.33306 | 0.63045 |  |
|             | -0.33306        | 0.63045  | 0.63045 | 0.812080794 |             |          |         |  |
| NA          | ENSG00000258346 | -1.4371  | 0.92466 | -1.4371     | 0.92466     | -1.1394  | 0.87274 |  |
|             | -0.33304        | 0.63045  | 0.63045 | 0.812080794 |             |          |         |  |
| ZNF48       | ENSG00000180035 | -0.3331  | 0.63047 | -0.42017    | 0.66282     | -0.3331  | 0.63047 |  |
|             | -0.3331         | 0.63047  | 0.63047 | 0.812085089 |             |          |         |  |
| ISY1        | ENSG00000240682 | -0.57771 | 0.71827 | -0.50458    | 0.69307     | -0.33325 | 0.63053 |  |
|             | -1.1024         | 0.86485  | 0.63053 | 0.812123735 |             |          |         |  |
| NA          | ENSG00000240591 | -0.33327 | 0.63054 | -0.33327    | 0.63054     | -0.33327 | 0.63054 |  |
|             | -0.33327        | 0.63054  | 0.63054 | 0.812123735 |             |          |         |  |
| TRAJ52      | ENSG00000211838 | -0.3333  | 0.63055 | -0.3333     | 0.63055     | -0.3333  |         |  |
|             | 0.63055         | -0.3333  | 0.63055 | 0.63055     | 0.812123735 |          |         |  |
| MOBP        | ENSG00000168314 | -0.63195 | 0.73629 | -0.82391    | 0.79501     | -0.33356 | 0.63064 |  |
|             | -0.75561        | 0.77506  | 0.63064 | 0.812218184 |             |          |         |  |
| RPL7P30     | ENSG00000227982 | -0.33362 | 0.63067 | -1.0179     | 0.84565     | -0.33362 |         |  |
|             | 0.63067         | -0.33362 | 0.63067 | 0.63067     | 0.812235354 |          |         |  |
| NA          | ENSG00000279880 | -0.33374 | 0.63071 | -0.33374    | 0.63071     | -0.33374 | 0.63071 |  |
|             | -0.33374        | 0.63071  | 0.63071 | 0.812265403 |             |          |         |  |
| RNU6-1007P  | ENSG00000252395 | -0.33406 | 0.63083 | -0.84206    | 0.80012     | -1.2481  |         |  |
|             | 0.89399         | -1.4299  | 0.92363 | 0.63083     | 0.812398475 |          |         |  |
| RPL30P10    | ENSG00000243050 | -1.1896  | 0.88291 | -0.33415    | 0.63087     | -1.4524  |         |  |
|             | 0.92681         | -1.4928  | 0.93226 | 0.63087     | 0.812406953 |          |         |  |
| SNHG6       | ENSG00000245910 | -0.33416 | 0.63087 | -0.33416    | 0.63087     | -0.33416 | 0.63087 |  |
|             | -0.33416        | 0.63087  | 0.63087 | 0.812406953 |             |          |         |  |
| NA          | ENSG00000233351 | -0.33429 | 0.63092 | -0.33429    | 0.63092     | -0.33429 | 0.63092 |  |
|             | -0.33429        | 0.63092  | 0.63092 | 0.812406953 |             |          |         |  |
| ARHGEF7-IT1 | ENSG00000233644 | -0.33446 | 0.63098 | -0.5215     | 0.69899     | -0.66969 |         |  |
|             | 0.74847         | -0.76394 | 0.77755 | 0.63098     | 0.812406953 |          |         |  |
| NA          | ENSG00000279030 | -0.33449 | 0.63099 | -0.33449    | 0.63099     | -0.33449 | 0.63099 |  |
|             | -0.33449        | 0.63099  | 0.63099 | 0.812406953 |             |          |         |  |
| NA          | ENSG00000269540 | -0.33457 | 0.63102 | -0.33457    | 0.63102     | -0.33457 | 0.63102 |  |
|             | -0.33457        | 0.63102  | 0.63102 | 0.812406953 |             |          |         |  |
| NA          | ENSG00000253849 | -0.33459 | 0.63103 | -0.33459    | 0.63103     | -0.33459 | 0.63103 |  |
|             | -0.33459        | 0.63103  | 0.63103 | 0.812406953 |             |          |         |  |
| BRINP3      | ENSG00000162670 | -1.646   | 0.95011 | -0.47395    | 0.68223     | -0.33462 |         |  |
|             | 0.63104         | -1.4997  | 0.93316 | 0.63104     | 0.812406953 |          |         |  |
| LINC01351   | ENSG00000237457 | -0.33462 | 0.63104 | -0.33462    | 0.63104     | -0.33462 |         |  |
|             | 0.63104         | -0.33462 | 0.63104 | 0.63104     | 0.812406953 |          |         |  |
| OR5D13      | ENSG00000279761 | -0.3346  | 0.63104 | -0.3346     | 0.63104     | -0.823   |         |  |
|             | 0.79475         | -0.85556 | 0.80388 | 0.63104     | 0.812406953 |          |         |  |
| FAM184A     | ENSG00000111879 | -1.4283  | 0.92339 | -1.6237     | 0.94778     | -0.92139 |         |  |

|            |                 |          |         |             |             |          |         |
|------------|-----------------|----------|---------|-------------|-------------|----------|---------|
|            | 0.82158         | -0.33468 | 0.63107 | 0.63107     | 0.812406953 |          |         |
| OR56B3P    | ENSG00000180913 | -1.2322  | 0.89105 | -1.1124     | 0.86701     | -1.7282  |         |
|            | 0.95802         | -0.33468 | 0.63107 | 0.63107     | 0.812406953 |          |         |
| NA         | ENSG00000201868 | -0.53229 | 0.70274 | -1.1432     | 0.87353     | -0.33468 | 0.63107 |
|            | -0.33468        | 0.63107  | 0.63107 | 0.812406953 |             |          |         |
| ITPRIP-AS1 | ENSG00000228261 | -0.33469 | 0.63107 | -0.33469    | 0.63107     | -0.33469 |         |
|            | 0.63107         | -0.33469 | 0.63107 | 0.63107     | 0.812406953 |          |         |
| NA         | ENSG00000233712 | -0.33477 | 0.6311  | -0.70416    | 0.75933     | -1.4234  | 0.92269 |
|            | -0.99512        | 0.84016  | 0.6311  | 0.812406953 |             |          |         |
| LINC02626  | ENSG00000236799 | -0.3348  | 0.63111 | -0.3348     | 0.63111     | -0.3348  |         |
|            | 0.63111         | -0.3348  | 0.63111 | 0.63111     | 0.812406953 |          |         |
| C6orf58    | ENSG00000184530 | -0.33481 | 0.63112 | -0.33481    | 0.63112     | -0.33481 |         |
|            | 0.63112         | -0.33481 | 0.63112 | 0.63112     | 0.812406953 |          |         |
| MR1        | ENSG00000153029 | -1.0044  | 0.8424  | -0.33493    | 0.63116     | -0.33493 | 0.63116 |
|            | -1.2714         | 0.8982   | 0.63116 | 0.812436981 |             |          |         |
| NA         | ENSG00000257294 | -1.2782  | 0.8994  | -0.33504    | 0.6312      | -1.0343  | 0.8495  |
|            | -0.33504        | 0.6312   | 0.6312  | 0.812441243 |             |          |         |
| HSPD1P4    | ENSG00000257576 | -0.36964 | 0.64417 | -0.33503    | 0.6312      | -1.0404  |         |
|            | 0.85093         | -0.52626 | 0.70065 | 0.6312      | 0.812441243 |          |         |
| NA         | ENSG00000259713 | -0.3351  | 0.63122 | -0.3351     | 0.63122     | -0.3351  | 0.63122 |
|            | -0.3351         | 0.63122  | 0.63122 | 0.812441243 |             |          |         |
| RNA5SP154  | ENSG00000252002 | -0.56388 | 0.71358 | -0.3351     | 0.63123     | -0.42267 |         |
|            | 0.66373         | -0.86218 | 0.8057  | 0.63123     | 0.812441243 |          |         |
| NDUFA9     | ENSG00000139180 | -0.33522 | 0.63127 | -1.0255     | 0.84742     | -0.86691 | 0.807   |
|            | -1.084          | 0.86081  | 0.63127 | 0.812471267 |             |          |         |
| NA         | ENSG00000280161 | -0.33534 | 0.63132 | -0.33534    | 0.63132     | -0.33534 | 0.63132 |
|            | -0.33534        | 0.63132  | 0.63132 | 0.812496903 |             |          |         |
| NA         | ENSG00000272760 | -0.3354  | 0.63134 | -0.3354     | 0.63134     | -0.3354  | 0.63134 |
|            | -0.3354         | 0.63134  | 0.63134 | 0.812496903 |             |          |         |
| NA         | ENSG00000258682 | -0.3355  | 0.63138 | -0.3355     | 0.63138     | -0.3355  | 0.63138 |
|            | -0.3355         | 0.63138  | 0.63138 | 0.812496903 |             |          |         |
| NA         | ENSG00000238912 | -0.33561 | 0.63142 | -0.33561    | 0.63142     | -0.33561 | 0.63142 |
|            | -0.33561        | 0.63142  | 0.63142 | 0.812496903 |             |          |         |
| NA         | ENSG00000255928 | -0.33564 | 0.63143 | -0.33564    | 0.63143     | -0.33564 | 0.63143 |
|            | -0.33564        | 0.63143  | 0.63143 | 0.812496903 |             |          |         |
| ADAM30     | ENSG00000134249 | -0.33568 | 0.63144 | -0.33568    | 0.63144     | -0.80427 |         |
|            | 0.78938         | -0.33568 | 0.63144 | 0.63144     | 0.812496903 |          |         |
| NA         | ENSG00000255428 | -0.33569 | 0.63145 | -1.0937     | 0.86295     | -0.33569 | 0.63145 |
|            | -0.65108        | 0.7425   | 0.63145 | 0.812496903 |             |          |         |
| NA         | ENSG00000261540 | -0.33573 | 0.63146 | -1.578      | 0.94272     | -1.578   | 0.94272 |
|            | -1.578          | 0.94272  | 0.63146 | 0.812496903 |             |          |         |
| MIR627     | ENSG00000207712 | -0.33575 | 0.63147 | -1.0107     | 0.84391     | -1.0107  |         |
|            | 0.84391         | -1.0107  | 0.84391 | 0.63147     | 0.812496903 |          |         |
| PGAM5P1    | ENSG00000253224 | -0.33578 | 0.63148 | -0.33578    | 0.63148     | -0.33578 |         |
|            | 0.63148         | -0.33578 | 0.63148 | 0.63148     | 0.812496903 |          |         |
| NA         | ENSG00000230026 | -0.35905 | 0.64022 | -0.35905    | 0.64022     | -0.35905 | 0.64022 |
|            | -0.3358         | 0.63149  | 0.63149 | 0.812496903 |             |          |         |
| LINC01975  | ENSG00000263312 | -0.33581 | 0.63149 | -1.7758     | 0.96212     | -1.2027  |         |
|            | 0.88545         | -2.4101  | 0.99203 | 0.63149     | 0.812496903 |          |         |
| NA         | ENSG00000256442 | -0.57128 | 0.7161  | -0.33584    | 0.63151     | -0.57128 | 0.7161  |
|            | -0.67828        | 0.7512   | 0.63151 | 0.812501183 |             |          |         |
| NA         | ENSG00000272202 | -0.68463 | 0.75321 | -0.33602    | 0.63157     | -0.33602 | 0.63157 |
|            | -0.33602        | 0.63157  | 0.63157 | 0.812518245 |             |          |         |
| NA         | ENSG00000250069 | -0.33604 | 0.63158 | -1.1578     | 0.87653     | -0.36546 | 0.64262 |
|            | -0.36546        | 0.64262  | 0.63158 | 0.812518245 |             |          |         |
| LGMNP1     | ENSG00000214269 | -0.33612 | 0.63161 | -0.33612    | 0.63161     | -0.33612 |         |
|            | 0.63161         | -0.33612 | 0.63161 | 0.63161     | 0.812518245 |          |         |
| NA         | ENSG00000207326 | -1.2188  | 0.88853 | -0.598      | 0.72508     | -0.33618 | 0.63163 |
|            | -0.33618        | 0.63163  | 0.63163 | 0.812518245 |             |          |         |
| MRPL33     | ENSG00000243147 | -1.2006  | 0.88505 | -0.65198    | 0.74279     | -0.3362  |         |
|            | 0.63164         | -0.62266 | 0.73325 | 0.63164     | 0.812518245 |          |         |
| NA         | ENSG00000268985 | -0.3362  | 0.63164 | -0.3362     | 0.63164     | -0.3362  | 0.63164 |

|           |                 |          |         |             |             |          |         |  |
|-----------|-----------------|----------|---------|-------------|-------------|----------|---------|--|
|           | -0.3362         | 0.63164  | 0.63164 | 0.812518245 |             |          |         |  |
| CAT       | ENSG00000121691 | -0.57552 | 0.71753 | -0.33623    | 0.63165     | -0.57552 | 0.71753 |  |
|           | -0.57552        | 0.71753  | 0.63165 | 0.812518245 |             |          |         |  |
| NA        | ENSG00000253659 | -0.33627 | 0.63167 | -0.33627    | 0.63167     | -0.33627 | 0.63167 |  |
|           | -0.33627        | 0.63167  | 0.63167 | 0.812518245 |             |          |         |  |
| ISL2      | ENSG00000159556 | -1.6395  | 0.94944 | -1.007      | 0.84304     | -0.33635 | 0.63169 |  |
|           | -0.38542        | 0.65004  | 0.63169 | 0.812518245 |             |          |         |  |
| LINC02632 | ENSG00000234864 | -1.141   | 0.87306 | -0.64996    | 0.74214     | -0.33634 |         |  |
|           | 0.63169         | -0.33634 | 0.63169 | 0.63169     | 0.812518245 |          |         |  |
| LINC02066 | ENSG00000241151 | -1.7852  | 0.96288 | -0.34109    | 0.63348     | -1.7852  |         |  |
|           | 0.96288         | -0.33664 | 0.6318  | 0.6318      | 0.812616834 |          |         |  |
| NA        | ENSG00000269636 | -0.33663 | 0.6318  | -0.64361    | 0.74008     | -0.64361 | 0.74008 |  |
|           | -0.64361        | 0.74008  | 0.6318  | 0.812616834 |             |          |         |  |
| LINC02831 | ENSG00000224173 | -0.33671 | 0.63183 | -0.33671    | 0.63183     | -0.45527 |         |  |
|           | 0.67554         | -0.54353 | 0.70662 | 0.63183     | 0.812633971 |          |         |  |
| CD22      | ENSG00000012124 | -0.74326 | 0.77134 | -0.33692    | 0.63191     | -1.2957  | 0.90246 |  |
|           | -0.86348        | 0.80606  | 0.63191 | 0.812715413 |             |          |         |  |
| GCNT1P3   | ENSG00000231047 | -0.33704 | 0.63196 | -0.33704    | 0.63196     | -0.33704 |         |  |
|           | 0.63196         | -0.33704 | 0.63196 | 0.63196     | 0.812758269 |          |         |  |
| ATG2A     | ENSG00000110046 | -0.33718 | 0.63201 | -0.44239    | 0.6709      | -0.56747 | 0.7148  |  |
|           | -1.2191         | 0.88859  | 0.63201 | 0.812775015 |             |          |         |  |
| FAM71D    | ENSG00000172717 | -1.0285  | 0.84815 | -1.0726     | 0.85828     | -0.85279 |         |  |
|           | 0.80311         | -0.33726 | 0.63204 | 0.63204     | 0.812775015 |          |         |  |
| NA        | ENSG00000259797 | -1.7338  | 0.95853 | -0.33725    | 0.63204     | -1.7338  | 0.95853 |  |
|           | -1.7338         | 0.95853  | 0.63204 | 0.812775015 |             |          |         |  |
| HAUS1P1   | ENSG00000251453 | -0.33733 | 0.63207 | -0.33733    | 0.63207     | -1.4776  |         |  |
|           | 0.93024         | -0.85004 | 0.80235 | 0.63207     | 0.812775015 |          |         |  |
| NA        | ENSG00000261833 | -0.33734 | 0.63207 | -0.54402    | 0.70679     | -0.33734 | 0.63207 |  |
|           | -0.33734        | 0.63207  | 0.63207 | 0.812775015 |             |          |         |  |
| NA        | ENSG00000254309 | -1.0114  | 0.84409 | -0.74733    | 0.77257     | -0.33747 | 0.63212 |  |
|           | -0.48879        | 0.6875   | 0.63212 | 0.812775015 |             |          |         |  |
| SLC25A4   | ENSG00000151729 | -0.9361  | 0.82539 | -0.33753    | 0.63214     | -0.49691 |         |  |
|           | 0.69037         | -1.0147  | 0.84488 | 0.63214     | 0.812775015 |          |         |  |
| OR8H1     | ENSG00000181693 | -0.33752 | 0.63214 | -0.33752    | 0.63214     | -1.3495  | 0.91141 |  |
|           | -0.33752        | 0.63214  | 0.63214 | 0.812775015 |             |          |         |  |
| NA        | ENSG00000257545 | -0.33756 | 0.63215 | -0.33756    | 0.63215     | -0.33756 | 0.63215 |  |
|           | -0.33756        | 0.63215  | 0.63215 | 0.812775015 |             |          |         |  |
| PPIC      | ENSG00000168938 | -0.33761 | 0.63217 | -0.33761    | 0.63217     | -0.33761 | 0.63217 |  |
|           | -0.60564        | 0.72762  | 0.63217 | 0.812775015 |             |          |         |  |
| GAPDHP47  | ENSG00000243033 | -0.33762 | 0.63218 | -0.33762    | 0.63218     | -0.33762 |         |  |
|           | 0.63218         | -0.33762 | 0.63218 | 0.63218     | 0.812775015 |          |         |  |
| CYP51A1P1 | ENSG00000241095 | -1.4894  | 0.93181 | -1.4894     | 0.93181     | -1.276   |         |  |
|           | 0.89902         | -0.33767 | 0.6322  | 0.6322      | 0.812775015 |          |         |  |
| TNFRSF18  | ENSG00000186891 | -0.33773 | 0.63222 | -0.33773    | 0.63222     | -0.33773 |         |  |
|           | 0.63222         | -0.33773 | 0.63222 | 0.63222     | 0.812775015 |          |         |  |
| DOT1L     | ENSG00000104885 | -0.53995 | 0.70538 | -0.33787    | 0.63227     | -0.45957 | 0.67709 |  |
|           | -0.47595        | 0.68294  | 0.63227 | 0.812775015 |             |          |         |  |
| NA        | ENSG00000283959 | -1.0052  | 0.8426  | -0.75968    | 0.77628     | -0.41691 | 0.66163 |  |
|           | -0.33787        | 0.63227  | 0.63227 | 0.812775015 |             |          |         |  |
| RUNDC1    | ENSG00000198863 | -0.33791 | 0.63228 | -0.33791    | 0.63228     | -0.52395 |         |  |
|           | 0.69984         | -0.98287 | 0.83716 | 0.63228     | 0.812775015 |          |         |  |
| FETUB     | ENSG00000090512 | -0.33799 | 0.63231 | -0.81698    | 0.79303     | -0.81698 | 0.79303 |  |
|           | -0.81698        | 0.79303  | 0.63231 | 0.812775015 |             |          |         |  |
| OR10T2    | ENSG00000186306 | -0.33807 | 0.63234 | -0.33807    | 0.63234     | -0.33807 |         |  |
|           | 0.63234         | -0.33807 | 0.63234 | 0.63234     | 0.812775015 |          |         |  |
| LINC02813 | ENSG00000225334 | -0.33812 | 0.63236 | -0.33812    | 0.63236     | -0.33812 |         |  |
|           | 0.63236         | -0.33812 | 0.63236 | 0.63236     | 0.812775015 |          |         |  |
| NA        | ENSG00000227813 | -0.33816 | 0.63238 | -0.33816    | 0.63238     | -0.33816 | 0.63238 |  |
|           | -0.33816        | 0.63238  | 0.63238 | 0.812775015 |             |          |         |  |
| NUTM2F    | ENSG00000130950 | -0.55241 | 0.70967 | -2.4489     | 0.99284     | -0.35998 |         |  |
|           | 0.64057         | -0.33818 | 0.63239 | 0.63239     | 0.812775015 |          |         |  |
| ABHD17AP6 | ENSG00000226981 | -0.73275 | 0.76814 | -0.33818    | 0.63239     | -1.7284  |         |  |

|             |                 |          |         |             |             |          |         |
|-------------|-----------------|----------|---------|-------------|-------------|----------|---------|
|             | 0.95804         | -1.4493  | 0.92638 | 0.63239     | 0.812775015 |          |         |
| NA          | ENSG00000250398 | -0.33819 | 0.63239 | -0.33819    | 0.63239     | -0.33819 | 0.63239 |
|             | -0.33819        | 0.63239  | 0.63239 | 0.812775015 |             |          |         |
| NA          | ENSG00000271606 | -0.33819 | 0.63239 | -0.33819    | 0.63239     | -0.33819 | 0.63239 |
|             | -0.33819        | 0.63239  | 0.63239 | 0.812775015 |             |          |         |
| CYP2C23P    | ENSG00000283232 | -0.33819 | 0.63239 | -0.33819    | 0.63239     | -1.8303  |         |
|             | 0.9664          | -1.8303  | 0.9664  | 0.63239     | 0.812775015 |          |         |
| NA          | ENSG00000230826 | -0.33838 | 0.63246 | -0.33838    | 0.63246     | -0.33838 | 0.63246 |
|             | -0.33838        | 0.63246  | 0.63246 | 0.812817788 |             |          |         |
| CASC4P1     | ENSG00000238132 | -0.3384  | 0.63247 | -0.3384     | 0.63247     | -0.3384  |         |
|             | 0.63247         | -0.3384  | 0.63247 | 0.63247     | 0.812817788 |          |         |
| OR11L1      | ENSG00000197591 | -1.3167  | 0.90604 | -0.33846    | 0.63249     | -0.33846 |         |
|             | 0.63249         | -0.33846 | 0.63249 | 0.63249     | 0.812817788 |          |         |
| LINC00374   | ENSG00000232954 | -0.33844 | 0.63249 | -0.33844    | 0.63249     | -0.33844 |         |
|             | 0.63249         | -0.33844 | 0.63249 | 0.63249     | 0.812817788 |          |         |
| VN1R32P     | ENSG00000230361 | -0.60768 | 0.7283  | -0.33866    | 0.63257     | -1.3981  |         |
|             | 0.91895         | -1.9084  | 0.97183 | 0.63257     | 0.812890573 |          |         |
| SNORD115-24 | ENSG00000200398 | -0.33869 | 0.63258 | -0.33869    | 0.63258     | -0.33869 |         |
|             | 0.63258         | -0.33869 | 0.63258 | 0.63258     | 0.812890573 |          |         |
| NA          | ENSG00000230676 | -0.8001  | 0.78817 | -1.3208     | 0.90671     | -0.33879 | 0.63262 |
|             | -1.2142         | 0.88767  | 0.63262 | 0.812911951 |             |          |         |
| NA          | ENSG00000259542 | -0.71519 | 0.76275 | -0.33882    | 0.63263     | -0.71519 | 0.76275 |
|             | -0.71519        | 0.76275  | 0.63263 | 0.812911951 |             |          |         |
| RNU6-240P   | ENSG00000251907 | -0.33892 | 0.63266 | -0.33892    | 0.63266     | -0.33892 |         |
|             | 0.63266         | -0.33892 | 0.63266 | 0.63266     | 0.812929063 |          |         |
| OR4D1       | ENSG00000141194 | -0.33919 | 0.63277 | -0.33919    | 0.63277     | -0.33919 | 0.63277 |
|             | -0.33919        | 0.63277  | 0.63277 | 0.81303179  |             |          |         |
| RPS3AP4     | ENSG00000259105 | -0.33922 | 0.63278 | -0.33922    | 0.63278     | -0.33922 |         |
|             | 0.63278         | -0.33922 | 0.63278 | 0.63278     | 0.81303179  |          |         |
| NA          | ENSG00000241042 | -0.33924 | 0.63279 | -0.33924    | 0.63279     | -0.33924 | 0.63279 |
|             | -0.33924        | 0.63279  | 0.63279 | 0.81303179  |             |          |         |
| RN7SL538P   | ENSG00000240692 | -0.3394  | 0.63285 | -0.3394     | 0.63285     | -0.3394  |         |
|             | 0.63285         | -0.3394  | 0.63285 | 0.63285     | 0.813066005 |          |         |
| NA          | ENSG00000266981 | -0.33941 | 0.63285 | -0.33941    | 0.63285     | -0.33941 | 0.63285 |
|             | -0.33941        | 0.63285  | 0.63285 | 0.813066005 |             |          |         |
| NA          | ENSG00000250405 | -0.96249 | 0.8321  | -0.73853    | 0.7699      | -1.2767  | 0.89915 |
|             | -0.33958        | 0.63291  | 0.63291 | 0.813121578 |             |          |         |
| PSMC1P5     | ENSG00000250273 | -0.33965 | 0.63294 | -0.33965    | 0.63294     | -0.33965 |         |
|             | 0.63294         | -0.33965 | 0.63294 | 0.63294     | 0.813121578 |          |         |
| KCNC4       | ENSG00000116396 | -1.3786  | 0.91599 | -0.75295    | 0.77426     | -0.83545 | 0.79827 |
|             | -0.33967        | 0.63295  | 0.63295 | 0.813121578 |             |          |         |
| NA          | ENSG00000239941 | -1.1396  | 0.87277 | -0.44095    | 0.67037     | -0.33971 | 0.63296 |
|             | -1.369          | 0.91449  | 0.63296 | 0.813121578 |             |          |         |
| JADE1       | ENSG00000077684 | -1.5846  | 0.94347 | -1.785      | 0.96287     | -1.8942  | 0.9709  |
|             | -0.33987        | 0.63302  | 0.63302 | 0.813147193 |             |          |         |
| YWHAEP1     | ENSG00000232727 | -1.3012  | 0.9034  | -0.65837    | 0.74485     | -1.4192  |         |
|             | 0.92208         | -0.33988 | 0.63303 | 0.63303     | 0.813147193 |          |         |
| MTND1P36    | ENSG00000253245 | -0.33988 | 0.63303 | -0.33988    | 0.63303     | -0.33988 |         |
|             | 0.63303         | -0.33988 | 0.63303 | 0.63303     | 0.813147193 |          |         |
| CNPY1       | ENSG00000146910 | -1.3999  | 0.91922 | -0.34005    | 0.63309     | -0.56422 | 0.7137  |
|             | -0.73571        | 0.76905  | 0.63309 | 0.813172804 |             |          |         |
| NA          | ENSG00000273355 | -0.34004 | 0.63309 | -0.34004    | 0.63309     | -0.34004 | 0.63309 |
|             | -0.34004        | 0.63309  | 0.63309 | 0.813172804 |             |          |         |
| CFL1        | ENSG00000172757 | -0.34007 | 0.6331  | -0.34007    | 0.6331      | -0.34007 | 0.6331  |
|             | -0.34007        | 0.6331   | 0.6331  | 0.813172804 |             |          |         |
| NA          | ENSG00000271828 | -0.34015 | 0.63313 | -0.34015    | 0.63313     | -0.34015 | 0.63313 |
|             | -0.34015        | 0.63313  | 0.63313 | 0.813176899 |             |          |         |
| ZNF488      | ENSG00000265763 | -0.34021 | 0.63315 | -0.34021    | 0.63315     | -0.34021 |         |
|             | 0.63315         | -0.34021 | 0.63315 | 0.63315     | 0.813176899 |          |         |
| NA          | ENSG00000265967 | -0.34026 | 0.63317 | -0.34026    | 0.63317     | -0.34026 | 0.63317 |
|             | -0.34026        | 0.63317  | 0.63317 | 0.813176899 |             |          |         |
| NA          | ENSG00000233444 | -0.34422 | 0.63466 | -0.34422    | 0.63466     | -0.34422 | 0.63466 |



|            |                 |          |         |             |             |          |         |
|------------|-----------------|----------|---------|-------------|-------------|----------|---------|
|            | -0.34032        | 0.63319  | 0.63319 | 0.813176899 |             |          |         |
| ZNF692     | ENSG00000171163 | -0.35691 | 0.63942 | -0.35691    | 0.63942     | -0.34036 |         |
|            | 0.63321         | -0.35691 | 0.63942 | 0.63321     | 0.813176899 |          |         |
| NA         | ENSG00000225531 | -0.34036 | 0.63321 | -0.34036    | 0.63321     | -0.34036 | 0.63321 |
|            | -0.34036        | 0.63321  | 0.63321 | 0.813176899 |             |          |         |
| SLC9C1     | ENSG00000172139 | -0.34039 | 0.63322 | -0.37036    | 0.64444     | -0.64254 |         |
|            | 0.73974         | -1.7363  | 0.95874 | 0.63322     | 0.813176899 |          |         |
| NA         | ENSG00000225647 | -0.34071 | 0.63334 | -0.34071    | 0.63334     | -0.34071 | 0.63334 |
|            | -0.34071        | 0.63334  | 0.63334 | 0.813275208 |             |          |         |
| PRAM1      | ENSG00000133246 | -1.2245  | 0.88962 | -0.34078    | 0.63336     | -1.2245  | 0.88962 |
|            | -1.2245         | 0.88962  | 0.63336 | 0.813275208 |             |          |         |
| MIR185     | ENSG00000208023 | -0.64523 | 0.74061 | -0.64523    | 0.74061     | -0.34082 |         |
|            | 0.63338         | -0.64523 | 0.74061 | 0.63338     | 0.813275208 |          |         |
| NA         | ENSG00000249849 | -1.7997  | 0.96405 | -0.3713     | 0.64479     | -0.34083 | 0.63338 |
|            | -0.51237        | 0.6958   | 0.63338 | 0.813275208 |             |          |         |
| NA         | ENSG00000257194 | -1.4299  | 0.92363 | -0.67691    | 0.75077     | -1.4299  | 0.92363 |
|            | -0.34082        | 0.63338  | 0.63338 | 0.813275208 |             |          |         |
| CACNB2     | ENSG00000165995 | -0.34093 | 0.63342 | -0.95844    | 0.83108     | -0.34093 |         |
|            | 0.63342         | -1.1273  | 0.8702  | 0.63342     | 0.81327937  |          |         |
| RPL13AP6   | ENSG00000234118 | -0.34093 | 0.63342 | -0.34093    | 0.63342     | -0.34093 |         |
|            | 0.63342         | -0.34093 | 0.63342 | 0.63342     | 0.81327937  |          |         |
| GDF3       | ENSG00000184344 | -0.83009 | 0.79675 | -0.34098    | 0.63344     | -0.62866 | 0.73521 |
|            | -0.46691        | 0.67972  | 0.63344 | 0.81327937  |             |          |         |
| DEFB135    | ENSG00000205883 | -0.7562  | 0.77524 | -0.34102    | 0.63345     | -0.7562  |         |
|            | 0.77524         | -0.7562  | 0.77524 | 0.63345     | 0.81327937  |          |         |
| LGI2       | ENSG00000153012 | -0.89844 | 0.81553 | -0.34121    | 0.63353     | -0.4857  | 0.68641 |
|            | -0.89844        | 0.81553  | 0.63353 | 0.813334421 |             |          |         |
| KLKP1      | ENSG00000197588 | -0.34133 | 0.63357 | -0.34133    | 0.63357     | -0.34133 | 0.63357 |
|            | -0.34133        | 0.63357  | 0.63357 | 0.813334421 |             |          |         |
| NA         | ENSG00000259520 | -0.34135 | 0.63358 | -0.34135    | 0.63358     | -0.34135 | 0.63358 |
|            | -0.34135        | 0.63358  | 0.63358 | 0.813334421 |             |          |         |
| SLC39A6    | ENSG00000141424 | -0.34138 | 0.63359 | -1.0468     | 0.85241     | -0.35488 |         |
|            | 0.63866         | -0.49444 | 0.6895  | 0.63359     | 0.813334421 |          |         |
| NA         | ENSG00000256298 | -1.801   | 0.96415 | -0.34143    | 0.63361     | -0.9752  | 0.83527 |
|            | -1.3988         | 0.91907  | 0.63361 | 0.813334421 |             |          |         |
| C1RL-AS1   | ENSG00000205885 | -0.34146 | 0.63362 | -0.34146    | 0.63362     | -0.34146 |         |
|            | 0.63362         | -0.34146 | 0.63362 | 0.63362     | 0.813334421 |          |         |
| NA         | ENSG00000249842 | -0.34146 | 0.63362 | -0.34146    | 0.63362     | -0.34146 | 0.63362 |
|            | -0.34146        | 0.63362  | 0.63362 | 0.813334421 |             |          |         |
| DONSON     | ENSG00000159147 | -0.34149 | 0.63363 | -0.57367    | 0.71691     | -2.1228  |         |
|            | 0.98311         | -1.7742  | 0.96199 | 0.63363     | 0.813334421 |          |         |
| NA         | ENSG00000251944 | -0.6353  | 0.73738 | -1.6598     | 0.95152     | -1.9286  | 0.97311 |
|            | -0.34159        | 0.63367  | 0.63367 | 0.813334421 |             |          |         |
| LINC02588  | ENSG00000257842 | -0.60228 | 0.72651 | -0.37485    | 0.64611     | -0.50091 |         |
|            | 0.69178         | -0.34162 | 0.63368 | 0.63368     | 0.813334421 |          |         |
| MYSM1      | ENSG00000162601 | -0.95624 | 0.83052 | -0.34165    | 0.63369     | -0.37916 | 0.64772 |
|            | -0.47393        | 0.68223  | 0.63369 | 0.813334421 |             |          |         |
| CHCHD2     | ENSG00000106153 | -0.86212 | 0.80569 | -0.34172    | 0.63372     | -0.34172 |         |
|            | 0.63372         | -0.48766 | 0.6871  | 0.63372     | 0.813334421 |          |         |
| NA         | ENSG00000277534 | -1.1569  | 0.87635 | -0.34171    | 0.63372     | -1.1569  | 0.87635 |
|            | -1.1569         | 0.87635  | 0.63372 | 0.813334421 |             |          |         |
| NA         | ENSG00000254391 | -0.82885 | 0.79641 | -1.0534     | 0.85392     | -0.34181 | 0.63375 |
|            | -0.34181        | 0.63375  | 0.63375 | 0.813334421 |             |          |         |
| MIR335     | ENSG00000199043 | -0.34183 | 0.63376 | -0.34183    | 0.63376     | -0.34183 |         |
|            | 0.63376         | -0.34183 | 0.63376 | 0.63376     | 0.813334421 |          |         |
| NA         | ENSG00000254705 | -0.34188 | 0.63378 | -0.34188    | 0.63378     | -0.34188 | 0.63378 |
|            | -0.34188        | 0.63378  | 0.63378 | 0.813334421 |             |          |         |
| SLC25A15P5 | ENSG00000249288 | -1.0215  | 0.84649 | -0.34195    | 0.6338      | -1.0215  |         |
|            | 0.84649         | -1.0503  | 0.85321 | 0.6338      | 0.813334421 |          |         |
| GZF1       | ENSG00000125812 | -0.4831  | 0.68549 | -0.4831     | 0.68549     | -0.4831  | 0.68549 |
|            | -0.34196        | 0.63381  | 0.63381 | 0.813334421 |             |          |         |
| MTND3P3    | ENSG00000249127 | -0.34197 | 0.63381 | -0.34197    | 0.63381     | -0.34197 |         |

|           |                 |          |             |             |             |          |         |
|-----------|-----------------|----------|-------------|-------------|-------------|----------|---------|
|           | 0.63381         | -0.34197 | 0.63381     | 0.63381     | 0.813334421 |          |         |
| GTF2H2C   | ENSG00000183474 | -0.51159 | 0.69553     | -0.34205    | 0.63384     | -0.65668 |         |
|           | 0.74431         | -0.52516 | 0.70026     | 0.63384     | 0.8133515   |          |         |
| MRGPRX7P  | ENSG00000254529 | -0.34224 | 0.63392     | -0.34224    | 0.63392     | -0.34224 |         |
|           | 0.63392         | -0.34224 | 0.63392     | 0.63392     | 0.813424149 |          |         |
| CICP8     | ENSG00000225371 | -0.34229 | 0.63393     | -0.34229    | 0.63393     | -1.1197  | 0.86859 |
|           | -0.50438        | 0.693    | 0.63393     | 0.813424149 |             |          |         |
| MTCO3P46  | ENSG00000235761 | -0.34233 | 0.63395     | -0.34233    | 0.63395     | -0.34233 |         |
|           | 0.63395         | -0.34233 | 0.63395     | 0.63395     | 0.813428393 |          |         |
| EIF4BP5   | ENSG00000261336 | -0.34247 | 0.634       | -0.34247    | 0.634       | -0.34247 | 0.634   |
|           | 0.634           | 0.634    | 0.813471129 |             |             |          |         |
| TCHH      | ENSG00000159450 | -0.34266 | 0.63407     | -1.0597     | 0.85536     | -1.0911  | 0.86238 |
|           | -1.0911         | 0.86238  | 0.63407     | 0.813492339 |             |          |         |
| LINC01527 | ENSG00000224308 | -0.34267 | 0.63408     | -0.34267    | 0.63408     | -0.34267 |         |
|           | 0.63408         | -0.34267 | 0.63408     | 0.63408     | 0.813492339 |          |         |
| DUSP12P1  | ENSG00000277000 | -0.90227 | 0.81654     | -0.34269    | 0.63408     | -1.4231  |         |
|           | 0.92265         | -1.4231  | 0.92265     | 0.63408     | 0.813492339 |          |         |
| DHRS4L1   | ENSG00000225766 | -0.62982 | 0.73559     | -0.34274    | 0.6341      | -0.60519 |         |
|           | 0.72747         | -0.46223 | 0.67804     | 0.6341      | 0.813492339 |          |         |
| PAICSP2   | ENSG00000228595 | -0.34274 | 0.6341      | -0.34274    | 0.6341      | -0.34274 |         |
|           | 0.6341          | -0.34274 | 0.6341      | 0.6341      | 0.813492339 |          |         |
| MED8      | ENSG00000159479 | -0.4527  | 0.67462     | -0.34279    | 0.63412     | -0.82449 | 0.79517 |
|           | -0.41424        | 0.66065  | 0.63412     | 0.81349658  |             |          |         |
| CDYL2     | ENSG00000166446 | -0.34284 | 0.63414     | -0.34284    | 0.63414     | -0.34284 | 0.63414 |
|           | -0.34284        | 0.63414  | 0.63414     | 0.813500821 |             |          |         |
| GSDMA     | ENSG00000167914 | -0.67681 | 0.75074     | -0.67681    | 0.75074     | -1.1109  | 0.86669 |
|           | -0.34297        | 0.63419  | 0.63419     | 0.813543546 |             |          |         |
| EXPH5     | ENSG00000110723 | -0.34305 | 0.63422     | -0.34305    | 0.63422     | -0.34305 | 0.63422 |
|           | -0.34305        | 0.63422  | 0.63422     | 0.813560614 |             |          |         |
| LAPTM4B   | ENSG00000104341 | -0.34314 | 0.63425     | -0.50007    | 0.69149     | -0.34314 |         |
|           | 0.63425         | -0.45901 | 0.67689     | 0.63425     | 0.813569092 |          |         |
| RNU6-966P | ENSG00000252288 | -0.34315 | 0.63426     | -0.34315    | 0.63426     | -0.34315 |         |
|           | 0.63426         | -0.34315 | 0.63426     | 0.63426     | 0.813569092 |          |         |
| NA        | ENSG00000250994 | -1.464   | 0.9284      | -0.34325    | 0.6343      | -1.6867  | 0.95417 |
|           | -1.5228         | 0.93609  | 0.6343      | 0.813598984 |             |          |         |
| CTSF      | ENSG00000174080 | -0.34338 | 0.63434     | -0.34338    | 0.63434     | -0.62596 | 0.73433 |
|           | -0.67364        | 0.74973  | 0.63434     | 0.813628874 |             |          |         |
| MTCO3P27  | ENSG00000251430 | -0.34353 | 0.6344      | -0.34353    | 0.6344      | -0.34353 |         |
|           | 0.6344          | -0.34353 | 0.6344      | 0.6344      | 0.813675825 |          |         |
| LINC01901 | ENSG00000267413 | -0.34355 | 0.63441     | -0.34355    | 0.63441     | -0.34355 |         |
|           | 0.63441         | -0.34355 | 0.63441     | 0.63441     | 0.813675825 |          |         |
| RGPD4     | ENSG00000196862 | -1.9318  | 0.97331     | -0.82548    | 0.79545     | -0.3437  | 0.63447 |
|           | -0.91511        | 0.81993  | 0.63447     | 0.813722648 |             |          |         |
| OR52J3    | ENSG00000205495 | -1.0398  | 0.85078     | -0.34376    | 0.63449     | -0.34376 |         |
|           | 0.63449         | -0.34376 | 0.63449     | 0.63449     | 0.813722648 |          |         |
| NA        | ENSG00000253475 | -0.34384 | 0.63452     | -0.34384    | 0.63452     | -0.34384 | 0.63452 |
|           | -0.34384        | 0.63452  | 0.63452     | 0.813722648 |             |          |         |
| NA        | ENSG00000267354 | -0.80632 | 0.78997     | -0.34387    | 0.63453     | -1.5928  | 0.9444  |
|           | -0.9048         | 0.81721  | 0.63453     | 0.813722648 |             |          |         |
| NA        | ENSG00000274698 | -0.34388 | 0.63453     | -0.34388    | 0.63453     | -0.34388 | 0.63453 |
|           | -0.34388        | 0.63453  | 0.63453     | 0.813722648 |             |          |         |
| TAF2      | ENSG00000064313 | -0.36026 | 0.64067     | -0.34415    | 0.63463     | -0.62129 | 0.7328  |
|           | -0.38359        | 0.64936  | 0.63463     | 0.813799077 |             |          |         |
| NA        | ENSG00000253912 | -0.34422 | 0.63466     | -0.34422    | 0.63466     | -0.34422 | 0.63466 |
|           | -0.34422        | 0.63466  | 0.63466     | 0.813799077 |             |          |         |
| NA        | ENSG00000279733 | -0.34422 | 0.63466     | -0.71009    | 0.76118     | -0.55559 | 0.71076 |
|           | -0.35333        | 0.63808  | 0.63466     | 0.813799077 |             |          |         |
| NA        | ENSG00000270681 | -0.34428 | 0.63468     | -0.34428    | 0.63468     | -0.34428 | 0.63468 |
|           | -0.34428        | 0.63468  | 0.63468     | 0.813799077 |             |          |         |
| DYNLL1P1  | ENSG00000205579 | -0.93418 | 0.8249      | -1.2499     | 0.89434     | -0.34433 |         |
|           | 0.6347          | -1.1712  | 0.87924     | 0.6347      | 0.813799077 |          |         |
| NA        | ENSG00000240296 | -0.34434 | 0.6347      | -0.34434    | 0.6347      | -0.34434 | 0.6347  |

|             |                 |          |         |             |             |          |         |  |
|-------------|-----------------|----------|---------|-------------|-------------|----------|---------|--|
|             | -0.34434        | 0.6347   | 0.6347  | 0.813799077 |             |          |         |  |
| TMEM229A    | ENSG00000234224 | -0.34439 | 0.63472 | -0.34439    | 0.63472     | -0.34439 |         |  |
|             | 0.63472         | -0.59459 | 0.72394 | 0.63472     | 0.813799077 |          |         |  |
| ZEB2-AS1    | ENSG00000238057 | -0.34442 | 0.63474 | -0.34442    | 0.63474     | -0.34442 |         |  |
|             | 0.63474         | -0.34442 | 0.63474 | 0.63474     | 0.813799077 |          |         |  |
| COX6B1P2    | ENSG00000241788 | -0.34445 | 0.63475 | -0.34445    | 0.63475     | -0.34445 |         |  |
|             | 0.63475         | -0.34445 | 0.63475 | 0.63475     | 0.813799077 |          |         |  |
| CRPPA       | ENSG00000214960 | -0.84451 | 0.80081 | -1.0519     | 0.85359     | -0.37462 | 0.64603 |  |
|             | -0.34448        | 0.63476  | 0.63476 | 0.813799077 |             |          |         |  |
| EVA1C       | ENSG00000166979 | -0.9715  | 0.83435 | -0.34457    | 0.63479     | -1.4168  | 0.92173 |  |
|             | -1.0221         | 0.84662  | 0.63479 | 0.813799077 |             |          |         |  |
| NA          | ENSG00000205959 | -0.59535 | 0.7242  | -0.51924    | 0.6982      | -0.59696 | 0.72473 |  |
|             | -0.34457        | 0.63479  | 0.63479 | 0.813799077 |             |          |         |  |
| NA          | ENSG00000279070 | -0.84482 | 0.80089 | -0.3447     | 0.63484     | -0.84482 | 0.80089 |  |
|             | -0.84482        | 0.80089  | 0.63484 | 0.813841766 |             |          |         |  |
| LINC02567   | ENSG00000237552 | -0.34481 | 0.63488 | -0.34481    | 0.63488     | -0.34481 |         |  |
|             | 0.63488         | -0.34481 | 0.63488 | 0.63488     | 0.813871633 |          |         |  |
| NA          | ENSG00000269651 | -0.36557 | 0.64266 | -0.36557    | 0.64266     | -0.36557 | 0.64266 |  |
|             | -0.34501        | 0.63496  | 0.63496 | 0.813952775 |             |          |         |  |
| ZNF143      | ENSG00000166478 | -0.59498 | 0.72407 | -0.99044    | 0.83902     | -0.79616 |         |  |
|             | 0.78703         | -0.34519 | 0.63502 | 0.63502     | 0.814008276 |          |         |  |
| NA          | ENSG00000248112 | -0.34526 | 0.63505 | -0.34526    | 0.63505     | -0.34526 | 0.63505 |  |
|             | -0.34526        | 0.63505  | 0.63505 | 0.814025318 |             |          |         |  |
| NA          | ENSG00000272103 | -0.51445 | 0.69653 | -1.5065     | 0.93404     | -0.34531 | 0.63507 |  |
|             | -0.34531        | 0.63507  | 0.63507 | 0.814029542 |             |          |         |  |
| NA          | ENSG00000248608 | -0.3659  | 0.64278 | -0.34548    | 0.63513     | -0.37272 | 0.64532 |  |
|             | -0.37272        | 0.64532  | 0.63513 | 0.814063623 |             |          |         |  |
| OR5BL1P     | ENSG00000272569 | -0.34547 | 0.63513 | -0.34547    | 0.63513     | -0.34547 |         |  |
|             | 0.63513         | -1.4984  | 0.93299 | 0.63513     | 0.814063623 |          |         |  |
| SMARCE1P5   | ENSG00000230793 | -0.7782  | 0.78177 | -0.34564    | 0.63519     | -1.2822  |         |  |
|             | 0.90011         | -0.91928 | 0.82103 | 0.63519     | 0.814097701 |          |         |  |
| NA          | ENSG00000251387 | -0.34564 | 0.63519 | -0.80151    | 0.78858     | -0.66702 | 0.74762 |  |
|             | -0.93576        | 0.8253   | 0.63519 | 0.814097701 |             |          |         |  |
| NA          | ENSG00000241043 | -0.34571 | 0.63522 | -0.34571    | 0.63522     | -0.34571 | 0.63522 |  |
|             | -0.34571        | 0.63522  | 0.63522 | 0.814110365 |             |          |         |  |
| ANKRD44-AS1 | ENSG00000231621 | -0.34579 | 0.63525 | -0.34579    | 0.63525     | -0.34579 |         |  |
|             | 0.63525         | -0.34579 | 0.63525 | 0.63525     | 0.814110365 |          |         |  |
| FOXC2-AS1   | ENSG00000260944 | -0.37512 | 0.64621 | -0.37512    | 0.64621     | -1.5981  |         |  |
|             | 0.94499         | -0.3458  | 0.63525 | 0.63525     | 0.814110365 |          |         |  |
| GOLGA8M     | ENSG00000188626 | -0.48717 | 0.68693 | -1.0312     | 0.84877     | -0.34584 |         |  |
|             | 0.63527         | -0.94866 | 0.8286  | 0.63527     | 0.814114585 |          |         |  |
| RPL7AP60    | ENSG00000213152 | -0.3461  | 0.63537 | -0.3461     | 0.63537     | -1.1475  |         |  |
|             | 0.87441         | -0.3461  | 0.63537 | 0.63537     | 0.814161155 |          |         |  |
| ERV3-1      | ENSG00000213462 | -0.34614 | 0.63538 | -0.34614    | 0.63538     | -0.34614 |         |  |
|             | 0.63538         | -0.34614 | 0.63538 | 0.63538     | 0.814161155 |          |         |  |
| SRMP3       | ENSG00000229173 | -0.34616 | 0.63539 | -0.34616    | 0.63539     | -0.34616 | 0.63539 |  |
|             | -0.34616        | 0.63539  | 0.63539 | 0.814161155 |             |          |         |  |
| NA          | ENSG00000255257 | -0.81123 | 0.79138 | -0.93681    | 0.82557     | -0.74459 | 0.77174 |  |
|             | -0.34621        | 0.63541  | 0.63541 | 0.814161155 |             |          |         |  |
| MIR383      | ENSG00000199127 | -1.2497  | 0.89429 | -0.77021    | 0.77941     | -0.34624 |         |  |
|             | 0.63542         | -1.2497  | 0.89429 | 0.63542     | 0.814161155 |          |         |  |
| HMG2P3      | ENSG00000230330 | -0.34626 | 0.63543 | -0.34626    | 0.63543     | -0.34626 |         |  |
|             | 0.63543         | -0.34626 | 0.63543 | 0.63543     | 0.814161155 |          |         |  |
| NA          | ENSG00000254458 | -0.83697 | 0.7987  | -1.2594     | 0.89606     | -0.34628 | 0.63543 |  |
|             | -0.34628        | 0.63543  | 0.63543 | 0.814161155 |             |          |         |  |
| NA          | ENSG00000267563 | -0.34628 | 0.63544 | -0.34628    | 0.63544     | -0.69797 | 0.7574  |  |
|             | -0.69797        | 0.7574   | 0.63544 | 0.814161155 |             |          |         |  |
| ZMYM5       | ENSG00000132950 | -1.3466  | 0.91094 | -0.34649    | 0.63551     | -0.34649 | 0.63551 |  |
|             | -0.34649        | 0.63551  | 0.63551 | 0.814229434 |             |          |         |  |
| NA          | ENSG00000258215 | -0.34658 | 0.63555 | -0.34658    | 0.63555     | -0.34658 | 0.63555 |  |
|             | -0.34658        | 0.63555  | 0.63555 | 0.814246298 |             |          |         |  |
| ASB16-AS1   | ENSG00000267080 | -0.34661 | 0.63556 | -0.34661    | 0.63556     | -0.34661 |         |  |

|            |                 |          |         |             |             |          |         |
|------------|-----------------|----------|---------|-------------|-------------|----------|---------|
|            | 0.63556         | -0.34661 | 0.63556 | 0.63556     | 0.814246298 |          |         |
| MIOS       | ENSG00000164654 | -0.53106 | 0.70231 | -0.76211    | 0.777       | -0.34671 | 0.63559 |
|            | -1.1365         | 0.87214  | 0.63559 | 0.814246298 |             |          |         |
| ADIPOQ-AS1 | ENSG00000226482 | -0.3467  | 0.63559 | -0.46431    | 0.67879     | -0.46431 |         |
|            | 0.67879         | -0.46431 | 0.67879 | 0.63559     | 0.814246298 |          |         |
| NA         | ENSG00000231599 | -0.34683 | 0.63564 | -0.34683    | 0.63564     | -0.34683 | 0.63564 |
|            | -0.34683        | 0.63564  | 0.63564 | 0.814275802 |             |          |         |
| CASD1      | ENSG00000127995 | -0.73873 | 0.76997 | -0.55477    | 0.71047     | -0.34686 | 0.63565 |
|            | -1.5251         | 0.93639  | 0.63565 | 0.814275802 |             |          |         |
| LRRD1      | ENSG00000240720 | -0.34701 | 0.63571 | -0.59602    | 0.72442     | -0.34701 | 0.63571 |
|            | -0.70574        | 0.75982  | 0.63571 | 0.814275802 |             |          |         |
| NA         | ENSG00000257342 | -0.34704 | 0.63572 | -0.34704    | 0.63572     | -0.34704 | 0.63572 |
|            | -0.34704        | 0.63572  | 0.63572 | 0.814275802 |             |          |         |
| FOXRED2    | ENSG00000100350 | -1.6774  | 0.95327 | -0.34706    | 0.63573     | -1.292   |         |
|            | 0.90181         | -1.0231  | 0.84687 | 0.63573     | 0.814275802 |          |         |
| DKK2       | ENSG00000155011 | -0.34707 | 0.63573 | -0.78693    | 0.78434     | -1.5163  | 0.93527 |
|            | -0.54445        | 0.70693  | 0.63573 | 0.814275802 |             |          |         |
| NA         | ENSG00000229021 | -0.34708 | 0.63573 | -0.85415    | 0.80349     | -0.98644 | 0.83804 |
|            | -0.70097        | 0.75834  | 0.63573 | 0.814275802 |             |          |         |
| NA         | ENSG00000258394 | -0.79402 | 0.78641 | -0.34717    | 0.63577     | -0.34717 | 0.63577 |
|            | -0.34717        | 0.63577  | 0.63577 | 0.814305633 |             |          |         |
| NA         | ENSG00000250516 | -2.2302  | 0.98713 | -0.34732    | 0.63582     | -1.6477  | 0.95029 |
|            | -0.50445        | 0.69303  | 0.63582 | 0.814348269 |             |          |         |
| SNORA1B    | ENSG00000199405 | -0.34752 | 0.6359  | -0.34752    | 0.6359      | -1.3657  |         |
|            | 0.91398         | -0.34752 | 0.6359  | 0.6359      | 0.814403358 |          |         |
| PROM1      | ENSG00000007062 | -1.0227  | 0.84678 | -0.94689    | 0.82815     | -0.3476  | 0.63593 |
|            | -1.4335         | 0.92414  | 0.63593 | 0.814403358 |             |          |         |
| ADAM12     | ENSG00000148848 | -0.34769 | 0.63596 | -1.1314     | 0.87105     | -1.1804  |         |
|            | 0.88108         | -1.8407  | 0.96717 | 0.63596     | 0.814403358 |          |         |
| FCMR       | ENSG00000162894 | -0.34769 | 0.63596 | -0.34769    | 0.63596     | -0.34826 | 0.63618 |
|            | -0.5626         | 0.71314  | 0.63596 | 0.814403358 |             |          |         |
| NA         | ENSG00000227769 | -1.2867  | 0.9009  | -1.2867     | 0.9009      | -0.59531 | 0.72418 |
|            | -0.34767        | 0.63596  | 0.63596 | 0.814403358 |             |          |         |
| HAUS4P1    | ENSG00000226967 | -1.2746  | 0.89878 | -0.73249    | 0.76807     | -0.77227 |         |
|            | 0.78002         | -0.34773 | 0.63598 | 0.63598     | 0.814403358 |          |         |
| RN7SL692P  | ENSG00000239710 | -0.34772 | 0.63598 | -0.34772    | 0.63598     | -0.34772 |         |
|            | 0.63598         | -0.34772 | 0.63598 | 0.63598     | 0.814403358 |          |         |
| NA         | ENSG00000259935 | -0.34781 | 0.63601 | -0.34781    | 0.63601     | -0.34781 | 0.63601 |
|            | -0.34781        | 0.63601  | 0.63601 | 0.814420373 |             |          |         |
| RN7SL394P  | ENSG00000239942 | -0.34793 | 0.63606 | -0.34793    | 0.63606     | -0.34793 |         |
|            | 0.63606         | -0.34793 | 0.63606 | 0.63606     | 0.814433    |          |         |
| NA         | ENSG00000254503 | -0.34797 | 0.63607 | -0.34797    | 0.63607     | -0.34797 | 0.63607 |
|            | -0.34797        | 0.63607  | 0.63607 | 0.814433    |             |          |         |
| NA         | ENSG00000260520 | -0.51486 | 0.69667 | -0.51486    | 0.69667     | -1.4336  | 0.92415 |
|            | -0.34796        | 0.63607  | 0.63607 | 0.814433    |             |          |         |
| ITFG1-AS1  | ENSG00000260281 | -0.45936 | 0.67701 | -0.34807    | 0.63611     | -0.42521 |         |
|            | 0.66466         | -0.42521 | 0.66466 | 0.63611     | 0.814462816 |          |         |
| ANXA2P2    | ENSG00000231991 | -0.53201 | 0.70264 | -0.34823    | 0.63616     | -0.34823 |         |
|            | 0.63616         | -0.34823 | 0.63616 | 0.63616     | 0.814475074 |          |         |
| DNAJA1P1   | ENSG00000223717 | -0.3483  | 0.63619 | -0.3483     | 0.63619     | -0.3483  |         |
|            | 0.63619         | -0.3483  | 0.63619 | 0.63619     | 0.814475074 |          |         |
| NA         | ENSG00000232830 | -1.0207  | 0.84631 | -1.8205     | 0.96565     | -0.34832 | 0.6362  |
|            | -0.34832        | 0.6362   | 0.6362  | 0.814475074 |             |          |         |
| ZNF614     | ENSG00000142556 | -0.34836 | 0.63622 | -0.34836    | 0.63622     | -0.34836 |         |
|            | 0.63622         | -0.34836 | 0.63622 | 0.63622     | 0.814475074 |          |         |
| NA         | ENSG00000230480 | -0.34839 | 0.63623 | -0.912      | 0.81912     | -0.912   | 0.81912 |
|            | -0.912          | 0.81912  | 0.63623 | 0.814475074 |             |          |         |
| SAMD4B     | ENSG00000179134 | -0.65509 | 0.74379 | -0.65509    | 0.74379     | -0.65509 |         |
|            | 0.74379         | -0.34842 | 0.63624 | 0.63624     | 0.814475074 |          |         |
| TMEM262    | ENSG00000187066 | -0.34845 | 0.63625 | -0.34845    | 0.63625     | -0.34845 |         |
|            | 0.63625         | -0.34845 | 0.63625 | 0.63625     | 0.814475074 |          |         |
| NA         | ENSG00000254055 | -0.3485  | 0.63627 | -0.8219     | 0.79443     | -0.3485  | 0.63627 |

|          |                 |          |         |             |             |          |         |  |
|----------|-----------------|----------|---------|-------------|-------------|----------|---------|--|
|          | -0.56788        | 0.71494  | 0.63627 | 0.814475074 |             |          |         |  |
| NA       | ENSG00000280277 | -0.34851 | 0.63627 | -0.34851    | 0.63627     | -0.34851 | 0.63627 |  |
|          | -0.34851        | 0.63627  | 0.63627 | 0.814475074 |             |          |         |  |
| TGFBR3   | ENSG00000069702 | -0.56129 | 0.7127  | -0.35316    | 0.63802     | -0.82151 |         |  |
|          | 0.79432         | -0.34861 | 0.63631 | 0.63631     | 0.814504881 |          |         |  |
| MPP2     | ENSG00000108852 | -0.34871 | 0.63635 | -0.34871    | 0.63635     | -0.42167 | 0.66337 |  |
|          | -1.0103         | 0.84383  | 0.63635 | 0.814513291 |             |          |         |  |
| YOD1     | ENSG00000180667 | -0.66556 | 0.74715 | -0.34872    | 0.63635     | -0.43244 | 0.66729 |  |
|          | -0.34872        | 0.63635  | 0.63635 | 0.814513291 |             |          |         |  |
| NA       | ENSG00000235820 | -0.34881 | 0.63638 | -0.34881    | 0.63638     | -0.34881 | 0.63638 |  |
|          | -0.34881        | 0.63638  | 0.63638 | 0.814530295 |             |          |         |  |
| NA       | ENSG00000225113 | -0.34888 | 0.63641 | -0.34888    | 0.63641     | -0.34888 | 0.63641 |  |
|          | -0.34888        | 0.63641  | 0.63641 | 0.814547299 |             |          |         |  |
| PSMA2P3  | ENSG00000227890 | -0.34912 | 0.6365  | -0.34912    | 0.6365      | -0.34912 |         |  |
|          | 0.6365          | -0.34912 | 0.6365  | 0.6365      | 0.814627519 |          |         |  |
| IRF1     | ENSG00000125347 | -1.1628  | 0.87755 | -1.1628     | 0.87755     | -0.34921 | 0.63654 |  |
|          | -0.47785        | 0.68362  | 0.63654 | 0.814627519 |             |          |         |  |
| MIR337   | ENSG00000199151 | -0.53841 | 0.70485 | -0.34925    | 0.63655     | -0.62599 |         |  |
|          | 0.73434         | -0.91384 | 0.8196  | 0.63655     | 0.814627519 |          |         |  |
| CNR2     | ENSG00000188822 | -0.34936 | 0.63659 | -0.34936    | 0.63659     | -0.34936 | 0.63659 |  |
|          | -0.44935        | 0.67341  | 0.63659 | 0.814627519 |             |          |         |  |
| MTATP6P9 | ENSG00000248420 | -0.34936 | 0.63659 | -0.34936    | 0.63659     | -0.65039 |         |  |
|          | 0.74228         | -0.58278 | 0.71998 | 0.63659     | 0.814627519 |          |         |  |
| RPL21P33 | ENSG00000237024 | -0.3494  | 0.63661 | -0.3494     | 0.63661     | -0.3494  |         |  |
|          | 0.63661         | -0.3494  | 0.63661 | 0.63661     | 0.814627519 |          |         |  |
| SCARA5   | ENSG00000168079 | -1.3458  | 0.91081 | -1.3071     | 0.90441     | -0.34955 |         |  |
|          | 0.63666         | -1.551   | 0.93955 | 0.63666     | 0.814627519 |          |         |  |
| RNU7-79P | ENSG00000251891 | -1.7674  | 0.96142 | -0.34954    | 0.63666     | -1.7674  |         |  |
|          | 0.96142         | -1.7674  | 0.96142 | 0.63666     | 0.814627519 |          |         |  |
| MIR4437  | ENSG00000266705 | -0.71819 | 0.76368 | -0.71819    | 0.76368     | -0.71819 |         |  |
|          | 0.76368         | -0.34956 | 0.63666 | 0.63666     | 0.814627519 |          |         |  |
| PIH1D2   | ENSG00000150773 | -0.34959 | 0.63668 | -0.34959    | 0.63668     | -0.34959 |         |  |
|          | 0.63668         | -0.34959 | 0.63668 | 0.63668     | 0.814627519 |          |         |  |
| TMEM43   | ENSG00000170876 | -0.62793 | 0.73497 | -0.48375    | 0.68572     | -0.3496  |         |  |
|          | 0.63668         | -0.3496  | 0.63668 | 0.63668     | 0.814627519 |          |         |  |
| ZC3H10   | ENSG00000135482 | -1.0986  | 0.86402 | -0.34961    | 0.63669     | -1.5082  |         |  |
|          | 0.93425         | -1.3624  | 0.91347 | 0.63669     | 0.814627519 |          |         |  |
| NA       | ENSG00000233943 | -0.34963 | 0.63669 | -0.34963    | 0.63669     | -0.34963 | 0.63669 |  |
|          | -0.34963        | 0.63669  | 0.63669 | 0.814627519 |             |          |         |  |
| NA       | ENSG00000235020 | -0.40309 | 0.65656 | -0.3497     | 0.63672     | -0.77158 | 0.77982 |  |
|          | -0.43135        | 0.66689  | 0.63672 | 0.814635919 |             |          |         |  |
| NA       | ENSG00000224371 | -0.34972 | 0.63673 | -0.34972    | 0.63673     | -0.34972 | 0.63673 |  |
|          | -0.34972        | 0.63673  | 0.63673 | 0.814635919 |             |          |         |  |
| DYNLL1   | ENSG00000088986 | -0.97088 | 0.8342  | -0.63753    | 0.73811     | -0.34991 |         |  |
|          | 0.6368          | -0.89251 | 0.81394 | 0.6368      | 0.814682699 |          |         |  |
| NA       | ENSG00000250030 | -1.1032  | 0.86502 | -1.1032     | 0.86502     | -1.1032  | 0.86502 |  |
|          | -0.34992        | 0.6368   | 0.6368  | 0.814682699 |             |          |         |  |
| NA       | ENSG00000258358 | -0.35006 | 0.63685 | -0.35006    | 0.63685     | -1.7377  | 0.95887 |  |
|          | -0.35006        | 0.63685  | 0.63685 | 0.814725276 |             |          |         |  |
| NA       | ENSG00000266429 | -0.35017 | 0.6369  | -0.78776    | 0.78458     | -0.78776 | 0.78458 |  |
|          | -0.78776        | 0.78458  | 0.6369  | 0.814758847 |             |          |         |  |
| MIR33A   | ENSG00000207932 | -0.35033 | 0.63695 | -0.35033    | 0.63695     | -0.35033 |         |  |
|          | 0.63695         | -0.35033 | 0.63695 | 0.63695     | 0.814758847 |          |         |  |
| NA       | ENSG00000279391 | -0.35038 | 0.63697 | -0.35038    | 0.63697     | -0.35038 | 0.63697 |  |
|          | -0.35038        | 0.63697  | 0.63697 | 0.814758847 |             |          |         |  |
| NA       | ENSG00000228955 | -0.35041 | 0.63698 | -0.35041    | 0.63698     | -0.35041 | 0.63698 |  |
|          | -0.35041        | 0.63698  | 0.63698 | 0.814758847 |             |          |         |  |
| OR14I1   | ENSG00000189181 | -0.35043 | 0.63699 | -0.35043    | 0.63699     | -0.35043 |         |  |
|          | 0.63699         | -0.35043 | 0.63699 | 0.63699     | 0.814758847 |          |         |  |
| CCDC130  | ENSG00000104957 | -1.9571  | 0.97483 | -0.35045    | 0.637       | -1.8668  | 0.96903 |  |
|          | -1.3473         | 0.91107  | 0.637   | 0.814758847 |             |          |         |  |
| WWTR1    | ENSG00000018408 | -0.35048 | 0.63701 | -1.0749     | 0.85878     | -0.35158 | 0.63742 |  |

|           |                 |          |         |             |             |          |         |  |
|-----------|-----------------|----------|---------|-------------|-------------|----------|---------|--|
|           | -1.0441         | 0.85177  | 0.63701 | 0.814758847 |             |          |         |  |
| NA        | ENSG00000264964 | -0.79097 | 0.78552 | -0.8572     | 0.80433     | -0.92593 | 0.82276 |  |
|           | -0.35047        | 0.63701  | 0.63701 | 0.814758847 |             |          |         |  |
| CD6       | ENSG00000013725 | -0.38913 | 0.65141 | -0.38913    | 0.65141     | -0.70437 | 0.7594  |  |
|           | -0.35056        | 0.63704  | 0.63704 | 0.814767237 |             |          |         |  |
| FGF12-AS2 | ENSG00000230126 | -1.0845  | 0.86093 | -0.49707    | 0.69043     | -0.3506  |         |  |
|           | 0.63705         | -0.3506  | 0.63705 | 0.63705     | 0.814767237 |          |         |  |
| TOPBP1    | ENSG00000163781 | -1.5275  | 0.93668 | -0.35071    | 0.6371      | -1.3578  |         |  |
|           | 0.91273         | -0.62071 | 0.7326  | 0.6371      | 0.814801205 |          |         |  |
| ARL6IP1   | ENSG00000170540 | -0.35075 | 0.63711 | -0.35075    | 0.63711     | -0.35075 |         |  |
|           | 0.63711         | -0.35075 | 0.63711 | 0.63711     | 0.814801205 |          |         |  |
| NA        | ENSG00000240710 | -0.73194 | 0.7679  | -0.73194    | 0.7679      | -0.35085 | 0.63715 |  |
|           | -0.73194        | 0.7679   | 0.63715 | 0.814830976 |             |          |         |  |
| PIP       | ENSG00000159763 | -0.35094 | 0.63718 | -0.35094    | 0.63718     | -1.1718  | 0.87936 |  |
|           | -0.35094        | 0.63718  | 0.63718 | 0.814847957 |             |          |         |  |
| NA        | ENSG00000235186 | -1.0904  | 0.86222 | -0.35104    | 0.63722     | -1.3259  | 0.90756 |  |
|           | -0.79157        | 0.78569  | 0.63722 | 0.814869129 |             |          |         |  |
| LIN7B     | ENSG00000104863 | -0.35106 | 0.63723 | -0.35106    | 0.63723     | -0.35106 | 0.63723 |  |
|           | -0.35106        | 0.63723  | 0.63723 | 0.814869129 |             |          |         |  |
| KRT18P67  | ENSG00000233425 | -0.35143 | 0.63737 | -1.3106     | 0.905       | -0.35143 | 0.63737 |  |
|           | -0.35143        | 0.63737  | 0.63737 | 0.814996783 |             |          |         |  |
| MAPK6P5   | ENSG00000254185 | -0.35145 | 0.63737 | -0.35145    | 0.63737     | -0.35145 |         |  |
|           | 0.63737         | -0.35145 | 0.63737 | 0.63737     | 0.814996783 |          |         |  |
| HHAT      | ENSG00000054392 | -0.35145 | 0.63738 | -0.49995    | 0.69144     | -0.88065 | 0.81075 |  |
|           | -1.1447         | 0.87383  | 0.63738 | 0.814996783 |             |          |         |  |
| MED28P8   | ENSG00000242598 | -0.35154 | 0.63741 | -0.35154    | 0.63741     | -0.35154 |         |  |
|           | 0.63741         | -0.35154 | 0.63741 | 0.63741     | 0.815009346 |          |         |  |
| NT5C      | ENSG00000125458 | -0.35163 | 0.63744 | -0.35163    | 0.63744     | -0.35163 | 0.63744 |  |
|           | -0.35163        | 0.63744  | 0.63744 | 0.815009346 |             |          |         |  |
| NA        | ENSG00000219699 | -0.35162 | 0.63744 | -0.35162    | 0.63744     | -0.35162 | 0.63744 |  |
|           | -0.35162        | 0.63744  | 0.63744 | 0.815009346 |             |          |         |  |
| NA        | ENSG00000254484 | -0.46935 | 0.68059 | -0.5964     | 0.72455     | -0.35183 | 0.63752 |  |
|           | -0.93979        | 0.82634  | 0.63752 | 0.815072588 |             |          |         |  |
| SNORD43   | ENSG00000263764 | -0.35189 | 0.63754 | -0.35189    | 0.63754     | -0.35189 |         |  |
|           | 0.63754         | -0.35189 | 0.63754 | 0.63754     | 0.815072588 |          |         |  |
| NA        | ENSG00000254855 | -0.35192 | 0.63755 | -0.35192    | 0.63755     | -0.35192 | 0.63755 |  |
|           | -0.35192        | 0.63755  | 0.63755 | 0.815072588 |             |          |         |  |
| NA        | ENSG00000277408 | -0.352   | 0.63758 | -0.352      | 0.63758     | -0.352   | 0.63758 |  |
|           | -0.352          | 0.63758  | 0.63758 | 0.815072588 |             |          |         |  |
| NA        | ENSG00000230704 | -0.35201 | 0.63759 | -0.35201    | 0.63759     | -0.35201 | 0.63759 |  |
|           | -0.35201        | 0.63759  | 0.63759 | 0.815072588 |             |          |         |  |
| JCHAINP1  | ENSG00000253655 | -1.2914  | 0.90171 | -0.35204    | 0.6376      | -1.2914  |         |  |
|           | 0.90171         | -1.2914  | 0.90171 | 0.6376      | 0.815072588 |          |         |  |
| KRTAP3-2  | ENSG00000212900 | -0.35215 | 0.63764 | -0.35215    | 0.63764     | -0.35215 |         |  |
|           | 0.63764         | -0.35215 | 0.63764 | 0.63764     | 0.815072588 |          |         |  |
| MYL6BP1   | ENSG00000228380 | -0.35216 | 0.63764 | -0.35216    | 0.63764     | -0.35216 |         |  |
|           | 0.63764         | -0.35216 | 0.63764 | 0.63764     | 0.815072588 |          |         |  |
| NA        | ENSG00000239377 | -0.53278 | 0.70291 | -0.35215    | 0.63764     | -0.35215 | 0.63764 |  |
|           | -0.35215        | 0.63764  | 0.63764 | 0.815072588 |             |          |         |  |
| NA        | ENSG00000255337 | -0.35222 | 0.63766 | -0.35222    | 0.63766     | -0.35222 | 0.63766 |  |
|           | -0.35222        | 0.63766  | 0.63766 | 0.815076773 |             |          |         |  |
| KRT18P28  | ENSG00000176855 | -0.72183 | 0.7648  | -0.53196    | 0.70262     | -0.72183 |         |  |
|           | 0.7648          | -0.35228 | 0.63769 | 0.63769     | 0.815085141 |          |         |  |
| NA        | ENSG00000281530 | -0.35233 | 0.6377  | -0.35233    | 0.6377      | -0.35233 | 0.6377  |  |
|           | -0.35233        | 0.6377   | 0.6377  | 0.815085141 |             |          |         |  |
| RNU6-973P | ENSG00000201560 | -0.53856 | 0.7049  | -0.78282    | 0.78313     | -0.91576 |         |  |
|           | 0.8201          | -0.35246 | 0.63775 | 0.63775     | 0.815093048 |          |         |  |
| NA        | ENSG00000272195 | -0.35253 | 0.63778 | -0.35253    | 0.63778     | -0.35253 | 0.63778 |  |
|           | -0.35253        | 0.63778  | 0.63778 | 0.815093048 |             |          |         |  |
| RPL7P50   | ENSG00000268785 | -0.35257 | 0.6378  | -0.35257    | 0.6378      | -0.35257 |         |  |
|           | 0.6378          | -0.35257 | 0.6378  | 0.6378      | 0.815093048 |          |         |  |
| KIAA0753  | ENSG00000198920 | -0.35267 | 0.63783 | -0.35267    | 0.63783     | -0.35267 |         |  |

|           |                 |          |         |             |             |          |         |
|-----------|-----------------|----------|---------|-------------|-------------|----------|---------|
|           | 0.63783         | -0.35267 | 0.63783 | 0.63783     | 0.815093048 |          |         |
| NA        | ENSG00000217379 | -0.35265 | 0.63783 | -0.35265    | 0.63783     | -0.35265 | 0.63783 |
|           | -0.80503        | 0.7896   | 0.63783 | 0.815093048 |             |          |         |
| FDPSP3    | ENSG00000258872 | -0.35268 | 0.63783 | -0.35268    | 0.63783     | -0.35268 | 0.63783 |
|           | 0.63783         | -0.35268 | 0.63783 | 0.63783     | 0.815093048 |          |         |
| NA        | ENSG00000226905 | -0.89757 | 0.81529 | -0.89757    | 0.81529     | -0.3527  | 0.63784 |
|           | -1.0654         | 0.85666  | 0.63784 | 0.815093048 |             |          |         |
| NA        | ENSG00000232486 | -0.35268 | 0.63784 | -0.81321    | 0.79195     | -1.2306  | 0.89077 |
|           | -0.96736        | 0.83332  | 0.63784 | 0.815093048 |             |          |         |
| CBX3P5    | ENSG00000257666 | -0.35276 | 0.63787 | -0.35276    | 0.63787     | -0.35276 |         |
|           | 0.63787         | -0.35276 | 0.63787 | 0.63787     | 0.815101183 |          |         |
| NA        | ENSG00000267390 | -0.6196  | 0.73224 | -0.35281    | 0.63789     | -0.6196  | 0.73224 |
|           | -1.0717         | 0.85808  | 0.63789 | 0.815101183 |             |          |         |
| NA        | ENSG00000269621 | -0.35292 | 0.63792 | -0.35292    | 0.63792     | -0.35292 | 0.63792 |
|           | -0.35292        | 0.63792  | 0.63792 | 0.815101183 |             |          |         |
| C12orf65  | ENSG00000130921 | -0.35292 | 0.63793 | -1.0294     | 0.84836     | -0.35292 |         |
|           | 0.63793         | -0.57583 | 0.71763 | 0.63793     | 0.815101183 |          |         |
| HMGB3P4   | ENSG00000228808 | -0.35294 | 0.63793 | -0.35294    | 0.63793     | -0.35294 |         |
|           | 0.63793         | -0.35294 | 0.63793 | 0.63793     | 0.815101183 |          |         |
| SNORD72   | ENSG00000212296 | -0.3531  | 0.63799 | -0.3531     | 0.63799     | -0.3531  |         |
|           | 0.63799         | -0.3531  | 0.63799 | 0.63799     | 0.815156472 |          |         |
| EEF1A1P4  | ENSG00000245205 | -0.35333 | 0.63808 | -0.35333    | 0.63808     | -0.35333 |         |
|           | 0.63808         | -0.35333 | 0.63808 | 0.63808     | 0.815167597 |          |         |
| NA        | ENSG00000228801 | -0.35345 | 0.63812 | -0.35345    | 0.63812     | -0.35345 | 0.63812 |
|           | -0.35345        | 0.63812  | 0.63812 | 0.815167597 |             |          |         |
| OXTR      | ENSG00000180914 | -0.41949 | 0.66257 | -1.8466     | 0.9676      | -1.642   | 0.9497  |
|           | -0.35352        | 0.63815  | 0.63815 | 0.815167597 |             |          |         |
| NA        | ENSG00000252945 | -0.35358 | 0.63817 | -0.82215    | 0.7945      | -0.82215 | 0.7945  |
|           | -1.0342         | 0.84948  | 0.63817 | 0.815167597 |             |          |         |
| TIMP2     | ENSG00000035862 | -0.79179 | 0.78576 | -1.1496     | 0.87485     | -0.35359 | 0.63818 |
|           | -1.0194         | 0.846    | 0.63818 | 0.815167597 |             |          |         |
| HLCS-IT1  | ENSG00000237646 | -0.35362 | 0.63819 | -0.35362    | 0.63819     | -0.35362 |         |
|           | 0.63819         | -0.35362 | 0.63819 | 0.63819     | 0.815167597 |          |         |
| NA        | ENSG00000275056 | -0.35361 | 0.63819 | -0.35361    | 0.63819     | -0.35361 | 0.63819 |
|           | -0.35361        | 0.63819  | 0.63819 | 0.815167597 |             |          |         |
| NA        | ENSG00000276517 | -0.35362 | 0.63819 | -0.35362    | 0.63819     | -0.35362 | 0.63819 |
|           | -0.35362        | 0.63819  | 0.63819 | 0.815167597 |             |          |         |
| NA        | ENSG00000231252 | -1.9574  | 0.97485 | -2.3264     | 0.99        | -0.35366 | 0.6382  |
|           | -1.5249         | 0.93636  | 0.6382  | 0.815167597 |             |          |         |
| NA        | ENSG00000255087 | -0.71237 | 0.76188 | -0.74716    | 0.77252     | -0.59528 | 0.72417 |
|           | -0.35365        | 0.6382   | 0.6382  | 0.815167597 |             |          |         |
| NA        | ENSG00000254915 | -0.37948 | 0.64783 | -0.37948    | 0.64783     | -0.35368 | 0.63821 |
|           | -0.59609        | 0.72444  | 0.63821 | 0.815167597 |             |          |         |
| TUBG1P    | ENSG00000237972 | -0.35371 | 0.63822 | -0.35371    | 0.63822     | -0.35371 |         |
|           | 0.63822         | -0.65284 | 0.74307 | 0.63822     | 0.815167597 |          |         |
| NA        | ENSG00000253510 | -0.3537  | 0.63822 | -0.3537     | 0.63822     | -0.3537  | 0.63822 |
|           | -0.3537         | 0.63822  | 0.63822 | 0.815167597 |             |          |         |
| FAM238A   | ENSG00000233261 | -0.91306 | 0.81939 | -1.434      | 0.92422     | -2.1144  |         |
|           | 0.98276         | -0.35384 | 0.63827 | 0.63827     | 0.815167597 |          |         |
| LINC01889 | ENSG00000235491 | -0.35384 | 0.63827 | -0.35384    | 0.63827     | -0.35384 |         |
|           | 0.63827         | -0.35384 | 0.63827 | 0.63827     | 0.815167597 |          |         |
| NA        | ENSG00000244083 | -0.36992 | 0.64428 | -0.36992    | 0.64428     | -0.35385 | 0.63828 |
|           | -0.61466        | 0.73061  | 0.63828 | 0.815167597 |             |          |         |
| NA        | ENSG00000275897 | -0.35396 | 0.63831 | -0.35396    | 0.63831     | -0.35396 | 0.63831 |
|           | -0.35396        | 0.63831  | 0.63831 | 0.815167597 |             |          |         |
| SNORD83A  | ENSG00000209482 | -0.35399 | 0.63833 | -0.35399    | 0.63833     | -0.35399 |         |
|           | 0.63833         | -0.35399 | 0.63833 | 0.63833     | 0.815167597 |          |         |
| RNU6-576P | ENSG00000212156 | -0.35403 | 0.63834 | -0.35403    | 0.63834     | -0.35403 |         |
|           | 0.63834         | -0.35403 | 0.63834 | 0.63834     | 0.815167597 |          |         |
| TUBB6     | ENSG00000176014 | -0.98392 | 0.83742 | -0.35406    | 0.63835     | -1.1959  | 0.88413 |
|           | -0.55345        | 0.71002  | 0.63835 | 0.815167597 |             |          |         |
| MIR3131   | ENSG00000264755 | -0.35405 | 0.63835 | -0.35405    | 0.63835     | -0.35405 |         |

|             |                 |          |         |             |             |          |         |  |
|-------------|-----------------|----------|---------|-------------|-------------|----------|---------|--|
|             | 0.63835         | -0.35405 | 0.63835 | 0.63835     | 0.815167597 |          |         |  |
| NA          | ENSG00000252305 | -0.97917 | 0.83625 | -2.017      | 0.97815     | -0.3541  | 0.63837 |  |
|             | -1.547          | 0.93906  | 0.63837 | 0.815171775 |             |          |         |  |
| MIA2        | ENSG00000150527 | -1.403   | 0.91969 | -0.61877    | 0.73197     | -0.35426 | 0.63843 |  |
|             | -0.65474        | 0.74368  | 0.63843 | 0.815222613 |             |          |         |  |
| EFNA3       | ENSG00000143590 | -0.85236 | 0.80299 | -0.91082    | 0.8188      | -0.7101  | 0.76118 |  |
|             | -0.35436        | 0.63846  | 0.63846 | 0.815222613 |             |          |         |  |
| RNU4-56P    | ENSG00000201570 | -0.77717 | 0.78147 | -0.91657    | 0.82032     | -1.2572  |         |  |
|             | 0.89566         | -0.35434 | 0.63846 | 0.63846     | 0.815222613 |          |         |  |
| RN7SKP179   | ENSG00000251935 | -1.3581  | 0.91279 | -1.5188     | 0.93559     | -0.35443 |         |  |
|             | 0.63849         | -0.35443 | 0.63849 | 0.63849     | 0.815239557 |          |         |  |
| CEP170P1    | ENSG00000154608 | -0.35483 | 0.63864 | -0.61682    | 0.73132     | -1.0198  |         |  |
|             | 0.84608         | -1.0144  | 0.84481 | 0.63864     | 0.815362565 |          |         |  |
| NA          | ENSG00000244953 | -0.35483 | 0.63864 | -0.35483    | 0.63864     | -1.1253  | 0.86977 |  |
|             | -0.70594        | 0.75989  | 0.63864 | 0.815362565 |             |          |         |  |
| LINC00564   | ENSG00000260094 | -0.35484 | 0.63864 | -0.35484    | 0.63864     | -0.35484 |         |  |
|             | 0.63864         | -0.35484 | 0.63864 | 0.63864     | 0.815362565 |          |         |  |
| NA          | ENSG00000240579 | -0.35487 | 0.63866 | -0.48035    | 0.68451     | -0.63689 | 0.7379  |  |
|             | -0.35487        | 0.63866  | 0.63866 | 0.815362565 |             |          |         |  |
| ZNF970P     | ENSG00000258368 | -0.83554 | 0.79829 | -0.79725    | 0.78735     | -0.3549  |         |  |
|             | 0.63867         | -0.52522 | 0.70028 | 0.63867     | 0.815362565 |          |         |  |
| PNLIPP1     | ENSG00000232091 | -0.3551  | 0.63874 | -0.3551     | 0.63874     | -0.3551  |         |  |
|             | 0.63874         | -0.3551  | 0.63874 | 0.63874     | 0.815400356 |          |         |  |
| IGHVII-67-1 | ENSG00000253820 | -0.35512 | 0.63875 | -0.35512    | 0.63875     | -0.35512 |         |  |
|             | 0.63875         | -0.35512 | 0.63875 | 0.63875     | 0.815400356 |          |         |  |
| THRAP3P1    | ENSG00000227339 | -0.35514 | 0.63876 | -0.42868    | 0.66592     | -0.42868 |         |  |
|             | 0.66592         | -0.35996 | 0.64056 | 0.63876     | 0.815400356 |          |         |  |
| C1GALT1     | ENSG00000106392 | -0.49829 | 0.69086 | -1.0541     | 0.85408     | -1.0541  |         |  |
|             | 0.85408         | -0.35521 | 0.63878 | 0.63878     | 0.815400356 |          |         |  |
| MIR520B     | ENSG00000207722 | -0.35524 | 0.63879 | -0.35524    | 0.63879     | -0.35524 |         |  |
|             | 0.63879         | -0.35524 | 0.63879 | 0.63879     | 0.815400356 |          |         |  |
| SMYD2       | ENSG00000143499 | -0.62398 | 0.73368 | -0.63115    | 0.73603     | -0.78509 | 0.7838  |  |
|             | -0.35526        | 0.6388   | 0.6388  | 0.815400356 |             |          |         |  |
| RPP14       | ENSG00000163684 | -0.57269 | 0.71657 | -0.44631    | 0.67231     | -0.35531 | 0.63882 |  |
|             | -0.40749        | 0.65818  | 0.63882 | 0.815404526 |             |          |         |  |
| NA          | ENSG00000232394 | -0.35549 | 0.63889 | -0.59045    | 0.72256     | -0.35549 | 0.63889 |  |
|             | -0.35549        | 0.63889  | 0.63889 | 0.81546392  |             |          |         |  |
| NA          | ENSG00000253678 | -0.35551 | 0.6389  | -0.35551    | 0.6389      | -0.35551 | 0.6389  |  |
|             | -0.35551        | 0.6389   | 0.6389  | 0.81546392  |             |          |         |  |
| NA          | ENSG00000249686 | -0.3556  | 0.63893 | -0.66135    | 0.74581     | -0.66135 | 0.74581 |  |
|             | -0.66135        | 0.74581  | 0.63893 | 0.815480851 |             |          |         |  |
| CNOT7       | ENSG00000198791 | -2.2446  | 0.9876  | -0.3558     | 0.63901     | -0.91593 | 0.82015 |  |
|             | -0.67544        | 0.7503   | 0.63901 | 0.815501163 |             |          |         |  |
| NA          | ENSG00000229914 | -1.0526  | 0.85375 | -0.37658    | 0.64676     | -0.35581 | 0.63901 |  |
|             | -0.35581        | 0.63901  | 0.63901 | 0.815501163 |             |          |         |  |
| NA          | ENSG00000249084 | -0.35584 | 0.63902 | -0.35584    | 0.63902     | -0.35584 | 0.63902 |  |
|             | -0.35584        | 0.63902  | 0.63902 | 0.815501163 |             |          |         |  |
| MIR4739     | ENSG00000266665 | -0.35584 | 0.63902 | -0.35584    | 0.63902     | -0.35584 |         |  |
|             | 0.63902         | -0.35584 | 0.63902 | 0.63902     | 0.815501163 |          |         |  |
| MIR5692C1   | ENSG00000265924 | -0.35588 | 0.63903 | -0.35588    | 0.63903     | -0.35588 |         |  |
|             | 0.63903         | -0.35588 | 0.63903 | 0.63903     | 0.815501163 |          |         |  |
| MTCO3P30    | ENSG00000229080 | -0.35593 | 0.63905 | -0.35593    | 0.63905     | -0.35593 |         |  |
|             | 0.63905         | -0.35593 | 0.63905 | 0.63905     | 0.815501163 |          |         |  |
| TAF15       | ENSG00000270647 | -1.1271  | 0.87014 | -0.35597    | 0.63907     | -1.0912  | 0.86241 |  |
|             | -0.74223        | 0.77102  | 0.63907 | 0.815501163 |             |          |         |  |
| ZNF37CP     | ENSG00000151963 | -0.93117 | 0.82412 | -0.89963    | 0.81584     | -0.68696 |         |  |
|             | 0.75395         | -0.35602 | 0.63909 | 0.63909     | 0.815501163 |          |         |  |
| SMC3        | ENSG00000108055 | -0.90037 | 0.81604 | -0.84567    | 0.80113     | -0.51166 | 0.69555 |  |
|             | -0.35606        | 0.6391   | 0.6391  | 0.815501163 |             |          |         |  |
| MTERF4      | ENSG00000122085 | -0.43741 | 0.66909 | -1.1429     | 0.87345     | -0.3561  |         |  |
|             | 0.63912         | -0.58482 | 0.72067 | 0.63912     | 0.815501163 |          |         |  |
| BCRP5       | ENSG00000235062 | -0.35613 | 0.63913 | -0.35613    | 0.63913     | -0.35613 | 0.63913 |  |



|              |                 |          |          |          |             |             |         |  |
|--------------|-----------------|----------|----------|----------|-------------|-------------|---------|--|
|              |                 | -0.35613 | 0.63913  | 0.63913  | 0.815501163 |             |         |  |
| NA           | ENSG00000207171 | -0.82352 | 0.79489  | -0.35625 | 0.63917     | -0.82352    | 0.79489 |  |
|              |                 | -0.82352 | 0.79489  | 0.63917  | 0.815530847 |             |         |  |
| LRR57P1      | ENSG00000238065 | -0.35631 | 0.6392   | -0.35631 | 0.6392      | -0.35631    | 0.6392  |  |
|              |                 | 0.6392   | -1.2685  | 0.89769  | 0.6392      | 0.815547771 |         |  |
| ZNF214       | ENSG00000149050 | -0.35638 | 0.63922  | -1.2023  | 0.88537     | -0.46836    |         |  |
|              |                 | 0.68024  | -0.46836 | 0.68024  | 0.63922     | 0.815551935 |         |  |
| NA           | ENSG00000204745 | -0.99978 | 0.84129  | -0.75892 | 0.77605     | -0.65306    | 0.74314 |  |
|              |                 | -0.35656 | 0.63929  | 0.63929  | 0.815615457 |             |         |  |
| PYHIN1       | ENSG00000163564 | -0.98807 | 0.83844  | -0.35664 | 0.63932     | -1.8559     |         |  |
|              |                 | 0.96827  | -1.0364  | 0.84999  | 0.63932     | 0.815615457 |         |  |
| RPL23AP55    | ENSG00000243265 | -0.35665 | 0.63932  | -0.35665 | 0.63932     | -0.35665    |         |  |
|              |                 | 0.63932  | -0.35665 | 0.63932  | 0.63932     | 0.815615457 |         |  |
| NA           | ENSG00000262038 | -0.35675 | 0.63936  | -0.35675 | 0.63936     | -0.35675    | 0.63936 |  |
|              |                 | -0.35675 | 0.63936  | 0.63936  | 0.815645133 |             |         |  |
| NA           | ENSG00000276449 | -0.35692 | 0.63942  | -0.35692 | 0.63942     | -0.35692    | 0.63942 |  |
|              |                 | -0.35692 | 0.63942  | 0.63942  | 0.815669822 |             |         |  |
| DCTN4        | ENSG00000132912 | -0.73781 | 0.76968  | -0.78475 | 0.7837      | -0.72769    | 0.7666  |  |
|              |                 | -0.35695 | 0.63944  | 0.63944  | 0.815669822 |             |         |  |
| NA           | ENSG00000234292 | -0.35698 | 0.63945  | -0.35698 | 0.63945     | -0.65893    | 0.74503 |  |
|              |                 | -0.86903 | 0.80758  | 0.63945  | 0.815669822 |             |         |  |
| NA           | ENSG00000251627 | -0.48425 | 0.6859   | -0.35699 | 0.63945     | -0.49347    | 0.68916 |  |
|              |                 | -1.1469  | 0.87428  | 0.63945  | 0.815669822 |             |         |  |
| SCAMP2       | ENSG00000140497 | -0.94296 | 0.82715  | -0.43674 | 0.66885     | -0.82225    |         |  |
|              |                 | 0.79453  | -0.35706 | 0.63948  | 0.63948     | 0.815669822 |         |  |
| PPP1R12A-AS1 | ENSG00000257557 | -0.35714 | 0.63951  | -0.35714 | 0.63951     | -0.35714    |         |  |
|              |                 | 0.63951  | -0.35714 | 0.63951  | 0.63951     | 0.815669822 |         |  |
| NA           | ENSG00000256108 | -1.0434  | 0.85162  | -0.81264 | 0.79179     | -0.35718    | 0.63952 |  |
|              |                 | -0.35718 | 0.63952  | 0.63952  | 0.815669822 |             |         |  |
| OR5W2        | ENSG00000187612 | -0.35721 | 0.63953  | -0.79225 | 0.78589     | -1.2748     | 0.8988  |  |
|              |                 | -0.79225 | 0.78589  | 0.63953  | 0.815669822 |             |         |  |
| NA           | ENSG00000259532 | -0.35721 | 0.63953  | -0.35721 | 0.63953     | -0.35721    | 0.63953 |  |
|              |                 | -0.35721 | 0.63953  | 0.63953  | 0.815669822 |             |         |  |
| RNU6ATAC26P  | ENSG00000210841 | -0.35745 | 0.63962  | -0.35745 | 0.63962     | -0.35745    |         |  |
|              |                 | 0.63962  | -0.35745 | 0.63962  | 0.63962     | 0.815733313 |         |  |
| ALKBH4       | ENSG00000160993 | -0.35747 | 0.63963  | -0.35747 | 0.63963     | -1.3065     |         |  |
|              |                 | 0.9043   | -0.35747 | 0.63963  | 0.63963     | 0.815733313 |         |  |
| NA           | ENSG00000200857 | -0.35747 | 0.63963  | -0.35747 | 0.63963     | -0.35747    | 0.63963 |  |
|              |                 | -0.35747 | 0.63963  | 0.63963  | 0.815733313 |             |         |  |
| RNA5SP56     | ENSG00000222209 | -0.3577  | 0.63971  | -0.97805 | 0.83598     | -0.88036    |         |  |
|              |                 | 0.81067  | -0.55866 | 0.7118   | 0.63971     | 0.815792638 |         |  |
| NA           | ENSG00000238838 | -0.35769 | 0.63971  | -0.35769 | 0.63971     | -0.35769    | 0.63971 |  |
|              |                 | -0.35769 | 0.63971  | 0.63971  | 0.815792638 |             |         |  |
| NA           | ENSG00000254428 | -0.35778 | 0.63975  | -0.35778 | 0.63975     | -0.35778    | 0.63975 |  |
|              |                 | -0.35778 | 0.63975  | 0.63975  | 0.815822299 |             |         |  |
| MRPL35P2     | ENSG00000232075 | -0.39053 | 0.65193  | -0.75731 | 0.77557     | -0.3579     |         |  |
|              |                 | 0.63979  | -0.75731 | 0.77557  | 0.63979     | 0.815830033 |         |  |
| HPN-AS1      | ENSG00000227392 | -1.0985  | 0.864    | -0.35793 | 0.6398      | -1.0985     | 0.864   |  |
|              |                 | -1.0985  | 0.864    | 0.6398   | 0.815830033 |             |         |  |
| AP4E1        | ENSG00000081014 | -1.35    | 0.91149  | -0.35804 | 0.63984     | -1.6718     | 0.95272 |  |
|              |                 | -0.83787 | 0.79895  | 0.63984  | 0.815830033 |             |         |  |
| LIG1         | ENSG00000105486 | -0.99748 | 0.84074  | -0.4884  | 0.68737     | -1.4475     | 0.92612 |  |
|              |                 | -0.35814 | 0.63988  | 0.63988  | 0.815830033 |             |         |  |
| MIR128-2     | ENSG00000207625 | -0.35813 | 0.63988  | -0.35813 | 0.63988     | -0.35813    |         |  |
|              |                 | 0.63988  | -0.35813 | 0.63988  | 0.63988     | 0.815830033 |         |  |
| NA           | ENSG00000251550 | -0.35813 | 0.63988  | -0.35813 | 0.63988     | -0.35813    | 0.63988 |  |
|              |                 | -0.35813 | 0.63988  | 0.63988  | 0.815830033 |             |         |  |
| GABRG2       | ENSG00000113327 | -0.79411 | 0.78643  | -2.1271  | 0.98329     | -1.8058     |         |  |
|              |                 | 0.96452  | -0.35816 | 0.63989  | 0.63989     | 0.815830033 |         |  |
| RDH16        | ENSG00000139547 | -1.4309  | 0.92377  | -1.5746  | 0.94233     | -1.0462     | 0.85226 |  |
|              |                 | -0.35817 | 0.63989  | 0.63989  | 0.815830033 |             |         |  |
| RNA5SP192    | ENSG00000201274 | -0.5858  | 0.72099  | -0.5858  | 0.72099     | -0.5858     |         |  |

|           |                 |             |         |             |             |          |         |
|-----------|-----------------|-------------|---------|-------------|-------------|----------|---------|
|           | 0.72099         | -0.35834    | 0.63996 | 0.63996     | 0.815867991 |          |         |
| NA        | ENSG00000258231 | -1.7363     | 0.95874 | -0.48794    | 0.6872      | -1.757   | 0.96054 |
|           | -0.35836        | 0.63996     | 0.63996 | 0.815867991 |             |          |         |
| TMEM18-DT | ENSG00000233296 | -0.35837    | 0.63997 | -0.58728    | 0.72149     | -1.4466  | 0.926   |
|           | -0.73793        | 0.76972     | 0.63997 | 0.815867991 |             |          |         |
| OR6C64P   | ENSG00000234670 | -0.66317    | 0.74639 | -0.97573    | 0.8354      | -0.35848 |         |
|           | 0.64001         | -0.55107    | 0.70921 | 0.64001     | 0.815870981 |          |         |
| ENDOU     | ENSG00000111405 | -0.62914    | 0.73537 | -0.35851    | 0.64002     | -1.3474  | 0.91107 |
|           | -0.65284        | 0.74307     | 0.64002 | 0.815870981 |             |          |         |
| NA        | ENSG00000274943 | -0.35867    | 0.64008 | -0.62704    | 0.73468     | -0.62704 | 0.73468 |
|           | -0.62704        | 0.73468     | 0.64008 | 0.815870981 |             |          |         |
| NA        | ENSG00000280023 | -0.35869    | 0.64009 | -0.35869    | 0.64009     | -0.35869 | 0.64009 |
|           | -0.35869        | 0.64009     | 0.64009 | 0.815870981 |             |          |         |
| OR5AK3P   | ENSG00000181282 | -0.35881    | 0.64013 | -0.35881    | 0.64013     | -0.35881 |         |
|           | 0.64013         | -0.35881    | 0.64013 | 0.815870981 |             |          |         |
| RN7SL823P | ENSG00000263595 | -0.3588     | 0.64013 | -0.3588     | 0.64013     | -0.3588  |         |
|           | 0.64013         | -0.3588     | 0.64013 | 0.815870981 |             |          |         |
| TOB1-AS1  | ENSG00000229980 | -0.35882    | 0.64014 | -0.35882    | 0.64014     | -1.7361  |         |
|           | 0.95873         | -0.35882    | 0.64014 | 0.815870981 |             |          |         |
| NA        | ENSG00000250576 | -0.35883    | 0.64014 | -0.35883    | 0.64014     | -0.35883 | 0.64014 |
|           | -0.71677        | 0.76324     | 0.64014 | 0.815870981 |             |          |         |
| NA        | ENSG00000207061 | -0.35885    | 0.64015 | -1.1373     | 0.8723      | -0.71194 | 0.76175 |
|           | -0.35885        | 0.64015     | 0.64015 | 0.815870981 |             |          |         |
| NA        | ENSG00000262967 | -0.35886    | 0.64015 | -0.35886    | 0.64015     | -0.35886 | 0.64015 |
|           | -0.35886        | 0.64015     | 0.64015 | 0.815870981 |             |          |         |
| LINC02366 | ENSG00000256888 | -0.35889    | 0.64016 | -0.79843    | 0.78769     | -0.59499 |         |
|           | 0.72407         | -1.6749     | 0.95303 | 0.64016     | 0.815870981 |          |         |
| ZNF397    | ENSG00000186812 | -0.79397    | 0.78639 | -0.35896    | 0.64019     | -1.6317  |         |
|           | 0.94863         | -0.40446    | 0.65706 | 0.64019     | 0.815870981 |          |         |
| SHTN1     | ENSG00000187164 | -1.2304     | 0.89072 | -0.35896    | 0.64019     | -0.51186 | 0.69562 |
|           | -1.0037         | 0.84223     | 0.64019 | 0.815870981 |             |          |         |
| LRBA      | ENSG00000198589 | -0.69737    | 0.75721 | -0.3592     | 0.64028     | -0.78952 | 0.7851  |
|           | -0.84021        | 0.7996      | 0.64028 | 0.815964339 |             |          |         |
| B3GNT3    | ENSG00000179913 | -0.35928    | 0.64031 | -0.5355     | 0.70385     | -1.0329  |         |
|           | 0.84917         | -0.80389    | 0.78927 | 0.64031     | 0.815981231 |          |         |
| NA        | ENSG00000219712 | -1.0795     | 0.85982 | -0.35941    | 0.64036     | -1.2076  | 0.88639 |
|           | -0.89888        | 0.81564     | 0.64036 | 0.816006417 |             |          |         |
| CRLF3P2   | ENSG00000250391 | -0.92623    | 0.82284 | -1.5146     | 0.93506     | -0.35946 |         |
|           | 0.64037         | -1.0538     | 0.85402 | 0.64037     | 0.816006417 |          |         |
| RN7SKP67  | ENSG00000251714 | -0.35947    | 0.64038 | -0.35947    | 0.64038     | -0.35947 |         |
|           | 0.64038         | -0.35947    | 0.64038 | 0.816006417 |             |          |         |
| NA        | ENSG00000224529 | -0.35952    | 0.6404  | -0.35952    | 0.6404      | -0.35952 | 0.6404  |
|           | -0.35952        | 0.6404      | 0.6404  | 0.816010564 |             |          |         |
| CTHRC1    | ENSG00000164932 | -1.2221     | 0.88917 | -0.86681    | 0.80698     | -0.35971 |         |
|           | 0.64047         | -1.6236     | 0.94777 | 0.64047     | 0.81602715  |          |         |
| PRSS3P3   | ENSG00000277083 | -0.35972    | 0.64047 | -0.35972    | 0.64047     | -0.35972 |         |
|           | 0.64047         | -0.35972    | 0.64047 | 0.81602715  |             |          |         |
| OR6C70    | ENSG00000184954 | -0.35974    | 0.64048 | -0.35974    | 0.64048     | -0.35974 |         |
|           | 0.64048         | -0.35974    | 0.64048 | 0.81602715  |             |          |         |
| NA        | ENSG00000240800 | -0.35974    | 0.64048 | -0.35974    | 0.64048     | -0.35974 | 0.64048 |
|           | -0.35974        | 0.64048     | 0.64048 | 0.81602715  |             |          |         |
| ENTPD1    | ENSG00000138185 | -0.52445    | 0.70002 | -0.35985    | 0.64052     | -0.61334 |         |
|           | 0.73017         | -0.36593    | 0.64279 | 0.64052     | 0.816056777 |          |         |
| NA        | ENSG00000234356 | -0.36003    | 0.64059 | -0.50404    | 0.69288     | -0.36003 | 0.64059 |
|           | -0.36003        | 0.64059     | 0.64059 | 0.816103286 |             |          |         |
| OR4A3P    | ENSG00000254464 | -0.36005    | 0.64059 | -0.36005    | 0.64059     | -0.36005 |         |
|           | 0.64059         | -0.36005    | 0.64059 | 0.816103286 |             |          |         |
| CDH18     | ENSG00000145526 | -0.36012    | 0.64062 | -0.84558    | 0.80111     | -0.68077 | 0.75199 |
|           | -0.63496        | 0.73727     | 0.64062 | 0.816114478 |             |          |         |
| LIX1-AS1  | ENSG00000251513 | -0.3602     | 0.64065 | -1.401      | 0.91939     | -1.401   |         |
|           | 0.91939         | -1.62094738 | 0.64065 | 0.816114478 |             |          |         |
| TFB2M     | ENSG00000162851 | -0.87534    | 0.80931 | -0.36022    | 0.64066     | -1.2062  | 0.88612 |

|           |                 |          |          |          |             |             |         |          |
|-----------|-----------------|----------|----------|----------|-------------|-------------|---------|----------|
|           |                 | -0.91137 | 0.81895  | 0.64066  | 0.816114478 |             |         |          |
| MIR515-2  | ENSG00000207615 | -0.36026 | 0.64067  | -0.36026 | 0.64067     | -0.36026    | 0.64067 | -0.36026 |
|           |                 | 0.64067  | -0.36026 | 0.64067  | 0.64067     | 0.816114478 |         |          |
| IKBIP     | ENSG00000166130 | -0.66962 | 0.74845  | -0.66962 | 0.74845     | -0.66962    | 0.64071 | 0.74845  |
|           |                 | -0.66962 | 0.74845  | 0.64071  | 0.816114478 |             |         |          |
| RPL5P9    | ENSG00000236330 | -0.36047 | 0.64075  | -0.36047 | 0.64075     | -0.36047    | 0.64075 | -0.36047 |
|           |                 | 0.64075  | -0.36047 | 0.64075  | 0.64075     | 0.816114478 |         |          |
| OR14A16   | ENSG00000196772 | -0.81395 | 0.79216  | -0.81395 | 0.79216     | -0.36049    | 0.64076 | -0.83302 |
|           |                 | 0.79758  | -0.36049 | 0.64076  | 0.64076     | 0.816114478 |         |          |
| CYP51A1   | ENSG00000001630 | -0.53572 | 0.70393  | -0.53572 | 0.70393     | -0.40738    | 0.65813 | -0.36051 |
|           |                 | 0.64077  | -1.0832  | 0.86063  | 0.64077     | 0.816114478 |         |          |
| NA        | ENSG00000226499 | -0.36051 | 0.64077  | -0.36051 | 0.64077     | -0.36051    | 0.64077 | 0.64077  |
|           |                 | -0.36051 | 0.64077  | 0.64077  | 0.816114478 |             |         |          |
| NA        | ENSG00000259914 | -0.36054 | 0.64078  | -0.36054 | 0.64078     | -0.36054    | 0.64078 | 0.64078  |
|           |                 | -0.36054 | 0.64078  | 0.64078  | 0.816114478 |             |         |          |
| NA        | ENSG00000267990 | -0.3607  | 0.64084  | -0.3607  | 0.64084     | -0.3607     | 0.64084 | 0.64084  |
|           |                 | -0.3607  | 0.64084  | 0.64084  | 0.816114478 |             |         |          |
| HHATL     | ENSG00000010282 | -0.36072 | 0.64085  | -0.36072 | 0.64085     | -0.36072    | 0.64085 | 0.64085  |
|           |                 | -0.36072 | 0.64085  | 0.64085  | 0.816114478 |             |         |          |
| AGAP1-IT1 | ENSG00000235529 | -1.0902  | 0.86219  | -1.0902  | 0.86219     | -1.7279     | 0.958   | -0.36073 |
|           |                 | -0.3669  | 0.64315  | 0.64085  | 0.816114478 |             |         |          |
| RN7SL464P | ENSG00000243872 | -0.36074 | 0.64085  | -0.36074 | 0.64085     | -0.36074    | 0.64085 | -0.36074 |
|           |                 | 0.64085  | -0.36074 | 0.64085  | 0.64085     | 0.816114478 |         |          |
| LINC02617 | ENSG00000256288 | -1.0299  | 0.84847  | -1.0299  | 0.84847     | -0.82918    | 0.7965  | -0.36073 |
|           |                 | 0.64085  | -0.62132 | 0.73281  | 0.64085     | 0.816114478 |         |          |
| SERPINH1  | ENSG00000149257 | -0.45315 | 0.67478  | -0.45315 | 0.67478     | -0.36088    | 0.64091 | -0.47161 |
|           |                 | 0.6814   | -0.38098 | 0.64839  | 0.64091     | 0.816169558 |         |          |
| FGD4      | ENSG00000139132 | -0.42102 | 0.66313  | -0.42102 | 0.66313     | -0.36095    | 0.64093 | -0.71665 |
|           |                 | -0.67156 | 0.74907  | 0.64093  | 0.816173698 |             |         |          |
| NA        | ENSG00000236886 | -1.0453  | 0.85207  | -1.0453  | 0.85207     | -1.4394     | 0.92498 | -0.36106 |
|           |                 | -1.1866  | 0.88231  | 0.64097  | 0.816185802 |             |         |          |
| NA        | ENSG00000272164 | -0.36108 | 0.64098  | -0.36108 | 0.64098     | -0.36108    | 0.64098 | 0.64098  |
|           |                 | -0.36108 | 0.64098  | 0.64098  | 0.816185802 |             |         |          |
| LRIT2     | ENSG00000204033 | -0.36119 | 0.64102  | -0.36119 | 0.64102     | -0.36119    | 0.64102 | 0.64102  |
|           |                 | -0.36119 | 0.64102  | 0.64102  | 0.816185802 |             |         |          |
| NUTF2P3   | ENSG00000228248 | -0.36118 | 0.64102  | -0.36118 | 0.64102     | -0.36118    | 0.64102 | -0.36118 |
|           |                 | 0.64102  | -0.36118 | 0.64102  | 0.64102     | 0.816185802 |         |          |
| NA        | ENSG00000261546 | -0.36122 | 0.64103  | -0.36122 | 0.64103     | -1.107      | 0.86585 | -0.36122 |
|           |                 | -0.36122 | 0.64103  | 0.64103  | 0.816185802 |             |         |          |
| QPCT      | ENSG00000115828 | -1.8785  | 0.96984  | -1.8785  | 0.96984     | -1.0609     | 0.85562 | -1.5524  |
|           |                 | -0.36124 | 0.64104  | 0.64104  | 0.816185802 |             |         |          |
| IFITM3P1  | ENSG00000236562 | -1.9394  | 0.97378  | -1.9394  | 0.97378     | -2.3067     | 0.98946 | -0.9949  |
|           |                 | 0.84011  | -0.36128 | 0.64106  | 0.64106     | 0.816189941 |         |          |
| NA        | ENSG00000257997 | -0.3614  | 0.6411   | -0.3614  | 0.6411      | -0.3614     | 0.6411  | 0.6411   |
|           |                 | -0.3614  | 0.6411   | 0.6411   | 0.816219543 |             |         |          |
| NA        | ENSG00000258824 | -0.36144 | 0.64112  | -0.36144 | 0.64112     | -0.36144    | 0.64112 | 0.64112  |
|           |                 | -0.36144 | 0.64112  | 0.64112  | 0.816223681 |             |         |          |
| RNU6-47P  | ENSG00000206593 | -0.36161 | 0.64118  | -0.36161 | 0.64118     | -0.36161    | 0.64118 | -0.36161 |
|           |                 | 0.64118  | -0.36161 | 0.64118  | 0.64118     | 0.816278742 |         |          |
| NA        | ENSG00000212558 | -0.36271 | 0.64159  | -0.36271 | 0.64159     | -0.70069    | 0.75825 | -0.36271 |
|           |                 | -0.36169 | 0.64121  | 0.64121  | 0.816287014 |             |         |          |
| TXNL4B    | ENSG00000140830 | -0.36173 | 0.64122  | -0.36173 | 0.64122     | -0.36173    | 0.64122 | -0.36173 |
|           |                 | 0.64122  | -0.36173 | 0.64122  | 0.64122     | 0.816287014 |         |          |
| LINC02821 | ENSG00000257139 | -0.3619  | 0.64129  | -0.3619  | 0.64129     | -0.3619     | 0.64129 | -0.3619  |
|           |                 | 0.64129  | -0.74301 | 0.77126  | 0.64129     | 0.816333147 |         |          |
| SEC16B    | ENSG00000120341 | -0.37643 | 0.6467   | -0.37643 | 0.6467      | -0.44485    | 0.67179 | -1.2717  |
|           |                 | 0.89826  | -0.36193 | 0.6413   | 0.6413      | 0.816333147 |         |          |
| HDGFL3    | ENSG00000166503 | -0.36199 | 0.64132  | -0.36199 | 0.64132     | -1.1497     | 0.87486 | -0.76984 |
|           |                 | 0.7793   | -1.8411  | 0.9672   | 0.64132     | 0.816333147 |         |          |
| SYNPR     | ENSG00000163630 | -1.6922  | 0.9547   | -1.6922  | 0.9547      | -0.36205    | 0.64134 | -0.63517 |
|           |                 | -1.6359  | 0.94907  | 0.64134  | 0.816333147 |             |         |          |
| TSPYL4    | ENSG00000187189 | -0.36204 | 0.64134  | -0.36204 | 0.64134     | -0.36204    | 0.64134 | -0.36204 |

|            |                 |          |         |             |             |          |         |
|------------|-----------------|----------|---------|-------------|-------------|----------|---------|
|            | 0.64134         | -0.36204 | 0.64134 | 0.64134     | 0.816333147 |          |         |
| SCP2D1-AS1 | ENSG00000149443 | -0.36217 | 0.64139 | -1.0635     | 0.85622     | -1.0635  |         |
|            | 0.85622         | -1.0635  | 0.85622 | 0.64139     | 0.81636687  |          |         |
| MTCO2P9    | ENSG00000249386 | -0.36219 | 0.6414  | -0.60676    | 0.72799     | -0.60676 |         |
|            | 0.72799         | -0.60676 | 0.72799 | 0.6414      | 0.81636687  |          |         |
| NA         | ENSG00000268083 | -0.36227 | 0.64142 | -0.36227    | 0.64142     | -0.36227 | 0.64142 |
|            | -0.36227        | 0.64142  | 0.64142 | 0.816371003 |             |          |         |
| NA         | ENSG00000253182 | -2.1346  | 0.9836  | -2.1346     | 0.9836      | -0.36257 | 0.64154 |
|            | -2.1346         | 0.9836   | 0.64154 | 0.816458415 |             |          |         |
| URB1-AS1   | ENSG00000256073 | -0.36262 | 0.64156 | -0.36262    | 0.64156     | -0.36262 |         |
|            | 0.64156         | -0.36262 | 0.64156 | 0.64156     | 0.816458415 |          |         |
| NA         | ENSG00000202417 | -0.36268 | 0.64158 | -0.36268    | 0.64158     | -0.36268 | 0.64158 |
|            | -0.36268        | 0.64158  | 0.64158 | 0.816458415 |             |          |         |
| NA         | ENSG00000274297 | -0.3627  | 0.64159 | -0.3627     | 0.64159     | -0.3627  | 0.64159 |
|            | -0.3627         | 0.64159  | 0.64159 | 0.816458415 |             |          |         |
| RNU6-1217P | ENSG00000223208 | -0.36276 | 0.64161 | -0.36276    | 0.64161     | -0.57316 |         |
|            | 0.71673         | -0.52468 | 0.7001  | 0.64161     | 0.816458415 |          |         |
| NA         | ENSG00000257878 | -0.36289 | 0.64166 | -0.36289    | 0.64166     | -0.36289 | 0.64166 |
|            | -0.36289        | 0.64166  | 0.64166 | 0.816458415 |             |          |         |
| NA         | ENSG00000255106 | -0.51227 | 0.69577 | -0.36292    | 0.64167     | -0.6876  | 0.75415 |
|            | -1.1347         | 0.87175  | 0.64167 | 0.816458415 |             |          |         |
| MEGF10     | ENSG00000145794 | -0.36295 | 0.64168 | -0.45146    | 0.67417     | -0.9291  |         |
|            | 0.82358         | -0.85717 | 0.80432 | 0.64168     | 0.816458415 |          |         |
| CLIP3      | ENSG00000105270 | -0.36298 | 0.64169 | -0.36298    | 0.64169     | -0.36298 | 0.64169 |
|            | -0.36298        | 0.64169  | 0.64169 | 0.816458415 |             |          |         |
| ERCC3      | ENSG00000163161 | -0.36669 | 0.64308 | -0.36303    | 0.64171     | -0.45224 | 0.67445 |
|            | -1.6007         | 0.94528  | 0.64171 | 0.816458415 |             |          |         |
| NA         | ENSG00000267577 | -0.36303 | 0.64171 | -0.36303    | 0.64171     | -0.36303 | 0.64171 |
|            | -0.36303        | 0.64171  | 0.64171 | 0.816458415 |             |          |         |
| TTC7B      | ENSG00000165914 | -0.36306 | 0.64172 | -0.65531    | 0.74387     | -0.76096 | 0.77666 |
|            | -0.77291        | 0.78021  | 0.64172 | 0.816458415 |             |          |         |
| NA         | ENSG00000226163 | -0.36309 | 0.64173 | -0.36309    | 0.64173     | -0.36309 | 0.64173 |
|            | -0.36309        | 0.64173  | 0.64173 | 0.816458415 |             |          |         |
| DPPA3P3    | ENSG00000270415 | -0.36308 | 0.64173 | -0.36308    | 0.64173     | -0.36308 |         |
|            | 0.64173         | -0.36308 | 0.64173 | 0.64173     | 0.816458415 |          |         |
| NA         | ENSG00000205890 | -0.3631  | 0.64174 | -0.3631     | 0.64174     | -0.3631  | 0.64174 |
|            | -0.3631         | 0.64174  | 0.64174 | 0.816458415 |             |          |         |
| SLC9A5     | ENSG00000135740 | -0.73976 | 0.77028 | -1.1525     | 0.87544     | -1.4096  |         |
|            | 0.92067         | -0.36316 | 0.64176 | 0.64176     | 0.816462543 |          |         |
| FES        | ENSG00000182511 | -0.36332 | 0.64182 | -1.1918     | 0.88332     | -0.43763 | 0.66917 |
|            | -0.47134        | 0.6813   | 0.64182 | 0.816508965 |             |          |         |
| NA         | ENSG00000257951 | -0.36336 | 0.64183 | -0.36336    | 0.64183     | -0.36336 | 0.64183 |
|            | -0.36336        | 0.64183  | 0.64183 | 0.816508965 |             |          |         |
| RNU6-720P  | ENSG00000252172 | -1.1897  | 0.88292 | -0.81902    | 0.79361     | -0.3634  |         |
|            | 0.64185         | -0.3634  | 0.64185 | 0.64185     | 0.816513092 |          |         |
| COX17      | ENSG00000138495 | -0.38034 | 0.64815 | -0.3635     | 0.64189     | -0.87491 | 0.80919 |
|            | -0.64828        | 0.7416   | 0.64189 | 0.816534066 |             |          |         |
| TRPC7      | ENSG00000069018 | -0.88767 | 0.81264 | -0.63163    | 0.73619     | -0.43374 | 0.66776 |
|            | -0.36354        | 0.6419   | 0.6419  | 0.816534066 |             |          |         |
| NA         | ENSG00000202449 | -0.40558 | 0.65747 | -0.40558    | 0.65747     | -0.40558 | 0.65747 |
|            | -0.36359        | 0.64192  | 0.64192 | 0.816538192 |             |          |         |
| ELOVL2     | ENSG00000197977 | -0.64349 | 0.74005 | -0.64349    | 0.74005     | -0.59157 |         |
|            | 0.72293         | -0.36369 | 0.64195 | 0.64195     | 0.816555038 |          |         |
| NA         | ENSG00000230563 | -0.36372 | 0.64197 | -0.36372    | 0.64197     | -0.36372 | 0.64197 |
|            | -0.36372        | 0.64197  | 0.64197 | 0.816559163 |             |          |         |
| LINC01954  | ENSG00000271952 | -0.36395 | 0.64205 | -0.70919    | 0.7609      | -0.92545 |         |
|            | 0.82263         | -0.36395 | 0.64205 | 0.64205     | 0.816622412 |          |         |
| NA         | ENSG00000226773 | -1.4708  | 0.92932 | -1.4708     | 0.92932     | -0.36399 | 0.64207 |
|            | -1.4708         | 0.92932  | 0.64207 | 0.816622412 |             |          |         |
| RN7SL509P  | ENSG00000263479 | -0.45243 | 0.67452 | -0.71291    | 0.76205     | -0.71291 |         |
|            | 0.76205         | -0.36399 | 0.64207 | 0.64207     | 0.816622412 |          |         |
| LINC02238  | ENSG00000223479 | -1.0023  | 0.84191 | -1.2952     | 0.90237     | -1.0265  |         |

|             |                 |          |         |             |             |          |         |
|-------------|-----------------|----------|---------|-------------|-------------|----------|---------|
|             | 0.84767         | -0.36424 | 0.64216 | 0.64216     | 0.816715563 |          |         |
| NA          | ENSG00000244604 | -0.36435 | 0.6422  | -1.3455     | 0.91076     | -1.3455  | 0.91076 |
|             | -1.3455         | 0.91076  | 0.6422  | 0.816723804 |             |          |         |
| IGLVI-68    | ENSG00000254355 | -0.36435 | 0.6422  | -0.36435    | 0.6422      | -0.36435 |         |
|             | 0.6422          | -0.36435 | 0.6422  | 0.6422      | 0.816723804 |          |         |
| OMG         | ENSG00000126861 | -1.689   | 0.9544  | -0.36442    | 0.64223     | -0.36442 | 0.64223 |
|             | -1.0303         | 0.84856  | 0.64223 | 0.816740641 |             |          |         |
| RNF14P4     | ENSG00000223500 | -0.60932 | 0.72884 | -0.43235    | 0.66725     | -0.3645  |         |
|             | 0.64226         | -0.3645  | 0.64226 | 0.64226     | 0.816757478 |          |         |
| NA          | ENSG00000268747 | -1.8624  | 0.96873 | -0.36461    | 0.6423      | -1.8624  | 0.96873 |
|             | -1.8624         | 0.96873  | 0.6423  | 0.81678703  |             |          |         |
| NA          | ENSG00000260342 | -0.36472 | 0.64234 | -0.36472    | 0.64234     | -0.36472 | 0.64234 |
|             | -0.36472        | 0.64234  | 0.64234 | 0.816816581 |             |          |         |
| CDKN3       | ENSG00000100526 | -1.3501  | 0.91151 | -0.36485    | 0.64239     | -1.1302  | 0.87081 |
|             | -1.1302         | 0.87081  | 0.64239 | 0.8168368   |             |          |         |
| NA          | ENSG00000255947 | -0.46586 | 0.67934 | -0.36495    | 0.64243     | -0.46586 | 0.67934 |
|             | -0.80715        | 0.79021  | 0.64243 | 0.8168368   |             |          |         |
| RANGRF      | ENSG00000108961 | -0.365   | 0.64244 | -0.365      | 0.64244     | -0.365   |         |
|             | 0.64244         | -0.365   | 0.64244 | 0.64244     | 0.8168368   |          |         |
| NA          | ENSG00000243829 | -0.36502 | 0.64245 | -0.36502    | 0.64245     | -0.48068 | 0.68463 |
|             | -0.36502        | 0.64245  | 0.64245 | 0.8168368   |             |          |         |
| RNPS1       | ENSG00000205937 | -0.36506 | 0.64247 | -0.36506    | 0.64247     | -0.36506 | 0.64247 |
|             | -0.36506        | 0.64247  | 0.64247 | 0.8168368   |             |          |         |
| HMGA1P7     | ENSG00000216753 | -0.98551 | 0.83781 | -0.36506    | 0.64247     | -0.68007 |         |
|             | 0.75177         | -0.45777 | 0.67644 | 0.64247     | 0.8168368   |          |         |
| TPRKBP1     | ENSG00000231911 | -0.36514 | 0.64249 | -0.36514    | 0.64249     | -1.1633  |         |
|             | 0.87765         | -0.85943 | 0.80495 | 0.64249     | 0.8168368   |          |         |
| NA          | ENSG00000283930 | -1.4983  | 0.93297 | -0.4222     | 0.66356     | -0.63074 | 0.7359  |
|             | -0.36513        | 0.64249  | 0.64249 | 0.8168368   |             |          |         |
| NA          | ENSG00000199635 | -0.80129 | 0.78852 | -0.3654     | 0.64259     | -0.47351 | 0.68208 |
|             | -0.47351        | 0.68208  | 0.64259 | 0.816911967 |             |          |         |
| NA          | ENSG00000238463 | -0.3654  | 0.6426  | -0.3654     | 0.6426      | -0.3654  | 0.6426  |
|             | -0.3654         | 0.6426   | 0.6426  | 0.816911967 |             |          |         |
| MTND4LP32   | ENSG00000283481 | -0.36545 | 0.64261 | -0.36545    | 0.64261     | -0.36545 |         |
|             | 0.64261         | -0.36545 | 0.64261 | 0.64261     | 0.816911967 |          |         |
| NA          | ENSG00000239408 | -0.36558 | 0.64266 | -0.36558    | 0.64266     | -0.36558 | 0.64266 |
|             | -0.36558        | 0.64266  | 0.64266 | 0.816911967 |             |          |         |
| ZNF35       | ENSG00000169981 | -1.5401  | 0.93823 | -0.3656     | 0.64267     | -0.46942 | 0.68061 |
|             | -0.3656         | 0.64267  | 0.64267 | 0.816911967 |             |          |         |
| BZW2        | ENSG00000136261 | -0.36564 | 0.64268 | -0.36564    | 0.64268     | -0.80232 | 0.78882 |
|             | -0.36564        | 0.64268  | 0.64268 | 0.816911967 |             |          |         |
| NA          | ENSG00000254342 | -0.40406 | 0.65692 | -0.40406    | 0.65692     | -0.36565 | 0.64269 |
|             | -0.40406        | 0.65692  | 0.64269 | 0.816911967 |             |          |         |
| NA          | ENSG00000230163 | -0.36568 | 0.6427  | -1.4232     | 0.92266     | -0.36568 | 0.6427  |
|             | -0.36568        | 0.6427   | 0.6427  | 0.816911967 |             |          |         |
| RNU6-341P   | ENSG00000252782 | -0.36569 | 0.6427  | -0.36569    | 0.6427      | -0.36569 |         |
|             | 0.6427          | -0.36569 | 0.6427  | 0.6427      | 0.816911967 |          |         |
| MIR4682     | ENSG00000265370 | -0.36577 | 0.64273 | -0.36577    | 0.64273     | -1.4068  |         |
|             | 0.92026         | -1.6066  | 0.94593 | 0.64273     | 0.816928791 |          |         |
| NA          | ENSG00000283149 | -0.3659  | 0.64278 | -0.3659     | 0.64278     | -0.3659  | 0.64278 |
|             | -0.55044        | 0.70899  | 0.64278 | 0.816932157 |             |          |         |
| NA          | ENSG00000223599 | -1.0409  | 0.85104 | -0.36594    | 0.64279     | -1.0409  | 0.85104 |
|             | -1.0409         | 0.85104  | 0.64279 | 0.816932157 |             |          |         |
| SNORD115-48 | ENSG00000201634 | -0.36596 | 0.6428  | -0.36596    | 0.6428      | -0.36596 |         |
|             | 0.6428          | -0.36596 | 0.6428  | 0.6428      | 0.816932157 |          |         |
| SNORD115-47 | ENSG00000212528 | -0.36596 | 0.6428  | -0.36596    | 0.6428      | -0.36596 |         |
|             | 0.6428          | -0.36596 | 0.6428  | 0.6428      | 0.816932157 |          |         |
| MAFF        | ENSG00000185022 | -0.58864 | 0.72195 | -0.36604    | 0.64283     | -0.62712 | 0.73471 |
|             | -0.46536        | 0.67916  | 0.64283 | 0.816932157 |             |          |         |
| JAKMIP2     | ENSG00000176049 | -0.36606 | 0.64284 | -0.73791    | 0.76972     | -0.62028 |         |
|             | 0.73246         | -0.68895 | 0.75457 | 0.64284     | 0.816932157 |          |         |
| SAPCD2P3    | ENSG00000232491 | -0.3661  | 0.64285 | -0.69387    | 0.75612     | -1.3832  |         |

|              |                 |          |         |             |             |          |          |
|--------------|-----------------|----------|---------|-------------|-------------|----------|----------|
|              | 0.9167          | -1.3832  | 0.9167  | 0.64285     | 0.816932157 |          |          |
| NA           | ENSG00000267661 | -1.3985  | 0.91901 | -0.36624    | 0.64291     | -0.86974 | 0.80778  |
|              | -1.6518         | 0.95072  | 0.64291 | 0.816987099 |             |          |          |
| EML4         | ENSG00000143924 | -1.1038  | 0.86516 | -0.75184    | 0.77393     | -0.36632 | 0.64294  |
|              | -0.56563        | 0.71418  | 0.64294 | 0.816990832 |             |          |          |
| IGHVIII-67-4 | ENSG00000254052 | -0.36637 | 0.64296 | -0.36637    | 0.64296     | -0.36637 | -0.36637 |
|              | 0.64296         | -0.36637 | 0.64296 | 0.64296     | 0.816990832 |          |          |
| NA           | ENSG00000238685 | -0.36644 | 0.64298 | -0.36644    | 0.64298     | -0.36644 | 0.64298  |
|              | -0.36644        | 0.64298  | 0.64298 | 0.816990832 |             |          |          |
| NA           | ENSG00000266987 | -0.94559 | 0.82782 | -1.0374     | 0.85022     | -0.36643 | 0.64298  |
|              | -0.94559        | 0.82782  | 0.64298 | 0.816990832 |             |          |          |
| NA           | ENSG00000259304 | -1.363   | 0.91355 | -0.36694    | 0.64317     | -0.36694 | 0.64317  |
|              | -0.36694        | 0.64317  | 0.64317 | 0.81709863  |             |          |          |
| FAM81B       | ENSG00000153347 | -0.36705 | 0.64321 | -0.36705    | 0.64321     | -0.36705 |          |
|              | 0.64321         | -0.36705 | 0.64321 | 0.64321     | 0.81709863  |          |          |
| LEMD1        | ENSG00000186007 | -1.2023  | 0.88537 | -0.36709    | 0.64322     | -1.1271  | 0.87015  |
|              | -0.98297        | 0.83719  | 0.64322 | 0.81709863  |             |          |          |
| NA           | ENSG00000220256 | -0.36712 | 0.64324 | -1.5036     | 0.93366     | -2.9862  | 0.99859  |
|              | -1.482          | 0.93084  | 0.64324 | 0.81709863  |             |          |          |
| PSMC1P6      | ENSG00000240255 | -0.36712 | 0.64324 | -1.1192     | 0.86848     | -1.1192  |          |
|              | 0.86848         | -1.1192  | 0.86848 | 0.64324     | 0.81709863  |          |          |
| PCDHGB8P     | ENSG00000248449 | -0.36713 | 0.64324 | -0.36713    | 0.64324     | -0.36713 |          |
|              | 0.64324         | -0.36713 | 0.64324 | 0.64324     | 0.81709863  |          |          |
| MIEN1        | ENSG00000141741 | -0.36723 | 0.64327 | -0.36723    | 0.64327     | -0.36723 | 0.64327  |
|              | -0.36723        | 0.64327  | 0.64327 | 0.81709863  |             |          |          |
| PRR20G       | ENSG00000239620 | -0.36722 | 0.64327 | -0.36722    | 0.64327     | -0.36722 |          |
|              | 0.64327         | -0.36722 | 0.64327 | 0.64327     | 0.81709863  |          |          |
| APOM         | ENSG00000204444 | -0.36724 | 0.64328 | -0.36724    | 0.64328     | -0.36724 | 0.64328  |
|              | -0.36724        | 0.64328  | 0.64328 | 0.81709863  |             |          |          |
| NA           | ENSG00000269815 | -0.36725 | 0.64328 | -0.36725    | 0.64328     | -0.36725 | 0.64328  |
|              | -0.36725        | 0.64328  | 0.64328 | 0.81709863  |             |          |          |
| TGM7         | ENSG00000159495 | -0.49129 | 0.68839 | -0.3673     | 0.6433      | -0.52291 | 0.69948  |
|              | -1.3139         | 0.90557  | 0.6433  | 0.81709863  |             |          |          |
| NPLOC4       | ENSG00000182446 | -0.36732 | 0.64331 | -0.36732    | 0.64331     | -0.55376 |          |
|              | 0.71013         | -0.7393  | 0.77014 | 0.64331     | 0.81709863  |          |          |
| AP1S2P1      | ENSG00000226046 | -1.503   | 0.93357 | -0.36736    | 0.64332     | -1.503   |          |
|              | 0.93357         | -1.503   | 0.93357 | 0.64332     | 0.81709863  |          |          |
| NA           | ENSG00000259595 | -0.65269 | 0.74302 | -0.36734    | 0.64332     | -1.0651  | 0.85658  |
|              | -1.0651         | 0.85658  | 0.64332 | 0.81709863  |             |          |          |
| TNFRSF13C    | ENSG00000159958 | -0.94154 | 0.82679 | -0.69144    | 0.75536     | -0.3674  |          |
|              | 0.64334         | -1.042   | 0.85128 | 0.64334     | 0.81709863  |          |          |
| ULK4         | ENSG00000168038 | -0.36746 | 0.64336 | -0.4659     | 0.67936     | -0.60616 | 0.7278   |
|              | -0.64943        | 0.74197  | 0.64336 | 0.81709863  |             |          |          |
| EEF1GP7      | ENSG00000236290 | -0.36746 | 0.64336 | -0.36746    | 0.64336     | -0.86108 |          |
|              | 0.8054          | -0.36746 | 0.64336 | 0.64336     | 0.81709863  |          |          |
| SLC2A3P2     | ENSG00000185031 | -0.3675  | 0.64338 | -0.3675     | 0.64338     | -0.3675  |          |
|              | 0.64338         | -0.3675  | 0.64338 | 0.64338     | 0.81709863  |          |          |
| CTR9         | ENSG00000198730 | -0.56036 | 0.71238 | -0.36768    | 0.64344     | -0.86287 | 0.80589  |
|              | -1.0152         | 0.84499  | 0.64344 | 0.81709863  |             |          |          |
| USP32P1      | ENSG00000188933 | -0.44566 | 0.67208 | -0.77171    | 0.77986     | -0.36772 |          |
|              | 0.64346         | -1.0415  | 0.85118 | 0.64346     | 0.81709863  |          |          |
| NA           | ENSG00000212512 | -1.6549  | 0.95103 | -1.6549     | 0.95103     | -0.36773 | 0.64346  |
|              | -1.6549         | 0.95103  | 0.64346 | 0.81709863  |             |          |          |
| RBM22P2      | ENSG00000213411 | -0.80653 | 0.79003 | -0.80653    | 0.79003     | -0.36771 |          |
|              | 0.64346         | -0.80653 | 0.79003 | 0.64346     | 0.81709863  |          |          |
| SNRPGP3      | ENSG00000239919 | -0.36773 | 0.64346 | -0.36773    | 0.64346     | -0.36773 |          |
|              | 0.64346         | -0.36773 | 0.64346 | 0.64346     | 0.81709863  |          |          |
| STRADA       | ENSG00000266173 | -0.36782 | 0.6435  | -0.36782    | 0.6435      | -0.36782 |          |
|              | 0.6435          | -0.36782 | 0.6435  | 0.6435      | 0.81709863  |          |          |
| ERVH48-1     | ENSG00000233056 | -0.69488 | 0.75644 | -0.43093    | 0.66674     | -0.71506 |          |
|              | 0.76271         | -0.36797 | 0.64355 | 0.64355     | 0.81709863  |          |          |
| NA           | ENSG00000259533 | -0.61093 | 0.72938 | -0.63537    | 0.73741     | -1.2638  | 0.89685  |

|             |                 |          |          |         |             |             |          |         |
|-------------|-----------------|----------|----------|---------|-------------|-------------|----------|---------|
|             |                 | -0.36798 | 0.64355  | 0.64355 | 0.81709863  |             |          |         |
| NA          | ENSG00000265791 | -0.36799 | 0.64356  | 0.64356 | -0.36799    | 0.64356     | -0.36799 | 0.64356 |
|             |                 | -0.36799 | 0.64356  | 0.64356 | 0.81709863  |             |          |         |
| ZNF542P     | ENSG00000240225 | -0.6134  | 0.73019  | 0.73019 | -0.36805    | 0.64358     | -0.6134  |         |
|             |                 | 0.73019  | -0.6134  | 0.73019 | 0.64358     | 0.81709863  |          |         |
| FBXO25      | ENSG00000147364 | -0.82113 | 0.79422  | 0.79422 | -0.3681     | 0.6436      | -1.0267  |         |
|             |                 | 0.84771  | -0.84412 | 0.8007  | 0.6436      | 0.81709863  |          |         |
| INSYN1-AS1  | ENSG00000260469 | -1.0665  | 0.85691  | 0.85691 | -1.0665     | 0.85691     | -0.36817 |         |
|             |                 | 0.64363  | -1.0665  | 0.85691 | 0.64363     | 0.81709863  |          |         |
| MTND1P16    | ENSG00000239586 | -0.36824 | 0.64365  | 0.64365 | -0.36824    | 0.64365     | -0.36824 |         |
|             |                 | 0.64365  | -0.36824 | 0.64365 | 0.64365     | 0.81709863  |          |         |
| NA          | ENSG00000260445 | -0.36823 | 0.64365  | 0.64365 | -0.36823    | 0.64365     | -0.36823 | 0.64365 |
|             |                 | -0.36823 | 0.64365  | 0.64365 | 0.81709863  |             |          |         |
| HARS1       | ENSG00000170445 | -0.64267 | 0.73978  | 0.73978 | -0.64267    | 0.73978     | -0.64267 | 0.73978 |
|             |                 | -0.36827 | 0.64367  | 0.64367 | 0.81709863  |             |          |         |
| NA          | ENSG00000228037 | -0.86915 | 0.80762  | 0.80762 | -0.36835    | 0.64369     | -0.36835 | 0.64369 |
|             |                 | -0.36835 | 0.64369  | 0.64369 | 0.81709863  |             |          |         |
| NA          | ENSG00000249426 | -0.36842 | 0.64372  | 0.64372 | -0.36842    | 0.64372     | -0.36842 | 0.64372 |
|             |                 | -0.36842 | 0.64372  | 0.64372 | 0.81709863  |             |          |         |
| TRBC2       | ENSG00000211772 | -0.36845 | 0.64373  | 0.64373 | -0.36845    | 0.64373     | -0.36845 | 0.64373 |
|             |                 | -0.36845 | 0.64373  | 0.64373 | 0.81709863  |             |          |         |
| C15orf48    | ENSG00000166920 | -0.86014 | 0.80514  | 0.80514 | -0.36851    | 0.64375     | -0.86014 |         |
|             |                 | 0.80514  | -0.86014 | 0.80514 | 0.64375     | 0.81709863  |          |         |
| NA          | ENSG00000258761 | -0.36859 | 0.64378  | 0.64378 | -0.36859    | 0.64378     | -0.36859 | 0.64378 |
|             |                 | -0.36859 | 0.64378  | 0.64378 | 0.81709863  |             |          |         |
| NA          | ENSG00000277133 | -0.36857 | 0.64378  | 0.64378 | -0.59949    | 0.72558     | -0.39549 | 0.65376 |
|             |                 | -0.39549 | 0.65376  | 0.64378 | 0.81709863  |             |          |         |
| NA          | ENSG00000253312 | -0.36865 | 0.6438   | 0.6438  | -0.36865    | 0.6438      | -0.36865 | 0.6438  |
|             |                 | -0.36865 | 0.6438   | 0.6438  | 0.81709863  |             |          |         |
| NA          | ENSG00000260891 | -0.36863 | 0.6438   | 0.6438  | -0.36863    | 0.6438      | -0.36863 | 0.6438  |
|             |                 | -0.36863 | 0.6438   | 0.6438  | 0.81709863  |             |          |         |
| NA          | ENSG00000279180 | -0.36867 | 0.64381  | 0.64381 | -0.36867    | 0.64381     | -0.36867 | 0.64381 |
|             |                 | -0.36867 | 0.64381  | 0.64381 | 0.81709863  |             |          |         |
| AIG1        | ENSG00000146416 | -0.78847 | 0.78479  | 0.78479 | -1.4932     | 0.93231     | -0.83958 | 0.79943 |
|             |                 | -0.36869 | 0.64382  | 0.64382 | 0.81709863  |             |          |         |
| NA          | ENSG00000206662 | -0.36874 | 0.64384  | 0.64384 | -0.87355    | 0.80882     | -0.36874 | 0.64384 |
|             |                 | -0.36874 | 0.64384  | 0.64384 | 0.81709863  |             |          |         |
| NA          | ENSG00000257809 | -0.97158 | 0.83437  | 0.83437 | -0.74127    | 0.77074     | -0.36877 | 0.64385 |
|             |                 | -0.36877 | 0.64385  | 0.64385 | 0.81709863  |             |          |         |
| PFKM        | ENSG00000152556 | -1.2614  | 0.89641  | 0.89641 | -0.36884    | 0.64388     | -1.2614  | 0.89641 |
|             |                 | -0.47756 | 0.68352  | 0.64388 | 0.81709863  |             |          |         |
| PRR20FP     | ENSG00000271140 | -0.36884 | 0.64388  | 0.64388 | -0.36884    | 0.64388     | -0.36884 |         |
|             |                 | 0.64388  | -0.36884 | 0.64388 | 0.64388     | 0.81709863  |          |         |
| LINC00964   | ENSG00000249816 | -0.53376 | 0.70325  | 0.70325 | -0.81893    | 0.79359     | -0.36887 |         |
|             |                 | 0.64389  | -0.48202 | 0.68511 | 0.64389     | 0.81709863  |          |         |
| NA          | ENSG00000249839 | -0.83348 | 0.79771  | 0.79771 | -1.2019     | 0.8853      | -0.86171 | 0.80558 |
|             |                 | -0.36894 | 0.64391  | 0.64391 | 0.81709863  |             |          |         |
| PROSER2-AS1 | ENSG00000225778 | -0.62889 | 0.73529  | 0.73529 | -0.36895    | 0.64392     | -0.57822 |         |
|             |                 | 0.71844  | -0.57822 | 0.71844 | 0.64392     | 0.81709863  |          |         |
| HNRNPA1P74  | ENSG00000259550 | -0.36896 | 0.64392  | 0.64392 | -0.36896    | 0.64392     | -0.36896 |         |
|             |                 | 0.64392  | -0.36896 | 0.64392 | 0.64392     | 0.81709863  |          |         |
| APLF        | ENSG00000169621 | -0.369   | 0.64394  | 0.64394 | -0.95546    | 0.83033     | -1.3749  | 0.91541 |
|             |                 | -0.64228 | 0.73965  | 0.64394 | 0.817102732 |             |          |         |
| GDPD5       | ENSG00000158555 | -0.41843 | 0.66218  | 0.66218 | -0.93184    | 0.82429     | -2.019   | 0.97826 |
|             |                 | -0.36906 | 0.64396  | 0.64396 | 0.817106833 |             |          |         |
| LINC00415   | ENSG00000231983 | -0.36921 | 0.64401  | 0.64401 | -0.36921    | 0.64401     | -0.36921 |         |
|             |                 | 0.64401  | -0.36921 | 0.64401 | 0.64401     | 0.817148999 |          |         |
| LINC01708   | ENSG00000224445 | -1.0871  | 0.86151  | 0.86151 | -0.52596    | 0.70054     | -0.36945 |         |
|             |                 | 0.6441   | -1.6836  | 0.95387 | 0.6441      | 0.817220637 |          |         |
| RPL36AP10   | ENSG00000237959 | -0.36943 | 0.6441   | 0.6441  | -0.36943    | 0.6441      | -0.36943 |         |
|             |                 | 0.6441   | -0.36943 | 0.6441  | 0.6441      | 0.817220637 |          |         |
| TEX261      | ENSG00000144043 | -1.1152  | 0.86763  | 0.86763 | -1.1152     | 0.86763     | -1.1152  |         |

|           |                 |          |         |             |             |          |         |
|-----------|-----------------|----------|---------|-------------|-------------|----------|---------|
|           | 0.86763         | -0.36962 | 0.64417 | 0.64417     | 0.81723663  |          |         |
| NA        | ENSG00000272669 | -0.36962 | 0.64417 | -0.36962    | 0.64417     | -0.36962 | 0.64417 |
|           | -0.36962        | 0.64417  | 0.64417 | 0.81723663  |             |          |         |
| OR51A9P   | ENSG00000180723 | -0.68546 | 0.75347 | -0.36966    | 0.64418     | -0.36966 |         |
|           | 0.64418         | -0.60323 | 0.72682 | 0.64418     | 0.81723663  |          |         |
| NA        | ENSG00000253432 | -0.36973 | 0.64421 | -1.2627     | 0.89666     | -0.36973 | 0.64421 |
|           | -0.36973        | 0.64421  | 0.64421 | 0.81723663  |             |          |         |
| NA        | ENSG00000273198 | -0.94405 | 0.82743 | -0.6933     | 0.75594     | -0.36976 | 0.64422 |
|           | -0.94405        | 0.82743  | 0.64422 | 0.81723663  |             |          |         |
| NA        | ENSG00000230634 | -0.36978 | 0.64423 | -0.36978    | 0.64423     | -0.36978 | 0.64423 |
|           | -0.36978        | 0.64423  | 0.64423 | 0.81723663  |             |          |         |
| OR4C16    | ENSG00000279514 | -1.1893  | 0.88284 | -0.36978    | 0.64423     | -0.99339 |         |
|           | 0.83974         | -0.9577  | 0.83089 | 0.64423     | 0.81723663  |          |         |
| KIF5C-AS1 | ENSG00000231079 | -0.36991 | 0.64428 | -0.36991    | 0.64428     | -0.70632 | 0.76    |
|           | -0.36991        | 0.64428  | 0.64428 | 0.817278782 |             |          |         |
| BUD23     | ENSG00000071462 | -0.37009 | 0.64434 | -0.37009    | 0.64434     | -0.37009 | 0.64434 |
|           | -0.96873        | 0.83366  | 0.64434 | 0.817307845 |             |          |         |
| RNU6-929P | ENSG00000207158 | -0.37008 | 0.64434 | -0.37008    | 0.64434     | -0.37008 |         |
|           | 0.64434         | -0.37008 | 0.64434 | 0.64434     | 0.817307845 |          |         |
| SIGLEC12  | ENSG00000254521 | -0.37014 | 0.64436 | -0.37014    | 0.64436     | -0.37014 |         |
|           | 0.64436         | -0.37014 | 0.64436 | 0.64436     | 0.817307845 |          |         |
| RNY4P19   | ENSG00000199400 | -0.37016 | 0.64437 | -0.37016    | 0.64437     | -0.37016 |         |
|           | 0.64437         | -0.37016 | 0.64437 | 0.64437     | 0.817307845 |          |         |
| NA        | ENSG00000263316 | -0.37023 | 0.6444  | -0.37023    | 0.6444      | -0.37023 | 0.6444  |
|           | -0.37023        | 0.6444   | 0.6444  | 0.817324623 |             |          |         |
| TAS2R30   | ENSG00000256188 | -0.37029 | 0.64442 | -0.37029    | 0.64442     | -0.73741 |         |
|           | 0.76956         | -0.80878 | 0.79068 | 0.64442     | 0.817328716 |          |         |
| MLIP-AS1  | ENSG00000235050 | -0.37043 | 0.64447 | -0.7182     | 0.76368     | -0.82008 |         |
|           | 0.79391         | -0.51575 | 0.69698 | 0.64447     | 0.817370858 |          |         |
| LAP3P1    | ENSG00000220091 | -0.37048 | 0.64449 | -0.42667    | 0.66519     | -0.37048 |         |
|           | 0.64449         | -0.37048 | 0.64449 | 0.64449     | 0.81737495  |          |         |
| NA        | ENSG00000229016 | -0.79557 | 0.78686 | -0.37104    | 0.64469     | -0.79557 | 0.78686 |
|           | -0.79557        | 0.78686  | 0.64469 | 0.817598725 |             |          |         |
| SPRR1B    | ENSG00000169469 | -0.83666 | 0.79861 | -0.83666    | 0.79861     | -0.37105 |         |
|           | 0.6447          | -0.37105 | 0.6447  | 0.6447      | 0.817598725 |          |         |
| CBX5      | ENSG00000094916 | -0.37125 | 0.64477 | -0.45787    | 0.67648     | -0.37291 | 0.64539 |
|           | -0.37291        | 0.64539  | 0.64477 | 0.817610557 |             |          |         |
| IGSF22    | ENSG00000179057 | -0.3713  | 0.64479 | -0.3713     | 0.64479     | -0.3713  |         |
|           | 0.64479         | -0.3713  | 0.64479 | 0.64479     | 0.817610557 |          |         |
| LIPI      | ENSG00000188992 | -0.37129 | 0.64479 | -0.64739    | 0.74131     | -0.38099 | 0.64839 |
|           | -0.73659        | 0.76931  | 0.64479 | 0.817610557 |             |          |         |
| NA        | ENSG00000257715 | -0.37128 | 0.64479 | -0.99728    | 0.84068     | -0.37128 | 0.64479 |
|           | -0.37128        | 0.64479  | 0.64479 | 0.817610557 |             |          |         |
| IRS2      | ENSG00000185950 | -0.78452 | 0.78363 | -0.37134    | 0.64481     | -1.0736  | 0.8585  |
|           | -0.89168        | 0.81372  | 0.64481 | 0.817610557 |             |          |         |
| NA        | ENSG00000273588 | -0.37134 | 0.64481 | -0.37134    | 0.64481     | -0.37134 | 0.64481 |
|           | -0.37134        | 0.64481  | 0.64481 | 0.817610557 |             |          |         |
| LYZL4     | ENSG00000157093 | -0.90444 | 0.81712 | -0.37143    | 0.64484     | -1.1436  | 0.87361 |
|           | -0.89978        | 0.81588  | 0.64484 | 0.817618726 |             |          |         |
| H3C1      | ENSG00000275714 | -0.97785 | 0.83593 | -0.37146    | 0.64485     | -0.97785 | 0.83593 |
|           | -0.97785        | 0.83593  | 0.64485 | 0.817618726 |             |          |         |
| RNU7-190P | ENSG00000239185 | -1.299   | 0.90302 | -0.37155    | 0.64489     | -0.37155 |         |
|           | 0.64489         | -0.37155 | 0.64489 | 0.64489     | 0.81764323  |          |         |
| C20orf204 | ENSG00000196421 | -1.1292  | 0.8706  | -0.37162    | 0.64491     | -0.37162 |         |
|           | 0.64491         | -0.37162 | 0.64491 | 0.64491     | 0.81764323  |          |         |
| NA        | ENSG00000202470 | -0.37171 | 0.64495 | -0.37171    | 0.64495     | -0.37171 | 0.64495 |
|           | -0.37171        | 0.64495  | 0.64495 | 0.81764323  |             |          |         |
| RNU6-77P  | ENSG00000222486 | -0.37172 | 0.64495 | -0.37172    | 0.64495     | -0.37172 |         |
|           | 0.64495         | -0.37172 | 0.64495 | 0.64495     | 0.81764323  |          |         |
| EIF4A2P3  | ENSG00000254589 | -0.71458 | 0.76257 | -0.71458    | 0.76257     | -0.51285 |         |
|           | 0.69597         | -0.37175 | 0.64496 | 0.64496     | 0.81764323  |          |         |
| RN7SL14P  | ENSG00000266720 | -0.74019 | 0.77041 | -0.44176    | 0.67067     | -0.906   |         |



|            |                 |          |         |             |             |         |          |
|------------|-----------------|----------|---------|-------------|-------------|---------|----------|
|            | 0.81753         | -0.37179 | 0.64497 | 0.64497     | 0.81764323  |         |          |
| SNORA74B   | ENSG00000212402 | -0.37187 | 0.64501 | 0.64501     | -0.37187    | 0.64501 | -0.37187 |
|            | 0.64501         | -0.37187 | 0.64501 | 0.64501     | 0.817672666 |         |          |
| NA         | ENSG00000269903 | -0.37202 | 0.64506 | 0.64506     | -0.37202    | 0.64506 | -0.37202 |
|            | -0.37202        | 0.64506  | 0.64506 | 0.817692645 |             |         | 0.64506  |
| CROT       | ENSG00000005469 | -1.1112  | 0.86676 | 0.86676     | -0.37207    | 0.64508 | -1.1112  |
|            | -1.3013         | 0.90342  | 0.64508 | 0.817692645 |             |         | 0.86676  |
| NA         | ENSG00000272486 | -0.37207 | 0.64508 | 0.64508     | -0.83812    | 0.79902 | -0.67071 |
|            | -0.67071        | 0.7488   | 0.64508 | 0.817692645 |             |         | 0.7488   |
| NA         | ENSG00000270640 | -0.37214 | 0.64511 | 0.64511     | -0.37214    | 0.64511 | -0.37214 |
|            | -0.37214        | 0.64511  | 0.64511 | 0.817692645 |             |         | 0.64511  |
| NA         | ENSG00000269970 | -0.37221 | 0.64513 | 0.64513     | -0.37221    | 0.64513 | -0.37221 |
|            | -0.37221        | 0.64513  | 0.64513 | 0.817692645 |             |         | 0.64513  |
| PKM        | ENSG00000067225 | -0.37228 | 0.64516 | 0.64516     | -1.3239     | 0.90723 | -1.3115  |
|            | -1.1427         | 0.87342  | 0.64516 | 0.817692645 |             |         | 0.90516  |
| COG7       | ENSG00000168434 | -1.318   | 0.90625 | 0.90625     | -0.48659    | 0.68672 | -0.37227 |
|            | -0.71257        | 0.76194  | 0.64516 | 0.817692645 |             |         | 0.64516  |
| RNU6-490P  | ENSG00000199855 | -0.3723  | 0.64516 | 0.64516     | -0.3723     | 0.64516 | -0.3723  |
|            | 0.64516         | -0.3723  | 0.64516 | 0.817692645 |             |         |          |
| PPIAP70    | ENSG00000232407 | -0.37255 | 0.64526 | 0.64526     | -0.87789    | 0.81    | -0.37255 |
|            | -1.2378         | 0.89211  | 0.64526 | 0.817708535 |             |         | 0.64526  |
| MIR4423    | ENSG00000266110 | -0.37255 | 0.64526 | 0.64526     | -0.37255    | 0.64526 | -0.37255 |
|            | 0.64526         | -0.37255 | 0.64526 | 0.817708535 |             |         |          |
| HMGB3P13   | ENSG00000214288 | -0.73673 | 0.76936 | 0.76936     | -0.37258    | 0.64527 | -0.37258 |
|            | 0.64527         | -0.37258 | 0.64527 | 0.817708535 |             |         |          |
| NA         | ENSG00000224560 | -1.2453  | 0.89349 | 0.89349     | -0.37257    | 0.64527 | -0.55154 |
|            | -0.55154        | 0.70937  | 0.64527 | 0.817708535 |             |         | 0.70937  |
| NA         | ENSG00000267651 | -1.038   | 0.85036 | 0.85036     | -0.41155    | 0.65967 | -0.41155 |
|            | -0.37261        | 0.64528  | 0.64528 | 0.817708535 |             |         | 0.65967  |
| GUCD1      | ENSG00000138867 | -0.37263 | 0.64529 | 0.64529     | -0.37263    | 0.64529 | -0.37263 |
|            | -0.37263        | 0.64529  | 0.64529 | 0.817708535 |             |         | 0.64529  |
| RN7SKP143  | ENSG00000222451 | -0.37264 | 0.64529 | 0.64529     | -0.37264    | 0.64529 | -0.37264 |
|            | 0.64529         | -0.37264 | 0.64529 | 0.817708535 |             |         |          |
| NA         | ENSG00000279523 | -0.37278 | 0.64534 | 0.64534     | -0.37278    | 0.64534 | -0.37278 |
|            | -0.37278        | 0.64534  | 0.64534 | 0.817724852 |             |         | 0.64534  |
| ANKRD20A9P | ENSG00000206192 | -0.79566 | 0.78689 | 0.78689     | -0.94242    | 0.82701 | -0.37279 |
|            | 0.64535         | -0.8003  | 0.78823 | 0.817724852 |             |         |          |
| PDZD9      | ENSG00000155714 | -0.37285 | 0.64537 | 0.64537     | -0.37285    | 0.64537 | -0.37285 |
|            | -1.8152         | 0.96525  | 0.64537 | 0.817724852 |             |         | 0.64537  |
| NA         | ENSG00000268707 | -0.37285 | 0.64537 | 0.64537     | -0.60976    | 0.72899 | -0.50913 |
|            | -0.50913        | 0.69467  | 0.64537 | 0.817724852 |             |         | 0.69467  |
| RABL2B     | ENSG00000079974 | -1.4568  | 0.92742 | 0.92742     | -0.83948    | 0.7994  | -0.44851 |
|            | 0.67311         | -0.37302 | 0.64543 | 0.81777102  |             |         |          |
| NA         | ENSG00000277386 | -0.37303 | 0.64544 | 0.64544     | -0.37303    | 0.64544 | -0.37303 |
|            | -0.37303        | 0.64544  | 0.64544 | 0.81777102  |             |         | 0.64544  |
| HMGB3P20   | ENSG00000226059 | -0.61674 | 0.7313  | 0.7313      | -0.61674    | 0.7313  | -1.4468  |
|            | 0.92603         | -0.37316 | 0.64548 | 0.817776252 |             |         |          |
| RBPMSLP    | ENSG00000234159 | -0.37321 | 0.6455  | 0.6455      | -0.37321    | 0.6455  | -0.37321 |
|            | 0.6455          | -0.37321 | 0.6455  | 0.817776252 |             |         |          |
| ZNF226     | ENSG00000167380 | -0.98779 | 0.83837 | 0.83837     | -0.37322    | 0.64551 | -0.37322 |
|            | 0.64551         | -0.37322 | 0.64551 | 0.817776252 |             |         |          |
| NA         | ENSG00000253613 | -0.97927 | 0.83628 | 0.83628     | -1.4408     | 0.92519 | -0.37333 |
|            | -0.37333        | 0.64555  | 0.64555 | 0.817776252 |             |         | 0.64555  |
| NA         | ENSG00000256875 | -0.37337 | 0.64556 | 0.64556     | -0.37337    | 0.64556 | -0.37337 |
|            | -0.37337        | 0.64556  | 0.64556 | 0.817776252 |             |         | 0.64556  |
| NA         | ENSG00000261068 | -0.37338 | 0.64557 | 0.64557     | -0.61055    | 0.72925 | -0.37338 |
|            | -0.37338        | 0.64557  | 0.64557 | 0.817776252 |             |         | 0.64557  |
| HAPLN3     | ENSG00000140511 | -1.2779  | 0.89936 | 0.89936     | -1.1306     | 0.8709  | -0.69575 |
|            | 0.75671         | -0.37349 | 0.64561 | 0.817776252 |             |         |          |
| P2RX3      | ENSG00000109991 | -0.85596 | 0.80399 | 0.80399     | -0.66991    | 0.74854 | -0.37355 |
|            | -1.0833         | 0.86066  | 0.64563 | 0.817776252 |             |         | 0.64563  |
| RPARP-AS1  | ENSG00000269609 | -0.37356 | 0.64563 | 0.64563     | -0.44583    | 0.67214 | -0.46352 |

|            |                 |             |             |             |             |          |         |          |
|------------|-----------------|-------------|-------------|-------------|-------------|----------|---------|----------|
|            | 0.6785          | -0.46352    | 0.6785      | 0.64563     | 0.817776252 |          |         |          |
| SEPTIN7-DT | ENSG00000228878 | -2.0266     | 0.97865     | -2.0266     | 0.97865     | -2.0266  | 0.97865 | -2.0266  |
|            | 0.97865         | -0.37364    | 0.64566     | 0.64566     | 0.817776252 |          |         |          |
| NA         | ENSG00000237950 | -1.9375     | 0.97366     | -1.8754     | 0.96963     | -0.37374 | 0.6457  |          |
|            | -0.37374        | 0.6457      | 0.6457      | 0.817776252 |             |          |         |          |
| LINC02506  | ENSG00000251129 | -0.66285    | 0.74629     | -0.37386    | 0.64575     | -0.66285 |         |          |
|            | 0.74629         | -0.38875    | 0.65127     | 0.64575     | 0.817776252 |          |         |          |
| NA         | ENSG00000200075 | -0.3739     | 0.64576     | -0.3739     | 0.64576     | -0.3739  | 0.64576 |          |
|            | -0.3739         | 0.64576     | 0.64576     | 0.817776252 |             |          |         |          |
| RNU6-784P  | ENSG00000207058 | -0.3739     | 0.64576     | -0.3739     | 0.64576     | -0.3739  |         |          |
|            | 0.64576         | -0.3739     | 0.64576     | 0.64576     | 0.817776252 |          |         |          |
| MTCO3P18   | ENSG00000227661 | -0.72088    | 0.76451     | -0.72088    | 0.76451     | -0.37396 |         |          |
|            | 0.64578         | -1.0654     | 0.85666     | 0.64578     | 0.817776252 |          |         |          |
| RN7SL104P  | ENSG00000243541 | -0.37398    | 0.64579     | -0.49442    | 0.6895      | -1.1277  |         |          |
|            | 0.87028         | -0.42089    | 0.66308     | 0.64579     | 0.817776252 |          |         |          |
| HCFC2P1    | ENSG00000232087 | -0.37402    | 0.6458      | -1.5116     | 0.93468     | -0.69714 |         |          |
|            | 0.75714         | -1.6182     | 0.94719     | 0.6458      | 0.817776252 |          |         |          |
| NA         | ENSG00000235819 | -1.2683     | 0.89765     | -0.69319    | 0.7559      | -1.2453  | 0.8935  |          |
|            | -0.374          | 0.6458      | 0.6458      | 0.817776252 |             |          |         |          |
| ACTN2      | ENSG00000077522 | -1.9953     | 0.97699     | -0.37409    | 0.64583     | -1.9073  | 0.97176 |          |
|            | -0.77869        | 0.78192     | 0.64583     | 0.817776252 |             |          |         |          |
| NA         | ENSG00000273232 | -0.70924    | 0.76091     | -0.37411    | 0.64584     | -0.62052 | 0.73254 |          |
|            | -0.54509        | 0.70715     | 0.64584     | 0.817776252 |             |          |         |          |
| NA         | ENSG00000179342 | -0.92968    | 0.82373     | -0.3742     | 0.64587     | -0.3742  | 0.64587 |          |
|            | -0.3742         | 0.64587     | 0.64587     | 0.817776252 |             |          |         |          |
| LINC01215  | ENSG00000271856 | -0.37421    | 0.64587     | -0.37421    | 0.64587     | -0.37421 |         |          |
|            | 0.64587         | -0.37421    | 0.64587     | 0.64587     | 0.817776252 |          |         |          |
| LINC00604  | ENSG00000250585 | -1.6914     | 0.95462     | -0.37432    | 0.64592     | -0.5349  |         |          |
|            | 0.70364         | -0.5349     | 0.70364     | 0.64592     | 0.817776252 |          |         |          |
| NA         | ENSG00000260761 | -0.37432    | 0.64592     | -0.37432    | 0.64592     | -0.37432 | 0.64592 |          |
|            | -0.52183        | 0.69911     | 0.64592     | 0.817776252 |             |          |         |          |
| RNU6-405P  | ENSG00000252446 | -0.37441    | 0.64595     | -0.37441    | 0.64595     | -0.37441 |         |          |
|            | 0.64595         | -0.37441    | 0.64595     | 0.64595     | 0.817776252 |          |         |          |
| SPSB2      | ENSG00000111671 | -0.3745     | 0.64599     | -0.3745     | 0.64599     | -0.3745  | 0.64599 |          |
|            | -0.3745         | 0.64599     | 0.64599     | 0.817776252 |             |          |         |          |
| C18orf15   | ENSG00000279020 | -0.54388    | 0.70674     | -0.54388    | 0.70674     | -0.54388 |         |          |
|            | 0.70674         | -0.37452    | 0.64599     | 0.64599     | 0.817776252 |          |         |          |
| ZNF428     | ENSG00000131116 | -0.37454    | 0.646       | -0.37454    | 0.646       | -0.37454 | 0.646   | -0.37454 |
|            | 0.646           | 0.646       | 0.817776252 |             |             |          |         |          |
| NA         | ENSG00000202498 | -0.37455    | 0.646       | -0.37455    | 0.646       | -0.37455 | 0.646   | -0.37455 |
|            | 0.646           | 0.817776252 |             |             |             |          |         |          |
| NA         | ENSG00000258604 | -0.3746     | 0.64602     | -0.3746     | 0.64602     | -0.3746  | 0.64602 |          |
|            | -0.3746         | 0.64602     | 0.64602     | 0.817776252 |             |          |         |          |
| FBXO6      | ENSG00000116663 | -1.6973     | 0.95518     | -1.6973     | 0.95518     | -1.6973  | 0.95518 |          |
|            | -0.37461        | 0.64603     | 0.64603     | 0.817776252 |             |          |         |          |
| PAEP       | ENSG00000122133 | -0.37474    | 0.64607     | -0.37474    | 0.64607     | -0.63819 | 0.73832 |          |
|            | -1.7534         | 0.96023     | 0.64607     | 0.817776252 |             |          |         |          |
| NA         | ENSG00000243094 | -0.37472    | 0.64607     | -0.37472    | 0.64607     | -0.37472 | 0.64607 |          |
|            | -0.37472        | 0.64607     | 0.64607     | 0.817776252 |             |          |         |          |
| NA         | ENSG00000283445 | -0.83065    | 0.79692     | -0.37474    | 0.64607     | -0.62749 | 0.73483 |          |
|            | -0.93328        | 0.82466     | 0.64607     | 0.817776252 |             |          |         |          |
| NA         | ENSG00000177803 | -0.37479    | 0.64609     | -0.46543    | 0.67919     | -0.77129 | 0.77973 |          |
|            | -0.77129        | 0.77973     | 0.64609     | 0.817776252 |             |          |         |          |
| AGPAT4     | ENSG00000026652 | -0.37482    | 0.6461      | -0.53657    | 0.70422     | -0.37482 |         |          |
|            | 0.6461          | -0.85944    | 0.80495     | 0.6461      | 0.817776252 |          |         |          |
| TMEM108    | ENSG00000144868 | -1.3684     | 0.91441     | -0.61002    | 0.72908     | -1.3796  |         |          |
|            | 0.91614         | -0.37484    | 0.64611     | 0.64611     | 0.817776252 |          |         |          |
| SPR        | ENSG00000116096 | -0.46122    | 0.67768     | -0.37505    | 0.64619     | -0.54404 | 0.70679 |          |
|            | -1.1241         | 0.86952     | 0.64619     | 0.817776252 |             |          |         |          |
| FBXO4      | ENSG00000151876 | -1.4649     | 0.92853     | -0.9403     | 0.82647     | -0.37505 | 0.64619 |          |
|            | -1.2718         | 0.89827     | 0.64619     | 0.817776252 |             |          |         |          |
| NA         | ENSG00000178715 | -0.61607    | 0.73108     | -0.62546    | 0.73417     | -0.37506 | 0.64619 |          |

|             |                 |          |         |             |             |          |         |  |
|-------------|-----------------|----------|---------|-------------|-------------|----------|---------|--|
|             | -1.2338         | 0.89136  | 0.64619 | 0.817776252 |             |          |         |  |
| FNBP1       | ENSG00000187239 | -0.90372 | 0.81693 | -1.2572     | 0.89567     | -1.2712  | 0.89817 |  |
|             | -0.37511        | 0.64621  | 0.64621 | 0.817776252 |             |          |         |  |
| RPSAP18     | ENSG00000224261 | -0.37511 | 0.64621 | -0.37511    | 0.64621     | -0.37511 |         |  |
|             | 0.64621         | -0.37511 | 0.64621 | 0.64621     | 0.817776252 |          |         |  |
| UBE2D3P4    | ENSG00000224188 | -0.37514 | 0.64622 | -0.37514    | 0.64622     | -0.37514 |         |  |
|             | 0.64622         | -0.7872  | 0.78442 | 0.64622     | 0.817776252 |          |         |  |
| NA          | ENSG00000255968 | -0.37513 | 0.64622 | -0.37513    | 0.64622     | -0.37513 | 0.64622 |  |
|             | -0.37513        | 0.64622  | 0.64622 | 0.817776252 |             |          |         |  |
| LINC02690   | ENSG00000255226 | -0.37516 | 0.64623 | -0.90531    | 0.81735     | -0.90531 |         |  |
|             | 0.81735         | -0.69784 | 0.75736 | 0.64623     | 0.817776252 |          |         |  |
| NA          | ENSG00000256843 | -0.37518 | 0.64624 | -0.37518    | 0.64624     | -0.37518 | 0.64624 |  |
|             | -0.37518        | 0.64624  | 0.64624 | 0.817776252 |             |          |         |  |
| NA          | ENSG00000236770 | -0.37526 | 0.64627 | -0.37526    | 0.64627     | -0.37526 | 0.64627 |  |
|             | -0.37526        | 0.64627  | 0.64627 | 0.817776252 |             |          |         |  |
| NA          | ENSG00000271933 | -0.37528 | 0.64627 | -0.37528    | 0.64627     | -0.37528 | 0.64627 |  |
|             | -0.37528        | 0.64627  | 0.64627 | 0.817776252 |             |          |         |  |
| RPL36AL     | ENSG00000165502 | -0.37533 | 0.64629 | -0.37533    | 0.64629     | -0.37533 |         |  |
|             | 0.64629         | -0.37533 | 0.64629 | 0.64629     | 0.817776252 |          |         |  |
| RNA5SP368   | ENSG00000201168 | -0.37536 | 0.6463  | -0.62144    | 0.73285     | -0.62144 |         |  |
|             | 0.73285         | -0.62144 | 0.73285 | 0.6463      | 0.817776252 |          |         |  |
| HMGB3P24    | ENSG00000215283 | -0.37534 | 0.6463  | -0.39541    | 0.65373     | -0.38572 |         |  |
|             | 0.65015         | -0.48638 | 0.68665 | 0.6463      | 0.817776252 |          |         |  |
| TPI1P2      | ENSG00000230359 | -0.3755  | 0.64636 | -0.3755     | 0.64636     | -0.3755  |         |  |
|             | 0.64636         | -0.3755  | 0.64636 | 0.64636     | 0.817826423 |          |         |  |
| NA          | ENSG00000269931 | -0.37556 | 0.64638 | -0.7278     | 0.76663     | -0.7278  | 0.76663 |  |
|             | -0.7278         | 0.76663  | 0.64638 | 0.817826423 |             |          |         |  |
| MT1A        | ENSG00000205362 | -0.37558 | 0.64639 | -0.37558    | 0.64639     | -0.37558 | 0.64639 |  |
|             | -0.37558        | 0.64639  | 0.64639 | 0.817826423 |             |          |         |  |
| NNMT        | ENSG00000166741 | -1.4559  | 0.92729 | -0.37575    | 0.64645     | -0.9344  | 0.82495 |  |
|             | -1.0067         | 0.84297  | 0.64645 | 0.817859424 |             |          |         |  |
| NA          | ENSG00000200201 | -0.3758  | 0.64647 | -0.3758     | 0.64647     | -0.3758  | 0.64647 |  |
|             | -0.3758         | 0.64647  | 0.64647 | 0.817859424 |             |          |         |  |
| RNU6-661P   | ENSG00000199279 | -0.37587 | 0.64649 | -0.37587    | 0.64649     | -0.37587 |         |  |
|             | 0.64649         | -0.37587 | 0.64649 | 0.64649     | 0.817859424 |          |         |  |
| NA          | ENSG00000235494 | -2.1174  | 0.98289 | -0.93017    | 0.82386     | -1.7982  | 0.96393 |  |
|             | -0.37585        | 0.64649  | 0.64649 | 0.817859424 |             |          |         |  |
| TRBV20OR9-2 | ENSG00000205274 | -0.37589 | 0.6465  | -0.37589    | 0.6465      | -0.37589 |         |  |
|             | 0.6465          | -0.37589 | 0.6465  | 0.6465      | 0.817859424 |          |         |  |
| PGAP3       | ENSG00000161395 | -0.37596 | 0.64653 | -0.47451    | 0.68243     | -0.70243 | 0.7588  |  |
|             | -0.37596        | 0.64653  | 0.64653 | 0.817876143 |             |          |         |  |
| SCG2        | ENSG00000171951 | -0.69789 | 0.75738 | -0.37708    | 0.64694     | -0.81995 | 0.79388 |  |
|             | -0.37618        | 0.64661  | 0.64661 | 0.817956111 |             |          |         |  |
| CYP2C18     | ENSG00000108242 | -0.37634 | 0.64667 | -0.736      | 0.76914     | -0.50389 |         |  |
|             | 0.69283         | -1.0212  | 0.84641 | 0.64667     | 0.818002191 |          |         |  |
| CENPIP1     | ENSG00000224778 | -0.37636 | 0.64668 | -1.7367     | 0.95878     | -1.4159  |         |  |
|             | 0.9216          | -1.3511  | 0.91166 | 0.64668     | 0.818002191 |          |         |  |
| ZDHHC20P1   | ENSG00000233916 | -0.42899 | 0.66603 | -0.3765     | 0.64673     | -0.41194 |         |  |
|             | 0.65981         | -0.72642 | 0.76621 | 0.64673     | 0.818013474 |          |         |  |
| NA          | ENSG00000241326 | -0.3765  | 0.64673 | -0.3765     | 0.64673     | -0.3765  | 0.64673 |  |
|             | -0.3765         | 0.64673  | 0.64673 | 0.818013474 |             |          |         |  |
| NA          | ENSG00000277866 | -0.37659 | 0.64676 | -0.49147    | 0.68845     | -0.49147 | 0.68845 |  |
|             | -0.49147        | 0.68845  | 0.64676 | 0.818013474 |             |          |         |  |
| RNA5SP394   | ENSG00000201086 | -0.37664 | 0.64678 | -0.37664    | 0.64678     | -0.37664 |         |  |
|             | 0.64678         | -0.37664 | 0.64678 | 0.64678     | 0.818013474 |          |         |  |
| C17orf107   | ENSG00000205710 | -0.37666 | 0.64679 | -0.37666    | 0.64679     | -0.37666 |         |  |
|             | 0.64679         | -0.37666 | 0.64679 | 0.64679     | 0.818013474 |          |         |  |
| RNU6-451P   | ENSG00000199791 | -0.37672 | 0.64681 | -0.37672    | 0.64681     | -0.37672 |         |  |
|             | 0.64681         | -0.37672 | 0.64681 | 0.64681     | 0.818013474 |          |         |  |
| IL18BP      | ENSG00000137496 | -0.37679 | 0.64683 | -0.37679    | 0.64683     | -0.62626 |         |  |
|             | 0.73443         | -0.37679 | 0.64683 | 0.64683     | 0.818013474 |          |         |  |
| NA          | ENSG00000279161 | -0.3768  | 0.64684 | -0.3768     | 0.64684     | -0.3768  | 0.64684 |  |

|            |                 |          |         |             |             |          |         |
|------------|-----------------|----------|---------|-------------|-------------|----------|---------|
|            | -0.61248        | 0.72989  | 0.64684 | 0.818013474 |             |          |         |
| FRG1KP     | ENSG00000280286 | -0.37681 | 0.64684 | -0.37681    | 0.64684     | -0.37681 |         |
|            | 0.64684         | -0.37681 | 0.64684 | 0.64684     | 0.818013474 |          |         |
| NA         | ENSG00000267766 | -0.37688 | 0.64687 | -0.37688    | 0.64687     | -0.37688 | 0.64687 |
|            | -1.3473         | 0.91106  | 0.64687 | 0.818021601 |             |          |         |
| NA         | ENSG00000258723 | -0.3769  | 0.64688 | -0.63754    | 0.73811     | -0.3769  | 0.64688 |
|            | -0.3769         | 0.64688  | 0.64688 | 0.818021601 |             |          |         |
| SLC25A51P1 | ENSG00000220483 | -0.37722 | 0.64699 | -0.37722    | 0.64699     | -0.37722 |         |
|            | 0.64699         | -0.37722 | 0.64699 | 0.64699     | 0.818139472 |          |         |
| NA         | ENSG00000254682 | -0.79358 | 0.78628 | -1.1706     | 0.87911     | -0.37727 | 0.64701 |
|            | -0.37727        | 0.64701  | 0.64701 | 0.818140742 |             |          |         |
| RASGRP4    | ENSG00000171777 | -0.8852  | 0.81198 | -0.37732    | 0.64703     | -1.0219  |         |
|            | 0.8466          | -1.1699  | 0.87899 | 0.64703     | 0.818140742 |          |         |
| NA         | ENSG00000223867 | -0.3774  | 0.64706 | -0.94716    | 0.82822     | -0.3774  | 0.64706 |
|            | -1.3574         | 0.91268  | 0.64706 | 0.818140742 |             |          |         |
| RPSAP57    | ENSG00000267524 | -0.37738 | 0.64706 | -0.37738    | 0.64706     | -0.37738 |         |
|            | 0.64706         | -0.37738 | 0.64706 | 0.64706     | 0.818140742 |          |         |
| KRT18P35   | ENSG00000215606 | -0.3775  | 0.6471  | -0.3775     | 0.6471      | -0.53097 |         |
|            | 0.70228         | -0.85925 | 0.8049  | 0.6471      | 0.818140742 |          |         |
| MARK3P3    | ENSG00000243022 | -1.979   | 0.97609 | -1.979      | 0.97609     | -1.979   |         |
|            | 0.97609         | -0.3775  | 0.6471  | 0.6471      | 0.818140742 |          |         |
| IMMTP1     | ENSG00000229880 | -0.54682 | 0.70775 | -0.54682    | 0.70775     | -0.37752 |         |
|            | 0.64711         | -1.1043  | 0.86527 | 0.64711     | 0.818140742 |          |         |
| NA         | ENSG00000254733 | -0.37761 | 0.64714 | -0.63769    | 0.73816     | -0.37761 | 0.64714 |
|            | -0.37761        | 0.64714  | 0.64714 | 0.818140742 |             |          |         |
| MYO5C      | ENSG00000128833 | -0.81694 | 0.79302 | -0.4186     | 0.66225     | -0.83013 | 0.79677 |
|            | -0.37763        | 0.64715  | 0.64715 | 0.818140742 |             |          |         |
| ARHGAP40   | ENSG00000124143 | -0.53615 | 0.70407 | -1.2869     | 0.90093     | -0.37785 |         |
|            | 0.64723         | -0.8722  | 0.80845 | 0.64723     | 0.818140742 |          |         |
| NA         | ENSG00000234034 | -0.39975 | 0.65533 | -1.1868     | 0.88236     | -0.37786 | 0.64723 |
|            | -0.37786        | 0.64723  | 0.64723 | 0.818140742 |             |          |         |
| NA         | ENSG00000278388 | -0.37784 | 0.64723 | -0.37784    | 0.64723     | -0.37784 | 0.64723 |
|            | -0.37784        | 0.64723  | 0.64723 | 0.818140742 |             |          |         |
| UBTF10     | ENSG00000255385 | -0.3779  | 0.64725 | -0.3779     | 0.64725     | -0.3779  |         |
|            | 0.64725         | -0.3779  | 0.64725 | 0.64725     | 0.818140742 |          |         |
| COPS3      | ENSG00000141030 | -1.0789  | 0.85968 | -1.0789     | 0.85968     | -0.37799 | 0.64728 |
|            | -0.90493        | 0.81725  | 0.64728 | 0.818140742 |             |          |         |
| ZFYVE9     | ENSG00000157077 | -1.2258  | 0.88987 | -0.84466    | 0.80085     | -0.37803 |         |
|            | 0.6473          | -0.71261 | 0.76196 | 0.6473      | 0.818140742 |          |         |
| SREBF2     | ENSG00000198911 | -1.5707  | 0.94187 | -0.37804    | 0.6473      | -1.0744  |         |
|            | 0.85868         | -1.5126  | 0.93481 | 0.6473      | 0.818140742 |          |         |
| FRG1       | ENSG00000109536 | -1.7155  | 0.95688 | -0.37807    | 0.64731     | -0.57615 | 0.71774 |
|            | -0.56739        | 0.71477  | 0.64731 | 0.818140742 |             |          |         |
| NA         | ENSG00000271568 | -1.1178  | 0.86818 | -1.173      | 0.87961     | -1.3544  | 0.91219 |
|            | -0.37807        | 0.64731  | 0.64731 | 0.818140742 |             |          |         |
| NA         | ENSG00000233404 | -0.37806 | 0.64731 | -0.37806    | 0.64731     | -0.37806 | 0.64731 |
|            | -0.37806        | 0.64731  | 0.64731 | 0.818140742 |             |          |         |
| SLC30A7    | ENSG00000162695 | -1.0147  | 0.84488 | -0.88374    | 0.81158     | -0.80103 |         |
|            | 0.78844         | -0.37826 | 0.64738 | 0.64738     | 0.818186773 |          |         |
| OR4K17     | ENSG00000176230 | -0.37825 | 0.64738 | -0.88681    | 0.81241     | -0.88681 |         |
|            | 0.81241         | -0.88681 | 0.81241 | 0.64738     | 0.818186773 |          |         |
| NA         | ENSG00000262518 | -0.37841 | 0.64744 | -0.37841    | 0.64744     | -0.37841 | 0.64744 |
|            | -0.37841        | 0.64744  | 0.64744 | 0.818211109 |             |          |         |
| SKAP1-AS1  | ENSG00000263787 | -0.37846 | 0.64746 | -0.37846    | 0.64746     | -0.37846 |         |
|            | 0.64746         | -0.37846 | 0.64746 | 0.64746     | 0.818211109 |          |         |
| CXCR1      | ENSG00000163464 | -0.77947 | 0.78215 | -0.77947    | 0.78215     | -0.77947 | 0.78215 |
|            | -0.37849        | 0.64747  | 0.64747 | 0.818211109 |             |          |         |
| NA         | ENSG00000240388 | -0.50505 | 0.69324 | -0.8811     | 0.81087     | -0.37849 | 0.64747 |
|            | -1.8043         | 0.96441  | 0.64747 | 0.818211109 |             |          |         |
| NA         | ENSG00000207955 | -0.37858 | 0.6475  | -0.37858    | 0.6475      | -0.37858 | 0.6475  |
|            | -0.37858        | 0.6475   | 0.6475  | 0.818211109 |             |          |         |
| NA         | ENSG00000257165 | -0.84393 | 0.80065 | -0.66631    | 0.74739     | -0.37859 | 0.6475  |

|            |                 |          |          |             |             |             |          |         |
|------------|-----------------|----------|----------|-------------|-------------|-------------|----------|---------|
|            |                 | -0.84393 | 0.80065  | 0.6475      | 0.818211109 |             |          |         |
| MMP13      | ENSG00000137745 | -0.37876 | 0.64757  | 0.64757     | -2.0803     | 0.98125     | -0.37876 | 0.64757 |
|            |                 | -0.37876 | 0.64757  | 0.64757     | 0.818271442 |             |          |         |
| NA         | ENSG00000253400 | -0.37889 | 0.64761  | 0.64761     | -0.37889    | 0.64761     | -0.37889 | 0.64761 |
|            |                 | -0.37889 | 0.64761  | 0.64761     | 0.818271442 |             |          |         |
| RNU6-379P  | ENSG00000200683 | -0.3789  | 0.64762  | 0.64762     | -0.3789     | 0.64762     | -0.3789  |         |
|            |                 | 0.64762  | -0.3789  | 0.64762     | 0.818271442 |             |          |         |
| YWHAQP6    | ENSG00000249986 | -0.37891 | 0.64762  | 0.64762     | -0.37891    | 0.64762     | -0.37891 |         |
|            |                 | 0.64762  | -0.37891 | 0.64762     | 0.818271442 |             |          |         |
| NA         | ENSG00000260063 | -0.37899 | 0.64765  | 0.64765     | -0.68952    | 0.75475     | -0.39757 | 0.65453 |
|            |                 | -0.39757 | 0.65453  | 0.64765     | 0.818271442 |             |          |         |
| NA         | ENSG00000228210 | -0.43154 | 0.66696  | 0.66696     | -1.0696     | 0.85761     | -2.0121  | 0.9779  |
|            |                 | -0.37905 | 0.64768  | 0.64768     | 0.818271442 |             |          |         |
| NAV2-AS4   | ENSG00000254622 | -0.37909 | 0.64769  | 0.64769     | -2.2351     | 0.9873      | -0.37909 |         |
|            |                 | 0.64769  | -0.37909 | 0.64769     | 0.818271442 |             |          |         |
| AKAP7      | ENSG00000118507 | -1.1365  | 0.87213  | 0.87213     | -0.42626    | 0.66504     | -0.37919 | 0.64773 |
|            |                 | -0.50999 | 0.69497  | 0.64773     | 0.818271442 |             |          |         |
| SREBF2-AS1 | ENSG00000184068 | -0.37924 | 0.64774  | 0.64774     | -0.37924    | 0.64774     | -0.37924 |         |
|            |                 | 0.64774  | -0.37924 | 0.64774     | 0.818271442 |             |          |         |
| OR5B10P    | ENSG00000255096 | -0.37923 | 0.64774  | 0.64774     | -0.37923    | 0.64774     | -0.37923 |         |
|            |                 | 0.64774  | -0.37923 | 0.64774     | 0.818271442 |             |          |         |
| RPS27AP2   | ENSG00000232333 | -0.37927 | 0.64775  | 0.64775     | -0.37927    | 0.64775     | -0.37927 |         |
|            |                 | 0.64775  | -0.37927 | 0.64775     | 0.818271442 |             |          |         |
| KRT8P35    | ENSG00000242841 | -0.37924 | 0.64775  | 0.64775     | -0.37924    | 0.64775     | -0.37924 |         |
|            |                 | 0.64775  | -0.37924 | 0.64775     | 0.818271442 |             |          |         |
| NA         | ENSG00000272324 | -0.80311 | 0.78905  | 0.78905     | -0.37939    | 0.6478      | -0.77112 | 0.77968 |
|            |                 | -0.77112 | 0.77968  | 0.6478      | 0.818271442 |             |          |         |
| NA         | ENSG00000234262 | -0.87773 | 0.80995  | 0.80995     | -0.54151    | 0.70592     | -0.37942 | 0.64781 |
|            |                 | -0.37942 | 0.64781  | 0.64781     | 0.818271442 |             |          |         |
| NA         | ENSG00000214558 | -1.655   | 0.95104  | 0.95104     | -1.2131     | 0.88746     | -0.44875 | 0.6732  |
|            |                 | -0.37947 | 0.64783  | 0.64783     | 0.818271442 |             |          |         |
| NA         | ENSG00000267595 | -0.37948 | 0.64783  | 0.64783     | -0.37948    | 0.64783     | -0.37948 | 0.64783 |
|            |                 | -0.37948 | 0.64783  | 0.64783     | 0.818271442 |             |          |         |
| NA         | ENSG00000270277 | -0.3795  | 0.64784  | 0.64784     | -0.3795     | 0.64784     | -0.3795  | 0.64784 |
|            |                 | -0.3795  | 0.64784  | 0.64784     | 0.818271442 |             |          |         |
| MIR548F4   | ENSG00000221442 | -0.37952 | 0.64785  | 0.64785     | -1.6851     | 0.95401     | -0.37952 |         |
|            |                 | 0.64785  | -0.37952 | 0.64785     | 0.818271442 |             |          |         |
| NA         | ENSG00000241678 | -0.37984 | 0.64797  | 0.64797     | -0.37984    | 0.64797     | -0.37984 | 0.64797 |
|            |                 | -0.37984 | 0.64797  | 0.64797     | 0.818401796 |             |          |         |
| KRT18P24   | ENSG00000226234 | -0.37993 | 0.648    | 0.648       | -0.37993    | 0.648       | -0.37993 | 0.648   |
|            |                 | 0.648    | 0.648    | 0.818418474 |             |             |          |         |
| OR5H7P     | ENSG00000187900 | -0.38006 | 0.64805  | 0.64805     | -0.38006    | 0.64805     | -0.38006 |         |
|            |                 | 0.64805  | -0.38006 | 0.64805     | 0.818460411 |             |          |         |
| NA         | ENSG00000250770 | -1.0633  | 0.85619  | 0.85619     | -1.0666     | 0.85693     | -0.85254 | 0.80304 |
|            |                 | -0.38014 | 0.64808  | 0.64808     | 0.818477087 |             |          |         |
| NA         | ENSG00000215297 | -0.38032 | 0.64814  | 0.64814     | -0.38032    | 0.64814     | -0.38032 | 0.64814 |
|            |                 | -0.38032 | 0.64814  | 0.64814     | 0.818510436 |             |          |         |
| NA         | ENSG00000257613 | -0.3803  | 0.64814  | 0.64814     | -0.3803     | 0.64814     | -0.3803  | 0.64814 |
|            |                 | -0.3803  | 0.64814  | 0.64814     | 0.818510436 |             |          |         |
| NA         | ENSG00000255845 | -1.2248  | 0.88968  | 0.88968     | -0.38041    | 0.64818     | -0.44588 | 0.67216 |
|            |                 | -0.78841 | 0.78477  | 0.64818     | 0.818530659 |             |          |         |
| NA         | ENSG00000265136 | -0.38047 | 0.6482   | 0.6482      | -0.38047    | 0.6482      | -0.38047 | 0.6482  |
|            |                 | -0.38047 | 0.6482   | 0.6482      | 0.818530659 |             |          |         |
| SLC41A1    | ENSG00000133065 | -1.3159  | 0.9059   | 0.9059      | -0.38049    | 0.64821     | -0.95805 |         |
|            |                 | 0.83098  | -1.4803  | 0.93061     | 0.64821     | 0.818530659 |          |         |
| NA         | ENSG00000254064 | -0.7027  | 0.75888  | 0.75888     | -0.38057    | 0.64824     | -0.7027  | 0.75888 |
|            |                 | -0.7027  | 0.75888  | 0.64824     | 0.818530659 |             |          |         |
| NA         | ENSG00000273951 | -0.38056 | 0.64824  | 0.64824     | -0.38056    | 0.64824     | -0.38056 | 0.64824 |
|            |                 | -0.38056 | 0.64824  | 0.64824     | 0.818530659 |             |          |         |
| TMA16P2    | ENSG00000232467 | -0.38066 | 0.64827  | 0.64827     | -0.38066    | 0.64827     | -0.38066 |         |
|            |                 | 0.64827  | -0.38066 | 0.64827     | 0.818538747 |             |          |         |
| NA         | ENSG00000260786 | -1.1407  | 0.87301  | 0.87301     | -0.58934    | 0.72218     | -0.58934 | 0.72218 |

|           |                 |          |         |             |             |          |         |  |
|-----------|-----------------|----------|---------|-------------|-------------|----------|---------|--|
|           | -0.38068        | 0.64828  | 0.64828 | 0.818538747 |             |          |         |  |
| NA        | ENSG00000251216 | -0.94124 | 0.82671 | -0.38074    | 0.6483      | -0.45397 | 0.67507 |  |
|           | -0.45397        | 0.67507  | 0.6483  | 0.818542791 |             |          |         |  |
| NA        | ENSG00000266792 | -0.38082 | 0.64833 | -1.1522     | 0.87539     | -0.38082 | 0.64833 |  |
|           | -0.38082        | 0.64833  | 0.64833 | 0.81855946  |             |          |         |  |
| CCDC71L   | ENSG00000253276 | -0.38093 | 0.64837 | -0.38093    | 0.64837     | -0.86333 |         |  |
|           | 0.80602         | -0.38093 | 0.64837 | 0.64837     | 0.818588753 |          |         |  |
| PKDREJ    | ENSG00000130943 | -0.38107 | 0.64842 | -0.38107    | 0.64842     | -0.38107 |         |  |
|           | 0.64842         | -0.38107 | 0.64842 | 0.64842     | 0.818600878 |          |         |  |
| ACLY      | ENSG00000131473 | -0.84737 | 0.8016  | -0.84737    | 0.8016      | -0.84737 | 0.8016  |  |
|           | -0.3811         | 0.64843  | 0.64843 | 0.818600878 |             |          |         |  |
| NA        | ENSG00000269274 | -0.79314 | 0.78615 | -0.38109    | 0.64843     | -0.81804 | 0.79333 |  |
|           | -0.42455        | 0.66442  | 0.64843 | 0.818600878 |             |          |         |  |
| RAB7A     | ENSG00000075785 | -1.1062  | 0.86567 | -0.38117    | 0.64846     | -0.46857 | 0.68031 |  |
|           | -0.76367        | 0.77747  | 0.64846 | 0.818617544 |             |          |         |  |
| NA        | ENSG00000266371 | -0.38131 | 0.64851 | -0.38131    | 0.64851     | -0.47791 | 0.68364 |  |
|           | -0.38131        | 0.64851  | 0.64851 | 0.818659455 |             |          |         |  |
| RNU6-554P | ENSG00000222398 | -0.98179 | 0.8369  | -0.98179    | 0.8369      | -0.38149 |         |  |
|           | 0.64858         | -1.7358  | 0.9587  | 0.64858     | 0.818669047 |          |         |  |
| CNEP1R1   | ENSG00000205423 | -1.3213  | 0.90679 | -0.38151    | 0.64859     | -0.79228 |         |  |
|           | 0.7859          | -2.1507  | 0.98425 | 0.64859     | 0.818669047 |          |         |  |
| NA        | ENSG00000254332 | -0.90547 | 0.81739 | -0.38158    | 0.64861     | -0.86389 | 0.80618 |  |
|           | -0.38158        | 0.64861  | 0.64861 | 0.818669047 |             |          |         |  |
| NA        | ENSG00000263368 | -0.42328 | 0.66395 | -0.38161    | 0.64863     | -0.38161 | 0.64863 |  |
|           | -0.38161        | 0.64863  | 0.64863 | 0.818669047 |             |          |         |  |
| NA        | ENSG00000254753 | -0.38172 | 0.64866 | -0.38172    | 0.64866     | -0.92351 | 0.82213 |  |
|           | -0.38172        | 0.64866  | 0.64866 | 0.818669047 |             |          |         |  |
| RAD18     | ENSG00000070950 | -1.1306  | 0.87088 | -0.38173    | 0.64867     | -0.92542 | 0.82263 |  |
|           | -1.3844         | 0.91688  | 0.64867 | 0.818669047 |             |          |         |  |
| ZNF493    | ENSG00000196268 | -0.38175 | 0.64867 | -0.80985    | 0.79099     | -0.93599 |         |  |
|           | 0.82536         | -1.4131  | 0.92119 | 0.64867     | 0.818669047 |          |         |  |
| TIMM13    | ENSG00000099800 | -0.38185 | 0.64871 | -0.38185    | 0.64871     | -0.71686 |         |  |
|           | 0.76327         | -0.38185 | 0.64871 | 0.64871     | 0.818669047 |          |         |  |
| NA        | ENSG00000239671 | -0.38183 | 0.64871 | -0.38183    | 0.64871     | -0.38183 | 0.64871 |  |
|           | -0.38183        | 0.64871  | 0.64871 | 0.818669047 |             |          |         |  |
| RAD17     | ENSG00000152942 | -0.38186 | 0.64872 | -1.0299     | 0.84846     | -0.9058  | 0.81748 |  |
|           | -1.0986         | 0.86404  | 0.64872 | 0.818669047 |             |          |         |  |
| WFDC6     | ENSG00000243543 | -0.38191 | 0.64873 | -0.38191    | 0.64873     | -0.38191 | 0.64873 |  |
|           | -0.38191        | 0.64873  | 0.64873 | 0.818669047 |             |          |         |  |
| NA        | ENSG00000219329 | -1.0861  | 0.86127 | -0.75303    | 0.77428     | -0.38197 | 0.64876 |  |
|           | -1.2483         | 0.89405  | 0.64876 | 0.818669047 |             |          |         |  |
| NA        | ENSG00000253308 | -0.38198 | 0.64876 | -0.82772    | 0.79609     | -0.65998 | 0.74537 |  |
|           | -0.82772        | 0.79609  | 0.64876 | 0.818669047 |             |          |         |  |
| NA        | ENSG00000225750 | -0.38204 | 0.64878 | -0.38204    | 0.64878     | -0.38204 | 0.64878 |  |
|           | -0.38204        | 0.64878  | 0.64878 | 0.818669047 |             |          |         |  |
| SNORA21B  | ENSG00000252699 | -0.38206 | 0.64879 | -0.38206    | 0.64879     | -0.38206 |         |  |
|           | 0.64879         | -0.38206 | 0.64879 | 0.64879     | 0.818669047 |          |         |  |
| NA        | ENSG00000260504 | -0.38205 | 0.64879 | -0.38205    | 0.64879     | -0.38205 | 0.64879 |  |
|           | -0.38205        | 0.64879  | 0.64879 | 0.818669047 |             |          |         |  |
| ELMOD3    | ENSG00000115459 | -1.1458  | 0.87406 | -0.97917    | 0.83625     | -0.38213 |         |  |
|           | 0.64882         | -0.84639 | 0.80133 | 0.64882     | 0.818669047 |          |         |  |
| RN7SL850P | ENSG00000263955 | -1.1552  | 0.876   | -0.38213    | 0.64882     | -0.38213 | 0.64882 |  |
|           | -0.38213        | 0.64882  | 0.64882 | 0.818669047 |             |          |         |  |
| NA        | ENSG00000258935 | -0.3822  | 0.64884 | -0.3822     | 0.64884     | -0.3822  | 0.64884 |  |
|           | -0.3822         | 0.64884  | 0.64884 | 0.818673085 |             |          |         |  |
| BNIP3P36  | ENSG00000271661 | -0.38225 | 0.64886 | -0.38225    | 0.64886     | -0.38225 |         |  |
|           | 0.64886         | -0.38225 | 0.64886 | 0.64886     | 0.818677122 |          |         |  |
| SNORD109B | ENSG00000239169 | -0.38233 | 0.64889 | -0.38233    | 0.64889     | -0.38233 |         |  |
|           | 0.64889         | -0.38233 | 0.64889 | 0.64889     | 0.818685196 |          |         |  |
| BARHL2    | ENSG00000143032 | -1.2872  | 0.90099 | -0.38236    | 0.6489      | -0.88829 |         |  |
|           | 0.81281         | -1.0413  | 0.85114 | 0.6489      | 0.818685196 |          |         |  |
| NA        | ENSG00000264340 | -0.3824  | 0.64892 | -0.3824     | 0.64892     | -0.3824  | 0.64892 |  |

|           |                 |          |         |             |             |          |         |
|-----------|-----------------|----------|---------|-------------|-------------|----------|---------|
|           | -0.3824         | 0.64892  | 0.64892 | 0.818689232 |             |          |         |
| CCDC68    | ENSG00000166510 | -1.8322  | 0.96654 | -0.84691    | 0.80148     | -0.63471 |         |
|           | 0.73719         | -0.38249 | 0.64895 | 0.64895     | 0.818697305 |          |         |
| NA        | ENSG00000277907 | -0.38251 | 0.64896 | -0.38251    | 0.64896     | -0.38251 | 0.64896 |
|           | -0.38251        | 0.64896  | 0.64896 | 0.818697305 |             |          |         |
| NA        | ENSG00000261765 | -0.38276 | 0.64905 | -0.38276    | 0.64905     | -0.38276 | 0.64905 |
|           | -0.38276        | 0.64905  | 0.64905 | 0.818789133 |             |          |         |
| NA        | ENSG00000264107 | -0.38285 | 0.64908 | -0.38285    | 0.64908     | -0.38285 | 0.64908 |
|           | -0.38285        | 0.64908  | 0.64908 | 0.818789133 |             |          |         |
| NA        | ENSG00000255548 | -0.38287 | 0.64909 | -0.38287    | 0.64909     | -0.38287 | 0.64909 |
|           | -0.38287        | 0.64909  | 0.64909 | 0.818789133 |             |          |         |
| OR4A45P   | ENSG00000213607 | -0.38289 | 0.6491  | -1.3032     | 0.90374     | -0.69852 |         |
|           | 0.75757         | -0.62988 | 0.73561 | 0.6491      | 0.818789133 |          |         |
| ST3GAL5   | ENSG00000115525 | -1.4095  | 0.92066 | -0.93887    | 0.8261      | -0.38297 |         |
|           | 0.64913         | -1.1933  | 0.88362 | 0.64913     | 0.81880578  |          |         |
| NA        | ENSG00000258230 | -0.38309 | 0.64917 | -0.38309    | 0.64917     | -0.38309 | 0.64917 |
|           | -0.38309        | 0.64917  | 0.64917 | 0.818825941 |             |          |         |
| RNU2-50P  | ENSG00000222426 | -0.38311 | 0.64918 | -0.38311    | 0.64918     | -0.38311 |         |
|           | 0.64918         | -0.38311 | 0.64918 | 0.64918     | 0.818825941 |          |         |
| NA        | ENSG00000229495 | -0.79723 | 0.78734 | -0.38316    | 0.6492      | -0.84298 | 0.80038 |
|           | -0.62881        | 0.73526  | 0.6492  | 0.818825941 |             |          |         |
| CHST2     | ENSG00000175040 | -1.4116  | 0.92096 | -1.4116     | 0.92096     | -0.43607 | 0.66861 |
|           | -0.3832         | 0.64922  | 0.64922 | 0.818825941 |             |          |         |
| ST13P16   | ENSG00000218698 | -0.38325 | 0.64923 | -0.38325    | 0.64923     | -0.38325 |         |
|           | 0.64923         | -0.38325 | 0.64923 | 0.64923     | 0.818825941 |          |         |
| RPS6KB2   | ENSG00000175634 | -1.173   | 0.87959 | -0.38346    | 0.64931     | -1.1186  |         |
|           | 0.86835         | -1.1186  | 0.86835 | 0.64931     | 0.818837518 |          |         |
| KRT9      | ENSG00000171403 | -0.3835  | 0.64932 | -0.4815     | 0.68492     | -0.3835  | 0.64932 |
|           | -0.3835         | 0.64932  | 0.64932 | 0.818837518 |             |          |         |
| OR8H3     | ENSG00000181761 | -0.38349 | 0.64932 | -0.38349    | 0.64932     | -0.49729 | 0.69051 |
|           | -0.84539        | 0.80105  | 0.64932 | 0.818837518 |             |          |         |
| RNU7-63P  | ENSG00000238417 | -1.2266  | 0.89001 | -1.2266     | 0.89001     | -1.2266  |         |
|           | 0.89001         | -0.38348 | 0.64932 | 0.64932     | 0.818837518 |          |         |
| RPS27AP8  | ENSG00000237483 | -1.7659  | 0.96129 | -0.96972    | 0.83391     | -0.38352 |         |
|           | 0.64933         | -0.38352 | 0.64933 | 0.64933     | 0.818837518 |          |         |
| NA        | ENSG00000243828 | -0.65257 | 0.74298 | -1.4898     | 0.93186     | -0.38354 | 0.64934 |
|           | -0.38354        | 0.64934  | 0.64934 | 0.818837518 |             |          |         |
| NA        | ENSG00000257042 | -0.68822 | 0.75434 | -0.38367    | 0.64939     | -0.39571 | 0.65384 |
|           | -0.39571        | 0.65384  | 0.64939 | 0.818879378 |             |          |         |
| RNA5SP425 | ENSG00000222268 | -0.38376 | 0.64942 | -0.38376    | 0.64942     | -0.38376 |         |
|           | 0.64942         | -0.38376 | 0.64942 | 0.64942     | 0.818886394 |          |         |
| MTFR2     | ENSG00000146410 | -0.38382 | 0.64944 | -0.75844    | 0.77591     | -0.3893  | 0.65147 |
|           | -0.43602        | 0.66859  | 0.64944 | 0.818886394 |             |          |         |
| UBXN2B    | ENSG00000215114 | -0.71785 | 0.76358 | -1.1541     | 0.87576     | -0.3839  |         |
|           | 0.64947         | -0.89556 | 0.81476 | 0.64947     | 0.818886394 |          |         |
| NA        | ENSG00000228748 | -0.38388 | 0.64947 | -0.57186    | 0.71629     | -0.38388 | 0.64947 |
|           | -0.38388        | 0.64947  | 0.64947 | 0.818886394 |             |          |         |
| NA        | ENSG00000251484 | -0.38396 | 0.6495  | -0.38396    | 0.6495      | -0.38396 | 0.6495  |
|           | -0.38396        | 0.6495   | 0.6495  | 0.818886394 |             |          |         |
| NA        | ENSG00000253357 | -1.1854  | 0.88208 | -0.38401    | 0.64951     | -0.79253 | 0.78597 |
|           | -0.81495        | 0.79245  | 0.64951 | 0.818886394 |             |          |         |
| CRISPLD2  | ENSG00000103196 | -1.4972  | 0.93283 | -0.38406    | 0.64953     | -0.75121 |         |
|           | 0.77374         | -0.40042 | 0.65558 | 0.64953     | 0.818886394 |          |         |
| ANAPC1P5  | ENSG00000275597 | -0.38406 | 0.64953 | -1.1832     | 0.88164     | -0.66901 |         |
|           | 0.74825         | -0.85358 | 0.80333 | 0.64953     | 0.818886394 |          |         |
| NA        | ENSG00000276542 | -0.38419 | 0.64958 | -0.38419    | 0.64958     | -0.38419 | 0.64958 |
|           | -0.48655        | 0.68671  | 0.64958 | 0.818907057 |             |          |         |
| NA        | ENSG00000277695 | -0.38419 | 0.64958 | -0.38419    | 0.64958     | -0.38419 | 0.64958 |
|           | -0.38419        | 0.64958  | 0.64958 | 0.818907057 |             |          |         |
| NA        | ENSG00000261013 | -0.62651 | 0.73451 | -0.46493    | 0.67901     | -0.38431 | 0.64963 |
|           | -0.46493        | 0.67901  | 0.64963 | 0.818926145 |             |          |         |
| NA        | ENSG00000255472 | -0.38434 | 0.64964 | -0.38434    | 0.64964     | -0.38434 | 0.64964 |

|           |                 |          |          |         |             |             |          |         |
|-----------|-----------------|----------|----------|---------|-------------|-------------|----------|---------|
|           |                 | -0.38434 | 0.64964  | 0.64964 | 0.818926145 |             |          |         |
| NA        | ENSG00000270166 | -0.38448 | 0.64969  | 0.64969 | -0.38448    | 0.64969     | -0.38448 | 0.64969 |
|           |                 | -0.38448 | 0.64969  | 0.64969 | 0.818926145 |             |          |         |
| NA        | ENSG00000261582 | -0.38459 | 0.64973  | 0.64973 | -0.38459    | 0.64973     | -0.38459 | 0.64973 |
|           |                 | -0.38459 | 0.64973  | 0.64973 | 0.818926145 |             |          |         |
| MMP28     | ENSG00000271447 | -0.8077  | 0.79037  | 0.79037 | -0.3846     | 0.64973     | -0.3846  | 0.64973 |
|           |                 | -0.65247 | 0.74295  | 0.64973 | 0.818926145 |             |          |         |
| PGAP2     | ENSG00000148985 | -1.6567  | 0.95121  | 0.95121 | -1.6852     | 0.95403     | -0.75154 | 0.77384 |
|           |                 | -0.38464 | 0.64975  | 0.64975 | 0.818926145 |             |          |         |
| LINC00545 | ENSG00000236094 | -0.38469 | 0.64977  | 0.64977 | -0.38469    | 0.64977     | -0.38469 |         |
|           |                 | 0.64977  | -0.38469 | 0.64977 | 0.64977     | 0.818926145 |          |         |
| FRMPD2    | ENSG00000170324 | -1.2452  | 0.89348  | 0.89348 | -1.0754     | 0.85891     | -0.38472 |         |
|           |                 | 0.64978  | -1.497   | 0.9328  | 0.64978     | 0.818926145 |          |         |
| MTATP6P13 | ENSG00000229842 | -0.38473 | 0.64978  | 0.64978 | -0.38473    | 0.64978     | -0.38473 |         |
|           |                 | 0.64978  | -0.38473 | 0.64978 | 0.64978     | 0.818926145 |          |         |
| NA        | ENSG00000250890 | -0.38473 | 0.64978  | 0.64978 | -0.38473    | 0.64978     | -0.38473 | 0.64978 |
|           |                 | -0.38473 | 0.64978  | 0.64978 | 0.818926145 |             |          |         |
| NA        | ENSG00000263300 | -0.38472 | 0.64978  | 0.64978 | -0.38472    | 0.64978     | -0.38472 | 0.64978 |
|           |                 | -0.38472 | 0.64978  | 0.64978 | 0.818926145 |             |          |         |
| SERPINB8  | ENSG00000166401 | -0.38491 | 0.64985  | 0.64985 | -0.38491    | 0.64985     | -0.38491 |         |
|           |                 | 0.64985  | -2.2066  | 0.98633 | 0.64985     | 0.818981435 |          |         |
| EIF2B1    | ENSG00000111361 | -0.38508 | 0.64991  | 0.64991 | -0.38508    | 0.64991     | -0.62077 |         |
|           |                 | 0.73263  | -0.38508 | 0.64991 | 0.64991     | 0.818981435 |          |         |
| NA        | ENSG00000271680 | -0.3851  | 0.64992  | 0.64992 | -0.3851     | 0.64992     | -0.3851  | 0.64992 |
|           |                 | -0.3851  | 0.64992  | 0.64992 | 0.818981435 |             |          |         |
| PITHD1    | ENSG00000057757 | -0.78867 | 0.78485  | 0.78485 | -0.78867    | 0.78485     | -0.38518 |         |
|           |                 | 0.64995  | -0.78867 | 0.78485 | 0.64995     | 0.818981435 |          |         |
| NA        | ENSG00000280850 | -0.38521 | 0.64996  | 0.64996 | -0.79324    | 0.78618     | -0.97884 | 0.83617 |
|           |                 | -0.56627 | 0.7144   | 0.64996 | 0.818981435 |             |          |         |
| NA        | ENSG00000272367 | -0.38523 | 0.64997  | 0.64997 | -0.38523    | 0.64997     | -0.38523 | 0.64997 |
|           |                 | -0.38523 | 0.64997  | 0.64997 | 0.818981435 |             |          |         |
| RPL30P16  | ENSG00000230169 | -0.3853  | 0.64999  | 0.64999 | -0.3853     | 0.64999     | -0.3853  |         |
|           |                 | 0.64999  | -0.3853  | 0.64999 | 0.64999     | 0.818981435 |          |         |
| OR5M6P    | ENSG00000254603 | -0.3853  | 0.64999  | 0.64999 | -0.90614    | 0.81757     | -0.3853  |         |
|           |                 | 0.64999  | -0.3853  | 0.64999 | 0.64999     | 0.818981435 |          |         |
| NA        | ENSG00000277143 | -0.38543 | 0.65004  | 0.65004 | -1.0663     | 0.85687     | -0.38543 | 0.65004 |
|           |                 | -0.38543 | 0.65004  | 0.65004 | 0.818981435 |             |          |         |
| SOX12     | ENSG00000177732 | -0.38552 | 0.65007  | 0.65007 | -1.3618     | 0.91336     | -1.0209  | 0.84636 |
|           |                 | -1.3469  | 0.91099  | 0.65007 | 0.818981435 |             |          |         |
| RPLP1P13  | ENSG00000232163 | -0.38552 | 0.65007  | 0.65007 | -0.38552    | 0.65007     | -0.38552 |         |
|           |                 | 0.65007  | -0.38552 | 0.65007 | 0.65007     | 0.818981435 |          |         |
| RN7SL398P | ENSG00000244356 | -0.38552 | 0.65007  | 0.65007 | -1.2795     | 0.89963     | -0.38552 |         |
|           |                 | 0.65007  | -0.38552 | 0.65007 | 0.65007     | 0.818981435 |          |         |
| NA        | ENSG00000280416 | -2.0399  | 0.97932  | 0.97932 | -2.3016     | 0.98932     | -1.1135  | 0.86726 |
|           |                 | -0.38562 | 0.65011  | 0.65011 | 0.818981435 |             |          |         |
| PPIAP24   | ENSG00000174408 | -0.38564 | 0.65012  | 0.65012 | -0.38564    | 0.65012     | -0.38564 |         |
|           |                 | 0.65012  | -0.38954 | 0.65156 | 0.65012     | 0.818981435 |          |         |
| NA        | ENSG00000228665 | -0.38565 | 0.65012  | 0.65012 | -0.38565    | 0.65012     | -0.38565 | 0.65012 |
|           |                 | -0.38565 | 0.65012  | 0.65012 | 0.818981435 |             |          |         |
| GYG1P2    | ENSG00000237099 | -0.73211 | 0.76795  | 0.76795 | -0.73211    | 0.76795     | -0.73211 |         |
|           |                 | 0.76795  | -0.38564 | 0.65012 | 0.65012     | 0.818981435 |          |         |
| NA        | ENSG00000224836 | -0.68213 | 0.75242  | 0.75242 | -0.4535     | 0.6749      | -0.38567 | 0.65013 |
|           |                 | -0.68213 | 0.75242  | 0.65013 | 0.818981435 |             |          |         |
| NA        | ENSG00000255400 | -0.38571 | 0.65015  | 0.65015 | -1.9126     | 0.9721      | -0.38571 | 0.65015 |
|           |                 | -1.0386  | 0.85051  | 0.65015 | 0.818981435 |             |          |         |
| NA        | ENSG00000224387 | -0.38574 | 0.65016  | 0.65016 | -0.38574    | 0.65016     | -0.38574 | 0.65016 |
|           |                 | -0.38574 | 0.65016  | 0.65016 | 0.818981435 |             |          |         |
| NA        | ENSG00000229393 | -0.38574 | 0.65016  | 0.65016 | -0.38574    | 0.65016     | -0.38574 | 0.65016 |
|           |                 | -0.38574 | 0.65016  | 0.65016 | 0.818981435 |             |          |         |
| NA        | ENSG00000258137 | -0.38587 | 0.6502   | 0.6502  | -0.53167    | 0.70252     | -0.38587 | 0.6502  |
|           |                 | -0.38587 | 0.6502   | 0.6502  | 0.81901065  |             |          |         |
| LINC00709 | ENSG00000230014 | -0.38601 | 0.65025  | 0.65025 | -0.38601    | 0.65025     | -0.38601 |         |



|              |                 |          |         |             |             |          |         |
|--------------|-----------------|----------|---------|-------------|-------------|----------|---------|
|              | 0.65025         | -0.38601 | 0.65025 | 0.65025     | 0.819014141 |          |         |
| RN7SL806P    | ENSG00000242719 | -1.2561  | 0.89547 | -0.38602    | 0.65026     | -1.4233  |         |
|              | 0.92268         | -2.3462  | 0.99052 | 0.65026     | 0.819014141 |          |         |
| NA           | ENSG00000248557 | -0.38602 | 0.65026 | -0.38602    | 0.65026     | -0.38602 | 0.65026 |
|              | -0.38602        | 0.65026  | 0.65026 | 0.819014141 |             |          |         |
| OR8V1P       | ENSG00000230213 | -0.38604 | 0.65027 | -0.38604    | 0.65027     | -0.38604 |         |
|              | 0.65027         | -0.38604 | 0.65027 | 0.819014141 |             |          |         |
| RPL30P4      | ENSG00000237676 | -0.38626 | 0.65035 | -1.012      | 0.84423     | -1.012   |         |
|              | 0.84423         | -1.012   | 0.84423 | 0.65035     | 0.819044172 |          |         |
| NA           | ENSG00000271133 | -0.78849 | 0.78479 | -0.38633    | 0.65037     | -0.78849 | 0.78479 |
|              | -0.78849        | 0.78479  | 0.65037 | 0.819044172 |             |          |         |
| IFITM3P3     | ENSG00000196114 | -0.38634 | 0.65038 | -0.40468    | 0.65714     | -1.3994  |         |
|              | 0.91915         | -1.0806  | 0.86006 | 0.65038     | 0.819044172 |          |         |
| NA           | ENSG00000254602 | -0.97324 | 0.83478 | -0.88222    | 0.81117     | -0.38639 | 0.6504  |
|              | -0.38639        | 0.6504   | 0.6504  | 0.819044172 |             |          |         |
| NA           | ENSG00000273493 | -0.3864  | 0.6504  | -0.3864     | 0.6504      | -0.3864  | 0.6504  |
|              | -0.3864         | 0.6504   | 0.6504  | 0.819044172 |             |          |         |
| SAA2         | ENSG00000134339 | -1.5074  | 0.93414 | -1.5074     | 0.93414     | -0.38642 | 0.65041 |
|              | -1.5074         | 0.93414  | 0.65041 | 0.819044172 |             |          |         |
| NA           | ENSG00000273184 | -0.38646 | 0.65042 | -0.59157    | 0.72293     | -0.41201 | 0.65983 |
|              | -0.41201        | 0.65983  | 0.65042 | 0.819044172 |             |          |         |
| SNORD11B     | ENSG00000271852 | -0.38656 | 0.65046 | -0.38656    | 0.65046     | -0.38656 |         |
|              | 0.65046         | -0.38656 | 0.65046 | 0.65046     | 0.819044172 |          |         |
| TMEM199      | ENSG00000244045 | -0.38664 | 0.65049 | -0.38664    | 0.65049     | -0.38664 |         |
|              | 0.65049         | -0.38664 | 0.65049 | 0.65049     | 0.819044172 |          |         |
| NA           | ENSG00000256199 | -0.38664 | 0.65049 | -0.38664    | 0.65049     | -0.38664 | 0.65049 |
|              | -0.38664        | 0.65049  | 0.65049 | 0.819044172 |             |          |         |
| NA           | ENSG00000252997 | -0.38675 | 0.65053 | -0.46513    | 0.67908     | -0.54681 | 0.70774 |
|              | -1.1068         | 0.86582  | 0.65053 | 0.819044172 |             |          |         |
| CAV2         | ENSG00000105971 | -0.38683 | 0.65056 | -0.50843    | 0.69442     | -0.38683 | 0.65056 |
|              | -0.38683        | 0.65056  | 0.65056 | 0.819044172 |             |          |         |
| GNPATP       | ENSG00000259844 | -0.38684 | 0.65056 | -0.38684    | 0.65056     | -0.38684 |         |
|              | 0.65056         | -0.38684 | 0.65056 | 0.65056     | 0.819044172 |          |         |
| FOLH1        | ENSG00000086205 | -1.6192  | 0.9473  | -0.38685    | 0.65057     | -1.7777  | 0.96228 |
|              | -1.7715         | 0.96176  | 0.65057 | 0.819044172 |             |          |         |
| RASGRP1      | ENSG00000172575 | -0.38686 | 0.65057 | -0.38686    | 0.65057     | -0.80911 |         |
|              | 0.79077         | -0.76647 | 0.7783  | 0.65057     | 0.819044172 |          |         |
| OAF          | ENSG00000184232 | -0.42061 | 0.66298 | -0.38686    | 0.65057     | -1.0078  | 0.84323 |
|              | -0.81564        | 0.79265  | 0.65057 | 0.819044172 |             |          |         |
| PABPC1P12    | ENSG00000225638 | -0.38693 | 0.65059 | -0.38693    | 0.65059     | -0.68669 |         |
|              | 0.75386         | -0.56454 | 0.71381 | 0.65059     | 0.819044172 |          |         |
| FANCL        | ENSG00000115392 | -1.0671  | 0.85704 | -0.38698    | 0.65061     | -1.0671  | 0.85704 |
|              | -1.0671         | 0.85704  | 0.65061 | 0.819044172 |             |          |         |
| NA           | ENSG00000207218 | -0.38702 | 0.65063 | -0.43086    | 0.66671     | -1.0445  | 0.85187 |
|              | -0.83205        | 0.79731  | 0.65063 | 0.819044172 |             |          |         |
| NA           | ENSG00000279275 | -0.38703 | 0.65063 | -0.6661     | 0.74733     | -1.2761  | 0.89905 |
|              | -1.0255         | 0.84743  | 0.65063 | 0.819044172 |             |          |         |
| FOXL2NB      | ENSG00000206262 | -0.38713 | 0.65067 | -0.38713    | 0.65067     | -0.38713 |         |
|              | 0.65067         | -0.38713 | 0.65067 | 0.65067     | 0.819073367 |          |         |
| HSP90B3P     | ENSG00000203914 | -0.38724 | 0.65071 | -0.38724    | 0.65071     | -0.38724 |         |
|              | 0.65071         | -0.38724 | 0.65071 | 0.65071     | 0.81910256  |          |         |
| RPL7L1P13    | ENSG00000251464 | -0.38734 | 0.65075 | -1.2744     | 0.89874     | -0.38734 |         |
|              | 0.65075         | -0.38734 | 0.65075 | 0.65075     | 0.819131752 |          |         |
| NA           | ENSG00000264203 | -0.3874  | 0.65077 | -0.3874     | 0.65077     | -0.73345 | 0.76836 |
|              | -0.3874         | 0.65077  | 0.65077 | 0.819135767 |             |          |         |
| NA           | ENSG00000234998 | -0.38755 | 0.65082 | -0.38755    | 0.65082     | -0.38755 | 0.65082 |
|              | -0.38755        | 0.65082  | 0.65082 | 0.819177544 |             |          |         |
| NAALADL2-AS2 | ENSG00000226779 | -0.38761 | 0.65085 | -0.38761    | 0.65085     | -0.50372 |         |
|              | 0.69277         | -0.38761 | 0.65085 | 0.65085     | 0.819194145 |          |         |
| COX10-AS1    | ENSG00000236088 | -0.38773 | 0.65089 | -1.0556     | 0.85441     | -0.63333 |         |
|              | 0.73674         | -0.60698 | 0.72807 | 0.65089     | 0.819202172 |          |         |
| NA           | ENSG00000269421 | -0.38774 | 0.65089 | -0.38774    | 0.65089     | -0.38774 | 0.65089 |

|           |                 |          |         |             |             |          |         |
|-----------|-----------------|----------|---------|-------------|-------------|----------|---------|
|           | -0.38774        | 0.65089  | 0.65089 | 0.819202172 |             |          |         |
| RPL39P40  | ENSG00000226580 | -0.38782 | 0.65093 | -0.38782    | 0.65093     | -0.38782 |         |
|           | 0.65093         | -0.38782 | 0.65093 | 0.65093     | 0.819210199 |          |         |
| RN7SL308P | ENSG00000243951 | -0.48856 | 0.68742 | -0.54043    | 0.70555     | -0.38784 |         |
|           | 0.65093         | -0.38784 | 0.65093 | 0.65093     | 0.819210199 |          |         |
| SPATS2L   | ENSG00000196141 | -0.747   | 0.77247 | -0.67679    | 0.75073     | -0.76444 |         |
|           | 0.7777          | -0.38788 | 0.65095 | 0.65095     | 0.819214212 |          |         |
| NA        | ENSG00000248725 | -0.86557 | 0.80664 | -0.38793    | 0.65097     | -0.97993 | 0.83644 |
|           | -0.97993        | 0.83644  | 0.65097 | 0.819218225 |             |          |         |
| NA        | ENSG00000232732 | -1.8531  | 0.96807 | -1.9314     | 0.97329     | -2.2175  | 0.98671 |
|           | -0.38813        | 0.65104  | 0.65104 | 0.819240654 |             |          |         |
| SAP130    | ENSG00000136715 | -0.38819 | 0.65106 | -1.4202     | 0.92223     | -1.5696  |         |
|           | 0.94175         | -1.6919  | 0.95467 | 0.65106     | 0.819240654 |          |         |
| NA        | ENSG00000261469 | -0.38834 | 0.65112 | -0.38834    | 0.65112     | -0.38834 | 0.65112 |
|           | -0.38834        | 0.65112  | 0.65112 | 0.819240654 |             |          |         |
| NA        | ENSG00000254394 | -0.38838 | 0.65113 | -0.38838    | 0.65113     | -0.38838 | 0.65113 |
|           | -0.38838        | 0.65113  | 0.65113 | 0.819240654 |             |          |         |
| NA        | ENSG00000238117 | -0.84823 | 0.80184 | -0.38843    | 0.65115     | -1.3587  | 0.91288 |
|           | -1.0041         | 0.84232  | 0.65115 | 0.819240654 |             |          |         |
| RPL7P32   | ENSG00000231006 | -0.3885  | 0.65118 | -0.3885     | 0.65118     | -0.3885  |         |
|           | 0.65118         | -0.3885  | 0.65118 | 0.65118     | 0.819240654 |          |         |
| NA        | ENSG00000248847 | -0.38854 | 0.65119 | -0.38854    | 0.65119     | -0.38854 | 0.65119 |
|           | -0.38854        | 0.65119  | 0.65119 | 0.819240654 |             |          |         |
| NA        | ENSG00000233221 | -0.70444 | 0.75942 | -0.88807    | 0.81275     | -0.38856 | 0.6512  |
|           | -0.38856        | 0.6512   | 0.6512  | 0.819240654 |             |          |         |
| NA        | ENSG00000262477 | -0.38855 | 0.6512  | -0.95004    | 0.82895     | -0.38855 | 0.6512  |
|           | -0.38855        | 0.6512   | 0.6512  | 0.819240654 |             |          |         |
| LINC00887 | ENSG00000214145 | -0.94376 | 0.82735 | -1.0126     | 0.84437     | -1.3034  |         |
|           | 0.90378         | -0.38861 | 0.65122 | 0.65122     | 0.819240654 |          |         |
| LYPD3     | ENSG00000124466 | -0.38863 | 0.65123 | -0.38863    | 0.65123     | -0.38863 | 0.65123 |
|           | -0.38863        | 0.65123  | 0.65123 | 0.819240654 |             |          |         |
| TAOK3     | ENSG00000135090 | -0.52423 | 0.69994 | -0.56682    | 0.71458     | -0.38864 | 0.65123 |
|           | -1.2688         | 0.89774  | 0.65123 | 0.819240654 |             |          |         |
| CCT8L2    | ENSG00000198445 | -0.39222 | 0.65255 | -1.1429     | 0.87347     | -0.38865 |         |
|           | 0.65123         | -0.49209 | 0.68867 | 0.65123     | 0.819240654 |          |         |
| NA        | ENSG00000240674 | -0.38865 | 0.65123 | -0.38865    | 0.65123     | -0.38865 | 0.65123 |
|           | -0.6642         | 0.74672  | 0.65123 | 0.819240654 |             |          |         |
| NA        | ENSG00000252989 | -0.38866 | 0.65124 | -0.38866    | 0.65124     | -0.38866 | 0.65124 |
|           | -0.38866        | 0.65124  | 0.65124 | 0.819240654 |             |          |         |
| KRT18P41  | ENSG00000253219 | -0.38885 | 0.65131 | -0.38885    | 0.65131     | -0.38885 |         |
|           | 0.65131         | -0.6553  | 0.74386 | 0.65131     | 0.819298991 |          |         |
| HSP90AB3P | ENSG00000183199 | -0.77872 | 0.78193 | -0.52247    | 0.69933     | -0.38889 |         |
|           | 0.65132         | -0.38889 | 0.65132 | 0.65132     | 0.819298991 |          |         |
| MIR4733   | ENSG00000265444 | -0.38904 | 0.65138 | -0.38904    | 0.65138     | -0.38904 |         |
|           | 0.65138         | -0.38904 | 0.65138 | 0.65138     | 0.819348751 |          |         |
| VN1R64P   | ENSG00000213547 | -0.38913 | 0.65141 | -0.38913    | 0.65141     | -0.38913 |         |
|           | 0.65141         | -0.38913 | 0.65141 | 0.65141     | 0.819348751 |          |         |
| NA        | ENSG00000257350 | -0.38912 | 0.65141 | -0.38912    | 0.65141     | -0.38912 | 0.65141 |
|           | -0.38912        | 0.65141  | 0.65141 | 0.819348751 |             |          |         |
| SYS1      | ENSG00000204070 | -0.84272 | 0.80031 | -0.89083    | 0.81349     | -0.38918 | 0.65143 |
|           | -0.60351        | 0.72691  | 0.65143 | 0.819352758 |             |          |         |
| SLCO4C1   | ENSG00000173930 | -1.0652  | 0.8566  | -1.9118     | 0.97205     | -0.38931 |         |
|           | 0.65147         | -1.9118  | 0.97205 | 0.65147     | 0.819372233 |          |         |
| NA        | ENSG00000261063 | -0.93135 | 0.82416 | -0.81037    | 0.79114     | -0.38935 | 0.65149 |
|           | -0.38935        | 0.65149  | 0.65149 | 0.819372233 |             |          |         |
| KRT8P28   | ENSG00000223810 | -0.38941 | 0.65151 | -0.48666    | 0.68675     | -0.48666 |         |
|           | 0.68675         | -0.48666 | 0.68675 | 0.65151     | 0.819372233 |          |         |
| NA        | ENSG00000254297 | -0.92187 | 0.8217  | -0.92187    | 0.8217      | -0.92187 | 0.8217  |
|           | -0.38946        | 0.65153  | 0.65153 | 0.819372233 |             |          |         |
| OR5D18    | ENSG00000186119 | -1.1066  | 0.86576 | -0.38954    | 0.65156     | -0.38954 |         |
|           | 0.65156         | -0.38954 | 0.65156 | 0.65156     | 0.819372233 |          |         |
| RNU6-263P | ENSG00000200681 | -1.0733  | 0.85844 | -1.0733     | 0.85844     | -0.38955 |         |

|           |                 |          |         |             |             |          |          |  |
|-----------|-----------------|----------|---------|-------------|-------------|----------|----------|--|
|           | 0.65156         | -0.38955 | 0.65156 | 0.65156     | 0.819372233 |          |          |  |
| MIR4753   | ENSG00000263439 | -0.74597 | 0.77216 | 0.77216     | -0.38955    | 0.65157  | -0.74597 |  |
|           | 0.77216         | -0.74597 | 0.77216 | 0.65157     | 0.819372233 |          |          |  |
| RNU6-530P | ENSG00000212482 | -0.3896  | 0.65158 | 0.65158     | -0.3896     | 0.65158  | -0.3896  |  |
|           | 0.65158         | -0.99792 | 0.84084 | 0.65158     | 0.819372233 |          |          |  |
| NA        | ENSG00000222394 | -0.75939 | 0.77619 | -2.1793     | 0.98534     | -1.0928  | 0.86276  |  |
|           | -0.38983        | 0.65167  | 0.65167 | 0.819428856 |             |          |          |  |
| LINC02516 | ENSG00000261083 | -1.6654  | 0.95208 | -1.8455     | 0.96752     | -0.38984 |          |  |
|           | 0.65167         | -0.51949 | 0.69829 | 0.65167     | 0.819428856 |          |          |  |
| TMEM211   | ENSG00000206069 | -0.38996 | 0.65172 | -0.67246    | 0.74935     | -0.38996 |          |  |
|           | 0.65172         | -0.38996 | 0.65172 | 0.65172     | 0.819428856 |          |          |  |
| NA        | ENSG00000269068 | -0.39002 | 0.65174 | -0.39002    | 0.65174     | -0.39002 | 0.65174  |  |
|           | -0.39002        | 0.65174  | 0.65174 | 0.819428856 |             |          |          |  |
| ASTE1     | ENSG00000034533 | -0.42985 | 0.66635 | -0.39012    | 0.65178     | -1.0363  | 0.84997  |  |
|           | -0.76388        | 0.77753  | 0.65178 | 0.819428856 |             |          |          |  |
| NA        | ENSG00000267879 | -0.39013 | 0.65178 | -0.39013    | 0.65178     | -0.39013 | 0.65178  |  |
|           | -0.39013        | 0.65178  | 0.65178 | 0.819428856 |             |          |          |  |
| EIF3J     | ENSG00000104131 | -1.6318  | 0.94864 | -1.6318     | 0.94864     | -1.2673  | 0.89747  |  |
|           | -0.39015        | 0.65179  | 0.65179 | 0.819428856 |             |          |          |  |
| MECR      | ENSG00000116353 | -0.39017 | 0.65179 | -0.59864    | 0.72529     | -1.4595  | 0.92778  |  |
|           | -0.59864        | 0.72529  | 0.65179 | 0.819428856 |             |          |          |  |
| LMX1A-AS1 | ENSG00000238022 | -0.39015 | 0.65179 | -0.39015    | 0.65179     | -0.39015 |          |  |
|           | 0.65179         | -0.39015 | 0.65179 | 0.65179     | 0.819428856 |          |          |  |
| RN7SKP165 | ENSG00000223282 | -1.4255  | 0.923   | -0.95673    | 0.83065     | -0.95673 | 0.83065  |  |
|           | -0.39022        | 0.65181  | 0.65181 | 0.819428856 |             |          |          |  |
| NA        | ENSG00000258414 | -0.39457 | 0.65342 | -0.39022    | 0.65181     | -0.39022 | 0.65181  |  |
|           | -0.39022        | 0.65181  | 0.65181 | 0.819428856 |             |          |          |  |
| IGHV3-42  | ENSG00000254228 | -0.39028 | 0.65183 | -0.39028    | 0.65183     | -0.39028 |          |  |
|           | 0.65183         | -0.39028 | 0.65183 | 0.65183     | 0.819432859 |          |          |  |
| RN7SKP14  | ENSG00000251809 | -0.39035 | 0.65186 | -0.39035    | 0.65186     | -0.39035 |          |  |
|           | 0.65186         | -0.39035 | 0.65186 | 0.65186     | 0.819440864 |          |          |  |
| MTDHP3    | ENSG00000268433 | -1.0308  | 0.84869 | -0.39037    | 0.65187     | -1.3512  |          |  |
|           | 0.91168         | -0.85079 | 0.80256 | 0.65187     | 0.819440864 |          |          |  |
| NA        | ENSG00000238377 | -0.43126 | 0.66686 | -0.43126    | 0.66686     | -0.39047 | 0.6519   |  |
|           | -0.4647         | 0.67893  | 0.6519  | 0.819448869 |             |          |          |  |
| POLR2J3   | ENSG00000168255 | -0.44737 | 0.6727  | -1.071      | 0.85792     | -0.39047 |          |  |
|           | 0.65191         | -2.4333  | 0.99252 | 0.65191     | 0.819448869 |          |          |  |
| NA        | ENSG00000229339 | -1.7531  | 0.96021 | -0.39054    | 0.65193     | -1.3413  | 0.91009  |  |
|           | -1.228          | 0.89028  | 0.65193 | 0.819452871 |             |          |          |  |
| NUDT19P3  | ENSG00000216723 | -1.2865  | 0.90087 | -1.2865     | 0.90087     | -0.39073 | 0.652    |  |
|           | -1.2865         | 0.90087  | 0.652   | 0.819498014 |             |          |          |  |
| SNORA68B  | ENSG00000201388 | -0.39081 | 0.65203 | -0.39081    | 0.65203     | -0.39081 |          |  |
|           | 0.65203         | -0.39081 | 0.65203 | 0.65203     | 0.819498014 |          |          |  |
| NA        | ENSG00000284024 | -0.39084 | 0.65204 | -0.39084    | 0.65204     | -0.39084 | 0.65204  |  |
|           | -0.39084        | 0.65204  | 0.65204 | 0.819498014 |             |          |          |  |
| UHRF2     | ENSG00000147854 | -1.2395  | 0.89243 | -1.2395     | 0.89243     | -0.39086 | 0.65205  |  |
|           | -0.6929         | 0.75581  | 0.65205 | 0.819498014 |             |          |          |  |
| OR2AT2P   | ENSG00000234611 | -0.39087 | 0.65205 | -0.85063    | 0.80251     | -0.39087 |          |  |
|           | 0.65205         | -0.39087 | 0.65205 | 0.65205     | 0.819498014 |          |          |  |
| NA        | ENSG00000237301 | -0.39103 | 0.65211 | -0.74149    | 0.7708      | -0.39103 | 0.65211  |  |
|           | -0.60275        | 0.72666  | 0.65211 | 0.819552285 |             |          |          |  |
| TAPT1-AS1 | ENSG00000263327 | -1.1198  | 0.86859 | -0.44408    | 0.67151     | -0.39116 |          |  |
|           | 0.65216         | -1.0355  | 0.84978 | 0.65216     | 0.819593986 |          |          |  |
| PCNP      | ENSG00000081154 | -0.39123 | 0.65219 | -0.39123    | 0.65219     | -0.39123 | 0.65219  |  |
|           | -1.4252         | 0.92296  | 0.65219 | 0.81961055  |             |          |          |  |
| NA        | ENSG00000258573 | -2.0001  | 0.97726 | -0.39129    | 0.65221     | -2.3609  | 0.99088  |  |
|           | -1.1197         | 0.86857  | 0.65221 | 0.819614547 |             |          |          |  |
| MAP3K7CL  | ENSG00000156265 | -0.52146 | 0.69898 | -0.44564    | 0.67207     | -0.689   |          |  |
|           | 0.75459         | -0.39142 | 0.65226 | 0.65226     | 0.819638474 |          |          |  |
| SPATA20P1 | ENSG00000231123 | -0.39157 | 0.65231 | -0.39157    | 0.65231     | -0.39157 |          |  |
|           | 0.65231         | -0.39157 | 0.65231 | 0.65231     | 0.819638474 |          |          |  |
| NA        | ENSG00000251599 | -0.39167 | 0.65235 | -0.4766     | 0.68318     | -0.4766  | 0.68318  |  |

|           |                 |          |         |             |             |          |         |
|-----------|-----------------|----------|---------|-------------|-------------|----------|---------|
|           | -0.4766         | 0.68318  | 0.65235 | 0.819638474 |             |          |         |
| FAM96AP1  | ENSG00000234048 | -0.39169 | 0.65236 | -0.39169    | 0.65236     | -0.39169 |         |
|           | 0.65236         | -0.39169 | 0.65236 | 0.65236     | 0.819638474 |          |         |
| NA        | ENSG00000267318 | -0.39178 | 0.65239 | -0.39178    | 0.65239     | -0.39178 | 0.65239 |
|           | -0.39178        | 0.65239  | 0.65239 | 0.819638474 |             |          |         |
| ZNF670    | ENSG00000277462 | -0.86292 | 0.80591 | -0.3918     | 0.6524      | -0.86292 |         |
|           | 0.80591         | -0.86292 | 0.80591 | 0.6524      | 0.819638474 |          |         |
| GIPC2     | ENSG00000137960 | -0.74831 | 0.77286 | -0.39191    | 0.65244     | -0.5841  | 0.72042 |
|           | -0.90839        | 0.81816  | 0.65244 | 0.819638474 |             |          |         |
| NA        | ENSG00000270281 | -0.39192 | 0.65244 | -0.39192    | 0.65244     | -0.39192 | 0.65244 |
|           | -0.39192        | 0.65244  | 0.65244 | 0.819638474 |             |          |         |
| RNU6-997P | ENSG00000207456 | -0.39195 | 0.65245 | -0.39195    | 0.65245     | -0.39195 |         |
|           | 0.65245         | -0.39195 | 0.65245 | 0.65245     | 0.819638474 |          |         |
| NA        | ENSG00000273098 | -0.39194 | 0.65245 | -0.39194    | 0.65245     | -0.42276 | 0.66376 |
|           | -0.39194        | 0.65245  | 0.65245 | 0.819638474 |             |          |         |
| LRRC58    | ENSG00000163428 | -1.0679  | 0.85721 | -0.39196    | 0.65246     | -1.6524  |         |
|           | 0.95077         | -0.39196 | 0.65246 | 0.65246     | 0.819638474 |          |         |
| NA        | ENSG00000266953 | -0.39202 | 0.65248 | -0.39202    | 0.65248     | -0.39202 | 0.65248 |
|           | -0.39202        | 0.65248  | 0.65248 | 0.819638474 |             |          |         |
| NA        | ENSG00000280306 | -0.39204 | 0.65249 | -0.39204    | 0.65249     | -0.39204 | 0.65249 |
|           | -0.39204        | 0.65249  | 0.65249 | 0.819638474 |             |          |         |
| SNORD11   | ENSG00000238317 | -0.39217 | 0.65253 | -0.39217    | 0.65253     | -0.39217 |         |
|           | 0.65253         | -0.39217 | 0.65253 | 0.65253     | 0.819638474 |          |         |
| NA        | ENSG00000250791 | -0.39217 | 0.65253 | -0.39217    | 0.65253     | -0.39217 | 0.65253 |
|           | -0.89917        | 0.81572  | 0.65253 | 0.819638474 |             |          |         |
| NA        | ENSG00000261650 | -0.57761 | 0.71824 | -1.6797     | 0.95349     | -1.4778  | 0.93027 |
|           | -0.39219        | 0.65254  | 0.65254 | 0.819638474 |             |          |         |
| PGM2L1    | ENSG00000165434 | -0.39225 | 0.65256 | -0.63877    | 0.73851     | -0.99983 |         |
|           | 0.8413          | -0.59493 | 0.72406 | 0.65256     | 0.819638474 |          |         |
| PI15      | ENSG00000137558 | -0.52141 | 0.69896 | -0.39228    | 0.65258     | -1.1372  | 0.87228 |
|           | -0.94085        | 0.82661  | 0.65258 | 0.819638474 |             |          |         |
| MIR4654   | ENSG00000266144 | -0.39229 | 0.65258 | -0.39229    | 0.65258     | -0.39229 |         |
|           | 0.65258         | -0.39229 | 0.65258 | 0.65258     | 0.819638474 |          |         |
| NA        | ENSG00000226266 | -1.2958  | 0.90248 | -0.39232    | 0.65259     | -0.43153 | 0.66696 |
|           | -0.62698        | 0.73467  | 0.65259 | 0.819638474 |             |          |         |
| NA        | ENSG00000257985 | -0.39234 | 0.6526  | -0.39234    | 0.6526      | -0.68878 | 0.75452 |
|           | -0.79524        | 0.78676  | 0.6526  | 0.819638474 |             |          |         |
| PRKCG     | ENSG00000126583 | -0.39243 | 0.65263 | -0.39243    | 0.65263     | -0.39243 | 0.65263 |
|           | -0.39243        | 0.65263  | 0.65263 | 0.819638474 |             |          |         |
| GPR61     | ENSG00000156097 | -0.39254 | 0.65267 | -0.83979    | 0.79949     | -1.0851  | 0.86106 |
|           | -0.94182        | 0.82686  | 0.65267 | 0.819638474 |             |          |         |
| PCDHA12   | ENSG00000251664 | -0.39257 | 0.65268 | -0.39257    | 0.65268     | -0.39257 |         |
|           | 0.65268         | -0.39257 | 0.65268 | 0.65268     | 0.819638474 |          |         |
| GH2       | ENSG00000136487 | -0.60828 | 0.7285  | -0.3926     | 0.65269     | -1.5105  | 0.93454 |
|           | -0.72507        | 0.7658   | 0.65269 | 0.819638474 |             |          |         |
| GAPDHP61  | ENSG00000248415 | -1.1085  | 0.86618 | -0.3926     | 0.65269     | -1.3583  |         |
|           | 0.91282         | -0.97534 | 0.8353  | 0.65269     | 0.819638474 |          |         |
| NA        | ENSG00000259968 | -0.39258 | 0.65269 | -0.39258    | 0.65269     | -1.2485  | 0.89407 |
|           | -0.64933        | 0.74194  | 0.65269 | 0.819638474 |             |          |         |
| NA        | ENSG00000261426 | -0.75591 | 0.77515 | -0.99759    | 0.84076     | -0.79993 | 0.78812 |
|           | -0.39263        | 0.6527   | 0.6527  | 0.819638474 |             |          |         |
| IGLV3-4   | ENSG00000226420 | -0.39282 | 0.65277 | -0.39282    | 0.65277     | -0.39282 |         |
|           | 0.65277         | -0.39282 | 0.65277 | 0.65277     | 0.819639002 |          |         |
| SBF1P2    | ENSG00000224904 | -0.92638 | 0.82288 | -0.95278    | 0.82965     | -0.393   |         |
|           | 0.65284         | -0.92638 | 0.82288 | 0.65284     | 0.819639002 |          |         |
| NA        | ENSG00000228566 | -0.54772 | 0.70806 | -0.54772    | 0.70806     | -0.39308 | 0.65287 |
|           | -0.54772        | 0.70806  | 0.65287 | 0.819639002 |             |          |         |
| UQCRHP4   | ENSG00000242728 | -0.39312 | 0.65288 | -0.39312    | 0.65288     | -0.62267 |         |
|           | 0.73325         | -0.98958 | 0.83881 | 0.65288     | 0.819639002 |          |         |
| PLEK      | ENSG00000115956 | -0.39315 | 0.6529  | -0.80596    | 0.78987     | -0.39315 | 0.6529  |
|           | -0.79333        | 0.78621  | 0.6529  | 0.819639002 |             |          |         |
| NA        | ENSG00000259308 | -0.39317 | 0.6529  | -0.39317    | 0.6529      | -0.39317 | 0.6529  |

|            |                 |          |         |             |             |          |         |
|------------|-----------------|----------|---------|-------------|-------------|----------|---------|
|            | -0.39317        | 0.6529   | 0.6529  | 0.819639002 |             |          |         |
| SNORD113-5 | ENSG00000272474 | -0.39318 | 0.65291 | -0.39318    | 0.65291     | -0.39318 |         |
|            | 0.65291         | -0.39318 | 0.65291 | 0.65291     | 0.819639002 |          |         |
| NA         | ENSG00000265303 | -0.39326 | 0.65293 | -0.39326    | 0.65293     | -0.39326 | 0.65293 |
|            | -0.39326        | 0.65293  | 0.65293 | 0.819639002 |             |          |         |
| USP10      | ENSG00000103194 | -1.2684  | 0.89768 | -2.0271     | 0.97867     | -0.39327 | 0.65294 |
|            | -0.60161        | 0.72628  | 0.65294 | 0.819639002 |             |          |         |
| NA         | ENSG00000217227 | -0.39328 | 0.65294 | -0.39328    | 0.65294     | -0.39328 | 0.65294 |
|            | -0.39328        | 0.65294  | 0.65294 | 0.819639002 |             |          |         |
| CHEK2P5    | ENSG00000234541 | -0.79317 | 0.78616 | -0.39331    | 0.65295     | -0.79317 |         |
|            | 0.78616         | -0.79317 | 0.78616 | 0.65295     | 0.819639002 |          |         |
| NA         | ENSG00000226957 | -0.39331 | 0.65296 | -0.39331    | 0.65296     | -0.39331 | 0.65296 |
|            | -0.39331        | 0.65296  | 0.65296 | 0.819639002 |             |          |         |
| NA         | ENSG00000259477 | -0.39338 | 0.65298 | -0.39338    | 0.65298     | -0.39338 | 0.65298 |
|            | -0.39338        | 0.65298  | 0.65298 | 0.819639002 |             |          |         |
| SEC24A     | ENSG00000113615 | -0.39341 | 0.65299 | -0.425      | 0.66458     | -0.85199 |         |
|            | 0.80289         | -1.6432  | 0.94983 | 0.65299     | 0.819639002 |          |         |
| EGFL7      | ENSG00000172889 | -0.53234 | 0.70276 | -0.39341    | 0.65299     | -0.53234 | 0.70276 |
|            | -0.53234        | 0.70276  | 0.65299 | 0.819639002 |             |          |         |
| NA         | ENSG00000267273 | -0.756   | 0.77517 | -0.756      | 0.77517     | -0.39344 | 0.653   |
|            | -0.756          | 0.77517  | 0.653   | 0.819639002 |             |          |         |
| NA         | ENSG00000279182 | -0.39347 | 0.65301 | -0.39347    | 0.65301     | -0.39347 | 0.65301 |
|            | -0.39347        | 0.65301  | 0.65301 | 0.819639002 |             |          |         |
| NSRP1      | ENSG00000126653 | -0.39347 | 0.65302 | -0.76943    | 0.77918     | -0.59006 | 0.72242 |
|            | -0.5247         | 0.70011  | 0.65302 | 0.819639002 |             |          |         |
| ACTR3BP5   | ENSG00000227264 | -1.0368  | 0.8501  | -1.0368     | 0.8501      | -1.0368  |         |
|            | 0.8501          | -0.3935  | 0.65302 | 0.65302     | 0.819639002 |          |         |
| NA         | ENSG00000237653 | -0.39366 | 0.65309 | -0.39366    | 0.65309     | -0.39366 | 0.65309 |
|            | -0.39366        | 0.65309  | 0.65309 | 0.819697187 |             |          |         |
| GM2AP2     | ENSG00000239428 | -0.39371 | 0.6531  | -0.39371    | 0.6531      | -0.39371 |         |
|            | 0.6531          | -1.0227  | 0.84678 | 0.6531      | 0.819697187 |          |         |
| NA         | ENSG00000231394 | -1.2032  | 0.88555 | -1.2032     | 0.88555     | -0.3938  | 0.65314 |
|            | -0.81757        | 0.7932   | 0.65314 | 0.819717717 |             |          |         |
| NA         | ENSG00000222570 | -0.39385 | 0.65315 | -0.39385    | 0.65315     | -0.39385 | 0.65315 |
|            | -0.39385        | 0.65315  | 0.65315 | 0.819717717 |             |          |         |
| TYMSOS     | ENSG00000176912 | -0.5555  | 0.71072 | -0.39403    | 0.65322     | -0.5555  |         |
|            | 0.71072         | -0.5555  | 0.71072 | 0.65322     | 0.819784455 |          |         |
| MIR133B    | ENSG00000199080 | -0.39425 | 0.6533  | -0.39425    | 0.6533      | -0.39425 |         |
|            | 0.6533          | -0.39425 | 0.6533  | 0.6533      | 0.819804388 |          |         |
| RN7SKP214  | ENSG00000201078 | -0.39423 | 0.6533  | -0.39423    | 0.6533      | -0.39423 |         |
|            | 0.6533          | -0.39423 | 0.6533  | 0.6533      | 0.819804388 |          |         |
| NA         | ENSG00000201114 | -0.39425 | 0.6533  | -0.39425    | 0.6533      | -0.39425 | 0.6533  |
|            | -0.39425        | 0.6533   | 0.6533  | 0.819804388 |             |          |         |
| CFAP70     | ENSG00000156042 | -0.68743 | 0.75409 | -1.0392     | 0.85065     | -0.39431 |         |
|            | 0.65332         | -0.79753 | 0.78743 | 0.65332     | 0.819804388 |          |         |
| NA         | ENSG00000254412 | -1.9512  | 0.97448 | -0.39431    | 0.65332     | -1.708   | 0.95618 |
|            | -1.3881         | 0.91744  | 0.65332 | 0.819804388 |             |          |         |
| LIN54      | ENSG00000189308 | -0.3944  | 0.65336 | -0.52158    | 0.69902     | -0.64213 | 0.73961 |
|            | -1.3115         | 0.90516  | 0.65336 | 0.819824907 |             |          |         |
| GEMIN4     | ENSG00000179409 | -0.66945 | 0.7484  | -0.39444    | 0.65337     | -0.39444 |         |
|            | 0.65337         | -0.39444 | 0.65337 | 0.65337     | 0.819824907 |          |         |
| OR5B19P    | ENSG00000255431 | -0.45278 | 0.67465 | -0.39457    | 0.65342     | -0.45278 |         |
|            | 0.67465         | -0.45278 | 0.67465 | 0.65342     | 0.819847629 |          |         |
| NA         | ENSG00000254208 | -0.41479 | 0.66085 | -0.3946     | 0.65343     | -0.77369 | 0.78044 |
|            | -0.77369        | 0.78044  | 0.65343 | 0.819847629 |             |          |         |
| ERO1A      | ENSG00000197930 | -0.39466 | 0.65345 | -0.45358    | 0.67494     | -0.86274 | 0.80586 |
|            | -2.3212         | 0.98986  | 0.65345 | 0.819847629 |             |          |         |
| COG8       | ENSG00000213380 | -0.39479 | 0.6535  | -0.5806     | 0.71925     | -0.39479 | 0.6535  |
|            | -0.39479        | 0.6535   | 0.6535  | 0.819847629 |             |          |         |
| NA         | ENSG00000224334 | -0.39478 | 0.6535  | -1.0718     | 0.85809     | -0.39478 | 0.6535  |
|            | -0.39478        | 0.6535   | 0.6535  | 0.819847629 |             |          |         |
| ARL5AP4    | ENSG00000224806 | -0.39478 | 0.6535  | -0.39478    | 0.6535      | -0.39478 |         |

|           |                 |          |         |             |             |          |         |
|-----------|-----------------|----------|---------|-------------|-------------|----------|---------|
|           | 0.6535          | -0.39478 | 0.6535  | 0.6535      | 0.819847629 |          |         |
| NA        | ENSG00000213062 | -0.39481 | 0.65351 | -0.39481    | 0.65351     | -0.39481 | 0.65351 |
|           | -0.39481        | 0.65351  | 0.65351 | 0.819847629 |             |          |         |
| SUGT1P1   | ENSG00000226823 | -0.82761 | 0.79606 | -0.39495    | 0.65356     | -0.92635 |         |
|           | 0.82287         | -0.82422 | 0.79509 | 0.65356     | 0.819847629 |          |         |
| PPFIA2    | ENSG00000139220 | -1.5495  | 0.93937 | -0.39496    | 0.65357     | -1.5133  |         |
|           | 0.93489         | -1.0539  | 0.85404 | 0.65357     | 0.819847629 |          |         |
| NA        | ENSG00000220326 | -0.39498 | 0.65357 | -0.39498    | 0.65357     | -0.39498 | 0.65357 |
|           | -0.39498        | 0.65357  | 0.65357 | 0.819847629 |             |          |         |
| CDC42P2   | ENSG00000234844 | -0.81776 | 0.79325 | -1.3261     | 0.9076      | -0.60935 |         |
|           | 0.72885         | -0.395   | 0.65358 | 0.65358     | 0.819847629 |          |         |
| NA        | ENSG00000277661 | -1.1801  | 0.88102 | -1.4171     | 0.92177     | -1.1189  | 0.86841 |
|           | -0.39502        | 0.65359  | 0.65359 | 0.819847629 |             |          |         |
| SIGLEC30P | ENSG00000224896 | -0.62715 | 0.73472 | -0.72037    | 0.76435     | -1.3308  |         |
|           | 0.90838         | -0.39525 | 0.65367 | 0.65367     | 0.819926873 |          |         |
| MYL12B    | ENSG00000118680 | -1.3762  | 0.91562 | -0.88322    | 0.81144     | -0.39533 |         |
|           | 0.6537          | -1.089   | 0.86193 | 0.6537      | 0.819943398 |          |         |
| MFAP3L    | ENSG00000198948 | -0.92649 | 0.8229  | -0.73569    | 0.76904     | -0.91416 |         |
|           | 0.81968         | -0.3954  | 0.65373 | 0.65373     | 0.819950758 |          |         |
| NA        | ENSG00000253235 | -0.39549 | 0.65376 | -0.39549    | 0.65376     | -0.39549 | 0.65376 |
|           | -0.39549        | 0.65376  | 0.65376 | 0.819950758 |             |          |         |
| LINC02409 | ENSG00000257920 | -0.39551 | 0.65377 | -1.2373     | 0.89201     | -0.39551 |         |
|           | 0.65377         | -0.39551 | 0.65377 | 0.65377     | 0.819950758 |          |         |
| NA        | ENSG00000257184 | -0.39554 | 0.65378 | -0.39554    | 0.65378     | -0.39554 | 0.65378 |
|           | -0.39554        | 0.65378  | 0.65378 | 0.819950758 |             |          |         |
| TPO       | ENSG00000115705 | -1.7042  | 0.95583 | -0.39556    | 0.65379     | -1.3768  | 0.91571 |
|           | -1.5027         | 0.93355  | 0.65379 | 0.819950758 |             |          |         |
| NA        | ENSG00000273664 | -0.39569 | 0.65383 | -0.39569    | 0.65383     | -0.39569 | 0.65383 |
|           | -0.39569        | 0.65383  | 0.65383 | 0.819971259 |             |          |         |
| LINC02008 | ENSG00000239440 | -1.2356  | 0.8917  | -1.1942     | 0.8838      | -1.0391  |         |
|           | 0.85062         | -0.3957  | 0.65384 | 0.65384     | 0.819971259 |          |         |
| NA        | ENSG00000224091 | -0.39588 | 0.6539  | -0.39588    | 0.6539      | -0.39588 | 0.6539  |
|           | -0.39588        | 0.6539   | 0.6539  | 0.8200254   |             |          |         |
| NA        | ENSG00000254824 | -0.39601 | 0.65395 | -0.39601    | 0.65395     | -0.76104 | 0.77668 |
|           | -1.4254         | 0.92297  | 0.65395 | 0.820066999 |             |          |         |
| OR1X5P    | ENSG00000214351 | -1.7583  | 0.96065 | -1.7583     | 0.96065     | -0.62079 |         |
|           | 0.73263         | -0.39611 | 0.65399 | 0.65399     | 0.820096055 |          |         |
| ABCA8     | ENSG00000141338 | -0.49698 | 0.6904  | -0.49698    | 0.6904      | -0.39627 | 0.65405 |
|           | -0.49698        | 0.6904   | 0.65405 | 0.820119907 |             |          |         |
| NA        | ENSG00000269892 | -0.823   | 0.79475 | -0.39628    | 0.65405     | -0.823   | 0.79475 |
|           | -0.823          | 0.79475  | 0.65405 | 0.820119907 |             |          |         |
| TMCO4     | ENSG00000162542 | -0.69394 | 0.75614 | -0.92607    | 0.8228      | -0.84856 | 0.80194 |
|           | -0.39637        | 0.65408  | 0.65408 | 0.820119907 |             |          |         |
| GHR       | ENSG00000112964 | -0.39639 | 0.65409 | -1.5178     | 0.93547     | -1.2148  | 0.88779 |
|           | -1.3289         | 0.90806  | 0.65409 | 0.820119907 |             |          |         |
| PAPOLG    | ENSG00000115421 | -0.39645 | 0.65411 | -1.3883     | 0.91748     | -0.39645 |         |
|           | 0.65411         | -1.6114  | 0.94646 | 0.65411     | 0.820119907 |          |         |
| NA        | ENSG00000256803 | -0.39643 | 0.65411 | -0.39643    | 0.65411     | -0.39643 | 0.65411 |
|           | -0.39643        | 0.65411  | 0.65411 | 0.820119907 |             |          |         |
| NA        | ENSG00000216775 | -0.39649 | 0.65413 | -0.39649    | 0.65413     | -0.90095 | 0.81619 |
|           | -0.60715        | 0.72812  | 0.65413 | 0.820123881 |             |          |         |
| MIER3     | ENSG00000155545 | -0.80587 | 0.78984 | -0.8317     | 0.79721     | -0.80587 | 0.78984 |
|           | -0.39659        | 0.65416  | 0.65416 | 0.820138547 |             |          |         |
| NA        | ENSG00000276375 | -0.81794 | 0.7933  | -0.39665    | 0.65419     | -0.65092 | 0.74245 |
|           | -1.3671         | 0.9142   | 0.65419 | 0.820138547 |             |          |         |
| NA        | ENSG00000237413 | -1.1981  | 0.88457 | -0.39671    | 0.65421     | -0.39671 | 0.65421 |
|           | -0.39671        | 0.65421  | 0.65421 | 0.820138547 |             |          |         |
| NA        | ENSG00000255164 | -0.39672 | 0.65421 | -0.39672    | 0.65421     | -0.39672 | 0.65421 |
|           | -0.39672        | 0.65421  | 0.65421 | 0.820138547 |             |          |         |
| EARS2     | ENSG00000103356 | -0.39685 | 0.65426 | -0.39685    | 0.65426     | -0.39685 | 0.65426 |
|           | -0.47295        | 0.68188  | 0.65426 | 0.820138547 |             |          |         |
| CYB5RL    | ENSG00000215883 | -0.75399 | 0.77457 | -0.4665     | 0.67957     | -0.39688 |         |

|            |                 |          |         |             |             |          |         |
|------------|-----------------|----------|---------|-------------|-------------|----------|---------|
|            | 0.65427         | -0.39688 | 0.65427 | 0.65427     | 0.820138547 |          |         |
| STX2       | ENSG00000111450 | -0.62767 | 0.73489 | -0.39689    | 0.65428     | -1.5333  | 0.9374  |
|            | -1.5388         | 0.93808  | 0.65428 | 0.820138547 |             |          |         |
| TRIM56     | ENSG00000169871 | -1.5712  | 0.94193 | -1.5712     | 0.94193     | -0.39696 |         |
|            | 0.6543          | -0.84369 | 0.80058 | 0.6543      | 0.820138547 |          |         |
| ZSCAN30    | ENSG00000186814 | -0.42558 | 0.66479 | -1.4004     | 0.9193      | -0.42558 |         |
|            | 0.66479         | -0.39694 | 0.6543  | 0.6543      | 0.820138547 |          |         |
| SORD       | ENSG00000140263 | -0.39697 | 0.65431 | -0.88777    | 0.81267     | -1.0157  | 0.84512 |
|            | -1.0078         | 0.84324  | 0.65431 | 0.820138547 |             |          |         |
| RPL7AP6    | ENSG00000242071 | -0.85622 | 0.80406 | -1.5049     | 0.93382     | -0.3973  |         |
|            | 0.65443         | -1.5049  | 0.93382 | 0.65443     | 0.820259297 |          |         |
| NA         | ENSG00000276384 | -0.39734 | 0.65444 | -0.39734    | 0.65444     | -0.39734 | 0.65444 |
|            | -0.39734        | 0.65444  | 0.65444 | 0.820259297 |             |          |         |
| NA         | ENSG00000200115 | -0.3975  | 0.6545  | -0.3975     | 0.6545      | -0.3975  | 0.6545  |
|            | -0.89784        | 0.81537  | 0.6545  | 0.8203134   |             |          |         |
| NA         | ENSG00000279431 | -0.39765 | 0.65456 | -0.39765    | 0.65456     | -0.39765 | 0.65456 |
|            | -0.39765        | 0.65456  | 0.65456 | 0.820328642 |             |          |         |
| COX8C      | ENSG00000187581 | -0.67075 | 0.74881 | -1.0178     | 0.84562     | -0.39778 | 0.6546  |
|            | -0.72565        | 0.76597  | 0.6546  | 0.820328642 |             |          |         |
| RNY4P18    | ENSG00000212409 | -0.39783 | 0.65462 | -0.39783    | 0.65462     | -0.39783 |         |
|            | 0.65462         | -0.39783 | 0.65462 | 0.65462     | 0.820328642 |          |         |
| KCP        | ENSG00000135253 | -0.62455 | 0.73387 | -0.39785    | 0.65463     | -0.62455 | 0.73387 |
|            | -1.1477         | 0.87446  | 0.65463 | 0.820328642 |             |          |         |
| FPR1       | ENSG00000171051 | -0.65251 | 0.74296 | -0.65251    | 0.74296     | -0.65251 | 0.74296 |
|            | -0.39786        | 0.65463  | 0.65463 | 0.820328642 |             |          |         |
| NA         | ENSG00000229732 | -0.39785 | 0.65463 | -0.39785    | 0.65463     | -0.39785 | 0.65463 |
|            | -0.39785        | 0.65463  | 0.65463 | 0.820328642 |             |          |         |
| PPIAP39    | ENSG00000230018 | -0.50346 | 0.69268 | -0.70822    | 0.7606      | -1.2818  |         |
|            | 0.90004         | -0.39784 | 0.65463 | 0.65463     | 0.820328642 |          |         |
| NA         | ENSG00000251218 | -0.39793 | 0.65466 | -0.96934    | 0.83381     | -0.96934 | 0.83381 |
|            | -0.39793        | 0.65466  | 0.65466 | 0.82034514  |             |          |         |
| NA         | ENSG00000250603 | -0.39808 | 0.65471 | -0.64443    | 0.74035     | -0.64443 | 0.74035 |
|            | -0.85077        | 0.80255  | 0.65471 | 0.820386698 |             |          |         |
| MTDHP2     | ENSG00000269615 | -0.39833 | 0.65481 | -0.39833    | 0.65481     | -0.39833 |         |
|            | 0.65481         | -0.39833 | 0.65481 | 0.65481     | 0.820486301 |          |         |
| MYBPH      | ENSG00000133055 | -0.88247 | 0.81124 | -0.88247    | 0.81124     | -1.0433  | 0.85159 |
|            | -0.39839        | 0.65483  | 0.65483 | 0.820486301 |             |          |         |
| MSL3P1     | ENSG00000224287 | -0.39841 | 0.65484 | -0.39841    | 0.65484     | -0.39841 |         |
|            | 0.65484         | -0.39841 | 0.65484 | 0.65484     | 0.820486301 |          |         |
| RNU6-11P   | ENSG00000201104 | -0.39847 | 0.65486 | -1.6025     | 0.94548     | -0.41032 |         |
|            | 0.65922         | -1.6025  | 0.94548 | 0.65486     | 0.820486413 |          |         |
| ANKRD65    | ENSG00000235098 | -0.96338 | 0.83232 | -0.39857    | 0.65489     | -0.39857 |         |
|            | 0.65489         | -0.39857 | 0.65489 | 0.65489     | 0.820486413 |          |         |
| PCGF7P     | ENSG00000268140 | -0.39859 | 0.6549  | -1.2065     | 0.8862      | -0.39859 |         |
|            | 0.6549          | -0.39859 | 0.6549  | 0.6549      | 0.820486413 |          |         |
| RNU6-138P  | ENSG00000251761 | -0.39861 | 0.65491 | -0.39861    | 0.65491     | -0.39861 |         |
|            | 0.65491         | -0.39861 | 0.65491 | 0.65491     | 0.820486413 |          |         |
| NMUR1      | ENSG00000171596 | -0.40303 | 0.65654 | -1.2921     | 0.90185     | -0.39868 | 0.65493 |
|            | -1.4774         | 0.93021  | 0.65493 | 0.820486413 |             |          |         |
| ZFHx4-AS1  | ENSG00000253661 | -0.39874 | 0.65496 | -0.67938    | 0.75155     | -0.63656 |         |
|            | 0.7378          | -1.0499  | 0.85311 | 0.65496     | 0.820486413 |          |         |
| IDI1P3     | ENSG00000231071 | -0.3988  | 0.65498 | -0.3988     | 0.65498     | -0.3988  |         |
|            | 0.65498         | -0.3988  | 0.65498 | 0.65498     | 0.820486413 |          |         |
| MRPS17P3   | ENSG00000239226 | -0.39893 | 0.65503 | -0.39893    | 0.65503     | -0.39893 |         |
|            | 0.65503         | -0.39893 | 0.65503 | 0.65503     | 0.820486413 |          |         |
| NA         | ENSG00000201816 | -0.39895 | 0.65504 | -0.39895    | 0.65504     | -0.39895 | 0.65504 |
|            | -0.49955        | 0.6913   | 0.65504 | 0.820486413 |             |          |         |
| RNU6-1254P | ENSG00000212568 | -0.39896 | 0.65504 | -0.72101    | 0.76455     | -0.39896 |         |
|            | 0.65504         | -0.39896 | 0.65504 | 0.65504     | 0.820486413 |          |         |
| MZT2B      | ENSG00000152082 | -0.39899 | 0.65505 | -0.39899    | 0.65505     | -0.39899 | 0.65505 |
|            | -0.39899        | 0.65505  | 0.65505 | 0.820486413 |             |          |         |
| NA         | ENSG00000237026 | -0.39902 | 0.65506 | -0.39902    | 0.65506     | -0.39902 | 0.65506 |

|             |                 |          |          |             |             |             |         |  |
|-------------|-----------------|----------|----------|-------------|-------------|-------------|---------|--|
|             |                 | -0.39902 | 0.65506  | 0.65506     | 0.820486413 |             |         |  |
| SNX10       | ENSG00000086300 | -0.3991  | 0.65509  | -0.96881    | 0.83368     | -0.58424    | 0.72047 |  |
|             |                 | -0.8197  | 0.79381  | 0.65509     | 0.820486413 |             |         |  |
| ATMIN       | ENSG00000166454 | -0.39912 | 0.6551   | -0.39912    | 0.6551      | -0.56574    | 0.71421 |  |
|             |                 | -0.45322 | 0.6748   | 0.6551      | 0.820486413 |             |         |  |
| NA          | ENSG00000215493 | -0.39921 | 0.65513  | -0.39921    | 0.65513     | -0.39921    | 0.65513 |  |
|             |                 | -0.39921 | 0.65513  | 0.820486413 |             |             |         |  |
| RNA5SP159   | ENSG00000252970 | -0.39923 | 0.65514  | -0.39923    | 0.65514     | -0.39923    |         |  |
|             |                 | 0.65514  | -0.39923 | 0.65514     | 0.65514     | 0.820486413 |         |  |
| NA          | ENSG00000277651 | -0.39924 | 0.65514  | -0.39924    | 0.65514     | -0.39924    | 0.65514 |  |
|             |                 | -0.39924 | 0.65514  | 0.65514     | 0.820486413 |             |         |  |
| NA          | ENSG00000275417 | -0.49602 | 0.69006  | -0.49602    | 0.69006     | -0.39925    | 0.65515 |  |
|             |                 | -0.49602 | 0.69006  | 0.65515     | 0.820486413 |             |         |  |
| NA          | ENSG00000279853 | -1.2409  | 0.89268  | -1.2409     | 0.89268     | -1.2409     | 0.89268 |  |
|             |                 | -0.3993  | 0.65516  | 0.65516     | 0.820486413 |             |         |  |
| SNORD114-23 | ENSG00000200406 | -0.3994  | 0.6552   | -0.3994     | 0.6552      | -0.3994     |         |  |
|             |                 | 0.6552   | -0.3994  | 0.6552      | 0.6552      | 0.820515419 |         |  |
| LRSAM1      | ENSG00000148356 | -0.39949 | 0.65523  | -1.0483     | 0.85275     | -0.69908    |         |  |
|             |                 | 0.75775  | -0.76501 | 0.77787     | 0.65523     | 0.820531902 |         |  |
| DNMBP-AS1   | ENSG00000227695 | -0.69352 | 0.75601  | -0.3996     | 0.65527     | -0.69352    |         |  |
|             |                 | 0.75601  | -0.69352 | 0.75601     | 0.65527     | 0.820535216 |         |  |
| TMEM114     | ENSG00000232258 | -1.3372  | 0.90943  | -0.39959    | 0.65527     | -1.169      |         |  |
|             |                 | 0.87879  | -0.67356 | 0.7497      | 0.65527     | 0.820535216 |         |  |
| KIAA0087    | ENSG00000122548 | -0.39963 | 0.65529  | -0.39963    | 0.65529     | -0.39963    |         |  |
|             |                 | 0.65529  | -0.39963 | 0.65529     | 0.65529     | 0.820535216 |         |  |
| NA          | ENSG00000254409 | -1.5166  | 0.93531  | -0.62281    | 0.7333      | -0.39967    | 0.6553  |  |
|             |                 | -1.0609  | 0.85563  | 0.6553      | 0.820535216 |             |         |  |
| RPS2P16     | ENSG00000230799 | -0.39986 | 0.65537  | -0.39986    | 0.65537     | -0.39986    |         |  |
|             |                 | 0.65537  | -0.39986 | 0.65537     | 0.65537     | 0.820546446 |         |  |
| NA          | ENSG00000234848 | -1.3232  | 0.90712  | -1.1078     | 0.86602     | -1.0688     | 0.85743 |  |
|             |                 | -0.39986 | 0.65537  | 0.65537     | 0.820546446 |             |         |  |
| NA          | ENSG00000232985 | -1.0632  | 0.85614  | -1.3632     | 0.91359     | -0.3999     | 0.65538 |  |
|             |                 | -1.2041  | 0.88573  | 0.65538     | 0.820546446 |             |         |  |
| PPP4R1-AS1  | ENSG00000263627 | -0.39991 | 0.65539  | -0.39991    | 0.65539     | -0.39991    |         |  |
|             |                 | 0.65539  | -0.39991 | 0.65539     | 0.65539     | 0.820546446 |         |  |
| NA          | ENSG00000273076 | -0.39995 | 0.6554   | -0.39995    | 0.6554      | -0.39995    | 0.6554  |  |
|             |                 | -0.39995 | 0.6554   | 0.6554      | 0.820546446 |             |         |  |
| NA          | ENSG00000280231 | -0.39997 | 0.65541  | -0.39997    | 0.65541     | -0.39997    | 0.65541 |  |
|             |                 | -0.39997 | 0.65541  | 0.65541     | 0.820546446 |             |         |  |
| NA          | ENSG00000259060 | -0.40004 | 0.65544  | -0.40004    | 0.65544     | -0.40004    | 0.65544 |  |
|             |                 | -0.40004 | 0.65544  | 0.65544     | 0.820562923 |             |         |  |
| VTRNA1-1    | ENSG00000199990 | -0.40031 | 0.65554  | -0.40031    | 0.65554     | -0.40031    |         |  |
|             |                 | 0.65554  | -0.43099 | 0.66676     | 0.65554     | 0.820658467 |         |  |
| DAZAP2      | ENSG00000183283 | -2.0719  | 0.98086  | -1.3895     | 0.91766     | -0.40036    |         |  |
|             |                 | 0.65555  | -0.40036 | 0.65555     | 0.65555     | 0.820658467 |         |  |
| NA          | ENSG00000280194 | -0.40042 | 0.65558  | -0.40042    | 0.65558     | -0.40042    | 0.65558 |  |
|             |                 | -0.40042 | 0.65558  | 0.65558     | 0.820666376 |             |         |  |
| HSPD1P10    | ENSG00000216990 | -1.0431  | 0.85156  | -1.5026     | 0.93353     | -0.40046    |         |  |
|             |                 | 0.65559  | -1.0942  | 0.86306     | 0.65559     | 0.820666376 |         |  |
| RPL3P5      | ENSG00000231546 | -0.40051 | 0.65561  | -0.40051    | 0.65561     | -0.43643    |         |  |
|             |                 | 0.66874  | -1.2451  | 0.89345     | 0.65561     | 0.820670331 |         |  |
| RCAN3       | ENSG00000117602 | -0.40066 | 0.65567  | -1.6827     | 0.95378     | -2.0982     | 0.98206 |  |
|             |                 | -2.2074  | 0.98636  | 0.65567     | 0.820676927 |             |         |  |
| NA          | ENSG00000263814 | -0.4007  | 0.65568  | -0.4007     | 0.65568     | -0.4007     | 0.65568 |  |
|             |                 | -0.4007  | 0.65568  | 0.65568     | 0.820676927 |             |         |  |
| OR2L3       | ENSG00000198128 | -0.40076 | 0.6557   | -0.50747    | 0.69409     | -0.50855    | 0.69447 |  |
|             |                 | -0.50747 | 0.69409  | 0.6557      | 0.820676927 |             |         |  |
| CBR4        | ENSG00000145439 | -0.75786 | 0.77573  | -0.65981    | 0.74531     | -0.40079    | 0.65571 |  |
|             |                 | -0.4885  | 0.6874   | 0.65571     | 0.820676927 |             |         |  |
| NA          | ENSG00000282936 | -0.40079 | 0.65571  | -0.40079    | 0.65571     | -0.40079    | 0.65571 |  |
|             |                 | -0.40079 | 0.65571  | 0.65571     | 0.820676927 |             |         |  |
| LINC00434   | ENSG00000227336 | -0.40083 | 0.65573  | -0.40083    | 0.65573     | -0.40083    |         |  |



|            |                 |             |         |             |             |          |         |
|------------|-----------------|-------------|---------|-------------|-------------|----------|---------|
|            | 0.65573         | -0.40083    | 0.65573 | 0.65573     | 0.820676927 |          |         |
| GLT8D2     | ENSG00000120820 | -1.4519     | 0.92673 | -0.76187    | 0.77693     | -1.424   |         |
|            | 0.92278         | -0.40087    | 0.65574 | 0.65574     | 0.820676927 |          |         |
| ODCP       | ENSG00000244556 | -0.40089    | 0.65575 | -0.40089    | 0.65575     | -0.40089 | 0.65575 |
|            | -0.40089        | 0.65575     | 0.65575 | 0.820676927 |             |          |         |
| BHMG1      | ENSG00000237452 | -0.40097    | 0.65578 | -1.0299     | 0.84847     | -1.2103  | 0.88693 |
|            | -1.2103         | 0.88693     | 0.65578 | 0.820693395 |             |          |         |
| RNU6-131P  | ENSG00000212446 | -0.40107    | 0.65581 | -0.40107    | 0.65581     | -0.40107 |         |
|            | 0.65581         | -0.40107    | 0.65581 | 0.65581     | 0.820709862 |          |         |
| LINC00237  | ENSG00000225127 | -0.40118    | 0.65586 | -0.44878    | 0.67321     | -0.44642 |         |
|            | 0.67235         | -0.40118    | 0.65586 | 0.65586     | 0.820751356 |          |         |
| OR3D1P     | ENSG00000230411 | -1.5701     | 0.9418  | -0.40136    | 0.65592     | -0.40805 |         |
|            | 0.65838         | -0.40805    | 0.65838 | 0.65592     | 0.820757934 |          |         |
| RNU6-1203P | ENSG00000222635 | -0.885      | 0.81192 | -0.40143    | 0.65595     | -1.9288  |         |
|            | 0.97312         | -1.9288     | 0.97312 | 0.65595     | 0.820757934 |          |         |
| STEAP3     | ENSG00000115107 | -1.7557     | 0.96043 | -1.5728     | 0.94212     | -0.40154 |         |
|            | 0.65599         | -1.0448     | 0.85194 | 0.65599     | 0.820757934 |          |         |
| NA         | ENSG00000197099 | -0.82147    | 0.79431 | -0.70688    | 0.76018     | -0.40154 | 0.65599 |
|            | -0.51806        | 0.69779     | 0.65599 | 0.820757934 |             |          |         |
| NA         | ENSG00000230470 | -0.40155    | 0.65599 | -0.40155    | 0.65599     | -0.40155 | 0.65599 |
|            | -0.40155        | 0.65599     | 0.65599 | 0.820757934 |             |          |         |
| RPL17P50   | ENSG00000213700 | -0.65466    | 0.74366 | -0.40158    | 0.656       | -0.65466 | 0.74366 |
|            | -0.65466        | 0.74366     | 0.656   | 0.820757934 |             |          |         |
| MIR4795    | ENSG00000264119 | -0.70174    | 0.75858 | -0.40156    | 0.656       | -0.40156 | 0.656   |
|            | -0.40156        | 0.656       | 0.656   | 0.820757934 |             |          |         |
| NA         | ENSG00000279977 | -0.40156    | 0.656   | -0.40156    | 0.656       | -0.40156 | 0.656   |
|            | 0.656           | 0.820757934 |         |             |             |          |         |
| NUPR2      | ENSG00000185290 | -0.42758    | 0.66552 | -0.67977    | 0.75168     | -0.42758 | 0.66552 |
|            | -0.40163        | 0.65602     | 0.65602 | 0.820761883 |             |          |         |
| RNU6-1296P | ENSG00000206606 | -0.40176    | 0.65607 | -0.53359    | 0.70319     | -0.40176 |         |
|            | 0.65607         | -0.40176    | 0.65607 | 0.65607     | 0.820803366 |          |         |
| CCDC136    | ENSG00000128596 | -0.40183    | 0.6561  | -0.40183    | 0.6561      | -0.40183 |         |
|            | 0.6561          | -0.40183    | 0.6561  | 0.6561      | 0.820819825 |          |         |
| LINC00954  | ENSG00000228784 | -0.40199    | 0.65615 | -0.40199    | 0.65615     | -1.2848  |         |
|            | 0.90057         | -0.85936    | 0.80493 | 0.65615     | 0.820858626 |          |         |
| EGFLAM-AS1 | ENSG00000249491 | -0.4021     | 0.65619 | -0.4021     | 0.65619     | -0.4021  |         |
|            | 0.65619         | -0.4021     | 0.65619 | 0.65619     | 0.820858626 |          |         |
| RSRP1      | ENSG00000117616 | -0.4022     | 0.65623 | -1.0958     | 0.86342     | -1.8449  | 0.96748 |
|            | -1.8449         | 0.96748     | 0.65623 | 0.820858626 |             |          |         |
| SNORA9B    | ENSG00000206897 | -0.40219    | 0.65623 | -0.40219    | 0.65623     | -0.40219 |         |
|            | 0.65623         | -0.40219    | 0.65623 | 0.65623     | 0.820858626 |          |         |
| MS4A10     | ENSG00000172689 | -0.89326    | 0.81414 | -0.63028    | 0.73574     | -0.40226 |         |
|            | 0.65625         | -0.84911    | 0.80209 | 0.65625     | 0.820858626 |          |         |
| NA         | ENSG00000203496 | -0.40233    | 0.65628 | -0.72852    | 0.76685     | -0.40233 | 0.65628 |
|            | -0.97094        | 0.83421     | 0.65628 | 0.820858626 |             |          |         |
| NA         | ENSG00000242145 | -0.40232    | 0.65628 | -0.40232    | 0.65628     | -0.40232 | 0.65628 |
|            | -0.40232        | 0.65628     | 0.65628 | 0.820858626 |             |          |         |
| NA         | ENSG00000253237 | -0.40233    | 0.65628 | -0.40233    | 0.65628     | -0.40233 | 0.65628 |
|            | -0.40233        | 0.65628     | 0.65628 | 0.820858626 |             |          |         |
| STATH      | ENSG00000126549 | -0.4024     | 0.65631 | -0.92482    | 0.82247     | -0.81494 | 0.79245 |
|            | -0.81494        | 0.79245     | 0.65631 | 0.820858626 |             |          |         |
| DSCAS      | ENSG00000265888 | -0.40242    | 0.65631 | -0.40242    | 0.65631     | -0.40242 | 0.65631 |
|            | -0.40242        | 0.65631     | 0.65631 | 0.820858626 |             |          |         |
| RNASEH1P2  | ENSG00000231458 | -0.40251    | 0.65634 | -0.79628    | 0.78707     | -0.96432 |         |
|            | 0.83256         | -1.3138     | 0.90554 | 0.65634     | 0.820858626 |          |         |
| NA         | ENSG00000235518 | -0.4025     | 0.65634 | -0.4025     | 0.65634     | -0.4025  | 0.65634 |
|            | -0.4025         | 0.65634     | 0.65634 | 0.820858626 |             |          |         |
| NA         | ENSG00000229750 | -0.40251    | 0.65635 | -0.40251    | 0.65635     | -0.40251 | 0.65635 |
|            | -0.40251        | 0.65635     | 0.65635 | 0.820858626 |             |          |         |
| CDK7       | ENSG00000134058 | -0.73923    | 0.77012 | -0.45317    | 0.67479     | -0.80894 | 0.79072 |
|            | -0.40267        | 0.65641     | 0.65641 | 0.820904034 |             |          |         |
| SLC28A3    | ENSG00000197506 | -0.5823     | 0.71982 | -0.4027     | 0.65642     | -0.68195 |         |

|            |                 |          |         |             |             |          |         |
|------------|-----------------|----------|---------|-------------|-------------|----------|---------|
|            | 0.75236         | -0.5921  | 0.72311 | 0.65642     | 0.820904034 |          |         |
| C2orf92    | ENSG00000228486 | -0.40287 | 0.65648 | -0.96684    | 0.83319     | -0.55686 |         |
|            | 0.71119         | -1.0095  | 0.84362 | 0.65648     | 0.82092692  |          |         |
| NA         | ENSG00000271508 | -0.40304 | 0.65654 | -0.40304    | 0.65654     | -0.40304 | 0.65654 |
|            | -0.40304        | 0.65654  | 0.65654 | 0.82092692  |             |          |         |
| RN7SKP224  | ENSG00000201010 | -1.2709  | 0.89811 | -0.40308    | 0.65655     | -1.5353  |         |
|            | 0.93765         | -1.5353  | 0.93765 | 0.65655     | 0.82092692  |          |         |
| BCL2L15    | ENSG00000188761 | -0.40316 | 0.65658 | -1.5914     | 0.94424     | -1.5914  |         |
|            | 0.94424         | -1.5914  | 0.94424 | 0.65658     | 0.82092692  |          |         |
| ASAH2      | ENSG00000188611 | -0.8923  | 0.81388 | -0.79197    | 0.78581     | -0.40318 | 0.65659 |
|            | -0.83339        | 0.79769  | 0.65659 | 0.82092692  |             |          |         |
| RAB12      | ENSG00000206418 | -0.40322 | 0.65661 | -0.65031    | 0.74225     | -0.45887 | 0.67684 |
|            | -1.4041         | 0.91985  | 0.65661 | 0.82092692  |             |          |         |
| RPS26P20   | ENSG00000224553 | -0.40329 | 0.65663 | -0.814      | 0.79218     | -0.92534 |         |
|            | 0.8226          | -1.2915  | 0.90174 | 0.65663     | 0.82092692  |          |         |
| OR9A3P     | ENSG00000240031 | -0.83386 | 0.79782 | -0.40331    | 0.65664     | -0.40331 |         |
|            | 0.65664         | -0.40331 | 0.65664 | 0.65664     | 0.82092692  |          |         |
| NA         | ENSG00000242545 | -0.40334 | 0.65665 | -0.40334    | 0.65665     | -0.40334 | 0.65665 |
|            | -0.40334        | 0.65665  | 0.65665 | 0.82092692  |             |          |         |
| NA         | ENSG00000251460 | -0.40333 | 0.65665 | -0.40333    | 0.65665     | -0.40333 | 0.65665 |
|            | -0.40333        | 0.65665  | 0.65665 | 0.82092692  |             |          |         |
| NA         | ENSG00000259876 | -0.40336 | 0.65666 | -0.40336    | 0.65666     | -0.40336 | 0.65666 |
|            | -0.40336        | 0.65666  | 0.65666 | 0.82092692  |             |          |         |
| NA         | ENSG00000238409 | -0.40337 | 0.65666 | -0.40337    | 0.65666     | -0.40337 | 0.65666 |
|            | -0.40337        | 0.65666  | 0.65666 | 0.82092692  |             |          |         |
| NA         | ENSG00000273237 | -0.40338 | 0.65667 | -0.40338    | 0.65667     | -0.40338 | 0.65667 |
|            | -0.40338        | 0.65667  | 0.65667 | 0.82092692  |             |          |         |
| LINC02845  | ENSG00000253644 | -0.93948 | 0.82626 | -0.40362    | 0.65675     | -0.63958 |         |
|            | 0.73878         | -1.7735  | 0.96192 | 0.65675     | 0.82092692  |          |         |
| NA         | ENSG00000256400 | -0.40364 | 0.65676 | -0.40364    | 0.65676     | -0.71209 | 0.76179 |
|            | -0.78441        | 0.7836   | 0.65676 | 0.82092692  |             |          |         |
| ZNF624     | ENSG00000197566 | -1.4546  | 0.92711 | -1.5587     | 0.94047     | -1.5529  |         |
|            | 0.93978         | -0.40368 | 0.65677 | 0.65677     | 0.82092692  |          |         |
| NA         | ENSG00000283479 | -0.40369 | 0.65678 | -0.40369    | 0.65678     | -0.40369 | 0.65678 |
|            | -0.40369        | 0.65678  | 0.65678 | 0.82092692  |             |          |         |
| JOSD1      | ENSG00000100221 | -0.40372 | 0.65679 | -0.40372    | 0.65679     | -0.40372 | 0.65679 |
|            | -0.40372        | 0.65679  | 0.65679 | 0.82092692  |             |          |         |
| ITGB6      | ENSG00000115221 | -1.5273  | 0.93666 | -1.0745     | 0.8587      | -0.40371 | 0.65679 |
|            | -1.1938         | 0.88372  | 0.65679 | 0.82092692  |             |          |         |
| SFXN3      | ENSG00000107819 | -0.47908 | 0.68406 | -0.40376    | 0.65681     | -1.419   | 0.92204 |
|            | -0.82778        | 0.7961   | 0.65681 | 0.82092692  |             |          |         |
| DPCD       | ENSG00000166171 | -1.4941  | 0.93242 | -0.40377    | 0.65681     | -1.7305  | 0.95823 |
|            | -1.2239         | 0.88951  | 0.65681 | 0.82092692  |             |          |         |
| UBTFL7     | ENSG00000229361 | -0.40385 | 0.65684 | -0.40385    | 0.65684     | -0.40385 |         |
|            | 0.65684         | -1.3758  | 0.91556 | 0.65684     | 0.82092692  |          |         |
| CCSER2     | ENSG00000107771 | -0.77774 | 0.78164 | -0.40393    | 0.65687     | -0.78124 |         |
|            | 0.78267         | -0.77629 | 0.78121 | 0.65687     | 0.82092692  |          |         |
| ZBTB12     | ENSG00000204366 | -0.40395 | 0.65688 | -0.40395    | 0.65688     | -0.40395 |         |
|            | 0.65688         | -0.40395 | 0.65688 | 0.65688     | 0.82092692  |          |         |
| MZT2A      | ENSG00000173272 | -0.404   | 0.65689 | -0.404      | 0.65689     | -0.404   | 0.65689 |
|            | -0.404          | 0.65689  | 0.65689 | 0.82092692  |             |          |         |
| PLTP       | ENSG00000100979 | -0.72975 | 0.76723 | -0.40405    | 0.65691     | -0.40405 | 0.65691 |
|            | -0.40405        | 0.65691  | 0.65691 | 0.82092692  |             |          |         |
| ST13P2     | ENSG00000235616 | -0.40404 | 0.65691 | -0.5329     | 0.70295     | -0.40404 |         |
|            | 0.65691         | -0.40404 | 0.65691 | 0.65691     | 0.82092692  |          |         |
| IGLCOR22-1 | ENSG00000254127 | -0.40405 | 0.65691 | -0.40405    | 0.65691     | -0.40405 |         |
|            | 0.65691         | -0.40405 | 0.65691 | 0.65691     | 0.82092692  |          |         |
| ATP6V0A2   | ENSG00000185344 | -0.97283 | 0.83468 | -0.89618    | 0.81492     | -0.53127 |         |
|            | 0.70238         | -0.40412 | 0.65694 | 0.65694     | 0.820933452 |          |         |
| ECT2       | ENSG00000114346 | -1.1674  | 0.87847 | -0.48284    | 0.68539     | -0.40424 | 0.65698 |
|            | -0.87836        | 0.81013  | 0.65698 | 0.820933452 |             |          |         |
| INTS9-AS1  | ENSG00000254034 | -0.40425 | 0.65698 | -0.40425    | 0.65698     | -0.40425 |         |

|           |                 |          |         |             |             |          |         |
|-----------|-----------------|----------|---------|-------------|-------------|----------|---------|
|           | 0.65698         | -0.40425 | 0.65698 | 0.65698     | 0.820933452 |          |         |
| SYT13     | ENSG00000019505 | -1.7211  | 0.95739 | -1.7211     | 0.95739     | -0.4043  | 0.65701 |
|           | -0.81029        | 0.79111  | 0.65701 | 0.820933452 |             |          |         |
| RASGEF1B  | ENSG00000138670 | -0.40432 | 0.65701 | -0.52347    | 0.69967     | -0.46775 |         |
|           | 0.68002         | -0.71374 | 0.76231 | 0.65701     | 0.820933452 |          |         |
| C5orf67   | ENSG00000225940 | -0.40439 | 0.65704 | -0.98512    | 0.83772     | -0.70218 |         |
|           | 0.75872         | -1.2502  | 0.89438 | 0.65704     | 0.820933452 |          |         |
| NTAN1P3   | ENSG00000256355 | -1.063   | 0.85611 | -0.48332    | 0.68557     | -0.99398 |         |
|           | 0.83988         | -0.40439 | 0.65704 | 0.65704     | 0.820933452 |          |         |
| CGGBP1    | ENSG00000163320 | -0.55649 | 0.71106 | -0.55649    | 0.71106     | -0.65519 |         |
|           | 0.74383         | -0.40443 | 0.65705 | 0.65705     | 0.820933452 |          |         |
| SLC4A1AP  | ENSG00000163798 | -2.2509  | 0.9878  | -0.40449    | 0.65707     | -0.96764 |         |
|           | 0.83339         | -2.2161  | 0.98666 | 0.65707     | 0.820937392 |          |         |
| NA        | ENSG00000224407 | -0.40464 | 0.65713 | -0.40464    | 0.65713     | -0.40464 | 0.65713 |
|           | -0.40464        | 0.65713  | 0.65713 | 0.820958998 |             |          |         |
| DOK1      | ENSG00000115325 | -0.40467 | 0.65714 | -0.40467    | 0.65714     | -0.40467 | 0.65714 |
|           | -0.40467        | 0.65714  | 0.65714 | 0.820958998 |             |          |         |
| DPYSL5    | ENSG00000157851 | -0.91848 | 0.82082 | -0.75226    | 0.77405     | -0.59783 |         |
|           | 0.72502         | -0.40479 | 0.65718 | 0.65718     | 0.820958998 |          |         |
| UBE3D     | ENSG00000118420 | -0.83461 | 0.79803 | -0.8394     | 0.79938     | -1.1678  | 0.87856 |
|           | -0.40486        | 0.65721  | 0.65721 | 0.820958998 |             |          |         |
| NA        | ENSG00000272541 | -0.66503 | 0.74698 | -0.74819    | 0.77283     | -0.80339 | 0.78912 |
|           | -0.40486        | 0.65721  | 0.65721 | 0.820958998 |             |          |         |
| NA        | ENSG00000257870 | -2.2278  | 0.98705 | -2.2278     | 0.98705     | -2.6102  | 0.99548 |
|           | -0.40488        | 0.65722  | 0.65722 | 0.820958998 |             |          |         |
| CPE       | ENSG00000109472 | -0.7785  | 0.78186 | -0.40495    | 0.65724     | -0.47514 | 0.68266 |
|           | -1.0581         | 0.85499  | 0.65724 | 0.820958998 |             |          |         |
| NA        | ENSG00000263105 | -1.079   | 0.85971 | -1.8447     | 0.96746     | -0.40494 | 0.65724 |
|           | -0.40494        | 0.65724  | 0.65724 | 0.820958998 |             |          |         |
| NA        | ENSG00000249209 | -0.40498 | 0.65726 | -0.40498    | 0.65726     | -0.40498 | 0.65726 |
|           | -0.40498        | 0.65726  | 0.65726 | 0.820958998 |             |          |         |
| H2BC15    | ENSG00000233822 | -1.9961  | 0.97704 | -0.40501    | 0.65727     | -1.9961  |         |
|           | 0.97704         | -1.9961  | 0.97704 | 0.65727     | 0.820958998 |          |         |
| NA        | ENSG00000243355 | -0.40508 | 0.65729 | -0.40508    | 0.65729     | -0.40508 | 0.65729 |
|           | -0.40508        | 0.65729  | 0.65729 | 0.820958998 |             |          |         |
| UBE2HP1   | ENSG00000253677 | -1.3085  | 0.90465 | -0.40512    | 0.6573      | -1.1119  |         |
|           | 0.86692         | -0.67044 | 0.74871 | 0.6573      | 0.820958998 |          |         |
| CELF4     | ENSG00000101489 | -0.40517 | 0.65732 | -1.3761     | 0.91561     | -0.91544 | 0.82002 |
|           | -1.2012         | 0.88516  | 0.65732 | 0.820958998 |             |          |         |
| CPD       | ENSG00000108582 | -0.46583 | 0.67933 | -1.8252     | 0.96602     | -0.40522 | 0.65734 |
|           | -0.87064        | 0.80802  | 0.65734 | 0.820958998 |             |          |         |
| HAUS6P3   | ENSG00000235454 | -0.40522 | 0.65734 | -0.40522    | 0.65734     | -0.40522 |         |
|           | 0.65734         | -0.40522 | 0.65734 | 0.65734     | 0.820958998 |          |         |
| RNU6-128P | ENSG00000206703 | -0.53662 | 0.70423 | -0.40552    | 0.65745     | -0.53662 |         |
|           | 0.70423         | -1.7343  | 0.95857 | 0.65745     | 0.821075335 |          |         |
| ZNF969P   | ENSG00000251046 | -0.89227 | 0.81388 | -3.2257     | 0.99937     | -1.7257  |         |
|           | 0.9578          | -0.40563 | 0.65749 | 0.65749     | 0.821104247 |          |         |
| NA        | ENSG00000248358 | -0.40567 | 0.65751 | -0.40567    | 0.65751     | -0.40567 | 0.65751 |
|           | -0.40567        | 0.65751  | 0.65751 | 0.82110818  |             |          |         |
| KRT8P49   | ENSG00000271602 | -0.40576 | 0.65754 | -0.40576    | 0.65754     | -0.40576 |         |
|           | 0.65754         | -0.40576 | 0.65754 | 0.65754     | 0.821116047 |          |         |
| ATXN8OS   | ENSG00000230223 | -0.40578 | 0.65755 | -0.9198     | 0.82116     | -1.0222  |         |
|           | 0.84666         | -0.40578 | 0.65755 | 0.65755     | 0.821116047 |          |         |
| NA        | ENSG00000273006 | -0.65901 | 0.74506 | -0.40588    | 0.65758     | -0.65901 | 0.74506 |
|           | -0.65901        | 0.74506  | 0.65758 | 0.821121848 |             |          |         |
| RNU6-863P | ENSG00000251798 | -0.6398  | 0.73885 | -0.40597    | 0.65762     | -0.52354 |         |
|           | 0.6997          | -0.52354 | 0.6997  | 0.65762     | 0.821121848 |          |         |
| NA        | ENSG00000235779 | -0.79284 | 0.78607 | -1.7693     | 0.96158     | -0.4061  | 0.65767 |
|           | -0.4061         | 0.65767  | 0.65767 | 0.821121848 |             |          |         |
| NA        | ENSG00000271553 | -0.4061  | 0.65767 | -0.4061     | 0.65767     | -0.4061  | 0.65767 |
|           | -0.4061         | 0.65767  | 0.65767 | 0.821121848 |             |          |         |
| C2orf15   | ENSG00000273045 | -0.40612 | 0.65767 | -0.40612    | 0.65767     | -0.40612 |         |

|           |                 |          |           |             |             |          |         |
|-----------|-----------------|----------|-----------|-------------|-------------|----------|---------|
|           | 0.65767         | -0.40612 | 0.65767   | 0.65767     | 0.821121848 |          |         |
| NA        | ENSG00000272211 | -0.40615 | 0.65768   | -0.40615    | 0.65768     | -0.40615 | 0.65768 |
|           | -0.40615        | 0.65768  | 0.65768   | 0.821121848 |             |          |         |
| NA        | ENSG00000237645 | -0.40617 | 0.65769   | -0.40617    | 0.65769     | -0.40617 | 0.65769 |
|           | -0.40617        | 0.65769  | 0.65769   | 0.821121848 |             |          |         |
| KRTAP10-5 | ENSG00000241123 | -1.46    | 0.92785   | -0.4062     | 0.6577      | -0.49894 | 0.69109 |
|           | -0.49894        | 0.69109  | 0.6577    | 0.821121848 |             |          |         |
| OR5BT1P   | ENSG00000258024 | -0.40622 | 0.65771   | -0.40622    | 0.65771     | -0.40622 |         |
|           | 0.65771         | -0.40622 | 0.65771   | 0.65771     | 0.821121848 |          |         |
| RPL7L1P3  | ENSG00000235090 | -1.2687  | 0.89773   | -0.40628    | 0.65773     | -0.93773 |         |
|           | 0.82581         | -2.3196  | 0.98982   | 0.65773     | 0.821121848 |          |         |
| TBR1      | ENSG00000136535 | -0.40631 | 0.65774   | -1.4789     | 0.93042     | -1.7852  | 0.96288 |
|           | -2.0125         | 0.97792  | 0.65774   | 0.821121848 |             |          |         |
| NA        | ENSG00000264791 | -0.40654 | 0.65783   | -1.5044     | 0.93376     | -0.41292 | 0.66017 |
|           | -0.98751        | 0.8383   | 0.65783   | 0.821213165 |             |          |         |
| ZNF33BP1  | ENSG00000225192 | -0.40665 | 0.65787   | -0.40665    | 0.65787     | -0.80703 |         |
|           | 0.79018         | -0.88197 | 0.8111    | 0.65787     | 0.821221024 |          |         |
| NA        | ENSG00000254380 | -0.44882 | 0.67322   | -1.3267     | 0.9077      | -1.3267  | 0.9077  |
|           | -0.40666        | 0.65787  | 0.65787   | 0.821221024 |             |          |         |
| NA        | ENSG00000220600 | -0.40674 | 0.6579    | -0.40674    | 0.6579      | -0.40674 | 0.6579  |
|           | -0.40674        | 0.6579   | 0.6579    | 0.821236738 |             |          |         |
| GPR87     | ENSG00000138271 | -1.0227  | 0.84679   | -0.40681    | 0.65793     | -1.1741  | 0.87982 |
|           | -1.1741         | 0.87982  | 0.65793   | 0.821236738 |             |          |         |
| NA        | ENSG00000266543 | -0.40684 | 0.65794   | -0.61197    | 0.72972     | -1.1331  | 0.87141 |
|           | -1.021          | 0.84636  | 0.65794   | 0.821236738 |             |          |         |
| NA        | ENSG00000269688 | -0.40687 | 0.65795   | -0.40687    | 0.65795     | -0.40687 | 0.65795 |
|           | -0.40687        | 0.65795  | 0.65795   | 0.821236738 |             |          |         |
| PDP2      | ENSG00000172840 | -0.82927 | 0.79652   | -0.82927    | 0.79652     | -0.407   | 0.65799 |
|           | -0.779          | 0.78201  | 0.65799   | 0.821265629 |             |          |         |
| NA        | ENSG00000267778 | -0.4071  | 0.65803   | -0.4071     | 0.65803     | -0.4071  | 0.65803 |
|           | -0.4071         | 0.65803  | 0.65803   | 0.821285965 |             |          |         |
| NA        | ENSG00000238615 | -0.40711 | 0.65804   | -0.40711    | 0.65804     | -0.40711 | 0.65804 |
|           | -0.40711        | 0.65804  | 0.65804   | 0.821285965 |             |          |         |
| IZUMO1R   | ENSG00000183560 | -0.40738 | 0.65813   | -0.78357    | 0.78335     | -0.74207 |         |
|           | 0.77098         | -0.40738 | 0.65813   | 0.65813     | 0.821372623 |          |         |
| STX18     | ENSG00000168818 | -0.75302 | 0.77428   | -0.40744    | 0.65816     | -1.3368  | 0.90935 |
|           | -0.84164        | 0.8      | 0.65816   | 0.821372623 |             |          |         |
| HCG24     | ENSG00000230313 | -0.40746 | 0.65816   | -0.40746    | 0.65816     | -0.49366 | 0.68923 |
|           | -0.40746        | 0.65816  | 0.65816   | 0.821372623 |             |          |         |
| NA        | ENSG00000243122 | -0.40761 | 0.65822   | -0.40761    | 0.65822     | -0.40761 | 0.65822 |
|           | -0.40761        | 0.65822  | 0.65822   | 0.8214033   |             |          |         |
| HMGB3P14  | ENSG00000231845 | -0.40765 | 0.65823   | -0.40765    | 0.65823     | -0.40765 |         |
|           | 0.65823         | -0.40765 | 0.65823   | 0.65823     | 0.8214033   |          |         |
| ANKS6     | ENSG00000165138 | -0.40767 | 0.65824   | -0.92182    | 0.82169     | -1.0086  | 0.84342 |
|           | -1.5706         | 0.94186  | 0.65824   | 0.8214033   |             |          |         |
| NA        | ENSG00000260505 | -0.40773 | 0.65826   | -0.40773    | 0.65826     | -0.40773 | 0.65826 |
|           | -0.40773        | 0.65826  | 0.65826   | 0.8214033   |             |          |         |
| MYCNOS    | ENSG00000233718 | -1.4509  | 0.9266    | -0.98571    | 0.83786     | -0.40783 |         |
|           | 0.6583          | -0.40783 | 0.6583    | 0.6583      | 0.8214033   |          |         |
| ZNF414    | ENSG00000133250 | -1.1482  | 0.87455   | -1.1482     | 0.87455     | -1.6314  |         |
|           | 0.94859         | -0.40788 | 0.65832   | 0.65832     | 0.8214033   |          |         |
| OVCH1     | ENSG00000187950 | -0.63508 | 0.73731   | -0.43379    | 0.66778     | -0.40791 | 0.65833 |
|           | -0.75704        | 0.77549  | 0.65833   | 0.8214033   |             |          |         |
| NA        | ENSG00000277687 | -0.4079  | 0.65833   | -0.4079     | 0.65833     | -0.4079  | 0.65833 |
|           | -0.4079         | 0.65833  | 0.65833   | 0.8214033   |             |          |         |
| LINC02497 | ENSG00000251182 | -0.40795 | 0.65834   | -0.40795    | 0.65834     | -0.40795 |         |
|           | 0.65834         | -0.40795 | 0.65834   | 0.65834     | 0.8214033   |          |         |
| NID2      | ENSG00000087303 | -0.73555 | 0.769     | -0.73555    | 0.769       | -0.73555 | 0.769   |
|           | 0.65836         | 0.65836  | 0.8214033 |             |             |          |         |
| RNA5SP344 | ENSG00000223013 | -0.40802 | 0.65837   | -0.40802    | 0.65837     | -0.40802 |         |
|           | 0.65837         | -0.40802 | 0.65837   | 0.65837     | 0.8214033   |          |         |
| GALM      | ENSG00000143891 | -0.40815 | 0.65842   | -0.41416    | 0.66062     | -1.019   | 0.84589 |

|           |                 |          |         |             |             |          |         |  |
|-----------|-----------------|----------|---------|-------------|-------------|----------|---------|--|
|           | -0.77779        | 0.78165  | 0.65842 | 0.821436096 |             |          |         |  |
| DDX27     | ENSG00000124228 | -0.44438 | 0.67162 | -0.40819    | 0.65843     | -0.83314 | 0.79762 |  |
|           | -0.81701        | 0.79304  | 0.65843 | 0.821436096 |             |          |         |  |
| MTMR4     | ENSG00000108389 | -0.51281 | 0.69596 | -0.69979    | 0.75797     | -0.69979 | 0.75797 |  |
|           | -0.40824        | 0.65845  | 0.65845 | 0.821440017 |             |          |         |  |
| NA        | ENSG00000261542 | -0.40832 | 0.65848 | -0.40832    | 0.65848     | -0.40832 | 0.65848 |  |
|           | -0.40832        | 0.65848  | 0.65848 | 0.821456413 |             |          |         |  |
| NA        | ENSG00000225741 | -0.40843 | 0.65852 | -0.40843    | 0.65852     | -0.40843 | 0.65852 |  |
|           | -0.40843        | 0.65852  | 0.65852 | 0.821483136 |             |          |         |  |
| LINC01238 | ENSG00000261186 | -1.3872  | 0.91731 | -0.44094    | 0.67037     | -0.40855 |         |  |
|           | 0.65856         | -0.40855 | 0.65856 | 0.65856     | 0.821483136 |          |         |  |
| NA        | ENSG00000264130 | -0.40852 | 0.65856 | -1.0554     | 0.85438     | -0.40852 | 0.65856 |  |
|           | -0.99141        | 0.83926  | 0.65856 | 0.821483136 |             |          |         |  |
| TSPAN12   | ENSG00000106025 | -1.287   | 0.90096 | -0.40867    | 0.65861     | -1.287   |         |  |
|           | 0.90096         | -1.287   | 0.90096 | 0.65861     | 0.821483136 |          |         |  |
| NA        | ENSG00000272827 | -0.40867 | 0.65861 | -0.40867    | 0.65861     | -0.40867 | 0.65861 |  |
|           | -0.40867        | 0.65861  | 0.65861 | 0.821483136 |             |          |         |  |
| POU6F2    | ENSG00000106536 | -0.59031 | 0.72251 | -0.40878    | 0.65865     | -0.60452 |         |  |
|           | 0.72725         | -0.56247 | 0.71131 | 0.65865     | 0.821483136 |          |         |  |
| NA        | ENSG00000228973 | -0.40882 | 0.65866 | -0.51862    | 0.69799     | -0.51862 | 0.69799 |  |
|           | -0.51862        | 0.69799  | 0.65866 | 0.821483136 |             |          |         |  |
| NA        | ENSG00000233832 | -0.59859 | 0.72528 | -0.40881    | 0.65866     | -0.40881 | 0.65866 |  |
|           | -0.40881        | 0.65866  | 0.65866 | 0.821483136 |             |          |         |  |
| ZNF714    | ENSG00000160352 | -0.51423 | 0.69646 | -0.83415    | 0.7979      | -1.2727  |         |  |
|           | 0.89844         | -0.40882 | 0.65867 | 0.65867     | 0.821483136 |          |         |  |
| RNU1-136P | ENSG00000206908 | -0.81361 | 0.79207 | -0.40884    | 0.65867     | -0.95914 |         |  |
|           | 0.83126         | -0.40884 | 0.65867 | 0.65867     | 0.821483136 |          |         |  |
| NA        | ENSG00000232050 | -0.40892 | 0.6587  | -0.40892    | 0.6587      | -0.40892 | 0.6587  |  |
|           | -0.40892        | 0.6587   | 0.6587  | 0.821499527 |             |          |         |  |
| NA        | ENSG00000225513 | -0.40902 | 0.65874 | -0.40902    | 0.65874     | -0.40902 | 0.65874 |  |
|           | -0.40902        | 0.65874  | 0.65874 | 0.821528387 |             |          |         |  |
| RPSAP38   | ENSG00000239694 | -1.0278  | 0.84797 | -0.40914    | 0.65878     | -2.0525  |         |  |
|           | 0.97994         | -0.55645 | 0.71105 | 0.65878     | 0.821552609 |          |         |  |
| GAPDHP50  | ENSG00000241861 | -1.1623  | 0.87745 | -0.45797    | 0.67651     | -0.40919 |         |  |
|           | 0.6588          | -0.77532 | 0.78093 | 0.6588      | 0.821552609 |          |         |  |
| NA        | ENSG00000243679 | -0.40921 | 0.65881 | -0.40921    | 0.65881     | -0.40921 | 0.65881 |  |
|           | -0.40921        | 0.65881  | 0.65881 | 0.821552609 |             |          |         |  |
| SLURP2    | ENSG00000283992 | -1.2295  | 0.89056 | -1.193      | 0.88357     | -0.40933 |         |  |
|           | 0.65885         | -0.40933 | 0.65885 | 0.65885     | 0.821572189 |          |         |  |
| SBNO1     | ENSG00000139697 | -0.40947 | 0.6589  | -0.5538     | 0.71014     | -0.70243 | 0.75879 |  |
|           | -0.60743        | 0.72822  | 0.6589  | 0.821572189 |             |          |         |  |
| CRK       | ENSG00000167193 | -0.56959 | 0.71552 | -0.75329    | 0.77436     | -0.40946 | 0.6589  |  |
|           | -1.6922         | 0.9547   | 0.6589  | 0.821572189 |             |          |         |  |
| RPP25L    | ENSG00000164967 | -0.40949 | 0.65891 | -0.40949    | 0.65891     | -0.40949 |         |  |
|           | 0.65891         | -0.40949 | 0.65891 | 0.65891     | 0.821572189 |          |         |  |
| NA        | ENSG00000260779 | -1.6539  | 0.95093 | -0.4095     | 0.65891     | -0.4095  | 0.65891 |  |
|           | -0.4095         | 0.65891  | 0.65891 | 0.821572189 |             |          |         |  |
| ACTN4P2   | ENSG00000214141 | -0.40956 | 0.65894 | -0.40956    | 0.65894     | -0.40956 |         |  |
|           | 0.65894         | -0.40956 | 0.65894 | 0.65894     | 0.821588573 |          |         |  |
| NA        | ENSG00000257496 | -0.40978 | 0.65902 | -0.40978    | 0.65902     | -0.40978 | 0.65902 |  |
|           | -0.40978        | 0.65902  | 0.65902 | 0.821647276 |             |          |         |  |
| RPS2P41   | ENSG00000244060 | -0.53518 | 0.70374 | -0.40985    | 0.65904     | -0.40985 |         |  |
|           | 0.65904         | -0.40985 | 0.65904 | 0.65904     | 0.821647276 |          |         |  |
| SVBP      | ENSG00000177868 | -0.54611 | 0.7075  | -0.40991    | 0.65906     | -0.77667 | 0.78132 |  |
|           | -0.77667        | 0.78132  | 0.65906 | 0.821647276 |             |          |         |  |
| LINC01093 | ENSG00000249173 | -1.3674  | 0.91425 | -0.62293    | 0.73333     | -0.41    | 0.6591  |  |
|           | -0.62293        | 0.73333  | 0.6591  | 0.821647276 |             |          |         |  |
| FAM50B    | ENSG00000145945 | -0.41298 | 0.66019 | -0.41012    | 0.65914     | -0.41298 |         |  |
|           | 0.66019         | -0.41298 | 0.66019 | 0.65914     | 0.821647276 |          |         |  |
| TRAV41    | ENSG00000211820 | -0.41011 | 0.65914 | -0.41011    | 0.65914     | -0.41011 |         |  |
|           | 0.65914         | -0.41011 | 0.65914 | 0.65914     | 0.821647276 |          |         |  |
| TFAMP2    | ENSG00000254798 | -1.3804  | 0.91626 | -1.0577     | 0.85489     | -0.41011 |         |  |

|            |                 |          |         |             |             |          |         |
|------------|-----------------|----------|---------|-------------|-------------|----------|---------|
|            | 0.65914         | -1.0433  | 0.85158 | 0.65914     | 0.821647276 |          |         |
| NA         | ENSG00000230948 | -0.4102  | 0.65917 | -0.4102     | 0.65917     | -0.4102  | 0.65917 |
|            | -0.4102         | 0.65917  | 0.65917 | 0.821647276 |             |          |         |
| NA         | ENSG00000201006 | -0.41023 | 0.65918 | -1.3179     | 0.90623     | -1.1282  | 0.87039 |
|            | -2.4352         | 0.99256  | 0.65918 | 0.821647276 |             |          |         |
| KRTAP6-1   | ENSG00000184724 | -0.41027 | 0.6592  | -0.41027    | 0.6592      | -0.41027 |         |
|            | 0.6592          | -0.41027 | 0.6592  | 0.821647276 |             |          |         |
| B3GALNT1P1 | ENSG00000229948 | -0.41031 | 0.65921 | -0.41031    | 0.65921     | -0.41031 |         |
|            | 0.65921         | -0.41031 | 0.65921 | 0.821647276 |             |          |         |
| RPL36AP16  | ENSG00000232228 | -0.41031 | 0.65921 | -0.41031    | 0.65921     | -0.41031 |         |
|            | 0.65921         | -0.41031 | 0.65921 | 0.821647276 |             |          |         |
| NA         | ENSG00000260780 | -0.56718 | 0.7147  | -0.41032    | 0.65921     | -0.56828 | 0.71508 |
|            | -0.98237        | 0.83704  | 0.65921 | 0.821647276 |             |          |         |
| LINC02148  | ENSG00000250427 | -0.41038 | 0.65923 | -0.41038    | 0.65923     | -0.63564 |         |
|            | 0.73749         | -0.41038 | 0.65923 | 0.821647276 |             |          |         |
| NA         | ENSG00000241846 | -1.5156  | 0.93519 | -0.41039    | 0.65924     | -0.71416 | 0.76244 |
|            | -0.63461        | 0.73716  | 0.65924 | 0.821647276 |             |          |         |
| NA         | ENSG00000202374 | -0.41056 | 0.6593  | -0.41056    | 0.6593      | -0.41056 | 0.6593  |
|            | -0.41056        | 0.6593   | 0.6593  | 0.821701041 |             |          |         |
| LINC01378  | ENSG00000236922 | -0.57226 | 0.71643 | -1.5611     | 0.94075     | -0.4106  |         |
|            | 0.65932         | -0.7098  | 0.76109 | 0.821704951 |             |          |         |
| TM9SF1     | ENSG00000100926 | -1.1986  | 0.88465 | -0.41075    | 0.65937     | -0.41075 |         |
|            | 0.65937         | -0.41075 | 0.65937 | 0.821716682 |             |          |         |
| RN7SL653P  | ENSG00000239794 | -0.41075 | 0.65937 | -1.3492     | 0.91136     | -0.41075 |         |
|            | 0.65937         | -0.41075 | 0.65937 | 0.821716682 |             |          |         |
| CEP126     | ENSG00000110318 | -0.53026 | 0.70203 | -0.69791    | 0.75738     | -0.43603 |         |
|            | 0.66859         | -0.41076 | 0.65938 | 0.821716682 |             |          |         |
| NA         | ENSG00000257711 | -0.41083 | 0.6594  | -0.41083    | 0.6594      | -0.41083 | 0.6594  |
|            | -0.41083        | 0.6594   | 0.6594  | 0.821720591 |             |          |         |
| NA         | ENSG00000259682 | -0.6557  | 0.74399 | -0.88178    | 0.81105     | -1.0727  | 0.85831 |
|            | -0.41102        | 0.65947  | 0.65947 | 0.821755769 |             |          |         |
| NA         | ENSG00000259369 | -0.41104 | 0.65948 | -0.41104    | 0.65948     | -0.41104 | 0.65948 |
|            | -0.41104        | 0.65948  | 0.65948 | 0.821755769 |             |          |         |
| LINC00028  | ENSG00000233354 | -0.4111  | 0.6595  | -0.4111     | 0.6595      | -0.4111  |         |
|            | 0.6595          | -0.4111  | 0.6595  | 0.821755769 |             |          |         |
| NA         | ENSG00000261680 | -0.41111 | 0.6595  | -0.41111    | 0.6595      | -0.41111 | 0.6595  |
|            | -0.41111        | 0.6595   | 0.6595  | 0.821755769 |             |          |         |
| NA         | ENSG00000257028 | -0.41118 | 0.65953 | -0.41118    | 0.65953     | -0.41118 | 0.65953 |
|            | -0.41118        | 0.65953  | 0.65953 | 0.821755769 |             |          |         |
| RN7SL791P  | ENSG00000241291 | -0.41121 | 0.65954 | -0.41121    | 0.65954     | -0.41121 |         |
|            | 0.65954         | -0.41121 | 0.65954 | 0.821755769 |             |          |         |
| NA         | ENSG00000276768 | -0.41129 | 0.65957 | -0.41129    | 0.65957     | -0.41129 | 0.65957 |
|            | -0.41129        | 0.65957  | 0.65957 | 0.821755769 |             |          |         |
| HMGB1P17   | ENSG00000217482 | -0.41132 | 0.65958 | -0.41132    | 0.65958     | -0.41132 |         |
|            | 0.65958         | -0.41132 | 0.65958 | 0.821755769 |             |          |         |
| NA         | ENSG00000227217 | -0.41132 | 0.65958 | -0.41132    | 0.65958     | -0.41132 | 0.65958 |
|            | -0.41132        | 0.65958  | 0.65958 | 0.821755769 |             |          |         |
| NA         | ENSG00000223402 | -0.41142 | 0.65962 | -0.41142    | 0.65962     | -0.41142 | 0.65962 |
|            | -0.41142        | 0.65962  | 0.65962 | 0.821784594 |             |          |         |
| CXCL11     | ENSG00000169248 | -0.41151 | 0.65965 | -0.43355    | 0.66769     | -0.47042 |         |
|            | 0.68097         | -0.44832 | 0.67304 | 0.821800959 |             |          |         |
| FOXD2-AS1  | ENSG00000237424 | -0.41163 | 0.65969 | -0.41163    | 0.65969     | -1.7165  |         |
|            | 0.95696         | -1.6298  | 0.94843 | 0.821829781 |             |          |         |
| ACOT6      | ENSG00000205669 | -0.41168 | 0.65971 | -0.41168    | 0.65971     | -0.41168 | 0.65971 |
|            | -0.41168        | 0.65971  | 0.65971 | 0.821833686 |             |          |         |
| PHBP14     | ENSG00000248913 | -1.8053  | 0.96448 | -0.41172    | 0.65973     | -0.41172 |         |
|            | 0.65973         | -0.41172 | 0.65973 | 0.821837591 |             |          |         |
| GHET1      | ENSG00000281189 | -0.41195 | 0.65981 | -0.41195    | 0.65981     | -0.41195 | 0.65981 |
|            | -0.41195        | 0.65981  | 0.65981 | 0.821903034 |             |          |         |
| CCDC152    | ENSG00000198865 | -1.2005  | 0.88503 | -1.3401     | 0.9099      | -1.3355  |         |
|            | 0.90915         | -0.41204 | 0.65984 | 0.821903034 |             |          |         |
| NA         | ENSG00000226920 | -0.41201 | 0.65984 | -0.41201    | 0.65984     | -0.41201 | 0.65984 |

|              |                 |          |         |             |             |          |         |  |
|--------------|-----------------|----------|---------|-------------|-------------|----------|---------|--|
|              | -0.41201        | 0.65984  | 0.65984 | 0.821903034 |             |          |         |  |
| CHD9         | ENSG00000177200 | -0.47439 | 0.68239 | -1.2551     | 0.89529     | -0.41205 | 0.65985 |  |
|              | -0.62583        | 0.73429  | 0.65985 | 0.821903034 |             |          |         |  |
| NA           | ENSG00000236591 | -0.41218 | 0.6599  | -0.51869    | 0.69801     | -0.47207 | 0.68156 |  |
|              | -1.2312         | 0.89088  | 0.6599  | 0.821927197 |             |          |         |  |
| RNU6-757P    | ENSG00000222266 | -0.41223 | 0.65991 | -0.41223    | 0.65991     | -0.41223 |         |  |
|              | 0.65991         | -0.41223 | 0.65991 | 0.821927197 |             |          |         |  |
| FBLIM1       | ENSG00000162458 | -0.82719 | 0.79594 | -1.8205     | 0.96566     | -0.41226 |         |  |
|              | 0.65992         | -0.60897 | 0.72873 | 0.65992     | 0.821927197 |          |         |  |
| IRX5         | ENSG00000176842 | -1.5189  | 0.93561 | -1.5189     | 0.93561     | -0.41237 | 0.65997 |  |
|              | -1.5189         | 0.93561  | 0.65997 | 0.821968463 |             |          |         |  |
| HEXA-AS1     | ENSG00000260339 | -0.41268 | 0.66008 | -0.41268    | 0.66008     | -0.41268 |         |  |
|              | 0.66008         | -0.41268 | 0.66008 | 0.66008     | 0.822054888 |          |         |  |
| NA           | ENSG00000260729 | -0.41268 | 0.66008 | -0.41268    | 0.66008     | -0.41268 | 0.66008 |  |
|              | -0.41268        | 0.66008  | 0.66008 | 0.822054888 |             |          |         |  |
| IGHVIII-76-1 | ENSG00000253310 | -0.4127  | 0.66009 | -0.4127     | 0.66009     | -0.4127  |         |  |
|              | 0.66009         | -0.4127  | 0.66009 | 0.66009     | 0.822054888 |          |         |  |
| CBX5P1       | ENSG00000241535 | -0.51823 | 0.69785 | -0.4129     | 0.66016     | -0.95742 |         |  |
|              | 0.83082         | -0.4129  | 0.66016 | 0.66016     | 0.822100043 |          |         |  |
| NA           | ENSG00000274560 | -0.41289 | 0.66016 | -0.41289    | 0.66016     | -0.78594 | 0.78405 |  |
|              | -0.63249        | 0.73647  | 0.66016 | 0.822100043 |             |          |         |  |
| SMYD5        | ENSG00000135632 | -0.41303 | 0.66021 | -0.41303    | 0.66021     | -0.41303 | 0.66021 |  |
|              | -0.41303        | 0.66021  | 0.66021 | 0.822119527 |             |          |         |  |
| AHCYP4       | ENSG00000232992 | -2.2108  | 0.98648 | -0.41302    | 0.66021     | -2.2108  |         |  |
|              | 0.98648         | -2.2108  | 0.98648 | 0.66021     | 0.822119527 |          |         |  |
| NOMO1        | ENSG00000103512 | -2.3672  | 0.99104 | -0.41316    | 0.66026     | -0.9824  | 0.83705 |  |
|              | -1.5908         | 0.94417  | 0.66026 | 0.822119527 |             |          |         |  |
| ZSCAN26      | ENSG00000197062 | -0.92143 | 0.82159 | -0.41318    | 0.66026     | -0.41318 |         |  |
|              | 0.66026         | -1.165   | 0.878   | 0.66026     | 0.822119527 |          |         |  |
| NA           | ENSG00000276302 | -0.41318 | 0.66026 | -0.41318    | 0.66026     | -0.41318 | 0.66026 |  |
|              | -0.41318        | 0.66026  | 0.66026 | 0.822119527 |             |          |         |  |
| TSPAN1       | ENSG00000117472 | -1.0766  | 0.85918 | -1.2725     | 0.8984      | -1.3036  |         |  |
|              | 0.90382         | -0.41322 | 0.66028 | 0.66028     | 0.822123423 |          |         |  |
| EIF6         | ENSG00000242372 | -0.4133  | 0.66031 | -0.77056    | 0.77952     | -0.46229 | 0.67806 |  |
|              | -0.46229        | 0.67806  | 0.66031 | 0.82213977  |             |          |         |  |
| PSENE1       | ENSG00000205155 | -0.41342 | 0.66035 | -0.41342    | 0.66035     | -0.41342 |         |  |
|              | 0.66035         | -0.41342 | 0.66035 | 0.66035     | 0.822168566 |          |         |  |
| LINC02398    | ENSG00000256287 | -0.41347 | 0.66037 | -0.41347    | 0.66037     | -0.41347 |         |  |
|              | 0.66037         | -0.41347 | 0.66037 | 0.66037     | 0.82217246  |          |         |  |
| NA           | ENSG00000255306 | -0.41362 | 0.66042 | -0.41362    | 0.66042     | -0.41362 | 0.66042 |  |
|              | -0.41362        | 0.66042  | 0.66042 | 0.822174821 |             |          |         |  |
| AKIRIN1P1    | ENSG00000257786 | -0.41367 | 0.66044 | -0.41367    | 0.66044     | -0.41367 |         |  |
|              | 0.66044         | -0.41367 | 0.66044 | 0.66044     | 0.822174821 |          |         |  |
| SNRPCP14     | ENSG00000254805 | -1.1995  | 0.88483 | -0.41368    | 0.66045     | -1.9975  |         |  |
|              | 0.97712         | -1.0179  | 0.84564 | 0.66045     | 0.822174821 |          |         |  |
| WFDC10B      | ENSG00000182931 | -1.3589  | 0.91291 | -1.7548     | 0.96035     | -0.83311 |         |  |
|              | 0.79761         | -0.41372 | 0.66046 | 0.66046     | 0.822174821 |          |         |  |
| ARAP1        | ENSG00000186635 | -1.4106  | 0.92082 | -0.41375    | 0.66047     | -0.91015 | 0.81863 |  |
|              | -0.80532        | 0.78968  | 0.66047 | 0.822174821 |             |          |         |  |
| NA           | ENSG00000283257 | -0.87996 | 0.81056 | -0.41378    | 0.66048     | -0.87996 | 0.81056 |  |
|              | -0.87996        | 0.81056  | 0.66048 | 0.822174821 |             |          |         |  |
| HMGB1        | ENSG00000189403 | -0.41457 | 0.66077 | -0.67857    | 0.7513      | -0.4138  | 0.66049 |  |
|              | -1.0102         | 0.84379  | 0.66049 | 0.822174821 |             |          |         |  |
| NA           | ENSG00000243176 | -0.60245 | 0.72656 | -0.41402    | 0.66057     | -0.65894 | 0.74503 |  |
|              | -0.85944        | 0.80495  | 0.66057 | 0.8222534   |             |          |         |  |
| LRWD1        | ENSG00000161036 | -0.41414 | 0.66061 | -0.41414    | 0.66061     | -0.41414 | 0.66061 |  |
|              | -0.41414        | 0.66061  | 0.66061 | 0.822261183 |             |          |         |  |
| OR5D15P      | ENSG00000255019 | -0.41412 | 0.66061 | -1.4988     | 0.93303     | -0.41412 |         |  |
|              | 0.66061         | -0.41412 | 0.66061 | 0.66061     | 0.822261183 |          |         |  |
| CHAT         | ENSG00000070748 | -0.74688 | 0.77243 | -0.41437    | 0.6607      | -0.45834 | 0.67664 |  |
|              | -0.51141        | 0.69547  | 0.6607  | 0.822286865 |             |          |         |  |
| NA           | ENSG00000231984 | -1.5632  | 0.94099 | -1.5289     | 0.93686     | -0.41438 | 0.6607  |  |

|            |                 |          |          |            |             |             |         |          |
|------------|-----------------|----------|----------|------------|-------------|-------------|---------|----------|
|            |                 | -1.277   | 0.8992   | 0.6607     | 0.822286865 |             |         |          |
| NA         | ENSG00000235620 | -0.41445 | 0.66073  | -0.41445   | 0.66073     | -0.41445    | 0.66073 | 0.66073  |
|            |                 | -0.41445 | 0.66073  | 0.66073    | 0.822286865 |             |         |          |
| HTR5A-AS1  | ENSG00000220575 | -0.66863 | 0.74813  | -0.42095   | 0.6631      | -0.41448    |         |          |
|            |                 | 0.66074  | -0.41448 | 0.66074    | 0.66074     | 0.822286865 |         |          |
| LINC01526  | ENSG00000224995 | -0.41458 | 0.66078  | -0.41458   | 0.66078     | -0.41458    | 0.66078 | -0.41458 |
|            |                 | 0.66078  | -0.41458 | 0.66078    | 0.66078     | 0.822286865 |         |          |
| ANXA13     | ENSG00000104537 | -0.41463 | 0.66079  | -1.1689    | 0.87877     | -1.6686     |         |          |
|            |                 | 0.9524   | -1.3904  | 0.91779    | 0.66079     | 0.822286865 |         |          |
| NA         | ENSG00000227135 | -0.41462 | 0.66079  | -0.99491   | 0.84011     | -0.41462    | 0.66079 | 0.66079  |
|            |                 | -0.41462 | 0.66079  | 0.66079    | 0.822286865 |             |         |          |
| SMURF2P1   | ENSG00000248121 | -0.41464 | 0.6608   | -0.41464   | 0.6608      | -0.41464    |         |          |
|            |                 | 0.6608   | -0.41464 | 0.6608     | 0.6608      | 0.822286865 |         |          |
| NA         | ENSG00000221673 | -0.41466 | 0.66081  | -0.41466   | 0.66081     | -0.41466    | 0.66081 | 0.66081  |
|            |                 | -0.41466 | 0.66081  | 0.66081    | 0.822286865 |             |         |          |
| RNU6-1115P | ENSG00000199360 | -1.4459  | 0.9259   | -0.41472   | 0.66083     | -1.7729     |         |          |
|            |                 | 0.96187  | -2.0883  | 0.98161    | 0.66083     | 0.822286865 |         |          |
| WDR20      | ENSG00000140153 | -0.62416 | 0.73374  | -0.41479   | 0.66085     | -0.44798    | 0.67292 | 0.67292  |
|            |                 | -0.57081 | 0.71594  | 0.66085    | 0.822286865 |             |         |          |
| RASAL2-AS1 | ENSG00000224687 | -0.41479 | 0.66085  | -0.41479   | 0.66085     | -0.41479    |         |          |
|            |                 | 0.66085  | -0.41479 | 0.66085    | 0.66085     | 0.822286865 |         |          |
| NA         | ENSG00000274029 | -0.41479 | 0.66085  | -0.41479   | 0.66085     | -0.41479    | 0.66085 | 0.66085  |
|            |                 | -0.41479 | 0.66085  | 0.66085    | 0.822286865 |             |         |          |
| MFGE8      | ENSG00000140545 | -1.1518  | 0.8753   | -0.52034   | 0.69859     | -0.65218    | 0.74286 | 0.74286  |
|            |                 | -0.41488 | 0.66089  | 0.66089    | 0.822310974 |             |         |          |
| NA         | ENSG00000228587 | -0.41498 | 0.66092  | -0.41498   | 0.66092     | -0.92215    | 0.82177 | 0.82177  |
|            |                 | -0.41498 | 0.66092  | 0.66092    | 0.822310974 |             |         |          |
| NA         | ENSG00000275607 | -0.41498 | 0.66092  | -0.41498   | 0.66092     | -0.41498    | 0.66092 | 0.66092  |
|            |                 | -0.41498 | 0.66092  | 0.66092    | 0.822310974 |             |         |          |
| IGFL1P2    | ENSG00000268238 | -0.41509 | 0.66096  | -0.497     | 0.6904      | -0.41509    |         |          |
|            |                 | 0.66096  | -2.1806  | 0.98539    | 0.66096     | 0.822331191 |         |          |
| NA         | ENSG00000254366 | -0.75861 | 0.77596  | -1.2102    | 0.88689     | -0.4151     | 0.66097 | 0.66097  |
|            |                 | -0.92051 | 0.82135  | 0.66097    | 0.822331191 |             |         |          |
| NA         | ENSG00000249631 | -0.41518 | 0.661    | -0.91764   | 0.8206      | -0.43       | 0.6664  | -0.45039 |
|            |                 | 0.67379  | 0.661    | 0.82234752 |             |             |         |          |
| ZNF234     | ENSG00000263002 | -0.41541 | 0.66108  | -0.41541   | 0.66108     | -0.41541    |         |          |
|            |                 | 0.66108  | -0.41541 | 0.66108    | 0.66108     | 0.8223965   |         |          |
| MAB21L3    | ENSG00000173212 | -1.1211  | 0.86887  | -0.41544   | 0.66109     | -1.6446     |         |          |
|            |                 | 0.94998  | -1.2449  | 0.89342    | 0.66109     | 0.8223965   |         |          |
| UBE2NP1    | ENSG00000256385 | -0.41544 | 0.66109  | -0.41544   | 0.66109     | -0.41544    |         |          |
|            |                 | 0.66109  | -0.41544 | 0.66109    | 0.66109     | 0.8223965   |         |          |
| NA         | ENSG00000267383 | -0.41549 | 0.66111  | -0.62327   | 0.73344     | -1.3105     | 0.90499 | 0.90499  |
|            |                 | -1.1536  | 0.87566  | 0.66111    | 0.822400385 |             |         |          |
| NA         | ENSG00000279405 | -0.41562 | 0.66116  | -0.41562   | 0.66116     | -0.41562    | 0.66116 | 0.66116  |
|            |                 | -0.41562 | 0.66116  | 0.66116    | 0.822441589 |             |         |          |
| NA         | ENSG00000251421 | -0.41573 | 0.6612   | -0.41573   | 0.6612      | -0.41573    | 0.6612  | 0.6612   |
|            |                 | -0.41573 | 0.6612   | 0.6612     | 0.822470351 |             |         |          |
| RNU6-730P  | ENSG00000206681 | -0.41579 | 0.66122  | -0.41579   | 0.66122     | -0.41579    |         |          |
|            |                 | 0.66122  | -0.41579 | 0.66122    | 0.66122     | 0.822474234 |         |          |
| SLC29A3    | ENSG00000198246 | -1.5007  | 0.93329  | -0.41587   | 0.66125     | -1.0517     |         |          |
|            |                 | 0.85352  | -1.9516  | 0.97451    | 0.66125     | 0.822477328 |         |          |
| PDE3A      | ENSG00000172572 | -0.41597 | 0.66128  | -1.4669    | 0.9288      | -0.95328    | 0.82978 | 0.82978  |
|            |                 | -0.66157 | 0.74588  | 0.66128    | 0.822477328 |             |         |          |
| LRAT       | ENSG00000121207 | -0.41598 | 0.66129  | -0.41598   | 0.66129     | -0.41598    | 0.66129 | 0.66129  |
|            |                 | -0.41598 | 0.66129  | 0.66129    | 0.822477328 |             |         |          |
| NA         | ENSG00000280388 | -0.4413  | 0.6705   | -0.41599   | 0.66129     | -0.4413     | 0.6705  | 0.6705   |
|            |                 | -0.4413  | 0.6705   | 0.66129    | 0.822477328 |             |         |          |
| ANK3       | ENSG00000151150 | -1.1829  | 0.88158  | -2.0896    | 0.98167     | -0.41611    | 0.66134 | 0.66134  |
|            |                 | -1.9431  | 0.974    | 0.66134    | 0.822518522 |             |         |          |
| BICDL2     | ENSG00000162069 | -0.41626 | 0.66139  | -0.52243   | 0.69931     | -0.41626    |         |          |
|            |                 | 0.66139  | -0.44025 | 0.67012    | 0.66139     | 0.822559714 |         |          |
| NA         | ENSG00000272049 | -0.41636 | 0.66143  | -0.41636   | 0.66143     | -0.41636    | 0.66143 | 0.66143  |



|           |                 |          |         |             |             |          |         |  |
|-----------|-----------------|----------|---------|-------------|-------------|----------|---------|--|
|           | -0.41636        | 0.66143  | 0.66143 | 0.822579007 |             |          |         |  |
| FTLP3     | ENSG00000226608 | -1.1164  | 0.86789 | -0.41644    | 0.66146     | -1.1164  | 0.86789 |  |
|           | -0.51175        | 0.69559  | 0.66146 | 0.822579007 |             |          |         |  |
| RNA5SP214 | ENSG00000200248 | -0.41651 | 0.66148 | -0.41651    | 0.66148     | -0.41651 |         |  |
|           | 0.66148         | -0.41651 | 0.66148 | 0.66148     | 0.822579007 |          |         |  |
| NA        | ENSG00000277971 | -0.4165  | 0.66148 | -0.4165     | 0.66148     | -0.4165  | 0.66148 |  |
|           | -0.4165         | 0.66148  | 0.66148 | 0.822579007 |             |          |         |  |
| NA        | ENSG00000260077 | -0.41653 | 0.66149 | -0.84124    | 0.79989     | -1.8129  | 0.96508 |  |
|           | -2.2591         | 0.98806  | 0.66149 | 0.822579007 |             |          |         |  |
| EDRF1-AS1 | ENSG00000236991 | -0.41661 | 0.66152 | -0.96021    | 0.83153     | -0.96021 |         |  |
|           | 0.83153         | -0.96021 | 0.83153 | 0.66152     | 0.822579007 |          |         |  |
| PCSK5     | ENSG00000099139 | -0.80362 | 0.78919 | -0.43511    | 0.66826     | -1.0283  | 0.84809 |  |
|           | -0.41674        | 0.66157  | 0.66157 | 0.822579007 |             |          |         |  |
| ZCRB1     | ENSG00000139168 | -0.41678 | 0.66158 | -0.41678    | 0.66158     | -0.41678 | 0.66158 |  |
|           | -0.41678        | 0.66158  | 0.66158 | 0.822579007 |             |          |         |  |
| NA        | ENSG00000272425 | -1.8549  | 0.96819 | -0.80324    | 0.78908     | -1.0108  | 0.84393 |  |
|           | -0.41679        | 0.66158  | 0.66158 | 0.822579007 |             |          |         |  |
| ZNF280A   | ENSG00000169548 | -1.4804  | 0.93062 | -0.83862    | 0.79916     | -1.4804  |         |  |
|           | 0.93062         | -0.4168  | 0.66159 | 0.66159     | 0.822579007 |          |         |  |
| ADRB3     | ENSG00000188778 | -0.41696 | 0.66165 | -0.41696    | 0.66165     | -0.41696 | 0.66165 |  |
|           | -0.85351        | 0.80331  | 0.66165 | 0.822579007 |             |          |         |  |
| BOLA3P4   | ENSG00000223807 | -1.1993  | 0.8848  | -1.1063     | 0.86571     | -0.41696 |         |  |
|           | 0.66165         | -0.97181 | 0.83443 | 0.66165     | 0.822579007 |          |         |  |
| NOC2LP2   | ENSG00000217950 | -1.0596  | 0.85533 | -0.94233    | 0.82699     | -0.41705 |         |  |
|           | 0.66168         | -1.1444  | 0.87378 | 0.66168     | 0.822579007 |          |         |  |
| NA        | ENSG00000276144 | -0.41705 | 0.66168 | -0.41705    | 0.66168     | -0.41705 | 0.66168 |  |
|           | -0.41705        | 0.66168  | 0.66168 | 0.822579007 |             |          |         |  |
| NA        | ENSG00000235089 | -0.41715 | 0.66171 | -0.86676    | 0.80696     | -0.86676 | 0.80696 |  |
|           | -0.86676        | 0.80696  | 0.66171 | 0.822579007 |             |          |         |  |
| SGMS1     | ENSG00000198964 | -0.41719 | 0.66173 | -1.0493     | 0.85299     | -3.5367  | 0.9998  |  |
|           | -1.3869         | 0.91727  | 0.66173 | 0.822579007 |             |          |         |  |
| C22orf46  | ENSG00000184208 | -0.41721 | 0.66174 | -0.41721    | 0.66174     | -0.41721 |         |  |
|           | 0.66174         | -0.41721 | 0.66174 | 0.66174     | 0.822579007 |          |         |  |
| RNU6-252P | ENSG00000200102 | -0.41724 | 0.66175 | -0.41724    | 0.66175     | -0.41724 |         |  |
|           | 0.66175         | -0.41724 | 0.66175 | 0.66175     | 0.822579007 |          |         |  |
| NA        | ENSG00000256020 | -0.41725 | 0.66175 | -0.8878     | 0.81267     | -0.62955 | 0.7355  |  |
|           | -0.62955        | 0.7355   | 0.66175 | 0.822579007 |             |          |         |  |
| ZNF416    | ENSG00000083817 | -1.0003  | 0.84142 | -0.41728    | 0.66176     | -1.0003  |         |  |
|           | 0.84142         | -1.0003  | 0.84142 | 0.66176     | 0.822579007 |          |         |  |
| NA        | ENSG00000253133 | -0.45567 | 0.67569 | -0.41727    | 0.66176     | -0.41727 | 0.66176 |  |
|           | -0.41727        | 0.66176  | 0.66176 | 0.822579007 |             |          |         |  |
| NA        | ENSG00000262681 | -0.41751 | 0.66185 | -0.41751    | 0.66185     | -0.41751 | 0.66185 |  |
|           | -0.41751        | 0.66185  | 0.66185 | 0.82262325  |             |          |         |  |
| NA        | ENSG00000266476 | -0.41751 | 0.66185 | -0.4517     | 0.67426     | -0.70927 | 0.76092 |  |
|           | -1.7445         | 0.95947  | 0.66185 | 0.82262325  |             |          |         |  |
| EAF1      | ENSG00000144597 | -0.55377 | 0.71013 | -0.41755    | 0.66186     | -0.73239 | 0.76803 |  |
|           | -0.47137        | 0.68131  | 0.66186 | 0.82262325  |             |          |         |  |
| OR8J1     | ENSG00000172487 | -0.4176  | 0.66188 | -0.4176     | 0.66188     | -0.4176  | 0.66188 |  |
|           | -0.4176         | 0.66188  | 0.66188 | 0.82262325  |             |          |         |  |
| ZNF609    | ENSG00000180357 | -0.88795 | 0.81272 | -1.0682     | 0.85728     | -0.82363 |         |  |
|           | 0.79493         | -0.41759 | 0.66188 | 0.66188     | 0.82262325  |          |         |  |
| NA        | ENSG00000243902 | -0.41774 | 0.66193 | -0.41774    | 0.66193     | -1.5738  | 0.94223 |  |
|           | -1.7489         | 0.95985  | 0.66193 | 0.822662805 |             |          |         |  |
| CWC15     | ENSG00000150316 | -0.9058  | 0.81748 | -0.65485    | 0.74372     | -0.74492 | 0.77184 |  |
|           | -0.41783        | 0.66197  | 0.66197 | 0.822662805 |             |          |         |  |
| NA        | ENSG00000230132 | -0.41784 | 0.66197 | -1.8699     | 0.96925     | -1.2515  | 0.89462 |  |
|           | -1.5893         | 0.944    | 0.66197 | 0.822662805 |             |          |         |  |
| RIT1      | ENSG00000143622 | -0.68436 | 0.75313 | -0.41796    | 0.66201     | -0.41796 | 0.66201 |  |
|           | -0.41796        | 0.66201  | 0.66201 | 0.822662805 |             |          |         |  |
| NA        | ENSG00000223989 | -0.41795 | 0.66201 | -0.41795    | 0.66201     | -0.41795 | 0.66201 |  |
|           | -0.41795        | 0.66201  | 0.66201 | 0.822662805 |             |          |         |  |
| TAF11L14  | ENSG00000250782 | -0.41798 | 0.66202 | -0.41798    | 0.66202     | -0.41798 |         |  |

|              |                 |          |         |             |             |          |         |
|--------------|-----------------|----------|---------|-------------|-------------|----------|---------|
|              | 0.66202         | -0.41798 | 0.66202 | 0.66202     | 0.822662805 |          |         |
| TMEM87A      | ENSG00000103978 | -0.61564 | 0.73093 | -0.68826    | 0.75436     | -0.41802 |         |
|              | 0.66203         | -1.2069  | 0.88626 | 0.66203     | 0.822662805 |          |         |
| NA           | ENSG00000259121 | -0.41819 | 0.6621  | -0.791      | 0.78553     | -0.41819 | 0.6621  |
|              | -0.41819        | 0.6621   | 0.6621  | 0.822690726 |             |          |         |
| LINC02038    | ENSG00000229155 | -1.3755  | 0.91551 | -0.41822    | 0.66211     | -2.2524  |         |
|              | 0.98785         | -0.42953 | 0.66623 | 0.66211     | 0.822690726 |          |         |
| NA           | ENSG00000231358 | -1.0566  | 0.85466 | -0.41823    | 0.66211     | -0.67364 | 0.74973 |
|              | -1.085          | 0.86103  | 0.66211 | 0.822690726 |             |          |         |
| LINC01859    | ENSG00000261558 | -0.5319  | 0.7026  | -0.83491    | 0.79812     | -0.41825 |         |
|              | 0.66212         | -0.6159  | 0.73102 | 0.66212     | 0.822690726 |          |         |
| RN7SL564P    | ENSG00000240606 | -0.41831 | 0.66214 | -1.269      | 0.89777     | -0.80173 |         |
|              | 0.78864         | -1.097   | 0.86367 | 0.66214     | 0.8226946   |          |         |
| RN7SL193P    | ENSG00000239679 | -0.41848 | 0.6622  | -1.5142     | 0.93501     | -0.67427 |         |
|              | 0.74993         | -1.0124  | 0.84432 | 0.6622      | 0.822748171 |          |         |
| NA           | ENSG00000226899 | -0.41867 | 0.66227 | -0.41867    | 0.66227     | -0.41867 | 0.66227 |
|              | -0.41867        | 0.66227  | 0.66227 | 0.822784632 |             |          |         |
| SLC25A46     | ENSG00000164209 | -0.67628 | 0.75057 | -0.41869    | 0.66228     | -1.2052  |         |
|              | 0.88594         | -1.1989  | 0.88471 | 0.66228     | 0.822784632 |          |         |
| CEL          | ENSG00000170835 | -0.4187  | 0.66228 | -1.1448     | 0.87386     | -0.50038 | 0.6916  |
|              | -1.421          | 0.92234  | 0.66228 | 0.822784632 |             |          |         |
| NA           | ENSG00000274328 | -0.41884 | 0.66233 | -0.41884    | 0.66233     | -0.41884 | 0.66233 |
|              | -0.41884        | 0.66233  | 0.66233 | 0.822825772 |             |          |         |
| SNORD114-30  | ENSG00000201318 | -0.41909 | 0.66242 | -0.41909    | 0.66242     | -0.41909 | 0.66242 |
|              | 0.66242         | -0.41909 | 0.66242 | 0.66242     | 0.822907224 |          |         |
| RNA5SP373    | ENSG00000253080 | -0.41913 | 0.66244 | -0.41913    | 0.66244     | -0.41913 | 0.66244 |
|              | 0.66244         | -0.41913 | 0.66244 | 0.66244     | 0.822907224 |          |         |
| NT5C1B-RDH14 | ENSG00000250741 | -0.41918 | 0.66246 | -0.41918    | 0.66246     | -0.41918 | 0.66246 |
|              | 0.66246         | -0.41918 | 0.66246 | 0.66246     | 0.822907224 |          |         |
| RN7SL636P    | ENSG00000244376 | -0.55985 | 0.71221 | -0.82196    | 0.79445     | -0.50416 |         |
|              | 0.69293         | -0.41923 | 0.66247 | 0.66247     | 0.822907224 |          |         |
| SOD2P1       | ENSG00000234257 | -0.93473 | 0.82504 | -0.41924    | 0.66248     | -0.41924 |         |
|              | 0.66248         | -0.41924 | 0.66248 | 0.66248     | 0.822907224 |          |         |
| SURF2        | ENSG00000148291 | -0.41936 | 0.66252 | -0.41936    | 0.66252     | -0.41936 | 0.66252 |
|              | -0.41936        | 0.66252  | 0.66252 | 0.822935933 |             |          |         |
| LRRC75B      | ENSG00000178026 | -0.4194  | 0.66254 | -0.4194     | 0.66254     | -0.4194  |         |
|              | 0.66254         | -1.0504  | 0.85323 | 0.66254     | 0.822939799 |          |         |
| NA           | ENSG00000235423 | -0.41958 | 0.6626  | -0.9043     | 0.81708     | -0.41958 | 0.6626  |
|              | -0.41958        | 0.6626   | 0.6626  | 0.822993347 |             |          |         |
| NA           | ENSG00000258864 | -0.41972 | 0.66266 | -0.41972    | 0.66266     | -0.41972 | 0.66266 |
|              | -0.41972        | 0.66266  | 0.66266 | 0.823000247 |             |          |         |
| TEX26-AS1    | ENSG00000224743 | -0.50739 | 0.69406 | -0.46763    | 0.67997     | -0.42745 |         |
|              | 0.66547         | -0.41977 | 0.66267 | 0.66267     | 0.823000247 |          |         |
| MYH9         | ENSG00000100345 | -0.89622 | 0.81493 | -0.4198     | 0.66269     | -1.1524  | 0.87542 |
|              | -0.80363        | 0.78919  | 0.66269 | 0.823000247 |             |          |         |
| LINC01918    | ENSG00000226508 | -0.41982 | 0.66269 | -1.6389     | 0.94938     | -0.41982 |         |
|              | 0.66269         | -1.1193  | 0.8685  | 0.66269     | 0.823000247 |          |         |
| NA           | ENSG00000249363 | -0.41981 | 0.66269 | -0.41981    | 0.66269     | -0.41981 | 0.66269 |
|              | -0.41981        | 0.66269  | 0.66269 | 0.823000247 |             |          |         |
| MIR643       | ENSG00000208002 | -0.41999 | 0.66275 | -0.41999    | 0.66275     | -0.41999 |         |
|              | 0.66275         | -0.41999 | 0.66275 | 0.66275     | 0.823045229 |          |         |
| OR52N1       | ENSG00000181001 | -0.42001 | 0.66276 | -1.1982     | 0.88458     | -0.753   |         |
|              | 0.77427         | -0.76881 | 0.779   | 0.66276     | 0.823045229 |          |         |
| PSMD6-AS1    | ENSG00000243410 | -0.67708 | 0.75082 | -0.83637    | 0.79853     | -0.42029 |         |
|              | 0.66286         | -0.42029 | 0.66286 | 0.66286     | 0.82313132  |          |         |
| DMXL1        | ENSG00000172869 | -0.4203  | 0.66287 | -1.0648     | 0.85652     | -1.0648  | 0.85652 |
|              | -1.0288         | 0.84822  | 0.66287 | 0.82313132  |             |          |         |
| HSBP1L1      | ENSG00000226742 | -1.29    | 0.90148 | -0.42033    | 0.66288     | -0.98728 | 0.83825 |
|              | -0.62101        | 0.7327   | 0.66288 | 0.82313132  |             |          |         |
| NA           | ENSG00000269578 | -0.42046 | 0.66293 | -0.42046    | 0.66293     | -0.42046 | 0.66293 |
|              | -0.42046        | 0.66293  | 0.66293 | 0.823172431 |             |          |         |
| SLC4A9       | ENSG00000113073 | -0.81621 | 0.79281 | -0.71958    | 0.76411     | -0.42051 |         |

|            |                 |          |         |             |             |          |         |
|------------|-----------------|----------|---------|-------------|-------------|----------|---------|
|            | 0.66295         | -0.85719 | 0.80433 | 0.66295     | 0.82317629  |          |         |
| ARPC3P2    | ENSG00000238137 | -0.42071 | 0.66301 | -0.42071    | 0.66301     | -0.42071 |         |
|            | 0.66301         | -0.42071 | 0.66301 | 0.66301     | 0.823229815 |          |         |
| LINC02510  | ENSG00000250341 | -2.135   | 0.98362 | -0.42076    | 0.66304     | -2.135   |         |
|            | 0.98362         | -0.84242 | 0.80022 | 0.66304     | 0.823246088 |          |         |
| CERNA1     | ENSG00000259577 | -0.42092 | 0.66309 | -0.42092    | 0.66309     | -0.42092 |         |
|            | 0.66309         | -0.42092 | 0.66309 | 0.66309     | 0.823287192 |          |         |
| INHBC      | ENSG00000175189 | -0.50837 | 0.6944  | -0.72685    | 0.76634     | -0.42961 | 0.66626 |
|            | -0.42101        | 0.66313  | 0.66313 | 0.823304763 |             |          |         |
| NA         | ENSG00000255207 | -0.4211  | 0.66316 | -0.4211     | 0.66316     | -0.4211  | 0.66316 |
|            | -0.4211         | 0.66316  | 0.66316 | 0.823304763 |             |          |         |
| RN7SL329P  | ENSG00000242170 | -0.42122 | 0.6632  | -0.42122    | 0.6632      | -0.42122 |         |
|            | 0.6632          | -0.42122 | 0.6632  | 0.6632      | 0.823304763 |          |         |
| SLC38A6    | ENSG00000139974 | -0.59882 | 0.72535 | -0.42126    | 0.66322     | -0.42628 |         |
|            | 0.66505         | -0.43716 | 0.669   | 0.66322     | 0.823304763 |          |         |
| OR5AP1P    | ENSG00000254795 | -0.42127 | 0.66322 | -0.42127    | 0.66322     | -0.42127 |         |
|            | 0.66322         | -0.42127 | 0.66322 | 0.66322     | 0.823304763 |          |         |
| NA         | ENSG00000248984 | -0.55899 | 0.71192 | -0.42131    | 0.66323     | -0.5788  | 0.71864 |
|            | -0.80808        | 0.79048  | 0.66323 | 0.823304763 |             |          |         |
| NHP2P2     | ENSG00000213786 | -0.56399 | 0.71362 | -0.42138    | 0.66326     | -0.42138 |         |
|            | 0.66326         | -0.42138 | 0.66326 | 0.66326     | 0.823304763 |          |         |
| NECAB2     | ENSG00000103154 | -2.0242  | 0.97853 | -1.9803     | 0.97616     | -1.1768  |         |
|            | 0.88036         | -0.42141 | 0.66327 | 0.66327     | 0.823304763 |          |         |
| NAGPA-AS1  | ENSG00000267072 | -0.4214  | 0.66327 | -0.4214     | 0.66327     | -0.4214  |         |
|            | 0.66327         | -0.4214  | 0.66327 | 0.66327     | 0.823304763 |          |         |
| RTF2       | ENSG00000022277 | -0.4726  | 0.68175 | -0.44664    | 0.67243     | -0.52508 | 0.70024 |
|            | -0.42145        | 0.66329  | 0.66329 | 0.823304763 |             |          |         |
| NA         | ENSG00000271494 | -0.42146 | 0.66329 | -0.42146    | 0.66329     | -0.42146 | 0.66329 |
|            | -0.42146        | 0.66329  | 0.66329 | 0.823304763 |             |          |         |
| NACC2      | ENSG00000148411 | -0.42164 | 0.66336 | -1.2447     | 0.89338     | -0.76139 | 0.77679 |
|            | -0.61535        | 0.73084  | 0.66336 | 0.823349706 |             |          |         |
| TAAR7P     | ENSG00000235998 | -0.42164 | 0.66336 | -0.42164    | 0.66336     | -0.42164 |         |
|            | 0.66336         | -0.42164 | 0.66336 | 0.66336     | 0.823349706 |          |         |
| NA         | ENSG00000252784 | -0.4217  | 0.66338 | -0.4217     | 0.66338     | -0.4217  | 0.66338 |
|            | -0.4217         | 0.66338  | 0.66338 | 0.823353558 |             |          |         |
| NA         | ENSG00000254632 | -0.7956  | 0.78687 | -0.4218     | 0.66341     | -1.0237  | 0.847   |
|            | -1.0237         | 0.847    | 0.66341 | 0.823368966 |             |          |         |
| NA         | ENSG00000274624 | -1.8605  | 0.96859 | -1.8605     | 0.96859     | -0.62713 | 0.73471 |
|            | -0.42184        | 0.66343  | 0.66343 | 0.823368966 |             |          |         |
| NA         | ENSG00000250105 | -0.42192 | 0.66346 | -0.42192    | 0.66346     | -0.42192 | 0.66346 |
|            | -0.42192        | 0.66346  | 0.66346 | 0.823368966 |             |          |         |
| NA         | ENSG00000266352 | -0.42192 | 0.66346 | -0.42192    | 0.66346     | -0.42192 | 0.66346 |
|            | -0.42192        | 0.66346  | 0.66346 | 0.823368966 |             |          |         |
| RNU6-1057P | ENSG00000252971 | -2.2361  | 0.98733 | -1.4725     | 0.92956     | -0.42207 |         |
|            | 0.66351         | -1.0172  | 0.84547 | 0.66351     | 0.823410047 |          |         |
| NA         | ENSG00000241754 | -1.2511  | 0.89455 | -0.42212    | 0.66353     | -1.5854  | 0.94356 |
|            | -1.2875         | 0.90104  | 0.66353 | 0.823413897 |             |          |         |
| COL27A1    | ENSG00000196739 | -0.42221 | 0.66356 | -0.62467    | 0.73391     | -0.64367 |         |
|            | 0.7401          | -0.48646 | 0.68668 | 0.66356     | 0.823425446 |          |         |
| NA         | ENSG00000206660 | -0.42227 | 0.66358 | -0.42227    | 0.66358     | -0.42227 | 0.66358 |
|            | -0.42227        | 0.66358  | 0.66358 | 0.823425446 |             |          |         |
| VENTXP3    | ENSG00000257364 | -0.42229 | 0.66359 | -0.42229    | 0.66359     | -0.42229 |         |
|            | 0.66359         | -0.42229 | 0.66359 | 0.66359     | 0.823425446 |          |         |
| KCNAB2     | ENSG00000069424 | -0.57877 | 0.71863 | -0.87572    | 0.80941     | -0.4224  |         |
|            | 0.66363         | -0.74746 | 0.77261 | 0.66363     | 0.823433145 |          |         |
| MIR553     | ENSG00000207750 | -0.42239 | 0.66363 | -0.42239    | 0.66363     | -0.42239 |         |
|            | 0.66363         | -0.42239 | 0.66363 | 0.66363     | 0.823433145 |          |         |
| NA         | ENSG00000225854 | -0.42251 | 0.66367 | -0.42251    | 0.66367     | -0.42251 | 0.66367 |
|            | -0.42251        | 0.66367  | 0.66367 | 0.82345325  |             |          |         |
| RN7SL582P  | ENSG00000241156 | -0.42254 | 0.66368 | -0.42254    | 0.66368     | -0.91229 |         |
|            | 0.81919         | -0.42254 | 0.66368 | 0.66368     | 0.82345325  |          |         |
| NENFP1     | ENSG00000233647 | -0.4227  | 0.66374 | -0.4227     | 0.66374     | -0.4227  |         |

|            |                 |          |         |             |             |          |          |
|------------|-----------------|----------|---------|-------------|-------------|----------|----------|
|            | 0.66374         | -0.4227  | 0.66374 | 0.66374     | 0.823498167 |          |          |
| RPS12P20   | ENSG00000244134 | -0.42272 | 0.66375 | 0.66375     | -0.42272    | 0.66375  | -0.42272 |
|            | 0.66375         | -0.42272 | 0.66375 | 0.66375     | 0.823498167 |          |          |
| CASC2      | ENSG00000177640 | -1.3442  | 0.91055 | -1.1278     | 0.87031     | -0.42285 | 0.6638   |
|            | -1.6096         | 0.94626  | 0.6638  | 0.823530673 |             |          |          |
| MTND4LP26  | ENSG00000254015 | -0.42288 | 0.66381 | -0.65487    | 0.74373     | -0.70781 |          |
|            | 0.76047         | -0.55811 | 0.71161 | 0.66381     | 0.823530673 |          |          |
| NA         | ENSG00000223800 | -0.42301 | 0.66386 | -0.42301    | 0.66386     | -0.42301 | 0.66386  |
|            | -0.42301        | 0.66386  | 0.66386 | 0.823563176 |             |          |          |
| KRT18P63   | ENSG00000235413 | -0.42304 | 0.66387 | -0.42304    | 0.66387     | -0.42304 |          |
|            | 0.66387         | -0.42304 | 0.66387 | 0.66387     | 0.823563176 |          |          |
| HS2ST1     | ENSG00000153936 | -0.55547 | 0.71071 | -0.42326    | 0.66395     | -1.2428  |          |
|            | 0.89302         | -1.1617  | 0.87732 | 0.66395     | 0.823603363 |          |          |
| ANXA7      | ENSG00000138279 | -1.3206  | 0.90669 | -1.3479     | 0.91115     | -1.7427  | 0.95931  |
|            | -0.4233         | 0.66396  | 0.66396 | 0.823603363 |             |          |          |
| TMEM185B   | ENSG00000226479 | -0.42329 | 0.66396 | -0.42329    | 0.66396     | -0.42329 |          |
|            | 0.66396         | -0.42329 | 0.66396 | 0.66396     | 0.823603363 |          |          |
| BTF3L4P4   | ENSG00000229226 | -0.77683 | 0.78137 | -0.77683    | 0.78137     | -0.77683 |          |
|            | 0.78137         | -0.42331 | 0.66397 | 0.66397     | 0.823603363 |          |          |
| ATP9A      | ENSG00000054793 | -1.2475  | 0.89389 | -0.84455    | 0.80082     | -1.25    | 0.89435  |
|            | -0.42355        | 0.66405  | 0.66405 | 0.82368163  |             |          |          |
| NA         | ENSG00000218107 | -0.42366 | 0.66409 | -0.42366    | 0.66409     | -0.836   | 0.79842  |
|            | -0.42366        | 0.66409  | 0.66409 | 0.823710278 |             |          |          |
| POLDIP3    | ENSG00000100227 | -0.94849 | 0.82856 | -1.3117     | 0.90518     | -0.42372 |          |
|            | 0.66411         | -1.04    | 0.85083 | 0.66411     | 0.823714119 |          |          |
| VWDE       | ENSG00000146530 | -0.80669 | 0.79008 | -1.1499     | 0.8749      | -0.42388 | 0.66417  |
|            | -1.2154         | 0.8879   | 0.66417 | 0.823724757 |             |          |          |
| CCDC57     | ENSG00000176155 | -1.3135  | 0.9055  | -0.65397    | 0.74343     | -0.47487 |          |
|            | 0.68256         | -0.42388 | 0.66417 | 0.66417     | 0.823724757 |          |          |
| PRG2       | ENSG00000186652 | -0.42389 | 0.66418 | -0.42389    | 0.66418     | -0.42389 | 0.66418  |
|            | -0.42389        | 0.66418  | 0.66418 | 0.823724757 |             |          |          |
| RNU6ATAC9P | ENSG00000252019 | -0.42392 | 0.66419 | -0.42392    | 0.66419     | -0.42392 |          |
|            | 0.66419         | -0.42392 | 0.66419 | 0.66419     | 0.823724757 |          |          |
| CLK3P2     | ENSG00000226191 | -0.42399 | 0.66421 | -1.4622     | 0.92815     | -1.4622  |          |
|            | 0.92815         | -1.4622  | 0.92815 | 0.66421     | 0.823724757 |          |          |
| NA         | ENSG00000267520 | -0.42402 | 0.66422 | -0.42402    | 0.66422     | -0.42402 | 0.66422  |
|            | -0.42402        | 0.66422  | 0.66422 | 0.823724757 |             |          |          |
| NA         | ENSG00000234892 | -0.42408 | 0.66425 | -0.42408    | 0.66425     | -0.42408 | 0.66425  |
|            | -0.42408        | 0.66425  | 0.66425 | 0.823740998 |             |          |          |
| OR52B1P    | ENSG00000180909 | -0.42421 | 0.66429 | -0.42421    | 0.66429     | -1.5857  |          |
|            | 0.94359         | -0.43644 | 0.66874 | 0.66429     | 0.823769638 |          |          |
| ITGA10     | ENSG00000143127 | -0.42446 | 0.66438 | -0.88235    | 0.81121     | -0.88235 |          |
|            | 0.81121         | -0.88235 | 0.81121 | 0.66438     | 0.823839315 |          |          |
| NA         | ENSG00000225544 | -0.42446 | 0.66438 | -1.0776     | 0.8594      | -0.42446 | 0.66438  |
|            | -1.2554         | 0.89534  | 0.66438 | 0.823839315 |             |          |          |
| NT5C3B     | ENSG00000141698 | -0.80212 | 0.78876 | -0.80212    | 0.78876     | -0.42456 |          |
|            | 0.66442         | -0.80212 | 0.78876 | 0.66442     | 0.823867951 |          |          |
| CCDC200    | ENSG00000236383 | -0.57586 | 0.71764 | -0.42462    | 0.66444     | -0.7312  |          |
|            | 0.76767         | -0.57586 | 0.71764 | 0.66444     | 0.823871786 |          |          |
| SNRPF3     | ENSG00000225501 | -0.42473 | 0.66448 | -0.42473    | 0.66448     | -0.42473 |          |
|            | 0.66448         | -0.42473 | 0.66448 | 0.66448     | 0.823889171 |          |          |
| STOML1     | ENSG00000067221 | -0.78235 | 0.78299 | -0.75678    | 0.77541     | -1.0431  |          |
|            | 0.85156         | -0.42479 | 0.66451 | 0.66451     | 0.823889171 |          |          |
| FKBP5      | ENSG00000096060 | -0.63511 | 0.73732 | -0.42479    | 0.66451     | -0.7998  | 0.78809  |
|            | -0.73752        | 0.7696   | 0.66451 | 0.823889171 |             |          |          |
| NA         | ENSG00000236665 | -0.42491 | 0.66455 | -0.42491    | 0.66455     | -0.84126 | 0.7999   |
|            | -0.42491        | 0.66455  | 0.66455 | 0.823889171 |             |          |          |
| FASLG      | ENSG00000117560 | -0.42498 | 0.66458 | -0.42498    | 0.66458     | -0.42498 | 0.66458  |
|            | -0.42498        | 0.66458  | 0.66458 | 0.823889171 |             |          |          |
| RN7SKP252  | ENSG00000223142 | -0.8604  | 0.80522 | -0.8604     | 0.80522     | -0.8604  |          |
|            | 0.80522         | -0.42501 | 0.66458 | 0.66458     | 0.823889171 |          |          |
| RNA5SP49   | ENSG00000252259 | -0.42512 | 0.66463 | -0.42512    | 0.66463     | -0.42512 |          |

|           |                 |          |         |             |             |          |         |
|-----------|-----------------|----------|---------|-------------|-------------|----------|---------|
|           | 0.66463         | -0.42512 | 0.66463 | 0.66463     | 0.823889171 |          |         |
| FAR2      | ENSG00000064763 | -0.42516 | 0.66464 | -0.80651    | 0.79002     | -0.94695 | 0.82817 |
|           | -1.2996         | 0.90312  | 0.66464 | 0.823889171 |             |          |         |
| ABI1      | ENSG00000136754 | -0.43313 | 0.66754 | -0.71673    | 0.76323     | -0.68318 | 0.75275 |
|           | -0.42516        | 0.66464  | 0.66464 | 0.823889171 |             |          |         |
| NA        | ENSG00000232636 | -0.42515 | 0.66464 | -0.42515    | 0.66464     | -0.42515 | 0.66464 |
|           | -0.42515        | 0.66464  | 0.66464 | 0.823889171 |             |          |         |
| NA        | ENSG00000279573 | -0.42517 | 0.66464 | -0.42517    | 0.66464     | -0.42517 | 0.66464 |
|           | -0.42517        | 0.66464  | 0.66464 | 0.823889171 |             |          |         |
| NA        | ENSG00000242088 | -0.42525 | 0.66467 | -0.42525    | 0.66467     | -0.42525 | 0.66467 |
|           | -0.42525        | 0.66467  | 0.66467 | 0.8239054   |             |          |         |
| GRAMD4    | ENSG00000075240 | -0.42529 | 0.66469 | -0.48294    | 0.68543     | -0.48294 |         |
|           | 0.68543         | -0.48294 | 0.68543 | 0.66469     | 0.823909234 |          |         |
| NA        | ENSG00000221345 | -0.42545 | 0.66474 | -0.42545    | 0.66474     | -0.42545 | 0.66474 |
|           | -0.42545        | 0.66474  | 0.66474 | 0.823950252 |             |          |         |
| NA        | ENSG00000238645 | -0.42576 | 0.66486 | -0.42576    | 0.66486     | -0.42576 | 0.66486 |
|           | -0.42576        | 0.66486  | 0.66486 | 0.824035206 |             |          |         |
| MRPL39    | ENSG00000154719 | -0.79905 | 0.78787 | -0.42581    | 0.66488     | -0.42581 |         |
|           | 0.66488         | -0.69103 | 0.75523 | 0.66488     | 0.824035206 |          |         |
| OR10J6P   | ENSG00000158731 | -0.72496 | 0.76576 | -0.42582    | 0.66488     | -0.42582 |         |
|           | 0.66488         | -0.42582 | 0.66488 | 0.66488     | 0.824035206 |          |         |
| NA        | ENSG00000283464 | -0.42586 | 0.6649  | -0.42586    | 0.6649      | -0.42586 | 0.6649  |
|           | -0.42586        | 0.6649   | 0.6649  | 0.824035206 |             |          |         |
| NA        | ENSG00000248537 | -0.4259  | 0.66491 | -0.91961    | 0.82111     | -0.60467 | 0.7273  |
|           | -0.66302        | 0.74634  | 0.66491 | 0.824035206 |             |          |         |
| NA        | ENSG00000279809 | -0.4259  | 0.66491 | -0.4259     | 0.66491     | -0.4259  | 0.66491 |
|           | -0.4259         | 0.66491  | 0.66491 | 0.824035206 |             |          |         |
| ROCK1     | ENSG00000067900 | -0.55986 | 0.71221 | -0.42596    | 0.66493     | -0.73837 | 0.76985 |
|           | -0.57988        | 0.719    | 0.66493 | 0.824039035 |             |          |         |
| NA        | ENSG00000280288 | -0.6752  | 0.75022 | -1.1398     | 0.87283     | -0.42604 | 0.66496 |
|           | -0.7636         | 0.77745  | 0.66496 | 0.824041958 |             |          |         |
| PWRN2     | ENSG00000260551 | -0.42607 | 0.66497 | -1.1159     | 0.86777     | -1.4365  | 0.92457 |
|           | -0.9087         | 0.81824  | 0.66497 | 0.824041958 |             |          |         |
| NA        | ENSG00000232895 | -0.68617 | 0.7537  | -0.42614    | 0.665       | -0.68617 | 0.7537  |
|           | -0.68617        | 0.7537   | 0.665   | 0.824041958 |             |          |         |
| NA        | ENSG00000279844 | -0.84634 | 0.80132 | -1.0756     | 0.85894     | -0.42614 | 0.665   |
|           | -1.3418         | 0.91017  | 0.665   | 0.824041958 |             |          |         |
| GALNT18   | ENSG00000110328 | -1.5543  | 0.93994 | -0.4262     | 0.66502     | -1.0941  |         |
|           | 0.86304         | -1.7858  | 0.96293 | 0.66502     | 0.824045787 |          |         |
| LINC00301 | ENSG00000181995 | -1.3361  | 0.90924 | -0.42627    | 0.66504     | -0.45489 |         |
|           | 0.6754          | -0.71513 | 0.76274 | 0.66504     | 0.824049615 |          |         |
| NA        | ENSG00000201884 | -0.42636 | 0.66508 | -0.42636    | 0.66508     | -0.42636 | 0.66508 |
|           | -0.42636        | 0.66508  | 0.66508 | 0.824069661 |             |          |         |
| OSBP2     | ENSG00000184792 | -0.42639 | 0.66509 | -2.3542     | 0.99072     | -2.1161  | 0.98283 |
|           | -1.9542         | 0.97466  | 0.66509 | 0.824069661 |             |          |         |
| SMU1P1    | ENSG00000237842 | -0.42653 | 0.66514 | -0.42653    | 0.66514     | -0.52963 |         |
|           | 0.70181         | -1.0439  | 0.85172 | 0.66514     | 0.824107926 |          |         |
| UBE2V1P12 | ENSG00000249191 | -0.58981 | 0.72234 | -0.58981    | 0.72234     | -0.58981 |         |
|           | 0.72234         | -0.42664 | 0.66518 | 0.66518     | 0.824107926 |          |         |
| NA        | ENSG00000273729 | -0.4267  | 0.6652  | -0.4267     | 0.6652      | -0.4267  | 0.6652  |
|           | -0.4267         | 0.6652   | 0.6652  | 0.824107926 |             |          |         |
| LINC00313 | ENSG00000185186 | -0.42684 | 0.66525 | -0.42684    | 0.66525     | -0.73162 |         |
|           | 0.7678          | -0.59793 | 0.72506 | 0.66525     | 0.824107926 |          |         |
| RN7SKP128 | ENSG00000201140 | -0.42684 | 0.66525 | -0.42684    | 0.66525     | -0.42684 |         |
|           | 0.66525         | -0.42684 | 0.66525 | 0.66525     | 0.824107926 |          |         |
| SEPHS1P6  | ENSG00000213938 | -0.49946 | 0.69127 | -0.49946    | 0.69127     | -0.49946 |         |
|           | 0.69127         | -0.42683 | 0.66525 | 0.66525     | 0.824107926 |          |         |
| RPL29P24  | ENSG00000241030 | -0.4269  | 0.66527 | -0.4269     | 0.66527     | -0.4269  |         |
|           | 0.66527         | -0.4269  | 0.66527 | 0.66527     | 0.824107926 |          |         |
| NA        | ENSG00000225965 | -0.42691 | 0.66528 | -1.103      | 0.86499     | -0.42691 | 0.66528 |
|           | -0.42691        | 0.66528  | 0.66528 | 0.824107926 |             |          |         |
| RNU4-54P  | ENSG00000252237 | -1.2119  | 0.88723 | -1.2119     | 0.88723     | -1.2119  |         |

|            |                 |          |         |             |             |          |         |
|------------|-----------------|----------|---------|-------------|-------------|----------|---------|
|            | 0.88723         | -0.42691 | 0.66528 | 0.66528     | 0.824107926 |          |         |
| LINC01697  | ENSG00000232079 | -1.1809  | 0.88117 | -0.62845    | 0.73515     | -0.56887 |         |
|            | 0.71528         | -0.42695 | 0.66529 | 0.66529     | 0.824107926 |          |         |
| NA         | ENSG00000229370 | -0.92307 | 0.82202 | -0.72925    | 0.76707     | -1.353   | 0.91198 |
|            | -0.4271         | 0.66535  | 0.66535 | 0.824110841 |             |          |         |
| NA         | ENSG00000244192 | -1.6013  | 0.94535 | -1.6983     | 0.95528     | -1.6983  | 0.95528 |
|            | -0.42711        | 0.66535  | 0.66535 | 0.824110841 |             |          |         |
| U2AF1L4    | ENSG00000161265 | -0.42713 | 0.66536 | -0.42713    | 0.66536     | -0.42713 |         |
|            | 0.66536         | -0.42713 | 0.66536 | 0.66536     | 0.824110841 |          |         |
| NA         | ENSG00000267120 | -0.42713 | 0.66536 | -0.42713    | 0.66536     | -0.42713 | 0.66536 |
|            | -0.42713        | 0.66536  | 0.66536 | 0.824110841 |             |          |         |
| HNRNPA1    | ENSG00000135486 | -0.42723 | 0.66539 | -1.1284     | 0.87043     | -0.42723 |         |
|            | 0.66539         | -0.42723 | 0.66539 | 0.66539     | 0.824127051 |          |         |
| LINC02050  | ENSG00000242781 | -0.42736 | 0.66544 | -1.4536     | 0.92697     | -1.4536  |         |
|            | 0.92697         | -1.4536  | 0.92697 | 0.66544     | 0.824168032 |          |         |
| RNU6-1165P | ENSG00000222051 | -0.42743 | 0.66547 | -0.42743    | 0.66547     | -0.42743 |         |
|            | 0.66547         | -0.42743 | 0.66547 | 0.66547     | 0.82418424  |          |         |
| ZSCAN22    | ENSG00000182318 | -0.64842 | 0.74164 | -0.43845    | 0.66947     | -0.42765 |         |
|            | 0.66555         | -0.64842 | 0.74164 | 0.66555     | 0.824262371 |          |         |
| MRPS35     | ENSG00000061794 | -0.7159  | 0.76297 | -0.81739    | 0.79315     | -1.4344  |         |
|            | 0.92428         | -0.42785 | 0.66562 | 0.66562     | 0.824320587 |          |         |
| NA         | ENSG00000237954 | -0.428   | 0.66567 | -0.428      | 0.66567     | -0.428   | 0.66567 |
|            | -0.428          | 0.66567  | 0.66567 | 0.824320587 |             |          |         |
| SEPTIN7P9  | ENSG00000120555 | -0.74099 | 0.77065 | -0.74099    | 0.77065     | -0.60909 |         |
|            | 0.72877         | -0.428   | 0.66568 | 0.66568     | 0.824320587 |          |         |
| ZNF781     | ENSG00000196381 | -1.1866  | 0.8823  | -0.42804    | 0.66569     | -1.1866  |         |
|            | 0.8823          | -1.1866  | 0.8823  | 0.66569     | 0.824320587 |          |         |
| NA         | ENSG00000254293 | -0.42808 | 0.6657  | -0.42808    | 0.6657      | -0.42808 | 0.6657  |
|            | -0.42808        | 0.6657   | 0.6657  | 0.824320587 |             |          |         |
| NA         | ENSG00000256280 | -0.95699 | 0.83071 | -1.5837     | 0.94337     | -0.42808 | 0.6657  |
|            | -0.42808        | 0.6657   | 0.6657  | 0.824320587 |             |          |         |
| HSPA5      | ENSG00000044574 | -0.71366 | 0.76228 | -0.71366    | 0.76228     | -0.89746 | 0.81526 |
|            | -0.42822        | 0.66575  | 0.66575 | 0.824320587 |             |          |         |
| SH3BP5-AS1 | ENSG00000224660 | -0.8296  | 0.79662 | -1.5985     | 0.94504     | -0.42822 |         |
|            | 0.66575         | -0.42822 | 0.66575 | 0.66575     | 0.824320587 |          |         |
| PPIAP29    | ENSG00000214975 | -0.42826 | 0.66577 | -1.2069     | 0.88626     | -0.56715 |         |
|            | 0.71469         | -1.2069  | 0.88626 | 0.66577     | 0.824320587 |          |         |
| STARD9     | ENSG00000159433 | -0.99891 | 0.84108 | -1.3897     | 0.9177      | -0.42831 |         |
|            | 0.66579         | -1.4955  | 0.9326  | 0.66579     | 0.824320587 |          |         |
| RNU6-572P  | ENSG00000252533 | -1.3343  | 0.90895 | -0.92988    | 0.82378     | -0.42832 |         |
|            | 0.66579         | -0.42832 | 0.66579 | 0.66579     | 0.824320587 |          |         |
| TRAJ61     | ENSG00000211831 | -0.42833 | 0.6658  | -0.94366    | 0.82733     | -0.94366 |         |
|            | 0.82733         | -0.94366 | 0.82733 | 0.6658      | 0.824320587 |          |         |
| NA         | ENSG00000231297 | -0.42842 | 0.66583 | -0.44081    | 0.67032     | -1.268   | 0.8976  |
|            | -0.82067        | 0.79408  | 0.66583 | 0.824336786 |             |          |         |
| LRRC47     | ENSG00000130764 | -0.88744 | 0.81258 | -0.88744    | 0.81258     | -1.1923  |         |
|            | 0.88343         | -0.42853 | 0.66587 | 0.66587     | 0.824365364 |          |         |
| GREB1L     | ENSG00000141449 | -0.42859 | 0.66589 | -0.90794    | 0.81805     | -0.71805 |         |
|            | 0.76364         | -0.927   | 0.82304 | 0.66589     | 0.824369181 |          |         |
| R3HDM2     | ENSG00000179912 | -0.63587 | 0.73757 | -0.55888    | 0.71188     | -0.97433 |         |
|            | 0.83505         | -0.42869 | 0.66593 | 0.66593     | 0.824397757 |          |         |
| NA         | ENSG00000228206 | -0.73504 | 0.76884 | -0.85454    | 0.8036      | -0.42875 | 0.66595 |
|            | -0.99816        | 0.8409   | 0.66595 | 0.824401573 |             |          |         |
| NA         | ENSG00000259873 | -0.42899 | 0.66603 | -0.42899    | 0.66603     | -0.42899 | 0.66603 |
|            | -0.42899        | 0.66603  | 0.66603 | 0.824436914 |             |          |         |
| ZBED3-AS1  | ENSG00000250802 | -0.53957 | 0.70525 | -0.43942    | 0.66982     | -0.61595 |         |
|            | 0.73104         | -0.42904 | 0.66605 | 0.66605     | 0.824436914 |          |         |
| NA         | ENSG00000267015 | -0.42904 | 0.66605 | -1.2051     | 0.88591     | -0.42904 | 0.66605 |
|            | -0.42904        | 0.66605  | 0.66605 | 0.824436914 |             |          |         |
| NA         | ENSG00000219619 | -0.42908 | 0.66607 | -0.61354    | 0.73024     | -0.61354 | 0.73024 |
|            | -0.61354        | 0.73024  | 0.66607 | 0.824436914 |             |          |         |
| BANCR      | ENSG00000278910 | -0.42914 | 0.66609 | -0.42914    | 0.66609     | -0.42914 | 0.66609 |

|           |                 |          |         |             |             |          |         |
|-----------|-----------------|----------|---------|-------------|-------------|----------|---------|
|           | -0.42914        | 0.66609  | 0.66609 | 0.824436914 |             |          |         |
| STPG2-AS1 | ENSG00000251620 | -0.98537 | 0.83778 | -0.42916    | 0.6661      | -0.42916 |         |
|           | 0.6661          | -0.69407 | 0.75618 | 0.6661      | 0.824436914 |          |         |
| NXN       | ENSG00000167693 | -0.6732  | 0.74959 | -1.0255     | 0.84744     | -0.8111  | 0.79135 |
|           | -0.42923        | 0.66612  | 0.66612 | 0.824436914 |             |          |         |
| DUSP3     | ENSG00000108861 | -0.71716 | 0.76336 | -0.42928    | 0.66614     | -0.42928 | 0.66614 |
|           | -0.59413        | 0.72379  | 0.66614 | 0.824436914 |             |          |         |
| NA        | ENSG00000263765 | -1.5031  | 0.93359 | -0.42933    | 0.66616     | -1.5031  | 0.93359 |
|           | -1.5031         | 0.93359  | 0.66616 | 0.824436914 |             |          |         |
| NA        | ENSG00000263923 | -0.85764 | 0.80445 | -0.93228    | 0.8244      | -0.9916  | 0.8393  |
|           | -0.42934        | 0.66616  | 0.66616 | 0.824436914 |             |          |         |
| NA        | ENSG00000238312 | -0.86857 | 0.80746 | -0.74924    | 0.77314     | -0.42943 | 0.66619 |
|           | -1.2101         | 0.88688  | 0.66619 | 0.824436914 |             |          |         |
| NA        | ENSG00000261460 | -0.42944 | 0.6662  | -0.42944    | 0.6662      | -0.42944 | 0.6662  |
|           | -0.42944        | 0.6662   | 0.6662  | 0.824436914 |             |          |         |
| NA        | ENSG00000207131 | -0.63378 | 0.73689 | -0.46039    | 0.67738     | -0.69391 | 0.75613 |
|           | -0.42957        | 0.66625  | 0.66625 | 0.824436914 |             |          |         |
| NA        | ENSG00000267800 | -0.42962 | 0.66626 | -0.42962    | 0.66626     | -0.42962 | 0.66626 |
|           | -0.42962        | 0.66626  | 0.66626 | 0.824436914 |             |          |         |
| NA        | ENSG00000231804 | -1.027   | 0.84778 | -1.027      | 0.84778     | -1.027   | 0.84778 |
|           | -0.42968        | 0.66628  | 0.66628 | 0.824436914 |             |          |         |
| CLDND2    | ENSG00000160318 | -0.4297  | 0.66629 | -0.4297     | 0.66629     | -0.4297  |         |
|           | 0.66629         | -0.4297  | 0.66629 | 0.66629     | 0.824436914 |          |         |
| NA        | ENSG00000269403 | -0.4297  | 0.66629 | -0.4297     | 0.66629     | -0.4297  | 0.66629 |
|           | -0.4297         | 0.66629  | 0.66629 | 0.824436914 |             |          |         |
| PBK       | ENSG00000168078 | -1.6002  | 0.94523 | -0.42971    | 0.6663      | -1.0365  | 0.85003 |
|           | -2.1861         | 0.9856   | 0.6663  | 0.824436914 |             |          |         |
| OR5BP1P   | ENSG00000273255 | -0.42972 | 0.6663  | -0.42972    | 0.6663      | -0.42972 |         |
|           | 0.6663          | -0.42972 | 0.6663  | 0.6663      | 0.824436914 |          |         |
| NR1D1     | ENSG00000126368 | -0.43012 | 0.66645 | -0.43012    | 0.66645     | -0.43012 | 0.66645 |
|           | -0.43012        | 0.66645  | 0.66645 | 0.824508334 |             |          |         |
| OR2AE1    | ENSG00000244623 | -0.70936 | 0.76095 | -0.43016    | 0.66646     | -0.70936 |         |
|           | 0.76095         | -0.70936 | 0.76095 | 0.66646     | 0.824508334 |          |         |
| MIR765    | ENSG00000211581 | -0.43021 | 0.66648 | -0.43021    | 0.66648     | -0.43021 |         |
|           | 0.66648         | -0.43021 | 0.66648 | 0.66648     | 0.824508334 |          |         |
| RN7SL487P | ENSG00000243871 | -0.50276 | 0.69243 | -0.4302     | 0.66648     | -0.50276 |         |
|           | 0.69243         | -0.50276 | 0.69243 | 0.66648     | 0.824508334 |          |         |
| NA        | ENSG00000271204 | -0.43023 | 0.66649 | -0.43023    | 0.66649     | -0.43023 | 0.66649 |
|           | -0.43023        | 0.66649  | 0.66649 | 0.824508334 |             |          |         |
| DPYSL3    | ENSG00000113657 | -0.81113 | 0.79136 | -0.89938    | 0.81577     | -0.43028 |         |
|           | 0.6665          | -0.86233 | 0.80575 | 0.6665      | 0.824508334 |          |         |
| RPS6P15   | ENSG00000230809 | -0.43027 | 0.6665  | -0.43027    | 0.6665      | -0.43027 |         |
|           | 0.6665          | -0.43027 | 0.6665  | 0.6665      | 0.824508334 |          |         |
| SNORA10B  | ENSG00000207187 | -0.94989 | 0.82892 | -0.43029    | 0.66651     | -1.5495  |         |
|           | 0.93937         | -0.81173 | 0.79153 | 0.66651     | 0.824508334 |          |         |
| LINC01198 | ENSG00000231817 | -1.177   | 0.88041 | -0.78804    | 0.78466     | -1.5015  |         |
|           | 0.93339         | -0.4303  | 0.66651 | 0.66651     | 0.824508334 |          |         |
| NA        | ENSG00000269463 | -0.43035 | 0.66653 | -0.43035    | 0.66653     | -0.43035 | 0.66653 |
|           | -0.43035        | 0.66653  | 0.66653 | 0.824512144 |             |          |         |
| NA        | ENSG00000254517 | -0.43395 | 0.66784 | -0.43045    | 0.66657     | -1.9796  | 0.97613 |
|           | -1.9183         | 0.97246  | 0.66657 | 0.824540694 |             |          |         |
| NA        | ENSG00000274964 | -0.43061 | 0.66662 | -0.43061    | 0.66662     | -0.43061 | 0.66662 |
|           | -0.43061        | 0.66662  | 0.66662 | 0.824573051 |             |          |         |
| DUSP23    | ENSG00000158716 | -0.43062 | 0.66663 | -0.43062    | 0.66663     | -0.89368 |         |
|           | 0.81425         | -0.5024  | 0.69231 | 0.66663     | 0.824573051 |          |         |
| RPL29P22  | ENSG00000239924 | -0.43073 | 0.66667 | -0.55553    | 0.71073     | -0.97072 |         |
|           | 0.83415         | -0.97072 | 0.83415 | 0.66667     | 0.824601597 |          |         |
| NA        | ENSG00000279798 | -0.43096 | 0.66675 | -0.43096    | 0.66675     | -0.43096 | 0.66675 |
|           | -0.43096        | 0.66675  | 0.66675 | 0.824621592 |             |          |         |
| RN7SKP131 | ENSG00000222630 | -0.43104 | 0.66678 | -0.43104    | 0.66678     | -0.43104 |         |
|           | 0.66678         | -0.43104 | 0.66678 | 0.66678     | 0.824621592 |          |         |
| NA        | ENSG00000226324 | -0.43116 | 0.66682 | -0.43116    | 0.66682     | -0.43116 | 0.66682 |

|            |                 |          |         |             |             |          |         |  |
|------------|-----------------|----------|---------|-------------|-------------|----------|---------|--|
|            | -0.43116        | 0.66682  | 0.66682 | 0.824621592 |             |          |         |  |
| SBDS       | ENSG00000126524 | -0.50331 | 0.69263 | -0.43121    | 0.66684     | -0.99838 | 0.84095 |  |
|            | -0.48953        | 0.68777  | 0.66684 | 0.824621592 |             |          |         |  |
| NA         | ENSG00000224605 | -0.43121 | 0.66684 | -0.43121    | 0.66684     | -0.43121 | 0.66684 |  |
|            | -0.43121        | 0.66684  | 0.66684 | 0.824621592 |             |          |         |  |
| NA         | ENSG00000279527 | -0.4312  | 0.66684 | -0.65523    | 0.74384     | -0.49458 | 0.68955 |  |
|            | -0.65523        | 0.74384  | 0.66684 | 0.824621592 |             |          |         |  |
| MIR559     | ENSG00000207923 | -0.43124 | 0.66685 | -0.43124    | 0.66685     | -0.43124 |         |  |
|            | 0.66685         | -0.43124 | 0.66685 | 0.66685     | 0.824621592 |          |         |  |
| RPS29P21   | ENSG00000241913 | -0.43122 | 0.66685 | -0.43122    | 0.66685     | -0.43122 |         |  |
|            | 0.66685         | -0.43122 | 0.66685 | 0.66685     | 0.824621592 |          |         |  |
| HSPD1P14   | ENSG00000227000 | -1.3653  | 0.91392 | -0.43125    | 0.66686     | -1.503   |         |  |
|            | 0.93358         | -1.3653  | 0.91392 | 0.66686     | 0.824621592 |          |         |  |
| PTRH1      | ENSG00000187024 | -0.43131 | 0.66688 | -0.43131    | 0.66688     | -0.43131 | 0.66688 |  |
|            | -0.43131        | 0.66688  | 0.66688 | 0.824621592 |             |          |         |  |
| NR2C1      | ENSG00000120798 | -1.1724  | 0.87949 | -0.43136    | 0.6669      | -1.2415  | 0.89278 |  |
|            | -1.3162         | 0.90595  | 0.6669  | 0.824621592 |             |          |         |  |
| SNORD113-6 | ENSG00000200215 | -0.73022 | 0.76737 | -0.73022    | 0.76737     | -0.43144 |         |  |
|            | 0.66693         | -0.86172 | 0.80558 | 0.66693     | 0.824621592 |          |         |  |
| NA         | ENSG00000271250 | -0.43145 | 0.66693 | -1.3916     | 0.91798     | -0.44364 | 0.67135 |  |
|            | -0.62262        | 0.73323  | 0.66693 | 0.824621592 |             |          |         |  |
| NA         | ENSG00000280028 | -0.43146 | 0.66693 | -0.43146    | 0.66693     | -0.43146 | 0.66693 |  |
|            | -0.43146        | 0.66693  | 0.66693 | 0.824621592 |             |          |         |  |
| DDX28      | ENSG00000182810 | -0.43149 | 0.66694 | -0.43149    | 0.66694     | -0.43149 | 0.66694 |  |
|            | -0.43149        | 0.66694  | 0.66694 | 0.824621592 |             |          |         |  |
| NA         | ENSG00000249098 | -0.43159 | 0.66698 | -0.43159    | 0.66698     | -0.43159 | 0.66698 |  |
|            | -0.43159        | 0.66698  | 0.66698 | 0.824650126 |             |          |         |  |
| PIP5K1B    | ENSG00000107242 | -1.7206  | 0.95734 | -1.3902     | 0.91776     | -0.43164 | 0.667   |  |
|            | -1.6902         | 0.9545   | 0.667   | 0.82465393  |             |          |         |  |
| RNU6-118P  | ENSG00000252361 | -0.43173 | 0.66703 | -0.43173    | 0.66703     | -0.43173 |         |  |
|            | 0.66703         | -1.2606  | 0.89627 | 0.66703     | 0.824670098 |          |         |  |
| RNU6-1206P | ENSG00000252148 | -0.43189 | 0.66709 | -0.43189    | 0.66709     | -0.43189 |         |  |
|            | 0.66709         | -0.43189 | 0.66709 | 0.66709     | 0.824723353 |          |         |  |
| SNORA70B   | ENSG00000206937 | -0.43196 | 0.66712 | -0.43196    | 0.66712     | -0.43196 |         |  |
|            | 0.66712         | -0.43196 | 0.66712 | 0.66712     | 0.824739518 |          |         |  |
| HMG2P11    | ENSG00000232605 | -0.43204 | 0.66714 | -2.0681     | 0.98069     | -0.43204 |         |  |
|            | 0.66714         | -0.43204 | 0.66714 | 0.66714     | 0.82474332  |          |         |  |
| RPL30P9    | ENSG00000242709 | -0.43207 | 0.66716 | -0.8408     | 0.79977     | -1.0858  |         |  |
|            | 0.86122         | -0.97076 | 0.83416 | 0.66716     | 0.824747122 |          |         |  |
| NA         | ENSG00000257038 | -0.74426 | 0.77164 | -0.43223    | 0.66721     | -0.74426 | 0.77164 |  |
|            | -0.74426        | 0.77164  | 0.66721 | 0.82476226  |             |          |         |  |
| NA         | ENSG00000231964 | -0.43232 | 0.66724 | -0.43232    | 0.66724     | -0.43232 | 0.66724 |  |
|            | -0.43232        | 0.66724  | 0.66724 | 0.82476226  |             |          |         |  |
| SKA3       | ENSG00000165480 | -1.7148  | 0.95681 | -1.5591     | 0.94052     | -0.43234 | 0.66725 |  |
|            | -1.6542         | 0.95096  | 0.66725 | 0.82476226  |             |          |         |  |
| THAP12P2   | ENSG00000243915 | -0.85648 | 0.80413 | -1.7034     | 0.95575     | -0.43236 |         |  |
|            | 0.66726         | -0.43236 | 0.66726 | 0.66726     | 0.82476226  |          |         |  |
| EIF4A1P7   | ENSG00000235472 | -0.85837 | 0.80466 | -0.43238    | 0.66727     | -0.6288  |         |  |
|            | 0.73526         | -0.6288  | 0.73526 | 0.66727     | 0.82476226  |          |         |  |
| LINC00929  | ENSG00000259150 | -0.5439  | 0.70675 | -0.62182    | 0.73297     | -0.43249 |         |  |
|            | 0.66731         | -0.48774 | 0.68713 | 0.66731     | 0.82476226  |          |         |  |
| NA         | ENSG00000251374 | -0.88162 | 0.81101 | -0.65636    | 0.7442      | -0.43259 | 0.66734 |  |
|            | -0.43259        | 0.66734  | 0.66734 | 0.82476226  |             |          |         |  |
| MIR551B    | ENSG00000207717 | -0.43266 | 0.66737 | -0.43266    | 0.66737     | -0.43266 |         |  |
|            | 0.66737         | -0.43266 | 0.66737 | 0.66737     | 0.82476226  |          |         |  |
| DUX4L27    | ENSG00000258794 | -1.1411  | 0.87309 | -0.43642    | 0.66873     | -0.43265 |         |  |
|            | 0.66737         | -0.43265 | 0.66737 | 0.66737     | 0.82476226  |          |         |  |
| HECTD3     | ENSG00000126107 | -1.8395  | 0.96708 | -0.43268    | 0.66738     | -0.7882  |         |  |
|            | 0.78471         | -1.4219  | 0.92248 | 0.66738     | 0.82476226  |          |         |  |
| UCP1       | ENSG00000109424 | -0.43271 | 0.66739 | -0.43271    | 0.66739     | -0.43271 | 0.66739 |  |
|            | -0.43271        | 0.66739  | 0.66739 | 0.82476226  |             |          |         |  |
| NA         | ENSG00000261184 | -0.43273 | 0.66739 | -0.43273    | 0.66739     | -0.43273 | 0.66739 |  |



|             |                 |          |         |             |             |          |         |
|-------------|-----------------|----------|---------|-------------|-------------|----------|---------|
|             | -0.43273        | 0.66739  | 0.66739 | 0.82476226  |             |          |         |
| PPIAP79     | ENSG00000214853 | -0.43279 | 0.66742 | -0.43279    | 0.66742     | -0.43279 |         |
|             | 0.66742         | -0.43279 | 0.66742 | 0.66742     | 0.82476226  |          |         |
| NA          | ENSG00000269873 | -0.43281 | 0.66742 | -0.43281    | 0.66742     | -0.43281 | 0.66742 |
|             | -0.43281        | 0.66742  | 0.66742 | 0.82476226  |             |          |         |
| BIN2        | ENSG00000110934 | -1.2096  | 0.88678 | -0.90032    | 0.81603     | -0.43284 | 0.66743 |
|             | -0.43284        | 0.66743  | 0.66743 | 0.82476226  |             |          |         |
| NA          | ENSG00000272983 | -0.43315 | 0.66755 | -1.1016     | 0.86469     | -1.1188  | 0.86839 |
|             | -0.89677        | 0.81508  | 0.66755 | 0.82476226  |             |          |         |
| NA          | ENSG00000270006 | -0.43318 | 0.66756 | -0.43318    | 0.66756     | -0.43318 | 0.66756 |
|             | -0.43318        | 0.66756  | 0.66756 | 0.82476226  |             |          |         |
| NA          | ENSG00000269515 | -0.43321 | 0.66757 | -0.43321    | 0.66757     | -0.43321 | 0.66757 |
|             | -0.43321        | 0.66757  | 0.66757 | 0.82476226  |             |          |         |
| KCTD8       | ENSG00000183783 | -0.43323 | 0.66758 | -1.2546     | 0.89519     | -1.6709  | 0.95263 |
|             | -1.7495         | 0.9599   | 0.66758 | 0.82476226  |             |          |         |
| NA          | ENSG00000269982 | -0.43323 | 0.66758 | -0.43323    | 0.66758     | -0.43323 | 0.66758 |
|             | -0.43323        | 0.66758  | 0.66758 | 0.82476226  |             |          |         |
| NA          | ENSG00000282836 | -0.70438 | 0.7594  | -0.43325    | 0.66758     | -0.43325 | 0.66758 |
|             | -0.43325        | 0.66758  | 0.66758 | 0.82476226  |             |          |         |
| MAGI2       | ENSG00000187391 | -1.565   | 0.94121 | -1.9637     | 0.97522     | -1.8262  | 0.96609 |
|             | -0.43332        | 0.66761  | 0.66761 | 0.82476226  |             |          |         |
| NA          | ENSG00000228040 | -0.43331 | 0.66761 | -1.0449     | 0.85196     | -0.85335 | 0.80327 |
|             | -0.85335        | 0.80327  | 0.66761 | 0.82476226  |             |          |         |
| NA          | ENSG00000263369 | -0.45863 | 0.67675 | -1.2397     | 0.89247     | -0.45863 | 0.67675 |
|             | -0.43333        | 0.66761  | 0.66761 | 0.82476226  |             |          |         |
| SLC10A4     | ENSG00000145248 | -0.82634 | 0.79569 | -0.77364    | 0.78043     | -0.43338 |         |
|             | 0.66763         | -1.2081  | 0.8865  | 0.66763     | 0.82476226  |          |         |
| PPIAP8      | ENSG00000225185 | -0.43339 | 0.66763 | -0.43339    | 0.66763     | -0.43339 |         |
|             | 0.66763         | -0.43339 | 0.66763 | 0.66763     | 0.82476226  |          |         |
| DHX38       | ENSG00000140829 | -0.43341 | 0.66764 | -0.71444    | 0.76252     | -0.43341 | 0.66764 |
|             | -0.43341        | 0.66764  | 0.66764 | 0.82476226  |             |          |         |
| SCAMP4      | ENSG00000227500 | -0.4799  | 0.68435 | -0.43348    | 0.66767     | -0.49749 |         |
|             | 0.69058         | -0.4799  | 0.68435 | 0.66767     | 0.82476226  |          |         |
| NMRK2       | ENSG00000077009 | -0.9     | 0.81594 | -0.4335     | 0.66768     | -0.95292 | 0.82968 |
|             | -0.53671        | 0.70427  | 0.66768 | 0.82476226  |             |          |         |
| NA          | ENSG00000255680 | -0.43353 | 0.66768 | -0.43353    | 0.66768     | -0.43353 | 0.66768 |
|             | -0.43353        | 0.66768  | 0.66768 | 0.82476226  |             |          |         |
| NDUFA5      | ENSG00000128609 | -0.54456 | 0.70697 | -0.53636    | 0.70414     | -0.53636 |         |
|             | 0.70414         | -0.43385 | 0.6678  | 0.6678      | 0.824843005 |          |         |
| TERF1P5     | ENSG00000226361 | -0.43384 | 0.6678  | -0.43384    | 0.6678      | -1.0131  |         |
|             | 0.8445          | -1.8583  | 0.96844 | 0.6678      | 0.824843005 |          |         |
| OR51A5P     | ENSG00000225003 | -0.4339  | 0.66782 | -0.4339     | 0.66782     | -0.4339  |         |
|             | 0.66782         | -0.4339  | 0.66782 | 0.66782     | 0.824843005 |          |         |
| NA          | ENSG00000231530 | -0.43391 | 0.66782 | -0.43391    | 0.66782     | -0.43391 | 0.66782 |
|             | -0.43391        | 0.66782  | 0.66782 | 0.824843005 |             |          |         |
| NA          | ENSG00000262413 | -0.43393 | 0.66783 | -0.43393    | 0.66783     | -0.43393 | 0.66783 |
|             | -0.43393        | 0.66783  | 0.66783 | 0.824843005 |             |          |         |
| NA          | ENSG00000259366 | -0.43404 | 0.66787 | -0.43404    | 0.66787     | -0.43404 | 0.66787 |
|             | -0.43404        | 0.66787  | 0.66787 | 0.824871502 |             |          |         |
| LINC00613   | ENSG00000248330 | -1.0739  | 0.85857 | -0.43411    | 0.6679      | -0.43411 |         |
|             | 0.6679          | -0.43411 | 0.6679  | 0.6679      | 0.824879091 |          |         |
| NA          | ENSG00000261457 | -0.43415 | 0.66791 | -0.43415    | 0.66791     | -0.43415 | 0.66791 |
|             | -0.43415        | 0.66791  | 0.66791 | 0.824879091 |             |          |         |
| SNORD115-45 | ENSG00000212380 | -0.43424 | 0.66794 | -0.43424    | 0.66794     | -0.43424 |         |
|             | 0.66794         | -0.43424 | 0.66794 | 0.66794     | 0.824894268 |          |         |
| NA          | ENSG00000250777 | -2.2134  | 0.98656 | -2.2134     | 0.98656     | -2.2134  | 0.98656 |
|             | -0.43433        | 0.66798  | 0.66798 | 0.824894268 |             |          |         |
| CYTL1       | ENSG00000170891 | -0.43438 | 0.66799 | -0.99096    | 0.83915     | -0.95078 | 0.82914 |
|             | -0.97342        | 0.83483  | 0.66799 | 0.824894268 |             |          |         |
| NA          | ENSG00000276308 | -0.43437 | 0.66799 | -0.43437    | 0.66799     | -0.43437 | 0.66799 |
|             | -0.43437        | 0.66799  | 0.66799 | 0.824894268 |             |          |         |
| NA          | ENSG00000255401 | -0.43463 | 0.66808 | -0.43463    | 0.66808     | -0.43463 | 0.66808 |

|            |                 |          |          |             |             |             |          |         |
|------------|-----------------|----------|----------|-------------|-------------|-------------|----------|---------|
|            |                 | -0.43463 | 0.66808  | 0.66808     | 0.82495504  |             |          |         |
| NA         | ENSG00000258985 | -0.43461 | 0.66808  | 0.66808     | -0.43461    | 0.66808     | -0.43461 | 0.66808 |
|            |                 | -0.43461 | 0.66808  | 0.66808     | 0.82495504  |             |          |         |
| NA         | ENSG00000268892 | -0.61232 | 0.72984  | -0.68414    | 0.75306     | -0.43466    | 0.66809  |         |
|            |                 | -0.48759 | 0.68708  | 0.66809     | 0.82495504  |             |          |         |
| NA         | ENSG00000270861 | -0.43475 | 0.66813  | -0.43475    | 0.66813     | -0.43475    | 0.66813  |         |
|            |                 | -0.43475 | 0.66813  | 0.66813     | 0.824983527 |             |          |         |
| RNU6-476P  | ENSG00000207457 | -0.43488 | 0.66817  | -0.43488    | 0.66817     | -0.43488    |          |         |
|            |                 | 0.66817  | -0.43488 | 0.66817     | 0.825012013 |             |          |         |
| NA         | ENSG00000255505 | -0.43495 | 0.6682   | -0.43495    | 0.6682      | -0.43495    | 0.6682   |         |
|            |                 | -0.43495 | 0.6682   | 0.6682      | 0.825025098 |             |          |         |
| CKAP2L     | ENSG00000169607 | -1.0392  | 0.85064  | -0.74156    | 0.77082     | -0.43519    |          |         |
|            |                 | 0.66829  | -0.43519 | 0.66829     | 0.66829     | 0.825025098 |          |         |
| PITX3      | ENSG00000107859 | -0.64497 | 0.74053  | -0.55859    | 0.71178     | -0.71778    | 0.76355  |         |
|            |                 | -0.43525 | 0.66831  | 0.66831     | 0.825025098 |             |          |         |
| FAM83C-AS1 | ENSG00000235214 | -0.43532 | 0.66833  | -0.43532    | 0.66833     | -0.43532    |          |         |
|            |                 | 0.66833  | -0.43532 | 0.66833     | 0.825025098 |             |          |         |
| TMPRSS11D  | ENSG00000153802 | -0.46221 | 0.67804  | -1.1762     | 0.88025     | -0.43536    |          |         |
|            |                 | 0.66835  | -0.59634 | 0.72453     | 0.66835     | 0.825025098 |          |         |
| NA         | ENSG00000255864 | -0.72852 | 0.76685  | -0.47528    | 0.68271     | -0.4354     | 0.66836  |         |
|            |                 | -0.46398 | 0.67867  | 0.66836     | 0.825025098 |             |          |         |
| MIR4427    | ENSG00000265744 | -0.4355  | 0.6684   | -0.4355     | 0.6684      | -0.4355     |          |         |
|            |                 | 0.6684   | -0.4355  | 0.6684      | 0.825025098 |             |          |         |
| NA         | ENSG00000250611 | -1.08    | 0.85992  | -0.45414    | 0.67514     | -0.4356     | 0.66844  | -1.08   |
|            |                 | 0.85992  | 0.66844  | 0.825025098 |             |             |          |         |
| FOXI1      | ENSG00000168269 | -1.3386  | 0.90965  | -0.43564    | 0.66845     | -2.2561     | 0.98797  |         |
|            |                 | -0.61751 | 0.73155  | 0.66845     | 0.825025098 |             |          |         |
| WAC        | ENSG00000095787 | -1.0507  | 0.8533   | -0.78554    | 0.78393     | -1.0747     | 0.85874  |         |
|            |                 | -0.43567 | 0.66846  | 0.66846     | 0.825025098 |             |          |         |
| NA         | ENSG00000230379 | -0.43565 | 0.66846  | -0.43565    | 0.66846     | -0.43565    | 0.66846  |         |
|            |                 | -0.43565 | 0.66846  | 0.66846     | 0.825025098 |             |          |         |
| AGBL5      | ENSG00000084693 | -0.43569 | 0.66847  | -1.5985     | 0.94504     | -0.6498     | 0.74209  |         |
|            |                 | -1.1427  | 0.87342  | 0.66847     | 0.825025098 |             |          |         |
| AMDHD1     | ENSG00000139344 | -2.3911  | 0.9916   | -0.4357     | 0.66847     | -1.1513     |          |         |
|            |                 | 0.87519  | -1.1513  | 0.87519     | 0.66847     | 0.825025098 |          |         |
| SLC2A13P1  | ENSG00000254954 | -0.43569 | 0.66847  | -0.43569    | 0.66847     | -0.43569    |          |         |
|            |                 | 0.66847  | -0.43569 | 0.66847     | 0.825025098 |             |          |         |
| NA         | ENSG00000274373 | -0.43572 | 0.66848  | -1.4336     | 0.92415     | -0.92659    | 0.82293  |         |
|            |                 | -1.2888  | 0.90127  | 0.66848     | 0.825025098 |             |          |         |
| NA         | ENSG00000273450 | -0.43575 | 0.66849  | -0.43575    | 0.66849     | -0.43575    | 0.66849  |         |
|            |                 | -0.43575 | 0.66849  | 0.66849     | 0.825025098 |             |          |         |
| PHKA1P1    | ENSG00000232882 | -1.9767  | 0.97596  | -0.43577    | 0.6685      | -0.80592    |          |         |
|            |                 | 0.78986  | -1.2552  | 0.8953      | 0.6685      | 0.825025098 |          |         |
| TXNDC5     | ENSG00000239264 | -1.0434  | 0.85162  | -0.48812    | 0.68727     | -0.4358     |          |         |
|            |                 | 0.66851  | -1.1551  | 0.87598     | 0.66851     | 0.825025098 |          |         |
| LINC02666  | ENSG00000283141 | -0.90383 | 0.81696  | -0.9256     | 0.82267     | -0.43583    |          |         |
|            |                 | 0.66852  | -0.53616 | 0.70407     | 0.66852     | 0.825025098 |          |         |
| NA         | ENSG00000274637 | -0.43593 | 0.66856  | -0.92206    | 0.82175     | -0.43593    | 0.66856  |         |
|            |                 | -0.43593 | 0.66856  | 0.66856     | 0.825025098 |             |          |         |
| TNFSF9     | ENSG00000125657 | -0.72373 | 0.76538  | -0.49048    | 0.6881      | -0.72373    |          |         |
|            |                 | 0.76538  | -0.43597 | 0.66857     | 0.66857     | 0.825025098 |          |         |
| DUSP5P1    | ENSG00000183929 | -0.43597 | 0.66857  | -0.43597    | 0.66857     | -0.85445    |          |         |
|            |                 | 0.80357  | -0.96554 | 0.83286     | 0.66857     | 0.825025098 |          |         |
| NA         | ENSG00000206878 | -0.43597 | 0.66857  | -0.43597    | 0.66857     | -0.43597    | 0.66857  |         |
|            |                 | -0.43597 | 0.66857  | 0.66857     | 0.825025098 |             |          |         |
| ATP5MGP2   | ENSG00000232362 | -0.43616 | 0.66864  | -0.68779    | 0.75421     | -0.94263    |          |         |
|            |                 | 0.82706  | -0.83572 | 0.79834     | 0.66864     | 0.825052458 |          |         |
| BAIAP2L1   | ENSG00000006453 | -1.6192  | 0.94729  | -0.85825    | 0.80462     | -1.9041     |          |         |
|            |                 | 0.97155  | -0.4362  | 0.66865     | 0.66865     | 0.825052458 |          |         |
| NA         | ENSG00000250645 | -0.43619 | 0.66865  | -0.43619    | 0.66865     | -0.43619    | 0.66865  |         |
|            |                 | -0.43619 | 0.66865  | 0.66865     | 0.825052458 |             |          |         |
| NA         | ENSG00000274769 | -1.2801  | 0.89975  | -0.43628    | 0.66868     | -1.2801     | 0.89975  |         |

|           |                 |          |             |             |             |          |         |          |
|-----------|-----------------|----------|-------------|-------------|-------------|----------|---------|----------|
|           | -1.2801         | 0.89975  | 0.66868     | 0.825052458 |             |          |         |          |
| EIF1P4    | ENSG00000262154 | -0.4364  | 0.66873     | -0.4364     | 0.66873     | -0.4364  |         |          |
|           | 0.66873         | -0.4364  | 0.66873     | 0.66873     | 0.825052458 |          |         |          |
| NA        | ENSG00000249091 | -0.43645 | 0.66874     | -0.43645    | 0.66874     | -0.43645 | 0.66874 |          |
|           | -0.43645        | 0.66874  | 0.66874     | 0.825052458 |             |          |         |          |
| EXOC1L    | ENSG00000250821 | -1.1783  | 0.88067     | -0.43643    | 0.66874     | -0.64894 |         |          |
|           | 0.74181         | -1.1783  | 0.88067     | 0.66874     | 0.825052458 |          |         |          |
| CNKSR3    | ENSG00000153721 | -0.58645 | 0.72121     | -0.43646    | 0.66875     | -0.66199 |         |          |
|           | 0.74601         | -0.4926  | 0.68885     | 0.66875     | 0.825052458 |          |         |          |
| NA        | ENSG00000271810 | -0.43645 | 0.66875     | -0.43645    | 0.66875     | -0.43645 | 0.66875 |          |
|           | -0.43645        | 0.66875  | 0.66875     | 0.825052458 |             |          |         |          |
| MARCHF8   | ENSG00000165406 | -0.92886 | 0.82352     | -0.65666    | 0.7443      | -0.43659 |         |          |
|           | 0.66879         | -0.73299 | 0.76822     | 0.66879     | 0.825052458 |          |         |          |
| NA        | ENSG00000237639 | -0.43664 | 0.66881     | -0.43664    | 0.66881     | -0.43664 | 0.66881 |          |
|           | -0.43664        | 0.66881  | 0.66881     | 0.825052458 |             |          |         |          |
| NA        | ENSG00000270115 | -0.43663 | 0.66881     | -0.43663    | 0.66881     | -0.43663 | 0.66881 |          |
|           | -0.43663        | 0.66881  | 0.66881     | 0.825052458 |             |          |         |          |
| NA        | ENSG00000269886 | -0.43665 | 0.66882     | -0.43665    | 0.66882     | -0.43665 | 0.66882 |          |
|           | -0.43665        | 0.66882  | 0.66882     | 0.825052458 |             |          |         |          |
| SPIRE1    | ENSG00000134278 | -0.69114 | 0.75526     | -0.43669    | 0.66883     | -1.6285  |         |          |
|           | 0.94829         | -1.4617  | 0.92808     | 0.66883     | 0.825052458 |          |         |          |
| HMGB3P2   | ENSG00000231470 | -0.50937 | 0.69475     | -0.50937    | 0.69475     | -0.43682 |         |          |
|           | 0.66888         | -1.3795  | 0.91613     | 0.66888     | 0.825052458 |          |         |          |
| NA        | ENSG00000256651 | -0.43682 | 0.66888     | -0.97968    | 0.83638     | -0.43682 | 0.66888 |          |
|           | -0.43682        | 0.66888  | 0.66888     | 0.825052458 |             |          |         |          |
| NA        | ENSG00000272389 | -0.43683 | 0.66888     | -0.43683    | 0.66888     | -0.43683 | 0.66888 |          |
|           | -0.43683        | 0.66888  | 0.66888     | 0.825052458 |             |          |         |          |
| RPL12P5   | ENSG00000243855 | -0.43689 | 0.6689      | -0.43689    | 0.6689      | -0.43689 |         |          |
|           | 0.6689          | -0.43689 | 0.6689      | 0.6689      | 0.825056243 |          |         |          |
| NA        | ENSG00000270282 | -0.43705 | 0.66896     | -0.43705    | 0.66896     | -0.43705 | 0.66896 |          |
|           | -0.43705        | 0.66896  | 0.66896     | 0.825057092 |             |          |         |          |
| NA        | ENSG00000230626 | -0.43713 | 0.66899     | -0.43713    | 0.66899     | -0.95564 | 0.83037 |          |
|           | -0.95564        | 0.83037  | 0.66899     | 0.825057092 |             |          |         |          |
| ATP6V1FNB | ENSG00000272899 | -0.43716 | 0.669       | -0.43716    | 0.669       | -0.43716 | 0.669   | -0.43716 |
|           | 0.669           | 0.669    | 0.825057092 |             |             |          |         |          |
| NA        | ENSG00000219201 | -0.43718 | 0.66901     | -0.43718    | 0.66901     | -0.43718 | 0.66901 |          |
|           | -0.43718        | 0.66901  | 0.66901     | 0.825057092 |             |          |         |          |
| NA        | ENSG00000268657 | -0.43717 | 0.66901     | -0.43717    | 0.66901     | -0.43717 | 0.66901 |          |
|           | -0.43717        | 0.66901  | 0.66901     | 0.825057092 |             |          |         |          |
| MIR150    | ENSG00000207782 | -0.4372  | 0.66902     | -0.4372     | 0.66902     | -0.4372  |         |          |
|           | 0.66902         | -0.4372  | 0.66902     | 0.66902     | 0.825057092 |          |         |          |
| NA        | ENSG00000267892 | -0.43725 | 0.66903     | -0.43725    | 0.66903     | -0.43725 | 0.66903 |          |
|           | -0.43725        | 0.66903  | 0.66903     | 0.825057092 |             |          |         |          |
| GRHL1     | ENSG00000134317 | -0.54205 | 0.70611     | -0.53291    | 0.70295     | -0.83826 | 0.79906 |          |
|           | -0.43729        | 0.66905  | 0.66905     | 0.825057092 |             |          |         |          |
| LINC00648 | ENSG00000259129 | -0.43731 | 0.66906     | -0.46269    | 0.67821     | -0.57507 |         |          |
|           | 0.71738         | -0.67623 | 0.75055     | 0.66906     | 0.825057092 |          |         |          |
| PA2G4     | ENSG00000170515 | -0.70582 | 0.75985     | -0.59582    | 0.72435     | -1.116   | 0.86778 |          |
|           | -0.43734        | 0.66907  | 0.66907     | 0.825057092 |             |          |         |          |
| RPL37P4   | ENSG00000230198 | -0.43745 | 0.66911     | -0.43745    | 0.66911     | -0.43745 |         |          |
|           | 0.66911         | -0.43745 | 0.66911     | 0.66911     | 0.82506466  |          |         |          |
| TAS2R64P  | ENSG00000256274 | -0.43745 | 0.66911     | -0.6564     | 0.74422     | -1.1078  |         |          |
|           | 0.86602         | -1.1078  | 0.86602     | 0.66911     | 0.82506466  |          |         |          |
| NA        | ENSG00000217495 | -1.1767  | 0.88034     | -0.43753    | 0.66914     | -1.3288  | 0.90805 |          |
|           | -1.3288         | 0.90805  | 0.66914     | 0.825080774 |             |          |         |          |
| OARD1     | ENSG00000124596 | -0.43763 | 0.66917     | -0.43763    | 0.66917     | -0.43763 | 0.66917 |          |
|           | -0.43763        | 0.66917  | 0.66917     | 0.825096888 |             |          |         |          |
| NA        | ENSG00000236889 | -0.47981 | 0.68432     | -0.46904    | 0.68048     | -0.43788 | 0.66926 |          |
|           | -0.69919        | 0.75778  | 0.66926     | 0.825186979 |             |          |         |          |
| RNU6-107P | ENSG00000252452 | -0.4381  | 0.66934     | -0.4381     | 0.66934     | -0.4381  |         |          |
|           | 0.66934         | -0.4381  | 0.66934     | 0.66934     | 0.825243857 |          |         |          |
| NA        | ENSG00000283025 | -0.43809 | 0.66934     | -0.43809    | 0.66934     | -0.43809 | 0.66934 |          |

|             |                 |          |             |             |             |          |         |
|-------------|-----------------|----------|-------------|-------------|-------------|----------|---------|
|             | -0.43809        | 0.66934  | 0.66934     | 0.825243857 |             |          |         |
| ACY3        | ENSG00000132744 | -0.43817 | 0.66937     | -0.43817    | 0.66937     | -0.43817 | 0.66937 |
|             | -1.01084375     | 0.66937  | 0.825251414 |             |             |          |         |
| NA          | ENSG00000228685 | -0.49246 | 0.6888      | -0.49246    | 0.6888      | -0.49246 | 0.6888  |
|             | -0.43821        | 0.66938  | 0.66938     | 0.825251414 |             |          |         |
| RPL5P26     | ENSG00000230469 | -0.73127 | 0.76769     | -0.73127    | 0.76769     | -0.43832 |         |
|             | 0.66942         | -0.73127 | 0.76769     | 0.66942     | 0.825275077 |          |         |
| THAP9-AS1   | ENSG00000251022 | -0.72437 | 0.76558     | -0.43837    | 0.66944     | -0.71522 |         |
|             | 0.76276         | -0.71522 | 0.76276     | 0.66944     | 0.825275077 |          |         |
| HTD2        | ENSG00000255154 | -1.1754  | 0.88007     | -0.4384     | 0.66945     | -1.1754  | 0.88007 |
|             | -1.1754         | 0.88007  | 0.66945     | 0.825275077 |             |          |         |
| SLC38A9     | ENSG00000177058 | -0.47319 | 0.68196     | -0.43846    | 0.66947     | -0.71089 |         |
|             | 0.76142         | -1.5533  | 0.93982     | 0.66947     | 0.825278854 |          |         |
| RNF44       | ENSG00000146083 | -0.43858 | 0.66952     | -0.93103    | 0.82408     | -0.93103 | 0.82408 |
|             | -0.93103        | 0.82408  | 0.66952     | 0.825311062 |             |          |         |
| RNA5SP389   | ENSG00000199480 | -0.43861 | 0.66953     | -0.43861    | 0.66953     | -0.43861 |         |
|             | 0.66953         | -0.43861 | 0.66953     | 0.66953     | 0.825311062 |          |         |
| OR10A5      | ENSG00000166363 | -0.90332 | 0.81682     | -0.90332    | 0.81682     | -0.54148 |         |
|             | 0.70591         | -0.43868 | 0.66955     | 0.66955     | 0.825314838 |          |         |
| LRP6        | ENSG00000070018 | -1.2407  | 0.89264     | -0.43882    | 0.66961     | -0.97028 | 0.83405 |
|             | -1.114          | 0.86737  | 0.66961     | 0.825367919 |             |          |         |
| C1QTNF9     | ENSG00000240654 | -0.43902 | 0.66968     | -0.43902    | 0.66968     | -0.43902 |         |
|             | 0.66968         | -0.43902 | 0.66968     | 0.66968     | 0.82542477  |          |         |
| CD109       | ENSG00000156535 | -0.82116 | 0.79422     | -1.189      | 0.88279     | -1.4208  | 0.92232 |
|             | -0.43905        | 0.66969  | 0.66969     | 0.82542477  |             |          |         |
| LINC00261   | ENSG00000259974 | -0.45189 | 0.67432     | -0.43915    | 0.66972     | -0.48322 |         |
|             | 0.68553         | -0.9183  | 0.82077     | 0.66972     | 0.825432316 |          |         |
| LINC00968   | ENSG00000246430 | -0.43916 | 0.66973     | -0.43916    | 0.66973     | -0.43916 |         |
|             | 0.66973         | -0.87608 | 0.80951     | 0.66973     | 0.825432316 |          |         |
| TCAP        | ENSG00000173991 | -0.43923 | 0.66975     | -0.43923    | 0.66975     | -0.43923 | 0.66975 |
|             | -0.43923        | 0.66975  | 0.66975     | 0.825436088 |             |          |         |
| NA          | ENSG00000233193 | -0.43933 | 0.66979     | -0.43933    | 0.66979     | -0.43933 | 0.66979 |
|             | -0.43933        | 0.66979  | 0.66979     | 0.825462492 |             |          |         |
| OR1H1P      | ENSG00000228914 | -0.43946 | 0.66984     | -0.43946    | 0.66984     | -0.43946 |         |
|             | 0.66984         | -0.43946 | 0.66984     | 0.66984     | 0.825462492 |          |         |
| CNTFR       | ENSG00000122756 | -0.43957 | 0.66987     | -0.43957    | 0.66987     | -0.83941 | 0.79938 |
|             | -0.67588        | 0.75044  | 0.66987     | 0.825462492 |             |          |         |
| RNU6-847P   | ENSG00000223047 | -0.43955 | 0.66987     | -0.43955    | 0.66987     | -0.43955 |         |
|             | 0.66987         | -0.43955 | 0.66987     | 0.66987     | 0.825462492 |          |         |
| NOXO1       | ENSG00000196408 | -0.43961 | 0.66989     | -0.43961    | 0.66989     | -0.43961 | 0.66989 |
|             | -0.43961        | 0.66989  | 0.66989     | 0.825462492 |             |          |         |
| KRTAP20-3   | ENSG00000206104 | -0.4396  | 0.66989     | -0.4396     | 0.66989     | -0.4396  |         |
|             | 0.66989         | -0.4396  | 0.66989     | 0.66989     | 0.825462492 |          |         |
| SNORD124    | ENSG00000238793 | -0.4396  | 0.66989     | -0.4396     | 0.66989     | -0.4396  |         |
|             | 0.66989         | -0.4396  | 0.66989     | 0.66989     | 0.825462492 |          |         |
| ATP13A4-AS1 | ENSG00000225473 | -1.2928  | 0.90196     | -0.8367     | 0.79862     | -0.4397  |         |
|             | 0.66992         | -0.99004 | 0.83892     | 0.66992     | 0.825473805 |          |         |
| NA          | ENSG00000221272 | -0.43974 | 0.66994     | -0.43974    | 0.66994     | -0.43974 | 0.66994 |
|             | -0.81189        | 0.79157  | 0.66994     | 0.825473805 |             |          |         |
| RNU6-1119P  | ENSG00000207077 | -0.99494 | 0.84012     | -1.954      | 0.97465     | -0.43977 |         |
|             | 0.66995         | -0.76633 | 0.77826     | 0.66995     | 0.825473805 |          |         |
| GIMAP2      | ENSG00000106560 | -1.302   | 0.90354     | -0.43993    | 0.67001     | -0.55667 |         |
|             | 0.71112         | -0.7225  | 0.76501     | 0.67001     | 0.82552686  |          |         |
| SAPCD2P1    | ENSG00000213644 | -0.84414 | 0.80071     | -0.84414    | 0.80071     | -0.44003 |         |
|             | 0.67004         | -0.84223 | 0.80017     | 0.67004     | 0.82554295  |          |         |
| NXPE4       | ENSG00000137634 | -0.44009 | 0.67006     | -0.44009    | 0.67006     | -0.44009 | 0.67006 |
|             | -1.5412         | 0.93836  | 0.67006     | 0.825546718 |             |          |         |
| GTF2E1      | ENSG00000153767 | -1.2603  | 0.89622     | -0.44023    | 0.67011     | -0.54098 |         |
|             | 0.70574         | -2.2796  | 0.98868     | 0.67011     | 0.825586429 |          |         |
| SOX13       | ENSG00000143842 | -0.49141 | 0.68843     | -0.44027    | 0.67013     | -0.55124 | 0.70927 |
|             | -0.45315        | 0.67478  | 0.67013     | 0.825586429 |             |          |         |
| NA          | ENSG00000268036 | -0.44032 | 0.67015     | -0.44032    | 0.67015     | -0.44032 | 0.67015 |

|              |                 |          |          |         |             |             |          |         |
|--------------|-----------------|----------|----------|---------|-------------|-------------|----------|---------|
|              |                 | -0.44032 | 0.67015  | 0.67015 | 0.825586429 |             |          |         |
| NA           | ENSG00000268465 | -0.44034 | 0.67016  | 0.67016 | -0.44034    | 0.67016     | -0.44034 | 0.67016 |
|              |                 | -0.44034 | 0.67016  | 0.67016 | 0.825586429 |             |          |         |
| HNRNPCP2     | ENSG00000204253 | -0.44047 | 0.6702   | 0.6702  | -0.44047    | 0.6702      | -0.44047 |         |
|              |                 | 0.6702   | -0.44047 | 0.6702  | 0.825606282 |             |          |         |
| GYG1P3       | ENSG00000231095 | -0.4405  | 0.67021  | 0.67021 | -0.4405     | 0.67021     | -0.4405  |         |
|              |                 | 0.67021  | -0.4405  | 0.67021 | 0.825606282 |             |          |         |
| NA           | ENSG00000275871 | -0.44056 | 0.67023  | 0.67023 | -0.44056    | 0.67023     | -0.44056 | 0.67023 |
|              |                 | -0.44056 | 0.67023  | 0.67023 | 0.825610048 |             |          |         |
| NA           | ENSG00000241772 | -0.44061 | 0.67025  | 0.67025 | -0.44061    | 0.67025     | -0.44061 | 0.67025 |
|              |                 | -0.44061 | 0.67025  | 0.67025 | 0.825613814 |             |          |         |
| ALG10        | ENSG00000139133 | -1.8807  | 0.96999  | 0.96999 | -1.2223     | 0.8892      | -0.44065 | 0.67027 |
|              |                 | -1.4706  | 0.92931  | 0.67027 | 0.82561758  |             |          |         |
| DRAM1        | ENSG00000136048 | -0.44074 | 0.6703   | 0.6703  | -0.65636    | 0.7442      | -0.9206  | 0.82137 |
|              |                 | -1.1754  | 0.88008  | 0.6703  | 0.825633664 |             |          |         |
| NA           | ENSG00000224643 | -0.44081 | 0.67033  | 0.67033 | -0.44081    | 0.67033     | -0.44081 | 0.67033 |
|              |                 | -0.44081 | 0.67033  | 0.67033 | 0.825649746 |             |          |         |
| LINC02652    | ENSG00000237128 | -1.5613  | 0.94077  | 0.94077 | -1.5613     | 0.94077     | -0.52259 |         |
|              |                 | 0.69937  | -0.44094 | 0.67037 | 0.67037     | 0.825678144 |          |         |
| NA           | ENSG00000243762 | -0.44104 | 0.67041  | 0.67041 | -0.44104    | 0.67041     | -0.44104 | 0.67041 |
|              |                 | -0.44104 | 0.67041  | 0.67041 | 0.825693199 |             |          |         |
| NA           | ENSG00000223754 | -0.44112 | 0.67044  | 0.67044 | -0.44112    | 0.67044     | -0.44112 | 0.67044 |
|              |                 | -0.44112 | 0.67044  | 0.67044 | 0.825693199 |             |          |         |
| NA           | ENSG00000256482 | -0.44114 | 0.67044  | 0.67044 | -0.44114    | 0.67044     | -0.44114 | 0.67044 |
|              |                 | -0.44114 | 0.67044  | 0.67044 | 0.825693199 |             |          |         |
| LINC01388    | ENSG00000231808 | -0.44115 | 0.67045  | 0.67045 | -0.78263    | 0.78308     | -0.78263 |         |
|              |                 | 0.78308  | -0.78263 | 0.78308 | 0.67045     | 0.825693199 |          |         |
| PABPC1P4     | ENSG00000255642 | -1.3958  | 0.91862  | 0.91862 | -1.3958     | 0.91862     | -0.70949 |         |
|              |                 | 0.76099  | -0.44121 | 0.67047 | 0.67047     | 0.825696962 |          |         |
| FLVCR1       | ENSG00000162769 | -0.44132 | 0.67051  | 0.67051 | -0.44132    | 0.67051     | -0.44132 |         |
|              |                 | 0.67051  | -0.44132 | 0.67051 | 0.67051     | 0.825725355 |          |         |
| WDSUB1       | ENSG00000196151 | -0.44173 | 0.67066  | 0.67066 | -1.3552     | 0.91232     | -0.71589 |         |
|              |                 | 0.76297  | -0.65823 | 0.7448  | 0.67066     | 0.825849151 |          |         |
| ADAMTS19-AS1 | ENSG00000249421 | -0.44176 | 0.67067  | 0.67067 | -0.44176    | 0.67067     | -0.44176 |         |
|              |                 | 0.67067  | -0.44176 | 0.67067 | 0.67067     | 0.825849151 |          |         |
| NA           | ENSG00000223886 | -0.44184 | 0.6707   | 0.6707  | -0.44184    | 0.6707      | -0.44184 | 0.6707  |
|              |                 | -0.44184 | 0.6707   | 0.6707  | 0.825849151 |             |          |         |
| SH2D4A       | ENSG00000104611 | -0.56653 | 0.71448  | 0.71448 | -0.76135    | 0.77678     | -0.63689 |         |
|              |                 | 0.7379   | -0.44187 | 0.67071 | 0.67071     | 0.825849151 |          |         |
| LINC02769    | ENSG00000259815 | -0.81785 | 0.79328  | 0.79328 | -0.44192    | 0.67073     | -1.3348  |         |
|              |                 | 0.90903  | -1.1269  | 0.87011 | 0.67073     | 0.825849151 |          |         |
| NA           | ENSG00000266821 | -0.44194 | 0.67074  | 0.67074 | -0.52692    | 0.70088     | -0.44194 | 0.67074 |
|              |                 | -0.44194 | 0.67074  | 0.67074 | 0.825849151 |             |          |         |
| NA           | ENSG00000243396 | -0.87717 | 0.8098   | 0.8098  | -0.44199    | 0.67075     | -0.44199 | 0.67075 |
|              |                 | -1.7311  | 0.95828  | 0.67075 | 0.825849151 |             |          |         |
| NA           | ENSG00000262823 | -0.44198 | 0.67075  | 0.67075 | -0.44198    | 0.67075     | -0.44198 | 0.67075 |
|              |                 | -0.44198 | 0.67075  | 0.67075 | 0.825849151 |             |          |         |
| RNU6-1019P   | ENSG00000201294 | -1.5226  | 0.93607  | 0.93607 | -0.44206    | 0.67078     | -1.2785  |         |
|              |                 | 0.89947  | -0.44206 | 0.67078 | 0.67078     | 0.825849151 |          |         |
| SNRPEP7      | ENSG00000225990 | -0.44207 | 0.67078  | 0.67078 | -0.44207    | 0.67078     | -0.44207 |         |
|              |                 | 0.67078  | -0.44207 | 0.67078 | 0.67078     | 0.825849151 |          |         |
| SNORD115-23  | ENSG00000201331 | -0.44222 | 0.67083  | 0.67083 | -0.44222    | 0.67083     | -0.44222 |         |
|              |                 | 0.67083  | -0.44222 | 0.67083 | 0.67083     | 0.825889844 |          |         |
| ADNP2        | ENSG00000101544 | -0.84343 | 0.80051  | 0.80051 | -0.81155    | 0.79147     | -0.44237 | 0.67089 |
|              |                 | -0.44237 | 0.67089  | 0.67089 | 0.825942845 |             |          |         |
| TRAV16       | ENSG00000211796 | -0.44251 | 0.67094  | 0.67094 | -0.44251    | 0.67094     | -0.44251 |         |
|              |                 | 0.67094  | -0.44251 | 0.67094 | 0.67094     | 0.825974977 |          |         |
| TRGJ1        | ENSG00000211690 | -0.44254 | 0.67095  | 0.67095 | -0.44254    | 0.67095     | -0.44254 | 0.67095 |
|              |                 | -0.44254 | 0.67095  | 0.67095 | 0.825974977 |             |          |         |
| KATNBL1P1    | ENSG00000271026 | -0.63421 | 0.73703  | 0.73703 | -0.44264    | 0.67099     | -0.63421 |         |
|              |                 | 0.73703  | -0.63421 | 0.73703 | 0.67099     | 0.826003352 |          |         |
| C11orf98     | ENSG00000278615 | -0.44272 | 0.67102  | 0.67102 | -0.56617    | 0.71436     | -0.56617 |         |

|           |                 |          |         |             |             |          |         |
|-----------|-----------------|----------|---------|-------------|-------------|----------|---------|
|           | 0.71436         | -0.56617 | 0.71436 | 0.67102     | 0.826019416 |          |         |
| MRPS15    | ENSG00000116898 | -1.2163  | 0.88806 | -1.8581     | 0.96842     | -1.8848  |         |
|           | 0.97027         | -0.44277 | 0.67104 | 0.67104     | 0.826023169 |          |         |
| PNLIPRP2  | ENSG00000266200 | -0.74347 | 0.7714  | -0.44291    | 0.67108     | -0.74347 |         |
|           | 0.7714          | -1.0028  | 0.84203 | 0.67108     | 0.826051541 |          |         |
| AGAP6     | ENSG00000204149 | -0.44296 | 0.6711  | -1.0598     | 0.85538     | -1.1467  | 0.87424 |
|           | -0.46455        | 0.67887  | 0.6711  | 0.826055293 |             |          |         |
| NA        | ENSG00000257682 | -0.76985 | 0.77931 | -0.44304    | 0.67113     | -0.76985 | 0.77931 |
|           | -0.76985        | 0.77931  | 0.67113 | 0.826071354 |             |          |         |
| SPIDR     | ENSG00000164808 | -0.44309 | 0.67115 | -0.55468    | 0.71044     | -0.85096 | 0.8026  |
|           | -0.48023        | 0.68447  | 0.67115 | 0.826075105 |             |          |         |
| NA        | ENSG00000237329 | -0.89158 | 0.81369 | -0.89158    | 0.81369     | -0.81968 | 0.7938  |
|           | -0.44316        | 0.67118  | 0.67118 | 0.826077803 |             |          |         |
| OLFML2A   | ENSG00000185585 | -0.9864  | 0.83803 | -0.88331    | 0.81147     | -0.44322 |         |
|           | 0.6712          | -1.0445  | 0.85188 | 0.6712      | 0.826077803 |          |         |
| NA        | ENSG00000226149 | -0.44326 | 0.67121 | -0.6824     | 0.75251     | -0.44326 | 0.67121 |
|           | -0.44326        | 0.67121  | 0.67121 | 0.826077803 |             |          |         |
| LNCOG     | ENSG00000257219 | -0.91156 | 0.819   | -0.87225    | 0.80847     | -0.4433  | 0.67122 |
|           | -1.405          | 0.91999  | 0.67122 | 0.826077803 |             |          |         |
| MMP16     | ENSG00000156103 | -0.44353 | 0.67131 | -0.52911    | 0.70163     | -0.90719 | 0.81785 |
|           | -0.51117        | 0.69538  | 0.67131 | 0.826167701 |             |          |         |
| NA        | ENSG00000202440 | -0.44367 | 0.67136 | -0.44367    | 0.67136     | -0.44367 | 0.67136 |
|           | -0.44367        | 0.67136  | 0.67136 | 0.826170389 |             |          |         |
| CRIP1P1   | ENSG00000233252 | -1.3191  | 0.90643 | -0.44369    | 0.67137     | -1.3191  |         |
|           | 0.90643         | -0.7334  | 0.76834 | 0.67137     | 0.826170389 |          |         |
| NA        | ENSG00000248484 | -0.98428 | 0.83751 | -1.1729     | 0.87958     | -0.57262 | 0.71655 |
|           | -0.44371        | 0.67137  | 0.67137 | 0.826170389 |             |          |         |
| NA        | ENSG00000248127 | -0.56444 | 0.71377 | -0.56444    | 0.71377     | -0.56444 | 0.71377 |
|           | -0.44372        | 0.67138  | 0.67138 | 0.826170389 |             |          |         |
| GPR161    | ENSG00000143147 | -1.851   | 0.96792 | -0.44395    | 0.67146     | -1.6167  |         |
|           | 0.94703         | -1.3075  | 0.90448 | 0.67146     | 0.826218547 |          |         |
| ZNF76     | ENSG00000065029 | -1.2956  | 0.90245 | -0.55237    | 0.70965     | -0.44399 | 0.67147 |
|           | -1.3366         | 0.90932  | 0.67147 | 0.826218547 |             |          |         |
| RNU6-719P | ENSG00000252480 | -0.44398 | 0.67147 | -0.44398    | 0.67147     | -0.44398 |         |
|           | 0.67147         | -0.44398 | 0.67147 | 0.67147     | 0.826218547 |          |         |
| NA        | ENSG00000242152 | -0.44409 | 0.67151 | -0.44409    | 0.67151     | -0.44409 | 0.67151 |
|           | -0.44409        | 0.67151  | 0.67151 | 0.82624209  |             |          |         |
| SNORD14A  | ENSG00000272034 | -0.44416 | 0.67154 | -0.44416    | 0.67154     | -0.44416 |         |
|           | 0.67154         | -0.44416 | 0.67154 | 0.67154     | 0.82624209  |          |         |
| NA        | ENSG00000279035 | -0.44418 | 0.67154 | -0.44418    | 0.67154     | -0.44418 | 0.67154 |
|           | -0.44418        | 0.67154  | 0.67154 | 0.82624209  |             |          |         |
| SUPT5H    | ENSG00000196235 | -0.44439 | 0.67162 | -0.44439    | 0.67162     | -0.44439 |         |
|           | 0.67162         | -0.60072 | 0.72599 | 0.67162     | 0.826319656 |          |         |
| NA        | ENSG00000230848 | -0.57898 | 0.7187  | -0.70923    | 0.76091     | -0.44466 | 0.67172 |
|           | -0.7426         | 0.77114  | 0.67172 | 0.826408442 |             |          |         |
| LINC00583 | ENSG00000205636 | -0.59111 | 0.72278 | -0.59111    | 0.72278     | -0.44475 |         |
|           | 0.67175         | -0.59111 | 0.72278 | 0.67175     | 0.826408442 |          |         |
| NA        | ENSG00000248739 | -2.2308  | 0.98715 | -0.44474    | 0.67175     | -2.2308  | 0.98715 |
|           | -2.2308         | 0.98715  | 0.67175 | 0.826408442 |             |          |         |
| LINC00917 | ENSG00000168367 | -0.66677 | 0.74754 | -0.70255    | 0.75883     | -0.66677 |         |
|           | 0.74754         | -0.44478 | 0.67176 | 0.67176     | 0.826408442 |          |         |
| NA        | ENSG00000251628 | -1.3868  | 0.91726 | -0.44909    | 0.67332     | -0.44487 | 0.67179 |
|           | -1.3868         | 0.91726  | 0.67179 | 0.826424485 |             |          |         |
| NA        | ENSG00000225818 | -0.44499 | 0.67184 | -0.44499    | 0.67184     | -0.44499 | 0.67184 |
|           | -0.44499        | 0.67184  | 0.67184 | 0.82646513  |             |          |         |
| NA        | ENSG00000237896 | -0.44515 | 0.67189 | -0.44515    | 0.67189     | -0.44515 | 0.67189 |
|           | -0.44515        | 0.67189  | 0.67189 | 0.826500949 |             |          |         |
| CLPTM1LP1 | ENSG00000271036 | -0.90569 | 0.81745 | -0.44519    | 0.67191     | -0.44519 |         |
|           | 0.67191         | -0.44519 | 0.67191 | 0.67191     | 0.826500949 |          |         |
| NA        | ENSG00000267512 | -0.44521 | 0.67192 | -0.44521    | 0.67192     | -0.44521 | 0.67192 |
|           | -0.44521        | 0.67192  | 0.67192 | 0.826500949 |             |          |         |
| NA        | ENSG00000257292 | -0.44537 | 0.67197 | -0.44537    | 0.67197     | -0.44537 | 0.67197 |

|               |                 |          |          |          |             |             |         |  |
|---------------|-----------------|----------|----------|----------|-------------|-------------|---------|--|
|               |                 | -0.44537 | 0.67197  | 0.67197  | 0.826541588 |             |         |  |
| NA            | ENSG00000259760 | -0.96069 | 0.83164  | -0.44558 | 0.67205     | -0.44558    | 0.67205 |  |
|               |                 | -0.44558 | 0.67205  | 0.67205  | 0.826596076 |             |         |  |
| TRMT61B       | ENSG00000171103 | -0.82462 | 0.79521  | -0.44566 | 0.67208     | -0.82462    |         |  |
|               |                 | 0.79521  | -0.82462 | 0.79521  | 0.67208     | 0.826596076 |         |  |
| RNASEH2B-AS1  | ENSG00000233672 | -0.94765 | 0.82835  | -0.5279  | 0.70122     | -0.45704    |         |  |
|               |                 | 0.67618  | -0.44578 | 0.67212  | 0.67212     | 0.826596076 |         |  |
| NA            | ENSG00000212415 | -0.44581 | 0.67213  | -0.44581 | 0.67213     | -0.44581    | 0.67213 |  |
|               |                 | -0.44581 | 0.67213  | 0.67213  | 0.826596076 |             |         |  |
| GIMAP1-GIMAP5 | ENSG00000281887 | -0.4458  | 0.67213  | -0.4458  | 0.67213     | -0.4458     | 0.67213 |  |
|               |                 | 0.67213  | -0.4458  | 0.67213  | 0.67213     | 0.826596076 |         |  |
| RNU5E-3P      | ENSG00000251722 | -0.44584 | 0.67214  | -0.44584 | 0.67214     | -0.44584    |         |  |
|               |                 | 0.67214  | -0.44584 | 0.67214  | 0.67214     | 0.826596076 |         |  |
| NA            | ENSG00000279425 | -1.2601  | 0.89618  | -0.79435 | 0.7865      | -0.79435    | 0.7865  |  |
|               |                 | -0.44584 | 0.67214  | 0.67214  | 0.826596076 |             |         |  |
| AIMP1P2       | ENSG00000227177 | -0.44585 | 0.67215  | -0.44585 | 0.67215     | -0.44585    |         |  |
|               |                 | 0.67215  | -0.44585 | 0.67215  | 0.67215     | 0.826596076 |         |  |
| NA            | ENSG00000239716 | -0.44593 | 0.67218  | -0.44593 | 0.67218     | -0.44593    | 0.67218 |  |
|               |                 | -0.44593 | 0.67218  | 0.67218  | 0.826596991 |             |         |  |
| RPL21P41      | ENSG00000214560 | -0.44605 | 0.67222  | -0.44605 | 0.67222     | -0.44605    |         |  |
|               |                 | 0.67222  | -0.44605 | 0.67222  | 0.67222     | 0.826596991 |         |  |
| MSMP          | ENSG00000215183 | -0.44621 | 0.67228  | -0.44621 | 0.67228     | -0.44621    | 0.67228 |  |
|               |                 | -0.44621 | 0.67228  | 0.67228  | 0.826596991 |             |         |  |
| NA            | ENSG00000268119 | -0.62339 | 0.73349  | -0.44621 | 0.67228     | -0.52246    | 0.69933 |  |
|               |                 | -0.8092  | 0.7908   | 0.67228  | 0.826596991 |             |         |  |
| ENC1          | ENSG00000171617 | -1.0869  | 0.86146  | -1.0895  | 0.86204     | -0.44631    | 0.67231 |  |
|               |                 | -1.546   | 0.93894  | 0.67231  | 0.826596991 |             |         |  |
| RASAL2        | ENSG00000075391 | -2.2675  | 0.98832  | -1.1398  | 0.87281     | -1.3327     |         |  |
|               |                 | 0.90869  | -0.44634 | 0.67232  | 0.67232     | 0.826596991 |         |  |
| TRAJ54        | ENSG00000211836 | -0.4465  | 0.67238  | -0.4465  | 0.67238     | -0.4465     |         |  |
|               |                 | 0.67238  | -0.4465  | 0.67238  | 0.67238     | 0.826596991 |         |  |
| TRAJ53        | ENSG00000211837 | -0.4465  | 0.67238  | -0.4465  | 0.67238     | -0.4465     |         |  |
|               |                 | 0.67238  | -0.4465  | 0.67238  | 0.67238     | 0.826596991 |         |  |
| NA            | ENSG00000216285 | -0.44648 | 0.67238  | -0.44648 | 0.67238     | -0.44648    | 0.67238 |  |
|               |                 | -0.44648 | 0.67238  | 0.67238  | 0.826596991 |             |         |  |
| TRAJ55        | ENSG00000250688 | -0.4465  | 0.67238  | -0.4465  | 0.67238     | -0.4465     |         |  |
|               |                 | 0.67238  | -0.4465  | 0.67238  | 0.67238     | 0.826596991 |         |  |
| NA            | ENSG00000278330 | -0.44651 | 0.67239  | -0.44651 | 0.67239     | -0.44651    | 0.67239 |  |
|               |                 | -0.44651 | 0.67239  | 0.67239  | 0.826596991 |             |         |  |
| NA            | ENSG00000235381 | -0.44659 | 0.67242  | -0.44659 | 0.67242     | -0.44659    | 0.67242 |  |
|               |                 | -0.44659 | 0.67242  | 0.67242  | 0.826596991 |             |         |  |
| NA            | ENSG00000261734 | -0.46941 | 0.68061  | -0.63309 | 0.73666     | -0.63309    | 0.73666 |  |
|               |                 | -0.44662 | 0.67243  | 0.67243  | 0.826596991 |             |         |  |
| MYLK4         | ENSG00000145949 | -1.4583  | 0.92762  | -1.4005  | 0.91932     | -1.1792     | 0.88084 |  |
|               |                 | -0.44667 | 0.67244  | 0.67244  | 0.826596991 |             |         |  |
| SCARNA18B     | ENSG00000238754 | -0.44668 | 0.67245  | -0.44668 | 0.67245     | -0.44668    |         |  |
|               |                 | 0.67245  | -0.44668 | 0.67245  | 0.67245     | 0.826596991 |         |  |
| AKIRIN2       | ENSG00000135334 | -0.56058 | 0.71246  | -0.44671 | 0.67246     | -0.44671    |         |  |
|               |                 | 0.67246  | -1.0012  | 0.84162  | 0.67246     | 0.826596991 |         |  |
| NA            | ENSG00000241251 | -0.44672 | 0.67246  | -0.44672 | 0.67246     | -0.44672    | 0.67246 |  |
|               |                 | -0.44672 | 0.67246  | 0.67246  | 0.826596991 |             |         |  |
| MCM4          | ENSG00000104738 | -0.83858 | 0.79915  | -1.5017  | 0.93341     | -0.51615    | 0.69713 |  |
|               |                 | -0.44681 | 0.67249  | 0.67249  | 0.826596991 |             |         |  |
| LINC01612     | ENSG00000250266 | -1.3864  | 0.91719  | -0.93725 | 0.82569     | -0.4468     |         |  |
|               |                 | 0.67249  | -1.2306  | 0.89076  | 0.67249     | 0.826596991 |         |  |
| RNU7-47P      | ENSG00000251787 | -0.44681 | 0.67249  | -1.1754  | 0.88008     | -1.1754     |         |  |
|               |                 | 0.88008  | -1.1754  | 0.88008  | 0.67249     | 0.826596991 |         |  |
| NA            | ENSG00000205850 | -0.44854 | 0.67312  | -0.44854 | 0.67312     | -0.44695    | 0.67254 |  |
|               |                 | -1.9666  | 0.97539  | 0.67254  | 0.826637598 |             |         |  |
| NA            | ENSG00000236664 | -0.44702 | 0.67257  | -0.46648 | 0.67956     | -0.44702    | 0.67257 |  |
|               |                 | -0.44702 | 0.67257  | 0.67257  | 0.826645062 |             |         |  |
| SLC25A18P1    | ENSG00000234309 | -0.44705 | 0.67258  | -1.2262  | 0.88994     | -0.8074     |         |  |

|                 |                 |          |         |             |             |          |         |
|-----------------|-----------------|----------|---------|-------------|-------------|----------|---------|
|                 | 0.79028         | -1.6733  | 0.95287 | 0.67258     | 0.826645062 |          |         |
| NA              | ENSG00000229424 | -0.44717 | 0.67262 | -0.44717    | 0.67262     | -0.44717 | 0.67262 |
|                 | -0.44717        | 0.67262  | 0.67262 | 0.826664815 |             |          |         |
| TRMT11          | ENSG00000066651 | -0.44718 | 0.67263 | -0.6163     | 0.73115     | -0.65246 |         |
|                 | 0.74295         | -1.635   | 0.94897 | 0.67263     | 0.826664815 |          |         |
| FGA             | ENSG00000171560 | -0.44725 | 0.67265 | -0.93207    | 0.82435     | -0.44725 | 0.67265 |
|                 | -0.44725        | 0.67265  | 0.67265 | 0.826668546 |             |          |         |
| NA              | ENSG00000271727 | -0.55571 | 0.7108  | -0.44734    | 0.67268     | -1.0755  | 0.85892 |
|                 | -0.44734        | 0.67268  | 0.67268 | 0.826684566 |             |          |         |
| STARD3          | ENSG00000131748 | -0.4477  | 0.67282 | -0.4477     | 0.67282     | -0.72409 |         |
|                 | 0.76549         | -1.0747  | 0.85874 | 0.67282     | 0.826835765 |          |         |
| RNU6-339P       | ENSG00000207037 | -1.378   | 0.9159  | -0.44786    | 0.67287     | -1.378   |         |
|                 | 0.9159          | -1.378   | 0.9159  | 0.67287     | 0.826845512 |          |         |
| GAL3ST1         | ENSG00000128242 | -1.345   | 0.91068 | -0.44787    | 0.67288     | -1.345   |         |
|                 | 0.91068         | -0.9982  | 0.84091 | 0.67288     | 0.826845512 |          |         |
| C1QL2           | ENSG00000144119 | -0.51727 | 0.69752 | -0.44789    | 0.67288     | -0.51727 | 0.69752 |
|                 | -0.51727        | 0.69752  | 0.67288 | 0.826845512 |             |          |         |
| USP34           | ENSG00000115464 | -0.86358 | 0.80609 | -0.44793    | 0.6729      | -0.8128  | 0.79183 |
|                 | -1.0295         | 0.84839  | 0.6729  | 0.826845512 |             |          |         |
| NA              | ENSG00000274867 | -0.448   | 0.67292 | -0.448      | 0.67292     | -0.448   | 0.67292 |
|                 | -0.448          | 0.67292  | 0.67292 | 0.826845512 |             |          |         |
| LINC01484       | ENSG00000253686 | -1.0783  | 0.85956 | -0.44813    | 0.67297     | -0.44813 |         |
|                 | 0.67297         | -0.81305 | 0.7919  | 0.67297     | 0.826845512 |          |         |
| CYCTP           | ENSG00000249909 | -0.4482  | 0.67299 | -2.6599     | 0.99609     | -2.6599  | 0.99609 |
|                 | -2.6599         | 0.99609  | 0.67299 | 0.826845512 |             |          |         |
| FZD3            | ENSG00000104290 | -0.68006 | 0.75177 | -0.86434    | 0.8063      | -0.44828 | 0.67302 |
|                 | -0.63329        | 0.73673  | 0.67302 | 0.826845512 |             |          |         |
| UBE2V1P14       | ENSG00000228134 | -0.44827 | 0.67302 | -0.44827    | 0.67302     | -0.44827 |         |
|                 | 0.67302         | -0.44827 | 0.67302 | 0.67302     | 0.826845512 |          |         |
| NA              | ENSG00000280419 | -0.44828 | 0.67302 | -0.44828    | 0.67302     | -0.44828 | 0.67302 |
|                 | -0.44828        | 0.67302  | 0.67302 | 0.826845512 |             |          |         |
| BTBD7           | ENSG00000011114 | -1.5323  | 0.93727 | -1.1067     | 0.86579     | -0.44831 | 0.67304 |
|                 | -1.0675         | 0.85712  | 0.67304 | 0.826845512 |             |          |         |
| RNU6-564P       | ENSG00000222915 | -0.44831 | 0.67304 | -0.44831    | 0.67304     | -0.44831 |         |
|                 | 0.67304         | -0.44831 | 0.67304 | 0.67304     | 0.826845512 |          |         |
| NA              | ENSG00000259211 | -0.44847 | 0.67309 | -0.44847    | 0.67309     | -0.44847 | 0.67309 |
|                 | -0.44847        | 0.67309  | 0.67309 | 0.826845512 |             |          |         |
| NA              | ENSG00000277040 | -0.44854 | 0.67312 | -0.44854    | 0.67312     | -0.44854 | 0.67312 |
|                 | -0.44854        | 0.67312  | 0.67312 | 0.826845512 |             |          |         |
| NA              | ENSG00000229180 | -0.44859 | 0.67314 | -1.2483     | 0.89403     | -0.82681 | 0.79583 |
|                 | -0.83914        | 0.79931  | 0.67314 | 0.826845512 |             |          |         |
| NA              | ENSG00000255074 | -1.3262  | 0.90761 | -0.44863    | 0.67315     | -0.53494 | 0.70366 |
|                 | -1.819          | 0.96555  | 0.67315 | 0.826845512 |             |          |         |
| LINC01483       | ENSG00000227517 | -0.67154 | 0.74906 | -0.69606    | 0.7568      | -0.54841 |         |
|                 | 0.70829         | -0.44868 | 0.67317 | 0.67317     | 0.826845512 |          |         |
| ANKHD1-EIF4EBP3 | ENSG00000254996 | -1.4139  | 0.92131 | -0.44868    | 0.67317     | -1.4139  |         |
|                 | 0.92131         | -1.4139  | 0.92131 | 0.67317     | 0.826845512 |          |         |
| NA              | ENSG00000280201 | -0.57596 | 0.71768 | -1.4828     | 0.93093     | -1.9339  | 0.97344 |
|                 | -0.44872        | 0.67318  | 0.67318 | 0.826845512 |             |          |         |
| NFE2L1-DT       | ENSG00000263412 | -0.44876 | 0.6732  | -0.44876    | 0.6732      | -0.44876 |         |
|                 | 0.6732          | -0.44876 | 0.6732  | 0.6732      | 0.826845512 |          |         |
| NA              | ENSG00000225420 | -0.58882 | 0.72201 | -0.4488     | 0.67321     | -0.58882 | 0.72201 |
|                 | -0.58882        | 0.72201  | 0.67321 | 0.826845512 |             |          |         |
| PPM1F-AS1       | ENSG00000224086 | -0.44886 | 0.67323 | -0.44886    | 0.67323     | -0.44886 |         |
|                 | 0.67323         | -0.44886 | 0.67323 | 0.67323     | 0.826845512 |          |         |
| SOWAHB          | ENSG00000186212 | -0.47249 | 0.68171 | -0.47249    | 0.68171     | -0.44897 |         |
|                 | 0.67327         | -0.62469 | 0.73391 | 0.67327     | 0.826845512 |          |         |
| NA              | ENSG00000225152 | -1.6835  | 0.95386 | -0.72219    | 0.76491     | -0.44899 | 0.67328 |
|                 | -1.6835         | 0.95386  | 0.67328 | 0.826845512 |             |          |         |
| NA              | ENSG00000228400 | -0.44899 | 0.67328 | -0.44899    | 0.67328     | -0.44899 | 0.67328 |
|                 | -0.44899        | 0.67328  | 0.67328 | 0.826845512 |             |          |         |
| PLCE1-AS2       | ENSG00000232913 | -1.1043  | 0.86526 | -1.9338     | 0.97343     | -0.44898 |         |



|            |                 |          |         |             |             |          |         |
|------------|-----------------|----------|---------|-------------|-------------|----------|---------|
|            | 0.67328         | -0.44898 | 0.67328 | 0.67328     | 0.826845512 |          |         |
| NA         | ENSG00000267992 | -0.44903 | 0.6733  | -0.44903    | 0.6733      | -0.44903 | 0.6733  |
|            | -0.44903        | 0.6733   | 0.6733  | 0.826845512 |             |          |         |
| TMEM184C   | ENSG00000164168 | -0.4491  | 0.67332 | -0.99331    | 0.83972     | -0.4491  |         |
|            | 0.67332         | -0.4491  | 0.67332 | 0.67332     | 0.826845512 |          |         |
| C4orf54    | ENSG00000248713 | -0.53913 | 0.7051  | -0.53913    | 0.7051      | -0.53913 |         |
|            | 0.7051          | -0.44911 | 0.67332 | 0.67332     | 0.826845512 |          |         |
| LINC00319  | ENSG00000188660 | -0.44921 | 0.67336 | -1.596      | 0.94475     | -0.54743 |         |
|            | 0.70796         | -0.75983 | 0.77632 | 0.67336     | 0.826873795 |          |         |
| RNU6-10P   | ENSG00000206763 | -0.44929 | 0.67339 | -0.44929    | 0.67339     | -0.44929 |         |
|            | 0.67339         | -0.44929 | 0.67339 | 0.67339     | 0.82688124  |          |         |
| HNRNPA1P35 | ENSG00000225695 | -2.0599  | 0.9803  | -0.44932    | 0.6734      | -1.4763  |         |
|            | 0.93007         | -0.61104 | 0.72941 | 0.6734      | 0.82688124  |          |         |
| NA         | ENSG00000236318 | -0.68315 | 0.75274 | -0.44945    | 0.67345     | -0.44945 | 0.67345 |
|            | -0.44945        | 0.67345  | 0.67345 | 0.826904684 |             |          |         |
| MIR1193    | ENSG00000221036 | -0.44948 | 0.67346 | -0.44948    | 0.67346     | -0.44948 |         |
|            | 0.67346         | -0.44948 | 0.67346 | 0.67346     | 0.826904684 |          |         |
| SDR42E1    | ENSG00000184860 | -0.44953 | 0.67347 | -0.44953    | 0.67347     | -0.44953 |         |
|            | 0.67347         | -0.44953 | 0.67347 | 0.67347     | 0.826904684 |          |         |
| NA         | ENSG00000279526 | -0.9746  | 0.83512 | -0.9746     | 0.83512     | -0.44969 | 0.67353 |
|            | -1.5828         | 0.94327  | 0.67353 | 0.826957517 |             |          |         |
| NA         | ENSG00000224810 | -0.44975 | 0.67356 | -1.5055     | 0.9339      | -0.56773 | 0.71489 |
|            | -0.56773        | 0.71489  | 0.67356 | 0.826972396 |             |          |         |
| NA         | ENSG00000252408 | -0.44981 | 0.67358 | -0.44981    | 0.67358     | -0.44981 | 0.67358 |
|            | -0.44981        | 0.67358  | 0.67358 | 0.826972396 |             |          |         |
| NAA40      | ENSG00000110583 | -1.4986  | 0.93301 | -1.3212     | 0.90678     | -1.6044  | 0.94568 |
|            | -0.44991        | 0.67361  | 0.67361 | 0.826972396 |             |          |         |
| ZNF726     | ENSG00000213967 | -0.44991 | 0.67361 | -0.52981    | 0.70188     | -0.85639 |         |
|            | 0.80411         | -0.52981 | 0.70188 | 0.67361     | 0.826972396 |          |         |
| NA         | ENSG00000258753 | -0.45004 | 0.67366 | -0.45004    | 0.67366     | -0.45004 | 0.67366 |
|            | -0.45004        | 0.67366  | 0.67366 | 0.826974996 |             |          |         |
| CMAS       | ENSG00000111726 | -1.0344  | 0.84952 | -0.53445    | 0.70349     | -0.45008 | 0.67367 |
|            | -0.60251        | 0.72658  | 0.67367 | 0.826974996 |             |          |         |
| OR52D1     | ENSG00000181609 | -0.52753 | 0.70109 | -0.52753    | 0.70109     | -0.45006 |         |
|            | 0.67367         | -2.1908  | 0.98577 | 0.67367     | 0.826974996 |          |         |
| GTSCR1     | ENSG00000263417 | -1.7646  | 0.96119 | -1.4492     | 0.92636     | -0.64917 |         |
|            | 0.74189         | -0.4501  | 0.67368 | 0.67368     | 0.826974996 |          |         |
| LINC02642  | ENSG00000232591 | -0.45027 | 0.67374 | -1.7688     | 0.96154     | -1.7688  |         |
|            | 0.96154         | -1.7688  | 0.96154 | 0.67374     | 0.827003619 |          |         |
| NA         | ENSG00000279074 | -0.4503  | 0.67375 | -0.4503     | 0.67375     | -0.4503  | 0.67375 |
|            | -0.4503         | 0.67375  | 0.67375 | 0.827003619 |             |          |         |
| RPA3       | ENSG00000106399 | -0.45032 | 0.67376 | -0.45032    | 0.67376     | -0.97115 | 0.83426 |
|            | -2.0165         | 0.97813  | 0.67376 | 0.827003619 |             |          |         |
| SAMD10     | ENSG00000130590 | -0.45039 | 0.67379 | -0.46412    | 0.67872     | -0.46412 |         |
|            | 0.67872         | -0.46412 | 0.67872 | 0.67379     | 0.827003619 |          |         |
| TNPO1P1    | ENSG00000225423 | -0.45041 | 0.67379 | -0.71421    | 0.76245     | -0.71421 |         |
|            | 0.76245         | -0.71421 | 0.76245 | 0.67379     | 0.827003619 |          |         |
| FKBP1AP4   | ENSG00000282502 | -0.45046 | 0.67381 | -0.45046    | 0.67381     | -0.45046 |         |
|            | 0.67381         | -0.45046 | 0.67381 | 0.67381     | 0.827003619 |          |         |
| NA         | ENSG00000264643 | -0.64718 | 0.74124 | -1.3832     | 0.91671     | -1.4233  | 0.92267 |
|            | -0.45052        | 0.67383  | 0.67383 | 0.827003619 |             |          |         |
| TSSK1B     | ENSG00000212122 | -0.81193 | 0.79158 | -0.81193    | 0.79158     | -1.4007  |         |
|            | 0.91935         | -0.45059 | 0.67386 | 0.67386     | 0.827003619 |          |         |
| NA         | ENSG00000227516 | -1.0599  | 0.8554  | -1.5345     | 0.93754     | -0.45061 | 0.67386 |
|            | -0.45061        | 0.67386  | 0.67386 | 0.827003619 |             |          |         |
| NA         | ENSG00000260036 | -0.45066 | 0.67388 | -0.45066    | 0.67388     | -0.45066 | 0.67388 |
|            | -0.45066        | 0.67388  | 0.67388 | 0.827003619 |             |          |         |
| NA         | ENSG00000207299 | -0.45068 | 0.67389 | -0.84726    | 0.80158     | -0.45068 | 0.67389 |
|            | -0.45068        | 0.67389  | 0.67389 | 0.827003619 |             |          |         |
| PMS2P4     | ENSG00000067601 | -0.6502  | 0.74222 | -0.45086    | 0.67395     | -0.45086 |         |
|            | 0.67395         | -0.50425 | 0.69296 | 0.67395     | 0.827056423 |          |         |
| FOSL1P1    | ENSG00000248394 | -0.45103 | 0.67401 | -0.55264    | 0.70975     | -0.45103 |         |

|           |                 |          |         |             |             |          |         |
|-----------|-----------------|----------|---------|-------------|-------------|----------|---------|
|           | 0.67401         | -0.45103 | 0.67401 | 0.67401     | 0.827087269 |          |         |
| LINC02191 | ENSG00000261636 | -0.45105 | 0.67402 | -0.45105    | 0.67402     | -0.45105 | 0.67402 |
|           | 0.67402         | -0.45105 | 0.67402 | 0.67402     | 0.827087269 |          |         |
| NA        | ENSG00000283897 | -1.8176  | 0.96544 | -0.45108    | 0.67403     | -0.87731 | 0.80984 |
|           | -0.4818         | 0.68502  | 0.67403 | 0.827087269 |             |          |         |
| NA        | ENSG00000259608 | -2.0942  | 0.98188 | -2.0942     | 0.98188     | -0.45113 | 0.67405 |
|           | -2.0942         | 0.98188  | 0.67405 | 0.827087269 |             |          |         |
| ADAMTS18  | ENSG00000140873 | -0.45116 | 0.67406 | -0.61232    | 0.72984     | -0.61232 |         |
|           | 0.72984         | -0.9625  | 0.8321  | 0.67406     | 0.827087269 |          |         |
| NA        | ENSG00000225166 | -0.79149 | 0.78567 | -1.9215     | 0.97266     | -0.45121 | 0.67408 |
|           | -0.79149        | 0.78567  | 0.67408 | 0.827090983 |             |          |         |
| NA        | ENSG00000271228 | -0.45135 | 0.67413 | -0.45135    | 0.67413     | -0.45135 | 0.67413 |
|           | -0.45135        | 0.67413  | 0.67413 | 0.827131506 |             |          |         |
| NA        | ENSG00000232749 | -0.45141 | 0.67415 | -0.45141    | 0.67415     | -0.45141 | 0.67415 |
|           | -0.45141        | 0.67415  | 0.67415 | 0.827135219 |             |          |         |
| NA        | ENSG00000251379 | -0.71873 | 0.76385 | -0.45165    | 0.67424     | -0.71873 | 0.76385 |
|           | -0.71873        | 0.76385  | 0.67424 | 0.827223678 |             |          |         |
| PLSCR5    | ENSG00000231213 | -0.45171 | 0.67426 | -0.49937    | 0.69124     | -0.49632 |         |
|           | 0.69016         | -1.055   | 0.85428 | 0.67426     | 0.827223678 |          |         |
| NA        | ENSG00000253244 | -1.5748  | 0.94235 | -0.66794    | 0.74791     | -0.45178 | 0.67429 |
|           | -0.45178        | 0.67429  | 0.67429 | 0.827223678 |             |          |         |
| NA        | ENSG00000259743 | -1.6487  | 0.95039 | -1.1667     | 0.87834     | -0.4518  | 0.67429 |
|           | -0.90004        | 0.81595  | 0.67429 | 0.827223678 |             |          |         |
| AMD1      | ENSG00000123505 | -0.45187 | 0.67432 | -1.3755     | 0.91551     | -0.97449 | 0.83509 |
|           | -1.2294         | 0.89053  | 0.67432 | 0.827239656 |             |          |         |
| NA        | ENSG00000229893 | -0.99606 | 0.84039 | -0.45201    | 0.67437     | -0.80286 | 0.78897 |
|           | -0.80286        | 0.78897  | 0.67437 | 0.827250784 |             |          |         |
| NA        | ENSG00000260493 | -0.452   | 0.67437 | -0.452      | 0.67437     | -0.452   | 0.67437 |
|           | -0.452          | 0.67437  | 0.67437 | 0.827250784 |             |          |         |
| DYRK4     | ENSG00000010219 | -0.83385 | 0.79782 | -1.7786     | 0.96235     | -0.64803 | 0.74152 |
|           | -0.45204        | 0.67438  | 0.67438 | 0.827250784 |             |          |         |
| NA        | ENSG00000253638 | -0.45213 | 0.67441 | -0.45213    | 0.67441     | -0.45213 | 0.67441 |
|           | -0.45213        | 0.67441  | 0.67441 | 0.82726562  |             |          |         |
| RNU4-43P  | ENSG00000222560 | -0.45221 | 0.67444 | -0.45221    | 0.67444     | -0.45221 |         |
|           | 0.67444         | -0.45221 | 0.67444 | 0.67444     | 0.82726562  |          |         |
| EPCAM-DT  | ENSG00000234690 | -1.0171  | 0.84546 | -0.45227    | 0.67446     | -0.92826 |         |
|           | 0.82336         | -0.6042  | 0.72714 | 0.67446     | 0.82726562  |          |         |
| NA        | ENSG00000251113 | -0.45225 | 0.67446 | -0.45225    | 0.67446     | -0.45225 | 0.67446 |
|           | -0.45225        | 0.67446  | 0.67446 | 0.82726562  |             |          |         |
| DOCK8     | ENSG00000107099 | -1.2592  | 0.89601 | -0.45235    | 0.67449     | -1.3005  | 0.90328 |
|           | -0.76569        | 0.77807  | 0.67449 | 0.827273036 |             |          |         |
| NA        | ENSG00000247934 | -0.73379 | 0.76846 | -0.45239    | 0.6745      | -0.73517 | 0.76888 |
|           | -0.50552        | 0.6934   | 0.6745  | 0.827273036 |             |          |         |
| TBC1D3P6  | ENSG00000224966 | -0.4525  | 0.67455 | -0.4525     | 0.67455     | -0.93059 |         |
|           | 0.82397         | -1.2253  | 0.88978 | 0.67455     | 0.827274463 |          |         |
| NA        | ENSG00000259123 | -1.1031  | 0.86502 | -0.4525     | 0.67455     | -0.72856 | 0.76687 |
|           | -0.65517        | 0.74382  | 0.67455 | 0.827274463 |             |          |         |
| NA        | ENSG00000248145 | -0.45265 | 0.6746  | -0.45265    | 0.6746      | -0.45265 | 0.6746  |
|           | -0.45265        | 0.6746   | 0.6746  | 0.827274463 |             |          |         |
| CCDC115   | ENSG00000136710 | -0.45268 | 0.67461 | -0.45268    | 0.67461     | -0.45268 |         |
|           | 0.67461         | -0.847   | 0.8015  | 0.67461     | 0.827274463 |          |         |
| IMP4      | ENSG00000136718 | -0.45268 | 0.67461 | -0.45268    | 0.67461     | -0.45268 | 0.67461 |
|           | -0.45268        | 0.67461  | 0.67461 | 0.827274463 |             |          |         |
| UQCRFS1P2 | ENSG00000223721 | -0.45271 | 0.67462 | -0.45271    | 0.67462     | -0.45271 |         |
|           | 0.67462         | -0.45271 | 0.67462 | 0.67462     | 0.827274463 |          |         |
| NA        | ENSG00000250043 | -1.9726  | 0.97573 | -0.45271    | 0.67462     | -1.9958  | 0.97702 |
|           | -1.2281         | 0.8903   | 0.67462 | 0.827274463 |             |          |         |
| LUNAR1    | ENSG00000278090 | -1.6184  | 0.94721 | -2.2441     | 0.98759     | -0.4528  |         |
|           | 0.67465         | -1.4666  | 0.92876 | 0.67465     | 0.827290433 |          |         |
| NA        | ENSG00000221175 | -0.45314 | 0.67477 | -1.3606     | 0.91317     | -1.0339  | 0.84941 |
|           | -1.5922         | 0.94433  | 0.67477 | 0.827416761 |             |          |         |
| MYCBPAP   | ENSG00000136449 | -0.99391 | 0.83987 | -0.99391    | 0.83987     | -0.99391 |         |

|            |                 |          |             |             |             |          |         |
|------------|-----------------|----------|-------------|-------------|-------------|----------|---------|
|            | 0.83987         | -0.45324 | 0.67481     | 0.67481     | 0.827444989 |          |         |
| NA         | ENSG00000257002 | -0.66418 | 0.74671     | -0.59773    | 0.72499     | -0.45328 | 0.67483 |
|            | -0.45328        | 0.67483  | 0.67483     | 0.827448692 |             |          |         |
| NA         | ENSG00000249458 | -0.45346 | 0.67489     | -0.45346    | 0.67489     | -0.45346 | 0.67489 |
|            | -0.45346        | 0.67489  | 0.67489     | 0.827467914 |             |          |         |
| SPRYD4     | ENSG00000176422 | -0.88753 | 0.8126      | -1.0946     | 0.86316     | -0.45357 |         |
|            | 0.67493         | -0.45357 | 0.67493     | 0.67493     | 0.827467914 |          |         |
| HHEX       | ENSG00000152804 | -0.45359 | 0.67494     | -0.45359    | 0.67494     | -0.45359 | 0.67494 |
|            | -0.45359        | 0.67494  | 0.67494     | 0.827467914 |             |          |         |
| PCDHAC1    | ENSG00000248383 | -0.87592 | 0.80946     | -0.4536     | 0.67494     | -0.96843 |         |
|            | 0.83359         | -0.74015 | 0.7704      | 0.67494     | 0.827467914 |          |         |
| LINC00993  | ENSG00000235687 | -0.45364 | 0.67495     | -1.3453     | 0.91074     | -0.6938  |         |
|            | 0.7561          | -0.73126 | 0.76769     | 0.67495     | 0.827467914 |          |         |
| NA         | ENSG00000273370 | -0.45378 | 0.67501     | -0.45378    | 0.67501     | -0.45378 | 0.67501 |
|            | -0.45378        | 0.67501  | 0.67501     | 0.827467914 |             |          |         |
| NA         | ENSG00000260029 | -0.45382 | 0.67502     | -0.45382    | 0.67502     | -0.45382 | 0.67502 |
|            | -0.45382        | 0.67502  | 0.67502     | 0.827467914 |             |          |         |
| NA         | ENSG00000226330 | -0.94212 | 0.82693     | -0.45384    | 0.67503     | -0.94212 | 0.82693 |
|            | -0.94212        | 0.82693  | 0.67503     | 0.827467914 |             |          |         |
| LINC00442  | ENSG00000232685 | -1.1985  | 0.88463     | -1.2413     | 0.89276     | -0.45385 |         |
|            | 0.67503         | -0.45385 | 0.67503     | 0.67503     | 0.827467914 |          |         |
| NA         | ENSG00000277152 | -0.49104 | 0.6883      | -0.91313    | 0.81941     | -0.45385 | 0.67503 |
|            | -0.51725        | 0.69751  | 0.67503     | 0.827467914 |             |          |         |
| NA         | ENSG00000253593 | -0.67654 | 0.75065     | -0.67131    | 0.74899     | -0.45397 | 0.67508 |
|            | -1.0677         | 0.85718  | 0.67508     | 0.827467914 |             |          |         |
| SLC25A38   | ENSG00000144659 | -0.91184 | 0.81907     | -0.91184    | 0.81907     | -0.45408 |         |
|            | 0.67511         | -1.0855  | 0.86114     | 0.67511     | 0.827467914 |          |         |
| OR9R1P     | ENSG00000224622 | -1.8401  | 0.96712     | -1.1691     | 0.87882     | -0.6402  |         |
|            | 0.73898         | -0.45408 | 0.67511     | 0.67511     | 0.827467914 |          |         |
| NA         | ENSG00000239041 | -0.45413 | 0.67513     | -0.45413    | 0.67513     | -1.1491  | 0.87475 |
|            | -0.45413        | 0.67513  | 0.67513     | 0.827467914 |             |          |         |
| NA         | ENSG00000255279 | -0.45412 | 0.67513     | -0.45412    | 0.67513     | -0.45412 | 0.67513 |
|            | -1.23089065     | 0.67513  | 0.827467914 |             |             |          |         |
| NA         | ENSG00000201792 | -0.45414 | 0.67514     | -0.71586    | 0.76296     | -1.743   | 0.95933 |
|            | -0.82032        | 0.79398  | 0.67514     | 0.827467914 |             |          |         |
| NA         | ENSG00000234460 | -0.4542  | 0.67516     | -0.4542     | 0.67516     | -0.4542  | 0.67516 |
|            | -0.4542         | 0.67516  | 0.67516     | 0.827467914 |             |          |         |
| NA         | ENSG00000256452 | -0.4542  | 0.67516     | -0.4542     | 0.67516     | -0.4542  | 0.67516 |
|            | -0.4542         | 0.67516  | 0.67516     | 0.827467914 |             |          |         |
| OR4A4P     | ENSG00000254769 | -0.45424 | 0.67517     | -0.45424    | 0.67517     | -0.45424 |         |
|            | 0.67517         | -0.45424 | 0.67517     | 0.67517     | 0.827467914 |          |         |
| NA         | ENSG00000279013 | -0.45436 | 0.67521     | -0.45436    | 0.67521     | -0.45436 | 0.67521 |
|            | -0.45436        | 0.67521  | 0.67521     | 0.827467914 |             |          |         |
| NA         | ENSG00000200855 | -0.45441 | 0.67523     | -0.45441    | 0.67523     | -0.45441 | 0.67523 |
|            | -0.45441        | 0.67523  | 0.67523     | 0.827467914 |             |          |         |
| GPR4       | ENSG00000177464 | -0.45443 | 0.67524     | -0.45443    | 0.67524     | -0.45443 | 0.67524 |
|            | -0.45443        | 0.67524  | 0.67524     | 0.827467914 |             |          |         |
| RRP7A      | ENSG00000189306 | -0.88142 | 0.81095     | -0.45442    | 0.67524     | -1.5661  | 0.94134 |
|            | -0.85246        | 0.80302  | 0.67524     | 0.827467914 |             |          |         |
| NA         | ENSG00000237468 | -0.58816 | 0.72179     | -0.45467    | 0.67533     | -0.58816 | 0.72179 |
|            | -0.58816        | 0.72179  | 0.67533     | 0.827467914 |             |          |         |
| RN7SL622P  | ENSG00000265052 | -0.45468 | 0.67533     | -0.45468    | 0.67533     | -0.45468 |         |
|            | 0.67533         | -0.45468 | 0.67533     | 0.67533     | 0.827467914 |          |         |
| RNU6-1098P | ENSG00000252581 | -0.69499 | 0.75647     | -0.4547     | 0.67534     | -0.69499 |         |
|            | 0.75647         | -0.69499 | 0.75647     | 0.67534     | 0.827467914 |          |         |
| VTN        | ENSG00000109072 | -0.45475 | 0.67536     | -0.45475    | 0.67536     | -0.45475 | 0.67536 |
|            | -0.45475        | 0.67536  | 0.67536     | 0.827467914 |             |          |         |
| NA         | ENSG00000235610 | -0.45482 | 0.67538     | -0.45482    | 0.67538     | -0.45482 | 0.67538 |
|            | -0.45482        | 0.67538  | 0.67538     | 0.827467914 |             |          |         |
| ZPLD1      | ENSG00000170044 | -0.45484 | 0.67539     | -0.95786    | 0.83093     | -0.9661  | 0.833   |
|            | -1.4867         | 0.93146  | 0.67539     | 0.827467914 |             |          |         |
| LINC01115  | ENSG00000237667 | -1.3596  | 0.91302     | -0.45484    | 0.67539     | -1.4584  |         |

|           |                 |          |             |             |             |          |         |
|-----------|-----------------|----------|-------------|-------------|-------------|----------|---------|
|           | 0.92763         | -0.71878 | 0.76386     | 0.67539     | 0.827467914 |          |         |
| NA        | ENSG00000240661 | -1.0571  | 0.85476     | -0.45486    | 0.67539     | -1.4087  | 0.92054 |
|           | -1.0571         | 0.85476  | 0.67539     | 0.827467914 |             |          |         |
| NA        | ENSG00000244332 | -0.45494 | 0.67542     | -0.45494    | 0.67542     | -0.45494 | 0.67542 |
|           | -0.87947        | 0.81043  | 0.67542     | 0.827467914 |             |          |         |
| ARMC5     | ENSG00000140691 | -0.455   | 0.67544     | -0.455      | 0.67544     | -0.455   | 0.67544 |
|           | -0.455          | 0.67544  | 0.67544     | 0.827467914 |             |          |         |
| NA        | ENSG00000254038 | -0.455   | 0.67544     | -0.455      | 0.67544     | -0.71948 | 0.76408 |
|           | -0.455          | 0.67544  | 0.67544     | 0.827467914 |             |          |         |
| MIR1268B  | ENSG00000265561 | -0.45499 | 0.67544     | -0.45499    | 0.67544     | -0.45499 |         |
|           | 0.67544         | -0.47422 | 0.68233     | 0.67544     | 0.827467914 |          |         |
| RN7SL283P | ENSG00000240977 | -0.45519 | 0.67551     | -0.45519    | 0.67551     | -0.45519 |         |
|           | 0.67551         | -0.45519 | 0.67551     | 0.67551     | 0.827532865 |          |         |
| RPA2P1    | ENSG00000258392 | -0.45555 | 0.67564     | -0.45555    | 0.67564     | -0.45555 |         |
|           | 0.67564         | -0.45555 | 0.67564     | 0.67564     | 0.827671314 |          |         |
| TMEM102   | ENSG00000181284 | -0.57925 | 0.71879     | -0.57925    | 0.71879     | -0.4556  |         |
|           | 0.67566         | -0.57925 | 0.71879     | 0.67566     | 0.827675008 |          |         |
| LINC01756 | ENSG00000230523 | -1.1075  | 0.86596     | -0.66439    | 0.74678     | -0.45594 |         |
|           | 0.67578         | -1.1075  | 0.86596     | 0.67578     | 0.827758405 |          |         |
| NA        | ENSG00000279584 | -0.45596 | 0.67579     | -0.45596    | 0.67579     | -0.45596 | 0.67579 |
|           | -0.45596        | 0.67579  | 0.67579     | 0.827758405 |             |          |         |
| NA        | ENSG00000231620 | -0.45599 | 0.6758      | -0.45599    | 0.6758      | -0.45599 | 0.6758  |
|           | -0.45599        | 0.6758   | 0.6758      | 0.827758405 |             |          |         |
| TRBV26    | ENSG00000249912 | -0.456   | 0.67581     | -0.85042    | 0.80246     | -0.77183 |         |
|           | 0.77989         | -0.85042 | 0.80246     | 0.67581     | 0.827758405 |          |         |
| NA        | ENSG00000253388 | -0.45605 | 0.67582     | -0.45605    | 0.67582     | -0.45605 | 0.67582 |
|           | -0.45605        | 0.67582  | 0.67582     | 0.827758405 |             |          |         |
| NA        | ENSG00000269053 | -0.45607 | 0.67583     | -0.45607    | 0.67583     | -0.45607 | 0.67583 |
|           | -0.45607        | 0.67583  | 0.67583     | 0.827758405 |             |          |         |
| ZNF365    | ENSG00000138311 | -1.6851  | 0.95402     | -1.6557     | 0.9511      | -1.7816  |         |
|           | 0.96259         | -0.45625 | 0.6759      | 0.6759      | 0.827802528 |          |         |
| NA        | ENSG00000254519 | -0.45627 | 0.6759      | -1.2502     | 0.89438     | -1.0196  | 0.84603 |
|           | -0.74892        | 0.77305  | 0.6759      | 0.827802528 |             |          |         |
| SSR1      | ENSG00000124783 | -0.45633 | 0.67592     | -0.96128    | 0.83179     | -0.60405 | 0.72709 |
|           | -0.69402        | 0.75617  | 0.67592     | 0.827806218 |             |          |         |
| TMA16P1   | ENSG00000255265 | -0.45655 | 0.676       | -0.45655    | 0.676       | -0.45655 | 0.676   |
|           | 0.676           | 0.676    | 0.827857711 |             |             |          |         |
| UBE2R2    | ENSG00000107341 | -0.65088 | 0.74244     | -0.98349    | 0.83732     | -1.2612  |         |
|           | 0.89638         | -0.45658 | 0.67601     | 0.67601     | 0.827857711 |          |         |
| TAC3      | ENSG00000166863 | -0.78971 | 0.78515     | -0.78971    | 0.78515     | -0.78971 | 0.78515 |
|           | -0.45659        | 0.67602  | 0.67602     | 0.827857711 |             |          |         |
| NA        | ENSG00000225385 | -0.53676 | 0.70428     | -0.45664    | 0.67603     | -0.53676 | 0.70428 |
|           | -0.79536        | 0.7868   | 0.67603     | 0.827857711 |             |          |         |
| NA        | ENSG00000275503 | -0.45679 | 0.67609     | -0.45679    | 0.67609     | -0.45679 | 0.67609 |
|           | -0.45679        | 0.67609  | 0.67609     | 0.827910381 |             |          |         |
| NA        | ENSG00000270022 | -0.45689 | 0.67613     | -0.45689    | 0.67613     | -0.45689 | 0.67613 |
|           | -0.45689        | 0.67613  | 0.67613     | 0.827938558 |             |          |         |
| NA        | ENSG00000230190 | -0.45696 | 0.67615     | -1.1132     | 0.86719     | -0.45696 | 0.67615 |
|           | -0.45696        | 0.67615  | 0.67615     | 0.827942243 |             |          |         |
| GJB3      | ENSG00000188910 | -0.45713 | 0.67621     | -0.89513    | 0.81464     | -0.45713 | 0.67621 |
|           | -0.45713        | 0.67621  | 0.67621     | 0.827943549 |             |          |         |
| NA        | ENSG00000236890 | -0.45722 | 0.67625     | -0.45722    | 0.67625     | -0.45722 | 0.67625 |
|           | -0.45722        | 0.67625  | 0.67625     | 0.827943549 |             |          |         |
| NA        | ENSG00000251143 | -0.45724 | 0.67625     | -0.45724    | 0.67625     | -0.45724 | 0.67625 |
|           | -0.45724        | 0.67625  | 0.67625     | 0.827943549 |             |          |         |
| NA        | ENSG00000220989 | -0.45724 | 0.67625     | -0.45724    | 0.67625     | -0.45724 | 0.67625 |
|           | -0.45724        | 0.67625  | 0.67625     | 0.827943549 |             |          |         |
| ACKR4     | ENSG00000129048 | -0.91053 | 0.81873     | -0.4573     | 0.67627     | -2.2157  | 0.98665 |
|           | -1.3149         | 0.90573  | 0.67627     | 0.827943549 |             |          |         |
| MDH2      | ENSG00000146701 | -0.66745 | 0.74776     | -0.93202    | 0.82434     | -0.7047  | 0.7595  |
|           | -0.45731        | 0.67627  | 0.67627     | 0.827943549 |             |          |         |
| RN7SL744P | ENSG00000264028 | -0.45729 | 0.67627     | -0.45729    | 0.67627     | -0.45729 |         |

|           |                 |          |          |             |             |             |         |          |
|-----------|-----------------|----------|----------|-------------|-------------|-------------|---------|----------|
|           |                 | 0.67627  | -0.45729 | 0.67627     | 0.67627     | 0.827943549 |         |          |
| IL19      | ENSG00000142224 | -0.45739 | 0.67631  | -1.0857     | 0.8612      | -1.0857     | 0.8612  |          |
|           |                 | -1.0857  | 0.8612   | 0.67631     | 0.827971719 |             |         |          |
| THAP12P4  | ENSG00000254465 | -1.0211  | 0.84639  | -1.6074     | 0.94601     | -1.0132     |         |          |
|           |                 | 0.84452  | -0.45748 | 0.67634     | 0.827979086 |             |         |          |
| AFF4      | ENSG00000072364 | -0.64339 | 0.74001  | -0.45751    | 0.67635     | -0.90023    | 0.816   |          |
|           |                 | -0.94308 | 0.82718  | 0.67635     | 0.827979086 |             |         |          |
| FLYWCH1P1 | ENSG00000239516 | -0.45766 | 0.6764   | -0.45766    | 0.6764      | -0.45766    |         |          |
|           |                 | 0.6764   | -0.45766 | 0.6764      | 0.827990135 |             |         |          |
| NA        | ENSG00000256353 | -0.45769 | 0.67641  | -0.45769    | 0.67641     | -0.45769    | 0.67641 |          |
|           |                 | -0.45769 | 0.67641  | 0.67641     | 0.827990135 |             |         |          |
| NA        | ENSG00000264874 | -0.45768 | 0.67641  | -0.45768    | 0.67641     | -0.45768    | 0.67641 |          |
|           |                 | -0.45768 | 0.67641  | 0.67641     | 0.827990135 |             |         |          |
| RNA5SP438 | ENSG00000252370 | -0.68204 | 0.75239  | -0.45781    | 0.67646     | -0.45781    |         |          |
|           |                 | 0.67646  | -0.45781 | 0.67646     | 0.828009741 |             |         |          |
| NA        | ENSG00000271581 | -0.45784 | 0.67646  | -0.45784    | 0.67646     | -0.45784    | 0.67646 |          |
|           |                 | -0.45784 | 0.67646  | 0.67646     | 0.828009741 |             |         |          |
| KMT2B     | ENSG00000272333 | -0.45798 | 0.67652  | -0.50998    | 0.69497     | -0.45798    | 0.67652 |          |
|           |                 | -0.45798 | 0.67652  | 0.67652     | 0.828062383 |             |         |          |
| CHCHD2P5  | ENSG00000223490 | -0.45819 | 0.67659  | -0.89994    | 0.81592     | -1.0359     |         |          |
|           |                 | 0.84988  | -1.0359  | 0.84988     | 0.67659     | 0.828118702 |         |          |
| NA        | ENSG00000239482 | -0.58634 | 0.72118  | -0.45821    | 0.6766      | -0.47016    | 0.68088 |          |
|           |                 | -0.55697 | 0.71122  | 0.6766      | 0.828118702 |             |         |          |
| ANKRD28   | ENSG00000206560 | -0.45831 | 0.67664  | -1.5222     | 0.93602     | -1.4581     |         |          |
|           |                 | 0.9276   | -1.1693  | 0.87886     | 0.67664     | 0.828146859 |         |          |
| NA        | ENSG00000258854 | -0.61725 | 0.73147  | -0.9943     | 0.83996     | -0.45841    | 0.67667 |          |
|           |                 | -0.61725 | 0.73147  | 0.67667     | 0.828162776 |             |         |          |
| RNU6-444P | ENSG00000206715 | -0.4585  | 0.6767   | -0.4585     | 0.6767      | -0.4585     |         |          |
|           |                 | 0.6767   | -0.4585  | 0.6767      | 0.828173809 |             |         |          |
| NA        | ENSG00000227598 | -0.45856 | 0.67672  | -0.45856    | 0.67672     | -0.79681    | 0.78722 |          |
|           |                 | -0.45856 | 0.67672  | 0.67672     | 0.828173809 |             |         |          |
| SNRK      | ENSG00000163788 | -1.3283  | 0.90795  | -2.1132     | 0.98271     | -0.45857    | 0.67673 |          |
|           |                 | -1.3835  | 0.91674  | 0.67673     | 0.828173809 |             |         |          |
| RMND1     | ENSG00000155906 | -1.1219  | 0.86905  | -0.45868    | 0.67677     | -1.6694     | 0.95248 |          |
|           |                 | -1.1248  | 0.86966  | 0.67677     | 0.828201961 |             |         |          |
| NA        | ENSG00000245748 | -0.45887 | 0.67684  | -0.45887    | 0.67684     | -0.45887    | 0.67684 |          |
|           |                 | -0.45887 | 0.67684  | 0.67684     | 0.828224017 |             |         |          |
| LINC00868 | ENSG00000267535 | -0.45888 | 0.67684  | -1.2797     | 0.89967     | -0.97853    |         |          |
|           |                 | 0.83609  | -1.3028  | 0.90367     | 0.67684     | 0.828224017 |         |          |
| NA        | ENSG00000181013 | -0.45887 | 0.67684  | -0.45887    | 0.67684     | -0.45887    | 0.67684 |          |
|           |                 | -0.45887 | 0.67684  | 0.67684     | 0.828224017 |             |         |          |
| NA        | ENSG00000200999 | -0.89768 | 0.81532  | -0.45896    | 0.67687     | -1.1798     | 0.88095 |          |
|           |                 | -0.89768 | 0.81532  | 0.67687     | 0.828224017 |             |         |          |
| UBN2      | ENSG00000157741 | -0.45902 | 0.67689  | -0.92421    | 0.82231     | -0.45902    | 0.67689 |          |
|           |                 | -0.90037 | 0.81604  | 0.67689     | 0.828224017 |             |         |          |
| HELT      | ENSG00000187821 | -0.47436 | 0.68238  | -0.45903    | 0.67689     | -0.51179    | 0.6956  |          |
|           |                 | -0.65211 | 0.74283  | 0.67689     | 0.828224017 |             |         |          |
| PIP5KL1   | ENSG00000167103 | -0.45917 | 0.67694  | -0.50315    | 0.69257     | -0.50315    |         |          |
|           |                 | 0.69257  | -0.50315 | 0.69257     | 0.67694     | 0.828243602 |         |          |
| NA        | ENSG00000253892 | -0.45915 | 0.67694  | -1.8141     | 0.96517     | -0.93364    | 0.82476 |          |
|           |                 | -1.3171  | 0.9061   | 0.67694     | 0.828243602 |             |         |          |
| CD300LF   | ENSG00000186074 | -0.45932 | 0.677    | -0.45932    | 0.677       | -0.45932    | 0.677   | -0.45932 |
|           |                 | 0.677    | 0.677    | 0.828270534 |             |             |         |          |
| MRPL9     | ENSG00000143436 | -0.95963 | 0.83138  | -0.95963    | 0.83138     | -0.95963    | 0.83138 |          |
|           |                 | -0.45937 | 0.67702  | 0.67702     | 0.828270534 |             |         |          |
| NA        | ENSG00000279367 | -0.67128 | 0.74898  | -0.45937    | 0.67702     | -0.45937    | 0.67702 |          |
|           |                 | -0.45937 | 0.67702  | 0.67702     | 0.828270534 |             |         |          |
| NA        | ENSG00000271871 | -0.45941 | 0.67703  | -0.45941    | 0.67703     | -0.45941    | 0.67703 |          |
|           |                 | -0.45941 | 0.67703  | 0.67703     | 0.828270534 |             |         |          |
| LRRC57    | ENSG00000180979 | -0.62014 | 0.73242  | -1.0463     | 0.8523      | -0.45951    |         |          |
|           |                 | 0.67706  | -1.0463  | 0.8523      | 0.67706     | 0.828286441 |         |          |
| NA        | ENSG00000234211 | -0.45965 | 0.67711  | -0.45965    | 0.67711     | -0.45965    | 0.67711 |          |

|            |                 |          |         |             |             |          |         |
|------------|-----------------|----------|---------|-------------|-------------|----------|---------|
|            | -0.45965        | 0.67711  | 0.67711 | 0.82830602  |             |          |         |
| PPP1R26P1  | ENSG00000238086 | -0.71706 | 0.76333 | -0.45964    | 0.67711     | -1.3917  |         |
|            | 0.91799         | -0.91472 | 0.81983 | 0.67711     | 0.82830602  |          |         |
| PGAM1P9    | ENSG00000249255 | -0.45975 | 0.67715 | -0.45975    | 0.67715     | -0.45975 |         |
|            | 0.67715         | -1.523   | 0.93612 | 0.67715     | 0.828334158 |          |         |
| ZNF654     | ENSG00000175105 | -0.45984 | 0.67719 | -0.6068     | 0.72801     | -0.6068  |         |
|            | 0.72801         | -0.83696 | 0.79869 | 0.67719     | 0.828357404 |          |         |
| NA         | ENSG00000220472 | -0.45991 | 0.67721 | -0.45991    | 0.67721     | -0.45991 | 0.67721 |
|            | -0.45991        | 0.67721  | 0.67721 | 0.828357404 |             |          |         |
| NA         | ENSG00000268087 | -0.45993 | 0.67722 | -0.50194    | 0.69214     | -0.45993 | 0.67722 |
|            | -0.64742        | 0.74132  | 0.67722 | 0.828357404 |             |          |         |
| OR4C6      | ENSG00000181903 | -0.7666  | 0.77834 | -1.3682     | 0.91437     | -0.46    | 0.67724 |
|            | -0.97797        | 0.83596  | 0.67724 | 0.828361074 |             |          |         |
| LINC02207  | ENSG00000258476 | -1.0879  | 0.86167 | -0.4601     | 0.67728     | -1.0276  |         |
|            | 0.84794         | -0.59304 | 0.72342 | 0.67728     | 0.828386764 |          |         |
| PTP4A1     | ENSG00000112245 | -0.46029 | 0.67735 | -0.46029    | 0.67735     | -0.61947 |         |
|            | 0.7322          | -1.0011  | 0.84162 | 0.67735     | 0.828386764 |          |         |
| DNAJC30    | ENSG00000176410 | -0.4603  | 0.67735 | -0.4603     | 0.67735     | -0.4603  |         |
|            | 0.67735         | -0.4603  | 0.67735 | 0.67735     | 0.828386764 |          |         |
| NA         | ENSG00000236099 | -0.98985 | 0.83888 | -1.0815     | 0.86027     | -0.77837 | 0.78183 |
|            | -0.46031        | 0.67735  | 0.67735 | 0.828386764 |             |          |         |
| NA         | ENSG00000238138 | -0.65066 | 0.74237 | -0.46033    | 0.67736     | -0.65066 | 0.74237 |
|            | -0.65066        | 0.74237  | 0.67736 | 0.828386764 |             |          |         |
| NA         | ENSG00000235546 | -0.46037 | 0.67737 | -0.46037    | 0.67737     | -0.46037 | 0.67737 |
|            | -0.46037        | 0.67737  | 0.67737 | 0.828386764 |             |          |         |
| NA         | ENSG00000267694 | -0.46037 | 0.67738 | -0.46037    | 0.67738     | -0.46037 | 0.67738 |
|            | -0.46037        | 0.67738  | 0.67738 | 0.828386764 |             |          |         |
| PTPN22     | ENSG00000134242 | -0.46069 | 0.67749 | -1.0201     | 0.84615     | -1.0201  |         |
|            | 0.84615         | -0.73247 | 0.76806 | 0.67749     | 0.828460127 |          |         |
| WIPF1      | ENSG00000115935 | -0.4608  | 0.67753 | -1.0956     | 0.86338     | -0.4608  | 0.67753 |
|            | -0.85189        | 0.80286  | 0.67753 | 0.828460127 |             |          |         |
| RPS26P34   | ENSG00000240427 | -0.46083 | 0.67754 | -0.46083    | 0.67754     | -0.46083 |         |
|            | 0.67754         | -0.53043 | 0.70209 | 0.67754     | 0.828460127 |          |         |
| NA         | ENSG00000278982 | -0.46085 | 0.67755 | -0.46085    | 0.67755     | -0.46085 | 0.67755 |
|            | -0.46085        | 0.67755  | 0.67755 | 0.828460127 |             |          |         |
| RNU6-1099P | ENSG00000200403 | -0.46093 | 0.67758 | -0.46093    | 0.67758     | -0.46093 |         |
|            | 0.67758         | -0.46093 | 0.67758 | 0.67758     | 0.828460127 |          |         |
| NA         | ENSG00000234553 | -0.46093 | 0.67758 | -0.46093    | 0.67758     | -0.46093 | 0.67758 |
|            | -0.46093        | 0.67758  | 0.67758 | 0.828460127 |             |          |         |
| NA         | ENSG00000262384 | -0.77054 | 0.77951 | -1.5721     | 0.94203     | -0.46097 | 0.67759 |
|            | -0.49291        | 0.68896  | 0.67759 | 0.828460127 |             |          |         |
| VEPH1      | ENSG00000197415 | -0.46102 | 0.67761 | -0.53627    | 0.70412     | -0.62538 | 0.73414 |
|            | -1.4376         | 0.92473  | 0.67761 | 0.828460127 |             |          |         |
| NA         | ENSG00000213150 | -0.46103 | 0.67761 | -0.60656    | 0.72793     | -0.60656 | 0.72793 |
|            | -1.0286         | 0.84816  | 0.67761 | 0.828460127 |             |          |         |
| NA         | ENSG00000258073 | -0.46101 | 0.67761 | -0.46101    | 0.67761     | -0.46101 | 0.67761 |
|            | -0.46101        | 0.67761  | 0.67761 | 0.828460127 |             |          |         |
| TTPA       | ENSG00000137561 | -0.46109 | 0.67763 | -0.46109    | 0.67763     | -0.46109 | 0.67763 |
|            | -0.65639        | 0.74421  | 0.67763 | 0.828463794 |             |          |         |
| ATOH7      | ENSG00000179774 | -0.4614  | 0.67775 | -0.4614     | 0.67775     | -0.4614  | 0.67775 |
|            | -0.4614         | 0.67775  | 0.67775 | 0.828576256 |             |          |         |
| UBAP2      | ENSG00000137073 | -0.69432 | 0.75626 | -0.99499    | 0.84013     | -0.99499 | 0.84013 |
|            | -0.46148        | 0.67777  | 0.67777 | 0.828576256 |             |          |         |
| NA         | ENSG00000262558 | -0.46149 | 0.67778 | -0.46149    | 0.67778     | -0.46149 | 0.67778 |
|            | -0.46149        | 0.67778  | 0.67778 | 0.828576256 |             |          |         |
| OR10K2     | ENSG00000180708 | -0.9188  | 0.8209  | -0.54134    | 0.70586     | -0.46154 |         |
|            | 0.67779         | -0.46154 | 0.67779 | 0.67779     | 0.828576256 |          |         |
| NRL        | ENSG00000129535 | -0.46176 | 0.67787 | -0.46176    | 0.67787     | -0.46176 | 0.67787 |
|            | -0.46176        | 0.67787  | 0.67787 | 0.828632478 |             |          |         |
| NA         | ENSG00000227249 | -1.7283  | 0.95803 | -0.46174    | 0.67787     | -1.7283  | 0.95803 |
|            | -1.7141         | 0.95674  | 0.67787 | 0.828632478 |             |          |         |
| SCAANT1    | ENSG00000280620 | -0.46193 | 0.67793 | -0.46193    | 0.67793     | -0.46193 |         |

|            |                 |             |             |             |             |          |         |          |
|------------|-----------------|-------------|-------------|-------------|-------------|----------|---------|----------|
|            | 0.67793         | -0.46193    | 0.67793     | 0.67793     | 0.828677647 |          |         |          |
| ACTG1P24   | ENSG00000226359 | -0.46212    | 0.678       | -0.46212    | 0.678       | -0.46212 | 0.678   | -0.46212 |
|            | 0.678           | 0.678       | 0.828677647 |             |             |          |         |          |
| NA         | ENSG00000282950 | -0.46211    | 0.678       | -0.46211    | 0.678       | -0.46211 | 0.678   | -0.46211 |
|            | 0.678           | 0.828677647 |             |             |             |          |         | 0.678    |
| CSF1       | ENSG00000184371 | -0.64824    | 0.74158     | -1.0833     | 0.86066     | -0.46215 | 0.67801 |          |
|            | -0.70907        | 0.76086     | 0.67801     | 0.828677647 |             |          |         |          |
| RPN1       | ENSG00000163902 | -0.46216    | 0.67802     | -0.95906    | 0.83124     | -0.99135 | 0.83924 |          |
|            | -0.79967        | 0.78805     | 0.67802     | 0.828677647 |             |          |         |          |
| RN7SKP185  | ENSG00000199683 | -1.3591     | 0.91295     | -0.46221    | 0.67803     | -1.3591  |         |          |
|            | 0.91295         | -0.60881    | 0.72868     | 0.67803     | 0.828677647 |          |         |          |
| WFDC21P    | ENSG00000261040 | -1.2094     | 0.88675     | -1.2094     | 0.88675     | -0.4622  |         |          |
|            | 0.67803         | -1.2094     | 0.88675     | 0.67803     | 0.828677647 |          |         |          |
| LINC00345  | ENSG00000235660 | -0.46225    | 0.67805     | -0.46225    | 0.67805     | -0.46225 |         |          |
|            | 0.67805         | -0.46225    | 0.67805     | 0.67805     | 0.828677647 |          |         |          |
| SAR1AP3    | ENSG00000225665 | -0.64896    | 0.74182     | -0.46227    | 0.67806     | -0.46227 |         |          |
|            | 0.67806         | -0.46227    | 0.67806     | 0.67806     | 0.828677647 |          |         |          |
| LTO1       | ENSG00000149716 | -0.67907    | 0.75145     | -0.46247    | 0.67813     | -0.82231 | 0.79455 |          |
|            | -0.47778        | 0.6836      | 0.67813     | 0.828692284 |             |          |         |          |
| SNORD33    | ENSG00000199631 | -0.4625     | 0.67814     | -0.4625     | 0.67814     | -0.4625  |         |          |
|            | 0.67814         | -0.4625     | 0.67814     | 0.67814     | 0.828692284 |          |         |          |
| SNORD34    | ENSG00000202503 | -0.4625     | 0.67814     | -0.4625     | 0.67814     | -0.4625  |         |          |
|            | 0.67814         | -0.4625     | 0.67814     | 0.67814     | 0.828692284 |          |         |          |
| NA         | ENSG00000280015 | -0.46251    | 0.67814     | -1.7255     | 0.95778     | -1.211   | 0.88705 |          |
|            | -1.2077         | 0.88641     | 0.67814     | 0.828692284 |             |          |         |          |
| SMIM3      | ENSG00000256235 | -0.81904    | 0.79362     | -0.81904    | 0.79362     | -0.46263 | 0.67818 |          |
|            | -0.61011        | 0.72911     | 0.67818     | 0.828720382 |             |          |         |          |
| RNU6-1109P | ENSG00000212489 | -0.64981    | 0.74209     | -0.46281    | 0.67825     | -0.72795 |         |          |
|            | 0.76668         | -0.72795    | 0.76668     | 0.67825     | 0.828738588 |          |         |          |
| LINC02356  | ENSG00000257595 | -0.46283    | 0.67826     | -0.75197    | 0.77396     | -1.2242  |         |          |
|            | 0.88956         | -1.2242     | 0.88956     | 0.67826     | 0.828738588 |          |         |          |
| SYDE1      | ENSG00000105137 | -0.46287    | 0.67827     | -0.46287    | 0.67827     | -0.46287 | 0.67827 |          |
|            | -0.46287        | 0.67827     | 0.67827     | 0.828738588 |             |          |         |          |
| NIT2       | ENSG00000114021 | -0.87828    | 0.8101      | -0.463      | 0.67832     | -0.463   | 0.67832 |          |
|            | -1.4819         | 0.93081     | 0.67832     | 0.828738588 |             |          |         |          |
| LILRP1     | ENSG00000186152 | -0.46303    | 0.67833     | -1.1746     | 0.87993     | -1.1746  |         |          |
|            | 0.87993         | -1.1746     | 0.87993     | 0.67833     | 0.828738588 |          |         |          |
| LINC02181  | ENSG00000232190 | -0.46309    | 0.67835     | -0.98677    | 0.83812     | -0.94912 |         |          |
|            | 0.82872         | -0.86631    | 0.80684     | 0.67835     | 0.828738588 |          |         |          |
| NA         | ENSG00000259804 | -0.4631     | 0.67836     | -0.4631     | 0.67836     | -0.4631  | 0.67836 |          |
|            | -0.4631         | 0.67836     | 0.67836     | 0.828738588 |             |          |         |          |
| NUP210L    | ENSG00000143552 | -0.46316    | 0.67837     | -0.69148    | 0.75537     | -0.70903 |         |          |
|            | 0.76085         | -0.47064    | 0.68105     | 0.67837     | 0.828738588 |          |         |          |
| LINC02658  | ENSG00000234973 | -1.8508     | 0.9679      | -0.76397    | 0.77756     | -0.46316 |         |          |
|            | 0.67838         | -0.46316    | 0.67838     | 0.67838     | 0.828738588 |          |         |          |
| RNU6-992P  | ENSG00000200213 | -0.46319    | 0.67839     | -0.46319    | 0.67839     | -0.46319 |         |          |
|            | 0.67839         | -0.46319    | 0.67839     | 0.67839     | 0.828738588 |          |         |          |
| NA         | ENSG00000254591 | -0.46322    | 0.6784      | -0.46322    | 0.6784      | -0.46322 | 0.6784  |          |
|            | -0.46322        | 0.6784      | 0.6784      | 0.828738588 |             |          |         |          |
| NA         | ENSG00000253838 | -0.46326    | 0.67841     | -0.46326    | 0.67841     | -0.46326 | 0.67841 |          |
|            | -0.46326        | 0.67841     | 0.67841     | 0.828738588 |             |          |         |          |
| NA         | ENSG00000229409 | -0.46331    | 0.67843     | -0.46331    | 0.67843     | -0.46331 | 0.67843 |          |
|            | -0.46331        | 0.67843     | 0.67843     | 0.828738588 |             |          |         |          |
| RN7SL390P  | ENSG00000241785 | -0.46335    | 0.67844     | -0.46335    | 0.67844     | -0.46335 |         |          |
|            | 0.67844         | -0.46335    | 0.67844     | 0.67844     | 0.828738588 |          |         |          |
| RN7SL835P  | ENSG00000264250 | -0.46336    | 0.67845     | -0.46336    | 0.67845     | -0.46336 |         |          |
|            | 0.67845         | -0.46336    | 0.67845     | 0.67845     | 0.828738588 |          |         |          |
| RPL34P6    | ENSG00000231333 | -0.46347    | 0.67849     | -1.0726     | 0.85828     | -0.46347 |         |          |
|            | 0.67849         | -0.46347    | 0.67849     | 0.67849     | 0.828758115 |          |         |          |
| FAM149B1   | ENSG00000138286 | -0.99611    | 0.8404      | -1.0952     | 0.86329     | -1.1382  |         |          |
|            | 0.87249         | -0.4635     | 0.6785      | 0.6785      | 0.828758115 |          |         |          |
| MIR580     | ENSG00000207756 | -0.46363    | 0.67854     | -0.46363    | 0.67854     | -0.46363 |         |          |

|            |                 |             |         |             |             |          |         |
|------------|-----------------|-------------|---------|-------------|-------------|----------|---------|
|            | 0.67854         | -0.46363    | 0.67854 | 0.67854     | 0.828786199 |          |         |
| CYP2R1     | ENSG00000186104 | -0.61197    | 0.72972 | -0.77872    | 0.78193     | -0.73125 |         |
|            | 0.76769         | -0.46374    | 0.67858 | 0.67858     | 0.828814282 |          |         |
| FKBP14-AS1 | ENSG00000227014 | -0.4639     | 0.67864 | -0.4639     | 0.67864     | -0.4639  |         |
|            | 0.67864         | -0.4639     | 0.67864 | 0.67864     | 0.82886679  |          |         |
| NA         | ENSG00000259924 | -0.87552    | 0.80935 | -0.57006    | 0.71568     | -0.46399 | 0.67867 |
|            | -0.46399        | 0.67867     | 0.67867 | 0.828882656 |             |          |         |
| NA         | ENSG00000259986 | -0.67668    | 0.7507  | -1.2864     | 0.90084     | -0.73227 | 0.768   |
|            | -0.46411        | 0.67872     | 0.67872 | 0.828922947 |             |          |         |
| TMEM140    | ENSG00000146859 | -0.70071    | 0.75826 | -0.46418    | 0.67874     | -0.46418 |         |
|            | 0.67874         | -0.6163     | 0.73115 | 0.67874     | 0.828926598 |          |         |
| NA         | ENSG00000248422 | -0.81888    | 0.79357 | -0.81888    | 0.79357     | -0.9527  | 0.82963 |
|            | -0.46426        | 0.67877     | 0.67877 | 0.828942462 |             |          |         |
| SDHCP3     | ENSG00000234946 | -0.46439    | 0.67882 | -0.46439    | 0.67882     | -0.46439 |         |
|            | 0.67882         | -0.46439    | 0.67882 | 0.67882     | 0.828982748 |          |         |
| PPIAP52    | ENSG00000270606 | -0.46448    | 0.67885 | -0.46448    | 0.67885     | -0.46448 |         |
|            | 0.67885         | -0.46448    | 0.67885 | 0.67885     | 0.828991166 |          |         |
| PUS10      | ENSG00000162927 | -0.78898    | 0.78494 | -0.46461    | 0.6789      | -1.3682  | 0.91437 |
|            | -0.55161        | 0.70939     | 0.6789  | 0.828991166 |             |          |         |
| CADM2-AS2  | ENSG00000241648 | -0.77584    | 0.78108 | -1.5524     | 0.93972     | -0.46464 |         |
|            | 0.67891         | -0.46464    | 0.67891 | 0.67891     | 0.828991166 |          |         |
| NA         | ENSG00000228015 | -0.46474    | 0.67894 | -0.46474    | 0.67894     | -0.46474 | 0.67894 |
|            | -0.46474        | 0.67894     | 0.67894 | 0.828991166 |             |          |         |
| POM121L4P  | ENSG00000217261 | -0.84565    | 0.80113 | -0.49498    | 0.68969     | -0.46478 |         |
|            | 0.67896         | -0.5668     | 0.71457 | 0.67896     | 0.828991166 |          |         |
| OR13I1P    | ENSG00000273423 | -0.4648     | 0.67896 | -0.4648     | 0.67896     | -0.4648  |         |
|            | 0.67896         | -0.4648     | 0.67896 | 0.67896     | 0.828991166 |          |         |
| KRI1       | ENSG00000129347 | -0.46483    | 0.67897 | -1.2624     | 0.8966      | -0.46483 | 0.67897 |
|            | -0.46483        | 0.67897     | 0.67897 | 0.828991166 |             |          |         |
| NA         | ENSG00000238801 | -0.73984    | 0.7703  | -0.73984    | 0.7703      | -0.46482 | 0.67897 |
|            | -0.73984        | 0.7703      | 0.67897 | 0.828991166 |             |          |         |
| HMG2P7     | ENSG00000226427 | -0.48457    | 0.68601 | -0.89707    | 0.81516     | -0.87287 |         |
|            | 0.80863         | -0.46484    | 0.67898 | 0.67898     | 0.828991166 |          |         |
| NA         | ENSG00000266826 | -0.4649     | 0.679   | -0.4649     | 0.679       | -0.4649  | 0.679   |
|            | 0.679           | 0.828994814 |         |             |             |          |         |
| CYB561D1   | ENSG00000174151 | -0.46526    | 0.67913 | -0.46526    | 0.67913     | -0.46526 |         |
|            | 0.67913         | -0.46526    | 0.67913 | 0.67913     | 0.829132758 |          |         |
| NA         | ENSG00000272129 | -0.64832    | 0.74161 | -0.46533    | 0.67915     | -0.46533 | 0.67915 |
|            | -0.46533        | 0.67915     | 0.67915 | 0.829135127 |             |          |         |
| PRELID3BP5 | ENSG00000251656 | -0.71166    | 0.76166 | -0.71166    | 0.76166     | -0.71166 |         |
|            | 0.76166         | -0.4654     | 0.67918 | 0.67918     | 0.829135127 |          |         |
| EFCAB14    | ENSG00000159658 | -0.68063    | 0.75195 | -0.61356    | 0.73025     | -1.6457  |         |
|            | 0.95009         | -0.46544    | 0.67919 | 0.67919     | 0.829135127 |          |         |
| Clorf43    | ENSG00000143612 | -0.46547    | 0.6792  | -1.0984     | 0.86397     | -0.46547 |         |
|            | 0.6792          | -1.3078     | 0.90452 | 0.6792      | 0.829135127 |          |         |
| KRT89P     | ENSG00000274928 | -1.2848     | 0.90056 | -0.46557    | 0.67924     | -1.1846  |         |
|            | 0.88191         | -1.2698     | 0.89793 | 0.67924     | 0.829161908 |          |         |
| NA         | ENSG00000236166 | -0.46563    | 0.67926 | -0.7095     | 0.76099     | -0.46563 | 0.67926 |
|            | -0.46563        | 0.67926     | 0.67926 | 0.829161908 |             |          |         |
| ARGFXP1    | ENSG00000240058 | -0.4657     | 0.67928 | -2.7697     | 0.9972      | -0.55808 |         |
|            | 0.7116          | -1.2091     | 0.88669 | 0.67928     | 0.829161908 |          |         |
| ATP6V0CP1  | ENSG00000230201 | -0.85068    | 0.80253 | -0.79455    | 0.78656     | -0.79455 |         |
|            | 0.78656         | -0.4657     | 0.67929 | 0.67929     | 0.829161908 |          |         |
| GCC2-AS1   | ENSG00000214184 | -1.0006     | 0.84149 | -0.46583    | 0.67933     | -0.91477 |         |
|            | 0.81984         | -0.91477    | 0.81984 | 0.67933     | 0.829189963 |          |         |
| NA         | ENSG00000259866 | -0.46587    | 0.67935 | -0.5347     | 0.70357     | -0.60705 | 0.72809 |
|            | -0.60705        | 0.72809     | 0.67935 | 0.829193605 |             |          |         |
| NA         | ENSG00000272716 | -0.46609    | 0.67942 | -0.46609    | 0.67942     | -0.46609 | 0.67942 |
|            | -0.46609        | 0.67942     | 0.67942 | 0.829236222 |             |          |         |
| KRT18P9    | ENSG00000271231 | -0.46614    | 0.67944 | -0.48327    | 0.68555     | -0.65642 |         |
|            | 0.74422         | -0.51992    | 0.69844 | 0.67944     | 0.829236222 |          |         |
| NA         | ENSG00000228144 | -0.46618    | 0.67946 | -0.46618    | 0.67946     | -0.46618 | 0.67946 |



|             |                 |          |         |             |             |          |         |
|-------------|-----------------|----------|---------|-------------|-------------|----------|---------|
|             | -0.46618        | 0.67946  | 0.67946 | 0.829236222 |             |          |         |
| TMSB4XP6    | ENSG00000230043 | -0.4662  | 0.67946 | -0.4662     | 0.67946     | -0.4662  |         |
|             | 0.67946         | -0.4662  | 0.67946 | 0.67946     | 0.829236222 |          |         |
| NA          | ENSG00000283176 | -0.6928  | 0.75578 | -0.46621    | 0.67947     | -0.6928  | 0.75578 |
|             | -0.6928         | 0.75578  | 0.67947 | 0.829236222 |             |          |         |
| PRKXP1      | ENSG00000259205 | -0.46636 | 0.67952 | -0.46636    | 0.67952     | -0.46636 |         |
|             | 0.67952         | -0.46636 | 0.67952 | 0.67952     | 0.829276474 |          |         |
| ATG16L2     | ENSG00000168010 | -1.5708  | 0.94189 | -0.46647    | 0.67956     | -1.2466  |         |
|             | 0.89374         | -1.1855  | 0.88208 | 0.67956     | 0.829283752 |          |         |
| CYTOR       | ENSG00000222041 | -0.46648 | 0.67956 | -2.1242     | 0.98317     | -0.54312 | 0.70648 |
|             | -1.3875         | 0.91736  | 0.67956 | 0.829283752 |             |          |         |
| NA          | ENSG00000256577 | -0.46657 | 0.6796  | -0.46657    | 0.6796      | -0.46657 | 0.6796  |
|             | -0.46657        | 0.6796   | 0.6796  | 0.829303233 |             |          |         |
| VTI1BP1     | ENSG00000243974 | -0.4666  | 0.67961 | -0.4666     | 0.67961     | -0.4666  |         |
|             | 0.67961         | -0.4666  | 0.67961 | 0.67961     | 0.829303233 |          |         |
| NA          | ENSG00000272078 | -0.46669 | 0.67964 | -1.1585     | 0.87667     | -0.46669 | 0.67964 |
|             | -0.46669        | 0.67964  | 0.67964 | 0.829310509 |             |          |         |
| KRTAP9-8    | ENSG00000187272 | -0.58656 | 0.72125 | -0.46671    | 0.67965     | -0.80044 |         |
|             | 0.78827         | -0.78539 | 0.78389 | 0.67965     | 0.829310509 |          |         |
| NA          | ENSG00000273428 | -0.46698 | 0.67974 | -0.46698    | 0.67974     | -0.46698 | 0.67974 |
|             | -0.46698        | 0.67974  | 0.67974 | 0.829373863 |             |          |         |
| OR5A01P     | ENSG00000272676 | -0.46699 | 0.67975 | -0.46699    | 0.67975     | -1.6016  |         |
|             | 0.94538         | -0.46699 | 0.67975 | 0.67975     | 0.829373863 |          |         |
| AOC3        | ENSG00000131471 | -0.46704 | 0.67976 | -0.52773    | 0.70116     | -0.52773 | 0.70116 |
|             | -0.52773        | 0.70116  | 0.67976 | 0.829373863 |             |          |         |
| B3GALNT2P1  | ENSG00000218725 | -1.029   | 0.84825 | -1.029      | 0.84825     | -1.029   |         |
|             | 0.84825         | -0.46706 | 0.67977 | 0.67977     | 0.829373863 |          |         |
| FZR1        | ENSG00000105325 | -0.51833 | 0.69788 | -0.62748    | 0.73483     | -0.46728 | 0.67985 |
|             | -0.46728        | 0.67985  | 0.67985 | 0.829450702 |             |          |         |
| NA          | ENSG00000253865 | -0.46734 | 0.67987 | -0.46734    | 0.67987     | -0.46734 | 0.67987 |
|             | -0.46734        | 0.67987  | 0.67987 | 0.829454336 |             |          |         |
| GARS1-DT    | ENSG00000196295 | -0.71134 | 0.76156 | -0.67044    | 0.74871     | -0.8487  |         |
|             | 0.80198         | -0.46745 | 0.67991 | 0.67991     | 0.82948237  |          |         |
| OR8U1       | ENSG00000172199 | -0.78006 | 0.78232 | -0.4675     | 0.67993     | -0.4675  | 0.67993 |
|             | -0.4675         | 0.67993  | 0.67993 | 0.829486003 |             |          |         |
| NA          | ENSG00000236154 | -0.46761 | 0.67997 | -0.46761    | 0.67997     | -0.46761 | 0.67997 |
|             | -0.46761        | 0.67997  | 0.67997 | 0.829514034 |             |          |         |
| NA          | ENSG00000272656 | -0.46779 | 0.68003 | -0.46779    | 0.68003     | -0.46779 | 0.68003 |
|             | -0.46779        | 0.68003  | 0.68003 | 0.82954439  |             |          |         |
| TRIM26BP    | ENSG00000236475 | -1.4574  | 0.9275  | -0.46787    | 0.68006     | -0.91848 |         |
|             | 0.82082         | -2.5359  | 0.99439 | 0.68006     | 0.82954439  |          |         |
| POPDC2      | ENSG00000121577 | -0.48497 | 0.68615 | -1.6284     | 0.94828     | -0.46789 |         |
|             | 0.68007         | -0.46789 | 0.68007 | 0.68007     | 0.82954439  |          |         |
| FXYD6-FXYD2 | ENSG00000255245 | -0.46791 | 0.68007 | -0.46791    | 0.68007     | -0.46791 |         |
|             | 0.68007         | -0.46791 | 0.68007 | 0.68007     | 0.82954439  |          |         |
| PGR         | ENSG00000082175 | -0.55669 | 0.71113 | -0.46793    | 0.68008     | -0.47324 | 0.68198 |
|             | -1.4109         | 0.92087  | 0.68008 | 0.82954439  |             |          |         |
| LTF         | ENSG00000012223 | -0.46808 | 0.68014 | -0.84304    | 0.8004      | -1.6769  | 0.95322 |
|             | -1.0106         | 0.8439   | 0.68014 | 0.829596811 |             |          |         |
| OR5S1P      | ENSG00000213048 | -0.74981 | 0.77331 | -0.46835    | 0.68023     | -0.92145 |         |
|             | 0.82159         | -1.0558  | 0.85446 | 0.68023     | 0.829660113 |          |         |
| RPS15AP5    | ENSG00000223540 | -0.46836 | 0.68024 | -1.6691     | 0.95245     | -1.897   |         |
|             | 0.97109         | -1.119   | 0.86844 | 0.68024     | 0.829660113 |          |         |
| FKBP10      | ENSG00000141756 | -0.4684  | 0.68025 | -0.4684     | 0.68025     | -0.4684  |         |
|             | 0.68025         | -0.4684  | 0.68025 | 0.68025     | 0.829660113 |          |         |
| CDH5        | ENSG00000179776 | -0.91987 | 0.82118 | -0.46844    | 0.68026     | -0.88517 | 0.81197 |
|             | -0.46844        | 0.68026  | 0.68026 | 0.829660113 |             |          |         |
| RNU1-151P   | ENSG00000201142 | -0.7521  | 0.774   | -0.46879    | 0.68039     | -0.7521  | 0.774   |
|             | -0.84688        | 0.80147  | 0.68039 | 0.829789324 |             |          |         |
| H1-7        | ENSG00000187166 | -1.6353  | 0.94901 | -1.6353     | 0.94901     | -1.6353  | 0.94901 |
|             | -0.46881        | 0.6804   | 0.6804  | 0.829789324 |             |          |         |
| SYNJ2BP     | ENSG00000213463 | -1.285   | 0.90061 | -0.59528    | 0.72417     | -0.59528 |         |

|             |                 |          |         |             |             |          |         |
|-------------|-----------------|----------|---------|-------------|-------------|----------|---------|
|             | 0.72417         | -0.46892 | 0.68044 | 0.68044     | 0.829808766 |          |         |
| MYH3        | ENSG00000109063 | -1.0886  | 0.86184 | -0.54201    | 0.70609     | -0.46896 | 0.68045 |
|             | -1.5868         | 0.94372  | 0.68045 | 0.829808766 |             |          |         |
| NA          | ENSG00000279762 | -0.46902 | 0.68047 | -0.46902    | 0.68047     | -0.46902 | 0.68047 |
|             | -0.46902        | 0.68047  | 0.68047 | 0.82981239  |             |          |         |
| SNRPGP10    | ENSG00000235363 | -0.46914 | 0.68052 | -0.50865    | 0.6945      | -0.50865 |         |
|             | 0.6945          | -0.50865 | 0.6945  | 0.68052     | 0.829844024 |          |         |
| NECAP2      | ENSG00000157191 | -0.46918 | 0.68053 | -0.46918    | 0.68053     | -0.46918 |         |
|             | 0.68053         | -0.8298  | 0.79667 | 0.68053     | 0.829844024 |          |         |
| EFCAB14-AS1 | ENSG00000228237 | -0.46944 | 0.68062 | -0.46944    | 0.68062     | -0.46944 |         |
|             | 0.68062         | -0.46944 | 0.68062 | 0.68062     | 0.829903663 |          |         |
| NA          | ENSG00000266405 | -0.46942 | 0.68062 | -1.3111     | 0.90509     | -1.3111  | 0.90509 |
|             | -1.3111         | 0.90509  | 0.68062 | 0.829903663 |             |          |         |
| GRIN3B      | ENSG00000116032 | -0.66644 | 0.74744 | -0.94117    | 0.82669     | -0.62421 |         |
|             | 0.73375         | -0.46946 | 0.68063 | 0.68063     | 0.829903663 |          |         |
| BNIP3P18    | ENSG00000269055 | -0.46966 | 0.6807  | -0.46966    | 0.6807      | -0.46966 |         |
|             | 0.6807          | -0.46966 | 0.6807  | 0.6807      | 0.829968248 |          |         |
| NSG1        | ENSG00000168824 | -0.4698  | 0.68075 | -0.71425    | 0.76246     | -0.72877 | 0.76693 |
|             | -2.0717         | 0.98085  | 0.68075 | 0.830008444 |             |          |         |
| NA          | ENSG00000201676 | -0.47007 | 0.68085 | -0.8708     | 0.80807     | -0.8708  | 0.80807 |
|             | -0.8708         | 0.80807  | 0.68085 | 0.830088831 |             |          |         |
| CYCSP2      | ENSG00000259547 | -0.47008 | 0.68085 | -0.47008    | 0.68085     | -0.4859  |         |
|             | 0.68648         | -0.47008 | 0.68085 | 0.68085     | 0.830088831 |          |         |
| NA          | ENSG00000272054 | -0.47016 | 0.68088 | -0.47016    | 0.68088     | -0.47016 | 0.68088 |
|             | -0.47016        | 0.68088  | 0.68088 | 0.830104638 |             |          |         |
| RPSAP21     | ENSG00000226498 | -0.47028 | 0.68092 | -0.47028    | 0.68092     | -0.47028 |         |
|             | 0.68092         | -0.47028 | 0.68092 | 0.68092     | 0.830111868 |          |         |
| NA          | ENSG00000276490 | -0.47028 | 0.68092 | -0.47028    | 0.68092     | -0.47028 | 0.68092 |
|             | -0.47028        | 0.68092  | 0.68092 | 0.830111868 |             |          |         |
| APOBEC3B    | ENSG00000179750 | -0.87738 | 0.80986 | -0.87738    | 0.80986     | -0.47051 | 0.681   |
|             | -0.87738        | 0.80986  | 0.681   | 0.830159282 |             |          |         |
| MIR3688-1   | ENSG00000264105 | -0.60737 | 0.7282  | -0.47049    | 0.681       | -0.8771  | 0.80978 |
|             | -1.8493         | 0.96779  | 0.681   | 0.830159282 |             |          |         |
| CLPTM1      | ENSG00000104853 | -0.47051 | 0.68101 | -0.55933    | 0.71203     | -0.78324 |         |
|             | 0.78326         | -0.47051 | 0.68101 | 0.68101     | 0.830159282 |          |         |
| NPAP1       | ENSG00000185823 | -0.47061 | 0.68104 | -0.47061    | 0.68104     | -0.47061 | 0.68104 |
|             | -0.47061        | 0.68104  | 0.68104 | 0.830175085 |             |          |         |
| NA          | ENSG00000279739 | -0.47073 | 0.68108 | -0.47073    | 0.68108     | -0.47073 | 0.68108 |
|             | -0.47073        | 0.68108  | 0.68108 | 0.830177346 |             |          |         |
| NA          | ENSG00000268635 | -0.47075 | 0.68109 | -0.47075    | 0.68109     | -0.47075 | 0.68109 |
|             | -0.47075        | 0.68109  | 0.68109 | 0.830177346 |             |          |         |
| NA          | ENSG00000278974 | -0.47077 | 0.6811  | -0.47077    | 0.6811      | -0.47077 | 0.6811  |
|             | -0.47077        | 0.6811   | 0.6811  | 0.830177346 |             |          |         |
| NA          | ENSG00000269069 | -0.47081 | 0.68111 | -0.47081    | 0.68111     | -0.47081 | 0.68111 |
|             | -0.47081        | 0.68111  | 0.68111 | 0.830177346 |             |          |         |
| NA          | ENSG00000230536 | -0.47087 | 0.68113 | -0.47087    | 0.68113     | -0.47087 | 0.68113 |
|             | -0.47087        | 0.68113  | 0.68113 | 0.830180958 |             |          |         |
| P4HB        | ENSG00000185624 | -0.83036 | 0.79683 | -0.83036    | 0.79683     | -0.47096 | 0.68116 |
|             | -0.83036        | 0.79683  | 0.68116 | 0.830183219 |             |          |         |
| RNU6-799P   | ENSG00000200437 | -0.47097 | 0.68117 | -0.47097    | 0.68117     | -0.47097 |         |
|             | 0.68117         | -0.47097 | 0.68117 | 0.68117     | 0.830183219 |          |         |
| MIR3972     | ENSG00000266634 | -0.47102 | 0.68119 | -0.47102    | 0.68119     | -0.47102 |         |
|             | 0.68119         | -0.47102 | 0.68119 | 0.68119     | 0.830183219 |          |         |
| WDR1        | ENSG00000071127 | -0.47105 | 0.6812  | -1.4125     | 0.92109     | -1.0688  | 0.85742 |
|             | -1.0688         | 0.85742  | 0.6812  | 0.830183219 |             |          |         |
| NBR2        | ENSG00000198496 | -0.52018 | 0.69853 | -0.52018    | 0.69853     | -0.48207 | 0.68512 |
|             | -0.47124        | 0.68126  | 0.68126 | 0.830214815 |             |          |         |
| NA          | ENSG00000276087 | -0.47122 | 0.68126 | -0.47122    | 0.68126     | -0.47122 | 0.68126 |
|             | -0.47122        | 0.68126  | 0.68126 | 0.830214815 |             |          |         |
| LINC01962   | ENSG00000248473 | -0.47131 | 0.68129 | -1.288      | 0.90113     | -0.76654 |         |
|             | 0.77832         | -0.76654 | 0.77832 | 0.68129     | 0.830230612 |          |         |
| NA          | ENSG00000176868 | -0.4714  | 0.68132 | -0.4714     | 0.68132     | -0.4714  | 0.68132 |

|            |                 |          |          |         |             |             |          |         |
|------------|-----------------|----------|----------|---------|-------------|-------------|----------|---------|
|            |                 | -0.4714  | 0.68132  | 0.68132 | 0.830246408 |             |          |         |
| B3GALT6    | ENSG00000176022 | -0.4715  | 0.68136  | 0.68136 | -0.64467    | 0.74043     | -0.4715  |         |
|            |                 | 0.68136  | -0.93513 | 0.82514 | 0.68136     | 0.830274389 |          |         |
| NA         | ENSG00000200049 | -0.84356 | 0.80054  | 0.80054 | -0.47158    | 0.68139     | -0.47158 | 0.68139 |
|            |                 | -1.1603  | 0.87703  | 0.68139 | 0.830290183 |             |          |         |
| ADA        | ENSG00000196839 | -0.4718  | 0.68147  | 0.68147 | -0.4718     | 0.68147     | -0.4718  | 0.68147 |
|            |                 | -0.4718  | 0.68147  | 0.68147 | 0.830366901 |             |          |         |
| GPHN       | ENSG00000171723 | -0.99797 | 0.84085  | 0.84085 | -0.80268    | 0.78892     | -1.1167  | 0.86794 |
|            |                 | -0.47186 | 0.68149  | 0.68149 | 0.830370507 |             |          |         |
| RNU6-1000P | ENSG00000212368 | -0.47202 | 0.68154  | 0.68154 | -0.47202    | 0.68154     | -0.47202 |         |
|            |                 | 0.68154  | -0.47202 | 0.68154 | 0.68154     | 0.830410667 |          |         |
| MAP3K9     | ENSG00000006432 | -0.64204 | 0.73958  | 0.73958 | -0.47219    | 0.6816      | -0.80412 |         |
|            |                 | 0.78934  | -1.2506  | 0.89445 | 0.6816      | 0.830412903 |          |         |
| G3BP1P1    | ENSG00000235651 | -1.2988  | 0.903    | 0.903   | -0.47218    | 0.6816      | -1.1272  | 0.87017 |
|            |                 | -0.90258 | 0.81663  | 0.6816  | 0.830412903 |             |          |         |
| KAT2A      | ENSG00000108773 | -0.4722  | 0.68161  | 0.68161 | -0.4722     | 0.68161     | -0.4722  | 0.68161 |
|            |                 | -0.4722  | 0.68161  | 0.68161 | 0.830412903 |             |          |         |
| PIGUP1     | ENSG00000224437 | -1.3226  | 0.90702  | 0.90702 | -1.3226     | 0.90702     | -1.3226  |         |
|            |                 | 0.90702  | -0.4722  | 0.68161 | 0.68161     | 0.830412903 |          |         |
| MIR1302-5  | ENSG00000221091 | -0.4723  | 0.68164  | 0.68164 | -1.0261     | 0.84759     | -0.4723  |         |
|            |                 | 0.68164  | -0.4723  | 0.68164 | 0.68164     | 0.830425952 |          |         |
| NA         | ENSG00000254216 | -1.1249  | 0.86969  | 0.86969 | -0.69859    | 0.7576      | -0.47246 | 0.6817  |
|            |                 | -0.47246 | 0.6817   | 0.6817  | 0.830425952 |             |          |         |
| TP53TG1    | ENSG00000182165 | -1.1193  | 0.86848  | 0.86848 | -0.47249    | 0.68171     | -1.1193  |         |
|            |                 | 0.86848  | -0.47249 | 0.68171 | 0.68171     | 0.830425952 |          |         |
| ST13P3     | ENSG00000257773 | -1.4351  | 0.92437  | 0.92437 | -1.0842     | 0.86085     | -0.71592 |         |
|            |                 | 0.76298  | -0.47254 | 0.68173 | 0.68173     | 0.830425952 |          |         |
| BRIX1      | ENSG00000113460 | -1.1549  | 0.87594  | 0.87594 | -1.1043     | 0.86527     | -0.94198 | 0.8269  |
|            |                 | -0.47256 | 0.68174  | 0.68174 | 0.830425952 |             |          |         |
| ST14       | ENSG00000149418 | -0.85167 | 0.8028   | 0.8028  | -0.47258    | 0.68174     | -0.79976 | 0.78808 |
|            |                 | -0.96722 | 0.83328  | 0.68174 | 0.830425952 |             |          |         |
| NA         | ENSG00000267058 | -0.47258 | 0.68174  | 0.68174 | -0.57492    | 0.71733     | -0.5097  | 0.69487 |
|            |                 | -0.57492 | 0.71733  | 0.68174 | 0.830425952 |             |          |         |
| NA         | ENSG00000279578 | -0.47268 | 0.68178  | 0.68178 | -0.47268    | 0.68178     | -0.47268 | 0.68178 |
|            |                 | -0.47268 | 0.68178  | 0.68178 | 0.830436763 |             |          |         |
| CHRNE      | ENSG00000108556 | -0.47272 | 0.68179  | 0.68179 | -0.47272    | 0.68179     | -0.47272 | 0.68179 |
|            |                 | -0.47272 | 0.68179  | 0.68179 | 0.830436763 |             |          |         |
| RN7SL154P  | ENSG00000264317 | -0.47273 | 0.6818   | 0.6818  | -0.47273    | 0.6818      | -0.47273 |         |
|            |                 | 0.6818   | -0.47273 | 0.6818  | 0.6818      | 0.830436763 |          |         |
| NA         | ENSG00000263809 | -0.4728  | 0.68182  | 0.68182 | -0.4728     | 0.68182     | -0.4728  | 0.68182 |
|            |                 | -0.4728  | 0.68182  | 0.68182 | 0.830440366 |             |          |         |
| NA         | ENSG00000250099 | -1.0775  | 0.85937  | 0.85937 | -1.0775     | 0.85937     | -0.473   | 0.68189 |
|            |                 | -1.0775  | 0.85937  | 0.68189 | 0.83046284  |             |          |         |
| IL23R      | ENSG00000162594 | -0.47309 | 0.68192  | 0.68192 | -1.9102     | 0.97194     | -0.69123 | 0.75529 |
|            |                 | -1.0333  | 0.84926  | 0.68192 | 0.83046284  |             |          |         |
| NA         | ENSG00000225649 | -0.47314 | 0.68194  | 0.68194 | -0.99431    | 0.83996     | -0.47314 | 0.68194 |
|            |                 | -0.47314 | 0.68194  | 0.68194 | 0.83046284  |             |          |         |
| NA         | ENSG00000235292 | -1.2981  | 0.90287  | 0.90287 | -0.47319    | 0.68196     | -1.0721  | 0.85816 |
|            |                 | -1.2981  | 0.90287  | 0.68196 | 0.83046284  |             |          |         |
| RPL7AP28   | ENSG00000184139 | -0.90683 | 0.81775  | 0.81775 | -0.60937    | 0.72886     | -0.58729 |         |
|            |                 | 0.72149  | -0.47336 | 0.68202 | 0.68202     | 0.83046284  |          |         |
| NA         | ENSG00000236760 | -0.53018 | 0.70201  | 0.70201 | -0.85179    | 0.80283     | -0.64284 | 0.73984 |
|            |                 | -0.47335 | 0.68202  | 0.68202 | 0.83046284  |             |          |         |
| RPS10P9    | ENSG00000227791 | -0.47802 | 0.68368  | 0.68368 | -0.48888    | 0.68754     | -0.88127 |         |
|            |                 | 0.81091  | -0.47338 | 0.68203 | 0.68203     | 0.83046284  |          |         |
| NA         | ENSG00000258796 | -0.47338 | 0.68203  | 0.68203 | -0.47338    | 0.68203     | -0.47338 | 0.68203 |
|            |                 | -0.47338 | 0.68203  | 0.68203 | 0.83046284  |             |          |         |
| NA         | ENSG00000256588 | -0.47342 | 0.68204  | 0.68204 | -0.47342    | 0.68204     | -0.47342 | 0.68204 |
|            |                 | -0.47342 | 0.68204  | 0.68204 | 0.83046284  |             |          |         |
| LINC01126  | ENSG00000279873 | -0.4734  | 0.68204  | 0.68204 | -0.4734     | 0.68204     | -0.4734  |         |
|            |                 | 0.68204  | -0.4734  | 0.68204 | 0.68204     | 0.83046284  |          |         |
| NA         | ENSG00000236151 | -0.47345 | 0.68205  | 0.68205 | -0.90685    | 0.81776     | -1.7012  | 0.95555 |

|           |                 |          |          |          |             |             |         |  |
|-----------|-----------------|----------|----------|----------|-------------|-------------|---------|--|
|           |                 | -0.47345 | 0.68205  | 0.68205  | 0.83046284  |             |         |  |
| YAF2      | ENSG00000015153 | -0.80678 | 0.7901   | -0.87082 | 0.80807     | -0.87082    | 0.80807 |  |
|           |                 | -0.47347 | 0.68206  | 0.68206  | 0.83046284  |             |         |  |
| RNA5SP86  | ENSG00000212171 | -0.47347 | 0.68206  | -0.91485 | 0.81987     | -0.47347    |         |  |
|           |                 | 0.68206  | -0.47347 | 0.68206  | 0.83046284  |             |         |  |
| TVP23BP2  | ENSG00000108442 | -0.95158 | 0.82935  | -0.4736  | 0.68211     | -0.4736     |         |  |
|           |                 | 0.68211  | -0.4736  | 0.68211  | 0.8304709   |             |         |  |
| NUDT16L1  | ENSG00000168101 | -0.47378 | 0.68217  | -0.47378 | 0.68217     | -0.47378    |         |  |
|           |                 | 0.68217  | -0.47378 | 0.68217  | 0.8304709   |             |         |  |
| RPL7P29   | ENSG00000214457 | -1.6599  | 0.95153  | -0.47379 | 0.68218     | -0.47379    |         |  |
|           |                 | 0.68218  | -0.47379 | 0.68218  | 0.8304709   |             |         |  |
| CARD16    | ENSG00000204397 | -0.47383 | 0.68219  | -0.47383 | 0.68219     | -0.47383    |         |  |
|           |                 | 0.68219  | -0.47383 | 0.68219  | 0.8304709   |             |         |  |
| NA        | ENSG00000267105 | -0.47383 | 0.68219  | -0.47383 | 0.68219     | -0.47383    | 0.68219 |  |
|           |                 | -0.47383 | 0.68219  | 0.68219  | 0.8304709   |             |         |  |
| TOR1A     | ENSG00000136827 | -0.65635 | 0.7442   | -0.47386 | 0.6822      | -0.47386    | 0.6822  |  |
|           |                 | -0.47386 | 0.6822   | 0.6822   | 0.8304709   |             |         |  |
| NA        | ENSG00000225075 | -0.47385 | 0.6822   | -0.47385 | 0.6822      | -0.47385    | 0.6822  |  |
|           |                 | -0.47385 | 0.6822   | 0.6822   | 0.8304709   |             |         |  |
| CALHM4    | ENSG00000164451 | -0.60767 | 0.7283   | -0.47388 | 0.68221     | -0.47927    |         |  |
|           |                 | 0.68413  | -0.68533 | 0.75343  | 0.68221     | 0.8304709   |         |  |
| LINC00997 | ENSG00000281332 | -0.86129 | 0.80546  | -0.49089 | 0.68825     | -0.47392    |         |  |
|           |                 | 0.68222  | -0.47392 | 0.68222  | 0.68222     | 0.8304709   |         |  |
| NA        | ENSG00000259087 | -0.47402 | 0.68226  | -0.47402 | 0.68226     | -0.47402    | 0.68226 |  |
|           |                 | -0.47402 | 0.68226  | 0.68226  | 0.830475357 |             |         |  |
| NA        | ENSG00000206692 | -0.47412 | 0.68229  | -0.47412 | 0.68229     | -0.47412    | 0.68229 |  |
|           |                 | -0.47412 | 0.68229  | 0.68229  | 0.830475357 |             |         |  |
| NA        | ENSG00000233502 | -0.47419 | 0.68232  | -0.47419 | 0.68232     | -0.47419    | 0.68232 |  |
|           |                 | -0.47419 | 0.68232  | 0.68232  | 0.830475357 |             |         |  |
| RPL21P4   | ENSG00000240828 | -0.47419 | 0.68232  | -0.47419 | 0.68232     | -0.47419    |         |  |
|           |                 | 0.68232  | -0.47419 | 0.68232  | 0.68232     | 0.830475357 |         |  |
| NA        | ENSG00000224626 | -0.78885 | 0.7849   | -1.3239  | 0.90723     | -0.47424    | 0.68234 |  |
|           |                 | -0.78885 | 0.7849   | 0.68234  | 0.830475357 |             |         |  |
| FDPSP8    | ENSG00000224763 | -0.47429 | 0.68235  | -0.47429 | 0.68235     | -0.47429    |         |  |
|           |                 | 0.68235  | -0.47429 | 0.68235  | 0.68235     | 0.830475357 |         |  |
| UBE2CP4   | ENSG00000259179 | -1.148   | 0.87451  | -0.47429 | 0.68235     | -0.47429    |         |  |
|           |                 | 0.68235  | -0.73713 | 0.76948  | 0.68235     | 0.830475357 |         |  |
| NA        | ENSG00000230939 | -0.4743  | 0.68236  | -0.4743  | 0.68236     | -0.4743     | 0.68236 |  |
|           |                 | -0.4743  | 0.68236  | 0.68236  | 0.830475357 |             |         |  |
| RNA5SP483 | ENSG00000200301 | -1.1836  | 0.88172  | -0.47436 | 0.68238     | -1.1836     |         |  |
|           |                 | 0.88172  | -1.1836  | 0.88172  | 0.68238     | 0.830478956 |         |  |
| SSH1      | ENSG00000084112 | -1.1731  | 0.87963  | -1.7412  | 0.95917     | -0.47447    | 0.68242 |  |
|           |                 | -0.49534 | 0.68982  | 0.68242  | 0.830506895 |             |         |  |
| WEE2      | ENSG00000214102 | -0.47475 | 0.68252  | -0.47475 | 0.68252     | -0.47475    | 0.68252 |  |
|           |                 | -0.47475 | 0.68252  | 0.68252  | 0.830607852 |             |         |  |
| NA        | ENSG00000253340 | -0.59284 | 0.72336  | -0.67638 | 0.7506      | -0.47484    | 0.68255 |  |
|           |                 | -0.47484 | 0.68255  | 0.68255  | 0.830615043 |             |         |  |
| VN1R104P  | ENSG00000249654 | -0.47487 | 0.68256  | -0.47487 | 0.68256     | -0.47487    |         |  |
|           |                 | 0.68256  | -0.47487 | 0.68256  | 0.68256     | 0.830615043 |         |  |
| NA        | ENSG00000264057 | -0.47499 | 0.6826   | -0.84094 | 0.79981     | -0.68177    | 0.75231 |  |
|           |                 | -0.64633 | 0.74097  | 0.6826   | 0.830642977 |             |         |  |
| SEMG2     | ENSG00000124157 | -1.3738  | 0.91524  | -1.384   | 0.91681     | -0.47506    | 0.68263 |  |
|           |                 | -1.0333  | 0.84926  | 0.68263  | 0.83065874  |             |         |  |
| MTCO3P9   | ENSG00000249698 | -0.47517 | 0.68267  | -0.47517 | 0.68267     | -0.47517    |         |  |
|           |                 | 0.68267  | -0.47517 | 0.68267  | 0.68267     | 0.830686671 |         |  |
| FUCA1     | ENSG00000179163 | -0.59464 | 0.72396  | -0.67718 | 0.75086     | -0.47539    | 0.68275 |  |
|           |                 | -2.2076  | 0.98637  | 0.68275  | 0.830763272 |             |         |  |
| NA        | ENSG00000218757 | -0.47545 | 0.68277  | -1.363   | 0.91356     | -1.1003     | 0.86441 |  |
|           |                 | -0.9103  | 0.81867  | 0.68277  | 0.830766863 |             |         |  |
| NA        | ENSG00000273720 | -0.95515 | 0.83025  | -0.47557 | 0.68281     | -1.3093     | 0.90478 |  |
|           |                 | -0.96482 | 0.83268  | 0.68281  | 0.830794789 |             |         |  |
| EIF1AD    | ENSG00000175376 | -0.74398 | 0.77156  | -0.47563 | 0.68283     | -0.47563    |         |  |

|           |                 |          |         |             |             |          |         |
|-----------|-----------------|----------|---------|-------------|-------------|----------|---------|
|           | 0.68283         | -0.47563 | 0.68283 | 0.68283     | 0.83079838  |          |         |
| SLC25A5P8 | ENSG00000225347 | -1.2392  | 0.89237 | -0.47582    | 0.6829      | -0.47582 |         |
|           | 0.6829          | -0.47582 | 0.6829  | 0.6829      | 0.830845648 |          |         |
| NA        | ENSG00000231575 | -0.47587 | 0.68292 | -0.47587    | 0.68292     | -0.47587 | 0.68292 |
|           | -0.47587        | 0.68292  | 0.68292 | 0.830845648 |             |          |         |
| NA        | ENSG00000237167 | -1.4111  | 0.92089 | -0.47588    | 0.68292     | -1.5058  | 0.93395 |
|           | -0.60982        | 0.72901  | 0.68292 | 0.830845648 |             |          |         |
| GUSBP6    | ENSG00000224458 | -1.6354  | 0.94901 | -1.7845     | 0.96283     | -0.76009 |         |
|           | 0.7764          | -0.47595 | 0.68294 | 0.68294     | 0.830849237 |          |         |
| LINC02871 | ENSG00000125899 | -0.47618 | 0.68303 | -0.47618    | 0.68303     | -0.47618 |         |
|           | 0.68303         | -0.47618 | 0.68303 | 0.68303     | 0.830931587 |          |         |
| NA        | ENSG00000248188 | -0.47624 | 0.68305 | -0.47624    | 0.68305     | -0.47624 | 0.68305 |
|           | -0.47624        | 0.68305  | 0.68305 | 0.830931587 |             |          |         |
| NA        | ENSG00000214347 | -0.95326 | 0.82977 | -0.95326    | 0.82977     | -0.47631 | 0.68307 |
|           | -0.95326        | 0.82977  | 0.68307 | 0.830931587 |             |          |         |
| MIR558    | ENSG00000207653 | -0.47638 | 0.6831  | -0.47638    | 0.6831      | -0.47638 |         |
|           | 0.6831          | -0.47638 | 0.6831  | 0.6831      | 0.830931587 |          |         |
| ST20-AS1  | ENSG00000259642 | -0.47642 | 0.68311 | -0.47642    | 0.68311     | -0.47642 |         |
|           | 0.68311         | -0.47642 | 0.68311 | 0.68311     | 0.830931587 |          |         |
| NA        | ENSG00000270422 | -0.4764  | 0.68311 | -0.4764     | 0.68311     | -0.4764  | 0.68311 |
|           | -0.4764         | 0.68311  | 0.68311 | 0.830931587 |             |          |         |
| C1orf194  | ENSG00000179902 | -1.048   | 0.85268 | -1.0462     | 0.85226     | -1.3081  |         |
|           | 0.90458         | -0.47655 | 0.68316 | 0.68316     | 0.830963086 |          |         |
| NA        | ENSG00000226955 | -1.1979  | 0.88453 | -1.1979     | 0.88453     | -1.1979  | 0.88453 |
|           | -0.47659        | 0.68317  | 0.68317 | 0.830963086 |             |          |         |
| NA        | ENSG00000237210 | -1.0566  | 0.85466 | -1.1422     | 0.87331     | -0.47664 | 0.68319 |
|           | -1.6657         | 0.95212  | 0.68319 | 0.830966671 |             |          |         |
| RPL23P8   | ENSG00000219451 | -0.47674 | 0.68322 | -1.0764     | 0.85912     | -0.47674 |         |
|           | 0.68322         | -0.47674 | 0.68322 | 0.68322     | 0.830982419 |          |         |
| H2BC13    | ENSG00000185130 | -0.79393 | 0.78638 | -0.79393    | 0.78638     | -0.79393 |         |
|           | 0.78638         | -0.47689 | 0.68328 | 0.68328     | 0.831026074 |          |         |
| RNA5SP404 | ENSG00000252927 | -0.66457 | 0.74684 | -0.47691    | 0.68329     | -0.47691 |         |
|           | 0.68329         | -0.47691 | 0.68329 | 0.68329     | 0.831026074 |          |         |
| NTHL1     | ENSG00000065057 | -0.47719 | 0.68339 | -0.47719    | 0.68339     | -0.47719 | 0.68339 |
|           | -0.47719        | 0.68339  | 0.68339 | 0.831116952 |             |          |         |
| NA        | ENSG00000254563 | -0.47724 | 0.68341 | -0.47724    | 0.68341     | -0.47724 | 0.68341 |
|           | -0.47724        | 0.68341  | 0.68341 | 0.831116952 |             |          |         |
| NCBP3     | ENSG00000074356 | -0.66647 | 0.74744 | -0.83653    | 0.79857     | -0.47734 | 0.68344 |
|           | -1.3338         | 0.90887  | 0.68344 | 0.831116952 |             |          |         |
| XPA       | ENSG00000136936 | -2.0344  | 0.97905 | -2.0344     | 0.97905     | -0.47734 | 0.68344 |
|           | -2.0344         | 0.97905  | 0.68344 | 0.831116952 |             |          |         |
| OR52A4P   | ENSG00000205494 | -0.89416 | 0.81438 | -0.91283    | 0.81933     | -0.47738 |         |
|           | 0.68345         | -1.2555  | 0.89535 | 0.68345     | 0.831116952 |          |         |
| NA        | ENSG00000229160 | -0.72718 | 0.76644 | -0.53272    | 0.70289     | -0.88484 | 0.81188 |
|           | -0.47758        | 0.68352  | 0.68352 | 0.831134853 |             |          |         |
| NA        | ENSG00000258117 | -1.3997  | 0.9192  | -0.47756    | 0.68352     | -0.71416 | 0.76244 |
|           | -0.47756        | 0.68352  | 0.68352 | 0.831134853 |             |          |         |
| NA        | ENSG00000267688 | -0.47761 | 0.68353 | -0.47761    | 0.68353     | -0.47761 | 0.68353 |
|           | -0.47761        | 0.68353  | 0.68353 | 0.831134853 |             |          |         |
| RNASE10   | ENSG00000182545 | -0.83125 | 0.79708 | -2.9627     | 0.99848     | -0.73393 |         |
|           | 0.76851         | -0.47763 | 0.68354 | 0.68354     | 0.831134853 |          |         |
| NA        | ENSG00000254829 | -0.47764 | 0.68355 | -0.47764    | 0.68355     | -0.47764 | 0.68355 |
|           | -0.47764        | 0.68355  | 0.68355 | 0.831134853 |             |          |         |
| NA        | ENSG00000238162 | -0.47777 | 0.68359 | -0.47777    | 0.68359     | -0.47777 | 0.68359 |
|           | -0.47777        | 0.68359  | 0.68359 | 0.831154171 |             |          |         |
| NA        | ENSG00000271596 | -0.54678 | 0.70774 | -0.47779    | 0.6836      | -0.54678 | 0.70774 |
|           | -0.54678        | 0.70774  | 0.6836  | 0.831154171 |             |          |         |
| NA        | ENSG00000258845 | -0.47786 | 0.68362 | -0.47786    | 0.68362     | -0.83082 | 0.79696 |
|           | -0.47786        | 0.68362  | 0.68362 | 0.83115775  |             |          |         |
| TRAV26-1  | ENSG00000211807 | -0.47823 | 0.68376 | -0.99076    | 0.8391      | -0.99076 |         |
|           | 0.8391          | -0.99076 | 0.8391  | 0.68376     | 0.831307223 |          |         |
| GLUD1P4   | ENSG00000267486 | -0.47834 | 0.68379 | -0.57301    | 0.71668     | -0.51808 |         |

|              |                 |          |         |             |             |          |                  |
|--------------|-----------------|----------|---------|-------------|-------------|----------|------------------|
|              | 0.6978          | -1.0696  | 0.8576  | 0.68379     | 0.831309365 |          |                  |
| NA           | ENSG00000228735 | -0.47839 | 0.68381 | 0.68381     | -0.47839    | 0.68381  | -0.47839 0.68381 |
|              | -0.47839        | 0.68381  | 0.68381 | 0.831309365 |             |          |                  |
| LMAN1L       | ENSG00000140506 | -0.53713 | 0.70441 | -1.7561     | 0.96047     | -0.47843 |                  |
|              | 0.68383         | -1.2628  | 0.89666 | 0.68383     | 0.831309365 |          |                  |
| NA           | ENSG00000272070 | -0.47844 | 0.68383 | 0.68383     | -0.47844    | 0.68383  | -0.47844 0.68383 |
|              | -0.47844        | 0.68383  | 0.68383 | 0.831309365 |             |          |                  |
| C9orf116     | ENSG00000160345 | -0.47864 | 0.6839  | 0.6839      | -0.74769    | 0.77268  | -0.47892 0.684   |
|              | -0.4807         | 0.68464  | 0.6839  | 0.8313444   |             |          |                  |
| NA           | ENSG00000254514 | -0.47866 | 0.68391 | 0.68391     | -0.47866    | 0.68391  | -0.47866 0.68391 |
|              | -0.47866        | 0.68391  | 0.68391 | 0.8313444   |             |          |                  |
| NA           | ENSG00000279475 | -0.47867 | 0.68391 | 0.68391     | -0.56182    | 0.71288  | -0.47867 0.68391 |
|              | -0.47867        | 0.68391  | 0.68391 | 0.8313444   |             |          |                  |
| BMP6         | ENSG00000153162 | -1.0808  | 0.8601  | -0.49086    | 0.68824     | -0.53481 | 0.70361          |
|              | -0.47881        | 0.68396  | 0.68396 | 0.83138444  |             |          |                  |
| NA           | ENSG00000227719 | -0.47886 | 0.68398 | 0.68398     | -0.47886    | 0.68398  | -0.47886 0.68398 |
|              | -0.47886        | 0.68398  | 0.68398 | 0.831388012 |             |          |                  |
| SNORD35B     | ENSG00000200530 | -0.479   | 0.68403 | -0.479      | 0.68403     | -0.479   |                  |
|              | 0.68403         | -0.479   | 0.68403 | 0.68403     | 0.831428049 |          |                  |
| RIMS2        | ENSG00000176406 | -1.3085  | 0.90464 | -1.0129     | 0.84444     | -0.59381 | 0.72368          |
|              | -0.47914        | 0.68408  | 0.68408 | 0.831468083 |             |          |                  |
| NA           | ENSG00000225815 | -0.47925 | 0.68412 | -0.47925    | 0.68412     | -0.47925 | 0.68412          |
|              | -0.47925        | 0.68412  | 0.68412 | 0.831495962 |             |          |                  |
| NA           | ENSG00000276390 | -0.47932 | 0.68415 | -0.47932    | 0.68415     | -0.47932 | 0.68415          |
|              | -0.47932        | 0.68415  | 0.68415 | 0.831511685 |             |          |                  |
| OR2A5        | ENSG00000221836 | -0.47951 | 0.68421 | -0.47951    | 0.68421     | -0.47951 | 0.68421          |
|              | -0.47951        | 0.68421  | 0.68421 | 0.83155885  |             |          |                  |
| ASF1A        | ENSG00000111875 | -0.67582 | 0.75042 | -0.67582    | 0.75042     | -0.67582 | 0.75042          |
|              | -0.47955        | 0.68423  | 0.68423 | 0.83155885  |             |          |                  |
| NA           | ENSG00000230212 | -0.47959 | 0.68424 | -0.50991    | 0.69494     | -0.50991 | 0.69494          |
|              | -0.50991        | 0.69494  | 0.68424 | 0.83155885  |             |          |                  |
| NA           | ENSG00000230516 | -1.072   | 0.85814 | -1.7872     | 0.96305     | -0.47982 | 0.68432          |
|              | -0.47982        | 0.68432  | 0.68432 | 0.831635333 |             |          |                  |
| NA           | ENSG00000264280 | -0.47986 | 0.68434 | -0.47986    | 0.68434     | -0.47986 | 0.68434          |
|              | -0.47986        | 0.68434  | 0.68434 | 0.831638899 |             |          |                  |
| PAICS        | ENSG00000128050 | -0.48427 | 0.6859  | -0.75383    | 0.77453     | -0.47993 | 0.68436          |
|              | -0.64286        | 0.73984  | 0.68436 | 0.831642464 |             |          |                  |
| NA           | ENSG00000263860 | -0.48002 | 0.68439 | -0.48002    | 0.68439     | -0.48002 | 0.68439          |
|              | -0.48002        | 0.68439  | 0.68439 | 0.831658181 |             |          |                  |
| NA           | ENSG00000229595 | -0.48006 | 0.68441 | -0.48006    | 0.68441     | -0.48006 | 0.68441          |
|              | -0.48006        | 0.68441  | 0.68441 | 0.831661745 |             |          |                  |
| ZNF25        | ENSG00000175395 | -0.48013 | 0.68443 | -0.73112    | 0.76765     | -0.54937 | 0.70863          |
|              | -1.0371         | 0.85016  | 0.68443 | 0.831665309 |             |          |                  |
| RNA5SP375    | ENSG00000199845 | -0.48023 | 0.68447 | -0.72646    | 0.76622     | -0.48023 |                  |
|              | 0.68447         | -0.48023 | 0.68447 | 0.68447     | 0.831693175 |          |                  |
| NA           | ENSG00000251639 | -0.48031 | 0.6845  | -0.48031    | 0.6845      | -0.48031 | 0.6845           |
|              | -0.48031        | 0.6845   | 0.6845  | 0.831700302 |             |          |                  |
| FAM240B      | ENSG00000283329 | -0.48034 | 0.68451 | -1.096      | 0.86345     | -0.90029 |                  |
|              | 0.81602         | -0.48419 | 0.68588 | 0.68451     | 0.831700302 |          |                  |
| CRYGC        | ENSG00000163254 | -0.48052 | 0.68457 | -0.48052    | 0.68457     | -0.48052 | 0.68457          |
|              | -0.48052        | 0.68457  | 0.68457 | 0.831731727 |             |          |                  |
| KBTBD8       | ENSG00000163376 | -0.48052 | 0.68457 | -0.48052    | 0.68457     | -0.48052 |                  |
|              | 0.68457         | -0.81821 | 0.79338 | 0.68457     | 0.831731727 |          |                  |
| NTMT1        | ENSG00000148335 | -1.1435  | 0.87359 | -0.70849    | 0.76068     | -0.48065 | 0.68462          |
|              | -0.62062        | 0.73258  | 0.68462 | 0.831771737 |             |          |                  |
| ANKMY1       | ENSG00000144504 | -1.5362  | 0.93775 | -1.6676     | 0.9523      | -1.0862  |                  |
|              | 0.86129         | -0.48071 | 0.68464 | 0.68464     | 0.831775298 |          |                  |
| RNU6-359P    | ENSG00000202336 | -0.48085 | 0.68469 | -0.48085    | 0.68469     | -0.48085 |                  |
|              | 0.68469         | -0.48085 | 0.68469 | 0.68469     | 0.831794568 |          |                  |
| ARHGEF26-AS1 | ENSG00000243069 | -0.52816 | 0.70131 | -0.48085    | 0.68469     | -0.52816 |                  |
|              | 0.70131         | -0.52816 | 0.70131 | 0.68469     | 0.831794568 |          |                  |
| NA           | ENSG00000229497 | -0.481   | 0.68474 | -0.481      | 0.68474     | -0.481   | 0.68474          |

|           |                 |          |         |             |             |          |         |  |
|-----------|-----------------|----------|---------|-------------|-------------|----------|---------|--|
|           | -1.3672         | 0.91422  | 0.68474 | 0.831834572 |             |          |         |  |
| RNU7-34P  | ENSG00000238904 | -0.48126 | 0.68484 | -0.48126    | 0.68484     | -0.55571 |         |  |
|           | 0.7108          | -0.48126 | 0.68484 | 0.68484     | 0.831926723 |          |         |  |
| MTND6P16  | ENSG00000249893 | -0.4813  | 0.68485 | -0.4813     | 0.68485     | -0.4813  |         |  |
|           | 0.68485         | -0.4813  | 0.68485 | 0.68485     | 0.831926723 |          |         |  |
| HAPLN1    | ENSG00000145681 | -0.71675 | 0.76324 | -0.4816     | 0.68496     | -1.1065  |         |  |
|           | 0.86574         | -1.1065  | 0.86574 | 0.68496     | 0.832010272 |          |         |  |
| SDAD1P2   | ENSG00000230750 | -0.48163 | 0.68497 | -0.48163    | 0.68497     | -1.0382  |         |  |
|           | 0.8504          | -0.48163 | 0.68497 | 0.68497     | 0.832010272 |          |         |  |
| OR52E5    | ENSG00000277932 | -1.5542  | 0.93994 | -0.48163    | 0.68497     | -1.5542  |         |  |
|           | 0.93994         | -1.5542  | 0.93994 | 0.68497     | 0.832010272 |          |         |  |
| NUDT19    | ENSG00000213965 | -0.48171 | 0.685   | -1.5154     | 0.93517     | -0.48171 | 0.685   |  |
|           | -0.78006        | 0.78232  | 0.685   | 0.83201738  |             |          |         |  |
| FAM185A   | ENSG00000222011 | -0.7023  | 0.75875 | -1.0632     | 0.85616     | -0.48175 |         |  |
|           | 0.68501         | -1.3557  | 0.9124  | 0.68501     | 0.83201738  |          |         |  |
| HMGB1P3   | ENSG00000250011 | -0.48186 | 0.68505 | -0.48186    | 0.68505     | -0.48186 |         |  |
|           | 0.68505         | -0.48186 | 0.68505 | 0.68505     | 0.832045226 |          |         |  |
| PTPN2P1   | ENSG00000228196 | -0.48199 | 0.68509 | -1.2695     | 0.89788     | -1.0225  |         |  |
|           | 0.84674         | -0.91445 | 0.81976 | 0.68509     | 0.832064477 |          |         |  |
| FBRSL1    | ENSG00000112787 | -0.73409 | 0.76855 | -0.97782    | 0.83592     | -0.48201 |         |  |
|           | 0.6851          | -1.3862  | 0.91715 | 0.6851      | 0.832064477 |          |         |  |
| PWAR1     | ENSG00000279050 | -0.48211 | 0.68513 | -0.48211    | 0.68513     | -0.48211 | 0.68513 |  |
|           | -0.48211        | 0.68513  | 0.68513 | 0.832080174 |             |          |         |  |
| CTBP1-AS  | ENSG00000280927 | -0.48231 | 0.68521 | -0.48231    | 0.68521     | -0.48231 |         |  |
|           | 0.68521         | -0.48231 | 0.68521 | 0.68521     | 0.832106173 |          |         |  |
| C11orf94  | ENSG00000234776 | -0.48242 | 0.68525 | -0.48242    | 0.68525     | -0.48242 |         |  |
|           | 0.68525         | -0.48242 | 0.68525 | 0.68525     | 0.832106173 |          |         |  |
| NA        | ENSG00000255498 | -0.48242 | 0.68525 | -0.48242    | 0.68525     | -0.48242 | 0.68525 |  |
|           | -0.48242        | 0.68525  | 0.68525 | 0.832106173 |             |          |         |  |
| TRAJ36    | ENSG00000276699 | -0.48244 | 0.68525 | -0.48244    | 0.68525     | -0.48244 |         |  |
|           | 0.68525         | -0.48244 | 0.68525 | 0.68525     | 0.832106173 |          |         |  |
| NA        | ENSG00000221093 | -0.48255 | 0.68529 | -0.48255    | 0.68529     | -0.48255 | 0.68529 |  |
|           | -0.48255        | 0.68529  | 0.68529 | 0.832106173 |             |          |         |  |
| BOD1P1    | ENSG00000263460 | -0.48259 | 0.68531 | -0.48259    | 0.68531     | -0.48259 |         |  |
|           | 0.68531         | -0.48259 | 0.68531 | 0.68531     | 0.832106173 |          |         |  |
| MTRNR2L2  | ENSG00000271043 | -0.48272 | 0.68535 | -0.48272    | 0.68535     | -0.48272 |         |  |
|           | 0.68535         | -0.48272 | 0.68535 | 0.68535     | 0.832106173 |          |         |  |
| NA        | ENSG00000271143 | -0.48274 | 0.68536 | -0.48274    | 0.68536     | -0.48274 | 0.68536 |  |
|           | -0.48274        | 0.68536  | 0.68536 | 0.832106173 |             |          |         |  |
| NA        | ENSG00000272316 | -0.48279 | 0.68538 | -0.48279    | 0.68538     | -0.71114 | 0.7615  |  |
|           | -0.55637        | 0.71102  | 0.68538 | 0.832106173 |             |          |         |  |
| NPM1P5    | ENSG00000258925 | -0.48286 | 0.6854  | -0.48286    | 0.6854      | -0.48286 |         |  |
|           | 0.6854          | -0.48286 | 0.6854  | 0.6854      | 0.832106173 |          |         |  |
| NA        | ENSG00000220131 | -1.5865  | 0.94369 | -1.5865     | 0.94369     | -1.5865  | 0.94369 |  |
|           | -0.48291        | 0.68542  | 0.68542 | 0.832106173 |             |          |         |  |
| NA        | ENSG00000220370 | -0.48293 | 0.68543 | -0.48293    | 0.68543     | -0.48293 | 0.68543 |  |
|           | -0.48293        | 0.68543  | 0.68543 | 0.832106173 |             |          |         |  |
| CCS       | ENSG00000173992 | -0.48297 | 0.68544 | -0.48297    | 0.68544     | -1.1735  | 0.8797  |  |
|           | -1.1792         | 0.88084  | 0.68544 | 0.832106173 |             |          |         |  |
| TLK1      | ENSG00000198586 | -1.1266  | 0.87005 | -1.1533     | 0.8756      | -0.73293 | 0.7682  |  |
|           | -0.48297        | 0.68544  | 0.68544 | 0.832106173 |             |          |         |  |
| NA        | ENSG00000222430 | -0.97136 | 0.83432 | -0.483      | 0.68545     | -2.8886  | 0.99806 |  |
|           | -2.8886         | 0.99806  | 0.68545 | 0.832106173 |             |          |         |  |
| UBE2N     | ENSG00000177889 | -2.0228  | 0.97845 | -2.0778     | 0.98114     | -0.48305 | 0.68547 |  |
|           | -1.3664         | 0.91409  | 0.68547 | 0.832106173 |             |          |         |  |
| NA        | ENSG00000253238 | -0.56634 | 0.71442 | -0.48304    | 0.68547     | -0.56634 | 0.71442 |  |
|           | -1.568          | 0.94156  | 0.68547 | 0.832106173 |             |          |         |  |
| DMAC2L    | ENSG00000125375 | -0.48308 | 0.68548 | -0.88891    | 0.81297     | -0.67654 |         |  |
|           | 0.75065         | -1.0306  | 0.84863 | 0.68548     | 0.832106173 |          |         |  |
| RNU6-314P | ENSG00000252383 | -0.48307 | 0.68548 | -0.48307    | 0.68548     | -0.48307 |         |  |
|           | 0.68548         | -0.48307 | 0.68548 | 0.68548     | 0.832106173 |          |         |  |
| NEPRO     | ENSG00000163608 | -1.7324  | 0.9584  | -1.3821     | 0.91652     | -0.48313 | 0.6855  |  |

|             |                 |          |         |             |             |          |         |
|-------------|-----------------|----------|---------|-------------|-------------|----------|---------|
|             | -1.4224         | 0.92255  | 0.6855  | 0.832106173 |             |          |         |
| OR8I4P      | ENSG00000254524 | -0.48315 | 0.68551 | -0.48315    | 0.68551     | -0.48315 |         |
|             | 0.68551         | -0.48315 | 0.68551 | 0.68551     | 0.832106173 |          |         |
| IFNG-AS1    | ENSG00000255733 | -1.9157  | 0.9723  | -0.48329    | 0.68556     | -1.6277  |         |
|             | 0.9482          | -1.9823  | 0.97628 | 0.68556     | 0.832117955 |          |         |
| NA          | ENSG00000276431 | -0.89354 | 0.81422 | -0.90599    | 0.81753     | -0.67126 | 0.74897 |
|             | -0.48334        | 0.68557  | 0.68557 | 0.832117955 |             |          |         |
| NA          | ENSG00000254495 | -0.48335 | 0.68558 | -0.48335    | 0.68558     | -0.48335 | 0.68558 |
|             | -0.48335        | 0.68558  | 0.68558 | 0.832117955 |             |          |         |
| LETM1P2     | ENSG00000268660 | -0.48352 | 0.68564 | -0.48352    | 0.68564     | -0.48352 |         |
|             | 0.68564         | -0.48352 | 0.68564 | 0.68564     | 0.832117955 |          |         |
| GNPDA1      | ENSG00000113552 | -1.0963  | 0.86353 | -0.48358    | 0.68566     | -0.6252  |         |
|             | 0.73408         | -0.53355 | 0.70317 | 0.68566     | 0.832117955 |          |         |
| PTOV1       | ENSG00000104960 | -1.1935  | 0.88366 | -0.48368    | 0.68569     | -0.48368 | 0.68569 |
|             | -0.48368        | 0.68569  | 0.68569 | 0.832117955 |             |          |         |
| PDZK1IP1    | ENSG00000162366 | -0.48366 | 0.68569 | -1.0742     | 0.85863     | -2.1881  |         |
|             | 0.98567         | -2.1881  | 0.98567 | 0.68569     | 0.832117955 |          |         |
| LINC02704   | ENSG00000255079 | -0.48367 | 0.68569 | -0.48367    | 0.68569     | -0.5264  |         |
|             | 0.70069         | -0.48367 | 0.68569 | 0.68569     | 0.832117955 |          |         |
| UQCRBP3     | ENSG00000249928 | -0.48374 | 0.68571 | -0.48374    | 0.68571     | -0.48374 |         |
|             | 0.68571         | -0.48374 | 0.68571 | 0.68571     | 0.832117955 |          |         |
| ZNF33CP     | ENSG00000235197 | -0.90828 | 0.81813 | -0.84281    | 0.80033     | -0.79545 |         |
|             | 0.78682         | -0.48375 | 0.68572 | 0.68572     | 0.832117955 |          |         |
| RNU6-367P   | ENSG00000252980 | -0.48381 | 0.68574 | -0.48381    | 0.68574     | -0.48381 |         |
|             | 0.68574         | -0.70907 | 0.76086 | 0.68574     | 0.832117955 |          |         |
| NA          | ENSG00000266941 | -0.48385 | 0.68575 | -0.48385    | 0.68575     | -0.48385 | 0.68575 |
|             | -0.48385        | 0.68575  | 0.68575 | 0.832117955 |             |          |         |
| NA          | ENSG00000233632 | -0.58987 | 0.72236 | -0.48392    | 0.68578     | -0.48392 | 0.68578 |
|             | -0.48392        | 0.68578  | 0.68578 | 0.832117955 |             |          |         |
| C14orf39    | ENSG00000179008 | -0.80344 | 0.78914 | -0.5126     | 0.69588     | -0.48396 |         |
|             | 0.68579         | -0.93335 | 0.82468 | 0.68579     | 0.832117955 |          |         |
| NDUFV2-AS1  | ENSG00000266053 | -1.9988  | 0.97719 | -0.48396    | 0.68579     | -1.8003  |         |
|             | 0.96409         | -1.8003  | 0.96409 | 0.68579     | 0.832117955 |          |         |
| NA          | ENSG00000218313 | -0.48398 | 0.6858  | -0.48398    | 0.6858      | -0.48398 | 0.6858  |
|             | -0.48398        | 0.6858   | 0.6858  | 0.832117955 |             |          |         |
| PCBD1       | ENSG00000166228 | -0.71745 | 0.76345 | -0.68307    | 0.75272     | -0.68307 | 0.75272 |
|             | -0.484          | 0.68581  | 0.68581 | 0.832117955 |             |          |         |
| RACK1       | ENSG00000204628 | -0.48414 | 0.68586 | -0.48414    | 0.68586     | -0.48414 | 0.68586 |
|             | -0.48414        | 0.68586  | 0.68586 | 0.832157902 |             |          |         |
| MRPL24      | ENSG00000143314 | -0.86557 | 0.80664 | -0.48433    | 0.68592     | -0.48433 |         |
|             | 0.68592         | -0.86557 | 0.80664 | 0.68592     | 0.832192805 |          |         |
| ZNF224      | ENSG00000267680 | -0.48434 | 0.68593 | -0.48434    | 0.68593     | -0.48434 |         |
|             | 0.68593         | -0.48434 | 0.68593 | 0.68593     | 0.832192805 |          |         |
| NA          | ENSG00000253858 | -0.48438 | 0.68594 | -0.48438    | 0.68594     | -0.48438 | 0.68594 |
|             | -0.48438        | 0.68594  | 0.68594 | 0.832192805 |             |          |         |
| CPM         | ENSG00000135678 | -0.48444 | 0.68596 | -0.924      | 0.82226     | -1.6073  | 0.94601 |
|             | -1.6886         | 0.95435  | 0.68596 | 0.83219635  |             |          |         |
| WASF5P      | ENSG00000231402 | -0.48475 | 0.68607 | -0.54993    | 0.70881     | -0.54993 |         |
|             | 0.70881         | -0.54993 | 0.70881 | 0.68607     | 0.832309079 |          |         |
| RPS6KA2-AS1 | ENSG00000231654 | -1.0803  | 0.85999 | -1.6089     | 0.94619     | -1.4377  |         |
|             | 0.92475         | -0.48495 | 0.68614 | 0.68614     | 0.832347508 |          |         |
| NA          | ENSG00000199196 | -1.4191  | 0.92206 | -1.233      | 0.8912      | -0.485   | 0.68616 |
|             | -1.3632         | 0.9136   | 0.68616 | 0.832347508 |             |          |         |
| LIFR-AS1    | ENSG00000244968 | -0.85753 | 0.80442 | -0.92122    | 0.82153     | -0.48501 |         |
|             | 0.68617         | -0.90356 | 0.81689 | 0.68617     | 0.832347508 |          |         |
| SRSF3P1     | ENSG00000257043 | -0.57401 | 0.71702 | -0.48503    | 0.68617     | -0.90878 |         |
|             | 0.81827         | -0.52752 | 0.70109 | 0.68617     | 0.832347508 |          |         |
| ZFYVE19     | ENSG00000166140 | -0.48513 | 0.68621 | -0.48513    | 0.68621     | -0.48513 |         |
|             | 0.68621         | -0.52395 | 0.69984 | 0.68621     | 0.832375309 |          |         |
| SNORD115-36 | ENSG00000202499 | -0.48523 | 0.68624 | -1.2739     | 0.89866     | -0.48523 |         |
|             | 0.68624         | -0.48523 | 0.68624 | 0.68624     | 0.832390979 |          |         |
| LUC7L       | ENSG00000007392 | -0.56497 | 0.71395 | -0.48538    | 0.6863      | -0.48661 | 0.68673 |



|                        |                 |          |             |             |             |             |         |          |
|------------------------|-----------------|----------|-------------|-------------|-------------|-------------|---------|----------|
|                        | -0.60434        | 0.72719  | 0.6863      | 0.832422317 |             |             |         |          |
| DAGLB                  | ENSG00000164535 | -0.48539 | 0.6863      | -2.1192     | 0.98297     | -1.911      | 0.972   |          |
|                        | -1.3235         | 0.90716  | 0.6863      | 0.832422317 |             |             |         |          |
| NA                     | ENSG00000270326 | -0.48551 | 0.68634     | -0.48551    | 0.68634     | -0.48551    | 0.68634 |          |
|                        | -0.48551        | 0.68634  | 0.68634     | 0.832450113 |             |             |         |          |
| GIMAP3P                | ENSG00000177590 | -0.48564 | 0.68639     | -0.48564    | 0.68639     | -0.48564    |         |          |
|                        | 0.68639         | -0.65511 | 0.7438      | 0.68639     | 0.832481446 |             |         |          |
| LRRC55                 | ENSG00000183908 | -0.48566 | 0.6864      | -1.4136     | 0.92126     | -1.5055     |         |          |
|                        | 0.9339          | -1.4136  | 0.92126     | 0.6864      | 0.832481446 |             |         |          |
| NA                     | ENSG00000215447 | -1.4971  | 0.93282     | -0.48576    | 0.68643     | -0.85192    | 0.80287 |          |
|                        | -0.79874        | 0.78778  | 0.68643     | 0.832497111 |             |             |         |          |
| NA                     | ENSG00000266995 | -0.48591 | 0.68648     | -0.48591    | 0.68648     | -0.48591    | 0.68648 |          |
|                        | -1.4818         | 0.93081  | 0.68648     | 0.83253703  |             |             |         |          |
| RPSAP37                | ENSG00000241888 | -0.48601 | 0.68652     | -0.48601    | 0.68652     | -0.48601    |         |          |
|                        | 0.68652         | -0.48601 | 0.68652     | 0.68652     | 0.83256482  |             |         |          |
| MGAT2                  | ENSG00000168282 | -0.48611 | 0.68656     | -0.48611    | 0.68656     | -0.61618    | 0.73111 |          |
|                        | -0.61618        | 0.73111  | 0.68656     | 0.832589559 |             |             |         |          |
| NA                     | ENSG00000224152 | -1.0012  | 0.84163     | -1.0012     | 0.84163     | -1.0012     | 0.84163 |          |
|                        | -0.48621        | 0.68659  | 0.68659     | 0.832589559 |             |             |         |          |
| NA                     | ENSG00000199474 | -0.69781 | 0.75735     | -0.48624    | 0.6866      | -0.48624    | 0.6866  |          |
|                        | -0.48624        | 0.6866   | 0.6866      | 0.832589559 |             |             |         |          |
| NA                     | ENSG00000234894 | -0.48625 | 0.68661     | -0.48625    | 0.68661     | -0.48625    | 0.68661 |          |
|                        | -0.48625        | 0.68661  | 0.68661     | 0.832589559 |             |             |         |          |
| LINC02198              | ENSG00000249352 | -0.91502 | 0.81991     | -0.91502    | 0.81991     | -0.48635    |         |          |
|                        | 0.68664         | -0.91502 | 0.81991     | 0.68664     | 0.832589559 |             |         |          |
| PIK3R3                 | ENSG00000117461 | -0.98137 | 0.83679     | -1.1263     | 0.86998     | -0.4864     |         |          |
|                        | 0.68666         | -1.3206  | 0.90668     | 0.68666     | 0.832589559 |             |         |          |
| NA                     | ENSG00000196758 | -0.74866 | 0.77297     | -1.6079     | 0.94607     | -0.65886    | 0.74501 |          |
|                        | -0.4864         | 0.68666  | 0.68666     | 0.832589559 |             |             |         |          |
| CTAGE16P               | ENSG00000214335 | -0.89425 | 0.8144      | -0.89425    | 0.8144      | -0.4866     |         |          |
|                        | 0.68673         | -1.416   | 0.92161     | 0.68673     | 0.832650552 |             |         |          |
| SYT5                   | ENSG00000129990 | -0.52756 | 0.7011      | -0.48676    | 0.68678     | -0.64514    | 0.74058 |          |
|                        | -0.48676        | 0.68678  | 0.68678     | 0.832650552 |             |             |         |          |
| METTL21EP              | ENSG00000250878 | -0.48676 | 0.68679     | -0.48676    | 0.68679     | -0.48676    |         |          |
|                        | 0.68679         | -0.48676 | 0.68679     | 0.68679     | 0.832650552 |             |         |          |
| NA                     | ENSG00000203630 | -0.58299 | 0.72005     | -0.48677    | 0.68679     | -0.58299    | 0.72005 |          |
|                        | -0.68635        | 0.75375  | 0.68679     | 0.832650552 |             |             |         |          |
| TMEM191A               | ENSG00000226287 | -0.4869  | 0.68683     | -0.4869     | 0.68683     | -0.4869     |         |          |
|                        | 0.68683         | -0.4869  | 0.68683     | 0.68683     | 0.832650552 |             |         |          |
| NA                     | ENSG00000284309 | -0.48688 | 0.68683     | -0.48688    | 0.68683     | -0.48688    | 0.68683 |          |
|                        | -0.48688        | 0.68683  | 0.68683     | 0.832650552 |             |             |         |          |
| RN7SKP45               | ENSG00000200379 | -0.48701 | 0.68687     | -1.1019     | 0.86475     | -1.265      |         |          |
|                        | 0.89707         | -0.48701 | 0.68687     | 0.68687     | 0.832650552 |             |         |          |
| NEU4                   | ENSG00000204099 | -0.48699 | 0.68687     | -0.48699    | 0.68687     | -0.48699    | 0.68687 |          |
|                        | -0.48699        | 0.68687  | 0.68687     | 0.832650552 |             |             |         |          |
| H2AZ2P1                | ENSG00000258741 | -0.48702 | 0.68688     | -0.48702    | 0.68688     | -0.48702    |         |          |
|                        | 0.68688         | -0.50368 | 0.69276     | 0.68688     | 0.832650552 |             |         |          |
| STAG3L5P-PVRIG2P-PILRB | ENSG00000272752 | -0.76223 | 0.77704     | -0.48716    | 0.68693     | 0.68693     | 0.68693 | 0.68693  |
|                        | -0.48716        | 0.68693  | -0.48716    | 0.68693     | 0.68693     | 0.832650552 |         |          |
| NA                     | ENSG00000230575 | -0.48718 | 0.68694     | -0.48718    | 0.68694     | -0.48718    | 0.68694 |          |
|                        | -0.48718        | 0.68694  | 0.68694     | 0.832650552 |             |             |         |          |
| IDI1P1                 | ENSG00000237939 | -1.3344  | 0.90897     | -0.48726    | 0.68696     | -0.48726    |         |          |
|                        | 0.68696         | -0.48726 | 0.68696     | 0.68696     | 0.832650552 |             |         |          |
| NA                     | ENSG00000261622 | -1.651   | 0.95064     | -0.92474    | 0.82245     | -0.72857    | 0.76687 |          |
|                        | -0.48733        | 0.68699  | 0.68699     | 0.832650552 |             |             |         |          |
| TRAF6P1                | ENSG00000226557 | -0.48736 | 0.687       | -0.48736    | 0.687       | -0.48736    | 0.687   | -0.48736 |
|                        | 0.687           | 0.687    | 0.832650552 |             |             |             |         |          |
| NA                     | ENSG00000258976 | -0.48738 | 0.687       | -0.48738    | 0.687       | -0.48738    | 0.687   | -1.0685  |
|                        | 0.85736         | 0.687    | 0.832650552 |             |             |             |         |          |
| H2BC11                 | ENSG00000124635 | -0.48758 | 0.68707     | -0.91705    | 0.82044     | -1.6364     |         |          |
|                        | 0.94912         | -1.0411  | 0.85109     | 0.68707     | 0.832650552 |             |         |          |
| IER5                   | ENSG00000162783 | -1.2035  | 0.8856      | -1.2035     | 0.8856      | -0.48758    | 0.68707 |          |

|           |                 |          |         |             |             |          |         |
|-----------|-----------------|----------|---------|-------------|-------------|----------|---------|
|           | -1.7677         | 0.96144  | 0.68707 | 0.832650552 |             |          |         |
| OR52E6    | ENSG00000205409 | -0.89341 | 0.81418 | -0.48759    | 0.68708     | -0.57384 |         |
|           | 0.71696         | -0.48759 | 0.68708 | 0.68708     | 0.832650552 |          |         |
| EZH1      | ENSG00000108799 | -0.48762 | 0.68709 | -0.48762    | 0.68709     | -0.48762 | 0.68709 |
|           | -0.67903        | 0.75144  | 0.68709 | 0.832650552 |             |          |         |
| NA        | ENSG00000279090 | -0.50282 | 0.69246 | -0.48762    | 0.68709     | -0.50282 | 0.69246 |
|           | -0.50282        | 0.69246  | 0.68709 | 0.832650552 |             |          |         |
| NA        | ENSG00000224555 | -0.48768 | 0.68711 | -0.48768    | 0.68711     | -0.48768 | 0.68711 |
|           | -0.48768        | 0.68711  | 0.68711 | 0.832650552 |             |          |         |
| NA        | ENSG00000232640 | -0.48768 | 0.68711 | -0.48768    | 0.68711     | -0.48768 | 0.68711 |
|           | -0.48768        | 0.68711  | 0.68711 | 0.832650552 |             |          |         |
| DGKE      | ENSG00000153933 | -0.48777 | 0.68714 | -0.48777    | 0.68714     | -0.48777 | 0.68714 |
|           | -0.48777        | 0.68714  | 0.68714 | 0.832650552 |             |          |         |
| NA        | ENSG00000227192 | -0.48775 | 0.68714 | -0.48775    | 0.68714     | -0.48775 | 0.68714 |
|           | -0.8665         | 0.80689  | 0.68714 | 0.832650552 |             |          |         |
| RNU4-76P  | ENSG00000201379 | -0.48785 | 0.68717 | -0.48785    | 0.68717     | -0.48785 |         |
|           | 0.68717         | -0.48785 | 0.68717 | 0.68717     | 0.832650552 |          |         |
| PPIAP54   | ENSG00000264655 | -0.48787 | 0.68718 | -0.48787    | 0.68718     | -0.48787 |         |
|           | 0.68718         | -0.48787 | 0.68718 | 0.68718     | 0.832650552 |          |         |
| HOTAIRM1  | ENSG00000233429 | -0.48791 | 0.68719 | -0.48791    | 0.68719     | -0.48791 |         |
|           | 0.68719         | -0.48791 | 0.68719 | 0.68719     | 0.832650552 |          |         |
| NA        | ENSG00000259767 | -0.48792 | 0.6872  | -0.48792    | 0.6872      | -0.48792 | 0.6872  |
|           | -0.48792        | 0.6872   | 0.6872  | 0.832650552 |             |          |         |
| NXT1P1    | ENSG00000214823 | -0.488   | 0.68722 | -0.488      | 0.68722     | -0.488   |         |
|           | 0.68722         | -0.708   | 0.76053 | 0.68722     | 0.832650552 |          |         |
| TMEM237   | ENSG00000155755 | -0.82718 | 0.79593 | -0.65323    | 0.7432      | -0.48803 |         |
|           | 0.68724         | -0.48803 | 0.68724 | 0.68724     | 0.832650552 |          |         |
| BANF1P1   | ENSG00000258531 | -0.48805 | 0.68724 | -0.48805    | 0.68724     | -0.48805 |         |
|           | 0.68724         | -0.48805 | 0.68724 | 0.68724     | 0.832650552 |          |         |
| TEX33     | ENSG00000185264 | -0.91099 | 0.81885 | -0.48818    | 0.68729     | -0.48818 | 0.68729 |
|           | -0.48818        | 0.68729  | 0.68729 | 0.832685369 |             |          |         |
| BFPSP2    | ENSG00000170819 | -0.48826 | 0.68732 | -0.48826    | 0.68732     | -0.48826 | 0.68732 |
|           | -0.75936        | 0.77618  | 0.68732 | 0.832685369 |             |          |         |
| SALL4P6   | ENSG00000231280 | -0.48826 | 0.68732 | -0.48826    | 0.68732     | -0.48826 |         |
|           | 0.68732         | -0.51632 | 0.69718 | 0.68732     | 0.832685369 |          |         |
| NA        | ENSG00000259792 | -0.48848 | 0.68739 | -0.48848    | 0.68739     | -0.48848 | 0.68739 |
|           | -0.48848        | 0.68739  | 0.68739 | 0.83274947  |             |          |         |
| NA        | ENSG00000267202 | -0.48856 | 0.68742 | -0.48856    | 0.68742     | -0.48856 | 0.68742 |
|           | -0.48856        | 0.68742  | 0.68742 | 0.832765111 |             |          |         |
| NA        | ENSG00000260686 | -0.48868 | 0.68747 | -0.48868    | 0.68747     | -0.48868 | 0.68747 |
|           | -0.48868        | 0.68747  | 0.68747 | 0.832798377 |             |          |         |
| SIGLEC31P | ENSG00000268847 | -0.48878 | 0.6875  | -0.48878    | 0.6875      | -0.48878 |         |
|           | 0.6875          | -0.48878 | 0.6875  | 0.6875      | 0.832798377 |          |         |
| SNRPF     | ENSG00000139343 | -0.48885 | 0.68753 | -0.48885    | 0.68753     | -0.48885 | 0.68753 |
|           | -1.4488         | 0.9263   | 0.68753 | 0.832798377 |             |          |         |
| NKX6-3    | ENSG00000165066 | -0.85901 | 0.80483 | -1.1333     | 0.87146     | -0.48888 |         |
|           | 0.68753         | -1.4619  | 0.92812 | 0.68753     | 0.832798377 |          |         |
| CES3      | ENSG00000172828 | -0.48892 | 0.68755 | -0.94169    | 0.82682     | -1.4225  | 0.92256 |
|           | -1.2216         | 0.88906  | 0.68755 | 0.832798377 |             |          |         |
| OR5M2P    | ENSG00000254752 | -0.48893 | 0.68755 | -0.48893    | 0.68755     | -0.48893 |         |
|           | 0.68755         | -0.48893 | 0.68755 | 0.68755     | 0.832798377 |          |         |
| UBTFL6    | ENSG00000228970 | -1.3793  | 0.91611 | -1.2629     | 0.89669     | -0.48902 |         |
|           | 0.68759         | -0.75867 | 0.77597 | 0.68759     | 0.832817538 |          |         |
| EEF1A1P17 | ENSG00000257907 | -0.48905 | 0.6876  | -0.48905    | 0.6876      | -0.48905 |         |
|           | 0.6876          | -0.48905 | 0.6876  | 0.6876      | 0.832817538 |          |         |
| MIR5685   | ENSG00000264056 | -0.48923 | 0.68766 | -0.48923    | 0.68766     | -0.48923 |         |
|           | 0.68766         | -0.48923 | 0.68766 | 0.68766     | 0.832869508 |          |         |
| VPS37A    | ENSG00000155975 | -1.4893  | 0.93179 | -0.48937    | 0.68771     | -2.2075  |         |
|           | 0.98636         | -2.1224  | 0.9831  | 0.68771     | 0.832888664 |          |         |
| NDUFAF4P2 | ENSG00000213483 | -0.91129 | 0.81893 | -0.91129    | 0.81893     | -0.48938 |         |
|           | 0.68771         | -0.91129 | 0.81893 | 0.68771     | 0.832888664 |          |         |
| NA        | ENSG00000267249 | -0.48968 | 0.68782 | -1.7586     | 0.96068     | -1.7586  | 0.96068 |

|             |                 |             |         |             |             |          |         |  |
|-------------|-----------------|-------------|---------|-------------|-------------|----------|---------|--|
|             | -1.7586         | 0.96068     | 0.68782 | 0.832978929 |             |          |         |  |
| MAIP1       | ENSG00000162972 | -1.1109     | 0.86669 | -0.48972    | 0.68783     | -1.8386  | 0.96701 |  |
|             | -1.8386         | 0.96701     | 0.68783 | 0.832978929 |             |          |         |  |
| NA          | ENSG00000264750 | -0.51077    | 0.69524 | -0.48974    | 0.68784     | -0.48974 | 0.68784 |  |
|             | -0.48974        | 0.68784     | 0.68784 | 0.832978929 |             |          |         |  |
| NA          | ENSG00000253376 | -0.48978    | 0.68786 | -0.48978    | 0.68786     | -0.48978 | 0.68786 |  |
|             | -0.48978        | 0.68786     | 0.68786 | 0.832978929 |             |          |         |  |
| NA          | ENSG00000280227 | -0.48981    | 0.68787 | -0.48981    | 0.68787     | -0.48981 | 0.68787 |  |
|             | -0.48981        | 0.68787     | 0.68787 | 0.832978929 |             |          |         |  |
| NA          | ENSG00000280326 | -0.48988    | 0.68789 | -0.5611     | 0.71264     | -0.5611  | 0.71264 |  |
|             | -0.5611         | 0.71264     | 0.68789 | 0.832982449 |             |          |         |  |
| NA          | ENSG00000241102 | -0.48995    | 0.68792 | -0.48995    | 0.68792     | -0.48995 | 0.68792 |  |
|             | -0.48995        | 0.68792     | 0.68792 | 0.832998077 |             |          |         |  |
| CLVS2       | ENSG00000146352 | -0.49007    | 0.68796 | -0.49007    | 0.68796     | -0.9678  | 0.83343 |  |
|             | -0.49007        | 0.68796     | 0.68796 | 0.833017222 |             |          |         |  |
| KLHL28      | ENSG00000179454 | -1.365      | 0.91387 | -1.3024     | 0.90362     | -0.49009 |         |  |
|             | 0.68797         | -1.1546     | 0.87587 | 0.68797     | 0.833017222 |          |         |  |
| NA          | ENSG00000238149 | -0.49019    | 0.688   | -0.49019    | 0.688       | -0.49019 | 0.688   |  |
|             | 0.688           | 0.833032848 |         |             |             |          |         |  |
| NA          | ENSG00000260004 | -0.49032    | 0.68805 | -0.49032    | 0.68805     | -0.49032 | 0.68805 |  |
|             | -0.49032        | 0.68805     | 0.68805 | 0.833072689 |             |          |         |  |
| DCLK3       | ENSG00000163673 | -0.49046    | 0.6881  | -1.2062     | 0.88613     | -0.93119 | 0.82412 |  |
|             | -0.49542        | 0.68985     | 0.6881  | 0.833074647 |             |          |         |  |
| MFSD8       | ENSG00000164073 | -0.53369    | 0.70322 | -0.4905     | 0.68811     | -0.53369 | 0.70322 |  |
|             | -0.68123        | 0.75214     | 0.68811 | 0.833074647 |             |          |         |  |
| ALOX5AP     | ENSG00000132965 | -1.2379     | 0.89213 | -1.0412     | 0.8511      | -0.52841 |         |  |
|             | 0.70139         | -0.49052    | 0.68812 | 0.68812     | 0.833074647 |          |         |  |
| NA          | ENSG00000271367 | -0.49052    | 0.68812 | -0.49052    | 0.68812     | -0.49052 | 0.68812 |  |
|             | -0.49052        | 0.68812     | 0.68812 | 0.833074647 |             |          |         |  |
| LINC01501   | ENSG00000229613 | -0.49061    | 0.68815 | -0.71954    | 0.7641      | -1.6366  |         |  |
|             | 0.94915         | -0.95349    | 0.82983 | 0.68815     | 0.833090269 |          |         |  |
| MT2A        | ENSG00000125148 | -0.49078    | 0.68821 | -0.49078    | 0.68821     | -0.49078 | 0.68821 |  |
|             | -0.49078        | 0.68821     | 0.68821 | 0.833142208 |             |          |         |  |
| ZP1         | ENSG00000149506 | -0.49086    | 0.68824 | -1.3559     | 0.91244     | -0.6919  | 0.7555  |  |
|             | -1.2091         | 0.88669     | 0.68824 | 0.833156264 |             |          |         |  |
| SMIM12P1    | ENSG00000271284 | -0.49093    | 0.68826 | -1.734      | 0.95854     | -0.49093 |         |  |
|             | 0.68826         | -1.1322     | 0.87122 | 0.68826     | 0.833156264 |          |         |  |
| NUDCP1      | ENSG00000213197 | -0.6416     | 0.73943 | -0.6416     | 0.73943     | -0.6416  |         |  |
|             | 0.73943         | -0.49101    | 0.68829 | 0.68829     | 0.833156264 |          |         |  |
| NA          | ENSG00000255166 | -0.491      | 0.68829 | -0.491      | 0.68829     | -0.491   | 0.68829 |  |
|             | -0.491          | 0.68829     | 0.68829 | 0.833156264 |             |          |         |  |
| NA          | ENSG00000261338 | -0.49108    | 0.68832 | -0.66548    | 0.74713     | -0.66548 | 0.74713 |  |
|             | -0.66548        | 0.74713     | 0.68832 | 0.83316329  |             |          |         |  |
| PPP2R1B     | ENSG00000137713 | -0.49111    | 0.68833 | -1.2035     | 0.88561     | -0.82247 |         |  |
|             | 0.7946          | -0.75302    | 0.77428 | 0.68833     | 0.83316329  |          |         |  |
| DAB1-AS1    | ENSG00000226759 | -0.7552     | 0.77494 | -1.2893     | 0.90136     | -0.4912  |         |  |
|             | 0.68836         | -0.4912     | 0.68836 | 0.68836     | 0.833178907 |          |         |  |
| RHPN1-AS1   | ENSG00000254389 | -0.49127    | 0.68838 | -0.56305    | 0.7133      | -0.68726 |         |  |
|             | 0.75404         | -0.68726    | 0.75404 | 0.68838     | 0.833179288 |          |         |  |
| MIR4502     | ENSG00000265450 | -0.49144    | 0.68844 | -0.49144    | 0.68844     | -0.49144 |         |  |
|             | 0.68844         | -0.49144    | 0.68844 | 0.68844     | 0.833179288 |          |         |  |
| TMSB4XP4    | ENSG00000223551 | -0.4915     | 0.68846 | -0.4915     | 0.68846     | -0.4915  |         |  |
|             | 0.68846         | -0.4915     | 0.68846 | 0.68846     | 0.833179288 |          |         |  |
| RNU4-46P    | ENSG00000222750 | -0.49153    | 0.68847 | -0.49153    | 0.68847     | -0.49153 |         |  |
|             | 0.68847         | -0.49153    | 0.68847 | 0.68847     | 0.833179288 |          |         |  |
| AOX3P-AOX2P | ENSG00000284084 | -0.49151    | 0.68847 | -0.49151    | 0.68847     | -0.49151 |         |  |
|             | 0.68847         | -0.49151    | 0.68847 | 0.68847     | 0.833179288 |          |         |  |
| SNORD114-2  | ENSG00000200823 | -0.49154    | 0.68848 | -0.49154    | 0.68848     | -0.49154 |         |  |
|             | 0.68848         | -0.49154    | 0.68848 | 0.68848     | 0.833179288 |          |         |  |
| NA          | ENSG00000254962 | -0.49153    | 0.68848 | -0.49153    | 0.68848     | -1.1191  | 0.86845 |  |
|             | -0.49153        | 0.68848     | 0.68848 | 0.833179288 |             |          |         |  |
| ATP1B3-AS1  | ENSG00000244124 | -0.49164    | 0.68851 | -0.49164    | 0.68851     | -0.49164 |         |  |

|          |                 |          |             |             |             |          |          |
|----------|-----------------|----------|-------------|-------------|-------------|----------|----------|
|          | 0.68851         | -0.49164 | 0.68851     | 0.68851     | 0.833194902 |          |          |
| SPON1    | ENSG00000262655 | -1.3659  | 0.91401     | -0.49168    | 0.68853     | -0.97042 | 0.83408  |
|          | -0.62318        | 0.73342  | 0.68853     | 0.833198413 |             |          |          |
| UBE2V1P1 | ENSG00000226632 | -0.49184 | 0.68858     | -0.49184    | 0.68858     | -0.49184 |          |
|          | 0.68858         | -0.49184 | 0.68858     | 0.833238227 |             |          |          |
| NA       | ENSG00000280118 | -0.49202 | 0.68865     | -0.49202    | 0.68865     | -0.49202 | 0.68865  |
|          | -0.49202        | 0.68865  | 0.68865     | 0.83330224  |             |          |          |
| NA       | ENSG00000232680 | -0.49218 | 0.68887     | -0.49218    | 0.68887     | -0.49218 | 0.68887  |
|          | -0.49218        | 0.68887  | 0.68887     | 0.833342049 |             |          |          |
| HERC1    | ENSG00000103657 | -0.71175 | 0.76169     | -0.98222    | 0.837       | -0.49225 | 0.68873  |
|          | -1.202          | 0.88532  | 0.68873     | 0.833349064 |             |          |          |
| MIR4695  | ENSG00000265606 | -0.49227 | 0.68874     | -0.49227    | 0.68874     | -0.49227 |          |
|          | 0.68874         | -0.49227 | 0.68874     | 0.833349064 |             |          |          |
| NA       | ENSG00000267498 | -0.49247 | 0.68881     | -0.49247    | 0.68881     | -0.49247 | 0.68881  |
|          | -0.49247        | 0.68881  | 0.68881     | 0.83337361  |             |          |          |
| MFAP2    | ENSG00000117122 | -0.49253 | 0.68883     | -0.49253    | 0.68883     | -0.49253 | 0.68883  |
|          | -0.49253        | 0.68883  | 0.68883     | 0.83337361  |             |          |          |
| RMND5B   | ENSG00000145916 | -0.49255 | 0.68884     | -0.49255    | 0.68884     | -0.49255 |          |
|          | 0.68884         | -1.6796  | 0.95348     | 0.68884     | 0.83337361  |          |          |
| NA       | ENSG00000269356 | -0.49257 | 0.68884     | -2.0036     | 0.97744     | -0.67994 | 0.75173  |
|          | -0.67994        | 0.75173  | 0.68884     | 0.83337361  |             |          |          |
| RTN1     | ENSG00000139970 | -1.1709  | 0.87917     | -0.79313    | 0.78615     | -0.49262 | 0.68886  |
|          | -0.93078        | 0.82402  | 0.68886     | 0.83337361  |             |          |          |
| FTH1P7   | ENSG00000232187 | -0.51519 | 0.69679     | -1.4333     | 0.92411     | -0.73805 |          |
|          | 0.76976         | -0.49268 | 0.68888     | 0.68888     | 0.83337361  |          |          |
| NA       | ENSG00000270458 | -0.49268 | 0.68888     | -0.49268    | 0.68888     | -0.49268 | 0.68888  |
|          | -0.49268        | 0.68888  | 0.68888     | 0.83337361  |             |          |          |
| NA       | ENSG00000265664 | -0.49282 | 0.68893     | -0.49282    | 0.68893     | -0.49282 | 0.68893  |
|          | -0.49282        | 0.68893  | 0.68893     | 0.833413408 |             |          |          |
| NA       | ENSG00000223628 | -1.0894  | 0.862       | -1.0894     | 0.862       | -1.2102  | 0.8869   |
|          | 0.68905         | 0.68905  | 0.833489821 |             |             |          | -0.49316 |
| MZF1-AS1 | ENSG00000267858 | -0.49315 | 0.68905     | -0.49315    | 0.68905     | -0.49315 |          |
|          | 0.68905         | -0.49315 | 0.68905     | 0.68905     | 0.833489821 |          |          |
| NIBAN3   | ENSG00000167483 | -1.6138  | 0.94671     | -1.6138     | 0.94671     | -1.6138  |          |
|          | 0.94671         | -0.49328 | 0.68909     | 0.68909     | 0.833489821 |          |          |
| RPL7P61  | ENSG00000230282 | -1.0822  | 0.86041     | -1.0822     | 0.86041     | -0.49329 |          |
|          | 0.6891          | -1.0822  | 0.86041     | 0.6891      | 0.833489821 |          |          |
| DPY19L2  | ENSG00000177990 | -0.79891 | 0.78783     | -0.49339    | 0.68913     | -1.212   |          |
|          | 0.88724         | -0.77033 | 0.77945     | 0.68913     | 0.833489821 |          |          |
| NA       | ENSG00000254953 | -0.50813 | 0.69432     | -0.81575    | 0.79268     | -0.49339 | 0.68913  |
|          | -0.49339        | 0.68913  | 0.68913     | 0.833489821 |             |          |          |
| MIR3165  | ENSG00000263742 | -0.4934  | 0.68913     | -0.4934     | 0.68913     | -0.4934  |          |
|          | 0.68913         | -0.4934  | 0.68913     | 0.68913     | 0.833489821 |          |          |
| MIR3124  | ENSG00000264500 | -0.49339 | 0.68913     | -0.49339    | 0.68913     | -0.49339 |          |
|          | 0.68913         | -0.49339 | 0.68913     | 0.68913     | 0.833489821 |          |          |
| TGIF2    | ENSG00000118707 | -0.82127 | 0.79426     | -0.79336    | 0.78622     | -0.50003 | 0.69147  |
|          | -0.49344        | 0.68915  | 0.68915     | 0.833493324 |             |          |          |
| NA       | ENSG00000253839 | -1.5317  | 0.93721     | -0.7527     | 0.77418     | -0.7527  | 0.77418  |
|          | -0.49357        | 0.68919  | 0.68919     | 0.833521014 |             |          |          |
| RNY1P5   | ENSG00000206617 | -0.49374 | 0.68925     | -1.5992     | 0.94512     | -1.3051  |          |
|          | 0.90408         | -0.78812 | 0.78469     | 0.68925     | 0.833544563 |          |          |
| PLPPR5   | ENSG00000117598 | -0.94289 | 0.82713     | -1.4587     | 0.92767     | -0.49397 |          |
|          | 0.68933         | -0.54808 | 0.70818     | 0.68933     | 0.833544563 |          |          |
| NA       | ENSG00000212293 | -1.076   | 0.85904     | -1.076      | 0.85904     | -1.076   | 0.85904  |
|          | -0.49404        | 0.68936  | 0.68936     | 0.833544563 |             |          |          |
| NA       | ENSG00000239181 | -0.49414 | 0.6894      | -0.59596    | 0.7244      | -0.59596 | 0.7244   |
|          | -1.4636         | 0.92834  | 0.6894      | 0.833544563 |             |          |          |
| NA       | ENSG00000271811 | -0.4942  | 0.68942     | -0.4942     | 0.68942     | -0.4942  | 0.68942  |
|          | -0.4942         | 0.68942  | 0.68942     | 0.833544563 |             |          |          |
| CEP43    | ENSG00000213066 | -0.53709 | 0.7044      | -0.49424    | 0.68943     | -0.49424 | 0.68943  |
|          | -0.49424        | 0.68943  | 0.68943     | 0.833544563 |             |          |          |
| NA       | ENSG00000254104 | -0.49427 | 0.68944     | -0.49427    | 0.68944     | -0.49427 | 0.68944  |

|            |                 |          |         |             |             |          |         |
|------------|-----------------|----------|---------|-------------|-------------|----------|---------|
|            | -0.49427        | 0.68944  | 0.68944 | 0.833544563 |             |          |         |
| NA         | ENSG00000268970 | -0.49426 | 0.68944 | -0.49426    | 0.68944     | -0.49426 | 0.68944 |
|            | -0.49426        | 0.68944  | 0.68944 | 0.833544563 |             |          |         |
| PDCL3P2    | ENSG00000282989 | -0.49425 | 0.68944 | -0.49425    | 0.68944     | -0.49425 |         |
|            | 0.68944         | -0.60414 | 0.72713 | 0.68944     | 0.833544563 |          |         |
| LINC02877  | ENSG00000237787 | -0.76059 | 0.77655 | -0.61764    | 0.73159     | -0.49442 |         |
|            | 0.6895          | -0.79381 | 0.78635 | 0.6895      | 0.833544563 |          |         |
| NA         | ENSG00000279550 | -0.49442 | 0.6895  | -0.49442    | 0.6895      | -0.49442 | 0.6895  |
|            | -0.49442        | 0.6895   | 0.6895  | 0.833544563 |             |          |         |
| NA         | ENSG00000267638 | -0.49447 | 0.68951 | -0.49447    | 0.68951     | -0.49447 | 0.68951 |
|            | -0.49447        | 0.68951  | 0.68951 | 0.833544563 |             |          |         |
| NA         | ENSG00000231114 | -0.79884 | 0.78781 | -0.79884    | 0.78781     | -0.79884 | 0.78781 |
|            | -0.49453        | 0.68953  | 0.68953 | 0.833544563 |             |          |         |
| LINC01214  | ENSG00000243550 | -0.49455 | 0.68954 | -0.49455    | 0.68954     | -0.49455 |         |
|            | 0.68954         | -0.49455 | 0.68954 | 0.68954     | 0.833544563 |          |         |
| NA         | ENSG00000226377 | -0.49459 | 0.68955 | -0.49459    | 0.68955     | -0.49459 | 0.68955 |
|            | -0.49459        | 0.68955  | 0.68955 | 0.833544563 |             |          |         |
| CREB3      | ENSG00000107175 | -0.49461 | 0.68956 | -0.49461    | 0.68956     | -0.49461 | 0.68956 |
|            | -0.49461        | 0.68956  | 0.68956 | 0.833544563 |             |          |         |
| NA         | ENSG00000253547 | -1.4245  | 0.92285 | -0.49463    | 0.68957     | -0.95525 | 0.83027 |
|            | -0.73218        | 0.76797  | 0.68957 | 0.833544563 |             |          |         |
| NA         | ENSG00000259772 | -0.49462 | 0.68957 | -0.60311    | 0.72678     | -0.49462 | 0.68957 |
|            | -1.2329         | 0.8912   | 0.68957 | 0.833544563 |             |          |         |
| NA         | ENSG00000251427 | -0.97131 | 0.8343  | -0.49467    | 0.68958     | -0.66996 | 0.74856 |
|            | -0.49467        | 0.68958  | 0.68958 | 0.833544563 |             |          |         |
| NA         | ENSG00000255628 | -0.49465 | 0.68958 | -1.4404     | 0.92513     | -0.59976 | 0.72567 |
|            | -1.8678         | 0.96911  | 0.68958 | 0.833544563 |             |          |         |
| NA         | ENSG00000272182 | -0.49465 | 0.68958 | -0.49465    | 0.68958     | -0.49465 | 0.68958 |
|            | -0.49465        | 0.68958  | 0.68958 | 0.833544563 |             |          |         |
| NA         | ENSG00000251139 | -1.2144  | 0.8877  | -0.49474    | 0.68961     | -0.49474 | 0.68961 |
|            | -0.49474        | 0.68961  | 0.68961 | 0.833544563 |             |          |         |
| TUFT1      | ENSG00000143367 | -0.49476 | 0.68962 | -0.49476    | 0.68962     | -0.49476 | 0.68962 |
|            | -0.49476        | 0.68962  | 0.68962 | 0.833544563 |             |          |         |
| OTUD3      | ENSG00000169914 | -0.76572 | 0.77808 | -1.377      | 0.91574     | -0.49477 | 0.68962 |
|            | -1.204          | 0.88571  | 0.68962 | 0.833544563 |             |          |         |
| NA         | ENSG00000224436 | -0.49493 | 0.68967 | -0.49493    | 0.68967     | -0.49493 | 0.68967 |
|            | -0.87566        | 0.80939  | 0.68967 | 0.83354488  |             |          |         |
| NA         | ENSG00000261056 | -0.49491 | 0.68967 | -0.49491    | 0.68967     | -0.49491 | 0.68967 |
|            | -0.49491        | 0.68967  | 0.68967 | 0.83354488  |             |          |         |
| MSC-AS1    | ENSG00000235531 | -0.60901 | 0.72874 | -0.60403    | 0.72709     | -0.50629 |         |
|            | 0.69367         | -0.49494 | 0.68968 | 0.68968     | 0.83354488  |          |         |
| RNA5SP25   | ENSG00000222747 | -0.49503 | 0.68971 | -0.73102    | 0.76762     | -0.49503 |         |
|            | 0.68971         | -0.49503 | 0.68971 | 0.68971     | 0.83354488  |          |         |
| GSX1       | ENSG00000169840 | -0.57228 | 0.71643 | -0.95236    | 0.82954     | -1.41    | 0.92074 |
|            | -0.49511        | 0.68974  | 0.68974 | 0.83354488  |             |          |         |
| IPO5P1     | ENSG00000269837 | -0.49511 | 0.68974 | -0.49511    | 0.68974     | -0.49511 |         |
|            | 0.68974         | -0.49511 | 0.68974 | 0.68974     | 0.83354488  |          |         |
| NA         | ENSG00000274828 | -0.4951  | 0.68974 | -1.1373     | 0.8723      | -1.0917  | 0.86252 |
|            | -1.0917         | 0.86252  | 0.68974 | 0.83354488  |             |          |         |
| NA         | ENSG00000267475 | -0.65317 | 0.74318 | -0.49518    | 0.68976     | -0.49518 | 0.68976 |
|            | -0.49518        | 0.68976  | 0.68976 | 0.833548378 |             |          |         |
| SAMD12-AS1 | ENSG00000281641 | -0.86437 | 0.80631 | -1.2738     | 0.89862     | -0.49529 |         |
|            | 0.6898          | -0.79977 | 0.78808 | 0.6898      | 0.833558871 |          |         |
| OOSP1P2    | ENSG00000263749 | -0.4953  | 0.68981 | -0.4953     | 0.68981     | -0.4953  |         |
|            | 0.68981         | -0.4953  | 0.68981 | 0.68981     | 0.833558871 |          |         |
| TNRC6A     | ENSG00000090905 | -0.49534 | 0.68982 | -0.96774    | 0.83341     | -0.88308 |         |
|            | 0.8114          | -1.0123  | 0.84431 | 0.68982     | 0.833558871 |          |         |
| NA         | ENSG00000200591 | -0.49541 | 0.68984 | -0.49541    | 0.68984     | -0.49541 | 0.68984 |
|            | -0.49541        | 0.68984  | 0.68984 | 0.833562369 |             |          |         |
| NA         | ENSG00000228286 | -0.4956  | 0.68991 | -0.4956     | 0.68991     | -0.4956  | 0.68991 |
|            | -0.4956         | 0.68991  | 0.68991 | 0.833624685 |             |          |         |
| FCRL3      | ENSG00000160856 | -1.3801  | 0.91622 | -1.4796     | 0.9305      | -0.49574 | 0.68996 |

|            |                 |          |          |         |             |             |          |         |
|------------|-----------------|----------|----------|---------|-------------|-------------|----------|---------|
|            |                 | -1.2535  | 0.89499  | 0.68996 | 0.833624685 |             |          |         |
| NA         | ENSG00000253335 | -0.49573 | 0.68996  | 0.68996 | -1.1543     | 0.8758      | -0.62945 | 0.73547 |
|            |                 | -0.93412 | 0.82488  | 0.68996 | 0.833624685 |             |          |         |
| NA         | ENSG00000252009 | -0.49574 | 0.68996  | 0.68996 | -0.49574    | 0.68996     | -0.49574 | 0.68996 |
|            |                 | -0.49574 | 0.68996  | 0.68996 | 0.833624685 |             |          |         |
| NA         | ENSG00000230729 | -0.4958  | 0.68998  | 0.68998 | -0.4958     | 0.68998     | -0.4958  | 0.68998 |
|            |                 | -0.4958  | 0.68998  | 0.68998 | 0.83362818  |             |          |         |
| OBSL1      | ENSG00000124006 | -0.56582 | 0.71424  | 0.71424 | -0.59708    | 0.72477     | -1.0557  | 0.85445 |
|            |                 | -0.49587 | 0.69001  | 0.69001 | 0.833643757 |             |          |         |
| ANKRD55    | ENSG00000164512 | -1.1952  | 0.88399  | 0.88399 | -0.54827    | 0.70825     | -1.1761  |         |
|            |                 | 0.88023  | -0.49606 | 0.69007 | 0.69007     | 0.833695577 |          |         |
| MIR4747    | ENSG00000263409 | -0.49618 | 0.69012  | 0.69012 | -1.2149     | 0.8878      | -1.2149  |         |
|            |                 | 0.8878   | -1.2149  | 0.8878  | 0.69012     | 0.833735313 |          |         |
| CCND3P2    | ENSG00000265836 | -0.49638 | 0.69019  | 0.69019 | -0.49638    | 0.69019     | -0.49638 |         |
|            |                 | 0.69019  | -1.3168  | 0.90605 | 0.69019     | 0.833744185 |          |         |
| TAS2R19    | ENSG00000212124 | -0.49641 | 0.6902   | 0.6902  | -0.59181    | 0.72301     | -0.66891 |         |
|            |                 | 0.74822  | -0.89678 | 0.81508 | 0.6902      | 0.833744185 |          |         |
| NA         | ENSG00000221300 | -0.49643 | 0.6902   | 0.6902  | -0.49643    | 0.6902      | -0.49643 | 0.6902  |
|            |                 | -0.49643 | 0.6902   | 0.6902  | 0.833744185 |             |          |         |
| RNU6-454P  | ENSG00000201162 | -0.91275 | 0.81931  | 0.81931 | -0.49647    | 0.69022     | -0.49647 |         |
|            |                 | 0.69022  | -0.49647 | 0.69022 | 0.69022     | 0.833744185 |          |         |
| MYCBP2     | ENSG00000005810 | -0.58601 | 0.72107  | 0.72107 | -0.82635    | 0.7957      | -1.0424  |         |
|            |                 | 0.85139  | -0.49649 | 0.69023 | 0.69023     | 0.833744185 |          |         |
| ZNF155     | ENSG00000204920 | -0.49649 | 0.69023  | 0.69023 | -0.49649    | 0.69023     | -0.49649 |         |
|            |                 | 0.69023  | -0.49649 | 0.69023 | 0.69023     | 0.833744185 |          |         |
| MIR2278    | ENSG00000252153 | -0.84137 | 0.79993  | 0.79993 | -0.91747    | 0.82055     | -0.84137 |         |
|            |                 | 0.79993  | -0.49664 | 0.69028 | 0.69028     | 0.833783913 |          |         |
| SF3B6      | ENSG00000115128 | -0.63835 | 0.73838  | 0.73838 | -0.63835    | 0.73838     | -0.63835 | 0.73838 |
|            |                 | -0.49673 | 0.69031  | 0.69031 | 0.833799482 |             |          |         |
| WBP1LP2    | ENSG00000250474 | -0.49686 | 0.69036  | 0.69036 | -0.49686    | 0.69036     | -0.49686 |         |
|            |                 | 0.69036  | -0.49686 | 0.69036 | 0.69036     | 0.833801363 |          |         |
| NA         | ENSG00000267702 | -0.9749  | 0.8352   | 0.8352  | -0.98287    | 0.83716     | -0.84038 | 0.79965 |
|            |                 | -0.4969  | 0.69037  | 0.69037 | 0.833801363 |             |          |         |
| NA         | ENSG00000253681 | -0.49693 | 0.69038  | 0.69038 | -0.49693    | 0.69038     | -0.49693 | 0.69038 |
|            |                 | -1.3073  | 0.90444  | 0.69038 | 0.833801363 |             |          |         |
| NA         | ENSG00000271889 | -0.49694 | 0.69038  | 0.69038 | -1.3215     | 0.90683     | -0.66072 | 0.74561 |
|            |                 | -0.66072 | 0.74561  | 0.69038 | 0.833801363 |             |          |         |
| H3P3       | ENSG00000234202 | -0.49698 | 0.6904   | 0.6904  | -0.49698    | 0.6904      | -0.49698 | 0.6904  |
|            |                 | -0.49698 | 0.6904   | 0.6904  | 0.833804853 |             |          |         |
| DDX31      | ENSG00000125485 | -0.6218  | 0.73296  | 0.73296 | -0.62533    | 0.73412     | -0.68241 | 0.75251 |
|            |                 | -0.49707 | 0.69043  | 0.69043 | 0.833818809 |             |          |         |
| SAMSN1-AS1 | ENSG00000223662 | -1.1474  | 0.8744   | 0.8744  | -0.49718    | 0.69047     | -0.49718 |         |
|            |                 | 0.69047  | -0.49718 | 0.69047 | 0.69047     | 0.833818809 |          |         |
| NA         | ENSG00000279002 | -0.49719 | 0.69047  | 0.69047 | -0.49719    | 0.69047     | -0.49719 | 0.69047 |
|            |                 | -0.49719 | 0.69047  | 0.69047 | 0.833818809 |             |          |         |
| DBP        | ENSG00000105516 | -0.49722 | 0.69048  | 0.69048 | -0.49722    | 0.69048     | -0.49722 | 0.69048 |
|            |                 | -0.49722 | 0.69048  | 0.69048 | 0.833818809 |             |          |         |
| FBXL20     | ENSG00000108306 | -0.49729 | 0.69051  | 0.69051 | -0.49729    | 0.69051     | -0.49729 |         |
|            |                 | 0.69051  | -0.8311  | 0.79704 | 0.69051     | 0.833834373 |          |         |
| ZNF142     | ENSG00000115568 | -0.49751 | 0.69058  | 0.69058 | -1.0192     | 0.84594     | -0.49751 |         |
|            |                 | 0.69058  | -0.49751 | 0.69058 | 0.69058     | 0.833877575 |          |         |
| WDR31      | ENSG00000148225 | -0.98243 | 0.83706  | 0.83706 | -0.49749    | 0.69058     | -1.0466  | 0.85236 |
|            |                 | -1.1633  | 0.87765  | 0.69058 | 0.833877575 |             |          |         |
| TNK2-AS1   | ENSG00000224614 | -0.81328 | 0.79197  | 0.79197 | -0.49755    | 0.6906      | -0.49755 |         |
|            |                 | 0.6906   | -0.49755 | 0.6906  | 0.6906      | 0.833881062 |          |         |
| NA         | ENSG00000223916 | -1.5028  | 0.93356  | 0.93356 | -1.8146     | 0.96521     | -0.49762 | 0.69062 |
|            |                 | -1.5028  | 0.93356  | 0.69062 | 0.833884548 |             |          |         |
| WARS2-AS1  | ENSG00000231365 | -0.49782 | 0.6907   | 0.6907  | -0.98432    | 0.83752     | -2.0131  |         |
|            |                 | 0.97795  | -0.71852 | 0.76378 | 0.6907      | 0.833943302 |          |         |
| NA         | ENSG00000272234 | -0.49786 | 0.69071  | 0.69071 | -0.49786    | 0.69071     | -0.49786 | 0.69071 |
|            |                 | -0.49786 | 0.69071  | 0.69071 | 0.833943302 |             |          |         |
| NOS1       | ENSG00000089250 | -0.4979  | 0.69072  | 0.69072 | -1.0869     | 0.86146     | -1.3799  | 0.91618 |

|              |                 |          |         |             |             |          |         |  |
|--------------|-----------------|----------|---------|-------------|-------------|----------|---------|--|
|              | -1.4365         | 0.92457  | 0.69072 | 0.833943302 |             |          |         |  |
| NA           | ENSG00000255516 | -0.51894 | 0.6981  | -0.72382    | 0.76541     | -0.81674 | 0.79296 |  |
|              | -0.49802        | 0.69076  | 0.69076 | 0.833970933 |             |          |         |  |
| NA           | ENSG00000252800 | -0.49812 | 0.6908  | -0.49812    | 0.6908      | -0.49812 | 0.6908  |  |
|              | -0.49812        | 0.6908   | 0.6908  | 0.833998563 |             |          |         |  |
| NA           | ENSG00000249927 | -0.49836 | 0.69088 | -0.49836    | 0.69088     | -0.49836 | 0.69088 |  |
|              | -0.49836        | 0.69088  | 0.69088 | 0.834069373 |             |          |         |  |
| TMPRSS11A    | ENSG00000187054 | -0.49842 | 0.69091 | -1.0354     | 0.84977     | -1.1667  |         |  |
|              | 0.87834         | -0.64731 | 0.74128 | 0.69091     | 0.834069373 |          |         |  |
| NA           | ENSG00000248813 | -0.49843 | 0.69091 | -0.49843    | 0.69091     | -0.49843 | 0.69091 |  |
|              | -0.49843        | 0.69091  | 0.69091 | 0.834069373 |             |          |         |  |
| NA           | ENSG00000255479 | -0.80212 | 0.78876 | -0.99652    | 0.8405      | -0.49862 | 0.69098 |  |
|              | -0.49862        | 0.69098  | 0.69098 | 0.834133213 |             |          |         |  |
| TP53I3       | ENSG00000115129 | -0.87778 | 0.80997 | -0.87778    | 0.80997     | -0.84981 |         |  |
|              | 0.80229         | -0.49878 | 0.69103 | 0.69103     | 0.834164314 |          |         |  |
| MAPK6P1      | ENSG00000206144 | -0.74697 | 0.77246 | -0.49881    | 0.69104     | -0.74697 |         |  |
|              | 0.77246         | -0.74697 | 0.77246 | 0.69104     | 0.834164314 |          |         |  |
| NFIA-AS2     | ENSG00000237928 | -1.5237  | 0.9362  | -0.4989     | 0.69108     | -0.54248 |         |  |
|              | 0.70626         | -1.084   | 0.86083 | 0.69108     | 0.834191935 |          |         |  |
| ANKRD37      | ENSG00000186352 | -1.6653  | 0.95207 | -0.49911    | 0.69115     | -0.49911 |         |  |
|              | 0.69115         | -0.49911 | 0.69115 | 0.69115     | 0.834204208 |          |         |  |
| RNU6-257P    | ENSG00000222170 | -1.5335  | 0.93742 | -0.49911    | 0.69115     | -0.49911 |         |  |
|              | 0.69115         | -0.49911 | 0.69115 | 0.69115     | 0.834204208 |          |         |  |
| ATP6V0E1P1   | ENSG00000225364 | -0.49922 | 0.69119 | -0.49922    | 0.69119     | -0.49922 |         |  |
|              | 0.69119         | -0.49922 | 0.69119 | 0.69119     | 0.834204208 |          |         |  |
| TRIM51CP     | ENSG00000249910 | -0.49923 | 0.69119 | -0.78293    | 0.78317     | -1.5513  |         |  |
|              | 0.93958         | -1.4893  | 0.9318  | 0.69119     | 0.834204208 |          |         |  |
| MRPS16P2     | ENSG00000232925 | -0.86065 | 0.80528 | -0.49924    | 0.6912      | -0.86065 |         |  |
|              | 0.80528         | -0.86065 | 0.80528 | 0.6912      | 0.834204208 |          |         |  |
| RPL36AP36    | ENSG00000237540 | -0.49926 | 0.6912  | -0.49926    | 0.6912      | -0.49926 |         |  |
|              | 0.6912          | -0.49926 | 0.6912  | 0.6912      | 0.834204208 |          |         |  |
| PRDM2        | ENSG00000116731 | -1.0991  | 0.86414 | -0.87822    | 0.81009     | -0.53138 | 0.70242 |  |
|              | -0.49927        | 0.69121  | 0.69121 | 0.834204208 |             |          |         |  |
| PGAM5        | ENSG00000247077 | -0.77722 | 0.78148 | -0.63591    | 0.73758     | -2.1265  | 0.98327 |  |
|              | -0.49938        | 0.69124  | 0.69124 | 0.834219753 |             |          |         |  |
| TEX38        | ENSG00000186118 | -0.49952 | 0.69129 | -0.49952    | 0.69129     | -0.49952 | 0.69129 |  |
|              | -0.49952        | 0.69129  | 0.69129 | 0.834259434 |             |          |         |  |
| TM2D2        | ENSG00000169490 | -0.49956 | 0.69131 | -0.59898    | 0.72541     | -0.59898 | 0.72541 |  |
|              | -0.59898        | 0.72541  | 0.69131 | 0.83426291  |             |          |         |  |
| NA           | ENSG00000269043 | -0.93381 | 0.8248  | -1.1873     | 0.88244     | -0.49982 | 0.6914  |  |
|              | -0.93439        | 0.82495  | 0.6914  | 0.83426841  |             |          |         |  |
| E2F1         | ENSG00000101412 | -0.49987 | 0.69142 | -0.5603     | 0.71236     | -0.5603  | 0.71236 |  |
|              | -0.5603         | 0.71236  | 0.69142 | 0.83426841  |             |          |         |  |
| NA           | ENSG00000273350 | -0.49989 | 0.69142 | -0.49989    | 0.69142     | -0.49989 | 0.69142 |  |
|              | -0.49989        | 0.69142  | 0.69142 | 0.83426841  |             |          |         |  |
| NA           | ENSG00000274269 | -0.4999  | 0.69143 | -0.4999     | 0.69143     | -0.4999  | 0.69143 |  |
|              | -0.4999         | 0.69143  | 0.69143 | 0.83426841  |             |          |         |  |
| NA           | ENSG00000236866 | -0.49995 | 0.69144 | -0.49995    | 0.69144     | -0.49995 | 0.69144 |  |
|              | -0.49995        | 0.69144  | 0.69144 | 0.83426841  |             |          |         |  |
| PRICKLE2-AS3 | ENSG00000226017 | -0.50896 | 0.69461 | -0.50005    | 0.69148     | -0.50896 |         |  |
|              | 0.69461         | -0.50896 | 0.69461 | 0.69148     | 0.83426841  |          |         |  |
| DNAJB5P1     | ENSG00000230335 | -0.50012 | 0.6915  | -0.50012    | 0.6915      | -0.50012 |         |  |
|              | 0.6915          | -0.50012 | 0.6915  | 0.6915      | 0.83426841  |          |         |  |
| NA           | ENSG00000280124 | -0.5001  | 0.6915  | -0.95333    | 0.82979     | -0.95333 | 0.82979 |  |
|              | -0.95333        | 0.82979  | 0.6915  | 0.83426841  |             |          |         |  |
| TMF1P1       | ENSG00000262235 | -0.50013 | 0.69151 | -0.50013    | 0.69151     | -0.50013 |         |  |
|              | 0.69151         | -0.50013 | 0.69151 | 0.69151     | 0.83426841  |          |         |  |
| NA           | ENSG00000268764 | -0.50013 | 0.69151 | -0.50013    | 0.69151     | -0.50013 | 0.69151 |  |
|              | -0.50013        | 0.69151  | 0.69151 | 0.83426841  |             |          |         |  |
| NDUFB2-AS1   | ENSG00000240889 | -0.50015 | 0.69152 | -0.50015    | 0.69152     | -0.50015 |         |  |
|              | 0.69152         | -0.50015 | 0.69152 | 0.69152     | 0.83426841  |          |         |  |
| RNU1-103P    | ENSG00000252311 | -0.50017 | 0.69152 | -0.50017    | 0.69152     | -0.50017 |         |  |

|            |                 |          |         |             |             |          |         |
|------------|-----------------|----------|---------|-------------|-------------|----------|---------|
|            | 0.69152         | -0.50017 | 0.69152 | 0.69152     | 0.83426841  |          |         |
| NA         | ENSG00000250481 | -0.50024 | 0.69155 | -0.50024    | 0.69155     | -0.50024 | 0.69155 |
|            | -0.50024        | 0.69155  | 0.69155 | 0.834283948 |             |          |         |
| NA         | ENSG00000206967 | -0.50038 | 0.6916  | -0.50038    | 0.6916      | -0.50038 | 0.6916  |
|            | -0.50038        | 0.6916   | 0.6916  | 0.834323612 |             |          |         |
| OR4X7P     | ENSG00000255077 | -1.1575  | 0.87647 | -0.93121    | 0.82413     | -1.0519  |         |
|            | 0.85358         | -0.50061 | 0.69168 | 0.69168     | 0.834390873 |          |         |
| NA         | ENSG00000269888 | -0.50065 | 0.69169 | -0.50065    | 0.69169     | -0.50065 | 0.69169 |
|            | -0.50065        | 0.69169  | 0.69169 | 0.834390873 |             |          |         |
| CCDC17     | ENSG00000159588 | -0.50086 | 0.69177 | -0.50086    | 0.69177     | -0.50086 |         |
|            | 0.69177         | -0.50086 | 0.69177 | 0.69177     | 0.834437471 |          |         |
| MYOZ3      | ENSG00000164591 | -0.82746 | 0.79601 | -0.50091    | 0.69178     | -0.83105 | 0.79703 |
|            | -0.76488        | 0.77783  | 0.69178 | 0.834437471 |             |          |         |
| GPR158-AS1 | ENSG00000233642 | -0.5009  | 0.69178 | -0.5009     | 0.69178     | -0.5009  |         |
|            | 0.69178         | -0.5009  | 0.69178 | 0.69178     | 0.834437471 |          |         |
| NA         | ENSG00000251193 | -0.93017 | 0.82386 | -0.50097    | 0.6918      | -0.50097 | 0.6918  |
|            | -0.50097        | 0.6918   | 0.6918  | 0.834440941 |             |          |         |
| TMC5       | ENSG00000103534 | -1.5498  | 0.9394  | -1.6003     | 0.94523     | -1.6003  | 0.94523 |
|            | -0.50108        | 0.69184  | 0.69184 | 0.834468533 |             |          |         |
| OR5T1      | ENSG00000181698 | -0.50115 | 0.69187 | -0.59071    | 0.72264     | -0.50115 | 0.69187 |
|            | -0.50115        | 0.69187  | 0.69187 | 0.83447547  |             |          |         |
| LINC01182  | ENSG00000250634 | -0.50118 | 0.69188 | -1.4399     | 0.92505     | -1.1888  |         |
|            | 0.88273         | -0.85001 | 0.80234 | 0.69188     | 0.83447547  |          |         |
| ZNF470     | ENSG00000197016 | -0.50129 | 0.69192 | -0.50129    | 0.69192     | -0.50129 |         |
|            | 0.69192         | -0.50129 | 0.69192 | 0.69192     | 0.834501401 |          |         |
| NA         | ENSG00000249163 | -0.50136 | 0.69194 | -0.50136    | 0.69194     | -0.50136 | 0.69194 |
|            | -0.50136        | 0.69194  | 0.69194 | 0.834501401 |             |          |         |
| NA         | ENSG00000228781 | -0.50141 | 0.69196 | -0.50141    | 0.69196     | -0.50141 | 0.69196 |
|            | -0.50141        | 0.69196  | 0.69196 | 0.834501401 |             |          |         |
| NA         | ENSG00000253992 | -0.50143 | 0.69197 | -0.8297     | 0.79665     | -0.8297  | 0.79665 |
|            | -0.8297         | 0.79665  | 0.69197 | 0.834501401 |             |          |         |
| NA         | ENSG00000235852 | -0.50151 | 0.69199 | -0.50151    | 0.69199     | -0.50151 | 0.69199 |
|            | -0.50151        | 0.69199  | 0.69199 | 0.834504868 |             |          |         |
| RPL31P33   | ENSG00000218049 | -0.50157 | 0.69202 | -0.50157    | 0.69202     | -1.3026  |         |
|            | 0.90364         | -1.2393  | 0.89238 | 0.69202     | 0.834520394 |          |         |
| LINC00837  | ENSG00000235824 | -0.50196 | 0.69215 | -0.50196    | 0.69215     | -0.50243 |         |
|            | 0.69232         | -0.50196 | 0.69215 | 0.69215     | 0.834656508 |          |         |
| NA         | ENSG00000255421 | -1.1689  | 0.87877 | -0.81697    | 0.79303     | -0.85774 | 0.80448 |
|            | -0.50208        | 0.69219  | 0.69219 | 0.834684088 |             |          |         |
| LINC00424  | ENSG00000226722 | -0.81176 | 0.79153 | -0.67678    | 0.75073     | -0.50211 |         |
|            | 0.69221         | -0.50211 | 0.69221 | 0.69221     | 0.834687551 |          |         |
| C11orf80   | ENSG00000173715 | -1.406   | 0.92014 | -0.5428     | 0.70637     | -0.50227 |         |
|            | 0.69226         | -0.89297 | 0.81406 | 0.69226     | 0.834713455 |          |         |
| C12orf77   | ENSG00000226397 | -0.50232 | 0.69228 | -0.64495    | 0.74052     | -0.79196 |         |
|            | 0.78581         | -0.65507 | 0.74379 | 0.69228     | 0.834713455 |          |         |
| RNY1P15    | ENSG00000222351 | -0.50238 | 0.6923  | -0.50238    | 0.6923      | -0.50238 |         |
|            | 0.6923          | -0.50238 | 0.6923  | 0.6923      | 0.834713455 |          |         |
| HNRNPCP7   | ENSG00000228653 | -0.50237 | 0.6923  | -0.81033    | 0.79112     | -0.81033 |         |
|            | 0.79112         | -1.1331  | 0.87142 | 0.6923      | 0.834713455 |          |         |
| C12orf29   | ENSG00000133641 | -0.50253 | 0.69235 | -0.91672    | 0.82036     | -0.91672 |         |
|            | 0.82036         | -0.91672 | 0.82036 | 0.69235     | 0.83474795  |          |         |
| ZNF483     | ENSG00000173258 | -0.6044  | 0.72721 | -0.6044     | 0.72721     | -0.6044  |         |
|            | 0.72721         | -0.50259 | 0.69237 | 0.69237     | 0.83474795  |          |         |
| XKR7       | ENSG00000260903 | -1.0384  | 0.85046 | -0.50262    | 0.69238     | -0.50262 | 0.69238 |
|            | -1.0734         | 0.85846  | 0.69238 | 0.83474795  |             |          |         |
| ZNF596     | ENSG00000172748 | -0.50287 | 0.69247 | -1.1244     | 0.86958     | -0.9508  |         |
|            | 0.82915         | -0.5865  | 0.72123 | 0.69247     | 0.834775625 |          |         |
| NA         | ENSG00000254547 | -0.89339 | 0.81418 | -0.90215    | 0.81651     | -0.84855 | 0.80193 |
|            | -0.50289        | 0.69248  | 0.69248 | 0.834775625 |             |          |         |
| NA         | ENSG00000266599 | -0.50292 | 0.69249 | -0.50292    | 0.69249     | -0.50292 | 0.69249 |
|            | -0.50292        | 0.69249  | 0.69249 | 0.834775625 |             |          |         |
| NA         | ENSG00000228187 | -0.50294 | 0.6925  | -0.54441    | 0.70692     | -1.0316  | 0.84886 |



|           |                 |          |          |         |             |             |          |         |
|-----------|-----------------|----------|----------|---------|-------------|-------------|----------|---------|
|           |                 | -0.66812 | 0.74797  | 0.6925  | 0.834775625 |             |          |         |
| NA        | ENSG00000272356 | -0.50296 | 0.6925   | 0.6925  | -1.5332     | 0.93739     | -1.5332  | 0.93739 |
|           |                 | -1.5332  | 0.93739  | 0.6925  | 0.834775625 |             |          |         |
| USP21P1   | ENSG00000224826 | -0.50297 | 0.69251  | 0.69251 | -0.50297    | 0.69251     | -0.50297 |         |
|           |                 | 0.69251  | -0.50297 | 0.69251 | 0.69251     | 0.834775625 |          |         |
| TYRP1     | ENSG00000107165 | -0.53559 | 0.70388  | 0.70388 | -0.53559    | 0.70388     | -1.2392  | 0.89237 |
|           |                 | -0.50307 | 0.69254  | 0.69254 | 0.834775625 |             |          |         |
| STK35     | ENSG00000125834 | -1.0471  | 0.85246  | 0.85246 | -1.0471     | 0.85246     | -0.50307 | 0.69254 |
|           |                 | -1.0471  | 0.85246  | 0.69254 | 0.834775625 |             |          |         |
| NA        | ENSG00000223738 | -1.6701  | 0.95255  | 0.95255 | -0.5033     | 0.69262     | -1.572   | 0.94202 |
|           |                 | -1.6701  | 0.95255  | 0.69262 | 0.834830755 |             |          |         |
| RPL39P6   | ENSG00000238173 | -0.50329 | 0.69262  | 0.69262 | -0.50329    | 0.69262     | -0.50329 |         |
|           |                 | 0.69262  | -0.50329 | 0.69262 | 0.69262     | 0.834830755 |          |         |
| NA        | ENSG00000279347 | -0.50347 | 0.69268  | 0.69268 | -0.50347    | 0.69268     | -0.50347 | 0.69268 |
|           |                 | -0.50347 | 0.69268  | 0.69268 | 0.834853178 |             |          |         |
| ASGR2     | ENSG00000161944 | -1.6303  | 0.94848  | 0.94848 | -0.50348    | 0.69269     | -0.50348 | 0.69269 |
|           |                 | -0.50348 | 0.69269  | 0.69269 | 0.834853178 |             |          |         |
| RNU4-55P  | ENSG00000222663 | -0.50349 | 0.69269  | 0.69269 | -0.50349    | 0.69269     | -0.50349 |         |
|           |                 | 0.69269  | -0.50349 | 0.69269 | 0.69269     | 0.834853178 |          |         |
| YWHAZ     | ENSG00000164924 | -0.50359 | 0.69273  | 0.69273 | -1.0528     | 0.85379     | -0.68482 | 0.75327 |
|           |                 | -1.0813  | 0.86023  | 0.69273 | 0.834880739 |             |          |         |
| TGM3      | ENSG00000125780 | -1.7153  | 0.95685  | 0.95685 | -0.50377    | 0.69279     | -0.50377 | 0.69279 |
|           |                 | -0.98551 | 0.83781  | 0.69279 | 0.834923804 |             |          |         |
| RN7SL209P | ENSG00000240927 | -0.50381 | 0.6928   | 0.6928  | -0.50381    | 0.6928      | -0.50381 |         |
|           |                 | 0.6928   | -0.50381 | 0.6928  | 0.6928      | 0.834923804 |          |         |
| RNU6-501P | ENSG00000200942 | -0.9454  | 0.82777  | 0.82777 | -0.50397    | 0.69286     | -0.9454  |         |
|           |                 | 0.82777  | -0.9454  | 0.82777 | 0.69286     | 0.834970318 |          |         |
| NA        | ENSG00000245667 | -0.50404 | 0.69288  | 0.69288 | -0.50404    | 0.69288     | -0.50404 | 0.69288 |
|           |                 | -0.50404 | 0.69288  | 0.69288 | 0.834970318 |             |          |         |
| KRTAP6-3  | ENSG00000212938 | -0.50405 | 0.69289  | 0.69289 | -0.50405    | 0.69289     | -0.50405 |         |
|           |                 | 0.69289  | -0.50405 | 0.69289 | 0.69289     | 0.834970318 |          |         |
| LINC02754 | ENSG00000251637 | -0.52838 | 0.70138  | 0.70138 | -1.369      | 0.9145      | -0.86877 |         |
|           |                 | 0.80751  | -0.50412 | 0.69291 | 0.69291     | 0.83497377  |          |         |
| GPX8      | ENSG00000164294 | -0.98399 | 0.83744  | 0.83744 | -1.0664     | 0.85688     | -0.50418 | 0.69293 |
|           |                 | -0.98399 | 0.83744  | 0.69293 | 0.834977223 |             |          |         |
| NA        | ENSG00000265948 | -0.61757 | 0.73157  | 0.73157 | -0.61757    | 0.73157     | -0.79341 | 0.78623 |
|           |                 | -0.50441 | 0.69301  | 0.69301 | 0.835052973 |             |          |         |
| NA        | ENSG00000221210 | -0.50456 | 0.69307  | 0.69307 | -0.50456    | 0.69307     | -0.50456 | 0.69307 |
|           |                 | -0.50456 | 0.69307  | 0.69307 | 0.835104621 |             |          |         |
| NA        | ENSG00000251508 | -0.50466 | 0.6931   | 0.6931  | -1.2243     | 0.88958     | -0.50466 | 0.6931  |
|           |                 | -0.50466 | 0.6931   | 0.6931  | 0.83511152  |             |          |         |
| MTND6P22  | ENSG00000270230 | -0.50469 | 0.69311  | 0.69311 | -0.50469    | 0.69311     | -0.50469 |         |
|           |                 | 0.69311  | -0.50469 | 0.69311 | 0.69311     | 0.83511152  |          |         |
| ZFP3      | ENSG00000180787 | -0.50487 | 0.69317  | 0.69317 | -0.50487    | 0.69317     | -0.50487 | 0.69317 |
|           |                 | -0.50487 | 0.69317  | 0.69317 | 0.835163162 |             |          |         |
| NA        | ENSG00000252064 | -0.77517 | 0.78088  | 0.78088 | -0.6129     | 0.73003     | -1.5054  | 0.93389 |
|           |                 | -0.50492 | 0.69319  | 0.69319 | 0.835164904 |             |          |         |
| ADGRG1    | ENSG00000205336 | -0.89906 | 0.81569  | 0.81569 | -0.50496    | 0.69321     | -0.69296 |         |
|           |                 | 0.75583  | -0.54192 | 0.70606 | 0.69321     | 0.835164904 |          |         |
| VTCN1     | ENSG00000134258 | -0.50505 | 0.69324  | 0.69324 | -0.50505    | 0.69324     | -0.50505 | 0.69324 |
|           |                 | -0.50505 | 0.69324  | 0.69324 | 0.835164904 |             |          |         |
| NA        | ENSG00000269427 | -0.50505 | 0.69324  | 0.69324 | -0.50505    | 0.69324     | -0.50505 | 0.69324 |
|           |                 | -0.50505 | 0.69324  | 0.69324 | 0.835164904 |             |          |         |
| XIAPP1    | ENSG00000270294 | -0.50537 | 0.69335  | 0.69335 | -1.548      | 0.93919     | -1.5743  |         |
|           |                 | 0.94229  | -0.96974 | 0.83391 | 0.69335     | 0.835276774 |          |         |
| SEPTIN7P5 | ENSG00000164740 | -0.51165 | 0.69555  | 0.69555 | -0.50557    | 0.69342     | -1.8703  |         |
|           |                 | 0.96928  | -0.86928 | 0.80765 | 0.69342     | 0.835292278 |          |         |
| TNRC18P2  | ENSG00000223566 | -1.4878  | 0.9316   | 0.9316  | -1.1565     | 0.87627     | -0.8558  |         |
|           |                 | 0.80395  | -0.50557 | 0.69342 | 0.69342     | 0.835292278 |          |         |
| RPS7P4    | ENSG00000229133 | -0.50559 | 0.69343  | 0.69343 | -1.3389     | 0.90969     | -0.50559 |         |
|           |                 | 0.69343  | -0.50559 | 0.69343 | 0.69343     | 0.835292278 |          |         |
| RN7SL160P | ENSG00000241159 | -0.50564 | 0.69345  | 0.69345 | -0.50564    | 0.69345     | -0.50564 |         |

|           |                 |          |             |             |             |          |         |       |
|-----------|-----------------|----------|-------------|-------------|-------------|----------|---------|-------|
|           | 0.69345         | -0.50564 | 0.69345     | 0.69345     | 0.835292278 |          |         |       |
| RNU4-14P  | ENSG00000222790 | -1.3771  | 0.91577     | -0.54949    | 0.70866     | -0.86148 |         |       |
|           | 0.80551         | -0.50567 | 0.69346     | 0.69346     | 0.835292278 |          |         |       |
| MTCO2P17  | ENSG00000233888 | -1.04    | 0.85083     | -0.50577    | 0.69349     | -1.04    | 0.85083 | -1.04 |
|           | 0.85083         | 0.69349  | 0.835292278 |             |             |          |         |       |
| NA        | ENSG00000242364 | -0.50577 | 0.69349     | -1.167      | 0.87839     | -0.50577 | 0.69349 |       |
|           | -0.50577        | 0.69349  | 0.69349     | 0.835292278 |             |          |         |       |
| NA        | ENSG00000223576 | -0.5058  | 0.6935      | -0.5058     | 0.6935      | -0.5058  | 0.6935  |       |
|           | -0.5058         | 0.6935   | 0.6935      | 0.835292278 |             |          |         |       |
| LINC02188 | ENSG00000261175 | -0.93052 | 0.82395     | -0.50592    | 0.69354     | -0.93052 |         |       |
|           | 0.82395         | -0.62146 | 0.73285     | 0.69354     | 0.835311209 |          |         |       |
| NA        | ENSG00000227417 | -0.50594 | 0.69355     | -0.50594    | 0.69355     | -0.50594 | 0.69355 |       |
|           | -0.50594        | 0.69355  | 0.69355     | 0.835311209 |             |          |         |       |
| NA        | ENSG00000199595 | -0.506   | 0.69357     | -0.506      | 0.69357     | -0.79388 | 0.78637 |       |
|           | -1.201          | 0.88513  | 0.69357     | 0.835314651 |             |          |         |       |
| LINC02865 | ENSG00000229922 | -0.83769 | 0.7989      | -0.53882    | 0.70499     | -0.50626 |         |       |
|           | 0.69366         | -1.177   | 0.8804      | 0.69366     | 0.835402397 |          |         |       |
| LINC02079 | ENSG00000266013 | -0.5064  | 0.69371     | -0.5064     | 0.69371     | -0.5064  |         |       |
|           | 0.69371         | -0.5064  | 0.69371     | 0.69371     | 0.835441967 |          |         |       |
| SCEL-AS1  | ENSG00000224347 | -0.50653 | 0.69376     | -0.50653    | 0.69376     | -0.50653 |         |       |
|           | 0.69376         | -0.50653 | 0.69376     | 0.69376     | 0.835481534 |          |         |       |
| XRN1      | ENSG00000114127 | -0.50686 | 0.69387     | -1.0977     | 0.86382     | -0.66395 | 0.74664 |       |
|           | -0.53659        | 0.70422  | 0.69387     | 0.83554859  |             |          |         |       |
| NA        | ENSG00000264290 | -0.50695 | 0.6939      | -0.50695    | 0.6939      | -0.50695 | 0.6939  |       |
|           | -0.50695        | 0.6939   | 0.6939      | 0.83554859  |             |          |         |       |
| SH3BP5    | ENSG00000131370 | -1.3332  | 0.90877     | -1.1811     | 0.88121     | -1.0786  |         |       |
|           | 0.85961         | -0.50702 | 0.69393     | 0.69393     | 0.83554859  |          |         |       |
| NA        | ENSG00000258154 | -0.50706 | 0.69394     | -0.50706    | 0.69394     | -0.50706 | 0.69394 |       |
|           | -0.59709        | 0.72478  | 0.69394     | 0.83554859  |             |          |         |       |
| NA        | ENSG00000200208 | -0.50707 | 0.69395     | -0.50707    | 0.69395     | -0.50707 | 0.69395 |       |
|           | -0.50707        | 0.69395  | 0.69395     | 0.83554859  |             |          |         |       |
| NA        | ENSG00000233470 | -1.4876  | 0.93158     | -1.7427     | 0.9593      | -0.50707 | 0.69395 |       |
|           | -0.50707        | 0.69395  | 0.69395     | 0.83554859  |             |          |         |       |
| MIR1302-8 | ENSG00000221269 | -0.50711 | 0.69396     | -0.50711    | 0.69396     | -0.50711 |         |       |
|           | 0.69396         | -0.50711 | 0.69396     | 0.69396     | 0.83554859  |          |         |       |
| SDHDP5    | ENSG00000229744 | -0.50711 | 0.69396     | -0.50711    | 0.69396     | -0.50711 |         |       |
|           | 0.69396         | -0.50711 | 0.69396     | 0.69396     | 0.83554859  |          |         |       |
| NA        | ENSG00000221121 | -1.236   | 0.89177     | -0.56644    | 0.71445     | -1.1     | 0.86434 |       |
|           | -0.50713        | 0.69397  | 0.69397     | 0.83554859  |             |          |         |       |
| NA        | ENSG00000265994 | -0.50727 | 0.69402     | -0.50727    | 0.69402     | -0.50727 | 0.69402 |       |
|           | -0.50727        | 0.69402  | 0.69402     | 0.835588145 |             |          |         |       |
| NA        | ENSG00000261668 | -0.50749 | 0.69409     | -0.50749    | 0.69409     | -0.50749 | 0.69409 |       |
|           | -0.50749        | 0.69409  | 0.69409     | 0.835651778 |             |          |         |       |
| APOOP3    | ENSG00000255700 | -0.50757 | 0.69412     | -1.2215     | 0.88905     | -0.61036 |         |       |
|           | 0.72919         | -0.61036 | 0.72919     | 0.69412     | 0.835658643 |          |         |       |
| NA        | ENSG00000248471 | -0.59521 | 0.72415     | -0.50759    | 0.69413     | -0.50759 | 0.69413 |       |
|           | -0.50759        | 0.69413  | 0.69413     | 0.835658643 |             |          |         |       |
| GKN2      | ENSG00000183607 | -1.4495  | 0.9264      | -0.80219    | 0.78878     | -0.50771 | 0.69417 |       |
|           | -1.1395         | 0.87275  | 0.69417     | 0.835686153 |             |          |         |       |
| NA        | ENSG00000283155 | -0.53093 | 0.70227     | -0.50782    | 0.69421     | -0.50782 | 0.69421 |       |
|           | -0.50782        | 0.69421  | 0.69421     | 0.835705054 |             |          |         |       |
| CRACDL    | ENSG00000196872 | -0.83147 | 0.79715     | -0.73646    | 0.76927     | -0.59622 |         |       |
|           | 0.72449         | -0.50785 | 0.69422     | 0.69422     | 0.835705054 |          |         |       |
| HSBP1     | ENSG00000230989 | -0.5079  | 0.69424     | -0.5079     | 0.69424     | -0.5079  | 0.69424 |       |
|           | -0.5079         | 0.69424  | 0.69424     | 0.835708485 |             |          |         |       |
| NR1H2     | ENSG00000131408 | -1.3584  | 0.91283     | -0.67688    | 0.75076     | -0.50796 | 0.69426 |       |
|           | -0.78798        | 0.78465  | 0.69426     | 0.835711916 |             |          |         |       |
| RPL23AP73 | ENSG00000244283 | -0.50807 | 0.6943      | -0.50807    | 0.6943      | -0.50807 |         |       |
|           | 0.6943          | -0.50807 | 0.6943      | 0.6943      | 0.835739421 |          |         |       |
| MPHOSPH9  | ENSG00000051825 | -0.7419  | 0.77093     | -0.50812    | 0.69432     | -0.86056 |         |       |
|           | 0.80526         | -1.2291  | 0.89048     | 0.69432     | 0.835741105 |          |         |       |
| TCEAL4P1  | ENSG00000223543 | -1.2975  | 0.90277     | -1.2975     | 0.90277     | -0.50818 |         |       |

|            |                 |          |         |             |             |          |         |
|------------|-----------------|----------|---------|-------------|-------------|----------|---------|
|            | 0.69434         | -1.2975  | 0.90277 | 0.69434     | 0.835741105 |          |         |
| PLA2G5     | ENSG00000127472 | -0.50826 | 0.69437 | -0.50826    | 0.69437     | -0.50826 |         |
|            | 0.69437         | -0.50826 | 0.69437 | 0.69437     | 0.835741105 |          |         |
| NA         | ENSG00000260695 | -0.50829 | 0.69437 | -0.50829    | 0.69437     | -0.50829 | 0.69437 |
|            | -0.50829        | 0.69437  | 0.69437 | 0.835741105 |             |          |         |
| IGLVV-66   | ENSG00000254075 | -0.5085  | 0.69445 | -0.5085     | 0.69445     | -0.5085  |         |
|            | 0.69445         | -0.5085  | 0.69445 | 0.69445     | 0.835811568 |          |         |
| OR1M4P     | ENSG00000267154 | -0.89281 | 0.81402 | -1.1768     | 0.88035     | -0.50856 |         |
|            | 0.69447         | -0.64168 | 0.73946 | 0.69447     | 0.835811568 |          |         |
| EEF1A1P7   | ENSG00000268222 | -1.0758  | 0.85899 | -1.0758     | 0.85899     | -0.79903 |         |
|            | 0.78786         | -0.50859 | 0.69448 | 0.69448     | 0.835811568 |          |         |
| RN7SL351P  | ENSG00000240098 | -0.50864 | 0.6945  | -0.50864    | 0.6945      | -0.50864 |         |
|            | 0.6945          | -0.50864 | 0.6945  | 0.6945      | 0.835814996 |          |         |
| NA         | ENSG00000250222 | -0.50885 | 0.69457 | -0.50885    | 0.69457     | -0.50885 | 0.69457 |
|            | -0.50885        | 0.69457  | 0.69457 | 0.835869987 |             |          |         |
| ASB15-AS1  | ENSG00000230442 | -0.67796 | 0.7511  | -1.4241     | 0.92279     | -0.67796 |         |
|            | 0.7511          | -0.50886 | 0.69458 | 0.69458     | 0.835869987 |          |         |
| NA         | ENSG00000232626 | -0.50897 | 0.69461 | -0.50897    | 0.69461     | -0.50897 | 0.69461 |
|            | -0.50897        | 0.69461  | 0.69461 | 0.835885447 |             |          |         |
| SNORD65B   | ENSG00000238936 | -0.50912 | 0.69467 | -0.50912    | 0.69467     | -0.50912 |         |
|            | 0.69467         | -2.2298  | 0.98712 | 0.69467     | 0.835928398 |          |         |
| HPX        | ENSG00000110169 | -0.50915 | 0.69468 | -1.1238     | 0.86945     | -0.56832 | 0.71509 |
|            | -1.0813         | 0.86023  | 0.69468 | 0.835928398 |             |          |         |
| LINC02028  | ENSG00000230102 | -0.50927 | 0.69472 | -1.3724     | 0.91502     | -0.73958 |         |
|            | 0.77022         | -2.4071  | 0.99196 | 0.69472     | 0.835945517 |          |         |
| SPINK4     | ENSG00000122711 | -0.95503 | 0.83022 | -0.5093     | 0.69473     | -0.57081 |         |
|            | 0.71594         | -0.56046 | 0.71242 | 0.69473     | 0.835945517 |          |         |
| PALLD      | ENSG00000129116 | -0.89    | 0.81327 | -0.50939    | 0.69476     | -1.0854  | 0.86113 |
|            | -1.3626         | 0.91349  | 0.69476 | 0.835945517 |             |          |         |
| OR4A50P    | ENSG00000255294 | -1.0546  | 0.8542  | -0.84963    | 0.80224     | -0.50945 |         |
|            | 0.69478         | -0.50945 | 0.69478 | 0.69478     | 0.835945517 |          |         |
| NA         | ENSG00000278657 | -0.50946 | 0.69478 | -0.50946    | 0.69478     | -0.50946 | 0.69478 |
|            | -0.50946        | 0.69478  | 0.69478 | 0.835945517 |             |          |         |
| PRODH2     | ENSG00000250799 | -0.50957 | 0.69482 | -0.94846    | 0.82855     | -0.76819 |         |
|            | 0.77881         | -0.76819 | 0.77881 | 0.69482     | 0.835973004 |          |         |
| KRT82      | ENSG00000161850 | -0.54882 | 0.70844 | -1.7929     | 0.9635      | -0.50972 | 0.69487 |
|            | -0.70373        | 0.7592   | 0.69487 | 0.83601252  |             |          |         |
| RNU4-39P   | ENSG00000199325 | -0.50985 | 0.69492 | -1.26       | 0.89616     | -1.3915  | 0.91797 |
|            | -1.3915         | 0.91797  | 0.69492 | 0.836043424 |             |          |         |
| TREBV11-1  | ENSG00000211720 | -0.50989 | 0.69493 | -0.50989    | 0.69493     | -0.50989 |         |
|            | 0.69493         | -0.50989 | 0.69493 | 0.69493     | 0.836043424 |          |         |
| TRIP11     | ENSG00000100815 | -1.0023  | 0.8419  | -0.51006    | 0.695       | -0.82633 | 0.79569 |
|            | -0.56912        | 0.71536  | 0.695   | 0.836061818 |             |          |         |
| ZFAND6     | ENSG00000086666 | -1.3721  | 0.91498 | -1.3721     | 0.91498     | -0.91323 |         |
|            | 0.81944         | -0.51012 | 0.69502 | 0.69502     | 0.836061818 |          |         |
| NA         | ENSG00000252245 | -0.51015 | 0.69503 | -0.51015    | 0.69503     | -0.51015 | 0.69503 |
|            | -0.51015        | 0.69503  | 0.69503 | 0.836061818 |             |          |         |
| NA         | ENSG00000250756 | -0.78721 | 0.78442 | -0.51019    | 0.69504     | -0.61216 | 0.72978 |
|            | -0.57567        | 0.71758  | 0.69504 | 0.836061818 |             |          |         |
| RAP1GAP2   | ENSG00000132359 | -0.76494 | 0.77785 | -0.88693    | 0.81244     | -0.51021 |         |
|            | 0.69505         | -0.99788 | 0.84083 | 0.69505     | 0.836061818 |          |         |
| NA         | ENSG00000259180 | -0.51035 | 0.6951  | -0.51035    | 0.6951      | -0.51035 | 0.6951  |
|            | -0.51035        | 0.6951   | 0.6951  | 0.836061818 |             |          |         |
| EHMT2-AS1  | ENSG00000237080 | -0.51039 | 0.69511 | -0.51039    | 0.69511     | -0.51039 |         |
|            | 0.69511         | -0.51039 | 0.69511 | 0.69511     | 0.836061818 |          |         |
| NA         | ENSG00000279889 | -0.85699 | 0.80427 | -0.51039    | 0.69511     | -0.85699 | 0.80427 |
|            | -0.85699        | 0.80427  | 0.69511 | 0.836061818 |             |          |         |
| RNU6-1116P | ENSG00000253078 | -0.51043 | 0.69512 | -0.77315    | 0.78028     | -0.77315 |         |
|            | 0.78028         | -0.91886 | 0.82092 | 0.69512     | 0.836061818 |          |         |
| OR10AH1P   | ENSG00000272595 | -0.5104  | 0.69512 | -0.5104     | 0.69512     | -2.3961  |         |
|            | 0.99172         | -0.5104  | 0.69512 | 0.69512     | 0.836061818 |          |         |
| TPM3P3     | ENSG00000254195 | -0.51048 | 0.69514 | -0.51048    | 0.69514     | -0.51048 |         |

|              |                 |          |         |             |             |          |          |
|--------------|-----------------|----------|---------|-------------|-------------|----------|----------|
|              | 0.69514         | -0.51048 | 0.69514 | 0.69514     | 0.836061818 |          |          |
| AKR1B10P2    | ENSG00000263355 | -0.51055 | 0.69517 | 0.69517     | -0.65557    | 0.74395  | -0.51055 |
|              | 0.69517         | -0.51055 | 0.69517 | 0.69517     | 0.836061818 |          |          |
| SPRR2A       | ENSG00000241794 | -0.51068 | 0.69521 | 0.69521     | -0.84713    | 0.80154  | -0.51068 |
|              | 0.69521         | -1.086   | 0.86127 | 0.69521     | 0.836061818 |          |          |
| NA           | ENSG00000260788 | -0.51066 | 0.69521 | -0.60957    | 0.72893     | -0.52565 | 0.70044  |
|              | -0.52565        | 0.70044  | 0.69521 | 0.836061818 |             |          |          |
| LINC01428    | ENSG00000228888 | -0.96498 | 0.83272 | -1.5604     | 0.94067     | -0.51074 |          |
|              | 0.69523         | -1.0903  | 0.86221 | 0.69523     | 0.836061818 |          |          |
| NA           | ENSG00000233109 | -1.0593  | 0.85526 | -0.7325     | 0.76807     | -0.5108  | 0.69525  |
|              | -0.85676        | 0.80421  | 0.69525 | 0.836061818 |             |          |          |
| ZBTB5        | ENSG00000168795 | -0.51083 | 0.69527 | -0.51083    | 0.69527     | -0.51083 | 0.69527  |
|              | -0.61115        | 0.72945  | 0.69527 | 0.836061818 |             |          |          |
| PTPRVP       | ENSG00000243323 | -0.62078 | 0.73263 | -1.3691     | 0.91452     | -0.51087 |          |
|              | 0.69528         | -0.89211 | 0.81383 | 0.69528     | 0.836061818 |          |          |
| OR56A3       | ENSG00000184478 | -0.51097 | 0.69531 | -0.51097    | 0.69531     | -0.51097 |          |
|              | 0.69531         | -0.55268 | 0.70976 | 0.69531     | 0.836061818 |          |          |
| IGHVIII-38-1 | ENSG00000253989 | -0.51102 | 0.69533 | -0.51102    | 0.69533     | -0.51102 |          |
|              | 0.69533         | -0.51102 | 0.69533 | 0.69533     | 0.836061818 |          |          |
| FTH1P25      | ENSG00000232792 | -0.51105 | 0.69534 | -0.51105    | 0.69534     | -0.51105 |          |
|              | 0.69534         | -0.51105 | 0.69534 | 0.69534     | 0.836061818 |          |          |
| NXPE2        | ENSG00000204361 | -1.0971  | 0.86369 | -1.0971     | 0.86369     | -0.51114 | 0.69537  |
|              | -1.4926         | 0.93223  | 0.69537 | 0.836061818 |             |          |          |
| NA           | ENSG00000226218 | -0.51113 | 0.69537 | -0.51113    | 0.69537     | -0.51113 | 0.69537  |
|              | -0.51113        | 0.69537  | 0.69537 | 0.836061818 |             |          |          |
| DSC2         | ENSG00000134755 | -0.68844 | 0.75441 | -0.72613    | 0.76612     | -0.5112  | 0.69539  |
|              | -0.5112         | 0.69539  | 0.69539 | 0.836061818 |             |          |          |
| RNU6-793P    | ENSG00000206960 | -1.4751  | 0.92991 | -1.4751     | 0.92991     | -1.4751  |          |
|              | 0.92991         | -0.51118 | 0.69539 | 0.69539     | 0.836061818 |          |          |
| NA           | ENSG00000254839 | -0.64707 | 0.74121 | -0.51123    | 0.69541     | -1.254   | 0.89507  |
|              | -0.53763        | 0.70459  | 0.69541 | 0.836061818 |             |          |          |
| NA           | ENSG00000200113 | -0.51129 | 0.69543 | -0.51129    | 0.69543     | -0.51129 | 0.69543  |
|              | -0.64778        | 0.74144  | 0.69543 | 0.836061818 |             |          |          |
| WEE1         | ENSG00000166483 | -0.9097  | 0.81851 | -0.51133    | 0.69544     | -0.9097  | 0.81851  |
|              | -1.2254         | 0.88979  | 0.69544 | 0.836061818 |             |          |          |
| LINC01120    | ENSG00000223631 | -0.61171 | 0.72964 | -0.5114     | 0.69546     | -0.5114  |          |
|              | 0.69546         | -0.7338  | 0.76847 | 0.69546     | 0.836061818 |          |          |
| NA           | ENSG00000249771 | -0.51139 | 0.69546 | -1.8416     | 0.96723     | -0.51139 | 0.69546  |
|              | -1.8416         | 0.96723  | 0.69546 | 0.836061818 |             |          |          |
| VWA8         | ENSG00000102763 | -2.0879  | 0.9816  | -0.9704     | 0.83408     | -2.0938  | 0.98186  |
|              | -0.5115         | 0.6955   | 0.6955  | 0.836068653 |             |          |          |
| NA           | ENSG00000284428 | -0.51151 | 0.6955  | -0.51151    | 0.6955      | -0.51151 | 0.6955   |
|              | -0.51151        | 0.6955   | 0.6955  | 0.836068653 |             |          |          |
| NAV2-AS3     | ENSG00000254542 | -0.5116  | 0.69554 | -0.5116     | 0.69554     | -0.5116  |          |
|              | 0.69554         | -0.5116  | 0.69554 | 0.69554     | 0.836096112 |          |          |
| KHDRBS2-OT1  | ENSG00000250686 | -1.7602  | 0.96082 | -0.51179    | 0.6956      | -0.88079 |          |
|              | 0.81078         | -1.2437  | 0.8932  | 0.6956      | 0.836147611 |          |          |
| NA           | ENSG00000237851 | -0.51189 | 0.69563 | -0.51189    | 0.69563     | -0.51189 | 0.69563  |
|              | -0.51189        | 0.69563  | 0.69563 | 0.836163046 |             |          |          |
| FUNDC2P3     | ENSG00000187103 | -0.51202 | 0.69568 | -0.51202    | 0.69568     | -0.51202 |          |
|              | 0.69568         | -0.51202 | 0.69568 | 0.69568     | 0.836202521 |          |          |
| NA           | ENSG00000264235 | -2.2983  | 0.98923 | -0.5121     | 0.69571     | -2.2983  | 0.98923  |
|              | -2.2983         | 0.98923  | 0.69571 | 0.836217954 |             |          |          |
| RN7SKP86     | ENSG00000222386 | -0.51241 | 0.69582 | -0.51241    | 0.69582     | -0.51241 |          |
|              | 0.69582         | -0.51241 | 0.69582 | 0.69582     | 0.836329541 |          |          |
| NA           | ENSG00000258385 | -0.51266 | 0.6959  | -0.51266    | 0.6959      | -0.51266 | 0.6959   |
|              | -0.51266        | 0.6959   | 0.6959  | 0.836396456 |             |          |          |
| NA           | ENSG00000234055 | -1.2612  | 0.89639 | -0.66282    | 0.74628     | -0.51268 | 0.69591  |
|              | -0.51268        | 0.69591  | 0.69591 | 0.836396456 |             |          |          |
| LRIG1        | ENSG00000144749 | -0.59425 | 0.72383 | -0.94331    | 0.82724     | -0.51276 | 0.69594  |
|              | -0.80538        | 0.7897   | 0.69594 | 0.836411883 |             |          |          |
| NA           | ENSG00000279507 | -0.51293 | 0.696   | -0.51293    | 0.696       | -0.51293 | 0.696    |

0.696 0.836425514

|             |                 |          |          |          |             |             |
|-------------|-----------------|----------|----------|----------|-------------|-------------|
| RAPGEF4-AS1 | ENSG00000228016 | -0.51296 | 0.69601  | -1.3174  | 0.90615     | -1.2573     |
|             |                 | 0.89567  | -1.3964  | 0.9187   | 0.69601     | 0.836425514 |
| IGLV3-29    | ENSG00000253338 | -0.51295 | 0.69601  | -0.51295 | 0.69601     | -0.51295    |
|             |                 | 0.69601  | -0.51295 | 0.69601  | 0.69601     | 0.836425514 |
| CYP8B1      | ENSG00000180432 | -0.51299 | 0.69602  | -0.51299 | 0.69602     | -1.6551     |
|             |                 | 0.95105  | -0.51332 | 0.69613  | 0.69602     | 0.836425514 |
| NA          | ENSG00000243574 | -0.51309 | 0.69606  | -0.51309 | 0.69606     | -0.51309    |
|             |                 | -0.51309 | 0.69606  | 0.69606  | 0.836452956 |             |
| CNIH4       | ENSG00000143771 | -0.56298 | 0.71328  | -0.51334 | 0.69614     | -0.51334    |
|             |                 | -0.51334 | 0.69614  | 0.69614  | 0.836528462 | 0.69614     |
| NA          | ENSG00000276603 | -0.51373 | 0.69628  | -0.51373 | 0.69628     | -0.51373    |
|             |                 | -0.51373 | 0.69628  | 0.69628  | 0.836667448 | 0.69628     |
| NA          | ENSG00000254833 | -0.51375 | 0.69629  | -0.72327 | 0.76524     | -1.0037     |
|             |                 | -1.2903  | 0.90153  | 0.69629  | 0.836667448 | 0.84223     |
| TAS2R31     | ENSG00000256436 | -0.51381 | 0.69631  | -0.59421 | 0.72382     | -0.59421    |
|             |                 | 0.72382  | -1.1971  | 0.88437  | 0.69631     | 0.836670849 |
| NA          | ENSG00000273275 | -0.51404 | 0.69639  | -0.51404 | 0.69639     | -0.51404    |
|             |                 | -0.51404 | 0.69639  | 0.69639  | 0.836744525 | 0.69639     |
| NA          | ENSG00000235537 | -0.51415 | 0.69643  | -0.51415 | 0.69643     | -0.51415    |
|             |                 | -0.51415 | 0.69643  | 0.69643  | 0.836744525 | 0.69643     |
| NA          | ENSG00000214525 | -0.51418 | 0.69644  | -0.51418 | 0.69644     | -0.51418    |
|             |                 | -0.51418 | 0.69644  | 0.69644  | 0.836744525 | 0.69644     |
| HSPD1P21    | ENSG00000229900 | -0.51419 | 0.69644  | -0.51419 | 0.69644     | -0.51419    |
|             |                 | 0.69644  | -0.51419 | 0.69644  | 0.69644     | 0.836744525 |
| SNORA70G    | ENSG00000206650 | -0.51435 | 0.6965   | -0.51435 | 0.6965      | -0.51435    |
|             |                 | 0.6965   | -1.3179  | 0.90623  | 0.6965      | 0.836775351 |
| RPL10P12    | ENSG00000234040 | -0.51435 | 0.6965   | -0.51435 | 0.6965      | -0.51435    |
|             |                 | 0.6965   | -0.51435 | 0.6965   | 0.6965      | 0.836775351 |
| RPL26P26    | ENSG00000242595 | -1.652   | 0.95073  | -1.652   | 0.95073     | -1.652      |
|             |                 | 0.95073  | -0.51447 | 0.69654  | 0.69654     | 0.836802776 |
| OR10X1      | ENSG00000279111 | -1.127   | 0.87012  | -1.127   | 0.87012     | -0.51453    |
|             |                 | 0.69656  | -1.127   | 0.87012  | 0.69656     | 0.836806173 |
| LLPH        | ENSG00000139233 | -1.2034  | 0.8856   | -0.51465 | 0.6966      | -1.4346     |
|             |                 | -1.419   | 0.92206  | 0.6966   | 0.836831772 | 0.9243      |
| KCTD9P3     | ENSG00000187988 | -1.0096  | 0.84365  | -0.51475 | 0.69664     | -0.51475    |
|             |                 | 0.69664  | -1.5642  | 0.94111  | 0.69664     | 0.836831772 |
| ZNF37A      | ENSG00000075407 | -0.97491 | 0.8352   | -0.84242 | 0.80022     | -0.5148     |
|             |                 | 0.69665  | -0.98727 | 0.83824  | 0.69665     | 0.836831772 |
| NA          | ENSG00000234915 | -0.51479 | 0.69665  | -0.51479 | 0.69665     | -0.51479    |
|             |                 | -0.51479 | 0.69665  | 0.69665  | 0.836831772 | 0.69665     |
| AGPAT1      | ENSG00000204310 | -0.51504 | 0.69674  | -0.51504 | 0.69674     | -0.51977    |
|             |                 | 0.69839  | -0.51504 | 0.69674  | 0.69674     | 0.836910634 |
| THUMPD3-AS1 | ENSG00000206573 | -0.74329 | 0.77135  | -0.51509 | 0.69675     | -1.3357     |
|             |                 | 0.90918  | -0.99933 | 0.84118  | 0.69675     | 0.836910634 |
| HMGCL       | ENSG00000117305 | -0.51524 | 0.69681  | -0.89479 | 0.81455     | -0.56853    |
|             |                 | -0.80585 | 0.78983  | 0.69681  | 0.836962073 | 0.71516     |
| JDP2        | ENSG00000140044 | -1.4158  | 0.92159  | -0.51545 | 0.69688     | -1.6212     |
|             |                 | -0.95332 | 0.82979  | 0.69688  | 0.836968307 | 0.94751     |
| MROH1       | ENSG00000179832 | -0.94473 | 0.8276   | -0.64892 | 0.7418      | -0.51547    |
|             |                 | -1.1407  | 0.87301  | 0.69689  | 0.836968307 | 0.69689     |
| RNU6-754P   | ENSG00000212468 | -0.51562 | 0.69694  | -0.51562 | 0.69694     | -0.51562    |
|             |                 | 0.69694  | -0.51562 | 0.69694  | 0.69694     | 0.836968307 |
| NA          | ENSG00000253216 | -0.51562 | 0.69694  | -1.3824  | 0.91657     | -0.51995    |
|             |                 | -0.5603  | 0.71236  | 0.69694  | 0.836968307 | 0.69845     |
| EIF3E       | ENSG00000104408 | -0.87405 | 0.80895  | -0.75763 | 0.77566     | -0.51583    |
|             |                 | -0.54209 | 0.70612  | 0.69701  | 0.836968307 | 0.69701     |
| LIAS        | ENSG00000121897 | -0.51581 | 0.69701  | -1.1075  | 0.86595     | -0.5836     |
|             |                 | -0.77345 | 0.78037  | 0.69701  | 0.836968307 | 0.72025     |
| BEAN1       | ENSG00000166546 | -1.1749  | 0.87999  | -1.2435  | 0.89315     | -1.1749     |
|             |                 | -0.51583 | 0.69701  | 0.69701  | 0.836968307 | 0.87999     |
| FAM166C     | ENSG00000173557 | -0.52564 | 0.70043  | -0.87862 | 0.8102      | -1.0234     |

|           |                 |          |         |             |             |         |          |
|-----------|-----------------|----------|---------|-------------|-------------|---------|----------|
|           | 0.84694         | -0.51582 | 0.69701 | 0.69701     | 0.836968307 |         |          |
| CICP12    | ENSG00000225270 | -0.51582 | 0.69701 | 0.69701     | -0.51582    | 0.69701 | -0.51582 |
|           | 0.69701         | -0.51582 | 0.69701 | 0.69701     | 0.836968307 |         |          |
| LINC01771 | ENSG00000225675 | -0.51584 | 0.69702 | 0.69702     | -0.51584    | 0.69702 | -0.51584 |
|           | 0.69702         | -0.51584 | 0.69702 | 0.69702     | 0.836968307 |         |          |
| NA        | ENSG00000083622 | -0.51586 | 0.69703 | 0.69703     | -0.51586    | 0.69703 | -0.51586 |
|           | -0.51586        | 0.69703  | 0.69703 | 0.836968307 |             |         |          |
| RNU2-18P  | ENSG00000223156 | -0.5159  | 0.69704 | 0.69704     | -0.63139    | 0.73611 | -1.8455  |
|           | 0.96752         | -0.63139 | 0.73611 | 0.69704     | 0.836968307 |         |          |
| SLC2A4    | ENSG00000181856 | -1.3878  | 0.91741 | 0.91741     | -0.51597    | 0.69706 | -1.3273  |
|           | 0.90779         | -0.51597 | 0.69706 | 0.69706     | 0.836968307 |         |          |
| NA        | ENSG00000238745 | -0.81236 | 0.79171 | 0.79171     | -0.51597    | 0.69706 | -0.51597 |
|           | -0.51597        | 0.69706  | 0.69706 | 0.836968307 |             |         |          |
| SCGB3A2   | ENSG00000164265 | -0.51604 | 0.69709 | 0.69709     | -2.8401     | 0.99775 | -0.68675 |
|           | 0.75388         | -1.5097  | 0.93443 | 0.69709     | 0.836968307 |         |          |
| NA        | ENSG00000273719 | -0.59761 | 0.72495 | 0.72495     | -0.51606    | 0.69709 | -0.51606 |
|           | -0.51606        | 0.69709  | 0.69709 | 0.836968307 |             |         |          |
| NA        | ENSG00000262855 | -0.51614 | 0.69712 | 0.69712     | -0.51614    | 0.69712 | -0.51614 |
|           | -0.51614        | 0.69712  | 0.69712 | 0.836983704 |             |         |          |
| NA        | ENSG00000244712 | -0.79583 | 0.78694 | 0.78694     | -0.79583    | 0.78694 | -0.51631 |
|           | -0.79583        | 0.78694  | 0.69718 | 0.837024665 |             |         |          |
| MIR378F   | ENSG00000264926 | -0.51644 | 0.69722 | 0.69722     | -0.51644    | 0.69722 | -0.51644 |
|           | 0.69722         | -0.51644 | 0.69722 | 0.69722     | 0.837024665 |         |          |
| POLR2LP1  | ENSG00000238211 | -0.51646 | 0.69723 | 0.69723     | -0.51646    | 0.69723 | -0.51646 |
|           | 0.69723         | -0.51646 | 0.69723 | 0.69723     | 0.837024665 |         |          |
| UQCRQ     | ENSG00000164405 | -0.51649 | 0.69724 | 0.69724     | -0.51649    | 0.69724 | -0.51649 |
|           | -0.51649        | 0.69724  | 0.69724 | 0.837024665 |             |         |          |
| NA        | ENSG00000258746 | -0.51649 | 0.69724 | 0.69724     | -0.51649    | 0.69724 | -0.51649 |
|           | -0.71629        | 0.76309  | 0.69724 | 0.837024665 |             |         |          |
| NA        | ENSG00000202276 | -0.51664 | 0.6973  | 0.6973      | -1.0786     | 0.85962 | -0.93575 |
|           | -0.51664        | 0.6973   | 0.6973  | 0.837066871 |             |         |          |
| CCDC59    | ENSG00000133773 | -2.0808  | 0.98127 | 0.98127     | -0.51674    | 0.69733 | -1.5312  |
|           | 0.93714         | -1.04085 | 0.85084 | 0.69733     | 0.837066871 |         |          |
| OR6N1     | ENSG00000197403 | -0.51674 | 0.69733 | 0.69733     | -1.2034     | 0.88558 | -2.1406  |
|           | -1.4021         | 0.91956  | 0.69733 | 0.837066871 |             |         |          |
| TRIM7     | ENSG00000146054 | -0.51685 | 0.69737 | 0.69737     | -0.51685    | 0.69737 | -0.51685 |
|           | -0.51685        | 0.69737  | 0.69737 | 0.837066871 |             |         |          |
| H3P31     | ENSG00000232466 | -0.51686 | 0.69737 | 0.69737     | -0.51686    | 0.69737 | -0.51686 |
|           | -0.51686        | 0.69737  | 0.69737 | 0.837066871 |             |         |          |
| PLEKHG6   | ENSG00000008323 | -1.5349  | 0.93759 | 0.93759     | -0.63543    | 0.73743 | -1.5349  |
|           | 0.93759         | -0.51691 | 0.69739 | 0.69739     | 0.837066871 |         |          |
| NA        | ENSG00000276698 | -0.51698 | 0.69741 | 0.69741     | -0.51698    | 0.69741 | -0.51698 |
|           | -0.51698        | 0.69741  | 0.69741 | 0.837066871 |             |         |          |
| PDCD4     | ENSG00000150593 | -1.2802  | 0.89976 | 0.89976     | -0.76475    | 0.77779 | -0.73695 |
|           | -0.51712        | 0.69746  | 0.69746 | 0.837066871 |             |         |          |
| ST3GAL3   | ENSG00000126091 | -0.51716 | 0.69748 | 0.69748     | -0.98169    | 0.83687 | -1.0883  |
|           | 0.86176         | -0.56197 | 0.71293 | 0.69748     | 0.837066871 |         |          |
| MUS81     | ENSG00000172732 | -0.51719 | 0.69749 | 0.69749     | -0.51719    | 0.69749 | -1.6716  |
|           | -0.84617        | 0.80127  | 0.69749 | 0.837066871 |             |         |          |
| NA        | ENSG00000263733 | -0.5172  | 0.69749 | 0.69749     | -0.5172     | 0.69749 | -0.5172  |
|           | -0.5172         | 0.69749  | 0.69749 | 0.837066871 |             |         |          |
| NA        | ENSG00000283766 | -0.51718 | 0.69749 | 0.69749     | -0.51718    | 0.69749 | -0.51718 |
|           | -0.51718        | 0.69749  | 0.69749 | 0.837066871 |             |         |          |
| ZDHC1     | ENSG00000159714 | -1.7605  | 0.96084 | 0.96084     | -0.51724    | 0.69751 | -0.51724 |
|           | 0.69751         | -0.70384 | 0.75924 | 0.69751     | 0.837066871 |         |          |
| NA        | ENSG00000283294 | -0.51728 | 0.69752 | 0.69752     | -0.51728    | 0.69752 | -0.51728 |
|           | -0.51728        | 0.69752  | 0.69752 | 0.837066871 |             |         |          |
| YWHAEP4   | ENSG00000250205 | -1.6458  | 0.9501  | 0.9501      | -1.6458     | 0.9501  | -1.6458  |
|           | 0.9501          | -0.51737 | 0.69755 | 0.69755     | 0.837066871 |         |          |
| LINC01919 | ENSG00000263438 | -1.291   | 0.90165 | 0.90165     | -0.72338    | 0.76528 | -0.51736 |
|           | 0.69755         | -0.81972 | 0.79381 | 0.69755     | 0.837066871 |         |          |
| GSTA11P   | ENSG00000230375 | -0.51748 | 0.69759 | 0.69759     | -0.8544     | 0.80356 | -1.8415  |

|           |                 |          |         |             |             |          |          |
|-----------|-----------------|----------|---------|-------------|-------------|----------|----------|
|           | 0.96723         | -1.8415  | 0.96723 | 0.69759     | 0.837094257 |          |          |
| RNA5SP222 | ENSG00000222971 | -0.51766 | 0.69765 | 0.69765     | -0.51766    | 0.69765  | -0.51766 |
|           | 0.69765         | -0.51766 | 0.69765 | 0.69765     | 0.837145641 |          |          |
| NA        | ENSG00000273189 | -0.51783 | 0.69771 | -0.51783    | 0.69771     | -0.51783 | 0.69771  |
|           | -0.51783        | 0.69771  | 0.69771 | 0.837197023 |             |          |          |
| NA        | ENSG00000274591 | -0.51796 | 0.69776 | -1.0453     | 0.85206     | -0.51796 | 0.69776  |
|           | -0.51796        | 0.69776  | 0.69776 | 0.837219171 |             |          |          |
| FBXO3     | ENSG00000110429 | -0.51802 | 0.69778 | -1.7243     | 0.95768     | -0.75188 | 0.77394  |
|           | -1.7243         | 0.95768  | 0.69778 | 0.837219171 |             |          |          |
| OR5T2     | ENSG00000181718 | -0.90231 | 0.81655 | -1.101      | 0.86456     | -0.51803 | 0.69778  |
|           | -0.80066        | 0.78834  | 0.69778 | 0.837219171 |             |          |          |
| OR10J9P   | ENSG00000249197 | -0.51813 | 0.69782 | -0.51813    | 0.69782     | -0.7918  |          |
|           | 0.78576         | -0.51813 | 0.69782 | 0.69782     | 0.837237933 |          |          |
| NA        | ENSG00000266805 | -1.4904  | 0.93194 | -1.2067     | 0.88623     | -1.2369  | 0.89195  |
|           | -0.51818        | 0.69783  | 0.69783 | 0.837237933 |             |          |          |
| CTBP2P8   | ENSG00000234383 | -0.65142 | 0.74261 | -0.51854    | 0.69796     | -0.65142 |          |
|           | 0.74261         | -0.65142 | 0.74261 | 0.69796     | 0.837347432 |          |          |
| BTLA      | ENSG00000186265 | -1.3318  | 0.90853 | -0.57686    | 0.71798     | -0.51859 | 0.69798  |
|           | -1.118          | 0.86821  | 0.69798 | 0.837347432 |             |          |          |
| RPS20P15  | ENSG00000227523 | -0.51861 | 0.69798 | -2.3024     | 0.98934     | -0.51861 |          |
|           | 0.69798         | -0.5424  | 0.70623 | 0.69798     | 0.837347432 |          |          |
| CRHBP     | ENSG00000145708 | -0.51862 | 0.69799 | -0.51862    | 0.69799     | -0.51862 | 0.69799  |
|           | -0.51862        | 0.69799  | 0.69799 | 0.837347432 |             |          |          |
| ZNF765    | ENSG00000196417 | -0.73116 | 0.76766 | -0.62653    | 0.73452     | -0.5188  |          |
|           | 0.69805         | -0.68989 | 0.75487 | 0.69805     | 0.837393555 |          |          |
| NA        | ENSG00000200355 | -0.5189  | 0.69808 | -0.5189     | 0.69808     | -0.5189  | 0.69808  |
|           | -0.5189         | 0.69808  | 0.69808 | 0.837393555 |             |          |          |
| RNA5SP474 | ENSG00000212536 | -0.80962 | 0.79092 | -0.93484    | 0.82507     | -0.5189  |          |
|           | 0.69808         | -1.0588  | 0.85516 | 0.69808     | 0.837393555 |          |          |
| NDUF4P3   | ENSG00000236411 | -0.5192  | 0.69819 | -1.4978     | 0.9329      | -0.6894  |          |
|           | 0.75472         | -0.6894  | 0.75472 | 0.69819     | 0.837467037 |          |          |
| NA        | ENSG00000272446 | -0.5192  | 0.69819 | -0.5192     | 0.69819     | -0.5192  | 0.69819  |
|           | -0.5192         | 0.69819  | 0.69819 | 0.837467037 |             |          |          |
| MTND4P8   | ENSG00000248548 | -0.51924 | 0.6982  | -0.51924    | 0.6982      | -0.51924 |          |
|           | 0.6982          | -0.51924 | 0.6982  | 0.6982      | 0.837467037 |          |          |
| MYRFL     | ENSG00000166268 | -0.51925 | 0.69821 | -1.1783     | 0.88067     | -0.58291 | 0.72002  |
|           | -1.2897         | 0.90143  | 0.69821 | 0.837467037 |             |          |          |
| NA        | ENSG00000235497 | -0.51931 | 0.69823 | -1.9935     | 0.9769      | -1.9935  | 0.9769   |
|           | -1.9935         | 0.9769   | 0.69823 | 0.837470412 |             |          |          |
| TRAJ58    | ENSG00000211833 | -0.51943 | 0.69827 | -0.51943    | 0.69827     | -0.51943 |          |
|           | 0.69827         | -0.51943 | 0.69827 | 0.69827     | 0.837489156 |          |          |
| PTH       | ENSG00000152266 | -0.51946 | 0.69828 | -0.51946    | 0.69828     | -0.51946 | 0.69828  |
|           | -0.51946        | 0.69828  | 0.69828 | 0.837489156 |             |          |          |
| NA        | ENSG00000271129 | -0.51954 | 0.69831 | -0.51954    | 0.69831     | -0.51954 | 0.69831  |
|           | -0.51954        | 0.69831  | 0.69831 | 0.837504524 |             |          |          |
| PIGT      | ENSG00000124155 | -0.51973 | 0.69837 | -0.74404    | 0.77158     | -0.67206 | 0.74923  |
|           | -1.5185         | 0.93555  | 0.69837 | 0.837535257 |             |          |          |
| NA        | ENSG00000253960 | -0.51972 | 0.69837 | -0.51972    | 0.69837     | -0.51972 | 0.69837  |
|           | -0.76684        | 0.77841  | 0.69837 | 0.837535257 |             |          |          |
| HLA-U     | ENSG00000228078 | -1.1854  | 0.88208 | -0.51981    | 0.6984      | -2.521   | 0.99415  |
|           | -2.521          | 0.99415  | 0.6984  | 0.837550623 |             |          |          |
| CLDN10    | ENSG00000134873 | -0.62598 | 0.73433 | -0.51988    | 0.69843     | -0.62598 |          |
|           | 0.73433         | -0.71974 | 0.76416 | 0.69843     | 0.837565987 |          |          |
| NA        | ENSG00000257225 | -0.51996 | 0.69845 | -0.51996    | 0.69845     | -0.51996 | 0.69845  |
|           | -0.51996        | 0.69845  | 0.69845 | 0.83756936  |             |          |          |
| LINC01906 | ENSG00000265786 | -0.89919 | 0.81572 | -0.89919    | 0.81572     | -0.52003 |          |
|           | 0.69848         | -0.89919 | 0.81572 | 0.69848     | 0.837576104 |          |          |
| COX20     | ENSG00000203667 | -0.75478 | 0.77481 | -0.76084    | 0.77662     | -0.52006 | 0.69849  |
|           | -1.0669         | 0.857    | 0.69849 | 0.837576104 |             |          |          |
| NRAV      | ENSG00000248008 | -0.52015 | 0.69852 | -0.52015    | 0.69852     | -0.52015 | 0.69852  |
|           | -0.52015        | 0.69852  | 0.69852 | 0.837591466 |             |          |          |
| NA        | ENSG00000201329 | -0.52045 | 0.69863 | -0.52045    | 0.69863     | -0.52045 | 0.69863  |

|             |                 |          |         |             |             |          |         |          |
|-------------|-----------------|----------|---------|-------------|-------------|----------|---------|----------|
|             | -0.52045        | 0.69863  | 0.69863 | 0.837664899 |             |          |         |          |
| PABPC4-AS1  | ENSG00000228060 | -0.52045 | 0.69863 | -0.52045    | 0.69863     | -0.52045 | 0.69863 | -0.52045 |
|             | 0.69863         | -0.52045 | 0.69863 | 0.69863     | 0.837664899 |          |         |          |
| RPL7P5      | ENSG00000241562 | -1.4498  | 0.92645 | -1.4498     | 0.92645     | 0.92645  |         | -0.58934 |
|             | 0.72218         | -0.52048 | 0.69864 | 0.69864     | 0.837664899 |          |         |          |
| NA          | ENSG00000199710 | -0.52486 | 0.70016 | -0.80297    | 0.789       | -0.52052 | 0.69865 |          |
|             | -1.0179         | 0.84564  | 0.69865 | 0.837664899 |             |          |         |          |
| PNKD        | ENSG00000127838 | -0.62277 | 0.73328 | -0.65965    | 0.74526     | -0.52068 | 0.69871 |          |
|             | -0.85479        | 0.80367  | 0.69871 | 0.837702352 |             |          |         |          |
| NA          | ENSG00000199979 | -0.52079 | 0.69874 | -0.52079    | 0.69874     | -0.52079 | 0.69874 |          |
|             | -0.52079        | 0.69874  | 0.69874 | 0.837702352 |             |          |         |          |
| RNA5SP299   | ENSG00000212505 | -1.5035  | 0.93365 | -1.5035     | 0.93365     | -0.52079 |         |          |
|             | 0.69874         | -1.5035  | 0.93365 | 0.69874     | 0.837702352 |          |         |          |
| NA          | ENSG00000267417 | -0.52082 | 0.69875 | -1.5405     | 0.93828     | -0.96707 | 0.83325 |          |
|             | -0.96707        | 0.83325  | 0.69875 | 0.837702352 |             |          |         |          |
| CATIP       | ENSG00000158428 | -0.54382 | 0.70672 | -1.322      | 0.90692     | -0.62887 | 0.73528 |          |
|             | -0.52098        | 0.69881  | 0.69881 | 0.837715822 |             |          |         |          |
| NA          | ENSG00000259049 | -0.52102 | 0.69882 | -0.52102    | 0.69882     | -0.52102 | 0.69882 |          |
|             | -0.52102        | 0.69882  | 0.69882 | 0.837715822 |             |          |         |          |
| MRGPRF      | ENSG00000172935 | -0.52103 | 0.69883 | -0.52103    | 0.69883     | -1.1031  |         |          |
|             | 0.86502         | -0.98303 | 0.8372  | 0.69883     | 0.837715822 |          |         |          |
| NA          | ENSG00000224058 | -1.3233  | 0.90713 | -1.5088     | 0.93432     | -1.7306  | 0.95824 |          |
|             | -0.52104        | 0.69883  | 0.69883 | 0.837715822 |             |          |         |          |
| NA          | ENSG00000271895 | -1.5276  | 0.93669 | -1.7646     | 0.96119     | -0.52118 | 0.69888 |          |
|             | -0.52118        | 0.69888  | 0.69888 | 0.837755151 |             |          |         |          |
| IGHVII-43-1 | ENSG00000283195 | -0.52135 | 0.69894 | -0.52135    | 0.69894     | -0.52135 |         |          |
|             | 0.69894         | -0.52135 | 0.69894 | 0.69894     | 0.837780601 |          |         |          |
| CXCR6       | ENSG00000172215 | -1.266   | 0.89724 | -0.53374    | 0.70324     | -0.52139 | 0.69895 |          |
|             | -0.80634        | 0.78998  | 0.69895 | 0.837780601 |             |          |         |          |
| SUB1        | ENSG00000113387 | -0.52144 | 0.69897 | -1.5864     | 0.94368     | -1.7981  | 0.96392 |          |
|             | -1.6214         | 0.94754  | 0.69897 | 0.837780601 |             |          |         |          |
| NA          | ENSG00000255746 | -0.52145 | 0.69897 | -0.52145    | 0.69897     | -0.52145 | 0.69897 |          |
|             | -0.52145        | 0.69897  | 0.69897 | 0.837780601 |             |          |         |          |
| NA          | ENSG00000251080 | -0.52158 | 0.69902 | -0.52158    | 0.69902     | -0.52158 | 0.69902 |          |
|             | -0.52158        | 0.69902  | 0.69902 | 0.837819923 |             |          |         |          |
| TMIE        | ENSG00000181585 | -1.55    | 0.93943 | -1.4249     | 0.92291     | -0.52175 | 0.69908 |          |
|             | -2.1592         | 0.98458  | 0.69908 | 0.837853984 |             |          |         |          |
| NA          | ENSG00000254828 | -0.52182 | 0.6991  | -1.0823     | 0.86044     | -0.77428 | 0.78062 |          |
|             | -0.97693        | 0.8357   | 0.6991  | 0.837853984 |             |          |         |          |
| LINC02314   | ENSG00000259082 | -2.099   | 0.98209 | -0.52181    | 0.6991      | -2.099   |         |          |
|             | 0.98209         | -1.1368  | 0.87219 | 0.6991      | 0.837853984 |          |         |          |
| LINC02468   | ENSG00000256499 | -1.5051  | 0.93386 | -0.5219     | 0.69913     | -1.5051  |         |          |
|             | 0.93386         | -1.5051  | 0.93386 | 0.69913     | 0.837869332 |          |         |          |
| MRPL32      | ENSG00000106591 | -0.52198 | 0.69916 | -0.52198    | 0.69916     | -0.52198 |         |          |
|             | 0.69916         | -0.52198 | 0.69916 | 0.69916     | 0.837875626 |          |         |          |
| CYP51A1-AS1 | ENSG00000188693 | -0.64456 | 0.74039 | -0.52206    | 0.69919     | -0.58389 |         |          |
|             | 0.72035         | -0.69585 | 0.75674 | 0.69919     | 0.837875626 |          |         |          |
| URI1        | ENSG00000105176 | -1.1329  | 0.87138 | -0.52217    | 0.69922     | -1.329   | 0.90808 |          |
|             | -1.329          | 0.90808  | 0.69922 | 0.837875626 |             |          |         |          |
| ROR2        | ENSG00000169071 | -0.78417 | 0.78353 | -0.86832    | 0.80739     | -0.52215 | 0.69922 |          |
|             | -1.4503         | 0.92651  | 0.69922 | 0.837875626 |             |          |         |          |
| NA          | ENSG00000252225 | -0.98234 | 0.83703 | -1.5353     | 0.93764     | -0.52222 | 0.69924 |          |
|             | -0.98234        | 0.83703  | 0.69924 | 0.837875626 |             |          |         |          |
| LINC01150   | ENSG00000229671 | -0.52226 | 0.69925 | -0.52226    | 0.69925     | -0.52226 |         |          |
|             | 0.69925         | -0.52226 | 0.69925 | 0.69925     | 0.837875626 |          |         |          |
| NA          | ENSG00000231482 | -0.52227 | 0.69926 | -0.71182    | 0.76171     | -0.92248 | 0.82186 |          |
|             | -1.6213         | 0.94752  | 0.69926 | 0.837875626 |             |          |         |          |
| ATXN3       | ENSG00000066427 | -0.78966 | 0.78514 | -0.917      | 0.82043     | -0.52235 | 0.69929 |          |
|             | -1.627          | 0.94813  | 0.69929 | 0.837875626 |             |          |         |          |
| MLLT1       | ENSG00000130382 | -0.52237 | 0.69929 | -0.92425    | 0.82232     | -0.74542 | 0.77199 |          |
|             | -0.52356        | 0.69971  | 0.69929 | 0.837875626 |             |          |         |          |
| RNU4-62P    | ENSG00000222057 | -0.52247 | 0.69933 | -0.52247    | 0.69933     | -0.52247 |         |          |



|            |                 |          |         |             |             |          |         |  |
|------------|-----------------|----------|---------|-------------|-------------|----------|---------|--|
|            | 0.69933         | -0.52247 | 0.69933 | 0.69933     | 0.837882349 |          |         |  |
| RNU6-177P  | ENSG00000223189 | -0.57577 | 0.71761 | -0.57577    | 0.71761     | -1.197   |         |  |
|            | 0.88435         | -0.52249 | 0.69933 | 0.69933     | 0.837882349 |          |         |  |
| RBBP8      | ENSG00000101773 | -0.56075 | 0.71251 | -0.52285    | 0.69946     | -0.67366 | 0.74974 |  |
|            | -0.889          | 0.813    | 0.69946 | 0.838017501 |             |          |         |  |
| NA         | ENSG00000236116 | -0.52293 | 0.69949 | -0.52293    | 0.69949     | -0.52293 | 0.69949 |  |
|            | -0.52293        | 0.69949  | 0.69949 | 0.838032839 |             |          |         |  |
| NA         | ENSG00000226706 | -0.5232  | 0.69958 | -0.5232     | 0.69958     | -0.5232  | 0.69958 |  |
|            | -0.5232         | 0.69958  | 0.69958 | 0.838085563 |             |          |         |  |
| SNORD113-8 | ENSG00000200367 | -0.52328 | 0.69961 | -0.52328    | 0.69961     | -0.52328 |         |  |
|            | 0.69961         | -0.52328 | 0.69961 | 0.69961     | 0.838085563 |          |         |  |
| RNU6-526P  | ENSG00000201815 | -1.1684  | 0.87867 | -1.1684     | 0.87867     | -0.52328 |         |  |
|            | 0.69961         | -1.1684  | 0.87867 | 0.69961     | 0.838085563 |          |         |  |
| CD207      | ENSG00000116031 | -0.52331 | 0.69962 | -0.6315     | 0.73614     | -0.52331 | 0.69962 |  |
|            | -0.52331        | 0.69962  | 0.69962 | 0.838085563 |             |          |         |  |
| SIGMAR1    | ENSG00000147955 | -0.5233  | 0.69962 | -0.5233     | 0.69962     | -0.5233  |         |  |
|            | 0.69962         | -1.7931  | 0.96352 | 0.69962     | 0.838085563 |          |         |  |
| POLD1      | ENSG00000062822 | -0.52343 | 0.69966 | -0.65782    | 0.74467     | -1.8802  | 0.96996 |  |
|            | -0.96158        | 0.83187  | 0.69966 | 0.838112876 |             |          |         |  |
| NA         | ENSG00000238939 | -0.52361 | 0.69973 | -0.52361    | 0.69973     | -0.52361 | 0.69973 |  |
|            | -0.52361        | 0.69973  | 0.69973 | 0.838170853 |             |          |         |  |
| RGSL1      | ENSG00000121446 | -2.2477  | 0.9877  | -1.6945     | 0.95491     | -0.52371 | 0.69976 |  |
|            | -0.76166        | 0.77687  | 0.69976 | 0.838170853 |             |          |         |  |
| MTND5P40   | ENSG00000259593 | -0.5237  | 0.69976 | -1.2286     | 0.8904      | -1.0933  |         |  |
|            | 0.86288         | -1.0933  | 0.86288 | 0.69976     | 0.838170853 |          |         |  |
| ALDOAP2    | ENSG00000214297 | -0.52379 | 0.69979 | -0.52379    | 0.69979     | -0.52379 |         |  |
|            | 0.69979         | -0.52379 | 0.69979 | 0.69979     | 0.838175641 |          |         |  |
| NA         | ENSG00000236274 | -0.52392 | 0.69983 | -0.52392    | 0.69983     | -0.52392 | 0.69983 |  |
|            | -0.52392        | 0.69983  | 0.69983 | 0.838175641 |             |          |         |  |
| ATP5PBP1   | ENSG00000224451 | -1.6234  | 0.94775 | -0.52393    | 0.69984     | -0.73781 |         |  |
|            | 0.76969         | -1.4551  | 0.92718 | 0.69984     | 0.838175641 |          |         |  |
| NA         | ENSG00000268000 | -0.52394 | 0.69984 | -0.52394    | 0.69984     | -0.52394 | 0.69984 |  |
|            | -0.52394        | 0.69984  | 0.69984 | 0.838175641 |             |          |         |  |
| NA         | ENSG00000271789 | -0.52397 | 0.69985 | -0.52397    | 0.69985     | -0.52397 | 0.69985 |  |
|            | -0.52397        | 0.69985  | 0.69985 | 0.838175641 |             |          |         |  |
| NA         | ENSG00000271220 | -0.52404 | 0.69987 | -0.52404    | 0.69987     | -0.52404 | 0.69987 |  |
|            | -0.52404        | 0.69987  | 0.69987 | 0.838178994 |             |          |         |  |
| H2AC17     | ENSG00000278677 | -0.52419 | 0.69993 | -0.52419    | 0.69993     | -0.52419 |         |  |
|            | 0.69993         | -0.52419 | 0.69993 | 0.69993     | 0.838207731 |          |         |  |
| C2orf74    | ENSG00000237651 | -0.52428 | 0.69996 | -0.62336    | 0.73348     | -0.52428 |         |  |
|            | 0.69996         | -1.2173  | 0.88825 | 0.69996     | 0.838207731 |          |         |  |
| DPM2       | ENSG00000136908 | -0.52431 | 0.69997 | -0.95474    | 0.83014     | -1.1411  | 0.87309 |  |
|            | -0.98094        | 0.83669  | 0.69997 | 0.838207731 |             |          |         |  |
| NA         | ENSG00000284171 | -0.5243  | 0.69997 | -0.5243     | 0.69997     | -0.5243  | 0.69997 |  |
|            | -0.5243         | 0.69997  | 0.69997 | 0.838207731 |             |          |         |  |
| NA         | ENSG00000224515 | -0.52435 | 0.69998 | -0.52435    | 0.69998     | -0.52435 | 0.69998 |  |
|            | -0.52435        | 0.69998  | 0.69998 | 0.838207731 |             |          |         |  |
| MKRN2      | ENSG00000075975 | -1.1297  | 0.8707  | -0.52451    | 0.70004     | -0.85252 | 0.80304 |  |
|            | -0.79956        | 0.78802  | 0.70004 | 0.838250356 |             |          |         |  |
| LINC02627  | ENSG00000229466 | -0.52456 | 0.70005 | -0.52456    | 0.70005     | -0.52456 |         |  |
|            | 0.70005         | -0.52456 | 0.70005 | 0.70005     | 0.838250356 |          |         |  |
| NA         | ENSG00000272345 | -0.74993 | 0.77335 | -0.52469    | 0.7001      | -0.74993 | 0.77335 |  |
|            | -0.74993        | 0.77335  | 0.7001  | 0.838289628 |             |          |         |  |
| PWRN1      | ENSG00000259905 | -1.2363  | 0.89183 | -0.52484    | 0.70015     | -0.7148  | 0.76263 |  |
|            | -1.2385         | 0.89223  | 0.70015 | 0.83832697  |             |          |         |  |
| NA         | ENSG00000252254 | -0.52488 | 0.70017 | -0.52488    | 0.70017     | -0.52488 | 0.70017 |  |
|            | -0.52488        | 0.70017  | 0.70017 | 0.83832697  |             |          |         |  |
| CLDN20     | ENSG00000171217 | -0.52498 | 0.7002  | -0.73793    | 0.76972     | -0.73793 |         |  |
|            | 0.76972         | -0.92649 | 0.8229  | 0.7002      | 0.83832697  |          |         |  |
| RN7SKP122  | ENSG00000251732 | -0.52499 | 0.7002  | -0.52499    | 0.7002      | -0.52499 |         |  |
|            | 0.7002          | -0.52499 | 0.7002  | 0.7002      | 0.83832697  |          |         |  |
| C10orf53   | ENSG00000178645 | -0.59863 | 0.72529 | -0.82381    | 0.79498     | -0.75836 |         |  |

|            |                 |          |         |             |             |          |         |
|------------|-----------------|----------|---------|-------------|-------------|----------|---------|
|            | 0.77588         | -0.52549 | 0.70038 | 0.70038     | 0.838475392 |          |         |
| PGBD4      | ENSG00000182405 | -0.52552 | 0.70039 | -0.56853    | 0.71516     | -0.66589 | 0.74726 |
|            | -0.58676        | 0.72132  | 0.70039 | 0.838475392 |             |          |         |
| LINC00463  | ENSG00000234056 | -0.65124 | 0.74255 | -1.2237     | 0.88947     | -1.4848  |         |
|            | 0.93121         | -0.52552 | 0.70039 | 0.70039     | 0.838475392 |          |         |
| NA         | ENSG00000212273 | -0.52557 | 0.70041 | -1.9674     | 0.97543     | -0.52557 | 0.70041 |
|            | -0.52557        | 0.70041  | 0.70041 | 0.838475392 |             |          |         |
| LLPHP2     | ENSG00000235514 | -0.52558 | 0.70041 | -0.52558    | 0.70041     | -0.52558 |         |
|            | 0.70041         | -0.52558 | 0.70041 | 0.70041     | 0.838475392 |          |         |
| NA         | ENSG00000249773 | -0.52594 | 0.70054 | -0.52594    | 0.70054     | -0.52594 | 0.70054 |
|            | -0.52594        | 0.70054  | 0.70054 | 0.838605127 |             |          |         |
| ZNF616     | ENSG00000204611 | -0.91134 | 0.81894 | -0.526      | 0.70056     | -0.91134 |         |
|            | 0.81894         | -0.91134 | 0.81894 | 0.70056     | 0.838605127 |          |         |
| OR4U1P     | ENSG00000258899 | -0.83562 | 0.79831 | -0.83562    | 0.79831     | -0.83562 |         |
|            | 0.79831         | -0.52603 | 0.70057 | 0.70057     | 0.838605127 |          |         |
| RPL31P30   | ENSG00000230702 | -0.52609 | 0.70059 | -0.52609    | 0.70059     | -0.52609 |         |
|            | 0.70059         | -0.52609 | 0.70059 | 0.70059     | 0.838608467 |          |         |
| RN7SKP162  | ENSG00000200475 | -0.52618 | 0.70062 | -0.52618    | 0.70062     | -0.52618 |         |
|            | 0.70062         | -0.52618 | 0.70062 | 0.70062     | 0.838615148 |          |         |
| TMC7       | ENSG00000170537 | -0.52621 | 0.70063 | -1.337      | 0.90939     | -2.2549  | 0.98793 |
|            | -1.2913         | 0.9017   | 0.70063 | 0.838615148 |             |          |         |
| SNAPC5P1   | ENSG00000241216 | -0.52641 | 0.7007  | -0.52641    | 0.7007      | -0.52641 |         |
|            | 0.7007          | -0.52641 | 0.7007  | 0.7007      | 0.838678334 |          |         |
| NA         | ENSG00000201500 | -0.52651 | 0.70073 | -0.52651    | 0.70073     | -0.52651 | 0.70073 |
|            | -0.52651        | 0.70073  | 0.70073 | 0.838693641 |             |          |         |
| WASHC4     | ENSG00000136051 | -0.85381 | 0.8034  | -1.226      | 0.88991     | -0.65713 |         |
|            | 0.74445         | -0.52668 | 0.70079 | 0.70079     | 0.838725634 |          |         |
| MOV10L1    | ENSG00000073146 | -0.52677 | 0.70082 | -0.6455     | 0.7407      | -1.304   |         |
|            | 0.90389         | -1.1961  | 0.88418 | 0.70082     | 0.838725634 |          |         |
| NA         | ENSG00000232825 | -0.52679 | 0.70083 | -1.0165     | 0.84531     | -1.0165  | 0.84531 |
|            | -1.0165         | 0.84531  | 0.70083 | 0.838725634 |             |          |         |
| TMED3      | ENSG00000166557 | -0.52684 | 0.70085 | -0.58269    | 0.71995     | -0.54854 | 0.70834 |
|            | -0.85131        | 0.8027   | 0.70085 | 0.838725634 |             |          |         |
| MRPS36P5   | ENSG00000257927 | -0.52689 | 0.70086 | -0.52689    | 0.70086     | -0.68133 |         |
|            | 0.75217         | -0.52689 | 0.70086 | 0.70086     | 0.838725634 |          |         |
| LINC00565  | ENSG00000260910 | -0.52687 | 0.70086 | -0.52687    | 0.70086     | -0.52687 |         |
|            | 0.70086         | -0.52687 | 0.70086 | 0.70086     | 0.838725634 |          |         |
| SPATA32    | ENSG00000184361 | -0.52701 | 0.70091 | -0.52701    | 0.70091     | -0.52701 |         |
|            | 0.70091         | -0.52701 | 0.70091 | 0.70091     | 0.838744273 |          |         |
| NA         | ENSG00000248667 | -0.52702 | 0.70091 | -0.97728    | 0.83578     | -0.52702 | 0.70091 |
|            | -0.52702        | 0.70091  | 0.70091 | 0.838744273 |             |          |         |
| TMPRSS11F  | ENSG00000198092 | -1.2213  | 0.889   | -0.52724    | 0.70099     | -1.2964  | 0.90258 |
|            | -1.2964         | 0.90258  | 0.70099 | 0.838819407 |             |          |         |
| HNRNPA3P10 | ENSG00000257851 | -0.52748 | 0.70107 | -0.52748    | 0.70107     | -0.52748 |         |
|            | 0.70107         | -0.52748 | 0.70107 | 0.70107     | 0.838883935 |          |         |
| NA         | ENSG00000278635 | -0.52751 | 0.70108 | -0.52751    | 0.70108     | -0.52751 | 0.70108 |
|            | -0.52751        | 0.70108  | 0.70108 | 0.838883935 |             |          |         |
| TFF2       | ENSG00000160181 | -0.52763 | 0.70112 | -0.52763    | 0.70112     | -0.52763 | 0.70112 |
|            | -0.52763        | 0.70112  | 0.70112 | 0.838883935 |             |          |         |
| WBP11P2    | ENSG00000226789 | -0.52764 | 0.70113 | -0.52764    | 0.70113     | -0.52764 |         |
|            | 0.70113         | -0.52764 | 0.70113 | 0.70113     | 0.838883935 |          |         |
| RNA5SP291  | ENSG00000253031 | -0.83958 | 0.79943 | -0.52765    | 0.70113     | -0.52765 |         |
|            | 0.70113         | -0.52765 | 0.70113 | 0.70113     | 0.838883935 |          |         |
| MAPKAPK5   | ENSG00000089022 | -0.64181 | 0.7395  | -0.62585    | 0.73429     | -0.52775 |         |
|            | 0.70116         | -0.70671 | 0.76013 | 0.70116     | 0.838899232 |          |         |
| C3orf52    | ENSG00000114529 | -0.52781 | 0.70118 | -0.89631    | 0.81496     | -1.4485  |         |
|            | 0.92626         | -1.5013  | 0.93336 | 0.70118     | 0.838902563 |          |         |
| NA         | ENSG00000228360 | -0.52784 | 0.7012  | -0.52809    | 0.70128     | -0.52784 | 0.7012  |
|            | -0.52784        | 0.7012   | 0.7012  | 0.838905895 |             |          |         |
| MTND5P42   | ENSG00000283578 | -0.52801 | 0.70125 | -0.59735    | 0.72486     | -0.72073 |         |
|            | 0.76446         | -0.59755 | 0.72493 | 0.70125     | 0.838945117 |          |         |
| CAND1      | ENSG00000111530 | -0.52822 | 0.70133 | -0.901      | 0.81621     | -1.2197  | 0.88871 |

|             |                 |          |             |          |             |             |         |          |       |
|-------------|-----------------|----------|-------------|----------|-------------|-------------|---------|----------|-------|
|             |                 | -1.2197  | 0.88871     | 0.70133  | 0.839020227 |             |         |          |       |
| NAV2-AS1    | ENSG00000254894 | -0.52835 | 0.70137     | -0.52835 | 0.70137     | -0.52835    | 0.70137 | -0.52835 |       |
|             |                 | 0.70137  | -0.52835    | 0.70137  | 0.70137     | 0.839030212 |         |          |       |
| NA          | ENSG00000273011 | -1.0855  | 0.86114     | -0.52838 | 0.70138     | -1.553      | 0.93979 |          |       |
|             |                 | -1.553   | 0.93979     | 0.70138  | 0.839030212 |             |         |          |       |
| NA          | ENSG00000199911 | -0.52841 | 0.70139     | -0.79655 | 0.78714     | -0.79655    | 0.78714 |          |       |
|             |                 | -1.2223  | 0.8892      | 0.70139  | 0.839030212 |             |         |          |       |
| RNU6-742P   | ENSG00000202159 | -0.95514 | 0.83025     | -0.95514 | 0.83025     | -0.95514    |         |          |       |
|             |                 | 0.83025  | -0.52864    | 0.70147  | 0.70147     | 0.839096676 |         |          |       |
| MYO16-AS2   | ENSG00000229938 | -0.52866 | 0.70148     | -0.52866 | 0.70148     | -0.52866    |         |          |       |
|             |                 | 0.70148  | -0.52866    | 0.70148  | 0.70148     | 0.839096676 |         |          |       |
| NA          | ENSG00000261590 | -0.52882 | 0.70153     | -0.52882 | 0.70153     | -0.52882    | 0.70153 |          |       |
|             |                 | -0.52882 | 0.70153     | 0.70153  | 0.839121941 |             |         |          |       |
| NA          | ENSG00000199756 | -1.6015  | 0.94536     | -1.6015  | 0.94536     | -0.53462    | 0.70354 |          |       |
|             |                 | -0.52884 | 0.70154     | 0.70154  | 0.839121941 |             |         |          |       |
| GSTM5       | ENSG00000134201 | -0.52891 | 0.70157     | -0.52891 | 0.70157     | -0.52891    | 0.70157 |          |       |
|             |                 | -0.52891 | 0.70157     | 0.70157  | 0.839121941 |             |         |          |       |
| OAZ1P1      | ENSG00000226745 | -0.52891 | 0.70157     | -0.52891 | 0.70157     | -0.52891    |         |          |       |
|             |                 | 0.70157  | -1.2371     | 0.89197  | 0.70157     | 0.839121941 |         |          |       |
| QTRT1       | ENSG00000213339 | -1.458   | 0.92758     | -1.458   | 0.92758     | -1.458      | 0.92758 |          |       |
|             |                 | -0.52902 | 0.7016      | 0.7016   | 0.839137226 |             |         |          |       |
| NA          | ENSG00000277459 | -0.52905 | 0.70162     | -0.52905 | 0.70162     | -0.52905    | 0.70162 |          |       |
|             |                 | -0.52905 | 0.70162     | 0.70162  | 0.839140551 |             |         |          |       |
| RN7SKP170   | ENSG00000199420 | -0.52912 | 0.70164     | -0.52912 | 0.70164     | -0.52912    |         |          |       |
|             |                 | 0.70164  | -0.52912    | 0.70164  | 0.70164     | 0.839143875 |         |          |       |
| UBE2V1P13   | ENSG00000224584 | -0.52945 | 0.70175     | -0.52945 | 0.70175     | -0.52945    |         |          |       |
|             |                 | 0.70175  | -0.52945    | 0.70175  | 0.70175     | 0.839216965 |         |          |       |
| NA          | ENSG00000227113 | -0.52945 | 0.70175     | -0.52945 | 0.70175     | -0.52945    | 0.70175 |          |       |
|             |                 | -0.52945 | 0.70175     | 0.70175  | 0.839216965 |             |         |          |       |
| BCS1L       | ENSG00000074582 | -0.52946 | 0.70176     | -0.52946 | 0.70176     | -0.52946    | 0.70176 |          |       |
|             |                 | -0.92902 | 0.82356     | 0.70176  | 0.839216965 |             |         |          |       |
| NA          | ENSG00000228392 | -1.0829  | 0.86057     | -1.8285  | 0.96626     | -0.52949    | 0.70177 |          |       |
|             |                 | -1.2705  | 0.89804     | 0.70177  | 0.839216965 |             |         |          |       |
| SLC7A4      | ENSG00000099960 | -0.52959 | 0.7018      | -0.52959 | 0.7018      | -0.52959    |         |          |       |
|             |                 | 0.7018   | -0.52959    | 0.7018   | 0.7018      | 0.839232245 |         |          |       |
| CPLX2       | ENSG00000145920 | -0.89407 | 0.81436     | -0.52966 | 0.70183     | -1.5107     | 0.93456 |          |       |
|             |                 | -1.1767  | 0.88034     | 0.70183  | 0.839247525 |             |         |          |       |
| IDI1        | ENSG00000067064 | -0.52973 | 0.70185     | -0.52973 | 0.70185     | -0.52973    | 0.70185 |          |       |
|             |                 | -0.52973 | 0.70185     | 0.70185  | 0.839250847 |             |         |          |       |
| HIBADH      | ENSG00000106049 | -0.52992 | 0.70192     | -0.79229 | 0.7859      | -0.79229    |         |          |       |
|             |                 | 0.7859   | -0.53779    | 0.70464  | 0.70192     | 0.83929668  |         |          |       |
| MIR605      | ENSG00000207813 | -0.52995 | 0.70193     | -0.52995 | 0.70193     | -0.52995    |         |          |       |
|             |                 | 0.70193  | -0.52995    | 0.70193  | 0.70193     | 0.83929668  |         |          |       |
| PGBD1       | ENSG00000137338 | -1.0777  | 0.85942     | -0.52999 | 0.70194     | -1.3907     | 0.91784 |          |       |
|             |                 | -1.2561  | 0.89547     | 0.70194  | 0.83929668  |             |         |          |       |
| TEX54       | ENSG00000283268 | -1.5904  | 0.94413     | -0.53004 | 0.70196     | -0.53004    | 0.70196 |          |       |
|             |                 | -0.53004 | 0.70196     | 0.70196  | 0.8393      |             |         |          |       |
| RNU6-826P   | ENSG00000252636 | -0.5301  | 0.70198     | -0.5301  | 0.70198     | -0.5301     |         |          |       |
|             |                 | 0.70198  | -0.5301     | 0.70198  | 0.70198     | 0.83930332  |         |          |       |
| NA          | ENSG00000278885 | -0.53016 | 0.702       | -0.53016 | 0.702       | -0.53016    | 0.702   | -0.53016 | 0.702 |
|             |                 | 0.702    | 0.839306639 |          |             |             |         |          |       |
| NA          | ENSG00000251999 | -0.95114 | 0.82923     | -0.53034 | 0.70206     | -0.53034    | 0.70206 |          |       |
|             |                 | -0.53034 | 0.70206     | 0.70206  | 0.839357781 |             |         |          |       |
| RC3H1-IT1   | ENSG00000236535 | -0.53046 | 0.7021      | -0.53046 | 0.7021      | -0.53046    |         |          |       |
|             |                 | 0.7021   | -0.53046    | 0.7021   | 0.7021      | 0.83938501  |         |          |       |
| NA          | ENSG00000236299 | -1.5764  | 0.94253     | -2.1058  | 0.98239     | -0.53087    | 0.70224 |          |       |
|             |                 | -0.60841 | 0.72854     | 0.70224  | 0.839531788 |             |         |          |       |
| KRTAP20-4   | ENSG00000206105 | -0.53095 | 0.70227     | -0.53095 | 0.70227     | -0.53095    |         |          |       |
|             |                 | 0.70227  | -0.53095    | 0.70227  | 0.70227     | 0.839547056 |         |          |       |
| SYS1-DBNDD2 | ENSG00000254806 | -0.53117 | 0.70235     | -0.53117 | 0.70235     | -0.53117    |         |          |       |
|             |                 | 0.70235  | -0.53117    | 0.70235  | 0.70235     | 0.839592857 |         |          |       |
| GIT1        | ENSG00000108262 | -1.2502  | 0.89438     | -0.8605  | 0.80524     | -1.2039     | 0.88568 |          |       |

|            |                 |          |         |             |             |          |         |  |
|------------|-----------------|----------|---------|-------------|-------------|----------|---------|--|
|            | -0.53121        | 0.70236  | 0.70236 | 0.839592857 |             |          |         |  |
| FXYD2      | ENSG00000137731 | -1.397   | 0.91879 | -0.53119    | 0.70236     | -2.422   | 0.99228 |  |
|            | -0.54605        | 0.70749  | 0.70236 | 0.839592857 |             |          |         |  |
| RN7SKP17   | ENSG00000223174 | -0.53131 | 0.7024  | -0.53131    | 0.7024      | -1.3182  |         |  |
|            | 0.90628         | -1.0226  | 0.84674 | 0.7024      | 0.839620076 |          |         |  |
| RNA5SP300  | ENSG00000212499 | -0.53148 | 0.70246 | -0.53148    | 0.70246     | -0.53148 |         |  |
|            | 0.70246         | -0.53148 | 0.70246 | 0.70246     | 0.8396712   |          |         |  |
| ATF4       | ENSG00000128272 | -0.53184 | 0.70258 | -0.53184    | 0.70258     | -0.53184 | 0.70258 |  |
|            | -0.53184        | 0.70258  | 0.70258 | 0.839794039 |             |          |         |  |
| SFRP1      | ENSG00000104332 | -1.0629  | 0.85609 | -2.7325     | 0.99686     | -0.53192 | 0.70261 |  |
|            | -1.8086         | 0.96474  | 0.70261 | 0.839809299 |             |          |         |  |
| ZNF45      | ENSG00000124459 | -0.53215 | 0.70269 | -0.77844    | 0.78184     | -0.53736 | 0.70449 |  |
|            | -0.53736        | 0.70449  | 0.70269 | 0.839867024 |             |          |         |  |
| NA         | ENSG00000276408 | -0.53219 | 0.7027  | -0.53219    | 0.7027      | -0.53219 | 0.7027  |  |
|            | -0.53219        | 0.7027   | 0.7027  | 0.839867024 |             |          |         |  |
| NA         | ENSG00000177418 | -0.66513 | 0.74702 | -0.66513    | 0.74702     | -0.53222 | 0.70271 |  |
|            | -1.0116         | 0.84413  | 0.70271 | 0.839867024 |             |          |         |  |
| ID4        | ENSG00000172201 | -0.53226 | 0.70273 | -1.2097     | 0.88681     | -0.65326 | 0.7432  |  |
|            | -0.67067        | 0.74878  | 0.70273 | 0.839870328 |             |          |         |  |
| TRIM51HP   | ENSG00000166007 | -0.53244 | 0.70279 | -0.87272    | 0.80859     | -1.0931  |         |  |
|            | 0.86282         | -0.96003 | 0.83148 | 0.70279     | 0.839921438 |          |         |  |
| RNU6-895P  | ENSG00000206852 | -0.53253 | 0.70282 | -1.1048     | 0.86538     | -0.53253 |         |  |
|            | 0.70282         | -2.7589  | 0.9971  | 0.70282     | 0.839936692 |          |         |  |
| NA         | ENSG00000270110 | -0.53265 | 0.70286 | -0.53265    | 0.70286     | -0.53265 | 0.70286 |  |
|            | -0.53265        | 0.70286  | 0.70286 | 0.839963895 |             |          |         |  |
| ITPRID1    | ENSG00000180347 | -2.4859  | 0.99354 | -0.53279    | 0.70291     | -1.154   |         |  |
|            | 0.87575         | -1.895   | 0.97096 | 0.70291     | 0.839994399 |          |         |  |
| ELAPOR2    | ENSG00000164659 | -1.6538  | 0.95092 | -1.0429     | 0.8515      | -0.53283 |         |  |
|            | 0.70292         | -1.2636  | 0.8968  | 0.70292     | 0.839994399 |          |         |  |
| RPL6       | ENSG00000089009 | -0.77052 | 0.7795  | -0.5329     | 0.70295     | -0.72643 | 0.76621 |  |
|            | -0.77052        | 0.7795   | 0.70295 | 0.84000965  |             |          |         |  |
| WDR64      | ENSG00000162843 | -1.1799  | 0.88097 | -1.2683     | 0.89765     | -1.006   | 0.84278 |  |
|            | -0.53306        | 0.703    | 0.703   | 0.840028199 |             |          |         |  |
| CFAP299    | ENSG00000197826 | -0.87166 | 0.8083  | -0.77012    | 0.77939     | -0.53304 | 0.703   |  |
|            | -0.85333        | 0.80326  | 0.703   | 0.840028199 |             |          |         |  |
| RNU6-1201P | ENSG00000206954 | -0.53326 | 0.70307 | -0.53326    | 0.70307     | -0.53326 |         |  |
|            | 0.70307         | -0.53326 | 0.70307 | 0.70307     | 0.840091244 |          |         |  |
| HAS1       | ENSG00000105509 | -0.53336 | 0.70311 | -0.53336    | 0.70311     | -0.53336 | 0.70311 |  |
|            | -0.70384        | 0.75923  | 0.70311 | 0.840118439 |             |          |         |  |
| LINC02044  | ENSG00000243795 | -0.53349 | 0.70315 | -0.7271     | 0.76642     | -0.53349 |         |  |
|            | 0.70315         | -0.53349 | 0.70315 | 0.70315     | 0.840145633 |          |         |  |
| RPSAP12    | ENSG00000240087 | -1.196   | 0.88414 | -0.53359    | 0.70319     | -0.53359 |         |  |
|            | 0.70319         | -0.53359 | 0.70319 | 0.70319     | 0.84016747  |          |         |  |
| LRP10      | ENSG00000197324 | -0.73446 | 0.76867 | -1.7904     | 0.9633      | -1.7904  | 0.9633  |  |
|            | -0.53364        | 0.70321  | 0.70321 | 0.84016747  |             |          |         |  |
| PGC        | ENSG00000096088 | -0.53746 | 0.70453 | -1.2607     | 0.89629     | -0.85122 | 0.80268 |  |
|            | -0.53368        | 0.70322  | 0.70322 | 0.84016747  |             |          |         |  |
| NA         | ENSG00000212930 | -0.53381 | 0.70326 | -0.53381    | 0.70326     | -0.53381 | 0.70326 |  |
|            | -0.53381        | 0.70326  | 0.70326 | 0.840181887 |             |          |         |  |
| NA         | ENSG00000249186 | -1.0191  | 0.84592 | -0.93572    | 0.82529     | -2.1496  | 0.98421 |  |
|            | -0.53386        | 0.70328  | 0.70328 | 0.840181887 |             |          |         |  |
| OR7E156P   | ENSG00000274052 | -0.53392 | 0.7033  | -0.53392    | 0.7033      | -0.53392 |         |  |
|            | 0.7033          | -0.53392 | 0.7033  | 0.7033      | 0.840181887 |          |         |  |
| PROX2      | ENSG00000119608 | -1.2023  | 0.88538 | -0.76781    | 0.7787      | -0.53399 | 0.70333 |  |
|            | -1.2676         | 0.89753  | 0.70333 | 0.840181887 |             |          |         |  |
| ZNF738     | ENSG00000172687 | -1.1723  | 0.87947 | -0.69008    | 0.75493     | -0.53408 |         |  |
|            | 0.70336         | -0.5985  | 0.72525 | 0.70336     | 0.840181887 |          |         |  |
| NA         | ENSG00000271787 | -0.53409 | 0.70336 | -0.53409    | 0.70336     | -0.53409 | 0.70336 |  |
|            | -0.53409        | 0.70336  | 0.70336 | 0.840181887 |             |          |         |  |
| SCARA3     | ENSG00000168077 | -1.6096  | 0.94626 | -1.2208     | 0.88891     | -0.53413 |         |  |
|            | 0.70337         | -0.67438 | 0.74996 | 0.70337     | 0.840181887 |          |         |  |
| PFN4       | ENSG00000176732 | -0.53411 | 0.70337 | -0.53411    | 0.70337     | -0.89153 | 0.81368 |  |

|           |                 |          |          |          |             |             |          |         |
|-----------|-----------------|----------|----------|----------|-------------|-------------|----------|---------|
|           |                 | -0.89629 | 0.81495  | 0.70337  | 0.840181887 |             |          |         |
| NA        | ENSG00000230202 | -0.53438 | 0.70346  | 0.70346  | -0.53438    | 0.70346     | -0.81497 | 0.79246 |
|           |                 | -0.53438 | 0.70346  | 0.70346  | 0.840246135 |             |          |         |
| NA        | ENSG00000254873 | -0.53439 | 0.70346  | 0.70346  | -0.53439    | 0.70346     | -0.53439 | 0.70346 |
|           |                 | -0.53439 | 0.70346  | 0.70346  | 0.840246135 |             |          |         |
| NA        | ENSG00000258526 | -0.94206 | 0.82692  | -1.5402  | 0.93824     | -1.0426     | 0.85143  |         |
|           |                 | -0.53443 | 0.70348  | 0.70348  | 0.840246135 |             |          |         |
| CR1L      | ENSG00000197721 | -0.53451 | 0.7035   | 0.7035   | -0.53451    | 0.7035      | -0.75028 | 0.77346 |
|           |                 | -0.72233 | 0.76495  | 0.7035   | 0.840246135 |             |          |         |
| NA        | ENSG00000258930 | -0.53453 | 0.70351  | 0.70351  | -0.53453    | 0.70351     | -0.53453 | 0.70351 |
|           |                 | -0.53453 | 0.70351  | 0.70351  | 0.840246135 |             |          |         |
| IGF2R     | ENSG00000197081 | -1.375   | 0.91543  | -0.53457 | 0.70353     | -1.3416     | 0.91014  |         |
|           |                 | -1.3226  | 0.90701  | 0.70353  | 0.840249428 |             |          |         |
| RNA5SP243 | ENSG00000252866 | -0.53485 | 0.70362  | -0.53485 | 0.70362     | -0.53485    |          |         |
|           |                 | 0.70362  | -0.53485 | 0.70362  | 0.70362     | 0.840336322 |          |         |
| NA        | ENSG00000258344 | -0.53491 | 0.70364  | -0.68614 | 0.75369     | -0.53491    | 0.70364  |         |
|           |                 | -0.53491 | 0.70364  | 0.70364  | 0.840339612 |             |          |         |
| TMEM132B  | ENSG00000139364 | -0.53524 | 0.70376  | -0.6544  | 0.74357     | -0.53524    |          |         |
|           |                 | 0.70376  | -0.94333 | 0.82724  | 0.70376     | 0.840462327 |          |         |
| MAP4K5    | ENSG00000012983 | -0.96965 | 0.83389  | -0.53543 | 0.70382     | -0.78149    |          |         |
|           |                 | 0.78274  | -0.59654 | 0.72459  | 0.70382     | 0.840513383 |          |         |
| NA        | ENSG00000255396 | -0.53548 | 0.70384  | -0.92797 | 0.82329     | -0.92797    | 0.82329  |         |
|           |                 | -0.92797 | 0.82329  | 0.70384  | 0.840516669 |             |          |         |
| RNU6-194P | ENSG00000200732 | -0.85386 | 0.80341  | -0.85386 | 0.80341     | -0.85386    |          |         |
|           |                 | 0.80341  | -0.53564 | 0.7039   | 0.7039      | 0.840559064 |          |         |
| MRPS36    | ENSG00000134056 | -0.56338 | 0.71341  | -0.91418 | 0.81969     | -0.53568    |          |         |
|           |                 | 0.70391  | -1.0869  | 0.86145  | 0.70391     | 0.840559064 |          |         |
| NA        | ENSG00000232193 | -0.53586 | 0.70397  | -0.62509 | 0.73404     | -0.62509    | 0.73404  |         |
|           |                 | -0.62509 | 0.73404  | 0.70397  | 0.840600559 |             |          |         |
| NA        | ENSG00000279721 | -1.4113  | 0.92092  | -1.6139  | 0.94673     | -1.6174     | 0.9471   |         |
|           |                 | -0.53604 | 0.70403  | 0.70403  | 0.840600559 |             |          |         |
| NALT1     | ENSG00000237886 | -0.53607 | 0.70405  | -0.53607 | 0.70405     | -0.53607    | 0.70405  |         |
|           |                 | -0.53607 | 0.70405  | 0.70405  | 0.840600559 |             |          |         |
| MIR3143   | ENSG00000265565 | -0.53609 | 0.70405  | -0.53609 | 0.70405     | -0.53609    |          |         |
|           |                 | 0.70405  | -0.53609 | 0.70405  | 0.70405     | 0.840600559 |          |         |
| H2AC12    | ENSG00000274997 | -0.53609 | 0.70405  | -0.53609 | 0.70405     | -0.53609    |          |         |
|           |                 | 0.70405  | -0.53609 | 0.70405  | 0.70405     | 0.840600559 |          |         |
| ATP6V1H   | ENSG00000047249 | -1.731   | 0.95827  | -1.0593  | 0.85528     | -1.7433     |          |         |
|           |                 | 0.95936  | -0.53613 | 0.70406  | 0.70406     | 0.840600559 |          |         |
| NA        | ENSG00000263830 | -0.53617 | 0.70408  | -0.53617 | 0.70408     | -0.53617    | 0.70408  |         |
|           |                 | -0.53617 | 0.70408  | 0.70408  | 0.840600559 |             |          |         |
| ALPI      | ENSG00000163295 | -0.53623 | 0.7041   | -0.53623 | 0.7041      | -0.53623    | 0.7041   |         |
|           |                 | -0.53623 | 0.7041   | 0.7041   | 0.840600559 |             |          |         |
| NA        | ENSG00000255031 | -0.81968 | 0.7938   | -0.53623 | 0.7041      | -0.81968    | 0.7938   |         |
|           |                 | -0.81968 | 0.7938   | 0.7041   | 0.840600559 |             |          |         |
| SPATA48   | ENSG00000164500 | -0.9442  | 0.82747  | -1.1104  | 0.86659     | -0.53634    |          |         |
|           |                 | 0.70414  | -0.84612 | 0.80126  | 0.70414     | 0.840627718 |          |         |
| NA        | ENSG00000254728 | -0.53643 | 0.70417  | -1.021   | 0.84638     | -1.4821     | 0.93084  |         |
|           |                 | -1.3615  | 0.91332  | 0.70417  | 0.840642938 |             |          |         |
| RNU7-50P  | ENSG00000238304 | -0.53664 | 0.70424  | -0.53664 | 0.70424     | -0.53664    |          |         |
|           |                 | 0.70424  | -0.53664 | 0.70424  | 0.70424     | 0.840705909 |          |         |
| CD1E      | ENSG00000158488 | -0.53675 | 0.70428  | -0.53675 | 0.70428     | -0.53675    | 0.70428  |         |
|           |                 | -0.94279 | 0.82711  | 0.70428  | 0.840712469 |             |          |         |
| NA        | ENSG00000261276 | -0.53674 | 0.70428  | -1.033   | 0.8492      | -0.53674    | 0.70428  |         |
|           |                 | -0.53674 | 0.70428  | 0.70428  | 0.840712469 |             |          |         |
| TPPP2     | ENSG00000179636 | -0.79533 | 0.78679  | -0.53692 | 0.70434     | -0.79533    | 0.78679  |         |
|           |                 | -0.79533 | 0.78679  | 0.70434  | 0.840732145 |             |          |         |
| C6orf226  | ENSG00000221821 | -0.53696 | 0.70435  | -2.0955  | 0.98193     | -2.0955     |          |         |
|           |                 | 0.98193  | -2.0955  | 0.98193  | 0.70435     | 0.840732145 |          |         |
| EPB42     | ENSG00000166947 | -0.89592 | 0.81485  | -0.53699 | 0.70436     | -0.82082    | 0.79412  |         |
|           |                 | -0.60356 | 0.72693  | 0.70436  | 0.840732145 |             |          |         |
| GABRA2    | ENSG00000151834 | -1.0365  | 0.85     | -0.53708 | 0.70439     | -0.95298    | 0.8297   |         |

|             |                 |          |             |             |             |          |          |          |
|-------------|-----------------|----------|-------------|-------------|-------------|----------|----------|----------|
|             | -0.95107        | 0.82922  | 0.70439     | 0.840732145 |             |          |          |          |
| RNU6-223P   | ENSG00000199700 | -0.53711 | 0.7044      | -0.53711    | 0.7044      | -0.53711 | 0.7044   | -0.53711 |
|             | 0.7044          | -0.53711 | 0.7044      | 0.7044      | 0.840732145 |          |          |          |
| LINC02416   | ENSG00000257924 | -0.53711 | 0.7044      | 0.7044      | -0.53711    | 0.7044   | -0.53711 |          |
|             | 0.7044          | -0.53711 | 0.7044      | 0.7044      | 0.840732145 |          |          |          |
| MIR4694     | ENSG00000264309 | -0.73234 | 0.76802     | -0.81657    | 0.79291     | -0.53719 |          |          |
|             | 0.70443         | -0.73234 | 0.76802     | 0.70443     | 0.840747358 |          |          |          |
| NA          | ENSG00000251520 | -0.53734 | 0.70448     | -0.53734    | 0.70448     | -0.53734 | 0.70448  |          |
|             | -0.53734        | 0.70448  | 0.70448     | 0.840769127 |             |          |          |          |
| NA          | ENSG00000228238 | -0.53735 | 0.70449     | -0.53735    | 0.70449     | -0.53735 | 0.70449  |          |
|             | -0.53735        | 0.70449  | 0.70449     | 0.840769127 |             |          |          |          |
| OGDHL       | ENSG00000197444 | -0.67569 | 0.75038     | -0.62256    | 0.73321     | -0.53739 | 0.7045   |          |
|             | -1.0189         | 0.84587  | 0.7045      | 0.840769127 |             |          |          |          |
| NA          | ENSG00000261195 | -0.53762 | 0.70458     | -1.8167     | 0.96537     | -0.53762 | 0.70458  |          |
|             | -0.53762        | 0.70458  | 0.70458     | 0.840844009 |             |          |          |          |
| RNU1-34P    | ENSG00000201291 | -0.85859 | 0.80472     | -0.53767    | 0.7046      | -0.53767 |          |          |
|             | 0.7046          | -0.53767 | 0.7046      | 0.7046      | 0.840847284 |          |          |          |
| ARMH4       | ENSG00000139971 | -0.8129  | 0.79186     | -0.81673    | 0.79296     | -0.53778 | 0.70464  |          |
|             | -0.5632         | 0.71335  | 0.70464     | 0.840853835 |             |          |          |          |
| PCDHA4      | ENSG00000204967 | -0.57135 | 0.71612     | -0.57135    | 0.71612     | -0.92541 |          |          |
|             | 0.82262         | -0.53779 | 0.70464     | 0.70464     | 0.840853835 |          |          |          |
| NA          | ENSG00000225181 | -0.57717 | 0.71809     | -0.53784    | 0.70466     | -0.57717 | 0.71809  |          |
|             | -0.57717        | 0.71809  | 0.70466     | 0.84085711  |             |          |          |          |
| NA          | ENSG00000256690 | -0.53811 | 0.70475     | -0.53811    | 0.70475     | -0.53811 | 0.70475  |          |
|             | -0.53811        | 0.70475  | 0.70475     | 0.840935253 |             |          |          |          |
| RN7SL689P   | ENSG00000263432 | -0.53813 | 0.70476     | -0.53813    | 0.70476     | -0.53813 |          |          |
|             | 0.70476         | -0.53813 | 0.70476     | 0.70476     | 0.840935253 |          |          |          |
| NA          | ENSG00000212031 | -0.95298 | 0.8297      | -0.53829    | 0.70481     | -0.78303 | 0.78319  |          |
|             | -0.78303        | 0.78319  | 0.70481     | 0.840974322 |             |          |          |          |
| RNU4ATAC10P | ENSG00000252776 | -0.91446 | 0.81976     | -0.53833    | 0.70483     | -0.63447 |          |          |
|             | 0.73711         | -1.8128  | 0.96507     | 0.70483     | 0.840977594 |          |          |          |
| NA          | ENSG00000250075 | -0.53853 | 0.70489     | -0.53853    | 0.70489     | -1.0196  | 0.84604  |          |
|             | -0.91372        | 0.81957  | 0.70489     | 0.841028591 |             |          |          |          |
| MIR1343     | ENSG00000251862 | -1.2884  | 0.9012      | -0.53856    | 0.70491     | -0.53856 |          |          |
|             | 0.70491         | -0.53856 | 0.70491     | 0.70491     | 0.841031861 |          |          |          |
| CHERP       | ENSG00000085872 | -0.53867 | 0.70494     | -0.6899     | 0.75487     | -1.4826  | 0.93091  |          |
|             | -0.6899         | 0.75487  | 0.70494     | 0.841038401 |             |          |          |          |
| ASXL2       | ENSG00000143970 | -0.6284  | 0.73513     | -0.53869    | 0.70495     | -1.0134  | 0.84455  |          |
|             | -0.83632        | 0.79851  | 0.70495     | 0.841038401 |             |          |          |          |
| TOPAZ1      | ENSG00000173769 | -2.3172  | 0.98975     | -1.3282     | 0.90794     | -1.781   |          |          |
|             | 0.96255         | -0.53887 | 0.70501     | 0.70501     | 0.841057044 |          |          |          |
| BHLHA15     | ENSG00000180535 | -1.4325  | 0.924       | -1.4325     | 0.924       | -1.4325  | 0.924    | -0.53887 |
|             | 0.70501         | 0.70501  | 0.841057044 |             |             |          |          |          |
| LINC02173   | ENSG00000249613 | -0.53902 | 0.70506     | -0.53902    | 0.70506     | -0.53902 |          |          |
|             | 0.70506         | -0.53902 | 0.70506     | 0.70506     | 0.841057044 |          |          |          |
| NA          | ENSG00000199490 | -0.53904 | 0.70507     | -0.53904    | 0.70507     | -0.53904 | 0.70507  |          |
|             | -0.53904        | 0.70507  | 0.70507     | 0.841057044 |             |          |          |          |
| SH3GLB2     | ENSG00000148341 | -0.97569 | 0.83539     | -0.64149    | 0.7394      | -1.1447  |          |          |
|             | 0.87383         | -0.53913 | 0.7051      | 0.7051      | 0.841057044 |          |          |          |
| NA          | ENSG00000253980 | -0.53913 | 0.7051      | -0.53913    | 0.7051      | -1.1827  | 0.88154  |          |
|             | -0.53913        | 0.7051   | 0.7051      | 0.841057044 |             |          |          |          |
| NA          | ENSG00000255179 | -0.53912 | 0.7051      | -0.55741    | 0.71138     | -0.55741 | 0.71138  |          |
|             | -0.55741        | 0.71138  | 0.7051      | 0.841057044 |             |          |          |          |
| COQ4        | ENSG00000167113 | -1.3289  | 0.90806     | -0.53924    | 0.70514     | -1.3723  | 0.91502  |          |
|             | -0.93801        | 0.82588  | 0.70514     | 0.841057044 |             |          |          |          |
| CCAR1       | ENSG00000060339 | -1.2188  | 0.88854     | -0.53927    | 0.70515     | -1.0663  | 0.85685  |          |
|             | -0.86529        | 0.80656  | 0.70515     | 0.841057044 |             |          |          |          |
| NA          | ENSG00000221664 | -0.53929 | 0.70516     | -0.53929    | 0.70516     | -0.53929 | 0.70516  |          |
|             | -0.53929        | 0.70516  | 0.70516     | 0.841057044 |             |          |          |          |
| PPIAP60     | ENSG00000226961 | -0.58444 | 0.72054     | -0.56001    | 0.71226     | -0.53935 |          |          |
|             | 0.70518         | -0.53935 | 0.70518     | 0.70518     | 0.841057044 |          |          |          |
| NA          | ENSG00000265662 | -0.53937 | 0.70518     | -0.53937    | 0.70518     | -0.53937 | 0.70518  |          |

|            |                 |          |             |         |             |             |          |         |  |
|------------|-----------------|----------|-------------|---------|-------------|-------------|----------|---------|--|
|            |                 | -0.53937 | 0.70518     | 0.70518 | 0.841057044 |             |          |         |  |
| NA         | ENSG00000257141 | -0.5394  | 0.70519     | 0.70519 | -0.5394     | 0.70519     | -0.5394  | 0.70519 |  |
|            |                 | -0.5394  | 0.70519     | 0.70519 | 0.841057044 |             |          |         |  |
| SPRR2D     | ENSG00000163216 | -0.54758 | 0.70801     | 0.70801 | -0.53948    | 0.70522     | -0.60829 |         |  |
|            |                 | 0.7285   | -0.54758    | 0.70801 | 0.70522     | 0.841072239 |          |         |  |
| CALR3      | ENSG00000269058 | -0.53959 | 0.70526     | 0.70526 | -0.53959    | 0.70526     | -0.53959 | 0.70526 |  |
|            |                 | -0.53959 | 0.70526     | 0.70526 | 0.841099359 |             |          |         |  |
| RPS3A      | ENSG00000145425 | -1.225   | 0.88972     | 0.88972 | -1.8606     | 0.9686      | -1.225   | 0.88972 |  |
|            |                 | -0.53963 | 0.70528     | 0.70528 | 0.841102626 |             |          |         |  |
| RPS3P6     | ENSG00000213363 | -0.53972 | 0.70531     | 0.70531 | -0.80822    | 0.79052     | -1.7269  |         |  |
|            |                 | 0.95791  | -1.7269     | 0.95791 | 0.70531     | 0.841117819 |          |         |  |
| NA         | ENSG00000246379 | -0.53996 | 0.70539     | 0.70539 | -0.77734    | 0.78152     | -0.77734 | 0.78152 |  |
|            |                 | -0.54088 | 0.70571     | 0.70539 | 0.841192636 |             |          |         |  |
| NA         | ENSG00000283399 | -0.54015 | 0.70545     | 0.70545 | -0.62053    | 0.73255     | -0.54015 | 0.70545 |  |
|            |                 | -0.54015 | 0.70545     | 0.70545 | 0.841214354 |             |          |         |  |
| SBF2-AS1   | ENSG00000246273 | -0.54017 | 0.70546     | 0.70546 | -0.72324    | 0.76523     | -0.54017 |         |  |
|            |                 | 0.70546  | -0.54017    | 0.70546 | 0.70546     | 0.841214354 |          |         |  |
| NA         | ENSG00000264263 | -0.56519 | 0.71403     | 0.71403 | -0.82772    | 0.79609     | -0.54017 | 0.70546 |  |
|            |                 | -0.84017 | 0.79959     | 0.70546 | 0.841214354 |             |          |         |  |
| LINC00174  | ENSG00000179406 | -0.97282 | 0.83468     | 0.83468 | -1.2123     | 0.8873      | -0.91665 |         |  |
|            |                 | 0.82034  | -0.54059    | 0.7056  | 0.7056      | 0.841360707 |          |         |  |
| WRBP1      | ENSG00000248633 | -0.54083 | 0.70569     | 0.70569 | -0.54083    | 0.70569     | -0.54083 | 0.70569 |  |
|            |                 | -0.54083 | 0.70569     | 0.70569 | 0.841424697 |             |          |         |  |
| METTL14-DT | ENSG00000281731 | -0.54088 | 0.7057      | 0.7057  | -0.57552    | 0.71753     | -2.1121  |         |  |
|            |                 | 0.98266  | -0.65386    | 0.7434  | 0.7057      | 0.841424697 |          |         |  |
| PDCL3P7    | ENSG00000256777 | -0.54096 | 0.70573     | 0.70573 | -1.7049     | 0.9559      | -0.72286 |         |  |
|            |                 | 0.76512  | -0.72286    | 0.76512 | 0.70573     | 0.841424697 |          |         |  |
| NA         | ENSG00000279022 | -0.54095 | 0.70573     | 0.70573 | -0.54095    | 0.70573     | -0.54095 | 0.70573 |  |
|            |                 | -0.54095 | 0.70573     | 0.70573 | 0.841424697 |             |          |         |  |
| NA         | ENSG00000259422 | -0.541   | 0.70574     | 0.70574 | -1.1242     | 0.86954     | -0.97057 | 0.83412 |  |
|            |                 | -1.4318  | 0.9239      | 0.70574 | 0.841424697 |             |          |         |  |
| TERB2      | ENSG00000167014 | -0.72869 | 0.7669      | 0.7669  | -0.54116    | 0.7058      | -1.4253  | 0.92296 |  |
|            |                 | -0.62632 | 0.73445     | 0.7058  | 0.841466979 |             |          |         |  |
| KIAA0232   | ENSG00000170871 | -0.54119 | 0.70581     | 0.70581 | -1.511      | 0.9346      | -0.91663 |         |  |
|            |                 | 0.82033  | -0.8569     | 0.80425 | 0.70581     | 0.841466979 |          |         |  |
| NA         | ENSG00000280099 | -0.54131 | 0.70585     | 0.70585 | -0.54131    | 0.70585     | -0.54131 | 0.70585 |  |
|            |                 | -0.54131 | 0.70585     | 0.70585 | 0.841485414 |             |          |         |  |
| SLC5A6     | ENSG00000138074 | -0.54133 | 0.70586     | 0.70586 | -1.1827     | 0.88154     | -1.1827  |         |  |
|            |                 | 0.88154  | -0.90145    | 0.81633 | 0.70586     | 0.841485414 |          |         |  |
| NA         | ENSG00000207387 | -0.54175 | 0.706       | 0.706   | -0.54175    | 0.706       | -0.54175 | 0.706   |  |
|            |                 | 0.706    | 0.841631724 |         |             |             |          |         |  |
| NA         | ENSG00000206651 | -0.54186 | 0.70604     | 0.70604 | -0.54186    | 0.70604     | -0.54186 | 0.70604 |  |
|            |                 | -0.54186 | 0.70604     | 0.70604 | 0.841658819 |             |          |         |  |
| NA         | ENSG00000268194 | -0.542   | 0.70609     | 0.70609 | -0.542      | 0.70609     | -0.542   | 0.70609 |  |
|            |                 | -0.542   | 0.70609     | 0.70609 | 0.841678329 |             |          |         |  |
| VPS8       | ENSG00000156931 | -0.84782 | 0.80173     | 0.80173 | -0.54203    | 0.7061      | -0.71497 | 0.76269 |  |
|            |                 | -0.61109 | 0.72943     | 0.7061  | 0.841678329 |             |          |         |  |
| NA         | ENSG00000268636 | -0.54205 | 0.70611     | 0.70611 | -0.54205    | 0.70611     | -0.54205 | 0.70611 |  |
|            |                 | -0.54205 | 0.70611     | 0.70611 | 0.841678329 |             |          |         |  |
| SLC6A4     | ENSG00000108576 | -0.92451 | 0.82239     | 0.82239 | -0.92451    | 0.82239     | -1.5902  |         |  |
|            |                 | 0.9441   | -0.54211    | 0.70613 | 0.70613     | 0.841678329 |          |         |  |
| TRAV12-3   | ENSG00000211794 | -1.0461  | 0.85225     | 0.85225 | -1.0461     | 0.85225     | -0.54216 |         |  |
|            |                 | 0.70615  | -1.0461     | 0.85225 | 0.70615     | 0.841678329 |          |         |  |
| NA         | ENSG00000249141 | -0.54221 | 0.70616     | 0.70616 | -0.54221    | 0.70616     | -0.54221 | 0.70616 |  |
|            |                 | -0.54221 | 0.70616     | 0.70616 | 0.841678329 |             |          |         |  |
| HMGCLL1    | ENSG00000146151 | -1.9506  | 0.97445     | 0.97445 | -1.3376     | 0.90948     | -0.58004 |         |  |
|            |                 | 0.71905  | -0.54233    | 0.7062  | 0.7062      | 0.841684831 |          |         |  |
| NA         | ENSG00000267079 | -0.54233 | 0.7062      | 0.7062  | -0.71875    | 0.76385     | -0.54233 | 0.7062  |  |
|            |                 | -0.71875 | 0.76385     | 0.7062  | 0.841684831 |             |          |         |  |
| CYP1B1     | ENSG00000138061 | -1.5608  | 0.94071     | 0.94071 | -1.5608     | 0.94071     | -0.54244 |         |  |
|            |                 | 0.70624  | -0.79277    | 0.78604 | 0.70624     | 0.841711918 |          |         |  |
| NA         | ENSG00000167945 | -1.3838  | 0.9168      | 0.9168  | -0.84641    | 0.80134     | -0.54253 | 0.70627 |  |

|           |                 |          |          |          |             |             |         |          |
|-----------|-----------------|----------|----------|----------|-------------|-------------|---------|----------|
|           |                 | -0.96774 | 0.83341  | 0.70627  | 0.841724917 |             |         |          |
| HMG2P23   | ENSG00000236124 | -0.54258 | 0.70629  | -0.54258 | 0.70629     | -0.54258    | 0.70629 | -0.54258 |
|           |                 | 0.70629  | -0.54258 | 0.70629  | 0.70629     | 0.841724917 |         |          |
| COX16     | ENSG00000133983 | -0.54266 | 0.70632  | -1.4737  | 0.92972     | -1.144      | 0.87368 |          |
|           |                 | -1.144   | 0.87368  | 0.70632  | 0.841724917 |             |         |          |
| NA        | ENSG00000270171 | -0.54265 | 0.70632  | -1.5989  | 0.94508     | -0.54265    | 0.70632 |          |
|           |                 | -0.54265 | 0.70632  | 0.70632  | 0.841724917 |             |         |          |
| DUOXA1    | ENSG00000140254 | -1.5457  | 0.93892  | -0.54282 | 0.70637     | -1.5457     |         |          |
|           |                 | 0.93892  | -1.5457  | 0.93892  | 0.70637     | 0.841763917 |         |          |
| MTND4P1   | ENSG00000228597 | -0.54323 | 0.70651  | -0.54323 | 0.70651     | -0.54323    |         |          |
|           |                 | 0.70651  | -0.54323 | 0.70651  | 0.70651     | 0.841859208 |         |          |
| NA        | ENSG00000228838 | -0.54325 | 0.70652  | -0.54325 | 0.70652     | -0.54325    | 0.70652 |          |
|           |                 | -0.54325 | 0.70652  | 0.70652  | 0.841859208 |             |         |          |
| NA        | ENSG00000253455 | -0.61511 | 0.73076  | -0.61511 | 0.73076     | -0.61511    | 0.73076 |          |
|           |                 | -0.54323 | 0.70652  | 0.70652  | 0.841859208 |             |         |          |
| NA        | ENSG00000248359 | -0.54327 | 0.70653  | -0.54327 | 0.70653     | -0.54327    | 0.70653 |          |
|           |                 | -0.54327 | 0.70653  | 0.70653  | 0.841859208 |             |         |          |
| WDR55     | ENSG00000120314 | -0.54334 | 0.70655  | -0.86227 | 0.80573     | -0.54334    | 0.70655 |          |
|           |                 | -0.54334 | 0.70655  | 0.70655  | 0.841859208 |             |         |          |
| TPM4P1    | ENSG00000232230 | -0.54337 | 0.70656  | -1.3631  | 0.91357     | -1.3631     |         |          |
|           |                 | 0.91357  | -1.3631  | 0.91357  | 0.70656     | 0.841859208 |         |          |
| SNORD111B | ENSG00000221514 | -0.54351 | 0.70661  | -0.54351 | 0.70661     | -0.54351    |         |          |
|           |                 | 0.70661  | -0.54351 | 0.70661  | 0.70661     | 0.841859208 |         |          |
| ATP5F1CP1 | ENSG00000224004 | -0.54355 | 0.70662  | -0.61369 | 0.73029     | -1.1832     |         |          |
|           |                 | 0.88163  | -1.6226  | 0.94766  | 0.70662     | 0.841859208 |         |          |
| LINC01053 | ENSG00000238169 | -0.54353 | 0.70662  | -1.6096  | 0.94626     | -0.54353    |         |          |
|           |                 | 0.70662  | -0.54353 | 0.70662  | 0.70662     | 0.841859208 |         |          |
| NA        | ENSG00000261061 | -0.54357 | 0.70663  | -0.54357 | 0.70663     | -0.54357    | 0.70663 |          |
|           |                 | -0.54357 | 0.70663  | 0.70663  | 0.841859208 |             |         |          |
| SMU1      | ENSG00000122692 | -0.95795 | 0.83096  | -0.54359 | 0.70664     | -0.72677    | 0.76632 |          |
|           |                 | -0.73142 | 0.76774  | 0.70664  | 0.841859208 |             |         |          |
| NA        | ENSG00000259945 | -0.54373 | 0.70669  | -0.54373 | 0.70669     | -0.54373    | 0.70669 |          |
|           |                 | -0.54373 | 0.70669  | 0.70669  | 0.841868943 |             |         |          |
| NA        | ENSG00000260894 | -0.54373 | 0.70669  | -0.54373 | 0.70669     | -0.54373    | 0.70669 |          |
|           |                 | -0.54373 | 0.70669  | 0.70669  | 0.841868943 |             |         |          |
| NA        | ENSG00000200179 | -0.54376 | 0.7067   | -0.54376 | 0.7067      | -0.54376    | 0.7067  |          |
|           |                 | -0.54376 | 0.7067   | 0.7067   | 0.841868943 |             |         |          |
| NA        | ENSG00000251648 | -0.54405 | 0.7068   | -0.8102  | 0.79109     | -0.95172    | 0.82938 |          |
|           |                 | -1.4546  | 0.92711  | 0.7068   | 0.841967487 |             |         |          |
| SNORD70   | ENSG00000212534 | -0.54421 | 0.70685  | -0.54421 | 0.70685     | -0.54421    |         |          |
|           |                 | 0.70685  | -0.54421 | 0.70685  | 0.70685     | 0.842004278 |         |          |
| H3-3A     | ENSG00000163041 | -0.54431 | 0.70689  | -0.99199 | 0.8394      | -0.54431    | 0.70689 |          |
|           |                 | -1.3413  | 0.91008  | 0.70689  | 0.842004278 |             |         |          |
| FAM174A   | ENSG00000174132 | -0.91199 | 0.81911  | -0.54433 | 0.70689     | -1.8915     |         |          |
|           |                 | 0.97072  | -1.8915  | 0.97072  | 0.70689     | 0.842004278 |         |          |
| NA        | ENSG00000253574 | -0.54435 | 0.7069   | -0.54435 | 0.7069      | -0.54435    | 0.7069  |          |
|           |                 | -0.54435 | 0.7069   | 0.7069   | 0.842004278 |             |         |          |
| HNRNPKP5  | ENSG00000250662 | -0.54442 | 0.70692  | -0.93093 | 0.82405     | -0.54442    |         |          |
|           |                 | 0.70692  | -0.54442 | 0.70692  | 0.70692     | 0.842007519 |         |          |
| FBL       | ENSG00000105202 | -0.63851 | 0.73843  | -0.54458 | 0.70698     | -0.63851    | 0.73843 |          |
|           |                 | -0.63851 | 0.73843  | 0.70698  | 0.842049731 |             |         |          |
| NA        | ENSG00000262133 | -0.54462 | 0.70699  | -1.8472  | 0.96764     | -0.76408    | 0.77759 |          |
|           |                 | -0.76436 | 0.77767  | 0.70699  | 0.842049731 |             |         |          |
| HDAC9-AS1 | ENSG00000226522 | -0.69198 | 0.75552  | -0.54484 | 0.70707     | -0.69198    |         |          |
|           |                 | 0.75552  | -0.69198 | 0.75552  | 0.70707     | 0.842103849 |         |          |
| DOC2GP    | ENSG00000231793 | -0.54483 | 0.70707  | -0.54483 | 0.70707     | -0.54483    |         |          |
|           |                 | 0.70707  | -0.54483 | 0.70707  | 0.70707     | 0.842103849 |         |          |
| NA        | ENSG00000200982 | -0.54501 | 0.70713  | -0.54501 | 0.70713     | -0.54501    | 0.70713 |          |
|           |                 | -1.205   | 0.8859   | 0.70713  | 0.842134144 |             |         |          |
| NA        | ENSG00000241269 | -0.91313 | 0.81941  | -0.54502 | 0.70713     | -1.2785     | 0.89946 |          |
|           |                 | -1.2785  | 0.89946  | 0.70713  | 0.842134144 |             |         |          |
| JAG1      | ENSG00000101384 | -1.1388  | 0.87261  | -0.63742 | 0.73807     | -0.60062    | 0.72595 |          |



|           |                 |          |          |         |             |             |          |         |  |
|-----------|-----------------|----------|----------|---------|-------------|-------------|----------|---------|--|
|           |                 | -0.54545 | 0.70728  | 0.70728 | 0.842229275 |             |          |         |  |
| SFXN4P1   | ENSG00000270390 | -0.54552 | 0.7073   | 0.7073  | -0.54552    | 0.7073      | -0.54552 |         |  |
|           |                 | 0.7073   | -0.54552 | 0.7073  | 0.7073      | 0.842229275 |          |         |  |
| NA        | ENSG00000271240 | -0.54554 | 0.70731  | 0.70731 | -0.54554    | 0.70731     | -0.54554 | 0.70731 |  |
|           |                 | -0.54554 | 0.70731  | 0.70731 | 0.842229275 |             |          |         |  |
| NA        | ENSG00000261534 | -0.8312  | 0.79707  | 0.79707 | -0.54557    | 0.70732     | -0.54557 | 0.70732 |  |
|           |                 | -0.54557 | 0.70732  | 0.70732 | 0.842229275 |             |          |         |  |
| NA        | ENSG00000269980 | -0.54557 | 0.70732  | 0.70732 | -0.54557    | 0.70732     | -0.54557 | 0.70732 |  |
|           |                 | -0.54557 | 0.70732  | 0.70732 | 0.842229275 |             |          |         |  |
| NA        | ENSG00000280348 | -0.54559 | 0.70733  | 0.70733 | -0.54559    | 0.70733     | -0.54559 | 0.70733 |  |
|           |                 | -0.54559 | 0.70733  | 0.70733 | 0.842229275 |             |          |         |  |
| HSD17B14  | ENSG00000087076 | -2.8539  | 0.99784  | 0.99784 | -2.244      | 0.98759     | -2.8539  |         |  |
|           |                 | 0.99784  | -0.54562 | 0.70734 | 0.70734     | 0.842229275 |          |         |  |
| NA        | ENSG00000236358 | -0.54565 | 0.70735  | 0.70735 | -0.82944    | 0.79657     | -0.54565 | 0.70735 |  |
|           |                 | -0.54565 | 0.70735  | 0.70735 | 0.842229275 |             |          |         |  |
| NA        | ENSG00000268367 | -0.97345 | 0.83484  | 0.83484 | -0.54574    | 0.70738     | -1.6328  | 0.94875 |  |
|           |                 | -1.6699  | 0.95253  | 0.70738 | 0.842229275 |             |          |         |  |
| TMEM14C   | ENSG00000111843 | -0.8865  | 0.81233  | 0.81233 | -1.9866     | 0.97652     | -1.1436  |         |  |
|           |                 | 0.87361  | -0.54582 | 0.7074  | 0.7074      | 0.842229275 |          |         |  |
| IARS2P1   | ENSG00000251563 | -1.1711  | 0.87922  | 0.87922 | -0.54579    | 0.7074      | -1.1754  |         |  |
|           |                 | 0.88009  | -1.1754  | 0.88009 | 0.7074      | 0.842229275 |          |         |  |
| MTCO3P15  | ENSG00000254895 | -0.54593 | 0.70744  | 0.70744 | -0.54593    | 0.70744     | -0.54593 |         |  |
|           |                 | 0.70744  | -0.54593 | 0.70744 | 0.70744     | 0.842238977 |          |         |  |
| RNFT1-DT  | ENSG00000267302 | -0.54596 | 0.70745  | 0.70745 | -0.54596    | 0.70745     | -0.54596 |         |  |
|           |                 | 0.70745  | -0.54596 | 0.70745 | 0.70745     | 0.842238977 |          |         |  |
| TRIM48    | ENSG00000150244 | -0.76965 | 0.77925  | 0.77925 | -1.1016     | 0.86468     | -0.84689 |         |  |
|           |                 | 0.80147  | -0.54597 | 0.70746 | 0.70746     | 0.842238977 |          |         |  |
| RNU6-68P  | ENSG00000252385 | -1.3595  | 0.91301  | 0.91301 | -0.54608    | 0.70749     | -0.99184 |         |  |
|           |                 | 0.83936  | -1.2636  | 0.89682 | 0.70749     | 0.842254115 |          |         |  |
| ETV7-AS1  | ENSG00000224666 | -0.54619 | 0.70753  | 0.70753 | -0.54619    | 0.70753     | -0.54619 |         |  |
|           |                 | 0.70753  | -0.54619 | 0.70753 | 0.70753     | 0.842259404 |          |         |  |
| RPL5P34   | ENSG00000234009 | -0.74706 | 0.77249  | 0.77249 | -0.54619    | 0.70753     | -0.76231 |         |  |
|           |                 | 0.77706  | -0.54619 | 0.70753 | 0.70753     | 0.842259404 |          |         |  |
| NLRP4     | ENSG00000160505 | -0.77985 | 0.78226  | 0.78226 | -0.54625    | 0.70755     | -0.54625 | 0.70755 |  |
|           |                 | -0.54625 | 0.70755  | 0.70755 | 0.842259404 |             |          |         |  |
| TRIP4     | ENSG00000103671 | -1.1569  | 0.87635  | 0.87635 | -0.73852    | 0.7699      | -0.89707 | 0.81516 |  |
|           |                 | -0.54638 | 0.7076   | 0.7076  | 0.842259404 |             |          |         |  |
| RBP2      | ENSG00000114113 | -0.90582 | 0.81748  | 0.81748 | -0.88786    | 0.81269     | -0.54639 | 0.7076  |  |
|           |                 | -0.90582 | 0.81748  | 0.7076  | 0.842259404 |             |          |         |  |
| SERTAD4   | ENSG00000082497 | -0.54642 | 0.70761  | 0.70761 | -0.54642    | 0.70761     | -0.54642 |         |  |
|           |                 | 0.70761  | -0.54642 | 0.70761 | 0.70761     | 0.842259404 |          |         |  |
| TYW5      | ENSG00000162971 | -0.78377 | 0.78341  | 0.78341 | -0.5465     | 0.70764     | -0.71214 | 0.76181 |  |
|           |                 | -1.397   | 0.91879  | 0.70764 | 0.842259404 |             |          |         |  |
| KRT12     | ENSG00000187242 | -0.54651 | 0.70764  | 0.70764 | -0.71692    | 0.76329     | -0.87964 | 0.81047 |  |
|           |                 | -1.0122  | 0.84427  | 0.70764 | 0.842259404 |             |          |         |  |
| NA        | ENSG00000256502 | -0.54652 | 0.70765  | 0.70765 | -0.54652    | 0.70765     | -0.54652 | 0.70765 |  |
|           |                 | -0.54652 | 0.70765  | 0.70765 | 0.842259404 |             |          |         |  |
| NA        | ENSG00000272940 | -0.54658 | 0.70767  | 0.70767 | -0.54658    | 0.70767     | -0.54658 | 0.70767 |  |
|           |                 | -0.54658 | 0.70767  | 0.70767 | 0.842262636 |             |          |         |  |
| CTNNB1    | ENSG00000168036 | -0.83065 | 0.79691  | 0.79691 | -0.54664    | 0.70769     | -0.74417 |         |  |
|           |                 | 0.77161  | -1.0922  | 0.86262 | 0.70769     | 0.842265868 |          |         |  |
| MSH2      | ENSG00000095002 | -0.60905 | 0.72875  | 0.72875 | -0.54677    | 0.70773     | -0.72869 | 0.76691 |  |
|           |                 | -1.1447  | 0.87384  | 0.70773 | 0.842292903 |             |          |         |  |
| ARID1B    | ENSG00000049618 | -1.7039  | 0.9558   | 0.9558  | -1.9668     | 0.9754      | -0.54699 |         |  |
|           |                 | 0.70781  | -0.92872 | 0.82348 | 0.70781     | 0.842362098 |          |         |  |
| OR51A1P   | ENSG00000176752 | -0.54705 | 0.70783  | 0.70783 | -0.54705    | 0.70783     | -0.54705 |         |  |
|           |                 | 0.70783  | -0.54705 | 0.70783 | 0.70783     | 0.842362098 |          |         |  |
| CCDC66    | ENSG00000180376 | -0.76015 | 0.77642  | 0.77642 | -0.72516    | 0.76582     | -1.2309  |         |  |
|           |                 | 0.89082  | -0.54708 | 0.70784 | 0.70784     | 0.842362098 |          |         |  |
| RN7SL809P | ENSG00000241217 | -0.54722 | 0.70789  | 0.70789 | -0.54722    | 0.70789     | -0.54722 |         |  |
|           |                 | 0.70789  | -0.54722 | 0.70789 | 0.70789     | 0.842401028 |          |         |  |
| NA        | ENSG00000275191 | -0.54733 | 0.70792  | 0.70792 | -0.54733    | 0.70792     | -0.54733 | 0.70792 |  |

|            |                 |          |          |          |             |             |         |          |
|------------|-----------------|----------|----------|----------|-------------|-------------|---------|----------|
|            |                 | -0.54733 | 0.70792  | 0.70792  | 0.842416156 |             |         |          |
| MTCYBP16   | ENSG00000251385 | -0.54749 | 0.70798  | -0.54749 | 0.70798     | -0.54749    | 0.70798 | -0.54749 |
|            |                 | 0.70798  | -0.54749 | 0.70798  | 0.70798     | 0.842466982 |         |          |
| RBBP4P1    | ENSG00000249485 | -0.70351 | 0.75913  | -0.70351 | 0.75913     | -0.63665    | 0.73783 | -1.5407  |
|            |                 | 0.9383   | -0.54764 | 0.70803  | 0.70803     | 0.842500459 |         |          |
| KRTAP9-9   | ENSG00000198083 | -0.54769 | 0.70805  | -0.54769 | 0.70805     | -0.54769    | 0.70805 | -0.54769 |
|            |                 | 0.70805  | -0.54769 | 0.70805  | 0.70805     | 0.842500459 |         |          |
| LINC00824  | ENSG00000254275 | -0.69579 | 0.75672  | -0.69579 | 0.75672     | -0.5667     | 0.71454 | -1.0826  |
|            |                 | 0.8605   | -0.54771 | 0.70806  | 0.70806     | 0.842500459 |         |          |
| ALG3       | ENSG00000214160 | -0.54779 | 0.70808  | -0.54779 | 0.70808     | -0.54779    | 0.70808 | 0.70808  |
|            |                 | -0.54779 | 0.70808  | 0.70808  | 0.842503685 |             |         |          |
| DPYS       | ENSG00000147647 | -0.69413 | 0.7562   | -0.69413 | 0.7562      | -0.5759     | 0.71766 | -0.5479  |
|            |                 | -0.77607 | 0.78115  | 0.70812  | 0.842530706 |             |         | 0.70812  |
| THAP7      | ENSG00000184436 | -0.54803 | 0.70817  | -0.54803 | 0.70817     | -0.54803    | 0.70817 | 0.70817  |
|            |                 | -0.54803 | 0.70817  | 0.70817  | 0.842549053 |             |         |          |
| NA         | ENSG00000223593 | -0.54805 | 0.70817  | -0.54805 | 0.70817     | -0.54805    | 0.70817 | 0.70817  |
|            |                 | -0.54805 | 0.70817  | 0.70817  | 0.842549053 |             |         |          |
| CSN1S2AP   | ENSG00000234124 | -0.67385 | 0.7498   | -0.67385 | 0.7498      | -0.5481     |         |          |
|            |                 | 0.70819  | -1.2442  | 0.89329  | 0.70819     | 0.842552277 |         |          |
| LSM6       | ENSG00000164167 | -0.54819 | 0.70822  | -0.54819 | 0.70822     | -0.54819    | 0.70822 | 0.70822  |
|            |                 | -0.54819 | 0.70822  | 0.70822  | 0.842567397 |             |         |          |
| CALML3-AS1 | ENSG00000205488 | -0.9894  | 0.83877  | -1.2893  | 0.90135     | -1.2893     |         |          |
|            |                 | 0.90135  | -0.54826 | 0.70824  | 0.70824     | 0.842570621 |         |          |
| NA         | ENSG00000258581 | -0.5484  | 0.70829  | -0.5484  | 0.70829     | -0.5484     | 0.70829 | 0.70829  |
|            |                 | -0.5484  | 0.70829  | 0.70829  | 0.842609533 |             |         |          |
| MAN2A1-DT  | ENSG00000271849 | -0.54849 | 0.70832  | -0.54849 | 0.70832     | -0.54849    | 0.70832 | -0.54849 |
|            |                 | 0.70832  | -0.54849 | 0.70832  | 0.70832     | 0.842617961 |         |          |
| TRAV29DV5  | ENSG00000211810 | -1.9478  | 0.97428  | -1.9478  | 0.97428     | -0.54859    |         |          |
|            |                 | 0.70836  | -1.9478  | 0.97428  | 0.70836     | 0.842617961 |         |          |
| RN7SL541P  | ENSG00000240250 | -0.95888 | 0.83119  | -1.234   | 0.89139     | -0.54862    |         |          |
|            |                 | 0.70837  | -0.79005 | 0.78525  | 0.70837     | 0.842617961 |         |          |
| TAF1B      | ENSG00000115750 | -0.8225  | 0.7946   | -0.5487  | 0.7084      | -0.55658    | 0.71109 | 0.71109  |
|            |                 | -0.92044 | 0.82133  | 0.7084   | 0.842617961 |             |         |          |
| NA         | ENSG00000270569 | -0.67125 | 0.74897  | -0.54883 | 0.70844     | -0.54883    | 0.70844 | 0.70844  |
|            |                 | -0.54883 | 0.70844  | 0.70844  | 0.842617961 |             |         |          |
| NA         | ENSG00000238282 | -1.459   | 0.92771  | -1.459   | 0.92771     | -2.5526     | 0.99465 | 0.99465  |
|            |                 | -0.54886 | 0.70845  | 0.70845  | 0.842617961 |             |         |          |
| NA         | ENSG00000240093 | -0.54888 | 0.70845  | -0.54888 | 0.70845     | -1.0912     | 0.86241 | 0.86241  |
|            |                 | -1.8306  | 0.96642  | 0.70845  | 0.842617961 |             |         |          |
| NA         | ENSG00000234683 | -0.5489  | 0.70846  | -0.5489  | 0.70846     | -0.5489     | 0.70846 | 0.70846  |
|            |                 | -0.5489  | 0.70846  | 0.70846  | 0.842617961 |             |         |          |
| IFI35      | ENSG00000068079 | -0.74754 | 0.77263  | -0.59948 | 0.72557     | -0.54891    | 0.70847 | 0.70847  |
|            |                 | -1.0476  | 0.85259  | 0.70847  | 0.842617961 |             |         |          |
| GPATCH2L   | ENSG00000089916 | -1.0174  | 0.84552  | -0.88681 | 0.81241     | -0.88681    |         |          |
|            |                 | 0.81241  | -0.54891 | 0.70847  | 0.70847     | 0.842617961 |         |          |
| MTND1P20   | ENSG00000226794 | -0.54898 | 0.70849  | -0.54898 | 0.70849     | -1.064      |         |          |
|            |                 | 0.85633  | -0.54898 | 0.70849  | 0.70849     | 0.842621182 |         |          |
| LEAP2      | ENSG00000164406 | -0.54915 | 0.70855  | -0.54915 | 0.70855     | -0.54915    | 0.70855 | 0.70855  |
|            |                 | -0.54915 | 0.70855  | 0.70855  | 0.842651409 |             |         |          |
| NA         | ENSG00000279648 | -0.7518  | 0.77391  | -0.7518  | 0.77391     | -0.7518     | 0.77391 | 0.77391  |
|            |                 | -0.54916 | 0.70855  | 0.70855  | 0.842651409 |             |         |          |
| MTND4P25   | ENSG00000226700 | -0.54925 | 0.70858  | -0.70221 | 0.75873     | -0.70221    |         |          |
|            |                 | 0.75873  | -0.70221 | 0.75873  | 0.70858     | 0.842654373 |         |          |
| NA         | ENSG00000227301 | -0.77433 | 0.78063  | -0.80486 | 0.78955     | -0.55215    | 0.70958 | 0.70958  |
|            |                 | -0.54926 | 0.70859  | 0.70859  | 0.842654373 |             |         |          |
| NA         | ENSG00000236731 | -0.60532 | 0.72752  | -1.7582  | 0.96065     | -0.60532    | 0.72752 | 0.72752  |
|            |                 | -0.54945 | 0.70865  | 0.70865  | 0.842654373 |             |         |          |
| GFI1       | ENSG00000162676 | -0.54948 | 0.70866  | -0.54948 | 0.70866     | -0.54948    | 0.70866 | 0.70866  |
|            |                 | -0.54948 | 0.70866  | 0.70866  | 0.842654373 |             |         |          |
| MTCYBP9    | ENSG00000229935 | -0.54947 | 0.70866  | -0.54947 | 0.70866     | -0.54947    | 0.70866 | 0.70866  |
|            |                 | 0.70866  | -0.54947 | 0.70866  | 0.70866     | 0.842654373 |         |          |
| IGHV3-43   | ENSG00000232216 | -0.54953 | 0.70868  | -0.54953 | 0.70868     | -0.54953    | 0.70868 | 0.70868  |

|           |                 |          |         |             |             |          |         |
|-----------|-----------------|----------|---------|-------------|-------------|----------|---------|
|           | 0.70868         | -0.54953 | 0.70868 | 0.70868     | 0.842654373 |          |         |
| MUC5AC    | ENSG00000215182 | -2.3611  | 0.99089 | -0.5497     | 0.70874     | -1.2363  |         |
|           | 0.89183         | -0.68946 | 0.75473 | 0.70874     | 0.842654373 |          |         |
| SERPIND1  | ENSG0000099937  | -0.67816 | 0.75116 | -0.80964    | 0.79093     | -1.1055  |         |
|           | 0.86553         | -0.54973 | 0.70875 | 0.70875     | 0.842654373 |          |         |
| NA        | ENSG00000255437 | -1.5777  | 0.94268 | -1.5777     | 0.94268     | -0.54972 | 0.70875 |
|           | -1.5777         | 0.94268  | 0.70875 | 0.842654373 |             |          |         |
| LORICRIN  | ENSG00000203782 | -0.54976 | 0.70876 | -0.54976    | 0.70876     | -0.54976 |         |
|           | 0.70876         | -0.54976 | 0.70876 | 0.70876     | 0.842654373 |          |         |
| PTMAP6    | ENSG00000237000 | -0.5676  | 0.71485 | -0.5676     | 0.71485     | -1.0255  |         |
|           | 0.84743         | -0.54977 | 0.70876 | 0.70876     | 0.842654373 |          |         |
| RN7SL681P | ENSG00000240966 | -0.54977 | 0.70876 | -0.54977    | 0.70876     | -0.54977 |         |
|           | 0.70876         | -0.54977 | 0.70876 | 0.70876     | 0.842654373 |          |         |
| SHOC1     | ENSG00000165181 | -0.62853 | 0.73517 | -1.1015     | 0.86467     | -0.80877 | 0.79067 |
|           | -0.55001        | 0.70884  | 0.70884 | 0.842658066 |             |          |         |
| KLHL2     | ENSG00000109466 | -1.1549  | 0.87593 | -0.55003    | 0.70885     | -0.81821 | 0.79338 |
|           | -0.56767        | 0.71487  | 0.70885 | 0.842658066 |             |          |         |
| NA        | ENSG00000227090 | -0.55019 | 0.7089  | -0.55019    | 0.7089      | -1.4942  | 0.93244 |
|           | -0.55019        | 0.7089   | 0.7089  | 0.842658066 |             |          |         |
| HMGB1P11  | ENSG00000230547 | -0.55024 | 0.70892 | -0.82153    | 0.79433     | -0.55024 |         |
|           | 0.70892         | -0.55024 | 0.70892 | 0.70892     | 0.842658066 |          |         |
| CTCF      | ENSG00000102974 | -1.0403  | 0.85091 | -1.1521     | 0.87536     | -0.78108 | 0.78262 |
|           | -0.55027        | 0.70893  | 0.70893 | 0.842658066 |             |          |         |
| NA        | ENSG00000240751 | -0.55051 | 0.70902 | -1.258      | 0.89581     | -1.258   | 0.89581 |
|           | -1.258          | 0.89581  | 0.70902 | 0.842658066 |             |          |         |
| RPL10A    | ENSG00000198755 | -0.55056 | 0.70903 | -0.55056    | 0.70903     | -0.55056 |         |
|           | 0.70903         | -0.55056 | 0.70903 | 0.70903     | 0.842658066 |          |         |
| NA        | ENSG00000261364 | -0.55055 | 0.70903 | -1.4295     | 0.92357     | -0.55055 | 0.70903 |
|           | -0.55055        | 0.70903  | 0.70903 | 0.842658066 |             |          |         |
| NA        | ENSG00000271146 | -0.55058 | 0.70904 | -0.55058    | 0.70904     | -0.55058 | 0.70904 |
|           | -0.55058        | 0.70904  | 0.70904 | 0.842658066 |             |          |         |
| TFDP1     | ENSG00000198176 | -1.4038  | 0.91981 | -0.55066    | 0.70907     | -0.91062 | 0.81875 |
|           | -1.2323         | 0.89108  | 0.70907 | 0.842658066 |             |          |         |
| NA        | ENSG00000267016 | -0.55068 | 0.70907 | -1.5983     | 0.94501     | -0.76594 | 0.77814 |
|           | -1.4662         | 0.9287   | 0.70907 | 0.842658066 |             |          |         |
| NA        | ENSG00000282849 | -0.70814 | 0.76057 | -0.55068    | 0.70907     | -1.7986  | 0.96396 |
|           | -1.6906         | 0.95454  | 0.70907 | 0.842658066 |             |          |         |
| GNAI1     | ENSG00000127955 | -0.58716 | 0.72145 | -0.98018    | 0.8365      | -0.73378 | 0.76846 |
|           | -0.55073        | 0.70909  | 0.70909 | 0.842658066 |             |          |         |
| SPINK9    | ENSG00000204909 | -2.4984  | 0.99376 | -0.55976    | 0.71218     | -1.6236  |         |
|           | 0.94777         | -0.55074 | 0.70909 | 0.70909     | 0.842658066 |          |         |
| NA        | ENSG00000237259 | -0.55072 | 0.70909 | -0.55072    | 0.70909     | -0.55072 | 0.70909 |
|           | -0.55072        | 0.70909  | 0.70909 | 0.842658066 |             |          |         |
| CLEC10A   | ENSG00000132514 | -0.55078 | 0.70911 | -0.81646    | 0.79288     | -0.55078 |         |
|           | 0.70911         | -0.55078 | 0.70911 | 0.70911     | 0.842658066 |          |         |
| RN7SKP114 | ENSG00000222259 | -0.55079 | 0.70911 | -0.55079    | 0.70911     | -0.55079 |         |
|           | 0.70911         | -0.55079 | 0.70911 | 0.70911     | 0.842658066 |          |         |
| NA        | ENSG00000224505 | -0.55082 | 0.70912 | -0.55082    | 0.70912     | -0.55082 | 0.70912 |
|           | -0.55082        | 0.70912  | 0.70912 | 0.842658066 |             |          |         |
| NA        | ENSG00000280551 | -0.63765 | 0.73815 | -1.3509     | 0.91164     | -0.55084 | 0.70913 |
|           | -1.3052         | 0.90409  | 0.70913 | 0.842658066 |             |          |         |
| LINC00589 | ENSG00000251191 | -0.55103 | 0.70919 | -1.6681     | 0.95235     | -1.0328  |         |
|           | 0.84916         | -0.67403 | 0.74985 | 0.70919     | 0.842658066 |          |         |
| NA        | ENSG00000235749 | -0.55106 | 0.7092  | -0.86803    | 0.80731     | -0.87384 | 0.8089  |
|           | -1.0142         | 0.84475  | 0.7092  | 0.842658066 |             |          |         |
| NA        | ENSG00000258172 | -1.4471  | 0.92606 | -0.55104    | 0.7092      | -0.55104 | 0.7092  |
|           | -0.55104        | 0.7092   | 0.7092  | 0.842658066 |             |          |         |
| NSUN4     | ENSG00000117481 | -1.3694  | 0.91457 | -1.3838     | 0.91678     | -1.1758  | 0.88016 |
|           | -0.55109        | 0.70921  | 0.70921 | 0.842658066 |             |          |         |
| NA        | ENSG00000213157 | -0.55107 | 0.70921 | -0.55107    | 0.70921     | -0.55107 | 0.70921 |
|           | -0.84303        | 0.80039  | 0.70921 | 0.842658066 |             |          |         |
| NA        | ENSG00000232937 | -0.55107 | 0.70921 | -0.55107    | 0.70921     | -0.55107 | 0.70921 |

|             |                 |          |         |             |             |          |         |
|-------------|-----------------|----------|---------|-------------|-------------|----------|---------|
|             | -0.55107        | 0.70921  | 0.70921 | 0.842658066 |             |          |         |
| FAM228A     | ENSG00000186453 | -0.8692  | 0.80763 | -0.85114    | 0.80265     | -0.94126 |         |
|             | 0.82671         | -0.5511  | 0.70922 | 0.70922     | 0.842658066 |          |         |
| NA          | ENSG00000272068 | -0.57023 | 0.71574 | -0.55114    | 0.70923     | -0.55114 | 0.70923 |
|             | -0.55114        | 0.70923  | 0.70923 | 0.842658066 |             |          |         |
| LINC01243   | ENSG00000260720 | -0.5512  | 0.70925 | -0.81046    | 0.79116     | -0.81046 |         |
|             | 0.79116         | -0.81046 | 0.79116 | 0.70925     | 0.842661282 |          |         |
| PLCG1       | ENSG00000124181 | -0.97161 | 0.83438 | -0.55166    | 0.70941     | -0.55209 | 0.70956 |
|             | -0.90191        | 0.81645  | 0.70941 | 0.842803559 |             |          |         |
| PHC3        | ENSG00000173889 | -1.2187  | 0.88851 | -0.58866    | 0.72196     | -0.58866 | 0.72196 |
|             | -0.55173        | 0.70943  | 0.70943 | 0.842803559 |             |          |         |
| RNY4P24     | ENSG00000199605 | -0.55173 | 0.70943 | -0.55173    | 0.70943     | -0.55173 |         |
|             | 0.70943         | -0.55173 | 0.70943 | 0.70943     | 0.842803559 |          |         |
| FABP4       | ENSG00000170323 | -0.91307 | 0.8194  | -0.91307    | 0.8194      | -0.91307 | 0.8194  |
|             | -0.55174        | 0.70944  | 0.70944 | 0.842803559 |             |          |         |
| NA          | ENSG00000236366 | -0.98798 | 0.83842 | -1.5433     | 0.93862     | -0.55196 | 0.70951 |
|             | -1.0632         | 0.85616  | 0.70951 | 0.842803559 |             |          |         |
| DNER        | ENSG00000187957 | -1.0793  | 0.85977 | -0.64103    | 0.73925     | -1.5772  | 0.94262 |
|             | -0.55198        | 0.70952  | 0.70952 | 0.842803559 |             |          |         |
| PIGQP1      | ENSG00000227104 | -0.552   | 0.70952 | -0.552      | 0.70952     | -0.552   |         |
|             | 0.70952         | -0.552   | 0.70952 | 0.70952     | 0.842803559 |          |         |
| NPM1P18     | ENSG00000225739 | -0.55204 | 0.70954 | -0.55204    | 0.70954     | -0.55204 |         |
|             | 0.70954         | -0.55204 | 0.70954 | 0.70954     | 0.842803559 |          |         |
| RNU6-436P   | ENSG00000251980 | -1.1402  | 0.87289 | -1.2028     | 0.88547     | -0.55205 |         |
|             | 0.70954         | -1.2028  | 0.88547 | 0.70954     | 0.842803559 |          |         |
| KLHDC9      | ENSG00000162755 | -0.55206 | 0.70955 | -0.55206    | 0.70955     | -0.55206 |         |
|             | 0.70955         | -0.55206 | 0.70955 | 0.70955     | 0.842803559 |          |         |
| NA          | ENSG00000274895 | -0.55211 | 0.70956 | -0.55211    | 0.70956     | -0.55211 | 0.70956 |
|             | -0.55211        | 0.70956  | 0.70956 | 0.842803559 |             |          |         |
| OR8K1       | ENSG00000150261 | -0.55229 | 0.70962 | -0.55229    | 0.70962     | -0.55229 | 0.70962 |
|             | -0.55229        | 0.70962  | 0.70962 | 0.842854281 |             |          |         |
| HSPB9       | ENSG00000260325 | -0.55237 | 0.70965 | -0.55237    | 0.70965     | -0.55237 | 0.70965 |
|             | -0.55237        | 0.70965  | 0.70965 | 0.84286937  |             |          |         |
| NA          | ENSG00000199740 | -0.55242 | 0.70967 | -0.55242    | 0.70967     | -0.55242 | 0.70967 |
|             | -0.78645        | 0.7842   | 0.70967 | 0.84287258  |             |          |         |
| OR51D1      | ENSG00000197428 | -0.88733 | 0.81255 | -0.55248    | 0.70969     | -1.455   |         |
|             | 0.92717         | -0.88733 | 0.81255 | 0.70969     | 0.842875791 |          |         |
| IGLVIV-66-1 | ENSG00000253874 | -0.55275 | 0.70978 | -0.76641    | 0.77828     | -0.76641 |         |
|             | 0.77828         | -0.76641 | 0.77828 | 0.70978     | 0.842936133 |          |         |
| NA          | ENSG00000242727 | -0.55281 | 0.7098  | -1.2734     | 0.89856     | -0.55281 | 0.7098  |
|             | -0.55281        | 0.7098   | 0.7098  | 0.842936133 |             |          |         |
| NA          | ENSG00000259727 | -0.55279 | 0.7098  | -0.55279    | 0.7098      | -0.89217 | 0.81385 |
|             | -0.55279        | 0.7098   | 0.7098  | 0.842936133 |             |          |         |
| SMIM30      | ENSG00000214194 | -0.55284 | 0.70981 | -0.55284    | 0.70981     | -0.55284 |         |
|             | 0.70981         | -1.1034  | 0.86508 | 0.70981     | 0.842936133 |          |         |
| KIAA1549L   | ENSG00000110427 | -1.1741  | 0.87982 | -1.651      | 0.95063     | -0.55293 |         |
|             | 0.70984         | -0.69928 | 0.75781 | 0.70984     | 0.842942217 |          |         |
| RIOX2       | ENSG00000170854 | -0.55304 | 0.70988 | -0.70572    | 0.75982     | -0.77704 | 0.78143 |
|             | -0.88513        | 0.81196  | 0.70988 | 0.842942217 |             |          |         |
| ARL1        | ENSG00000120805 | -1.1149  | 0.86755 | -0.55306    | 0.70989     | -1.322   | 0.90692 |
|             | -1.366          | 0.91404  | 0.70989 | 0.842942217 |             |          |         |
| MMP17       | ENSG00000198598 | -0.65861 | 0.74493 | -0.55309    | 0.7099      | -0.5624  | 0.71308 |
|             | -0.96896        | 0.83372  | 0.7099  | 0.842942217 |             |          |         |
| NA          | ENSG00000241612 | -1.0006  | 0.8415  | -1.0006     | 0.8415      | -0.55312 | 0.70991 |
|             | -1.0006         | 0.8415   | 0.70991 | 0.842942217 |             |          |         |
| MKRN3       | ENSG00000179455 | -0.66665 | 0.7475  | -0.78078    | 0.78254     | -0.63546 | 0.73743 |
|             | -0.55335        | 0.70999  | 0.70999 | 0.842942217 |             |          |         |
| RPS23P4     | ENSG00000240992 | -0.55335 | 0.70999 | -0.55335    | 0.70999     | -1.3456  |         |
|             | 0.91079         | -1.5115  | 0.93467 | 0.70999     | 0.842942217 |          |         |
| ZNF486      | ENSG00000256229 | -0.55334 | 0.70999 | -0.83716    | 0.79875     | -1.2006  |         |
|             | 0.88505         | -0.86714 | 0.80707 | 0.70999     | 0.842942217 |          |         |
| TBC1D23     | ENSG00000036054 | -1.1101  | 0.86653 | -0.55346    | 0.71003     | -0.70341 |         |

|           |                 |          |         |             |             |          |         |
|-----------|-----------------|----------|---------|-------------|-------------|----------|---------|
|           | 0.7591          | -1.3961  | 0.91865 | 0.71003     | 0.842942217 |          |         |
| AK4P5     | ENSG00000217377 | -0.55346 | 0.71003 | -0.55346    | 0.71003     | -0.55346 | 0.71003 |
|           | -0.55346        | 0.71003  | 0.71003 | 0.842942217 |             |          |         |
| LINC01341 | ENSG00000227953 | -0.55349 | 0.71003 | -0.55349    | 0.71003     | -0.55349 |         |
|           | 0.71003         | -0.55349 | 0.71003 | 0.71003     | 0.842942217 |          |         |
| NA        | ENSG00000248664 | -0.55348 | 0.71003 | -1.1984     | 0.88462     | -0.55348 | 0.71003 |
|           | -0.55348        | 0.71003  | 0.71003 | 0.842942217 |             |          |         |
| PPIAP20   | ENSG00000235686 | -0.55349 | 0.71004 | -0.55349    | 0.71004     | -0.55349 |         |
|           | 0.71004         | -0.55349 | 0.71004 | 0.71004     | 0.842942217 |          |         |
| SLITRK3   | ENSG00000121871 | -0.55366 | 0.71009 | -0.55366    | 0.71009     | -0.55366 |         |
|           | 0.71009         | -0.55366 | 0.71009 | 0.71009     | 0.842960503 |          |         |
| NA        | ENSG00000273062 | -0.55365 | 0.71009 | -0.55365    | 0.71009     | -0.55365 | 0.71009 |
|           | -0.55365        | 0.71009  | 0.71009 | 0.842960503 |             |          |         |
| NA        | ENSG00000255454 | -0.55375 | 0.71012 | -0.55375    | 0.71012     | -0.55375 | 0.71012 |
|           | -0.55375        | 0.71012  | 0.71012 | 0.842975581 |             |          |         |
| PROSER3   | ENSG00000167595 | -0.55388 | 0.71017 | -0.55388    | 0.71017     | -0.55388 |         |
|           | 0.71017         | -0.55388 | 0.71017 | 0.71017     | 0.843004083 |          |         |
| OR4A46P   | ENSG00000255304 | -0.55391 | 0.71018 | -0.55391    | 0.71018     | -0.55391 |         |
|           | 0.71018         | -0.55391 | 0.71018 | 0.71018     | 0.843004083 |          |         |
| NA        | ENSG00000267811 | -0.554   | 0.71021 | -0.554      | 0.71021     | -0.554   | 0.71021 |
|           | -0.554          | 0.71021  | 0.71021 | 0.843004083 |             |          |         |
| NA        | ENSG00000243695 | -0.55412 | 0.71025 | -0.55412    | 0.71025     | -0.55412 | 0.71025 |
|           | -0.55412        | 0.71025  | 0.71025 | 0.843004083 |             |          |         |
| FAU       | ENSG00000149806 | -0.55419 | 0.71027 | -0.55419    | 0.71027     | -0.55419 | 0.71027 |
|           | -0.55419        | 0.71027  | 0.71027 | 0.843004083 |             |          |         |
| NA        | ENSG00000234985 | -0.55421 | 0.71028 | -0.55421    | 0.71028     | -0.55421 | 0.71028 |
|           | -0.55421        | 0.71028  | 0.71028 | 0.843004083 |             |          |         |
| BTF3P13   | ENSG00000227118 | -0.55429 | 0.71031 | -0.55429    | 0.71031     | -0.55429 |         |
|           | 0.71031         | -0.55429 | 0.71031 | 0.71031     | 0.843004083 |          |         |
| PRSS16    | ENSG00000112812 | -1.327   | 0.90774 | -0.57008    | 0.71569     | -1.9104  |         |
|           | 0.97196         | -0.55435 | 0.71033 | 0.71033     | 0.843004083 |          |         |
| RDH10     | ENSG00000121039 | -1.3069  | 0.90438 | -1.3069     | 0.90438     | -0.74967 | 0.77327 |
|           | -0.55434        | 0.71033  | 0.71033 | 0.843004083 |             |          |         |
| SSH2      | ENSG00000141298 | -0.55438 | 0.71034 | -0.90953    | 0.81846     | -0.76785 | 0.77871 |
|           | -0.63722        | 0.73801  | 0.71034 | 0.843004083 |             |          |         |
| NA        | ENSG00000279790 | -1.3806  | 0.91629 | -0.55438    | 0.71034     | -1.5499  | 0.93942 |
|           | -1.5499         | 0.93942  | 0.71034 | 0.843004083 |             |          |         |
| TWF1      | ENSG00000151239 | -0.5545  | 0.71038 | -0.5545     | 0.71038     | -0.5545  | 0.71038 |
|           | -0.5545         | 0.71038  | 0.71038 | 0.843004083 |             |          |         |
| HMGB3P23  | ENSG00000235148 | -0.55451 | 0.71038 | -0.55451    | 0.71038     | -0.55451 |         |
|           | 0.71038         | -0.55451 | 0.71038 | 0.71038     | 0.843004083 |          |         |
| NA        | ENSG00000259433 | -0.55453 | 0.71039 | -0.55453    | 0.71039     | -0.55453 | 0.71039 |
|           | -0.55453        | 0.71039  | 0.71039 | 0.843004083 |             |          |         |
| SMUG1     | ENSG00000123415 | -2.0081  | 0.97769 | -0.5547     | 0.71045     | -1.7933  | 0.96354 |
|           | -2.0847         | 0.98145  | 0.71045 | 0.843004083 |             |          |         |
| FYN       | ENSG00000010810 | -0.59968 | 0.72564 | -0.55475    | 0.71047     | -0.6717  | 0.74911 |
|           | -0.73586        | 0.76909  | 0.71047 | 0.843004083 |             |          |         |
| VIRMA     | ENSG00000164944 | -0.55476 | 0.71047 | -1.498      | 0.93293     | -0.55476 | 0.71047 |
|           | -0.92972        | 0.82374  | 0.71047 | 0.843004083 |             |          |         |
| MTATP6P30 | ENSG00000226998 | -0.5548  | 0.71048 | -0.5548     | 0.71048     | -0.5548  |         |
|           | 0.71048         | -0.5548  | 0.71048 | 0.71048     | 0.843004083 |          |         |
| LBHD1     | ENSG00000162194 | -0.55482 | 0.71049 | -0.55482    | 0.71049     | -0.55482 | 0.71049 |
|           | -0.85934        | 0.80492  | 0.71049 | 0.843004083 |             |          |         |
| UQCC3     | ENSG00000204922 | -0.55482 | 0.71049 | -0.55482    | 0.71049     | -0.55482 | 0.71049 |
|           | -0.55482        | 0.71049  | 0.71049 | 0.843004083 |             |          |         |
| NA        | ENSG00000252283 | -0.5549  | 0.71052 | -0.5549     | 0.71052     | -0.5549  | 0.71052 |
|           | -0.5549         | 0.71052  | 0.71052 | 0.843019152 |             |          |         |
| CARNS1    | ENSG00000172508 | -1.4484  | 0.92624 | -0.5943     | 0.72384     | -0.5943  |         |
|           | 0.72384         | -0.55502 | 0.71056 | 0.71056     | 0.843037424 |          |         |
| NA        | ENSG00000253468 | -0.55505 | 0.71057 | -0.86305    | 0.80595     | -0.55505 | 0.71057 |
|           | -0.58053        | 0.71922  | 0.71057 | 0.843037424 |             |          |         |
| NA        | ENSG00000250082 | -1.4884  | 0.93168 | -1.4884     | 0.93168     | -0.55522 | 0.71063 |

|               |                 |          |             |             |             |          |         |
|---------------|-----------------|----------|-------------|-------------|-------------|----------|---------|
|               | -1.4884         | 0.93168  | 0.71063     | 0.843088082 |             |          |         |
| RPL22P18      | ENSG00000230171 | -0.55538 | 0.71068     | -0.59715    | 0.72479     | -0.59715 |         |
|               | 0.72479         | -0.96538 | 0.83282     | 0.71068     | 0.84310955  |          |         |
| CBWD2         | ENSG00000136682 | -0.55543 | 0.7107      | -0.90368    | 0.81692     | -1.1973  | 0.8844  |
|               | -0.611          | 0.7294   | 0.7107      | 0.84310955  |             |          |         |
| BCL2L2-PABPN1 | ENSG00000258643 | -0.55544 | 0.7107      | -0.55544    | 0.7107      | -0.55544 |         |
|               | 0.7107          | -0.55544 | 0.7107      | 0.7107      | 0.84310955  |          |         |
| VRK3          | ENSG00000105053 | -0.55553 | 0.71074     | -1.0022     | 0.84189     | -0.72208 | 0.76488 |
|               | -0.55553        | 0.71074  | 0.71074     | 0.843136477 |             |          |         |
| SYNCRIP       | ENSG00000135316 | -0.74573 | 0.77209     | -0.55561    | 0.71076     | -0.74573 |         |
|               | 0.77209         | -0.63888 | 0.73855     | 0.71076     | 0.843139677 |          |         |
| NA            | ENSG00000262905 | -0.55578 | 0.71082     | -0.55578    | 0.71082     | -0.55578 | 0.71082 |
|               | -0.55578        | 0.71082  | 0.71082     | 0.843184862 |             |          |         |
| PPIEL         | ENSG00000243970 | -0.63906 | 0.73861     | -0.55586    | 0.71085     | -0.55586 | 0.71085 |
|               | -0.55586        | 0.71085  | 0.71085     | 0.843184862 |             |          |         |
| NA            | ENSG00000284060 | -0.55588 | 0.71085     | -0.55588    | 0.71085     | -0.55588 | 0.71085 |
|               | -0.55588        | 0.71085  | 0.71085     | 0.843184862 |             |          |         |
| NA            | ENSG00000234500 | -0.55606 | 0.71091     | -0.77456    | 0.7807      | -0.55606 | 0.71091 |
|               | -0.62317        | 0.73341  | 0.71091     | 0.843233238 |             |          |         |
| NA            | ENSG00000181705 | -0.55978 | 0.71218     | -0.71223    | 0.76184     | -0.5561  | 0.71093 |
|               | -1.0836         | 0.86072  | 0.71093     | 0.843233238 |             |          |         |
| NA            | ENSG00000269836 | -0.55619 | 0.71096     | -0.55619    | 0.71096     | -0.55619 | 0.71096 |
|               | -0.55619        | 0.71096  | 0.71096     | 0.843233238 |             |          |         |
| NA            | ENSG00000269883 | -0.55619 | 0.71096     | -0.55619    | 0.71096     | -0.55619 | 0.71096 |
|               | -0.55619        | 0.71096  | 0.71096     | 0.843233238 |             |          |         |
| ZKSCAN4       | ENSG00000187626 | -1.6863  | 0.95413     | -1.161      | 0.87717     | -1.5002  |         |
|               | 0.93321         | -0.55624 | 0.71098     | 0.71098     | 0.843236435 |          |         |
| RNU2-27P      | ENSG00000251994 | -0.5563  | 0.711       | -0.5563     | 0.711       | -0.5563  | 0.711   |
|               | 0.711           | 0.711    | 0.843239632 |             |             |          |         |
| GZMAP1        | ENSG00000249454 | -0.55647 | 0.71105     | -1.4867     | 0.93146     | -1.9151  |         |
|               | 0.97226         | -1.6402  | 0.94952     | 0.71105     | 0.843269744 |          |         |
| NA            | ENSG00000254937 | -0.64242 | 0.7397      | -0.64242    | 0.7397      | -0.55649 | 0.71106 |
|               | -0.64242        | 0.7397   | 0.71106     | 0.843269744 |             |          |         |
| NDE1          | ENSG00000072864 | -1.7327  | 0.95842     | -0.85458    | 0.80361     | -0.5568  | 0.71117 |
|               | -1.6355         | 0.94902  | 0.71117     | 0.843379672 |             |          |         |
| ADCK2         | ENSG00000133597 | -1.8733  | 0.96949     | -2.0356     | 0.9791      | -1.6458  | 0.9501  |
|               | -0.55706        | 0.71126  | 0.71126     | 0.843465877 |             |          |         |
| NA            | ENSG00000271751 | -0.55716 | 0.71129     | -0.55716    | 0.71129     | -0.55716 | 0.71129 |
|               | -0.55716        | 0.71129  | 0.71129     | 0.84347545  |             |          |         |
| RPP30         | ENSG00000148688 | -0.61641 | 0.73119     | -0.55723    | 0.71132     | -0.56064 | 0.71248 |
|               | -0.6215         | 0.73286  | 0.71132     | 0.84347545  |             |          |         |
| NA            | ENSG00000231652 | -0.55726 | 0.71132     | -0.55726    | 0.71132     | -0.55726 | 0.71132 |
|               | -0.55726        | 0.71132  | 0.71132     | 0.84347545  |             |          |         |
| RPL17P14      | ENSG00000226297 | -0.55731 | 0.71134     | -0.55731    | 0.71134     | -0.55731 |         |
|               | 0.71134         | -0.55731 | 0.71134     | 0.71134     | 0.84347864  |          |         |
| NA            | ENSG00000266775 | -0.5574  | 0.71137     | -0.5574     | 0.71137     | -0.5574  | 0.71137 |
|               | -0.5574         | 0.71137  | 0.71137     | 0.843493688 |             |          |         |
| NA            | ENSG00000259971 | -0.55753 | 0.71142     | -1.3618     | 0.91336     | -0.55753 | 0.71142 |
|               | -0.55753        | 0.71142  | 0.71142     | 0.843532449 |             |          |         |
| TSPAN19       | ENSG00000231738 | -0.88678 | 0.8124      | -0.55772    | 0.71148     | -0.64402 |         |
|               | 0.74022         | -0.58022 | 0.71912     | 0.71148     | 0.843533349 |          |         |
| NA            | ENSG00000270580 | -0.55773 | 0.71148     | -0.55773    | 0.71148     | -0.55773 | 0.71148 |
|               | -0.55773        | 0.71148  | 0.71148     | 0.843533349 |             |          |         |
| ERVK3-1       | ENSG00000142396 | -0.55775 | 0.71149     | -0.55775    | 0.71149     | -0.55775 |         |
|               | 0.71149         | -0.55775 | 0.71149     | 0.71149     | 0.843533349 |          |         |
| NA            | ENSG00000264262 | -0.55775 | 0.71149     | -0.55775    | 0.71149     | -0.55775 | 0.71149 |
|               | -0.55775        | 0.71149  | 0.71149     | 0.843533349 |             |          |         |
| ZNF821        | ENSG00000102984 | -0.55784 | 0.71152     | -0.55784    | 0.71152     | -0.55784 |         |
|               | 0.71152         | -0.55784 | 0.71152     | 0.71152     | 0.843548393 |          |         |
| LINC02426     | ENSG00000257747 | -0.71561 | 0.76288     | -0.71561    | 0.76288     | -0.71561 |         |
|               | 0.76288         | -0.55802 | 0.71158     | 0.71158     | 0.843569812 |          |         |
| NA            | ENSG00000249655 | -0.55804 | 0.71159     | -0.55804    | 0.71159     | -0.55804 | 0.71159 |

|           |                 |          |          |         |             |             |          |         |  |
|-----------|-----------------|----------|----------|---------|-------------|-------------|----------|---------|--|
|           |                 | -0.55804 | 0.71159  | 0.71159 | 0.843569812 |             |          |         |  |
| NA        | ENSG00000230839 | -0.55805 | 0.71159  | 0.71159 | -0.55805    | 0.71159     | -1.1384  | 0.87252 |  |
|           |                 | -0.89243 | 0.81392  | 0.71159 | 0.843569812 |             |          |         |  |
| FCF1P5    | ENSG00000220392 | -0.55812 | 0.71162  | 0.71162 | -0.55812    | 0.71162     | -0.55812 |         |  |
|           |                 | 0.71162  | -0.55812 | 0.71162 | 0.71162     | 0.843584854 |          |         |  |
| NA        | ENSG00000256469 | -1.3668  | 0.91416  | 0.91416 | -0.78276    | 0.78312     | -0.55823 | 0.71166 |  |
|           |                 | -2.109   | 0.98253  | 0.71166 | 0.84361175  |             |          |         |  |
| FCHO2     | ENSG00000157107 | -0.86732 | 0.80712  | 0.80712 | -0.55833    | 0.71169     | -1.1399  | 0.87284 |  |
|           |                 | -0.88562 | 0.81209  | 0.71169 | 0.84362679  |             |          |         |  |
| EPN3      | ENSG00000049283 | -1.3072  | 0.90443  | 0.90443 | -1.1484     | 0.8746      | -0.55843 | 0.71172 |  |
|           |                 | -0.59143 | 0.72288  | 0.71172 | 0.843641829 |             |          |         |  |
| KCNH1-IT1 | ENSG00000234233 | -1.0244  | 0.84717  | 0.84717 | -1.0216     | 0.84652     | -0.55846 |         |  |
|           |                 | 0.71174  | -0.55846 | 0.71174 | 0.71174     | 0.843645015 |          |         |  |
| RCC2P5    | ENSG00000241018 | -0.93014 | 0.82385  | 0.82385 | -0.93014    | 0.82385     | -0.55893 |         |  |
|           |                 | 0.7119   | -0.93014 | 0.82385 | 0.7119      | 0.843814142 |          |         |  |
| SULT1C2P1 | ENSG00000237223 | -1.3505  | 0.91157  | 0.91157 | -0.70412    | 0.75932     | -1.1366  |         |  |
|           |                 | 0.87214  | -0.55918 | 0.71198 | 0.71198     | 0.843879766 |          |         |  |
| NA        | ENSG00000255391 | -0.55921 | 0.71199  | 0.71199 | -0.55921    | 0.71199     | -0.55921 | 0.71199 |  |
|           |                 | -0.55921 | 0.71199  | 0.71199 | 0.843879766 |             |          |         |  |
| WNT2B     | ENSG00000134245 | -0.83374 | 0.79779  | 0.79779 | -1.1376     | 0.87236     | -0.70603 | 0.75991 |  |
|           |                 | -0.55933 | 0.71203  | 0.71203 | 0.843880631 |             |          |         |  |
| MRPS28    | ENSG00000147586 | -0.55934 | 0.71203  | 0.71203 | -1.2621     | 0.89655     | -0.56014 |         |  |
|           |                 | 0.71231  | -0.93835 | 0.82597 | 0.71203     | 0.843880631 |          |         |  |
| RTP3      | ENSG00000163825 | -0.55938 | 0.71205  | 0.71205 | -1.9015     | 0.97138     | -1.9388  | 0.97374 |  |
|           |                 | -0.8083  | 0.79054  | 0.71205 | 0.843880631 |             |          |         |  |
| OR51G2    | ENSG00000176893 | -0.55943 | 0.71206  | 0.71206 | -0.73586    | 0.76909     | -0.55943 |         |  |
|           |                 | 0.71206  | -0.55943 | 0.71206 | 0.71206     | 0.843880631 |          |         |  |
| NA        | ENSG00000266105 | -0.55953 | 0.7121   | 0.7121  | -0.55953    | 0.7121      | -0.55953 | 0.7121  |  |
|           |                 | -0.55953 | 0.7121   | 0.7121  | 0.843884675 |             |          |         |  |
| NA        | ENSG00000111780 | -1.062   | 0.85588  | 0.85588 | -1.062      | 0.85588     | -1.229   | 0.89046 |  |
|           |                 | -0.55955 | 0.71211  | 0.71211 | 0.843884675 |             |          |         |  |
| PRSS3     | ENSG00000010438 | -1.1775  | 0.88051  | 0.88051 | -1.1646     | 0.87791     | -0.55967 | 0.71215 |  |
|           |                 | -0.55967 | 0.71215  | 0.71215 | 0.843884675 |             |          |         |  |
| RPS29P20  | ENSG00000240385 | -0.55969 | 0.71215  | 0.71215 | -0.55969    | 0.71215     | -0.57792 |         |  |
|           |                 | 0.71834  | -0.55969 | 0.71215 | 0.71215     | 0.843884675 |          |         |  |
| NA        | ENSG00000249320 | -0.6456  | 0.74073  | 0.74073 | -0.66076    | 0.74562     | -1.0788  | 0.85966 |  |
|           |                 | -0.55968 | 0.71215  | 0.71215 | 0.843884675 |             |          |         |  |
| MLC1      | ENSG00000100427 | -0.83079 | 0.79695  | 0.79695 | -0.55992    | 0.71223     | -1.1619  | 0.87735 |  |
|           |                 | -1.468   | 0.92894  | 0.71223 | 0.843922808 |             |          |         |  |
| SNX21     | ENSG00000124104 | -0.55991 | 0.71223  | 0.71223 | -0.79446    | 0.78653     | -0.55991 | 0.71223 |  |
|           |                 | -0.55991 | 0.71223  | 0.71223 | 0.843922808 |             |          |         |  |
| NA        | ENSG00000249691 | -0.55993 | 0.71224  | 0.71224 | -0.55993    | 0.71224     | -0.55993 | 0.71224 |  |
|           |                 | -0.55993 | 0.71224  | 0.71224 | 0.843922808 |             |          |         |  |
| AADACL2   | ENSG00000197953 | -1.4331  | 0.92409  | 0.92409 | -1.4331     | 0.92409     | -1.0374  |         |  |
|           |                 | 0.85021  | -0.56004 | 0.71227 | 0.71227     | 0.843922808 |          |         |  |
| NA        | ENSG00000233114 | -1.1223  | 0.86914  | 0.86914 | -0.56022    | 0.71234     | -0.56022 | 0.71234 |  |
|           |                 | -1.1178  | 0.86818  | 0.71234 | 0.843922808 |             |          |         |  |
| MTND2P40  | ENSG00000236483 | -0.56026 | 0.71235  | 0.71235 | -0.56026    | 0.71235     | -0.56026 |         |  |
|           |                 | 0.71235  | -0.56026 | 0.71235 | 0.71235     | 0.843922808 |          |         |  |
| TEX35     | ENSG00000240021 | -0.81366 | 0.79208  | 0.79208 | -0.56028    | 0.71235     | -1.1548  | 0.87592 |  |
|           |                 | -0.98457 | 0.83758  | 0.71235 | 0.843922808 |             |          |         |  |
| VN1R81P   | ENSG00000268357 | -0.56025 | 0.71235  | 0.71235 | -0.56025    | 0.71235     | -0.56025 |         |  |
|           |                 | 0.71235  | -0.56025 | 0.71235 | 0.71235     | 0.843922808 |          |         |  |
| MTND4P27  | ENSG00000230548 | -0.5603  | 0.71236  | 0.71236 | -0.5603     | 0.71236     | -0.5603  |         |  |
|           |                 | 0.71236  | -0.5603  | 0.71236 | 0.71236     | 0.843922808 |          |         |  |
| LINC02400 | ENSG00000257784 | -0.5603  | 0.71236  | 0.71236 | -0.7962     | 0.78704     | -0.5603  |         |  |
|           |                 | 0.71236  | -0.5603  | 0.71236 | 0.71236     | 0.843922808 |          |         |  |
| NA        | ENSG00000260552 | -0.56035 | 0.71238  | 0.71238 | -0.56035    | 0.71238     | -0.56035 | 0.71238 |  |
|           |                 | -0.56035 | 0.71238  | 0.71238 | 0.843922808 |             |          |         |  |
| NA        | ENSG00000257070 | -0.56037 | 0.71239  | 0.71239 | -0.56037    | 0.71239     | -0.56037 | 0.71239 |  |
|           |                 | -0.56037 | 0.71239  | 0.71239 | 0.843922808 |             |          |         |  |
| GLI1      | ENSG00000111087 | -1.5635  | 0.94103  | 0.94103 | -1.5635     | 0.94103     | -1.5635  | 0.94103 |  |

|            |                 |          |         |             |             |          |         |
|------------|-----------------|----------|---------|-------------|-------------|----------|---------|
|            | -0.56048        | 0.71242  | 0.71242 | 0.843926845 |             |          |         |
| OR5AN2P    | ENSG00000235678 | -1.3458  | 0.91082 | -0.71426    | 0.76247     | -0.71426 |         |
|            | 0.76247         | -0.56052 | 0.71244 | 0.71244     | 0.843926845 |          |         |
| NA         | ENSG00000227433 | -0.56062 | 0.71247 | -0.5929     | 0.72338     | -0.65424 | 0.74352 |
|            | -0.70346        | 0.75912  | 0.71247 | 0.843926845 |             |          |         |
| NA         | ENSG00000261182 | -0.56062 | 0.71247 | -0.56062    | 0.71247     | -0.56062 | 0.71247 |
|            | -0.56062        | 0.71247  | 0.71247 | 0.843926845 |             |          |         |
| OR5J1P     | ENSG00000181780 | -0.56065 | 0.71248 | -0.56065    | 0.71248     | -0.56065 |         |
|            | 0.71248         | -0.56065 | 0.71248 | 0.71248     | 0.843926845 |          |         |
| COA1       | ENSG00000106603 | -0.84116 | 0.79987 | -0.56082    | 0.71254     | -0.67247 | 0.74936 |
|            | -1.1832         | 0.88163  | 0.71254 | 0.843948217 |             |          |         |
| RNU6-275P  | ENSG00000201780 | -0.56082 | 0.71254 | -0.56082    | 0.71254     | -0.56082 |         |
|            | 0.71254         | -0.56082 | 0.71254 | 0.71254     | 0.843948217 |          |         |
| NA         | ENSG00000224864 | -0.56085 | 0.71255 | -0.56085    | 0.71255     | -0.56085 | 0.71255 |
|            | -0.56085        | 0.71255  | 0.71255 | 0.843948217 |             |          |         |
| NA         | ENSG00000250200 | -0.5609  | 0.71257 | -0.5609     | 0.71257     | -0.5609  | 0.71257 |
|            | -0.5609         | 0.71257  | 0.71257 | 0.843951393 |             |          |         |
| GTF2IP5    | ENSG00000224316 | -0.62279 | 0.73329 | -0.70283    | 0.75892     | -0.561   |         |
|            | 0.7126          | -0.64745 | 0.74133 | 0.7126      | 0.843966411 |          |         |
| LINC02776  | ENSG00000224977 | -0.56112 | 0.71264 | -0.56112    | 0.71264     | -0.56112 |         |
|            | 0.71264         | -0.56112 | 0.71264 | 0.71264     | 0.843993273 |          |         |
| NA         | ENSG00000242880 | -1.007   | 0.84304 | -0.56128    | 0.7127      | -0.60258 | 0.72661 |
|            | -0.94607        | 0.82794  | 0.7127  | 0.84401781  |             |          |         |
| NA         | ENSG00000260945 | -0.77606 | 0.78114 | -0.77606    | 0.78114     | -0.77606 | 0.78114 |
|            | -0.56136        | 0.71272  | 0.71272 | 0.84401781  |             |          |         |
| NA         | ENSG00000232243 | -1.231   | 0.89084 | -0.56135    | 0.71272     | -0.56135 | 0.71272 |
|            | -0.56135        | 0.71272  | 0.71272 | 0.84401781  |             |          |         |
| ANKRD26P1  | ENSG00000261239 | -0.82963 | 0.79663 | -0.56137    | 0.71273     | -0.61227 |         |
|            | 0.72982         | -1.0173  | 0.8455  | 0.71273     | 0.84401781  |          |         |
| NA         | ENSG00000248843 | -0.93424 | 0.82491 | -0.56161    | 0.71281     | -0.56161 | 0.71281 |
|            | -0.56161        | 0.71281  | 0.71281 | 0.844023536 |             |          |         |
| H4C10P     | ENSG00000217862 | -0.5617  | 0.71284 | -1.1424     | 0.87336     | -1.1424  |         |
|            | 0.87336         | -1.1424  | 0.87336 | 0.71284     | 0.844023536 |          |         |
| HERC2      | ENSG00000128731 | -1.1434  | 0.87357 | -1.0826     | 0.86052     | -1.0703  | 0.85775 |
|            | -0.56175        | 0.71286  | 0.71286 | 0.844023536 |             |          |         |
| THAP7-AS1  | ENSG00000230513 | -0.5618  | 0.71288 | -0.5618     | 0.71288     | -0.5618  |         |
|            | 0.71288         | -0.5618  | 0.71288 | 0.71288     | 0.844023536 |          |         |
| CXCL2      | ENSG00000081041 | -0.9533  | 0.82978 | -1.145      | 0.8739      | -0.9533  | 0.82978 |
|            | -0.56185        | 0.71289  | 0.71289 | 0.844023536 |             |          |         |
| NA         | ENSG00000270690 | -0.99639 | 0.84047 | -0.81199    | 0.7916      | -0.56188 | 0.7129  |
|            | -0.56188        | 0.7129   | 0.7129  | 0.844023536 |             |          |         |
| NA         | ENSG00000269210 | -0.56192 | 0.71291 | -0.56192    | 0.71291     | -0.56192 | 0.71291 |
|            | -0.56192        | 0.71291  | 0.71291 | 0.844023536 |             |          |         |
| OR4A16     | ENSG00000181961 | -1.1073  | 0.86592 | -0.56193    | 0.71292     | -1.1543  |         |
|            | 0.87581         | -0.56193 | 0.71292 | 0.71292     | 0.844023536 |          |         |
| CBX1P3     | ENSG00000237379 | -0.56192 | 0.71292 | -0.69838    | 0.75753     | -0.69838 |         |
|            | 0.75753         | -0.69838 | 0.75753 | 0.71292     | 0.844023536 |          |         |
| RNU6-1108P | ENSG00000252117 | -1.1524  | 0.87541 | -1.1524     | 0.87541     | -1.1524  |         |
|            | 0.87541         | -0.56196 | 0.71293 | 0.71293     | 0.844023536 |          |         |
| LDHAP4     | ENSG00000214110 | -0.56198 | 0.71294 | -0.56198    | 0.71294     | -0.56198 |         |
|            | 0.71294         | -0.56198 | 0.71294 | 0.71294     | 0.844023536 |          |         |
| PRG4       | ENSG00000116690 | -0.56203 | 0.71295 | -0.56203    | 0.71295     | -0.56203 | 0.71295 |
|            | -1.1402         | 0.87289  | 0.71295 | 0.844023536 |             |          |         |
| RN7SL122P  | ENSG00000263529 | -0.56205 | 0.71296 | -0.56205    | 0.71296     | -0.56205 |         |
|            | 0.71296         | -0.56205 | 0.71296 | 0.71296     | 0.844023536 |          |         |
| NA         | ENSG00000225292 | -1.596   | 0.94476 | -1.596      | 0.94476     | -0.56223 | 0.71302 |
|            | -0.66753        | 0.74778  | 0.71302 | 0.844063068 |             |          |         |
| SLC2A13    | ENSG00000151229 | -0.56228 | 0.71304 | -0.97084    | 0.83419     | -0.97952 |         |
|            | 0.83634         | -0.75815 | 0.77582 | 0.71304     | 0.844063068 |          |         |
| FOXN3-AS2  | ENSG00000259073 | -0.56232 | 0.71305 | -0.56232    | 0.71305     | -0.56232 |         |
|            | 0.71305         | -0.56232 | 0.71305 | 0.71305     | 0.844063068 |          |         |
| NUDCD3     | ENSG00000015676 | -1.1811  | 0.88123 | -1.4066     | 0.92022     | -0.5624  |         |



|             |                 |          |         |             |             |         |          |         |
|-------------|-----------------|----------|---------|-------------|-------------|---------|----------|---------|
|             | 0.71308         | -1.2662  | 0.89727 | 0.71308     | 0.844063068 |         |          |         |
| LINC02012   | ENSG00000272989 | -1.2435  | 0.89315 | 0.71308     | -1.4686     | 0.92903 | -0.5624  |         |
|             | 0.71308         | -0.5624  | 0.71308 | 0.71308     | 0.844063068 |         |          |         |
| GAPDHP58    | ENSG00000229570 | -0.65679 | 0.74434 | 0.71311     | -0.56248    | 0.71311 | -0.56248 |         |
|             | 0.71311         | -0.98658 | 0.83808 | 0.71311     | 0.844078076 |         |          |         |
| LINC00363   | ENSG00000232849 | -0.56259 | 0.71314 | 0.71314     | -0.56259    | 0.71314 | -1.2704  |         |
|             | 0.89804         | -0.56259 | 0.71314 | 0.71314     | 0.844093082 |         |          |         |
| NA          | ENSG00000260574 | -0.56263 | 0.71316 | 0.71316     | -0.62278    | 0.73329 | -0.56263 | 0.71316 |
|             | -0.56263        | 0.71316  | 0.71316 | 0.844096252 |             |         |          |         |
| NA          | ENSG00000259870 | -0.56282 | 0.71322 | 0.71322     | -0.56282    | 0.71322 | -0.56282 | 0.71322 |
|             | -0.56282        | 0.71322  | 0.71322 | 0.844146765 |             |         |          |         |
| HEXD-IT1    | ENSG00000279066 | -0.5632  | 0.71335 | 0.71335     | -0.5632     | 0.71335 | -0.5632  |         |
|             | 0.71335         | -0.5632  | 0.71335 | 0.71335     | 0.844280123 |         |          |         |
| NA          | ENSG00000269799 | -0.5633  | 0.71339 | 0.71339     | -0.5633     | 0.71339 | -0.5633  | 0.71339 |
|             | -0.5633         | 0.71339  | 0.71339 | 0.84429209  |             |         |          |         |
| RNU6-21P    | ENSG00000207441 | -0.56335 | 0.7134  | 0.7134      | -1.2251     | 0.88973 | -0.56335 |         |
|             | 0.7134          | -0.60846 | 0.72856 | 0.7134      | 0.84429209  |         |          |         |
| NA          | ENSG00000263683 | -0.56341 | 0.71342 | 0.71342     | -0.56341    | 0.71342 | -0.56341 | 0.71342 |
|             | -0.56341        | 0.71342  | 0.71342 | 0.84429209  |             |         |          |         |
| NA          | ENSG00000223897 | -0.56353 | 0.71346 | 0.71346     | -0.56353    | 0.71346 | -0.56353 | 0.71346 |
|             | -2.0483         | 0.97973  | 0.71346 | 0.84429209  |             |         |          |         |
| NA          | ENSG00000272797 | -0.56351 | 0.71346 | 0.71346     | -0.58406    | 0.72041 | -1.0419  | 0.85128 |
|             | -0.58406        | 0.72041  | 0.71346 | 0.84429209  |             |         |          |         |
| NA          | ENSG00000226113 | -0.90821 | 0.81812 | 0.71349     | -0.91418    | 0.81969 | -1.0152  | 0.84499 |
|             | -0.56362        | 0.71349  | 0.71349 | 0.84429209  |             |         |          |         |
| EVI5        | ENSG00000067208 | -1.5109  | 0.9346  | 0.71354     | -1.5831     | 0.9433  | -1.0088  | 0.84346 |
|             | -0.56375        | 0.71354  | 0.71354 | 0.84429209  |             |         |          |         |
| NA          | ENSG00000201134 | -0.56375 | 0.71354 | 0.71354     | -0.56375    | 0.71354 | -0.56375 | 0.71354 |
|             | -0.56375        | 0.71354  | 0.71354 | 0.84429209  |             |         |          |         |
| SLC12A5-AS1 | ENSG00000204044 | -0.56384 | 0.71357 | 0.71357     | -0.56384    | 0.71357 | -0.56384 |         |
|             | 0.71357         | -0.56384 | 0.71357 | 0.71357     | 0.84429209  |         |          |         |
| PANK3       | ENSG00000120137 | -0.56396 | 0.71361 | 0.71361     | -0.86862    | 0.80747 | -0.86862 | 0.80747 |
|             | -2.3142         | 0.98967  | 0.71361 | 0.84429209  |             |         |          |         |
| NA          | ENSG00000254334 | -1.275   | 0.89884 | 0.71361     | -0.56395    | 0.71361 | -1.2211  | 0.88898 |
|             | -1.1371         | 0.87225  | 0.71361 | 0.84429209  |             |         |          |         |
| NA          | ENSG00000273261 | -0.56396 | 0.71361 | 0.71361     | -0.56396    | 0.71361 | -0.56396 | 0.71361 |
|             | -0.56396        | 0.71361  | 0.71361 | 0.84429209  |             |         |          |         |
| THRA        | ENSG00000126351 | -0.94136 | 0.82674 | 0.71362     | -0.99874    | 0.84104 | -0.564   | 0.71362 |
|             | -0.86433        | 0.8063   | 0.71362 | 0.84429209  |             |         |          |         |
| OBSCN       | ENSG00000154358 | -0.91752 | 0.82056 | 0.71362     | -0.6424     | 0.73969 | -0.7171  | 0.76334 |
|             | -0.56398        | 0.71362  | 0.71362 | 0.84429209  |             |         |          |         |
| RNU6-907P   | ENSG00000212226 | -0.56398 | 0.71362 | 0.71362     | -0.57054    | 0.71584 | -0.57054 |         |
|             | 0.71584         | -0.57054 | 0.71584 | 0.71362     | 0.84429209  |         |          |         |
| SCYL3       | ENSG00000000457 | -1.2326  | 0.89114 | 0.71375     | -1.405      | 0.91999 | -0.56437 | 0.71375 |
|             | -0.56437        | 0.71375  | 0.71375 | 0.84434972  |             |         |          |         |
| NA          | ENSG00000229213 | -1.1881  | 0.8826  | 0.71376     | -1.4905     | 0.93196 | -0.56441 | 0.71376 |
|             | -1.3048         | 0.90403  | 0.71376 | 0.84434972  |             |         |          |         |
| NA          | ENSG00000213604 | -0.56447 | 0.71378 | 0.71378     | -0.73161    | 0.7678  | -0.56447 | 0.71378 |
|             | -0.56447        | 0.71378  | 0.71378 | 0.84434972  |             |         |          |         |
| LINC02449   | ENSG00000215241 | -1.1604  | 0.87705 | 0.71378     | -0.56446    | 0.71378 | -0.75542 | 0.775   |
|             | -0.75542        | 0.775    | 0.71378 | 0.84434972  |             |         |          |         |
| ANKRD18DP   | ENSG00000226435 | -1.2439  | 0.89322 | 0.71378     | -1.3836     | 0.91676 | -1.2439  |         |
|             | 0.89322         | -0.56445 | 0.71378 | 0.71378     | 0.84434972  |         |          |         |
| NA          | ENSG00000279726 | -0.56446 | 0.71378 | 0.71378     | -0.72031    | 0.76433 | -1.2695  | 0.89787 |
|             | -1.2695         | 0.89787  | 0.71378 | 0.84434972  |             |         |          |         |
| CAMK2B      | ENSG00000058404 | -0.56448 | 0.9081  | 0.71379     | -1.1393     | 0.87272 | -0.96613 |         |
|             | 0.83301         | -1.3291  | 0.9081  | 0.71379     | 0.84434972  |         |          |         |
| ACTL10      | ENSG00000182584 | -0.56455 | 0.71381 | 0.71381     | -0.56455    | 0.71381 | -0.56455 |         |
|             | 0.71381         | -0.56455 | 0.71381 | 0.71381     | 0.844352881 |         |          |         |
| NHLRC4      | ENSG00000257108 | -0.56467 | 0.71385 | 0.71385     | -0.56467    | 0.71385 | -0.56467 |         |
|             | 0.71385         | -0.56467 | 0.71385 | 0.71385     | 0.8443797   |         |          |         |
| NA          | ENSG00000257429 | -0.56479 | 0.71389 | 0.71389     | -0.56479    | 0.71389 | -0.56479 | 0.71389 |

|             |                 |          |         |             |             |          |         |          |
|-------------|-----------------|----------|---------|-------------|-------------|----------|---------|----------|
|             | -0.56479        | 0.71389  | 0.71389 | 0.844380515 |             |          |         |          |
| RPL23AP3    | ENSG00000214914 | -0.56486 | 0.71391 | -0.56486    | 0.71391     | -0.56486 | 0.71391 | -0.56486 |
|             | 0.71391         | -0.56486 | 0.71391 | 0.71391     | 0.844380515 |          |         |          |
| LINC01168   | ENSG00000240707 | -0.79489 | 0.78666 | -0.87603    | 0.80949     | -0.56483 |         |          |
|             | 0.71391         | -1.3983  | 0.91899 | 0.71391     | 0.844380515 |          |         |          |
| IMPG1       | ENSG00000112706 | -0.66401 | 0.74666 | -0.6917     | 0.75544     | -0.68129 | 0.75216 |          |
|             | -0.56488        | 0.71392  | 0.71392 | 0.844380515 |             |          |         |          |
| NA          | ENSG00000181123 | -1.5624  | 0.9409  | -1.5624     | 0.9409      | -1.5624  | 0.9409  |          |
|             | -0.565          | 0.71396  | 0.71396 | 0.84440733  |             |          |         |          |
| NA          | ENSG00000247844 | -1.0553  | 0.85436 | -1.0553     | 0.85436     | -1.0553  | 0.85436 |          |
|             | -0.56506        | 0.71398  | 0.71398 | 0.84441049  |             |          |         |          |
| KIF26B      | ENSG00000162849 | -0.56517 | 0.71402 | -1.5489     | 0.9393      | -1.2725  |         |          |
|             | 0.8984          | -1.3183  | 0.90631 | 0.71402     | 0.84441617  |          |         |          |
| TYMS        | ENSG00000176890 | -0.56521 | 0.71403 | -0.56521    | 0.71403     | -0.56521 | 0.71403 |          |
|             | -0.56521        | 0.71403  | 0.71403 | 0.84441617  |             |          |         |          |
| RPL32P33    | ENSG00000243514 | -0.56522 | 0.71404 | -0.56522    | 0.71404     | -0.56522 |         |          |
|             | 0.71404         | -0.56522 | 0.71404 | 0.71404     | 0.84441617  |          |         |          |
| IRAK4       | ENSG00000198001 | -0.82985 | 0.79669 | -0.56538    | 0.71409     | -0.82985 | 0.79669 |          |
|             | -0.82985        | 0.79669  | 0.71409 | 0.84441617  |             |          |         |          |
| ZNF626      | ENSG00000188171 | -1.1124  | 0.86702 | -0.56543    | 0.71411     | -0.82846 |         |          |
|             | 0.7963          | -0.8601  | 0.80513 | 0.71411     | 0.84441617  |          |         |          |
| TRIM68      | ENSG00000167333 | -0.56551 | 0.71414 | -0.56551    | 0.71414     | -0.56551 |         |          |
|             | 0.71414         | -0.56551 | 0.71414 | 0.71414     | 0.84441617  |          |         |          |
| FANCM       | ENSG00000187790 | -0.56556 | 0.71415 | -0.56556    | 0.71415     | -0.56556 | 0.71415 |          |
|             | -0.56556        | 0.71415  | 0.71415 | 0.84441617  |             |          |         |          |
| SNORD115-22 | ENSG00000201326 | -0.56559 | 0.71416 | -0.56559    | 0.71416     | -0.56559 | 0.71416 | -0.56559 |
|             | 0.71416         | -0.56559 | 0.71416 | 0.71416     | 0.84441617  |          |         |          |
| MTND2P11    | ENSG00000237124 | -0.56569 | 0.7142  | -0.56569    | 0.7142      | -0.56569 |         |          |
|             | 0.7142          | -0.56569 | 0.7142  | 0.7142      | 0.84441617  |          |         |          |
| LINC01879   | ENSG00000276397 | -0.87578 | 0.80942 | -0.72255    | 0.76502     | -0.5657  |         |          |
|             | 0.7142          | -1.5656  | 0.94128 | 0.7142      | 0.84441617  |          |         |          |
| TACC1       | ENSG00000147526 | -2.0965  | 0.98198 | -0.56583    | 0.71424     | -1.6897  | 0.95446 |          |
|             | -0.84017        | 0.79959  | 0.71424 | 0.84441617  |             |          |         |          |
| NA          | ENSG00000249041 | -1.5183  | 0.93553 | -1.483      | 0.93097     | -0.56586 | 0.71425 |          |
|             | -1.8533         | 0.96808  | 0.71425 | 0.84441617  |             |          |         |          |
| NA          | ENSG00000244259 | -0.90239 | 0.81658 | -0.56586    | 0.71426     | -0.56586 | 0.71426 |          |
|             | -0.56586        | 0.71426  | 0.71426 | 0.84441617  |             |          |         |          |
| NA          | ENSG00000227293 | -0.56593 | 0.71428 | -0.56593    | 0.71428     | -0.56593 | 0.71428 |          |
|             | -0.56593        | 0.71428  | 0.71428 | 0.84441617  |             |          |         |          |
| NA          | ENSG00000261730 | -1.0511  | 0.8534  | -1.3554     | 0.91235     | -0.74208 | 0.77098 |          |
|             | -0.56599        | 0.7143   | 0.7143  | 0.84441617  |             |          |         |          |
| NA          | ENSG00000226999 | -1.2316  | 0.89095 | -0.56601    | 0.71431     | -1.2316  | 0.89095 |          |
|             | -1.2316         | 0.89095  | 0.71431 | 0.84441617  |             |          |         |          |
| NA          | ENSG00000253945 | -0.56603 | 0.71431 | -0.90857    | 0.81821     | -2.0381  | 0.97923 |          |
|             | -2.0381         | 0.97923  | 0.71431 | 0.84441617  |             |          |         |          |
| NA          | ENSG00000254909 | -0.56604 | 0.71432 | -0.56604    | 0.71432     | -0.56604 | 0.71432 |          |
|             | -0.56604        | 0.71432  | 0.71432 | 0.84441617  |             |          |         |          |
| LINC01342   | ENSG00000223823 | -0.56616 | 0.71436 | -1.0912     | 0.8624      | -1.5489  |         |          |
|             | 0.9393          | -1.5489  | 0.9393  | 0.71436     | 0.84441617  |          |         |          |
| CDCA4P1     | ENSG00000229029 | -0.56624 | 0.71438 | -0.56624    | 0.71438     | -0.56624 |         |          |
|             | 0.71438         | -0.56624 | 0.71438 | 0.71438     | 0.84441617  |          |         |          |
| ACRV1       | ENSG00000134940 | -0.56627 | 0.7144  | -0.56627    | 0.7144      | -0.56627 | 0.7144  |          |
|             | -0.56627        | 0.7144   | 0.7144  | 0.84441617  |             |          |         |          |
| NA          | ENSG00000242536 | -1.0726  | 0.85827 | -0.56635    | 0.71442     | -1.1796  | 0.88091 |          |
|             | -1.2736         | 0.8986   | 0.71442 | 0.84441617  |             |          |         |          |
| AKIP1       | ENSG00000166452 | -0.56638 | 0.71443 | -0.56638    | 0.71443     | -0.77097 | 0.77964 |          |
|             | -0.56638        | 0.71443  | 0.71443 | 0.84441617  |             |          |         |          |
| NA          | ENSG00000270829 | -0.56643 | 0.71445 | -0.56643    | 0.71445     | -0.56643 | 0.71445 |          |
|             | -0.56643        | 0.71445  | 0.71445 | 0.84441617  |             |          |         |          |
| ACAP2       | ENSG00000114331 | -0.63947 | 0.73874 | -0.65761    | 0.74461     | -0.63399 | 0.73696 |          |
|             | -0.56647        | 0.71446  | 0.71446 | 0.84441617  |             |          |         |          |
| THEMIS      | ENSG00000172673 | -1.1419  | 0.87324 | -0.56645    | 0.71446     | -1.0774  |         |          |

|              |                 |             |         |             |             |          |                  |
|--------------|-----------------|-------------|---------|-------------|-------------|----------|------------------|
|              | 0.85934         | -1.0346     | 0.84957 | 0.71446     | 0.84441617  |          |                  |
| NA           | ENSG00000236867 | -0.56647    | 0.71446 | 0.71446     | -0.56647    | 0.71446  | -0.56647 0.71446 |
|              | -0.56647        | 0.71446     | 0.71446 | 0.84441617  |             |          |                  |
| SNORD32A     | ENSG00000201675 | -0.56648    | 0.71447 | 0.71447     | -0.56648    | 0.71447  | -0.56648         |
|              | 0.71447         | -0.56648    | 0.71447 | 0.71447     | 0.84441617  |          |                  |
| RN7SL471P    | ENSG00000263426 | -1.0142     | 0.84474 | 0.84474     | -0.56655    | 0.71449  | -1.8539          |
|              | 0.96813         | -0.66873    | 0.74817 | 0.71449     | 0.844419327 |          |                  |
| TCTEX1D1     | ENSG00000152760 | -0.56667    | 0.71453 | 0.71453     | -1.0806     | 0.86006  | -0.80631         |
|              | 0.78997         | -1.1614     | 0.87726 | 0.71453     | 0.844441424 |          |                  |
| VGLL4        | ENSG00000144560 | -0.56675    | 0.71456 | -0.60459    | 0.72728     | -0.964   | 0.83248          |
|              | -0.74192        | 0.77093     | 0.71456 | 0.844441424 |             |          |                  |
| RN7SKP280    | ENSG00000201066 | -0.56678    | 0.71457 | -0.56678    | 0.71457     | -0.56678 |                  |
|              | 0.71457         | -0.56678    | 0.71457 | 0.71457     | 0.844441424 |          |                  |
| NAIF1        | ENSG00000171169 | -0.56681    | 0.71458 | -1.4849     | 0.93122     | -1.4849  | 0.93122          |
|              | -0.80989        | 0.791       | 0.71458 | 0.844441424 |             |          |                  |
| NA           | ENSG00000206886 | -0.56688    | 0.7146  | -0.65163    | 0.74268     | -0.65163 | 0.74268          |
|              | -0.65163        | 0.74268     | 0.7146  | 0.844441424 |             |          |                  |
| CNPY2        | ENSG00000257727 | -1.0367     | 0.85006 | -0.56694    | 0.71462     | -1.2011  | 0.88515          |
|              | -1.2011         | 0.88515     | 0.71462 | 0.844441424 |             |          |                  |
| OLFM4        | ENSG00000102837 | -0.56698    | 0.71463 | -0.56698    | 0.71463     | -1.1531  | 0.87557          |
|              | -0.56698        | 0.71463     | 0.71463 | 0.844441424 |             |          |                  |
| NA           | ENSG00000212270 | -0.56709    | 0.71467 | -0.56709    | 0.71467     | -0.56709 | 0.71467          |
|              | -0.56709        | 0.71467     | 0.71467 | 0.844468213 |             |          |                  |
| NA           | ENSG00000233242 | -0.56729    | 0.71474 | -0.56729    | 0.71474     | -0.56729 | 0.71474          |
|              | -1.3442         | 0.91056     | 0.71474 | 0.844530448 |             |          |                  |
| TDRD12       | ENSG00000173809 | -0.99223    | 0.83946 | -0.56742    | 0.71479     | -1.0251  |                  |
|              | 0.84735         | -0.58223    | 0.7198  | 0.71479     | 0.844569049 |          |                  |
| OR5G5P       | ENSG00000205025 | -0.87905    | 0.81031 | -0.56756    | 0.71483     | -1.0648  |                  |
|              | 0.85652         | -0.8655     | 0.80662 | 0.71483     | 0.844575354 |          |                  |
| SLC25A34-AS1 | ENSG00000224459 | -0.56755    | 0.71483 | -0.56755    | 0.71483     | -0.56755 |                  |
|              | 0.71483         | -0.56755    | 0.71483 | 0.71483     | 0.844575354 |          |                  |
| SNORD116-14  | ENSG00000206621 | -0.56764    | 0.71486 | -0.56764    | 0.71486     | -0.56764 |                  |
|              | 0.71486         | -0.56764    | 0.71486 | 0.71486     | 0.844584811 |          |                  |
| PPP1R35-AS1  | ENSG00000240211 | -0.5677     | 0.71488 | -0.5677     | 0.71488     | -0.5677  |                  |
|              | 0.71488         | -0.5677     | 0.71488 | 0.71488     | 0.844584811 |          |                  |
| NA           | ENSG00000236355 | -0.56774    | 0.71489 | -0.56774    | 0.71489     | -0.56774 | 0.71489          |
|              | -0.56774        | 0.71489     | 0.71489 | 0.844584811 |             |          |                  |
| RNU6-120P    | ENSG00000251886 | -0.63439    | 0.73709 | -0.78101    | 0.7826      | -0.56784 |                  |
|              | 0.71493         | -0.85457    | 0.8036  | 0.71493     | 0.844611591 |          |                  |
| MIR498       | ENSG00000207869 | -0.56793    | 0.71496 | -0.56793    | 0.71496     | -0.56793 |                  |
|              | 0.71496         | -0.56793    | 0.71496 | 0.71496     | 0.844624195 |          |                  |
| NA           | ENSG00000258866 | -0.56803    | 0.71499 | -0.57761    | 0.71824     | -0.56803 | 0.71499          |
|              | -0.56803        | 0.71499     | 0.71499 | 0.844624195 |             |          |                  |
| NA           | ENSG00000225096 | -0.56804    | 0.715   | -0.56804    | 0.715       | -0.56804 | 0.715            |
|              | 0.715           | 0.844624195 |         |             |             |          |                  |
| NA           | ENSG00000274489 | -0.56808    | 0.71501 | -0.56808    | 0.71501     | -0.56808 | 0.71501          |
|              | -0.56808        | 0.71501     | 0.71501 | 0.844624195 |             |          |                  |
| CLTCL1       | ENSG00000070371 | -0.88653    | 0.81234 | -0.62704    | 0.73468     | -2.245   |                  |
|              | 0.98762         | -0.56821    | 0.71505 | 0.71505     | 0.844650971 |          |                  |
| NA           | ENSG00000183562 | -0.56864    | 0.7152  | -0.56864    | 0.7152      | -0.56864 | 0.7152           |
|              | -0.62408        | 0.73371     | 0.7152  | 0.844778536 |             |          |                  |
| IGHVIII-25-1 | ENSG00000253367 | -0.56863    | 0.7152  | -0.56863    | 0.7152      | -0.56863 |                  |
|              | 0.7152          | -0.56863    | 0.7152  | 0.7152      | 0.844778536 |          |                  |
| PKD1L1       | ENSG00000158683 | -0.73405    | 0.76854 | -1.0851     | 0.86106     | -0.87696 |                  |
|              | 0.80975         | -0.56868    | 0.71521 | 0.71521     | 0.844778536 |          |                  |
| WDR36        | ENSG00000134987 | -0.82313    | 0.79478 | -0.56882    | 0.71526     | -0.79323 | 0.78618          |
|              | -1.0872         | 0.86154     | 0.71526 | 0.844799787 |             |          |                  |
| TUBB3P2      | ENSG00000230101 | -0.56887    | 0.71528 | -0.56887    | 0.71528     | -0.56887 |                  |
|              | 0.71528         | -0.56887    | 0.71528 | 0.71528     | 0.844799787 |          |                  |
| NA           | ENSG00000266963 | -0.56887    | 0.71528 | -0.56887    | 0.71528     | -0.56887 | 0.71528          |
|              | -0.56887        | 0.71528     | 0.71528 | 0.844799787 |             |          |                  |
| NA           | ENSG00000283201 | -0.56894    | 0.7153  | -0.56894    | 0.7153      | -0.56894 | 0.7153           |

|           |                 |          |         |             |             |          |         |  |
|-----------|-----------------|----------|---------|-------------|-------------|----------|---------|--|
|           | -0.56894        | 0.7153   | 0.7153  | 0.844802933 |             |          |         |  |
| TTLL4     | ENSG00000135912 | -0.70701 | 0.76022 | -0.78512    | 0.78381     | -1.4522  | 0.92677 |  |
|           | -0.56906        | 0.71534  | 0.71534 | 0.844816286 |             |          |         |  |
| RTL10     | ENSG00000215012 | -0.56909 | 0.71535 | -1.6518     | 0.95072     | -2.0347  | 0.97906 |  |
|           | -1.6518         | 0.95072  | 0.71535 | 0.844816286 |             |          |         |  |
| NA        | ENSG00000255004 | -0.56914 | 0.71537 | -0.56914    | 0.71537     | -0.56914 | 0.71537 |  |
|           | -0.56914        | 0.71537  | 0.71537 | 0.844816286 |             |          |         |  |
| NA        | ENSG00000203392 | -0.56919 | 0.71539 | -0.56919    | 0.71539     | -0.56919 | 0.71539 |  |
|           | -0.56919        | 0.71539  | 0.71539 | 0.844816286 |             |          |         |  |
| RPSAP1    | ENSG00000228820 | -1.1649  | 0.87796 | -0.56928    | 0.71542     | -1.4597  |         |  |
|           | 0.92782         | -1.4987  | 0.93303 | 0.71542     | 0.844816286 |          |         |  |
| MIR3188   | ENSG00000267959 | -0.56935 | 0.71544 | -0.56935    | 0.71544     | -0.56935 |         |  |
|           | 0.71544         | -0.56935 | 0.71544 | 0.71544     | 0.844816286 |          |         |  |
| NA        | ENSG00000273335 | -0.82842 | 0.79628 | -0.56935    | 0.71544     | -0.82842 | 0.79628 |  |
|           | -0.82842        | 0.79628  | 0.71544 | 0.844816286 |             |          |         |  |
| NA        | ENSG00000259770 | -0.56937 | 0.71545 | -0.56937    | 0.71545     | -0.56937 | 0.71545 |  |
|           | -0.56937        | 0.71545  | 0.71545 | 0.844816286 |             |          |         |  |
| ESPL1     | ENSG00000135476 | -0.65764 | 0.74462 | -1.4309     | 0.92377     | -0.58964 | 0.72228 |  |
|           | -0.5696         | 0.71553  | 0.71553 | 0.844890278 |             |          |         |  |
| NA        | ENSG00000280395 | -0.5697  | 0.71556 | -0.5697     | 0.71556     | -0.5697  | 0.71556 |  |
|           | -0.5697         | 0.71556  | 0.71556 | 0.844896564 |             |          |         |  |
| NA        | ENSG00000273466 | -0.56972 | 0.71557 | -0.56972    | 0.71557     | -0.56972 | 0.71557 |  |
|           | -0.56972        | 0.71557  | 0.71557 | 0.844896564 |             |          |         |  |
| NA        | ENSG00000268050 | -0.56987 | 0.71562 | -0.56987    | 0.71562     | -0.56987 | 0.71562 |  |
|           | -0.56987        | 0.71562  | 0.71562 | 0.844929605 |             |          |         |  |
| SEC63P1   | ENSG00000228057 | -0.56993 | 0.71564 | -0.56993    | 0.71564     | -0.56993 |         |  |
|           | 0.71564         | -0.56993 | 0.71564 | 0.71564     | 0.844929605 |          |         |  |
| RPS6P22   | ENSG00000244390 | -0.56997 | 0.71565 | -0.57215    | 0.71639     | -0.56997 |         |  |
|           | 0.71565         | -0.56997 | 0.71565 | 0.71565     | 0.844929605 |          |         |  |
| GTF2F2    | ENSG00000188342 | -0.7549  | 0.77485 | -1.2176     | 0.88831     | -0.75831 |         |  |
|           | 0.77587         | -0.57002 | 0.71567 | 0.71567     | 0.844932746 |          |         |  |
| NA        | ENSG00000212145 | -0.57018 | 0.71572 | -1.7814     | 0.96257     | -1.7814  | 0.96257 |  |
|           | -1.7814         | 0.96257  | 0.71572 | 0.844971305 |             |          |         |  |
| NA        | ENSG00000276805 | -0.73019 | 0.76736 | -0.57044    | 0.71581     | -0.57044 | 0.71581 |  |
|           | -0.57044        | 0.71581  | 0.71581 | 0.845057085 |             |          |         |  |
| NA        | ENSG00000188525 | -0.57053 | 0.71584 | -0.57053    | 0.71584     | -0.57053 | 0.71584 |  |
|           | -0.57053        | 0.71584  | 0.71584 | 0.845063362 |             |          |         |  |
| NA        | ENSG00000275339 | -0.57057 | 0.71585 | -0.57057    | 0.71585     | -0.57057 | 0.71585 |  |
|           | -0.57057        | 0.71585  | 0.71585 | 0.845063362 |             |          |         |  |
| NA        | ENSG00000213121 | -0.73166 | 0.76781 | -0.57068    | 0.71589     | -1.023   | 0.84686 |  |
|           | -0.65867        | 0.74495  | 0.71589 | 0.845090109 |             |          |         |  |
| TPRA1     | ENSG00000163870 | -0.57077 | 0.71592 | -0.68075    | 0.75199     | -0.62885 | 0.73528 |  |
|           | -0.82624        | 0.79567  | 0.71592 | 0.845105051 |             |          |         |  |
| CD80      | ENSG00000121594 | -0.8627  | 0.80585 | -0.57088    | 0.71596     | -1.5049  | 0.93382 |  |
|           | -0.60807        | 0.72843  | 0.71596 | 0.845111324 |             |          |         |  |
| CADM2-AS1 | ENSG00000239519 | -0.57089 | 0.71596 | -0.57089    | 0.71596     | -0.57089 |         |  |
|           | 0.71596         | -0.57089 | 0.71596 | 0.71596     | 0.845111324 |          |         |  |
| TMEM215   | ENSG00000188133 | -1.116   | 0.86779 | -0.72982    | 0.76725     | -0.57103 |         |  |
|           | 0.71601         | -0.72982 | 0.76725 | 0.71601     | 0.845123869 |          |         |  |
| MYBPC2    | ENSG00000086967 | -0.5711  | 0.71603 | -1.3259     | 0.90756     | -0.5711  |         |  |
|           | 0.71603         | -0.5711  | 0.71603 | 0.71603     | 0.845123869 |          |         |  |
| PRKDC     | ENSG00000253729 | -0.57109 | 0.71603 | -0.81298    | 0.79189     | -1.3428  | 0.91033 |  |
|           | -2.6128         | 0.99551  | 0.71603 | 0.845123869 |             |          |         |  |
| NA        | ENSG00000262990 | -0.57112 | 0.71604 | -0.57112    | 0.71604     | -0.57112 | 0.71604 |  |
|           | -0.57112        | 0.71604  | 0.71604 | 0.845123869 |             |          |         |  |
| DHX58     | ENSG00000108771 | -0.72382 | 0.76541 | -0.57128    | 0.7161      | -0.62744 | 0.73481 |  |
|           | -1.2274         | 0.89017  | 0.7161  | 0.845174215 |             |          |         |  |
| NA        | ENSG00000223642 | -1.3128  | 0.90538 | -0.57142    | 0.71614     | -0.75747 | 0.77562 |  |
|           | -0.75747        | 0.77562  | 0.71614 | 0.845200954 |             |          |         |  |
| LINC01869 | ENSG00000180279 | -0.57154 | 0.71618 | -1.0365     | 0.85002     | -0.58936 |         |  |
|           | 0.72219         | -0.58936 | 0.72219 | 0.71618     | 0.845227692 |          |         |  |
| PUS3      | ENSG00000110060 | -0.69355 | 0.75602 | -0.69355    | 0.75602     | -1.3309  | 0.90839 |  |

|           |                 |             |         |             |             |          |         |
|-----------|-----------------|-------------|---------|-------------|-------------|----------|---------|
|           | -0.57158        | 0.7162      | 0.7162  | 0.845230825 |             |          |         |
| LINC00508 | ENSG00000256971 | -0.57168    | 0.71623 | -0.57168    | 0.71623     | -0.57168 |         |
|           | 0.71623         | -0.57168    | 0.71623 | 0.71623     | 0.845245759 |          |         |
| NA        | ENSG00000241054 | -0.57181    | 0.71628 | -0.57181    | 0.71628     | -0.57181 | 0.71628 |
|           | -0.57181        | 0.71628     | 0.71628 | 0.845284295 |             |          |         |
| NA        | ENSG00000280311 | -0.57194    | 0.71632 | -0.57194    | 0.71632     | -0.57194 | 0.71632 |
|           | -0.57194        | 0.71632     | 0.71632 | 0.845302359 |             |          |         |
| RN7SKP53  | ENSG00000223269 | -0.63433    | 0.73707 | -0.57198    | 0.71633     | -0.57198 |         |
|           | 0.71633         | -0.74744    | 0.7726  | 0.71633     | 0.845302359 |          |         |
| NA        | ENSG00000269215 | -0.57215    | 0.71639 | -0.57215    | 0.71639     | -0.57215 | 0.71639 |
|           | -0.57215        | 0.71639     | 0.71639 | 0.84535269  |             |          |         |
| MTCO1P45  | ENSG00000232982 | -1.3939     | 0.91832 | -0.62929    | 0.73542     | -0.57224 |         |
|           | 0.71642         | -0.78544    | 0.7839  | 0.71642     | 0.84536762  |          |         |
| OR52E4    | ENSG00000180974 | -0.57238    | 0.71647 | -0.82436    | 0.79513     | -0.57238 |         |
|           | 0.71647         | -0.57238    | 0.71647 | 0.71647     | 0.845385678 |          |         |
| SNORA71C  | ENSG00000201512 | -0.57238    | 0.71647 | -0.57238    | 0.71647     | -0.57238 |         |
|           | 0.71647         | -0.57238    | 0.71647 | 0.71647     | 0.845385678 |          |         |
| NA        | ENSG00000268866 | -0.57253    | 0.71652 | -0.57253    | 0.71652     | -0.57253 | 0.71652 |
|           | -0.57253        | 0.71652     | 0.71652 | 0.845389522 |             |          |         |
| RPS20P5   | ENSG00000236888 | -0.5726     | 0.71654 | -0.5726     | 0.71654     | -0.5726  |         |
|           | 0.71654         | -0.5726     | 0.71654 | 0.71654     | 0.845389522 |          |         |
| SAMM50P1  | ENSG00000224488 | -0.57261    | 0.71655 | -0.57261    | 0.71655     | -0.57261 |         |
|           | 0.71655         | -0.57261    | 0.71655 | 0.71655     | 0.845389522 |          |         |
| NA        | ENSG00000277526 | -1.1029     | 0.86497 | -0.57263    | 0.71655     | -1.3739  | 0.91527 |
|           | -1.3739         | 0.91527     | 0.71655 | 0.845389522 |             |          |         |
| P3H1      | ENSG00000117385 | -0.91422    | 0.8197  | -1.3208     | 0.90672     | -0.57265 | 0.71656 |
|           | -1.9611         | 0.97507     | 0.71656 | 0.845389522 |             |          |         |
| SLC35B2   | ENSG00000157593 | -0.57276    | 0.7166  | -0.57276    | 0.7166      | -0.57276 |         |
|           | 0.7166          | -0.57276    | 0.7166  | 0.7166      | 0.845390237 |          |         |
| ITGAE     | ENSG00000083457 | -0.57284    | 0.71662 | -1.0613     | 0.85573     | -1.4894  | 0.93181 |
|           | -2.9944         | 0.99863     | 0.71662 | 0.845390237 |             |          |         |
| METTL11B  | ENSG00000203740 | -0.57283    | 0.71662 | -0.71398    | 0.76238     | -0.57283 |         |
|           | 0.71662         | -0.57283    | 0.71662 | 0.71662     | 0.845390237 |          |         |
| PATE1     | ENSG00000171053 | -0.57286    | 0.71663 | -0.57286    | 0.71663     | -0.57286 | 0.71663 |
|           | -0.57286        | 0.71663     | 0.71663 | 0.845390237 |             |          |         |
| NA        | ENSG00000257989 | -0.68906    | 0.75461 | -0.57306    | 0.7167      | -0.90857 | 0.81821 |
|           | -0.72059        | 0.76442     | 0.7167  | 0.845452347 |             |          |         |
| HSPE1P13  | ENSG00000225900 | -0.57326    | 0.71677 | -0.57326    | 0.71677     | -0.57326 |         |
|           | 0.71677         | -0.57326    | 0.71677 | 0.71677     | 0.845514454 |          |         |
| MTND4P19  | ENSG00000230338 | -1.4024     | 0.9196  | -1.0906     | 0.86228     | -0.57341 |         |
|           | 0.71682         | -0.57341    | 0.71682 | 0.71682     | 0.845544295 |          |         |
| PTGES3L   | ENSG00000267060 | -0.57345    | 0.71683 | -0.57345    | 0.71683     | -0.57345 |         |
|           | 0.71683         | -0.57345    | 0.71683 | 0.71683     | 0.845544295 |          |         |
| TRIM60P16 | ENSG00000229909 | -0.96148    | 0.83185 | -1.0578     | 0.85493     | -0.82079 |         |
|           | 0.79412         | -0.57357    | 0.71687 | 0.71687     | 0.845553666 |          |         |
| IL31      | ENSG00000204671 | -0.84383    | 0.80062 | -0.84383    | 0.80062     | -0.84383 | 0.80062 |
|           | -0.57359        | 0.71688     | 0.71688 | 0.845553666 |             |          |         |
| LINC02649 | ENSG00000215244 | -0.57362    | 0.71689 | -0.61577    | 0.73098     | -1.0762  |         |
|           | 0.85909         | -1.71095637 | 0.71689 | 0.845553666 |             |          |         |
| NA        | ENSG00000206813 | -0.57371    | 0.71692 | -0.57371    | 0.71692     | -0.57371 | 0.71692 |
|           | -0.57371        | 0.71692     | 0.71692 | 0.845568584 |             |          |         |
| NA        | ENSG00000278909 | -0.57382    | 0.71696 | -0.57382    | 0.71696     | -0.57382 | 0.71696 |
|           | -0.57382        | 0.71696     | 0.71696 | 0.845586623 |             |          |         |
| NCAPD2    | ENSG00000010292 | -0.72853    | 0.76686 | -0.87316    | 0.80871     | -0.57388 |         |
|           | 0.71697         | -1.0674     | 0.8571  | 0.71697     | 0.845586623 |          |         |
| GOLM2     | ENSG00000166734 | -1.1028     | 0.86494 | -0.57405    | 0.71703     | -0.93721 | 0.82567 |
|           | -1.0848         | 0.86099     | 0.71703 | 0.84563692  |             |          |         |
| NA        | ENSG00000248170 | -0.57416    | 0.71707 | -0.57416    | 0.71707     | -0.57416 | 0.71707 |
|           | -0.57416        | 0.71707     | 0.71707 | 0.845663628 |             |          |         |
| LINC00333 | ENSG00000233349 | -0.57421    | 0.71709 | -0.57421    | 0.71709     | -0.57421 |         |
|           | 0.71709         | -0.57421    | 0.71709 | 0.71709     | 0.845666748 |          |         |
| ERHP2     | ENSG00000218143 | -0.91096    | 0.81884 | -0.5743     | 0.71712     | -0.5743  | 0.71712 |

|            |                 |          |         |             |             |          |         |
|------------|-----------------|----------|---------|-------------|-------------|----------|---------|
|            | -0.5743         | 0.71712  | 0.71712 | 0.845681661 |             |          |         |
| OR2A14     | ENSG00000221938 | -0.57451 | 0.71719 | -0.88669    | 0.81238     | -0.88669 |         |
|            | 0.81238         | -0.88669 | 0.81238 | 0.71719     | 0.845735069 |          |         |
| NA         | ENSG00000242154 | -0.57454 | 0.7172  | -0.57454    | 0.7172      | -0.57454 | 0.7172  |
|            | -0.57454        | 0.7172   | 0.7172  | 0.845735069 |             |          |         |
| NA         | ENSG00000256031 | -0.57461 | 0.71722 | -0.57461    | 0.71722     | -0.57461 | 0.71722 |
|            | -0.57461        | 0.71722  | 0.71722 | 0.845738188 |             |          |         |
| NA         | ENSG00000217178 | -0.57469 | 0.71725 | -1.3143     | 0.90563     | -1.4992  | 0.93308 |
|            | -1.4992         | 0.93308  | 0.71725 | 0.845745104 |             |          |         |
| CD68       | ENSG00000129226 | -0.79192 | 0.7858  | -0.57478    | 0.71728     | -0.79192 | 0.7858  |
|            | -0.79192        | 0.7858   | 0.71728 | 0.845745104 |             |          |         |
| RNU6-1149P | ENSG00000252619 | -0.57485 | 0.7173  | -0.57485    | 0.7173      | -0.57485 |         |
|            | 0.7173          | -0.57485 | 0.7173  | 0.7173      | 0.845745104 |          |         |
| CUZD1      | ENSG00000138161 | -0.57493 | 0.71733 | -0.57493    | 0.71733     | -0.57493 | 0.71733 |
|            | -0.57493        | 0.71733  | 0.71733 | 0.845745104 |             |          |         |
| MIR4762    | ENSG00000264160 | -0.57492 | 0.71733 | -0.57492    | 0.71733     | -0.57492 |         |
|            | 0.71733         | -0.57492 | 0.71733 | 0.71733     | 0.845745104 |          |         |
| NA         | ENSG00000266850 | -1.7233  | 0.95759 | -0.97313    | 0.83476     | -0.57491 | 0.71733 |
|            | -1.3279         | 0.90789  | 0.71733 | 0.845745104 |             |          |         |
| NA         | ENSG00000234789 | -0.57505 | 0.71737 | -0.57505    | 0.71737     | -0.57505 | 0.71737 |
|            | -0.57505        | 0.71737  | 0.71737 | 0.845771802 |             |          |         |
| ZNF395     | ENSG00000186918 | -0.57528 | 0.71745 | -0.96551    | 0.83285     | -0.66008 |         |
|            | 0.7454          | -0.65455 | 0.74362 | 0.71745     | 0.845845656 |          |         |
| TRADD      | ENSG00000102871 | -0.57545 | 0.71751 | -1.5334     | 0.93741     | -1.6068  | 0.94595 |
|            | -0.97226        | 0.83454  | 0.71751 | 0.845895928 |             |          |         |
| NA         | ENSG00000241710 | -0.57561 | 0.71756 | -0.57561    | 0.71756     | -0.57561 | 0.71756 |
|            | -0.57561        | 0.71756  | 0.71756 | 0.845934409 |             |          |         |
| TSPAN14    | ENSG00000108219 | -0.67285 | 0.74948 | -0.5757     | 0.71759     | -0.62803 |         |
|            | 0.73501         | -0.68196 | 0.75237 | 0.71759     | 0.845949311 |          |         |
| CD3G       | ENSG00000160654 | -0.57583 | 0.71763 | -0.6043     | 0.72718     | -0.72068 | 0.76445 |
|            | -0.72068        | 0.76445  | 0.71763 | 0.845970435 |             |          |         |
| NA         | ENSG00000261438 | -0.57588 | 0.71765 | -0.57588    | 0.71765     | -0.57588 | 0.71765 |
|            | -0.57588        | 0.71765  | 0.71765 | 0.845970435 |             |          |         |
| SMR3A      | ENSG00000109208 | -0.5759  | 0.71766 | -0.5759     | 0.71766     | -0.5759  | 0.71766 |
|            | -0.89672        | 0.81507  | 0.71766 | 0.845970435 |             |          |         |
| ISOC1      | ENSG00000066583 | -1.3637  | 0.91366 | -1.3637     | 0.91366     | -0.57604 | 0.71771 |
|            | -1.3637         | 0.91366  | 0.71771 | 0.846008909 |             |          |         |
| NA         | ENSG00000238129 | -0.57634 | 0.71781 | -0.57634    | 0.71781     | -0.57634 | 0.71781 |
|            | -0.57634        | 0.71781  | 0.71781 | 0.846065387 |             |          |         |
| HMG1P11    | ENSG00000248336 | -0.57635 | 0.71781 | -0.57635    | 0.71781     | -0.57635 |         |
|            | 0.71781         | -0.57635 | 0.71781 | 0.71781     | 0.846065387 |          |         |
| NA         | ENSG00000279312 | -1.6307  | 0.94853 | -0.57635    | 0.71781     | -0.57635 | 0.71781 |
|            | -0.57635        | 0.71781  | 0.71781 | 0.846065387 |             |          |         |
| OR7E36P    | ENSG00000205240 | -1.9746  | 0.97584 | -1.2698     | 0.89793     | -1.1335  |         |
|            | 0.87149         | -0.57648 | 0.71785 | 0.71785     | 0.846071605 |          |         |
| CYP2C58P   | ENSG00000235199 | -0.57647 | 0.71785 | -1.4085     | 0.92051     | -0.68558 |         |
|            | 0.75351         | -1.4085  | 0.92051 | 0.71785     | 0.846071605 |          |         |
| LINC00488  | ENSG00000214381 | -0.57652 | 0.71787 | -0.57652    | 0.71787     | -0.57652 |         |
|            | 0.71787         | -0.57652 | 0.71787 | 0.71787     | 0.846074713 |          |         |
| ALDH2      | ENSG00000111275 | -0.57674 | 0.71794 | -1.2133     | 0.8875      | -1.3449  | 0.91067 |
|            | -1.2887         | 0.90124  | 0.71794 | 0.84613675  |             |          |         |
| OR2D3      | ENSG00000178358 | -1.4711  | 0.92936 | -0.57686    | 0.71798     | -0.57686 | 0.71798 |
|            | -0.57686        | 0.71798  | 0.71798 | 0.846142964 |             |          |         |
| ST13P15    | ENSG00000243759 | -0.57685 | 0.71798 | -1.002      | 0.84182     | -0.57685 |         |
|            | 0.71798         | -0.57685 | 0.71798 | 0.71798     | 0.846142964 |          |         |
| LINC00239  | ENSG00000258512 | -0.57695 | 0.71801 | -0.87194    | 0.80838     | -0.84714 |         |
|            | 0.80154         | -0.84714 | 0.80154 | 0.71801     | 0.846157855 |          |         |
| NA         | ENSG00000267628 | -0.57707 | 0.71806 | -0.57707    | 0.71806     | -0.57707 | 0.71806 |
|            | -0.57707        | 0.71806  | 0.71806 | 0.846182062 |             |          |         |
| NA         | ENSG00000256615 | -0.57715 | 0.71808 | -0.57715    | 0.71808     | -0.57715 | 0.71808 |
|            | -0.57715        | 0.71808  | 0.71808 | 0.846182062 |             |          |         |
| RNU2-66P   | ENSG00000222582 | -0.57722 | 0.7181  | -0.57722    | 0.7181      | -0.57722 |         |

|              |                 |          |         |             |             |          |         |
|--------------|-----------------|----------|---------|-------------|-------------|----------|---------|
|              | 0.7181          | -0.57722 | 0.7181  | 0.7181      | 0.846182062 |          |         |
| NA           | ENSG00000236209 | -0.57721 | 0.7181  | -0.57721    | 0.7181      | -0.57721 | 0.7181  |
|              | -0.57721        | 0.7181   | 0.7181  | 0.846182062 |             |          |         |
| NA           | ENSG00000212161 | -0.57745 | 0.71818 | -0.57745    | 0.71818     | -0.57745 | 0.71818 |
|              | -0.57745        | 0.71818  | 0.71818 | 0.846209369 |             |          |         |
| NA           | ENSG00000238819 | -0.81107 | 0.79134 | -1.0007     | 0.8415      | -0.57744 | 0.71818 |
|              | -0.57744        | 0.71818  | 0.71818 | 0.846209369 |             |          |         |
| CLHC1        | ENSG00000162994 | -1.3208  | 0.90671 | -1.1636     | 0.8777      | -1.3649  | 0.91386 |
|              | -0.5775         | 0.7182   | 0.7182  | 0.846209369 |             |          |         |
| CHKB-DT      | ENSG00000205559 | -0.57753 | 0.71821 | -0.57753    | 0.71821     | -0.57753 |         |
|              | 0.71821         | -0.57753 | 0.71821 | 0.71821     | 0.846209369 |          |         |
| NA           | ENSG00000231062 | -0.57754 | 0.71821 | -0.57754    | 0.71821     | -0.57754 | 0.71821 |
|              | -0.57754        | 0.71821  | 0.71821 | 0.846209369 |             |          |         |
| ST6GALNAC4P1 | ENSG00000233469 | -0.57767 | 0.71826 | -0.57767    | 0.71826     | -0.57767 |         |
|              | 0.71826         | -0.57767 | 0.71826 | 0.71826     | 0.846247819 |          |         |
| MTX3         | ENSG00000177034 | -0.57789 | 0.71833 | -0.57789    | 0.71833     | -0.57789 | 0.71833 |
|              | -0.57789        | 0.71833  | 0.71833 | 0.846309831 |             |          |         |
| NA           | ENSG00000223554 | -0.57801 | 0.71837 | -0.57801    | 0.71837     | -0.57801 | 0.71837 |
|              | -0.57801        | 0.71837  | 0.71837 | 0.846310456 |             |          |         |
| FABP5P11     | ENSG00000240122 | -0.578   | 0.71837 | -0.578      | 0.71837     | -0.578   |         |
|              | 0.71837         | -0.578   | 0.71837 | 0.71837     | 0.846310456 |          |         |
| RNU6-1011P   | ENSG00000207399 | -0.57809 | 0.7184  | -0.57809    | 0.7184      | -0.57809 |         |
|              | 0.7184          | -0.57809 | 0.7184  | 0.7184      | 0.846310456 |          |         |
| NA           | ENSG00000266289 | -0.57809 | 0.7184  | -0.57809    | 0.7184      | -0.57809 | 0.7184  |
|              | -0.57809        | 0.7184   | 0.7184  | 0.846310456 |             |          |         |
| KRT8P25      | ENSG00000239829 | -0.72742 | 0.76652 | -1.2201     | 0.88878     | -2.0774  |         |
|              | 0.98112         | -0.57821 | 0.71844 | 0.71844     | 0.846320383 |          |         |
| NA           | ENSG00000248591 | -0.57827 | 0.71846 | -0.57827    | 0.71846     | -0.57827 | 0.71846 |
|              | -0.57827        | 0.71846  | 0.71846 | 0.846320383 |             |          |         |
| A4GNT        | ENSG00000118017 | -0.93721 | 0.82568 | -0.93721    | 0.82568     | -0.93721 | 0.82568 |
|              | -0.57829        | 0.71847  | 0.71847 | 0.846320383 |             |          |         |
| RPL38P3      | ENSG00000244422 | -0.57832 | 0.71848 | -0.94126    | 0.82671     | -1.092   |         |
|              | 0.86259         | -0.6679  | 0.7479  | 0.71848     | 0.846320383 |          |         |
| WIPF2        | ENSG00000171475 | -0.90488 | 0.81723 | -0.57839    | 0.7185      | -0.63694 | 0.73792 |
|              | -1.1735         | 0.8797   | 0.7185  | 0.846320383 |             |          |         |
| MTCO2P18     | ENSG00000234480 | -0.57849 | 0.71853 | -0.57849    | 0.71853     | -0.57849 |         |
|              | 0.71853         | -1.1183  | 0.86828 | 0.71853     | 0.846320383 |          |         |
| MTATP6P4     | ENSG00000236590 | -0.57849 | 0.71853 | -0.57849    | 0.71853     | -0.57849 |         |
|              | 0.71853         | -0.57849 | 0.71853 | 0.71853     | 0.846320383 |          |         |
| NA           | ENSG00000279636 | -0.57857 | 0.71856 | -0.57857    | 0.71856     | -0.57857 | 0.71856 |
|              | -0.57857        | 0.71856  | 0.71856 | 0.846335262 |             |          |         |
| ZNF208       | ENSG00000160321 | -0.62792 | 0.73497 | -0.57877    | 0.71863     | -1.384   |         |
|              | 0.91682         | -1.0345  | 0.84955 | 0.71863     | 0.846397252 |          |         |
| S1PR1        | ENSG00000170989 | -1.2748  | 0.89882 | -1.2748     | 0.89882     | -0.74975 | 0.7733  |
|              | -0.57905        | 0.71872  | 0.71872 | 0.846482794 |             |          |         |
| FGF9         | ENSG00000102678 | -0.57912 | 0.71875 | -0.95357    | 0.82985     | -1.46    | 0.92786 |
|              | -0.89542        | 0.81472  | 0.71875 | 0.846497668 |             |          |         |
| NA           | ENSG00000259172 | -0.5792  | 0.71877 | -0.5792     | 0.71877     | -0.5792  | 0.71877 |
|              | -0.5792         | 0.71877  | 0.71877 | 0.846500764 |             |          |         |
| NA           | ENSG00000230499 | -1.593   | 0.94442 | -0.57935    | 0.71882     | -1.593   | 0.94442 |
|              | -1.593          | 0.94442  | 0.71882 | 0.84653919  |             |          |         |
| MTATP6P27    | ENSG00000234003 | -0.5795  | 0.71888 | -0.5795     | 0.71888     | -0.5795  |         |
|              | 0.71888         | -0.5795  | 0.71888 | 0.71888     | 0.846589391 |          |         |
| NA           | ENSG00000269388 | -0.57967 | 0.71893 | -0.57967    | 0.71893     | -0.57967 | 0.71893 |
|              | -0.57967        | 0.71893  | 0.71893 | 0.846627813 |             |          |         |
| RRP8         | ENSG00000132275 | -0.59323 | 0.72349 | -0.59323    | 0.72349     | -0.59323 | 0.72349 |
|              | -0.57989        | 0.719    | 0.719   | 0.846684192 |             |          |         |
| KHSRP        | ENSG00000088247 | -0.57995 | 0.71903 | -0.92242    | 0.82185     | -0.92242 | 0.82185 |
|              | -0.87555        | 0.80936  | 0.71903 | 0.846684192 |             |          |         |
| NA           | ENSG00000259046 | -0.57995 | 0.71903 | -0.57995    | 0.71903     | -0.57995 | 0.71903 |
|              | -0.57995        | 0.71903  | 0.71903 | 0.846684192 |             |          |         |
| RPL22P20     | ENSG00000239200 | -0.58006 | 0.71906 | -1.4109     | 0.92086     | -1.6245  |         |

|           |                 |          |         |             |             |          |         |
|-----------|-----------------|----------|---------|-------------|-------------|----------|---------|
|           | 0.94787         | -1.6245  | 0.94787 | 0.71906     | 0.846699058 |          |         |
| NA        | ENSG00000243155 | -0.58017 | 0.7191  | -0.58017    | 0.7191      | -0.58017 | 0.7191  |
|           | -0.58017        | 0.7191   | 0.7191  | 0.846725698 |             |          |         |
| EEF1B2    | ENSG00000114942 | -0.58025 | 0.71913 | -0.58025    | 0.71913     | -0.58025 | 0.71913 |
|           | 0.71913         | -0.58025 | 0.71913 | 0.71913     | 0.846740562 |          |         |
| NA        | ENSG00000236141 | -0.58038 | 0.71917 | -0.58038    | 0.71917     | -0.58038 | 0.71917 |
|           | -0.58038        | 0.71917  | 0.71917 | 0.846762184 |             |          |         |
| PDE5A     | ENSG00000138735 | -1.7223  | 0.95749 | -1.7454     | 0.95955     | -1.6275  | 0.94818 |
|           | -0.5805         | 0.71921  | 0.71921 | 0.846762184 |             |          |         |
| NA        | ENSG00000254532 | -0.58054 | 0.71922 | -1.819      | 0.96555     | -2.1565  | 0.98448 |
|           | -0.58054        | 0.71922  | 0.71922 | 0.846762184 |             |          |         |
| RPS6KL1   | ENSG00000198208 | -1.421   | 0.92234 | -0.66655    | 0.74747     | -0.5806  |         |
|           | 0.71925         | -0.90966 | 0.8185  | 0.71925     | 0.846762184 |          |         |
| NA        | ENSG00000277562 | -0.58062 | 0.71925 | -0.60356    | 0.72693     | -0.60356 | 0.72693 |
|           | -1.0086         | 0.84342  | 0.71925 | 0.846762184 |             |          |         |
| BSX       | ENSG00000188909 | -0.61234 | 0.72984 | -0.61234    | 0.72984     | -1.8019  | 0.96422 |
|           | -0.58064        | 0.71926  | 0.71926 | 0.846762184 |             |          |         |
| NA        | ENSG00000271238 | -0.58068 | 0.71927 | -0.58068    | 0.71927     | -0.58068 | 0.71927 |
|           | -0.58068        | 0.71927  | 0.71927 | 0.846762184 |             |          |         |
| NA        | ENSG00000240159 | -0.77998 | 0.7823  | -0.63639    | 0.73774     | -0.67455 | 0.75002 |
|           | -0.58096        | 0.71936  | 0.71936 | 0.846847678 |             |          |         |
| VWA5B1    | ENSG00000158816 | -1.1582  | 0.87662 | -1.4278     | 0.92332     | -0.58109 |         |
|           | 0.71941         | -1.4119  | 0.921   | 0.71941     | 0.846863108 |          |         |
| MTND4P11  | ENSG00000234099 | -0.58111 | 0.71942 | -0.58111    | 0.71942     | -0.58111 |         |
|           | 0.71942         | -0.58111 | 0.71942 | 0.71942     | 0.846863108 |          |         |
| NA        | ENSG00000272085 | -0.71629 | 0.76309 | -0.58122    | 0.71945     | -0.71629 | 0.76309 |
|           | -0.71629        | 0.76309  | 0.71945 | 0.846863108 |             |          |         |
| TAAR2     | ENSG00000146378 | -0.86012 | 0.80514 | -0.58123    | 0.71946     | -0.86012 | 0.80514 |
|           | -0.86012        | 0.80514  | 0.71946 | 0.846863108 |             |          |         |
| UGDH-AS1  | ENSG00000249348 | -1.2575  | 0.89572 | -0.93417    | 0.82489     | -0.58125 |         |
|           | 0.71946         | -1.309   | 0.90473 | 0.71946     | 0.846863108 |          |         |
| NA        | ENSG00000261094 | -0.58161 | 0.71959 | -0.58161    | 0.71959     | -0.58161 | 0.71959 |
|           | -0.58161        | 0.71959  | 0.71959 | 0.846940464 |             |          |         |
| IDI2-AS1  | ENSG00000232656 | -0.58168 | 0.71961 | -0.58168    | 0.71961     | -0.58168 |         |
|           | 0.71961         | -0.58168 | 0.71961 | 0.71961     | 0.846940464 |          |         |
| NA        | ENSG00000257852 | -1.4888  | 0.93173 | -0.61989    | 0.73233     | -0.5817  | 0.71961 |
|           | -1.2618         | 0.89649  | 0.71961 | 0.846940464 |             |          |         |
| NA        | ENSG00000258782 | -0.5817  | 0.71961 | -0.5817     | 0.71961     | -0.5817  | 0.71961 |
|           | -0.5817         | 0.71961  | 0.71961 | 0.846940464 |             |          |         |
| NMRK1     | ENSG00000106733 | -1.7634  | 0.96108 | -1.7634     | 0.96108     | -1.6671  | 0.95225 |
|           | -0.5817         | 0.71962  | 0.71962 | 0.846940464 |             |          |         |
| PPIAP37   | ENSG00000226003 | -0.58175 | 0.71963 | -0.58175    | 0.71963     | -0.58175 |         |
|           | 0.71963         | -0.58175 | 0.71963 | 0.71963     | 0.846940464 |          |         |
| RPL21P65  | ENSG00000216977 | -0.58184 | 0.71966 | -0.58184    | 0.71966     | -0.58184 |         |
|           | 0.71966         | -0.58184 | 0.71966 | 0.71966     | 0.846955316 |          |         |
| TMEM116   | ENSG00000198270 | -1.2192  | 0.88862 | -0.6684     | 0.74806     | -0.58192 |         |
|           | 0.71969         | -1.0402  | 0.85088 | 0.71969     | 0.846970167 |          |         |
| LINC01681 | ENSG00000233985 | -0.58198 | 0.71971 | -1.0714     | 0.85801     | -1.483   |         |
|           | 0.93096         | -1.1838  | 0.88175 | 0.71971     | 0.846973249 |          |         |
| OR10G7    | ENSG00000182634 | -0.58218 | 0.71978 | -0.58218    | 0.71978     | -0.77163 |         |
|           | 0.77983         | -0.58218 | 0.71978 | 0.71978     | 0.847014716 |          |         |
| MTND4P17  | ENSG00000242178 | -0.92627 | 0.82285 | -0.58218    | 0.71978     | -0.92627 |         |
|           | 0.82285         | -2.254   | 0.9879  | 0.71978     | 0.847014716 |          |         |
| MIR3138   | ENSG00000264931 | -0.58224 | 0.7198  | -0.58224    | 0.7198      | -0.58224 |         |
|           | 0.7198          | -0.58224 | 0.7198  | 0.7198      | 0.847017797 |          |         |
| NA        | ENSG00000250613 | -1.493   | 0.93228 | -1.493      | 0.93228     | -1.493   | 0.93228 |
|           | -0.58238        | 0.71984  | 0.71984 | 0.847027039 |             |          |         |
| NA        | ENSG00000272335 | -0.84799 | 0.80178 | -0.58238    | 0.71985     | -0.58238 | 0.71985 |
|           | -0.58238        | 0.71985  | 0.71985 | 0.847027039 |             |          |         |
| RNA5SP118 | ENSG00000222317 | -0.58243 | 0.71986 | -0.58243    | 0.71986     | -0.58243 |         |
|           | 0.71986         | -0.58243 | 0.71986 | 0.71986     | 0.847027039 |          |         |
| NA        | ENSG00000280179 | -0.58262 | 0.71993 | -0.58262    | 0.71993     | -0.58262 | 0.71993 |



|            |                 |          |         |             |             |          |         |
|------------|-----------------|----------|---------|-------------|-------------|----------|---------|
|            | -0.58262        | 0.71993  | 0.71993 | 0.847071577 |             |          |         |
| BNIP3P38   | ENSG00000268469 | -0.5827  | 0.71995 | -0.5827     | 0.71995     | -0.5827  |         |
|            | 0.71995         | -1.1757  | 0.88015 | 0.71995     | 0.847071577 |          |         |
| NA         | ENSG00000279603 | -0.5827  | 0.71995 | -0.5827     | 0.71995     | -0.5827  | 0.71995 |
|            | -0.5827         | 0.71995  | 0.71995 | 0.847071577 |             |          |         |
| NA         | ENSG00000260473 | -1.0028  | 0.84202 | -1.2413     | 0.89275     | -1.1267  | 0.87007 |
|            | -0.58278        | 0.71998  | 0.71998 | 0.847072128 |             |          |         |
| NA         | ENSG00000201791 | -1.089   | 0.86191 | -1.2696     | 0.89788     | -0.85398 | 0.80344 |
|            | -0.58283        | 0.72     | 0.72    | 0.847072128 |             |          |         |
| NA         | ENSG00000248744 | -1.0932  | 0.86285 | -0.95373    | 0.82989     | -0.5829  | 0.72002 |
|            | -0.67955        | 0.7516   | 0.72002 | 0.847072128 |             |          |         |
| NA         | ENSG00000278205 | -0.98815 | 0.83846 | -0.99722    | 0.84067     | -0.5965  | 0.72458 |
|            | -0.5829         | 0.72002  | 0.72002 | 0.847072128 |             |          |         |
| TENT5C     | ENSG00000183508 | -0.58303 | 0.72006 | -0.58303    | 0.72006     | -0.58303 |         |
|            | 0.72006         | -0.58303 | 0.72006 | 0.72006     | 0.847098735 |          |         |
| CCND3      | ENSG00000112576 | -0.83322 | 0.79764 | -0.58315    | 0.7201      | -0.73444 | 0.76866 |
|            | -1.4799         | 0.93055  | 0.7201  | 0.847117201 |             |          |         |
| NA         | ENSG00000216480 | -0.72954 | 0.76716 | -0.71349    | 0.76223     | -0.58324 | 0.72014 |
|            | -0.71349        | 0.76223  | 0.72014 | 0.847117201 |             |          |         |
| AOPEP      | ENSG00000148120 | -1.0328  | 0.84915 | -1.5064     | 0.93402     | -0.58329 | 0.72015 |
|            | -0.93613        | 0.8254   | 0.72015 | 0.847117201 |             |          |         |
| NA         | ENSG00000243004 | -1.4848  | 0.9312  | -1.3907     | 0.91785     | -1.0802  | 0.85998 |
|            | -0.58327        | 0.72015  | 0.72015 | 0.847117201 |             |          |         |
| CRYGN      | ENSG00000127377 | -0.58334 | 0.72017 | -0.58334    | 0.72017     | -1.7689  | 0.96154 |
|            | -1.7689         | 0.96154  | 0.72017 | 0.847117201 |             |          |         |
| NA         | ENSG00000250928 | -0.58338 | 0.72018 | -0.58338    | 0.72018     | -0.58338 | 0.72018 |
|            | -0.58338        | 0.72018  | 0.72018 | 0.847117201 |             |          |         |
| TRIM60P17  | ENSG00000223558 | -0.65155 | 0.74265 | -0.63099    | 0.73598     | -0.63099 |         |
|            | 0.73598         | -0.58366 | 0.72027 | 0.72027     | 0.847182165 |          |         |
| NA         | ENSG00000276026 | -0.58366 | 0.72027 | -0.58366    | 0.72027     | -0.58366 | 0.72027 |
|            | -0.58366        | 0.72027  | 0.72027 | 0.847182165 |             |          |         |
| CUL4AP1    | ENSG00000248139 | -1.1798  | 0.88096 | -1.2939     | 0.90215     | -0.6936  |         |
|            | 0.75603         | -0.58373 | 0.7203  | 0.7203      | 0.847188316 |          |         |
| NA         | ENSG00000249941 | -1.579   | 0.94283 | -1.6011     | 0.94532     | -0.58377 | 0.72031 |
|            | -0.67038        | 0.74869  | 0.72031 | 0.847188316 |             |          |         |
| NA         | ENSG00000213561 | -0.5839  | 0.72035 | -0.5839     | 0.72035     | -0.5839  | 0.72035 |
|            | -0.5839         | 0.72035  | 0.72035 | 0.847214913 |             |          |         |
| MTND6P11   | ENSG00000226839 | -0.58404 | 0.7204  | -0.58404    | 0.7204      | -0.58404 |         |
|            | 0.7204          | -0.58404 | 0.7204  | 0.7204      | 0.84725327  |          |         |
| KAT2B      | ENSG00000114166 | -0.58413 | 0.72043 | -1.8222     | 0.96579     | -1.8222  | 0.96579 |
|            | -1.3632         | 0.91359  | 0.72043 | 0.847268104 |             |          |         |
| NA         | ENSG00000270093 | -0.5843  | 0.72049 | -0.5843     | 0.72049     | -0.5843  | 0.72049 |
|            | -0.5843         | 0.72049  | 0.72049 | 0.847318218 |             |          |         |
| RNU6-1164P | ENSG00000201298 | -0.5844  | 0.72052 | -0.5844     | 0.72052     | -0.5844  |         |
|            | 0.72052         | -0.5844  | 0.72052 | 0.72052     | 0.84733305  |          |         |
| NA         | ENSG00000255343 | -0.58449 | 0.72055 | -0.58449    | 0.72055     | -0.58449 | 0.72055 |
|            | -0.58449        | 0.72055  | 0.72055 | 0.847339193 |             |          |         |
| NA         | ENSG00000227383 | -0.80689 | 0.79014 | -0.58449    | 0.72056     | -0.80689 | 0.79014 |
|            | -0.80689        | 0.79014  | 0.72056 | 0.847339193 |             |          |         |
| BCAP29     | ENSG00000075790 | -0.58459 | 0.72059 | -0.65964    | 0.74526     | -1.0705  |         |
|            | 0.8578          | -0.92192 | 0.82171 | 0.72059     | 0.847354023 |          |         |
| NA         | ENSG00000221385 | -0.58477 | 0.72065 | -0.70982    | 0.76109     | -0.58477 | 0.72065 |
|            | -0.58477        | 0.72065  | 0.72065 | 0.84738779  |             |          |         |
| NA         | ENSG00000273160 | -0.5848  | 0.72066 | -0.5848     | 0.72066     | -0.5848  | 0.72066 |
|            | -0.5848         | 0.72066  | 0.72066 | 0.84738779  |             |          |         |
| FNDC3B     | ENSG00000075420 | -0.99824 | 0.84092 | -1.1403     | 0.87291     | -0.58486 |         |
|            | 0.72068         | -1.6464  | 0.95016 | 0.72068     | 0.84738779  |          |         |
| OR52E2     | ENSG00000176787 | -1.5342  | 0.93751 | -1.1699     | 0.87898     | -0.79781 |         |
|            | 0.78751         | -0.58492 | 0.7207  | 0.7207      | 0.84738779  |          |         |
| GACAT2     | ENSG00000265962 | -0.83664 | 0.7986  | -0.58507    | 0.72075     | -0.59703 |         |
|            | 0.72476         | -1.6182  | 0.94719 | 0.72075     | 0.84738779  |          |         |
| EEF1A1P12  | ENSG00000214199 | -2.2351  | 0.9873  | -0.58509    | 0.72076     | -1.8987  |         |

|            |                 |          |         |             |             |          |         |
|------------|-----------------|----------|---------|-------------|-------------|----------|---------|
|            | 0.9712          | -1.8971  | 0.97109 | 0.72076     | 0.84738779  |          |         |
| NA         | ENSG00000267441 | -0.58512 | 0.72077 | -0.58512    | 0.72077     | -0.58512 | 0.72077 |
|            | -0.58512        | 0.72077  | 0.72077 | 0.84738779  |             |          |         |
| NA         | ENSG00000221362 | -0.58512 | 0.72077 | -0.58512    | 0.72077     | -0.58512 | 0.72077 |
|            | -0.58512        | 0.72077  | 0.72077 | 0.84738779  |             |          |         |
| RNU6-45P   | ENSG00000207200 | -1.3299  | 0.90823 | -1.6408     | 0.94959     | -1.3299  |         |
|            | 0.90823         | -0.5852  | 0.72079 | 0.72079     | 0.84738779  |          |         |
| ACVR2B-AS1 | ENSG00000229589 | -0.58525 | 0.72081 | -0.58525    | 0.72081     | -0.58525 |         |
|            | 0.72081         | -0.58525 | 0.72081 | 0.72081     | 0.84738779  |          |         |
| HNRNP1P3   | ENSG00000248854 | -0.58525 | 0.72081 | -0.58525    | 0.72081     | -0.58525 |         |
|            | 0.72081         | -0.58525 | 0.72081 | 0.72081     | 0.84738779  |          |         |
| NA         | ENSG00000280440 | -0.58533 | 0.72084 | -0.72596    | 0.76607     | -0.58533 | 0.72084 |
|            | -0.58533        | 0.72084  | 0.72084 | 0.847394966 |             |          |         |
| RPS26P45   | ENSG00000241765 | -1.1477  | 0.87444 | -1.1477     | 0.87444     | -1.1477  |         |
|            | 0.87444         | -0.58541 | 0.72086 | 0.72086     | 0.847394966 |          |         |
| NA         | ENSG00000224011 | -1.3776  | 0.91583 | -0.58553    | 0.7209      | -1.6111  | 0.94642 |
|            | -1.2905         | 0.90156  | 0.7209  | 0.847394966 |             |          |         |
| APOL3      | ENSG00000128284 | -1.1251  | 0.86973 | -1.3647     | 0.91382     | -1.0667  | 0.85694 |
|            | -0.58555        | 0.72091  | 0.72091 | 0.847394966 |             |          |         |
| ADAM1A     | ENSG00000229186 | -0.58558 | 0.72092 | -0.58558    | 0.72092     | -0.58558 |         |
|            | 0.72092         | -0.58558 | 0.72092 | 0.72092     | 0.847394966 |          |         |
| RPS12P21   | ENSG00000243930 | -0.58565 | 0.72095 | -0.58565    | 0.72095     | -0.58565 |         |
|            | 0.72095         | -0.58565 | 0.72095 | 0.72095     | 0.847394966 |          |         |
| NA         | ENSG00000259064 | -0.58568 | 0.72096 | -0.58568    | 0.72096     | -0.58568 | 0.72096 |
|            | -0.58568        | 0.72096  | 0.72096 | 0.847394966 |             |          |         |
| LINC00375  | ENSG00000226370 | -0.58577 | 0.72098 | -0.58577    | 0.72098     | -1.2191  |         |
|            | 0.88859         | -1.586   | 0.94363 | 0.72098     | 0.847394966 |          |         |
| RN7SL431P  | ENSG00000264384 | -0.58576 | 0.72098 | -0.58576    | 0.72098     | -0.58576 |         |
|            | 0.72098         | -0.58576 | 0.72098 | 0.72098     | 0.847394966 |          |         |
| SMYD1      | ENSG00000115593 | -0.84084 | 0.79978 | -0.58579    | 0.72099     | -0.65738 | 0.74453 |
|            | -1.2213         | 0.88901  | 0.72099 | 0.847394966 |             |          |         |
| DPY19L2P2  | ENSG00000170629 | -0.58597 | 0.72105 | -0.5945     | 0.72391     | -1.1692  |         |
|            | 0.87885         | -1.4771  | 0.93018 | 0.72105     | 0.847445046 |          |         |
| ISCA1P4    | ENSG00000259405 | -0.71237 | 0.76188 | -0.5863     | 0.72116     | -1.2783  |         |
|            | 0.89942         | -1.2783  | 0.89942 | 0.72116     | 0.847528329 |          |         |
| NA         | ENSG00000249289 | -1.6333  | 0.9488  | -0.58636    | 0.72118     | -0.58636 | 0.72118 |
|            | -0.58636        | 0.72118  | 0.72118 | 0.847528329 |             |          |         |
| MYLKP1     | ENSG00000228868 | -0.94392 | 0.82739 | -1.2706     | 0.89807     | -0.87264 |         |
|            | 0.80857         | -0.58643 | 0.72121 | 0.72121     | 0.847528329 |          |         |
| TDGF1      | ENSG00000241186 | -0.99442 | 0.83999 | -0.98487    | 0.83766     | -0.58646 | 0.72122 |
|            | -0.58646        | 0.72122  | 0.72122 | 0.847528329 |             |          |         |
| NA         | ENSG00000259619 | -0.85418 | 0.8035  | -0.58649    | 0.72123     | -1.0958  | 0.86342 |
|            | -0.58649        | 0.72123  | 0.72123 | 0.847528329 |             |          |         |
| OSBPL9P5   | ENSG00000256285 | -0.58656 | 0.72125 | -0.58656    | 0.72125     | -0.58656 |         |
|            | 0.72125         | -0.58656 | 0.72125 | 0.72125     | 0.847528329 |          |         |
| DERL3      | ENSG00000099958 | -1.005   | 0.84254 | -1.005      | 0.84254     | -0.6328  | 0.73657 |
|            | -0.58659        | 0.72126  | 0.72126 | 0.847528329 |             |          |         |
| FAM215A    | ENSG00000267496 | -1.192   | 0.88338 | -1.192      | 0.88338     | -0.58659 |         |
|            | 0.72126         | -2.014   | 0.97799 | 0.72126     | 0.847528329 |          |         |
| RNU6-1097P | ENSG00000200456 | -0.58669 | 0.72129 | -1.403      | 0.9197      | -1.403   |         |
|            | 0.9197          | -1.403   | 0.9197  | 0.72129     | 0.847543143 |          |         |
| ERI1       | ENSG00000104626 | -0.58689 | 0.72136 | -0.78807    | 0.78467     | -0.89876 | 0.81561 |
|            | -0.9906         | 0.83906  | 0.72136 | 0.847560975 |             |          |         |
| SAMD7      | ENSG00000187033 | -0.58693 | 0.72138 | -0.58693    | 0.72138     | -0.58693 | 0.72138 |
|            | -0.58693        | 0.72138  | 0.72138 | 0.847560975 |             |          |         |
| RNU7-30P   | ENSG00000252644 | -0.58697 | 0.72139 | -0.58697    | 0.72139     | -0.58697 |         |
|            | 0.72139         | -0.58697 | 0.72139 | 0.72139     | 0.847560975 |          |         |
| NA         | ENSG00000268685 | -1.3569  | 0.9126  | -1.6887     | 0.95436     | -0.58698 | 0.72139 |
|            | -1.4085         | 0.92051  | 0.72139 | 0.847560975 |             |          |         |
| GDF6       | ENSG00000156466 | -0.58709 | 0.72143 | -0.82488    | 0.79528     | -1.531   | 0.93712 |
|            | -1.1218         | 0.86902  | 0.72143 | 0.847560975 |             |          |         |
| SH3GLB1    | ENSG00000097033 | -0.58716 | 0.72145 | -0.58716    | 0.72145     | -0.58716 |         |

|           |                 |          |         |             |             |          |         |
|-----------|-----------------|----------|---------|-------------|-------------|----------|---------|
|           | 0.72145         | -0.58716 | 0.72145 | 0.72145     | 0.847560975 |          |         |
| CRIM1     | ENSG00000150938 | -1.6492  | 0.95045 | -0.58718    | 0.72146     | -1.6492  | 0.95045 |
|           | -1.6848         | 0.95399  | 0.72146 | 0.847560975 |             |          |         |
| RPL12P9   | ENSG00000232687 | -0.58723 | 0.72148 | -0.58723    | 0.72148     | -0.58723 |         |
|           | 0.72148         | -0.58723 | 0.72148 | 0.72148     | 0.847560975 |          |         |
| NA        | ENSG00000228366 | -0.5873  | 0.7215  | -0.5873     | 0.7215      | -0.5873  | 0.7215  |
|           | -0.5873         | 0.7215   | 0.7215  | 0.847560975 |             |          |         |
| RNA5SP378 | ENSG00000200516 | -0.58733 | 0.72151 | -0.58733    | 0.72151     | -0.58733 |         |
|           | 0.72151         | -0.58733 | 0.72151 | 0.72151     | 0.847560975 |          |         |
| FEM1AP4   | ENSG00000235876 | -0.58736 | 0.72152 | -0.9091     | 0.81835     | -1.4063  |         |
|           | 0.92019         | -0.62035 | 0.73249 | 0.72152     | 0.847560975 |          |         |
| BET1P1    | ENSG00000241134 | -0.58761 | 0.7216  | -0.58761    | 0.7216      | -0.58761 |         |
|           | 0.7216          | -0.58761 | 0.7216  | 0.7216      | 0.847560975 |          |         |
| RNU6-313P | ENSG00000252126 | -0.58761 | 0.7216  | -0.95971    | 0.8314      | -0.90271 |         |
|           | 0.81666         | -0.90271 | 0.81666 | 0.7216      | 0.847560975 |          |         |
| PPFIA3    | ENSG00000177380 | -0.58767 | 0.72162 | -0.58767    | 0.72162     | -0.58767 |         |
|           | 0.72162         | -0.58767 | 0.72162 | 0.72162     | 0.847560975 |          |         |
| ENTPD7    | ENSG00000198018 | -0.58768 | 0.72163 | -0.58768    | 0.72163     | -0.58768 |         |
|           | 0.72163         | -1.1522  | 0.87537 | 0.72163     | 0.847560975 |          |         |
| NA        | ENSG00000260914 | -0.58768 | 0.72163 | -0.58768    | 0.72163     | -0.58768 | 0.72163 |
|           | -0.58768        | 0.72163  | 0.72163 | 0.847560975 |             |          |         |
| NDUFA2    | ENSG00000131495 | -0.58782 | 0.72167 | -0.58782    | 0.72167     | -0.58782 |         |
|           | 0.72167         | -0.58782 | 0.72167 | 0.72167     | 0.847560975 |          |         |
| MYO15A    | ENSG00000091536 | -1.3805  | 0.91629 | -1.7079     | 0.95618     | -0.58784 |         |
|           | 0.72168         | -1.3574  | 0.91267 | 0.72168     | 0.847560975 |          |         |
| NA        | ENSG00000263917 | -0.58783 | 0.72168 | -0.58783    | 0.72168     | -0.58783 | 0.72168 |
|           | -0.58783        | 0.72168  | 0.72168 | 0.847560975 |             |          |         |
| NAPA      | ENSG00000105402 | -1.1918  | 0.88332 | -1.3096     | 0.90483     | -1.1918  | 0.88332 |
|           | -0.58789        | 0.7217   | 0.7217  | 0.847560975 |             |          |         |
| NA        | ENSG00000222881 | -0.58793 | 0.72171 | -0.58793    | 0.72171     | -0.58793 | 0.72171 |
|           | -0.58793        | 0.72171  | 0.72171 | 0.847560975 |             |          |         |
| MRPS27    | ENSG00000113048 | -1.1055  | 0.86552 | -1.5185     | 0.93556     | -0.90175 |         |
|           | 0.8164          | -0.588   | 0.72173 | 0.72173     | 0.847560975 |          |         |
| IGLVIV-65 | ENSG00000254161 | -0.58799 | 0.72173 | -0.58799    | 0.72173     | -0.58799 |         |
|           | 0.72173         | -0.58799 | 0.72173 | 0.72173     | 0.847560975 |          |         |
| TMEM251   | ENSG00000153485 | -1.4858  | 0.93133 | -1.4858     | 0.93133     | -1.4858  |         |
|           | 0.93133         | -0.58801 | 0.72174 | 0.72174     | 0.847560975 |          |         |
| TTC32     | ENSG00000183891 | -0.7994  | 0.78797 | -0.7994     | 0.78797     | -0.7994  | 0.78797 |
|           | -0.58801        | 0.72174  | 0.72174 | 0.847560975 |             |          |         |
| NA        | ENSG00000280332 | -0.58821 | 0.7218  | -0.58821    | 0.7218      | -0.58821 | 0.7218  |
|           | -0.58821        | 0.7218   | 0.7218  | 0.847611008 |             |          |         |
| NA        | ENSG00000130489 | -0.58834 | 0.72185 | -0.58834    | 0.72185     | -0.58834 | 0.72185 |
|           | -0.58834        | 0.72185  | 0.72185 | 0.847649296 |             |          |         |
| NEXN      | ENSG00000162614 | -0.58846 | 0.72189 | -0.58846    | 0.72189     | -0.58846 | 0.72189 |
|           | -1.1858         | 0.88215  | 0.72189 | 0.847655414 |             |          |         |
| RNVU1-21  | ENSG00000202408 | -0.58846 | 0.72189 | -0.58846    | 0.72189     | -0.58846 |         |
|           | 0.72189         | -0.58846 | 0.72189 | 0.72189     | 0.847655414 |          |         |
| SETX      | ENSG00000107290 | -0.8414  | 0.79994 | -0.67372    | 0.74976     | -1.0351  | 0.84968 |
|           | -0.58854        | 0.72192  | 0.72192 | 0.847670215 |             |          |         |
| TRAV20    | ENSG00000211800 | -0.83617 | 0.79847 | -0.5888     | 0.722       | -0.5888  | 0.722   |
|           | -0.5888         | 0.722    | 0.722   | 0.847735524 |             |          |         |
| NA        | ENSG00000259605 | -0.58892 | 0.72204 | -0.58892    | 0.72204     | -0.58892 | 0.72204 |
|           | -0.58892        | 0.72204  | 0.72204 | 0.847735524 |             |          |         |
| NA        | ENSG00000256311 | -0.58897 | 0.72206 | -0.87925    | 0.81037     | -0.7702  | 0.77941 |
|           | -0.58897        | 0.72206  | 0.72206 | 0.847735524 |             |          |         |
| CCL7      | ENSG00000108688 | -0.589   | 0.72207 | -0.589      | 0.72207     | -0.589   | 0.72207 |
|           | -0.589          | 0.72207  | 0.72207 | 0.847735524 |             |          |         |
| SRSF7     | ENSG00000115875 | -1.2418  | 0.89284 | -0.58903    | 0.72208     | -1.0893  | 0.862   |
|           | -1.0893         | 0.862    | 0.72208 | 0.847735524 |             |          |         |
| NA        | ENSG00000274918 | -0.58902 | 0.72208 | -0.58902    | 0.72208     | -0.58902 | 0.72208 |
|           | -0.58902        | 0.72208  | 0.72208 | 0.847735524 |             |          |         |
| NA        | ENSG00000270075 | -0.58922 | 0.72214 | -0.58922    | 0.72214     | -0.58922 | 0.72214 |

|            |                 |          |         |             |             |          |         |
|------------|-----------------|----------|---------|-------------|-------------|----------|---------|
|            | -0.58922        | 0.72214  | 0.72214 | 0.847771227 |             |          |         |
| RNU6-1026P | ENSG00000207194 | -0.5893  | 0.72217 | -0.5893     | 0.72217     | -0.5893  |         |
|            | 0.72217         | -0.5893  | 0.72217 | 0.72217     | 0.847771227 |          |         |
| NA         | ENSG00000232545 | -0.58934 | 0.72218 | -0.58934    | 0.72218     | -0.58934 | 0.72218 |
|            | -0.58934        | 0.72218  | 0.72218 | 0.847771227 |             |          |         |
| NA         | ENSG00000263485 | -0.58933 | 0.72218 | -1.2156     | 0.88792     | -0.82796 | 0.79615 |
|            | -0.82796        | 0.79615  | 0.72218 | 0.847771227 |             |          |         |
| NA         | ENSG00000256071 | -0.58954 | 0.72225 | -1.6036     | 0.9456      | -0.80813 | 0.79049 |
|            | -2.0071         | 0.97763  | 0.72225 | 0.847824291 |             |          |         |
| AK6P1      | ENSG00000256614 | -0.58958 | 0.72226 | -1.0323     | 0.84904     | -0.98104 | 0.83671 |
|            | -2.43           | 0.99245  | 0.72226 | 0.847824291 |             |          |         |
| TDH        | ENSG00000154316 | -1.4171  | 0.92177 | -0.67813    | 0.75115     | -0.58971 | 0.72231 |
|            | -0.7733         | 0.78033  | 0.72231 | 0.847826199 |             |          |         |
| NA         | ENSG00000260741 | -0.58971 | 0.72231 | -0.58971    | 0.72231     | -0.58971 | 0.72231 |
|            | -0.58971        | 0.72231  | 0.72231 | 0.847826199 |             |          |         |
| NA         | ENSG00000255219 | -0.58985 | 0.72235 | -0.58985    | 0.72235     | -0.58985 | 0.72235 |
|            | -0.58985        | 0.72235  | 0.72235 | 0.847826199 |             |          |         |
| RN7SL845P  | ENSG00000244328 | -0.58986 | 0.72236 | -0.58986    | 0.72236     | -0.58986 |         |
|            | 0.72236         | -0.58986 | 0.72236 | 0.72236     | 0.847826199 |          |         |
| FFAR1      | ENSG00000126266 | -0.79017 | 0.78528 | -0.79017    | 0.78528     | -0.58989 | 0.72237 |
|            | -0.97579        | 0.83542  | 0.72237 | 0.847826199 |             |          |         |
| RGL1       | ENSG00000143344 | -0.67771 | 0.75102 | -0.58996    | 0.72239     | -0.84301 | 0.80039 |
|            | -0.91003        | 0.8186   | 0.72239 | 0.847826199 |             |          |         |
| OXER1      | ENSG00000162881 | -0.58999 | 0.7224  | -1.2251     | 0.88973     | -0.58999 | 0.7224  |
|            | -0.58999        | 0.7224   | 0.7224  | 0.847826199 |             |          |         |
| DENND2A    | ENSG00000146966 | -1.7338  | 0.95852 | -2.0652     | 0.98055     | -1.2066  |         |
|            | 0.88621         | -0.59004 | 0.72242 | 0.72242     | 0.847826199 |          |         |
| DNASE1     | ENSG00000213918 | -0.59005 | 0.72242 | -1.0017     | 0.84176     | -0.89735 |         |
|            | 0.81523         | -1.2351  | 0.89161 | 0.72242     | 0.847826199 |          |         |
| DPH2       | ENSG00000132768 | -0.5902  | 0.72247 | -0.5902     | 0.72247     | -0.5902  | 0.72247 |
|            | -0.5902         | 0.72247  | 0.72247 | 0.847826199 |             |          |         |
| OR5M9      | ENSG00000150269 | -1.0981  | 0.86393 | -1.7138     | 0.95671     | -1.2848  | 0.90057 |
|            | -0.59019        | 0.72247  | 0.72247 | 0.847826199 |             |          |         |
| MFSD13B    | ENSG00000230872 | -0.59024 | 0.72249 | -0.59024    | 0.72249     | -0.59024 |         |
|            | 0.72249         | -0.59024 | 0.72249 | 0.72249     | 0.847826199 |          |         |
| RNU6-1136P | ENSG00000252643 | -0.5903  | 0.72251 | -0.5903     | 0.72251     | -0.5903  |         |
|            | 0.72251         | -0.5903  | 0.72251 | 0.72251     | 0.847826199 |          |         |
| NA         | ENSG00000263698 | -0.59037 | 0.72253 | -0.59037    | 0.72253     | -0.59037 | 0.72253 |
|            | -0.59037        | 0.72253  | 0.72253 | 0.847826199 |             |          |         |
| CCDC144A   | ENSG00000170160 | -0.68283 | 0.75264 | -0.92676    | 0.82298     | -0.84645 |         |
|            | 0.80135         | -0.5904  | 0.72254 | 0.72254     | 0.847826199 |          |         |
| MTND5P11   | ENSG00000248923 | -0.5904  | 0.72254 | -0.5904     | 0.72254     | -0.5904  |         |
|            | 0.72254         | -0.5904  | 0.72254 | 0.72254     | 0.847826199 |          |         |
| TAF8       | ENSG00000137413 | -0.96375 | 0.83241 | -0.59047    | 0.72256     | -0.77664 | 0.78131 |
|            | -1.6009         | 0.9453   | 0.72256 | 0.847829251 |             |          |         |
| RPL17P1    | ENSG00000229500 | -0.59056 | 0.72259 | -0.59056    | 0.72259     | -0.59056 |         |
|            | 0.72259         | -0.59056 | 0.72259 | 0.72259     | 0.847835356 |          |         |
| LAPTM4A    | ENSG00000068697 | -0.5906  | 0.7226  | -0.9552     | 0.83026     | -1.538   |         |
|            | 0.93798         | -1.2924  | 0.90189 | 0.7226      | 0.847835356 |          |         |
| UBE2V1     | ENSG00000244687 | -1.6542  | 0.95095 | -1.8385     | 0.96701     | -1.6848  |         |
|            | 0.95399         | -0.59067 | 0.72263 | 0.72263     | 0.847844512 |          |         |
| MUC20P1    | ENSG00000224769 | -1.8059  | 0.96454 | -1.1595     | 0.87688     | -0.59076 |         |
|            | 0.72266         | -0.77276 | 0.78017 | 0.72266     | 0.847844512 |          |         |
| NA         | ENSG00000260310 | -0.59077 | 0.72266 | -0.59077    | 0.72266     | -0.59077 | 0.72266 |
|            | -0.59077        | 0.72266  | 0.72266 | 0.847844512 |             |          |         |
| VAMP1      | ENSG00000139190 | -0.7116  | 0.76164 | -0.59088    | 0.7227      | -0.59088 | 0.7227  |
|            | -0.59088        | 0.7227   | 0.7227  | 0.847871028 |             |          |         |
| NA         | ENSG00000272966 | -0.59097 | 0.72273 | -0.59097    | 0.72273     | -0.59097 | 0.72273 |
|            | -0.59097        | 0.72273  | 0.72273 | 0.84788581  |             |          |         |
| NA         | ENSG00000265943 | -0.87127 | 0.8082  | -0.59117    | 0.7228      | -0.77983 | 0.78225 |
|            | -0.59117        | 0.7228   | 0.7228  | 0.847947518 |             |          |         |
| LUZP4P1    | ENSG00000232853 | -0.59146 | 0.72289 | -0.59146    | 0.72289     | -0.59146 |         |

|           |                 |          |         |             |             |          |         |
|-----------|-----------------|----------|---------|-------------|-------------|----------|---------|
|           | 0.72289         | -0.59146 | 0.72289 | 0.72289     | 0.847957128 |          |         |
| TDGF1P7   | ENSG00000269584 | -0.59144 | 0.72289 | -0.59144    | 0.72289     | -0.59144 |         |
|           | 0.72289         | -0.59144 | 0.72289 | 0.72289     | 0.847957128 |          |         |
| NA        | ENSG00000264341 | -0.59147 | 0.7229  | -0.59147    | 0.7229      | -0.59147 | 0.7229  |
|           | -0.59147        | 0.7229   | 0.7229  | 0.847957128 |             |          |         |
| OR5F2P    | ENSG00000182365 | -0.59153 | 0.72292 | -0.81835    | 0.79342     | -0.59153 |         |
|           | 0.72292         | -0.59153 | 0.72292 | 0.72292     | 0.847957128 |          |         |
| NA        | ENSG00000257848 | -0.78968 | 0.78514 | -0.78968    | 0.78514     | -0.78968 | 0.78514 |
|           | -0.59154        | 0.72292  | 0.72292 | 0.847957128 |             |          |         |
| NA        | ENSG00000260495 | -0.59157 | 0.72293 | -0.66699    | 0.74761     | -0.59157 | 0.72293 |
|           | -0.59157        | 0.72293  | 0.72293 | 0.847957128 |             |          |         |
| NA        | ENSG00000262899 | -0.59158 | 0.72293 | -0.59158    | 0.72293     | -0.59158 | 0.72293 |
|           | -0.59158        | 0.72293  | 0.72293 | 0.847957128 |             |          |         |
| NA        | ENSG00000227917 | -0.59174 | 0.72299 | -1.2787     | 0.8995      | -0.7915  | 0.78567 |
|           | -0.67305        | 0.74954  | 0.72299 | 0.848007093 |             |          |         |
| LNCOC1    | ENSG00000253741 | -0.59203 | 0.72308 | -0.68742    | 0.75409     | -0.66607 |         |
|           | 0.74732         | -0.66607 | 0.74732 | 0.72308     | 0.848092243 |          |         |
| HSPA9     | ENSG00000113013 | -1.2585  | 0.89589 | -0.59247    | 0.72323     | -0.9547  | 0.83014 |
|           | -0.6927         | 0.75575  | 0.72323 | 0.848204327 |             |          |         |
| NA        | ENSG00000225478 | -0.59246 | 0.72323 | -1.3516     | 0.91174     | -0.91464 | 0.81981 |
|           | -1.2501         | 0.89437  | 0.72323 | 0.848204327 |             |          |         |
| HNMT      | ENSG00000150540 | -0.63289 | 0.7366  | -0.59252    | 0.72325     | -0.92172 | 0.82166 |
|           | -0.62621        | 0.73441  | 0.72325 | 0.848204327 |             |          |         |
| GPN3P1    | ENSG00000227465 | -0.79422 | 0.78647 | -0.59258    | 0.72327     | -0.79422 |         |
|           | 0.78647         | -0.79422 | 0.78647 | 0.72327     | 0.848204327 |          |         |
| TIGD1     | ENSG00000221944 | -0.59261 | 0.72328 | -0.59261    | 0.72328     | -0.59261 | 0.72328 |
|           | -0.59261        | 0.72328  | 0.72328 | 0.848204327 |             |          |         |
| NA        | ENSG00000279190 | -0.59261 | 0.72328 | -0.59261    | 0.72328     | -0.59261 | 0.72328 |
|           | -0.59261        | 0.72328  | 0.72328 | 0.848204327 |             |          |         |
| NGF       | ENSG00000134259 | -0.84344 | 0.80051 | -0.84344    | 0.80051     | -0.84344 | 0.80051 |
|           | -0.59266        | 0.7233   | 0.7233  | 0.848207369 |             |          |         |
| SNORD127  | ENSG00000239043 | -0.59279 | 0.72334 | -0.59279    | 0.72334     | -0.59279 |         |
|           | 0.72334         | -0.59279 | 0.72334 | 0.72334     | 0.848233864 |          |         |
| GIMAP5    | ENSG00000196329 | -0.59293 | 0.72339 | -1.4285     | 0.92343     | -0.59293 |         |
|           | 0.72339         | -1.0353  | 0.84973 | 0.72339     | 0.848234301 |          |         |
| CETN4P    | ENSG00000224786 | -0.59297 | 0.7234  | -0.66493    | 0.74695     | -0.59297 |         |
|           | 0.7234          | -0.59297 | 0.7234  | 0.7234      | 0.848234301 |          |         |
| NA        | ENSG00000256609 | -0.59298 | 0.7234  | -0.59298    | 0.7234      | -0.59298 | 0.7234  |
|           | -0.59298        | 0.7234   | 0.7234  | 0.848234301 |             |          |         |
| FXVD6P2   | ENSG00000235964 | -0.59299 | 0.72341 | -0.59299    | 0.72341     | -0.59299 |         |
|           | 0.72341         | -0.59299 | 0.72341 | 0.72341     | 0.848234301 |          |         |
| NA        | ENSG00000230432 | -0.5931  | 0.72344 | -0.5931     | 0.72344     | -0.5931  | 0.72344 |
|           | -0.5931         | 0.72344  | 0.72344 | 0.848240382 |             |          |         |
| KRTAP13-3 | ENSG00000240432 | -0.59311 | 0.72345 | -0.59311    | 0.72345     | -0.59311 |         |
|           | 0.72345         | -0.59311 | 0.72345 | 0.72345     | 0.848240382 |          |         |
| MIR101-2  | ENSG00000199065 | -0.59324 | 0.72349 | -0.59324    | 0.72349     | -0.59324 |         |
|           | 0.72349         | -0.59324 | 0.72349 | 0.72349     | 0.848266871 |          |         |
| NA        | ENSG00000277867 | -0.59344 | 0.72356 | -0.59344    | 0.72356     | -0.59344 | 0.72356 |
|           | -0.59344        | 0.72356  | 0.72356 | 0.848319847 |             |          |         |
| SPPL2C    | ENSG00000185294 | -0.87255 | 0.80854 | -0.87255    | 0.80854     | -0.87255 |         |
|           | 0.80854         | -0.59349 | 0.72357 | 0.72357     | 0.848319847 |          |         |
| FAM86C1P  | ENSG00000158483 | -1.3991  | 0.91912 | -0.78669    | 0.78427     | -0.68139 |         |
|           | 0.75219         | -0.59362 | 0.72362 | 0.72362     | 0.848337646 |          |         |
| CPA3      | ENSG00000163751 | -0.88736 | 0.81256 | -0.59362    | 0.72362     | -0.59362 | 0.72362 |
|           | -0.59362        | 0.72362  | 0.72362 | 0.848337646 |             |          |         |
| LINC01645 | ENSG00000224968 | -1.4443  | 0.92567 | -1.8549     | 0.96819     | -1.104   |         |
|           | 0.86521         | -0.59369 | 0.72364 | 0.72364     | 0.848340684 |          |         |
| RNU6-692P | ENSG00000207225 | -0.59377 | 0.72367 | -0.59377    | 0.72367     | -0.59377 |         |
|           | 0.72367         | -0.59377 | 0.72367 | 0.72367     | 0.848346758 |          |         |
| NA        | ENSG00000272564 | -0.90582 | 0.81748 | -0.90084    | 0.81616     | -0.59381 | 0.72368 |
|           | -0.59381        | 0.72368  | 0.72368 | 0.848346758 |             |          |         |
| LINC02091 | ENSG00000273172 | -0.94995 | 0.82893 | -1.0523     | 0.85367     | -1.304   |         |

|             |                 |          |         |             |             |          |         |
|-------------|-----------------|----------|---------|-------------|-------------|----------|---------|
|             | 0.90388         | -0.59401 | 0.72375 | 0.72375     | 0.848408408 |          |         |
| IFNA2       | ENSG00000188379 | -0.59418 | 0.72381 | -0.59418    | 0.72381     | -0.59418 | 0.72381 |
|             | -0.59418        | 0.72381  | 0.72381 | 0.848429235 |             |          |         |
| NA          | ENSG00000236854 | -0.59419 | 0.72381 | -0.59419    | 0.72381     | -0.59419 | 0.72381 |
|             | -0.59419        | 0.72381  | 0.72381 | 0.848429235 |             |          |         |
| NA          | ENSG00000228809 | -1.1766  | 0.88032 | -0.59424    | 0.72382     | -0.59424 | 0.72382 |
|             | -0.59424        | 0.72382  | 0.72382 | 0.848429235 |             |          |         |
| RPS16P5     | ENSG00000217527 | -0.96641 | 0.83308 | -0.59431    | 0.72385     | -0.96641 |         |
|             | 0.83308         | -0.64622 | 0.74093 | 0.72385     | 0.848443991 |          |         |
| SAP18P3     | ENSG00000230697 | -0.59445 | 0.72389 | -0.59445    | 0.72389     | -0.59445 |         |
|             | 0.72389         | -0.59445 | 0.72389 | 0.72389     | 0.848453094 |          |         |
| NA          | ENSG00000254537 | -0.59448 | 0.7239  | -0.59448    | 0.7239      | -0.59448 | 0.7239  |
|             | -0.59448        | 0.7239   | 0.7239  | 0.848453094 |             |          |         |
| NA          | ENSG00000235296 | -0.59451 | 0.72391 | -0.59451    | 0.72391     | -0.59451 | 0.72391 |
|             | -0.59451        | 0.72391  | 0.72391 | 0.848453094 |             |          |         |
| RSPH6A      | ENSG00000104941 | -0.66461 | 0.74685 | -0.59456    | 0.72393     | -0.66461 |         |
|             | 0.74685         | -0.79838 | 0.78768 | 0.72393     | 0.848456128 |          |         |
| NA          | ENSG00000223214 | -1.1514  | 0.87522 | -0.59463    | 0.72395     | -1.1514  | 0.87522 |
|             | -1.1514         | 0.87522  | 0.72395 | 0.848459162 |             |          |         |
| RNF32       | ENSG00000105982 | -0.59474 | 0.72399 | -0.59474    | 0.72399     | -0.59474 | 0.72399 |
|             | -0.59474        | 0.72399  | 0.72399 | 0.848465229 |             |          |         |
| NA          | ENSG00000261291 | -0.59474 | 0.72399 | -0.59474    | 0.72399     | -0.59474 | 0.72399 |
|             | -0.59474        | 0.72399  | 0.72399 | 0.848465229 |             |          |         |
| SORCS2      | ENSG00000184985 | -0.97373 | 0.83491 | -1.6087     | 0.94615     | -0.77418 |         |
|             | 0.78059         | -0.59492 | 0.72405 | 0.72405     | 0.84848908  |          |         |
| NA          | ENSG00000241069 | -0.59491 | 0.72405 | -0.59491    | 0.72405     | -0.59491 | 0.72405 |
|             | -0.59491        | 0.72405  | 0.72405 | 0.84848908  |             |          |         |
| RPL37P25    | ENSG00000251597 | -0.59501 | 0.72408 | -0.59501    | 0.72408     | -0.59501 |         |
|             | 0.72408         | -0.59501 | 0.72408 | 0.72408     | 0.84848908  |          |         |
| OR4A41P     | ENSG00000255297 | -0.595   | 0.72408 | -1.0092     | 0.84356     | -1.3292  |         |
|             | 0.90811         | -0.595   | 0.72408 | 0.72408     | 0.84848908  |          |         |
| RN7SL571P   | ENSG00000243274 | -0.5951  | 0.72411 | -0.5951     | 0.72411     | -0.5951  |         |
|             | 0.72411         | -0.5951  | 0.72411 | 0.72411     | 0.848495145 |          |         |
| SNORD115-31 | ENSG00000202188 | -0.59511 | 0.72412 | -0.59511    | 0.72412     | -0.59511 |         |
|             | 0.72412         | -0.59511 | 0.72412 | 0.72412     | 0.848495145 |          |         |
| TRAJ57      | ENSG00000211834 | -0.59534 | 0.72419 | -0.59534    | 0.72419     | -0.59534 |         |
|             | 0.72419         | -0.59534 | 0.72419 | 0.72419     | 0.848548078 |          |         |
| NA          | ENSG00000276115 | -0.59537 | 0.7242  | -0.61721    | 0.73145     | -0.90677 | 0.81774 |
|             | -0.90677        | 0.81774  | 0.7242  | 0.848548078 |             |          |         |
| NA          | ENSG00000223342 | -1.3685  | 0.91442 | -1.3685     | 0.91442     | -1.3685  | 0.91442 |
|             | -0.59549        | 0.72424  | 0.72424 | 0.848574542 |             |          |         |
| LINC01179   | ENSG00000249500 | -0.5957  | 0.72431 | -0.5957     | 0.72431     | -0.5957  |         |
|             | 0.72431         | -0.5957  | 0.72431 | 0.72431     | 0.84861655  |          |         |
| OR5AQ1P     | ENSG00000184741 | -0.79036 | 0.78534 | -0.59575    | 0.72433     | -0.98847 |         |
|             | 0.83854         | -1.3466  | 0.91094 | 0.72433     | 0.84861655  |          |         |
| RPL13AP23   | ENSG00000242990 | -0.59576 | 0.72433 | -0.59576    | 0.72433     | -0.59576 |         |
|             | 0.72433         | -0.59576 | 0.72433 | 0.72433     | 0.84861655  |          |         |
| NA          | ENSG00000248417 | -0.59591 | 0.72438 | -0.74651    | 0.77232     | -0.59591 | 0.72438 |
|             | -0.59591        | 0.72438  | 0.72438 | 0.84861655  |             |          |         |
| GNRH2       | ENSG00000125787 | -0.59595 | 0.7244  | -1.1702     | 0.87905     | -0.59595 | 0.7244  |
|             | -0.59595        | 0.7244   | 0.7244  | 0.84861655  |             |          |         |
| NA          | ENSG00000260658 | -0.59596 | 0.7244  | -0.59596    | 0.7244      | -0.59596 | 0.7244  |
|             | -0.59596        | 0.7244   | 0.7244  | 0.84861655  |             |          |         |
| MFAP5       | ENSG00000197614 | -1.217   | 0.8882  | -1.0118     | 0.84418     | -0.85428 | 0.80353 |
|             | -0.59598        | 0.72441  | 0.72441 | 0.84861655  |             |          |         |
| MTND4LP21   | ENSG00000231582 | -0.59601 | 0.72442 | -0.59601    | 0.72442     | -0.59601 |         |
|             | 0.72442         | -0.59601 | 0.72442 | 0.72442     | 0.84861655  |          |         |
| NUP62       | ENSG00000213024 | -1.1089  | 0.86627 | -0.5961     | 0.72445     | -0.5961  | 0.72445 |
|             | -0.5961         | 0.72445  | 0.72445 | 0.84861655  |             |          |         |
| NA          | ENSG00000261266 | -0.59612 | 0.72445 | -0.59612    | 0.72445     | -0.59612 | 0.72445 |
|             | -0.59612        | 0.72445  | 0.72445 | 0.84861655  |             |          |         |
| RNU6-92P    | ENSG00000272393 | -0.59622 | 0.72448 | -0.59622    | 0.72448     | -0.59622 |         |

|             |                 |             |         |             |             |          |          |
|-------------|-----------------|-------------|---------|-------------|-------------|----------|----------|
|             | 0.72448         | -0.59622    | 0.72448 | 0.72448     | 0.848631293 |          |          |
| SNORD114-25 | ENSG00000200612 | -0.59629    | 0.72451 | 0.72451     | -0.59629    | 0.72451  | -0.59629 |
|             | 0.72451         | -0.59629    | 0.72451 | 0.72451     | 0.848646034 |          |          |
| CHORDC1     | ENSG00000110172 | -0.5965     | 0.72458 | 0.72458     | -0.5965     | 0.72458  | -0.5965  |
|             | 0.72458         | -0.5965     | 0.72458 | 0.72458     | 0.848655908 |          |          |
| SNORA40B    | ENSG00000208308 | -0.59649    | 0.72458 | 0.72458     | -0.59649    | 0.72458  | -0.59649 |
|             | 0.72458         | -0.59649    | 0.72458 | 0.72458     | 0.848655908 |          |          |
| RNU6-28P    | ENSG00000199248 | -0.88685    | 0.81242 | 0.81242     | -0.88685    | 0.81242  | -0.88685 |
|             | 0.81242         | -0.5966     | 0.72461 | 0.72461     | 0.848655908 |          |          |
| SH2D4B      | ENSG00000178217 | -0.59662    | 0.72462 | 0.72462     | -0.87309    | 0.80869  | -1.4495  |
|             | 0.9264          | -0.59662    | 0.72462 | 0.72462     | 0.848655908 |          |          |
| NA          | ENSG00000249304 | -0.59661    | 0.72462 | -0.59661    | 0.72462     | -0.59661 | 0.72462  |
|             | -1.0458         | 0.85217     | 0.72462 | 0.848655908 |             |          |          |
| IER2        | ENSG00000160888 | -0.59669    | 0.72464 | -0.59669    | 0.72464     | -0.59669 | 0.72464  |
|             | -0.59669        | 0.72464     | 0.72464 | 0.848655908 |             |          |          |
| NA          | ENSG00000259818 | -0.59673    | 0.72466 | -0.59673    | 0.72466     | -0.59673 | 0.72466  |
|             | -0.59673        | 0.72466     | 0.72466 | 0.848655908 |             |          |          |
| NA          | ENSG00000270664 | -0.59675    | 0.72466 | -0.59675    | 0.72466     | -0.59675 | 0.72466  |
|             | -0.59675        | 0.72466     | 0.72466 | 0.848655908 |             |          |          |
| LAMTOR5     | ENSG00000134248 | -0.76695    | 0.77844 | -0.59681    | 0.72468     | -0.76695 |          |
|             | 0.77844         | -0.76695    | 0.77844 | 0.72468     | 0.848655908 |          |          |
| GNAO1       | ENSG00000087258 | -1.7828     | 0.96269 | -0.59688    | 0.72471     | -0.99306 | 0.83966  |
|             | -1.3844         | 0.91688     | 0.72471 | 0.848655908 |             |          |          |
| MIR579      | ENSG00000207956 | -0.59689    | 0.72471 | -0.59689    | 0.72471     | -0.59689 |          |
|             | 0.72471         | -0.59689    | 0.72471 | 0.72471     | 0.848655908 |          |          |
| REEP5       | ENSG00000129625 | -0.65204    | 0.74281 | -0.65204    | 0.74281     | -0.59698 | 0.72474  |
|             | -0.83413        | 0.7979      | 0.72474 | 0.848670644 |             |          |          |
| GSDMC       | ENSG00000147697 | -0.59717    | 0.7248  | -0.59717    | 0.7248      | -0.59717 | 0.7248   |
|             | -2.0615         | 0.98037     | 0.7248  | 0.848683927 |             |          |          |
| SALL4       | ENSG00000101115 | -0.5972     | 0.72481 | -1.727      | 0.95791     | -0.5972  | 0.72481  |
|             | -0.5972         | 0.72481     | 0.72481 | 0.848683927 |             |          |          |
| TOMM20P1    | ENSG00000224829 | -0.59723    | 0.72482 | -0.59723    | 0.72482     | -0.59723 |          |
|             | 0.72482         | -0.59723    | 0.72482 | 0.72482     | 0.848683927 |          |          |
| LILRP2      | ENSG00000170858 | -0.59738    | 0.72487 | -0.59738    | 0.72487     | -0.59738 |          |
|             | 0.72487         | -0.59738    | 0.72487 | 0.72487     | 0.848683927 |          |          |
| YTHDF3      | ENSG00000185728 | -0.59744    | 0.72489 | -0.59744    | 0.72489     | -0.59744 |          |
|             | 0.72489         | -0.59744    | 0.72489 | 0.72489     | 0.848683927 |          |          |
| POLE        | ENSG00000177084 | -0.64802    | 0.74151 | -0.59751    | 0.72492     | -2.1632  | 0.98474  |
|             | -1.431          | 0.92379     | 0.72492 | 0.848683927 |             |          |          |
| NA          | ENSG00000200040 | -0.59751    | 0.72492 | -0.59751    | 0.72492     | -0.59751 | 0.72492  |
|             | -0.59751        | 0.72492     | 0.72492 | 0.848683927 |             |          |          |
| SNORD114-13 | ENSG00000201247 | -0.59753    | 0.72492 | -0.59753    | 0.72492     | -0.59753 |          |
|             | 0.72492         | -0.59753    | 0.72492 | 0.72492     | 0.848683927 |          |          |
| PPIAP53     | ENSG00000223878 | -0.59758    | 0.72494 | -0.73204    | 0.76793     | -0.59758 |          |
|             | 0.72494         | -0.78141    | 0.78272 | 0.72494     | 0.848683927 |          |          |
| RPL7P41     | ENSG00000241146 | -0.80252    | 0.78888 | -0.59764    | 0.72496     | -1.1664  |          |
|             | 0.87827         | -1.1003     | 0.86439 | 0.72496     | 0.848683927 |          |          |
| RNU6-975P   | ENSG00000207023 | -0.5977     | 0.72498 | -0.5977     | 0.72498     | -0.5977  |          |
|             | 0.72498         | -0.5977     | 0.72498 | 0.72498     | 0.848683927 |          |          |
| ESYT1       | ENSG00000139641 | -0.59773    | 0.72499 | -0.80981    | 0.79098     | -0.59773 | 0.72499  |
|             | -1.2826         | 0.90018     | 0.72499 | 0.848683927 |             |          |          |
| NA          | ENSG00000267141 | -0.59777    | 0.725   | -0.59777    | 0.725       | -0.59777 | 0.725    |
|             | 0.725           | 0.848683927 |         |             |             |          |          |
| NA          | ENSG00000267303 | -0.59778    | 0.72501 | -0.59778    | 0.72501     | -0.59778 | 0.72501  |
|             | -0.59778        | 0.72501     | 0.72501 | 0.848683927 |             |          |          |
| NIBAN2      | ENSG00000136830 | -1.0452     | 0.85205 | -0.59782    | 0.72502     | -1.1599  |          |
|             | 0.87696         | -1.2166     | 0.88813 | 0.72502     | 0.848683927 |          |          |
| STXBP1      | ENSG00000136854 | -0.64119    | 0.7393  | -0.59785    | 0.72503     | -0.78432 |          |
|             | 0.78357         | -0.91321    | 0.81943 | 0.72503     | 0.848683927 |          |          |
| TMEM168     | ENSG00000146802 | -1.0539     | 0.85403 | -0.598      | 0.72508     | -0.598   |          |
|             | 0.72508         | -0.598      | 0.72508 | 0.72508     | 0.848704705 |          |          |
| GTF2IP23    | ENSG00000230295 | -0.59802    | 0.72509 | -0.59802    | 0.72509     | -0.59802 |          |

|           |                 |          |         |             |             |          |         |  |
|-----------|-----------------|----------|---------|-------------|-------------|----------|---------|--|
|           | 0.72509         | -0.59802 | 0.72509 | 0.72509     | 0.848704705 |          |         |  |
| NA        | ENSG00000199851 | -1.3308  | 0.90837 | -1.3308     | 0.90837     | -1.3308  | 0.90837 |  |
|           | -0.59806        | 0.7251   | 0.7251  | 0.848704705 |             |          |         |  |
| TSSC4     | ENSG00000184281 | -0.59819 | 0.72514 | -1.1937     | 0.88371     | -1.1937  | 0.88371 |  |
|           | -1.1937         | 0.88371  | 0.72514 | 0.848731138 |             |          |         |  |
| TMEM92    | ENSG00000167105 | -0.59834 | 0.72519 | -1.3916     | 0.91797     | -2.0813  |         |  |
|           | 0.9813          | -1.3651  | 0.91389 | 0.72519     | 0.84874323  |          |         |  |
| NA        | ENSG00000199470 | -0.77867 | 0.78191 | -0.77867    | 0.78191     | -0.59834 | 0.72519 |  |
|           | -0.77867        | 0.78191  | 0.72519 | 0.84874323  |             |          |         |  |
| DNAJC5B   | ENSG00000147570 | -1.0828  | 0.86055 | -1.0743     | 0.85866     | -1.0672  |         |  |
|           | 0.85705         | -0.59843 | 0.72522 | 0.72522     | 0.84874323  |          |         |  |
| CYP4F44P  | ENSG00000253748 | -0.59841 | 0.72522 | -0.59841    | 0.72522     | -0.59841 |         |  |
|           | 0.72522         | -0.59841 | 0.72522 | 0.72522     | 0.84874323  |          |         |  |
| NA        | ENSG00000259635 | -0.59851 | 0.72525 | -1.2978     | 0.90283     | -1.2978  | 0.90283 |  |
|           | -1.2978         | 0.90283  | 0.72525 | 0.848755319 |             |          |         |  |
| NA        | ENSG00000250900 | -0.59857 | 0.72527 | -0.59857    | 0.72527     | -0.59857 | 0.72527 |  |
|           | -0.59857        | 0.72527  | 0.72527 | 0.848755319 |             |          |         |  |
| GTF3A     | ENSG00000122034 | -0.59864 | 0.72529 | -1.1183     | 0.86828     | -0.89291 | 0.81405 |  |
|           | -1.7409         | 0.95915  | 0.72529 | 0.848755319 |             |          |         |  |
| ZNF268    | ENSG00000090612 | -0.59865 | 0.7253  | -0.59865    | 0.7253      | -0.59865 |         |  |
|           | 0.7253          | -0.79696 | 0.78726 | 0.7253      | 0.848755319 |          |         |  |
| RNU6-901P | ENSG00000207323 | -1.295   | 0.90233 | -0.59884    | 0.72536     | -1.295   |         |  |
|           | 0.90233         | -1.295   | 0.90233 | 0.72536     | 0.848805149 |          |         |  |
| RN7SL623P | ENSG00000244501 | -0.5989  | 0.72538 | -0.5989     | 0.72538     | -0.5989  |         |  |
|           | 0.72538         | -0.5989  | 0.72538 | 0.72538     | 0.848808169 |          |         |  |
| KRTAP10-9 | ENSG00000221837 | -1.0305  | 0.84862 | -0.599      | 0.72541     | -0.80549 |         |  |
|           | 0.78973         | -0.80549 | 0.78973 | 0.72541     | 0.848809339 |          |         |  |
| PKP1      | ENSG00000081277 | -1.097   | 0.86369 | -0.59919    | 0.72548     | -1.097   | 0.86369 |  |
|           | -1.097          | 0.86369  | 0.72548 | 0.848809339 |             |          |         |  |
| TPM2      | ENSG00000198467 | -0.79147 | 0.78567 | -1.4125     | 0.9211      | -0.5992  | 0.72548 |  |
|           | -0.5992         | 0.72548  | 0.72548 | 0.848809339 |             |          |         |  |
| CLYBL-AS1 | ENSG00000234303 | -0.59926 | 0.7255  | -1.5265     | 0.93656     | -1.6472  |         |  |
|           | 0.95024         | -0.86281 | 0.80588 | 0.7255      | 0.848809339 |          |         |  |
| NA        | ENSG00000241220 | -0.59927 | 0.7255  | -0.59927    | 0.7255      | -0.59927 | 0.7255  |  |
|           | -0.59927        | 0.7255   | 0.7255  | 0.848809339 |             |          |         |  |
| NA        | ENSG00000282882 | -0.59925 | 0.7255  | -0.59925    | 0.7255      | -0.59925 | 0.7255  |  |
|           | -0.59925        | 0.7255   | 0.7255  | 0.848809339 |             |          |         |  |
| NA        | ENSG00000260122 | -0.5995  | 0.72558 | -0.5995     | 0.72558     | -0.5995  | 0.72558 |  |
|           | -0.5995         | 0.72558  | 0.72558 | 0.848809339 |             |          |         |  |
| NA        | ENSG00000265484 | -1.5258  | 0.93647 | -0.80612    | 0.78991     | -0.59951 | 0.72558 |  |
|           | -0.59951        | 0.72558  | 0.72558 | 0.848809339 |             |          |         |  |
| NA        | ENSG00000260415 | -0.5995  | 0.72558 | -0.5995     | 0.72558     | -0.5995  | 0.72558 |  |
|           | -0.5995         | 0.72558  | 0.72558 | 0.848809339 |             |          |         |  |
| NSA2P5    | ENSG00000227176 | -0.59955 | 0.7256  | -0.59955    | 0.7256      | -0.59955 |         |  |
|           | 0.7256          | -0.59955 | 0.7256  | 0.7256      | 0.848809339 |          |         |  |
| NA        | ENSG00000248876 | -1.5701  | 0.9418  | -1.5701     | 0.9418      | -1.5701  | 0.9418  |  |
|           | -0.59957        | 0.7256   | 0.7256  | 0.848809339 |             |          |         |  |
| NA        | ENSG00000226876 | -1.1634  | 0.87766 | -0.59959    | 0.72561     | -0.59959 | 0.72561 |  |
|           | -0.59959        | 0.72561  | 0.72561 | 0.848809339 |             |          |         |  |
| NA        | ENSG00000266885 | -0.59962 | 0.72562 | -0.59962    | 0.72562     | -0.59962 | 0.72562 |  |
|           | -0.59962        | 0.72562  | 0.72562 | 0.848809339 |             |          |         |  |
| PABPC1P1  | ENSG00000231707 | -0.59967 | 0.72564 | -0.59967    | 0.72564     | -0.59967 |         |  |
|           | 0.72564         | -0.59967 | 0.72564 | 0.72564     | 0.848809339 |          |         |  |
| NAE1      | ENSG00000159593 | -0.59971 | 0.72565 | -0.59971    | 0.72565     | -0.59971 | 0.72565 |  |
|           | -1.4321         | 0.92394  | 0.72565 | 0.848809339 |             |          |         |  |
| CDAN1     | ENSG00000140326 | -1.1635  | 0.87768 | -0.59981    | 0.72568     | -0.76517 | 0.77791 |  |
|           | -0.91772        | 0.82062  | 0.72568 | 0.848809339 |             |          |         |  |
| NA        | ENSG00000200305 | -0.59981 | 0.72569 | -0.59981    | 0.72569     | -0.59981 | 0.72569 |  |
|           | -0.59981        | 0.72569  | 0.72569 | 0.848809339 |             |          |         |  |
| SLC24A2   | ENSG00000155886 | -0.59985 | 0.7257  | -1.8932     | 0.97083     | -1.694   |         |  |
|           | 0.95487         | -3.0903  | 0.999   | 0.7257      | 0.848809339 |          |         |  |
| NA        | ENSG00000268266 | -0.59991 | 0.72572 | -0.59991    | 0.72572     | -0.59991 | 0.72572 |  |



|             |                 |          |          |          |             |             |          |         |
|-------------|-----------------|----------|----------|----------|-------------|-------------|----------|---------|
|             |                 | -0.59991 | 0.72572  | 0.72572  | 0.848809339 |             |          |         |
| NA          | ENSG00000251779 | -0.59999 | 0.72574  | 0.72574  | -0.59999    | 0.72574     | -0.59999 | 0.72574 |
|             |                 | -0.59999 | 0.72574  | 0.72574  | 0.848809339 |             |          |         |
| C11orf98P1  | ENSG00000232158 | -1.5125  | 0.93479  | 0.93479  | -1.5125     | 0.93479     | -0.60007 |         |
|             |                 | 0.72577  | -1.1269  | 0.87011  | 0.72577     | 0.848809339 |          |         |
| DSP         | ENSG00000096696 | -1.116   | 0.8678   | 0.8678   | -1.3884     | 0.9175      | -0.60025 | 0.72583 |
|             |                 | -0.60025 | 0.72583  | 0.72583  | 0.848809339 |             |          |         |
| NA          | ENSG00000263176 | -0.60024 | 0.72583  | 0.72583  | -0.60024    | 0.72583     | -0.60024 | 0.72583 |
|             |                 | -0.60024 | 0.72583  | 0.72583  | 0.848809339 |             |          |         |
| KHDC1       | ENSG00000135314 | -0.84029 | 0.79963  | 0.79963  | -0.7721     | 0.77997     | -0.60029 | 0.72584 |
|             |                 | -1.5444  | 0.93875  | 0.72584  | 0.848809339 |             |          |         |
| HERPUD1     | ENSG00000051108 | -1.0343  | 0.8495   | 0.8495   | -0.90798    | 0.81805     | -1.0343  |         |
|             |                 | 0.8495   | -0.60033 | 0.72586  | 0.72586     | 0.848809339 |          |         |
| CCNJ1       | ENSG00000227491 | -0.60053 | 0.72592  | 0.72592  | -1.1305     | 0.87086     | -0.60053 |         |
|             |                 | 0.72592  | -0.60053 | 0.72592  | 0.72592     | 0.848809339 |          |         |
| NA          | ENSG00000263906 | -0.60059 | 0.72594  | 0.72594  | -0.60059    | 0.72594     | -0.60059 | 0.72594 |
|             |                 | -0.60059 | 0.72594  | 0.72594  | 0.848809339 |             |          |         |
| KCTD10P1    | ENSG00000224955 | -0.60065 | 0.72596  | 0.72596  | -0.60065    | 0.72596     | -0.60065 |         |
|             |                 | 0.72596  | -0.60065 | 0.72596  | 0.72596     | 0.848809339 |          |         |
| NA          | ENSG00000249275 | -0.60075 | 0.726    | -0.94941 | 0.8288      | -0.94941    | 0.8288   |         |
|             |                 | -1.1077  | 0.866    | 0.726    | 0.848809339 |             |          |         |
| MIR3936     | ENSG00000263597 | -0.60078 | 0.72601  | 0.72601  | -0.60078    | 0.72601     | -0.60078 |         |
|             |                 | 0.72601  | -0.60078 | 0.72601  | 0.72601     | 0.848809339 |          |         |
| NA          | ENSG00000260041 | -0.60084 | 0.72603  | 0.72603  | -0.60084    | 0.72603     | -0.60084 | 0.72603 |
|             |                 | -0.60084 | 0.72603  | 0.72603  | 0.848809339 |             |          |         |
| NA          | ENSG00000248676 | -0.60091 | 0.72605  | 0.72605  | -0.60091    | 0.72605     | -0.60091 | 0.72605 |
|             |                 | -0.60091 | 0.72605  | 0.72605  | 0.848809339 |             |          |         |
| FGL1        | ENSG00000104760 | -0.6028  | 0.72668  | 0.72668  | -0.96876    | 0.83367     | -0.60097 | 0.72607 |
|             |                 | -1.3892  | 0.91761  | 0.72607  | 0.848809339 |             |          |         |
| SNORD116-13 | ENSG00000207137 | -0.60097 | 0.72607  | 0.72607  | -0.60097    | 0.72607     | -0.60097 |         |
|             |                 | 0.72607  | -0.60097 | 0.72607  | 0.72607     | 0.848809339 |          |         |
| NA          | ENSG00000284600 | -0.60097 | 0.72607  | 0.72607  | -0.60097    | 0.72607     | -0.60097 | 0.72607 |
|             |                 | -0.60097 | 0.72607  | 0.72607  | 0.848809339 |             |          |         |
| HS3ST1      | ENSG00000002587 | -0.60101 | 0.72608  | 0.72608  | -1.7447     | 0.95948     | -0.75461 |         |
|             |                 | 0.77476  | -1.6713  | 0.95267  | 0.72608     | 0.848809339 |          |         |
| NA          | ENSG00000270541 | -0.60099 | 0.72608  | 0.72608  | -0.60099    | 0.72608     | -0.60099 | 0.72608 |
|             |                 | -0.60099 | 0.72608  | 0.72608  | 0.848809339 |             |          |         |
| RNA5SP416   | ENSG00000252647 | -0.60102 | 0.72609  | 0.72609  | -0.60102    | 0.72609     | -0.60102 |         |
|             |                 | 0.72609  | -0.60102 | 0.72609  | 0.72609     | 0.848809339 |          |         |
| NA          | ENSG00000271044 | -0.60104 | 0.72609  | 0.72609  | -0.60104    | 0.72609     | -0.60104 | 0.72609 |
|             |                 | -0.60104 | 0.72609  | 0.72609  | 0.848809339 |             |          |         |
| NA          | ENSG00000247270 | -0.60102 | 0.72609  | 0.72609  | -0.60102    | 0.72609     | -0.60102 | 0.72609 |
|             |                 | -0.60102 | 0.72609  | 0.72609  | 0.848809339 |             |          |         |
| NKAPL       | ENSG00000189134 | -0.60107 | 0.7261   | 0.7261   | -0.60107    | 0.7261      | -0.60107 | 0.7261  |
|             |                 | -0.60107 | 0.7261   | 0.7261   | 0.848809339 |             |          |         |
| CDK2AP1     | ENSG00000111328 | -0.60113 | 0.72612  | 0.72612  | -0.60113    | 0.72612     | -1.1227  |         |
|             |                 | 0.86921  | -1.6377  | 0.94925  | 0.72612     | 0.848809339 |          |         |
| ZNF583      | ENSG00000198440 | -0.60115 | 0.72613  | 0.72613  | -0.60115    | 0.72613     | -0.60115 |         |
|             |                 | 0.72613  | -0.60115 | 0.72613  | 0.72613     | 0.848809339 |          |         |
| BORA        | ENSG00000136122 | -0.60126 | 0.72617  | 0.72617  | -0.60126    | 0.72617     | -0.60126 | 0.72617 |
|             |                 | -0.60126 | 0.72617  | 0.72617  | 0.848827062 |             |          |         |
| DNAJC16     | ENSG00000116138 | -0.60131 | 0.72618  | 0.72618  | -1.402      | 0.91954     | -0.90673 |         |
|             |                 | 0.81772  | -0.76416 | 0.77761  | 0.72618     | 0.848827062 |          |         |
| SH3TC1      | ENSG00000125089 | -0.60138 | 0.72621  | 0.72621  | -1.6314     | 0.9486      | -1.2321  |         |
|             |                 | 0.89105  | -1.2102  | 0.8869   | 0.72621     | 0.848841768 |          |         |
| RPL39P28    | ENSG00000244432 | -0.60147 | 0.72624  | 0.72624  | -0.60147    | 0.72624     | -0.60147 |         |
|             |                 | 0.72624  | -1.2591  | 0.89601  | 0.72624     | 0.848847801 |          |         |
| NA          | ENSG00000267263 | -0.60151 | 0.72625  | 0.72625  | -0.60151    | 0.72625     | -0.60151 | 0.72625 |
|             |                 | -0.60151 | 0.72625  | 0.72625  | 0.848847801 |             |          |         |
| TMEM258     | ENSG00000134825 | -0.99944 | 0.84121  | 0.84121  | -0.60167    | 0.7263      | -0.60167 |         |
|             |                 | 0.7263   | -0.60167 | 0.7263   | 0.7263      | 0.84888588  |          |         |
| LINC00845   | ENSG00000227244 | -0.60176 | 0.72633  | 0.72633  | -0.60176    | 0.72633     | -0.60176 |         |

|           |                 |          |         |             |             |          |         |
|-----------|-----------------|----------|---------|-------------|-------------|----------|---------|
|           | 0.72633         | -0.60176 | 0.72633 | 0.72633     | 0.848900583 |          |         |
| NA        | ENSG00000204971 | -0.60186 | 0.72637 | -0.60186    | 0.72637     | -0.60186 | 0.72637 |
|           | -1.5506         | 0.9395   | 0.72637 | 0.848909627 |             |          |         |
| NA        | ENSG00000259450 | -0.60191 | 0.72638 | -0.60191    | 0.72638     | -0.60191 | 0.72638 |
|           | -0.60191        | 0.72638  | 0.72638 | 0.848909627 |             |          |         |
| HEATR5B   | ENSG00000008869 | -0.60193 | 0.72639 | -0.74147    | 0.7708      | -0.60193 |         |
|           | 0.72639         | -0.60193 | 0.72639 | 0.72639     | 0.848909627 |          |         |
| NA        | ENSG00000263823 | -0.60206 | 0.72643 | -0.60206    | 0.72643     | -0.60206 | 0.72643 |
|           | -0.60206        | 0.72643  | 0.72643 | 0.848936014 |             |          |         |
| RNU6-208P | ENSG00000199301 | -0.60218 | 0.72647 | -0.60218    | 0.72647     | -0.60218 |         |
|           | 0.72647         | -0.60218 | 0.72647 | 0.72647     | 0.8489624   |          |         |
| NA        | ENSG00000274308 | -2.2048  | 0.98627 | -2.2048     | 0.98627     | -0.60225 | 0.7265  |
|           | -2.2048         | 0.98627  | 0.7265  | 0.848977098 |             |          |         |
| NA        | ENSG00000261669 | -0.77447 | 0.78067 | -0.60248    | 0.72657     | -0.77447 | 0.78067 |
|           | -0.77447        | 0.78067  | 0.72657 | 0.849029864 |             |          |         |
| TMEM130   | ENSG00000166448 | -0.87044 | 0.80797 | -0.6025     | 0.72658     | -0.79897 |         |
|           | 0.78785         | -0.98163 | 0.83686 | 0.72658     | 0.849029864 |          |         |
| TUNAR     | ENSG00000250366 | -0.99843 | 0.84097 | -1.7979     | 0.96391     | -0.60271 | 0.72665 |
|           | -1.7695         | 0.9616   | 0.72665 | 0.849082625 |             |          |         |
| NA        | ENSG00000278493 | -0.83287 | 0.79754 | -0.60275    | 0.72666     | -0.83287 | 0.79754 |
|           | -0.83287        | 0.79754  | 0.72666 | 0.849082625 |             |          |         |
| NA        | ENSG00000249435 | -0.60288 | 0.7267  | -0.60288    | 0.7267      | -0.60288 | 0.7267  |
|           | -0.60288        | 0.7267   | 0.7267  | 0.849109004 |             |          |         |
| KCTD19    | ENSG00000168676 | -0.78872 | 0.78486 | -0.9096     | 0.81848     | -0.60298 |         |
|           | 0.72674         | -0.60298 | 0.72674 | 0.72674     | 0.849109355 |          |         |
| RPL21P112 | ENSG00000237924 | -0.60297 | 0.72674 | -0.60297    | 0.72674     | -0.60297 |         |
|           | 0.72674         | -0.60297 | 0.72674 | 0.72674     | 0.849109355 |          |         |
| LINC02572 | ENSG00000229536 | -1.3703  | 0.9147  | -0.94142    | 0.82676     | -0.60307 |         |
|           | 0.72677         | -0.79758 | 0.78744 | 0.72677     | 0.849109355 |          |         |
| NA        | ENSG00000248774 | -1.0766  | 0.85917 | -0.75829    | 0.77586     | -0.60309 | 0.72677 |
|           | -0.60309        | 0.72677  | 0.72677 | 0.849109355 |             |          |         |
| NA        | ENSG00000234692 | -0.6032  | 0.72681 | -0.6032     | 0.72681     | -0.6032  | 0.72681 |
|           | -0.6032         | 0.72681  | 0.72681 | 0.849112715 |             |          |         |
| NA        | ENSG00000258941 | -0.60323 | 0.72682 | -0.60323    | 0.72682     | -0.60323 | 0.72682 |
|           | -0.60323        | 0.72682  | 0.72682 | 0.849112715 |             |          |         |
| CEP120    | ENSG00000168944 | -0.60326 | 0.72683 | -0.98387    | 0.83741     | -0.94774 |         |
|           | 0.82837         | -1.0424  | 0.85139 | 0.72683     | 0.849112715 |          |         |
| MAPK7     | ENSG00000166484 | -0.60332 | 0.72685 | -0.60332    | 0.72685     | -0.60332 | 0.72685 |
|           | -0.60332        | 0.72685  | 0.72685 | 0.849112715 |             |          |         |
| NA        | ENSG00000235139 | -0.74447 | 0.77171 | -1.1503     | 0.87499     | -0.60336 | 0.72686 |
|           | -0.60336        | 0.72686  | 0.72686 | 0.849112715 |             |          |         |
| MTRES1P1  | ENSG00000220181 | -0.60346 | 0.7269  | -0.60346    | 0.7269      | -0.60346 |         |
|           | 0.7269          | -0.60346 | 0.7269  | 0.7269      | 0.849139087 |          |         |
| NA        | ENSG00000278928 | -0.60369 | 0.72698 | -0.70109    | 0.75838     | -0.70109 | 0.75838 |
|           | -0.70109        | 0.75838  | 0.72698 | 0.849212182 |             |          |         |
| NA        | ENSG00000223859 | -0.60382 | 0.72702 | -0.60382    | 0.72702     | -0.60382 | 0.72702 |
|           | -0.60382        | 0.72702  | 0.72702 | 0.84923855  |             |          |         |
| MIR4322   | ENSG00000264266 | -0.60397 | 0.72707 | -0.60397    | 0.72707     | -0.60397 |         |
|           | 0.72707         | -0.60397 | 0.72707 | 0.72707     | 0.849244898 |          |         |
| LINC02720 | ENSG00000255178 | -0.60401 | 0.72708 | -0.60401    | 0.72708     | -0.60401 |         |
|           | 0.72708         | -0.60401 | 0.72708 | 0.72708     | 0.849244898 |          |         |
| ARL6IP6   | ENSG00000177917 | -1.8718  | 0.96938 | -0.60407    | 0.7271      | -0.97934 |         |
|           | 0.83629         | -0.975   | 0.83522 | 0.7271      | 0.849244898 |          |         |
| NA        | ENSG00000277109 | -0.60413 | 0.72712 | -0.60413    | 0.72712     | -1.256   | 0.89544 |
|           | -0.60413        | 0.72712  | 0.72712 | 0.849244898 |             |          |         |
| NDUFS8    | ENSG00000110717 | -0.61428 | 0.73049 | -0.60416    | 0.72713     | -0.60416 |         |
|           | 0.72713         | -0.60416 | 0.72713 | 0.72713     | 0.849244898 |          |         |
| NA        | ENSG00000260379 | -0.60416 | 0.72713 | -0.60416    | 0.72713     | -0.60416 | 0.72713 |
|           | -0.60416        | 0.72713  | 0.72713 | 0.849244898 |             |          |         |
| MTND5P27  | ENSG00000225045 | -0.60435 | 0.7272  | -0.60435    | 0.7272      | -0.60435 |         |
|           | 0.7272          | -0.60435 | 0.7272  | 0.7272      | 0.849306299 |          |         |
| ESRP2     | ENSG00000103067 | -0.60444 | 0.72722 | -0.60444    | 0.72722     | -0.60444 | 0.72722 |

|             |                 |             |          |             |             |          |         |
|-------------|-----------------|-------------|----------|-------------|-------------|----------|---------|
|             | -0.60444        | 0.72722     | 0.72722  | 0.849309301 |             |          |         |
| HERPUD2     | ENSG00000122557 | -0.83195    | 0.79728  | -0.82912    | 0.79648     | -0.70458 |         |
|             | 0.75946         | -0.60448    | 0.72724  | 0.72724     | 0.849312304 |          |         |
| CD27        | ENSG00000139193 | -0.60458    | 0.72727  | -0.60458    | 0.72727     | -1.0573  | 0.85481 |
|             | -1.0573         | 0.85481     | 0.72727  | 0.849326985 |             |          |         |
| CXCL9       | ENSG00000138755 | -0.71512    | 0.76273  | -0.69175    | 0.75545     | -0.60481 | 0.72735 |
|             | -0.71231        | 0.76186     | 0.72735  | 0.849357327 |             |          |         |
| CACYBPP2    | ENSG00000177855 | -0.60482    | 0.72735  | -0.60482    | 0.72735     | -0.60482 |         |
|             | 0.72735         | -0.60482    | 0.72735  | 0.72735     | 0.849357327 |          |         |
| UBXN8       | ENSG00000104691 | -0.63986    | 0.73887  | -0.60493    | 0.72739     | -0.63986 | 0.73887 |
|             | -1.1719         | 0.87939     | 0.72739  | 0.849357327 |             |          |         |
| NA          | ENSG00000254050 | -0.60495    | 0.72739  | -0.60495    | 0.72739     | -0.60495 | 0.72739 |
|             | -0.60495        | 0.72739     | 0.72739  | 0.849357327 |             |          |         |
| NA          | ENSG00000255328 | -0.69681    | 0.75704  | -0.69681    | 0.75704     | -0.69681 | 0.75704 |
|             | -0.60493        | 0.72739     | 0.72739  | 0.849357327 |             |          |         |
| SLC25A3P2   | ENSG00000258373 | -0.68964    | 0.75479  | -0.60498    | 0.72741     | -0.60498 |         |
|             | 0.72741         | -0.60498    | 0.72741  | 0.72741     | 0.849357327 |          |         |
| JRK         | ENSG00000234616 | -0.85242    | 0.80301  | -0.60504    | 0.72742     | -1.1495  | 0.87483 |
|             | -0.64116        | 0.73929     | 0.72742  | 0.849357327 |             |          |         |
| NA          | ENSG00000226233 | -0.60515    | 0.72746  | -0.60515    | 0.72746     | -0.60515 | 0.72746 |
|             | -0.67438        | 0.74997     | 0.72746  | 0.849357327 |             |          |         |
| SLC35A4     | ENSG00000176087 | -0.60521    | 0.72748  | -0.60521    | 0.72748     | -0.60521 |         |
|             | 0.72748         | -0.60521    | 0.72748  | 0.72748     | 0.849357327 |          |         |
| NA          | ENSG00000272822 | -0.60523    | 0.72749  | -0.60523    | 0.72749     | -0.60523 | 0.72749 |
|             | -0.60523        | 0.72749     | 0.72749  | 0.849357327 |             |          |         |
| EMC9        | ENSG00000100908 | -0.60529    | 0.72751  | -0.60529    | 0.72751     | -0.60529 | 0.72751 |
|             | -0.60529        | 0.72751     | 0.72751  | 0.849357327 |             |          |         |
| GGH         | ENSG00000137563 | -0.83858    | 0.79915  | -0.60532    | 0.72752     | -1.4829  | 0.93095 |
|             | -0.73997        | 0.77034     | 0.72752  | 0.849357327 |             |          |         |
| PCOLCE2     | ENSG00000163710 | -2.7796     | 0.99728  | -2.3751     | 0.99123     | -2.7796  |         |
|             | 0.99728         | -0.60536    | 0.72753  | 0.72753     | 0.849357327 |          |         |
| IGHVII-46-1 | ENSG00000253808 | -0.60538    | 0.72754  | -0.60538    | 0.72754     | -0.60538 |         |
|             | 0.72754         | -0.60538    | 0.72754  | 0.72754     | 0.849357327 |          |         |
| RPL3        | ENSG00000100316 | -1.0134     | 0.84457  | -0.77686    | 0.78138     | -0.60556 | 0.7276  |
|             | -0.60556        | 0.7276      | 0.7276   | 0.849407024 |             |          |         |
| NA          | ENSG00000231589 | -0.60562    | 0.72762  | -0.60562    | 0.72762     | -0.60562 | 0.72762 |
|             | -0.60562        | 0.72762     | 0.72762  | 0.849410023 |             |          |         |
| IGLV3-16    | ENSG00000211665 | -1.3297     | 0.9082   | -0.6058     | 0.72767     | -1.3297  |         |
|             | 0.9082          | -1.3297     | 0.9082   | 0.72767     | 0.849448043 |          |         |
| RNU6-674P   | ENSG00000200701 | -0.94206    | 0.82692  | -0.60594    | 0.72772     | -1.4542  |         |
|             | 0.92705         | -1.53093699 | 0.72772  | 0.849486061 |             |          |         |
| WNT5A       | ENSG00000114251 | -1.2713     | 0.89819  | -0.6061     | 0.72778     | -0.76026 | 0.77645 |
|             | -1.2069         | 0.88626     | 0.72778  | 0.849518396 |             |          |         |
| PDE4B       | ENSG00000184588 | -0.68727    | 0.75404  | -0.72517    | 0.76583     | -0.60617 | 0.7278  |
|             | -1.7118         | 0.95653     | 0.7278   | 0.849518396 |             |          |         |
| NA          | ENSG00000267340 | -0.60618    | 0.7278   | -0.60618    | 0.7278      | -0.60618 | 0.7278  |
|             | -0.60618        | 0.7278      | 0.7278   | 0.849518396 |             |          |         |
| TMEM246-AS1 | ENSG00000225376 | -1.03084851 | -0.60626 | 0.72783     | -0.75534    |          |         |
|             | 0.77498         | -0.75534    | 0.77498  | 0.72783     | 0.849533064 |          |         |
| NA          | ENSG00000269721 | -0.60637    | 0.72787  | -0.60637    | 0.72787     | -0.60637 | 0.72787 |
|             | -0.60637        | 0.72787     | 0.72787  | 0.849559404 |             |          |         |
| RN7SL638P   | ENSG00000243702 | -0.6066     | 0.72794  | -1.4639     | 0.92839     | -1.1549  |         |
|             | 0.87593         | -1.1549     | 0.87593  | 0.72794     | 0.849603401 |          |         |
| NA          | ENSG00000228561 | -0.60662    | 0.72795  | -0.60662    | 0.72795     | -0.60662 | 0.72795 |
|             | -0.60662        | 0.72795     | 0.72795  | 0.849603401 |             |          |         |
| NA          | ENSG00000226168 | -1.7473     | 0.95971  | -0.60666    | 0.72796     | -0.88819 | 0.81278 |
|             | -0.88819        | 0.81278     | 0.72796  | 0.849603401 |             |          |         |
| NCR2        | ENSG00000096264 | -1.1615     | 0.87727  | -0.60676    | 0.728       | -1.0003  | 0.84142 |
|             | -1.6321         | 0.94868     | 0.728    | 0.849629736 |             |          |         |
| NA          | ENSG00000258949 | -1.1475     | 0.87442  | -1.0504     | 0.85322     | -0.60687 | 0.72803 |
|             | -0.63862        | 0.73847     | 0.72803  | 0.849644399 |             |          |         |
| HAUS8P1     | ENSG00000257300 | -0.60706    | 0.72809  | -0.60706    | 0.72809     | -0.60706 |         |

|              |                 |          |         |             |             |          |         |
|--------------|-----------------|----------|---------|-------------|-------------|----------|---------|
|              | 0.72809         | -0.60706 | 0.72809 | 0.72809     | 0.849685394 |          |         |
| NA           | ENSG00000145063 | -1.0539  | 0.85405 | -1.0198     | 0.84608     | -0.60709 | 0.7281  |
|              | -1.5493         | 0.93935  | 0.7281  | 0.849685394 |             |          |         |
| ZMYM2        | ENSG00000121741 | -0.82397 | 0.79502 | -1.2877     | 0.90108     | -0.60732 | 0.72818 |
|              | -1.1058         | 0.86559  | 0.72818 | 0.849741044 |             |          |         |
| PRICKLE2-AS2 | ENSG00000241101 | -0.60735 | 0.72819 | -0.60735    | 0.72819     | -0.60735 | 0.72819 |
|              | 0.72819         | -0.60735 | 0.72819 | 0.72819     | 0.849741044 |          |         |
| NA           | ENSG00000251878 | -0.60737 | 0.7282  | -0.60737    | 0.7282      | -0.60737 | 0.7282  |
|              | -0.60737        | 0.7282   | 0.7282  | 0.849741044 |             |          |         |
| IFNA12P      | ENSG00000235108 | -0.60748 | 0.72823 | -0.60748    | 0.72823     | -0.60748 |         |
|              | 0.72823         | -0.60748 | 0.72823 | 0.72823     | 0.849755703 |          |         |
| SIX1         | ENSG00000126778 | -0.95505 | 0.83022 | -1.0742     | 0.85864     | -0.68575 | 0.75357 |
|              | -0.60759        | 0.72827  | 0.72827 | 0.849782029 |             |          |         |
| RNF165       | ENSG00000141622 | -0.91092 | 0.81883 | -0.60766    | 0.72829     | -1.1396  |         |
|              | 0.87278         | -1.0019  | 0.8418  | 0.72829     | 0.849785018 |          |         |
| RNU4-48P     | ENSG00000202429 | -0.60784 | 0.72835 | -0.60784    | 0.72835     | -2.4112  |         |
|              | 0.99205         | -2.4141  | 0.99211 | 0.72835     | 0.849825998 |          |         |
| NA           | ENSG00000200615 | -0.60785 | 0.72836 | -0.60785    | 0.72836     | -0.60785 | 0.72836 |
|              | -0.60785        | 0.72836  | 0.72836 | 0.849825998 |             |          |         |
| NA           | ENSG00000228478 | -0.60802 | 0.72841 | -0.67895    | 0.75142     | -0.60802 | 0.72841 |
|              | -0.60802        | 0.72841  | 0.72841 | 0.849863987 |             |          |         |
| SLC25A15P2   | ENSG00000237164 | -0.6082  | 0.72847 | -0.6082     | 0.72847     | -0.6082  |         |
|              | 0.72847         | -0.6082  | 0.72847 | 0.72847     | 0.849913642 |          |         |
| CEP250-AS1   | ENSG00000230155 | -0.60824 | 0.72849 | -0.60824    | 0.72849     | -0.60824 |         |
|              | 0.72849         | -0.60824 | 0.72849 | 0.72849     | 0.849916628 |          |         |
| GOSR1        | ENSG00000108587 | -0.60841 | 0.72854 | -0.97035    | 0.83406     | -1.1378  | 0.8724  |
|              | -0.7937         | 0.78632  | 0.72854 | 0.84994593  |             |          |         |
| TSKS         | ENSG00000126467 | -0.60842 | 0.72855 | -0.72398    | 0.76546     | -0.60842 | 0.72855 |
|              | -0.72398        | 0.76546  | 0.72855 | 0.84994593  |             |          |         |
| ANKRD44      | ENSG00000065413 | -0.68756 | 0.75413 | -1.1306     | 0.87089     | -0.80931 |         |
|              | 0.79083         | -0.60851 | 0.72857 | 0.72857     | 0.849948914 |          |         |
| EIF2S2P5     | ENSG00000225650 | -1.0513  | 0.85345 | -0.60874    | 0.72865     | -1.0513  |         |
|              | 0.85345         | -1.0513  | 0.85345 | 0.72865     | 0.850001544 |          |         |
| NA           | ENSG00000279047 | -0.80481 | 0.78954 | -0.60874    | 0.72865     | -0.90659 | 0.81769 |
|              | -0.93741        | 0.82573  | 0.72865 | 0.850001544 |             |          |         |
| CHEK1        | ENSG00000149554 | -0.60891 | 0.72871 | -1.0142     | 0.84475     | -1.0142  | 0.84475 |
|              | -1.0142         | 0.84475  | 0.72871 | 0.850051187 |             |          |         |
| IGHVIII-67-2 | ENSG00000254036 | -0.60899 | 0.72873 | -0.60899    | 0.72873     | -0.60899 | 0.72873 |
|              | 0.72873         | -0.60899 | 0.72873 | 0.72873     | 0.850054169 |          |         |
| RNU6-513P    | ENSG00000251913 | -0.60918 | 0.7288  | -0.60918    | 0.7288      | -0.60918 |         |
|              | 0.7288          | -0.60918 | 0.7288  | 0.7288      | 0.850106788 |          |         |
| KLHL24       | ENSG00000114796 | -1.5941  | 0.94454 | -1.5145     | 0.93506     | -0.60923 |         |
|              | 0.72881         | -1.6739  | 0.95292 | 0.72881     | 0.850106788 |          |         |
| NA           | ENSG00000282915 | -1.0241  | 0.84711 | -0.6093     | 0.72884     | -0.6093  | 0.72884 |
|              | -0.68521        | 0.7534   | 0.72884 | 0.850121432 |             |          |         |
| NA           | ENSG00000196826 | -0.60951 | 0.72891 | -0.60951    | 0.72891     | -0.60951 | 0.72891 |
|              | -0.60951        | 0.72891  | 0.72891 | 0.850145012 |             |          |         |
| REXO1L1P     | ENSG00000205176 | -1.2116  | 0.88718 | -0.60956    | 0.72892     | -1.1462  |         |
|              | 0.87415         | -1.2111  | 0.88706 | 0.72892     | 0.850145012 |          |         |
| MAJIN        | ENSG00000168070 | -1.0341  | 0.84945 | -0.60957    | 0.72893     | -0.88224 | 0.81118 |
|              | -1.0828         | 0.86054  | 0.72893 | 0.850145012 |             |          |         |
| GPR160P1     | ENSG00000203363 | -1.6636  | 0.9519  | -0.61705    | 0.7314      | -0.60957 |         |
|              | 0.72893         | -0.60957 | 0.72893 | 0.72893     | 0.850145012 |          |         |
| NA           | ENSG00000249419 | -1.4129  | 0.92116 | -1.0824     | 0.86047     | -1.0824  | 0.86047 |
|              | -0.60971        | 0.72897  | 0.72897 | 0.850171316 |             |          |         |
| NOLC1        | ENSG00000166197 | -0.61005 | 0.72909 | -0.83991    | 0.79952     | -0.91994 | 0.8212  |
|              | -0.73079        | 0.76755  | 0.72909 | 0.850265338 |             |          |         |
| ATL2         | ENSG00000119787 | -0.83012 | 0.79677 | -1.175      | 0.88001     | -0.61012 | 0.72911 |
|              | -0.65074        | 0.74239  | 0.72911 | 0.850265338 |             |          |         |
| NA           | ENSG00000248388 | -0.61021 | 0.72914 | -0.61021    | 0.72914     | -0.61021 | 0.72914 |
|              | -0.61021        | 0.72914  | 0.72914 | 0.850265338 |             |          |         |
| IGLV3-22     | ENSG00000211661 | -0.61027 | 0.72916 | -0.61027    | 0.72916     | -0.61027 |         |

|           |                 |          |         |             |             |          |         |
|-----------|-----------------|----------|---------|-------------|-------------|----------|---------|
|           | 0.72916         | -0.61027 | 0.72916 | 0.72916     | 0.850265338 |          |         |
| CBX3P3    | ENSG00000250045 | -0.6104  | 0.7292  | -0.6104     | 0.7292      | -0.6104  |         |
|           | 0.7292          | -0.6104  | 0.7292  | 0.7292      | 0.850265338 |          |         |
| NA        | ENSG00000216316 | -0.61042 | 0.72921 | -0.61042    | 0.72921     | -0.61042 | 0.72921 |
|           | -0.61042        | 0.72921  | 0.72921 | 0.850265338 |             |          |         |
| RN7SL285P | ENSG00000243313 | -2.0586  | 0.98023 | -0.84447    | 0.8008      | -0.61731 |         |
|           | 0.73148         | -0.61042 | 0.72921 | 0.72921     | 0.850265338 |          |         |
| MIR4535   | ENSG00000266887 | -1.6216  | 0.94755 | -0.61042    | 0.72921     | -1.1466  |         |
|           | 0.87422         | -1.1466  | 0.87422 | 0.72921     | 0.850265338 |          |         |
| NA        | ENSG00000272148 | -0.61051 | 0.72924 | -0.61051    | 0.72924     | -0.61051 | 0.72924 |
|           | -0.61051        | 0.72924  | 0.72924 | 0.850265338 |             |          |         |
| NA        | ENSG00000201800 | -1.6664  | 0.95218 | -0.61055    | 0.72925     | -0.61055 | 0.72925 |
|           | -0.61055        | 0.72925  | 0.72925 | 0.850265338 |             |          |         |
| EPN2-AS1  | ENSG00000235397 | -0.61053 | 0.72925 | -0.79518    | 0.78674     | -0.61053 |         |
|           | 0.72925         | -0.61053 | 0.72925 | 0.72925     | 0.850265338 |          |         |
| NA        | ENSG00000268163 | -0.61057 | 0.72926 | -0.61057    | 0.72926     | -0.61057 | 0.72926 |
|           | -0.61057        | 0.72926  | 0.72926 | 0.850265338 |             |          |         |
| NA        | ENSG00000271611 | -0.61078 | 0.72933 | -0.93758    | 0.82577     | -0.93758 | 0.82577 |
|           | -1.1293         | 0.87062  | 0.72933 | 0.850326608 |             |          |         |
| TRAM2     | ENSG00000065308 | -0.67714 | 0.75084 | -0.61091    | 0.72937     | -0.94602 | 0.82793 |
|           | -0.95437        | 0.83005  | 0.72937 | 0.850352899 |             |          |         |
| NA        | ENSG00000225568 | -0.61104 | 0.72941 | -0.61104    | 0.72941     | -0.61104 | 0.72941 |
|           | -0.61104        | 0.72941  | 0.72941 | 0.850358844 |             |          |         |
| MTCYBP6   | ENSG00000230605 | -0.61103 | 0.72941 | -0.61103    | 0.72941     | -0.61103 |         |
|           | 0.72941         | -0.61103 | 0.72941 | 0.72941     | 0.850358844 |          |         |
| SRRM2     | ENSG00000167978 | -0.65711 | 0.74444 | -0.65711    | 0.74444     | -0.61116 | 0.72945 |
|           | -0.61116        | 0.72945  | 0.72945 | 0.850385132 |             |          |         |
| MELTF-AS1 | ENSG00000228109 | -1.4741  | 0.92978 | -0.61145    | 0.72955     | -1.4741  |         |
|           | 0.92978         | -1.4741  | 0.92978 | 0.72955     | 0.850424201 |          |         |
| MT4       | ENSG00000102891 | -0.61162 | 0.72961 | -0.61162    | 0.72961     | -1.1     | 0.86434 |
|           | -0.61162        | 0.72961  | 0.72961 | 0.850424201 |             |          |         |
| TRAV8-7   | ENSG00000211808 | -0.61163 | 0.72961 | -0.61163    | 0.72961     | -0.61163 |         |
|           | 0.72961         | -0.61163 | 0.72961 | 0.72961     | 0.850424201 |          |         |
| NA        | ENSG00000256083 | -0.61173 | 0.72964 | -0.61173    | 0.72964     | -0.61173 | 0.72964 |
|           | -0.61173        | 0.72964  | 0.72964 | 0.850424201 |             |          |         |
| NUMA1     | ENSG00000137497 | -0.61177 | 0.72966 | -1.0852     | 0.86108     | -0.87014 | 0.80789 |
|           | -1.506          | 0.93396  | 0.72966 | 0.850424201 |             |          |         |
| KIAA0586  | ENSG00000100578 | -0.78005 | 0.78232 | -0.76243    | 0.7771      | -1.1079  |         |
|           | 0.86605         | -0.61187 | 0.72969 | 0.72969     | 0.850424201 |          |         |
| SLC25A27  | ENSG00000153291 | -0.61188 | 0.72969 | -0.61188    | 0.72969     | -0.61188 |         |
|           | 0.72969         | -0.61188 | 0.72969 | 0.72969     | 0.850424201 |          |         |
| NA        | ENSG00000273141 | -0.61188 | 0.72969 | -0.61188    | 0.72969     | -0.61188 | 0.72969 |
|           | -0.61188        | 0.72969  | 0.72969 | 0.850424201 |             |          |         |
| GTPBP1    | ENSG00000100226 | -0.6119  | 0.7297  | -0.87688    | 0.80973     | -0.87688 |         |
|           | 0.80973         | -0.87688 | 0.80973 | 0.7297      | 0.850424201 |          |         |
| NA        | ENSG00000223373 | -0.61192 | 0.7297  | -0.76172    | 0.77689     | -0.82285 | 0.7947  |
|           | -0.82285        | 0.7947   | 0.7297  | 0.850424201 |             |          |         |
| NA        | ENSG00000271109 | -0.612   | 0.72973 | -0.612      | 0.72973     | -0.612   | 0.72973 |
|           | -0.612          | 0.72973  | 0.72973 | 0.850424201 |             |          |         |
| OR51A4    | ENSG00000205497 | -0.61204 | 0.72974 | -0.61204    | 0.72974     | -2.0974  |         |
|           | 0.98202         | -0.61204 | 0.72974 | 0.72974     | 0.850424201 |          |         |
| SLC30A5   | ENSG00000145740 | -1.138   | 0.87244 | -1.172      | 0.8794      | -1.4697  |         |
|           | 0.92918         | -0.61212 | 0.72977 | 0.72977     | 0.850424201 |          |         |
| NA        | ENSG00000259208 | -0.61212 | 0.72977 | -0.61212    | 0.72977     | -0.61212 | 0.72977 |
|           | -0.61212        | 0.72977  | 0.72977 | 0.850424201 |             |          |         |
| RNU4-51P  | ENSG00000201076 | -0.61224 | 0.72981 | -0.61224    | 0.72981     | -0.61224 |         |
|           | 0.72981         | -0.61224 | 0.72981 | 0.72981     | 0.850424201 |          |         |
| NA        | ENSG00000227237 | -0.61227 | 0.72982 | -0.61227    | 0.72982     | -0.61227 | 0.72982 |
|           | -0.61227        | 0.72982  | 0.72982 | 0.850424201 |             |          |         |
| CHKA      | ENSG00000110721 | -0.81958 | 0.79377 | -1.8215     | 0.96574     | -1.7891  | 0.9632  |
|           | -0.61231        | 0.72983  | 0.72983 | 0.850424201 |             |          |         |
| NA        | ENSG00000217776 | -0.9015  | 0.81634 | -0.9015     | 0.81634     | -1.4546  | 0.9271  |

|              |                 |          |         |             |             |          |         |  |
|--------------|-----------------|----------|---------|-------------|-------------|----------|---------|--|
|              | -0.61231        | 0.72983  | 0.72983 | 0.850424201 |             |          |         |  |
| PYHIN5P      | ENSG00000229849 | -0.6123  | 0.72983 | -1.1046     | 0.86534     | -1.3001  |         |  |
|              | 0.90321         | -1.1046  | 0.86534 | 0.72983     | 0.850424201 |          |         |  |
| NA           | ENSG00000282879 | -0.73426 | 0.76861 | -0.65962    | 0.74525     | -0.61232 | 0.72984 |  |
|              | -1.1512         | 0.87518  | 0.72984 | 0.850424201 |             |          |         |  |
| LEF1-AS1     | ENSG00000232021 | -0.61236 | 0.72985 | -0.61236    | 0.72985     | -0.61236 |         |  |
|              | 0.72985         | -0.61236 | 0.72985 | 0.72985     | 0.850424201 |          |         |  |
| NA           | ENSG00000241357 | -0.61253 | 0.72991 | -0.61253    | 0.72991     | -0.61253 | 0.72991 |  |
|              | -0.61253        | 0.72991  | 0.72991 | 0.85046301  |             |          |         |  |
| RNU6-254P    | ENSG00000200247 | -0.61267 | 0.72995 | -0.61267    | 0.72995     | -0.61267 |         |  |
|              | 0.72995         | -0.61267 | 0.72995 | 0.72995     | 0.85046301  |          |         |  |
| C17orf49     | ENSG00000258315 | -0.61278 | 0.72999 | -0.61278    | 0.72999     | -0.61278 |         |  |
|              | 0.72999         | -0.61278 | 0.72999 | 0.72999     | 0.85046301  |          |         |  |
| KLK1         | ENSG00000167748 | -1.1009  | 0.86454 | -1.1009     | 0.86454     | -1.1009  | 0.86454 |  |
|              | -0.61286        | 0.73002  | 0.73002 | 0.85046301  |             |          |         |  |
| AKR7A2       | ENSG00000053371 | -0.61295 | 0.73004 | -0.61295    | 0.73004     | -0.61295 |         |  |
|              | 0.73004         | -0.61295 | 0.73004 | 0.73004     | 0.85046301  |          |         |  |
| BACE2-IT1    | ENSG00000224388 | -0.61296 | 0.73005 | -0.61296    | 0.73005     | -0.61296 |         |  |
|              | 0.73005         | -0.61296 | 0.73005 | 0.73005     | 0.85046301  |          |         |  |
| SNORA55      | ENSG00000201457 | -0.61306 | 0.73008 | -0.61306    | 0.73008     | -0.61306 |         |  |
|              | 0.73008         | -0.61306 | 0.73008 | 0.73008     | 0.85046301  |          |         |  |
| GALNT2       | ENSG00000143641 | -0.82227 | 0.79454 | -0.61311    | 0.7301      | -1.0027  | 0.842   |  |
|              | -1.0754         | 0.8589   | 0.7301  | 0.85046301  |             |          |         |  |
| MDM2         | ENSG00000135679 | -0.82762 | 0.79606 | -1.0392     | 0.85063     | -0.61316 | 0.73011 |  |
|              | -1.6891         | 0.9544   | 0.73011 | 0.85046301  |             |          |         |  |
| MOV10        | ENSG00000155363 | -1.6115  | 0.94647 | -1.6115     | 0.94647     | -1.6115  | 0.94647 |  |
|              | -0.61316        | 0.73011  | 0.73011 | 0.85046301  |             |          |         |  |
| RPSAP32      | ENSG00000238075 | -0.61314 | 0.73011 | -0.83011    | 0.79676     | -1.0288  |         |  |
|              | 0.84822         | -1.2298  | 0.89062 | 0.73011     | 0.85046301  |          |         |  |
| PPIAP17      | ENSG00000225622 | -0.6973  | 0.75719 | -0.61322    | 0.73013     | -0.6973  |         |  |
|              | 0.75719         | -0.70338 | 0.75909 | 0.73013     | 0.85046301  |          |         |  |
| FAM198B-AS1  | ENSG00000248429 | -0.61329 | 0.73016 | -0.61329    | 0.73016     | -0.61329 |         |  |
|              | 0.73016         | -0.73013 | 0.76734 | 0.73016     | 0.85046301  |          |         |  |
| PTCD2        | ENSG00000049883 | -1.024   | 0.84708 | -0.97831    | 0.83604     | -0.91875 | 0.82089 |  |
|              | -0.61333        | 0.73017  | 0.73017 | 0.85046301  |             |          |         |  |
| HEATR9       | ENSG00000270379 | -1.4231  | 0.92264 | -1.4231     | 0.92264     | -0.61331 |         |  |
|              | 0.73017         | -1.4231  | 0.92264 | 0.73017     | 0.85046301  |          |         |  |
| CIB4         | ENSG00000157884 | -0.669   | 0.74825 | -1.1904     | 0.88305     | -1.5175  | 0.93544 |  |
|              | -0.61335        | 0.73018  | 0.73018 | 0.85046301  |             |          |         |  |
| RNU6-37P     | ENSG00000199562 | -0.61335 | 0.73018 | -0.61335    | 0.73018     | -0.61335 |         |  |
|              | 0.73018         | -0.61335 | 0.73018 | 0.73018     | 0.85046301  |          |         |  |
| CDKN2AIPNLP2 | ENSG00000145835 | -0.61372 | 0.7303  | -0.85054    | 0.80249     | -0.67475 |         |  |
|              | 0.75008         | -0.61996 | 0.73236 | 0.7303      | 0.850582447 |          |         |  |
| XCR1         | ENSG00000173578 | -0.61387 | 0.73035 | -0.75406    | 0.77459     | -1.3111  | 0.90509 |  |
|              | -0.95343        | 0.82981  | 0.73035 | 0.850602985 |             |          |         |  |
| NA           | ENSG00000251014 | -0.64513 | 0.74058 | -0.68328    | 0.75278     | -0.82201 | 0.79446 |  |
|              | -0.6139         | 0.73036  | 0.73036 | 0.850602985 |             |          |         |  |
| NA           | ENSG00000264645 | -0.61393 | 0.73037 | -0.61393    | 0.73037     | -0.61393 | 0.73037 |  |
|              | -0.61393        | 0.73037  | 0.73037 | 0.850602985 |             |          |         |  |
| NA           | ENSG00000270977 | -0.61411 | 0.73043 | -1.5968     | 0.94485     | -1.5968  | 0.94485 |  |
|              | -1.5968         | 0.94485  | 0.73043 | 0.850646811 |             |          |         |  |
| NA           | ENSG00000234165 | -0.61417 | 0.73045 | -0.61417    | 0.73045     | -0.61417 | 0.73045 |  |
|              | -0.61417        | 0.73045  | 0.73045 | 0.850646811 |             |          |         |  |
| NA           | ENSG00000224819 | -0.75385 | 0.77453 | -0.75385    | 0.77453     | -0.6142  | 0.73046 |  |
|              | -0.62845        | 0.73515  | 0.73046 | 0.850646811 |             |          |         |  |
| NA           | ENSG00000227836 | -0.61431 | 0.7305  | -0.61431    | 0.7305      | -0.61431 | 0.7305  |  |
|              | -0.61431        | 0.7305   | 0.7305  | 0.850673063 |             |          |         |  |
| NA           | ENSG00000263599 | -0.61461 | 0.73059 | -0.6733     | 0.74962     | -0.61461 | 0.73059 |  |
|              | -1.1278         | 0.87031  | 0.73059 | 0.850731484 |             |          |         |  |
| NA           | ENSG00000262554 | -0.61461 | 0.7306  | -0.61461    | 0.7306      | -0.61461 | 0.7306  |  |
|              | -0.61461        | 0.7306   | 0.7306  | 0.850731484 |             |          |         |  |
| LENG8-AS1    | ENSG00000226696 | -0.78763 | 0.78454 | -0.61469    | 0.73062     | -0.78763 |         |  |

|                |                 |          |         |             |             |          |         |
|----------------|-----------------|----------|---------|-------------|-------------|----------|---------|
|                | 0.78454         | -0.78763 | 0.78454 | 0.73062     | 0.850731484 |          |         |
| NA             | ENSG00000234884 | -0.61468 | 0.73062 | -0.61468    | 0.73062     | -0.61468 | 0.73062 |
|                | -0.96756        | 0.83337  | 0.73062 | 0.850731484 |             |          |         |
| PGDP1          | ENSG00000265273 | -0.61499 | 0.73072 | -0.61499    | 0.73072     | -0.61499 | 0.73072 |
|                | -1.1838         | 0.88176  | 0.73072 | 0.850827593 |             |          |         |
| NA             | ENSG00000225085 | -0.61509 | 0.73075 | -0.61509    | 0.73075     | -0.61509 | 0.73075 |
|                | -0.61509        | 0.73075  | 0.73075 | 0.850836465 |             |          |         |
| NA             | ENSG00000213755 | -0.61515 | 0.73077 | -0.61515    | 0.73077     | -0.61515 | 0.73077 |
|                | -0.61515        | 0.73077  | 0.73077 | 0.850836465 |             |          |         |
| LINC02509      | ENSG00000250263 | -0.61518 | 0.73078 | -0.61518    | 0.73078     | -0.61518 |         |
|                | 0.73078         | -0.61518 | 0.73078 | 0.73078     | 0.850836465 |          |         |
| NA             | ENSG00000250796 | -0.61535 | 0.73084 | -0.61535    | 0.73084     | -0.61535 | 0.73084 |
|                | -0.61535        | 0.73084  | 0.73084 | 0.850839607 |             |          |         |
| NA             | ENSG00000245970 | -0.61538 | 0.73085 | -0.61538    | 0.73085     | -0.61538 | 0.73085 |
|                | -0.61538        | 0.73085  | 0.73085 | 0.850839607 |             |          |         |
| IL1RN          | ENSG00000136689 | -1.5092  | 0.93437 | -0.87741    | 0.80987     | -1.4705  | 0.92929 |
|                | -0.61544        | 0.73087  | 0.73087 | 0.850839607 |             |          |         |
| MIR518B        | ENSG00000207862 | -0.61545 | 0.73087 | -0.61545    | 0.73087     | -0.61545 |         |
|                | 0.73087         | -0.61545 | 0.73087 | 0.73087     | 0.850839607 |          |         |
| NA             | ENSG00000250714 | -1.3158  | 0.90588 | -0.61544    | 0.73087     | -0.61544 | 0.73087 |
|                | -0.61544        | 0.73087  | 0.73087 | 0.850839607 |             |          |         |
| STRBP          | ENSG00000165209 | -0.78132 | 0.78269 | -0.75514    | 0.77492     | -0.67506 | 0.75018 |
|                | -0.61552        | 0.73089  | 0.73089 | 0.850842563 |             |          |         |
| TAS2R41        | ENSG00000221855 | -0.61559 | 0.73092 | -0.79515    | 0.78674     | -0.79515 |         |
|                | 0.78674         | -0.61559 | 0.73092 | 0.73092     | 0.850851616 |          |         |
| RNU6-1055P     | ENSG00000212387 | -0.6158  | 0.73099 | -0.6158     | 0.73099     | -0.6158  |         |
|                | 0.73099         | -0.6158  | 0.73099 | 0.73099     | 0.850851616 |          |         |
| NA             | ENSG00000230113 | -0.61583 | 0.73099 | -0.61583    | 0.73099     | -0.61583 | 0.73099 |
|                | -0.61583        | 0.73099  | 0.73099 | 0.850851616 |             |          |         |
| RN7SL138P      | ENSG00000266274 | -0.61583 | 0.73099 | -0.61583    | 0.73099     | -0.61583 |         |
|                | 0.73099         | -0.61583 | 0.73099 | 0.73099     | 0.850851616 |          |         |
| NDUFAF2P2      | ENSG00000255358 | -0.61588 | 0.73101 | -0.61588    | 0.73101     | -0.61588 |         |
|                | 0.73101         | -0.61588 | 0.73101 | 0.73101     | 0.850851616 |          |         |
| BEND4          | ENSG00000188848 | -0.6159  | 0.73102 | -0.6159     | 0.73102     | -0.6159  | 0.73102 |
|                | -1.3545         | 0.91221  | 0.73102 | 0.850851616 |             |          |         |
| MED15P4        | ENSG00000224679 | -0.61591 | 0.73102 | -0.61591    | 0.73102     | -0.61591 |         |
|                | 0.73102         | -0.61591 | 0.73102 | 0.73102     | 0.850851616 |          |         |
| RAB2B          | ENSG00000129472 | -0.61602 | 0.73106 | -0.61602    | 0.73106     | -0.61602 | 0.73106 |
|                | -0.61602        | 0.73106  | 0.73106 | 0.850877849 |             |          |         |
| NA             | ENSG00000269397 | -0.61614 | 0.7311  | -0.61614    | 0.7311      | -0.61614 | 0.7311  |
|                | -0.61614        | 0.7311   | 0.7311  | 0.850904082 |             |          |         |
| ALX4           | ENSG00000052850 | -1.0597  | 0.85537 | -0.61659    | 0.73125     | -1.0597  | 0.85537 |
|                | -2.0782         | 0.98116  | 0.73125 | 0.85103801  |             |          |         |
| CCR5AS         | ENSG00000223552 | -0.90532 | 0.81735 | -0.61659    | 0.73125     | -1.2683  |         |
|                | 0.89765         | -1.4567  | 0.9274  | 0.73125     | 0.85103801  |          |         |
| RN7SL145P      | ENSG00000244357 | -0.61669 | 0.73128 | -0.61669    | 0.73128     | -0.61669 |         |
|                | 0.73128         | -0.61669 | 0.73128 | 0.73128     | 0.851052598 |          |         |
| CFAP298-TCP10L | ENSG00000265590 | -0.61674 | 0.7313  | -0.61674    | 0.7313      | -0.61674 |         |
|                | 0.7313          | -0.61674 | 0.7313  | 0.7313      | 0.851055549 |          |         |
| NA             | ENSG00000225107 | -0.61685 | 0.73133 | -0.61685    | 0.73133     | -0.61685 | 0.73133 |
|                | -0.68348        | 0.75285  | 0.73133 | 0.851070137 |             |          |         |
| TEX44          | ENSG00000177673 | -0.61691 | 0.73135 | -0.61691    | 0.73135     | -1.076   | 0.85903 |
|                | -1.1058         | 0.8656   | 0.73135 | 0.851073087 |             |          |         |
| RN7SKP68       | ENSG00000222987 | -0.61718 | 0.73144 | -0.61718    | 0.73144     | -0.61718 |         |
|                | 0.73144         | -0.61718 | 0.73144 | 0.73144     | 0.851148805 |          |         |
| NA             | ENSG00000278730 | -0.61719 | 0.73145 | -0.61719    | 0.73145     | -0.61719 | 0.73145 |
|                | -0.61719        | 0.73145  | 0.73145 | 0.851148805 |             |          |         |
| HK1            | ENSG00000156515 | -1.2599  | 0.89615 | -1.0506     | 0.85329     | -0.61733 | 0.73149 |
|                | -1.3781         | 0.91591  | 0.73149 | 0.851175025 |             |          |         |
| NA             | ENSG00000199204 | -0.77285 | 0.78019 | -0.61749    | 0.73154     | -0.77285 | 0.78019 |
|                | -0.77285        | 0.78019  | 0.73154 | 0.85118976  |             |          |         |
| NA             | ENSG00000248831 | -1.249   | 0.89417 | -0.61748    | 0.73154     | -1.249   | 0.89417 |

|            |                 |          |         |             |             |          |         |  |
|------------|-----------------|----------|---------|-------------|-------------|----------|---------|--|
|            | -0.95836        | 0.83106  | 0.73154 | 0.85118976  |             |          |         |  |
| INTS4P2    | ENSG00000273024 | -0.71517 | 0.76275 | -0.61759    | 0.73158     | -0.88926 |         |  |
|            | 0.81307         | -0.90498 | 0.81726 | 0.73158     | 0.85118976  |          |         |  |
| MTCO3P40   | ENSG00000228046 | -0.76269 | 0.77718 | -0.76269    | 0.77718     | -0.76269 |         |  |
|            | 0.77718         | -0.61763 | 0.73159 | 0.73159     | 0.85118976  |          |         |  |
| NA         | ENSG00000232234 | -0.61764 | 0.73159 | -0.61764    | 0.73159     | -2.0004  | 0.97727 |  |
|            | -2.362          | 0.99091  | 0.73159 | 0.85118976  |             |          |         |  |
| LINC02065  | ENSG00000248846 | -0.61775 | 0.73163 | -0.61775    | 0.73163     | -0.61775 |         |  |
|            | 0.73163         | -0.61775 | 0.73163 | 0.73163     | 0.851215975 |          |         |  |
| P2RY1      | ENSG00000169860 | -0.61809 | 0.73174 | -0.61809    | 0.73174     | -0.61809 | 0.73174 |  |
|            | -0.61809        | 0.73174  | 0.73174 | 0.851303304 |             |          |         |  |
| NA         | ENSG00000201405 | -0.61807 | 0.73174 | -0.61807    | 0.73174     | -0.61807 | 0.73174 |  |
|            | -0.61807        | 0.73174  | 0.73174 | 0.851303304 |             |          |         |  |
| RPS27AP14  | ENSG00000236594 | -0.61817 | 0.73177 | -0.94802    | 0.82844     | -0.94802 |         |  |
|            | 0.82844         | -0.94802 | 0.82844 | 0.73177     | 0.851317881 |          |         |  |
| RNU5E-1    | ENSG00000199347 | -0.61826 | 0.7318  | -1.8837     | 0.9702      | -2.0556  |         |  |
|            | 0.98009         | -0.81557 | 0.79263 | 0.7318      | 0.851332458 |          |         |  |
| LINC02839  | ENSG00000254123 | -0.93992 | 0.82637 | -0.61841    | 0.73185     | -1.4982  |         |  |
|            | 0.93296         | -0.61841 | 0.73185 | 0.73185     | 0.8513703   |          |         |  |
| NA         | ENSG00000267857 | -0.66087 | 0.74565 | -0.66087    | 0.74565     | -0.66087 | 0.74565 |  |
|            | -0.61855        | 0.73189  | 0.73189 | 0.851387816 |             |          |         |  |
| NA         | ENSG00000271762 | -0.61857 | 0.7319  | -0.61857    | 0.7319      | -0.61857 | 0.7319  |  |
|            | -0.61857        | 0.7319   | 0.7319  | 0.851387816 |             |          |         |  |
| NA         | ENSG00000235939 | -0.61868 | 0.73194 | -0.89533    | 0.8147      | -0.89533 | 0.8147  |  |
|            | -0.89533        | 0.8147   | 0.73194 | 0.851414022 |             |          |         |  |
| NA         | ENSG00000268936 | -1.3545  | 0.91221 | -0.75527    | 0.77496     | -0.61878 | 0.73197 |  |
|            | -0.85883        | 0.80478  | 0.73197 | 0.851419903 |             |          |         |  |
| RNU6-903P  | ENSG00000212572 | -0.80322 | 0.78908 | -0.61882    | 0.73198     | -0.78802 |         |  |
|            | 0.78466         | -0.65763 | 0.74461 | 0.73198     | 0.851419903 |          |         |  |
| CFAP91     | ENSG00000183833 | -0.99394 | 0.83987 | -1.5497     | 0.9394      | -0.61903 |         |  |
|            | 0.73205         | -1.0106  | 0.8439  | 0.73205     | 0.851460676 |          |         |  |
| NA         | ENSG00000278385 | -0.61901 | 0.73205 | -0.61901    | 0.73205     | -0.61901 | 0.73205 |  |
|            | -0.61901        | 0.73205  | 0.73205 | 0.851460676 |             |          |         |  |
| KLRF2      | ENSG00000256797 | -0.61917 | 0.7321  | -0.61917    | 0.7321      | -0.61917 | 0.7321  |  |
|            | -0.61917        | 0.7321   | 0.7321  | 0.851498508 |             |          |         |  |
| NA         | ENSG00000239203 | -0.61927 | 0.73213 | -0.61927    | 0.73213     | -0.61927 | 0.73213 |  |
|            | -0.61927        | 0.73213  | 0.73213 | 0.851513077 |             |          |         |  |
| SNRPGP19   | ENSG00000270526 | -0.89586 | 0.81483 | -0.89586    | 0.81483     | -0.61955 |         |  |
|            | 0.73222         | -0.89586 | 0.81483 | 0.73222     | 0.851539511 |          |         |  |
| NA         | ENSG00000254557 | -0.68628 | 0.75373 | -1.8077     | 0.96467     | -0.61958 | 0.73223 |  |
|            | -1.8077         | 0.96467  | 0.73223 | 0.851539511 |             |          |         |  |
| NA         | ENSG00000261451 | -0.61956 | 0.73223 | -1.121      | 0.86886     | -1.5573  | 0.94029 |  |
|            | -1.2557         | 0.89539  | 0.73223 | 0.851539511 |             |          |         |  |
| NA         | ENSG00000271966 | -0.61957 | 0.73223 | -0.61957    | 0.73223     | -0.61957 | 0.73223 |  |
|            | -0.61957        | 0.73223  | 0.73223 | 0.851539511 |             |          |         |  |
| UBE2M      | ENSG00000130725 | -0.61963 | 0.73225 | -0.61963    | 0.73225     | -0.61963 | 0.73225 |  |
|            | -0.61963        | 0.73225  | 0.73225 | 0.851539511 |             |          |         |  |
| HOXD12     | ENSG00000170178 | -0.61975 | 0.73229 | -0.61975    | 0.73229     | -0.61975 |         |  |
|            | 0.73229         | -0.61975 | 0.73229 | 0.73229     | 0.851539511 |          |         |  |
| ARL4AP1    | ENSG00000122872 | -0.61978 | 0.7323  | -0.61978    | 0.7323      | -0.61978 |         |  |
|            | 0.7323          | -0.61978 | 0.7323  | 0.7323      | 0.851539511 |          |         |  |
| OR4C14P    | ENSG00000233301 | -0.77094 | 0.77963 | -1.5303     | 0.93703     | -0.61977 |         |  |
|            | 0.7323          | -0.61977 | 0.7323  | 0.7323      | 0.851539511 |          |         |  |
| ELOF1      | ENSG00000130165 | -1.2458  | 0.89357 | -0.80889    | 0.79071     | -0.61981 | 0.73231 |  |
|            | -0.80889        | 0.79071  | 0.73231 | 0.851539511 |             |          |         |  |
| OR5AP2     | ENSG00000172464 | -0.61999 | 0.73237 | -0.61999    | 0.73237     | -0.88168 |         |  |
|            | 0.81103         | -0.61999 | 0.73237 | 0.73237     | 0.851588959 |          |         |  |
| STARD4-AS1 | ENSG00000246859 | -0.62016 | 0.73242 | -0.62016    | 0.73242     | -0.62016 |         |  |
|            | 0.73242         | -0.62016 | 0.73242 | 0.73242     | 0.851626777 |          |         |  |
| NA         | ENSG00000284052 | -1.0295  | 0.84839 | -0.62025    | 0.73245     | -1.0295  | 0.84839 |  |
|            | -1.4691         | 0.9291   | 0.73245 | 0.851635579 |             |          |         |  |
| NA         | ENSG00000267561 | -0.6203  | 0.73247 | -0.6203     | 0.73247     | -0.6203  | 0.73247 |  |



|             |                 |          |          |         |             |             |          |         |
|-------------|-----------------|----------|----------|---------|-------------|-------------|----------|---------|
|             |                 | -0.6203  | 0.73247  | 0.73247 | 0.851635579 |             |          |         |
| NA          | ENSG00000199783 | -0.62032 | 0.73248  | 0.73248 | -0.62032    | 0.73248     | -0.62032 | 0.73248 |
|             |                 | -0.62032 | 0.73248  | 0.73248 | 0.851635579 |             |          |         |
| EIF3K       | ENSG00000178982 | -0.75836 | 0.77588  | 0.77588 | -0.75836    | 0.77588     | -0.62038 | 0.7325  |
|             |                 | -0.75836 | 0.77588  | 0.7325  | 0.851638513 |             |          |         |
| NA          | ENSG00000279590 | -0.62055 | 0.73255  | 0.73255 | -0.62055    | 0.73255     | -0.62055 | 0.73255 |
|             |                 | -0.62055 | 0.73255  | 0.73255 | 0.851676325 |             |          |         |
| FAM163A     | ENSG00000143340 | -0.62083 | 0.73264  | 0.73264 | -0.99285    | 0.83961     | -0.71309 |         |
|             |                 | 0.76211  | -1.147   | 0.87432 | 0.73264     | 0.851760639 |          |         |
| ACYP1       | ENSG00000119640 | -2.0726  | 0.9809   | 0.9809  | -0.62086    | 0.73266     | -0.66196 | 0.746   |
|             |                 | -1.5326  | 0.93732  | 0.73266 | 0.85176357  |             |          |         |
| RNU6-16P    | ENSG00000207113 | -1.3569  | 0.91259  | 0.91259 | -0.62103    | 0.73271     | -1.9525  |         |
|             |                 | 0.97456  | -1.3428  | 0.91033 | 0.73271     | 0.851801377 |          |         |
| NA          | ENSG00000223838 | -0.62125 | 0.73278  | 0.73278 | -0.62125    | 0.73278     | -0.62125 | 0.73278 |
|             |                 | -1.172   | 0.87939  | 0.73278 | 0.851862431 |             |          |         |
| NA          | ENSG00000224969 | -0.62134 | 0.73281  | 0.73281 | -0.62134    | 0.73281     | -0.62134 | 0.73281 |
|             |                 | -0.62134 | 0.73281  | 0.73281 | 0.851862518 |             |          |         |
| SLC6A18     | ENSG00000164363 | -0.62137 | 0.73282  | 0.73282 | -0.78274    | 0.78311     | -0.62137 |         |
|             |                 | 0.73282  | -0.62137 | 0.73282 | 0.73282     | 0.851862518 |          |         |
| NA          | ENSG00000224669 | -0.62146 | 0.73285  | 0.73285 | -0.7682     | 0.77882     | -0.7682  | 0.77882 |
|             |                 | -0.7682  | 0.77882  | 0.73285 | 0.851862518 |             |          |         |
| RN7SL774P   | ENSG00000263882 | -0.62144 | 0.73285  | 0.73285 | -0.62144    | 0.73285     | -0.62144 |         |
|             |                 | 0.73285  | -0.62144 | 0.73285 | 0.73285     | 0.851862518 |          |         |
| NA          | ENSG00000279299 | -0.62154 | 0.73288  | 0.73288 | -0.62154    | 0.73288     | -0.62154 | 0.73288 |
|             |                 | -0.62154 | 0.73288  | 0.73288 | 0.85187707  |             |          |         |
| SNORD35A    | ENSG00000200259 | -0.62163 | 0.73291  | 0.73291 | -0.62163    | 0.73291     | -0.62163 |         |
|             |                 | 0.73291  | -0.62163 | 0.73291 | 0.73291     | 0.851891621 |          |         |
| MIR3617     | ENSG00000266071 | -0.62176 | 0.73295  | 0.73295 | -0.62176    | 0.73295     | -0.62176 |         |
|             |                 | 0.73295  | -0.62176 | 0.73295 | 0.73295     | 0.851917794 |          |         |
| IGLV3-25    | ENSG00000211659 | -1.5321  | 0.93725  | 0.93725 | -0.62195    | 0.73301     | -1.6585  |         |
|             |                 | 0.95139  | -1.6585  | 0.95139 | 0.73301     | 0.851967211 |          |         |
| LINC00680   | ENSG00000215190 | -1.1349  | 0.8718   | 0.8718  | -0.65271    | 0.74303     | -0.82198 |         |
|             |                 | 0.79446  | -0.622   | 0.73303 | 0.73303     | 0.851970136 |          |         |
| MIR4776-1   | ENSG00000266354 | -0.62213 | 0.73307  | 0.73307 | -0.62213    | 0.73307     | -0.62213 |         |
|             |                 | 0.73307  | -0.62213 | 0.73307 | 0.73307     | 0.851987608 |          |         |
| NA          | ENSG00000250328 | -1.2     | 0.88494  | 0.88494 | -0.62216    | 0.73308     | -1.0148  | 0.8449  |
|             |                 | -1.0516  | 0.8535   | 0.73308 | 0.851987608 |             |          |         |
| SNORD114-24 | ENSG00000201899 | -0.62228 | 0.73312  | 0.73312 | -0.62228    | 0.73312     | -0.62228 |         |
|             |                 | 0.73312  | -0.62228 | 0.73312 | 0.73312     | 0.852013775 |          |         |
| SCARNA6     | ENSG00000251791 | -0.62241 | 0.73316  | 0.73316 | -0.62241    | 0.73316     | -0.62241 |         |
|             |                 | 0.73316  | -0.62241 | 0.73316 | 0.73316     | 0.852019622 |          |         |
| NA          | ENSG00000259617 | -0.76986 | 0.77931  | 0.77931 | -0.6224     | 0.73316     | -1.2529  | 0.89489 |
|             |                 | -1.2529  | 0.89489  | 0.73316 | 0.852019622 |             |          |         |
| THEM6       | ENSG00000130193 | -0.62247 | 0.73319  | 0.73319 | -1.4898     | 0.93186     | -1.5921  | 0.94432 |
|             |                 | -1.1339  | 0.87159  | 0.73319 | 0.852025469 |             |          |         |
| TCTEX1D4    | ENSG00000188396 | -0.62251 | 0.7332   | 0.7332  | -0.62251    | 0.7332      | -0.62251 |         |
|             |                 | 0.7332   | -0.62251 | 0.7332  | 0.7332      | 0.852025469 |          |         |
| NA          | ENSG00000200256 | -1.0324  | 0.84905  | 0.84905 | -0.62272    | 0.73327     | -0.73704 | 0.76945 |
|             |                 | -0.73704 | 0.76945  | 0.73327 | 0.852066175 |             |          |         |
| SEBOX       | ENSG00000274529 | -0.62272 | 0.73327  | 0.73327 | -0.62272    | 0.73327     | -0.62272 | 0.73327 |
|             |                 | -0.62272 | 0.73327  | 0.73327 | 0.852066175 |             |          |         |
| NA          | ENSG00000226690 | -0.81629 | 0.79283  | 0.79283 | -1.4806     | 0.93064     | -0.62282 | 0.7333  |
|             |                 | -1.7252  | 0.95776  | 0.7333  | 0.852080716 |             |          |         |
| CEP85       | ENSG00000130695 | -1.214   | 0.88762  | 0.88762 | -1.402      | 0.91954     | -0.62293 | 0.73334 |
|             |                 | -1.6415  | 0.94965  | 0.73334 | 0.852101099 |             |          |         |
| CCDC87      | ENSG00000182791 | -0.62305 | 0.73337  | 0.73337 | -1.224      | 0.88953     | -1.1716  |         |
|             |                 | 0.87932  | -0.85356 | 0.80333 | 0.73337     | 0.852101099 |          |         |
| NA          | ENSG00000234237 | -0.62303 | 0.73337  | 0.73337 | -0.62303    | 0.73337     | -0.62303 | 0.73337 |
|             |                 | -0.62303 | 0.73337  | 0.73337 | 0.852101099 |             |          |         |
| PPM1G       | ENSG00000115241 | -1.2345  | 0.8915   | 0.8915  | -0.76766    | 0.77866     | -0.62311 | 0.73339 |
|             |                 | -1.4856  | 0.9313   | 0.73339 | 0.85210402  |             |          |         |
| OR5BN2P     | ENSG00000255140 | -1.2589  | 0.89596  | 0.89596 | -0.62321    | 0.73343     | -0.62321 |         |

|           |                 |          |         |             |             |          |          |         |
|-----------|-----------------|----------|---------|-------------|-------------|----------|----------|---------|
|           | 0.73343         | -0.62321 | 0.73343 | 0.73343     | 0.852130177 |          |          |         |
| ERCC5     | ENSG00000134899 | -0.62339 | 0.73349 | 0.73349     | -0.62339    | 0.73349  | -0.62339 | 0.73349 |
|           | -1.1843         | 0.88184  | 0.73349 | 0.852150554 |             |          |          |         |
| MTCO1P27  | ENSG00000232579 | -0.6234  | 0.73349 | 0.73349     | -0.6234     | 0.73349  | -0.6234  |         |
|           | 0.73349         | -0.6234  | 0.73349 | 0.852150554 |             |          |          |         |
| CNTN4-AS2 | ENSG00000227588 | -0.62343 | 0.7335  | 0.7335      | -0.70089    | 0.75831  | -1.2674  |         |
|           | 0.89749         | -0.62343 | 0.7335  | 0.7335      | 0.852150554 |          |          |         |
| OR8R1P    | ENSG00000256347 | -0.86655 | 0.80691 | 0.80691     | -0.86655    | 0.80691  | -1.4866  |         |
|           | 0.93144         | -0.62355 | 0.73354 | 0.73354     | 0.852156393 |          |          |         |
| NA        | ENSG00000259265 | -1.679   | 0.95342 | -0.62355    | 0.73354     | -0.62355 | 0.73354  |         |
|           | -0.62355        | 0.73354  | 0.73354 | 0.852156393 |             |          |          |         |
| HSPA8P16  | ENSG00000224059 | -0.6241  | 0.73372 | 0.73372     | -0.6241     | 0.73372  | -0.6241  |         |
|           | 0.73372         | -0.6241  | 0.73372 | 0.73372     | 0.852324861 |          |          |         |
| DDX18P5   | ENSG00000255220 | -0.62409 | 0.73372 | 0.73372     | -0.62409    | 0.73372  | -0.62409 |         |
|           | 0.73372         | -0.62409 | 0.73372 | 0.73372     | 0.852324861 |          |          |         |
| SLC50A1   | ENSG00000169241 | -0.6243  | 0.73378 | 0.73378     | -1.2149     | 0.88779  | -1.0392  |         |
|           | 0.85065         | -1.0392  | 0.85065 | 0.73378     | 0.852374241 |          |          |         |
| NA        | ENSG00000262503 | -0.62447 | 0.73384 | -0.62447    | 0.73384     | -0.62447 | 0.73384  |         |
|           | -0.62447        | 0.73384  | 0.73384 | 0.852417827 |             |          |          |         |
| VIP       | ENSG00000146469 | -0.8299  | 0.7967  | -0.77573    | 0.78105     | -0.78417 | 0.78353  |         |
|           | -0.62457        | 0.73387  | 0.73387 | 0.852417827 |             |          |          |         |
| NA        | ENSG00000212093 | -0.62455 | 0.73387 | -0.62455    | 0.73387     | -0.62455 | 0.73387  |         |
|           | -0.62455        | 0.73387  | 0.73387 | 0.852417827 |             |          |          |         |
| ART4      | ENSG00000111339 | -0.62464 | 0.7339  | -0.70379    | 0.75922     | -0.96702 | 0.83323  |         |
|           | -0.84747        | 0.80163  | 0.7339  | 0.852432354 |             |          |          |         |
| ZAP70     | ENSG00000115085 | -0.62479 | 0.73394 | -0.68983    | 0.75485     | -0.79778 | 0.7875   |         |
|           | -1.5857         | 0.9436   | 0.73394 | 0.852458496 |             |          |          |         |
| TGM5      | ENSG00000104055 | -0.76028 | 0.77646 | -0.9394     | 0.82624     | -0.62501 | 0.73402  |         |
|           | -0.7784         | 0.78183  | 0.73402 | 0.852531094 |             |          |          |         |
| NA        | ENSG00000261831 | -0.62513 | 0.73406 | -0.62513    | 0.73406     | -0.62513 | 0.73406  |         |
|           | -0.62513        | 0.73406  | 0.73406 | 0.85254564  |             |          |          |         |
| RGMA      | ENSG00000182175 | -0.67036 | 0.74869 | -0.71172    | 0.76168     | -0.62992 | 0.73563  |         |
|           | -0.6252         | 0.73408  | 0.73408 | 0.85254564  |             |          |          |         |
| NA        | ENSG00000259614 | -0.62523 | 0.73409 | -1.1235     | 0.86939     | -1.1235  | 0.86939  |         |
|           | -1.1235         | 0.86939  | 0.73409 | 0.85254564  |             |          |          |         |
| LCE1E     | ENSG00000186226 | -0.6253  | 0.73411 | -0.6253     | 0.73411     | -0.96305 | 0.83224  |         |
|           | -0.6253         | 0.73411  | 0.73411 | 0.85254564  |             |          |          |         |
| TRMT112P6 | ENSG00000268412 | -1.3594  | 0.91299 | -0.62533    | 0.73412     | -1.3594  |          |         |
|           | 0.91299         | -1.3594  | 0.91299 | 0.73412     | 0.85254564  |          |          |         |
| LINC00305 | ENSG00000179676 | -1.4581  | 0.92759 | -0.62539    | 0.73414     | -0.63835 |          |         |
|           | 0.73838         | -1.1872  | 0.88242 | 0.73414     | 0.852548549 |          |          |         |
| PRSS3P4   | ENSG00000204982 | -0.62546 | 0.73417 | -0.62546    | 0.73417     | -1.2511  |          |         |
|           | 0.89454         | -1.8234  | 0.96588 | 0.73417     | 0.852554366 |          |          |         |
| GJA1      | ENSG00000152661 | -0.62552 | 0.73418 | -1.2117     | 0.88718     | -1.573   | 0.94214  |         |
|           | -1.3206         | 0.90668  | 0.73418 | 0.852554366 |             |          |          |         |
| NA        | ENSG00000273165 | -0.62558 | 0.73421 | -0.62558    | 0.73421     | -0.62558 | 0.73421  |         |
|           | -0.62558        | 0.73421  | 0.73421 | 0.852568886 |             |          |          |         |
| NA        | ENSG00000250860 | -0.62565 | 0.73423 | -0.62565    | 0.73423     | -0.62565 | 0.73423  |         |
|           | -0.62565        | 0.73423  | 0.73423 | 0.852571794 |             |          |          |         |
| RNU6-524P | ENSG00000206997 | -0.62575 | 0.73426 | -0.62575    | 0.73426     | -0.62575 |          |         |
|           | 0.73426         | -0.62575 | 0.73426 | 0.73426     | 0.852586313 |          |          |         |
| KCTD7     | ENSG00000243335 | -0.62609 | 0.73437 | -0.91131    | 0.81894     | -0.91131 | 0.81894  |         |
|           | -1.0465         | 0.85234  | 0.73437 | 0.852693721 |             |          |          |         |
| ZBED6     | ENSG00000257315 | -0.82717 | 0.79593 | -0.62623    | 0.73442     | -0.62623 | 0.73442  |         |
|           | -0.62623        | 0.73442  | 0.73442 | 0.852722752 |             |          |          |         |
| NA        | ENSG00000279958 | -0.62628 | 0.73443 | -1.0523     | 0.85367     | -1.0523  | 0.85367  |         |
|           | -1.0523         | 0.85367  | 0.73443 | 0.852722752 |             |          |          |         |
| H4-16     | ENSG00000197837 | -0.62649 | 0.7345  | -0.62649    | 0.7345      | -0.62649 | 0.7345   |         |
|           | -0.62649        | 0.7345   | 0.7345  | 0.852783708 |             |          |          |         |
| NA        | ENSG00000258687 | -0.98724 | 0.83824 | -0.62667    | 0.73456     | -0.62667 | 0.73456  |         |
|           | -0.62667        | 0.73456  | 0.73456 | 0.852818535 |             |          |          |         |
| POLI      | ENSG00000101751 | -0.62673 | 0.73458 | -0.62673    | 0.73458     | -0.62673 | 0.73458  |         |

|           |                 |          |         |             |             |          |         |
|-----------|-----------------|----------|---------|-------------|-------------|----------|---------|
|           | -1.0602         | 0.85547  | 0.73458 | 0.852818535 |             |          |         |
| NA        | ENSG00000258888 | -1.4555  | 0.92723 | -0.62674    | 0.73459     | -0.88437 | 0.81175 |
|           | -2.0296         | 0.9788   | 0.73459 | 0.852818535 |             |          |         |
| MTND2P21  | ENSG00000230950 | -0.62679 | 0.7346  | -0.62679    | 0.7346      | -0.62679 |         |
|           | 0.7346          | -0.62679 | 0.7346  | 0.7346      | 0.852818535 |          |         |
| NA        | ENSG00000232642 | -0.6269  | 0.73464 | -0.6269     | 0.73464     | -0.6269  | 0.73464 |
|           | -0.6269         | 0.73464  | 0.73464 | 0.852844654 |             |          |         |
| CES1P2    | ENSG00000260765 | -0.62712 | 0.73471 | -1.6182     | 0.94719     | -0.78796 |         |
|           | 0.78464         | -0.78796 | 0.78464 | 0.73471     | 0.852905598 |          |         |
| NA        | ENSG00000274214 | -0.6272  | 0.73474 | -0.6272     | 0.73474     | -0.6272  | 0.73474 |
|           | -0.6272         | 0.73474  | 0.73474 | 0.852911383 |             |          |         |
| RPL17P40  | ENSG00000241067 | -0.62726 | 0.73476 | -0.62726    | 0.73476     | -0.62726 |         |
|           | 0.73476         | -0.62726 | 0.73476 | 0.73476     | 0.852911383 |          |         |
| MFSD4BP1  | ENSG00000250827 | -0.62736 | 0.73479 | -0.62736    | 0.73479     | -0.62736 |         |
|           | 0.73479         | -0.62736 | 0.73479 | 0.73479     | 0.852911383 |          |         |
| NA        | ENSG00000273536 | -1.7945  | 0.96363 | -0.62739    | 0.7348      | -0.62739 | 0.7348  |
|           | -0.62739        | 0.7348   | 0.7348  | 0.852911383 |             |          |         |
| WWP1P1    | ENSG00000244153 | -0.62745 | 0.73482 | -0.62745    | 0.73482     | -0.62745 |         |
|           | 0.73482         | -0.62745 | 0.73482 | 0.73482     | 0.852911383 |          |         |
| NA        | ENSG00000273093 | -0.62745 | 0.73482 | -1.7724     | 0.96184     | -0.62745 | 0.73482 |
|           | -0.62745        | 0.73482  | 0.73482 | 0.852911383 |             |          |         |
| GC        | ENSG00000145321 | -0.77226 | 0.78002 | -0.71223    | 0.76184     | -0.62764 | 0.73488 |
|           | -1.0632         | 0.85614  | 0.73488 | 0.852949085 |             |          |         |
| NCCRP1    | ENSG00000188505 | -0.62772 | 0.73491 | -0.62772    | 0.73491     | -0.62772 |         |
|           | 0.73491         | -0.62772 | 0.73491 | 0.73491     | 0.852949085 |          |         |
| NA        | ENSG00000264376 | -0.62775 | 0.73491 | -0.62775    | 0.73491     | -0.62775 | 0.73491 |
|           | -0.62775        | 0.73491  | 0.73491 | 0.852949085 |             |          |         |
| PRPF38B   | ENSG00000134186 | -1.726   | 0.95782 | -0.6278     | 0.73493     | -1.726   |         |
|           | 0.95782         | -1.726   | 0.95782 | 0.73493     | 0.852949085 |          |         |
| FTH1P6    | ENSG00000233083 | -0.62781 | 0.73494 | -0.62781    | 0.73494     | -0.62781 |         |
|           | 0.73494         | -0.62781 | 0.73494 | 0.73494     | 0.852949085 |          |         |
| UQCRHP3   | ENSG00000224162 | -0.62792 | 0.73497 | -0.62792    | 0.73497     | -0.62792 |         |
|           | 0.73497         | -0.68445 | 0.75315 | 0.73497     | 0.852963588 |          |         |
| NRBP1     | ENSG00000115216 | -1.037   | 0.85013 | -0.62813    | 0.73504     | -1.2103  | 0.88692 |
|           | -1.4828         | 0.93093  | 0.73504 | 0.853004196 |             |          |         |
| NA        | ENSG00000251164 | -0.62814 | 0.73504 | -0.62814    | 0.73504     | -0.62814 | 0.73504 |
|           | -0.62814        | 0.73504  | 0.73504 | 0.853004196 |             |          |         |
| COMMD9    | ENSG00000110442 | -0.87059 | 0.80801 | -0.62819    | 0.73506     | -0.98642 |         |
|           | 0.83804         | -0.8634  | 0.80604 | 0.73506     | 0.853007092 |          |         |
| OSBPL9P4  | ENSG00000256420 | -0.62837 | 0.73512 | -0.62837    | 0.73512     | -0.62837 |         |
|           | 0.73512         | -0.62837 | 0.73512 | 0.73512     | 0.853056405 |          |         |
| NDUFV2P1  | ENSG00000267809 | -0.62853 | 0.73517 | -0.62853    | 0.73517     | -0.62853 |         |
|           | 0.73517         | -0.98978 | 0.83886 | 0.73517     | 0.853085401 |          |         |
| MTND4P20  | ENSG00000233377 | -0.92853 | 0.82343 | -0.62856    | 0.73518     | -0.72134 |         |
|           | 0.76465         | -0.72134 | 0.76465 | 0.73518     | 0.853085401 |          |         |
| NA        | ENSG00000258515 | -0.62869 | 0.73522 | -0.62869    | 0.73522     | -0.62869 | 0.73522 |
|           | -0.62869        | 0.73522  | 0.73522 | 0.853111501 |             |          |         |
| RNY1P16   | ENSG00000199933 | -0.62879 | 0.73526 | -0.62879    | 0.73526     | -0.62879 |         |
|           | 0.73526         | -0.62879 | 0.73526 | 0.73526     | 0.853123038 |          |         |
| HMMR-AS1  | ENSG00000251018 | -0.62883 | 0.73527 | -0.62883    | 0.73527     | -0.62883 |         |
|           | 0.73527         | -0.62883 | 0.73527 | 0.73527     | 0.853123038 |          |         |
| OR5BS1P   | ENSG00000198678 | -0.62892 | 0.7353  | -0.62892    | 0.7353      | -0.62892 |         |
|           | 0.7353          | -0.62892 | 0.7353  | 0.7353      | 0.853123038 |          |         |
| MIR5691   | ENSG00000264984 | -0.62893 | 0.7353  | -0.62893    | 0.7353      | -0.62893 |         |
|           | 0.7353          | -0.62893 | 0.7353  | 0.7353      | 0.853123038 |          |         |
| NA        | ENSG00000204850 | -0.62898 | 0.73532 | -0.71296    | 0.76207     | -1.3136  | 0.90551 |
|           | -0.84073        | 0.79975  | 0.73532 | 0.853123038 |             |          |         |
| RNU6-977P | ENSG00000252220 | -0.62908 | 0.73535 | -0.62908    | 0.73535     | -0.62908 |         |
|           | 0.73535         | -0.62908 | 0.73535 | 0.73535     | 0.853123038 |          |         |
| SAYSD1    | ENSG00000112167 | -0.62912 | 0.73536 | -0.62912    | 0.73536     | -0.62912 |         |
|           | 0.73536         | -0.62912 | 0.73536 | 0.73536     | 0.853123038 |          |         |
| GABRG3    | ENSG00000182256 | -0.62913 | 0.73537 | -1.1348     | 0.87177     | -1.0297  |         |

|              |                 |          |          |         |             |             |                  |
|--------------|-----------------|----------|----------|---------|-------------|-------------|------------------|
|              | 0.84843         | -0.72442 | 0.7656   | 0.73537 | 0.853123038 |             |                  |
| NA           | ENSG00000248120 | -0.6294  | 0.73546  | 0.73546 | -0.6294     | 0.73546     | -0.6294 0.73546  |
|              |                 | -0.6294  | 0.73546  | 0.73546 | 0.853207137 |             |                  |
| LINC01941    | ENSG00000226813 | -1.2473  | 0.89385  | 0.89385 | -0.90959    | 0.81848     | -0.6295          |
|              |                 | 0.73549  | -0.6295  | 0.73549 | 0.73549     | 0.853221628 |                  |
| PTBP3        | ENSG00000119314 | -1.2415  | 0.89279  | 0.89279 | -0.62973    | 0.73557     | -0.69764 0.7573  |
|              |                 | -0.80238 | 0.78883  | 0.73557 | 0.85329412  |             |                  |
| SLAMF6P1     | ENSG00000227243 | -0.62992 | 0.73563  | 0.73563 | -0.62992    | 0.73563     | -0.62992         |
|              |                 | 0.73563  | -0.62992 | 0.73563 | 0.73563     | 0.853343408 |                  |
| NA           | ENSG00000267598 | -0.63016 | 0.7357   | 0.7357  | -0.63016    | 0.7357      | -0.63016 0.7357  |
|              |                 | -0.63016 | 0.7357   | 0.7357  | 0.85339558  |             |                  |
| RPS27A       | ENSG00000143947 | -1.2374  | 0.89203  | 0.89203 | -1.2374     | 0.89203     | -1.2374          |
|              |                 | 0.89203  | -0.63018 | 0.73571 | 0.73571     | 0.85339558  |                  |
| ANO5         | ENSG00000171714 | -0.63062 | 0.73586  | 0.73586 | -1.0722     | 0.85818     | -0.84286 0.80035 |
|              |                 | -0.79642 | 0.78711  | 0.73586 | 0.853549256 |             |                  |
| SWI5         | ENSG00000175854 | -1.1673  | 0.87846  | 0.87846 | -1.2746     | 0.89877     | -0.88401 0.81165 |
|              |                 | -0.63085 | 0.73593  | 0.73593 | 0.853595575 |             |                  |
| MPP5         | ENSG00000072415 | -0.63092 | 0.73595  | 0.73595 | -0.80265    | 0.78891     | -0.88031 0.81065 |
|              |                 | -0.67281 | 0.74947  | 0.73595 | 0.853595575 |             |                  |
| SBF2         | ENSG00000133812 | -1.2509  | 0.89451  | 0.89451 | -0.63098    | 0.73597     | -1.0979 0.86387  |
|              |                 | -0.66915 | 0.7483   | 0.73597 | 0.853595575 |             |                  |
| MAGI2-AS3    | ENSG00000234456 | -0.63097 | 0.73597  | 0.73597 | -0.69766    | 0.75731     | -0.69766         |
|              |                 | 0.75731  | -0.69766 | 0.75731 | 0.73597     | 0.853595575 |                  |
| NA           | ENSG00000280013 | -0.63104 | 0.73599  | 0.73599 | -0.63104    | 0.73599     | -0.63104 0.73599 |
|              |                 | -0.63104 | 0.73599  | 0.73599 | 0.853598455 |             |                  |
| ADAM9        | ENSG00000168615 | -0.6926  | 0.75572  | 0.75572 | -0.7701     | 0.77938     | -0.92184 0.82169 |
|              |                 | -0.63126 | 0.73606  | 0.73606 | 0.853639007 |             |                  |
| NA           | ENSG00000256981 | -0.63126 | 0.73606  | 0.73606 | -0.63126    | 0.73606     | -0.63126 0.73606 |
|              |                 | -0.63126 | 0.73606  | 0.73606 | 0.853639007 |             |                  |
| H3P23        | ENSG00000250705 | -0.93723 | 0.82568  | 0.82568 | -0.63136    | 0.7361      | -1.3735 0.9152   |
|              |                 | -0.93723 | 0.82568  | 0.7361  | 0.853661949 |             |                  |
| NA           | ENSG00000255801 | -0.93048 | 0.82394  | 0.82394 | -0.63153    | 0.73615     | -1.1186 0.86834  |
|              |                 | -0.93048 | 0.82394  | 0.73615 | 0.853661949 |             |                  |
| OTUD4P1      | ENSG00000118976 | -0.63155 | 0.73616  | 0.73616 | -0.63155    | 0.73616     | -0.64318         |
|              |                 | 0.73995  | -1.3224  | 0.90698 | 0.73616     | 0.853661949 |                  |
| LINC02457    | ENSG00000258018 | -0.6316  | 0.73618  | 0.73618 | -0.6316     | 0.73618     | -2.0028          |
|              |                 | 0.9774   | -0.6316  | 0.73618 | 0.73618     | 0.853661949 |                  |
| NA           | ENSG00000269205 | -0.63167 | 0.7362   | 0.7362  | -0.63167    | 0.7362      | -0.63167 0.7362  |
|              |                 | -0.63167 | 0.7362   | 0.7362  | 0.853661949 |             |                  |
| LRRC9        | ENSG00000131951 | -0.63173 | 0.73622  | 0.73622 | -0.89982    | 0.81589     | -0.74363 0.77145 |
|              |                 | -1.0658  | 0.85673  | 0.73622 | 0.853661949 |             |                  |
| RPL5P12      | ENSG00000242697 | -1.2509  | 0.89451  | 0.89451 | -1.7858     | 0.96293     | -0.6318          |
|              |                 | 0.73624  | -0.67902 | 0.75144 | 0.73624     | 0.853661949 |                  |
| MIR124-1HG   | ENSG00000253230 | -1.0275  | 0.8479   | 0.8479  | -0.63184    | 0.73625     | -1.4628          |
|              |                 | 0.92824  | -1.2819  | 0.90006 | 0.73625     | 0.853661949 |                  |
| NA           | ENSG00000258587 | -0.63182 | 0.73625  | 0.73625 | -1.0767     | 0.85919     | -1.0767 0.85919  |
|              |                 | -1.0767  | 0.85919  | 0.73625 | 0.853661949 |             |                  |
| UBE2V2P1     | ENSG00000226255 | -0.63185 | 0.73626  | 0.73626 | -0.63185    | 0.73626     | -0.63185         |
|              |                 | 0.73626  | -0.63185 | 0.73626 | 0.73626     | 0.853661949 |                  |
| ARHGEF38-IT1 | ENSG00000249885 | -0.63191 | 0.73628  | 0.73628 | -0.63191    | 0.73628     | -0.63191         |
|              |                 | 0.73628  | -0.72286 | 0.76512 | 0.73628     | 0.853661949 |                  |
| NA           | ENSG00000271949 | -0.63195 | 0.73629  | 0.73629 | -0.63195    | 0.73629     | -0.63195 0.73629 |
|              |                 | -0.63195 | 0.73629  | 0.73629 | 0.853661949 |             |                  |
| RNU6-101P    | ENSG00000222255 | -0.63204 | 0.73632  | 0.73632 | -0.63204    | 0.73632     | -0.63204         |
|              |                 | 0.73632  | -0.63204 | 0.73632 | 0.73632     | 0.85367642  |                  |
| BTF3P12      | ENSG00000213003 | -0.63217 | 0.73636  | 0.73636 | -0.63217    | 0.73636     | -0.63217         |
|              |                 | 0.73636  | -0.63217 | 0.73636 | 0.73636     | 0.853682174 |                  |
| NA           | ENSG00000237035 | -1.363   | 0.91356  | 0.91356 | -1.363      | 0.91356     | -0.63215 0.73636 |
|              |                 | -1.507   | 0.9341   | 0.73636 | 0.853682174 |             |                  |
| CARNMT1-AS1  | ENSG00000203321 | -0.96483 | 0.83269  | 0.83269 | -0.6323     | 0.7364      | -0.66854         |
|              |                 | 0.74811  | -0.64458 | 0.7404  | 0.7364      | 0.853690803 |                  |
| RNA5SP78     | ENSG00000201492 | -0.63233 | 0.73641  | 0.73641 | -0.63233    | 0.73641     | -0.63233         |

|             |                 |          |         |             |             |          |         |
|-------------|-----------------|----------|---------|-------------|-------------|----------|---------|
|             | 0.73641         | -0.63233 | 0.73641 | 0.73641     | 0.853690803 |          |         |
| RN7SL16P    | ENSG00000243005 | -0.63235 | 0.73642 | -1.0523     | 0.85367     | -1.0523  |         |
|             | 0.85367         | -1.0523  | 0.85367 | 0.73642     | 0.853690803 |          |         |
| MIR4641     | ENSG00000266494 | -0.63244 | 0.73645 | -0.63244    | 0.73645     | -0.63244 |         |
|             | 0.73645         | -0.63244 | 0.73645 | 0.73645     | 0.853693592 |          |         |
| NA          | ENSG00000275250 | -0.63251 | 0.73647 | -0.83036    | 0.79683     | -0.63251 | 0.73647 |
|             | -0.63251        | 0.73647  | 0.73647 | 0.853693592 |             |          |         |
| TTC33       | ENSG00000113638 | -1.6495  | 0.95047 | -1.9679     | 0.97546     | -1.7169  | 0.957   |
|             | -0.63255        | 0.73649  | 0.73649 | 0.853693592 |             |          |         |
| MTCO1P15    | ENSG00000255350 | -0.6326  | 0.7365  | -0.6326     | 0.7365      | -0.6326  |         |
|             | 0.7365          | -0.6326  | 0.7365  | 0.7365      | 0.853693592 |          |         |
| SEC13P1     | ENSG00000223899 | -0.63261 | 0.73651 | -0.63261    | 0.73651     | -0.63261 |         |
|             | 0.73651         | -0.63261 | 0.73651 | 0.73651     | 0.853693592 |          |         |
| RPSAP47     | ENSG00000188856 | -0.63269 | 0.73653 | -0.91633    | 0.82025     | -0.91633 |         |
|             | 0.82025         | -0.91633 | 0.82025 | 0.73653     | 0.853696468 |          |         |
| VOPP1       | ENSG00000154978 | -0.63283 | 0.73658 | -0.63456    | 0.73714     | -0.72469 | 0.76568 |
|             | -0.81073        | 0.79124  | 0.73658 | 0.853713809 |             |          |         |
| SNORD115-27 | ENSG00000201300 | -0.63285 | 0.73658 | -0.63285    | 0.73658     | -0.63285 |         |
|             | 0.73658         | -0.63285 | 0.73658 | 0.73658     | 0.853713809 |          |         |
| NA          | ENSG00000230609 | -0.77014 | 0.77939 | -0.63299    | 0.73663     | -0.77014 | 0.77939 |
|             | -0.77014        | 0.77939  | 0.73663 | 0.853742739 |             |          |         |
| NA          | ENSG00000272969 | -0.63301 | 0.73664 | -0.63301    | 0.73664     | -0.63301 | 0.73664 |
|             | -0.63301        | 0.73664  | 0.73664 | 0.853742739 |             |          |         |
| SWAP70      | ENSG00000133789 | -0.6333  | 0.73673 | -0.77592    | 0.7811      | -1.1654  |         |
|             | 0.87807         | -1.0319  | 0.84894 | 0.73673     | 0.853803462 |          |         |
| NA          | ENSG00000257316 | -1.3092  | 0.90476 | -1.441      | 0.92521     | -1.6639  | 0.95193 |
|             | -0.63333        | 0.73674  | 0.73674 | 0.853803462 |             |          |         |
| NA          | ENSG00000227484 | -0.63335 | 0.73675 | -0.63335    | 0.73675     | -0.63335 | 0.73675 |
|             | -0.63335        | 0.73675  | 0.73675 | 0.853803462 |             |          |         |
| FUCA2       | ENSG00000001036 | -1.724   | 0.95765 | -0.63343    | 0.73677     | -0.63343 | 0.73677 |
|             | -0.63343        | 0.73677  | 0.73677 | 0.853803462 |             |          |         |
| NAV2        | ENSG00000166833 | -1.5227  | 0.93608 | -0.72575    | 0.76601     | -1.3207  | 0.90671 |
|             | -0.63346        | 0.73678  | 0.73678 | 0.853803462 |             |          |         |
| APBB3       | ENSG00000113108 | -0.85193 | 0.80287 | -1.561      | 0.94074     | -0.73942 | 0.77017 |
|             | -0.63358        | 0.73682  | 0.73682 | 0.853829511 |             |          |         |
| TUBB4BP5    | ENSG00000224062 | -0.63384 | 0.73691 | -0.9036     | 0.8169      | -0.63384 |         |
|             | 0.73691         | -0.63384 | 0.73691 | 0.73691     | 0.85390478  |          |         |
| NA          | ENSG00000237813 | -0.84584 | 0.80118 | -0.63387    | 0.73692     | -0.63387 | 0.73692 |
|             | -0.63387        | 0.73692  | 0.73692 | 0.85390478  |             |          |         |
| DAZAP2P1    | ENSG00000223825 | -0.63404 | 0.73697 | -0.63404    | 0.73697     | -0.63404 |         |
|             | 0.73697         | -0.63404 | 0.73697 | 0.73697     | 0.853921997 |          |         |
| NA          | ENSG00000261242 | -0.63405 | 0.73698 | -0.63405    | 0.73698     | -0.63405 | 0.73698 |
|             | -0.63405        | 0.73698  | 0.73698 | 0.853921997 |             |          |         |
| NA          | ENSG00000227896 | -0.63416 | 0.73701 | -0.63416    | 0.73701     | -0.63416 | 0.73701 |
|             | -0.63416        | 0.73701  | 0.73701 | 0.853921997 |             |          |         |
| PPP1R15A    | ENSG00000087074 | -0.63418 | 0.73702 | -0.63418    | 0.73702     | -1.0745  |         |
|             | 0.85869         | -0.63418 | 0.73702 | 0.73702     | 0.853921997 |          |         |
| CD300LD     | ENSG00000204345 | -0.63423 | 0.73704 | -0.63423    | 0.73704     | -0.63423 |         |
|             | 0.73704         | -0.63423 | 0.73704 | 0.73704     | 0.853921997 |          |         |
| MRPS21P9    | ENSG00000262759 | -0.63424 | 0.73704 | -0.63424    | 0.73704     | -0.63424 |         |
|             | 0.73704         | -0.63424 | 0.73704 | 0.73704     | 0.853921997 |          |         |
| TREH        | ENSG00000118094 | -0.63432 | 0.73706 | -1.2743     | 0.89872     | -0.6413  | 0.73934 |
|             | -1.096          | 0.86347  | 0.73706 | 0.853924866 |             |          |         |
| VN2R1P      | ENSG00000174930 | -0.80554 | 0.78975 | -1.6174     | 0.9471      | -0.63463 |         |
|             | 0.73717         | -1.2245  | 0.88961 | 0.73717     | 0.854032003 |          |         |
| NA          | ENSG00000201071 | -0.63481 | 0.73722 | -0.63481    | 0.73722     | -0.63481 | 0.73722 |
|             | -0.63481        | 0.73722  | 0.73722 | 0.854069624 |             |          |         |
| MKRN7P      | ENSG00000225849 | -0.63486 | 0.73724 | -0.63486    | 0.73724     | -0.63486 |         |
|             | 0.73724         | -0.63486 | 0.73724 | 0.73724     | 0.85407249  |          |         |
| TRBV29OR9-2 | ENSG00000223394 | -0.63495 | 0.73727 | -0.63495    | 0.73727     | -0.63495 |         |
|             | 0.73727         | -1.0584  | 0.85507 | 0.73727     | 0.854086939 |          |         |
| NA          | ENSG00000258662 | -0.63655 | 0.73779 | -0.63509    | 0.73731     | -0.63509 | 0.73731 |

|            |                 |             |         |             |             |          |         |          |
|------------|-----------------|-------------|---------|-------------|-------------|----------|---------|----------|
|            | -0.63509        | 0.73731     | 0.73731 | 0.854112972 |             |          |         |          |
| BCL3       | ENSG00000069399 | -0.63515    | 0.73734 | -0.63515    | 0.73734     | -0.63515 | 0.73734 | 0.73734  |
|            | -0.63515        | 0.73734     | 0.73734 | 0.854118701 |             |          |         |          |
| SYK        | ENSG00000165025 | -1.0881     | 0.86172 | -0.6352     | 0.73735     | -1.029   | 0.84826 | 0.84826  |
|            | -0.69716        | 0.75715     | 0.73735 | 0.854118701 |             |          |         |          |
| NA         | ENSG00000266922 | -0.63529    | 0.73738 | -0.63529    | 0.73738     | -0.63529 | 0.73738 | 0.73738  |
|            | -0.63529        | 0.73738     | 0.73738 | 0.854133019 |             |          |         |          |
| RNU6-728P  | ENSG00000202245 | -1.3466     | 0.91095 | -1.3466     | 0.91095     | -1.3466  | 0.91095 | -1.3466  |
|            | 0.91095         | -0.6354     | 0.73742 | 0.73742     | 0.854133019 |          |         |          |
| OPA1       | ENSG00000198836 | -0.93747    | 0.82574 | -0.63545    | 0.73743     | -1.457   | 0.92744 | 0.92744  |
|            | -1.3166         | 0.90602     | 0.73743 | 0.854133019 |             |          |         |          |
| RPL22P16   | ENSG00000213935 | -0.63552    | 0.73745 | -0.63552    | 0.73745     | -0.73448 | 0.73745 | -0.73448 |
|            | 0.76867         | -0.73448    | 0.76867 | 0.73745     | 0.854133019 |          |         |          |
| RNU7-102P  | ENSG00000238808 | -0.6355     | 0.73745 | -0.6355     | 0.73745     | -0.6355  | 0.73745 | -0.6355  |
|            | 0.73745         | -0.6355     | 0.73745 | 0.73745     | 0.854133019 |          |         |          |
| NA         | ENSG00000261250 | -0.63557    | 0.73747 | -0.63557    | 0.73747     | -0.63557 | 0.73747 | 0.73747  |
|            | -0.63557        | 0.73747     | 0.73747 | 0.854135882 |             |          |         |          |
| NA         | ENSG00000272689 | -0.63576    | 0.73753 | -0.63576    | 0.73753     | -0.63576 | 0.73753 | 0.73753  |
|            | -0.63576        | 0.73753     | 0.73753 | 0.854185072 |             |          |         |          |
| LINC01940  | ENSG00000227744 | -0.63597    | 0.7376  | -1.7392     | 0.959       | -0.63597 | 0.7376  | 0.7376   |
|            | -0.63597        | 0.7376      | 0.7376  | 0.854225539 |             |          |         |          |
| NA         | ENSG00000240050 | -0.63595    | 0.7376  | -0.63595    | 0.7376      | -0.63595 | 0.7376  | 0.7376   |
|            | -0.63595        | 0.7376      | 0.7376  | 0.854225539 |             |          |         |          |
| BICD1      | ENSG00000151746 | -1.5385     | 0.93804 | -0.74536    | 0.77197     | -1.9372  | 0.97364 | 0.97364  |
|            | -0.63612        | 0.73765     | 0.73765 | 0.854263142 |             |          |         |          |
| NA         | ENSG00000266803 | -0.63619    | 0.73767 | -0.63619    | 0.73767     | -0.63619 | 0.73767 | 0.73767  |
|            | -0.63619        | 0.73767     | 0.73767 | 0.854266002 |             |          |         |          |
| NA         | ENSG00000270531 | -1.2761     | 0.89903 | -0.80214    | 0.78876     | -1.0792  | 0.85976 | 0.85976  |
|            | -0.63669        | 0.73784     | 0.73784 | 0.854413382 |             |          |         |          |
| FAM169B    | ENSG00000283597 | -0.75972    | 0.77629 | -0.85572    | 0.80392     | -0.66016 | 0.77629 | -0.66016 |
|            | 0.74542         | -0.63673    | 0.73785 | 0.73785     | 0.854413382 |          |         |          |
| SP2-AS1    | ENSG00000234494 | -0.63684    | 0.73788 | -0.63684    | 0.73788     | -0.63684 | 0.73788 | -0.63684 |
|            | 0.73788         | -0.63684    | 0.73788 | 0.73788     | 0.854413382 |          |         |          |
| NA         | ENSG00000260634 | -0.63685    | 0.73789 | -0.63685    | 0.73789     | -0.63685 | 0.73789 | 0.73789  |
|            | -0.63685        | 0.73789     | 0.73789 | 0.854413382 |             |          |         |          |
| RASA2      | ENSG00000155903 | -0.75478    | 0.77481 | -0.6369     | 0.73791     | -0.63894 | 0.73857 | 0.73857  |
|            | -1.019          | 0.84589     | 0.73791 | 0.854413382 |             |          |         |          |
| SON        | ENSG00000159140 | -1.1975     | 0.88444 | -1.1814     | 0.88129     | -0.63694 | 0.73792 | 0.73792  |
|            | -0.67465        | 0.75005     | 0.73792 | 0.854413382 |             |          |         |          |
| NA         | ENSG00000238215 | -0.63694    | 0.73792 | -1.0104     | 0.84384     | -0.63694 | 0.73792 | 0.73792  |
|            | -0.63694        | 0.73792     | 0.73792 | 0.854413382 |             |          |         |          |
| SRP19      | ENSG00000153037 | -0.63702    | 0.73795 | -0.63702    | 0.73795     | -0.63702 | 0.73795 | 0.73795  |
|            | -0.63702        | 0.73795     | 0.73795 | 0.854419093 |             |          |         |          |
| VN1R91P    | ENSG00000268148 | -1.2875     | 0.90104 | -1.8004     | 0.9641      | -0.63708 | 0.90104 | -0.63708 |
|            | 0.73796         | -0.63708    | 0.73796 | 0.73796     | 0.854419093 |          |         |          |
| NA         | ENSG00000273464 | -0.63718    | 0.738   | -0.63718    | 0.738       | -0.63718 | 0.738   | -0.63718 |
|            | 0.738           | 0.854445104 |         |             |             |          |         |          |
| SNORD113-1 | ENSG00000202191 | -0.63725    | 0.73802 | -0.63725    | 0.73802     | -0.63725 | 0.73802 | -0.63725 |
|            | 0.73802         | -0.63725    | 0.73802 | 0.73802     | 0.854447959 |          |         |          |
| NA         | ENSG00000270314 | -0.63739    | 0.73806 | -0.63739    | 0.73806     | -0.63739 | 0.73806 | 0.73806  |
|            | -0.63739        | 0.73806     | 0.73806 | 0.854473968 |             |          |         |          |
| MBOAT7     | ENSG00000125505 | -0.93007    | 0.82383 | -0.63747    | 0.73809     | -0.63747 | 0.73809 | -0.63747 |
|            | 0.73809         | -1.5135     | 0.93492 | 0.73809     | 0.854479676 |          |         |          |
| NA         | ENSG00000280537 | -0.63748    | 0.7381  | -0.63748    | 0.7381      | -0.63748 | 0.7381  | 0.7381   |
|            | -0.63748        | 0.7381      | 0.7381  | 0.854479676 |             |          |         |          |
| CLPB       | ENSG00000162129 | -0.63755    | 0.73812 | -0.63755    | 0.73812     | -1.7079  | 0.95617 | 0.95617  |
|            | -1.2046         | 0.88582     | 0.73812 | 0.85448253  |             |          |         |          |
| PPP1R36    | ENSG00000165807 | -0.63771    | 0.73817 | -1.6423     | 0.94974     | -1.6423  | 0.73817 | -1.6423  |
|            | 0.94974         | -0.63771    | 0.73817 | 0.73817     | 0.854520112 |          |         |          |
| RSF1-IT1   | ENSG00000255409 | -0.638      | 0.73826 | -0.638      | 0.73826     | -0.638   | 0.73826 | -0.638   |
|            | 0.73826         | -0.638      | 0.73826 | 0.73826     | 0.854560204 |          |         |          |
| NA         | ENSG00000256739 | -0.63808    | 0.73829 | -0.63808    | 0.73829     | -0.63808 | 0.73829 | 0.73829  |

|             |                 |          |         |             |             |          |         |
|-------------|-----------------|----------|---------|-------------|-------------|----------|---------|
|             | -0.63808        | 0.73829  | 0.73829 | 0.854560204 |             |          |         |
| LINC02056   | ENSG00000248371 | -0.63813 | 0.73831 | -1.6211     | 0.94751     | -1.6211  |         |
|             | 0.94751         | -0.74338 | 0.77137 | 0.73831     | 0.854560204 |          |         |
| NA          | ENSG00000237718 | -0.63816 | 0.73832 | -0.82632    | 0.79569     | -0.63816 | 0.73832 |
|             | -0.63816        | 0.73832  | 0.73832 | 0.854560204 |             |          |         |
| RAB11AP2    | ENSG00000255976 | -0.63825 | 0.73834 | -0.63825    | 0.73834     | -1.089   |         |
|             | 0.86192         | -0.63825 | 0.73834 | 0.73834     | 0.854560204 |          |         |
| BIRC2       | ENSG00000110330 | -0.63828 | 0.73835 | -1.6653     | 0.95208     | -0.69297 | 0.75584 |
|             | -0.72976        | 0.76723  | 0.73835 | 0.854560204 |             |          |         |
| ABCD2       | ENSG00000173208 | -0.63827 | 0.73835 | -0.63827    | 0.73835     | -1.4268  | 0.92318 |
|             | -0.64272        | 0.7398   | 0.73835 | 0.854560204 |             |          |         |
| LINC00638   | ENSG00000258701 | -0.72853 | 0.76686 | -0.63831    | 0.73837     | -0.63831 |         |
|             | 0.73837         | -0.63831 | 0.73837 | 0.73837     | 0.854560204 |          |         |
| NLRX1       | ENSG00000160703 | -1.1261  | 0.86993 | -1.2549     | 0.89524     | -0.71952 | 0.76409 |
|             | -0.63836        | 0.73838  | 0.73838 | 0.854560204 |             |          |         |
| NA          | ENSG00000251357 | -0.63837 | 0.73838 | -0.63837    | 0.73838     | -0.63837 | 0.73838 |
|             | -0.63837        | 0.73838  | 0.73838 | 0.854560204 |             |          |         |
| NA          | ENSG00000258439 | -0.63841 | 0.7384  | -1.0957     | 0.86338     | -0.63841 | 0.7384  |
|             | -0.63841        | 0.7384   | 0.7384  | 0.854563055 |             |          |         |
| NA          | ENSG00000270655 | -0.63872 | 0.7385  | -1.3862     | 0.91715     | -1.2347  | 0.89154 |
|             | -0.63872        | 0.7385   | 0.7385  | 0.854626444 |             |          |         |
| ZNF767P     | ENSG00000133624 | -1.0984  | 0.86399 | -1.3189     | 0.9064      | -0.63876 |         |
|             | 0.73851         | -0.77247 | 0.78008 | 0.73851     | 0.854626444 |          |         |
| NA          | ENSG00000228919 | -0.63884 | 0.73853 | -0.63884    | 0.73853     | -0.63884 | 0.73853 |
|             | -0.63884        | 0.73853  | 0.73853 | 0.854626444 |             |          |         |
| RN7SL798P   | ENSG00000240905 | -0.63884 | 0.73854 | -0.63884    | 0.73854     | -0.63884 |         |
|             | 0.73854         | -0.63884 | 0.73854 | 0.73854     | 0.854626444 |          |         |
| PAXBP1P1    | ENSG00000233489 | -0.81488 | 0.79243 | -0.76748    | 0.7786      | -0.76748 |         |
|             | 0.7786          | -0.6389  | 0.73856 | 0.73856     | 0.854626444 |          |         |
| PSMD6-AS2   | ENSG00000239653 | -0.6389  | 0.73856 | -1.2954     | 0.90241     | -0.66695 |         |
|             | 0.7476          | -0.66695 | 0.7476  | 0.73856     | 0.854626444 |          |         |
| NA          | ENSG00000268926 | -0.63911 | 0.73862 | -0.63911    | 0.73862     | -0.63911 | 0.73862 |
|             | -0.63911        | 0.73862  | 0.73862 | 0.854640687 |             |          |         |
| NA          | ENSG00000238372 | -0.654   | 0.74344 | -0.654      | 0.74344     | -0.654   | 0.74344 |
|             | -0.63914        | 0.73863  | 0.73863 | 0.854640687 |             |          |         |
| RN7SL724P   | ENSG00000244692 | -1.2818  | 0.90005 | -0.63914    | 0.73863     | -0.63914 |         |
|             | 0.73863         | -0.63914 | 0.73863 | 0.73863     | 0.854640687 |          |         |
| NA          | ENSG00000227537 | -0.63919 | 0.73865 | -0.63919    | 0.73865     | -0.63919 | 0.73865 |
|             | -0.63919        | 0.73865  | 0.73865 | 0.854640687 |             |          |         |
| NA          | ENSG00000243164 | -0.63921 | 0.73866 | -0.63921    | 0.73866     | -0.63921 | 0.73866 |
|             | -0.7764         | 0.78124  | 0.73866 | 0.854640687 |             |          |         |
| CNOT10      | ENSG00000182973 | -1.9908  | 0.97675 | -1.8905     | 0.97066     | -0.63943 |         |
|             | 0.73873         | -1.1985  | 0.88463 | 0.73873     | 0.854666315 |          |         |
| MIR4463     | ENSG00000263533 | -0.63949 | 0.73875 | -0.63949    | 0.73875     | -0.63949 |         |
|             | 0.73875         | -0.63949 | 0.73875 | 0.73875     | 0.854666315 |          |         |
| NA          | ENSG00000279861 | -0.63948 | 0.73875 | -0.63948    | 0.73875     | -0.63948 | 0.73875 |
|             | -0.63948        | 0.73875  | 0.73875 | 0.854666315 |             |          |         |
| PFDN1       | ENSG00000113068 | -0.63965 | 0.7388  | -0.79844    | 0.78769     | -0.8139  | 0.79215 |
|             | -1.1148         | 0.86753  | 0.7388  | 0.854666315 |             |          |         |
| NA          | ENSG00000199362 | -0.63973 | 0.73883 | -0.63973    | 0.73883     | -0.63973 | 0.73883 |
|             | -0.63973        | 0.73883  | 0.73883 | 0.854666315 |             |          |         |
| S100A13     | ENSG00000189171 | -1.827   | 0.96615 | -0.63976    | 0.73884     | -1.827   |         |
|             | 0.96615         | -1.827   | 0.96615 | 0.73884     | 0.854666315 |          |         |
| MTCO3P10    | ENSG00000231537 | -0.63977 | 0.73884 | -0.63977    | 0.73884     | -0.63977 |         |
|             | 0.73884         | -0.63977 | 0.73884 | 0.73884     | 0.854666315 |          |         |
| IGHVII-49-1 | ENSG00000253386 | -0.63977 | 0.73884 | -0.63977    | 0.73884     | -0.63977 |         |
|             | 0.73884         | -0.63977 | 0.73884 | 0.73884     | 0.854666315 |          |         |
| NA          | ENSG00000261144 | -0.63979 | 0.73884 | -0.63979    | 0.73884     | -0.63979 | 0.73884 |
|             | -0.63979        | 0.73884  | 0.73884 | 0.854666315 |             |          |         |
| TMEM54      | ENSG00000121900 | -0.63991 | 0.73888 | -0.63991    | 0.73888     | -0.63991 |         |
|             | 0.73888         | -0.63991 | 0.73888 | 0.73888     | 0.854672009 |          |         |
| TMEM88B     | ENSG00000205116 | -0.6399  | 0.73888 | -0.6399     | 0.73888     | -0.6399  |         |

|             |                 |          |         |             |             |          |         |
|-------------|-----------------|----------|---------|-------------|-------------|----------|---------|
|             | 0.73888         | -1.5006  | 0.93327 | 0.73888     | 0.854672009 |          |         |
| NA          | ENSG00000260400 | -1.8232  | 0.96587 | -0.6401     | 0.73895     | -0.74393 | 0.77154 |
|             | -1.1721         | 0.87942  | 0.73895 | 0.854682671 |             |          |         |
| MIR591      | ENSG00000208025 | -0.64022 | 0.73899 | -0.64022    | 0.73899     | -0.64022 |         |
|             | 0.73899         | -0.64022 | 0.73899 | 0.73899     | 0.854682671 |          |         |
| LINC02611   | ENSG00000226791 | -0.86817 | 0.80735 | -0.86817    | 0.80735     | -0.64024 |         |
|             | 0.73899         | -1.4129  | 0.92115 | 0.73899     | 0.854682671 |          |         |
| TSPAN18     | ENSG00000157570 | -0.90645 | 0.81765 | -0.64026    | 0.739       | -1.6102  | 0.94632 |
|             | -0.72701        | 0.76639  | 0.739   | 0.854682671 |             |          |         |
| NA          | ENSG00000237768 | -0.6403  | 0.73901 | -0.6403     | 0.73901     | -0.6403  | 0.73901 |
|             | -0.6403         | 0.73901  | 0.73901 | 0.854682671 |             |          |         |
| NA          | ENSG00000264881 | -1.048   | 0.85268 | -0.64032    | 0.73902     | -1.2655  | 0.89716 |
|             | -1.2655         | 0.89716  | 0.73902 | 0.854682671 |             |          |         |
| SNORD115-44 | ENSG00000202261 | -0.64036 | 0.73903 | -0.64036    | 0.73903     | -0.64036 | 0.73903 |
|             | 0.73903         | -0.64036 | 0.73903 | 0.73903     | 0.854682671 |          |         |
| NA          | ENSG00000283162 | -1.0043  | 0.84237 | -0.96521    | 0.83278     | -0.95126 | 0.82926 |
|             | -0.64042        | 0.73905  | 0.73905 | 0.854682671 |             |          |         |
| NA          | ENSG00000268056 | -0.64051 | 0.73908 | -0.64051    | 0.73908     | -0.64051 | 0.73908 |
|             | -0.64051        | 0.73908  | 0.73908 | 0.854682671 |             |          |         |
| HCG17       | ENSG00000270604 | -0.64054 | 0.73909 | -0.64054    | 0.73909     | -0.64054 | 0.73909 |
|             | -0.64054        | 0.73909  | 0.73909 | 0.854682671 |             |          |         |
| NA          | ENSG00000230714 | -0.64058 | 0.7391  | -0.64058    | 0.7391      | -0.64058 | 0.7391  |
|             | -0.64058        | 0.7391   | 0.7391  | 0.854682671 |             |          |         |
| SIK2        | ENSG00000170145 | -0.64062 | 0.73912 | -1.6302     | 0.94847     | -0.73521 | 0.76889 |
|             | -1.458          | 0.92758  | 0.73912 | 0.854682671 |             |          |         |
| LINC02257   | ENSG00000238042 | -0.64065 | 0.73912 | -1.5138     | 0.93496     | -1.5138  |         |
|             | 0.93496         | -1.5138  | 0.93496 | 0.73912     | 0.854682671 |          |         |
| NA          | ENSG00000279294 | -0.6407  | 0.73914 | -0.6407     | 0.73914     | -0.6407  | 0.73914 |
|             | -0.6407         | 0.73914  | 0.73914 | 0.854682671 |             |          |         |
| NA          | ENSG00000268170 | -0.64075 | 0.73916 | -0.66793    | 0.74791     | -0.80939 | 0.79086 |
|             | -0.80939        | 0.79086  | 0.73916 | 0.854682671 |             |          |         |
| NA          | ENSG00000262831 | -0.64081 | 0.73918 | -0.64081    | 0.73918     | -0.64081 | 0.73918 |
|             | -0.64081        | 0.73918  | 0.73918 | 0.854682671 |             |          |         |
| NA          | ENSG00000248318 | -0.78086 | 0.78256 | -0.64091    | 0.73921     | -0.64091 | 0.73921 |
|             | -0.64091        | 0.73921  | 0.73921 | 0.854682671 |             |          |         |
| MST1        | ENSG00000173531 | -0.64093 | 0.73922 | -0.64093    | 0.73922     | -0.64093 | 0.73922 |
|             | -0.64093        | 0.73922  | 0.73922 | 0.854682671 |             |          |         |
| OR4S1       | ENSG00000176555 | -1.3139  | 0.90556 | -1.3609     | 0.91323     | -0.64098 | 0.73923 |
|             | -0.68232        | 0.75248  | 0.73923 | 0.854682671 |             |          |         |
| NA          | ENSG00000250909 | -0.641   | 0.73924 | -1.0327     | 0.84913     | -1.0327  | 0.84913 |
|             | -1.0327         | 0.84913  | 0.73924 | 0.854682671 |             |          |         |
| NA          | ENSG00000280259 | -0.64113 | 0.73928 | -0.64113    | 0.73928     | -0.64113 | 0.73928 |
|             | -0.64113        | 0.73928  | 0.73928 | 0.854708638 |             |          |         |
| NA          | ENSG00000232456 | -0.64129 | 0.73933 | -0.64129    | 0.73933     | -0.64129 | 0.73933 |
|             | -0.64129        | 0.73933  | 0.73933 | 0.854746166 |             |          |         |
| NA          | ENSG00000253430 | -1.1936  | 0.88369 | -1.1936     | 0.88369     | -0.64136 | 0.73936 |
|             | -1.1936         | 0.88369  | 0.73936 | 0.85476057  |             |          |         |
| PGPEP1L     | ENSG00000183571 | -1.621   | 0.94749 | -0.64143    | 0.73938     | -1.5984  |         |
|             | 0.94502         | -2.1394  | 0.9838  | 0.73938     | 0.854763413 |          |         |
| NA          | ENSG00000226097 | -0.97731 | 0.83579 | -1.0437     | 0.85169     | -0.64162 | 0.73944 |
|             | -0.80601        | 0.78988  | 0.73944 | 0.854795061 |             |          |         |
| SNORD117    | ENSG00000201785 | -0.64164 | 0.73945 | -0.64164    | 0.73945     | -0.64164 |         |
|             | 0.73945         | -0.64164 | 0.73945 | 0.73945     | 0.854795061 |          |         |
| REL         | ENSG00000162924 | -0.64168 | 0.73946 | -0.64168    | 0.73946     | -1.1278  | 0.8703  |
|             | -0.91506        | 0.81992  | 0.73946 | 0.854795061 |             |          |         |
| NA          | ENSG00000279913 | -0.6418  | 0.7395  | -0.6418     | 0.7395      | -0.6418  | 0.7395  |
|             | -0.6418         | 0.7395   | 0.7395  | 0.854821022 |             |          |         |
| NA          | ENSG00000264622 | -0.64198 | 0.73956 | -1.4056     | 0.92008     | -1.4056  | 0.92008 |
|             | -1.4056         | 0.92008  | 0.73956 | 0.8548701   |             |          |         |
| SMIM26      | ENSG00000232388 | -0.64204 | 0.73958 | -0.64204    | 0.73958     | -0.64204 |         |
|             | 0.73958         | -0.64204 | 0.73958 | 0.73958     | 0.85487294  |          |         |
| NA          | ENSG00000259083 | -0.64216 | 0.73962 | -0.64216    | 0.73962     | -0.64216 | 0.73962 |



|            |                 |          |          |          |             |             |         |
|------------|-----------------|----------|----------|----------|-------------|-------------|---------|
|            |                 | -0.64216 | 0.73962  | 0.73962  | 0.854898897 |             |         |
| RNU4-80P   | ENSG00000200070 | -0.64223 | 0.73964  | -0.64223 | 0.73964     | -0.64223    | 0.73964 |
|            |                 | 0.73964  | -0.64223 | 0.73964  | 0.73964     | 0.854901736 |         |
| PSAT1      | ENSG00000135069 | -0.93569 | 0.82528  | -0.64242 | 0.7397      | -0.64242    | 0.7397  |
|            |                 | -0.64242 | 0.7397   | 0.7397   | 0.85493053  |             |         |
| OR4C1P     | ENSG00000254576 | -1.3345  | 0.90898  | -0.64242 | 0.7397      | -0.93733    |         |
|            |                 | 0.8257   | -1.1261  | 0.86994  | 0.7397      | 0.85493053  |         |
| NA         | ENSG00000229791 | -0.64251 | 0.73973  | -0.64251 | 0.73973     | -0.64251    | 0.73973 |
|            |                 | -0.64251 | 0.73973  | 0.73973  | 0.854936206 |             |         |
| NA         | ENSG00000253754 | -0.64255 | 0.73974  | -0.64255 | 0.73974     | -0.64255    | 0.73974 |
|            |                 | -0.64255 | 0.73974  | 0.73974  | 0.854936206 |             |         |
| NA         | ENSG00000250428 | -0.69371 | 0.75607  | -1.2102  | 0.88691     | -0.98256    | 0.83709 |
|            |                 | -0.64264 | 0.73977  | 0.73977  | 0.854950601 |             |         |
| AADACL3    | ENSG00000188984 | -1.7281  | 0.95802  | -0.64272 | 0.7398      | -0.91571    |         |
|            |                 | 0.82009  | -1.4404  | 0.92512  | 0.7398      | 0.854964995 |         |
| LARGE-AS1  | ENSG00000224973 | -0.6429  | 0.73985  | -0.79013 | 0.78527     | -0.6429     |         |
|            |                 | 0.73985  | -0.6429  | 0.73985  | 0.73985     | 0.855002502 |         |
| RN7SL840P  | ENSG00000272536 | -1.4886  | 0.93171  | -1.4886  | 0.93171     | -0.64294    |         |
|            |                 | 0.73987  | -0.9943  | 0.83996  | 0.73987     | 0.855005338 |         |
| RPL21P91   | ENSG00000224907 | -0.64314 | 0.73993  | -0.64314 | 0.73993     | -0.64314    |         |
|            |                 | 0.73993  | -0.64314 | 0.73993  | 0.73993     | 0.855054398 |         |
| UBE2F-SCLY | ENSG00000258984 | -0.6433  | 0.73999  | -1.1711  | 0.87923     | -0.6433     |         |
|            |                 | 0.73999  | -0.6433  | 0.73999  | 0.73999     | 0.855103455 |         |
| NA         | ENSG00000228792 | -0.64343 | 0.74003  | -0.64343 | 0.74003     | -0.64343    | 0.74003 |
|            |                 | -0.64343 | 0.74003  | 0.74003  | 0.855129399 |             |         |
| ZNF271P    | ENSG00000257267 | -0.67656 | 0.75066  | -1.0861  | 0.86129     | -1.1834     |         |
|            |                 | 0.88167  | -0.64368 | 0.74011  | 0.74011     | 0.855166444 |         |
| DNAJC17P1  | ENSG00000235218 | -0.64375 | 0.74013  | -0.64375 | 0.74013     | -0.64375    |         |
|            |                 | 0.74013  | -0.64375 | 0.74013  | 0.74013     | 0.855166444 |         |
| RPL6P2     | ENSG00000227056 | -0.64381 | 0.74015  | -1.0549  | 0.85426     | -0.64381    |         |
|            |                 | 0.74015  | -0.64381 | 0.74015  | 0.74015     | 0.855166444 |         |
| RNA5SP165  | ENSG00000252951 | -0.64387 | 0.74017  | -0.64387 | 0.74017     | -0.64387    |         |
|            |                 | 0.74017  | -0.64387 | 0.74017  | 0.74017     | 0.855166444 |         |
| NA         | ENSG00000277895 | -0.64387 | 0.74017  | -0.64387 | 0.74017     | -0.64387    | 0.74017 |
|            |                 | -0.64387 | 0.74017  | 0.74017  | 0.855166444 |             |         |
| RN7SL293P  | ENSG00000242483 | -1.7945  | 0.96364  | -1.7945  | 0.96364     | -0.64391    |         |
|            |                 | 0.74018  | -1.7945  | 0.96364  | 0.74018     | 0.855166444 |         |
| MTMR12     | ENSG00000150712 | -0.65793 | 0.74471  | -0.64399 | 0.74021     | -0.75095    |         |
|            |                 | 0.77366  | -1.107   | 0.86586  | 0.74021     | 0.855166444 |         |
| RNU1-58P   | ENSG00000199283 | -0.64402 | 0.74022  | -0.64402 | 0.74022     | -0.64402    |         |
|            |                 | 0.74022  | -0.64402 | 0.74022  | 0.74022     | 0.855166444 |         |
| NA         | ENSG00000255882 | -0.64404 | 0.74022  | -0.64404 | 0.74022     | -0.64404    | 0.74022 |
|            |                 | -0.64404 | 0.74022  | 0.74022  | 0.855166444 |             |         |
| AZIN1-AS1  | ENSG00000253320 | -0.64412 | 0.74025  | -2.0273  | 0.97868     | -2.3669     |         |
|            |                 | 0.99103  | -1.4357  | 0.92446  | 0.74025     | 0.855180828 |         |
| NDUFV2     | ENSG00000178127 | -1.2767  | 0.89914  | -0.64417 | 0.74027     | -0.82663    |         |
|            |                 | 0.79578  | -0.80029 | 0.78823  | 0.74027     | 0.855183659 |         |
| SMYD3-IT1  | ENSG00000230184 | -1.1151  | 0.86759  | -0.64435 | 0.74033     | -0.64435    |         |
|            |                 | 0.74033  | -0.64435 | 0.74033  | 0.74033     | 0.855232698 |         |
| NA         | ENSG00000218809 | -0.64464 | 0.74042  | -0.64464 | 0.74042     | -0.64464    | 0.74042 |
|            |                 | -0.64464 | 0.74042  | 0.74042  | 0.855296115 |             |         |
| HMGB3P8    | ENSG00000227096 | -0.64463 | 0.74042  | -0.64463 | 0.74042     | -0.64463    |         |
|            |                 | 0.74042  | -0.64463 | 0.74042  | 0.74042     | 0.855296115 |         |
| CCDC177    | ENSG00000267909 | -0.97722 | 0.83577  | -0.73699 | 0.76944     | -0.96474    |         |
|            |                 | 0.83266  | -0.64477 | 0.74046  | 0.74046     | 0.855313322 |         |
| TRAJ37     | ENSG00000278661 | -0.6448  | 0.74047  | -0.6448  | 0.74047     | -0.6448     |         |
|            |                 | 0.74047  | -0.6448  | 0.74047  | 0.74047     | 0.855313322 |         |
| NA         | ENSG00000268460 | -0.7444  | 0.77168  | -0.69406 | 0.75618     | -0.64486    | 0.74049 |
|            |                 | -0.80435 | 0.7894   | 0.74049  | 0.855316149 |             |         |
| BRI3BPP1   | ENSG00000269136 | -0.64493 | 0.74051  | -0.64493 | 0.74051     | -0.64493    |         |
|            |                 | 0.74051  | -0.64493 | 0.74051  | 0.74051     | 0.855318977 |         |
| LINC02631  | ENSG00000237772 | -0.64505 | 0.74055  | -0.64505 | 0.74055     | -0.64505    |         |

|           |                 |          |         |             |             |          |         |
|-----------|-----------------|----------|---------|-------------|-------------|----------|---------|
|           | 0.74055         | -0.64505 | 0.74055 | 0.74055     | 0.855344904 |          |         |
| NA        | ENSG00000232464 | -0.6452  | 0.7406  | -0.6452     | 0.7406      | -0.6452  | 0.7406  |
|           | -1.2231         | 0.88935  | 0.7406  | 0.85538238  |             |          |         |
| NA        | ENSG00000212978 | -0.99142 | 0.83926 | -1.0015     | 0.84171     | -0.64545 | 0.74068 |
|           | -1.2082         | 0.88651  | 0.74068 | 0.855416779 |             |          |         |
| GAL3ST3   | ENSG00000175229 | -0.87542 | 0.80933 | -0.87542    | 0.80933     | -0.87542 |         |
|           | 0.80933         | -0.64547 | 0.74069 | 0.74069     | 0.855416779 |          |         |
| RNU1-149P | ENSG00000212172 | -0.64547 | 0.74069 | -0.64547    | 0.74069     | -0.64547 |         |
|           | 0.74069         | -0.64547 | 0.74069 | 0.74069     | 0.855416779 |          |         |
| NA        | ENSG00000270512 | -0.64552 | 0.7407  | -0.64552    | 0.7407      | -0.64552 | 0.7407  |
|           | -0.64552        | 0.7407   | 0.7407  | 0.855416779 |             |          |         |
| OR10G9    | ENSG00000236981 | -0.64568 | 0.74076 | -0.64568    | 0.74076     | -0.64568 |         |
|           | 0.74076         | -0.64568 | 0.74076 | 0.74076     | 0.855465798 |          |         |
| ZNF708    | ENSG00000182141 | -0.64577 | 0.74079 | -0.68349    | 0.75285     | -1.7019  |         |
|           | 0.95561         | -1.7019  | 0.95561 | 0.74079     | 0.855471444 |          |         |
| RN7SKP184 | ENSG00000199218 | -0.6458  | 0.7408  | -0.6458     | 0.7408      | -0.6458  |         |
|           | 0.7408          | -0.6458  | 0.7408  | 0.7408      | 0.855471444 |          |         |
| WDR97     | ENSG00000179698 | -1.0057  | 0.84273 | -0.64587    | 0.74082     | -1.0057  | 0.84273 |
|           | -1.0057         | 0.84273  | 0.74082 | 0.855474267 |             |          |         |
| PRSS30P   | ENSG00000172460 | -1.343   | 0.91036 | -1.343      | 0.91036     | -1.343   |         |
|           | 0.91036         | -0.64605 | 0.74088 | 0.74088     | 0.855494025 |          |         |
| TAS2R42   | ENSG00000186136 | -1.5556  | 0.9401  | -0.64605    | 0.74088     | -0.6899  |         |
|           | 0.75487         | -0.85316 | 0.80322 | 0.74088     | 0.855494025 |          |         |
| C2orf80   | ENSG00000188674 | -0.64609 | 0.74089 | -0.64609    | 0.74089     | -1.2337  |         |
|           | 0.89134         | -1.2337  | 0.89134 | 0.74089     | 0.855494025 |          |         |
| NA        | ENSG00000250747 | -0.64618 | 0.74092 | -0.64618    | 0.74092     | -0.64618 | 0.74092 |
|           | -0.64618        | 0.74092  | 0.74092 | 0.855494025 |             |          |         |
| AADAC     | ENSG00000114771 | -0.64628 | 0.74095 | -0.77956    | 0.78218     | -1.5083  | 0.93427 |
|           | -1.2715         | 0.89823  | 0.74095 | 0.855494025 |             |          |         |
| NA        | ENSG00000241505 | -0.64631 | 0.74096 | -0.64631    | 0.74096     | -0.64631 | 0.74096 |
|           | -0.64631        | 0.74096  | 0.74096 | 0.855494025 |             |          |         |
| NA        | ENSG00000248431 | -0.6463  | 0.74096 | -0.6463     | 0.74096     | -0.6463  | 0.74096 |
|           | -0.6463         | 0.74096  | 0.74096 | 0.855494025 |             |          |         |
| NACA3P    | ENSG00000121089 | -0.64636 | 0.74098 | -0.64636    | 0.74098     | -0.64636 |         |
|           | 0.74098         | -0.64636 | 0.74098 | 0.74098     | 0.855496846 |          |         |
| LPP-AS2   | ENSG00000270959 | -0.64649 | 0.74102 | -2.157      | 0.9845      | -1.0312  |         |
|           | 0.84877         | -1.0312  | 0.84877 | 0.74102     | 0.855522759 |          |         |
| MCCC1-AS1 | ENSG00000243368 | -0.64661 | 0.74106 | -0.64661    | 0.74106     | -0.64661 |         |
|           | 0.74106         | -0.64661 | 0.74106 | 0.74106     | 0.855539946 |          |         |
| HJURP     | ENSG00000123485 | -1.0796  | 0.85984 | -0.95999    | 0.83147     | -1.1915  | 0.88327 |
|           | -0.64664        | 0.74107  | 0.74107 | 0.855539946 |             |          |         |
| DHX9P1    | ENSG00000228002 | -0.64694 | 0.74116 | -0.64694    | 0.74116     | -0.64694 |         |
|           | 0.74116         | -0.64694 | 0.74116 | 0.74116     | 0.855574049 |          |         |
| HLA-W     | ENSG00000235290 | -0.64706 | 0.7412  | -0.64706    | 0.7412      | -0.64706 | 0.7412  |
|           | -0.64706        | 0.7412   | 0.7412  | 0.855574049 |             |          |         |
| RN7SL12P  | ENSG00000239553 | -0.81169 | 0.79152 | -0.64706    | 0.7412      | -0.81169 |         |
|           | 0.79152         | -0.81169 | 0.79152 | 0.7412      | 0.855574049 |          |         |
| DCAF13P1  | ENSG00000242562 | -0.64706 | 0.7412  | -0.64706    | 0.7412      | -0.91144 |         |
|           | 0.81897         | -0.64706 | 0.7412  | 0.7412      | 0.855574049 |          |         |
| MTCO2P33  | ENSG00000217083 | -0.97099 | 0.83422 | -0.64711    | 0.74122     | -0.64711 |         |
|           | 0.74122         | -0.64711 | 0.74122 | 0.74122     | 0.855574049 |          |         |
| SNAI2     | ENSG00000019549 | -1.2656  | 0.89717 | -0.64714    | 0.74123     | -1.0857  | 0.86119 |
|           | -0.76123        | 0.77674  | 0.74123 | 0.855574049 |             |          |         |
| GAPDHP55  | ENSG00000224055 | -0.64715 | 0.74123 | -1.7304     | 0.95822     | -0.75963 |         |
|           | 0.77626         | -1.6203  | 0.94742 | 0.74123     | 0.855574049 |          |         |
| SND1-IT1  | ENSG00000279078 | -0.88536 | 0.81202 | -0.64717    | 0.74124     | -1.2715  |         |
|           | 0.89823         | -0.69243 | 0.75567 | 0.74124     | 0.855574049 |          |         |
| DGUOK     | ENSG00000114956 | -0.64722 | 0.74126 | -1.3518     | 0.91178     | -0.7941  | 0.78643 |
|           | -0.81937        | 0.79371  | 0.74126 | 0.855576868 |             |          |         |
| OR4C4P    | ENSG00000197161 | -0.91917 | 0.821   | -0.64747    | 0.74134     | -1.118   | 0.86823 |
|           | -0.85727        | 0.80435  | 0.74134 | 0.855640215 |             |          |         |
| RPL37P10  | ENSG00000224627 | -0.6475  | 0.74135 | -1.094      | 0.86302     | -1.094   |         |

|             |                 |             |         |             |             |          |         |  |
|-------------|-----------------|-------------|---------|-------------|-------------|----------|---------|--|
|             | 0.86302         | -1.094      | 0.86302 | 0.74135     | 0.855640215 |          |         |  |
| NA          | ENSG00000229923 | -0.64757    | 0.74137 | -1.0884     | 0.86179     | -0.98206 | 0.83696 |  |
|             | -1              | 0.84134     | 0.74137 | 0.855643032 |             |          |         |  |
| SERPINB11   | ENSG00000206072 | -0.91981    | 0.82116 | -1.6357     | 0.94905     | -0.88257 |         |  |
|             | 0.81127         | -0.6477     | 0.74141 | 0.74141     | 0.855668932 |          |         |  |
| NA          | ENSG00000269504 | -1.118      | 0.86822 | -1.0776     | 0.8594      | -0.64782 | 0.74145 |  |
|             | -1.4196         | 0.92213     | 0.74145 | 0.855677381 |             |          |         |  |
| TRAPPC2P2   | ENSG00000253124 | -0.847      | 0.8015  | -0.64786    | 0.74146     | -1.3275  |         |  |
|             | 0.90783         | -1.3275     | 0.90783 | 0.74146     | 0.855677381 |          |         |  |
| NA          | ENSG00000258425 | -0.64789    | 0.74147 | -0.64789    | 0.74147     | -0.64789 | 0.74147 |  |
|             | -0.64789        | 0.74147     | 0.74147 | 0.855677381 |             |          |         |  |
| NA          | ENSG00000259855 | -0.64799    | 0.7415  | -0.64799    | 0.7415      | -0.64799 | 0.7415  |  |
|             | -0.64799        | 0.7415      | 0.7415  | 0.855691738 |             |          |         |  |
| RASD2       | ENSG00000100302 | -0.90144    | 0.81632 | -0.64805    | 0.74152     | -0.74698 | 0.77246 |  |
|             | -0.64805        | 0.74152     | 0.74152 | 0.855694553 |             |          |         |  |
| GPR20       | ENSG00000204882 | -0.6481     | 0.74154 | -1.0504     | 0.85322     | -0.6481  | 0.74154 |  |
|             | -0.6481         | 0.74154     | 0.74154 | 0.855697369 |             |          |         |  |
| NA          | ENSG00000233842 | -0.64833    | 0.74161 | -0.64833    | 0.74161     | -0.64833 | 0.74161 |  |
|             | -0.64833        | 0.74161     | 0.74161 | 0.855720169 |             |          |         |  |
| NA          | ENSG00000273444 | -0.64835    | 0.74162 | -0.64835    | 0.74162     | -0.64835 | 0.74162 |  |
|             | -0.64835        | 0.74162     | 0.74162 | 0.855720169 |             |          |         |  |
| SLC25A25    | ENSG00000148339 | -0.64839    | 0.74163 | -0.64839    | 0.74163     | -1.1128  |         |  |
|             | 0.86709         | -1.1267     | 0.87008 | 0.74163     | 0.855720169 |          |         |  |
| GABRA5      | ENSG00000186297 | -0.95577    | 0.83041 | -1.3863     | 0.91718     | -0.64836 |         |  |
|             | 0.74163         | -1.911      | 0.972   | 0.74163     | 0.855720169 |          |         |  |
| C1orf56     | ENSG00000143443 | -0.64853    | 0.74168 | -0.64853    | 0.74168     | -0.64853 |         |  |
|             | 0.74168         | -0.64853    | 0.74168 | 0.74168     | 0.855737336 |          |         |  |
| RPS27L      | ENSG00000185088 | -0.91539    | 0.82001 | -0.64854    | 0.74168     | -1.0319  |         |  |
|             | 0.84895         | -1.0204     | 0.84624 | 0.74168     | 0.855737336 |          |         |  |
| ACTL6A      | ENSG00000136518 | -0.85665    | 0.80418 | -0.64882    | 0.74177     | -0.72426 |         |  |
|             | 0.76555         | -0.77975    | 0.78223 | 0.74177     | 0.855820913 |          |         |  |
| NA          | ENSG00000267061 | -0.76143    | 0.7768  | -0.76143    | 0.7768      | -0.64934 | 0.74194 |  |
|             | -1.0726         | 0.85827     | 0.74194 | 0.855938499 |             |          |         |  |
| NA          | ENSG00000236807 | -0.64945    | 0.74198 | -0.64945    | 0.74198     | -0.64945 | 0.74198 |  |
|             | -0.64945        | 0.74198     | 0.74198 | 0.855938499 |             |          |         |  |
| NA          | ENSG00000253027 | -0.64945    | 0.74198 | -0.64945    | 0.74198     | -0.64945 | 0.74198 |  |
|             | -0.64945        | 0.74198     | 0.74198 | 0.855938499 |             |          |         |  |
| VWA8P1      | ENSG00000250289 | -0.64949    | 0.74199 | -0.64949    | 0.74199     | -0.64949 |         |  |
|             | 0.74199         | -0.64949    | 0.74199 | 0.74199     | 0.855938499 |          |         |  |
| MSANTD3     | ENSG00000066697 | -1.1841     | 0.88181 | -0.67899    | 0.75143     | -1.1841  |         |  |
|             | 0.88181         | -0.64951    | 0.742   | 0.742       | 0.855938499 |          |         |  |
| NA          | ENSG00000200385 | -0.64952    | 0.742   | -0.64952    | 0.742       | -0.64952 | 0.742   |  |
|             | 0.742           | 0.855938499 |         |             |             |          |         |  |
| PTGES3P2    | ENSG00000217643 | -1.3181     | 0.90627 | -1.3181     | 0.90627     | -0.64951 | 0.742   |  |
|             | -1.3181         | 0.90627     | 0.742   | 0.855938499 |             |          |         |  |
| OR4A13P     | ENSG00000181950 | -1.0175     | 0.84553 | -0.9976     | 0.84076     | -1.0325  |         |  |
|             | 0.84907         | -0.64962    | 0.74203 | 0.74203     | 0.855938499 |          |         |  |
| NA          | ENSG00000272642 | -0.64961    | 0.74203 | -0.90833    | 0.81815     | -0.90833 | 0.81815 |  |
|             | -0.90833        | 0.81815     | 0.74203 | 0.855938499 |             |          |         |  |
| UTP6        | ENSG00000108651 | -1.183      | 0.88159 | -0.64985    | 0.7421      | -0.82585 | 0.79556 |  |
|             | -0.64985        | 0.7421      | 0.7421  | 0.855998982 |             |          |         |  |
| RNU6-864P   | ENSG00000252065 | -0.64992    | 0.74213 | -1.7222     | 0.95748     | -1.7222  |         |  |
|             | 0.95748         | -1.7222     | 0.95748 | 0.74213     | 0.856001484 |          |         |  |
| RN7SL8P     | ENSG00000243352 | -0.65003    | 0.74216 | -0.65003    | 0.74216     | -0.65003 |         |  |
|             | 0.74216         | -0.65003    | 0.74216 | 0.74216     | 0.856001484 |          |         |  |
| KLRG1       | ENSG00000139187 | -0.6501     | 0.74219 | -0.6501     | 0.74219     | -0.6501  | 0.74219 |  |
|             | -0.6501         | 0.74219     | 0.74219 | 0.856001484 |             |          |         |  |
| SNORD113-3  | ENSG00000201700 | -0.6501     | 0.74219 | -0.6501     | 0.74219     | -0.6501  |         |  |
|             | 0.74219         | -0.6501     | 0.74219 | 0.74219     | 0.856001484 |          |         |  |
| DENND6A-AS1 | ENSG00000239801 | -0.65012    | 0.74219 | -0.65012    | 0.74219     | -0.65012 |         |  |
|             | 0.74219         | -0.65012    | 0.74219 | 0.74219     | 0.856001484 |          |         |  |
| NA          | ENSG00000259231 | -0.65031    | 0.74225 | -0.65031    | 0.74225     | -0.65031 | 0.74225 |  |

|             |                 |          |         |             |             |          |         |
|-------------|-----------------|----------|---------|-------------|-------------|----------|---------|
|             | -0.65031        | 0.74225  | 0.74225 | 0.856050424 |             |          |         |
| LURAP1L     | ENSG00000153714 | -0.65058 | 0.74234 | -0.65058    | 0.74234     | -0.65058 |         |
|             | 0.74234         | -0.65058 | 0.74234 | 0.74234     | 0.856128035 |          |         |
| NA          | ENSG00000258480 | -0.65064 | 0.74236 | -0.65064    | 0.74236     | -0.65064 | 0.74236 |
|             | -0.65064        | 0.74236  | 0.74236 | 0.856128035 |             |          |         |
| NA          | ENSG00000272688 | -0.65066 | 0.74237 | -0.65066    | 0.74237     | -0.65066 | 0.74237 |
|             | -0.65066        | 0.74237  | 0.74237 | 0.856128035 |             |          |         |
| KIT         | ENSG00000157404 | -0.6509  | 0.74245 | -1.2852     | 0.90064     | -1.2852  | 0.90064 |
|             | -1.1858         | 0.88215  | 0.74245 | 0.856182571 |             |          |         |
| RNU6-745P   | ENSG00000200216 | -1.1373  | 0.8723  | -1.1719     | 0.87938     | -0.65096 |         |
|             | 0.74246         | -0.98362 | 0.83735 | 0.74246     | 0.856182571 |          |         |
| RNU6-875P   | ENSG00000252297 | -0.65099 | 0.74247 | -0.65099    | 0.74247     | -0.65099 |         |
|             | 0.74247         | -0.65099 | 0.74247 | 0.74247     | 0.856182571 |          |         |
| RN7SL838P   | ENSG00000243562 | -0.78018 | 0.78236 | -0.65113    | 0.74252     | -0.65113 |         |
|             | 0.74252         | -0.65113 | 0.74252 | 0.74252     | 0.856219967 |          |         |
| MRPS33      | ENSG00000090263 | -0.65133 | 0.74258 | -0.98357    | 0.83734     | -0.83185 |         |
|             | 0.79725         | -1.2989  | 0.90301 | 0.74258     | 0.856240734 |          |         |
| MIR27B      | ENSG00000207864 | -0.65141 | 0.74261 | -0.65141    | 0.74261     | -0.65141 |         |
|             | 0.74261         | -0.65141 | 0.74261 | 0.74261     | 0.856240734 |          |         |
| RNU6-735P   | ENSG00000222544 | -0.65141 | 0.74261 | -0.65141    | 0.74261     | -0.65141 |         |
|             | 0.74261         | -0.65141 | 0.74261 | 0.74261     | 0.856240734 |          |         |
| NA          | ENSG00000219702 | -0.65163 | 0.74268 | -0.65163    | 0.74268     | -0.65163 | 0.74268 |
|             | -0.65163        | 0.74268  | 0.74268 | 0.856240734 |             |          |         |
| NA          | ENSG00000229032 | -0.65162 | 0.74268 | -0.65162    | 0.74268     | -0.65162 | 0.74268 |
|             | -0.65162        | 0.74268  | 0.74268 | 0.856240734 |             |          |         |
| SYMPK       | ENSG00000125755 | -0.65167 | 0.74269 | -0.68088    | 0.75203     | -0.7448  | 0.7718  |
|             | -0.7448         | 0.7718   | 0.74269 | 0.856240734 |             |          |         |
| SNORD13E    | ENSG00000238311 | -0.65166 | 0.74269 | -0.65166    | 0.74269     | -0.65166 |         |
|             | 0.74269         | -0.65166 | 0.74269 | 0.74269     | 0.856240734 |          |         |
| SLC9A4      | ENSG00000180251 | -1.3429  | 0.91035 | -1.5701     | 0.9418      | -0.65175 |         |
|             | 0.74272         | -1.4426  | 0.92543 | 0.74272     | 0.856240734 |          |         |
| LINC02026   | ENSG00000214146 | -0.98224 | 0.83701 | -0.65184    | 0.74275     | -0.98886 |         |
|             | 0.83864         | -0.92137 | 0.82157 | 0.74275     | 0.856240734 |          |         |
| MKRN20S     | ENSG00000225526 | -0.65183 | 0.74275 | -0.65183    | 0.74275     | -0.65183 |         |
|             | 0.74275         | -0.65183 | 0.74275 | 0.74275     | 0.856240734 |          |         |
| DDX5        | ENSG00000108654 | -1.1402  | 0.87289 | -0.65189    | 0.74276     | -1.1402  | 0.87289 |
|             | -1.1402         | 0.87289  | 0.74276 | 0.856240734 |             |          |         |
| RN7SL833P   | ENSG00000244080 | -0.65204 | 0.74281 | -0.65204    | 0.74281     | -0.65204 |         |
|             | 0.74281         | -0.65204 | 0.74281 | 0.74281     | 0.856240734 |          |         |
| NA          | ENSG00000227416 | -0.65207 | 0.74282 | -0.65207    | 0.74282     | -0.65207 | 0.74282 |
|             | -0.65207        | 0.74282  | 0.74282 | 0.856240734 |             |          |         |
| SNORD115-10 | ENSG00000201943 | -0.65226 | 0.74288 | -0.65226    | 0.74288     | -0.65226 |         |
|             | 0.74288         | -0.65226 | 0.74288 | 0.74288     | 0.856240734 |          |         |
| FOXD2       | ENSG00000186564 | -0.65228 | 0.74289 | -0.65228    | 0.74289     | -0.65228 | 0.74289 |
|             | -0.65228        | 0.74289  | 0.74289 | 0.856240734 |             |          |         |
| RNU4-66P    | ENSG00000202069 | -0.65237 | 0.74292 | -0.65237    | 0.74292     | -0.65237 |         |
|             | 0.74292         | -0.65237 | 0.74292 | 0.74292     | 0.856240734 |          |         |
| NA          | ENSG00000263033 | -1.6651  | 0.95206 | -1.4723     | 0.92952     | -1.97    | 0.97558 |
|             | -0.65239        | 0.74292  | 0.74292 | 0.856240734 |             |          |         |
| NA          | ENSG00000252042 | -0.6524  | 0.74293 | -0.6524     | 0.74293     | -0.6524  | 0.74293 |
|             | -0.6524         | 0.74293  | 0.74293 | 0.856240734 |             |          |         |
| KDM4A       | ENSG00000066135 | -1.1663  | 0.87825 | -0.65245    | 0.74294     | -0.75239 | 0.77409 |
|             | -0.88941        | 0.81311  | 0.74294 | 0.856240734 |             |          |         |
| NA          | ENSG00000206982 | -0.68751 | 0.75412 | -0.68751    | 0.75412     | -1.1987  | 0.88468 |
|             | -0.65245        | 0.74294  | 0.74294 | 0.856240734 |             |          |         |
| THAP12P3    | ENSG00000227972 | -1.1357  | 0.87197 | -1.3785     | 0.91597     | -0.65246 |         |
|             | 0.74295         | -1.3785  | 0.91597 | 0.74295     | 0.856240734 |          |         |
| NA          | ENSG00000205767 | -0.65253 | 0.74297 | -0.65253    | 0.74297     | -0.65253 | 0.74297 |
|             | -0.65253        | 0.74297  | 0.74297 | 0.856240734 |             |          |         |
| MIR3156-2   | ENSG00000265499 | -0.65254 | 0.74298 | -1.2403     | 0.89257     | -0.65254 |         |
|             | 0.74298         | -0.65254 | 0.74298 | 0.74298     | 0.856240734 |          |         |
| NA          | ENSG00000252427 | -0.65258 | 0.74299 | -0.69464    | 0.75636     | -2.5083  | 0.99393 |

|              |                 |          |          |          |             |             |         |         |
|--------------|-----------------|----------|----------|----------|-------------|-------------|---------|---------|
|              |                 | -2.5083  | 0.99393  | 0.74299  | 0.856240734 |             |         |         |
| NA           | ENSG00000271049 | -0.6526  | 0.74299  | 0.74299  | -0.6526     | 0.74299     | -0.6526 | 0.74299 |
|              |                 | -0.6526  | 0.74299  | 0.74299  | 0.856240734 |             |         |         |
| ANKRD7       | ENSG00000106013 | -0.65262 | 0.743    | -0.65262 | 0.743       | -1.0027     | 0.84201 |         |
|              |                 | -0.83054 | 0.79688  | 0.743    | 0.856240734 |             |         |         |
| ILVBL        | ENSG00000105135 | -1.253   | 0.8949   | -0.65272 | 0.74303     | -0.65272    | 0.74303 |         |
|              |                 | -0.65272 | 0.74303  | 0.74303  | 0.856240734 |             |         |         |
| SLC3A1       | ENSG00000138079 | -0.65273 | 0.74303  | -1.0407  | 0.85098     | -1.6782     |         |         |
|              |                 | 0.95334  | -0.97943 | 0.83632  | 0.74303     | 0.856240734 |         |         |
| NA           | ENSG00000233352 | -0.65281 | 0.74306  | -0.65281 | 0.74306     | -0.65281    | 0.74306 |         |
|              |                 | -0.65281 | 0.74306  | 0.74306  | 0.856242876 |             |         |         |
| HNRNPA1P3    | ENSG00000226188 | -1.3929  | 0.91818  | -0.65301 | 0.74312     | -0.65301    |         |         |
|              |                 | 0.74312  | -0.65301 | 0.74312  | 0.74312     | 0.856242876 |         |         |
| NA           | ENSG00000273682 | -0.653   | 0.74312  | -0.97422 | 0.83503     | -0.653      | 0.74312 |         |
|              |                 | -0.653   | 0.74312  | 0.74312  | 0.856242876 |             |         |         |
| NA           | ENSG00000278464 | -0.65302 | 0.74313  | -0.77888 | 0.78197     | -0.77888    | 0.78197 |         |
|              |                 | -0.77888 | 0.78197  | 0.74313  | 0.856242876 |             |         |         |
| NA           | ENSG00000230684 | -0.65312 | 0.74316  | -0.65312 | 0.74316     | -0.65312    | 0.74316 |         |
|              |                 | -0.65312 | 0.74316  | 0.74316  | 0.856242876 |             |         |         |
| KRT23        | ENSG00000108244 | -0.73649 | 0.76929  | -0.65317 | 0.74318     | -1.2608     | 0.89631 |         |
|              |                 | -1.0999  | 0.86432  | 0.74318  | 0.856242876 |             |         |         |
| REG3A        | ENSG00000172016 | -1.1113  | 0.86679  | -0.65319 | 0.74318     | -0.69269    | 0.75575 |         |
|              |                 | -0.69269 | 0.75575  | 0.74318  | 0.856242876 |             |         |         |
| NA           | ENSG00000269110 | -0.65317 | 0.74318  | -0.65317 | 0.74318     | -0.65317    | 0.74318 |         |
|              |                 | -0.65317 | 0.74318  | 0.74318  | 0.856242876 |             |         |         |
| NA           | ENSG00000253085 | -0.65321 | 0.74319  | -0.65321 | 0.74319     | -0.65321    | 0.74319 |         |
|              |                 | -0.65321 | 0.74319  | 0.74319  | 0.856242876 |             |         |         |
| IRS3P        | ENSG00000184414 | -0.65347 | 0.74327  | -0.65347 | 0.74327     | -0.65347    | 0.74327 |         |
|              |                 | -0.65347 | 0.74327  | 0.74327  | 0.8563148   |             |         |         |
| NA           | ENSG00000260790 | -0.65352 | 0.74329  | -0.65352 | 0.74329     | -0.65352    | 0.74329 |         |
|              |                 | -0.65352 | 0.74329  | 0.74329  | 0.856317597 |             |         |         |
| P2RY13       | ENSG00000181631 | -0.65359 | 0.74331  | -0.65359 | 0.74331     | -0.88036    |         |         |
|              |                 | 0.81067  | -0.65359 | 0.74331  | 0.74331     | 0.856320393 |         |         |
| NA           | ENSG00000236733 | -0.65377 | 0.74337  | -0.65377 | 0.74337     | -0.65377    | 0.74337 |         |
|              |                 | -0.65377 | 0.74337  | 0.74337  | 0.85636893  |             |         |         |
| SNORD115-43  | ENSG00000202373 | -0.65383 | 0.74339  | -0.65383 | 0.74339     | -0.65383    | 0.74339 |         |
|              |                 | 0.74339  | -0.65383 | 0.74339  | 0.74339     | 0.85636893  |         |         |
| NA           | ENSG00000267396 | -0.65394 | 0.74342  | -0.65394 | 0.74342     | -0.65394    | 0.74342 |         |
|              |                 | -0.65394 | 0.74342  | 0.74342  | 0.85636893  |             |         |         |
| TPTE2P5      | ENSG00000168852 | -1.3968  | 0.91877  | -1.6752  | 0.95306     | -0.65396    |         |         |
|              |                 | 0.74343  | -1.7671  | 0.96139  | 0.74343     | 0.85636893  |         |         |
| CYCSP34      | ENSG00000176268 | -0.93379 | 0.82479  | -0.65399 | 0.74344     | -0.85016    |         |         |
|              |                 | 0.80238  | -0.85016 | 0.80238  | 0.74344     | 0.85636893  |         |         |
| MTND1P5      | ENSG00000253795 | -0.75961 | 0.77625  | -0.6541  | 0.74348     | -1.3684     |         |         |
|              |                 | 0.91441  | -0.73003 | 0.76731  | 0.74348     | 0.856394762 |         |         |
| RNU6-13P     | ENSG00000206975 | -1.3034  | 0.90378  | -2.3574  | 0.9908      | -0.65417    |         |         |
|              |                 | 0.7435   | -1.1065  | 0.86574  | 0.7435      | 0.856397556 |         |         |
| CARD6        | ENSG00000132357 | -1.4841  | 0.93111  | -1.0509  | 0.85334     | -0.65435    | 0.74356 |         |
|              |                 | -1.0951  | 0.86326  | 0.74356  | 0.856437697 |             |         |         |
| NA           | ENSG00000221633 | -1.1474  | 0.87439  | -1.1474  | 0.87439     | -0.65438    | 0.74357 |         |
|              |                 | -1.1474  | 0.87439  | 0.74357  | 0.856437697 |             |         |         |
| SPDYE22P     | ENSG00000266537 | -0.83345 | 0.79771  | -0.65446 | 0.74359     | -0.65446    |         |         |
|              |                 | 0.74359  | -0.65446 | 0.74359  | 0.74359     | 0.85644049  |         |         |
| TNPO2        | ENSG00000105576 | -0.65467 | 0.74366  | -0.65467 | 0.74366     | -0.65467    | 0.74366 |         |
|              |                 | -0.65467 | 0.74366  | 0.74366  | 0.856465969 |             |         |         |
| NA           | ENSG00000268488 | -0.65466 | 0.74366  | -0.65466 | 0.74366     | -0.65466    | 0.74366 |         |
|              |                 | -0.65466 | 0.74366  | 0.74366  | 0.856465969 |             |         |         |
| OR51F1       | ENSG00000280021 | -0.6547  | 0.74367  | -0.6547  | 0.74367     | -0.6547     |         |         |
|              |                 | 0.74367  | -0.6547  | 0.74367  | 0.74367     | 0.856465969 |         |         |
| NA           | ENSG00000221718 | -0.65476 | 0.74369  | -0.65476 | 0.74369     | -0.65476    | 0.74369 |         |
|              |                 | -0.65476 | 0.74369  | 0.74369  | 0.856465969 |             |         |         |
| RABGAP1L-AS1 | ENSG00000229531 | -0.65478 | 0.7437   | -0.65478 | 0.7437      | -0.65478    |         |         |

|             |                 |          |         |             |             |          |         |
|-------------|-----------------|----------|---------|-------------|-------------|----------|---------|
|             | 0.7437          | -0.65478 | 0.7437  | 0.7437      | 0.856465969 |          |         |
| SETP17      | ENSG00000255222 | -1.8649  | 0.9689  | -0.65492    | 0.74374     | -1.8649  |         |
|             | 0.9689          | -2.3164  | 0.98973 | 0.74374     | 0.856491793 |          |         |
| DCAF17      | ENSG00000115827 | -1.3643  | 0.91376 | -1.3763     | 0.91563     | -0.89904 |         |
|             | 0.81568         | -0.65523 | 0.74384 | 0.74384     | 0.85654308  |          |         |
| KRBA2       | ENSG00000184619 | -0.65523 | 0.74384 | -0.65523    | 0.74384     | -0.65523 | 0.74384 |
|             | -0.65523        | 0.74384  | 0.74384 | 0.85654308  |             |          |         |
| ZFP57       | ENSG00000204644 | -0.7141  | 0.76242 | -0.65526    | 0.74385     | -0.89983 | 0.81589 |
|             | -0.83139        | 0.79712  | 0.74385 | 0.85654308  |             |          |         |
| OR1L4       | ENSG00000136939 | -0.65533 | 0.74387 | -1.5754     | 0.94241     | -0.91362 | 0.81954 |
|             | -1.818          | 0.96547  | 0.74387 | 0.85654308  |             |          |         |
| EVX1-AS     | ENSG00000253405 | -0.65536 | 0.74388 | -0.65536    | 0.74388     | -0.65536 |         |
|             | 0.74388         | -0.65536 | 0.74388 | 0.74388     | 0.85654308  |          |         |
| TOMM22P3    | ENSG00000227604 | -0.65539 | 0.74389 | -0.65539    | 0.74389     | -0.65539 |         |
|             | 0.74389         | -0.65539 | 0.74389 | 0.74389     | 0.85654308  |          |         |
| ZNF663P     | ENSG00000215452 | -0.65561 | 0.74396 | -0.65561    | 0.74396     | -0.65561 |         |
|             | 0.74396         | -0.65561 | 0.74396 | 0.74396     | 0.85660344  |          |         |
| BBIP1       | ENSG00000214413 | -0.65569 | 0.74399 | -0.65569    | 0.74399     | -0.65569 | 0.74399 |
|             | -0.65569        | 0.74399  | 0.74399 | 0.856609016 |             |          |         |
| LINC02824   | ENSG00000255998 | -0.65572 | 0.744   | -0.65572    | 0.744       | -1.722   | 0.95747 |
|             | -0.65572        | 0.744    | 0.744   | 0.856609016 |             |          |         |
| SERHL2      | ENSG00000183569 | -0.65585 | 0.74404 | -0.65585    | 0.74404     | -1.4339  |         |
|             | 0.9242          | -1.0674  | 0.85709 | 0.74404     | 0.856626105 |          |         |
| NA          | ENSG00000222604 | -0.65588 | 0.74405 | -0.74709    | 0.7725      | -0.65588 | 0.74405 |
|             | -0.65588        | 0.74405  | 0.74405 | 0.856626105 |             |          |         |
| RPS13P3     | ENSG00000236913 | -0.65608 | 0.74411 | -0.65608    | 0.74411     | -0.65608 |         |
|             | 0.74411         | -0.65608 | 0.74411 | 0.74411     | 0.856669002 |          |         |
| SNORD114-12 | ENSG00000202270 | -0.65617 | 0.74414 | -0.65617    | 0.74414     | -0.65617 |         |
|             | 0.74414         | -0.65617 | 0.74414 | 0.74414     | 0.856669002 |          |         |
| NA          | ENSG00000265171 | -0.65616 | 0.74414 | -0.65616    | 0.74414     | -0.65616 | 0.74414 |
|             | -0.65616        | 0.74414  | 0.74414 | 0.856669002 |             |          |         |
| LINC02096   | ENSG00000238212 | -1.3443  | 0.91057 | -0.65648    | 0.74424     | -1.9574  |         |
|             | 0.97485         | -0.89262 | 0.81397 | 0.74424     | 0.856757563 |          |         |
| NA          | ENSG00000256378 | -1.2279  | 0.89026 | -0.65654    | 0.74426     | -1.2279  | 0.89026 |
|             | -1.2279         | 0.89026  | 0.74426 | 0.856757563 |             |          |         |
| PTPRF       | ENSG00000142949 | -0.65664 | 0.74429 | -0.77412    | 0.78057     | -0.81392 | 0.79216 |
|             | -0.80783        | 0.7904   | 0.74429 | 0.856757563 |             |          |         |
| MRPL51      | ENSG00000111639 | -0.65668 | 0.74431 | -0.95331    | 0.82978     | -0.65668 |         |
|             | 0.74431         | -0.65668 | 0.74431 | 0.74431     | 0.856757563 |          |         |
| NA          | ENSG00000251805 | -0.65676 | 0.74433 | -0.65676    | 0.74433     | -0.65676 | 0.74433 |
|             | -0.65676        | 0.74433  | 0.74433 | 0.856757563 |             |          |         |
| CTNS        | ENSG00000040531 | -0.6568  | 0.74434 | -1.3169     | 0.90607     | -1.1174  | 0.86809 |
|             | -1.0991         | 0.86414  | 0.74434 | 0.856757563 |             |          |         |
| HAUS6P2     | ENSG00000236121 | -0.65678 | 0.74434 | -0.80425    | 0.78937     | -0.80425 |         |
|             | 0.78937         | -1.3124  | 0.90532 | 0.74434     | 0.856757563 |          |         |
| HOMER1      | ENSG00000152413 | -0.65693 | 0.74439 | -0.9694     | 0.83383     | -1.0496  |         |
|             | 0.85305         | -0.83971 | 0.79946 | 0.74439     | 0.856794877 |          |         |
| TRBV23-1    | ENSG00000211749 | -0.71346 | 0.76222 | -0.65701    | 0.74441     | -0.71346 |         |
|             | 0.76222         | -0.71346 | 0.76222 | 0.74441     | 0.856797659 |          |         |
| KRTAP13-4   | ENSG00000186971 | -0.65708 | 0.74444 | -0.65708    | 0.74444     | -0.65708 |         |
|             | 0.74444         | -0.65708 | 0.74444 | 0.74444     | 0.856811951 |          |         |
| AREG        | ENSG00000109321 | -1.0199  | 0.8461  | -1.7404     | 0.9591      | -0.71768 | 0.76352 |
|             | -0.65722        | 0.74448  | 0.74448 | 0.856837752 |             |          |         |
| DSTNP4      | ENSG00000215034 | -1.8356  | 0.96679 | -1.8356     | 0.96679     | -1.8356  |         |
|             | 0.96679         | -0.65747 | 0.74456 | 0.74456     | 0.856877452 |          |         |
| NA          | ENSG00000227615 | -0.65748 | 0.74456 | -0.65748    | 0.74456     | -0.65748 | 0.74456 |
|             | -0.65748        | 0.74456  | 0.74456 | 0.856877452 |             |          |         |
| CCL22       | ENSG00000102962 | -0.65753 | 0.74458 | -0.65753    | 0.74458     | -1.1324  | 0.87126 |
|             | -1.1324         | 0.87126  | 0.74458 | 0.856877452 |             |          |         |
| NA          | ENSG00000282852 | -0.69559 | 0.75666 | -0.65757    | 0.74459     | -0.69559 | 0.75666 |
|             | -0.69559        | 0.75666  | 0.74459 | 0.856877452 |             |          |         |
| NA          | ENSG00000268201 | -0.65763 | 0.74461 | -0.65763    | 0.74461     | -0.65763 | 0.74461 |

|            |                 |          |          |          |             |             |          |  |
|------------|-----------------|----------|----------|----------|-------------|-------------|----------|--|
|            |                 | -0.65763 | 0.74461  | 0.74461  | 0.856877452 |             |          |  |
| MYL12BP1   | ENSG00000260490 | -0.65766 | 0.74462  | 0.74462  | -0.65766    | 0.74462     | -0.65766 |  |
|            |                 | 0.74462  | -0.65766 | 0.74462  | 0.74462     | 0.856877452 |          |  |
| RNU6-470P  | ENSG00000251763 | -0.66969 | 0.74847  | 0.74847  | -0.65791    | 0.7447      | -0.66969 |  |
|            |                 | 0.74847  | -0.66969 | 0.74847  | 0.7447      | 0.856931819 |          |  |
| NA         | ENSG00000280067 | -1.1092  | 0.86634  | -1.1092  | 0.86634     | -0.65794    | 0.74471  |  |
|            |                 | -1.3253  | 0.90746  | 0.74471  | 0.856931819 |             |          |  |
| MRPS16     | ENSG00000182180 | -0.65798 | 0.74472  | -1.3687  | 0.91446     | -1.8612     |          |  |
|            |                 | 0.96864  | -1.8612  | 0.96864  | 0.74472     | 0.856931819 |          |  |
| NA         | ENSG00000267424 | -0.65805 | 0.74475  | -0.65805 | 0.74475     | -0.65805    | 0.74475  |  |
|            |                 | -0.65805 | 0.74475  | 0.74475  | 0.856946104 |             |          |  |
| NA         | ENSG00000256072 | -1.2668  | 0.89738  | -1.2668  | 0.89738     | -1.2668     | 0.89738  |  |
|            |                 | -0.65817 | 0.74479  | 0.74479  | 0.856971894 |             |          |  |
| NA         | ENSG00000249236 | -0.65827 | 0.74482  | -0.65827 | 0.74482     | -1.1648     | 0.87795  |  |
|            |                 | -0.65827 | 0.74482  | 0.74482  | 0.856986178 |             |          |  |
| RBM15B     | ENSG00000259956 | -0.90652 | 0.81767  | -0.65835 | 0.74484     | -0.65835    |          |  |
|            |                 | 0.74484  | -0.65835 | 0.74484  | 0.74484     | 0.856988955 |          |  |
| SPPL2A     | ENSG00000138600 | -0.65845 | 0.74488  | -0.65845 | 0.74488     | -0.65845    |          |  |
|            |                 | 0.74488  | -0.65845 | 0.74488  | 0.74488     | 0.857014742 |          |  |
| NA         | ENSG00000273299 | -0.65859 | 0.74492  | -0.97592 | 0.83545     | -0.92585    | 0.82274  |  |
|            |                 | -0.97592 | 0.83545  | 0.74492  | 0.857040529 |             |          |  |
| KRT5       | ENSG00000186081 | -1.3177  | 0.90619  | -1.3177  | 0.90619     | -1.3177     | 0.90619  |  |
|            |                 | -0.65875 | 0.74497  | 0.74497  | 0.857068683 |             |          |  |
| RNA5SP84   | ENSG00000201610 | -0.65882 | 0.745    | -0.77456 | 0.7807      | -0.65882    | 0.745    |  |
|            |                 | -0.65882 | 0.745    | 0.745    | 0.857068683 |             |          |  |
| KRT41P     | ENSG00000225438 | -0.87361 | 0.80883  | -0.659   | 0.74505     | -0.659      |          |  |
|            |                 | 0.74505  | -0.659   | 0.74505  | 0.74505     | 0.857068683 |          |  |
| NA         | ENSG00000248137 | -0.65901 | 0.74505  | -0.65901 | 0.74505     | -0.65901    | 0.74505  |  |
|            |                 | -0.65901 | 0.74505  | 0.74505  | 0.857068683 |             |          |  |
| NA         | ENSG00000254595 | -1.0562  | 0.85455  | -0.659   | 0.74505     | -0.659      | 0.74505  |  |
|            |                 | -0.659   | 0.74505  | 0.74505  | 0.857068683 |             |          |  |
| NA         | ENSG00000221607 | -0.65899 | 0.74505  | -0.65899 | 0.74505     | -0.65899    | 0.74505  |  |
|            |                 | -0.65899 | 0.74505  | 0.74505  | 0.857068683 |             |          |  |
| RPAP2      | ENSG00000122484 | -0.65924 | 0.74513  | -0.8637  | 0.80612     | -1.7382     | 0.95892  |  |
|            |                 | -0.95453 | 0.83009  | 0.74513  | 0.857120244 |             |          |  |
| HNRNPA1P70 | ENSG00000236946 | -0.65924 | 0.74513  | -2.339   | 0.99033     | -0.65924    |          |  |
|            |                 | 0.74513  | -1.5635  | 0.94103  | 0.74513     | 0.857120244 |          |  |
| GATM       | ENSG00000171766 | -1.497   | 0.9328   | -1.497   | 0.9328      | -0.65955    | 0.74523  |  |
|            |                 | -1.5738  | 0.94223  | 0.74523  | 0.857206307 |             |          |  |
| NA         | ENSG00000271253 | -1.1041  | 0.86522  | -0.65958 | 0.74524     | -0.69959    | 0.75791  |  |
|            |                 | -0.69959 | 0.75791  | 0.74524  | 0.857206307 |             |          |  |
| GJD4       | ENSG00000177291 | -0.65971 | 0.74528  | -0.65971 | 0.74528     | -0.65971    | 0.74528  |  |
|            |                 | -0.65971 | 0.74528  | 0.74528  | 0.857223351 |             |          |  |
| LRRC19     | ENSG00000184434 | -0.65975 | 0.74529  | -0.65975 | 0.74529     | -0.65975    |          |  |
|            |                 | 0.74529  | -0.65975 | 0.74529  | 0.74529     | 0.857223351 |          |  |
| NA         | ENSG00000202310 | -0.65987 | 0.74533  | -0.65987 | 0.74533     | -0.65987    | 0.74533  |  |
|            |                 | -0.65987 | 0.74533  | 0.74533  | 0.857249124 |             |          |  |
| PIK3CD-AS1 | ENSG00000179840 | -0.65999 | 0.74537  | -0.65999 | 0.74537     | -0.65999    |          |  |
|            |                 | 0.74537  | -0.65999 | 0.74537  | 0.74537     | 0.857266165 |          |  |
| HOPX       | ENSG00000171476 | -1.2473  | 0.89386  | -0.96739 | 0.83333     | -0.66002    | 0.74538  |  |
|            |                 | -0.66002 | 0.74538  | 0.74538  | 0.857266165 |             |          |  |
| TFAM       | ENSG00000108064 | -0.66018 | 0.74543  | -0.66018 | 0.74543     | -0.66018    | 0.74543  |  |
|            |                 | -0.94122 | 0.82671  | 0.74543  | 0.857271279 |             |          |  |
| RNA5SP171  | ENSG00000212373 | -1.6814  | 0.95365  | -1.0802  | 0.85998     | -0.66021    |          |  |
|            |                 | 0.74544  | -0.66021 | 0.74544  | 0.74544     | 0.857271279 |          |  |
| HSPE1P7    | ENSG00000270945 | -0.66022 | 0.74544  | -0.66022 | 0.74544     | -0.66022    |          |  |
|            |                 | 0.74544  | -0.66022 | 0.74544  | 0.74544     | 0.857271279 |          |  |
| RNU6-1267P | ENSG00000222679 | -0.66031 | 0.74547  | -0.66031 | 0.74547     | -0.66031    |          |  |
|            |                 | 0.74547  | -0.66031 | 0.74547  | 0.74547     | 0.857271279 |          |  |
| SLC25A26   | ENSG00000144741 | -0.80066 | 0.78834  | -0.66032 | 0.74548     | -1.3081     |          |  |
|            |                 | 0.90458  | -0.92475 | 0.82245  | 0.74548     | 0.857271279 |          |  |
| OR8L1P     | ENSG00000254903 | -0.66036 | 0.74549  | -0.66036 | 0.74549     | -0.66036    |          |  |

|           |                 |          |         |             |             |          |         |  |
|-----------|-----------------|----------|---------|-------------|-------------|----------|---------|--|
|           | 0.74549         | -0.66036 | 0.74549 | 0.74549     | 0.857271279 |          |         |  |
| P2RY6     | ENSG00000171631 | -0.66053 | 0.74554 | -0.68223    | 0.75245     | -0.66053 | 0.74554 |  |
|           | -0.92509        | 0.82254  | 0.74554 | 0.857308545 |             |          |         |  |
| NA        | ENSG00000254247 | -0.66068 | 0.74559 | -0.66068    | 0.74559     | -0.66068 | 0.74559 |  |
|           | -0.87565        | 0.80939  | 0.74559 | 0.857345809 |             |          |         |  |
| MIR4637   | ENSG00000264792 | -2.1973  | 0.986   | -2.1973     | 0.986       | -0.66073 | 0.74561 |  |
|           | -0.66073        | 0.74561  | 0.74561 | 0.857348576 |             |          |         |  |
| SPACA9    | ENSG00000165698 | -0.66092 | 0.74567 | -0.83747    | 0.79884     | -0.66092 |         |  |
|           | 0.74567         | -0.66092 | 0.74567 | 0.74567     | 0.857377105 |          |         |  |
| NA        | ENSG00000234389 | -0.66093 | 0.74567 | -0.66093    | 0.74567     | -0.66093 | 0.74567 |  |
|           | -0.66093        | 0.74567  | 0.74567 | 0.857377105 |             |          |         |  |
| ERP29P1   | ENSG00000233347 | -0.66122 | 0.74576 | -0.66122    | 0.74576     | -0.66122 |         |  |
|           | 0.74576         | -0.66122 | 0.74576 | 0.74576     | 0.857460356 |          |         |  |
| ZNF232    | ENSG00000167840 | -0.66134 | 0.7458  | -0.66134    | 0.7458      | -0.66134 |         |  |
|           | 0.7458          | -0.66134 | 0.7458  | 0.7458      | 0.857486115 |          |         |  |
| NA        | ENSG00000261043 | -0.6614  | 0.74582 | -0.6614     | 0.74582     | -0.6614  | 0.74582 |  |
|           | -0.6614         | 0.74582  | 0.74582 | 0.857488878 |             |          |         |  |
| CDH23     | ENSG00000107736 | -1.5958  | 0.94473 | -1.9957     | 0.97702     | -1.9381  | 0.97369 |  |
|           | -0.66157        | 0.74588  | 0.74588 | 0.857537629 |             |          |         |  |
| PDGFC     | ENSG00000145431 | -0.99831 | 0.84094 | -0.66164    | 0.7459      | -1.1014  | 0.86463 |  |
|           | -1.1736         | 0.87973  | 0.7459  | 0.857540391 |             |          |         |  |
| NA        | ENSG00000256657 | -1.288   | 0.90112 | -0.88923    | 0.81306     | -0.6617  | 0.74592 |  |
|           | -0.7022         | 0.75872  | 0.74592 | 0.857543152 |             |          |         |  |
| KCNJ6-AS1 | ENSG00000233213 | -0.7967  | 0.78719 | -1.6247     | 0.94789     | -1.434   |         |  |
|           | 0.92421         | -0.66181 | 0.74595 | 0.74595     | 0.857548225 |          |         |  |
| NA        | ENSG00000240792 | -0.66182 | 0.74596 | -0.94292    | 0.82714     | -0.94292 | 0.82714 |  |
|           | -0.94292        | 0.82714  | 0.74596 | 0.857548225 |             |          |         |  |
| NA        | ENSG00000276127 | -1.144   | 0.87369 | -1.144      | 0.87369     | -1.144   | 0.87369 |  |
|           | -0.66191        | 0.74598  | 0.74598 | 0.857548225 |             |          |         |  |
| KCNE4     | ENSG00000152049 | -1.4696  | 0.92917 | -1.6405     | 0.94955     | -1.1586  | 0.87669 |  |
|           | -0.66198        | 0.74601  | 0.74601 | 0.857548225 |             |          |         |  |
| TM4SF20   | ENSG00000168955 | -2.1341  | 0.98358 | -2.1341     | 0.98358     | -2.1341  |         |  |
|           | 0.98358         | -0.66206 | 0.74603 | 0.74603     | 0.857548225 |          |         |  |
| NA        | ENSG00000260237 | -0.66204 | 0.74603 | -0.66204    | 0.74603     | -0.66204 | 0.74603 |  |
|           | -0.66204        | 0.74603  | 0.74603 | 0.857548225 |             |          |         |  |
| LINC00324 | ENSG00000178977 | -0.66225 | 0.74609 | -0.66225    | 0.74609     | -0.66225 |         |  |
|           | 0.74609         | -0.66225 | 0.74609 | 0.74609     | 0.857582256 |          |         |  |
| MTND4P35  | ENSG00000270906 | -0.66227 | 0.7461  | -0.66227    | 0.7461      | -0.66227 |         |  |
|           | 0.7461          | -0.66227 | 0.7461  | 0.7461      | 0.857582256 |          |         |  |
| HOXC8     | ENSG00000037965 | -0.66234 | 0.74612 | -1.5271     | 0.93664     | -0.66234 | 0.74612 |  |
|           | -0.66234        | 0.74612  | 0.74612 | 0.857582256 |             |          |         |  |
| ZP3P2     | ENSG00000226066 | -0.66236 | 0.74613 | -0.66236    | 0.74613     | -1.6905  | 0.95453 |  |
|           | -1.7145         | 0.95678  | 0.74613 | 0.857582256 |             |          |         |  |
| NA        | ENSG00000255933 | -0.6625  | 0.74617 | -0.6625     | 0.74617     | -0.6625  | 0.74617 |  |
|           | -0.6625         | 0.74617  | 0.74617 | 0.857608003 |             |          |         |  |
| LCN6      | ENSG00000267206 | -0.66262 | 0.74621 | -0.66262    | 0.74621     | -0.66262 | 0.74621 |  |
|           | -0.66262        | 0.74621  | 0.74621 | 0.857633748 |             |          |         |  |
| MIR5188   | ENSG00000265345 | -0.66296 | 0.74632 | -0.66296    | 0.74632     | -0.66296 |         |  |
|           | 0.74632         | -0.66296 | 0.74632 | 0.74632     | 0.857731207 |          |         |  |
| TRAJ38    | ENSG00000211851 | -0.66299 | 0.74633 | -0.66299    | 0.74633     | -0.66299 |         |  |
|           | 0.74633         | -0.66299 | 0.74633 | 0.74633     | 0.857731207 |          |         |  |
| NA        | ENSG00000212411 | -0.66314 | 0.74638 | -0.99547    | 0.84025     | -0.66314 | 0.74638 |  |
|           | -0.66314        | 0.74638  | 0.74638 | 0.857762459 |             |          |         |  |
| NA        | ENSG00000244086 | -0.66319 | 0.7464  | -0.66319    | 0.7464      | -0.66319 | 0.7464  |  |
|           | -0.66319        | 0.7464   | 0.7464  | 0.857762459 |             |          |         |  |
| FMO2      | ENSG00000094963 | -1.9567  | 0.97481 | -0.66322    | 0.74641     | -0.93329 | 0.82466 |  |
|           | -2.074          | 0.98096  | 0.74641 | 0.857762459 |             |          |         |  |
| RPS29P1   | ENSG00000242293 | -0.66337 | 0.74645 | -0.89865    | 0.81558     | -0.77199 |         |  |
|           | 0.77994         | -0.66337 | 0.74645 | 0.74645     | 0.857788197 |          |         |  |
| RPS3AP37  | ENSG00000227583 | -0.66352 | 0.7465  | -0.66352    | 0.7465      | -0.66352 |         |  |
|           | 0.7465          | -0.66352 | 0.7465  | 0.7465      | 0.857796461 |          |         |  |
| NA        | ENSG00000232290 | -0.84301 | 0.80039 | -0.84301    | 0.80039     | -0.66355 | 0.74651 |  |



|           |                 |          |          |          |             |             |         |  |
|-----------|-----------------|----------|----------|----------|-------------|-------------|---------|--|
|           |                 | -0.84301 | 0.80039  | 0.74651  | 0.857796461 |             |         |  |
| NA        | ENSG00000259319 | -2.0648  | 0.98053  | -0.66354 | 0.74651     | -0.66354    | 0.74651 |  |
|           |                 | -0.66354 | 0.74651  | 0.74651  | 0.857796461 |             |         |  |
| NA        | ENSG00000236846 | -0.66365 | 0.74654  | -0.66365 | 0.74654     | -0.66365    | 0.74654 |  |
|           |                 | -0.66365 | 0.74654  | 0.74654  | 0.857810705 |             |         |  |
| TDGP1     | ENSG00000255725 | -0.66369 | 0.74656  | -0.66369 | 0.74656     | -0.66369    | 0.74656 |  |
|           |                 | -0.66369 | 0.74656  | 0.74656  | 0.857813459 |             |         |  |
| NA        | ENSG00000277831 | -0.66375 | 0.74658  | -1.0476  | 0.85259     | -1.0476     | 0.85259 |  |
|           |                 | -1.0476  | 0.85259  | 0.74658  | 0.857816213 |             |         |  |
| GRM5      | ENSG00000168959 | -1.4306  | 0.92373  | -0.94261 | 0.82706     | -0.66384    | 0.7466  |  |
|           |                 | -0.74105 | 0.77067  | 0.7466   | 0.857818966 |             |         |  |
| MRPL49P2  | ENSG00000253934 | -0.66409 | 0.74668  | -0.66409 | 0.74668     | -0.66409    |         |  |
|           |                 | 0.74668  | -0.66409 | 0.74668  | 0.74668     | 0.857881919 |         |  |
| RPL10L    | ENSG00000165496 | -0.66412 | 0.74669  | -0.66412 | 0.74669     | -0.66412    |         |  |
|           |                 | 0.74669  | -0.66412 | 0.74669  | 0.74669     | 0.857881919 |         |  |
| NA        | ENSG00000230947 | -0.66417 | 0.74671  | -0.66417 | 0.74671     | -0.66417    | 0.74671 |  |
|           |                 | -0.66417 | 0.74671  | 0.74671  | 0.857884671 |             |         |  |
| OSGEP     | ENSG00000092094 | -0.66476 | 0.7469   | -0.66476 | 0.7469      | -1.2438     | 0.89321 |  |
|           |                 | -1.3943  | 0.91839  | 0.7469   | 0.858059253 |             |         |  |
| NA        | ENSG00000228585 | -0.66479 | 0.74691  | -0.66479 | 0.74691     | -0.66479    | 0.74691 |  |
|           |                 | -0.66479 | 0.74691  | 0.74691  | 0.858059253 |             |         |  |
| JMJD6     | ENSG00000070495 | -0.66494 | 0.74695  | -0.66494 | 0.74695     | -0.66494    | 0.74695 |  |
|           |                 | -0.66494 | 0.74695  | 0.74695  | 0.858059253 |             |         |  |
| NA        | ENSG00000201554 | -0.66492 | 0.74695  | -0.66492 | 0.74695     | -0.66492    | 0.74695 |  |
|           |                 | -0.66492 | 0.74695  | 0.74695  | 0.858059253 |             |         |  |
| NA        | ENSG00000282978 | -0.8031  | 0.78904  | -0.66492 | 0.74695     | -0.66492    | 0.74695 |  |
|           |                 | -0.66492 | 0.74695  | 0.74695  | 0.858059253 |             |         |  |
| EIF2AP4   | ENSG00000227395 | -1.1883  | 0.88264  | -1.1679  | 0.87858     | -0.66505    |         |  |
|           |                 | 0.74699  | -0.66505 | 0.74699  | 0.74699     | 0.858084974 |         |  |
| NA        | ENSG00000264735 | -0.66525 | 0.74705  | -1.22    | 0.88877     | -0.66525    | 0.74705 |  |
|           |                 | -0.94197 | 0.8269   | 0.74705  | 0.858133669 |             |         |  |
| NA        | ENSG00000277548 | -0.66548 | 0.74713  | -0.66548 | 0.74713     | -0.66548    | 0.74713 |  |
|           |                 | -0.66548 | 0.74713  | 0.74713  | 0.858196592 |             |         |  |
| NA        | ENSG00000260937 | -0.8843  | 0.81173  | -0.83344 | 0.7977      | -1.7971     | 0.96384 |  |
|           |                 | -0.66551 | 0.74714  | 0.74714  | 0.858196592 |             |         |  |
| NA        | ENSG00000207395 | -0.66562 | 0.74717  | -0.66562 | 0.74717     | -0.66562    | 0.74717 |  |
|           |                 | -0.66562 | 0.74717  | 0.74717  | 0.858210821 |             |         |  |
| PRR23C    | ENSG00000233701 | -0.66573 | 0.74721  | -0.66573 | 0.74721     | -0.66573    |         |  |
|           |                 | 0.74721  | -0.66573 | 0.74721  | 0.74721     | 0.858236537 |         |  |
| NA        | ENSG00000207127 | -0.66593 | 0.74727  | -0.66593 | 0.74727     | -0.66593    | 0.74727 |  |
|           |                 | -0.66593 | 0.74727  | 0.74727  | 0.858276478 |             |         |  |
| MRPL55    | ENSG00000162910 | -0.66595 | 0.74728  | -0.66595 | 0.74728     | -0.66595    |         |  |
|           |                 | 0.74728  | -0.66595 | 0.74728  | 0.74728     | 0.858276478 |         |  |
| SLC22A9   | ENSG00000149742 | -1.32    | 0.90659  | -1.1502  | 0.87497     | -0.66608    | 0.74732 |  |
|           |                 | -1.0047  | 0.84249  | 0.74732  | 0.85830219  |             |         |  |
| CCDC137   | ENSG00000185298 | -0.92035 | 0.82131  | -0.66621 | 0.74736     | -0.66621    |         |  |
|           |                 | 0.74736  | -0.87038 | 0.80795  | 0.74736     | 0.8583279   |         |  |
| MIR1272   | ENSG00000221033 | -0.66637 | 0.74741  | -0.66637 | 0.74741     | -0.66637    |         |  |
|           |                 | 0.74741  | -0.66637 | 0.74741  | 0.74741     | 0.858365094 |         |  |
| YES1P1    | ENSG00000224003 | -0.66645 | 0.74744  | -0.66645 | 0.74744     | -0.66645    |         |  |
|           |                 | 0.74744  | -0.66645 | 0.74744  | 0.74744     | 0.858379317 |         |  |
| NA        | ENSG00000261024 | -0.66656 | 0.74747  | -0.75488 | 0.77484     | -0.97053    | 0.83411 |  |
|           |                 | -0.75488 | 0.77484  | 0.74747  | 0.85839354  |             |         |  |
| NA        | ENSG00000275094 | -0.6666  | 0.74749  | -0.6666  | 0.74749     | -0.6666     | 0.74749 |  |
|           |                 | -0.6666  | 0.74749  | 0.74749  | 0.858396279 |             |         |  |
| ARMC9     | ENSG00000135931 | -1.6653  | 0.95207  | -1.4593  | 0.92776     | -0.66719    | 0.74768 |  |
|           |                 | -1.5111  | 0.93462  | 0.74768  | 0.858541745 |             |         |  |
| NAV2-IT1  | ENSG00000255270 | -0.66721 | 0.74768  | -0.66721 | 0.74768     | -0.66721    |         |  |
|           |                 | 0.74768  | -0.66721 | 0.74768  | 0.74768     | 0.858541745 |         |  |
| RN7SKP126 | ENSG00000223075 | -0.66726 | 0.7477   | -0.66726 | 0.7477      | -0.66726    |         |  |
|           |                 | 0.7477   | -0.66726 | 0.7477   | 0.7477      | 0.858541745 |         |  |
| MTCYBP7   | ENSG00000227789 | -0.6673  | 0.74771  | -0.6673  | 0.74771     | -0.6673     |         |  |

|             |                 |          |         |             |             |          |         |
|-------------|-----------------|----------|---------|-------------|-------------|----------|---------|
|             | 0.74771         | -0.6673  | 0.74771 | 0.74771     | 0.858541745 |          |         |
| ZNF100      | ENSG00000197020 | -1.5437  | 0.93866 | -0.66734    | 0.74772     | -0.86013 |         |
|             | 0.80514         | -1.0963  | 0.86352 | 0.74772     | 0.858541745 |          |         |
| RPL12P25    | ENSG00000235330 | -0.66736 | 0.74773 | -0.66736    | 0.74773     | -0.66736 |         |
|             | 0.74773         | -0.66736 | 0.74773 | 0.74773     | 0.858541745 |          |         |
| MPI         | ENSG00000178802 | -0.90013 | 0.81597 | -1.0054     | 0.84266     | -0.6674  | 0.74774 |
|             | -0.92736        | 0.82313  | 0.74774 | 0.858541745 |             |          |         |
| KCTD20      | ENSG00000112078 | -1.2596  | 0.8961  | -1.2606     | 0.89628     | -0.66759 |         |
|             | 0.7478          | -1.2408  | 0.89267 | 0.7478      | 0.858561429 |          |         |
| ARPC2       | ENSG00000163466 | -0.95238 | 0.82955 | -0.66759    | 0.7478      | -1.036   | 0.84989 |
|             | -0.94243        | 0.82701  | 0.7478  | 0.858561429 |             |          |         |
| NA          | ENSG00000256098 | -0.66761 | 0.74781 | -0.66761    | 0.74781     | -0.66761 | 0.74781 |
|             | -0.66761        | 0.74781  | 0.74781 | 0.858561429 |             |          |         |
| NA          | ENSG00000253403 | -0.66769 | 0.74783 | -0.66769    | 0.74783     | -0.66769 | 0.74783 |
|             | -0.66769        | 0.74783  | 0.74783 | 0.858564163 |             |          |         |
| PHBP19      | ENSG00000257246 | -0.66782 | 0.74787 | -0.66782    | 0.74787     | -0.66782 |         |
|             | 0.74787         | -0.66782 | 0.74787 | 0.74787     | 0.858572364 |          |         |
| NA          | ENSG00000229695 | -0.66786 | 0.74789 | -0.66786    | 0.74789     | -0.66786 | 0.74789 |
|             | -0.66786        | 0.74789  | 0.74789 | 0.858572364 |             |          |         |
| TRBV12-1    | ENSG00000244661 | -1.4033  | 0.91973 | -0.66786    | 0.74789     | -0.66786 |         |
|             | 0.74789         | -0.66786 | 0.74789 | 0.74789     | 0.858572364 |          |         |
| KRTAP10-12  | ENSG00000189169 | -0.66808 | 0.74796 | -0.66808    | 0.74796     | -0.66808 |         |
|             | 0.74796         | -0.66808 | 0.74796 | 0.74796     | 0.858620465 |          |         |
| NA          | ENSG00000235083 | -1.9684  | 0.97549 | -0.66818    | 0.74799     | -0.66818 | 0.74799 |
|             | -0.66818        | 0.74799  | 0.74799 | 0.858620465 |             |          |         |
| FRK         | ENSG00000111816 | -1.029   | 0.84826 | -0.66822    | 0.748       | -0.81587 | 0.79271 |
|             | -1.5376         | 0.93793  | 0.748   | 0.858620465 |             |          |         |
| OR8B4       | ENSG00000280090 | -0.66826 | 0.74801 | -0.66826    | 0.74801     | -0.66826 | 0.74801 |
|             | -0.66826        | 0.74801  | 0.74801 | 0.858620465 |             |          |         |
| CD164L2     | ENSG00000174950 | -0.66826 | 0.74802 | -0.66826    | 0.74802     | -0.66826 |         |
|             | 0.74802         | -0.66826 | 0.74802 | 0.74802     | 0.858620465 |          |         |
| CYSTM1      | ENSG00000120306 | -1.2498  | 0.89431 | -0.91542    | 0.82001     | -0.66837 |         |
|             | 0.74805         | -1.0247  | 0.84725 | 0.74805     | 0.858634675 |          |         |
| ART5        | ENSG00000167311 | -0.66849 | 0.74809 | -1.3684     | 0.91441     | -0.66849 | 0.74809 |
|             | -0.66849        | 0.74809  | 0.74809 | 0.858651616 |             |          |         |
| RBMS2       | ENSG00000076067 | -0.71232 | 0.76187 | -0.71994    | 0.76422     | -0.73844 | 0.76988 |
|             | -0.66853        | 0.7481   | 0.7481  | 0.858651616 |             |          |         |
| RN7SL152P   | ENSG00000242102 | -1.1529  | 0.87552 | -1.1529     | 0.87552     | -1.1529  |         |
|             | 0.87552         | -0.66872 | 0.74816 | 0.74816     | 0.858680032 |          |         |
| RNU6ATAC13P | ENSG00000251961 | -1.2588  | 0.89595 | -1.4045     | 0.91992     | -1.5197  |         |
|             | 0.9357          | -0.6687  | 0.74816 | 0.74816     | 0.858680032 |          |         |
| LINC00603   | ENSG00000250048 | -0.66888 | 0.74821 | -1.9878     | 0.97658     | -1.7486  |         |
|             | 0.95982         | -2.061   | 0.98035 | 0.74821     | 0.858717193 |          |         |
| SELENOTP1   | ENSG00000233846 | -0.66891 | 0.74823 | -0.66891    | 0.74823     | -0.66891 |         |
|             | 0.74823         | -0.66891 | 0.74823 | 0.74823     | 0.858719922 |          |         |
| PPIAP6      | ENSG00000258477 | -1.0289  | 0.84823 | -1.1012     | 0.86459     | -0.66903 |         |
|             | 0.74826         | -1.4838  | 0.93107 | 0.74826     | 0.858730838 |          |         |
| LINC02381   | ENSG00000250742 | -1.2504  | 0.89443 | -0.66916    | 0.7483      | -1.2504  |         |
|             | 0.89443         | -1.2504  | 0.89443 | 0.7483      | 0.858730838 |          |         |
| NA          | ENSG00000278344 | -0.66916 | 0.7483  | -0.66916    | 0.7483      | -0.66916 | 0.7483  |
|             | -0.66916        | 0.7483   | 0.7483  | 0.858730838 |             |          |         |
| MIR561      | ENSG00000207951 | -0.66917 | 0.74831 | -0.66917    | 0.74831     | -0.66917 |         |
|             | 0.74831         | -0.66917 | 0.74831 | 0.74831     | 0.858730838 |          |         |
| RPS24P12    | ENSG00000220237 | -0.66957 | 0.74843 | -0.66957    | 0.74843     | -0.66957 |         |
|             | 0.74843         | -0.66957 | 0.74843 | 0.74843     | 0.85883957  |          |         |
| OR10AE3P    | ENSG00000272837 | -0.66958 | 0.74844 | -0.89609    | 0.8149      | -0.89609 |         |
|             | 0.8149          | -0.89609 | 0.8149  | 0.74844     | 0.85883957  |          |         |
| IGHV3-69-1  | ENSG00000282600 | -0.66968 | 0.74847 | -1.9477     | 0.97427     | -1.9477  |         |
|             | 0.97427         | -1.9477  | 0.97427 | 0.74847     | 0.858853771 |          |         |
| RPLP0P1     | ENSG00000226229 | -0.66986 | 0.74853 | -0.66986    | 0.74853     | -0.66986 |         |
|             | 0.74853         | -0.66986 | 0.74853 | 0.74853     | 0.858902395 |          |         |
| CDHR4       | ENSG00000187492 | -1.4017  | 0.91949 | -2.1528     | 0.98433     | -2.0056  | 0.97755 |

|             |                 |          |         |             |             |          |         |  |
|-------------|-----------------|----------|---------|-------------|-------------|----------|---------|--|
|             | -0.66992        | 0.74855  | 0.74855 | 0.858905119 |             |          |         |  |
| GSDMB       | ENSG00000073605 | -0.67006 | 0.74859 | -0.67006    | 0.74859     | -0.67006 | 0.74859 |  |
|             | -0.81555        | 0.79262  | 0.74859 | 0.858930791 |             |          |         |  |
| NA          | ENSG00000257087 | -0.67038 | 0.74869 | -0.67038    | 0.74869     | -0.67038 | 0.74869 |  |
|             | -0.67038        | 0.74869  | 0.74869 | 0.8590078   |             |          |         |  |
| NA          | ENSG00000267604 | -0.67041 | 0.7487  | -0.67041    | 0.7487      | -0.67041 | 0.7487  |  |
|             | -0.67041        | 0.7487   | 0.7487  | 0.8590078   |             |          |         |  |
| HSPD1P7     | ENSG00000215005 | -0.67044 | 0.74871 | -0.67044    | 0.74871     | -0.67044 |         |  |
|             | 0.74871         | -0.67044 | 0.74871 | 0.74871     | 0.8590078   |          |         |  |
| LINC01606   | ENSG00000253301 | -1.0916  | 0.86249 | -1.2391     | 0.89234     | -0.67054 |         |  |
|             | 0.74874         | -0.67054 | 0.74874 | 0.74874     | 0.859013243 |          |         |  |
| SNORD114-26 | ENSG00000200413 | -0.67058 | 0.74875 | -0.67058    | 0.74875     | -0.67058 |         |  |
|             | 0.74875         | -0.67058 | 0.74875 | 0.74875     | 0.859013243 |          |         |  |
| FCHO1       | ENSG00000130475 | -1.1029  | 0.86497 | -0.9348     | 0.82506     | -0.85483 | 0.80368 |  |
|             | -0.67063        | 0.74877  | 0.74877 | 0.859015964 |             |          |         |  |
| PRPH2       | ENSG00000112619 | -0.96468 | 0.83265 | -0.94506    | 0.82768     | -0.67073 | 0.7488  |  |
|             | -0.83413        | 0.79789  | 0.7488  | 0.859030157 |             |          |         |  |
| ELOCP33     | ENSG00000271278 | -0.67079 | 0.74882 | -1.3169     | 0.90607     | -1.3169  |         |  |
|             | 0.90607         | -1.3169  | 0.90607 | 0.74882     | 0.859032878 |          |         |  |
| GPATCH11    | ENSG00000152133 | -0.67099 | 0.74889 | -0.67099    | 0.74889     | -0.67099 |         |  |
|             | 0.74889         | -0.67099 | 0.74889 | 0.74889     | 0.859082423 |          |         |  |
| EIF2AK3-DT  | ENSG00000234028 | -0.67107 | 0.74891 | -0.67107    | 0.74891     | -0.67107 |         |  |
|             | 0.74891         | -0.67107 | 0.74891 | 0.74891     | 0.859082423 |          |         |  |
| HMGCS2      | ENSG00000134240 | -1.1157  | 0.86772 | -0.8269     | 0.79585     | -0.67109 |         |  |
|             | 0.74892         | -0.67109 | 0.74892 | 0.74892     | 0.859082423 |          |         |  |
| EEF1GP6     | ENSG00000216518 | -0.67116 | 0.74894 | -0.67116    | 0.74894     | -0.67116 |         |  |
|             | 0.74894         | -0.67116 | 0.74894 | 0.74894     | 0.859082423 |          |         |  |
| NUDT1       | ENSG00000106268 | -0.67131 | 0.74899 | -0.67131    | 0.74899     | -0.67131 | 0.74899 |  |
|             | -0.67131        | 0.74899  | 0.74899 | 0.859082423 |             |          |         |  |
| MEF2C-AS2   | ENSG00000245864 | -0.67145 | 0.74903 | -0.67145    | 0.74903     | -0.67145 |         |  |
|             | 0.74903         | -0.67145 | 0.74903 | 0.74903     | 0.859082423 |          |         |  |
| TMEM67      | ENSG00000164953 | -1.3339  | 0.90888 | -1.1726     | 0.87953     | -1.0557  |         |  |
|             | 0.85444         | -0.67148 | 0.74904 | 0.74904     | 0.859082423 |          |         |  |
| CNTFR-AS1   | ENSG00000237159 | -0.99516 | 0.84017 | -0.67149    | 0.74904     | -1.0956  |         |  |
|             | 0.86338         | -1.0956  | 0.86338 | 0.74904     | 0.859082423 |          |         |  |
| IFNB1       | ENSG00000171855 | -0.67153 | 0.74906 | -0.67153    | 0.74906     | -0.67153 | 0.74906 |  |
|             | -0.67153        | 0.74906  | 0.74906 | 0.859082423 |             |          |         |  |
| CYP51A1P3   | ENSG00000215223 | -0.67154 | 0.74906 | -0.67154    | 0.74906     | -0.67154 |         |  |
|             | 0.74906         | -0.67154 | 0.74906 | 0.74906     | 0.859082423 |          |         |  |
| NA          | ENSG00000240950 | -0.67162 | 0.74909 | -0.67162    | 0.74909     | -0.67162 | 0.74909 |  |
|             | -0.67162        | 0.74909  | 0.74909 | 0.859082423 |             |          |         |  |
| OXLD1       | ENSG00000204237 | -0.67167 | 0.7491  | -0.67167    | 0.7491      | -0.67167 | 0.7491  |  |
|             | -0.67167        | 0.7491   | 0.7491  | 0.859082423 |             |          |         |  |
| NA          | ENSG00000272567 | -0.67166 | 0.7491  | -0.67166    | 0.7491      | -0.67166 | 0.7491  |  |
|             | -0.67166        | 0.7491   | 0.7491  | 0.859082423 |             |          |         |  |
| NA          | ENSG00000257616 | -0.67171 | 0.74911 | -0.67171    | 0.74911     | -0.67171 | 0.74911 |  |
|             | -0.67171        | 0.74911  | 0.74911 | 0.859082423 |             |          |         |  |
| NA          | ENSG00000266980 | -0.67187 | 0.74917 | -0.67187    | 0.74917     | -0.67187 | 0.74917 |  |
|             | -0.67187        | 0.74917  | 0.74917 | 0.859131012 |             |          |         |  |
| NA          | ENSG00000260659 | -0.67201 | 0.74921 | -0.67201    | 0.74921     | -0.67201 | 0.74921 |  |
|             | -0.67201        | 0.74921  | 0.74921 | 0.859141881 |             |          |         |  |
| NA          | ENSG00000279812 | -0.67207 | 0.74923 | -0.67207    | 0.74923     | -0.67207 | 0.74923 |  |
|             | -0.67207        | 0.74923  | 0.74923 | 0.859141881 |             |          |         |  |
| SNORD115-32 | ENSG00000200949 | -0.67213 | 0.74925 | -0.67213    | 0.74925     | -0.67213 |         |  |
|             | 0.74925         | -0.67213 | 0.74925 | 0.74925     | 0.859141881 |          |         |  |
| RNU7-113P   | ENSG00000238735 | -0.67213 | 0.74925 | -0.67213    | 0.74925     | -0.67213 |         |  |
|             | 0.74925         | -0.67213 | 0.74925 | 0.74925     | 0.859141881 |          |         |  |
| IGHV4-80    | ENSG00000283906 | -0.67231 | 0.74931 | -0.67231    | 0.74931     | -0.67231 |         |  |
|             | 0.74931         | -0.67231 | 0.74931 | 0.74931     | 0.859190463 |          |         |  |
| EIF4EBP3    | ENSG00000243056 | -0.67243 | 0.74934 | -0.67243    | 0.74934     | -0.67243 |         |  |
|             | 0.74934         | -0.67243 | 0.74934 | 0.74934     | 0.859195894 |          |         |  |
| NA          | ENSG00000225507 | -0.67245 | 0.74935 | -0.67245    | 0.74935     | -0.67245 | 0.74935 |  |

|             |                 |          |          |         |             |             |          |         |
|-------------|-----------------|----------|----------|---------|-------------|-------------|----------|---------|
|             |                 | -0.67245 | 0.74935  | 0.74935 | 0.859195894 |             |          |         |
| NA          | ENSG00000272019 | -0.6726  | 0.7494   | 0.7494  | -0.6726     | 0.7494      | -0.6726  | 0.7494  |
|             |                 | -0.6726  | 0.7494   | 0.7494  | 0.859229684 |             |          |         |
| RN7SL395P   | ENSG00000244307 | -0.67274 | 0.74944  | 0.74944 | -0.67274    | 0.74944     | -0.67274 |         |
|             |                 | 0.74944  | -0.67274 | 0.74944 | 0.74944     | 0.859229684 |          |         |
| SNORD116-19 | ENSG00000207460 | -0.67275 | 0.74945  | 0.74945 | -0.67275    | 0.74945     | -0.67275 |         |
|             |                 | 0.74945  | -0.67275 | 0.74945 | 0.74945     | 0.859229684 |          |         |
| NA          | ENSG00000279513 | -0.67277 | 0.74945  | 0.74945 | -0.67277    | 0.74945     | -0.67277 | 0.74945 |
|             |                 | -0.67277 | 0.74945  | 0.74945 | 0.859229684 |             |          |         |
| NA          | ENSG00000269846 | -0.67283 | 0.74947  | 0.74947 | -0.67283    | 0.74947     | -0.67283 | 0.74947 |
|             |                 | -0.67283 | 0.74947  | 0.74947 | 0.859232399 |             |          |         |
| NA          | ENSG00000260601 | -0.67294 | 0.74951  | 0.74951 | -0.67294    | 0.74951     | -0.67294 | 0.74951 |
|             |                 | -1.1417  | 0.87322  | 0.74951 | 0.859258041 |             |          |         |
| NA          | ENSG00000264574 | -0.67301 | 0.74953  | 0.74953 | -0.67301    | 0.74953     | -0.67301 | 0.74953 |
|             |                 | -0.67301 | 0.74953  | 0.74953 | 0.859260755 |             |          |         |
| RNU6-155P   | ENSG00000252156 | -0.67317 | 0.74958  | 0.74958 | -0.67317    | 0.74958     | -0.67317 |         |
|             |                 | 0.74958  | -0.67317 | 0.74958 | 0.74958     | 0.859297859 |          |         |
| SPINK7      | ENSG00000145879 | -0.98255 | 0.83708  | 0.83708 | -0.67372    | 0.74976     | -0.67372 |         |
|             |                 | 0.74976  | -0.67372 | 0.74976 | 0.74976     | 0.859483987 |          |         |
| ARHGFE39    | ENSG00000137135 | -0.8089  | 0.79071  | 0.79071 | -1.3414     | 0.9101      | -0.73396 |         |
|             |                 | 0.76851  | -0.67385 | 0.7498  | 0.7498      | 0.859494818 |          |         |
| NA          | ENSG00000248884 | -1.4652  | 0.92857  | 0.92857 | -0.67394    | 0.74982     | -0.67394 | 0.74982 |
|             |                 | -1.8223  | 0.96579  | 0.74982 | 0.859494818 |             |          |         |
| NA          | ENSG00000269021 | -0.67396 | 0.74983  | 0.74983 | -0.67396    | 0.74983     | -0.67396 | 0.74983 |
|             |                 | -0.67396 | 0.74983  | 0.74983 | 0.859494818 |             |          |         |
| NA          | ENSG00000257658 | -0.67398 | 0.74984  | 0.74984 | -0.67398    | 0.74984     | -1.0037  | 0.84224 |
|             |                 | -0.67398 | 0.74984  | 0.74984 | 0.859494818 |             |          |         |
| NA          | ENSG00000275826 | -0.67406 | 0.74986  | 0.74986 | -0.67406    | 0.74986     | -0.67406 | 0.74986 |
|             |                 | -0.67406 | 0.74986  | 0.74986 | 0.859497526 |             |          |         |
| NA          | ENSG00000241774 | -0.67419 | 0.7499   | 0.7499  | -0.67419    | 0.7499      | -0.67419 | 0.7499  |
|             |                 | -0.67419 | 0.7499   | 0.7499  | 0.859514402 |             |          |         |
| NA          | ENSG00000258096 | -0.6742  | 0.74991  | 0.74991 | -0.6742     | 0.74991     | -0.6742  | 0.74991 |
|             |                 | -0.6742  | 0.74991  | 0.74991 | 0.859514402 |             |          |         |
| THUMPD1P1   | ENSG00000215317 | -0.88353 | 0.81153  | 0.81153 | -0.88353    | 0.81153     | -0.88353 |         |
|             |                 | 0.81153  | -0.67434 | 0.74995 | 0.74995     | 0.859524593 |          |         |
| LINC02046   | ENSG00000242440 | -0.81381 | 0.79212  | 0.79212 | -0.85042    | 0.80245     | -0.81441 |         |
|             |                 | 0.7923   | -0.67436 | 0.74996 | 0.74996     | 0.859524593 |          |         |
| SLC1A1      | ENSG00000106688 | -0.67452 | 0.75001  | 0.75001 | -1.0203     | 0.8462      | -1.329   |         |
|             |                 | 0.90807  | -1.5755  | 0.94243 | 0.75001     | 0.859524593 |          |         |
| RNF152      | ENSG00000176641 | -1.2599  | 0.89614  | 0.89614 | -0.77625    | 0.7812      | -0.67452 |         |
|             |                 | 0.75001  | -1.0653  | 0.85663 | 0.75001     | 0.859524593 |          |         |
| MIR548A3    | ENSG00000208032 | -0.67454 | 0.75002  | 0.75002 | -0.67454    | 0.75002     | -0.67454 |         |
|             |                 | 0.75002  | -0.67454 | 0.75002 | 0.75002     | 0.859524593 |          |         |
| MIEF2       | ENSG00000177427 | -0.6746  | 0.75003  | 0.75003 | -0.6746     | 0.75003     | -0.6746  | 0.75003 |
|             |                 | -1.7719  | 0.96179  | 0.75003 | 0.859524593 |             |          |         |
| RECQL       | ENSG00000004700 | -0.67467 | 0.75006  | 0.75006 | -0.67467    | 0.75006     | -0.67467 | 0.75006 |
|             |                 | -1.1397  | 0.8728   | 0.75006 | 0.859524593 |             |          |         |
| LINC01143   | ENSG00000237751 | -1.1177  | 0.86815  | 0.86815 | -0.81555    | 0.79262     | -1.3034  |         |
|             |                 | 0.90378  | -0.67468 | 0.75006 | 0.75006     | 0.859524593 |          |         |
| NA          | ENSG00000231424 | -0.67491 | 0.75013  | 0.75013 | -0.67491    | 0.75013     | -0.67491 | 0.75013 |
|             |                 | -0.67491 | 0.75013  | 0.75013 | 0.859584595 |             |          |         |
| LIN28AP2    | ENSG00000228473 | -0.6751  | 0.75019  | 0.75019 | -0.6751     | 0.75019     | -0.6751  |         |
|             |                 | 0.75019  | -0.6751  | 0.75019 | 0.75019     | 0.859633135 |          |         |
| DLC1        | ENSG00000164741 | -1.7713  | 0.96175  | 0.96175 | -0.80854    | 0.79061     | -1.4167  | 0.92171 |
|             |                 | -0.67515 | 0.75021  | 0.75021 | 0.859635838 |             |          |         |
| NA          | ENSG00000228172 | -0.67535 | 0.75027  | 0.75027 | -0.67535    | 0.75027     | -0.67535 | 0.75027 |
|             |                 | -0.67535 | 0.75027  | 0.75027 | 0.859684375 |             |          |         |
| RPL17P37    | ENSG00000241590 | -0.86638 | 0.80686  | 0.80686 | -0.86638    | 0.80686     | -0.86638 |         |
|             |                 | 0.80686  | -0.67546 | 0.75031 | 0.75031     | 0.859701237 |          |         |
| NA          | ENSG00000255517 | -0.67551 | 0.75032  | 0.75032 | -0.67551    | 0.75032     | -0.67551 | 0.75032 |
|             |                 | -0.67551 | 0.75032  | 0.75032 | 0.859701237 |             |          |         |
| RNU6-629P   | ENSG00000206788 | -0.67558 | 0.75035  | 0.75035 | -0.67558    | 0.75035     | -0.67558 |         |

|             |                 |          |         |             |             |          |          |
|-------------|-----------------|----------|---------|-------------|-------------|----------|----------|
|             | 0.75035         | -0.67558 | 0.75035 | 0.75035     | 0.859703287 |          |          |
| SNORA80B    | ENSG00000206633 | -0.67569 | 0.75038 | 0.75038     | -0.67569    | 0.75038  | -0.67569 |
|             | 0.75038         | -0.67569 | 0.75038 | 0.75038     | 0.859703287 |          |          |
| SNORD51     | ENSG00000207047 | -0.6757  | 0.75038 | 0.75038     | -0.6757     | 0.75038  | -0.6757  |
|             | 0.75038         | -0.6757  | 0.75038 | 0.75038     | 0.859703287 |          |          |
| NA          | ENSG00000257564 | -0.67576 | 0.7504  | -0.67576    | 0.7504      | -0.67576 | 0.7504   |
|             | -0.67576        | 0.7504   | 0.7504  | 0.859703287 |             |          |          |
| OR5M7P      | ENSG00000254490 | -0.67578 | 0.75041 | -0.67578    | 0.75041     | -0.67578 |          |
|             | 0.75041         | -0.67578 | 0.75041 | 0.75041     | 0.859703287 |          |          |
| RN7SL100P   | ENSG00000240306 | -0.67602 | 0.75049 | -0.67602    | 0.75049     | -0.67602 |          |
|             | 0.75049         | -0.67602 | 0.75049 | 0.75049     | 0.859774725 |          |          |
| NA          | ENSG00000283312 | -1.1442  | 0.87372 | -0.67613    | 0.75052     | -0.67613 | 0.75052  |
|             | -0.67613        | 0.75052  | 0.75052 | 0.859782164 |             |          |          |
| OR5AL1      | ENSG00000272987 | -0.67619 | 0.75054 | -0.70904    | 0.76085     | -0.67619 |          |
|             | 0.75054         | -0.67619 | 0.75054 | 0.75054     | 0.859782164 |          |          |
| NA          | ENSG00000272954 | -0.6763  | 0.75058 | -0.6763     | 0.75058     | -0.6763  | 0.75058  |
|             | -0.6763         | 0.75058  | 0.75058 | 0.859782164 |             |          |          |
| GLI3        | ENSG00000106571 | -1.3641  | 0.91373 | -0.67637    | 0.7506      | -0.90938 | 0.81843  |
|             | -1.4724         | 0.92954  | 0.7506  | 0.859782164 |             |          |          |
| LINC02045   | ENSG00000243347 | -0.67637 | 0.7506  | -1.0783     | 0.85954     | -0.67637 |          |
|             | 0.7506          | -0.67637 | 0.7506  | 0.7506      | 0.859782164 |          |          |
| RNU7-70P    | ENSG00000252750 | -0.67641 | 0.75061 | -0.67641    | 0.75061     | -0.67641 |          |
|             | 0.75061         | -0.67641 | 0.75061 | 0.75061     | 0.859782164 |          |          |
| TXNP4       | ENSG00000262519 | -0.77467 | 0.78073 | -0.67643    | 0.75062     | -0.77467 | 0.78073  |
|             | -0.77467        | 0.78073  | 0.75062 | 0.859782164 |             |          |          |
| NA          | ENSG00000251419 | -1.1554  | 0.87603 | -0.86195    | 0.80564     | -0.67652 | 0.75064  |
|             | -0.67652        | 0.75064  | 0.75064 | 0.859784863 |             |          |          |
| KIF24       | ENSG00000186638 | -0.75292 | 0.77425 | -0.75292    | 0.77425     | -1.3454  | 0.91075  |
|             | -0.67658        | 0.75066  | 0.75066 | 0.859787561 |             |          |          |
| SNORA71B    | ENSG00000235408 | -0.67662 | 0.75068 | -0.67662    | 0.75068     | -0.67662 |          |
|             | 0.75068         | -0.67662 | 0.75068 | 0.75068     | 0.85979026  |          |          |
| CHCHD2P3    | ENSG00000270849 | -1.8544  | 0.96816 | -0.67671    | 0.7507      | -0.67671 |          |
|             | 0.7507          | -0.67671 | 0.7507  | 0.7507      | 0.859792958 |          |          |
| DPRXP3      | ENSG00000282308 | -0.67677 | 0.75072 | -0.67677    | 0.75072     | -0.67677 |          |
|             | 0.75072         | -0.67677 | 0.75072 | 0.75072     | 0.859795657 |          |          |
| RNU5A-7P    | ENSG00000251788 | -0.67694 | 0.75078 | -0.67694    | 0.75078     | -0.67694 |          |
|             | 0.75078         | -0.67694 | 0.75078 | 0.75078     | 0.859806449 |          |          |
| ZSWIM7      | ENSG00000214941 | -0.67697 | 0.75079 | -0.67697    | 0.75079     | -1.047   |          |
|             | 0.85245         | -1.072   | 0.85814 | 0.75079     | 0.859806449 |          |          |
| NA          | ENSG00000254790 | -0.67698 | 0.75079 | -0.67698    | 0.75079     | -0.67698 | 0.75079  |
|             | -0.67698        | 0.75079  | 0.75079 | 0.859806449 |             |          |          |
| RNA5SP23    | ENSG00000212308 | -0.85326 | 0.80324 | -0.85326    | 0.80324     | -0.85326 |          |
|             | 0.80324         | -0.67702 | 0.7508  | 0.7508      | 0.859806449 |          |          |
| RNU6ATAC4P  | ENSG00000210181 | -0.70381 | 0.75922 | -0.67717    | 0.75085     | -0.67717 |          |
|             | 0.75085         | -0.67717 | 0.75085 | 0.75085     | 0.859843501 |          |          |
| RPS15AP14   | ENSG00000233131 | -0.67738 | 0.75092 | -0.67738    | 0.75092     | -0.67738 |          |
|             | 0.75092         | -0.67738 | 0.75092 | 0.75092     | 0.859903454 |          |          |
| CREB3L2-AS1 | ENSG00000237243 | -0.67753 | 0.75096 | -0.67753    | 0.75096     | -0.67753 |          |
|             | 0.75096         | -0.67753 | 0.75096 | 0.75096     | 0.859929052 |          |          |
| NA          | ENSG00000266968 | -0.6776  | 0.75099 | -0.6776     | 0.75099     | -0.6776  | 0.75099  |
|             | -0.6776         | 0.75099  | 0.75099 | 0.859943197 |             |          |          |
| NA          | ENSG00000267393 | -1.042   | 0.85128 | -0.67774    | 0.75103     | -1.3773  | 0.91579  |
|             | -0.92139        | 0.82158  | 0.75103 | 0.859960036 |             |          |          |
| NA          | ENSG00000229852 | -0.77413 | 0.78057 | -0.77413    | 0.78057     | -0.77413 | 0.78057  |
|             | -0.67776        | 0.75104  | 0.75104 | 0.859960036 |             |          |          |
| NA          | ENSG00000251278 | -0.67784 | 0.75106 | -0.85963    | 0.805       | -0.67784 | 0.75106  |
|             | -0.67784        | 0.75106  | 0.75106 | 0.859962729 |             |          |          |
| NA          | ENSG00000220987 | -1.0608  | 0.85562 | -0.67791    | 0.75109     | -1.0608  | 0.85562  |
|             | -1.0608         | 0.85562  | 0.75109 | 0.85997081  |             |          |          |
| NA          | ENSG00000222421 | -0.67799 | 0.75111 | -0.67799    | 0.75111     | -0.67799 | 0.75111  |
|             | -0.67799        | 0.75111  | 0.75111 | 0.85997081  |             |          |          |
| TRAJ35      | ENSG00000211854 | -0.67803 | 0.75112 | -0.67803    | 0.75112     | -0.67803 |          |

|              |                 |          |         |             |             |          |         |
|--------------|-----------------|----------|---------|-------------|-------------|----------|---------|
|              | 0.75112         | -0.67803 | 0.75112 | 0.75112     | 0.85997081  |          |         |
| CCDC7        | ENSG00000216937 | -1.3457  | 0.91081 | -1.1702     | 0.87903     | -0.6781  | 0.75115 |
|              | -0.72297        | 0.76515  | 0.75115 | 0.859984952 |             |          |         |
| RNU7-194P    | ENSG00000238721 | -1.3312  | 0.90844 | -0.73368    | 0.76843     | -1.279   |         |
|              | 0.89954         | -0.67871 | 0.75134 | 0.75134     | 0.860173511 |          |         |
| PNPP1        | ENSG00000228209 | -0.67874 | 0.75135 | -0.67874    | 0.75135     | -0.67874 | 0.75135 |
|              | -0.67874        | 0.75135  | 0.75135 | 0.860173511 |             |          |         |
| KANK4        | ENSG00000132854 | -0.67886 | 0.75139 | -0.73061    | 0.76749     | -0.67886 | 0.75139 |
|              | -1.0919         | 0.86257  | 0.75139 | 0.860192326 |             |          |         |
| FBXL13       | ENSG00000161040 | -1.2886  | 0.90122 | -0.67904    | 0.75144     | -0.95748 |         |
|              | 0.83084         | -1.701   | 0.95552 | 0.75144     | 0.860192326 |          |         |
| TMEM221      | ENSG00000188051 | -0.67904 | 0.75144 | -0.67904    | 0.75144     | -0.67904 |         |
|              | 0.75144         | -1.4272  | 0.92324 | 0.75144     | 0.860192326 |          |         |
| NA           | ENSG00000283230 | -0.67913 | 0.75147 | -0.67913    | 0.75147     | -0.67913 | 0.75147 |
|              | -0.67913        | 0.75147  | 0.75147 | 0.860192326 |             |          |         |
| RN7SL499P    | ENSG00000239202 | -0.6792  | 0.75149 | -1.2525     | 0.89481     | -1.3882  |         |
|              | 0.91746         | -0.76124 | 0.77674 | 0.75149     | 0.860192326 |          |         |
| CFAP20DC-AS1 | ENSG00000242428 | -0.67917 | 0.75149 | -1.0457     | 0.85215     | -1.756   |         |
|              | 0.96046         | -0.74748 | 0.77261 | 0.75149     | 0.860192326 |          |         |
| HNRNPC8      | ENSG00000254748 | -0.67918 | 0.75149 | -0.67918    | 0.75149     | -0.67918 |         |
|              | 0.75149         | -0.67918 | 0.75149 | 0.75149     | 0.860192326 |          |         |
| DLX6         | ENSG00000006377 | -0.67928 | 0.75152 | -1.3164     | 0.90598     | -1.4278  | 0.92332 |
|              | -1.936          | 0.97356  | 0.75152 | 0.860206459 |             |          |         |
| NA           | ENSG00000259348 | -0.67951 | 0.75159 | -1.2206     | 0.88888     | -1.4832  | 0.93099 |
|              | -1.4832         | 0.93099  | 0.75159 | 0.860244767 |             |          |         |
| NA           | ENSG00000207830 | -0.67956 | 0.75161 | -0.67956    | 0.75161     | -0.67956 | 0.75161 |
|              | -0.67956        | 0.75161  | 0.75161 | 0.860244767 |             |          |         |
| ASPDH        | ENSG00000204653 | -0.67965 | 0.75164 | -0.67965    | 0.75164     | -0.67965 | 0.75164 |
|              | -0.67965        | 0.75164  | 0.75164 | 0.860244767 |             |          |         |
| C5orf63      | ENSG00000164241 | -1.0047  | 0.84249 | -1.3314     | 0.90848     | -0.67969 |         |
|              | 0.75165         | -0.75364 | 0.77447 | 0.75165     | 0.860244767 |          |         |
| NA           | ENSG00000237934 | -0.6797  | 0.75165 | -1.2712     | 0.89818     | -1.2712  | 0.89818 |
|              | -1.2712         | 0.89818  | 0.75165 | 0.860244767 |             |          |         |
| LINC01477    | ENSG00000261715 | -0.67972 | 0.75166 | -0.67972    | 0.75166     | -0.67972 |         |
|              | 0.75166         | -1.5479  | 0.93918 | 0.75166     | 0.860244767 |          |         |
| POC1B        | ENSG00000139323 | -0.67992 | 0.75172 | -0.98722    | 0.83823     | -1.1985  | 0.88465 |
|              | -1.1956         | 0.88406  | 0.75172 | 0.860244767 |             |          |         |
| GABRA6       | ENSG00000145863 | -1.3223  | 0.90696 | -0.67991    | 0.75172     | -0.67991 |         |
|              | 0.75172         | -1.0727  | 0.8583  | 0.75172     | 0.860244767 |          |         |
| NA           | ENSG00000263797 | -0.67994 | 0.75173 | -0.67994    | 0.75173     | -0.67994 | 0.75173 |
|              | -0.67994        | 0.75173  | 0.75173 | 0.860244767 |             |          |         |
| NA           | ENSG00000269376 | -0.67994 | 0.75173 | -0.67994    | 0.75173     | -0.67994 | 0.75173 |
|              | -0.67994        | 0.75173  | 0.75173 | 0.860244767 |             |          |         |
| RPS13P4      | ENSG00000238111 | -0.6801  | 0.75178 | -0.6801     | 0.75178     | -0.6801  |         |
|              | 0.75178         | -0.6801  | 0.75178 | 0.75178     | 0.86026158  |          |         |
| NA           | ENSG00000270510 | -0.68009 | 0.75178 | -0.68009    | 0.75178     | -0.68009 | 0.75178 |
|              | -0.68009        | 0.75178  | 0.75178 | 0.86026158  |             |          |         |
| NA           | ENSG00000259164 | -0.68035 | 0.75186 | -0.68035    | 0.75186     | -0.68035 | 0.75186 |
|              | -0.68035        | 0.75186  | 0.75186 | 0.860332922 |             |          |         |
| ST8SIA6      | ENSG00000148488 | -0.6804  | 0.75188 | -0.6804     | 0.75188     | -0.6804  |         |
|              | 0.75188         | -0.90269 | 0.81666 | 0.75188     | 0.860335605 |          |         |
| NA           | ENSG00000280212 | -0.68052 | 0.75191 | -0.68052    | 0.75191     | -0.68052 | 0.75191 |
|              | -0.68052        | 0.75191  | 0.75191 | 0.86034973  |             |          |         |
| NA           | ENSG00000229528 | -0.72555 | 0.76594 | -0.68058    | 0.75193     | -1.1638  | 0.87774 |
|              | -1.1638         | 0.87774  | 0.75193 | 0.860352413 |             |          |         |
| NA           | ENSG00000213303 | -0.68083 | 0.75201 | -0.68083    | 0.75201     | -0.68083 | 0.75201 |
|              | -0.68083        | 0.75201  | 0.75201 | 0.860411586 |             |          |         |
| NA           | ENSG00000250655 | -0.68089 | 0.75203 | -0.68089    | 0.75203     | -0.68089 | 0.75203 |
|              | -0.68089        | 0.75203  | 0.75203 | 0.860411586 |             |          |         |
| NXPE3        | ENSG00000144815 | -0.76291 | 0.77724 | -1.3227     | 0.90703     | -0.68091 | 0.75204 |
|              | -0.98531        | 0.83776  | 0.75204 | 0.860411586 |             |          |         |
| NA           | ENSG00000232101 | -0.68097 | 0.75206 | -0.68097    | 0.75206     | -0.68097 | 0.75206 |

|           |                 |          |          |         |             |             |          |         |
|-----------|-----------------|----------|----------|---------|-------------|-------------|----------|---------|
|           |                 | -0.68097 | 0.75206  | 0.75206 | 0.860411586 |             |          |         |
| NA        | ENSG00000226996 | -0.68102 | 0.75207  | 0.75207 | -1.1381     | 0.87246     | -1.1381  | 0.87246 |
|           |                 | -1.1381  | 0.87246  | 0.75207 | 0.860411586 |             |          |         |
| NA        | ENSG00000281039 | -0.68124 | 0.75214  | 0.75214 | -0.68124    | 0.75214     | -0.68124 | 0.75214 |
|           |                 | -0.68124 | 0.75214  | 0.75214 | 0.860471468 |             |          |         |
| RN7SKP155 | ENSG00000251840 | -0.68133 | 0.75217  | 0.75217 | -2.0544     | 0.98003     | -0.68133 |         |
|           |                 | 0.75217  | -0.97792 | 0.83594 | 0.75217     | 0.860485588 |          |         |
| YBX2P2    | ENSG00000258611 | -0.68141 | 0.75219  | 0.75219 | -0.993      | 0.83965     | -0.993   |         |
|           |                 | 0.83965  | -0.993   | 0.83965 | 0.75219     | 0.860488267 |          |         |
| NA        | ENSG00000253195 | -0.68164 | 0.75227  | 0.75227 | -0.68164    | 0.75227     | -0.68164 | 0.75227 |
|           |                 | -0.68164 | 0.75227  | 0.75227 | 0.860529892 |             |          |         |
| NA        | ENSG00000240436 | -0.68176 | 0.7523   | 0.7523  | -0.68176    | 0.7523      | -0.68176 | 0.7523  |
|           |                 | -0.68176 | 0.7523   | 0.7523  | 0.860529892 |             |          |         |
| ELP3      | ENSG00000134014 | -0.68176 | 0.75231  | 0.75231 | -1.4976     | 0.93288     | -0.79353 | 0.78627 |
|           |                 | -1.0777  | 0.85941  | 0.75231 | 0.860529892 |             |          |         |
| YIF1B     | ENSG00000167645 | -0.6818  | 0.75232  | 0.75232 | -1.5078     | 0.9342      | -1.4074  | 0.92034 |
|           |                 | -1.5078  | 0.9342   | 0.75232 | 0.860529892 |             |          |         |
| NA        | ENSG00000266126 | -0.6818  | 0.75232  | 0.75232 | -0.6818     | 0.75232     | -0.6818  | 0.75232 |
|           |                 | -0.6818  | 0.75232  | 0.75232 | 0.860529892 |             |          |         |
| CPNE8-AS1 | ENSG00000257718 | -0.6819  | 0.75235  | 0.75235 | -0.77281    | 0.78018     | -0.6819  |         |
|           |                 | 0.75235  | -0.6819  | 0.75235 | 0.75235     | 0.860529892 |          |         |
| NA        | ENSG00000260619 | -0.6819  | 0.75235  | 0.75235 | -0.6819     | 0.75235     | -0.6819  | 0.75235 |
|           |                 | -0.6819  | 0.75235  | 0.75235 | 0.860529892 |             |          |         |
| NA        | ENSG00000259802 | -1.8866  | 0.97039  | 0.97039 | -1.8866     | 0.97039     | -0.68216 | 0.75243 |
|           |                 | -0.68216 | 0.75243  | 0.75243 | 0.860601195 |             |          |         |
| NA        | ENSG00000255237 | -0.68232 | 0.75248  | 0.75248 | -0.68232    | 0.75248     | -0.68232 | 0.75248 |
|           |                 | -0.68232 | 0.75248  | 0.75248 | 0.860638182 |             |          |         |
| NA        | ENSG00000242958 | -0.75037 | 0.77349  | 0.77349 | -0.68237    | 0.7525      | -0.75037 | 0.77349 |
|           |                 | -0.75037 | 0.77349  | 0.7525  | 0.860640857 |             |          |         |
| RNU6-216P | ENSG00000200152 | -0.68249 | 0.75253  | 0.75253 | -0.68249    | 0.75253     | -0.68249 |         |
|           |                 | 0.75253  | -0.68249 | 0.75253 | 0.75253     | 0.860654969 |          |         |
| OR4A21P   | ENSG00000181943 | -0.68266 | 0.75259  | 0.75259 | -1.2835     | 0.90034     | -0.68266 |         |
|           |                 | 0.75259  | -0.9828  | 0.83715 | 0.75259     | 0.860703389 |          |         |
| NA        | ENSG00000255452 | -1.9614  | 0.97509  | 0.97509 | -1.2828     | 0.90021     | -0.68271 | 0.75261 |
|           |                 | -0.68271 | 0.75261  | 0.75261 | 0.860706062 |             |          |         |
| NA        | ENSG00000237689 | -0.68282 | 0.75264  | 0.75264 | -0.68282    | 0.75264     | -0.68282 | 0.75264 |
|           |                 | -0.68282 | 0.75264  | 0.75264 | 0.860711408 |             |          |         |
| SMUG1P1   | ENSG00000267444 | -0.68285 | 0.75265  | 0.75265 | -0.78879    | 0.78488     | -0.78879 |         |
|           |                 | 0.78488  | -0.78879 | 0.78488 | 0.75265     | 0.860711408 |          |         |
| STRCP1    | ENSG00000166763 | -0.81192 | 0.79158  | 0.79158 | -0.68309    | 0.75273     | -0.89411 |         |
|           |                 | 0.81437  | -1.7352  | 0.95865 | 0.75273     | 0.860744219 |          |         |
| SUMO2P3   | ENSG00000224971 | -0.68318 | 0.75275  | 0.75275 | -1.2079     | 0.88646     | -0.93631 |         |
|           |                 | 0.82544  | -0.80376 | 0.78923 | 0.75275     | 0.860744219 |          |         |
| RNA5SP295 | ENSG00000199525 | -0.68319 | 0.75276  | 0.75276 | -0.68319    | 0.75276     | -0.68319 |         |
|           |                 | 0.75276  | -0.68319 | 0.75276 | 0.75276     | 0.860744219 |          |         |
| SLFN11    | ENSG00000172716 | -0.68323 | 0.75277  | 0.75277 | -0.81817    | 0.79337     | -0.68484 |         |
|           |                 | 0.75328  | -0.80611 | 0.78991 | 0.75277     | 0.860744219 |          |         |
| SLC16A10  | ENSG00000112394 | -0.77426 | 0.78061  | 0.78061 | -0.68334    | 0.7528      | -0.9034  |         |
|           |                 | 0.81684  | -0.75983 | 0.77632 | 0.7528      | 0.860744219 |          |         |
| NA        | ENSG00000225721 | -0.68337 | 0.75281  | 0.75281 | -0.68337    | 0.75281     | -0.68337 | 0.75281 |
|           |                 | -0.68337 | 0.75281  | 0.75281 | 0.860744219 |             |          |         |
| NA        | ENSG00000266960 | -0.68337 | 0.75281  | 0.75281 | -0.68337    | 0.75281     | -0.68337 | 0.75281 |
|           |                 | -0.68337 | 0.75281  | 0.75281 | 0.860744219 |             |          |         |
| NA        | ENSG00000223544 | -0.6834  | 0.75282  | 0.75282 | -2.1404     | 0.98384     | -1.7692  | 0.96157 |
|           |                 | -1.5261  | 0.9365   | 0.75282 | 0.860744219 |             |          |         |
| TMEM123   | ENSG00000152558 | -1.4736  | 0.92971  | 0.92971 | -1.2757     | 0.89897     | -0.68354 |         |
|           |                 | 0.75287  | -1.7848  | 0.96285 | 0.75287     | 0.86078119  |          |         |
| LY6K      | ENSG00000160886 | -1.1748  | 0.87997  | 0.87997 | -0.68368    | 0.75291     | -0.7229  | 0.76513 |
|           |                 | -1.2762  | 0.89906  | 0.75291 | 0.860797964 |             |          |         |
| PLA2G4A   | ENSG00000116711 | -0.68372 | 0.75292  | 0.75292 | -0.7504     | 0.77349     | -0.72576 |         |
|           |                 | 0.76601  | -1.0052  | 0.84261 | 0.75292     | 0.860797964 |          |         |
| MIR4717   | ENSG00000264004 | -0.68389 | 0.75298  | 0.75298 | -0.68389    | 0.75298     | -0.68389 |         |

|           |                 |             |         |             |             |          |       |          |
|-----------|-----------------|-------------|---------|-------------|-------------|----------|-------|----------|
|           | 0.75298         | -0.68389    | 0.75298 | 0.75298     | 0.860831506 |          |       |          |
| NA        | ENSG00000279606 | -0.68395    | 0.753   | -0.68395    | 0.753       | -0.68395 | 0.753 | -0.68395 |
|           | 0.753           | 0.860831506 |         |             |             |          |       | 0.753    |
| CRYBB3    | ENSG00000100053 | -1.2513     | 0.89458 | -0.68401    | 0.75301     | -1.2513  |       |          |
|           | 0.89458         | -1.3434     | 0.91043 | 0.75301     | 0.860831506 |          |       |          |
| SNORA3B   | ENSG00000212607 | -0.68403    | 0.75302 | -0.68403    | 0.75302     | -0.68403 |       |          |
|           | 0.75302         | -0.68403    | 0.75302 | 0.75302     | 0.860831506 |          |       |          |
| ZNF736    | ENSG00000234444 | -0.88786    | 0.81269 | -0.99636    | 0.84046     | -0.68412 |       |          |
|           | 0.75305         | -1.2994     | 0.9031  | 0.75305     | 0.860845606 |          |       |          |
| PANDAR    | ENSG00000281450 | -0.68422    | 0.75308 | -0.68422    | 0.75308     | -0.68422 |       |          |
|           | 0.75308         | -0.68422    | 0.75308 | 0.75308     | 0.860850943 |          |       |          |
| NA        | ENSG00000279559 | -1.194      | 0.88376 | -0.68423    | 0.75309     | -0.68423 |       | 0.75309  |
|           | -0.68423        | 0.75309     | 0.75309 | 0.860850943 |             |          |       |          |
| NA        | ENSG00000200171 | -0.68434    | 0.75312 | -0.68434    | 0.75312     | -0.68434 |       | 0.75312  |
|           | -0.68434        | 0.75312     | 0.75312 | 0.860865042 |             |          |       |          |
| H2BC12    | ENSG00000197903 | -0.95236    | 0.82954 | -1.8438     | 0.96739     | -0.68457 |       |          |
|           | 0.75319         | -0.86054    | 0.80525 | 0.75319     | 0.860924862 |          |       |          |
| NKAPD1    | ENSG00000150776 | -0.68473    | 0.75324 | -0.68473    | 0.75324     | -0.68473 |       |          |
|           | 0.75324         | -0.68473    | 0.75324 | 0.75324     | 0.860935526 |          |       |          |
| NA        | ENSG00000217067 | -0.68475    | 0.75325 | -0.68475    | 0.75325     | -0.68475 |       | 0.75325  |
|           | -0.68475        | 0.75325     | 0.75325 | 0.860935526 |             |          |       |          |
| GP5       | ENSG00000178732 | -1.3022     | 0.90357 | -1.3022     | 0.90357     | -1.3022  |       | 0.90357  |
|           | -0.6848         | 0.75327     | 0.75327 | 0.860935526 |             |          |       |          |
| IGLV10-54 | ENSG00000211642 | -0.68483    | 0.75327 | -0.68483    | 0.75327     | -0.68483 |       |          |
|           | 0.75327         | -2.0818     | 0.98132 | 0.75327     | 0.860935526 |          |       |          |
| SNORA57   | ENSG00000206597 | -0.68505    | 0.75334 | -0.68505    | 0.75334     | -0.68505 |       |          |
|           | 0.75334         | -0.68505    | 0.75334 | 0.75334     | 0.860937426 |          |       |          |
| CSKMT     | ENSG00000214756 | -0.68505    | 0.75334 | -0.68505    | 0.75334     | -0.68505 |       | 0.75334  |
|           | -0.68505        | 0.75334     | 0.75334 | 0.860937426 |             |          |       |          |
| NA        | ENSG00000255432 | -0.68505    | 0.75334 | -0.68505    | 0.75334     | -0.68505 |       | 0.75334  |
|           | -0.68505        | 0.75334     | 0.75334 | 0.860937426 |             |          |       |          |
| NA        | ENSG00000266994 | -0.68507    | 0.75335 | -0.68507    | 0.75335     | -0.68507 |       | 0.75335  |
|           | -0.68507        | 0.75335     | 0.75335 | 0.860937426 |             |          |       |          |
| NA        | ENSG00000236638 | -1.7271     | 0.95793 | -0.68509    | 0.75336     | -1.5431  |       | 0.93859  |
|           | -1.1956         | 0.88408     | 0.75336 | 0.860937426 |             |          |       |          |
| C6orf118  | ENSG00000112539 | -0.68545    | 0.75347 | -1.566      | 0.94132     | -0.68545 |       |          |
|           | 0.75347         | -1.1307     | 0.87091 | 0.75347     | 0.861034177 |          |       |          |
| NA        | ENSG00000199203 | -0.73394    | 0.76851 | -1.0419     | 0.85127     | -1.7663  |       | 0.96133  |
|           | -0.68548        | 0.75348     | 0.75348 | 0.861034177 |             |          |       |          |
| ACTBP13   | ENSG00000234667 | -1.9091     | 0.97187 | -1.9091     | 0.97187     | -1.9091  |       |          |
|           | 0.97187         | -0.68573    | 0.75356 | 0.75356     | 0.861095077 |          |       |          |
| AGRP      | ENSG00000159723 | -0.68583    | 0.75359 | -0.68583    | 0.75359     | -0.68583 |       | 0.75359  |
|           | -0.68583        | 0.75359     | 0.75359 | 0.861095077 |             |          |       |          |
| TEX48     | ENSG00000230601 | -0.97609    | 0.83549 | -0.75757    | 0.77565     | -0.68586 |       | 0.7536   |
|           | -1.1166         | 0.86793     | 0.7536  | 0.861095077 |             |          |       |          |
| ANP32A    | ENSG00000140350 | -0.9558     | 0.83041 | -1.4719     | 0.92948     | -0.68588 |       |          |
|           | 0.75361         | -0.69368    | 0.75606 | 0.75361     | 0.861095077 |          |       |          |
| CYB5AP5   | ENSG00000257503 | -1.4287     | 0.92346 | -1.4287     | 0.92346     | -0.68608 |       |          |
|           | 0.75367         | -1.4287     | 0.92346 | 0.75367     | 0.861095077 |          |       |          |
| NA        | ENSG00000213750 | -0.68614    | 0.75369 | -0.86636    | 0.80685     | -0.86636 |       | 0.80685  |
|           | -0.86636        | 0.80685     | 0.75369 | 0.861095077 |             |          |       |          |
| MTCO3P21  | ENSG00000232752 | -0.68616    | 0.75369 | -0.68616    | 0.75369     | -0.68616 |       |          |
|           | 0.75369         | -0.68616    | 0.75369 | 0.75369     | 0.861095077 |          |       |          |
| NA        | ENSG00000227728 | -0.68618    | 0.7537  | -0.68618    | 0.7537      | -1.2137  |       | 0.88758  |
|           | -0.83225        | 0.79736     | 0.7537  | 0.861095077 |             |          |       |          |
| NA        | ENSG00000262294 | -0.68619    | 0.7537  | -0.68619    | 0.7537      | -0.68619 |       | 0.7537   |
|           | -0.68619        | 0.7537      | 0.7537  | 0.861095077 |             |          |       |          |
| ADI1P1    | ENSG00000235102 | -0.6862     | 0.75371 | -0.88851    | 0.81287     | -0.82381 |       |          |
|           | 0.79498         | -0.89985    | 0.8159  | 0.75371     | 0.861095077 |          |       |          |
| NA        | ENSG00000218227 | -0.68635    | 0.75375 | -0.75925    | 0.77615     | -0.68635 |       | 0.75375  |
|           | -1.122          | 0.86906     | 0.75375 | 0.861120587 |             |          |       |          |
| ITGA2B    | ENSG00000005961 | -0.68645    | 0.75378 | -0.68645    | 0.75378     | -0.68645 |       |          |



|            |                 |          |         |             |             |          |         |
|------------|-----------------|----------|---------|-------------|-------------|----------|---------|
|            | 0.75378         | -0.68645 | 0.75378 | 0.75378     | 0.861134671 |          |         |
| USP44      | ENSG00000136014 | -1.6243  | 0.94784 | -0.68667    | 0.75385     | -1.7378  | 0.95888 |
|            | -0.90152        | 0.81634  | 0.75385 | 0.861194451 |             |          |         |
| NA         | ENSG00000249034 | -0.68674 | 0.75388 | -0.68674    | 0.75388     | -0.68674 | 0.75388 |
|            | -0.68674        | 0.75388  | 0.75388 | 0.861208533 |             |          |         |
| RNA5SP183  | ENSG00000199322 | -0.68691 | 0.75393 | -0.68691    | 0.75393     | -0.68691 |         |
|            | 0.75393         | -0.68691 | 0.75393 | 0.861245462 |             |          |         |
| NA         | ENSG00000223968 | -0.68717 | 0.75401 | -0.68717    | 0.75401     | -0.68717 | 0.75401 |
|            | -0.68717        | 0.75401  | 0.75401 | 0.861316658 |             |          |         |
| FOXA2      | ENSG00000125798 | -0.68723 | 0.75403 | -0.68723    | 0.75403     | -0.68723 | 0.75403 |
|            | -0.68723        | 0.75403  | 0.75403 | 0.861318512 |             |          |         |
| HNRNPALP40 | ENSG00000212961 | -0.6873  | 0.75405 | -0.6873     | 0.75405     | -0.6873  |         |
|            | 0.75405         | -0.6873  | 0.75405 | 0.861318512 |             |          |         |
| USP46      | ENSG00000109189 | -2.0316  | 0.9789  | -1.8114     | 0.96496     | -0.68745 | 0.7541  |
|            | -1.3733         | 0.91517  | 0.7541  | 0.861318512 |             |          |         |
| MED1       | ENSG00000125686 | -0.81994 | 0.79387 | -0.81994    | 0.79387     | -0.68746 | 0.7541  |
|            | -1.0997         | 0.86426  | 0.7541  | 0.861318512 |             |          |         |
| NA         | ENSG00000201354 | -0.7149  | 0.76266 | -0.68746    | 0.7541      | -0.68746 | 0.7541  |
|            | -0.68746        | 0.7541   | 0.7541  | 0.861318512 |             |          |         |
| RPL26P34   | ENSG00000225404 | -0.68759 | 0.75414 | -0.68759    | 0.75414     | -0.68759 |         |
|            | 0.75414         | -0.68759 | 0.75414 | 0.86134401  |             |          |         |
| NA         | ENSG00000228072 | -0.68768 | 0.75417 | -0.68768    | 0.75417     | -0.68768 | 0.75417 |
|            | -0.68768        | 0.75417  | 0.75417 | 0.861358086 |             |          |         |
| TRIM51GP   | ENSG00000220948 | -2.3613  | 0.9909  | -0.6878     | 0.75421     | -1.6084  |         |
|            | 0.94612         | -0.88715 | 0.8125  | 0.75421     | 0.861374815 |          |         |
| NA         | ENSG00000258297 | -0.68784 | 0.75422 | -0.68784    | 0.75422     | -0.68784 | 0.75422 |
|            | -0.68784        | 0.75422  | 0.75422 | 0.861374815 |             |          |         |
| USP24      | ENSG00000162402 | -0.68788 | 0.75424 | -1.4872     | 0.93151     | -0.68788 | 0.75424 |
|            | -1.0927         | 0.86274  | 0.75424 | 0.861377468 |             |          |         |
| NPM1P19    | ENSG00000223864 | -0.68806 | 0.75429 | -0.68806    | 0.75429     | -0.68806 |         |
|            | 0.75429         | -0.68806 | 0.75429 | 0.861394195 |             |          |         |
| NA         | ENSG00000228167 | -0.68807 | 0.75429 | -0.68807    | 0.75429     | -1.0567  | 0.85468 |
|            | -0.68807        | 0.75429  | 0.75429 | 0.861394195 |             |          |         |
| SEC1P      | ENSG00000232871 | -0.68831 | 0.75437 | -0.68831    | 0.75437     | -1.7084  | 0.95622 |
|            | -1.7084         | 0.95622  | 0.75437 | 0.861465366 |             |          |         |
| NA         | ENSG00000236048 | -0.923   | 0.822   | -0.68848    | 0.75442     | -0.68848 | 0.75442 |
|            | -0.68848        | 0.75442  | 0.75442 | 0.861502275 |             |          |         |
| USP53      | ENSG00000145390 | -2.4509  | 0.99288 | -0.92668    | 0.82295     | -0.72872 | 0.76691 |
|            | -0.68855        | 0.75445  | 0.75445 | 0.861516345 |             |          |         |
| SENP7      | ENSG00000138468 | -0.68871 | 0.7545  | -1.3087     | 0.90467     | -0.97449 | 0.83509 |
|            | -1.6131         | 0.94663  | 0.7545  | 0.861553251 |             |          |         |
| CCP110     | ENSG00000103540 | -1.0344  | 0.84952 | -1.1386     | 0.87257     | -1.0504  |         |
|            | 0.85324         | -0.68894 | 0.75457 | 0.75457     | 0.861559551 |          |         |
| NA         | ENSG00000248770 | -0.68897 | 0.75458 | -0.68897    | 0.75458     | -0.68897 | 0.75458 |
|            | -0.68897        | 0.75458  | 0.75458 | 0.861559551 |             |          |         |
| CALR       | ENSG00000179218 | -1.2779  | 0.89936 | -1.2779     | 0.89936     | -1.3431  | 0.91039 |
|            | -0.68901        | 0.75459  | 0.75459 | 0.861559551 |             |          |         |
| MYRIP      | ENSG00000170011 | -0.81568 | 0.79266 | -0.68906    | 0.75461     | -1.4576  | 0.92752 |
|            | -0.80451        | 0.78945  | 0.75461 | 0.861559551 |             |          |         |
| NA         | ENSG00000260803 | -0.6891  | 0.75462 | -0.6891     | 0.75462     | -0.6891  | 0.75462 |
|            | -0.6891         | 0.75462  | 0.75462 | 0.861559551 |             |          |         |
| NA         | ENSG00000270857 | -1.8223  | 0.96579 | -1.057      | 0.85474     | -0.68909 | 0.75462 |
|            | -1.057          | 0.85474  | 0.75462 | 0.861559551 |             |          |         |
| RN7SL4P    | ENSG00000263740 | -0.68914 | 0.75463 | -1.1648     | 0.87796     | -0.77662 |         |
|            | 0.78131         | -1.504   | 0.93372 | 0.75463     | 0.861559551 |          |         |
| IMPA1      | ENSG00000133731 | -1.0211  | 0.8464  | -0.68924    | 0.75466     | -0.68924 | 0.75466 |
|            | -0.68924        | 0.75466  | 0.75466 | 0.861559551 |             |          |         |
| LINC01264  | ENSG00000229630 | -0.6893  | 0.75468 | -2.4737     | 0.99331     | -0.6893  |         |
|            | 0.75468         | -0.72265 | 0.76505 | 0.75468     | 0.861559551 |          |         |
| RPF2       | ENSG00000197498 | -1.4283  | 0.92339 | -0.90003    | 0.81595     | -1.4283  | 0.92339 |
|            | -0.68934        | 0.75469  | 0.75469 | 0.861559551 |             |          |         |
| RNU6-644P  | ENSG00000212457 | -0.68937 | 0.7547  | -1.4658     | 0.92864     | -0.68937 |         |

|             |                 |          |         |             |             |          |         |  |
|-------------|-----------------|----------|---------|-------------|-------------|----------|---------|--|
|             | 0.7547          | -0.68937 | 0.7547  | 0.7547      | 0.861559551 |          |         |  |
| ZNF43       | ENSG00000198521 | -1.2037  | 0.88565 | -1.2092     | 0.8867      | -1.2092  | 0.8867  |  |
|             | -0.68964        | 0.75479  | 0.75479 | 0.861621924 |             |          |         |  |
| NA          | ENSG00000223537 | -0.68963 | 0.75479 | -0.68963    | 0.75479     | -0.68963 | 0.75479 |  |
|             | -0.68963        | 0.75479  | 0.75479 | 0.861621924 |             |          |         |  |
| SSRP1       | ENSG00000149136 | -0.9267  | 0.82296 | -0.68969    | 0.75481     | -0.68969 | 0.75481 |  |
|             | -0.68969        | 0.75481  | 0.75481 | 0.861624571 |             |          |         |  |
| NA          | ENSG00000274730 | -0.68984 | 0.75485 | -0.8433     | 0.80047     | -1.1814  | 0.88128 |  |
|             | -0.68984        | 0.75485  | 0.75485 | 0.861650047 |             |          |         |  |
| MIR148B     | ENSG00000199122 | -0.69002 | 0.75491 | -0.69002    | 0.75491     | -0.69002 |         |  |
|             | 0.75491         | -0.69002 | 0.75491 | 0.75491     | 0.861672043 |          |         |  |
| NA          | ENSG00000272787 | -0.69001 | 0.75491 | -0.69001    | 0.75491     | -0.69001 | 0.75491 |  |
|             | -0.69001        | 0.75491  | 0.75491 | 0.861672043 |             |          |         |  |
| NA          | ENSG00000227532 | -0.69009 | 0.75493 | -0.69009    | 0.75493     | -0.69009 | 0.75493 |  |
|             | -0.69009        | 0.75493  | 0.75493 | 0.861672043 |             |          |         |  |
| TIGD3       | ENSG00000173825 | -0.69012 | 0.75494 | -0.69012    | 0.75494     | -0.69012 | 0.75494 |  |
|             | -0.69012        | 0.75494  | 0.75494 | 0.861672043 |             |          |         |  |
| NA          | ENSG00000270823 | -0.69019 | 0.75496 | -0.69019    | 0.75496     | -0.69019 | 0.75496 |  |
|             | -0.69019        | 0.75496  | 0.75496 | 0.861674688 |             |          |         |  |
| LAMA2       | ENSG00000196569 | -1.1936  | 0.88369 | -0.78208    | 0.78291     | -0.69035 | 0.75501 |  |
|             | -1.1316         | 0.87111  | 0.75501 | 0.861711573 |             |          |         |  |
| INHA        | ENSG00000123999 | -0.69055 | 0.75508 | -1.1296     | 0.87067     | -0.69055 | 0.75508 |  |
|             | -0.69055        | 0.75508  | 0.75508 | 0.861747615 |             |          |         |  |
| MTCO1P18    | ENSG00000237910 | -0.69056 | 0.75508 | -0.69056    | 0.75508     | -0.69056 |         |  |
|             | 0.75508         | -0.69056 | 0.75508 | 0.75508     | 0.861747615 |          |         |  |
| ATP13A4     | ENSG00000127249 | -0.69062 | 0.7551  | -1.7098     | 0.95635     | -0.97609 |         |  |
|             | 0.83549         | -1.2325  | 0.89111 | 0.7551      | 0.861747615 |          |         |  |
| FAM90A27P   | ENSG00000189348 | -0.74761 | 0.77265 | -0.80621    | 0.78994     | -0.80621 |         |  |
|             | 0.78994         | -0.69071 | 0.75513 | 0.75513     | 0.861747615 |          |         |  |
| SNORD114-11 | ENSG00000200608 | -0.69073 | 0.75513 | -0.69073    | 0.75513     | -0.69073 |         |  |
|             | 0.75513         | -0.69073 | 0.75513 | 0.75513     | 0.861747615 |          |         |  |
| MIR4706     | ENSG00000266531 | -0.69079 | 0.75515 | -0.69079    | 0.75515     | -0.69079 |         |  |
|             | 0.75515         | -0.69079 | 0.75515 | 0.75515     | 0.861750258 |          |         |  |
| ASS1P2      | ENSG00000223922 | -0.69112 | 0.75526 | -0.69112    | 0.75526     | -0.69112 |         |  |
|             | 0.75526         | -0.69112 | 0.75526 | 0.75526     | 0.861835421 |          |         |  |
| NA          | ENSG00000248799 | -0.69112 | 0.75526 | -0.69112    | 0.75526     | -0.69112 | 0.75526 |  |
|             | -0.69112        | 0.75526  | 0.75526 | 0.861835421 |             |          |         |  |
| NA          | ENSG00000276718 | -0.69122 | 0.75529 | -0.69122    | 0.75529     | -0.69122 | 0.75529 |  |
|             | -0.69122        | 0.75529  | 0.75529 | 0.861849472 |             |          |         |  |
| RPSAP41     | ENSG00000239626 | -0.80316 | 0.78906 | -0.69132    | 0.75532     | -0.69132 |         |  |
|             | 0.75532         | -0.69132 | 0.75532 | 0.75532     | 0.861854752 |          |         |  |
| NA          | ENSG00000268518 | -0.69137 | 0.75533 | -0.69137    | 0.75533     | -0.69137 | 0.75533 |  |
|             | -0.69137        | 0.75533  | 0.75533 | 0.861854752 |             |          |         |  |
| ASLP1       | ENSG00000244723 | -0.69145 | 0.75536 | -0.69145    | 0.75536     | -0.69145 | 0.75536 |  |
|             | -0.69145        | 0.75536  | 0.75536 | 0.861868802 |             |          |         |  |
| NA          | ENSG00000233105 | -1.034   | 0.84943 | -0.69154    | 0.75539     | -1.2603  | 0.89622 |  |
|             | -1.2603         | 0.89622  | 0.75539 | 0.861882851 |             |          |         |  |
| DYRK2       | ENSG00000127334 | -0.69188 | 0.7555  | -0.69188    | 0.7555      | -0.70962 | 0.76103 |  |
|             | -1.2459         | 0.89359  | 0.7555  | 0.861915369 |             |          |         |  |
| SLC4A1APP2  | ENSG00000236401 | -0.69191 | 0.7555  | -0.69191    | 0.7555      | -0.69191 |         |  |
|             | 0.7555          | -0.69191 | 0.7555  | 0.7555      | 0.861915369 |          |         |  |
| TBC1D10C    | ENSG00000175463 | -0.69195 | 0.75551 | -1.0844     | 0.86091     | -0.69195 |         |  |
|             | 0.75551         | -0.69195 | 0.75551 | 0.75551     | 0.861915369 |          |         |  |
| TMEM50B     | ENSG00000142188 | -1.7255  | 0.95778 | -1.8308     | 0.96643     | -2.3921  |         |  |
|             | 0.99162         | -0.69197 | 0.75552 | 0.75552     | 0.861915369 |          |         |  |
| NA          | ENSG00000224545 | -1.185   | 0.88199 | -1.185      | 0.88199     | -0.77849 | 0.78186 |  |
|             | -0.69203        | 0.75554  | 0.75554 | 0.861915369 |             |          |         |  |
| HOOK3       | ENSG00000168172 | -0.75749 | 0.77562 | -0.69205    | 0.75555     | -1.0403  | 0.85089 |  |
|             | -0.89963        | 0.81584  | 0.75555 | 0.861915369 |             |          |         |  |
| NA          | ENSG00000259126 | -0.6921  | 0.75556 | -0.6921     | 0.75556     | -0.6921  | 0.75556 |  |
|             | -0.6921         | 0.75556  | 0.75556 | 0.861915369 |             |          |         |  |
| MTND4LP5    | ENSG00000270350 | -0.69208 | 0.75556 | -0.69208    | 0.75556     | -0.69208 |         |  |

|            |                 |             |             |             |             |          |         |
|------------|-----------------|-------------|-------------|-------------|-------------|----------|---------|
|            | 0.75556         | -0.69208    | 0.75556     | 0.75556     | 0.861915369 |          |         |
| NA         | ENSG00000235390 | -0.69228    | 0.75562     | -0.69228    | 0.75562     | -0.69228 | 0.75562 |
|            | -1.2872         | 0.901075562 | 0.861963636 |             |             |          |         |
| TRAK1      | ENSG00000182606 | -0.69267    | 0.75574     | -1.2722     | 0.89834     | -0.84751 | 0.80164 |
|            | -1.256          | 0.89545     | 0.75574     | 0.862080344 |             |          |         |
| RN7SKP152  | ENSG00000222376 | -0.69286    | 0.7558      | -1.1199     | 0.86862     | -1.4603  |         |
|            | 0.9279          | -0.69286    | 0.7558      | 0.7558      | 0.862082106 |          |         |
| NA         | ENSG00000261648 | -0.69284    | 0.7558      | -0.69284    | 0.7558      | -0.69284 | 0.7558  |
|            | -0.69284        | 0.7558      | 0.7558      | 0.862082106 |             |          |         |
| MT1M       | ENSG00000205364 | -0.69289    | 0.75581     | -0.69289    | 0.75581     | -0.69289 | 0.75581 |
|            | -0.69289        | 0.75581     | 0.75581     | 0.862082106 |             |          |         |
| RN7SKP190  | ENSG00000251888 | -0.69294    | 0.75582     | -0.69294    | 0.75582     | -0.69294 |         |
|            | 0.75582         | -0.69294    | 0.75582     | 0.75582     | 0.862082106 |          |         |
| NA         | ENSG00000207247 | -0.69295    | 0.75583     | -0.69295    | 0.75583     | -0.69295 | 0.75583 |
|            | -0.69295        | 0.75583     | 0.75583     | 0.862082106 |             |          |         |
| MIR518F    | ENSG00000207706 | -0.69316    | 0.7559      | -0.69316    | 0.7559      | -0.69316 |         |
|            | 0.7559          | -0.69316    | 0.7559      | 0.7559      | 0.862141767 |          |         |
| SRGAP1     | ENSG00000196935 | -0.81771    | 0.79324     | -0.7683     | 0.77884     | -0.69332 |         |
|            | 0.75595         | -2.0982     | 0.98206     | 0.75595     | 0.862178615 |          |         |
| ALKBH5     | ENSG00000091542 | -1.546      | 0.93895     | -1.546      | 0.93895     | -2.2283  |         |
|            | 0.98707         | -0.69346    | 0.75599     | 0.75599     | 0.862195282 |          |         |
| NA         | ENSG00000248577 | -1.0015     | 0.84171     | -0.69351    | 0.756       | -0.69351 | 0.756   |
|            | 0.82817         | 0.756       | 0.862195282 |             |             |          |         |
| NA         | ENSG00000279390 | -0.75154    | 0.77383     | -0.6936     | 0.75603     | -0.6936  | 0.75603 |
|            | -1.1474         | 0.8744      | 0.75603     | 0.862209317 |             |          |         |
| NA         | ENSG00000280265 | -1.9582     | 0.9749      | -0.69369    | 0.75606     | -2.1625  | 0.98471 |
|            | -2.1625         | 0.98471     | 0.75606     | 0.862217207 |             |          |         |
| NA         | ENSG00000229365 | -1.4919     | 0.93213     | -0.69375    | 0.75608     | -1.7809  | 0.96254 |
|            | -0.9412         | 0.8267      | 0.75608     | 0.862217207 |             |          |         |
| DNA2       | ENSG00000138346 | -0.69378    | 0.75609     | -1.2151     | 0.88783     | -1.3596  | 0.91302 |
|            | -0.94106        | 0.82666     | 0.75609     | 0.862217207 |             |          |         |
| LSM3P4     | ENSG00000250835 | -0.69393    | 0.75614     | -0.69393    | 0.75614     | -0.69393 |         |
|            | 0.75614         | -0.69393    | 0.75614     | 0.75614     | 0.862244387 |          |         |
| PPARA      | ENSG00000186951 | -1.7975     | 0.96387     | -0.69399    | 0.75616     | -1.5309  | 0.93711 |
|            | -1.5309         | 0.93711     | 0.75616     | 0.862244387 |             |          |         |
| NA         | ENSG00000267574 | -0.6941     | 0.75619     | -1.1813     | 0.88126     | -1.1813  | 0.88126 |
|            | -1.1813         | 0.88126     | 0.75619     | 0.862244387 |             |          |         |
| NA         | ENSG00000279001 | -0.69414    | 0.7562      | -1.0088     | 0.84346     | -0.69414 | 0.7562  |
|            | -0.69414        | 0.7562      | 0.7562      | 0.862244387 |             |          |         |
| OR5I1      | ENSG00000167825 | -0.82546    | 0.79544     | -0.81671    | 0.79295     | -0.69421 | 0.75622 |
|            | -0.87396        | 0.80893     | 0.75622     | 0.862244387 |             |          |         |
| NA         | ENSG00000278445 | -1.4415     | 0.92528     | -0.69418    | 0.75622     | -1.4415  | 0.92528 |
|            | -1.4415         | 0.92528     | 0.75622     | 0.862244387 |             |          |         |
| NA         | ENSG00000238287 | -0.69437    | 0.75628     | -0.69437    | 0.75628     | -0.69437 | 0.75628 |
|            | -0.69437        | 0.75628     | 0.75628     | 0.862280331 |             |          |         |
| RNU6-1301P | ENSG00000199594 | -0.69445    | 0.7563      | -0.69445    | 0.7563      | -0.69445 |         |
|            | 0.7563          | -0.69445    | 0.7563      | 0.7563      | 0.862280331 |          |         |
| MIPEPP1    | ENSG00000225358 | -0.69448    | 0.75631     | -0.8442     | 0.80072     | -0.69448 |         |
|            | 0.75631         | -0.69448    | 0.75631     | 0.75631     | 0.862280331 |          |         |
| NA         | ENSG00000230829 | -1.2688     | 0.89774     | -0.69456    | 0.75633     | -1.2688  | 0.89774 |
|            | -1.2688         | 0.89774     | 0.75633     | 0.862280331 |             |          |         |
| NA         | ENSG00000219666 | -0.69459    | 0.75634     | -0.69459    | 0.75634     | -0.69459 | 0.75634 |
|            | -0.69459        | 0.75634     | 0.75634     | 0.862280331 |             |          |         |
| NA         | ENSG00000251200 | -0.69469    | 0.75637     | -1.4849     | 0.93122     | -0.69469 | 0.75637 |
|            | -0.81715        | 0.79308     | 0.75637     | 0.862294359 |             |          |         |
| LINC00384  | ENSG00000232117 | -0.90229    | 0.81655     | -0.70989    | 0.76111     | -0.69478 |         |
|            | 0.7564          | -0.96035    | 0.83156     | 0.7564      | 0.862308387 |          |         |
| NA         | ENSG00000279855 | -0.69485    | 0.75642     | -0.69485    | 0.75642     | -0.69485 | 0.75642 |
|            | -0.69485        | 0.75642     | 0.75642     | 0.862311014 |             |          |         |
| NA         | ENSG00000249290 | -0.69501    | 0.75648     | -0.69501    | 0.75648     | -0.69501 | 0.75648 |
|            | -0.69501        | 0.75648     | 0.75648     | 0.862311856 |             |          |         |
| ANKLE2     | ENSG00000176915 | -2.1213     | 0.98305     | -0.69505    | 0.75649     | -1.671   |         |

|           |                 |          |         |             |             |          |         |  |
|-----------|-----------------|----------|---------|-------------|-------------|----------|---------|--|
|           | 0.95264         | -1.8294  | 0.96633 | 0.75649     | 0.862311856 |          |         |  |
| NA        | ENSG00000238906 | -0.69512 | 0.75651 | -0.69512    | 0.75651     | -0.69512 | 0.75651 |  |
|           | -0.69512        | 0.75651  | 0.75651 | 0.862311856 |             |          |         |  |
| NA        | ENSG00000198580 | -0.69517 | 0.75652 | -0.69517    | 0.75652     | -0.69517 | 0.75652 |  |
|           | -0.69517        | 0.75652  | 0.75652 | 0.862311856 |             |          |         |  |
| RNU6-545P | ENSG00000206783 | -1.0787  | 0.85965 | -0.95274    | 0.82964     | -1.0787  |         |  |
|           | 0.85965         | -0.69526 | 0.75655 | 0.75655     | 0.862311856 |          |         |  |
| IGHV3-66  | ENSG00000211972 | -0.69524 | 0.75655 | -0.69524    | 0.75655     | -0.69524 |         |  |
|           | 0.75655         | -0.69524 | 0.75655 | 0.75655     | 0.862311856 |          |         |  |
| RNU1-98P  | ENSG00000239023 | -0.69527 | 0.75656 | -0.69527    | 0.75656     | -0.69527 |         |  |
|           | 0.75656         | -0.69527 | 0.75656 | 0.75656     | 0.862311856 |          |         |  |
| NA        | ENSG00000270779 | -0.69531 | 0.75657 | -0.8155     | 0.79261     | -0.8155  | 0.79261 |  |
|           | -0.8155         | 0.79261  | 0.75657 | 0.862311856 |             |          |         |  |
| RPS29P19  | ENSG00000243353 | -0.69534 | 0.75658 | -0.69534    | 0.75658     | -0.69534 |         |  |
|           | 0.75658         | -0.69534 | 0.75658 | 0.75658     | 0.862311856 |          |         |  |
| RN7SKP94  | ENSG00000222976 | -0.69548 | 0.75662 | -0.69548    | 0.75662     | -0.69548 |         |  |
|           | 0.75662         | -0.69548 | 0.75662 | 0.75662     | 0.862337277 |          |         |  |
| NA        | ENSG00000235907 | -0.69568 | 0.75669 | -0.69568    | 0.75669     | -0.69568 | 0.75669 |  |
|           | -0.69568        | 0.75669  | 0.75669 | 0.862396887 |             |          |         |  |
| KRT18P32  | ENSG00000215149 | -0.69575 | 0.75671 | -0.69575    | 0.75671     | -0.69575 |         |  |
|           | 0.75671         | -0.69575 | 0.75671 | 0.75671     | 0.862399511 |          |         |  |
| EPM2AIP1  | ENSG00000178567 | -0.6959  | 0.75676 | -0.6959     | 0.75676     | -0.6959  |         |  |
|           | 0.75676         | -0.89369 | 0.81426 | 0.75676     | 0.862424025 |          |         |  |
| LRIG3     | ENSG00000139263 | -0.7185  | 0.76377 | -0.696      | 0.75679     | -1.3101  | 0.90492 |  |
|           | -1.3101         | 0.90492  | 0.75679 | 0.862424025 |             |          |         |  |
| NA        | ENSG00000258970 | -1.6631  | 0.95185 | -0.69607    | 0.75681     | -0.92429 | 0.82233 |  |
|           | -1.6631         | 0.95185  | 0.75681 | 0.862424025 |             |          |         |  |
| NMT1      | ENSG00000136448 | -0.69612 | 0.75682 | -0.73213    | 0.76796     | -1.2096  | 0.88679 |  |
|           | -0.95739        | 0.83081  | 0.75682 | 0.862424025 |             |          |         |  |
| NA        | ENSG00000250397 | -0.6961  | 0.75682 | -0.6961     | 0.75682     | -0.6961  | 0.75682 |  |
|           | -0.6961         | 0.75682  | 0.75682 | 0.862424025 |             |          |         |  |
| ANKDD1B   | ENSG00000189045 | -0.69622 | 0.75685 | -1.3635     | 0.91364     | -1.7507  | 0.96    |  |
|           | -1.3955         | 0.91857  | 0.75685 | 0.862429272 |             |          |         |  |
| NA        | ENSG00000199487 | -0.69624 | 0.75686 | -1.6003     | 0.94523     | -1.3575  | 0.91269 |  |
|           | -1.2674         | 0.89749  | 0.75686 | 0.862429272 |             |          |         |  |
| RNU6-241P | ENSG00000212450 | -0.83777 | 0.79892 | -0.83777    | 0.79892     | -0.69647 |         |  |
|           | 0.75693         | -0.71407 | 0.76241 | 0.75693     | 0.862488867 |          |         |  |
| HMGB3P21  | ENSG00000224551 | -0.96576 | 0.83292 | -1.2724     | 0.89838     | -0.69669 | 0.757   |  |
|           | -0.69669        | 0.757    | 0.757   | 0.862513367 |             |          |         |  |
| MIR526B   | ENSG00000207580 | -0.69673 | 0.75702 | -2.2521     | 0.98784     | -2.2521  |         |  |
|           | 0.98784         | -2.2521  | 0.98784 | 0.75702     | 0.862513367 |          |         |  |
| FITM1     | ENSG00000139914 | -0.69677 | 0.75703 | -0.69677    | 0.75703     | -0.69677 | 0.75703 |  |
|           | -0.69677        | 0.75703  | 0.75703 | 0.862513367 |             |          |         |  |
| CTBP1     | ENSG00000159692 | -0.69681 | 0.75704 | -1.9214     | 0.97266     | -1.3945  | 0.91842 |  |
|           | -1.632          | 0.94866  | 0.75704 | 0.862513367 |             |          |         |  |
| NA        | ENSG00000270030 | -0.69681 | 0.75704 | -0.69681    | 0.75704     | -0.69681 | 0.75704 |  |
|           | -0.69681        | 0.75704  | 0.75704 | 0.862513367 |             |          |         |  |
| NA        | ENSG00000228401 | -0.69695 | 0.75708 | -0.98799    | 0.83842     | -0.69695 | 0.75708 |  |
|           | -0.69695        | 0.75708  | 0.75708 | 0.862538773 |             |          |         |  |
| NA        | ENSG00000279297 | -0.75047 | 0.77351 | -1.2284     | 0.89035     | -0.69707 | 0.75712 |  |
|           | -1.5219         | 0.93598  | 0.75712 | 0.862555405 |             |          |         |  |
| ABHD2     | ENSG00000140526 | -1.254   | 0.89509 | -0.80431    | 0.78939     | -2.1494  | 0.9842  |  |
|           | -0.6971         | 0.75713  | 0.75713 | 0.862555405 |             |          |         |  |
| USP29     | ENSG00000131864 | -0.69748 | 0.75725 | -0.72205    | 0.76487     | -0.81609 | 0.79278 |  |
|           | -1.3042         | 0.90392  | 0.75725 | 0.862645622 |             |          |         |  |
| RPL15P1   | ENSG00000227343 | -0.79808 | 0.78759 | -0.79808    | 0.78759     | -0.7593  |         |  |
|           | 0.77616         | -0.69749 | 0.75725 | 0.75725     | 0.862645622 |          |         |  |
| NA        | ENSG00000221044 | -0.69754 | 0.75727 | -0.69754    | 0.75727     | -0.69754 | 0.75727 |  |
|           | -0.69754        | 0.75727  | 0.75727 | 0.862645622 |             |          |         |  |
| EIF3FP3   | ENSG00000233426 | -0.69757 | 0.75728 | -0.69757    | 0.75728     | -0.69757 |         |  |
|           | 0.75728         | -0.69757 | 0.75728 | 0.75728     | 0.862645622 |          |         |  |
| NA        | ENSG00000254198 | -1.1142  | 0.8674  | -0.69765    | 0.7573      | -1.0443  | 0.85184 |  |

|           |                 |          |         |             |             |          |         |
|-----------|-----------------|----------|---------|-------------|-------------|----------|---------|
|           | -0.69765        | 0.7573   | 0.7573  | 0.862648239 |             |          |         |
| POLR2D    | ENSG00000144231 | -0.69789 | 0.75738 | -0.69789    | 0.75738     | -0.69789 |         |
|           | 0.75738         | -1.361   | 0.91325 | 0.75738     | 0.86267887  |          |         |
| HCG14     | ENSG00000224157 | -0.69791 | 0.75738 | -1.6055     | 0.94581     | -0.97323 | 0.83478 |
|           | -1.8925         | 0.97079  | 0.75738 | 0.86267887  |             |          |         |
| NA        | ENSG00000278740 | -0.69789 | 0.75738 | -0.69789    | 0.75738     | -0.69789 | 0.75738 |
|           | -0.69789        | 0.75738  | 0.75738 | 0.86267887  |             |          |         |
| NA        | ENSG00000263786 | -0.69813 | 0.75745 | -0.69813    | 0.75745     | -0.69813 | 0.75745 |
|           | -0.69813        | 0.75745  | 0.75745 | 0.862738436 |             |          |         |
| NA        | ENSG00000273791 | -0.69818 | 0.75747 | -0.69818    | 0.75747     | -0.69818 | 0.75747 |
|           | -0.69818        | 0.75747  | 0.75747 | 0.86274105  |             |          |         |
| GPR52     | ENSG00000203737 | -0.69862 | 0.7576  | -0.69862    | 0.7576      | -0.69862 | 0.7576  |
|           | -0.69862        | 0.7576   | 0.7576  | 0.862832692 |             |          |         |
| SUGT1P3   | ENSG00000239827 | -1.9362  | 0.97358 | -0.69863    | 0.75761     | -1.3091  |         |
|           | 0.90475         | -1.1494  | 0.8748  | 0.75761     | 0.862832692 |          |         |
| KRTAP1-4  | ENSG00000204887 | -0.69875 | 0.75765 | -0.69875    | 0.75765     | -0.69875 |         |
|           | 0.75765         | -1.4045  | 0.91991 | 0.75765     | 0.862832692 |          |         |
| CCL23     | ENSG00000274736 | -0.86027 | 0.80518 | -0.86027    | 0.80518     | -0.86027 | 0.80518 |
|           | -0.69893        | 0.7577   | 0.7577  | 0.862832692 |             |          |         |
| MBD2      | ENSG00000134046 | -0.7941  | 0.78643 | -1.6368     | 0.94916     | -0.69899 | 0.75772 |
|           | -1.0341         | 0.84946  | 0.75772 | 0.862832692 |             |          |         |
| SCO2      | ENSG00000284194 | -0.69901 | 0.75773 | -0.69901    | 0.75773     | -0.69901 | 0.75773 |
|           | -0.69901        | 0.75773  | 0.75773 | 0.862832692 |             |          |         |
| LRATD2    | ENSG00000168672 | -0.77817 | 0.78177 | -1.2628     | 0.89667     | -0.69904 |         |
|           | 0.75774         | -1.2628  | 0.89667 | 0.75774     | 0.862832692 |          |         |
| PTCHD4    | ENSG00000244694 | -0.6991  | 0.75775 | -0.6991     | 0.75775     | -0.6991  |         |
|           | 0.75775         | -0.6991  | 0.75775 | 0.75775     | 0.862832692 |          |         |
| NA        | ENSG00000258858 | -0.69908 | 0.75775 | -0.69908    | 0.75775     | -0.69908 | 0.75775 |
|           | -0.69908        | 0.75775  | 0.75775 | 0.862832692 |             |          |         |
| NA        | ENSG00000252920 | -0.69917 | 0.75778 | -0.69917    | 0.75778     | -0.69917 | 0.75778 |
|           | -1.1989         | 0.88473  | 0.75778 | 0.862832692 |             |          |         |
| TOMM22    | ENSG00000100216 | -0.69921 | 0.75779 | -0.69921    | 0.75779     | -0.69921 |         |
|           | 0.75779         | -0.69921 | 0.75779 | 0.75779     | 0.862832692 |          |         |
| NA        | ENSG00000226609 | -0.69925 | 0.7578  | -0.69925    | 0.7578      | -0.69925 | 0.7578  |
|           | -0.69925        | 0.7578   | 0.7578  | 0.862832692 |             |          |         |
| IGLV3-7   | ENSG00000254077 | -0.69942 | 0.75785 | -0.69942    | 0.75785     | -0.69942 |         |
|           | 0.75785         | -0.69942 | 0.75785 | 0.75785     | 0.862832692 |          |         |
| TMEM120A  | ENSG00000189077 | -0.69948 | 0.75787 | -0.69948    | 0.75787     | -0.69948 |         |
|           | 0.75787         | -0.69948 | 0.75787 | 0.75787     | 0.862832692 |          |         |
| NA        | ENSG00000261864 | -0.69949 | 0.75788 | -0.69949    | 0.75788     | -0.69949 | 0.75788 |
|           | -0.69949        | 0.75788  | 0.75788 | 0.862832692 |             |          |         |
| NA        | ENSG00000250214 | -0.69952 | 0.75789 | -0.69952    | 0.75789     | -0.69952 | 0.75789 |
|           | -0.69952        | 0.75789  | 0.75789 | 0.862832692 |             |          |         |
| NA        | ENSG00000261732 | -0.69952 | 0.75789 | -0.69952    | 0.75789     | -0.69952 | 0.75789 |
|           | -0.69952        | 0.75789  | 0.75789 | 0.862832692 |             |          |         |
| NA        | ENSG00000275481 | -0.69954 | 0.75789 | -0.69954    | 0.75789     | -0.69954 | 0.75789 |
|           | -0.69954        | 0.75789  | 0.75789 | 0.862832692 |             |          |         |
| CECR9     | ENSG00000231004 | -1.2165  | 0.88811 | -0.709      | 0.76084     | -0.69961 | 0.75792 |
|           | -1.0548         | 0.85425  | 0.75792 | 0.862832692 |             |          |         |
| NA        | ENSG00000256569 | -0.69966 | 0.75793 | -0.69966    | 0.75793     | -0.69966 | 0.75793 |
|           | -0.69966        | 0.75793  | 0.75793 | 0.862832692 |             |          |         |
| IGLV5-37  | ENSG00000211654 | -0.69969 | 0.75794 | -0.77209    | 0.77997     | -0.69969 |         |
|           | 0.75794         | -0.69969 | 0.75794 | 0.75794     | 0.862832692 |          |         |
| LINC01938 | ENSG00000254066 | -1.8731  | 0.96948 | -2.037      | 0.97918     | -2.037   |         |
|           | 0.97918         | -0.69969 | 0.75794 | 0.75794     | 0.862832692 |          |         |
| NA        | ENSG00000265043 | -1.0769  | 0.85924 | -0.69975    | 0.75796     | -1.0769  | 0.85924 |
|           | -1.2251         | 0.88974  | 0.75796 | 0.862835303 |             |          |         |
| ZNF25-DT  | ENSG00000226447 | -0.69986 | 0.75799 | -0.9106     | 0.81875     | -0.70715 |         |
|           | 0.76026         | -0.70715 | 0.76026 | 0.75799     | 0.862849297 |          |         |
| BIK       | ENSG00000100290 | -1.3387  | 0.90967 | -1.3387     | 0.90967     | -1.3387  | 0.90967 |
|           | -0.70018        | 0.75809  | 0.75809 | 0.862942972 |             |          |         |
| TMEM18    | ENSG00000151353 | -1.1137  | 0.86729 | -0.70057    | 0.75821     | -1.5027  |         |

|             |                 |          |         |             |             |          |         |
|-------------|-----------------|----------|---------|-------------|-------------|----------|---------|
|             | 0.93354         | -0.73615 | 0.76918 | 0.75821     | 0.863021697 |          |         |
| GABBR1      | ENSG00000204681 | -0.7097  | 0.76106 | -0.70058    | 0.75822     | -1.5845  |         |
|             | 0.94346         | -1.3484  | 0.91123 | 0.75822     | 0.863021697 |          |         |
| LINC02126   | ENSG00000259847 | -0.70059 | 0.75822 | -1.4727     | 0.92958     | -0.87331 |         |
|             | 0.80875         | -0.87331 | 0.80875 | 0.75822     | 0.863021697 |          |         |
| VN1R105P    | ENSG00000242856 | -0.70063 | 0.75823 | -0.70063    | 0.75823     | -0.70063 |         |
|             | 0.75823         | -0.70063 | 0.75823 | 0.75823     | 0.863021697 |          |         |
| HMGB1P8     | ENSG00000259699 | -2.005   | 0.97752 | -1.8971     | 0.9711      | -1.8971  |         |
|             | 0.9711          | -0.70093 | 0.75833 | 0.75833     | 0.863115357 |          |         |
| NA          | ENSG00000277587 | -0.70111 | 0.75838 | -0.70111    | 0.75838     | -0.70111 | 0.75838 |
|             | -0.70111        | 0.75838  | 0.75838 | 0.863152106 |             |          |         |
| RNU6-1246P  | ENSG00000212366 | -0.99213 | 0.83943 | -0.70115    | 0.7584      | -1.4778  |         |
|             | 0.93028         | -1.4778  | 0.93028 | 0.7584      | 0.863154709 |          |         |
| HMGB1P1     | ENSG00000124097 | -0.70135 | 0.75846 | -1.2208     | 0.88892     | -0.88221 |         |
|             | 0.81117         | -1.8119  | 0.965   | 0.75846     | 0.863182676 |          |         |
| NA          | ENSG00000237885 | -0.70136 | 0.75846 | -0.70136    | 0.75846     | -0.70136 | 0.75846 |
|             | -0.70136        | 0.75846  | 0.75846 | 0.863182676 |             |          |         |
| MIR525      | ENSG00000207711 | -0.70148 | 0.7585  | -0.70148    | 0.7585      | -0.70148 |         |
|             | 0.7585          | -0.70148 | 0.7585  | 0.7585      | 0.86319926  |          |         |
| NA          | ENSG00000261470 | -0.70152 | 0.75851 | -0.70152    | 0.75851     | -0.70152 | 0.75851 |
|             | -0.70152        | 0.75851  | 0.75851 | 0.86319926  |             |          |         |
| FMO6P       | ENSG00000117507 | -0.70163 | 0.75854 | -0.70163    | 0.75854     | -0.70163 | 0.75854 |
|             | -0.70163        | 0.75854  | 0.75854 | 0.863213241 |             |          |         |
| NA          | ENSG00000257570 | -0.70172 | 0.75857 | -0.70172    | 0.75857     | -0.70172 | 0.75857 |
|             | -0.70172        | 0.75857  | 0.75857 | 0.863227222 |             |          |         |
| IGLV3-6     | ENSG00000253448 | -0.70191 | 0.75863 | -0.70191    | 0.75863     | -0.70191 |         |
|             | 0.75863         | -0.70191 | 0.75863 | 0.75863     | 0.86327534  |          |         |
| NA          | ENSG00000226308 | -0.70206 | 0.75868 | -0.70206    | 0.75868     | -0.70206 | 0.75868 |
|             | -0.70206        | 0.75868  | 0.75868 | 0.863312077 |             |          |         |
| KDM4F       | ENSG00000255855 | -1.3322  | 0.90861 | -0.70241    | 0.75879     | -1.0754  | 0.8589  |
|             | -1.0754         | 0.8589   | 0.75879 | 0.863408303 |             |          |         |
| LRTOMT      | ENSG00000184154 | -0.70244 | 0.7588  | -0.70244    | 0.7588      | -0.70244 |         |
|             | 0.7588          | -0.70244 | 0.7588  | 0.7588      | 0.863408303 |          |         |
| NA          | ENSG00000202306 | -0.7026  | 0.75885 | -0.7026     | 0.75885     | -0.7026  | 0.75885 |
|             | -0.7026         | 0.75885  | 0.75885 | 0.863438848 |             |          |         |
| NOMO3       | ENSG00000103226 | -1.316   | 0.90592 | -0.70266    | 0.75887     | -1.1264  | 0.87    |
|             | -1.4478         | 0.92617  | 0.75887 | 0.863438848 |             |          |         |
| NA          | ENSG00000271349 | -0.70272 | 0.75888 | -0.70871    | 0.76075     | -0.74112 | 0.77069 |
|             | -0.84969        | 0.80225  | 0.75888 | 0.863438848 |             |          |         |
| PMPCB       | ENSG00000105819 | -0.70276 | 0.7589  | -2.4672     | 0.99319     | -2.4672  | 0.99319 |
|             | -2.4672         | 0.99319  | 0.7589  | 0.863441443 |             |          |         |
| LYNX1       | ENSG00000180155 | -0.72564 | 0.76597 | -0.72564    | 0.76597     | -0.72564 | 0.76597 |
|             | -0.70314        | 0.75902  | 0.75902 | 0.863557811 |             |          |         |
| NA          | ENSG00000265621 | -0.70327 | 0.75906 | -0.70327    | 0.75906     | -0.70327 | 0.75906 |
|             | -0.70327        | 0.75906  | 0.75906 | 0.863565588 |             |          |         |
| ARF4P1      | ENSG00000271525 | -0.71116 | 0.76151 | -0.71116    | 0.76151     | -0.71116 |         |
|             | 0.76151         | -0.7033  | 0.75907 | 0.75907     | 0.863565588 |          |         |
| NA          | ENSG00000274797 | -0.70333 | 0.75908 | -0.70333    | 0.75908     | -0.70333 | 0.75908 |
|             | -0.70333        | 0.75908  | 0.75908 | 0.863565588 |             |          |         |
| RPSAP10     | ENSG00000224439 | -0.70343 | 0.75911 | -0.70343    | 0.75911     | -0.91449 |         |
|             | 0.81977         | -1.3074  | 0.90446 | 0.75911     | 0.863579556 |          |         |
| ANKRD52     | ENSG00000139645 | -1.3748  | 0.91541 | -1.8264     | 0.9661      | -0.91271 |         |
|             | 0.8193          | -0.70368 | 0.75919 | 0.75919     | 0.863641618 |          |         |
| COPZ1       | ENSG00000111481 | -0.70372 | 0.7592  | -0.70372    | 0.7592      | -1.4429  | 0.92547 |
|             | -0.79202        | 0.78583  | 0.7592  | 0.863641618 |             |          |         |
| NA          | ENSG00000267565 | -0.70387 | 0.75924 | -0.70387    | 0.75924     | -0.70387 | 0.75924 |
|             | -0.70387        | 0.75924  | 0.75924 | 0.863666959 |             |          |         |
| SNORA80E    | ENSG00000207475 | -0.70406 | 0.7593  | -0.70406    | 0.7593      | -0.70406 |         |
|             | 0.7593          | -0.70406 | 0.7593  | 0.7593      | 0.86371144  |          |         |
| NA          | ENSG00000264288 | -0.70411 | 0.75932 | -0.70411    | 0.75932     | -0.70411 | 0.75932 |
|             | -0.70411        | 0.75932  | 0.75932 | 0.86371144  |             |          |         |
| C8orf37-AS1 | ENSG00000253773 | -1.3915  | 0.91797 | -1.4343     | 0.92426     | -0.70423 |         |

|             |                 |          |         |             |             |          |         |
|-------------|-----------------|----------|---------|-------------|-------------|----------|---------|
|             | 0.75935         | -0.80541 | 0.78971 | 0.75935     | 0.86371144  |          |         |
| NA          | ENSG00000264080 | -0.71554 | 0.76286 | -0.7042     | 0.75935     | -0.88388 | 0.81162 |
|             | -0.88388        | 0.81162  | 0.75935 | 0.86371144  |             |          |         |
| ZNF501      | ENSG00000186446 | -0.70451 | 0.75944 | -0.70451    | 0.75944     | -0.70451 |         |
|             | 0.75944         | -0.70451 | 0.75944 | 0.75944     | 0.863753374 |          |         |
| LINC02711   | ENSG00000255183 | -0.7045  | 0.75944 | -0.7045     | 0.75944     | -0.7045  |         |
|             | 0.75944         | -0.7045  | 0.75944 | 0.75944     | 0.863753374 |          |         |
| RARS2       | ENSG00000146282 | -0.70454 | 0.75945 | -0.70454    | 0.75945     | -0.70454 | 0.75945 |
|             | -1.6177         | 0.94713  | 0.75945 | 0.863753374 |             |          |         |
| TAF2        | ENSG00000198673 | -1.1102  | 0.86654 | -0.7046     | 0.75947     | -1.2585  | 0.8959  |
|             | -0.7046         | 0.75947  | 0.75947 | 0.863753374 |             |          |         |
| NA          | ENSG00000260919 | -0.70463 | 0.75948 | -0.70463    | 0.75948     | -0.70463 | 0.75948 |
|             | -0.70463        | 0.75948  | 0.75948 | 0.863753374 |             |          |         |
| NA          | ENSG00000269973 | -0.70471 | 0.7595  | -0.70471    | 0.7595      | -0.70471 | 0.7595  |
|             | -0.70471        | 0.7595   | 0.7595  | 0.863753374 |             |          |         |
| IGHVII-78-1 | ENSG00000253674 | -0.70479 | 0.75953 | -0.70479    | 0.75953     | -0.70479 | 0.75953 |
|             | 0.75953         | -0.70479 | 0.75953 | 0.75953     | 0.863753374 |          |         |
| DIP2B       | ENSG00000066084 | -1.0107  | 0.84391 | -0.77587    | 0.78109     | -0.70482 | 0.75954 |
|             | -1.1258         | 0.86987  | 0.75954 | 0.863753374 |             |          |         |
| INHCAP      | ENSG00000242337 | -0.70489 | 0.75956 | -0.70753    | 0.76038     | -0.99165 |         |
|             | 0.83932         | -1.1155  | 0.86767 | 0.75956     | 0.863753374 |          |         |
| NA          | ENSG00000267199 | -1.4059  | 0.92012 | -0.70491    | 0.75957     | -1.4059  | 0.92012 |
|             | -1.4059         | 0.92012  | 0.75957 | 0.863753374 |             |          |         |
| CTSL        | ENSG00000135047 | -1.0242  | 0.84712 | -0.70501    | 0.7596      | -1.0242  | 0.84712 |
|             | -1.0242         | 0.84712  | 0.7596  | 0.863753374 |             |          |         |
| RNY1P11     | ENSG00000200629 | -0.70522 | 0.75966 | -0.70522    | 0.75966     | -0.70522 |         |
|             | 0.75966         | -0.70522 | 0.75966 | 0.75966     | 0.863753374 |          |         |
| SPRR4       | ENSG00000184148 | -0.70529 | 0.75968 | -0.70529    | 0.75968     | -0.70529 | 0.75968 |
|             | -0.70529        | 0.75968  | 0.75968 | 0.863753374 |             |          |         |
| NA          | ENSG00000277999 | -0.70534 | 0.7597  | -0.70534    | 0.7597      | -0.70534 | 0.7597  |
|             | -0.70534        | 0.7597   | 0.7597  | 0.863753374 |             |          |         |
| NA          | ENSG00000202019 | -0.70539 | 0.75972 | -0.70539    | 0.75972     | -0.70539 | 0.75972 |
|             | -0.70539        | 0.75972  | 0.75972 | 0.863753374 |             |          |         |
| POGLUT1     | ENSG00000163389 | -0.70547 | 0.75974 | -1.1265     | 0.87003     | -0.93293 |         |
|             | 0.82457         | -1.3122  | 0.90527 | 0.75974     | 0.863753374 |          |         |
| MDM4        | ENSG00000198625 | -1.0781  | 0.8595  | -1.1231     | 0.86929     | -0.70545 | 0.75974 |
|             | -0.97031        | 0.83405  | 0.75974 | 0.863753374 |             |          |         |
| TRBV25-1    | ENSG00000282499 | -0.70546 | 0.75974 | -0.70546    | 0.75974     | -0.70546 |         |
|             | 0.75974         | -0.70546 | 0.75974 | 0.75974     | 0.863753374 |          |         |
| AMPH        | ENSG00000078053 | -0.89585 | 0.81483 | -0.73292    | 0.7682      | -0.70562 | 0.75979 |
|             | -0.80647        | 0.79001  | 0.75979 | 0.863753374 |             |          |         |
| ENHO        | ENSG00000168913 | -0.70569 | 0.75981 | -0.70569    | 0.75981     | -0.70569 | 0.75981 |
|             | -0.70569        | 0.75981  | 0.75981 | 0.863753374 |             |          |         |
| SDR9C7      | ENSG00000170426 | -1.4527  | 0.92685 | -1.0766     | 0.85918     | -0.70569 |         |
|             | 0.75981         | -1.9499  | 0.97441 | 0.75981     | 0.863753374 |          |         |
| RNU5F-1     | ENSG00000199377 | -0.70569 | 0.75981 | -2.17       | 0.985       | -0.93248 | 0.82446 |
|             | -0.93248        | 0.82446  | 0.75981 | 0.863753374 |             |          |         |
| MTND5P3     | ENSG00000232447 | -0.70573 | 0.75982 | -0.70573    | 0.75982     | -0.70573 |         |
|             | 0.75982         | -0.70573 | 0.75982 | 0.75982     | 0.863753374 |          |         |
| ASH2LP2     | ENSG00000237428 | -0.70574 | 0.75982 | -0.70574    | 0.75982     | -0.70574 |         |
|             | 0.75982         | -0.70574 | 0.75982 | 0.75982     | 0.863753374 |          |         |
| RPEP6       | ENSG00000257075 | -0.70576 | 0.75983 | -0.70576    | 0.75983     | -0.70576 | 0.75983 |
|             | -0.70576        | 0.75983  | 0.75983 | 0.863753374 |             |          |         |
| FAM160A2    | ENSG00000051009 | -0.70586 | 0.75986 | -0.70586    | 0.75986     | -0.70586 |         |
|             | 0.75986         | -0.70586 | 0.75986 | 0.75986     | 0.863761131 |          |         |
| BUB1B-PAK6  | ENSG00000259288 | -0.70593 | 0.75988 | -0.70593    | 0.75988     | -0.70593 |         |
|             | 0.75988         | -0.70593 | 0.75988 | 0.75988     | 0.863761131 |          |         |
| RPL27P7     | ENSG00000233741 | -1.2432  | 0.8931  | -1.2432     | 0.8931      | -0.70594 |         |
|             | 0.75989         | -1.2432  | 0.8931  | 0.75989     | 0.863761131 |          |         |
| IL37        | ENSG00000125571 | -1.0484  | 0.85277 | -0.70612    | 0.75994     | -0.9508  | 0.82915 |
|             | -1.0484         | 0.85277  | 0.75994 | 0.863777668 |             |          |         |
| ZKSCAN7-AS1 | ENSG00000236869 | -0.94212 | 0.82693 | -0.70613    | 0.75994     | -0.94212 |         |

|            |                 |          |         |             |             |          |         |  |
|------------|-----------------|----------|---------|-------------|-------------|----------|---------|--|
|            | 0.82693         | -0.94212 | 0.82693 | 0.75994     | 0.863777668 |          |         |  |
| NPM1P29    | ENSG00000239351 | -0.70622 | 0.75997 | -0.73281    | 0.76816     | -1.0809  |         |  |
|            | 0.86012         | -1.0262  | 0.84759 | 0.75997     | 0.863791619 |          |         |  |
| FAR1       | ENSG00000197601 | -0.7063  | 0.76    | -1.6037     | 0.94561     | -1.4157  | 0.92156 |  |
|            | -0.93485        | 0.82507  | 0.76    | 0.863792677 |             |          |         |  |
| RNU5A-8P   | ENSG00000200972 | -0.70648 | 0.76005 | -0.70648    | 0.76005     | -0.70648 |         |  |
|            | 0.76005         | -0.70648 | 0.76005 | 0.76005     | 0.863792677 |          |         |  |
| IGFBP2     | ENSG00000115457 | -1.2485  | 0.89407 | -2.004      | 0.97746     | -0.70651 |         |  |
|            | 0.76006         | -1.0585  | 0.85508 | 0.76006     | 0.863792677 |          |         |  |
| LINC01304  | ENSG00000237401 | -0.88377 | 0.81159 | -0.95954    | 0.83136     | -1.8235  |         |  |
|            | 0.96589         | -0.70648 | 0.76006 | 0.76006     | 0.863792677 |          |         |  |
| RNY1P8     | ENSG00000206697 | -0.70655 | 0.76008 | -0.70655    | 0.76008     | -0.70655 |         |  |
|            | 0.76008         | -0.70655 | 0.76008 | 0.76008     | 0.863792677 |          |         |  |
| GALNT15    | ENSG00000131386 | -0.70659 | 0.76009 | -1.0174     | 0.84553     | -1.6706  |         |  |
|            | 0.9526          | -1.4686  | 0.92904 | 0.76009     | 0.863792677 |          |         |  |
| LINC01585  | ENSG00000245479 | -0.70664 | 0.76011 | -0.70664    | 0.76011     | -0.70664 |         |  |
|            | 0.76011         | -1.2281  | 0.89029 | 0.76011     | 0.863792677 |          |         |  |
| RPL17P35   | ENSG00000233900 | -1.1317  | 0.87112 | -0.70676    | 0.76014     | -1.1317  |         |  |
|            | 0.87112         | -1.1317  | 0.87112 | 0.76014     | 0.863792677 |          |         |  |
| ZNF346-IT1 | ENSG00000251666 | -0.70674 | 0.76014 | -0.70674    | 0.76014     | -0.70674 |         |  |
|            | 0.76014         | -0.70674 | 0.76014 | 0.76014     | 0.863792677 |          |         |  |
| GPR156     | ENSG00000175697 | -1.241   | 0.8927  | -0.72582    | 0.76603     | -0.99981 |         |  |
|            | 0.8413          | -0.70683 | 0.76016 | 0.76016     | 0.863792677 |          |         |  |
| LINC01436  | ENSG00000231106 | -0.70705 | 0.76023 | -0.70705    | 0.76023     | -0.70705 |         |  |
|            | 0.76023         | -0.70705 | 0.76023 | 0.76023     | 0.863792677 |          |         |  |
| RNU6-877P  | ENSG00000206595 | -0.70706 | 0.76024 | -0.70706    | 0.76024     | -1.1629  |         |  |
|            | 0.87756         | -0.70706 | 0.76024 | 0.76024     | 0.863792677 |          |         |  |
| RNU6-22P   | ENSG00000207083 | -0.70706 | 0.76024 | -0.70706    | 0.76024     | -0.70706 |         |  |
|            | 0.76024         | -0.70706 | 0.76024 | 0.76024     | 0.863792677 |          |         |  |
| TMEM275    | ENSG00000282881 | -0.70707 | 0.76024 | -1.7584     | 0.96066     | -1.3617  |         |  |
|            | 0.91335         | -0.93028 | 0.82389 | 0.76024     | 0.863792677 |          |         |  |
| NXNP1      | ENSG00000226693 | -0.7071  | 0.76025 | -0.7071     | 0.76025     | -0.7071  | 0.76025 |  |
|            | -0.7071         | 0.76025  | 0.76025 | 0.863792677 |             |          |         |  |
| NA         | ENSG00000267052 | -0.70719 | 0.76028 | -0.70719    | 0.76028     | -0.70719 | 0.76028 |  |
|            | -0.70719        | 0.76028  | 0.76028 | 0.863792677 |             |          |         |  |
| SLC46A2    | ENSG00000119457 | -0.70722 | 0.76029 | -0.70722    | 0.76029     | -0.70722 |         |  |
|            | 0.76029         | -0.70722 | 0.76029 | 0.76029     | 0.863792677 |          |         |  |
| FPR3       | ENSG00000187474 | -1.0784  | 0.85957 | -0.70723    | 0.76029     | -0.70723 | 0.76029 |  |
|            | -0.70723        | 0.76029  | 0.76029 | 0.863792677 |             |          |         |  |
| NA         | ENSG00000224427 | -0.70731 | 0.76031 | -1.0455     | 0.85211     | -0.93532 | 0.82519 |  |
|            | -0.93532        | 0.82519  | 0.76031 | 0.86379526  |             |          |         |  |
| B3GNT4     | ENSG00000176383 | -0.70753 | 0.76038 | -0.70753    | 0.76038     | -0.70753 |         |  |
|            | 0.76038         | -0.70753 | 0.76038 | 0.76038     | 0.863854648 |          |         |  |
| NA         | ENSG00000257732 | -0.70764 | 0.76042 | -0.70764    | 0.76042     | -0.70764 | 0.76042 |  |
|            | -0.70764        | 0.76042  | 0.76042 | 0.863870137 |             |          |         |  |
| OR2AH1P    | ENSG00000232511 | -0.70775 | 0.76045 | -0.70775    | 0.76045     | -0.70775 |         |  |
|            | 0.76045         | -0.70775 | 0.76045 | 0.76045     | 0.863870137 |          |         |  |
| C3orf86    | ENSG00000225873 | -0.70785 | 0.76048 | -0.70785    | 0.76048     | -0.70785 |         |  |
|            | 0.76048         | -0.70785 | 0.76048 | 0.76048     | 0.863870137 |          |         |  |
| NA         | ENSG00000267576 | -0.70786 | 0.76048 | -0.70786    | 0.76048     | -0.70786 | 0.76048 |  |
|            | -0.70786        | 0.76048  | 0.76048 | 0.863870137 |             |          |         |  |
| NA         | ENSG00000243533 | -0.7079  | 0.76049 | -0.7079     | 0.76049     | -0.7079  | 0.76049 |  |
|            | -0.7079         | 0.76049  | 0.76049 | 0.863870137 |             |          |         |  |
| NA         | ENSG00000271993 | -0.70791 | 0.7605  | -0.70791    | 0.7605      | -0.70791 | 0.7605  |  |
|            | -0.70791        | 0.7605   | 0.7605  | 0.863870137 |             |          |         |  |
| NA         | ENSG00000253926 | -0.7081  | 0.76056 | -0.7081     | 0.76056     | -0.7081  | 0.76056 |  |
|            | -0.7081         | 0.76056  | 0.76056 | 0.863908337 |             |          |         |  |
| NIP7       | ENSG00000132603 | -0.70829 | 0.76062 | -0.70829    | 0.76062     | -0.70829 | 0.76062 |  |
|            | -0.70829        | 0.76062  | 0.76062 | 0.863908337 |             |          |         |  |
| CD247      | ENSG00000198821 | -0.70833 | 0.76063 | -1.8835     | 0.97018     | -0.70833 | 0.76063 |  |
|            | -0.83409        | 0.79789  | 0.76063 | 0.863908337 |             |          |         |  |
| ACTBP6     | ENSG00000203413 | -0.70833 | 0.76063 | -0.70833    | 0.76063     | -0.70833 |         |  |



|           |                 |          |         |             |             |          |         |
|-----------|-----------------|----------|---------|-------------|-------------|----------|---------|
|           | 0.76063         | -0.70833 | 0.76063 | 0.76063     | 0.863908337 |          |         |
| ADGRG7    | ENSG00000144820 | -1.0075  | 0.84316 | -1.2964     | 0.90258     | -0.98345 |         |
|           | 0.83731         | -0.70837 | 0.76064 | 0.76064     | 0.863908337 |          |         |
| MTCYBP5   | ENSG00000234671 | -0.70838 | 0.76064 | -0.70838    | 0.76064     | -0.70838 |         |
|           | 0.76064         | -0.70838 | 0.76064 | 0.76064     | 0.863908337 |          |         |
| ACOX3     | ENSG00000087008 | -0.90412 | 0.81703 | -0.70873    | 0.76075     | -1.1671  | 0.87842 |
|           | -0.8729         | 0.80864  | 0.76075 | 0.864013133 |             |          |         |
| CCNL1     | ENSG00000163660 | -1.0342  | 0.84947 | -1.0342     | 0.84947     | -1.0342  | 0.84947 |
|           | -0.70887        | 0.7608   | 0.7608  | 0.864013615 |             |          |         |
| NA        | ENSG00000271454 | -0.70889 | 0.7608  | -0.70889    | 0.7608      | -0.70889 | 0.7608  |
|           | -0.70889        | 0.7608   | 0.7608  | 0.864013615 |             |          |         |
| RNU6-87P  | ENSG00000272028 | -0.70901 | 0.76084 | -0.70901    | 0.76084     | -0.70901 |         |
|           | 0.76084         | -0.70901 | 0.76084 | 0.76084     | 0.864013615 |          |         |
| PHACTR1   | ENSG00000112137 | -1.8254  | 0.96603 | -1.6183     | 0.9472      | -1.3335  |         |
|           | 0.90882         | -0.70905 | 0.76085 | 0.76085     | 0.864013615 |          |         |
| RNU6-66P  | ENSG00000200267 | -0.70907 | 0.76086 | -0.70907    | 0.76086     | -0.70907 |         |
|           | 0.76086         | -0.70907 | 0.76086 | 0.76086     | 0.864013615 |          |         |
| NA        | ENSG00000230286 | -1.0584  | 0.85506 | -0.81197    | 0.79159     | -0.70908 | 0.76086 |
|           | -0.70908        | 0.76086  | 0.76086 | 0.864013615 |             |          |         |
| RPS15AP11 | ENSG00000234093 | -0.70912 | 0.76088 | -0.70912    | 0.76088     | -0.70912 |         |
|           | 0.76088         | -0.70912 | 0.76088 | 0.76088     | 0.864013615 |          |         |
| NA        | ENSG00000257586 | -1.438   | 0.92479 | -0.7092     | 0.7609      | -1.438   | 0.92479 |
|           | -2.2769         | 0.9886   | 0.7609  | 0.864013615 |             |          |         |
| LINC02149 | ENSG00000249332 | -0.70923 | 0.76091 | -0.70923    | 0.76091     | -0.70923 |         |
|           | 0.76091         | -0.70923 | 0.76091 | 0.76091     | 0.864013615 |          |         |
| LINC00452 | ENSG00000229373 | -0.70946 | 0.76098 | -0.70946    | 0.76098     | -0.70946 |         |
|           | 0.76098         | -0.70946 | 0.76098 | 0.76098     | 0.864072966 |          |         |
| SLC6A14P3 | ENSG00000236655 | -0.70956 | 0.76101 | -0.70956    | 0.76101     | -0.70956 |         |
|           | 0.76101         | -0.70956 | 0.76101 | 0.76101     | 0.864086896 |          |         |
| XBP1P1    | ENSG00000249947 | -0.70963 | 0.76103 | -0.70963    | 0.76103     | -0.70963 |         |
|           | 0.76103         | -0.70963 | 0.76103 | 0.76103     | 0.864089471 |          |         |
| MIR4748   | ENSG00000265879 | -0.70969 | 0.76105 | -0.70969    | 0.76105     | -0.70969 |         |
|           | 0.76105         | -0.70969 | 0.76105 | 0.76105     | 0.864092045 |          |         |
| NA        | ENSG00000275675 | -0.70981 | 0.76109 | -0.70981    | 0.76109     | -0.70981 | 0.76109 |
|           | -0.70981        | 0.76109  | 0.76109 | 0.864117328 |             |          |         |
| CPNE6     | ENSG00000100884 | -0.70996 | 0.76114 | -0.70996    | 0.76114     | -0.70996 | 0.76114 |
|           | -0.70996        | 0.76114  | 0.76114 | 0.864133829 |             |          |         |
| NA        | ENSG00000200545 | -0.70999 | 0.76114 | -0.70999    | 0.76114     | -0.70999 | 0.76114 |
|           | -0.70999        | 0.76114  | 0.76114 | 0.864133829 |             |          |         |
| RNU2-46P  | ENSG00000252847 | -0.71025 | 0.76122 | -0.71025    | 0.76122     | -0.71025 |         |
|           | 0.76122         | -0.71025 | 0.76122 | 0.76122     | 0.864184386 |          |         |
| NA        | ENSG00000277498 | -0.71025 | 0.76122 | -0.71025    | 0.76122     | -0.71025 | 0.76122 |
|           | -0.71025        | 0.76122  | 0.76122 | 0.864184386 |             |          |         |
| MTATP6P16 | ENSG00000224299 | -0.71029 | 0.76124 | -0.71029    | 0.76124     | -0.71029 |         |
|           | 0.76124         | -0.71029 | 0.76124 | 0.76124     | 0.864186959 |          |         |
| HLA-DRB6  | ENSG00000229391 | -0.71047 | 0.76129 | -0.84902    | 0.80207     | -0.71047 |         |
|           | 0.76129         | -0.71047 | 0.76129 | 0.76129     | 0.864206026 |          |         |
| NA        | ENSG00000236095 | -1.0136  | 0.84461 | -0.90158    | 0.81636     | -0.76427 | 0.77765 |
|           | -0.7105         | 0.7613   | 0.7613  | 0.864206026 |             |          |         |
| CYCSP52   | ENSG00000235700 | -0.71053 | 0.76131 | -0.71053    | 0.76131     | -0.71053 |         |
|           | 0.76131         | -0.71053 | 0.76131 | 0.76131     | 0.864206026 |          |         |
| CHPF      | ENSG00000123989 | -0.71071 | 0.76137 | -0.71071    | 0.76137     | -0.71071 | 0.76137 |
|           | -0.71071        | 0.76137  | 0.76137 | 0.864254003 |             |          |         |
| NA        | ENSG00000275232 | -0.7108  | 0.7614  | -0.7108     | 0.7614      | -0.94748 | 0.8283  |
|           | -1.5745         | 0.94231  | 0.7614  | 0.864259144 |             |          |         |
| CLK2P1    | ENSG00000232553 | -0.71084 | 0.76141 | -1.3494     | 0.91139     | -0.71084 |         |
|           | 0.76141         | -0.96239 | 0.83207 | 0.76141     | 0.864259144 |          |         |
| NA        | ENSG00000234859 | -0.71098 | 0.76145 | -0.71098    | 0.76145     | -0.71098 | 0.76145 |
|           | -0.71098        | 0.76145  | 0.76145 | 0.864275634 |             |          |         |
| NA        | ENSG00000257434 | -0.71099 | 0.76146 | -0.71099    | 0.76146     | -0.71099 | 0.76146 |
|           | -0.71099        | 0.76146  | 0.76146 | 0.864275634 |             |          |         |
| TFAP2B    | ENSG00000008196 | -0.94938 | 0.82879 | -1.4706     | 0.9293      | -0.72005 |         |

|           |                 |          |         |             |             |          |         |
|-----------|-----------------|----------|---------|-------------|-------------|----------|---------|
|           | 0.76425         | -0.71106 | 0.76148 | 0.76148     | 0.864278204 |          |         |
| NA        | ENSG00000257687 | -0.71114 | 0.7615  | -0.71114    | 0.7615      | -0.71114 | 0.7615  |
|           | -0.71114        | 0.7615   | 0.7615  | 0.864280773 |             |          |         |
| NA        | ENSG00000259940 | -0.7112  | 0.76152 | -0.7112     | 0.76152     | -0.7112  | 0.76152 |
|           | -0.7112         | 0.76152  | 0.76152 | 0.864283343 |             |          |         |
| NA        | ENSG00000241345 | -1.2504  | 0.89442 | -1.1425     | 0.87338     | -0.71128 | 0.76155 |
|           | -1.2325         | 0.89112  | 0.76155 | 0.86429105  |             |          |         |
| BTBD6     | ENSG00000184887 | -0.71138 | 0.76157 | -0.71138    | 0.76157     | -0.71138 | 0.76157 |
|           | -0.71138        | 0.76157  | 0.76157 | 0.86429105  |             |          |         |
| ZNF713    | ENSG00000178665 | -0.71138 | 0.76158 | -1.2609     | 0.89633     | -0.86956 |         |
|           | 0.80773         | -0.83908 | 0.79929 | 0.76158     | 0.86429105  |          |         |
| SELE      | ENSG00000007908 | -0.71152 | 0.76162 | -0.71152    | 0.76162     | -0.71152 | 0.76162 |
|           | -0.71152        | 0.76162  | 0.76162 | 0.864307536 |             |          |         |
| MIR1263   | ENSG00000221251 | -1.4896  | 0.93184 | -0.71156    | 0.76163     | -0.71156 |         |
|           | 0.76163         | -0.71156 | 0.76163 | 0.76163     | 0.864307536 |          |         |
| DDA1      | ENSG00000130311 | -0.71164 | 0.76166 | -0.71164    | 0.76166     | -0.71164 | 0.76166 |
|           | -0.71164        | 0.76166  | 0.76166 | 0.864321452 |             |          |         |
| SNAP23P1  | ENSG00000230758 | -0.71175 | 0.76169 | -0.71175    | 0.76169     | -0.71175 |         |
|           | 0.76169         | -0.71175 | 0.76169 | 0.76169     | 0.864335368 |          |         |
| SULT1B1   | ENSG00000173597 | -1.0156  | 0.84509 | -0.71186    | 0.76172     | -0.91604 |         |
|           | 0.82018         | -1.7237  | 0.95762 | 0.76172     | 0.864349283 |          |         |
| RNA5SP497 | ENSG00000251890 | -0.71215 | 0.76181 | -0.71215    | 0.76181     | -0.98028 |         |
|           | 0.83653         | -1.3122  | 0.90528 | 0.76181     | 0.86443128  |          |         |
| NA        | ENSG00000251549 | -0.71237 | 0.76188 | -0.71237    | 0.76188     | -0.71237 | 0.76188 |
|           | -0.71237        | 0.76188  | 0.76188 | 0.864490579 |             |          |         |
| RUFY4     | ENSG00000188282 | -1.1791  | 0.88082 | -1.1791     | 0.88082     | -1.2748  | 0.89881 |
|           | -0.71262        | 0.76196  | 0.76196 | 0.864550982 |             |          |         |
| DUS4L     | ENSG00000105865 | -0.71269 | 0.76198 | -0.71269    | 0.76198     | -0.71269 | 0.76198 |
|           | -0.71269        | 0.76198  | 0.76198 | 0.864550982 |             |          |         |
| DCLK2     | ENSG00000170390 | -1.0994  | 0.8642  | -1.2095     | 0.88677     | -0.71272 | 0.76199 |
|           | -1.0279         | 0.84801  | 0.76199 | 0.864550982 |             |          |         |
| NA        | ENSG00000236297 | -0.71405 | 0.7624  | -2.2467     | 0.98767     | -0.88127 | 0.81091 |
|           | -0.71284        | 0.76203  | 0.76203 | 0.864550982 |             |          |         |
| NA        | ENSG00000268015 | -0.71301 | 0.76208 | -0.71301    | 0.76208     | -0.71301 | 0.76208 |
|           | -0.71301        | 0.76208  | 0.76208 | 0.864550982 |             |          |         |
| BPNT2     | ENSG00000104331 | -1.6478  | 0.95031 | -1.6057     | 0.94583     | -1.3765  | 0.91567 |
|           | -0.71311        | 0.76211  | 0.76211 | 0.864550982 |             |          |         |
| NA        | ENSG00000253414 | -0.96851 | 0.8336  | -0.71319    | 0.76213     | -1.9741  | 0.97582 |
|           | -0.96851        | 0.8336   | 0.76213 | 0.864550982 |             |          |         |
| NA        | ENSG00000228255 | -0.71331 | 0.76217 | -2.2785     | 0.98865     | -2.2785  | 0.98865 |
|           | -2.2785         | 0.98865  | 0.76217 | 0.864550982 |             |          |         |
| PSMC1P4   | ENSG00000248781 | -0.79507 | 0.78671 | -1.4424     | 0.9254      | -0.95579 |         |
|           | 0.83041         | -0.71331 | 0.76217 | 0.76217     | 0.864550982 |          |         |
| NA        | ENSG00000254675 | -0.71331 | 0.76217 | -0.71331    | 0.76217     | -0.71331 | 0.76217 |
|           | -0.71331        | 0.76217  | 0.76217 | 0.864550982 |             |          |         |
| NA        | ENSG00000244650 | -1.9845  | 0.9764  | -2.272      | 0.98846     | -0.71332 | 0.76218 |
|           | -1.1737         | 0.87974  | 0.76218 | 0.864550982 |             |          |         |
| NA        | ENSG00000272774 | -0.71338 | 0.76219 | -0.71338    | 0.76219     | -0.71338 | 0.76219 |
|           | -0.71338        | 0.76219  | 0.76219 | 0.864550982 |             |          |         |
| NA        | ENSG00000242622 | -1.7778  | 0.96228 | -1.7778     | 0.96228     | -1.5341  | 0.9375  |
|           | -0.7135         | 0.76223  | 0.76223 | 0.864550982 |             |          |         |
| FBXO33    | ENSG00000165355 | -0.71357 | 0.76225 | -1.1026     | 0.8649      | -0.71357 |         |
|           | 0.76225         | -0.71357 | 0.76225 | 0.76225     | 0.864550982 |          |         |
| RNU6-104P | ENSG00000238509 | -0.71359 | 0.76226 | -0.71359    | 0.76226     | -0.71359 |         |
|           | 0.76226         | -0.71359 | 0.76226 | 0.76226     | 0.864550982 |          |         |
| NA        | ENSG00000251378 | -0.71359 | 0.76226 | -0.71359    | 0.76226     | -0.71359 | 0.76226 |
|           | -0.71359        | 0.76226  | 0.76226 | 0.864550982 |             |          |         |
| NA        | ENSG00000255730 | -0.7137  | 0.76229 | -0.7137     | 0.76229     | -0.7137  | 0.76229 |
|           | -0.7137         | 0.76229  | 0.76229 | 0.864550982 |             |          |         |
| NA        | ENSG00000250950 | -0.71372 | 0.7623  | -0.71372    | 0.7623      | -0.71372 | 0.7623  |
|           | -0.71372        | 0.7623   | 0.7623  | 0.864550982 |             |          |         |
| NA        | ENSG00000271853 | -0.71375 | 0.76231 | -0.71375    | 0.76231     | -0.71375 | 0.76231 |

|           |                 |          |          |         |             |             |          |         |
|-----------|-----------------|----------|----------|---------|-------------|-------------|----------|---------|
|           |                 | -0.71375 | 0.76231  | 0.76231 | 0.864550982 |             |          |         |
| NA        | ENSG00000272030 | -0.71375 | 0.76231  | 0.76231 | -0.71375    | 0.76231     | -0.71375 | 0.76231 |
|           |                 | -0.71375 | 0.76231  | 0.76231 | 0.864550982 |             |          |         |
| CFL1P6    | ENSG00000215785 | -0.71385 | 0.76234  | 0.76234 | -0.71385    | 0.76234     | -0.71385 |         |
|           |                 | 0.76234  | -0.71385 | 0.76234 | 0.76234     | 0.864550982 |          |         |
| NA        | ENSG00000258842 | -0.7139  | 0.76236  | 0.76236 | -0.7139     | 0.76236     | -0.7139  | 0.76236 |
|           |                 | -0.7139  | 0.76236  | 0.76236 | 0.864550982 |             |          |         |
| TMX2P1    | ENSG00000213839 | -2.2393  | 0.98743  | 0.98743 | -0.71402    | 0.76239     | -0.71402 |         |
|           |                 | 0.76239  | -0.71402 | 0.76239 | 0.76239     | 0.864550982 |          |         |
| GMFBP1    | ENSG00000243495 | -1.7746  | 0.96202  | 0.96202 | -0.71403    | 0.76239     | -1.3486  |         |
|           |                 | 0.91127  | -1.3486  | 0.91127 | 0.76239     | 0.864550982 |          |         |
| NA        | ENSG00000252744 | -0.71401 | 0.76239  | 0.76239 | -0.71401    | 0.76239     | -0.71401 | 0.76239 |
|           |                 | -0.71401 | 0.76239  | 0.76239 | 0.864550982 |             |          |         |
| GUSBP11   | ENSG00000228315 | -0.71406 | 0.7624   | 0.7624  | -0.78686    | 0.78432     | -0.92443 |         |
|           |                 | 0.82237  | -1.1165  | 0.8679  | 0.7624      | 0.864550982 |          |         |
| NA        | ENSG00000256399 | -0.97266 | 0.83464  | 0.83464 | -0.97266    | 0.83464     | -0.71412 | 0.76242 |
|           |                 | -0.97266 | 0.83464  | 0.76242 | 0.864550982 |             |          |         |
| ARHGAP44  | ENSG00000006740 | -1.1236  | 0.86941  | 0.86941 | -0.71413    | 0.76243     | -1.1033  |         |
|           |                 | 0.86505  | -0.89564 | 0.81478 | 0.76243     | 0.864550982 |          |         |
| RN7SL176P | ENSG00000266610 | -0.71445 | 0.76253  | 0.76253 | -0.71445    | 0.76253     | -0.71445 |         |
|           |                 | 0.76253  | -0.71445 | 0.76253 | 0.76253     | 0.864635476 |          |         |
| TACC1P1   | ENSG00000224920 | -1.2375  | 0.89205  | 0.89205 | -0.90925    | 0.81839     | -0.71451 |         |
|           |                 | 0.76254  | -0.82845 | 0.79629 | 0.76254     | 0.864635476 |          |         |
| RPS17P11  | ENSG00000244621 | -0.71455 | 0.76256  | 0.76256 | -1.3237     | 0.9072      | -1.1768  |         |
|           |                 | 0.88036  | -1.1768  | 0.88036 | 0.76256     | 0.864638034 |          |         |
| RPS6P16   | ENSG00000243250 | -0.71474 | 0.76261  | 0.76261 | -0.71474    | 0.76261     | -0.71474 |         |
|           |                 | 0.76261  | -0.71474 | 0.76261 | 0.76261     | 0.864674608 |          |         |
| NA        | ENSG00000219453 | -1.0437  | 0.85168  | 0.85168 | -1.0437     | 0.85168     | -1.0437  | 0.85168 |
|           |                 | -0.71482 | 0.76264  | 0.76264 | 0.864688504 |             |          |         |
| DCP2      | ENSG00000172795 | -0.71491 | 0.76267  | 0.76267 | -1.0529     | 0.85382     | -0.96975 | 0.83391 |
|           |                 | -0.89783 | 0.81536  | 0.76267 | 0.864702399 |             |          |         |
| NA        | ENSG00000229242 | -0.71505 | 0.76271  | 0.76271 | -0.71505    | 0.76271     | -0.71505 | 0.76271 |
|           |                 | -0.71505 | 0.76271  | 0.76271 | 0.864707512 |             |          |         |
| MIR4259   | ENSG00000266458 | -0.71505 | 0.76271  | 0.76271 | -0.71505    | 0.76271     | -0.71505 |         |
|           |                 | 0.76271  | -0.71505 | 0.76271 | 0.76271     | 0.864707512 |          |         |
| LINC02511 | ENSG00000248869 | -1.9827  | 0.9763   | 0.9763  | -1.2561     | 0.89547     | -0.71511 |         |
|           |                 | 0.76273  | -1.3489  | 0.91131 | 0.76273     | 0.864710069 |          |         |
| PEBP1P2   | ENSG00000270532 | -0.71533 | 0.7628   | 0.7628  | -0.71533    | 0.7628      | -0.71533 |         |
|           |                 | 0.7628   | -0.71533 | 0.7628  | 0.7628      | 0.86476931  |          |         |
| NA        | ENSG00000259925 | -1.2982  | 0.90289  | 0.90289 | -0.79851    | 0.78771     | -0.78009 | 0.78233 |
|           |                 | -0.71551 | 0.76285  | 0.76285 | 0.86478831  |             |          |         |
| NA        | ENSG00000270196 | -0.71554 | 0.76286  | 0.76286 | -0.71554    | 0.76286     | -0.71554 | 0.76286 |
|           |                 | -0.71554 | 0.76286  | 0.76286 | 0.86478831  |             |          |         |
| NA        | ENSG00000257696 | -0.71556 | 0.76287  | 0.76287 | -0.71556    | 0.76287     | -0.71556 | 0.76287 |
|           |                 | -0.71556 | 0.76287  | 0.76287 | 0.86478831  |             |          |         |
| PGAP4     | ENSG00000165152 | -2.2252  | 0.98697  | 0.98697 | -1.5657     | 0.9413      | -0.71586 | 0.76296 |
|           |                 | -0.71586 | 0.76296  | 0.76296 | 0.864811296 |             |          |         |
| MIR135A1  | ENSG00000207926 | -0.71587 | 0.76297  | 0.76297 | -0.71587    | 0.76297     | -0.71587 |         |
|           |                 | 0.76297  | -0.71587 | 0.76297 | 0.76297     | 0.864811296 |          |         |
| NA        | ENSG00000226643 | -1.685   | 0.954    | 0.954   | -0.71592    | 0.76298     | -1.3656  | 0.91397 |
|           |                 | -0.81856 | 0.79348  | 0.76298 | 0.864811296 |             |          |         |
| NOX4      | ENSG00000086991 | -1.9587  | 0.97492  | 0.97492 | -2.0738     | 0.98095     | -0.71599 | 0.763   |
|           |                 | -2.0083  | 0.97769  | 0.763   | 0.864811296 |             |          |         |
| NA        | ENSG00000266205 | -0.71603 | 0.76301  | 0.76301 | -0.71603    | 0.76301     | -0.71603 | 0.76301 |
|           |                 | -0.71603 | 0.76301  | 0.76301 | 0.864811296 |             |          |         |
| DDX41     | ENSG00000183258 | -0.80797 | 0.79045  | 0.79045 | -1.0316     | 0.84886     | -0.71608 | 0.76303 |
|           |                 | -0.71608 | 0.76303  | 0.76303 | 0.864811296 |             |          |         |
| NA        | ENSG00000279212 | -0.71608 | 0.76303  | 0.76303 | -0.71608    | 0.76303     | -0.71608 | 0.76303 |
|           |                 | -0.71608 | 0.76303  | 0.76303 | 0.864811296 |             |          |         |
| MTND6P6   | ENSG00000240034 | -0.7161  | 0.76304  | 0.76304 | -0.7161     | 0.76304     | -0.7161  |         |
|           |                 | 0.76304  | -0.7161  | 0.76304 | 0.76304     | 0.864811296 |          |         |
| HMGB1P49  | ENSG00000230519 | -0.71616 | 0.76305  | 0.76305 | -0.71616    | 0.76305     | -0.71616 |         |

|             |                 |          |         |             |             |          |          |
|-------------|-----------------|----------|---------|-------------|-------------|----------|----------|
|             | 0.76305         | -0.71616 | 0.76305 | 0.76305     | 0.864811296 |          |          |
| RN7SL200P   | ENSG00000265123 | -0.71622 | 0.76307 | 0.76307     | -0.71622    | 0.76307  | -0.71622 |
|             | 0.76307         | -0.71622 | 0.76307 | 0.76307     | 0.86481385  |          |          |
| RN7SL148P   | ENSG00000244066 | -0.7163  | 0.7631  | 0.7631      | -0.7163     | 0.7631   | -0.7163  |
|             | 0.7631          | -0.7163  | 0.7631  | 0.7631      | 0.864818956 |          |          |
| APOBEC3G    | ENSG00000239713 | -0.71635 | 0.76311 | 0.76311     | -1.0053     | 0.84262  | -0.71635 |
|             | 0.76311         | -0.71635 | 0.76311 | 0.76311     | 0.864818956 |          |          |
| SOCS5P1     | ENSG00000236610 | -1.4412  | 0.92523 | 0.92523     | -0.71655    | 0.76317  | -0.71655 |
|             | 0.76317         | -0.71655 | 0.76317 | 0.76317     | 0.8648405   |          |          |
| NA          | ENSG00000266976 | -1.0762  | 0.85907 | -1.3049     | 0.90404     | -0.71658 | 0.76318  |
|             | -0.89143        | 0.81365  | 0.76318 | 0.8648405   |             |          |          |
| FILIP1      | ENSG00000118407 | -0.71659 | 0.76319 | -0.83287    | 0.79754     | -1.0935  |          |
|             | 0.86292         | -1.3489  | 0.91132 | 0.76319     | 0.8648405   |          |          |
| ENPEP       | ENSG00000138792 | -0.71664 | 0.7632  | -1.4478     | 0.92616     | -1.0883  | 0.86177  |
|             | -1.0853         | 0.8611   | 0.7632  | 0.8648405   |             |          |          |
| NA          | ENSG00000257343 | -0.71683 | 0.76326 | -2.1451     | 0.98403     | -2.1451  | 0.98403  |
|             | -2.1451         | 0.98403  | 0.76326 | 0.864888378 |             |          |          |
| NA          | ENSG00000258173 | -0.71694 | 0.7633  | -0.71694    | 0.7633      | -0.71694 | 0.7633   |
|             | -0.71694        | 0.7633   | 0.7633  | 0.864909912 |             |          |          |
| RPSAP70     | ENSG00000250327 | -0.71703 | 0.76332 | -0.71703    | 0.76332     | -0.71703 |          |
|             | 0.76332         | -0.71703 | 0.76332 | 0.76332     | 0.864909912 |          |          |
| HSD17B3     | ENSG00000130948 | -1.2677  | 0.89754 | -1.1502     | 0.87498     | -0.71712 |          |
|             | 0.76335         | -0.72877 | 0.76693 | 0.76335     | 0.864909912 |          |          |
| MIR3169     | ENSG00000266663 | -0.71713 | 0.76335 | -0.71713    | 0.76335     | -0.71713 |          |
|             | 0.76335         | -0.71713 | 0.76335 | 0.76335     | 0.864909912 |          |          |
| NA          | ENSG00000283667 | -0.71721 | 0.76338 | -0.71721    | 0.76338     | -0.71721 | 0.76338  |
|             | -0.71721        | 0.76338  | 0.76338 | 0.864923793 |             |          |          |
| SNORA60     | ENSG00000199266 | -0.71756 | 0.76349 | -0.71756    | 0.76349     | -0.71756 |          |
|             | 0.76349         | -0.71756 | 0.76349 | 0.76349     | 0.865028312 |          |          |
| SYNE4       | ENSG00000181392 | -0.71781 | 0.76356 | -0.71781    | 0.76356     | -0.71781 | 0.76356  |
|             | -0.71781        | 0.76356  | 0.76356 | 0.865087508 |             |          |          |
| NOBOX       | ENSG00000106410 | -1.3025  | 0.90362 | -0.71802    | 0.76363     | -1.3025  | 0.90362  |
|             | -1.3025         | 0.90362  | 0.76363 | 0.865146701 |             |          |          |
| MIR4504     | ENSG00000264712 | -0.71826 | 0.7637  | -0.71826    | 0.7637      | -0.71826 |          |
|             | 0.7637          | -0.71826 | 0.7637  | 0.7637      | 0.865205891 |          |          |
| LINC00595   | ENSG00000230417 | -1.0058  | 0.84273 | -0.76212    | 0.77701     | -0.71833 |          |
|             | 0.76372         | -0.92422 | 0.82231 | 0.76372     | 0.865208434 |          |          |
| MRPL18      | ENSG00000112110 | -0.71839 | 0.76374 | -0.71839    | 0.76374     | -0.71839 |          |
|             | 0.76374         | -0.71839 | 0.76374 | 0.76374     | 0.865210978 |          |          |
| NA          | ENSG00000225945 | -1.0772  | 0.8593  | -1.9175     | 0.97241     | -0.7185  | 0.76378  |
|             | -0.7185         | 0.76378  | 0.76378 | 0.865236177 |             |          |          |
| CYS1        | ENSG00000205795 | -1.1443  | 0.87375 | -1.748      | 0.95977     | -0.71858 | 0.7638   |
|             | -2.158          | 0.98454  | 0.7638  | 0.86523872  |             |          |          |
| NA          | ENSG00000240774 | -0.71883 | 0.76388 | -0.71883    | 0.76388     | -0.71883 | 0.76388  |
|             | -0.71883        | 0.76388  | 0.76388 | 0.865262756 |             |          |          |
| OR13C4      | ENSG00000148136 | -0.71889 | 0.76389 | -0.71889    | 0.76389     | -0.71889 |          |
|             | 0.76389         | -0.71889 | 0.76389 | 0.76389     | 0.865262756 |          |          |
| OR5BM1P     | ENSG00000250750 | -0.71887 | 0.76389 | -0.71887    | 0.76389     | -0.71887 |          |
|             | 0.76389         | -0.71887 | 0.76389 | 0.76389     | 0.865262756 |          |          |
| FAH         | ENSG00000103876 | -1.2003  | 0.88498 | -1.098      | 0.86389     | -1.2003  | 0.88498  |
|             | -0.71895        | 0.76391  | 0.76391 | 0.865262756 |             |          |          |
| NA          | ENSG00000279149 | -1.1072  | 0.86589 | -0.71895    | 0.76391     | -1.1072  | 0.86589  |
|             | -1.1072         | 0.86589  | 0.76391 | 0.865262756 |             |          |          |
| NA          | ENSG00000261872 | -0.71925 | 0.76401 | -0.71925    | 0.76401     | -0.71925 | 0.76401  |
|             | -0.71925        | 0.76401  | 0.76401 | 0.865343415 |             |          |          |
| ST3GAL5-AS1 | ENSG00000232504 | -0.71932 | 0.76403 | -0.71932    | 0.76403     | -0.71932 |          |
|             | 0.76403         | -0.71932 | 0.76403 | 0.76403     | 0.865343415 |          |          |
| KRT17P3     | ENSG00000231870 | -1.1471  | 0.87432 | -0.74017    | 0.7704      | -0.73123 |          |
|             | 0.76768         | -0.71946 | 0.76407 | 0.76407     | 0.865343415 |          |          |
| PGBD4P3     | ENSG00000249834 | -0.71946 | 0.76407 | -0.71946    | 0.76407     | -0.71946 |          |
|             | 0.76407         | -0.71946 | 0.76407 | 0.76407     | 0.865343415 |          |          |
| MIR139      | ENSG00000272036 | -1.3323  | 0.90862 | -0.71946    | 0.76407     | -1.3323  |          |

|            |                 |          |         |             |             |          |         |  |
|------------|-----------------|----------|---------|-------------|-------------|----------|---------|--|
|            | 0.90862         | -1.3323  | 0.90862 | 0.76407     | 0.865343415 |          |         |  |
| NA         | ENSG00000259669 | -1.4661  | 0.92869 | -1.4557     | 0.92726     | -0.71951 | 0.76409 |  |
|            | -1.6817         | 0.95369  | 0.76409 | 0.865345954 |             |          |         |  |
| LINC00385  | ENSG00000232643 | -0.71975 | 0.76416 | -0.71975    | 0.76416     | -0.71975 |         |  |
|            | 0.76416         | -0.71975 | 0.76416 | 0.76416     | 0.865376219 |          |         |  |
| RNU7-161P  | ENSG00000253098 | -0.71976 | 0.76416 | -1.2738     | 0.89864     | -0.71976 |         |  |
|            | 0.76416         | -0.71976 | 0.76416 | 0.76416     | 0.865376219 |          |         |  |
| NA         | ENSG00000230276 | -0.71977 | 0.76417 | -0.71977    | 0.76417     | -0.71977 | 0.76417 |  |
|            | -0.71977        | 0.76417  | 0.76417 | 0.865376219 |             |          |         |  |
| ZNF540     | ENSG00000171817 | -0.71988 | 0.7642  | -0.71988    | 0.7642      | -0.71988 |         |  |
|            | 0.7642          | -0.7252  | 0.76583 | 0.7642      | 0.865390082 |          |         |  |
| RNU7-169P  | ENSG00000238457 | -1.6676  | 0.9523  | -1.0223     | 0.84668     | -1.0697  |         |  |
|            | 0.85763         | -0.72076 | 0.76424 | 0.76424     | 0.865415267 |          |         |  |
| VPS39      | ENSG00000166887 | -0.72021 | 0.7643  | -1.2681     | 0.89762     | -2.1328  | 0.98353 |  |
|            | -0.9807         | 0.83663  | 0.7643  | 0.865419166 |             |          |         |  |
| NA         | ENSG00000230189 | -0.72025 | 0.76431 | -0.72025    | 0.76431     | -0.72025 | 0.76431 |  |
|            | -0.72025        | 0.76431  | 0.76431 | 0.865419166 |             |          |         |  |
| H3P19      | ENSG00000271296 | -0.7203  | 0.76433 | -0.7203     | 0.76433     | -0.7203  | 0.76433 |  |
|            | -0.7203         | 0.76433  | 0.76433 | 0.865419166 |             |          |         |  |
| NA         | ENSG00000231080 | -0.72035 | 0.76434 | -0.72035    | 0.76434     | -0.72035 | 0.76434 |  |
|            | -0.72035        | 0.76434  | 0.76434 | 0.865419166 |             |          |         |  |
| LINC02420  | ENSG00000256172 | -1.7146  | 0.95679 | -0.72033    | 0.76434     | -1.1743  |         |  |
|            | 0.87986         | -1.7847  | 0.96285 | 0.76434     | 0.865419166 |          |         |  |
| RN7SKP57   | ENSG00000253057 | -0.92601 | 0.82278 | -0.92601    | 0.82278     | -0.92601 |         |  |
|            | 0.82278         | -0.72036 | 0.76435 | 0.76435     | 0.865419166 |          |         |  |
| NA         | ENSG00000271978 | -0.72054 | 0.7644  | -1.6543     | 0.95096     | -1.6543  | 0.95096 |  |
|            | -1.6543         | 0.95096  | 0.7644  | 0.865446883 |             |          |         |  |
| NA         | ENSG00000236498 | -0.72057 | 0.76441 | -0.72057    | 0.76441     | -0.72057 | 0.76441 |  |
|            | -0.72057        | 0.76441  | 0.76441 | 0.865446883 |             |          |         |  |
| RPL7AP38   | ENSG00000213787 | -1.373   | 0.91513 | -0.72083    | 0.76449     | -1.0267  |         |  |
|            | 0.84772         | -0.72083 | 0.76449 | 0.76449     | 0.865463631 |          |         |  |
| NA         | ENSG00000273365 | -0.7209  | 0.76451 | -0.7209     | 0.76451     | -0.7209  | 0.76451 |  |
|            | -0.7209         | 0.76451  | 0.76451 | 0.865463631 |             |          |         |  |
| LINC01605  | ENSG00000253161 | -0.72091 | 0.76452 | -0.76948    | 0.77919     | -0.76948 |         |  |
|            | 0.77919         | -0.92454 | 0.8224  | 0.76452     | 0.865463631 |          |         |  |
| MIR5681A   | ENSG00000266502 | -0.72105 | 0.76456 | -1.6172     | 0.94708     | -1.0351  |         |  |
|            | 0.84969         | -0.72105 | 0.76456 | 0.76456     | 0.865463631 |          |         |  |
| SLC25A15P3 | ENSG00000251299 | -0.89847 | 0.81553 | -0.89847    | 0.81553     | -0.7211  |         |  |
|            | 0.76458         | -1.0896  | 0.86205 | 0.76458     | 0.865463631 |          |         |  |
| NA         | ENSG00000268870 | -0.72113 | 0.76459 | -0.72113    | 0.76459     | -0.72113 | 0.76459 |  |
|            | -0.72113        | 0.76459  | 0.76459 | 0.865463631 |             |          |         |  |
| LEPROTL1   | ENSG00000104660 | -0.78625 | 0.78414 | -0.72117    | 0.7646      | -0.72117 |         |  |
|            | 0.7646          | -0.86246 | 0.80578 | 0.7646      | 0.865463631 |          |         |  |
| NA         | ENSG00000252200 | -0.7212  | 0.76461 | -1.2765     | 0.89912     | -1.023   | 0.84685 |  |
|            | -1.0478         | 0.85262  | 0.76461 | 0.865463631 |             |          |         |  |
| SMIM28     | ENSG00000262543 | -0.7213  | 0.76464 | -0.7213     | 0.76464     | -0.7213  |         |  |
|            | 0.76464         | -0.7213  | 0.76464 | 0.76464     | 0.865463631 |          |         |  |
| NA         | ENSG00000284534 | -1.8371  | 0.9669  | -0.72136    | 0.76465     | -0.72136 | 0.76465 |  |
|            | -0.72136        | 0.76465  | 0.76465 | 0.865463631 |             |          |         |  |
| ZHX3       | ENSG00000174306 | -0.72138 | 0.76466 | -0.94665    | 0.82809     | -0.95062 | 0.8291  |  |
|            | -0.80282        | 0.78896  | 0.76466 | 0.865463631 |             |          |         |  |
| NA         | ENSG00000260108 | -0.72147 | 0.76469 | -0.72147    | 0.76469     | -0.72147 | 0.76469 |  |
|            | -0.72147        | 0.76469  | 0.76469 | 0.865463631 |             |          |         |  |
| CICP9      | ENSG00000228882 | -0.72151 | 0.7647  | -0.72151    | 0.7647      | -0.72151 | 0.7647  |  |
|            | -0.72151        | 0.7647   | 0.7647  | 0.865463631 |             |          |         |  |
| NA         | ENSG00000232524 | -0.72155 | 0.76471 | -0.72155    | 0.76471     | -0.72155 | 0.76471 |  |
|            | -0.72155        | 0.76471  | 0.76471 | 0.865463631 |             |          |         |  |
| YBX1P9     | ENSG00000236994 | -0.72152 | 0.76471 | -0.72152    | 0.76471     | -0.72152 |         |  |
|            | 0.76471         | -0.72152 | 0.76471 | 0.76471     | 0.865463631 |          |         |  |
| TMEM30A    | ENSG00000112697 | -0.72161 | 0.76473 | -0.77491    | 0.7808      | -0.82498 |         |  |
|            | 0.79531         | -1.0667  | 0.85695 | 0.76473     | 0.865463631 |          |         |  |
| NA         | ENSG00000226089 | -0.72167 | 0.76475 | -1.8571     | 0.96835     | -0.72167 | 0.76475 |  |

|            |                 |          |         |             |             |          |         |          |
|------------|-----------------|----------|---------|-------------|-------------|----------|---------|----------|
|            | -0.72167        | 0.76475  | 0.76475 | 0.865463631 |             |          |         |          |
| OSTCP8     | ENSG00000226801 | -0.72169 | 0.76476 | -0.72169    | 0.76476     | -0.72169 | 0.76476 | -0.72169 |
|            | 0.76476         | -0.72169 | 0.76476 | 0.76476     | 0.865463631 |          |         |          |
| OR1A1      | ENSG00000172146 | -0.72172 | 0.76477 | -0.93406    | 0.82486     | -1.1851  | 0.88201 |          |
|            | -0.93406        | 0.82486  | 0.76477 | 0.865463631 |             |          |         |          |
| RNU7-84P   | ENSG00000251892 | -2.3169  | 0.98975 | -0.72178    | 0.76478     | -1.8037  |         |          |
|            | 0.96436         | -1.8037  | 0.96436 | 0.76478     | 0.865463631 |          |         |          |
| HIGD1AP11  | ENSG00000227644 | -0.72184 | 0.7648  | -0.72184    | 0.7648      | -0.72184 |         |          |
|            | 0.7648          | -0.72184 | 0.7648  | 0.7648      | 0.865466165 |          |         |          |
| MIR593     | ENSG00000207588 | -0.72191 | 0.76483 | -0.72191    | 0.76483     | -0.72191 |         |          |
|            | 0.76483         | -0.72191 | 0.76483 | 0.76483     | 0.865470054 |          |         |          |
| RNU6-425P  | ENSG00000206604 | -0.72204 | 0.76486 | -0.72204    | 0.76486     | -0.72204 |         |          |
|            | 0.76486         | -0.72204 | 0.76486 | 0.76486     | 0.865470054 |          |         |          |
| RNU6-1338P | ENSG00000252137 | -0.72205 | 0.76487 | -0.72205    | 0.76487     | -0.72205 |         |          |
|            | 0.76487         | -1.1673  | 0.87845 | 0.76487     | 0.865470054 |          |         |          |
| NA         | ENSG00000243648 | -0.94431 | 0.82749 | -1.2439     | 0.89324     | -1.1159  | 0.86776 |          |
|            | -0.72215        | 0.7649   | 0.7649  | 0.865470054 |             |          |         |          |
| NA         | ENSG00000253396 | -0.72218 | 0.76491 | -0.72218    | 0.76491     | -2.4524  | 0.9929  |          |
|            | -1.624          | 0.94781  | 0.76491 | 0.865470054 |             |          |         |          |
| NA         | ENSG00000281160 | -0.7222  | 0.76491 | -0.7222     | 0.76491     | -0.7222  | 0.76491 |          |
|            | -0.7222         | 0.76491  | 0.76491 | 0.865470054 |             |          |         |          |
| NA         | ENSG00000269480 | -0.72228 | 0.76494 | -0.72228    | 0.76494     | -0.72228 | 0.76494 |          |
|            | -0.72228        | 0.76494  | 0.76494 | 0.865483903 |             |          |         |          |
| TSTA3      | ENSG00000104522 | -0.72257 | 0.76503 | -0.72257    | 0.76503     | -0.72257 | 0.76503 |          |
|            | -0.72257        | 0.76503  | 0.76503 | 0.865565635 |             |          |         |          |
| RALBP1     | ENSG00000017797 | -0.72264 | 0.76505 | -1.6012     | 0.94533     | -1.25    | 0.89435 |          |
|            | -0.96325        | 0.83229  | 0.76505 | 0.865568167 |             |          |         |          |
| HMG2P30    | ENSG00000213721 | -0.95838 | 0.83106 | -0.95838    | 0.83106     | -0.72289 |         |          |
|            | 0.76513         | -0.95838 | 0.83106 | 0.76513     | 0.865618483 |          |         |          |
| XRCC6P4    | ENSG00000253517 | -1.7333  | 0.95847 | -1.4831     | 0.93098     | -0.7229  |         |          |
|            | 0.76513         | -1.8531  | 0.96807 | 0.76513     | 0.865618483 |          |         |          |
| OR5G3      | ENSG00000241356 | -0.723   | 0.76516 | -0.723      | 0.76516     | -0.723   | 0.76516 |          |
|            | -0.723          | 0.76516  | 0.76516 | 0.865632326 |             |          |         |          |
| MIR3920    | ENSG00000263885 | -0.72323 | 0.76523 | -0.72323    | 0.76523     | -0.72323 |         |          |
|            | 0.76523         | -1.2045  | 0.8858  | 0.76523     | 0.865640055 |          |         |          |
| NA         | ENSG00000271101 | -0.7233  | 0.76525 | -0.7233     | 0.76525     | -0.7233  | 0.76525 |          |
|            | -0.7233         | 0.76525  | 0.76525 | 0.865640055 |             |          |         |          |
| NA         | ENSG00000280571 | -0.7233  | 0.76525 | -0.7233     | 0.76525     | -0.7233  | 0.76525 |          |
|            | -0.7233         | 0.76525  | 0.76525 | 0.865640055 |             |          |         |          |
| NA         | ENSG00000279852 | -1.0184  | 0.84576 | -0.72333    | 0.76526     | -0.72333 | 0.76526 |          |
|            | -0.72333        | 0.76526  | 0.76526 | 0.865640055 |             |          |         |          |
| POU2F1     | ENSG00000143190 | -0.72335 | 0.76527 | -1.2007     | 0.88507     | -1.377   |         |          |
|            | 0.91574         | -1.1761  | 0.88023 | 0.76527     | 0.865640055 |          |         |          |
| RRAS2      | ENSG00000133818 | -1.1462  | 0.87415 | -0.78701    | 0.78436     | -0.72342 | 0.76529 |          |
|            | -1.6891         | 0.9544   | 0.76529 | 0.865640055 |             |          |         |          |
| P2RY14     | ENSG00000174944 | -1.0969  | 0.86366 | -1.1713     | 0.87925     | -1.0305  |         |          |
|            | 0.84862         | -0.72345 | 0.7653  | 0.7653      | 0.865640055 |          |         |          |
| PARP6      | ENSG00000137817 | -0.738   | 0.76974 | -1.1559     | 0.87613     | -1.1142  | 0.86741 |          |
|            | -0.72362        | 0.76535  | 0.76535 | 0.865640055 |             |          |         |          |
| NA         | ENSG00000267098 | -0.72369 | 0.76537 | -1.418      | 0.92191     | -1.2579  | 0.89579 |          |
|            | -0.74043        | 0.77048  | 0.76537 | 0.865640055 |             |          |         |          |
| VWA3B      | ENSG00000168658 | -0.72373 | 0.76538 | -0.72741    | 0.76651     | -0.87665 | 0.80966 |          |
|            | -1.1756         | 0.88011  | 0.76538 | 0.865640055 |             |          |         |          |
| RPS4XP16   | ENSG00000224892 | -0.97534 | 0.8353  | -0.97534    | 0.8353      | -1.4396  |         |          |
|            | 0.92501         | -0.72373 | 0.76538 | 0.76538     | 0.865640055 |          |         |          |
| H2AZP7     | ENSG00000253156 | -0.72372 | 0.76538 | -0.72372    | 0.76538     | -0.72372 |         |          |
|            | 0.76538         | -0.72372 | 0.76538 | 0.76538     | 0.865640055 |          |         |          |
| ANKRD36BP2 | ENSG00000230006 | -1.2591  | 0.896   | -1.1411     | 0.87308     | -0.74264 | 0.77115 |          |
|            | -0.72388        | 0.76543  | 0.76543 | 0.865656422 |             |          |         |          |
| LUARIS     | ENSG00000231638 | -0.74536 | 0.77197 | -2.0565     | 0.98013     | -1.1283  |         |          |
|            | 0.87041         | -0.72389 | 0.76543 | 0.76543     | 0.865656422 |          |         |          |
| DLX5       | ENSG00000105880 | -1.1083  | 0.86612 | -0.72406    | 0.76549     | -1.4988  | 0.93304 |          |

|            |                 |          |         |             |             |          |         |
|------------|-----------------|----------|---------|-------------|-------------|----------|---------|
|            | -1.574          | 0.94226  | 0.76549 | 0.865695405 |             |          |         |
| UPK1B      | ENSG00000114638 | -2.0103  | 0.9778  | -2.3594     | 0.99085     | -0.72411 | 0.7655  |
|            | -1.7165         | 0.95696  | 0.7655  | 0.865695405 |             |          |         |
| OR4A9P     | ENSG00000254891 | -1.2518  | 0.89468 | -1.4692     | 0.92911     | -0.72428 |         |
|            | 0.76555         | -0.76438 | 0.77768 | 0.76555     | 0.865731858 |          |         |
| NA         | ENSG00000238690 | -0.84024 | 0.79961 | -0.75701    | 0.77548     | -0.72449 | 0.76562 |
|            | -1.6577         | 0.95132  | 0.76562 | 0.865782143 |             |          |         |
| NA         | ENSG00000272264 | -0.72452 | 0.76563 | -0.72452    | 0.76563     | -0.72452 | 0.76563 |
|            | -0.72452        | 0.76563  | 0.76563 | 0.865782143 |             |          |         |
| NA         | ENSG00000232120 | -0.725   | 0.76577 | -1.8269     | 0.96614     | -1.9584  | 0.97491 |
|            | -1.6784         | 0.95336  | 0.76577 | 0.865920362 |             |          |         |
| ERMAP      | ENSG00000164010 | -0.82764 | 0.79606 | -1.1608     | 0.87714     | -1.1608  | 0.87714 |
|            | -0.72516        | 0.76582  | 0.76582 | 0.865936713 |             |          |         |
| NA         | ENSG00000269736 | -0.72516 | 0.76582 | -0.72516    | 0.76582     | -0.72516 | 0.76582 |
|            | -0.72516        | 0.76582  | 0.76582 | 0.865936713 |             |          |         |
| MTND1P3    | ENSG00000239648 | -0.72535 | 0.76588 | -0.72535    | 0.76588     | -0.72535 |         |
|            | 0.76588         | -0.72535 | 0.76588 | 0.76588     | 0.865984463 |          |         |
| NA         | ENSG00000222698 | -1.4151  | 0.92148 | -0.91885    | 0.82091     | -0.91885 | 0.82091 |
|            | -0.72546        | 0.76592  | 0.76592 | 0.866009597 |             |          |         |
| NA         | ENSG00000260645 | -0.72559 | 0.76595 | -0.72559    | 0.76595     | -0.72559 | 0.76595 |
|            | -0.72559        | 0.76595  | 0.76595 | 0.866014636 |             |          |         |
| NA         | ENSG00000255520 | -0.92662 | 0.82294 | -0.7256     | 0.76596     | -1.1417  | 0.87321 |
|            | -1.3559         | 0.91244  | 0.76596 | 0.866014636 |             |          |         |
| NA         | ENSG00000241573 | -0.72571 | 0.76599 | -0.72571    | 0.76599     | -0.72571 | 0.76599 |
|            | -0.72571        | 0.76599  | 0.76599 | 0.866028461 |             |          |         |
| NA         | ENSG00000257940 | -0.72584 | 0.76603 | -1.9131     | 0.97213     | -1.9131  | 0.97213 |
|            | -1.9131         | 0.97213  | 0.76603 | 0.866053591 |             |          |         |
| UGCG       | ENSG00000148154 | -0.80776 | 0.79039 | -0.80776    | 0.79039     | -0.72593 | 0.76606 |
|            | -0.91002        | 0.81859  | 0.76606 | 0.866058628 |             |          |         |
| NA         | ENSG00000284431 | -0.72598 | 0.76607 | -0.72598    | 0.76607     | -0.72598 | 0.76607 |
|            | -0.72598        | 0.76607  | 0.76607 | 0.866058628 |             |          |         |
| CDC20B     | ENSG00000164287 | -1.0376  | 0.85027 | -0.72602    | 0.76609     | -1.6951  |         |
|            | 0.95497         | -0.85632 | 0.80409 | 0.76609     | 0.866061146 |          |         |
| NA         | ENSG00000264242 | -1.0754  | 0.8589  | -0.83419    | 0.79791     | -0.72614 | 0.76612 |
|            | -0.72614        | 0.76612  | 0.76612 | 0.866066182 |             |          |         |
| NA         | ENSG00000261697 | -1.251   | 0.89453 | -0.72617    | 0.76613     | -0.77657 | 0.7813  |
|            | -0.77657        | 0.7813   | 0.76613 | 0.866066182 |             |          |         |
| SETP7      | ENSG00000257444 | -0.72633 | 0.76618 | -0.72633    | 0.76618     | -0.72633 | 0.76618 |
|            | -0.72633        | 0.76618  | 0.76618 | 0.866085038 |             |          |         |
| KRT8P32    | ENSG00000250221 | -0.72637 | 0.76619 | -1.0837     | 0.86075     | -1.0837  |         |
|            | 0.86075         | -1.0837  | 0.86075 | 0.76619     | 0.866085038 |          |         |
| MRGPRF-AS1 | ENSG00000256508 | -0.7264  | 0.7662  | -0.7264     | 0.7662      | -0.7264  |         |
|            | 0.7662          | -0.7264  | 0.7662  | 0.7662      | 0.866085038 |          |         |
| NA         | ENSG00000273177 | -0.72652 | 0.76624 | -0.72652    | 0.76624     | -0.72652 | 0.76624 |
|            | -0.72652        | 0.76624  | 0.76624 | 0.866095106 |             |          |         |
| NA         | ENSG00000218426 | -1.1384  | 0.87253 | -1.1384     | 0.87253     | -0.72654 | 0.76625 |
|            | -1.0453         | 0.85206  | 0.76625 | 0.866095106 |             |          |         |
| RNU2-6P    | ENSG00000223336 | -0.72661 | 0.76627 | -0.72661    | 0.76627     | -0.72661 |         |
|            | 0.76627         | -0.72661 | 0.76627 | 0.76627     | 0.866095106 |          |         |
| EMP3       | ENSG00000142227 | -0.72666 | 0.76628 | -0.72666    | 0.76628     | -0.72666 | 0.76628 |
|            | -0.72666        | 0.76628  | 0.76628 | 0.866095106 |             |          |         |
| RNU6-185P  | ENSG00000207150 | -0.72679 | 0.76632 | -1.2947     | 0.90229     | -1.2947  |         |
|            | 0.90229         | -1.2947  | 0.90229 | 0.76632     | 0.866117752 |          |         |
| NA         | ENSG00000215066 | -0.72683 | 0.76634 | -0.72683    | 0.76634     | -0.72683 | 0.76634 |
|            | -0.72683        | 0.76634  | 0.76634 | 0.866117752 |             |          |         |
| OR4C15     | ENSG00000181939 | -0.90653 | 0.81767 | -1.0227     | 0.84676     | -0.7269  |         |
|            | 0.76636         | -0.7269  | 0.76636 | 0.76636     | 0.866117752 |          |         |
| RPL9P14    | ENSG00000185078 | -0.72702 | 0.76639 | -0.72702    | 0.76639     | -0.72702 |         |
|            | 0.76639         | -0.72702 | 0.76639 | 0.76639     | 0.866117752 |          |         |
| TAS2R4     | ENSG00000127364 | -0.72709 | 0.76641 | -2.0782     | 0.98115     | -1.3744  |         |
|            | 0.91535         | -1.3744  | 0.91535 | 0.76641     | 0.866117752 |          |         |
| LINC01881  | ENSG00000220804 | -0.72712 | 0.76642 | -1.8985     | 0.97118     | -0.72712 |         |

|           |                 |          |         |             |             |          |         |
|-----------|-----------------|----------|---------|-------------|-------------|----------|---------|
|           | 0.76642         | -0.72712 | 0.76642 | 0.76642     | 0.866117752 |          |         |
| NA        | ENSG00000275386 | -0.72717 | 0.76644 | -0.72717    | 0.76644     | -0.72717 | 0.76644 |
|           | -0.72717        | 0.76644  | 0.76644 | 0.866117752 |             |          |         |
| NRIP3     | ENSG00000175352 | -0.72719 | 0.76645 | -0.72719    | 0.76645     | -0.72719 | 0.76645 |
|           | -0.72719        | 0.76645  | 0.76645 | 0.866117752 |             |          |         |
| GOLGA2P5  | ENSG00000238105 | -0.72725 | 0.76646 | -0.72725    | 0.76646     | -0.72725 |         |
|           | 0.76646         | -0.72725 | 0.76646 | 0.866117752 |             |          |         |
| OR6M2P    | ENSG00000254613 | -0.72748 | 0.76653 | -0.72748    | 0.76653     | -0.72748 |         |
|           | 0.76653         | -0.72748 | 0.76653 | 0.86617301  |             |          |         |
| TIMM9     | ENSG00000100575 | -0.72789 | 0.76666 | -0.72789    | 0.76666     | -1.3223  | 0.90697 |
|           | -0.72756        | 0.76656  | 0.76656 | 0.86617301  |             |          |         |
| ALKBH7    | ENSG00000125652 | -0.72763 | 0.76658 | -0.72763    | 0.76658     | -0.72763 |         |
|           | 0.76658         | -0.72763 | 0.76658 | 0.86617301  |             |          |         |
| ASS1P11   | ENSG00000225308 | -0.72764 | 0.76658 | -2.3804     | 0.99135     | -2.3804  |         |
|           | 0.99135         | -2.3804  | 0.99135 | 0.86617301  |             |          |         |
| NA        | ENSG00000274902 | -0.72819 | 0.76675 | -0.72819    | 0.76675     | -0.72819 | 0.76675 |
|           | -0.72819        | 0.76675  | 0.76675 | 0.866322408 |             |          |         |
| ASCL5     | ENSG00000232237 | -2.0929  | 0.98182 | -2.0929     | 0.98182     | -0.72824 | 0.76677 |
|           | -2.0929         | 0.98182  | 0.76677 | 0.866322408 |             |          |         |
| NA        | ENSG00000212404 | -0.72828 | 0.76678 | -0.72828    | 0.76678     | -0.72828 | 0.76678 |
|           | -0.72828        | 0.76678  | 0.76678 | 0.866322408 |             |          |         |
| MTND5P8   | ENSG00000230999 | -1.0701  | 0.85771 | -0.72833    | 0.76679     | -1.1548  |         |
|           | 0.87591         | -1.703   | 0.95571 | 0.76679     | 0.866322408 |          |         |
| KMT2A     | ENSG00000118058 | -1.097   | 0.86367 | -1.0572     | 0.8548      | -1.191   | 0.88317 |
|           | -0.72841        | 0.76682  | 0.76682 | 0.866322408 |             |          |         |
| EIF2AK3   | ENSG00000172071 | -1.0864  | 0.86135 | -0.72856    | 0.76686     | -0.77677 |         |
|           | 0.78135         | -0.98151 | 0.83683 | 0.76686     | 0.866322408 |          |         |
| NA        | ENSG00000259371 | -0.72855 | 0.76686 | -0.72855    | 0.76686     | -0.72855 | 0.76686 |
|           | -0.72855        | 0.76686  | 0.76686 | 0.866322408 |             |          |         |
| RNA5SP495 | ENSG00000252267 | -0.78215 | 0.78294 | -0.78215    | 0.78294     | -0.72857 |         |
|           | 0.76687         | -0.78215 | 0.78294 | 0.76687     | 0.866322408 |          |         |
| LINC02535 | ENSG00000234155 | -1.1516  | 0.87525 | -0.72862    | 0.76688     | -1.1516  |         |
|           | 0.87525         | -0.8127  | 0.7918  | 0.76688     | 0.866322408 |          |         |
| NA        | ENSG00000268282 | -1.0097  | 0.84369 | -0.72864    | 0.76689     | -0.90972 | 0.81852 |
|           | -0.90972        | 0.81852  | 0.76689 | 0.866322408 |             |          |         |
| RPS26P19  | ENSG00000244563 | -0.72875 | 0.76692 | -0.72875    | 0.76692     | -0.72875 |         |
|           | 0.76692         | -0.72875 | 0.76692 | 0.76692     | 0.866336214 |          |         |
| PAIP1P1   | ENSG00000233892 | -0.72883 | 0.76695 | -0.72883    | 0.76695     | -0.72883 |         |
|           | 0.76695         | -0.72883 | 0.76695 | 0.76695     | 0.866341233 |          |         |
| ADD3-AS1  | ENSG00000203876 | -0.72887 | 0.76696 | -0.72887    | 0.76696     | -0.72887 |         |
|           | 0.76696         | -0.92835 | 0.82339 | 0.76696     | 0.866341233 |          |         |
| NA        | ENSG00000228998 | -0.72908 | 0.76702 | -0.72908    | 0.76702     | -0.72908 | 0.76702 |
|           | -0.72908        | 0.76702  | 0.76702 | 0.866388925 |             |          |         |
| GPR32P1   | ENSG00000269565 | -1.14    | 0.87285 | -0.72917    | 0.76705     | -1.5727  | 0.94211 |
|           | -1.342          | 0.91021  | 0.76705 | 0.866402728 |             |          |         |
| IGLL1     | ENSG00000128322 | -0.72932 | 0.7671  | -1.0274     | 0.84788     | -0.72932 | 0.7671  |
|           | -0.72932        | 0.7671   | 0.7671  | 0.866430333 |             |          |         |
| NA        | ENSG00000271338 | -0.72936 | 0.76711 | -0.72936    | 0.76711     | -0.72936 | 0.76711 |
|           | -0.72936        | 0.76711  | 0.76711 | 0.866430333 |             |          |         |
| CCKAR     | ENSG00000163394 | -0.72943 | 0.76713 | -1.5861     | 0.94364     | -0.72943 | 0.76713 |
|           | -0.72943        | 0.76713  | 0.76713 | 0.86643284  |             |          |         |
| FBXO3-DT  | ENSG00000254508 | -0.72955 | 0.76717 | -0.72955    | 0.76717     | -0.72955 |         |
|           | 0.76717         | -0.72955 | 0.76717 | 0.76717     | 0.866457936 |          |         |
| BBOX1-AS1 | ENSG00000254560 | -0.78175 | 0.78282 | -1.1456     | 0.87402     | -0.99933 |         |
|           | 0.84118         | -0.72965 | 0.7672  | 0.7672      | 0.866462948 |          |         |
| RN7SL239P | ENSG00000242999 | -0.72969 | 0.76721 | -0.72969    | 0.76721     | -0.72969 |         |
|           | 0.76721         | -0.72969 | 0.76721 | 0.76721     | 0.866462948 |          |         |
| LINC01847 | ENSG00000253311 | -0.72979 | 0.76724 | -0.92294    | 0.82198     | -0.72979 |         |
|           | 0.76724         | -0.72979 | 0.76724 | 0.76724     | 0.866470467 |          |         |
| NA        | ENSG00000273272 | -0.72984 | 0.76726 | -0.72984    | 0.76726     | -0.72984 | 0.76726 |
|           | -0.72984        | 0.76726  | 0.76726 | 0.866470467 |             |          |         |
| LAMTOR1   | ENSG00000149357 | -1.0786  | 0.85962 | -1.0786     | 0.85962     | -0.72989 |         |



|            |                 |          |         |             |             |          |          |
|------------|-----------------|----------|---------|-------------|-------------|----------|----------|
|            | 0.76727         | -1.0786  | 0.85962 | 0.76727     | 0.866470467 |          |          |
| RNU6-662P  | ENSG00000206980 | -1.231   | 0.89083 | 0.89083     | -0.87703    | 0.80976  | -0.73001 |
|            | 0.76731         | -1.231   | 0.89083 | 0.76731     | 0.866495558 |          |          |
| OR5M4P     | ENSG00000230416 | -0.73007 | 0.76733 | 0.76733     | -1.2049     | 0.88588  | -1.2049  |
|            | 0.88588         | -1.2049  | 0.88588 | 0.76733     | 0.866498063 |          |          |
| EFCAB6-AS1 | ENSG00000223843 | -0.73061 | 0.76749 | 0.76749     | -0.73061    | 0.76749  | -0.73061 |
|            | 0.76749         | -0.73061 | 0.76749 | 0.76749     | 0.866620995 |          |          |
| NCKAP5-IT1 | ENSG00000232474 | -0.7306  | 0.76749 | 0.76749     | -0.7306     | 0.76749  | -0.7306  |
|            | 0.76749         | -0.7306  | 0.76749 | 0.76749     | 0.866620995 |          |          |
| NA         | ENSG00000250954 | -0.73064 | 0.7675  | -0.73064    | 0.7675      | -0.73064 | 0.7675   |
|            | -0.73064        | 0.7675   | 0.7675  | 0.866620995 |             |          |          |
| C2orf83    | ENSG0000042304  | -0.73067 | 0.76751 | -0.73067    | 0.76751     | -0.73067 |          |
|            | 0.76751         | -0.73067 | 0.76751 | 0.76751     | 0.866620995 |          |          |
| DENND11    | ENSG00000257093 | -1.063   | 0.85612 | -0.73077    | 0.76754     | -0.85056 |          |
|            | 0.80249         | -0.85056 | 0.80249 | 0.76754     | 0.866634788 |          |          |
| LINC00706  | ENSG00000281186 | -1.369   | 0.9145  | -0.73084    | 0.76756     | -0.73084 |          |
|            | 0.76756         | -0.73084 | 0.76756 | 0.76756     | 0.86663729  |          |          |
| NA         | ENSG00000238369 | -0.73094 | 0.76759 | -0.73094    | 0.76759     | -0.73094 | 0.76759  |
|            | -0.73094        | 0.76759  | 0.76759 | 0.866651082 |             |          |          |
| LRP2BP     | ENSG00000109771 | -0.83951 | 0.79941 | -0.92301    | 0.822       | -1.2605  | 0.89625  |
|            | -0.73115        | 0.76766  | 0.76766 | 0.866701244 |             |          |          |
| NA         | ENSG00000272515 | -0.7312  | 0.76767 | -0.7312     | 0.76767     | -0.7312  | 0.76767  |
|            | -0.7312         | 0.76767  | 0.76767 | 0.866701244 |             |          |          |
| ZFYVE26    | ENSG00000072121 | -0.73153 | 0.76777 | -1.2477     | 0.89393     | -1.0564  |          |
|            | 0.8546          | -1.3791  | 0.91606 | 0.76777     | 0.866763893 |          |          |
| NA         | ENSG00000257740 | -0.73165 | 0.76781 | -1.1417     | 0.87321     | -0.73165 | 0.76781  |
|            | -0.73165        | 0.76781  | 0.76781 | 0.866763893 |             |          |          |
| COX8A      | ENSG00000176340 | -1.249   | 0.89417 | -1.249      | 0.89417     | -0.94288 | 0.82713  |
|            | -0.73173        | 0.76783  | 0.76783 | 0.866763893 |             |          |          |
| NA         | ENSG00000258860 | -1.2061  | 0.88612 | -1.2061     | 0.88612     | -1.2061  | 0.88612  |
|            | -0.73173        | 0.76783  | 0.76783 | 0.866763893 |             |          |          |
| PCDH8P1    | ENSG00000225510 | -0.73177 | 0.76784 | -0.73177    | 0.76784     | -0.73177 |          |
|            | 0.76784         | -0.73177 | 0.76784 | 0.76784     | 0.866763893 |          |          |
| OR10AF1P   | ENSG00000255416 | -0.83448 | 0.79799 | -1.2107     | 0.88699     | -1.0691  |          |
|            | 0.85748         | -0.73175 | 0.76784 | 0.76784     | 0.866763893 |          |          |
| TOMM70     | ENSG00000154174 | -0.99102 | 0.83916 | -0.99102    | 0.83916     | -0.99102 |          |
|            | 0.83916         | -0.73178 | 0.76785 | 0.76785     | 0.866763893 |          |          |
| TCF23      | ENSG00000163792 | -1.0902  | 0.86218 | -0.73189    | 0.76788     | -0.85216 | 0.80294  |
|            | -0.85216        | 0.80294  | 0.76788 | 0.866777679 |             |          |          |
| EPS15-AS1  | ENSG00000227070 | -1.7009  | 0.95552 | -1.7009     | 0.95552     | -1.7009  |          |
|            | 0.95552         | -0.73204 | 0.76793 | 0.76793     | 0.86681404  |          |          |
| LINC01905  | ENSG00000267057 | -0.73216 | 0.76797 | -0.73216    | 0.76797     | -0.73216 |          |
|            | 0.76797         | -0.73216 | 0.76797 | 0.76797     | 0.866839111 |          |          |
| SNORA3A    | ENSG00000200983 | -0.73266 | 0.76812 | -0.73266    | 0.76812     | -0.73266 |          |
|            | 0.76812         | -0.73266 | 0.76812 | 0.76812     | 0.866873928 |          |          |
| KCNK5      | ENSG00000164626 | -0.7327  | 0.76813 | -1.4889     | 0.93174     | -1.2367  | 0.8919   |
|            | -2.7934         | 0.99739  | 0.76813 | 0.866873928 |             |          |          |
| ELOBP3     | ENSG00000232285 | -0.73281 | 0.76816 | -0.73281    | 0.76816     | -0.73281 |          |
|            | 0.76816         | -0.73281 | 0.76816 | 0.76816     | 0.866873928 |          |          |
| TRAF3IP3   | ENSG00000009790 | -0.73284 | 0.76817 | -0.73284    | 0.76817     | -0.73284 |          |
|            | 0.76817         | -0.73284 | 0.76817 | 0.76817     | 0.866873928 |          |          |
| NA         | ENSG00000217612 | -0.73292 | 0.7682  | -0.73292    | 0.7682      | -0.73292 | 0.7682   |
|            | -0.73292        | 0.7682   | 0.7682  | 0.866873928 |             |          |          |
| NA         | ENSG00000253707 | -0.733   | 0.76822 | -0.733      | 0.76822     | -0.733   | 0.76822  |
|            | -0.733          | 0.76822  | 0.76822 | 0.866873928 |             |          |          |
| NA         | ENSG00000263385 | -1.4006  | 0.91934 | -1.4006     | 0.91934     | -1.4006  | 0.91934  |
|            | -0.733          | 0.76822  | 0.76822 | 0.866873928 |             |          |          |
| DCAF13     | ENSG00000164934 | -0.73304 | 0.76823 | -0.73304    | 0.76823     | -0.73304 |          |
|            | 0.76823         | -1.5494  | 0.93936 | 0.76823     | 0.866873928 |          |          |
| CHRNA9     | ENSG00000174343 | -1.0158  | 0.84513 | -1.0158     | 0.84513     | -0.7331  |          |
|            | 0.76825         | -1.2135  | 0.88752 | 0.76825     | 0.866873928 |          |          |
| NA         | ENSG00000232936 | -0.73311 | 0.76825 | -1.821      | 0.96569     | -0.73311 | 0.76825  |

|           |                 |          |          |          |             |             |         |  |
|-----------|-----------------|----------|----------|----------|-------------|-------------|---------|--|
|           |                 | -0.73311 | 0.76825  | 0.76825  | 0.866873928 |             |         |  |
| NA        | ENSG00000254485 | -1.4482  | 0.92621  | -0.73311 | 0.76825     | -1.2358     | 0.89174 |  |
|           |                 | -0.77042 | 0.77947  | 0.76825  | 0.866873928 |             |         |  |
| OR8J2     | ENSG00000254658 | -0.78011 | 0.78234  | -0.73311 | 0.76825     | -0.73311    | 0.76825 |  |
|           |                 | -0.73311 | 0.76825  | 0.76825  | 0.866873928 |             |         |  |
| GALR3     | ENSG00000128310 | -0.7334  | 0.76834  | -0.7334  | 0.76834     | -0.7334     | 0.76834 |  |
|           |                 | -0.7334  | 0.76834  | 0.76834  | 0.866873928 |             |         |  |
| NA        | ENSG00000226047 | -0.73347 | 0.76836  | -0.73347 | 0.76836     | -0.73347    | 0.76836 |  |
|           |                 | -0.73347 | 0.76836  | 0.76836  | 0.866873928 |             |         |  |
| NA        | ENSG00000270244 | -1.1957  | 0.8841   | -1.1957  | 0.8841      | -1.3506     | 0.91159 |  |
|           |                 | -0.73351 | 0.76837  | 0.76837  | 0.866873928 |             |         |  |
| RNA5SP80  | ENSG00000222407 | -0.73354 | 0.76838  | -0.73354 | 0.76838     | -0.73354    |         |  |
|           |                 | 0.76838  | -0.73354 | 0.76838  | 0.76838     | 0.866873928 |         |  |
| ACAP2-IT1 | ENSG00000229325 | -0.73352 | 0.76838  | -0.73352 | 0.76838     | -0.73352    |         |  |
|           |                 | 0.76838  | -0.73352 | 0.76838  | 0.76838     | 0.866873928 |         |  |
| KRT18P6   | ENSG00000258783 | -0.73352 | 0.76838  | -0.73352 | 0.76838     | -0.73352    |         |  |
|           |                 | 0.76838  | -0.73352 | 0.76838  | 0.76838     | 0.866873928 |         |  |
| NA        | ENSG00000259008 | -0.73351 | 0.76838  | -0.73351 | 0.76838     | -0.92492    | 0.8225  |  |
|           |                 | -0.73351 | 0.76838  | 0.76838  | 0.866873928 |             |         |  |
| TIAM2     | ENSG00000146426 | -0.80121 | 0.78849  | -1.1689  | 0.87878     | -1.4808     | 0.93067 |  |
|           |                 | -0.73356 | 0.76839  | 0.76839  | 0.866873928 |             |         |  |
| ZBTB11    | ENSG00000066422 | -1.8284  | 0.96625  | -1.2196  | 0.88869     | -1.9693     |         |  |
|           |                 | 0.97554  | -0.7336  | 0.7684   | 0.7684      | 0.866873928 |         |  |
| SKOR1     | ENSG00000188779 | -0.73358 | 0.7684   | -1.6373  | 0.94922     | -0.86375    | 0.80614 |  |
|           |                 | -1.051   | 0.85338  | 0.7684   | 0.866873928 |             |         |  |
| OR10Q1    | ENSG00000180475 | -0.73362 | 0.76841  | -0.73362 | 0.76841     | -0.73362    |         |  |
|           |                 | 0.76841  | -0.73362 | 0.76841  | 0.76841     | 0.866873928 |         |  |
| KRT8P38   | ENSG00000226358 | -0.73371 | 0.76844  | -0.73371 | 0.76844     | -0.73371    |         |  |
|           |                 | 0.76844  | -0.73371 | 0.76844  | 0.76844     | 0.866878915 |         |  |
| PCDH12    | ENSG00000113555 | -0.7615  | 0.77682  | -0.73375 | 0.76845     | -2.2648     |         |  |
|           |                 | 0.98824  | -0.7615  | 0.77682  | 0.76845     | 0.866878915 |         |  |
| NA        | ENSG00000269243 | -0.73393 | 0.76851  | -0.73393 | 0.76851     | -0.73393    | 0.76851 |  |
|           |                 | -0.73393 | 0.76851  | 0.76851  | 0.866926531 |             |         |  |
| NA        | ENSG00000238267 | -0.73401 | 0.76853  | -0.73401 | 0.76853     | -0.73401    | 0.76853 |  |
|           |                 | -0.73401 | 0.76853  | 0.76853  | 0.866929024 |             |         |  |
| RMDN3     | ENSG00000137824 | -0.73408 | 0.76855  | -0.73408 | 0.76855     | -0.73408    | 0.76855 |  |
|           |                 | -1.1654  | 0.87807  | 0.76855  | 0.866931516 |             |         |  |
| RPL37     | ENSG00000145592 | -0.77618 | 0.78118  | -0.73418 | 0.76858     | -1.0319     | 0.84894 |  |
|           |                 | -1.0802  | 0.85996  | 0.76858  | 0.866945288 |             |         |  |
| NA        | ENSG00000206713 | -0.73438 | 0.76864  | -0.73438 | 0.76864     | -0.73438    | 0.76864 |  |
|           |                 | -0.73438 | 0.76864  | 0.76864  | 0.866986601 |             |         |  |
| CYTH3     | ENSG00000008256 | -0.73444 | 0.76866  | -0.87068 | 0.80804     | -0.78979    | 0.78518 |  |
|           |                 | -1.747   | 0.95968  | 0.76866  | 0.866986601 |             |         |  |
| NFKBID    | ENSG00000167604 | -0.73448 | 0.76867  | -0.73448 | 0.76867     | -0.73448    |         |  |
|           |                 | 0.76867  | -1.3447  | 0.91063  | 0.76867     | 0.866986601 |         |  |
| MTND2P14  | ENSG00000240796 | -0.73475 | 0.76875  | -0.73475 | 0.76875     | -0.73475    |         |  |
|           |                 | 0.76875  | -0.73475 | 0.76875  | 0.76875     | 0.867036696 |         |  |
| MTCO1P35  | ENSG00000250630 | -0.73475 | 0.76875  | -0.73475 | 0.76875     | -0.73475    |         |  |
|           |                 | 0.76875  | -0.73475 | 0.76875  | 0.76875     | 0.867036696 |         |  |
| TRGV7     | ENSG00000249978 | -0.73489 | 0.7688   | -0.73489 | 0.7688      | -0.73489    | 0.7688  |  |
|           |                 | -0.73489 | 0.7688   | 0.7688   | 0.867046654 |             |         |  |
| NA        | ENSG00000264213 | -0.73498 | 0.76882  | -0.73498 | 0.76882     | -0.73498    | 0.76882 |  |
|           |                 | -0.73498 | 0.76882  | 0.76882  | 0.867046654 |             |         |  |
| RN7SL253P | ENSG00000241652 | -0.735   | 0.76883  | -0.735   | 0.76883     | -0.735      |         |  |
|           |                 | 0.76883  | -0.735   | 0.76883  | 0.76883     | 0.867046654 |         |  |
| NA        | ENSG00000249105 | -0.735   | 0.76883  | -1.3186  | 0.90636     | -0.735      | 0.76883 |  |
|           |                 | -0.735   | 0.76883  | 0.76883  | 0.867046654 |             |         |  |
| NA        | ENSG00000259203 | -0.73565 | 0.76903  | -0.91889 | 0.82092     | -1.8252     | 0.96602 |  |
|           |                 | -1.8252  | 0.96602  | 0.76903  | 0.86724334  |             |         |  |
| NA        | ENSG00000226079 | -1.1775  | 0.88051  | -1.6563  | 0.95117     | -0.83507    | 0.79816 |  |
|           |                 | -0.73569 | 0.76904  | 0.76904  | 0.86724334  |             |         |  |
| TRAJ3     | ENSG00000211886 | -0.73583 | 0.76908  | -0.73583 | 0.76908     | -0.73583    | 0.76908 |  |

|             |                 |          |         |             |             |          |         |  |
|-------------|-----------------|----------|---------|-------------|-------------|----------|---------|--|
|             | -0.73583        | 0.76908  | 0.76908 | 0.867268378 |             |          |         |  |
| NA          | ENSG00000271551 | -0.73603 | 0.76914 | -0.73603    | 0.76914     | -0.73603 | 0.76914 |  |
|             | -0.73603        | 0.76914  | 0.76914 | 0.867307173 |             |          |         |  |
| NA          | ENSG00000221398 | -0.73605 | 0.76915 | -0.73605    | 0.76915     | -0.73605 | 0.76915 |  |
|             | -0.73605        | 0.76915  | 0.76915 | 0.867307173 |             |          |         |  |
| MTND5P6     | ENSG00000228440 | -0.73629 | 0.76922 | -1.3566     | 0.91255     | -0.73629 |         |  |
|             | 0.76922         | -0.73629 | 0.76922 | 0.76922     | 0.867342136 |          |         |  |
| SNORA47     | ENSG00000238961 | -0.73632 | 0.76923 | -0.73632    | 0.76923     | -0.73632 |         |  |
|             | 0.76923         | -0.73632 | 0.76923 | 0.76923     | 0.867342136 |          |         |  |
| RNU6-553P   | ENSG00000200917 | -0.73636 | 0.76924 | -0.73636    | 0.76924     | -0.73636 |         |  |
|             | 0.76924         | -0.73636 | 0.76924 | 0.76924     | 0.867342136 |          |         |  |
| NA          | ENSG00000206978 | -1.0619  | 0.85586 | -1.0619     | 0.85586     | -0.80438 | 0.78941 |  |
|             | -0.73642        | 0.76926  | 0.76926 | 0.867342136 |             |          |         |  |
| NA          | ENSG00000272219 | -0.90786 | 0.81803 | -0.73645    | 0.76927     | -1.2131  | 0.88745 |  |
|             | -0.78097        | 0.78259  | 0.76927 | 0.867342136 |             |          |         |  |
| NA          | ENSG00000249637 | -0.7366  | 0.76932 | -1.5058     | 0.93395     | -1.4139  | 0.92131 |  |
|             | -1.4139         | 0.92131  | 0.76932 | 0.867369647 |             |          |         |  |
| MIR5091     | ENSG00000266240 | -0.73664 | 0.76933 | -0.73664    | 0.76933     | -0.73664 |         |  |
|             | 0.76933         | -0.73664 | 0.76933 | 0.76933     | 0.867369647 |          |         |  |
| NA          | ENSG00000268573 | -1.1282  | 0.87038 | -1.0726     | 0.85827     | -1.1282  | 0.87038 |  |
|             | -0.73671        | 0.76935  | 0.76935 | 0.867372128 |             |          |         |  |
| KRTAP15-1   | ENSG00000186970 | -0.73687 | 0.7694  | -0.73687    | 0.7694      | -0.73687 |         |  |
|             | 0.7694          | -0.73687 | 0.7694  | 0.7694      | 0.867408431 |          |         |  |
| RN7SKP263   | ENSG00000223126 | -0.73698 | 0.76943 | -0.73698    | 0.76943     | -0.73698 |         |  |
|             | 0.76943         | -0.73698 | 0.76943 | 0.76943     | 0.867422184 |          |         |  |
| NA          | ENSG00000265114 | -0.73704 | 0.76945 | -0.73704    | 0.76945     | -0.73704 | 0.76945 |  |
|             | -0.73704        | 0.76945  | 0.76945 | 0.867424663 |             |          |         |  |
| LINC01257   | ENSG00000204603 | -0.73711 | 0.76947 | -1.2415     | 0.89279     | -1.0474  |         |  |
|             | 0.85254         | -1.2337  | 0.89135 | 0.76947     | 0.867427143 |          |         |  |
| IGHV7-81    | ENSG00000211979 | -0.73716 | 0.76949 | -0.73716    | 0.76949     | -0.73716 |         |  |
|             | 0.76949         | -0.73716 | 0.76949 | 0.76949     | 0.867429622 |          |         |  |
| ZNF512      | ENSG00000243943 | -0.75215 | 0.77402 | -0.73729    | 0.76953     | -1.1093  |         |  |
|             | 0.86635         | -1.1189  | 0.8684  | 0.76953     | 0.867454646 |          |         |  |
| MIR635      | ENSG00000207561 | -0.73739 | 0.76956 | -0.73739    | 0.76956     | -0.73739 |         |  |
|             | 0.76956         | -0.73739 | 0.76956 | 0.76956     | 0.867468397 |          |         |  |
| NA          | ENSG00000223695 | -1.6264  | 0.94807 | -0.73751    | 0.76959     | -1.6264  | 0.94807 |  |
|             | -1.6264         | 0.94807  | 0.76959 | 0.867482147 |             |          |         |  |
| CCDC157     | ENSG00000187860 | -1.7035  | 0.95576 | -1.7035     | 0.95576     | -0.73781 |         |  |
|             | 0.76969         | -1.7035  | 0.95576 | 0.76969     | 0.867550888 |          |         |  |
| MAGOH3P     | ENSG00000270975 | -0.73786 | 0.7697  | -1.1447     | 0.87384     | -1.0935  |         |  |
|             | 0.86292         | -1.2053  | 0.88596 | 0.7697      | 0.867550888 |          |         |  |
| RPL12P10    | ENSG00000226279 | -0.73789 | 0.76971 | -0.73789    | 0.76971     | -0.73789 |         |  |
|             | 0.76971         | -0.73789 | 0.76971 | 0.76971     | 0.867550888 |          |         |  |
| NA          | ENSG00000257735 | -0.73795 | 0.76973 | -0.73795    | 0.76973     | -0.73795 | 0.76973 |  |
|             | -0.73795        | 0.76973  | 0.76973 | 0.867550888 |             |          |         |  |
| CCDC83      | ENSG00000150676 | -1.2332  | 0.89125 | -1.3811     | 0.91638     | -0.738   |         |  |
|             | 0.76974         | -2.1426  | 0.98393 | 0.76974     | 0.867550888 |          |         |  |
| SPATA13-AS1 | ENSG00000227213 | -0.73807 | 0.76976 | -0.73807    | 0.76976     | -0.73807 |         |  |
|             | 0.76976         | -0.73807 | 0.76976 | 0.76976     | 0.867553364 |          |         |  |
| TRIM49B     | ENSG00000182053 | -1.1875  | 0.88248 | -0.73843    | 0.76987     | -1.284   |         |  |
|             | 0.90043         | -1.8456  | 0.96753 | 0.76987     | 0.867657271 |          |         |  |
| LINC01424   | ENSG00000236519 | -0.73872 | 0.76996 | -0.73872    | 0.76996     | -0.73872 |         |  |
|             | 0.76996         | -0.73872 | 0.76996 | 0.76996     | 0.867729836 |          |         |  |
| NA          | ENSG00000266446 | -0.73876 | 0.76997 | -0.73876    | 0.76997     | -0.73876 | 0.76997 |  |
|             | -0.73876        | 0.76997  | 0.76997 | 0.867729836 |             |          |         |  |
| CLDND1      | ENSG00000080822 | -0.73881 | 0.76999 | -0.73881    | 0.76999     | -1.7772  |         |  |
|             | 0.96223         | -0.73881 | 0.76999 | 0.76999     | 0.867732307 |          |         |  |
| ZNF605      | ENSG00000196458 | -1.8535  | 0.9681  | -0.73891    | 0.77002     | -0.73891 |         |  |
|             | 0.77002         | -0.83944 | 0.79939 | 0.77002     | 0.867744663 |          |         |  |
| ERVK-28     | ENSG00000267696 | -0.73913 | 0.77008 | -0.85514    | 0.80376     | -1.1503  |         |  |
|             | 0.87499         | -0.96135 | 0.83181 | 0.77008     | 0.867744663 |          |         |  |
| NA          | ENSG00000283547 | -0.73911 | 0.77008 | -0.73911    | 0.77008     | -0.73911 | 0.77008 |  |

|            |                 |          |          |         |             |             |          |         |
|------------|-----------------|----------|----------|---------|-------------|-------------|----------|---------|
|            |                 | -0.73911 | 0.77008  | 0.77008 | 0.867744663 |             |          |         |
| NA         | ENSG00000260257 | -0.73916 | 0.77009  | 0.77009 | -0.73916    | 0.77009     | -0.73916 | 0.77009 |
|            |                 | -0.73916 | 0.77009  | 0.77009 | 0.867744663 |             |          |         |
| NA         | ENSG00000267257 | -0.73915 | 0.77009  | 0.77009 | -0.73915    | 0.77009     | -0.73915 | 0.77009 |
|            |                 | -0.73915 | 0.77009  | 0.77009 | 0.867744663 |             |          |         |
| NA         | ENSG00000247903 | -1.4143  | 0.92136  | 0.92136 | -0.73926    | 0.77013     | -1.4143  | 0.92136 |
|            |                 | -1.4143  | 0.92136  | 0.77013 | 0.867760872 |             |          |         |
| SPDYE20P   | ENSG00000277327 | -0.73931 | 0.77014  | 0.77014 | -1.7221     | 0.95747     | -0.73931 |         |
|            |                 | 0.77014  | -0.73931 | 0.77014 | 0.77014     | 0.867760872 |          |         |
| DUSP12     | ENSG00000081721 | -0.73943 | 0.77018  | 0.77018 | -0.73943    | 0.77018     | -0.73943 |         |
|            |                 | 0.77018  | -0.73943 | 0.77018 | 0.77018     | 0.867785877 |          |         |
| TRBVB      | ENSG00000241911 | -1.4889  | 0.93175  | 0.93175 | -1.4018     | 0.91951     | -1.4018  | 0.91951 |
|            |                 | -0.73972 | 0.77026  | 0.77026 | 0.867855949 |             |          |         |
| NA         | ENSG00000233547 | -0.74014 | 0.77039  | 0.77039 | -0.74014    | 0.77039     | -0.74014 | 0.77039 |
|            |                 | -0.74014 | 0.77039  | 0.77039 | 0.867982352 |             |          |         |
| IFRD1      | ENSG00000006652 | -1.0931  | 0.86283  | 0.86283 | -1.1773     | 0.88046     | -1.1898  | 0.88293 |
|            |                 | -0.74033 | 0.77045  | 0.77045 | 0.868021081 |             |          |         |
| NA         | ENSG00000234941 | -0.74036 | 0.77046  | 0.77046 | -0.75611    | 0.77521     | -0.75611 | 0.77521 |
|            |                 | -0.98365 | 0.83736  | 0.77046 | 0.868021081 |             |          |         |
| RNU6-283P  | ENSG00000201658 | -0.74043 | 0.77048  | 0.77048 | -0.74043    | 0.77048     | -0.74043 |         |
|            |                 | 0.77048  | -0.74043 | 0.77048 | 0.77048     | 0.868023545 |          |         |
| LINC01851  | ENSG00000233605 | -0.74051 | 0.7705   | 0.7705  | -0.74051    | 0.7705      | -0.74051 |         |
|            |                 | 0.7705   | -0.74051 | 0.7705  | 0.7705      | 0.868026009 |          |         |
| SRD5A3P1   | ENSG00000270929 | -0.74076 | 0.77058  | 0.77058 | -0.74076    | 0.77058     | -0.74076 |         |
|            |                 | 0.77058  | -0.74076 | 0.77058 | 0.77058     | 0.868096065 |          |         |
| LINC02847  | ENSG00000253702 | -0.74083 | 0.7706   | 0.7706  | -0.74083    | 0.7706      | -0.74083 |         |
|            |                 | 0.7706   | -0.74083 | 0.7706  | 0.7706      | 0.868098527 |          |         |
| ACAD10     | ENSG00000111271 | -0.74113 | 0.77069  | 0.77069 | -1.6949     | 0.95495     | -0.86337 |         |
|            |                 | 0.80603  | -0.75655 | 0.77534 | 0.77069     | 0.868150971 |          |         |
| XIAPP3     | ENSG00000180152 | -1.1146  | 0.8675   | 0.8675  | -0.74114    | 0.7707      | -0.90463 |         |
|            |                 | 0.81717  | -0.90463 | 0.81717 | 0.7707      | 0.868150971 |          |         |
| NA         | ENSG00000260830 | -0.74115 | 0.7707   | 0.7707  | -0.74115    | 0.7707      | -0.74115 | 0.7707  |
|            |                 | -0.74115 | 0.7707   | 0.7707  | 0.868150971 |             |          |         |
| PITRM1-AS1 | ENSG00000237399 | -0.74141 | 0.77078  | 0.77078 | -0.99112    | 0.83919     | -0.74141 |         |
|            |                 | 0.77078  | -0.74141 | 0.77078 | 0.77078     | 0.868212212 |          |         |
| FGFR1OP2   | ENSG00000111790 | -0.74144 | 0.77079  | 0.77079 | -1.9239     | 0.97281     | -0.74144 |         |
|            |                 | 0.77079  | -1.7896  | 0.96324 | 0.77079     | 0.868212212 |          |         |
| NA         | ENSG00000256603 | -0.7415  | 0.77081  | 0.77081 | -0.7415     | 0.77081     | -0.7415  | 0.77081 |
|            |                 | -0.7415  | 0.77081  | 0.77081 | 0.868214671 |             |          |         |
| EIF3EP1    | ENSG00000234882 | -0.74176 | 0.77088  | 0.77088 | -0.74176    | 0.77088     | -0.74176 |         |
|            |                 | 0.77088  | -0.74176 | 0.77088 | 0.77088     | 0.86823291  |          |         |
| RNU6-795P  | ENSG00000252132 | -0.83022 | 0.79679  | 0.79679 | -0.83022    | 0.79679     | -0.83022 |         |
|            |                 | 0.79679  | -0.74185 | 0.77091 | 0.77091     | 0.86823291  |          |         |
| IGLV2-28   | ENSG00000253451 | -0.74184 | 0.77091  | 0.77091 | -0.74184    | 0.77091     | -0.74184 |         |
|            |                 | 0.77091  | -0.74184 | 0.77091 | 0.77091     | 0.86823291  |          |         |
| NA         | ENSG00000227698 | -0.74187 | 0.77092  | 0.77092 | -0.74187    | 0.77092     | -0.74187 | 0.77092 |
|            |                 | -0.74187 | 0.77092  | 0.77092 | 0.86823291  |             |          |         |
| MYO9A      | ENSG00000066933 | -1.1581  | 0.87658  | 0.87658 | -0.74191    | 0.77093     | -1.2222  | 0.88918 |
|            |                 | -1.4597  | 0.92781  | 0.77093 | 0.86823291  |             |          |         |
| RHOV       | ENSG00000104140 | -0.79099 | 0.78553  | 0.78553 | -0.75691    | 0.77545     | -0.79099 | 0.78553 |
|            |                 | -0.74197 | 0.77095  | 0.77095 | 0.86823291  |             |          |         |
| FLG        | ENSG00000143631 | -1.0793  | 0.85976  | 0.85976 | -2.2104     | 0.98646     | -0.74201 | 0.77096 |
|            |                 | -1.8004  | 0.9641   | 0.77096 | 0.86823291  |             |          |         |
| NA         | ENSG00000276846 | -0.74213 | 0.77099  | 0.77099 | -0.74213    | 0.77099     | -0.74213 | 0.77099 |
|            |                 | -0.74213 | 0.77099  | 0.77099 | 0.86823291  |             |          |         |
| NA         | ENSG00000259003 | -1.3419  | 0.91018  | 0.91018 | -1.3419     | 0.91018     | -0.74216 | 0.771   |
|            |                 | -0.97492 | 0.8352   | 0.771   | 0.86823291  |             |          |         |
| NA         | ENSG00000268112 | -0.74218 | 0.77101  | 0.77101 | -0.74218    | 0.77101     | -0.74218 | 0.77101 |
|            |                 | -0.74218 | 0.77101  | 0.77101 | 0.86823291  |             |          |         |
| NA         | ENSG00000280091 | -0.74225 | 0.77103  | 0.77103 | -0.74225    | 0.77103     | -0.74225 | 0.77103 |
|            |                 | -0.74225 | 0.77103  | 0.77103 | 0.86823291  |             |          |         |
| ANGPTL4    | ENSG00000167772 | -1.2076  | 0.8864   | 0.8864  | -1.2076     | 0.8864      | -1.2076  |         |

|                |                 |          |         |             |             |          |         |
|----------------|-----------------|----------|---------|-------------|-------------|----------|---------|
|                | 0.8864          | -0.74228 | 0.77104 | 0.77104     | 0.86823291  |          |         |
| NA             | ENSG00000280401 | -0.74242 | 0.77108 | -0.74242    | 0.77108     | -0.74242 | 0.77108 |
|                | -0.74242        | 0.77108  | 0.77108 | 0.868257889 |             |          |         |
| NA             | ENSG00000217786 | -0.74258 | 0.77113 | -1.3826     | 0.91661     | -0.74258 | 0.77113 |
|                | -1.0246         | 0.84722  | 0.77113 | 0.868285323 |             |          |         |
| NA             | ENSG00000248993 | -0.7426  | 0.77114 | -0.7426     | 0.77114     | -0.7426  | 0.77114 |
|                | -0.7426         | 0.77114  | 0.77114 | 0.868285323 |             |          |         |
| ARHGAP9        | ENSG00000123329 | -0.96132 | 0.83181 | -0.96132    | 0.83181     | -0.74288 |         |
|                | 0.77122         | -1.5882  | 0.94388 | 0.77122     | 0.868301688 |          |         |
| PLXNC1         | ENSG00000136040 | -2.4011  | 0.99183 | -0.74292    | 0.77123     | -0.98452 |         |
|                | 0.83757         | -1.5598  | 0.94059 | 0.77123     | 0.868301688 |          |         |
| PTGES3L-AARSD1 | ENSG00000108825 | -2.5094  | 0.99395 | -2.5094     | 0.99395     | -0.74292 |         |
|                | 0.77124         | -0.92181 | 0.82169 | 0.77124     | 0.868301688 |          |         |
| SHMT1P1        | ENSG00000224751 | -1.376   | 0.91559 | -1.6838     | 0.95389     | -0.743   |         |
|                | 0.77126         | -1.6951  | 0.95497 | 0.77126     | 0.868301688 |          |         |
| NA             | ENSG00000254086 | -0.74315 | 0.7713  | -0.74315    | 0.7713      | -0.74315 | 0.7713  |
|                | -0.74315        | 0.7713   | 0.7713  | 0.868301688 |             |          |         |
| NA             | ENSG00000270430 | -0.74318 | 0.77131 | -0.74318    | 0.77131     | -0.74318 | 0.77131 |
|                | -0.74318        | 0.77131  | 0.77131 | 0.868301688 |             |          |         |
| NA             | ENSG00000253210 | -0.88328 | 0.81146 | -0.7432     | 0.77132     | -0.85174 | 0.80282 |
|                | -0.85174        | 0.80282  | 0.77132 | 0.868301688 |             |          |         |
| KIF14          | ENSG00000118193 | -0.78624 | 0.78414 | -1.146      | 0.8741      | -0.7433  | 0.77135 |
|                | -0.99704        | 0.84063  | 0.77135 | 0.868301688 |             |          |         |
| NA             | ENSG00000254816 | -1.7739  | 0.96196 | -0.74329    | 0.77135     | -0.74329 | 0.77135 |
|                | -0.74329        | 0.77135  | 0.77135 | 0.868301688 |             |          |         |
| SLC9A9         | ENSG00000181804 | -1.3308  | 0.90836 | -1.1693     | 0.87885     | -0.74337 |         |
|                | 0.77137         | -1.6805  | 0.95357 | 0.77137     | 0.868301688 |          |         |
| NA             | ENSG00000249679 | -0.74351 | 0.77141 | -0.74351    | 0.77141     | -0.74351 | 0.77141 |
|                | -0.74351        | 0.77141  | 0.77141 | 0.868301688 |             |          |         |
| PAFAH1B2       | ENSG00000168092 | -0.74352 | 0.77142 | -0.74352    | 0.77142     | -0.74352 |         |
|                | 0.77142         | -0.74352 | 0.77142 | 0.77142     | 0.868301688 |          |         |
| EXOC3-AS1      | ENSG00000221990 | -0.75442 | 0.7747  | -0.74355    | 0.77142     | -0.74355 |         |
|                | 0.77142         | -0.74355 | 0.77142 | 0.77142     | 0.868301688 |          |         |
| SLC9A3P2       | ENSG00000238125 | -1.1784  | 0.88068 | -1.1784     | 0.88068     | -1.1784  |         |
|                | 0.88068         | -0.74361 | 0.77144 | 0.77144     | 0.868301688 |          |         |
| LRRFIP1P1      | ENSG00000240429 | -0.74365 | 0.77146 | -0.74365    | 0.77146     | -0.74365 |         |
|                | 0.77146         | -0.74365 | 0.77146 | 0.77146     | 0.868301688 |          |         |
| NA             | ENSG00000259160 | -0.74368 | 0.77147 | -0.74368    | 0.77147     | -0.74368 | 0.77147 |
|                | -0.74368        | 0.77147  | 0.77147 | 0.868301688 |             |          |         |
| EEF1DP2        | ENSG00000226721 | -0.74373 | 0.77148 | -0.74373    | 0.77148     | -0.74373 |         |
|                | 0.77148         | -0.74373 | 0.77148 | 0.77148     | 0.868301688 |          |         |
| MTND1P9        | ENSG00000228995 | -0.74394 | 0.77154 | -0.74394    | 0.77154     | -0.74394 |         |
|                | 0.77154         | -0.74394 | 0.77154 | 0.77154     | 0.868301688 |          |         |
| NA             | ENSG00000258679 | -0.81803 | 0.79333 | -0.74394    | 0.77154     | -1.3028  | 0.90368 |
|                | -0.81803        | 0.79333  | 0.77154 | 0.868301688 |             |          |         |
| TIMM50         | ENSG00000105197 | -0.74395 | 0.77155 | -0.74395    | 0.77155     | -0.74395 |         |
|                | 0.77155         | -0.74395 | 0.77155 | 0.77155     | 0.868301688 |          |         |
| DEFB117        | ENSG00000212717 | -0.74395 | 0.77155 | -0.74395    | 0.77155     | -0.74395 |         |
|                | 0.77155         | -1.6355  | 0.94903 | 0.77155     | 0.868301688 |          |         |
| NA             | ENSG00000277476 | -0.74396 | 0.77155 | -0.74396    | 0.77155     | -0.74396 | 0.77155 |
|                | -0.74396        | 0.77155  | 0.77155 | 0.868301688 |             |          |         |
| GPR17          | ENSG00000144230 | -1.1335  | 0.8715  | -0.74402    | 0.77157     | -1.1335  | 0.8715  |
|                | -1.1335         | 0.8715   | 0.77157 | 0.868301688 |             |          |         |
| MIR597         | ENSG00000207701 | -0.74408 | 0.77159 | -0.74408    | 0.77159     | -0.74408 |         |
|                | 0.77159         | -0.74408 | 0.77159 | 0.77159     | 0.868301688 |          |         |
| NA             | ENSG00000252985 | -0.74413 | 0.7716  | -0.88304    | 0.81139     | -1.1115  | 0.86683 |
|                | -1.1115         | 0.86683  | 0.7716  | 0.868301688 |             |          |         |
| SPRR2C         | ENSG00000229035 | -0.74418 | 0.77162 | -0.74418    | 0.77162     | -0.74418 |         |
|                | 0.77162         | -0.74418 | 0.77162 | 0.77162     | 0.868304143 |          |         |
| ZNF106         | ENSG00000103994 | -1.3497  | 0.91145 | -0.7444     | 0.77168     | -1.3497  |         |
|                | 0.91145         | -0.93342 | 0.8247  | 0.77168     | 0.868351608 |          |         |
| FAM126B        | ENSG00000155744 | -1.2499  | 0.89433 | -0.74484    | 0.77181     | -0.89142 |         |

|           |                 |          |         |             |             |          |         |          |
|-----------|-----------------|----------|---------|-------------|-------------|----------|---------|----------|
|           | 0.81365         | -1.175   | 0.88    | 0.77181     | 0.868477839 |          |         |          |
| METTL25   | ENSG00000127720 | -0.74492 | 0.77184 | -0.74492    | 0.77184     | -0.74492 | 0.77184 | -0.74492 |
|           | 0.77184         | -1.8212  | 0.96571 | 0.77184     | 0.868491542 |          |         |          |
| NELL2     | ENSG00000184613 | -0.74509 | 0.77189 | -1.4054     | 0.92005     | -1.3086  | 0.90466 |          |
|           | -1.0655         | 0.85668  | 0.77189 | 0.868518945 |             |          |         |          |
| NA        | ENSG00000226032 | -1.3958  | 0.91861 | -1.3958     | 0.91861     | -1.3958  | 0.91861 |          |
|           | -0.74513        | 0.7719   | 0.7719  | 0.868518945 |             |          |         |          |
| NA        | ENSG00000201012 | -0.74525 | 0.77194 | -0.77568    | 0.78103     | -1.2647  | 0.89701 |          |
|           | -1.2647         | 0.89701  | 0.77194 | 0.868522389 |             |          |         |          |
| NA        | ENSG00000282012 | -0.74533 | 0.77196 | -0.74533    | 0.77196     | -0.74533 | 0.77196 |          |
|           | -0.74533        | 0.77196  | 0.77196 | 0.868522389 |             |          |         |          |
| NA        | ENSG00000264548 | -0.74537 | 0.77198 | -0.74537    | 0.77198     | -0.74537 | 0.77198 |          |
|           | -0.74537        | 0.77198  | 0.77198 | 0.868522389 |             |          |         |          |
| NA        | ENSG00000279483 | -0.74542 | 0.77199 | -1.2833     | 0.90031     | -0.74542 | 0.77199 |          |
|           | -0.74542        | 0.77199  | 0.77199 | 0.868522389 |             |          |         |          |
| RBM15     | ENSG00000162775 | -0.90772 | 0.81799 | -0.95443    | 0.83007     | -0.74544 | 0.772   |          |
|           | -0.90772        | 0.81799  | 0.772   | 0.868522389 |             |          |         |          |
| RIMBP2    | ENSG00000060709 | -0.8816  | 0.811   | -0.96197    | 0.83197     | -0.74547 | 0.77201 |          |
|           | -0.79111        | 0.78556  | 0.77201 | 0.868522389 |             |          |         |          |
| NA        | ENSG00000231073 | -0.74564 | 0.77206 | -0.74564    | 0.77206     | -0.74564 | 0.77206 |          |
|           | -0.74564        | 0.77206  | 0.77206 | 0.868558588 |             |          |         |          |
| NA        | ENSG00000236837 | -0.80718 | 0.79022 | -1.0628     | 0.85605     | -0.74573 | 0.77208 |          |
|           | -0.74573        | 0.77208  | 0.77208 | 0.868561036 |             |          |         |          |
| NA        | ENSG00000252203 | -0.74586 | 0.77212 | -1.319      | 0.90642     | -0.74586 | 0.77212 |          |
|           | -0.74586        | 0.77212  | 0.77212 | 0.868585983 |             |          |         |          |
| OR5AS1    | ENSG00000181785 | -0.74606 | 0.77218 | -0.74606    | 0.77218     | -0.74606 |         |          |
|           | 0.77218         | -0.74606 | 0.77218 | 0.77218     | 0.868633426 |          |         |          |
| CAPN10-DT | ENSG00000260942 | -0.74636 | 0.77227 | -0.74636    | 0.77227     | -0.74636 |         |          |
|           | 0.77227         | -0.74636 | 0.77227 | 0.77227     | 0.868714614 |          |         |          |
| MAF1      | ENSG00000179632 | -0.74663 | 0.77236 | -1.3518     | 0.91179     | -1.3518  | 0.91179 |          |
|           | -1.3518         | 0.91179  | 0.77236 | 0.868795799 |             |          |         |          |
| NMNAT1P3  | ENSG00000238077 | -0.74694 | 0.77245 | -0.74694    | 0.77245     | -0.74694 |         |          |
|           | 0.77245         | -0.74694 | 0.77245 | 0.77245     | 0.868876979 |          |         |          |
| PIWIL3    | ENSG00000184571 | -1.3909  | 0.91788 | -1.3909     | 0.91788     | -1.3909  |         |          |
|           | 0.91788         | -0.74702 | 0.77248 | 0.77248     | 0.86888186  |          |         |          |
| ZNF517    | ENSG00000197363 | -0.74707 | 0.77249 | -1.1326     | 0.8713      | -1.1326  |         |          |
|           | 0.8713          | -1.3412  | 0.91007 | 0.77249     | 0.86888186  |          |         |          |
| APBB1IP   | ENSG00000077420 | -0.74718 | 0.77252 | -0.78385    | 0.78344     | -0.97345 |         |          |
|           | 0.83483         | -0.89459 | 0.8145  | 0.77252     | 0.868882813 |          |         |          |
| ACTL7B    | ENSG00000148156 | -1.2817  | 0.90003 | -0.74728    | 0.77255     | -1.2817  |         |          |
|           | 0.90003         | -1.2817  | 0.90003 | 0.77255     | 0.868882813 |          |         |          |
| NA        | ENSG00000280380 | -1.1267  | 0.87007 | -0.7473     | 0.77256     | -0.7473  | 0.77256 |          |
|           | -0.7473         | 0.77256  | 0.77256 | 0.868882813 |             |          |         |          |
| NA        | ENSG00000279617 | -0.74735 | 0.77257 | -0.74735    | 0.77257     | -0.74735 | 0.77257 |          |
|           | -0.74735        | 0.77257  | 0.77257 | 0.868882813 |             |          |         |          |
| SMARCB1   | ENSG00000099956 | -1.2982  | 0.90289 | -0.74738    | 0.77258     | -0.74738 |         |          |
|           | 0.77258         | -1.4818  | 0.9308  | 0.77258     | 0.868882813 |          |         |          |
| SNORA68   | ENSG00000207166 | -0.74761 | 0.77265 | -0.74761    | 0.77265     | -0.74761 |         |          |
|           | 0.77265         | -0.74761 | 0.77265 | 0.77265     | 0.868941484 |          |         |          |
| PNMT      | ENSG00000141744 | -0.74771 | 0.77268 | -0.74771    | 0.77268     | -0.74771 | 0.77268 |          |
|           | -0.74771        | 0.77268  | 0.77268 | 0.868955168 |             |          |         |          |
| GNPAT     | ENSG00000116906 | -0.74781 | 0.77271 | -0.74781    | 0.77271     | -0.74781 | 0.77271 |          |
|           | -0.74781        | 0.77271  | 0.77271 | 0.86895855  |             |          |         |          |
| ATP6AP1L  | ENSG00000205464 | -0.74794 | 0.77275 | -0.74794    | 0.77275     | -0.74794 |         |          |
|           | 0.77275         | -0.74794 | 0.77275 | 0.77275     | 0.86895855  |          |         |          |
| NA        | ENSG00000220076 | -0.748   | 0.77277 | -0.748      | 0.77277     | -0.748   | 0.77277 |          |
|           | -0.748          | 0.77277  | 0.77277 | 0.86895855  |             |          |         |          |
| ZKSCAN8   | ENSG00000198315 | -0.79965 | 0.78804 | -0.74805    | 0.77278     | -1.1687  |         |          |
|           | 0.87875         | -1.4257  | 0.92302 | 0.77278     | 0.86895855  |          |         |          |
| PRELID1P3 | ENSG00000235816 | -0.74807 | 0.77279 | -0.74807    | 0.77279     | -0.74807 |         |          |
|           | 0.77279         | -0.74807 | 0.77279 | 0.77279     | 0.86895855  |          |         |          |
| NA        | ENSG00000253290 | -0.74808 | 0.77279 | -0.9508     | 0.82915     | -0.74808 | 0.77279 |          |

|              |                 |          |          |         |             |             |          |         |
|--------------|-----------------|----------|----------|---------|-------------|-------------|----------|---------|
|              |                 | -0.74808 | 0.77279  | 0.77279 | 0.86895855  |             |          |         |
| NA           | ENSG00000254924 | -0.74832 | 0.77287  | 0.77287 | -0.74832    | 0.77287     | -0.74832 | 0.77287 |
|              |                 | -0.74832 | 0.77287  | 0.77287 | 0.869008401 |             |          |         |
| LINC01228    | ENSG00000261082 | -0.74834 | 0.77287  | 0.77287 | -1.8945     | 0.97092     | -0.74834 |         |
|              |                 | 0.77287  | -0.74834 | 0.77287 | 0.77287     | 0.869008401 |          |         |
| TG           | ENSG00000042832 | -0.74841 | 0.77289  | 0.77289 | -1.1999     | 0.88492     | -1.1713  | 0.87926 |
|              |                 | -1.1951  | 0.88398  | 0.77289 | 0.869010838 |             |          |         |
| SEPTIN3      | ENSG00000100167 | -0.74862 | 0.77296  | 0.77296 | -1.0764     | 0.85912     | -1.0989  |         |
|              |                 | 0.86409  | -1.4864  | 0.93141 | 0.77296     | 0.869040632 |          |         |
| NA           | ENSG00000230785 | -0.74864 | 0.77296  | 0.77296 | -0.74864    | 0.77296     | -0.74864 | 0.77296 |
|              |                 | -0.74864 | 0.77296  | 0.77296 | 0.869040632 |             |          |         |
| SMG7-AS1     | ENSG00000232860 | -0.91473 | 0.81983  | 0.81983 | -0.91473    | 0.81983     | -0.74866 |         |
|              |                 | 0.77297  | -0.91473 | 0.81983 | 0.77297     | 0.869040632 |          |         |
| CDC37        | ENSG00000105401 | -0.83317 | 0.79763  | 0.79763 | -0.74885    | 0.77303     | -0.74885 | 0.77303 |
|              |                 | -0.74885 | 0.77303  | 0.77303 | 0.86905918  |             |          |         |
| CPN2         | ENSG00000178772 | -0.9596  | 0.83137  | 0.83137 | -1.3384     | 0.90961     | -1.0432  | 0.85157 |
|              |                 | -0.74888 | 0.77303  | 0.77303 | 0.86905918  |             |          |         |
| FDCSP        | ENSG00000181617 | -0.74888 | 0.77304  | 0.77304 | -0.74888    | 0.77304     | -0.74888 | 0.77304 |
|              |                 | -0.74888 | 0.77304  | 0.77304 | 0.86905918  |             |          |         |
| OR10H2       | ENSG00000171942 | -0.74923 | 0.77314  | 0.77314 | -0.74923    | 0.77314     | -1.1779  |         |
|              |                 | 0.88058  | -0.74923 | 0.77314 | 0.77314     | 0.869107508 |          |         |
| SLC25A21-AS1 | ENSG00000258708 | -0.74922 | 0.77314  | 0.77314 | -1.843      | 0.96734     | -1.843   |         |
|              |                 | 0.96734  | -1.843   | 0.96734 | 0.77314     | 0.869107508 |          |         |
| NA           | ENSG00000248755 | -0.9239  | 0.82223  | 0.82223 | -0.74937    | 0.77318     | -0.74937 | 0.77318 |
|              |                 | -0.74937 | 0.77318  | 0.77318 | 0.869107508 |             |          |         |
| LINC02624    | ENSG00000229775 | -0.74938 | 0.77319  | 0.77319 | -1.1316     | 0.87111     | -1.1316  |         |
|              |                 | 0.87111  | -1.0704  | 0.85777 | 0.77319     | 0.869107508 |          |         |
| NA           | ENSG00000275186 | -0.74938 | 0.77319  | 0.77319 | -0.74938    | 0.77319     | -0.74938 | 0.77319 |
|              |                 | -0.74938 | 0.77319  | 0.77319 | 0.869107508 |             |          |         |
| NA           | ENSG00000278901 | -0.74939 | 0.77319  | 0.77319 | -0.74939    | 0.77319     | -0.74939 | 0.77319 |
|              |                 | -0.74939 | 0.77319  | 0.77319 | 0.869107508 |             |          |         |
| NA           | ENSG00000280199 | -0.74946 | 0.77321  | 0.77321 | -1.0232     | 0.8469      | -0.74946 | 0.77321 |
|              |                 | -0.98289 | 0.83717  | 0.77321 | 0.869109942 |             |          |         |
| NA           | ENSG00000262119 | -1.0771  | 0.85929  | 0.85929 | -0.74962    | 0.77326     | -0.74962 | 0.77326 |
|              |                 | -0.74962 | 0.77326  | 0.77326 | 0.869130913 |             |          |         |
| NA           | ENSG00000265940 | -0.74969 | 0.77328  | 0.77328 | -0.74969    | 0.77328     | -1.9007  | 0.97133 |
|              |                 | -0.85674 | 0.80421  | 0.77328 | 0.869130913 |             |          |         |
| VPS41        | ENSG00000006715 | -0.86321 | 0.80599  | 0.80599 | -0.78051    | 0.78245     | -0.94482 | 0.82763 |
|              |                 | -0.74973 | 0.77329  | 0.77329 | 0.869130913 |             |          |         |
| STIM1        | ENSG00000167323 | -0.74977 | 0.7733   | 0.7733  | -1.223      | 0.88933     | -1.1169  | 0.86798 |
|              |                 | -1.0013  | 0.84166  | 0.7733  | 0.869130913 |             |          |         |
| ZNF733P      | ENSG00000185037 | -1.2319  | 0.89101  | 0.89101 | -1.2319     | 0.89101     | -0.74991 |         |
|              |                 | 0.77335  | -1.1269  | 0.87012 | 0.77335     | 0.869158255 |          |         |
| LINC00380    | ENSG00000234625 | -0.74995 | 0.77336  | 0.77336 | -1.0871     | 0.8615      | -0.74995 |         |
|              |                 | 0.77336  | -0.74995 | 0.77336 | 0.77336     | 0.869158255 |          |         |
| TRAJ33       | ENSG00000211856 | -0.7501  | 0.7734   | 0.7734  | -0.7501     | 0.7734      | -0.7501  |         |
|              |                 | 0.7734   | -0.7501  | 0.7734  | 0.7734      | 0.869170413 |          |         |
| EGFR         | ENSG00000146648 | -0.83105 | 0.79703  | 0.79703 | -0.94328    | 0.82723     | -0.75023 | 0.77344 |
|              |                 | -0.89068 | 0.81345  | 0.77344 | 0.869170413 |             |          |         |
| NA           | ENSG00000251487 | -0.75026 | 0.77345  | 0.77345 | -0.75026    | 0.77345     | -0.75026 | 0.77345 |
|              |                 | -0.75026 | 0.77345  | 0.77345 | 0.869170413 |             |          |         |
| NA           | ENSG00000274295 | -0.75027 | 0.77345  | 0.77345 | -0.75027    | 0.77345     | -0.75027 | 0.77345 |
|              |                 | -0.75027 | 0.77345  | 0.77345 | 0.869170413 |             |          |         |
| TRAFD1       | ENSG00000135148 | -0.8039  | 0.78927  | 0.78927 | -0.91046    | 0.81871     | -1.1984  |         |
|              |                 | 0.88462  | -0.75028 | 0.77346 | 0.77346     | 0.869170413 |          |         |
| SNORD13P3    | ENSG00000239128 | -0.75053 | 0.77353  | 0.77353 | -1.1735     | 0.8797      | -0.75053 |         |
|              |                 | 0.77353  | -0.75053 | 0.77353 | 0.77353     | 0.869208986 |          |         |
| NA           | ENSG00000264058 | -0.75053 | 0.77353  | 0.77353 | -0.75053    | 0.77353     | -0.75053 | 0.77353 |
|              |                 | -0.75053 | 0.77353  | 0.77353 | 0.869208986 |             |          |         |
| ZKSCAN2-DT   | ENSG00000274925 | -0.75076 | 0.7736   | 0.7736  | -0.75076    | 0.7736      | -0.75076 |         |
|              |                 | 0.7736   | -0.75076 | 0.7736  | 0.7736      | 0.869258792 |          |         |
| APCS         | ENSG00000132703 | -0.7508  | 0.77361  | 0.77361 | -0.7508     | 0.77361     | -0.7508  | 0.77361 |

|           |                 |          |             |             |             |          |         |  |
|-----------|-----------------|----------|-------------|-------------|-------------|----------|---------|--|
|           | -0.7508         | 0.77361  | 0.77361     | 0.869258792 |             |          |         |  |
| MSS51     | ENSG00000166343 | -0.75118 | 0.77373     | -1.3103     | 0.90495     | -1.3103  | 0.90495 |  |
|           | -2.117          | 0.98287  | 0.77373     | 0.869373583 |             |          |         |  |
| BNIP3P15  | ENSG00000270716 | -0.75129 | 0.77376     | -0.75129    | 0.77376     | -0.75129 | 0.77376 |  |
|           | 0.77376         | -0.75129 | 0.77376     | 0.869387245 |             |          |         |  |
| MTND4P4   | ENSG00000225295 | -0.84071 | 0.79974     | -0.84071    | 0.79974     | -0.84071 | 0.79974 |  |
|           | 0.77378         | -1.206   | 0.88609     | 0.77378     | 0.869389671 |          |         |  |
| LINC02197 | ENSG00000250387 | -0.75145 | 0.77381     | -0.75145    | 0.77381     | -0.75145 | 0.77381 |  |
|           | 0.77381         | -0.75145 | 0.77381     | 0.869394522 |             |          |         |  |
| LEP       | ENSG00000174697 | -0.75149 | 0.77382     | -0.90273    | 0.81667     | -1.4221  | 0.9225  |  |
|           | -0.94688        | 0.82815  | 0.77382     | 0.869394522 |             |          |         |  |
| ZFP36     | ENSG00000128016 | -0.75155 | 0.77384     | -0.75155    | 0.77384     | -0.75155 | 0.77384 |  |
|           | -0.75155        | 0.77384  | 0.77384     | 0.869396947 |             |          |         |  |
| RN7SKP248 | ENSG00000252087 | -1.0828  | 0.86054     | -0.75173    | 0.77389     | -0.75173 | 0.77389 |  |
|           | 0.77389         | -0.75173 | 0.77389     | 0.869413033 |             |          |         |  |
| NA        | ENSG00000261815 | -0.75173 | 0.77389     | -0.75173    | 0.77389     | -0.75173 | 0.77389 |  |
|           | -0.75173        | 0.77389  | 0.77389     | 0.869413033 |             |          |         |  |
| RNA5SP67  | ENSG00000252231 | -0.75191 | 0.77395     | -0.75191    | 0.77395     | -0.75191 | 0.77395 |  |
|           | 0.77395         | -0.75191 | 0.77395     | 0.869460394 |             |          |         |  |
| MTND2P4   | ENSG00000230252 | -0.75208 | 0.774       | -0.75208    | 0.774       | -0.75208 | 0.774   |  |
|           | 0.774           | 0.774    | 0.869496519 |             |             |          |         |  |
| NA        | ENSG00000272263 | -0.7522  | 0.77404     | -0.7522     | 0.77404     | -0.7522  | 0.77404 |  |
|           | -0.7522         | 0.77404  | 0.77404     | 0.8694974   |             |          |         |  |
| SUSD2     | ENSG00000099994 | -0.75228 | 0.77406     | -0.75228    | 0.77406     | -0.75228 | 0.77406 |  |
|           | -0.86104        | 0.80539  | 0.77406     | 0.8694974   |             |          |         |  |
| CAGE1     | ENSG00000164304 | -0.75233 | 0.77407     | -1.5074     | 0.93414     | -0.75233 | 0.77407 |  |
|           | -1.6456         | 0.95008  | 0.77407     | 0.8694974   |             |          |         |  |
| MICOS10P4 | ENSG00000248117 | -0.75235 | 0.77408     | -0.75235    | 0.77408     | -0.75235 | 0.77408 |  |
|           | 0.77408         | -0.75235 | 0.77408     | 0.8694974   |             |          |         |  |
| NCOA4P4   | ENSG00000249215 | -0.75238 | 0.77409     | -0.75238    | 0.77409     | -0.75238 | 0.77409 |  |
|           | 0.77409         | -0.75238 | 0.77409     | 0.8694974   |             |          |         |  |
| ELOA-AS1  | ENSG00000236810 | -0.95345 | 0.82982     | -0.75254    | 0.77414     | -0.87492 | 0.77414 |  |
|           | 0.80919         | -0.87492 | 0.80919     | 0.77414     | 0.869533519 |          |         |  |
| SCN5A     | ENSG00000183873 | -0.75283 | 0.77422     | -2.0342     | 0.97903     | -0.94504 | 0.82768 |  |
|           | -1.1673         | 0.87845  | 0.77422     | 0.869603333 |             |          |         |  |
| MTND1P26  | ENSG00000234576 | -0.75292 | 0.77425     | -0.75292    | 0.77425     | -0.75292 | 0.77425 |  |
|           | 0.77425         | -0.75292 | 0.77425     | 0.869616985 |             |          |         |  |
| HTR1F     | ENSG00000179097 | -1.0678  | 0.85718     | -0.75307    | 0.7743      | -0.90339 | 0.81684 |  |
|           | -1.0925         | 0.86269  | 0.7743      | 0.869631501 |             |          |         |  |
| RNA5SP132 | ENSG00000201595 | -0.75308 | 0.7743      | -0.75308    | 0.7743      | -0.75308 | 0.7743  |  |
|           | 0.7743          | -0.75308 | 0.7743      | 0.869631501 |             |          |         |  |
| NA        | ENSG00000243981 | -0.75314 | 0.77432     | -0.75314    | 0.77432     | -0.75314 | 0.77432 |  |
|           | -0.75314        | 0.77432  | 0.77432     | 0.869631501 |             |          |         |  |
| GEN1      | ENSG00000178295 | -0.75328 | 0.77436     | -1.6972     | 0.95517     | -1.6972  | 0.95517 |  |
|           | -1.6972         | 0.95517  | 0.77436     | 0.869631501 |             |          |         |  |
| NA        | ENSG00000268466 | -0.75327 | 0.77436     | -0.75327    | 0.77436     | -0.75327 | 0.77436 |  |
|           | -0.75327        | 0.77436  | 0.77436     | 0.869631501 |             |          |         |  |
| SNORD105B | ENSG00000238531 | -0.75331 | 0.77437     | -0.75331    | 0.77437     | -0.75331 | 0.77437 |  |
|           | 0.77437         | -0.75331 | 0.77437     | 0.869631501 |             |          |         |  |
| NA        | ENSG00000267927 | -1.0798  | 0.85989     | -0.75346    | 0.77441     | -0.75346 | 0.77441 |  |
|           | -0.75346        | 0.77441  | 0.77441     | 0.86965638  |             |          |         |  |
| NA        | ENSG00000264982 | -0.94195 | 0.82689     | -0.75353    | 0.77444     | -1.1981  | 0.88455 |  |
|           | -1.1981         | 0.88455  | 0.77444     | 0.869670028 |             |          |         |  |
| RN7SL38P  | ENSG00000240481 | -0.90466 | 0.81718     | -0.93925    | 0.8262      | -0.90466 | 0.81718 |  |
|           | 0.81718         | -0.75363 | 0.77447     | 0.77447     | 0.869674864 |          |         |  |
| NA        | ENSG00000279440 | -0.75369 | 0.77448     | -0.75369    | 0.77448     | -0.75369 | 0.77448 |  |
|           | -0.75369        | 0.77448  | 0.77448     | 0.869674864 |             |          |         |  |
| NA        | ENSG00000278995 | -0.75386 | 0.77453     | -0.75386    | 0.77453     | -0.75386 | 0.77453 |  |
|           | -0.75386        | 0.77453  | 0.77453     | 0.869710969 |             |          |         |  |
| NA        | ENSG00000279700 | -0.75404 | 0.77459     | -0.87707    | 0.80978     | -1.2802  | 0.89976 |  |
|           | -1.2802         | 0.89976  | 0.77459     | 0.869729447 |             |          |         |  |
| FZD1      | ENSG00000157240 | -1.2352  | 0.89162     | -1.1965     | 0.88424     | -0.75408 | 0.7746  |  |



|           |                 |             |         |             |             |          |         |  |
|-----------|-----------------|-------------|---------|-------------|-------------|----------|---------|--|
|           | -0.75408        | 0.7746      | 0.7746  | 0.869729447 |             |          |         |  |
| RN7SL615P | ENSG00000263989 | -1.0793     | 0.85977 | -1.0793     | 0.85977     | -0.75407 |         |  |
|           | 0.7746          | -1.1828     | 0.88156 | 0.7746      | 0.869729447 |          |         |  |
| CYP4F8    | ENSG00000186526 | -0.75413    | 0.77462 | -0.93009    | 0.82384     | -0.80866 |         |  |
|           | 0.79065         | -0.80099    | 0.78843 | 0.77462     | 0.869731863 |          |         |  |
| NA        | ENSG00000233937 | -0.75427    | 0.77466 | -0.75427    | 0.77466     | -0.75427 | 0.77466 |  |
|           | -0.75427        | 0.77466     | 0.77466 | 0.869756735 |             |          |         |  |
| FAM225A   | ENSG00000231528 | -0.75438    | 0.77469 | -0.75438    | 0.77469     | -0.75438 |         |  |
|           | 0.77469         | -0.75438    | 0.77469 | 0.77469     | 0.869770378 |          |         |  |
| TCP10L    | ENSG00000242220 | -0.75443    | 0.77471 | -1.5561     | 0.94016     | -0.99128 |         |  |
|           | 0.83923         | -0.75443    | 0.77471 | 0.77471     | 0.869772793 |          |         |  |
| NA        | ENSG00000261691 | -0.7546     | 0.77476 | -0.7546     | 0.77476     | -0.7546  | 0.77476 |  |
|           | -0.7546         | 0.77476     | 0.77476 | 0.869808888 |             |          |         |  |
| RNF114    | ENSG00000124226 | -1.3474     | 0.91107 | -1.4503     | 0.92651     | -0.75468 |         |  |
|           | 0.77478         | -1.3774     | 0.91581 | 0.77478     | 0.869811303 |          |         |  |
| NA        | ENSG00000271963 | -0.75483    | 0.77482 | -0.75483    | 0.77482     | -0.75483 | 0.77482 |  |
|           | -0.75483        | 0.77482     | 0.77482 | 0.869836169 |             |          |         |  |
| RASAL1    | ENSG00000111344 | -1.1252     | 0.86975 | -1.1252     | 0.86975     | -1.2209  |         |  |
|           | 0.88894         | -0.75489    | 0.77484 | 0.77484     | 0.869838583 |          |         |  |
| OR5F1     | ENSG00000149133 | -0.75516    | 0.77492 | -1.2836     | 0.90036     | -1.2836  | 0.90036 |  |
|           | -1.2836         | 0.90036     | 0.77492 | 0.869897959 |             |          |         |  |
| CST9      | ENSG00000173335 | -0.75522    | 0.77494 | -0.75522    | 0.77494     | -1.3869  | 0.91726 |  |
|           | -1.383          | 0.91667     | 0.77494 | 0.869897959 |             |          |         |  |
| MIR4255   | ENSG00000264698 | -1.6513     | 0.95066 | -0.75529    | 0.77496     | -0.83419 |         |  |
|           | 0.79791         | -0.83419    | 0.79791 | 0.77496     | 0.869897959 |          |         |  |
| NA        | ENSG00000228403 | -0.75539    | 0.77499 | -0.75539    | 0.77499     | -0.75539 | 0.77499 |  |
|           | -0.75539        | 0.77499     | 0.77499 | 0.869897959 |             |          |         |  |
| SCARNA11  | ENSG00000251898 | -0.75539    | 0.77499 | -0.75539    | 0.77499     | -0.75539 |         |  |
|           | 0.77499         | -0.75539    | 0.77499 | 0.77499     | 0.869897959 |          |         |  |
| NA        | ENSG00000270402 | -0.75542    | 0.775   | -1.3596     | 0.91301     | -1.8014  | 0.96418 |  |
|           | -1.8014         | 0.96418     | 0.775   | 0.869897959 |             |          |         |  |
| NA        | ENSG00000267515 | -0.75551    | 0.77503 | -1.3218     | 0.90688     | -0.75551 | 0.77503 |  |
|           | -0.75551        | 0.77503     | 0.77503 | 0.869911595 |             |          |         |  |
| RNF25     | ENSG00000163481 | -0.75589    | 0.77514 | -0.75589    | 0.77514     | -0.75589 | 0.77514 |  |
|           | -0.75589        | 0.77514     | 0.77514 | 0.870011025 |             |          |         |  |
| MIR4308   | ENSG00000265432 | -1.1478     | 0.87447 | -1.1478     | 0.87447     | -0.756   |         |  |
|           | 0.77517         | -2.0163     | 0.97812 | 0.77517     | 0.870011025 |          |         |  |
| SRP72     | ENSG00000174780 | -1.0897     | 0.86209 | -0.75603    | 0.77518     | -0.84577 | 0.80116 |  |
|           | -0.84577        | 0.80116     | 0.77518 | 0.870011025 |             |          |         |  |
| LINC02155 | ENSG00000254120 | -0.75604    | 0.77519 | -0.75604    | 0.77519     | -0.75604 |         |  |
|           | 0.77519         | -0.75604    | 0.77519 | 0.77519     | 0.870011025 |          |         |  |
| NA        | ENSG00000256686 | -0.79758    | 0.78744 | -0.79758    | 0.78744     | -0.75652 | 0.77533 |  |
|           | -1.0613         | 0.85573     | 0.77533 | 0.870141698 |             |          |         |  |
| ACTR3B    | ENSG00000133627 | -0.7566     | 0.77535 | -1.2629     | 0.89669     | -1.3041  |         |  |
|           | 0.90391         | -1.01084374 | 0.77535 | 0.870141698 |             |          |         |  |
| MTND2P18  | ENSG00000234939 | -0.75661    | 0.77536 | -0.75661    | 0.77536     | -0.75661 |         |  |
|           | 0.77536         | -0.75661    | 0.77536 | 0.77536     | 0.870141698 |          |         |  |
| OR10J4    | ENSG00000249730 | -0.81509    | 0.79249 | -0.75695    | 0.77546     | -0.75695 |         |  |
|           | 0.77546         | -0.75695    | 0.77546 | 0.77546     | 0.870233881 |          |         |  |
| NA        | ENSG00000254719 | -0.75707    | 0.77549 | -0.75707    | 0.77549     | -0.91459 | 0.8198  |  |
|           | -0.9217         | 0.82166     | 0.77549 | 0.870247506 |             |          |         |  |
| NA        | ENSG00000261103 | -0.75719    | 0.77553 | -0.75719    | 0.77553     | -0.75719 | 0.77553 |  |
|           | -0.75719        | 0.77553     | 0.77553 | 0.870272352 |             |          |         |  |
| SERPINB13 | ENSG00000197641 | -0.75746    | 0.77561 | -0.86938    | 0.80768     | -0.86938 |         |  |
|           | 0.80768         | -0.86938    | 0.80768 | 0.77561     | 0.870342083 |          |         |  |
| NA        | ENSG00000254411 | -1.416      | 0.92161 | -0.81741    | 0.79315     | -0.7577  | 0.77568 |  |
|           | -0.8519         | 0.80286     | 0.77568 | 0.870400589 |             |          |         |  |
| PVRIG2P   | ENSG00000235333 | -0.75786    | 0.77573 | -0.75786    | 0.77573     | -0.75786 |         |  |
|           | 0.77573         | -0.75786    | 0.77573 | 0.77573     | 0.870421406 |          |         |  |
| RNU4-59P  | ENSG00000201317 | -0.75797    | 0.77576 | -0.75797    | 0.77576     | -0.75797 |         |  |
|           | 0.77576         | -0.75797    | 0.77576 | 0.77576     | 0.870421406 |          |         |  |
| OR4E1     | ENSG00000276240 | -0.75794    | 0.77576 | -0.75794    | 0.77576     | -0.75794 | 0.77576 |  |

|              |                 |          |          |         |             |             |          |         |
|--------------|-----------------|----------|----------|---------|-------------|-------------|----------|---------|
|              |                 | -0.75794 | 0.77576  | 0.77576 | 0.870421406 |             |          |         |
| RPS15AP18    | ENSG00000242979 | -0.75797 | 0.77577  | 0.77577 | -1.6635     | 0.95189     | -0.80619 |         |
|              |                 | 0.78993  | -0.96782 | 0.83343 | 0.77577     | 0.870421406 |          |         |
| UBL5P2       | ENSG00000266282 | -0.75813 | 0.77581  | 0.77581 | -0.75813    | 0.77581     | -0.75813 |         |
|              |                 | 0.77581  | -0.75813 | 0.77581 | 0.870444617 |             |          |         |
| MESTP3       | ENSG00000250927 | -0.75824 | 0.77585  | 0.77585 | -0.75824    | 0.77585     | -0.75824 |         |
|              |                 | 0.77585  | -0.75824 | 0.77585 | 0.870444617 |             |          |         |
| NA           | ENSG00000249451 | -0.75833 | 0.77587  | 0.77587 | -0.75833    | 0.77587     | -0.75833 | 0.77587 |
|              |                 | -0.75833 | 0.77587  | 0.77587 | 0.870444617 |             |          |         |
| NA           | ENSG00000275630 | -0.75833 | 0.77587  | 0.77587 | -1.5539     | 0.93989     | -1.2138  | 0.88759 |
|              |                 | -1.1173  | 0.86806  | 0.77587 | 0.870444617 |             |          |         |
| NA           | ENSG00000237498 | -1.4595  | 0.92779  | 0.77588 | -1.356      | 0.91245     | -0.76386 | 0.77753 |
|              |                 | -0.75834 | 0.77588  | 0.77588 | 0.870444617 |             |          |         |
| MTND4P6      | ENSG00000224042 | -0.75847 | 0.77591  | 0.77591 | -0.75847    | 0.77591     | -0.75847 |         |
|              |                 | 0.77591  | -1.3436  | 0.91047 | 0.77591     | 0.870458234 |          |         |
| NA           | ENSG00000251623 | -0.76801 | 0.77876  | 0.77876 | -1.0015     | 0.84171     | -1.2855  | 0.9007  |
|              |                 | -0.75859 | 0.77595  | 0.77595 | 0.870474247 |             |          |         |
| RNU6-508P    | ENSG00000200101 | -0.75862 | 0.77596  | 0.77596 | -0.75862    | 0.77596     | -0.75862 |         |
|              |                 | 0.77596  | -0.75862 | 0.77596 | 0.870474247 |             |          |         |
| XRCC6        | ENSG00000196419 | -1.0905  | 0.86225  | 0.86225 | -1.8424     | 0.96729     | -0.75878 | 0.77601 |
|              |                 | -0.86445 | 0.80633  | 0.77601 | 0.870510297 |             |          |         |
| OAT          | ENSG00000065154 | -0.86822 | 0.80736  | 0.80736 | -1.3351     | 0.90908     | -1.4584  | 0.92764 |
|              |                 | -0.75913 | 0.77611  | 0.77611 | 0.870556684 |             |          |         |
| KIF1B        | ENSG00000054523 | -0.7592  | 0.77613  | 0.77613 | -0.84359    | 0.80055     | -1.1404  | 0.87294 |
|              |                 | -0.81312 | 0.79193  | 0.77613 | 0.870556684 |             |          |         |
| NA           | ENSG00000276166 | -0.75921 | 0.77614  | 0.77614 | -0.75921    | 0.77614     | -0.75921 | 0.77614 |
|              |                 | -0.75921 | 0.77614  | 0.77614 | 0.870556684 |             |          |         |
| NA           | ENSG00000279502 | -1.1679  | 0.87859  | 0.87859 | -1.3873     | 0.91732     | -0.75928 | 0.77616 |
|              |                 | -1.0421  | 0.85131  | 0.77616 | 0.870556684 |             |          |         |
| TNKS1BP1     | ENSG00000149115 | -0.75933 | 0.77617  | 0.77617 | -1.16       | 0.87698     | -1.3474  | 0.91108 |
|              |                 | -1.3277  | 0.90785  | 0.77617 | 0.870556684 |             |          |         |
| C14orf119    | ENSG00000179933 | -0.7594  | 0.77619  | 0.77619 | -0.7594     | 0.77619     | -0.7594  |         |
|              |                 | 0.77619  | -0.7594  | 0.77619 | 0.870556684 |             |          |         |
| GLMN         | ENSG00000174842 | -1.2207  | 0.8889   | 0.8889  | -0.83631    | 0.79851     | -0.75947 | 0.77621 |
|              |                 | -0.76797 | 0.77875  | 0.77621 | 0.870556684 |             |          |         |
| NPHP3-ACAD11 | ENSG00000274810 | -1.2175  | 0.88829  | 0.88829 | -0.75949    | 0.77622     | -1.5274  |         |
|              |                 | 0.93667  | -1.5274  | 0.93667 | 0.77622     | 0.870556684 |          |         |
| TUBB         | ENSG00000196230 | -1.2624  | 0.8966   | 0.8966  | -1.1617     | 0.87732     | -0.75952 | 0.77623 |
|              |                 | -0.75952 | 0.77623  | 0.77623 | 0.870556684 |             |          |         |
| FOXB2        | ENSG00000204612 | -0.75952 | 0.77623  | 0.77623 | -0.75952    | 0.77623     | -0.75952 | 0.77623 |
|              |                 | -0.75952 | 0.77623  | 0.77623 | 0.870556684 |             |          |         |
| NA           | ENSG00000263924 | -0.75983 | 0.77632  | 0.77632 | -0.75983    | 0.77632     | -0.75983 | 0.77632 |
|              |                 | -0.75983 | 0.77632  | 0.77632 | 0.870617546 |             |          |         |
| NA           | ENSG00000275765 | -0.75983 | 0.77632  | 0.77632 | -0.75983    | 0.77632     | -0.75983 | 0.77632 |
|              |                 | -0.75983 | 0.77632  | 0.77632 | 0.870617546 |             |          |         |
| TPT1P12      | ENSG00000256817 | -0.76019 | 0.77643  | 0.77643 | -0.76019    | 0.77643     | -0.76019 |         |
|              |                 | 0.77643  | -0.76019 | 0.77643 | 0.77643     | 0.870720869 |          |         |
| NA           | ENSG00000273360 | -1.1566  | 0.87628  | 0.87628 | -0.76043    | 0.7765      | -1.1436  | 0.8736  |
|              |                 | -0.97297 | 0.83472  | 0.7765  | 0.87077933  |             |          |         |
| NA           | ENSG00000264187 | -0.76069 | 0.77658  | 0.77658 | -0.76069    | 0.77658     | -0.76069 | 0.77658 |
|              |                 | -0.76069 | 0.77658  | 0.77658 | 0.870849002 |             |          |         |
| LINC00276    | ENSG00000230448 | -0.76082 | 0.77662  | 0.77662 | -0.81353    | 0.79204     | -0.83353 |         |
|              |                 | 0.79773  | -1.7484  | 0.9598  | 0.77662     | 0.870873817 |          |         |
| CATSPERG     | ENSG00000099338 | -1.3015  | 0.90346  | 0.90346 | -1.023      | 0.84684     | -0.76107 |         |
|              |                 | 0.77669  | -0.76107 | 0.77669 | 0.77669     | 0.870915332 |          |         |
| NA           | ENSG00000267033 | -0.76128 | 0.77675  | 0.77675 | -0.76128    | 0.77675     | -0.76128 | 0.77675 |
|              |                 | -0.76128 | 0.77675  | 0.77675 | 0.870915332 |             |          |         |
| NA           | ENSG00000236180 | -0.76131 | 0.77676  | 0.77676 | -0.76131    | 0.77676     | -0.76131 | 0.77676 |
|              |                 | -0.76131 | 0.77676  | 0.77676 | 0.870915332 |             |          |         |
| SULF2        | ENSG00000196562 | -0.94009 | 0.82642  | 0.82642 | -0.76135    | 0.77678     | -1.2025  | 0.88541 |
|              |                 | -1.3304  | 0.90831  | 0.77678 | 0.870915332 |             |          |         |
| NA           | ENSG00000234286 | -1.3604  | 0.91315  | 0.91315 | -0.76139    | 0.77679     | -1.3604  | 0.91315 |

|           |                 |          |             |             |             |          |         |
|-----------|-----------------|----------|-------------|-------------|-------------|----------|---------|
|           | -1.3604         | 0.91315  | 0.77679     | 0.870915332 |             |          |         |
| NA        | ENSG00000261222 | -0.76138 | 0.77679     | -0.76138    | 0.77679     | -0.76138 | 0.77679 |
|           | -0.76138        | 0.77679  | 0.77679     | 0.870915332 |             |          |         |
| SENP8     | ENSG00000166192 | -0.94216 | 0.82695     | -1.4595     | 0.92778     | -0.76144 | 0.7768  |
|           | -1.4595         | 0.92778  | 0.7768      | 0.870915332 |             |          |         |
| NA        | ENSG00000262410 | -0.76144 | 0.7768      | -0.76144    | 0.7768      | -0.76144 | 0.7768  |
|           | -0.76144        | 0.7768   | 0.7768      | 0.870915332 |             |          |         |
| PDE2A-AS2 | ENSG00000256633 | -0.76222 | 0.77704     | -0.76222    | 0.77704     | -0.76222 |         |
|           | 0.77704         | -0.76222 | 0.77704     | 0.77704     | 0.871151464 |          |         |
| NA        | ENSG00000265647 | -0.76226 | 0.77705     | -0.76226    | 0.77705     | -0.76226 | 0.77705 |
|           | -0.76226        | 0.77705  | 0.77705     | 0.871151464 |             |          |         |
| HBP1      | ENSG00000105856 | -0.97263 | 0.83463     | -1.1567     | 0.87631     | -0.76241 | 0.77709 |
|           | -1.1447         | 0.87383  | 0.77709     | 0.871151464 |             |          |         |
| LINC01762 | ENSG00000233154 | -0.76241 | 0.77709     | -1.1832     | 0.88164     | -1.4639  |         |
|           | 0.92839         | -1.6924  | 0.95472     | 0.77709     | 0.871151464 |          |         |
| NA        | ENSG00000268931 | -0.76244 | 0.7771      | -0.76244    | 0.7771      | -0.76244 | 0.7771  |
|           | -0.76244        | 0.7771   | 0.7771      | 0.871151464 |             |          |         |
| RPL15P18  | ENSG00000228501 | -0.76255 | 0.77713     | -0.76255    | 0.77713     | -0.76255 |         |
|           | 0.77713         | -0.76255 | 0.77713     | 0.77713     | 0.871165054 |          |         |
| OR8I2     | ENSG00000172154 | -0.96727 | 0.83329     | -0.77722    | 0.78148     | -0.94431 | 0.82749 |
|           | -0.76268        | 0.77717  | 0.77717     | 0.871181022 |             |          |         |
| TRAJ34    | ENSG00000211855 | -0.76269 | 0.77718     | -0.76269    | 0.77718     | -0.76269 |         |
|           | 0.77718         | -0.76269 | 0.77718     | 0.77718     | 0.871181022 |          |         |
| OR4K15    | ENSG00000169488 | -1.468   | 0.92894     | -1.5257     | 0.93646     | -0.76285 |         |
|           | 0.77722         | -0.91608 | 0.82019     | 0.77722     | 0.871188159 |          |         |
| KRTAP19-3 | ENSG00000244025 | -0.76288 | 0.77723     | -0.76288    | 0.77723     | -0.76288 |         |
|           | 0.77723         | -0.76288 | 0.77723     | 0.77723     | 0.871188159 |          |         |
| NA        | ENSG00000253871 | -1.8313  | 0.96647     | -0.76291    | 0.77724     | -0.8689  | 0.80755 |
|           | -1.3021         | 0.90356  | 0.77724     | 0.871188159 |             |          |         |
| NA        | ENSG00000276170 | -0.76314 | 0.77731     | -0.76314    | 0.77731     | -0.76314 | 0.77731 |
|           | -0.76314        | 0.77731  | 0.77731     | 0.87124658  |             |          |         |
| NA        | ENSG00000275138 | -0.76324 | 0.77734     | -0.76324    | 0.77734     | -0.76324 | 0.77734 |
|           | -0.76324        | 0.77734  | 0.77734     | 0.871251334 |             |          |         |
| NA        | ENSG00000235449 | -0.76327 | 0.77735     | -0.76327    | 0.77735     | -0.76327 | 0.77735 |
|           | -0.76327        | 0.77735  | 0.77735     | 0.871251334 |             |          |         |
| IGFL2     | ENSG00000204866 | -1.7616  | 0.96093     | -0.76342    | 0.77739     | -1.1686  | 0.87873 |
|           | -1.7616         | 0.96093  | 0.77739     | 0.871276126 |             |          |         |
| SIGLEC16  | ENSG00000161643 | -0.76384 | 0.77752     | -0.76384    | 0.77752     | -0.76384 |         |
|           | 0.77752         | -0.76384 | 0.77752     | 0.77752     | 0.871401785 |          |         |
| NA        | ENSG00000248687 | -0.76401 | 0.77757     | -0.76401    | 0.77757     | -0.76401 | 0.77757 |
|           | -0.76401        | 0.77757  | 0.77757     | 0.87143778  |             |          |         |
| NA        | ENSG00000260621 | -0.76415 | 0.77761     | -0.76415    | 0.77761     | -0.76415 | 0.77761 |
|           | -0.76415        | 0.77761  | 0.77761     | 0.871462566 |             |          |         |
| RNU7-40P  | ENSG00000252206 | -0.7654  | 0.77798     | -0.7654     | 0.77798     | -0.7654  |         |
|           | 0.77798         | -0.7654  | 0.77798     | 0.77798     | 0.871857172 |          |         |
| KPNA2P2   | ENSG00000228928 | -0.76545 | 0.778       | -0.76545    | 0.778       | -0.76545 | 0.778   |
|           | 0.778           | 0.778    | 0.871859535 |             |             |          |         |
| ZG16B     | ENSG00000162078 | -0.76558 | 0.77804     | -0.76558    | 0.77804     | -0.76558 | 0.77804 |
|           | -0.76558        | 0.77804  | 0.77804     | 0.871862504 |             |          |         |
| NA        | ENSG00000230233 | -0.76568 | 0.77807     | -0.76568    | 0.77807     | -0.76568 | 0.77807 |
|           | -0.76568        | 0.77807  | 0.77807     | 0.871862504 |             |          |         |
| LRFN4     | ENSG00000173621 | -0.76577 | 0.77809     | -0.76577    | 0.77809     | -0.76577 | 0.77809 |
|           | -0.76577        | 0.77809  | 0.77809     | 0.871862504 |             |          |         |
| PCDHA6    | ENSG00000081842 | -0.76579 | 0.7781      | -0.88315    | 0.81142     | -1.0698  |         |
|           | 0.85764         | -0.86573 | 0.80668     | 0.7781      | 0.871862504 |          |         |
| MIR135A2  | ENSG00000207586 | -0.76584 | 0.77811     | -0.76584    | 0.77811     | -0.76584 |         |
|           | 0.77811         | -0.76584 | 0.77811     | 0.77811     | 0.871862504 |          |         |
| OR51B3P   | ENSG00000223735 | -0.76584 | 0.77811     | -0.76584    | 0.77811     | -1.4486  |         |
|           | 0.92628         | -0.76584 | 0.77811     | 0.77811     | 0.871862504 |          |         |
| NGF-AS1   | ENSG00000228035 | -1.3969  | 0.91878     | -0.77493    | 0.78081     | -0.76596 |         |
|           | 0.77815         | -0.76596 | 0.77815     | 0.77815     | 0.871878433 |          |         |
| RN7SL602P | ENSG00000264352 | -0.76601 | 0.77816     | -0.76601    | 0.77816     | -0.76601 |         |

|             |                 |          |          |             |             |             |         |
|-------------|-----------------|----------|----------|-------------|-------------|-------------|---------|
|             | 0.77816         | -0.76601 | 0.77816  | 0.77816     | 0.871878433 |             |         |
| NA          | ENSG00000202027 | -0.76621 | 0.77823  | -0.76621    | 0.77823     | -0.76621    | 0.77823 |
|             |                 | -0.76621 | 0.77823  | 0.77823     | 0.871936815 |             |         |
| NCBP2AS2    | ENSG00000270170 | -1.8142  | 0.96518  | -1.8112     | 0.96494     | -0.76641    |         |
|             |                 | 0.77828  | -0.76641 | 0.77828     | 0.871964538 |             |         |
| ENTHD1      | ENSG00000176177 | -0.76649 | 0.77831  | -1.5188     | 0.93559     | -1.5188     |         |
|             |                 | 0.93559  | -1.5188  | 0.93559     | 0.871964538 |             |         |
| TUBB2A      | ENSG00000137267 | -0.76659 | 0.77834  | -0.76659    | 0.77834     | -0.76659    |         |
|             |                 | 0.77834  | -0.76659 | 0.77834     | 0.871964538 |             |         |
| VN1R74P     | ENSG00000273732 | -1.4783  | 0.93033  | -1.4783     | 0.93033     | -0.76669    |         |
|             |                 | 0.77837  | -1.7984  | 0.96394     | 0.77837     | 0.871964538 |         |
| CACNA2D3    | ENSG00000157445 | -1.9926  | 0.97685  | -1.6072     | 0.94599     | -1.8811     |         |
|             |                 | 0.97002  | -0.76673 | 0.77838     | 0.77838     | 0.871964538 |         |
| NA          | ENSG00000176593 | -0.76675 | 0.77838  | -0.76675    | 0.77838     | -0.76675    | 0.77838 |
|             |                 | -0.76675 | 0.77838  | 0.77838     | 0.871964538 |             |         |
| NA          | ENSG00000201565 | -0.76672 | 0.77838  | -0.76672    | 0.77838     | -0.76672    | 0.77838 |
|             |                 | -0.76672 | 0.77838  | 0.77838     | 0.871964538 |             |         |
| LINC01824   | ENSG00000226488 | -0.76699 | 0.77845  | -0.76699    | 0.77845     | -0.76699    |         |
|             |                 | 0.77845  | -1.8379  | 0.96696     | 0.77845     | 0.872011705 |         |
| RPL11P4     | ENSG00000184111 | -0.76706 | 0.77848  | -0.76706    | 0.77848     | -0.76706    |         |
|             |                 | 0.77848  | -0.76706 | 0.77848     | 0.77848     | 0.872011705 |         |
| TAX1BP3     | ENSG00000213977 | -0.76708 | 0.77848  | -0.76708    | 0.77848     | -0.76708    |         |
|             |                 | 0.77848  | -0.76708 | 0.77848     | 0.77848     | 0.872011705 |         |
| NA          | ENSG00000224215 | -1.0377  | 0.8503   | -1.5258     | 0.93646     | -0.76719    | 0.77852 |
|             |                 | -0.76719 | 0.77852  | 0.77852     | 0.872011705 |             |         |
| NA          | ENSG00000255357 | -0.76732 | 0.77855  | -0.76732    | 0.77855     | -0.76732    | 0.77855 |
|             |                 | -0.76732 | 0.77855  | 0.77855     | 0.872011705 |             |         |
| GPR37       | ENSG00000170775 | -0.76733 | 0.77856  | -1.0817     | 0.86032     | -0.92387    | 0.82222 |
|             |                 | -0.87347 | 0.8088   | 0.77856     | 0.872011705 |             |         |
| NA          | ENSG00000267650 | -0.76741 | 0.77858  | -0.76741    | 0.77858     | -0.76741    | 0.77858 |
|             |                 | -0.76741 | 0.77858  | 0.77858     | 0.872011705 |             |         |
| NARS1P2     | ENSG00000253789 | -1.0127  | 0.84439  | -2.08       | 0.98124     | -0.76753    | 0.77862 |
|             |                 | -0.78471 | 0.78369  | 0.77862     | 0.872011705 |             |         |
| NA          | ENSG00000257813 | -0.76755 | 0.77862  | -0.76755    | 0.77862     | -0.76755    | 0.77862 |
|             |                 | -0.76755 | 0.77862  | 0.77862     | 0.872011705 |             |         |
| ARMC10      | ENSG00000170632 | -0.97732 | 0.8358   | -1.3708     | 0.91479     | -0.76759    |         |
|             |                 | 0.77863  | -1.5287  | 0.93683     | 0.77863     | 0.872011705 |         |
| LINC02654   | ENSG00000226140 | -0.76763 | 0.77865  | -0.76763    | 0.77865     | -0.84347    |         |
|             |                 | 0.80052  | -0.76763 | 0.77865     | 0.77865     | 0.872011705 |         |
| SNORD115-37 | ENSG00000200638 | -0.76788 | 0.77872  | -0.76788    | 0.77872     | -0.76788    |         |
|             |                 | 0.77872  | -0.76788 | 0.77872     | 0.77872     | 0.872011705 |         |
| PLEKHA2     | ENSG00000169499 | -1.2611  | 0.89636  | -1.094      | 0.86302     | -0.76791    |         |
|             |                 | 0.77873  | -1.0499  | 0.85311     | 0.77873     | 0.872011705 |         |
| ZBTB6       | ENSG00000186130 | -0.7679  | 0.77873  | -1.0714     | 0.858       | -1.0714     | 0.858   |
|             |                 | 0.858    | 0.77873  | 0.872011705 |             |             |         |
| NA          | ENSG00000256682 | -0.76793 | 0.77873  | -1.1268     | 0.87009     | -0.76793    | 0.77873 |
|             |                 | -0.76793 | 0.77873  | 0.77873     | 0.872011705 |             |         |
| IGHV5-51    | ENSG00000211966 | -0.76797 | 0.77875  | -0.76797    | 0.77875     | -0.76797    |         |
|             |                 | 0.77875  | -0.76797 | 0.77875     | 0.77875     | 0.872011705 |         |
| ZFPM2-AS1   | ENSG00000251003 | -1.3896  | 0.91767  | -1.4518     | 0.92671     | -0.76799    |         |
|             |                 | 0.77875  | -1.1718  | 0.87935     | 0.77875     | 0.872011705 |         |
| TRIM52      | ENSG00000183718 | -0.76808 | 0.77878  | -0.76808    | 0.77878     | -0.76808    |         |
|             |                 | 0.77878  | -0.76808 | 0.77878     | 0.77878     | 0.872011705 |         |
| RNU6-873P   | ENSG00000200703 | -0.76807 | 0.77878  | -0.79792    | 0.78754     | -0.76807    |         |
|             |                 | 0.77878  | -0.76807 | 0.77878     | 0.77878     | 0.872011705 |         |
| SUMO2P1     | ENSG00000235238 | -0.76807 | 0.77878  | -0.76807    | 0.77878     | -0.76807    |         |
|             |                 | 0.77878  | -0.76807 | 0.77878     | 0.77878     | 0.872011705 |         |
| RNY4P13     | ENSG00000207011 | -0.76828 | 0.77884  | -0.76828    | 0.77884     | -0.76828    |         |
|             |                 | 0.77884  | -0.76828 | 0.77884     | 0.77884     | 0.87205885  |         |
| NA          | ENSG00000274227 | -0.76839 | 0.77887  | -0.76839    | 0.77887     | -0.76839    | 0.77887 |
|             |                 | -0.76839 | 0.77887  | 0.77887     | 0.872072402 |             |         |
| OR2T6       | ENSG00000198104 | -0.76848 | 0.7789   | -0.88774    | 0.81266     | -0.98981    | 0.83887 |

|           |                 |          |             |             |             |          |         |       |
|-----------|-----------------|----------|-------------|-------------|-------------|----------|---------|-------|
|           | -0.94008        | 0.82641  | 0.7789      | 0.872085955 |             |          |         |       |
| TRPM6     | ENSG00000119121 | -0.76878 | 0.77899     | -0.99332    | 0.83972     | -1.2755  | 0.89894 |       |
|           | -1.623          | 0.9477   | 0.77899     | 0.872166683 |             |          |         |       |
| NA        | ENSG00000271894 | -1.2243  | 0.88958     | -0.76898    | 0.77905     | -0.77523 | 0.7809  |       |
|           | -1.1864         | 0.88228  | 0.77905     | 0.87221382  |             |          |         |       |
| NOP56     | ENSG00000101361 | -0.76919 | 0.77911     | -0.76919    | 0.77911     | -0.76919 | 0.77911 |       |
|           | -0.85649        | 0.80414  | 0.77911     | 0.872240915 |             |          |         |       |
| NA        | ENSG00000186842 | -1.6135  | 0.94668     | -1.3554     | 0.91235     | -1.4887  | 0.93171 |       |
|           | -0.76919        | 0.77911  | 0.77911     | 0.872240915 |             |          |         |       |
| ARRB2     | ENSG00000141480 | -1.1344  | 0.87168     | -1.077      | 0.85926     | -0.76935 | 0.77916 |       |
|           | -1.8453         | 0.96751  | 0.77916     | 0.872276852 |             |          |         |       |
| NA        | ENSG00000257837 | -0.76981 | 0.77929     | -0.76981    | 0.77929     | -0.76981 | 0.77929 |       |
|           | -0.76981        | 0.77929  | 0.77929     | 0.872391696 |             |          |         |       |
| POLL      | ENSG00000166169 | -1.0924  | 0.86268     | -1.3619     | 0.91338     | -0.76996 | 0.77934 |       |
|           | -0.94312        | 0.82719  | 0.77934     | 0.872391696 |             |          |         |       |
| SNORA63   | ENSG00000200320 | -0.77    | 0.77935     | -0.77       | 0.77935     | -0.77    | 0.77935 | -0.77 |
|           | 0.77935         | 0.77935  | 0.872391696 |             |             |          |         |       |
| SNORA4    | ENSG00000263776 | -0.77    | 0.77935     | -0.77       | 0.77935     | -0.77    | 0.77935 | -0.77 |
|           | 0.77935         | 0.77935  | 0.872391696 |             |             |          |         |       |
| NA        | ENSG00000235435 | -0.77006 | 0.77937     | -0.77006    | 0.77937     | -0.77006 | 0.77937 |       |
|           | -0.77006        | 0.77937  | 0.77937     | 0.872391696 |             |          |         |       |
| NA        | ENSG00000260163 | -0.77007 | 0.77937     | -0.77007    | 0.77937     | -0.77007 | 0.77937 |       |
|           | -0.77007        | 0.77937  | 0.77937     | 0.872391696 |             |          |         |       |
| MIR4713HG | ENSG00000259240 | -2.6399  | 0.99585     | -0.77013    | 0.77939     | -1.4431  |         |       |
|           | 0.92551         | -1.4206  | 0.92229     | 0.77939     | 0.872394044 |          |         |       |
| NA        | ENSG00000225451 | -0.77031 | 0.77944     | -1.3035     | 0.90379     | -1.6204  | 0.94742 |       |
|           | -1.0383         | 0.85044  | 0.77944     | 0.872429971 |             |          |         |       |
| NA        | ENSG00000254972 | -0.77045 | 0.77948     | -2.0786     | 0.98117     | -0.79589 | 0.78695 |       |
|           | -0.79589        | 0.78695  | 0.77948     | 0.872445856 |             |          |         |       |
| NA        | ENSG00000270540 | -0.77048 | 0.77949     | -0.77048    | 0.77949     | -0.77048 | 0.77949 |       |
|           | -0.77048        | 0.77949  | 0.77949     | 0.872445856 |             |          |         |       |
| RNU1-49P  | ENSG00000200338 | -0.77063 | 0.77954     | -1.2463     | 0.89368     | -0.77063 |         |       |
|           | 0.77954         | -1.6498  | 0.95051     | 0.77954     | 0.87248178  |          |         |       |
| KCNK12    | ENSG00000184261 | -1.4782  | 0.93032     | -1.4782     | 0.93032     | -1.4782  |         |       |
|           | 0.93032         | -0.77083 | 0.7796      | 0.7796      | 0.87249116  |          |         |       |
| NA        | ENSG00000280224 | -0.77087 | 0.77961     | -0.77087    | 0.77961     | -0.77087 | 0.77961 |       |
|           | -1.2281         | 0.8903   | 0.77961     | 0.87249116  |             |          |         |       |
| MELTF     | ENSG00000163975 | -0.8909  | 0.81351     | -1.3002     | 0.90323     | -1.243   | 0.89307 |       |
|           | -0.7709         | 0.77962  | 0.77962     | 0.87249116  |             |          |         |       |
| HSPD1P5   | ENSG00000249193 | -1.443   | 0.92549     | -0.77091    | 0.77962     | -0.77091 |         |       |
|           | 0.77962         | -1.443   | 0.92549     | 0.77962     | 0.87249116  |          |         |       |
| NA        | ENSG00000272254 | -0.77121 | 0.77971     | -0.77121    | 0.77971     | -0.77121 | 0.77971 |       |
|           | -0.77121        | 0.77971  | 0.77971     | 0.872558834 |             |          |         |       |
| KCNK1     | ENSG00000135750 | -0.7713  | 0.77973     | -0.7713     | 0.77973     | -0.7713  | 0.77973 |       |
|           | -0.7713         | 0.77973  | 0.77973     | 0.872558834 |             |          |         |       |
| NA        | ENSG00000225344 | -0.77132 | 0.77974     | -0.89477    | 0.81454     | -1.8654  | 0.96894 |       |
|           | -0.77678        | 0.78135  | 0.77974     | 0.872558834 |             |          |         |       |
| RNU2-56P  | ENSG00000252635 | -1.3096  | 0.90483     | -0.77139    | 0.77976     | -0.77139 |         |       |
|           | 0.77976         | -0.77139 | 0.77976     | 0.77976     | 0.872558834 |          |         |       |
| NUDT12    | ENSG00000112874 | -0.7714  | 0.77977     | -1.1753     | 0.88005     | -0.7714  |         |       |
|           | 0.77977         | -0.7714  | 0.77977     | 0.77977     | 0.872558834 |          |         |       |
| IL1A      | ENSG00000115008 | -0.95496 | 0.8302      | -1.498      | 0.93293     | -0.77154 | 0.77981 |       |
|           | -1.2182         | 0.88843  | 0.77981     | 0.872583556 |             |          |         |       |
| VLDLR     | ENSG00000147852 | -0.77188 | 0.77991     | -0.98745    | 0.83829     | -0.88336 | 0.81148 |       |
|           | -0.99338        | 0.83974  | 0.77991     | 0.872655376 |             |          |         |       |
| NA        | ENSG00000262380 | -0.77188 | 0.77991     | -0.77188    | 0.77991     | -0.77188 | 0.77991 |       |
|           | -0.77188        | 0.77991  | 0.77991     | 0.872655376 |             |          |         |       |
| CFAP97D1  | ENSG00000231256 | -0.77203 | 0.77995     | -0.77203    | 0.77995     | -0.77203 |         |       |
|           | 0.77995         | -0.77203 | 0.77995     | 0.77995     | 0.872680095 |          |         |       |
| NA        | ENSG00000268424 | -0.77217 | 0.77999     | -0.77217    | 0.77999     | -0.77217 | 0.77999 |       |
|           | -0.77217        | 0.77999  | 0.77999     | 0.872695964 |             |          |         |       |
| RNU6-746P | ENSG00000206839 | -0.78807 | 0.78467     | -1.4499     | 0.92646     | -0.7722  | 0.78    |       |

|            |                 |          |         |             |             |          |         |          |
|------------|-----------------|----------|---------|-------------|-------------|----------|---------|----------|
|            | -1.582          | 0.94317  | 0.78    | 0.872695964 |             |          |         |          |
| RNU6-1126P | ENSG00000206729 | -0.77252 | 0.7801  | -0.77252    | 0.7801      | -0.77252 | 0.7801  | -0.77252 |
|            | 0.7801          | -0.77252 | 0.7801  | 0.7801      | 0.87275892  |          |         |          |
| SOX9-AS1   | ENSG00000234899 | -0.77252 | 0.7801  | -1.2941     | 0.90218     | -0.82283 |         |          |
|            | 0.7947          | -0.93061 | 0.82397 | 0.7801      | 0.87275892  |          |         |          |
| TTBK2      | ENSG00000128881 | -0.84121 | 0.79988 | -0.78522    | 0.78384     | -0.77255 | 0.78011 |          |
|            | -1.0459         | 0.85219  | 0.78011 | 0.87275892  |             |          |         |          |
| NA         | ENSG00000261898 | -0.77264 | 0.78013 | -0.77264    | 0.78013     | -0.77264 | 0.78013 |          |
|            | -0.77264        | 0.78013  | 0.78013 | 0.872761259 |             |          |         |          |
| BTF3P1     | ENSG00000254225 | -0.77291 | 0.78021 | -0.77291    | 0.78021     | -0.77291 |         |          |
|            | 0.78021         | -0.77291 | 0.78021 | 0.78021     | 0.872830719 |          |         |          |
| SPINT2     | ENSG00000167642 | -0.77307 | 0.78026 | -1.3419     | 0.91018     | -0.77307 |         |          |
|            | 0.78026         | -0.77307 | 0.78026 | 0.78026     | 0.872846578 |          |         |          |
| NA         | ENSG00000229177 | -0.77309 | 0.78026 | -0.77309    | 0.78026     | -0.77309 | 0.78026 |          |
|            | -1.4394         | 0.92498  | 0.78026 | 0.872846578 |             |          |         |          |
| GTF3C2     | ENSG00000115207 | -0.87002 | 0.80786 | -0.77342    | 0.78036     | -0.81459 |         |          |
|            | 0.79235         | -1.1236  | 0.86941 | 0.78036     | 0.872920701 |          |         |          |
| NA         | ENSG00000273183 | -0.77343 | 0.78037 | -0.77343    | 0.78037     | -0.77343 | 0.78037 |          |
|            | -0.77343        | 0.78037  | 0.78037 | 0.872920701 |             |          |         |          |
| NA         | ENSG00000259912 | -1.1886  | 0.8827  | -1.2902     | 0.90151     | -1.0435  | 0.85163 |          |
|            | -0.77348        | 0.78038  | 0.78038 | 0.872920701 |             |          |         |          |
| OTULIN     | ENSG00000154124 | -1.145   | 0.87389 | -1.7227     | 0.95753     | -0.77359 |         |          |
|            | 0.78041         | -1.4398  | 0.92504 | 0.78041     | 0.872925368 |          |         |          |
| NA         | ENSG00000248701 | -0.7736  | 0.78042 | -0.7736     | 0.78042     | -0.7736  | 0.78042 |          |
|            | -0.7736         | 0.78042  | 0.78042 | 0.872925368 |             |          |         |          |
| KATNAL1    | ENSG00000102781 | -0.92835 | 0.82339 | -0.8935     | 0.81421     | -1.3827  |         |          |
|            | 0.91662         | -0.77371 | 0.78045 | 0.78045     | 0.872938887 |          |         |          |
| ZNF750     | ENSG00000141579 | -0.77385 | 0.78049 | -1.043      | 0.85152     | -0.77385 |         |          |
|            | 0.78049         | -0.77385 | 0.78049 | 0.78049     | 0.87296359  |          |         |          |
| NA         | ENSG00000256226 | -1.5468  | 0.93905 | -1.5211     | 0.93588     | -0.77392 | 0.78051 |          |
|            | -1.5618         | 0.94083  | 0.78051 | 0.872965923 |             |          |         |          |
| NA         | ENSG00000223615 | -0.77421 | 0.7806  | -0.77421    | 0.7806      | -0.77421 | 0.7806  |          |
|            | -0.77421        | 0.7806   | 0.7806  | 0.873046546 |             |          |         |          |
| NA         | ENSG00000225359 | -1.5431  | 0.93859 | -0.82023    | 0.79396     | -0.77436 | 0.78064 |          |
|            | -1.3484         | 0.91123  | 0.78064 | 0.873071245 |             |          |         |          |
| HSPB7      | ENSG00000173641 | -0.77457 | 0.7807  | -0.77457    | 0.7807      | -0.77457 | 0.7807  |          |
|            | -0.77457        | 0.7807   | 0.7807  | 0.87311831  |             |          |         |          |
| OR5AK1P    | ENSG00000255083 | -0.77464 | 0.78072 | -1.9131     | 0.97213     | -0.77464 |         |          |
|            | 0.78072         | -0.77464 | 0.78072 | 0.78072     | 0.873120639 |          |         |          |
| MIR297     | ENSG00000215961 | -0.77469 | 0.78074 | -0.77469    | 0.78074     | -0.77469 |         |          |
|            | 0.78074         | -0.77469 | 0.78074 | 0.78074     | 0.873122968 |          |         |          |
| NA         | ENSG00000269590 | -0.77478 | 0.78077 | -0.77478    | 0.78077     | -0.77478 | 0.78077 |          |
|            | -0.77478        | 0.78077  | 0.78077 | 0.87313648  |             |          |         |          |
| RNU4-70P   | ENSG00000207309 | -0.77489 | 0.7808  | -0.77489    | 0.7808      | -0.77489 |         |          |
|            | 0.7808          | -0.77489 | 0.7808  | 0.7808      | 0.873149991 |          |         |          |
| NA         | ENSG00000274995 | -0.77521 | 0.78089 | -0.77521    | 0.78089     | -0.77521 | 0.78089 |          |
|            | -0.77521        | 0.78089  | 0.78089 | 0.873210558 |             |          |         |          |
| NA         | ENSG00000280307 | -1.8064  | 0.96457 | -1.1887     | 0.88273     | -0.94636 | 0.82802 |          |
|            | -0.7752         | 0.78089  | 0.78089 | 0.873210558 |             |          |         |          |
| HNRNPA1P22 | ENSG00000236459 | -0.77533 | 0.78093 | -0.77533    | 0.78093     | -0.77533 |         |          |
|            | 0.78093         | -0.77533 | 0.78093 | 0.78093     | 0.873235249 |          |         |          |
| CDKN2AIPNL | ENSG00000237190 | -0.90719 | 0.81785 | -1.5517     | 0.93963     | -0.77542 |         |          |
|            | 0.78095         | -1.4749  | 0.92988 | 0.78095     | 0.873237575 |          |         |          |
| ATP5MC1P4  | ENSG00000227440 | -0.77549 | 0.78098 | -1.4048     | 0.91996     | -0.77549 |         |          |
|            | 0.78098         | -0.77549 | 0.78098 | 0.78098     | 0.873251082 |          |         |          |
| NA         | ENSG00000200536 | -0.77568 | 0.78103 | -0.77568    | 0.78103     | -0.77568 | 0.78103 |          |
|            | -0.77568        | 0.78103  | 0.78103 | 0.873286951 |             |          |         |          |
| NA         | ENSG00000250906 | -0.77578 | 0.78106 | -0.77578    | 0.78106     | -0.77578 | 0.78106 |          |
|            | -0.77578        | 0.78106  | 0.78106 | 0.873300457 |             |          |         |          |
| ZFYVE9P2   | ENSG00000214843 | -0.77588 | 0.78109 | -0.77588    | 0.78109     | -0.77588 |         |          |
|            | 0.78109         | -0.77588 | 0.78109 | 0.78109     | 0.873313962 |          |         |          |
| SPTA1      | ENSG00000163554 | -0.7764  | 0.78124 | -1.3339     | 0.90888     | -0.87615 | 0.80953 |          |

|           |                 |          |             |             |             |          |         |          |
|-----------|-----------------|----------|-------------|-------------|-------------|----------|---------|----------|
|           | -0.84462        | 0.80084  | 0.78124     | 0.873461631 |             |          |         |          |
| MFSD5     | ENSG00000182544 | -1.1701  | 0.87903     | -0.77653    | 0.78128     | -1.1701  | 0.87903 |          |
|           | -1.1701         | 0.87903  | 0.78128     | 0.873486312 |             |          |         |          |
| NAP1L4P3  | ENSG00000234145 | -1.3093  | 0.90478     | -1.4582     | 0.9276      | -1.4947  |         |          |
|           | 0.9325          | -0.77658 | 0.7813      | 0.7813      | 0.873488632 |          |         |          |
| NA        | ENSG00000246982 | -0.83796 | 0.79897     | -0.7767     | 0.78133     | -0.83796 | 0.79897 |          |
|           | -0.83796        | 0.79897  | 0.78133     | 0.873502131 |             |          |         |          |
| NA        | ENSG00000249333 | -0.77687 | 0.78138     | -0.77687    | 0.78138     | -0.77687 | 0.78138 |          |
|           | -0.77687        | 0.78138  | 0.78138     | 0.873529128 |             |          |         |          |
| ANO7L1    | ENSG00000237276 | -1.3735  | 0.91521     | -1.388      | 0.91743     | -0.7769  |         |          |
|           | 0.78139         | -1.3347  | 0.90902     | 0.78139     | 0.873529128 |          |         |          |
| CYP2C6P   | ENSG00000260863 | -0.7771  | 0.78145     | -1.2928     | 0.90197     | -1.2928  |         |          |
|           | 0.90197         | -1.2928  | 0.90197     | 0.78145     | 0.873551898 |          |         |          |
| SDR16C6P  | ENSG00000253542 | -2.0191  | 0.97826     | -0.77713    | 0.78146     | -1.9964  |         |          |
|           | 0.97705         | -1.2575  | 0.89571     | 0.78146     | 0.873551898 |          |         |          |
| PADI3     | ENSG00000142619 | -0.77723 | 0.78149     | -0.77723    | 0.78149     | -0.89898 | 0.81567 |          |
|           | -1.0128         | 0.84443  | 0.78149     | 0.873551898 |             |          |         |          |
| MYOZ2     | ENSG00000172399 | -0.9081  | 0.81809     | -0.77726    | 0.7815      | -0.9081  | 0.81809 |          |
|           | -1.2189         | 0.88856  | 0.7815      | 0.873551898 |             |          |         |          |
| LINC02556 | ENSG00000236611 | -1.2705  | 0.89805     | -0.77727    | 0.7815      | -1.0872  |         |          |
|           | 0.86153         | -1.2555  | 0.89536     | 0.7815      | 0.873551898 |          |         |          |
| NA        | ENSG00000242568 | -1.265   | 0.89707     | -0.77733    | 0.78152     | -1.265   | 0.89707 |          |
|           | -1.0342         | 0.84948  | 0.78152     | 0.873554216 |             |          |         |          |
| NA        | ENSG00000231626 | -0.77752 | 0.78158     | -0.77752    | 0.78158     | -0.77752 | 0.78158 |          |
|           | -0.77752        | 0.78158  | 0.78158     | 0.873592383 |             |          |         |          |
| SHCBP1L   | ENSG00000157060 | -0.77756 | 0.78159     | -0.78619    | 0.78412     | -1.067   |         |          |
|           | 0.85702         | -1.0119  | 0.84421     | 0.78159     | 0.873592383 |          |         |          |
| SPINT5P   | ENSG00000168630 | -0.77763 | 0.78161     | -0.77763    | 0.78161     | -0.77763 |         |          |
|           | 0.78161         | -0.77763 | 0.78161     | 0.78161     | 0.873594699 |          |         |          |
| AZU1P1    | ENSG00000270444 | -1.3821  | 0.91653     | -0.77785    | 0.78167     | -0.93144 |         |          |
|           | 0.82419         | -0.93144 | 0.82419     | 0.78167     | 0.873632862 |          |         |          |
| VDAC1P13  | ENSG00000232526 | -0.77788 | 0.78168     | -0.77788    | 0.78168     | -0.77788 |         |          |
|           | 0.78168         | -0.77788 | 0.78168     | 0.78168     | 0.873632862 |          |         |          |
| SNORD126  | ENSG00000238344 | -0.77804 | 0.78173     | -0.77804    | 0.78173     | -0.77804 |         |          |
|           | 0.78173         | -0.77804 | 0.78173     | 0.78173     | 0.873668706 |          |         |          |
| MYLK-AS1  | ENSG00000239523 | -1.0557  | 0.85445     | -0.77811    | 0.78175     | -1.0581  |         |          |
|           | 0.85499         | -1.0581  | 0.85499     | 0.78175     | 0.87367102  |          |         |          |
| STK38     | ENSG00000112079 | -1.25    | 0.89436     | -1.1073     | 0.86592     | -1.4812  | 0.93073 |          |
|           | -0.77817        | 0.78177  | 0.78177     | 0.873673335 |             |          |         |          |
| NA        | ENSG00000150526 | -0.77843 | 0.78184     | -0.77843    | 0.78184     | -0.77843 | 0.78184 |          |
|           | -1.169          | 0.8788   | 0.78184     | 0.873689535 |             |          |         |          |
| NA        | ENSG00000202211 | -0.77851 | 0.78187     | -0.77851    | 0.78187     | -0.77851 | 0.78187 |          |
|           | -0.77851        | 0.78187  | 0.78187     | 0.873689535 |             |          |         |          |
| STARD6    | ENSG00000174448 | -1.2608  | 0.8963      | -1.5323     | 0.93728     | -0.77861 |         |          |
|           | 0.78189         | -1.8096  | 0.96482     | 0.78189     | 0.873689535 |          |         |          |
| NA        | ENSG00000249635 | -0.77862 | 0.7819      | -0.77862    | 0.7819      | -0.77862 | 0.7819  |          |
|           | -0.77862        | 0.7819   | 0.7819      | 0.873689535 |             |          |         |          |
| NA        | ENSG00000250098 | -1.5232  | 0.93615     | -0.77861    | 0.7819      | -1.3804  | 0.91626 |          |
|           | -1.3432         | 0.91039  | 0.7819      | 0.873689535 |             |          |         |          |
| NA        | ENSG00000200112 | -0.77866 | 0.78191     | -1.9164     | 0.97234     | -1.9164  | 0.97234 |          |
|           | -1.9164         | 0.97234  | 0.78191     | 0.873689535 |             |          |         |          |
| NA        | ENSG00000274455 | -0.94872 | 0.82862     | -0.77866    | 0.78191     | -1.0269  | 0.84777 |          |
|           | -1.7087         | 0.95625  | 0.78191     | 0.873689535 |             |          |         |          |
| TPPP3     | ENSG00000159713 | -0.77885 | 0.78197     | -0.9502     | 0.82899     | -0.77885 | 0.78197 |          |
|           | -0.77885        | 0.78197  | 0.78197     | 0.873696476 |             |          |         |          |
| RPL39P26  | ENSG00000240454 | -0.77885 | 0.78197     | -0.77885    | 0.78197     | -0.77885 |         |          |
|           | 0.78197         | -0.77885 | 0.78197     | 0.78197     | 0.873696476 |          |         |          |
| MTRNR2L3  | ENSG00000256222 | -0.77887 | 0.78197     | -0.77887    | 0.78197     | -0.77887 |         |          |
|           | 0.78197         | -0.77887 | 0.78197     | 0.78197     | 0.873696476 |          |         |          |
| COA5      | ENSG00000183513 | -1.2692  | 0.89782     | -0.77897    | 0.782       | -0.77897 | 0.782   | -0.77897 |
|           | 0.782           | 0.782    | 0.873709962 |             |             |          |         |          |
| NA        | ENSG00000223450 | -0.77906 | 0.78203     | -0.77906    | 0.78203     | -0.77906 | 0.78203 |          |

|              |                 |          |         |             |             |          |         |
|--------------|-----------------|----------|---------|-------------|-------------|----------|---------|
|              | -0.77906        | 0.78203  | 0.78203 | 0.873716901 |             |          |         |
| IFNA14       | ENSG00000228083 | -0.77915 | 0.78205 | -0.77915    | 0.78205     | -0.77915 |         |
|              | 0.78205         | -0.77915 | 0.78205 | 0.78205     | 0.873716901 |          |         |
| SPDYE21      | ENSG00000230358 | -0.96036 | 0.83156 | -1.2955     | 0.90242     | -0.77916 |         |
|              | 0.78206         | -1.0929  | 0.86278 | 0.78206     | 0.873716901 |          |         |
| PRM3         | ENSG00000178257 | -0.77965 | 0.7822  | -0.77965    | 0.7822      | -0.77965 | 0.7822  |
|              | -0.77965        | 0.7822   | 0.7822  | 0.873813209 |             |          |         |
| NA           | ENSG00000257731 | -0.77963 | 0.7822  | -0.77963    | 0.7822      | -0.77963 | 0.7822  |
|              | -0.77963        | 0.7822   | 0.7822  | 0.873813209 |             |          |         |
| NA           | ENSG00000258076 | -0.77963 | 0.7822  | -0.77963    | 0.7822      | -0.77963 | 0.7822  |
|              | -0.77963        | 0.7822   | 0.7822  | 0.873813209 |             |          |         |
| DEFB136      | ENSG00000205884 | -0.77976 | 0.78223 | -1.0805     | 0.86003     | -0.77976 |         |
|              | 0.78223         | -0.77976 | 0.78223 | 0.78223     | 0.873826691 |          |         |
| FAM86MP      | ENSG00000186234 | -0.77981 | 0.78225 | -1.2159     | 0.88799     | -1.8941  |         |
|              | 0.9709          | -1.1528  | 0.87551 | 0.78225     | 0.873829001 |          |         |
| HMG2P27      | ENSG00000232916 | -0.78004 | 0.78232 | -0.78004    | 0.78232     | -0.78004 |         |
|              | 0.78232         | -0.78004 | 0.78232 | 0.78232     | 0.873878301 |          |         |
| RSAD1        | ENSG00000136444 | -0.78008 | 0.78233 | -1.1532     | 0.8756      | -1.1461  | 0.87411 |
|              | -1.1461         | 0.87411  | 0.78233 | 0.873878301 |             |          |         |
| NA           | ENSG00000234715 | -0.78032 | 0.7824  | -0.78032    | 0.7824      | -0.78032 | 0.7824  |
|              | -0.78032        | 0.7824   | 0.7824  | 0.87393646  |             |          |         |
| NA           | ENSG00000259340 | -0.89095 | 0.81352 | -0.78085    | 0.78255     | -0.89095 | 0.81352 |
|              | -0.89095        | 0.81352  | 0.78255 | 0.874083973 |             |          |         |
| RND3         | ENSG00000115963 | -0.78091 | 0.78257 | -1.6485     | 0.95037     | -0.86042 | 0.80522 |
|              | -1.1444         | 0.87378  | 0.78257 | 0.874086277 |             |          |         |
| ARHGAP16P    | ENSG00000258894 | -0.78108 | 0.78262 | -0.78108    | 0.78262     | -0.78108 |         |
|              | 0.78262         | -0.78108 | 0.78262 | 0.78262     | 0.874095492 |          |         |
| MSRB3        | ENSG00000174099 | -0.78116 | 0.78265 | -1.181      | 0.8812      | -1.3651  | 0.91388 |
|              | -1.3407         | 0.90999  | 0.78265 | 0.874095492 |             |          |         |
| FKBP9P1      | ENSG00000176826 | -0.78117 | 0.78265 | -1.3172     | 0.90612     | -1.2428  |         |
|              | 0.89302         | -1.6719  | 0.95273 | 0.78265     | 0.874095492 |          |         |
| NA           | ENSG00000201984 | -1.5565  | 0.94021 | -0.78117    | 0.78265     | -1.5815  | 0.94311 |
|              | -1.5815         | 0.94311  | 0.78265 | 0.874095492 |             |          |         |
| KRT8P47      | ENSG00000271647 | -0.78135 | 0.7827  | -0.78135    | 0.7827      | -0.78135 |         |
|              | 0.7827          | -0.78135 | 0.7827  | 0.7827      | 0.8741313   |          |         |
| MCU          | ENSG00000156026 | -1.1426  | 0.8734  | -0.78155    | 0.78276     | -1.3949  | 0.91848 |
|              | -1.4224         | 0.92254  | 0.78276 | 0.874178274 |             |          |         |
| ST6GALNAC2P1 | ENSG00000228902 | -0.78169 | 0.7828  | -1.1196     | 0.86855     | -1.1196  |         |
|              | 0.86855         | -1.1196  | 0.86855 | 0.7828      | 0.874182877 |          |         |
| ENSAP2       | ENSG00000259032 | -0.7817  | 0.7828  | -0.7817     | 0.7828      | -0.7817  |         |
|              | 0.7828          | -0.7817  | 0.7828  | 0.7828      | 0.874182877 |          |         |
| GRHL3-AS1    | ENSG00000232298 | -1.921   | 0.97264 | -0.78206    | 0.78291     | -1.921   |         |
|              | 0.97264         | -1.921   | 0.97264 | 0.78291     | 0.874276814 |          |         |
| NA           | ENSG00000250672 | -1.7446  | 0.95947 | -1.1367     | 0.87217     | -1.0085  | 0.84339 |
|              | -0.78209        | 0.78292  | 0.78292 | 0.874276814 |             |          |         |
| RNU6-1167P   | ENSG00000200097 | -1.1462  | 0.87415 | -1.6532     | 0.95085     | -1.1462  |         |
|              | 0.87415         | -0.78221 | 0.78295 | 0.78295     | 0.874290279 |          |         |
| Clorf185     | ENSG00000204006 | -0.78255 | 0.78306 | -0.78255    | 0.78306     | -0.78255 |         |
|              | 0.78306         | -0.78255 | 0.78306 | 0.78306     | 0.874384205 |          |         |
| NA           | ENSG00000253102 | -0.78262 | 0.78307 | -0.78262    | 0.78307     | -0.78262 | 0.78307 |
|              | -0.78262        | 0.78307  | 0.78307 | 0.874384205 |             |          |         |
| NA           | ENSG00000212490 | -1.0546  | 0.85419 | -1.0546     | 0.85419     | -0.99212 | 0.83943 |
|              | -0.78272        | 0.7831   | 0.7831  | 0.874397667 |             |          |         |
| PLA2G12AP1   | ENSG00000224680 | -0.78291 | 0.78316 | -0.78291    | 0.78316     | -0.78291 |         |
|              | 0.78316         | -0.78291 | 0.78316 | 0.78316     | 0.874426885 |          |         |
| NA           | ENSG00000269035 | -0.78295 | 0.78317 | -0.78295    | 0.78317     | -0.78295 | 0.78317 |
|              | -0.78295        | 0.78317  | 0.78317 | 0.874426885 |             |          |         |
| RNU6-296P    | ENSG00000207338 | -0.78298 | 0.78318 | -0.78298    | 0.78318     | -0.78298 |         |
|              | 0.78318         | -0.78298 | 0.78318 | 0.78318     | 0.874426885 |          |         |
| NA           | ENSG00000200685 | -0.78313 | 0.78322 | -0.78313    | 0.78322     | -0.78313 | 0.78322 |
|              | -0.78313        | 0.78322  | 0.78322 | 0.874431785 |             |          |         |
| NA           | ENSG00000226969 | -1.7792  | 0.96239 | -0.7832     | 0.78324     | -1.7792  | 0.96239 |



|             |                 |          |         |             |             |          |         |          |
|-------------|-----------------|----------|---------|-------------|-------------|----------|---------|----------|
|             | -1.7792         | 0.96239  | 0.78324 | 0.874431785 |             |          |         |          |
| ARMH3       | ENSG00000120029 | -0.91706 | 0.82044 | -0.85809    | 0.80458     | -0.87716 | 0.8098  |          |
|             | -0.78329        | 0.78327  | 0.78327 | 0.874431785 |             |          |         |          |
| NA          | ENSG00000228123 | -0.78331 | 0.78328 | -0.78331    | 0.78328     | -0.78331 | 0.78328 |          |
|             | -0.78331        | 0.78328  | 0.78328 | 0.874431785 |             |          |         |          |
| NA          | ENSG00000256969 | -0.82051 | 0.79404 | -0.95162    | 0.82936     | -1.566   | 0.94132 |          |
|             | -0.78334        | 0.78328  | 0.78328 | 0.874431785 |             |          |         |          |
| NA          | ENSG00000230570 | -0.78338 | 0.78333 | -0.78338    | 0.78333     | -0.78338 | 0.78333 |          |
|             | -1.7818         | 0.96261  | 0.78333 | 0.874431785 |             |          |         |          |
| METTL8      | ENSG00000123600 | -1.1427  | 0.87342 | -1.0776     | 0.85939     | -0.78341 |         |          |
|             | 0.78331         | -0.97031 | 0.83405 | 0.78331     | 0.874431785 |          |         |          |
| SNORD115-15 | ENSG00000201679 | -0.78347 | 0.78333 | -0.78347    | 0.78333     | -0.78347 | 0.78333 | -0.78347 |
|             | 0.78333         | -0.78347 | 0.78333 | 0.78333     | 0.87443408  |          |         |          |
| PTPRO       | ENSG00000151490 | -0.84431 | 0.80075 | -0.89283    | 0.81403     | -0.78383 | 0.78343 |          |
|             | -0.9873         | 0.83825  | 0.78343 | 0.874507937 |             |          |         |          |
| NA          | ENSG00000255076 | -1.8226  | 0.96582 | -0.78386    | 0.78344     | -1.8226  | 0.96582 |          |
|             | -1.8226         | 0.96582  | 0.78344 | 0.874507937 |             |          |         |          |
| LINC02444   | ENSG00000258123 | -1.5806  | 0.94301 | -1.5806     | 0.94301     | -1.5806  |         |          |
|             | 0.94301         | -0.78391 | 0.78345 | 0.78345     | 0.874507937 |          |         |          |
| GZMM        | ENSG00000197540 | -0.78442 | 0.7836  | -0.78442    | 0.7836      | -0.78442 | 0.7836  |          |
|             | -0.78442        | 0.7836   | 0.7836  | 0.874655336 |             |          |         |          |
| SETD9       | ENSG00000155542 | -1.3147  | 0.9057  | -0.78454    | 0.78364     | -0.80906 | 0.79076 |          |
|             | -0.88437        | 0.81175  | 0.78364 | 0.874679949 |             |          |         |          |
| RNA5SP228   | ENSG00000252041 | -0.7847  | 0.78369 | -0.7847     | 0.78369     | -0.7847  |         |          |
|             | 0.78369         | -0.7847  | 0.78369 | 0.78369     | 0.874706848 |          |         |          |
| RPL3P2      | ENSG00000227939 | -0.78474 | 0.7837  | -0.78474    | 0.7837      | -0.78474 |         |          |
|             | 0.7837          | -0.78474 | 0.7837  | 0.7837      | 0.874706848 |          |         |          |
| NA          | ENSG00000227148 | -1.0621  | 0.8559  | -0.96286    | 0.83219     | -0.78492 | 0.78375 |          |
|             | -1.986          | 0.97648  | 0.78375 | 0.874742619 |             |          |         |          |
| NA          | ENSG00000274238 | -0.78508 | 0.7838  | -0.78508    | 0.7838      | -0.78508 | 0.7838  |          |
|             | -0.78508        | 0.7838   | 0.7838  | 0.874769786 |             |          |         |          |
| MDM1        | ENSG00000111554 | -1.6642  | 0.95196 | -2.0504     | 0.97984     | -1.7764  | 0.96217 |          |
|             | -0.78516        | 0.78382  | 0.78382 | 0.874769786 |             |          |         |          |
| NA          | ENSG00000258178 | -0.78519 | 0.78383 | -0.78519    | 0.78383     | -0.78519 | 0.78383 |          |
|             | -0.78519        | 0.78383  | 0.78383 | 0.874769786 |             |          |         |          |
| NA          | ENSG00000237189 | -0.78531 | 0.78386 | -0.78531    | 0.78386     | -2.1263  | 0.98326 |          |
|             | -0.78531        | 0.78386  | 0.78386 | 0.874769786 |             |          |         |          |
| NA          | ENSG00000207512 | -0.78534 | 0.78387 | -0.78534    | 0.78387     | -0.78534 | 0.78387 |          |
|             | -0.78534        | 0.78387  | 0.78387 | 0.874769786 |             |          |         |          |
| NA          | ENSG00000268864 | -0.78538 | 0.78389 | -0.78538    | 0.78389     | -0.78538 | 0.78389 |          |
|             | -0.78538        | 0.78389  | 0.78389 | 0.874769786 |             |          |         |          |
| AKR1B1      | ENSG00000085662 | -1.8768  | 0.96973 | -0.78543    | 0.7839      | -1.8768  |         |          |
|             | 0.96973         | -1.122   | 0.86906 | 0.7839      | 0.874769786 |          |         |          |
| DAOA-AS1    | ENSG00000232307 | -0.78564 | 0.78396 | -0.78564    | 0.78396     | -0.78564 |         |          |
|             | 0.78396         | -0.78564 | 0.78396 | 0.78396     | 0.874796675 |          |         |          |
| VDAC1P11    | ENSG00000237679 | -0.78563 | 0.78396 | -0.78563    | 0.78396     | -0.78563 |         |          |
|             | 0.78396         | -0.78563 | 0.78396 | 0.78396     | 0.874796675 |          |         |          |
| RN7SKP295   | ENSG00000253073 | -0.78596 | 0.78405 | -0.78596    | 0.78405     | -0.78596 |         |          |
|             | 0.78405         | -0.78596 | 0.78405 | 0.78405     | 0.874877069 |          |         |          |
| EEF1A1P10   | ENSG00000243746 | -0.78626 | 0.78414 | -0.78626    | 0.78414     | -0.78626 |         |          |
|             | 0.78414         | -0.78626 | 0.78414 | 0.78414     | 0.87495746  |          |         |          |
| NA          | ENSG00000232294 | -0.78635 | 0.78417 | -0.86382    | 0.80616     | -0.78635 | 0.78417 |          |
|             | -0.78635        | 0.78417  | 0.78417 | 0.8749709   |             |          |         |          |
| ELOVL3      | ENSG00000119915 | -0.84993 | 0.80232 | -1.0716     | 0.85806     | -0.78649 |         |          |
|             | 0.78421         | -0.78649 | 0.78421 | 0.78421     | 0.874971148 |          |         |          |
| CES2        | ENSG00000172831 | -0.93423 | 0.82491 | -0.78655    | 0.78423     | -1.3816  | 0.91646 |          |
|             | -1.0574         | 0.85483  | 0.78423 | 0.874971148 |             |          |         |          |
| RPL31P7     | ENSG00000232083 | -0.78657 | 0.78423 | -0.78657    | 0.78423     | -0.78657 |         |          |
|             | 0.78423         | -1.8385  | 0.96701 | 0.78423     | 0.874971148 |          |         |          |
| MTCO2P22    | ENSG00000270225 | -0.78663 | 0.78425 | -0.78663    | 0.78425     | -0.78663 |         |          |
|             | 0.78425         | -0.78663 | 0.78425 | 0.78425     | 0.874971148 |          |         |          |
| MGST3       | ENSG00000143198 | -1.7302  | 0.9582  | -1.7302     | 0.9582      | -1.7302  | 0.9582  |          |

|            |                 |          |         |             |             |          |         |
|------------|-----------------|----------|---------|-------------|-------------|----------|---------|
|            | -0.78665        | 0.78426  | 0.78426 | 0.874971148 |             |          |         |
| ZNF391     | ENSG00000124613 | -0.91267 | 0.81929 | -0.78692    | 0.78434     | -1.0859  |         |
|            | 0.86123         | -0.99054 | 0.83904 | 0.78434     | 0.875022614 |          |         |
| NA         | ENSG00000255149 | -0.787   | 0.78436 | -0.787      | 0.78436     | -0.787   | 0.78436 |
|            | -0.787          | 0.78436  | 0.78436 | 0.875022614 |             |          |         |
| NA         | ENSG00000261672 | -0.78699 | 0.78436 | -0.78699    | 0.78436     | -0.78699 | 0.78436 |
|            | -0.78699        | 0.78436  | 0.78436 | 0.875022614 |             |          |         |
| NA         | ENSG00000270956 | -0.78716 | 0.78441 | -0.78716    | 0.78441     | -0.78716 | 0.78441 |
|            | -0.78716        | 0.78441  | 0.78441 | 0.87505836  |             |          |         |
| RAB21      | ENSG00000080371 | -0.78723 | 0.78443 | -0.89568    | 0.81479     | -0.89568 | 0.81479 |
|            | -0.89568        | 0.81479  | 0.78443 | 0.875060639 |             |          |         |
| NA         | ENSG00000200888 | -0.78731 | 0.78445 | -1.1446     | 0.87381     | -1.0162  | 0.84524 |
|            | -1.1446         | 0.87381  | 0.78445 | 0.875062918 |             |          |         |
| RANP6      | ENSG00000213370 | -0.9264  | 0.82288 | -0.9264     | 0.82288     | -0.9264  | 0.82288 |
|            | -0.78737        | 0.78447  | 0.78447 | 0.875065196 |             |          |         |
| KRT40      | ENSG00000204889 | -1.1695  | 0.8789  | -0.78743    | 0.78449     | -0.98838 | 0.83852 |
|            | -0.78743        | 0.78449  | 0.78449 | 0.875067475 |             |          |         |
| MICU2      | ENSG00000165487 | -2.0767  | 0.98108 | -2.5483     | 0.99459     | -1.0591  | 0.85523 |
|            | -0.78764        | 0.78455  | 0.78455 | 0.875103449 |             |          |         |
| NOP10      | ENSG00000182117 | -0.78768 | 0.78456 | -0.78768    | 0.78456     | -0.78768 | 0.78456 |
|            | -0.78768        | 0.78456  | 0.78456 | 0.875103449 |             |          |         |
| TMEM97     | ENSG00000109084 | -0.78775 | 0.78458 | -0.78775    | 0.78458     | -1.1381  |         |
|            | 0.87247         | -0.78775 | 0.78458 | 0.78458     | 0.875103449 |          |         |
| NA         | ENSG00000267737 | -0.94333 | 0.82724 | -0.78782    | 0.7846      | -0.94333 | 0.82724 |
|            | -0.94333        | 0.82724  | 0.7846  | 0.875103449 |             |          |         |
| RN7SL77P   | ENSG00000240837 | -0.78791 | 0.78463 | -0.78791    | 0.78463     | -0.78791 |         |
|            | 0.78463         | -0.78791 | 0.78463 | 0.78463     | 0.875103449 |          |         |
| NA         | ENSG00000266341 | -0.78791 | 0.78463 | -0.78791    | 0.78463     | -0.78791 | 0.78463 |
|            | -0.78791        | 0.78463  | 0.78463 | 0.875103449 |             |          |         |
| NA         | ENSG00000272537 | -0.78799 | 0.78465 | -0.78799    | 0.78465     | -0.78799 | 0.78465 |
|            | -0.78799        | 0.78465  | 0.78465 | 0.875105726 |             |          |         |
| CFAP97D2   | ENSG00000283361 | -0.78809 | 0.78468 | -0.78809    | 0.78468     | -0.78809 |         |
|            | 0.78468         | -0.78809 | 0.78468 | 0.78468     | 0.875119156 |          |         |
| H2BC14     | ENSG00000273703 | -0.7884  | 0.78477 | -0.7884     | 0.78477     | -0.7884  |         |
|            | 0.78477         | -0.7884  | 0.78477 | 0.78477     | 0.875199499 |          |         |
| HTR7P1     | ENSG00000183935 | -0.78856 | 0.78482 | -0.78856    | 0.78482     | -0.78856 |         |
|            | 0.78482         | -0.78856 | 0.78482 | 0.78482     | 0.875227009 |          |         |
| PIN4P1     | ENSG00000227973 | -0.78872 | 0.78486 | -0.78872    | 0.78486     | -0.78872 |         |
|            | 0.78486         | -0.78872 | 0.78486 | 0.78486     | 0.875227009 |          |         |
| NEU3       | ENSG00000162139 | -1.5105  | 0.93454 | -0.96781    | 0.83343     | -0.78874 | 0.78487 |
|            | -1.5105         | 0.93454  | 0.78487 | 0.875227009 |             |          |         |
| TNFRSF4    | ENSG00000186827 | -0.78886 | 0.7849  | -0.78886    | 0.7849      | -0.78886 |         |
|            | 0.7849          | -0.78886 | 0.7849  | 0.7849      | 0.875227009 |          |         |
| NA         | ENSG00000279667 | -0.78903 | 0.78495 | -0.78903    | 0.78495     | -0.78903 | 0.78495 |
|            | -0.78903        | 0.78495  | 0.78495 | 0.875227009 |             |          |         |
| SLC22A24   | ENSG00000197658 | -1.0396  | 0.85074 | -0.841      | 0.79983     | -0.78914 |         |
|            | 0.78499         | -0.85137 | 0.80272 | 0.78499     | 0.875227009 |          |         |
| AOX3P      | ENSG00000244301 | -0.78915 | 0.78499 | -1.8929     | 0.97081     | -0.81774 | 0.79325 |
|            | -1.0006         | 0.84148  | 0.78499 | 0.875227009 |             |          |         |
| NA         | ENSG00000250500 | -0.78914 | 0.78499 | -0.78914    | 0.78499     | -0.78914 | 0.78499 |
|            | -0.78914        | 0.78499  | 0.78499 | 0.875227009 |             |          |         |
| SNORD113-7 | ENSG00000200632 | -0.78923 | 0.78501 | -0.78923    | 0.78501     | -0.78923 |         |
|            | 0.78501         | -0.78923 | 0.78501 | 0.78501     | 0.875227009 |          |         |
| MTCO3P23   | ENSG00000259651 | -0.78921 | 0.78501 | -1.3048     | 0.90401     | -1.3048  |         |
|            | 0.90401         | -1.3048  | 0.90401 | 0.78501     | 0.875227009 |          |         |
| TIMMDC1    | ENSG00000113845 | -0.78927 | 0.78502 | -0.78927    | 0.78502     | -0.78927 |         |
|            | 0.78502         | -1.318   | 0.90624 | 0.78502     | 0.875227009 |          |         |
| LINC01259  | ENSG00000249667 | -1.6561  | 0.95115 | -0.78927    | 0.78502     | -0.78927 |         |
|            | 0.78502         | -0.78927 | 0.78502 | 0.78502     | 0.875227009 |          |         |
| RNU6-727P  | ENSG00000200462 | -1.0391  | 0.85063 | -1.0768     | 0.85922     | -0.7893  |         |
|            | 0.78503         | -1.1783  | 0.88066 | 0.78503     | 0.875227009 |          |         |
| UBA52P8    | ENSG00000240793 | -0.78938 | 0.78505 | -0.78938    | 0.78505     | -0.78938 |         |

|             |                 |          |         |             |             |          |         |  |
|-------------|-----------------|----------|---------|-------------|-------------|----------|---------|--|
|             | 0.78505         | -0.78938 | 0.78505 | 0.78505     | 0.875227009 |          |         |  |
| NA          | ENSG00000283374 | -1.2934  | 0.90206 | -1.0456     | 0.85212     | -0.78947 | 0.78508 |  |
|             | -0.78947        | 0.78508  | 0.78508 | 0.875227009 |             |          |         |  |
| MIR1179     | ENSG00000221630 | -1.0303  | 0.84857 | -0.78948    | 0.78509     | -0.78948 |         |  |
|             | 0.78509         | -0.78948 | 0.78509 | 0.78509     | 0.875227009 |          |         |  |
| NA          | ENSG00000231156 | -1.3107  | 0.90502 | -1.3107     | 0.90502     | -1.3107  | 0.90502 |  |
|             | -0.78954        | 0.7851   | 0.7851  | 0.875227009 |             |          |         |  |
| DISC1FP1    | ENSG00000261645 | -0.78962 | 0.78512 | -1.8186     | 0.96551     | -1.2504  |         |  |
|             | 0.89443         | -1.3263  | 0.90763 | 0.78512     | 0.875229282 |          |         |  |
| SIAH2-AS1   | ENSG00000244265 | -0.92902 | 0.82356 | -0.82706    | 0.7959      | -0.82706 |         |  |
|             | 0.7959          | -0.78967 | 0.78514 | 0.78514     | 0.875231555 |          |         |  |
| B3GALT5-AS1 | ENSG00000184809 | -0.78983 | 0.78519 | -0.78983    | 0.78519     | -0.78983 |         |  |
|             | 0.78519         | -0.78983 | 0.78519 | 0.78519     | 0.87526727  |          |         |  |
| NA          | ENSG00000273221 | -0.78992 | 0.78521 | -0.78992    | 0.78521     | -0.78992 | 0.78521 |  |
|             | -0.78992        | 0.78521  | 0.78521 | 0.875269542 |             |          |         |  |
| NA          | ENSG00000232736 | -0.79008 | 0.78526 | -0.79008    | 0.78526     | -0.79008 | 0.78526 |  |
|             | -0.79008        | 0.78526  | 0.78526 | 0.875305254 |             |          |         |  |
| UBE4A       | ENSG00000110344 | -0.86956 | 0.80773 | -0.79023    | 0.7853      | -1.5467  | 0.93903 |  |
|             | -1.5662         | 0.94135  | 0.7853  | 0.875329818 |             |          |         |  |
| NA          | ENSG00000243433 | -0.79045 | 0.78537 | -0.79045    | 0.78537     | -0.79045 | 0.78537 |  |
|             | -0.79045        | 0.78537  | 0.78537 | 0.875381213 |             |          |         |  |
| HTRA3       | ENSG00000170801 | -1.733   | 0.95845 | -1.232      | 0.89102     | -0.79054 | 0.78539 |  |
|             | -1.0612         | 0.8557   | 0.78539 | 0.875381213 |             |          |         |  |
| NA          | ENSG00000213169 | -1.1541  | 0.87577 | -0.79056    | 0.7854      | -1.1541  | 0.87577 |  |
|             | -1.1541         | 0.87577  | 0.7854  | 0.875381213 |             |          |         |  |
| ERICH3-AS1  | ENSG00000234497 | -0.79062 | 0.78542 | -0.79062    | 0.78542     | -0.79062 |         |  |
|             | 0.78542         | -0.79062 | 0.78542 | 0.78542     | 0.875383482 |          |         |  |
| MIR519E     | ENSG00000207810 | -0.79091 | 0.7855  | -0.79091    | 0.7855      | -0.79091 |         |  |
|             | 0.7855          | -0.79091 | 0.7855  | 0.7855      | 0.875425991 |          |         |  |
| MED15P3     | ENSG00000226831 | -0.79091 | 0.7855  | -1.1298     | 0.87072     | -1.0306  |         |  |
|             | 0.84863         | -1.1697  | 0.87894 | 0.7855      | 0.875425991 |          |         |  |
| NA          | ENSG00000273437 | -0.79096 | 0.78552 | -0.79096    | 0.78552     | -0.79096 | 0.78552 |  |
|             | -0.79096        | 0.78552  | 0.78552 | 0.875425991 |             |          |         |  |
| NA          | ENSG00000274798 | -0.79099 | 0.78553 | -0.79099    | 0.78553     | -0.79099 | 0.78553 |  |
|             | -0.79099        | 0.78553  | 0.78553 | 0.875425991 |             |          |         |  |
| RHOT1P2     | ENSG00000203616 | -1.5151  | 0.93512 | -1.5151     | 0.93512     | -1.0519  |         |  |
|             | 0.85357         | -0.7912  | 0.78559 | 0.78559     | 0.875472836 |          |         |  |
| RPS12P28    | ENSG00000240494 | -0.79156 | 0.78569 | -0.79156    | 0.78569     | -0.79156 |         |  |
|             | 0.78569         | -0.79156 | 0.78569 | 0.78569     | 0.875564254 |          |         |  |
| NA          | ENSG00000230914 | -0.79175 | 0.78575 | -0.79175    | 0.78575     | -0.79175 | 0.78575 |  |
|             | -0.79175        | 0.78575  | 0.78575 | 0.875602214 |             |          |         |  |
| KIAA1841    | ENSG00000162929 | -1.1199  | 0.86862 | -0.87145    | 0.80825     | -1.3734  |         |  |
|             | 0.91518         | -0.7918  | 0.78576 | 0.78576     | 0.875602214 |          |         |  |
| EFNB3       | ENSG00000108947 | -0.79197 | 0.78581 | -0.964      | 0.83248     | -0.964   | 0.83248 |  |
|             | -0.93871        | 0.82606  | 0.78581 | 0.875637907 |             |          |         |  |
| NA          | ENSG00000253829 | -0.79244 | 0.78595 | -0.79244    | 0.78595     | -0.79244 | 0.78595 |  |
|             | -0.79244        | 0.78595  | 0.78595 | 0.875773884 |             |          |         |  |
| DNAJB12     | ENSG00000148719 | -0.79254 | 0.78598 | -1.1252     | 0.86975     | -1.313   |         |  |
|             | 0.90541         | -1.1976  | 0.88446 | 0.78598     | 0.875787286 |          |         |  |
| DPY30       | ENSG00000162961 | -0.79269 | 0.78602 | -0.79269    | 0.78602     | -0.79269 | 0.78602 |  |
|             | -1.2732         | 0.89852  | 0.78602 | 0.875789855 |             |          |         |  |
| CEP95       | ENSG00000258890 | -1.321   | 0.90675 | -0.7927     | 0.78602     | -0.99136 | 0.83924 |  |
|             | -0.99136        | 0.83924  | 0.78602 | 0.875789855 |             |          |         |  |
| KRT18P21    | ENSG00000250363 | -1.6765  | 0.95318 | -1.6765     | 0.95318     | -1.6765  |         |  |
|             | 0.95318         | -0.79297 | 0.7861  | 0.7861      | 0.875789855 |          |         |  |
| RPL23AP86   | ENSG00000262959 | -0.79302 | 0.78612 | -0.79302    | 0.78612     | -0.79302 |         |  |
|             | 0.78612         | -0.79302 | 0.78612 | 0.78612     | 0.875789855 |          |         |  |
| CYP2D8P     | ENSG00000226450 | -0.7931  | 0.78614 | -0.7931     | 0.78614     | -0.7931  |         |  |
|             | 0.78614         | -0.7931  | 0.78614 | 0.78614     | 0.875789855 |          |         |  |
| RPL12P29    | ENSG00000233189 | -0.79606 | 0.787   | -0.79313    | 0.78615     | -0.79606 | 0.787   |  |
|             | -0.98811        | 0.83845  | 0.78615 | 0.875789855 |             |          |         |  |
| NA          | ENSG00000250458 | -0.79312 | 0.78615 | -1.0339     | 0.84941     | -0.79312 | 0.78615 |  |

|           |                 |          |          |         |             |             |          |         |
|-----------|-----------------|----------|----------|---------|-------------|-------------|----------|---------|
|           |                 | -0.79312 | 0.78615  | 0.78615 | 0.875789855 |             |          |         |
| NA        | ENSG00000217275 | -0.79316 | 0.78616  | 0.78616 | -0.79316    | 0.78616     | -0.79316 | 0.78616 |
|           |                 | -0.79316 | 0.78616  | 0.78616 | 0.875789855 |             |          |         |
| NA        | ENSG00000253332 | -0.79316 | 0.78616  | 0.78616 | -0.79316    | 0.78616     | -0.79316 | 0.78616 |
|           |                 | -0.79316 | 0.78616  | 0.78616 | 0.875789855 |             |          |         |
| NA        | ENSG00000254348 | -0.7932  | 0.78617  | 0.78617 | -0.7932     | 0.78617     | -0.7932  | 0.78617 |
|           |                 | -0.7932  | 0.78617  | 0.78617 | 0.875789855 |             |          |         |
| PDZD3     | ENSG00000172367 | -0.79323 | 0.78618  | 0.78618 | -1.463      | 0.92827     | -0.81674 | 0.79296 |
|           |                 | -0.81674 | 0.79296  | 0.78618 | 0.875789855 |             |          |         |
| POU5F1    | ENSG00000204531 | -0.79338 | 0.78622  | 0.78622 | -0.79338    | 0.78622     | -1.0117  |         |
|           |                 | 0.84415  | -0.79338 | 0.78622 | 0.78622     | 0.875814393 |          |         |
| NA        | ENSG00000251189 | -0.79344 | 0.78624  | 0.78624 | -0.79344    | 0.78624     | -0.79344 | 0.78624 |
|           |                 | -0.79344 | 0.78624  | 0.78624 | 0.875816651 |             |          |         |
| GAPDHP49  | ENSG00000234285 | -0.79367 | 0.78631  | 0.78631 | -0.79367    | 0.78631     | -0.79367 |         |
|           |                 | 0.78631  | -0.79367 | 0.78631 | 0.78631     | 0.875825832 |          |         |
| TRPM2-AS  | ENSG00000230061 | -0.79376 | 0.78633  | 0.78633 | -0.79376    | 0.78633     | -0.79376 |         |
|           |                 | 0.78633  | -0.79376 | 0.78633 | 0.78633     | 0.875825832 |          |         |
| SLC9B1P3  | ENSG00000233867 | -0.87774 | 0.80996  | 0.80996 | -0.98313    | 0.83723     | -0.98482 |         |
|           |                 | 0.83764  | -0.79374 | 0.78633 | 0.78633     | 0.875825832 |          |         |
| NIT1      | ENSG00000158793 | -0.79378 | 0.78634  | 0.78634 | -0.79378    | 0.78634     | -0.79378 | 0.78634 |
|           |                 | -0.79378 | 0.78634  | 0.78634 | 0.875825832 |             |          |         |
| NA        | ENSG00000262358 | -0.7939  | 0.78637  | 0.78637 | -0.7939     | 0.78637     | -0.7939  | 0.78637 |
|           |                 | -0.7939  | 0.78637  | 0.78637 | 0.875825832 |             |          |         |
| H2AC13    | ENSG00000196747 | -0.79393 | 0.78638  | 0.78638 | -0.79393    | 0.78638     | -0.79393 |         |
|           |                 | 0.78638  | -0.79393 | 0.78638 | 0.78638     | 0.875825832 |          |         |
| FNTAP2    | ENSG00000230022 | -0.79395 | 0.78639  | 0.78639 | -0.79395    | 0.78639     | -0.79395 |         |
|           |                 | 0.78639  | -0.79395 | 0.78639 | 0.78639     | 0.875825832 |          |         |
| LINC01532 | ENSG00000267014 | -0.794   | 0.7864   | 0.7864  | -0.794      | 0.7864      | -0.794   |         |
|           |                 | 0.7864   | -0.794   | 0.7864  | 0.7864      | 0.875825832 |          |         |
| NA        | ENSG00000234907 | -0.79404 | 0.78641  | 0.78641 | -0.79404    | 0.78641     | -0.79404 | 0.78641 |
|           |                 | -0.79404 | 0.78641  | 0.78641 | 0.875825832 |             |          |         |
| AMY2B     | ENSG00000240038 | -0.79421 | 0.78646  | 0.78646 | -0.79421    | 0.78646     | -0.79421 | 0.78646 |
|           |                 | -0.79421 | 0.78646  | 0.78646 | 0.875857133 |             |          |         |
| POLR3A    | ENSG00000148606 | -1.1617  | 0.90244  | 0.90244 | -0.80564    | 0.78978     | -0.79427 |         |
|           |                 | 0.78648  | -1.2956  | 0.90244 | 0.78648     | 0.875857133 |          |         |
| ENOPH1    | ENSG00000145293 | -0.82685 | 0.79584  | 0.79584 | -0.87886    | 0.81026     | -0.79432 |         |
|           |                 | 0.7865   | -1.0542  | 0.85411 | 0.7865      | 0.875857133 |          |         |
| GANC      | ENSG00000214013 | -0.81993 | 0.79387  | 0.79387 | -1.166      | 0.87819     | -0.79436 | 0.78651 |
|           |                 | -1.2329  | 0.89119  | 0.78651 | 0.875857133 |             |          |         |
| NA        | ENSG00000265061 | -0.79576 | 0.78691  | 0.78691 | -0.79443    | 0.78653     | -0.79576 | 0.78691 |
|           |                 | -0.79576 | 0.78691  | 0.78653 | 0.87585939  |             |          |         |
| OR4D2     | ENSG00000255713 | -0.79473 | 0.78661  | 0.78661 | -0.79473    | 0.78661     | -0.79473 | 0.78661 |
|           |                 | -0.79473 | 0.78661  | 0.78661 | 0.875921834 |             |          |         |
| PCYOX1L   | ENSG00000145882 | -0.79479 | 0.78663  | 0.78663 | -1.8315     | 0.96648     | -1.9592  |         |
|           |                 | 0.97495  | -1.1806  | 0.88112 | 0.78663     | 0.875921834 |          |         |
| SMCR5     | ENSG00000226746 | -0.89982 | 0.81589  | 0.81589 | -0.79482    | 0.78664     | -0.9635  | 0.83235 |
|           |                 | -0.79482 | 0.78664  | 0.78664 | 0.875921834 |             |          |         |
| NA        | ENSG00000262651 | -0.79492 | 0.78667  | 0.78667 | -0.79492    | 0.78667     | -0.79492 | 0.78667 |
|           |                 | -0.79492 | 0.78667  | 0.78667 | 0.875935223 |             |          |         |
| NA        | ENSG00000261334 | -0.79525 | 0.78677  | 0.78677 | -0.79525    | 0.78677     | -0.79525 | 0.78677 |
|           |                 | -0.79525 | 0.78677  | 0.78677 | 0.876026553 |             |          |         |
| NA        | ENSG00000267191 | -0.7955  | 0.78684  | 0.78684 | -0.7955     | 0.78684     | -0.7955  | 0.78684 |
|           |                 | -0.7955  | 0.78684  | 0.78684 | 0.876066956 |             |          |         |
| NA        | ENSG00000223787 | -0.79558 | 0.78686  | 0.78686 | -0.79558    | 0.78686     | -0.79558 | 0.78686 |
|           |                 | -0.79558 | 0.78686  | 0.78686 | 0.876066956 |             |          |         |
| CPAMD8    | ENSG00000160111 | -0.79569 | 0.78689  | 0.78689 | -0.93609    | 0.82539     | -1.1194  |         |
|           |                 | 0.86851  | -1.6009  | 0.9453  | 0.78689     | 0.876066956 |          |         |
| NA        | ENSG00000272600 | -0.79567 | 0.78689  | 0.78689 | -0.79567    | 0.78689     | -0.79567 | 0.78689 |
|           |                 | -0.79567 | 0.78689  | 0.78689 | 0.876066956 |             |          |         |
| NA        | ENSG00000265263 | -0.79571 | 0.7869   | 0.7869  | -0.79571    | 0.7869      | -0.79571 | 0.7869  |
|           |                 | -0.79571 | 0.7869   | 0.7869  | 0.876066956 |             |          |         |
| UNC13C    | ENSG00000137766 | -2.0292  | 0.97878  | 0.97878 | -1.6381     | 0.9493      | -0.79594 |         |

|           |                 |          |         |             |             |          |         |
|-----------|-----------------|----------|---------|-------------|-------------|----------|---------|
|           | 0.78697         | -1.5551  | 0.94004 | 0.78697     | 0.876066956 |          |         |
| OR5AU1    | ENSG00000169327 | -0.79603 | 0.78699 | -0.79603    | 0.78699     | -0.79603 |         |
|           | 0.78699         | -0.79603 | 0.78699 | 0.78699     | 0.876066956 |          |         |
| UBA5      | ENSG00000081307 | -0.79604 | 0.787   | -1.0561     | 0.85453     | -0.88825 | 0.8128  |
|           | -1.8208         | 0.96568  | 0.787   | 0.876066956 |             |          |         |
| GNG11     | ENSG00000127920 | -0.79608 | 0.78701 | -0.79608    | 0.78701     | -0.79608 | 0.78701 |
|           | -1.0057         | 0.84273  | 0.78701 | 0.876066956 |             |          |         |
| NA        | ENSG00000167807 | -0.79611 | 0.78702 | -0.79611    | 0.78702     | -0.79611 | 0.78702 |
|           | -0.79611        | 0.78702  | 0.78702 | 0.876066956 |             |          |         |
| FDX2      | ENSG00000267673 | -0.79611 | 0.78702 | -0.79611    | 0.78702     | -0.79611 | 0.78702 |
|           | -0.79611        | 0.78702  | 0.78702 | 0.876066956 |             |          |         |
| RNU4-42P  | ENSG00000201608 | -0.79615 | 0.78703 | -0.79615    | 0.78703     | -0.79615 |         |
|           | 0.78703         | -0.79615 | 0.78703 | 0.78703     | 0.876066956 |          |         |
| NA        | ENSG00000251076 | -0.79619 | 0.78704 | -0.79619    | 0.78704     | -0.79619 | 0.78704 |
|           | -0.97579        | 0.83542  | 0.78704 | 0.876066956 |             |          |         |
| NA        | ENSG00000255292 | -0.79638 | 0.78709 | -0.79638    | 0.78709     | -0.79638 | 0.78709 |
|           | -0.79638        | 0.78709  | 0.78709 | 0.876078208 |             |          |         |
| NA        | ENSG00000225253 | -0.79643 | 0.78711 | -0.79643    | 0.78711     | -0.79643 | 0.78711 |
|           | -0.79643        | 0.78711  | 0.78711 | 0.876078208 |             |          |         |
| WDR88     | ENSG00000166359 | -1.4519  | 0.92673 | -2.2548     | 0.98793     | -1.4099  | 0.92072 |
|           | -0.79651        | 0.78713  | 0.78713 | 0.876078208 |             |          |         |
| MIR520D   | ENSG00000207735 | -0.79653 | 0.78714 | -0.79653    | 0.78714     | -0.79653 |         |
|           | 0.78714         | -0.79653 | 0.78714 | 0.78714     | 0.876078208 |          |         |
| RNU6-803P | ENSG00000251843 | -0.79653 | 0.78714 | -0.79653    | 0.78714     | -0.79653 |         |
|           | 0.78714         | -0.79653 | 0.78714 | 0.78714     | 0.876078208 |          |         |
| MARCOL    | ENSG00000248109 | -0.79669 | 0.78718 | -1.0885     | 0.86182     | -1.5706  |         |
|           | 0.94186         | -1.613   | 0.94663 | 0.78718     | 0.876093838 |          |         |
| NA        | ENSG00000246283 | -0.79671 | 0.78719 | -0.79671    | 0.78719     | -0.79671 | 0.78719 |
|           | -0.79671        | 0.78719  | 0.78719 | 0.876093838 |             |          |         |
| NA        | ENSG00000273007 | -0.79683 | 0.78722 | -2.0053     | 0.97753     | -1.4542  | 0.92706 |
|           | -1.4542         | 0.92706  | 0.78722 | 0.876107217 |             |          |         |
| ACTG1P1   | ENSG00000178631 | -0.79695 | 0.78726 | -0.79695    | 0.78726     | -0.79695 |         |
|           | 0.78726         | -0.79695 | 0.78726 | 0.78726     | 0.876131724 |          |         |
| RNU6-285P | ENSG00000222488 | -0.79706 | 0.78729 | -0.79706    | 0.78729     | -0.79706 |         |
|           | 0.78729         | -0.79706 | 0.78729 | 0.78729     | 0.876145101 |          |         |
| NA        | ENSG00000276101 | -0.79724 | 0.78734 | -0.79724    | 0.78734     | -0.79724 | 0.78734 |
|           | -0.79724        | 0.78734  | 0.78734 | 0.876165222 |             |          |         |
| NA        | ENSG00000235403 | -1.4424  | 0.92541 | -0.79731    | 0.78736     | -1.4039  | 0.91983 |
|           | -1.4157         | 0.92157  | 0.78736 | 0.876165222 |             |          |         |
| RPS2P45   | ENSG00000244378 | -0.79733 | 0.78737 | -0.79733    | 0.78737     | -0.79733 |         |
|           | 0.78737         | -0.79733 | 0.78737 | 0.78737     | 0.876165222 |          |         |
| NA        | ENSG00000229119 | -0.79736 | 0.78738 | -0.79736    | 0.78738     | -0.79736 | 0.78738 |
|           | -0.79736        | 0.78738  | 0.78738 | 0.876165222 |             |          |         |
| EIF4EBP1  | ENSG00000187840 | -0.79762 | 0.78745 | -0.79762    | 0.78745     | -0.79762 |         |
|           | 0.78745         | -1.5736  | 0.94221 | 0.78745     | 0.876220965 |          |         |
| RPL21P31  | ENSG00000227187 | -0.79775 | 0.78749 | -1.1787     | 0.88075     | -0.79775 |         |
|           | 0.78749         | -0.79775 | 0.78749 | 0.78749     | 0.876220965 |          |         |
| GCC1      | ENSG00000179562 | -0.80252 | 0.78887 | -0.80252    | 0.78887     | -0.79777 | 0.7875  |
|           | -0.79777        | 0.7875   | 0.7875  | 0.876220965 |             |          |         |
| NA        | ENSG00000267117 | -0.79782 | 0.78751 | -0.79782    | 0.78751     | -0.79782 | 0.78751 |
|           | -0.79782        | 0.78751  | 0.78751 | 0.876220965 |             |          |         |
| GPBAR1    | ENSG00000179921 | -0.79785 | 0.78752 | -0.79785    | 0.78752     | -0.79785 |         |
|           | 0.78752         | -0.79785 | 0.78752 | 0.78752     | 0.876220965 |          |         |
| MIF       | ENSG00000240972 | -0.79814 | 0.78761 | -0.79814    | 0.78761     | -0.79814 | 0.78761 |
|           | -0.79814        | 0.78761  | 0.78761 | 0.876301094 |             |          |         |
| NA        | ENSG00000266876 | -0.79838 | 0.78767 | -0.79838    | 0.78767     | -0.79838 | 0.78767 |
|           | -0.79838        | 0.78767  | 0.78767 | 0.876325683 |             |          |         |
| NRM       | ENSG00000137404 | -0.79844 | 0.78769 | -0.79844    | 0.78769     | -1.3019  | 0.90352 |
|           | -0.83205        | 0.79731  | 0.78769 | 0.876325683 |             |          |         |
| OR5BE1P   | ENSG00000225538 | -1.0665  | 0.85691 | -0.79846    | 0.7877      | -0.79846 |         |
|           | 0.7877          | -0.79846 | 0.7877  | 0.7877      | 0.876325683 |          |         |
| RPS7P8    | ENSG00000213183 | -1.6705  | 0.95259 | -1.4515     | 0.92668     | -0.7985  |         |

|           |                 |          |         |             |             |          |         |
|-----------|-----------------|----------|---------|-------------|-------------|----------|---------|
|           | 0.78771         | -0.7985  | 0.78771 | 0.78771     | 0.876325683 |          |         |
| GAPDHP16  | ENSG00000225502 | -0.98762 | 0.83833 | -0.79861    | 0.78774     | -0.79861 |         |
|           | 0.78774         | -0.79861 | 0.78774 | 0.78774     | 0.876325683 |          |         |
| IMPA1P1   | ENSG00000251521 | -1.8707  | 0.96931 | -1.9464     | 0.9742      | -2.0908  |         |
|           | 0.98173         | -0.7986  | 0.78774 | 0.78774     | 0.876325683 |          |         |
| NA        | ENSG00000259393 | -1.6923  | 0.95471 | -1.2181     | 0.8884      | -0.7989  | 0.78783 |
|           | -1.5237         | 0.93621  | 0.78783 | 0.876405796 |             |          |         |
| OR4C7P    | ENSG00000255312 | -0.79912 | 0.78789 | -1.1543     | 0.87581     | -0.83134 |         |
|           | 0.79711         | -1.6489  | 0.95041 | 0.78789     | 0.876452534 |          |         |
| NA        | ENSG00000265600 | -0.7992  | 0.78791 | -0.7992     | 0.78791     | -0.7992  | 0.78791 |
|           | -0.7992         | 0.78791  | 0.78791 | 0.876452612 |             |          |         |
| NA        | ENSG00000260959 | -1.0419  | 0.85128 | -1.0419     | 0.85128     | -0.79929 | 0.78794 |
|           | -1.0597         | 0.85537  | 0.78794 | 0.876452612 |             |          |         |
| MTND5P9   | ENSG00000248748 | -0.79932 | 0.78795 | -0.79932    | 0.78795     | -0.79932 |         |
|           | 0.78795         | -0.79932 | 0.78795 | 0.78795     | 0.876452612 |          |         |
| RNU6-179P | ENSG00000200220 | -0.79943 | 0.78798 | -0.79943    | 0.78798     | -0.79943 |         |
|           | 0.78798         | -0.79943 | 0.78798 | 0.78798     | 0.876452612 |          |         |
| NA        | ENSG00000279478 | -1.9036  | 0.97152 | -1.7185     | 0.95714     | -0.79944 | 0.78798 |
|           | -1.8262         | 0.96609  | 0.78798 | 0.876452612 |             |          |         |
| SUM01P2   | ENSG00000229612 | -0.79952 | 0.78801 | -0.79952    | 0.78801     | -0.79952 |         |
|           | 0.78801         | -0.79952 | 0.78801 | 0.78801     | 0.876465975 |          |         |
| ATP5MC3   | ENSG00000154518 | -0.95651 | 0.83059 | -0.88096    | 0.81083     | -0.88096 |         |
|           | 0.81083         | -0.79987 | 0.78811 | 0.78811     | 0.876557193 |          |         |
| RN7SKP25  | ENSG00000199319 | -0.80009 | 0.78817 | -0.80009    | 0.78817     | -0.80009 |         |
|           | 0.78817         | -0.80009 | 0.78817 | 0.78817     | 0.876595034 |          |         |
| MTND5P23  | ENSG00000235080 | -0.80012 | 0.78818 | -0.80012    | 0.78818     | -0.80012 |         |
|           | 0.78818         | -0.80012 | 0.78818 | 0.78818     | 0.876595034 |          |         |
| TRIM51    | ENSG00000124900 | -1.061   | 0.85564 | -0.88019    | 0.81062     | -1.1342  |         |
|           | 0.87164         | -0.80019 | 0.7882  | 0.7882      | 0.87659727  |          |         |
| NA        | ENSG00000226230 | -0.80038 | 0.78825 | -0.80038    | 0.78825     | -0.80038 | 0.78825 |
|           | -0.80038        | 0.78825  | 0.78825 | 0.876632871 |             |          |         |
| NA        | ENSG00000255283 | -0.80051 | 0.78829 | -1.1501     | 0.87495     | -0.9431  | 0.82719 |
|           | -0.9431         | 0.82719  | 0.78829 | 0.876648463 |             |          |         |
| MIR4634   | ENSG00000266890 | -0.80052 | 0.7883  | -0.80052    | 0.7883      | -0.80052 |         |
|           | 0.7883          | -0.80052 | 0.7883  | 0.7883      | 0.876648463 |          |         |
| FAM133EP  | ENSG00000270528 | -0.91655 | 0.82031 | -0.80062    | 0.78832     | -0.80062 |         |
|           | 0.78832         | -0.80062 | 0.78832 | 0.78832     | 0.876650698 |          |         |
| LINC01187 | ENSG00000249601 | -0.80067 | 0.78834 | -1.5501     | 0.93944     | -1.5101  |         |
|           | 0.93449         | -0.98495 | 0.83767 | 0.78834     | 0.876650754 |          |         |
| LINC01398 | ENSG00000224863 | -2.0258  | 0.97861 | -2.0258     | 0.97861     | -1.7454  |         |
|           | 0.95954         | -0.80073 | 0.78836 | 0.78836     | 0.876650754 |          |         |
| IFITM3P7  | ENSG00000233419 | -0.80081 | 0.78838 | -1.0475     | 0.85256     | -1.0475  |         |
|           | 0.85256         | -1.0475  | 0.85256 | 0.78838     | 0.876650754 |          |         |
| USP33     | ENSG00000077254 | -1.2199  | 0.88874 | -0.80093    | 0.78841     | -1.2199  | 0.88874 |
|           | -1.2199         | 0.88874  | 0.78841 | 0.876650754 |             |          |         |
| SSTR5-AS1 | ENSG00000261713 | -2.3081  | 0.9895  | -1.1003     | 0.86441     | -0.80093 |         |
|           | 0.78841         | -2.3703  | 0.99111 | 0.78841     | 0.876650754 |          |         |
| CDKL3     | ENSG00000006837 | -1.324   | 0.90724 | -2.3088     | 0.98952     | -1.8176  | 0.96544 |
|           | -0.80109        | 0.78846  | 0.78846 | 0.876686346 |             |          |         |
| CYP4F26P  | ENSG00000226562 | -1.3534  | 0.91204 | -1.6613     | 0.95167     | -0.80115 |         |
|           | 0.78848         | -1.9466  | 0.97421 | 0.78848     | 0.87668858  |          |         |
| FRMD6-AS2 | ENSG00000258537 | -0.80127 | 0.78851 | -0.80127    | 0.78851     | -0.80127 |         |
|           | 0.78851         | -0.80127 | 0.78851 | 0.78851     | 0.876701933 |          |         |
| NA        | ENSG00000220748 | -0.80138 | 0.78854 | -0.80138    | 0.78854     | -0.80138 | 0.78854 |
|           | -0.80138        | 0.78854  | 0.78854 | 0.876715284 |             |          |         |
| CMTM3     | ENSG00000140931 | -0.80172 | 0.78864 | -0.80172    | 0.78864     | -0.80172 | 0.78864 |
|           | -0.80172        | 0.78864  | 0.78864 | 0.876777695 |             |          |         |
| NA        | ENSG00000255380 | -0.80188 | 0.78869 | -0.80188    | 0.78869     | -0.80188 | 0.78869 |
|           | -0.80188        | 0.78869  | 0.78869 | 0.876777695 |             |          |         |
| NA        | ENSG00000201913 | -0.80192 | 0.7887  | -0.80192    | 0.7887      | -0.80192 | 0.7887  |
|           | -0.80192        | 0.7887   | 0.7887  | 0.876777695 |             |          |         |
| RPSAP25   | ENSG00000230384 | -0.80194 | 0.78871 | -0.80194    | 0.78871     | -0.80194 |         |

|           |                 |          |          |          |             |             |         |          |
|-----------|-----------------|----------|----------|----------|-------------|-------------|---------|----------|
|           | 0.78871         | -0.80194 | 0.78871  | 0.78871  | 0.876777695 |             |         |          |
| NA        | ENSG00000247033 | -0.80196 | 0.78871  | -0.80196 | 0.78871     | -0.80196    | 0.78871 | 0.78871  |
|           |                 | -0.80196 | 0.78871  | 0.78871  | 0.876777695 |             |         |          |
| LINC01291 | ENSG00000204792 | -0.80218 | 0.78878  | -1.2298  | 0.89062     | -1.2168     |         |          |
|           |                 | 0.88815  | -1.5545  | 0.93997  | 0.78878     | 0.876777695 |         |          |
| CYP4F10P  | ENSG00000267241 | -0.80219 | 0.78878  | -0.80219 | 0.78878     | -0.80219    | 0.78878 | -0.80219 |
|           |                 | 0.78878  | -0.80219 | 0.78878  | 0.78878     | 0.876777695 |         |          |
| SOCS5P3   | ENSG00000235805 | -1.4319  | 0.92392  | -0.80232 | 0.78881     | -0.80232    | 0.78881 | -0.80232 |
|           |                 | 0.78881  | -0.80232 | 0.78881  | 0.78881     | 0.876777695 |         |          |
| LRRC8A    | ENSG00000136802 | -0.80233 | 0.78882  | -1.9341  | 0.97345     | -0.8563     |         |          |
|           |                 | 0.80408  | -1.0049  | 0.84252  | 0.78882     | 0.876777695 |         |          |
| TGFBR2    | ENSG00000163513 | -1.5402  | 0.93824  | -1.7964  | 0.96378     | -1.0371     |         |          |
|           |                 | 0.85015  | -0.80239 | 0.78884  | 0.78884     | 0.876777695 |         |          |
| SNORD125  | ENSG00000239127 | -0.8024  | 0.78884  | -0.8024  | 0.78884     | -0.8024     | 0.78884 | -0.8024  |
|           |                 | 0.78884  | -0.8024  | 0.78884  | 0.78884     | 0.876777695 |         |          |
| KANK1P1   | ENSG00000215589 | -0.80246 | 0.78886  | -0.80246 | 0.78886     | -0.80246    | 0.78886 | -0.80246 |
|           |                 | 0.78886  | -0.80246 | 0.78886  | 0.78886     | 0.876777695 |         |          |
| ANHX      | ENSG00000227059 | -0.80251 | 0.78887  | -0.80251 | 0.78887     | -0.80251    | 0.78887 | 0.78887  |
|           |                 | -0.80251 | 0.78887  | 0.78887  | 0.876777695 |             |         |          |
| TRBVA     | ENSG00000239992 | -1.0311  | 0.84876  | -0.80255 | 0.78888     | -1.0676     | 0.85715 |          |
|           |                 | -1.1975  | 0.88445  | 0.78888  | 0.876777695 |             |         |          |
| VN1R78P   | ENSG00000268272 | -1.783   | 0.96271  | -1.717   | 0.95701     | -0.80254    |         |          |
|           |                 | 0.78888  | -1.1927  | 0.88351  | 0.78888     | 0.876777695 |         |          |
| OR52E7P   | ENSG00000233563 | -0.80259 | 0.78889  | -0.80259 | 0.78889     | -0.80259    | 0.78889 | -0.80259 |
|           |                 | 0.78889  | -0.80259 | 0.78889  | 0.78889     | 0.876777695 |         |          |
| ALX3      | ENSG00000156150 | -0.80265 | 0.78891  | -0.80265 | 0.78891     | -0.80265    | 0.78891 | 0.78891  |
|           |                 | -0.80265 | 0.78891  | 0.78891  | 0.876777695 |             |         |          |
| MORN5     | ENSG00000185681 | -0.80269 | 0.78892  | -0.80269 | 0.78892     | -0.80269    | 0.78892 | 0.78892  |
|           |                 | -0.80269 | 0.78892  | 0.78892  | 0.876777695 |             |         |          |
| NA        | ENSG00000253217 | -1.5545  | 0.93996  | -0.80305 | 0.78903     | -0.99139    | 0.83925 |          |
|           |                 | -1.2248  | 0.88968  | 0.78903  | 0.876851065 |             |         |          |
| TEK       | ENSG00000120156 | -0.80308 | 0.78904  | -0.80308 | 0.78904     | -1.5798     | 0.94293 |          |
|           |                 | -1.1862  | 0.88223  | 0.78904  | 0.876851065 |             |         |          |
| NA        | ENSG00000199466 | -0.8031  | 0.78904  | -0.8031  | 0.78904     | -0.8031     | 0.78904 | 0.78904  |
|           |                 | -0.8031  | 0.78904  | 0.78904  | 0.876851065 |             |         |          |
| NA        | ENSG00000265968 | -0.83546 | 0.79827  | -0.80324 | 0.78908     | -0.83546    | 0.79827 | 0.79827  |
|           |                 | -0.83546 | 0.79827  | 0.78908  | 0.876875519 |             |         |          |
| AP1M1     | ENSG00000072958 | -1.5513  | 0.93959  | -1.4856  | 0.93131     | -0.80369    | 0.78921 |          |
|           |                 | -0.87308 | 0.80869  | 0.78921  | 0.876999984 |             |         |          |
| NA        | ENSG00000232057 | -0.8038  | 0.78924  | -0.8038  | 0.78924     | -0.8038     | 0.78924 | 0.78924  |
|           |                 | -0.8038  | 0.78924  | 0.78924  | 0.877013322 |             |         |          |
| PPP1CA    | ENSG00000172531 | -0.80392 | 0.78928  | -0.80392 | 0.78928     | -0.84193    |         |          |
|           |                 | 0.80009  | -0.98703 | 0.83819  | 0.78928     | 0.87702446  |         |          |
| NA        | ENSG00000251023 | -0.86896 | 0.80757  | -0.84865 | 0.80196     | -0.82689    | 0.79585 |          |
|           |                 | -0.80414 | 0.78934  | 0.78934  | 0.87702446  |             |         |          |
| TTN-AS1   | ENSG00000237298 | -0.80419 | 0.78936  | -0.80419 | 0.78936     | -0.80419    |         |          |
|           |                 | 0.78936  | -0.80419 | 0.78936  | 0.78936     | 0.87702446  |         |          |
| NA        | ENSG00000240376 | -1.6728  | 0.95281  | -0.80421 | 0.78936     | -1.2041     | 0.88573 |          |
|           |                 | -1.6728  | 0.95281  | 0.78936  | 0.87702446  |             |         |          |
| NA        | ENSG00000258044 | -0.80421 | 0.78936  | -0.80421 | 0.78936     | -0.80421    | 0.78936 | 0.78936  |
|           |                 | -0.80421 | 0.78936  | 0.78936  | 0.87702446  |             |         |          |
| NA        | ENSG00000280389 | -1.5296  | 0.93695  | -1.5296  | 0.93695     | -0.8042     | 0.78936 |          |
|           |                 | -0.8042  | 0.78936  | 0.78936  | 0.87702446  |             |         |          |
| NA        | ENSG00000274737 | -0.80426 | 0.78938  | -0.80426 | 0.78938     | -0.80426    | 0.78938 | 0.78938  |
|           |                 | -0.80426 | 0.78938  | 0.78938  | 0.87702446  |             |         |          |
| MTCO2P16  | ENSG00000234842 | -0.80441 | 0.78942  | -0.80441 | 0.78942     | -0.80441    |         |          |
|           |                 | 0.78942  | -0.80441 | 0.78942  | 0.78942     | 0.87702446  |         |          |
| DPRXP5    | ENSG00000270652 | -0.80443 | 0.78942  | -0.80443 | 0.78942     | -0.80443    | 0.78942 | -0.80443 |
|           |                 | 0.78942  | -0.80443 | 0.78942  | 0.78942     | 0.87702446  |         |          |
| PCDHA3    | ENSG00000255408 | -0.80443 | 0.78943  | -0.80443 | 0.78943     | -0.80443    | 0.78943 | -0.80443 |
|           |                 | 0.78943  | -0.80443 | 0.78943  | 0.78943     | 0.87702446  |         |          |
| GOLGA2    | ENSG00000167110 | -1.8935  | 0.97085  | -1.8935  | 0.97085     | -0.80467    |         |          |

|           |                 |          |         |             |             |          |         |
|-----------|-----------------|----------|---------|-------------|-------------|----------|---------|
|           | 0.7895          | -1.7123  | 0.95658 | 0.7895      | 0.877082231 |          |         |
| PTPN2     | ENSG00000175354 | -1.3076  | 0.90449 | -1.1676     | 0.87851     | -0.83152 | 0.79716 |
|           | -0.80482        | 0.78954  | 0.78954 | 0.877104454 |             |          |         |
| NA        | ENSG00000200150 | -0.8049  | 0.78956 | -0.8049     | 0.78956     | -0.8049  | 0.78956 |
|           | -0.8049         | 0.78956  | 0.78956 | 0.877104454 |             |          |         |
| NA        | ENSG00000278876 | -0.80499 | 0.78959 | -0.80499    | 0.78959     | -0.80499 | 0.78959 |
|           | -0.80499        | 0.78959  | 0.78959 | 0.877104454 |             |          |         |
| SPAG8     | ENSG00000137098 | -1.4499  | 0.92645 | -0.80507    | 0.78961     | -1.4499  | 0.92645 |
|           | -1.4499         | 0.92645  | 0.78961 | 0.877104454 |             |          |         |
| NA        | ENSG00000226078 | -0.81364 | 0.79207 | -0.80508    | 0.78961     | -0.81364 | 0.79207 |
|           | -0.98297        | 0.83719  | 0.78961 | 0.877104454 |             |          |         |
| FAM216B   | ENSG00000179813 | -1.5162  | 0.93526 | -1.7387     | 0.95895     | -0.80521 |         |
|           | 0.78965         | -0.80521 | 0.78965 | 0.78965     | 0.877108899 |          |         |
| VN1R38P   | ENSG00000235227 | -0.80521 | 0.78965 | -0.8075     | 0.79031     | -0.8075  |         |
|           | 0.79031         | -0.8075  | 0.79031 | 0.78965     | 0.877108899 |          |         |
| LINC02546 | ENSG00000255117 | -0.80534 | 0.78969 | -0.80534    | 0.78969     | -0.80534 |         |
|           | 0.78969         | -0.80534 | 0.78969 | 0.78969     | 0.877133336 |          |         |
| NA        | ENSG00000260484 | -0.80557 | 0.78975 | -1.8016     | 0.9642      | -0.80557 | 0.78975 |
|           | -0.80557        | 0.78975  | 0.78975 | 0.877146663 |             |          |         |
| PROSER2   | ENSG00000148426 | -0.80561 | 0.78977 | -0.80561    | 0.78977     | -0.80561 |         |
|           | 0.78977         | -0.80561 | 0.78977 | 0.78977     | 0.877146663 |          |         |
| NA        | ENSG00000251099 | -0.80564 | 0.78977 | -0.80564    | 0.78977     | -0.80564 | 0.78977 |
|           | -0.80564        | 0.78977  | 0.78977 | 0.877146663 |             |          |         |
| IGHV3-15  | ENSG00000211943 | -0.80566 | 0.78978 | -0.80566    | 0.78978     | -0.80566 |         |
|           | 0.78978         | -1.7012  | 0.95554 | 0.78978     | 0.877146663 |          |         |
| RNA5SP69  | ENSG00000201347 | -1.5149  | 0.9351  | -0.86195    | 0.80564     | -0.80573 |         |
|           | 0.7898          | -0.92585 | 0.82274 | 0.7898      | 0.877146663 |          |         |
| NA        | ENSG00000223275 | -1.2066  | 0.8862  | -0.80576    | 0.78981     | -0.80576 | 0.78981 |
|           | -1.0887         | 0.86186  | 0.78981 | 0.877146663 |             |          |         |
| CKMT1A    | ENSG00000223572 | -1.0659  | 0.85677 | -1.6791     | 0.95344     | -1.428   |         |
|           | 0.92335         | -0.80586 | 0.78984 | 0.78984     | 0.87715999  |          |         |
| CYP2C9    | ENSG00000138109 | -0.93085 | 0.82403 | -0.80604    | 0.78989     | -0.8794  |         |
|           | 0.81041         | -0.905   | 0.81727 | 0.78989     | 0.877195526 |          |         |
| RPL13A    | ENSG00000142541 | -0.80611 | 0.78991 | -0.80611    | 0.78991     | -0.80611 |         |
|           | 0.78991         | -0.80611 | 0.78991 | 0.78991     | 0.877197746 |          |         |
| HSPB3     | ENSG00000169271 | -1.9046  | 0.97158 | -1.5815     | 0.94311     | -1.4052  | 0.92002 |
|           | -0.80624        | 0.78995  | 0.78995 | 0.877206617 |             |          |         |
| NA        | ENSG00000214093 | -0.80634 | 0.78998 | -0.80634    | 0.78998     | -0.80634 | 0.78998 |
|           | -0.80634        | 0.78998  | 0.78998 | 0.877206617 |             |          |         |
| MIR3942   | ENSG00000265102 | -0.80638 | 0.78999 | -0.80638    | 0.78999     | -0.80638 |         |
|           | 0.78999         | -0.80638 | 0.78999 | 0.78999     | 0.877206617 |          |         |
| IGHV3-76  | ENSG00000253247 | -0.80648 | 0.79002 | -0.80648    | 0.79002     | -0.80648 |         |
|           | 0.79002         | -0.80648 | 0.79002 | 0.79002     | 0.877206617 |          |         |
| MFAP1P1   | ENSG00000232489 | -0.80653 | 0.79003 | -0.80653    | 0.79003     | -0.80653 |         |
|           | 0.79003         | -0.80653 | 0.79003 | 0.79003     | 0.877206617 |          |         |
| OR51H1    | ENSG00000176904 | -0.80656 | 0.79004 | -1.5245     | 0.93631     | -1.2901  |         |
|           | 0.90149         | -1.2901  | 0.90149 | 0.79004     | 0.877206617 |          |         |
| PRKG2-AS1 | ENSG00000251059 | -1.2329  | 0.89119 | -1.1397     | 0.87279     | -0.80663 |         |
|           | 0.79006         | -0.80663 | 0.79006 | 0.79006     | 0.877206617 |          |         |
| NA        | ENSG00000278400 | -0.80667 | 0.79007 | -1.0448     | 0.85194     | -1.5115  | 0.93467 |
|           | -1.4256         | 0.92301  | 0.79007 | 0.877206617 |             |          |         |
| NA        | ENSG00000228804 | -1.8183  | 0.96549 | -0.8067     | 0.79008     | -0.979   | 0.83621 |
|           | -0.979          | 0.83621  | 0.79008 | 0.877206617 |             |          |         |
| FAM98A    | ENSG00000119812 | -1.1858  | 0.88214 | -0.80682    | 0.79012     | -1.4419  |         |
|           | 0.92533         | -1.1661  | 0.87821 | 0.79012     | 0.877231041 |          |         |
| H3P21     | ENSG00000250386 | -0.80689 | 0.79014 | -0.80689    | 0.79014     | -0.80689 | 0.79014 |
|           | -0.80689        | 0.79014  | 0.79014 | 0.877233259 |             |          |         |
| NA        | ENSG00000272008 | -0.80707 | 0.79019 | -0.80707    | 0.79019     | -0.80707 | 0.79019 |
|           | -0.80707        | 0.79019  | 0.79019 | 0.877244314 |             |          |         |
| RPL12P32  | ENSG00000242314 | -1.8548  | 0.96819 | -1.8548     | 0.96819     | -0.80724 |         |
|           | 0.79024         | -0.80724 | 0.79024 | 0.79024     | 0.877244314 |          |         |
| MIR518E   | ENSG00000207987 | -0.80734 | 0.79027 | -0.80734    | 0.79027     | -0.80734 |         |



|            |                 |          |         |             |             |          |         |
|------------|-----------------|----------|---------|-------------|-------------|----------|---------|
|            | 0.79027         | -0.80734 | 0.79027 | 0.79027     | 0.877244314 |          |         |
| NA         | ENSG00000232324 | -0.8074  | 0.79028 | -0.8074     | 0.79028     | -0.8074  | 0.79028 |
|            | -0.8074         | 0.79028  | 0.79028 | 0.877244314 |             |          |         |
| MIR520C    | ENSG00000207738 | -0.80742 | 0.79029 | -0.80742    | 0.79029     | -0.80742 |         |
|            | 0.79029         | -0.80742 | 0.79029 | 0.877244314 |             |          |         |
| NA         | ENSG00000202100 | -0.80761 | 0.79034 | -0.80761    | 0.79034     | -0.80761 | 0.79034 |
|            | -0.80761        | 0.79034  | 0.79034 | 0.877244314 |             |          |         |
| TRGV5P     | ENSG00000228668 | -0.80761 | 0.79034 | -0.80761    | 0.79034     | -0.80761 |         |
|            | 0.79034         | -0.80761 | 0.79034 | 0.877244314 |             |          |         |
| NA         | ENSG00000229261 | -1.4684  | 0.92901 | -0.8076     | 0.79034     | -1.5867  | 0.94371 |
|            | -1.2655         | 0.89715  | 0.79034 | 0.877244314 |             |          |         |
| PRDX2P3    | ENSG00000249140 | -0.80767 | 0.79036 | -0.80767    | 0.79036     | -0.80767 |         |
|            | 0.79036         | -0.80767 | 0.79036 | 0.877244314 |             |          |         |
| KRT34      | ENSG00000131737 | -0.80775 | 0.79038 | -0.80775    | 0.79038     | -0.80775 | 0.79038 |
|            | -0.80775        | 0.79038  | 0.79038 | 0.877244314 |             |          |         |
| RAD54L2P1  | ENSG00000269316 | -0.8078  | 0.7904  | -0.8078     | 0.7904      | -0.8078  |         |
|            | 0.7904          | -0.8078  | 0.7904  | 0.877244314 |             |          |         |
| NA         | ENSG00000270133 | -1.4549  | 0.92715 | -1.448      | 0.92619     | -0.8078  | 0.7904  |
|            | -1.448          | 0.92619  | 0.7904  | 0.877244314 |             |          |         |
| SNX19      | ENSG00000120451 | -0.98701 | 0.83818 | -0.85603    | 0.80401     | -1.1618  | 0.87733 |
|            | -0.80786        | 0.79041  | 0.79041 | 0.877244314 |             |          |         |
| ATG7       | ENSG00000197548 | -0.8201  | 0.79392 | -1.1271     | 0.87014     | -0.85106 | 0.80263 |
|            | -0.80789        | 0.79042  | 0.79042 | 0.877244314 |             |          |         |
| NA         | ENSG00000251511 | -1.6511  | 0.95064 | -1.6511     | 0.95064     | -0.80788 | 0.79042 |
|            | -1.2387         | 0.89228  | 0.79042 | 0.877244314 |             |          |         |
| MRPL20P1   | ENSG00000215734 | -0.808   | 0.79045 | -0.808      | 0.79045     | -0.808   |         |
|            | 0.79045         | -0.808   | 0.79045 | 0.877244314 |             |          |         |
| MFF        | ENSG00000168958 | -0.80803 | 0.79046 | -0.80803    | 0.79046     | -0.80803 | 0.79046 |
|            | -0.80803        | 0.79046  | 0.79046 | 0.877244314 |             |          |         |
| LINC00539  | ENSG00000224429 | -1.4012  | 0.91943 | -1.6455     | 0.95007     | -1.1292  |         |
|            | 0.87059         | -0.80809 | 0.79048 | 0.79048     | 0.877244314 |          |         |
| NA         | ENSG00000225898 | -0.80815 | 0.7905  | -0.80815    | 0.7905      | -0.80815 | 0.7905  |
|            | -0.80815        | 0.7905   | 0.7905  | 0.877244314 |             |          |         |
| NA         | ENSG00000262165 | -0.8082  | 0.79051 | -0.8082     | 0.79051     | -0.8082  | 0.79051 |
|            | -0.8082         | 0.79051  | 0.79051 | 0.877244314 |             |          |         |
| RNU2-29P   | ENSG00000222355 | -0.80831 | 0.79054 | -1.2918     | 0.90179     | -0.80831 |         |
|            | 0.79054         | -0.80831 | 0.79054 | 0.79054     | 0.877257628 |          |         |
| OR4A17P    | ENSG00000255196 | -0.80845 | 0.79058 | -1.2536     | 0.895       | -1.0998  | 0.86428 |
|            | -0.96922        | 0.83378  | 0.79058 | 0.877282038 |             |          |         |
| MRPL57P3   | ENSG00000275940 | -1.0167  | 0.84535 | -0.80855    | 0.79061     | -1.1894  |         |
|            | 0.88286         | -1.1894  | 0.88286 | 0.79061     | 0.87729535  |          |         |
| OR4C46     | ENSG00000185926 | -1.3656  | 0.91397 | -1.0244     | 0.84717     | -1.0244  |         |
|            | 0.84717         | -0.80865 | 0.79064 | 0.79064     | 0.877308662 |          |         |
| NA         | ENSG00000273204 | -0.80881 | 0.79069 | -0.80881    | 0.79069     | -0.80881 | 0.79069 |
|            | -0.80881        | 0.79069  | 0.79069 | 0.877344165 |             |          |         |
| CNNM4      | ENSG00000158158 | -0.89149 | 0.81367 | -0.80905    | 0.79076     | -1.4217  | 0.92245 |
|            | -1.4217         | 0.92245  | 0.79076 | 0.877401858 |             |          |         |
| NA         | ENSG00000261798 | -0.80912 | 0.79078 | -0.80912    | 0.79078     | -0.80912 | 0.79078 |
|            | -0.80912        | 0.79078  | 0.79078 | 0.877404071 |             |          |         |
| NA         | ENSG00000268620 | -0.8092  | 0.7908  | -0.8092     | 0.7908      | -0.8092  | 0.7908  |
|            | -0.8092         | 0.7908   | 0.7908  | 0.877406284 |             |          |         |
| NA         | ENSG00000254696 | -0.8094  | 0.79086 | -0.97659    | 0.83561     | -1.2371  | 0.89198 |
|            | -1.0033         | 0.84215  | 0.79086 | 0.877452877 |             |          |         |
| NA         | ENSG00000277511 | -1.1155  | 0.86769 | -1.1155     | 0.86769     | -0.80959 | 0.79091 |
|            | -1.1155         | 0.86769  | 0.79091 | 0.877479489 |             |          |         |
| RNU6-796P  | ENSG00000212388 | -0.80961 | 0.79092 | -0.80961    | 0.79092     | -0.80961 |         |
|            | 0.79092         | -0.80961 | 0.79092 | 0.79092     | 0.877479489 |          |         |
| NA         | ENSG00000280131 | -0.80976 | 0.79096 | -0.80976    | 0.79096     | -0.80976 | 0.79096 |
|            | -0.80976        | 0.79096  | 0.79096 | 0.877497216 |             |          |         |
| KRTAP13-5P | ENSG00000233640 | -0.80982 | 0.79098 | -0.80982    | 0.79098     | -0.80982 |         |
|            | 0.79098         | -0.80982 | 0.79098 | 0.79098     | 0.877497216 |          |         |
| NA         | ENSG00000205644 | -0.95412 | 0.82999 | -1.0363     | 0.84996     | -1.2901  | 0.90149 |

|           |                 |             |         |             |             |          |         |
|-----------|-----------------|-------------|---------|-------------|-------------|----------|---------|
|           | -0.80987        | 0.79099     | 0.79099 | 0.877497216 |             |          |         |
| MYCL-AS1  | ENSG00000236546 | -0.80996    | 0.79102 | -0.80996    | 0.79102     | -0.80996 |         |
|           | 0.79102         | -0.80996    | 0.79102 | 0.79102     | 0.877501637 |          |         |
| NA        | ENSG00000235110 | -0.80999    | 0.79103 | -0.80999    | 0.79103     | -0.80999 | 0.79103 |
|           | -0.80999        | 0.79103     | 0.79103 | 0.877501637 |             |          |         |
| FDPSP1    | ENSG00000225462 | -0.81016    | 0.79108 | -0.81016    | 0.79108     | -0.81016 |         |
|           | 0.79108         | -0.81016    | 0.79108 | 0.79108     | 0.877537126 |          |         |
| NA        | ENSG00000200262 | -0.81023    | 0.7911  | -0.81023    | 0.7911      | -0.81023 | 0.7911  |
|           | -0.81023        | 0.7911      | 0.7911  | 0.877539335 |             |          |         |
| LINC02239 | ENSG00000248908 | -0.81059    | 0.7912  | -0.81059    | 0.7912      | -0.81059 |         |
|           | 0.7912          | -0.81059    | 0.7912  | 0.7912      | 0.877630284 |          |         |
| C11orf52  | ENSG00000149300 | -0.81071    | 0.79123 | -0.81071    | 0.79123     | -0.81071 |         |
|           | 0.79123         | -0.81071    | 0.79123 | 0.79123     | 0.877643583 |          |         |
| NA        | ENSG00000273014 | -0.81077    | 0.79125 | -0.81077    | 0.79125     | -0.81077 | 0.79125 |
|           | -0.81077        | 0.79125     | 0.79125 | 0.87764579  |             |          |         |
| ANKRD35   | ENSG00000198483 | -1.5381     | 0.93799 | -0.81099    | 0.79131     | -0.81099 |         |
|           | 0.79131         | -0.81099    | 0.79131 | 0.79131     | 0.877692364 |          |         |
| NA        | ENSG00000270516 | -0.81103    | 0.79133 | -1.245      | 0.89343     | -1.007   | 0.84304 |
|           | -1.4976         | 0.93288     | 0.79133 | 0.877694569 |             |          |         |
| RN7SKP106 | ENSG00000222764 | -0.81112    | 0.79135 | -0.81112    | 0.79135     | -0.81112 |         |
|           | 0.79135         | -0.81112    | 0.79135 | 0.79135     | 0.877696775 |          |         |
| NA        | ENSG00000270634 | -0.81122    | 0.79138 | -0.81122    | 0.79138     | -0.81122 | 0.79138 |
|           | -0.81122        | 0.79138     | 0.79138 | 0.877710071 |             |          |         |
| NA        | ENSG00000267049 | -0.81131    | 0.79141 | -0.81131    | 0.79141     | -0.81131 | 0.79141 |
|           | -0.81131        | 0.79141     | 0.79141 | 0.877723367 |             |          |         |
| CRYBG2    | ENSG00000176092 | -0.92583    | 0.82273 | -0.81167    | 0.79151     | -0.81167 |         |
|           | 0.79151         | -0.81167    | 0.79151 | 0.79151     | 0.877787634 |          |         |
| NA        | ENSG00000214871 | -0.81165    | 0.79151 | -0.81165    | 0.79151     | -0.81165 | 0.79151 |
|           | -0.81165        | 0.79151     | 0.79151 | 0.877787634 |             |          |         |
| NA        | ENSG00000257849 | -0.81173    | 0.79153 | -0.81173    | 0.79153     | -0.81173 | 0.79153 |
|           | -0.81173        | 0.79153     | 0.79153 | 0.877787634 |             |          |         |
| NOC4L     | ENSG00000184967 | -1.6308     | 0.94853 | -0.81178    | 0.79154     | -1.334   | 0.90889 |
|           | -2.1032         | 0.98228     | 0.79154 | 0.877787634 |             |          |         |
| NA        | ENSG00000260091 | -0.81209    | 0.79163 | -0.81209    | 0.79163     | -1.5521  | 0.93968 |
|           | -2.405          | 0.99191     | 0.79163 | 0.877820825 |             |          |         |
| ACRP1     | ENSG00000175509 | -1.0711     | 0.85793 | -0.83165    | 0.7972      | -0.81213 | 0.79164 |
|           | -0.81213        | 0.79164     | 0.79164 | 0.877820825 |             |          |         |
| NA        | ENSG00000263165 | -0.81211    | 0.79164 | -0.81211    | 0.79164     | -0.81211 | 0.79164 |
|           | -0.81211        | 0.79164     | 0.79164 | 0.877820825 |             |          |         |
| CABIN1    | ENSG00000099991 | -0.95188    | 0.82942 | -0.81215    | 0.79165     | -1.3979  |         |
|           | 0.91893         | -0.96309    | 0.83225 | 0.79165     | 0.877820825 |          |         |
| RNU6-485P | ENSG00000200345 | -0.81221    | 0.79166 | -0.81221    | 0.79166     | -0.81221 |         |
|           | 0.79166         | -0.81221    | 0.79166 | 0.79166     | 0.877820825 |          |         |
| LINC01446 | ENSG00000205628 | -1.5934     | 0.94447 | -0.81229    | 0.79169     | -1.5934  |         |
|           | 0.94447         | -1.0084     | 0.84337 | 0.79169     | 0.877834115 |          |         |
| SNORD121A | ENSG00000238886 | -0.81238    | 0.79171 | -0.81238    | 0.79171     | -0.81238 |         |
|           | 0.79171         | -0.81238    | 0.79171 | 0.79171     | 0.877836317 |          |         |
| KCNJ14    | ENSG00000182324 | -0.81251    | 0.79175 | -0.81251    | 0.79175     | -0.81251 |         |
|           | 0.79175         | -0.81251    | 0.79175 | 0.79175     | 0.87785621  |          |         |
| NA        | ENSG00000266540 | -0.81262    | 0.79178 | -0.81262    | 0.79178     | -0.81262 | 0.79178 |
|           | -0.81262        | 0.79178     | 0.79178 | 0.87785621  |             |          |         |
| NA        | ENSG00000279837 | -0.81264    | 0.79179 | -0.81264    | 0.79179     | -0.81264 | 0.79179 |
|           | -0.81264        | 0.79179     | 0.79179 | 0.87785621  |             |          |         |
| NA        | ENSG00000255545 | -1.6216     | 0.94756 | -0.91357    | 0.81953     | -1.1157  | 0.86772 |
|           | -0.81267        | 0.7918      | 0.7918  | 0.87785621  |             |          |         |
| NA        | ENSG00000259357 | -0.81314    | 0.79193 | -0.81314    | 0.79193     | -0.81314 | 0.79193 |
|           | -0.81314        | 0.79193     | 0.79193 | 0.877980364 |             |          |         |
| NA        | ENSG00000266897 | -0.81335    | 0.79199 | -0.81335    | 0.79199     | -0.81335 | 0.79199 |
|           | -0.81335        | 0.79199     | 0.79199 | 0.878018018 |             |          |         |
| NA        | ENSG00000265294 | -0.81338    | 0.792   | -0.81338    | 0.792       | -0.81338 | 0.792   |
|           | 0.792           | 0.878018018 |         |             |             |          |         |
| RNU6-243P | ENSG00000212442 | -0.81357    | 0.79205 | -0.81357    | 0.79205     | -0.81357 |         |

|           |                 |          |         |             |             |          |         |
|-----------|-----------------|----------|---------|-------------|-------------|----------|---------|
|           | 0.79205         | -0.81357 | 0.79205 | 0.79205     | 0.878053473 |          |         |
| NA        | ENSG00000236386 | -0.81363 | 0.79207 | -0.81363    | 0.79207     | -0.81363 | 0.79207 |
|           | -0.81363        | 0.79207  | 0.79207 | 0.878055669 |             |          |         |
| NA        | ENSG00000255173 | -0.81375 | 0.79211 | -0.81375    | 0.79211     | -0.81375 | 0.79211 |
|           | -0.81375        | 0.79211  | 0.79211 | 0.878080036 |             |          |         |
| NDUFB10P2 | ENSG00000261624 | -0.81389 | 0.79215 | -0.81389    | 0.79215     | -0.81389 |         |
|           | 0.79215         | -0.81389 | 0.79215 | 0.79215     | 0.878082124 |          |         |
| NA        | ENSG00000267699 | -0.81401 | 0.79218 | -0.81401    | 0.79218     | -0.81401 | 0.79218 |
|           | -0.81401        | 0.79218  | 0.79218 | 0.878082124 |             |          |         |
| THAP12P8  | ENSG00000223963 | -0.81403 | 0.79219 | -0.81403    | 0.79219     | -0.81403 |         |
|           | 0.79219         | -0.81403 | 0.79219 | 0.79219     | 0.878082124 |          |         |
| NA        | ENSG00000199866 | -0.81407 | 0.7922  | -0.81407    | 0.7922      | -0.81407 | 0.7922  |
|           | -0.81407        | 0.7922   | 0.7922  | 0.878082124 |             |          |         |
| MSX2P1    | ENSG00000229590 | -0.81413 | 0.79221 | -0.81413    | 0.79221     | -0.81413 |         |
|           | 0.79221         | -0.81413 | 0.79221 | 0.79221     | 0.878082124 |          |         |
| NA        | ENSG00000256748 | -0.81416 | 0.79222 | -0.81416    | 0.79222     | -0.81416 | 0.79222 |
|           | -0.81416        | 0.79222  | 0.79222 | 0.878082124 |             |          |         |
| ITGA11    | ENSG00000137809 | -0.81425 | 0.79225 | -1.0451     | 0.85201     | -1.2154  |         |
|           | 0.88788         | -2.2112  | 0.98649 | 0.79225     | 0.878086515 |          |         |
| GNB2      | ENSG00000172354 | -1.631   | 0.94855 | -1.9164     | 0.97234     | -0.81428 | 0.79226 |
|           | -0.81428        | 0.79226  | 0.79226 | 0.878086515 |             |          |         |
| NA        | ENSG00000228835 | -0.81445 | 0.79231 | -0.81445    | 0.79231     | -0.81445 | 0.79231 |
|           | -0.81445        | 0.79231  | 0.79231 | 0.8780931   |             |          |         |
| NA        | ENSG00000256427 | -0.81451 | 0.79232 | -0.81451    | 0.79232     | -0.81451 | 0.79232 |
|           | -0.81451        | 0.79232  | 0.79232 | 0.8780931   |             |          |         |
| MTND3P19  | ENSG00000271480 | -0.81451 | 0.79232 | -0.81451    | 0.79232     | -0.81451 |         |
|           | 0.79232         | -0.81451 | 0.79232 | 0.79232     | 0.8780931   |          |         |
| NA        | ENSG00000269385 | -0.81456 | 0.79234 | -0.81456    | 0.79234     | -0.81456 | 0.79234 |
|           | -0.81456        | 0.79234  | 0.79234 | 0.878095295 |             |          |         |
| RNA5SP464 | ENSG00000252060 | -0.81467 | 0.79237 | -0.81467    | 0.79237     | -0.81467 |         |
|           | 0.79237         | -0.81467 | 0.79237 | 0.79237     | 0.878108461 |          |         |
| RPL7P2    | ENSG00000227663 | -1.5797  | 0.94291 | -1.2773     | 0.89925     | -1.2773  |         |
|           | 0.89925         | -0.81483 | 0.79241 | 0.79241     | 0.878108461 |          |         |
| RNPS1P1   | ENSG00000250896 | -0.81489 | 0.79243 | -0.81489    | 0.79243     | -0.81489 |         |
|           | 0.79243         | -0.81489 | 0.79243 | 0.79243     | 0.878108461 |          |         |
| HMG2      | ENSG00000149948 | -2.0617  | 0.98038 | -0.81495    | 0.79245     | -2.0617  | 0.98038 |
|           | -2.0617         | 0.98038  | 0.79245 | 0.878108461 |             |          |         |
| NA        | ENSG00000272630 | -0.81494 | 0.79245 | -0.93826    | 0.82594     | -1.0763  | 0.85909 |
|           | -0.81494        | 0.79245  | 0.79245 | 0.878108461 |             |          |         |
| NA        | ENSG00000277954 | -0.81499 | 0.79246 | -0.81499    | 0.79246     | -0.81499 | 0.79246 |
|           | -0.81499        | 0.79246  | 0.79246 | 0.878108461 |             |          |         |
| ANKRD49P4 | ENSG00000214684 | -0.94425 | 0.82748 | -1.2402     | 0.89255     | -1.1507  |         |
|           | 0.87508         | -0.81525 | 0.79254 | 0.79254     | 0.878170326 |          |         |
| PEX13     | ENSG00000162928 | -0.81537 | 0.79257 | -0.81537    | 0.79257     | -0.81537 | 0.79257 |
|           | -1.4273         | 0.92326  | 0.79257 | 0.878170326 |             |          |         |
| EEF1A1P20 | ENSG00000249963 | -0.83099 | 0.79701 | -2.2145     | 0.9866      | -0.81553 |         |
|           | 0.79261         | -0.97138 | 0.83432 | 0.79261     | 0.878170326 |          |         |
| SLCO2B1   | ENSG00000137491 | -1.0561  | 0.85453 | -0.81553    | 0.79262     | -1.3962  |         |
|           | 0.91868         | -1.0545  | 0.85417 | 0.79262     | 0.878170326 |          |         |
| NA        | ENSG00000242068 | -0.81554 | 0.79262 | -0.81554    | 0.79262     | -0.81554 | 0.79262 |
|           | -0.8428         | 0.80033  | 0.79262 | 0.878170326 |             |          |         |
| CD33      | ENSG00000105383 | -0.81563 | 0.79264 | -0.81563    | 0.79264     | -0.81563 | 0.79264 |
|           | -1.0014         | 0.84167  | 0.79264 | 0.878170326 |             |          |         |
| KRT38     | ENSG00000171360 | -0.81567 | 0.79265 | -0.81567    | 0.79265     | -0.81567 | 0.79265 |
|           | -0.81567        | 0.79265  | 0.79265 | 0.878170326 |             |          |         |
| NA        | ENSG00000199540 | -0.8157  | 0.79266 | -0.8157     | 0.79266     | -0.8157  | 0.79266 |
|           | -0.8157         | 0.79266  | 0.79266 | 0.878170326 |             |          |         |
| PSORS1C1  | ENSG00000204540 | -0.81602 | 0.79275 | -1.4238     | 0.92275     | -1.6698  |         |
|           | 0.95252         | -1.4238  | 0.92275 | 0.79275     | 0.878250068 |          |         |
| NA        | ENSG00000241281 | -0.81606 | 0.79277 | -0.81606    | 0.79277     | -0.81606 | 0.79277 |
|           | -0.81606        | 0.79277  | 0.79277 | 0.878252259 |             |          |         |
| NA        | ENSG00000269749 | -0.81627 | 0.79283 | -0.81627    | 0.79283     | -0.81627 | 0.79283 |

|              |                 |          |             |             |             |          |         |         |
|--------------|-----------------|----------|-------------|-------------|-------------|----------|---------|---------|
|              | -0.81627        | 0.79283  | 0.79283     | 0.878298761 |             |          |         |         |
| RMRP         | ENSG00000269900 | -0.81646 | 0.79288     | -0.81646    | 0.79288     | -0.81646 | 0.79288 |         |
|              | -0.81646        | 0.79288  | 0.79288     | 0.878334184 |             |          |         |         |
| ST3GAL6      | ENSG00000064225 | -0.99043 | 0.83902     | -0.81654    | 0.79291     | -1.9222  |         |         |
|              | 0.97271         | -1.0986  | 0.86403     | 0.79291     | 0.878347449 |          |         |         |
| ATF2         | ENSG00000115966 | -0.9316  | 0.82423     | -0.81678    | 0.79297     | -0.81678 | 0.79297 |         |
|              | -0.81678        | 0.79297  | 0.79297     | 0.878373979 |             |          |         |         |
| NA           | ENSG00000218175 | -1.0494  | 0.853       | -0.81677    | 0.79297     | -0.81677 | 0.79297 |         |
|              | -0.81677        | 0.79297  | 0.79297     | 0.878373979 |             |          |         |         |
| BNIP3P17     | ENSG00000271524 | -0.81692 | 0.79301     | -0.81692    | 0.79301     | -0.81692 |         |         |
|              | 0.79301         | -0.81692 | 0.79301     | 0.79301     | 0.878382728 |          |         |         |
| AFAP1        | ENSG00000196526 | -0.81698 | 0.79303     | -1.8591     | 0.96849     | -1.6487  | 0.95039 |         |
|              | -1.4366         | 0.92459  | 0.79303     | 0.878382728 |             |          |         |         |
| NA           | ENSG00000271607 | -0.81702 | 0.79304     | -0.81702    | 0.79304     | -0.81702 | 0.79304 |         |
|              | -0.81702        | 0.79304  | 0.79304     | 0.878382728 |             |          |         |         |
| MTND5P29     | ENSG00000234934 | -0.81704 | 0.79305     | -0.81704    | 0.79305     | -0.81704 |         |         |
|              | 0.79305         | -0.81704 | 0.79305     | 0.79305     | 0.878382728 |          |         |         |
| RPL38P6      | ENSG00000224291 | -1.5783  | 0.94275     | -1.335      | 0.90907     | -0.91825 |         |         |
|              | 0.82076         | -0.81724 | 0.7931      | 0.7931      | 0.878418142 |          |         |         |
| NA           | ENSG00000230863 | -0.87152 | 0.80827     | -0.98086    | 0.83667     | -0.96905 | 0.83374 |         |
|              | -0.81741        | 0.79315  | 0.79315     | 0.87844685  |             |          |         |         |
| RPL7P39      | ENSG00000243020 | -0.81752 | 0.79318     | -0.81752    | 0.79318     | -0.81752 |         |         |
|              | 0.79318         | -0.81752 | 0.79318     | 0.79318     | 0.87844685  |          |         |         |
| NA           | ENSG00000253186 | -0.81751 | 0.79318     | -0.81751    | 0.79318     | -0.81751 | 0.79318 |         |
|              | -0.81751        | 0.79318  | 0.79318     | 0.87844685  |             |          |         |         |
| ANP32D       | ENSG00000139223 | -1.7757  | 0.96211     | -1.9643     | 0.97525     | -0.81757 |         |         |
|              | 0.7932          | -0.81757 | 0.7932      | 0.7932      | 0.878449035 |          |         |         |
| NA           | ENSG00000255020 | -0.81767 | 0.79323     | -0.81767    | 0.79323     | -0.85641 | 0.80412 |         |
|              | -0.81767        | 0.79323  | 0.79323     | 0.878462295 |             |          |         |         |
| EIF4HP1      | ENSG00000233830 | -0.81793 | 0.7933      | -0.92506    | 0.82253     | -0.81793 |         |         |
|              | 0.7933          | -0.81793 | 0.7933      | 0.7933      | 0.878499886 |          |         |         |
| MTCO3P38     | ENSG00000242456 | -0.81791 | 0.7933      | -0.81791    | 0.7933      | -0.81791 |         |         |
|              | 0.7933          | -0.81791 | 0.7933      | 0.7933      | 0.878499886 |          |         |         |
| ABHD18       | ENSG00000164074 | -0.82464 | 0.79521     | -0.82464    | 0.79521     | -0.81819 |         |         |
|              | 0.79338         | -1.0854  | 0.86113     | 0.79338     | 0.878552913 |          |         |         |
| TTC19        | ENSG00000011295 | -1.2473  | 0.89386     | -0.81827    | 0.7934      | -0.81827 | 0.7934  |         |
|              | -0.81827        | 0.7934   | 0.7934      | 0.878552913 |             |          |         |         |
| FBN3         | ENSG00000142449 | -1.9156  | 0.97229     | -1.8415     | 0.96723     | -1.279   | 0.89955 |         |
|              | -0.81836        | 0.79342  | 0.79342     | 0.878552913 |             |          |         |         |
| LRRC37A9P    | ENSG00000271013 | -1.6048  | 0.94573     | -0.81836    | 0.79342     | -1.6048  |         |         |
|              | 0.94573         | -1.6048  | 0.94573     | 0.79342     | 0.878552913 |          |         |         |
| MIR365A      | ENSG00000199130 | -0.81849 | 0.79346     | -1.1032     | 0.86503     | -0.85782 |         |         |
|              | 0.8045          | -0.97383 | 0.83493     | 0.79346     | 0.878577241 |          |         |         |
| MTCO1P54     | ENSG00000233311 | -0.81904 | 0.79362     | -0.81904    | 0.79362     | -0.81904 |         |         |
|              | 0.79362         | -0.81904 | 0.79362     | 0.79362     | 0.878734438 |          |         |         |
| ZNF385A      | ENSG00000161642 | -0.81911 | 0.79364     | -0.81911    | 0.79364     | -0.81911 |         |         |
|              | 0.79364         | -0.81911 | 0.79364     | 0.79364     | 0.878736616 |          |         |         |
| NA           | ENSG00000260166 | -0.81921 | 0.79367     | -0.81921    | 0.79367     | -0.81921 | 0.79367 |         |
|              | -0.81921        | 0.79367  | 0.79367     | 0.878740972 |             |          |         |         |
| SLC35F1      | ENSG00000196376 | -0.81926 | 0.79368     | -2.4389     | 0.99263     | -1.5192  |         |         |
|              | 0.93564         | -2.7987  | 0.99743     | 0.79368     | 0.878740972 |          |         |         |
| NA           | ENSG00000258909 | -0.8194  | 0.79372     | -0.84094    | 0.79981     | -0.8194  | 0.79372 |         |
|              | -0.8194         | 0.79372  | 0.79372     | 0.878765293 |             |          |         |         |
| CARM1        | ENSG00000142453 | -0.81966 | 0.79379     | -1.143      | 0.87348     | -1.1152  | 0.86762 |         |
|              | -1.3601         | 0.91311  | 0.79379     | 0.878782895 |             |          |         |         |
| NA           | ENSG00000273319 | -1.5063  | 0.934       | -0.81965    | 0.79379     | -1.5063  | 0.934   | -1.5063 |
|              | 0.934           | 0.79379  | 0.878782895 |             |             |          |         |         |
| NA           | ENSG00000276393 | -0.81963 | 0.79379     | -0.81963    | 0.79379     | -0.81963 | 0.79379 |         |
|              | -0.81963        | 0.79379  | 0.79379     | 0.878782895 |             |          |         |         |
| RN7SL316P    | ENSG00000241631 | -1.0638  | 0.85629     | -1.3358     | 0.90919     | -1.1633  |         |         |
|              | 0.87765         | -0.81987 | 0.79386     | 0.79386     | 0.878840424 |          |         |         |
| SLC39A12-AS1 | ENSG00000226083 | -1.1843  | 0.88185     | -0.82032    | 0.79398     | -1.2087  |         |         |

|             |                 |          |             |             |             |          |         |
|-------------|-----------------|----------|-------------|-------------|-------------|----------|---------|
|             | 0.88661         | -1.2087  | 0.88661     | 0.79398     | 0.878915542 |          |         |
| TYRL        | ENSG00000123447 | -0.82035 | 0.79399     | -1.6602     | 0.95157     | -1.797   | 0.96383 |
|             | -1.8351         | 0.96676  | 0.79399     | 0.878915542 |             |          |         |
| BTBD17      | ENSG00000204347 | -0.82039 | 0.794       | -0.82039    | 0.794       | -0.82039 | 0.794   |
|             | 0.794           | 0.794    | 0.878915542 |             |             |          |         |
| IGKV3OR2-5  | ENSG00000270252 | -0.99528 | 0.8402      | -0.82039    | 0.794       | -0.99528 | 0.8402  |
|             | -0.99528        | 0.8402   | 0.794       | 0.878915542 |             |          |         |
| SMAD2       | ENSG00000175387 | -1.294   | 0.90218     | -1.2853     | 0.90066     | -0.87764 | 0.80993 |
|             | -0.82051        | 0.79404  | 0.79404     | 0.878939854 |             |          |         |
| KRTDAP      | ENSG00000188508 | -1.1791  | 0.88082     | -0.82065    | 0.79408     | -0.88518 |         |
|             | 0.81197         | -0.82065 | 0.79408     | 0.79408     | 0.878964165 |          |         |
| RNU7-188P   | ENSG00000252872 | -0.82078 | 0.79411     | -0.82078    | 0.79411     | -0.82078 |         |
|             | 0.79411         | -0.82078 | 0.79411     | 0.79411     | 0.878970682 |          |         |
| OTOF        | ENSG00000115155 | -0.82089 | 0.79414     | -1.5725     | 0.94208     | -1.0824  | 0.86046 |
|             | -2.0989         | 0.98209  | 0.79414     | 0.878970682 |             |          |         |
| H2AC8       | ENSG00000277075 | -0.82087 | 0.79414     | -0.82087    | 0.79414     | -0.82087 | 0.79414 |
|             | -0.82087        | 0.79414  | 0.79414     | 0.878970682 |             |          |         |
| NA          | ENSG00000249876 | -0.82096 | 0.79417     | -0.82096    | 0.79417     | -0.82096 | 0.79417 |
|             | -0.82096        | 0.79417  | 0.79417     | 0.878983922 |             |          |         |
| ANKRD36B    | ENSG00000196912 | -1.2987  | 0.90298     | -1.0885     | 0.86182     | -0.82134 |         |
|             | 0.79427         | -1.0679  | 0.85722     | 0.79427     | 0.879074635 |          |         |
| KRTAP4-5    | ENSG00000198271 | -0.82146 | 0.79431     | -0.82146    | 0.79431     | -0.82146 |         |
|             | 0.79431         | -0.82146 | 0.79431     | 0.79431     | 0.879098939 |          |         |
| NA          | ENSG00000280169 | -0.82166 | 0.79437     | -0.82166    | 0.79437     | -0.82166 | 0.79437 |
|             | -0.82166        | 0.79437  | 0.79437     | 0.879145377 |             |          |         |
| NA          | ENSG00000270964 | -0.82181 | 0.79441     | -1.2977     | 0.90281     | -2.9322  | 0.99832 |
|             | -2.9322         | 0.99832  | 0.79441     | 0.879169679 |             |          |         |
| SETDB2      | ENSG00000136169 | -0.822   | 0.79446     | -1.0177     | 0.84558     | -1.0177  |         |
|             | 0.84558         | -0.9632  | 0.83228     | 0.79446     | 0.879178347 |          |         |
| REV3L-IT1   | ENSG00000229276 | -0.82199 | 0.79446     | -0.82199    | 0.79446     | -0.82199 |         |
|             | 0.79446         | -0.82199 | 0.79446     | 0.79446     | 0.879178347 |          |         |
| NA          | ENSG00000276531 | -0.82208 | 0.79448     | -0.82208    | 0.79448     | -0.82208 | 0.79448 |
|             | -0.82208        | 0.79448  | 0.79448     | 0.879178347 |             |          |         |
| FAM89A      | ENSG00000182118 | -0.82211 | 0.79449     | -0.82211    | 0.79449     | -0.82211 |         |
|             | 0.79449         | -0.82211 | 0.79449     | 0.79449     | 0.879178347 |          |         |
| OTX2P2      | ENSG00000227134 | -0.82222 | 0.79452     | -0.82222    | 0.79452     | -0.82222 |         |
|             | 0.79452         | -0.82222 | 0.79452     | 0.79452     | 0.87919158  |          |         |
| KNR1        | ENSG00000113889 | -1.2109  | 0.88704     | -0.97253    | 0.83461     | -1.5384  | 0.93802 |
|             | -0.82243        | 0.79458  | 0.79458     | 0.879238008 |             |          |         |
| MRPL40P1    | ENSG00000256037 | -0.8227  | 0.79466     | -0.90289    | 0.81671     | -0.98165 |         |
|             | 0.83686         | -1.0036  | 0.84221     | 0.79466     | 0.879306565 |          |         |
| RNU6-196P   | ENSG00000207042 | -0.82312 | 0.79478     | -0.82312    | 0.79478     | -0.82312 |         |
|             | 0.79478         | -0.82312 | 0.79478     | 0.79478     | 0.879419378 |          |         |
| B3GNT10     | ENSG00000214654 | -0.82346 | 0.79488     | -0.82346    | 0.79488     | -0.82346 |         |
|             | 0.79488         | -0.82346 | 0.79488     | 0.79488     | 0.879478757 |          |         |
| NA          | ENSG00000273156 | -0.82355 | 0.7949      | -0.82355    | 0.7949      | -0.82355 | 0.7949  |
|             | -0.82355        | 0.7949   | 0.7949      | 0.879478757 |             |          |         |
| RPL13P      | ENSG00000213916 | -0.82362 | 0.79492     | -0.82362    | 0.79492     | -1.0409  |         |
|             | 0.85104         | -0.96286 | 0.83219     | 0.79492     | 0.879478757 |          |         |
| MTND4LP31   | ENSG00000248259 | -0.82368 | 0.79494     | -0.82368    | 0.79494     | -0.82368 |         |
|             | 0.79494         | -0.82368 | 0.79494     | 0.79494     | 0.879478757 |          |         |
| NA          | ENSG00000255326 | -1.2421  | 0.8929      | -0.82371    | 0.79495     | -1.4297  | 0.9236  |
|             | -0.95862        | 0.83113  | 0.79495     | 0.879478757 |             |          |         |
| TPI1P3      | ENSG00000186743 | -0.82374 | 0.79496     | -1.3608     | 0.91322     | -0.97905 |         |
|             | 0.83622         | -0.82374 | 0.79496     | 0.79496     | 0.879478757 |          |         |
| SNORD115-21 | ENSG00000199833 | -0.82376 | 0.79496     | -0.82376    | 0.79496     | -0.82376 |         |
|             | 0.79496         | -0.82376 | 0.79496     | 0.79496     | 0.879478757 |          |         |
| NA          | ENSG00000263798 | -0.82385 | 0.79499     | -0.82385    | 0.79499     | -0.82385 | 0.79499 |
|             | -0.82385        | 0.79499  | 0.79499     | 0.879491979 |             |          |         |
| HBB         | ENSG00000244734 | -0.82408 | 0.79505     | -0.82408    | 0.79505     | -0.82408 | 0.79505 |
|             | -0.82408        | 0.79505  | 0.79505     | 0.879529485 |             |          |         |
| RN7SKP23    | ENSG00000280039 | -0.82411 | 0.79506     | -0.82411    | 0.79506     | -0.82411 |         |

|            |                 |          |         |             |             |          |         |  |
|------------|-----------------|----------|---------|-------------|-------------|----------|---------|--|
|            | 0.79506         | -0.82411 | 0.79506 | 0.79506     | 0.879529485 |          |         |  |
| NA         | ENSG00000261646 | -0.96635 | 0.83306 | -0.83827    | 0.79906     | -0.82423 | 0.7951  |  |
|            | -1.4872         | 0.93152  | 0.7951  | 0.879553767 |             |          |         |  |
| HNRNPA1P5  | ENSG00000259512 | -0.82436 | 0.79513 | -2.3981     | 0.99176     | -2.3981  |         |  |
|            | 0.99176         | -2.3981  | 0.99176 | 0.79513     | 0.879566987 |          |         |  |
| SGO1-AS1   | ENSG00000231304 | -0.85562 | 0.8039  | -1.5287     | 0.93683     | -0.82448 |         |  |
|            | 0.79517         | -0.83322 | 0.79764 | 0.79517     | 0.879582363 |          |         |  |
| MUTYH      | ENSG00000132781 | -0.82453 | 0.79518 | -1.3584     | 0.91283     | -1.3584  | 0.91283 |  |
|            | -2.2441         | 0.98759  | 0.79518 | 0.879582363 |             |          |         |  |
| LYPLA2     | ENSG00000011009 | -0.8248  | 0.79526 | -0.8416     | 0.79999     | -0.8416  |         |  |
|            | 0.79999         | -2.4641  | 0.99313 | 0.79526     | 0.879641981 |          |         |  |
| OR8J3      | ENSG00000167822 | -0.82486 | 0.79527 | -0.82486    | 0.79527     | -0.84179 | 0.80005 |  |
|            | -0.82486        | 0.79527  | 0.79527 | 0.879641981 |             |          |         |  |
| CBFB       | ENSG00000067955 | -1.1184  | 0.86831 | -1.3627     | 0.91352     | -1.2777  | 0.89932 |  |
|            | -0.82498        | 0.79531  | 0.79531 | 0.879666257 |             |          |         |  |
| NA         | ENSG00000224269 | -0.82511 | 0.79535 | -0.97346    | 0.83484     | -0.97346 | 0.83484 |  |
|            | -0.97346        | 0.83484  | 0.79535 | 0.879681627 |             |          |         |  |
| NA         | ENSG00000255839 | -0.82517 | 0.79536 | -0.82517    | 0.79536     | -0.82517 | 0.79536 |  |
|            | -0.82517        | 0.79536  | 0.79536 | 0.879681627 |             |          |         |  |
| LINC02349  | ENSG00000259284 | -0.8254  | 0.79543 | -0.8254     | 0.79543     | -0.8254  |         |  |
|            | 0.79543         | -0.8254  | 0.79543 | 0.79543     | 0.879732327 |          |         |  |
| NA         | ENSG00000250180 | -0.82547 | 0.79545 | -0.82547    | 0.79545     | -0.82547 | 0.79545 |  |
|            | -0.86086        | 0.80534  | 0.79545 | 0.879732327 |             |          |         |  |
| TADA1      | ENSG00000152382 | -0.8255  | 0.79546 | -0.8255     | 0.79546     | -0.8255  | 0.79546 |  |
|            | -1.3001         | 0.90321  | 0.79546 | 0.879732327 |             |          |         |  |
| RNU6-36P   | ENSG00000206899 | -0.82561 | 0.79549 | -0.82561    | 0.79549     | -0.82561 |         |  |
|            | 0.79549         | -0.82561 | 0.79549 | 0.79549     | 0.879745539 |          |         |  |
| KRT7-AS    | ENSG00000257671 | -0.82568 | 0.79551 | -0.82568    | 0.79551     | -0.82568 |         |  |
|            | 0.79551         | -0.82568 | 0.79551 | 0.79551     | 0.879747692 |          |         |  |
| NA         | ENSG00000231416 | -0.82588 | 0.79556 | -0.82588    | 0.79556     | -0.82588 | 0.79556 |  |
|            | -0.82588        | 0.79556  | 0.79556 | 0.879783021 |             |          |         |  |
| NA         | ENSG00000279933 | -0.8261  | 0.79563 | -0.8261     | 0.79563     | -0.8261  | 0.79563 |  |
|            | -0.8261         | 0.79563  | 0.79563 | 0.8798248   |             |          |         |  |
| MIR4500    | ENSG00000266052 | -0.82614 | 0.79564 | -0.82614    | 0.79564     | -0.82614 |         |  |
|            | 0.79564         | -0.82614 | 0.79564 | 0.79564     | 0.8798248   |          |         |  |
| TAS2R5     | ENSG00000127366 | -0.82625 | 0.79567 | -0.82625    | 0.79567     | -0.82625 |         |  |
|            | 0.79567         | -1.0479  | 0.85266 | 0.79567     | 0.8798248   |          |         |  |
| RNU6-1250P | ENSG00000212520 | -0.82625 | 0.79567 | -0.82625    | 0.79567     | -0.82625 |         |  |
|            | 0.79567         | -0.82625 | 0.79567 | 0.79567     | 0.8798248   |          |         |  |
| TMEM161BP1 | ENSG00000237970 | -0.82645 | 0.79572 | -0.95343    | 0.82981     | -1.2624  |         |  |
|            | 0.8966          | -0.95343 | 0.82981 | 0.79572     | 0.879835552 |          |         |  |
| LILRB2     | ENSG00000131042 | -1.2945  | 0.90225 | -0.82648    | 0.79573     | -1.1391  |         |  |
|            | 0.87267         | -1.1391  | 0.87267 | 0.79573     | 0.879835552 |          |         |  |
| NA         | ENSG00000178412 | -1.4767  | 0.93012 | -0.82658    | 0.79576     | -0.9995  | 0.84122 |  |
|            | -1.427          | 0.92321  | 0.79576 | 0.879835552 |             |          |         |  |
| RBM22P3    | ENSG00000226485 | -0.82656 | 0.79576 | -0.82656    | 0.79576     | -0.82656 |         |  |
|            | 0.79576         | -0.82656 | 0.79576 | 0.79576     | 0.879835552 |          |         |  |
| OR2Z1      | ENSG00000181733 | -1.4178  | 0.92188 | -1.6348     | 0.94896     | -0.82661 | 0.79577 |  |
|            | -2.134          | 0.98358  | 0.79577 | 0.879835552 |             |          |         |  |
| LINC01050  | ENSG00000271216 | -0.82701 | 0.79588 | -0.82701    | 0.79588     | -0.82701 |         |  |
|            | 0.79588         | -0.82701 | 0.79588 | 0.79588     | 0.879937207 |          |         |  |
| NA         | ENSG00000257511 | -0.82732 | 0.79597 | -0.82732    | 0.79597     | -0.82732 | 0.79597 |  |
|            | -0.82732        | 0.79597  | 0.79597 | 0.879987872 |             |          |         |  |
| COX6A1P3   | ENSG00000216710 | -0.82736 | 0.79598 | -0.96487    | 0.83269     | -0.82736 |         |  |
|            | 0.79598         | -0.82736 | 0.79598 | 0.79598     | 0.879987872 |          |         |  |
| NA         | ENSG00000278865 | -0.82736 | 0.79598 | -0.82736    | 0.79598     | -0.82736 | 0.79598 |  |
|            | -0.82736        | 0.79598  | 0.79598 | 0.879987872 |             |          |         |  |
| DEXI       | ENSG00000182108 | -0.82745 | 0.79601 | -0.82745    | 0.79601     | -0.82745 | 0.79601 |  |
|            | -0.82745        | 0.79601  | 0.79601 | 0.880001073 |             |          |         |  |
| NA         | ENSG00000270435 | -0.82772 | 0.79609 | -0.82772    | 0.79609     | -0.82772 | 0.79609 |  |
|            | -0.82772        | 0.79609  | 0.79609 | 0.880069549 |             |          |         |  |
| DDR1       | ENSG00000204580 | -1.0682  | 0.85729 | -0.83504    | 0.79815     | -0.82807 | 0.79618 |  |

|             |                 |          |          |          |             |             |         |          |
|-------------|-----------------|----------|----------|----------|-------------|-------------|---------|----------|
|             |                 | -1.9281  | 0.97308  | 0.79618  | 0.880133395 |             |         |          |
| NA          | ENSG00000233538 | -0.82813 | 0.7962   | -0.82813 | 0.7962      | -0.82813    | 0.7962  |          |
|             |                 | -0.82813 | 0.7962   | 0.7962   | 0.880133395 |             |         |          |
| MTND3P8     | ENSG00000232714 | -0.82819 | 0.79622  | -0.82819 | 0.79622     | -0.82819    | 0.79622 | -0.82819 |
|             |                 | 0.79622  | -0.82819 | 0.79622  | 0.79622     | 0.880133395 |         |          |
| MTND3P7     | ENSG00000240824 | -0.82821 | 0.79622  | -0.82821 | 0.79622     | -0.82821    | 0.79622 | -0.82821 |
|             |                 | 0.79622  | -0.82821 | 0.79622  | 0.79622     | 0.880133395 |         |          |
| ARL4A       | ENSG00000122644 | -1.1395  | 0.87275  | -0.82841 | 0.79628     | -1.246      | 0.89362 |          |
|             |                 | -0.83537 | 0.79825  | 0.79628  | 0.880170841 |             |         |          |
| NA          | ENSG00000221148 | -0.82843 | 0.79629  | -0.82843 | 0.79629     | -0.82843    | 0.79629 |          |
|             |                 | -0.82843 | 0.79629  | 0.79629  | 0.880170841 |             |         |          |
| GAPDHP72    | ENSG00000216624 | -1.7393  | 0.95901  | -1.0915  | 0.86247     | -0.82855    |         |          |
|             |                 | 0.79632  | -2.1917  | 0.9858   | 0.79632     | 0.880177266 |         |          |
| AADACP1     | ENSG00000240602 | -0.82864 | 0.79635  | -1.5542  | 0.93993     | -0.82864    |         |          |
|             |                 | 0.79635  | -0.82864 | 0.79635  | 0.79635     | 0.880177266 |         |          |
| NA          | ENSG00000284474 | -0.82866 | 0.79635  | -0.82866 | 0.79635     | -0.82866    | 0.79635 |          |
|             |                 | -0.82866 | 0.79635  | 0.79635  | 0.880177266 |             |         |          |
| NA          | ENSG00000267941 | -0.82888 | 0.79641  | -0.82888 | 0.79641     | -0.82888    | 0.79641 |          |
|             |                 | -0.82888 | 0.79641  | 0.79641  | 0.880216498 |             |         |          |
| NA          | ENSG00000251012 | -0.82899 | 0.79644  | -0.82899 | 0.79644     | -0.82899    | 0.79644 |          |
|             |                 | -0.82899 | 0.79644  | 0.79644  | 0.880216498 |             |         |          |
| CATSPER2    | ENSG00000166762 | -1.0614  | 0.85575  | -1.3151  | 0.90576     | -0.82902    |         |          |
|             |                 | 0.79645  | -1.3074  | 0.90446  | 0.79645     | 0.880216498 |         |          |
| RPS10P20    | ENSG00000240443 | -0.82916 | 0.79649  | -0.82916 | 0.79649     | -0.82916    |         |          |
|             |                 | 0.79649  | -0.82916 | 0.79649  | 0.79649     | 0.880216498 |         |          |
| C11orf16    | ENSG00000176029 | -0.82923 | 0.79651  | -0.82923 | 0.79651     | -0.82923    |         |          |
|             |                 | 0.79651  | -0.82923 | 0.79651  | 0.79651     | 0.880216498 |         |          |
| SIAH3       | ENSG00000215475 | -0.91695 | 0.82042  | -0.82924 | 0.79652     | -1.1202     | 0.86868 |          |
|             |                 | -0.82924 | 0.79652  | 0.79652  | 0.880216498 |             |         |          |
| NA          | ENSG00000274068 | -0.82926 | 0.79652  | -0.82926 | 0.79652     | -0.82926    | 0.79652 |          |
|             |                 | -0.82926 | 0.79652  | 0.79652  | 0.880216498 |             |         |          |
| AMOTL1      | ENSG00000166025 | -1.6006  | 0.94526  | -0.89997 | 0.81593     | -1.6006     |         |          |
|             |                 | 0.94526  | -0.82929 | 0.79653  | 0.79653     | 0.880216498 |         |          |
| HMCN1       | ENSG00000143341 | -1.2625  | 0.89662  | -0.98067 | 0.83662     | -0.82963    | 0.79663 |          |
|             |                 | -1.7593  | 0.96074  | 0.79663  | 0.880269257 |             |         |          |
| DEFB115     | ENSG00000215547 | -0.82968 | 0.79664  | -2.0449  | 0.97957     | -1.6713     |         |          |
|             |                 | 0.95267  | -1.4858  | 0.93133  | 0.79664     | 0.880269257 |         |          |
| RNU6-998P   | ENSG00000251703 | -0.82968 | 0.79664  | -0.82968 | 0.79664     | -0.82968    |         |          |
|             |                 | 0.79664  | -0.82968 | 0.79664  | 0.79664     | 0.880269257 |         |          |
| NA          | ENSG00000259392 | -0.82971 | 0.79665  | -0.82971 | 0.79665     | -0.82971    | 0.79665 |          |
|             |                 | -0.82971 | 0.79665  | 0.79665  | 0.880269257 |             |         |          |
| NA          | ENSG00000250801 | -1.7151  | 0.95683  | -0.88787 | 0.81269     | -1.5048     | 0.93381 |          |
|             |                 | -0.82985 | 0.79669  | 0.79669  | 0.880286722 |             |         |          |
| CFAP54      | ENSG00000188596 | -1.0971  | 0.8637   | -1.5092  | 0.93438     | -1.6024     |         |          |
|             |                 | 0.94546  | -0.82991 | 0.79671  | 0.79671     | 0.880286722 |         |          |
| RNU6-1089P  | ENSG00000252282 | -0.82995 | 0.79672  | -0.82995 | 0.79672     | -0.82995    |         |          |
|             |                 | 0.79672  | -0.82995 | 0.79672  | 0.79672     | 0.880286722 |         |          |
| LINC00210   | ENSG00000231814 | -0.83004 | 0.79674  | -0.83004 | 0.79674     | -0.83004    |         |          |
|             |                 | 0.79674  | -0.83004 | 0.79674  | 0.79674     | 0.880288861 |         |          |
| SNORD114-29 | ENSG00000201689 | -0.83035 | 0.79683  | -0.83035 | 0.79683     | -0.83035    |         |          |
|             |                 | 0.79683  | -0.83035 | 0.79683  | 0.79683     | 0.880368338 |         |          |
| NA          | ENSG00000283602 | -1.2305  | 0.89074  | -0.8305  | 0.79687     | -0.8305     | 0.79687 |          |
|             |                 | -0.8305  | 0.79687  | 0.79687  | 0.880383658 |             |         |          |
| NA          | ENSG00000234936 | -0.83054 | 0.79688  | -0.83054 | 0.79688     | -0.83054    | 0.79688 |          |
|             |                 | -0.83054 | 0.79688  | 0.79688  | 0.880383658 |             |         |          |
| NA          | ENSG00000200849 | -0.98219 | 0.837    | -0.83064 | 0.79691     | -0.83064    | 0.79691 |          |
|             |                 | -0.83064 | 0.79691  | 0.79691  | 0.880396842 |             |         |          |
| SLC22A3     | ENSG00000146477 | -1.5601  | 0.94063  | -0.83072 | 0.79693     | -1.493      |         |          |
|             |                 | 0.93228  | -1.2821  | 0.9001   | 0.79693     | 0.880398978 |         |          |
| NA          | ENSG00000229245 | -1.319   | 0.90641  | -1.0693  | 0.85754     | -0.83083    | 0.79697 |          |
|             |                 | -0.96864 | 0.83364  | 0.79697  | 0.880400743 |             |         |          |
| GGTA2P      | ENSG00000237766 | -0.99289 | 0.83962  | -0.83093 | 0.79699     | -0.83093    |         |          |

|            |                 |          |         |             |             |          |         |
|------------|-----------------|----------|---------|-------------|-------------|----------|---------|
|            | 0.79699         | -0.83093 | 0.79699 | 0.79699     | 0.880400743 |          |         |
| EEF1B2P6   | ENSG00000213261 | -0.831   | 0.79701 | -1.1415     | 0.87318     | -1.5194  |         |
|            | 0.93567         | -1.5882  | 0.94388 | 0.79701     | 0.880400743 |          |         |
| ERICH6-AS1 | ENSG00000240137 | -0.83099 | 0.79701 | -1.2729     | 0.89847     | -1.5585  |         |
|            | 0.94044         | -0.83099 | 0.79701 | 0.79701     | 0.880400743 |          |         |
| NRAD1      | ENSG00000233725 | -1.4537  | 0.92698 | -1.2214     | 0.88903     | -0.83108 | 0.79703 |
|            | -0.99875        | 0.84104  | 0.79703 | 0.880400743 |             |          |         |
| FSTL1      | ENSG00000163430 | -0.83109 | 0.79704 | -1.7376     | 0.95886     | -1.9612  | 0.97507 |
|            | -2.5576         | 0.99473  | 0.79704 | 0.880400743 |             |          |         |
| ZNF248     | ENSG00000198105 | -0.83132 | 0.7971  | -0.83122    | 0.79707     | -0.9285  |         |
|            | 0.82343         | -0.99831 | 0.84093 | 0.79707     | 0.880407149 |          |         |
| AFG3L2     | ENSG00000141385 | -0.97297 | 0.83472 | -1.6337     | 0.94884     | -1.3738  |         |
|            | 0.91525         | -0.83126 | 0.79709 | 0.79709     | 0.880407149 |          |         |
| VN1R53P    | ENSG00000236313 | -0.83129 | 0.7971  | -0.83129    | 0.7971      | -0.83129 |         |
|            | 0.7971          | -0.83129 | 0.7971  | 0.7971      | 0.880407149 |          |         |
| MRGPRX12P  | ENSG00000254857 | -0.83141 | 0.79713 | -0.83141    | 0.79713     | -2.014   |         |
|            | 0.97799         | -0.83141 | 0.79713 | 0.79713     | 0.880420329 |          |         |
| MIR3142    | ENSG00000265237 | -1.13    | 0.87076 | -0.83151    | 0.79716     | -0.83455 | 0.79801 |
|            | -0.83455        | 0.79801  | 0.79716 | 0.880426732 |             |          |         |
| NAALAD2    | ENSG00000077616 | -0.92558 | 0.82267 | -0.83158    | 0.79718     | -0.92558 |         |
|            | 0.82267         | -0.88981 | 0.81322 | 0.79718     | 0.880426732 |          |         |
| NA         | ENSG00000203605 | -0.83164 | 0.79719 | -0.83164    | 0.79719     | -0.83164 | 0.79719 |
|            | -0.83164        | 0.79719  | 0.79719 | 0.880426732 |             |          |         |
| RNU6-588P  | ENSG00000222213 | -0.8317  | 0.79721 | -0.8317     | 0.79721     | -0.8317  |         |
|            | 0.79721         | -0.8317  | 0.79721 | 0.79721     | 0.880428866 |          |         |
| NA         | ENSG00000279032 | -0.83176 | 0.79723 | -1.2406     | 0.89263     | -1.2406  | 0.89263 |
|            | -1.2406         | 0.89263  | 0.79723 | 0.880431001 |             |          |         |
| NA         | ENSG00000260594 | -0.83194 | 0.79728 | -0.96492    | 0.83271     | -0.96492 | 0.83271 |
|            | -0.96492        | 0.83271  | 0.79728 | 0.880466265 |             |          |         |
| NA         | ENSG00000269139 | -0.83224 | 0.79736 | -0.83224    | 0.79736     | -0.83224 | 0.79736 |
|            | -0.83224        | 0.79736  | 0.79736 | 0.880525746 |             |          |         |
| MAST2      | ENSG00000086015 | -0.83228 | 0.79737 | -1.2681     | 0.89761     | -1.4761  | 0.93004 |
|            | -2.3895         | 0.99156  | 0.79737 | 0.880525746 |             |          |         |
| SNU13      | ENSG00000100138 | -1.8269  | 0.96614 | -0.93201    | 0.82433     | -1.9275  | 0.97304 |
|            | -0.83234        | 0.79739  | 0.79739 | 0.880527877 |             |          |         |
| OR52N2     | ENSG00000180988 | -0.83267 | 0.79749 | -1.3692     | 0.91453     | -0.97352 |         |
|            | 0.83485         | -0.9136  | 0.81954 | 0.79749     | 0.880602653 |          |         |
| NDUFB4P10  | ENSG00000232880 | -0.83271 | 0.7975  | -0.83271    | 0.7975      | -0.83271 |         |
|            | 0.7975          | -0.83271 | 0.7975  | 0.7975      | 0.880602653 |          |         |
| RN7SL172P  | ENSG00000243544 | -0.83284 | 0.79753 | -0.83284    | 0.79753     | -0.83284 |         |
|            | 0.79753         | -0.83284 | 0.79753 | 0.79753     | 0.880602653 |          |         |
| RNU2-35P   | ENSG00000252255 | -0.83284 | 0.79753 | -0.83284    | 0.79753     | -0.83284 |         |
|            | 0.79753         | -0.83284 | 0.79753 | 0.79753     | 0.880602653 |          |         |
| RN7SKP93   | ENSG00000200708 | -0.94964 | 0.82885 | -0.94964    | 0.82885     | -1.4723  |         |
|            | 0.92953         | -0.83293 | 0.79756 | 0.79756     | 0.880615825 |          |         |
| NA         | ENSG00000261232 | -0.83317 | 0.79763 | -0.83317    | 0.79763     | -0.83317 | 0.79763 |
|            | -0.83317        | 0.79763  | 0.79763 | 0.880643897 |             |          |         |
| MIR1180    | ENSG00000221540 | -0.83321 | 0.79764 | -0.83321    | 0.79764     | -0.83321 |         |
|            | 0.79764         | -0.83321 | 0.79764 | 0.79764     | 0.880643897 |          |         |
| SH3GL1P3   | ENSG00000267352 | -0.83321 | 0.79764 | -0.83321    | 0.79764     | -0.83321 |         |
|            | 0.79764         | -0.83321 | 0.79764 | 0.79764     | 0.880643897 |          |         |
| NA         | ENSG00000279359 | -1.1198  | 0.86861 | -0.83329    | 0.79766     | -0.83329 | 0.79766 |
|            | -0.83329        | 0.79766  | 0.79766 | 0.880643897 |             |          |         |
| NA         | ENSG00000276073 | -0.8334  | 0.79769 | -0.8334     | 0.79769     | -0.8334  | 0.79769 |
|            | -0.8334         | 0.79769  | 0.79769 | 0.880643897 |             |          |         |
| RNU6-762P  | ENSG00000252916 | -0.83343 | 0.7977  | -0.83343    | 0.7977      | -0.83343 |         |
|            | 0.7977          | -0.83343 | 0.7977  | 0.7977      | 0.880643897 |          |         |
| CYB5R3     | ENSG00000100243 | -1.3739  | 0.91527 | -1.5119     | 0.93472     | -0.83353 |         |
|            | 0.79773         | -1.6514  | 0.95067 | 0.79773     | 0.880643897 |          |         |
| NFYB       | ENSG00000120837 | -0.89769 | 0.81532 | -1.0219     | 0.84659     | -0.83355 | 0.79773 |
|            | -1.0593         | 0.85526  | 0.79773 | 0.880643897 |             |          |         |
| NA         | ENSG00000279034 | -0.83387 | 0.79782 | -0.83387    | 0.79782     | -0.83387 | 0.79782 |



|           |                 |          |          |         |             |             |          |         |
|-----------|-----------------|----------|----------|---------|-------------|-------------|----------|---------|
|           |                 | -0.83387 | 0.79782  | 0.79782 | 0.880723299 |             |          |         |
| NA        | ENSG00000270021 | -0.83392 | 0.79784  | 0.79784 | -0.83392    | 0.79784     | -0.83392 | 0.79784 |
|           |                 | -0.83392 | 0.79784  | 0.79784 | 0.880725426 |             |          |         |
| LINC02431 | ENSG00000248872 | -1.669   | 0.95244  | 0.95244 | -0.83411    | 0.79789     | -1.669   |         |
|           |                 | 0.95244  | -1.669   | 0.95244 | 0.79789     | 0.880760668 |          |         |
| RPL21P71  | ENSG00000239412 | -1.3524  | 0.91187  | 0.91187 | -0.83426    | 0.79793     | -1.3524  |         |
|           |                 | 0.91187  | -1.3524  | 0.91187 | 0.79793     | 0.880767045 |          |         |
| TAT       | ENSG00000198650 | -0.83428 | 0.79794  | 0.79794 | -0.83428    | 0.79794     | -0.83428 | 0.79794 |
|           |                 | -0.83428 | 0.79794  | 0.79794 | 0.880767045 |             |          |         |
| TM4SF4    | ENSG00000169903 | -1.2009  | 0.88511  | 0.88511 | -0.90956    | 0.81847     | -0.83432 |         |
|           |                 | 0.79795  | -0.97647 | 0.83558 | 0.79795     | 0.880767045 |          |         |
| NA        | ENSG00000261161 | -0.91585 | 0.82013  | 0.82013 | -1.7378     | 0.95888     | -0.91585 | 0.82013 |
|           |                 | -0.8344  | 0.79797  | 0.79797 | 0.88076917  |             |          |         |
| NA        | ENSG00000272915 | -0.83448 | 0.79799  | 0.79799 | -1.0816     | 0.86029     | -1.0816  | 0.86029 |
|           |                 | -1.2372  | 0.892    | 0.79799 | 0.880771296 |             |          |         |
| MKRN9P    | ENSG00000258128 | -1.437   | 0.92465  | 0.92465 | -0.90246    | 0.81659     | -0.8346  |         |
|           |                 | 0.79803  | -1.7725  | 0.96185 | 0.79803     | 0.880795495 |          |         |
| GIMAP4    | ENSG00000133574 | -1.3828  | 0.91663  | 0.91663 | -1.04       | 0.85082     | -0.83478 | 0.79808 |
|           |                 | -0.83478 | 0.79808  | 0.79808 | 0.880810781 |             |          |         |
| NA        | ENSG00000279028 | -0.83478 | 0.79808  | 0.79808 | -0.83478    | 0.79808     | -0.83478 | 0.79808 |
|           |                 | -0.83478 | 0.79808  | 0.79808 | 0.880810781 |             |          |         |
| SCAND3P1  | ENSG00000232795 | -1.7014  | 0.95556  | 0.95556 | -0.84013    | 0.79958     | -1.2542  |         |
|           |                 | 0.89512  | -0.83524 | 0.79821 | 0.79821     | 0.880934305 |          |         |
| NA        | ENSG00000283657 | -0.83548 | 0.79828  | 0.79828 | -1.3401     | 0.90989     | -1.1501  | 0.87496 |
|           |                 | -1.1501  | 0.87496  | 0.79828 | 0.880938117 |             |          |         |
| NA        | ENSG00000260254 | -0.83552 | 0.79829  | 0.79829 | -0.83552    | 0.79829     | -0.83552 | 0.79829 |
|           |                 | -0.83552 | 0.79829  | 0.79829 | 0.880938117 |             |          |         |
| RPL21P24  | ENSG00000229554 | -0.83555 | 0.7983   | 0.7983  | -0.83555    | 0.7983      | -0.83555 |         |
|           |                 | 0.7983   | -0.83555 | 0.7983  | 0.7983      | 0.880938117 |          |         |
| OR9N1P    | ENSG00000244292 | -0.83561 | 0.79831  | 0.79831 | -0.83561    | 0.79831     | -0.83561 |         |
|           |                 | 0.79831  | -0.83561 | 0.79831 | 0.79831     | 0.880938117 |          |         |
| DLG5-AS1  | ENSG00000233871 | -0.83568 | 0.79833  | 0.79833 | -0.83568    | 0.79833     | -0.83568 |         |
|           |                 | 0.79833  | -0.83568 | 0.79833 | 0.79833     | 0.880938117 |          |         |
| KIAA1328  | ENSG00000150477 | -0.84078 | 0.79976  | 0.79976 | -0.83571    | 0.79834     | -0.92867 |         |
|           |                 | 0.82347  | -1.0244  | 0.84719 | 0.79834     | 0.880938117 |          |         |
| NA        | ENSG00000265443 | -0.83571 | 0.79834  | 0.79834 | -0.83571    | 0.79834     | -0.83571 | 0.79834 |
|           |                 | -0.83571 | 0.79834  | 0.79834 | 0.880938117 |             |          |         |
| NA        | ENSG00000221547 | -0.83591 | 0.7984   | 0.7984  | -1.869      | 0.96919     | -0.88252 | 0.81125 |
|           |                 | -1.4518  | 0.92672  | 0.7984  | 0.880984376 |             |          |         |
| PCMTD1    | ENSG00000168300 | -0.83605 | 0.79844  | 0.79844 | -1.3057     | 0.90418     | -0.83605 |         |
|           |                 | 0.79844  | -1.4442  | 0.92566 | 0.79844     | 0.881008564 |          |         |
| LINC02023 | ENSG00000239205 | -0.83624 | 0.79849  | 0.79849 | -0.95986    | 0.83144     | -0.95986 |         |
|           |                 | 0.83144  | -0.95986 | 0.83144 | 0.79849     | 0.881039106 |          |         |
| NA        | ENSG00000115934 | -0.83634 | 0.79852  | 0.79852 | -1.0528     | 0.85377     | -0.84828 | 0.80186 |
|           |                 | -0.84828 | 0.80186  | 0.79852 | 0.881039106 |             |          |         |
| ATP6V1C1  | ENSG00000155097 | -0.83642 | 0.79854  | 0.79854 | -0.94825    | 0.8285      | -1.0028  |         |
|           |                 | 0.84202  | -1.259   | 0.89599 | 0.79854     | 0.881039106 |          |         |
| NA        | ENSG00000253911 | -0.83643 | 0.79854  | 0.79854 | -0.89168    | 0.81372     | -0.83643 | 0.79854 |
|           |                 | -0.83643 | 0.79854  | 0.79854 | 0.881039106 |             |          |         |
| CYLD      | ENSG00000083799 | -0.8365  | 0.79856  | 0.79856 | -1.4007     | 0.91935     | -1.4007  | 0.91935 |
|           |                 | -1.9016  | 0.97139  | 0.79856 | 0.881041224 |             |          |         |
| PRXL2AP2  | ENSG00000254213 | -0.8366  | 0.79859  | 0.79859 | -0.8366     | 0.79859     | -0.8366  |         |
|           |                 | 0.79859  | -0.8366  | 0.79859 | 0.79859     | 0.881054375 |          |         |
| TOMM20P2  | ENSG00000255987 | -0.83684 | 0.79866  | 0.79866 | -0.83684    | 0.79866     | -0.83684 |         |
|           |                 | 0.79866  | -0.83684 | 0.79866 | 0.79866     | 0.881091707 |          |         |
| NA        | ENSG00000252309 | -1.1536  | 0.87567  | 0.87567 | -1.1536     | 0.87567     | -0.83685 | 0.79866 |
|           |                 | -1.1536  | 0.87567  | 0.79866 | 0.881091707 |             |          |         |
| CRYZL2P   | ENSG00000242193 | -0.87743 | 0.80987  | 0.80987 | -0.97844    | 0.83607     | -0.83704 |         |
|           |                 | 0.79871  | -1.8266  | 0.96612 | 0.79871     | 0.881106973 |          |         |
| NA        | ENSG00000259534 | -0.83703 | 0.79871  | 0.79871 | -0.83703    | 0.79871     | -0.83703 | 0.79871 |
|           |                 | -0.83703 | 0.79871  | 0.79871 | 0.881106973 |             |          |         |
| MIR4451   | ENSG00000266421 | -0.83723 | 0.79877  | 0.79877 | -0.83723    | 0.79877     | -0.83723 |         |

|           |                 |          |         |             |             |          |          |
|-----------|-----------------|----------|---------|-------------|-------------|----------|----------|
|           | 0.79877         | -0.83723 | 0.79877 | 0.79877     | 0.881153215 |          |          |
| NUDCP2    | ENSG00000238082 | -0.83739 | 0.79881 | 0.79881     | -0.83739    | 0.79881  | -0.83739 |
|           | 0.79881         | -0.83739 | 0.79881 | 0.79881     | 0.88116379  |          |          |
| LNCTAM34A | ENSG00000234546 | -0.83747 | 0.79884 | 0.79884     | -1.14087286 | -0.83747 | 0.79884  |
|           | -0.83747        | 0.79884  | 0.79884 | 0.88116379  |             |          |          |
| NA        | ENSG00000238525 | -0.9158  | 0.82011 | -0.8375     | 0.79885     | -0.8375  | 0.79885  |
|           | -0.8375         | 0.79885  | 0.79885 | 0.88116379  |             |          |          |
| NA        | ENSG00000258622 | -0.83755 | 0.79886 | -0.83755    | 0.79886     | -0.83755 | 0.79886  |
|           | -0.83755        | 0.79886  | 0.79886 | 0.88116379  |             |          |          |
| MIR1260B  | ENSG00000266192 | -0.83758 | 0.79887 | 0.79887     | -0.83758    | 0.79887  | -0.83758 |
|           | 0.79887         | -0.83758 | 0.79887 | 0.79887     | 0.88116379  |          |          |
| MIR3065   | ENSG00000211563 | -0.83777 | 0.79892 | 0.79892     | -0.83777    | 0.79892  | -0.83777 |
|           | 0.79892         | -0.83777 | 0.79892 | 0.79892     | 0.881170135 |          |          |
| NA        | ENSG00000261790 | -0.83776 | 0.79892 | -0.83776    | 0.79892     | -0.83776 | 0.79892  |
|           | -0.83776        | 0.79892  | 0.79892 | 0.881170135 |             |          |          |
| INSYN2A   | ENSG00000188916 | -0.83779 | 0.79893 | -0.83779    | 0.79893     | -0.90167 |          |
|           | 0.81639         | -0.85337 | 0.80327 | 0.79893     | 0.881170135 |          |          |
| SHPK      | ENSG00000197417 | -1.6192  | 0.9473  | -1.3187     | 0.90637     | -1.3187  | 0.90637  |
|           | -0.83789        | 0.79895  | 0.79895 | 0.88117225  |             |          |          |
| RNU6-333P | ENSG00000238669 | -0.92632 | 0.82286 | -1.7146     | 0.95679     | -0.83797 |          |
|           | 0.79898         | -1.3597  | 0.91304 | 0.79898     | 0.881185393 |          |          |
| NA        | ENSG00000254314 | -0.83816 | 0.79903 | -0.83816    | 0.79903     | -0.83816 | 0.79903  |
|           | -0.83816        | 0.79903  | 0.79903 | 0.881220593 |             |          |          |
| NA        | ENSG00000273853 | -1.3843  | 0.91687 | -1.1909     | 0.88315     | -0.83823 | 0.79905  |
|           | -0.83823        | 0.79905  | 0.79905 | 0.881222706 |             |          |          |
| NA        | ENSG00000216917 | -0.83834 | 0.79908 | -0.83834    | 0.79908     | -0.83834 | 0.79908  |
|           | -1.405          | 0.91999  | 0.79908 | 0.881235848 |             |          |          |
| C15orf65  | ENSG00000261652 | -0.83846 | 0.79911 | -1.8876     | 0.97046     | -0.83846 |          |
|           | 0.79911         | -0.83846 | 0.79911 | 0.79911     | 0.881240073 |          |          |
| NA        | ENSG00000254501 | -0.8385  | 0.79912 | -0.8385     | 0.79912     | -0.8385  | 0.79912  |
|           | -0.8385         | 0.79912  | 0.79912 | 0.881240073 |             |          |          |
| NA        | ENSG00000269402 | -0.83883 | 0.79922 | -0.83883    | 0.79922     | -0.83883 | 0.79922  |
|           | -0.83883        | 0.79922  | 0.79922 | 0.881330405 |             |          |          |
| H2BC17    | ENSG00000274641 | -0.83919 | 0.79932 | -0.83919    | 0.79932     | -0.83919 |          |
|           | 0.79932         | -0.83919 | 0.79932 | 0.79932     | 0.881420733 |          |          |
| UBXN11    | ENSG00000158062 | -0.85992 | 0.80508 | -0.89631    | 0.81496     | -0.83935 |          |
|           | 0.79936         | -0.93275 | 0.82452 | 0.79936     | 0.881444895 |          |          |
| TOB2P1    | ENSG00000176933 | -1.3607  | 0.91319 | -0.83954    | 0.79942     | -0.83954 |          |
|           | 0.79942         | -0.83954 | 0.79942 | 0.79942     | 0.881473271 |          |          |
| EDNRB-AS1 | ENSG00000225579 | -0.83958 | 0.79943 | -0.83958    | 0.79943     | -0.83958 |          |
|           | 0.79943         | -0.83958 | 0.79943 | 0.79943     | 0.881473271 |          |          |
| RPL39P38  | ENSG00000241464 | -0.83961 | 0.79944 | -0.83961    | 0.79944     | -0.83961 |          |
|           | 0.79944         | -0.83961 | 0.79944 | 0.79944     | 0.881473271 |          |          |
| FAM240C   | ENSG00000216921 | -1.6632  | 0.95186 | -0.83971    | 0.79946     | -1.7626  |          |
|           | 0.96102         | -1.1501  | 0.87494 | 0.79946     | 0.881475378 |          |          |
| NA        | ENSG00000249962 | -0.8399  | 0.79952 | -0.8399     | 0.79952     | -0.8399  | 0.79952  |
|           | -0.8399         | 0.79952  | 0.79952 | 0.881492724 |             |          |          |
| SP4       | ENSG00000105866 | -0.83993 | 0.79953 | -1.326      | 0.90759     | -0.83993 | 0.79953  |
|           | -0.83993        | 0.79953  | 0.79953 | 0.881492724 |             |          |          |
| NA        | ENSG00000254725 | -0.83995 | 0.79953 | -0.83995    | 0.79953     | -0.83995 | 0.79953  |
|           | -0.83995        | 0.79953  | 0.79953 | 0.881492724 |             |          |          |
| SMG1      | ENSG00000157106 | -1.566   | 0.94133 | -0.84016    | 0.79959     | -1.1023  | 0.86484  |
|           | -1.2738         | 0.89864  | 0.79959 | 0.88153893  |             |          |          |
| NA        | ENSG00000275358 | -0.92931 | 0.82364 | -1.549      | 0.93931     | -1.4302  | 0.92367  |
|           | -0.84053        | 0.7997   | 0.7997  | 0.881617701 |             |          |          |
| NAMA      | ENSG00000271086 | -0.84059 | 0.79971 | -0.84059    | 0.79971     | -0.92888 | 0.82352  |
|           | -1.1629         | 0.87757  | 0.79971 | 0.881617701 |             |          |          |
| FAF2P1    | ENSG00000228759 | -0.84062 | 0.79972 | -0.84062    | 0.79972     | -0.84062 |          |
|           | 0.79972         | -0.84291 | 0.80036 | 0.79972     | 0.881617701 |          |          |
| RNU1-91P  | ENSG00000201616 | -0.84076 | 0.79976 | -0.84076    | 0.79976     | -0.84076 |          |
|           | 0.79976         | -0.84076 | 0.79976 | 0.79976     | 0.881617701 |          |          |
| NA        | ENSG00000260100 | -0.84076 | 0.79976 | -0.84076    | 0.79976     | -0.84076 | 0.79976  |

|           |                 |          |         |             |             |          |         |
|-----------|-----------------|----------|---------|-------------|-------------|----------|---------|
|           | -0.84076        | 0.79976  | 0.79976 | 0.881617701 |             |          |         |
| RN7SL552P | ENSG00000239466 | -0.8408  | 0.79977 | -0.8408     | 0.79977     | -0.8408  |         |
|           | 0.79977         | -0.8408  | 0.79977 | 0.79977     | 0.881617701 |          |         |
| NA        | ENSG00000278052 | -0.84098 | 0.79982 | -0.84098    | 0.79982     | -0.84098 | 0.79982 |
|           | -0.84098        | 0.79982  | 0.79982 | 0.881652874 |             |          |         |
| TFG       | ENSG00000114354 | -1.2811  | 0.89992 | -0.84123    | 0.79989     | -2.1773  | 0.98527 |
|           | -0.95605        | 0.83048  | 0.79989 | 0.881710091 |             |          |         |
| NA        | ENSG00000257514 | -0.84141 | 0.79994 | -0.84141    | 0.79994     | -0.84141 | 0.79994 |
|           | -0.84141        | 0.79994  | 0.79994 | 0.88174526  |             |          |         |
| NA        | ENSG00000201277 | -0.84182 | 0.80006 | -1.0146     | 0.84486     | -1.0146  | 0.84486 |
|           | -1.0146         | 0.84486  | 0.80006 | 0.881840239 |             |          |         |
| LINC01781 | ENSG00000234184 | -0.84194 | 0.80009 | -0.84194    | 0.80009     | -0.84194 |         |
|           | 0.80009         | -0.84194 | 0.80009 | 0.80009     | 0.881840239 |          |         |
| ATG5      | ENSG00000057663 | -0.8421  | 0.80014 | -0.84498    | 0.80094     | -1.216   | 0.888   |
|           | -1.5724         | 0.94207  | 0.80014 | 0.881840239 |             |          |         |
| NA        | ENSG00000256278 | -0.84218 | 0.80016 | -0.84218    | 0.80016     | -0.84218 | 0.80016 |
|           | -0.84218        | 0.80016  | 0.80016 | 0.881840239 |             |          |         |
| NA        | ENSG00000254397 | -0.84223 | 0.80017 | -0.84223    | 0.80017     | -0.84223 | 0.80017 |
|           | -0.84223        | 0.80017  | 0.80017 | 0.881840239 |             |          |         |
| UMLILO    | ENSG00000228277 | -0.9739  | 0.83495 | -1.8703     | 0.96928     | -0.84231 |         |
|           | 0.80019         | -0.9739  | 0.83495 | 0.80019     | 0.881840239 |          |         |
| NA        | ENSG00000250956 | -0.84229 | 0.80019 | -0.84229    | 0.80019     | -0.84229 | 0.80019 |
|           | -0.84229        | 0.80019  | 0.80019 | 0.881840239 |             |          |         |
| LY9       | ENSG00000122224 | -1.4948  | 0.93252 | -0.84237    | 0.80021     | -0.84237 | 0.80021 |
|           | -1.1932         | 0.8836   | 0.80021 | 0.881840239 |             |          |         |
| NA        | ENSG00000201511 | -0.84251 | 0.80025 | -0.84251    | 0.80025     | -0.84251 | 0.80025 |
|           | -0.84251        | 0.80025  | 0.80025 | 0.881840239 |             |          |         |
| RNU6-774P | ENSG00000200108 | -0.84255 | 0.80026 | -0.84255    | 0.80026     | -0.84255 |         |
|           | 0.80026         | -0.84255 | 0.80026 | 0.80026     | 0.881840239 |          |         |
| LINC01723 | ENSG00000234265 | -0.84256 | 0.80026 | -0.84256    | 0.80026     | -0.84256 |         |
|           | 0.80026         | -0.84256 | 0.80026 | 0.80026     | 0.881840239 |          |         |
| SNCB      | ENSG00000074317 | -0.85091 | 0.80259 | -0.8427     | 0.8003      | -1.1137  | 0.86731 |
|           | -0.99235        | 0.83949  | 0.8003  | 0.881840239 |             |          |         |
| NA        | ENSG00000260228 | -0.84273 | 0.80031 | -0.84273    | 0.80031     | -0.84273 | 0.80031 |
|           | -0.84273        | 0.80031  | 0.80031 | 0.881840239 |             |          |         |
| TMEM131   | ENSG00000075568 | -0.84275 | 0.80032 | -1.3008     | 0.90333     | -1.6359  |         |
|           | 0.94907         | -1.5623  | 0.94089 | 0.80032     | 0.881840239 |          |         |
| MGAT4A    | ENSG00000071073 | -1.8181  | 0.96547 | -1.387      | 0.91728     | -1.4806  |         |
|           | 0.93064         | -0.84279 | 0.80033 | 0.80033     | 0.881840239 |          |         |
| TP53TG5   | ENSG00000124251 | -0.93481 | 0.82506 | -1.1586     | 0.8767      | -1.1586  |         |
|           | 0.8767          | -0.8428  | 0.80033 | 0.80033     | 0.881840239 |          |         |
| RNU2-41P  | ENSG00000222923 | -0.84284 | 0.80034 | -0.84284    | 0.80034     | -0.84284 |         |
|           | 0.80034         | -0.84284 | 0.80034 | 0.80034     | 0.881840239 |          |         |
| NA        | ENSG00000260860 | -0.84289 | 0.80036 | -0.84289    | 0.80036     | -0.84289 | 0.80036 |
|           | -0.84289        | 0.80036  | 0.80036 | 0.881840239 |             |          |         |
| NA        | ENSG00000277324 | -0.84294 | 0.80037 | -0.84294    | 0.80037     | -0.84294 | 0.80037 |
|           | -0.84294        | 0.80037  | 0.80037 | 0.881840239 |             |          |         |
| NA        | ENSG00000280020 | -0.84306 | 0.8004  | -0.84306    | 0.8004      | -0.84306 | 0.8004  |
|           | -0.84306        | 0.8004   | 0.8004  | 0.881844434 |             |          |         |
| NIFKP8    | ENSG00000259449 | -0.84308 | 0.80041 | -0.84308    | 0.80041     | -0.84308 |         |
|           | 0.80041         | -0.84308 | 0.80041 | 0.80041     | 0.881844434 |          |         |
| MTCYBP3   | ENSG00000232373 | -0.84329 | 0.80047 | -0.84329    | 0.80047     | -0.84329 |         |
|           | 0.80047         | -0.84329 | 0.80047 | 0.80047     | 0.881890599 |          |         |
| NA        | ENSG00000253615 | -1.6899  | 0.95448 | -0.84346    | 0.80051     | -1.6899  | 0.95448 |
|           | -1.6899         | 0.95448  | 0.80051 | 0.881894791 |             |          |         |
| TBILA     | ENSG00000261488 | -0.84344 | 0.80051 | -0.84344    | 0.80051     | -0.84344 | 0.80051 |
|           | -0.84344        | 0.80051  | 0.80051 | 0.881894791 |             |          |         |
| NA        | ENSG00000279097 | -0.84359 | 0.80055 | -0.84359    | 0.80055     | -0.84359 | 0.80055 |
|           | -0.84359        | 0.80055  | 0.80055 | 0.88191892  |             |          |         |
| CORO1C    | ENSG00000110880 | -1.3357  | 0.90918 | -0.84365    | 0.80057     | -1.4841  |         |
|           | 0.93111         | -1.2578  | 0.89577 | 0.80057     | 0.881921015 |          |         |
| NA        | ENSG00000257943 | -1.1833  | 0.88166 | -0.84411    | 0.8007      | -1.2973  | 0.90273 |

|           |                 |          |         |             |             |          |         |  |
|-----------|-----------------|----------|---------|-------------|-------------|----------|---------|--|
|           | -1.0905         | 0.86226  | 0.8007  | 0.882037454 |             |          |         |  |
| NA        | ENSG00000200688 | -0.84421 | 0.80072 | -0.84421    | 0.80072     | -0.84421 | 0.80072 |  |
|           | -0.84421        | 0.80072  | 0.80072 | 0.882037454 |             |          |         |  |
| ARCN1     | ENSG00000095139 | -0.86631 | 0.80684 | -1.8536     | 0.9681      | -1.2123  | 0.8873  |  |
|           | -0.84424        | 0.80073  | 0.80073 | 0.882037454 |             |          |         |  |
| NA        | ENSG00000272897 | -0.8444  | 0.80078 | -0.8444     | 0.80078     | -0.8444  | 0.80078 |  |
|           | -0.8444         | 0.80078  | 0.80078 | 0.882072592 |             |          |         |  |
| CLCNKB    | ENSG00000184908 | -1.2282  | 0.89032 | -0.84447    | 0.8008      | -0.88699 |         |  |
|           | 0.81246         | -0.98346 | 0.83731 | 0.8008      | 0.882074684 |          |         |  |
| NA        | ENSG00000261234 | -0.84467 | 0.80085 | -0.84467    | 0.80085     | -0.84467 | 0.80085 |  |
|           | -0.84467        | 0.80085  | 0.80085 | 0.882109819 |             |          |         |  |
| FUBP1     | ENSG00000162613 | -0.8449  | 0.80092 | -1.1286     | 0.87047     | -0.8449  | 0.80092 |  |
|           | -0.8449         | 0.80092  | 0.80092 | 0.882147042 |             |          |         |  |
| SNORD95   | ENSG00000264549 | -0.8449  | 0.80092 | -0.8449     | 0.80092     | -0.8449  |         |  |
|           | 0.80092         | -0.8449  | 0.80092 | 0.80092     | 0.882147042 |          |         |  |
| OR2L8     | ENSG00000279263 | -0.91565 | 0.82007 | -1.0586     | 0.8551      | -0.84497 | 0.80094 |  |
|           | -1.6111         | 0.94642  | 0.80094 | 0.882149132 |             |          |         |  |
| NA        | ENSG00000271653 | -0.84517 | 0.80099 | -0.93736    | 0.82571     | -0.84517 | 0.80099 |  |
|           | -1.0054         | 0.84265  | 0.80099 | 0.882184263 |             |          |         |  |
| NA        | ENSG00000235400 | -0.8453  | 0.80103 | -0.8453     | 0.80103     | -0.8453  | 0.80103 |  |
|           | -0.8453         | 0.80103  | 0.80103 | 0.882208378 |             |          |         |  |
| RN7SL459P | ENSG00000240993 | -0.8455  | 0.80108 | -0.94274    | 0.82709     | -1.188   |         |  |
|           | 0.88258         | -1.2492  | 0.89421 | 0.80108     | 0.882243506 |          |         |  |
| PACERR    | ENSG00000273129 | -0.84585 | 0.80118 | -0.84585    | 0.80118     | -0.84585 |         |  |
|           | 0.80118         | -0.84585 | 0.80118 | 0.80118     | 0.882290567 |          |         |  |
| NA        | ENSG00000240808 | -0.8459  | 0.80119 | -0.8459     | 0.80119     | -0.8459  | 0.80119 |  |
|           | -0.8459         | 0.80119  | 0.80119 | 0.882290567 |             |          |         |  |
| NA        | ENSG00000278945 | -1.1642  | 0.87783 | -0.846      | 0.80122     | -1.1642  | 0.87783 |  |
|           | -1.1642         | 0.87783  | 0.80122 | 0.882290567 |             |          |         |  |
| NA        | ENSG00000221731 | -0.84617 | 0.80127 | -0.84617    | 0.80127     | -0.84617 | 0.80127 |  |
|           | -0.84617        | 0.80127  | 0.80127 | 0.882290567 |             |          |         |  |
| CCDC113   | ENSG00000103021 | -0.84621 | 0.80128 | -0.84621    | 0.80128     | -0.84621 |         |  |
|           | 0.80128         | -0.84621 | 0.80128 | 0.80128     | 0.882290567 |          |         |  |
| PTH2R     | ENSG00000144407 | -0.84621 | 0.80128 | -0.99496    | 0.84012     | -1.2633  | 0.89677 |  |
|           | -1.0268         | 0.84774  | 0.80128 | 0.882290567 |             |          |         |  |
| NA        | ENSG00000275419 | -0.84624 | 0.80129 | -0.84624    | 0.80129     | -0.84624 | 0.80129 |  |
|           | -0.84624        | 0.80129  | 0.80129 | 0.882290567 |             |          |         |  |
| ATP12A    | ENSG00000075673 | -1.0067  | 0.84297 | -0.84628    | 0.8013      | -1.0067  |         |  |
|           | 0.84297         | -1.0067  | 0.84297 | 0.8013      | 0.882290567 |          |         |  |
| RNU6-328P | ENSG00000212189 | -0.84628 | 0.8013  | -0.84628    | 0.8013      | -0.84628 |         |  |
|           | 0.8013          | -0.84628 | 0.8013  | 0.8013      | 0.882290567 |          |         |  |
| MIR4511   | ENSG00000264737 | -0.84635 | 0.80132 | -0.84635    | 0.80132     | -0.84635 |         |  |
|           | 0.80132         | -0.84635 | 0.80132 | 0.80132     | 0.882290567 |          |         |  |
| TRAJ32    | ENSG00000211857 | -0.84638 | 0.80133 | -0.84638    | 0.80133     | -0.84638 |         |  |
|           | 0.80133         | -0.84638 | 0.80133 | 0.80133     | 0.882290567 |          |         |  |
| NA        | ENSG00000234567 | -0.84643 | 0.80134 | -0.84643    | 0.80134     | -0.84643 | 0.80134 |  |
|           | -0.84643        | 0.80134  | 0.80134 | 0.882290567 |             |          |         |  |
| ACADL     | ENSG00000115361 | -1.6357  | 0.94904 | -0.84654    | 0.80138     | -0.93099 | 0.82407 |  |
|           | -1.0583         | 0.85504  | 0.80138 | 0.882307833 |             |          |         |  |
| NA        | ENSG00000283286 | -1.4894  | 0.93181 | -1.5905     | 0.94413     | -0.84662 | 0.8014  |  |
|           | -0.84662        | 0.8014   | 0.8014  | 0.882307833 |             |          |         |  |
| NA        | ENSG00000259589 | -0.84667 | 0.80141 | -0.84667    | 0.80141     | -0.84667 | 0.80141 |  |
|           | -0.84667        | 0.80141  | 0.80141 | 0.882307833 |             |          |         |  |
| NA        | ENSG00000200235 | -0.84676 | 0.80143 | -0.84676    | 0.80143     | -0.84676 | 0.80143 |  |
|           | -0.84676        | 0.80143  | 0.80143 | 0.882309918 |             |          |         |  |
| NA        | ENSG00000267459 | -0.84699 | 0.8015  | -0.84699    | 0.8015      | -0.84699 | 0.8015  |  |
|           | -0.84699        | 0.8015   | 0.8015  | 0.882367048 |             |          |         |  |
| IGBP1P5   | ENSG00000250858 | -0.84714 | 0.80154 | -0.84714    | 0.80154     | -0.84714 |         |  |
|           | 0.80154         | -1.0238  | 0.84703 | 0.80154     | 0.882391149 |          |         |  |
| RPS3AP7   | ENSG00000229965 | -1.1381  | 0.87246 | -0.84723    | 0.80157     | -0.84723 |         |  |
|           | 0.80157         | -0.84723 | 0.80157 | 0.80157     | 0.882395315 |          |         |  |
| TLCD3A    | ENSG00000167695 | -0.84728 | 0.80158 | -1.0534     | 0.85392     | -1.0534  |         |  |

|           |                 |          |         |             |             |          |         |
|-----------|-----------------|----------|---------|-------------|-------------|----------|---------|
|           | 0.85392         | -1.216   | 0.888   | 0.80158     | 0.882395315 |          |         |
| LINC00862 | ENSG00000203721 | -0.90073 | 0.81613 | -0.84782    | 0.80173     | -0.90073 |         |
|           | 0.81613         | -0.90073 | 0.81613 | 0.80173     | 0.882511638 |          |         |
| NA        | ENSG00000271081 | -0.84782 | 0.80173 | -0.84782    | 0.80173     | -0.84782 | 0.80173 |
|           | -0.84782        | 0.80173  | 0.80173 | 0.882511638 |             |          |         |
| RN7SKP118 | ENSG00000201201 | -0.84786 | 0.80174 | -0.84786    | 0.80174     | -0.84786 |         |
|           | 0.80174         | -0.84786 | 0.80174 | 0.80174     | 0.882511638 |          |         |
| NA        | ENSG00000263986 | -0.84791 | 0.80176 | -0.84791    | 0.80176     | -0.84791 | 0.80176 |
|           | -0.84791        | 0.80176  | 0.80176 | 0.882513718 |             |          |         |
| PDCD2L    | ENSG00000126249 | -0.84798 | 0.80178 | -0.84798    | 0.80178     | -0.84798 |         |
|           | 0.80178         | -0.84798 | 0.80178 | 0.80178     | 0.882515798 |          |         |
| NA        | ENSG00000279409 | -0.84806 | 0.8018  | -0.84806    | 0.8018      | -0.84806 | 0.8018  |
|           | -0.84806        | 0.8018   | 0.8018  | 0.882517878 |             |          |         |
| LRRC42    | ENSG00000116212 | -0.84814 | 0.80182 | -0.84814    | 0.80182     | -0.84814 |         |
|           | 0.80182         | -0.84814 | 0.80182 | 0.80182     | 0.882519958 |          |         |
| LINC02735 | ENSG00000255433 | -0.99871 | 0.84103 | -0.99871    | 0.84103     | -0.98631 |         |
|           | 0.83801         | -0.84837 | 0.80188 | 0.80188     | 0.882557135 |          |         |
| NA        | ENSG00000213073 | -0.84841 | 0.80189 | -0.84841    | 0.80189     | -0.84841 | 0.80189 |
|           | -0.84841        | 0.80189  | 0.80189 | 0.882557135 |             |          |         |
| RNA5SP43  | ENSG00000252368 | -1.8804  | 0.96997 | -0.8485     | 0.80192     | -1.8804  |         |
|           | 0.96997         | -1.8804  | 0.96997 | 0.80192     | 0.882570219 |          |         |
| NA        | ENSG00000272024 | -0.84861 | 0.80195 | -0.84861    | 0.80195     | -0.84861 | 0.80195 |
|           | -0.84861        | 0.80195  | 0.80195 | 0.882583303 |             |          |         |
| IQCK      | ENSG00000174628 | -0.84882 | 0.80201 | -1.2493     | 0.89422     | -0.90541 | 0.81738 |
|           | -1.0609         | 0.85563  | 0.80201 | 0.882591615 |             |          |         |
| NA        | ENSG00000279198 | -0.84887 | 0.80202 | -0.84887    | 0.80202     | -0.84887 | 0.80202 |
|           | -0.84887        | 0.80202  | 0.80202 | 0.882591615 |             |          |         |
| NA        | ENSG00000224138 | -0.84888 | 0.80203 | -0.84888    | 0.80203     | -0.84888 | 0.80203 |
|           | -0.84888        | 0.80203  | 0.80203 | 0.882591615 |             |          |         |
| TIMM23    | ENSG00000265354 | -1.9511  | 0.97448 | -2.7631     | 0.99714     | -0.84889 |         |
|           | 0.80203         | -1.2805  | 0.89982 | 0.80203     | 0.882591615 |          |         |
| ZSCAN12P1 | ENSG00000219891 | -0.8491  | 0.80209 | -1.1072     | 0.86589     | -1.6284  |         |
|           | 0.94828         | -1.4945  | 0.93248 | 0.80209     | 0.88263771  |          |         |
| MIR340    | ENSG00000198995 | -0.84926 | 0.80213 | -0.84926    | 0.80213     | -0.84926 |         |
|           | 0.80213         | -0.84926 | 0.80213 | 0.80213     | 0.882652867 |          |         |
| NA        | ENSG00000269514 | -1.3114  | 0.90514 | -0.84928    | 0.80214     | -1.3114  | 0.90514 |
|           | -1.3114         | 0.90514  | 0.80214 | 0.882652867 |             |          |         |
| NA        | ENSG00000201938 | -0.84949 | 0.80219 | -0.84949    | 0.80219     | -0.84949 | 0.80219 |
|           | -0.84949        | 0.80219  | 0.80219 | 0.882659095 |             |          |         |
| MAP3K2    | ENSG00000169967 | -0.91245 | 0.81923 | -1.0887     | 0.86186     | -1.224   |         |
|           | 0.88952         | -0.8495  | 0.8022  | 0.8022      | 0.882659095 |          |         |
| NA        | ENSG00000223917 | -0.84952 | 0.8022  | -0.84952    | 0.8022      | -0.84952 | 0.8022  |
|           | -0.84952        | 0.8022   | 0.8022  | 0.882659095 |             |          |         |
| ANTXR1    | ENSG00000169604 | -2.0026  | 0.97739 | -1.3327     | 0.90869     | -1.2088  |         |
|           | 0.88664         | -0.84958 | 0.80222 | 0.80222     | 0.882661171 |          |         |
| STIM2-AS1 | ENSG00000240005 | -1.072   | 0.85813 | -0.84971    | 0.80226     | -1.072   |         |
|           | 0.85813         | -1.072   | 0.85813 | 0.80226     | 0.882685252 |          |         |
| NA        | ENSG00000179066 | -1.0304  | 0.8486  | -1.0304     | 0.8486      | -1.0304  | 0.8486  |
|           | -0.84986        | 0.8023   | 0.8023  | 0.882691477 |             |          |         |
| NA        | ENSG00000249494 | -0.84989 | 0.80231 | -0.84989    | 0.80231     | -1.041   | 0.85106 |
|           | -1.041          | 0.85106  | 0.80231 | 0.882691477 |             |          |         |
| NA        | ENSG00000243568 | -1.926   | 0.97295 | -2.0456     | 0.9796      | -0.84994 | 0.80232 |
|           | -1.926          | 0.97295  | 0.80232 | 0.882691477 |             |          |         |
| NA        | ENSG00000271052 | -0.85007 | 0.80236 | -0.85007    | 0.80236     | -0.85007 | 0.80236 |
|           | -0.85007        | 0.80236  | 0.80236 | 0.882715555 |             |          |         |
| CAPN7     | ENSG00000131375 | -0.95026 | 0.82901 | -1.071      | 0.85791     | -0.85086 | 0.80258 |
|           | -1.1126         | 0.86706  | 0.80258 | 0.882917722 |             |          |         |
| SYVN1     | ENSG00000162298 | -0.95094 | 0.82918 | -0.85086    | 0.80258     | -2.0422  | 0.97943 |
|           | -2.0792         | 0.9812   | 0.80258 | 0.882917722 |             |          |         |
| CHRNA1    | ENSG00000196811 | -0.85115 | 0.80266 | -0.85115    | 0.80266     | -0.85115 | 0.80266 |
|           | -0.85115        | 0.80266  | 0.80266 | 0.882976864 |             |          |         |
| SETP1     | ENSG00000258863 | -0.85121 | 0.80267 | -0.85121    | 0.80267     | -0.85121 | 0.80267 |

|            |                 |          |         |             |             |          |         |  |
|------------|-----------------|----------|---------|-------------|-------------|----------|---------|--|
|            | -0.85121        | 0.80267  | 0.80267 | 0.882976864 |             |          |         |  |
| PLEKHA4    | ENSG00000105559 | -1.53    | 0.93699 | -0.9246     | 0.82241     | -0.85132 | 0.8027  |  |
|            | -1.3107         | 0.90502  | 0.8027  | 0.882981    |             |          |         |  |
| RN7SL526P  | ENSG00000243642 | -0.85133 | 0.80271 | -0.85133    | 0.80271     | -0.85133 |         |  |
|            | 0.80271         | -0.85133 | 0.80271 | 0.80271     | 0.882981    |          |         |  |
| C16orf54   | ENSG00000185905 | -0.85162 | 0.80279 | -0.85162    | 0.80279     | -0.85162 |         |  |
|            | 0.80279         | -0.93515 | 0.82514 | 0.80279     | 0.883020202 |          |         |  |
| LINC01400  | ENSG00000232920 | -1.2572  | 0.89567 | -0.93928    | 0.82621     | -0.93928 |         |  |
|            | 0.82621         | -0.85162 | 0.80279 | 0.80279     | 0.883020202 |          |         |  |
| NA         | ENSG00000227359 | -0.97676 | 0.83566 | -0.85166    | 0.8028      | -0.85166 | 0.8028  |  |
|            | -0.85166        | 0.8028   | 0.8028  | 0.883020202 |             |          |         |  |
| NA         | ENSG00000244527 | -0.85177 | 0.80283 | -0.85177    | 0.80283     | -0.85177 | 0.80283 |  |
|            | -0.85177        | 0.80283  | 0.80283 | 0.883033268 |             |          |         |  |
| NA         | ENSG00000278736 | -1.5214  | 0.93592 | -1.7107     | 0.95643     | -0.85206 | 0.80291 |  |
|            | -1.3652         | 0.91391  | 0.80291 | 0.883092394 |             |          |         |  |
| RNU6-1170P | ENSG00000251783 | -1.4618  | 0.9281  | -0.85208    | 0.80292     | -1.4618  |         |  |
|            | 0.9281          | -1.4618  | 0.9281  | 0.80292     | 0.883092394 |          |         |  |
| NA         | ENSG00000270168 | -0.85233 | 0.80298 | -0.85233    | 0.80298     | -0.85233 | 0.80298 |  |
|            | -0.85233        | 0.80298  | 0.80298 | 0.883131583 |             |          |         |  |
| FSBP       | ENSG00000265817 | -0.85239 | 0.803   | -2.001      | 0.9773      | -2.001   | 0.9773  |  |
|            | -2.001          | 0.9773   | 0.803   | 0.883131583 |             |          |         |  |
| RNA5SP428  | ENSG00000201999 | -1.1052  | 0.86546 | -1.2845     | 0.90052     | -1.1052  |         |  |
|            | 0.86546         | -0.85243 | 0.80301 | 0.80301     | 0.883131583 |          |         |  |
| RNU6-19P   | ENSG00000207449 | -0.85311 | 0.8032  | -0.85311    | 0.8032      | -0.85311 |         |  |
|            | 0.8032          | -0.85311 | 0.8032  | 0.8032      | 0.88330067  |          |         |  |
| NA         | ENSG00000277214 | -0.85311 | 0.8032  | -0.85311    | 0.8032      | -0.85311 | 0.8032  |  |
|            | -0.85311        | 0.8032   | 0.8032  | 0.88330067  |             |          |         |  |
| NA         | ENSG00000280086 | -1.0053  | 0.84263 | -1.0053     | 0.84263     | -1.0053  | 0.84263 |  |
|            | -0.85329        | 0.80325  | 0.80325 | 0.883335722 |             |          |         |  |
| ATP6V0D1   | ENSG00000159720 | -0.85353 | 0.80332 | -1.0525     | 0.85372     | -0.85353 |         |  |
|            | 0.80332         | -0.85353 | 0.80332 | 0.80332     | 0.883387943 |          |         |  |
| NA         | ENSG00000249852 | -0.89957 | 0.81583 | -1.1795     | 0.8809      | -1.1658  | 0.87815 |  |
|            | -0.85364        | 0.80335  | 0.80335 | 0.883387943 |             |          |         |  |
| LINC02872  | ENSG00000204446 | -1.2381  | 0.89216 | -0.85372    | 0.80337     | -0.85372 |         |  |
|            | 0.80337         | -0.85372 | 0.80337 | 0.80337     | 0.883387943 |          |         |  |
| NA         | ENSG00000270382 | -0.87294 | 0.80865 | -0.86367    | 0.80611     | -0.85374 | 0.80337 |  |
|            | -0.85374        | 0.80337  | 0.80337 | 0.883387943 |             |          |         |  |
| DOC2B      | ENSG00000272636 | -0.85379 | 0.80339 | -0.85384    | 0.8034      | -1.2831  | 0.90027 |  |
|            | -1.1045         | 0.86531  | 0.80339 | 0.883390002 |             |          |         |  |
| NA         | ENSG00000222235 | -0.85388 | 0.80341 | -0.85388    | 0.80341     | -0.85388 | 0.80341 |  |
|            | -0.85388        | 0.80341  | 0.80341 | 0.88339206  |             |          |         |  |
| RNA5SP379  | ENSG00000201469 | -0.96193 | 0.83196 | -0.85393    | 0.80343     | -0.85393 |         |  |
|            | 0.80343         | -0.85393 | 0.80343 | 0.80343     | 0.883394118 |          |         |  |
| PCSK6-AS1  | ENSG00000259764 | -0.85425 | 0.80352 | -0.85425    | 0.80352     | -0.85425 |         |  |
|            | 0.80352         | -0.85425 | 0.80352 | 0.80352     | 0.883443558 |          |         |  |
| NA         | ENSG00000279511 | -1.412   | 0.92103 | -1.1866     | 0.88231     | -1.132   | 0.87118 |  |
|            | -0.85446        | 0.80357  | 0.80357 | 0.883443558 |             |          |         |  |
| NA         | ENSG00000261431 | -0.85448 | 0.80358 | -0.85448    | 0.80358     | -0.85448 | 0.80358 |  |
|            | -0.85448        | 0.80358  | 0.80358 | 0.883443558 |             |          |         |  |
| NA         | ENSG00000277581 | -0.85448 | 0.80358 | -0.85448    | 0.80358     | -0.85448 | 0.80358 |  |
|            | -0.85448        | 0.80358  | 0.80358 | 0.883443558 |             |          |         |  |
| ZNHIT6     | ENSG00000117174 | -2.1313  | 0.98347 | -1.2898     | 0.90144     | -0.85454 |         |  |
|            | 0.8036          | -2.6959  | 0.99649 | 0.8036      | 0.883443558 |          |         |  |
| NA         | ENSG00000266985 | -0.85456 | 0.8036  | -0.85456    | 0.8036      | -0.85456 | 0.8036  |  |
|            | -0.85456        | 0.8036   | 0.8036  | 0.883443558 |             |          |         |  |
| TRPM7      | ENSG00000092439 | -1.0942  | 0.86307 | -0.85731    | 0.80436     | -0.85463 | 0.80362 |  |
|            | -1.5855         | 0.94357  | 0.80362 | 0.883443558 |             |          |         |  |
| NA         | ENSG00000279259 | -0.85462 | 0.80362 | -0.85462    | 0.80362     | -0.85462 | 0.80362 |  |
|            | -0.85462        | 0.80362  | 0.80362 | 0.883443558 |             |          |         |  |
| MDC1-AS1   | ENSG00000224328 | -0.85482 | 0.80367 | -0.85482    | 0.80367     | -0.85482 |         |  |
|            | 0.80367         | -0.85482 | 0.80367 | 0.80367     | 0.883478594 |          |         |  |
| NA         | ENSG00000279341 | -0.85496 | 0.80371 | -0.90261    | 0.81663     | -0.90261 | 0.81663 |  |

|           |                 |          |         |             |             |          |         |  |
|-----------|-----------------|----------|---------|-------------|-------------|----------|---------|--|
|           | -0.90261        | 0.81663  | 0.80371 | 0.883493697 |             |          |         |  |
| PSMA2     | ENSG00000106588 | -1.3834  | 0.91674 | -1.6803     | 0.95355     | -1.0627  | 0.85604 |  |
|           | -0.85498        | 0.80372  | 0.80372 | 0.883493697 |             |          |         |  |
| NA        | ENSG00000236680 | -0.94437 | 0.82751 | -0.85508    | 0.80375     | -0.96927 | 0.8338  |  |
|           | -0.92479        | 0.82246  | 0.80375 | 0.883506745 |             |          |         |  |
| NA        | ENSG00000238202 | -0.85522 | 0.80379 | -0.85522    | 0.80379     | -0.85522 | 0.80379 |  |
|           | -0.85522        | 0.80379  | 0.80379 | 0.883530784 |             |          |         |  |
| NA        | ENSG00000255870 | -0.85535 | 0.80382 | -0.85535    | 0.80382     | -0.85535 | 0.80382 |  |
|           | -0.85535        | 0.80382  | 0.80382 | 0.88354383  |             |          |         |  |
| CTXN1     | ENSG00000178531 | -0.85575 | 0.80393 | -0.85575    | 0.80393     | -0.85575 | 0.80393 |  |
|           | -0.85575        | 0.80393  | 0.80393 | 0.883626928 |             |          |         |  |
| MESTP1    | ENSG00000220884 | -0.8558  | 0.80394 | -0.8558     | 0.80394     | -0.8558  |         |  |
|           | 0.80394         | -0.8558  | 0.80394 | 0.80394     | 0.883626928 |          |         |  |
| NA        | ENSG00000224644 | -0.85583 | 0.80395 | -0.85583    | 0.80395     | -0.85583 | 0.80395 |  |
|           | -0.85583        | 0.80395  | 0.80395 | 0.883626928 |             |          |         |  |
| MDP1      | ENSG00000213920 | -0.85591 | 0.80398 | -0.85591    | 0.80398     | -0.85591 | 0.80398 |  |
|           | -0.85591        | 0.80398  | 0.80398 | 0.883631032 |             |          |         |  |
| PUS7L     | ENSG00000129317 | -0.96832 | 0.83356 | -1.1939     | 0.88373     | -0.85595 | 0.80399 |  |
|           | -1.2111         | 0.88707  | 0.80399 | 0.883631032 |             |          |         |  |
| NA        | ENSG00000260120 | -1.0623  | 0.85596 | -0.85629    | 0.80408     | -1.4276  | 0.9233  |  |
|           | -1.4276         | 0.9233   | 0.80408 | 0.883710016 |             |          |         |  |
| NA        | ENSG00000253667 | -0.8565  | 0.80414 | -0.8565     | 0.80414     | -0.8565  | 0.80414 |  |
|           | -0.8565         | 0.80414  | 0.80414 | 0.883736095 |             |          |         |  |
| NA        | ENSG00000278733 | -0.85649 | 0.80414 | -0.85649    | 0.80414     | -0.85649 | 0.80414 |  |
|           | -0.85649        | 0.80414  | 0.80414 | 0.883736095 |             |          |         |  |
| HMGB3P10  | ENSG00000223656 | -0.85662 | 0.80417 | -0.85662    | 0.80417     | -0.85662 |         |  |
|           | 0.80417         | -0.85662 | 0.80417 | 0.80417     | 0.883749134 |          |         |  |
| NA        | ENSG00000225156 | -1.0245  | 0.84721 | -1.1028     | 0.86494     | -0.85679 | 0.80422 |  |
|           | -1.0786         | 0.85961  | 0.80422 | 0.88375528  |             |          |         |  |
| RPL27P12  | ENSG00000239215 | -0.85684 | 0.80423 | -0.85684    | 0.80423     | -0.85684 |         |  |
|           | 0.80423         | -0.85684 | 0.80423 | 0.80423     | 0.88375528  |          |         |  |
| IGHV3-79  | ENSG00000275747 | -0.85683 | 0.80423 | -0.85683    | 0.80423     | -0.85683 |         |  |
|           | 0.80423         | -0.85683 | 0.80423 | 0.80423     | 0.88375528  |          |         |  |
| NA        | ENSG00000225006 | -1.946   | 0.97417 | -0.857      | 0.80428     | -0.857   | 0.80428 |  |
|           | -0.857          | 0.80428  | 0.80428 | 0.883790295 |             |          |         |  |
| OR4P1P    | ENSG00000188439 | -1.0015  | 0.84171 | -0.88314    | 0.81142     | -1.0402  |         |  |
|           | 0.85088         | -0.85708 | 0.8043  | 0.8043      | 0.883792342 |          |         |  |
| HNRNPA3P8 | ENSG00000239699 | -1.3306  | 0.90834 | -0.85719    | 0.80433     | -1.3306  |         |  |
|           | 0.90834         | -0.92307 | 0.82201 | 0.80433     | 0.883796437 |          |         |  |
| MTND5P10  | ENSG00000271687 | -0.85721 | 0.80434 | -0.85721    | 0.80434     | -0.85721 |         |  |
|           | 0.80434         | -0.85721 | 0.80434 | 0.80434     | 0.883796437 |          |         |  |
| NA        | ENSG00000215263 | -1.4603  | 0.9279  | -0.85747    | 0.80441     | -0.96936 | 0.83382 |  |
|           | -0.96936        | 0.83382  | 0.80441 | 0.883853423 |             |          |         |  |
| RN7SL443P | ENSG00000241229 | -0.85764 | 0.80445 | -0.85764    | 0.80445     | -0.85764 |         |  |
|           | 0.80445         | -0.85764 | 0.80445 | 0.80445     | 0.883877444 |          |         |  |
| RN7SKP34  | ENSG00000251951 | -0.85769 | 0.80447 | -0.85769    | 0.80447     | -0.85769 |         |  |
|           | 0.80447         | -0.85769 | 0.80447 | 0.80447     | 0.883879489 |          |         |  |
| NA        | ENSG00000274551 | -1.2581  | 0.89583 | -1.2581     | 0.89583     | -1.2581  | 0.89583 |  |
|           | -0.85789        | 0.80452  | 0.80452 | 0.883905553 |             |          |         |  |
| NA        | ENSG00000251967 | -1.4249  | 0.92291 | -1.0437     | 0.8517      | -1.0437  | 0.8517  |  |
|           | -0.8579         | 0.80453  | 0.80453 | 0.883905553 |             |          |         |  |
| KATNBL1P5 | ENSG00000271108 | -0.85806 | 0.80457 | -0.85806    | 0.80457     | -0.85806 |         |  |
|           | 0.80457         | -0.85806 | 0.80457 | 0.80457     | 0.883929571 |          |         |  |
| LINC01028 | ENSG00000267603 | -0.85837 | 0.80465 | -0.85837    | 0.80465     | -0.85837 |         |  |
|           | 0.80465         | -0.85837 | 0.80465 | 0.80465     | 0.883997531 |          |         |  |
| CA9       | ENSG00000107159 | -0.85856 | 0.80471 | -1.3036     | 0.90382     | -0.97642 | 0.83557 |  |
|           | -0.85856        | 0.80471  | 0.80471 | 0.884000843 |             |          |         |  |
| NA        | ENSG00000250910 | -1.7454  | 0.95954 | -1.9327     | 0.97336     | -0.85862 | 0.80472 |  |
|           | -1.2987         | 0.90298  | 0.80472 | 0.884000843 |             |          |         |  |
| NA        | ENSG00000272768 | -0.8587  | 0.80475 | -0.8587     | 0.80475     | -0.8587  | 0.80475 |  |
|           | -0.8587         | 0.80475  | 0.80475 | 0.884000843 |             |          |         |  |
| OR9M1P    | ENSG00000186124 | -0.85874 | 0.80476 | -0.96133    | 0.83181     | -1.6514  |         |  |

|               |                 |            |             |             |             |           |         |          |
|---------------|-----------------|------------|-------------|-------------|-------------|-----------|---------|----------|
|               | 0.95067         | -1.6514    | 0.95067     | 0.80476     | 0.884000843 |           |         |          |
| WASF2         | ENSG00000158195 | -0.98312   | 0.83723     | -1.0228     | 0.84681     | -0.85878  | 0.80477 |          |
|               | -0.9053         | 0.81735    | 0.80477     | 0.884000843 |             |           |         |          |
| NA            | ENSG00000258971 | -0.85879   | 0.80477     | -0.85879    | 0.80477     | -0.85879  | 0.80477 |          |
|               | -1.7635         | 0.96109    | 0.80477     | 0.884000843 |             |           |         |          |
| GABARAPL1-AS1 | ENSG00000255958 | -0.85884   | 0.80478     | -0.85884    | 0.80478     | -0.85884  | 0.80478 | -0.85884 |
|               | 0.80478         | -0.85884   | 0.80478     | 0.80478     | 0.884000843 |           |         |          |
| NA            | ENSG00000226130 | -0.85898   | 0.80482     | -2.1152     | 0.98279     | -1.960975 | -1.7841 |          |
|               | 0.9628          | 0.80482    | 0.884015911 |             |             |           |         |          |
| RNA5SP251     | ENSG00000222546 | -1.5219    | 0.93598     | -0.859      | 0.80483     | -0.859    |         |          |
|               | 0.80483         | -0.859     | 0.80483     | 0.80483     | 0.884015911 |           |         |          |
| PLEKHJ1       | ENSG00000104886 | -0.85908   | 0.80485     | -0.85908    | 0.80485     | -0.85908  |         |          |
|               | 0.80485         | -0.85908   | 0.80485     | 0.80485     | 0.884017953 |           |         |          |
| NA            | ENSG00000270033 | -0.85913   | 0.80487     | -0.85913    | 0.80487     | -0.85913  | 0.80487 |          |
|               | -0.85913        | 0.80487    | 0.80487     | 0.884019995 |             |           |         |          |
| RN7SKP275     | ENSG00000201496 | -0.85936   | 0.80493     | -1.2044     | 0.88578     | -0.85936  |         |          |
|               | 0.80493         | -0.85936   | 0.80493     | 0.80493     | 0.884065969 |           |         |          |
| NA            | ENSG00000276445 | -0.85952   | 0.80497     | -0.85952    | 0.80497     | -0.85952  | 0.80497 |          |
|               | -0.85952        | 0.80497    | 0.80497     | 0.884089975 |             |           |         |          |
| H3P25         | ENSG00000275506 | -0.85975   | 0.80504     | -0.85975    | 0.80504     | -0.85975  | 0.80504 |          |
|               | -0.85975        | 0.80504    | 0.80504     | 0.884146928 |             |           |         |          |
| NA            | ENSG00000238707 | -0.85997   | 0.8051      | -0.85997    | 0.8051      | -0.85997  | 0.8051  |          |
|               | -0.85997        | 0.8051     | 0.8051      | 0.884177045 |             |           |         |          |
| LINC02067     | ENSG00000240567 | -0.86014   | 0.80514     | -1.0637     | 0.85626     | -0.91015  |         |          |
|               | 0.81863         | -0.91015   | 0.81863     | 0.80514     | 0.884177045 |           |         |          |
| NA            | ENSG00000278864 | -0.86013   | 0.80514     | -0.86013    | 0.80514     | -0.86013  | 0.80514 |          |
|               | -0.86013        | 0.80514    | 0.80514     | 0.884177045 |             |           |         |          |
| NA            | ENSG00000279146 | -0.86013   | 0.80514     | -0.86013    | 0.80514     | -0.86013  | 0.80514 |          |
|               | -0.86013        | 0.80514    | 0.80514     | 0.884177045 |             |           |         |          |
| NA            | ENSG00000238515 | -0.86022   | 0.80517     | -0.86022    | 0.80517     | -0.86022  | 0.80517 |          |
|               | -0.86022        | 0.80517    | 0.80517     | 0.884190064 |             |           |         |          |
| BMPR1AP2      | ENSG00000232460 | -1.4885    | 0.9317      | -1.3227     | 0.90704     | -1.2377   |         |          |
|               | 0.89208         | -0.8604    | 0.80521     | 0.80521     | 0.884214064 |           |         |          |
| RN7SL629P     | ENSG00000241243 | -1.268     | 0.89761     | -0.86052    | 0.80525     | -1.268    |         |          |
|               | 0.89761         | -0.86052   | 0.80525     | 0.80525     | 0.884238063 |           |         |          |
| NA            | ENSG00000205625 | -1.9179    | 0.97244     | -0.86058    | 0.80527     | -1.036    | 0.84989 |          |
|               | -1.036          | 0.84989    | 0.80527     | 0.884240099 |             |           |         |          |
| ATP6V0E1P3    | ENSG00000238038 | -0.86073   | 0.80531     | -0.86073    | 0.80531     | -0.86073  |         |          |
|               | 0.80531         | -0.86073   | 0.80531     | 0.80531     | 0.884244171 |           |         |          |
| NA            | ENSG00000246596 | -1.0708577 | -1.1448     | 0.87386     | -1.8236     | 0.96589   |         |          |
|               | -0.86073        | 0.80531    | 0.80531     | 0.884244171 |             |           |         |          |
| PPIAP58       | ENSG00000267258 | -0.86088   | 0.80535     | -0.86088    | 0.80535     | -0.86088  |         |          |
|               | 0.80535         | -0.86088   | 0.80535     | 0.80535     | 0.884268167 |           |         |          |
| MSC           | ENSG00000178860 | -0.86459   | 0.80637     | -0.86109    | 0.80541     | -0.86109  | 0.80541 |          |
|               | -0.86109        | 0.80541    | 0.80541     | 0.884291356 |             |           |         |          |
| RNU6-230P     | ENSG00000199327 | -1.0234    | 0.84694     | -1.0234     | 0.84694     | -0.86112  |         |          |
|               | 0.80541         | -1.2363    | 0.89182     | 0.80541     | 0.884291356 |           |         |          |
| MAP7          | ENSG00000135525 | -1.8651    | 0.96891     | -1.8736     | 0.96951     | -2.1585   | 0.98456 |          |
|               | -0.86124        | 0.80545    | 0.80545     | 0.884291356 |             |           |         |          |
| MIMT1         | ENSG00000268654 | -0.8613    | 0.80546     | -0.8613     | 0.80546     | -0.8613   | 0.80546 |          |
|               | -0.8613         | 0.80546    | 0.80546     | 0.884291356 |             |           |         |          |
| NA            | ENSG00000227040 | -1.8178    | 0.96545     | -0.86137    | 0.80548     | -0.8967   | 0.81506 |          |
|               | -1.8178         | 0.96545    | 0.80548     | 0.884291356 |             |           |         |          |
| NA            | ENSG00000255438 | -0.86135   | 0.80548     | -0.86135    | 0.80548     | -0.86135  | 0.80548 |          |
|               | -0.86135        | 0.80548    | 0.80548     | 0.884291356 |             |           |         |          |
| UBE4B         | ENSG00000130939 | -1.2811    | 0.89991     | -1.0583     | 0.85505     | -0.86174  | 0.80558 |          |
|               | -1.0418         | 0.85124    | 0.80558     | 0.884358446 |             |           |         |          |
| ELAC1         | ENSG00000141642 | -1.4067    | 0.92024     | -0.86181    | 0.8056      | -0.86181  | 0.8056  |          |
|               | -0.94518        | 0.82772    | 0.8056      | 0.884358446 |             |           |         |          |
| HMG1P9        | ENSG00000248377 | -2.5068    | 0.99391     | -0.86188    | 0.80562     | -2.5068   |         |          |
|               | 0.99391         | -2.5068    | 0.99391     | 0.80562     | 0.884358446 |           |         |          |
| RPL7P33       | ENSG00000215236 | -0.86192   | 0.80563     | -0.86192    | 0.80563     | -0.86192  |         |          |



|             |                 |          |         |             |             |         |                  |
|-------------|-----------------|----------|---------|-------------|-------------|---------|------------------|
|             | 0.80563         | -0.86192 | 0.80563 | 0.80563     | 0.884358446 |         |                  |
| NA          | ENSG00000265739 | -0.86196 | 0.80564 | 0.80564     | -0.86196    | 0.80564 | -0.86196 0.80564 |
|             | -0.86196        | 0.80564  | 0.80564 | 0.884358446 |             |         |                  |
| RNA5SP446   | ENSG00000251764 | -1.0503  | 0.8532  | 0.8532      | -1.1282     | 0.87038 | -0.91584         |
|             | 0.82013         | -0.86197 | 0.80565 | 0.80565     | 0.884358446 |         |                  |
| RPS20P21    | ENSG00000244295 | -0.86226 | 0.80573 | 0.80573     | -0.86226    | 0.80573 | -0.86226         |
|             | 0.80573         | -0.86226 | 0.80573 | 0.80573     | 0.884426339 |         |                  |
| RBP7        | ENSG00000162444 | -0.91554 | 0.82005 | 0.82005     | -0.86235    | 0.80575 | -1.126 0.86993   |
|             | -0.89496        | 0.8146   | 0.80575 | 0.88442837  |             |         |                  |
| CAD         | ENSG00000084774 | -0.86263 | 0.80583 | 0.80583     | -0.86263    | 0.80583 | -0.86263 0.80583 |
|             | -0.86263        | 0.80583  | 0.80583 | 0.88449543  |             |         |                  |
| MIR4662B    | ENSG00000263735 | -1.1414  | 0.87314 | 0.87314     | -1.1414     | 0.87314 | -1.1414          |
|             | 0.87314         | -0.86284 | 0.80589 | 0.80589     | 0.88449543  |         |                  |
| NA          | ENSG00000269608 | -0.86288 | 0.8059  | 0.8059      | -0.86288    | 0.8059  | -0.86288 0.8059  |
|             | -0.86288        | 0.8059   | 0.8059  | 0.88449543  |             |         |                  |
| CCL17       | ENSG00000102970 | -2.0182  | 0.97822 | 0.97822     | -1.6541     | 0.95095 | -0.86291 0.80591 |
|             | -1.6098         | 0.94628  | 0.80591 | 0.88449543  |             |         |                  |
| NA          | ENSG00000273565 | -0.86292 | 0.80591 | 0.80591     | -0.86292    | 0.80591 | -0.86292 0.80591 |
|             | -0.86292        | 0.80591  | 0.80591 | 0.88449543  |             |         |                  |
| DTD2        | ENSG00000129480 | -1.1242  | 0.86953 | 0.86953     | -1.1242     | 0.86953 | -0.86295 0.80592 |
|             | -1.4282         | 0.92339  | 0.80592 | 0.88449543  |             |         |                  |
| NA          | ENSG00000262624 | -0.86322 | 0.80599 | 0.80599     | -0.86322    | 0.80599 | -0.86322 0.80599 |
|             | -0.86322        | 0.80599  | 0.80599 | 0.884532412 |             |         |                  |
| NA          | ENSG00000279747 | -0.86323 | 0.80599 | 0.80599     | -0.86323    | 0.80599 | -0.86323 0.80599 |
|             | -0.86323        | 0.80599  | 0.80599 | 0.884532412 |             |         |                  |
| PLS1        | ENSG00000120756 | -0.94094 | 0.82663 | 0.82663     | -0.94094    | 0.82663 | -0.94094 0.82663 |
|             | -0.86349        | 0.80607  | 0.80607 | 0.884600286 |             |         |                  |
| NA          | ENSG00000248751 | -0.8637  | 0.80612 | 0.80612     | -0.8637     | 0.80612 | -0.8637 0.80612  |
|             | -0.8637         | 0.80612  | 0.80612 | 0.884606366 |             |         |                  |
| RNA5SP423   | ENSG00000252936 | -0.86369 | 0.80612 | 0.80612     | -0.86369    | 0.80612 | -0.86369         |
|             | 0.80612         | -0.86369 | 0.80612 | 0.80612     | 0.884606366 |         |                  |
| LINC01310   | ENSG00000205632 | -1.3191  | 0.90642 | 0.90642     | -1.0066     | 0.84293 | -1.4643          |
|             | 0.92845         | -0.86372 | 0.80613 | 0.80613     | 0.884606366 |         |                  |
| OSGEPL1-AS1 | ENSG00000253559 | -0.86378 | 0.80615 | 0.80615     | -0.86378    | 0.80615 | -0.86378         |
|             | 0.80615         | -0.86378 | 0.80615 | 0.80615     | 0.884608393 |         |                  |
| NA          | ENSG00000264269 | -0.86399 | 0.8062  | 0.8062      | -0.86399    | 0.8062  | -0.86399 0.8062  |
|             | -0.86399        | 0.8062   | 0.8062  | 0.884623418 |             |         |                  |
| H2BC3       | ENSG00000276410 | -0.86397 | 0.8062  | 0.8062      | -0.86397    | 0.8062  | -0.86397 0.8062  |
|             | -0.86397        | 0.8062   | 0.8062  | 0.884623418 |             |         |                  |
| NA          | ENSG00000249901 | -0.86437 | 0.80631 | 0.80631     | -0.93155    | 0.82422 | -0.93155 0.82422 |
|             | -0.93155        | 0.82422  | 0.80631 | 0.884715248 |             |         |                  |
| H2ACP2      | ENSG00000223951 | -0.86442 | 0.80632 | 0.80632     | -0.86442    | 0.80632 | -0.86442         |
|             | 0.80632         | -0.86442 | 0.80632 | 0.80632     | 0.884715248 |         |                  |
| ZNF250      | ENSG00000196150 | -0.88594 | 0.81217 | 0.81217     | -1.5063     | 0.93401 | -1.5063          |
|             | 0.93401         | -0.86448 | 0.80634 | 0.80634     | 0.884717272 |         |                  |
| KRTCAP2     | ENSG00000163463 | -0.86469 | 0.8064  | 0.8064      | -0.86469    | 0.8064  | -0.86469         |
|             | 0.8064          | -0.86469 | 0.8064  | 0.8064      | 0.884763183 |         |                  |
| ACTG1P16    | ENSG00000260298 | -0.86498 | 0.80647 | 0.80647     | -0.86498    | 0.80647 | -0.86498         |
|             | 0.80647         | -0.86498 | 0.80647 | 0.80647     | 0.884820063 |         |                  |
| EQTN        | ENSG00000120160 | -0.86509 | 0.8065  | 0.8065      | -0.86509    | 0.8065  | -0.86509 0.8065  |
|             | -0.86509        | 0.8065   | 0.8065  | 0.88482122  |             |         |                  |
| SUGP2       | ENSG00000064607 | -1.1842  | 0.88183 | 0.88183     | -1.0908     | 0.86231 | -1.0908 0.86231  |
|             | -0.86523        | 0.80654  | 0.80654 | 0.88482122  |             |         |                  |
| RNA5SP237   | ENSG00000222346 | -0.86525 | 0.80655 | 0.80655     | -0.86525    | 0.80655 | -0.86525         |
|             | 0.80655         | -0.86525 | 0.80655 | 0.80655     | 0.88482122  |         |                  |
| FBXO15      | ENSG00000141665 | -0.86529 | 0.80656 | 0.80656     | -1.8593     | 0.96851 | -1.9388          |
|             | 0.97374         | -1.9388  | 0.97374 | 0.80656     | 0.88482122  |         |                  |
| TRMT44      | ENSG00000155275 | -1.6722  | 0.95275 | 0.95275     | -0.86534    | 0.80657 | -2.1607          |
|             | 0.98464         | -0.9269  | 0.82301 | 0.80657     | 0.88482122  |         |                  |
| NA          | ENSG00000204758 | -0.86536 | 0.80658 | 0.80658     | -0.86536    | 0.80658 | -0.86536 0.80658 |
|             | -0.86536        | 0.80658  | 0.80658 | 0.88482122  |             |         |                  |
| OTOL1       | ENSG00000182447 | -0.92516 | 0.82256 | 0.82256     | -0.92516    | 0.82256 | -0.92516 0.82256 |

|             |                 |          |          |         |             |             |          |         |
|-------------|-----------------|----------|----------|---------|-------------|-------------|----------|---------|
|             |                 | -0.86553 | 0.80663  | 0.80663 | 0.88485615  |             |          |         |
| NA          | ENSG00000273219 | -0.86563 | 0.80665  | 0.80665 | -0.86563    | 0.80665     | -0.86563 | 0.80665 |
|             |                 | -0.86563 | 0.80665  | 0.80665 | 0.88485817  |             |          |         |
| FUNDC2P1    | ENSG00000255883 | -0.86591 | 0.80673  | 0.80673 | -0.86591    | 0.80673     | -0.86591 |         |
|             |                 | 0.80673  | -0.86591 | 0.80673 | 0.80673     | 0.884906087 |          |         |
| NA          | ENSG00000280331 | -0.86592 | 0.80673  | 0.80673 | -0.86592    | 0.80673     | -0.86592 | 0.80673 |
|             |                 | -0.86592 | 0.80673  | 0.80673 | 0.884906087 |             |          |         |
| IGHV3-53    | ENSG00000211967 | -0.86599 | 0.80675  | 0.80675 | -0.86599    | 0.80675     | -0.86599 |         |
|             |                 | 0.80675  | -0.86599 | 0.80675 | 0.80675     | 0.884908106 |          |         |
| MIR4287     | ENSG00000265847 | -1.1711  | 0.80678  | 0.80678 | -0.86608    | 0.80678     | -1.539   |         |
|             |                 | 0.9381   | -1.0408  | 0.85101 | 0.80678     | 0.884912143 |          |         |
| NA          | ENSG00000241257 | -0.86614 | 0.80679  | 0.80679 | -0.86614    | 0.80679     | -0.86614 | 0.80679 |
|             |                 | -0.86614 | 0.80679  | 0.80679 | 0.884912143 |             |          |         |
| NA          | ENSG00000263603 | -0.8662  | 0.80681  | 0.80681 | -1.4079     | 0.92043     | -1.2019  | 0.88531 |
|             |                 | -0.99133 | 0.83924  | 0.80681 | 0.884914162 |             |          |         |
| SLC25A6P3   | ENSG00000232846 | -0.86637 | 0.80686  | 0.80686 | -0.86637    | 0.80686     | -0.86637 |         |
|             |                 | 0.80686  | -0.86637 | 0.80686 | 0.80686     | 0.884949084 |          |         |
| STAG3L5P    | ENSG00000242294 | -0.86678 | 0.80697  | 0.80697 | -0.90393    | 0.81699     | -1.2425  |         |
|             |                 | 0.89297  | -1.2425  | 0.89297 | 0.80697     | 0.88504981  |          |         |
| NPHP3       | ENSG00000113971 | -0.88436 | 0.81175  | 0.81175 | -1.272      | 0.89831     | -0.86699 | 0.80703 |
|             |                 | -0.94181 | 0.82686  | 0.80703 | 0.885095695 |             |          |         |
| RPL34P22    | ENSG00000244267 | -0.86713 | 0.80706  | 0.80706 | -0.86713    | 0.80706     | -1.9047  |         |
|             |                 | 0.97159  | -0.86713 | 0.80706 | 0.80706     | 0.885097932 |          |         |
| NA          | ENSG00000234953 | -0.8672  | 0.80708  | 0.80708 | -0.8672     | 0.80708     | -0.8672  | 0.80708 |
|             |                 | -0.8672  | 0.80708  | 0.80708 | 0.885097932 |             |          |         |
| NA          | ENSG00000261357 | -0.86735 | 0.80713  | 0.80713 | -0.86735    | 0.80713     | -0.86735 | 0.80713 |
|             |                 | -0.86735 | 0.80713  | 0.80713 | 0.885097932 |             |          |         |
| NDUFB10     | ENSG00000140990 | -1.2169  | 0.88817  | 0.88817 | -0.86742    | 0.80714     | -1.2169  |         |
|             |                 | 0.88817  | -1.2169  | 0.88817 | 0.80714     | 0.885097932 |          |         |
| PAK6        | ENSG00000137843 | -0.9485  | 0.82856  | 0.82856 | -0.8675     | 0.80717     | -1.0285  | 0.84815 |
|             |                 | -0.9485  | 0.82856  | 0.80717 | 0.885097932 |             |          |         |
| NA          | ENSG00000272142 | -2.5731  | 0.99496  | 0.99496 | -1.8475     | 0.96766     | -2.1125  | 0.98268 |
|             |                 | -0.8675  | 0.80717  | 0.80717 | 0.885097932 |             |          |         |
| NA          | ENSG00000257645 | -1.2233  | 0.88939  | 0.88939 | -0.86756    | 0.80718     | -0.86756 | 0.80718 |
|             |                 | -0.86756 | 0.80718  | 0.80718 | 0.885097932 |             |          |         |
| NA          | ENSG00000249906 | -0.86758 | 0.80719  | 0.80719 | -0.86758    | 0.80719     | -0.86758 | 0.80719 |
|             |                 | -0.86758 | 0.80719  | 0.80719 | 0.885097932 |             |          |         |
| NA          | ENSG00000234358 | -0.86771 | 0.80722  | 0.80722 | -0.86771    | 0.80722     | -0.86771 | 0.80722 |
|             |                 | -0.86771 | 0.80722  | 0.80722 | 0.885097932 |             |          |         |
| NA          | ENSG00000253060 | -0.86771 | 0.80722  | 0.80722 | -0.86771    | 0.80722     | -0.86771 | 0.80722 |
|             |                 | -0.86771 | 0.80722  | 0.80722 | 0.885097932 |             |          |         |
| NEK11       | ENSG00000114670 | -1.0954  | 0.86333  | 0.86333 | -1.6943     | 0.9549      | -1.5794  | 0.94288 |
|             |                 | -0.86778 | 0.80724  | 0.80724 | 0.885097932 |             |          |         |
| NA          | ENSG00000277453 | -0.8678  | 0.80725  | 0.80725 | -0.8678     | 0.80725     | -0.8678  | 0.80725 |
|             |                 | -0.8678  | 0.80725  | 0.80725 | 0.885097932 |             |          |         |
| LINC00514   | ENSG00000262152 | -0.86787 | 0.80727  | 0.80727 | -0.86787    | 0.80727     | -0.86787 |         |
|             |                 | 0.80727  | -0.86787 | 0.80727 | 0.80727     | 0.885099946 |          |         |
| HSD17B7P2   | ENSG00000099251 | -0.86802 | 0.80731  | 0.80731 | -1.1956     | 0.88407     | -0.98486 |         |
|             |                 | 0.83765  | -1.0959  | 0.86344 | 0.80731     | 0.885123887 |          |         |
| RPL36P20    | ENSG00000234270 | -0.86815 | 0.80734  | 0.80734 | -0.86815    | 0.80734     | -0.86815 |         |
|             |                 | 0.80734  | -0.86815 | 0.80734 | 0.80734     | 0.885136864 |          |         |
| NA          | ENSG00000262412 | -0.86828 | 0.80738  | 0.80738 | -0.86828    | 0.80738     | -0.86828 | 0.80738 |
|             |                 | -0.86828 | 0.80738  | 0.80738 | 0.885160804 |             |          |         |
| NA          | ENSG00000277382 | -0.86857 | 0.80746  | 0.80746 | -0.86857    | 0.80746     | -0.86857 | 0.80746 |
|             |                 | -0.86857 | 0.80746  | 0.80746 | 0.885190777 |             |          |         |
| TBCAP3      | ENSG00000249055 | -1.2004  | 0.885    | 0.885   | -0.86862    | 0.80747     | -0.86862 | 0.80747 |
|             |                 | -0.86862 | 0.80747  | 0.80747 | 0.885190777 |             |          |         |
| BYSL        | ENSG00000112578 | -1.2506  | 0.89447  | 0.89447 | -0.86866    | 0.80748     | -0.86866 | 0.80748 |
|             |                 | -1.0476  | 0.85258  | 0.80748 | 0.885190777 |             |          |         |
| SNORD115-39 | ENSG00000200564 | -0.86863 | 0.80748  | 0.80748 | -0.86863    | 0.80748     | -0.86863 |         |
|             |                 | 0.80748  | -0.86863 | 0.80748 | 0.80748     | 0.885190777 |          |         |
| NA          | ENSG00000244063 | -0.86886 | 0.80754  | 0.80754 | -1.6182     | 0.94719     | -1.6182  | 0.94719 |

|            |                 |          |             |             |             |          |         |          |
|------------|-----------------|----------|-------------|-------------|-------------|----------|---------|----------|
|            | -1.6182         | 0.94719  | 0.80754     | 0.885227685 |             |          |         |          |
| SI         | ENSG00000090402 | -1.6945  | 0.95491     | -1.6181     | 0.94718     | -0.8689  | 0.80755 |          |
|            | -1.243          | 0.89307  | 0.80755     | 0.885227685 |             |          |         |          |
| NA         | ENSG00000199667 | -0.86898 | 0.80757     | -0.86898    | 0.80757     | -0.86898 | 0.80757 |          |
|            | -0.86898        | 0.80757  | 0.80757     | 0.885229695 |             |          |         |          |
| RN7SKP32   | ENSG00000222099 | -0.97826 | 0.83603     | -0.86935    | 0.80767     | -1.1888  |         |          |
|            | 0.88273         | -1.1888  | 0.88273     | 0.80767     | 0.885299483 |          |         |          |
| NA         | ENSG00000224691 | -0.86933 | 0.80767     | -0.86933    | 0.80767     | -0.86933 | 0.80767 |          |
|            | -0.86933        | 0.80767  | 0.80767     | 0.885299483 |             |          |         |          |
| NA         | ENSG00000276148 | -0.86944 | 0.8077      | -0.86944    | 0.8077      | -0.86944 | 0.8077  |          |
|            | -0.86944        | 0.8077   | 0.8077      | 0.885312452 |             |          |         |          |
| TRAJ39     | ENSG00000211850 | -1.0636  | 0.85624     | -0.86963    | 0.80775     | -0.86963 |         |          |
|            | 0.80775         | -0.86963 | 0.80775     | 0.80775     | 0.885347342 |          |         |          |
| NA         | ENSG00000223101 | -0.87002 | 0.80785     | -1.3747     | 0.91539     | -1.3747  | 0.91539 |          |
|            | -1.3747         | 0.91539  | 0.80785     | 0.885412176 |             |          |         |          |
| RNA5SP29   | ENSG00000222920 | -0.87008 | 0.80787     | -0.87008    | 0.80787     | -0.87008 |         |          |
|            | 0.80787         | -0.87008 | 0.80787     | 0.80787     | 0.885412176 |          |         |          |
| NA         | ENSG00000227766 | -1.3332  | 0.90877     | -0.87009    | 0.80788     | -1.3332  | 0.90877 |          |
|            | -1.3332         | 0.90877  | 0.80788     | 0.885412176 |             |          |         |          |
| NA         | ENSG00000260719 | -0.87018 | 0.8079      | -0.87018    | 0.8079      | -0.87018 | 0.8079  |          |
|            | -0.87018        | 0.8079   | 0.8079      | 0.885412176 |             |          |         |          |
| NA         | ENSG00000276092 | -0.87017 | 0.8079      | -0.87017    | 0.8079      | -0.87017 | 0.8079  |          |
|            | -0.87017        | 0.8079   | 0.8079      | 0.885412176 |             |          |         |          |
| RNU6-798P  | ENSG00000252721 | -0.87055 | 0.808       | -0.87055    | 0.808       | -0.87055 | 0.808   | -0.87055 |
|            | 0.808           | 0.808    | 0.885501855 |             |             |          |         |          |
| MIR4471    | ENSG00000265599 | -0.87085 | 0.80808     | -0.87085    | 0.80808     | -0.87085 |         |          |
|            | 0.80808         | -0.87085 | 0.80808     | 0.80808     | 0.885569613 |          |         |          |
| ZNF343     | ENSG00000088876 | -1.7062  | 0.95602     | -1.4647     | 0.9285      | -0.8711  |         |          |
|            | 0.80815         | -1.3452  | 0.91073     | 0.80815     | 0.885626408 |          |         |          |
| PCDHA10    | ENSG00000250120 | -0.98473 | 0.83762     | -0.87143    | 0.80824     | -0.87143 |         |          |
|            | 0.80824         | -0.87143 | 0.80824     | 0.80824     | 0.885705118 |          |         |          |
| NA         | ENSG00000239861 | -0.87149 | 0.80826     | -0.87149    | 0.80826     | -0.87149 | 0.80826 |          |
|            | -0.87149        | 0.80826  | 0.80826     | 0.885706154 |             |          |         |          |
| CACNG7     | ENSG00000105605 | -0.87173 | 0.80832     | -0.87173    | 0.80832     | -1.1126  |         |          |
|            | 0.86705         | -0.87173 | 0.80832     | 0.80832     | 0.885706154 |          |         |          |
| NA         | ENSG00000273483 | -0.8717  | 0.80832     | -0.8717     | 0.80832     | -0.8717  | 0.80832 |          |
|            | -0.8717         | 0.80832  | 0.80832     | 0.885706154 |             |          |         |          |
| NECAP1P2   | ENSG00000234632 | -0.87179 | 0.80834     | -0.87179    | 0.80834     | -0.87179 |         |          |
|            | 0.80834         | -0.87179 | 0.80834     | 0.80834     | 0.885706154 |          |         |          |
| FAM237A    | ENSG00000235118 | -0.87178 | 0.80834     | -0.87178    | 0.80834     | -0.87178 |         |          |
|            | 0.80834         | -0.87178 | 0.80834     | 0.80834     | 0.885706154 |          |         |          |
| RN7SL22P   | ENSG00000243136 | -0.87184 | 0.80835     | -0.87184    | 0.80835     | -0.87184 |         |          |
|            | 0.80835         | -0.87184 | 0.80835     | 0.80835     | 0.885706154 |          |         |          |
| IL10       | ENSG00000136634 | -0.87201 | 0.8084      | -0.87201    | 0.8084      | -0.87201 | 0.8084  |          |
|            | -0.87201        | 0.8084   | 0.8084      | 0.885721108 |             |          |         |          |
| CCDC126    | ENSG00000169193 | -0.872   | 0.8084      | -1.8732     | 0.96948     | -1.8732  |         |          |
|            | 0.96948         | -1.8601  | 0.96857     | 0.8084      | 0.885721108 |          |         |          |
| NA         | ENSG00000256325 | -0.8721  | 0.80842     | -1.4507     | 0.92657     | -0.8721  | 0.80842 |          |
|            | -0.8721         | 0.80842  | 0.80842     | 0.885723106 |             |          |         |          |
| IGFL1P1    | ENSG00000268879 | -0.87222 | 0.80845     | -0.87222    | 0.80845     | -0.87222 |         |          |
|            | 0.80845         | -0.87222 | 0.80845     | 0.80845     | 0.885727103 |          |         |          |
| HNRNPA3P14 | ENSG00000224494 | -0.87223 | 0.80846     | -0.87223    | 0.80846     | -0.87223 |         |          |
|            | 0.80846         | -0.87223 | 0.80846     | 0.80846     | 0.885727103 |          |         |          |
| NA         | ENSG00000249779 | -0.87231 | 0.80848     | -0.87231    | 0.80848     | -0.87231 | 0.80848 |          |
|            | -0.87231        | 0.80848  | 0.80848     | 0.885729101 |             |          |         |          |
| NA         | ENSG00000227098 | -0.87269 | 0.80858     | -0.87269    | 0.80858     | -0.87269 | 0.80858 |          |
|            | -0.87269        | 0.80858  | 0.80858     | 0.885818741 |             |          |         |          |
| NA         | ENSG00000274834 | -0.8728  | 0.80861     | -0.8728     | 0.80861     | -0.8728  | 0.80861 |          |
|            | -0.8728         | 0.80861  | 0.80861     | 0.885831691 |             |          |         |          |
| RN7SL75P   | ENSG00000239908 | -0.87291 | 0.80864     | -0.87291    | 0.80864     | -0.87291 |         |          |
|            | 0.80864         | -0.87291 | 0.80864     | 0.80864     | 0.885841668 |          |         |          |
| OR9A4      | ENSG00000258083 | -0.87299 | 0.80866     | -0.87299    | 0.80866     | -0.87299 | 0.80866 |          |

|           |                 |          |         |             |             |          |         |
|-----------|-----------------|----------|---------|-------------|-------------|----------|---------|
|           | -0.87299        | 0.80866  | 0.80866 | 0.885841668 |             |          |         |
| ZNF292    | ENSG00000188994 | -0.99778 | 0.84081 | -1.1906     | 0.88309     | -0.90146 |         |
|           | 0.81633         | -0.87314 | 0.80871 | 0.80871     | 0.885841668 |          |         |
| SGSM3-AS1 | ENSG00000229999 | -1.1983  | 0.88459 | -0.87317    | 0.80871     | -1.2445  |         |
|           | 0.89335         | -0.98739 | 0.83828 | 0.80871     | 0.885841668 |          |         |
| NA        | ENSG00000264968 | -0.87317 | 0.80871 | -0.87317    | 0.80871     | -0.87317 | 0.80871 |
|           | -0.87317        | 0.80871  | 0.80871 | 0.885841668 |             |          |         |
| C4BPAP2   | ENSG00000232621 | -0.8734  | 0.80878 | -0.8734     | 0.80878     | -0.8734  |         |
|           | 0.80878         | -0.8734  | 0.80878 | 0.80878     | 0.885883518 |          |         |
| BET1      | ENSG00000105829 | -0.87361 | 0.80884 | -0.87361    | 0.80884     | -0.87361 | 0.80884 |
|           | -0.87361        | 0.80884  | 0.80884 | 0.885883518 |             |          |         |
| NA        | ENSG00000248964 | -1.0546  | 0.85419 | -0.87368    | 0.80885     | -1.3364  | 0.90929 |
|           | -0.87368        | 0.80885  | 0.80885 | 0.885883518 |             |          |         |
| OR10AD1   | ENSG00000172640 | -0.87375 | 0.80887 | -0.87375    | 0.80887     | -0.87375 |         |
|           | 0.80887         | -1.3407  | 0.90999 | 0.80887     | 0.885883518 |          |         |
| RPS8      | ENSG00000142937 | -1.3332  | 0.90876 | -1.3332     | 0.90876     | -1.3332  | 0.90876 |
|           | -0.87383        | 0.80889  | 0.80889 | 0.885883518 |             |          |         |
| UTS2B     | ENSG00000188958 | -0.89399 | 0.81434 | -0.87381    | 0.80889     | -0.89399 | 0.81434 |
|           | -0.89399        | 0.81434  | 0.80889 | 0.885883518 |             |          |         |
| NA        | ENSG00000261433 | -0.87393 | 0.80892 | -0.87393    | 0.80892     | -0.87393 | 0.80892 |
|           | -0.87393        | 0.80892  | 0.80892 | 0.885883518 |             |          |         |
| NA        | ENSG00000272077 | -1.2916  | 0.90176 | -0.87393    | 0.80892     | -1.6348  | 0.94896 |
|           | -1.2401         | 0.89253  | 0.80892 | 0.885883518 |             |          |         |
| PPIH      | ENSG00000171960 | -1.3339  | 0.90888 | -0.87398    | 0.80893     | -1.643   | 0.94981 |
|           | -1.7659         | 0.96129  | 0.80893 | 0.885883518 |             |          |         |
| CDSN      | ENSG00000204539 | -1.2638  | 0.89686 | -1.2638     | 0.89686     | -0.87396 | 0.80893 |
|           | -1.2638         | 0.89686  | 0.80893 | 0.885883518 |             |          |         |
| IGHV3-74  | ENSG00000224650 | -0.87414 | 0.80898 | -0.87414    | 0.80898     | -0.87414 |         |
|           | 0.80898         | -0.87414 | 0.80898 | 0.80898     | 0.885918365 |          |         |
| MYADM     | ENSG00000179820 | -0.87432 | 0.80903 | -0.87432    | 0.80903     | -0.87432 | 0.80903 |
|           | -0.87432        | 0.80903  | 0.80903 | 0.885944252 |             |          |         |
| ZNF33A    | ENSG00000189180 | -1.1895  | 0.88288 | -0.87435    | 0.80904     | -1.0243  |         |
|           | 0.84715         | -1.0351  | 0.84968 | 0.80904     | 0.885944252 |          |         |
| NA        | ENSG00000201311 | -0.87445 | 0.80906 | -0.87445    | 0.80906     | -0.87445 | 0.80906 |
|           | -0.87445        | 0.80906  | 0.80906 | 0.885946244 |             |          |         |
| NA        | ENSG00000226117 | -0.87458 | 0.8091  | -0.87458    | 0.8091      | -0.87458 | 0.8091  |
|           | -0.87458        | 0.8091   | 0.8091  | 0.885950228 |             |          |         |
| NA        | ENSG00000271998 | -0.87458 | 0.8091  | -0.87458    | 0.8091      | -0.87458 | 0.8091  |
|           | -0.87458        | 0.8091   | 0.8091  | 0.885950228 |             |          |         |
| NA        | ENSG00000254847 | -1.2997  | 0.90316 | -1.1552     | 0.87599     | -0.8748  | 0.80916 |
|           | -1.2997         | 0.90316  | 0.80916 | 0.885996018 |             |          |         |
| FLG-AS1   | ENSG00000237975 | -0.87506 | 0.80923 | -1.1026     | 0.8649      | -1.1695  |         |
|           | 0.8789          | -1.637   | 0.94919 | 0.80923     | 0.886052756 |          |         |
| CDC45     | ENSG00000093009 | -1.8211  | 0.96571 | -1.4485     | 0.92626     | -1.1193  | 0.86848 |
|           | -0.87546        | 0.80934  | 0.80934 | 0.886153287 |             |          |         |
| NA        | ENSG00000232031 | -0.88954 | 0.81314 | -1.1253     | 0.86977     | -0.87587 | 0.80945 |
|           | -1.1253         | 0.86977  | 0.80945 | 0.886212971 |             |          |         |
| NA        | ENSG00000248363 | -0.8759  | 0.80946 | -0.8759     | 0.80946     | -0.8759  | 0.80946 |
|           | -0.8759         | 0.80946  | 0.80946 | 0.886212971 |             |          |         |
| NA        | ENSG00000283321 | -0.87591 | 0.80946 | -0.87591    | 0.80946     | -0.87591 | 0.80946 |
|           | -0.87591        | 0.80946  | 0.80946 | 0.886212971 |             |          |         |
| NA        | ENSG00000239327 | -2.8903  | 0.99808 | -2.054      | 0.98001     | -0.87599 | 0.80948 |
|           | -2.8903         | 0.99808  | 0.80948 | 0.886212971 |             |          |         |
| NA        | ENSG00000248356 | -0.87614 | 0.80952 | -0.87614    | 0.80952     | -0.87614 | 0.80952 |
|           | -0.87614        | 0.80952  | 0.80952 | 0.886212971 |             |          |         |
| NA        | ENSG00000223235 | -0.87617 | 0.80953 | -0.87617    | 0.80953     | -1.0875  | 0.86159 |
|           | -1.248          | 0.89399  | 0.80953 | 0.886212971 |             |          |         |
| NA        | ENSG00000267943 | -1.5226  | 0.93607 | -1.5226     | 0.93607     | -0.8762  | 0.80954 |
|           | -1.5226         | 0.93607  | 0.80954 | 0.886212971 |             |          |         |
| NA        | ENSG00000273133 | -0.87619 | 0.80954 | -0.87619    | 0.80954     | -0.87619 | 0.80954 |
|           | -0.87619        | 0.80954  | 0.80954 | 0.886212971 |             |          |         |
| LINC02830 | ENSG00000224899 | -0.87634 | 0.80958 | -0.87634    | 0.80958     | -0.87634 |         |

|           |                 |          |         |             |             |          |         |
|-----------|-----------------|----------|---------|-------------|-------------|----------|---------|
|           | 0.80958         | -0.87634 | 0.80958 | 0.80958     | 0.88623685  |          |         |
| RARG      | ENSG00000172819 | -1.1606  | 0.8771  | -0.89364    | 0.81424     | -1.4538  | 0.927   |
|           | -0.87647        | 0.80961  | 0.80961 | 0.886249782 |             |          |         |
| OR12D3    | ENSG00000112462 | -1.7576  | 0.96059 | -2.113      | 0.9827      | -0.87673 |         |
|           | 0.80968         | -0.87673 | 0.80968 | 0.80968     | 0.88628659  |          |         |
| NA        | ENSG00000268509 | -0.87671 | 0.80968 | -0.87671    | 0.80968     | -0.87671 | 0.80968 |
|           | -0.87671        | 0.80968  | 0.80968 | 0.88628659  |             |          |         |
| CRIM1-DT  | ENSG00000260025 | -1.5239  | 0.93623 | -0.87688    | 0.80972     | -1.5239  |         |
|           | 0.93623         | -1.5239  | 0.93623 | 0.80972     | 0.886287475 |          |         |
| NA        | ENSG00000207371 | -0.87702 | 0.80976 | -0.87702    | 0.80976     | -0.87702 | 0.80976 |
|           | -0.87702        | 0.80976  | 0.80976 | 0.886287475 |             |          |         |
| ZYX       | ENSG00000159840 | -0.87705 | 0.80977 | -0.87705    | 0.80977     | -0.87705 | 0.80977 |
|           | -0.87705        | 0.80977  | 0.80977 | 0.886287475 |             |          |         |
| NA        | ENSG00000184441 | -0.87725 | 0.80983 | -0.87725    | 0.80983     | -0.87725 | 0.80983 |
|           | -0.87725        | 0.80983  | 0.80983 | 0.886287475 |             |          |         |
| NA        | ENSG00000250573 | -0.87727 | 0.80983 | -0.87727    | 0.80983     | -0.87727 | 0.80983 |
|           | -0.87727        | 0.80983  | 0.80983 | 0.886287475 |             |          |         |
| CDH20     | ENSG00000101542 | -1.0867  | 0.86142 | -0.87738    | 0.80986     | -1.0804  | 0.86002 |
|           | -1.0732         | 0.85842  | 0.80986 | 0.886287475 |             |          |         |
| NA        | ENSG00000227215 | -0.87737 | 0.80986 | -0.87737    | 0.80986     | -0.87737 | 0.80986 |
|           | -1.2744         | 0.89874  | 0.80986 | 0.886287475 |             |          |         |
| RPS26P47  | ENSG00000234354 | -0.8775  | 0.80989 | -0.8775     | 0.80989     | -0.8775  |         |
|           | 0.80989         | -0.8775  | 0.80989 | 0.80989     | 0.886287475 |          |         |
| MTCO1P6   | ENSG00000240309 | -1.0095  | 0.84364 | -1.0095     | 0.84364     | -0.87749 |         |
|           | 0.80989         | -1.0095  | 0.84364 | 0.80989     | 0.886287475 |          |         |
| LINC02186 | ENSG00000261856 | -1.3174  | 0.90614 | -0.94164    | 0.82681     | -1.3174  |         |
|           | 0.90614         | -0.87753 | 0.8099  | 0.8099      | 0.886287475 |          |         |
| PLEK2     | ENSG00000100558 | -1.3393  | 0.90976 | -0.87756    | 0.80991     | -1.1608  | 0.87715 |
|           | -1.1608         | 0.87715  | 0.80991 | 0.886287475 |             |          |         |
| NA        | ENSG00000253833 | -0.87762 | 0.80993 | -0.87762    | 0.80993     | -0.87762 | 0.80993 |
|           | -0.87762        | 0.80993  | 0.80993 | 0.886287475 |             |          |         |
| NA        | ENSG00000260988 | -0.87768 | 0.80994 | -0.87768    | 0.80994     | -0.87768 | 0.80994 |
|           | -0.87768        | 0.80994  | 0.80994 | 0.886287475 |             |          |         |
| RSL24D1   | ENSG00000137876 | -0.87772 | 0.80995 | -0.87772    | 0.80995     | -0.87772 |         |
|           | 0.80995         | -0.87772 | 0.80995 | 0.80995     | 0.886287475 |          |         |
| LRRC4C    | ENSG00000148948 | -0.92582 | 0.82273 | -1.3474     | 0.91108     | -1.137   |         |
|           | 0.87224         | -0.87778 | 0.80997 | 0.80997     | 0.886287475 |          |         |
| AGK       | ENSG00000006530 | -0.87781 | 0.80998 | -1.0045     | 0.84242     | -1.1288  | 0.87051 |
|           | -1.1361         | 0.87204  | 0.80998 | 0.886287475 |             |          |         |
| LINC02035 | ENSG00000273033 | -1.6199  | 0.94738 | -1.6199     | 0.94738     | -0.87787 |         |
|           | 0.80999         | -1.6199  | 0.94738 | 0.80999     | 0.886287475 |          |         |
| RNA5SP405 | ENSG00000199929 | -1.4775  | 0.93023 | -1.2803     | 0.89977     | -0.87801 |         |
|           | 0.81003         | -0.87801 | 0.81003 | 0.81003     | 0.886304365 |          |         |
| LINC00309 | ENSG00000230923 | -0.87813 | 0.81006 | -1.4612     | 0.92801     | -1.4612  |         |
|           | 0.92801         | -1.4612  | 0.92801 | 0.81006     | 0.886304365 |          |         |
| NA        | ENSG00000263321 | -0.87813 | 0.81006 | -0.87813    | 0.81006     | -0.87813 | 0.81006 |
|           | -0.87813        | 0.81006  | 0.81006 | 0.886304365 |             |          |         |
| NA        | ENSG00000271937 | -1.3325  | 0.90866 | -1.5171     | 0.93538     | -0.87822 | 0.81009 |
|           | -0.87822        | 0.81009  | 0.81009 | 0.8863073   |             |          |         |
| NA        | ENSG00000250723 | -0.87826 | 0.8101  | -1.2779     | 0.89937     | -1.2008  | 0.88509 |
|           | -1.2008         | 0.88509  | 0.8101  | 0.8863073   |             |          |         |
| SNORA49   | ENSG00000208892 | -0.87833 | 0.81012 | -0.87833    | 0.81012     | -0.87833 |         |
|           | 0.81012         | -0.87833 | 0.81012 | 0.81012     | 0.8863073   |          |         |
| NA        | ENSG00000253176 | -0.87847 | 0.81015 | -0.87847    | 0.81015     | -0.87847 | 0.81015 |
|           | -0.87847        | 0.81015  | 0.81015 | 0.8863073   |             |          |         |
| SLC25A15  | ENSG00000102743 | -0.94576 | 0.82786 | -2.0476     | 0.9797      | -0.87853 |         |
|           | 0.81017         | -1.5008  | 0.9333  | 0.81017     | 0.8863073   |          |         |
| NA        | ENSG00000248176 | -0.87856 | 0.81018 | -0.87856    | 0.81018     | -0.87856 | 0.81018 |
|           | -1.2137         | 0.88757  | 0.81018 | 0.8863073   |             |          |         |
| TRDD1     | ENSG00000223997 | -0.87859 | 0.81019 | -0.87859    | 0.81019     | -0.87859 | 0.81019 |
|           | -0.87859        | 0.81019  | 0.81019 | 0.8863073   |             |          |         |
| NA        | ENSG00000256734 | -0.87867 | 0.81021 | -0.87867    | 0.81021     | -0.87867 | 0.81021 |

|             |                 |          |             |             |             |          |         |       |
|-------------|-----------------|----------|-------------|-------------|-------------|----------|---------|-------|
|             | -0.87867        | 0.81021  | 0.81021     | 0.886309283 |             |          |         |       |
| EVX1        | ENSG00000106038 | -0.87873 | 0.81023     | -0.87873    | 0.81023     | -1.2483  | 0.89404 |       |
|             | -0.87873        | 0.81023  | 0.81023     | 0.886311265 |             |          |         |       |
| ZNF10       | ENSG00000256223 | -0.8789  | 0.81027     | -0.8789     | 0.81027     | -0.8789  | 0.81027 |       |
|             | -0.8789         | 0.81027  | 0.81027     | 0.886335124 |             |          |         |       |
| RNA5SP273   | ENSG00000199354 | -0.87903 | 0.81031     | -1.8348     | 0.96673     | -0.941   |         |       |
|             | 0.82665         | -1.1352  | 0.87186     | 0.81031     | 0.886357948 |          |         |       |
| NA          | ENSG00000261116 | -0.87917 | 0.81035     | -0.87917    | 0.81035     | -0.87917 | 0.81035 |       |
|             | -0.87917        | 0.81035  | 0.81035     | 0.886357948 |             |          |         |       |
| KRT8P33     | ENSG00000250539 | -0.87922 | 0.81036     | -0.87922    | 0.81036     | -0.87922 |         |       |
|             | 0.81036         | -0.87922 | 0.81036     | 0.81036     | 0.886357948 |          |         |       |
| PROC        | ENSG00000115718 | -2.223   | 0.98689     | -2.4251     | 0.99235     | -0.87925 | 0.81037 |       |
|             | -2.1749         | 0.98518  | 0.81037     | 0.886357948 |             |          |         |       |
| TBC1D27P    | ENSG00000128438 | -0.87934 | 0.81039     | -1.7046     | 0.95586     | -0.87934 |         |       |
|             | 0.81039         | -1.1964  | 0.88423     | 0.81039     | 0.886357948 |          |         |       |
| RNU6-172P   | ENSG00000222932 | -0.87938 | 0.8104      | -0.87938    | 0.8104      | -0.87938 |         |       |
|             | 0.8104          | -0.87938 | 0.8104      | 0.8104      | 0.886357948 |          |         |       |
| RNU4ATAC11P | ENSG00000251748 | -0.87958 | 0.81046     | -0.87958    | 0.81046     | -0.87958 |         |       |
|             | 0.81046         | -1.1269  | 0.87011     | 0.81046     | 0.886403676 |          |         |       |
| NA          | ENSG00000235617 | -0.87966 | 0.81048     | -0.87966    | 0.81048     | -0.87966 | 0.81048 |       |
|             | -0.87966        | 0.81048  | 0.81048     | 0.886405656 |             |          |         |       |
| TMEM266     | ENSG00000169758 | -1.0925  | 0.86269     | -0.87983    | 0.81052     | -1.0616  |         |       |
|             | 0.85579         | -1.0905  | 0.86225     | 0.81052     | 0.886429508 |          |         |       |
| IKZF3       | ENSG00000161405 | -0.97718 | 0.83576     | -0.88       | 0.81057     | -0.88    | 0.81057 | -0.88 |
|             | 0.81057         | 0.81057  | 0.886464296 |             |             |          |         |       |
| RNU5D-1     | ENSG00000200169 | -0.8801  | 0.8106      | -0.8801     | 0.8106      | -0.8801  |         |       |
|             | 0.8106          | -0.8801  | 0.8106      | 0.8106      | 0.88647721  |          |         |       |
| NA          | ENSG00000213556 | -1.2542  | 0.89512     | -0.88038    | 0.81067     | -0.88038 | 0.81067 |       |
|             | -0.88038        | 0.81067  | 0.81067     | 0.886505939 |             |          |         |       |
| NA          | ENSG00000235240 | -1.6627  | 0.95182     | -0.88047    | 0.8107      | -0.91932 | 0.82103 |       |
|             | -1.6627         | 0.95182  | 0.8107      | 0.886505939 |             |          |         |       |
| NA          | ENSG00000233175 | -0.88057 | 0.81072     | -0.88057    | 0.81072     | -0.88057 | 0.81072 |       |
|             | -0.88057        | 0.81072  | 0.81072     | 0.886505939 |             |          |         |       |
| NA          | ENSG00000262528 | -0.88064 | 0.81074     | -0.88064    | 0.81074     | -0.88064 | 0.81074 |       |
|             | -0.88064        | 0.81074  | 0.81074     | 0.886505939 |             |          |         |       |
| TRAF6       | ENSG00000175104 | -1.4392  | 0.92495     | -1.0137     | 0.84463     | -0.88074 | 0.81077 |       |
|             | -1.0184         | 0.84576  | 0.81077     | 0.886505939 |             |          |         |       |
| NA          | ENSG00000229444 | -2.1242  | 0.98317     | -2.1242     | 0.98317     | -2.1242  | 0.98317 |       |
|             | -0.88079        | 0.81078  | 0.81078     | 0.886505939 |             |          |         |       |
| RN7SL455P   | ENSG00000264047 | -0.88076 | 0.81078     | -0.88076    | 0.81078     | -0.88076 |         |       |
|             | 0.81078         | -0.88076 | 0.81078     | 0.81078     | 0.886505939 |          |         |       |
| OR14C36     | ENSG00000177174 | -1.7716  | 0.96177     | -1.7716     | 0.96177     | -0.88082 |         |       |
|             | 0.81079         | -1.7716  | 0.96177     | 0.81079     | 0.886505939 |          |         |       |
| NA          | ENSG00000248839 | -0.88083 | 0.81079     | -0.88083    | 0.81079     | -0.88083 | 0.81079 |       |
|             | -0.88083        | 0.81079  | 0.81079     | 0.886505939 |             |          |         |       |
| H4C4        | ENSG00000277157 | -0.88089 | 0.81081     | -0.88089    | 0.81081     | -0.88089 | 0.81081 |       |
|             | -0.88089        | 0.81081  | 0.81081     | 0.886507916 |             |          |         |       |
| NA          | ENSG00000248787 | -0.881   | 0.81084     | -0.881      | 0.81084     | -0.881   | 0.81084 |       |
|             | -0.881          | 0.81084  | 0.81084     | 0.886520826 |             |          |         |       |
| EFNA1       | ENSG00000169242 | -1.2356  | 0.8917      | -0.88125    | 0.81091     | -1.2356  | 0.8917  |       |
|             | -1.2356         | 0.8917   | 0.81091     | 0.886577467 |             |          |         |       |
| DOCK1       | ENSG00000150760 | -1.6077  | 0.94605     | -0.96996    | 0.83397     | -0.88135 | 0.81094 |       |
|             | -0.90321        | 0.81679  | 0.81094     | 0.886590375 |             |          |         |       |
| PATJ        | ENSG00000132849 | -2.1445  | 0.984       | -2.8816     | 0.99802     | -2.0454  | 0.97959 |       |
|             | -0.88142        | 0.81096  | 0.81096     | 0.88659235  |             |          |         |       |
| RN7SL375P   | ENSG00000265745 | -0.88153 | 0.81098     | -0.88153    | 0.81098     | -0.88153 |         |       |
|             | 0.81098         | -0.88153 | 0.81098     | 0.81098     | 0.886594324 |          |         |       |
| RAMP2-AS1   | ENSG00000197291 | -1.8126  | 0.96505     | -1.8126     | 0.96505     | -1.8126  |         |       |
|             | 0.96505         | -0.88158 | 0.811       | 0.811       | 0.886596298 |          |         |       |
| MIR4288     | ENSG00000265251 | -0.88175 | 0.81104     | -0.88175    | 0.81104     | -0.88175 |         |       |
|             | 0.81104         | -0.88175 | 0.81104     | 0.81104     | 0.886620136 |          |         |       |
| DUSP19      | ENSG00000162999 | -0.88192 | 0.81109     | -1.1041     | 0.86523     | -0.88192 |         |       |

|            |                 |          |             |             |             |          |         |
|------------|-----------------|----------|-------------|-------------|-------------|----------|---------|
|            | 0.81109         | -1.4205  | 0.92227     | 0.81109     | 0.886654905 |          |         |
| NA         | ENSG00000230285 | -0.88223 | 0.81117     | -2.2761     | 0.98858     | -0.88223 | 0.81117 |
|            | -0.88223        | 0.81117  | 0.81117     | 0.886717449 |             |          |         |
| DNAJB1     | ENSG00000132002 | -0.88233 | 0.81112     | -0.88233    | 0.81112     | -0.88233 |         |
|            | 0.81112         | -1.206   | 0.88609     | 0.81112     | 0.886717449 |          |         |
| NA         | ENSG00000244619 | -0.88235 | 0.81121     | -0.88235    | 0.81121     | -0.88235 | 0.81121 |
|            | -0.88235        | 0.81121  | 0.81121     | 0.886717449 |             |          |         |
| RHEX       | ENSG00000263961 | -1.4136  | 0.92126     | -0.88242    | 0.81122     | -1.7547  | 0.96035 |
|            | -2.3366         | 0.99027  | 0.81122     | 0.886717449 |             |          |         |
| YWHAQ7     | ENSG00000271142 | -0.8828  | 0.81133     | -1.065      | 0.85655     | -1.7805  |         |
|            | 0.9625          | -0.972   | 0.83447     | 0.81133     | 0.886799872 |          |         |
| NA         | ENSG00000227857 | -1.16    | 0.87698     | -0.88284    | 0.81134     | -1.16    | 0.87698 |
|            | 0.81424         | 0.81134  | 0.886799872 |             |             |          |         |
| NXP2       | ENSG00000144227 | -0.88289 | 0.81135     | -1.2887     | 0.90125     | -1.0253  | 0.84739 |
|            | -1.2844         | 0.9005   | 0.81135     | 0.886799872 |             |          |         |
| PDHA1P1    | ENSG00000270772 | -0.88301 | 0.81138     | -0.88301    | 0.81138     | -0.88301 |         |
|            | 0.81138         | -1.0886  | 0.86183     | 0.81138     | 0.88680578  |          |         |
| NA         | ENSG00000260008 | -0.88311 | 0.81141     | -0.88311    | 0.81141     | -0.88311 | 0.81141 |
|            | -0.88311        | 0.81141  | 0.81141     | 0.88680578  |             |          |         |
| NA         | ENSG00000280073 | -0.8831  | 0.81141     | -0.8831     | 0.81141     | -0.8831  | 0.81141 |
|            | -0.8831         | 0.81141  | 0.81141     | 0.88680578  |             |          |         |
| NA         | ENSG00000279085 | -0.88325 | 0.81145     | -0.88325    | 0.81145     | -0.88325 | 0.81145 |
|            | -0.88325        | 0.81145  | 0.81145     | 0.886822615 |             |          |         |
| MTCO2P15   | ENSG00000255417 | -0.88332 | 0.81147     | -0.88332    | 0.81147     | -0.88332 |         |
|            | 0.81147         | -0.88332 | 0.81147     | 0.81147     | 0.886822615 |          |         |
| CTXND2     | ENSG00000283324 | -0.88334 | 0.81148     | -1.0923     | 0.86265     | -0.88334 |         |
|            | 0.81148         | -0.88334 | 0.81148     | 0.81148     | 0.886822615 |          |         |
| BRWD1P3    | ENSG00000232841 | -1.4357  | 0.92446     | -0.88345    | 0.81115     | -1.4357  |         |
|            | 0.92446         | -1.4357  | 0.92446     | 0.81115     | 0.886824583 |          |         |
| RNA5SP330  | ENSG00000252905 | -0.88352 | 0.81152     | -0.88352    | 0.81152     | -0.88352 |         |
|            | 0.81152         | -0.88352 | 0.81152     | 0.81152     | 0.886826552 |          |         |
| NA         | ENSG00000229951 | -0.8836  | 0.81154     | -1.3504     | 0.91156     | -1.4301  | 0.92366 |
|            | -1.0166         | 0.84533  | 0.81154     | 0.88682852  |             |          |         |
| PGRMC2     | ENSG00000164040 | -0.88378 | 0.81159     | -1.3992     | 0.91913     | -1.3992  |         |
|            | 0.91913         | -1.7305  | 0.95823     | 0.81159     | 0.88683836  |          |         |
| NA         | ENSG00000254874 | -0.88386 | 0.81161     | -0.88386    | 0.81161     | -0.88386 | 0.81161 |
|            | -0.88386        | 0.81161  | 0.81161     | 0.88683836  |             |          |         |
| LINC00922  | ENSG00000261742 | -0.88926 | 0.81307     | -0.88384    | 0.81161     | -1.5419  |         |
|            | 0.93846         | -1.7676  | 0.96144     | 0.81161     | 0.88683836  |          |         |
| OR7E85P    | ENSG00000250884 | -0.92403 | 0.82226     | -0.92403    | 0.82226     | -0.88395 |         |
|            | 0.81164         | -2.4831  | 0.99349     | 0.81164     | 0.88683836  |          |         |
| NA         | ENSG00000278944 | -0.88395 | 0.81164     | -0.88395    | 0.81164     | -0.88395 | 0.81164 |
|            | -0.88395        | 0.81164  | 0.81164     | 0.88683836  |             |          |         |
| MTND5P1    | ENSG00000227999 | -0.88429 | 0.81173     | -0.88429    | 0.81173     | -0.88429 |         |
|            | 0.81173         | -0.88429 | 0.81173     | 0.81173     | 0.886871801 |          |         |
| NA         | ENSG00000238854 | -0.88438 | 0.81175     | -0.88438    | 0.81175     | -0.88438 | 0.81175 |
|            | -0.88438        | 0.81175  | 0.81175     | 0.886871801 |             |          |         |
| CCNB3P1    | ENSG00000249616 | -0.88435 | 0.81175     | -0.88435    | 0.81175     | -0.88435 |         |
|            | 0.81175         | -0.88435 | 0.81175     | 0.81175     | 0.886871801 |          |         |
| NA         | ENSG00000259277 | -0.88443 | 0.81177     | -0.88443    | 0.81177     | -0.88443 | 0.81177 |
|            | -0.88443        | 0.81177  | 0.81177     | 0.886871801 |             |          |         |
| NPTX1      | ENSG00000171246 | -1.209   | 0.88667     | -2.0929     | 0.98182     | -0.88447 | 0.81178 |
|            | -0.9696         | 0.83388  | 0.81178     | 0.886871801 |             |          |         |
| NA         | ENSG00000274270 | -1.5603  | 0.94065     | -0.88467    | 0.81183     | -0.90132 | 0.81629 |
|            | -0.98201        | 0.83695  | 0.81183     | 0.886871801 |             |          |         |
| ERP29      | ENSG00000089248 | -1.3103  | 0.90495     | -1.2407     | 0.89264     | -0.88484 | 0.81188 |
|            | -1.1835         | 0.88169  | 0.81188     | 0.886871801 |             |          |         |
| ZDHC20-IT1 | ENSG00000236953 | -0.88489 | 0.81189     | -0.88489    | 0.81189     | -0.88489 |         |
|            | 0.81189         | -0.88489 | 0.81189     | 0.81189     | 0.886871801 |          |         |
| TNFAIP1    | ENSG00000109079 | -0.88497 | 0.81191     | -0.88497    | 0.81191     | -0.88497 |         |
|            | 0.81191         | -0.88497 | 0.81191     | 0.81191     | 0.886871801 |          |         |
| NA         | ENSG00000254704 | -0.88495 | 0.81191     | -0.88495    | 0.81191     | -0.88495 | 0.81191 |

|           |                 |          |             |             |             |          |         |
|-----------|-----------------|----------|-------------|-------------|-------------|----------|---------|
|           | -0.88495        | 0.81191  | 0.81191     | 0.886871801 |             |          |         |
| ZC3HAV1L  | ENSG00000146858 | -0.88503 | 0.81193     | -0.88503    | 0.81193     | -0.88503 |         |
|           | 0.81193         | -0.88503 | 0.81193     | 0.81193     | 0.886871801 |          |         |
| NA        | ENSG00000273851 | -0.88504 | 0.81193     | -0.88504    | 0.81193     | -0.88504 | 0.81193 |
|           | -0.88504        | 0.81193  | 0.81193     | 0.886871801 |             |          |         |
| NA        | ENSG00000274849 | -1.0654  | 0.85665     | -0.88502    | 0.81193     | -0.88502 | 0.81193 |
|           | -0.88502        | 0.81193  | 0.81193     | 0.886871801 |             |          |         |
| NA        | ENSG00000250114 | -0.88511 | 0.81195     | -0.88511    | 0.81195     | -0.88511 | 0.81195 |
|           | -0.88511        | 0.81195  | 0.81195     | 0.886871801 |             |          |         |
| NA        | ENSG00000234805 | -1.1652  | 0.87804     | -1.1652     | 0.87804     | -0.88515 | 0.81196 |
|           | -1.1923         | 0.88343  | 0.81196     | 0.886871801 |             |          |         |
| MTCO1P43  | ENSG00000228898 | -0.88517 | 0.81197     | -0.88517    | 0.81197     | -0.88517 |         |
|           | 0.81197         | -1.1499  | 0.87492     | 0.81197     | 0.886871801 |          |         |
| MTND5P13  | ENSG00000250169 | -0.88523 | 0.81198     | -0.88523    | 0.81198     | -0.88523 |         |
|           | 0.81198         | -0.88523 | 0.81198     | 0.81198     | 0.886871801 |          |         |
| NA        | ENSG00000255521 | -0.88546 | 0.81205     | -0.88546    | 0.81205     | -0.88546 | 0.81205 |
|           | -0.88546        | 0.81205  | 0.81205     | 0.886901508 |             |          |         |
| MIR3936HG | ENSG00000233006 | -1.6735  | 0.95289     | -0.88553    | 0.81206     | -1.5783  |         |
|           | 0.94275         | -1.5874  | 0.94379     | 0.81206     | 0.886901508 |          |         |
| NA        | ENSG00000240527 | -0.88557 | 0.81207     | -0.90563    | 0.81743     | -0.88557 | 0.81207 |
|           | -0.88557        | 0.81207  | 0.81207     | 0.886901508 |             |          |         |
| CCDC38    | ENSG00000165972 | -0.94518 | 0.82772     | -1.7807     | 0.96252     | -0.8856  |         |
|           | 0.81208         | -1.9008  | 0.97134     | 0.81208     | 0.886901508 |          |         |
| LINC00165 | ENSG00000261706 | -0.8858  | 0.81214     | -0.8858     | 0.81214     | -0.8858  |         |
|           | 0.81214         | -0.8858  | 0.81214     | 0.81214     | 0.886911335 |          |         |
| NA        | ENSG00000202195 | -0.88585 | 0.81215     | -0.88585    | 0.81215     | -0.88585 | 0.81215 |
|           | -0.88585        | 0.81215  | 0.81215     | 0.886911335 |             |          |         |
| LINC02201 | ENSG00000251538 | -1.1776  | 0.88053     | -0.88585    | 0.81215     | -1.0907  |         |
|           | 0.86231         | -1.0173  | 0.84548     | 0.81215     | 0.886911335 |          |         |
| OR4K14    | ENSG00000169484 | -0.88591 | 0.81217     | -1.8579     | 0.96841     | -1.8579  |         |
|           | 0.96841         | -1.8579  | 0.96841     | 0.81217     | 0.886911335 |          |         |
| NA        | ENSG00000279722 | -0.88596 | 0.81218     | -0.88596    | 0.81218     | -0.88596 | 0.81218 |
|           | -0.88596        | 0.81218  | 0.81218     | 0.886911335 |             |          |         |
| WDR24     | ENSG00000127580 | -0.88603 | 0.8122      | -0.88603    | 0.8122      | -0.88603 | 0.8122  |
|           | -0.88603        | 0.8122   | 0.8122      | 0.8869133   |             |          |         |
| C7orf33   | ENSG00000170279 | -0.88649 | 0.81232     | -0.88649    | 0.81232     | -0.88649 |         |
|           | 0.81232         | -0.88649 | 0.81232     | 0.81232     | 0.887024461 |          |         |
| NA        | ENSG00000253853 | -1.7037  | 0.95578     | -0.94471    | 0.8276      | -0.88666 | 0.81237 |
|           | -1.5797         | 0.94291  | 0.81237     | 0.887059182 |             |          |         |
| RRAS      | ENSG00000126458 | -0.88682 | 0.81241     | -0.88682    | 0.81241     | -0.98923 | 0.83872 |
|           | -0.98923        | 0.83872  | 0.81241     | 0.887082982 |             |          |         |
| NA        | ENSG00000268823 | -0.88715 | 0.8125      | -0.88715    | 0.8125      | -0.88715 | 0.8125  |
|           | -0.88715        | 0.8125   | 0.8125      | 0.887134498 |             |          |         |
| CLASP1    | ENSG00000074054 | -1.2494  | 0.89425     | -0.89205    | 0.81382     | -0.88719 |         |
|           | 0.81251         | -1.4335  | 0.92414     | 0.81251     | 0.887134498 |          |         |
| TYR       | ENSG00000077498 | -1.0635  | 0.85623     | -1.3289     | 0.90807     | -1.1578  | 0.87653 |
|           | -0.88721        | 0.81252  | 0.81252     | 0.887134498 |             |          |         |
| NA        | ENSG00000236545 | -0.88726 | 0.81253     | -0.90677    | 0.81774     | -0.88726 | 0.81253 |
|           | -0.88726        | 0.81253  | 0.81253     | 0.887134498 |             |          |         |
| RNA5SP435 | ENSG00000200914 | -0.88747 | 0.81259     | -0.88747    | 0.81259     | -0.88747 |         |
|           | 0.81259         | -0.88747 | 0.81259     | 0.81259     | 0.887180129 |          |         |
| RDM1      | ENSG00000278023 | -0.88758 | 0.81262     | -0.88758    | 0.81262     | -0.88758 | 0.81262 |
|           | -0.88758        | 0.81262  | 0.81262     | 0.887193005 |             |          |         |
| NA        | ENSG00000237076 | -0.88786 | 0.81269     | -0.88786    | 0.81269     | -0.88786 | 0.81269 |
|           | -0.88786        | 0.81269  | 0.81269     | 0.887249551 |             |          |         |
| PICART1   | ENSG00000246640 | -1.1651  | 0.878       | -1.1651     | 0.878       | -1.1651  | 0.878   |
|           | 0.81273         | 0.81273  | 0.887273342 |             |             |          |         |
| NA        | ENSG00000206814 | -1.1632  | 0.87762     | -0.88813    | 0.81276     | -1.1632  | 0.87762 |
|           | -1.4537         | 0.92698  | 0.81276     | 0.887286215 |             |          |         |
| RPL7L1P10 | ENSG00000237322 | -0.88818 | 0.81278     | -0.88818    | 0.81278     | -0.88818 |         |
|           | 0.81278         | -0.88818 | 0.81278     | 0.81278     | 0.887288172 |          |         |
| NA        | ENSG00000273341 | -0.88839 | 0.81283     | -0.88839    | 0.81283     | -0.88839 | 0.81283 |



|            |                 |          |             |             |             |          |         |          |
|------------|-----------------|----------|-------------|-------------|-------------|----------|---------|----------|
|            | -0.88839        | 0.81283  | 0.81283     | 0.887322877 |             |          |         |          |
| POLR2B     | ENSG00000047315 | -0.88888 | 0.81297     | -0.88888    | 0.81297     | -0.88888 | 0.81297 | -0.88888 |
|            | 0.81297         | -0.88888 | 0.81297     | 0.81297     | 0.887455827 |          |         |          |
| DPP9-AS1   | ENSG00000205790 | -0.88899 | 0.813       | -0.88899    | 0.813       | -0.88899 | 0.813   | -0.88899 |
|            | 0.813           | 0.813    | 0.887459731 |             |             |          |         |          |
| NA         | ENSG00000235804 | -0.95704 | 0.83073     | -0.95704    | 0.83073     | -1.0459  | 0.85221 |          |
|            | -0.88904        | 0.81301  | 0.81301     | 0.887459731 |             |          |         |          |
| NA         | ENSG00000271452 | -0.88918 | 0.81305     | -0.88918    | 0.81305     | -0.88918 | 0.81305 |          |
|            | -0.88918        | 0.81305  | 0.81305     | 0.887483514 |             |          |         |          |
| LINC02305  | ENSG00000258532 | -0.88939 | 0.8131      | -0.88939    | 0.8131      | -0.88939 |         |          |
|            | 0.8131          | -0.88939 | 0.8131      | 0.8131      | 0.887518211 |          |         |          |
| NA         | ENSG00000279017 | -0.88952 | 0.81314     | -0.88952    | 0.81314     | -0.88952 | 0.81314 |          |
|            | -0.88952        | 0.81314  | 0.81314     | 0.887541991 |             |          |         |          |
| AMN1       | ENSG00000151743 | -0.8897  | 0.81319     | -2.489      | 0.9936      | -1.449   | 0.92634 |          |
|            | -1.1438         | 0.87365  | 0.81319     | 0.887576685 |             |          |         |          |
| KCND3-AS1  | ENSG00000237556 | -0.88986 | 0.81323     | -0.88986    | 0.81323     | -0.88986 |         |          |
|            | 0.81323         | -0.88986 | 0.81323     | 0.81323     | 0.887600464 |          |         |          |
| CCNJP2     | ENSG00000223896 | -0.88995 | 0.81325     | -0.88995    | 0.81325     | -0.88995 |         |          |
|            | 0.81325         | -1.2991  | 0.90304     | 0.81325     | 0.887602412 |          |         |          |
| IL26       | ENSG00000111536 | -1.2555  | 0.89535     | -0.89008    | 0.81329     | -0.89008 | 0.81329 |          |
|            | -1.2949         | 0.90232  | 0.81329     | 0.887626189 |             |          |         |          |
| SH2D3C     | ENSG00000095370 | -1.1113  | 0.86677     | -1.2403     | 0.89257     | -0.89034 |         |          |
|            | 0.81336         | -2.4015  | 0.99184     | 0.81336     | 0.887662825 |          |         |          |
| NA         | ENSG00000253907 | -0.89033 | 0.81336     | -0.89033    | 0.81336     | -0.89033 | 0.81336 |          |
|            | -0.89033        | 0.81336  | 0.81336     | 0.887662825 |             |          |         |          |
| NA         | ENSG00000267481 | -0.89071 | 0.81346     | -0.89071    | 0.81346     | -0.89071 | 0.81346 |          |
|            | -0.89071        | 0.81346  | 0.81346     | 0.887752078 |             |          |         |          |
| RN7SKP209  | ENSG00000252697 | -0.89092 | 0.81351     | -0.89092    | 0.81351     | -0.89092 |         |          |
|            | 0.81351         | -0.89092 | 0.81351     | 0.81351     | 0.887777794 |          |         |          |
| HCST       | ENSG00000126264 | -0.89095 | 0.81352     | -0.89095    | 0.81352     | -0.89095 | 0.81352 |          |
|            | -0.89095        | 0.81352  | 0.81352     | 0.887777794 |             |          |         |          |
| NA         | ENSG00000270062 | -0.89115 | 0.81357     | -0.89115    | 0.81357     | -0.89115 | 0.81357 |          |
|            | -0.89115        | 0.81357  | 0.81357     | 0.887812476 |             |          |         |          |
| RNU6-986P  | ENSG00000200003 | -0.89132 | 0.81362     | -0.89132    | 0.81362     | -0.89132 |         |          |
|            | 0.81362         | -0.89132 | 0.81362     | 0.81362     | 0.887847156 |          |         |          |
| KRTAP1-5   | ENSG00000221852 | -0.89148 | 0.81366     | -0.89148    | 0.81366     | -0.89148 |         |          |
|            | 0.81366         | -0.89148 | 0.81366     | 0.81366     | 0.887867779 |          |         |          |
| WDR72      | ENSG00000166415 | -1.8984  | 0.97118     | -1.801      | 0.96415     | -2.3387  | 0.99032 |          |
|            | -0.89163        | 0.81371  | 0.81371     | 0.887867779 |             |          |         |          |
| CPT1B      | ENSG00000205560 | -1.7252  | 0.95775     | -1.7252     | 0.95775     | -0.8917  | 0.81372 |          |
|            | -1.7252         | 0.95775  | 0.81372     | 0.887867779 |             |          |         |          |
| NA         | ENSG00000228708 | -0.89173 | 0.81373     | -0.89173    | 0.81373     | -0.89173 | 0.81373 |          |
|            | -0.89173        | 0.81373  | 0.81373     | 0.887867779 |             |          |         |          |
| NA         | ENSG00000272056 | -0.89172 | 0.81373     | -0.89172    | 0.81373     | -0.89172 | 0.81373 |          |
|            | -0.89172        | 0.81373  | 0.81373     | 0.887867779 |             |          |         |          |
| NA         | ENSG00000270172 | -0.8921  | 0.81383     | -0.8921     | 0.81383     | -0.8921  | 0.81383 |          |
|            | -0.8921         | 0.81383  | 0.81383     | 0.887880169 |             |          |         |          |
| KCNH7      | ENSG00000184611 | -1.339   | 0.90972     | -1.0028     | 0.84203     | -1.1699  | 0.87898 |          |
|            | -0.89219        | 0.81386  | 0.81386     | 0.887880169 |             |          |         |          |
| OR56A1     | ENSG00000180934 | -0.89229 | 0.81388     | -1.9223     | 0.97271     | -1.9223  |         |          |
|            | 0.97271         | -1.6256  | 0.94798     | 0.81388     | 0.887880169 |          |         |          |
| PRELID3BP1 | ENSG00000226226 | -0.89234 | 0.81389     | -0.89234    | 0.81389     | -0.89234 |         |          |
|            | 0.81389         | -0.98807 | 0.83844     | 0.81389     | 0.887880169 |          |         |          |
| SNHG16     | ENSG00000163597 | -0.89235 | 0.8139      | -0.89235    | 0.8139      | -0.89235 |         |          |
|            | 0.8139          | -1.3198  | 0.90655     | 0.8139      | 0.887880169 |          |         |          |
| RNU6-593P  | ENSG00000201586 | -0.89238 | 0.8139      | -0.89238    | 0.8139      | -0.89238 |         |          |
|            | 0.8139          | -0.89238 | 0.8139      | 0.8139      | 0.887880169 |          |         |          |
| LEMD3      | ENSG00000174106 | -1.2783  | 0.89943     | -0.89239    | 0.81391     | -1.2783  | 0.89943 |          |
|            | -1.235          | 0.89158  | 0.81391     | 0.887880169 |             |          |         |          |
| NA         | ENSG00000251867 | -0.89247 | 0.81393     | -0.89247    | 0.81393     | -0.89247 | 0.81393 |          |
|            | -0.89247        | 0.81393  | 0.81393     | 0.887880169 |             |          |         |          |
| ZNF571     | ENSG00000180479 | -0.89251 | 0.81394     | -0.89251    | 0.81394     | -0.89251 |         |          |

|           |                 |          |             |             |             |          |         |
|-----------|-----------------|----------|-------------|-------------|-------------|----------|---------|
|           | 0.81394         | -0.89251 | 0.81394     | 0.81394     | 0.887880169 |          |         |
| NA        | ENSG00000258122 | -0.89253 | 0.81395     | -0.89253    | 0.81395     | -0.89253 | 0.81395 |
|           | -0.89253        | 0.81395  | 0.81395     | 0.887880169 |             |          |         |
| NA        | ENSG00000259943 | -0.89256 | 0.81395     | -0.89256    | 0.81395     | -0.89256 | 0.81395 |
|           | -0.89256        | 0.81395  | 0.81395     | 0.887880169 |             |          |         |
| HADHAP1   | ENSG00000251596 | -0.89259 | 0.81396     | -0.89259    | 0.81396     | -0.89259 |         |
|           | 0.81396         | -0.89259 | 0.81396     | 0.81396     | 0.887880169 |          |         |
| NA        | ENSG00000280291 | -1.0356  | 0.84979     | -0.89276    | 0.81401     | -1.0356  | 0.84979 |
|           | -1.0356         | 0.84979  | 0.81401     | 0.887909748 |             |          |         |
| MIR3117   | ENSG00000264720 | -0.89286 | 0.81403     | -0.89286    | 0.81403     | -0.89286 |         |
|           | 0.81403         | -0.89286 | 0.81403     | 0.81403     | 0.887909748 |          |         |
| LCE1C     | ENSG00000197084 | -0.89293 | 0.81405     | -0.89293    | 0.81405     | -0.89293 | 0.81405 |
|           | -0.89293        | 0.81405  | 0.81405     | 0.887909748 |             |          |         |
| NA        | ENSG00000273226 | -0.89296 | 0.81406     | -0.89296    | 0.81406     | -0.89296 | 0.81406 |
|           | -0.89296        | 0.81406  | 0.81406     | 0.887909748 |             |          |         |
| NA        | ENSG00000258988 | -0.89305 | 0.81409     | -0.89305    | 0.81409     | -0.89305 | 0.81409 |
|           | -0.89305        | 0.81409  | 0.81409     | 0.887922595 |             |          |         |
| NA        | ENSG00000254262 | -1.0019  | 0.84179     | -1.0019     | 0.84179     | -0.8932  | 0.81412 |
|           | -1.5846         | 0.94348  | 0.81412     | 0.887935442 |             |          |         |
| EXOSC3P2  | ENSG00000269763 | -0.89379 | 0.81428     | -1.2899     | 0.90146     | -1.2899  |         |
|           | 0.90146         | -1.0096  | 0.84365     | 0.81428     | 0.888090072 |          |         |
| LINC01973 | ENSG00000204283 | -1.176   | 0.88021     | -0.89387    | 0.8143      | -1.3524  |         |
|           | 0.91187         | -0.89387 | 0.8143      | 0.8143      | 0.888092008 |          |         |
| RPS7P1    | ENSG00000263266 | -0.89414 | 0.81438     | -0.89414    | 0.81438     | -0.89414 |         |
|           | 0.81438         | -0.89414 | 0.81438     | 0.81438     | 0.88815938  |          |         |
| NA        | ENSG00000233620 | -0.89466 | 0.81452     | -0.89466    | 0.81452     | -0.89466 | 0.81452 |
|           | -0.89466        | 0.81452  | 0.81452     | 0.888283209 |             |          |         |
| NA        | ENSG00000240418 | -0.89471 | 0.81453     | -0.89471    | 0.81453     | -0.89471 | 0.81453 |
|           | -0.89471        | 0.81453  | 0.81453     | 0.888283209 |             |          |         |
| NA        | ENSG00000223375 | -0.89488 | 0.81457     | -0.89488    | 0.81457     | -0.89488 | 0.81457 |
|           | -0.89488        | 0.81457  | 0.81457     | 0.888306951 |             |          |         |
| NA        | ENSG00000229625 | -0.89503 | 0.81461     | -1.1761     | 0.88023     | -0.98331 | 0.83727 |
|           | -0.98331        | 0.83727  | 0.81461     | 0.888330692 |             |          |         |
| PDCL3P4   | ENSG00000244119 | -1.1013  | 0.86463     | -0.89519    | 0.81466     | -1.0549  |         |
|           | 0.85426         | -0.94311 | 0.82719     | 0.81466     | 0.888365337 |          |         |
| NA        | ENSG00000241746 | -0.89532 | 0.81469     | -0.89532    | 0.81469     | -0.89532 | 0.81469 |
|           | -0.89532        | 0.81469  | 0.81469     | 0.888378171 |             |          |         |
| NA        | ENSG00000273012 | -0.89581 | 0.81482     | -1.0443     | 0.85184     | -1.6222  | 0.94762 |
|           | -1.028          | 0.84803  | 0.81482     | 0.888500047 |             |          |         |
| ANO10     | ENSG00000160746 | -1.6153  | 0.94688     | -2.2561     | 0.98797     | -1.0245  | 0.8472  |
|           | -0.89597        | 0.81487  | 0.81487     | 0.888514804 |             |          |         |
| NA        | ENSG00000251424 | -0.89599 | 0.81487     | -0.89599    | 0.81487     | -0.89599 | 0.81487 |
|           | -0.89599        | 0.81487  | 0.81487     | 0.888514804 |             |          |         |
| SNORD111  | ENSG00000221066 | -0.89624 | 0.81494     | -1.2976     | 0.90279     | -0.89624 |         |
|           | 0.81494         | -0.89624 | 0.81494     | 0.81494     | 0.888562269 |          |         |
| NA        | ENSG00000231043 | -0.90005 | 0.81595     | -0.89629    | 0.81495     | -1.8276  | 0.9662  |
|           | -0.90005        | 0.81595  | 0.81495     | 0.888562269 |             |          |         |
| NA        | ENSG00000253586 | -0.89647 | 0.815       | -1.7142     | 0.95675     | -0.89647 | 0.815   |
|           | 0.95675         | 0.815    | 0.888596903 |             |             |          |         |
| NA        | ENSG00000261167 | -0.93302 | 0.8246      | -0.89661    | 0.81504     | -1.3995  | 0.91917 |
|           | -1.3995         | 0.91917  | 0.81504     | 0.888620633 |             |          |         |
| GALE      | ENSG00000117308 | -0.89669 | 0.81506     | -0.89669    | 0.81506     | -0.89669 | 0.81506 |
|           | -0.89669        | 0.81506  | 0.81506     | 0.888622557 |             |          |         |
| TRBV7-3   | ENSG00000211714 | -0.89679 | 0.81509     | -0.89679    | 0.81509     | -0.89679 |         |
|           | 0.81509         | -1.4067  | 0.92024     | 0.81509     | 0.888626404 |          |         |
| RN7SL187P | ENSG00000240299 | -1.3812  | 0.91639     | -1.3812     | 0.91639     | -0.89684 |         |
|           | 0.8151          | -1.0963  | 0.86353     | 0.8151      | 0.888626404 |          |         |
| TDRKH     | ENSG00000182134 | -0.92736 | 0.82313     | -0.92736    | 0.82313     | -0.92736 | 0.82313 |
|           | -0.89692        | 0.81512  | 0.81512     | 0.888628327 |             |          |         |
| OR5BQ1P   | ENSG00000273228 | -0.89706 | 0.81516     | -0.89706    | 0.81516     | -0.89706 |         |
|           | 0.81516         | -0.89706 | 0.81516     | 0.81516     | 0.888652054 |          |         |
| RPS3AP47  | ENSG00000205871 | -2.037   | 0.97918     | -0.89715    | 0.81518     | -2.037   |         |

|             |                 |          |         |             |             |          |         |
|-------------|-----------------|----------|---------|-------------|-------------|----------|---------|
|             | 0.97918         | -2.037   | 0.97918 | 0.81518     | 0.888653976 |          |         |
| CLDN22      | ENSG00000177300 | -0.89732 | 0.81523 | -0.89732    | 0.81523     | -0.89732 |         |
|             | 0.81523         | -0.89732 | 0.81523 | 0.81523     | 0.888688602 |          |         |
| MIRLET7A1   | ENSG00000199165 | -0.89752 | 0.81528 | -0.89752    | 0.81528     | -0.89752 |         |
|             | 0.81528         | -0.89752 | 0.81528 | 0.81528     | 0.888723227 |          |         |
| NA          | ENSG00000276121 | -0.89767 | 0.81532 | -1.7149     | 0.95681     | -0.96036 | 0.83156 |
|             | -1.1228         | 0.86924  | 0.81532 | 0.888746949 |             |          |         |
| CLDN25      | ENSG00000228607 | -0.89789 | 0.81538 | -0.89789    | 0.81538     | -0.89789 |         |
|             | 0.81538         | -0.89789 | 0.81538 | 0.81538     | 0.888792471 |          |         |
| NA          | ENSG00000272354 | -0.89806 | 0.81542 | -0.89806    | 0.81542     | -0.89806 | 0.81542 |
|             | -0.89806        | 0.81542  | 0.81542 | 0.88881619  |             |          |         |
| CARS1P1     | ENSG00000271232 | -1.0092  | 0.84355 | -0.89824    | 0.81547     | -1.0092  |         |
|             | 0.84355         | -1.0092  | 0.84355 | 0.81547     | 0.888825783 |          |         |
| EBF1        | ENSG00000164330 | -2.2321  | 0.9872  | -2.1369     | 0.9837      | -2.4917  | 0.99364 |
|             | -0.8983         | 0.81549  | 0.81549 | 0.888825783 |             |          |         |
| PLS1-AS1    | ENSG00000239641 | -0.89836 | 0.8155  | -0.89836    | 0.8155      | -0.89836 |         |
|             | 0.8155          | -0.89836 | 0.8155  | 0.8155      | 0.888825783 |          |         |
| NA          | ENSG00000219993 | -0.89838 | 0.81551 | -0.89838    | 0.81551     | -0.89838 | 0.81551 |
|             | -1.1298         | 0.87072  | 0.81551 | 0.888825783 |             |          |         |
| NA          | ENSG00000262703 | -0.89842 | 0.81552 | -1.0198     | 0.8461      | -1.0198  | 0.8461  |
|             | -1.0198         | 0.8461   | 0.81552 | 0.888825783 |             |          |         |
| NA          | ENSG00000272871 | -0.89858 | 0.81556 | -0.89858    | 0.81556     | -0.89858 | 0.81556 |
|             | -0.89858        | 0.81556  | 0.81556 | 0.888831538 |             |          |         |
| SNORD114-28 | ENSG00000200480 | -0.89866 | 0.81558 | -0.89866    | 0.81558     | -0.89866 |         |
|             | 0.81558         | -0.89866 | 0.81558 | 0.81558     | 0.888831538 |          |         |
| RN7SKP85    | ENSG00000223281 | -1.236   | 0.89177 | -0.89866    | 0.81558     | -0.89866 |         |
|             | 0.81558         | -1.236   | 0.89177 | 0.81558     | 0.888831538 |          |         |
| NA          | ENSG00000235245 | -0.89899 | 0.81567 | -0.89899    | 0.81567     | -0.89899 | 0.81567 |
|             | -0.89899        | 0.81567  | 0.81567 | 0.888909742 |             |          |         |
| NA          | ENSG00000270482 | -0.8992  | 0.81573 | -0.8992     | 0.81573     | -0.8992  | 0.81573 |
|             | -0.8992         | 0.81573  | 0.81573 | 0.888955249 |             |          |         |
| IGLVVI-22-1 | ENSG00000253546 | -0.89928 | 0.81575 | -0.89928    | 0.81575     | -0.89928 |         |
|             | 0.81575         | -0.89928 | 0.81575 | 0.81575     | 0.888957164 |          |         |
| TRPC1       | ENSG00000144935 | -1.7385  | 0.95894 | -1.6769     | 0.95322     | -0.89951 | 0.81581 |
|             | -1.4967         | 0.93277  | 0.81581 | 0.889002668 |             |          |         |
| PRELID1P7   | ENSG00000230748 | -0.89986 | 0.8159  | -0.89986    | 0.8159      | -0.89986 |         |
|             | 0.8159          | -0.89986 | 0.8159  | 0.8159      | 0.88908086  |          |         |
| TIGD2       | ENSG00000180346 | -0.90001 | 0.81594 | -0.90001    | 0.81594     | -0.90001 | 0.81594 |
|             | -0.90001        | 0.81594  | 0.81594 | 0.889104566 |             |          |         |
| NA          | ENSG00000244706 | -0.90072 | 0.81613 | -0.90072    | 0.81613     | -0.90072 | 0.81613 |
|             | -0.90072        | 0.81613  | 0.81613 | 0.889291718 |             |          |         |
| NA          | ENSG00000253261 | -1.3577  | 0.91271 | -1.3577     | 0.91271     | -1.3577  | 0.91271 |
|             | -0.90116        | 0.81625  | 0.81625 | 0.889384606 |             |          |         |
| NA          | ENSG00000231748 | -0.90122 | 0.81626 | -0.90122    | 0.81626     | -0.90122 | 0.81626 |
|             | -0.90122        | 0.81626  | 0.81626 | 0.889384606 |             |          |         |
| GRPEL2-AS1  | ENSG00000253618 | -0.90126 | 0.81627 | -0.90126    | 0.81627     | -0.90126 |         |
|             | 0.81627         | -0.90126 | 0.81627 | 0.81627     | 0.889384606 |          |         |
| RPS20P13    | ENSG00000228848 | -0.90141 | 0.81632 | -0.90141    | 0.81632     | -0.90141 |         |
|             | 0.81632         | -0.90141 | 0.81632 | 0.81632     | 0.889396036 |          |         |
| FSCN1       | ENSG00000075618 | -1.4797  | 0.93053 | -0.90156    | 0.81635     | -1.1449  | 0.87387 |
|             | -1.287          | 0.90094  | 0.81635 | 0.889396036 |             |          |         |
| NA          | ENSG00000069712 | -1.7072  | 0.9561  | -1.7072     | 0.9561      | -1.7072  | 0.9561  |
|             | -0.90153        | 0.81635  | 0.81635 | 0.889396036 |             |          |         |
| NA          | ENSG00000280408 | -0.90163 | 0.81637 | -0.90163    | 0.81637     | -0.90163 | 0.81637 |
|             | -0.90163        | 0.81637  | 0.81637 | 0.889396036 |             |          |         |
| NA          | ENSG00000272192 | -0.90164 | 0.81638 | -0.90164    | 0.81638     | -0.90164 | 0.81638 |
|             | -0.90164        | 0.81638  | 0.81638 | 0.889396036 |             |          |         |
| KMT2E-AS1   | ENSG00000239569 | -0.90171 | 0.81639 | -0.90171    | 0.81639     | -0.90171 |         |
|             | 0.81639         | -0.90171 | 0.81639 | 0.81639     | 0.889396036 |          |         |
| BTBD7P2     | ENSG00000237618 | -1.3173  | 0.90613 | -0.90183    | 0.81643     | -1.2576  |         |
|             | 0.89573         | -1.8687  | 0.96917 | 0.81643     | 0.889419729 |          |         |
| NA          | ENSG00000269934 | -0.90194 | 0.81646 | -0.90194    | 0.81646     | -0.90194 | 0.81646 |

|              |                 |          |         |             |             |          |         |
|--------------|-----------------|----------|---------|-------------|-------------|----------|---------|
|              | -0.90194        | 0.81646  | 0.81646 | 0.889432527 |             |          |         |
| HMG2P20      | ENSG00000232963 | -0.90211 | 0.8165  | -0.90211    | 0.8165      | -0.90211 |         |
|              | 0.8165          | -0.90211 | 0.8165  | 0.8165      | 0.889456218 |          |         |
| NA           | ENSG00000272343 | -0.9023  | 0.81655 | -0.9023     | 0.81655     | -0.9023  | 0.81655 |
|              | -0.9023         | 0.81655  | 0.81655 | 0.889490801 |             |          |         |
| HMG3P11      | ENSG00000213301 | -1.3894  | 0.91765 | -0.90265    | 0.81664     | -1.3894  |         |
|              | 0.91765         | -1.3894  | 0.91765 | 0.81664     | 0.889568955 |          |         |
| NA           | ENSG00000237922 | -0.9028  | 0.81669 | -0.9028     | 0.81669     | -0.9028  | 0.81669 |
|              | -0.9028         | 0.81669  | 0.81669 | 0.889587449 |             |          |         |
| NOTUM        | ENSG00000185269 | -0.90292 | 0.81672 | -1.2459     | 0.89361     | -1.0343  | 0.84951 |
|              | -0.95655        | 0.8306   | 0.81672 | 0.889587449 |             |          |         |
| NA           | ENSG00000228334 | -0.90294 | 0.81672 | -0.90294    | 0.81672     | -1.1662  | 0.87823 |
|              | -0.90294        | 0.81672  | 0.81672 | 0.889587449 |             |          |         |
| RNU6-876P    | ENSG00000212597 | -0.90297 | 0.81673 | -0.90297    | 0.81673     | -0.90297 |         |
|              | 0.81673         | -0.90297 | 0.81673 | 0.81673     | 0.889587449 |          |         |
| MFS1P1       | ENSG00000261868 | -0.90348 | 0.81686 | -0.90348    | 0.81686     | -0.90348 |         |
|              | 0.81686         | -0.90348 | 0.81686 | 0.81686     | 0.88970916  |          |         |
| ORA1P1       | ENSG00000251008 | -0.90366 | 0.81691 | -0.90366    | 0.81691     | -0.90366 |         |
|              | 0.81691         | -0.90366 | 0.81691 | 0.81691     | 0.889723846 |          |         |
| NA           | ENSG00000272109 | -0.90365 | 0.81691 | -0.90365    | 0.81691     | -0.90365 | 0.81691 |
|              | -0.90365        | 0.81691  | 0.81691 | 0.889723846 |             |          |         |
| MOB4P1       | ENSG00000231386 | -0.90375 | 0.81694 | -0.90375    | 0.81694     | -0.90375 |         |
|              | 0.81694         | -0.90375 | 0.81694 | 0.81694     | 0.889736634 |          |         |
| NA           | ENSG00000233214 | -0.90395 | 0.81699 | -0.90395    | 0.81699     | -0.90395 | 0.81699 |
|              | -0.90395        | 0.81699  | 0.81699 | 0.889771203 |             |          |         |
| FOX1         | ENSG00000280916 | -1.1609  | 0.87717 | -1.0671     | 0.85704     | -0.90429 |         |
|              | 0.81708         | -0.96738 | 0.83332 | 0.81708     | 0.88981004  |          |         |
| NA           | ENSG00000253299 | -0.90439 | 0.81711 | -0.90439    | 0.81711     | -0.90439 | 0.81711 |
|              | -0.90439        | 0.81711  | 0.81711 | 0.88981004  |             |          |         |
| BOLA3P1      | ENSG00000255469 | -0.90453 | 0.81714 | -0.93055    | 0.82396     | -0.93055 |         |
|              | 0.82396         | -0.93055 | 0.82396 | 0.81714     | 0.88981004  |          |         |
| USP30        | ENSG00000135093 | -2.9481  | 0.9984  | -1.8453     | 0.9675      | -0.99514 | 0.84017 |
|              | -0.90456        | 0.81715  | 0.81715 | 0.88981004  |             |          |         |
| WDR45BP1     | ENSG00000265574 | -0.90457 | 0.81715 | -0.90457    | 0.81715     | -0.90457 |         |
|              | 0.81715         | -0.90457 | 0.81715 | 0.81715     | 0.88981004  |          |         |
| HNRNP1P53    | ENSG00000229534 | -0.9046  | 0.81716 | -0.9046     | 0.81716     | -0.9046  |         |
|              | 0.81716         | -0.9046  | 0.81716 | 0.81716     | 0.88981004  |          |         |
| MTCO3P28     | ENSG00000248328 | -0.90465 | 0.81717 | -0.90465    | 0.81717     | -0.90465 |         |
|              | 0.81717         | -0.90465 | 0.81717 | 0.81717     | 0.88981004  |          |         |
| NA           | ENSG00000250406 | -0.90471 | 0.81719 | -0.90471    | 0.81719     | -0.90471 | 0.81719 |
|              | -0.90471        | 0.81719  | 0.81719 | 0.88981004  |             |          |         |
| NA           | ENSG00000257829 | -0.9047  | 0.81719 | -0.9047     | 0.81719     | -0.9047  | 0.81719 |
|              | -0.9047         | 0.81719  | 0.81719 | 0.88981004  |             |          |         |
| NA           | ENSG00000258378 | -0.90543 | 0.81738 | -0.90543    | 0.81738     | -0.90543 | 0.81738 |
|              | -0.90543        | 0.81738  | 0.81738 | 0.889977608 |             |          |         |
| ADAM1B       | ENSG00000226469 | -0.90553 | 0.81741 | -0.90553    | 0.81741     | -0.90553 |         |
|              | 0.81741         | -0.90553 | 0.81741 | 0.81741     | 0.889977608 |          |         |
| NA           | ENSG00000242479 | -0.90557 | 0.81742 | -0.90557    | 0.81742     | -0.90557 | 0.81742 |
|              | -0.90557        | 0.81742  | 0.81742 | 0.889977608 |             |          |         |
| NA           | ENSG00000280106 | -0.90567 | 0.81745 | -0.90567    | 0.81745     | -0.90567 | 0.81745 |
|              | -0.90567        | 0.81745  | 0.81745 | 0.889977608 |             |          |         |
| HNRNP3P7     | ENSG00000253119 | -0.90575 | 0.81747 | -0.90575    | 0.81747     | -0.90575 |         |
|              | 0.81747         | -0.90575 | 0.81747 | 0.81747     | 0.889977608 |          |         |
| AK6          | ENSG00000085231 | -0.9058  | 0.81748 | -0.9058     | 0.81748     | -0.9058  | 0.81748 |
|              | -1.2948         | 0.90231  | 0.81748 | 0.889977608 |             |          |         |
| TAF9         | ENSG00000273841 | -0.98155 | 0.83684 | -0.9058     | 0.81748     | -0.9058  | 0.81748 |
|              | -0.9058         | 0.81748  | 0.81748 | 0.889977608 |             |          |         |
| NA           | ENSG00000272407 | -0.90585 | 0.81749 | -1.0191     | 0.84592     | -0.90585 | 0.81749 |
|              | -0.90585        | 0.81749  | 0.81749 | 0.889977608 |             |          |         |
| SPTLC1P2     | ENSG00000218512 | -0.90607 | 0.81755 | -0.90607    | 0.81755     | -0.90607 |         |
|              | 0.81755         | -0.90607 | 0.81755 | 0.81755     | 0.890003161 |          |         |
| IGHVIII-26-1 | ENSG00000253462 | -0.90606 | 0.81755 | -0.90606    | 0.81755     | -0.90606 | 0.81755 |

|            |                 |          |         |             |             |          |         |  |
|------------|-----------------|----------|---------|-------------|-------------|----------|---------|--|
|            | 0.81755         | -0.90606 | 0.81755 | 0.81755     | 0.890003161 |          |         |  |
| GAN        | ENSG00000261609 | -1.148   | 0.87452 | -1.182      | 0.88139     | -0.90614 | 0.81757 |  |
|            | -1.0329         | 0.84917  | 0.81757 | 0.890005051 |             |          |         |  |
| NA         | ENSG00000279026 | -0.90637 | 0.81763 | -0.90637    | 0.81763     | -0.90637 | 0.81763 |  |
|            | -0.90637        | 0.81763  | 0.81763 | 0.890041487 |             |          |         |  |
| NA         | ENSG00000227066 | -0.90641 | 0.81764 | -0.95412    | 0.82999     | -0.95412 | 0.82999 |  |
|            | -0.95412        | 0.82999  | 0.81764 | 0.890041487 |             |          |         |  |
| KCNIP2     | ENSG00000120049 | -0.90673 | 0.81772 | -1.4141     | 0.92133     | -1.0564  |         |  |
|            | 0.85461         | -1.3678  | 0.91431 | 0.81772     | 0.89005093  |          |         |  |
| TM4SF1-AS1 | ENSG00000240541 | -0.90674 | 0.81773 | -0.90674    | 0.81773     | -0.90674 |         |  |
|            | 0.81773         | -0.90674 | 0.81773 | 0.81773     | 0.89005093  |          |         |  |
| NA         | ENSG00000207342 | -0.9068  | 0.81774 | -0.9068     | 0.81774     | -0.9068  | 0.81774 |  |
|            | -0.9068         | 0.81774  | 0.81774 | 0.89005093  |             |          |         |  |
| NA         | ENSG00000269729 | -1.0514  | 0.85347 | -1.1951     | 0.88397     | -0.90677 | 0.81774 |  |
|            | -0.90677        | 0.81774  | 0.81774 | 0.89005093  |             |          |         |  |
| NA         | ENSG00000262180 | -1.8723  | 0.96942 | -2.4355     | 0.99257     | -0.90679 | 0.81774 |  |
|            | -0.90679        | 0.81774  | 0.81774 | 0.89005093  |             |          |         |  |
| HK2        | ENSG00000159399 | -1.371   | 0.91481 | -1.2353     | 0.89164     | -1.3171  | 0.90611 |  |
|            | -0.90699        | 0.81779  | 0.81779 | 0.89006226  |             |          |         |  |
| ADAMTS20   | ENSG00000173157 | -1.0921  | 0.86261 | -0.93876    | 0.82607     | -1.7922  |         |  |
|            | 0.96345         | -0.90709 | 0.81782 | 0.81782     | 0.89006226  |          |         |  |
| RN7SL561P  | ENSG00000242348 | -0.90719 | 0.81785 | -0.90719    | 0.81785     | -0.90719 |         |  |
|            | 0.81785         | -0.90719 | 0.81785 | 0.81785     | 0.89006226  |          |         |  |
| NA         | ENSG00000249379 | -0.90724 | 0.81786 | -0.90724    | 0.81786     | -0.90724 | 0.81786 |  |
|            | -0.90724        | 0.81786  | 0.81786 | 0.89006226  |             |          |         |  |
| NA         | ENSG00000261465 | -0.90723 | 0.81786 | -0.90723    | 0.81786     | -0.90723 | 0.81786 |  |
|            | -0.90723        | 0.81786  | 0.81786 | 0.89006226  |             |          |         |  |
| NA         | ENSG00000274930 | -0.90722 | 0.81786 | -0.90722    | 0.81786     | -0.90722 | 0.81786 |  |
|            | -0.90722        | 0.81786  | 0.81786 | 0.89006226  |             |          |         |  |
| NA         | ENSG00000258052 | -0.90751 | 0.81793 | -0.90751    | 0.81793     | -0.90751 | 0.81793 |  |
|            | -0.90751        | 0.81793  | 0.81793 | 0.89011856  |             |          |         |  |
| EPS15L1    | ENSG00000127527 | -0.90771 | 0.81798 | -1.1615     | 0.87728     | -1.4884  |         |  |
|            | 0.93167         | -0.93917 | 0.82618 | 0.81798     | 0.890153094 |          |         |  |
| NA         | ENSG00000256825 | -0.90784 | 0.81802 | -0.90784    | 0.81802     | -0.90784 | 0.81802 |  |
|            | -0.90784        | 0.81802  | 0.81802 | 0.890156866 |             |          |         |  |
| PACRG-AS1  | ENSG00000281692 | -0.90785 | 0.81802 | -0.90785    | 0.81802     | -0.90785 |         |  |
|            | 0.81802         | -0.96318 | 0.83227 | 0.81802     | 0.890156866 |          |         |  |
| BTBD16     | ENSG00000138152 | -1.2226  | 0.88925 | -0.90809    | 0.81809     | -1.0407  | 0.851   |  |
|            | -1.1741         | 0.87983  | 0.81809 | 0.890206047 |             |          |         |  |
| CXCL10     | ENSG00000169245 | -0.9082  | 0.81811 | -0.9082     | 0.81811     | -1.1249  |         |  |
|            | 0.86969         | -0.9082  | 0.81811 | 0.81811     | 0.890206047 |          |         |  |
| LINC01821  | ENSG00000225539 | -1.6982  | 0.95526 | -0.90823    | 0.81812     | -1.7217  |         |  |
|            | 0.95744         | -1.7654  | 0.96125 | 0.81812     | 0.890206047 |          |         |  |
| OR52B6     | ENSG00000187747 | -0.9083  | 0.81814 | -1.5634     | 0.94102     | -0.9083  |         |  |
|            | 0.81814         | -0.9083  | 0.81814 | 0.81814     | 0.890207931 |          |         |  |
| NA         | ENSG00000256484 | -0.9086  | 0.81822 | -0.9086     | 0.81822     | -0.9086  | 0.81822 |  |
|            | -0.9086         | 0.81822  | 0.81822 | 0.890275099 |             |          |         |  |
| MIR17HG    | ENSG00000215417 | -0.90873 | 0.81825 | -1.4134     | 0.92123     | -0.90873 |         |  |
|            | 0.81825         | -1.4134  | 0.92123 | 0.81825     | 0.89028263  |          |         |  |
| NA         | ENSG00000257948 | -0.9088  | 0.81827 | -0.9088     | 0.81827     | -0.9088  | 0.81827 |  |
|            | -0.9088         | 0.81827  | 0.81827 | 0.89028263  |             |          |         |  |
| H1-5       | ENSG00000184357 | -0.90889 | 0.81829 | -0.90889    | 0.81829     | -0.90889 | 0.81829 |  |
|            | -0.90889        | 0.81829  | 0.81829 | 0.89028263  |             |          |         |  |
| NA         | ENSG00000266900 | -0.90892 | 0.8183  | -0.90892    | 0.8183      | -0.90892 | 0.8183  |  |
|            | -0.90892        | 0.8183   | 0.8183  | 0.89028263  |             |          |         |  |
| NA         | ENSG00000262921 | -0.90898 | 0.81832 | -0.90898    | 0.81832     | -0.90898 | 0.81832 |  |
|            | -0.90898        | 0.81832  | 0.81832 | 0.890284513 |             |          |         |  |
| PLA2G4E    | ENSG00000188089 | -1.0389  | 0.85056 | -1.0107     | 0.84391     | -1.5026  |         |  |
|            | 0.93353         | -0.90957 | 0.81847 | 0.81847     | 0.890418824 |          |         |  |
| NA         | ENSG00000227679 | -0.90959 | 0.81848 | -0.90959    | 0.81848     | -0.90959 | 0.81848 |  |
|            | -0.90959        | 0.81848  | 0.81848 | 0.890418824 |             |          |         |  |
| ACTBP12    | ENSG00000233125 | -0.91009 | 0.81861 | -1.7817     | 0.9626      | -1.7817  |         |  |

|             |                 |          |         |             |             |          |         |
|-------------|-----------------|----------|---------|-------------|-------------|----------|---------|
|             | 0.9626          | -1.7817  | 0.9626  | 0.81861     | 0.890533244 |          |         |
| NA          | ENSG00000258924 | -0.91015 | 0.81863 | -0.91015    | 0.81863     | -0.91015 | 0.81863 |
|             | -0.91015        | 0.81863  | 0.81863 | 0.890533244 |             |          |         |
| NA          | ENSG00000278934 | -0.91019 | 0.81864 | -0.91019    | 0.81864     | -0.91019 | 0.81864 |
|             | -0.91019        | 0.81864  | 0.81864 | 0.890533244 |             |          |         |
| RPL18A      | ENSG00000105640 | -0.91036 | 0.81868 | -0.91036    | 0.81868     | -1.2874  |         |
|             | 0.90103         | -0.91036 | 0.81868 | 0.81868     | 0.890556877 |          |         |
| NA          | ENSG00000225519 | -0.91058 | 0.81874 | -0.91058    | 0.81874     | -0.91058 | 0.81874 |
|             | -0.91058        | 0.81874  | 0.81874 | 0.890602263 |             |          |         |
| NA          | ENSG00000277383 | -0.91106 | 0.81887 | -0.91106    | 0.81887     | -0.91106 | 0.81887 |
|             | -0.91106        | 0.81887  | 0.81887 | 0.890714786 |             |          |         |
| NA          | ENSG00000238739 | -0.91112 | 0.81888 | -0.91112    | 0.81888     | -0.91112 | 0.81888 |
|             | -0.91112        | 0.81888  | 0.81888 | 0.890714786 |             |          |         |
| PLAC4       | ENSG00000280109 | -0.91118 | 0.8189  | -1.0271     | 0.84781     | -0.91118 | 0.8189  |
|             | -0.91118        | 0.8189   | 0.8189  | 0.890716658 |             |          |         |
| GRAMD2A     | ENSG00000175318 | -0.91125 | 0.81892 | -1.2554     | 0.89534     | -0.91125 |         |
|             | 0.81892         | -0.91125 | 0.81892 | 0.81892     | 0.89071853  |          |         |
| NA          | ENSG00000201365 | -0.91142 | 0.81896 | -0.91142    | 0.81896     | -0.91142 | 0.81896 |
|             | -0.91142        | 0.81896  | 0.81896 | 0.890733151 |             |          |         |
| NA          | ENSG00000238004 | -0.91146 | 0.81897 | -0.91146    | 0.81897     | -0.91146 | 0.81897 |
|             | -0.91146        | 0.81897  | 0.81897 | 0.890733151 |             |          |         |
| NA          | ENSG00000253171 | -0.91154 | 0.81899 | -0.91154    | 0.81899     | -0.91154 | 0.81899 |
|             | -0.91154        | 0.81899  | 0.81899 | 0.890733506 |             |          |         |
| NA          | ENSG00000256799 | -0.91162 | 0.81902 | -0.91162    | 0.81902     | -0.91162 | 0.81902 |
|             | -0.91162        | 0.81902  | 0.81902 | 0.890733506 |             |          |         |
| RASA3-IT1   | ENSG00000232487 | -0.91173 | 0.81905 | -0.91173    | 0.81905     | -0.91173 |         |
|             | 0.81905         | -0.91173 | 0.81905 | 0.81905     | 0.890733506 |          |         |
| NA          | ENSG00000264446 | -0.91176 | 0.81905 | -0.91176    | 0.81905     | -0.91176 | 0.81905 |
|             | -0.91176        | 0.81905  | 0.81905 | 0.890733506 |             |          |         |
| ANKRD12     | ENSG00000101745 | -1.1709  | 0.87918 | -1.0525     | 0.85371     | -1.6522  |         |
|             | 0.95076         | -0.91182 | 0.81907 | 0.81907     | 0.890733506 |          |         |
| PRH2        | ENSG00000134551 | -1.019   | 0.84591 | -0.91186    | 0.81908     | -0.91186 | 0.81908 |
|             | -0.91186        | 0.81908  | 0.81908 | 0.890733506 |             |          |         |
| ZIM2        | ENSG00000269699 | -0.91218 | 0.81916 | -0.91218    | 0.81916     | -0.91218 | 0.81916 |
|             | -0.91218        | 0.81916  | 0.81916 | 0.890793491 |             |          |         |
| UBE2D3P2    | ENSG00000225558 | -0.91225 | 0.81918 | -0.91225    | 0.81918     | -0.91225 |         |
|             | 0.81918         | -0.91225 | 0.81918 | 0.81918     | 0.890793491 |          |         |
| LINC02169   | ENSG00000259517 | -1.5448  | 0.9388  | -0.91227    | 0.81919     | -1.5448  |         |
|             | 0.9388          | -1.5448  | 0.9388  | 0.81919     | 0.890793491 |          |         |
| RNU6-181P   | ENSG00000200095 | -0.91252 | 0.81925 | -0.91252    | 0.81925     | -0.91252 |         |
|             | 0.81925         | -0.91252 | 0.81925 | 0.81925     | 0.890829852 |          |         |
| NA          | ENSG00000261633 | -0.91256 | 0.81926 | -0.91256    | 0.81926     | -0.91256 | 0.81926 |
|             | -0.91256        | 0.81926  | 0.81926 | 0.890829852 |             |          |         |
| KRTAP2-2    | ENSG00000214518 | -0.91276 | 0.81932 | -0.91276    | 0.81932     | -0.91276 |         |
|             | 0.81932         | -0.91276 | 0.81932 | 0.81932     | 0.890866209 |          |         |
| WTAPP1      | ENSG00000255282 | -1.2953  | 0.90239 | -0.9604     | 0.83157     | -1.2953  |         |
|             | 0.90239         | -0.91281 | 0.81933 | 0.81933     | 0.890866209 |          |         |
| IFNWP15     | ENSG00000232281 | -0.91306 | 0.8194  | -1.426      | 0.92306     | -1.426   |         |
|             | 0.92306         | -1.426   | 0.92306 | 0.8194      | 0.890922442 |          |         |
| NA          | ENSG00000266928 | -0.91315 | 0.81942 | -1.3781     | 0.91591     | -1.0004  | 0.84145 |
|             | -0.9194         | 0.82106  | 0.81942 | 0.890924309 |             |          |         |
| MIR4764     | ENSG00000266012 | -0.91329 | 0.81945 | -0.91329    | 0.81945     | -0.91329 |         |
|             | 0.81945         | -0.91329 | 0.81945 | 0.81945     | 0.890928043 |          |         |
| LYPLAL1-AS1 | ENSG00000228536 | -1.3058  | 0.90419 | -1.0729     | 0.85835     | -0.91329 |         |
|             | 0.81946         | -1.5726  | 0.9421  | 0.81946     | 0.890928043 |          |         |
| H2AC14      | ENSG00000276368 | -0.91344 | 0.81949 | -0.91344    | 0.81949     | -0.91344 |         |
|             | 0.81949         | -0.91344 | 0.81949 | 0.81949     | 0.890940781 |          |         |
| C1GALT1C1L  | ENSG00000223658 | -0.91361 | 0.81954 | -0.91361    | 0.81954     | -0.91361 |         |
|             | 0.81954         | -0.91361 | 0.81954 | 0.81954     | 0.890975263 |          |         |
| GTF3AP6     | ENSG00000229982 | -0.91382 | 0.81959 | -0.91382    | 0.81959     | -0.91382 |         |
|             | 0.81959         | -0.91382 | 0.81959 | 0.81959     | 0.891009743 |          |         |
| NA          | ENSG00000226558 | -0.91404 | 0.81965 | -0.91404    | 0.81965     | -0.91404 | 0.81965 |

|                |                 |          |         |             |             |          |         |  |
|----------------|-----------------|----------|---------|-------------|-------------|----------|---------|--|
|                | -0.91404        | 0.81965  | 0.81965 | 0.8910318   |             |          |         |  |
| MYORG          | ENSG00000164976 | -0.91424 | 0.81971 | -0.98802    | 0.83843     | -0.91424 | 0.81971 |  |
|                | -0.91424        | 0.81971  | 0.81971 | 0.8910318   |             |          |         |  |
| RNF207-AS1     | ENSG00000226944 | -0.91425 | 0.81971 | -0.91425    | 0.81971     | -0.91425 | 0.81971 |  |
|                | 0.81971         | -0.91425 | 0.81971 | 0.81971     | 0.8910318   |          |         |  |
| NA             | ENSG00000272426 | -0.91425 | 0.81971 | -0.91425    | 0.81971     | -0.91425 | 0.81971 |  |
|                | -0.91425        | 0.81971  | 0.81971 | 0.8910318   |             |          |         |  |
| OR10AG1        | ENSG00000174970 | -0.91431 | 0.81972 | -1.2282     | 0.89032     | -1.2282  |         |  |
|                | 0.89032         | -1.1622  | 0.87742 | 0.81972     | 0.8910318   |          |         |  |
| NA             | ENSG00000278886 | -1.3443  | 0.91058 | -0.91428    | 0.81972     | -1.3443  | 0.91058 |  |
|                | -1.3443         | 0.91058  | 0.81972 | 0.8910318   |             |          |         |  |
| RNU6-299P      | ENSG00000253032 | -1.1342  | 0.87165 | -0.91444    | 0.81976     | -1.1342  |         |  |
|                | 0.87165         | -1.1342  | 0.87165 | 0.81976     | 0.891055404 |          |         |  |
| EIF5AL1        | ENSG00000253626 | -0.91501 | 0.81991 | -0.91501    | 0.81991     | -0.91501 |         |  |
|                | 0.81991         | -0.91501 | 0.81991 | 0.81991     | 0.89119857  |          |         |  |
| NDUFB5P1       | ENSG00000251025 | -0.91529 | 0.81998 | -0.91529    | 0.81998     | -0.91529 |         |  |
|                | 0.81998         | -0.91529 | 0.81998 | 0.81998     | 0.891245767 |          |         |  |
| AFAP1-AS1      | ENSG00000272620 | -1.3265  | 0.90767 | -0.91533    | 0.81999     | -1.3265  |         |  |
|                | 0.90767         | -1.3265  | 0.90767 | 0.81999     | 0.891245767 |          |         |  |
| NA             | ENSG00000260021 | -0.91564 | 0.82007 | -0.91564    | 0.82007     | -0.91564 | 0.82007 |  |
|                | -0.91564        | 0.82007  | 0.82007 | 0.891258779 |             |          |         |  |
| FAM178B        | ENSG00000168754 | -0.91576 | 0.8201  | -1.3772     | 0.91577     | -1.6777  |         |  |
|                | 0.95329         | -1.5525  | 0.93973 | 0.8201      | 0.891258779 |          |         |  |
| NA             | ENSG00000228124 | -0.91577 | 0.82011 | -0.91577    | 0.82011     | -0.91577 | 0.82011 |  |
|                | -0.91577        | 0.82011  | 0.82011 | 0.891258779 |             |          |         |  |
| NA             | ENSG00000267389 | -0.91578 | 0.82011 | -0.91578    | 0.82011     | -0.91578 | 0.82011 |  |
|                | -0.91578        | 0.82011  | 0.82011 | 0.891258779 |             |          |         |  |
| NRP1           | ENSG00000099250 | -1.4803  | 0.9306  | -1.1767     | 0.88034     | -1.347   | 0.911   |  |
|                | -0.91584        | 0.82012  | 0.82012 | 0.891258779 |             |          |         |  |
| NA             | ENSG00000260572 | -0.91582 | 0.82012 | -1.9132     | 0.97214     | -1.9132  | 0.97214 |  |
|                | -1.9132         | 0.97214  | 0.82012 | 0.891258779 |             |          |         |  |
| YY1P2          | ENSG00000229104 | -0.91586 | 0.82013 | -0.91586    | 0.82013     | -0.91586 | 0.82013 |  |
|                | -0.91586        | 0.82013  | 0.82013 | 0.891258779 |             |          |         |  |
| RN7SL306P      | ENSG00000242241 | -0.91609 | 0.82019 | -0.91609    | 0.82019     | -0.91609 |         |  |
|                | 0.82019         | -0.91609 | 0.82019 | 0.82019     | 0.891304106 |          |         |  |
| HSH2D          | ENSG00000196684 | -0.91615 | 0.82021 | -0.91615    | 0.82021     | -1.0253  | 0.84739 |  |
|                | -1.0594         | 0.8553   | 0.82021 | 0.891305963 |             |          |         |  |
| LRRC2          | ENSG00000163827 | -0.93072 | 0.824   | -0.91657    | 0.82031     | -1.3623  | 0.91345 |  |
|                | -1.1124         | 0.86702  | 0.82031 | 0.891354999 |             |          |         |  |
| NA             | ENSG00000256504 | -0.91654 | 0.82031 | -0.91654    | 0.82031     | -0.91654 | 0.82031 |  |
|                | -0.91654        | 0.82031  | 0.82031 | 0.891354999 |             |          |         |  |
| NA             | ENSG00000272821 | -0.91655 | 0.82031 | -0.91655    | 0.82031     | -0.91655 | 0.82031 |  |
|                | -0.91655        | 0.82031  | 0.82031 | 0.891354999 |             |          |         |  |
| KRT18P14       | ENSG00000186082 | -0.9243  | 0.82234 | -0.9243     | 0.82234     | -0.9243  |         |  |
|                | 0.82234         | -0.91676 | 0.82037 | 0.82037     | 0.891380443 |          |         |  |
| RNU6-86P       | ENSG00000271923 | -0.91678 | 0.82037 | -1.7313     | 0.9583      | -2.4488  |         |  |
|                | 0.99283         | -2.4488  | 0.99283 | 0.82037     | 0.891380443 |          |         |  |
| NA             | ENSG00000227094 | -1.006   | 0.84278 | -0.91686    | 0.82039     | -1.006   | 0.84278 |  |
|                | -1.006          | 0.84278  | 0.82039 | 0.891382298 |             |          |         |  |
| RPL7P37        | ENSG00000226646 | -0.98544 | 0.8378  | -1.2358     | 0.89173     | -0.91715 |         |  |
|                | 0.82047         | -1.419   | 0.92204 | 0.82047     | 0.891449344 |          |         |  |
| NA             | ENSG00000276586 | -0.9174  | 0.82053 | -0.9174     | 0.82053     | -0.9174  | 0.82053 |  |
|                | -0.9174         | 0.82053  | 0.82053 | 0.891494658 |             |          |         |  |
| RN7SKP273      | ENSG00000223324 | -1.9234  | 0.97278 | -0.91776    | 0.82063     | -0.91776 |         |  |
|                | 0.82063         | -0.91776 | 0.82063 | 0.82063     | 0.891583428 |          |         |  |
| NA             | ENSG00000261235 | -0.93942 | 0.82624 | -0.91805    | 0.8207      | -0.91805 | 0.8207  |  |
|                | -0.91805        | 0.8207   | 0.8207  | 0.891632436 |             |          |         |  |
| TPM3P2         | ENSG00000214200 | -0.91816 | 0.82073 | -1.0529     | 0.8538      | -1.0529  |         |  |
|                | 0.8538          | -1.0529  | 0.8538  | 0.82073     | 0.891632436 |          |         |  |
| NA             | ENSG00000271763 | -0.91817 | 0.82073 | -0.91817    | 0.82073     | -0.91817 | 0.82073 |  |
|                | -0.91817        | 0.82073  | 0.82073 | 0.891632436 |             |          |         |  |
| BLOC1S5-TXNDC5 | ENSG00000259040 | -0.91827 | 0.82076 | -0.91827    | 0.82076     | -0.91827 |         |  |

|            |                 |          |         |             |             |          |         |
|------------|-----------------|----------|---------|-------------|-------------|----------|---------|
|            | 0.82076         | -0.91827 | 0.82076 | 0.82076     | 0.891645149 |          |         |
| IDO1       | ENSG00000131203 | -0.91838 | 0.82079 | -0.91838    | 0.82079     | -0.91838 | 0.82079 |
|            | -1.3635         | 0.91364  | 0.82079 | 0.891657862 |             |          |         |
| FAM133GP   | ENSG00000256079 | -1.2764  | 0.89909 | -2.0823     | 0.98134     | -0.94988 |         |
|            | 0.82891         | -0.91844 | 0.82081 | 0.82081     | 0.891659711 |          |         |
| KLRD1      | ENSG00000134539 | -1.37    | 0.91465 | -0.91853    | 0.82083     | -1.4577  | 0.92754 |
|            | -1.3115         | 0.90516  | 0.82083 | 0.89166156  |             |          |         |
| NA         | ENSG00000228651 | -0.91865 | 0.82086 | -1.3764     | 0.91566     | -0.91865 | 0.82086 |
|            | -0.91865        | 0.82086  | 0.82086 | 0.891674271 |             |          |         |
| NA         | ENSG00000241539 | -0.91906 | 0.82097 | -0.91906    | 0.82097     | -0.91906 | 0.82097 |
|            | -0.91906        | 0.82097  | 0.82097 | 0.891768558 |             |          |         |
| RGS8       | ENSG00000135824 | -0.91914 | 0.82099 | -0.91914    | 0.82099     | -0.91914 | 0.82099 |
|            | -0.91914        | 0.82099  | 0.82099 | 0.891768558 |             |          |         |
| NA         | ENSG00000217488 | -0.91927 | 0.82102 | -0.91927    | 0.82102     | -0.91927 | 0.82102 |
|            | -0.91927        | 0.82102  | 0.82102 | 0.891768558 |             |          |         |
| NA         | ENSG00000230813 | -0.91926 | 0.82102 | -0.91926    | 0.82102     | -0.91926 | 0.82102 |
|            | -0.91926        | 0.82102  | 0.82102 | 0.891768558 |             |          |         |
| NA         | ENSG00000275465 | -0.91973 | 0.82114 | -1.1538     | 0.87571     | -1.1538  | 0.87571 |
|            | -1.1538         | 0.87571  | 0.82114 | 0.891879019 |             |          |         |
| NA         | ENSG00000259425 | -0.91981 | 0.82116 | -0.91981    | 0.82116     | -0.91981 | 0.82116 |
|            | -0.91981        | 0.82116  | 0.82116 | 0.891880863 |             |          |         |
| NA         | ENSG00000272662 | -0.92009 | 0.82124 | -0.92009    | 0.82124     | -0.92009 | 0.82124 |
|            | -0.92009        | 0.82124  | 0.82124 | 0.891939047 |             |          |         |
| NA         | ENSG00000267283 | -0.9202  | 0.82126 | -0.9202     | 0.82126     | -0.9202  | 0.82126 |
|            | -0.9202         | 0.82126  | 0.82126 | 0.891939047 |             |          |         |
| NA         | ENSG00000241777 | -0.92035 | 0.8213  | -0.92035    | 0.8213      | -0.92035 | 0.8213  |
|            | -0.92035        | 0.8213   | 0.8213  | 0.891939047 |             |          |         |
| ZNF133     | ENSG00000125846 | -1.3432  | 0.91039 | -1.2539     | 0.89506     | -1.0826  |         |
|            | 0.8605          | -0.9204  | 0.82132 | 0.82132     | 0.891939047 |          |         |
| SPDL1      | ENSG00000040275 | -1.2121  | 0.88726 | -1.0286     | 0.84817     | -0.92047 | 0.82134 |
|            | -1.629          | 0.94834  | 0.82134 | 0.891939047 |             |          |         |
| KRT18P54   | ENSG00000250834 | -0.92046 | 0.82134 | -0.92046    | 0.82134     | -0.92046 |         |
|            | 0.82134         | -0.92046 | 0.82134 | 0.82134     | 0.891939047 |          |         |
| RNU6-1227P | ENSG00000206708 | -0.92055 | 0.82136 | -0.92055    | 0.82136     | -0.92055 |         |
|            | 0.82136         | -0.92055 | 0.82136 | 0.82136     | 0.891939047 |          |         |
| NA         | ENSG00000214719 | -1.2071  | 0.88629 | -1.2688     | 0.89774     | -1.2102  | 0.8869  |
|            | -0.92054        | 0.82136  | 0.82136 | 0.891939047 |             |          |         |
| NA         | ENSG00000203647 | -0.92117 | 0.82152 | -0.92117    | 0.82152     | -0.92117 | 0.82152 |
|            | -0.92117        | 0.82152  | 0.82152 | 0.892092916 |             |          |         |
| RN7SL368P  | ENSG00000239948 | -0.92139 | 0.82158 | -0.92139    | 0.82158     | -0.92139 |         |
|            | 0.82158         | -0.92139 | 0.82158 | 0.82158     | 0.89213819  |          |         |
| NA         | ENSG00000279384 | -0.92152 | 0.82161 | -1.6463     | 0.95015     | -0.92152 | 0.82161 |
|            | -0.92152        | 0.82161  | 0.82161 | 0.892150886 |             |          |         |
| FAUP1      | ENSG00000235297 | -0.92183 | 0.82169 | -1.3919     | 0.91802     | -0.92183 | 0.82169 |
|            | -1.0533         | 0.85389  | 0.82169 | 0.892217873 |             |          |         |
| UQCRFS1    | ENSG00000169021 | -0.92227 | 0.82181 | -0.92227    | 0.82181     | -0.92227 |         |
|            | 0.82181         | -0.92227 | 0.82181 | 0.82181     | 0.892328289 |          |         |
| LINC02490  | ENSG00000259237 | -0.92267 | 0.82191 | -0.92267    | 0.82191     | -2.1513  |         |
|            | 0.98427         | -0.92267 | 0.82191 | 0.82191     | 0.892395402 |          |         |
| RNU6-1333P | ENSG00000251971 | -0.92269 | 0.82192 | -0.92269    | 0.82192     | -0.92269 |         |
|            | 0.82192         | -0.92269 | 0.82192 | 0.82192     | 0.892395402 |          |         |
| ISLR2      | ENSG00000167178 | -1.2641  | 0.89691 | -1.2641     | 0.89691     | -1.2641  | 0.89691 |
|            | -0.92287        | 0.82196  | 0.82196 | 0.892395402 |             |          |         |
| TNFAIP8L3  | ENSG00000183578 | -0.92286 | 0.82196 | -0.92286    | 0.82196     | -0.92286 |         |
|            | 0.82196         | -0.92286 | 0.82196 | 0.82196     | 0.892395402 |          |         |
| DLD        | ENSG00000091140 | -0.93564 | 0.82527 | -1.015      | 0.84496     | -1.1831  | 0.88161 |
|            | -0.92297        | 0.82199  | 0.82199 | 0.892395402 |             |          |         |
| SNAP29     | ENSG00000099940 | -1.1198  | 0.8686  | -0.923      | 0.822       | -1.0062  | 0.84284 |
|            | -1.0062         | 0.84284  | 0.822   | 0.892395402 |             |          |         |
| NA         | ENSG00000235724 | -1.3551  | 0.91231 | -1.6392     | 0.94941     | -0.92303 | 0.822   |
|            | -2.2281         | 0.98706  | 0.822   | 0.892395402 |             |          |         |
| OR5BK1P    | ENSG00000257763 | -0.92314 | 0.82203 | -0.92314    | 0.82203     | -0.92314 |         |



|            |                 |          |         |             |             |         |          |         |
|------------|-----------------|----------|---------|-------------|-------------|---------|----------|---------|
|            | 0.82203         | -0.92314 | 0.82203 | 0.82203     | 0.892399064 |         |          |         |
| NA         | ENSG00000242375 | -0.92316 | 0.82204 | 0.82204     | -0.92316    | 0.82204 | -0.92316 | 0.82204 |
|            | -0.92316        | 0.82204  | 0.82204 | 0.892399064 |             |         |          |         |
| NA         | ENSG00000276563 | -0.92323 | 0.82206 | 0.82206     | -0.92323    | 0.82206 | -0.92323 | 0.82206 |
|            | -1.1456         | 0.87401  | 0.82206 | 0.892400896 |             |         |          |         |
| C4orf3     | ENSG00000164096 | -0.92339 | 0.8221  | 0.8221      | -1.8121     | 0.96502 | -1.327   |         |
|            | 0.90774         | -1.6774  | 0.95326 | 0.8221      | 0.892424438 |         |          |         |
| TUBB4BP1   | ENSG00000255988 | -0.92355 | 0.82214 | 0.82214     | -1.3468     | 0.91097 | -0.98628 | 0.838   |
|            | -1.7906         | 0.96333  | 0.82214 | 0.892447978 |             |         |          |         |
| LINC02445  | ENSG00000257750 | -0.92381 | 0.82221 | 0.82221     | -0.92381    | 0.82221 | -0.92381 |         |
|            | 0.82221         | -0.92381 | 0.82221 | 0.892484202 |             |         |          |         |
| NA         | ENSG00000258958 | -0.92382 | 0.82221 | 0.82221     | -0.92382    | 0.82221 | -0.92382 | 0.82221 |
|            | -0.92382        | 0.82221  | 0.82221 | 0.892484202 |             |         |          |         |
| EEF1A1P21  | ENSG00000249542 | -1.4585  | 0.92765 | 0.92765     | -1.4585     | 0.92765 | -1.4585  |         |
|            | 0.92765         | -0.92407 | 0.82227 | 0.82227     | 0.892500779 |         |          |         |
| NA         | ENSG00000283402 | -0.9762  | 0.83552 | 0.83552     | -0.9762     | 0.83552 | -0.9762  | 0.83552 |
|            | -0.92407        | 0.82228  | 0.82228 | 0.892500779 |             |         |          |         |
| NA         | ENSG00000261436 | -0.92432 | 0.82234 | 0.82234     | -0.92432    | 0.82234 | -0.92432 | 0.82234 |
|            | -0.92432        | 0.82234  | 0.82234 | 0.892500779 |             |         |          |         |
| NDUFB3     | ENSG00000119013 | -0.94262 | 0.82706 | 0.82706     | -1.6617     | 0.95171 | -0.92452 |         |
|            | 0.82239         | -1.0718  | 0.8581  | 0.82239     | 0.892500779 |         |          |         |
| LINC01210  | ENSG00000239513 | -0.92451 | 0.82239 | 0.82239     | -1.2876     | 0.90105 | -0.92451 |         |
|            | 0.82239         | -0.92451 | 0.82239 | 0.82239     | 0.892500779 |         |          |         |
| TERB1      | ENSG00000249961 | -0.92456 | 0.8224  | 0.8224      | -0.92456    | 0.8224  | -0.92456 | 0.8224  |
|            | -0.92456        | 0.8224   | 0.8224  | 0.892500779 |             |         |          |         |
| NA         | ENSG00000261572 | -0.9977  | 0.84079 | 0.84079     | -0.92457    | 0.8224  | -0.9977  | 0.84079 |
|            | -0.9977         | 0.84079  | 0.8224  | 0.892500779 |             |         |          |         |
| NA         | ENSG00000280334 | -0.92455 | 0.8224  | 0.8224      | -0.92455    | 0.8224  | -0.92455 | 0.8224  |
|            | -0.92455        | 0.8224   | 0.8224  | 0.892500779 |             |         |          |         |
| MTREX      | ENSG00000039123 | -0.96698 | 0.83322 | 0.83322     | -1.4553     | 0.92721 | -0.92463 | 0.82242 |
|            | -1.1628         | 0.87754  | 0.82242 | 0.892500779 |             |         |          |         |
| NA         | ENSG00000246731 | -0.92472 | 0.82244 | 0.82244     | -0.92472    | 0.82244 | -0.92472 | 0.82244 |
|            | -0.92472        | 0.82244  | 0.82244 | 0.892500779 |             |         |          |         |
| COX10      | ENSG00000006695 | -1.1557  | 0.8761  | 0.8761      | -1.2008     | 0.88509 | -0.92474 | 0.82245 |
|            | -1.5933         | 0.94445  | 0.82245 | 0.892500779 |             |         |          |         |
| BAX        | ENSG00000087088 | -0.92482 | 0.82247 | 0.82247     | -1.4594     | 0.92778 | -0.92482 | 0.82247 |
|            | -1.1283         | 0.8704   | 0.82247 | 0.892500779 |             |         |          |         |
| RNU6-5P    | ENSG00000206965 | -0.92483 | 0.82247 | 0.82247     | -0.92483    | 0.82247 | -0.92483 |         |
|            | 0.82247         | -0.92483 | 0.82247 | 0.82247     | 0.892500779 |         |          |         |
| TMEM189    | ENSG00000240849 | -1.6242  | 0.94783 | 0.94783     | -2.078      | 0.98115 | -0.92492 |         |
|            | 0.8225          | -1.4917  | 0.93211 | 0.8225      | 0.892500779 |         |          |         |
| NA         | ENSG00000251940 | -0.92494 | 0.8225  | 0.8225      | -0.92494    | 0.8225  | -0.92494 | 0.8225  |
|            | -0.92494        | 0.8225   | 0.8225  | 0.892500779 |             |         |          |         |
| LIN7C      | ENSG00000148943 | -0.92515 | 0.82255 | 0.82255     | -0.92515    | 0.82255 | -1.0302  | 0.84854 |
|            | -1.1323         | 0.87124  | 0.82255 | 0.89253516  |             |         |          |         |
| RNU6-855P  | ENSG00000222327 | -1.4727  | 0.92959 | 0.92959     | -0.92526    | 0.82258 | -1.0775  |         |
|            | 0.85937         | -1.0775  | 0.85937 | 0.82258     | 0.892547838 |         |          |         |
| NPAP1L     | ENSG00000278499 | -0.92551 | 0.82265 | 0.82265     | -0.92551    | 0.82265 | -0.92551 |         |
|            | 0.82265         | -0.92551 | 0.82265 | 0.82265     | 0.892603917 |         |          |         |
| LINC01491  | ENSG00000259572 | -0.92587 | 0.82274 | 0.82274     | -1.9865     | 0.97651 | -0.92587 |         |
|            | 0.82274         | -0.92587 | 0.82274 | 0.82274     | 0.892681693 |         |          |         |
| SPTY2D10S  | ENSG00000247595 | -0.92626 | 0.82285 | 0.82285     | -0.92626    | 0.82285 | -0.92626 |         |
|            | 0.82285         | -0.92626 | 0.82285 | 0.82285     | 0.892775781 |         |          |         |
| PCDHA14    | ENSG00000249504 | -0.92638 | 0.82288 | 0.82288     | -0.92638    | 0.82288 | -0.92638 |         |
|            | 0.82288         | -0.92638 | 0.82288 | 0.82288     | 0.892775781 |         |          |         |
| MAPRE3-AS1 | ENSG00000205500 | -1.4101  | 0.92075 | 0.92075     | -0.92643    | 0.82289 | -0.97193 |         |
|            | 0.83446         | -1.9153  | 0.97227 | 0.82289     | 0.892775781 |         |          |         |
| RPL29P30   | ENSG00000235420 | -0.92645 | 0.8229  | 0.8229      | -0.92645    | 0.8229  | -0.92645 |         |
|            | 0.8229          | -0.92645 | 0.8229  | 0.8229      | 0.892775781 |         |          |         |
| PRADC1     | ENSG00000135617 | -1.0277  | 0.84795 | 0.84795     | -1.0277     | 0.84795 | -1.0277  |         |
|            | 0.84795         | -0.92676 | 0.82297 | 0.82297     | 0.892811971 |         |          |         |
| NA         | ENSG00000272551 | -0.92674 | 0.82297 | 0.82297     | -1.0137     | 0.84463 | -1.0137  | 0.84463 |

|            |                 |          |         |             |             |          |         |  |
|------------|-----------------|----------|---------|-------------|-------------|----------|---------|--|
|            | -1.1083         | 0.86613  | 0.82297 | 0.892811971 |             |          |         |  |
| NA         | ENSG00000232603 | -0.92692 | 0.82302 | -0.92692    | 0.82302     | -0.92692 | 0.82302 |  |
|            | -0.92692        | 0.82302  | 0.82302 | 0.892846337 |             |          |         |  |
| NA         | ENSG00000279845 | -0.927   | 0.82304 | -0.927      | 0.82304     | -0.927   | 0.82304 |  |
|            | -0.927          | 0.82304  | 0.82304 | 0.892848157 |             |          |         |  |
| RNA5SP479  | ENSG00000201728 | -0.92726 | 0.8231  | -0.92726    | 0.8231      | -0.92726 |         |  |
|            | 0.8231          | -0.92726 | 0.8231  | 0.89288434  |             |          |         |  |
| CHCHD2P11  | ENSG00000270809 | -0.92727 | 0.82311 | -0.92727    | 0.82311     | -0.92727 |         |  |
|            | 0.82311         | -0.92727 | 0.82311 | 0.89288434  |             |          |         |  |
| HMG2P39    | ENSG00000214281 | -0.92762 | 0.8232  | -0.92762    | 0.8232      | -0.92762 |         |  |
|            | 0.8232          | -0.92762 | 0.8232  | 0.892962091 |             |          |         |  |
| FGFBP3     | ENSG00000174721 | -0.92802 | 0.8233  | -1.171      | 0.87919     | -1.1857  |         |  |
|            | 0.88213         | -1.4039  | 0.91983 | 0.8233      | 0.892998317 |          |         |  |
| MECOM-AS1  | ENSG00000241479 | -0.92813 | 0.82333 | -0.92813    | 0.82333     | -0.92813 |         |  |
|            | 0.82333         | -0.92813 | 0.82333 | 0.892998317 |             |          |         |  |
| NA         | ENSG00000253424 | -0.92821 | 0.82335 | -0.92821    | 0.82335     | -0.92821 | 0.82335 |  |
|            | -0.92821        | 0.82335  | 0.82335 | 0.892998317 |             |          |         |  |
| NA         | ENSG00000267625 | -0.92823 | 0.82336 | -0.92823    | 0.82336     | -0.92823 | 0.82336 |  |
|            | -0.92823        | 0.82336  | 0.82336 | 0.892998317 |             |          |         |  |
| FBXL8      | ENSG00000135722 | -0.9283  | 0.82337 | -0.9283     | 0.82337     | -0.9283  | 0.82337 |  |
|            | -0.9283         | 0.82337  | 0.82337 | 0.892998317 |             |          |         |  |
| FRZB       | ENSG00000162998 | -0.9283  | 0.82337 | -0.9283     | 0.82337     | -0.9283  | 0.82337 |  |
|            | -1.3827         | 0.91663  | 0.82337 | 0.892998317 |             |          |         |  |
| AP2B1      | ENSG00000006125 | -0.92831 | 0.82338 | -1.2774     | 0.89928     | -1.9456  | 0.97415 |  |
|            | -1.2879         | 0.90111  | 0.82338 | 0.892998317 |             |          |         |  |
| RPL18AP7   | ENSG00000232439 | -0.92831 | 0.82338 | -0.92831    | 0.82338     | -0.92831 |         |  |
|            | 0.82338         | -1.0036  | 0.84222 | 0.82338     | 0.892998317 |          |         |  |
| FABP6-AS1  | ENSG00000247699 | -0.92851 | 0.82343 | -1.023      | 0.84684     | -1.023   |         |  |
|            | 0.84684         | -0.92851 | 0.82343 | 0.82343     | 0.893032669 |          |         |  |
| CPSF6      | ENSG00000111605 | -1.0094  | 0.84361 | -1.7293     | 0.95812     | -0.92865 | 0.82347 |  |
|            | -1.3814         | 0.91642  | 0.82347 | 0.8930363   |             |          |         |  |
| RPS14P7    | ENSG00000242635 | -1.9093  | 0.97189 | -1.4865     | 0.93143     | -0.92868 |         |  |
|            | 0.82347         | -0.92868 | 0.82347 | 0.82347     | 0.8930363   |          |         |  |
| BTBD1      | ENSG00000064726 | -0.92902 | 0.82356 | -1.1585     | 0.87666     | -1.1161  | 0.86781 |  |
|            | -1.1585         | 0.87666  | 0.82356 | 0.893094152 |             |          |         |  |
| NA         | ENSG00000256913 | -0.92903 | 0.82356 | -0.92903    | 0.82356     | -0.92903 | 0.82356 |  |
|            | -0.92903        | 0.82356  | 0.82356 | 0.893094152 |             |          |         |  |
| NA         | ENSG00000265399 | -1.9752  | 0.97588 | -1.0081     | 0.84329     | -0.92917 | 0.8236  |  |
|            | -0.92917        | 0.8236   | 0.8236  | 0.893117654 |             |          |         |  |
| FZD6       | ENSG00000164930 | -0.94322 | 0.82722 | -0.94322    | 0.82722     | -0.94322 | 0.82722 |  |
|            | -0.92933        | 0.82364  | 0.82364 | 0.893141154 |             |          |         |  |
| ELOVL2-AS1 | ENSG00000230314 | -1.324   | 0.90725 | -1.1474     | 0.8744      | -1.3416  |         |  |
|            | 0.91013         | -0.92942 | 0.82366 | 0.82366     | 0.893142967 |          |         |  |
| MRPL1      | ENSG00000169288 | -1.2994  | 0.90311 | -1.3956     | 0.91859     | -1.4397  | 0.92502 |  |
|            | -0.92954        | 0.82369  | 0.82369 | 0.893150217 |             |          |         |  |
| NA         | ENSG00000255336 | -0.92968 | 0.82373 | -0.94821    | 0.82849     | -0.92968 | 0.82373 |  |
|            | -0.92968        | 0.82373  | 0.82373 | 0.893150217 |             |          |         |  |
| NA         | ENSG00000275784 | -0.92967 | 0.82373 | -0.92967    | 0.82373     | -0.92967 | 0.82373 |  |
|            | -0.92967        | 0.82373  | 0.82373 | 0.893150217 |             |          |         |  |
| NA         | ENSG00000264355 | -0.92971 | 0.82374 | -0.92971    | 0.82374     | -0.92971 | 0.82374 |  |
|            | -0.92971        | 0.82374  | 0.82374 | 0.893150217 |             |          |         |  |
| ACVR1B     | ENSG00000135503 | -0.92981 | 0.82376 | -0.94612    | 0.82796     | -1.1432  |         |  |
|            | 0.87353         | -1.2282  | 0.89032 | 0.82376     | 0.893152029 |          |         |  |
| FTLP18     | ENSG00000230214 | -2.6207  | 0.99561 | -2.2894     | 0.98897     | -1.2317  |         |  |
|            | 0.89096         | -0.92994 | 0.8238  | 0.8238      | 0.893175526 |          |         |  |
| NA         | ENSG00000255563 | -0.93011 | 0.82384 | -1.0047     | 0.84249     | -0.93011 | 0.82384 |  |
|            | -1.0047         | 0.84249  | 0.82384 | 0.893199021 |             |          |         |  |
| NA         | ENSG00000224302 | -1.7094  | 0.95632 | -0.93081    | 0.82402     | -0.93081 | 0.82402 |  |
|            | -1.093          | 0.86279  | 0.82402 | 0.893325523 |             |          |         |  |
| TMED2-DT   | ENSG00000247373 | -1.2733  | 0.89854 | -1.7898     | 0.96326     | -0.93083 |         |  |
|            | 0.82403         | -0.93083 | 0.82403 | 0.82403     | 0.893325523 |          |         |  |
| SMC2-AS1   | ENSG00000270332 | -0.93088 | 0.82404 | -0.93088    | 0.82404     | -0.93088 |         |  |

|            |                 |          |         |             |             |             |          |
|------------|-----------------|----------|---------|-------------|-------------|-------------|----------|
|            | 0.82404         | -0.93088 | 0.82404 | 0.82404     | 0.893325523 |             |          |
| YWHABP2    | ENSG00000256464 | -0.93091 | 0.82405 | 0.82405     | -0.93091    | 0.82405     | -0.93091 |
|            | 0.82405         | -0.93091 | 0.82405 | 0.82405     | 0.893325523 |             |          |
| NA         | ENSG00000261439 | -0.93092 | 0.82405 | 0.82405     | -0.93092    | 0.82405     | -0.93092 |
|            | -0.93092        | 0.82405  | 0.82405 | 0.893325523 |             |             |          |
| NA         | ENSG00000261644 | -0.93119 | 0.82412 | 0.82412     | -0.93119    | 0.82412     | -0.93119 |
|            | -0.93119        | 0.82412  | 0.82412 | 0.893325523 |             |             |          |
| MIR3181    | ENSG00000264947 | -0.93119 | 0.82412 | 0.82412     | -0.93119    | 0.82412     | -0.93119 |
|            | 0.82412         | -0.93119 | 0.82412 | 0.82412     | 0.893325523 |             |          |
| IL20RA     | ENSG00000016402 | -1.384   | 0.91681 | 0.91681     | -0.9312     | 0.82413     | -0.9312  |
|            | 0.82413         | -0.9312  | 0.82413 | 0.82413     | 0.893325523 |             |          |
| ELMO3      | ENSG00000102890 | -2.2646  | 0.98823 | 0.98823     | -2.2646     | 0.98823     | -2.2646  |
|            | -0.93122        | 0.82413  | 0.82413 | 0.893325523 |             |             |          |
| NA         | ENSG00000257410 | -0.93125 | 0.82414 | 0.82414     | -0.93125    | 0.82414     | -0.93125 |
|            | -0.93125        | 0.82414  | 0.82414 | 0.893325523 |             |             |          |
| EIF1P1     | ENSG00000229875 | -0.93143 | 0.82418 | 0.82418     | -0.93143    | 0.82418     | -0.93143 |
|            | 0.82418         | -0.93143 | 0.82418 | 0.82418     | 0.893349009 |             |          |
| NA         | ENSG00000258225 | -1.71    | 0.95637 | 0.95637     | -0.9402     | 0.82644     | -0.9402  |
|            | -0.93154        | 0.82421  | 0.82421 | 0.893361655 |             |             |          |
| C5orf22    | ENSG00000082213 | -1.1515  | 0.87523 | 0.87523     | -0.93488    | 0.82507     | -0.93176 |
|            | 0.82427         | -1.6232  | 0.94772 | 0.94772     | 0.82427     | 0.893379721 |          |
| TPRG1LP1   | ENSG00000269097 | -0.93177 | 0.82427 | 0.82427     | -0.93177    | 0.82427     | -0.93177 |
|            | 0.82427         | -0.93177 | 0.82427 | 0.82427     | 0.893379721 |             |          |
| NA         | ENSG00000261629 | -0.93182 | 0.82429 | 0.82429     | -0.93182    | 0.82429     | -0.93182 |
|            | -0.93182        | 0.82429  | 0.82429 | 0.893379721 |             |             |          |
| ATP5BP5    | ENSG00000254944 | -0.93189 | 0.8243  | 0.8243      | -0.93189    | 0.8243      | -0.93189 |
|            | 0.8243          | -0.93189 | 0.8243  | 0.8243      | 0.893379721 |             |          |
| IGHV3-16   | ENSG00000211944 | -0.93212 | 0.82436 | 0.82436     | -0.93212    | 0.82436     | -0.93212 |
|            | 0.82436         | -0.93212 | 0.82436 | 0.82436     | 0.893397783 |             |          |
| GNPTG      | ENSG00000090581 | -0.93216 | 0.82437 | 0.82437     | -0.93216    | 0.82437     | -0.93216 |
|            | -0.93216        | 0.82437  | 0.82437 | 0.893397783 |             |             |          |
| RPS16      | ENSG00000105193 | -0.93218 | 0.82438 | 0.82438     | -0.93218    | 0.82438     | -0.93218 |
|            | -0.93218        | 0.82438  | 0.82438 | 0.893397783 |             |             |          |
| GAPDHP34   | ENSG00000235306 | -0.93222 | 0.82439 | 0.82439     | -1.206      | 0.88609     | -0.93222 |
|            | 0.82439         | -0.93222 | 0.82439 | 0.82439     | 0.893397783 |             |          |
| IRS1       | ENSG00000169047 | -0.93258 | 0.82448 | 0.82448     | -1.6688     | 0.95242     | -1.2846  |
|            | -1.08           | 0.85993  | 0.82448 | 0.893475446 |             |             | 0.90053  |
| TRIM52-AS1 | ENSG00000248275 | -0.93268 | 0.82451 | 0.82451     | -0.93268    | 0.82451     | -0.93268 |
|            | 0.82451         | -0.93268 | 0.82451 | 0.82451     | 0.893488087 |             |          |
| DKK1       | ENSG00000107984 | -0.93284 | 0.82455 | 0.82455     | -0.93284    | 0.82455     | -0.93284 |
|            | -0.93284        | 0.82455  | 0.82455 | 0.893511564 |             |             |          |
| CCDC82     | ENSG00000149231 | -1.576   | 0.94248 | 0.94248     | -1.5974     | 0.94491     | -1.4509  |
|            | 0.92659         | -0.93304 | 0.8246  | 0.8246      | 0.893536842 |             |          |
| NA         | ENSG00000279356 | -0.93309 | 0.82461 | 0.82461     | -0.93309    | 0.82461     | -0.93309 |
|            | -0.93309        | 0.82461  | 0.82461 | 0.893536842 |             |             |          |
| NA         | ENSG00000272170 | -0.9334  | 0.82469 | 0.82469     | -0.9334     | 0.82469     | -0.9334  |
|            | -0.9334         | 0.82469  | 0.82469 | 0.893603658 |             |             |          |
| NA         | ENSG00000265801 | -0.93347 | 0.82471 | 0.82471     | -0.93347    | 0.82471     | -0.93347 |
|            | -0.93347        | 0.82471  | 0.82471 | 0.893605459 |             |             |          |
| BZW1P1     | ENSG00000236686 | -0.93362 | 0.82475 | 0.82475     | -0.93362    | 0.82475     | -0.93362 |
|            | 0.82475         | -0.93362 | 0.82475 | 0.82475     | 0.893621696 |             |          |
| NA         | ENSG00000217289 | -1.5153  | 0.93515 | 0.93515     | -1.5153     | 0.93515     | -1.3533  |
|            | -0.93374        | 0.82478  | 0.82478 | 0.893621696 |             |             | 0.91202  |
| HIGD1AP4   | ENSG00000233299 | -0.93375 | 0.82478 | 0.82478     | -0.93375    | 0.82478     | -0.93375 |
|            | 0.82478         | -0.93375 | 0.82478 | 0.82478     | 0.893621696 |             |          |
| LMOD2      | ENSG00000170807 | -0.93393 | 0.82483 | 0.82483     | -0.93393    | 0.82483     | -0.93393 |
|            | -0.93393        | 0.82483  | 0.82483 | 0.893630697 |             |             |          |
| NA         | ENSG00000253406 | -0.93392 | 0.82483 | 0.82483     | -1.4101     | 0.92074     | -1.653   |
|            | -1.2414         | 0.89278  | 0.82483 | 0.893630697 |             |             | 0.95084  |
| MTATP6P15  | ENSG00000254931 | -0.934   | 0.82485 | 0.82485     | -0.934      | 0.82485     | -0.934   |
|            | 0.82485         | -0.934   | 0.82485 | 0.82485     | 0.893630697 |             |          |
| GLRB       | ENSG00000109738 | -1.6226  | 0.94767 | 0.94767     | -0.93412    | 0.82488     | -2.1331  |
|            |                 |          |         |             |             |             | 0.98354  |

|             |                 |          |          |         |             |             |          |         |
|-------------|-----------------|----------|----------|---------|-------------|-------------|----------|---------|
|             |                 | -1.9406  | 0.97385  | 0.82488 | 0.893630697 |             |          |         |
| NA          | ENSG00000253384 | -0.93414 | 0.82488  | 0.82488 | -0.93414    | 0.82488     | -0.93414 | 0.82488 |
|             |                 | -0.93414 | 0.82488  | 0.82488 | 0.893630697 |             |          |         |
| DNAJB6P7    | ENSG00000243508 | -0.93426 | 0.82492  | 0.82492 | -0.94422    | 0.82747     | -1.5402  |         |
|             |                 | 0.93825  | -0.98517 | 0.83773 | 0.82492     | 0.89364513  |          |         |
| NA          | ENSG00000249829 | -0.96327 | 0.83229  | 0.83229 | -0.96327    | 0.83229     | -1.1219  | 0.86905 |
|             |                 | -0.93433 | 0.82493  | 0.82493 | 0.89364513  |             |          |         |
| MTATP6P2    | ENSG00000270307 | -0.93439 | 0.82495  | 0.82495 | -0.93439    | 0.82495     | -0.93439 |         |
|             |                 | 0.82495  | -0.93439 | 0.82495 | 0.82495     | 0.89364693  |          |         |
| OR7G2       | ENSG00000170923 | -0.93474 | 0.82504  | 0.82504 | -0.93474    | 0.82504     | -0.93474 | 0.82504 |
|             |                 | -0.93474 | 0.82504  | 0.82504 | 0.893724557 |             |          |         |
| NA          | ENSG00000237479 | -0.93482 | 0.82506  | 0.82506 | -0.93482    | 0.82506     | -0.93482 | 0.82506 |
|             |                 | -0.93482 | 0.82506  | 0.82506 | 0.893726355 |             |          |         |
| PCNX1       | ENSG00000100731 | -0.935   | 0.8251   | 0.8251  | -1.0237     | 0.84702     | -1.589   | 0.94397 |
|             |                 | -1.9188  | 0.97249  | 0.8251  | 0.893740782 |             |          |         |
| LINC00972   | ENSG00000225128 | -0.93501 | 0.82511  | 0.82511 | -1.3267     | 0.90769     | -1.6701  |         |
|             |                 | 0.95255  | -1.9693  | 0.97554 | 0.82511     | 0.893740782 |          |         |
| NA          | ENSG00000259759 | -0.93514 | 0.82514  | 0.82514 | -0.93514    | 0.82514     | -0.93514 | 0.82514 |
|             |                 | -0.93514 | 0.82514  | 0.82514 | 0.893744377 |             |          |         |
| UBAP1L      | ENSG00000246922 | -1.3617  | 0.91335  | 0.91335 | -0.93518    | 0.82515     | -1.3617  |         |
|             |                 | 0.91335  | -1.3617  | 0.91335 | 0.82515     | 0.893744377 |          |         |
| NA          | ENSG00000260592 | -0.93523 | 0.82517  | 0.82517 | -0.93523    | 0.82517     | -0.93523 | 0.82517 |
|             |                 | -0.93523 | 0.82517  | 0.82517 | 0.893746174 |             |          |         |
| OR2E1P      | ENSG00000219262 | -1.144   | 0.87369  | 0.87369 | -1.5158     | 0.93522     | -0.93533 |         |
|             |                 | 0.82519  | -1.144   | 0.87369 | 0.82519     | 0.893747971 |          |         |
| HPS6        | ENSG00000166189 | -1.5795  | 0.94289  | 0.94289 | -1.5795     | 0.94289     | -1.5795  | 0.94289 |
|             |                 | -0.93543 | 0.82522  | 0.82522 | 0.893753361 |             |          |         |
| NA          | ENSG00000207751 | -1.4809  | 0.93068  | 0.93068 | -1.4857     | 0.93132     | -0.93554 | 0.82524 |
|             |                 | -1.4857  | 0.93132  | 0.82524 | 0.893753361 |             |          |         |
| CUTALP      | ENSG00000226752 | -0.93557 | 0.82525  | 0.82525 | -0.93557    | 0.82525     | -0.93557 |         |
|             |                 | 0.82525  | -0.93557 | 0.82525 | 0.82525     | 0.893753361 |          |         |
| RNU6-550P   | ENSG00000212359 | -0.9359  | 0.82534  | 0.82534 | -0.9359     | 0.82534     | -0.9359  |         |
|             |                 | 0.82534  | -0.9359  | 0.82534 | 0.82534     | 0.893755059 |          |         |
| NA          | ENSG00000224374 | -0.93593 | 0.82534  | 0.82534 | -0.93593    | 0.82534     | -0.93593 | 0.82534 |
|             |                 | -0.93593 | 0.82534  | 0.82534 | 0.893755059 |             |          |         |
| SNRPGP7     | ENSG00000242915 | -0.93592 | 0.82534  | 0.82534 | -0.93592    | 0.82534     | -0.93592 |         |
|             |                 | 0.82534  | -0.93592 | 0.82534 | 0.82534     | 0.893755059 |          |         |
| NA          | ENSG00000201209 | -0.93609 | 0.82539  | 0.82539 | -0.93609    | 0.82539     | -0.93609 | 0.82539 |
|             |                 | -0.93609 | 0.82539  | 0.82539 | 0.893755059 |             |          |         |
| NA          | ENSG00000201627 | -1.2156  | 0.88794  | 0.88794 | -1.4879     | 0.93162     | -1.8603  | 0.96858 |
|             |                 | -0.93609 | 0.82539  | 0.82539 | 0.893755059 |             |          |         |
| LINC00364   | ENSG00000230040 | -0.93614 | 0.8254   | 0.8254  | -0.93614    | 0.8254      | -0.93614 |         |
|             |                 | 0.8254   | -0.93614 | 0.8254  | 0.8254      | 0.893755059 |          |         |
| NA          | ENSG00000264637 | -1.2237  | 0.88947  | 0.88947 | -0.98448    | 0.83756     | -0.93615 | 0.8254  |
|             |                 | -1.0629  | 0.85609  | 0.8254  | 0.893755059 |             |          |         |
| NA          | ENSG00000229854 | -1.1625  | 0.87748  | 0.87748 | -1.157      | 0.87636     | -1.157   | 0.87636 |
|             |                 | -0.93617 | 0.82541  | 0.82541 | 0.893755059 |             |          |         |
| OR13C2      | ENSG00000276119 | -1.1018  | 0.86473  | 0.86473 | -1.1018     | 0.86473     | -0.93628 |         |
|             |                 | 0.82543  | -1.1018  | 0.86473 | 0.82543     | 0.893755059 |          |         |
| LINC01498   | ENSG00000247213 | -1.4703  | 0.92926  | 0.92926 | -1.3083     | 0.90461     | -1.1096  |         |
|             |                 | 0.86641  | -0.93633 | 0.82545 | 0.82545     | 0.893755059 |          |         |
| CD302       | ENSG00000241399 | -1.6982  | 0.95526  | 0.95526 | -0.93644    | 0.82548     | -1.6982  | 0.95526 |
|             |                 | -1.342   | 0.91021  | 0.82548 | 0.893755059 |             |          |         |
| NA          | ENSG00000233482 | -0.93649 | 0.82549  | 0.82549 | -1.1619     | 0.87737     | -0.93649 | 0.82549 |
|             |                 | -0.93649 | 0.82549  | 0.82549 | 0.893755059 |             |          |         |
| NA          | ENSG00000284413 | -0.9365  | 0.82549  | 0.82549 | -0.9365     | 0.82549     | -0.9365  | 0.82549 |
|             |                 | -0.9365  | 0.82549  | 0.82549 | 0.893755059 |             |          |         |
| HSPA4L      | ENSG00000164070 | -0.93662 | 0.82552  | 0.82552 | -1.0805     | 0.86005     | -0.93662 |         |
|             |                 | 0.82552  | -1.0157  | 0.84511 | 0.82552     | 0.893767682 |          |         |
| NA          | ENSG00000257764 | -0.93692 | 0.8256   | 0.8256  | -0.93692    | 0.8256      | -0.93692 | 0.8256  |
|             |                 | -0.93692 | 0.8256   | 0.8256  | 0.893834437 |             |          |         |
| KIAA0895LP1 | ENSG00000264714 | -0.93705 | 0.82563  | 0.82563 | -0.93705    | 0.82563     | -1.2614  |         |

|           |                 |          |         |             |             |          |                  |
|-----------|-----------------|----------|---------|-------------|-------------|----------|------------------|
|           | 0.89641         | -0.93705 | 0.82563 | 0.82563     | 0.893847057 |          |                  |
| NA        | ENSG00000238220 | -0.93716 | 0.82566 | 0.82566     | -0.93716    | 0.82566  | -0.93716 0.82566 |
|           | -0.93716        | 0.82566  | 0.82566 | 0.893859677 |             |          |                  |
| BAZ2B     | ENSG00000123636 | -1.8516  | 0.96796 | -1.1873     | 0.88245     | -1.3817  | 0.91648          |
|           | -0.93723        | 0.82568  | 0.82568 | 0.893861471 |             |          |                  |
| CCNB2     | ENSG00000157456 | -0.93734 | 0.82571 | -0.93734    | 0.82571     | -0.93734 | 0.82571          |
|           | -0.93734        | 0.82571  | 0.82571 | 0.89387409  |             |          |                  |
| MIR548H2  | ENSG00000221801 | -0.93743 | 0.82573 | -0.93743    | 0.82573     | -0.93743 |                  |
|           | 0.82573         | -0.93743 | 0.82573 | 0.82573     | 0.893875884 |          |                  |
| CD2BP2    | ENSG00000169217 | -0.93749 | 0.82575 | -0.93749    | 0.82575     | -0.93749 |                  |
|           | 0.82575         | -1.5608  | 0.94071 | 0.82575     | 0.893877677 |          |                  |
| CENPA     | ENSG00000115163 | -0.93775 | 0.82581 | -0.93775    | 0.82581     | -1.0112  | 0.84404          |
|           | -1.4658         | 0.92865  | 0.82581 | 0.893893744 |             |          |                  |
| NA        | ENSG00000251716 | -0.93773 | 0.82581 | -0.93773    | 0.82581     | -0.93773 | 0.82581          |
|           | -0.93773        | 0.82581  | 0.82581 | 0.893893744 |             |          |                  |
| NA        | ENSG00000279446 | -0.9378  | 0.82583 | -0.9378     | 0.82583     | -0.9378  | 0.82583          |
|           | -0.9378         | 0.82583  | 0.82583 | 0.893893744 |             |          |                  |
| NA        | ENSG00000284003 | -0.93791 | 0.82586 | -0.93791    | 0.82586     | -0.93791 | 0.82586          |
|           | -0.93791        | 0.82586  | 0.82586 | 0.893893744 |             |          |                  |
| C1DP1     | ENSG00000231245 | -1.1007  | 0.86448 | -1.1604     | 0.87705     | -0.98316 | 0.83723          |
|           | -0.93799        | 0.82587  | 0.82587 | 0.893893744 |             |          |                  |
| NA        | ENSG00000251162 | -0.93802 | 0.82588 | -0.93802    | 0.82588     | -0.93802 | 0.82588          |
|           | -0.93802        | 0.82588  | 0.82588 | 0.893893744 |             |          |                  |
| NA        | ENSG00000233287 | -1.3964  | 0.91871 | -1.0092     | 0.84357     | -1.3964  | 0.91871          |
|           | -0.93821        | 0.82593  | 0.82593 | 0.893893744 |             |          |                  |
| NA        | ENSG00000242123 | -1.5697  | 0.94176 | -1.5697     | 0.94176     | -0.93833 | 0.82596          |
|           | -1.5697         | 0.94176  | 0.82596 | 0.893893744 |             |          |                  |
| FAM240A   | ENSG00000283473 | -1.2765  | 0.89911 | -1.491      | 0.93202     | -0.93831 |                  |
|           | 0.82596         | -1.564   | 0.94109 | 0.82596     | 0.893893744 |          |                  |
| NA        | ENSG00000202523 | -0.93835 | 0.82597 | -0.93835    | 0.82597     | -0.93835 | 0.82597          |
|           | -0.93835        | 0.82597  | 0.82597 | 0.893893744 |             |          |                  |
| ZNF197    | ENSG00000186448 | -1.363   | 0.91356 | -0.98453    | 0.83757     | -1.5734  |                  |
|           | 0.94219         | -0.9384  | 0.82598 | 0.82598     | 0.893893744 |          |                  |
| TMEM106C  | ENSG00000134291 | -1.6783  | 0.95336 | -1.6783     | 0.95336     | -1.6783  |                  |
|           | 0.95336         | -0.93856 | 0.82602 | 0.82602     | 0.893893744 |          |                  |
| RNU4-38P  | ENSG00000201342 | -0.93857 | 0.82603 | -0.93857    | 0.82603     | -0.93857 |                  |
|           | 0.82603         | -0.93857 | 0.82603 | 0.82603     | 0.893893744 |          |                  |
| NA        | ENSG00000278206 | -0.93858 | 0.82603 | -0.93858    | 0.82603     | -0.93858 | 0.82603          |
|           | -0.93858        | 0.82603  | 0.82603 | 0.893893744 |             |          |                  |
| MPHOSPH8  | ENSG00000196199 | -0.9935  | 0.83977 | -0.93863    | 0.82604     | -1.0648  |                  |
|           | 0.85652         | -1.241   | 0.8927  | 0.82604     | 0.893893744 |          |                  |
| SMYD3     | ENSG00000185420 | -2.351   | 0.99064 | -1.4664     | 0.92872     | -0.93886 | 0.8261           |
|           | -1.1231         | 0.86931  | 0.8261  | 0.893900913 |             |          |                  |
| LINC01363 | ENSG00000231605 | -1.4393  | 0.92497 | -0.93887    | 0.8261      | -0.93887 |                  |
|           | 0.8261          | -0.93887 | 0.8261  | 0.8261      | 0.893900913 |          |                  |
| LINC02687 | ENSG00000255267 | -1.6836  | 0.95387 | -0.9389     | 0.82611     | -0.9794  |                  |
|           | 0.83631         | -1.3237  | 0.90719 | 0.82611     | 0.893900913 |          |                  |
| ASTN1     | ENSG00000152092 | -1.3852  | 0.91701 | -0.93894    | 0.82612     | -1.4673  | 0.92886          |
|           | -1.3053         | 0.90411  | 0.82612 | 0.893900913 |             |          |                  |
| NA        | ENSG00000201075 | -0.93965 | 0.8263  | -0.93965    | 0.8263      | -0.93965 | 0.8263           |
|           | -1.0878         | 0.86166  | 0.8263  | 0.894057675 |             |          |                  |
| POMGNT1   | ENSG00000085998 | -1.5596  | 0.94057 | -1.2877     | 0.90107     | -0.93984 |                  |
|           | 0.82635         | -0.93984 | 0.82635 | 0.82635     | 0.894057675 |          |                  |
| MIR548AA1 | ENSG00000207704 | -0.93988 | 0.82636 | -0.93988    | 0.82636     | -0.93988 |                  |
|           | 0.82636         | -0.93988 | 0.82636 | 0.82636     | 0.894057675 |          |                  |
| KRTAP3-4P | ENSG00000226776 | -0.94001 | 0.82639 | -0.94001    | 0.82639     | -0.94001 |                  |
|           | 0.82639         | -0.94001 | 0.82639 | 0.82639     | 0.894057675 |          |                  |
| NA        | ENSG00000278703 | -0.93998 | 0.82639 | -0.93998    | 0.82639     | -0.93998 | 0.82639          |
|           | -0.93998        | 0.82639  | 0.82639 | 0.894057675 |             |          |                  |
| NA        | ENSG00000268746 | -0.94008 | 0.82641 | -0.94008    | 0.82641     | -0.94008 | 0.82641          |
|           | -0.94008        | 0.82641  | 0.82641 | 0.894057675 |             |          |                  |
| KRT18P5   | ENSG00000236670 | -0.94015 | 0.82643 | -0.94015    | 0.82643     | -0.94015 |                  |

|            |                 |             |         |             |             |          |         |       |
|------------|-----------------|-------------|---------|-------------|-------------|----------|---------|-------|
|            | 0.82643         | -0.94015    | 0.82643 | 0.82643     | 0.894057675 |          |         |       |
| LINC01502  | ENSG00000237339 | -1.6237     | 0.94778 | -1.0213     | 0.84644     | -1.0144  |         |       |
|            | 0.84481         | -0.94014    | 0.82643 | 0.82643     | 0.894057675 |          |         |       |
| NA         | ENSG00000269680 | -0.94017    | 0.82643 | -0.94017    | 0.82643     | -0.94017 | 0.82643 |       |
|            | -0.94017        | 0.82643     | 0.82643 | 0.894057675 |             |          |         |       |
| PRDX3P1    | ENSG00000229598 | -0.9403     | 0.82647 | -0.9403     | 0.82647     | -0.9403  |         |       |
|            | 0.82647         | -0.9403     | 0.82647 | 0.82647     | 0.894081099 |          |         |       |
| BRAF       | ENSG00000157764 | -1.6941     | 0.95487 | -0.94054    | 0.82653     | -1.6825  | 0.95376 |       |
|            | -1.3138         | 0.90554     | 0.82653 | 0.894117127 |             |          |         |       |
| GSAP       | ENSG00000186088 | -1.6607     | 0.95161 | -0.9406     | 0.82654     | -1.2473  | 0.89386 |       |
|            | -1.2473         | 0.89386     | 0.82654 | 0.894117127 |             |          |         |       |
| TMED1      | ENSG00000099203 | -0.94088    | 0.82662 | -0.94088    | 0.82662     | -0.94088 | 0.82662 |       |
|            | -0.94088        | 0.82662     | 0.82662 | 0.894178356 |             |          |         |       |
| MAPK14     | ENSG00000112062 | -1.1947     | 0.88391 | -0.94104    | 0.82666     | -1.6591  |         |       |
|            | 0.95145         | -1.1947     | 0.88391 | 0.82666     | 0.894178356 |          |         |       |
| RPL9P32    | ENSG00000242100 | -0.94107    | 0.82666 | -1.1848     | 0.88195     | -1.1848  |         |       |
|            | 0.88195         | -1.1848     | 0.88195 | 0.82666     | 0.894178356 |          |         |       |
| RPL5P19    | ENSG00000220553 | -0.94109    | 0.82667 | -1.0677     | 0.85718     | -0.94109 |         |       |
|            | 0.82667         | -0.94109    | 0.82667 | 0.82667     | 0.894178356 |          |         |       |
| NA         | ENSG00000225498 | -0.94128    | 0.82672 | -0.94128    | 0.82672     | -0.94128 | 0.82672 |       |
|            | -0.94128        | 0.82672     | 0.82672 | 0.89421259  |             |          |         |       |
| UBE2CP3    | ENSG00000250384 | -0.94145    | 0.82676 | -0.94145    | 0.82676     | -0.94145 |         |       |
|            | 0.82676         | -0.94145    | 0.82676 | 0.82676     | 0.894223294 |          |         |       |
| NBEAL2     | ENSG00000160796 | -1.203      | 0.88552 | -1.0871     | 0.8615      | -1.175   | 0.88    |       |
|            | -0.94152        | 0.82678     | 0.82678 | 0.894223294 |             |          |         |       |
| HSPA8P19   | ENSG00000251614 | -0.94159    | 0.8268  | -0.94159    | 0.8268      | -0.94159 |         |       |
|            | 0.8268          | -0.94159    | 0.8268  | 0.8268      | 0.894223294 |          |         |       |
| NA         | ENSG00000272094 | -0.94168    | 0.82682 | -0.94168    | 0.82682     | -0.94168 | 0.82682 |       |
|            | -0.94168        | 0.82682     | 0.82682 | 0.894223294 |             |          |         |       |
| SLC2A8     | ENSG00000136856 | -1.5018     | 0.93342 | -1.7503     | 0.95997     | -1.5018  |         |       |
|            | 0.93342         | -0.94175    | 0.82684 | 0.82684     | 0.894223294 |          |         |       |
| NA         | ENSG00000269350 | -0.94176    | 0.82684 | -0.94176    | 0.82684     | -0.94176 | 0.82684 |       |
|            | -0.94176        | 0.82684     | 0.82684 | 0.894223294 |             |          |         |       |
| DCAF11     | ENSG00000100897 | -0.9421     | 0.82693 | -0.9421     | 0.82693     | -0.9421  |         |       |
|            | 0.82693         | -0.9421     | 0.82693 | 0.82693     | 0.894271903 |          |         |       |
| ANKFN1     | ENSG00000153930 | -1.0798     | 0.85989 | -1.2872     | 0.90099     | -0.94211 |         |       |
|            | 0.82693         | -1.3221     | 0.90693 | 0.82693     | 0.894271903 |          |         |       |
| OR52H1     | ENSG00000181616 | -1.2934     | 0.90207 | -1.2934     | 0.90207     | -0.94215 |         |       |
|            | 0.82694         | -1.2934     | 0.90207 | 0.82694     | 0.894271903 |          |         |       |
| NA         | ENSG00000273933 | -0.94228    | 0.82698 | -0.94228    | 0.82698     | -0.94228 | 0.82698 |       |
|            | -0.94228        | 0.82698     | 0.82698 | 0.894282477 |             |          |         |       |
| NA         | ENSG00000257864 | -0.94238    | 0.827   | -0.94238    | 0.827       | -0.94238 | 0.827   | 0.827 |
|            | 0.827           | 0.894282477 |         |             |             |          |         |       |
| NA         | ENSG00000267115 | -0.9425     | 0.82703 | -0.9425     | 0.82703     | -0.9425  | 0.82703 |       |
|            | -0.9425         | 0.82703     | 0.82703 | 0.894282477 |             |          |         |       |
| TFB1M      | ENSG00000029639 | -1.7469     | 0.95967 | -2.0718     | 0.98086     | -0.94261 | 0.82706 |       |
|            | -1.5465         | 0.93901     | 0.82706 | 0.894282477 |             |          |         |       |
| TMBIM4     | ENSG00000155957 | -1.9562     | 0.97478 | -1.5237     | 0.93621     | -0.94261 |         |       |
|            | 0.82706         | -1.1606     | 0.8771  | 0.82706     | 0.894282477 |          |         |       |
| NA         | ENSG00000272699 | -0.94268    | 0.82708 | -0.94268    | 0.82708     | -0.94268 | 0.82708 |       |
|            | -0.94268        | 0.82708     | 0.82708 | 0.894282477 |             |          |         |       |
| RNU6-1244P | ENSG00000200484 | -1.5392     | 0.93813 | -0.94274    | 0.82709     | -0.94274 |         |       |
|            | 0.82709         | -0.94274    | 0.82709 | 0.82709     | 0.894282477 |          |         |       |
| NA         | ENSG00000240983 | -0.94284    | 0.82712 | -0.94284    | 0.82712     | -0.94284 | 0.82712 |       |
|            | -0.94284        | 0.82712     | 0.82712 | 0.894282477 |             |          |         |       |
| HTR3E      | ENSG00000186038 | -0.94289    | 0.82713 | -0.94289    | 0.82713     | -0.94289 | 0.82713 |       |
|            | -0.94289        | 0.82713     | 0.82713 | 0.894282477 |             |          |         |       |
| NA         | ENSG00000228019 | -0.94291    | 0.82714 | -0.94291    | 0.82714     | -0.94291 | 0.82714 |       |
|            | -0.94291        | 0.82714     | 0.82714 | 0.894282477 |             |          |         |       |
| MTND3P1    | ENSG00000226118 | -0.95109    | 0.82922 | -0.95109    | 0.82922     | -0.95109 |         |       |
|            | 0.82922         | -0.94299    | 0.82716 | 0.82716     | 0.894282477 |          |         |       |
| LINC02151  | ENSG00000236437 | -1.4583     | 0.92762 | -1.3325     | 0.90866     | -0.94305 |         |       |

|              |                 |          |         |             |             |          |         |
|--------------|-----------------|----------|---------|-------------|-------------|----------|---------|
|              | 0.82717         | -0.94305 | 0.82717 | 0.82717     | 0.894282477 |          |         |
| IRF6         | ENSG00000117595 | -0.94311 | 0.82719 | -0.94311    | 0.82719     | -0.94311 | 0.82719 |
|              | -1.3149         | 0.90573  | 0.82719 | 0.894284259 |             |          |         |
| NA           | ENSG00000265697 | -0.94318 | 0.82721 | -0.94318    | 0.82721     | -0.94318 | 0.82721 |
|              | -0.94318        | 0.82721  | 0.82721 | 0.894286041 |             |          |         |
| TAF11L10     | ENSG00000284356 | -0.94328 | 0.82723 | -0.94328    | 0.82723     | -0.94328 |         |
|              | 0.82723         | -0.94328 | 0.82723 | 0.82723     | 0.894287823 |          |         |
| MEIG1        | ENSG00000197889 | -1.2468  | 0.89377 | -1.2468     | 0.89377     | -0.94356 | 0.8273  |
|              | -1.4801         | 0.93057  | 0.8273  | 0.89432013  |             |          |         |
| NA           | ENSG00000248803 | -0.94361 | 0.82731 | -0.94361    | 0.82731     | -0.94361 | 0.82731 |
|              | -0.94361        | 0.82731  | 0.82731 | 0.89432013  |             |          |         |
| NA           | ENSG00000228384 | -0.94375 | 0.82735 | -0.94375    | 0.82735     | -0.94375 | 0.82735 |
|              | -0.94375        | 0.82735  | 0.82735 | 0.89432013  |             |          |         |
| KRTAP17-1    | ENSG00000186860 | -1.2318  | 0.89099 | -0.96548    | 0.83285     | -1.0003  |         |
|              | 0.84142         | -0.9438  | 0.82736 | 0.82736     | 0.89432013  |          |         |
| NA           | ENSG00000236556 | -0.94384 | 0.82737 | -0.94384    | 0.82737     | -0.94384 | 0.82737 |
|              | -0.94384        | 0.82737  | 0.82737 | 0.89432013  |             |          |         |
| SNORD115-40  | ENSG00000272460 | -0.94382 | 0.82737 | -0.94382    | 0.82737     | -0.94382 | 0.82737 |
|              | 0.82737         | -0.94382 | 0.82737 | 0.82737     | 0.89432013  |          |         |
| NA           | ENSG00000280098 | -0.94399 | 0.82741 | -1.0966     | 0.86359     | -1.0966  | 0.86359 |
|              | -1.0966         | 0.86359  | 0.82741 | 0.894339841 |             |          |         |
| DDX1         | ENSG00000079785 | -0.94423 | 0.82747 | -1.609      | 0.94619     | -1.2886  | 0.90124 |
|              | -1.7206         | 0.95734  | 0.82747 | 0.894339841 |             |          |         |
| SORCS1       | ENSG00000108018 | -1.1938  | 0.88372 | -1.3867     | 0.91724     | -0.94422 |         |
|              | 0.82747         | -1.7752  | 0.96207 | 0.82747     | 0.894339841 |          |         |
| LINC02448    | ENSG00000257230 | -0.9442  | 0.82747 | -0.9442     | 0.82747     | -0.9442  |         |
|              | 0.82747         | -0.9442  | 0.82747 | 0.82747     | 0.894339841 |          |         |
| SHQ1P1       | ENSG00000231588 | -1.1805  | 0.8811  | -0.94426    | 0.82748     | -1.4003  |         |
|              | 0.91929         | -1.4003  | 0.91929 | 0.82748     | 0.894339841 |          |         |
| PNLDC1       | ENSG00000146453 | -1.2771  | 0.89922 | -1.0179     | 0.84563     | -0.94434 |         |
|              | 0.8275          | -1.2163  | 0.88806 | 0.8275      | 0.894341621 |          |         |
| NA           | ENSG00000233090 | -0.94444 | 0.82753 | -0.94444    | 0.82753     | -0.94444 | 0.82753 |
|              | -0.94444        | 0.82753  | 0.82753 | 0.894354208 |             |          |         |
| NA           | ENSG00000275834 | -0.94474 | 0.8276  | -0.94474    | 0.8276      | -0.94474 | 0.8276  |
|              | -0.94474        | 0.8276   | 0.8276  | 0.894410024 |             |          |         |
| TMEM198      | ENSG00000188760 | -0.94509 | 0.82769 | -0.94509    | 0.82769     | -0.94509 |         |
|              | 0.82769         | -0.94509 | 0.82769 | 0.82769     | 0.894487452 |          |         |
| SAA3P        | ENSG00000166787 | -1.4436  | 0.92558 | -0.94533    | 0.82775     | -1.6214  | 0.94754 |
|              | -1.4436         | 0.92558  | 0.82775 | 0.894512618 |             |          |         |
| OR2L2        | ENSG00000203663 | -1.9616  | 0.97509 | -0.94531    | 0.82775     | -0.94531 | 0.82775 |
|              | -0.94531        | 0.82775  | 0.82775 | 0.894512618 |             |          |         |
| NA           | ENSG00000265478 | -0.94546 | 0.82779 | -0.94546    | 0.82779     | -0.94546 | 0.82779 |
|              | -0.94546        | 0.82779  | 0.82779 | 0.894536007 |             |          |         |
| NA           | ENSG00000224950 | -0.95136 | 0.82929 | -1.292      | 0.90181     | -0.94555 | 0.82781 |
|              | -1.1555         | 0.87606  | 0.82781 | 0.894537782 |             |          |         |
| RN7SKP116    | ENSG00000252711 | -0.94565 | 0.82784 | -0.94565    | 0.82784     | -0.94565 |         |
|              | 0.82784         | -0.94565 | 0.82784 | 0.82784     | 0.894543108 |          |         |
| SNORD56B     | ENSG00000207444 | -0.94574 | 0.82786 | -1.2544     | 0.89515     | -0.94574 |         |
|              | 0.82786         | -0.94574 | 0.82786 | 0.82786     | 0.894543108 |          |         |
| SERF1AP1     | ENSG00000250813 | -0.9458  | 0.82787 | -0.9458     | 0.82787     | -0.9458  |         |
|              | 0.82787         | -0.9458  | 0.82787 | 0.82787     | 0.894543108 |          |         |
| HLA-DQB1-AS1 | ENSG00000223534 | -0.94587 | 0.82789 | -0.94587    | 0.82789     | -0.94587 | 0.82789 |
|              | 0.82789         | -0.94587 | 0.82789 | 0.82789     | 0.894544883 |          |         |
| NA           | ENSG00000251852 | -1.2989  | 0.90301 | -0.94622    | 0.82798     | -0.94622 | 0.82798 |
|              | -0.94622        | 0.82798  | 0.82798 | 0.894622293 |             |          |         |
| NA           | ENSG00000213279 | -1.6291  | 0.94836 | -1.4717     | 0.92945     | -1.6537  | 0.9509  |
|              | -0.9464         | 0.82803  | 0.82803 | 0.89465648  |             |          |         |
| RNA5SP218    | ENSG00000200058 | -1.1802  | 0.88104 | -1.1802     | 0.88104     | -0.94654 |         |
|              | 0.82806         | -1.2827  | 0.90021 | 0.82806     | 0.894669057 |          |         |
| OR52E8       | ENSG00000183269 | -0.94679 | 0.82813 | -0.94679    | 0.82813     | -0.94679 |         |
|              | 0.82813         | -0.94679 | 0.82813 | 0.82813     | 0.89472485  |          |         |
| NA           | ENSG00000278627 | -0.94688 | 0.82815 | -0.94688    | 0.82815     | -0.94688 | 0.82815 |

|            |                 |          |          |         |             |             |          |         |
|------------|-----------------|----------|----------|---------|-------------|-------------|----------|---------|
|            |                 | -0.94688 | 0.82815  | 0.82815 | 0.894726621 |             |          |         |
| NA         | ENSG00000238079 | -0.94713 | 0.82821  | 0.82821 | -0.94713    | 0.82821     | -0.94713 | 0.82821 |
|            |                 | -0.94713 | 0.82821  | 0.82821 | 0.894771606 |             |          |         |
| SREK1      | ENSG00000153914 | -1.3008  | 0.90333  | 0.90333 | -1.1383     | 0.87249     | -0.94721 | 0.82823 |
|            |                 | -1.3702  | 0.91469  | 0.82823 | 0.894773376 |             |          |         |
| RNU6-1191P | ENSG00000252608 | -0.94765 | 0.82834  | 0.82834 | -0.94765    | 0.82834     | -0.94765 |         |
|            |                 | 0.82834  | -0.94765 | 0.82834 | 0.82834     | 0.894872375 |          |         |
| NA         | ENSG00000224272 | -0.94771 | 0.82836  | 0.82836 | -0.94771    | 0.82836     | -0.94771 | 0.82836 |
|            |                 | -0.94771 | 0.82836  | 0.82836 | 0.894874142 |             |          |         |
| NA         | ENSG00000259175 | -0.94778 | 0.82838  | 0.82838 | -0.94778    | 0.82838     | -0.94778 | 0.82838 |
|            |                 | -0.94778 | 0.82838  | 0.82838 | 0.894875909 |             |          |         |
| NA         | ENSG00000223786 | -1.8577  | 0.9684   | 0.9684  | -1.5579     | 0.94037     | -0.94816 | 0.82848 |
|            |                 | -0.95571 | 0.83039  | 0.82848 | 0.894964097 |             |          |         |
| CSE1L-AS1  | ENSG00000227431 | -0.94836 | 0.82853  | 0.82853 | -0.94836    | 0.82853     | -0.94836 |         |
|            |                 | 0.82853  | -0.94836 | 0.82853 | 0.82853     | 0.894998269 |          |         |
| LINC02368  | ENSG00000256659 | -0.9489  | 0.82866  | 0.82866 | -0.9489     | 0.82866     | -0.9489  |         |
|            |                 | 0.82866  | -0.9489  | 0.82866 | 0.82866     | 0.895118855 |          |         |
| PPIAP22    | ENSG00000198618 | -0.94932 | 0.82877  | 0.82877 | -0.94932    | 0.82877     | -0.94932 |         |
|            |                 | 0.82877  | -0.94932 | 0.82877 | 0.82877     | 0.895217833 |          |         |
| KRT2       | ENSG00000172867 | -2.6614  | 0.99611  | 0.99611 | -0.94955    | 0.82883     | -1.2494  | 0.89424 |
|            |                 | -1.2494  | 0.89424  | 0.82883 | 0.895262799 |             |          |         |
| RNU6-1340P | ENSG00000207167 | -0.94986 | 0.82891  | 0.82891 | -0.94986    | 0.82891     | -0.94986 |         |
|            |                 | 0.82891  | -0.94986 | 0.82891 | 0.82891     | 0.895291434 |          |         |
| IGHV3-35   | ENSG00000211957 | -0.94986 | 0.82891  | 0.82891 | -0.94986    | 0.82891     | -0.94986 |         |
|            |                 | 0.82891  | -0.94986 | 0.82891 | 0.82891     | 0.895291434 |          |         |
| RNA5SP328  | ENSG00000222740 | -0.94995 | 0.82893  | 0.82893 | -0.94995    | 0.82893     | -0.94995 |         |
|            |                 | 0.82893  | -0.94995 | 0.82893 | 0.82893     | 0.895291434 |          |         |
| NA         | ENSG00000258273 | -0.94995 | 0.82893  | 0.82893 | -0.94995    | 0.82893     | -0.94995 | 0.82893 |
|            |                 | -0.94995 | 0.82893  | 0.82893 | 0.895291434 |             |          |         |
| COX5BP3    | ENSG00000235967 | -0.95012 | 0.82897  | 0.82897 | -0.95012    | 0.82897     | -0.95012 |         |
|            |                 | 0.82897  | -0.95012 | 0.82897 | 0.82897     | 0.895300222 |          |         |
| RNA5SP152  | ENSG00000202054 | -0.95026 | 0.82901  | 0.82901 | -0.95026    | 0.82901     | -0.95026 |         |
|            |                 | 0.82901  | -0.95026 | 0.82901 | 0.82901     | 0.895300222 |          |         |
| CSN3       | ENSG00000171209 | -0.95028 | 0.82902  | 0.82902 | -0.95028    | 0.82902     | -0.95028 | 0.82902 |
|            |                 | -0.95028 | 0.82902  | 0.82902 | 0.895300222 |             |          |         |
| NA         | ENSG00000270720 | -1.0881  | 0.86172  | 0.86172 | -1.0881     | 0.86172     | -1.0881  | 0.86172 |
|            |                 | -0.95031 | 0.82902  | 0.82902 | 0.895300222 |             |          |         |
| RPL21P103  | ENSG00000241423 | -1.1833  | 0.88166  | 0.88166 | -0.95035    | 0.82903     | -1.1833  |         |
|            |                 | 0.88166  | -1.1833  | 0.88166 | 0.82903     | 0.895300222 |          |         |
| NA         | ENSG00000241324 | -0.95083 | 0.82915  | 0.82915 | -0.95083    | 0.82915     | -1.087   | 0.86147 |
|            |                 | -0.95083 | 0.82915  | 0.82915 | 0.89540997  |             |          |         |
| MIR4263    | ENSG00000265321 | -0.95104 | 0.82921  | 0.82921 | -0.95104    | 0.82921     | -0.95104 |         |
|            |                 | 0.82921  | -0.95104 | 0.82921 | 0.82921     | 0.895454921 |          |         |
| NA         | ENSG00000256827 | -0.95116 | 0.82924  | 0.82924 | -1.774      | 0.96197     | -1.1582  | 0.87661 |
|            |                 | -1.1582  | 0.87661  | 0.82924 | 0.895467473 |             |          |         |
| NA         | ENSG00000280250 | -0.95127 | 0.82927  | 0.82927 | -0.95127    | 0.82927     | -0.95127 | 0.82927 |
|            |                 | -0.95127 | 0.82927  | 0.82927 | 0.895480025 |             |          |         |
| NA         | ENSG00000236226 | -0.95192 | 0.82943  | 0.82943 | -1.6172     | 0.94708     | -0.95192 | 0.82943 |
|            |                 | -1.0355  | 0.84978  | 0.82943 | 0.895632953 |             |          |         |
| BEND3P1    | ENSG00000231345 | -0.95209 | 0.82947  | 0.82947 | -1.4852     | 0.93125     | -2.5843  |         |
|            |                 | 0.99512  | -2.5843  | 0.99512 | 0.82947     | 0.895656299 |          |         |
| RAD54B     | ENSG00000197275 | -0.95217 | 0.82949  | 0.82949 | -2.2555     | 0.98795     | -2.3487  |         |
|            |                 | 0.99058  | -1.1518  | 0.8753  | 0.82949     | 0.895658048 |          |         |
| NA         | ENSG00000273870 | -1.2607  | 0.8963   | 0.8963  | -0.9526     | 0.8296      | -1.2607  | 0.8963  |
|            |                 | -1.2607  | 0.8963   | 0.8296  | 0.895737127 |             |          |         |
| MTND6P29   | ENSG00000283311 | -0.95258 | 0.8296   | 0.8296  | -0.95258    | 0.8296      | -0.95258 |         |
|            |                 | 0.8296   | -0.95258 | 0.8296  | 0.8296      | 0.895737127 |          |         |
| NA         | ENSG00000279226 | -0.95286 | 0.82967  | 0.82967 | -0.95286    | 0.82967     | -0.95286 | 0.82967 |
|            |                 | -0.95286 | 0.82967  | 0.82967 | 0.895792859 |             |          |         |
| SGK3       | ENSG00000104205 | -1.2085  | 0.88657  | 0.88657 | -1.2085     | 0.88657     | -1.2085  | 0.88657 |
|            |                 | -0.95302 | 0.82971  | 0.82971 | 0.895816198 |             |          |         |
| NA         | ENSG00000252682 | -0.95327 | 0.82977  | 0.82977 | -0.95327    | 0.82977     | -0.95327 | 0.82977 |



|           |                 |          |          |          |             |             |         |  |
|-----------|-----------------|----------|----------|----------|-------------|-------------|---------|--|
|           |                 | -0.95327 | 0.82977  | 0.82977  | 0.895852078 |             |         |  |
| NA        | ENSG00000254794 | -1.2589  | 0.89596  | -0.95328 | 0.82978     | -0.95328    | 0.82978 |  |
|           |                 | -0.95328 | 0.82978  | 0.82978  | 0.895852078 |             |         |  |
| NRBF2P5   | ENSG00000270427 | -0.95345 | 0.82982  | -0.95345 | 0.82982     | -0.95345    | 0.82982 |  |
|           |                 | 0.82982  | -0.95345 | 0.82982  | 0.895875415 |             |         |  |
| NA        | ENSG00000256674 | -0.95384 | 0.82992  | -0.95384 | 0.82992     | -0.95384    | 0.82992 |  |
|           |                 | -0.95384 | 0.82992  | 0.82992  | 0.895963525 |             |         |  |
| NA        | ENSG00000254540 | -0.95395 | 0.82994  | -0.95395 | 0.82994     | -0.95395    | 0.82994 |  |
|           |                 | -0.95395 | 0.82994  | 0.82994  | 0.895965267 |             |         |  |
| NA        | ENSG00000251093 | -0.95399 | 0.82996  | -0.95399 | 0.82996     | -0.95399    | 0.82996 |  |
|           |                 | -0.95399 | 0.82996  | 0.82996  | 0.895967009 |             |         |  |
| SNORD21   | ENSG00000206680 | -0.95407 | 0.82998  | -0.95407 | 0.82998     | -0.95407    | 0.82998 |  |
|           |                 | 0.82998  | -0.95407 | 0.82998  | 0.895968751 |             |         |  |
| NA        | ENSG00000254298 | -1.4339  | 0.9242   | -1.4339  | 0.9242      | -0.95428    | 0.83003 |  |
|           |                 | -0.98043 | 0.83656  | 0.83003  | 0.896002878 |             |         |  |
| ACSF2     | ENSG00000167107 | -0.95439 | 0.83006  | -0.95439 | 0.83006     | -2.2425     | 0.98754 |  |
|           |                 | -0.95439 | 0.83006  | 0.83006  | 0.896015413 |             |         |  |
| MTCO1P7   | ENSG00000236211 | -0.9545  | 0.83009  | -0.9545  | 0.83009     | -0.9545     |         |  |
|           |                 | 0.83009  | -0.9545  | 0.83009  | 0.896027948 |             |         |  |
| HMX1      | ENSG00000215612 | -1.0652  | 0.8566   | -1.1938  | 0.88371     | -1.5371     | 0.93787 |  |
|           |                 | -0.9546  | 0.83011  | 0.83011  | 0.896029689 |             |         |  |
| BMP3      | ENSG00000152785 | -1.1438  | 0.87364  | -1.4665  | 0.92874     | -0.9547     | 0.83014 |  |
|           |                 | -1.5859  | 0.94362  | 0.83014  | 0.896042223 |             |         |  |
| PRXL2A    | ENSG00000122378 | -1.1223  | 0.86913  | -1.7091  | 0.95628     | -1.1162     |         |  |
|           |                 | 0.86784  | -0.9549  | 0.83019  | 0.83019     | 0.896050568 |         |  |
| OR5AR1    | ENSG00000172459 | -0.95497 | 0.8302   | -0.95497 | 0.8302      | -0.95497    |         |  |
|           |                 | 0.8302   | -0.95497 | 0.8302   | 0.896050568 |             |         |  |
| NA        | ENSG00000267893 | -0.95508 | 0.83023  | -0.95508 | 0.83023     | -0.95508    | 0.83023 |  |
|           |                 | -0.95508 | 0.83023  | 0.83023  | 0.896050568 |             |         |  |
| OR2T4     | ENSG00000196944 | -0.95515 | 0.83025  | -1.5034  | 0.93363     | -0.95515    | 0.83025 |  |
|           |                 | -0.95515 | 0.83025  | 0.83025  | 0.896050568 |             |         |  |
| MTCO3P22  | ENSG00000270388 | -0.95514 | 0.83025  | -0.95514 | 0.83025     | -0.95514    |         |  |
|           |                 | 0.83025  | -0.95514 | 0.83025  | 0.896050568 |             |         |  |
| P2RX6P    | ENSG00000206145 | -0.95521 | 0.83026  | -1.3134  | 0.90548     | -0.95521    |         |  |
|           |                 | 0.83026  | -1.3134  | 0.90548  | 0.83026     | 0.896050568 |         |  |
| LINC02850 | ENSG00000236436 | -0.95526 | 0.83028  | -0.95526 | 0.83028     | -0.95526    |         |  |
|           |                 | 0.83028  | -0.99719 | 0.84066  | 0.83028     | 0.896050568 |         |  |
| NA        | ENSG00000271984 | -0.95537 | 0.8303   | -0.95537 | 0.8303      | -0.95537    | 0.8303  |  |
|           |                 | -0.95537 | 0.8303   | 0.8303   | 0.896050568 |             |         |  |
| BUD13P1   | ENSG00000270689 | -0.95544 | 0.83032  | -0.95544 | 0.83032     | -0.95544    |         |  |
|           |                 | 0.83032  | -0.95544 | 0.83032  | 0.896050568 |             |         |  |
| MTCYBP17  | ENSG00000249247 | -0.95549 | 0.83034  | -2.1142  | 0.98275     | -1.0246     |         |  |
|           |                 | 0.84722  | -1.0246  | 0.84722  | 0.83034     | 0.896050568 |         |  |
| NA        | ENSG00000207319 | -0.95554 | 0.83035  | -0.95554 | 0.83035     | -0.95554    | 0.83035 |  |
|           |                 | -0.95554 | 0.83035  | 0.83035  | 0.896050568 |             |         |  |
| NA        | ENSG00000238140 | -0.95565 | 0.83037  | -0.95565 | 0.83037     | -0.95565    | 0.83037 |  |
|           |                 | -0.95565 | 0.83037  | 0.83037  | 0.896052307 |             |         |  |
| NA        | ENSG00000223726 | -0.95578 | 0.83041  | -0.95578 | 0.83041     | -0.99143    | 0.83926 |  |
|           |                 | -0.95578 | 0.83041  | 0.83041  | 0.896075628 |             |         |  |
| NA        | ENSG00000240328 | -0.95588 | 0.83043  | -0.95588 | 0.83043     | -0.95588    | 0.83043 |  |
|           |                 | -0.95588 | 0.83043  | 0.83043  | 0.896077367 |             |         |  |
| LINC01260 | ENSG00000283440 | -0.95602 | 0.83047  | -0.95602 | 0.83047     | -0.95602    |         |  |
|           |                 | 0.83047  | -0.95602 | 0.83047  | 0.896100686 |             |         |  |
| RN7SL717P | ENSG00000240302 | -0.95624 | 0.83052  | -0.95624 | 0.83052     | -0.95624    |         |  |
|           |                 | 0.83052  | -0.95624 | 0.83052  | 0.896134795 |             |         |  |
| MIR519B   | ENSG00000207825 | -0.95634 | 0.83055  | -0.95634 | 0.83055     | -0.95634    |         |  |
|           |                 | 0.83055  | -0.95634 | 0.83055  | 0.896147322 |             |         |  |
| NA        | ENSG00000259782 | -0.95643 | 0.83057  | -0.95643 | 0.83057     | -0.95643    | 0.83057 |  |
|           |                 | -0.95643 | 0.83057  | 0.83057  | 0.896149059 |             |         |  |
| CNGA4     | ENSG00000132259 | -0.9565  | 0.83059  | -0.9565  | 0.83059     | -0.9565     | 0.83059 |  |
|           |                 | -0.9565  | 0.83059  | 0.83059  | 0.896150796 |             |         |  |
| CTDSPL2   | ENSG00000137770 | -0.99308 | 0.83966  | -0.95674 | 0.83065     | -1.165      |         |  |

|           |                 |          |         |             |             |         |          |
|-----------|-----------------|----------|---------|-------------|-------------|---------|----------|
|           | 0.87798         | -1.145   | 0.87391 | 0.83065     | 0.896175847 |         |          |
| LRR37BP1  | ENSG00000250462 | -0.95673 | 0.83065 | 0.83065     | -0.95673    | 0.83065 | -0.95673 |
|           | 0.83065         | -0.95673 | 0.83065 | 0.83065     | 0.896175847 |         |          |
| MIR1253   | ENSG00000221200 | -0.95685 | 0.83068 | 0.83068     | -0.95685    | 0.83068 | -0.95685 |
|           | 0.83068         | -0.95685 | 0.83068 | 0.83068     | 0.896188372 |         |          |
| LINC01169 | ENSG00000259471 | -1.5429  | 0.93857 | 0.93857     | -0.95692    | 0.8307  | -1.5429  |
|           | 0.93857         | -1.5429  | 0.93857 | 0.8307      | 0.896190108 |         |          |
| NA        | ENSG00000255174 | -0.95722 | 0.83077 | 0.83077     | -0.95722    | 0.83077 | -0.95722 |
|           | -0.95722        | 0.83077  | 0.83077 | 0.896245785 |             |         |          |
| MTRNR2L6  | ENSG00000270672 | -1.0106  | 0.8439  | 0.8439      | -1.4394     | 0.92498 | -1.7923  |
|           | 0.96346         | -0.95733 | 0.8308  | 0.8308      | 0.896258307 |         |          |
| MIR320B1  | ENSG00000211543 | -0.95785 | 0.83093 | 0.83093     | -0.95785    | 0.83093 | -0.95785 |
|           | 0.83093         | -0.95785 | 0.83093 | 0.83093     | 0.896378706 |         |          |
| WIZ       | ENSG00000011451 | -0.95945 | 0.83134 | 0.83134     | -0.95815    | 0.83101 | -0.95945 |
|           | -0.95945        | 0.83134  | 0.83101 | 0.896445162 |             |         |          |
| NA        | ENSG00000216902 | -0.95838 | 0.83106 | 0.83106     | -2.7513     | 0.99703 | -2.7513  |
|           | -2.7513         | 0.99703  | 0.83106 | 0.896479254 |             |         |          |
| NA        | ENSG00000261407 | -0.95862 | 0.83112 | 0.83112     | -0.95862    | 0.83112 | -0.95862 |
|           | -0.95862        | 0.83112  | 0.83112 | 0.896524131 |             |         |          |
| UCK1      | ENSG00000130717 | -0.95943 | 0.83133 | 0.83133     | -0.95943    | 0.83133 | -0.95943 |
|           | -0.95943        | 0.83133  | 0.83133 | 0.896717853 |             |         |          |
| PHBP18    | ENSG00000257885 | -0.95954 | 0.83136 | 0.83136     | -0.95954    | 0.83136 | -0.95954 |
|           | 0.83136         | -0.95954 | 0.83136 | 0.83136     | 0.896717853 |         |          |
| DHX35     | ENSG00000101452 | -0.95963 | 0.83138 | 0.83138     | -0.95963    | 0.83138 | -0.95963 |
|           | -0.95963        | 0.83138  | 0.83138 | 0.896717853 |             |         |          |
| RPS3AP43  | ENSG00000242661 | -1.2925  | 0.90191 | 0.90191     | -0.95973    | 0.8314  | -0.95973 |
|           | 0.8314          | -0.95973 | 0.8314  | 0.8314      | 0.896717853 |         |          |
| FOXN3-AS1 | ENSG00000258920 | -0.95969 | 0.8314  | 0.8314      | -0.95969    | 0.8314  | -0.95969 |
|           | 0.8314          | -0.95969 | 0.8314  | 0.8314      | 0.896717853 |         |          |
| MIR148A   | ENSG00000199085 | -0.95976 | 0.83141 | 0.83141     | -0.95976    | 0.83141 | -0.95976 |
|           | 0.83141         | -0.95976 | 0.83141 | 0.83141     | 0.896717853 |         |          |
| PAQR8     | ENSG00000170915 | -0.95994 | 0.83146 | 0.83146     | -2.4947     | 0.9937  | -2.5647  |
|           | -2.1104         | 0.98259  | 0.83146 | 0.896751932 |             |         |          |
| NA        | ENSG00000271631 | -0.96017 | 0.83152 | 0.83152     | -0.96017    | 0.83152 | -0.96017 |
|           | -0.96017        | 0.83152  | 0.83152 | 0.896796795 |             |         |          |
| MIR152    | ENSG00000207947 | -0.96029 | 0.83155 | 0.83155     | -0.96029    | 0.83155 | -0.96029 |
|           | 0.83155         | -0.96029 | 0.83155 | 0.83155     | 0.896809302 |         |          |
| NA        | ENSG00000255446 | -0.96078 | 0.83167 | 0.83167     | -0.96078    | 0.83167 | -0.96078 |
|           | -0.96078        | 0.83167  | 0.83167 | 0.896918869 |             |         |          |
| RPP38-DT  | ENSG00000176236 | -0.96113 | 0.83176 | 0.83176     | -0.96113    | 0.83176 | -0.96113 |
|           | 0.83176         | -0.96113 | 0.83176 | 0.83176     | 0.896967162 |         |          |
| OR8K3     | ENSG00000280314 | -1.0401  | 0.85085 | 0.85085     | -1.1711     | 0.87921 | -0.96113 |
|           | -0.96113        | 0.83176  | 0.83176 | 0.896967162 |             |         |          |
| NA        | ENSG00000238867 | -1.2067  | 0.88622 | 0.88622     | -0.96119    | 0.83177 | -1.1622  |
|           | -1.8454         | 0.96751  | 0.83177 | 0.896967162 |             |         |          |
| NA        | ENSG00000199201 | -1.4488  | 0.92631 | 0.92631     | -0.96133    | 0.83181 | -0.96133 |
|           | -0.96133        | 0.83181  | 0.83181 | 0.896981381 |             |         |          |
| H3P16     | ENSG00000178458 | -0.9614  | 0.83182 | 0.83182     | -0.9614     | 0.83182 | -0.9614  |
|           | -0.9614         | 0.83182  | 0.83182 | 0.896981381 |             |         |          |
| NME2P2    | ENSG00000224443 | -0.96145 | 0.83184 | 0.83184     | -0.96145    | 0.83184 | -0.96145 |
|           | 0.83184         | -0.96145 | 0.83184 | 0.83184     | 0.896983098 |         |          |
| HLA-E     | ENSG00000204592 | -1.0532  | 0.85387 | 0.85387     | -2.0838     | 0.98141 | -0.96172 |
|           | -1.0726         | 0.85828  | 0.83191 | 0.897029664 |             |         |          |
| MIR22HG   | ENSG00000186594 | -0.96178 | 0.83192 | 0.83192     | -0.96178    | 0.83192 | -0.96178 |
|           | 0.83192         | -0.96178 | 0.83192 | 0.83192     | 0.897029664 |         |          |
| KLHDC10   | ENSG00000128607 | -1.0654  | 0.85665 | 0.85665     | -1.5053     | 0.93388 | -0.96196 |
|           | 0.83197         | -1.1969  | 0.88432 | 0.83197     | 0.897059808 |         |          |
| NA        | ENSG00000231740 | -0.9622  | 0.83202 | 0.83202     | -1.0588     | 0.85514 | -0.9622  |
|           | -0.9622         | 0.83202  | 0.83202 | 0.897059808 |             |         |          |
| SEMG1     | ENSG00000124233 | -1.0667  | 0.85695 | 0.85695     | -0.96221    | 0.83203 | -1.332   |
|           | -0.96221        | 0.83203  | 0.83203 | 0.897059808 |             |         |          |
| NA        | ENSG00000236782 | -0.96221 | 0.83203 | 0.83203     | -0.96221    | 0.83203 | -0.96221 |

|            |                 |          |         |             |             |          |         |
|------------|-----------------|----------|---------|-------------|-------------|----------|---------|
|            | -0.96221        | 0.83203  | 0.83203 | 0.897059808 |             |          |         |
| OR52B5P    | ENSG00000231049 | -0.96225 | 0.83204 | -0.96225    | 0.83204     | -0.96225 | 0.83204 |
|            | 0.83204         | -0.96225 | 0.83204 | 0.83204     | 0.897059808 |          |         |
| HMG1P15    | ENSG00000250197 | -0.96232 | 0.83206 | -0.96232    | 0.83206     | -0.96232 | 0.83206 |
|            | 0.83206         | -0.96232 | 0.83206 | 0.83206     | 0.897061523 |          |         |
| KRT18P12   | ENSG00000215819 | -0.96253 | 0.83211 | -0.96253    | 0.83211     | -0.96253 | 0.83211 |
|            | 0.83211         | -1.7532  | 0.96022 | 0.83211     | 0.897075735 |          |         |
| MTND4LP10  | ENSG00000240084 | -0.96252 | 0.83211 | -0.96252    | 0.83211     | -0.96252 | 0.83211 |
|            | 0.83211         | -0.96252 | 0.83211 | 0.83211     | 0.897075735 |          |         |
| TDRKH-AS1  | ENSG00000203288 | -0.96271 | 0.83215 | -0.96271    | 0.83215     | -0.96271 | 0.83215 |
|            | 0.83215         | -0.96271 | 0.83215 | 0.83215     | 0.897099011 |          |         |
| NA         | ENSG00000278959 | -0.96285 | 0.83219 | -0.96285    | 0.83219     | -0.96285 | 0.83219 |
|            | -0.96285        | 0.83219  | 0.83219 | 0.897122286 |             |          |         |
| NA         | ENSG00000267776 | -0.96298 | 0.83222 | -0.96298    | 0.83222     | -0.96298 | 0.83222 |
|            | -0.96298        | 0.83222  | 0.83222 | 0.89713478  |             |          |         |
| OR7E5P     | ENSG00000214880 | -0.96307 | 0.83224 | -1.4439     | 0.92562     | -1.2977  |         |
|            | 0.9028          | -1.576   | 0.94249 | 0.83224     | 0.897136494 |          |         |
| IDI2       | ENSG00000148377 | -0.96335 | 0.83231 | -0.96335    | 0.83231     | -0.96335 | 0.83231 |
|            | -0.96335        | 0.83231  | 0.83231 | 0.897155339 |             |          |         |
| OR2AK2     | ENSG00000187080 | -1.8512  | 0.96793 | -0.96339    | 0.83232     | -1.5816  |         |
|            | 0.94313         | -1.502   | 0.93345 | 0.83232     | 0.897155339 |          |         |
| NA         | ENSG00000282381 | -1.222   | 0.88914 | -0.9634     | 0.83233     | -1.222   | 0.88914 |
|            | -1.222          | 0.88914  | 0.83233 | 0.897155339 |             |          |         |
| NA         | ENSG00000254662 | -0.96358 | 0.83237 | -0.96358    | 0.83237     | -0.96358 | 0.83237 |
|            | -0.96358        | 0.83237  | 0.83237 | 0.897155339 |             |          |         |
| ZPBP2      | ENSG00000186075 | -0.96361 | 0.83238 | -0.96361    | 0.83238     | -0.96361 | 0.83238 |
|            | -0.96361        | 0.83238  | 0.83238 | 0.897155339 |             |          |         |
| MMP21      | ENSG00000154485 | -0.96368 | 0.8324  | -0.96368    | 0.8324      | -0.96368 | 0.8324  |
|            | -0.96368        | 0.8324   | 0.8324  | 0.897155339 |             |          |         |
| LRRC17     | ENSG00000128606 | -1.1626  | 0.87749 | -2.1939     | 0.98588     | -0.9638  |         |
|            | 0.83243         | -1.0509  | 0.85335 | 0.83243     | 0.897155339 |          |         |
| RNU1-54P   | ENSG00000252990 | -0.96391 | 0.83245 | -0.96391    | 0.83245     | -0.96391 |         |
|            | 0.83245         | -0.96391 | 0.83245 | 0.83245     | 0.897155339 |          |         |
| OR4A12P    | ENSG00000254723 | -1.2908  | 0.90162 | -1.2574     | 0.8957      | -1.0747  |         |
|            | 0.85875         | -0.9639  | 0.83245 | 0.83245     | 0.897155339 |          |         |
| MYCT1      | ENSG00000120279 | -1.8269  | 0.96614 | -0.96393    | 0.83246     | -0.96393 | 0.83246 |
|            | -0.96393        | 0.83246  | 0.83246 | 0.897155339 |             |          |         |
| NA         | ENSG00000283371 | -0.96394 | 0.83246 | -0.96394    | 0.83246     | -0.96394 | 0.83246 |
|            | -0.96394        | 0.83246  | 0.83246 | 0.897155339 |             |          |         |
| NA         | ENSG00000223414 | -2.0676  | 0.98066 | -1.7702     | 0.96166     | -0.96418 | 0.83252 |
|            | -1.1245         | 0.86959  | 0.83252 | 0.89718203  |             |          |         |
| NA         | ENSG00000277496 | -1.0661  | 0.85681 | -0.96422    | 0.83253     | -1.0661  | 0.85681 |
|            | -1.0661         | 0.85681  | 0.83253 | 0.89718203  |             |          |         |
| HMGB1P41   | ENSG00000253516 | -0.96426 | 0.83254 | -0.96426    | 0.83254     | -0.96426 |         |
|            | 0.83254         | -0.96426 | 0.83254 | 0.83254     | 0.89718203  |          |         |
| HNRNPA1P30 | ENSG00000233780 | -1.905   | 0.97161 | -0.96452    | 0.83261     | -1.9419  |         |
|            | 0.97392         | -2.2876  | 0.98892 | 0.83261     | 0.897217782 |          |         |
| LINC00032  | ENSG00000283945 | -1.7197  | 0.95725 | -1.9388     | 0.97374     | -1.5426  |         |
|            | 0.93854         | -0.96455 | 0.83261 | 0.83261     | 0.897217782 |          |         |
| ABHD17AP3  | ENSG00000250536 | -1.4277  | 0.92331 | -1.5801     | 0.94296     | -0.96482 |         |
|            | 0.83268         | -0.96482 | 0.83268 | 0.83268     | 0.897224626 |          |         |
| MIR4661    | ENSG00000266194 | -0.9648  | 0.83268 | -0.9648     | 0.83268     | -0.9648  |         |
|            | 0.83268         | -0.9648  | 0.83268 | 0.83268     | 0.897224626 |          |         |
| NA         | ENSG00000274395 | -0.96481 | 0.83268 | -0.96481    | 0.83268     | -0.96481 | 0.83268 |
|            | -0.96481        | 0.83268  | 0.83268 | 0.897224626 |             |          |         |
| NA         | ENSG00000249319 | -0.96486 | 0.83269 | -0.96486    | 0.83269     | -0.96486 | 0.83269 |
|            | -0.96486        | 0.83269  | 0.83269 | 0.897224626 |             |          |         |
| NA         | ENSG00000270354 | -0.96507 | 0.83275 | -0.96507    | 0.83275     | -0.96507 | 0.83275 |
|            | -0.96507        | 0.83275  | 0.83275 | 0.897262081 |             |          |         |
| LRRC37A13P | ENSG00000257101 | -0.96519 | 0.83278 | -0.96519    | 0.83278     | -0.96519 |         |
|            | 0.83278         | -0.96519 | 0.83278 | 0.83278     | 0.897262081 |          |         |
| EBLN3P     | ENSG00000281649 | -1.2085  | 0.88656 | -0.96523    | 0.83278     | -1.0294  |         |

|           |                 |          |             |         |             |             |                  |
|-----------|-----------------|----------|-------------|---------|-------------|-------------|------------------|
|           | 0.84835         | -1.5199  | 0.93573     | 0.83278 | 0.897262081 |             |                  |
| NA        | ENSG00000261270 | -0.96538 | 0.83282     | 0.83282 | -0.96538    | 0.83282     | -0.96538 0.83282 |
|           |                 | -0.96538 | 0.83282     | 0.83282 | 0.897285339 |             |                  |
| RNU6-365P | ENSG00000252922 | -1.1642  | 0.83284     | 0.87783 | -0.96546    | 0.83284     | -1.3735          |
|           |                 | 0.9152   | -0.96546    | 0.83284 | 0.83284     | 0.897287048 |                  |
| NA        | ENSG00000216687 | -1.0394  | 0.85068     | 0.85068 | -0.96558    | 0.83287     | -1.0653 0.85663  |
|           |                 | -0.98888 | 0.83864     | 0.83287 | 0.897290467 |             |                  |
| RNU6-482P | ENSG00000212370 | -0.96562 | 0.83288     | 0.83288 | -0.96562    | 0.83288     | -0.96562         |
|           |                 | 0.83288  | -0.96562    | 0.83288 | 0.83288     | 0.897290467 |                  |
| RNU7-12P  | ENSG00000251839 | -0.96579 | 0.83293     | 0.83293 | -0.96579    | 0.83293     | -0.96579         |
|           |                 | 0.83293  | -0.96579    | 0.83293 | 0.83293     | 0.897324495 |                  |
| SNORD1B   | ENSG00000199961 | -0.96595 | 0.83297     | 0.83297 | -0.96595    | 0.83297     | -0.96595         |
|           |                 | 0.83297  | -0.96595    | 0.83297 | 0.83297     | 0.897338685 |                  |
| NA        | ENSG00000265678 | -0.96602 | 0.83298     | 0.83298 | -0.96602    | 0.83298     | -0.96602 0.83298 |
|           |                 | -0.96602 | 0.83298     | 0.83298 | 0.897338685 |             |                  |
| NA        | ENSG00000199857 | -0.96609 | 0.833       | 0.833   | -0.96609    | 0.833       | -0.96609 0.833   |
|           |                 | 0.833    | 0.897340393 |         |             |             |                  |
| NA        | ENSG00000200063 | -0.96633 | 0.83306     | 0.83306 | -0.96633    | 0.83306     | -0.96633 0.83306 |
|           |                 | -0.96633 | 0.83306     | 0.83306 | 0.897356288 |             |                  |
| CARD18    | ENSG00000255501 | -1.3113  | 0.90513     | 0.90513 | -1.3113     | 0.90513     | -1.0727          |
|           |                 | 0.85829  | -0.96633    | 0.83306 | 0.83306     | 0.897356288 |                  |
| NA        | ENSG00000261684 | -0.96635 | 0.83307     | 0.83307 | -0.96635    | 0.83307     | -0.96635 0.83307 |
|           |                 | -0.96635 | 0.83307     | 0.83307 | 0.897356288 |             |                  |
| SLC32A1   | ENSG00000101438 | -0.99631 | 0.84045     | 0.84045 | -1.9868     | 0.97653     | -0.9665          |
|           |                 | 0.8331   | -1.04       | 0.85082 | 0.8331      | 0.897368767 |                  |
| RNU1-123P | ENSG00000239194 | -0.96667 | 0.83315     | 0.83315 | -0.96667    | 0.83315     | -0.96667         |
|           |                 | 0.83315  | -0.96667    | 0.83315 | 0.83315     | 0.897402787 |                  |
| NA        | ENSG00000255022 | -0.96682 | 0.83318     | 0.83318 | -0.96682    | 0.83318     | -0.96682 0.83318 |
|           |                 | -0.96682 | 0.83318     | 0.83318 | 0.897415265 |             |                  |
| NA        | ENSG00000273171 | -0.96714 | 0.83326     | 0.83326 | -0.96714    | 0.83326     | -0.96714 0.83326 |
|           |                 | -0.96714 | 0.83326     | 0.83326 | 0.897481595 |             |                  |
| CASP8     | ENSG00000064012 | -1.5661  | 0.94133     | 0.94133 | -0.96734    | 0.83331     | -1.1321 0.87121  |
|           |                 | -1.4207  | 0.9223      | 0.83331 | 0.897486708 |             |                  |
| NA        | ENSG00000227782 | -0.96732 | 0.83331     | 0.83331 | -0.96732    | 0.83331     | -0.96732 0.83331 |
|           |                 | -0.96732 | 0.83331     | 0.83331 | 0.897486708 |             |                  |
| NA        | ENSG00000252582 | -0.96736 | 0.83332     | 0.83332 | -1.3631     | 0.91357     | -0.96736 0.83332 |
|           |                 | -0.96736 | 0.83332     | 0.83332 | 0.897486708 |             |                  |
| GPR78     | ENSG00000155269 | -0.96762 | 0.83338     | 0.83338 | -1.5284     | 0.93679     | -1.097 0.86368   |
|           |                 | -0.98326 | 0.83726     | 0.83338 | 0.897531492 |             |                  |
| CT70      | ENSG00000230013 | -1.2372  | 0.89199     | 0.89199 | -1.2372     | 0.89199     | -1.2372 0.89199  |
|           |                 | -0.9677  | 0.8334      | 0.8334  | 0.897533195 |             |                  |
| HLA-DQB1  | ENSG00000179344 | -1.3597  | 0.91304     | 0.91304 | -1.3597     | 0.91304     | -1.0355          |
|           |                 | 0.84979  | -0.96781    | 0.83343 | 0.83343     | 0.897545667 |                  |
| RNA5SP91  | ENSG00000212204 | -0.96807 | 0.8335      | 0.8335  | -1.4134     | 0.92123     | -0.96807         |
|           |                 | 0.8335   | -0.96807    | 0.8335  | 0.8335      | 0.897601215 |                  |
| LINC01503 | ENSG00000233901 | -1.369   | 0.9145      | 0.9145  | -1.037      | 0.85012     | -1.8045          |
|           |                 | 0.96442  | -0.96816    | 0.83352 | 0.83352     | 0.897602917 |                  |
| FNIP2     | ENSG00000052795 | -1.8879  | 0.97048     | 0.97048 | -1.8494     | 0.9678      | -1.8237 0.9659   |
|           |                 | -0.96848 | 0.8336      | 0.8336  | 0.897649393 |             |                  |
| NA        | ENSG00000233411 | -0.9685  | 0.8336      | 0.8336  | -0.9685     | 0.8336      | -0.9685 0.8336   |
|           |                 | -1.1399  | 0.87284     | 0.8336  | 0.897649393 |             |                  |
| NA        | ENSG00000258280 | -0.96893 | 0.83371     | 0.83371 | -0.96893    | 0.83371     | -0.96893 0.83371 |
|           |                 | -0.96893 | 0.83371     | 0.83371 | 0.897748007 |             |                  |
| CHTOP     | ENSG00000160679 | -0.96922 | 0.83378     | 0.83378 | -0.96922    | 0.83378     | -0.96922 0.83378 |
|           |                 | -0.96922 | 0.83378     | 0.83378 | 0.897786517 |             |                  |
| IZUMO3    | ENSG00000205442 | -0.96931 | 0.8338      | 0.8338  | -0.96931    | 0.8338      | -0.96931         |
|           |                 | 0.8338   | -0.96931    | 0.8338  | 0.8338      | 0.897786517 |                  |
| NA        | ENSG00000249604 | -0.96939 | 0.83382     | 0.83382 | -0.96939    | 0.83382     | -0.96939 0.83382 |
|           |                 | -0.96939 | 0.83382     | 0.83382 | 0.897786517 |             |                  |
| LINC00866 | ENSG00000227356 | -0.96959 | 0.83387     | 0.83387 | -0.96959    | 0.83387     | -0.96959         |
|           |                 | 0.83387  | -0.96959    | 0.83387 | 0.83387     | 0.897786517 |                  |
| NA        | ENSG00000200390 | -0.96961 | 0.83388     | 0.83388 | -0.96961    | 0.83388     | -0.96961 0.83388 |

|              |                 |          |          |          |             |             |          |  |
|--------------|-----------------|----------|----------|----------|-------------|-------------|----------|--|
|              |                 | -0.96961 | 0.83388  | 0.83388  | 0.897786517 |             |          |  |
| NA           | ENSG00000243038 | -1.0768  | 0.85923  | -1.1374  | 0.87231     | -1.264      | 0.89689  |  |
|              |                 | -0.96967 | 0.83389  | 0.83389  | 0.897786517 |             |          |  |
| PSTK         | ENSG00000179988 | -0.9697  | 0.8339   | -0.9697  | 0.8339      | -0.9697     | 0.8339   |  |
|              |                 | -0.9697  | 0.8339   | 0.8339   | 0.897786517 |             |          |  |
| SLCO4A1-AS1  | ENSG00000232803 | -0.96976 | 0.83392  | -0.96976 | 0.83392     | 0.83392     | -0.96976 |  |
|              |                 | 0.83392  | -0.96976 | 0.83392  | 0.83392     | 0.897786517 |          |  |
| RN7SL812P    | ENSG00000242876 | -0.96982 | 0.83393  | -0.96982 | 0.83393     | -0.96982    | 0.83393  |  |
|              |                 | 0.83393  | -0.96982 | 0.83393  | 0.83393     | 0.897786517 |          |  |
| NA           | ENSG00000261198 | -0.96981 | 0.83393  | -0.96981 | 0.83393     | -0.96981    | 0.83393  |  |
|              |                 | -0.96981 | 0.83393  | 0.83393  | 0.897786517 |             |          |  |
| RNU4-79P     | ENSG00000199634 | -0.96988 | 0.83395  | -0.96988 | 0.83395     | -0.96988    | 0.83395  |  |
|              |                 | 0.83395  | -0.96988 | 0.83395  | 0.83395     | 0.897788214 |          |  |
| CD48         | ENSG00000117091 | -1.6343  | 0.94891  | -0.97016 | 0.83402     | -1.6343     | 0.94891  |  |
|              |                 | -1.6343  | 0.94891  | 0.83402  | 0.897843737 |             |          |  |
| SYCP3        | ENSG00000139351 | -0.97043 | 0.83408  | -0.97043 | 0.83408     | -0.97043    | 0.83408  |  |
|              |                 | -0.97043 | 0.83408  | 0.83408  | 0.897888493 |             |          |  |
| NA           | ENSG00000267039 | -1.1064  | 0.86572  | -0.97064 | 0.83414     | -1.3416     | 0.91014  |  |
|              |                 | -1.3416  | 0.91014  | 0.83414  | 0.897933246 |             |          |  |
| NA           | ENSG00000227704 | -1.0513  | 0.85343  | -1.6517  | 0.9507      | -1.633      | 0.94877  |  |
|              |                 | -0.97098 | 0.83422  | 0.83422  | 0.897981383 |             |          |  |
| NA           | ENSG00000270661 | -0.971   | 0.83423  | -0.971   | 0.83423     | -0.971      | 0.83423  |  |
|              |                 | -0.971   | 0.83423  | 0.83423  | 0.897981383 |             |          |  |
| ZNF90P1      | ENSG00000241738 | -0.97106 | 0.83424  | -0.97106 | 0.83424     | -0.97106    | 0.83424  |  |
|              |                 | 0.83424  | -0.97106 | 0.83424  | 0.83424     | 0.897981383 |          |  |
| IGHV2-26     | ENSG00000211951 | -1.1745  | 0.87991  | -1.1745  | 0.87991     | -1.1745     | 0.87991  |  |
|              |                 | 0.87991  | -0.97129 | 0.8343   | 0.8343      | 0.898023824 |          |  |
| NA           | ENSG00000249847 | -0.97139 | 0.83432  | -0.97139 | 0.83432     | -0.97139    | 0.83432  |  |
|              |                 | -0.97139 | 0.83432  | 0.83432  | 0.898023824 |             |          |  |
| NA           | ENSG00000196656 | -0.97157 | 0.83437  | -0.97157 | 0.83437     | -0.97157    | 0.83437  |  |
|              |                 | -0.97157 | 0.83437  | 0.83437  | 0.898023824 |             |          |  |
| TTL10-AS1    | ENSG00000205231 | -1.3064  | 0.90429  | -0.97159 | 0.83437     | -1.3064     | 0.83437  |  |
|              |                 | 0.90429  | -1.3064  | 0.90429  | 0.83437     | 0.898023824 |          |  |
| NA           | ENSG00000206645 | -0.97167 | 0.83439  | -0.97167 | 0.83439     | -0.97167    | 0.83439  |  |
|              |                 | -0.97167 | 0.83439  | 0.83439  | 0.898023824 |             |          |  |
| NA           | ENSG00000260608 | -0.97167 | 0.83439  | -0.97167 | 0.83439     | -0.97167    | 0.83439  |  |
|              |                 | -0.97167 | 0.83439  | 0.83439  | 0.898023824 |             |          |  |
| NA           | ENSG00000274397 | -0.97194 | 0.83446  | -0.97194 | 0.83446     | -0.97194    | 0.83446  |  |
|              |                 | -0.97194 | 0.83446  | 0.83446  | 0.898079328 |             |          |  |
| CYMP         | ENSG00000240194 | -1.1059  | 0.86562  | -1.1059  | 0.86562     | -1.1059     | 0.86562  |  |
|              |                 | -0.97229 | 0.83455  | 0.83455  | 0.898112677 |             |          |  |
| OR4A7P       | ENSG00000255349 | -0.9723  | 0.83455  | -1.6347  | 0.94894     | -1.1457     | 0.83455  |  |
|              |                 | 0.87404  | -1.6378  | 0.94927  | 0.83455     | 0.898112677 |          |  |
| THA1P        | ENSG00000267676 | -0.97239 | 0.83457  | -0.99572 | 0.84031     | -0.97239    | 0.83457  |  |
|              |                 | -1.6212  | 0.94751  | 0.83457  | 0.898112677 |             |          |  |
| NA           | ENSG00000252580 | -0.97251 | 0.8346   | -0.97251 | 0.8346      | -0.97251    | 0.8346   |  |
|              |                 | -1.74    | 0.95907  | 0.8346   | 0.898112677 |             |          |  |
| CD1A         | ENSG00000158477 | -1.3006  | 0.9033   | -0.97254 | 0.83461     | -1.7003     | 0.95546  |  |
|              |                 | -1.3006  | 0.9033   | 0.83461  | 0.898112677 |             |          |  |
| ZNF677       | ENSG00000197928 | -0.97259 | 0.83462  | -1.5103  | 0.93451     | -0.97259    | 0.83462  |  |
|              |                 | 0.83462  | -0.97259 | 0.83462  | 0.83462     | 0.898112677 |          |  |
| NA           | ENSG00000263893 | -0.9726  | 0.83462  | -0.9726  | 0.83462     | -0.9726     | 0.83462  |  |
|              |                 | -0.9726  | 0.83462  | 0.83462  | 0.898112677 |             |          |  |
| KMT2C        | ENSG00000055609 | -1.1384  | 0.87252  | -1.3751  | 0.91544     | -1.022      | 0.84662  |  |
|              |                 | -0.97268 | 0.83464  | 0.83464  | 0.898114366 |             |          |  |
| NA           | ENSG00000217041 | -1.7272  | 0.95793  | -1.4828  | 0.93094     | -0.97279    | 0.83467  |  |
|              |                 | -1.3461  | 0.91086  | 0.83467  | 0.898126816 |             |          |  |
| SMIM14       | ENSG00000163683 | -1.2439  | 0.89323  | -0.97294 | 0.83471     | -1.5457     | 0.83471  |  |
|              |                 | 0.93891  | -1.5281  | 0.93676  | 0.83471     | 0.898142641 |          |  |
| NAALADL2-AS1 | ENSG00000225552 | -0.97301 | 0.83473  | -0.97301 | 0.83473     | -0.97301    | 0.83473  |  |
|              |                 | 0.83473  | -0.97301 | 0.83473  | 0.83473     | 0.898142641 |          |  |
| NA           | ENSG00000235996 | -0.97306 | 0.83474  | -0.97306 | 0.83474     | -0.97306    | 0.83474  |  |

|          |                 |          |         |             |             |          |         |
|----------|-----------------|----------|---------|-------------|-------------|----------|---------|
|          | -0.97306        | 0.83474  | 0.83474 | 0.898142641 |             |          |         |
| NA       | ENSG00000254432 | -0.9732  | 0.83477 | -0.9732     | 0.83477     | -0.9732  | 0.83477 |
|          | -0.9732         | 0.83477  | 0.83477 | 0.898147705 |             |          |         |
| ATF4P4   | ENSG00000256167 | -0.97328 | 0.83479 | -0.97328    | 0.83479     | -0.97328 | 0.83479 |
|          | 0.83479         | -0.97328 | 0.83479 | 0.83479     | 0.898147705 |          |         |
| ZNF80    | ENSG00000174255 | -0.97329 | 0.8348  | -0.97329    | 0.8348      | -0.97329 | 0.8348  |
|          | -0.97329        | 0.8348   | 0.8348  | 0.898147705 |             |          |         |
| NA       | ENSG00000201178 | -0.9734  | 0.83482 | -0.9734     | 0.83482     | -0.9734  | 0.83482 |
|          | -0.9734         | 0.83482  | 0.83482 | 0.898149393 |             |          |         |
| NA       | ENSG00000264046 | -0.97354 | 0.83486 | -0.97354    | 0.83486     | -0.97354 | 0.83486 |
|          | -0.97354        | 0.83486  | 0.83486 | 0.898172597 |             |          |         |
| NA       | ENSG00000221590 | -0.97363 | 0.83488 | -0.97363    | 0.83488     | -0.97363 | 0.83488 |
|          | -0.97363        | 0.83488  | 0.83488 | 0.898174285 |             |          |         |
| NA       | ENSG00000237685 | -1.7514  | 0.96006 | -0.97399    | 0.83497     | -1.514   | 0.93499 |
|          | -1.514          | 0.93499  | 0.83497 | 0.898251277 |             |          |         |
| NA       | ENSG00000228596 | -1.0559  | 0.8545  | -0.97429    | 0.83504     | -1.3495  | 0.91142 |
|          | -2.2511         | 0.98781  | 0.83504 | 0.898306751 |             |          |         |
| NA       | ENSG00000234900 | -1.271   | 0.89813 | -0.97452    | 0.8351      | -1.271   | 0.89813 |
|          | -1.271          | 0.89813  | 0.8351  | 0.898342391 |             |          |         |
| RPL26P9  | ENSG00000226128 | -0.97455 | 0.83511 | -0.97455    | 0.83511     | -0.97455 | 0.83511 |
|          | 0.83511         | -0.97455 | 0.83511 | 0.83511     | 0.898342391 |          |         |
| TRIT1    | ENSG00000043514 | -1.4931  | 0.93229 | -2.3753     | 0.99123     | -2.0172  | 0.97816 |
|          | -0.97465        | 0.83513  | 0.83513 | 0.898344074 |             |          |         |
| NA       | ENSG00000275401 | -0.97471 | 0.83515 | -0.97471    | 0.83515     | -0.97471 | 0.83515 |
|          | -0.97471        | 0.83515  | 0.83515 | 0.898345757 |             |          |         |
| NA       | ENSG00000253165 | -1.4909  | 0.93201 | -1.4909     | 0.93201     | -1.4909  | 0.93201 |
|          | -0.97492        | 0.8352   | 0.8352  | 0.89835988  |             |          |         |
| NA       | ENSG00000268836 | -0.97491 | 0.8352  | -0.97491    | 0.8352      | -0.97491 | 0.8352  |
|          | -0.97491        | 0.8352   | 0.8352  | 0.89835988  |             |          |         |
| NRADDP   | ENSG00000236409 | -0.97498 | 0.83522 | -0.97498    | 0.83522     | -0.97498 | 0.83522 |
|          | 0.83522         | -0.97498 | 0.83522 | 0.83522     | 0.898361563 |          |         |
| OR4A2P   | ENSG00000227547 | -0.97508 | 0.83524 | -1.228      | 0.89028     | -1.2272  | 0.83524 |
|          | 0.89012         | -1.1925  | 0.88347 | 0.83524     | 0.898362586 |          |         |
| TMEM26   | ENSG00000196932 | -0.97522 | 0.83527 | -0.97522    | 0.83527     | -0.97522 | 0.83527 |
|          | 0.83527         | -1.489   | 0.93175 | 0.83527     | 0.898362586 |          |         |
| NA       | ENSG00000234297 | -0.97525 | 0.83528 | -0.97525    | 0.83528     | -0.97525 | 0.83528 |
|          | -0.97525        | 0.83528  | 0.83528 | 0.898362586 |             |          |         |
| NA       | ENSG00000270292 | -0.97539 | 0.83532 | -0.97539    | 0.83532     | -0.97539 | 0.83532 |
|          | -0.97539        | 0.83532  | 0.83532 | 0.898362586 |             |          |         |
| NA       | ENSG00000243813 | -1.0436  | 0.85167 | -0.97544    | 0.83533     | -1.0436  | 0.85167 |
|          | -1.0436         | 0.85167  | 0.83533 | 0.898362586 |             |          |         |
| NAB1     | ENSG00000138386 | -1.1721  | 0.87941 | -1.2183     | 0.88844     | -1.4821  | 0.93085 |
|          | -0.97548        | 0.83534  | 0.83534 | 0.898362586 |             |          |         |
| GAPDHP52 | ENSG00000235076 | -0.97551 | 0.83535 | -1.3219     | 0.9069      | -1.1698  | 0.83535 |
|          | 0.87897         | -1.1698  | 0.87897 | 0.83535     | 0.898362586 |          |         |
| NA       | ENSG00000254291 | -0.97567 | 0.83539 | -0.97567    | 0.83539     | -0.97567 | 0.83539 |
|          | -0.97567        | 0.83539  | 0.83539 | 0.898369315 |             |          |         |
| NA       | ENSG00000234775 | -0.97575 | 0.83541 | -0.97575    | 0.83541     | -0.97575 | 0.83541 |
|          | -0.97575        | 0.83541  | 0.83541 | 0.898369315 |             |          |         |
| EIF4E    | ENSG00000151247 | -1.0213  | 0.84644 | -0.97584    | 0.83543     | -2.0258  | 0.97861 |
|          | -0.99614        | 0.84041  | 0.83543 | 0.898369315 |             |          |         |
| NA       | ENSG00000271184 | -0.99227 | 0.83947 | -0.97586    | 0.83543     | -0.99227 | 0.83947 |
|          | -0.99227        | 0.83947  | 0.83543 | 0.898369315 |             |          |         |
| NA       | ENSG00000253397 | -0.97617 | 0.83551 | -0.97617    | 0.83551     | -0.97617 | 0.83551 |
|          | -0.97617        | 0.83551  | 0.83551 | 0.898426444 |             |          |         |
| HMG2P36  | ENSG00000228901 | -0.97621 | 0.83552 | -1.3627     | 0.91352     | -1.3627  | 0.83552 |
|          | 0.91352         | -1.3627  | 0.91352 | 0.83552     | 0.898426444 |          |         |
| NA       | ENSG00000258690 | -0.97628 | 0.83554 | -1.1361     | 0.87205     | -1.1361  | 0.87205 |
|          | -1.1361         | 0.87205  | 0.83554 | 0.898428125 |             |          |         |
| NA       | ENSG00000226155 | -0.97636 | 0.83556 | -0.97636    | 0.83556     | -0.97636 | 0.83556 |
|          | -0.97636        | 0.83556  | 0.83556 | 0.898429806 |             |          |         |
| UBTFL9   | ENSG00000254567 | -1.6143  | 0.94676 | -0.97656    | 0.83561     | -1.7876  | 0.83561 |

|              |                 |          |         |             |             |          |         |
|--------------|-----------------|----------|---------|-------------|-------------|----------|---------|
|              | 0.96308         | -1.1269  | 0.8701  | 0.83561     | 0.898463743 |          |         |
| NA           | ENSG00000223635 | -1.1063  | 0.8657  | -2.6589     | 0.99608     | -0.97687 | 0.83568 |
|              | -0.97687        | 0.83568  | 0.83568 | 0.898519183 |             |          |         |
| NA           | ENSG00000274367 | -0.97708 | 0.83573 | -0.97708    | 0.83573     | -0.97708 | 0.83573 |
|              | -0.97708        | 0.83573  | 0.83573 | 0.898536648 |             |          |         |
| NA           | ENSG00000237759 | -0.97717 | 0.83576 | -0.97717    | 0.83576     | -0.97717 | 0.83576 |
|              | -0.97717        | 0.83576  | 0.83576 | 0.898536648 |             |          |         |
| NA           | ENSG00000251085 | -0.97719 | 0.83576 | -0.97719    | 0.83576     | -0.97719 | 0.83576 |
|              | -0.97719        | 0.83576  | 0.83576 | 0.898536648 |             |          |         |
| NA           | ENSG00000207401 | -0.97721 | 0.83577 | -0.97721    | 0.83577     | -0.97721 | 0.83577 |
|              | -0.97721        | 0.83577  | 0.83577 | 0.898536648 |             |          |         |
| CRLF3        | ENSG00000176390 | -0.97743 | 0.83582 | -0.98669    | 0.8381      | -1.0931  | 0.86283 |
|              | -1.0369         | 0.85012  | 0.83582 | 0.898550755 |             |          |         |
| MTCYBP8      | ENSG00000233550 | -1.1487  | 0.87467 | -1.1487     | 0.87467     | -0.9774  |         |
|              | 0.83582         | -1.1487  | 0.87467 | 0.83582     | 0.898550755 |          |         |
| NA           | ENSG00000259499 | -1.4234  | 0.92269 | -1.4234     | 0.92269     | -1.4234  | 0.92269 |
|              | -0.97786        | 0.83593  | 0.83593 | 0.898649185 |             |          |         |
| CCND2        | ENSG00000118971 | -0.97803 | 0.83597 | -1.1151     | 0.86759     | -1.1136  | 0.86728 |
|              | -1.359          | 0.91293  | 0.83597 | 0.898663286 |             |          |         |
| NA           | ENSG00000251799 | -0.97806 | 0.83598 | -0.97806    | 0.83598     | -0.97806 | 0.83598 |
|              | -0.97806        | 0.83598  | 0.83598 | 0.898663286 |             |          |         |
| NA           | ENSG00000213791 | -0.9784  | 0.83606 | -0.9784     | 0.83606     | -0.9784  | 0.83606 |
|              | -0.9784         | 0.83606  | 0.83606 | 0.898716329 |             |          |         |
| PRADC1P1     | ENSG00000236165 | -0.97855 | 0.8361  | -0.97855    | 0.8361      | -0.97855 |         |
|              | 0.8361          | -0.97855 | 0.8361  | 0.8361      | 0.898716329 |          |         |
| NA           | ENSG00000272334 | -0.97855 | 0.8361  | -0.97855    | 0.8361      | -0.97855 | 0.8361  |
|              | -0.97855        | 0.8361   | 0.8361  | 0.898716329 |             |          |         |
| ZNF445       | ENSG00000185219 | -1.0624  | 0.85598 | -1.112      | 0.86692     | -1.246   |         |
|              | 0.89363         | -0.97863 | 0.83612 | 0.83612     | 0.898716329 |          |         |
| MIR5582      | ENSG00000263540 | -0.97869 | 0.83613 | -0.97869    | 0.83613     | -0.97869 |         |
|              | 0.83613         | -0.97869 | 0.83613 | 0.83613     | 0.898716329 |          |         |
| NA           | ENSG00000275965 | -0.97874 | 0.83614 | -0.97874    | 0.83614     | -0.97874 | 0.83614 |
|              | -0.97874        | 0.83614  | 0.83614 | 0.898716329 |             |          |         |
| COX11P1      | ENSG00000231162 | -0.97913 | 0.83624 | -0.97913    | 0.83624     | -0.97913 |         |
|              | 0.83624         | -0.97913 | 0.83624 | 0.83624     | 0.898784164 |          |         |
| TRAF3IP2-AS1 | ENSG00000231889 | -0.97911 | 0.83624 | -0.99142    | 0.83926     | -0.97911 |         |
|              | 0.83624         | -0.97911 | 0.83624 | 0.83624     | 0.898784164 |          |         |
| NA           | ENSG00000275400 | -0.97936 | 0.8363  | -0.97936    | 0.8363      | -0.97936 | 0.8363  |
|              | -0.97936        | 0.8363   | 0.8363  | 0.898828827 |             |          |         |
| NA           | ENSG00000261822 | -0.97952 | 0.83634 | -0.97952    | 0.83634     | -0.97952 | 0.83634 |
|              | -0.97952        | 0.83634  | 0.83634 | 0.898851993 |             |          |         |
| CAPZA1P4     | ENSG00000233263 | -0.97967 | 0.83638 | -0.97967    | 0.83638     | -0.97967 |         |
|              | 0.83638         | -0.97967 | 0.83638 | 0.83638     | 0.898858675 |          |         |
| NA           | ENSG00000212182 | -0.97982 | 0.83641 | -1.0359     | 0.84987     | -1.0359  | 0.84987 |
|              | -1.0359         | 0.84987  | 0.83641 | 0.898858675 |             |          |         |
| MTHFD2P3     | ENSG00000231112 | -0.97984 | 0.83642 | -0.97984    | 0.83642     | -0.97984 |         |
|              | 0.83642         | -0.97984 | 0.83642 | 0.83642     | 0.898858675 |          |         |
| NA           | ENSG00000253939 | -1.5311  | 0.93713 | -0.97986    | 0.83642     | -1.2793  | 0.8996  |
|              | -1.2793         | 0.8996   | 0.83642 | 0.898858675 |             |          |         |
| RPL7P12      | ENSG00000227770 | -0.98007 | 0.83647 | -0.98007    | 0.83647     | -0.98007 |         |
|              | 0.83647         | -0.98007 | 0.83647 | 0.83647     | 0.898892584 |          |         |
| SRSF2        | ENSG00000161547 | -0.98016 | 0.8365  | -0.98016    | 0.8365      | -0.98016 | 0.8365  |
|              | -0.98016        | 0.8365   | 0.8365  | 0.898904999 |             |          |         |
| LINC02555    | ENSG00000260943 | -0.98046 | 0.83657 | -0.98046    | 0.83657     | -0.98046 |         |
|              | 0.83657         | -0.98046 | 0.83657 | 0.83657     | 0.898960397 |          |         |
| KLHDC7B-DT   | ENSG00000272666 | -0.98093 | 0.83669 | -0.98093    | 0.83669     | -0.98093 |         |
|              | 0.83669         | -0.98093 | 0.83669 | 0.83669     | 0.899069521 |          |         |
| ATP10B       | ENSG00000118322 | -1.435   | 0.92435 | -1.2887     | 0.90126     | -0.9811  |         |
|              | 0.83673         | -1.8016  | 0.96419 | 0.83673     | 0.899092677 |          |         |
| NA           | ENSG00000235554 | -0.98132 | 0.83678 | -0.98132    | 0.83678     | -0.98132 | 0.83678 |
|              | -0.98132        | 0.83678  | 0.83678 | 0.899126577 |             |          |         |
| OSBPL6       | ENSG00000079156 | -1.0092  | 0.84357 | -1.2469     | 0.89377     | -0.99973 |         |

|           |                 |          |             |             |             |          |                  |
|-----------|-----------------|----------|-------------|-------------|-------------|----------|------------------|
|           | 0.84128         | -0.98137 | 0.8368      | 0.8368      | 0.899128241 |          |                  |
| NA        | ENSG00000248927 | -0.98165 | 0.83686     | 0.83686     | -0.98165    | 0.83686  | -0.98165 0.83686 |
|           | -0.98165        | 0.83686  | 0.83686     | 0.899153058 |             |          |                  |
| NA        | ENSG00000259028 | -0.98162 | 0.83686     | 0.83686     | -0.98162    | 0.83686  | -0.98162 0.83686 |
|           | -0.98162        | 0.83686  | 0.83686     | 0.899153058 |             |          |                  |
| ZER1      | ENSG00000160445 | -1.6261  | 0.94804     | -1.707      | 0.95609     | -1.2132  | 0.88748          |
|           | -0.98192        | 0.83693  | 0.83693     | 0.899208442 |             |          |                  |
| MTND5P31  | ENSG00000227841 | -0.98222 | 0.837       | -0.98222    | 0.837       | -1.1532  | 0.87559          |
|           | -0.98222        | 0.837    | 0.837       | 0.899243998 |             |          |                  |
| NA        | ENSG00000249148 | -1.9115  | 0.97203     | -0.98221    | 0.837       | -0.98221 | 0.837 -0.98221   |
|           | 0.837           | 0.837    | 0.899243998 |             |             |          |                  |
| IQCH-AS1  | ENSG00000259673 | -0.98229 | 0.83702     | -1.2914     | 0.90172     | -2.6132  |                  |
|           | 0.99551         | -2.6132  | 0.99551     | 0.83702     | 0.899245659 |          |                  |
| NA        | ENSG00000224731 | -0.98282 | 0.83715     | -0.98282    | 0.83715     | -0.98282 | 0.83715          |
|           | -0.98282        | 0.83715  | 0.83715     | 0.899316759 |             |          |                  |
| KRT35     | ENSG00000197079 | -0.98285 | 0.83716     | -1.9199     | 0.97257     | -1.2589  | 0.89596          |
|           | -1.2589         | 0.89596  | 0.83716     | 0.899316759 |             |          |                  |
| NA        | ENSG00000250101 | -1.4314  | 0.92384     | -1.8345     | 0.96671     | -1.1689  | 0.87879          |
|           | -0.98286        | 0.83716  | 0.83716     | 0.899316759 |             |          |                  |
| FKBP1AP2  | ENSG00000259691 | -0.98284 | 0.83716     | -0.9991     | 0.84113     | -0.98284 |                  |
|           | 0.83716         | -0.98284 | 0.83716     | 0.83716     | 0.899316759 |          |                  |
| RPS23     | ENSG00000186468 | -1.5332  | 0.93739     | -1.5332     | 0.93739     | -1.5332  | 0.93739          |
|           | -0.98298        | 0.83719  | 0.83719     | 0.89932916  |             |          |                  |
| NA        | ENSG00000260970 | -1.2732  | 0.89852     | -1.2441     | 0.89327     | -0.98304 | 0.83721          |
|           | -1.809          | 0.96478  | 0.83721     | 0.89933082  |             |          |                  |
| NA        | ENSG00000255649 | -0.98317 | 0.83724     | -0.98317    | 0.83724     | -0.98317 | 0.83724          |
|           | -0.98317        | 0.83724  | 0.83724     | 0.899343221 |             |          |                  |
| NA        | ENSG00000207365 | -0.98344 | 0.8373      | -0.98344    | 0.8373      | -0.98344 | 0.8373           |
|           | -0.98344        | 0.8373   | 0.8373      | 0.899387846 |             |          |                  |
| NA        | ENSG00000229398 | -0.98368 | 0.83736     | -0.98368    | 0.83736     | -0.98368 | 0.83736          |
|           | -0.98368        | 0.83736  | 0.83736     | 0.899423384 |             |          |                  |
| HNRNPLP1  | ENSG00000233503 | -0.9837  | 0.83737     | -0.9837     | 0.83737     | -0.9837  |                  |
|           | 0.83737         | -0.9837  | 0.83737     | 0.83737     | 0.899423384 |          |                  |
| CD52      | ENSG00000169442 | -0.98379 | 0.83739     | -0.98379    | 0.83739     | -0.98379 | 0.83739          |
|           | -0.98379        | 0.83739  | 0.83739     | 0.899425041 |             |          |                  |
| NA        | ENSG00000251058 | -0.98415 | 0.83748     | -0.98415    | 0.83748     | -0.98415 | 0.83748          |
|           | -0.98415        | 0.83748  | 0.83748     | 0.899494453 |             |          |                  |
| MTCO1P46  | ENSG00000236007 | -0.98426 | 0.83751     | -0.98426    | 0.83751     | -0.98426 |                  |
|           | 0.83751         | -0.98426 | 0.83751     | 0.83751     | 0.899494453 |          |                  |
| NA        | ENSG00000265800 | -0.98428 | 0.83751     | -0.98428    | 0.83751     | -0.98428 | 0.83751          |
|           | -0.98428        | 0.83751  | 0.83751     | 0.899494453 |             |          |                  |
| RNU6-751P | ENSG00000252191 | -0.98469 | 0.83761     | -0.98469    | 0.83761     | -0.98469 |                  |
|           | 0.83761         | -0.98469 | 0.83761     | 0.83761     | 0.899582027 |          |                  |
| NA        | ENSG00000261376 | -0.9848  | 0.83764     | -0.9848     | 0.83764     | -0.9848  | 0.83764          |
|           | -0.9848         | 0.83764  | 0.83764     | 0.899585333 |             |          |                  |
| NA        | ENSG00000256196 | -0.98484 | 0.83765     | -0.98484    | 0.83765     | -0.98484 | 0.83765          |
|           | -0.98484        | 0.83765  | 0.83765     | 0.899585333 |             |          |                  |
| NA        | ENSG00000279652 | -0.98533 | 0.83777     | -0.98533    | 0.83777     | -0.98533 | 0.83777          |
|           | -0.98533        | 0.83777  | 0.83777     | 0.899694378 |             |          |                  |
| ZNF7      | ENSG00000147789 | -0.98556 | 0.83783     | -1.6592     | 0.95146     | -1.3674  | 0.91425          |
|           | -1.3472         | 0.91105  | 0.83783     | 0.899729896 |             |          |                  |
| NA        | ENSG00000267614 | -0.98564 | 0.83784     | -0.98564    | 0.83784     | -0.98564 | 0.83784          |
|           | -0.98564        | 0.83784  | 0.83784     | 0.899729896 |             |          |                  |
| NA        | ENSG00000273027 | -0.98574 | 0.83787     | -1.2518     | 0.89468     | -0.98574 | 0.83787          |
|           | -0.98574        | 0.83787  | 0.83787     | 0.899742284 |             |          |                  |
| NA        | ENSG00000236641 | -0.98605 | 0.83795     | -0.98605    | 0.83795     | -0.98605 | 0.83795          |
|           | -0.98605        | 0.83795  | 0.83795     | 0.899770357 |             |          |                  |
| NA        | ENSG00000253622 | -0.98608 | 0.83795     | -0.98608    | 0.83795     | -0.98608 | 0.83795          |
|           | -0.98608        | 0.83795  | 0.83795     | 0.899770357 |             |          |                  |
| C4orf33   | ENSG00000151470 | -0.98616 | 0.83797     | -0.98616    | 0.83797     | -0.98616 |                  |
|           | 0.83797         | -1.7539  | 0.96028     | 0.83797     | 0.899770357 |          |                  |
| MIR4760   | ENSG00000263973 | -0.98614 | 0.83797     | -0.98614    | 0.83797     | -0.98614 |                  |



|           |                 |          |         |             |             |          |         |
|-----------|-----------------|----------|---------|-------------|-------------|----------|---------|
|           | 0.83797         | -0.98614 | 0.83797 | 0.83797     | 0.899770357 |          |         |
| NRCAM     | ENSG00000091129 | -1.0185  | 0.84578 | -1.1883     | 0.88264     | -1.5186  | 0.93557 |
|           | -0.98627        | 0.83808  | 0.83808 | 0.899782743 |             |          |         |
| PPP6R2    | ENSG00000100239 | -0.99542 | 0.84023 | -0.98642    | 0.83804     | -1.3335  |         |
|           | 0.90882         | -1.149   | 0.87473 | 0.83804     | 0.89978604  |          |         |
| RPL17P22  | ENSG00000243592 | -0.98643 | 0.83804 | -0.98643    | 0.83804     | -0.98643 |         |
|           | 0.83804         | -0.98643 | 0.83804 | 0.83804     | 0.89978604  |          |         |
| NA        | ENSG00000261835 | -0.98661 | 0.83808 | -0.98661    | 0.83808     | -0.98661 | 0.83808 |
|           | -0.98661        | 0.83808  | 0.83808 | 0.899809161 |             |          |         |
| THAP1     | ENSG00000131931 | -0.98682 | 0.83813 | -0.98682    | 0.83813     | -1.3316  | 0.90851 |
|           | -1.3458         | 0.91081  | 0.83813 | 0.899843018 |             |          |         |
| GIMAP1    | ENSG00000213203 | -0.98725 | 0.83824 | -0.98725    | 0.83824     | -0.98725 |         |
|           | 0.83824         | -0.98725 | 0.83824 | 0.83824     | 0.899917308 |          |         |
| OR9G1     | ENSG00000174914 | -1.498   | 0.93293 | -1.498      | 0.93293     | -1.498   | 0.93293 |
|           | -0.98735        | 0.83827  | 0.83827 | 0.899917308 |             |          |         |
| FOXA3     | ENSG00000170608 | -0.98744 | 0.83829 | -0.98744    | 0.83829     | -0.98744 | 0.83829 |
|           | -0.98744        | 0.83829  | 0.83829 | 0.899917308 |             |          |         |
| RNA5SP226 | ENSG00000199523 | -0.98745 | 0.83829 | -1.9691     | 0.97553     | -1.9691  |         |
|           | 0.97553         | -1.9691  | 0.97553 | 0.83829     | 0.899917308 |          |         |
| NA        | ENSG00000279438 | -0.98755 | 0.83831 | -0.98755    | 0.83831     | -0.98755 | 0.83831 |
|           | -0.98755        | 0.83831  | 0.83831 | 0.899917308 |             |          |         |
| NA        | ENSG00000225946 | -0.98753 | 0.83831 | -0.98753    | 0.83831     | -0.98753 | 0.83831 |
|           | -0.98753        | 0.83831  | 0.83831 | 0.899917308 |             |          |         |
| RASGRP3   | ENSG00000152689 | -1.2998  | 0.90317 | -0.98773    | 0.83836     | -1.6227  |         |
|           | 0.94768         | -1.8829  | 0.97014 | 0.83836     | 0.899931333 |          |         |
| IDO2      | ENSG00000188676 | -1.1231  | 0.86931 | -0.98772    | 0.83836     | -1.2466  | 0.89373 |
|           | -1.179          | 0.88081  | 0.83836 | 0.899931333 |             |          |         |
| SPINK13   | ENSG00000214510 | -1.2686  | 0.8977  | -1.0294     | 0.84835     | -0.98784 |         |
|           | 0.83838         | -0.98784 | 0.83838 | 0.83838     | 0.899932978 |          |         |
| TMEM38B   | ENSG00000095209 | -1.8092  | 0.96479 | -0.98801    | 0.83843     | -0.98801 |         |
|           | 0.83843         | -1.3931  | 0.91821 | 0.83843     | 0.899966825 |          |         |
| OR2AD1P   | ENSG00000223677 | -1.2359  | 0.89175 | -1.5168     | 0.93534     | -1.2291  |         |
|           | 0.89049         | -0.98818 | 0.83847 | 0.83847     | 0.899989936 |          |         |
| NA        | ENSG00000232918 | -0.98832 | 0.8385  | -0.98832    | 0.8385      | -0.98832 | 0.8385  |
|           | -0.98832        | 0.8385   | 0.8385  | 0.899993223 |             |          |         |
| NA        | ENSG00000261578 | -0.98834 | 0.83851 | -1.1618     | 0.87734     | -0.98834 | 0.83851 |
|           | -1.021          | 0.84637  | 0.83851 | 0.899993223 |             |          |         |
| PNN       | ENSG00000100941 | -0.98866 | 0.83859 | -0.98866    | 0.83859     | -0.98866 | 0.83859 |
|           | -1.0091         | 0.84353  | 0.83859 | 0.900031992 |             |          |         |
| MIR4447   | ENSG00000265433 | -1.4127  | 0.92113 | -0.9887     | 0.8386      | -1.7909  |         |
|           | 0.96335         | -1.7909  | 0.96335 | 0.8386      | 0.900031992 |          |         |
| NA        | ENSG00000207223 | -1.217   | 0.8882  | -0.98875    | 0.83861     | -1.4706  | 0.9293  |
|           | -1.1776         | 0.88053  | 0.83861 | 0.900031992 |             |          |         |
| NA        | ENSG00000227034 | -0.98882 | 0.83862 | -0.98882    | 0.83862     | -0.98882 | 0.83862 |
|           | -0.98882        | 0.83862  | 0.83862 | 0.900031992 |             |          |         |
| NA        | ENSG00000225209 | -1.6062  | 0.94588 | -1.6062     | 0.94588     | -1.6062  | 0.94588 |
|           | -0.98896        | 0.83866  | 0.83866 | 0.900055098 |             |          |         |
| OR13G1    | ENSG00000197437 | -0.98905 | 0.83868 | -0.98905    | 0.83868     | -0.98905 |         |
|           | 0.83868         | -0.98905 | 0.83868 | 0.83868     | 0.90005674  |          |         |
| CMSS1     | ENSG00000184220 | -0.98943 | 0.83877 | -1.1288     | 0.8705      | -1.8589  | 0.96848 |
|           | -1.4459         | 0.92589  | 0.83877 | 0.900133503 |             |          |         |
| SNAP25    | ENSG00000132639 | -0.9898  | 0.83886 | -0.9898     | 0.83886     | -0.9898  |         |
|           | 0.83886         | -0.9898  | 0.83886 | 0.83886     | 0.900181346 |          |         |
| NA        | ENSG00000251728 | -0.9898  | 0.83886 | -0.9898     | 0.83886     | -0.9898  | 0.83886 |
|           | -0.9898         | 0.83886  | 0.83886 | 0.900181346 |             |          |         |
| TCAIM     | ENSG00000179152 | -0.98984 | 0.83887 | -1.4338     | 0.92418     | -1.2844  | 0.90049 |
|           | -1.2799         | 0.89971  | 0.83887 | 0.900181346 |             |          |         |
| NA        | ENSG00000264752 | -1.256   | 0.89543 | -1.1818     | 0.88136     | -1.251   | 0.89453 |
|           | -0.99008        | 0.83893  | 0.83893 | 0.900225907 |             |          |         |
| CRYBA4    | ENSG00000196431 | -0.99055 | 0.83905 | -0.99055    | 0.83905     | -0.99055 |         |
|           | 0.83905         | -1.2857  | 0.90073 | 0.83905     | 0.900305015 |          |         |
| NT5CP1    | ENSG00000258524 | -0.99057 | 0.83905 | -0.99057    | 0.83905     | -0.99057 |         |

|             |                 |          |         |             |             |          |         |
|-------------|-----------------|----------|---------|-------------|-------------|----------|---------|
|             | 0.83905         | -0.99057 | 0.83905 | 0.83905     | 0.900305015 |          |         |
| NA          | ENSG00000206768 | -0.99071 | 0.83909 | -0.99071    | 0.83909     | -0.99071 | 0.83909 |
|             | -0.99071        | 0.83909  | 0.83909 | 0.900305015 |             |          |         |
| NA          | ENSG00000280561 | -0.99081 | 0.83911 | -0.99081    | 0.83911     | -0.99081 | 0.83911 |
|             | -0.99081        | 0.83911  | 0.83911 | 0.900305015 |             |          |         |
| ARPC1BP1    | ENSG00000213081 | -0.99094 | 0.83914 | -0.99094    | 0.83914     | -0.99094 |         |
|             | 0.83914         | -0.99094 | 0.83914 | 0.900305015 |             |          |         |
| NA          | ENSG00000230721 | -1.1433  | 0.87355 | -0.99096    | 0.83915     | -1.3287  | 0.90803 |
|             | -1.3287         | 0.90803  | 0.83915 | 0.900305015 |             |          |         |
| TMUB2       | ENSG00000168591 | -0.99105 | 0.83917 | -0.99105    | 0.83917     | -0.99105 | 0.83917 |
|             | -0.99105        | 0.83917  | 0.83917 | 0.900305015 |             |          |         |
| NA          | ENSG00000257472 | -1.5521  | 0.93968 | -2.1347     | 0.98361     | -0.99104 | 0.83917 |
|             | -0.99104        | 0.83917  | 0.83917 | 0.900305015 |             |          |         |
| NA          | ENSG00000258490 | -0.99107 | 0.83917 | -0.99107    | 0.83917     | -0.99107 | 0.83917 |
|             | -0.99107        | 0.83917  | 0.83917 | 0.900305015 |             |          |         |
| NA          | ENSG00000242318 | -0.99141 | 0.83926 | -0.99141    | 0.83926     | -0.99141 | 0.83926 |
|             | -0.99141        | 0.83926  | 0.83926 | 0.900318099 |             |          |         |
| IRX1P1      | ENSG00000231417 | -0.99147 | 0.83927 | -0.99147    | 0.83927     | -0.99147 |         |
|             | 0.83927         | -0.99147 | 0.83927 | 0.900318099 |             |          |         |
| NA          | ENSG00000272654 | -0.99145 | 0.83927 | -0.99145    | 0.83927     | -0.99145 | 0.83927 |
|             | -0.99145        | 0.83927  | 0.83927 | 0.900318099 |             |          |         |
| NA          | ENSG00000259286 | -0.99149 | 0.83928 | -0.99149    | 0.83928     | -2.0085  | 0.9777  |
|             | -0.99149        | 0.83928  | 0.83928 | 0.900318099 |             |          |         |
| NA          | ENSG00000269966 | -0.9916  | 0.8393  | -0.9916     | 0.8393      | -0.9916  | 0.8393  |
|             | -0.9916         | 0.8393   | 0.8393  | 0.900318099 |             |          |         |
| MTND2P31    | ENSG00000251252 | -0.99161 | 0.83931 | -1.3111     | 0.90509     | -1.3111  |         |
|             | 0.90509         | -1.3111  | 0.90509 | 0.83931     | 0.900318099 |          |         |
| NA          | ENSG00000233479 | -0.99165 | 0.83932 | -0.99165    | 0.83932     | -0.99165 | 0.83932 |
|             | -0.99165        | 0.83932  | 0.83932 | 0.900318099 |             |          |         |
| RNA5SP266   | ENSG00000222205 | -0.99172 | 0.83933 | -1.3649     | 0.91386     | -1.2566  |         |
|             | 0.89555         | -1.2566  | 0.89555 | 0.83933     | 0.900318099 |          |         |
| LAMTOR5-AS1 | ENSG00000224699 | -1.2441  | 0.89327 | -0.99186    | 0.83937     | -1.1926  |         |
|             | 0.88349         | -1.1926  | 0.88349 | 0.83937     | 0.900318818 |          |         |
| GNAT2       | ENSG00000134183 | -0.9919  | 0.83938 | -0.9919     | 0.83938     | -0.9919  | 0.83938 |
|             | -0.9919         | 0.83938  | 0.83938 | 0.900318818 |             |          |         |
| VSX1        | ENSG00000100987 | -0.99199 | 0.8394  | -1.6134     | 0.94667     | -1.5079  | 0.93421 |
|             | -1.0449         | 0.85196  | 0.8394  | 0.900318818 |             |          |         |
| NA          | ENSG00000238139 | -0.99204 | 0.83941 | -1.9648     | 0.97528     | -1.311   | 0.90507 |
|             | -1.311          | 0.90507  | 0.83941 | 0.900318818 |             |          |         |
| CSTP1       | ENSG00000228476 | -1.6047  | 0.94572 | -1.5514     | 0.9396      | -1.8424  | 0.96729 |
|             | -0.99217        | 0.83944  | 0.83944 | 0.900318818 |             |          |         |
| ALOX15      | ENSG00000161905 | -1.3858  | 0.9171  | -0.99223    | 0.83946     | -1.5517  |         |
|             | 0.93963         | -1.7442  | 0.95944 | 0.83946     | 0.900318818 |          |         |
| NA          | ENSG00000253090 | -0.99226 | 0.83946 | -0.99226    | 0.83946     | -0.99226 | 0.83946 |
|             | -0.99226        | 0.83946  | 0.83946 | 0.900318818 |             |          |         |
| RN7SL825P   | ENSG00000239731 | -0.99257 | 0.83954 | -0.99257    | 0.83954     | -0.99257 |         |
|             | 0.83954         | -0.99257 | 0.83954 | 0.83954     | 0.900357529 |          |         |
| MIR449C     | ENSG00000251856 | -1.1006  | 0.86446 | -0.99264    | 0.83956     | -1.1006  |         |
|             | 0.86446         | -1.1006  | 0.86446 | 0.83956     | 0.900357529 |          |         |
| APPL2       | ENSG00000136044 | -0.99271 | 0.83957 | -1.424      | 0.92277     | -1.6172  | 0.94709 |
|             | -1.8935         | 0.97085  | 0.83957 | 0.900357529 |             |          |         |
| LINC02521   | ENSG00000228718 | -0.99271 | 0.83957 | -1.188      | 0.88259     | -1.2013  |         |
|             | 0.88518         | -0.99271 | 0.83957 | 0.83957     | 0.900357529 |          |         |
| NA          | ENSG00000261410 | -1.8201  | 0.96563 | -0.99295    | 0.83963     | -1.6213  | 0.94752 |
|             | -1.6213         | 0.94752  | 0.83963 | 0.900402058 |             |          |         |
| NA          | ENSG00000251368 | -0.993   | 0.83965 | -0.993      | 0.83965     | -0.993   | 0.83965 |
|             | -0.993          | 0.83965  | 0.83965 | 0.90040369  |             |          |         |
| NA          | ENSG00000262471 | -0.99309 | 0.83967 | -0.99309    | 0.83967     | -0.99309 | 0.83967 |
|             | -0.99309        | 0.83967  | 0.83967 | 0.900405323 |             |          |         |
| FARSA-AS1   | ENSG00000266975 | -0.99317 | 0.83969 | -0.99317    | 0.83969     | -0.99317 |         |
|             | 0.83969         | -0.99317 | 0.83969 | 0.83969     | 0.900406956 |          |         |
| SDCBP2-AS1  | ENSG00000234684 | -1.3403  | 0.90992 | -1.3403     | 0.90992     | -0.99334 |         |

|            |                 |          |         |             |             |          |          |
|------------|-----------------|----------|---------|-------------|-------------|----------|----------|
|            | 0.83973         | -1.1106  | 0.86664 | 0.83973     | 0.90042584  |          |          |
| OR52I2     | ENSG00000226288 | -0.99347 | 0.83976 | 0.83976     | -0.99347    | 0.83976  | -0.99347 |
|            | 0.83976         | -0.99347 | 0.83976 | 0.83976     | 0.90042584  |          |          |
| NA         | ENSG00000201047 | -1.7149  | 0.95682 | -0.99351    | 0.83977     | -0.99351 | 0.83977  |
|            | -0.9998         | 0.8413   | 0.83977 | 0.90042584  |             |          |          |
| NA         | ENSG00000255543 | -0.99362 | 0.8398  | -0.99362    | 0.8398      | -0.99362 | 0.8398   |
|            | -0.99362        | 0.8398   | 0.8398  | 0.90042584  |             |          |          |
| NA         | ENSG00000284526 | -0.99365 | 0.8398  | -0.99365    | 0.8398      | -0.99365 | 0.8398   |
|            | -0.99365        | 0.8398   | 0.8398  | 0.90042584  |             |          |          |
| LINC00486  | ENSG00000230876 | -1.2199  | 0.88875 | -1.2199     | 0.88875     | -2.04    | 0.97933  |
|            | -0.99385        | 0.83985  | 0.83985 | 0.900459637 |             |          |          |
| ZSCAN23    | ENSG00000187987 | -0.99392 | 0.83987 | -1.3539     | 0.91212     | -1.7365  |          |
|            | 0.95876         | -1.7809  | 0.96253 | 0.83987     | 0.900461268 |          |          |
| ADH5P4     | ENSG00000233859 | -0.99421 | 0.83994 | -0.99421    | 0.83994     | -0.99421 |          |
|            | 0.83994         | -0.99421 | 0.83994 | 0.83994     | 0.900516505 |          |          |
| NA         | ENSG00000226431 | -0.99439 | 0.83998 | -0.99439    | 0.83998     | -1.1727  | 0.87954  |
|            | -1.38           | 0.91621  | 0.83998 | 0.900539577 |             |          |          |
| NA         | ENSG00000236004 | -1.1685  | 0.87869 | -0.99452    | 0.84001     | -1.087   | 0.86148  |
|            | -0.99452        | 0.84001  | 0.84001 | 0.900551927 |             |          |          |
| NA         | ENSG00000214035 | -0.99478 | 0.84008 | -0.99478    | 0.84008     | -0.99478 | 0.84008  |
|            | -0.99478        | 0.84008  | 0.84008 | 0.900607159 |             |          |          |
| BTBD8      | ENSG00000189195 | -0.99498 | 0.84013 | -1.02       | 0.84613     | -1.8615  | 0.96867  |
|            | -1.8615         | 0.96867  | 0.84013 | 0.900640947 |             |          |          |
| RN7SL860P  | ENSG00000240713 | -0.99526 | 0.84019 | -0.99526    | 0.84019     | -0.99526 |          |
|            | 0.84019         | -0.99526 | 0.84019 | 0.84019     | 0.900676361 |          |          |
| NA         | ENSG00000199515 | -0.99527 | 0.8402  | -0.99527    | 0.8402      | -1.1226  | 0.86919  |
|            | -0.99527        | 0.8402   | 0.8402  | 0.900676361 |             |          |          |
| LINC02573  | ENSG00000233236 | -1.1259  | 0.8699  | -1.0581     | 0.855       | -1.1259  | 0.8699   |
|            | -0.99551        | 0.84025  | 0.84025 | 0.900710145 |             |          |          |
| NA         | ENSG00000230520 | -0.99563 | 0.84029 | -0.99563    | 0.84029     | -0.99563 | 0.84029  |
|            | -0.99563        | 0.84029  | 0.84029 | 0.900733209 |             |          |          |
| MRPL57P7   | ENSG00000254312 | -0.9959  | 0.84035 | -0.9959     | 0.84035     | -0.9959  |          |
|            | 0.84035         | -0.9959  | 0.84035 | 0.84035     | 0.900739708 |          |          |
| NA         | ENSG00000252692 | -0.99595 | 0.84036 | -0.99595    | 0.84036     | -0.99595 | 0.84036  |
|            | -2.4303         | 0.99246  | 0.84036 | 0.900739708 |             |          |          |
| NA         | ENSG00000232001 | -0.996   | 0.84037 | -1.0172     | 0.84546     | -1.539   | 0.93809  |
|            | -0.996          | 0.84037  | 0.84037 | 0.900739708 |             |          |          |
| NA         | ENSG00000242768 | -0.99596 | 0.84037 | -2.0045     | 0.97749     | -1.2024  | 0.88539  |
|            | -1.7109         | 0.95645  | 0.84037 | 0.900739708 |             |          |          |
| RPS27P22   | ENSG00000241451 | -0.99628 | 0.84044 | -0.99628    | 0.84044     | -0.99628 |          |
|            | 0.84044         | -0.99628 | 0.84044 | 0.84044     | 0.900794924 |          |          |
| ZNF603P    | ENSG00000216901 | -0.99659 | 0.84052 | -0.99659    | 0.84052     | -0.99659 |          |
|            | 0.84052         | -0.99659 | 0.84052 | 0.84052     | 0.900841041 |          |          |
| RNU6-1190P | ENSG00000222743 | -0.99659 | 0.84052 | -0.99659    | 0.84052     | -0.99659 |          |
|            | 0.84052         | -0.99659 | 0.84052 | 0.84052     | 0.900841041 |          |          |
| KCNC3      | ENSG00000131398 | -0.99682 | 0.84057 | -1.0251     | 0.84735     | -0.99682 | 0.84057  |
|            | -0.99682        | 0.84057  | 0.84057 | 0.900861489 |             |          |          |
| NA         | ENSG00000255260 | -0.99699 | 0.84061 | -0.99699    | 0.84061     | -0.99699 | 0.84061  |
|            | -0.99699        | 0.84061  | 0.84061 | 0.900861489 |             |          |          |
| RNU6-279P  | ENSG00000212599 | -0.99702 | 0.84062 | -0.99702    | 0.84062     | -0.99702 |          |
|            | 0.84062         | -0.99702 | 0.84062 | 0.84062     | 0.900861489 |          |          |
| RPL28P2    | ENSG00000237641 | -0.99702 | 0.84062 | -0.99702    | 0.84062     | -0.99702 |          |
|            | 0.84062         | -0.99702 | 0.84062 | 0.84062     | 0.900861489 |          |          |
| MIR4731    | ENSG00000265110 | -2.2685  | 0.98835 | -0.99714    | 0.84065     | -1.2737  |          |
|            | 0.89861         | -2.0271  | 0.97867 | 0.84065     | 0.900861489 |          |          |
| NA         | ENSG00000267886 | -1.252   | 0.89471 | -1.252      | 0.89471     | -0.99715 | 0.84065  |
|            | -1.252          | 0.89471  | 0.84065 | 0.900861489 |             |          |          |
| DLG1       | ENSG00000075711 | -1.9884  | 0.97661 | -1.6238     | 0.94779     | -0.99729 | 0.84069  |
|            | -1.8961         | 0.97102  | 0.84069 | 0.900884543 |             |          |          |
| NFE2       | ENSG00000123405 | -0.99759 | 0.84076 | -0.99759    | 0.84076     | -0.99759 | 0.84076  |
|            | -0.99759        | 0.84076  | 0.84076 | 0.900939743 |             |          |          |
| OR56B1     | ENSG00000181023 | -0.99791 | 0.84084 | -0.99791    | 0.84084     | -0.99791 |          |

|           |                 |          |             |             |             |          |         |
|-----------|-----------------|----------|-------------|-------------|-------------|----------|---------|
|           | 0.84084         | -0.99791 | 0.84084     | 0.84084     | 0.901005656 |          |         |
| RNU6-393P | ENSG00000207204 | -2.0262  | 0.97863     | -1.7739     | 0.96196     | -1.4824  |         |
|           | 0.93089         | -0.99821 | 0.84091     | 0.84091     | 0.901051752 |          |         |
| NA        | ENSG00000279253 | -1.1235  | 0.86939     | -0.99823    | 0.84092     | -1.1235  | 0.86939 |
|           | -1.1235         | 0.86939  | 0.84092     | 0.901051752 |             |          |         |
| FOXG1-AS1 | ENSG00000257126 | -1.2197  | 0.8887      | -0.99843    | 0.84097     | -1.7335  |         |
|           | 0.95849         | -1.9741  | 0.97582     | 0.84097     | 0.901073785 |          |         |
| ARL2BPP1  | ENSG00000265934 | -1.4766  | 0.93011     | -0.99849    | 0.84098     | -1.7696  |         |
|           | 0.9616          | -1.7696  | 0.9616      | 0.84098     | 0.901073785 |          |         |
| RCBTB2P1  | ENSG00000235150 | -0.99856 | 0.841       | -0.99856    | 0.841       | -0.99856 | 0.841   |
|           | 0.841           | 0.841    | 0.901073785 |             |             |          |         |
| ZNF575    | ENSG00000176472 | -1.1244  | 0.86957     | -2.0006     | 0.97728     | -0.99879 |         |
|           | 0.84105         | -1.6377  | 0.94926     | 0.84105     | 0.901073785 |          |         |
| MGAT4C    | ENSG00000182050 | -1.5962  | 0.94478     | -1.6394     | 0.94944     | -1.6359  |         |
|           | 0.94907         | -0.99884 | 0.84106     | 0.84106     | 0.901073785 |          |         |
| NA        | ENSG00000276232 | -0.99881 | 0.84106     | -0.99881    | 0.84106     | -0.99881 | 0.84106 |
|           | -0.99881        | 0.84106  | 0.84106     | 0.901073785 |             |          |         |
| NA        | ENSG00000233848 | -0.99885 | 0.84107     | -0.99885    | 0.84107     | -1.4743  | 0.9298  |
|           | -0.99885        | 0.84107  | 0.84107     | 0.901073785 |             |          |         |
| NA        | ENSG00000275632 | -0.99895 | 0.84109     | -0.99895    | 0.84109     | -0.99895 | 0.84109 |
|           | -0.99895        | 0.84109  | 0.84109     | 0.901075401 |             |          |         |
| SPOUT1    | ENSG00000198917 | -1.2549  | 0.89525     | -0.99909    | 0.84112     | -0.99909 |         |
|           | 0.84112         | -0.99909 | 0.84112     | 0.84112     | 0.901087731 |          |         |
| NA        | ENSG00000276529 | -0.99928 | 0.84117     | -0.99928    | 0.84117     | -0.99928 | 0.84117 |
|           | -0.99928        | 0.84117  | 0.84117     | 0.901112388 |             |          |         |
| NA        | ENSG00000233633 | -0.99933 | 0.84118     | -2.2425     | 0.98754     | -1.2726  | 0.89842 |
|           | -1.3908         | 0.91786  | 0.84118     | 0.901112388 |             |          |         |
| NA        | ENSG00000231713 | -1.6496  | 0.95048     | -0.99939    | 0.8412      | -1.6496  | 0.95048 |
|           | -1.6496         | 0.95048  | 0.8412      | 0.901114003 |             |          |         |
| CHORDC1P1 | ENSG00000232202 | -1.3528  | 0.91193     | -1.1113     | 0.86678     | -1.2211  |         |
|           | 0.88897         | -0.99951 | 0.84123     | 0.84123     | 0.90112633  |          |         |
| NA        | ENSG00000253806 | -0.99993 | 0.84133     | -0.99993    | 0.84133     | -0.99993 | 0.84133 |
|           | -0.99993        | 0.84133  | 0.84133     | 0.901197057 |             |          |         |
| NA        | ENSG00000264167 | -1.0001  | 0.84136     | -1.0001     | 0.84136     | -1.0001  | 0.84136 |
|           | -1.0001         | 0.84136  | 0.84136     | 0.901197057 |             |          |         |
| OR4X2     | ENSG00000172208 | -1.4676  | 0.9289      | -1.2635     | 0.89679     | -1.0001  | 0.84137 |
|           | -1.081          | 0.86015  | 0.84137     | 0.901197057 |             |          |         |
| GPR176-DT | ENSG00000246863 | -1.0001  | 0.84137     | -1.0001     | 0.84137     | -1.0001  |         |
|           | 0.84137         | -1.0001  | 0.84137     | 0.84137     | 0.901197057 |          |         |
| IGLV3-26  | ENSG00000253913 | -1.0007  | 0.8415      | -1.0007     | 0.8415      | -1.0007  |         |
|           | 0.8415          | -1.0007  | 0.8415      | 0.8415      | 0.901296679 |          |         |
| NA        | ENSG00000254219 | -1.0007  | 0.8415      | -1.0007     | 0.8415      | -1.0007  | 0.8415  |
|           | -1.0007         | 0.8415   | 0.8415      | 0.901296679 |             |          |         |
| NA        | ENSG00000238775 | -1.0009  | 0.84156     | -1.0009     | 0.84156     | -1.0009  | 0.84156 |
|           | -1.0009         | 0.84156  | 0.84156     | 0.901341131 |             |          |         |
| RPL26P30  | ENSG00000236264 | -1.0011  | 0.8416      | -1.0011     | 0.8416      | -1.0011  |         |
|           | 0.8416          | -1.8891  | 0.97056     | 0.8416      | 0.901364162 |          |         |
| ARIH2P1   | ENSG00000266296 | -1.0013  | 0.84166     | -1.0013     | 0.84166     | -1.0013  |         |
|           | 0.84166         | -1.0013  | 0.84166     | 0.84166     | 0.901408611 |          |         |
| NA        | ENSG00000214305 | -1.0015  | 0.84171     | -1.0015     | 0.84171     | -1.0015  | 0.84171 |
|           | -1.0015         | 0.84171  | 0.84171     | 0.901442349 |             |          |         |
| UVRAG-DT  | ENSG00000255507 | -1.0016  | 0.84173     | -1.0016     | 0.84173     | -1.0016  |         |
|           | 0.84173         | -1.0016  | 0.84173     | 0.84173     | 0.901443956 |          |         |
| RNU6-167P | ENSG00000207019 | -1.0017  | 0.84175     | -1.0017     | 0.84175     | -1.0017  |         |
|           | 0.84175         | -1.0017  | 0.84175     | 0.84175     | 0.901445564 |          |         |
| AGBL1-AS1 | ENSG00000260125 | -1.0019  | 0.8418      | -1.0019     | 0.8418      | -1.0019  |         |
|           | 0.8418          | -1.0019  | 0.8418      | 0.8418      | 0.901461095 |          |         |
| CASC20    | ENSG00000229876 | -1.0059  | 0.84276     | -1.0019     | 0.84181     | -2.0753  |         |
|           | 0.98102         | -2.0753  | 0.98102     | 0.84181     | 0.901461095 |          |         |
| KRT8P1    | ENSG00000258948 | -1.002   | 0.84182     | -1.1957     | 0.8841      | -1.2088  |         |
|           | 0.88664         | -1.0589  | 0.85519     | 0.84182     | 0.901461095 |          |         |
| NA        | ENSG00000228857 | -1.5115  | 0.93467     | -1.5115     | 0.93467     | -1.5115  | 0.93467 |

|             |                 |         |         |         |             |             |         |         |
|-------------|-----------------|---------|---------|---------|-------------|-------------|---------|---------|
|             |                 | -1.0021 | 0.84184 | 0.84184 | 0.901462702 |             |         |         |
| NA          | ENSG00000271991 | -1.0023 | 0.8419  | 0.8419  | -1.0023     | 0.8419      | -1.0023 | 0.8419  |
|             |                 | -1.0023 | 0.8419  | 0.8419  | 0.901470737 |             |         |         |
| RN7SKP35    | ENSG00000253019 | -1.0024 | 0.84192 | 0.84192 | -1.0024     | 0.84192     | -1.0024 |         |
|             |                 | 0.84192 | -1.0024 | 0.84192 | 0.84192     | 0.901470737 |         |         |
| NA          | ENSG00000259219 | -1.0024 | 0.84192 | 0.84192 | -1.4336     | 0.92416     | -1.4336 | 0.92416 |
|             |                 | -1.023  | 0.84685 | 0.84192 | 0.901470737 |             |         |         |
| RNA5SP388   | ENSG00000199454 | -1.0024 | 0.84193 | 0.84193 | -1.0024     | 0.84193     | -1.0024 |         |
|             |                 | 0.84193 | -1.0024 | 0.84193 | 0.84193     | 0.901470737 |         |         |
| NA          | ENSG00000263063 | -1.0025 | 0.84194 | 0.84194 | -1.0025     | 0.84194     | -1.0025 | 0.84194 |
|             |                 | -1.0025 | 0.84194 | 0.84194 | 0.901470737 |             |         |         |
| MT1X        | ENSG00000187193 | -2.1564 | 0.98447 | 0.98447 | -2.1564     | 0.98447     | -2.1564 | 0.98447 |
|             |                 | -1.0026 | 0.84196 | 0.84196 | 0.901472344 |             |         |         |
| RPS4XP5     | ENSG00000229920 | -1.0678 | 0.85719 | 0.85719 | -1.0678     | 0.85719     | -1.0026 |         |
|             |                 | 0.84198 | -1.0678 | 0.85719 | 0.84198     | 0.901473951 |         |         |
| NA          | ENSG00000220660 | -1.0028 | 0.84201 | 0.84201 | -1.0028     | 0.84201     | -1.0028 | 0.84201 |
|             |                 | -1.0028 | 0.84201 | 0.84201 | 0.901486264 |             |         |         |
| NA          | ENSG00000263738 | -1.0028 | 0.84203 | 0.84203 | -1.0028     | 0.84203     | -1.0028 | 0.84203 |
|             |                 | -1.0028 | 0.84203 | 0.84203 | 0.90148787  |             |         |         |
| LRRC70      | ENSG00000186105 | -1.0031 | 0.84211 | 0.84211 | -1.0031     | 0.84211     | -1.0031 |         |
|             |                 | 0.84211 | -1.0031 | 0.84211 | 0.84211     | 0.901553712 |         |         |
| SNORD115-42 | ENSG00000201143 | -1.0033 | 0.84214 | 0.84214 | -1.0033     | 0.84214     | -1.0033 |         |
|             |                 | 0.84214 | -1.0033 | 0.84214 | 0.84214     | 0.901566022 |         |         |
| HIGD1AP5    | ENSG00000255254 | -1.0035 | 0.8422  | 0.8422  | -1.0035     | 0.8422      | -1.0035 |         |
|             |                 | 0.8422  | -1.0035 | 0.8422  | 0.8422      | 0.901592245 |         |         |
| NA          | ENSG00000259701 | -1.0036 | 0.84222 | 0.84222 | -1.0036     | 0.84222     | -1.0036 | 0.84222 |
|             |                 | -1.0036 | 0.84222 | 0.84222 | 0.901592245 |             |         |         |
| PTOV1-AS2   | ENSG00000269352 | -1.0036 | 0.84222 | 0.84222 | -1.0036     | 0.84222     | -1.0036 |         |
|             |                 | 0.84222 | -1.0036 | 0.84222 | 0.84222     | 0.901592245 |         |         |
| RNU7-22P    | ENSG00000252482 | -1.2783 | 0.89943 | 0.89943 | -1.0038     | 0.84225     | -1.0038 |         |
|             |                 | 0.84225 | -1.0038 | 0.84225 | 0.84225     | 0.901604554 |         |         |
| RNU6-536P   | ENSG00000200254 | -1.0039 | 0.84227 | 0.84227 | -1.0039     | 0.84227     | -1.0039 |         |
|             |                 | 0.84227 | -1.0039 | 0.84227 | 0.84227     | 0.901606157 |         |         |
| SNORA24B    | ENSG00000206903 | -1.0045 | 0.84243 | 0.84243 | -1.0045     | 0.84243     | -1.0045 |         |
|             |                 | 0.84243 | -1.0045 | 0.84243 | 0.84243     | 0.901737812 |         |         |
| NA          | ENSG00000272750 | -1.0045 | 0.84243 | 0.84243 | -1.0045     | 0.84243     | -1.0045 | 0.84243 |
|             |                 | -1.0045 | 0.84243 | 0.84243 | 0.901737812 |             |         |         |
| USP30-AS1   | ENSG00000256262 | -1.3441 | 0.91054 | 0.91054 | -1.005      | 0.84256     | -1.3441 |         |
|             |                 | 0.91054 | -1.3441 | 0.91054 | 0.84256     | 0.901857154 |         |         |
| BEAN1-AS1   | ENSG00000261656 | -1.0053 | 0.84261 | 0.84261 | -1.0053     | 0.84261     | -1.0053 |         |
|             |                 | 0.84261 | -1.0053 | 0.84261 | 0.84261     | 0.901890863 |         |         |
| SSBP1       | ENSG00000106028 | -1.0055 | 0.84266 | 0.84266 | -1.1372     | 0.87227     | -1.1372 | 0.87227 |
|             |                 | -1.6297 | 0.94842 | 0.84266 | 0.901924569 |             |         |         |
| NA          | ENSG00000268091 | -1.0056 | 0.8427  | 0.8427  | -1.0056     | 0.8427      | -1.0056 | 0.8427  |
|             |                 | -1.0056 | 0.8427  | 0.8427  | 0.901947572 |             |         |         |
| NA          | ENSG00000255338 | -1.7997 | 0.96404 | 0.96404 | -1.0058     | 0.84275     | -1.0058 | 0.84275 |
|             |                 | -1.0058 | 0.84275 | 0.84275 | 0.901957145 |             |         |         |
| NA          | ENSG00000231519 | -1.006  | 0.84278 | 0.84278 | -1.006      | 0.84278     | -1.006  | 0.84278 |
|             |                 | -1.006  | 0.84278 | 0.84278 | 0.901957145 |             |         |         |
| PHLPP1      | ENSG00000081913 | -1.0461 | 0.85225 | 0.85225 | -1.4243     | 0.92282     | -1.006  |         |
|             |                 | 0.84279 | -1.3114 | 0.90514 | 0.84279     | 0.901957145 |         |         |
| NA          | ENSG00000261114 | -1.006  | 0.8428  | 0.8428  | -1.006      | 0.8428      | -1.006  | 0.8428  |
|             |                 | -1.006  | 0.8428  | 0.8428  | 0.901957145 |             |         |         |
| RNU7-103P   | ENSG00000238370 | -1.1114 | 0.8668  | 0.8668  | -1.1114     | 0.8668      | -1.0271 |         |
|             |                 | 0.84781 | -1.0061 | 0.84281 | 0.84281     | 0.901957145 |         |         |
| NA          | ENSG00000258338 | -1.0061 | 0.84282 | 0.84282 | -1.0061     | 0.84282     | -1.0061 | 0.84282 |
|             |                 | -1.0061 | 0.84282 | 0.84282 | 0.901957145 |             |         |         |
| NA          | ENSG00000258007 | -1.0062 | 0.84284 | 0.84284 | -1.0062     | 0.84284     | -1.0062 | 0.84284 |
|             |                 | -1.0062 | 0.84284 | 0.84284 | 0.90195874  |             |         |         |
| HGD         | ENSG00000113924 | -1.381  | 0.91635 | 0.91635 | -1.266      | 0.89725     | -1.0651 | 0.85658 |
|             |                 | -1.0063 | 0.84287 | 0.84287 | 0.901971037 |             |         |         |
| NA          | ENSG00000271265 | -1.7556 | 0.96042 | 0.96042 | -1.0064     | 0.84289     | -1.7556 | 0.96042 |

|           |                 |         |         |             |             |         |         |
|-----------|-----------------|---------|---------|-------------|-------------|---------|---------|
|           | -1.7556         | 0.96042 | 0.84289 | 0.901972632 |             |         |         |
| NA        | ENSG00000230289 | -1.0065 | 0.84291 | -1.0065     | 0.84291     | -1.0065 | 0.84291 |
|           | -1.0065         | 0.84291 | 0.84291 | 0.901974226 |             |         |         |
| OR6Q1     | ENSG00000279051 | -1.0067 | 0.84296 | -1.0067     | 0.84296     | -1.0067 | 0.84296 |
|           | -1.0067         | 0.84296 | 0.84296 | 0.902007923 |             |         |         |
| MRPL19    | ENSG00000115364 | -1.0068 | 0.84298 | -1.0068     | 0.84298     | -1.0068 |         |
|           | 0.84298         | -1.0068 | 0.84298 | 0.902009517 |             |         |         |
| NA        | ENSG00000238339 | -2.2027 | 0.98619 | -1.007      | 0.84304     | -1.007  | 0.84304 |
|           | -1.007          | 0.84304 | 0.84304 | 0.902028185 |             |         |         |
| NA        | ENSG00000200605 | -1.0072 | 0.84308 | -1.0072     | 0.84308     | -1.0072 | 0.84308 |
|           | -1.0072         | 0.84308 | 0.84308 | 0.902028185 |             |         |         |
| NA        | ENSG00000231201 | -1.0072 | 0.84308 | -1.0072     | 0.84308     | -1.0072 | 0.84308 |
|           | -1.0072         | 0.84308 | 0.84308 | 0.902028185 |             |         |         |
| OR2P1P    | ENSG00000236909 | -1.2167 | 0.88814 | -1.2167     | 0.88814     | -1.0072 |         |
|           | 0.84309         | -1.2608 | 0.89631 | 0.84309     | 0.902028185 |         |         |
| NA        | ENSG00000279349 | -1.0072 | 0.84309 | -1.0072     | 0.84309     | -1.0072 | 0.84309 |
|           | -1.0072         | 0.84309 | 0.84309 | 0.902028185 |             |         |         |
| NA        | ENSG00000227910 | -1.079  | 0.8597  | -1.1746     | 0.87992     | -1.0076 | 0.84317 |
|           | -1.0076         | 0.84317 | 0.84317 | 0.902071429 |             |         |         |
| NA        | ENSG00000279201 | -1.0077 | 0.84319 | -1.0077     | 0.84319     | -1.0077 | 0.84319 |
|           | -1.0077         | 0.84319 | 0.84319 | 0.902071429 |             |         |         |
| NA        | ENSG00000249051 | -1.0077 | 0.84321 | -1.0077     | 0.84321     | -1.0077 | 0.84321 |
|           | -1.0077         | 0.84321 | 0.84321 | 0.902071429 |             |         |         |
| NA        | ENSG00000273080 | -1.0078 | 0.84323 | -1.0078     | 0.84323     | -1.0078 | 0.84323 |
|           | -1.0078         | 0.84323 | 0.84323 | 0.902071429 |             |         |         |
| TGFB2-OT1 | ENSG00000281453 | -1.0078 | 0.84323 | -1.0078     | 0.84323     | -1.0078 |         |
|           | 0.84323         | -1.0078 | 0.84323 | 0.84323     | 0.902071429 |         |         |
| SLC30A3   | ENSG00000115194 | -1.0079 | 0.84326 | -1.0079     | 0.84326     | -1.0079 |         |
|           | 0.84326         | -1.0356 | 0.8498  | 0.84326     | 0.902071429 |         |         |
| NA        | ENSG00000267477 | -1.0079 | 0.84326 | -1.0079     | 0.84326     | -1.0079 | 0.84326 |
|           | -1.0079         | 0.84326 | 0.84326 | 0.902071429 |             |         |         |
| RNA5SP372 | ENSG00000212138 | -1.0083 | 0.84334 | -1.0083     | 0.84334     | -1.0083 |         |
|           | 0.84334         | -1.0083 | 0.84334 | 0.84334     | 0.902102373 |         |         |
| ZSWIM5P3  | ENSG00000248958 | -1.0083 | 0.84336 | -1.0083     | 0.84336     | -1.2127 |         |
|           | 0.88738         | -1.0083 | 0.84336 | 0.84336     | 0.902102373 |         |         |
| HENMT1    | ENSG00000162639 | -1.343  | 0.91036 | -1.0085     | 0.84338     | -1.343  |         |
|           | 0.91036         | -1.343  | 0.91036 | 0.84338     | 0.902102373 |         |         |
| PRPF39    | ENSG00000185246 | -1.0084 | 0.84338 | -1.0084     | 0.84338     | -1.0084 |         |
|           | 0.84338         | -1.2339 | 0.89139 | 0.84338     | 0.902102373 |         |         |
| LINC00500 | ENSG00000249381 | -1.0085 | 0.84339 | -1.0085     | 0.84339     | -1.0085 |         |
|           | 0.84339         | -1.0085 | 0.84339 | 0.84339     | 0.902102373 |         |         |
| ZNF192P2  | ENSG00000218016 | -1.0086 | 0.8434  | -1.0086     | 0.8434      | -1.2785 |         |
|           | 0.89946         | -1.0644 | 0.85643 | 0.8434      | 0.902102373 |         |         |
| ARHGAP33  | ENSG00000004777 | -1.0088 | 0.84346 | -1.0088     | 0.84346     | -1.3875 |         |
|           | 0.91735         | -1.3875 | 0.91735 | 0.84346     | 0.902146747 |         |         |
| NA        | ENSG00000257329 | -1.0099 | 0.84374 | -1.0099     | 0.84374     | -1.0099 | 0.84374 |
|           | -1.0099         | 0.84374 | 0.84374 | 0.902426422 |             |         |         |
| GVINP2    | ENSG00000254781 | -1.0104 | 0.84385 | -1.0104     | 0.84385     | -1.0137 |         |
|           | 0.84464         | -1.0104 | 0.84385 | 0.84385     | 0.902524264 |         |         |
| RNU2-34P  | ENSG00000252343 | -1.0106 | 0.84389 | -1.0106     | 0.84389     | -1.0106 |         |
|           | 0.84389         | -1.0106 | 0.84389 | 0.84389     | 0.902547236 |         |         |
| NA        | ENSG00000226296 | -1.0109 | 0.84397 | -1.0109     | 0.84397     | -1.0109 | 0.84397 |
|           | -1.6918         | 0.95466 | 0.84397 | 0.902612986 |             |         |         |
| MIR4782   | ENSG00000265429 | -1.0112 | 0.84403 | -1.0112     | 0.84403     | -1.0112 |         |
|           | 0.84403         | -1.0112 | 0.84403 | 0.84403     | 0.902657344 |         |         |
| NA        | ENSG00000215841 | -1.0112 | 0.84405 | -1.0112     | 0.84405     | -1.0112 | 0.84405 |
|           | -1.0112         | 0.84405 | 0.84405 | 0.902658923 |             |         |         |
| MTND2P5   | ENSG00000224354 | -1.0114 | 0.84408 | -1.0114     | 0.84408     | -1.0114 |         |
|           | 0.84408         | -1.0114 | 0.84408 | 0.84408     | 0.902671196 |         |         |
| NA        | ENSG00000260212 | -1.0116 | 0.84414 | -1.0116     | 0.84414     | -1.0116 | 0.84414 |
|           | -1.0116         | 0.84414 | 0.84414 | 0.90271555  |             |         |         |
| SENP6     | ENSG00000112701 | -1.2364 | 0.89185 | -1.0119     | 0.84421     | -1.0119 | 0.84421 |

|             |                 |         |         |             |             |         |         |  |
|-------------|-----------------|---------|---------|-------------|-------------|---------|---------|--|
|             | -1.501          | 0.93333 | 0.84421 | 0.902770596 |             |         |         |  |
| NRN1L       | ENSG00000188038 | -1.0123 | 0.84429 | -1.0123     | 0.84429     | -1.0123 | 0.84429 |  |
|             | -1.0123         | 0.84429 | 0.84429 | 0.902795471 |             |         |         |  |
| RPL7L1P5    | ENSG00000267634 | -1.0123 | 0.8443  | -1.0123     | 0.8443      | -1.0123 |         |  |
|             | 0.8443          | -1.0123 | 0.8443  | 0.902795471 |             |         |         |  |
| NA          | ENSG00000261332 | -1.0124 | 0.84433 | -1.0124     | 0.84433     | -1.0124 | 0.84433 |  |
|             | -1.0124         | 0.84433 | 0.84433 | 0.902795471 |             |         |         |  |
| CICP24      | ENSG00000271466 | -2.4686 | 0.99322 | -1.0124     | 0.84433     | -1.0756 |         |  |
|             | 0.85894         | -1.0657 | 0.85673 | 0.84433     | 0.902795471 |         |         |  |
| NA          | ENSG00000268565 | -1.0125 | 0.84434 | -1.0125     | 0.84434     | -1.0125 | 0.84434 |  |
|             | -1.0125         | 0.84434 | 0.84434 | 0.902795471 |             |         |         |  |
| RN7SL864P   | ENSG00000239923 | -1.0125 | 0.84436 | -1.0125     | 0.84436     | -1.0125 |         |  |
|             | 0.84436         | -1.0125 | 0.84436 | 0.84436     | 0.902795471 |         |         |  |
| IRX4-AS1    | ENSG00000249116 | -1.0126 | 0.84438 | -1.0126     | 0.84438     | -1.0126 |         |  |
|             | 0.84438         | -1.0126 | 0.84438 | 0.84438     | 0.902795471 |         |         |  |
| RNU6-820P   | ENSG00000207000 | -1.0127 | 0.8444  | -1.5626     | 0.94092     | -1.0127 |         |  |
|             | 0.8444          | -1.0127 | 0.8444  | 0.8444      | 0.902795471 |         |         |  |
| IGHVII-53-1 | ENSG00000253714 | -1.0127 | 0.8444  | -1.0127     | 0.8444      | -1.0127 |         |  |
|             | 0.8444          | -1.0127 | 0.8444  | 0.8444      | 0.902795471 |         |         |  |
| NUDT21      | ENSG00000167005 | -1.013  | 0.84446 | -1.013      | 0.84446     | -1.013  |         |  |
|             | 0.84446         | -1.013  | 0.84446 | 0.84446     | 0.902809647 |         |         |  |
| PPP1R9A     | ENSG00000158528 | -1.2789 | 0.89953 | -1.013      | 0.84447     | -1.0193 |         |  |
|             | 0.84597         | -1.7015 | 0.95558 | 0.84447     | 0.902809647 |         |         |  |
| NA          | ENSG00000236526 | -1.0131 | 0.84449 | -1.0131     | 0.84449     | -1.0131 | 0.84449 |  |
|             | -1.0131         | 0.84449 | 0.84449 | 0.902809647 |             |         |         |  |
| CENPJ       | ENSG00000151849 | -1.0132 | 0.84452 | -1.1091     | 0.86631     | -1.0132 | 0.84452 |  |
|             | -1.2342         | 0.89144 | 0.84452 | 0.902809647 |             |         |         |  |
| CCT5        | ENSG00000150753 | -1.1424 | 0.87335 | -1.1811     | 0.88123     | -1.1233 | 0.86934 |  |
|             | -1.0132         | 0.84453 | 0.84453 | 0.902809647 |             |         |         |  |
| NA          | ENSG00000241651 | -1.0134 | 0.84456 | -1.0134     | 0.84456     | -1.0134 | 0.84456 |  |
|             | -1.0134         | 0.84456 | 0.84456 | 0.902809647 |             |         |         |  |
| NA          | ENSG00000278690 | -1.0134 | 0.84456 | -1.0134     | 0.84456     | -1.0134 | 0.84456 |  |
|             | -1.0134         | 0.84456 | 0.84456 | 0.902809647 |             |         |         |  |
| NA          | ENSG00000229679 | -1.0134 | 0.84457 | -1.0134     | 0.84457     | -1.0134 | 0.84457 |  |
|             | -1.0134         | 0.84457 | 0.84457 | 0.902809647 |             |         |         |  |
| NA          | ENSG00000272256 | -1.0135 | 0.84458 | -1.3285     | 0.908       | -1.0135 | 0.84458 |  |
|             | -1.0135         | 0.84458 | 0.84458 | 0.902809647 |             |         |         |  |
| MTCYBP29    | ENSG00000224880 | -1.0136 | 0.8446  | -1.0136     | 0.8446      | -1.0136 |         |  |
|             | 0.8446          | -1.0136 | 0.8446  | 0.8446      | 0.902811222 |         |         |  |
| NA          | ENSG00000255081 | -1.0137 | 0.84463 | -1.0137     | 0.84463     | -1.0137 | 0.84463 |  |
|             | -1.0137         | 0.84463 | 0.84463 | 0.902823486 |             |         |         |  |
| NA          | ENSG00000259871 | -1.014  | 0.8447  | -1.014      | 0.8447      | -1.014  | 0.8447  |  |
|             | -1.014          | 0.8447  | 0.8447  | 0.9028587   |             |         |         |  |
| NA          | ENSG00000284486 | -1.014  | 0.8447  | -1.014      | 0.8447      | -1.014  | 0.8447  |  |
|             | -1.014          | 0.8447  | 0.8447  | 0.9028587   |             |         |         |  |
| KLF10       | ENSG00000155090 | -1.5981 | 0.94498 | -1.454      | 0.92702     | -2.2339 | 0.98725 |  |
|             | -1.0141         | 0.84473 | 0.84473 | 0.902870962 |             |         |         |  |
| RPA2P2      | ENSG00000226466 | -1.0142 | 0.84477 | -1.0142     | 0.84477     | -1.0142 |         |  |
|             | 0.84477         | -1.0142 | 0.84477 | 0.84477     | 0.902893911 |         |         |  |
| SLU7        | ENSG00000164609 | -1.0143 | 0.84479 | -1.0143     | 0.84479     | -1.0143 | 0.84479 |  |
|             | -1.5758         | 0.94246 | 0.84479 | 0.902895484 |             |         |         |  |
| RNU6-628P   | ENSG00000222607 | -1.0145 | 0.84482 | -1.0145     | 0.84482     | -1.0145 |         |  |
|             | 0.84482         | -1.0145 | 0.84482 | 0.84482     | 0.902907744 |         |         |  |
| FZD10-AS1   | ENSG00000250208 | -1.1733 | 0.87966 | -1.3452     | 0.91071     | -2.1735 |         |  |
|             | 0.98513         | -1.0147 | 0.84487 | 0.84487     | 0.902940121 |         |         |  |
| ABITRAMP1   | ENSG00000251106 | -1.015  | 0.84494 | -1.015      | 0.84494     | -1.015  |         |  |
|             | 0.84494         | -1.015  | 0.84494 | 0.84494     | 0.902940121 |         |         |  |
| OR4A11P     | ENSG00000254663 | -1.0517 | 0.85353 | -1.1523     | 0.87541     | -1.0695 |         |  |
|             | 0.85758         | -1.015  | 0.84495 | 0.84495     | 0.902940121 |         |         |  |
| RNU6-1220P  | ENSG00000252935 | -1.0151 | 0.84497 | -1.0151     | 0.84497     | -1.0151 |         |  |
|             | 0.84497         | -1.0151 | 0.84497 | 0.84497     | 0.902940121 |         |         |  |
| NA          | ENSG00000273497 | -1.0151 | 0.84497 | -1.0151     | 0.84497     | -1.0151 | 0.84497 |  |

|            |                 |         |         |             |             |         |         |  |
|------------|-----------------|---------|---------|-------------|-------------|---------|---------|--|
|            | -1.0151         | 0.84497 | 0.84497 | 0.902940121 |             |         |         |  |
| NA         | ENSG00000268615 | -1.0151 | 0.84498 | -1.0772     | 0.8593      | -1.0151 | 0.84498 |  |
|            | -1.0151         | 0.84498 | 0.84498 | 0.902940121 |             |         |         |  |
| NA         | ENSG00000275944 | -1.2358 | 0.89174 | -1.2358     | 0.89174     | -1.0151 | 0.84498 |  |
|            | -1.2358         | 0.89174 | 0.84498 | 0.902940121 |             |         |         |  |
| NA         | ENSG00000232121 | -1.0154 | 0.84504 | -1.0154     | 0.84504     | -1.0154 | 0.84504 |  |
|            | -1.0154         | 0.84504 | 0.84504 | 0.90295552  |             |         |         |  |
| GLS        | ENSG00000115419 | -1.266  | 0.89723 | -1.7816     | 0.96259     | -1.2495 | 0.89425 |  |
|            | -1.0154         | 0.84505 | 0.84505 | 0.90295552  |             |         |         |  |
| MIR4455    | ENSG00000263458 | -1.851  | 0.96792 | -1.1333     | 0.87145     | -1.0154 |         |  |
|            | 0.84505         | -1.1019 | 0.86475 | 0.84505     | 0.90295552  |         |         |  |
| SNRPCP3    | ENSG00000244668 | -1.8966 | 0.97106 | -1.5175     | 0.93544     | -1.0161 |         |  |
|            | 0.84521         | -1.8966 | 0.97106 | 0.84521     | 0.903065804 |         |         |  |
| NA         | ENSG00000252526 | -1.0161 | 0.84521 | -1.0161     | 0.84521     | -1.0161 | 0.84521 |  |
|            | -1.0161         | 0.84521 | 0.84521 | 0.903065804 |             |         |         |  |
| RPL10P14   | ENSG00000260031 | -1.0161 | 0.84521 | -1.0161     | 0.84521     | -1.0161 |         |  |
|            | 0.84521         | -1.0161 | 0.84521 | 0.84521     | 0.903065804 |         |         |  |
| IFT172     | ENSG00000138002 | -1.1448 | 0.87385 | -1.085      | 0.86103     | -1.0163 |         |  |
|            | 0.84526         | -1.047  | 0.85245 | 0.84526     | 0.903065804 |         |         |  |
| SLFN14     | ENSG00000236320 | -1.6247 | 0.94789 | -1.0164     | 0.84529     | -1.6247 |         |  |
|            | 0.94789         | -1.6247 | 0.94789 | 0.84529     | 0.903065804 |         |         |  |
| ENPP7P8    | ENSG00000255319 | -1.3777 | 0.91585 | -1.0164     | 0.84529     | -1.1009 |         |  |
|            | 0.86453         | -1.5235 | 0.93618 | 0.84529     | 0.903065804 |         |         |  |
| NA         | ENSG00000237764 | -1.0164 | 0.84529 | -1.0164     | 0.84529     | -1.7092 | 0.95629 |  |
|            | -1.0164         | 0.84529 | 0.84529 | 0.903065804 |             |         |         |  |
| SF3A1      | ENSG00000099995 | -1.8429 | 0.96733 | -2.0789     | 0.98119     | -1.0165 | 0.84531 |  |
|            | -1.0791         | 0.85972 | 0.84531 | 0.903065804 |             |         |         |  |
| NA         | ENSG00000278396 | -1.0166 | 0.84532 | -1.0166     | 0.84532     | -1.0166 | 0.84532 |  |
|            | -1.0166         | 0.84532 | 0.84532 | 0.903065804 |             |         |         |  |
| NA         | ENSG00000244705 | -1.0168 | 0.84537 | -1.0168     | 0.84537     | -1.0168 | 0.84537 |  |
|            | -1.0168         | 0.84537 | 0.84537 | 0.903099421 |             |         |         |  |
| SNORD15B   | ENSG00000207445 | -1.017  | 0.84542 | -1.017      | 0.84542     | -1.017  |         |  |
|            | 0.84542         | -1.017  | 0.84542 | 0.84542     | 0.903125488 |         |         |  |
| PLCB4      | ENSG00000101333 | -1.5416 | 0.93842 | -1.3131     | 0.90543     | -1.3834 | 0.91673 |  |
|            | -1.0171         | 0.84545 | 0.84545 | 0.903125488 |             |         |         |  |
| NA         | ENSG00000271830 | -1.0171 | 0.84545 | -1.0171     | 0.84545     | -1.0171 | 0.84545 |  |
|            | -1.0171         | 0.84545 | 0.84545 | 0.903125488 |             |         |         |  |
| TSEN15P1   | ENSG00000230865 | -1.5208 | 0.93584 | -1.0175     | 0.84554     | -1.9055 |         |  |
|            | 0.97164         | -1.5208 | 0.93584 | 0.84554     | 0.903162232 |         |         |  |
| RN7SL153P  | ENSG00000244748 | -1.0175 | 0.84554 | -1.2761     | 0.89903     | -1.2761 |         |  |
|            | 0.89903         | -1.2761 | 0.89903 | 0.84554     | 0.903162232 |         |         |  |
| NA         | ENSG00000258256 | -1.0175 | 0.84554 | -1.0175     | 0.84554     | -1.0175 | 0.84554 |  |
|            | -1.3113         | 0.90513 | 0.84554 | 0.903162232 |             |         |         |  |
| RNU6-1177P | ENSG00000212360 | -2.0265 | 0.97864 | -2.4711     | 0.99326     | -1.3416 |         |  |
|            | 0.91014         | -1.0176 | 0.84557 | 0.84557     | 0.903170061 |         |         |  |
| SEC24D     | ENSG00000150961 | -1.0518 | 0.85356 | -1.0178     | 0.84562     | -1.2916 |         |  |
|            | 0.90175         | -1.2482 | 0.89402 | 0.84562     | 0.903170061 |         |         |  |
| C22orf34   | ENSG00000188511 | -1.0179 | 0.84563 | -1.1978     | 0.88449     | -1.6345 |         |  |
|            | 0.94892         | -1.0224 | 0.8467  | 0.84563     | 0.903170061 |         |         |  |
| NA         | ENSG00000282843 | -1.0179 | 0.84563 | -1.0179     | 0.84563     | -1.0179 | 0.84563 |  |
|            | -1.0179         | 0.84563 | 0.84563 | 0.903170061 |             |         |         |  |
| NA         | ENSG00000224384 | -1.0179 | 0.84564 | -1.0179     | 0.84564     | -1.0179 | 0.84564 |  |
|            | -1.0179         | 0.84564 | 0.84564 | 0.903170061 |             |         |         |  |
| RPL39P34   | ENSG00000242255 | -1.0185 | 0.84577 | -1.0185     | 0.84577     | -1.0185 |         |  |
|            | 0.84577         | -1.0185 | 0.84577 | 0.84577     | 0.903260194 |         |         |  |
| SCUBE1-AS1 | ENSG00000203527 | -2.1552 | 0.98443 | -1.2254     | 0.88979     | -1.0185 |         |  |
|            | 0.84578         | -1.133  | 0.87139 | 0.84578     | 0.903260194 |         |         |  |
| NA         | ENSG00000276251 | -1.0185 | 0.84578 | -1.0185     | 0.84578     | -1.0854 | 0.86112 |  |
|            | -1.0185         | 0.84578 | 0.84578 | 0.903260194 |             |         |         |  |
| C19orf44   | ENSG00000105072 | -1.0186 | 0.8458  | -1.0186     | 0.8458      | -1.0186 |         |  |
|            | 0.8458          | -1.0186 | 0.8458  | 0.8458      | 0.903261758 |         |         |  |
| HES1       | ENSG00000114315 | -1.1197 | 0.86858 | -1.405      | 0.91999     | -1.0189 | 0.84588 |  |



|            |                 |         |         |             |             |         |         |  |
|------------|-----------------|---------|---------|-------------|-------------|---------|---------|--|
|            | -1.117          | 0.868   | 0.84588 | 0.903304733 |             |         |         |  |
| GCKR       | ENSG00000084734 | -1.0225 | 0.84673 | -1.0191     | 0.84591     | -1.2778 | 0.89934 |  |
|            | -1.7914         | 0.96338 | 0.84591 | 0.903304733 |             |         |         |  |
| LARP7P4    | ENSG00000244024 | -1.6646 | 0.952   | -1.0191     | 0.84591     | -1.0191 | 0.84591 |  |
|            | -1.0191         | 0.84591 | 0.84591 | 0.903304733 |             |         |         |  |
| NA         | ENSG00000232581 | -1.0192 | 0.84593 | -1.0192     | 0.84593     | -1.0192 | 0.84593 |  |
|            | -1.0192         | 0.84593 | 0.84593 | 0.903304733 |             |         |         |  |
| SEMA4G     | ENSG00000095539 | -1.0192 | 0.84595 | -1.0192     | 0.84595     | -1.0192 |         |  |
|            | 0.84595         | -1.0192 | 0.84595 | 0.84595     | 0.903304733 |         |         |  |
| NA         | ENSG00000235738 | -1.0193 | 0.84596 | -1.0193     | 0.84596     | -1.0193 | 0.84596 |  |
|            | -1.0193         | 0.84596 | 0.84596 | 0.903304733 |             |         |         |  |
| NA         | ENSG00000244239 | -1.0193 | 0.84597 | -1.0193     | 0.84597     | -1.0193 | 0.84597 |  |
|            | -1.0193         | 0.84597 | 0.84597 | 0.903304733 |             |         |         |  |
| NA         | ENSG00000271509 | -1.0197 | 0.84607 | -1.0197     | 0.84607     | -1.0197 | 0.84607 |  |
|            | -1.0197         | 0.84607 | 0.84607 | 0.903373482 |             |         |         |  |
| GRPEL2     | ENSG00000164284 | -1.0198 | 0.84609 | -1.0198     | 0.84609     | -1.0198 |         |  |
|            | 0.84609         | -1.0198 | 0.84609 | 0.84609     | 0.903373482 |         |         |  |
| NA         | ENSG00000229976 | -1.0198 | 0.84609 | -2.2357     | 0.98731     | -1.0198 | 0.84609 |  |
|            | -1.0198         | 0.84609 | 0.84609 | 0.903373482 |             |         |         |  |
| MIRLET7G   | ENSG00000199150 | -1.0199 | 0.84611 | -1.0199     | 0.84611     | -1.0199 |         |  |
|            | 0.84611         | -1.0199 | 0.84611 | 0.84611     | 0.903375042 |         |         |  |
| LAMTOR3P2  | ENSG00000248979 | -1.0201 | 0.84615 | -1.0201     | 0.84615     | -1.0201 |         |  |
|            | 0.84615         | -1.0201 | 0.84615 | 0.84615     | 0.903388839 |         |         |  |
| MTCO1P8    | ENSG00000234700 | -2.1084 | 0.9825  | -1.0201     | 0.84616     | -1.0201 |         |  |
|            | 0.84616         | -1.0201 | 0.84616 | 0.84616     | 0.903388839 |         |         |  |
| NA         | ENSG00000258927 | -1.0202 | 0.84618 | -1.509      | 0.93435     | -1.3574 | 0.91267 |  |
|            | -1.0319         | 0.84894 | 0.84618 | 0.9033904   |             |         |         |  |
| NA         | ENSG00000261638 | -1.0207 | 0.84629 | -1.0207     | 0.84629     | -1.0207 | 0.84629 |  |
|            | -1.0207         | 0.84629 | 0.84629 | 0.903488043 |             |         |         |  |
| PRPS1L1    | ENSG00000229937 | -1.0208 | 0.84633 | -1.0208     | 0.84633     | -1.0208 |         |  |
|            | 0.84633         | -1.0208 | 0.84633 | 0.84633     | 0.903510952 |         |         |  |
| NA         | ENSG00000271869 | -1.021  | 0.84637 | -1.021      | 0.84637     | -1.021  | 0.84637 |  |
|            | -1.021          | 0.84637 | 0.84637 | 0.90353386  |             |         |         |  |
| NA         | ENSG00000199927 | -1.0308 | 0.84868 | -1.0308     | 0.84868     | -1.0211 | 0.8464  |  |
|            | -1.2896         | 0.90141 | 0.8464  | 0.903536973 |             |         |         |  |
| RN7SL319P  | ENSG00000241807 | -1.0211 | 0.84641 | -1.0211     | 0.84641     | -1.0211 |         |  |
|            | 0.84641         | -1.0211 | 0.84641 | 0.84641     | 0.903536973 |         |         |  |
| NOL3       | ENSG00000140939 | -1.0215 | 0.84649 | -1.0215     | 0.84649     | -1.0215 | 0.84649 |  |
|            | -1.0215         | 0.84649 | 0.84649 | 0.903553874 |             |         |         |  |
| WWTR1-AS1  | ENSG00000241313 | -1.0215 | 0.84649 | -1.0215     | 0.84649     | -1.0215 |         |  |
|            | 0.84649         | -1.0215 | 0.84649 | 0.84649     | 0.903553874 |         |         |  |
| GACAT3     | ENSG00000236289 | -1.0215 | 0.8465  | -1.3457     | 0.9108      | -1.0215 |         |  |
|            | 0.8465          | -1.1568 | 0.87633 | 0.8465      | 0.903553874 |         |         |  |
| RNU6-1121P | ENSG00000252611 | -1.0215 | 0.8465  | -1.0215     | 0.8465      | -1.0215 |         |  |
|            | 0.8465          | -1.0215 | 0.8465  | 0.8465      | 0.903553874 |         |         |  |
| IQCB1      | ENSG00000173226 | -1.0219 | 0.84658 | -2.1811     | 0.98541     | -2.1811 | 0.98541 |  |
|            | -2.1811         | 0.98541 | 0.84658 | 0.903619473 |             |         |         |  |
| LINC01422  | ENSG00000223704 | -1.6236 | 0.94777 | -1.022      | 0.84661     | -1.3874 |         |  |
|            | 0.91734         | -1.022  | 0.84661 | 0.84661     | 0.903622582 |         |         |  |
| MTND3P18   | ENSG00000283865 | -1.0221 | 0.84662 | -1.0221     | 0.84662     | -1.0221 |         |  |
|            | 0.84662         | -1.0221 | 0.84662 | 0.84662     | 0.903622582 |         |         |  |
| LMCD1      | ENSG00000071282 | -1.0221 | 0.84664 | -1.0996     | 0.86425     | -1.0996 | 0.86425 |  |
|            | -1.1611         | 0.8772  | 0.84664 | 0.903624136 |             |         |         |  |
| NA         | ENSG00000275017 | -1.0223 | 0.84667 | -1.0223     | 0.84667     | -1.0223 | 0.84667 |  |
|            | -1.0223         | 0.84667 | 0.84667 | 0.903627245 |             |         |         |  |
| TMEM70     | ENSG00000175606 | -1.0223 | 0.84668 | -1.0223     | 0.84668     | -1.0223 |         |  |
|            | 0.84668         | -1.0223 | 0.84668 | 0.84668     | 0.903627245 |         |         |  |
| OR52B3P    | ENSG00000175800 | -1.0713 | 0.85798 | -1.0228     | 0.8468      | -1.0713 |         |  |
|            | 0.85798         | -1.0713 | 0.85798 | 0.8468      | 0.903715731 |         |         |  |
| RYKP1      | ENSG00000263219 | -1.0228 | 0.8468  | -1.0228     | 0.8468      | -1.0228 | 0.8468  |  |
|            | -1.0228         | 0.8468  | 0.8468  | 0.903715731 |             |         |         |  |
| NA         | ENSG00000259985 | -1.0231 | 0.84686 | -1.0231     | 0.84686     | -1.0231 | 0.84686 |  |

|             |                 |         |         |             |             |         |         |         |
|-------------|-----------------|---------|---------|-------------|-------------|---------|---------|---------|
|             | -1.0231         | 0.84686 | 0.84686 | 0.903759971 |             |         |         |         |
| NA          | ENSG00000255703 | -1.0232 | 0.84688 | -1.3252     | 0.90744     | -1.5282 | 0.93676 |         |
|             | -1.4505         | 0.92654 | 0.84688 | 0.903761522 |             |         |         |         |
| NA          | ENSG00000256152 | -1.0233 | 0.84692 | -1.0233     | 0.84692     | -1.0233 | 0.84692 |         |
|             | -1.0233         | 0.84692 | 0.84692 | 0.903775296 |             |         |         |         |
| APIP        | ENSG00000149089 | -1.0234 | 0.84693 | -1.1139     | 0.86734     | -2.0458 | 0.97961 |         |
|             | -1.2053         | 0.88596 | 0.84693 | 0.903775296 |             |         |         |         |
| SLC46A1     | ENSG00000076351 | -1.0239 | 0.84706 | -1.0239     | 0.84706     | -1.0239 |         |         |
|             | 0.84706         | -1.0239 | 0.84706 | 0.84706     | 0.90385774  |         |         |         |
| ADGRD1-AS1  | ENSG00000256151 | -1.0239 | 0.84706 | -1.0239     | 0.84706     | -1.0239 |         |         |
|             | 0.84706         | -1.0239 | 0.84706 | 0.84706     | 0.90385774  |         |         |         |
| GPBP1L1     | ENSG00000159592 | -1.367  | 0.91419 | -1.2364     | 0.89184     | -1.0241 |         |         |
|             | 0.8471          | -2.2301 | 0.98713 | 0.8471      | 0.90385774  |         |         |         |
| NA          | ENSG00000272798 | -1.0241 | 0.8471  | -1.0241     | 0.8471      | -1.0241 | 0.8471  |         |
|             | -1.0241         | 0.8471  | 0.8471  | 0.90385774  |             |         |         |         |
| NA          | ENSG00000272942 | -1.0241 | 0.8471  | -1.0241     | 0.8471      | -1.0241 | 0.8471  |         |
|             | -1.0241         | 0.8471  | 0.8471  | 0.90385774  |             |         |         |         |
| RPS2P35     | ENSG00000238172 | -1.0242 | 0.84714 | -1.0242     | 0.84714     | -1.0242 |         |         |
|             | 0.84714         | -1.0242 | 0.84714 | 0.84714     | 0.903880629 |         |         |         |
| MTND6P17    | ENSG00000249770 | -1.0246 | 0.84722 | -1.0246     | 0.84722     | -1.0246 |         |         |
|             | 0.84722         | -1.0246 | 0.84722 | 0.84722     | 0.903946195 |         |         |         |
| NA          | ENSG00000236896 | -1.0247 | 0.84724 | -1.0247     | 0.84724     | -1.0247 | 0.84724 |         |
|             | -1.0247         | 0.84724 | 0.84724 | 0.903947742 |             |         |         |         |
| MIR520H     | ENSG00000207861 | -1.025  | 0.84733 | -1.025      | 0.84733     | -1.025  |         |         |
|             | 0.84733         | -1.025  | 0.84733 | 0.84733     | 0.904023972 |         |         |         |
| NA          | ENSG00000242407 | -1.0252 | 0.84737 | -1.0252     | 0.84737     | -1.0252 | 0.84737 |         |
|             | -1.0252         | 0.84737 | 0.84737 | 0.904046855 |             |         |         |         |
| ZSCAN31     | ENSG00000235109 | -1.3139 | 0.90555 | -1.3588     | 0.9129      | -1.0256 |         |         |
|             | 0.84745         | -1.397  | 0.91879 | 0.84745     | 0.904112411 |         |         |         |
| NA          | ENSG00000256218 | -1.8446 | 0.96745 | -1.026      | 0.84756     | -1.026  | 0.84756 |         |
|             | -1.026          | 0.84756 | 0.84756 | 0.90420997  |             |         |         |         |
| NA          | ENSG00000259632 | -1.0265 | 0.84767 | -1.0265     | 0.84767     | -1.0265 | 0.84767 |         |
|             | -1.0265         | 0.84767 | 0.84767 | 0.90430609  |             |         |         |         |
| FOXD3       | ENSG00000187140 | -1.0266 | 0.8477  | -1.0266     | 0.8477      | -1.0266 | 0.8477  |         |
|             | -1.0266         | 0.8477  | 0.8477  | 0.90430609  |             |         |         |         |
| NA          | ENSG00000260664 | -1.4204 | 0.92225 | -1.2274     | 0.89017     | -1.2274 | 0.89017 |         |
|             | -1.0267         | 0.84771 | 0.84771 | 0.90430609  |             |         |         |         |
| UBQLN4P1    | ENSG00000241627 | -1.0269 | 0.84776 | -1.0269     | 0.84776     | -1.0269 |         |         |
|             | 0.84776         | -1.0269 | 0.84776 | 0.84776     | 0.90430609  |         |         |         |
| PPAN        | ENSG00000130810 | -1.0269 | 0.84777 | -1.0269     | 0.84777     | -1.0269 | 0.84777 |         |
|             | -1.0269         | 0.84777 | 0.84777 | 0.90430609  |             |         |         |         |
| PPAN-P2RY11 | ENSG00000243207 | -1.0269 | 0.84777 | -1.0269     | 0.84777     | -1.0269 | 0.84777 | -1.0269 |
|             | 0.84777         | -1.0269 | 0.84777 | 0.84777     | 0.90430609  |         |         |         |
| TMEM42      | ENSG00000169964 | -1.9044 | 0.97157 | -1.9044     | 0.97157     | -1.0269 |         |         |
|             | 0.84778         | -1.1007 | 0.86448 | 0.84778     | 0.90430609  |         |         |         |
| OR51A7      | ENSG00000176895 | -1.0271 | 0.84782 | -1.0271     | 0.84782     | -1.0271 |         |         |
|             | 0.84782         | -1.0271 | 0.84782 | 0.84782     | 0.904328961 |         |         |         |
| PABPC1P2    | ENSG00000198526 | -1.0273 | 0.84785 | -1.0273     | 0.84785     | -1.0273 |         |         |
|             | 0.84785         | -1.0273 | 0.84785 | 0.84785     | 0.904341166 |         |         |         |
| CBX3        | ENSG00000122565 | -1.0566 | 0.85466 | -1.0566     | 0.85466     | -1.0274 | 0.84787 |         |
|             | -1.0566         | 0.85466 | 0.84787 | 0.904342704 |             |         |         |         |
| SNORD15A    | ENSG00000206941 | -1.0279 | 0.84801 | -1.0279     | 0.84801     | -1.0279 |         |         |
|             | 0.84801         | -1.0279 | 0.84801 | 0.84801     | 0.904434175 |         |         |         |
| NA          | ENSG00000279223 | -1.0279 | 0.84801 | -1.0279     | 0.84801     | -1.0279 | 0.84801 |         |
|             | -1.0279         | 0.84801 | 0.84801 | 0.904434175 |             |         |         |         |
| RPL12       | ENSG00000197958 | -1.028  | 0.84802 | -1.028      | 0.84802     | -1.028  | 0.84802 |         |
|             | -1.028          | 0.84802 | 0.84802 | 0.904434175 |             |         |         |         |
| NA          | ENSG00000254201 | -1.028  | 0.84803 | -1.028      | 0.84803     | -1.028  | 0.84803 |         |
|             | -1.028          | 0.84803 | 0.84803 | 0.904434175 |             |         |         |         |
| TRAV30      | ENSG00000259092 | -1.0282 | 0.84806 | -1.0282     | 0.84806     | -1.0282 |         |         |
|             | 0.84806         | -1.0282 | 0.84806 | 0.84806     | 0.904446376 |         |         |         |
| SLC5A5      | ENSG00000105641 | -1.7837 | 0.96276 | -1.7837     | 0.96276     | -1.7837 |         |         |

|            |                 |         |             |             |             |         |         |         |
|------------|-----------------|---------|-------------|-------------|-------------|---------|---------|---------|
|            | 0.96276         | -1.0283 | 0.84809     | 0.84809     | 0.904458576 |         |         |         |
| H2BL1P     | ENSG00000223497 | -1.7233 | 0.95759     | 0.95759     | -1.7233     | 0.95759 | -1.0285 |         |
|            | 0.84814         | -1.5999 | 0.94519     | 0.84814     | 0.904492104 |         |         |         |
| TMCO1-AS1  | ENSG00000224358 | -1.0287 | 0.8482      | 0.8482      | -2.3894     | 0.99156 | -2.3894 |         |
|            | 0.99156         | -1.0287 | 0.8482      | 0.8482      | 0.904528698 |         |         |         |
| PTGS2      | ENSG00000073756 | -1.0289 | 0.84823     | 0.84823     | -1.0289     | 0.84823 | -1.0289 | 0.84823 |
|            | -1.0289         | 0.84823 | 0.84823     | 0.904528698 |             |         |         |         |
| NA         | ENSG00000260555 | -1.0289 | 0.84823     | 0.84823     | -1.0522     | 0.85364 | -1.558  | 0.94039 |
|            | -1.9052         | 0.97163 | 0.84823     | 0.904528698 |             |         |         |         |
| HRC        | ENSG00000130528 | -1.0293 | 0.84832     | 0.84832     | -1.0293     | 0.84832 | -1.0293 | 0.84832 |
|            | -1.0293         | 0.84832 | 0.84832     | 0.904585081 |             |         |         |         |
| OR52Z1     | ENSG00000176748 | -1.0293 | 0.84832     | 0.84832     | -1.0293     | 0.84832 | -1.7958 |         |
|            | 0.96374         | -1.432  | 0.92392     | 0.84832     | 0.904585081 |         |         |         |
| NRG1-IT3   | ENSG00000254049 | -1.0603 | 0.85549     | 0.85549     | -1.0294     | 0.84836 | -1.4793 |         |
|            | 0.93047         | -1.0294 | 0.84836     | 0.84836     | 0.904597335 |         |         |         |
| MIR4672    | ENSG00000263979 | -1.0296 | 0.84841     | 0.84841     | -1.0296     | 0.84841 | -1.0296 |         |
|            | 0.84841         | -1.0296 | 0.84841     | 0.84841     | 0.904597335 |         |         |         |
| TACR2      | ENSG00000075073 | -1.0297 | 0.84843     | 0.84843     | -2.2246     | 0.98694 | -1.3061 | 0.90423 |
|            | -1.868          | 0.96912 | 0.84843     | 0.904597335 |             |         |         |         |
| C19orf33   | ENSG00000167644 | -1.1224 | 0.86916     | 0.86916     | -1.0297     | 0.84843 | -1.1128 |         |
|            | 0.86711         | -1.7117 | 0.95653     | 0.84843     | 0.904597335 |         |         |         |
| NA         | ENSG00000207243 | -1.0298 | 0.84845     | 0.84845     | -1.0298     | 0.84845 | -1.0298 | 0.84845 |
|            | -1.0298         | 0.84845 | 0.84845     | 0.904597335 |             |         |         |         |
| RPL7P44    | ENSG00000233873 | -1.0299 | 0.84846     | 0.84846     | -1.0299     | 0.84846 | -1.0299 |         |
|            | 0.84846         | -1.0299 | 0.84846     | 0.84846     | 0.904597335 |         |         |         |
| TRAPPC6B   | ENSG00000182400 | -1.0389 | 0.85057     | 0.85057     | -1.0299     | 0.84848 | -1.0389 |         |
|            | 0.85057         | -1.3592 | 0.91296     | 0.84848     | 0.904597335 |         |         |         |
| NA         | ENSG00000233196 | -1.0299 | 0.84848     | 0.84848     | -1.0299     | 0.84848 | -1.0299 | 0.84848 |
|            | -1.0299         | 0.84848 | 0.84848     | 0.904597335 |             |         |         |         |
| NA         | ENSG00000252341 | -1.0302 | 0.84853     | 0.84853     | -1.0302     | 0.84853 | -1.0302 | 0.84853 |
|            | -1.0302         | 0.84853 | 0.84853     | 0.90463085  |             |         |         |         |
| NA         | ENSG00000254964 | -1.0303 | 0.84857     | 0.84857     | -1.0303     | 0.84857 | -1.0303 | 0.84857 |
|            | -1.0303         | 0.84857 | 0.84857     | 0.904649163 |             |         |         |         |
| NA         | ENSG00000225092 | -1.0304 | 0.84859     | 0.84859     | -1.0304     | 0.84859 | -1.0304 | 0.84859 |
|            | -1.0304         | 0.84859 | 0.84859     | 0.904649163 |             |         |         |         |
| NA         | ENSG00000238291 | -1.0305 | 0.84861     | 0.84861     | -1.0305     | 0.84861 | -1.0305 | 0.84861 |
|            | -1.0305         | 0.84861 | 0.84861     | 0.904649163 |             |         |         |         |
| TMEM132D   | ENSG00000151952 | -1.4887 | 0.93172     | 0.93172     | -1.4419     | 0.92533 | -1.0306 |         |
|            | 0.84864         | -1.3116 | 0.90516     | 0.84864     | 0.904649163 |         |         |         |
| NA         | ENSG00000255843 | -1.0306 | 0.84864     | 0.84864     | -1.0306     | 0.84864 | -1.0306 | 0.84864 |
|            | -1.0306         | 0.84864 | 0.84864     | 0.904649163 |             |         |         |         |
| NA         | ENSG00000267610 | -1.031  | 0.84874     | 0.84874     | -1.031      | 0.84874 | -1.031  | 0.84874 |
|            | -1.031          | 0.84874 | 0.84874     | 0.904735971 |             |         |         |         |
| TRAJ59     | ENSG00000211832 | -1.0313 | 0.84879     | 0.84879     | -1.0313     | 0.84879 | -1.0313 |         |
|            | 0.84879         | -1.0313 | 0.84879     | 0.84879     | 0.904769478 |         |         |         |
| NA         | ENSG00000270038 | -1.0314 | 0.84882     | 0.84882     | -1.0314     | 0.84882 | -1.0314 | 0.84882 |
|            | -1.0314         | 0.84882 | 0.84882     | 0.904781665 |             |         |         |         |
| NA         | ENSG00000238771 | -1.461  | 0.928       | 0.928       | -1.461      | 0.928   | -1.461  | 0.928   |
|            | 0.84886         | 0.84886 | 0.90480451  |             |             |         |         |         |
| NA         | ENSG00000274133 | -1.0665 | 0.85689     | 0.85689     | -1.0665     | 0.85689 | -1.0318 | 0.84891 |
|            | -1.0665         | 0.85689 | 0.84891     | 0.904828881 |             |         |         |         |
| STEAP3-AS1 | ENSG00000229867 | -1.0318 | 0.84892     | 0.84892     | -1.0318     | 0.84892 | -1.0318 |         |
|            | 0.84892         | -1.0318 | 0.84892     | 0.84892     | 0.904828881 |         |         |         |
| C6orf15    | ENSG00000204542 | -1.2636 | 0.89682     | 0.89682     | -1.032      | 0.84897 | -1.1217 | 0.869   |
|            | -1.1217         | 0.869   | 0.84897     | 0.904830431 |             |         |         |         |
| EHD4-AS1   | ENSG00000259883 | -1.0321 | 0.84899     | 0.84899     | -1.0321     | 0.84899 | -1.0321 |         |
|            | 0.84899         | -1.0321 | 0.84899     | 0.84899     | 0.904830431 |         |         |         |
| RN7SKP15   | ENSG00000201612 | -1.0322 | 0.849       | 0.849       | -1.0322     | 0.849   | -1.0322 | 0.849   |
|            | 0.849           | 0.849   | 0.904830431 |             |             |         |         |         |
| DNMT3L-AS1 | ENSG00000232010 | -1.0322 | 0.849       | 0.849       | -1.0322     | 0.849   | -1.0322 | 0.849   |
|            | 0.849           | 0.849   | 0.904830431 |             |             |         |         |         |
| KRT18P59   | ENSG00000187686 | -1.0323 | 0.84902     | 0.84902     | -1.0323     | 0.84902 | -1.0323 |         |

|             |                 |         |         |             |             |         |         |  |
|-------------|-----------------|---------|---------|-------------|-------------|---------|---------|--|
|             | 0.84902         | -1.0323 | 0.84902 | 0.84902     | 0.904830431 |         |         |  |
| SNORD115-20 | ENSG00000201969 | -1.0324 | 0.84905 | 0.84905     | -1.0324     | 0.84905 | -1.0324 |  |
|             | 0.84905         | -1.0324 | 0.84905 | 0.84905     | 0.904830431 |         |         |  |
| TYMSP1      | ENSG00000219139 | -1.0325 | 0.84907 | 0.84907     | -1.0325     | 0.84907 | -1.0325 |  |
|             | 0.84907         | -1.0325 | 0.84907 | 0.84907     | 0.904830431 |         |         |  |
| NA          | ENSG00000236792 | -1.0324 | 0.84907 | -1.0324     | 0.84907     | -1.0324 | 0.84907 |  |
|             | -1.0324         | 0.84907 | 0.84907 | 0.904830431 |             |         |         |  |
| C1DP5       | ENSG00000254965 | -1.0328 | 0.84915 | -1.0328     | 0.84915     | -1.0328 | 0.84915 |  |
|             | -1.0328         | 0.84915 | 0.84915 | 0.904895895 |             |         |         |  |
| MTND3P16    | ENSG00000224590 | -1.033  | 0.84919 | -1.033      | 0.84919     | -1.033  |         |  |
|             | 0.84919         | -1.033  | 0.84919 | 0.84919     | 0.904901992 |         |         |  |
| RNU6-351P   | ENSG00000251906 | -1.033  | 0.84921 | -1.033      | 0.84921     | -1.033  |         |  |
|             | 0.84921         | -1.033  | 0.84921 | 0.84921     | 0.904901992 |         |         |  |
| RPL9P21     | ENSG00000214089 | -1.074  | 0.85859 | -1.0331     | 0.84922     | -1.1264 | 0.87    |  |
|             | -1.3799         | 0.91619 | 0.84922 | 0.904901992 |             |         |         |  |
| CAMK2N2     | ENSG00000163888 | -1.0331 | 0.84923 | -1.0331     | 0.84923     | -1.0331 |         |  |
|             | 0.84923         | -1.0331 | 0.84923 | 0.84923     | 0.904901992 |         |         |  |
| SLC16A7     | ENSG00000118596 | -1.0332 | 0.84925 | -1.0332     | 0.84925     | -1.0332 |         |  |
|             | 0.84925         | -1.2696 | 0.89789 | 0.84925     | 0.904903516 |         |         |  |
| VSTM2A-OT1  | ENSG00000224223 | -1.0334 | 0.8493  | -1.0334     | 0.8493      | -1.0334 |         |  |
|             | 0.8493          | -1.0334 | 0.8493  | 0.8493      | 0.904937005 |         |         |  |
| ZNF286A     | ENSG00000187607 | -1.0338 | 0.84939 | -1.8735     | 0.9695      | -1.0375 |         |  |
|             | 0.85024         | -1.6206 | 0.94745 | 0.84939     | 0.904985714 |         |         |  |
| WEE2-AS1    | ENSG00000228775 | -1.0339 | 0.84941 | -1.0339     | 0.84941     | -1.0339 |         |  |
|             | 0.84941         | -1.0339 | 0.84941 | 0.84941     | 0.904985714 |         |         |  |
| UBE2V2P3    | ENSG00000238199 | -1.0339 | 0.84942 | -1.0339     | 0.84942     | -1.0339 |         |  |
|             | 0.84942         | -1.0339 | 0.84942 | 0.84942     | 0.904985714 |         |         |  |
| OR10Q2P     | ENSG00000272900 | -1.5031 | 0.93359 | -1.9111     | 0.972       | -1.2295 | 0.89055 |  |
|             | -1.034          | 0.84942 | 0.84942 | 0.904985714 |             |         |         |  |
| NA          | ENSG00000267401 | -1.0341 | 0.84945 | -1.0341     | 0.84945     | -1.0341 | 0.84945 |  |
|             | -1.0341         | 0.84945 | 0.84945 | 0.90499789  |             |         |         |  |
| ARPC4-TTLL3 | ENSG00000250151 | -1.0342 | 0.84947 | -1.0342     | 0.84947     | -1.0342 |         |  |
|             | 0.84947         | -1.0342 | 0.84947 | 0.84947     | 0.904999412 |         |         |  |
| OTOS        | ENSG00000178602 | -1.1824 | 0.88147 | -1.0692     | 0.8575      | -1.0344 | 0.84952 |  |
|             | -1.207          | 0.88629 | 0.84952 | 0.905013108 |             |         |         |  |
| OR52L1      | ENSG00000183313 | -1.0344 | 0.84952 | -1.0344     | 0.84952     | -1.0344 |         |  |
|             | 0.84952         | -1.0344 | 0.84952 | 0.84952     | 0.905013108 |         |         |  |
| MIR449A     | ENSG00000198983 | -1.0346 | 0.84957 | -1.0346     | 0.84957     | -1.0346 |         |  |
|             | 0.84957         | -1.0346 | 0.84957 | 0.84957     | 0.905046589 |         |         |  |
| PCOLCE      | ENSG00000106333 | -1.1595 | 0.87688 | -1.0354     | 0.84977     | -1.2764 |         |  |
|             | 0.89909         | -1.2764 | 0.89909 | 0.84977     | 0.905239859 |         |         |  |
| RPL12P42    | ENSG00000213253 | -1.0358 | 0.84985 | -1.0358     | 0.84985     | -1.0358 |         |  |
|             | 0.84985         | -1.5222 | 0.93602 | 0.84985     | 0.90530529  |         |         |  |
| NA          | ENSG00000270792 | -1.0359 | 0.84987 | -1.0359     | 0.84987     | -1.0359 | 0.84987 |  |
|             | -1.0359         | 0.84987 | 0.84987 | 0.905306805 |             |         |         |  |
| NA          | ENSG00000212551 | -1.0361 | 0.84992 | -1.0361     | 0.84992     | -1.0361 | 0.84992 |  |
|             | -1.0361         | 0.84992 | 0.84992 | 0.905332652 |             |         |         |  |
| CDRT4       | ENSG00000239704 | -1.0362 | 0.84995 | -1.0362     | 0.84995     | -1.1386 | 0.87257 |  |
|             | -1.4899         | 0.93187 | 0.84995 | 0.905332652 |             |         |         |  |
| NA          | ENSG00000258656 | -1.0362 | 0.84995 | -1.0362     | 0.84995     | -1.0362 | 0.84995 |  |
|             | -1.0362         | 0.84995 | 0.84995 | 0.905332652 |             |         |         |  |
| TMEM45A     | ENSG00000181458 | -1.0364 | 0.85    | -2.4027     | 0.99186     | -1.784  | 0.96279 |  |
|             | -1.5762         | 0.94251 | 0.85    | 0.90536612  |             |         |         |  |
| FAM221B     | ENSG00000204930 | -1.0367 | 0.85006 | -1.0367     | 0.85006     | -1.0367 |         |  |
|             | 0.85006         | -1.0367 | 0.85006 | 0.85006     | 0.905402612 |         |         |  |
| HSP90B1     | ENSG00000166598 | -1.0368 | 0.85008 | -1.3179     | 0.90623     | -1.2897 |         |  |
|             | 0.90143         | -1.0868 | 0.86144 | 0.85008     | 0.905402612 |         |         |  |
| NA          | ENSG00000248791 | -1.2563 | 0.89549 | -1.2563     | 0.89549     | -1.4305 | 0.92371 |  |
|             | -1.0368         | 0.85009 | 0.85009 | 0.905402612 |             |         |         |  |
| RN7SL559P   | ENSG00000240750 | -1.0373 | 0.85019 | -1.0373     | 0.85019     | -1.0373 |         |  |
|             | 0.85019         | -1.0373 | 0.85019 | 0.85019     | 0.905489328 |         |         |  |
| MIATNB      | ENSG00000244625 | -1.1908 | 0.88313 | -1.2711     | 0.89816     | -3.0075 |         |  |

|            |                 |             |         |             |             |          |         |  |
|------------|-----------------|-------------|---------|-------------|-------------|----------|---------|--|
|            | 0.99868         | -1.0374     | 0.85023 | 0.85023     | 0.905512139 |          |         |  |
| ALDH3B1    | ENSG00000006534 | -1.0375     | 0.85025 | 0.85025     | -1.9098     | 0.97192  | -1.0375 |  |
|            | 0.85025         | -1.13087077 | 0.85025 | 0.905513648 |             |          |         |  |
| CNNM3-DT   | ENSG00000273265 | -1.0378     | 0.85032 | 0.85032     | -1.0378     | 0.85032  | -1.0378 |  |
|            | 0.85032         | -1.0378     | 0.85032 | 0.85032     | 0.905568407 |          |         |  |
| IGLV2-23   | ENSG00000211660 | -1.0379     | 0.85034 | 0.85034     | -1.0379     | 0.85034  | -1.0379 |  |
|            | 0.85034         | -1.0379     | 0.85034 | 0.85034     | 0.905569916 |          |         |  |
| HIGD1AP1   | ENSG00000258016 | -1.038      | 0.85037 | 0.85037     | -1.038      | 0.85037  | -1.038  |  |
|            | 0.85037         | -1.038      | 0.85037 | 0.85037     | 0.905582073 |          |         |  |
| LINC02648  | ENSG00000225948 | -1.0383     | 0.85043 | 0.85043     | -1.0383     | 0.85043  | -1.0383 |  |
|            | 0.85043         | -1.0383     | 0.85043 | 0.85043     | 0.905617036 |          |         |  |
| NA         | ENSG00000273055 | -1.0383     | 0.85044 | -1.0383     | 0.85044     | -1.0383  | 0.85044 |  |
|            | -1.0383         | 0.85044     | 0.85044 | 0.905617036 |             |          |         |  |
| OR5T3      | ENSG00000172489 | -1.0385     | 0.85047 | -1.677      | 0.95323     | -1.5359  | 0.93772 |  |
|            | -1.5359         | 0.93772     | 0.85047 | 0.905629192 |             |          |         |  |
| LRRC29     | ENSG00000125122 | -2.2575     | 0.98801 | -1.8941     | 0.97089     | -1.8941  |         |  |
|            | 0.97089         | -1.0386     | 0.8505  | 0.8505      | 0.905641348 |          |         |  |
| NA         | ENSG00000258253 | -1.039      | 0.8506  | -1.039      | 0.8506      | -1.039   | 0.8506  |  |
|            | -1.039          | 0.8506      | 0.8506  | 0.90572804  |             |          |         |  |
| RN7SL784P  | ENSG00000264113 | -1.0392     | 0.85065 | -1.0392     | 0.85065     | -1.0392  |         |  |
|            | 0.85065         | -1.0392     | 0.85065 | 0.85065     | 0.905761488 |          |         |  |
| MTND4LP16  | ENSG00000234731 | -1.0395     | 0.85072 | -1.0395     | 0.85072     | -1.0395  |         |  |
|            | 0.85072         | -1.0395     | 0.85072 | 0.85072     | 0.90581623  |          |         |  |
| SEMA6A-AS2 | ENSG00000249167 | -1.0397     | 0.85077 | -1.0397     | 0.85077     | -1.0397  |         |  |
|            | 0.85077         | -1.0397     | 0.85077 | 0.85077     | 0.905849676 |          |         |  |
| NA         | ENSG00000264650 | -1.04083    | 0.85083 | -1.04083    | 0.85083     | -1.04083 | 0.85083 |  |
|            | 0.85083         | 0.905875475 |         |             |             |          |         |  |
| MYL6       | ENSG00000092841 | -1.2918     | 0.90179 | -1.2918     | 0.90179     | -1.0401  | 0.85084 |  |
|            | -1.2918         | 0.90179     | 0.85084 | 0.905875475 |             |          |         |  |
| OPN1SW     | ENSG00000128617 | -1.0401     | 0.85085 | -1.0401     | 0.85085     | -1.0401  |         |  |
|            | 0.85085         | -1.0401     | 0.85085 | 0.85085     | 0.905875475 |          |         |  |
| MTND5P7    | ENSG00000230531 | -1.0403     | 0.85089 | -1.0403     | 0.85089     | -1.0403  |         |  |
|            | 0.85089         | -1.0403     | 0.85089 | 0.85089     | 0.905878478 |          |         |  |
| TCF7L1-IT1 | ENSG00000231134 | -1.1718     | 0.87936 | -1.6452     | 0.95003     | -1.1718  |         |  |
|            | 0.87936         | -1.0403     | 0.85089 | 0.85089     | 0.905878478 |          |         |  |
| NA         | ENSG00000250393 | -1.2192     | 0.88861 | -1.0403     | 0.85091     | -1.2192  | 0.88861 |  |
|            | -1.2192         | 0.88861     | 0.85091 | 0.905879979 |             |          |         |  |
| MPC2       | ENSG00000143158 | -1.2296     | 0.89058 | -1.0404     | 0.85093     | -1.2296  | 0.89058 |  |
|            | -1.2296         | 0.89058     | 0.85093 | 0.905881481 |             |          |         |  |
| C14orf28   | ENSG00000179476 | -1.0413     | 0.85113 | -1.5982     | 0.945       | -1.0413  | 0.85113 |  |
|            | -1.3191         | 0.90643     | 0.85113 | 0.906074602 |             |          |         |  |
| NA         | ENSG00000219736 | -1.954      | 0.97465 | -1.0414     | 0.85117     | -1.1009  | 0.86454 |  |
|            | -2.2084         | 0.98639     | 0.85117 | 0.906097389 |             |          |         |  |
| SNORD46    | ENSG00000200913 | -1.0418     | 0.85125 | -1.0418     | 0.85125     | -1.0418  |         |  |
|            | 0.85125         | -1.0418     | 0.85125 | 0.85125     | 0.906162756 |          |         |  |
| DLAT       | ENSG00000150768 | -1.1064     | 0.86572 | -1.0484     | 0.85276     | -1.0484  | 0.85276 |  |
|            | -1.0423         | 0.85137     | 0.85137 | 0.9062707   |             |          |         |  |
| NA         | ENSG00000280115 | -1.0427     | 0.85146 | -1.0427     | 0.85146     | -1.0427  | 0.85146 |  |
|            | -1.0427         | 0.85146     | 0.85146 | 0.906346705 |             |          |         |  |
| OR2W2P     | ENSG00000217315 | -1.5825     | 0.94324 | -1.3375     | 0.90948     | -1.0428  |         |  |
|            | 0.85149         | -1.0428     | 0.85149 | 0.85149     | 0.90635884  |          |         |  |
| CALCA      | ENSG00000110680 | -1.0432     | 0.85158 | -1.0432     | 0.85158     | -1.0432  | 0.85158 |  |
|            | -1.0432         | 0.85158     | 0.85158 | 0.906415041 |             |          |         |  |
| RNU6-1086P | ENSG00000222862 | -1.0432     | 0.85158 | -1.0432     | 0.85158     | -1.0432  |         |  |
|            | 0.85158         | -1.0432     | 0.85158 | 0.85158     | 0.906415041 |          |         |  |
| LINC01144  | ENSG00000281912 | -1.4096     | 0.92068 | -1.1206     | 0.86877     | -1.4493  |         |  |
|            | 0.92637         | -1.0435     | 0.85164 | 0.85164     | 0.906459105 |          |         |  |
| YTHDF3-AS1 | ENSG00000270673 | -1.0438     | 0.85172 | -1.0438     | 0.85172     | -1.0438  |         |  |
|            | 0.85172         | -1.0438     | 0.85172 | 0.85172     | 0.906524454 |          |         |  |
| NA         | ENSG00000252733 | -1.0439     | 0.85174 | -1.0439     | 0.85174     | -1.0439  | 0.85174 |  |
|            | -1.0439         | 0.85174     | 0.85174 | 0.906525941 |             |          |         |  |
| MOB3B      | ENSG00000120162 | -1.5058     | 0.93394 | -1.5826     | 0.94324     | -1.0441  | 0.85178 |  |

|                |                 |         |         |             |             |         |         |         |
|----------------|-----------------|---------|---------|-------------|-------------|---------|---------|---------|
|                | -1.166          | 0.8782  | 0.85178 | 0.906548714 |             |         |         |         |
| MIR5695        | ENSG00000266721 | -1.0443 | 0.85184 | -1.0443     | 0.85184     | -1.0443 | 0.85184 | -1.0443 |
|                | 0.85184         | -1.0443 | 0.85184 | 0.85184     | 0.906585099 |         |         |         |
| RNA5SP276      | ENSG00000199450 | -1.0445 | 0.85187 | -1.0445     | 0.85187     | -1.0445 | 0.85187 | -1.0445 |
|                | 0.85187         | -1.0445 | 0.85187 | 0.85187     | 0.906585099 |         |         |         |
| IMP3P1         | ENSG00000230589 | -1.0445 | 0.85187 | -1.0445     | 0.85187     | -1.0445 | 0.85187 | -1.0445 |
|                | 0.85187         | -1.0445 | 0.85187 | 0.85187     | 0.906585099 |         |         |         |
| SIDT1-AS1      | ENSG00000239453 | -1.0448 | 0.85194 | -1.0448     | 0.85194     | -1.0448 | 0.85194 | -1.0448 |
|                | 0.85194         | -1.0448 | 0.85194 | 0.85194     | 0.906639795 |         |         |         |
| LRRC36         | ENSG00000159708 | -1.1699 | 0.87897 | -1.0451     | 0.85201     | -1.0451 | 0.85201 | -1.0451 |
|                | 0.85201         | -1.4785 | 0.93037 | 0.85201     | 0.906648699 |         |         |         |
| MTND3P24       | ENSG00000249045 | -1.0451 | 0.85201 | -1.0451     | 0.85201     | -1.0451 | 0.85201 | -1.0451 |
|                | 0.85201         | -1.0451 | 0.85201 | 0.85201     | 0.906648699 |         |         |         |
| NA             | ENSG00000256566 | -1.0451 | 0.85201 | -1.0451     | 0.85201     | -1.0451 | 0.85201 | 0.85201 |
|                | -1.0451         | 0.85201 | 0.85201 | 0.906648699 |             |         |         |         |
| SLC35G2        | ENSG00000168917 | -1.0452 | 0.85204 | -1.0452     | 0.85204     | -1.0452 | 0.85204 | -1.0452 |
|                | 0.85204         | -1.0452 | 0.85204 | 0.85204     | 0.906648699 |         |         |         |
| IRAK3          | ENSG00000090376 | -1.4869 | 0.93148 | -1.7065     | 0.95604     | -1.2314 | 0.8909  |         |
|                | -1.0453         | 0.85206 | 0.85206 | 0.906648699 |             |         |         |         |
| MSANTD3-TMEFF1 | ENSG00000251349 | -1.0453 | 0.85206 | -1.0453     | 0.85206     | -1.0453 | 0.85206 | -1.0453 |
|                | 0.85206         | -1.0453 | 0.85206 | 0.85206     | 0.906648699 |         |         |         |
| LINC01020      | ENSG00000215231 | -1.0455 | 0.85209 | -1.0455     | 0.85209     | -1.0455 | 0.85209 | -1.0455 |
|                | 0.85209         | -1.0455 | 0.85209 | 0.85209     | 0.9066576   |         |         |         |
| TRPV1          | ENSG00000196689 | -1.0982 | 0.86394 | -1.0455     | 0.85211     | -1.9005 | 0.97131 |         |
|                | -1.0609         | 0.85564 | 0.85211 | 0.9066576   |             |         |         |         |
| SLC6A12        | ENSG00000111181 | -1.0456 | 0.85214 | -1.0456     | 0.85214     | -1.0456 | 0.85214 | -1.0456 |
|                | 0.85214         | -1.2167 | 0.88815 | 0.85214     | 0.9066576   |         |         |         |
| NA             | ENSG00000259732 | -1.0458 | 0.85217 | -1.0458     | 0.85217     | -1.0458 | 0.85217 | 0.85217 |
|                | -1.0458         | 0.85217 | 0.85217 | 0.9066576   |             |         |         |         |
| APOBEC3H       | ENSG00000100298 | -1.0458 | 0.85218 | -1.9531     | 0.9746      | -1.8775 |         |         |
|                | 0.96978         | -2.2887 | 0.98895 | 0.85218     | 0.9066576   |         |         |         |
| OR52T1P        | ENSG00000233646 | -1.0458 | 0.85218 | -1.0458     | 0.85218     | -1.0458 | 0.85218 | -1.0458 |
|                | 0.85218         | -1.0458 | 0.85218 | 0.85218     | 0.9066576   |         |         |         |
| NA             | ENSG00000236111 | -1.393  | 0.91819 | -1.393      | 0.91819     | -1.393  | 0.91819 | 0.91819 |
|                | -1.046          | 0.85223 | 0.85223 | 0.906691001 |             |         |         |         |
| NA             | ENSG00000277878 | -1.0463 | 0.85228 | -1.0463     | 0.85228     | -1.0463 | 0.85228 | 0.85228 |
|                | -1.0463         | 0.85228 | 0.85228 | 0.9067244   |             |         |         |         |
| NA             | ENSG00000266923 | -1.047  | 0.85245 | -1.047      | 0.85245     | -1.047  | 0.85245 | 0.85245 |
|                | -1.047          | 0.85245 | 0.85245 | 0.90688546  |             |         |         |         |
| NA             | ENSG00000260303 | -1.0472 | 0.85249 | -1.1321     | 0.87121     | -1.1321 | 0.87121 | 0.87121 |
|                | -1.1321         | 0.87121 | 0.85249 | 0.906908215 |             |         |         |         |
| NA             | ENSG00000251033 | -1.0474 | 0.85253 | -1.0474     | 0.85253     | -1.0474 | 0.85253 | 0.85253 |
|                | -1.0474         | 0.85253 | 0.85253 | 0.906921808 |             |         |         |         |
| LINC01529      | ENSG00000225872 | -1.0474 | 0.85254 | -1.0474     | 0.85254     | -1.0474 | 0.85254 | -1.0474 |
|                | 0.85254         | -1.0474 | 0.85254 | 0.85254     | 0.906921808 |         |         |         |
| PECR           | ENSG00000115425 | -1.3884 | 0.91749 | -1.6137     | 0.94671     | -1.3884 | 0.91749 |         |
|                | -1.0478         | 0.85264 | 0.85264 | 0.906988588 |             |         |         |         |
| NA             | ENSG00000282041 | -1.0478 | 0.85264 | -1.0478     | 0.85264     | -1.0478 | 0.85264 | 0.85264 |
|                | -1.0478         | 0.85264 | 0.85264 | 0.906988588 |             |         |         |         |
| FGF7P1         | ENSG00000264061 | -1.048  | 0.85267 | -1.048      | 0.85267     | -1.048  | 0.85267 | -1.048  |
|                | 0.85267         | -1.048  | 0.85267 | 0.85267     | 0.907000701 |         |         |         |
| LRRC15         | ENSG00000172061 | -1.0481 | 0.85271 | -1.4065     | 0.92021     | -1.0481 |         |         |
|                | 0.85271         | -1.6849 | 0.95399 | 0.85271     | 0.90702345  |         |         |         |
| ITGB8          | ENSG00000105855 | -1.118  | 0.86822 | -1.5107     | 0.93457     | -1.0485 | 0.85279 |         |
|                | -1.5107         | 0.93457 | 0.85279 | 0.907088746 |             |         |         |         |
| NA             | ENSG00000238124 | -1.0487 | 0.85285 | -1.0487     | 0.85285     | -1.0487 | 0.85285 | 0.85285 |
|                | -1.2252         | 0.88974 | 0.85285 | 0.907123601 |             |         |         |         |
| RN7SL481P      | ENSG00000240322 | -1.0488 | 0.85286 | -1.0488     | 0.85286     | -1.0488 | 0.85286 | -1.0488 |
|                | 0.85286         | -1.0488 | 0.85286 | 0.85286     | 0.907123601 |         |         |         |
| RN7SL720P      | ENSG00000241152 | -1.049  | 0.85292 | -1.049      | 0.85292     | -1.049  | 0.85292 | -1.049  |
|                | 0.85292         | -1.049  | 0.85292 | 0.85292     | 0.907167618 |         |         |         |
| OR10H5         | ENSG00000172519 | -1.0495 | 0.85302 | -1.0495     | 0.85302     | -1.0495 | 0.85302 | -1.0495 |

|             |                 |         |         |             |             |         |         |         |
|-------------|-----------------|---------|---------|-------------|-------------|---------|---------|---------|
|             | 0.85302         | -1.0495 | 0.85302 | 0.85302     | 0.907245011 |         |         |         |
| NA          | ENSG00000279122 | -1.0495 | 0.85303 | 0.85303     | -1.0495     | 0.85303 | -1.0495 | 0.85303 |
|             | -1.0495         | 0.85303 | 0.85303 | 0.907245011 |             |         |         |         |
| IL1F10      | ENSG00000136697 | -1.0498 | 0.85309 | 0.85309     | -1.4578     | 0.92756 | -1.2624 |         |
|             | 0.89659         | -1.2624 | 0.89659 | 0.85309     | 0.907289022 |         |         |         |
| NA          | ENSG00000266498 | -1.0499 | 0.85312 | 0.85312     | -1.0499     | 0.85312 | -1.0499 | 0.85312 |
|             | -1.0499         | 0.85312 | 0.85312 | 0.907301126 |             |         |         |         |
| MIR1295A    | ENSG00000221390 | -1.0502 | 0.85318 | 0.85318     | -1.0502     | 0.85318 | -1.0502 |         |
|             | 0.85318         | -1.0502 | 0.85318 | 0.85318     | 0.907345134 |         |         |         |
| NA          | ENSG00000234937 | -1.0507 | 0.8533  | 0.8533      | -1.0507     | 0.8533  | -1.0507 | 0.8533  |
|             | -1.0507         | 0.8533  | 0.8533  | 0.907452948 |             |         |         |         |
| NA          | ENSG00000256157 | -1.051  | 0.85336 | 0.85336     | -1.051      | 0.85336 | -1.051  | 0.85336 |
|             | -1.051          | 0.85336 | 0.85336 | 0.907496951 |             |         |         |         |
| TAF1C       | ENSG00000103168 | -1.0511 | 0.85339 | 0.85339     | -1.0511     | 0.85339 | -1.0511 | 0.85339 |
|             | -1.0511         | 0.85339 | 0.85339 | 0.90750905  |             |         |         |         |
| MICU1       | ENSG00000107745 | -1.4289 | 0.92348 | 0.92348     | -1.0514     | 0.85345 | -1.1437 | 0.87362 |
|             | -1.558          | 0.94038 | 0.85345 | 0.90755305  |             |         |         |         |
| RNA5SP145   | ENSG00000199994 | -1.0517 | 0.85354 | 0.85354     | -1.0517     | 0.85354 | -1.0517 |         |
|             | 0.85354         | -1.0517 | 0.85354 | 0.85354     | 0.907627084 |         |         |         |
| NA          | ENSG00000257121 | -2.0056 | 0.97755 | 0.97755     | -1.0518     | 0.85356 | -1.0518 | 0.85356 |
|             | -1.0518         | 0.85356 | 0.85356 | 0.907627084 |             |         |         |         |
| NA          | ENSG00000234042 | -1.0519 | 0.85358 | 0.85358     | -1.0519     | 0.85358 | -1.0519 | 0.85358 |
|             | -1.3927         | 0.91814 | 0.85358 | 0.907627084 |             |         |         |         |
| FIP1L1      | ENSG00000145216 | -1.0884 | 0.86179 | 0.86179     | -1.7581     | 0.96063 | -1.7159 |         |
|             | 0.95691         | -1.0521 | 0.85362 | 0.85362     | 0.907627084 |         |         |         |
| NA          | ENSG00000252217 | -1.0522 | 0.85364 | 0.85364     | -1.0522     | 0.85364 | -1.0522 | 0.85364 |
|             | -1.0522         | 0.85364 | 0.85364 | 0.907627084 |             |         |         |         |
| NA          | ENSG00000273455 | -1.0522 | 0.85364 | 0.85364     | -1.0522     | 0.85364 | -1.0522 | 0.85364 |
|             | -1.0522         | 0.85364 | 0.85364 | 0.907627084 |             |         |         |         |
| NA          | ENSG00000269925 | -1.0522 | 0.85365 | 0.85365     | -1.0522     | 0.85365 | -1.0522 | 0.85365 |
|             | -1.0522         | 0.85365 | 0.85365 | 0.907627084 |             |         |         |         |
| NA          | ENSG00000201133 | -1.0524 | 0.85369 | 0.85369     | -1.0524     | 0.85369 | -1.0524 | 0.85369 |
|             | -1.0524         | 0.85369 | 0.85369 | 0.907640638 |             |         |         |         |
| NA          | ENSG00000275875 | -1.0524 | 0.8537  | 0.8537      | -1.0524     | 0.8537  | -1.0524 | 0.8537  |
|             | -1.0524         | 0.8537  | 0.8537  | 0.907640638 |             |         |         |         |
| MAP3K14-AS1 | ENSG00000267278 | -1.0527 | 0.85376 | 0.85376     | -1.0527     | 0.85376 | -1.0527 |         |
|             | 0.85376         | -1.0527 | 0.85376 | 0.85376     | 0.907684625 |         |         |         |
| OR51A6P     | ENSG00000197023 | -1.0534 | 0.85391 | 0.85391     | -1.0534     | 0.85391 | -1.0534 |         |
|             | 0.85391         | -1.0534 | 0.85391 | 0.85391     | 0.907824293 |         |         |         |
| H1-9P       | ENSG00000188662 | -1.0536 | 0.85397 | 0.85397     | -1.0536     | 0.85397 | -1.0536 | 0.85397 |
|             | -1.0536         | 0.85397 | 0.85397 | 0.907859099 |             |         |         |         |
| SYNPO2      | ENSG00000172403 | -1.0536 | 0.85398 | 0.85398     | -1.305      | 0.90405 | -2.1729 |         |
|             | 0.98511         | -1.2475 | 0.8939  | 0.85398     | 0.907859099 |         |         |         |
| ZDHHC12     | ENSG00000160446 | -1.0542 | 0.8541  | 0.8541      | -1.0542     | 0.8541  | -1.0542 |         |
|             | 0.8541          | -1.0542 | 0.8541  | 0.8541      | 0.907927249 |         |         |         |
| NA          | ENSG00000223478 | -1.0542 | 0.8541  | 0.8541      | -1.0542     | 0.8541  | -1.0542 | 0.8541  |
|             | -1.0542         | 0.8541  | 0.8541  | 0.907927249 |             |         |         |         |
| NA          | ENSG00000234208 | -1.0542 | 0.8541  | 0.8541      | -1.0542     | 0.8541  | -1.0542 | 0.8541  |
|             | -1.0542         | 0.8541  | 0.8541  | 0.907927249 |             |         |         |         |
| AARSD1      | ENSG00000266967 | -1.0546 | 0.85419 | 0.85419     | -1.0546     | 0.85419 | -1.0546 |         |
|             | 0.85419         | -1.0546 | 0.85419 | 0.85419     | 0.908003113 |         |         |         |
| NFE4        | ENSG00000230257 | -1.1964 | 0.88424 | 0.88424     | -1.79       | 0.96327 | -1.1224 | 0.86914 |
|             | -1.0548         | 0.85425 | 0.85425 | 0.908047085 |             |         |         |         |
| RBMS2P1     | ENSG00000213250 | -1.5427 | 0.93855 | 0.93855     | -1.6946     | 0.95492 | -1.055  |         |
|             | 0.85429         | -1.5427 | 0.93855 | 0.85429     | 0.908060617 |         |         |         |
| STAM-AS1    | ENSG00000260589 | -1.055  | 0.8543  | 0.8543      | -1.055      | 0.8543  | -1.055  |         |
|             | 0.8543          | -1.055  | 0.8543  | 0.8543      | 0.908060617 |         |         |         |
| MTCO3P7     | ENSG00000249997 | -1.0551 | 0.85432 | 0.85432     | -1.0551     | 0.85432 | -1.0551 |         |
|             | 0.85432         | -1.0551 | 0.85432 | 0.85432     | 0.908062069 |         |         |         |
| NA          | ENSG00000267732 | -1.0555 | 0.8544  | 0.8544      | -1.0555     | 0.8544  | -1.0555 | 0.8544  |
|             | -1.0555         | 0.8544  | 0.8544  | 0.908127293 |             |         |         |         |
| NA          | ENSG00000258749 | -1.0557 | 0.85445 | 0.85445     | -1.0557     | 0.85445 | -1.0557 | 0.85445 |

|           |                 |             |         |             |             |         |         |  |
|-----------|-----------------|-------------|---------|-------------|-------------|---------|---------|--|
|           | -1.0557         | 0.85445     | 0.85445 | 0.908160629 |             |         |         |  |
| FAM234A   | ENSG00000167930 | -1.244      | 0.89325 | -1.0777     | 0.85941     | -1.0777 |         |  |
|           | 0.85941         | -1.0561     | 0.85453 | 0.85453     | 0.908161593 |         |         |  |
| LINC02332 | ENSG00000259054 | -1.0561     | 0.85454 | -1.0561     | 0.85454     | -1.0561 |         |  |
|           | 0.85454         | -1.0561     | 0.85454 | 0.85454     | 0.908161593 |         |         |  |
| NA        | ENSG00000277873 | -1.0561     | 0.85454 | -1.0561     | 0.85454     | -1.0561 | 0.85454 |  |
|           | -1.0561         | 0.85454     | 0.85454 | 0.908161593 |             |         |         |  |
| PRDM6     | ENSG00000061455 | -1.2655     | 0.89716 | -1.0561     | 0.85455     | -1.703  | 0.95572 |  |
|           | -1.2064         | 0.88617     | 0.85455 | 0.908161593 |             |         |         |  |
| NA        | ENSG00000250286 | -1.0562     | 0.85457 | -1.0562     | 0.85457     | -1.0562 | 0.85457 |  |
|           | -1.0562         | 0.85457     | 0.85457 | 0.908161593 |             |         |         |  |
| MIR4752   | ENSG00000264703 | -1.0562     | 0.85457 | -1.0562     | 0.85457     | -1.0562 |         |  |
|           | 0.85457         | -1.0562     | 0.85457 | 0.85457     | 0.908161593 |         |         |  |
| MIR3194   | ENSG00000266761 | -1.0563     | 0.85459 | -1.0563     | 0.85459     | -1.0563 |         |  |
|           | 0.85459         | -1.0563     | 0.85459 | 0.85459     | 0.908161593 |         |         |  |
| NRBF2P2   | ENSG00000226933 | -1.0564     | 0.8546  | -1.0564     | 0.8546      | -1.0564 |         |  |
|           | 0.8546          | -1.0564     | 0.8546  | 0.8546      | 0.908161593 |         |         |  |
| HOXC-AS3  | ENSG00000251151 | -1.0566     | 0.85465 | -1.0566     | 0.85465     | -1.0566 |         |  |
|           | 0.85465         | -1.0566     | 0.85465 | 0.85465     | 0.908175117 |         |         |  |
| NA        | ENSG00000273049 | -1.0566     | 0.85465 | -1.0566     | 0.85465     | -1.0566 | 0.85465 |  |
|           | -1.0566         | 0.85465     | 0.85465 | 0.908175117 |             |         |         |  |
| NA        | ENSG00000229947 | -1.0569     | 0.85472 | -1.0569     | 0.85472     | -1.0569 | 0.85472 |  |
|           | -1.0569         | 0.85472     | 0.85472 | 0.908229695 |             |         |         |  |
| NA        | ENSG00000257896 | -1.0572     | 0.85479 | -1.0572     | 0.85479     | -1.0572 | 0.85479 |  |
|           | -1.0572         | 0.85479     | 0.85479 | 0.908265913 |             |         |         |  |
| RPL36AP13 | ENSG00000233747 | -1.0573     | 0.85481 | -1.0573     | 0.85481     | -1.0573 |         |  |
|           | 0.85481         | -1.0573     | 0.85481 | 0.85481     | 0.908265913 |         |         |  |
| MRPL53P1  | ENSG00000235299 | -1.0573     | 0.85481 | -1.0573     | 0.85481     | -1.0573 |         |  |
|           | 0.85481         | -1.0573     | 0.85481 | 0.85481     | 0.908265913 |         |         |  |
| NA        | ENSG00000207148 | -1.0574     | 0.85484 | -1.0574     | 0.85484     | -1.0574 | 0.85484 |  |
|           | -1.0574         | 0.85484     | 0.85484 | 0.908277984 |             |         |         |  |
| NA        | ENSG00000258674 | -1.0575     | 0.85486 | -1.0575     | 0.85486     | -1.0575 | 0.85486 |  |
|           | -1.0575         | 0.85486     | 0.85486 | 0.90827943  |             |         |         |  |
| NA        | ENSG00000267504 | -1.0577     | 0.8549  | -1.0577     | 0.8549      | -1.0577 | 0.8549  |  |
|           | -1.0577         | 0.8549      | 0.8549  | 0.908302126 |             |         |         |  |
| FAM83E    | ENSG00000105523 | -1.0579     | 0.85494 | -1.0579     | 0.85494     | -1.0579 |         |  |
|           | 0.85494         | -1.0579     | 0.85494 | 0.85494     | 0.908315641 |         |         |  |
| CXCL16    | ENSG00000161921 | -1.0579     | 0.85495 | -1.0579     | 0.85495     | -1.0579 |         |  |
|           | 0.85495         | -1.0579     | 0.85495 | 0.85495     | 0.908315641 |         |         |  |
| LINC02100 | ENSG00000248693 | -1.4264     | 0.92312 | -1.3692     | 0.91453     | -1.4264 |         |  |
|           | 0.92312         | -1.0585     | 0.85509 | 0.85509     | 0.908444574 |         |         |  |
| FUOM      | ENSG00000148803 | -1.1401     | 0.87287 | -1.0588     | 0.85515     | -1.1401 | 0.87287 |  |
|           | -1.1401         | 0.87287     | 0.85515 | 0.908468705 |             |         |         |  |
| NA        | ENSG00000278139 | -1.0588     | 0.85515 | -1.0588     | 0.85515     | -1.0588 | 0.85515 |  |
|           | -1.0588         | 0.85515     | 0.85515 | 0.908468705 |             |         |         |  |
| NA        | ENSG00000254224 | -1.0591     | 0.85521 | -1.0591     | 0.85521     | -1.0591 | 0.85521 |  |
|           | -1.0591         | 0.85521     | 0.85521 | 0.90851264  |             |         |         |  |
| LINC00471 | ENSG00000181798 | -1.8003     | 0.9641  | -1.8003     | 0.9641      | -1.0594 |         |  |
|           | 0.8553          | -2.3503     | 0.99062 | 0.8553      | 0.908580697 |         |         |  |
| SCN8A     | ENSG00000196876 | -1.3228     | 0.90705 | -1.5682     | 0.94158     | -1.327  | 0.90775 |  |
|           | -1.0595         | 0.85532     | 0.85532 | 0.908580697 |             |         |         |  |
| NA        | ENSG00000225218 | -1.3242     | 0.90727 | -1.0596     | 0.85533     | -1.3204 | 0.90664 |  |
|           | -2.0427         | 0.97946     | 0.85533 | 0.908580697 |             |         |         |  |
| NA        | ENSG00000267214 | -1.0597     | 0.85535 | -1.3147     | 0.90569     | -1.0597 | 0.85535 |  |
|           | -1.0597         | 0.85535     | 0.85535 | 0.908582136 |             |         |         |  |
| NA        | ENSG00000258090 | -1.0599     | 0.8554  | -1.0599     | 0.8554      | -1.0599 | 0.8554  |  |
|           | -1.0599         | 0.8554      | 0.8554  | 0.908605706 |             |         |         |  |
| NA        | ENSG00000267682 | -1.06       | 0.85542 | -1.06       | 0.85542     | -1.06   | 0.85542 |  |
|           | 0.85542         | 0.908605706 |         |             |             |         |         |  |
| IFNA21    | ENSG00000137080 | -1.0602     | 0.85548 | -1.0602     | 0.85548     | -1.0602 |         |  |
|           | 0.85548         | -1.0602     | 0.85548 | 0.85548     | 0.908605706 |         |         |  |
| PDGFD     | ENSG00000170962 | -1.2784     | 0.89945 | -1.3363     | 0.90927     | -1.0603 | 0.8555  |  |



|              |                 |         |         |             |             |         |         |  |
|--------------|-----------------|---------|---------|-------------|-------------|---------|---------|--|
|              | -1.0658         | 0.85674 | 0.8555  | 0.908605706 |             |         |         |  |
| SUCLA2P1     | ENSG00000224936 | -1.0603 | 0.8555  | -1.0603     | 0.8555      | -1.311  |         |  |
|              | 0.90507         | -1.0603 | 0.8555  | 0.8555      | 0.908605706 |         |         |  |
| YWHAEP5      | ENSG00000234645 | -1.0603 | 0.8555  | -1.4547     | 0.92713     | -1.0603 |         |  |
|              | 0.8555          | -1.0603 | 0.8555  | 0.8555      | 0.908605706 |         |         |  |
| OR13D2P      | ENSG00000237443 | -1.0605 | 0.85553 | -1.0605     | 0.85553     | -1.0605 |         |  |
|              | 0.85553         | -1.0605 | 0.85553 | 0.85553     | 0.908605706 |         |         |  |
| NA           | ENSG00000260694 | -1.0604 | 0.85553 | -1.1863     | 0.88224     | -1.0604 | 0.85553 |  |
|              | -1.0604         | 0.85553 | 0.85553 | 0.908605706 |             |         |         |  |
| CXCL3        | ENSG00000163734 | -2.0882 | 0.98161 | -1.0605     | 0.85554     | -2.0882 | 0.98161 |  |
|              | -2.0882         | 0.98161 | 0.85554 | 0.908605706 |             |         |         |  |
| BABAM2       | ENSG00000158019 | -1.2799 | 0.89971 | -1.0607     | 0.85559     | -1.3992 |         |  |
|              | 0.91913         | -1.5161 | 0.93525 | 0.85559     | 0.908639004 |         |         |  |
| C16orf70     | ENSG00000125149 | -1.5423 | 0.9385  | -1.0611     | 0.85568     | -1.7026 |         |  |
|              | 0.95568         | -2.0944 | 0.98189 | 0.85568     | 0.908688666 |         |         |  |
| NA           | ENSG00000257976 | -1.0611 | 0.85569 | -1.0611     | 0.85569     | -1.0611 | 0.85569 |  |
|              | -1.0611         | 0.85569 | 0.85569 | 0.908688666 |             |         |         |  |
| SOS1-IT1     | ENSG00000229692 | -1.0613 | 0.85572 | -1.0613     | 0.85572     | -1.0613 |         |  |
|              | 0.85572         | -1.0613 | 0.85572 | 0.85572     | 0.908688666 |         |         |  |
| RNA5SP418    | ENSG00000251760 | -1.0613 | 0.85573 | -1.0613     | 0.85573     | -1.0613 |         |  |
|              | 0.85573         | -1.0613 | 0.85573 | 0.85573     | 0.908688666 |         |         |  |
| RNA5SP417    | ENSG00000252268 | -1.0613 | 0.85573 | -1.0613     | 0.85573     | -1.0613 |         |  |
|              | 0.85573         | -1.0613 | 0.85573 | 0.85573     | 0.908688666 |         |         |  |
| NA           | ENSG00000273297 | -2.2167 | 0.98668 | -1.7719     | 0.96179     | -2.2167 | 0.98668 |  |
|              | -1.0617         | 0.85581 | 0.85581 | 0.908709336 |             |         |         |  |
| LYNX1-SLURP2 | ENSG00000284505 | -1.0617 | 0.85581 | -1.0617     | 0.85581     | -1.0617 | 0.85581 |  |
|              | 0.85581         | -1.0617 | 0.85581 | 0.85581     | 0.908709336 |         |         |  |
| THEM5        | ENSG00000196407 | -1.0617 | 0.85582 | -1.0617     | 0.85582     | -1.0617 | 0.85582 |  |
|              | -1.5531         | 0.93981 | 0.85582 | 0.908709336 |             |         |         |  |
| NA           | ENSG00000279979 | -1.0619 | 0.85586 | -1.0619     | 0.85586     | -1.0619 | 0.85586 |  |
|              | -1.0619         | 0.85586 | 0.85586 | 0.908709336 |             |         |         |  |
| LRCOL1       | ENSG00000204583 | -1.7134 | 0.95668 | -1.8469     | 0.96762     | -1.0619 |         |  |
|              | 0.85587         | -1.8469 | 0.96762 | 0.85587     | 0.908709336 |         |         |  |
| NA           | ENSG00000273026 | -1.0619 | 0.85587 | -1.0619     | 0.85587     | -1.0619 | 0.85587 |  |
|              | -1.0619         | 0.85587 | 0.85587 | 0.908709336 |             |         |         |  |
| SMIM31       | ENSG00000248771 | -1.908  | 0.9718  | -1.062      | 0.85588     | -1.8357 |         |  |
|              | 0.9668          | -1.7286 | 0.95806 | 0.85588     | 0.908709336 |         |         |  |
| NA           | ENSG00000229407 | -1.0623 | 0.85596 | -1.0623     | 0.85596     | -1.0623 | 0.85596 |  |
|              | -1.0623         | 0.85596 | 0.85596 | 0.908774474 |             |         |         |  |
| NA           | ENSG00000224114 | -1.0628 | 0.85606 | -1.0628     | 0.85606     | -1.0628 | 0.85606 |  |
|              | -1.0628         | 0.85606 | 0.85606 | 0.908860842 |             |         |         |  |
| NA           | ENSG00000253423 | -1.0767 | 0.85919 | -1.0631     | 0.85613     | -1.2111 | 0.88707 |  |
|              | -1.2111         | 0.88707 | 0.85613 | 0.908906172 |             |         |         |  |
| CCDC107      | ENSG00000159884 | -1.0631 | 0.85614 | -1.0631     | 0.85614     | -1.0631 |         |  |
|              | 0.85614         | -1.0631 | 0.85614 | 0.85614     | 0.908906172 |         |         |  |
| REG3G        | ENSG00000143954 | -1.3321 | 0.90858 | -1.153      | 0.87555     | -1.2677 | 0.89755 |  |
|              | -1.0635         | 0.85622 | 0.85622 | 0.9089713   |             |         |         |  |
| NA           | ENSG00000225272 | -1.0638 | 0.85628 | -1.0638     | 0.85628     | -1.0638 | 0.85628 |  |
|              | -1.0638         | 0.85628 | 0.85628 | 0.908999678 |             |         |         |  |
| LINC02536    | ENSG00000281248 | -1.1869 | 0.88236 | -1.0638     | 0.85629     | -1.0638 |         |  |
|              | 0.85629         | -1.196  | 0.88415 | 0.85629     | 0.908999678 |         |         |  |
| NA           | ENSG00000265245 | -1.0639 | 0.85631 | -1.0639     | 0.85631     | -1.0639 | 0.85631 |  |
|              | -1.0639         | 0.85631 | 0.85631 | 0.908999678 |             |         |         |  |
| RNU6-776P    | ENSG00000201273 | -1.064  | 0.85633 | -1.064      | 0.85633     | -1.064  |         |  |
|              | 0.85633         | -1.064  | 0.85633 | 0.85633     | 0.908999678 |         |         |  |
| MBOAT4       | ENSG00000177669 | -1.1744 | 0.87989 | -1.064      | 0.85634     | -1.1744 |         |  |
|              | 0.87989         | -1.3816 | 0.91646 | 0.85634     | 0.908999678 |         |         |  |
| ZNF793-AS1   | ENSG00000266916 | -1.0643 | 0.8564  | -1.0643     | 0.8564      | -1.0643 |         |  |
|              | 0.8564          | -1.0643 | 0.8564  | 0.8564      | 0.909043565 |         |         |  |
| CCDC96       | ENSG00000173013 | -1.0645 | 0.85644 | -1.0645     | 0.85644     | -1.0645 |         |  |
|              | 0.85644         | -1.0645 | 0.85644 | 0.85644     | 0.909066222 |         |         |  |
| NA           | ENSG00000253641 | -1.0645 | 0.85646 | -1.0645     | 0.85646     | -1.0645 | 0.85646 |  |

|            |                 |         |         |             |             |         |         |  |
|------------|-----------------|---------|---------|-------------|-------------|---------|---------|--|
|            | -1.0645         | 0.85646 | 0.85646 | 0.90906765  |             |         |         |  |
| ACTN1      | ENSG00000072110 | -1.0648 | 0.85652 | -1.1137     | 0.86729     | -1.3522 | 0.91185 |  |
|            | -1.235          | 0.89158 | 0.85652 | 0.909111533 |             |         |         |  |
| NA         | ENSG00000203825 | -1.8995 | 0.97125 | -1.065      | 0.85655     | -1.1043 | 0.86528 |  |
|            | -1.19           | 0.88297 | 0.85655 | 0.909123573 |             |         |         |  |
| RNU6-946P  | ENSG00000206605 | -1.0654 | 0.85664 | -1.0654     | 0.85664     | -1.0654 |         |  |
|            | 0.85664         | -1.0654 | 0.85664 | 0.85664     | 0.909179492 |         |         |  |
| MIR3667    | ENSG00000264139 | -1.0654 | 0.85664 | -1.0654     | 0.85664     | -1.0654 |         |  |
|            | 0.85664         | -1.0654 | 0.85664 | 0.85664     | 0.909179492 |         |         |  |
| DNAJC13    | ENSG00000138246 | -1.238  | 0.89214 | -1.4213     | 0.92238     | -1.0654 |         |  |
|            | 0.85666         | -1.466  | 0.92868 | 0.85666     | 0.909180917 |         |         |  |
| RN7SL786P  | ENSG00000263993 | -1.0656 | 0.8567  | -1.0656     | 0.8567      | -1.0656 |         |  |
|            | 0.8567          | -1.0836 | 0.86072 | 0.8567      | 0.909194379 |         |         |  |
| IGLVI-38   | ENSG00000253889 | -1.0656 | 0.85671 | -1.0656     | 0.85671     | -1.0656 |         |  |
|            | 0.85671         | -1.0656 | 0.85671 | 0.85671     | 0.909194379 |         |         |  |
| NA         | ENSG00000258881 | -1.0658 | 0.85675 | -1.0658     | 0.85675     | -1.0658 | 0.85675 |  |
|            | -1.0658         | 0.85675 | 0.85675 | 0.90920784  |             |         |         |  |
| NA         | ENSG00000279757 | -1.0659 | 0.85676 | -1.0659     | 0.85676     | -1.0659 | 0.85676 |  |
|            | -1.0659         | 0.85676 | 0.85676 | 0.90920784  |             |         |         |  |
| NA         | ENSG00000262222 | -1.066  | 0.8568  | -1.066      | 0.8568      | -1.066  | 0.8568  |  |
|            | -1.066          | 0.8568  | 0.8568  | 0.909230488 |             |         |         |  |
| NA         | ENSG00000229110 | -1.1156 | 0.8677  | -1.0661     | 0.85682     | -1.1156 | 0.8677  |  |
|            | -1.1156         | 0.8677  | 0.85682 | 0.909231911 |             |         |         |  |
| NA         | ENSG00000265280 | -1.0664 | 0.85687 | -1.0664     | 0.85687     | -1.0664 | 0.85687 |  |
|            | -1.0664         | 0.85687 | 0.85687 | 0.909265169 |             |         |         |  |
| CAPZA1     | ENSG00000116489 | -1.3442 | 0.91056 | -1.0665     | 0.85691     | -1.2412 |         |  |
|            | 0.89274         | -1.397  | 0.91879 | 0.85691     | 0.909287814 |         |         |  |
| VHL        | ENSG00000134086 | -1.0668 | 0.85696 | -1.0668     | 0.85696     | -1.9985 | 0.97717 |  |
|            | -1.0668         | 0.85696 | 0.85696 | 0.90932107  |             |         |         |  |
| FAM8A2P    | ENSG00000254722 | -1.0669 | 0.85699 | -1.6745     | 0.95298     | -2.1245 |         |  |
|            | 0.98319         | -2.1245 | 0.98319 | 0.85699     | 0.909333102 |         |         |  |
| OR5BN1P    | ENSG00000254848 | -1.067  | 0.85702 | -1.067      | 0.85702     | -1.067  |         |  |
|            | 0.85702         | -1.067  | 0.85702 | 0.85702     | 0.909345133 |         |         |  |
| LINC01826  | ENSG00000232740 | -1.0672 | 0.85707 | -1.0672     | 0.85707     | -1.0672 |         |  |
|            | 0.85707         | -1.0672 | 0.85707 | 0.85707     | 0.909378385 |         |         |  |
| RNU5A-5P   | ENSG00000222986 | -1.0674 | 0.85709 | -1.0674     | 0.85709     | -1.0674 |         |  |
|            | 0.85709         | -1.0674 | 0.85709 | 0.85709     | 0.909379805 |         |         |  |
| NA         | ENSG00000251478 | -1.0674 | 0.85711 | -1.0674     | 0.85711     | -1.0674 | 0.85711 |  |
|            | -1.2458         | 0.89359 | 0.85711 | 0.909381225 |             |         |         |  |
| RPS6P25    | ENSG00000240616 | -1.0677 | 0.85716 | -1.0677     | 0.85716     | -1.0677 |         |  |
|            | 0.85716         | -1.0677 | 0.85716 | 0.85716     | 0.909405284 |         |         |  |
| NA         | ENSG00000223446 | -1.0677 | 0.85717 | -1.0677     | 0.85717     | -1.0677 | 0.85717 |  |
|            | -1.0677         | 0.85717 | 0.85717 | 0.909405284 |             |         |         |  |
| RNU6-1013P | ENSG00000206907 | -1.0681 | 0.85726 | -1.0681     | 0.85726     | -1.0681 |         |  |
|            | 0.85726         | -1.0681 | 0.85726 | 0.85726     | 0.909480968 |         |         |  |
| NA         | ENSG00000242097 | -1.0682 | 0.85729 | -1.0682     | 0.85729     | -1.0682 | 0.85729 |  |
|            | -1.0682         | 0.85729 | 0.85729 | 0.909492994 |             |         |         |  |
| NA         | ENSG00000259846 | -1.8915 | 0.97072 | -1.0683     | 0.85731     | -1.0683 | 0.85731 |  |
|            | -1.9433         | 0.97401 | 0.85731 | 0.909494412 |             |         |         |  |
| LINC00308  | ENSG00000184856 | -1.0685 | 0.85735 | -1.0685     | 0.85735     | -1.0685 |         |  |
|            | 0.85735         | -1.0685 | 0.85735 | 0.85735     | 0.909495142 |         |         |  |
| NA         | ENSG00000251613 | -1.2902 | 0.90151 | -1.2902     | 0.90151     | -1.0685 | 0.85736 |  |
|            | -1.1525         | 0.87545 | 0.85736 | 0.909495142 |             |         |         |  |
| NA         | ENSG00000277010 | -1.0687 | 0.8574  | -1.0687     | 0.8574      | -1.0687 | 0.8574  |  |
|            | -1.0687         | 0.8574  | 0.8574  | 0.909495142 |             |         |         |  |
| NA         | ENSG00000283198 | -1.0688 | 0.85742 | -1.0688     | 0.85742     | -1.0688 | 0.85742 |  |
|            | -1.0688         | 0.85742 | 0.85742 | 0.909495142 |             |         |         |  |
| NA         | ENSG00000253872 | -1.0689 | 0.85743 | -1.3575     | 0.91268     | -1.0689 | 0.85743 |  |
|            | -1.0689         | 0.85743 | 0.85743 | 0.909495142 |             |         |         |  |
| NA         | ENSG00000258272 | -1.0689 | 0.85743 | -1.5357     | 0.93769     | -1.0689 | 0.85743 |  |
|            | -1.0689         | 0.85743 | 0.85743 | 0.909495142 |             |         |         |  |
| NA         | ENSG00000278727 | -1.0689 | 0.85745 | -1.0689     | 0.85745     | -1.0689 | 0.85745 |  |

|            |                 |         |         |             |             |         |         |         |
|------------|-----------------|---------|---------|-------------|-------------|---------|---------|---------|
|            | -1.0689         | 0.85745 | 0.85745 | 0.909495142 |             |         |         |         |
| OR2A3P     | ENSG00000183122 | -1.069  | 0.85746 | -1.069      | 0.85746     | -1.069  | 0.85746 | -1.069  |
|            | 0.85746         | -1.069  | 0.85746 | 0.85746     | 0.909495142 |         |         |         |
| NA         | ENSG00000249932 | -1.0691 | 0.85749 | -1.0691     | 0.85749     | -1.0691 | 0.85749 | 0.85749 |
|            | -1.0691         | 0.85749 | 0.85749 | 0.909497976 |             |         |         |         |
| NA         | ENSG00000223004 | -1.0691 | 0.8575  | -1.0691     | 0.8575      | -1.0691 | 0.8575  | 0.8575  |
|            | -1.0691         | 0.8575  | 0.8575  | 0.909497976 |             |         |         |         |
| RNU6-1325P | ENSG00000201775 | -1.0696 | 0.8576  | -1.0696     | 0.8576      | -1.0696 | 0.8576  | -1.0696 |
|            | 0.8576          | -1.0696 | 0.8576  | 0.8576      | 0.909576466 |         |         |         |
| GAPDHP36   | ENSG00000213158 | -1.0697 | 0.85763 | -1.0697     | 0.85763     | -1.0697 | 0.85763 | -1.0697 |
|            | 0.85763         | -1.0697 | 0.85763 | 0.85763     | 0.909576466 |         |         |         |
| RNU2-70P   | ENSG00000222650 | -1.0697 | 0.85763 | -1.0697     | 0.85763     | -1.0697 | 0.85763 | -1.0697 |
|            | 0.85763         | -1.0697 | 0.85763 | 0.85763     | 0.909576466 |         |         |         |
| NA         | ENSG00000180803 | -1.0699 | 0.85767 | -1.0699     | 0.85767     | -1.0699 | 0.85767 | 0.85767 |
|            | -1.0699         | 0.85767 | 0.85767 | 0.909599092 |             |         |         |         |
| GASK1B     | ENSG00000164125 | -1.0703 | 0.85775 | -1.2278     | 0.89024     | -1.2543 |         |         |
|            | 0.89513         | -1.6084 | 0.94613 | 0.85775     | 0.909606165 |         |         |         |
| LINC01774  | ENSG00000236950 | -1.0703 | 0.85776 | -1.0703     | 0.85776     | -1.0703 | 0.85776 | -1.0703 |
|            | 0.85776         | -1.0703 | 0.85776 | 0.85776     | 0.909606165 |         |         |         |
| CDC37L1-DT | ENSG00000273061 | -1.0703 | 0.85776 | -1.0703     | 0.85776     | -1.0703 | 0.85776 | -1.0703 |
|            | 0.85776         | -1.0703 | 0.85776 | 0.85776     | 0.909606165 |         |         |         |
| NA         | ENSG00000283209 | -1.0703 | 0.85776 | -1.2388     | 0.89229     | -1.2388 | 0.89229 | 0.89229 |
|            | -1.2388         | 0.89229 | 0.85776 | 0.909606165 |             |         |         |         |
| RNU6-468P  | ENSG00000206730 | -1.0703 | 0.85777 | -1.0703     | 0.85777     | -1.0703 | 0.85777 | -1.0703 |
|            | 0.85777         | -1.0703 | 0.85777 | 0.85777     | 0.909606165 |         |         |         |
| NA         | ENSG00000225230 | -1.0705 | 0.85781 | -1.0705     | 0.85781     | -1.0705 | 0.85781 | 0.85781 |
|            | -1.0705         | 0.85781 | 0.85781 | 0.909628787 |             |         |         |         |
| ODF3B      | ENSG00000177989 | -1.3215 | 0.90683 | -1.0711     | 0.85793     | -1.0711 | 0.85793 | 0.85793 |
|            | -1.0711         | 0.85793 | 0.85793 | 0.909716444 |             |         |         |         |
| NA         | ENSG00000244510 | -1.0711 | 0.85793 | -1.0711     | 0.85793     | -1.0711 | 0.85793 | 0.85793 |
|            | -1.0711         | 0.85793 | 0.85793 | 0.909716444 |             |         |         |         |
| NA         | ENSG00000238007 | -1.0715 | 0.85803 | -1.0715     | 0.85803     | -1.0715 | 0.85803 | 0.85803 |
|            | -1.3135         | 0.90549 | 0.85803 | 0.90979349  |             |         |         |         |
| NA         | ENSG00000213365 | -1.0715 | 0.85804 | -1.0715     | 0.85804     | -1.0715 | 0.85804 | 0.85804 |
|            | -1.0715         | 0.85804 | 0.85804 | 0.90979349  |             |         |         |         |
| PTER       | ENSG00000165983 | -1.0717 | 0.85808 | -1.323      | 0.90708     | -1.4376 | 0.92473 | 0.92473 |
|            | -1.3416         | 0.91014 | 0.85808 | 0.909816106 |             |         |         |         |
| MIR1269B   | ENSG00000265503 | -1.072  | 0.85814 | -1.072      | 0.85814     | -1.072  | 0.85814 | -1.072  |
|            | 0.85814         | -1.072  | 0.85814 | 0.85814     | 0.909842948 |         |         |         |
| NA         | ENSG00000274630 | -1.0721 | 0.85815 | -1.0721     | 0.85815     | -1.0721 | 0.85815 | 0.85815 |
|            | -1.0721         | 0.85815 | 0.85815 | 0.909842948 |             |         |         |         |
| NA         | ENSG00000266988 | -1.0721 | 0.85817 | -1.0721     | 0.85817     | -1.0721 | 0.85817 | 0.85817 |
|            | -1.0721         | 0.85817 | 0.85817 | 0.909842948 |             |         |         |         |
| NA         | ENSG00000253334 | -1.0722 | 0.85818 | -1.1052     | 0.86546     | -1.0722 | 0.85818 | 0.85818 |
|            | -1.0722         | 0.85818 | 0.85818 | 0.909842948 |             |         |         |         |
| NA         | ENSG00000258010 | -1.0723 | 0.85821 | -1.0723     | 0.85821     | -1.2151 | 0.88784 | 0.88784 |
|            | -1.0723         | 0.85821 | 0.85821 | 0.909854958 |             |         |         |         |
| NA         | ENSG00000201501 | -1.0724 | 0.85823 | -1.0724     | 0.85823     | -1.0724 | 0.85823 | 0.85823 |
|            | -1.0724         | 0.85823 | 0.85823 | 0.909856367 |             |         |         |         |
| NA         | ENSG00000254406 | -1.0727 | 0.8583  | -1.2618     | 0.8965      | -1.0727 | 0.8583  | 0.8583  |
|            | -1.0727         | 0.8583  | 0.8583  | 0.909910782 |             |         |         |         |
| RPL21P127  | ENSG00000243720 | -1.0733 | 0.85842 | -1.0733     | 0.85842     | -1.0733 | 0.85842 | -1.0733 |
|            | 0.85842         | -1.0733 | 0.85842 | 0.85842     | 0.910009004 |         |         |         |
| NUP42      | ENSG00000136243 | -1.0733 | 0.85843 | -1.0733     | 0.85843     | -1.0733 | 0.85843 | 0.85843 |
|            | -1.0733         | 0.85843 | 0.85843 | 0.910009004 |             |         |         |         |
| PDC        | ENSG00000116703 | -1.0737 | 0.85852 | -1.1739     | 0.87977     | -1.0883 | 0.86178 | 0.86178 |
|            | -1.0883         | 0.86178 | 0.85852 | 0.910084614 |             |         |         |         |
| SLC25A42   | ENSG00000181035 | -1.0743 | 0.85865 | -1.0743     | 0.85865     | -1.0743 | 0.85865 | -1.0743 |
|            | 0.85865         | -1.0743 | 0.85865 | 0.85865     | 0.910182822 |         |         |         |
| TLX1NB     | ENSG00000236311 | -1.3635 | 0.91364 | -1.4045     | 0.91992     | -1.0743 | 0.85865 | 0.85865 |
|            | 0.85865         | -1.124  | 0.86949 | 0.85865     | 0.910182822 |         |         |         |
| FOXN1      | ENSG00000109101 | -1.1855 | 0.8821  | -1.1389     | 0.87262     | -1.0744 | 0.85869 | 0.85869 |

|            |                 |         |         |         |             |             |         |         |
|------------|-----------------|---------|---------|---------|-------------|-------------|---------|---------|
|            |                 | -1.1855 | 0.8821  | 0.85869 | 0.910185624 |             |         |         |
| NA         | ENSG00000255340 | -1.0744 | 0.85869 | 0.85869 | -1.0744     | 0.85869     | -1.0744 | 0.85869 |
|            |                 | -1.0744 | 0.85869 | 0.85869 | 0.910185624 |             |         |         |
| NA         | ENSG00000226087 | -1.445  | 0.92578 | 0.92578 | -2.2638     | 0.98821     | -1.0749 | 0.85878 |
|            |                 | -1.2214 | 0.88904 | 0.85878 | 0.910261222 |             |         |         |
| NA         | ENSG00000251408 | -1.075  | 0.85881 | 0.85881 | -1.075      | 0.85881     | -1.075  | 0.85881 |
|            |                 | -1.075  | 0.85881 | 0.85881 | 0.91026402  |             |         |         |
| NA         | ENSG00000273599 | -1.5405 | 0.93828 | 0.93828 | -1.075      | 0.85882     | -1.075  | 0.85882 |
|            |                 | -1.075  | 0.85882 | 0.85882 | 0.91026402  |             |         |         |
| RBFOX2     | ENSG00000100320 | -1.7388 | 0.95897 | 0.95897 | -1.7388     | 0.95897     | -1.2699 |         |
|            |                 | 0.89794 | -1.0752 | 0.85886 | 0.85886     | 0.910286617 |         |         |
| OR2A13P    | ENSG00000273234 | -1.0757 | 0.85897 | 0.85897 | -1.0757     | 0.85897     | -1.0757 |         |
|            |                 | 0.85897 | -1.0757 | 0.85897 | 0.85897     | 0.910374201 |         |         |
| MIR216A    | ENSG00000207798 | -1.0757 | 0.85898 | 0.85898 | -1.0757     | 0.85898     | -1.0757 |         |
|            |                 | 0.85898 | -1.0757 | 0.85898 | 0.85898     | 0.910374201 |         |         |
| CHCHD10    | ENSG00000250479 | -1.0759 | 0.85901 | 0.85901 | -1.0759     | 0.85901     | -1.0759 |         |
|            |                 | 0.85901 | -1.0759 | 0.85901 | 0.85901     | 0.910386196 |         |         |
| DCUN1D5    | ENSG00000137692 | -2.1332 | 0.98354 | 0.98354 | -1.0762     | 0.85908     | -1.0762 |         |
|            |                 | 0.85908 | -1.0762 | 0.85908 | 0.85908     | 0.910440582 |         |         |
| NA         | ENSG00000228386 | -1.0765 | 0.85914 | 0.85914 | -1.0765     | 0.85914     | -1.0765 | 0.85914 |
|            |                 | -1.0765 | 0.85914 | 0.85914 | 0.910484368 |             |         |         |
| TUBB4BP6   | ENSG00000231166 | -1.077  | 0.85926 | 0.85926 | -1.077      | 0.85926     | -1.077  |         |
|            |                 | 0.85926 | -1.077  | 0.85926 | 0.85926     | 0.910571934 |         |         |
| SNORA84    | ENSG00000239183 | -1.077  | 0.85926 | 0.85926 | -1.077      | 0.85926     | -1.077  |         |
|            |                 | 0.85926 | -1.077  | 0.85926 | 0.85926     | 0.910571934 |         |         |
| NA         | ENSG00000248596 | -1.088  | 0.86171 | 0.86171 | -1.375      | 0.91544     | -1.0772 | 0.8593  |
|            |                 | -1.375  | 0.91544 | 0.8593  | 0.910585315 |             |         |         |
| RNU6-354P  | ENSG00000206589 | -1.0772 | 0.85931 | 0.85931 | -1.0772     | 0.85931     | -1.0772 |         |
|            |                 | 0.85931 | -1.0772 | 0.85931 | 0.85931     | 0.910585315 |         |         |
| ZNF90P3    | ENSG00000233782 | -1.8302 | 0.96639 | 0.96639 | -1.0775     | 0.85937     | -1.8904 |         |
|            |                 | 0.97065 | -1.8064 | 0.96458 | 0.85937     | 0.910619888 |         |         |
| RNA5SP206  | ENSG00000252512 | -1.0775 | 0.85938 | 0.85938 | -1.0775     | 0.85938     | -1.0775 |         |
|            |                 | 0.85938 | -1.0775 | 0.85938 | 0.85938     | 0.910619888 |         |         |
| COQ7       | ENSG00000167186 | -2.3786 | 0.99131 | 0.99131 | -2.119      | 0.98295     | -1.6588 | 0.95142 |
|            |                 | -1.0778 | 0.85943 | 0.85943 | 0.910643862 |             |         |         |
| NA         | ENSG00000277342 | -1.0778 | 0.85944 | 0.85944 | -1.0778     | 0.85944     | -1.0778 | 0.85944 |
|            |                 | -1.0778 | 0.85944 | 0.85944 | 0.910643862 |             |         |         |
| NA         | ENSG00000212383 | -1.2135 | 0.88754 | 0.88754 | -1.0779     | 0.85946     | -1.0779 | 0.85946 |
|            |                 | -1.1194 | 0.86852 | 0.85946 | 0.910645252 |             |         |         |
| MIR562     | ENSG00000207626 | -1.0783 | 0.85956 | 0.85956 | -1.0783     | 0.85956     | -1.5911 |         |
|            |                 | 0.9442  | -1.5754 | 0.94242 | 0.85956     | 0.910731405 |         |         |
| GORASP2    | ENSG00000115806 | -1.2381 | 0.89216 | 0.89216 | -1.671      | 0.95264     | -1.2404 |         |
|            |                 | 0.89259 | -1.0786 | 0.85962 | 0.85962     | 0.910755372 |         |         |
| NA         | ENSG00000228530 | -1.0786 | 0.85962 | 0.85962 | -1.0786     | 0.85962     | -1.7223 | 0.95749 |
|            |                 | -1.0786 | 0.85962 | 0.85962 | 0.910755372 |             |         |         |
| OR2B7P     | ENSG00000187763 | -1.0787 | 0.85965 | 0.85965 | -1.0787     | 0.85965     | -1.0787 |         |
|            |                 | 0.85965 | -1.0787 | 0.85965 | 0.85965     | 0.910767355 |         |         |
| JPT2       | ENSG00000206053 | -1.1225 | 0.86918 | 0.86918 | -1.0789     | 0.85969     | -1.0789 | 0.85969 |
|            |                 | -1.0789 | 0.85969 | 0.85969 | 0.910770131 |             |         |         |
| TMEM26-AS1 | ENSG00000237233 | -1.0789 | 0.85969 | 0.85969 | -1.0789     | 0.85969     | -1.0789 |         |
|            |                 | 0.85969 | -1.0789 | 0.85969 | 0.85969     | 0.910770131 |         |         |
| NA         | ENSG00000283457 | -1.5053 | 0.93388 | 0.93388 | -2.0119     | 0.97789     | -1.0791 | 0.85973 |
|            |                 | -1.0791 | 0.85973 | 0.85973 | 0.910792706 |             |         |         |
| SMARCE1P4  | ENSG00000253650 | -1.0793 | 0.85977 | 0.85977 | -1.3617     | 0.91336     | -1.0793 |         |
|            |                 | 0.85977 | -1.0793 | 0.85977 | 0.85977     | 0.910815281 |         |         |
| TOGARAM1   | ENSG00000198718 | -1.2906 | 0.90158 | 0.90158 | -1.2906     | 0.90158     | -1.2906 |         |
|            |                 | 0.90158 | -1.0801 | 0.85996 | 0.85996     | 0.910996757 |         |         |
| NA         | ENSG00000272370 | -1.0806 | 0.86006 | 0.86006 | -1.0806     | 0.86006     | -1.0806 | 0.86006 |
|            |                 | -1.0806 | 0.86006 | 0.86006 | 0.911082885 |             |         |         |
| BRD7P4     | ENSG00000218676 | -1.7821 | 0.96263 | 0.96263 | -1.0808     | 0.8601      | -1.7821 |         |
|            |                 | 0.96263 | -1.7821 | 0.96263 | 0.8601      | 0.911105452 |         |         |
| ZNF415     | ENSG00000170954 | -1.081  | 0.86015 | 0.86015 | -1.081      | 0.86015     | -1.081  |         |

|             |                 |         |             |             |             |         |         |         |
|-------------|-----------------|---------|-------------|-------------|-------------|---------|---------|---------|
|             | 0.86015         | -1.081  | 0.86015     | 0.86015     | 0.911129397 |         |         |         |
| CCL15-CCL14 | ENSG00000275688 | -1.0811 | 0.86016     | 0.86016     | -1.0811     | 0.86016 | -1.3339 |         |
|             | 0.90887         | -1.0811 | 0.86016     | 0.86016     | 0.911129397 |         |         |         |
| ASB8        | ENSG00000177981 | -1.0811 | 0.86018     | -1.0811     | 0.86018     | -1.4958 | 0.93265 |         |
|             | -1.4958         | 0.93265 | 0.86018     | 0.911130777 |             |         |         |         |
| NA          | ENSG00000241770 | -1.0818 | 0.86033     | -1.0818     | 0.86033     | -1.0818 | 0.86033 |         |
|             | -1.0818         | 0.86033 | 0.86033     | 0.911251424 |             |         |         |         |
| ASPN        | ENSG00000106819 | -1.2597 | 0.89612     | -1.0818     | 0.86034     | -1.5682 | 0.94159 |         |
|             | -1.5682         | 0.94159 | 0.86034     | 0.911251424 |             |         |         |         |
| NA          | ENSG00000259080 | -1.0819 | 0.86035     | -1.0819     | 0.86035     | -1.0819 | 0.86035 |         |
|             | -1.0819         | 0.86035 | 0.86035     | 0.911251424 |             |         |         |         |
| NA          | ENSG00000271499 | -1.0823 | 0.86044     | -1.0823     | 0.86044     | -1.0823 | 0.86044 |         |
|             | -1.0823         | 0.86044 | 0.86044     | 0.911283617 |             |         |         |         |
| NA          | ENSG00000258323 | -1.2063 | 0.88615     | -1.0824     | 0.86047     | -1.0824 | 0.86047 |         |
|             | -1.0824         | 0.86047 | 0.86047     | 0.911283617 |             |         |         |         |
| LINC01988   | ENSG00000283036 | -1.0824 | 0.86047     | -1.0824     | 0.86047     | -1.0824 |         |         |
|             | 0.86047         | -1.0824 | 0.86047     | 0.86047     | 0.911283617 |         |         |         |
| NA          | ENSG00000270475 | -1.0825 | 0.86048     | -1.0825     | 0.86048     | -1.0825 | 0.86048 |         |
|             | -1.0825         | 0.86048 | 0.86048     | 0.911283617 |             |         |         |         |
| PAK5        | ENSG00000101349 | -1.0826 | 0.8605      | -1.2824     | 0.90015     | -1.2824 | 0.90015 |         |
|             | -1.2824         | 0.90015 | 0.8605      | 0.911283617 |             |         |         |         |
| OR3A4P      | ENSG00000180068 | -1.0826 | 0.86052     | -1.2416     | 0.89281     | -1.0826 |         |         |
|             | 0.86052         | -1.0826 | 0.86052     | 0.86052     | 0.911283617 |         |         |         |
| NA          | ENSG00000279517 | -1.0826 | 0.86052     | -1.0826     | 0.86052     | -1.0826 | 0.86052 |         |
|             | -1.0826         | 0.86052 | 0.86052     | 0.911283617 |             |         |         |         |
| RPL36P16    | ENSG00000224476 | -1.2503 | 0.89441     | -1.0827     | 0.86053     | -1.0827 |         |         |
|             | 0.86053         | -1.0827 | 0.86053     | 0.86053     | 0.911283617 |         |         |         |
| RNU6-841P   | ENSG00000206599 | -1.0834 | 0.86068     | -1.0834     | 0.86068     | -1.0834 |         |         |
|             | 0.86068         | -1.0834 | 0.86068     | 0.86068     | 0.911422657 |         |         |         |
| NA          | ENSG00000272040 | -1.0836 | 0.86073     | -1.0836     | 0.86073     | -1.0836 | 0.86073 |         |
|             | -1.0836         | 0.86073 | 0.86073     | 0.911455798 |             |         |         |         |
| LRRC7-AS1   | ENSG00000237919 | -1.0837 | 0.86075     | -1.0837     | 0.86075     | -1.0837 |         |         |
|             | 0.86075         | -1.0837 | 0.86075     | 0.86075     | 0.91145717  |         |         |         |
| ZNF565      | ENSG00000196357 | -1.0838 | 0.86077     | -1.0838     | 0.86077     | -1.6644 |         |         |
|             | 0.95198         | -1.0838 | 0.86077     | 0.86077     | 0.911458542 |         |         |         |
| IAPP        | ENSG00000121351 | -1.0839 | 0.8608      | -1.0839     | 0.8608      | -1.0839 | 0.8608  |         |
|             | -1.8013         | 0.96417 | 0.8608      | 0.911470503 |             |         |         |         |
| NA          | ENSG00000283877 | -1.0842 | 0.86086     | -1.4944     | 0.93247     | -1.9203 | 0.97259 |         |
|             | -1.399          | 0.91909 | 0.86086     | 0.911495793 |             |         |         |         |
| NA          | ENSG00000231815 | -1.0842 | 0.86087     | -1.0842     | 0.86087     | -1.0842 | 0.86087 |         |
|             | -1.0842         | 0.86087 | 0.86087     | 0.911495793 |             |         |         |         |
| AP2A1       | ENSG00000196961 | -1.0843 | 0.86088     | -1.2756     | 0.89895     | -1.3532 | 0.91201 |         |
|             | -1.3532         | 0.91201 | 0.86088     | 0.911495793 |             |         |         |         |
| GIMAP6      | ENSG00000133561 | -1.5978 | 0.94496     | -1.3739     | 0.91526     | -1.3739 |         |         |
|             | 0.91526         | -1.0844 | 0.86092     | 0.86092     | 0.911498536 |         |         |         |
| OR5AC4P     | ENSG00000251090 | -1.0845 | 0.86092     | -1.0845     | 0.86092     | -1.0845 |         |         |
|             | 0.86092         | -1.0845 | 0.86092     | 0.86092     | 0.911498536 |         |         |         |
| FAM237B     | ENSG00000283267 | -1.0848 | 0.86099     | -1.0848     | 0.86099     | -1.0848 |         |         |
|             | 0.86099         | -1.0848 | 0.86099     | 0.86099     | 0.911543626 |         |         |         |
| HMG2P10     | ENSG00000231261 | -1.0848 | 0.861       | -1.0848     | 0.861       | -1.0848 | 0.861   | -1.0848 |
|             | 0.861           | 0.861   | 0.911543626 |             |             |         |         |         |
| NA          | ENSG00000252672 | -1.0853 | 0.8611      | -1.0853     | 0.8611      | -1.0853 | 0.8611  |         |
|             | -1.0853         | 0.8611  | 0.8611      | 0.91162184  |             |         |         |         |
| CCDC8       | ENSG00000169515 | -1.0854 | 0.86112     | -1.9668     | 0.9754      | -1.9691 | 0.97553 |         |
|             | -1.0854         | 0.86112 | 0.86112     | 0.91162184  |             |         |         |         |
| OGFR-AS1    | ENSG00000229873 | -1.0854 | 0.86113     | -1.0854     | 0.86113     | -1.0854 |         |         |
|             | 0.86113         | -1.0854 | 0.86113     | 0.86113     | 0.91162184  |         |         |         |
| RPL7AP9     | ENSG00000213272 | -1.0855 | 0.86116     | -1.0855     | 0.86116     | -1.0855 |         |         |
|             | 0.86116         | -1.0855 | 0.86116     | 0.86116     | 0.911633794 |         |         |         |
| SIGLECL1    | ENSG00000179213 | -1.0857 | 0.86119     | -1.0857     | 0.86119     | -1.0857 |         |         |
|             | 0.86119         | -1.0857 | 0.86119     | 0.86119     | 0.91163653  |         |         |         |
| OR1AC1P     | ENSG00000267129 | -1.1839 | 0.88178     | -1.0857     | 0.8612      | -1.1839 |         |         |

|            |                 |         |         |             |             |         |         |  |
|------------|-----------------|---------|---------|-------------|-------------|---------|---------|--|
|            | 0.88178         | -1.1839 | 0.88178 | 0.8612      | 0.91163653  |         |         |  |
| DCAF6      | ENSG00000143164 | -1.0861 | 0.86128 | -1.0861     | 0.86128     | -1.0861 | 0.86128 |  |
|            | -1.4889         | 0.93174 | 0.86128 | 0.911681606 |             |         |         |  |
| MIRLET7F1  | ENSG00000199072 | -1.0861 | 0.86128 | -1.0861     | 0.86128     | -1.133  |         |  |
|            | 0.87138         | -1.4244 | 0.92284 | 0.86128     | 0.911681606 |         |         |  |
| NA         | ENSG00000273925 | -1.0863 | 0.86133 | -1.0863     | 0.86133     | -1.0863 | 0.86133 |  |
|            | -1.0863         | 0.86133 | 0.86133 | 0.911714727 |             |         |         |  |
| RNU6-1307P | ENSG00000212314 | -1.0865 | 0.86136 | -1.0865     | 0.86136     | -1.0865 |         |  |
|            | 0.86136         | -1.0865 | 0.86136 | 0.86136     | 0.911726678 |         |         |  |
| NA         | ENSG00000259170 | -1.0867 | 0.86141 | -1.0867     | 0.86141     | -1.0867 | 0.86141 |  |
|            | -1.0867         | 0.86141 | 0.86141 | 0.911733506 |             |         |         |  |
| NPM1P13    | ENSG00000232492 | -1.9036 | 0.97152 | -1.0867     | 0.86142     | -1.0867 |         |  |
|            | 0.86142         | -1.0867 | 0.86142 | 0.86142     | 0.911733506 |         |         |  |
| RNU6-1308P | ENSG00000252626 | -1.0868 | 0.86144 | -1.0868     | 0.86144     | -1.0868 |         |  |
|            | 0.86144         | -1.0868 | 0.86144 | 0.86144     | 0.911733506 |         |         |  |
| ZNF836     | ENSG00000196267 | -1.0869 | 0.86146 | -1.0869     | 0.86146     | -1.0869 |         |  |
|            | 0.86146         | -1.0869 | 0.86146 | 0.86146     | 0.911733506 |         |         |  |
| NA         | ENSG00000262995 | -1.0869 | 0.86146 | -1.0869     | 0.86146     | -1.0869 | 0.86146 |  |
|            | -1.0869         | 0.86146 | 0.86146 | 0.911733506 |             |         |         |  |
| RN7SKP245  | ENSG00000200895 | -1.0872 | 0.86153 | -1.0872     | 0.86153     | -1.0872 |         |  |
|            | 0.86153         | -1.0872 | 0.86153 | 0.86153     | 0.911758767 |         |         |  |
| NA         | ENSG00000259201 | -1.0872 | 0.86153 | -1.0872     | 0.86153     | -1.0872 | 0.86153 |  |
|            | -1.0872         | 0.86153 | 0.86153 | 0.911758767 |             |         |         |  |
| MIR1323    | ENSG00000221017 | -1.0873 | 0.86154 | -1.0873     | 0.86154     | -1.0873 |         |  |
|            | 0.86154         | -1.0873 | 0.86154 | 0.86154     | 0.911758767 |         |         |  |
| LINC01655  | ENSG00000227925 | -1.0876 | 0.86161 | -1.0876     | 0.86161     | -1.0876 |         |  |
|            | 0.86161         | -1.0876 | 0.86161 | 0.86161     | 0.911813045 |         |         |  |
| TRBV4-1    | ENSG00000211710 | -1.479  | 0.93043 | -1.0878     | 0.86165     | -1.0878 |         |  |
|            | 0.86165         | -1.6822 | 0.95374 | 0.86165     | 0.911835574 |         |         |  |
| NA         | ENSG00000279200 | -3.037  | 0.99881 | -3.037      | 0.99881     | -3.037  | 0.99881 |  |
|            | -1.0879         | 0.86169 | 0.86169 | 0.911858101 |             |         |         |  |
| NA         | ENSG00000266910 | -1.0883 | 0.86176 | -1.0883     | 0.86176     | -1.0883 | 0.86176 |  |
|            | -1.0883         | 0.86176 | 0.86176 | 0.911866275 |             |         |         |  |
| TAF9P3     | ENSG00000267692 | -1.0883 | 0.86176 | -1.0883     | 0.86176     | -1.0883 |         |  |
|            | 0.86176         | -1.0883 | 0.86176 | 0.86176     | 0.911866275 |         |         |  |
| SNORA11F   | ENSG00000221164 | -1.0883 | 0.86177 | -1.0883     | 0.86177     | -1.0883 |         |  |
|            | 0.86177         | -1.0883 | 0.86177 | 0.86177     | 0.911866275 |         |         |  |
| NA         | ENSG00000248173 | -1.0884 | 0.86178 | -1.0884     | 0.86178     | -1.0884 | 0.86178 |  |
|            | -1.0884         | 0.86178 | 0.86178 | 0.911866275 |             |         |         |  |
| NA         | ENSG00000255672 | -1.0884 | 0.8618  | -1.0884     | 0.8618      | -1.0884 | 0.8618  |  |
|            | -1.0884         | 0.8618  | 0.8618  | 0.911866275 |             |         |         |  |
| NA         | ENSG00000270105 | -1.0885 | 0.86181 | -1.0885     | 0.86181     | -1.0885 | 0.86181 |  |
|            | -1.0885         | 0.86181 | 0.86181 | 0.911866275 |             |         |         |  |
| NA         | ENSG00000256381 | -1.0886 | 0.86184 | -1.0886     | 0.86184     | -1.0886 | 0.86184 |  |
|            | -1.0886         | 0.86184 | 0.86184 | 0.911868999 |             |         |         |  |
| SNORD115-3 | ENSG00000199970 | -1.0887 | 0.86185 | -1.0887     | 0.86185     | -1.0887 |         |  |
|            | 0.86185         | -1.2617 | 0.89648 | 0.86185     | 0.911868999 |         |         |  |
| NA         | ENSG00000236266 | -1.0895 | 0.86202 | -1.0895     | 0.86202     | -1.0895 | 0.86202 |  |
|            | -1.0895         | 0.86202 | 0.86202 | 0.912029063 |             |         |         |  |
| NA         | ENSG00000267543 | -1.0896 | 0.86206 | -1.0896     | 0.86206     | -1.0896 | 0.86206 |  |
|            | -1.0896         | 0.86206 | 0.86206 | 0.912051582 |             |         |         |  |
| GOLPH3     | ENSG00000113384 | -1.6117 | 0.94649 | -1.09       | 0.86215     | -1.4318 | 0.92391 |  |
|            | -1.5751         | 0.94238 | 0.86215 | 0.912126997 |             |         |         |  |
| NA         | ENSG00000227291 | -1.0903 | 0.86221 | -1.0903     | 0.86221     | -1.0903 | 0.86221 |  |
|            | -1.0903         | 0.86221 | 0.86221 | 0.912170672 |             |         |         |  |
| RNF186     | ENSG00000178828 | -1.0906 | 0.86227 | -1.4395     | 0.92499     | -1.0906 |         |  |
|            | 0.86227         | -1.0906 | 0.86227 | 0.86227     | 0.912205119 |         |         |  |
| MNDA       | ENSG00000163563 | -1.0906 | 0.86228 | -1.0906     | 0.86228     | -1.8744 | 0.96956 |  |
|            | -1.0906         | 0.86228 | 0.86228 | 0.912205119 |             |         |         |  |
| NA         | ENSG00000222185 | -1.0909 | 0.86235 | -1.0909     | 0.86235     | -1.0909 | 0.86235 |  |
|            | -1.0909         | 0.86235 | 0.86235 | 0.912239564 |             |         |         |  |
| ELOCP18    | ENSG00000237622 | -1.0909 | 0.86235 | -1.0909     | 0.86235     | -1.0909 |         |  |

|             |                 |         |         |             |             |         |         |
|-------------|-----------------|---------|---------|-------------|-------------|---------|---------|
|             | 0.86235         | -1.0909 | 0.86235 | 0.86235     | 0.912239564 |         |         |
| C12orf40    | ENSG00000180116 | -1.0913 | 0.86243 | 0.86243     | -1.5216     | 0.93595 | -1.5222 |
|             | 0.93603         | -1.2018 | 0.88528 | 0.86243     | 0.912304387 |         |         |
| NA          | ENSG00000278895 | -1.171  | 0.87919 | -1.0914     | 0.86245     | -1.171  | 0.87919 |
|             | -1.171          | 0.87919 | 0.86245 | 0.912305739 |             |         |         |
| OR10AK1P    | ENSG00000254807 | -1.3248 | 0.90738 | -1.0915     | 0.86247     | -1.0915 |         |
|             | 0.86247         | -1.0915 | 0.86247 | 0.912307092 |             |         |         |
| SLC35G5     | ENSG00000177710 | -1.0919 | 0.86255 | -1.0919     | 0.86255     | -1.0919 |         |
|             | 0.86255         | -1.0919 | 0.86255 | 0.912352105 |             |         |         |
| NA          | ENSG00000254509 | -1.0919 | 0.86255 | -1.0919     | 0.86255     | -1.0919 | 0.86255 |
|             | -1.0919         | 0.86255 | 0.86255 | 0.912352105 |             |         |         |
| NA          | ENSG00000255863 | -1.0919 | 0.86257 | -1.0919     | 0.86257     | -1.0919 | 0.86257 |
|             | -1.0919         | 0.86257 | 0.86257 | 0.912353457 |             |         |         |
| SDF2L1      | ENSG00000128228 | -1.0924 | 0.86266 | -1.0924     | 0.86266     | -1.0924 |         |
|             | 0.86266         | -1.1173 | 0.86807 | 0.86266     | 0.912419619 |         |         |
| NA          | ENSG00000254814 | -1.0924 | 0.86267 | -1.0924     | 0.86267     | -1.0924 | 0.86267 |
|             | -1.0924         | 0.86267 | 0.86267 | 0.912419619 |             |         |         |
| NA          | ENSG00000279388 | -1.0932 | 0.86284 | -1.6385     | 0.94934     | -1.155  | 0.87596 |
|             | -1.1549         | 0.87594 | 0.86284 | 0.912579615 |             |         |         |
| NA          | ENSG00000280079 | -1.0933 | 0.86286 | -1.0933     | 0.86286     | -1.0933 | 0.86286 |
|             | -1.0933         | 0.86286 | 0.86286 | 0.912580961 |             |         |         |
| TSPAN18-AS1 | ENSG00000255032 | -1.3337 | 0.90885 | -1.1796     | 0.88092     | -1.8813 |         |
|             | 0.97004         | -1.0935 | 0.86291 | 0.86291     | 0.912614036 |         |         |
| RPL7P25     | ENSG00000216636 | -1.0937 | 0.86296 | -1.0937     | 0.86296     | -1.0937 |         |
|             | 0.86296         | -1.0937 | 0.86296 | 0.912637877 |             |         |         |
| NA          | ENSG00000279366 | -1.5341 | 0.9375  | -1.5341     | 0.9375      | -1.0938 | 0.86297 |
|             | -1.5341         | 0.9375  | 0.86297 | 0.912637877 |             |         |         |
| NA          | ENSG00000228509 | -1.3382 | 0.90959 | -1.0941     | 0.86305     | -1.6061 | 0.94588 |
|             | -1.6061         | 0.94588 | 0.86305 | 0.912668437 |             |         |         |
| OR52A1      | ENSG00000182070 | -1.5211 | 0.93588 | -1.0942     | 0.86306     | -1.8353 |         |
|             | 0.96677         | -1.7068 | 0.95607 | 0.86306     | 0.912668437 |         |         |
| NA          | ENSG00000228790 | -1.0943 | 0.86308 | -1.0943     | 0.86308     | -1.0943 | 0.86308 |
|             | -1.0943         | 0.86308 | 0.86308 | 0.912668437 |             |         |         |
| NA          | ENSG00000255692 | -1.0943 | 0.86309 | -1.0943     | 0.86309     | -1.0943 | 0.86309 |
|             | -1.0943         | 0.86309 | 0.86309 | 0.912668437 |             |         |         |
| TAF10       | ENSG00000166337 | -1.0943 | 0.8631  | -1.0943     | 0.8631      | -1.0943 | 0.8631  |
|             | -1.0943         | 0.8631  | 0.8631  | 0.912668437 |             |         |         |
| RNA5SP151   | ENSG00000202502 | -1.0944 | 0.86312 | -1.0944     | 0.86312     | -1.0944 |         |
|             | 0.86312         | -1.0944 | 0.86312 | 0.912668437 |             |         |         |
| LDHAL6B     | ENSG00000171989 | -1.0945 | 0.86313 | -1.0945     | 0.86313     | -1.0945 |         |
|             | 0.86313         | -1.0945 | 0.86313 | 0.912668437 |             |         |         |
| AGBL5-AS1   | ENSG00000231636 | -1.1988 | 0.8847  | -1.4799     | 0.93055     | -1.0949 |         |
|             | 0.86322         | -1.0949 | 0.86322 | 0.912743796 |             |         |         |
| CATSPER2P1  | ENSG00000205771 | -1.1223 | 0.86913 | -1.4693     | 0.92913     | -1.0953 |         |
|             | 0.86331         | -1.2569 | 0.89561 | 0.86331     | 0.912819153 |         |         |
| FIGNL2      | ENSG00000261308 | -1.0954 | 0.86333 | -1.6645     | 0.952       | -1.0954 | 0.86333 |
|             | -1.0954         | 0.86333 | 0.86333 | 0.912820493 |             |         |         |
| NA          | ENSG00000243403 | -1.1282 | 0.87039 | -1.0956     | 0.86336     | -1.3792 | 0.91609 |
|             | -1.7341         | 0.95855 | 0.86336 | 0.912832407 |             |         |         |
| FRG2FP      | ENSG00000232783 | -1.0957 | 0.8634  | -1.0957     | 0.8634      | -1.0957 |         |
|             | 0.8634          | -1.0957 | 0.8634  | 0.912854893 |             |         |         |
| NA          | ENSG00000236883 | -1.0959 | 0.86344 | -1.0959     | 0.86344     | -1.0959 | 0.86344 |
|             | -1.0959         | 0.86344 | 0.86344 | 0.912877377 |             |         |         |
| FRMD1       | ENSG00000153303 | -1.3644 | 0.91378 | -1.193      | 0.88357     | -1.0962 | 0.86351 |
|             | -1.1228         | 0.86924 | 0.86351 | 0.912931578 |             |         |         |
| MIR4307HG   | ENSG00000257612 | -1.0964 | 0.86354 | -1.1211     | 0.86888     | -1.0964 |         |
|             | 0.86354         | -1.0964 | 0.86354 | 0.912943488 |             |         |         |
| ANKRD18B    | ENSG00000230453 | -1.137  | 0.87222 | -1.1256     | 0.86983     | -1.6395 |         |
|             | 0.94945         | -1.0975 | 0.86379 | 0.86379     | 0.913187979 |         |         |
| SPRN        | ENSG00000203772 | -1.0976 | 0.86382 | -1.0976     | 0.86382     | -1.0976 | 0.86382 |
|             | -1.0976         | 0.86382 | 0.86382 | 0.913199883 |             |         |         |
| NA          | ENSG00000253585 | -1.098  | 0.8639  | -1.098      | 0.8639      | -1.098  | 0.8639  |

|           |                 |         |            |         |             |             |         |         |         |
|-----------|-----------------|---------|------------|---------|-------------|-------------|---------|---------|---------|
|           |                 | -1.207  | 0.88627    | 0.8639  | 0.913264643 |             |         |         |         |
| NA        | ENSG00000270856 | -1.5164 | 0.93529    | -1.5164 | 0.93529     | -1.5164     | 0.93529 | -1.5164 | 0.93529 |
|           |                 | -1.0983 | 0.86395    | 0.86395 | 0.913280536 |             |         |         |         |
| RN7SKP286 | ENSG00000222826 | -1.0983 | 0.86397    | -1.0983 | 0.86397     | -1.0983     | 0.86397 | -1.0983 | 0.86397 |
|           |                 | 0.86397 | -1.335     | 0.90906 | 0.86397     | 0.913280536 |         |         |         |
| NA        | ENSG00000238947 | -1.0984 | 0.86398    | 0.86398 | -1.0984     | 0.86398     | -1.0984 | 0.86398 | 0.86398 |
|           |                 | -1.0984 | 0.86398    | 0.86398 | 0.913280536 |             |         |         |         |
| OR4C12    | ENSG00000221954 | -1.8849 | 0.97028    | -1.6046 | 0.94571     | -1.0984     |         |         |         |
|           |                 | 0.86399 | -2.1566    | 0.98448 | 0.86399     | 0.913280536 |         |         |         |
| NA        | ENSG00000254307 | -1.0985 | 0.86401    | -1.0985 | 0.86401     | -1.0985     | 0.86401 | -1.0985 | 0.86401 |
|           |                 | -1.0985 | 0.86401    | 0.86401 | 0.913281866 |             |         |         |         |
| NA        | ENSG00000257910 | -1.0988 | 0.86407    | -1.0988 | 0.86407     | -1.0988     | 0.86407 | -1.0988 | 0.86407 |
|           |                 | -1.0988 | 0.86407    | 0.86407 | 0.913305666 |             |         |         |         |
| NA        | ENSG00000272243 | -1.0988 | 0.86407    | -1.5731 | 0.94215     | -1.37       | 0.91466 |         |         |
|           |                 | -1.7153 | 0.95686    | 0.86407 | 0.913305666 |             |         |         |         |
| SEC62-AS1 | ENSG00000240373 | -1.0989 | 0.86409    | -1.0989 | 0.86409     | -1.0989     | 0.86409 | -1.0989 | 0.86409 |
|           |                 | 0.86409 | -1.0989    | 0.86409 | 0.86409     | 0.913306995 |         |         |         |
| DAAM2     | ENSG00000146122 | -2.1259 | 0.98324    | -1.5315 | 0.93718     | -1.5412     | 0.93837 |         |         |
|           |                 | -1.0991 | 0.86414    | 0.86414 | 0.913322881 |             |         |         |         |
| LINC00930 | ENSG00000258647 | -1.0992 | 0.86416    | -1.9527 | 0.97457     | -1.0992     |         |         |         |
|           |                 | 0.86416 | -1.0992    | 0.86416 | 0.86416     | 0.913322881 |         |         |         |
| NDRG3     | ENSG00000101079 | -1.0992 | 0.86417    | -1.5672 | 0.94147     | -1.411      | 0.92087 |         |         |
|           |                 | -1.1126 | 0.86707    | 0.86417 | 0.913322881 |             |         |         |         |
| MTHFD2P2  | ENSG00000217169 | -2.4564 | 0.99298    | -1.0993 | 0.86418     | -1.0993     |         |         |         |
|           |                 | 0.86418 | -1.0993    | 0.86418 | 0.86418     | 0.913322881 |         |         |         |
| NA        | ENSG00000201346 | -1.0994 | 0.8642     | -1.0994 | 0.8642      | -1.0994     | 0.8642  |         |         |
|           |                 | -1.0994 | 0.8642     | 0.8642  | 0.91332421  |             |         |         |         |
| NA        | ENSG00000254665 | -1.0996 | 0.86424    | -1.0996 | 0.86424     | -1.0996     | 0.86424 |         |         |
|           |                 | -1.0996 | 0.86424    | 0.86424 | 0.913346675 |             |         |         |         |
| CABP4     | ENSG00000175544 | -1.1    | 0.86433    | -1.1    | 0.86433     | -1.1        | 0.86433 | -1.1    | 0.86433 |
|           |                 | 0.86433 | 0.91342198 |         |             |             |         |         |         |
| PPIAP65   | ENSG00000233428 | -1.1002 | 0.86438    | -1.1002 | 0.86438     | -1.1002     |         |         |         |
|           |                 | 0.86438 | -1.1002    | 0.86438 | 0.86438     | 0.91345501  |         |         |         |
| NACC1     | ENSG00000160877 | -1.1003 | 0.86441    | -1.6334 | 0.94881     | -1.1003     | 0.86441 |         |         |
|           |                 | -1.1003 | 0.86441    | 0.86441 | 0.913466903 |             |         |         |         |
| LIPK      | ENSG00000204021 | -1.1005 | 0.86443    | -1.1005 | 0.86443     | -1.1005     | 0.86443 |         |         |
|           |                 | -1.1005 | 0.86443    | 0.86443 | 0.913468229 |             |         |         |         |
| PEX12     | ENSG00000108733 | -1.1008 | 0.86451    | -1.1008 | 0.86451     | -1.1008     | 0.86451 |         |         |
|           |                 | -1.1008 | 0.86451    | 0.86451 | 0.913532957 |             |         |         |         |
| BLOC1S5   | ENSG00000188428 | -1.3064 | 0.9043     | -1.1009 | 0.86453     | -1.7075     |         |         |         |
|           |                 | 0.95614 | -1.3914    | 0.91795 | 0.86453     | 0.913534281 |         |         |         |
| NLRC4     | ENSG00000091106 | -2.1834 | 0.9855     | -2.1834 | 0.9855      | -2.1834     | 0.9855  |         |         |
|           |                 | -1.1012 | 0.86459    | 0.86459 | 0.913548819 |             |         |         |         |
| ESCO2     | ENSG00000171320 | -1.4161 | 0.92163    | -1.4161 | 0.92163     | -1.1012     | 0.8646  |         |         |
|           |                 | -1.4161 | 0.92163    | 0.8646  | 0.913548819 |             |         |         |         |
| LAP3P2    | ENSG00000213500 | -1.1012 | 0.8646     | -1.1012 | 0.8646      | -1.1012     |         |         |         |
|           |                 | 0.8646  | -1.1012    | 0.8646  | 0.8646      | 0.913548819 |         |         |         |
| RNA5SP345 | ENSG00000222578 | -1.1017 | 0.86471    | -1.1017 | 0.86471     | -1.1017     |         |         |         |
|           |                 | 0.86471 | -1.1017    | 0.86471 | 0.86471     | 0.913645236 |         |         |         |
| SCAT1     | ENSG00000267123 | -1.1019 | 0.86474    | -1.1019 | 0.86474     | -1.1019     | 0.86474 |         |         |
|           |                 | -1.1019 | 0.86474    | 0.86474 | 0.913645244 |             |         |         |         |
| NA        | ENSG00000249609 | -1.102  | 0.86477    | -1.2923 | 0.90187     | -1.102      | 0.86477 |         |         |
|           |                 | -1.102  | 0.86477    | 0.86477 | 0.913645244 |             |         |         |         |
| HMSD      | ENSG00000221887 | -1.1021 | 0.86478    | -1.1021 | 0.86478     | -1.1021     | 0.86478 |         |         |
|           |                 | -1.1021 | 0.86478    | 0.86478 | 0.913645244 |             |         |         |         |
| LINC00943 | ENSG00000189238 | -1.1022 | 0.86481    | -1.569  | 0.94167     | -1.1022     |         |         |         |
|           |                 | 0.86481 | -1.1022    | 0.86481 | 0.86481     | 0.913645244 |         |         |         |
| COMMD5    | ENSG00000170619 | -1.1023 | 0.86484    | -1.1023 | 0.86484     | -1.1023     |         |         |         |
|           |                 | 0.86484 | -1.1023    | 0.86484 | 0.86484     | 0.913645244 |         |         |         |
| LINC01277 | ENSG00000229017 | -1.8392 | 0.96706    | -2.435  | 0.99255     | -1.1024     |         |         |         |
|           |                 | 0.86485 | -1.2392    | 0.89236 | 0.86485     | 0.913645244 |         |         |         |
| RPL39P16  | ENSG00000227470 | -1.1024 | 0.86486    | -1.1024 | 0.86486     | -1.1024     |         |         |         |



|            |                 |         |         |             |             |         |         |
|------------|-----------------|---------|---------|-------------|-------------|---------|---------|
|            | 0.86486         | -1.1024 | 0.86486 | 0.86486     | 0.913645244 |         |         |
| NA         | ENSG00000268472 | -1.1338 | 0.87155 | -1.7514     | 0.96006     | -1.1024 | 0.86486 |
|            | -1.1024         | 0.86486 | 0.86486 | 0.913645244 |             |         |         |
| LINC01743  | ENSG00000242042 | -1.4091 | 0.9206  | -1.7307     | 0.95825     | -1.1025 |         |
|            | 0.86488         | -1.1025 | 0.86488 | 0.86488     | 0.913646565 |         |         |
| ZBTB40-IT1 | ENSG00000237200 | -1.1028 | 0.86494 | -1.1028     | 0.86494     | -1.1028 |         |
|            | 0.86494         | -1.1028 | 0.86494 | 0.86494     | 0.913690141 |         |         |
| NA         | ENSG00000258235 | -1.1029 | 0.86496 | -1.1029     | 0.86496     | -1.1029 | 0.86496 |
|            | -1.1029         | 0.86496 | 0.86496 | 0.913691461 |             |         |         |
| NA         | ENSG00000250538 | -1.1033 | 0.86504 | -1.1243     | 0.86955     | -1.1243 | 0.86955 |
|            | -1.1243         | 0.86955 | 0.86504 | 0.913756161 |             |         |         |
| NA         | ENSG00000277013 | -1.621  | 0.94749 | -1.1034     | 0.86507     | -1.621  | 0.94749 |
|            | -1.621          | 0.94749 | 0.86507 | 0.913768042 |             |         |         |
| TMX4       | ENSG00000125827 | -2.0669 | 0.98063 | -1.1305     | 0.87087     | -1.1041 | 0.86523 |
|            | -1.4318         | 0.92389 | 0.86523 | 0.913917239 |             |         |         |
| NA         | ENSG00000249690 | -1.1044 | 0.86529 | -1.1557     | 0.87609     | -1.1044 | 0.86529 |
|            | -1.1044         | 0.86529 | 0.86529 | 0.913931747 |             |         |         |
| GPR152     | ENSG00000175514 | -2.2736 | 0.98851 | -1.1045     | 0.8653      | -2.2736 |         |
|            | 0.98851         | -2.2736 | 0.98851 | 0.8653      | 0.913931747 |         |         |
| H2BP3      | ENSG00000240912 | -1.1045 | 0.8653  | -1.1045     | 0.8653      | -1.1045 | 0.8653  |
|            | -1.1045         | 0.8653  | 0.8653  | 0.913931747 |             |         |         |
| SUZ12P1    | ENSG00000264538 | -1.2159 | 0.88799 | -1.5051     | 0.93385     | -1.736  |         |
|            | 0.95872         | -1.105  | 0.86542 | 0.86542     | 0.91403868  |         |         |
| NA         | ENSG00000263013 | -1.1051 | 0.86545 | -1.1051     | 0.86545     | -1.1051 | 0.86545 |
|            | -1.1051         | 0.86545 | 0.86545 | 0.914050554 |             |         |         |
| NA         | ENSG00000238108 | -1.1058 | 0.86559 | -1.1058     | 0.86559     | -1.1058 | 0.86559 |
|            | -1.1058         | 0.86559 | 0.86559 | 0.914162719 |             |         |         |
| OAZ3       | ENSG00000143450 | -1.1058 | 0.8656  | -1.1058     | 0.8656      | -1.1058 | 0.8656  |
|            | -1.1058         | 0.8656  | 0.8656  | 0.914162719 |             |         |         |
| MIR4276    | ENSG00000265846 | -1.106  | 0.86563 | -1.106      | 0.86563     | -1.106  |         |
|            | 0.86563         | -1.106  | 0.86563 | 0.86563     | 0.914162719 |         |         |
| NA         | ENSG00000230194 | -1.106  | 0.86564 | -1.106      | 0.86564     | -1.106  | 0.86564 |
|            | -1.106          | 0.86564 | 0.86564 | 0.914162719 |             |         |         |
| MIR4456    | ENSG00000264233 | -1.106  | 0.86565 | -1.5568     | 0.94024     | -1.106  |         |
|            | 0.86565         | -1.106  | 0.86565 | 0.86565     | 0.914162719 |         |         |
| NA         | ENSG00000236617 | -1.1063 | 0.8657  | -1.1063     | 0.8657      | -1.1063 | 0.8657  |
|            | -1.1063         | 0.8657  | 0.8657  | 0.914169267 |             |         |         |
| NA         | ENSG00000255110 | -1.1063 | 0.8657  | -1.1063     | 0.8657      | -1.1063 | 0.8657  |
|            | -1.1063         | 0.8657  | 0.8657  | 0.914169267 |             |         |         |
| NUF2       | ENSG00000143228 | -1.1064 | 0.86572 | -1.4677     | 0.92891     | -1.4677 | 0.92891 |
|            | -1.4112         | 0.9209  | 0.86572 | 0.914169267 |             |         |         |
| CPS1-IT1   | ENSG00000280837 | -1.1065 | 0.86574 | -1.1065     | 0.86574     | -1.1065 |         |
|            | 0.86574         | -1.1065 | 0.86574 | 0.86574     | 0.914169267 |         |         |
| NA         | ENSG00000271268 | -1.1065 | 0.86575 | -1.1065     | 0.86575     | -1.1065 | 0.86575 |
|            | -1.1065         | 0.86575 | 0.86575 | 0.914169267 |             |         |         |
| RN7SL748P  | ENSG00000239964 | -1.1068 | 0.86582 | -2.5962     | 0.99529     | -2.5962 |         |
|            | 0.99529         | -2.5962 | 0.99529 | 0.86582     | 0.914223372 |         |         |
| C18orf54   | ENSG00000166845 | -1.6479 | 0.95032 | -1.1072     | 0.86589     | -1.1072 |         |
|            | 0.86589         | -1.4552 | 0.92719 | 0.86589     | 0.914277474 |         |         |
| RNU6-871P  | ENSG00000251931 | -1.1073 | 0.86591 | -1.1073     | 0.86591     | -1.1073 |         |
|            | 0.86591         | -1.1073 | 0.86591 | 0.86591     | 0.914278781 |         |         |
| TMEM78     | ENSG00000177800 | -2.4576 | 0.99301 | -1.1074     | 0.86594     | -2.4576 |         |
|            | 0.99301         | -1.1315 | 0.87108 | 0.86594     | 0.914290646 |         |         |
| NA         | ENSG00000267480 | -1.1075 | 0.86596 | -1.1075     | 0.86596     | -1.1075 | 0.86596 |
|            | -1.1075         | 0.86596 | 0.86596 | 0.914291953 |             |         |         |
| OR5M3      | ENSG00000174937 | -1.108  | 0.86608 | -1.108      | 0.86608     | -1.108  | 0.86608 |
|            | -1.108          | 0.86608 | 0.86608 | 0.914398839 |             |         |         |
| NA         | ENSG00000238832 | -1.1082 | 0.86611 | -1.1082     | 0.86611     | -1.1082 | 0.86611 |
|            | -1.1082         | 0.86611 | 0.86611 | 0.914410701 |             |         |         |
| CICP20     | ENSG00000235955 | -1.1084 | 0.86616 | -1.1084     | 0.86616     | -1.1084 |         |
|            | 0.86616         | -1.1084 | 0.86616 | 0.86616     | 0.914443677 |         |         |
| ATP5F1EP2  | ENSG00000180389 | -1.8924 | 0.97078 | -1.1087     | 0.86621     | -1.6981 |         |

|             |                 |         |             |             |             |         |         |
|-------------|-----------------|---------|-------------|-------------|-------------|---------|---------|
|             | 0.95526         | -1.8924 | 0.97078     | 0.86621     | 0.914476652 |         |         |
| ST13P20     | ENSG00000215875 | -1.109  | 0.86629     | 0.86629     | -1.109      | 0.86629 | -1.109  |
|             | 0.86629         | -1.109  | 0.86629     | 0.86629     | 0.914505578 |         |         |
| MIR608      | ENSG00000207551 | -1.1091 | 0.86631     | 0.86631     | -1.1091     | 0.86631 | -1.1091 |
|             | 0.86631         | -1.1091 | 0.86631     | 0.86631     | 0.914505578 |         |         |
| RNU6ATAC22P | ENSG00000252603 | -1.1091 | 0.86631     | 0.86631     | -1.1091     | 0.86631 | -1.1091 |
|             | 0.86631         | -1.1091 | 0.86631     | 0.86631     | 0.914505578 |         |         |
| SKP1        | ENSG00000113558 | -1.1444 | 0.87376     | -1.3702     | 0.91469     | -1.1091 | 0.86632 |
|             | -1.726          | 0.95782 | 0.86632     | 0.914505578 |             |         |         |
| ETFBKMT     | ENSG00000139160 | -1.4627 | 0.92822     | -1.5126     | 0.93481     | -1.1093 |         |
|             | 0.86634         | -1.4817 | 0.93078     | 0.86634     | 0.914505578 |         |         |
| NA          | ENSG00000264150 | -1.1093 | 0.86635     | -1.1093     | 0.86635     | -1.1093 | 0.86635 |
|             | -1.1093         | 0.86635 | 0.86635     | 0.914505578 |             |         |         |
| CHROMR      | ENSG00000223960 | -1.4247 | 0.92288     | -1.4264     | 0.92313     | -1.6318 |         |
|             | 0.94864         | -1.1095 | 0.8664      | 0.8664      | 0.914538547 |         |         |
| NA          | ENSG00000267024 | -1.1099 | 0.86648     | -1.1099     | 0.86648     | -1.1099 | 0.86648 |
|             | -1.1099         | 0.86648 | 0.86648     | 0.914575414 |             |         |         |
| NA          | ENSG00000206929 | -1.3375 | 0.90947     | -1.3375     | 0.90947     | -1.3375 | 0.90947 |
|             | -1.11           | 0.86651 | 0.86651     | 0.914575414 |             |         |         |
| RNU6-772P   | ENSG00000251851 | -1.11   | 0.86651     | -1.11       | 0.86651     | -1.11   | 0.86651 |
|             | 0.86651         | 0.86651 | 0.914575414 |             |             |         |         |
| RN7SKP147   | ENSG00000252963 | -1.11   | 0.86651     | -1.11       | 0.86651     | -1.11   | 0.86651 |
|             | 0.86651         | 0.86651 | 0.914575414 |             |             |         |         |
| LINC02258   | ENSG00000257912 | -1.3039 | 0.90387     | -1.1104     | 0.86658     | -1.1289 |         |
|             | 0.87052         | -1.1289 | 0.87052     | 0.86658     | 0.914629487 |         |         |
| SEC14L2     | ENSG00000100003 | -1.1106 | 0.86662     | -1.1106     | 0.86662     | -1.1106 |         |
|             | 0.86662         | -1.874  | 0.96954     | 0.86662     | 0.914642638 |         |         |
| RNU2-51P    | ENSG00000222640 | -1.1106 | 0.86663     | -1.1106     | 0.86663     | -1.1106 |         |
|             | 0.86663         | -1.1106 | 0.86663     | 0.86663     | 0.914642638 |         |         |
| NA          | ENSG00000279077 | -1.4122 | 0.92106     | -1.2488     | 0.89413     | -1.1112 | 0.86676 |
|             | -1.1112         | 0.86676 | 0.86676     | 0.914715041 |             |         |         |
| NA          | ENSG00000249806 | -1.1113 | 0.86678     | -1.1113     | 0.86678     | -1.1113 | 0.86678 |
|             | -1.1113         | 0.86678 | 0.86678     | 0.914715041 |             |         |         |
| GOLGA5      | ENSG00000066455 | -1.901  | 0.97135     | -1.3162     | 0.90595     | -1.3298 |         |
|             | 0.90821         | -1.1115 | 0.86682     | 0.86682     | 0.914715041 |         |         |
| GLO1        | ENSG00000124767 | -1.1115 | 0.86683     | -1.1115     | 0.86683     | -1.8339 | 0.96667 |
|             | -1.1115         | 0.86683 | 0.86683     | 0.914715041 |             |         |         |
| SH3BGRL3    | ENSG00000142669 | -1.1115 | 0.86683     | -1.1115     | 0.86683     | -1.1115 |         |
|             | 0.86683         | -1.1115 | 0.86683     | 0.86683     | 0.914715041 |         |         |
| MANF        | ENSG00000145050 | -1.1115 | 0.86683     | -1.1115     | 0.86683     | -1.1115 | 0.86683 |
|             | -1.1115         | 0.86683 | 0.86683     | 0.914715041 |             |         |         |
| TAS2R20     | ENSG00000255837 | -1.1115 | 0.86683     | -1.1115     | 0.86683     | -1.1115 |         |
|             | 0.86683         | -1.1115 | 0.86683     | 0.86683     | 0.914715041 |         |         |
| NA          | ENSG00000201036 | -1.1117 | 0.86686     | -1.1117     | 0.86686     | -1.1117 | 0.86686 |
|             | -1.1117         | 0.86686 | 0.86686     | 0.914717635 |             |         |         |
| SSTR3       | ENSG00000278195 | -1.1117 | 0.86687     | -1.1117     | 0.86687     | -1.1436 | 0.8736  |
|             | -1.1117         | 0.86687 | 0.86687     | 0.914717635 |             |         |         |
| NOP56P1     | ENSG00000235559 | -1.4835 | 0.93103     | -1.1118     | 0.86689     | -2.1761 |         |
|             | 0.98523         | -2.2855 | 0.98886     | 0.86689     | 0.914718932 |         |         |
| MSRA        | ENSG00000175806 | -1.6694 | 0.95248     | -1.7792     | 0.9624      | -1.1123 | 0.86699 |
|             | -1.1202         | 0.86869 | 0.86699     | 0.91480464  |             |         |         |
| RPLP1P11    | ENSG00000243686 | -1.1128 | 0.86711     | -1.1128     | 0.86711     | -1.1128 |         |
|             | 0.86711         | -1.1128 | 0.86711     | 0.86711     | 0.914902189 |         |         |
| KLHL11      | ENSG00000178502 | -1.1129 | 0.86712     | -1.1129     | 0.86712     | -1.1129 |         |
|             | 0.86712         | -1.1129 | 0.86712     | 0.86712     | 0.914902189 |         |         |
| RNU6-395P   | ENSG00000202532 | -1.1131 | 0.86717     | -1.1131     | 0.86717     | -1.1131 |         |
|             | 0.86717         | -1.1131 | 0.86717     | 0.86717     | 0.914935134 |         |         |
| PES1        | ENSG00000100029 | -1.1133 | 0.86722     | -1.1133     | 0.86722     | -1.1133 | 0.86722 |
|             | -1.1133         | 0.86722 | 0.86722     | 0.914958818 |             |         |         |
| NA          | ENSG00000276651 | -1.1134 | 0.86723     | -1.1134     | 0.86723     | -1.1134 | 0.86723 |
|             | -1.1134         | 0.86723 | 0.86723     | 0.914958818 |             |         |         |
| NA          | ENSG00000271833 | -1.1136 | 0.86727     | -1.1136     | 0.86727     | -1.1136 | 0.86727 |

|              |                 |         |         |             |             |         |         |  |
|--------------|-----------------|---------|---------|-------------|-------------|---------|---------|--|
|              | -1.1136         | 0.86727 | 0.86727 | 0.91498121  |             |         |         |  |
| HAUS2        | ENSG00000137814 | -1.1137 | 0.8673  | -1.1662     | 0.87823     | -1.1662 | 0.87823 |  |
|              | -1.4733         | 0.92966 | 0.8673  | 0.91499305  |             |         |         |  |
| NA           | ENSG00000258509 | -1.114  | 0.86737 | -1.114      | 0.86737     | -1.114  | 0.86737 |  |
|              | -1.114          | 0.86737 | 0.86737 | 0.915047089 |             |         |         |  |
| GAPDHP21     | ENSG00000236993 | -1.8817 | 0.97006 | -1.1144     | 0.86745     | -1.1144 |         |  |
|              | 0.86745         | -1.1144 | 0.86745 | 0.86745     | 0.915102414 |         |         |  |
| OR11M1P      | ENSG00000224709 | -1.8626 | 0.96874 | -1.1145     | 0.86746     | -1.9049 |         |  |
|              | 0.9716          | -1.4533 | 0.92692 | 0.86746     | 0.915102414 |         |         |  |
| TUBBP8       | ENSG00000259300 | -1.1146 | 0.86748 | -1.1146     | 0.86748     | -1.1146 |         |  |
|              | 0.86748         | -1.1146 | 0.86748 | 0.86748     | 0.915103702 |         |         |  |
| GNPTAB       | ENSG00000111670 | -1.8915 | 0.97072 | -1.1149     | 0.86755     | -1.5721 |         |  |
|              | 0.94204         | -1.4921 | 0.93216 | 0.86755     | 0.915157734 |         |         |  |
| ANKRD33      | ENSG00000167612 | -1.8631 | 0.96877 | -1.2452     | 0.89347     | -1.3891 |         |  |
|              | 0.9176          | -1.1151 | 0.86759 | 0.86759     | 0.915180117 |         |         |  |
| NA           | ENSG00000272121 | -1.1153 | 0.86763 | -1.1153     | 0.86763     | -1.1153 | 0.86763 |  |
|              | -1.1153         | 0.86763 | 0.86763 | 0.9152025   |             |         |         |  |
| RNU6ATAC     | ENSG00000221676 | -1.1154 | 0.86766 | -1.1154     | 0.86766     | -1.1154 |         |  |
|              | 0.86766         | -1.1154 | 0.86766 | 0.86766     | 0.915214334 |         |         |  |
| SP3P         | ENSG00000225530 | -1.1157 | 0.86772 | -1.1157     | 0.86772     | -1.1157 | 0.86772 |  |
|              | -1.1157         | 0.86772 | 0.86772 | 0.915257811 |             |         |         |  |
| SPTY2D1      | ENSG00000179119 | -1.116  | 0.86779 | -1.116      | 0.86779     | -1.116  |         |  |
|              | 0.86779         | -1.116  | 0.86779 | 0.86779     | 0.915302569 |         |         |  |
| UQCRB        | ENSG00000156467 | -1.116  | 0.8678  | -1.116      | 0.8678      | -1.116  | 0.8678  |  |
|              | -1.116          | 0.8678  | 0.8678  | 0.915302569 |             |         |         |  |
| RNU6-1240P   | ENSG00000202025 | -1.1165 | 0.8679  | -1.1165     | 0.8679      | -1.1165 |         |  |
|              | 0.8679          | -1.1165 | 0.8679  | 0.8679      | 0.915378965 |         |         |  |
| NA           | ENSG00000255448 | -1.1166 | 0.86791 | -1.1166     | 0.86791     | -1.1166 | 0.86791 |  |
|              | -1.1166         | 0.86791 | 0.86791 | 0.915378965 |             |         |         |  |
| NA           | ENSG00000266479 | -1.1167 | 0.86794 | -1.3199     | 0.90657     | -1.3199 | 0.90657 |  |
|              | -1.3199         | 0.90657 | 0.86794 | 0.915381528 |             |         |         |  |
| RNU7-46P     | ENSG00000238830 | -1.1167 | 0.86795 | -1.1167     | 0.86795     | -1.1167 |         |  |
|              | 0.86795         | -1.1167 | 0.86795 | 0.86795     | 0.915381528 |         |         |  |
| TRAJ46       | ENSG00000211843 | -1.1173 | 0.86806 | -1.1173     | 0.86806     | -1.1173 |         |  |
|              | 0.86806         | -1.1173 | 0.86806 | 0.86806     | 0.915435238 |         |         |  |
| SENP3-EIF4A1 | ENSG00000277957 | -1.1174 | 0.86808 | -1.1174     | 0.86808     | -1.1174 |         |  |
|              | 0.86808         | -1.1174 | 0.86808 | 0.86808     | 0.915435238 |         |         |  |
| NA           | ENSG00000261244 | -1.1175 | 0.8681  | -1.1175     | 0.8681      | -1.1175 | 0.8681  |  |
|              | -1.1175         | 0.8681  | 0.8681  | 0.915435238 |             |         |         |  |
| LARP1BP2     | ENSG00000243438 | -1.1175 | 0.86812 | -1.1175     | 0.86812     | -1.1175 |         |  |
|              | 0.86812         | -1.1175 | 0.86812 | 0.86812     | 0.915435238 |         |         |  |
| EIF4A2P5     | ENSG00000255490 | -1.1176 | 0.86813 | -1.1176     | 0.86813     | -1.1176 |         |  |
|              | 0.86813         | -1.1176 | 0.86813 | 0.86813     | 0.915435238 |         |         |  |
| NA           | ENSG00000258489 | -1.1176 | 0.86814 | -1.1176     | 0.86814     | -1.1176 | 0.86814 |  |
|              | -1.1176         | 0.86814 | 0.86814 | 0.915435238 |             |         |         |  |
| H2AC1        | ENSG00000164508 | -1.1177 | 0.86815 | -1.1177     | 0.86815     | -1.1177 | 0.86815 |  |
|              | -1.1177         | 0.86815 | 0.86815 | 0.915435238 |             |         |         |  |
| IGHV4-59     | ENSG00000224373 | -1.1177 | 0.86816 | -1.1177     | 0.86816     | -1.1177 |         |  |
|              | 0.86816         | -1.1177 | 0.86816 | 0.86816     | 0.915435238 |         |         |  |
| DPM3         | ENSG00000179085 | -1.1178 | 0.86817 | -1.1178     | 0.86817     | -1.1178 | 0.86817 |  |
|              | -1.1178         | 0.86817 | 0.86817 | 0.915435238 |             |         |         |  |
| MIR5706      | ENSG00000264536 | -1.1179 | 0.8682  | -1.1179     | 0.8682      | -1.1179 |         |  |
|              | 0.8682          | -1.1179 | 0.8682  | 0.8682      | 0.915447063 |         |         |  |
| TRUB2        | ENSG00000167112 | -1.197  | 0.88435 | -1.1182     | 0.86826     | -1.5943 | 0.94456 |  |
|              | -1.4459         | 0.92589 | 0.86826 | 0.915490518 |             |         |         |  |
| LITAFD       | ENSG00000283516 | -1.1184 | 0.8683  | -1.1184     | 0.8683      | -1.1184 |         |  |
|              | 0.8683          | -1.1184 | 0.8683  | 0.8683      | 0.915512885 |         |         |  |
| NA           | ENSG00000258260 | -1.1186 | 0.86835 | -1.1186     | 0.86835     | -1.1186 | 0.86835 |  |
|              | -1.1186         | 0.86835 | 0.86835 | 0.915527263 |             |         |         |  |
| IGLV1-47     | ENSG00000211648 | -1.1187 | 0.86836 | -1.1187     | 0.86836     | -1.1187 |         |  |
|              | 0.86836         | -1.1187 | 0.86836 | 0.86836     | 0.915527263 |         |         |  |
| NA           | ENSG00000259928 | -1.1187 | 0.86837 | -1.1187     | 0.86837     | -1.1187 | 0.86837 |  |

|             |                 |             |             |             |             |         |         |         |
|-------------|-----------------|-------------|-------------|-------------|-------------|---------|---------|---------|
|             | -1.1187         | 0.86837     | 0.86837     | 0.915527263 |             |         |         |         |
| OR52N4      | ENSG00000181074 | -1.1191     | 0.86845     | -1.1191     | 0.86845     | -1.1191 | 0.86845 | -1.1191 |
|             | 0.86845         | -1.1191     | 0.86845     | 0.86845     | 0.915549305 |         |         |         |
| TRAJ42      | ENSG00000211847 | -1.1191     | 0.86846     | -1.1191     | 0.86846     | -1.1191 | 0.86846 | -1.1191 |
|             | 0.86846         | -1.1191     | 0.86846     | 0.86846     | 0.915549305 |         |         |         |
| NA          | ENSG00000227220 | -1.3545     | 0.91221     | -1.1192     | 0.86847     | -1.3545 | 0.91221 |         |
|             | -1.3545         | 0.91221     | 0.86847     | 0.915549305 |             |         |         |         |
| LINC01152   | ENSG00000256124 | -1.1192     | 0.86848     | -1.1192     | 0.86848     | -1.1192 | 0.86848 | -1.1192 |
|             | 0.86848         | -1.1192     | 0.86848     | 0.86848     | 0.915549305 |         |         |         |
| TBC1D13     | ENSG00000107021 | -1.2287     | 0.89041     | -1.3144     | 0.90565     | -1.1195 |         |         |
|             | 0.86853         | -1.5805     | 0.943086853 | 0.915549305 |             |         |         |         |
| OR2B11      | ENSG00000177535 | -1.1195     | 0.86854     | -1.1195     | 0.86854     | -1.1195 | 0.86854 | -1.1195 |
|             | 0.86854         | -1.1195     | 0.86854     | 0.86854     | 0.915549305 |         |         |         |
| NA          | ENSG00000267552 | -1.1195     | 0.86854     | -1.1195     | 0.86854     | -1.1195 | 0.86854 | 0.86854 |
|             | -1.1195         | 0.86854     | 0.86854     | 0.915549305 |             |         |         |         |
| NA          | ENSG00000280439 | -1.1196     | 0.86855     | -1.1196     | 0.86855     | -1.1196 | 0.86855 | 0.86855 |
|             | -1.1196         | 0.86855     | 0.86855     | 0.915549305 |             |         |         |         |
| NA          | ENSG00000239040 | -1.1196     | 0.86856     | -1.1196     | 0.86856     | -1.1196 | 0.86856 | 0.86856 |
|             | -1.1196         | 0.86856     | 0.86856     | 0.915549305 |             |         |         |         |
| NA          | ENSG00000272842 | -1.1198     | 0.86861     | -1.1198     | 0.86861     | -1.1198 | 0.86861 | 0.86861 |
|             | -1.1198         | 0.86861     | 0.86861     | 0.915582204 |             |         |         |         |
| RAB5A       | ENSG00000144566 | -1.12       | 0.86863     | -1.12       | 0.86863     | -1.12   | 0.86863 | -1.9972 |
|             | 0.9771          | 0.86863     | 0.915583481 |             |             |         |         |         |
| CCDC88C     | ENSG00000015133 | -1.425      | 0.92292     | -1.496      | 0.93267     | -1.283  |         |         |
|             | 0.90026         | -1.1201     | 0.86867     | 0.86867     | 0.915605838 |         |         |         |
| NA          | ENSG00000227579 | -1.1206     | 0.86878     | -1.1206     | 0.86878     | -1.1206 | 0.86878 | 0.86878 |
|             | -1.1206         | 0.86878     | 0.86878     | 0.915701975 |             |         |         |         |
| OSBPL10-AS1 | ENSG00000232490 | -1.1207     | 0.8688      | -1.1207     | 0.8688      | -1.1207 | 0.8688  | -1.1207 |
|             | 0.8688          | -1.1259     | 0.8699      | 0.8688      | 0.915703249 |         |         |         |
| NEK4P2      | ENSG00000264359 | -1.121      | 0.86886     | -1.4616     | 0.92807     | -1.4616 |         |         |
|             | 0.92807         | -1.3922     | 0.91807     | 0.86886     | 0.915719805 |         |         |         |
| TAS2R6P     | ENSG00000270923 | -1.1211     | 0.86887     | -1.1211     | 0.86887     | -1.1211 |         |         |
|             | 0.86887         | -1.1211     | 0.86887     | 0.86887     | 0.915719805 |         |         |         |
| RNU6-505P   | ENSG00000207156 | -1.1214     | 0.86894     | -1.1214     | 0.86894     | -1.1214 |         |         |
|             | 0.86894         | -1.1281     | 0.87036     | 0.86894     | 0.915719805 |         |         |         |
| NA          | ENSG00000228173 | -1.5557     | 0.94011     | -1.5557     | 0.94011     | -1.5557 | 0.94011 | 0.94011 |
|             | -1.1214         | 0.86894     | 0.86894     | 0.915719805 |             |         |         |         |
| IMPG2       | ENSG00000081148 | -1.867      | 0.96905     | -1.4981     | 0.93294     | -1.1215 | 0.86896 | 0.86896 |
|             | -2.1121         | 0.98266     | 0.86896     | 0.915719805 |             |         |         |         |
| NA          | ENSG00000257035 | -1.1215     | 0.86896     | -1.1215     | 0.86896     | -1.1215 | 0.86896 | 0.86896 |
|             | -1.1215         | 0.86896     | 0.86896     | 0.915719805 |             |         |         |         |
| NA          | ENSG00000274717 | -1.1215     | 0.86897     | -1.1215     | 0.86897     | -1.1215 | 0.86897 | 0.86897 |
|             | -1.1215         | 0.86897     | 0.86897     | 0.915719805 |             |         |         |         |
| NA          | ENSG00000250685 | -1.1216     | 0.86899     | -1.1216     | 0.86899     | -1.1216 | 0.86899 | 0.86899 |
|             | -1.1216         | 0.86899     | 0.86899     | 0.915719805 |             |         |         |         |
| NA          | ENSG00000238453 | -1.1217     | 0.869       | -1.1217     | 0.869       | -1.1217 | 0.869   | -1.1217 |
|             | 0.869           | 0.915719805 |             |             |             |         |         | 0.869   |
| MIR199B     | ENSG00000207581 | -1.1219     | 0.86904     | -1.1219     | 0.86904     | -1.1219 |         |         |
|             | 0.86904         | -1.1219     | 0.86904     | 0.86904     | 0.915719805 |         |         |         |
| MIR3154     | ENSG00000264823 | -1.1219     | 0.86904     | -1.1219     | 0.86904     | -1.1219 |         |         |
|             | 0.86904         | -1.1219     | 0.86904     | 0.86904     | 0.915719805 |         |         |         |
| OR51B2      | ENSG00000279012 | -1.1219     | 0.86905     | -1.1219     | 0.86905     | -1.1219 |         |         |
|             | 0.86905         | -1.1219     | 0.86905     | 0.86905     | 0.915719805 |         |         |         |
| NA          | ENSG00000228527 | -1.122      | 0.86906     | -1.122      | 0.86906     | -1.122  | 0.86906 | 0.86906 |
|             | -1.493          | 0.93228     | 0.86906     | 0.915719805 |             |         |         |         |
| NA          | ENSG00000226853 | -1.1223     | 0.86913     | -1.1223     | 0.86913     | -1.1223 | 0.86913 | 0.86913 |
|             | -1.1223         | 0.86913     | 0.86913     | 0.91575396  |             |         |         |         |
| BNIP3P40    | ENSG00000268058 | -1.1223     | 0.86913     | -1.1223     | 0.86913     | -1.1223 |         |         |
|             | 0.86913         | -1.1223     | 0.86913     | 0.86913     | 0.91575396  |         |         |         |
| HNRNPALP21  | ENSG00000228168 | -1.1225     | 0.86917     | -1.1225     | 0.86917     | -1.1225 |         |         |
|             | 0.86917         | -1.1225     | 0.86917     | 0.86917     | 0.915776305 |         |         |         |
| PKNOX2      | ENSG00000165495 | -1.3538     | 0.9121      | -1.1228     | 0.86923     | -1.5594 |         |         |

|            |                 |         |         |             |             |         |         |  |
|------------|-----------------|---------|---------|-------------|-------------|---------|---------|--|
|            | 0.94054         | -1.3896 | 0.91767 | 0.86923     | 0.915819721 |         |         |  |
| NA         | ENSG00000259232 | -1.1233 | 0.86934 | -1.1233     | 0.86934     | -1.1233 | 0.86934 |  |
|            | -1.1233         | 0.86934 | 0.86934 | 0.915886745 |             |         |         |  |
| NA         | ENSG00000260059 | -1.2248 | 0.88968 | -1.1233     | 0.86934     | -1.1233 | 0.86934 |  |
|            | -1.1233         | 0.86934 | 0.86934 | 0.915886745 |             |         |         |  |
| RPL5P29    | ENSG00000242208 | -1.1233 | 0.86935 | -1.1233     | 0.86935     | -1.1233 |         |  |
|            | 0.86935         | -1.1233 | 0.86935 | 0.86935     | 0.915886745 |         |         |  |
| NA         | ENSG00000265194 | -1.1236 | 0.86941 | -1.1236     | 0.86941     | -1.1236 | 0.86941 |  |
|            | -1.1236         | 0.86941 | 0.86941 | 0.915930155 |             |         |         |  |
| RPS3P7     | ENSG00000243101 | -1.1237 | 0.86943 | -1.1237     | 0.86943     | -1.1237 |         |  |
|            | 0.86943         | -1.1237 | 0.86943 | 0.86943     | 0.915931423 |         |         |  |
| NA         | ENSG00000237581 | -1.1241 | 0.86951 | -1.1241     | 0.86951     | -1.1241 | 0.86951 |  |
|            | -1.1241         | 0.86951 | 0.86951 | 0.915976097 |             |         |         |  |
| NA         | ENSG00000259659 | -1.1241 | 0.86951 | -1.1241     | 0.86951     | -1.1241 | 0.86951 |  |
|            | -1.1241         | 0.86951 | 0.86951 | 0.915976097 |             |         |         |  |
| PIGPP2     | ENSG00000234204 | -1.8142 | 0.96517 | -1.1252     | 0.86975     | -1.1252 |         |  |
|            | 0.86975         | -1.1252 | 0.86975 | 0.86975     | 0.916209116 |         |         |  |
| EIF3M      | ENSG00000149100 | -1.1257 | 0.86986 | -1.1257     | 0.86986     | -1.1257 | 0.86986 |  |
|            | -1.1257         | 0.86986 | 0.86986 | 0.916305184 |             |         |         |  |
| CLIC4P1    | ENSG00000236739 | -1.126  | 0.86992 | -1.126      | 0.86992     | -1.126  |         |  |
|            | 0.86992         | -1.126  | 0.86992 | 0.86992     | 0.916348579 |         |         |  |
| MIR519D    | ENSG00000207981 | -1.1262 | 0.86995 | -1.1262     | 0.86995     | -1.1262 |         |  |
|            | 0.86995         | -1.1262 | 0.86995 | 0.86995     | 0.916351097 |         |         |  |
| NA         | ENSG00000256192 | -1.1262 | 0.86996 | -1.1262     | 0.86996     | -1.1262 | 0.86996 |  |
|            | -1.1262         | 0.86996 | 0.86996 | 0.916351097 |             |         |         |  |
| NA         | ENSG00000241179 | -1.1266 | 0.87004 | -1.1266     | 0.87004     | -1.1266 | 0.87004 |  |
|            | -1.1266         | 0.87004 | 0.87004 | 0.916395746 |             |         |         |  |
| NA         | ENSG00000279859 | -1.1266 | 0.87004 | -1.1266     | 0.87004     | -1.1266 | 0.87004 |  |
|            | -1.1266         | 0.87004 | 0.87004 | 0.916395746 |             |         |         |  |
| NA         | ENSG00000232867 | -1.1269 | 0.8701  | -1.1269     | 0.8701      | -1.1269 | 0.8701  |  |
|            | -1.1269         | 0.8701  | 0.8701  | 0.916439135 |             |         |         |  |
| NA         | ENSG00000265391 | -1.1271 | 0.87015 | -1.1271     | 0.87015     | -1.1271 | 0.87015 |  |
|            | -1.1271         | 0.87015 | 0.87015 | 0.916471989 |             |         |         |  |
| NA         | ENSG00000243081 | -1.1273 | 0.8702  | -1.1443     | 0.87375     | -1.1273 | 0.8702  |  |
|            | -1.6968         | 0.95513 | 0.8702  | 0.916504841 |             |         |         |  |
| CCNB2P1    | ENSG00000214998 | -1.1276 | 0.87025 | -1.1276     | 0.87025     | -1.1276 |         |  |
|            | 0.87025         | -1.1276 | 0.87025 | 0.87025     | 0.916537693 |         |         |  |
| NA         | ENSG00000228201 | -1.1277 | 0.87028 | -1.1277     | 0.87028     | -1.1277 | 0.87028 |  |
|            | -1.1277         | 0.87028 | 0.87028 | 0.916549479 |             |         |         |  |
| PPM1L      | ENSG00000163590 | -1.2296 | 0.89058 | -1.1279     | 0.87031     | -1.1366 | 0.87214 |  |
|            | -1.4878         | 0.9316  | 0.87031 | 0.916561265 |             |         |         |  |
| NA         | ENSG00000226872 | -1.1282 | 0.87039 | -1.1282     | 0.87039     | -1.1282 | 0.87039 |  |
|            | -1.1282         | 0.87039 | 0.87039 | 0.916625707 |             |         |         |  |
| PIK3CDP1   | ENSG00000231610 | -1.1287 | 0.87049 | -1.1287     | 0.87049     | -1.1287 |         |  |
|            | 0.87049         | -1.1287 | 0.87049 | 0.87049     | 0.916711207 |         |         |  |
| NA         | ENSG00000261399 | -1.1293 | 0.87061 | -1.1293     | 0.87061     | -1.1293 | 0.87061 |  |
|            | -1.1336         | 0.87152 | 0.87061 | 0.916817766 |             |         |         |  |
| NA         | ENSG00000254928 | -1.1294 | 0.87064 | -1.1294     | 0.87064     | -1.1294 | 0.87064 |  |
|            | -1.1294         | 0.87064 | 0.87064 | 0.916829545 |             |         |         |  |
| RNU6-1312P | ENSG00000199295 | -1.1295 | 0.87066 | -1.1295     | 0.87066     | -1.1295 |         |  |
|            | 0.87066         | -1.1295 | 0.87066 | 0.87066     | 0.916830793 |         |         |  |
| NA         | ENSG00000252524 | -1.1296 | 0.87068 | -1.8526     | 0.96803     | -1.2736 | 0.89859 |  |
|            | -1.1998         | 0.8849  | 0.87068 | 0.916832042 |             |         |         |  |
| SNORA71D   | ENSG00000200354 | -1.1298 | 0.87071 | -1.1298     | 0.87071     | -1.1298 |         |  |
|            | 0.87071         | -1.1298 | 0.87071 | 0.87071     | 0.91684382  |         |         |  |
| TRMT5      | ENSG00000126814 | -1.1628 | 0.87755 | -1.1302     | 0.8708      | -1.1628 | 0.87755 |  |
|            | -1.1628         | 0.87755 | 0.8708  | 0.916909492 |             |         |         |  |
| RNA5SP399  | ENSG00000200873 | -1.1302 | 0.87081 | -1.1302     | 0.87081     | -1.1302 |         |  |
|            | 0.87081         | -1.1302 | 0.87081 | 0.87081     | 0.916909492 |         |         |  |
| MLANA      | ENSG00000120215 | -2.2639 | 0.98821 | -2.2639     | 0.98821     | -2.2639 | 0.98821 |  |
|            | -1.1312         | 0.87101 | 0.87101 | 0.917034023 |             |         |         |  |
| PDE6G      | ENSG00000185527 | -1.1312 | 0.87101 | -1.2594     | 0.89607     | -1.1312 | 0.87101 |  |

|             |                 |         |         |             |             |         |         |
|-------------|-----------------|---------|---------|-------------|-------------|---------|---------|
|             | -1.1312         | 0.87101 | 0.87101 | 0.917034023 |             |         |         |
| TMEM184B    | ENSG00000198792 | -1.1313 | 0.87103 | -1.1313     | 0.87103     | -1.1313 | 0.87103 |
|             | 0.87103         | -1.1313 | 0.87103 | 0.87103     | 0.917034023 |         |         |
| NA          | ENSG00000279841 | -1.1313 | 0.87103 | -1.1313     | 0.87103     | -1.1313 | 0.87103 |
|             | -1.1313         | 0.87103 | 0.87103 | 0.917034023 |             |         |         |
| RNU2-48P    | ENSG00000222626 | -1.1314 | 0.87105 | -1.1314     | 0.87105     | -1.1314 | 0.87105 |
|             | 0.87105         | -1.1314 | 0.87105 | 0.87105     | 0.917034023 |         |         |
| NA          | ENSG00000226526 | -1.1314 | 0.87105 | -1.1314     | 0.87105     | -1.1314 | 0.87105 |
|             | -1.1314         | 0.87105 | 0.87105 | 0.917034023 |             |         |         |
| NA          | ENSG00000226738 | -1.1314 | 0.87106 | -1.1314     | 0.87106     | -1.1314 | 0.87106 |
|             | -1.1314         | 0.87106 | 0.87106 | 0.917034023 |             |         |         |
| RNU2-45P    | ENSG00000251877 | -1.1316 | 0.87109 | -1.1316     | 0.87109     | -1.1316 | 0.87109 |
|             | 0.87109         | -1.1316 | 0.87109 | 0.87109     | 0.917045794 |         |         |
| OR6K6       | ENSG00000180433 | -1.1317 | 0.87111 | -1.1317     | 0.87111     | -1.1317 | 0.87111 |
|             | -1.1317         | 0.87111 | 0.87111 | 0.917047037 |             |         |         |
| POU4F1      | ENSG00000152192 | -1.1319 | 0.87116 | -1.1319     | 0.87116     | -1.1319 | 0.87116 |
|             | 0.87116         | -1.1319 | 0.87116 | 0.87116     | 0.917060051 |         |         |
| CARS1-AS1   | ENSG00000247473 | -1.1319 | 0.87116 | -1.1319     | 0.87116     | -1.1319 | 0.87116 |
|             | 0.87116         | -1.1319 | 0.87116 | 0.87116     | 0.917060051 |         |         |
| NA          | ENSG00000274403 | -1.1321 | 0.8712  | -1.1321     | 0.8712      | -1.1321 | 0.8712  |
|             | -1.1321         | 0.8712  | 0.8712  | 0.917082347 |             |         |         |
| TMEM169     | ENSG00000163449 | -1.7038 | 0.95579 | -1.7038     | 0.95579     | -1.1322 | 0.95579 |
|             | 0.87123         | -1.7038 | 0.95579 | 0.87123     | 0.917094116 |         |         |
| SNHG11      | ENSG00000174365 | -1.1323 | 0.87125 | -1.1323     | 0.87125     | -1.1323 | 0.87125 |
|             | 0.87125         | -1.1323 | 0.87125 | 0.87125     | 0.917095358 |         |         |
| FGF2        | ENSG00000138685 | -1.2395 | 0.89242 | -1.1325     | 0.87129     | -1.2395 | 0.89242 |
|             | -1.2395         | 0.89242 | 0.87129 | 0.917097842 |             |         |         |
| SNRPGP14    | ENSG00000236577 | -1.1325 | 0.87129 | -1.1325     | 0.87129     | -1.1325 | 0.87129 |
|             | 0.87129         | -1.1325 | 0.87129 | 0.87129     | 0.917097842 |         |         |
| NA          | ENSG00000225056 | -1.1327 | 0.87133 | -1.1327     | 0.87133     | -1.1327 | 0.87133 |
|             | -1.1327         | 0.87133 | 0.87133 | 0.917100326 |             |         |         |
| NA          | ENSG00000238885 | -1.1327 | 0.87133 | -1.1327     | 0.87133     | -1.1327 | 0.87133 |
|             | -1.1327         | 0.87133 | 0.87133 | 0.917100326 |             |         |         |
| NA          | ENSG00000262692 | -1.1328 | 0.87136 | -1.1328     | 0.87136     | -1.1328 | 0.87136 |
|             | -1.1328         | 0.87136 | 0.87136 | 0.917112093 |             |         |         |
| LINC01742   | ENSG00000275852 | -1.2235 | 0.88942 | -1.1329     | 0.87138     | -1.2235 | 0.88942 |
|             | 0.88942         | -1.2235 | 0.88942 | 0.87138     | 0.917113335 |         |         |
| HNRNPA1P11  | ENSG00000264315 | -1.1332 | 0.87143 | -1.6746     | 0.953       | -1.6746 | 0.953   |
|             | -1.6746         | 0.953   | 0.87143 | 0.91714615  |             |         |         |
| HYOU1       | ENSG00000149428 | -1.5402 | 0.93825 | -1.2014     | 0.88519     | -1.2224 | 0.88923 |
|             | -1.1336         | 0.87152 | 0.87152 | 0.917221062 |             |         |         |
| NA          | ENSG00000272546 | -1.1338 | 0.87156 | -1.1338     | 0.87156     | -1.1338 | 0.87156 |
|             | -1.1338         | 0.87156 | 0.87156 | 0.917243349 |             |         |         |
| NA          | ENSG00000277654 | -1.4741 | 0.92977 | -1.1342     | 0.87164     | -1.4828 | 0.93094 |
|             | -1.1342         | 0.87164 | 0.87164 | 0.917307732 |             |         |         |
| OR9L1P      | ENSG00000255131 | -1.1345 | 0.87171 | -1.1345     | 0.87171     | -1.1345 | 0.87171 |
|             | 0.87171         | -1.1345 | 0.87171 | 0.87171     | 0.917361587 |         |         |
| LINC02206   | ENSG00000259289 | -1.2528 | 0.89486 | -1.3144     | 0.90565     | -1.1346 | 0.89486 |
|             | 0.87173         | -1.8833 | 0.97017 | 0.87173     | 0.917362823 |         |         |
| APOC2       | ENSG00000234906 | -1.1348 | 0.87176 | -1.1348     | 0.87176     | -1.1348 | 0.87176 |
|             | -1.1348         | 0.87176 | 0.87176 | 0.917374583 |             |         |         |
| RN7SL543P   | ENSG00000265918 | -1.1349 | 0.87178 | -1.1349     | 0.87178     | -1.1349 | 0.87178 |
|             | 0.87178         | -1.2032 | 0.88554 | 0.87178     | 0.917375818 |         |         |
| MXI1        | ENSG00000119950 | -1.1355 | 0.87191 | -1.2801     | 0.89975     | -1.2696 | 0.89789 |
|             | -1.3382         | 0.90958 | 0.87191 | 0.917492805 |             |         |         |
| SNORD114-22 | ENSG00000202293 | -1.1357 | 0.87196 | -1.1357     | 0.87196     | -1.1357 | 0.87196 |
|             | 0.87196         | -1.1357 | 0.87196 | 0.87196     | 0.917525606 |         |         |
| RNU7-21P    | ENSG00000238558 | -1.1358 | 0.87198 | -1.1358     | 0.87198     | -1.1358 | 0.87198 |
|             | 0.87198         | -1.1358 | 0.87198 | 0.87198     | 0.917526838 |         |         |
| OR4A8       | ENSG00000225997 | -1.4343 | 0.92426 | -2.091      | 0.98174     | -1.2436 | 0.89318 |
|             | -1.1364         | 0.8721  | 0.8721  | 0.917633292 |             |         |         |
| RNU6-1110P  | ENSG00000252271 | -1.1368 | 0.87219 | -1.1368     | 0.87219     | -1.1368 | 0.87219 |

|            |                 |         |         |             |             |         |         |  |
|------------|-----------------|---------|---------|-------------|-------------|---------|---------|--|
|            | 0.87219         | -1.1368 | 0.87219 | 0.87219     | 0.91768836  |         |         |  |
| NA         | ENSG00000261078 | -1.1368 | 0.87219 | -1.1368     | 0.87219     | -1.1368 | 0.87219 |  |
|            | -1.1368         | 0.87219 | 0.87219 | 0.91768836  |             |         |         |  |
| ZNF833P    | ENSG00000267343 | -1.137  | 0.87223 | -1.137      | 0.87223     | 0.87223 | -1.137  |  |
|            | 0.87223         | -1.137  | 0.87223 | 0.87223     | 0.917710632 |         |         |  |
| HNRNPA1P76 | ENSG00000255141 | -1.1371 | 0.87225 | -1.1371     | 0.87225     | 0.87225 | -1.5666 |  |
|            | 0.9414          | -1.1371 | 0.87225 | 0.87225     | 0.91771186  |         |         |  |
| ZNF675     | ENSG00000197372 | -1.141  | 0.87307 | -1.1375     | 0.87233     | 0.87233 | -1.2718 |  |
|            | 0.89827         | -1.2077 | 0.88641 | 0.87233     | 0.917776214 |         |         |  |
| NA         | ENSG00000228030 | -1.8178 | 0.96545 | -1.8178     | 0.96545     | -1.1376 | 0.87235 |  |
|            | -2.4457         | 0.99277 | 0.87235 | 0.917777441 |             |         |         |  |
| NA         | ENSG00000226956 | -1.2989 | 0.90301 | -1.2989     | 0.90301     | -1.2989 | 0.90301 |  |
|            | -1.1387         | 0.87258 | 0.87258 | 0.917999598 |             |         |         |  |
| NA         | ENSG00000234477 | -1.1395 | 0.87276 | -1.1395     | 0.87276     | -1.1395 | 0.87276 |  |
|            | -1.1395         | 0.87276 | 0.87276 | 0.918169145 |             |         |         |  |
| UBE2FP1    | ENSG00000224080 | -1.1397 | 0.8728  | -1.1397     | 0.8728      | -1.1397 |         |  |
|            | 0.8728          | -1.1397 | 0.8728  | 0.8728      | 0.918171582 |         |         |  |
| LINC02625  | ENSG00000233643 | -1.1397 | 0.8728  | -1.9182     | 0.97246     | -1.1397 |         |  |
|            | 0.8728          | -1.1397 | 0.8728  | 0.8728      | 0.918171582 |         |         |  |
| ATF1       | ENSG00000123268 | -1.1399 | 0.87283 | -1.4029     | 0.91967     | -1.5592 | 0.94052 |  |
|            | -1.5779         | 0.94271 | 0.87283 | 0.918183319 |             |         |         |  |
| NA         | ENSG00000259342 | -1.1401 | 0.87288 | -1.1401     | 0.87288     | -1.1401 | 0.87288 |  |
|            | -1.1401         | 0.87288 | 0.87288 | 0.918216095 |             |         |         |  |
| NA         | ENSG00000232375 | -1.1409 | 0.87305 | -1.1409     | 0.87305     | -1.1409 | 0.87305 |  |
|            | -1.1409         | 0.87305 | 0.87305 | 0.9183751   |             |         |         |  |
| TRIM80P    | ENSG00000232724 | -1.8187 | 0.96552 | -1.1411     | 0.87308     | -1.1411 |         |  |
|            | 0.87308         | -1.1411 | 0.87308 | 0.87308     | 0.918386832 |         |         |  |
| NA         | ENSG00000272973 | -1.1412 | 0.8731  | -1.1412     | 0.8731      | -1.1412 | 0.8731  |  |
|            | -1.1412         | 0.8731  | 0.8731  | 0.918388046 |             |         |         |  |
| NA         | ENSG00000201786 | -1.1413 | 0.87312 | -1.1413     | 0.87312     | -1.1413 | 0.87312 |  |
|            | -1.1413         | 0.87312 | 0.87312 | 0.918389259 |             |         |         |  |
| NA         | ENSG00000238321 | -1.1418 | 0.87324 | -1.1418     | 0.87324     | -1.1418 | 0.87324 |  |
|            | -1.1418         | 0.87324 | 0.87324 | 0.918478253 |             |         |         |  |
| C12orf60   | ENSG00000182993 | -1.1419 | 0.87326 | -1.1419     | 0.87326     | -1.1419 |         |  |
|            | 0.87326         | -1.1419 | 0.87326 | 0.87326     | 0.918478253 |         |         |  |
| UST-AS1    | ENSG00000227660 | -1.5299 | 0.93698 | -1.142      | 0.87328     | -1.142  |         |  |
|            | 0.87328         | -1.142  | 0.87328 | 0.87328     | 0.918478253 |         |         |  |
| NA         | ENSG00000280163 | -1.1421 | 0.87328 | -1.6563     | 0.95117     | -2.4657 | 0.99316 |  |
|            | -2.4657         | 0.99316 | 0.87328 | 0.918478253 |             |         |         |  |
| B3GNTL1P1  | ENSG00000251237 | -1.1421 | 0.8733  | -1.1421     | 0.8733      | -1.1421 |         |  |
|            | 0.8733          | -1.1421 | 0.8733  | 0.8733      | 0.918479464 |         |         |  |
| RNU4-78P   | ENSG00000222872 | -1.1424 | 0.87336 | -1.1424     | 0.87336     | -1.1424 |         |  |
|            | 0.87336         | -1.1424 | 0.87336 | 0.87336     | 0.91850292  |         |         |  |
| NA         | ENSG00000260146 | -1.1424 | 0.87336 | -1.1424     | 0.87336     | -1.1424 | 0.87336 |  |
|            | -1.1424         | 0.87336 | 0.87336 | 0.91850292  |             |         |         |  |
| RNU6-1317P | ENSG00000201452 | -1.1432 | 0.87352 | -1.1432     | 0.87352     | -1.1432 |         |  |
|            | 0.87352         | -1.1432 | 0.87352 | 0.87352     | 0.918651364 |         |         |  |
| NA         | ENSG00000268051 | -1.1434 | 0.87356 | -1.1434     | 0.87356     | -1.1434 | 0.87356 |  |
|            | -1.1434         | 0.87356 | 0.87356 | 0.918665502 |             |         |         |  |
| H2AZP5     | ENSG00000234612 | -1.1435 | 0.87359 | -1.1435     | 0.87359     | -1.1435 |         |  |
|            | 0.87359         | -1.1435 | 0.87359 | 0.87359     | 0.918665502 |         |         |  |
| NA         | ENSG00000251401 | -1.1435 | 0.87359 | -1.1435     | 0.87359     | -1.1435 | 0.87359 |  |
|            | -1.1435         | 0.87359 | 0.87359 | 0.918665502 |             |         |         |  |
| TFPT       | ENSG00000105619 | -1.1437 | 0.87362 | -1.1437     | 0.87362     | -1.1437 | 0.87362 |  |
|            | -1.1437         | 0.87362 | 0.87362 | 0.91867395  |             |         |         |  |
| LYZ        | ENSG00000090382 | -1.4922 | 0.93218 | -1.1438     | 0.87366     | -1.1438 | 0.87366 |  |
|            | -1.4922         | 0.93218 | 0.87366 | 0.91867395  |             |         |         |  |
| ITGB2-AS1  | ENSG00000227039 | -1.1439 | 0.87366 | -1.1439     | 0.87366     | -1.1439 |         |  |
|            | 0.87366         | -1.1439 | 0.87366 | 0.87366     | 0.91867395  |         |         |  |
| ZIK1       | ENSG00000171649 | -1.144  | 0.8737  | -1.144      | 0.8737      | -1.144  | 0.8737  |  |
|            | -1.144          | 0.8737  | 0.8737  | 0.91867395  |             |         |         |  |
| MTCO2P7    | ENSG00000230496 | -1.1442 | 0.87372 | -1.1442     | 0.87372     | -1.1442 |         |  |

|           |                 |         |         |             |             |         |         |
|-----------|-----------------|---------|---------|-------------|-------------|---------|---------|
|           | 0.87372         | -1.1442 | 0.87372 | 0.87372     | 0.91867395  |         |         |
| MTATP6P7  | ENSG00000232990 | -1.1442 | 0.87372 | 0.87372     | -1.1442     | 0.87372 | -1.1442 |
|           | 0.87372         | -1.1442 | 0.87372 | 0.87372     | 0.91867395  |         |         |
| NA        | ENSG00000271022 | -1.1442 | 0.87373 | -1.1442     | 0.87373     | -1.8858 | 0.97034 |
|           | -1.1442         | 0.87373 | 0.87373 | 0.91867395  |             |         |         |
| NA        | ENSG00000264208 | -1.1444 | 0.87378 | -1.1444     | 0.87378     | -1.1444 | 0.87378 |
|           | -1.1444         | 0.87378 | 0.87378 | 0.918706699 |             |         |         |
| NA        | ENSG00000267035 | -1.1445 | 0.8738  | -1.1445     | 0.8738      | -1.1445 | 0.8738  |
|           | -1.1445         | 0.8738  | 0.8738  | 0.918707905 |             |         |         |
| NA        | ENSG00000251812 | -1.1448 | 0.87384 | -1.1448     | 0.87384     | -1.1448 | 0.87384 |
|           | -1.1448         | 0.87384 | 0.87384 | 0.918730139 |             |         |         |
| MIR30B    | ENSG00000207582 | -1.145  | 0.87389 | -1.145      | 0.87389     | -1.145  |         |
|           | 0.87389         | -1.145  | 0.87389 | 0.87389     | 0.918743063 |         |         |
| RPL35AP   | ENSG00000234075 | -1.145  | 0.87389 | -1.145      | 0.87389     | -1.145  |         |
|           | 0.87389         | -1.145  | 0.87389 | 0.87389     | 0.918743063 |         |         |
| NA        | ENSG00000235002 | -1.1456 | 0.87402 | -1.1456     | 0.87402     | -1.1456 | 0.87402 |
|           | -1.1456         | 0.87402 | 0.87402 | 0.918859911 |             |         |         |
| NA        | ENSG00000266907 | -1.146  | 0.87409 | -1.146      | 0.87409     | -1.146  | 0.87409 |
|           | -1.146          | 0.87409 | 0.87409 | 0.918884543 |             |         |         |
| NA        | ENSG00000275413 | -1.146  | 0.87409 | -1.146      | 0.87409     | -1.146  | 0.87409 |
|           | -1.146          | 0.87409 | 0.87409 | 0.918884543 |             |         |         |
| NA        | ENSG00000237848 | -1.146  | 0.8741  | -1.146      | 0.8741      | -1.146  | 0.8741  |
|           | -1.146          | 0.8741  | 0.8741  | 0.918884543 |             |         |         |
| RN7SL683P | ENSG00000242330 | -1.1463 | 0.87417 | -1.1463     | 0.87417     | -1.1463 |         |
|           | 0.87417         | -1.1463 | 0.87417 | 0.87417     | 0.918938306 |         |         |
| ANK3-DT   | ENSG00000254271 | -1.1464 | 0.87419 | -1.1464     | 0.87419     | -1.1464 |         |
|           | 0.87419         | -1.1464 | 0.87419 | 0.87419     | 0.918939506 |         |         |
| NA        | ENSG00000234329 | -1.1465 | 0.87421 | -1.1465     | 0.87421     | -1.1465 | 0.87421 |
|           | -1.1465         | 0.87421 | 0.87421 | 0.918940707 |             |         |         |
| FOXN2     | ENSG00000170802 | -1.2973 | 0.90274 | -1.1469     | 0.87428     | -1.3165 | 0.90599 |
|           | -1.5294         | 0.93692 | 0.87428 | 0.91894671  |             |         |         |
| NA        | ENSG00000232633 | -1.6402 | 0.94952 | -1.3537     | 0.91208     | -1.1469 | 0.87429 |
|           | -1.4291         | 0.92352 | 0.87429 | 0.91894671  |             |         |         |
| C18orf12  | ENSG00000280197 | -1.1469 | 0.87429 | -1.1469     | 0.87429     | -1.1469 |         |
|           | 0.87429         | -1.1469 | 0.87429 | 0.87429     | 0.91894671  |         |         |
| CMTM6     | ENSG00000091317 | -1.147  | 0.8743  | -1.2558     | 0.8954      | -1.62   | 0.94739 |
|           | -1.3136         | 0.90551 | 0.8743  | 0.91894671  |             |         |         |
| NA        | ENSG00000258379 | -1.147  | 0.87431 | -1.147      | 0.87431     | -1.147  | 0.87431 |
|           | -1.147          | 0.87431 | 0.87431 | 0.91894671  |             |         |         |
| DDX4      | ENSG00000152670 | -1.6375 | 0.94924 | -1.1478     | 0.87448     | -1.4    | 0.91925 |
|           | -1.1478         | 0.87448 | 0.87448 | 0.919101039 |             |         |         |
| UNC93B1   | ENSG00000110057 | -1.148  | 0.87451 | -1.2438     | 0.89322     | -1.5139 |         |
|           | 0.93498         | -2.177  | 0.98526 | 0.87451     | 0.919101039 |         |         |
| CCDC121   | ENSG00000176714 | -1.1481 | 0.87455 | -1.5644     | 0.94114     | -1.6428 |         |
|           | 0.94979         | -1.5618 | 0.94083 | 0.87455     | 0.919101039 |         |         |
| C10orf88B | ENSG00000255624 | -1.1481 | 0.87455 | -1.1481     | 0.87455     | -1.1481 |         |
|           | 0.87455         | -1.1481 | 0.87455 | 0.87455     | 0.919101039 |         |         |
| NA        | ENSG00000230495 | -1.1482 | 0.87456 | -1.1482     | 0.87456     | -1.1482 | 0.87456 |
|           | -1.1482         | 0.87456 | 0.87456 | 0.919101039 |             |         |         |
| CDRT15    | ENSG00000223510 | -1.1483 | 0.87457 | -1.1555     | 0.87605     | -1.2768 |         |
|           | 0.89917         | -1.16   | 0.87697 | 0.87457     | 0.919101039 |         |         |
| NA        | ENSG00000280444 | -1.1484 | 0.87459 | -1.1484     | 0.87459     | -1.1484 | 0.87459 |
|           | -1.1484         | 0.87459 | 0.87459 | 0.919102236 |             |         |         |
| NA        | ENSG00000220030 | -1.3102 | 0.90493 | -1.3171     | 0.9061      | -1.1488 | 0.87468 |
|           | -1.1488         | 0.87468 | 0.87468 | 0.919176994 |             |         |         |
| NA        | ENSG00000262211 | -1.1491 | 0.87474 | -1.1491     | 0.87474     | -1.1491 | 0.87474 |
|           | -1.1491         | 0.87474 | 0.87474 | 0.919215687 |             |         |         |
| FAM171A2  | ENSG00000161682 | -1.1492 | 0.87476 | -1.1492     | 0.87476     | -1.1492 |         |
|           | 0.87476         | -1.1492 | 0.87476 | 0.87476     | 0.919215687 |         |         |
| SELENOKP2 | ENSG00000219532 | -1.1495 | 0.87482 | -1.1495     | 0.87482     | -1.1495 |         |
|           | 0.87482         | -1.1495 | 0.87482 | 0.87482     | 0.919215687 |         |         |
| RRN3P4    | ENSG00000229781 | -1.1495 | 0.87483 | -1.1495     | 0.87483     | -1.1495 |         |



|           |                 |         |         |             |             |         |         |  |
|-----------|-----------------|---------|---------|-------------|-------------|---------|---------|--|
|           | 0.87483         | -1.1495 | 0.87483 | 0.87483     | 0.919215687 |         |         |  |
| LINC01664 | ENSG00000235478 | -1.1495 | 0.87483 | 0.87483     | -1.1495     | 0.87483 | -1.1495 |  |
|           | 0.87483         | -1.1495 | 0.87483 | 0.87483     | 0.919215687 |         |         |  |
| NA        | ENSG00000280033 | -1.1495 | 0.87483 | -1.1495     | 0.87483     | -1.1495 | 0.87483 |  |
|           | -1.1495         | 0.87483 | 0.87483 | 0.919215687 |             |         |         |  |
| ESYT2     | ENSG00000117868 | -1.184  | 0.88178 | -1.453      | 0.92688     | -1.1498 | 0.87488 |  |
|           | -1.6223         | 0.94763 | 0.87488 | 0.919248402 |             |         |         |  |
| RNY1P7    | ENSG00000207474 | -1.1499 | 0.8749  | -1.1499     | 0.8749      | -1.1499 |         |  |
|           | 0.8749          | -1.1499 | 0.8749  | 0.8749      | 0.919249596 |         |         |  |
| NA        | ENSG00000278898 | -1.1506 | 0.87505 | -1.1506     | 0.87505     | -1.1506 | 0.87505 |  |
|           | -1.1506         | 0.87505 | 0.87505 | 0.919387376 |             |         |         |  |
| MIR4281   | ENSG00000266329 | -1.1507 | 0.87508 | -1.1507     | 0.87508     | -1.1507 |         |  |
|           | 0.87508         | -1.1507 | 0.87508 | 0.87508     | 0.919395708 |         |         |  |
| TRDD2     | ENSG00000237235 | -1.1509 | 0.87512 | -1.1509     | 0.87512     | -1.1509 | 0.87512 |  |
|           | -1.1509         | 0.87512 | 0.87512 | 0.919395708 |             |         |         |  |
| NA        | ENSG00000248930 | -1.151  | 0.87513 | -1.151      | 0.87513     | -1.151  | 0.87513 |  |
|           | -1.151          | 0.87513 | 0.87513 | 0.919395708 |             |         |         |  |
| RPSAP69   | ENSG00000233487 | -1.1511 | 0.87515 | -1.4014     | 0.91946     | -1.3844 |         |  |
|           | 0.91688         | -1.16   | 0.87699 | 0.87515     | 0.919395708 |         |         |  |
| NA        | ENSG00000254254 | -1.1513 | 0.87519 | -1.1861     | 0.88222     | -1.6833 | 0.95385 |  |
|           | -1.6833         | 0.95385 | 0.87519 | 0.919395708 |             |         |         |  |
| HMG1P3    | ENSG00000258967 | -1.1513 | 0.87519 | -1.1513     | 0.87519     | -1.1513 |         |  |
|           | 0.87519         | -1.1513 | 0.87519 | 0.87519     | 0.919395708 |         |         |  |
| NA        | ENSG00000273115 | -1.1513 | 0.87519 | -1.1513     | 0.87519     | -1.1513 | 0.87519 |  |
|           | -1.1513         | 0.87519 | 0.87519 | 0.919395708 |             |         |         |  |
| NA        | ENSG00000251660 | -1.1516 | 0.87526 | -1.1516     | 0.87526     | -1.1516 | 0.87526 |  |
|           | -1.1516         | 0.87526 | 0.87526 | 0.919449422 |             |         |         |  |
| RNA5SP217 | ENSG00000251768 | -1.1517 | 0.87528 | -1.1517     | 0.87528     | -1.1517 |         |  |
|           | 0.87528         | -1.1517 | 0.87528 | 0.87528     | 0.919450611 |         |         |  |
| NA        | ENSG00000280128 | -1.1521 | 0.87535 | -1.1521     | 0.87535     | -1.1521 | 0.87535 |  |
|           | -1.1521         | 0.87535 | 0.87535 | 0.919496193 |             |         |         |  |
| NA        | ENSG00000255893 | -1.1522 | 0.87538 | -1.1522     | 0.87538     | -1.1522 | 0.87538 |  |
|           | -1.1522         | 0.87538 | 0.87538 | 0.919496193 |             |         |         |  |
| NA        | ENSG00000259937 | -1.1522 | 0.87538 | -1.1522     | 0.87538     | -1.1522 | 0.87538 |  |
|           | -1.1522         | 0.87538 | 0.87538 | 0.919496193 |             |         |         |  |
| NA        | ENSG00000274105 | -1.1529 | 0.87552 | -1.1529     | 0.87552     | -1.1529 | 0.87552 |  |
|           | -1.1529         | 0.87552 | 0.87552 | 0.91961901  |             |         |         |  |
| DEFB119   | ENSG00000180483 | -1.1531 | 0.87556 | -1.1531     | 0.87556     | -1.1531 |         |  |
|           | 0.87556         | -1.1531 | 0.87556 | 0.87556     | 0.91961901  |         |         |  |
| NA        | ENSG00000234793 | -1.1532 | 0.87558 | -1.1532     | 0.87558     | -1.1532 | 0.87558 |  |
|           | -1.1532         | 0.87558 | 0.87558 | 0.91961901  |             |         |         |  |
| NA        | ENSG00000277806 | -1.1534 | 0.87563 | -1.1534     | 0.87563     | -1.1534 | 0.87563 |  |
|           | -1.1534         | 0.87563 | 0.87563 | 0.91961901  |             |         |         |  |
| NA        | ENSG00000223302 | -1.1535 | 0.87564 | -1.1535     | 0.87564     | -1.1535 | 0.87564 |  |
|           | -1.1535         | 0.87564 | 0.87564 | 0.91961901  |             |         |         |  |
| ACKR4P1   | ENSG00000225415 | -1.178  | 0.8806  | -1.909      | 0.97187     | -1.1537 |         |  |
|           | 0.87568         | -1.909  | 0.97187 | 0.87568     | 0.91961901  |         |         |  |
| NA        | ENSG00000249068 | -2.3043 | 0.9894  | -1.1537     | 0.87568     | -1.1537 | 0.87568 |  |
|           | -1.1537         | 0.87568 | 0.87568 | 0.91961901  |             |         |         |  |
| ALOX12P1  | ENSG00000264958 | -1.1536 | 0.87568 | -1.1536     | 0.87568     | -1.1536 |         |  |
|           | 0.87568         | -1.1536 | 0.87568 | 0.87568     | 0.91961901  |         |         |  |
| RN7SL788P | ENSG00000241745 | -1.4654 | 0.9286  | -1.1537     | 0.87569     | -1.1537 |         |  |
|           | 0.87569         | -1.1537 | 0.87569 | 0.87569     | 0.91961901  |         |         |  |
| NA        | ENSG00000201710 | -1.1538 | 0.8757  | -1.1538     | 0.8757      | -1.1538 | 0.8757  |  |
|           | -1.1538         | 0.8757  | 0.8757  | 0.91961901  |             |         |         |  |
| NA        | ENSG00000225057 | -1.1539 | 0.87572 | -1.1539     | 0.87572     | -1.1539 | 0.87572 |  |
|           | -1.1539         | 0.87572 | 0.87572 | 0.91961901  |             |         |         |  |
| NA        | ENSG00000212593 | -1.154  | 0.87575 | -1.154      | 0.87575     | -1.154  | 0.87575 |  |
|           | -1.154          | 0.87575 | 0.87575 | 0.91961901  |             |         |         |  |
| NA        | ENSG00000224046 | -1.1541 | 0.87577 | -1.2913     | 0.90171     | -1.2207 | 0.8889  |  |
|           | -1.2207         | 0.8889  | 0.87577 | 0.91961901  |             |         |         |  |
| H2BC1     | ENSG00000146047 | -1.1541 | 0.87578 | -1.1541     | 0.87578     | -1.1541 | 0.87578 |  |

|              |                 |         |         |             |             |         |         |  |
|--------------|-----------------|---------|---------|-------------|-------------|---------|---------|--|
|              | -1.1541         | 0.87578 | 0.87578 | 0.91961901  |             |         |         |  |
| LINC02818    | ENSG00000231966 | -1.1541 | 0.87578 | 0.87578     | -1.6005     | 0.94525 | -1.1541 |  |
|              | 0.87578         | -1.1541 | 0.87578 | 0.87578     | 0.91961901  |         |         |  |
| SPRR1A       | ENSG00000169474 | -1.1544 | 0.87582 | 0.87582     | -1.1544     | 0.87582 | -1.1544 |  |
|              | 0.87582         | -1.1544 | 0.87582 | 0.87582     | 0.919641195 |         |         |  |
| NA           | ENSG00000236377 | -1.1544 | 0.87584 | -1.1544     | 0.87584     | -1.1544 | 0.87584 |  |
|              | -1.1544         | 0.87584 | 0.87584 | 0.91964238  |             |         |         |  |
| NA           | ENSG00000268530 | -1.1545 | 0.87586 | -1.1545     | 0.87586     | -1.1545 | 0.87586 |  |
|              | -1.1545         | 0.87586 | 0.87586 | 0.919643564 |             |         |         |  |
| NA           | ENSG00000243129 | -1.1548 | 0.8759  | -1.1548     | 0.8759      | -1.1548 | 0.8759  |  |
|              | -1.1548         | 0.8759  | 0.8759  | 0.919665747 |             |         |         |  |
| MAGI1-AS1    | ENSG00000240175 | -1.6813 | 0.95364 | -1.6813     | 0.95364     | -1.6813 |         |  |
|              | 0.95364         | -1.1555 | 0.87606 | 0.87606     | 0.919813923 |         |         |  |
| LINC00551    | ENSG00000272274 | -1.3817 | 0.91647 | -1.1557     | 0.87609     | -1.1557 |         |  |
|              | 0.87609         | -1.1557 | 0.87609 | 0.87609     | 0.919817464 |         |         |  |
| RNU4-15P     | ENSG00000199483 | -1.1558 | 0.87612 | -1.2715     | 0.89822     | -1.1558 |         |  |
|              | 0.87612         | -1.1558 | 0.87612 | 0.87612     | 0.919817464 |         |         |  |
| TOMM6        | ENSG00000214736 | -1.1558 | 0.87612 | -1.1558     | 0.87612     | -1.1558 | 0.87612 |  |
|              | -1.1558         | 0.87612 | 0.87612 | 0.919817464 |             |         |         |  |
| RNA5SP117    | ENSG00000202164 | -1.156  | 0.87615 | -1.156      | 0.87615     | -1.156  |         |  |
|              | 0.87615         | -1.156  | 0.87615 | 0.87615     | 0.919829143 |         |         |  |
| MIR1265      | ENSG00000221371 | -1.1562 | 0.8762  | -1.1562     | 0.8762      | -1.1562 |         |  |
|              | 0.8762          | -1.1562 | 0.8762  | 0.8762      | 0.919833863 |         |         |  |
| NA           | ENSG00000226724 | -1.1563 | 0.87621 | -1.1563     | 0.87621     | -1.1563 | 0.87621 |  |
|              | -1.1563         | 0.87621 | 0.87621 | 0.919833863 |             |         |         |  |
| RNU6-258P    | ENSG00000212186 | -2.0028 | 0.9774  | -1.5188     | 0.93559     | -2.1585 |         |  |
|              | 0.98455         | -1.1563 | 0.87622 | 0.87622     | 0.919833863 |         |         |  |
| RNA5SP432    | ENSG00000199350 | -1.1563 | 0.87623 | -1.1563     | 0.87623     | -1.1563 |         |  |
|              | 0.87623         | -1.1563 | 0.87623 | 0.87623     | 0.919833863 |         |         |  |
| RNA5SP245    | ENSG00000201109 | -1.157  | 0.87636 | -1.157      | 0.87636     | -1.157  |         |  |
|              | 0.87636         | -1.157  | 0.87636 | 0.87636     | 0.919950514 |         |         |  |
| RNA5SP133    | ENSG00000200238 | -1.2967 | 0.90264 | -1.2967     | 0.90264     | -1.2967 |         |  |
|              | 0.90264         | -1.1572 | 0.8764  | 0.8764      | 0.919972685 |         |         |  |
| ZNF256       | ENSG00000152454 | -1.296  | 0.90252 | -1.1576     | 0.87648     | -1.296  |         |  |
|              | 0.90252         | -1.296  | 0.90252 | 0.87648     | 0.920018201 |         |         |  |
| LINC02168    | ENSG00000261703 | -1.894  | 0.97088 | -1.7866     | 0.963       | -1.1576 | 0.87649 |  |
|              | -1.1576         | 0.87649 | 0.87649 | 0.920018201 |             |         |         |  |
| BNIP5        | ENSG00000189325 | -1.1577 | 0.8765  | -1.8387     | 0.96702     | -1.1837 | 0.88173 |  |
|              | -1.8865         | 0.97038 | 0.8765  | 0.920018201 |             |         |         |  |
| NA           | ENSG00000273108 | -1.1578 | 0.87653 | -1.1578     | 0.87653     | -1.1578 | 0.87653 |  |
|              | -1.1578         | 0.87653 | 0.87653 | 0.920029873 |             |         |         |  |
| ZAR1         | ENSG00000182223 | -1.1582 | 0.8766  | -1.1582     | 0.8766      | -1.1582 | 0.8766  |  |
|              | -1.1582         | 0.8766  | 0.8766  | 0.920083529 |             |         |         |  |
| CES4A        | ENSG00000172824 | -1.3076 | 0.90449 | -1.7082     | 0.9562      | -1.1585 | 0.87666 |  |
|              | -1.4854         | 0.93128 | 0.87666 | 0.920106869 |             |         |         |  |
| RNU6-90P     | ENSG00000272337 | -1.1584 | 0.87666 | -1.1584     | 0.87666     | -1.1584 |         |  |
|              | 0.87666         | -1.1584 | 0.87666 | 0.87666     | 0.920106869 |         |         |  |
| RNU6-899P    | ENSG00000200817 | -1.1589 | 0.87675 | -1.1589     | 0.87675     | -1.1589 |         |  |
|              | 0.87675         | -1.1589 | 0.87675 | 0.87675     | 0.92018151  |         |         |  |
| NA           | ENSG00000213068 | -1.159  | 0.87677 | -1.159      | 0.87677     | -1.159  | 0.87677 |  |
|              | -1.159          | 0.87677 | 0.87677 | 0.920182682 |             |         |         |  |
| SLFN12       | ENSG00000172123 | -1.1594 | 0.87686 | -1.1594     | 0.87686     | -1.1594 |         |  |
|              | 0.87686         | -1.1594 | 0.87686 | 0.87686     | 0.920247994 |         |         |  |
| BNIP3P5      | ENSG00000260571 | -1.1595 | 0.87687 | -1.1595     | 0.87687     | -1.1595 |         |  |
|              | 0.87687         | -1.1595 | 0.87687 | 0.87687     | 0.920247994 |         |         |  |
| RNU6-1257P   | ENSG00000207355 | -1.1596 | 0.87689 | -1.1596     | 0.87689     | -1.1596 |         |  |
|              | 0.87689         | -1.1596 | 0.87689 | 0.87689     | 0.920249164 |         |         |  |
| NA           | ENSG00000253929 | -1.1624 | 0.87746 | -1.1624     | 0.87746     | -1.1624 | 0.87746 |  |
|              | -1.1597         | 0.87692 | 0.87692 | 0.920260829 |             |         |         |  |
| ADAMTSL4-AS1 | ENSG00000203804 | -1.1599 | 0.87695 | -1.1599     | 0.87695     | -1.1599 |         |  |
|              | 0.87695         | -1.1599 | 0.87695 | 0.87695     | 0.920263169 |         |         |  |
| MDFIC2       | ENSG00000242120 | -1.1599 | 0.87696 | -1.1599     | 0.87696     | -1.1599 |         |  |

|              |                 |         |         |             |             |         |         |
|--------------|-----------------|---------|---------|-------------|-------------|---------|---------|
|              | 0.87696         | -1.1599 | 0.87696 | 0.87696     | 0.920263169 |         |         |
| IGHVIII-82   | ENSG00000253303 | -1.1601 | 0.87701 | 0.87701     | -1.1601     | 0.87701 | -1.1601 |
|              | 0.87701         | -1.1601 | 0.87701 | 0.87701     | 0.92026668  |         |         |
| SUMO2P4      | ENSG00000249183 | -1.678  | 0.95332 | 0.95332     | -1.1602     | 0.87702 | -1.1602 |
|              | 0.87702         | -1.6029 | 0.94552 | 0.87702     | 0.92026668  |         |         |
| MTCYBP22     | ENSG00000270232 | -1.2316 | 0.89095 | 0.89095     | -1.3988     | 0.91907 | -1.1602 |
|              | 0.87702         | -1.1602 | 0.87702 | 0.87702     | 0.92026668  |         |         |
| NA           | ENSG00000271320 | -1.3528 | 0.91194 | -1.1609     | 0.87715     | -1.3528 | 0.91194 |
|              | -1.3528         | 0.91194 | 0.87715 | 0.920355297 |             |         |         |
| CDPF1P1      | ENSG00000227799 | -2.1649 | 0.9848  | -1.1609     | 0.87716     | -1.1609 |         |
|              | 0.87716         | -1.1609 | 0.87716 | 0.87716     | 0.920355297 |         |         |
| KRTAP2-3     | ENSG00000212724 | -1.161  | 0.87718 | -1.161      | 0.87718     | -1.161  |         |
|              | 0.87718         | -1.3159 | 0.90589 | 0.87718     | 0.920355297 |         |         |
| NA           | ENSG00000265408 | -1.7135 | 0.95669 | -2.1186     | 0.98294     | -1.161  | 0.87718 |
|              | -1.161          | 0.87718 | 0.87718 | 0.920355297 |             |         |         |
| ZNF511-PRAP1 | ENSG00000283496 | -1.1616 | 0.87731 | -1.1616     | 0.87731     | -1.1616 |         |
|              | 0.87731         | -1.1616 | 0.87731 | 0.87731     | 0.920453224 |         |         |
| NA           | ENSG00000213896 | -1.1617 | 0.87732 | -1.1617     | 0.87732     | -1.1617 | 0.87732 |
|              | -2.4961         | 0.99372 | 0.87732 | 0.920453224 |             |         |         |
| MMP8         | ENSG00000118113 | -1.1618 | 0.87733 | -1.1618     | 0.87733     | -1.1618 | 0.87733 |
|              | -1.1618         | 0.87733 | 0.87733 | 0.920453224 |             |         |         |
| RNF151       | ENSG00000179580 | -1.1619 | 0.87735 | -1.1619     | 0.87735     | -1.1619 |         |
|              | 0.87735         | -1.1619 | 0.87735 | 0.87735     | 0.92045439  |         |         |
| ITGA2        | ENSG00000164171 | -1.162  | 0.87738 | -1.1787     | 0.88074     | -1.3754 | 0.9155  |
|              | -1.6399         | 0.94948 | 0.87738 | 0.920456721 |             |         |         |
| FBXW9        | ENSG00000132004 | -1.1621 | 0.87739 | -1.1621     | 0.87739     | -1.1621 | 0.87739 |
|              | -1.1621         | 0.87739 | 0.87739 | 0.920456721 |             |         |         |
| NA           | ENSG00000269194 | -1.1624 | 0.87746 | -1.1624     | 0.87746     | -1.1624 | 0.87746 |
|              | -1.1624         | 0.87746 | 0.87746 | 0.92051034  |             |         |         |
| P2RY11       | ENSG00000244165 | -1.1626 | 0.8775  | -1.1626     | 0.8775      | -1.1626 |         |
|              | 0.8775          | -1.1626 | 0.8775  | 0.8775      | 0.920532485 |         |         |
| TMEM108-AS1  | ENSG00000251011 | -1.1634 | 0.87766 | -1.1634     | 0.87766     | -1.1634 |         |
|              | 0.87766         | -1.1634 | 0.87766 | 0.87766     | 0.920642035 |         |         |
| COX6CP2      | ENSG00000231715 | -1.5115 | 0.93467 | -1.3312     | 0.90844     | -1.1635 |         |
|              | 0.87768         | -1.7711 | 0.96173 | 0.87768     | 0.920642035 |         |         |
| CYCSP20      | ENSG00000240416 | -1.1635 | 0.87768 | -1.1635     | 0.87768     | -1.1635 |         |
|              | 0.87768         | -1.1635 | 0.87768 | 0.87768     | 0.920642035 |         |         |
| NA           | ENSG00000272599 | -1.1635 | 0.87768 | -1.1635     | 0.87768     | -1.1635 | 0.87768 |
|              | -1.1635         | 0.87768 | 0.87768 | 0.920642035 |             |         |         |
| NA           | ENSG00000267592 | -1.164  | 0.8778  | -1.164      | 0.8778      | -1.164  | 0.8778  |
|              | -1.164          | 0.8778  | 0.8778  | 0.92074809  |             |         |         |
| OR4E2        | ENSG00000221977 | -1.1645 | 0.87789 | -1.3306     | 0.90835     | -1.3306 | 0.90835 |
|              | -1.3306         | 0.90835 | 0.87789 | 0.920822672 |             |         |         |
| NA           | ENSG00000230284 | -1.1646 | 0.87792 | -1.7291     | 0.9581      | -1.762  | 0.96097 |
|              | -1.2223         | 0.88921 | 0.87792 | 0.920834318 |             |         |         |
| NA           | ENSG00000207141 | -1.1651 | 0.87801 | -1.1651     | 0.87801     | -1.1651 | 0.87801 |
|              | -1.1651         | 0.87801 | 0.87801 | 0.920880899 |             |         |         |
| NA           | ENSG00000254633 | -1.1651 | 0.87802 | -1.1651     | 0.87802     | -1.1651 | 0.87802 |
|              | -1.4677         | 0.9289  | 0.87802 | 0.920880899 |             |         |         |
| OVOL1-AS1    | ENSG00000255120 | -1.1652 | 0.87803 | -1.1652     | 0.87803     | -1.1652 |         |
|              | 0.87803         | -1.1652 | 0.87803 | 0.87803     | 0.920880899 |         |         |
| RPL12P41     | ENSG00000269637 | -1.1652 | 0.87804 | -1.1652     | 0.87804     | -1.1652 |         |
|              | 0.87804         | -1.1652 | 0.87804 | 0.87804     | 0.920880899 |         |         |
| ARL11        | ENSG00000152213 | -1.1654 | 0.87807 | -1.1654     | 0.87807     | -1.1654 | 0.87807 |
|              | -1.5076         | 0.93417 | 0.87807 | 0.920883211 |             |         |         |
| TBC1D29P     | ENSG00000266733 | -1.1654 | 0.87808 | -1.1654     | 0.87808     | -1.1654 |         |
|              | 0.87808         | -1.1654 | 0.87808 | 0.87808     | 0.920883211 |         |         |
| LLPH-DT      | ENSG00000239335 | -1.1657 | 0.87813 | -1.1657     | 0.87813     | -1.1657 |         |
|              | 0.87813         | -1.1657 | 0.87813 | 0.87813     | 0.920915829 |         |         |
| QTRT2        | ENSG00000151576 | -1.1662 | 0.87824 | -1.1662     | 0.87824     | -1.1662 | 0.87824 |
|              | -1.3024         | 0.90361 | 0.87824 | 0.920972881 |             |         |         |
| NA           | ENSG00000281831 | -1.2706 | 0.89807 | -1.1662     | 0.87824     | -1.9448 | 0.9741  |

|           |                 |             |         |             |             |         |         |  |
|-----------|-----------------|-------------|---------|-------------|-------------|---------|---------|--|
|           | -1.6567         | 0.95121     | 0.87824 | 0.920972881 |             |         |         |  |
| LINC00923 | ENSG00000251209 | -1.1663     | 0.87826 | -1.4872     | 0.93152     | -1.2444 |         |  |
|           | 0.89332         | -1.2444     | 0.89332 | 0.87826     | 0.920972881 |         |         |  |
| NA        | ENSG00000256884 | -1.1664     | 0.87826 | -1.1664     | 0.87826     | -1.1664 | 0.87826 |  |
|           | -1.1664         | 0.87826     | 0.87826 | 0.920972881 |             |         |         |  |
| NA        | ENSG00000279886 | -1.1667     | 0.87833 | -1.1667     | 0.87833     | -1.1667 | 0.87833 |  |
|           | -1.1667         | 0.87833     | 0.87833 | 0.921026466 |             |         |         |  |
| MPZL3     | ENSG00000160588 | -1.1668     | 0.87835 | -1.1668     | 0.87835     | -1.4412 | 0.92524 |  |
|           | -1.4996         | 0.93314     | 0.87835 | 0.921027619 |             |         |         |  |
| TXNP7     | ENSG00000217268 | -1.1669     | 0.87837 | -1.6216     | 0.94756     | -1.9678 | 0.97545 |  |
|           | -1.1757         | 0.88014     | 0.87837 | 0.921028772 |             |         |         |  |
| MS4A18    | ENSG00000214782 | -1.1673     | 0.87845 | -1.1673     | 0.87845     | -1.1673 |         |  |
|           | 0.87845         | -1.1673     | 0.87845 | 0.87845     | 0.921083503 |         |         |  |
| NUDT9P1   | ENSG00000234043 | -1.422      | 0.92248 | -1.422      | 0.92248     | -1.422  |         |  |
|           | 0.92248         | -1.1673     | 0.87846 | 0.87846     | 0.921083503 |         |         |  |
| ZPLD2P    | ENSG00000236155 | -1.5424     | 0.93851 | -1.6852     | 0.95402     | -1.4747 |         |  |
|           | 0.92985         | -1.1678     | 0.87855 | 0.87855     | 0.921091562 |         |         |  |
| NUDT6     | ENSG00000170917 | -1.3748     | 0.91541 | -1.1678     | 0.87856     | -1.3876 | 0.91737 |  |
|           | -1.5475         | 0.93913     | 0.87856 | 0.921091562 |             |         |         |  |
| MTCYBP28  | ENSG00000260161 | -1.1679     | 0.87857 | -1.1679     | 0.87857     | -1.1679 |         |  |
|           | 0.87857         | -1.1679     | 0.87857 | 0.87857     | 0.921091562 |         |         |  |
| ZNF725P   | ENSG00000268100 | -1.612      | 0.94651 | -1.9629     | 0.97517     | -1.2241 |         |  |
|           | 0.88954         | -1.1679     | 0.87858 | 0.87858     | 0.921091562 |         |         |  |
| NA        | ENSG00000201541 | -1.168      | 0.87859 | -1.168      | 0.87859     | -1.168  | 0.87859 |  |
|           | -1.168          | 0.87859     | 0.87859 | 0.921091562 |             |         |         |  |
| NA        | ENSG00000227512 | -1.168      | 0.87859 | -1.168      | 0.87859     | -1.168  | 0.87859 |  |
|           | -1.168          | 0.87859     | 0.87859 | 0.921091562 |             |         |         |  |
| LINC01237 | ENSG00000233806 | -1.236      | 0.89177 | -1.168      | 0.8786      | -1.2288 |         |  |
|           | 0.89044         | -1.4892     | 0.93178 | 0.8786      | 0.921091562 |         |         |  |
| UBE2B     | ENSG00000119048 | -1.7995     | 0.96403 | -1.1681     | 0.87862     | -2.2636 | 0.9882  |  |
|           | -1.6062         | 0.94588     | 0.87862 | 0.921092713 |             |         |         |  |
| FRS2      | ENSG00000166225 | -1.2887     | 0.90125 | -1.4026     | 0.91964     | -1.1683 | 0.87866 |  |
|           | -1.3254         | 0.90748     | 0.87866 | 0.921096167 |             |         |         |  |
| OR4A10P   | ENSG00000255493 | -1.1684     | 0.87867 | -1.1684     | 0.87867     | -1.1684 |         |  |
|           | 0.87867         | -1.1684     | 0.87867 | 0.87867     | 0.921096167 |         |         |  |
| TRGV3     | ENSG00000211699 | -1.1684     | 0.87868 | -1.1684     | 0.87868     | -1.1684 | 0.87868 |  |
|           | -1.1684         | 0.87868     | 0.87868 | 0.921096167 |             |         |         |  |
| TDGF1P6   | ENSG00000241438 | -1.1689     | 0.87878 | -1.1689     | 0.87878     | -1.1689 |         |  |
|           | 0.87878         | -1.1689     | 0.87878 | 0.87878     | 0.921181178 |         |         |  |
| LINC01094 | ENSG00000251442 | -1.1696     | 0.87892 | -1.1696     | 0.87892     | -1.1696 |         |  |
|           | 0.87892         | -1.1696     | 0.87892 | 0.87892     | 0.921282402 |         |         |  |
| RPL32P14  | ENSG00000242654 | -1.1697     | 0.87894 | -1.1697     | 0.87894     | -1.1697 |         |  |
|           | 0.87894         | -1.1697     | 0.87894 | 0.87894     | 0.921282402 |         |         |  |
| NA        | ENSG00000200448 | -1.1697     | 0.87895 | -1.1697     | 0.87895     | -1.1697 | 0.87895 |  |
|           | -1.2362         | 0.8918      | 0.87895 | 0.921282402 |             |         |         |  |
| NA        | ENSG00000248375 | -1.1699     | 0.87897 | -1.1699     | 0.87897     | -1.1699 | 0.87897 |  |
|           | -1.1699         | 0.87897     | 0.87897 | 0.921282402 |             |         |         |  |
| NA        | ENSG00000202414 | -1.1699     | 0.87898 | -1.1699     | 0.87898     | -1.1699 | 0.87898 |  |
|           | -1.1699         | 0.87898     | 0.87898 | 0.921282402 |             |         |         |  |
| NA        | ENSG00000251177 | -1.17       | 0.87899 | -1.17       | 0.87899     | -1.17   | 0.87899 |  |
|           | 0.87899         | 0.921282402 |         |             |             |         |         |  |
| NA        | ENSG00000262983 | -1.1701     | 0.87902 | -1.1701     | 0.87902     | -1.1701 | 0.87902 |  |
|           | -1.1701         | 0.87902     | 0.87902 | 0.921285842 |             |         |         |  |
| SNRPGP20  | ENSG00000271496 | -1.1702     | 0.87905 | -1.1702     | 0.87905     | -1.1702 |         |  |
|           | 0.87905         | -1.1702     | 0.87905 | 0.87905     | 0.921285842 |         |         |  |
| NA        | ENSG00000280325 | -1.1702     | 0.87905 | -1.1702     | 0.87905     | -1.1702 | 0.87905 |  |
|           | -1.1702         | 0.87905     | 0.87905 | 0.921285842 |             |         |         |  |
| SMAD4     | ENSG00000141646 | -1.2259     | 0.88988 | -1.1703     | 0.87907     | -1.2394 | 0.89241 |  |
|           | -1.66           | 0.95155     | 0.87907 | 0.921286988 |             |         |         |  |
| PCSK9     | ENSG00000169174 | -1.1704     | 0.87909 | -1.1704     | 0.87909     | -1.1704 | 0.87909 |  |
|           | -1.1704         | 0.87909     | 0.87909 | 0.921288135 |             |         |         |  |
| LINC02479 | ENSG00000251326 | -1.1706     | 0.87913 | -1.1706     | 0.87913     | -1.1706 |         |  |

|           |                 |         |         |             |             |         |         |
|-----------|-----------------|---------|---------|-------------|-------------|---------|---------|
|           | 0.87913         | -1.3651 | 0.91389 | 0.87913     | 0.921310241 |         |         |
| NA        | ENSG00000200042 | -1.171  | 0.8792  | -1.171      | 0.8792      | -1.171  | 0.8792  |
|           | -1.171          | 0.8792  | 0.8792  | 0.92135445  |             |         |         |
| OR6Y1     | ENSG00000197532 | -1.5169 | 0.93535 | -1.3364     | 0.90929     | -1.171  | 0.87921 |
|           | -1.171          | 0.87921 | 0.87921 | 0.92135445  |             |         |         |
| SNORD32B  | ENSG00000201330 | -1.5381 | 0.93799 | -1.1711     | 0.87923     | -1.2545 |         |
|           | 0.89518         | -2.5307 | 0.99431 | 0.87923     | 0.921355595 |         |         |
| NA        | ENSG00000255450 | -1.4598 | 0.92783 | -1.1716     | 0.87932     | -1.1716 | 0.87932 |
|           | -1.1716         | 0.87932 | 0.87932 | 0.921430093 |             |         |         |
| RNU6-957P | ENSG00000200522 | -1.172  | 0.8794  | -1.172      | 0.8794      | -1.172  |         |
|           | 0.8794          | -1.172  | 0.8794  | 0.8794      | 0.921494108 |         |         |
| RN7SL574P | ENSG00000266075 | -1.1724 | 0.87948 | -1.1724     | 0.87948     | -1.1724 |         |
|           | 0.87948         | -1.1724 | 0.87948 | 0.87948     | 0.921558121 |         |         |
| NA        | ENSG00000224479 | -1.8526 | 0.96803 | -1.8109     | 0.96492     | -2.0904 | 0.98171 |
|           | -1.1728         | 0.87957 | 0.87957 | 0.921632609 |             |         |         |
| NA        | ENSG00000256250 | -1.1734 | 0.87968 | -1.1734     | 0.87968     | -1.1734 | 0.87968 |
|           | -1.1734         | 0.87968 | 0.87968 | 0.921710505 |             |         |         |
| ALKBH6    | ENSG00000239382 | -1.1736 | 0.87972 | -1.1736     | 0.87972     | -1.1736 |         |
|           | 0.87972         | -1.1736 | 0.87972 | 0.87972     | 0.921710505 |         |         |
| NA        | ENSG00000248101 | -1.1736 | 0.87972 | -1.1736     | 0.87972     | -1.1736 | 0.87972 |
|           | -1.1736         | 0.87972 | 0.87972 | 0.921710505 |             |         |         |
| NA        | ENSG00000267698 | -1.1736 | 0.87972 | -1.1736     | 0.87972     | -1.1736 | 0.87972 |
|           | -1.1736         | 0.87972 | 0.87972 | 0.921710505 |             |         |         |
| NA        | ENSG00000253600 | -1.1737 | 0.87974 | -1.1737     | 0.87974     | -1.1737 | 0.87974 |
|           | -1.1737         | 0.87974 | 0.87974 | 0.921711642 |             |         |         |
| ANAPC15   | ENSG00000110200 | -1.1741 | 0.87982 | -1.1741     | 0.87982     | -1.1741 |         |
|           | 0.87982         | -1.2747 | 0.89879 | 0.87982     | 0.921775641 |         |         |
| DDX55     | ENSG00000111364 | -1.1881 | 0.88261 | -1.1881     | 0.88261     | -1.1881 | 0.88261 |
|           | -1.1743         | 0.87986 | 0.87986 | 0.92179773  |             |         |         |
| LDHAP3    | ENSG00000236090 | -1.1751 | 0.88002 | -1.1751     | 0.88002     | -1.1751 |         |
|           | 0.88002         | -1.1751 | 0.88002 | 0.88002     | 0.921945535 |         |         |
| RASA3     | ENSG00000185989 | -1.8202 | 0.96564 | -1.8202     | 0.96564     | -1.8202 | 0.96564 |
|           | -1.1755         | 0.88009 | 0.88009 | 0.921989702 |             |         |         |
| NA        | ENSG00000270002 | -1.1755 | 0.8801  | -1.1755     | 0.8801      | -1.1755 | 0.8801  |
|           | -1.1755         | 0.8801  | 0.8801  | 0.921989702 |             |         |         |
| DHFRP2    | ENSG00000228432 | -1.2355 | 0.89168 | -1.176      | 0.8802      | -1.176  |         |
|           | 0.8802          | -1.176  | 0.8802  | 0.8802      | 0.922074639 |         |         |
| LINC01218 | ENSG00000251636 | -1.1767 | 0.88035 | -1.1767     | 0.88035     | -1.1767 |         |
|           | 0.88035         | -1.1767 | 0.88035 | 0.88035     | 0.92221195  |         |         |
| LINC01842 | ENSG00000267147 | -1.1777 | 0.88054 | -1.1769     | 0.88038     | -2.2424 |         |
|           | 0.98753         | -1.1777 | 0.88054 | 0.88038     | 0.922223552 |         |         |
| NA        | ENSG00000260862 | -1.2878 | 0.9011  | -1.2045     | 0.8858      | -1.1775 | 0.8805  |
|           | -1.1775         | 0.8805  | 0.8805  | 0.922292026 |             |         |         |
| NA        | ENSG00000260999 | -1.4399 | 0.92505 | -1.1775     | 0.88051     | -1.1775 | 0.88051 |
|           | -1.6032         | 0.94556 | 0.88051 | 0.922292026 |             |         |         |
| MIR621    | ENSG00000207652 | -1.1776 | 0.88053 | -1.1776     | 0.88053     | -1.1776 |         |
|           | 0.88053         | -1.1776 | 0.88053 | 0.88053     | 0.922292026 |         |         |
| COX6C     | ENSG00000164919 | -1.1777 | 0.88054 | -1.3639     | 0.9137      | -1.1777 | 0.88054 |
|           | -1.1777         | 0.88054 | 0.88054 | 0.922292026 |             |         |         |
| NA        | ENSG00000269237 | -1.1777 | 0.88054 | -1.1777     | 0.88054     | -1.1777 | 0.88054 |
|           | -1.1777         | 0.88054 | 0.88054 | 0.922292026 |             |         |         |
| NA        | ENSG00000226338 | -1.178  | 0.88061 | -1.178      | 0.88061     | -1.178  | 0.88061 |
|           | -1.178          | 0.88061 | 0.88061 | 0.92234552  |             |         |         |
| RNF24     | ENSG00000101236 | -1.4562 | 0.92734 | -1.1784     | 0.88069     | -1.4789 | 0.93042 |
|           | -1.72           | 0.95728 | 0.88069 | 0.922383675 |             |         |         |
| RAD23A    | ENSG00000179262 | -1.3413 | 0.91009 | -1.2932     | 0.90203     | -1.5829 |         |
|           | 0.94327         | -1.1786 | 0.88072 | 0.88072     | 0.922383675 |         |         |
| NA        | ENSG00000233157 | -1.1787 | 0.88073 | -1.1787     | 0.88073     | -1.1787 | 0.88073 |
|           | -1.1787         | 0.88073 | 0.88073 | 0.922383675 |             |         |         |
| RCC2-AS1  | ENSG00000227751 | -1.1788 | 0.88075 | -1.1788     | 0.88075     | -1.1788 |         |
|           | 0.88075         | -1.1788 | 0.88075 | 0.88075     | 0.922383675 |         |         |
| RN7SL645P | ENSG00000240863 | -1.1788 | 0.88076 | -1.1788     | 0.88076     | -1.1788 |         |

|             |                 |         |         |             |             |         |         |         |
|-------------|-----------------|---------|---------|-------------|-------------|---------|---------|---------|
|             | 0.88076         | -1.1788 | 0.88076 | 0.88076     | 0.922383675 |         |         |         |
| RN7SL842P   | ENSG00000243066 | -1.1788 | 0.88076 | 0.88076     | -1.1788     | 0.88076 | -1.1788 |         |
|             | 0.88076         | -1.1788 | 0.88076 | 0.88076     | 0.922383675 |         |         |         |
| SPIB        | ENSG00000269404 | -1.179  | 0.88081 | 0.88081     | -1.179      | 0.88081 | -1.179  | 0.88081 |
|             | -1.179          | 0.88081 | 0.88081 | 0.922416215 |             |         |         |         |
| IGHV1OR15-1 | ENSG00000270505 | -1.1795 | 0.88091 | 0.88091     | -1.1795     | 0.88091 | -1.1795 |         |
|             | 0.88091         | -1.1795 | 0.88091 | 0.88091     | 0.922501113 |         |         |         |
| MTCO3P16    | ENSG00000227736 | -1.1797 | 0.88093 | 0.88093     | -1.1797     | 0.88093 | -1.1797 |         |
|             | 0.88093         | -1.1797 | 0.88093 | 0.88093     | 0.922502233 |         |         |         |
| NA          | ENSG00000226816 | -1.1798 | 0.88095 | 0.88095     | -1.1798     | 0.88095 | -1.1798 | 0.88095 |
|             | -1.1798         | 0.88095 | 0.88095 | 0.922503352 |             |         |         |         |
| GAA         | ENSG00000171298 | -1.3143 | 0.90563 | -1.1801     | 0.88102     | -1.3143 | 0.90563 |         |
|             | -2.1919         | 0.98581 | 0.88102 | 0.922547476 |             |         |         |         |
| PNLIPRP1    | ENSG00000187021 | -1.1801 | 0.88103 | 0.88103     | -1.5562     | 0.94017 | -1.1801 |         |
|             | 0.88103         | -1.1801 | 0.88103 | 0.88103     | 0.922547476 |         |         |         |
| SCML2P2     | ENSG00000271105 | -1.1805 | 0.88111 | 0.88111     | -1.1805     | 0.88111 | -1.1805 |         |
|             | 0.88111         | -1.1805 | 0.88111 | 0.88111     | 0.922611421 |         |         |         |
| CFAP44-AS1  | ENSG00000243849 | -1.1806 | 0.88113 | 0.88113     | -1.1806     | 0.88113 | -1.1806 |         |
|             | 0.88113         | -1.1806 | 0.88113 | 0.88113     | 0.922612538 |         |         |         |
| KNOP1       | ENSG00000103550 | -1.1816 | 0.88132 | -1.1816     | 0.88132     | -1.1816 | 0.88132 |         |
|             | -1.6481         | 0.95033 | 0.88132 | 0.92276247  |             |         |         |         |
| NA          | ENSG00000199552 | -1.7604 | 0.96083 | -1.55       | 0.93943     | -1.3056 | 0.90415 |         |
|             | -1.1816         | 0.88132 | 0.88132 | 0.92276247  |             |         |         |         |
| NA          | ENSG00000257512 | -1.1816 | 0.88133 | -1.5836     | 0.94336     | -1.1816 | 0.88133 |         |
|             | -1.1816         | 0.88133 | 0.88133 | 0.92276247  |             |         |         |         |
| MIR5189     | ENSG00000263456 | -1.1818 | 0.88135 | -1.1818     | 0.88135     | -1.1818 |         |         |
|             | 0.88135         | -1.1818 | 0.88135 | 0.88135     | 0.922763584 |         |         |         |
| NA          | ENSG00000266654 | -1.1821 | 0.88141 | -1.1821     | 0.88141     | -1.1821 | 0.88141 |         |
|             | -1.1821         | 0.88141 | 0.88141 | 0.922806577 |             |         |         |         |
| PRICKLE4    | ENSG00000278224 | -1.1826 | 0.88151 | -1.1826     | 0.88151     | -1.1826 |         |         |
|             | 0.88151         | -1.1826 | 0.88151 | 0.88151     | 0.922891445 |         |         |         |
| NA          | ENSG00000241520 | -1.1828 | 0.88156 | -1.1828     | 0.88156     | -1.1828 | 0.88156 |         |
|             | -1.1828         | 0.88156 | 0.88156 | 0.922923963 |             |         |         |         |
| NA          | ENSG00000263235 | -1.183  | 0.88159 | -1.183      | 0.88159     | -1.183  | 0.88159 |         |
|             | -1.183          | 0.88159 | 0.88159 | 0.922935543 |             |         |         |         |
| FFAR2       | ENSG00000126262 | -1.1832 | 0.88163 | -1.1832     | 0.88163     | -1.1832 | 0.88163 |         |
|             | -1.1832         | 0.88163 | 0.88163 | 0.92295759  |             |         |         |         |
| SNORA62     | ENSG00000202363 | -1.1833 | 0.88165 | -1.1833     | 0.88165     | -1.1833 |         |         |
|             | 0.88165         | -1.1833 | 0.88165 | 0.88165     | 0.922958699 |         |         |         |
| NA          | ENSG00000270893 | -1.1835 | 0.88169 | -1.1835     | 0.88169     | -1.1835 | 0.88169 |         |
|             | -1.1835         | 0.88169 | 0.88169 | 0.922980745 |             |         |         |         |
| NA          | ENSG00000260107 | -1.1838 | 0.88176 | -1.1838     | 0.88176     | -1.1838 | 0.88176 |         |
|             | -1.1838         | 0.88176 | 0.88176 | 0.923034195 |             |         |         |         |
| H2AC2P      | ENSG00000216436 | -1.1842 | 0.88183 | -1.1842     | 0.88183     | -1.1842 |         |         |
|             | 0.88183         | -1.1842 | 0.88183 | 0.88183     | 0.923087642 |         |         |         |
| FAM24B      | ENSG00000213185 | -1.1848 | 0.88195 | -1.1848     | 0.88195     | -1.1848 |         |         |
|             | 0.88195         | -1.1848 | 0.88195 | 0.88195     | 0.923193425 |         |         |         |
| DMXL2       | ENSG00000104093 | -1.1851 | 0.88201 | -1.7052     | 0.95592     | -1.7052 | 0.95592 |         |
|             | -1.7052         | 0.95592 | 0.88201 | 0.923228138 |             |         |         |         |
| TMEM200A    | ENSG00000164484 | -1.1852 | 0.88204 | -1.8837     | 0.9702      | -1.1852 |         |         |
|             | 0.88204         | -1.1852 | 0.88204 | 0.88204     | 0.923228138 |         |         |         |
| OR4C50P     | ENSG00000237610 | -1.5269 | 0.93661 | -1.2093     | 0.88673     | -1.3767 |         |         |
|             | 0.9157          | -1.1853 | 0.88204 | 0.88204     | 0.923228138 |         |         |         |
| SDR42E1P5   | ENSG00000236785 | -1.7013 | 0.95556 | -1.7013     | 0.95556     | -1.7013 |         |         |
|             | 0.95556         | -1.1855 | 0.88209 | 0.88209     | 0.923260642 |         |         |         |
| IGHV3-13    | ENSG00000211942 | -1.7325 | 0.95841 | -1.7325     | 0.95841     | -1.7325 |         |         |
|             | 0.95841         | -1.1857 | 0.88213 | 0.88213     | 0.923282678 |         |         |         |
| SNORD73A    | ENSG00000208797 | -1.1859 | 0.88217 | -1.1859     | 0.88217     | -1.1859 |         |         |
|             | 0.88217         | -1.1859 | 0.88217 | 0.88217     | 0.923295348 |         |         |         |
| NA          | ENSG00000279039 | -1.186  | 0.88218 | -1.186      | 0.88218     | -1.186  | 0.88218 |         |
|             | -1.186          | 0.88218 | 0.88218 | 0.923295348 |             |         |         |         |
| TRBV6-4     | ENSG00000211713 | -1.3363 | 0.90928 | -1.1862     | 0.88223     | -1.1862 |         |         |

|           |                 |         |             |             |             |         |         |  |
|-----------|-----------------|---------|-------------|-------------|-------------|---------|---------|--|
|           | 0.88223         | -1.1862 | 0.88223     | 0.88223     | 0.923318483 |         |         |  |
| MIR4713   | ENSG00000266593 | -1.1863 | 0.88224     | 0.88224     | -1.1863     | 0.88224 | -1.1863 |  |
|           | 0.88224         | -1.1863 | 0.88224     | 0.88224     | 0.923318483 |         |         |  |
| EBNA1BP2  | ENSG00000117395 | -1.5975 | 0.94492     | 0.94492     | -1.5975     | 0.94492 | -1.5975 |  |
|           | 0.94492         | -1.1864 | 0.88226     | 0.88226     | 0.923319584 |         |         |  |
| RGS1      | ENSG00000090104 | -1.1867 | 0.88233     | -1.1867     | 0.88233     | -1.1867 | 0.88233 |  |
|           | -1.1867         | 0.88233 | 0.88233     | 0.923353182 |             |         |         |  |
| RNU6-878P | ENSG00000207308 | -1.9847 | 0.97641     | -1.7719     | 0.96179     | -1.9699 |         |  |
|           | 0.97557         | -1.1867 | 0.88233     | 0.88233     | 0.923353182 |         |         |  |
| NA        | ENSG00000271283 | -1.1868 | 0.88235     | -1.5723     | 0.94205     | -1.1868 | 0.88235 |  |
|           | -1.1868         | 0.88235 | 0.88235     | 0.923354282 |             |         |         |  |
| IFI16     | ENSG00000163565 | -1.1869 | 0.88237     | -1.6753     | 0.95307     | -1.5549 | 0.94001 |  |
|           | -1.4122         | 0.92105 | 0.88237     | 0.923355383 |             |         |         |  |
| CPZ       | ENSG00000109625 | -1.1872 | 0.88242     | -1.4046     | 0.91993     | -1.2104 | 0.88693 |  |
|           | -1.257          | 0.89562 | 0.88242     | 0.923387876 |             |         |         |  |
| NA        | ENSG00000252412 | -1.1873 | 0.88244     | -1.1873     | 0.88244     | -1.1873 | 0.88244 |  |
|           | -1.1873         | 0.88244 | 0.88244     | 0.923388975 |             |         |         |  |
| NA        | ENSG00000226939 | -1.1875 | 0.88249     | -1.1875     | 0.88249     | -1.1875 | 0.88249 |  |
|           | -1.1875         | 0.88249 | 0.88249     | 0.923403837 |             |         |         |  |
| PHOSPHO1  | ENSG00000173868 | -1.1876 | 0.88251     | -1.363      | 0.91356     | -1.1876 |         |  |
|           | 0.88251         | -1.1876 | 0.88251     | 0.88251     | 0.923403837 |         |         |  |
| RPL7P51   | ENSG00000243469 | -1.1877 | 0.88253     | -1.4662     | 0.92871     | -1.1877 |         |  |
|           | 0.88253         | -1.1877 | 0.88253     | 0.88253     | 0.923403837 |         |         |  |
| SIGLEC14  | ENSG00000254415 | -1.1877 | 0.88253     | -1.1877     | 0.88253     | -1.1877 |         |  |
|           | 0.88253         | -1.1877 | 0.88253     | 0.88253     | 0.923403837 |         |         |  |
| NA        | ENSG00000271218 | -1.1879 | 0.88257     | -1.1879     | 0.88257     | -1.1879 | 0.88257 |  |
|           | -1.1879         | 0.88257 | 0.88257     | 0.923425862 |             |         |         |  |
| NA        | ENSG00000244540 | -1.1882 | 0.88263     | -1.1882     | 0.88263     | -1.1882 | 0.88263 |  |
|           | -1.1882         | 0.88263 | 0.88263     | 0.923468812 |             |         |         |  |
| CCPG1     | ENSG00000260916 | -1.1884 | 0.88266     | -1.1884     | 0.88266     | -1.1884 | 0.88266 |  |
|           | -1.1884         | 0.88266 | 0.88266     | 0.923480372 |             |         |         |  |
| NA        | ENSG00000267611 | -1.189  | 0.88278     | -1.189      | 0.88278     | -1.189  | 0.88278 |  |
|           | -1.189          | 0.88278 | 0.88278     | 0.923586092 |             |         |         |  |
| NA        | ENSG00000271590 | -1.1892 | 0.88283     | -1.1892     | 0.88283     | -1.1892 | 0.88283 |  |
|           | -1.1892         | 0.88283 | 0.88283     | 0.923618573 |             |         |         |  |
| RPS15AP28 | ENSG00000229197 | -1.1895 | 0.88289     | -2.022      | 0.97841     | -1.1895 |         |  |
|           | 0.88289         | -1.1895 | 0.88289     | 0.88289     | 0.923652147 |         |         |  |
| PXDN      | ENSG00000130508 | -1.6064 | 0.9459      | -1.1896     | 0.8829      | -1.2099 | 0.88684 |  |
|           | -1.8946         | 0.97092 | 0.8829      | 0.923652147 |             |         |         |  |
| NA        | ENSG00000259563 | -1.1897 | 0.88292     | -1.1897     | 0.88292     | -1.1897 | 0.88292 |  |
|           | -1.1897         | 0.88292 | 0.88292     | 0.923653241 |             |         |         |  |
| AANAT     | ENSG00000129673 | -1.4827 | 0.93092     | -1.1899     | 0.88295     | -1.4827 | 0.93092 |  |
|           | -1.4827         | 0.93092 | 0.88295     | 0.923664795 |             |         |         |  |
| RN7SL35P  | ENSG00000240347 | -1.19   | 0.88299     | -1.19       | 0.88299     | -1.19   | 0.88299 |  |
|           | 0.88299         | 0.88299 | 0.923686811 |             |             |         |         |  |
| NA        | ENSG00000283559 | -1.1904 | 0.88305     | -1.1904     | 0.88305     | -1.1904 | 0.88305 |  |
|           | -1.1904         | 0.88305 | 0.88305     | 0.923729746 |             |         |         |  |
| NA        | ENSG00000270760 | -1.1906 | 0.88309     | -1.1906     | 0.88309     | -1.1906 | 0.88309 |  |
|           | -1.1906         | 0.88309 | 0.88309     | 0.923751759 |             |         |         |  |
| KLF1      | ENSG00000105610 | -1.1909 | 0.88316     | -1.1909     | 0.88316     | -1.1909 | 0.88316 |  |
|           | -1.1909         | 0.88316 | 0.88316     | 0.923785322 |             |         |         |  |
| MYOM3-AS1 | ENSG00000230703 | -1.1909 | 0.88316     | -1.1909     | 0.88316     | -1.1909 |         |  |
|           | 0.88316         | -1.1909 | 0.88316     | 0.88316     | 0.923785322 |         |         |  |
| TLE5      | ENSG00000104964 | -2.8664 | 0.99792     | -1.191      | 0.88318     | -1.1971 | 0.88437 |  |
|           | -1.8453         | 0.9675  | 0.88318     | 0.923786413 |             |         |         |  |
| NA        | ENSG00000261596 | -1.1916 | 0.8833      | -1.1916     | 0.8833      | -1.1916 | 0.8833  |  |
|           | -1.1916         | 0.8833  | 0.8833      | 0.923872269 |             |         |         |  |
| NA        | ENSG00000223678 | -1.1917 | 0.8833      | -1.1917     | 0.8833      | -1.1917 | 0.8833  |  |
|           | -1.1917         | 0.8833  | 0.8833      | 0.923872269 |             |         |         |  |
| NA        | ENSG00000257534 | -1.9883 | 0.97661     | -1.1919     | 0.88335     | -1.9883 | 0.97661 |  |
|           | -1.9883         | 0.97661 | 0.88335     | 0.923885994 |             |         |         |  |
| NA        | ENSG00000256195 | -1.192  | 0.88337     | -1.192      | 0.88337     | -1.192  | 0.88337 |  |

|                |                 |         |            |             |             |         |         |         |
|----------------|-----------------|---------|------------|-------------|-------------|---------|---------|---------|
|                | -1.192          | 0.88337 | 0.88337    | 0.923885994 |             |         |         |         |
| TLE7           | ENSG00000260734 | -1.192  | 0.88337    | -1.192      | 0.88337     | -1.192  | 0.88337 | 0.88337 |
|                | -1.192          | 0.88337 | 0.88337    | 0.923885994 |             |         |         |         |
| NA             | ENSG00000259690 | -1.1924 | 0.88345    | -1.1924     | 0.88345     | -1.1924 | 0.88345 | 0.88345 |
|                | -1.1924         | 0.88345 | 0.88345    | 0.923949833 |             |         |         |         |
| VN1R31P        | ENSG00000236284 | -2.0614 | 0.98037    | -1.668      | 0.95235     | -1.1927 |         |         |
|                | 0.8835          | -1.3157 | 0.90587    | 0.8835      | 0.923982294 |         |         |         |
| LPCAT2BP       | ENSG00000233228 | -1.1929 | 0.88355    | -1.1929     | 0.88355     | -1.2681 |         |         |
|                | 0.89762         | -1.1929 | 0.88355    | 0.88355     | 0.924014754 |         |         |         |
| RPL23P11       | ENSG00000226407 | -1.1935 | 0.88366    | -1.1935     | 0.88366     | -1.1935 |         |         |
|                | 0.88366         | -1.1935 | 0.88366    | 0.88366     | 0.92410996  |         |         |         |
| RNU6-1112P     | ENSG00000200455 | -1.1941 | 0.88379    | -1.1941     | 0.88379     | -1.1941 |         |         |
|                | 0.88379         | -1.1941 | 0.88379    | 0.88379     | 0.924226076 |         |         |         |
| RNA5SP116      | ENSG00000251941 | -1.9513 | 0.97449    | -1.1944     | 0.88385     | -1.9513 |         |         |
|                | 0.97449         | -1.9513 | 0.97449    | 0.88385     | 0.924268986 |         |         |         |
| RNU6-1043P     | ENSG00000222287 | -1.1948 | 0.88392    | -1.1948     | 0.88392     | -1.1948 |         |         |
|                | 0.88392         | -1.1948 | 0.88392    | 0.88392     | 0.92429314  |         |         |         |
| NA             | ENSG00000221683 | -1.1948 | 0.88392    | -1.1948     | 0.88392     | -1.1948 | 0.88392 |         |
|                | -1.1948         | 0.88392 | 0.88392    | 0.92429314  |             |         |         |         |
| CYCSP53        | ENSG00000234333 | -1.1949 | 0.88393    | -1.1949     | 0.88393     | -1.1949 |         |         |
|                | 0.88393         | -1.1949 | 0.88393    | 0.88393     | 0.92429314  |         |         |         |
| LINC02854      | ENSG00000238131 | -1.2348 | 0.89155    | -1.1955     | 0.88405     | -1.2348 |         |         |
|                | 0.89155         | -1.2348 | 0.89155    | 0.88405     | 0.924398783 |         |         |         |
| NA             | ENSG00000267054 | -1.1959 | 0.88412    | -1.1959     | 0.88412     | -1.1959 | 0.88412 |         |
|                | -1.1959         | 0.88412 | 0.88412    | 0.924452141 |             |         |         |         |
| DUOX2          | ENSG00000140279 | -1.1962 | 0.88418    | -1.1962     | 0.88418     | -1.1962 | 0.88418 |         |
|                | -1.1962         | 0.88418 | 0.88418    | 0.924485661 |             |         |         |         |
| TRIM41         | ENSG00000146063 | -1.4365 | 0.92457    | -1.1962     | 0.88419     | -1.4365 |         |         |
|                | 0.92457         | -1.4365 | 0.92457    | 0.88419     | 0.924485661 |         |         |         |
| NA             | ENSG00000251772 | -1.8794 | 0.9699     | -1.1966     | 0.88427     | -1.1966 | 0.88427 |         |
|                | -1.1966         | 0.88427 | 0.88427    | 0.92451302  |             |         |         |         |
| NA             | ENSG00000257275 | -1.25   | 0.89436    | -1.1967     | 0.88429     | -2.0618 | 0.98038 | -1.25   |
|                | 0.89436         | 0.88429 | 0.92451302 |             |             |         |         |         |
| TMOD2          | ENSG00000128872 | -1.478  | 0.9303     | -1.1968     | 0.88431     | -1.4497 | 0.92643 |         |
|                | -1.4047         | 0.91994 | 0.88431    | 0.92451302  |             |         |         |         |
| RN7SKP278      | ENSG00000222436 | -1.1969 | 0.88433    | -1.1969     | 0.88433     | -1.1969 |         |         |
|                | 0.88433         | -1.1969 | 0.88433    | 0.88433     | 0.92451302  |         |         |         |
| NA             | ENSG00000254506 | -1.1969 | 0.88433    | -1.1969     | 0.88433     | -1.1969 | 0.88433 |         |
|                | -1.1969         | 0.88433 | 0.88433    | 0.92451302  |             |         |         |         |
| NA             | ENSG00000270179 | -1.1969 | 0.88433    | -1.1969     | 0.88433     | -1.1969 | 0.88433 |         |
|                | -1.1969         | 0.88433 | 0.88433    | 0.92451302  |             |         |         |         |
| NA             | ENSG00000280024 | -1.1972 | 0.88439    | -1.5624     | 0.9409      | -1.5624 | 0.9409  |         |
|                | -1.5624         | 0.9409  | 0.88439    | 0.924547605 |             |         |         |         |
| KRTCAP3        | ENSG00000157992 | -1.1974 | 0.88442    | -1.1974     | 0.88442     | -1.1974 |         |         |
|                | 0.88442         | -1.1974 | 0.88442    | 0.88442     | 0.924547605 |         |         |         |
| PRRT3          | ENSG00000163704 | -1.1974 | 0.88442    | -1.1974     | 0.88442     | -1.1974 | 0.88442 |         |
|                | -1.1974         | 0.88442 | 0.88442    | 0.924547605 |             |         |         |         |
| NA             | ENSG00000267827 | -1.1976 | 0.88446    | -1.1976     | 0.88446     | -1.1976 | 0.88446 |         |
|                | -1.1976         | 0.88446 | 0.88446    | 0.924560206 |             |         |         |         |
| NA             | ENSG00000228988 | -1.1976 | 0.88447    | -1.1976     | 0.88447     | -1.1976 | 0.88447 |         |
|                | -1.1976         | 0.88447 | 0.88447    | 0.924560206 |             |         |         |         |
| NA             | ENSG00000253811 | -1.1981 | 0.88455    | -1.1981     | 0.88455     | -1.1981 | 0.88455 |         |
|                | -1.1981         | 0.88455 | 0.88455    | 0.924623997 |             |         |         |         |
| NEURL2         | ENSG00000124257 | -1.1983 | 0.8846     | -1.1983     | 0.8846      | -1.1983 |         |         |
|                | 0.8846          | -1.1983 | 0.8846     | 0.8846      | 0.924656428 |         |         |         |
| RPS26P41       | ENSG00000237139 | -1.1986 | 0.88466    | -1.1986     | 0.88466     | -1.1986 |         |         |
|                | 0.88466         | -1.1986 | 0.88466    | 0.88466     | 0.924690998 |         |         |         |
| ELOCP32        | ENSG00000257465 | -1.1987 | 0.88468    | -1.1987     | 0.88468     | -1.1987 |         |         |
|                | 0.88468         | -1.1987 | 0.88468    | 0.88468     | 0.924690998 |         |         |         |
| REP15          | ENSG00000174236 | -1.1987 | 0.88469    | -1.1987     | 0.88469     | -1.1987 | 0.88469 |         |
|                | -1.1987         | 0.88469 | 0.88469    | 0.924690998 |             |         |         |         |
| CRYZL2P-SEC16B | ENSG00000254154 | -2.0369 | 0.97917    | -1.1991     | 0.88476     | -1.9992 |         |         |



|             |                 |         |         |             |             |         |         |         |
|-------------|-----------------|---------|---------|-------------|-------------|---------|---------|---------|
|             | 0.97721         | -1.9992 | 0.97721 | 0.88476     | 0.924724494 |         |         |         |
| NA          | ENSG00000261544 | -1.1991 | 0.88476 | 0.88476     | -1.1991     | 0.88476 | -1.1991 | 0.88476 |
|             | -1.1991         | 0.88476 | 0.88476 | 0.924724494 |             |         |         |         |
| RPS15AP10   | ENSG00000225447 | -1.1995 | 0.88482 | 0.88482     | -1.2384     | 0.89222 | -1.1995 |         |
|             | 0.88482         | -1.1995 | 0.88482 | 0.88482     | 0.924767369 |         |         |         |
| PSME1       | ENSG00000092010 | -1.1998 | 0.88489 | 0.88489     | -1.1998     | 0.88489 | -1.1998 | 0.88489 |
|             | -1.6434         | 0.94985 | 0.88489 | 0.924802157 |             |         |         |         |
| PRH1        | ENSG00000231887 | -1.2    | 0.88493 | 0.88493     | -1.6813     | 0.95365 | -1.6813 | 0.95365 |
|             | -1.6813         | 0.95365 | 0.88493 | 0.924802157 |             |         |         |         |
| RPL23AP77   | ENSG00000267301 | -1.9446 | 0.88493 | 0.88493     | -1.2        | 0.88493 | -1.7709 | 0.96171 |
|             | -1.7709         | 0.96171 | 0.88493 | 0.924802157 |             |         |         |         |
| NA          | ENSG00000260681 | -1.2001 | 0.88495 | 0.88495     | -1.2001     | 0.88495 | -1.2001 | 0.88495 |
|             | -1.2001         | 0.88495 | 0.88495 | 0.924802157 |             |         |         |         |
| MIRLET7E    | ENSG00000198972 | -1.2002 | 0.88497 | 0.88497     | -1.2002     | 0.88497 | -1.2002 |         |
|             | 0.88497         | -1.2002 | 0.88497 | 0.88497     | 0.924802157 |         |         |         |
| MIR99B      | ENSG00000207550 | -1.2002 | 0.88497 | 0.88497     | -1.2002     | 0.88497 | -1.2002 |         |
|             | 0.88497         | -1.2002 | 0.88497 | 0.88497     | 0.924802157 |         |         |         |
| NA          | ENSG00000276570 | -1.2006 | 0.88504 | 0.88504     | -1.2006     | 0.88504 | -1.2006 | 0.88504 |
|             | -1.2006         | 0.88504 | 0.88504 | 0.924802157 |             |         |         |         |
| NA          | ENSG00000269808 | -1.2006 | 0.88504 | 0.88504     | -1.2006     | 0.88504 | -1.2006 | 0.88504 |
|             | -1.2006         | 0.88504 | 0.88504 | 0.924802157 |             |         |         |         |
| CDH23-AS1   | ENSG00000223817 | -1.2389 | 0.88506 | 0.88506     | -1.2006     | 0.88506 | -1.877  |         |
|             | 0.96974         | -1.877  | 0.96974 | 0.88506     | 0.924802157 |         |         |         |
| GATA6-AS1   | ENSG00000266010 | -1.2007 | 0.88506 | 0.88506     | -1.2007     | 0.88506 | -1.2007 |         |
|             | 0.88506         | -1.2007 | 0.88506 | 0.88506     | 0.924802157 |         |         |         |
| KRT8P34     | ENSG00000264663 | -1.2007 | 0.88507 | 0.88507     | -1.2007     | 0.88507 | -1.2007 |         |
|             | 0.88507         | -1.2007 | 0.88507 | 0.88507     | 0.924802157 |         |         |         |
| NA          | ENSG00000270289 | -1.5787 | 0.9428  | 0.88509     | -1.2008     | 0.88509 | -1.2008 | 0.88509 |
|             | -1.2008         | 0.88509 | 0.88509 | 0.924802157 |             |         |         |         |
| NA          | ENSG00000201892 | -1.2009 | 0.8851  | 0.8851      | -1.2009     | 0.8851  | -1.2009 | 0.8851  |
|             | -1.2009         | 0.8851  | 0.8851  | 0.924802157 |             |         |         |         |
| NA          | ENSG00000236028 | -1.201  | 0.88513 | 0.88513     | -1.201      | 0.88513 | -1.201  | 0.88513 |
|             | -1.201          | 0.88513 | 0.88513 | 0.924813673 |             |         |         |         |
| TRBV28      | ENSG00000211753 | -1.2012 | 0.88517 | 0.88517     | -1.2012     | 0.88517 | -1.2012 |         |
|             | 0.88517         | -1.2012 | 0.88517 | 0.88517     | 0.924823279 |         |         |         |
| NA          | ENSG00000224570 | -1.2015 | 0.88521 | 0.88521     | -1.2015     | 0.88521 | -1.2015 | 0.88521 |
|             | -1.2015         | 0.88521 | 0.88521 | 0.924823279 |             |         |         |         |
| SNORD114-27 | ENSG00000200636 | -1.2016 | 0.88524 | 0.88524     | -1.2016     | 0.88524 | -1.2016 |         |
|             | 0.88524         | -1.2016 | 0.88524 | 0.88524     | 0.924823279 |         |         |         |
| LINC02313   | ENSG00000258474 | -1.334  | 0.9089  | 0.88526     | -1.2017     | 0.88526 | -1.334  |         |
|             | 0.9089          | -1.6673 | 0.95227 | 0.88526     | 0.924823279 |         |         |         |
| NA          | ENSG00000258693 | -1.2017 | 0.88526 | 0.88526     | -1.2017     | 0.88526 | -1.2017 | 0.88526 |
|             | -1.2017         | 0.88526 | 0.88526 | 0.924823279 |             |         |         |         |
| NA          | ENSG00000278917 | -1.2018 | 0.88527 | 0.88527     | -1.2018     | 0.88527 | -1.2018 | 0.88527 |
|             | -1.2018         | 0.88527 | 0.88527 | 0.924823279 |             |         |         |         |
| NA          | ENSG00000227979 | -1.2948 | 0.9023  | 0.88529     | -1.2948     | 0.9023  | -1.2948 | 0.9023  |
|             | -1.2019         | 0.88529 | 0.88529 | 0.924823279 |             |         |         |         |
| NA          | ENSG00000239063 | -1.2019 | 0.8853  | 0.8853      | -1.2019     | 0.8853  | -1.2019 | 0.8853  |
|             | -1.2019         | 0.8853  | 0.8853  | 0.924823279 |             |         |         |         |
| NA          | ENSG00000255114 | -1.202  | 0.88531 | 0.88531     | -1.202      | 0.88531 | -1.202  | 0.88531 |
|             | -1.202          | 0.88531 | 0.88531 | 0.924823279 |             |         |         |         |
| BNIP3P25    | ENSG00000268322 | -1.2022 | 0.88535 | 0.88535     | -1.4183     | 0.92194 | -1.2022 |         |
|             | 0.88535         | -1.2022 | 0.88535 | 0.88535     | 0.924845238 |         |         |         |
| LINC02103   | ENSG00000249785 | -1.2023 | 0.88538 | 0.88538     | -1.2023     | 0.88538 | -1.2023 |         |
|             | 0.88538         | -1.2023 | 0.88538 | 0.88538     | 0.92485675  |         |         |         |
| MRE11P1     | ENSG00000242537 | -1.4763 | 0.93007 | 0.88542     | -1.444      | 0.92563 | -1.2025 |         |
|             | 0.88542         | -1.5882 | 0.94388 | 0.88542     | 0.924858883 |         |         |         |
| OVCA2       | ENSG00000262664 | -1.2025 | 0.88542 | 0.88542     | -1.2025     | 0.88542 | -1.2025 | 0.88542 |
|             | -1.2025         | 0.88542 | 0.88542 | 0.924858883 |             |         |         |         |
| FOXE1       | ENSG00000178919 | -1.2028 | 0.88547 | 0.88547     | -1.2304     | 0.89072 | -1.2028 | 0.88547 |
|             | -1.2028         | 0.88547 | 0.88547 | 0.924872526 |             |         |         |         |
| NA          | ENSG00000252777 | -1.2029 | 0.88548 | 0.88548     | -1.2029     | 0.88548 | -1.2029 | 0.88548 |

|           |                 |         |         |             |             |         |         |  |
|-----------|-----------------|---------|---------|-------------|-------------|---------|---------|--|
|           | -1.2029         | 0.88548 | 0.88548 | 0.924872526 |             |         |         |  |
| TRAM2-AS1 | ENSG00000225791 | -1.2029 | 0.88549 | 0.88549     | -1.2029     | 0.88549 | -1.2029 |  |
|           | 0.88549         | -1.2029 | 0.88549 | 0.88549     | 0.924872526 |         |         |  |
| NA        | ENSG00000260256 | -1.2031 | 0.88552 | -1.2031     | 0.88552     | -1.2031 | 0.88552 |  |
|           | -1.2031         | 0.88552 | 0.88552 | 0.924884036 |             |         |         |  |
| RNU7-195P | ENSG00000239151 | -1.368  | 0.91434 | -1.368      | 0.91434     | 0.91434 | -1.368  |  |
|           | 0.91434         | -1.2031 | 0.88554 | 0.88554     | 0.924885102 |         |         |  |
| NA        | ENSG00000275612 | -1.2032 | 0.88556 | -1.2032     | 0.88556     | -1.2032 | 0.88556 |  |
|           | -1.2032         | 0.88556 | 0.88556 | 0.924886167 |             |         |         |  |
| PPIAP36   | ENSG00000236872 | -1.2035 | 0.88561 | -1.2035     | 0.88561     | -1.2035 |         |  |
|           | 0.88561         | -1.2035 | 0.88561 | 0.88561     | 0.924918564 |         |         |  |
| OR3A1     | ENSG00000180090 | -2.1581 | 0.98454 | -1.2038     | 0.88568     | -1.2038 | 0.88568 |  |
|           | -1.2038         | 0.88568 | 0.88568 | 0.924937523 |             |         |         |  |
| SLC35G1   | ENSG00000176273 | -1.6251 | 0.94793 | -1.6194     | 0.94732     | -1.4354 |         |  |
|           | 0.92441         | -1.2041 | 0.88573 | 0.88573     | 0.924937523 |         |         |  |
| RN7SKP230 | ENSG00000202512 | -2.3205 | 0.98984 | -1.7578     | 0.96061     | -1.7578 |         |  |
|           | 0.96061         | -1.2041 | 0.88573 | 0.88573     | 0.924937523 |         |         |  |
| PTGES3P5  | ENSG00000234544 | -1.2042 | 0.88574 | -1.2042     | 0.88574     | -1.2042 |         |  |
|           | 0.88574         | -1.2042 | 0.88574 | 0.88574     | 0.924937523 |         |         |  |
| SUMO2P5   | ENSG00000251663 | -1.2043 | 0.88576 | -1.2043     | 0.88576     | -1.2043 |         |  |
|           | 0.88576         | -1.2043 | 0.88576 | 0.88576     | 0.924937523 |         |         |  |
| OR51B8P   | ENSG00000236359 | -1.2043 | 0.88577 | -1.2043     | 0.88577     | -1.2043 |         |  |
|           | 0.88577         | -1.2043 | 0.88577 | 0.88577     | 0.924937523 |         |         |  |
| MTND2P41  | ENSG00000283131 | -1.2043 | 0.88577 | -1.8463     | 0.96758     | -1.8463 |         |  |
|           | 0.96758         | -1.8463 | 0.96758 | 0.88577     | 0.924937523 |         |         |  |
| NA        | ENSG00000277981 | -1.2044 | 0.88578 | -1.2044     | 0.88578     | -1.2044 | 0.88578 |  |
|           | -1.2044         | 0.88578 | 0.88578 | 0.924937523 |             |         |         |  |
| POU5F1P6  | ENSG00000242551 | -1.2046 | 0.88582 | -1.6905     | 0.95453     | -1.36   | 0.91308 |  |
|           | -1.36           | 0.91308 | 0.88582 | 0.924959471 |             |         |         |  |
| RPS27P16  | ENSG00000225907 | -1.2047 | 0.88585 | -1.2047     | 0.88585     | -1.2047 |         |  |
|           | 0.88585         | -1.2047 | 0.88585 | 0.88585     | 0.924970976 |         |         |  |
| C15orf32  | ENSG00000183643 | -1.2049 | 0.88588 | -1.2049     | 0.88588     | -1.2049 |         |  |
|           | 0.88588         | -1.2049 | 0.88588 | 0.88588     | 0.924982481 |         |         |  |
| PTBP1P    | ENSG00000259078 | -1.5817 | 0.94314 | -1.5817     | 0.94314     | -1.5817 |         |  |
|           | 0.94314         | -1.2052 | 0.88595 | 0.88595     | 0.92503062  |         |         |  |
| NA        | ENSG00000225681 | -1.9275 | 0.97304 | -2.2086     | 0.9864      | -1.2056 | 0.88602 |  |
|           | -2.0909         | 0.98173 | 0.88602 | 0.92503062  |             |         |         |  |
| MAP1B     | ENSG00000131711 | -1.3046 | 0.90399 | -1.2057     | 0.88603     | -1.2203 | 0.88883 |  |
|           | -1.3859         | 0.91711 | 0.88603 | 0.92503062  |             |         |         |  |
| MIR604    | ENSG00000207612 | -1.8124 | 0.96504 | -1.2057     | 0.88604     | -1.2057 |         |  |
|           | 0.88604         | -1.2057 | 0.88604 | 0.88604     | 0.92503062  |         |         |  |
| NA        | ENSG00000235055 | -1.2057 | 0.88604 | -1.2057     | 0.88604     | -1.2057 | 0.88604 |  |
|           | -1.2057         | 0.88604 | 0.88604 | 0.92503062  |             |         |         |  |
| NA        | ENSG00000280107 | -1.2057 | 0.88604 | -1.2057     | 0.88604     | -1.2057 | 0.88604 |  |
|           | -1.2057         | 0.88604 | 0.88604 | 0.92503062  |             |         |         |  |
| ZNF607    | ENSG00000198182 | -1.2058 | 0.88606 | -1.2058     | 0.88606     | -1.2058 |         |  |
|           | 0.88606         | -1.2058 | 0.88606 | 0.88606     | 0.925031682 |         |         |  |
| USP49     | ENSG00000164663 | -1.4304 | 0.9237  | -1.2237     | 0.88946     | -1.3207 | 0.9067  |  |
|           | -1.206          | 0.88609 | 0.88609 | 0.925043183 |             |         |         |  |
| CRELD2    | ENSG00000184164 | -1.2529 | 0.89488 | -1.2065     | 0.88619     | -1.2093 |         |  |
|           | 0.88673         | -1.25   | 0.89435 | 0.88619     | 0.925109002 |         |         |  |
| LINC01626 | ENSG00000223765 | -1.3397 | 0.90983 | -1.2066     | 0.8862      | -1.2066 |         |  |
|           | 0.8862          | -1.9836 | 0.97635 | 0.8862      | 0.925109002 |         |         |  |
| NA        | ENSG00000281538 | -1.2066 | 0.88621 | -1.2066     | 0.88621     | -1.2066 | 0.88621 |  |
|           | -1.2066         | 0.88621 | 0.88621 | 0.925109002 |             |         |         |  |
| MTCO2P32  | ENSG00000248951 | -1.209  | 0.88667 | -1.209      | 0.88667     | -1.2068 |         |  |
|           | 0.88625         | -1.209  | 0.88667 | 0.88625     | 0.92512156  |         |         |  |
| NA        | ENSG00000244716 | -1.2069 | 0.88626 | -1.2069     | 0.88626     | -1.2069 | 0.88626 |  |
|           | -1.2069         | 0.88626 | 0.88626 | 0.92512156  |             |         |         |  |
| NA        | ENSG00000273384 | -1.2074 | 0.88637 | -1.2074     | 0.88637     | -1.2074 | 0.88637 |  |
|           | -1.2074         | 0.88637 | 0.88637 | 0.925216565 |             |         |         |  |
| TBP       | ENSG00000112592 | -1.31   | 0.90491 | -1.3573     | 0.91266     | -1.2082 | 0.88651 |  |

|             |                 |         |         |             |             |         |         |  |
|-------------|-----------------|---------|---------|-------------|-------------|---------|---------|--|
|             | -1.2082         | 0.88651 | 0.88651 | 0.925323058 |             |         |         |  |
| MORF4       | ENSG00000234801 | -1.2082 | 0.88651 | -2.0208     | 0.97835     | -1.6267 | 0.9481  |  |
|             | -1.9742         | 0.97582 | 0.88651 | 0.925323058 |             |         |         |  |
| TGIF1P1     | ENSG00000259339 | -1.3395 | 0.9098  | -1.3395     | 0.9098      | -1.2087 |         |  |
|             | 0.8866          | -1.3395 | 0.9098  | 0.8866      | 0.925387793 |         |         |  |
| NA          | ENSG00000271511 | -1.2087 | 0.88661 | -1.2087     | 0.88661     | -1.2087 | 0.88661 |  |
|             | -1.2087         | 0.88661 | 0.88661 | 0.925387793 |             |         |         |  |
| ZNF891      | ENSG00000214029 | -1.2092 | 0.8867  | -1.2092     | 0.8867      | -1.2092 |         |  |
|             | 0.8867          | -1.2092 | 0.8867  | 0.8867      | 0.925461908 |         |         |  |
| MFS2A       | ENSG00000168389 | -1.2093 | 0.88673 | -1.5695     | 0.94174     | -1.2093 |         |  |
|             | 0.88673         | -1.5231 | 0.93613 | 0.88673     | 0.925473397 |         |         |  |
| RNA5SP370   | ENSG00000199415 | -1.2099 | 0.88685 | -1.2099     | 0.88685     | -1.2099 |         |  |
|             | 0.88685         | -1.2099 | 0.88685 | 0.88685     | 0.92557153  |         |         |  |
| RNU6-1090P  | ENSG00000200935 | -1.2101 | 0.88688 | -1.2101     | 0.88688     | -1.2101 |         |  |
|             | 0.88688         | -1.2101 | 0.88688 | 0.88688     | 0.92557153  |         |         |  |
| FUNDC2P2    | ENSG00000182814 | -1.2102 | 0.8869  | -2.4211     | 0.99226     | -2.4211 |         |  |
|             | 0.99226         | -2.4211 | 0.99226 | 0.8869      | 0.92557153  |         |         |  |
| NA          | ENSG00000279181 | -1.8576 | 0.96839 | -1.3678     | 0.91432     | -1.2102 | 0.8869  |  |
|             | -1.2102         | 0.8869  | 0.8869  | 0.92557153  |             |         |         |  |
| NA          | ENSG00000223505 | -1.2105 | 0.88695 | -1.2105     | 0.88695     | -1.2105 | 0.88695 |  |
|             | -1.2105         | 0.88695 | 0.88695 | 0.925603887 |             |         |         |  |
| BCAM        | ENSG00000187244 | -1.2108 | 0.88701 | -1.2108     | 0.88701     | -1.2108 | 0.88701 |  |
|             | -1.2108         | 0.88701 | 0.88701 | 0.925646679 |             |         |         |  |
| SNORD115-35 | ENSG00000201992 | -1.2111 | 0.88706 | -1.2111     | 0.88706     | -1.2111 | 0.88706 |  |
|             | 0.88706         | -1.2111 | 0.88706 | 0.88706     | 0.925679033 |         |         |  |
| NA          | ENSG00000236466 | -1.2113 | 0.88712 | -1.2113     | 0.88712     | -1.2113 | 0.88712 |  |
|             | -1.2113         | 0.88712 | 0.88712 | 0.925721821 |             |         |         |  |
| ITPKB-AS1   | ENSG00000228548 | -1.2115 | 0.88715 | -1.2115     | 0.88715     | -1.2115 |         |  |
|             | 0.88715         | -1.2115 | 0.88715 | 0.88715     | 0.925733303 |         |         |  |
| NA          | ENSG00000233388 | -1.2116 | 0.88717 | -1.2116     | 0.88717     | -1.2116 | 0.88717 |  |
|             | -1.2116         | 0.88717 | 0.88717 | 0.925734349 |             |         |         |  |
| SNX17       | ENSG00000115234 | -1.4042 | 0.91988 | -1.4042     | 0.91988     | -1.2118 | 0.8872  |  |
|             | -1.3381         | 0.90957 | 0.8872  | 0.92574583  |             |         |         |  |
| NA          | ENSG00000218986 | -1.2119 | 0.88722 | -1.6175     | 0.94712     | -1.2119 | 0.88722 |  |
|             | -1.2119         | 0.88722 | 0.88722 | 0.925746876 |             |         |         |  |
| NA          | ENSG00000278112 | -1.212  | 0.88725 | -1.212      | 0.88725     | -1.212  | 0.88725 |  |
|             | -1.212          | 0.88725 | 0.88725 | 0.925758356 |             |         |         |  |
| NA          | ENSG00000215014 | -1.2122 | 0.88728 | -1.2122     | 0.88728     | -1.2122 | 0.88728 |  |
|             | -1.2122         | 0.88728 | 0.88728 | 0.925769836 |             |         |         |  |
| TRAV21      | ENSG00000211801 | -1.2124 | 0.88732 | -1.2124     | 0.88732     | -1.2124 |         |  |
|             | 0.88732         | -1.2124 | 0.88732 | 0.88732     | 0.925791748 |         |         |  |
| NA          | ENSG00000259672 | -1.7734 | 0.96192 | -1.7662     | 0.96132     | -1.4331 | 0.92409 |  |
|             | -1.2126         | 0.88736 | 0.88736 | 0.92581366  |             |         |         |  |
| CYCS        | ENSG00000172115 | -1.2129 | 0.88741 | -1.2129     | 0.88741     | -1.2129 | 0.88741 |  |
|             | -1.2129         | 0.88741 | 0.88741 | 0.925816793 |             |         |         |  |
| NA          | ENSG00000258133 | -1.2129 | 0.88741 | -1.6274     | 0.94817     | -1.2129 | 0.88741 |  |
|             | -1.2129         | 0.88741 | 0.88741 | 0.925816793 |             |         |         |  |
| NA          | ENSG00000248750 | -1.2129 | 0.88742 | -1.2129     | 0.88742     | -1.2129 | 0.88742 |  |
|             | -1.2129         | 0.88742 | 0.88742 | 0.925816793 |             |         |         |  |
| MTCO3P44    | ENSG00000248654 | -1.2133 | 0.8875  | -1.2133     | 0.8875      | -1.2133 |         |  |
|             | 0.8875          | -1.2133 | 0.8875  | 0.8875      | 0.925880432 |         |         |  |
| SPATA25     | ENSG00000149634 | -1.2135 | 0.88753 | -1.2135     | 0.88753     | -1.2135 |         |  |
|             | 0.88753         | -1.2135 | 0.88753 | 0.88753     | 0.925891908 |         |         |  |
| MIR3168     | ENSG00000264226 | -1.214  | 0.88762 | -1.214      | 0.88762     | -1.5534 |         |  |
|             | 0.93984         | -1.214  | 0.88762 | 0.88762     | 0.925965974 |         |         |  |
| MIR218-2    | ENSG00000207739 | -1.2141 | 0.88764 | -1.2141     | 0.88764     | -1.2141 |         |  |
|             | 0.88764         | -1.2141 | 0.88764 | 0.88764     | 0.925967016 |         |         |  |
| NA          | ENSG00000234327 | -1.2143 | 0.88768 | -1.2143     | 0.88768     | -1.2143 | 0.88768 |  |
|             | -1.2143         | 0.88768 | 0.88768 | 0.92598892  |             |         |         |  |
| PDZRN3-AS1  | ENSG00000239677 | -1.2146 | 0.88774 | -1.2146     | 0.88774     | -1.2146 |         |  |
|             | 0.88774         | -1.2146 | 0.88774 | 0.88774     | 0.926031686 |         |         |  |
| OR51G1      | ENSG00000278870 | -1.6571 | 0.95125 | -1.5752     | 0.94239     | -1.2149 |         |  |

|            |                 |         |         |         |             |         |         |         |
|------------|-----------------|---------|---------|---------|-------------|---------|---------|---------|
|            | 0.88779         | -1.6571 | 0.95125 | 0.88779 | 0.926064019 |         |         |         |
| KLHL7-DT   | ENSG00000230658 | -1.2151 | 0.88784 | 0.88784 | -1.2151     | 0.88784 | -1.2151 |         |
|            | 0.88784         | -1.2151 | 0.88784 | 0.88784 | 0.92609635  |         |         |         |
| NA         | ENSG00000204894 | -1.2154 | 0.8879  | 0.8879  | -1.2154     | 0.8879  | -1.2154 | 0.8879  |
|            | -1.2154         | 0.8879  | 0.8879  | 0.8879  | 0.926099465 |         |         |         |
| SEPTIN7P6  | ENSG00000241007 | -1.2154 | 0.8879  | 0.8879  | -1.2154     | 0.8879  | -1.2154 |         |
|            | 0.8879          | -1.2154 | 0.8879  | 0.8879  | 0.926099465 |         |         |         |
| NA         | ENSG00000270405 | -1.2154 | 0.8879  | 0.8879  | -1.2154     | 0.8879  | -1.2154 | 0.8879  |
|            | -1.2154         | 0.8879  | 0.8879  | 0.8879  | 0.926099465 |         |         |         |
| NA         | ENSG00000269089 | -1.2159 | 0.88799 | 0.88799 | -1.2159     | 0.88799 | -1.2159 | 0.88799 |
|            | -1.2159         | 0.88799 | 0.88799 | 0.88799 | 0.926173513 |         |         |         |
| RPS6P2     | ENSG00000231541 | -2.1968 | 0.98598 | 0.98598 | -2.1968     | 0.98598 | -1.3161 |         |
|            | 0.90593         | -1.2165 | 0.88809 | 0.88809 | 0.926249628 |         |         |         |
| RN7SL693P  | ENSG00000265272 | -1.2165 | 0.88811 | 0.88811 | -1.2165     | 0.88811 | -1.2165 |         |
|            | 0.88811         | -1.2165 | 0.88811 | 0.88811 | 0.926249628 |         |         |         |
| NA         | ENSG00000269758 | -1.2166 | 0.88812 | 0.88812 | -1.2166     | 0.88812 | -1.2166 | 0.88812 |
|            | -1.2166         | 0.88812 | 0.88812 | 0.88812 | 0.926249628 |         |         |         |
| CDRT7      | ENSG00000259944 | -1.9423 | 0.97395 | 0.97395 | -1.2167     | 0.88814 | -1.2167 | 0.88814 |
|            | -1.2167         | 0.88814 | 0.88814 | 0.88814 | 0.926250662 |         |         |         |
| NA         | ENSG00000272861 | -1.438  | 0.92479 | 0.92479 | -1.2169     | 0.88818 | -1.438  | 0.92479 |
|            | -1.438          | 0.92479 | 0.88818 | 0.88818 | 0.926272555 |         |         |         |
| UFD1       | ENSG00000070010 | -1.2175 | 0.8883  | 0.8883  | -1.2175     | 0.8883  | -1.7332 | 0.95847 |
|            | -1.5011         | 0.93333 | 0.8883  | 0.8883  | 0.926358051 |         |         |         |
| NA         | ENSG00000270240 | -1.2176 | 0.8883  | 0.8883  | -1.4162     | 0.92165 | -1.4162 | 0.92165 |
|            | -1.4162         | 0.92165 | 0.8883  | 0.8883  | 0.926358051 |         |         |         |
| NA         | ENSG00000259316 | -1.2177 | 0.88832 | 0.88832 | -1.2177     | 0.88832 | -1.2177 | 0.88832 |
|            | -1.2177         | 0.88832 | 0.88832 | 0.88832 | 0.926359083 |         |         |         |
| NA         | ENSG00000256732 | -1.5676 | 0.94151 | 0.94151 | -1.2178     | 0.88836 | -1.2178 | 0.88836 |
|            | -1.6925         | 0.95473 | 0.88836 | 0.88836 | 0.926380972 |         |         |         |
| FABP5P14   | ENSG00000234588 | -1.2182 | 0.88842 | 0.88842 | -1.2182     | 0.88842 | -1.2182 |         |
|            | 0.88842         | -1.2182 | 0.88842 | 0.88842 | 0.92640389  |         |         |         |
| OR4A6P     | ENSG00000255078 | -1.2319 | 0.891   | 0.891   | -1.2933     | 0.90204 | -1.2182 | 0.88842 |
|            | -1.2892         | 0.90133 | 0.88842 | 0.88842 | 0.92640389  |         |         |         |
| RPL12P44   | ENSG00000227123 | -1.2183 | 0.88845 | 0.88845 | -1.2183     | 0.88845 | -1.2183 |         |
|            | 0.88845         | -1.2183 | 0.88845 | 0.88845 | 0.926415349 |         |         |         |
| TRAV1-2    | ENSG00000256553 | -1.2187 | 0.88853 | 0.88853 | -1.2187     | 0.88853 | -1.2187 |         |
|            | 0.88853         | -1.2187 | 0.88853 | 0.88853 | 0.926478943 |         |         |         |
| NA         | ENSG00000228650 | -1.2599 | 0.89615 | 0.89615 | -1.2191     | 0.88859 | -1.2599 | 0.89615 |
|            | -1.2599         | 0.89615 | 0.88859 | 0.88859 | 0.92652168  |         |         |         |
| NA         | ENSG00000236919 | -1.9467 | 0.97421 | 0.97421 | -2.2179     | 0.98672 | -1.2198 | 0.88873 |
|            | -1.5367         | 0.93781 | 0.88873 | 0.88873 | 0.926647828 |         |         |         |
| HIBCH      | ENSG00000198130 | -1.2203 | 0.88883 | 0.88883 | -2.4012     | 0.99183 | -1.4566 | 0.92738 |
|            | -1.7156         | 0.95688 | 0.88883 | 0.88883 | 0.926732266 |         |         |         |
| NA         | ENSG00000268392 | -1.2205 | 0.88887 | 0.88887 | -1.2205     | 0.88887 | -1.2205 | 0.88887 |
|            | -1.2205         | 0.88887 | 0.88887 | 0.88887 | 0.926736362 |         |         |         |
| NA         | ENSG00000230001 | -1.2206 | 0.88889 | 0.88889 | -1.2206     | 0.88889 | -1.2206 | 0.88889 |
|            | -1.2206         | 0.88889 | 0.88889 | 0.88889 | 0.926736362 |         |         |         |
| VN1R2      | ENSG00000196131 | -1.2208 | 0.88891 | 0.88891 | -1.2208     | 0.88891 | -1.2208 | 0.88891 |
|            | -1.2208         | 0.88891 | 0.88891 | 0.88891 | 0.926736362 |         |         |         |
| PLSCR5-AS1 | ENSG00000241457 | -1.2208 | 0.88891 | 0.88891 | -1.2208     | 0.88891 | -1.2208 |         |
|            | 0.88891         | -1.2208 | 0.88891 | 0.88891 | 0.926736362 |         |         |         |
| NA         | ENSG00000224376 | -1.3256 | 0.90751 | 0.90751 | -2.1202     | 0.983   | -1.3845 | 0.9169  |
|            | -1.2209         | 0.88893 | 0.88893 | 0.88893 | 0.926737386 |         |         |         |
| PGBD4P8    | ENSG00000229332 | -1.3598 | 0.91306 | 0.91306 | -1.3598     | 0.91306 | -1.2211 |         |
|            | 0.88898         | -1.3598 | 0.91306 | 0.88898 | 0.926769685 |         |         |         |
| KRT33A     | ENSG00000006059 | -1.2215 | 0.88906 | 0.88906 | -1.2215     | 0.88906 | -1.2215 |         |
|            | 0.88906         | -1.2215 | 0.88906 | 0.88906 | 0.926833258 |         |         |         |
| NA         | ENSG00000282199 | -1.2219 | 0.88913 | 0.88913 | -1.2219     | 0.88913 | -1.2219 | 0.88913 |
|            | -1.2219         | 0.88913 | 0.88913 | 0.88913 | 0.926886403 |         |         |         |
| NA         | ENSG00000259436 | -1.222  | 0.88915 | 0.88915 | -1.222      | 0.88915 | -1.741  | 0.95916 |
|            | -1.222          | 0.88915 | 0.88915 | 0.88915 | 0.926887206 |         |         |         |
| RNF146     | ENSG00000118518 | -1.2222 | 0.88919 | 0.88919 | -1.2222     | 0.88919 | -1.2222 |         |

|           |                 |         |             |         |             |             |         |         |
|-----------|-----------------|---------|-------------|---------|-------------|-------------|---------|---------|
|           | 0.88919         | -1.2222 | 0.88919     | 0.88919 | 0.926887206 |             |         |         |
| NA        | ENSG00000238224 | -1.2224 | 0.88922     | 0.88922 | -1.7634     | 0.96109     | -1.2224 | 0.88922 |
|           |                 | -1.2224 | 0.88922     | 0.88922 | 0.926887206 |             |         |         |
| OR5J7P    | ENSG00000255217 | -1.2224 | 0.88922     | 0.88922 | -1.2224     | 0.88922     | -1.2224 |         |
|           |                 | 0.88922 | -1.2224     | 0.88922 | 0.88922     | 0.926887206 |         |         |
| KCNV1     | ENSG00000164794 | -1.4415 | 0.92528     | 0.92528 | -1.3752     | 0.91547     | -2.0394 | 0.9793  |
|           |                 | -1.2227 | 0.88927     | 0.88927 | 0.926887206 |             |         |         |
| GNG2      | ENSG00000186469 | -1.2227 | 0.88927     | 0.88927 | -1.2227     | 0.88927     | -1.8948 | 0.97094 |
|           |                 | -1.2359 | 0.89175     | 0.88927 | 0.926887206 |             |         |         |
| RNU4-49P  | ENSG00000251889 | -1.2227 | 0.88928     | 0.88928 | -1.2227     | 0.88928     | -1.2227 |         |
|           |                 | 0.88928 | -1.2227     | 0.88928 | 0.88928     | 0.926887206 |         |         |
| CADPS     | ENSG00000163618 | -1.4463 | 0.92596     | 0.92596 | -1.6039     | 0.94564     | -1.223  | 0.88933 |
|           |                 | -1.387  | 0.91727     | 0.88933 | 0.926887206 |             |         |         |
| RPS3AP20  | ENSG00000213757 | -1.223  | 0.88933     | 0.88933 | -1.223      | 0.88933     | -1.223  |         |
|           |                 | 0.88933 | -1.223      | 0.88933 | 0.88933     | 0.926887206 |         |         |
| IGFL1     | ENSG00000188293 | -1.6782 | 0.95334     | 0.95334 | -1.6782     | 0.95334     | -1.6782 | 0.95334 |
|           |                 | -1.223  | 0.88934     | 0.88934 | 0.926887206 |             |         |         |
| NA        | ENSG00000255847 | -1.223  | 0.88934     | 0.88934 | -1.223      | 0.88934     | -1.223  | 0.88934 |
|           |                 | -1.223  | 0.88934     | 0.88934 | 0.926887206 |             |         |         |
| DNAH8     | ENSG00000124721 | -1.2232 | 0.88938     | 0.88938 | -1.8687     | 0.96917     | -1.8098 | 0.96484 |
|           |                 | -1.4989 | 0.93306     | 0.88938 | 0.92690907  |             |         |         |
| RPS28P4   | ENSG00000237039 | -1.2238 | 0.88949     | 0.88949 | -2.2703     | 0.9884      | -1.2238 |         |
|           |                 | 0.88949 | -1.2238     | 0.88949 | 0.88949     | 0.927003886 |         |         |
| IGBP1P3   | ENSG00000231552 | -1.3581 | 0.91278     | 0.91278 | -1.4148     | 0.92143     | -1.2247 |         |
|           |                 | 0.88966 | -1.2419     | 0.89286 | 0.88966     | 0.927161227 |         |         |
| NA        | ENSG00000273004 | -1.2251 | 0.88973     | 0.88973 | -1.2251     | 0.88973     | -1.2251 | 0.88973 |
|           |                 | -1.2251 | 0.88973     | 0.88973 | 0.927214348 |             |         |         |
| NA        | ENSG00000228606 | -1.2252 | 0.88975     | 0.88975 | -1.2252     | 0.88975     | -1.2252 | 0.88975 |
|           |                 | -1.2252 | 0.88975     | 0.88975 | 0.927215361 |             |         |         |
| NA        | ENSG00000280162 | -1.2253 | 0.88977     | 0.88977 | -1.2253     | 0.88977     | -1.2253 | 0.88977 |
|           |                 | -1.2253 | 0.88977     | 0.88977 | 0.927216374 |             |         |         |
| SOX5      | ENSG00000134532 | -1.2384 | 0.89221     | 0.89221 | -1.2608     | 0.89631     | -1.3458 | 0.91081 |
|           |                 | -1.2256 | 0.88982     | 0.88982 | 0.92724865  |             |         |         |
| NA        | ENSG00000261774 | -1.226  | 0.8899      | 0.8899  | -1.226      | 0.8899      | -1.226  | 0.8899  |
|           |                 | -1.226  | 0.8899      | 0.8899  | 0.927312185 |             |         |         |
| NA        | ENSG00000200834 | -1.2263 | 0.88995     | 0.88995 | -1.2263     | 0.88995     | -1.2634 | 0.89677 |
|           |                 | -1.2263 | 0.88995     | 0.88995 | 0.927344456 |             |         |         |
| NA        | ENSG00000228132 | -1.2265 | 0.89        | 0.89    | -1.2265     | 0.89        | -1.2265 | 0.89    |
|           |                 | 0.89    | 0.927376727 |         |             |             |         |         |
| MIR548E   | ENSG00000221214 | -1.227  | 0.89009     | 0.89009 | -1.227      | 0.89009     | -1.227  |         |
|           |                 | 0.89009 | -1.227      | 0.89009 | 0.89009     | 0.927450675 |         |         |
| NA        | ENSG00000282034 | -1.2273 | 0.89014     | 0.89014 | -1.2273     | 0.89014     | -1.2273 | 0.89014 |
|           |                 | -1.2273 | 0.89014     | 0.89014 | 0.927482941 |             |         |         |
| NA        | ENSG00000228843 | -1.2278 | 0.89023     | 0.89023 | -1.2278     | 0.89023     | -1.2278 | 0.89023 |
|           |                 | -1.2278 | 0.89023     | 0.89023 | 0.927548477 |             |         |         |
| NA        | ENSG00000232350 | -1.2279 | 0.89026     | 0.89026 | -1.2279     | 0.89026     | -1.2279 | 0.89026 |
|           |                 | -1.2279 | 0.89026     | 0.89026 | 0.927548477 |             |         |         |
| MIR4670   | ENSG00000264158 | -1.2279 | 0.89026     | 0.89026 | -1.2279     | 0.89026     | -1.2279 |         |
|           |                 | 0.89026 | -1.2279     | 0.89026 | 0.89026     | 0.927548477 |         |         |
| NA        | ENSG00000283255 | -1.2286 | 0.89039     | 0.89039 | -1.2286     | 0.89039     | -1.2286 | 0.89039 |
|           |                 | -1.2286 | 0.89039     | 0.89039 | 0.927664087 |             |         |         |
| NA        | ENSG00000265451 | -1.2288 | 0.89043     | 0.89043 | -1.2873     | 0.901       | -1.2853 | 0.90066 |
|           |                 | -1.2853 | 0.90066     | 0.89043 | 0.927685928 |             |         |         |
| NUTM1     | ENSG00000184507 | -1.2296 | 0.89058     | 0.89058 | -1.2296     | 0.89058     | -1.3933 | 0.91823 |
|           |                 | -1.3933 | 0.91823     | 0.89058 | 0.927802531 |             |         |         |
| RNU6-41P  | ENSG00000207472 | -1.2296 | 0.89058     | 0.89058 | -1.2296     | 0.89058     | -1.2296 |         |
|           |                 | 0.89058 | -1.2296     | 0.89058 | 0.89058     | 0.927802531 |         |         |
| RPL12P34  | ENSG00000229824 | -1.3807 | 0.91632     | 0.91632 | -1.3807     | 0.91632     | -1.3807 |         |
|           |                 | 0.91632 | -1.2306     | 0.89076 | 0.89076     | 0.927970215 |         |         |
| DCTN1-AS1 | ENSG00000237737 | -1.2307 | 0.89079     | 0.89079 | -1.2307     | 0.89079     | -1.2307 |         |
|           |                 | 0.89079 | -1.2307     | 0.89079 | 0.89079     | 0.92798163  |         |         |
| PDC-AS1   | ENSG00000229739 | -1.231  | 0.89083     | 0.89083 | -1.231      | 0.89083     | -1.231  |         |

|             |                 |         |         |             |             |         |         |         |
|-------------|-----------------|---------|---------|-------------|-------------|---------|---------|---------|
|             | 0.89083         | -1.231  | 0.89083 | 0.89083     | 0.928003461 |         |         |         |
| NA          | ENSG00000213016 | -1.3558 | 0.91242 | -1.2311     | 0.89086     | -1.2311 | 0.89086 |         |
|             | -1.2311         | 0.89086 | 0.89086 | 0.928014874 |             |         |         |         |
| NA          | ENSG00000234134 | -1.2313 | 0.8909  | -1.2313     | 0.8909      | -1.2313 | 0.8909  |         |
|             | -1.2313         | 0.8909  | 0.8909  | 0.928028278 |             |         |         |         |
| CNN2P9      | ENSG00000213149 | -1.4401 | 0.92508 | -1.3824     | 0.91658     | -1.4401 |         |         |
|             | 0.92508         | -1.2315 | 0.89093 | 0.89093     | 0.928028278 |         |         |         |
| NA          | ENSG00000278952 | -1.2315 | 0.89093 | -1.2315     | 0.89093     | -1.2315 | 0.89093 |         |
|             | -1.2315         | 0.89093 | 0.89093 | 0.928028278 |             |         |         |         |
| NA          | ENSG00000225811 | -2.3713 | 0.99114 | -1.3988     | 0.91906     | -1.232  | 0.89102 |         |
|             | -1.232          | 0.89102 | 0.89102 | 0.928092765 |             |         |         |         |
| NA          | ENSG00000276814 | -1.232  | 0.89103 | -1.232      | 0.89103     | -1.232  | 0.89103 |         |
|             | -1.232          | 0.89103 | 0.89103 | 0.928092765 |             |         |         |         |
| MIR449B     | ENSG00000207728 | -1.2323 | 0.89108 | -1.2323     | 0.89108     | -1.2323 |         |         |
|             | 0.89108         | -1.2323 | 0.89108 | 0.89108     | 0.928115584 |         |         |         |
| OR52U1P     | ENSG00000232381 | -1.2324 | 0.89109 | -1.2324     | 0.89109     | -1.2324 |         |         |
|             | 0.89109         | -1.2324 | 0.89109 | 0.89109     | 0.928115584 |         |         |         |
| TSC22D1-AS1 | ENSG00000278156 | -1.2326 | 0.89114 | -1.2326     | 0.89114     | -1.2326 | 0.89114 | -1.2326 |
|             | 0.89114         | -1.2326 | 0.89114 | 0.89114     | 0.928139394 |         |         |         |
| NA          | ENSG00000215380 | -1.2327 | 0.89116 | -1.2327     | 0.89116     | -1.2327 | 0.89116 |         |
|             | -1.2327         | 0.89116 | 0.89116 | 0.928139394 |             |         |         |         |
| NA          | ENSG00000207117 | -1.2328 | 0.89117 | -1.2328     | 0.89117     | -1.2328 | 0.89117 |         |
|             | -1.2328         | 0.89117 | 0.89117 | 0.928139394 |             |         |         |         |
| MIR4653     | ENSG00000264425 | -1.2329 | 0.8912  | -1.2329     | 0.8912      | -1.2329 |         |         |
|             | 0.8912          | -1.2329 | 0.8912  | 0.8912      | 0.928150801 |         |         |         |
| RNU7-49P    | ENSG00000251991 | -1.2332 | 0.89125 | -1.2332     | 0.89125     | -1.2332 |         |         |
|             | 0.89125         | -1.2332 | 0.89125 | 0.89125     | 0.928165186 |         |         |         |
| ZNF602P     | ENSG00000219392 | -1.7247 | 0.95771 | -1.8058     | 0.96453     | -1.5887 |         |         |
|             | 0.94394         | -1.2333 | 0.89127 | 0.89127     | 0.928165186 |         |         |         |
| NA          | ENSG00000235267 | -1.2334 | 0.89128 | -1.2334     | 0.89128     | -1.2334 | 0.89128 |         |
|             | -1.2334         | 0.89128 | 0.89128 | 0.928165186 |             |         |         |         |
| SLC16A4     | ENSG00000168679 | -1.6492 | 0.95044 | -1.2334     | 0.89129     | -1.3566 |         |         |
|             | 0.91255         | -1.3566 | 0.91255 | 0.89129     | 0.928165186 |         |         |         |
| RNU1-63P    | ENSG00000206629 | -1.2335 | 0.89131 | -1.2335     | 0.89131     | -1.2335 |         |         |
|             | 0.89131         | -1.2335 | 0.89131 | 0.89131     | 0.928166178 |         |         |         |
| NA          | ENSG00000272923 | -1.234  | 0.89139 | -1.234      | 0.89139     | -1.234  | 0.89139 |         |
|             | -1.234          | 0.89139 | 0.89139 | 0.92822965  |             |         |         |         |
| MTCYBP43    | ENSG00000250624 | -1.234  | 0.89141 | -1.234      | 0.89141     | -1.234  |         |         |
|             | 0.89141         | -1.234  | 0.89141 | 0.89141     | 0.928230641 |         |         |         |
| RNU6-94P    | ENSG00000271819 | -1.2346 | 0.89152 | -1.2346     | 0.89152     | -1.2346 |         |         |
|             | 0.89152         | -1.2346 | 0.89152 | 0.89152     | 0.928325347 |         |         |         |
| TMEM208     | ENSG00000168701 | -1.235  | 0.89159 | -1.235      | 0.89159     | -1.235  |         |         |
|             | 0.89159         | -1.235  | 0.89159 | 0.89159     | 0.92835955  |         |         |         |
| AP3S1       | ENSG00000177879 | -1.2351 | 0.8916  | -1.2351     | 0.8916      | -1.2351 | 0.8916  |         |
|             | -1.2351         | 0.8916  | 0.8916  | 0.92835955  |             |         |         |         |
| NA          | ENSG00000235743 | -1.3992 | 0.91912 | -1.3992     | 0.91912     | -1.4463 | 0.92595 |         |
|             | -1.2351         | 0.89161 | 0.89161 | 0.92835955  |             |         |         |         |
| HAX1        | ENSG00000143575 | -1.2353 | 0.89164 | -1.2353     | 0.89164     | -1.2353 | 0.89164 |         |
|             | -1.2353         | 0.89164 | 0.89164 | 0.928361526 |             |         |         |         |
| ERVV-1      | ENSG00000269526 | -1.2353 | 0.89165 | -1.2353     | 0.89165     | -1.2353 |         |         |
|             | 0.89165         | -1.2353 | 0.89165 | 0.89165     | 0.928361526 |         |         |         |
| NA          | ENSG00000253576 | -1.2354 | 0.89167 | -1.2354     | 0.89167     | -1.2354 | 0.89167 |         |
|             | -1.2354         | 0.89167 | 0.89167 | 0.928362514 |             |         |         |         |
| C20orf173   | ENSG00000125975 | -1.2357 | 0.89172 | -1.2357     | 0.89172     | -1.2357 |         |         |
|             | 0.89172         | -1.2357 | 0.89172 | 0.89172     | 0.928365477 |         |         |         |
| ST13P10     | ENSG00000213234 | -1.2357 | 0.89172 | -1.2357     | 0.89172     | -1.2357 |         |         |
|             | 0.89172         | -1.2357 | 0.89172 | 0.89172     | 0.928365477 |         |         |         |
| CALR4P      | ENSG00000227742 | -1.2358 | 0.89173 | -1.2358     | 0.89173     | -1.2358 |         |         |
|             | 0.89173         | -1.6169 | 0.94705 | 0.89173     | 0.928365477 |         |         |         |
| LINC02671   | ENSG00000224714 | -1.3937 | 0.9183  | -1.3937     | 0.9183      | -1.4208 |         |         |
|             | 0.92231         | -1.2359 | 0.89175 | 0.89175     | 0.928366465 |         |         |         |
| NAPEPLD     | ENSG00000161048 | -1.2364 | 0.89184 | -1.3742     | 0.91532     | -1.2364 |         |         |

|            |                 |         |         |         |             |             |         |         |
|------------|-----------------|---------|---------|---------|-------------|-------------|---------|---------|
|            | 0.89184         | -1.3504 | 0.91156 | 0.89184 | 0.9283828   |             |         |         |
| NA         | ENSG00000271779 | -1.2364 | 0.89184 | 0.89184 | -1.2364     | 0.89184     | -1.2364 | 0.89184 |
|            |                 | -1.2364 | 0.89184 | 0.89184 | 0.9283828   |             |         |         |
| PARD6A     | ENSG00000102981 | -1.2364 | 0.89185 | 0.89185 | -1.2364     | 0.89185     | -1.2364 |         |
|            |                 | 0.89185 | -1.2364 | 0.89185 | 0.9283828   |             |         |         |
| NA         | ENSG00000234071 | -1.2365 | 0.89187 | 0.89187 | -1.2365     | 0.89187     | -1.2365 | 0.89187 |
|            |                 | -1.2365 | 0.89187 | 0.89187 | 0.9283828   |             |         |         |
| HBA1       | ENSG00000206172 | -1.2366 | 0.89188 | 0.89188 | -1.2366     | 0.89188     | -1.2366 | 0.89188 |
|            |                 | -1.2366 | 0.89188 | 0.89188 | 0.9283828   |             |         |         |
| NA         | ENSG00000248362 | -1.2366 | 0.89188 | 0.89188 | -1.2366     | 0.89188     | -1.2366 | 0.89188 |
|            |                 | -1.2366 | 0.89188 | 0.89188 | 0.9283828   |             |         |         |
| NA         | ENSG00000272033 | -1.2367 | 0.8919  | 0.8919  | -1.2367     | 0.8919      | -1.2367 | 0.8919  |
|            |                 | -1.2367 | 0.8919  | 0.8919  | 0.928383787 |             |         |         |
| CDC20      | ENSG00000117399 | -1.237  | 0.89195 | 0.89195 | -1.237      | 0.89195     | -1.237  | 0.89195 |
|            |                 | -1.237  | 0.89195 | 0.89195 | 0.928416001 |             |         |         |
| LINC00353  | ENSG00000236176 | -1.2378 | 0.8921  | 0.8921  | -1.2378     | 0.8921      | -1.2378 |         |
|            |                 | 0.8921  | -1.2378 | 0.8921  | 0.928532466 |             |         |         |
| NA         | ENSG00000272555 | -1.2378 | 0.8921  | 0.8921  | -1.2378     | 0.8921      | -1.2378 | 0.8921  |
|            |                 | -1.2378 | 0.8921  | 0.8921  | 0.928532466 |             |         |         |
| LINC02545  | ENSG00000254930 | -1.2386 | 0.89225 | 0.89225 | -1.2386     | 0.89225     | -1.2386 |         |
|            |                 | 0.89225 | -1.2386 | 0.89225 | 0.928668756 |             |         |         |
| GRIN3A     | ENSG00000198785 | -1.2387 | 0.89228 | 0.89228 | -1.2387     | 0.89228     | -1.2387 |         |
|            |                 | 0.89228 | -1.2387 | 0.89228 | 0.928680145 |             |         |         |
| MED8-AS1   | ENSG00000229431 | -1.2391 | 0.89234 | 0.89234 | -1.2391     | 0.89234     | -1.2391 |         |
|            |                 | 0.89234 | -1.2391 | 0.89234 | 0.928722757 |             |         |         |
| IGHV7-56   | ENSG00000253131 | -1.2394 | 0.89239 | 0.89239 | -1.2394     | 0.89239     | -1.2394 |         |
|            |                 | 0.89239 | -1.2394 | 0.89239 | 0.928745531 |             |         |         |
| CENPM      | ENSG00000100162 | -1.3911 | 0.9179  | 0.9179  | -1.3349     | 0.90905     | -1.2394 | 0.8924  |
|            |                 | -1.4131 | 0.92118 | 0.8924  | 0.928745531 |             |         |         |
| NA         | ENSG00000200677 | -1.2399 | 0.8925  | 0.8925  | -1.2399     | 0.8925      | -1.2399 | 0.8925  |
|            |                 | -1.2399 | 0.8925  | 0.8925  | 0.928829767 |             |         |         |
| SMIM10L1   | ENSG00000256537 | -1.2401 | 0.89252 | 0.89252 | -1.2401     | 0.89252     | -1.2401 |         |
|            |                 | 0.89252 | -1.2401 | 0.89252 | 0.928830744 |             |         |         |
| NA         | ENSG00000223652 | -1.4098 | 0.92071 | 0.92071 | -1.2402     | 0.89256     | -1.4098 | 0.92071 |
|            |                 | -1.4098 | 0.92071 | 0.89256 | 0.928852535 |             |         |         |
| BTF3       | ENSG00000145741 | -1.2404 | 0.89259 | 0.89259 | -1.2404     | 0.89259     | -1.2404 | 0.89259 |
|            |                 | -1.2404 | 0.89259 | 0.89259 | 0.928854489 |             |         |         |
| NA         | ENSG00000279147 | -1.2405 | 0.8926  | 0.8926  | -1.2405     | 0.8926      | -1.2405 | 0.8926  |
|            |                 | -1.2405 | 0.8926  | 0.8926  | 0.928854489 |             |         |         |
| MAP4K4     | ENSG00000071054 | -1.8922 | 0.97077 | 0.97077 | -1.2799     | 0.8997      | -1.2408 |         |
|            |                 | 0.89267 | -1.2795 | 0.89964 | 0.89267     | 0.928907495 |         |         |
| LAPTM4A-DT | ENSG00000223734 | -1.2412 | 0.89273 | 0.89273 | -1.2412     | 0.89273     | -1.2412 |         |
|            |                 | 0.89273 | -1.2412 | 0.89273 | 0.928930258 |             |         |         |
| NA         | ENSG00000259241 | -1.2412 | 0.89273 | 0.89273 | -1.2412     | 0.89273     | -1.2412 | 0.89273 |
|            |                 | -1.2412 | 0.89273 | 0.89273 | 0.928930258 |             |         |         |
| MIR4323    | ENSG00000266226 | -1.2416 | 0.89281 | 0.89281 | -1.2416     | 0.89281     | -1.2416 |         |
|            |                 | 0.89281 | -1.2416 | 0.89281 | 0.928946512 |             |         |         |
| RNU6-910P  | ENSG00000212146 | -1.2417 | 0.89282 | 0.89282 | -1.2417     | 0.89282     | -1.2417 |         |
|            |                 | 0.89282 | -1.2417 | 0.89282 | 0.928946512 |             |         |         |
| NA         | ENSG00000265487 | -1.2417 | 0.89283 | 0.89283 | -1.2417     | 0.89283     | -1.2417 | 0.89283 |
|            |                 | -1.2417 | 0.89283 | 0.89283 | 0.928946512 |             |         |         |
| NA         | ENSG00000242198 | -1.2419 | 0.89285 | 0.89285 | -1.2419     | 0.89285     | -1.2419 | 0.89285 |
|            |                 | -1.2419 | 0.89285 | 0.89285 | 0.928946512 |             |         |         |
| FILIP1L    | ENSG00000168386 | -1.3222 | 0.90695 | 0.90695 | -1.2419     | 0.89286     | -1.5278 |         |
|            |                 | 0.93673 | -1.3425 | 0.91029 | 0.89286     | 0.928946512 |         |         |
| NA         | ENSG00000278255 | -1.5007 | 0.93329 | 0.93329 | -1.2419     | 0.89286     | -1.5007 | 0.93329 |
|            |                 | -1.5007 | 0.93329 | 0.89286 | 0.928946512 |             |         |         |
| NA         | ENSG00000279991 | -1.242  | 0.89288 | 0.89288 | -1.242      | 0.89288     | -1.242  | 0.89288 |
|            |                 | -1.242  | 0.89288 | 0.89288 | 0.928947487 |             |         |         |
| H3C10      | ENSG00000278828 | -1.2422 | 0.89292 | 0.89292 | -1.2422     | 0.89292     | -1.2422 | 0.89292 |
|            |                 | -1.2422 | 0.89292 | 0.89292 | 0.928969269 |             |         |         |
| NA         | ENSG00000231104 | -1.2425 | 0.89297 | 0.89297 | -1.2425     | 0.89297     | -1.2425 | 0.89297 |

|           |                 |             |             |             |             |             |             |
|-----------|-----------------|-------------|-------------|-------------|-------------|-------------|-------------|
|           | -1.2425         | 0.89297     | 0.89297     | 0.929001454 |             |             |             |
| RPS10P14  | ENSG00000213744 | -1.8568     | 0.96833     | -1.2429     | 0.89304     | -1.2429     |             |
|           | 0.89304         | -1.8568     | 0.96833     | 0.89304     | 0.929026153 |             |             |
| NA        | ENSG00000227386 | -1.2429     | 0.89305     | -1.6565     | 0.95119     | -1.3482     | 0.9112      |
|           | -1.7351         | 0.95864     | 0.89305     | 0.929026153 |             |             |             |
| NA        | ENSG00000234982 | -1.243      | 0.89306     | -1.243      | 0.89306     | -1.243      | 0.89306     |
|           | -1.243          | 0.89306     | 0.89306     | 0.929026153 |             |             |             |
| NA        | ENSG00000224218 | -1.5111     | 0.93462     | -1.5111     | 0.93462     | -1.243      | 0.89307     |
|           | -1.5111         | 0.93462     | 0.89307     | 0.929026153 |             |             |             |
| RPL21P40  | ENSG00000235670 | -1.2437     | 0.89319     | -1.2437     | 0.89319     | -1.2437     |             |
|           | 0.89319         | -1.45092647 | 0.89319     | 0.92913115  |             |             |             |
| RPL37A    | ENSG00000197756 | -1.6075     | 0.94603     | -1.282      | 0.90008     | -1.2438     |             |
|           | 0.89322         | -1.3521     | 0.91182     | 0.89322     | 0.929142522 |             |             |
| NA        | ENSG00000258837 | -1.244      | 0.89326     | -1.244      | 0.89326     | -2.0226     | 0.97844     |
|           | -1.244          | 0.89326     | 0.89326     | 0.929164297 |             |             |             |
| NA        | ENSG00000237234 | -1.2442     | 0.89329     | -1.2442     | 0.89329     | -1.2442     | 0.89329     |
|           | -1.2442         | 0.89329     | 0.89329     | 0.929175668 |             |             |             |
| NA        | ENSG00000276182 | -1.2446     | 0.89336     | -1.2446     | 0.89336     | -1.2446     | 0.89336     |
|           | -1.2446         | 0.89336     | 0.89336     | 0.929228645 |             |             |             |
| NA        | ENSG00000266998 | -1.2448     | 0.8934      | -1.2448     | 0.8934      | -1.2448     | 0.8934      |
|           | -1.2448         | 0.8934      | 0.8934      | 0.929250416 |             |             |             |
| NA        | ENSG00000270972 | -1.2451     | 0.89345     | -1.2451     | 0.89345     | -1.2451     | 0.89345     |
|           | -1.2451         | 0.89345     | 0.89345     | 0.929282587 |             |             |             |
| NA        | ENSG00000262903 | -1.2452     | 0.89348     | -1.2452     | 0.89348     | -1.2452     | 0.89348     |
|           | -1.2452         | 0.89348     | 0.89348     | 0.929293955 |             |             |             |
| MIR517B   | ENSG00000207837 | -1.2459     | 0.8936      | -1.2459     | 0.8936      | -1.2459     |             |
|           | 0.8936          | -1.2459     | 0.8936      | 0.8936      | 0.929398929 |             |             |
| RNA5SP68  | ENSG00000200755 | -1.2466     | 0.89373     | -1.2466     | 0.89373     | -1.2466     |             |
|           | 0.89373         | -1.2466     | 0.89373     | 0.89373     | 0.929514298 |             |             |
| RNU6-821P | ENSG00000212297 | -1.2468     | 0.89377     | -1.2468     | 0.89377     | -1.2468     |             |
|           | 0.89377         | -1.2468     | 0.89377     | 0.89377     | 0.92953606  |             |             |
| OR5H1     | ENSG00000231192 | -1.247      | 0.89379     | -2.501      | 0.99381     | -1.612      | 0.94652     |
|           | -2.2339         | 0.98725     | 0.89379     | 0.929537022 |             |             |             |
| TRBV27    | ENSG00000211752 | -1.2472     | 0.89384     | -1.2472     | 0.89384     | -1.2472     |             |
|           | 0.89384         | -1.2472     | 0.89384     | 0.89384     | 0.929569183 |             |             |
| NA        | ENSG00000243886 | -1.2473     | 0.89386     | -1.2473     | 0.89386     | -1.2473     | 0.89386     |
|           | -1.2473         | 0.89386     | 0.89386     | 0.929570144 |             |             |             |
| OR4A5     | ENSG00000221840 | -1.5823     | 0.94321     | -1.2475     | 0.8939      | -1.2944     | 0.90223     |
|           | -1.437          | 0.92464     | 0.8939      | 0.929591903 |             |             |             |
| NA        | ENSG00000263889 | -1.2477     | 0.89394     | -1.2477     | 0.89394     | -1.2477     | 0.89394     |
|           | -1.2477         | 0.89394     | 0.89394     | 0.929613662 |             |             |             |
| FEN1P1    | ENSG00000215873 | -1.2488     | 0.89413     | -1.2488     | 0.89413     | -1.2488     |             |
|           | 0.89413         | -1.2488     | 0.89413     | 0.89413     | 0.929773474 |             |             |
| NA        | ENSG00000257807 | -1.2489     | 0.89415     | -1.2489     | 0.89415     | -1.2489     | 0.89415     |
|           | -1.2489         | 0.89415     | 0.89415     | 0.929773474 |             |             |             |
| NA        | ENSG00000272874 | -1.249      | 0.89416     | -1.249      | 0.89416     | -1.249      | 0.89416     |
|           | -1.249          | 0.89416     | 0.89416     | 0.929773474 |             |             |             |
| NA        | ENSG00000256100 | -1.249      | 0.89417     | -1.249      | 0.89417     | -1.249      | 0.89417     |
|           | -1.249          | 0.89417     | 0.89417     | 0.929773474 |             |             |             |
| RSRC1     | ENSG00000174891 | -1.2492     | 0.8942      | -2.0234     | 0.97848     | -1.4003     | 0.91928     |
|           | -1.6913         | 0.95461     | 0.8942      | 0.929784829 |             |             |             |
| TAS2R63P  | ENSG00000256019 | -1.2493     | 0.89422     | -1.2493     | 0.89422     | -1.2493     |             |
|           | 0.89422         | -1.2493     | 0.89422     | 0.89422     | 0.929785785 |             |             |
| NA        | ENSG00000261147 | -1.2495     | 0.89426     | -1.2495     | 0.89426     | -1.2495     | 0.89426     |
|           | -1.2495         | 0.89426     | 0.89426     | 0.929807536 |             |             |             |
| NA        | ENSG00000201881 | -1.2498     | 0.89432     | -1.2498     | 0.89432     | -1.2498     | 0.89432     |
|           | -1.2498         | 0.89432     | 0.89432     | 0.929850081 |             |             |             |
| NA        | ENSG00000269989 | -1.25089434 | -1.25089434 | -1.25089434 | -1.25089434 | -1.25089434 | -1.25089434 |
|           | 0.89434         | 0.929851036 |             |             |             |             |             |
| NA        | ENSG00000226411 | -2.1426     | 0.98393     | -1.5174     | 0.93541     | -1.4808     | 0.93066     |
|           | -1.2501         | 0.89437     | 0.89437     | 0.929862387 |             |             |             |
| NA        | ENSG00000258627 | -1.2505     | 0.89445     | -1.2505     | 0.89445     | -1.2505     | 0.89445     |



|            |                 |             |         |             |             |         |         |       |
|------------|-----------------|-------------|---------|-------------|-------------|---------|---------|-------|
|            | -1.2505         | 0.89445     | 0.89445 | 0.929925722 |             |         |         |       |
| NA         | ENSG00000213304 | -1.2508     | 0.8945  | -1.2508     | 0.8945      | -1.2508 | 0.8945  |       |
|            | -1.2508         | 0.8945      | 0.8945  | 0.929957864 |             |         |         |       |
| NA         | ENSG00000258940 | -1.2511     | 0.89455 | -1.2511     | 0.89455     | -1.2511 | 0.89455 |       |
|            | -1.2511         | 0.89455     | 0.89455 | 0.929990005 |             |         |         |       |
| SPINK5     | ENSG00000133710 | -1.7469     | 0.95967 | -1.2514     | 0.89461     | -2.0904 |         |       |
|            | 0.98171         | -1.6599     | 0.95153 | 0.89461     | 0.93003254  |         |         |       |
| LINC01671  | ENSG00000225431 | -1.2871     | 0.90097 | -1.6055     | 0.94581     | -1.2519 |         |       |
|            | 0.8947          | -1.4643     | 0.92845 | 0.8947      | 0.930106261 |         |         |       |
| LINC01637  | ENSG00000237476 | -1.2521     | 0.89474 | -1.2521     | 0.89474     | -1.2521 |         |       |
|            | 0.89474         | -1.2521     | 0.89474 | 0.89474     | 0.930118555 |         |         |       |
| NA         | ENSG00000274272 | -1.2522     | 0.89475 | -1.2522     | 0.89475     | -1.2522 | 0.89475 |       |
|            | -1.2522         | 0.89475     | 0.89475 | 0.930118555 |             |         |         |       |
| RPL26P13   | ENSG00000213495 | -1.5336     | 0.93744 | -1.375      | 0.91543     | -1.626  |         |       |
|            | 0.94803         | -1.2525     | 0.89481 | 0.89481     | 0.930161084 |         |         |       |
| NA         | ENSG00000257802 | -1.2529     | 0.89487 | -1.2529     | 0.89487     | -1.2529 | 0.89487 |       |
|            | -1.2529         | 0.89487     | 0.89487 | 0.930203611 |             |         |         |       |
| SNORA48    | ENSG00000209582 | -1.253      | 0.8949  | -1.253      | 0.8949      | -1.253  |         |       |
|            | 0.8949          | -1.253      | 0.8949  | 0.8949      | 0.930214953 |         |         |       |
| NA         | ENSG00000269826 | -1.2535     | 0.895   | -1.2535     | 0.895       | -1.2535 | 0.895   | 0.895 |
|            | 0.895           | 0.930299055 |         |             |             |         |         |       |
| HSPE1P5    | ENSG00000261395 | -1.3538     | 0.9121  | -1.2537     | 0.89503     | -1.3538 |         |       |
|            | 0.9121          | -1.3538     | 0.9121  | 0.89503     | 0.930310394 |         |         |       |
| BNIP3P34   | ENSG00000269509 | -1.2542     | 0.89512 | -1.2542     | 0.89512     | -1.2542 |         |       |
|            | 0.89512         | -1.2542     | 0.89512 | 0.89512     | 0.930354802 |         |         |       |
| NA         | ENSG00000270273 | -2.1493     | 0.9842  | -2.1493     | 0.9842      | -1.2542 | 0.89512 |       |
|            | -2.1493         | 0.9842      | 0.89512 | 0.930354802 |             |         |         |       |
| NA         | ENSG00000273486 | -1.2543     | 0.89513 | -1.2543     | 0.89513     | -1.2543 | 0.89513 |       |
|            | -1.2543         | 0.89513     | 0.89513 | 0.930354802 |             |         |         |       |
| DYRK1B     | ENSG00000105204 | -1.2546     | 0.89518 | -1.2546     | 0.89518     | -1.2546 |         |       |
|            | 0.89518         | -1.2546     | 0.89518 | 0.89518     | 0.930386926 |         |         |       |
| SNORD7     | ENSG00000207297 | -1.2547     | 0.89521 | -1.2547     | 0.89521     | -1.2547 |         |       |
|            | 0.89521         | -1.2547     | 0.89521 | 0.89521     | 0.930398262 |         |         |       |
| RNU6-204P  | ENSG00000199335 | -1.2549     | 0.89524 | -1.2549     | 0.89524     | -1.2549 |         |       |
|            | 0.89524         | -1.2549     | 0.89524 | 0.89524     | 0.930400147 |         |         |       |
| MYCL       | ENSG00000116990 | -1.6002     | 0.94522 | -1.5162     | 0.93526     | -1.2549 | 0.89525 |       |
|            | -1.3507         | 0.91161     | 0.89525 | 0.930400147 |             |         |         |       |
| PLPPR1     | ENSG00000148123 | -1.2551     | 0.89529 | -1.4141     | 0.92134     | -1.661  |         |       |
|            | 0.95164         | -1.4365     | 0.92457 | 0.89529     | 0.930421875 |         |         |       |
| NA         | ENSG00000244184 | -1.2554     | 0.89533 | -1.2554     | 0.89533     | -1.2554 | 0.89533 |       |
|            | -1.2554         | 0.89533     | 0.89533 | 0.930443601 |             |         |         |       |
| NA         | ENSG00000257373 | -1.2555     | 0.89536 | -1.2555     | 0.89536     | -1.2555 | 0.89536 |       |
|            | -1.2555         | 0.89536     | 0.89536 | 0.930454935 |             |         |         |       |
| PCK1       | ENSG00000124253 | -1.2558     | 0.8954  | -1.2558     | 0.8954      | -1.8445 | 0.96745 |       |
|            | -1.2558         | 0.8954      | 0.8954  | 0.930456818 |             |         |         |       |
| NA         | ENSG00000225443 | -1.2558     | 0.8954  | -1.2558     | 0.8954      | -1.2558 | 0.8954  |       |
|            | -1.2558         | 0.8954      | 0.8954  | 0.930456818 |             |         |         |       |
| NA         | ENSG00000279792 | -1.2562     | 0.89547 | -1.2562     | 0.89547     | -1.2562 | 0.89547 |       |
|            | -1.2562         | 0.89547     | 0.89547 | 0.930509715 |             |         |         |       |
| NA         | ENSG00000276317 | -1.2562     | 0.89549 | -1.2562     | 0.89549     | -1.2562 | 0.89549 |       |
|            | -1.2562         | 0.89549     | 0.89549 | 0.930510655 |             |         |         |       |
| NA         | ENSG00000254887 | -1.257      | 0.89562 | -1.257      | 0.89562     | -1.257  | 0.89562 |       |
|            | -1.257          | 0.89562     | 0.89562 | 0.930625895 |             |         |         |       |
| NA         | ENSG00000255147 | -1.3433     | 0.91041 | -2.0298     | 0.97881     | -1.9969 | 0.97708 |       |
|            | -1.2573         | 0.89568     | 0.89568 | 0.930668395 |             |         |         |       |
| DIAPH3-AS1 | ENSG00000227528 | -1.2576     | 0.89573 | -1.2576     | 0.89573     | -1.2576 |         |       |
|            | 0.89573         | -1.2576     | 0.89573 | 0.89573     | 0.930700503 |         |         |       |
| ELMOD2     | ENSG00000179387 | -1.258      | 0.8958  | -1.258      | 0.8958      | -1.258  |         |       |
|            | 0.8958          | -1.258      | 0.8958  | 0.8958      | 0.930735416 |         |         |       |
| SPPL2B     | ENSG00000005206 | -1.6611     | 0.95165 | -1.2582     | 0.89584     | -1.2776 |         |       |
|            | 0.89931         | -2.1123     | 0.98267 | 0.89584     | 0.930735416 |         |         |       |
| UHRF1BP1L  | ENSG00000111647 | -1.2582     | 0.89584 | -1.3219     | 0.90689     | -1.6742 |         |       |

|              |                 |         |         |             |             |         |         |         |
|--------------|-----------------|---------|---------|-------------|-------------|---------|---------|---------|
|              | 0.95295         | -1.2748 | 0.89882 | 0.89584     | 0.930735416 |         |         |         |
| RNU6-260P    | ENSG00000206819 | -1.2582 | 0.89584 | 0.89584     | -1.2582     | 0.89584 | -1.2582 |         |
|              | 0.89584         | -1.2582 | 0.89584 | 0.89584     | 0.930735416 |         |         |         |
| RPL15P21     | ENSG00000244753 | -1.2583 | 0.89587 | 0.89587     | -1.2583     | 0.89587 | -1.2583 |         |
|              | 0.89587         | -1.2583 | 0.89587 | 0.89587     | 0.930737286 |         |         |         |
| NA           | ENSG00000258203 | -1.2584 | 0.89588 | 0.89588     | -1.2584     | 0.89588 | -1.2584 | 0.89588 |
|              | -1.2584         | 0.89588 | 0.89588 | 0.930737286 |             |         |         |         |
| NA           | ENSG00000270549 | -1.2586 | 0.89591 | 0.89591     | -1.2586     | 0.89591 | -1.2586 | 0.89591 |
|              | -1.2586         | 0.89591 | 0.89591 | 0.930740091 |             |         |         |         |
| NA           | ENSG00000275569 | -1.2587 | 0.89593 | 0.89593     | -1.2587     | 0.89593 | -1.2587 | 0.89593 |
|              | -1.2587         | 0.89593 | 0.89593 | 0.930740091 |             |         |         |         |
| LY75-CD302   | ENSG00000248672 | -1.2587 | 0.89594 | 0.89594     | -1.2587     | 0.89594 | -1.2587 |         |
|              | 0.89594         | -1.2587 | 0.89594 | 0.89594     | 0.930740091 |         |         |         |
| C2CD2L       | ENSG00000172375 | -1.3064 | 0.90429 | 0.90429     | -1.3064     | 0.90429 | -1.2596 |         |
|              | 0.89609         | -1.3064 | 0.90429 | 0.89609     | 0.930858094 |         |         |         |
| NA           | ENSG00000253656 | -2.5574 | 0.99473 | 0.99473     | -2.5517     | 0.99464 | -2.2808 | 0.98872 |
|              | -1.2597         | 0.89611 | 0.89611 | 0.930858094 |             |         |         |         |
| NA           | ENSG00000263126 | -1.2598 | 0.89612 | 0.89612     | -1.2598     | 0.89612 | -1.2598 | 0.89612 |
|              | -1.2598         | 0.89612 | 0.89612 | 0.930858094 |             |         |         |         |
| IGHVIII-47-1 | ENSG00000253862 | -1.2598 | 0.89613 | 0.89613     | -1.2598     | 0.89613 | -1.2598 |         |
|              | 0.89613         | -1.2598 | 0.89613 | 0.89613     | 0.930858094 |         |         |         |
| PTPRCAP      | ENSG00000213402 | -1.2603 | 0.89622 | 0.89622     | -1.2603     | 0.89622 | -1.2603 |         |
|              | 0.89622         | -1.2603 | 0.89622 | 0.89622     | 0.930911894 |         |         |         |
| PDE9A-AS1    | ENSG00000225731 | -1.2603 | 0.89622 | 0.89622     | -2.6348     | 0.99579 | -1.2603 |         |
|              | 0.89622         | -1.2603 | 0.89622 | 0.89622     | 0.930911894 |         |         |         |
| CTSO         | ENSG00000256043 | -1.2606 | 0.89628 | 0.89628     | -1.719      | 0.95719 | -1.4995 | 0.93313 |
|              | -1.6711         | 0.95265 | 0.89628 | 0.930954373 |             |         |         |         |
| EYS          | ENSG00000188107 | -1.519  | 0.93562 | 0.93562     | -1.7727     | 0.96186 | -1.6794 | 0.95346 |
|              | -1.2609         | 0.89632 | 0.89632 | 0.930976076 |             |         |         |         |
| RN7SL493P    | ENSG00000266439 | -1.2612 | 0.89638 | 0.89638     | -1.2612     | 0.89638 | -1.2612 |         |
|              | 0.89638         | -1.2612 | 0.89638 | 0.89638     | 0.931018552 |         |         |         |
| NA           | ENSG00000207390 | -1.2617 | 0.89647 | 0.89647     | -1.2617     | 0.89647 | -1.2617 | 0.89647 |
|              | -1.2617         | 0.89647 | 0.89647 | 0.931082726 |             |         |         |         |
| RPS15AP7     | ENSG00000234088 | -1.2618 | 0.89648 | 0.89648     | -1.2618     | 0.89648 | -1.9561 |         |
|              | 0.97477         | -1.2618 | 0.89648 | 0.89648     | 0.931082726 |         |         |         |
| NA           | ENSG00000217331 | -1.2624 | 0.8966  | 0.8966      | -1.2624     | 0.8966  | -1.2624 | 0.8966  |
|              | -1.2857         | 0.90072 | 0.8966  | 0.93116859  |             |         |         |         |
| ZNF398       | ENSG00000197024 | -1.2625 | 0.89662 | 0.89662     | -1.6665     | 0.9522  | -1.784  |         |
|              | 0.96279         | -1.6254 | 0.94797 | 0.89662     | 0.93116859  |         |         |         |
| NA           | ENSG00000238742 | -1.2625 | 0.89662 | 0.89662     | -1.2625     | 0.89662 | -1.2625 | 0.89662 |
|              | -1.2625         | 0.89662 | 0.89662 | 0.93116859  |             |         |         |         |
| NA           | ENSG00000260136 | -1.2627 | 0.89666 | 0.89666     | -1.2627     | 0.89666 | -1.2627 | 0.89666 |
|              | -1.2627         | 0.89666 | 0.89666 | 0.931190286 |             |         |         |         |
| LNP1         | ENSG00000206535 | -2.1349 | 0.98362 | 0.98362     | -2.4376     | 0.99261 | -1.3147 | 0.90569 |
|              | -1.2632         | 0.89674 | 0.89674 | 0.931253521 |             |         |         |         |
| CIR1P3       | ENSG00000216708 | -1.2635 | 0.8968  | 0.8968      | -1.2635     | 0.8968  | -1.2635 |         |
|              | 0.8968          | -1.2635 | 0.8968  | 0.8968      | 0.931276137 |         |         |         |
| NA           | ENSG00000270082 | -1.2635 | 0.8968  | 0.8968      | -1.2635     | 0.8968  | -1.2635 | 0.8968  |
|              | -1.2635         | 0.8968  | 0.8968  | 0.931276137 |             |         |         |         |
| NA           | ENSG00000269177 | -1.2639 | 0.89687 | 0.89687     | -1.2639     | 0.89687 | -1.2639 | 0.89687 |
|              | -1.2639         | 0.89687 | 0.89687 | 0.931328981 |             |         |         |         |
| NA           | ENSG00000275092 | -1.2644 | 0.89695 | 0.89695     | -1.2644     | 0.89695 | -1.2644 | 0.89695 |
|              | -1.2644         | 0.89695 | 0.89695 | 0.931385507 |             |         |         |         |
| ZFP64        | ENSG0000020256  | -1.3605 | 0.91316 | 0.91316     | -1.2645     | 0.89697 | -1.5688 | 0.94165 |
|              | -1.305          | 0.90405 | 0.89697 | 0.931385507 |             |         |         |         |
| NA           | ENSG00000279469 | -1.8003 | 0.96409 | 0.96409     | -1.2646     | 0.89699 | -1.8003 | 0.96409 |
|              | -1.8003         | 0.96409 | 0.89699 | 0.931385507 |             |         |         |         |
| SNORD88B     | ENSG00000221381 | -1.2648 | 0.89702 | 0.89702     | -1.2648     | 0.89702 | -1.2648 |         |
|              | 0.89702         | -1.2648 | 0.89702 | 0.89702     | 0.931385507 |         |         |         |
| NA           | ENSG00000249138 | -1.2648 | 0.89702 | 0.89702     | -1.5554     | 0.94008 | -1.3662 | 0.91407 |
|              | -1.4235         | 0.92271 | 0.89702 | 0.931385507 |             |         |         |         |
| NA           | ENSG00000238142 | -1.265  | 0.89706 | 0.89706     | -1.265      | 0.89706 | -1.265  | 0.89706 |

|             |                 |         |             |             |             |         |         |         |
|-------------|-----------------|---------|-------------|-------------|-------------|---------|---------|---------|
|             | -1.265          | 0.89706 | 0.89706     | 0.931407193 |             |         |         |         |
| CREBRF      | ENSG00000164463 | -1.6486 | 0.95038     | -1.7265     | 0.95787     | -1.4021 |         |         |
|             | 0.91956         | -1.2654 | 0.89714     | 0.89714     | 0.93147041  |         |         |         |
| NA          | ENSG00000234784 | -1.2655 | 0.89716     | -1.2655     | 0.89716     | -1.2655 | 0.89716 |         |
|             | -1.2655         | 0.89716 | 0.89716     | 0.931471328 |             |         |         |         |
| NA          | ENSG00000270190 | -1.2659 | 0.89722     | -1.2659     | 0.89722     | -1.2659 | 0.89722 |         |
|             | -1.2659         | 0.89722 | 0.89722     | 0.931513776 |             |         |         |         |
| EIF3G       | ENSG00000130811 | -1.2661 | 0.89726     | -1.2661     | 0.89726     | -1.2661 | 0.89726 |         |
|             | -1.2661         | 0.89726 | 0.89726     | 0.931535458 |             |         |         |         |
| NA          | ENSG00000261924 | -1.2667 | 0.89737     | -1.2667     | 0.89737     | -1.2667 | 0.89737 |         |
|             | -1.2667         | 0.89737 | 0.89737     | 0.931629812 |             |         |         |         |
| USP46-DT    | ENSG00000248866 | -1.267  | 0.89742     | -1.267      | 0.89742     | -1.267  |         |         |
|             | 0.89742         | -1.267  | 0.89742     | 0.89742     | 0.931661872 |         |         |         |
| SNORD114-20 | ENSG00000202048 | -1.2674 | 0.8975      | -1.2674     | 0.8975      | -1.2674 | 0.8975  | -1.2674 |
|             | 0.8975          | -1.2674 | 0.8975      | 0.8975      | 0.931705226 |         |         |         |
| MTCO2P2     | ENSG00000267541 | -1.2674 | 0.8975      | -1.2674     | 0.8975      | -1.4157 |         |         |
|             | 0.92156         | -1.2674 | 0.8975      | 0.8975      | 0.931705226 |         |         |         |
| FEM1C       | ENSG00000145780 | -1.8041 | 0.9644      | -1.2728     | 0.89845     | -1.8298 | 0.96636 |         |
|             | -1.2676         | 0.89753 | 0.89753     | 0.931707053 |             |         |         |         |
| ATP5PDP4    | ENSG00000234925 | -1.2677 | 0.89754     | -1.2677     | 0.89754     | -1.7592 |         |         |
|             | 0.96072         | -1.2677 | 0.89754     | 0.89754     | 0.931707053 |         |         |         |
| GPR108      | ENSG00000125734 | -1.268  | 0.89761     | -1.268      | 0.89761     | -1.268  |         |         |
|             | 0.89761         | -1.268  | 0.89761     | 0.89761     | 0.931740021 |         |         |         |
| RN7SL242P   | ENSG00000244389 | -1.2681 | 0.89761     | -1.2681     | 0.89761     | -1.2681 |         |         |
|             | 0.89761         | -1.2681 | 0.89761     | 0.89761     | 0.931740021 |         |         |         |
| NA          | ENSG00000200121 | -1.2683 | 0.89766     | -1.2683     | 0.89766     | -1.2683 | 0.89766 |         |
|             | -1.2683         | 0.89766 | 0.89766     | 0.931772074 |             |         |         |         |
| NA          | ENSG00000222666 | -2.5529 | 0.99466     | -2.5506     | 0.99462     | -1.2686 | 0.89771 |         |
|             | -2.0649         | 0.98053 | 0.89771     | 0.931794658 |             |         |         |         |
| NA          | ENSG00000242295 | -1.2687 | 0.89772     | -1.2687     | 0.89772     | -1.2687 | 0.89772 |         |
|             | -1.2687         | 0.89772 | 0.89772     | 0.931794658 |             |         |         |         |
| NA          | ENSG00000259881 | -1.5688 | 0.94166     | -1.269      | 0.89777     | -1.269  | 0.89777 |         |
|             | -1.269          | 0.89777 | 0.89777     | 0.93181724  |             |         |         |         |
| CPA5        | ENSG00000158525 | -1.269  | 0.89778     | -1.3453     | 0.91073     | -1.3453 | 0.91073 |         |
|             | -1.7061         | 0.95601 | 0.89778     | 0.93181724  |             |         |         |         |
| SLC19A2     | ENSG00000117479 | -1.2692 | 0.89782     | -1.2692     | 0.89782     | -1.2692 |         |         |
|             | 0.89782         | -1.2692 | 0.89782     | 0.89782     | 0.931838909 |         |         |         |
| NA          | ENSG00000272459 | -1.2697 | 0.8979      | -1.2697     | 0.8979      | -1.2697 | 0.8979  |         |
|             | -1.2697         | 0.8979  | 0.8979      | 0.931902091 |             |         |         |         |
| NA          | ENSG00000280429 | -1.2698 | 0.89792     | -1.2698     | 0.89792     | -1.2698 | 0.89792 |         |
|             | -1.2698         | 0.89792 | 0.89792     | 0.931903001 |             |         |         |         |
| LINC02554   | ENSG00000226741 | -1.2699 | 0.89794     | -1.2699     | 0.89794     | -1.2699 |         |         |
|             | 0.89794         | -1.2699 | 0.89794     | 0.89794     | 0.93190391  |         |         |         |
| NA          | ENSG00000251334 | -1.2702 | 0.89799     | -1.2702     | 0.89799     | -1.4148 | 0.92144 |         |
|             | -1.2702         | 0.89799 | 0.89799     | 0.931926484 |             |         |         |         |
| LINC00347   | ENSG00000236678 | -1.2702 | 0.898       | -1.2702     | 0.898       | -1.2702 | 0.898   | -1.2702 |
|             | 0.898           | 0.898   | 0.931926484 |             |             |         |         |         |
| NA          | ENSG00000230407 | -1.2705 | 0.89804     | -1.2705     | 0.89804     | -1.3133 | 0.90545 |         |
|             | -1.2705         | 0.89804 | 0.89804     | 0.931948148 |             |         |         |         |
| RPL7AP52    | ENSG00000225354 | -1.2709 | 0.89812     | -1.2709     | 0.89812     | -1.2709 |         |         |
|             | 0.89812         | -1.2709 | 0.89812     | 0.89812     | 0.932011321 |         |         |         |
| NA          | ENSG00000229728 | -1.2715 | 0.89822     | -1.2715     | 0.89822     | -1.2715 | 0.89822 |         |
|             | -1.2715         | 0.89822 | 0.89822     | 0.932095245 |             |         |         |         |
| MEIS1-AS2   | ENSG00000230749 | -1.2717 | 0.89825     | -1.2717     | 0.89825     | -1.2717 |         |         |
|             | 0.89825         | -1.2717 | 0.89825     | 0.89825     | 0.932097055 |         |         |         |
| STRA6LP     | ENSG00000255036 | -1.2717 | 0.89826     | -1.2717     | 0.89826     | -1.2717 |         |         |
|             | 0.89826         | -1.2717 | 0.89826     | 0.89826     | 0.932097055 |         |         |         |
| RPL10P5     | ENSG00000235644 | -1.3427 | 0.91032     | -1.3427     | 0.91032     | -1.272  |         |         |
|             | 0.89832         | -1.878  | 0.96981     | 0.89832     | 0.932139466 |         |         |         |
| LINC01755   | ENSG00000233079 | -1.2724 | 0.89839     | -1.2724     | 0.89839     | -1.2724 |         |         |
|             | 0.89839         | -1.2724 | 0.89839     | 0.89839     | 0.932182778 |         |         |         |
| ANGPTL2     | ENSG00000136859 | -1.6092 | 0.94621     | -1.2725     | 0.8984      | -1.4561 |         |         |

|           |                 |         |         |             |             |         |         |         |
|-----------|-----------------|---------|---------|-------------|-------------|---------|---------|---------|
|           | 0.92731         | -1.3331 | 0.90875 | 0.8984      | 0.932182778 |         |         |         |
| SNORA41   | ENSG00000207406 | -1.2731 | 0.89851 | 0.89851     | -1.2731     | 0.89851 | -1.2731 |         |
|           | 0.89851         | -1.2731 | 0.89851 | 0.89851     | 0.932277064 |         |         |         |
| HSPB6     | ENSG00000004776 | -1.2734 | 0.89857 | 0.89857     | -1.2734     | 0.89857 | -1.2734 | 0.89857 |
|           | -1.2734         | 0.89857 | 0.89857 | 0.932319467 |             |         |         |         |
| LINC02269 | ENSG00000250708 | -1.2736 | 0.8986  | 0.8986      | -1.4358     | 0.92448 | -1.2736 |         |
|           | 0.8986          | -1.2736 | 0.8986  | 0.8986      | 0.932330743 |         |         |         |
| MTND4LP30 | ENSG00000198868 | -1.2743 | 0.89872 | 0.89872     | -1.2743     | 0.89872 | -1.2743 |         |
|           | 0.89872         | -1.2743 | 0.89872 | 0.89872     | 0.93237584  |         |         |         |
| MTND4P12  | ENSG00000247627 | -1.2743 | 0.89872 | 0.89872     | -1.2743     | 0.89872 | -1.2743 |         |
|           | 0.89872         | -1.2743 | 0.89872 | 0.89872     | 0.93237584  |         |         |         |
| GCSHP1    | ENSG00000248651 | -1.71   | 0.95636 | -1.6795     | 0.95347     | -1.5236 | 0.93619 |         |
|           | -1.2743         | 0.89872 | 0.89872 | 0.93237584  |             |         |         |         |
| NA        | ENSG00000263963 | -1.2743 | 0.89872 | -1.2743     | 0.89872     | -1.2743 | 0.89872 |         |
|           | -1.2743         | 0.89872 | 0.89872 | 0.93237584  |             |         |         |         |
| FCF1P1    | ENSG00000227436 | -1.2744 | 0.89875 | -1.2744     | 0.89875     | -1.2744 |         |         |
|           | 0.89875         | -1.2744 | 0.89875 | 0.89875     | 0.932387114 |         |         |         |
| IGFBP5    | ENSG00000115461 | -1.2751 | 0.89886 | -1.6763     | 0.95316     | -2.0585 |         |         |
|           | 0.98023         | -2.4433 | 0.99272 | 0.89886     | 0.932481379 |         |         |         |
| NA        | ENSG00000279464 | -1.2752 | 0.89888 | -1.2752     | 0.89888     | -1.2752 | 0.89888 |         |
|           | -1.2752         | 0.89888 | 0.89888 | 0.932482275 |             |         |         |         |
| RN7SL337P | ENSG00000243488 | -1.2755 | 0.89893 | -1.2755     | 0.89893     | -1.2755 |         |         |
|           | 0.89893         | -1.2755 | 0.89893 | 0.89893     | 0.932504815 |         |         |         |
| NA        | ENSG00000278572 | -1.2755 | 0.89894 | -1.2755     | 0.89894     | -1.2755 | 0.89894 |         |
|           | -1.2755         | 0.89894 | 0.89894 | 0.932504815 |             |         |         |         |
| NA        | ENSG00000245958 | -1.2756 | 0.89896 | -1.8568     | 0.96833     | -1.8748 | 0.96959 |         |
|           | -1.3276         | 0.90785 | 0.89896 | 0.932505711 |             |         |         |         |
| NA        | ENSG00000274031 | -1.2758 | 0.89899 | -1.2758     | 0.89899     | -1.2758 | 0.89899 |         |
|           | -1.2758         | 0.89899 | 0.89899 | 0.93251698  |             |         |         |         |
| KRT18P31  | ENSG00000249850 | -1.5073 | 0.93414 | -1.5181     | 0.93551     | -1.8795 |         |         |
|           | 0.96991         | -1.2768 | 0.89916 | 0.89916     | 0.932673467 |         |         |         |
| NA        | ENSG00000271755 | -1.277  | 0.8992  | -1.277      | 0.8992      | -1.277  | 0.8992  |         |
|           | -1.277          | 0.8992  | 0.8992  | 0.932685624 |             |         |         |         |
| LRRC59    | ENSG00000108829 | -1.2771 | 0.89921 | -1.2771     | 0.89921     | -1.5427 |         |         |
|           | 0.93854         | -1.2771 | 0.89921 | 0.89921     | 0.932685624 |         |         |         |
| NA        | ENSG00000233133 | -1.2774 | 0.89927 | -1.2774     | 0.89927     | -1.2774 | 0.89927 |         |
|           | -1.2774         | 0.89927 | 0.89927 | 0.932728004 |             |         |         |         |
| RNU6-599P | ENSG00000238529 | -1.2779 | 0.89936 | -1.2779     | 0.89936     | -1.2779 |         |         |
|           | 0.89936         | -1.2779 | 0.89936 | 0.89936     | 0.932801498 |         |         |         |
| INTS6P1   | ENSG00000250492 | -1.5938 | 0.94451 | -1.278      | 0.89938     | -1.3085 |         |         |
|           | 0.90466         | -1.389  | 0.91758 | 0.89938     | 0.932802388 |         |         |         |
| NA        | ENSG00000188365 | -1.2785 | 0.89946 | -1.2785     | 0.89946     | -1.2785 | 0.89946 |         |
|           | -1.3814         | 0.91642 | 0.89946 | 0.932817206 |             |         |         |         |
| NA        | ENSG00000263065 | -1.2785 | 0.89946 | -1.2785     | 0.89946     | -1.2785 | 0.89946 |         |
|           | -1.2785         | 0.89946 | 0.89946 | 0.932817206 |             |         |         |         |
| NA        | ENSG00000277726 | -1.2785 | 0.89946 | -1.2785     | 0.89946     | -1.2785 | 0.89946 |         |
|           | -1.2785         | 0.89946 | 0.89946 | 0.932817206 |             |         |         |         |
| SPEM1     | ENSG00000181323 | -1.2787 | 0.89949 | -1.2787     | 0.89949     | -1.2787 | 0.89949 |         |
|           | -1.2787         | 0.89949 | 0.89949 | 0.932817206 |             |         |         |         |
| CDK8P2    | ENSG00000227368 | -1.4042 | 0.91987 | -1.2786     | 0.89949     | -1.4885 |         |         |
|           | 0.93169         | -1.3408 | 0.91001 | 0.89949     | 0.932817206 |         |         |         |
| RNU6-890P | ENSG00000206848 | -1.2792 | 0.89958 | -1.2792     | 0.89958     | -1.2792 |         |         |
|           | 0.89958         | -1.2792 | 0.89958 | 0.89958     | 0.932890687 |         |         |         |
| NA        | ENSG00000271028 | -1.2793 | 0.8996  | -1.2793     | 0.8996      | -1.2793 | 0.8996  |         |
|           | -1.2793         | 0.8996  | 0.8996  | 0.932891575 |             |         |         |         |
| NA        | ENSG00000247363 | -1.2794 | 0.89962 | -1.2794     | 0.89962     | -1.2794 | 0.89962 |         |
|           | -1.2794         | 0.89962 | 0.89962 | 0.932892463 |             |         |         |         |
| NA        | ENSG00000265012 | -1.2796 | 0.89967 | -1.2796     | 0.89967     | -1.2796 | 0.89967 |         |
|           | -1.2796         | 0.89967 | 0.89967 | 0.932924459 |             |         |         |         |
| NA        | ENSG00000267922 | -1.2801 | 0.89975 | -1.684      | 0.95391     | -2.0408 | 0.97936 |         |
|           | -2.4352         | 0.99256 | 0.89975 | 0.932978079 |             |         |         |         |
| RPL30P13  | ENSG00000229014 | -1.2802 | 0.89976 | -1.2802     | 0.89976     | -1.2802 |         |         |

|              |                 |         |         |             |             |         |         |
|--------------|-----------------|---------|---------|-------------|-------------|---------|---------|
|              | 0.89976         | -1.2802 | 0.89976 | 0.89976     | 0.932978079 |         |         |
| DIS3L2       | ENSG00000144535 | -1.809  | 0.96478 | -1.2805     | 0.89981     | -1.7494 |         |
|              | 0.95989         | -1.6098 | 0.94628 | 0.89981     | 0.933010071 |         |         |
| ZNF192P1     | ENSG00000226314 | -1.2814 | 0.89997 | -1.2814     | 0.89997     | -1.2814 |         |
|              | 0.89997         | -1.2814 | 0.89997 | 0.89997     | 0.933136263 |         |         |
| NA           | ENSG00000249008 | -2.028  | 0.97872 | -1.2814     | 0.89997     | -1.2814 | 0.89997 |
|              | -1.2814         | 0.89997 | 0.89997 | 0.933136263 |             |         |         |
| HSD17B6      | ENSG00000025423 | -1.883  | 0.97015 | -2.1236     | 0.98315     | -1.6768 |         |
|              | 0.95321         | -1.2816 | 0.90001 | 0.90001     | 0.933140674 |         |         |
| KRTAP1-3     | ENSG00000221880 | -1.2819 | 0.90006 | -1.2819     | 0.90006     | -1.2819 |         |
|              | 0.90006         | -1.2819 | 0.90006 | 0.90006     | 0.933140674 |         |         |
| RN7SL502P    | ENSG00000240733 | -1.4503 | 0.92651 | -1.2819     | 0.90006     | -1.5277 |         |
|              | 0.93671         | -1.5145 | 0.93506 | 0.90006     | 0.933140674 |         |         |
| NA           | ENSG00000262265 | -1.2819 | 0.90006 | -1.2819     | 0.90006     | -1.2819 | 0.90006 |
|              | -1.2819         | 0.90006 | 0.90006 | 0.933140674 |             |         |         |
| NA           | ENSG00000254035 | -1.282  | 0.90007 | -1.282      | 0.90007     | -1.282  | 0.90007 |
|              | -1.282          | 0.90007 | 0.90007 | 0.933140674 |             |         |         |
| HSPD1P1      | ENSG00000213430 | -1.2821 | 0.90009 | -1.778      | 0.96229     | -1.4439 |         |
|              | 0.92562         | -1.4439 | 0.92562 | 0.90009     | 0.933141556 |         |         |
| CCL15        | ENSG00000275718 | -1.2825 | 0.90016 | -1.2825     | 0.90016     | -1.2825 | 0.90016 |
|              | -1.2825         | 0.90016 | 0.90016 | 0.933194273 |             |         |         |
| EGFLAM-AS3   | ENSG00000249071 | -1.2834 | 0.90032 | -1.2834     | 0.90032     | -1.2834 |         |
|              | 0.90032         | -1.2834 | 0.90032 | 0.90032     | 0.933340288 |         |         |
| LINC01564    | ENSG00000235899 | -1.2835 | 0.90034 | -1.2835     | 0.90034     | -1.2835 |         |
|              | 0.90034         | -1.6231 | 0.94771 | 0.90034     | 0.933341166 |         |         |
| NA           | ENSG00000254702 | -1.4219 | 0.92247 | -1.4219     | 0.92247     | -1.4219 | 0.92247 |
|              | -1.2838         | 0.90039 | 0.90039 | 0.933373143 |             |         |         |
| NA           | ENSG00000279616 | -1.2843 | 0.90048 | -1.2843     | 0.90048     | -1.2843 | 0.90048 |
|              | -1.2843         | 0.90048 | 0.90048 | 0.933446583 |             |         |         |
| RNU6-660P    | ENSG00000201436 | -1.2845 | 0.90052 | -1.2845     | 0.90052     | -1.2845 |         |
|              | 0.90052         | -1.2845 | 0.90052 | 0.90052     | 0.93346819  |         |         |
| IL31RA       | ENSG00000164509 | -2.243  | 0.98755 | -2.1503     | 0.98424     | -2.0613 |         |
|              | 0.98036         | -1.2847 | 0.90054 | 0.90054     | 0.933469065 |         |         |
| RNU6-353P    | ENSG00000201136 | -1.2848 | 0.90057 | -1.2848     | 0.90057     | -1.2848 |         |
|              | 0.90057         | -1.2848 | 0.90057 | 0.90057     | 0.933480305 |         |         |
| SQSTM1P1     | ENSG00000271465 | -1.2852 | 0.90064 | -1.2852     | 0.90064     | -1.2852 |         |
|              | 0.90064         | -1.2852 | 0.90064 | 0.90064     | 0.933516645 |         |         |
| NA           | ENSG00000279875 | -1.2853 | 0.90066 | -1.2853     | 0.90066     | -1.2853 | 0.90066 |
|              | -1.2853         | 0.90066 | 0.90066 | 0.933516645 |             |         |         |
| OR2B8P       | ENSG00000182477 | -1.2855 | 0.90069 | -1.2855     | 0.90069     | -1.2855 |         |
|              | 0.90069         | -1.2855 | 0.90069 | 0.90069     | 0.933516645 |         |         |
| NA           | ENSG00000250895 | -1.2856 | 0.9007  | -1.514      | 0.93498     | -1.514  | 0.93498 |
|              | -1.514          | 0.93498 | 0.9007  | 0.933516645 |             |         |         |
| NA           | ENSG00000167046 | -1.2857 | 0.90072 | -1.2857     | 0.90072     | -1.2857 | 0.90072 |
|              | -1.2857         | 0.90072 | 0.90072 | 0.933516645 |             |         |         |
| NA           | ENSG00000237572 | -2.1006 | 0.98216 | -1.2857     | 0.90072     | -2.2692 | 0.98837 |
|              | -1.998          | 0.97714 | 0.90072 | 0.933516645 |             |         |         |
| NA           | ENSG00000270328 | -1.2864 | 0.90085 | -1.2864     | 0.90085     | -1.2864 | 0.90085 |
|              | -1.2864         | 0.90085 | 0.90085 | 0.933631521 |             |         |         |
| NA           | ENSG00000234182 | -1.2865 | 0.90087 | -1.2865     | 0.90087     | -1.2865 | 0.90087 |
|              | -1.5775         | 0.94266 | 0.90087 | 0.933632393 |             |         |         |
| NA           | ENSG00000201464 | -1.2869 | 0.90094 | -1.2869     | 0.90094     | -1.2869 | 0.90094 |
|              | -1.2869         | 0.90094 | 0.90094 | 0.933685081 |             |         |         |
| CACNA2D3-AS1 | ENSG00000243715 | -1.3044 | 0.90395 | -2.2184     | 0.98674     | -1.2876 |         |
|              | 0.90105         | -1.2876 | 0.90105 | 0.90105     | 0.933734357 |         |         |
| NA           | ENSG00000260957 | -1.2876 | 0.90106 | -1.2876     | 0.90106     | -1.2876 | 0.90106 |
|              | -1.2876         | 0.90106 | 0.90106 | 0.933734357 |             |         |         |
| ECCEL1       | ENSG00000171551 | -1.2877 | 0.90107 | -1.2877     | 0.90107     | -1.2877 | 0.90107 |
|              | -1.2877         | 0.90107 | 0.90107 | 0.933734357 |             |         |         |
| RFC3P1       | ENSG00000236158 | -1.2877 | 0.90107 | -1.2877     | 0.90107     | -1.2877 |         |
|              | 0.90107         | -1.2877 | 0.90107 | 0.90107     | 0.933734357 |         |         |
| RPS5P3       | ENSG00000215088 | -1.288  | 0.90112 | -1.288      | 0.90112     | -1.288  |         |

|           |                 |         |         |             |             |         |         |  |
|-----------|-----------------|---------|---------|-------------|-------------|---------|---------|--|
|           | 0.90112         | -1.288  | 0.90112 | 0.90112     | 0.933734357 |         |         |  |
| PRAP1     | ENSG00000165828 | -1.288  | 0.90113 | -1.288      | 0.90113     | -1.288  | 0.90113 |  |
|           | -1.288          | 0.90113 | 0.90113 | 0.933734357 |             |         |         |  |
| NA        | ENSG00000251414 | -1.288  | 0.90113 | -1.288      | 0.90113     | -1.288  | 0.90113 |  |
|           | -1.288          | 0.90113 | 0.90113 | 0.933734357 |             |         |         |  |
| HIGD1AP10 | ENSG00000254455 | -1.2881 | 0.90115 | -2.2547     | 0.98792     | -2.2547 |         |  |
|           | 0.98792         | -2.2547 | 0.98792 | 0.90115     | 0.933734357 |         |         |  |
| EIF5A2P1  | ENSG00000260576 | -1.2882 | 0.90116 | -1.2882     | 0.90116     | -1.2882 |         |  |
|           | 0.90116         | -1.2882 | 0.90116 | 0.90116     | 0.933734357 |         |         |  |
| NA        | ENSG00000260597 | -1.2885 | 0.90121 | -1.2885     | 0.90121     | -1.2885 | 0.90121 |  |
|           | -1.2885         | 0.90121 | 0.90121 | 0.933766309 |             |         |         |  |
| RNU6-397P | ENSG00000252035 | -1.2887 | 0.90125 | -1.381      | 0.91637     | -1.8798 |         |  |
|           | 0.96994         | -1.2887 | 0.90125 | 0.90125     | 0.9337879   |         |         |  |
| NA        | ENSG00000272510 | -1.2895 | 0.90138 | -1.2895     | 0.90138     | -1.2895 | 0.90138 |  |
|           | -1.2895         | 0.90138 | 0.90138 | 0.933902736 |             |         |         |  |
| TRAJ56    | ENSG00000211835 | -1.2897 | 0.90143 | -1.2897     | 0.90143     | -1.2897 |         |  |
|           | 0.90143         | -1.2897 | 0.90143 | 0.90143     | 0.933934683 |         |         |  |
| MIR4777   | ENSG00000263641 | -1.2902 | 0.9015  | -1.2902     | 0.9015      | -1.2902 |         |  |
|           | 0.9015          | -1.2902 | 0.9015  | 0.9015      | 0.93398735  |         |         |  |
| IGHV3-54  | ENSG00000275475 | -1.2904 | 0.90154 | -1.2904     | 0.90154     | -1.2904 |         |  |
|           | 0.90154         | -1.2904 | 0.90154 | 0.90154     | 0.934008934 |         |         |  |
| NA        | ENSG00000260851 | -1.2908 | 0.90161 | -1.2908     | 0.90161     | -1.2908 | 0.90161 |  |
|           | -1.2908         | 0.90161 | 0.90161 | 0.934061596 |             |         |         |  |
| NA        | ENSG00000271797 | -1.291  | 0.90165 | -1.291      | 0.90165     | -1.291  | 0.90165 |  |
|           | -1.291          | 0.90165 | 0.90165 | 0.934064182 |             |         |         |  |
| NA        | ENSG00000223918 | -1.2911 | 0.90167 | -1.2911     | 0.90167     | -1.2911 | 0.90167 |  |
|           | -1.2911         | 0.90167 | 0.90167 | 0.934064182 |             |         |         |  |
| NA        | ENSG00000273008 | -1.2911 | 0.90167 | -1.2911     | 0.90167     | -1.2911 | 0.90167 |  |
|           | -1.2911         | 0.90167 | 0.90167 | 0.934064182 |             |         |         |  |
| STEAP1    | ENSG00000164647 | -1.3478 | 0.91115 | -1.4793     | 0.93046     | -1.492  |         |  |
|           | 0.93215         | -1.2914 | 0.90171 | 0.90171     | 0.934085761 |         |         |  |
| TASOR     | ENSG00000163946 | -1.7251 | 0.95775 | -1.2916     | 0.90175     | -1.7101 | 0.95638 |  |
|           | -1.7273         | 0.95795 | 0.90175 | 0.93410734  |             |         |         |  |
| SNORD121B | ENSG00000238300 | -1.2919 | 0.90181 | -1.2919     | 0.90181     | -1.2919 |         |  |
|           | 0.90181         | -1.2919 | 0.90181 | 0.90181     | 0.934129779 |         |         |  |
| RPL23AP91 | ENSG00000260965 | -1.5152 | 0.93513 | -1.5152     | 0.93513     | -2.0557 |         |  |
|           | 0.98009         | -1.292  | 0.90181 | 0.90181     | 0.934129779 |         |         |  |
| FOLR1     | ENSG00000110195 | -1.2925 | 0.9019  | -1.2925     | 0.9019      | -1.2925 | 0.9019  |  |
|           | -1.2925         | 0.9019  | 0.9019  | 0.934203146 |             |         |         |  |
| CRPP1     | ENSG00000223603 | -1.2929 | 0.90198 | -1.2929     | 0.90198     | -1.2929 | 0.90198 |  |
|           | -1.2929         | 0.90198 | 0.90198 | 0.934266152 |             |         |         |  |
| NA        | ENSG00000223906 | -1.2931 | 0.90201 | -1.2931     | 0.90201     | -1.2931 | 0.90201 |  |
|           | -1.2931         | 0.90201 | 0.90201 | 0.934277367 |             |         |         |  |
| HASPIN    | ENSG00000177602 | -1.2936 | 0.90209 | -1.2936     | 0.90209     | -1.2936 |         |  |
|           | 0.90209         | -1.2936 | 0.90209 | 0.90209     | 0.934313578 |         |         |  |
| NA        | ENSG00000226647 | -1.2936 | 0.9021  | -1.2936     | 0.9021      | -1.2936 | 0.9021  |  |
|           | -1.2936         | 0.9021  | 0.9021  | 0.934313578 |             |         |         |  |
| NA        | ENSG00000255951 | -1.2937 | 0.90211 | -1.2937     | 0.90211     | -1.2937 | 0.90211 |  |
|           | -1.2937         | 0.90211 | 0.90211 | 0.934313578 |             |         |         |  |
| NA        | ENSG00000229915 | -1.2938 | 0.90213 | -1.2938     | 0.90213     | -1.2938 | 0.90213 |  |
|           | -1.2938         | 0.90213 | 0.90213 | 0.934313578 |             |         |         |  |
| LSP1P3    | ENSG00000162685 | -1.294  | 0.90216 | -1.294      | 0.90216     | -1.294  |         |  |
|           | 0.90216         | -2.8169 | 0.99758 | 0.90216     | 0.934313578 |         |         |  |
| PLCB2-AS1 | ENSG00000259307 | -1.294  | 0.90216 | -1.294      | 0.90216     | -1.294  |         |  |
|           | 0.90216         | -1.294  | 0.90216 | 0.90216     | 0.934313578 |         |         |  |
| NA        | ENSG00000228259 | -1.2944 | 0.90224 | -1.2944     | 0.90224     | -1.2944 | 0.90224 |  |
|           | -1.2944         | 0.90224 | 0.90224 | 0.934356714 |             |         |         |  |
| DPP10-AS2 | ENSG00000235717 | -1.2944 | 0.90224 | -1.2944     | 0.90224     | -1.2944 |         |  |
|           | 0.90224         | -1.2944 | 0.90224 | 0.90224     | 0.934356714 |         |         |  |
| OR2B2     | ENSG00000168131 | -1.5111 | 0.93462 | -1.5111     | 0.93462     | -1.2946 | 0.90228 |  |
|           | -1.5111         | 0.93462 | 0.90228 | 0.934378281 |             |         |         |  |
| CORO2B    | ENSG00000103647 | -1.3263 | 0.90764 | -1.7118     | 0.95653     | -1.2947 |         |  |

|             |                 |         |         |             |             |         |         |         |
|-------------|-----------------|---------|---------|-------------|-------------|---------|---------|---------|
|             | 0.9023          | -2.0136 | 0.97798 | 0.9023      | 0.934379136 |         |         |         |
| APOOP2      | ENSG00000240902 | -1.295  | 0.90234 | 0.90234     | -1.295      | 0.90234 | -1.295  |         |
|             | 0.90234         | -1.295  | 0.90234 | 0.90234     | 0.9343912   |         |         |         |
| NA          | ENSG00000271035 | -1.295  | 0.90235 | 0.90235     | -1.295      | 0.90235 | -1.295  | 0.90235 |
|             | -1.295          | 0.90235 | 0.90235 | 0.9343912   |             |         |         |         |
| NA          | ENSG00000258907 | -1.2956 | 0.90245 | 0.90245     | -1.2956     | 0.90245 | -1.9066 | 0.97172 |
|             | -1.429          | 0.9235  | 0.90245 | 0.934474894 |             |         |         |         |
| RNU6-535P   | ENSG00000207453 | -2.3562 | 0.99077 | 0.99077     | -2.3562     | 0.99077 | -2.3562 |         |
|             | 0.99077         | -1.2958 | 0.90248 | 0.90248     | 0.934476599 |         |         |         |
| GJB7        | ENSG00000164411 | -1.2959 | 0.90249 | 0.90249     | -1.2959     | 0.90249 | -1.2959 | 0.90249 |
|             | -1.2959         | 0.90249 | 0.90249 | 0.934476599 |             |         |         |         |
| HMGB1P33    | ENSG00000261174 | -1.2961 | 0.90253 | 0.90253     | -1.2961     | 0.90253 | -1.2961 |         |
|             | 0.90253         | -1.2961 | 0.90253 | 0.90253     | 0.93449816  |         |         |         |
| NREP        | ENSG00000134986 | -1.5273 | 0.93666 | 0.93666     | -1.4505     | 0.92655 | -1.2963 | 0.90257 |
|             | -2.0827         | 0.98136 | 0.90257 | 0.93451972  |             |         |         |         |
| RPS6KB2-AS1 | ENSG00000255949 | -1.297  | 0.90269 | 0.90269     | -1.297      | 0.90269 | -1.297  |         |
|             | 0.90269         | -1.297  | 0.90269 | 0.90269     | 0.934624109 |         |         |         |
| NA          | ENSG00000270871 | -1.2972 | 0.90272 | 0.90272     | -1.2972     | 0.90272 | -1.2972 | 0.90272 |
|             | -1.2972         | 0.90272 | 0.90272 | 0.934635312 |             |         |         |         |
| NA          | ENSG00000208038 | -1.2976 | 0.90278 | 0.90278     | -1.2976     | 0.90278 | -1.2976 | 0.90278 |
|             | -1.2976         | 0.90278 | 0.90278 | 0.934677575 |             |         |         |         |
| SPAM1       | ENSG00000106304 | -1.2981 | 0.90288 | 0.90288     | -1.8355     | 0.96679 | -1.8355 | 0.96679 |
|             | -1.4453         | 0.92581 | 0.90288 | 0.934761248 |             |         |         |         |
| NA          | ENSG00000235545 | -1.2983 | 0.90291 | 0.90291     | -1.2983     | 0.90291 | -1.4592 | 0.92774 |
|             | -1.2983         | 0.90291 | 0.90291 | 0.934772447 |             |         |         |         |
| NA          | ENSG00000274594 | -1.2995 | 0.90312 | 0.90312     | -1.2995     | 0.90312 | -1.2995 | 0.90312 |
|             | -1.6395         | 0.94944 | 0.90312 | 0.934969994 |             |         |         |         |
| KRTAP29-1   | ENSG00000212658 | -1.316  | 0.90591 | 0.90591     | -1.316      | 0.90591 | -1.6806 |         |
|             | 0.95358         | -1.3001 | 0.90321 | 0.90321     | 0.935043303 |         |         |         |
| C20orf194   | ENSG00000088854 | -2.0473 | 0.97969 | 0.97969     | -1.3008     | 0.90333 | -2.0084 |         |
|             | 0.9777          | -2.2715 | 0.98844 | 0.90333     | 0.935147665 |         |         |         |
| NA          | ENSG00000280002 | -1.3009 | 0.90335 | 0.90335     | -1.3009     | 0.90335 | -1.3009 | 0.90335 |
|             | -1.3009         | 0.90335 | 0.90335 | 0.935148503 |             |         |         |         |
| RPL29P14    | ENSG00000241112 | -2.0663 | 0.9806  | 0.9806      | -1.3011     | 0.90339 | -1.3011 |         |
|             | 0.90339         | -1.3011 | 0.90339 | 0.90339     | 0.935170045 |         |         |         |
| NA          | ENSG00000266152 | -1.3012 | 0.90341 | 0.90341     | -1.3012     | 0.90341 | -1.3012 | 0.90341 |
|             | -1.3012         | 0.90341 | 0.90341 | 0.935170883 |             |         |         |         |
| NA          | ENSG00000215159 | -1.914  | 0.97219 | 0.97219     | -1.914      | 0.97219 | -1.914  | 0.97219 |
|             | -1.3018         | 0.9035  | 0.9035  | 0.93524418  |             |         |         |         |
| MIR301B     | ENSG00000212102 | -1.3019 | 0.90352 | 0.90352     | -1.3019     | 0.90352 | -1.3019 |         |
|             | 0.90352         | -1.3019 | 0.90352 | 0.90352     | 0.935245016 |         |         |         |
| BNIP3P16    | ENSG00000267641 | -1.3022 | 0.90357 | 0.90357     | -1.3022     | 0.90357 | -1.3022 |         |
|             | 0.90357         | -1.3022 | 0.90357 | 0.90357     | 0.935267389 |         |         |         |
| RNU6-675P   | ENSG00000206963 | -1.3022 | 0.90358 | 0.90358     | -1.3022     | 0.90358 | -1.3022 |         |
|             | 0.90358         | -1.3022 | 0.90358 | 0.90358     | 0.935267389 |         |         |         |
| NA          | ENSG00000269392 | -1.3024 | 0.90362 | 0.90362     | -1.3024     | 0.90362 | -1.3024 | 0.90362 |
|             | -1.3024         | 0.90362 | 0.90362 | 0.935269895 |             |         |         |         |
| NA          | ENSG00000232019 | -1.4524 | 0.92681 | 0.92681     | -1.6858     | 0.95408 | -1.3025 | 0.90363 |
|             | -1.5401         | 0.93823 | 0.90363 | 0.935269895 |             |         |         |         |
| RPL7        | ENSG00000147604 | -1.5051 | 0.93385 | 0.93385     | -1.3026     | 0.90364 | -1.5051 | 0.93385 |
|             | -1.5051         | 0.93385 | 0.90364 | 0.935269895 |             |         |         |         |
| PARP2       | ENSG00000129484 | -1.306  | 0.90422 | 0.90422     | -2.1592     | 0.98458 | -1.8368 | 0.96688 |
|             | -1.3033         | 0.90376 | 0.90376 | 0.935374228 |             |         |         |         |
| HSF4        | ENSG00000102878 | -1.3043 | 0.90394 | 0.90394     | -1.6543     | 0.95097 | -1.3043 | 0.90394 |
|             | -1.3043         | 0.90394 | 0.90394 | 0.935540655 |             |         |         |         |
| NA          | ENSG00000259600 | -1.3048 | 0.90401 | 0.90401     | -1.3048     | 0.90401 | -1.3048 | 0.90401 |
|             | -1.3048         | 0.90401 | 0.90401 | 0.935573362 |             |         |         |         |
| MTND3P12    | ENSG00000259626 | -1.3048 | 0.90401 | 0.90401     | -1.3048     | 0.90401 | -1.3048 |         |
|             | 0.90401         | -1.3048 | 0.90401 | 0.90401     | 0.935573362 |         |         |         |
| NA          | ENSG00000255540 | -1.3049 | 0.90404 | 0.90404     | -1.3049     | 0.90404 | -1.3049 | 0.90404 |
|             | -1.3049         | 0.90404 | 0.90404 | 0.935584539 |             |         |         |         |
| RPS27P27    | ENSG00000244043 | -1.9372 | 0.97364 | 0.97364     | -1.3054     | 0.90413 | -1.3054 |         |

|             |                 |         |         |             |             |             |         |  |
|-------------|-----------------|---------|---------|-------------|-------------|-------------|---------|--|
|             | 0.90413         | -1.3054 | 0.90413 | 0.90413     | 0.935648287 |             |         |  |
| NA          | ENSG00000272009 | -1.3055 | 0.90414 | -1.3055     | 0.90414     | -1.3055     | 0.90414 |  |
|             |                 | -1.3055 | 0.90414 | 0.935648287 |             |             |         |  |
| IGHV5-78    | ENSG00000211978 | -1.3058 | 0.9042  | -1.3058     | 0.9042      | -1.3058     | 0.9042  |  |
|             |                 | 0.9042  | -1.3058 | 0.9042      | 0.935690508 |             |         |  |
| RNA5SP209   | ENSG00000223169 | -1.3063 | 0.90427 | -1.3063     | 0.90427     | -1.3063     | 0.90427 |  |
|             |                 | 0.90427 | -1.3063 | 0.90427     | 0.935733551 |             |         |  |
| LINC02748   | ENSG00000255187 | -2.0559 | 0.9801  | -1.3064     | 0.90428     | -2.0559     |         |  |
|             |                 | 0.9801  | -2.0559 | 0.9801      | 0.90428     | 0.935733551 |         |  |
| STARD13-IT1 | ENSG00000230300 | -1.307  | 0.90439 | -1.307      | 0.90439     | -1.307      | 0.90439 |  |
|             |                 | 0.90439 | -1.307  | 0.90439     | 0.935827505 |             |         |  |
| NA          | ENSG00000263212 | -1.3071 | 0.90441 | -1.3071     | 0.90441     | -1.3071     | 0.90441 |  |
|             |                 | -1.3071 | 0.90441 | 0.90441     | 0.935828328 |             |         |  |
| NA          | ENSG00000241169 | -1.3075 | 0.90447 | -1.4593     | 0.92775     | -1.3186     | 0.90635 |  |
|             |                 | -1.6739 | 0.95293 | 0.90447     | 0.93587054  |             |         |  |
| HNRNPA1P50  | ENSG00000257195 | -1.3076 | 0.9045  | -1.3076     | 0.9045      | -1.3076     | 0.9045  |  |
|             |                 | 0.9045  | -1.3076 | 0.9045      | 0.93588171  |             |         |  |
| HMGB1P9     | ENSG00000224159 | -1.3084 | 0.90464 | -1.3084     | 0.90464     | -1.3084     | 0.90464 |  |
|             |                 | 0.90464 | -1.3084 | 0.90464     | 0.936006693 |             |         |  |
| NA          | ENSG00000272817 | -1.3086 | 0.90467 | -1.3086     | 0.90467     | -1.3086     | 0.90467 |  |
|             |                 | -1.3086 | 0.90467 | 0.90467     | 0.936017859 |             |         |  |
| NA          | ENSG00000279753 | -1.3089 | 0.90472 | -1.3089     | 0.90472     | -1.3089     | 0.90472 |  |
|             |                 | -1.3089 | 0.90472 | 0.90472     | 0.936040189 |             |         |  |
| FGD6        | ENSG00000180263 | -2.0079 | 0.97767 | -1.309      | 0.90473     | -2.2394     | 0.98743 |  |
|             |                 | -1.6289 | 0.94833 | 0.90473     | 0.936040189 |             |         |  |
| NA          | ENSG00000200616 | -1.3098 | 0.90486 | -1.3098     | 0.90486     | -1.3098     | 0.90486 |  |
|             |                 | -1.3098 | 0.90486 | 0.90486     | 0.936154812 |             |         |  |
| MYBL1       | ENSG00000185697 | -1.5034 | 0.93363 | -1.6655     | 0.95209     | -1.31       | 0.9049  |  |
|             |                 | -1.4096 | 0.92067 | 0.9049      | 0.936176319 |             |         |  |
| NA          | ENSG00000258033 | -1.3102 | 0.90494 | -1.3102     | 0.90494     | -1.3102     | 0.90494 |  |
|             |                 | -1.3102 | 0.90494 | 0.90494     | 0.936197826 |             |         |  |
| C19orf85    | ENSG00000283567 | -1.3104 | 0.90497 | -1.3104     | 0.90497     | -1.3104     | 0.90497 |  |
|             |                 | 0.90497 | -1.3104 | 0.90497     | 0.936199457 |             |         |  |
| PPM1J       | ENSG00000155367 | -1.3105 | 0.90498 | -1.3105     | 0.90498     | -1.3105     | 0.90498 |  |
|             |                 | -1.3105 | 0.90498 | 0.90498     | 0.936199457 |             |         |  |
| CRCT1       | ENSG00000169509 | -1.3109 | 0.90506 | -1.3109     | 0.90506     | -1.3109     | 0.90506 |  |
|             |                 | -1.3109 | 0.90506 | 0.90506     | 0.93626234  |             |         |  |
| ZSWIM1      | ENSG00000168612 | -1.4927 | 0.93225 | -1.5803     | 0.94299     | -1.3114     | 0.90514 |  |
|             |                 | 0.90514 | -1.3114 | 0.90514     | 0.936305345 |             |         |  |
| TSEN15P3    | ENSG00000234922 | -1.3114 | 0.90514 | -1.3114     | 0.90514     | -1.3114     | 0.90514 |  |
|             |                 | 0.90514 | -1.3114 | 0.90514     | 0.936305345 |             |         |  |
| RNA5SP280   | ENSG00000223162 | -1.3116 | 0.90517 | -1.3116     | 0.90517     | -1.3116     | 0.90517 |  |
|             |                 | 0.90517 | -1.3116 | 0.90517     | 0.936316502 |             |         |  |
| DMTF1       | ENSG00000135164 | -1.312  | 0.90524 | -1.3952     | 0.91852     | -1.4622     | 0.92815 |  |
|             |                 | -1.8585 | 0.96845 | 0.90524     | 0.936369034 |             |         |  |
| RNU7-175P   | ENSG00000251724 | -1.3124 | 0.9053  | -1.3124     | 0.9053      | -1.3124     | 0.9053  |  |
|             |                 | 0.9053  | -1.3124 | 0.9053      | 0.93641122  |             |         |  |
| MAP2K5      | ENSG00000137764 | -1.862  | 0.9687  | -2.3784     | 0.99131     | -1.3126     | 0.90534 |  |
|             |                 | 0.90534 | -2.264  | 0.98821     | 0.90534     | 0.936424805 |         |  |
| SNORD115-12 | ENSG00000199453 | -1.3129 | 0.90539 | -1.3129     | 0.90539     | -1.3129     | 0.90539 |  |
|             |                 | 0.90539 | -1.3129 | 0.90539     | 0.936424805 |             |         |  |
| HTN3        | ENSG00000205649 | -1.8616 | 0.96867 | -1.3129     | 0.90539     | -1.3129     | 0.90539 |  |
|             |                 | -1.3129 | 0.90539 | 0.90539     | 0.936424805 |             |         |  |
| NA          | ENSG00000255286 | -1.6816 | 0.95367 | -1.6816     | 0.95367     | -1.6816     | 0.95367 |  |
|             |                 | -1.3129 | 0.90539 | 0.90539     | 0.936424805 |             |         |  |
| OPRPN       | ENSG00000171199 | -1.4141 | 0.92133 | -1.8137     | 0.96514     | -1.4141     | 0.92133 |  |
|             |                 | -1.313  | 0.90541 | 0.90541     | 0.936425616 |             |         |  |
| RPL31P41    | ENSG00000239261 | -1.3135 | 0.90549 | -1.3135     | 0.90549     | -1.3135     | 0.90549 |  |
|             |                 | 0.90549 | -1.4529 | 0.92688     | 0.90549     | 0.93648848  |         |  |
| NA          | ENSG00000253973 | -1.3142 | 0.9056  | -1.3142     | 0.9056      | -1.3142     | 0.9056  |  |
|             |                 | -1.3142 | 0.9056  | 0.9056      | 0.936582368 |             |         |  |
| RNU6-269P   | ENSG00000212379 | -1.3142 | 0.90562 | -1.3142     | 0.90562     | -1.3142     | 0.90562 |  |



|            |                 |             |             |             |             |         |         |         |
|------------|-----------------|-------------|-------------|-------------|-------------|---------|---------|---------|
|            | 0.90562         | -2.6513     | 0.99599     | 0.90562     | 0.936583175 |         |         |         |
| NA         | ENSG00000174171 | -1.3146     | 0.90568     | 0.90568     | -1.3146     | 0.90568 | -1.3146 | 0.90568 |
|            | -1.3146         | 0.90568     | 0.90568     | 0.936625348 |             |         |         |         |
| CHMP4C     | ENSG00000164695 | -1.5078     | 0.9342      | 0.9342      | -1.3151     | 0.90576 | -1.5078 |         |
|            | 0.9342          | -1.5078     | 0.9342      | 0.90576     | 0.936688203 |         |         |         |
| SDC4P      | ENSG00000214161 | -1.3157     | 0.90586     | 0.90586     | -1.3157     | 0.90586 | -1.3157 | 0.90586 |
|            | -1.3157         | 0.90586     | 0.90586     | 0.936771737 |             |         |         |         |
| NA         | ENSG00000254139 | -1.3158     | 0.90588     | 0.90588     | -1.3158     | 0.90588 | -1.3158 | 0.90588 |
|            | -1.3158         | 0.90588     | 0.90588     | 0.93677254  |             |         |         |         |
| RANBP3     | ENSG00000031823 | -1.316      | 0.90592     | 0.90592     | -1.316      | 0.90592 | -1.4099 |         |
|            | 0.92072         | -1.316      | 0.90592     | 0.90592     | 0.936774145 |         |         |         |
| MIR5698    | ENSG00000263987 | -1.316      | 0.90592     | 0.90592     | -1.316      | 0.90592 | -1.316  |         |
|            | 0.90592         | -1.316      | 0.90592     | 0.90592     | 0.936774145 |         |         |         |
| RN7SKP299  | ENSG00000271765 | -1.4909     | 0.93201     | 0.93201     | -1.4094     | 0.92065 | -1.4909 |         |
|            | 0.93201         | -1.3165     | 0.90609     | 0.93683699  |             |         |         |         |
| NA         | ENSG00000280214 | -1.3169     | 0.90607     | 0.90607     | -1.3169     | 0.90607 | -1.3169 | 0.90607 |
|            | -1.3169         | 0.90607     | 0.90607     | 0.936879952 |             |         |         |         |
| RNU4ATAC   | ENSG00000264229 | -1.317      | 0.90608     | 0.90608     | -1.317      | 0.90608 | -1.317  |         |
|            | 0.90608         | -1.317      | 0.90608     | 0.90608     | 0.936879952 |         |         |         |
| FTMT       | ENSG00000181867 | -1.3177     | 0.9062      | 0.9062      | -1.3177     | 0.9062  | -1.3177 | 0.9062  |
|            | -1.3177         | 0.9062      | 0.9062      | 0.936957124 |             |         |         |         |
| NA         | ENSG00000269378 | -1.3178     | 0.90621     | 0.90621     | -1.3178     | 0.90621 | -1.3178 | 0.90621 |
|            | -1.3178         | 0.90621     | 0.90621     | 0.936957124 |             |         |         |         |
| PPIAP40    | ENSG00000230593 | -1.318      | 0.90624     | 0.90624     | -1.854      | 0.96813 | -1.318  |         |
|            | 0.90624         | -1.318      | 0.90624     | 0.90624     | 0.936957124 |         |         |         |
| NA         | ENSG00000279036 | -1.3179     | 0.90624     | 0.90624     | -1.3179     | 0.90624 | -1.3179 | 0.90624 |
|            | -1.3179         | 0.90624     | 0.90624     | 0.936957124 |             |         |         |         |
| SHISA6     | ENSG00000188803 | -1.3677     | 0.9143      | 0.9143      | -1.4853     | 0.93127 | -1.4556 |         |
|            | 0.92724         | -1.3181     | 0.90626     | 0.90626     | 0.936957124 |         |         |         |
| NA         | ENSG00000268777 | -1.3181     | 0.90627     | 0.90627     | -1.3181     | 0.90627 | -1.3181 | 0.90627 |
|            | -1.3181         | 0.90627     | 0.90627     | 0.936957124 |             |         |         |         |
| NA         | ENSG00000252398 | -1.3183     | 0.9063      | 0.9063      | -1.3183     | 0.9063  | -1.3183 | 0.9063  |
|            | -1.3183         | 0.9063      | 0.9063      | 0.936968261 |             |         |         |         |
| GLS2       | ENSG00000135423 | -2.073      | 0.98091     | 0.98091     | -1.6078     | 0.94606 | -1.3185 | 0.90632 |
|            | -1.5259         | 0.93649     | 0.90632     | 0.93696906  |             |         |         |         |
| OOSP4B     | ENSG00000255393 | -1.3188     | 0.90638     | 0.90638     | -1.3188     | 0.90638 | -1.3188 |         |
|            | 0.90638         | -1.3188     | 0.90638     | 0.90638     | 0.937003265 |         |         |         |
| MARK2      | ENSG00000072518 | -1.3684     | 0.91441     | 0.91441     | -1.8105     | 0.96489 | -1.5141 | 0.935   |
|            | -1.319          | 0.90642     | 0.90642     | 0.937003265 |             |         |         |         |
| CXCL6      | ENSG00000124875 | -1.3191     | 0.90643     | 0.90643     | -1.3191     | 0.90643 | -1.3191 | 0.90643 |
|            | -1.3191         | 0.90643     | 0.90643     | 0.937003265 |             |         |         |         |
| RNU6-543P  | ENSG00000199446 | -1.7322     | 0.95838     | 0.95838     | -1.3191     | 0.90643 | -1.5192 |         |
|            | 0.93565         | -1.5249     | 0.93635     | 0.90643     | 0.937003265 |         |         |         |
| CNKSR1     | ENSG00000142675 | -2.0702     | 0.98078     | 0.98078     | -1.3192     | 0.90646 | -2.1262 |         |
|            | 0.98326         | -2.0175     | 0.97818     | 0.90646     | 0.937014399 |         |         |         |
| FAM180A    | ENSG00000189320 | -1.3196     | 0.90651     | 0.90651     | -1.3196     | 0.90651 | -1.3196 |         |
|            | 0.90651         | -1.3196     | 0.90651     | 0.90651     | 0.937046207 |         |         |         |
| RPL13AP19  | ENSG00000228754 | -1.3198     | 0.90655     | 0.90655     | -1.3198     | 0.90655 | -1.3198 |         |
|            | 0.90655         | -1.3198     | 0.90655     | 0.90655     | 0.937067677 |         |         |         |
| RNU6-1272P | ENSG00000199646 | -1.32       | 0.90659     | 0.90659     | -1.32       | 0.90659 | -1.32   | 0.90659 |
|            | 0.90659         | 0.90659     | 0.937069269 |             |             |         |         |         |
| NA         | ENSG00000229025 | -1.32       | 0.90659     | 0.90659     | -1.32       | 0.90659 | -1.32   | 0.90659 |
|            | 0.90659         | 0.937069269 |             |             |             |         |         |         |
| RNA5SP120  | ENSG00000222832 | -1.3713     | 0.91486     | 0.91486     | -1.3713     | 0.91486 | -1.3207 |         |
|            | 0.90671         | -1.3713     | 0.91486     | 0.90671     | 0.937173425 |         |         |         |
| RNA5SP326  | ENSG00000200079 | -1.3219     | 0.9069      | 0.9069      | -1.3219     | 0.9069  | -1.3219 |         |
|            | 0.9069          | -1.3219     | 0.9069      | 0.9069      | 0.937349927 |         |         |         |
| EID1       | ENSG00000255302 | -1.322      | 0.90692     | 0.90692     | -1.322      | 0.90692 | -1.322  | 0.90692 |
|            | -1.322          | 0.90692     | 0.90692     | 0.937350717 |             |         |         |         |
| NA         | ENSG00000270917 | -1.3224     | 0.90699     | 0.90699     | -1.3224     | 0.90699 | -1.3224 | 0.90699 |
|            | -1.3224         | 0.90699     | 0.90699     | 0.937403184 |             |         |         |         |
| NA         | ENSG00000262304 | -1.3226     | 0.90702     | 0.90702     | -1.3226     | 0.90702 | -1.3226 | 0.90702 |

|             |                 |         |             |             |             |         |         |         |
|-------------|-----------------|---------|-------------|-------------|-------------|---------|---------|---------|
|             | -1.3226         | 0.90702 | 0.90702     | 0.937414308 |             |         |         |         |
| CDKN2A-DT   | ENSG00000224854 | -1.3227 | 0.90704     | -1.3227     | 0.90704     | -1.3227 | 0.90704 | -1.3227 |
|             | 0.90704         | -1.3227 | 0.90704     | 0.90704     | 0.937415096 |         |         |         |
| ZKSCAN3     | ENSG00000189298 | -1.323  | 0.90709     | -1.9428     | 0.90709     | 0.97398 |         | -1.3761 |
|             | 0.91561         | -1.7638 | 0.96112     | 0.90709     | 0.937446889 |         |         |         |
| PAQR9       | ENSG00000188582 | -1.3238 | 0.90722     | -1.3238     | 0.90722     | -1.3238 |         | 0.90722 |
|             | -1.3238         | 0.90722 | 0.90722     | 0.937522377 |             |         |         |         |
| NA          | ENSG00000271792 | -1.3238 | 0.90722     | -1.3238     | 0.90722     | -1.3238 |         | 0.90722 |
|             | -1.3238         | 0.90722 | 0.90722     | 0.937522377 |             |         |         |         |
| NA          | ENSG00000256273 | -1.7615 | 0.96092     | -1.3501     | 0.91151     | -1.5043 |         | 0.93375 |
|             | -1.3239         | 0.90724 | 0.90724     | 0.937522377 |             |         |         |         |
| NA          | ENSG00000268533 | -1.324  | 0.90724     | -1.324      | 0.90724     | -1.324  |         | 0.90724 |
|             | -1.324          | 0.90724 | 0.90724     | 0.937522377 |             |         |         |         |
| MTERF3      | ENSG00000156469 | -1.3244 | 0.90732     | -1.3244     | 0.90732     | -1.3244 |         |         |
|             | 0.90732         | -1.6733 | 0.95287     | 0.90732     | 0.937566068 |         |         |         |
| NA          | ENSG00000206719 | -1.3245 | 0.90733     | -1.3245     | 0.90733     | -1.3245 |         | 0.90733 |
|             | -1.3245         | 0.90733 | 0.90733     | 0.937566068 |             |         |         |         |
| EGR2        | ENSG00000122877 | -1.7882 | 0.96313     | -1.7882     | 0.96313     | -1.7882 |         | 0.96313 |
|             | -1.3246         | 0.90734 | 0.90734     | 0.937566068 |             |         |         |         |
| RNU6-689P   | ENSG00000206924 | -1.3248 | 0.90738     | -1.3248     | 0.90738     | -1.3248 |         |         |
|             | 0.90738         | -1.3248 | 0.90738     | 0.90738     | 0.937569209 |         |         |         |
| NA          | ENSG00000267808 | -1.3249 | 0.90739     | -1.3249     | 0.90739     | -1.3249 |         | 0.90739 |
|             | -1.3249         | 0.90739 | 0.90739     | 0.937569209 |             |         |         |         |
| AK3P3       | ENSG00000230042 | -1.325  | 0.90741     | -1.325      | 0.90741     | -1.325  |         | 0.90741 |
|             | -1.325          | 0.90741 | 0.90741     | 0.937569209 |             |         |         |         |
| NA          | ENSG00000247324 | -1.325  | 0.90742     | -1.325      | 0.90742     | -1.325  |         | 0.90742 |
|             | -1.325          | 0.90742 | 0.90742     | 0.937569209 |             |         |         |         |
| RSL24D1P2   | ENSG00000230595 | -1.3256 | 0.90752     | -1.4012     | 0.91942     | -1.3256 |         |         |
|             | 0.90752         | -1.3256 | 0.90752     | 0.90752     | 0.93765265  |         |         |         |
| NA          | ENSG00000269303 | -1.326  | 0.90759     | -1.326      | 0.90759     | -1.326  |         | 0.90759 |
|             | -1.326          | 0.90759 | 0.90759     | 0.937705093 |             |         |         |         |
| NA          | ENSG00000277715 | -1.3264 | 0.90764     | -1.3264     | 0.90764     | -1.3264 |         | 0.90764 |
|             | -1.3264         | 0.90764 | 0.90764     | 0.93773687  |             |         |         |         |
| NA          | ENSG00000272186 | -1.3273 | 0.90779     | -1.3273     | 0.90779     | -1.3273 |         | 0.90779 |
|             | -1.3273         | 0.90779 | 0.90779     | 0.937871959 |             |         |         |         |
| NA          | ENSG00000226990 | -1.328  | 0.90792     | -1.328      | 0.90792     | -1.328  |         | 0.90792 |
|             | -1.328          | 0.90792 | 0.90792     | 0.937932168 |             |         |         |         |
| NA          | ENSG00000232176 | -1.3282 | 0.90794     | -1.3282     | 0.90794     | -1.3282 |         | 0.90794 |
|             | -1.3282         | 0.90794 | 0.90794     | 0.937932168 |             |         |         |         |
| NA          | ENSG00000229881 | -1.901  | 0.97135     | -1.3283     | 0.90796     | -2.0532 |         | 0.97997 |
|             | -1.7552         | 0.96039 | 0.90796     | 0.937932168 |             |         |         |         |
| NA          | ENSG00000243537 | -1.3283 | 0.90797     | -1.3283     | 0.90797     | -1.3283 |         | 0.90797 |
|             | -1.5405         | 0.93828 | 0.90797     | 0.937932168 |             |         |         |         |
| NA          | ENSG00000242190 | -1.3284 | 0.90798     | -1.3284     | 0.90798     | -1.3284 |         | 0.90798 |
|             | -1.3284         | 0.90798 | 0.90798     | 0.937932168 |             |         |         |         |
| KHDC1L      | ENSG00000256980 | -1.3286 | 0.908       | -1.3286     | 0.908       | -1.3286 |         | 0.908   |
|             | 0.908           | 0.908   | 0.937932168 |             |             |         |         |         |
| DUOXA2      | ENSG00000140274 | -1.3286 | 0.90801     | -1.3286     | 0.90801     | -1.3286 |         |         |
|             | 0.90801         | -1.3286 | 0.90801     | 0.90801     | 0.937932168 |         |         |         |
| NA          | ENSG00000236338 | -1.3288 | 0.90805     | -1.3288     | 0.90805     | -1.3288 |         | 0.90805 |
|             | -1.3288         | 0.90805 | 0.90805     | 0.937932168 |             |         |         |         |
| NA          | ENSG00000267697 | -1.3288 | 0.90805     | -1.3288     | 0.90805     | -1.3288 |         | 0.90805 |
|             | -1.3288         | 0.90805 | 0.90805     | 0.937932168 |             |         |         |         |
| SNORD115-11 | ENSG00000200486 | -1.3289 | 0.90806     | -1.3289     | 0.90806     | -1.3289 |         |         |
|             | 0.90806         | -1.3289 | 0.90806     | 0.90806     | 0.937932168 |         |         |         |
| LINC02354   | ENSG00000257488 | -1.5852 | 0.94354     | -1.3289     | 0.90806     | -1.5852 |         |         |
|             | 0.94354         | -1.5852 | 0.94354     | 0.90806     | 0.937932168 |         |         |         |
| NA          | ENSG00000253887 | -1.3291 | 0.9081      | -1.3291     | 0.9081      | -1.3291 |         | 0.9081  |
|             | -1.3291         | 0.9081  | 0.9081      | 0.937953602 |             |         |         |         |
| ZNF740      | ENSG00000139651 | -1.3295 | 0.90815     | -1.3295     | 0.90815     | -1.3295 |         |         |
|             | 0.90815         | -1.3295 | 0.90815     | 0.90815     | 0.937977365 |         |         |         |
| BCAS2P2     | ENSG00000234332 | -1.3296 | 0.90818     | -1.3296     | 0.90818     | -1.3296 |         |         |

|           |                 |         |         |             |             |         |         |         |
|-----------|-----------------|---------|---------|-------------|-------------|---------|---------|---------|
|           | 0.90818         | -1.3296 | 0.90818 | 0.90818     | 0.937977365 |         |         |         |
| MIR661    | ENSG00000207574 | -1.3298 | 0.9082  | 0.9082      | -1.3298     | 0.9082  | -1.3298 |         |
|           | 0.9082          | -1.3298 | 0.9082  | 0.9082      | 0.937977365 |         |         |         |
| NA        | ENSG00000261839 | -1.3298 | 0.9082  | 0.9082      | -1.3298     | 0.9082  | -1.3298 | 0.9082  |
|           | -1.3298         | 0.9082  | 0.9082  | 0.937977365 |             |         |         |         |
| NA        | ENSG00000261033 | -1.3307 | 0.90836 | 0.90836     | -1.3307     | 0.90836 | -1.3307 | 0.90836 |
|           | -1.3307         | 0.90836 | 0.90836 | 0.93810362  |             |         |         |         |
| RNA5SP355 | ENSG00000202187 | -1.3308 | 0.90837 | 0.90837     | -1.3308     | 0.90837 | -1.3308 |         |
|           | 0.90837         | -1.3308 | 0.90837 | 0.90837     | 0.93810362  |         |         |         |
| TDG       | ENSG00000139372 | -1.3807 | 0.91631 | 0.91631     | -1.3308     | 0.90838 | -1.9213 | 0.97265 |
|           | -1.3391         | 0.90973 | 0.90838 | 0.93810362  |             |         |         |         |
| NA        | ENSG00000270777 | -1.331  | 0.90841 | 0.90841     | -1.331      | 0.90841 | -1.331  | 0.90841 |
|           | -1.331          | 0.90841 | 0.90841 | 0.93811472  |             |         |         |         |
| COG5      | ENSG00000164597 | -1.8079 | 0.96469 | 0.96469     | -1.3315     | 0.90849 | -1.3675 | 0.91427 |
|           | -1.9278         | 0.97306 | 0.90849 | 0.938177454 |             |         |         |         |
| NA        | ENSG00000259670 | -1.3318 | 0.90853 | 0.90853     | -1.3318     | 0.90853 | -1.3318 | 0.90853 |
|           | -1.3318         | 0.90853 | 0.90853 | 0.938198879 |             |         |         |         |
| IDH3A     | ENSG00000166411 | -1.3318 | 0.90855 | 0.90855     | -1.3318     | 0.90855 | -1.3318 | 0.90855 |
|           | -1.3318         | 0.90855 | 0.90855 | 0.93819965  |             |         |         |         |
| CDH16     | ENSG00000166589 | -1.332  | 0.90858 | 0.90858     | -1.4983     | 0.93297 | -1.9759 | 0.97592 |
|           | -1.4262         | 0.9231  | 0.90858 | 0.938210748 |             |         |         |         |
| NA        | ENSG00000227535 | -1.3324 | 0.90864 | 0.90864     | -1.3324     | 0.90864 | -1.3324 | 0.90864 |
|           | -1.3324         | 0.90864 | 0.90864 | 0.938252823 |             |         |         |         |
| SNORD55   | ENSG00000264294 | -1.3332 | 0.90876 | 0.90876     | -1.3332     | 0.90876 | -1.3332 |         |
|           | 0.90876         | -1.3332 | 0.90876 | 0.90876     | 0.93835685  |         |         |         |
| TRGV1     | ENSG00000211701 | -1.3336 | 0.90883 | 0.90883     | -1.3336     | 0.90883 | -1.3336 | 0.90883 |
|           | -1.3336         | 0.90883 | 0.90883 | 0.938399686 |             |         |         |         |
| NA        | ENSG00000270894 | -1.3336 | 0.90884 | 0.90884     | -1.3336     | 0.90884 | -1.3336 | 0.90884 |
|           | -1.3336         | 0.90884 | 0.90884 | 0.938399686 |             |         |         |         |
| LINC01275 | ENSG00000237595 | -1.6752 | 0.95305 | 0.95305     | -2.177      | 0.98526 | -1.3352 |         |
|           | 0.9091          | -1.3352 | 0.9091  | 0.9091      | 0.938629128 |         |         |         |
| NA        | ENSG00000223080 | -1.3354 | 0.90912 | 0.90912     | -1.3354     | 0.90912 | -1.3354 | 0.90912 |
|           | -1.3354         | 0.90912 | 0.90912 | 0.938629128 |             |         |         |         |
| NA        | ENSG00000226963 | -1.3353 | 0.90912 | 0.90912     | -1.3353     | 0.90912 | -1.3353 | 0.90912 |
|           | -1.3353         | 0.90912 | 0.90912 | 0.938629128 |             |         |         |         |
| LINC01539 | ENSG00000267712 | -1.8299 | 0.96637 | 0.96637     | -1.4229     | 0.92262 | -1.5016 |         |
|           | 0.93339         | -1.3357 | 0.90917 | 0.90917     | 0.938660864 |         |         |         |
| SELENOKP1 | ENSG00000267319 | -1.336  | 0.90923 | 0.90923     | -1.336      | 0.90923 | -1.336  |         |
|           | 0.90923         | -1.336  | 0.90923 | 0.90923     | 0.938683795 |         |         |         |
| NA        | ENSG00000267505 | -1.3361 | 0.90924 | 0.90924     | -1.3361     | 0.90924 | -1.3361 | 0.90924 |
|           | -1.3361         | 0.90924 | 0.90924 | 0.938683795 |             |         |         |         |
| NA        | ENSG00000222160 | -1.3361 | 0.90925 | 0.90925     | -1.3361     | 0.90925 | -1.3361 | 0.90925 |
|           | -1.3361         | 0.90925 | 0.90925 | 0.938683795 |             |         |         |         |
| NA        | ENSG00000263338 | -1.3364 | 0.90929 | 0.90929     | -1.3364     | 0.90929 | -1.3364 | 0.90929 |
|           | -1.3364         | 0.90929 | 0.90929 | 0.938705203 |             |         |         |         |
| NA        | ENSG00000242396 | -1.337  | 0.90939 | 0.90939     | -2.4671     | 0.99319 | -2.4671 | 0.99319 |
|           | -2.4671         | 0.99319 | 0.90939 | 0.93878855  |             |         |         |         |
| NA        | ENSG00000272240 | -1.3372 | 0.90942 | 0.90942     | -1.3372     | 0.90942 | -1.3372 | 0.90942 |
|           | -1.3372         | 0.90942 | 0.90942 | 0.938799631 |             |         |         |         |
| WASHC2A   | ENSG00000099290 | -1.3373 | 0.90944 | 0.90944     | -1.878      | 0.96981 | -1.6554 |         |
|           | 0.95108         | -1.4093 | 0.92063 | 0.90944     | 0.93880039  |         |         |         |
| AKR1D1P1  | ENSG00000227776 | -1.3376 | 0.90949 | 0.90949     | -1.3376     | 0.90949 | -1.3376 |         |
|           | 0.90949         | -1.3376 | 0.90949 | 0.90949     | 0.938812229 |         |         |         |
| DPY19L4P1 | ENSG00000229663 | -1.5257 | 0.93646 | 0.93646     | -1.9231     | 0.97276 | -1.3377 |         |
|           | 0.90949         | -1.9231 | 0.97276 | 0.90949     | 0.938812229 |         |         |         |
| NA        | ENSG00000257624 | -1.3382 | 0.90958 | 0.90958     | -1.3382     | 0.90958 | -1.3382 | 0.90958 |
|           | -1.3382         | 0.90958 | 0.90958 | 0.938875677 |             |         |         |         |
| NA        | ENSG00000273442 | -1.3383 | 0.90959 | 0.90959     | -1.3383     | 0.90959 | -1.3383 | 0.90959 |
|           | -1.3383         | 0.90959 | 0.90959 | 0.938875677 |             |         |         |         |
| HYAL3     | ENSG00000186792 | -1.339  | 0.90971 | 0.90971     | -1.339      | 0.90971 | -1.339  | 0.90971 |
|           | -1.339          | 0.90971 | 0.90971 | 0.938950196 |             |         |         |         |
| NAA80     | ENSG00000243477 | -1.339  | 0.90971 | 0.90971     | -1.339      | 0.90971 | -1.339  | 0.90971 |

|             |                 |             |             |             |             |             |             |  |
|-------------|-----------------|-------------|-------------|-------------|-------------|-------------|-------------|--|
|             | -1.339          | 0.90971     | 0.90971     | 0.938950196 |             |             |             |  |
| YTHDC2      | ENSG00000047188 | -1.339      | 0.90972     | -1.402      | 0.91955     | -1.4082     |             |  |
|             | 0.92047         | -1.81096485 | 0.90972     | 0.938950196 |             |             |             |  |
| RPL36AP35   | ENSG00000231810 | -1.3391     | 0.90974     | -1.3391     | 0.90974     | -1.3391     |             |  |
|             | 0.90974         | -1.3391     | 0.90974     | 0.90974     | 0.938950951 |             |             |  |
| NA          | ENSG00000223774 | -1.3396     | 0.90981     | -1.3396     | 0.90981     | -1.3396     | 0.90981     |  |
|             | -1.3396         | 0.90981     | 0.90981     | 0.93900331  |             |             |             |  |
| NA          | ENSG00000271980 | -1.34090987 | -1.34090987 | -1.34090987 | -1.34090987 | -1.34090987 | -1.34090987 |  |
|             | 0.90987         | 0.939045347 |             |             |             |             |             |  |
| NA          | ENSG00000263325 | -1.3403     | 0.90992     | -1.3403     | 0.90992     | -1.3403     | 0.90992     |  |
|             | -1.3403         | 0.90992     | 0.90992     | 0.939077061 |             |             |             |  |
| RPL36P1     | ENSG00000230636 | -1.3405     | 0.90995     | -1.3405     | 0.90995     | -1.3405     |             |  |
|             | 0.90995         | -1.3405     | 0.90995     | 0.90995     | 0.939088134 |             |             |  |
| NA          | ENSG00000273106 | -1.3409     | 0.91002     | -1.3409     | 0.91002     | -1.3409     | 0.91002     |  |
|             | -1.3409         | 0.91002     | 0.91002     | 0.939130917 |             |             |             |  |
| RPS4XP17    | ENSG00000244097 | -1.3409     | 0.91003     | -1.3409     | 0.91003     | -1.3409     |             |  |
|             | 0.91003         | -1.3409     | 0.91003     | 0.91003     | 0.939130917 |             |             |  |
| MPDU1       | ENSG00000129255 | -1.3411     | 0.91006     | -1.3411     | 0.91006     | -1.3411     | 0.91006     |  |
|             | -1.3411         | 0.91006     | 0.91006     | 0.939141988 |             |             |             |  |
| NA          | ENSG00000284291 | -1.3413     | 0.91009     | -1.3413     | 0.91009     | -1.3413     | 0.91009     |  |
|             | -1.3413         | 0.91009     | 0.91009     | 0.939153058 |             |             |             |  |
| CP          | ENSG00000047457 | -1.3414     | 0.91011     | -1.3414     | 0.91011     | -1.3414     | 0.91011     |  |
|             | -1.3414         | 0.91011     | 0.91011     | 0.939153809 |             |             |             |  |
| OR6X1       | ENSG00000221931 | -1.3422     | 0.91024     | -1.3422     | 0.91024     | -1.3422     | 0.91024     |  |
|             | -1.3422         | 0.91024     | 0.91024     | 0.939217392 |             |             |             |  |
| NA          | ENSG00000255010 | -1.3424     | 0.91027     | -1.3424     | 0.91027     | -1.3424     | 0.91027     |  |
|             | -1.3424         | 0.91027     | 0.91027     | 0.939217392 |             |             |             |  |
| NA          | ENSG00000240882 | -1.5539     | 0.9399      | -1.5539     | 0.9399      | -1.5539     | 0.9399      |  |
|             | -1.3425         | 0.91028     | 0.91028     | 0.939217392 |             |             |             |  |
| NA          | ENSG00000254112 | -1.3426     | 0.91029     | -1.3426     | 0.91029     | -1.3426     | 0.91029     |  |
|             | -1.3426         | 0.91029     | 0.91029     | 0.939217392 |             |             |             |  |
| CRLF3P3     | ENSG00000228225 | -1.3429     | 0.91035     | -1.4675     | 0.92888     | -1.3429     |             |  |
|             | 0.91035         | -1.4675     | 0.92888     | 0.91035     | 0.939217392 |             |             |  |
| NA          | ENSG00000279139 | -1.343      | 0.91037     | -1.5274     | 0.93667     | -1.8748     | 0.96959     |  |
|             | -1.343          | 0.91037     | 0.91037     | 0.939217392 |             |             |             |  |
| LINC02279   | ENSG00000258933 | -1.3431     | 0.91038     | -1.8772     | 0.96976     | -1.3431     |             |  |
|             | 0.91038         | -1.3431     | 0.91038     | 0.91038     | 0.939217392 |             |             |  |
| NA          | ENSG00000142539 | -1.3432     | 0.9104      | -1.3432     | 0.9104      | -1.3432     | 0.9104      |  |
|             | -1.3432         | 0.9104      | 0.9104      | 0.939217392 |             |             |             |  |
| NA          | ENSG00000269387 | -1.3432     | 0.9104      | -1.8519     | 0.96798     | -1.3432     | 0.9104      |  |
|             | -1.3432         | 0.9104      | 0.9104      | 0.939217392 |             |             |             |  |
| NA          | ENSG00000235772 | -1.3434     | 0.91042     | -1.3434     | 0.91042     | -1.3434     | 0.91042     |  |
|             | -1.3434         | 0.91042     | 0.91042     | 0.939217392 |             |             |             |  |
| NA          | ENSG00000270462 | -1.3434     | 0.91042     | -1.3434     | 0.91042     | -1.3434     | 0.91042     |  |
|             | -1.3434         | 0.91042     | 0.91042     | 0.939217392 |             |             |             |  |
| MAP3K2-DT   | ENSG00000236682 | -2.3014     | 0.98932     | -2.3014     | 0.98932     | -1.3436     |             |  |
|             | 0.91046         | -2.5561     | 0.99471     | 0.91046     | 0.939217392 |             |             |  |
| NA          | ENSG00000259967 | -1.3436     | 0.91046     | -1.3436     | 0.91046     | -1.3436     | 0.91046     |  |
|             | -1.3436         | 0.91046     | 0.91046     | 0.939217392 |             |             |             |  |
| EHD4        | ENSG00000103966 | -1.4891     | 0.93177     | -1.7796     | 0.96243     | -1.4891     | 0.93177     |  |
|             | -1.3437         | 0.91048     | 0.91048     | 0.939217392 |             |             |             |  |
| RPS10P18    | ENSG00000229455 | -1.3437     | 0.91048     | -1.3437     | 0.91048     | -1.3437     |             |  |
|             | 0.91048         | -1.3437     | 0.91048     | 0.91048     | 0.939217392 |             |             |  |
| NA          | ENSG00000263648 | -1.3437     | 0.91048     | -1.3437     | 0.91048     | -1.3437     | 0.91048     |  |
|             | -1.3437         | 0.91048     | 0.91048     | 0.939217392 |             |             |             |  |
| NA          | ENSG00000228407 | -1.3439     | 0.9105      | -1.3439     | 0.9105      | -1.3439     | 0.9105      |  |
|             | -1.3439         | 0.9105      | 0.9105      | 0.939218141 |             |             |             |  |
| RNU6ATAC39P | ENSG00000252118 | -1.344      | 0.91053     | -1.344      | 0.91053     | -1.344      |             |  |
|             | 0.91053         | -1.344      | 0.91053     | 0.91053     | 0.939229206 |             |             |  |
| NA          | ENSG00000279310 | -1.3445     | 0.9106      | -1.7126     | 0.95661     | -1.7126     | 0.95661     |  |
|             | -1.7126         | 0.95661     | 0.9106      | 0.939263143 |             |             |             |  |
| LY6D        | ENSG00000167656 | -1.8908     | 0.97068     | -1.3446     | 0.91062     | -1.8908     | 0.97068     |  |

|           |                 |         |         |             |             |         |         |
|-----------|-----------------|---------|---------|-------------|-------------|---------|---------|
|           | -1.8908         | 0.97068 | 0.91062 | 0.939263143 |             |         |         |
| RNU7-107P | ENSG00000238523 | -1.3446 | 0.91063 | -1.3446     | 0.91063     | -1.3446 | 0.91063 |
|           | 0.91063         | -1.3446 | 0.91063 | 0.91063     | 0.939263143 |         |         |
| NA        | ENSG00000279966 | -1.3447 | 0.91064 | -1.3447     | 0.91064     | -1.3447 | 0.91064 |
|           | -1.3447         | 0.91064 | 0.91064 | 0.939263143 |             |         |         |
| FAM43B    | ENSG00000183114 | -1.3452 | 0.91072 | -1.3452     | 0.91072     | -1.3452 | 0.91072 |
|           | 0.91072         | -1.3452 | 0.91072 | 0.91072     | 0.939325776 |         |         |
| NA        | ENSG00000247679 | -1.3937 | 0.9183  | -1.3458     | 0.91082     | -1.3458 | 0.91082 |
|           | -1.3458         | 0.91082 | 0.91082 | 0.939409033 |             |         |         |
| RNU6-158P | ENSG00000252913 | -1.3467 | 0.91095 | -1.3467     | 0.91095     | -1.3467 | 0.91095 |
|           | 0.91095         | -1.3467 | 0.91095 | 0.91095     | 0.939503344 |         |         |
| PDLIM1P1  | ENSG00000270788 | -1.3466 | 0.91095 | -1.3466     | 0.91095     | -1.3466 | 0.91095 |
|           | 0.91095         | -1.3466 | 0.91095 | 0.91095     | 0.939503344 |         |         |
| RBM5-AS1  | ENSG00000281691 | -1.3473 | 0.91106 | -1.3473     | 0.91106     | -1.3473 | 0.91106 |
|           | 0.91106         | -1.3473 | 0.91106 | 0.91106     | 0.939579244 |         |         |
| NA        | ENSG00000259843 | -1.3474 | 0.91107 | -1.3474     | 0.91107     | -1.3474 | 0.91107 |
|           | -1.5193         | 0.93565 | 0.91107 | 0.939579244 |             |         |         |
| NA        | ENSG00000226400 | -1.3476 | 0.91111 | -1.3476     | 0.91111     | -1.3476 | 0.91111 |
|           | -1.3476         | 0.91111 | 0.91111 | 0.939579244 |             |         |         |
| NA        | ENSG00000274307 | -1.3476 | 0.91111 | -1.3476     | 0.91111     | -1.3476 | 0.91111 |
|           | -1.3476         | 0.91111 | 0.91111 | 0.939579244 |             |         |         |
| SPRR3     | ENSG00000163209 | -1.3477 | 0.91112 | -1.3477     | 0.91112     | -1.3477 | 0.91112 |
|           | -1.3477         | 0.91112 | 0.91112 | 0.939579244 |             |         |         |
| NA        | ENSG00000241059 | -1.3479 | 0.91116 | -1.3479     | 0.91116     | -1.3479 | 0.91116 |
|           | -1.3479         | 0.91116 | 0.91116 | 0.939600609 |             |         |         |
| NA        | ENSG00000224277 | -1.3484 | 0.91123 | -1.3695     | 0.91458     | -1.3484 | 0.91123 |
|           | -1.3484         | 0.91123 | 0.91123 | 0.93965291  |             |         |         |
| RNU6-882P | ENSG00000212327 | -1.3485 | 0.91125 | -1.3485     | 0.91125     | -1.3485 | 0.91125 |
|           | 0.91125         | -1.3485 | 0.91125 | 0.91125     | 0.939653649 |         |         |
| SNRPGP2   | ENSG00000264350 | -1.6714 | 0.95267 | -2.1646     | 0.98479     | -1.6168 |         |
|           | 0.94704         | -1.3492 | 0.91137 | 0.91137     | 0.939757503 |         |         |
| OR4L1     | ENSG00000176246 | -1.4154 | 0.92153 | -1.3497     | 0.91144     | -1.3497 | 0.91144 |
|           | -1.3497         | 0.91144 | 0.91144 | 0.939809797 |             |         |         |
| NA        | ENSG00000230659 | -1.3498 | 0.91146 | -1.3498     | 0.91146     | -1.3498 | 0.91146 |
|           | -1.3498         | 0.91146 | 0.91146 | 0.939810533 |             |         |         |
| FRMD5     | ENSG00000171877 | -2.0218 | 0.9784  | -1.6214     | 0.94753     | -1.5103 | 0.93452 |
|           | -1.35           | 0.9115  | 0.9115  | 0.939831891 |             |         |         |
| NA        | ENSG00000273373 | -1.3511 | 0.91167 | -1.3511     | 0.91167     | -1.3511 | 0.91167 |
|           | -1.3511         | 0.91167 | 0.91167 | 0.939987286 |             |         |         |
| NA        | ENSG00000279222 | -1.3513 | 0.9117  | -1.6099     | 0.9463      | -1.3513 | 0.9117  |
|           | -1.3513         | 0.9117  | 0.9117  | 0.939998329 |             |         |         |
| MSRB2     | ENSG00000148450 | -2.0547 | 0.98005 | -2.0547     | 0.98005     | -2.0547 | 0.98005 |
|           | -1.3514         | 0.91172 | 0.91172 | 0.939999061 |             |         |         |
| HINT1P2   | ENSG00000271159 | -1.352  | 0.91181 | -1.352      | 0.91181     | -1.352  | 0.91181 |
|           | 0.91181         | -1.352  | 0.91181 | 0.91181     | 0.940007112 |         |         |
| NA        | ENSG00000279872 | -1.352  | 0.91181 | -1.352      | 0.91181     | -1.352  | 0.91181 |
|           | -1.352          | 0.91181 | 0.91181 | 0.940007112 |             |         |         |
| NA        | ENSG00000265067 | -1.3522 | 0.91184 | -1.3522     | 0.91184     | -1.3522 | 0.91184 |
|           | -1.3522         | 0.91184 | 0.91184 | 0.940007112 |             |         |         |
| DUTP2     | ENSG00000254388 | -1.3523 | 0.91185 | -1.3523     | 0.91185     | -1.3523 | 0.91185 |
|           | -1.3523         | 0.91185 | 0.91185 | 0.940007112 |             |         |         |
| RNASE12   | ENSG00000258436 | -1.3523 | 0.91185 | -1.3523     | 0.91185     | -1.3523 | 0.91185 |
|           | 0.91185         | -1.3523 | 0.91185 | 0.91185     | 0.940007112 |         |         |
| OSBPL9P2  | ENSG00000254677 | -1.3523 | 0.91186 | -1.3523     | 0.91186     | -1.3523 | 0.91186 |
|           | 0.91186         | -1.3523 | 0.91186 | 0.91186     | 0.940007112 |         |         |
| RPL35AP12 | ENSG00000227283 | -1.3524 | 0.91188 | -1.9365     | 0.9736      | -1.3524 | 0.91188 |
|           | 0.91188         | -1.3524 | 0.91188 | 0.91188     | 0.940007112 |         |         |
| MTATP6P20 | ENSG00000237948 | -1.3526 | 0.91191 | -1.3526     | 0.91191     | -1.3526 | 0.91191 |
|           | 0.91191         | -1.3526 | 0.91191 | 0.91191     | 0.940007112 |         |         |
| OR8I1P    | ENSG00000255461 | -1.3527 | 0.91192 | -1.3527     | 0.91192     | -1.3527 | 0.91192 |
|           | 0.91192         | -1.3527 | 0.91192 | 0.91192     | 0.940007112 |         |         |
| NA        | ENSG00000255741 | -1.3527 | 0.91193 | -1.3527     | 0.91193     | -1.3527 | 0.91193 |

|            |                 |         |            |             |             |         |         |
|------------|-----------------|---------|------------|-------------|-------------|---------|---------|
|            | -1.3527         | 0.91193 | 0.91193    | 0.940007112 |             |         |         |
| RPH3AL     | ENSG00000181031 | -1.3864 | 0.91718    | -1.8979     | 0.97115     | -1.3528 |         |
|            | 0.91194         | -2.3557 | 0.99076    | 0.91194     | 0.940007112 |         |         |
| NA         | ENSG00000254840 | -1.4064 | 0.9202     | -2.6042     | 0.99539     | -1.3532 | 0.912   |
|            | -2.0434         | 0.97949 | 0.912      | 0.94002919  |             |         |         |
| MIR4673    | ENSG00000263403 | -1.3532 | 0.912      | -1.3532     | 0.912       | -1.3532 | 0.912   |
|            | 0.912           | 0.912   | 0.94002919 |             |             |         |         |
| HMGB1P25   | ENSG00000230886 | -1.3534 | 0.91204    | -1.692      | 0.95468     | -1.692  |         |
|            | 0.95468         | -2.5121 | 0.994      | 0.91204     | 0.940040959 |         |         |
| NA         | ENSG00000230718 | -1.3535 | 0.91205    | -1.3535     | 0.91205     | -1.3535 | 0.91205 |
|            | -1.3535         | 0.91205 | 0.91205    | 0.940040959 |             |         |         |
| NA         | ENSG00000280435 | -1.3539 | 0.91212    | -1.3539     | 0.91212     | -1.3539 | 0.91212 |
|            | -1.3539         | 0.91212 | 0.91212    | 0.940083647 |             |         |         |
| NA         | ENSG00000257515 | -1.354  | 0.91213    | -1.354      | 0.91213     | -1.354  | 0.91213 |
|            | -1.354          | 0.91213 | 0.91213    | 0.940083647 |             |         |         |
| RNU6-1279P | ENSG00000206644 | -1.3543 | 0.91217    | -1.3543     | 0.91217     | -1.3543 |         |
|            | 0.91217         | -1.3543 | 0.91217    | 0.91217     | 0.940104989 |         |         |
| NDUFS6P1   | ENSG00000241905 | -1.3549 | 0.91228    | -1.3549     | 0.91228     | -1.3549 |         |
|            | 0.91228         | -1.3549 | 0.91228    | 0.91228     | 0.940198473 |         |         |
| DPP10-AS1  | ENSG00000235026 | -1.355  | 0.9123     | -1.3795     | 0.91613     | -1.4433 |         |
|            | 0.92553         | -1.355  | 0.9123     | 0.9123      | 0.940199201 |         |         |
| ZNF181     | ENSG00000197841 | -1.3554 | 0.91236    | -1.3554     | 0.91236     | -1.3554 |         |
|            | 0.91236         | -1.3554 | 0.91236    | 0.91236     | 0.94024115  |         |         |
| HUS1B      | ENSG00000188996 | -1.9185 | 0.97248    | -1.4517     | 0.92671     | -1.3562 | 0.91248 |
|            | -1.9185         | 0.97248 | 0.91248    | 0.940344931 |             |         |         |
| NA         | ENSG00000250699 | -1.3565 | 0.91253    | -1.3565     | 0.91253     | -1.3565 | 0.91253 |
|            | -1.3565         | 0.91253 | 0.91253    | 0.940376571 |             |         |         |
| LMX1A-AS2  | ENSG00000224702 | -1.3567 | 0.91256    | -1.3567     | 0.91256     | -1.3567 |         |
|            | 0.91256         | -1.3567 | 0.91256    | 0.91256     | 0.940387599 |         |         |
| LINC00674  | ENSG00000237854 | -1.3572 | 0.91263    | -1.8858     | 0.97034     | -1.8858 |         |
|            | 0.97034         | -1.8858 | 0.97034    | 0.91263     | 0.940439846 |         |         |
| NA         | ENSG00000241526 | -1.3577 | 0.91272    | -1.3577     | 0.91272     | -1.3577 | 0.91272 |
|            | -1.3577         | 0.91272 | 0.91272    | 0.9405127   |             |         |         |
| NIPA2P3    | ENSG00000271486 | -1.4227 | 0.92259    | -1.3579     | 0.91275     | -1.3579 |         |
|            | 0.91275         | -1.3579 | 0.91275    | 0.91275     | 0.940523725 |         |         |
| NA         | ENSG00000252047 | -1.358  | 0.91277    | -1.358      | 0.91277     | -1.358  | 0.91277 |
|            | -1.358          | 0.91277 | 0.91277    | 0.940524446 |             |         |         |
| NA         | ENSG00000254826 | -1.3586 | 0.91286    | -1.3586     | 0.91286     | -1.3586 | 0.91286 |
|            | -1.3586         | 0.91286 | 0.91286    | 0.940597293 |             |         |         |
| NA         | ENSG00000261611 | -1.3589 | 0.91291    | -1.3589     | 0.91291     | -1.3589 | 0.91291 |
|            | -1.3589         | 0.91291 | 0.91291    | 0.940628923 |             |         |         |
| TOE1       | ENSG00000132773 | -1.3591 | 0.91294    | -1.3591     | 0.91294     | -1.3591 | 0.91294 |
|            | -1.3591         | 0.91294 | 0.91294    | 0.940639945 |             |         |         |
| LINC01479  | ENSG00000255772 | -1.4147 | 0.92142    | -1.3595     | 0.91301     | -1.7437 |         |
|            | 0.9594          | -1.6833 | 0.95384    | 0.91301     | 0.940692179 |         |         |
| PTOV1-AS1  | ENSG00000268006 | -1.3598 | 0.91306    | -1.3598     | 0.91306     | -1.3598 |         |
|            | 0.91306         | -1.3598 | 0.91306    | 0.91306     | 0.940723805 |         |         |
| NA         | ENSG00000273712 | -1.3605 | 0.91316    | -1.7456     | 0.95956     | -1.8888 | 0.97054 |
|            | -1.8888         | 0.97054 | 0.91316    | 0.940787767 |             |         |         |
| L3HYPDH    | ENSG00000126790 | -1.3605 | 0.91317    | -1.3605     | 0.91317     | -1.4324 |         |
|            | 0.92399         | -1.3605 | 0.91317    | 0.91317     | 0.940787767 |         |         |
| ZNF14      | ENSG00000105708 | -1.8398 | 0.9671     | -1.8398     | 0.9671      | -1.3606 | 0.91318 |
|            | -1.3606         | 0.91318 | 0.91318    | 0.940787767 |             |         |         |
| MAP10      | ENSG00000212916 | -1.3609 | 0.91322    | -1.3609     | 0.91322     | -1.3609 | 0.91322 |
|            | -1.3609         | 0.91322 | 0.91322    | 0.940789197 |             |         |         |
| RPL19P5    | ENSG00000230580 | -1.3608 | 0.91322    | -1.3608     | 0.91322     | -1.3608 |         |
|            | 0.91322         | -1.3608 | 0.91322    | 0.91322     | 0.940789197 |         |         |
| NA         | ENSG00000177699 | -1.361  | 0.91324    | -1.361      | 0.91324     | -1.361  | 0.91324 |
|            | -1.361          | 0.91324 | 0.91324    | 0.940789912 |             |         |         |
| RNU6-545P  | ENSG00000199551 | -1.3614 | 0.9133     | -1.3614     | 0.9133      | -1.3614 |         |
|            | 0.9133          | -1.3614 | 0.9133     | 0.9133      | 0.940812658 |         |         |
| NA         | ENSG00000276473 | -1.3614 | 0.91331    | -1.3614     | 0.91331     | -1.3614 | 0.91331 |

|          |                 |         |         |             |             |         |         |
|----------|-----------------|---------|---------|-------------|-------------|---------|---------|
|          | -1.3614         | 0.91331 | 0.91331 | 0.940812658 |             |         |         |
| RPSAP34  | ENSG00000239939 | -1.3615 | 0.91332 | -1.3615     | 0.91332     | -1.3615 | 0.91332 |
|          | 0.91332         | -1.3615 | 0.91332 | 0.91332     | 0.940812658 |         |         |
| CASP3P1  | ENSG00000237033 | -1.3626 | 0.9135  | -1.3626     | 0.9135      | -1.3626 | 0.9135  |
|          | 0.9135          | -1.3626 | 0.9135  | 0.9135      | 0.940978185 |         |         |
| GTF2IP12 | ENSG00000283050 | -2.4089 | 0.992   | -2.1001     | 0.98214     | -1.9653 | 0.97531 |
|          | -1.3628         | 0.91353 | 0.91353 | 0.940979606 |             |         |         |
| NA       | ENSG00000277602 | -1.3629 | 0.91354 | -1.3629     | 0.91354     | -1.3629 | 0.91354 |
|          | -1.3629         | 0.91354 | 0.91354 | 0.940979606 |             |         |         |
| RNU5F-3P | ENSG00000200637 | -1.3631 | 0.91358 | -1.3631     | 0.91358     | -1.3631 | 0.91358 |
|          | 0.91358         | -1.3631 | 0.91358 | 0.91358     | 0.940994879 |         |         |
| RALGPS1  | ENSG00000136828 | -1.3636 | 0.91365 | -1.7839     | 0.96278     | -1.804  |         |
|          | 0.96438         | -2.0381 | 0.97923 | 0.91365     | 0.940994879 |         |         |
| CYP2C59P | ENSG00000228460 | -1.3636 | 0.91365 | -1.4033     | 0.91973     | -1.5813 |         |
|          | 0.94309         | -1.4033 | 0.91973 | 0.91365     | 0.940994879 |         |         |
| RPLP2P1  | ENSG00000214374 | -1.3637 | 0.91366 | -1.5476     | 0.93914     | -1.3637 |         |
|          | 0.91366         | -1.3637 | 0.91366 | 0.91366     | 0.940994879 |         |         |
| NA       | ENSG00000207488 | -1.3638 | 0.91368 | -1.3638     | 0.91368     | -1.3638 | 0.91368 |
|          | -1.3638         | 0.91368 | 0.91368 | 0.940994879 |             |         |         |
| NA       | ENSG00000242507 | -1.3637 | 0.91368 | -1.3637     | 0.91368     | -1.3637 | 0.91368 |
|          | -1.3637         | 0.91368 | 0.91368 | 0.940994879 |             |         |         |
| SCOCP1   | ENSG00000258896 | -1.3638 | 0.91369 | -1.3638     | 0.91369     | -1.3638 |         |
|          | 0.91369         | -1.3638 | 0.91369 | 0.91369     | 0.940994879 |         |         |
| NA       | ENSG00000227021 | -1.3643 | 0.91376 | -1.3643     | 0.91376     | -1.3643 | 0.91376 |
|          | -1.3643         | 0.91376 | 0.91376 | 0.941047082 |             |         |         |
| NA       | ENSG00000267004 | -1.3653 | 0.91392 | -1.3653     | 0.91392     | -1.3653 | 0.91392 |
|          | -1.3653         | 0.91392 | 0.91392 | 0.941191969 |             |         |         |
| NA       | ENSG00000215504 | -1.5392 | 0.93813 | -2.4494     | 0.99284     | -1.3658 | 0.91399 |
|          | -1.3658         | 0.91399 | 0.91399 | 0.941244166 |             |         |         |
| MIR4632  | ENSG00000263676 | -1.3669 | 0.91417 | -1.3669     | 0.91417     | -1.3669 |         |
|          | 0.91417         | -1.3669 | 0.91417 | 0.91417     | 0.941389745 |         |         |
| NA       | ENSG00000272834 | -1.3669 | 0.91417 | -1.3669     | 0.91417     | -1.3669 | 0.91417 |
|          | -1.3669         | 0.91417 | 0.91417 | 0.941389745 |             |         |         |
| MIR5195  | ENSG00000265929 | -1.3683 | 0.9144  | -1.3683     | 0.9144      | -1.3683 |         |
|          | 0.9144          | -1.3683 | 0.9144  | 0.9144      | 0.941606695 |         |         |
| RPL29P33 | ENSG00000257074 | -1.4817 | 0.93078 | -1.3688     | 0.91446     | -1.3688 |         |
|          | 0.91446         | -1.3941 | 0.91836 | 0.91446     | 0.941648581 |         |         |
| NA       | ENSG00000234698 | -1.369  | 0.9145  | -1.369      | 0.9145      | -1.369  | 0.9145  |
|          | -1.369          | 0.9145  | 0.9145  | 0.94166027  |             |         |         |
| NA       | ENSG00000251654 | -1.9251 | 0.97289 | -1.7378     | 0.95888     | -1.3691 | 0.91451 |
|          | -2.1863         | 0.9856  | 0.91451 | 0.94166027  |             |         |         |
| NA       | ENSG00000270157 | -1.3693 | 0.91454 | -1.3693     | 0.91454     | -1.3693 | 0.91454 |
|          | -1.3693         | 0.91454 | 0.91454 | 0.941671263 |             |         |         |
| SPACA6   | ENSG00000182310 | -1.3694 | 0.91457 | -1.3694     | 0.91457     | -1.3694 |         |
|          | 0.91457         | -1.3694 | 0.91457 | 0.91457     | 0.941682255 |         |         |
| WDR76    | ENSG00000092470 | -1.6361 | 0.94909 | -1.37       | 0.91465     | -1.8233 | 0.96587 |
|          | -1.7351         | 0.95864 | 0.91465 | 0.941744728 |             |         |         |
| NA       | ENSG00000229289 | -1.3708 | 0.91478 | -1.3708     | 0.91478     | -1.3708 | 0.91478 |
|          | -1.3708         | 0.91478 | 0.91478 | 0.941842931 |             |         |         |
| HMBS     | ENSG00000256269 | -2.102  | 0.98222 | -1.6367     | 0.94916     | -1.3708 | 0.91479 |
|          | -1.3708         | 0.91479 | 0.91479 | 0.941842931 |             |         |         |
| CYGB     | ENSG00000161544 | -1.3711 | 0.91484 | -1.3711     | 0.91484     | -1.3711 | 0.91484 |
|          | -1.3711         | 0.91484 | 0.91484 | 0.941842931 |             |         |         |
| VDAC2P2  | ENSG00000255776 | -1.3712 | 0.91485 | -1.3712     | 0.91485     | -1.3712 |         |
|          | 0.91485         | -1.3712 | 0.91485 | 0.91485     | 0.941842931 |         |         |
| NPY2R    | ENSG00000185149 | -1.413  | 0.92118 | -1.413      | 0.92118     | -1.413  | 0.92118 |
|          | -1.3714         | 0.91488 | 0.91488 | 0.941842931 |             |         |         |
| NA       | ENSG00000224883 | -1.3715 | 0.9149  | -1.3715     | 0.9149      | -1.3715 | 0.9149  |
|          | -1.3715         | 0.9149  | 0.9149  | 0.941842931 |             |         |         |
| NA       | ENSG00000229115 | -1.3716 | 0.9149  | -1.3716     | 0.9149      | -1.3716 | 0.9149  |
|          | -1.3716         | 0.9149  | 0.9149  | 0.941842931 |             |         |         |
| NA       | ENSG00000283375 | -1.3715 | 0.9149  | -1.3715     | 0.9149      | -1.3715 | 0.9149  |

|            |                 |         |         |             |             |         |         |
|------------|-----------------|---------|---------|-------------|-------------|---------|---------|
|            | -1.3715         | 0.9149  | 0.9149  | 0.941842931 |             |         |         |
| UBA6-AS1   | ENSG00000248049 | -1.3718 | 0.91493 | -1.3718     | 0.91493     | -1.3718 |         |
|            | 0.91493         | -1.4296 | 0.92358 | 0.91493     | 0.941853918 |         |         |
| NA         | ENSG00000232167 | -1.3723 | 0.91502 | -1.3723     | 0.91502     | -1.3723 | 0.91502 |
|            | -1.3723         | 0.91502 | 0.91502 | 0.941926668 |             |         |         |
| NDUFB9P3   | ENSG00000253994 | -1.6028 | 0.94551 | -1.3726     | 0.91506     | -1.6028 |         |
|            | 0.94551         | -1.6028 | 0.94551 | 0.91506     | 0.941947946 |         |         |
| SPACA6P-AS | ENSG00000269959 | -1.3732 | 0.91515 | -1.3732     | 0.91515     | -1.3732 |         |
|            | 0.91515         | -1.3732 | 0.91515 | 0.91515     | 0.942011086 |         |         |
| RNU6-466P  | ENSG00000212526 | -1.3733 | 0.91516 | -1.3733     | 0.91516     | -1.3733 |         |
|            | 0.91516         | -1.3733 | 0.91516 | 0.91516     | 0.942011086 |         |         |
| DYNLRB2    | ENSG00000168589 | -1.3739 | 0.91526 | -1.3739     | 0.91526     | -1.3739 |         |
|            | 0.91526         | -1.3739 | 0.91526 | 0.91526     | 0.942084513 |         |         |
| AGBL5-IT1  | ENSG00000229122 | -1.374  | 0.91527 | -1.374      | 0.91527     | -1.374  |         |
|            | 0.91527         | -1.374  | 0.91527 | 0.91527     | 0.942084513 |         |         |
| NA         | ENSG00000255268 | -1.3744 | 0.91534 | -1.3744     | 0.91534     | -1.3744 | 0.91534 |
|            | -1.3744         | 0.91534 | 0.91534 | 0.942136664 |             |         |         |
| NA         | ENSG00000277373 | -1.3746 | 0.91537 | -1.3746     | 0.91537     | -1.533  | 0.93736 |
|            | -1.3746         | 0.91537 | 0.91537 | 0.942147642 |             |         |         |
| HNRNPMP1   | ENSG00000259335 | -1.7469 | 0.95968 | -1.3747     | 0.91539     | -1.7469 |         |
|            | 0.95968         | -1.7813 | 0.96257 | 0.91539     | 0.942148327 |         |         |
| NA         | ENSG00000254678 | -1.3755 | 0.91551 | -1.3755     | 0.91551     | -1.3755 | 0.91551 |
|            | -1.3755         | 0.91551 | 0.91551 | 0.942251934 |             |         |         |
| SAAL1      | ENSG00000166788 | -1.6278 | 0.94822 | -1.9854     | 0.97645     | -1.3758 | 0.91555 |
|            | -1.9834         | 0.97634 | 0.91555 | 0.942263592 |             |         |         |
| ATRN       | ENSG00000088812 | -1.7214 | 0.95741 | -1.3758     | 0.91556     | -1.5233 | 0.93616 |
|            | -1.9719         | 0.97569 | 0.91556 | 0.942263592 |             |         |         |
| NA         | ENSG00000261396 | -1.376  | 0.91559 | -1.376      | 0.91559     | -1.376  | 0.91559 |
|            | -1.376          | 0.91559 | 0.91559 | 0.942274566 |             |         |         |
| SNRPEP6    | ENSG00000217824 | -1.5988 | 0.94506 | -1.3761     | 0.91561     | -1.9929 |         |
|            | 0.97686         | -2.8483 | 0.9978  | 0.91561     | 0.942275249 |         |         |
| NA         | ENSG00000236341 | -1.3766 | 0.91568 | -1.3766     | 0.91568     | -1.3766 | 0.91568 |
|            | -1.3766         | 0.91568 | 0.91568 | 0.942317777 |             |         |         |
| NA         | ENSG00000280367 | -1.3767 | 0.91569 | -1.3767     | 0.91569     | -1.3767 | 0.91569 |
|            | -1.3767         | 0.91569 | 0.91569 | 0.942317777 |             |         |         |
| HMGNI1P18  | ENSG00000234927 | -1.3771 | 0.91576 | -1.3771     | 0.91576     | -1.3771 |         |
|            | 0.91576         | -1.3771 | 0.91576 | 0.91576     | 0.942360302 |         |         |
| NA         | ENSG00000232361 | -1.4526 | 0.92683 | -1.9395     | 0.97378     | -1.4575 | 0.92751 |
|            | -1.3771         | 0.91577 | 0.91577 | 0.942360302 |             |         |         |
| NA         | ENSG00000206824 | -1.3778 | 0.91587 | -1.3778     | 0.91587     | -1.3778 | 0.91587 |
|            | -1.3778         | 0.91587 | 0.91587 | 0.942443304 |             |         |         |
| NA         | ENSG00000221707 | -1.778  | 0.9623  | -1.778      | 0.9623      | -1.378  | 0.91589 |
|            | -1.778          | 0.9623  | 0.91589 | 0.942443983 |             |         |         |
| SGCZ       | ENSG00000185053 | -1.4983 | 0.93297 | -1.4689     | 0.92907     | -1.3781 | 0.91591 |
|            | -1.9109         | 0.97199 | 0.91591 | 0.942444662 |             |         |         |
| NA         | ENSG00000258830 | -1.3783 | 0.91594 | -1.3783     | 0.91594     | -1.3783 | 0.91594 |
|            | -1.3783         | 0.91594 | 0.91594 | 0.94245563  |             |         |         |
| NA         | ENSG00000276631 | -1.3793 | 0.9161  | -1.3793     | 0.9161      | -1.3793 | 0.9161  |
|            | -1.3793         | 0.9161  | 0.9161  | 0.942600359 |             |         |         |
| NA         | ENSG00000254886 | -1.3798 | 0.91617 | -1.3798     | 0.91617     | -1.4392 | 0.92496 |
|            | -1.3798         | 0.91617 | 0.91617 | 0.94265248  |             |         |         |
| NA         | ENSG00000250318 | -1.3799 | 0.91619 | -1.3799     | 0.91619     | -1.3799 | 0.91619 |
|            | -1.3799         | 0.91619 | 0.91619 | 0.942653154 |             |         |         |
| MTND1P2    | ENSG00000235646 | -1.3803 | 0.91626 | -1.3803     | 0.91626     | -1.3803 |         |
|            | 0.91626         | -1.3803 | 0.91626 | 0.91626     | 0.942705272 |         |         |
| ACTBP7     | ENSG00000185607 | -1.3809 | 0.91634 | -1.3809     | 0.91634     | -1.3809 |         |
|            | 0.91634         | -1.3809 | 0.91634 | 0.91634     | 0.942759404 |         |         |
| NA         | ENSG00000270733 | -1.381  | 0.91637 | -1.381      | 0.91637     | -1.381  | 0.91637 |
|            | -1.381          | 0.91637 | 0.91637 | 0.942759404 |             |         |         |
| NA         | ENSG00000249547 | -1.8212 | 0.96571 | -1.3812     | 0.91638     | -1.8212 | 0.96571 |
|            | -1.8212         | 0.96571 | 0.91638 | 0.942759404 |             |         |         |
| MIR657     | ENSG00000207736 | -1.3812 | 0.91639 | -1.3812     | 0.91639     | -1.3812 |         |



|            |                 |         |         |             |             |         |         |  |
|------------|-----------------|---------|---------|-------------|-------------|---------|---------|--|
|            | 0.91639         | -1.3812 | 0.91639 | 0.91639     | 0.942759404 |         |         |  |
| ANXA4      | ENSG00000196975 | -1.382  | 0.91652 | -2.8069     | 0.9975      | -2.4843 | 0.99351 |  |
|            | -1.4427         | 0.92545 | 0.91652 | 0.942873239 |             |         |         |  |
| SLC4A11    | ENSG00000088836 | -1.3827 | 0.91662 | -1.3947     | 0.91844     | -1.4275 |         |  |
|            | 0.92329         | -1.3847 | 0.91693 | 0.91662     | 0.942947925 |         |         |  |
| NA         | ENSG00000230741 | -1.3829 | 0.91665 | -1.3829     | 0.91665     | -1.3829 | 0.91665 |  |
|            | -1.3829         | 0.91665 | 0.91665 | 0.942947925 |             |         |         |  |
| SNX32      | ENSG00000172803 | -1.4068 | 0.92026 | -1.8312     | 0.96647     | -1.383  | 0.91666 |  |
|            | -1.5685         | 0.94162 | 0.91666 | 0.942947925 |             |         |         |  |
| HHATL-AS1  | ENSG00000230970 | -1.383  | 0.91667 | -1.383      | 0.91667     | -1.383  |         |  |
|            | 0.91667         | -1.383  | 0.91667 | 0.91667     | 0.942947925 |         |         |  |
| PMAIP1     | ENSG00000141682 | -1.3833 | 0.91672 | -1.3833     | 0.91672     | -1.3833 |         |  |
|            | 0.91672         | -1.3833 | 0.91672 | 0.91672     | 0.942979452 |         |         |  |
| TAS2R46    | ENSG00000226761 | -1.3843 | 0.91686 | -1.3843     | 0.91686     | -1.3843 |         |  |
|            | 0.91686         | -1.3843 | 0.91686 | 0.91686     | 0.943074692 |         |         |  |
| NA         | ENSG00000222649 | -1.7355 | 0.95868 | -1.7355     | 0.95868     | -1.7355 | 0.95868 |  |
|            | -1.3844         | 0.91688 | 0.91688 | 0.943074692 |             |         |         |  |
| MIR3913-1  | ENSG00000264405 | -1.3845 | 0.91689 | -1.3845     | 0.91689     | -1.3845 |         |  |
|            | 0.91689         | -1.3845 | 0.91689 | 0.91689     | 0.943074692 |         |         |  |
| MIR548AG2  | ENSG00000265617 | -1.9574 | 0.97485 | -1.3845     | 0.91689     | -1.9574 |         |  |
|            | 0.97485         | -1.9574 | 0.97485 | 0.91689     | 0.943074692 |         |         |  |
| ZSCAN12    | ENSG00000158691 | -1.5403 | 0.93825 | -1.385      | 0.91697     | -1.385  |         |  |
|            | 0.91697         | -1.385  | 0.91697 | 0.91697     | 0.94313707  |         |         |  |
| NA         | ENSG00000253415 | -1.386  | 0.91713 | -1.386      | 0.91713     | -1.386  | 0.91713 |  |
|            | -1.386          | 0.91713 | 0.91713 | 0.943281726 |             |         |         |  |
| NA         | ENSG00000283626 | -1.3866 | 0.91723 | -1.3866     | 0.91723     | -1.3866 | 0.91723 |  |
|            | -1.3866         | 0.91723 | 0.91723 | 0.943364667 |             |         |         |  |
| NA         | ENSG00000249967 | -1.3868 | 0.91725 | -1.3868     | 0.91725     | -1.3868 | 0.91725 |  |
|            | -1.3868         | 0.91725 | 0.91725 | 0.943365326 |             |         |         |  |
| PPP2CA     | ENSG00000113575 | -1.8463 | 0.96757 | -1.8463     | 0.96757     | -1.387  |         |  |
|            | 0.91727         | -2.1869 | 0.98562 | 0.91727     | 0.943365985 |         |         |  |
| OR10Z1     | ENSG00000198967 | -1.3878 | 0.9174  | -1.4385     | 0.92485     | -1.4385 |         |  |
|            | 0.92485         | -1.4385 | 0.92485 | 0.9174      | 0.943479771 |         |         |  |
| ODR4       | ENSG00000157181 | -1.3886 | 0.91752 | -1.9776     | 0.97601     | -2.2836 | 0.9888  |  |
|            | -2.395          | 0.99169 | 0.91752 | 0.943563355 |             |         |         |  |
| YWHAZP4    | ENSG00000213131 | -1.3886 | 0.91752 | -1.3886     | 0.91752     | -1.3886 |         |  |
|            | 0.91752         | -1.3886 | 0.91752 | 0.91752     | 0.943563355 |         |         |  |
| ORMDL3     | ENSG00000172057 | -1.3888 | 0.91755 | -1.3888     | 0.91755     | -1.3888 |         |  |
|            | 0.91755         | -1.3888 | 0.91755 | 0.91755     | 0.943565975 |         |         |  |
| RNU6-714P  | ENSG00000252772 | -1.3891 | 0.91759 | -1.3891     | 0.91759     | -1.3891 |         |  |
|            | 0.91759         | -1.3891 | 0.91759 | 0.91759     | 0.943565975 |         |         |  |
| NA         | ENSG00000257663 | -1.3891 | 0.9176  | -1.3891     | 0.9176      | -1.3891 | 0.9176  |  |
|            | -1.3891         | 0.9176  | 0.9176  | 0.943565975 |             |         |         |  |
| NA         | ENSG00000279742 | -1.3891 | 0.9176  | -1.3891     | 0.9176      | -1.3891 | 0.9176  |  |
|            | -1.3891         | 0.9176  | 0.9176  | 0.943565975 |             |         |         |  |
| MED12L     | ENSG00000144893 | -1.3902 | 0.91777 | -1.7621     | 0.96097     | -1.5385 |         |  |
|            | 0.93804         | -2.0394 | 0.97929 | 0.91777     | 0.94370161  |         |         |  |
| CYC1       | ENSG00000179091 | -1.4213 | 0.92239 | -2.1026     | 0.98225     | -1.3903 | 0.91778 |  |
|            | -1.4213         | 0.92239 | 0.91778 | 0.94370161  |             |         |         |  |
| GNS        | ENSG00000135677 | -1.6898 | 0.95447 | -1.6898     | 0.95447     | -1.6898 | 0.95447 |  |
|            | -1.3904         | 0.91779 | 0.91779 | 0.94370161  |             |         |         |  |
| FGB        | ENSG00000171564 | -2.1023 | 0.98224 | -1.3907     | 0.91784     | -1.3907 | 0.91784 |  |
|            | -1.3907         | 0.91784 | 0.91784 | 0.943733108 |             |         |         |  |
| RBM14-RBM4 | ENSG00000248643 | -1.3915 | 0.91797 | -1.3915     | 0.91797     | -1.3915 |         |  |
|            | 0.91797         | -1.3915 | 0.91797 | 0.91797     | 0.94384686  |         |         |  |
| NA         | ENSG00000254511 | -1.3921 | 0.91805 | -1.3921     | 0.91805     | -1.3921 | 0.91805 |  |
|            | -1.3921         | 0.91805 | 0.91805 | 0.943899565 |             |         |         |  |
| KRT8P22    | ENSG00000260731 | -1.3921 | 0.91806 | -1.3921     | 0.91806     | -1.3921 |         |  |
|            | 0.91806         | -1.3921 | 0.91806 | 0.91806     | 0.943899565 |         |         |  |
| NA         | ENSG00000218596 | -1.3924 | 0.9181  | -1.3924     | 0.9181      | -1.6714 | 0.95268 |  |
|            | -1.9193         | 0.97253 | 0.9181  | 0.943920776 |             |         |         |  |
| OSBPL9P3   | ENSG00000255070 | -1.393  | 0.91819 | -1.393      | 0.91819     | -1.393  |         |  |

|             |                 |             |         |             |             |         |         |       |
|-------------|-----------------|-------------|---------|-------------|-------------|---------|---------|-------|
|             | 0.91819         | -1.393      | 0.91819 | 0.91819     | 0.94399339  |         |         |       |
| SYT3        | ENSG00000213023 | -2.083      | 0.98137 | -1.3935     | 0.91827     | -1.7837 | 0.96276 |       |
|             | -1.8316         | 0.96649     | 0.91827 | 0.944055721 |             |         |         |       |
| EEF1A1P42   | ENSG00000277043 | -2.4527     | 0.99291 | -1.3936     | 0.91829     | -1.3936 |         |       |
|             | 0.91829         | -1.3936     | 0.91829 | 0.91829     | 0.944056365 |         |         |       |
| NA          | ENSG00000266861 | -1.3939     | 0.91832 | -1.3939     | 0.91832     | -1.3939 | 0.91832 |       |
|             | -1.3939         | 0.91832     | 0.91832 | 0.94406729  |             |         |         |       |
| KLHDC7B     | ENSG00000130487 | -1.8731     | 0.96947 | -1.8731     | 0.96947     | -1.8731 |         |       |
|             | 0.96947         | -1.3941     | 0.91835 | 0.91835     | 0.944078214 |         |         |       |
| MTATP6P14   | ENSG00000233449 | -1.3943     | 0.91838 | -1.3943     | 0.91838     | -1.3943 |         |       |
|             | 0.91838         | -1.3943     | 0.91838 | 0.91838     | 0.944079502 |         |         |       |
| NA          | ENSG00000269151 | -1.3943     | 0.91839 | -1.3943     | 0.91839     | -1.3943 | 0.91839 |       |
|             | -1.3943         | 0.91839     | 0.91839 | 0.944079502 |             |         |         |       |
| NA          | ENSG00000278147 | -1.3945     | 0.91841 | -1.3945     | 0.91841     | -1.3945 | 0.91841 |       |
|             | -1.3945         | 0.91841     | 0.91841 | 0.944080146 |             |         |         |       |
| B4GALT4-AS1 | ENSG00000240254 | -1.3954     | 0.91856 | -1.3954     | 0.91856     | -1.3954 |         |       |
|             | 0.91856         | -1.3954     | 0.91856 | 0.91856     | 0.94421442  |         |         |       |
| TTC27       | ENSG00000018699 | -1.5126     | 0.93481 | -2.396      | 0.99171     | -1.3958 | 0.91861 |       |
|             | -2.0918         | 0.98177     | 0.91861 | 0.944216984 |             |         |         |       |
| RNU6-398P   | ENSG00000206870 | -1.3959     | 0.91863 | -1.3959     | 0.91863     | -1.3959 |         |       |
|             | 0.91863         | -1.3959     | 0.91863 | 0.91863     | 0.944216984 |         |         |       |
| ARAFP1      | ENSG00000231264 | -1.396      | 0.91864 | -1.396      | 0.91864     | -1.396  |         |       |
|             | 0.91864         | -1.396      | 0.91864 | 0.91864     | 0.944216984 |         |         |       |
| IFT74-AS1   | ENSG00000234676 | -1.396      | 0.91864 | -1.396      | 0.91864     | -1.396  |         |       |
|             | 0.91864         | -1.396      | 0.91864 | 0.91864     | 0.944216984 |         |         |       |
| RNU6-609P   | ENSG00000202329 | -1.3963     | 0.91869 | -1.3963     | 0.91869     | -1.3963 |         |       |
|             | 0.91869         | -1.3963     | 0.91869 | 0.91869     | 0.944229184 |         |         |       |
| RNU6-315P   | ENSG00000199536 | -1.3965     | 0.91871 | -1.3965     | 0.91871     | -1.3965 |         |       |
|             | 0.91871         | -1.3965     | 0.91871 | 0.91871     | 0.944229184 |         |         |       |
| NA          | ENSG00000249564 | -1.3964     | 0.91871 | -1.3964     | 0.91871     | -1.3964 | 0.91871 |       |
|             | -1.3964         | 0.91871     | 0.91871 | 0.944229184 |             |         |         |       |
| SLC37A4     | ENSG00000137700 | -1.7392     | 0.959   | -1.599      | 0.94509     | -1.3967 | 0.91875 |       |
|             | -1.4208         | 0.92232     | 0.91875 | 0.944240742 |             |         |         |       |
| NA          | ENSG00000280140 | -1.3968     | 0.91876 | -1.3968     | 0.91876     | -1.3968 | 0.91876 |       |
|             | -1.3968         | 0.91876     | 0.91876 | 0.944240742 |             |         |         |       |
| NA          | ENSG00000230695 | -1.3974     | 0.91886 | -1.3974     | 0.91886     | -1.3974 | 0.91886 |       |
|             | -1.3974         | 0.91886     | 0.91886 | 0.9443236   |             |         |         |       |
| NA          | ENSG00000267783 | -1.3984     | 0.919   | -1.3984     | 0.919       | -1.3984 | 0.919   | 0.919 |
|             | 0.919           | 0.944378809 |         |             |             |         |         |       |
| RNU4ATAC3P  | ENSG00000252508 | -1.3985     | 0.91901 | -1.3985     | 0.91901     | -1.3985 |         |       |
|             | 0.91901         | -1.3985     | 0.91901 | 0.91901     | 0.944378809 |         |         |       |
| NA          | ENSG00000255648 | -1.3984     | 0.91901 | -1.3984     | 0.91901     | -1.3984 | 0.91901 |       |
|             | -1.3984         | 0.91901     | 0.91901 | 0.944378809 |             |         |         |       |
| MIR5682     | ENSG00000264477 | -1.3985     | 0.91902 | -1.3985     | 0.91902     | -1.3985 |         |       |
|             | 0.91902         | -1.3985     | 0.91902 | 0.91902     | 0.944378809 |         |         |       |
| HMG2P34     | ENSG00000231471 | -1.6169     | 0.94705 | -1.6169     | 0.94705     | -1.3986 |         |       |
|             | 0.91903         | -1.6169     | 0.94705 | 0.91903     | 0.944378809 |         |         |       |
| NA          | ENSG00000259216 | -1.3986     | 0.91903 | -1.3986     | 0.91903     | -1.3986 | 0.91903 |       |
|             | -1.3986         | 0.91903     | 0.91903 | 0.944378809 |             |         |         |       |
| RNU6-665P   | ENSG00000207369 | -1.399      | 0.9191  | -1.399      | 0.9191      | -1.399  |         |       |
|             | 0.9191          | -1.399      | 0.9191  | 0.9191      | 0.94441091  |         |         |       |
| C12orf71    | ENSG00000214700 | -2.0205     | 0.97833 | -1.6238     | 0.94779     | -1.399  |         |       |
|             | 0.9191          | -2.2297     | 0.98711 | 0.9191      | 0.94441091  |         |         |       |
| NA          | ENSG00000272920 | -1.3993     | 0.91914 | -1.3993     | 0.91914     | -1.3993 | 0.91914 |       |
|             | -1.3993         | 0.91914     | 0.91914 | 0.944432097 |             |         |         |       |
| NA          | ENSG00000219951 | -1.3994     | 0.91916 | -1.3994     | 0.91916     | -1.3994 | 0.91916 |       |
|             | -1.3994         | 0.91916     | 0.91916 | 0.944432733 |             |         |         |       |
| TRAJ45      | ENSG00000211844 | -1.4001     | 0.91925 | -1.4001     | 0.91925     | -1.4001 |         |       |
|             | 0.91925         | -1.4001     | 0.91925 | 0.91925     | 0.944505292 |         |         |       |
| RNU6-1184P  | ENSG00000207318 | -1.4003     | 0.91929 | -1.4003     | 0.91929     | -1.4003 |         |       |
|             | 0.91929         | -1.4003     | 0.91929 | 0.91929     | 0.944526476 |         |         |       |
| NA          | ENSG00000206770 | -1.4007     | 0.91934 | -1.4007     | 0.91934     | -1.4007 | 0.91934 |       |

|             |                 |         |         |             |             |         |         |  |
|-------------|-----------------|---------|---------|-------------|-------------|---------|---------|--|
|             | -1.4007         | 0.91934 | 0.91934 | 0.944557933 |             |         |         |  |
| NA          | ENSG00000281655 | -1.4008 | 0.91937 | -1.4008     | 0.91937     | -1.4008 | 0.91937 |  |
|             | -1.4008         | 0.91937 | 0.91937 | 0.94456884  |             |         |         |  |
| CIB1        | ENSG00000185043 | -1.4013 | 0.91944 | -1.4013     | 0.91944     | -1.4013 | 0.91944 |  |
|             | -1.4013         | 0.91944 | 0.91944 | 0.944600928 |             |         |         |  |
| NA          | ENSG00000275672 | -1.4013 | 0.91944 | -1.4013     | 0.91944     | -1.4013 | 0.91944 |  |
|             | -1.4013         | 0.91944 | 0.91944 | 0.944600928 |             |         |         |  |
| SNORD14B    | ENSG00000201403 | -1.4016 | 0.91948 | -1.4016     | 0.91948     | -1.4016 |         |  |
|             | 0.91948         | -1.4016 | 0.91948 | 0.91948     | 0.944602825 |         |         |  |
| NA          | ENSG00000261243 | -1.4017 | 0.91949 | -2.1682     | 0.98493     | -1.4017 | 0.91949 |  |
|             | -1.4017         | 0.91949 | 0.91949 | 0.944602825 |             |         |         |  |
| CEMIP       | ENSG00000103888 | -2.0015 | 0.97733 | -1.8317     | 0.9665      | -1.4017 | 0.9195  |  |
|             | -1.8824         | 0.97011 | 0.9195  | 0.944602825 |             |         |         |  |
| ANKRD29     | ENSG00000154065 | -1.402  | 0.91954 | -1.7362     | 0.95873     | -1.536  |         |  |
|             | 0.93774         | -1.4899 | 0.93187 | 0.91954     | 0.94460409  |         |         |  |
| GEM         | ENSG00000164949 | -1.402  | 0.91954 | -1.402      | 0.91954     | -2.0768 | 0.98109 |  |
|             | -1.402          | 0.91954 | 0.91954 | 0.94460409  |             |         |         |  |
| ARL4AP2     | ENSG00000248780 | -1.4023 | 0.91958 | -1.4023     | 0.91958     | -1.4023 |         |  |
|             | 0.91958         | -1.4023 | 0.91958 | 0.91958     | 0.944625267 |         |         |  |
| NA          | ENSG00000253993 | -1.4027 | 0.91964 | -1.4027     | 0.91964     | -1.4027 | 0.91964 |  |
|             | -1.4027         | 0.91964 | 0.91964 | 0.944666987 |             |         |         |  |
| ST3GAL1P1   | ENSG00000250656 | -1.4795 | 0.93049 | -1.4031     | 0.91971     | -1.4795 |         |  |
|             | 0.93049         | -1.4795 | 0.93049 | 0.91971     | 0.944709336 |         |         |  |
| PAQR9-AS1   | ENSG00000241570 | -1.4032 | 0.91972 | -1.8918     | 0.97074     | -1.7987 |         |  |
|             | 0.96397         | -1.6558 | 0.95112 | 0.91972     | 0.944709336 |         |         |  |
| ARL2BPP10   | ENSG00000225225 | -1.4037 | 0.91979 | -1.4037     | 0.91979     | -1.4037 |         |  |
|             | 0.91979         | -1.4037 | 0.91979 | 0.91979     | 0.94474141  |         |         |  |
| NA          | ENSG00000229700 | -1.4037 | 0.91979 | -1.4037     | 0.91979     | -1.4037 | 0.91979 |  |
|             | -1.9583         | 0.9749  | 0.91979 | 0.94474141  |             |         |         |  |
| IGKV3OR22-2 | ENSG00000254264 | -1.404  | 0.91985 | -1.404      | 0.91985     | -1.404  |         |  |
|             | 0.91985         | -1.404  | 0.91985 | 0.91985     | 0.9447586   |         |         |  |
| FGF8        | ENSG00000107831 | -1.9332 | 0.97339 | -1.4043     | 0.91988     | -1.5934 | 0.94447 |  |
|             | -1.828          | 0.96623 | 0.91988 | 0.9447586   |             |         |         |  |
| MAP9        | ENSG00000164114 | -1.4979 | 0.93293 | -1.4044     | 0.9199      | -1.9678 | 0.97546 |  |
|             | -2.2296         | 0.98711 | 0.9199  | 0.9447586   |             |         |         |  |
| RNA5SP234   | ENSG00000200786 | -1.4045 | 0.91991 | -1.4045     | 0.91991     | -1.4045 |         |  |
|             | 0.91991         | -1.4045 | 0.91991 | 0.91991     | 0.9447586   |         |         |  |
| LINC01790   | ENSG00000230173 | -2.0115 | 0.97786 | -1.4046     | 0.91992     | -1.8247 |         |  |
|             | 0.96598         | -1.8247 | 0.96598 | 0.91992     | 0.9447586   |         |         |  |
| NA          | ENSG00000201809 | -1.4046 | 0.91993 | -1.4046     | 0.91993     | -1.4046 | 0.91993 |  |
|             | -1.4046         | 0.91993 | 0.91993 | 0.9447586   |             |         |         |  |
| CNN2        | ENSG00000064666 | -2.2565 | 0.98798 | -1.8875     | 0.97045     | -1.4049 | 0.91997 |  |
|             | -2.1624         | 0.98471 | 0.91997 | 0.9447586   |             |         |         |  |
| RNY3P5      | ENSG00000206854 | -1.405  | 0.91999 | -1.998      | 0.97714     | -1.998  |         |  |
|             | 0.97714         | -1.998  | 0.97714 | 0.91999     | 0.9447586   |         |         |  |
| LINC01273   | ENSG00000231742 | -1.5246 | 0.93633 | -1.5019     | 0.93344     | -1.405  |         |  |
|             | 0.91999         | -1.9928 | 0.97686 | 0.91999     | 0.9447586   |         |         |  |
| NA          | ENSG00000283914 | -1.4051 | 0.92001 | -1.4051     | 0.92001     | -1.4051 | 0.92001 |  |
|             | -1.4051         | 0.92001 | 0.92001 | 0.9447586   |             |         |         |  |
| MCM9        | ENSG00000111877 | -1.4052 | 0.92002 | -1.4052     | 0.92002     | -1.9078 | 0.97179 |  |
|             | -1.4052         | 0.92002 | 0.92002 | 0.9447586   |             |         |         |  |
| NA          | ENSG00000254313 | -1.406  | 0.92014 | -1.406      | 0.92014     | -1.406  | 0.92014 |  |
|             | -1.406          | 0.92014 | 0.92014 | 0.944842005 |             |         |         |  |
| NA          | ENSG00000258874 | -1.406  | 0.92014 | -1.406      | 0.92014     | -1.406  | 0.92014 |  |
|             | -1.406          | 0.92014 | 0.92014 | 0.944842005 |             |         |         |  |
| NA          | ENSG00000230840 | -1.4065 | 0.92021 | -1.4065     | 0.92021     | -1.4065 | 0.92021 |  |
|             | -1.4065         | 0.92021 | 0.92021 | 0.94487469  |             |         |         |  |
| NA          | ENSG00000249244 | -1.5403 | 0.93825 | -1.423      | 0.92263     | -1.4066 | 0.92023 |  |
|             | -1.6912         | 0.9546  | 0.92023 | 0.94487469  |             |         |         |  |
| NA          | ENSG00000284098 | -1.4066 | 0.92023 | -1.4066     | 0.92023     | -1.4066 | 0.92023 |  |
|             | -1.4066         | 0.92023 | 0.92023 | 0.94487469  |             |         |         |  |
| NA          | ENSG00000259163 | -1.4138 | 0.92128 | -1.48       | 0.93057     | -1.4068 | 0.92026 |  |

|           |                 |         |         |             |             |         |         |         |
|-----------|-----------------|---------|---------|-------------|-------------|---------|---------|---------|
|           | -1.4138         | 0.92128 | 0.92026 | 0.944875942 |             |         |         |         |
| MIR4301   | ENSG00000265140 | -1.4069 | 0.92027 | -1.4069     | 0.92027     | -1.4069 | 0.92027 | -1.4069 |
|           | 0.92027         | -1.4069 | 0.92027 | 0.92027     | 0.944875942 |         |         |         |
| RN7SL255P | ENSG00000239808 | -1.4073 | 0.92033 | -1.4073     | 0.92033     | -1.4073 | 0.92033 | -1.4073 |
|           | 0.92033         | -1.4073 | 0.92033 | 0.92033     | 0.944917637 |         |         |         |
| RN7SKP50  | ENSG00000201564 | -1.4076 | 0.92038 | -1.4076     | 0.92038     | -1.4076 | 0.92038 | -1.4076 |
|           | 0.92038         | -1.4076 | 0.92038 | 0.92038     | 0.944929155 |         |         |         |
| NA        | ENSG00000228081 | -2.1262 | 0.98326 | -1.4076     | 0.92038     | -1.8225 | 0.96581 |         |
|           | -1.4076         | 0.92038 | 0.92038 | 0.944929155 |             |         |         |         |
| ZSCAN9    | ENSG00000137185 | -1.5525 | 0.93973 | -1.4078     | 0.92041     | -1.4943 |         |         |
|           | 0.93246         | -1.7197 | 0.95725 | 0.92041     | 0.944940046 |         |         |         |
| BOLA2P1   | ENSG00000266575 | -1.409  | 0.92058 | -1.409      | 0.92058     | -1.409  |         |         |
|           | 0.92058         | -1.409  | 0.92058 | 0.92058     | 0.945085643 |         |         |         |
| NA        | ENSG00000231612 | -1.4091 | 0.9206  | -1.4091     | 0.9206      | -1.4091 | 0.9206  |         |
|           | -1.4091         | 0.9206  | 0.9206  | 0.945085643 |             |         |         |         |
| NCOA4P3   | ENSG00000249245 | -1.4092 | 0.92061 | -1.4092     | 0.92061     | -1.4092 |         |         |
|           | 0.92061         | -1.4092 | 0.92061 | 0.92061     | 0.945085643 |         |         |         |
| MED21     | ENSG00000152944 | -1.646  | 0.95011 | -1.4097     | 0.92069     | -1.646  | 0.95011 |         |
|           | -1.646          | 0.95011 | 0.92069 | 0.945127948 |             |         |         |         |
| NA        | ENSG00000236796 | -1.7728 | 0.96187 | -1.4097     | 0.92069     | -1.5589 | 0.94049 |         |
|           | -1.6946         | 0.95493 | 0.92069 | 0.945127948 |             |         |         |         |
| VN1R17P   | ENSG00000235818 | -1.4101 | 0.92075 | -1.4101     | 0.92075     | -1.4101 |         |         |
|           | 0.92075         | -1.4101 | 0.92075 | 0.92075     | 0.945151581 |         |         |         |
| NA        | ENSG00000231102 | -1.4105 | 0.9208  | -1.4105     | 0.9208      | -1.4105 | 0.9208  |         |
|           | -1.4105         | 0.9208  | 0.9208  | 0.945151581 |             |         |         |         |
| LINC01365 | ENSG00000250772 | -1.4105 | 0.9208  | -1.4105     | 0.9208      | -1.4105 |         |         |
|           | 0.9208          | -1.4105 | 0.9208  | 0.9208      | 0.945151581 |         |         |         |
| NA        | ENSG00000231153 | -1.4105 | 0.92081 | -1.4105     | 0.92081     | -1.4105 | 0.92081 |         |
|           | -1.4105         | 0.92081 | 0.92081 | 0.945151581 |             |         |         |         |
| NA        | ENSG00000252652 | -1.4106 | 0.92081 | -1.4106     | 0.92081     | -1.4106 | 0.92081 |         |
|           | -1.4106         | 0.92081 | 0.92081 | 0.945151581 |             |         |         |         |
| CRYBB1    | ENSG00000100122 | -1.4114 | 0.92093 | -1.4114     | 0.92093     | -1.4114 |         |         |
|           | 0.92093         | -1.4114 | 0.92093 | 0.92093     | 0.945234933 |         |         |         |
| GTF2IP11  | ENSG00000255199 | -1.848  | 0.9677  | -1.5196     | 0.93569     | -1.4114 |         |         |
|           | 0.92093         | -1.5817 | 0.94314 | 0.92093     | 0.945234933 |         |         |         |
| NA        | ENSG00000201778 | -1.4115 | 0.92095 | -1.4115     | 0.92095     | -1.4115 | 0.92095 |         |
|           | -1.4115         | 0.92095 | 0.92095 | 0.945235551 |             |         |         |         |
| NA        | ENSG00000277425 | -1.4116 | 0.92097 | -1.4116     | 0.92097     | -1.4116 | 0.92097 |         |
|           | -1.4116         | 0.92097 | 0.92097 | 0.94523617  |             |         |         |         |
| MTCO3P20  | ENSG00000225557 | -1.4121 | 0.92105 | -1.4121     | 0.92105     | -1.4121 |         |         |
|           | 0.92105         | -1.4121 | 0.92105 | 0.92105     | 0.945259786 |         |         |         |
| MTCYBP34  | ENSG00000237129 | -1.4121 | 0.92105 | -1.4121     | 0.92105     | -1.4121 |         |         |
|           | 0.92105         | -1.4121 | 0.92105 | 0.92105     | 0.945259786 |         |         |         |
| RN7SL498P | ENSG00000263755 | -1.4122 | 0.92106 | -1.4122     | 0.92106     | -1.4122 |         |         |
|           | 0.92106         | -1.4122 | 0.92106 | 0.92106     | 0.945259786 |         |         |         |
| NA        | ENSG00000239615 | -2.1932 | 0.98585 | -1.656      | 0.95114     | -1.4125 | 0.92109 |         |
|           | -1.7091         | 0.95629 | 0.92109 | 0.945259786 |             |         |         |         |
| NA        | ENSG00000278988 | -1.4124 | 0.92109 | -1.4124     | 0.92109     | -1.4124 | 0.92109 |         |
|           | -1.4124         | 0.92109 | 0.92109 | 0.945259786 |             |         |         |         |
| DEFB122   | ENSG00000204547 | -1.6746 | 0.95299 | -2.0963     | 0.98197     | -1.849  |         |         |
|           | 0.96777         | -1.4133 | 0.92121 | 0.92121     | 0.945363026 |         |         |         |
| NA        | ENSG00000270666 | -1.4137 | 0.92128 | -1.4137     | 0.92128     | -1.4137 | 0.92128 |         |
|           | -1.4137         | 0.92128 | 0.92128 | 0.945414952 |             |         |         |         |
| RNY1P12   | ENSG00000201121 | -1.4141 | 0.92133 | -1.4141     | 0.92133     | -1.4141 |         |         |
|           | 0.92133         | -1.4141 | 0.92133 | 0.92133     | 0.945426442 |         |         |         |
| MRGPRX6P  | ENSG00000254541 | -1.7313 | 0.9583  | -1.4141     | 0.92133     | -1.4141 |         |         |
|           | 0.92133         | -1.4141 | 0.92133 | 0.92133     | 0.945426442 |         |         |         |
| NA        | ENSG00000269781 | -1.4261 | 0.92308 | -1.4143     | 0.92136     | -1.7659 | 0.96129 |         |
|           | -1.7659         | 0.96129 | 0.92136 | 0.945437318 |             |         |         |         |
| MTND3P4   | ENSG00000230302 | -1.4148 | 0.92144 | -1.4148     | 0.92144     | -1.4148 |         |         |
|           | 0.92144         | -1.4148 | 0.92144 | 0.92144     | 0.945489851 |         |         |         |
| RPL7P49   | ENSG00000242931 | -1.4149 | 0.92145 | -1.4149     | 0.92145     | -1.4149 |         |         |

|            |                 |         |         |             |             |         |         |
|------------|-----------------|---------|---------|-------------|-------------|---------|---------|
|            | 0.92145         | -1.4149 | 0.92145 | 0.92145     | 0.945489851 |         |         |
| TRAJ40     | ENSG00000211849 | -1.415  | 0.92147 | 0.92147     | -1.415      | 0.92147 | -1.415  |
|            | 0.92147         | -1.415  | 0.92147 | 0.92147     | 0.945490464 |         |         |
| NA         | ENSG00000251228 | -1.4157 | 0.92157 | 0.92157     | -1.4157     | 0.92157 | -1.4157 |
|            | -1.4157         | 0.92157 | 0.92157 | 0.94557316  |             |         |         |
| NA         | ENSG00000227068 | -1.4161 | 0.92162 | 0.92162     | -1.6876     | 0.95426 | -1.4522 |
|            | -1.869          | 0.96919 | 0.92162 | 0.945604552 |             |         |         |
| RNU6-20P   | ENSG00000206833 | -1.4164 | 0.92167 | 0.92167     | -1.4164     | 0.92167 | -1.4164 |
|            | 0.92167         | -1.4164 | 0.92167 | 0.92167     | 0.945635943 |         |         |
| NA         | ENSG00000226138 | -1.4165 | 0.92169 | 0.92169     | -1.4165     | 0.92169 | -1.4165 |
|            | -1.4165         | 0.92169 | 0.92169 | 0.945636553 |             |         |         |
| RNU6-534P  | ENSG00000201747 | -1.4171 | 0.92177 | 0.92177     | -1.4171     | 0.92177 | -1.4171 |
|            | 0.92177         | -1.4171 | 0.92177 | 0.92177     | 0.94569872  |         |         |
| CXCL13     | ENSG00000156234 | -1.7332 | 0.95847 | 0.95847     | -1.4173     | 0.9218  | -1.5626 |
|            | 0.94093         | -1.8876 | 0.97046 | 0.9218      | 0.945709588 |         |         |
| MKNK2P1    | ENSG00000233533 | -1.418  | 0.9219  | 0.9219      | -1.418      | 0.9219  | -1.418  |
|            | 0.9219          | -1.418  | 0.9219  | 0.9219      | 0.945773572 |         |         |
| P2RY12     | ENSG00000169313 | -1.476  | 0.93002 | 0.93002     | -1.476      | 0.93002 | -1.4182 |
|            | 0.92193         | -1.476  | 0.93002 | 0.92193     | 0.945773572 |         |         |
| LINC01693  | ENSG00000227764 | -1.4182 | 0.92193 | 0.92193     | -1.4182     | 0.92193 | -1.4182 |
|            | 0.92193         | -1.4182 | 0.92193 | 0.92193     | 0.945773572 |         |         |
| NA         | ENSG00000259623 | -1.4182 | 0.92194 | 0.92194     | -1.4182     | 0.92194 | -1.4182 |
|            | -1.4182         | 0.92194 | 0.92194 | 0.945773572 |             |         |         |
| LPP-AS1    | ENSG00000224563 | -1.4191 | 0.92206 | 0.92206     | -1.4191     | 0.92206 | -1.4191 |
|            | 0.92206         | -1.4191 | 0.92206 | 0.92206     | 0.945867713 |         |         |
| NA         | ENSG00000213976 | -1.4193 | 0.92209 | 0.92209     | -1.4193     | 0.92209 | -1.4193 |
|            | -1.4193         | 0.92209 | 0.92209 | 0.945867713 |             |         |         |
| NA         | ENSG00000268731 | -1.4193 | 0.92209 | 0.92209     | -1.4193     | 0.92209 | -1.4193 |
|            | -1.4193         | 0.92209 | 0.92209 | 0.945867713 |             |         |         |
| NA         | ENSG00000283769 | -1.4194 | 0.92212 | 0.92212     | -1.4194     | 0.92212 | -1.4194 |
|            | -1.4194         | 0.92212 | 0.92212 | 0.945878575 |             |         |         |
| OR2W4P     | ENSG00000216629 | -1.4198 | 0.92217 | 0.92217     | -1.4198     | 0.92217 | -1.4198 |
|            | 0.92217         | -1.4198 | 0.92217 | 0.92217     | 0.945900903 |         |         |
| RPL37P2    | ENSG00000239559 | -1.4199 | 0.92219 | 0.92219     | -1.4199     | 0.92219 | -1.4199 |
|            | 0.92219         | -1.4199 | 0.92219 | 0.92219     | 0.945900903 |         |         |
| DPP10-AS3  | ENSG00000231538 | -1.7329 | 0.95844 | 0.95844     | -1.7329     | 0.95844 | -1.7329 |
|            | 0.95844         | -1.42   | 0.9222  | 0.9222      | 0.945900903 |         |         |
| RNU6-1157P | ENSG00000207185 | -1.421  | 0.92234 | 0.92234     | -1.421      | 0.92234 | -1.421  |
|            | 0.92234         | -1.421  | 0.92234 | 0.92234     | 0.946024589 |         |         |
| TREML1     | ENSG00000161911 | -1.4216 | 0.92243 | 0.92243     | -1.4216     | 0.92243 | -1.4216 |
|            | 0.92243         | -1.4216 | 0.92243 | 0.92243     | 0.946096986 |         |         |
| MCFD2P1    | ENSG00000237154 | -1.4218 | 0.92245 | 0.92245     | -1.4218     | 0.92245 | -1.4218 |
|            | 0.92245         | -1.4218 | 0.92245 | 0.92245     | 0.946097586 |         |         |
| NA         | ENSG00000268375 | -1.4228 | 0.9226  | 0.9226      | -1.4228     | 0.9226  | -1.4228 |
|            | -1.4228         | 0.9226  | 0.9226  | 0.946231516 |             |         |         |
| TMEM225    | ENSG00000204300 | -1.423  | 0.92263 | 0.92263     | -1.423      | 0.92263 | -1.423  |
|            | 0.92263         | -1.423  | 0.92263 | 0.92263     | 0.946242369 |         |         |
| NA         | ENSG00000279951 | -1.4232 | 0.92266 | 0.92266     | -1.4232     | 0.92266 | -1.4232 |
|            | -1.4232         | 0.92266 | 0.92266 | 0.946253221 |             |         |         |
| TCEA1P2    | ENSG00000230409 | -1.4235 | 0.92271 | 0.92271     | -1.4235     | 0.92271 | -1.4235 |
|            | 0.92271         | -1.4235 | 0.92271 | 0.92271     | 0.946284584 |         |         |
| RN7SKP220  | ENSG00000222543 | -1.4238 | 0.92274 | 0.92274     | -1.4238     | 0.92274 | -1.4238 |
|            | 0.92274         | -1.4238 | 0.92274 | 0.92274     | 0.946295435 |         |         |
| NA         | ENSG00000258051 | -1.4239 | 0.92276 | 0.92276     | -1.4239     | 0.92276 | -1.4239 |
|            | -1.4239         | 0.92276 | 0.92276 | 0.946296031 |             |         |         |
| ARRDC4     | ENSG00000140450 | -1.4244 | 0.92284 | 0.92284     | -1.4244     | 0.92284 | -1.4244 |
|            | 0.92284         | -1.4244 | 0.92284 | 0.92284     | 0.946328581 |         |         |
| C7orf26    | ENSG00000146576 | -1.4244 | 0.92284 | 0.92284     | -1.4835     | 0.93104 | -1.6061 |
|            | 0.94587         | -1.6956 | 0.95502 | 0.92284     | 0.946328581 |         |         |
| SUPT4H1P1  | ENSG00000226247 | -1.4245 | 0.92285 | 0.92285     | -1.4245     | 0.92285 | -1.4245 |
|            | 0.92285         | -1.4245 | 0.92285 | 0.92285     | 0.946328581 |         |         |
| GPRACR     | ENSG00000196979 | -1.4251 | 0.92293 | 0.92293     | -1.4251     | 0.92293 | -1.4251 |

|            |                 |         |         |         |             |             |         |         |
|------------|-----------------|---------|---------|---------|-------------|-------------|---------|---------|
|            | 0.92293         | -1.4251 | 0.92293 | 0.92293 | 0.946390701 |             |         |         |
| NA         | ENSG00000228027 | -1.4257 | 0.92303 | 0.92303 | -1.4257     | 0.92303     | -1.4257 | 0.92303 |
|            |                 | -1.4257 | 0.92303 | 0.92303 | 0.94644375  |             |         |         |
| ARL2BPP8   | ENSG00000263125 | -1.4257 | 0.92303 | 0.92303 | -1.4257     | 0.92303     | -1.4257 |         |
|            |                 | 0.92303 | -1.4257 | 0.92303 | 0.92303     | 0.94644375  |         |         |
| NA         | ENSG00000255062 | -1.4258 | 0.92304 | 0.92304 | -1.4258     | 0.92304     | -1.4258 | 0.92304 |
|            |                 | -1.4258 | 0.92304 | 0.92304 | 0.94644375  |             |         |         |
| NA         | ENSG00000259088 | -1.4262 | 0.92309 | 0.92309 | -2.1443     | 0.98399     | -2.1443 | 0.98399 |
|            |                 | -2.1443 | 0.98399 | 0.92309 | 0.946475102 |             |         |         |
| NA         | ENSG00000233144 | -1.4263 | 0.92311 | 0.92311 | -1.4263     | 0.92311     | -1.4263 | 0.92311 |
|            |                 | -1.4263 | 0.92311 | 0.92311 | 0.946475694 |             |         |         |
| NA         | ENSG00000264772 | -1.4265 | 0.92314 | 0.92314 | -1.4265     | 0.92314     | -1.4265 | 0.92314 |
|            |                 | -1.4265 | 0.92314 | 0.92314 | 0.946486538 |             |         |         |
| NA         | ENSG00000274956 | -1.9595 | 0.97497 | 0.97497 | -2.0943     | 0.98188     | -2.0501 | 0.97982 |
|            |                 | -1.4267 | 0.92317 | 0.92317 | 0.946497383 |             |         |         |
| NA         | ENSG00000267771 | -1.4273 | 0.92325 | 0.92325 | -1.4273     | 0.92325     | -1.4273 | 0.92325 |
|            |                 | -1.4273 | 0.92325 | 0.92325 | 0.946559489 |             |         |         |
| RNA5SP480  | ENSG00000252649 | -1.4278 | 0.92333 | 0.92333 | -1.4278     | 0.92333     | -1.4278 |         |
|            |                 | 0.92333 | -1.4278 | 0.92333 | 0.92333     | 0.946621592 |         |         |
| RPL37A-DT  | ENSG00000232485 | -1.4281 | 0.92337 | 0.92337 | -1.4281     | 0.92337     | -1.4281 |         |
|            |                 | 0.92337 | -1.9477 | 0.97427 | 0.92337     | 0.946642685 |         |         |
| MIR4311    | ENSG00000263512 | -1.4284 | 0.92341 | 0.92341 | -1.4284     | 0.92341     | -1.4284 |         |
|            |                 | 0.92341 | -1.4284 | 0.92341 | 0.92341     | 0.946663777 |         |         |
| RNU6-1147P | ENSG00000200250 | -1.4286 | 0.92344 | 0.92344 | -1.4286     | 0.92344     | -1.4286 |         |
|            |                 | 0.92344 | -1.4286 | 0.92344 | 0.92344     | 0.946674616 |         |         |
| MIR4685    | ENSG00000264610 | -1.4289 | 0.92349 | 0.92349 | -1.4289     | 0.92349     | -1.4289 |         |
|            |                 | 0.92349 | -1.4289 | 0.92349 | 0.92349     | 0.946705958 |         |         |
| NA         | ENSG00000235005 | -1.4293 | 0.92354 | 0.92354 | -1.4293     | 0.92354     | -1.4293 | 0.92354 |
|            |                 | -1.4293 | 0.92354 | 0.92354 | 0.946727633 |             |         |         |
| NA         | ENSG00000251822 | -1.4293 | 0.92355 | 0.92355 | -1.4293     | 0.92355     | -1.4293 | 0.92355 |
|            |                 | -1.7704 | 0.96167 | 0.92355 | 0.946727633 |             |         |         |
| HMG2P21    | ENSG00000228034 | -1.4298 | 0.92361 | 0.92361 | -1.4704     | 0.92928     | -1.4704 |         |
|            |                 | 0.92928 | -1.4704 | 0.92928 | 0.92361     | 0.946739642 |         |         |
| NA         | ENSG00000236453 | -1.6777 | 0.9533  | 0.9533  | -1.4298     | 0.92361     | -1.4298 | 0.92361 |
|            |                 | -1.4298 | 0.92361 | 0.92361 | 0.946739642 |             |         |         |
| TRAPPC5    | ENSG00000181029 | -1.4298 | 0.92362 | 0.92362 | -1.4298     | 0.92362     | -1.4298 |         |
|            |                 | 0.92362 | -1.4298 | 0.92362 | 0.92362     | 0.946739642 |         |         |
| OSBPL9     | ENSG00000117859 | -1.4306 | 0.92373 | 0.92373 | -1.9147     | 0.97224     | -2.2043 |         |
|            |                 | 0.98625 | -3.0469 | 0.99884 | 0.92373     | 0.946832479 |         |         |
| NA         | ENSG00000227673 | -1.431  | 0.92379 | 0.92379 | -1.431      | 0.92379     | -1.431  | 0.92379 |
|            |                 | -1.431  | 0.92379 | 0.92379 | 0.946874063 |             |         |         |
| NA         | ENSG00000213703 | -1.4315 | 0.92385 | 0.92385 | -1.4315     | 0.92385     | -1.4315 | 0.92385 |
|            |                 | -1.4315 | 0.92385 | 0.92385 | 0.946915645 |             |         |         |
| NA         | ENSG00000214708 | -1.4316 | 0.92387 | 0.92387 | -1.4316     | 0.92387     | -1.4316 | 0.92387 |
|            |                 | -1.4316 | 0.92387 | 0.92387 | 0.946916227 |             |         |         |
| ANKEF1     | ENSG00000132623 | -1.432  | 0.92393 | 0.92393 | -1.432      | 0.92393     | -1.432  |         |
|            |                 | 0.92393 | -1.432  | 0.92393 | 0.92393     | 0.946957806 |         |         |
| MED25      | ENSG00000104973 | -1.4322 | 0.92395 | 0.92395 | -1.7745     | 0.96201     | -1.7318 | 0.95835 |
|            |                 | -1.7318 | 0.95835 | 0.92395 | 0.946958388 |             |         |         |
| NA         | ENSG00000239291 | -1.4324 | 0.92399 | 0.92399 | -1.4324     | 0.92399     | -1.4324 | 0.92399 |
|            |                 | -1.4324 | 0.92399 | 0.92399 | 0.946979467 |             |         |         |
| NA         | ENSG00000260616 | -1.4328 | 0.92404 | 0.92404 | -1.4328     | 0.92404     | -1.4328 | 0.92404 |
|            |                 | -1.4328 | 0.92404 | 0.92404 | 0.947001706 |             |         |         |
| GRID1-AS1  | ENSG00000234942 | -1.4329 | 0.92406 | 0.92406 | -1.4329     | 0.92406     | -1.4642 |         |
|            |                 | 0.92843 | -1.4329 | 0.92406 | 0.92406     | 0.947001706 |         |         |
| NA         | ENSG00000251001 | -1.7117 | 0.95652 | 0.95652 | -1.7117     | 0.95652     | -1.7117 | 0.95652 |
|            |                 | -1.433  | 0.92407 | 0.92407 | 0.947001706 |             |         |         |
| GPS1       | ENSG00000169727 | -1.4336 | 0.92416 | 0.92416 | -1.4336     | 0.92416     | -1.5151 | 0.93513 |
|            |                 | -1.4336 | 0.92416 | 0.92416 | 0.947074022 |             |         |         |
| KRT18P62   | ENSG00000233471 | -1.4343 | 0.92426 | 0.92426 | -1.4343     | 0.92426     | -1.4343 |         |
|            |                 | 0.92426 | -1.4343 | 0.92426 | 0.92426     | 0.947156582 |         |         |
| HINT2P1    | ENSG00000230398 | -1.435  | 0.92435 | 0.92435 | -1.435      | 0.92435     | -1.435  |         |

|             |                 |         |         |             |             |         |         |
|-------------|-----------------|---------|---------|-------------|-------------|---------|---------|
|             | 0.92435         | -1.435  | 0.92435 | 0.92435     | 0.947228892 |         |         |
| ARL6IP1P1   | ENSG00000255664 | -1.4353 | 0.9244  | 0.9244      | -1.4353     | 0.9244  | -1.4353 |
|             | 0.9244          | -1.4353 | 0.9244  | 0.9244      | 0.947260209 |         |         |
| GSTA7P      | ENSG00000237674 | -1.4359 | 0.92449 | 0.92449     | -1.4359     | 0.92449 | -1.4359 |
|             | 0.92449         | -1.4359 | 0.92449 | 0.92449     | 0.947294397 |         |         |
| SNORD99     | ENSG00000221539 | -1.4362 | 0.92453 | 0.92453     | -1.4362     | 0.92453 | -1.4362 |
|             | 0.92453         | -1.4362 | 0.92453 | 0.92453     | 0.947294397 |         |         |
| NA          | ENSG00000267458 | -1.4362 | 0.92453 | -1.4362     | 0.92453     | -1.4362 | 0.92453 |
|             | -1.4362         | 0.92453 | 0.92453 | 0.947294397 |             |         |         |
| NA          | ENSG00000221002 | -1.4363 | 0.92453 | -1.4363     | 0.92453     | -1.4363 | 0.92453 |
|             | -1.4363         | 0.92453 | 0.92453 | 0.947294397 |             |         |         |
| NA          | ENSG00000278797 | -1.4363 | 0.92454 | -1.4363     | 0.92454     | -1.4363 | 0.92454 |
|             | -1.4363         | 0.92454 | 0.92454 | 0.947294397 |             |         |         |
| SNRNP25     | ENSG00000161981 | -1.4364 | 0.92455 | -1.4364     | 0.92455     | -1.4364 |         |
|             | 0.92455         | -1.4364 | 0.92455 | 0.92455     | 0.947294397 |         |         |
| MIR125A     | ENSG00000208008 | -1.4371 | 0.92466 | -1.4371     | 0.92466     | -1.4371 |         |
|             | 0.92466         | -1.4371 | 0.92466 | 0.92466     | 0.947368409 |         |         |
| METR1       | ENSG00000103260 | -1.7071 | 0.9561  | -1.7071     | 0.9561      | -1.4372 | 0.92467 |
|             | -1.5475         | 0.93912 | 0.92467 | 0.947368409 |             |         |         |
| SFTA1P      | ENSG00000225383 | -1.6518 | 0.95071 | -1.6518     | 0.95071     | -1.6518 |         |
|             | 0.95071         | -1.4373 | 0.92469 | 0.92469     | 0.947368409 |         |         |
| NA          | ENSG00000265883 | -1.4374 | 0.9247  | -1.4374     | 0.9247      | -1.4374 | 0.9247  |
|             | -1.4374         | 0.9247  | 0.9247  | 0.947368409 |             |         |         |
| SPC24       | ENSG00000161888 | -1.4379 | 0.92476 | -2.3659     | 0.99101     | -1.8586 | 0.96846 |
|             | -2.5781         | 0.99503 | 0.92476 | 0.947390043 |             |         |         |
| RNU6-432P   | ENSG00000206923 | -1.4379 | 0.92476 | -1.4379     | 0.92476     | -1.4379 |         |
|             | 0.92476         | -1.4379 | 0.92476 | 0.92476     | 0.947390043 |         |         |
| GPR151      | ENSG00000173250 | -1.4389 | 0.92491 | -1.4389     | 0.92491     | -1.4389 |         |
|             | 0.92491         | -1.4389 | 0.92491 | 0.92491     | 0.947503874 |         |         |
| NA          | ENSG00000279799 | -1.4389 | 0.92491 | -1.4389     | 0.92491     | -1.4389 | 0.92491 |
|             | -1.4389         | 0.92491 | 0.92491 | 0.947503874 |             |         |         |
| RNA5SP325   | ENSG00000200626 | -1.4393 | 0.92497 | -1.4754     | 0.92995     | -1.4393 |         |
|             | 0.92497         | -1.4393 | 0.92497 | 0.92497     | 0.947525501 |         |         |
| ZSCAN16-AS1 | ENSG00000269293 | -1.4394 | 0.92497 | -1.7414     | 0.95919     | -1.4588 |         |
|             | 0.9277          | -1.4588 | 0.9277  | 0.92497     | 0.947525501 |         |         |
| RPL7P42     | ENSG00000241825 | -1.6841 | 0.95392 | -1.6841     | 0.95392     | -1.4395 |         |
|             | 0.92499         | -1.6841 | 0.95392 | 0.92499     | 0.947526071 |         |         |
| NA          | ENSG00000229190 | -1.4398 | 0.92504 | -1.4398     | 0.92504     | -1.4398 | 0.92504 |
|             | -1.4398         | 0.92504 | 0.92504 | 0.94755737  |             |         |         |
| COX6B1P7    | ENSG00000225242 | -1.4402 | 0.92509 | -1.4402     | 0.92509     | -1.4402 |         |
|             | 0.92509         | -1.4402 | 0.92509 | 0.92509     | 0.947559075 |         |         |
| NA          | ENSG00000227625 | -1.4402 | 0.9251  | -1.4402     | 0.9251      | -1.4402 | 0.9251  |
|             | -1.4402         | 0.9251  | 0.9251  | 0.947559075 |             |         |         |
| NA          | ENSG00000250475 | -1.7207 | 0.95735 | -1.8758     | 0.96966     | -1.6529 | 0.95082 |
|             | -1.4403         | 0.9251  | 0.9251  | 0.947559075 |             |         |         |
| TBC1D30     | ENSG00000111490 | -2.0892 | 0.98166 | -1.7878     | 0.96309     | -1.8361 |         |
|             | 0.96683         | -1.4406 | 0.92515 | 0.92515     | 0.947581832 |         |         |
| SHARPIN     | ENSG00000179526 | -1.4409 | 0.92519 | -1.4409     | 0.92519     | -1.4409 |         |
|             | 0.92519         | -1.4409 | 0.92519 | 0.92519     | 0.947581832 |         |         |
| RN7SL749P   | ENSG00000242853 | -1.4409 | 0.92519 | -1.4409     | 0.92519     | -1.4409 |         |
|             | 0.92519         | -1.4409 | 0.92519 | 0.92519     | 0.947581832 |         |         |
| DNAJC2      | ENSG00000105821 | -1.4409 | 0.9252  | -2.6334     | 0.99577     | -2.6334 |         |
|             | 0.99577         | -2.004  | 0.97746 | 0.9252      | 0.947581832 |         |         |
| NA          | ENSG00000249795 | -1.4996 | 0.93314 | -1.4412     | 0.92523     | -1.4412 | 0.92523 |
|             | -1.4412         | 0.92523 | 0.92523 | 0.947582968 |             |         |         |
| DNAJC9-AS1  | ENSG00000236756 | -1.4412 | 0.92524 | -1.5565     | 0.94021     | -1.4412 |         |
|             | 0.92524         | -1.4412 | 0.92524 | 0.92524     | 0.947582968 |         |         |
| NA          | ENSG00000280405 | -1.4425 | 0.92541 | -1.4425     | 0.92541     | -1.4425 | 0.92541 |
|             | -1.4425         | 0.92541 | 0.92541 | 0.947698451 |             |         |         |
| NA          | ENSG00000212061 | -1.5427 | 0.93855 | -1.738      | 0.9589      | -1.4424 | 0.92541 |
|             | -1.6497         | 0.95049 | 0.92541 | 0.947698451 |             |         |         |
| PNLIP       | ENSG00000175535 | -1.4426 | 0.92543 | -1.4426     | 0.92543     | -1.4426 | 0.92543 |

|           |                 |             |             |             |             |         |         |       |
|-----------|-----------------|-------------|-------------|-------------|-------------|---------|---------|-------|
|           | -1.4426         | 0.92543     | 0.92543     | 0.947698451 |             |         |         |       |
| NA        | ENSG00000279993 | -1.5627     | 0.94094     | -1.4426     | 0.92544     | -1.5627 | 0.94094 |       |
|           | -1.5627         | 0.94094     | 0.92544     | 0.947698451 |             |         |         |       |
| NA        | ENSG00000265257 | -1.4427     | 0.92545     | -1.6583     | 0.95137     | -1.4427 | 0.92545 |       |
|           | -1.4427         | 0.92545     | 0.92545     | 0.947698451 |             |         |         |       |
| NA        | ENSG00000252442 | -1.443      | 0.92549     | -1.443      | 0.92549     | -1.443  | 0.92549 |       |
|           | -1.443          | 0.92549     | 0.92549     | 0.947719497 |             |         |         |       |
| NA        | ENSG00000232043 | -1.4447     | 0.92572     | -1.6448     | 0.94999     | -1.54   | 0.93822 | -1.54 |
|           | 0.93822         | 0.92572     | 0.947935101 |             |             |         |         |       |
| RNF215    | ENSG00000099999 | -1.4451     | 0.92578     | -1.4967     | 0.93277     | -1.4451 |         |       |
|           | 0.92578         | -1.5842     | 0.94342     | 0.92578     | 0.947976621 |         |         |       |
| HSDL1     | ENSG00000103160 | -1.4861     | 0.93138     | -1.4861     | 0.93138     | -1.4454 | 0.92582 |       |
|           | -1.4861         | 0.93138     | 0.92582     | 0.947997659 |             |         |         |       |
| NA        | ENSG00000258599 | -1.4458     | 0.92588     | -1.4458     | 0.92588     | -1.4458 | 0.92588 |       |
|           | -1.4458         | 0.92588     | 0.92588     | 0.948039175 |             |         |         |       |
| RNA5SP436 | ENSG00000251829 | -1.4466     | 0.92599     | -1.4466     | 0.92599     | -1.4466 |         |       |
|           | 0.92599         | -1.4466     | 0.92599     | 0.92599     | 0.948122203 |         |         |       |
| NA        | ENSG00000268564 | -1.4467     | 0.926       | -1.4467     | 0.926       | -1.4467 | 0.926   | 0.926 |
|           | 0.926           | 0.948122203 |             |             |             |         |         |       |
| RPL6P9    | ENSG00000242390 | -2.2476     | 0.9877      | -1.9248     | 0.97287     | -2.161  |         |       |
|           | 0.98465         | -1.4468     | 0.92602     | 0.92602     | 0.948122759 |         |         |       |
| TCL1A     | ENSG00000100721 | -1.447      | 0.92606     | -1.7831     | 0.96271     | -1.447  | 0.92606 |       |
|           | -1.447          | 0.92606     | 0.92606     | 0.948143792 |             |         |         |       |
| NDUFB1P2  | ENSG00000234523 | -1.4473     | 0.92609     | -1.4473     | 0.92609     | -1.4473 |         |       |
|           | 0.92609         | -1.4473     | 0.92609     | 0.92609     | 0.948154587 |         |         |       |
| RAD23BP3  | ENSG00000226298 | -1.4478     | 0.92616     | -1.4478     | 0.92616     | -1.4478 |         |       |
|           | 0.92616         | -1.4478     | 0.92616     | 0.92616     | 0.948196649 |         |         |       |
| PRR4      | ENSG00000111215 | -1.4479     | 0.92617     | -1.4479     | 0.92617     | -1.4479 | 0.92617 |       |
|           | -1.5013         | 0.93336     | 0.92617     | 0.948196649 |             |         |         |       |
| MTND5P12  | ENSG00000251544 | -1.4481     | 0.92621     | -1.4481     | 0.92621     | -1.4481 |         |       |
|           | 0.92621         | -1.4481     | 0.92621     | 0.92621     | 0.948217679 |         |         |       |
| NCOR1     | ENSG00000141027 | -1.8396     | 0.96709     | -2.0109     | 0.97783     | -1.5259 | 0.93648 |       |
|           | -1.449          | 0.92633     | 0.92633     | 0.948320607 |             |         |         |       |
| LINC02672 | ENSG00000227121 | -1.4495     | 0.9264      | -1.4495     | 0.9264      | -1.4495 |         |       |
|           | 0.9264          | -1.4495     | 0.9264      | 0.9264      | 0.948372345 |         |         |       |
| RCC2P3    | ENSG00000233951 | -1.4501     | 0.92649     | -1.4501     | 0.92649     | -1.4501 |         |       |
|           | 0.92649         | -1.4501     | 0.92649     | 0.92649     | 0.948444555 |         |         |       |
| NA        | ENSG00000255532 | -1.849      | 0.96777     | -1.4505     | 0.92654     | -2.189  | 0.9857  |       |
|           | -2.1949         | 0.98592     | 0.92654     | 0.948466127 |             |         |         |       |
| NA        | ENSG00000274765 | -1.4506     | 0.92655     | -1.4506     | 0.92655     | -1.4506 | 0.92655 |       |
|           | -1.4506         | 0.92655     | 0.92655     | 0.948466127 |             |         |         |       |
| VN1R82P   | ENSG00000268995 | -1.4507     | 0.92657     | -1.4507     | 0.92657     | -1.4507 |         |       |
|           | 0.92657         | -1.4507     | 0.92657     | 0.92657     | 0.948466676 |         |         |       |
| NA        | ENSG00000280304 | -1.4518     | 0.92672     | -1.4518     | 0.92672     | -1.4518 | 0.92672 |       |
|           | -1.4518         | 0.92672     | 0.92672     | 0.948600294 |             |         |         |       |
| BANF1P2   | ENSG00000230306 | -1.4524     | 0.92681     | -1.4524     | 0.92681     | -1.4524 |         |       |
|           | 0.92681         | -1.4524     | 0.92681     | 0.92681     | 0.948672491 |         |         |       |
| ARF4-AS1  | ENSG00000272146 | -1.453      | 0.92688     | -1.453      | 0.92688     | -1.453  |         |       |
|           | 0.92688         | -1.453      | 0.92688     | 0.92688     | 0.948724214 |         |         |       |
| NA        | ENSG00000229060 | -1.4531     | 0.92691     | -1.4531     | 0.92691     | -1.4531 | 0.92691 |       |
|           | -1.4531         | 0.92691     | 0.92691     | 0.948725845 |             |         |         |       |
| VN1R83P   | ENSG00000268521 | -1.4533     | 0.92694     | -1.4533     | 0.92694     | -1.4533 |         |       |
|           | 0.92694         | -1.4533     | 0.92694     | 0.92694     | 0.948725845 |         |         |       |
| NA        | ENSG00000279838 | -1.4534     | 0.92694     | -1.4534     | 0.92694     | -1.4534 | 0.92694 |       |
|           | -1.4534         | 0.92694     | 0.92694     | 0.948725845 |             |         |         |       |
| ELF1      | ENSG00000120690 | -2.2038     | 0.98623     | -1.4538     | 0.927       | -1.518  | 0.93549 |       |
|           | -1.518          | 0.93549     | 0.927       | 0.948767328 |             |         |         |       |
| KLHL2P1   | ENSG00000250412 | -1.5909     | 0.94418     | -1.4542     | 0.92705     | -1.5943 |         |       |
|           | 0.94457         | -1.5733     | 0.94218     | 0.92705     | 0.948798574 |         |         |       |
| NA        | ENSG00000228205 | -1.4547     | 0.92712     | -1.4547     | 0.92712     | -1.4547 | 0.92712 |       |
|           | -1.4547         | 0.92712     | 0.92712     | 0.948850288 |             |         |         |       |
| ZNF23     | ENSG00000167377 | -1.4549     | 0.92715     | -1.4549     | 0.92715     | -1.4549 | 0.92715 |       |



|           |                 |         |             |             |             |         |         |         |
|-----------|-----------------|---------|-------------|-------------|-------------|---------|---------|---------|
|           | -1.4549         | 0.92715 | 0.92715     | 0.948861063 |             |         |         |         |
| DAP3P2    | ENSG00000228507 | -1.4553 | 0.92721     | -1.4553     | 0.92721     | -1.4553 | 0.92721 | -1.4553 |
|           | 0.92721         | -1.4553 | 0.92721     | 0.92721     | 0.948902539 |         |         |         |
| SUGT1P2   | ENSG00000213842 | -1.729  | 0.95809     | -1.4555     | 0.92723     | -1.729  |         |         |
|           | 0.95809         | -1.729  | 0.95809     | 0.92723     | 0.948903079 |         |         |         |
| NA        | ENSG00000207466 | -1.4558 | 0.92727     | -1.4558     | 0.92727     | -1.4558 | 0.92727 | 0.92727 |
|           | -1.4558         | 0.92727 | 0.92727     | 0.948924085 |             |         |         |         |
| SLC25A1   | ENSG00000100075 | -1.4563 | 0.92735     | -1.4563     | 0.92735     | -1.4563 | 0.92735 | -1.4563 |
|           | 0.92735         | -1.4563 | 0.92735     | 0.92735     | 0.948986024 |         |         |         |
| KDM7A-DT  | ENSG00000260231 | -1.4565 | 0.92737     | -1.4565     | 0.92737     | -1.4565 | 0.92737 | -1.4565 |
|           | 0.92737         | -1.4565 | 0.92737     | 0.92737     | 0.948986562 |         |         |         |
| EIF3J-DT  | ENSG00000179523 | -1.4572 | 0.92746     | -1.9362     | 0.97358     | -1.9362 |         |         |
|           | 0.97358         | -1.9362 | 0.97358     | 0.92746     | 0.94905873  |         |         |         |
| NA        | ENSG00000224628 | -1.5266 | 0.93657     | -1.5136     | 0.93493     | -1.5136 | 0.93493 | 0.93493 |
|           | -1.4578         | 0.92755 | 0.92755     | 0.949130895 |             |         |         |         |
| NA        | ENSG00000260418 | -2.3795 | 0.99133     | -2.3795     | 0.99133     | -2.3795 | 0.99133 | 0.99133 |
|           | -1.4582         | 0.92761 | 0.92761     | 0.94917236  |             |         |         |         |
| PIGBOS1   | ENSG00000225973 | -1.4786 | 0.93037     | -1.4584     | 0.92763     | -1.87   | 0.96926 | 0.96926 |
|           | -1.87           | 0.96926 | 0.92763     | 0.949172894 |             |         |         |         |
| RNY4P3    | ENSG00000202124 | -1.4586 | 0.92767     | -1.4586     | 0.92767     | -1.4586 | 0.92767 | -1.4586 |
|           | 0.92767         | -1.4586 | 0.92767     | 0.92767     | 0.949193892 |         |         |         |
| MIR3923   | ENSG00000265193 | -1.4588 | 0.92769     | -1.5296     | 0.93695     | -1.7301 |         |         |
|           | 0.95819         | -1.4588 | 0.92769     | 0.92769     | 0.949194425 |         |         |         |
| FUT2      | ENSG00000176920 | -2.1161 | 0.98283     | -2.1161     | 0.98283     | -1.4598 | 0.92783 | 0.92783 |
|           | -1.4598         | 0.92783 | 0.92783     | 0.949317738 |             |         |         |         |
| GARRE1    | ENSG00000166398 | -2.1432 | 0.98395     | -2.4032     | 0.99187     | -2.1432 |         |         |
|           | 0.98395         | -1.4606 | 0.92793     | 0.92793     | 0.94940012  |         |         |         |
| LINC01036 | ENSG00000230426 | -1.4614 | 0.92805     | -1.4614     | 0.92805     | -1.4614 |         |         |
|           | 0.92805         | -1.4614 | 0.92805     | 0.92805     | 0.949493256 |         |         |         |
| NA        | ENSG00000261159 | -1.4615 | 0.92806     | -1.4615     | 0.92806     | -1.4615 | 0.92806 | 0.92806 |
|           | -1.4615         | 0.92806 | 0.92806     | 0.949493256 |             |         |         |         |
| ART2P     | ENSG00000238048 | -1.4619 | 0.92811     | -2.013      | 0.97794     | -1.4619 | 0.92811 | 0.92811 |
|           | -1.4619         | 0.92811 | 0.92811     | 0.949514772 |             |         |         |         |
| NA        | ENSG00000282278 | -1.4619 | 0.92812     | -1.4619     | 0.92812     | -1.4619 | 0.92812 | 0.92812 |
|           | -1.4619         | 0.92812 | 0.92812     | 0.949514772 |             |         |         |         |
| LINC00683 | ENSG00000266256 | -1.6656 | 0.9521      | -1.9764     | 0.97594     | -1.4621 |         |         |
|           | 0.92815         | -1.7556 | 0.96042     | 0.92815     | 0.949515825 |         |         |         |
| NA        | ENSG00000232900 | -1.4622 | 0.92816     | -1.4622     | 0.92816     | -1.4622 | 0.92816 | 0.92816 |
|           | -1.4622         | 0.92816 | 0.92816     | 0.949515825 |             |         |         |         |
| ATP5F1B   | ENSG00000110955 | -1.4634 | 0.92832     | -1.4634     | 0.92832     | -1.4634 |         |         |
|           | 0.92832         | -1.4634 | 0.92832     | 0.92832     | 0.949630453 |         |         |         |
| ZNF502    | ENSG00000196653 | -1.4634 | 0.92832     | -1.9056     | 0.97165     | -1.9056 |         |         |
|           | 0.97165         | -1.9056 | 0.97165     | 0.92832     | 0.949630453 |         |         |         |
| NA        | ENSG00000227062 | -1.4635 | 0.92834     | -1.4635     | 0.92834     | -1.4635 | 0.92834 | 0.92834 |
|           | -1.4635         | 0.92834 | 0.92834     | 0.949630453 |             |         |         |         |
| NA        | ENSG00000207229 | -1.4636 | 0.92835     | -1.4636     | 0.92835     | -1.4636 | 0.92835 | 0.92835 |
|           | -1.4636         | 0.92835 | 0.92835     | 0.949630453 |             |         |         |         |
| NA        | ENSG00000253174 | -1.464  | 0.9284      | -1.464      | 0.9284      | -1.464  | 0.9284  | 0.9284  |
|           | -1.464          | 0.9284  | 0.9284      | 0.949661664 |             |         |         |         |
| CICP11    | ENSG00000237799 | -1.4647 | 0.9285      | -1.4647     | 0.9285      | -1.4647 |         |         |
|           | 0.9285          | -1.4647 | 0.9285      | 0.9285      | 0.949744018 |         |         |         |
| NA        | ENSG00000235859 | -1.6048 | 0.94573     | -1.4653     | 0.92858     | -1.4653 | 0.92858 | 0.92858 |
|           | -1.4653         | 0.92858 | 0.92858     | 0.949805911 |             |         |         |         |
| RPEP4     | ENSG00000233010 | -1.4663 | 0.92872     | -1.4663     | 0.92872     | -1.4663 | 0.92872 | 0.92872 |
|           | -1.4663         | 0.92872 | 0.92872     | 0.949929172 |             |         |         |         |
| HMG1P16   | ENSG00000249503 | -1.468  | 0.92894     | -1.468      | 0.92894     | -1.468  |         |         |
|           | 0.92894         | -1.468  | 0.92894     | 0.92894     | 0.950124538 |         |         |         |
| PHBP3     | ENSG00000228121 | -1.468  | 0.92895     | -1.468      | 0.92895     | -1.468  | 0.92895 | 0.92895 |
|           | -1.468          | 0.92895 | 0.92895     | 0.950124538 |             |         |         |         |
| RNU6-188P | ENSG00000201077 | -1.4684 | 0.929       | -1.4684     | 0.929       | -1.4684 | 0.929   | -1.4684 |
|           | 0.929           | 0.929   | 0.950155735 |             |             |         |         |         |
| NUAK1     | ENSG00000074590 | -1.4691 | 0.92909     | -2.3387     | 0.99032     | -2.1544 | 0.9844  | 0.9844  |

|            |                 |         |         |             |             |             |         |         |
|------------|-----------------|---------|---------|-------------|-------------|-------------|---------|---------|
|            |                 | -2.2897 | 0.98898 | 0.92909     | 0.950207898 |             |         |         |
| NA         | ENSG00000273312 | -1.469  | 0.92909 | 0.92909     | -1.469      | 0.92909     | -1.469  | 0.92909 |
|            |                 | -1.469  | 0.92909 | 0.92909     | 0.950207898 |             |         |         |
| NA         | ENSG00000279482 | -1.47   | 0.92922 | -1.9358     | 0.97355     | -1.9358     | 0.97355 |         |
|            |                 | -1.9358 | 0.97355 | 0.92922     | 0.950320907 |             |         |         |
| NA         | ENSG00000231454 | -1.4704 | 0.92927 | 0.92927     | -1.4704     | 0.92927     | -1.4704 | 0.92927 |
|            |                 | -1.4704 | 0.92927 | 0.92927     | 0.950352098 |             |         |         |
| NA         | ENSG00000267180 | -1.4707 | 0.92931 | 0.92931     | -1.4707     | 0.92931     | -1.4707 | 0.92931 |
|            |                 | -1.4707 | 0.92931 | 0.92931     | 0.950353624 |             |         |         |
| SKP1P1     | ENSG00000231234 | -1.4707 | 0.92932 | 0.92932     | -1.4707     | 0.92932     | -1.4707 |         |
|            |                 | 0.92932 | -1.4707 | 0.92932     | 0.92932     | 0.950353624 |         |         |
| RNU6-1276P | ENSG00000202242 | -1.4708 | 0.92933 | 0.92933     | -1.4708     | 0.92933     | -1.4708 |         |
|            |                 | 0.92933 | -1.4708 | 0.92933     | 0.92933     | 0.950353624 |         |         |
| NA         | ENSG00000200428 | -1.4711 | 0.92937 | 0.92937     | -1.4711     | 0.92937     | -1.4711 | 0.92937 |
|            |                 | -1.4711 | 0.92937 | 0.92937     | 0.950354642 |             |         |         |
| RNY1P9     | ENSG00000255156 | -1.4711 | 0.92937 | 0.92937     | -1.4711     | 0.92937     | -1.4711 |         |
|            |                 | 0.92937 | -1.4711 | 0.92937     | 0.92937     | 0.950354642 |         |         |
| MYG1-AS1   | ENSG00000257605 | -1.4719 | 0.92947 | 0.92947     | -1.4719     | 0.92947     | -1.4719 |         |
|            |                 | 0.92947 | -1.4719 | 0.92947     | 0.92947     | 0.950436955 |         |         |
| NA         | ENSG00000253194 | -1.4724 | 0.92954 | 0.92954     | -1.4724     | 0.92954     | -1.4724 | 0.92954 |
|            |                 | -1.4724 | 0.92954 | 0.92954     | 0.950449715 |             |         |         |
| KRT39      | ENSG00000196859 | -1.5451 | 0.93884 | 0.93884     | -1.7214     | 0.95741     | -1.7823 | 0.96265 |
|            |                 | -1.4726 | 0.92957 | 0.92957     | 0.950449715 |             |         |         |
| NA         | ENSG00000253746 | -1.4726 | 0.92957 | 0.92957     | -1.4726     | 0.92957     | -1.4726 | 0.92957 |
|            |                 | -1.4726 | 0.92957 | 0.92957     | 0.950449715 |             |         |         |
| NASP       | ENSG00000132780 | -1.8011 | 0.96416 | 0.96416     | -1.4845     | 0.93116     | -1.4727 | 0.92958 |
|            |                 | -1.8138 | 0.96514 | 0.92958     | 0.950449715 |             |         |         |
| MIR1183    | ENSG00000221783 | -1.4727 | 0.92958 | 0.92958     | -1.4727     | 0.92958     | -1.4727 |         |
|            |                 | 0.92958 | -1.4727 | 0.92958     | 0.92958     | 0.950449715 |         |         |
| RPL15P5    | ENSG00000233045 | -1.4729 | 0.92961 | 0.92961     | -1.4729     | 0.92961     | -1.4729 |         |
|            |                 | 0.92961 | -1.4729 | 0.92961     | 0.92961     | 0.950460446 |         |         |
| DEFB134    | ENSG00000205882 | -1.4731 | 0.92964 | 0.92964     | -1.4731     | 0.92964     | -1.4731 |         |
|            |                 | 0.92964 | -1.4731 | 0.92964     | 0.92964     | 0.950471176 |         |         |
| RNU6-570P  | ENSG00000252860 | -1.4749 | 0.92988 | 0.92988     | -1.4749     | 0.92988     | -1.4749 |         |
|            |                 | 0.92988 | -1.4749 | 0.92988     | 0.92988     | 0.950696607 |         |         |
| NA         | ENSG00000234863 | -1.4753 | 0.92993 | 0.92993     | -1.4753     | 0.92993     | -1.4753 | 0.92993 |
|            |                 | -1.4753 | 0.92993 | 0.92993     | 0.950718057 |             |         |         |
| NA         | ENSG00000256276 | -1.4754 | 0.92994 | 0.92994     | -1.4754     | 0.92994     | -1.4754 | 0.92994 |
|            |                 | -1.4754 | 0.92994 | 0.92994     | 0.950718057 |             |         |         |
| NA         | ENSG00000257489 | -1.4759 | 0.93001 | 0.93001     | -1.4759     | 0.93001     | -1.4759 | 0.93001 |
|            |                 | -1.8443 | 0.96743 | 0.93001     | 0.950769674 |             |         |         |
| RN7SL108P  | ENSG00000243546 | -1.9202 | 0.97258 | 0.97258     | -1.4763     | 0.93006     | -1.702  |         |
|            |                 | 0.95562 | -2.1778 | 0.98529     | 0.93006     | 0.950800843 |         |         |
| IL6STP1    | ENSG00000227018 | -1.4769 | 0.93016 | 0.93016     | -1.4769     | 0.93016     | -1.4769 |         |
|            |                 | 0.93016 | -1.4769 | 0.93016     | 0.93016     | 0.950863675 |         |         |
| HSD11B1L   | ENSG00000167733 | -1.4772 | 0.93018 | 0.93018     | -1.4772     | 0.93018     | -1.4772 |         |
|            |                 | 0.93018 | -1.4772 | 0.93018     | 0.93018     | 0.950863675 |         |         |
| NA         | ENSG00000268351 | -1.4772 | 0.93018 | 0.93018     | -1.4772     | 0.93018     | -1.4772 | 0.93018 |
|            |                 | -1.4772 | 0.93018 | 0.93018     | 0.950863675 |             |         |         |
| DPAGT1     | ENSG00000172269 | -2.0932 | 0.98183 | 0.98183     | -1.4775     | 0.93023     | -1.703  |         |
|            |                 | 0.95571 | -1.7349 | 0.95862     | 0.93023     | 0.95089484  |         |         |
| NA         | ENSG00000249016 | -1.5707 | 0.94188 | 0.94188     | -2.1333     | 0.98355     | -1.5707 | 0.94188 |
|            |                 | -1.4777 | 0.93025 | 0.93025     | 0.950895337 |             |         |         |
| NA         | ENSG00000267416 | -1.478  | 0.9303  | 0.9303      | -1.478      | 0.9303      | -1.478  | 0.9303  |
|            |                 | -1.478  | 0.9303  | 0.9303      | 0.950926499 |             |         |         |
| SGMS1-AS1  | ENSG00000226200 | -2.3378 | 0.9903  | 0.9903      | -2.3378     | 0.9903      | -2.3378 |         |
|            |                 | 0.9903  | -1.4785 | 0.93037     | 0.93037     | 0.950978103 |         |         |
| RN7SL384P  | ENSG00000242912 | -1.48   | 0.93056 | 0.93056     | -1.48       | 0.93056     | -1.48   | 0.93056 |
|            |                 | 0.93056 | 0.93056 | 0.951143616 |             |             |         |         |
| NA         | ENSG00000265394 | -1.4803 | 0.9306  | 0.9306      | -1.4803     | 0.9306      | -1.4803 | 0.9306  |
|            |                 | -1.4803 | 0.9306  | 0.9306      | 0.951143616 |             |         |         |
| NA         | ENSG00000266919 | -1.4803 | 0.9306  | 0.9306      | -1.4803     | 0.9306      | -1.4803 | 0.9306  |

|            |                 |         |             |             |             |         |         |         |
|------------|-----------------|---------|-------------|-------------|-------------|---------|---------|---------|
|            | -1.4803         | 0.9306  | 0.9306      | 0.951143616 |             |         |         |         |
| NA         | ENSG00000252585 | -1.4803 | 0.93061     | -1.4803     | 0.93061     | -1.4803 | 0.93061 | 0.93061 |
|            | -1.4803         | 0.93061 | 0.93061     | 0.951143616 |             |         |         |         |
| NA         | ENSG00000255191 | -1.4809 | 0.93068     | -1.4809     | 0.93068     | -1.4809 | 0.93068 | 0.93068 |
|            | -1.4809         | 0.93068 | 0.93068     | 0.95119521  |             |         |         |         |
| NA         | ENSG00000256712 | -1.4811 | 0.93071     | -1.4811     | 0.93071     | -1.4811 | 0.93071 | 0.93071 |
|            | -1.4811         | 0.93071 | 0.93071     | 0.951205921 |             |         |         |         |
| DNAJB6P6   | ENSG00000234247 | -1.4817 | 0.93079     | -1.4817     | 0.93079     | -1.4817 | 0.93079 | 0.93079 |
|            | 0.93079         | -1.4817 | 0.93079     | 0.93079     | 0.951267731 |         |         |         |
| NA         | ENSG00000268500 | -1.4826 | 0.93091     | -1.4826     | 0.93091     | -1.4826 | 0.93091 | 0.93091 |
|            | -1.4826         | 0.93091 | 0.93091     | 0.951360686 |             |         |         |         |
| PLIN4      | ENSG00000167676 | -1.8933 | 0.97084     | -1.4827     | 0.93092     | -1.6048 | 0.94573 | 0.94573 |
|            | -1.8933         | 0.97084 | 0.93092     | 0.951360686 |             |         |         |         |
| SLC36A3    | ENSG00000186334 | -1.8115 | 0.96497     | -1.4832     | 0.93098     | -1.927  |         |         |
|            | 0.97301         | -1.8115 | 0.96497     | 0.93098     | 0.951392805 |         |         |         |
| MIR4692    | ENSG00000265064 | -1.4833 | 0.931       | -1.4833     | 0.931       | -1.4833 | 0.931   | -1.4833 |
|            | 0.931           | 0.931   | 0.951392805 |             |             |         |         |         |
| SRP14P3    | ENSG00000235183 | -1.4834 | 0.93101     | -1.4834     | 0.93101     | -1.4834 |         |         |
|            | 0.93101         | -1.4834 | 0.93101     | 0.93101     | 0.951392805 |         |         |         |
| NA         | ENSG00000201432 | -1.4836 | 0.93104     | -1.4836     | 0.93104     | -1.4836 | 0.93104 | 0.93104 |
|            | -1.4836         | 0.93104 | 0.93104     | 0.95140351  |             |         |         |         |
| GSTO3P     | ENSG00000232829 | -1.4842 | 0.93112     | -1.4842     | 0.93112     | -1.4842 |         |         |
|            | 0.93112         | -1.4842 | 0.93112     | 0.93112     | 0.951465308 |         |         |         |
| RPL9P18    | ENSG00000213309 | -1.4849 | 0.93122     | -1.4849     | 0.93122     | -1.4849 |         |         |
|            | 0.93122         | -1.4849 | 0.93122     | 0.93122     | 0.951547539 |         |         |         |
| NA         | ENSG00000259066 | -1.4858 | 0.93133     | -1.4858     | 0.93133     | -1.4858 | 0.93133 | 0.93133 |
|            | -1.4858         | 0.93133 | 0.93133     | 0.951639985 |             |         |         |         |
| NA         | ENSG00000270953 | -1.4865 | 0.93143     | -1.4865     | 0.93143     | -1.4865 | 0.93143 | 0.93143 |
|            | -1.4865         | 0.93143 | 0.93143     | 0.951712952 |             |         |         |         |
| ZNF140     | ENSG00000196387 | -1.4866 | 0.93145     | -1.4866     | 0.93145     | -1.4866 |         |         |
|            | 0.93145         | -1.4866 | 0.93145     | 0.93145     | 0.951712952 |         |         |         |
| NA         | ENSG00000234072 | -1.4868 | 0.93146     | -1.5549     | 0.94001     | -1.4868 | 0.93146 | 0.93146 |
|            | -1.4868         | 0.93146 | 0.93146     | 0.951712952 |             |         |         |         |
| NA         | ENSG00000223294 | -1.4878 | 0.9316      | -1.4878     | 0.9316      | -1.4878 | 0.9316  | 0.9316  |
|            | -1.4878         | 0.9316  | 0.9316      | 0.951836038 |             |         |         |         |
| NA         | ENSG00000284558 | -1.9024 | 0.97144     | -1.4888     | 0.93172     | -2.149  | 0.98418 | 0.98418 |
|            | -2.149          | 0.98418 | 0.93172     | 0.951928944 |             |         |         |         |
| NA         | ENSG00000258759 | -1.4888 | 0.93173     | -1.4888     | 0.93173     | -1.4888 | 0.93173 | 0.93173 |
|            | -1.4888         | 0.93173 | 0.93173     | 0.951928944 |             |         |         |         |
| NA         | ENSG00000225752 | -1.4896 | 0.93183     | -1.4896     | 0.93183     | -1.4896 | 0.93183 | 0.93183 |
|            | -1.4896         | 0.93183 | 0.93183     | 0.952011152 |             |         |         |         |
| NA         | ENSG00000279707 | -1.4898 | 0.93186     | -1.4898     | 0.93186     | -1.4898 | 0.93186 | 0.93186 |
|            | -1.4898         | 0.93186 | 0.93186     | 0.952021842 |             |         |         |         |
| NA         | ENSG00000247049 | -1.4907 | 0.93197     | -1.4907     | 0.93197     | -1.4907 | 0.93197 | 0.93197 |
|            | -1.4907         | 0.93197 | 0.93197     | 0.95211426  |             |         |         |         |
| LRRC72     | ENSG00000205858 | -1.8237 | 0.9659      | -1.4912     | 0.93204     | -2.144  |         |         |
|            | 0.98398         | -2.0522 | 0.97992     | 0.93204     | 0.952165811 |         |         |         |
| NA         | ENSG00000229369 | -1.4931 | 0.9323      | -1.4931     | 0.9323      | -1.4931 | 0.9323  | 0.9323  |
|            | -1.4931         | 0.9323  | 0.9323      | 0.952411459 |             |         |         |         |
| RNU6-1016P | ENSG00000252498 | -1.4934 | 0.93234     | -1.4934     | 0.93234     | -1.4934 |         |         |
|            | 0.93234         | -1.4934 | 0.93234     | 0.93234     | 0.952432355 |         |         |         |
| NA         | ENSG00000234459 | -1.4943 | 0.93245     | -1.4943     | 0.93245     | -1.4943 | 0.93245 | 0.93245 |
|            | -1.4943         | 0.93245 | 0.93245     | 0.952515005 |             |         |         |         |
| RPS24P17   | ENSG00000243988 | -1.4943 | 0.93246     | -1.4943     | 0.93246     | -1.4943 |         |         |
|            | 0.93246         | -1.4943 | 0.93246     | 0.93246     | 0.952515005 |         |         |         |
| RNU4-90P   | ENSG00000199643 | -1.4949 | 0.93253     | -1.4949     | 0.93253     | -1.4949 |         |         |
|            | 0.93253         | -1.4949 | 0.93253     | 0.93253     | 0.952566542 |         |         |         |
| C12orf73   | ENSG00000204954 | -1.4958 | 0.93264     | -1.4958     | 0.93264     | -1.4958 |         |         |
|            | 0.93264         | -1.4958 | 0.93264     | 0.93264     | 0.952649181 |         |         |         |
| NA         | ENSG00000231359 | -1.4958 | 0.93265     | -1.8287     | 0.96628     | -1.9118 | 0.97205 | 0.97205 |
|            | -1.9118         | 0.97205 | 0.93265     | 0.952649181 |             |         |         |         |
| NA         | ENSG00000254315 | -1.4964 | 0.93273     | -1.4964     | 0.93273     | -1.4964 | 0.93273 | 0.93273 |

|           |                 |            |              |              |              |              |         |
|-----------|-----------------|------------|--------------|--------------|--------------|--------------|---------|
|           | -1.4964         | 0.93273    | 0.93273      | 0.952710927  |              |              |         |
| NA        | ENSG00000265477 | -1.4974    | 0.93286      | -1.4974      | 0.93286      | -1.4974      | 0.93286 |
|           | -1.4974         | 0.93286    | 0.93286      | 0.95282374   |              |              |         |
| PCM1      | ENSG00000078674 | -1.7919    | 0.96343      | -1.7563      | 0.96048      | -1.6991      | 0.95535 |
|           | -1.4978         | 0.9329     | 0.9329       | 0.952844624  |              |              |         |
| HLA-A     | ENSG00000206503 | -2.0428    | 0.97946      | -2.0428      | 0.97946      | -1.498       | 0.93294 |
|           | -2.2036         | 0.98622    | 0.93294      | 0.952865507  |              |              |         |
| RBM46     | ENSG00000151962 | -1.4983    | 0.93297      | -2.2236      | 0.98691      | -2.2302      | 0.98713 |
|           | -1.7488         | 0.95983    | 0.93297      | 0.952866873  |              |              |         |
| NKAIN3    | ENSG00000185942 | -1.9202    | 0.97258      | -1.7352      | 0.95865      | -1.9403      |         |
|           | 0.97383         | -1.4986    | 0.9330.933   | 0.952866873  |              |              |         |
| RPL19P14  | ENSG00000240870 | -1.4986    | 0.933-1.4986 | 0.933-1.4986 | 0.933-1.4986 | 0.933-1.4986 |         |
|           | 0.933           | 0.933      | 0.952866873  |              |              |              |         |
| RN7SKP73  | ENSG00000223007 | -1.4986    | 0.93302      | -1.899       | 0.97122      | -2.0594      |         |
|           | 0.98027         | -1.4986    | 0.93302      | 0.93302      | 0.952867329  |              |         |
| MICOS13   | ENSG00000174917 | -1.4993    | 0.9331       | -1.4993      | 0.9331       | -1.4993      |         |
|           | 0.9331          | -1.4993    | 0.9331       | 0.9331       | 0.952929059  |              |         |
| MIR4638   | ENSG00000264732 | -1.4997    | 0.93316      | -1.4997      | 0.93316      | -1.4997      |         |
|           | 0.93316         | -1.4997    | 0.93316      | 0.93316      | 0.952970363  |              |         |
| SIRPAP1   | ENSG00000225774 | -1.5002    | 0.93322      | -1.5002      | 0.93322      | -1.5002      |         |
|           | 0.93322         | -1.5002    | 0.93322      | 0.93322      | 0.953011664  |              |         |
| NA        | ENSG00000261096 | -1.5014    | 0.93337      | -1.5014      | 0.93337      | -1.5014      | 0.93337 |
|           | -1.5014         | 0.93337    | 0.93337      | 0.953144871  |              |              |         |
| TREBV10-1 | ENSG00000211717 | -1.502     | 0.93345      | -1.502       | 0.93345      | -1.502       |         |
|           | 0.93345         | -1.502     | 0.93345      | 0.93345      | 0.953206591  |              |         |
| HES4      | ENSG00000188290 | -1.5023    | 0.93349      | -1.5023      | 0.93349      | -1.5023      | 0.93349 |
|           | -1.5023         | 0.93349    | 0.93349      | 0.953227462  |              |              |         |
| PPIHP1    | ENSG00000230911 | -1.503     | 0.93358      | -1.503       | 0.93358      | -1.503       |         |
|           | 0.93358         | -1.503     | 0.93358      | 0.93358      | 0.953279412  |              |         |
| NA        | ENSG00000258459 | -1.503     | 0.93358      | -1.503       | 0.93358      | -1.503       | 0.93358 |
|           | -1.503          | 0.93358    | 0.93358      | 0.953279412  |              |              |         |
| RNU2-23P  | ENSG00000222477 | -2.1142    | 0.98275      | -2.1142      | 0.98275      | -1.5037      |         |
|           | 0.93367         | -2.1142    | 0.98275      | 0.93367      | 0.953351335  |              |         |
| LINC02727 | ENSG00000254823 | -1.504     | 0.93371      | -1.504       | 0.93371      | -1.504       |         |
|           | 0.93371         | -1.504     | 0.93371      | 0.93371      | 0.953362436  |              |         |
| URM1      | ENSG00000167118 | -1.5041    | 0.93372      | -2.3796      | 0.99133      | -2.0465      | 0.97965 |
|           | -3.2902         | 0.9995     | 0.93372      | 0.953362436  |              |              |         |
| MIR4783   | ENSG00000264075 | -1.5045    | 0.93377      | -1.5045      | 0.93377      | -1.5045      |         |
|           | 0.93377         | -1.5045    | 0.93377      | 0.93377      | 0.953393511  |              |         |
| NA        | ENSG00000237761 | -1.5048    | 0.93381      | -1.5048      | 0.93381      | -1.5048      | 0.93381 |
|           | -1.5048         | 0.93381    | 0.93381      | 0.953414375  |              |              |         |
| IL36RN    | ENSG00000136695 | -1.5051    | 0.93386      | -1.5051      | 0.93386      | -1.5051      |         |
|           | 0.93386         | -1.5051    | 0.93386      | 0.93386      | 0.953445448  |              |         |
| NA        | ENSG00000273783 | -1.5075    | 0.93415      | -1.5075      | 0.93415      | -1.5075      | 0.93415 |
|           | -1.5075         | 0.93415    | 0.93415      | 0.953711776  |              |              |         |
| CHAD      | ENSG00000136457 | -1.5075    | 0.93416      | -1.5075      | 0.93416      | -1.5075      | 0.93416 |
|           | -1.5075         | 0.93416    | 0.93416      | 0.953711776  |              |              |         |
| RNU6-2    | ENSG00000207357 | -1.5085    | 0.93428      | -1.5085      | 0.93428      | -1.5085      |         |
|           | 0.93428         | -1.5085    | 0.93428      | 0.93428      | 0.953814305  |              |         |
| MTFP1     | ENSG00000242114 | -1.5087    | 0.93431      | -1.5087      | 0.93431      | -1.5087      | 0.93431 |
|           | -1.5087         | 0.93431    | 0.93431      | 0.953824949  |              |              |         |
| RPL13AP17 | ENSG00000231322 | -1.5091    | 0.93436      | -1.5091      | 0.93436      | -1.5091      |         |
|           | 0.93436         | -1.5091    | 0.93436      | 0.93436      | 0.95385601   |              |         |
| NA        | ENSG00000236692 | -1.5093    | 0.93439      | -1.5093      | 0.93439      | -1.5093      | 0.93439 |
|           | -1.5093         | 0.93439    | 0.93439      | 0.953866653  |              |              |         |
| IGHV4-55  | ENSG00000254395 | -1.5099    | 0.93447      | -1.5099      | 0.93447      | -1.5099      |         |
|           | 0.93447         | -1.5099    | 0.93447      | 0.93447      | 0.95389858   |              |         |
| NA        | ENSG00000271426 | -1.5099    | 0.93447      | -1.5099      | 0.93447      | -1.5099      | 0.93447 |
|           | -1.5099         | 0.93447    | 0.93447      | 0.95389858   |              |              |         |
| NA        | ENSG00000237856 | -1.51      | 0.93448      | -1.51        | 0.93448      | -1.51        | 0.93448 |
|           | 0.93448         | 0.95389858 |              |              |              |              |         |
| NA        | ENSG00000201160 | -1.5105    | 0.93454      | -1.5105      | 0.93454      | -1.5105      | 0.93454 |

|             |                 |             |         |             |             |         |         |
|-------------|-----------------|-------------|---------|-------------|-------------|---------|---------|
|             | -2.1036         | 0.98229     | 0.93454 | 0.953939844 |             |         |         |
| CCL18       | ENSG00000275385 | -1.5109     | 0.93459 | -1.5109     | 0.93459     | -1.5109 | 0.93459 |
|             | -1.5109         | 0.93459     | 0.93459 | 0.953950916 |             |         |         |
| NA          | ENSG00000275778 | -1.5109     | 0.93459 | -1.5109     | 0.93459     | -1.5109 | 0.93459 |
|             | -1.5109         | 0.93459     | 0.93459 | 0.953950916 |             |         |         |
| MFAP1       | ENSG00000140259 | -1.6372     | 0.94921 | -1.6459     | 0.9501      | -1.5124 | 0.93479 |
|             | -1.6834         | 0.95385     | 0.93479 | 0.954135074 |             |         |         |
| GSC         | ENSG00000133937 | -1.5141     | 0.935   | -1.5141     | 0.935       | -1.5141 | 0.935   |
|             | 0.935           | 0.95428988  |         |             |             |         |         |
| ZSCAN16     | ENSG00000196812 | -1.9269     | 0.973   | -1.9269     | 0.973       | -1.5207 | 0.93583 |
|             | -1.5141         | 0.935       | 0.935   | 0.95428988  |             |         |         |
| JADE2       | ENSG00000043143 | -1.6368     | 0.94916 | -1.5142     | 0.93502     | -1.6212 | 0.94751 |
|             | -1.8752         | 0.96962     | 0.93502 | 0.95428988  |             |         |         |
| MIR645      | ENSG00000208018 | -1.5143     | 0.93502 | -1.5143     | 0.93502     | -1.5143 |         |
|             | 0.93502         | -1.5143     | 0.93502 | 0.93502     | 0.95428988  |         |         |
| MIR516B2    | ENSG00000207925 | -1.5148     | 0.93509 | -1.5148     | 0.93509     | -1.5148 |         |
|             | 0.93509         | -1.5148     | 0.93509 | 0.93509     | 0.954301361 |         |         |
| MIR526A2    | ENSG00000211532 | -1.5148     | 0.93509 | -1.5148     | 0.93509     | -1.5148 |         |
|             | 0.93509         | -1.5148     | 0.93509 | 0.93509     | 0.954301361 |         |         |
| LINC02750   | ENSG00000254518 | -2.0301     | 0.97882 | -1.5148     | 0.93509     | -2.2069 |         |
|             | 0.98634         | -2.0358     | 0.97911 | 0.93509     | 0.954301361 |         |         |
| SPRR2G      | ENSG00000159516 | -1.5158     | 0.93521 | -1.5158     | 0.93521     | -1.5158 |         |
|             | 0.93521         | -1.5158     | 0.93521 | 0.93521     | 0.95437407  |         |         |
| PIWIL1      | ENSG00000125207 | -2.0181     | 0.97821 | -1.5158     | 0.93522     | -2.1458 |         |
|             | 0.98405         | -2.0627     | 0.98043 | 0.93522     | 0.95437407  |         |         |
| NA          | ENSG00000263694 | -1.8535     | 0.96809 | -2.0633     | 0.98046     | -1.7441 | 0.95943 |
|             | -1.5158         | 0.93522     | 0.93522 | 0.95437407  |             |         |         |
| CUPIN1P     | ENSG00000283613 | -1.516      | 0.93524 | -1.8506     | 0.96788     | -2.6304 |         |
|             | 0.99574         | -1.758      | 0.96062 | 0.93524     | 0.954374494 |         |         |
| BOLA3-AS1   | ENSG00000225439 | -1.5169     | 0.93535 | -1.5169     | 0.93535     | -1.5169 |         |
|             | 0.93535         | -1.5169     | 0.93535 | 0.93535     | 0.954466757 |         |         |
| NCOA3       | ENSG00000124151 | -1.6496     | 0.95049 | -1.5173     | 0.9354      | -2.0907 | 0.98172 |
|             | -1.888          | 0.97049     | 0.9354  | 0.954497791 |             |         |         |
| TMEM86B     | ENSG00000180089 | -1.5175     | 0.93543 | -1.5175     | 0.93543     | -1.5175 |         |
|             | 0.93543         | -1.5175     | 0.93543 | 0.93543     | 0.954508416 |         |         |
| RPS15AP38   | ENSG00000237668 | -1.71       | 0.95637 | -1.6515     | 0.95069     | -1.5177 | 0.93545 |
|             | -1.6515         | 0.95069     | 0.93545 | 0.954508836 |             |         |         |
| PRKACG      | ENSG00000165059 | -1.5179     | 0.93547 | -1.5179     | 0.93547     | -1.5179 |         |
|             | 0.93547         | -1.5179     | 0.93547 | 0.93547     | 0.954509257 |         |         |
| NA          | ENSG00000272825 | -1.5181     | 0.93551 | -1.5181     | 0.93551     | -1.5181 | 0.93551 |
|             | -1.5181         | 0.93551     | 0.93551 | 0.954530084 |             |         |         |
| NA          | ENSG00000257530 | -1.5186     | 0.93557 | -1.5186     | 0.93557     | -1.5186 | 0.93557 |
|             | -1.5186         | 0.93557     | 0.93557 | 0.954571317 |             |         |         |
| RN7SL330P   | ENSG00000244391 | -1.5187     | 0.93559 | -1.896      | 0.97102     | -1.5187 |         |
|             | 0.93559         | -1.5187     | 0.93559 | 0.93559     | 0.954571736 |         |         |
| NA          | ENSG00000260979 | -1.5193     | 0.93566 | -1.5193     | 0.93566     | -1.5193 | 0.93566 |
|             | -1.5193         | 0.93566     | 0.93566 | 0.954623169 |             |         |         |
| SNORD88A    | ENSG00000221241 | -1.5198     | 0.93572 | -1.5198     | 0.93572     | -1.5198 |         |
|             | 0.93572         | -1.5198     | 0.93572 | 0.93572     | 0.954664397 |         |         |
| NA          | ENSG00000258471 | -1.5213     | 0.9359  | -1.5213     | 0.9359      | -1.5213 | 0.9359  |
|             | -1.5213         | 0.9359      | 0.9359  | 0.95482805  |             |         |         |
| NA          | ENSG00000269871 | -1.5216     | 0.93594 | -1.5216     | 0.93594     | -1.5216 | 0.93594 |
|             | -1.5216         | 0.93594     | 0.93594 | 0.954848868 |             |         |         |
| NA          | ENSG00000213939 | -1.522      | 0.936   | -1.522      | 0.936       | -1.522  | 0.936   |
|             | 0.936           | 0.954890089 |         |             |             |         |         |
| NA          | ENSG00000267734 | -1.5227     | 0.93608 | -1.5227     | 0.93608     | -1.5227 | 0.93608 |
|             | -1.5227         | 0.93608     | 0.93608 | 0.954951711 |             |         |         |
| SNORD114-21 | ENSG00000272344 | -1.523      | 0.93612 | -1.523      | 0.93612     | -1.523  |         |
|             | 0.93612         | -1.523      | 0.93612 | 0.93612     | 0.954972526 |         |         |
| NA          | ENSG00000216022 | -1.5233     | 0.93615 | -1.5233     | 0.93615     | -1.818  | 0.96547 |
|             | -1.5233         | 0.93615     | 0.93615 | 0.954983138 |             |         |         |
| NA          | ENSG00000249602 | -1.5239     | 0.93624 | -1.5239     | 0.93624     | -1.5239 | 0.93624 |

|            |                 |         |         |             |             |         |         |         |
|------------|-----------------|---------|---------|-------------|-------------|---------|---------|---------|
|            | -1.5239         | 0.93624 | 0.93624 | 0.955034963 |             |         |         |         |
| NA         | ENSG00000251186 | -1.524  | 0.93624 | -1.524      | 0.93624     | -1.524  | 0.93624 | 0.93624 |
|            | -1.524          | 0.93624 | 0.93624 | 0.955034963 |             |         |         |         |
| FOLH1B     | ENSG00000134612 | -1.7315 | 0.95832 | -1.8831     | 0.97016     | -1.9664 |         |         |
|            | 0.97537         | -1.5244 | 0.93629 | 0.93629     | 0.955045982 |         |         |         |
| NA         | ENSG00000268220 | -1.5243 | 0.93629 | -1.5243     | 0.93629     | -1.5243 | 0.93629 | 0.93629 |
|            | -1.5243         | 0.93629 | 0.93629 | 0.955045982 |             |         |         |         |
| BRI3BP     | ENSG00000184992 | -1.563  | 0.94098 | -1.563      | 0.94098     | -1.563  |         |         |
|            | 0.94098         | -1.5247 | 0.93633 | 0.93633     | 0.955057001 |         |         |         |
| NA         | ENSG00000274400 | -1.5247 | 0.93634 | -1.5247     | 0.93634     | -1.5247 | 0.93634 | 0.93634 |
|            | -1.5247         | 0.93634 | 0.93634 | 0.955057001 |             |         |         |         |
| H3P37      | ENSG00000270433 | -1.5254 | 0.93642 | -1.5254     | 0.93642     | -1.5254 | 0.93642 | 0.93642 |
|            | -1.5254         | 0.93642 | 0.93642 | 0.955118608 |             |         |         |         |
| LINC02783  | ENSG00000204362 | -1.5383 | 0.93801 | -1.5383     | 0.93801     | -1.9939 |         |         |
|            | 0.97692         | -1.5257 | 0.93646 | 0.93646     | 0.955139414 |         |         |         |
| DCAF13P3   | ENSG00000259378 | -1.5263 | 0.93653 | -1.5263     | 0.93653     | -1.5263 |         |         |
|            | 0.93653         | -1.5263 | 0.93653 | 0.93653     | 0.955190818 |         |         |         |
| Clorf198   | ENSG00000119280 | -2.0772 | 0.98111 | -2.0772     | 0.98111     | -2.0772 |         |         |
|            | 0.98111         | -1.528  | 0.93675 | 0.93675     | 0.955395205 |         |         |         |
| RNU6-1024P | ENSG00000206926 | -1.5285 | 0.9368  | -1.5285     | 0.9368      | -1.5285 |         |         |
|            | 0.9368          | -1.5285 | 0.9368  | 0.9368      | 0.955407413 |         |         |         |
| TMEM243    | ENSG00000135185 | -1.5286 | 0.93682 | -1.5286     | 0.93682     | -1.5286 |         |         |
|            | 0.93682         | -1.5286 | 0.93682 | 0.93682     | 0.955407413 |         |         |         |
| RNU7-26P   | ENSG00000238610 | -1.5287 | 0.93683 | -1.5287     | 0.93683     | -1.5287 |         |         |
|            | 0.93683         | -1.5287 | 0.93683 | 0.93683     | 0.955407413 |         |         |         |
| ZNF165     | ENSG00000197279 | -1.6689 | 0.95243 | -1.6689     | 0.95243     | -1.6689 |         |         |
|            | 0.95243         | -1.5289 | 0.93685 | 0.93685     | 0.955407413 |         |         |         |
| RASSF8     | ENSG00000123094 | -1.5784 | 0.94277 | -1.529      | 0.93686     | -1.9861 |         |         |
|            | 0.97649         | -2.2042 | 0.98624 | 0.93686     | 0.955407413 |         |         |         |
| MIR1273C   | ENSG00000264814 | -1.6625 | 0.95179 | -1.5294     | 0.93691     | -1.5959 |         |         |
|            | 0.94474         | -1.6625 | 0.95179 | 0.93691     | 0.955428611 |         |         |         |
| MIR205HG   | ENSG00000230937 | -1.5294 | 0.93692 | -1.5294     | 0.93692     | -1.5294 |         |         |
|            | 0.93692         | -1.5294 | 0.93692 | 0.93692     | 0.955428611 |         |         |         |
| NA         | ENSG00000282898 | -1.8315 | 0.96649 | -2.1315     | 0.98347     | -1.5296 | 0.93694 | 0.93694 |
|            | -1.5296         | 0.93694 | 0.93694 | 0.955429012 |             |         |         |         |
| LRRC2-AS1  | ENSG00000268324 | -1.5298 | 0.93697 | -1.5298     | 0.93697     | -1.5298 |         |         |
|            | 0.93697         | -1.5298 | 0.93697 | 0.93697     | 0.95543961  |         |         |         |
| RPS26P52   | ENSG00000242307 | -1.5303 | 0.93703 | -1.5303     | 0.93703     | -1.5303 |         |         |
|            | 0.93703         | -1.5303 | 0.93703 | 0.93703     | 0.955480799 |         |         |         |
| NA         | ENSG00000262700 | -1.5305 | 0.93705 | -1.5305     | 0.93705     | -1.5305 | 0.93705 | 0.93705 |
|            | -1.5305         | 0.93705 | 0.93705 | 0.955481199 |             |         |         |         |
| CLINT1     | ENSG00000113282 | -1.5316 | 0.93718 | -1.5985     | 0.94503     | -2.2377 |         |         |
|            | 0.98738         | -1.6717 | 0.9527  | 0.93718     | 0.955573765 |         |         |         |
| NA         | ENSG00000248482 | -1.5315 | 0.93718 | -1.5315     | 0.93718     | -1.5315 | 0.93718 | 0.93718 |
|            | -1.5315         | 0.93718 | 0.93718 | 0.955573765 |             |         |         |         |
| PGK1P2     | ENSG00000213290 | -1.5317 | 0.93721 | -1.5317     | 0.93721     | -1.5317 |         |         |
|            | 0.93721         | -1.5317 | 0.93721 | 0.93721     | 0.95558436  |         |         |         |
| NIFK-AS1   | ENSG00000236859 | -1.5572 | 0.94028 | -1.5539     | 0.9399      | -1.5321 |         |         |
|            | 0.93725         | -1.5321 | 0.93725 | 0.93725     | 0.955585155 |         |         |         |
| NA         | ENSG00000278965 | -1.5321 | 0.93725 | -1.5321     | 0.93725     | -1.5321 | 0.93725 | 0.93725 |
|            | -1.5321         | 0.93725 | 0.93725 | 0.955585155 |             |         |         |         |
| NA         | ENSG00000270696 | -1.5333 | 0.9374  | -1.5333     | 0.9374      | -1.5333 | 0.9374  | 0.9374  |
|            | -1.5333         | 0.9374  | 0.9374  | 0.955718094 |             |         |         |         |
| NA         | ENSG00000249692 | -1.5336 | 0.93744 | -1.5336     | 0.93744     | -1.5336 | 0.93744 | 0.93744 |
|            | -1.5336         | 0.93744 | 0.93744 | 0.955738879 |             |         |         |         |
| H3C5P      | ENSG00000277720 | -1.5339 | 0.93747 | -1.5339     | 0.93747     | -1.5339 | 0.93747 | 0.93747 |
|            | -1.5339         | 0.93747 | 0.93747 | 0.955749469 |             |         |         |         |
| RPS27AP10  | ENSG00000240974 | -1.5343 | 0.93752 | -1.5343     | 0.93752     | -1.5343 |         |         |
|            | 0.93752         | -1.5343 | 0.93752 | 0.93752     | 0.95577104  |         |         |         |
| NA         | ENSG00000273454 | -1.5344 | 0.93754 | -1.5344     | 0.93754     | -1.5344 | 0.93754 | 0.93754 |
|            | -1.5344         | 0.93754 | 0.93754 | 0.95577104  |             |         |         |         |
| NA         | ENSG00000266990 | -1.5345 | 0.93755 | -1.5345     | 0.93755     | -1.5345 | 0.93755 | 0.93755 |

|           |                 |         |         |             |             |         |         |
|-----------|-----------------|---------|---------|-------------|-------------|---------|---------|
|           | -1.5345         | 0.93755 | 0.93755 | 0.95577104  |             |         |         |
| CFL1P3    | ENSG00000228056 | -1.5353 | 0.93764 | -1.5353     | 0.93764     | -1.5353 | 0.93764 |
|           | 0.93764         | -1.5353 | 0.93764 | 0.93764     | 0.955842793 |         |         |
| NA        | ENSG00000200847 | -1.5358 | 0.9377  | -1.5358     | 0.9377      | -1.5358 | 0.9377  |
|           | -1.5358         | 0.9377  | 0.9377  | 0.955863965 |             |         |         |
| LINC01948 | ENSG00000248727 | -1.5358 | 0.9377  | -1.5358     | 0.9377      | -1.5358 | 0.9377  |
|           | 0.9377          | -1.5358 | 0.9377  | 0.9377      | 0.955863965 |         |         |
| EME1      | ENSG00000154920 | -1.5368 | 0.93783 | -1.5368     | 0.93783     | -1.5368 | 0.93783 |
|           | -1.5368         | 0.93783 | 0.93783 | 0.955956879 |             |         |         |
| UBE2FP2   | ENSG00000261199 | -1.5369 | 0.93784 | -1.5369     | 0.93784     | -1.5369 | 0.93784 |
|           | 0.93784         | -1.5369 | 0.93784 | 0.93784     | 0.955956879 |         |         |
| NA        | ENSG00000272386 | -1.537  | 0.93785 | -1.537      | 0.93785     | -1.537  | 0.93785 |
|           | -1.537          | 0.93785 | 0.93785 | 0.955956879 |             |         |         |
| IQCB2P    | ENSG00000217539 | -1.5376 | 0.93792 | -1.5376     | 0.93792     | -1.5376 | 0.93792 |
|           | 0.93792         | -1.5376 | 0.93792 | 0.93792     | 0.956008233 |         |         |
| RNA5SP215 | ENSG00000200310 | -1.5383 | 0.93801 | -1.5383     | 0.93801     | -1.5383 | 0.93801 |
|           | 0.93801         | -1.5383 | 0.93801 | 0.93801     | 0.95607997  |         |         |
| CASTOR1   | ENSG00000239282 | -1.539  | 0.9381  | -1.539      | 0.9381      | -1.539  | 0.9381  |
|           | 0.9381          | -1.539  | 0.9381  | 0.9381      | 0.956151705 |         |         |
| NA        | ENSG00000265752 | -1.5401 | 0.93824 | -1.5401     | 0.93824     | -1.5401 | 0.93824 |
|           | -1.5401         | 0.93824 | 0.93824 | 0.956264588 |             |         |         |
| SGO1P2    | ENSG00000234304 | -1.7676 | 0.96143 | -1.5403     | 0.93825     | -1.5403 | 0.93825 |
|           | 0.93825         | -1.5403 | 0.93825 | 0.93825     | 0.956264588 |         |         |
| VWF       | ENSG00000110799 | -1.5405 | 0.93827 | -1.7471     | 0.95969     | -1.6007 | 0.94527 |
|           | -2.4605         | 0.99306 | 0.93827 | 0.956264972 |             |         |         |
| RPL29P11  | ENSG00000224858 | -1.5408 | 0.93832 | -1.5408     | 0.93832     | -1.5408 | 0.93832 |
|           | 0.93832         | -1.5408 | 0.93832 | 0.93832     | 0.956286122 |         |         |
| PRKAR1AP1 | ENSG00000233401 | -1.5409 | 0.93833 | -1.5409     | 0.93833     | -1.5409 | 0.93833 |
|           | 0.93833         | -1.5409 | 0.93833 | 0.93833     | 0.956286122 |         |         |
| NA        | ENSG00000212567 | -1.5416 | 0.93841 | -1.5416     | 0.93841     | -1.5416 | 0.93841 |
|           | -1.5416         | 0.93841 | 0.93841 | 0.956328033 |             |         |         |
| NIP7P3    | ENSG00000218428 | -1.5417 | 0.93843 | -1.5417     | 0.93843     | -1.5417 | 0.93843 |
|           | 0.93843         | -1.5417 | 0.93843 | 0.93843     | 0.956328033 |         |         |
| NA        | ENSG00000253144 | -1.5418 | 0.93843 | -1.5418     | 0.93843     | -1.5418 | 0.93843 |
|           | -1.5418         | 0.93843 | 0.93843 | 0.956328033 |             |         |         |
| SOSTDC1   | ENSG00000171243 | -1.7123 | 0.95658 | -2.2836     | 0.9888      | -1.846  | 0.9888  |
|           | 0.96755         | -1.5425 | 0.93852 | 0.93852     | 0.956399749 |         |         |
| NA        | ENSG00000233539 | -1.544  | 0.9387  | -1.544      | 0.9387      | -1.544  | 0.9387  |
|           | -1.6501         | 0.95054 | 0.9387  | 0.956563174 |             |         |         |
| NA        | ENSG00000264273 | -1.5445 | 0.93877 | -1.5445     | 0.93877     | -1.5445 | 0.93877 |
|           | -1.5445         | 0.93877 | 0.93877 | 0.956605441 |             |         |         |
| KRTAP12-3 | ENSG00000205439 | -1.5447 | 0.9388  | -1.5447     | 0.9388      | -1.5447 | 0.9388  |
|           | 0.9388          | -1.5447 | 0.9388  | 0.9388      | 0.956605441 |         |         |
| POLR2DP2  | ENSG00000244565 | -1.5449 | 0.93882 | -1.5449     | 0.93882     | -1.5449 | 0.93882 |
|           | 0.93882         | -1.5449 | 0.93882 | 0.93882     | 0.956605441 |         |         |
| NA        | ENSG00000254497 | -1.5449 | 0.93882 | -1.5449     | 0.93882     | -1.5449 | 0.93882 |
|           | -1.5449         | 0.93882 | 0.93882 | 0.956605441 |             |         |         |
| NA        | ENSG00000259668 | -1.5451 | 0.93884 | -1.5451     | 0.93884     | -1.5451 | 0.93884 |
|           | -1.5451         | 0.93884 | 0.93884 | 0.956605817 |             |         |         |
| NA        | ENSG00000214883 | -1.5773 | 0.94264 | -1.6013     | 0.94535     | -1.5535 | 0.93985 |
|           | -1.5454         | 0.93888 | 0.93888 | 0.956626571 |             |         |         |
| VN1R36P   | ENSG00000230639 | -1.5465 | 0.93901 | -1.5465     | 0.93901     | -1.5465 | 0.93901 |
|           | 0.93901         | -1.5465 | 0.93901 | 0.93901     | 0.956739024 |         |         |
| LINC00461 | ENSG00000245526 | -1.8977 | 0.97113 | -1.547      | 0.93906     | -1.8783 | 0.93906 |
|           | 0.96983         | -1.7017 | 0.9556  | 0.93906     | 0.956760148 |         |         |
| RNU6-883P | ENSG00000207327 | -1.547  | 0.93907 | -1.547      | 0.93907     | -1.547  | 0.93907 |
|           | 0.93907         | -1.547  | 0.93907 | 0.93907     | 0.956760148 |         |         |
| ASS1P7    | ENSG00000236893 | -1.5472 | 0.93909 | -1.5472     | 0.93909     | -1.5472 | 0.93909 |
|           | 0.93909         | -1.5472 | 0.93909 | 0.93909     | 0.956760521 |         |         |
| MIR3132   | ENSG00000265252 | -1.5475 | 0.93913 | -1.5475     | 0.93913     | -1.5475 | 0.93913 |
|           | 0.93913         | -1.5475 | 0.93913 | 0.93913     | 0.956781269 |         |         |
| MIR3134   | ENSG00000264354 | -1.5477 | 0.93916 | -1.5477     | 0.93916     | -1.5477 | 0.93916 |

|            |                 |         |         |             |             |         |         |  |
|------------|-----------------|---------|---------|-------------|-------------|---------|---------|--|
|            | 0.93916         | -1.5477 | 0.93916 | 0.93916     | 0.95679183  |         |         |  |
| EP400      | ENSG00000183495 | -2.008  | 0.97768 | -1.9277     | 0.97305     | -1.5483 | 0.93922 |  |
|            | -1.975          | 0.97587 | 0.93922 | 0.956812949 |             |         |         |  |
| NA         | ENSG00000249318 | -1.5483 | 0.93922 | -1.5483     | 0.93922     | -1.5483 | 0.93922 |  |
|            | -1.5483         | 0.93922 | 0.93922 | 0.956812949 |             |         |         |  |
| FARSA      | ENSG00000179115 | -1.5487 | 0.93927 | -1.5487     | 0.93927     | -1.5487 | 0.93927 |  |
|            | -1.5487         | 0.93927 | 0.93927 | 0.956843882 |             |         |         |  |
| NA         | ENSG00000221245 | -2.177  | 0.98526 | -1.5491     | 0.93932     | -2.177  | 0.98526 |  |
|            | -2.177          | 0.98526 | 0.93932 | 0.956874814 |             |         |         |  |
| NA         | ENSG00000243503 | -1.5495 | 0.93937 | -1.5495     | 0.93937     | -1.7244 | 0.95768 |  |
|            | -1.5495         | 0.93937 | 0.93937 | 0.956905745 |             |         |         |  |
| NA         | ENSG00000279793 | -1.5508 | 0.93952 | -1.5508     | 0.93952     | -1.5508 | 0.93952 |  |
|            | -1.5508         | 0.93952 | 0.93952 | 0.957028719 |             |         |         |  |
| MIR4312    | ENSG00000265195 | -1.634  | 0.94887 | -1.5508     | 0.93953     | -1.5508 |         |  |
|            | 0.93953         | -1.5508 | 0.93953 | 0.93953     | 0.957028719 |         |         |  |
| NA         | ENSG00000272086 | -1.551  | 0.93955 | -1.551      | 0.93955     | -1.551  | 0.93955 |  |
|            | -1.551          | 0.93955 | 0.93955 | 0.957029087 |             |         |         |  |
| CDK20      | ENSG00000156345 | -1.5517 | 0.93963 | -1.5517     | 0.93963     | -1.5517 | 0.93963 |  |
|            | -1.5517         | 0.93963 | 0.93963 | 0.957090569 |             |         |         |  |
| NA         | ENSG00000236114 | -2.7067 | 0.9966  | -2.2762     | 0.98858     | -2.1778 | 0.98529 |  |
|            | -1.5525         | 0.93972 | 0.93972 | 0.957152778 |             |         |         |  |
| C15orf61   | ENSG00000189227 | -1.6893 | 0.95442 | -1.6893     | 0.95442     | -1.6893 |         |  |
|            | 0.95442         | -1.5526 | 0.93974 | 0.93974     | 0.957152778 |         |         |  |
| HNRNPA1P34 | ENSG00000213049 | -1.5526 | 0.93975 | -1.8277     | 0.96621     | -1.8277 |         |  |
|            | 0.96621         | -1.8277 | 0.96621 | 0.93975     | 0.957152778 |         |         |  |
| NR5A2      | ENSG00000116833 | -2.7408 | 0.99694 | -1.5529     | 0.93978     | -2.1089 | 0.98252 |  |
|            | -2.7408         | 0.99694 | 0.93978 | 0.957163327 |             |         |         |  |
| NA         | ENSG00000279044 | -1.5533 | 0.93982 | -1.5533     | 0.93982     | -1.5533 | 0.93982 |  |
|            | -1.5533         | 0.93982 | 0.93982 | 0.957184061 |             |         |         |  |
| RNU7-65P   | ENSG00000252457 | -1.5538 | 0.93988 | -1.5538     | 0.93988     | -1.5538 |         |  |
|            | 0.93988         | -1.5538 | 0.93988 | 0.93988     | 0.957225164 |         |         |  |
| RNU1-124P  | ENSG00000200731 | -1.5541 | 0.93992 | -1.5541     | 0.93992     | -1.5541 |         |  |
|            | 0.93992         | -1.5541 | 0.93992 | 0.93992     | 0.957245895 |         |         |  |
| NA         | ENSG00000271020 | -1.5544 | 0.93995 | -1.5544     | 0.93995     | -1.5544 | 0.93995 |  |
|            | -1.5544         | 0.93995 | 0.93995 | 0.957256442 |             |         |         |  |
| MTND3P5    | ENSG00000251353 | -1.5549 | 0.94002 | -1.5549     | 0.94002     | -1.5549 |         |  |
|            | 0.94002         | -1.5549 | 0.94002 | 0.94002     | 0.957307724 |         |         |  |
| OR5K2      | ENSG00000231861 | -1.5559 | 0.94013 | -1.5559     | 0.94013     | -1.5559 | 0.94013 |  |
|            | -1.5559         | 0.94013 | 0.94013 | 0.957399739 |             |         |         |  |
| NA         | ENSG00000275609 | -1.5565 | 0.9402  | -1.5565     | 0.9402      | -1.5565 | 0.9402  |  |
|            | -1.5565         | 0.9402  | 0.9402  | 0.957441549 |             |         |         |  |
| OR5J2      | ENSG00000174957 | -1.5566 | 0.94022 | -1.5566     | 0.94022     | -1.5566 | 0.94022 |  |
|            | -1.5566         | 0.94022 | 0.94022 | 0.957441549 |             |         |         |  |
| NA         | ENSG00000231483 | -1.5567 | 0.94023 | -2.4168     | 0.99217     | -1.5567 | 0.94023 |  |
|            | -1.5567         | 0.94023 | 0.94023 | 0.957441549 |             |         |         |  |
| NA         | ENSG00000267219 | -1.5571 | 0.94027 | -1.5571     | 0.94027     | -1.5571 | 0.94027 |  |
|            | -1.5571         | 0.94027 | 0.94027 | 0.957462274 |             |         |         |  |
| ZNF641     | ENSG00000167528 | -1.5577 | 0.94034 | -1.7021     | 0.95563     | -1.7021 |         |  |
|            | 0.95563         | -1.7351 | 0.95863 | 0.94034     | 0.957513545 |         |         |  |
| RNU6-246P  | ENSG00000207433 | -1.5585 | 0.94045 | -1.5585     | 0.94045     | -1.5585 |         |  |
|            | 0.94045         | -1.5585 | 0.94045 | 0.94045     | 0.957536049 |         |         |  |
| NA         | ENSG00000282408 | -1.5586 | 0.94045 | -1.5586     | 0.94045     | -1.5586 | 0.94045 |  |
|            | -1.5586         | 0.94045 | 0.94045 | 0.957536049 |             |         |         |  |
| NA         | ENSG00000259556 | -1.5587 | 0.94046 | -1.5587     | 0.94046     | -1.5587 | 0.94046 |  |
|            | -1.5587         | 0.94046 | 0.94046 | 0.957536049 |             |         |         |  |
| FTLP17     | ENSG00000228347 | -1.5587 | 0.94047 | -1.5587     | 0.94047     | -1.5587 |         |  |
|            | 0.94047         | -1.5587 | 0.94047 | 0.94047     | 0.957536049 |         |         |  |
| NA         | ENSG00000235872 | -1.5588 | 0.94047 | -1.5588     | 0.94047     | -1.5588 | 0.94047 |  |
|            | -1.5588         | 0.94047 | 0.94047 | 0.957536049 |             |         |         |  |
| LINC00941  | ENSG00000235884 | -1.5588 | 0.94048 | -1.5588     | 0.94048     | -1.5588 |         |  |
|            | 0.94048         | -1.7254 | 0.95778 | 0.94048     | 0.957536049 |         |         |  |
| NA         | ENSG00000250505 | -1.7423 | 0.95927 | -1.7423     | 0.95927     | -1.7423 | 0.95927 |  |



|            |                 |         |             |             |             |         |         |
|------------|-----------------|---------|-------------|-------------|-------------|---------|---------|
|            | -1.559          | 0.9405  | 0.9405      | 0.957536406 |             |         |         |
| DNAJC9     | ENSG00000213551 | -1.5598 | 0.9406      | -1.5598     | 0.9406      | -1.5598 |         |
|            | 0.9406          | -1.5598 | 0.9406      | 0.9406      | 0.95761821  |         |         |
| HMGN1P7    | ENSG00000239614 | -1.5602 | 0.94064     | -1.5602     | 0.94064     | -1.5602 |         |
|            | 0.94064         | -1.5602 | 0.94064     | 0.94064     | 0.957638926 |         |         |
| KRTAP19-2  | ENSG00000186965 | -1.5605 | 0.94068     | -1.5605     | 0.94068     | -1.5605 |         |
|            | 0.94068         | -1.5605 | 0.94068     | 0.94068     | 0.957659641 |         |         |
| NA         | ENSG00000216613 | -1.5608 | 0.94072     | -1.7624     | 0.961       | -1.7624 | 0.961   |
|            | 0.961           | 0.94072 | 0.957680356 |             |             |         |         |
| RAF1P1     | ENSG00000250040 | -1.5613 | 0.94077     | -1.5613     | 0.94077     | -1.5613 |         |
|            | 0.94077         | -1.5613 | 0.94077     | 0.94077     | 0.95771125  |         |         |
| PLEKHG4    | ENSG00000196155 | -1.5625 | 0.94091     | -1.5625     | 0.94091     | -1.5625 |         |
|            | 0.94091         | -1.5625 | 0.94091     | 0.94091     | 0.957833761 |         |         |
| HNRNPA1P42 | ENSG00000233615 | -2.4922 | 0.99365     | -2.4922     | 0.99365     | -2.4922 |         |
|            | 0.99365         | -1.563  | 0.94097     | 0.94097     | 0.95787483  |         |         |
| SYT14P1    | ENSG00000215127 | -1.5634 | 0.94102     | -1.5634     | 0.94102     | -1.5634 |         |
|            | 0.94102         | -1.5634 | 0.94102     | 0.94102     | 0.957905717 |         |         |
| LTBP1      | ENSG00000049323 | -1.9    | 0.97129     | -2.1111     | 0.98262     | -1.9364 | 0.97359 |
|            | -1.5642         | 0.94111 | 0.94111     | 0.957977321 |             |         |         |
| SLC36A1    | ENSG00000123643 | -1.6393 | 0.94942     | -1.9916     | 0.97679     | -1.5644 |         |
|            | 0.94114         | -1.6918 | 0.95466     | 0.94114     | 0.957987847 |         |         |
| NA         | ENSG00000259396 | -1.5647 | 0.94117     | -1.5647     | 0.94117     | -1.5647 | 0.94117 |
|            | -1.5647         | 0.94117 | 0.94117     | 0.957998373 |             |         |         |
| NA         | ENSG00000251204 | -1.5655 | 0.94127     | -1.5655     | 0.94127     | -1.5655 | 0.94127 |
|            | -1.5655         | 0.94127 | 0.94127     | 0.958080148 |             |         |         |
| KSR2       | ENSG00000171435 | -1.6491 | 0.95044     | -1.5674     | 0.94149     | -2.0731 | 0.98092 |
|            | -2.1485         | 0.98416 | 0.94149     | 0.958274565 |             |         |         |
| LINC01553  | ENSG00000235931 | -1.5676 | 0.94151     | -1.5676     | 0.94151     | -1.5676 |         |
|            | 0.94151         | -1.5676 | 0.94151     | 0.94151     | 0.958274565 |         |         |
| NA         | ENSG00000212377 | -1.5677 | 0.94152     | -1.5677     | 0.94152     | -1.5677 | 0.94152 |
|            | -1.5677         | 0.94152 | 0.94152     | 0.958274565 |             |         |         |
| RNA5SP73   | ENSG00000252553 | -1.5678 | 0.94154     | -1.5678     | 0.94154     | -1.5678 |         |
|            | 0.94154         | -1.5678 | 0.94154     | 0.94154     | 0.958274905 |         |         |
| MRPS18BP1  | ENSG00000226013 | -1.5698 | 0.94177     | -1.5698     | 0.94177     | -1.5698 |         |
|            | 0.94177         | -1.5698 | 0.94177     | 0.94177     | 0.958488975 |         |         |
| RNA5SP349  | ENSG00000200613 | -1.57   | 0.94179     | -2.1314     | 0.98347     | -2.1314 | 0.98347 |
|            | -2.1314         | 0.98347 | 0.94179     | 0.958489311 |             |         |         |
| RSL24D1P11 | ENSG00000231544 | -1.961  | 0.97506     | -1.5701     | 0.94181     | -1.961  |         |
|            | 0.97506         | -1.961  | 0.97506     | 0.94181     | 0.958489647 |         |         |
| BTF3L4P1   | ENSG00000232260 | -1.5704 | 0.94184     | -1.5704     | 0.94184     | -1.5704 |         |
|            | 0.94184         | -1.5704 | 0.94184     | 0.94184     | 0.958500161 |         |         |
| OR10G6     | ENSG00000198674 | -1.5712 | 0.94193     | -1.5712     | 0.94193     | -1.5712 |         |
|            | 0.94193         | -1.5712 | 0.94193     | 0.94193     | 0.958571734 |         |         |
| TAS2R3     | ENSG00000127362 | -1.572  | 0.94203     | -1.572      | 0.94203     | -1.572  |         |
|            | 0.94203         | -1.572  | 0.94203     | 0.94203     | 0.958624619 |         |         |
| C2orf88    | ENSG00000187699 | -1.5724 | 0.94207     | -1.5724     | 0.94207     | -1.5724 |         |
|            | 0.94207         | -1.5724 | 0.94207     | 0.94207     | 0.958624619 |         |         |
| GTSF1      | ENSG00000170627 | -1.5725 | 0.94208     | -1.7025     | 0.95567     | -1.7025 | 0.95567 |
|            | -1.7025         | 0.95567 | 0.94208     | 0.958624619 |             |         |         |
| MIR4742    | ENSG00000266618 | -1.5725 | 0.94208     | -1.5725     | 0.94208     | -1.5725 |         |
|            | 0.94208         | -1.5725 | 0.94208     | 0.94208     | 0.958624619 |         |         |
| TRBV9      | ENSG00000211716 | -1.5741 | 0.94227     | -1.5727     | 0.9421      | -1.5796 | 0.9429  |
|            | -1.5727         | 0.9421  | 0.9421      | 0.958624619 |             |         |         |
| NA         | ENSG00000253568 | -1.5727 | 0.9421      | -1.5727     | 0.9421      | -1.5727 | 0.9421  |
|            | -1.5727         | 0.9421  | 0.9421      | 0.958624619 |             |         |         |
| NA         | ENSG00000284572 | -1.5732 | 0.94216     | -1.5732     | 0.94216     | -1.5732 | 0.94216 |
|            | -1.5732         | 0.94216 | 0.94216     | 0.958655811 |             |         |         |
| C19orf48   | ENSG00000167747 | -1.6258 | 0.948       | -1.6258     | 0.948       | -1.6258 | 0.948   |
|            | 0.94217         | 0.94217 | 0.958655811 |             |             |         |         |
| HEATR3     | ENSG00000155393 | -2.0685 | 0.9807      | -1.9821     | 0.97626     | -1.574  |         |
|            | 0.94226         | -1.574  | 0.94226     | 0.94226     | 0.958727367 |         |         |
| KDM4A-AS1  | ENSG00000236200 | -1.5744 | 0.9423      | -1.5744     | 0.9423      | -1.5744 |         |

|           |                 |         |         |             |             |         |         |
|-----------|-----------------|---------|---------|-------------|-------------|---------|---------|
|           | 0.9423          | -1.5744 | 0.9423  | 0.9423      | 0.958748048 |         |         |
| NA        | ENSG00000228981 | -1.6125 | 0.94657 | -1.5746     | 0.94232     | -1.5746 | 0.94232 |
|           | -1.5746         | 0.94232 | 0.94232 | 0.958748379 |             |         |         |
| CAPZA1P2  | ENSG00000225369 | -1.6049 | 0.94575 | -1.6049     | 0.94575     | -1.5749 |         |
|           | 0.94236         | -1.6049 | 0.94575 | 0.94236     | 0.958769058 |         |         |
| RPL22P7   | ENSG00000234559 | -1.5752 | 0.94239 | -1.5752     | 0.94239     | -1.5752 |         |
|           | 0.94239         | -1.5752 | 0.94239 | 0.94239     | 0.958779562 |         |         |
| KIF21A    | ENSG00000139116 | -1.838  | 0.96697 | -1.6269     | 0.94812     | -1.5756 |         |
|           | 0.94244         | -1.6964 | 0.9551  | 0.94244     | 0.958810414 |         |         |
| NA        | ENSG00000269490 | -1.5764 | 0.94253 | -1.5764     | 0.94253     | -1.5764 | 0.94253 |
|           | -1.5764         | 0.94253 | 0.94253 | 0.958881958 |             |         |         |
| NA        | ENSG00000234061 | -1.5768 | 0.94258 | -1.5768     | 0.94258     | -1.5768 | 0.94258 |
|           | -1.5768         | 0.94258 | 0.94258 | 0.958912806 |             |         |         |
| RN7SL356P | ENSG00000266553 | -1.5773 | 0.94264 | -1.5773     | 0.94264     | -1.5773 |         |
|           | 0.94264         | -1.5773 | 0.94264 | 0.94264     | 0.958934461 |         |         |
| FAM183A   | ENSG00000186973 | -2.0821 | 0.98134 | -1.5776     | 0.94267     | -1.5776 |         |
|           | 0.94267         | -1.5776 | 0.94267 | 0.94267     | 0.958934461 |         |         |
| NA        | ENSG00000279203 | -1.5776 | 0.94267 | -1.5776     | 0.94267     | -1.5776 | 0.94267 |
|           | -1.5776         | 0.94267 | 0.94267 | 0.958934461 |             |         |         |
| PNPLA1    | ENSG00000180316 | -1.8311 | 0.96645 | -2.0401     | 0.97933     | -1.5777 |         |
|           | 0.94268         | -2.4788 | 0.99341 | 0.94268     | 0.958934461 |         |         |
| MTCO2P8   | ENSG00000234234 | -1.5783 | 0.94275 | -1.5783     | 0.94275     | -1.5783 |         |
|           | 0.94275         | -1.5783 | 0.94275 | 0.94275     | 0.958985649 |         |         |
| RPL26P29  | ENSG00000234806 | -1.579  | 0.94284 | -1.579      | 0.94284     | -1.579  |         |
|           | 0.94284         | -1.579  | 0.94284 | 0.94284     | 0.959057179 |         |         |
| MIR4300   | ENSG00000264110 | -1.5794 | 0.94288 | -1.5794     | 0.94288     | -1.5794 |         |
|           | 0.94288         | -1.5794 | 0.94288 | 0.94288     | 0.959067999 |         |         |
| BICC1     | ENSG00000122870 | -1.9286 | 0.97311 | -1.5795     | 0.94289     | -1.8956 | 0.971   |
|           | -1.8354         | 0.96678 | 0.94289 | 0.959067999 |             |         |         |
| NA        | ENSG00000252455 | -1.5804 | 0.94299 | -1.5804     | 0.94299     | -1.5804 | 0.94299 |
|           | -1.5804         | 0.94299 | 0.94299 | 0.959149694 |             |         |         |
| RNA5SP293 | ENSG00000222459 | -1.5806 | 0.94302 | -1.5806     | 0.94302     | -1.5806 |         |
|           | 0.94302         | -1.5806 | 0.94302 | 0.94302     | 0.959160188 |         |         |
| NA        | ENSG00000276460 | -1.5811 | 0.94307 | -1.5811     | 0.94307     | -1.5811 | 0.94307 |
|           | -1.5811         | 0.94307 | 0.94307 | 0.959191023 |             |         |         |
| NA        | ENSG00000233230 | -1.5816 | 0.94313 | -1.5816     | 0.94313     | -1.5816 | 0.94313 |
|           | -1.5816         | 0.94313 | 0.94313 | 0.959232027 |             |         |         |
| NA        | ENSG00000256658 | -1.5819 | 0.94317 | -1.5819     | 0.94317     | -1.5819 | 0.94317 |
|           | -1.5819         | 0.94317 | 0.94317 | 0.959242839 |             |         |         |
| CHFR      | ENSG00000072609 | -1.582  | 0.94318 | -1.7371     | 0.95882     | -1.8863 | 0.97037 |
|           | -1.9076         | 0.97178 | 0.94318 | 0.959242839 |             |         |         |
| NA        | ENSG00000242775 | -1.5826 | 0.94325 | -1.5826     | 0.94325     | -1.5826 | 0.94325 |
|           | -1.5826         | 0.94325 | 0.94325 | 0.95927431  |             |         |         |
| UBA2      | ENSG00000126261 | -1.5829 | 0.94327 | -1.5829     | 0.94327     | -1.5829 | 0.94327 |
|           | -1.5829         | 0.94327 | 0.94327 | 0.95927431  |             |         |         |
| KRT8P39   | ENSG00000233560 | -1.5828 | 0.94327 | -1.5828     | 0.94327     | -1.5828 |         |
|           | 0.94327         | -1.5828 | 0.94327 | 0.94327     | 0.95927431  |         |         |
| NA        | ENSG00000272153 | -1.5838 | 0.94338 | -1.5838     | 0.94338     | -1.5838 | 0.94338 |
|           | -1.5838         | 0.94338 | 0.94338 | 0.959346452 |             |         |         |
| ZSCAN4    | ENSG00000180532 | -1.5839 | 0.94339 | -1.5839     | 0.94339     | -1.5839 |         |
|           | 0.94339         | -1.5839 | 0.94339 | 0.94339     | 0.959346452 |         |         |
| NA        | ENSG00000200060 | -1.5839 | 0.9434  | -1.5839     | 0.9434      | -1.5839 | 0.9434  |
|           | -1.8423         | 0.96728 | 0.9434  | 0.959346452 |             |         |         |
| NA        | ENSG00000268053 | -1.5847 | 0.94348 | -1.5847     | 0.94348     | -1.5847 | 0.94348 |
|           | -1.5847         | 0.94348 | 0.94348 | 0.959407784 |             |         |         |
| IGFL2-AS1 | ENSG00000268621 | -1.5855 | 0.94358 | -1.5855     | 0.94358     | -1.5855 |         |
|           | 0.94358         | -1.5855 | 0.94358 | 0.94358     | 0.95948945  |         |         |
| SAA4      | ENSG00000148965 | -2.7508 | 0.99703 | -1.5859     | 0.94362     | -1.5859 | 0.94362 |
|           | -1.6213         | 0.94753 | 0.94362 | 0.95949008  |             |         |         |
| CAPNS2    | ENSG00000256812 | -1.5859 | 0.94362 | -1.5859     | 0.94362     | -1.5859 |         |
|           | 0.94362         | -1.5859 | 0.94362 | 0.94362     | 0.95949008  |         |         |
| NA        | ENSG00000221125 | -1.5867 | 0.94371 | -1.5867     | 0.94371     | -1.5867 | 0.94371 |

|            |                 |         |         |         |             |             |         |         |
|------------|-----------------|---------|---------|---------|-------------|-------------|---------|---------|
|            |                 | -1.5867 | 0.94371 | 0.94371 | 0.959561571 |             |         |         |
| NA         | ENSG00000272203 | -1.5869 | 0.94373 | 0.94373 | -1.5869     | 0.94373     | -1.5869 | 0.94373 |
|            |                 | -1.5869 | 0.94373 | 0.94373 | 0.959561885 |             |         |         |
| LYPLA1P2   | ENSG00000251483 | -1.5877 | 0.94383 | 0.94383 | -1.5877     | 0.94383     | -1.5877 |         |
|            |                 | 0.94383 | -1.5877 | 0.94383 | 0.94383     | 0.959643539 |         |         |
| RNU6-1077P | ENSG00000222438 | -1.8345 | 0.94406 | 0.94406 | 0.96671     | -1.5898     | 0.94406 | -1.5898 |
|            |                 | 0.94406 | -1.5898 | 0.94406 | 0.94406     | 0.959857365 |         |         |
| NA         | ENSG00000221041 | -1.59   | 0.94409 | 0.94409 | -1.6449     | 0.95001     | -1.6449 | 0.95001 |
|            |                 | -1.6449 | 0.95001 | 0.94409 | 0.95986784  |             |         |         |
| NA         | ENSG00000279796 | -1.5924 | 0.94435 | 0.94435 | -1.5924     | 0.94435     | -1.5924 | 0.94435 |
|            |                 | -1.5924 | 0.94435 | 0.94435 | 0.960112153 |             |         |         |
| PRSS22     | ENSG00000005001 | -1.5929 | 0.94441 | 0.94441 | -1.5929     | 0.94441     | -1.5929 |         |
|            |                 | 0.94441 | -1.5929 | 0.94441 | 0.94441     | 0.960133091 |         |         |
| ENO1P4     | ENSG00000241790 | -1.5929 | 0.94441 | 0.94441 | -1.5929     | 0.94441     | -1.5929 |         |
|            |                 | 0.94441 | -1.5929 | 0.94441 | 0.94441     | 0.960133091 |         |         |
| ZNF19      | ENSG00000157429 | -1.5935 | 0.94448 | 0.94448 | -1.7824     | 0.96266     | -1.5935 | 0.94448 |
|            |                 | -1.5935 | 0.94448 | 0.94448 | 0.960184224 |             |         |         |
| NA         | ENSG00000267436 | -1.5944 | 0.94458 | 0.94458 | -1.5944     | 0.94458     | -1.5944 | 0.94458 |
|            |                 | -1.5944 | 0.94458 | 0.94458 | 0.960235954 |             |         |         |
| PSMD10P3   | ENSG00000232041 | -1.5945 | 0.94459 | 0.94459 | -1.5945     | 0.94459     | -1.5945 |         |
|            |                 | 0.94459 | -2.2171 | 0.98669 | 0.94459     | 0.960235954 |         |         |
| PPIAP67    | ENSG00000237260 | -1.5945 | 0.94459 | 0.94459 | -1.5945     | 0.94459     | -1.5945 |         |
|            |                 | 0.94459 | -1.5945 | 0.94459 | 0.94459     | 0.960235954 |         |         |
| ATP5MGP5   | ENSG00000242561 | -1.5947 | 0.94461 | 0.94461 | -1.5947     | 0.94461     | -1.5947 |         |
|            |                 | 0.94461 | -1.5947 | 0.94461 | 0.94461     | 0.960236254 |         |         |
| NA         | ENSG00000229345 | -1.5956 | 0.94471 | 0.94471 | -1.5956     | 0.94471     | -1.5956 | 0.94471 |
|            |                 | -1.5956 | 0.94471 | 0.94471 | 0.960297843 |             |         |         |
| NA         | ENSG00000263234 | -1.5956 | 0.94471 | 0.94471 | -1.5956     | 0.94471     | -1.5956 | 0.94471 |
|            |                 | -1.5956 | 0.94471 | 0.94471 | 0.960297843 |             |         |         |
| TRAJ43     | ENSG00000211846 | -1.5957 | 0.94473 | 0.94473 | -1.5957     | 0.94473     | -1.5957 |         |
|            |                 | 0.94473 | -1.5957 | 0.94473 | 0.94473     | 0.960298141 |         |         |
| LINC02517  | ENSG00000249145 | -1.5971 | 0.94488 | 0.94488 | -1.9209     | 0.97263     | -1.5971 |         |
|            |                 | 0.94488 | -1.5971 | 0.94488 | 0.94488     | 0.960430579 |         |         |
| IGLV3-24   | ENSG00000253822 | -1.598  | 0.94498 | 0.94498 | -1.598      | 0.94498     | -1.598  |         |
|            |                 | 0.94498 | -1.598  | 0.94498 | 0.94498     | 0.96051219  |         |         |
| SNORD10    | ENSG00000238917 | -1.5983 | 0.94501 | 0.94501 | -1.5983     | 0.94501     | -1.5983 |         |
|            |                 | 0.94501 | -1.5983 | 0.94501 | 0.94501     | 0.960522648 |         |         |
| NA         | ENSG00000261776 | -1.5986 | 0.94504 | 0.94504 | -1.5986     | 0.94504     | -1.5986 | 0.94504 |
|            |                 | -1.5986 | 0.94504 | 0.94504 | 0.960533105 |             |         |         |
| AURKC      | ENSG00000105146 | -1.6286 | 0.9483  | 0.9483  | -1.6286     | 0.9483      | -1.5987 | 0.94506 |
|            |                 | -1.6286 | 0.9483  | 0.94506 | 0.960533399 |             |         |         |
| NA         | ENSG00000236676 | -1.5995 | 0.94515 | 0.94515 | -1.5995     | 0.94515     | -1.5995 | 0.94515 |
|            |                 | -1.5995 | 0.94515 | 0.94515 | 0.960604837 |             |         |         |
| LINC02027  | ENSG00000243694 | -1.6002 | 0.94523 | 0.94523 | -1.6002     | 0.94523     | -1.6002 |         |
|            |                 | 0.94523 | -1.6002 | 0.94523 | 0.94523     | 0.960646946 |         |         |
| MMP24OS    | ENSG00000126005 | -1.6003 | 0.94524 | 0.94524 | -1.6003     | 0.94524     | -1.6003 |         |
|            |                 | 0.94524 | -1.6003 | 0.94524 | 0.94524     | 0.960646946 |         |         |
| RNU1-21P   | ENSG00000200197 | -1.6008 | 0.94529 | 0.94529 | -1.6008     | 0.94529     | -1.6008 |         |
|            |                 | 0.94529 | -1.6008 | 0.94529 | 0.94529     | 0.960646946 |         |         |
| RSL24D1P8  | ENSG00000237273 | -1.6008 | 0.94529 | 0.94529 | -1.6008     | 0.94529     | -1.6008 |         |
|            |                 | 0.94529 | -1.6008 | 0.94529 | 0.94529     | 0.960646946 |         |         |
| C1GALT1P1  | ENSG00000257818 | -1.6008 | 0.94529 | 0.94529 | -1.6008     | 0.94529     | -1.6008 |         |
|            |                 | 0.94529 | -1.6008 | 0.94529 | 0.94529     | 0.960646946 |         |         |
| NA         | ENSG00000248552 | -1.6011 | 0.94532 | 0.94532 | -1.6011     | 0.94532     | -1.6011 | 0.94532 |
|            |                 | -1.6011 | 0.94532 | 0.94532 | 0.960647528 |             |         |         |
| NA         | ENSG00000230551 | -1.8659 | 0.96897 | 0.96897 | -1.9322     | 0.97333     | -1.6011 | 0.94533 |
|            |                 | -1.6011 | 0.94533 | 0.94533 | 0.960647528 |             |         |         |
| NA         | ENSG00000260579 | -1.6016 | 0.94537 | 0.94537 | -1.6016     | 0.94537     | -1.6016 | 0.94537 |
|            |                 | -1.6016 | 0.94537 | 0.94537 | 0.960668142 |             |         |         |
| GAPDHP2    | ENSG00000236811 | -1.6019 | 0.94541 | 0.94541 | -1.6019     | 0.94541     | -1.6019 |         |
|            |                 | 0.94541 | -1.6019 | 0.94541 | 0.94541     | 0.960668723 |         |         |
| RPL23AP95  | ENSG00000236848 | -1.6019 | 0.94541 | 0.94541 | -1.6019     | 0.94541     | -1.6019 |         |

|           |                 |         |         |             |             |         |         |
|-----------|-----------------|---------|---------|-------------|-------------|---------|---------|
|           | 0.94541         | -1.6019 | 0.94541 | 0.94541     | 0.960668723 |         |         |
| MTND1P10  | ENSG00000229088 | -1.6022 | 0.94544 | 0.94544     | -1.6022     | 0.94544 | -1.6022 |
|           | 0.94544         | -1.6022 | 0.94544 | 0.94544     | 0.960679175 |         |         |
| NA        | ENSG00000235351 | -1.6037 | 0.94561 | 0.94561     | -1.6037     | 0.94561 | -1.6037 |
|           | -1.6037         | 0.94561 | 0.94561 | 0.96083188  |             |         |         |
| BBS12     | ENSG00000181004 | -1.7933 | 0.96354 | 0.96354     | -1.7093     | 0.9563  | -1.9655 |
|           | -1.6039         | 0.94563 | 0.94563 | 0.960832167 |             |         |         |
| NA        | ENSG00000271676 | -1.6041 | 0.94566 | 0.94566     | -1.6041     | 0.94566 | -1.6041 |
|           | -1.6041         | 0.94566 | 0.94566 | 0.960842615 |             |         |         |
| PNLIPRP3  | ENSG00000203837 | -1.6049 | 0.94574 | 0.94574     | -1.6049     | 0.94574 | -1.6049 |
|           | 0.94574         | -1.6049 | 0.94574 | 0.94574     | 0.960903864 |         |         |
| NA        | ENSG00000244193 | -1.6053 | 0.94579 | 0.94579     | -1.6053     | 0.94579 | -1.6053 |
|           | -1.6053         | 0.94579 | 0.94579 | 0.960934629 |             |         |         |
| ZNF32-AS1 | ENSG00000226245 | -1.606  | 0.94586 | 0.94586     | -1.606      | 0.94586 | -1.606  |
|           | 0.94586         | -1.606  | 0.94586 | 0.94586     | 0.960955803 |         |         |
| NA        | ENSG00000264365 | -1.6059 | 0.94586 | 0.94586     | -1.6059     | 0.94586 | -1.6059 |
|           | -1.6059         | 0.94586 | 0.94586 | 0.960955803 |             |         |         |
| PGM5      | ENSG00000154330 | -1.7195 | 0.95724 | 0.95724     | -2.3534     | 0.9907  | -1.6061 |
|           | -1.9164         | 0.97234 | 0.94587 | 0.94587     | 0.960955803 |         |         |
| NA        | ENSG00000267791 | -1.6063 | 0.94589 | 0.94589     | -1.6063     | 0.94589 | -1.6063 |
|           | -1.6063         | 0.94589 | 0.94589 | 0.960956088 |             |         |         |
| NA        | ENSG00000270982 | -2.0439 | 0.97952 | 0.97952     | -1.9311     | 0.97326 | -1.6067 |
|           | -1.6374         | 0.94923 | 0.94594 | 0.94594     | 0.960986849 |         |         |
| MTHFD2P6  | ENSG00000249266 | -1.6076 | 0.94604 | 0.94604     | -1.6076     | 0.94604 | -1.6076 |
|           | 0.94604         | -1.7484 | 0.9598  | 0.94604     | 0.96105881  |         |         |
| SLC2A3P1  | ENSG00000253861 | -1.6078 | 0.94606 | 0.94606     | -1.6078     | 0.94606 | -1.6078 |
|           | 0.94606         | -1.6078 | 0.94606 | 0.94606     | 0.96105881  |         |         |
| TRBV5-2   | ENSG00000242771 | -1.6079 | 0.94607 | 0.94607     | -1.6079     | 0.94607 | -1.6079 |
|           | 0.94607         | -1.6079 | 0.94607 | 0.94607     | 0.96105881  |         |         |
| NA        | ENSG00000212997 | -1.6089 | 0.94618 | 0.94618     | -1.6089     | 0.94618 | -1.6089 |
|           | -1.6089         | 0.94618 | 0.94618 | 0.961140919 |             |         |         |
| H4C12     | ENSG00000273542 | -1.6091 | 0.9462  | 0.9462      | -1.6091     | 0.9462  | -1.6091 |
|           | -1.6091         | 0.9462  | 0.9462  | 0.961140919 |             |         |         |
| GNRHR     | ENSG00000109163 | -1.6478 | 0.95031 | 0.95031     | -1.7074     | 0.95613 | -1.6091 |
|           | -2.4165         | 0.99217 | 0.94621 | 0.94621     | 0.961140919 |         |         |
| RPL22P14  | ENSG00000218300 | -1.6104 | 0.94635 | 0.94635     | -1.6104     | 0.94635 | -1.6104 |
|           | 0.94635         | -1.6104 | 0.94635 | 0.94635     | 0.96126309  |         |         |
| TAS2R50   | ENSG00000212126 | -1.611  | 0.9464  | 0.9464      | -1.611      | 0.9464  | -1.611  |
|           | 0.9464          | -1.611  | 0.9464  | 0.9464      | 0.961283961 |         |         |
| RNU7-105P | ENSG00000251919 | -1.6804 | 0.95356 | 0.95356     | -2.275      | 0.98855 | -1.611  |
|           | 0.94641         | -1.611  | 0.94641 | 0.94641     | 0.961283961 |         |         |
| OR4A1P    | ENSG00000254408 | -1.6118 | 0.9465  | 0.9465      | -2.3666     | 0.99102 | -1.7239 |
|           | 0.95764         | -2.0738 | 0.98095 | 0.9465      | 0.961355337 |         |         |
| PMP22     | ENSG00000109099 | -2.2831 | 0.98879 | 0.98879     | -2.1048     | 0.98235 | -1.9892 |
|           | -1.6124         | 0.94657 | 0.94657 | 0.94657     | 0.961406397 |         |         |
| OR1F12    | ENSG00000220721 | -1.6128 | 0.94661 | 0.94661     | -1.6128     | 0.94661 | -1.6128 |
|           | 0.94661         | -1.6128 | 0.94661 | 0.94661     | 0.961417103 |         |         |
| RBMX2P4   | ENSG00000230879 | -1.613  | 0.94662 | 0.94662     | -1.613      | 0.94662 | -1.613  |
|           | 0.94662         | -1.613  | 0.94662 | 0.94662     | 0.961417103 |         |         |
| OR4A49P   | ENSG00000254472 | -1.9569 | 0.97482 | 0.97482     | -1.7278     | 0.95799 | -1.6132 |
|           | 0.94665         | -1.7648 | 0.9612  | 0.94665     | 0.961427534 |         |         |
| NA        | ENSG00000275228 | -1.6139 | 0.94672 | 0.94672     | -1.6139     | 0.94672 | -1.6139 |
|           | -1.6139         | 0.94672 | 0.94672 | 0.961478588 |             |         |         |
| MIR328    | ENSG00000207948 | -1.6141 | 0.94675 | 0.94675     | -1.6141     | 0.94675 | -1.6141 |
|           | 0.94675         | -1.6141 | 0.94675 | 0.94675     | 0.961489017 |         |         |
| RNU6-412P | ENSG00000252243 | -1.6143 | 0.94677 | 0.94677     | -1.6538     | 0.95092 | -1.6143 |
|           | 0.94677         | -1.6143 | 0.94677 | 0.94677     | 0.96148929  |         |         |
| NA        | ENSG00000248559 | -1.6148 | 0.94682 | 0.94682     | -1.6148     | 0.94682 | -1.6148 |
|           | -1.6148         | 0.94682 | 0.94682 | 0.961520029 |             |         |         |
| NA        | ENSG00000232027 | -1.6152 | 0.94687 | 0.94687     | -1.6152     | 0.94687 | -1.6152 |
|           | -1.6152         | 0.94687 | 0.94687 | 0.961550767 |             |         |         |
| GNG14     | ENSG00000283980 | -1.6172 | 0.94708 | 0.94708     | -1.6172     | 0.94708 | -1.6172 |
|           |                 |         |         |             |             |         |         |

|            |                 |         |             |         |             |             |         |         |
|------------|-----------------|---------|-------------|---------|-------------|-------------|---------|---------|
|            |                 | -1.6172 | 0.94708     | 0.94708 | 0.961743981 |             |         |         |
| NA         | ENSG00000235226 | -1.6194 | 0.94732     | 0.94732 | -1.6194     | 0.94732     | -1.6194 | 0.94732 |
|            |                 | -1.6194 | 0.94732     | 0.94732 | 0.96196765  |             |         |         |
| NA         | ENSG00000269318 | -1.62   | 0.94739     | 0.94739 | -1.62       | 0.94739     | -1.62   | 0.94739 |
|            |                 | 0.94739 | 0.962018686 |         |             |             |         |         |
| LIPN       | ENSG00000204020 | -1.6206 | 0.94745     | 0.94745 | -1.6206     | 0.94745     | -1.6206 | 0.94745 |
|            |                 | -1.6206 | 0.94745     | 0.94745 | 0.962039518 |             |         |         |
| LINC00427  | ENSG00000236463 | -1.6206 | 0.94745     | 0.94745 | -1.671      | 0.95264     | -1.671  |         |
|            |                 | 0.95264 | -1.671      | 0.95264 | 0.94745     | 0.962039518 |         |         |
| NA         | ENSG00000252517 | -1.6212 | 0.94752     | 0.94752 | -1.6212     | 0.94752     | -1.6212 | 0.94752 |
|            |                 | -1.6212 | 0.94752     | 0.94752 | 0.962090548 |             |         |         |
| NA         | ENSG00000269624 | -1.6214 | 0.94754     | 0.94754 | -1.6214     | 0.94754     | -1.6214 | 0.94754 |
|            |                 | -1.6214 | 0.94754     | 0.94754 | 0.962090809 |             |         |         |
| NA         | ENSG00000268614 | -1.6217 | 0.94757     | 0.94757 | -1.6217     | 0.94757     | -1.6217 | 0.94757 |
|            |                 | -1.6217 | 0.94757     | 0.94757 | 0.96209133  |             |         |         |
| KRT8P24    | ENSG00000259500 | -2.4217 | 0.99228     | 0.99228 | -2.0191     | 0.97826     | -2.4217 |         |
|            |                 | 0.99228 | -1.6218     | 0.94758 | 0.94758     | 0.96209133  |         |         |
| TMPOP2     | ENSG00000262904 | -1.6227 | 0.94767     | 0.94767 | -1.6227     | 0.94767     | -1.6227 |         |
|            |                 | 0.94767 | -1.6227     | 0.94767 | 0.94767     | 0.962162661 |         |         |
| C3P1       | ENSG00000167798 | -2.1876 | 0.98565     | 0.98565 | -1.7092     | 0.9563      | -1.6232 | 0.94773 |
|            |                 | -2.0857 | 0.9815      | 0.94773 | 0.962203531 |             |         |         |
| RN7SL211P  | ENSG00000244534 | -1.6234 | 0.94775     | 0.94775 | -1.6234     | 0.94775     | -1.6234 |         |
|            |                 | 0.94775 | -1.6234     | 0.94775 | 0.94775     | 0.96220379  |         |         |
| NA         | ENSG00000260954 | -1.6239 | 0.9478      | 0.9478  | -1.6239     | 0.9478      | -1.6239 | 0.9478  |
|            |                 | -1.6239 | 0.9478      | 0.9478  | 0.962234505 |             |         |         |
| ANGPTL3    | ENSG00000132855 | -1.6241 | 0.94783     | 0.94783 | -1.6241     | 0.94783     | -1.6241 |         |
|            |                 | 0.94783 | -1.6241     | 0.94783 | 0.94783     | 0.962244915 |         |         |
| HNRNPCL1   | ENSG00000179172 | -1.6643 | 0.95198     | 0.95198 | -1.6643     | 0.95198     | -1.6643 |         |
|            |                 | 0.95198 | -1.6262     | 0.94805 | 0.94805     | 0.962448209 |         |         |
| CHKB-CPT1B | ENSG00000254413 | -1.6278 | 0.94822     | 0.94822 | -1.6278     | 0.94822     | -1.6278 |         |
|            |                 | 0.94822 | -1.6278     | 0.94822 | 0.94822     | 0.962600737 |         |         |
| MIR3116-1  | ENSG00000263908 | -1.628  | 0.94824     | 0.94824 | -1.628      | 0.94824     | -1.628  |         |
|            |                 | 0.94824 | -1.628      | 0.94824 | 0.94824     | 0.962600987 |         |         |
| SYT10      | ENSG00000110975 | -1.6285 | 0.94829     | 0.94829 | -1.9341     | 0.97345     | -1.7423 | 0.95928 |
|            |                 | -1.8587 | 0.96846     | 0.94829 | 0.962631691 |             |         |         |
| NA         | ENSG00000228341 | -1.653  | 0.95084     | 0.95084 | -1.653      | 0.95084     | -1.653  | 0.95084 |
|            |                 | -1.6287 | 0.94831     | 0.94831 | 0.96263194  |             |         |         |
| C1orf74    | ENSG00000162757 | -1.6294 | 0.94839     | 0.94839 | -1.6294     | 0.94839     | -1.6294 |         |
|            |                 | 0.94839 | -1.6294     | 0.94839 | 0.94839     | 0.962673041 |         |         |
| HSP90AA6P  | ENSG00000181359 | -1.6295 | 0.94839     | 0.94839 | -1.6295     | 0.94839     | -1.6295 |         |
|            |                 | 0.94839 | -1.6295     | 0.94839 | 0.94839     | 0.962673041 |         |         |
| NA         | ENSG00000262732 | -1.6299 | 0.94844     | 0.94844 | -1.6299     | 0.94844     | -1.6299 | 0.94844 |
|            |                 | -1.6299 | 0.94844     | 0.94844 | 0.962694087 |             |         |         |
| NA         | ENSG00000267197 | -1.6302 | 0.94847     | 0.94847 | -1.6302     | 0.94847     | -1.6302 | 0.94847 |
|            |                 | -1.6302 | 0.94847     | 0.94847 | 0.962694087 |             |         |         |
| THRIL      | ENSG00000280634 | -1.6302 | 0.94847     | 0.94847 | -1.6302     | 0.94847     | -1.6302 | 0.94847 |
|            |                 | -1.6302 | 0.94847     | 0.94847 | 0.962694087 |             |         |         |
| RN7SL690P  | ENSG00000264879 | -1.6308 | 0.94854     | 0.94854 | -1.6308     | 0.94854     | -1.6308 |         |
|            |                 | 0.94854 | -1.6308     | 0.94854 | 0.94854     | 0.962715377 |         |         |
| HLA-N      | ENSG00000224372 | -1.6311 | 0.94856     | 0.94856 | -1.6311     | 0.94856     | -1.6311 | 0.94856 |
|            |                 | -1.6311 | 0.94856     | 0.94856 | 0.962715377 |             |         |         |
| NA         | ENSG00000278966 | -1.6311 | 0.94856     | 0.94856 | -1.6311     | 0.94856     | -1.6311 | 0.94856 |
|            |                 | -1.6311 | 0.94856     | 0.94856 | 0.962715377 |             |         |         |
| PTGER4     | ENSG00000171522 | -1.6311 | 0.94857     | 0.94857 | -1.8783     | 0.96983     | -1.6364 |         |
|            |                 | 0.94912 | -1.8327     | 0.96657 | 0.94857     | 0.962715377 |         |         |
| NA         | ENSG00000267012 | -1.6446 | 0.94998     | 0.94998 | -1.6446     | 0.94998     | -1.6319 | 0.94865 |
|            |                 | -1.6446 | 0.94998     | 0.94865 | 0.962776518 |             |         |         |
| HAGHL      | ENSG00000103253 | -1.6324 | 0.9487      | 0.9487  | -1.6324     | 0.9487      | -1.6324 | 0.9487  |
|            |                 | -1.6324 | 0.9487      | 0.9487  | 0.962787159 |             |         |         |
| CCDC78     | ENSG00000162004 | -1.6324 | 0.9487      | 0.9487  | -1.6324     | 0.9487      | -1.6324 |         |
|            |                 | 0.9487  | -1.6324     | 0.9487  | 0.9487      | 0.962787159 |         |         |
| CARS1P2    | ENSG00000253756 | -1.6332 | 0.94879     | 0.94879 | -1.6332     | 0.94879     | -1.6332 |         |

|            |                 |         |             |             |             |         |         |         |
|------------|-----------------|---------|-------------|-------------|-------------|---------|---------|---------|
|            | 0.94879         | -1.6332 | 0.94879     | 0.94879     | 0.962858443 |         |         |         |
| RAP1B      | ENSG00000127314 | -1.8318 | 0.96651     | -1.7993     | 0.96401     | -1.7097 | 0.95634 |         |
|            | -1.6335         | 0.94881 | 0.94881     | 0.962858687 |             |         |         |         |
| NA         | ENSG00000278967 | -1.6342 | 0.94889     | -1.6342     | 0.94889     | -1.6342 | 0.94889 |         |
|            | -1.6342         | 0.94889 | 0.94889     | 0.962919819 |             |         |         |         |
| MARK2P11   | ENSG00000253743 | -2.2796 | 0.98869     | -1.6344     | 0.94891     | -1.6344 |         |         |
|            | 0.94891         | -1.6344 | 0.94891     | 0.962920062 |             |         |         |         |
| IGHVIII-44 | ENSG00000283562 | -1.6353 | 0.949       | -1.6353     | 0.949       | -1.6353 | 0.949   | -1.6353 |
|            | 0.949           | 0.949   | 0.962991337 |             |             |         |         |         |
| SRSF9      | ENSG00000111786 | -1.6358 | 0.94906     | -1.6358     | 0.94906     | -1.6358 | 0.94906 |         |
|            | -1.6358         | 0.94906 | 0.94906     | 0.963032168 |             |         |         |         |
| TRIM60P18  | ENSG00000227986 | -1.636  | 0.94908     | -1.636      | 0.94908     | -1.636  |         |         |
|            | 0.94908         | -2.1183 | 0.98293     | 0.94908     | 0.963032409 |         |         |         |
| RNU1-7P    | ENSG00000200975 | -1.6362 | 0.9491      | -1.6362     | 0.9491      | -1.6362 |         |         |
|            | 0.9491          | -1.6362 | 0.9491      | 0.9491      | 0.96303265  |         |         |         |
| NA         | ENSG00000251376 | -1.6377 | 0.94925     | -1.6377     | 0.94925     | -1.6377 | 0.94925 |         |
|            | -1.6377         | 0.94925 | 0.94925     | 0.963164796 |             |         |         |         |
| RN7SL225P  | ENSG00000239856 | -1.6384 | 0.94933     | -1.6384     | 0.94933     | -1.6384 |         |         |
|            | 0.94933         | -1.6384 | 0.94933     | 0.94933     | 0.963225913 |         |         |         |
| NA         | ENSG00000265055 | -1.6394 | 0.94944     | -1.6394     | 0.94944     | -1.6394 | 0.94944 |         |
|            | -1.6394         | 0.94944 | 0.94944     | 0.963317465 |             |         |         |         |
| NA         | ENSG00000280060 | -1.6398 | 0.94948     | -1.6398     | 0.94948     | -1.6398 | 0.94948 |         |
|            | -1.6398         | 0.94948 | 0.94948     | 0.963337992 |             |         |         |         |
| MIR4772    | ENSG00000264764 | -1.6401 | 0.9495      | -1.6401     | 0.9495      | -1.6401 |         |         |
|            | 0.9495          | -1.6401 | 0.9495      | 0.9495      | 0.963338226 |         |         |         |
| TRIM51FP   | ENSG00000219061 | -1.6406 | 0.94956     | -2.23       | 0.98713     | -2.1158 | 0.98282 |         |
|            | -2.1237         | 0.98315 | 0.94956     | 0.963379043 |             |         |         |         |
| NA         | ENSG00000269476 | -1.6417 | 0.94968     | -1.6417     | 0.94968     | -1.6417 | 0.94968 |         |
|            | -1.6417         | 0.94968 | 0.94968     | 0.96348073  |             |         |         |         |
| NA         | ENSG00000226268 | -1.6422 | 0.94972     | -1.9598     | 0.97499     | -2.1778 | 0.98529 |         |
|            | -1.9745         | 0.97584 | 0.94972     | 0.963492031 |             |         |         |         |
| NA         | ENSG00000213414 | -1.6426 | 0.94977     | -1.6426     | 0.94977     | -1.6426 | 0.94977 |         |
|            | -1.6426         | 0.94977 | 0.94977     | 0.963492031 |             |         |         |         |
| OST4       | ENSG00000228474 | -1.6426 | 0.94977     | -1.6426     | 0.94977     | -1.6426 | 0.94977 |         |
|            | -1.6426         | 0.94977 | 0.94977     | 0.963492031 |             |         |         |         |
| NA         | ENSG00000250145 | -1.6428 | 0.94979     | -1.6428     | 0.94979     | -1.6428 | 0.94979 |         |
|            | -1.6428         | 0.94979 | 0.94979     | 0.963492031 |             |         |         |         |
| NA         | ENSG00000252337 | -1.6428 | 0.94979     | -1.6428     | 0.94979     | -1.6428 | 0.94979 |         |
|            | -1.6428         | 0.94979 | 0.94979     | 0.963492031 |             |         |         |         |
| NA         | ENSG00000271862 | -1.6439 | 0.9499      | -2.1345     | 0.9836      | -1.6439 | 0.9499  |         |
|            | -1.6439         | 0.9499  | 0.9499      | 0.963583559 |             |         |         |         |
| NA         | ENSG00000254846 | -1.6445 | 0.94996     | -1.6445     | 0.94996     | -1.6445 | 0.94996 |         |
|            | -1.6445         | 0.94996 | 0.94996     | 0.963624364 |             |         |         |         |
| PTTG1      | ENSG00000164611 | -1.645  | 0.95002     | -1.645      | 0.95002     | -1.645  | 0.95002 |         |
|            | -1.645          | 0.95002 | 0.95002     | 0.963655251 |             |         |         |         |
| MTCYBP41   | ENSG00000254650 | -1.6452 | 0.95003     | -1.6452     | 0.95003     | -1.6452 |         |         |
|            | 0.95003         | -1.6452 | 0.95003     | 0.95003     | 0.963655251 |         |         |         |
| NA         | ENSG00000200065 | -1.6453 | 0.95005     | -1.6453     | 0.95005     | -1.6453 | 0.95005 |         |
|            | -1.6453         | 0.95005 | 0.95005     | 0.963655479 |             |         |         |         |
| CISD3      | ENSG00000277972 | -1.6456 | 0.95008     | -1.6456     | 0.95008     | -1.6456 | 0.95008 |         |
|            | -1.6456         | 0.95008 | 0.95008     | 0.963665849 |             |         |         |         |
| RNU7-3P    | ENSG00000252244 | -1.646  | 0.95012     | -1.646      | 0.95012     | -1.646  |         |         |
|            | 0.95012         | -1.646  | 0.95012     | 0.95012     | 0.963686363 |         |         |         |
| GAS2L1     | ENSG00000185340 | -1.6482 | 0.95034     | -1.6482     | 0.95034     | -1.6482 |         |         |
|            | 0.95034         | -1.6482 | 0.95034     | 0.95034     | 0.963889441 |         |         |         |
| NA         | ENSG00000261959 | -1.6484 | 0.95036     | -1.6484     | 0.95036     | -1.6484 | 0.95036 |         |
|            | -1.6484         | 0.95036 | 0.95036     | 0.963889664 |             |         |         |         |
| SEPHS1P7   | ENSG00000231926 | -1.6501 | 0.95054     | -1.6501     | 0.95054     | -1.6501 |         |         |
|            | 0.95054         | -1.6501 | 0.95054     | 0.95054     | 0.964032097 |         |         |         |
| SUGT1P4    | ENSG00000254483 | -1.6501 | 0.95054     | -1.6501     | 0.95054     | -1.6501 |         |         |
|            | 0.95054         | -1.6501 | 0.95054     | 0.95054     | 0.964032097 |         |         |         |
| POU5F2     | ENSG00000248483 | -1.6504 | 0.95057     | -1.6504     | 0.95057     | -1.6504 |         |         |

|            |                 |             |         |             |             |         |         |         |
|------------|-----------------|-------------|---------|-------------|-------------|---------|---------|---------|
|            | 0.95057         | -1.9413     | 0.97389 | 0.95057     | 0.964032537 |         |         |         |
| RN7SL824P  | ENSG00000242764 | -1.6505     |         | 0.95058     | -1.6505     | 0.95058 | -1.6505 |         |
|            | 0.95058         | -1.6505     | 0.95058 | 0.95058     | 0.964032537 |         |         |         |
| YEATS4     | ENSG00000127337 | -1.6514     |         | 0.95067     | -1.7681     | 0.96148 | -1.71   | 0.95637 |
|            | -1.8062         | 0.96455     | 0.95067 | 0.964103746 |             |         |         |         |
| NA         | ENSG00000250079 | -1.6525     | 0.95078 | -1.6525     | 0.95078     | -1.6525 | 0.95078 |         |
|            | -1.6525         | 0.95078     | 0.95078 | 0.964195234 |             |         |         |         |
| C11orf40   | ENSG00000171987 | -1.6531     |         | 0.95085     | -2.2982     | 0.98923 | -2.2982 |         |
|            | 0.98923         | -2.2982     | 0.98923 | 0.95085     | 0.964246155 |         |         |         |
| MFRP       | ENSG00000235718 | -1.6547     | 0.95101 | -1.6547     | 0.95101     | -1.6547 | 0.95101 |         |
|            | -1.6547         | 0.95101     | 0.95101 | 0.96438834  |             |         |         |         |
| NA         | ENSG00000241490 | -1.6554     | 0.95107 | -1.6554     | 0.95107     | -1.6554 | 0.95107 |         |
|            | -1.6554         | 0.95107     | 0.95107 | 0.964409046 |             |         |         |         |
| NA         | ENSG00000275638 | -1.6553     | 0.95107 | -1.6553     | 0.95107     | -1.6553 | 0.95107 |         |
|            | -1.6553         | 0.95107     | 0.95107 | 0.964409046 |             |         |         |         |
| SETP21     | ENSG00000214244 | -1.7629     |         | 0.96104     | -1.7629     | 0.96104 | -1.6557 |         |
|            | 0.9511          | -1.7629     | 0.96104 | 0.9511      | 0.964419398 |         |         |         |
| RNA5SP216  | ENSG00000251920 | -1.6563     |         | 0.95117     | -1.6563     | 0.95117 | -1.6563 |         |
|            | 0.95117         | -1.6563     | 0.95117 | 0.95117     | 0.964470309 |         |         |         |
| CCL5       | ENSG00000271503 | -1.6567     | 0.95121 | -1.6567     | 0.95121     | -1.6567 | 0.95121 |         |
|            | -1.6567         | 0.95121     | 0.95121 | 0.964490799 |             |         |         |         |
| RNU6-951P  | ENSG00000199603 | -2.858      |         | 0.99787     | -1.6587     | 0.95141 | -2.858  |         |
|            | 0.99787         | -1.8223     | 0.9658  | 0.95141     | 0.964673519 |         |         |         |
| NA         | ENSG00000255176 | -1.6594     | 0.95148 | -1.6594     | 0.95148     | -1.6594 | 0.95148 |         |
|            | -1.6594         | 0.95148     | 0.95148 | 0.964724421 |             |         |         |         |
| NA         | ENSG00000259678 | -1.66       | 0.95155 | -1.66       | 0.95155     | -1.66   | 0.95155 |         |
|            | 0.95155         | 0.964775321 |         |             |             |         |         |         |
| NA         | ENSG00000280123 | -1.6603     | 0.95158 | -1.6603     | 0.95158     | -1.6603 | 0.95158 |         |
|            | -1.6603         | 0.95158     | 0.95158 | 0.964785665 |             |         |         |         |
| HSPA8P18   | ENSG00000232953 | -1.6608     |         | 0.95162     | -1.6608     | 0.95162 | -1.6608 |         |
|            | 0.95162         | -1.6608     | 0.95162 | 0.95162     | 0.964806146 |         |         |         |
| NA         | ENSG00000257808 | -1.6611     | 0.95165 | -1.6611     | 0.95165     | -1.6611 | 0.95165 |         |
|            | -1.6611         | 0.95165     | 0.95165 | 0.964806553 |             |         |         |         |
| NA         | ENSG00000248200 | -1.6611     | 0.95166 | -1.6611     | 0.95166     | -1.6611 | 0.95166 |         |
|            | -1.6611         | 0.95166     | 0.95166 | 0.964806553 |             |         |         |         |
| TRAJ44     | ENSG00000211845 | -1.662      |         | 0.95175     | -1.662      | 0.95175 | -1.662  |         |
|            | 0.95175         | -1.662      | 0.95175 | 0.95175     | 0.964877723 |         |         |         |
| MTND4P2    | ENSG00000248704 | -1.6623     |         | 0.95178     | -1.6623     | 0.95178 | -1.6623 |         |
|            | 0.95178         | -1.6623     | 0.95178 | 0.95178     | 0.964888063 |         |         |         |
| NA         | ENSG00000255402 | -1.6631     | 0.95186 | -1.6631     | 0.95186     | -1.6631 | 0.95186 |         |
|            | -1.6631         | 0.95186     | 0.95186 | 0.96494909  |             |         |         |         |
| SNORA10    | ENSG00000206811 | -1.6635     |         | 0.9519      | -1.6635     | 0.9519  | -1.6635 |         |
|            | 0.9519          | -1.6635     | 0.9519  | 0.9519      | 0.964969565 |         |         |         |
| RPL23AP67  | ENSG00000240991 | -1.6639     |         | 0.95193     | -1.6639     | 0.95193 | -1.6639 |         |
|            | 0.95193         | -1.6639     | 0.95193 | 0.95193     | 0.964979903 |         |         |         |
| NA         | ENSG00000201563 | -1.6646     | 0.952   | -1.6646     | 0.952       | -1.6646 | 0.952   | -1.6646 |
|            | 0.952           | 0.965030787 |         |             |             |         |         | 0.952   |
| NA         | ENSG00000257040 | -1.6652     | 0.95206 | -1.6652     | 0.95206     | -2.5698 | 0.99491 |         |
|            | -1.6652         | 0.95206     | 0.95206 | 0.965071533 |             |         |         |         |
| OR6T1      | ENSG00000181499 | -1.6671     | 0.95226 | -1.6671     | 0.95226     | -1.6671 | 0.95226 |         |
|            | -1.6671         | 0.95226     | 0.95226 | 0.965234109 |             |         |         |         |
| CDC42P5    | ENSG00000253439 | -1.6672     |         | 0.95226     | -1.6672     | 0.95226 | -1.6672 |         |
|            | 0.95226         | -1.6672     | 0.95226 | 0.95226     | 0.965234109 |         |         |         |
| RPL12P15   | ENSG00000230993 | -1.6682     |         | 0.95236     | -1.6682     | 0.95236 | -1.6682 |         |
|            | 0.95236         | -1.6682     | 0.95236 | 0.95236     | 0.965315392 |         |         |         |
| NA         | ENSG00000253385 | -1.6687     | 0.95241 | -1.6687     | 0.95241     | -1.6687 | 0.95241 |         |
|            | -1.6687         | 0.95241     | 0.95241 | 0.965345993 |             |         |         |         |
| RAD51AP1P1 | ENSG00000214283 | -1.6709     |         | 0.95263     | -1.6709     | 0.95263 | -1.6709 |         |
|            | 0.95263         | -1.6709     | 0.95263 | 0.95263     | 0.965548898 |         |         |         |
| NA         | ENSG00000270487 | -1.6718     | 0.95272 | -1.6718     | 0.95272     | -1.6718 | 0.95272 |         |
|            | -1.6718         | 0.95272     | 0.95272 | 0.96559019  |             |         |         |         |
| MIR4466    | ENSG00000271899 | -1.6718     |         | 0.95272     | -1.6718     | 0.95272 | -1.6718 |         |

|           |                 |         |           |             |             |         |         |         |
|-----------|-----------------|---------|-----------|-------------|-------------|---------|---------|---------|
|           | 0.95272         | -1.6718 | 0.95272   | 0.95272     | 0.96559019  |         |         |         |
| MRPL27    | ENSG00000108826 | -1.6721 | 0.95275   | 0.95275     | -1.6721     | 0.95275 | -1.6721 |         |
|           | 0.95275         | -1.6721 | 0.95275   | 0.95275     | 0.96559019  |         |         |         |
| MIR378E   | ENSG00000263831 | -1.6721 | 0.95275   | 0.95275     | -1.6721     | 0.95275 | -1.6721 |         |
|           | 0.95275         | -1.6721 | 0.95275   | 0.95275     | 0.96559019  |         |         |         |
| NA        | ENSG00000273314 | -1.6724 | 0.95278   | 0.95278     | -1.6724     | 0.95278 | -1.6724 | 0.95278 |
|           | -1.6724         | 0.95278 | 0.95278   | 0.965600512 |             |         |         |         |
| OR4R3P    | ENSG00000254624 | -2.3243 | 0.98994   | 0.98994     | -2.3243     | 0.98994 | -2.3243 |         |
|           | 0.98994         | -1.6736 | 0.95289   | 0.95289     | 0.965691908 |         |         |         |
| NA        | ENSG00000250074 | -1.792  | 0.96344   | 0.96344     | -1.792      | 0.96344 | -1.792  | 0.96344 |
|           | -1.6745         | 0.95298 | 0.95298   | 0.965743501 |             |         |         |         |
| ANAPC10P1 | ENSG00000213735 | -2.2034 | 0.98622   | 0.98622     | -2.2034     | 0.98622 | -1.6746 | 0.953   |
|           | -2.2034         | 0.98622 | 0.953     | 0.965743501 |             |         |         |         |
| NA        | ENSG00000202318 | -1.675  | 0.95304   | 0.95304     | -1.675      | 0.95304 | -1.675  | 0.95304 |
|           | -1.675          | 0.95304 | 0.95304   | 0.965743501 |             |         |         |         |
| IMPDH1P10 | ENSG00000232133 | -1.675  | 0.95304   | 0.95304     | -1.675      | 0.95304 | -1.675  |         |
|           | 0.95304         | -1.675  | 0.95304   | 0.95304     | 0.965743501 |         |         |         |
| NA        | ENSG00000253648 | -1.675  | 0.95304   | 0.95304     | -1.675      | 0.95304 | -1.675  | 0.95304 |
|           | -1.675          | 0.95304 | 0.95304   | 0.965743501 |             |         |         |         |
| LINC00587 | ENSG00000204250 | -1.6766 | 0.95319   | 0.95319     | -1.6766     | 0.95319 | -1.6766 |         |
|           | 0.95319         | -1.6766 | 0.95319   | 0.95319     | 0.965855331 |         |         |         |
| NA        | ENSG00000278487 | -1.6766 | 0.95319   | 0.95319     | -1.6766     | 0.95319 | -1.6766 | 0.95319 |
|           | -1.6766         | 0.95319 | 0.95319   | 0.965855331 |             |         |         |         |
| RNA5SP390 | ENSG00000222123 | -1.6769 | 0.95322   | 0.95322     | -1.6769     | 0.95322 | -1.6769 |         |
|           | 0.95322         | -1.6769 | 0.95322   | 0.95322     | 0.965865645 |         |         |         |
| RNU6-953P | ENSG00000238941 | -1.6773 | 0.95326   | 0.95326     | -1.6773     | 0.95326 | -1.6773 |         |
|           | 0.95326         | -1.6773 | 0.95326   | 0.95326     | 0.965886092 |         |         |         |
| NA        | ENSG00000261029 | -1.6781 | 0.95333   | 0.95333     | -1.6781     | 0.95333 | -1.6781 | 0.95333 |
|           | -1.6781         | 0.95333 | 0.95333   | 0.965936934 |             |         |         |         |
| NA        | ENSG00000254487 | -1.806  | 0.96454   | 0.96454     | -2.0103     | 0.9778  | -1.7857 | 0.96293 |
|           | -1.6789         | 0.95341 | 0.95341   | 0.965997906 |             |         |         |         |
| ARL2BPP3  | ENSG00000215486 | -1.8014 | 0.96418   | 0.96418     | -1.679      | 0.95343 | -1.8014 |         |
|           | 0.96418         | -1.8014 | 0.96418   | 0.95343     | 0.965998085 |         |         |         |
| H2AX      | ENSG00000188486 | -1.6799 | 0.95351   | 0.95351     | -1.6799     | 0.95351 | -1.6799 | 0.95351 |
|           | -1.6799         | 0.95351 | 0.95351   | 0.9660491   |             |         |         |         |
| AGGF1P4   | ENSG00000261689 | -1.68   | 0.95352   | 0.95352     | -1.68       | 0.95352 | -1.68   | 0.95352 |
|           | 0.95352         | 0.95352 | 0.9660491 |             |             |         |         |         |
| NA        | ENSG00000235011 | -1.6811 | 0.95363   | 0.95363     | -1.6811     | 0.95363 | -1.6811 | 0.95363 |
|           | -1.6811         | 0.95363 | 0.95363   | 0.966121077 |             |         |         |         |
| NA        | ENSG00000263990 | -1.6814 | 0.95366   | 0.95366     | -1.6814     | 0.95366 | -1.6814 | 0.95366 |
|           | -1.6814         | 0.95366 | 0.95366   | 0.966121077 |             |         |         |         |
| NA        | ENSG00000249899 | -1.8098 | 0.96483   | 0.96483     | -1.8098     | 0.96483 | -1.8098 | 0.96483 |
|           | -1.6816         | 0.95368 | 0.95368   | 0.966121077 |             |         |         |         |
| NA        | ENSG00000255404 | -1.6816 | 0.95368   | 0.95368     | -1.6816     | 0.95368 | -1.6816 | 0.95368 |
|           | -1.6816         | 0.95368 | 0.95368   | 0.966121077 |             |         |         |         |
| NA        | ENSG00000258633 | -1.6818 | 0.9537    | 0.9537      | -1.6818     | 0.9537  | -1.6818 | 0.9537  |
|           | -1.6818         | 0.9537  | 0.9537    | 0.966121077 |             |         |         |         |
| FTH1P3    | ENSG00000213453 | -1.682  | 0.95371   | 0.95371     | -1.682      | 0.95371 | -1.682  |         |
|           | 0.95371         | -1.682  | 0.95371   | 0.95371     | 0.966121077 |         |         |         |
| MTND3P2   | ENSG00000230052 | -1.6825 | 0.95377   | 0.95377     | -1.6825     | 0.95377 | -1.6825 |         |
|           | 0.95377         | -1.6825 | 0.95377   | 0.95377     | 0.966161773 |         |         |         |
| NA        | ENSG00000279406 | -1.6831 | 0.95382   | 0.95382     | -1.6831     | 0.95382 | -1.6831 | 0.95382 |
|           | -1.6831         | 0.95382 | 0.95382   | 0.966192338 |             |         |         |         |
| RNU2-44P  | ENSG00000252604 | -2.5266 | 0.99424   | 0.99424     | -1.933      | 0.97338 | -1.6839 |         |
|           | 0.9539          | -1.6839 | 0.9539    | 0.9539      | 0.96625329  |         |         |         |
| RN7SL445P | ENSG00000240577 | -1.6841 | 0.95392   | 0.95392     | -1.6841     | 0.95392 | -1.6841 |         |
|           | 0.95392         | -1.6841 | 0.95392   | 0.95392     | 0.966253463 |         |         |         |
| SCARNA18  | ENSG00000238835 | -1.6854 | 0.95404   | 0.95404     | -1.6854     | 0.95404 | -1.6854 |         |
|           | 0.95404         | -1.6854 | 0.95404   | 0.95404     | 0.966354927 |         |         |         |
| SYCP2L    | ENSG00000153157 | -1.8168 | 0.96537   | 0.96537     | -1.9664     | 0.97537 | -1.6856 |         |
|           | 0.95406         | -1.7013 | 0.95556   | 0.95406     | 0.966355099 |         |         |         |
| MIR3198-1 | ENSG00000264757 | -1.6879 | 0.95428   | 0.95428     | -1.6879     | 0.95428 | -1.6879 |         |



|            |                 |         |         |             |             |         |         |         |
|------------|-----------------|---------|---------|-------------|-------------|---------|---------|---------|
|            | 0.95428         | -1.6879 | 0.95428 | 0.95428     | 0.966527961 |         |         |         |
| LINC02418  | ENSG00000214039 | -1.7285 | 0.95805 | 0.95805     | -1.7847     | 0.96284 | -1.688  |         |
|            | 0.95429         | -1.7094 | 0.95631 | 0.95429     | 0.966527961 |         |         |         |
| IGLVIV-59  | ENSG00000254308 | -1.688  | 0.9543  | 0.9543      | -1.688      | 0.9543  | -1.688  |         |
|            | 0.9543          | -1.688  | 0.9543  | 0.9543      | 0.966527961 |         |         |         |
| NA         | ENSG00000212342 | -1.6882 | 0.95431 | 0.95431     | -1.6882     | 0.95431 | -1.6882 | 0.95431 |
|            | -1.6882         | 0.95431 | 0.95431 | 0.966527961 |             |         |         |         |
| ZNHIT2     | ENSG00000174276 | -1.6887 | 0.95436 | 0.95436     | -1.6887     | 0.95436 | -1.6887 |         |
|            | 0.95436         | -1.6887 | 0.95436 | 0.95436     | 0.966538424 |         |         |         |
| NA         | ENSG00000279063 | -1.6887 | 0.95436 | 0.95436     | -1.6887     | 0.95436 | -1.6887 | 0.95436 |
|            | -1.6887         | 0.95436 | 0.95436 | 0.966538424 |             |         |         |         |
| LINC02628  | ENSG00000226412 | -1.6893 | 0.95442 | 0.95442     | -1.6893     | 0.95442 | -1.6893 |         |
|            | 0.95442         | -1.6893 | 0.95442 | 0.95442     | 0.966579101 |         |         |         |
| NA         | ENSG00000235672 | -1.6898 | 0.95446 | 0.95446     | -1.6898     | 0.95446 | -1.6898 | 0.95446 |
|            | -1.6898         | 0.95446 | 0.95446 | 0.966599522 |             |         |         |         |
| NA         | ENSG00000273038 | -1.6899 | 0.95448 | 0.95448     | -1.6899     | 0.95448 | -1.6899 | 0.95448 |
|            | -1.6899         | 0.95448 | 0.95448 | 0.966599688 |             |         |         |         |
| HMGB1P24   | ENSG00000275029 | -1.6905 | 0.95453 | 0.95453     | -1.6905     | 0.95453 | -1.6905 |         |
|            | 0.95453         | -1.6905 | 0.95453 | 0.95453     | 0.966630235 |         |         |         |
| RNU6-352P  | ENSG00000252717 | -1.691  | 0.95458 | 0.95458     | -1.691      | 0.95458 | -1.691  |         |
|            | 0.95458         | -1.691  | 0.95458 | 0.95458     | 0.96666078  |         |         |         |
| EEF2       | ENSG00000167658 | -1.6917 | 0.95464 | 0.95464     | -1.6917     | 0.95464 | -1.6917 | 0.95464 |
|            | -1.6917         | 0.95464 | 0.95464 | 0.96670145  |             |         |         |         |
| H2AC15     | ENSG00000275221 | -1.6919 | 0.95467 | 0.95467     | -1.6919     | 0.95467 | -1.6919 |         |
|            | 0.95467         | -1.6919 | 0.95467 | 0.95467     | 0.966711741 |         |         |         |
| BRIX1P1    | ENSG00000254025 | -1.6922 | 0.95469 | 0.95469     | -1.6922     | 0.95469 | -1.6922 |         |
|            | 0.95469         | -1.6922 | 0.95469 | 0.95469     | 0.966711905 |         |         |         |
| NA         | ENSG00000233223 | -1.6929 | 0.95476 | 0.95476     | -1.6929     | 0.95476 | -1.6929 | 0.95476 |
|            | -1.6929         | 0.95476 | 0.95476 | 0.966762697 |             |         |         |         |
| NA         | ENSG00000254714 | -1.6932 | 0.95479 | 0.95479     | -1.9546     | 0.97469 | -1.8512 | 0.96793 |
|            | -1.819          | 0.96554 | 0.95479 | 0.966772985 |             |         |         |         |
| SNRPGP13   | ENSG00000231480 | -1.6935 | 0.95482 | 0.95482     | -1.6935     | 0.95482 | -1.6935 |         |
|            | 0.95482         | -1.6935 | 0.95482 | 0.95482     | 0.966783273 |         |         |         |
| MCOLN3     | ENSG00000055732 | -1.6949 | 0.95495 | 0.95495     | -1.6949     | 0.95495 | -1.6949 |         |
|            | 0.95495         | -1.6949 | 0.95495 | 0.95495     | 0.966894812 |         |         |         |
| SELENOKP3  | ENSG00000225549 | -2.7727 | 0.99722 | 0.99722     | -1.6951     | 0.95498 | -3.0756 |         |
|            | 0.99895         | -3.2745 | 0.99947 | 0.95498     | 0.966905097 |         |         |         |
| NA         | ENSG00000236748 | -1.696  | 0.95506 | 0.95506     | -1.696      | 0.95506 | -1.696  | 0.95506 |
|            | -1.696          | 0.95506 | 0.95506 | 0.966966005 |             |         |         |         |
| KRTAP12-6P | ENSG00000276647 | -1.6962 | 0.95508 | 0.95508     | -1.6962     | 0.95508 | -1.6962 |         |
|            | 0.95508         | -1.6962 | 0.95508 | 0.95508     | 0.966966163 |         |         |         |
| TMEM232    | ENSG00000186952 | -2.2862 | 0.98888 | 0.98888     | -2.0927     | 0.98181 | -1.6968 |         |
|            | 0.95513         | -2.1463 | 0.98408 | 0.95513     | 0.966996695 |         |         |         |
| NA         | ENSG00000240399 | -1.6973 | 0.95518 | 0.95518     | -1.6973     | 0.95518 | -1.6973 | 0.95518 |
|            | -1.6973         | 0.95518 | 0.95518 | 0.967007134 |             |         |         |         |
| NA         | ENSG00000254033 | -1.6973 | 0.95518 | 0.95518     | -1.6973     | 0.95518 | -1.6973 | 0.95518 |
|            | -1.6973         | 0.95518 | 0.95518 | 0.967007134 |             |         |         |         |
| RORA-AS2   | ENSG00000259482 | -1.6979 | 0.95524 | 0.95524     | -1.6979     | 0.95524 | -1.6979 |         |
|            | 0.95524         | -1.6979 | 0.95524 | 0.95524     | 0.967047786 |         |         |         |
| NA         | ENSG00000259204 | -1.6983 | 0.95528 | 0.95528     | -1.6983     | 0.95528 | -1.6983 | 0.95528 |
|            | -1.6983         | 0.95528 | 0.95528 | 0.96706819  |             |         |         |         |
| NA         | ENSG00000230832 | -1.6988 | 0.95533 | 0.95533     | -1.6988     | 0.95533 | -1.6988 | 0.95533 |
|            | -1.6988         | 0.95533 | 0.95533 | 0.967078939 |             |         |         |         |
| MZT1       | ENSG00000204899 | -1.699  | 0.95534 | 0.95534     | -1.699      | 0.95534 | -1.699  | 0.95534 |
|            | -1.699          | 0.95534 | 0.95534 | 0.967078939 |             |         |         |         |
| UBBP2      | ENSG00000228247 | -1.6993 | 0.95537 | 0.95537     | -1.6993     | 0.95537 | -1.6993 | 0.95537 |
|            | -1.6993         | 0.95537 | 0.95537 | 0.967078939 |             |         |         |         |
| NA         | ENSG00000271396 | -1.6994 | 0.95537 | 0.95537     | -1.6994     | 0.95537 | -1.6994 | 0.95537 |
|            | -1.6994         | 0.95537 | 0.95537 | 0.967078939 |             |         |         |         |
| NA         | ENSG00000256299 | -1.6998 | 0.95542 | 0.95542     | -1.6998     | 0.95542 | -1.6998 | 0.95542 |
|            | -1.6998         | 0.95542 | 0.95542 | 0.967109462 |             |         |         |         |
| NA         | ENSG00000237389 | -1.7002 | 0.95545 | 0.95545     | -1.7002     | 0.95545 | -1.7002 | 0.95545 |

|            |                 |             |         |             |             |         |         |       |
|------------|-----------------|-------------|---------|-------------|-------------|---------|---------|-------|
|            | -1.7002         | 0.95545     | 0.95545 | 0.967109773 |             |         |         |       |
| BPIFA1     | ENSG00000198183 | -1.8597     | 0.96854 | -1.8597     | 0.96854     | -1.7003 |         |       |
|            | 0.95546         | -1.8597     | 0.96854 | 0.95546     | 0.967109773 |         |         |       |
| KCTD9P5    | ENSG00000248216 | -1.7017     | 0.95559 | -1.7017     | 0.95559     | -1.7017 |         |       |
|            | 0.95559         | -1.7017     | 0.95559 | 0.95559     | 0.967201485 |         |         |       |
| NARF-AS1   | ENSG00000266445 | -1.7018     | 0.95561 | -1.7018     | 0.95561     | -1.7018 |         |       |
|            | 0.95561         | -1.7018     | 0.95561 | 0.95561     | 0.967201485 |         |         |       |
| NA         | ENSG00000249883 | -1.7021     | 0.95563 | -1.7021     | 0.95563     | -1.7021 | 0.95563 |       |
|            | -1.7021         | 0.95563     | 0.95563 | 0.967201485 |             |         |         |       |
| NA         | ENSG00000260037 | -1.7021     | 0.95563 | -1.7021     | 0.95563     | -1.7021 | 0.95563 |       |
|            | -1.7021         | 0.95563     | 0.95563 | 0.967201485 |             |         |         |       |
| TRAJ41     | ENSG00000211848 | -1.7026     | 0.95568 | -1.7026     | 0.95568     | -1.7026 |         |       |
|            | 0.95568         | -1.7026     | 0.95568 | 0.95568     | 0.967232001 |         |         |       |
| SERINC4    | ENSG00000184716 | -1.7033     | 0.95574 | -1.7033     | 0.95574     | -1.7033 |         |       |
|            | 0.95574         | -1.7033     | 0.95574 | 0.95574     | 0.967272637 |         |         |       |
| SEPTIN14P1 | ENSG00000231523 | -1.9136     | 0.97216 | -1.7037     | 0.95578     | -2.0491 |         |       |
|            | 0.97977         | -1.7542     | 0.9603  | 0.95578     | 0.96729303  |         |         |       |
| NA         | ENSG00000232536 | -1.7042     | 0.95583 | -1.7042     | 0.95583     | -1.7042 | 0.95583 |       |
|            | -1.7042         | 0.95583     | 0.95583 | 0.967323543 |             |         |         |       |
| NA         | ENSG00000240898 | -1.706      | 0.95599 | -1.706      | 0.95599     | -1.706  | 0.95599 |       |
|            | -1.706          | 0.95599     | 0.95599 | 0.967465374 |             |         |         |       |
| NA         | ENSG00000243818 | -1.7068     | 0.95607 | -1.7305     | 0.95823     | -1.7068 | 0.95607 |       |
|            | -1.7068         | 0.95607     | 0.95607 | 0.967526241 |             |         |         |       |
| SNHG30     | ENSG00000267321 | -1.7077     | 0.95616 | -1.7077     | 0.95616     | -1.7077 |         |       |
|            | 0.95616         | -1.7077     | 0.95616 | 0.95616     | 0.967597226 |         |         |       |
| C1orf158   | ENSG00000157330 | -2.4853     | 0.99353 | -2.1236     | 0.98315     | -1.8982 |         |       |
|            | 0.97117         | -1.7086     | 0.95624 | 0.95624     | 0.967658087 |         |         |       |
| ARL5AP3    | ENSG00000228431 | -1.7092     | 0.95629 | -1.7092     | 0.95629     | -1.7092 |         |       |
|            | 0.95629         | -1.7092     | 0.95629 | 0.95629     | 0.967688589 |         |         |       |
| RN7SL654P  | ENSG00000244568 | -1.7098     | 0.95635 | -1.7098     | 0.95635     | -1.7098 |         |       |
|            | 0.95635         | -1.7098     | 0.95635 | 0.95635     | 0.967729209 |         |         |       |
| MIR3661    | ENSG00000266751 | -1.87       | 0.96926 | -1.7104     | 0.95641     | -1.9335 | 0.97341 |       |
|            | -1.9335         | 0.97341     | 0.95641 | 0.967769826 |             |         |         |       |
| NA         | ENSG00000229067 | -1.7111     | 0.95647 | -1.7111     | 0.95647     | -1.7111 | 0.95647 |       |
|            | -1.7111         | 0.95647     | 0.95647 | 0.967800465 |             |         |         |       |
| XAF1       | ENSG00000132530 | -1.7112     | 0.95648 | -1.7112     | 0.95648     | -1.7112 | 0.95648 |       |
|            | -1.7112         | 0.95648     | 0.95648 | 0.967800465 |             |         |         |       |
| RNA5SP21   | ENSG00000222849 | -1.7114     | 0.9565  | -1.7114     | 0.9565      | -1.7114 |         |       |
|            | 0.9565          | -1.7114     | 0.9565  | 0.9565      | 0.967800606 |         |         |       |
| NA         | ENSG00000215023 | -1.7122     | 0.95657 | -1.7122     | 0.95657     | -1.7122 | 0.95657 |       |
|            | -1.7122         | 0.95657     | 0.95657 | 0.967851337 |             |         |         |       |
| MIGA1      | ENSG00000180488 | -1.7131     | 0.95665 | -2.186      | 0.98559     | -2.186  | 0.98559 |       |
|            | -2.186          | 0.98559     | 0.95665 | 0.967882249 |             |         |         |       |
| RNU6-85P   | ENSG00000271932 | -1.7132     | 0.95666 | -1.7132     | 0.95666     | -1.7132 |         |       |
|            | 0.95666         | -1.7132     | 0.95666 | 0.95666     | 0.967882249 |         |         |       |
| RN7SL141P  | ENSG00000243398 | -1.7133     | 0.95667 | -1.7133     | 0.95667     | -1.7133 |         |       |
|            | 0.95667         | -1.7133     | 0.95667 | 0.95667     | 0.967882249 |         |         |       |
| NA         | ENSG00000227540 | -1.7134     | 0.95668 | -1.7134     | 0.95668     | -1.7134 | 0.95668 |       |
|            | -1.7134         | 0.95668     | 0.95668 | 0.967882249 |             |         |         |       |
| RNU6-710P  | ENSG00000222356 | -1.7149     | 0.95682 | -1.7149     | 0.95682     | -1.7149 |         |       |
|            | 0.95682         | -1.7149     | 0.95682 | 0.95682     | 0.968003791 |         |         |       |
| NA         | ENSG00000282816 | -1.7169     | 0.957   | -1.7169     | 0.957       | -1.7169 | 0.957   | 0.957 |
|            | 0.957           | 0.968156079 |         |             |             |         |         |       |
| NA         | ENSG00000212134 | -1.7172     | 0.95703 | -1.7172     | 0.95703     | -1.7172 | 0.95703 |       |
|            | -1.7172         | 0.95703     | 0.95703 | 0.968156079 |             |         |         |       |
| PRNP       | ENSG00000171867 | -1.7174     | 0.95705 | -2.0127     | 0.97793     | -1.7174 | 0.95705 |       |
|            | -1.7174         | 0.95705     | 0.95705 | 0.968156079 |             |         |         |       |
| RN7SL508P  | ENSG00000244112 | -1.7174     | 0.95705 | -1.7174     | 0.95705     | -1.7174 |         |       |
|            | 0.95705         | -1.7174     | 0.95705 | 0.95705     | 0.968156079 |         |         |       |
| EPX        | ENSG00000121053 | -1.7183     | 0.95713 | -1.7183     | 0.95713     | -1.7183 | 0.95713 |       |
|            | -1.7183         | 0.95713     | 0.95713 | 0.968216908 |             |         |         |       |
| NA         | ENSG00000224785 | -1.8194     | 0.96558 | -1.719      | 0.95719     | -2.0915 | 0.98176 |       |

|             |                 |         |             |             |             |         |         |
|-------------|-----------------|---------|-------------|-------------|-------------|---------|---------|
|             | -1.8308         | 0.96643 | 0.95719     | 0.968257503 |             |         |         |
| NA          | ENSG00000279562 | -1.7192 | 0.95721     | -1.7192     | 0.95721     | -1.7192 | 0.95721 |
|             | -1.7192         | 0.95721 | 0.95721     | 0.968257635 |             |         |         |
| NA          | ENSG00000272721 | -1.7196 | 0.95724     | -1.7196     | 0.95724     | -1.7196 | 0.95724 |
|             | -1.7196         | 0.95724 | 0.95724     | 0.968257898 |             |         |         |
| NA          | ENSG00000260867 | -1.7196 | 0.95725     | -1.7196     | 0.95725     | -1.7196 | 0.95725 |
|             | -1.7196         | 0.95725 | 0.95725     | 0.968257898 |             |         |         |
| ACTG1P14    | ENSG00000230581 | -1.7202 | 0.9573      | -1.7202     | 0.9573      | -1.7202 |         |
|             | 0.9573          | -1.7202 | 0.9573      | 0.9573      | 0.968288374 |         |         |
| RNF7P1      | ENSG00000239831 | -1.7204 | 0.95732     | -1.7204     | 0.95732     | -1.7204 |         |
|             | 0.95732         | -1.7204 | 0.95732     | 0.95732     | 0.968288505 |         |         |
| HLA-K       | ENSG00000230795 | -1.7207 | 0.95734     | -1.7207     | 0.95734     | -1.7207 | 0.95734 |
|             | -1.7207         | 0.95734 | 0.95734     | 0.968288636 |             |         |         |
| PRSS33      | ENSG00000103355 | -2.076  | 0.98105     | -2.076      | 0.98105     | -2.076  |         |
|             | 0.98105         | -1.7222 | 0.95749     | 0.95749     | 0.968420251 |         |         |
| WDR83OS     | ENSG00000105583 | -1.7233 | 0.95759     | -1.7233     | 0.95759     | -1.7233 |         |
|             | 0.95759         | -1.7233 | 0.95759     | 0.95759     | 0.968501291 |         |         |
| NA          | ENSG00000229440 | -1.7245 | 0.95769     | -1.7245     | 0.95769     | -1.7245 | 0.95769 |
|             | -1.7245         | 0.95769 | 0.95769     | 0.968572339 |             |         |         |
| OR2H2       | ENSG00000204657 | -1.7246 | 0.9577      | -1.7246     | 0.9577      | -1.7246 | 0.9577  |
|             | -1.7246         | 0.9577  | 0.9577      | 0.968572339 |             |         |         |
| TRMT1       | ENSG00000104907 | -1.7253 | 0.95776     | -1.7253     | 0.95776     | -1.7253 | 0.95776 |
|             | -1.7253         | 0.95776 | 0.95776     | 0.968612917 |             |         |         |
| DUSP18      | ENSG00000167065 | -1.7279 | 0.95799     | -1.7279     | 0.95799     | -1.7279 |         |
|             | 0.95799         | -1.7279 | 0.95799     | 0.95799     | 0.968825417 |         |         |
| NA          | ENSG00000271357 | -1.7293 | 0.95812     | -1.7293     | 0.95812     | -1.7293 | 0.95812 |
|             | -1.7293         | 0.95812 | 0.95812     | 0.96891667  |             |         |         |
| NA          | ENSG00000279716 | -1.7293 | 0.95812     | -1.7293     | 0.95812     | -1.7293 | 0.95812 |
|             | -1.7293         | 0.95812 | 0.95812     | 0.96891667  |             |         |         |
| NA          | ENSG00000276475 | -2.1838 | 0.98551     | -2.1838     | 0.98551     | -2.1838 | 0.98551 |
|             | -1.73095818     | 0.95818 | 0.968957238 |             |             |         |         |
| MTCO3P8     | ENSG00000233385 | -1.7314 | 0.95831     | -1.7314     | 0.95831     | -1.7314 |         |
|             | 0.95831         | -1.7314 | 0.95831     | 0.95831     | 0.96906859  |         |         |
| SNORD115-19 | ENSG00000199968 | -1.7317 | 0.95834     | -1.7317     | 0.95834     | -1.7317 |         |
|             | 0.95834         | -1.7317 | 0.95834     | 0.95834     | 0.969078817 |         |         |
| NA          | ENSG00000278949 | -1.7337 | 0.95851     | -1.7337     | 0.95851     | -1.7337 | 0.95851 |
|             | -1.7337         | 0.95851 | 0.95851     | 0.969230609 |             |         |         |
| RPL21P23    | ENSG00000236776 | -1.734  | 0.95854     | -1.734      | 0.95854     | -1.734  |         |
|             | 0.95854         | -1.734  | 0.95854     | 0.95854     | 0.969240833 |         |         |
| MIR4449     | ENSG00000264585 | -1.7343 | 0.95857     | -1.7343     | 0.95857     | -1.7343 |         |
|             | 0.95857         | -1.7343 | 0.95857     | 0.95857     | 0.969251055 |         |         |
| MTATP6P18   | ENSG00000227035 | -1.7349 | 0.95862     | -1.7349     | 0.95862     | -1.7349 |         |
|             | 0.95862         | -1.7349 | 0.95862     | 0.95862     | 0.9692815   |         |         |
| KRR1P1      | ENSG00000237672 | -1.7372 | 0.95882     | -1.7372     | 0.95882     | -1.7372 |         |
|             | 0.95882         | -1.7372 | 0.95882     | 0.95882     | 0.969453711 |         |         |
| NA          | ENSG00000271643 | -1.7374 | 0.95884     | -1.7374     | 0.95884     | -1.7374 | 0.95884 |
|             | -1.7374         | 0.95884 | 0.95884     | 0.969453711 |             |         |         |
| RNA5SP20    | ENSG00000251785 | -1.7374 | 0.95885     | -1.7374     | 0.95885     | -1.7374 |         |
|             | 0.95885         | -1.7374 | 0.95885     | 0.95885     | 0.969453711 |         |         |
| NA          | ENSG00000225678 | -1.7383 | 0.95892     | -1.7383     | 0.95892     | -1.7383 | 0.95892 |
|             | -1.7383         | 0.95892 | 0.95892     | 0.969504369 |             |         |         |
| NA          | ENSG00000274124 | -1.7394 | 0.95901     | -1.7394     | 0.95901     | -1.7394 | 0.95901 |
|             | -1.7394         | 0.95901 | 0.95901     | 0.969565658 |             |         |         |
| DEFB121     | ENSG00000204548 | -1.7399 | 0.95906     | -1.7811     | 0.96256     | -1.7811 |         |
|             | 0.96256         | -1.7811 | 0.96256     | 0.95906     | 0.969565658 |         |         |
| PIGB        | ENSG00000069943 | -2.1349 | 0.98362     | -1.7401     | 0.95908     | -2.1349 | 0.98362 |
|             | -2.1349         | 0.98362 | 0.95908     | 0.969565658 |             |         |         |
| ELOCP3      | ENSG00000229919 | -1.7401 | 0.95908     | -1.7401     | 0.95908     | -1.9541 |         |
|             | 0.97465         | -1.7401 | 0.95908     | 0.95908     | 0.969565658 |         |         |
| NA          | ENSG00000253961 | -1.7402 | 0.95909     | -1.7402     | 0.95909     | -1.7402 | 0.95909 |
|             | -1.7402         | 0.95909 | 0.95909     | 0.969565658 |             |         |         |
| TAF9BP1     | ENSG00000213871 | -1.7403 | 0.9591      | -1.7403     | 0.9591      | -1.7403 |         |

|             |                 |         |         |             |             |         |         |
|-------------|-----------------|---------|---------|-------------|-------------|---------|---------|
|             | 0.9591          | -1.7403 | 0.9591  | 0.9591      | 0.969565658 |         |         |
| NA          | ENSG00000207416 | -1.7406 | 0.95913 | -1.7406     | 0.95913     | -1.7406 | 0.95913 |
|             | -1.7406         | 0.95913 | 0.95913 | 0.969575872 |             |         |         |
| PCAT18      | ENSG00000265369 | -1.7411 | 0.95916 | -1.7411     | 0.95916     | -1.7411 |         |
|             | 0.95916         | -1.7411 | 0.95916 | 0.95916     | 0.969586085 |         |         |
| NA          | ENSG00000231296 | -1.7412 | 0.95918 | -1.7412     | 0.95918     | -1.7412 | 0.95918 |
|             | -1.7412         | 0.95918 | 0.95918 | 0.969586189 |             |         |         |
| NA          | ENSG00000202461 | -1.7421 | 0.95925 | -1.7421     | 0.95925     | -1.7421 | 0.95925 |
|             | -1.7421         | 0.95925 | 0.95925 | 0.969636834 |             |         |         |
| NA          | ENSG00000258798 | -1.7432 | 0.95935 | -1.7432     | 0.95935     | -1.7432 | 0.95935 |
|             | -1.7432         | 0.95935 | 0.95935 | 0.969697687 |             |         |         |
| NA          | ENSG00000259001 | -1.7432 | 0.95935 | -1.7432     | 0.95935     | -1.7432 | 0.95935 |
|             | -1.7432         | 0.95935 | 0.95935 | 0.969697687 |             |         |         |
| RNU6-307P   | ENSG00000252552 | -1.7438 | 0.95941 | -1.7438     | 0.95941     | -1.7438 |         |
|             | 0.95941         | -1.7438 | 0.95941 | 0.95941     | 0.969738219 |         |         |
| H2AC16      | ENSG00000276903 | -1.7461 | 0.9596  | -1.7461     | 0.9596      | -1.7461 |         |
|             | 0.9596          | -1.7461 | 0.9596  | 0.9596      | 0.969910147 |         |         |
| RNU6-547P   | ENSG00000252082 | -1.7463 | 0.95962 | -1.7463     | 0.95962     | -1.7463 |         |
|             | 0.95962         | -1.7463 | 0.95962 | 0.95962     | 0.969910244 |         |         |
| PPP1R14A    | ENSG00000167641 | -1.7468 | 0.95967 | -1.7468     | 0.95967     | -1.7468 |         |
|             | 0.95967         | -1.7468 | 0.95967 | 0.95967     | 0.969940662 |         |         |
| NA          | ENSG00000269745 | -1.7472 | 0.9597  | -1.7472     | 0.9597      | -1.7472 | 0.9597  |
|             | -1.7472         | 0.9597  | 0.9597  | 0.969950866 |             |         |         |
| NA          | ENSG00000226699 | -1.7485 | 0.95981 | -1.7485     | 0.95981     | -1.7485 | 0.95981 |
|             | -1.7485         | 0.95981 | 0.95981 | 0.970041922 |             |         |         |
| E2F4        | ENSG00000205250 | -1.7491 | 0.95987 | -1.7491     | 0.95987     | -1.7491 | 0.95987 |
|             | -1.7491         | 0.95987 | 0.95987 | 0.970082442 |             |         |         |
| VN1R35P     | ENSG00000228660 | -1.7495 | 0.9599  | -1.7495     | 0.9599      | -1.7495 |         |
|             | 0.9599          | -1.7495 | 0.9599  | 0.9599      | 0.970092642 |         |         |
| NA          | ENSG00000202254 | -1.7516 | 0.96007 | -1.7516     | 0.96007     | -1.7516 | 0.96007 |
|             | -1.7516         | 0.96007 | 0.96007 | 0.970244325 |             |         |         |
| MIR938      | ENSG00000216035 | -1.7525 | 0.96015 | -1.7525     | 0.96015     | -1.7525 |         |
|             | 0.96015         | -1.7525 | 0.96015 | 0.96015     | 0.970295123 |         |         |
| MIR4441     | ENSG00000264810 | -1.7527 | 0.96018 | -1.7527     | 0.96018     | -1.7527 |         |
|             | 0.96018         | -1.7527 | 0.96018 | 0.96018     | 0.970295123 |         |         |
| NA          | ENSG00000265416 | -1.7527 | 0.96018 | -1.7527     | 0.96018     | -1.7527 | 0.96018 |
|             | -1.7527         | 0.96018 | 0.96018 | 0.970295123 |             |         |         |
| SLC14A2-AS1 | ENSG00000267097 | -1.753  | 0.9602  | -1.8259     | 0.96607     | -1.903  |         |
|             | 0.97148         | -1.903  | 0.97148 | 0.9602      | 0.970295212 |         |         |
| OR12D2      | ENSG00000280236 | -2.1852 | 0.98556 | -2.3046     | 0.98941     | -1.7534 |         |
|             | 0.96024         | -2.6756 | 0.99627 | 0.96024     | 0.970315511 |         |         |
| ZNF551      | ENSG00000204519 | -1.7537 | 0.96026 | -1.7537     | 0.96026     | -1.7537 |         |
|             | 0.96026         | -1.7537 | 0.96026 | 0.96026     | 0.9703156   |         |         |
| CEP97       | ENSG00000182504 | -1.9107 | 0.97198 | -2.342      | 0.99041     | -1.9107 | 0.97198 |
|             | -1.7544         | 0.96032 | 0.96032 | 0.970346179 |             |         |         |
| NA          | ENSG00000227358 | -1.7546 | 0.96034 | -1.7546     | 0.96034     | -1.7546 | 0.96034 |
|             | -1.7546         | 0.96034 | 0.96034 | 0.970346179 |             |         |         |
| KRTAP8-2P   | ENSG00000233036 | -1.7548 | 0.96035 | -1.7548     | 0.96035     | -1.7548 |         |
|             | 0.96035         | -1.7548 | 0.96035 | 0.96035     | 0.970346179 |         |         |
| NA          | ENSG00000202169 | -1.755  | 0.96037 | -1.755      | 0.96037     | -1.755  | 0.96037 |
|             | -1.755          | 0.96037 | 0.96037 | 0.970346267 |             |         |         |
| RPL15P13    | ENSG00000226428 | -1.7565 | 0.9605  | -1.7565     | 0.9605      | -1.7565 |         |
|             | 0.9605          | -1.7565 | 0.9605  | 0.9605      | 0.970457495 |         |         |
| CSNK1A1     | ENSG00000113712 | -1.7587 | 0.96069 | -2.7097     | 0.99663     | -2.1736 |         |
|             | 0.98513         | -2.3148 | 0.98969 | 0.96069     | 0.970619319 |         |         |
| NA          | ENSG00000234584 | -1.7589 | 0.9607  | -2.0574     | 0.98018     | -2.0574 | 0.98018 |
|             | -2.0574         | 0.98018 | 0.9607  | 0.970619319 |             |         |         |
| NA          | ENSG00000204584 | -1.7597 | 0.96077 | -1.7597     | 0.96077     | -1.7597 | 0.96077 |
|             | -1.7597         | 0.96077 | 0.96077 | 0.970669917 |             |         |         |
| NA          | ENSG00000260989 | -1.7612 | 0.9609  | -1.7612     | 0.9609      | -1.7612 | 0.9609  |
|             | -1.7612         | 0.9609  | 0.9609  | 0.970761003 |             |         |         |
| NA          | ENSG00000280193 | -1.7613 | 0.9609  | -1.7613     | 0.9609      | -1.7613 | 0.9609  |

|           |                 |             |             |             |             |         |         |         |
|-----------|-----------------|-------------|-------------|-------------|-------------|---------|---------|---------|
|           | -1.7613         | 0.9609      | 0.9609      | 0.970761003 |             |         |         |         |
| MTND2P6   | ENSG00000237309 | -1.7616     | 0.96093     | -1.7616     | 0.96093     | -1.7616 | 0.96093 | -1.7616 |
|           | 0.96093         | -1.7616     | 0.96093     | 0.96093     | 0.970771185 |         |         |         |
| MXRA7P1   | ENSG00000232320 | -1.7618     | 0.96095     | -1.7618     | 0.96095     | -1.7618 | 0.96095 | -1.7618 |
|           | 0.96095         | -1.7618     | 0.96095     | 0.96095     | 0.970771265 |         |         |         |
| NA        | ENSG00000259864 | -1.7636     | 0.9611      | -1.7636     | 0.9611      | -1.7636 | 0.9611  | -1.7636 |
|           | -1.7636         | 0.9611      | 0.9611      | 0.97086265  |             |         |         |         |
| NA        | ENSG00000261113 | -1.7636     | 0.9611      | -1.7636     | 0.9611      | -1.7636 | 0.9611  | -1.7636 |
|           | -1.7636         | 0.9611      | 0.9611      | 0.97086265  |             |         |         |         |
| LIMS1-AS1 | ENSG00000228763 | -1.7638     | 0.96112     | -1.7638     | 0.96112     | -1.7638 | 0.96112 | -1.7638 |
|           | 0.96112         | -1.7638     | 0.96112     | 0.96112     | 0.97086265  |         |         |         |
| RNU6-88P  | ENSG00000272507 | -1.764      | 0.96113     | -1.764      | 0.96113     | -1.764  | 0.96113 | -1.764  |
|           | 0.96113         | -1.764      | 0.96113     | 0.96113     | 0.97086265  |         |         |         |
| NA        | ENSG00000251320 | -1.7643     | 0.96116     | -1.7643     | 0.96116     | -1.7643 | 0.96116 | -1.7643 |
|           | -1.7643         | 0.96116     | 0.96116     | 0.97086265  |             |         |         |         |
| PRAL      | ENSG00000279296 | -1.7643     | 0.96116     | -1.7643     | 0.96116     | -1.7643 | 0.96116 | -1.7643 |
|           | -1.7643         | 0.96116     | 0.96116     | 0.97086265  |             |         |         |         |
| SNORD37   | ENSG00000206775 | -1.7651     | 0.96122     | -1.7651     | 0.96122     | -1.7651 | 0.96122 | -1.7651 |
|           | 0.96122         | -1.7651     | 0.96122     | 0.96122     | 0.970893106 |         |         |         |
| RFNG      | ENSG00000169733 | -1.7651     | 0.96123     | -1.7651     | 0.96123     | -1.7651 | 0.96123 | -1.7651 |
|           | -1.7651         | 0.96123     | 0.96123     | 0.970893106 |             |         |         |         |
| VN1R34P   | ENSG00000233173 | -1.7657     | 0.96128     | -1.7657     | 0.96128     | -1.7657 | 0.96128 | -1.7657 |
|           | 0.96128         | -1.7657     | 0.96128     | 0.96128     | 0.970923484 |         |         |         |
| NA        | ENSG00000240518 | -1.7659     | 0.9613      | -1.7659     | 0.9613      | -2.1083 | 0.9825  | -1.7659 |
|           | -1.7659         | 0.9613      | 0.9613      | 0.97092356  |             |         |         |         |
| NA        | ENSG00000268047 | -1.7666     | 0.96135     | -1.7666     | 0.96135     | -1.7666 | 0.96135 | -1.7666 |
|           | -1.7666         | 0.96135     | 0.96135     | 0.970953936 |             |         |         |         |
| NA        | ENSG00000253875 | -1.7671     | 0.9614      | -1.7671     | 0.9614      | -1.7671 | 0.9614  | -1.7671 |
|           | -1.7671         | 0.9614      | 0.9614      | 0.970974286 |             |         |         |         |
| NA        | ENSG00000264564 | -1.9921     | 0.97682     | -2.0173     | 0.97817     | -1.8783 | 0.96983 | -1.7673 |
|           | -1.7673         | 0.96141     | 0.96141     | 0.970974286 |             |         |         |         |
| SNORA64   | ENSG00000207405 | -1.7686     | 0.96152     | -1.7686     | 0.96152     | -1.7686 | 0.96152 | -1.7686 |
|           | 0.96152         | -1.7686     | 0.96152     | 0.96152     | 0.971065255 |         |         |         |
| GOLGA3    | ENSG00000090615 | -2.1495     | 0.9842      | -2.1209     | 0.98304     | -1.7694 | 0.96158 | -1.9044 |
|           | 0.96158         | -1.9044     | 0.97157     | 0.96158     | 0.971105724 |         |         |         |
| NA        | ENSG00000225183 | -1.7697     | 0.96161     | -1.7697     | 0.96161     | -1.7697 | 0.96161 | -1.7697 |
|           | -1.7697         | 0.96161     | 0.96161     | 0.971105941 |             |         |         |         |
| PPM1N     | ENSG00000213889 | -1.77       | 0.96164     | -1.77       | 0.96164     | -1.77   | 0.96164 | -1.77   |
|           | 0.96164         | 0.971105941 |             |             |             |         |         |         |
| NA        | ENSG00000251338 | -1.77       | 0.96164     | -1.77       | 0.96164     | -1.77   | 0.96164 | -1.77   |
|           | 0.96164         | 0.971105941 |             |             |             |         |         |         |
| NDUFA9P1  | ENSG00000237406 | -1.7704     | 0.96167     | -1.7704     | 0.96167     | -1.7704 | 0.96167 | -1.7704 |
|           | 0.96167         | -1.7704     | 0.96167     | 0.96167     | 0.971116112 |         |         |         |
| ZSWIM5    | ENSG00000162415 | -1.7737     | 0.96194     | -1.7714     | 0.96175     | -1.8015 | 0.96419 | -2.3597 |
|           | 0.96419         | -2.3597     | 0.99085     | 0.96175     | 0.971156648 |         |         |         |
| RPL5P22   | ENSG00000239198 | -1.8432     | 0.96735     | -1.8797     | 0.96992     | -1.8137 | 0.96513 | -1.7713 |
|           | 0.96513         | -1.7713     | 0.96175     | 0.96175     | 0.971156648 |         |         |         |
| NA        | ENSG00000212618 | -1.7728     | 0.96187     | -1.7728     | 0.96187     | -1.7728 | 0.96187 | -1.7728 |
|           | -1.7728         | 0.96187     | 0.96187     | 0.971247806 |             |         |         |         |
| GNGT2     | ENSG00000167083 | -1.7731     | 0.96189     | -1.7731     | 0.96189     | -1.7731 | 0.96189 | -1.7731 |
|           | -1.7731         | 0.96189     | 0.96189     | 0.971247806 |             |         |         |         |
| NA        | ENSG00000270904 | -1.7733     | 0.96191     | -1.7733     | 0.96191     | -1.7733 | 0.96191 | -1.7733 |
|           | -1.7733         | 0.96191     | 0.96191     | 0.971247806 |             |         |         |         |
| NA        | ENSG00000236930 | -1.7734     | 0.96192     | -1.7734     | 0.96192     | -1.7734 | 0.96192 | -1.7734 |
|           | -1.7734         | 0.96192     | 0.96192     | 0.971247806 |             |         |         |         |
| RNU6-718P | ENSG00000251975 | -1.7744     | 0.962       | -1.7744     | 0.962       | -1.7744 | 0.962   | -1.7744 |
|           | 0.962           | 0.962       | 0.971308456 |             |             |         |         |         |
| NA        | ENSG00000225195 | -1.7755     | 0.96209     | -1.7755     | 0.96209     | -1.7755 | 0.96209 | -1.7755 |
|           | -1.7755         | 0.96209     | 0.96209     | 0.9713792   |             |         |         |         |
| H2AZP4    | ENSG00000255329 | -1.7801     | 0.96247     | -1.7801     | 0.96247     | -1.7801 | 0.96247 | -1.7801 |
|           | 0.96247         | -1.7801     | 0.96247     | 0.96247     | 0.971742735 |         |         |         |
| NA        | ENSG00000248480 | -1.7805     | 0.9625      | -1.7805     | 0.9625      | -1.7805 | 0.9625  | -1.7805 |

|               |                 |         |         |             |             |         |         |         |
|---------------|-----------------|---------|---------|-------------|-------------|---------|---------|---------|
|               | -1.7805         | 0.9625  | 0.9625  | 0.97175289  |             |         |         |         |
| TVP23C-CDRT4  | ENSG00000259024 | -1.7808 | 0.96253 | -1.7808     | 0.96253     | -1.7808 | 0.96253 | -1.7808 |
|               | 0.96253         | -1.7808 | 0.96253 | 0.96253     | 0.971763045 |         |         |         |
| DYNAP         | ENSG00000178690 | -1.9128 | 0.97212 | -2.5827     | 0.9951      | -2.3925 | 0.99163 |         |
|               | -1.7816         | 0.9626  | 0.9626  | 0.971793507 |             |         |         |         |
| NA            | ENSG00000263335 | -1.7818 | 0.96261 | -1.7818     | 0.96261     | -1.7818 | 0.96261 |         |
|               | -1.7818         | 0.96261 | 0.96261 | 0.971793507 |             |         |         |         |
| PSAT1P3       | ENSG00000230787 | -1.7819 | 0.96262 | -1.7819     | 0.96262     | -1.7819 | 0.96262 |         |
|               | 0.96262         | -1.7819 | 0.96262 | 0.96262     | 0.971793507 |         |         |         |
| MIR4718       | ENSG00000264733 | -1.7827 | 0.96268 | -1.7827     | 0.96268     | -1.7827 | 0.96268 |         |
|               | 0.96268         | -1.7827 | 0.96268 | 0.96268     | 0.971833946 |         |         |         |
| SLC10A5       | ENSG00000253598 | -1.7838 | 0.96277 | -1.7838     | 0.96277     | -1.7838 | 0.96277 |         |
|               | 0.96277         | -1.7838 | 0.96277 | 0.96277     | 0.971904667 |         |         |         |
| OR4A18P       | ENSG00000254637 | -1.8377 | 0.96695 | -1.7855     | 0.96291     | -2.4809 |         |         |
|               | 0.99345         | -2.4809 | 0.99345 | 0.96291     | 0.972025859 |         |         |         |
| MIR3924       | ENSG00000264747 | -1.7859 | 0.96294 | -1.7859     | 0.96294     | -1.7859 | 0.96294 |         |
|               | 0.96294         | -1.7859 | 0.96294 | 0.96294     | 0.972036007 |         |         |         |
| RNU6-862P     | ENSG00000199674 | -1.7886 | 0.96316 | -1.7886     | 0.96316     | -1.7886 | 0.96316 |         |
|               | 0.96316         | -1.7886 | 0.96316 | 0.96316     | 0.972227998 |         |         |         |
| CER1          | ENSG00000147869 | -1.7888 | 0.96318 | -1.7888     | 0.96318     | -1.7888 | 0.96318 |         |
|               | -1.7888         | 0.96318 | 0.96318 | 0.972227998 |             |         |         |         |
| SNORA58B      | ENSG00000201129 | -1.7893 | 0.96321 | -1.7893     | 0.96321     | -1.7893 | 0.96321 |         |
|               | 0.96321         | -1.7893 | 0.96321 | 0.96321     | 0.972227998 |         |         |         |
| NA            | ENSG00000248696 | -1.7892 | 0.96321 | -1.7892     | 0.96321     | -1.7892 | 0.96321 |         |
|               | -1.7892         | 0.96321 | 0.96321 | 0.972227998 |             |         |         |         |
| CEP295NL      | ENSG00000178404 | -1.7905 | 0.96332 | -1.7905     | 0.96332     | -1.9842 |         |         |
|               | 0.97638         | -1.7905 | 0.96332 | 0.96332     | 0.972298749 |         |         |         |
| CDC20P1       | ENSG00000231007 | -1.7906 | 0.96332 | -1.7906     | 0.96332     | -1.7965 |         |         |
|               | 0.9638          | -1.7906 | 0.96332 | 0.96332     | 0.972298749 |         |         |         |
| NA            | ENSG00000224415 | -1.7911 | 0.96336 | -1.7911     | 0.96336     | -1.7911 | 0.96336 |         |
|               | -1.7911         | 0.96336 | 0.96336 | 0.972318983 |             |         |         |         |
| RNU6-290P     | ENSG00000202082 | -1.7937 | 0.96357 | -1.7937     | 0.96357     | -1.7937 | 0.96357 |         |
|               | 0.96357         | -1.7937 | 0.96357 | 0.96357     | 0.972500787 |         |         |         |
| NA            | ENSG00000255054 | -1.794  | 0.96359 | -1.794      | 0.96359     | -1.794  | 0.96359 |         |
|               | -1.794          | 0.96359 | 0.96359 | 0.972500787 |             |         |         |         |
| UBA6          | ENSG00000033178 | -2.1332 | 0.98354 | -1.794      | 0.9636      | -2.3736 | 0.99119 |         |
|               | -1.8528         | 0.96804 | 0.9636  | 0.972500787 |             |         |         |         |
| RPS11P5       | ENSG00000232888 | -2.0758 | 0.98104 | -2.06       | 0.9803      | -1.7952 | 0.96369 |         |
|               | -1.7952         | 0.96369 | 0.96369 | 0.972571476 |             |         |         |         |
| MTND5P32      | ENSG00000259379 | -1.7969 | 0.96383 | -1.7969     | 0.96383     | -1.7969 | 0.96383 |         |
|               | 0.96383         | -1.7969 | 0.96383 | 0.96383     | 0.972672477 |         |         |         |
| MTCYBP23      | ENSG00000259671 | -1.7969 | 0.96383 | -1.7969     | 0.96383     | -1.7969 | 0.96383 |         |
|               | 0.96383         | -1.7969 | 0.96383 | 0.96383     | 0.972672477 |         |         |         |
| NA            | ENSG00000255001 | -2.2791 | 0.98867 | -1.7978     | 0.9639      | -2.2791 | 0.98867 |         |
|               | -2.2791         | 0.98867 | 0.9639  | 0.972722975 |             |         |         |         |
| NA            | ENSG00000199071 | -1.7986 | 0.96396 | -1.7986     | 0.96396     | -1.7986 | 0.96396 |         |
|               | -1.7986         | 0.96396 | 0.96396 | 0.972753326 |             |         |         |         |
| NA            | ENSG00000279840 | -1.7988 | 0.96397 | -1.7988     | 0.96397     | -1.7988 | 0.96397 |         |
|               | -1.7988         | 0.96397 | 0.96397 | 0.972753326 |             |         |         |         |
| TTN           | ENSG00000155657 | -1.8514 | 0.96794 | -2.2229     | 0.98689     | -1.9621 | 0.97513 |         |
|               | -1.7991         | 0.964   | 0.964   | 0.972763455 |             |         |         |         |
| NA            | ENSG00000265690 | -1.7994 | 0.96402 | -1.7994     | 0.96402     | -1.7994 | 0.96402 |         |
|               | -1.7994         | 0.96402 | 0.96402 | 0.972763493 |             |         |         |         |
| NA            | ENSG00000264812 | -1.7997 | 0.96404 | -1.7997     | 0.96404     | -1.7997 | 0.96404 |         |
|               | -1.7997         | 0.96404 | 0.96404 | 0.972763531 |             |         |         |         |
| AIM2          | ENSG00000163568 | -2.5568 | 0.99472 | -1.8022     | 0.96424     | -2.5568 | 0.99472 |         |
|               | -2.5568         | 0.99472 | 0.96424 | 0.972945194 |             |         |         |         |
| P2RX5-TAX1BP3 | ENSG00000257950 | -1.8032 | 0.96432 | -1.8032     | 0.96432     | -1.8032 | 0.96432 |         |
|               | 0.96432         | -1.8032 | 0.96432 | 0.96432     | 0.973005769 |         |         |         |
| NA            | ENSG00000236976 | -1.8034 | 0.96434 | -1.8034     | 0.96434     | -1.8034 | 0.96434 |         |
|               | -1.8034         | 0.96434 | 0.96434 | 0.973005802 |             |         |         |         |
| RPL32P34      | ENSG00000239524 | -1.804  | 0.96439 | -1.804      | 0.96439     | -1.804  | 0.96439 |         |

|             |                 |         |             |             |             |         |         |         |
|-------------|-----------------|---------|-------------|-------------|-------------|---------|---------|---------|
|             | 0.96439         | -1.804  | 0.96439     | 0.96439     | 0.973036104 |         |         |         |
| H4C13       | ENSG00000275126 | -1.805  | 0.96446     | -1.805      | 0.96446     | -1.805  | 0.96446 |         |
|             | -1.805          | 0.96446 | 0.96446     | 0.973086583 |             |         |         |         |
| NA          | ENSG00000260955 | -1.8055 | 0.9645      | -1.8055     | 0.9645      | -1.8055 | 0.9645  |         |
|             | -1.8055         | 0.9645  | 0.9645      | 0.973106793 |             |         |         |         |
| NA          | ENSG00000232886 | -1.8058 | 0.96452     | -2.4108     | 0.99204     | -1.8058 | 0.96452 |         |
|             | -1.8058         | 0.96452 | 0.96452     | 0.973106824 |             |         |         |         |
| DKKL1P1     | ENSG00000215546 | -1.8071 | 0.96463     | -1.8562     | 0.96829     | -2.0618 |         |         |
|             | 0.98039         | -2.1891 | 0.9857      | 0.96463     | 0.973197654 |         |         |         |
| SNORD115-16 | ENSG00000200757 | -1.8075 | 0.96466     | -1.8075     | 0.96466     | -1.8075 | 0.96466 | -1.8075 |
|             | 0.96466         | -1.8075 | 0.96466     | 0.96466     | 0.973207772 |         |         |         |
| VENTXP4     | ENSG00000230465 | -1.8083 | 0.96472     | -1.8083     | 0.96472     | -1.8083 |         |         |
|             | 0.96472         | -1.8083 | 0.96472     | 0.96472     | 0.973248154 |         |         |         |
| NA          | ENSG00000144785 | -1.8089 | 0.96477     | -1.8089     | 0.96477     | -1.8089 | 0.96477 |         |
|             | -1.8089         | 0.96477 | 0.96477     | 0.973278447 |             |         |         |         |
| NA          | ENSG00000263677 | -1.8092 | 0.96479     | -1.8092     | 0.96479     | -1.8092 | 0.96479 |         |
|             | -1.8092         | 0.96479 | 0.96479     | 0.973278474 |             |         |         |         |
| NA          | ENSG00000264701 | -1.8098 | 0.96484     | -1.8098     | 0.96484     | -1.8098 | 0.96484 |         |
|             | -1.8098         | 0.96484 | 0.96484     | 0.973308765 |             |         |         |         |
| NA          | ENSG00000269267 | -1.8104 | 0.96488     | -1.8104     | 0.96488     | -1.8104 | 0.96488 |         |
|             | -1.8104         | 0.96488 | 0.96488     | 0.973328967 |             |         |         |         |
| MIR4749     | ENSG00000265954 | -1.8119 | 0.965       | -1.8119     | 0.965       | -1.8119 | 0.965   | -1.8119 |
|             | 0.965           | 0.965   | 0.973429867 |             |             |         |         |         |
| OR13C1P     | ENSG00000235248 | -1.8124 | 0.96504     | -1.8124     | 0.96504     | -1.8124 |         |         |
|             | 0.96504         | -1.8124 | 0.96504     | 0.96504     | 0.973450065 |         |         |         |
| RNU4-58P    | ENSG00000200062 | -1.8128 | 0.96507     | -1.8128     | 0.96507     | -1.8128 |         |         |
|             | 0.96507         | -1.8128 | 0.96507     | 0.96507     | 0.973460176 |         |         |         |
| IFI44       | ENSG00000137965 | -1.8142 | 0.96517     | -1.8142     | 0.96517     | -1.8142 | 0.96517 |         |
|             | -1.8142         | 0.96517 | 0.96517     | 0.973540893 |             |         |         |         |
| NA          | ENSG00000262079 | -1.8148 | 0.96523     | -1.8148     | 0.96523     | -1.8148 | 0.96523 |         |
|             | -1.8148         | 0.96523 | 0.96523     | 0.973581261 |             |         |         |         |
| NA          | ENSG00000235163 | -1.8699 | 0.96925     | -1.8699     | 0.96925     | -1.8699 | 0.96925 |         |
|             | -1.8156         | 0.96528 | 0.96528     | 0.973611541 |             |         |         |         |
| H2BC16P     | ENSG00000217646 | -1.8165 | 0.96535     | -1.8165     | 0.96535     | -1.8165 |         |         |
|             | 0.96535         | -1.8165 | 0.96535     | 0.96535     | 0.973661992 |         |         |         |
| IL15        | ENSG00000164136 | -1.8175 | 0.96543     | -2.6523     | 0.996       | -1.8175 | 0.96543 |         |
|             | -1.8175         | 0.96543 | 0.96543     | 0.97371246  |             |         |         |         |
| NA          | ENSG00000255442 | -1.8176 | 0.96544     | -2.023      | 0.97846     | -2.0644 | 0.98051 |         |
|             | -1.8694         | 0.96922 | 0.96544     | 0.97371246  |             |         |         |         |
| MMP27       | ENSG00000137675 | -1.8205 | 0.96566     | -1.8205     | 0.96566     | -1.8205 | 0.96566 |         |
|             | -1.8205         | 0.96566 | 0.96566     | 0.973883961 |             |         |         |         |
| GZMA        | ENSG00000145649 | -1.8206 | 0.96567     | -1.8206     | 0.96567     | -1.8206 | 0.96567 |         |
|             | -1.8206         | 0.96567 | 0.96567     | 0.973883961 |             |         |         |         |
| NA          | ENSG00000277287 | -2.0287 | 0.97876     | -1.8207     | 0.96567     | -2.0287 | 0.97876 |         |
|             | -2.0287         | 0.97876 | 0.96567     | 0.973883961 |             |         |         |         |
| NA          | ENSG00000275345 | -1.8211 | 0.9657      | -1.8211     | 0.9657      | -1.8211 | 0.9657  |         |
|             | -1.8211         | 0.9657  | 0.9657      | 0.97389406  |             |         |         |         |
| NA          | ENSG00000253307 | -1.8231 | 0.96586     | -1.8231     | 0.96586     | -1.8231 | 0.96586 |         |
|             | -1.8231         | 0.96586 | 0.96586     | 0.974025187 |             |         |         |         |
| NA          | ENSG00000246477 | -1.8232 | 0.96587     | -1.8232     | 0.96587     | -1.8232 | 0.96587 |         |
|             | -1.8232         | 0.96587 | 0.96587     | 0.974025187 |             |         |         |         |
| SRGAP3-AS1  | ENSG00000224808 | -1.8247 | 0.96598     | -1.8247     | 0.96598     | -1.8247 |         |         |
|             | 0.96598         | -1.8247 | 0.96598     | 0.96598     | 0.974115957 |         |         |         |
| NA          | ENSG00000223353 | -1.8255 | 0.96604     | -1.8255     | 0.96604     | -1.8255 | 0.96604 |         |
|             | -1.8255         | 0.96604 | 0.96604     | 0.974156303 |             |         |         |         |
| S100A1      | ENSG00000160678 | -1.827  | 0.96615     | -1.827      | 0.96615     | -1.827  |         |         |
|             | 0.96615         | -1.827  | 0.96615     | 0.96615     | 0.974226907 |         |         |         |
| CDPF1       | ENSG00000205643 | -1.8269 | 0.96615     | -1.8269     | 0.96615     | -1.8269 | 0.96615 |         |
|             | -1.8269         | 0.96615 | 0.96615     | 0.974226907 |             |         |         |         |
| NA          | ENSG00000262691 | -1.8274 | 0.96618     | -1.8274     | 0.96618     | -1.8274 | 0.96618 |         |
|             | -1.8274         | 0.96618 | 0.96618     | 0.974236998 |             |         |         |         |
| SPCS2P1     | ENSG00000260928 | -1.8279 | 0.96622     | -1.8279     | 0.96622     | -1.8279 |         |         |

|             |                 |         |             |             |             |         |         |
|-------------|-----------------|---------|-------------|-------------|-------------|---------|---------|
|             | 0.96622         | -1.8279 | 0.96622     | 0.96622     | 0.974247103 |         |         |
| SNORD115-17 | ENSG00000201482 | -1.8282 | 0.96624     | 0.96624     | -1.8282     | 0.96624 | -1.8282 |
|             | 0.96624         | -1.8282 | 0.96624     | 0.96624     | 0.974247103 |         |         |
| NA          | ENSG00000230835 | -1.8283 | 0.96625     | -1.8283     | 0.96625     | -1.8283 | 0.96625 |
|             | -1.8283         | 0.96625 | 0.96625     | 0.974247103 |             |         |         |
| NA          | ENSG00000199440 | -1.8287 | 0.96628     | -1.8287     | 0.96628     | -1.8287 | 0.96628 |
|             | -1.8287         | 0.96628 | 0.96628     | 0.974257193 |             |         |         |
| EIF4A1      | ENSG00000161960 | -1.8292 | 0.96631     | -1.8292     | 0.96631     | -1.8292 |         |
|             | 0.96631         | -1.8292 | 0.96631     | 0.96631     | 0.974267283 |         |         |
| LRRC10      | ENSG00000198812 | -1.8297 | 0.96635     | -1.8297     | 0.96635     | -1.8297 |         |
|             | 0.96635         | -1.8297 | 0.96635     | 0.96635     | 0.974287454 |         |         |
| RNU6-1281P  | ENSG00000252032 | -1.8313 | 0.96647     | -1.8313     | 0.96647     | -1.8313 |         |
|             | 0.96647         | -2.3656 | 0.991       | 0.96647     | 0.974378207 |         |         |
| NA          | ENSG00000280206 | -1.8316 | 0.96649     | -1.8316     | 0.96649     | -1.8316 | 0.96649 |
|             | -1.8316         | 0.96649 | 0.96649     | 0.974378207 |             |         |         |
| LINC02303   | ENSG00000258616 | -1.8317 | 0.9665      | -1.8317     | 0.9665      | -1.8317 |         |
|             | 0.9665          | -1.8317 | 0.9665      | 0.9665      | 0.974378207 |         |         |
| NA          | ENSG00000251473 | -1.8327 | 0.96658     | -1.8327     | 0.96658     | -1.8327 | 0.96658 |
|             | -1.8327         | 0.96658 | 0.96658     | 0.974438699 |             |         |         |
| KCNIP2-AS1  | ENSG00000226009 | -1.8346 | 0.96672     | -1.8346     | 0.96672     | -1.8346 |         |
|             | 0.96672         | -1.8346 | 0.96672     | 0.96672     | 0.974559676 |         |         |
| NA          | ENSG00000251792 | -1.8349 | 0.96674     | -1.8349     | 0.96674     | -1.8349 | 0.96674 |
|             | -1.8349         | 0.96674 | 0.96674     | 0.974559676 |             |         |         |
| NA          | ENSG00000269026 | -1.8352 | 0.96676     | -1.8352     | 0.96676     | -1.8352 | 0.96676 |
|             | -1.8352         | 0.96676 | 0.96676     | 0.974559677 |             |         |         |
| RNU6-261P   | ENSG00000238697 | -2.2009 | 0.98613     | -2.2009     | 0.98613     | -1.836  |         |
|             | 0.96682         | -2.2009 | 0.98613     | 0.96682     | 0.97455968  |         |         |
| NA          | ENSG00000243234 | -1.836  | 0.96682     | -1.836      | 0.96682     | -1.836  | 0.96682 |
|             | -1.836          | 0.96682 | 0.96682     | 0.97455968  |             |         |         |
| MRGPRX13P   | ENSG00000254546 | -2.1411 | 0.98387     | -2.1411     | 0.98387     | -2.1411 |         |
|             | 0.98387         | -1.836  | 0.96682     | 0.96682     | 0.97455968  |         |         |
| NA          | ENSG00000267169 | -1.839  | 0.96704     | -1.839      | 0.96704     | -1.839  | 0.96704 |
|             | -1.839          | 0.96704 | 0.96704     | 0.974751195 |             |         |         |
| NA          | ENSG00000260836 | -1.839  | 0.96705     | -1.839      | 0.96705     | -1.839  | 0.96705 |
|             | -1.839          | 0.96705 | 0.96705     | 0.974751195 |             |         |         |
| NA          | ENSG00000260859 | -1.8443 | 0.96743     | -1.8443     | 0.96743     | -1.8443 | 0.96743 |
|             | -1.8443         | 0.96743 | 0.96743     | 0.975114051 |             |         |         |
| MIR3665     | ENSG00000266325 | -1.8453 | 0.9675      | -1.8453     | 0.9675      | -1.8453 |         |
|             | 0.9675          | -1.8453 | 0.9675      | 0.9675      | 0.975164436 |         |         |
| SNHG9       | ENSG00000255198 | -1.8466 | 0.9676      | -1.8466     | 0.9676      | -1.8466 | 0.9676  |
|             | -1.8466         | 0.9676  | 0.9676      | 0.975224886 |             |         |         |
| NA          | ENSG00000255513 | -1.8466 | 0.9676      | -1.8466     | 0.9676      | -1.8466 | 0.9676  |
|             | -1.8466         | 0.9676  | 0.9676      | 0.975224886 |             |         |         |
| SNORD88C    | ENSG00000220988 | -1.8472 | 0.96764     | -1.8472     | 0.96764     | -1.8472 |         |
|             | 0.96764         | -1.8472 | 0.96764     | 0.96764     | 0.975244977 |         |         |
| TPSG1       | ENSG00000116176 | -1.89   | 0.97062     | -1.89       | 0.97062     | -1.89   | 0.97062 |
|             | 0.96771         | 0.96771 | 0.975244977 |             |             |         |         |
| NA          | ENSG00000200397 | -1.8481 | 0.96771     | -1.8481     | 0.96771     | -1.8481 | 0.96771 |
|             | -1.8481         | 0.96771 | 0.96771     | 0.975244977 |             |         |         |
| NA          | ENSG00000260183 | -1.8482 | 0.96771     | -1.8482     | 0.96771     | -1.8482 | 0.96771 |
|             | -1.8482         | 0.96771 | 0.96771     | 0.975244977 |             |         |         |
| NA          | ENSG00000234695 | -1.8483 | 0.96772     | -1.8483     | 0.96772     | -1.8483 | 0.96772 |
|             | -1.8483         | 0.96772 | 0.96772     | 0.975244977 |             |         |         |
| NA          | ENSG00000280088 | -1.8487 | 0.96775     | -1.8487     | 0.96775     | -1.8487 | 0.96775 |
|             | -1.8487         | 0.96775 | 0.96775     | 0.975255041 |             |         |         |
| FNDC4       | ENSG00000115226 | -1.8492 | 0.96779     | -1.8492     | 0.96779     | -1.8492 | 0.96779 |
|             | -1.8492         | 0.96779 | 0.96779     | 0.975275182 |             |         |         |
| IGLV2-5     | ENSG00000253234 | -1.8499 | 0.96784     | -1.8499     | 0.96784     | -1.8499 |         |
|             | 0.96784         | -1.8499 | 0.96784     | 0.96784     | 0.975295308 |         |         |
| RN7SL841P   | ENSG00000239555 | -1.8501 | 0.96785     | -1.8501     | 0.96785     | -1.8501 |         |
|             | 0.96785         | -1.8501 | 0.96785     | 0.96785     | 0.975295308 |         |         |
| NA          | ENSG00000268366 | -1.8505 | 0.96788     | -1.8505     | 0.96788     | -1.8505 | 0.96788 |



|            |                 |         |         |         |             |             |         |         |
|------------|-----------------|---------|---------|---------|-------------|-------------|---------|---------|
|            |                 | -1.8505 | 0.96788 | 0.96788 | 0.97530537  |             |         |         |
| NA         | ENSG00000204399 | -1.8519 | 0.96798 | 0.96798 | -1.8519     | 0.96798     | -2.1729 | 0.98511 |
|            |                 | -1.8519 | 0.96798 | 0.96798 | 0.975385968 |             |         |         |
| RN7SKP69   | ENSG00000202260 | -1.854  | 0.96813 | 0.96813 | -1.854      | 0.96813     | -1.854  |         |
|            |                 | 0.96813 | -1.854  | 0.96813 | 0.96813     | 0.975516943 |         |         |
| NA         | ENSG00000260816 | -1.8569 | 0.96834 | 0.96834 | -1.8569     | 0.96834     | -1.8569 | 0.96834 |
|            |                 | -1.8569 | 0.96834 | 0.96834 | 0.97570837  |             |         |         |
| RPL32P31   | ENSG00000213128 | -1.8581 | 0.96842 | 0.96842 | -1.8581     | 0.96842     | -1.8581 |         |
|            |                 | 0.96842 | -1.8581 | 0.96842 | 0.96842     | 0.975768803 |         |         |
| GDPGP1     | ENSG00000183208 | -2.0194 | 0.97828 | 0.97828 | -2.0194     | 0.97828     | -1.8593 |         |
|            |                 | 0.96851 | -2.0194 | 0.97828 | 0.96851     | 0.975839308 |         |         |
| RNU6-833P  | ENSG00000200356 | -1.8598 | 0.96854 | 0.96854 | -1.8598     | 0.96854     | -1.8598 |         |
|            |                 | 0.96854 | -1.8598 | 0.96854 | 0.96854     | 0.975849358 |         |         |
| EXOC3L1    | ENSG00000179044 | -2.3806 | 0.99136 | 0.99136 | -2.1367     | 0.98369     | -1.8606 |         |
|            |                 | 0.9686  | -1.8606 | 0.9686  | 0.9686      | 0.975879505 |         |         |
| NA         | ENSG00000256986 | -1.8607 | 0.96861 | 0.96861 | -1.8607     | 0.96861     | -1.8607 | 0.96861 |
|            |                 | -1.8607 | 0.96861 | 0.96861 | 0.975879505 |             |         |         |
| RNU6-701P  | ENSG00000206786 | -1.8611 | 0.96863 | 0.96863 | -1.8611     | 0.96863     | -1.8611 |         |
|            |                 | 0.96863 | -1.8611 | 0.96863 | 0.96863     | 0.975879505 |         |         |
| NA         | ENSG00000248611 | -1.8614 | 0.96866 | 0.96866 | -1.8614     | 0.96866     | -1.8614 | 0.96866 |
|            |                 | -1.8614 | 0.96866 | 0.96866 | 0.975889553 |             |         |         |
| NA         | ENSG00000262251 | -1.8619 | 0.96869 | 0.96869 | -1.8619     | 0.96869     | -1.8619 | 0.96869 |
|            |                 | -1.8619 | 0.96869 | 0.96869 | 0.975899574 |             |         |         |
| NA         | ENSG00000279339 | -1.8622 | 0.96871 | 0.96871 | -1.8622     | 0.96871     | -1.8622 | 0.96871 |
|            |                 | -1.8622 | 0.96871 | 0.96871 | 0.975899574 |             |         |         |
| NA         | ENSG00000244550 | -1.8629 | 0.96876 | 0.96876 | -1.8629     | 0.96876     | -1.8629 | 0.96876 |
|            |                 | -1.8629 | 0.96876 | 0.96876 | 0.975929769 |             |         |         |
| ZFP42      | ENSG00000179059 | -1.8638 | 0.96883 | 0.96883 | -1.8638     | 0.96883     | -1.8638 | 0.96883 |
|            |                 | -1.8638 | 0.96883 | 0.96883 | 0.975980111 |             |         |         |
| NA         | ENSG00000264067 | -1.8646 | 0.96888 | 0.96888 | -1.8646     | 0.96888     | -1.8646 | 0.96888 |
|            |                 | -1.8646 | 0.96888 | 0.96888 | 0.976010303 |             |         |         |
| ZNRF4      | ENSG00000105428 | -2.6397 | 0.99585 | 0.99585 | -2.6397     | 0.99585     | -1.8659 | 0.96897 |
|            |                 | -2.6397 | 0.99585 | 0.96897 | 0.976070684 |             |         |         |
| TET1       | ENSG00000138336 | -1.9067 | 0.97172 | 0.97172 | -1.866      | 0.96898     | -2.0532 | 0.97997 |
|            |                 | -2.6136 | 0.99552 | 0.96898 | 0.976070684 |             |         |         |
| NA         | ENSG00000263720 | -1.8668 | 0.96904 | 0.96904 | -1.8668     | 0.96904     | -1.8668 | 0.96904 |
|            |                 | -1.8668 | 0.96904 | 0.96904 | 0.976110945 |             |         |         |
| NA         | ENSG00000206649 | -1.8673 | 0.96907 | 0.96907 | -1.8673     | 0.96907     | -1.8673 | 0.96907 |
|            |                 | -1.8673 | 0.96907 | 0.96907 | 0.976120987 |             |         |         |
| NA         | ENSG00000272478 | -1.8678 | 0.96911 | 0.96911 | -1.8678     | 0.96911     | -1.8678 | 0.96911 |
|            |                 | -1.8678 | 0.96911 | 0.96911 | 0.9761411   |             |         |         |
| LINC02382  | ENSG00000250968 | -1.8683 | 0.96914 | 0.96914 | -1.8683     | 0.96914     | -1.8683 |         |
|            |                 | 0.96914 | -1.8683 | 0.96914 | 0.96914     | 0.976151109 |         |         |
| PRKAA1     | ENSG00000132356 | -1.8687 | 0.96916 | 0.96916 | -1.8687     | 0.96916     | -1.8687 |         |
|            |                 | 0.96916 | -2.1147 | 0.98277 | 0.96916     | 0.976151109 |         |         |
| NA         | ENSG00000224611 | -1.8701 | 0.96926 | 0.96926 | -1.8701     | 0.96926     | -1.8701 | 0.96926 |
|            |                 | -1.8701 | 0.96926 | 0.96926 | 0.976211442 |             |         |         |
| SNORA80A   | ENSG00000200792 | -1.8703 | 0.96928 | 0.96928 | -1.8703     | 0.96928     | -1.8703 |         |
|            |                 | 0.96928 | -1.8703 | 0.96928 | 0.96928     | 0.976211442 |         |         |
| NA         | ENSG00000229434 | -1.8703 | 0.96928 | 0.96928 | -1.8703     | 0.96928     | -2.1327 | 0.98353 |
|            |                 | -1.8703 | 0.96928 | 0.96928 | 0.976211442 |             |         |         |
| NA         | ENSG00000244021 | -1.8716 | 0.96937 | 0.96937 | -1.8716     | 0.96937     | -1.8716 | 0.96937 |
|            |                 | -1.8716 | 0.96937 | 0.96937 | 0.976271802 |             |         |         |
| OR2W6P     | ENSG00000168126 | -1.8718 | 0.96938 | 0.96938 | -1.8718     | 0.96938     | -1.8718 |         |
|            |                 | 0.96938 | -1.8718 | 0.96938 | 0.96938     | 0.976271802 |         |         |
| NA         | ENSG00000255550 | -2.2767 | 0.9886  | 0.9886  | -1.9236     | 0.9728      | -1.8729 | 0.96946 |
|            |                 | -1.8729 | 0.96946 | 0.96946 | 0.976332193 |             |         |         |
| RNU6-965P  | ENSG00000252530 | -1.8736 | 0.9695  | 0.9695  | -1.8736     | 0.9695      | -1.8736 |         |
|            |                 | 0.9695  | -1.8736 | 0.9695  | 0.9695      | 0.976352298 |         |         |
| RNU6-1255P | ENSG00000200304 | -1.8745 | 0.96957 | 0.96957 | -1.8745     | 0.96957     | -1.8745 |         |
|            |                 | 0.96957 | -1.8745 | 0.96957 | 0.96957     | 0.976392433 |         |         |
| NA         | ENSG00000279827 | -1.8749 | 0.9696  | 0.9696  | -1.8749     | 0.9696      | -1.8749 | 0.9696  |

|             |                 |         |         |             |             |         |         |
|-------------|-----------------|---------|---------|-------------|-------------|---------|---------|
|             | -1.8749         | 0.9696  | 0.9696  | 0.976392433 |             |         |         |
| UGT2A3P7    | ENSG00000248886 | -1.8752 | 0.96962 | -1.8752     | 0.96962     | -1.8752 | 0.96962 |
|             | 0.96962         | -1.8752 | 0.96962 | 0.96962     | 0.976392433 |         |         |
| NA          | ENSG00000273345 | -1.8752 | 0.96962 | -1.8752     | 0.96962     | -1.8752 | 0.96962 |
|             | -1.8752         | 0.96962 | 0.96962 | 0.976392433 |             |         |         |
| HSPE1P1     | ENSG00000234878 | -2.2317 | 0.98718 | -1.8761     | 0.96968     | -2.2317 |         |
|             | 0.98718         | -2.2317 | 0.98718 | 0.96968     | 0.976432598 |         |         |
| IGKV2OR22-3 | ENSG00000253460 | -1.8765 | 0.9697  | -1.8765     | 0.9697      | -1.8765 | 0.9697  |
|             | 0.9697          | -1.8765 | 0.9697  | 0.9697      | 0.976432598 |         |         |
| NA          | ENSG00000255042 | -1.8767 | 0.96972 | -1.8889     | 0.97055     | -2.3527 | 0.99068 |
|             | -2.3527         | 0.99068 | 0.96972 | 0.976432598 |             |         |         |
| NA          | ENSG00000255500 | -1.8773 | 0.96976 | -1.9105     | 0.97197     | -2.4325 | 0.9925  |
|             | -2.4325         | 0.9925  | 0.96976 | 0.976452699 |             |         |         |
| H4C11       | ENSG00000197238 | -1.8778 | 0.96979 | -1.8778     | 0.96979     | -1.8778 | 0.96979 |
|             | -1.8778         | 0.96979 | 0.96979 | 0.976462729 |             |         |         |
| NAPSA       | ENSG00000131400 | -2.3527 | 0.99068 | -1.8804     | 0.96997     | -1.9539 | 0.97464 |
|             | -2.1247         | 0.98319 | 0.96997 | 0.976623788 |             |         |         |
| FOX3D3-AS1  | ENSG00000230798 | -1.8833 | 0.97017 | -1.8833     | 0.97017     | -1.8833 |         |
|             | 0.97017         | -1.8833 | 0.97017 | 0.97017     | 0.976804932 |         |         |
| LINC00602   | ENSG00000281832 | -1.8836 | 0.97019 | -1.8836     | 0.97019     | -1.8836 |         |
|             | 0.97019         | -1.8836 | 0.97019 | 0.97019     | 0.976804932 |         |         |
| TIMM21      | ENSG00000075336 | -1.8849 | 0.97028 | -1.8849     | 0.97028     | -1.8849 |         |
|             | 0.97028         | -1.9803 | 0.97616 | 0.97028     | 0.976875315 |         |         |
| NA          | ENSG00000277171 | -1.8852 | 0.9703  | -1.8852     | 0.9703      | -1.8852 | 0.9703  |
|             | -1.8852         | 0.9703  | 0.9703  | 0.976875315 |             |         |         |
| SRA1        | ENSG00000213523 | -1.8857 | 0.97033 | -1.8857     | 0.97033     | -1.8857 | 0.97033 |
|             | -1.8857         | 0.97033 | 0.97033 | 0.976885336 |             |         |         |
| HHLA3-AS1   | ENSG00000226088 | -1.888  | 0.97049 | -1.888      | 0.97049     | -1.888  |         |
|             | 0.97049         | -1.888  | 0.97049 | 0.97049     | 0.977026231 |         |         |
| CXXC5-AS1   | ENSG00000250635 | -1.8889 | 0.97055 | -1.8889     | 0.97055     | -1.8889 |         |
|             | 0.97055         | -1.8889 | 0.97055 | 0.97055     | 0.97706645  |         |         |
| RN7SKP70    | ENSG00000252464 | -1.8915 | 0.97072 | -1.8915     | 0.97072     | -1.8915 |         |
|             | 0.97072         | -1.8915 | 0.97072 | 0.97072     | 0.977217403 |         |         |
| NA          | ENSG00000255236 | -1.8937 | 0.97086 | -1.8937     | 0.97086     | -1.8937 | 0.97086 |
|             | -1.8937         | 0.97086 | 0.97086 | 0.977338093 |             |         |         |
| NA          | ENSG00000243220 | -1.8938 | 0.97088 | -1.8938     | 0.97088     | -1.8938 | 0.97088 |
|             | -1.8938         | 0.97088 | 0.97088 | 0.977338093 |             |         |         |
| NA          | ENSG00000276428 | -1.8944 | 0.97091 | -1.8944     | 0.97091     | -1.8944 | 0.97091 |
|             | -1.8944         | 0.97091 | 0.97091 | 0.977348103 |             |         |         |
| MORC1-AS1   | ENSG00000239314 | -1.8947 | 0.97094 | -1.8947     | 0.97094     | -1.8947 |         |
|             | 0.97094         | -1.8947 | 0.97094 | 0.97094     | 0.977358112 |         |         |
| GLTPP1      | ENSG00000255138 | -1.8961 | 0.97102 | -1.8961     | 0.97102     | -1.8961 |         |
|             | 0.97102         | -1.8961 | 0.97102 | 0.97102     | 0.97741845  |         |         |
| NA          | ENSG00000269949 | -1.901  | 0.97135 | -1.901      | 0.97135     | -1.901  | 0.97135 |
|             | -1.901          | 0.97135 | 0.97135 | 0.977730428 |             |         |         |
| NA          | ENSG00000216359 | -1.9017 | 0.97139 | -1.9017     | 0.97139     | -1.9017 | 0.97139 |
|             | -1.9017         | 0.97139 | 0.97139 | 0.977750495 |             |         |         |
| TRAJ60      | ENSG00000249446 | -1.9028 | 0.97147 | -1.9028     | 0.97147     | -1.9028 |         |
|             | 0.97147         | -1.9028 | 0.97147 | 0.97147     | 0.977810821 |         |         |
| NA          | ENSG00000266893 | -1.9046 | 0.97158 | -1.9046     | 0.97158     | -1.9046 | 0.97158 |
|             | -1.9046         | 0.97158 | 0.97158 | 0.97790134  |             |         |         |
| WAC-AS1     | ENSG00000254635 | -1.9055 | 0.97164 | -1.9055     | 0.97164     | -1.9055 |         |
|             | 0.97164         | -1.9055 | 0.97164 | 0.97164     | 0.977941463 |         |         |
| MPHOSPH6    | ENSG00000135698 | -1.9058 | 0.97166 | -1.9058     | 0.97166     | -1.9058 |         |
|             | 0.97166         | -1.9058 | 0.97166 | 0.97166     | 0.977941463 |         |         |
| RPL5P24     | ENSG00000244052 | -1.9062 | 0.97169 | -1.9062     | 0.97169     | -1.9062 |         |
|             | 0.97169         | -1.9062 | 0.97169 | 0.97169     | 0.977951458 |         |         |
| MTND4LP2    | ENSG00000248315 | -1.907  | 0.97174 | -1.907      | 0.97174     | -1.907  |         |
|             | 0.97174         | -1.907  | 0.97174 | 0.97174     | 0.977981582 |         |         |
| NA          | ENSG00000267491 | -1.9083 | 0.97183 | -1.9083     | 0.97183     | -1.9083 | 0.97183 |
|             | -1.9083         | 0.97183 | 0.97183 | 0.97805196  |             |         |         |
| MTND4P5     | ENSG00000227584 | -1.9095 | 0.9719  | -1.9095     | 0.9719      | -1.9095 |         |

|             |                 |         |             |             |             |         |                 |
|-------------|-----------------|---------|-------------|-------------|-------------|---------|-----------------|
|             | 0.9719          | -1.9095 | 0.9719      | 0.9719      | 0.978082008 |         |                 |
| NA          | ENSG00000237439 | -1.9095 | 0.9719      | 0.9719      | -1.9095     | 0.9719  | -1.9095 0.9719  |
|             | -1.9095         | 0.9719  | 0.9719      | 0.978082008 |             |         |                 |
| NA          | ENSG00000279255 | -1.9111 | 0.97201     | 0.97201     | -1.9111     | 0.97201 | -1.9111 0.97201 |
|             | -1.9111         | 0.97201 | 0.97201     | 0.978172507 |             |         |                 |
| NA          | ENSG00000261720 | -1.9123 | 0.97208     | 0.97208     | -1.9123     | 0.97208 | -1.9123 0.97208 |
|             | -1.9123         | 0.97208 | 0.97208     | 0.978202251 |             |         |                 |
| NA          | ENSG00000262120 | -1.9125 | 0.97209     | 0.97209     | -1.9125     | 0.97209 | -1.9125 0.97209 |
|             | -1.9125         | 0.97209 | 0.97209     | 0.978202251 |             |         |                 |
| NA          | ENSG00000249234 | -1.9134 | 0.97215     | 0.97215     | -1.9134     | 0.97215 | -1.9134 0.97215 |
|             | -1.9134         | 0.97215 | 0.97215     | 0.978202251 |             |         |                 |
| NA          | ENSG00000239153 | -1.9135 | 0.97216     | 0.97216     | -1.9135     | 0.97216 | -1.9135 0.97216 |
|             | -1.9135         | 0.97216 | 0.97216     | 0.978202251 |             |         |                 |
| NA          | ENSG00000255599 | -1.9135 | 0.97216     | 0.97216     | -1.9135     | 0.97216 | -1.9135 0.97216 |
|             | -1.9135         | 0.97216 | 0.97216     | 0.978202251 |             |         |                 |
| NA          | ENSG00000274976 | -1.9135 | 0.97216     | 0.97216     | -2.1786     | 0.98532 | -1.9135 0.97216 |
|             | -1.9135         | 0.97216 | 0.97216     | 0.978202251 |             |         |                 |
| NA          | ENSG00000217195 | -1.9165 | 0.97235     | 0.97235     | -1.9165     | 0.97235 | -1.9165 0.97235 |
|             | -1.9165         | 0.97235 | 0.97235     | 0.97836309  |             |         |                 |
| DCAF7       | ENSG00000136485 | -2.0581 | 0.98021     | 0.98021     | -2.0581     | 0.98021 | -2.0581 0.98021 |
|             | -1.9167         | 0.97236 | 0.97236     | 0.97836309  |             |         |                 |
| RNA5SP281   | ENSG00000252313 | -1.9203 | 0.97259     | 0.97259     | -1.9203     | 0.97259 | -1.9203         |
|             | 0.97259         | -1.9203 | 0.97259     | 0.97259     | 0.978574304 |         |                 |
| NA          | ENSG00000268945 | -1.9225 | 0.97273     | 0.97273     | -1.9225     | 0.97273 | -1.9225 0.97273 |
|             | -1.9225         | 0.97273 | 0.97273     | 0.978694958 |             |         |                 |
| NA          | ENSG00000204049 | -1.9233 | 0.97278     | 0.97278     | -1.9233     | 0.97278 | -1.9233 0.97278 |
|             | -1.9233         | 0.97278 | 0.97278     | 0.97870485  |             |         |                 |
| NA          | ENSG00000272189 | -1.9233 | 0.97278     | 0.97278     | -1.9233     | 0.97278 | -1.9233 0.97278 |
|             | -1.9233         | 0.97278 | 0.97278     | 0.97870485  |             |         |                 |
| NA          | ENSG00000249590 | -1.9252 | 0.9729      | 0.9729      | -1.9252     | 0.9729  | -1.9252 0.9729  |
|             | -1.9252         | 0.9729  | 0.9729      | 0.978805372 |             |         |                 |
| MIR3144     | ENSG00000265725 | -1.9259 | 0.97294     | 0.97294     | -1.9259     | 0.97294 | -1.9259         |
|             | 0.97294         | -1.9259 | 0.97294     | 0.97294     | 0.978825406 |         |                 |
| MIR5589     | ENSG00000266204 | -1.9268 | 0.973       | 0.973       | -1.9268     | 0.973   | -1.9268         |
|             | 0.973           | 0.973   | 0.978855412 |             |             |         |                 |
| AFAP1L1     | ENSG00000157510 | -1.9269 | 0.97301     | 0.97301     | -2.8529     | 0.99783 | -2.1237         |
|             | 0.98315         | -2.3325 | 0.99016     | 0.97301     | 0.978855412 |         |                 |
| SNORD115-38 | ENSG00000201907 | -1.9287 | 0.97311     | 0.97311     | -1.9287     | 0.97311 | -1.9287         |
|             | 0.97311         | -1.9287 | 0.97311     | 0.97311     | 0.978935803 |         |                 |
| NA          | ENSG00000259321 | -1.9328 | 0.97337     | 0.97337     | -1.9328     | 0.97337 | -1.9328 0.97337 |
|             | -1.9328         | 0.97337 | 0.97337     | 0.979177145 |             |         |                 |
| NA          | ENSG00000280417 | -1.9352 | 0.97351     | 0.97351     | -1.9352     | 0.97351 | -1.9352 0.97351 |
|             | -1.9352         | 0.97351 | 0.97351     | 0.979297764 |             |         |                 |
| NA          | ENSG00000275582 | -1.937  | 0.97363     | 0.97363     | -1.937      | 0.97363 | -1.937 0.97363  |
|             | -1.937          | 0.97363 | 0.97363     | 0.97939826  |             |         |                 |
| NA          | ENSG00000201363 | -1.938  | 0.97369     | 0.97369     | -1.938      | 0.97369 | -1.938 0.97369  |
|             | -1.938          | 0.97369 | 0.97369     | 0.979438397 |             |         |                 |
| NA          | ENSG00000263357 | -1.9416 | 0.97391     | 0.97391     | -1.9416     | 0.97391 | -1.9416 0.97391 |
|             | -1.9416         | 0.97391 | 0.97391     | 0.979629311 |             |         |                 |
| NA          | ENSG00000239991 | -1.9418 | 0.97392     | 0.97392     | -1.9418     | 0.97392 | -1.9418 0.97392 |
|             | -1.9418         | 0.97392 | 0.97392     | 0.979629311 |             |         |                 |
| NA          | ENSG00000259814 | -1.9427 | 0.97398     | 0.97398     | -1.9427     | 0.97398 | -1.9427 0.97398 |
|             | -1.9427         | 0.97398 | 0.97398     | 0.979669441 |             |         |                 |
| NA          | ENSG00000239455 | -1.9433 | 0.97401     | 0.97401     | -1.9433     | 0.97401 | -1.9433 0.97401 |
|             | -1.9433         | 0.97401 | 0.97401     | 0.979679394 |             |         |                 |
| IGHV3-21    | ENSG00000211947 | -1.9443 | 0.97407     | 0.97407     | -1.9443     | 0.97407 | -1.9443         |
|             | 0.97407         | -2.4453 | 0.99276     | 0.97407     | 0.979709358 |         |                 |
| NA          | ENSG00000270177 | -1.9444 | 0.97408     | 0.97408     | -1.9444     | 0.97408 | -1.9444 0.97408 |
|             | -1.9444         | 0.97408 | 0.97408     | 0.979709358 |             |         |                 |
| NA          | ENSG00000254800 | -2.1288 | 0.98336     | 0.98336     | -2.0265     | 0.97864 | -1.946 0.97417  |
|             | -2.0265         | 0.97864 | 0.97417     | 0.979779656 |             |         |                 |
| NA          | ENSG00000235085 | -1.9474 | 0.97425     | 0.97425     | -1.9474     | 0.97425 | -1.9474 0.97425 |

|             |                 |         |         |             |             |             |         |         |
|-------------|-----------------|---------|---------|-------------|-------------|-------------|---------|---------|
|             |                 | -1.9474 | 0.97425 | 0.97425     | 0.979839893 |             |         |         |
| NA          | ENSG00000236528 | -1.9481 | 0.9743  | 0.9743      | -1.9481     | 0.9743      | -1.9481 | 0.9743  |
|             |                 | -1.9481 | 0.9743  | 0.9743      | 0.979869956 |             |         |         |
| RNU6-716P   | ENSG00000202491 | -1.9513 | 0.97449 | 0.97449     | -1.9513     | 0.97449     | -1.9513 |         |
|             |                 | 0.97449 | -1.9513 | 0.97449     | 0.97449     | 0.980040816 |         |         |
| NA          | ENSG00000272772 | -1.9519 | 0.97452 | 0.97452     | -1.9519     | 0.97452     | -1.9519 | 0.97452 |
|             |                 | -1.9519 | 0.97452 | 0.97452     | 0.98005076  |             |         |         |
| DNM1P35     | ENSG00000246877 | -1.9524 | 0.97456 | 0.97456     | -1.9524     | 0.97456     | -1.9524 |         |
|             |                 | 0.97456 | -1.9524 | 0.97456     | 0.97456     | 0.980060592 |         |         |
| NA          | ENSG00000215444 | -1.9526 | 0.97457 | 0.97457     | -1.9526     | 0.97457     | -1.9526 | 0.97457 |
|             |                 | -1.9526 | 0.97457 | 0.97457     | 0.980060592 |             |         |         |
| MARK2P4     | ENSG00000250372 | -1.956  | 0.97477 | 0.97477     | -1.956      | 0.97477     | -1.956  |         |
|             |                 | 0.97477 | -1.956  | 0.97477     | 0.97477     | 0.98024149  |         |         |
| CLEC3A      | ENSG00000166509 | -2.1667 | 0.98487 | 0.98487     | -2.1667     | 0.98487     | -2.1667 |         |
|             |                 | 0.98487 | -1.9565 | 0.9748      | 0.9748      | 0.980251429 |         |         |
| TRIM51DP    | ENSG00000255190 | -2.241  | 0.98749 | 0.98749     | -2.241      | 0.98749     | -2.5771 |         |
|             |                 | 0.99502 | -1.9594 | 0.97496     | 0.97496     | 0.980392092 |         |         |
| NA          | ENSG00000272379 | -1.9612 | 0.97507 | 0.97507     | -1.9612     | 0.97507     | -1.9612 | 0.97507 |
|             |                 | -1.9612 | 0.97507 | 0.97507     | 0.980482351 |             |         |         |
| NA          | ENSG00000234542 | -1.9787 | 0.97608 | 0.97608     | -3.0259     | 0.99876     | -2.2795 | 0.98868 |
|             |                 | -1.9616 | 0.97509 | 0.97509     | 0.980482351 |             |         |         |
| NA          | ENSG00000260755 | -1.9631 | 0.97518 | 0.97518     | -1.9631     | 0.97518     | -1.9631 | 0.97518 |
|             |                 | -1.9631 | 0.97518 | 0.97518     | 0.980552615 |             |         |         |
| NA          | ENSG00000254019 | -1.9638 | 0.97522 | 0.97522     | -1.9638     | 0.97522     | -1.9638 | 0.97522 |
|             |                 | -1.9638 | 0.97522 | 0.97522     | 0.980572602 |             |         |         |
| NA          | ENSG00000251248 | -1.9666 | 0.97539 | 0.97539     | -1.9666     | 0.97539     | -1.9666 | 0.97539 |
|             |                 | -1.9666 | 0.97539 | 0.97539     | 0.980723299 |             |         |         |
| NA          | ENSG00000282317 | -1.9676 | 0.97544 | 0.97544     | -1.9676     | 0.97544     | -1.9676 | 0.97544 |
|             |                 | -1.9676 | 0.97544 | 0.97544     | 0.980733101 |             |         |         |
| NA          | ENSG00000284188 | -1.9676 | 0.97544 | 0.97544     | -1.9676     | 0.97544     | -1.9676 | 0.97544 |
|             |                 | -1.9676 | 0.97544 | 0.97544     | 0.980733101 |             |         |         |
| NA          | ENSG00000214125 | -1.9689 | 0.97552 | 0.97552     | -1.9689     | 0.97552     | -1.9689 | 0.97552 |
|             |                 | -1.9689 | 0.97552 | 0.97552     | 0.980793299 |             |         |         |
| NA          | ENSG00000205035 | -2.0637 | 0.98048 | 0.98048     | -1.9846     | 0.97641     | -2.0108 | 0.97783 |
|             |                 | -1.9721 | 0.9757  | 0.9757      | 0.980954032 |             |         |         |
| LINC02152   | ENSG00000261319 | -1.9775 | 0.97601 | 0.97601     | -1.9775     | 0.97601     | -1.9775 |         |
|             |                 | 0.97601 | -1.9775 | 0.97601     | 0.97601     | 0.981245457 |         |         |
| RN7SL761P   | ENSG00000243671 | -1.9824 | 0.97628 | 0.97628     | -1.9824     | 0.97628     | -1.9824 |         |
|             |                 | 0.97628 | -1.9824 | 0.97628     | 0.97628     | 0.981496371 |         |         |
| PI3         | ENSG00000124102 | -1.9828 | 0.9763  | 0.9763      | -1.9828     | 0.9763      | -2.1247 | 0.98319 |
|             |                 | -2.1247 | 0.98319 | 0.9763      | 0.981496371 |             |         |         |
| RNU6-164P   | ENSG00000201474 | -1.9831 | 0.97632 | 0.97632     | -1.9831     | 0.97632     | -1.9831 |         |
|             |                 | 0.97632 | -1.9831 | 0.97632     | 0.97632     | 0.981496371 |         |         |
| RN7SL834P   | ENSG00000243650 | -1.986  | 0.97648 | 0.97648     | -1.986      | 0.97648     | -1.986  |         |
|             |                 | 0.97648 | -1.986  | 0.97648     | 0.97648     | 0.981636968 |         |         |
| ARL2BPP2    | ENSG00000258071 | -2.3067 | 0.98946 | 0.98946     | -1.9875     | 0.97657     | -2.3067 |         |
|             |                 | 0.98946 | -2.6027 | 0.99538     | 0.97657     | 0.981707191 |         |         |
| NA          | ENSG00000236241 | -1.9893 | 0.97667 | 0.97667     | -1.9893     | 0.97667     | -1.9893 | 0.97667 |
|             |                 | -1.9893 | 0.97667 | 0.97667     | 0.981787464 |             |         |         |
| C6orf163    | ENSG00000203872 | -1.99   | 0.9767  | 0.9767      | -1.99       | 0.9767      | -1.99   | 0.9767  |
|             |                 | 0.9767  | 0.9767  | 0.981797368 |             |             |         |         |
| SERTAD4-AS1 | ENSG00000203706 | -1.9924 | 0.97684 | 0.97684     | -1.9924     | 0.97684     | -1.9924 |         |
|             |                 | 0.97684 | -1.9924 | 0.97684     | 0.97684     | 0.981917843 |         |         |
| ZNF32-AS2   | ENSG00000230565 | -1.9935 | 0.9769  | 0.9769      | -1.9935     | 0.9769      | -1.9935 |         |
|             |                 | 0.9769  | -1.9935 | 0.9769      | 0.9769      | 0.981957899 |         |         |
| RPL17P12    | ENSG00000230559 | -1.9942 | 0.97693 | 0.97693     | -1.9942     | 0.97693     | -1.9942 |         |
|             |                 | 0.97693 | -1.9942 | 0.97693     | 0.97693     | 0.981967799 |         |         |
| NA          | ENSG00000229233 | -1.9965 | 0.97706 | 0.97706     | -1.9965     | 0.97706     | -1.9965 | 0.97706 |
|             |                 | -1.9965 | 0.97706 | 0.97706     | 0.982078212 |             |         |         |
| ABI3        | ENSG00000108798 | -1.9987 | 0.97718 | 0.97718     | -1.9987     | 0.97718     | -1.9987 | 0.97718 |
|             |                 | -1.9987 | 0.97718 | 0.97718     | 0.982178569 |             |         |         |
| RNA5SP407   | ENSG00000222207 | -3.6259 | 0.99986 | 0.99986     | -3.6259     | 0.99986     | -3.6259 |         |

|           |                 |         |         |             |             |         |         |         |
|-----------|-----------------|---------|---------|-------------|-------------|---------|---------|---------|
|           | 0.99986         | -2.0006 | 0.97728 | 0.97728     | 0.982258821 |         |         |         |
| NA        | ENSG00000270257 | -2.0021 | 0.97736 | 0.97736     | -2.0021     | 0.97736 | -2.0021 | 0.97736 |
|           | -2.0021         | 0.97736 | 0.97736 | 0.982318967 |             |         |         |         |
| RNA5SP452 | ENSG00000199874 | -2.0029 | 0.97741 | 0.97741     | -2.0029     | 0.97741 | -2.0029 |         |
|           | 0.97741         | -2.0029 | 0.97741 | 0.97741     | 0.982348959 |         |         |         |
| NDUFB4P1  | ENSG00000242510 | -2.0035 | 0.97744 | 0.97744     | -2.0035     | 0.97744 | -2.0035 |         |
|           | 0.97744         | -2.0035 | 0.97744 | 0.97744     | 0.98235885  |         |         |         |
| HLA-DOB   | ENSG00000241106 | -2.0042 | 0.97747 | 0.97747     | -2.0042     | 0.97747 | -2.0042 |         |
|           | 0.97747         | -2.0042 | 0.97747 | 0.97747     | 0.98236874  |         |         |         |
| NA        | ENSG00000262008 | -2.0048 | 0.97751 | 0.97751     | -2.0048     | 0.97751 | -2.0048 | 0.97751 |
|           | -2.0048         | 0.97751 | 0.97751 | 0.98238868  |             |         |         |         |
| YWHAZP5   | ENSG00000213260 | -2.0065 | 0.9776  | 0.9776      | -2.0065     | 0.9776  | -2.0065 |         |
|           | 0.9776          | -2.0065 | 0.9776  | 0.9776      | 0.982448655 |         |         |         |
| COX20P1   | ENSG00000213025 | -2.5359 | 0.99439 | 0.99439     | -2.5359     | 0.99439 | -2.5359 |         |
|           | 0.99439         | -2.0067 | 0.97761 | 0.97761     | 0.982448655 |         |         |         |
| NA        | ENSG00000243659 | -2.008  | 0.97768 | 0.97768     | -2.008      | 0.97768 | -2.008  | 0.97768 |
|           | -2.008          | 0.97768 | 0.97768 | 0.982488203 |             |         |         |         |
| RN7SKP163 | ENSG00000200091 | -2.0089 | 0.97773 | 0.97773     | -2.0089     | 0.97773 | -2.0089 |         |
|           | 0.97773         | -2.0089 | 0.97773 | 0.97773     | 0.982488203 |         |         |         |
| LINC02659 | ENSG00000236769 | -2.009  | 0.97773 | 0.97773     | -2.3757     | 0.99124 | -2.009  |         |
|           | 0.97773         | -2.009  | 0.97773 | 0.97773     | 0.982488203 |         |         |         |
| NA        | ENSG00000260236 | -2.0091 | 0.97773 | 0.97773     | -2.0091     | 0.97773 | -2.0091 | 0.97773 |
|           | -2.0091         | 0.97773 | 0.97773 | 0.982488203 |             |         |         |         |
| PSMC2     | ENSG00000161057 | -2.0121 | 0.97789 | 0.97789     | -2.0121     | 0.97789 | -2.0121 | 0.97789 |
|           | -2.0121         | 0.97789 | 0.97789 | 0.982628718 |             |         |         |         |
| NA        | ENSG00000234917 | -2.0136 | 0.97797 | 0.97797     | -2.0136     | 0.97797 | -2.0136 | 0.97797 |
|           | -2.0136         | 0.97797 | 0.97797 | 0.982678628 |             |         |         |         |
| RN7SL803P | ENSG00000272197 | -2.0136 | 0.97798 | 0.97798     | -2.0136     | 0.97798 | -2.0136 |         |
|           | 0.97798         | -2.0136 | 0.97798 | 0.97798     | 0.982678628 |         |         |         |
| KRT18P26  | ENSG00000229798 | -2.0157 | 0.97808 | 0.97808     | -2.0157     | 0.97808 | -2.0157 |         |
|           | 0.97808         | -2.0157 | 0.97808 | 0.97808     | 0.982738412 |         |         |         |
| RNU6-327P | ENSG00000252079 | -2.0159 | 0.97809 | 0.97809     | -2.0159     | 0.97809 | -2.0159 |         |
|           | 0.97809         | -2.0159 | 0.97809 | 0.97809     | 0.982738412 |         |         |         |
| IGLV3-15  | ENSG00000253786 | -2.016  | 0.9781  | 0.9781      | -2.016      | 0.9781  | -2.016  |         |
|           | 0.9781          | -2.016  | 0.9781  | 0.9781      | 0.982738412 |         |         |         |
| NA        | ENSG00000266364 | -2.0166 | 0.97813 | 0.97813     | -2.0166     | 0.97813 | -2.0166 | 0.97813 |
|           | -2.0166         | 0.97813 | 0.97813 | 0.982748292 |             |         |         |         |
| NA        | ENSG00000270228 | -2.0204 | 0.97833 | 0.97833     | -2.0204     | 0.97833 | -2.0204 | 0.97833 |
|           | -2.0204         | 0.97833 | 0.97833 | 0.982917894 |             |         |         |         |
| NA        | ENSG00000258446 | -2.0209 | 0.97836 | 0.97836     | -2.0209     | 0.97836 | -2.0209 | 0.97836 |
|           | -2.0209         | 0.97836 | 0.97836 | 0.982917894 |             |         |         |         |
| NA        | ENSG00000267405 | -2.0213 | 0.97838 | 0.97838     | -2.0213     | 0.97838 | -2.0213 | 0.97838 |
|           | -2.0213         | 0.97838 | 0.97838 | 0.982917894 |             |         |         |         |
| SNORD105  | ENSG00000209645 | -2.022  | 0.97841 | 0.97841     | -2.022      | 0.97841 | -2.022  |         |
|           | 0.97841         | -2.022  | 0.97841 | 0.97841     | 0.982917894 |         |         |         |
| KRTAP3-1  | ENSG00000212901 | -2.022  | 0.97841 | 0.97841     | -2.022      | 0.97841 | -2.022  |         |
|           | 0.97841         | -2.022  | 0.97841 | 0.97841     | 0.982917894 |         |         |         |
| RNU2-63P  | ENSG00000222724 | -2.0225 | 0.97844 | 0.97844     | -2.0225     | 0.97844 | -2.0225 |         |
|           | 0.97844         | -2.0225 | 0.97844 | 0.97844     | 0.982917894 |         |         |         |
| NA        | ENSG00000259817 | -2.0226 | 0.97844 | 0.97844     | -2.0226     | 0.97844 | -2.0226 | 0.97844 |
|           | -2.0226         | 0.97844 | 0.97844 | 0.982917894 |             |         |         |         |
| RPL37P23  | ENSG00000243680 | -2.0266 | 0.97865 | 0.97865     | -2.0266     | 0.97865 | -2.0266 |         |
|           | 0.97865         | -2.0266 | 0.97865 | 0.97865     | 0.983088147 |         |         |         |
| NA        | ENSG00000268458 | -2.0266 | 0.97865 | 0.97865     | -2.0266     | 0.97865 | -2.0266 | 0.97865 |
|           | -2.0266         | 0.97865 | 0.97865 | 0.983088147 |             |         |         |         |
| NA        | ENSG00000273164 | -2.027  | 0.97867 | 0.97867     | -2.027      | 0.97867 | -2.027  | 0.97867 |
|           | -2.027          | 0.97867 | 0.97867 | 0.983088147 |             |         |         |         |
| RPS27AP6  | ENSG00000224800 | -2.0281 | 0.97873 | 0.97873     | -2.0281     | 0.97873 | -2.0281 |         |
|           | 0.97873         | -2.0281 | 0.97873 | 0.97873     | 0.98311758  |         |         |         |
| NA        | ENSG00000272593 | -2.0285 | 0.97874 | 0.97874     | -2.0285     | 0.97874 | -2.0285 | 0.97874 |
|           | -2.0285         | 0.97874 | 0.97874 | 0.98311758  |             |         |         |         |
| LINC01547 | ENSG00000183250 | -2.029  | 0.97877 | 0.97877     | -2.029      | 0.97877 | -2.029  |         |

|             |                 |         |         |            |             |         |         |
|-------------|-----------------|---------|---------|------------|-------------|---------|---------|
|             | 0.97877         | -2.029  | 0.97877 | 0.97877    | 0.98311758  |         |         |
| NA          | ENSG00000258365 | -2.0292 | 0.97878 | -2.0292    | 0.97878     | -2.0292 | 0.97878 |
|             |                 | 0.97878 | 0.97878 | 0.98311758 |             |         |         |
| RASSF8-AS1  | ENSG00000246695 | -2.0319 | 0.97892 | -2.7696    | 0.99719     | -2.6159 |         |
|             | 0.99555         | -2.63   | 0.99573 | 0.97892    | 0.983207269 |         |         |
| MIR219A1    | ENSG00000199036 | -2.0323 | 0.97894 | -2.0323    | 0.97894     | -2.0323 |         |
|             | 0.97894         | -2.0323 | 0.97894 | 0.97894    | 0.983207269 |         |         |
| TCERG1L-AS1 | ENSG00000230098 | -2.0326 | 0.97895 | -2.0326    | 0.97895     | -2.0326 |         |
|             | 0.97895         | -2.0326 | 0.97895 | 0.97895    | 0.983207269 |         |         |
| NA          | ENSG00000273116 | -2.0325 | 0.97895 | -2.0325    | 0.97895     | -2.0325 | 0.97895 |
|             |                 | -2.0325 | 0.97895 | 0.97895    | 0.983207269 |         |         |
| RNU6-819P   | ENSG00000200986 | -2.0344 | 0.97905 | -2.0344    | 0.97905     | -2.0344 |         |
|             | 0.97905         | -2.0344 | 0.97905 | 0.97905    | 0.983286722 |         |         |
| RPS2P15     | ENSG00000235440 | -2.0357 | 0.97911 | -2.0357    | 0.97911     | -2.0357 |         |
|             | 0.97911         | -2.0357 | 0.97911 | 0.97911    | 0.983286722 |         |         |
| LINC00383   | ENSG00000235221 | -2.0362 | 0.97913 | -2.0362    | 0.97913     | -2.0362 |         |
|             | 0.97913         | -2.0362 | 0.97913 | 0.97913    | 0.983286722 |         |         |
| NA          | ENSG00000261341 | -2.0361 | 0.97913 | -2.481     | 0.99345     | -2.1147 | 0.98277 |
|             |                 | -2.1147 | 0.98277 | 0.97913    | 0.983286722 |         |         |
| NA          | ENSG00000271743 | -2.0361 | 0.97913 | -2.0361    | 0.97913     | -2.0361 | 0.97913 |
|             |                 | -2.0361 | 0.97913 | 0.97913    | 0.983286722 |         |         |
| RN7SL370P   | ENSG00000243437 | -2.0396 | 0.9793  | -2.0396    | 0.9793      | -2.0396 |         |
|             | 0.9793          | -2.0396 | 0.9793  | 0.9793     | 0.983437177 |         |         |
| MPRIPP1     | ENSG00000214820 | -2.0403 | 0.97934 | -2.0403    | 0.97934     | -2.0403 |         |
|             | 0.97934         | -2.0403 | 0.97934 | 0.97934    | 0.983457079 |         |         |
| RPS2P32     | ENSG00000232818 | -2.0433 | 0.97949 | -2.0433    | 0.97949     | -2.0433 |         |
|             | 0.97949         | -2.0433 | 0.97949 | 0.97949    | 0.98358744  |         |         |
| NA          | ENSG00000264765 | -2.0441 | 0.97953 | -2.0441    | 0.97953     | -2.0441 | 0.97953 |
|             |                 | -2.0441 | 0.97953 | 0.97953    | 0.983607338 |         |         |
| NA          | ENSG00000236525 | -2.0449 | 0.97957 | -2.0449    | 0.97957     | -2.0449 | 0.97957 |
|             |                 | -2.0449 | 0.97957 | 0.97957    | 0.983627235 |         |         |
| APOL5       | ENSG00000128313 | -2.048  | 0.97972 | -2.2349    | 0.98729     | -2.048  | 0.97972 |
|             |                 | -2.048  | 0.97972 | 0.97972    | 0.983757585 |         |         |
| RPS20P4     | ENSG00000241907 | -2.0489 | 0.97976 | -2.0489    | 0.97976     | -2.0489 |         |
|             | 0.97976         | -2.0489 | 0.97976 | 0.97976    | 0.983777478 |         |         |
| ZNF281      | ENSG00000162702 | -2.0535 | 0.97999 | -2.0535    | 0.97999     | -2.0535 |         |
|             | 0.97999         | -2.0535 | 0.97999 | 0.97999    | 0.983988146 |         |         |
| TIMM8B      | ENSG00000150779 | -2.0555 | 0.98008 | -2.0555    | 0.98008     | -2.0555 |         |
|             | 0.98008         | -2.0555 | 0.98008 | 0.98008    | 0.984057847 |         |         |
| NA          | ENSG00000227678 | -2.056  | 0.98011 | -2.056     | 0.98011     | -2.056  | 0.98011 |
|             |                 | -2.056  | 0.98011 | 0.98011    | 0.984057847 |         |         |
| NA          | ENSG00000261743 | -2.0563 | 0.98012 | -2.0563    | 0.98012     | -2.0563 | 0.98012 |
|             |                 | -2.0563 | 0.98012 | 0.98012    | 0.984057847 |         |         |
| NA          | ENSG00000263680 | -2.0581 | 0.98021 | -2.0581    | 0.98021     | -2.0581 | 0.98021 |
|             |                 | -2.0581 | 0.98021 | 0.98021    | 0.9841175   |         |         |
| ZBTB11-AS1  | ENSG00000256628 | -2.0586 | 0.98023 | -2.0586    | 0.98023     | -2.0586 |         |
|             | 0.98023         | -2.0586 | 0.98023 | 0.98023    | 0.9841175   |         |         |
| OSTCP5      | ENSG00000234315 | -2.0587 | 0.98024 | -2.4863    | 0.99355     | -2.0587 |         |
|             | 0.98024         | -2.4863 | 0.99355 | 0.98024    | 0.9841175   |         |         |
| NA          | ENSG00000283839 | -2.0613 | 0.98036 | -2.0613    | 0.98036     | -2.0613 | 0.98036 |
|             |                 | -2.0613 | 0.98036 | 0.98036    | 0.984217697 |         |         |
| BUB1P1      | ENSG00000270778 | -2.0627 | 0.98043 | -2.0627    | 0.98043     | -2.0627 |         |
|             | 0.98043         | -2.0627 | 0.98043 | 0.98043    | 0.984257457 |         |         |
| EXOSC4      | ENSG00000178896 | -2.063  | 0.98044 | -2.063     | 0.98044     | -2.0968 |         |
|             | 0.98199         | -2.063  | 0.98044 | 0.98044    | 0.984257457 |         |         |
| NA          | ENSG00000228302 | -2.0653 | 0.98055 | -2.0653    | 0.98055     | -2.0653 | 0.98055 |
|             |                 | -2.0653 | 0.98055 | 0.98055    | 0.984327328 |         |         |
| NA          | ENSG00000252379 | -2.0653 | 0.98055 | -2.0653    | 0.98055     | -2.0653 | 0.98055 |
|             |                 | -2.0653 | 0.98055 | 0.98055    | 0.984327328 |         |         |
| RNU6-893P   | ENSG00000238444 | -2.0663 | 0.9806  | -2.0663    | 0.9806      | -2.0663 |         |
|             | 0.9806          | -2.0663 | 0.9806  | 0.9806     | 0.984357243 |         |         |
| PAICSP3     | ENSG00000226840 | -2.067  | 0.98063 | -2.067     | 0.98063     | -2.067  |         |

|           |                 |             |             |             |             |         |         |         |
|-----------|-----------------|-------------|-------------|-------------|-------------|---------|---------|---------|
|           | 0.98063         | -2.067      | 0.98063     | 0.98063     | 0.98436708  |         |         |         |
| TMC4      | ENSG00000167608 | -2.0686     | 0.98071     | -2.0686     | 0.98071     | -2.0686 | 0.98071 |         |
|           | -2.0686         | 0.98071     | 0.98071     | 0.984427106 |             |         |         |         |
| MIR190B   | ENSG00000215938 | -2.0721     | 0.98087     | -2.0721     | 0.98087     | -2.0721 | 0.98087 |         |
|           | 0.98087         | -2.0721     | 0.98087     | 0.98087     | 0.984547151 |         |         |         |
| DHCR24-DT | ENSG00000233203 | -2.0721     | 0.98087     | -2.0721     | 0.98087     | -2.0721 | 0.98087 |         |
|           | 0.98087         | -2.0721     | 0.98087     | 0.98087     | 0.984547151 |         |         |         |
| NA        | ENSG00000279989 | -2.0749     | 0.981       | -2.0749     | 0.981       | -2.0749 | 0.981   | 0.981   |
|           | 0.981           | 0.984657356 |             |             |             |         |         |         |
| HSPE1P9   | ENSG00000232690 | -2.0756     | 0.98104     | -2.0756     | 0.98104     | -2.0756 | 0.98104 |         |
|           | 0.98104         | -2.0756     | 0.98104     | 0.98104     | 0.984677016 |         |         |         |
| MIR4656   | ENSG00000264474 | -2.0761     | 0.98106     | -2.0761     | 0.98106     | -2.0761 | 0.98106 |         |
|           | 0.98106         | -2.0761     | 0.98106     | 0.98106     | 0.984677016 |         |         |         |
| RN7SL494P | ENSG00000241175 | -2.0784     | 0.98116     | -2.0784     | 0.98116     | -2.0784 | 0.98116 |         |
|           | 0.98116         | -2.0784     | 0.98116     | 0.98116     | 0.984757102 |         |         |         |
| NA        | ENSG00000270697 | -2.0815     | 0.9813      | -2.0815     | 0.9813      | -2.0815 | 0.9813  |         |
|           | -2.0815         | 0.9813      | 0.9813      | 0.98487733  |             |         |         |         |
| NA        | ENSG00000267359 | -2.0844     | 0.98144     | -2.0844     | 0.98144     | -2.0844 | 0.98144 |         |
|           | -2.0844         | 0.98144     | 0.98144     | 0.984997553 |             |         |         |         |
| RPL21P39  | ENSG00000239797 | -2.0891     | 0.98165     | -2.0891     | 0.98165     | -2.0891 | 0.98165 |         |
|           | 0.98165         | -2.0891     | 0.98165     | 0.98165     | 0.985188024 |         |         |         |
| NA        | ENSG00000255214 | -2.0906     | 0.98172     | -2.2396     | 0.98744     | -2.2396 | 0.98744 |         |
|           | -2.2396         | 0.98744     | 0.98172     | 0.985237985 |             |         |         |         |
| NA        | ENSG00000229677 | -2.0938     | 0.98186     | -2.0938     | 0.98186     | -2.0938 | 0.98186 |         |
|           | -2.0938         | 0.98186     | 0.98186     | 0.985358193 |             |         |         |         |
| NA        | ENSG00000202071 | -2.0962     | 0.98197     | -2.0962     | 0.98197     | -2.0962 | 0.98197 |         |
|           | -2.0962         | 0.98197     | 0.98197     | 0.985448291 |             |         |         |         |
| NA        | ENSG00000219284 | -2.1006     | 0.98216     | -2.1006     | 0.98216     | -2.1006 | 0.98216 |         |
|           | -2.1006         | 0.98216     | 0.98216     | 0.985608404 |             |         |         |         |
| NA        | ENSG00000256530 | -2.1007     | 0.98217     | -2.1007     | 0.98217     | -2.1007 | 0.98217 |         |
|           | -2.1007         | 0.98217     | 0.98217     | 0.985608404 |             |         |         |         |
| NA        | ENSG00000267546 | -2.1071     | 0.98245     | -2.1071     | 0.98245     | -2.1071 | 0.98245 |         |
|           | -2.1071         | 0.98245     | 0.98245     | 0.985869082 |             |         |         |         |
| NA        | ENSG00000266635 | -2.1095     | 0.98255     | -2.1095     | 0.98255     | -2.1095 | 0.98255 |         |
|           | -2.1095         | 0.98255     | 0.98255     | 0.985949127 |             |         |         |         |
| LSM7      | ENSG00000130332 | -2.1123     | 0.98267     | -2.1123     | 0.98267     | -2.1123 | 0.98267 |         |
|           | -2.1123         | 0.98267     | 0.98267     | 0.986028698 |             |         |         |         |
| NA        | ENSG00000255111 | -2.1124     | 0.98268     | -2.1719     | 0.98507     | -2.3528 | 0.99068 |         |
|           | -2.3528         | 0.99068     | 0.98268     | 0.986028698 |             |         |         |         |
| RPL31P3   | ENSG00000237929 | -2.1127     | 0.98269     | -2.1127     | 0.98269     | -2.1127 | 0.98269 |         |
|           | 0.98269         | -2.1127     | 0.98269     | 0.98269     | 0.986028698 |         |         |         |
| NA        | ENSG00000267428 | -2.3254     | 0.98997     | -2.1139     | 0.98274     | -2.5446 | 0.99453 |         |
|           | -2.2455         | 0.98763     | 0.98274     | 0.986058564 |             |         |         |         |
| UBFD1P1   | ENSG00000244653 | -2.1153     | 0.9828      | -2.1153     | 0.9828      | -2.1153 | 0.9828  |         |
|           | 0.9828          | -2.1153     | 0.9828      | 0.9828      | 0.986098462 |         |         |         |
| NA        | ENSG00000272406 | -2.1161     | 0.98283     | -2.1161     | 0.98283     | -2.1161 | 0.98283 |         |
|           | -2.1161         | 0.98283     | 0.98283     | 0.986108259 |             |         |         |         |
| NA        | ENSG00000267063 | -2.1172     | 0.98288     | -2.1172     | 0.98288     | -2.1172 | 0.98288 |         |
|           | -2.1172         | 0.98288     | 0.98288     | 0.986137883 |             |         |         |         |
| NA        | ENSG00000229225 | -2.1177     | 0.9829      | -2.1177     | 0.9829      | -2.1177 | 0.9829  |         |
|           | -2.1177         | 0.9829      | 0.9829      | 0.986137883 |             |         |         |         |
| PRR13P3   | ENSG00000271412 | -2.1195     | 0.98298     | -2.1195     | 0.98298     | -2.1195 | 0.98298 |         |
|           | 0.98298         | -2.1195     | 0.98298     | 0.98298     | 0.986197604 |         |         |         |
| RPP40     | ENSG00000124787 | -2.1202     | 0.983       | -2.242      | 0.98752     | -2.1202 | 0.983   | -2.1202 |
|           | 0.983           | 0.983       | 0.986197604 |             |             |         |         |         |
| NA        | ENSG00000273032 | -2.1231     | 0.98313     | -2.1231     | 0.98313     | -2.1231 | 0.98313 |         |
|           | -2.1231         | 0.98313     | 0.98313     | 0.98630772  |             |         |         |         |
| COX6CP18  | ENSG00000236041 | -2.1277     | 0.98332     | -2.1277     | 0.98332     | -2.1277 | 0.98332 |         |
|           | 0.98332         | -2.1277     | 0.98332     | 0.98332     | 0.986478025 |         |         |         |
| MIR4524B  | ENSG00000265331 | -2.1286     | 0.98336     | -2.1286     | 0.98336     | -2.1286 | 0.98336 |         |
|           | 0.98336         | -2.1286     | 0.98336     | 0.98336     | 0.986497845 |         |         |         |
| NA        | ENSG00000260743 | -2.1329     | 0.98353     | -2.1329     | 0.98353     | -2.1329 | 0.98353 |         |

|            |                 |             |         |             |             |         |         |
|------------|-----------------|-------------|---------|-------------|-------------|---------|---------|
|            | -2.1329         | 0.98353     | 0.98353 | 0.986648075 |             |         |         |
| RPIAP1     | ENSG00000267597 | -2.1352     | 0.98363 | -2.1352     | 0.98363     | -2.1352 | 0.98363 |
|            | 0.98363         | -2.1352     | 0.98363 | 0.98363     | 0.986728079 |         |         |
| NA         | ENSG00000250501 | -2.936      | 0.99834 | -2.137      | 0.9837      | -2.936  | 0.99834 |
|            | -2.936          | 0.99834     | 0.9837  | 0.986777986 |             |         |         |
| NA         | ENSG00000267124 | -2.1384     | 0.98376 | -2.1384     | 0.98376     | -2.1384 | 0.98376 |
|            | -2.1384         | 0.98376     | 0.98376 | 0.98681786  |             |         |         |
| RGS17P1    | ENSG00000229473 | -2.1427     | 0.98393 | -2.1427     | 0.98393     | -2.1427 | 0.98393 |
|            | 0.98393         | -2.1427     | 0.98393 | 0.98393     | 0.986967053 |         |         |
| NA         | ENSG00000235241 | -2.1438     | 0.98397 | -2.1438     | 0.98397     | -2.1438 | 0.98397 |
|            | -2.1438         | 0.98397     | 0.98397 | 0.986967053 |             |         |         |
| NA         | ENSG00000235560 | -2.1438     | 0.98398 | -2.1438     | 0.98398     | -2.1438 | 0.98398 |
|            | -2.1438         | 0.98398     | 0.98398 | 0.986967053 |             |         |         |
| NA         | ENSG00000234872 | -2.1445     | 0.984   | -2.1445     | 0.984       | -2.1445 | 0.984   |
|            | 0.984           | 0.986967053 |         |             |             |         |         |
| TRIM45     | ENSG00000134253 | -2.1448     | 0.98401 | -2.1448     | 0.98401     | -2.1448 | 0.98401 |
|            | 0.98401         | -2.1448     | 0.98401 | 0.98401     | 0.986967053 |         |         |
| TAGLN2     | ENSG00000158710 | -2.1457     | 0.98405 | -2.1457     | 0.98405     | -2.1457 | 0.98405 |
|            | 0.98405         | -2.1457     | 0.98405 | 0.98405     | 0.986986858 |         |         |
| NA         | ENSG00000259900 | -2.148      | 0.98414 | -2.148      | 0.98414     | -2.148  | 0.98414 |
|            | -2.148          | 0.98414     | 0.98414 | 0.987056811 |             |         |         |
| NA         | ENSG00000284221 | -2.149      | 0.98418 | -2.149      | 0.98418     | -2.149  | 0.98418 |
|            | -2.149          | 0.98418     | 0.98418 | 0.987066327 |             |         |         |
| RNA5SP197  | ENSG00000200227 | -2.1493     | 0.98419 | -2.1493     | 0.98419     | -2.1493 | 0.98419 |
|            | 0.98419         | -2.1493     | 0.98419 | 0.98419     | 0.987066327 |         |         |
| NA         | ENSG00000228008 | -2.1541     | 0.98438 | -2.1541     | 0.98438     | -2.1541 | 0.98438 |
|            | -2.1541         | 0.98438     | 0.98438 | 0.987236564 |             |         |         |
| SLC2AXP1   | ENSG00000275768 | -3.164      | 0.99922 | -3.164      | 0.99922     | -2.1574 | 0.99922 |
|            | 0.98451         | -3.164      | 0.99922 | 0.98451     | 0.987346621 |         |         |
| NA         | ENSG00000237798 | -2.1594     | 0.98459 | -2.1594     | 0.98459     | -2.1594 | 0.98459 |
|            | -2.1594         | 0.98459     | 0.98459 | 0.98740653  |             |         |         |
| NA         | ENSG00000267140 | -2.1621     | 0.98469 | -2.1621     | 0.98469     | -2.1621 | 0.98469 |
|            | -2.1621         | 0.98469     | 0.98469 | 0.987486228 |             |         |         |
| NA         | ENSG00000248029 | -2.1624     | 0.98471 | -2.1624     | 0.98471     | -2.1624 | 0.98471 |
|            | -2.1624         | 0.98471     | 0.98471 | 0.987486228 |             |         |         |
| NA         | ENSG00000276728 | -2.1632     | 0.98474 | -2.1632     | 0.98474     | -2.1632 | 0.98474 |
|            | -2.1632         | 0.98474     | 0.98474 | 0.987495991 |             |         |         |
| RNU6-416P  | ENSG00000252074 | -2.1663     | 0.98486 | -2.1663     | 0.98486     | -2.1663 | 0.98486 |
|            | 0.98486         | -2.1663     | 0.98486 | 0.98486     | 0.987596004 |         |         |
| NA         | ENSG00000207473 | -2.1689     | 0.98495 | -2.1689     | 0.98495     | -2.1689 | 0.98495 |
|            | -2.1689         | 0.98495     | 0.98495 | 0.987665929 |             |         |         |
| NA         | ENSG00000261189 | -2.1702     | 0.985   | -2.1702     | 0.985       | -2.1702 | 0.985   |
|            | 0.985           | 0.987695473 |         |             |             |         |         |
| NA         | ENSG00000213002 | -2.1706     | 0.98502 | -2.1706     | 0.98502     | -2.1706 | 0.98502 |
|            | -2.1706         | 0.98502     | 0.98502 | 0.987695473 |             |         |         |
| KRT125P    | ENSG00000258036 | -2.7041     | 0.99658 | -2.1713     | 0.98505     | -2.7041 | 0.99658 |
|            | 0.99658         | -2.7041     | 0.99658 | 0.98505     | 0.987705231 |         |         |
| NA         | ENSG00000202222 | -2.1822     | 0.98545 | -2.3334     | 0.99019     | -2.1745 | 0.98517 |
|            | -2.1745         | 0.98517     | 0.98517 | 0.987805228 |             |         |         |
| NA         | ENSG00000253713 | -2.1754     | 0.9852  | -2.1754     | 0.9852      | -2.1754 | 0.9852  |
|            | -2.1754         | 0.9852      | 0.9852  | 0.987814983 |             |         |         |
| NA         | ENSG00000278863 | -2.1767     | 0.98525 | -2.1767     | 0.98525     | -2.1767 | 0.98525 |
|            | -2.1767         | 0.98525     | 0.98525 | 0.98784479  |             |         |         |
| NA         | ENSG00000261382 | -2.1796     | 0.98536 | -2.1796     | 0.98536     | -2.1796 | 0.98536 |
|            | -2.1796         | 0.98536     | 0.98536 | 0.987934753 |             |         |         |
| NME2P3     | ENSG00000229338 | -2.1806     | 0.98539 | -2.1806     | 0.98539     | -2.1806 | 0.98539 |
|            | 0.98539         | -2.1806     | 0.98539 | 0.98539     | 0.987944505 |         |         |
| NA         | ENSG00000264545 | -2.1819     | 0.98544 | -2.1819     | 0.98544     | -2.1819 | 0.98544 |
|            | -2.1819         | 0.98544     | 0.98544 | 0.987964007 |             |         |         |
| APOBEC3AP1 | ENSG00000248822 | -2.1821     | 0.98545 | -2.1821     | 0.98545     | -2.1821 | 0.98545 |
|            | 0.98545         | -2.1821     | 0.98545 | 0.98545     | 0.987964007 |         |         |
| PPP2R1A    | ENSG00000105568 | -2.1835     | 0.9855  | -2.3373     | 0.99029     | -2.708  | 0.9855  |



|           |                 |         |         |             |             |         |         |         |
|-----------|-----------------|---------|---------|-------------|-------------|---------|---------|---------|
|           | 0.99662         | -2.1835 | 0.9855  | 0.9855      | 0.987993807 |         |         |         |
| OR52Q1P   | ENSG00000277514 | -2.1883 | 0.98568 | 0.98568     | -2.1883     | 0.98568 | -2.1883 |         |
|           | 0.98568         | -2.806  | 0.99749 | 0.98568     | 0.98814363  |         |         |         |
| NA        | ENSG00000258466 | -2.1888 | 0.98569 | 0.98569     | -2.1888     | 0.98569 | -2.1888 | 0.98569 |
|           | -2.1888         | 0.98569 | 0.98569 | 0.98814363  |             |         |         |         |
| CX3CL1    | ENSG00000006210 | -2.1897 | 0.98573 | 0.98573     | -2.1897     | 0.98573 | -2.2851 |         |
|           | 0.98885         | -2.5343 | 0.99437 | 0.98573     | 0.988163401 |         |         |         |
| ZIC4-AS1  | ENSG00000241202 | -2.194  | 0.98588 | 0.98588     | -2.194      | 0.98588 | -2.194  |         |
|           | 0.98588         | -2.194  | 0.98588 | 0.98588     | 0.988283134 |         |         |         |
| IPO4      | ENSG00000196497 | -2.1942 | 0.98589 | 0.98589     | -2.1942     | 0.98589 | -2.1942 | 0.98589 |
|           | -2.1942         | 0.98589 | 0.98589 | 0.988283134 |             |         |         |         |
| NA        | ENSG00000277056 | -2.1954 | 0.98593 | 0.98593     | -2.1954     | 0.98593 | -2.1954 | 0.98593 |
|           | -2.1954         | 0.98593 | 0.98593 | 0.9883029   |             |         |         |         |
| ECI1      | ENSG00000167969 | -3.8794 | 0.99995 | 0.98608     | -2.1997     | 0.98608 | -2.1997 | 0.98608 |
|           | -2.1997         | 0.98608 | 0.98608 | 0.988432929 |             |         |         |         |
| SCARNA21B | ENSG00000251866 | -2.2008 | 0.98613 | 0.98613     | -2.2008     | 0.98613 | -2.2008 |         |
|           | 0.98613         | -2.2008 | 0.98613 | 0.98613     | 0.988462715 |         |         |         |
| NA        | ENSG00000207783 | -2.2019 | 0.98616 | 0.98616     | -2.2019     | 0.98616 | -2.2019 | 0.98616 |
|           | -2.2019         | 0.98616 | 0.98616 | 0.988472454 |             |         |         |         |
| DNAJC19P7 | ENSG00000237663 | -2.2034 | 0.98622 | 0.98622     | -2.2034     | 0.98622 | -2.2034 |         |
|           | 0.98622         | -2.2034 | 0.98622 | 0.98622     | 0.988512261 |         |         |         |
| NA        | ENSG00000257005 | -2.2056 | 0.98629 | 0.98629     | -2.2056     | 0.98629 | -2.2056 | 0.98629 |
|           | -2.2056         | 0.98629 | 0.98629 | 0.98856209  |             |         |         |         |
| FDX1P2    | ENSG00000227054 | -2.212  | 0.98652 | 0.98652     | -2.212      | 0.98652 | -2.212  |         |
|           | 0.98652         | -2.212  | 0.98652 | 0.98652     | 0.988772282 |         |         |         |
| NA        | ENSG00000277545 | -2.2142 | 0.98659 | 0.98659     | -2.2142     | 0.98659 | -2.2142 | 0.98659 |
|           | -2.2142         | 0.98659 | 0.98659 | 0.988822104 |             |         |         |         |
| MTND2P8   | ENSG00000237257 | -2.2159 | 0.98665 | 0.98665     | -2.2159     | 0.98665 | -2.2159 |         |
|           | 0.98665         | -2.2159 | 0.98665 | 0.98665     | 0.988861901 |         |         |         |
| NA        | ENSG00000249819 | -2.2225 | 0.98687 | 0.98687     | -2.2225     | 0.98687 | -2.2225 | 0.98687 |
|           | -2.2225         | 0.98687 | 0.98687 | 0.989062052 |             |         |         |         |
| DPRXP1    | ENSG00000224323 | -2.2274 | 0.98704 | 0.98704     | -2.2274     | 0.98704 | -2.2274 |         |
|           | 0.98704         | -2.2274 | 0.98704 | 0.98704     | 0.989191441 |         |         |         |
| NA        | ENSG00000274104 | -2.2276 | 0.98705 | 0.98705     | -2.2276     | 0.98705 | -2.2276 | 0.98705 |
|           | -2.2276         | 0.98705 | 0.98705 | 0.989191441 |             |         |         |         |
| NA        | ENSG00000248881 | -2.228  | 0.98706 | 0.98706     | -2.228      | 0.98706 | -2.228  | 0.98706 |
|           | -2.228          | 0.98706 | 0.98706 | 0.989191441 |             |         |         |         |
| NA        | ENSG00000231495 | -2.229  | 0.98709 | 0.98709     | -2.229      | 0.98709 | -2.229  | 0.98709 |
|           | -2.229          | 0.98709 | 0.98709 | 0.989200862 |             |         |         |         |
| LINC00857 | ENSG00000237523 | -2.2296 | 0.98711 | 0.98711     | -2.2296     | 0.98711 | -2.2296 |         |
|           | 0.98711         | -2.2296 | 0.98711 | 0.98711     | 0.989200862 |         |         |         |
| NA        | ENSG00000279370 | -2.2315 | 0.98718 | 0.98718     | -2.2315     | 0.98718 | -2.2315 | 0.98718 |
|           | -2.2315         | 0.98718 | 0.98718 | 0.989250666 |             |         |         |         |
| NA        | ENSG00000227029 | -2.4952 | 0.99371 | 0.98726     | -2.4952     | 0.99371 | -2.2339 | 0.98726 |
|           | -2.4952         | 0.99371 | 0.98726 | 0.98931049  |             |         |         |         |
| NA        | ENSG00000199630 | -2.239  | 0.98742 | 0.98742     | -2.239      | 0.98742 | -2.239  | 0.98742 |
|           | -2.239          | 0.98742 | 0.98742 | 0.989450475 |             |         |         |         |
| NA        | ENSG00000227374 | -2.2438 | 0.98758 | 0.98758     | -2.2438     | 0.98758 | -2.2438 | 0.98758 |
|           | -2.2438         | 0.98758 | 0.98758 | 0.989590455 |             |         |         |         |
| NA        | ENSG00000252965 | -2.2456 | 0.98763 | 0.98763     | -2.2456     | 0.98763 | -2.2456 | 0.98763 |
|           | -2.2456         | 0.98763 | 0.98763 | 0.989599858 |             |         |         |         |
| NA        | ENSG00000265553 | -2.2455 | 0.98763 | 0.98763     | -2.2455     | 0.98763 | -2.2455 | 0.98763 |
|           | -2.2455         | 0.98763 | 0.98763 | 0.989599858 |             |         |         |         |
| MIR4708   | ENSG00000266740 | -2.2482 | 0.98772 | 0.98772     | -2.2482     | 0.98772 | -2.2482 |         |
|           | 0.98772         | -2.2482 | 0.98772 | 0.98772     | 0.989669688 |         |         |         |
| NA        | ENSG00000267168 | -2.2494 | 0.98776 | 0.98776     | -2.2494     | 0.98776 | -2.2494 | 0.98776 |
|           | -2.2494         | 0.98776 | 0.98776 | 0.989689417 |             |         |         |         |
| NA        | ENSG00000254673 | -2.2522 | 0.98785 | 0.98785     | -2.2522     | 0.98785 | -2.2522 | 0.98785 |
|           | -2.2522         | 0.98785 | 0.98785 | 0.989759242 |             |         |         |         |
| RNA5SP129 | ENSG00000222208 | -2.2552 | 0.98794 | 0.98794     | -2.2552     | 0.98794 | -2.2552 |         |
|           | 0.98794         | -2.2552 | 0.98794 | 0.98794     | 0.989829064 |         |         |         |
| NA        | ENSG00000255641 | -2.2584 | 0.98804 | 0.98804     | -2.2584     | 0.98804 | -2.2584 | 0.98804 |

|           |                 |         |             |             |             |         |         |         |
|-----------|-----------------|---------|-------------|-------------|-------------|---------|---------|---------|
|           | -2.2584         | 0.98804 | 0.98804     | 0.989908903 |             |         |         |         |
| RPS26P18  | ENSG00000229087 | -2.2594 | 0.98807     | -2.2594     | 0.98807     | -2.2594 | 0.98807 | -2.2594 |
|           | 0.98807         | -2.2594 | 0.98807     | 0.98807     | 0.989918606 |         |         |         |
| NA        | ENSG00000202514 | -2.2625 | 0.98817     | -2.2625     | 0.98817     | -2.2625 | 0.98817 | -2.2625 |
|           | -2.2625         | 0.98817 | 0.98817     | 0.98999844  |             |         |         |         |
| NA        | ENSG00000272372 | -2.2653 | 0.98825     | -2.2653     | 0.98825     | -2.2653 | 0.98825 | -2.2653 |
|           | -2.2653         | 0.98825 | 0.98825     | 0.990058233 |             |         |         |         |
| RPSAP16   | ENSG00000235145 | -2.2691 | 0.98837     | -2.2691     | 0.98837     | -2.2691 | 0.98837 | -2.2691 |
|           | 0.98837         | -2.2691 | 0.98837     | 0.98837     | 0.990158096 |         |         |         |
| PLAA      | ENSG00000137055 | -2.2702 | 0.9884      | -2.2702     | 0.9884      | -2.2702 | 0.9884  | -2.2702 |
|           | -2.2702         | 0.9884  | 0.9884      | 0.990167794 |             |         |         |         |
| TMEM115   | ENSG00000126062 | -2.2732 | 0.98849     | -2.2732     | 0.98849     | -2.2732 | 0.98849 | -2.2732 |
|           | 0.98849         | -2.2732 | 0.98849     | 0.98849     | 0.990217241 |         |         |         |
| NA        | ENSG00000229834 | -2.273  | 0.98849     | -2.273      | 0.98849     | -2.273  | 0.98849 | -2.273  |
|           | -2.273          | 0.98849 | 0.98849     | 0.990217241 |             |         |         |         |
| PGBD4P1   | ENSG00000244273 | -2.2792 | 0.98867     | -2.2792     | 0.98867     | -2.2792 | 0.98867 | -2.2792 |
|           | 0.98867         | -2.2792 | 0.98867     | 0.98867     | 0.990376548 |         |         |         |
| NA        | ENSG00000200237 | -2.2806 | 0.98871     | -2.2806     | 0.98871     | -2.2806 | 0.98871 | -2.2806 |
|           | -2.2806         | 0.98871 | 0.98871     | 0.990376548 |             |         |         |         |
| RPL10P15  | ENSG00000267119 | -2.2806 | 0.98871     | -2.2806     | 0.98871     | -2.2806 | 0.98871 | -2.2806 |
|           | 0.98871         | -2.2806 | 0.98871     | 0.98871     | 0.990376548 |         |         |         |
| NA        | ENSG00000278462 | -2.2867 | 0.98889     | -2.2867     | 0.98889     | -2.2867 | 0.98889 | -2.2867 |
|           | -2.2867         | 0.98889 | 0.98889     | 0.99053649  |             |         |         |         |
| NA        | ENSG00000257962 | -2.2885 | 0.98895     | -2.2885     | 0.98895     | -2.2885 | 0.98895 | -2.2885 |
|           | -2.2885         | 0.98895 | 0.98895     | 0.990576228 |             |         |         |         |
| LYL1      | ENSG00000104903 | -2.2919 | 0.98904     | -2.2919     | 0.98904     | -2.2919 | 0.98904 | -2.2919 |
|           | -2.2919         | 0.98904 | 0.98904     | 0.990646013 |             |         |         |         |
| NA        | ENSG00000252136 | -2.2935 | 0.98909     | -2.2935     | 0.98909     | -2.2935 | 0.98909 | -2.2935 |
|           | -2.2935         | 0.98909 | 0.98909     | 0.990675732 |             |         |         |         |
| NA        | ENSG00000258012 | -2.2969 | 0.98919     | -2.2969     | 0.98919     | -2.2969 | 0.98919 | -2.2969 |
|           | -2.2969         | 0.98919 | 0.98919     | 0.990755528 |             |         |         |         |
| RNU6-926P | ENSG00000206802 | -2.3027 | 0.98935     | -2.3027     | 0.98935     | -2.3027 | 0.98935 | -2.3027 |
|           | 0.98935         | -2.3027 | 0.98935     | 0.98935     | 0.990895415 |         |         |         |
| NA        | ENSG00000283073 | -2.3044 | 0.9894      | -2.3044     | 0.9894      | -2.3044 | 0.9894  | -2.3044 |
|           | -2.3044         | 0.9894  | 0.9894      | 0.990925126 |             |         |         |         |
| HES6      | ENSG00000144485 | -2.3068 | 0.98947     | -2.3068     | 0.98947     | -2.3068 | 0.98947 | -2.3068 |
|           | -2.3068         | 0.98947 | 0.98947     | 0.990974866 |             |         |         |         |
| RPS29P16  | ENSG00000235354 | -2.3079 | 0.9895      | -2.3079     | 0.9895      | -2.3079 | 0.9895  | -2.3079 |
|           | 0.9895          | -2.3079 | 0.9895      | 0.9895      | 0.990984545 |         |         |         |
| NA        | ENSG00000255470 | -2.3094 | 0.98954     | -2.3094     | 0.98954     | -2.3094 | 0.98954 | -2.3094 |
|           | -2.3094         | 0.98954 | 0.98954     | 0.991004238 |             |         |         |         |
| NA        | ENSG00000274363 | -2.3116 | 0.9896      | -2.3116     | 0.9896      | -2.3116 | 0.9896  | -2.3116 |
|           | -2.3116         | 0.9896  | 0.9896      | 0.991043959 |             |         |         |         |
| RN7SL521P | ENSG00000240877 | -2.3133 | 0.98965     | -2.3133     | 0.98965     | -2.3133 | 0.98965 | -2.3133 |
|           | 0.98965         | -2.3133 | 0.98965     | 0.98965     | 0.991073664 |         |         |         |
| NA        | ENSG00000269653 | -2.3163 | 0.98973     | -2.3163     | 0.98973     | -2.3163 | 0.98973 | -2.3163 |
|           | -2.3163         | 0.98973 | 0.98973     | 0.991133411 |             |         |         |         |
| TOR1BP1   | ENSG00000233872 | -2.318  | 0.98977     | -2.318      | 0.98977     | -2.318  | 0.98977 | -2.318  |
|           | 0.98977         | -2.318  | 0.98977     | 0.98977     | 0.991153099 |         |         |         |
| BTBD10P1  | ENSG00000257675 | -2.3189 | 0.9898      | -2.3189     | 0.9898      | -2.3189 | 0.9898  | -2.3189 |
|           | 0.9898          | -2.3189 | 0.9898      | 0.9898      | 0.991162773 |         |         |         |
| CYCSP32   | ENSG00000223625 | -2.3263 | 0.99        | -2.3263     | 0.99        | -2.3263 | 0.99    | -2.3263 |
|           | 0.99            | 0.99    | 0.991342676 |             |             |         |         |         |
| NA        | ENSG00000231355 | -2.3283 | 0.99005     | -2.3283     | 0.99005     | -2.3283 | 0.99005 | -2.3283 |
|           | -2.3283         | 0.99005 | 0.99005     | 0.991372372 |             |         |         |         |
| RNU4-65P  | ENSG00000222405 | -2.3339 | 0.9902      | -2.3339     | 0.9902      | -2.3339 | 0.9902  | -2.3339 |
|           | 0.9902          | -2.3339 | 0.9902      | 0.9902      | 0.991502199 |         |         |         |
| CCDC12P1  | ENSG00000226366 | -2.3416 | 0.9904      | -2.3416     | 0.9904      | -2.3416 | 0.9904  | -2.3416 |
|           | 0.9904          | -2.3416 | 0.9904      | 0.9904      | 0.991682084 |         |         |         |
| TAAR8     | ENSG00000146385 | -2.3433 | 0.99044     | -2.3433     | 0.99044     | -2.3433 | 0.99044 | -2.3433 |
|           | -2.3433         | 0.99044 | 0.99044     | 0.991701759 |             |         |         |         |
| ARMH2     | ENSG00000260286 | -2.354  | 0.99071     | -2.354      | 0.99071     | -2.354  | 0.99071 | -2.354  |
|           |                 |         |             |             |             |         |         |         |

|            |                 |         |         |             |             |         |         |
|------------|-----------------|---------|---------|-------------|-------------|---------|---------|
|            | -2.354          | 0.99071 | 0.99071 | 0.991951721 |             |         |         |
| NA         | ENSG00000266469 | -2.3633 | 0.99094 | -2.3633     | 0.99094     | -2.3633 | 0.99094 |
|            | -2.3633         | 0.99094 | 0.99094 | 0.992161623 |             |         |         |
| RNA5SP108  | ENSG00000271924 | -2.3647 | 0.99098 | -2.3647     | 0.99098     | -2.3647 |         |
|            | 0.99098         | -2.3647 | 0.99098 | 0.99098     | 0.992181287 |         |         |
| NA         | ENSG00000269165 | -2.3724 | 0.99116 | -2.3724     | 0.99116     | -2.3724 | 0.99116 |
|            | -2.3724         | 0.99116 | 0.99116 | 0.992341116 |             |         |         |
| NA         | ENSG00000279095 | -2.3838 | 0.99143 | -2.3838     | 0.99143     | -2.3838 | 0.99143 |
|            | -2.3838         | 0.99143 | 0.99143 | 0.992591044 |             |         |         |
| RN7SL338P  | ENSG00000241568 | -2.3862 | 0.99149 | -2.3862     | 0.99149     | -2.3862 |         |
|            | 0.99149         | -2.3862 | 0.99149 | 0.99149     | 0.992630721 |         |         |
| NA         | ENSG00000266677 | -2.4016 | 0.99184 | -2.4016     | 0.99184     | -2.4016 | 0.99184 |
|            | -2.4016         | 0.99184 | 0.99184 | 0.992960723 |             |         |         |
| OR4A19P    | ENSG00000254940 | -2.4041 | 0.99189 | -2.4041     | 0.99189     | -2.4041 |         |
|            | 0.99189         | -2.4041 | 0.99189 | 0.99189     | 0.992990379 |         |         |
| NA         | ENSG00000268842 | -2.4158 | 0.99215 | -2.4158     | 0.99215     | -2.4158 | 0.99215 |
|            | -2.4158         | 0.99215 | 0.99215 | 0.993230263 |             |         |         |
| PAXBP1-AS1 | ENSG00000238197 | -2.4252 | 0.99235 | -2.4252     | 0.99235     | -2.4252 |         |
|            | 0.99235         | -2.4252 | 0.99235 | 0.99235     | 0.993410072 |         |         |
| DNAJC19P9  | ENSG00000258608 | -2.4351 | 0.99256 | -2.4351     | 0.99256     | -2.4351 |         |
|            | 0.99256         | -2.4351 | 0.99256 | 0.99256     | 0.993599885 |         |         |
| NA         | ENSG00000258179 | -2.4371 | 0.9926  | -2.4371     | 0.9926      | -2.4371 | 0.9926  |
|            | -2.4371         | 0.9926  | 0.9926  | 0.993619515 |             |         |         |
| MRPL9P1    | ENSG00000254305 | -2.4385 | 0.99263 | -2.4385     | 0.99263     | -2.4385 |         |
|            | 0.99263         | -2.4385 | 0.99263 | 0.99263     | 0.993629135 |         |         |
| MIR554     | ENSG00000207606 | -2.4429 | 0.99271 | -2.4429     | 0.99271     | -2.4429 |         |
|            | 0.99271         | -2.4429 | 0.99271 | 0.99271     | 0.993688803 |         |         |
| NA         | ENSG00000216809 | -2.4472 | 0.9928  | -2.4472     | 0.9928      | -2.4472 | 0.9928  |
|            | -2.4472         | 0.9928  | 0.9928  | 0.993738066 |             |         |         |
| RPL31P9    | ENSG00000264054 | -2.4472 | 0.9928  | -2.4472     | 0.9928      | -2.4472 |         |
|            | 0.9928          | -2.4472 | 0.9928  | 0.9928      | 0.993738066 |         |         |
| NA         | ENSG00000199668 | -2.4551 | 0.99296 | -2.4551     | 0.99296     | -2.4551 | 0.99296 |
|            | -2.4551         | 0.99296 | 0.99296 | 0.993877802 |             |         |         |
| CDC42P3    | ENSG00000253971 | -2.4653 | 0.99316 | -2.4653     | 0.99316     | -2.4653 |         |
|            | 0.99316         | -2.4653 | 0.99316 | 0.99316     | 0.994057569 |         |         |
| RNU6-980P  | ENSG00000252734 | -2.4725 | 0.99329 | -2.4725     | 0.99329     | -2.4725 |         |
|            | 0.99329         | -2.4725 | 0.99329 | 0.99329     | 0.994167266 |         |         |
| MIR518A1   | ENSG00000207803 | -2.4783 | 0.9934  | -2.4783     | 0.9934      | -2.4783 |         |
|            | 0.9934          | -2.4783 | 0.9934  | 0.9934      | 0.994256942 |         |         |
| ZDHHC20P4  | ENSG00000232380 | -2.4805 | 0.99344 | -2.4805     | 0.99344     | -2.4805 |         |
|            | 0.99344         | -2.4805 | 0.99344 | 0.99344     | 0.994276555 |         |         |
| RN7SL647P  | ENSG00000243957 | -2.4855 | 0.99353 | -2.4855     | 0.99353     | -2.4855 |         |
|            | 0.99353         | -2.4855 | 0.99353 | 0.99353     | 0.994346209 |         |         |
| SNORA65    | ENSG00000201302 | -2.4881 | 0.99358 | -2.4881     | 0.99358     | -2.4881 |         |
|            | 0.99358         | -2.4881 | 0.99358 | 0.99358     | 0.994355405 |         |         |
| CD83P1     | ENSG00000219738 | -2.4883 | 0.99358 | -2.4883     | 0.99358     | -2.4883 |         |
|            | 0.99358         | -2.4883 | 0.99358 | 0.99358     | 0.994355405 |         |         |
| NA         | ENSG00000259970 | -2.5023 | 0.99383 | -2.5023     | 0.99383     | -2.5023 | 0.99383 |
|            | -2.5023         | 0.99383 | 0.99383 | 0.994585174 |             |         |         |
| RPL21P88   | ENSG00000238263 | -2.5071 | 0.99391 | -2.5071     | 0.99391     | -2.5071 |         |
|            | 0.99391         | -2.5071 | 0.99391 | 0.99391     | 0.99463439  |         |         |
| NA         | ENSG00000223368 | -2.5074 | 0.99392 | -2.5074     | 0.99392     | -2.5074 | 0.99392 |
|            | -2.5074         | 0.99392 | 0.99392 | 0.99463439  |             |         |         |
| NA         | ENSG00000279863 | -2.8873 | 0.99806 | -2.5165     | 0.99407     | -2.5165 | 0.99407 |
|            | -2.5165         | 0.99407 | 0.99407 | 0.994764069 |             |         |         |
| RN7SL258P  | ENSG00000240589 | -2.5273 | 0.99425 | -2.5273     | 0.99425     | -2.5273 |         |
|            | 0.99425         | -2.5273 | 0.99425 | 0.99425     | 0.994923763 |         |         |
| NA         | ENSG00000280132 | -2.5296 | 0.99429 | -2.5296     | 0.99429     | -2.5296 | 0.99429 |
|            | -2.5296         | 0.99429 | 0.99429 | 0.994943359 |             |         |         |
| NA         | ENSG00000270322 | -2.5319 | 0.99433 | -2.5319     | 0.99433     | -2.5319 | 0.99433 |
|            | -2.5319         | 0.99433 | 0.99433 | 0.994962954 |             |         |         |
| HEXIM1     | ENSG00000186834 | -2.5735 | 0.99497 | -2.5735     | 0.99497     | -2.5735 |         |

|           |                 |         |         |             |             |         |         |  |
|-----------|-----------------|---------|---------|-------------|-------------|---------|---------|--|
|           | 0.99497         | -2.5735 | 0.99497 | 0.99497     | 0.995582918 |         |         |  |
| NA        | ENSG00000265973 | -2.6039 | 0.99539 | -2.6039     | 0.99539     | -2.6039 | 0.99539 |  |
|           | -2.6039         | 0.99539 | 0.99539 | 0.995982725 |             |         |         |  |
| TRGV9     | ENSG00000211695 | -2.6469 | 0.99594 | -2.6469     | 0.99594     | -2.6469 | 0.99594 |  |
|           | -2.6469         | 0.99594 | 0.99594 | 0.996512591 |             |         |         |  |
| RN7SKP217 | ENSG00000201510 | -2.6582 | 0.99607 | -2.6582     | 0.99607     | -2.6582 | 0.99607 |  |
|           | 0.99607         | -2.6582 | 0.99607 | 0.99662175  |             |         |         |  |
| SNORA16B  | ENSG00000201544 | -2.6601 | 0.99609 | -2.6601     | 0.99609     | -2.6601 | 0.99609 |  |
|           | 0.99609         | -2.6601 | 0.99609 | 0.99662175  |             |         |         |  |
| NA        | ENSG00000259258 | -2.6676 | 0.99618 | -2.6676     | 0.99618     | -2.6676 | 0.99618 |  |
|           | -2.6676         | 0.99618 | 0.99618 | 0.996691334 |             |         |         |  |
| RN7SL684P | ENSG00000243959 | -2.6708 | 0.99622 | -2.6708     | 0.99622     | -2.6708 | 0.99622 |  |
|           | 0.99622         | -2.6708 | 0.99622 | 0.99671089  |             |         |         |  |
| NA        | ENSG00000206817 | -2.6899 | 0.99643 | -2.6899     | 0.99643     | -2.6899 | 0.99643 |  |
|           | -2.6899         | 0.99643 | 0.99643 | 0.996900068 |             |         |         |  |
| OTOP2     | ENSG00000183034 | -2.6916 | 0.99645 | -2.6916     | 0.99645     | -2.6916 | 0.99645 |  |
|           | -2.6916         | 0.99645 | 0.99645 | 0.996900068 |             |         |         |  |
| NDUFS5P1  | ENSG00000218424 | -2.725  | 0.99679 | -2.725      | 0.99679     | -2.725  | 0.99679 |  |
|           | 0.99679         | -2.725  | 0.99679 | 0.997219748 |             |         |         |  |
| NR4A1AS   | ENSG00000259884 | -2.7552 | 0.99707 | -2.7552     | 0.99707     | -2.7552 | 0.99707 |  |
|           | 0.99707         | -2.7552 | 0.99707 | 0.99747939  |             |         |         |  |
| ASAP1-IT2 | ENSG00000280543 | -2.7604 | 0.99711 | -2.7604     | 0.99711     | -2.7604 | 0.99711 |  |
|           | 0.99711         | -2.7604 | 0.99711 | 0.997498928 |             |         |         |  |
| NA        | ENSG00000249753 | -2.7728 | 0.99722 | -2.7728     | 0.99722     | -2.7728 | 0.99722 |  |
|           | -2.7728         | 0.99722 | 0.99722 | 0.997588492 |             |         |         |  |
| SGO1      | ENSG00000129810 | -2.7882 | 0.99735 | -2.7882     | 0.99735     | -2.7882 | 0.99735 |  |
|           | -2.7882         | 0.99735 | 0.99735 | 0.997687581 |             |         |         |  |
| NA        | ENSG00000276098 | -2.7891 | 0.99736 | -2.7891     | 0.99736     | -2.7891 | 0.99736 |  |
|           | -2.7891         | 0.99736 | 0.99736 | 0.997687581 |             |         |         |  |
| RNU1-45P  | ENSG00000253000 | -2.8008 | 0.99745 | -2.8008     | 0.99745     | -2.8008 | 0.99745 |  |
|           | 0.99745         | -2.8008 | 0.99745 | 0.997757128 |             |         |         |  |
| NA        | ENSG00000207450 | -2.8415 | 0.99775 | -2.8415     | 0.99775     | -2.8415 | 0.99775 |  |
|           | -2.8415         | 0.99775 | 0.99775 | 0.998036733 |             |         |         |  |
| NA        | ENSG00000230698 | -2.8483 | 0.9978  | -2.8483     | 0.9978      | -2.8483 | 0.9978  |  |
|           | -2.8483         | 0.9978  | 0.9978  | 0.99806626  |             |         |         |  |
| MIR4636   | ENSG00000266415 | -2.8568 | 0.99786 | -2.8568     | 0.99786     | -2.8568 | 0.99786 |  |
|           | 0.99786         | -2.8568 | 0.99786 | 0.998105788 |             |         |         |  |
| RNU6-598P | ENSG00000200887 | -2.9504 | 0.99841 | -2.9504     | 0.99841     | -2.9504 | 0.99841 |  |
|           | 0.99841         | -2.9504 | 0.99841 | 0.998635426 |             |         |         |  |
| NA        | ENSG00000280340 | -2.9733 | 0.99853 | -2.9733     | 0.99853     | -2.9733 | 0.99853 |  |
|           | -2.9733         | 0.99853 | 0.99853 | 0.998734457 |             |         |         |  |
| NA        | ENSG00000240524 | -2.9777 | 0.99855 | -2.9777     | 0.99855     | -2.9777 | 0.99855 |  |
|           | -2.9777         | 0.99855 | 0.99855 | 0.998734457 |             |         |         |  |
| NA        | ENSG00000259522 | -2.9873 | 0.99859 | -2.9873     | 0.99859     | -2.9873 | 0.99859 |  |
|           | -2.9873         | 0.99859 | 0.99859 | 0.998753965 |             |         |         |  |
| NA        | ENSG00000259496 | -3.0115 | 0.9987  | -3.0115     | 0.9987      | -3.0115 | 0.9987  |  |
|           | -3.0115         | 0.9987  | 0.9987  | 0.998843483 |             |         |         |  |
| OR10A4    | ENSG00000170782 | -3.0241 | 0.99875 | -3.0241     | 0.99875     | -3.0241 | 0.99875 |  |
|           | 0.99875         | -3.0241 | 0.99875 | 0.998872989 |             |         |         |  |
| NA        | ENSG00000224359 | -3.1095 | 0.99906 | -3.1095     | 0.99906     | -3.1095 | 0.99906 |  |
|           | -3.1095         | 0.99906 | 0.99906 | 0.999142015 |             |         |         |  |
| RPS3AP32  | ENSG00000240047 | -3.1082 | 0.99906 | -3.1082     | 0.99906     | -3.1082 | 0.99906 |  |
|           | 0.99906         | -3.1082 | 0.99906 | 0.999142015 |             |         |         |  |
| NA        | ENSG00000275966 | -3.1314 | 0.99913 | -3.1314     | 0.99913     | -3.1314 | 0.99913 |  |
|           | -3.1314         | 0.99913 | 0.99913 | 0.999191514 |             |         |         |  |
| RNA5SP408 | ENSG00000251924 | -3.6259 | 0.99986 | -3.6259     | 0.99986     | -3.6259 | 0.99986 |  |
|           | 0.99986         | -3.6259 | 0.99986 | 0.999880519 |             |         |         |  |
| RNA5SP409 | ENSG00000252624 | -3.6259 | 0.99986 | -3.6259     | 0.99986     | -3.6259 | 0.99986 |  |
|           | 0.99986         | -3.6259 | 0.99986 | 0.999880519 |             |         |         |  |
| NA        | ENSG00000273487 | -3.7324 | 0.99991 | -3.7324     | 0.99991     | -3.7324 | 0.99991 |  |
|           | -3.7324         | 0.99991 | 0.99991 | 0.99991     |             |         |         |  |
